# Supplementary material for: Notos - a galaxy tool to analyze CpN observed expected ratios for inferring DNA methylation types
Source: PubMed Central journal article supplement (PMC5870242; doi:10.1186/s12859-018-2115-4), 2018-03-27

# Acanthoscurria\_gomesiana

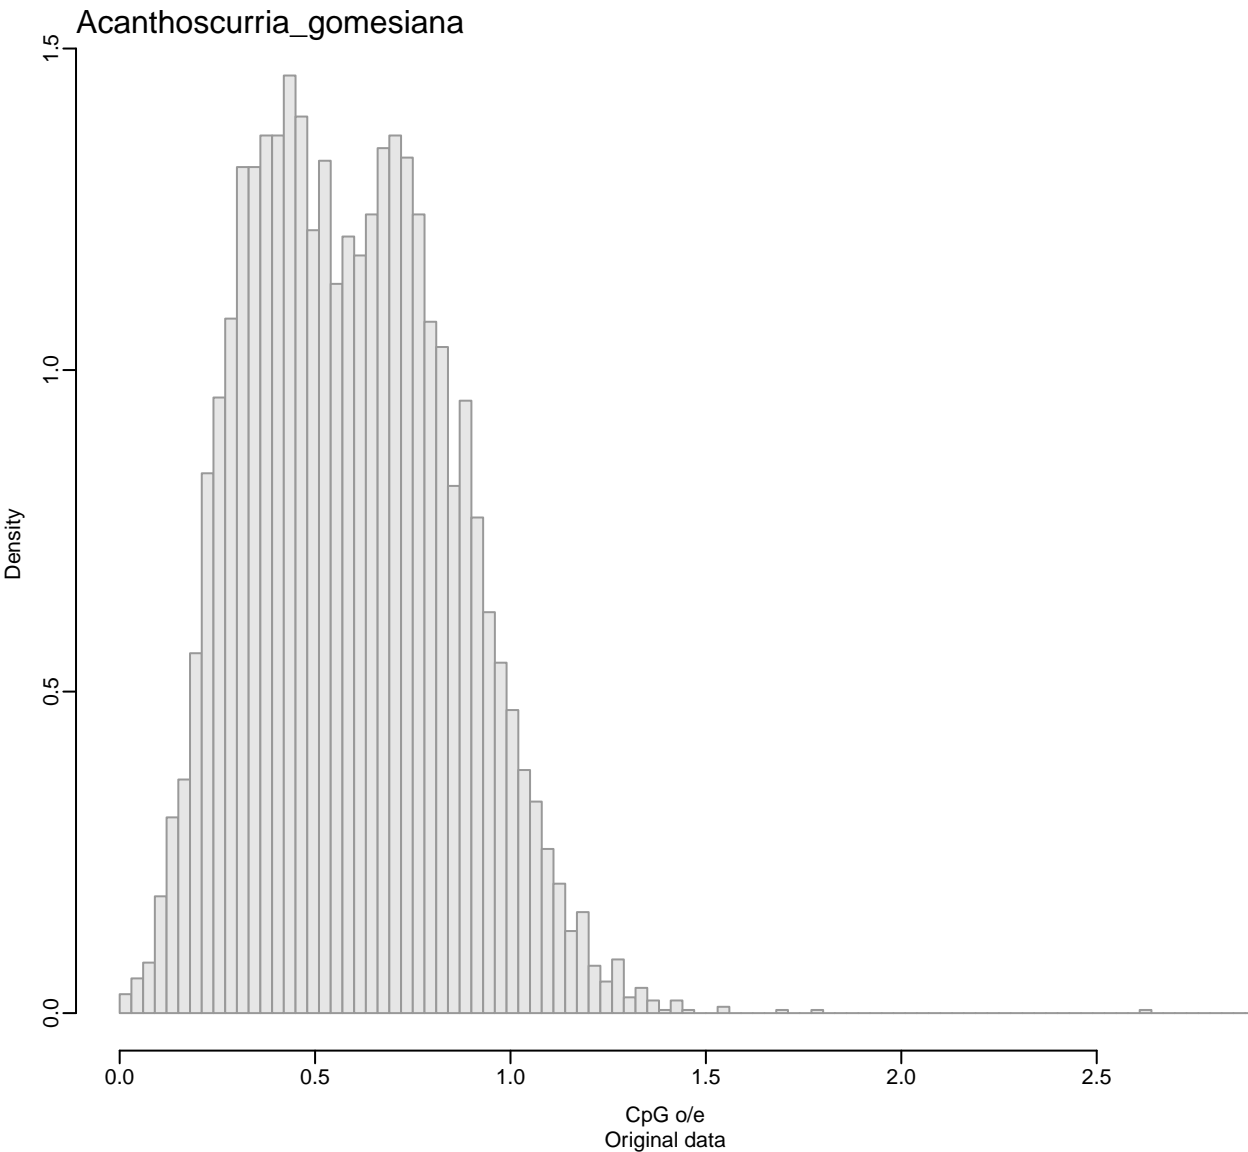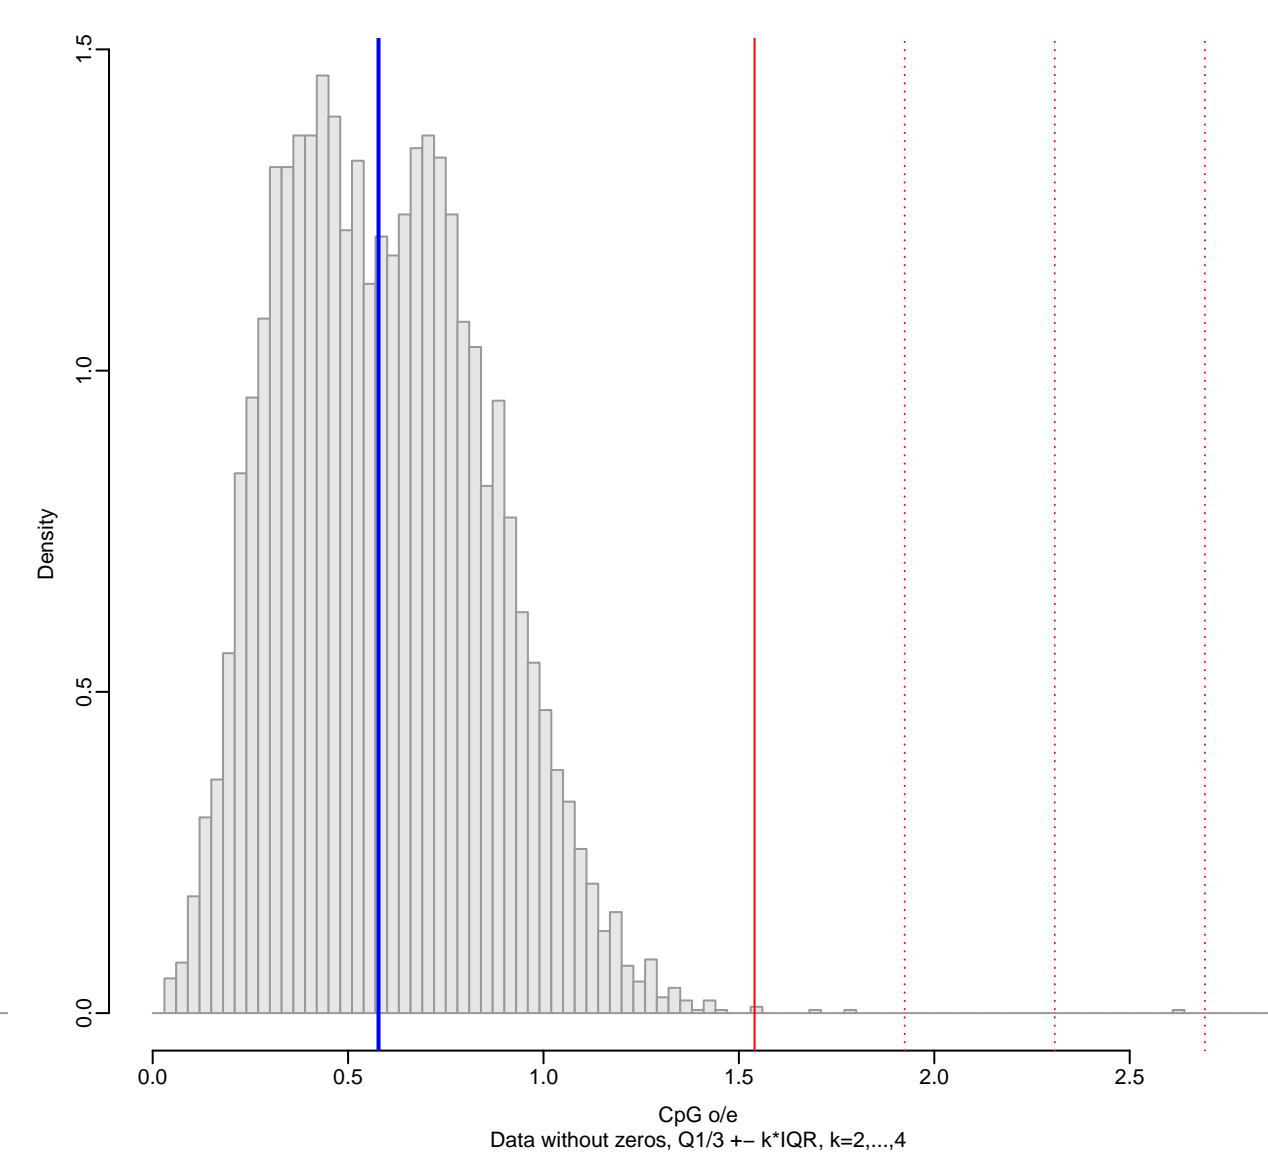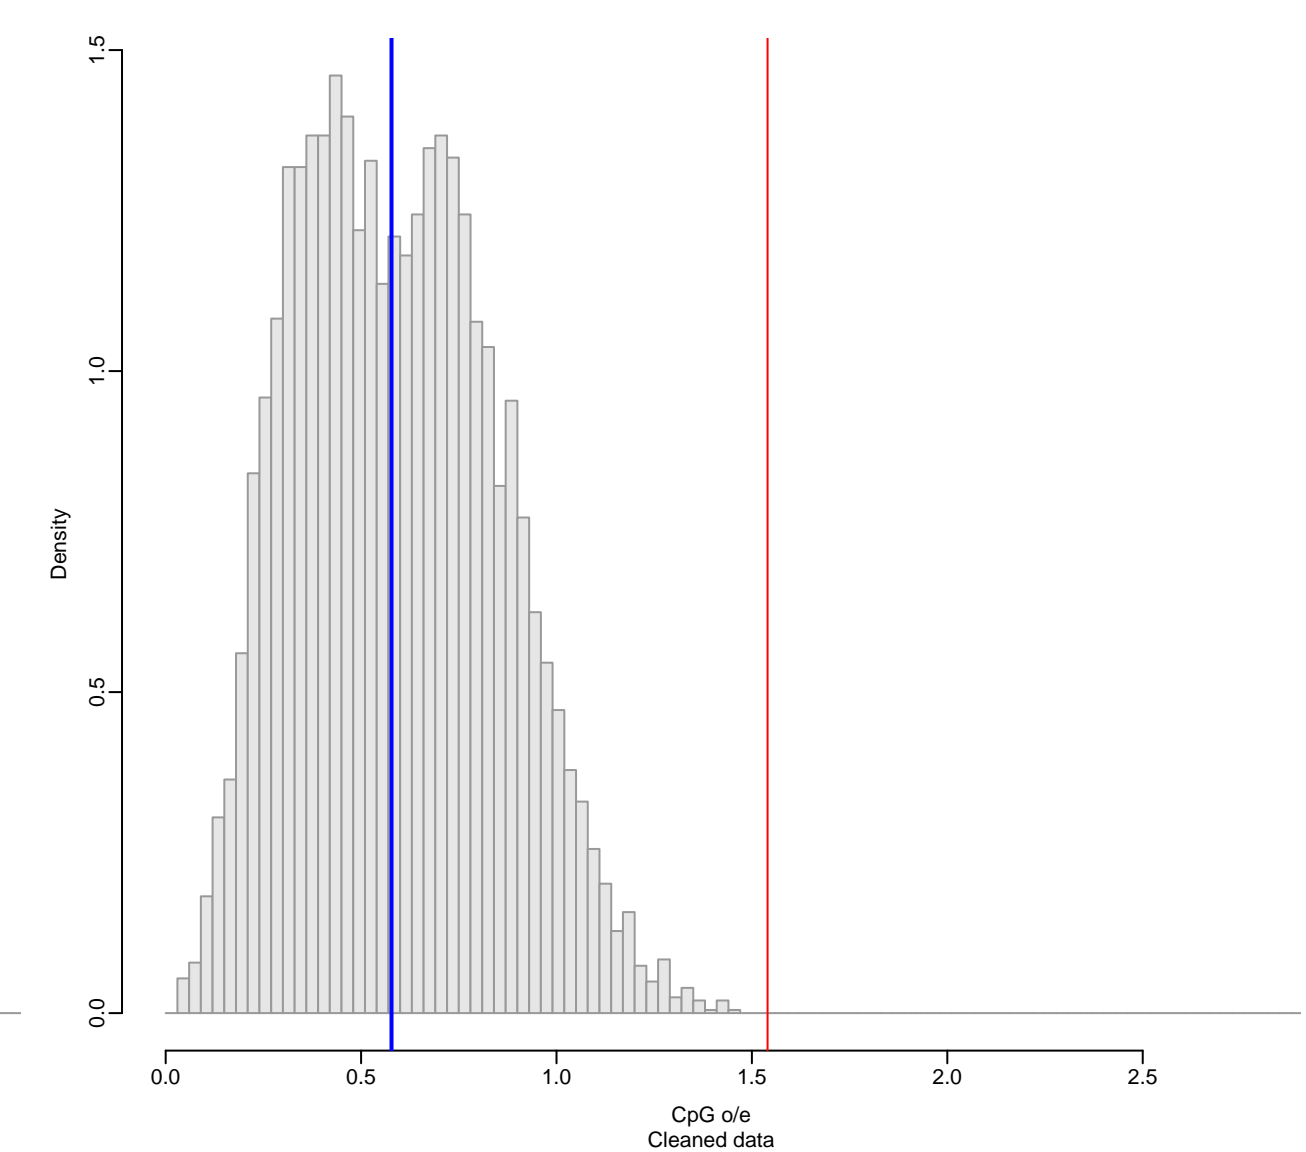

Density

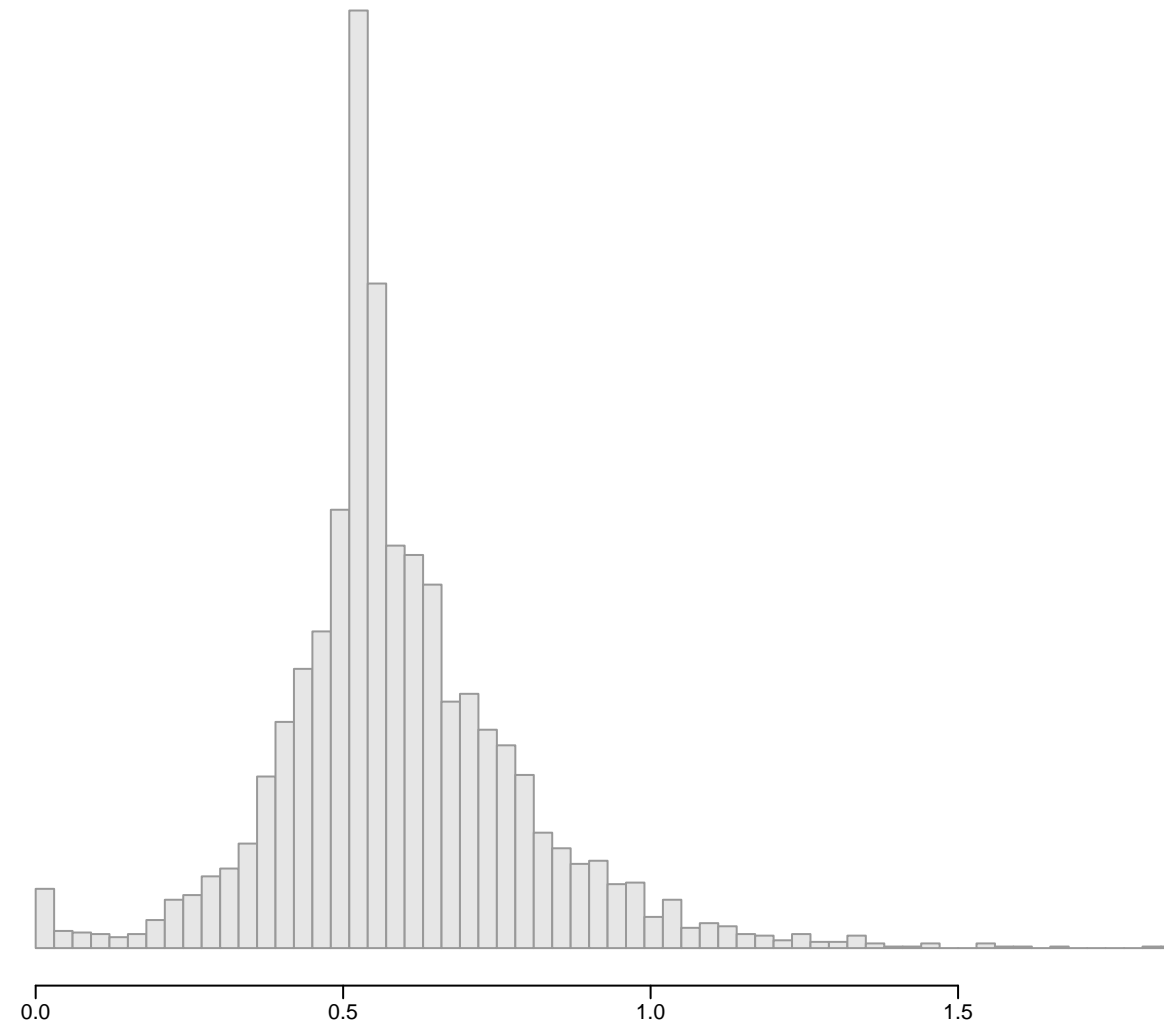

Density

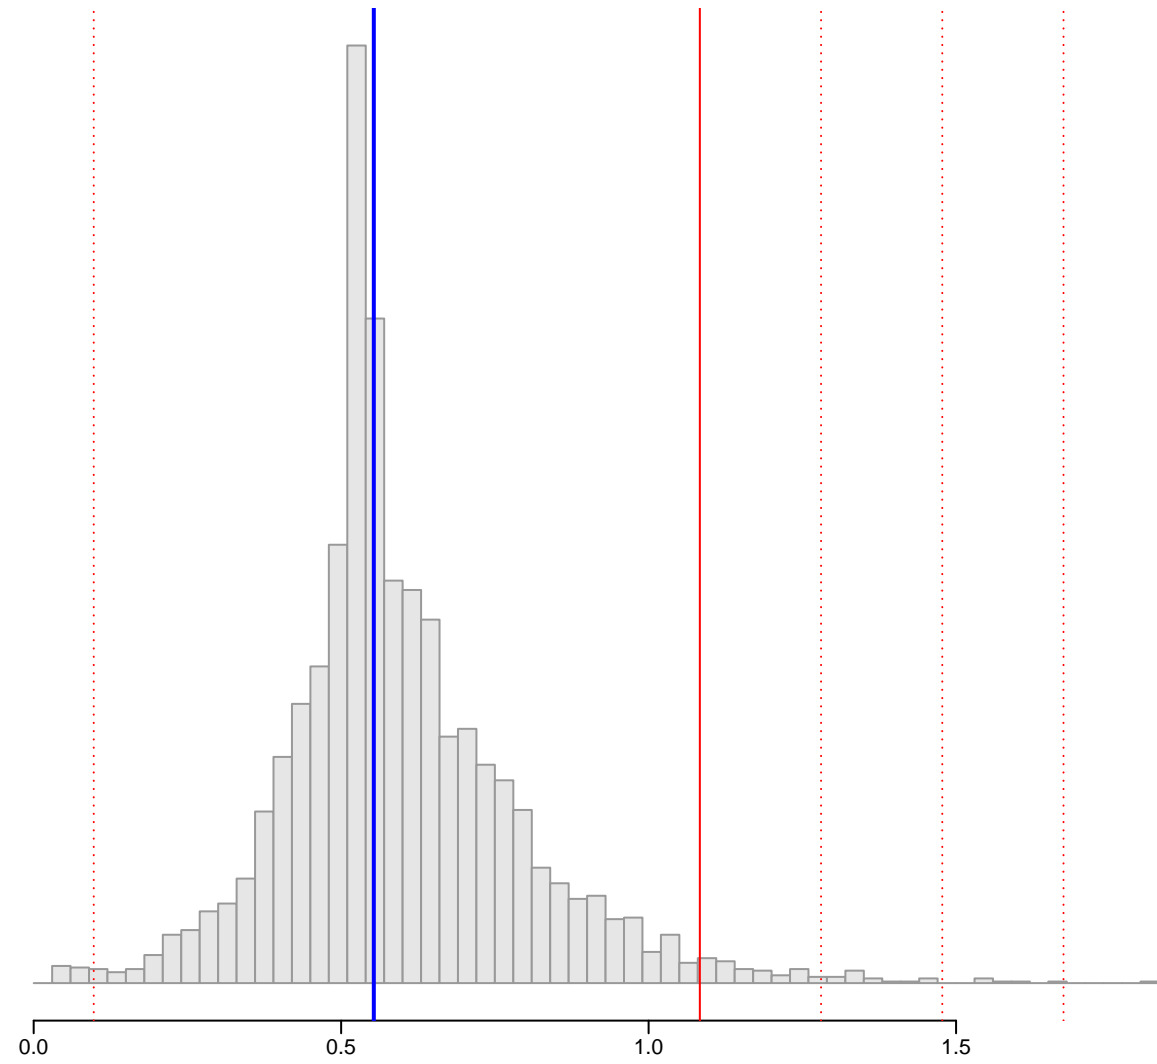

Density

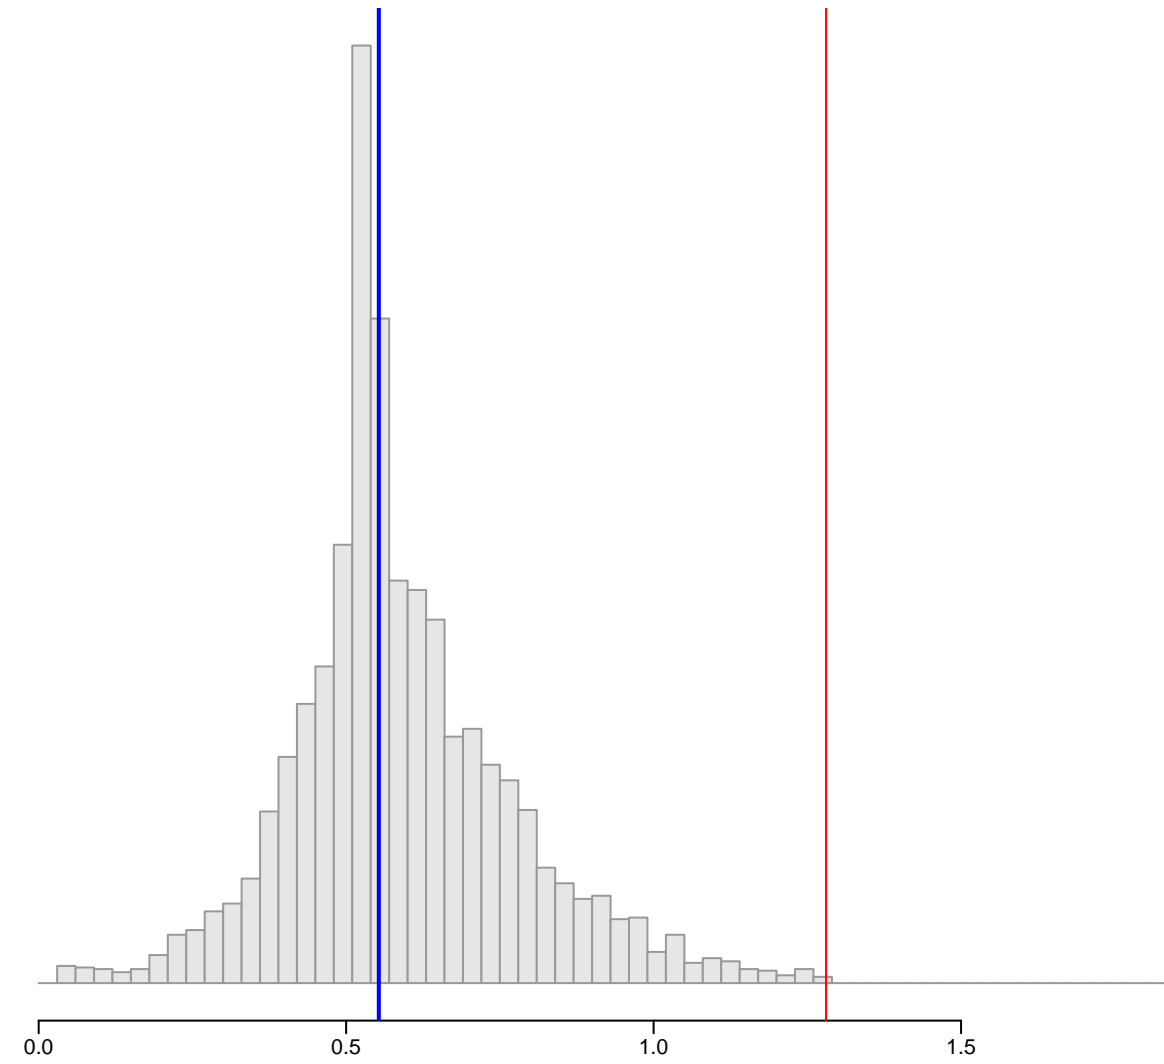

# Acetabularia\_acetabulum

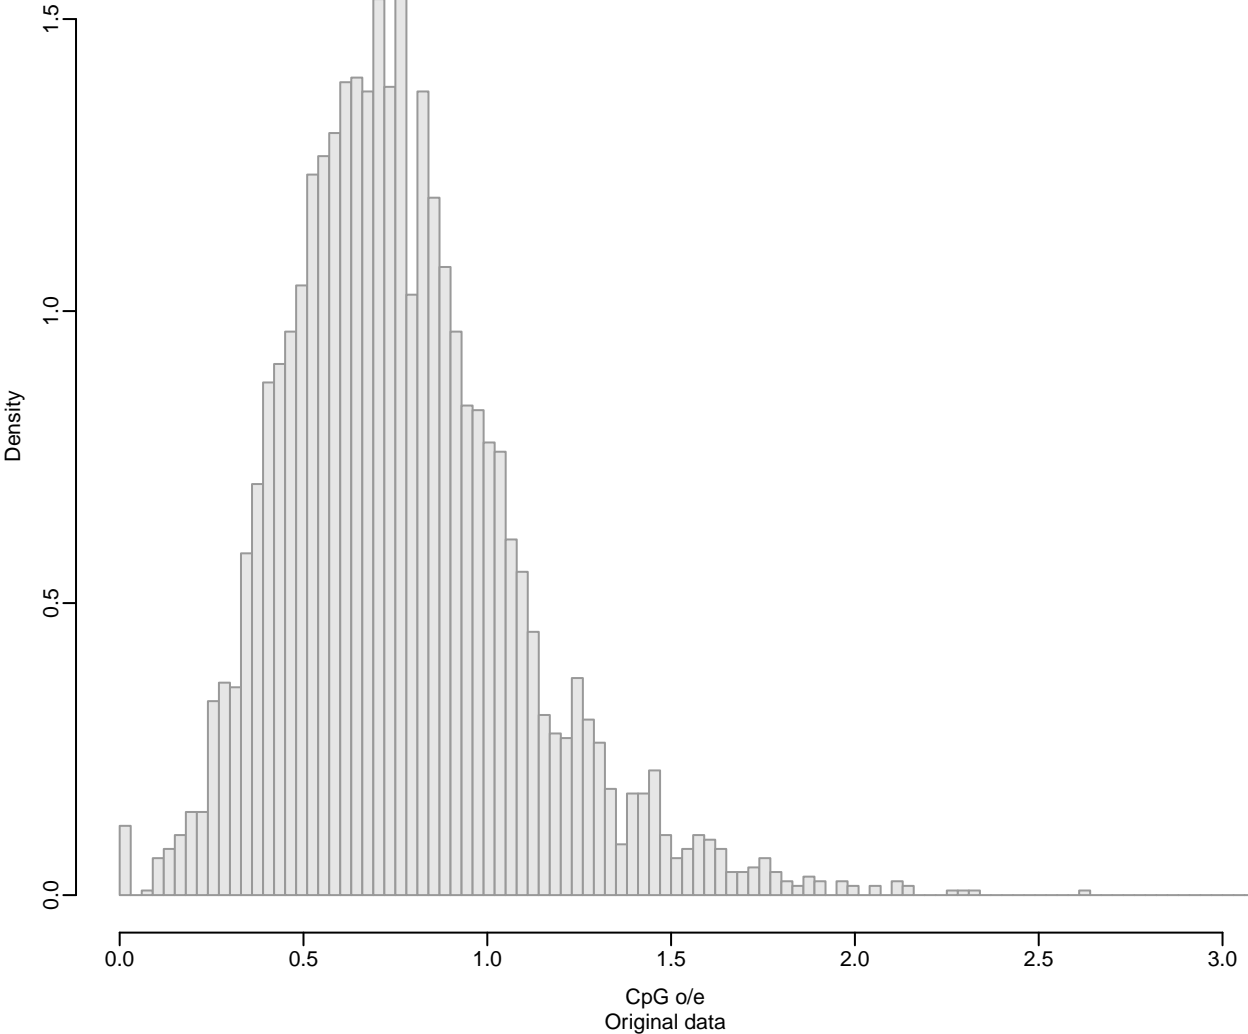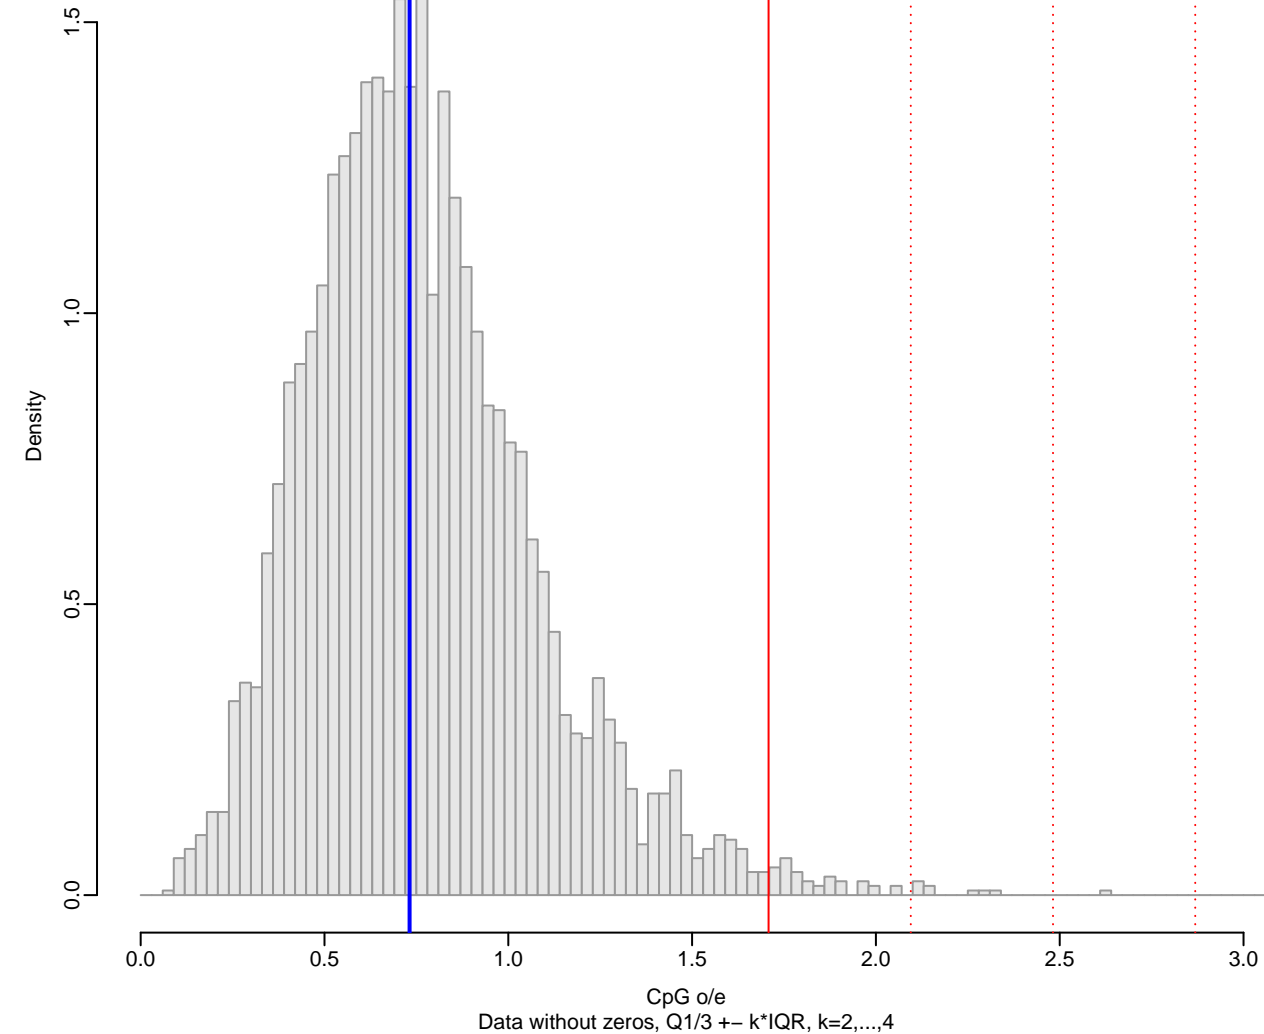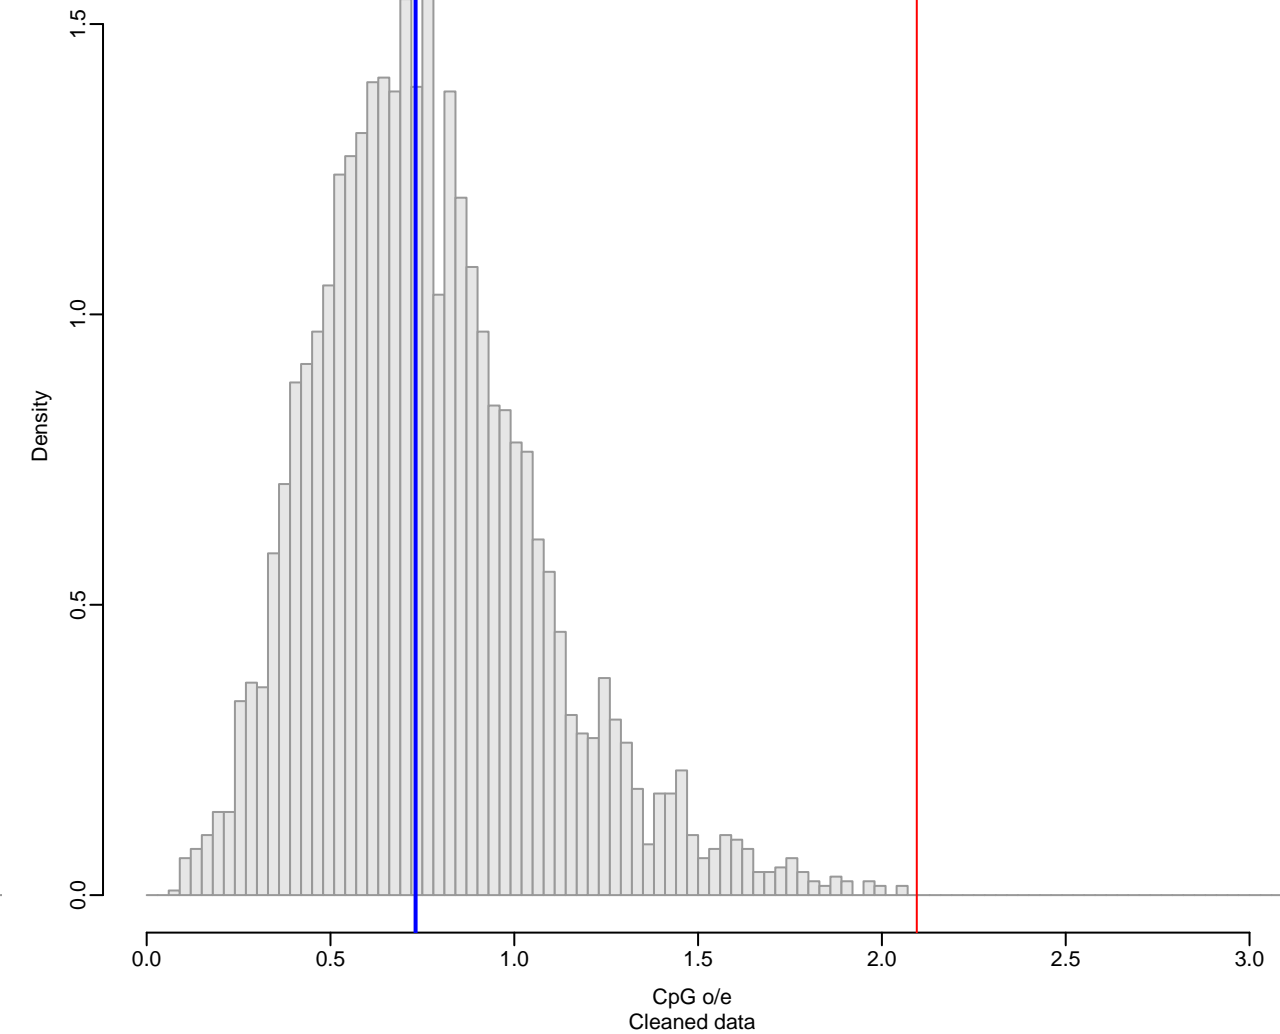

Acipenser\_sinensis

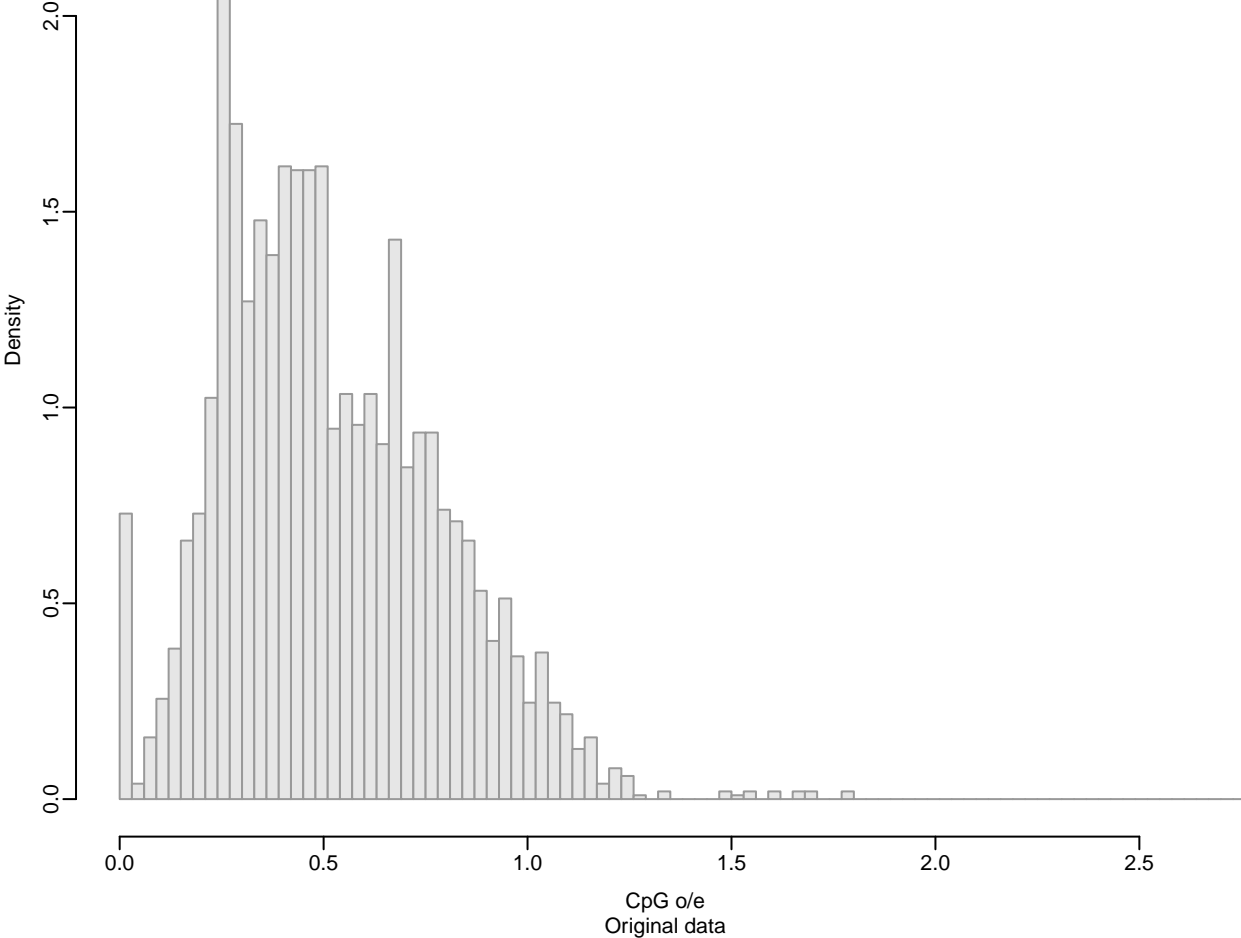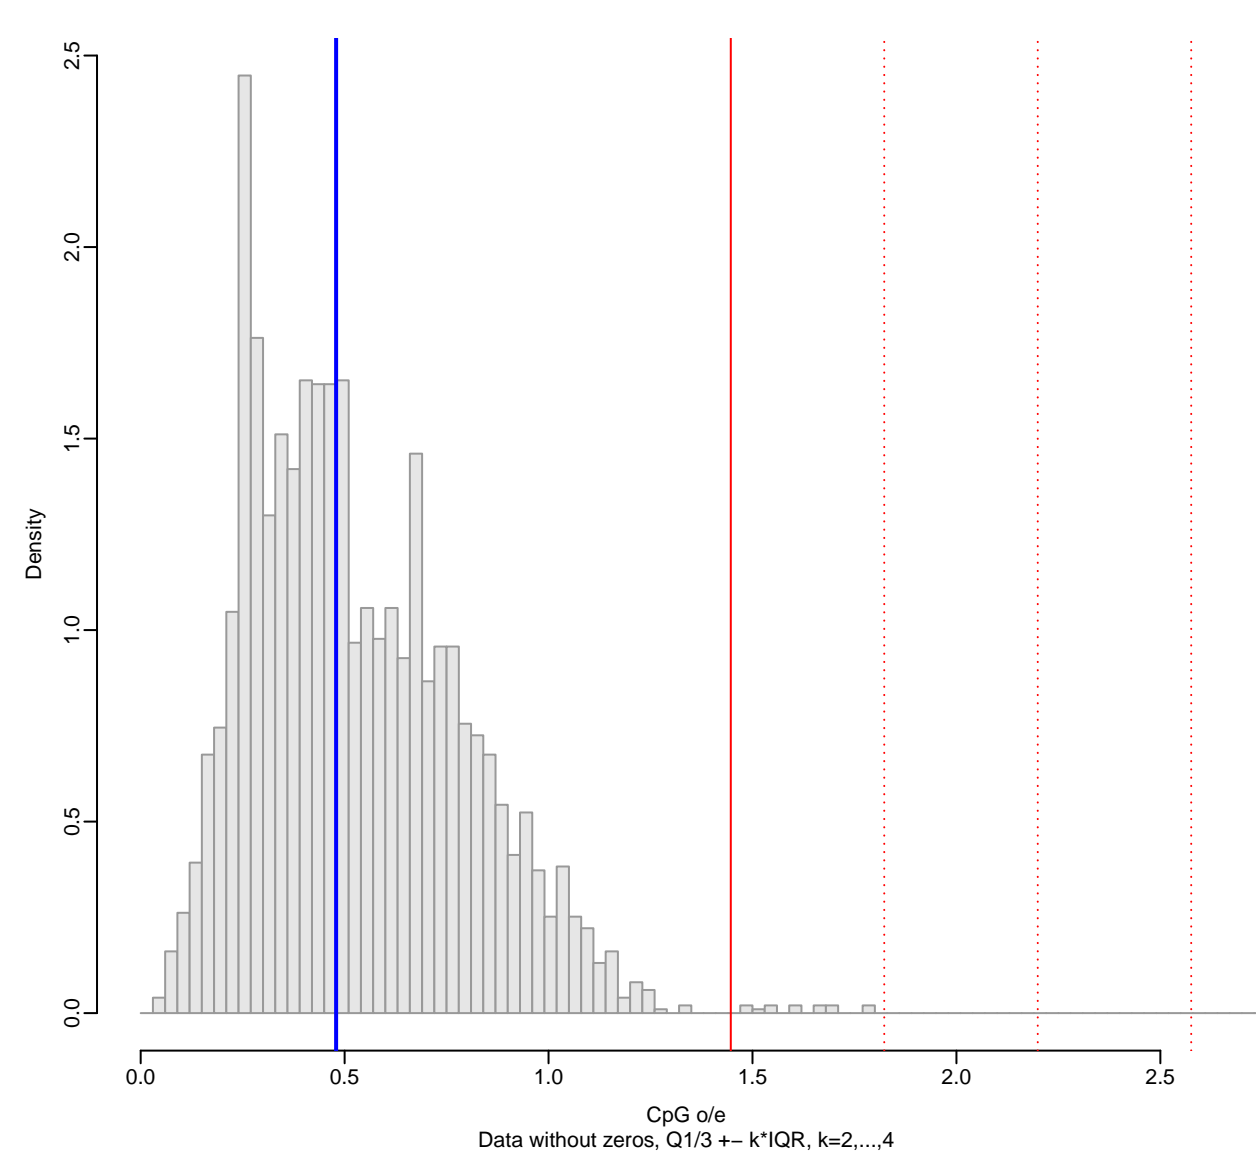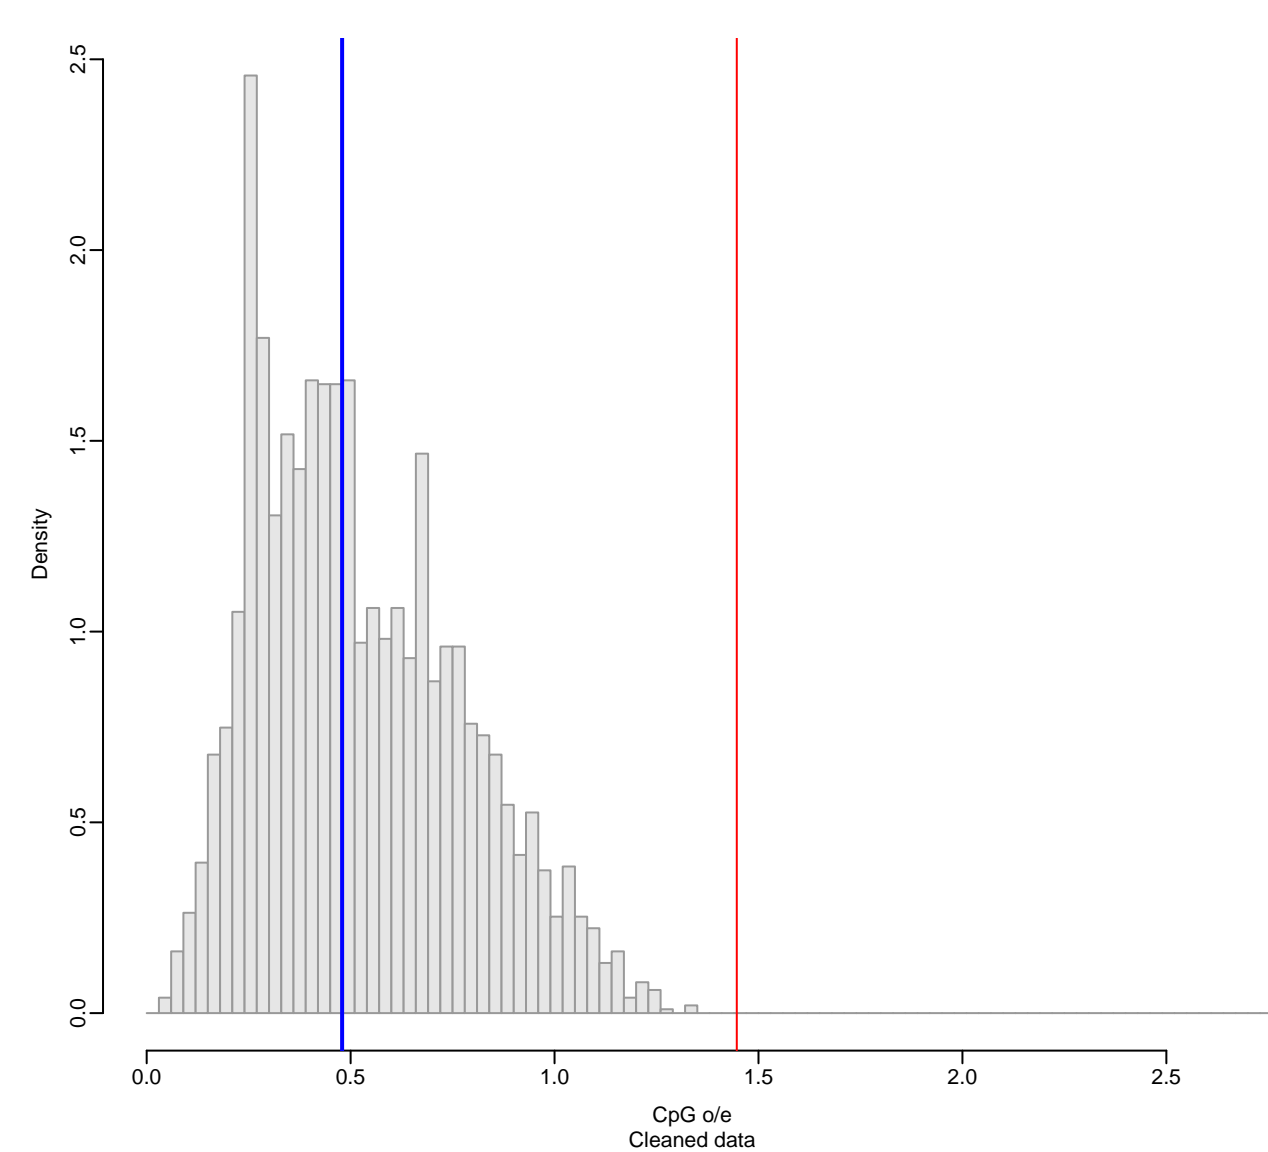

Acipenser\_transmontanus

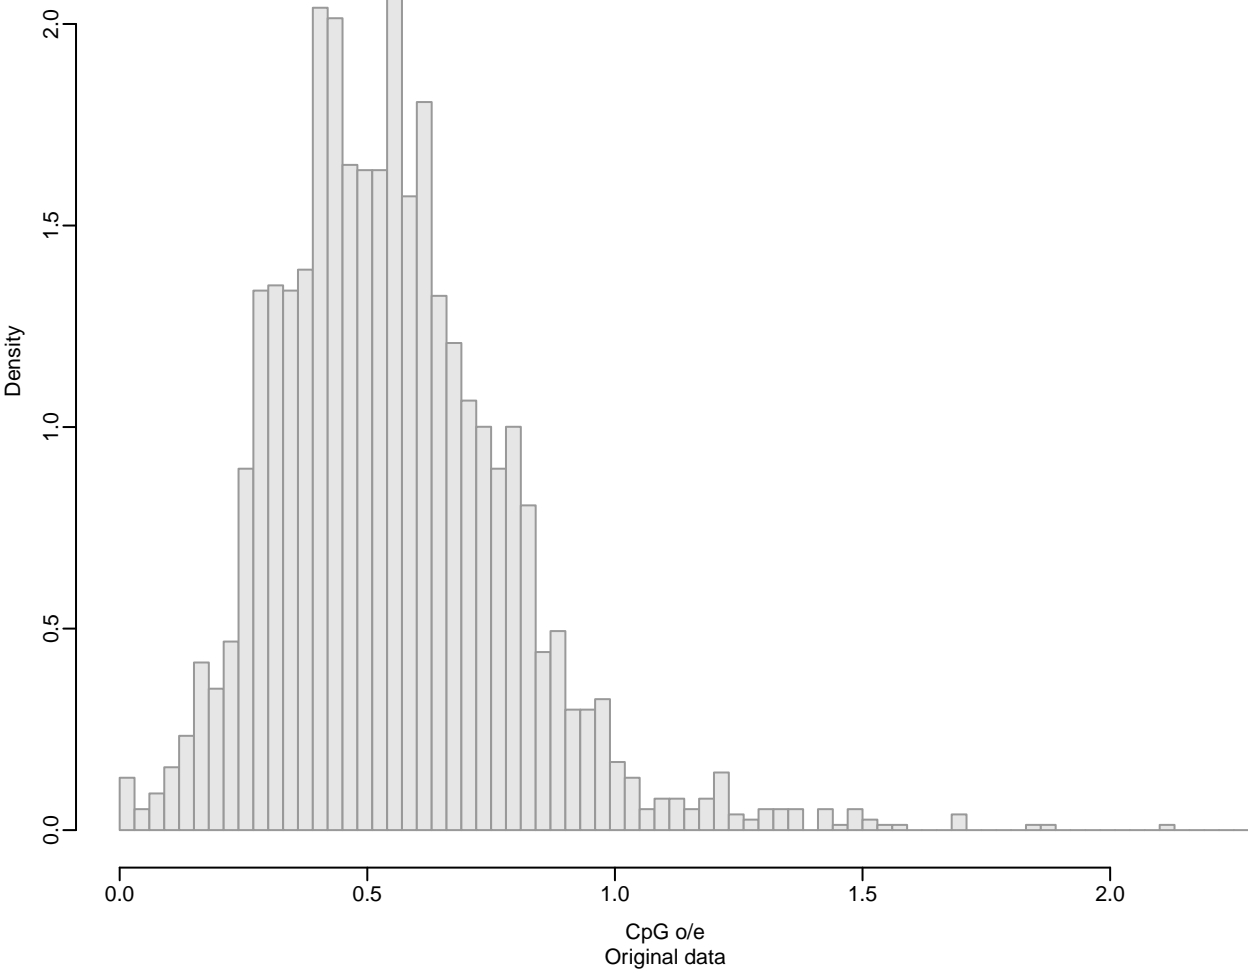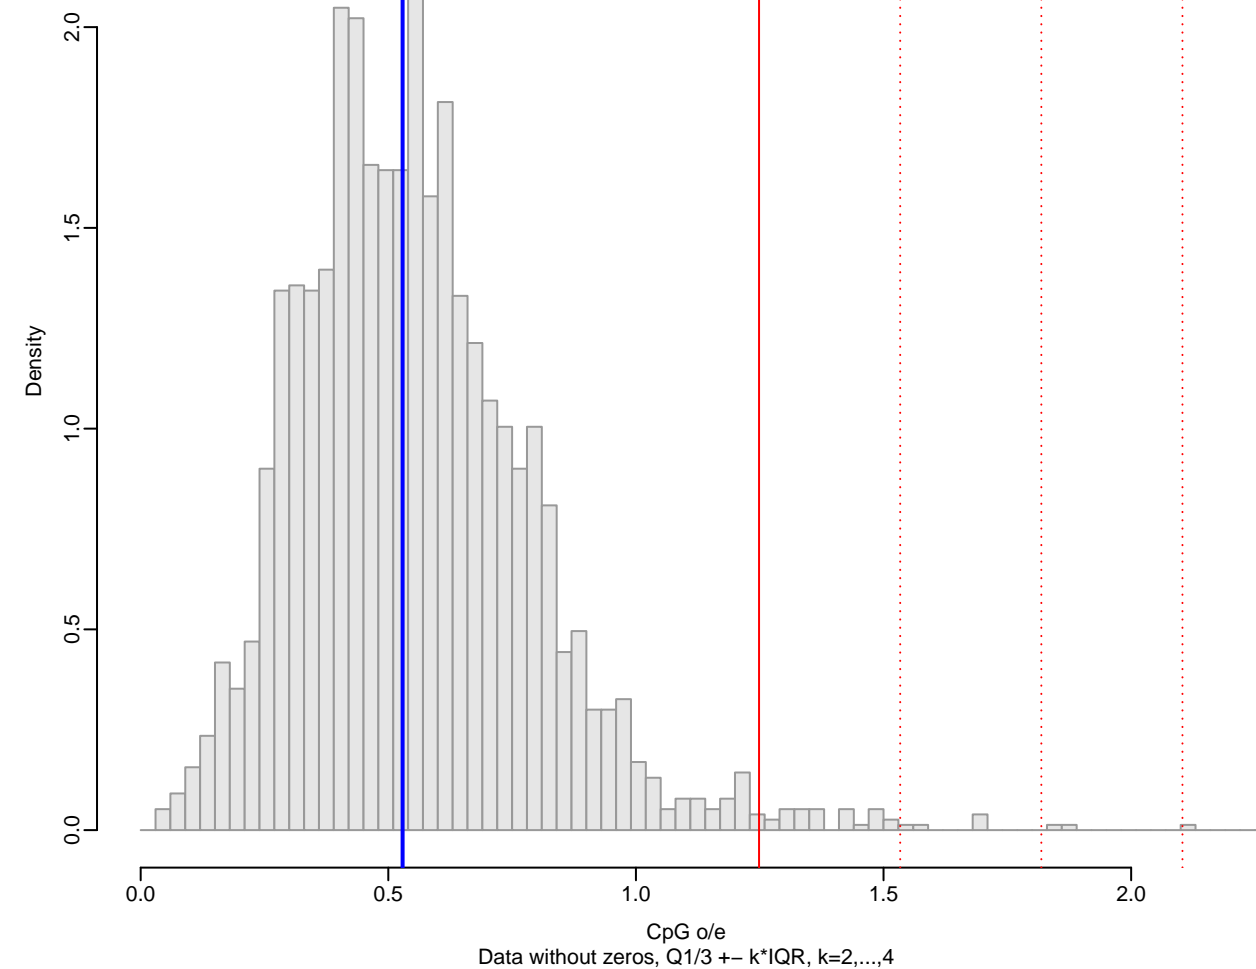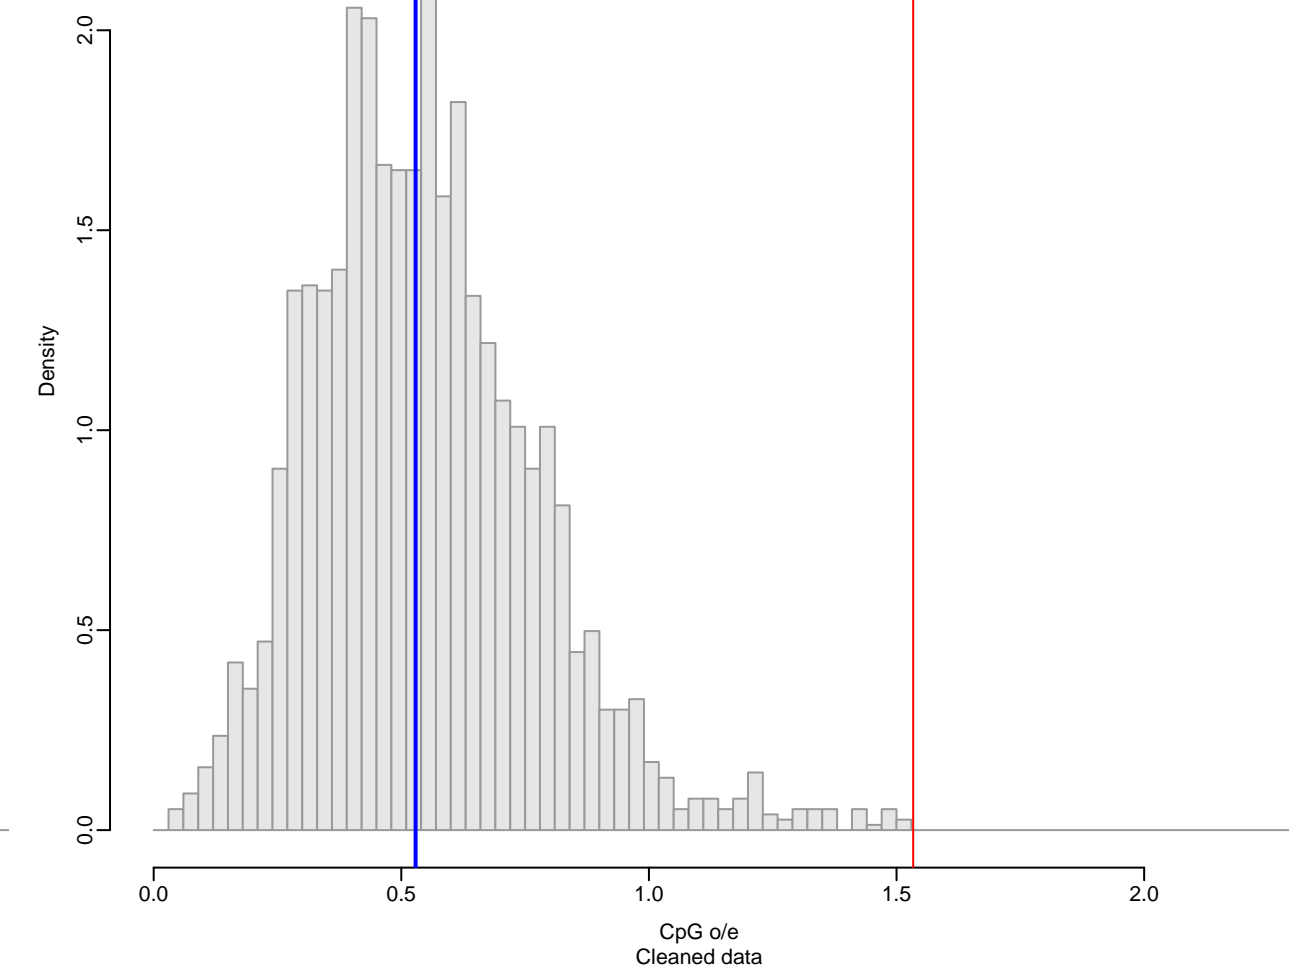

# Acropora\_millepora

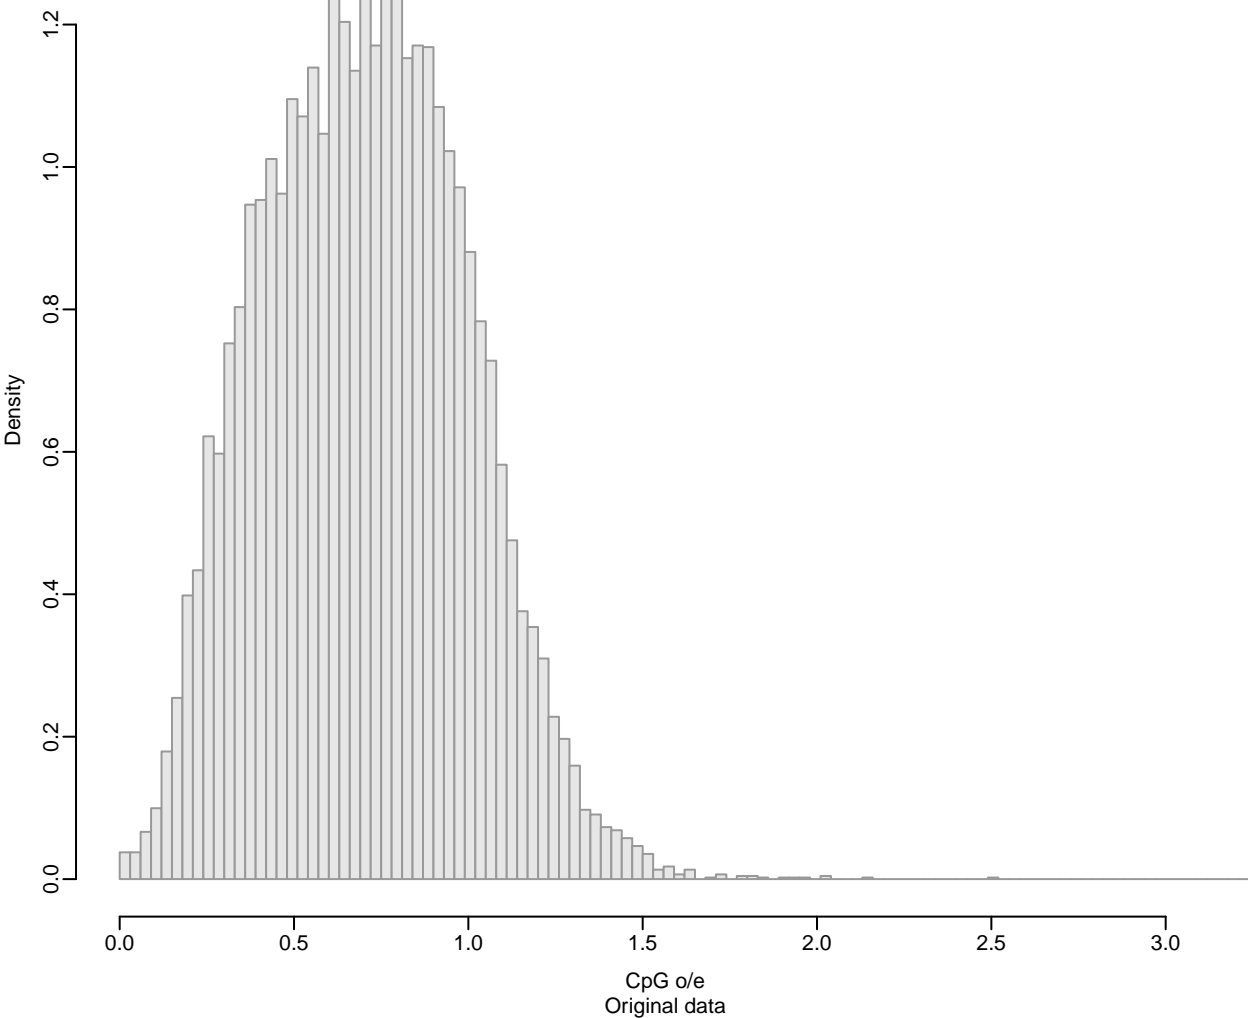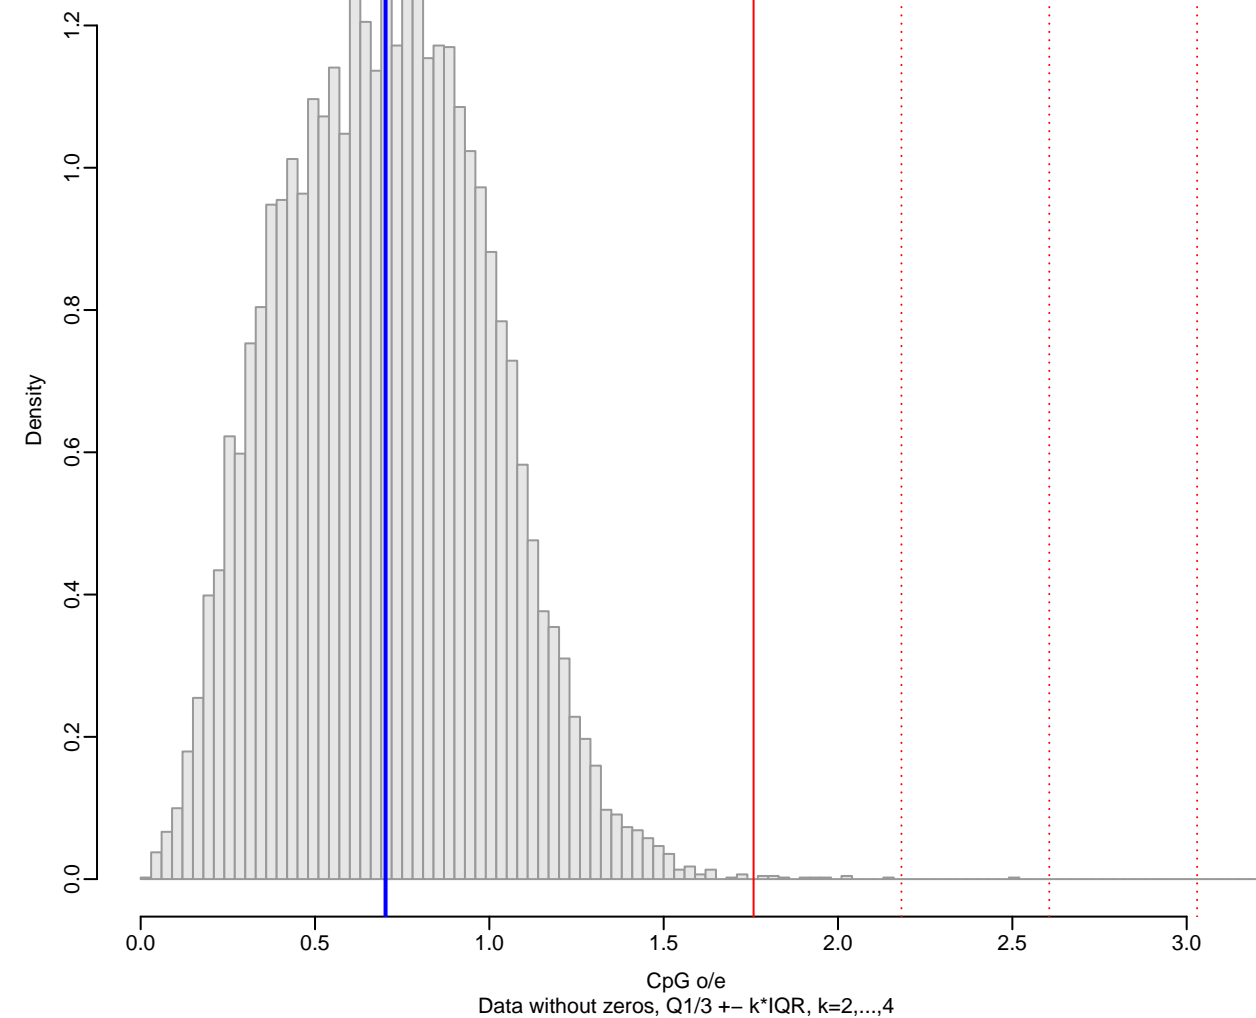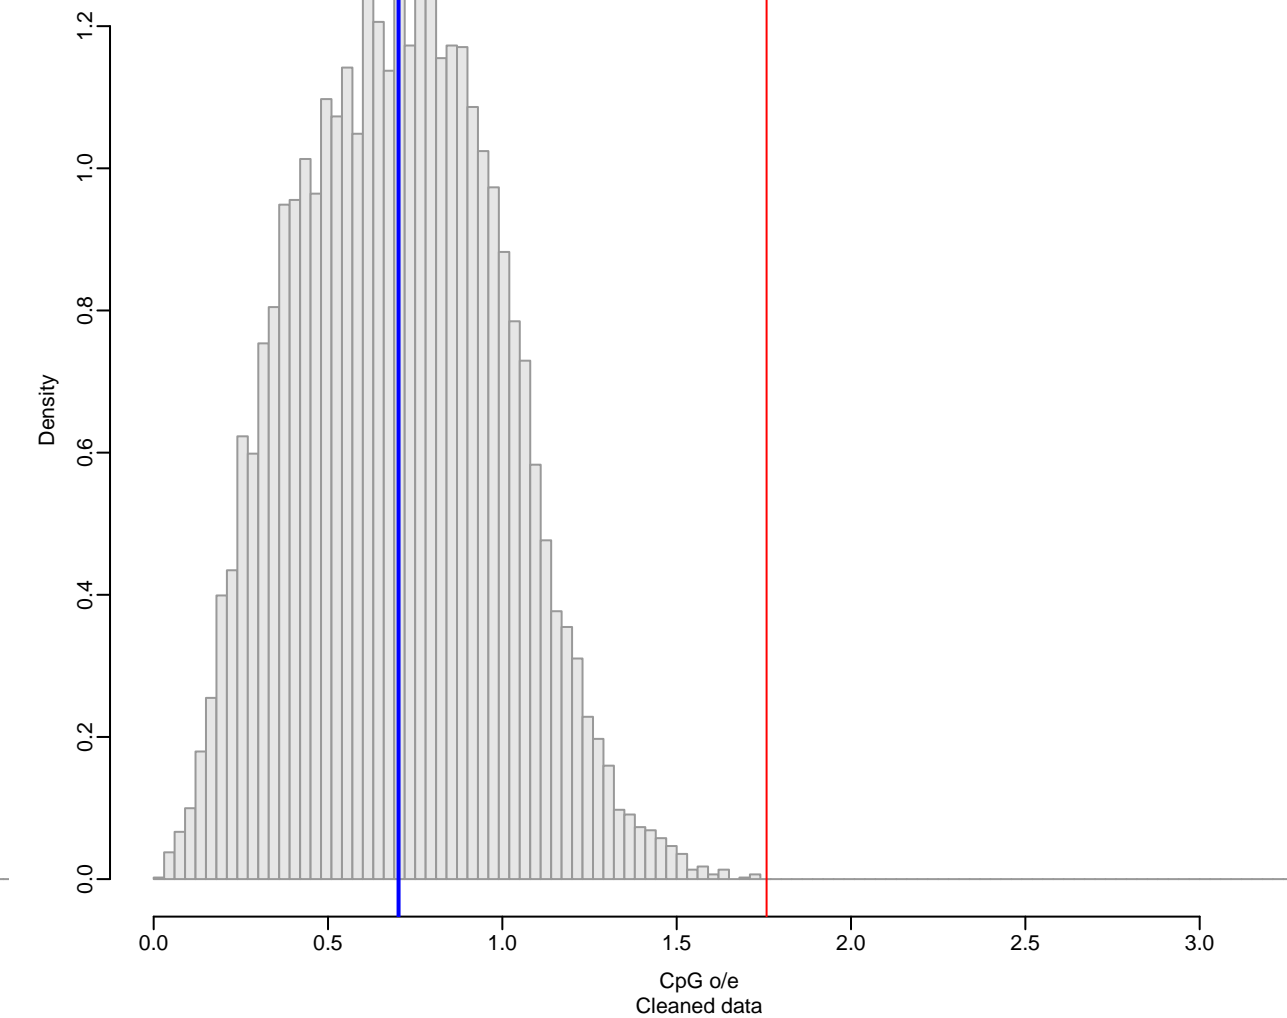

# Acropora\_palmata

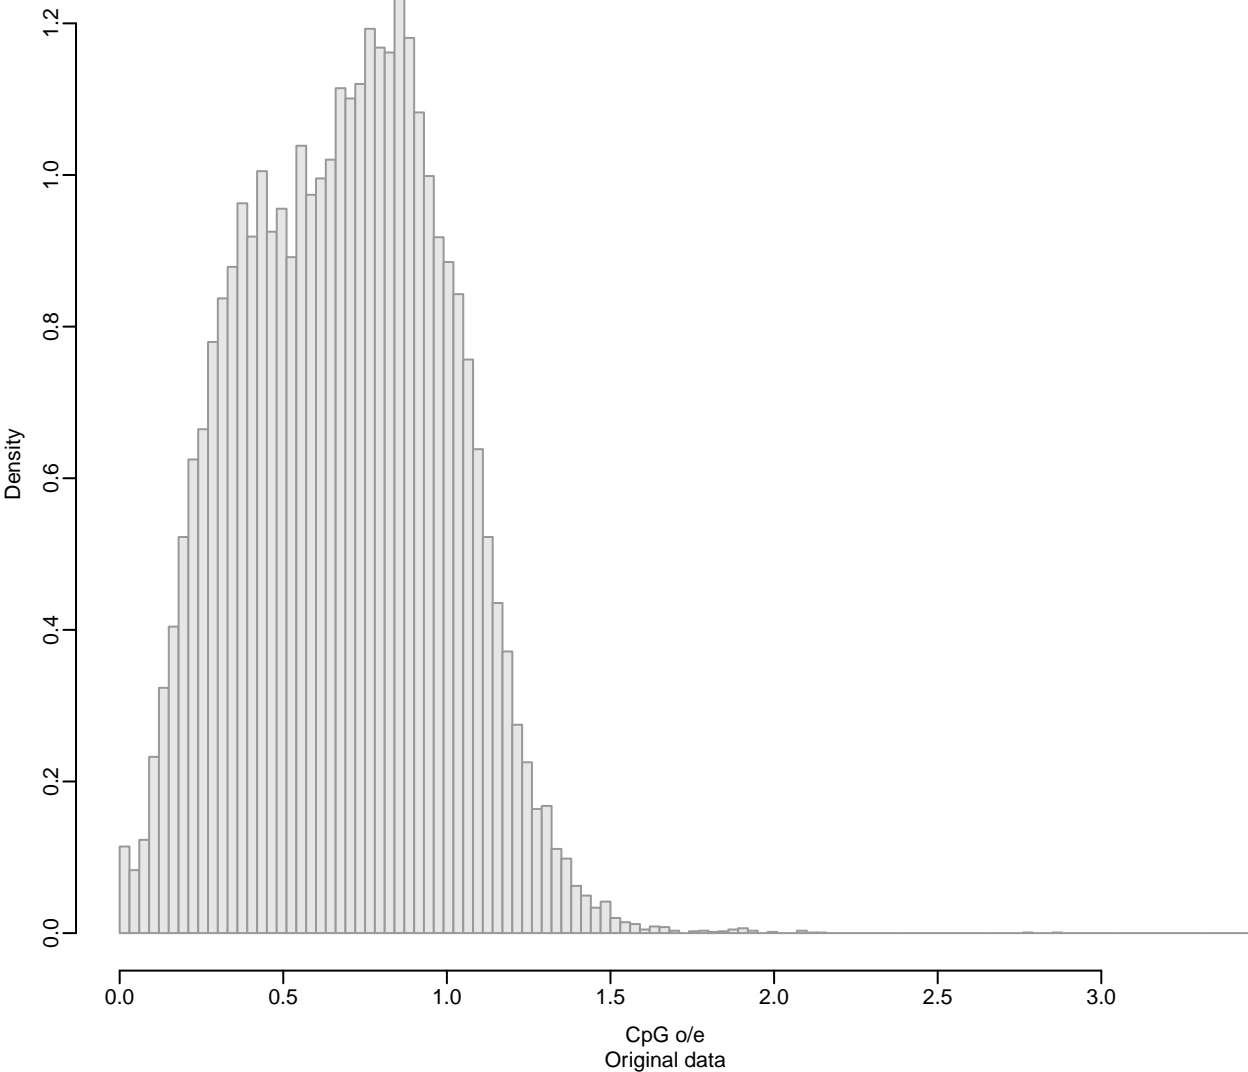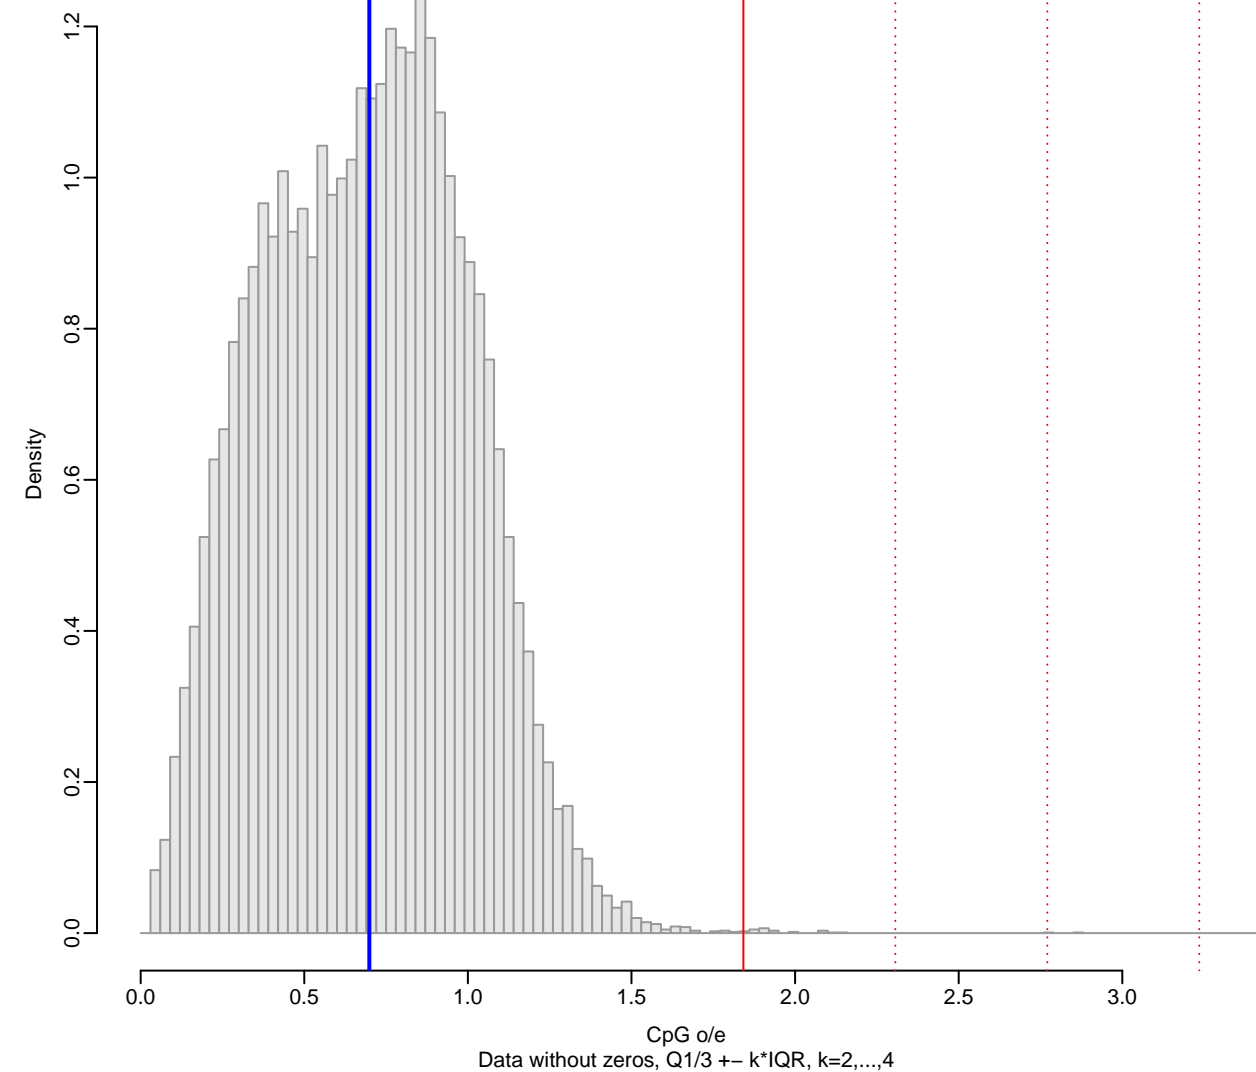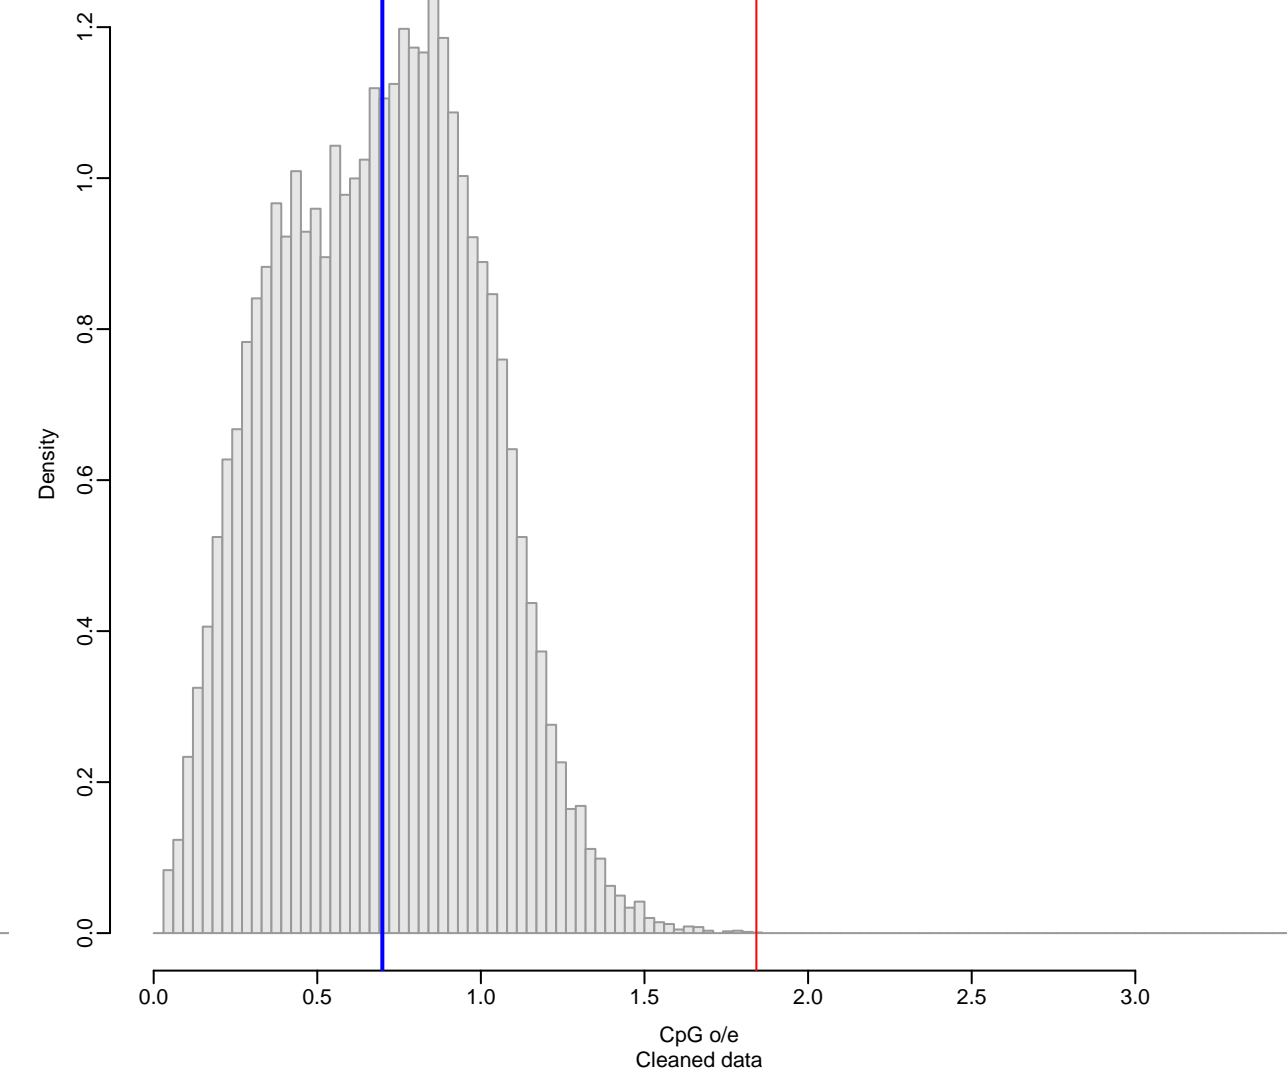

Actinidia\_arguta

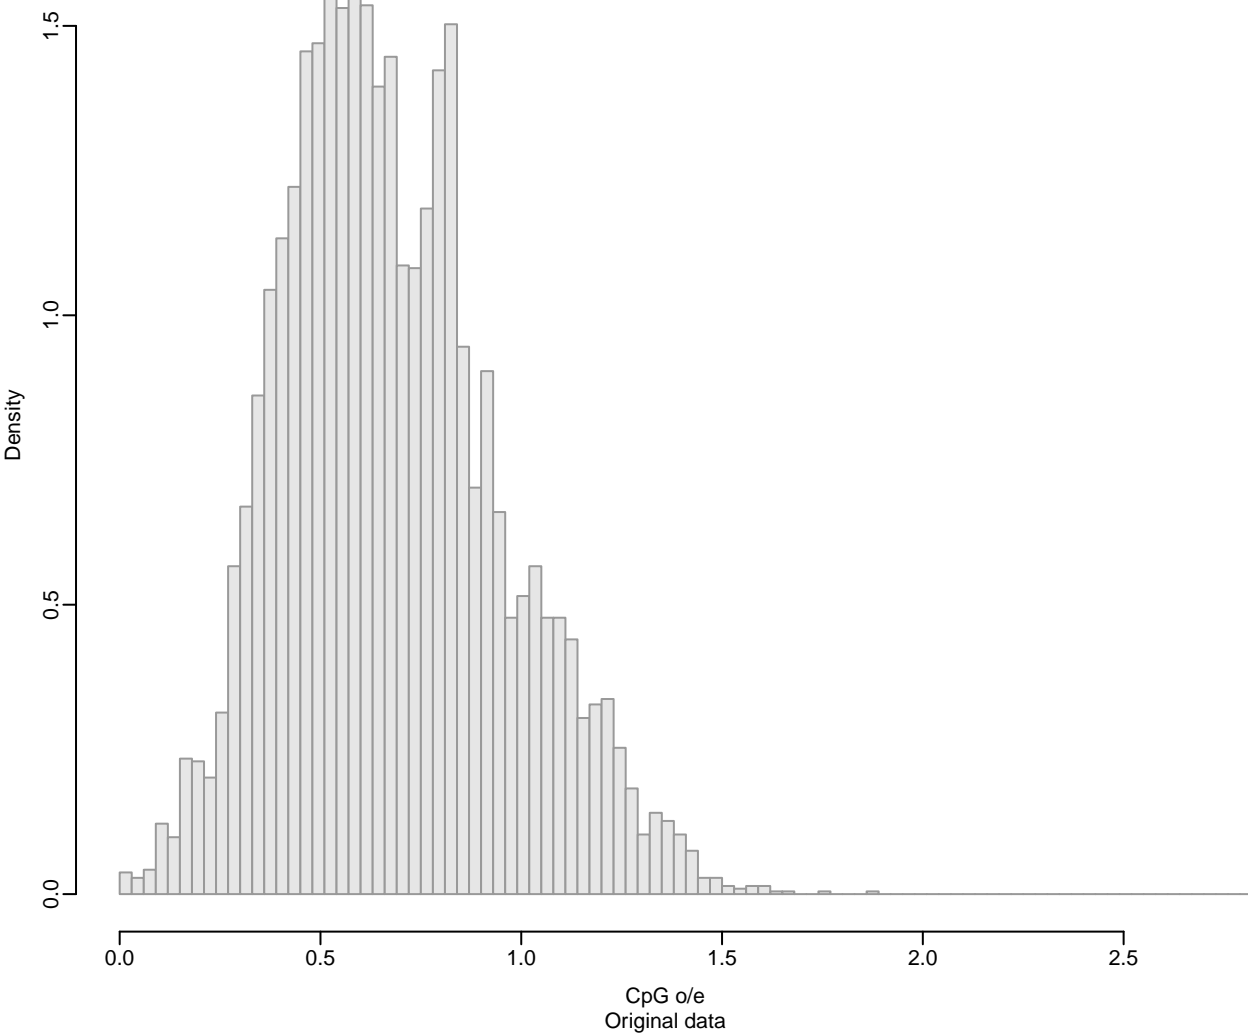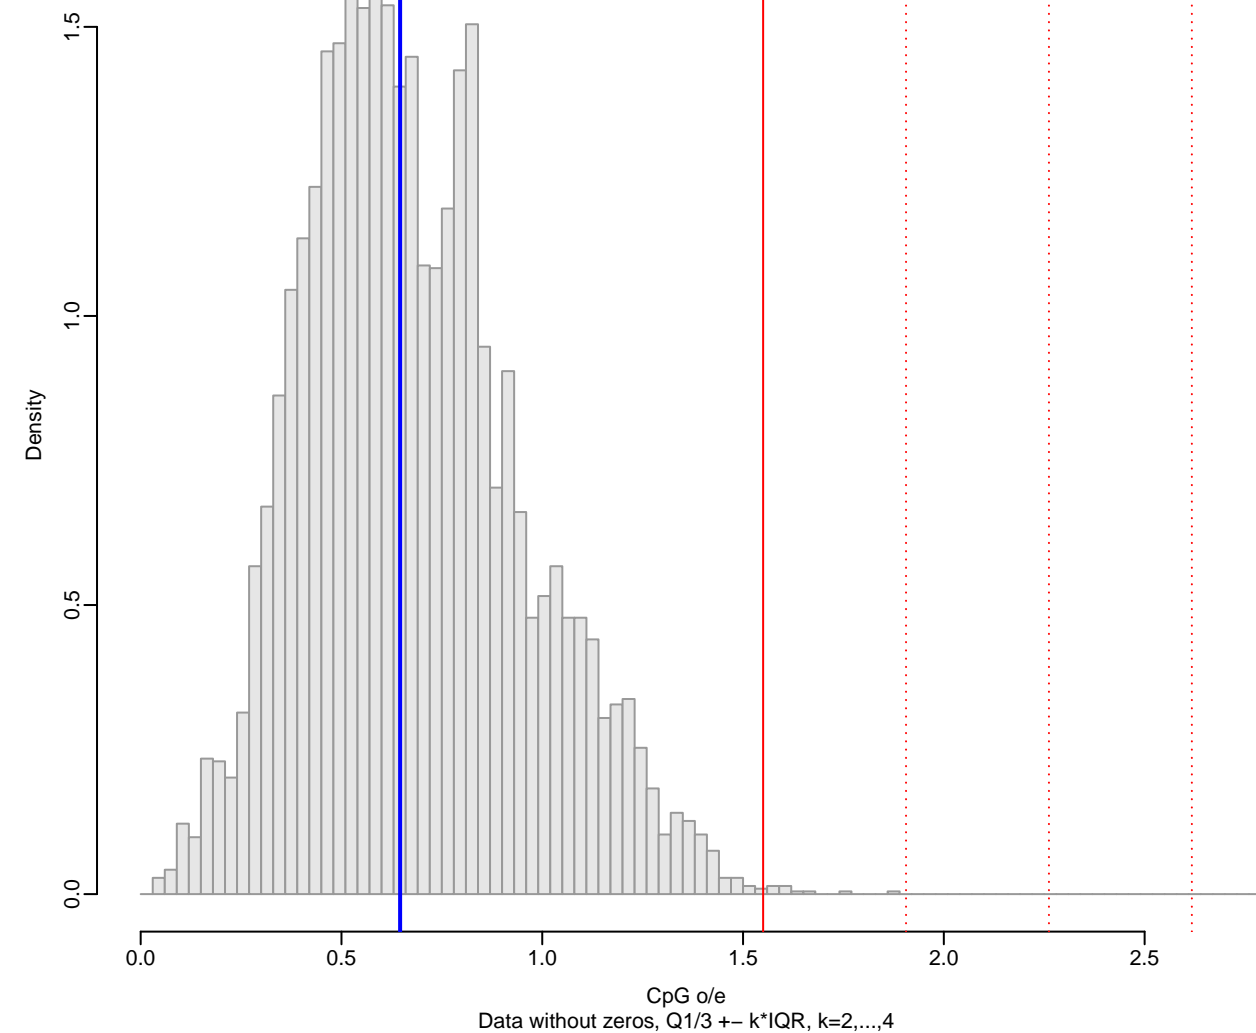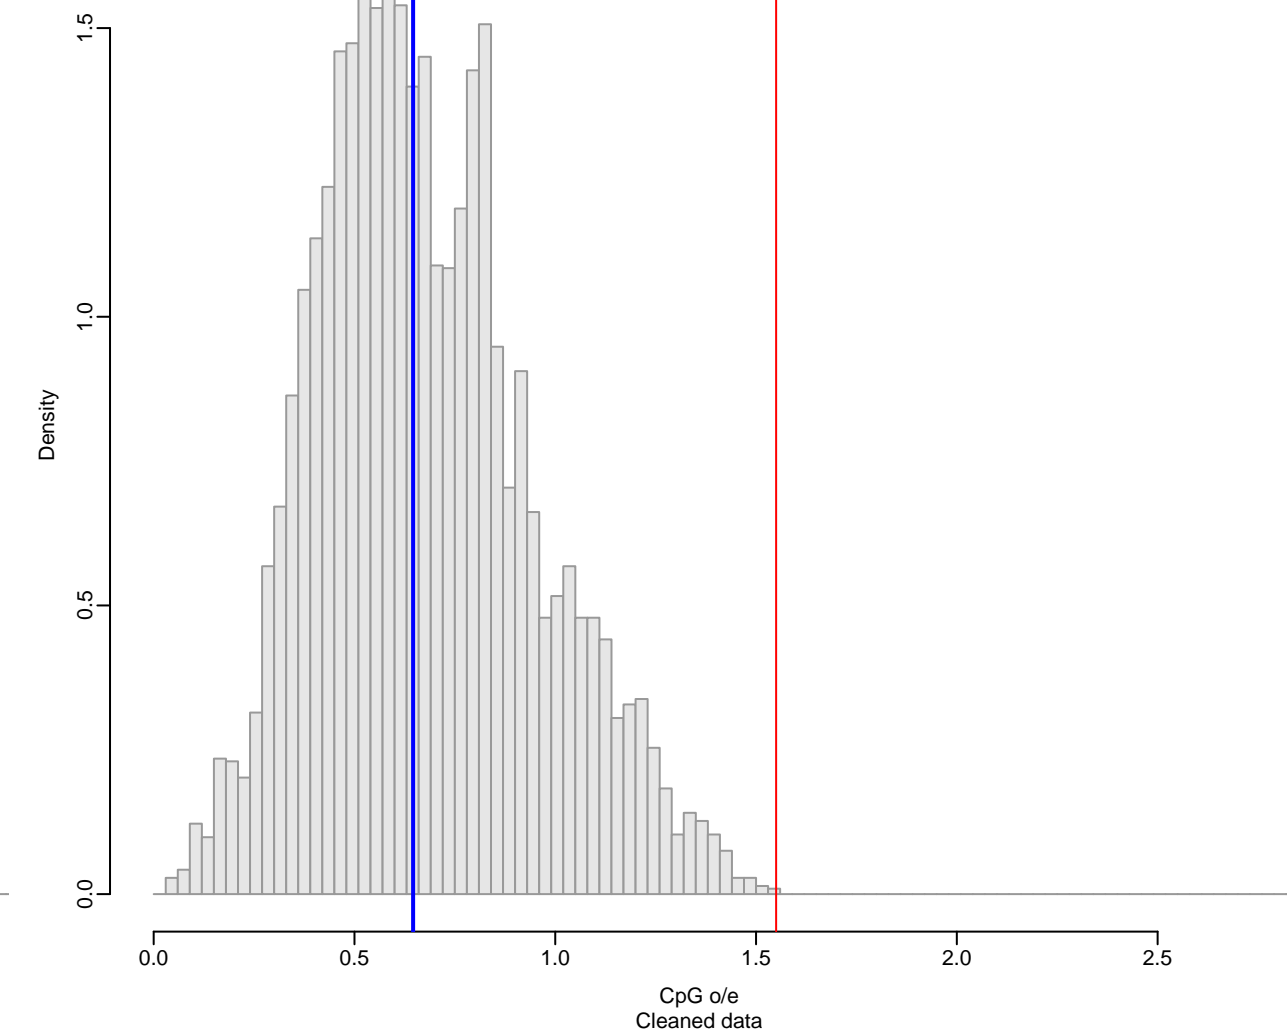



Actinidia\_chinensis

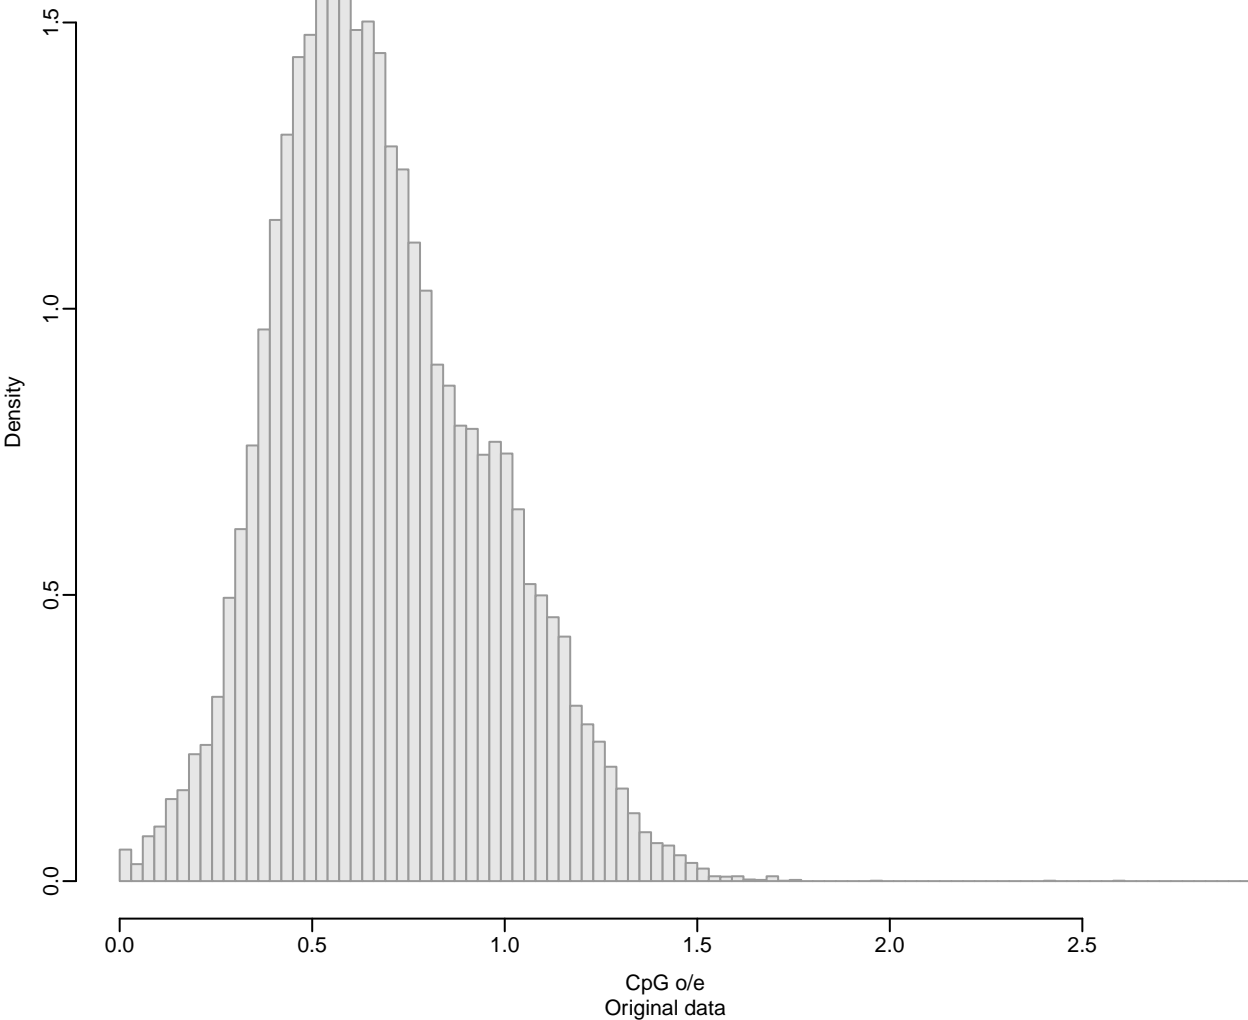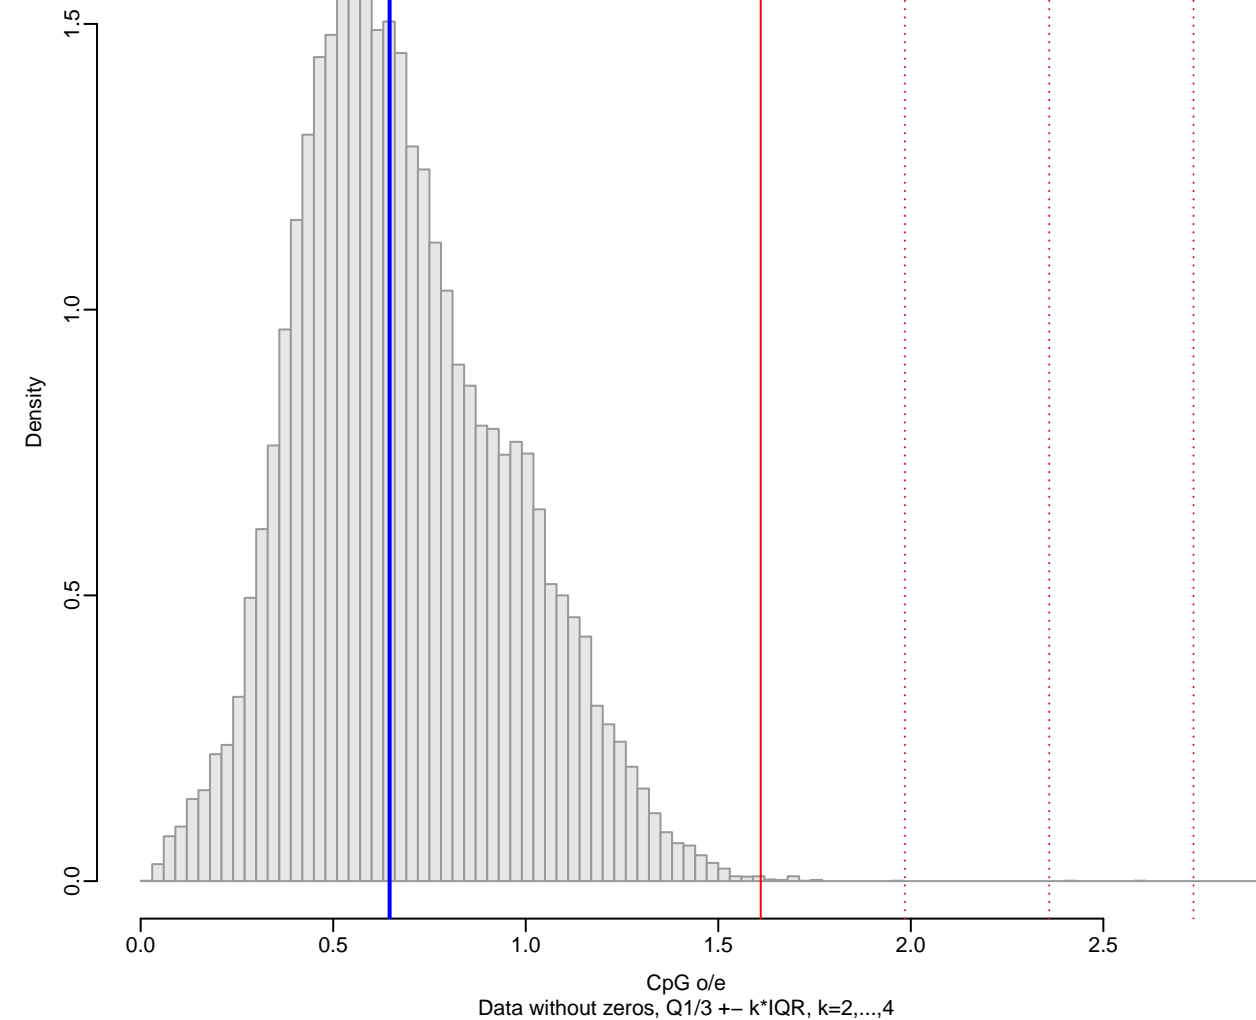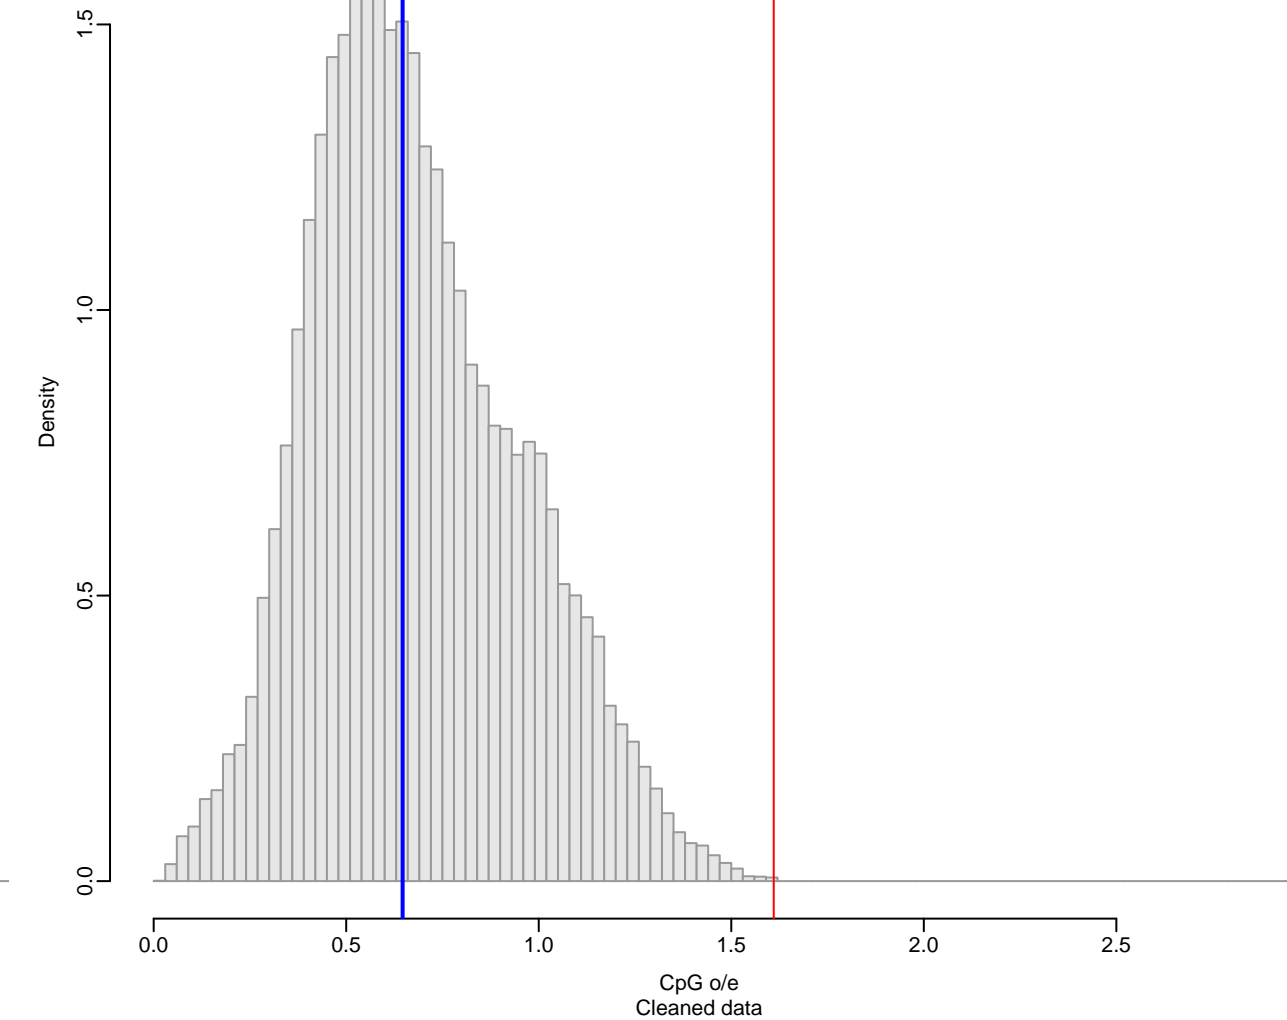

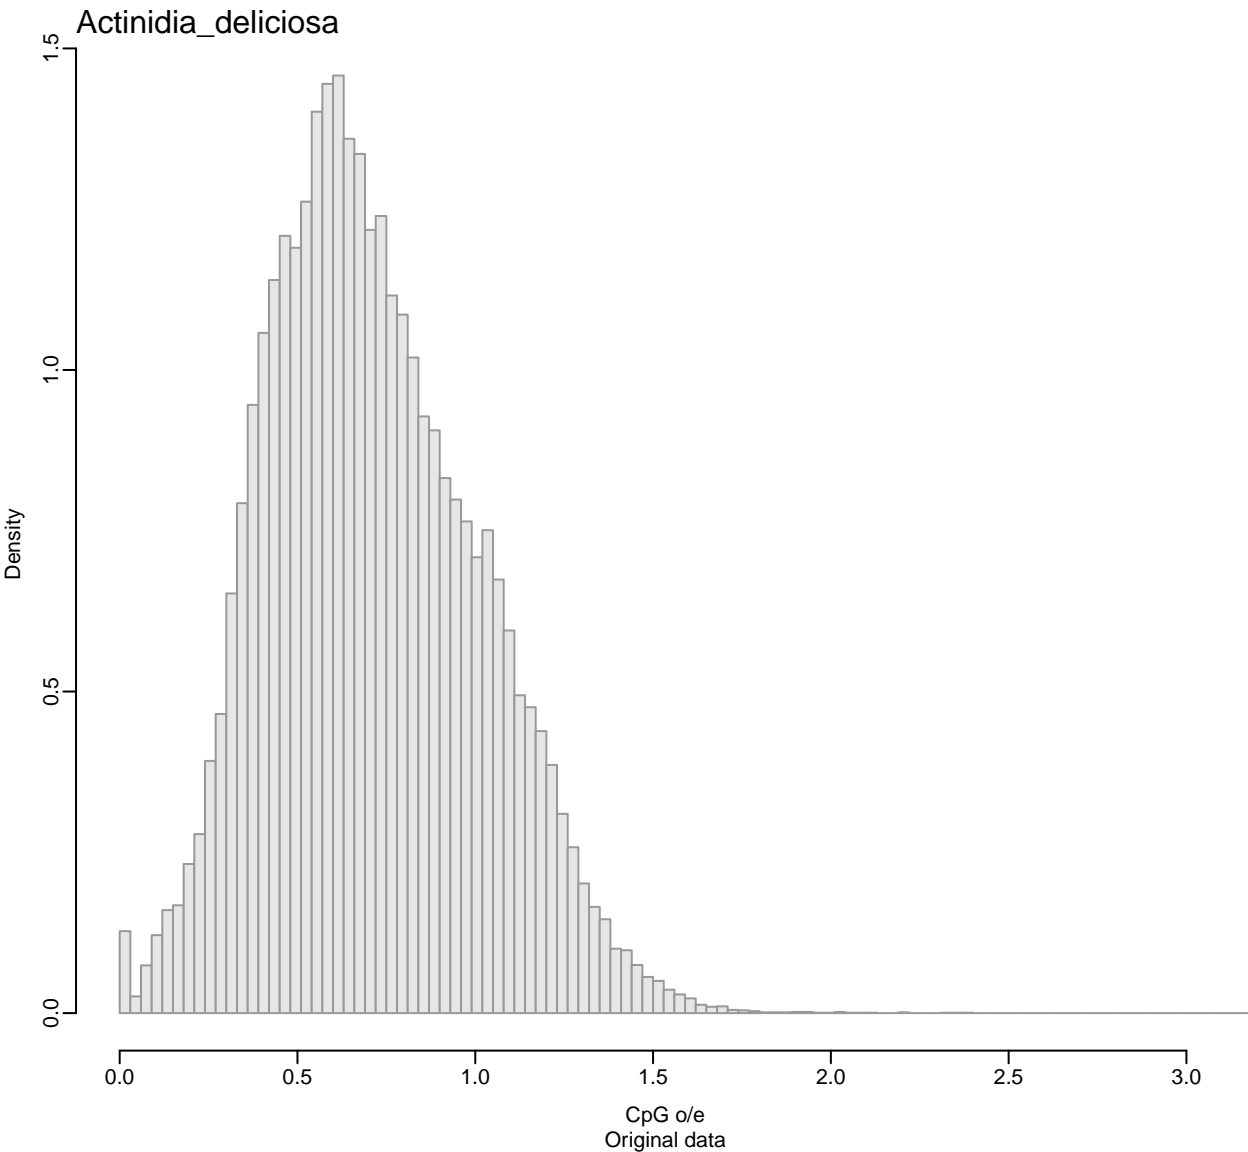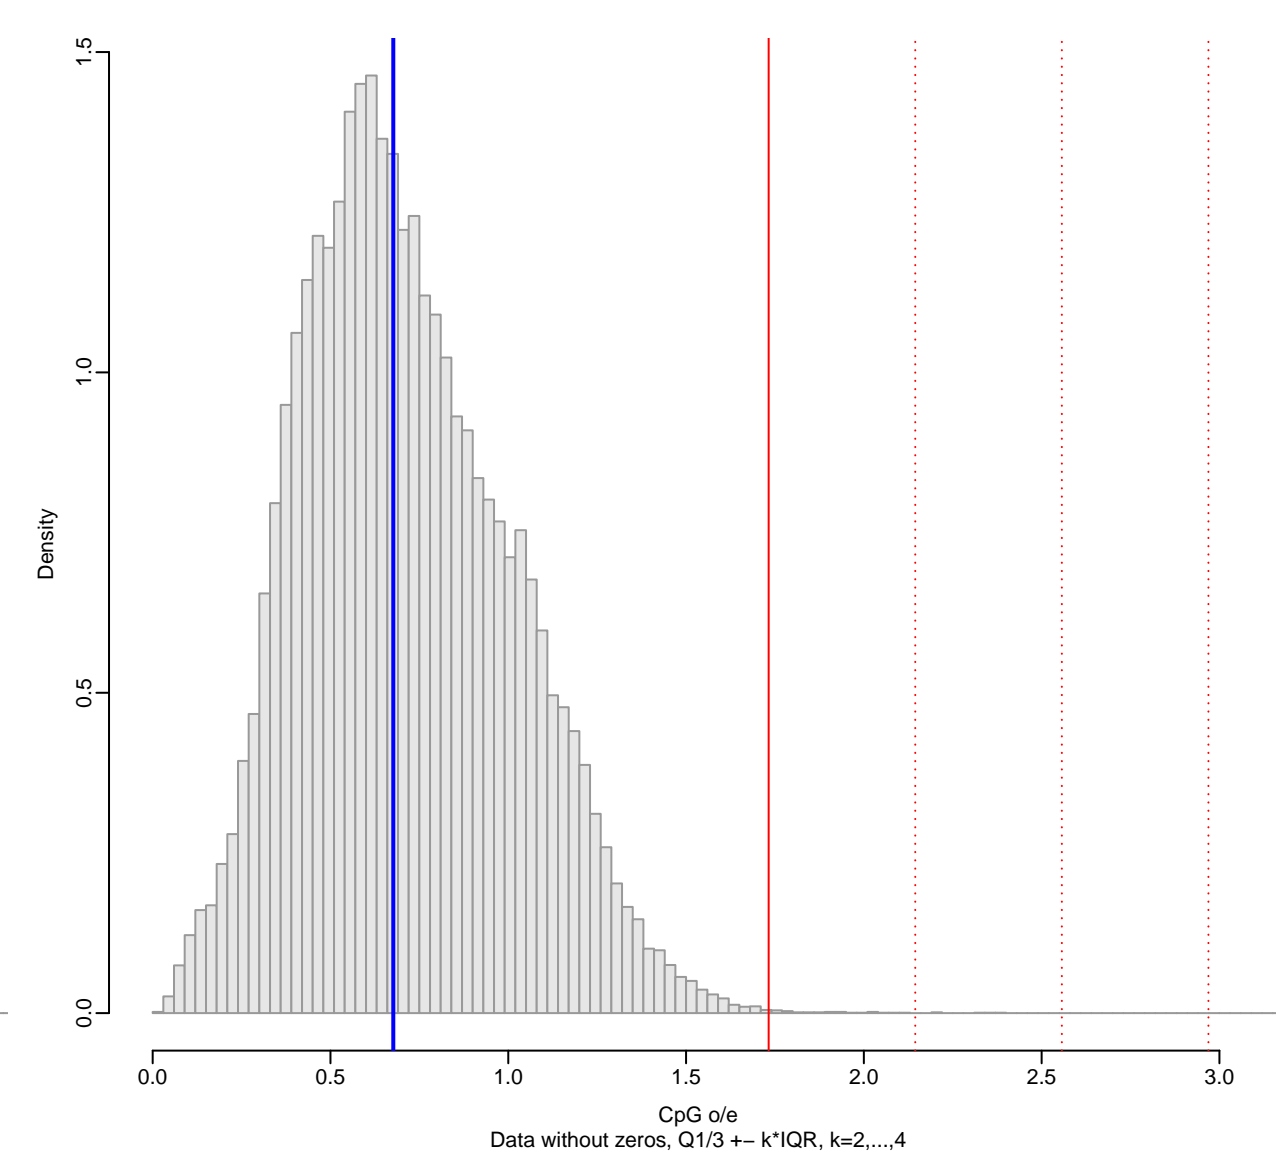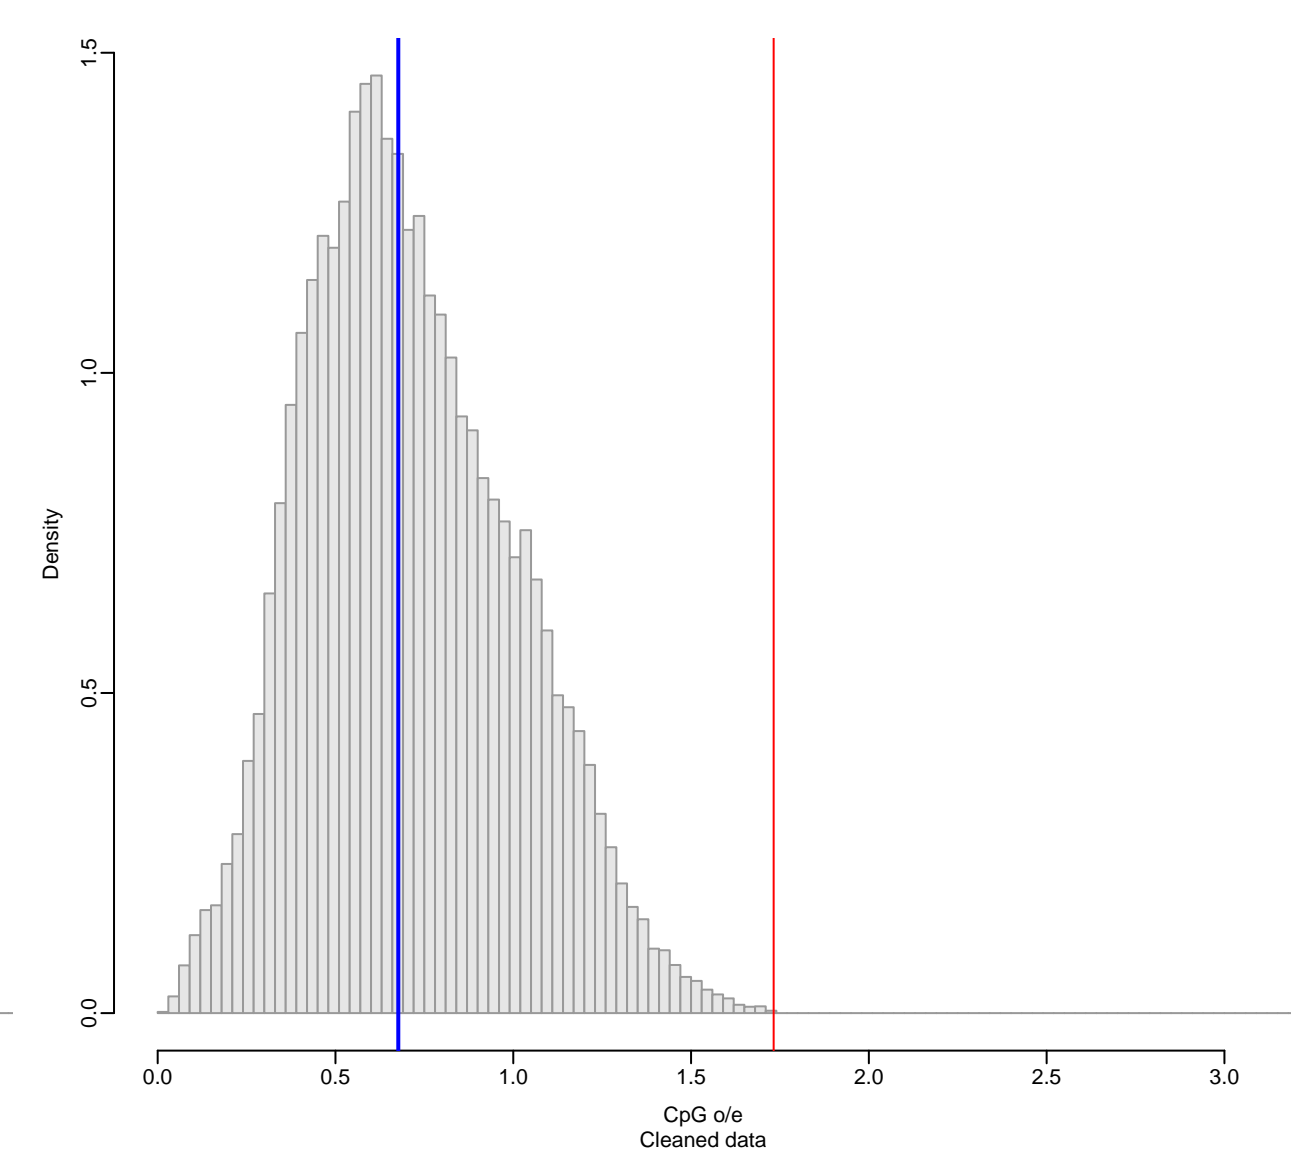

Actinidia\_eriantha

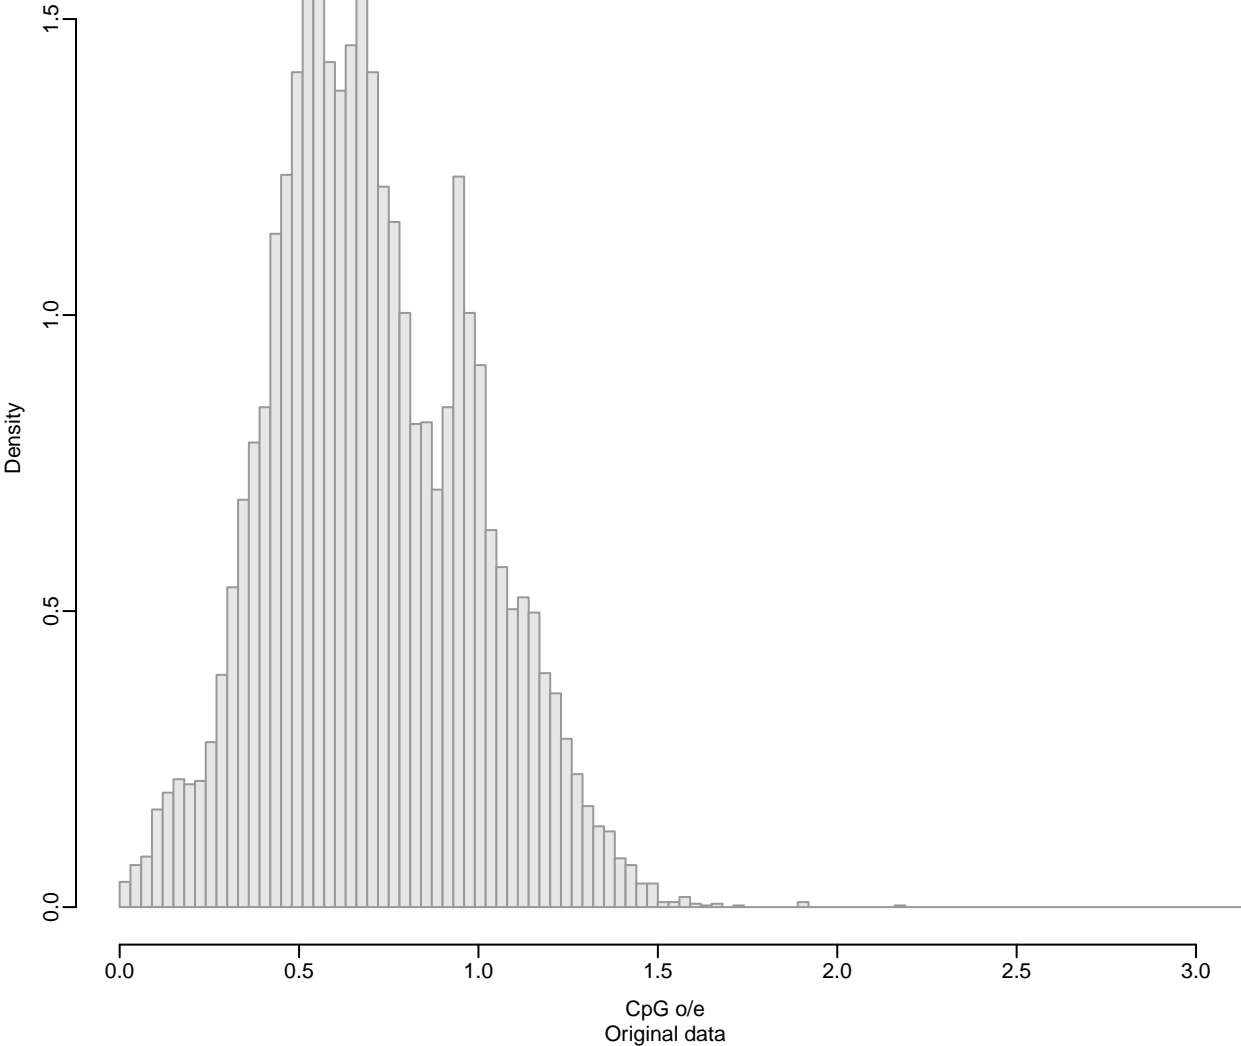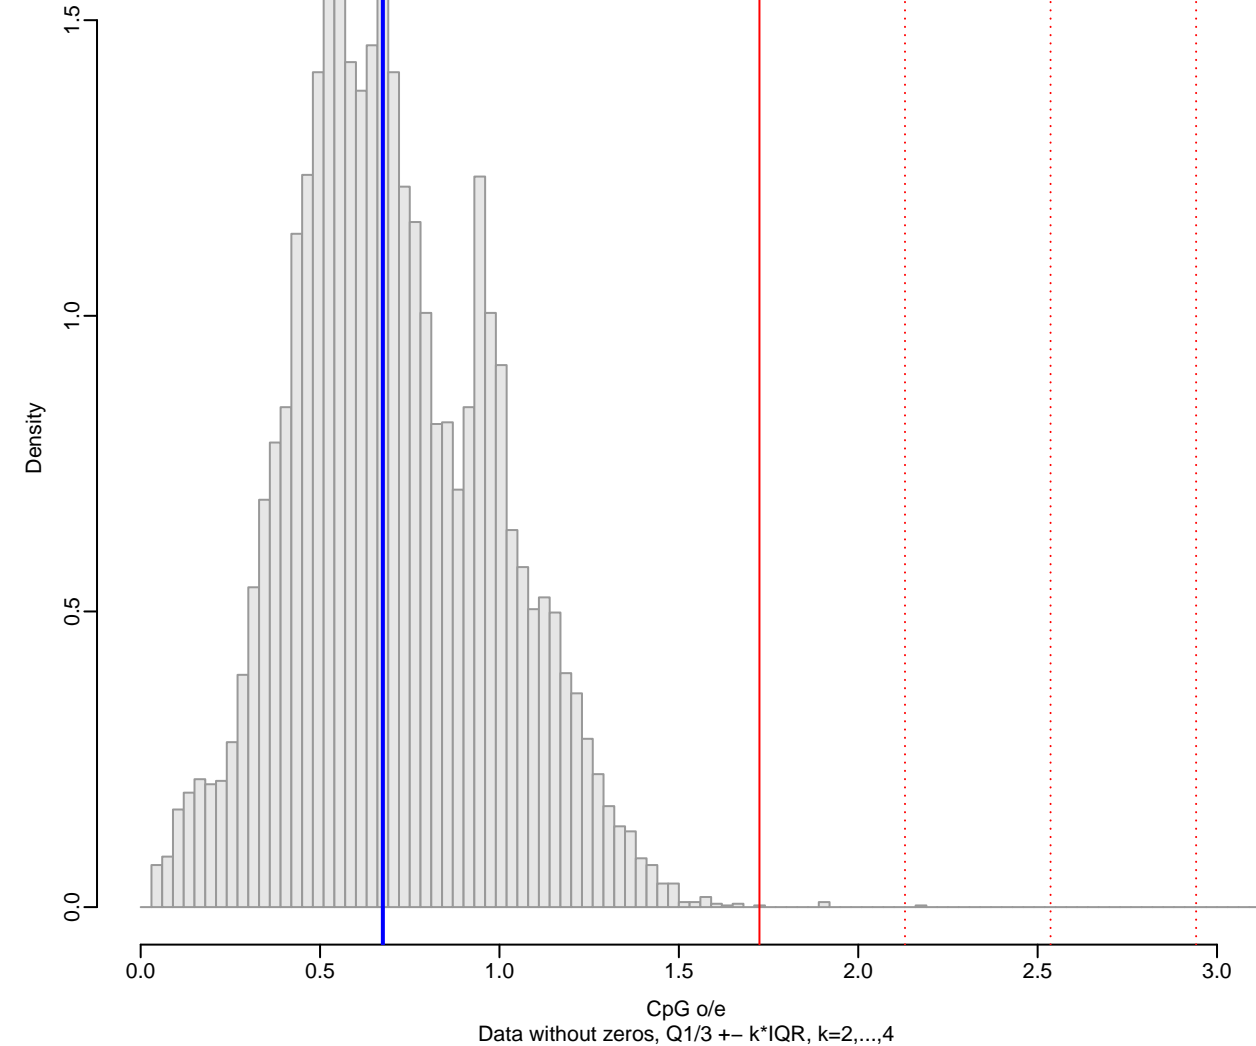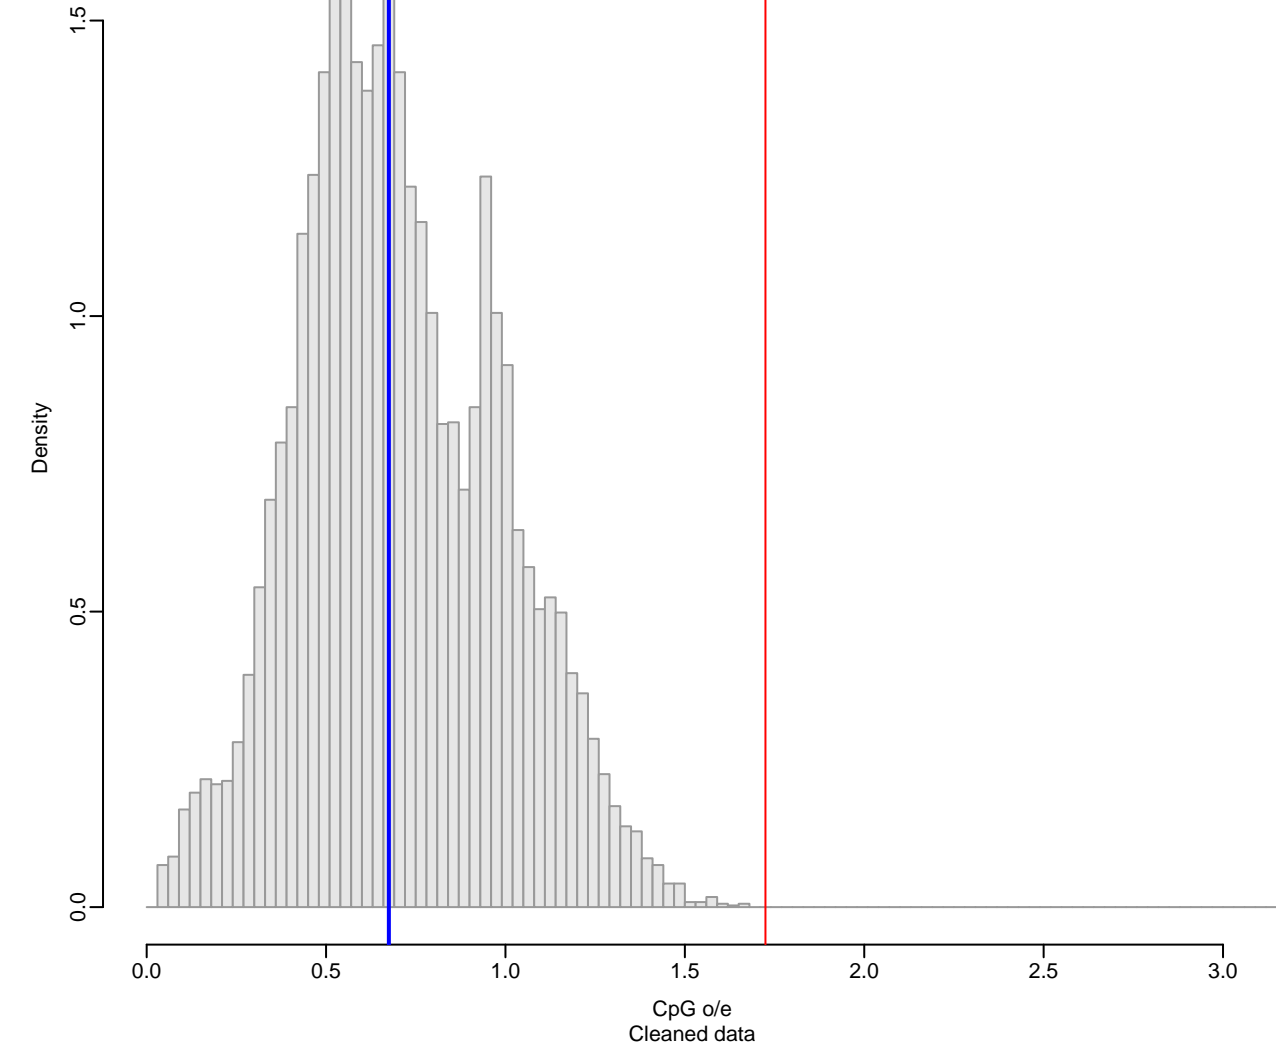

Actinidia\_hemsleyana

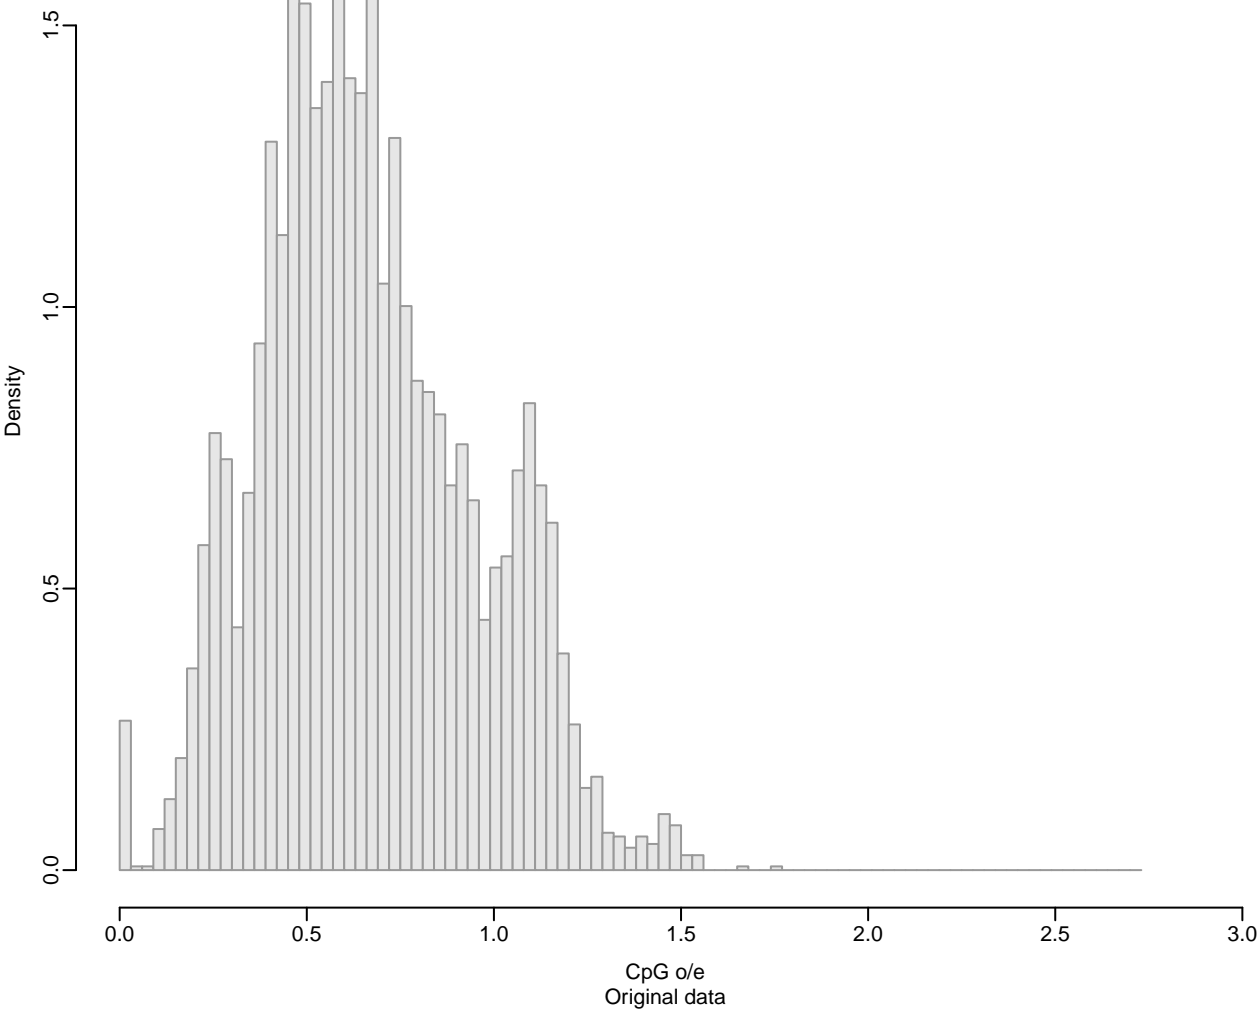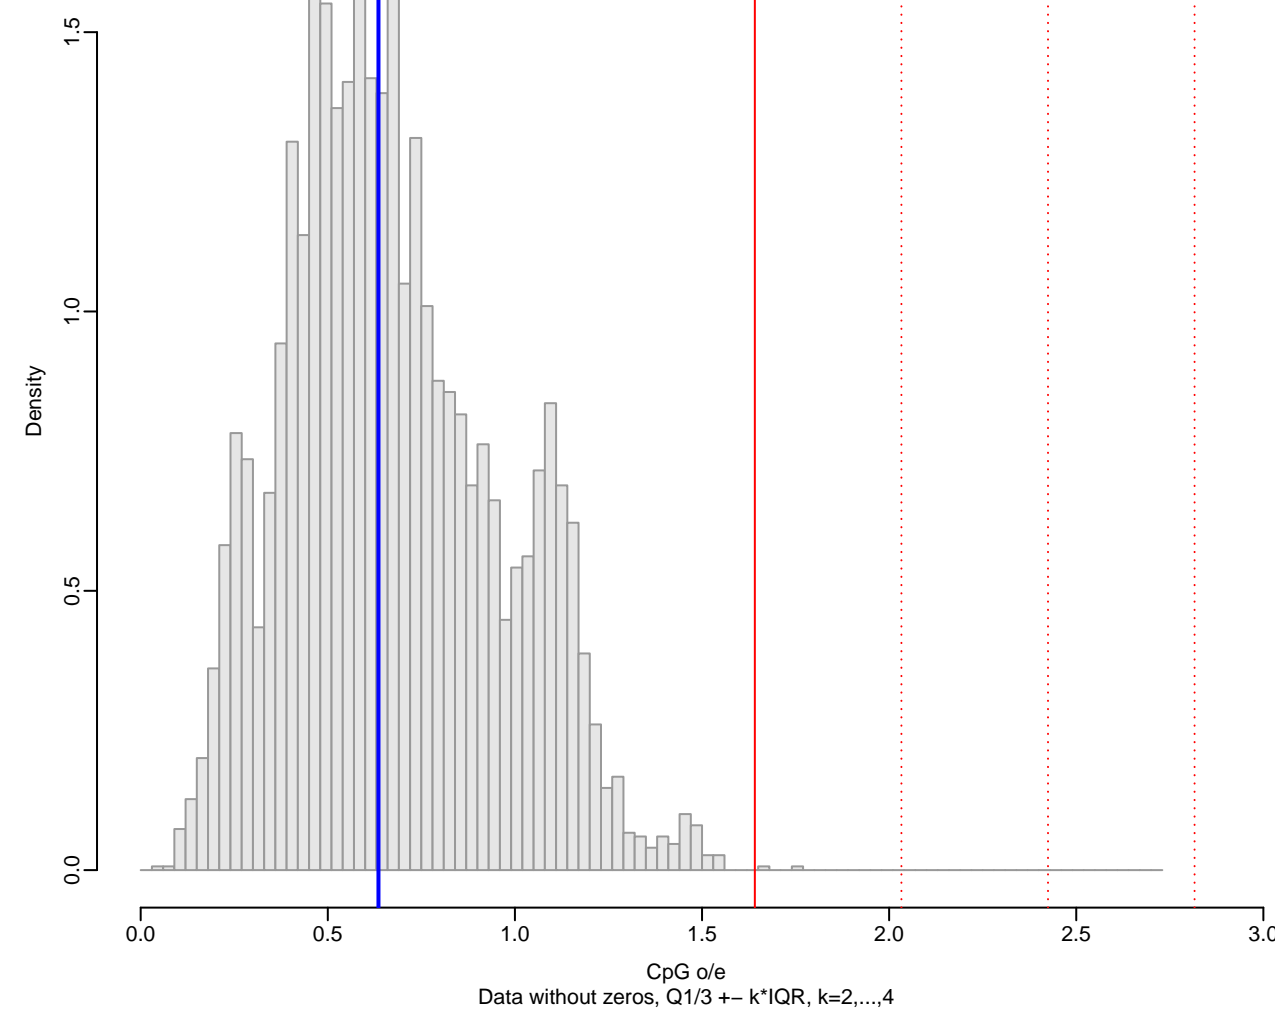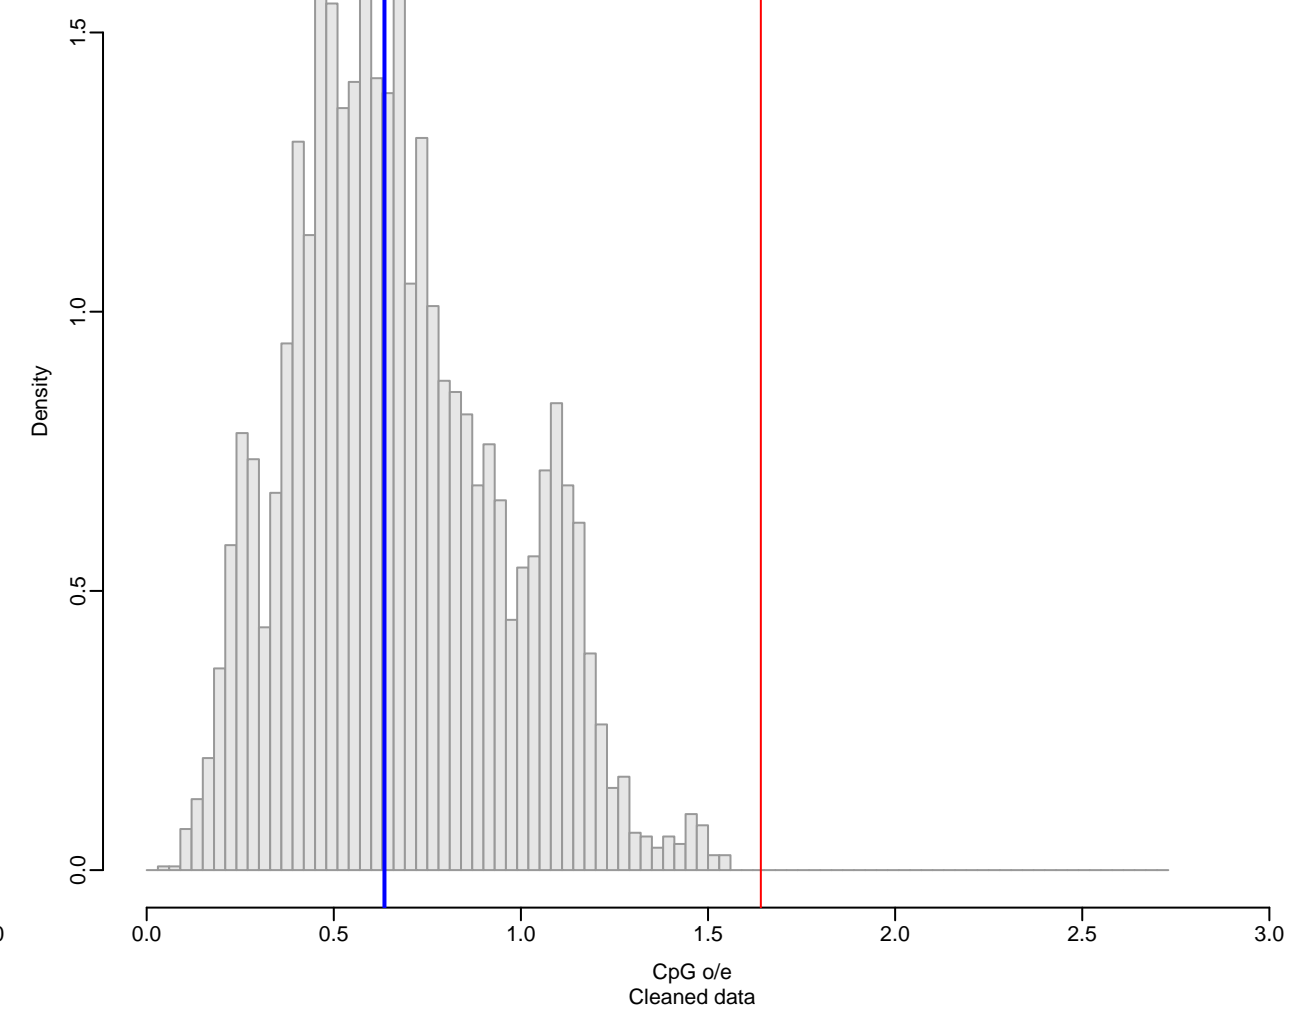

Actinidia\_polygama

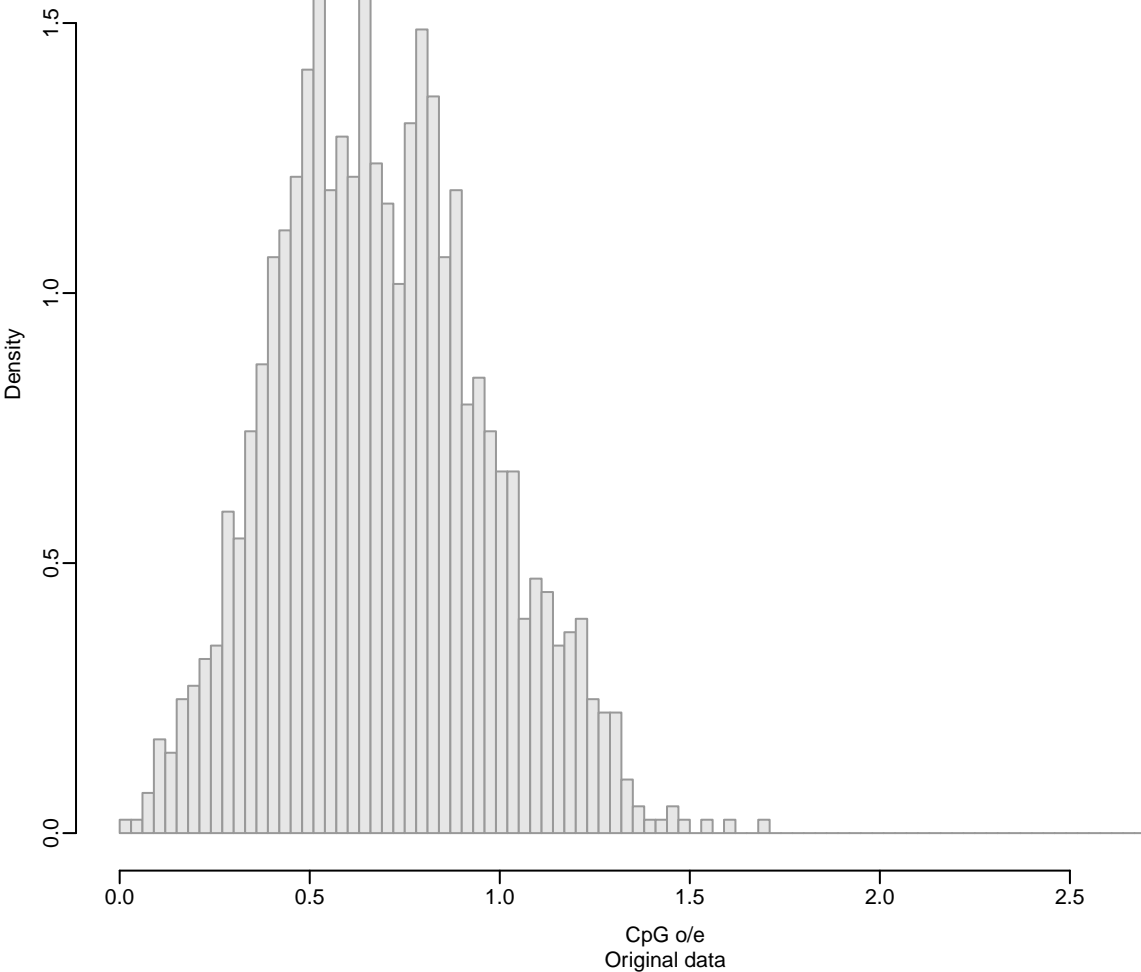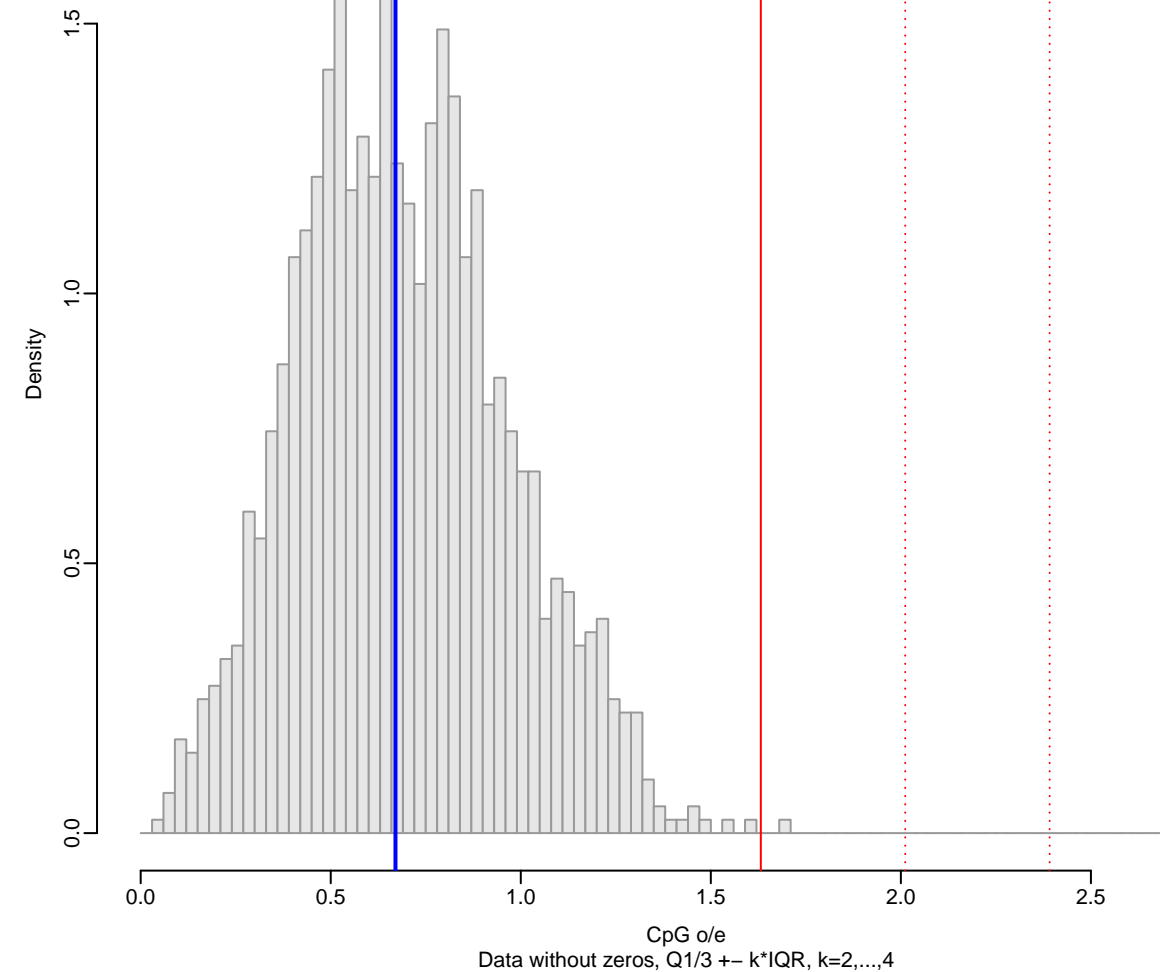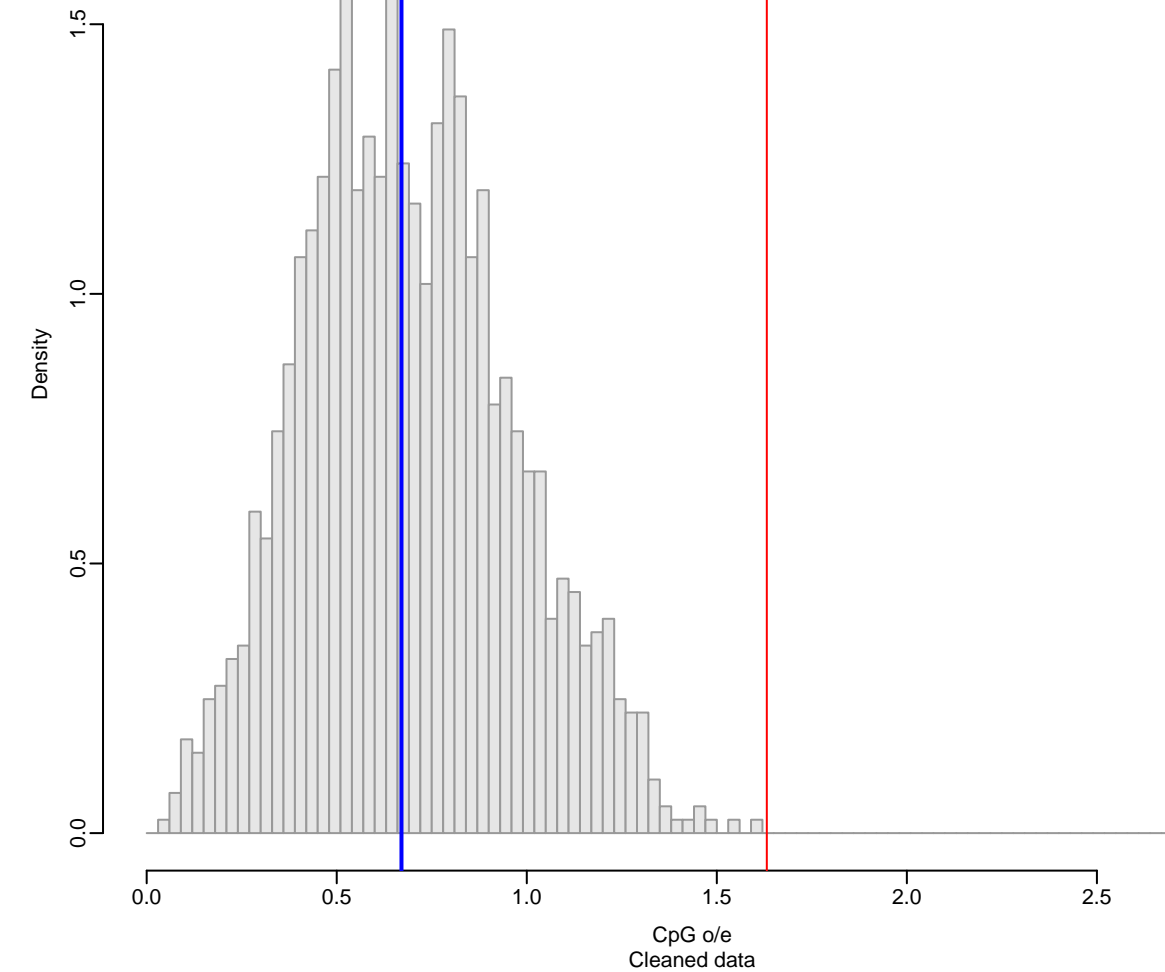

## Actinidia\_setosa

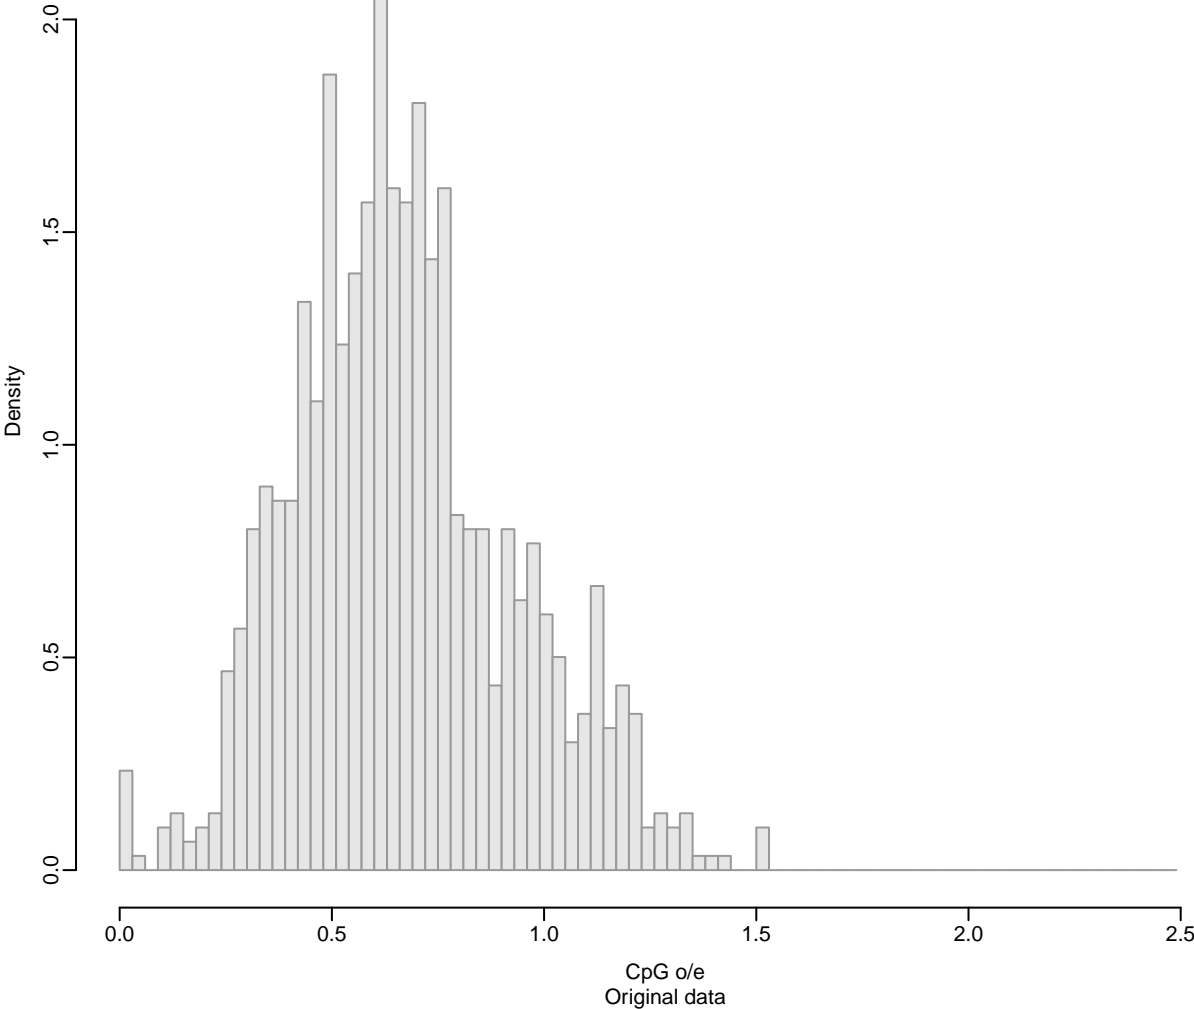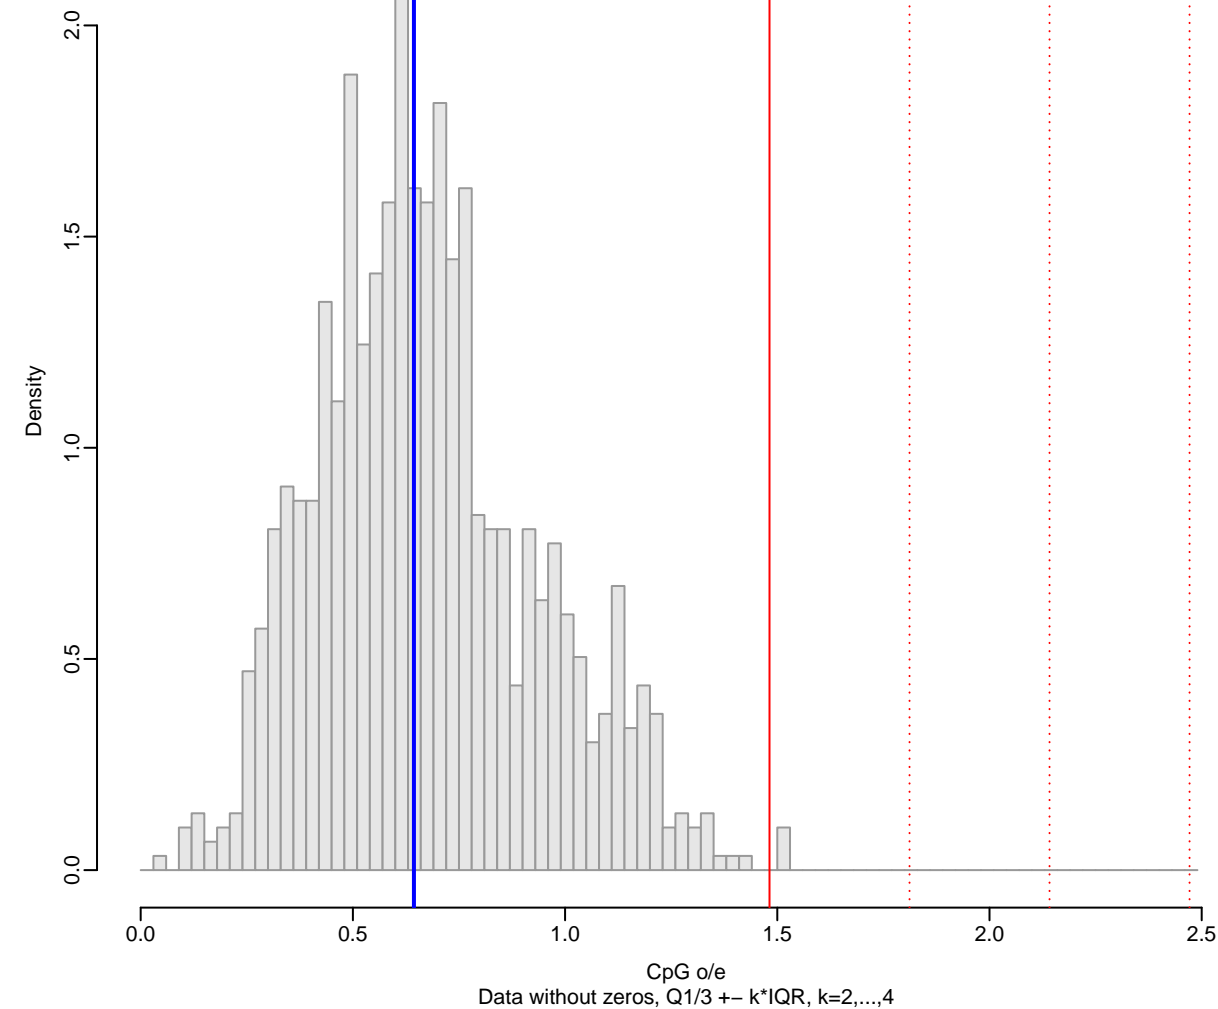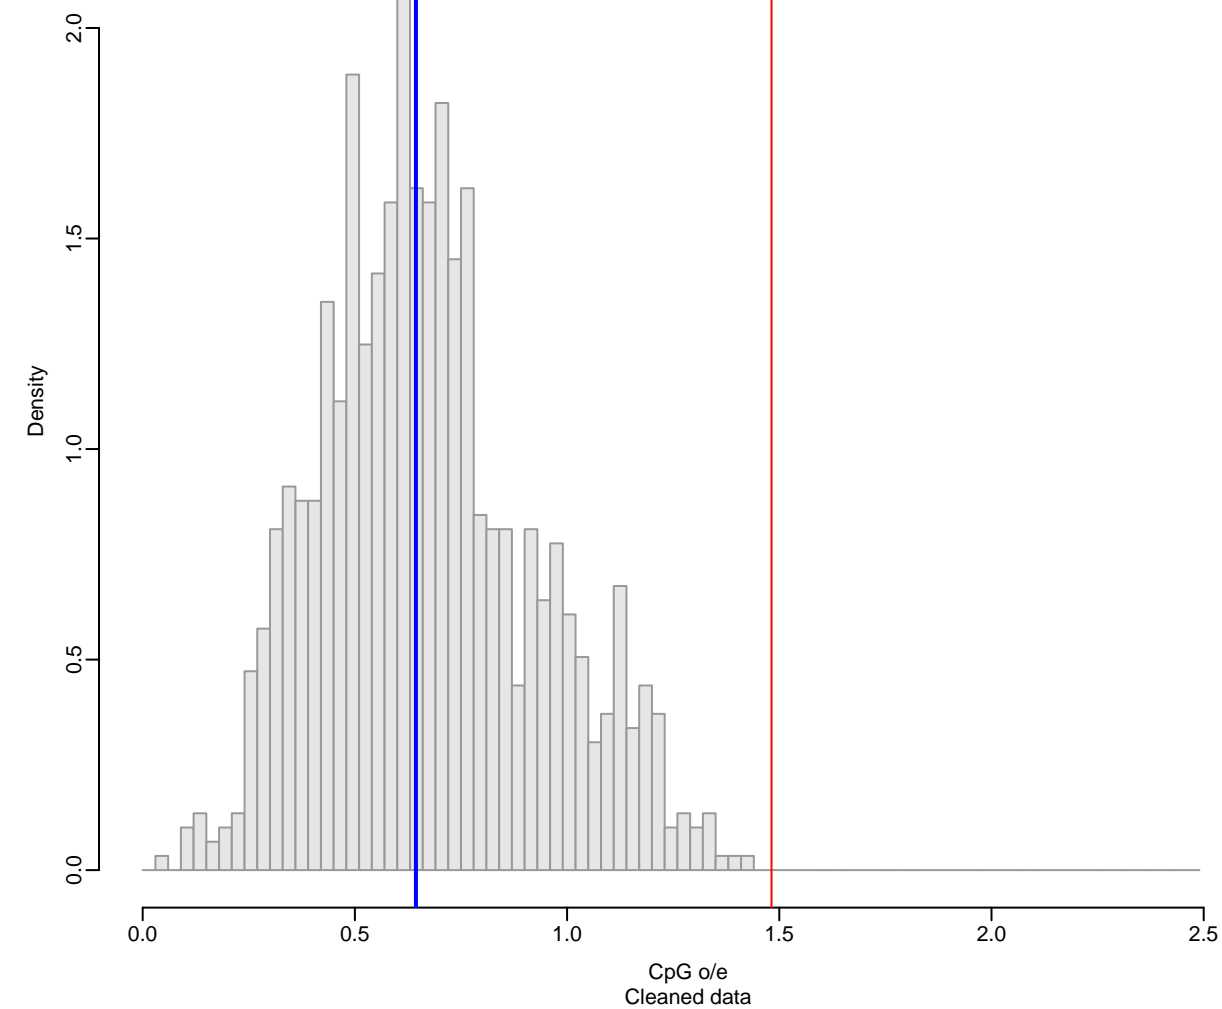

# Acyrtosiphon\_kondoii

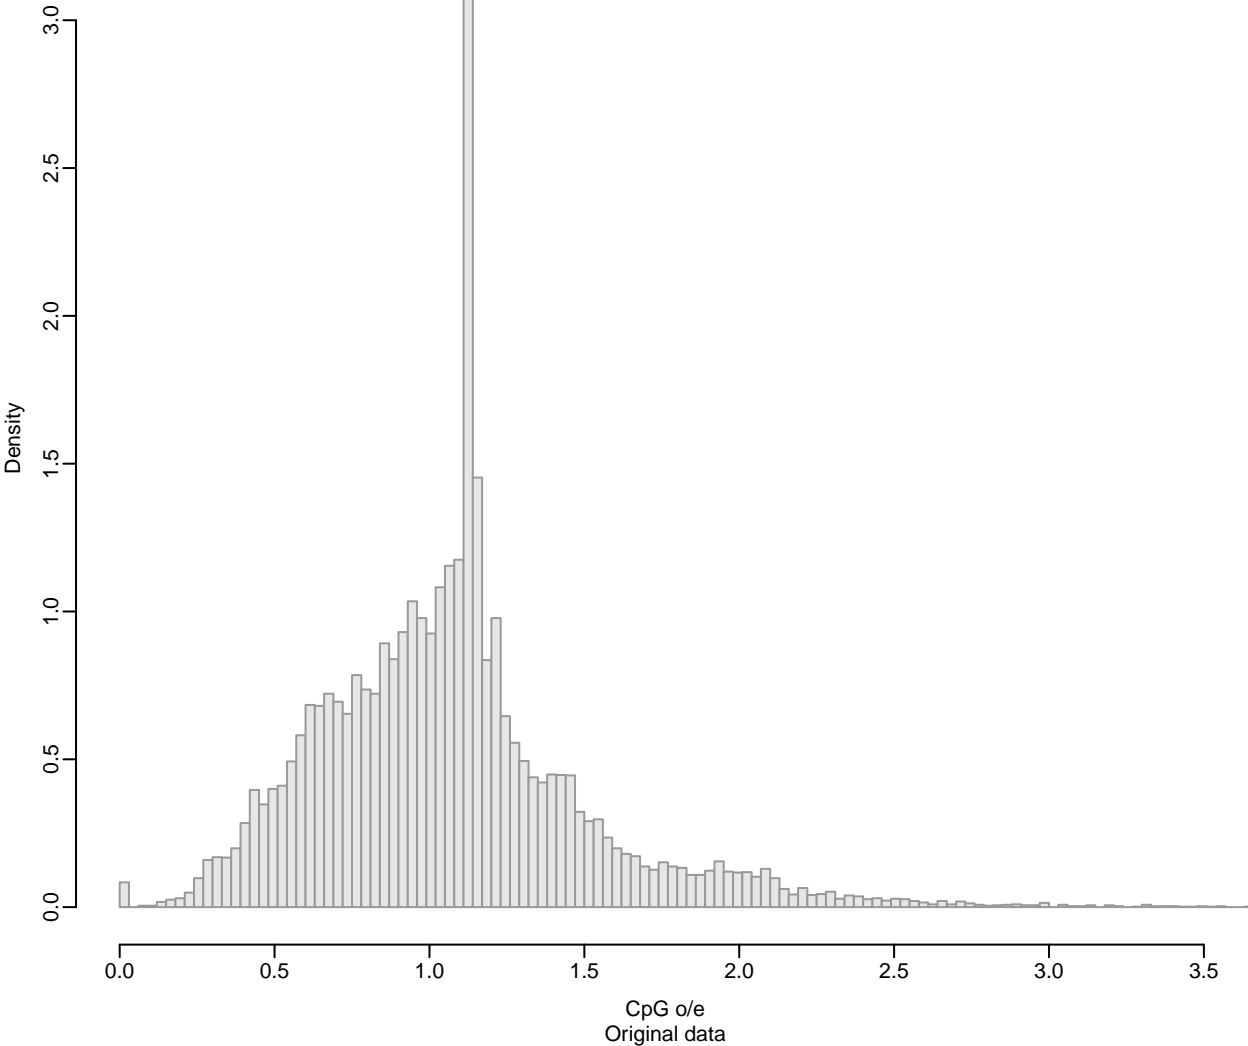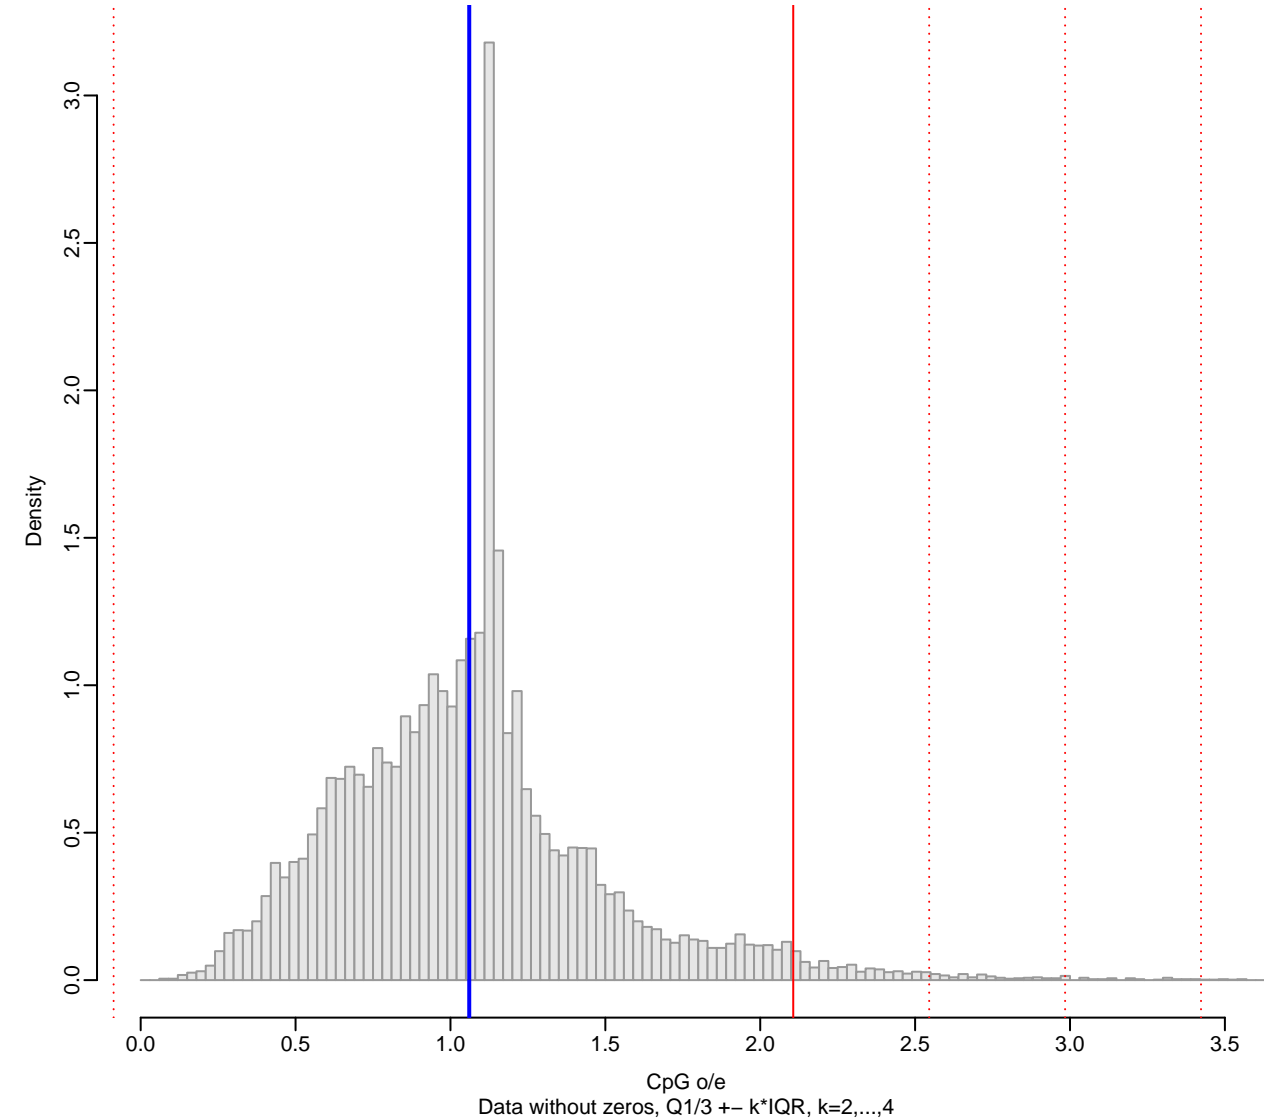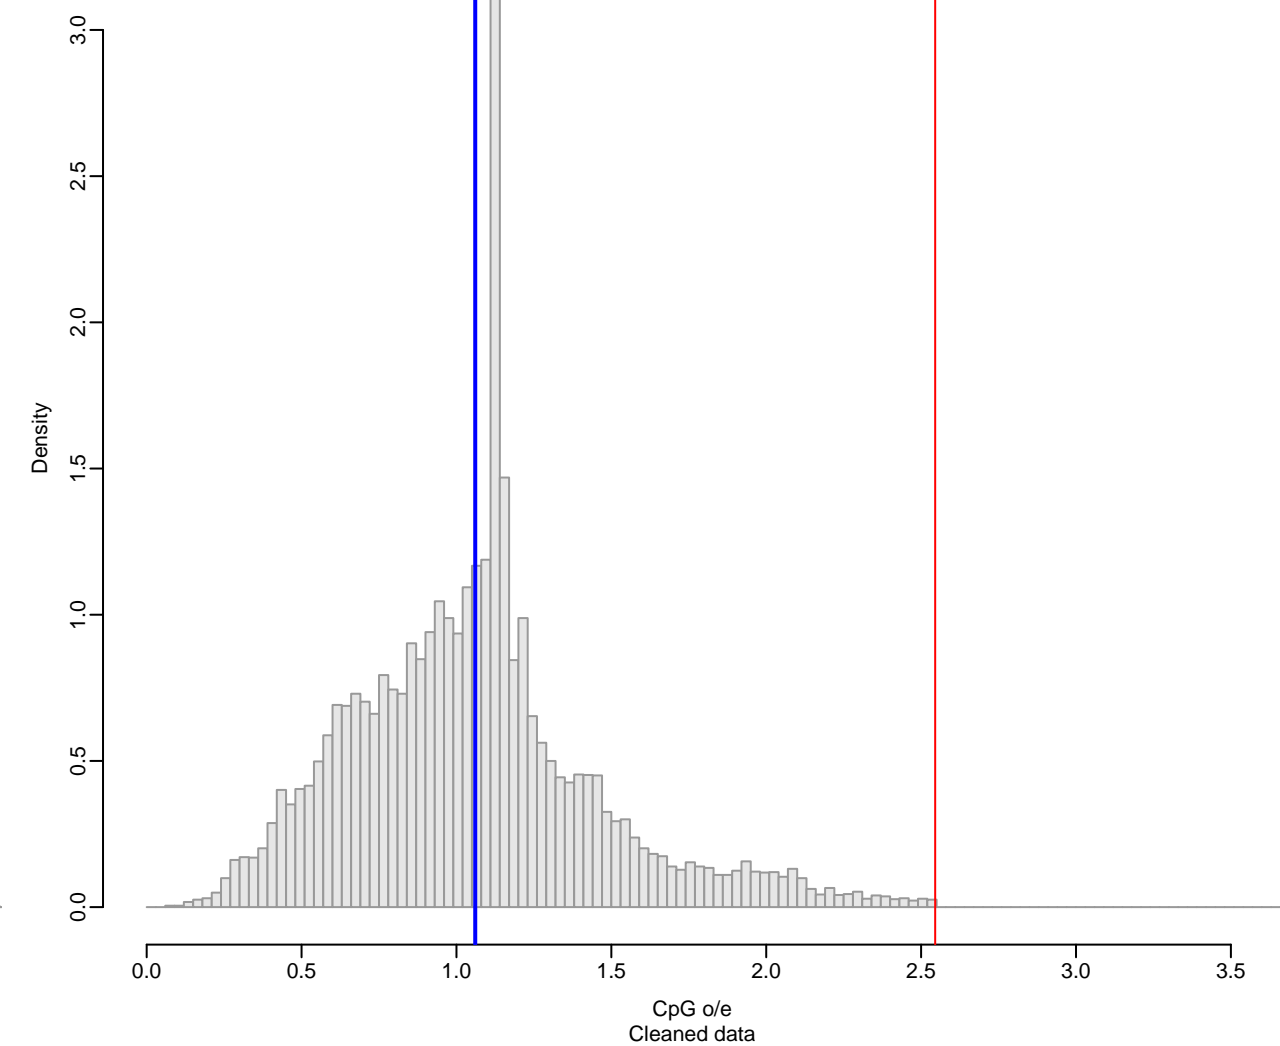

Acyrrhosiphon\_pisum

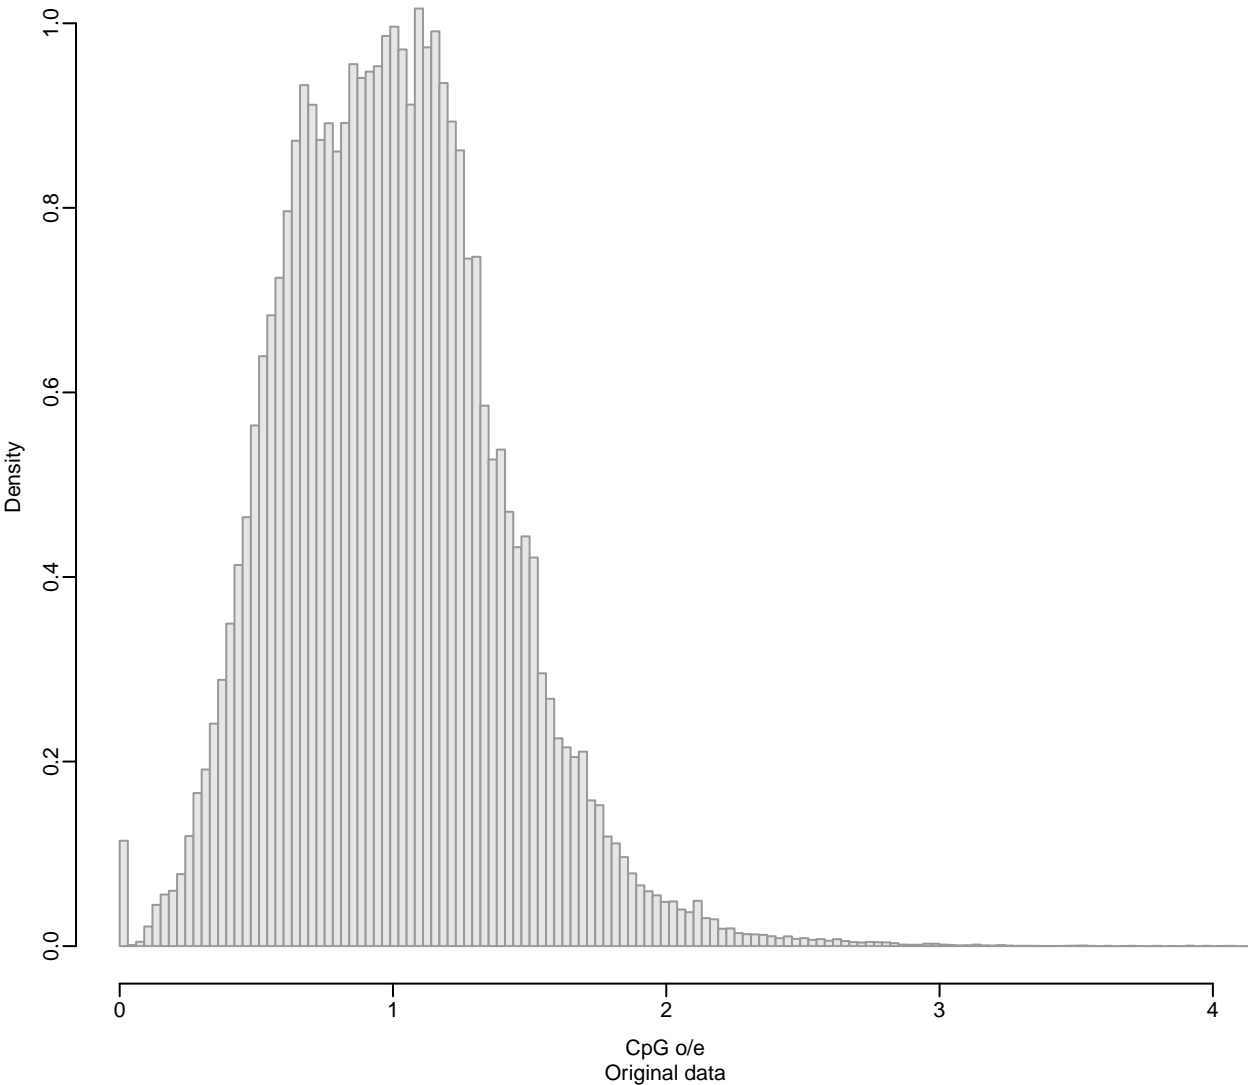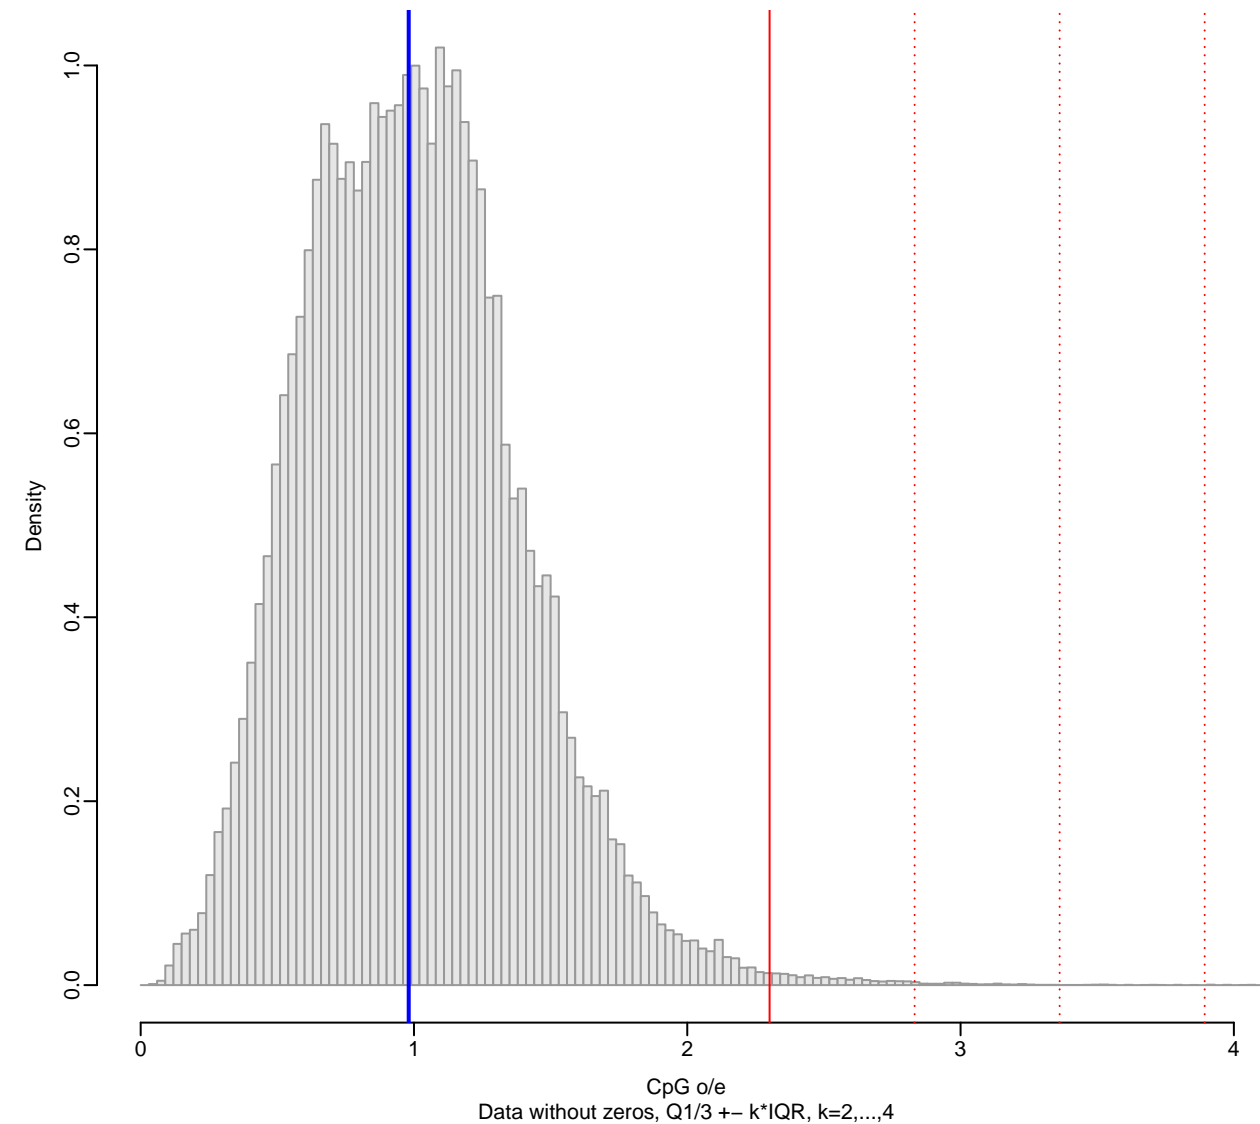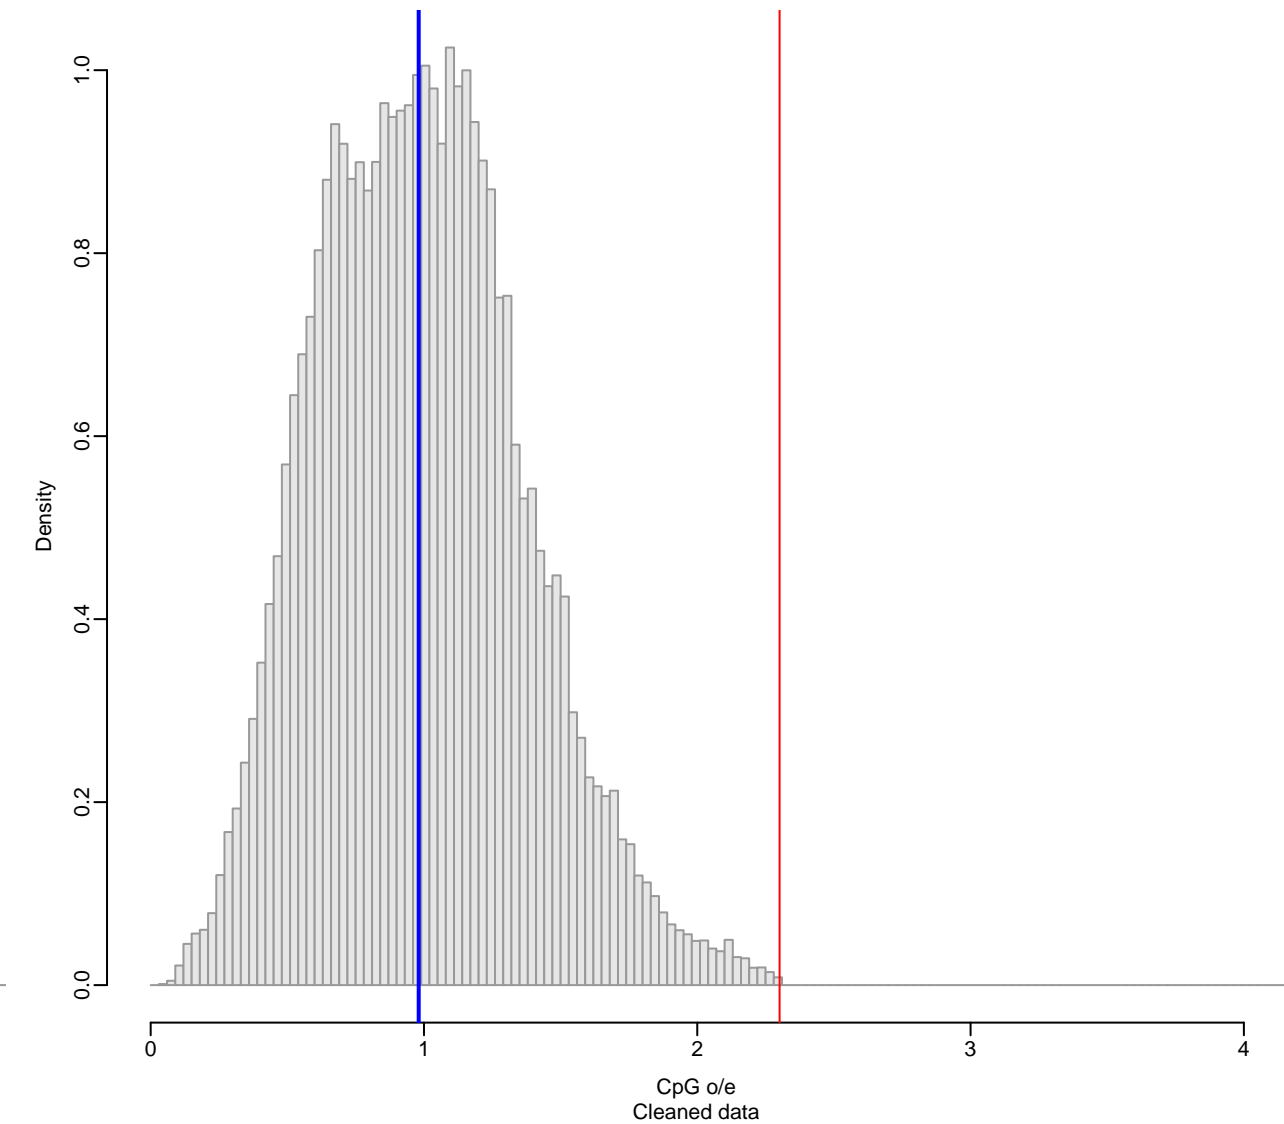



Adelphocoris\_lineolatus

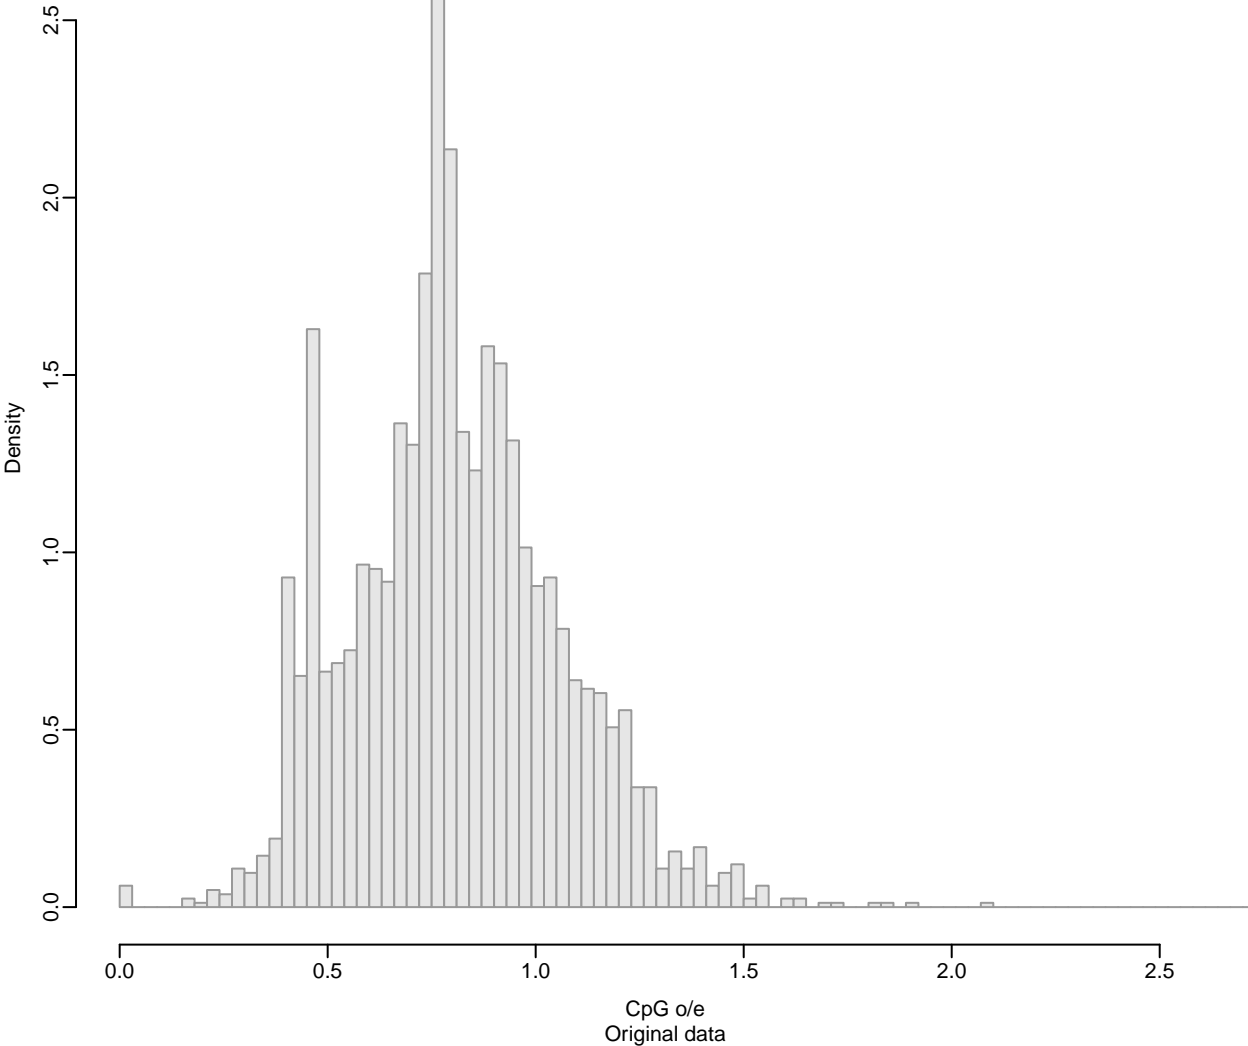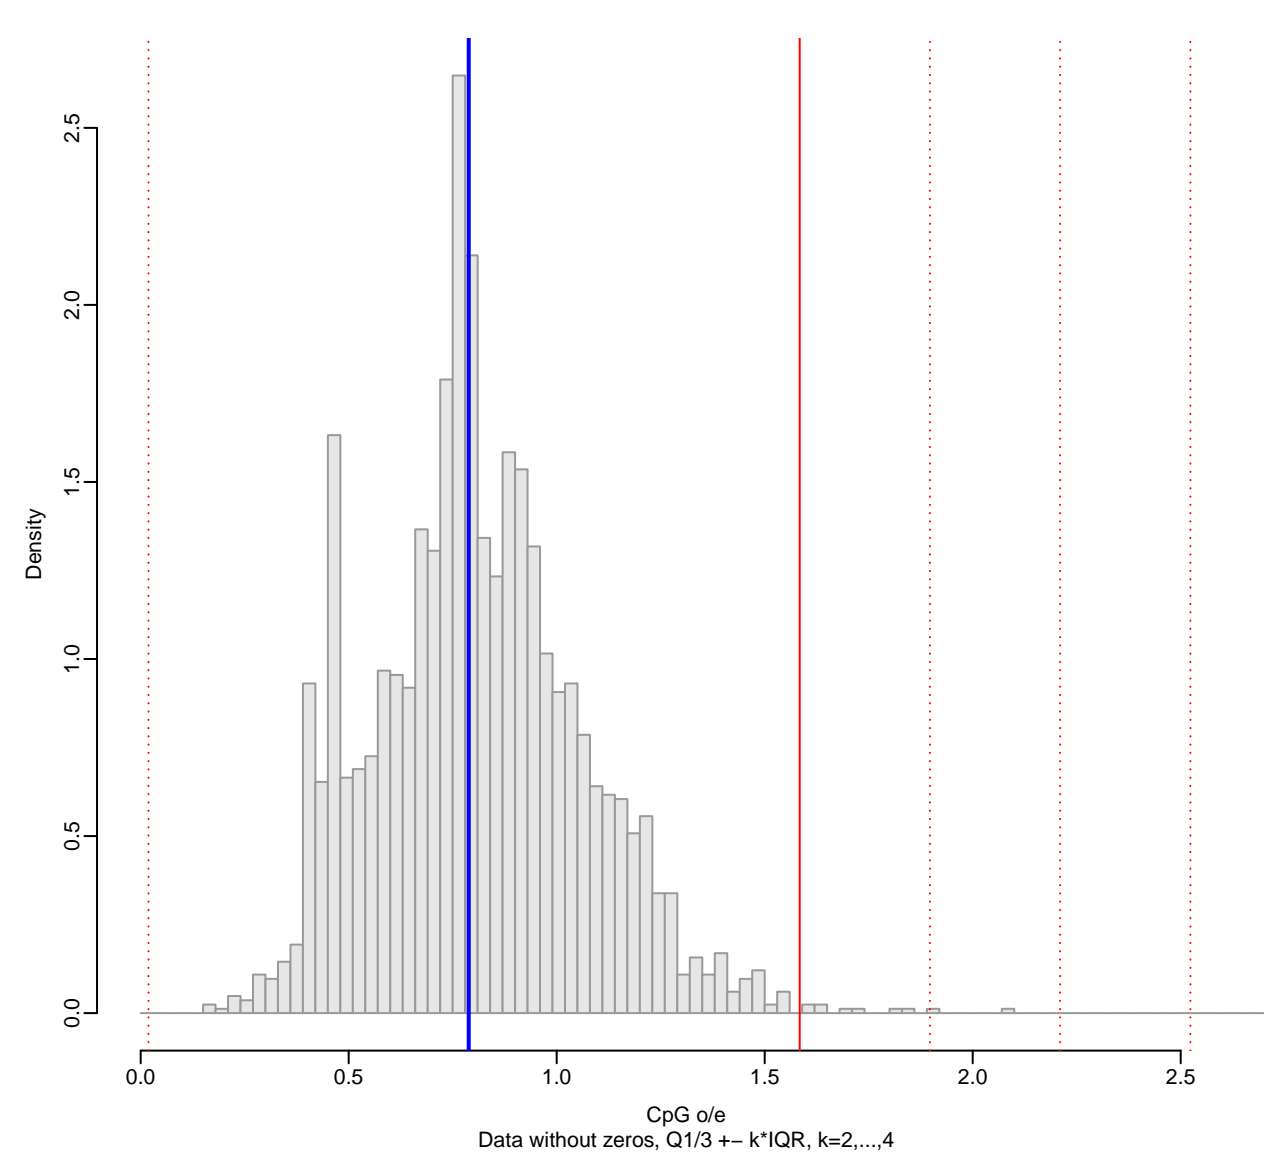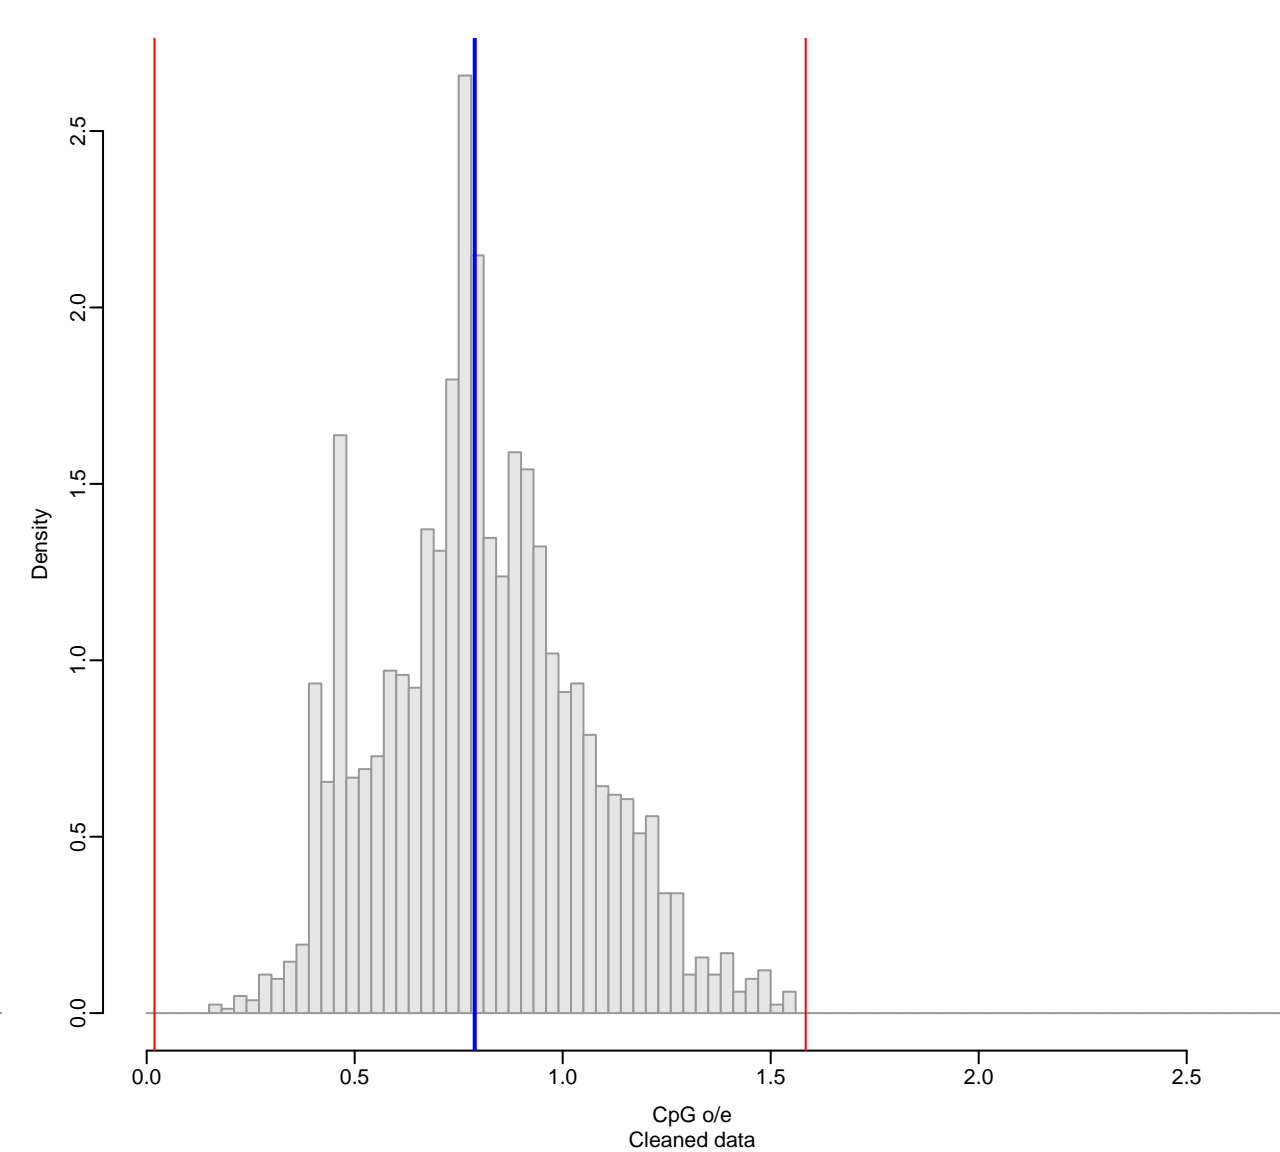

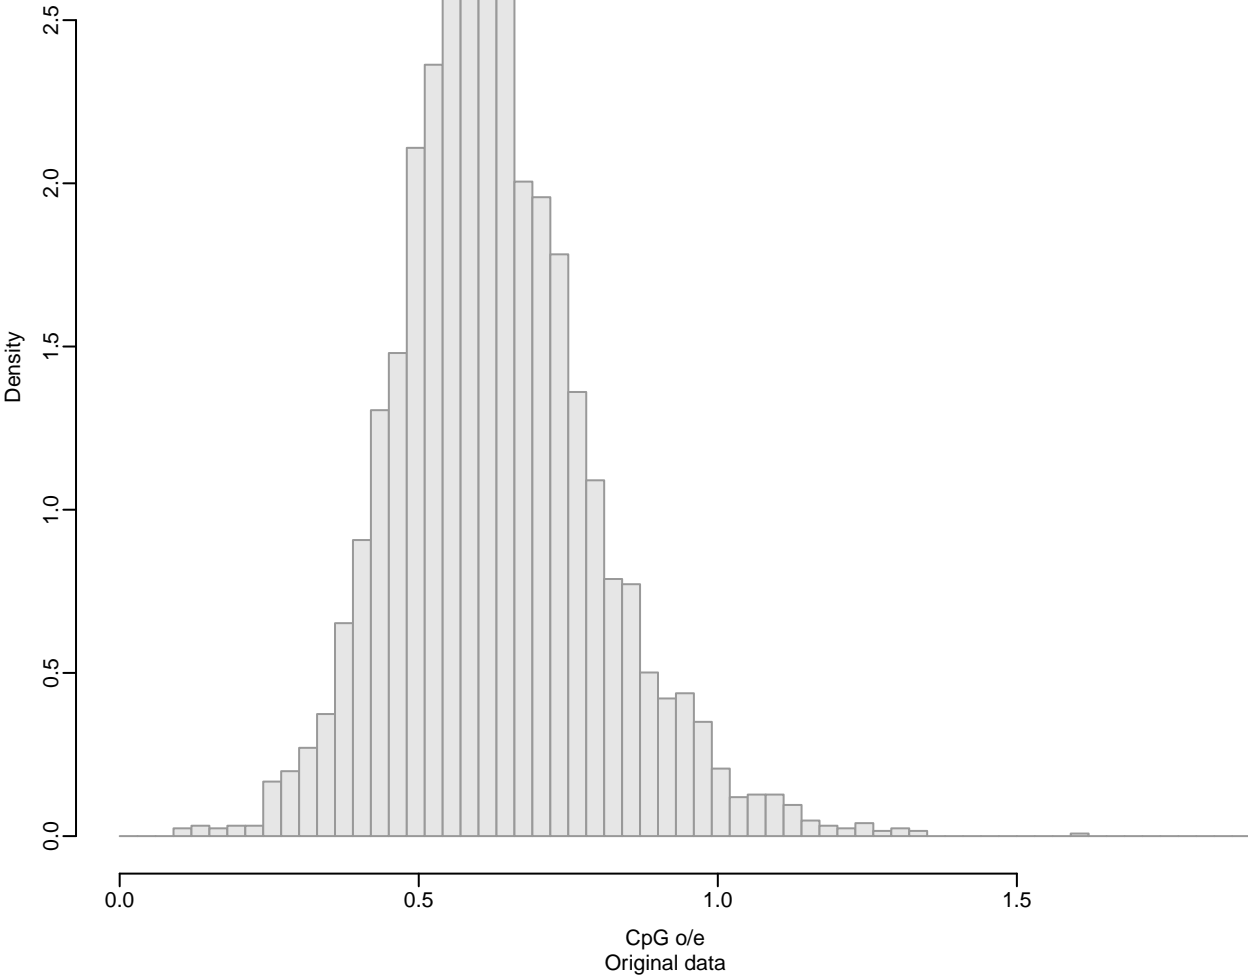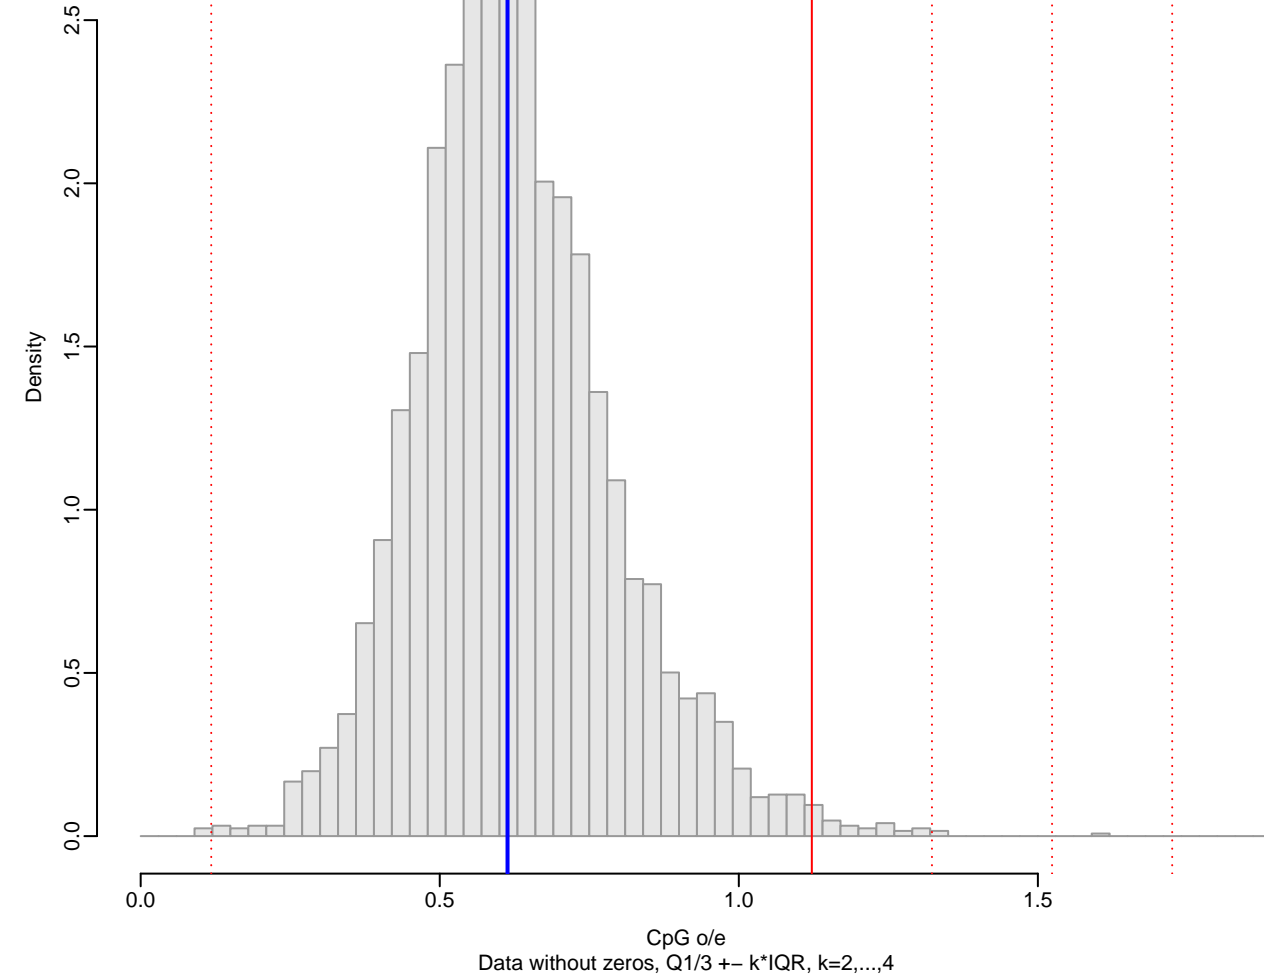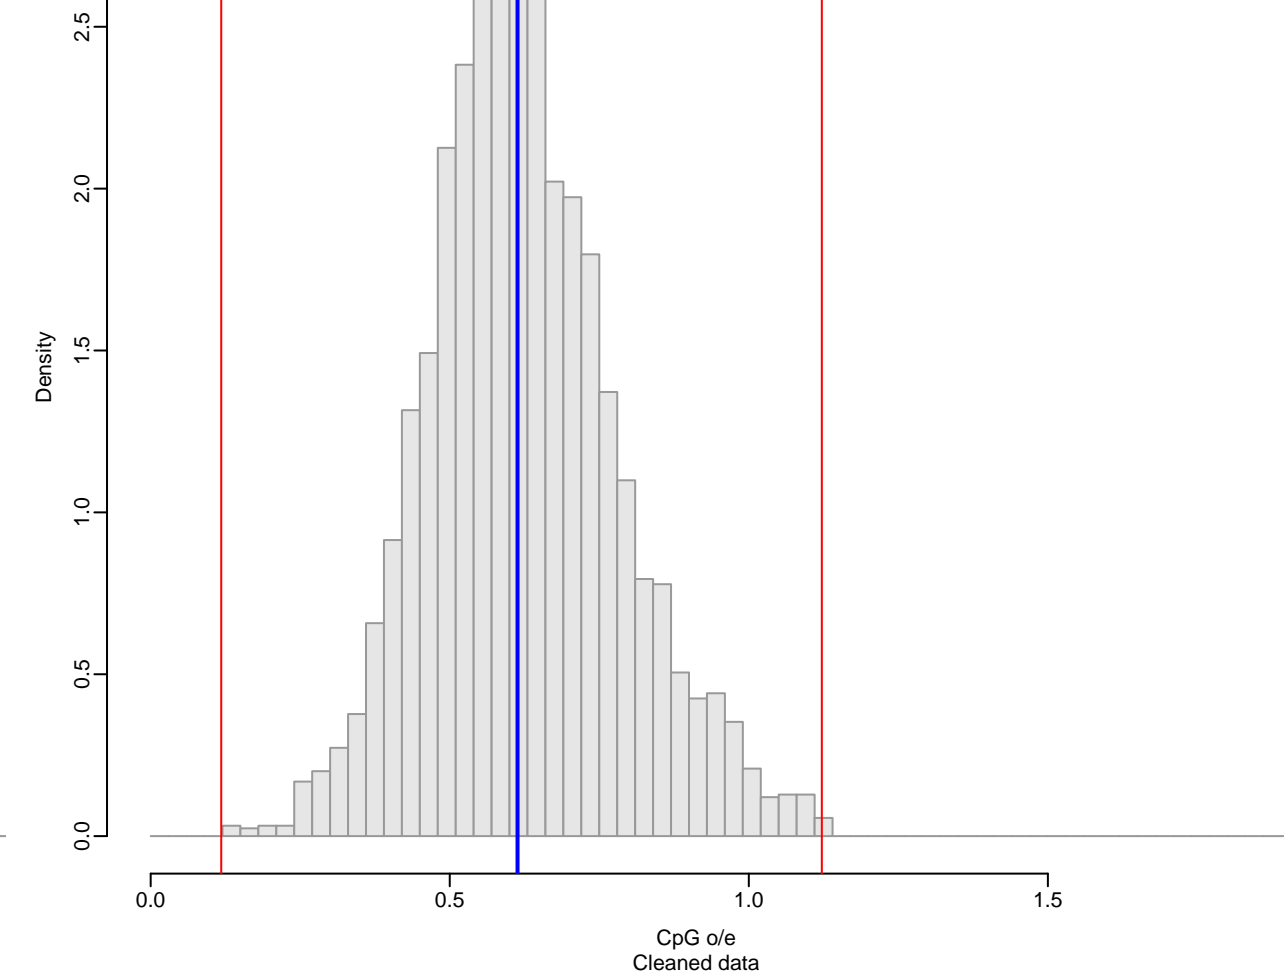

# Aegilops\_speltoides

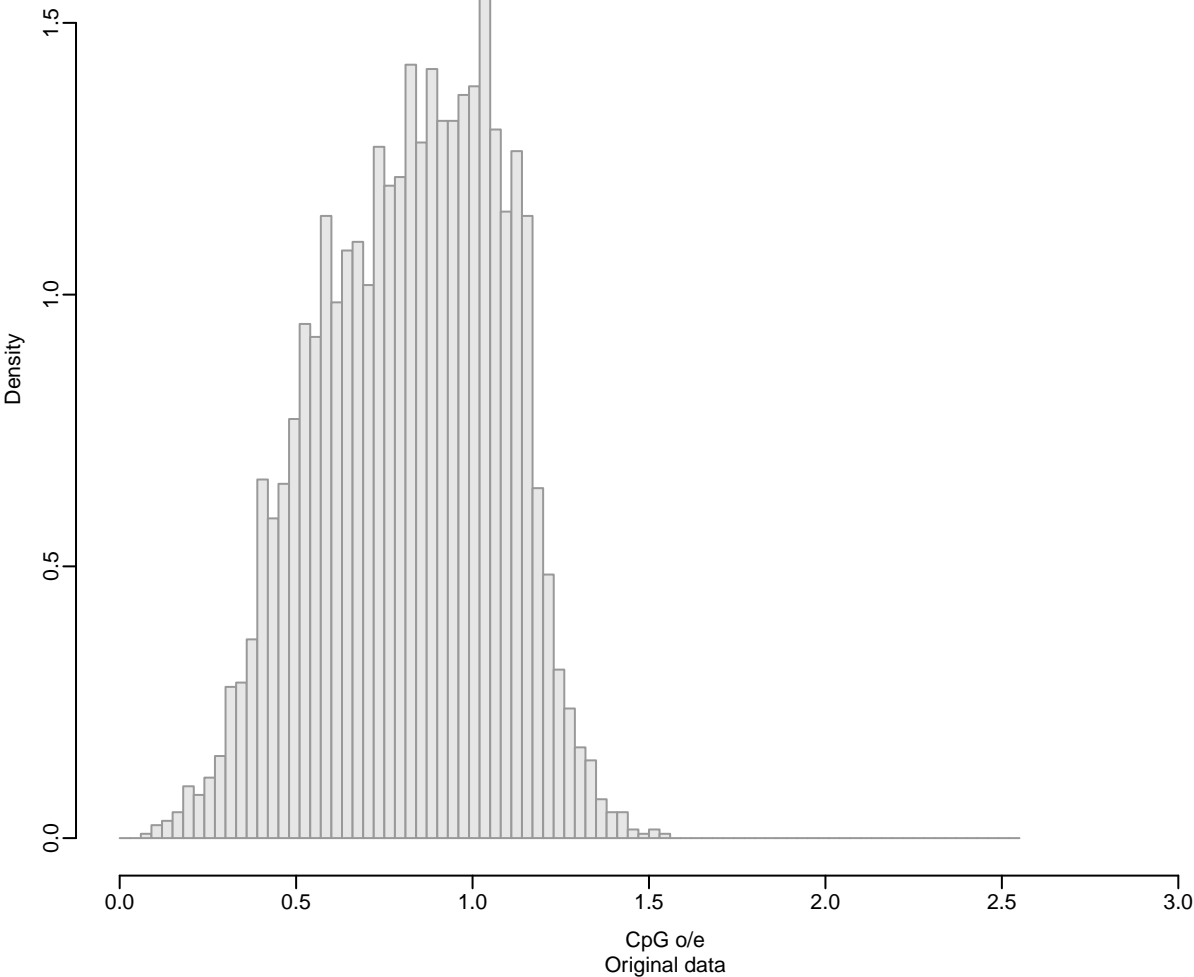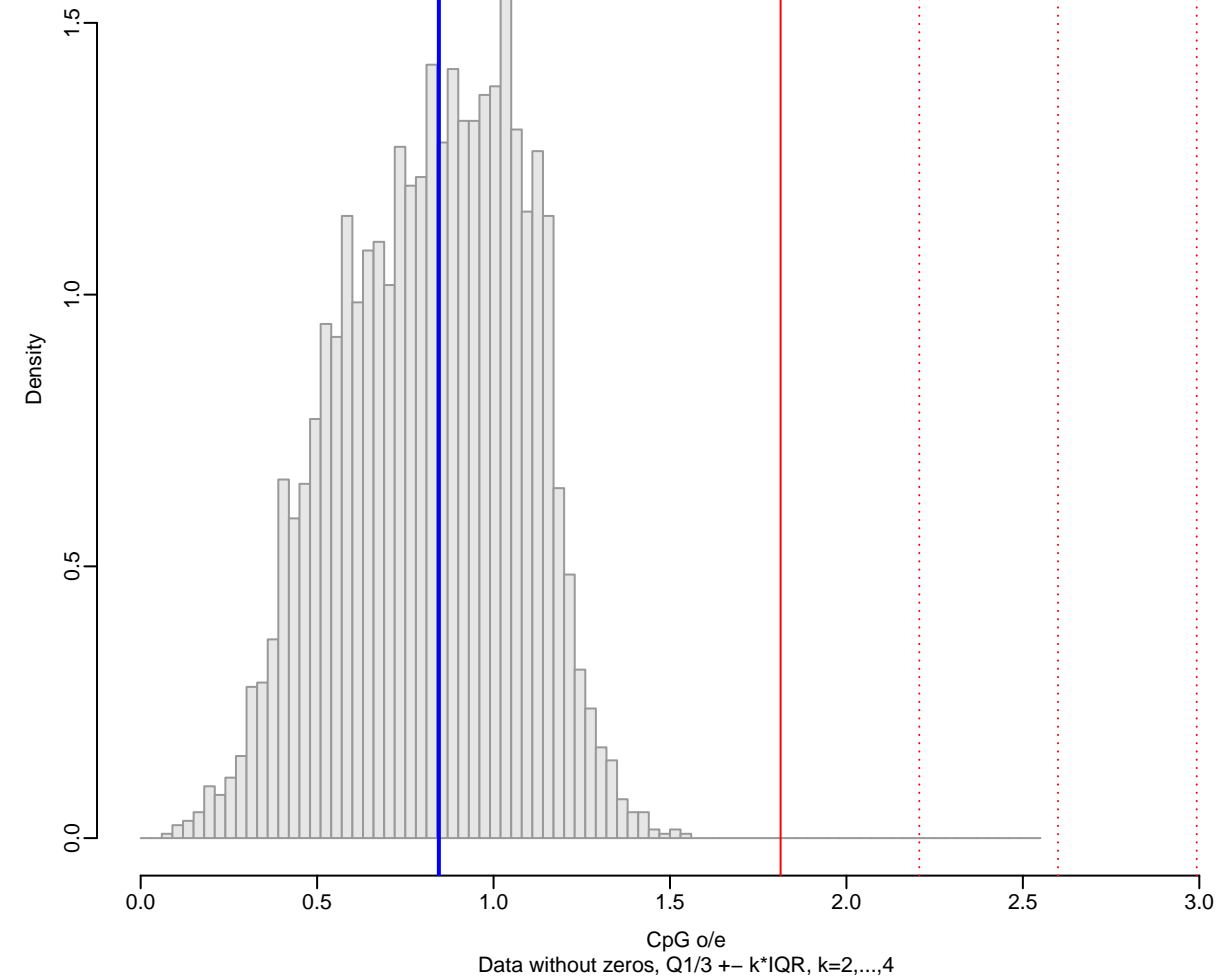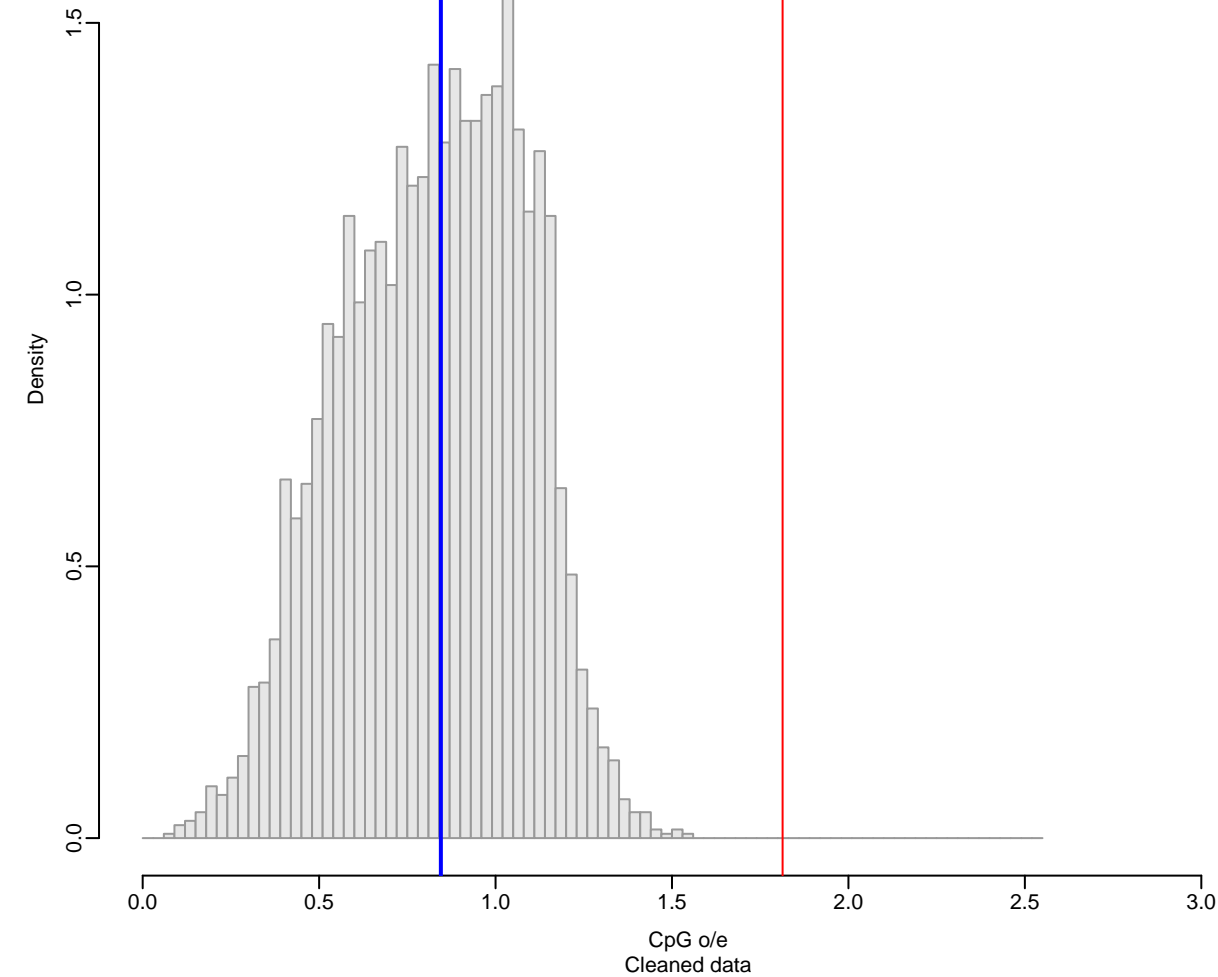

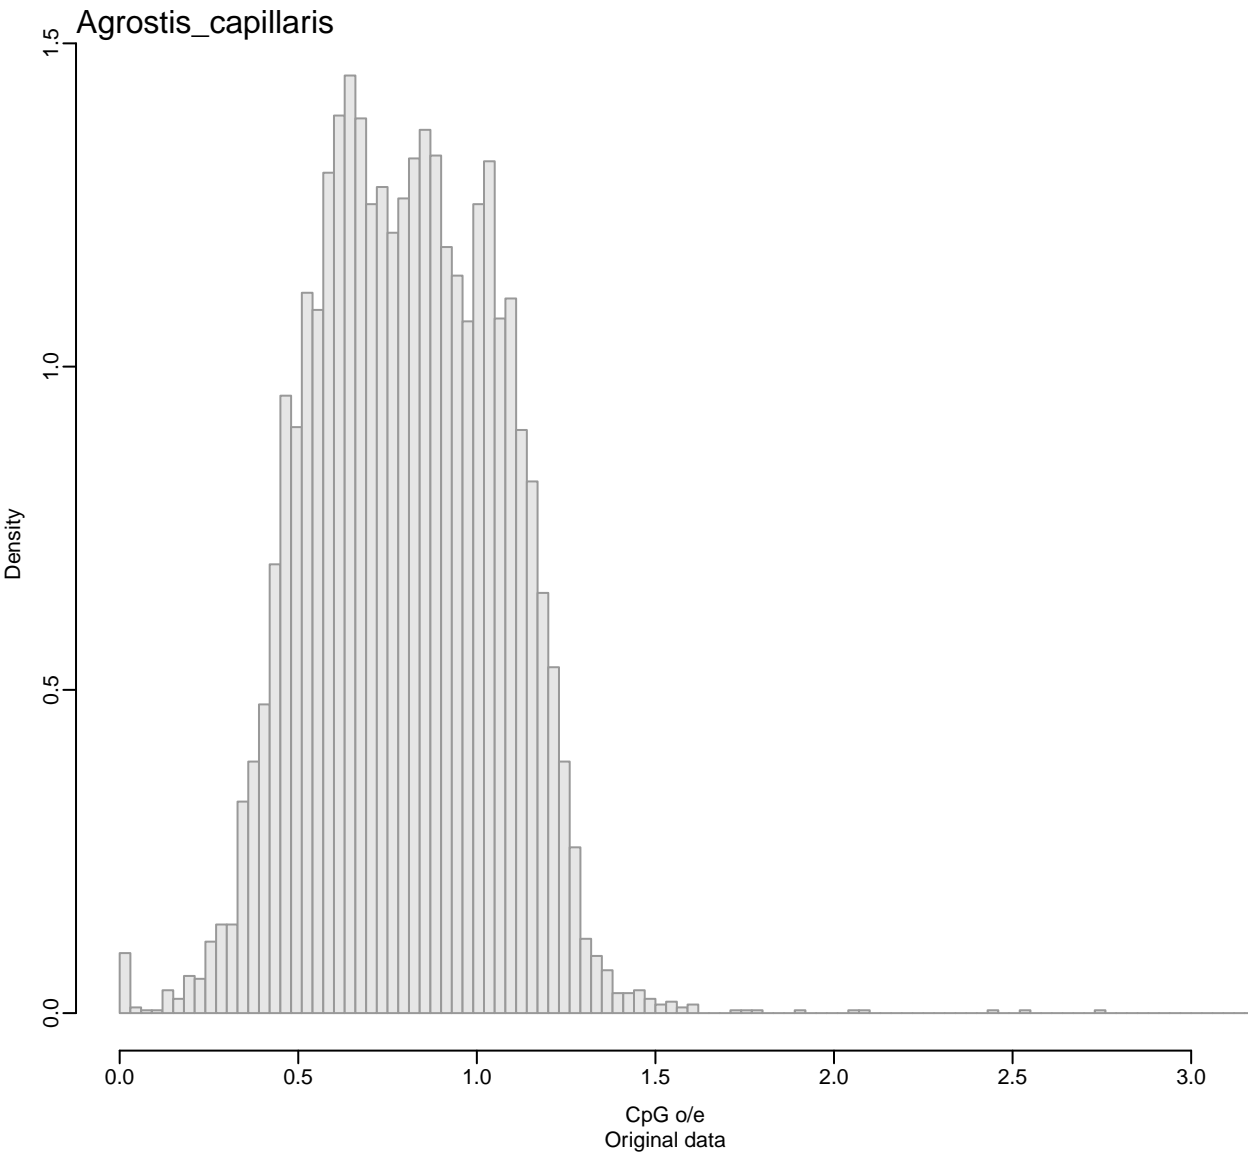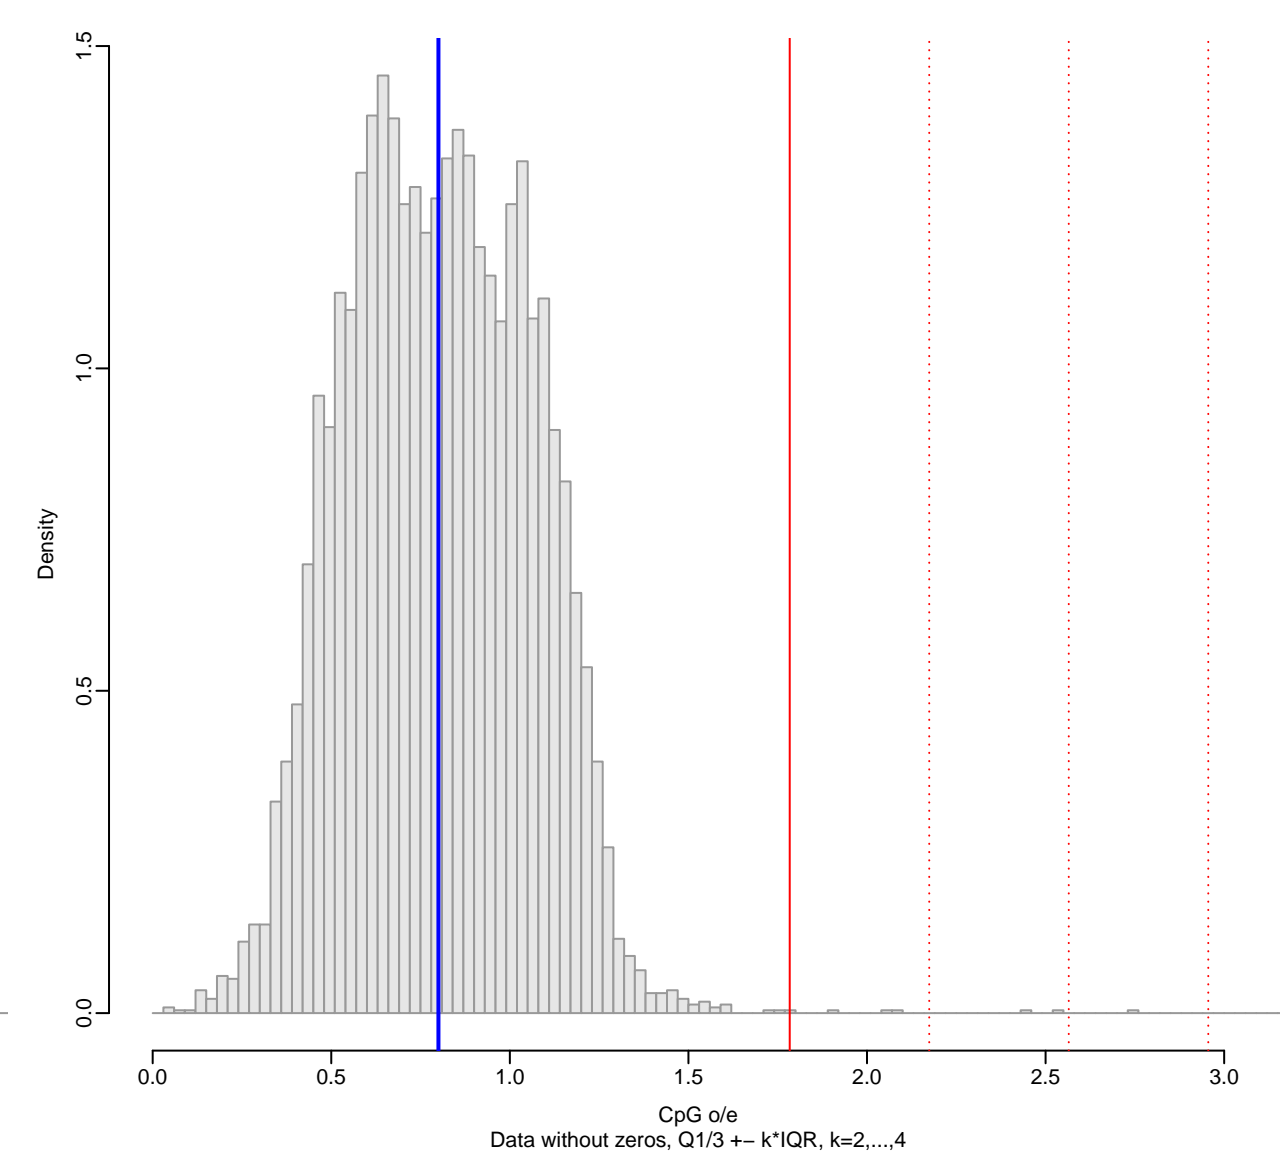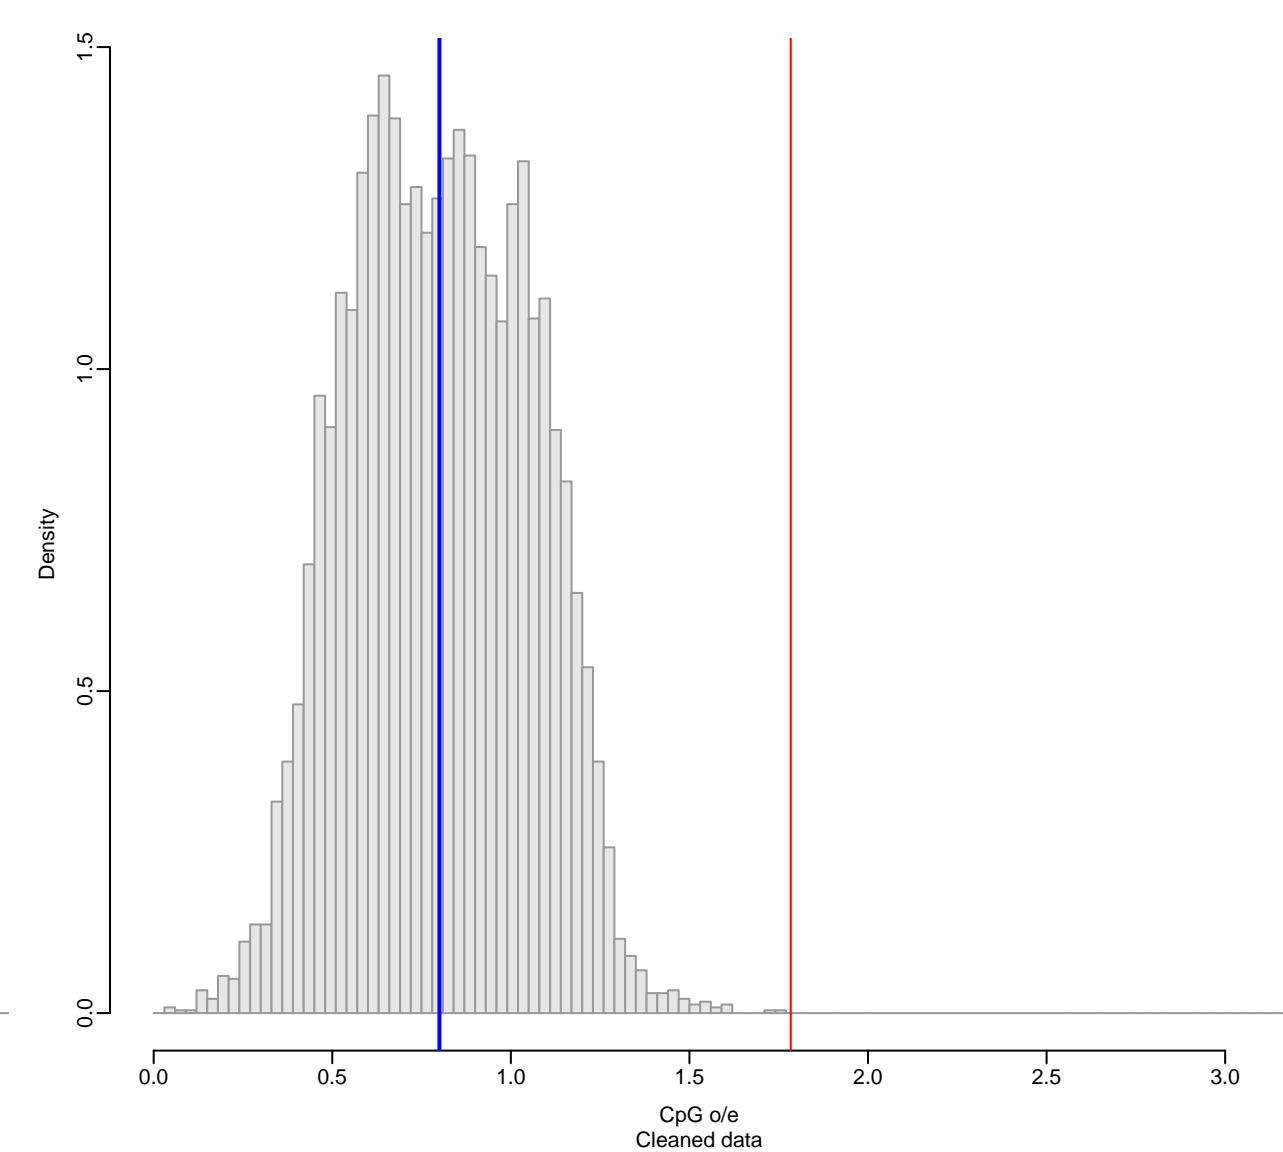

Agrostis\_stolonifera

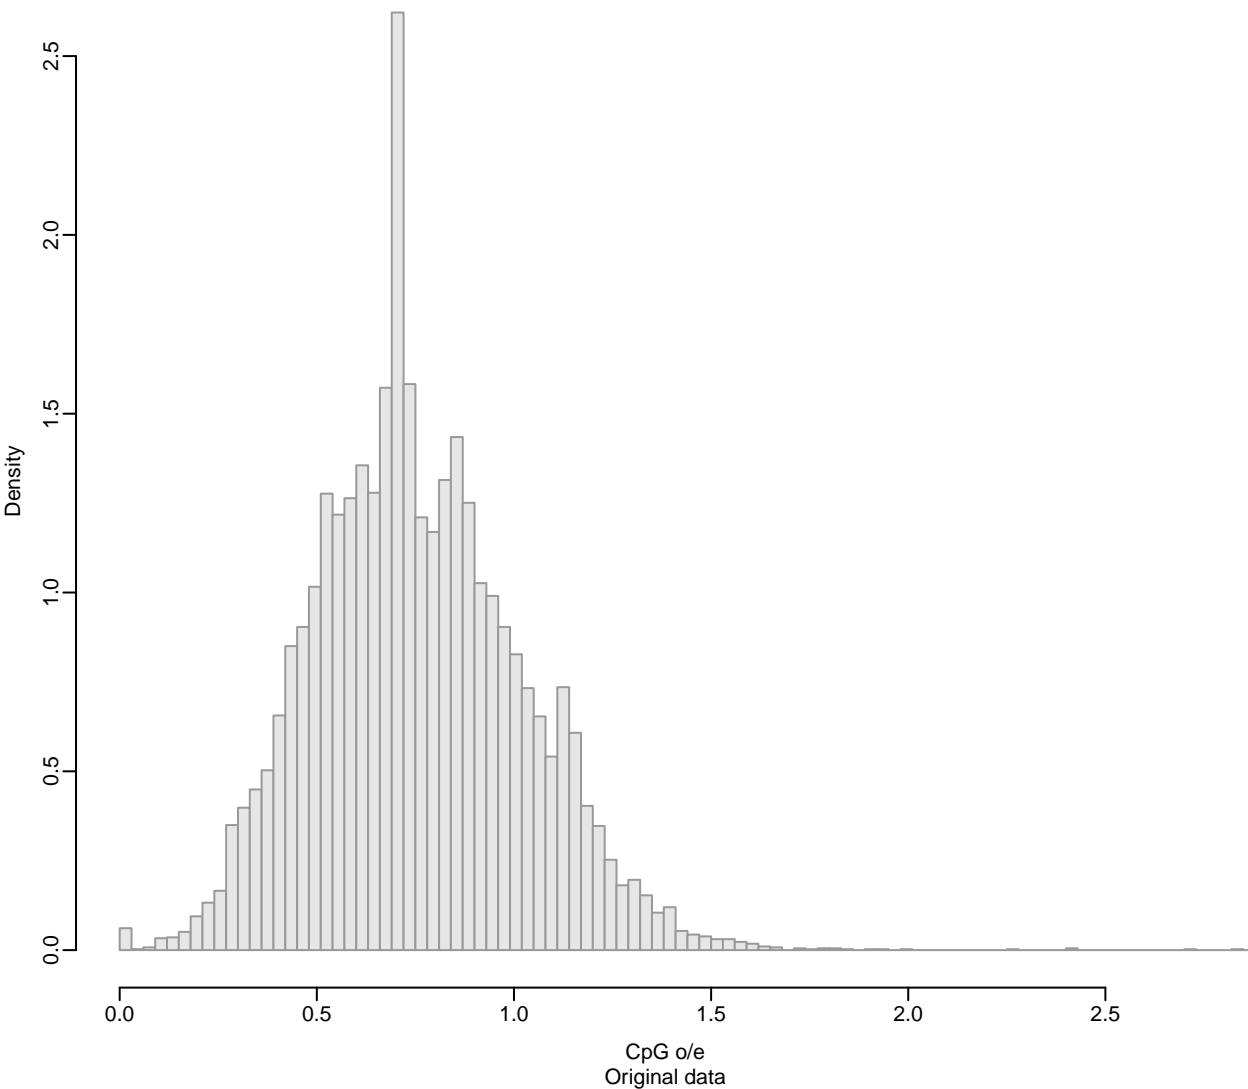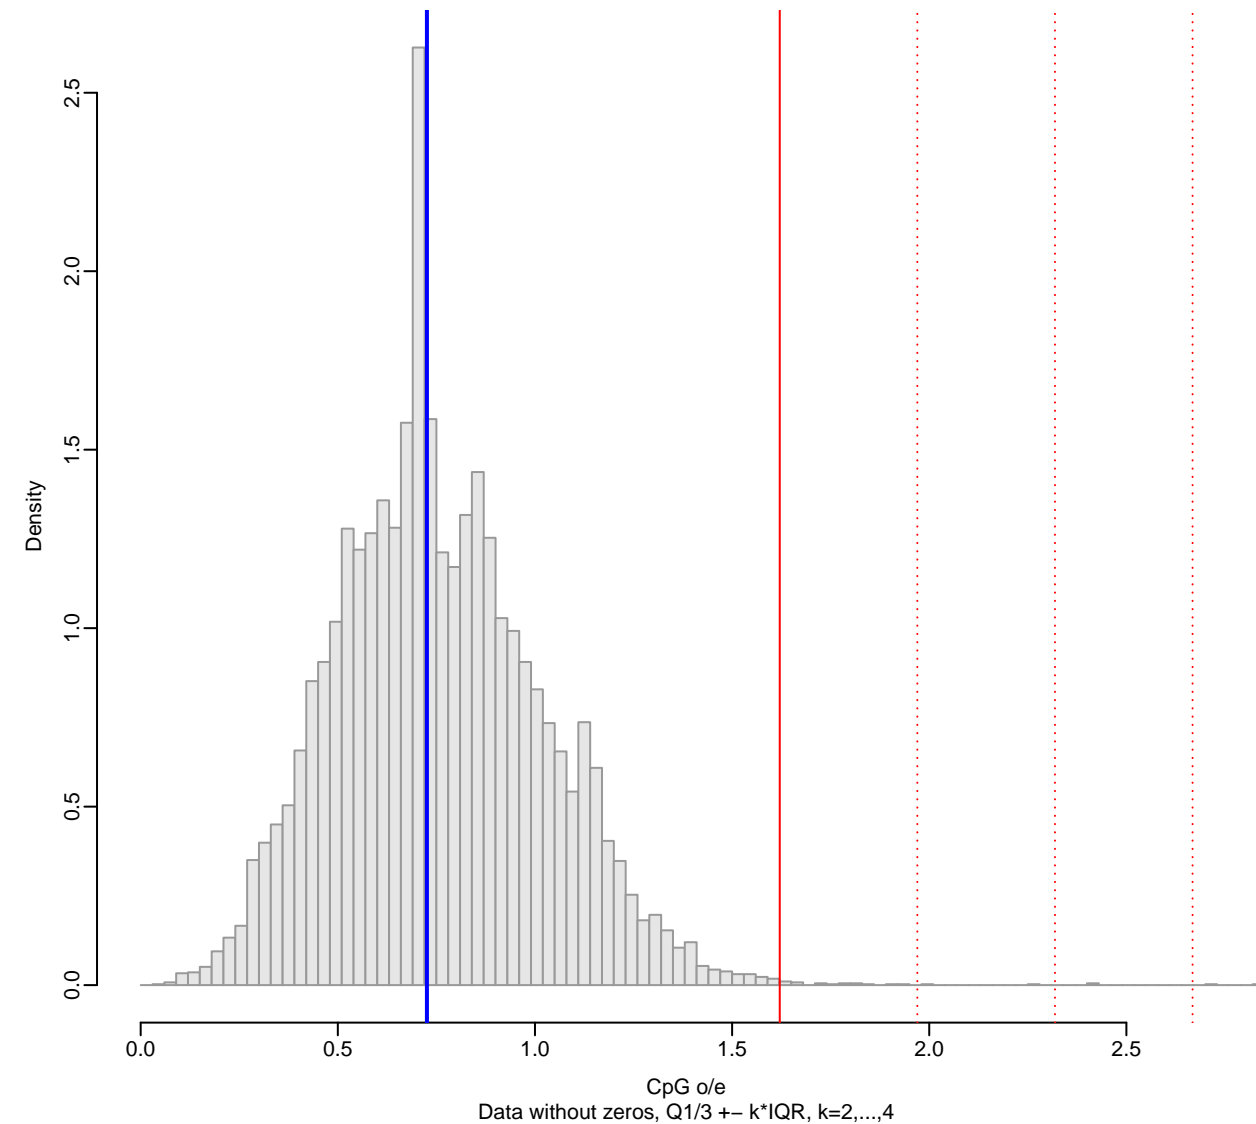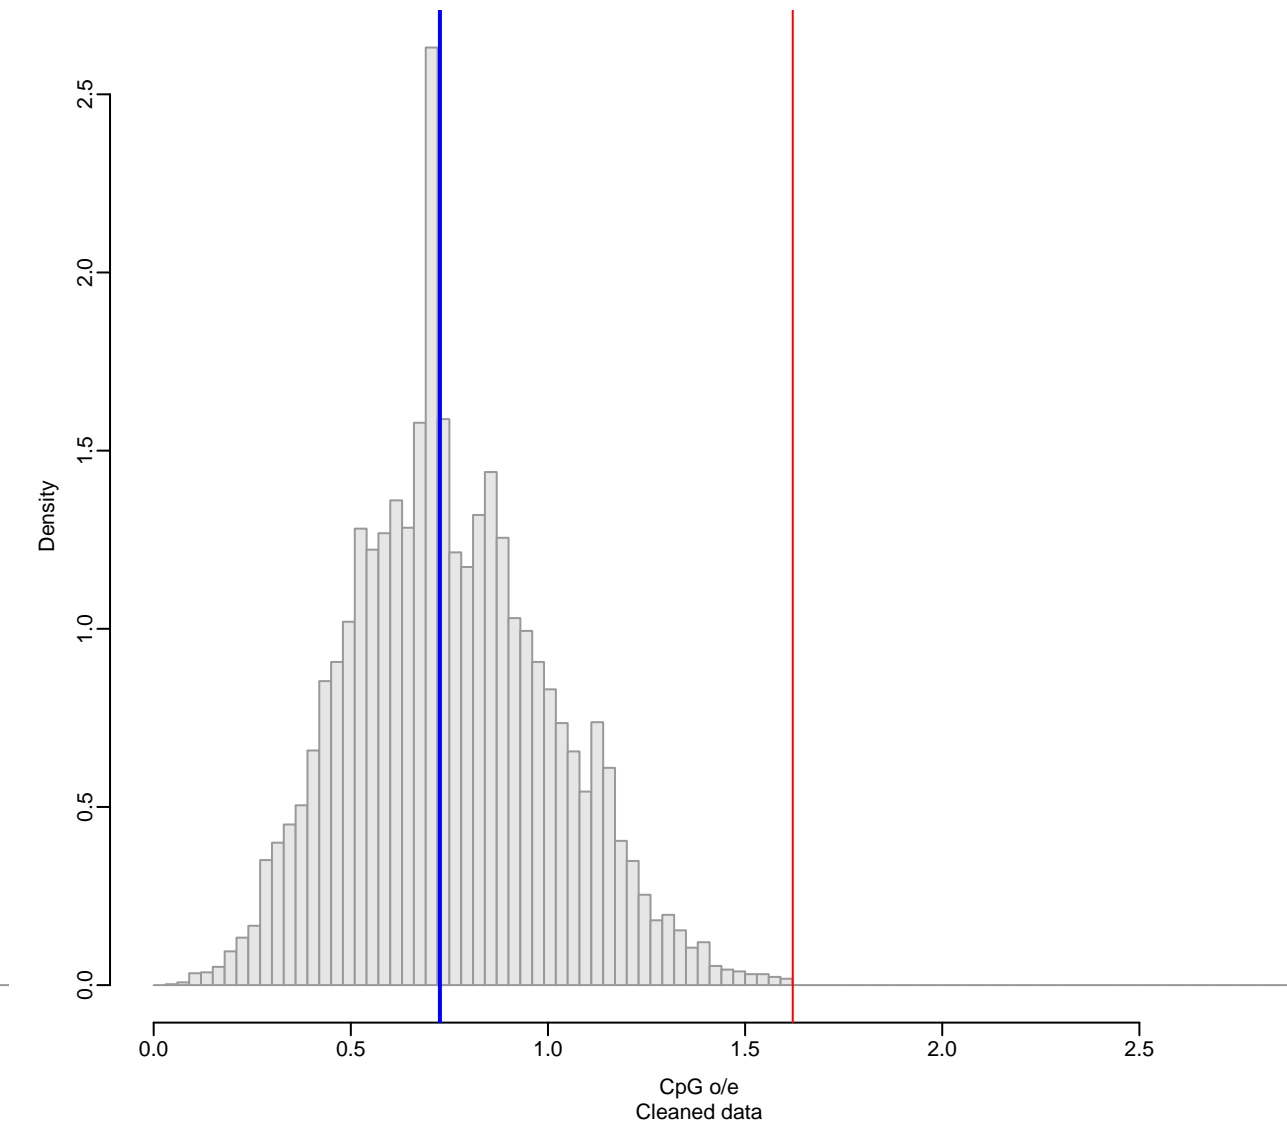

*Aiptasia\_pallida*

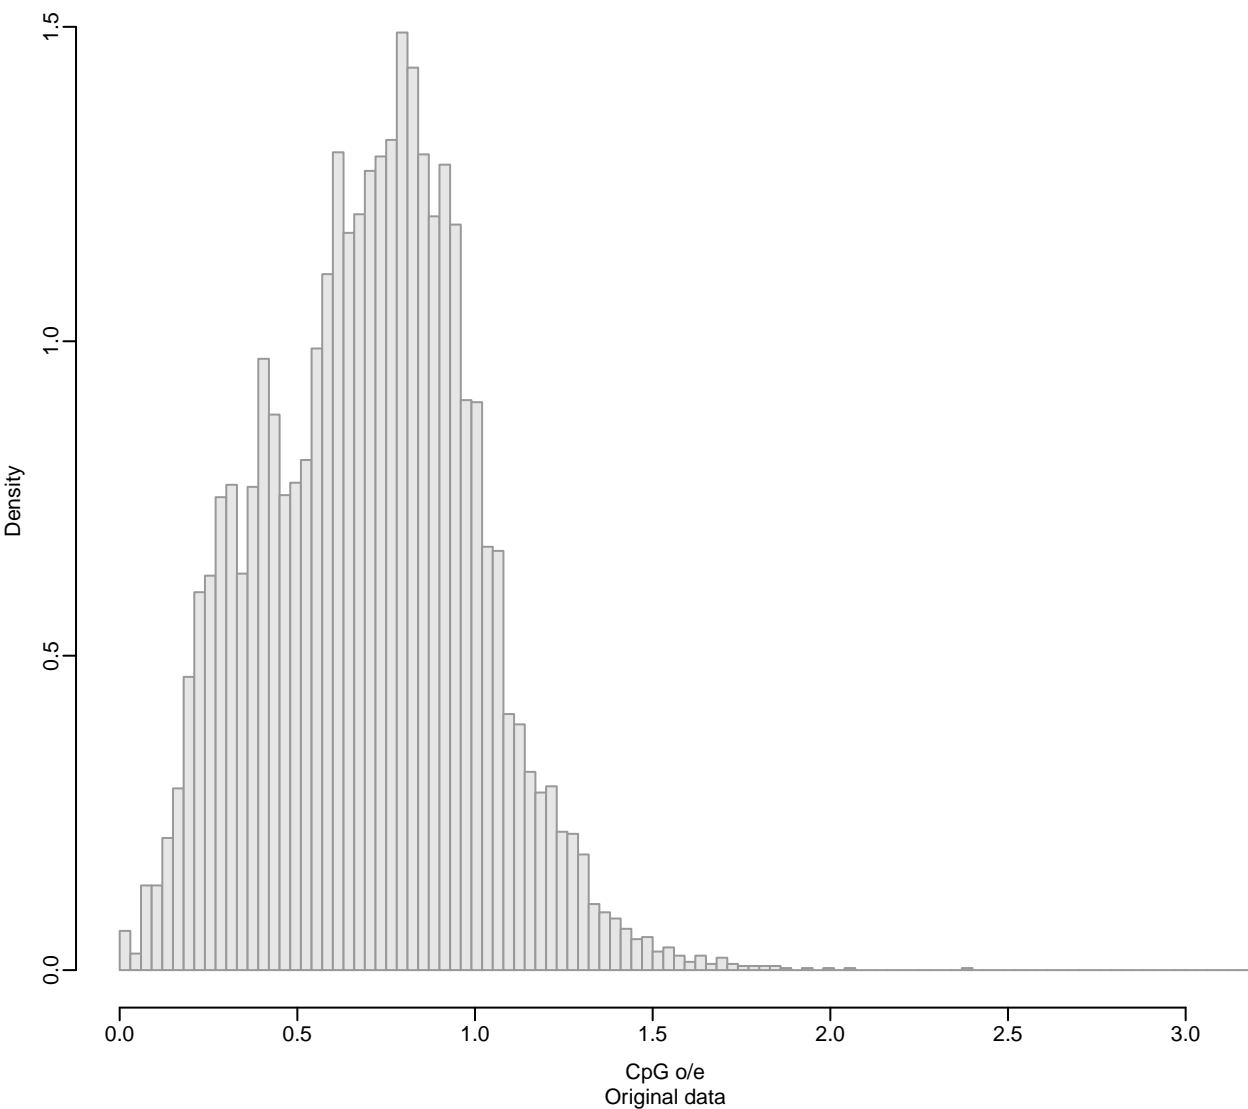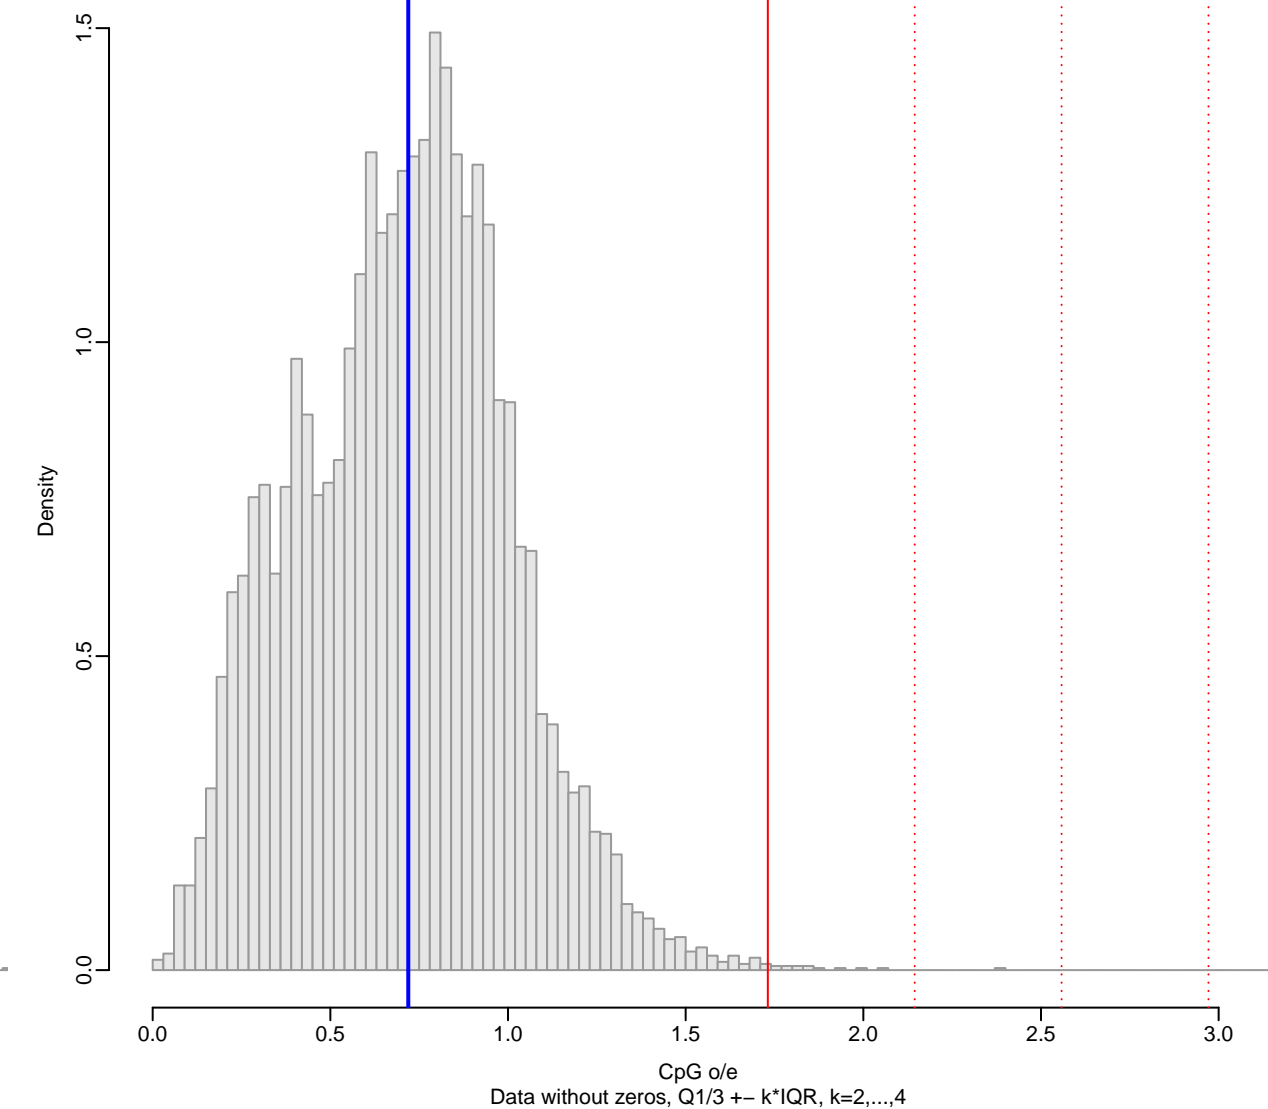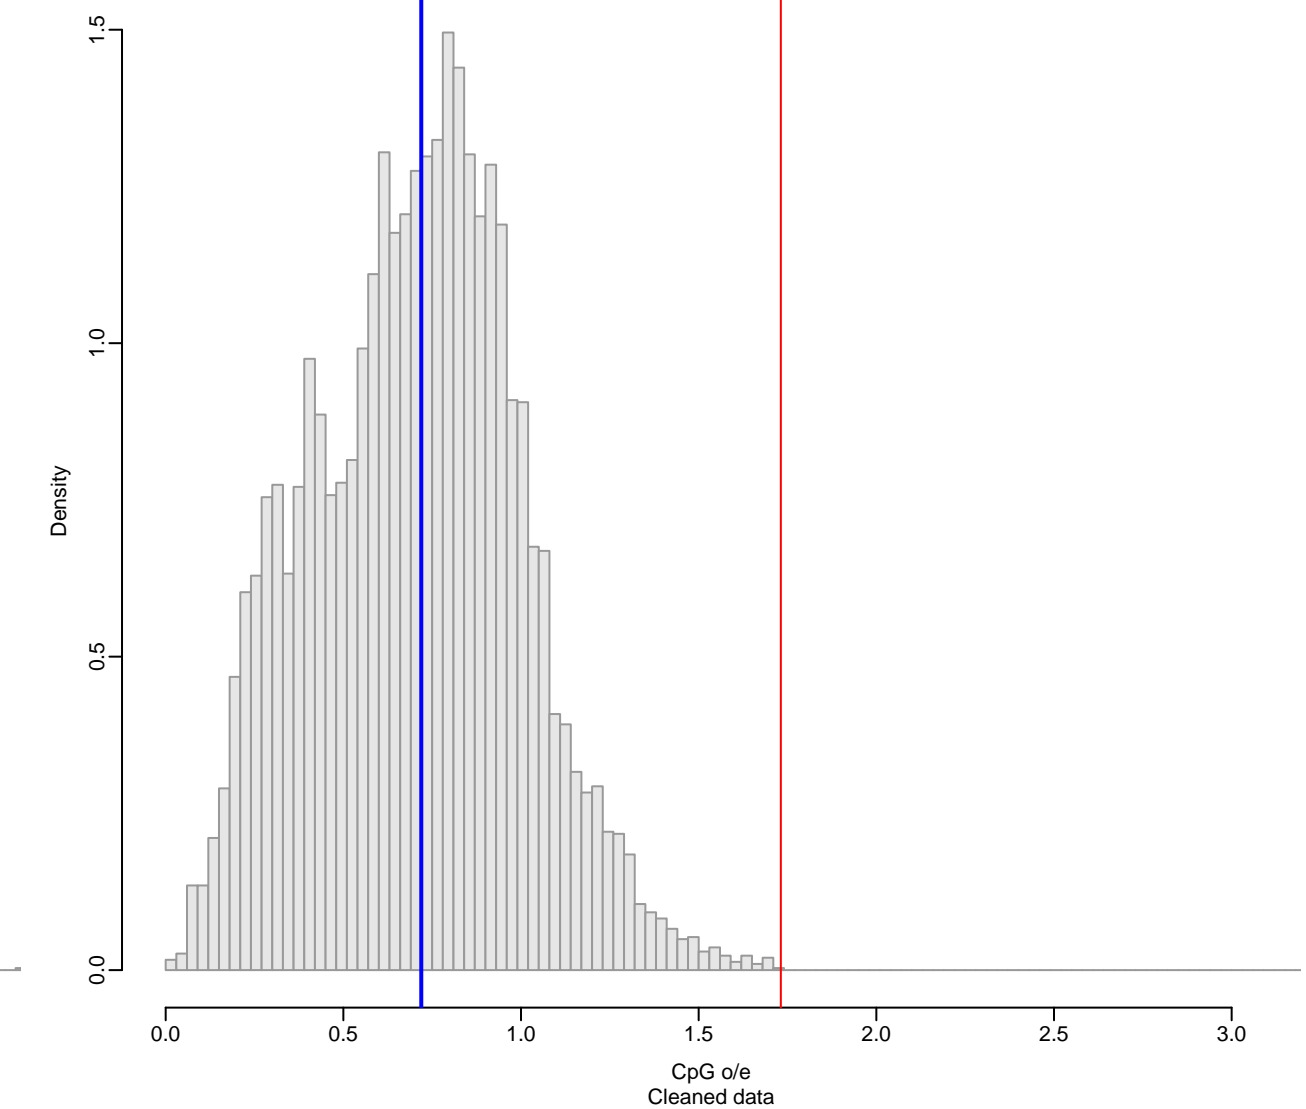

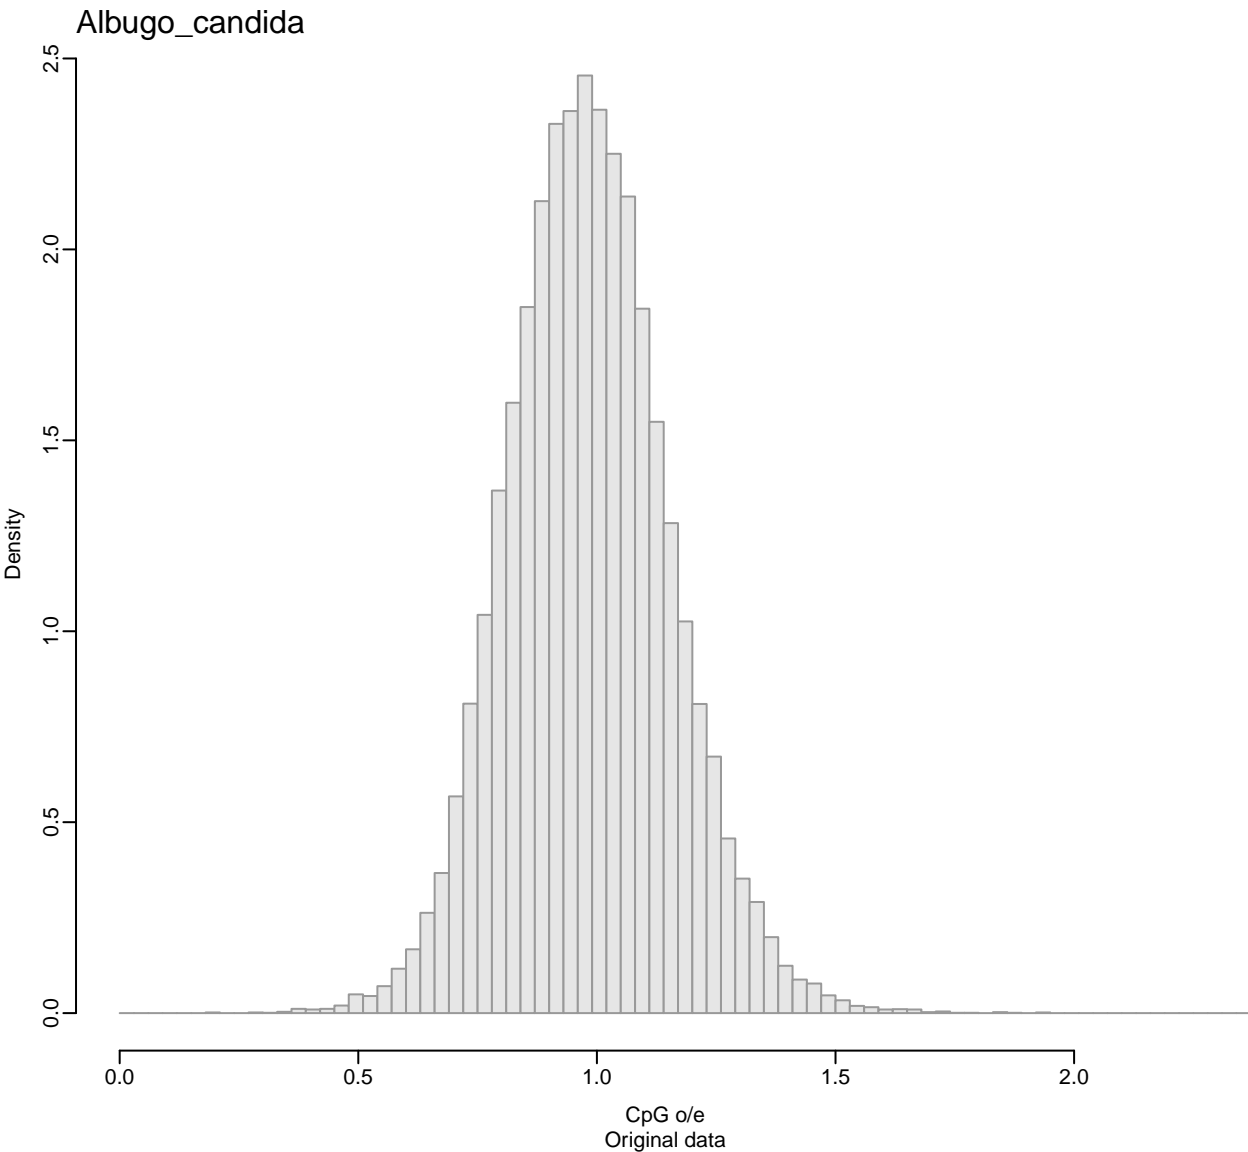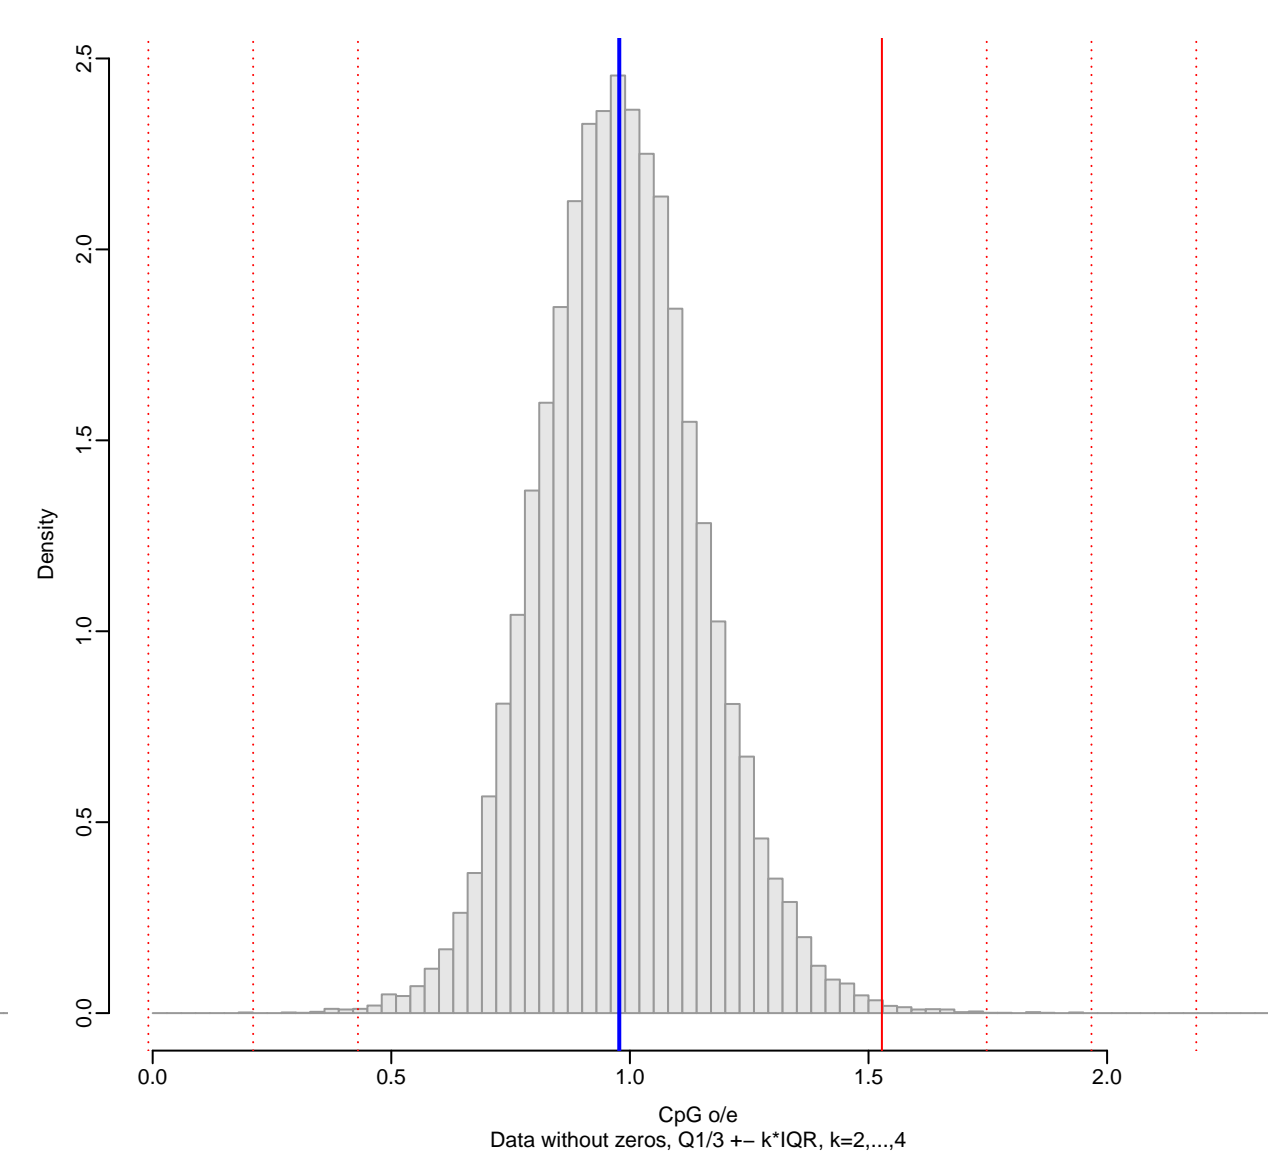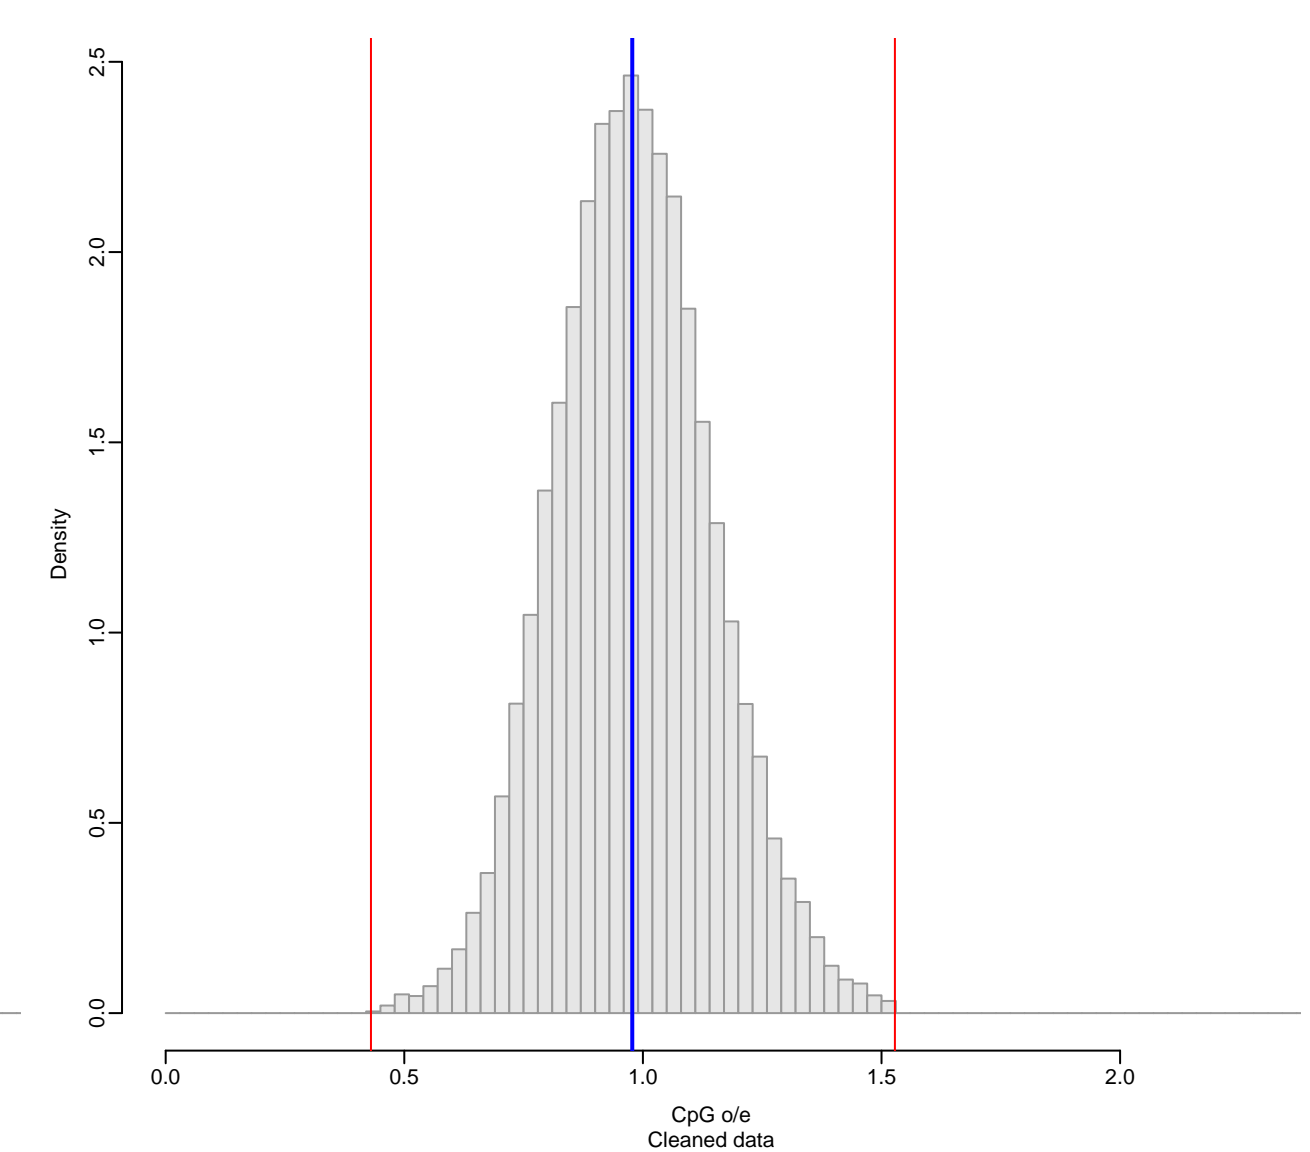

Alexandrium\_catenella

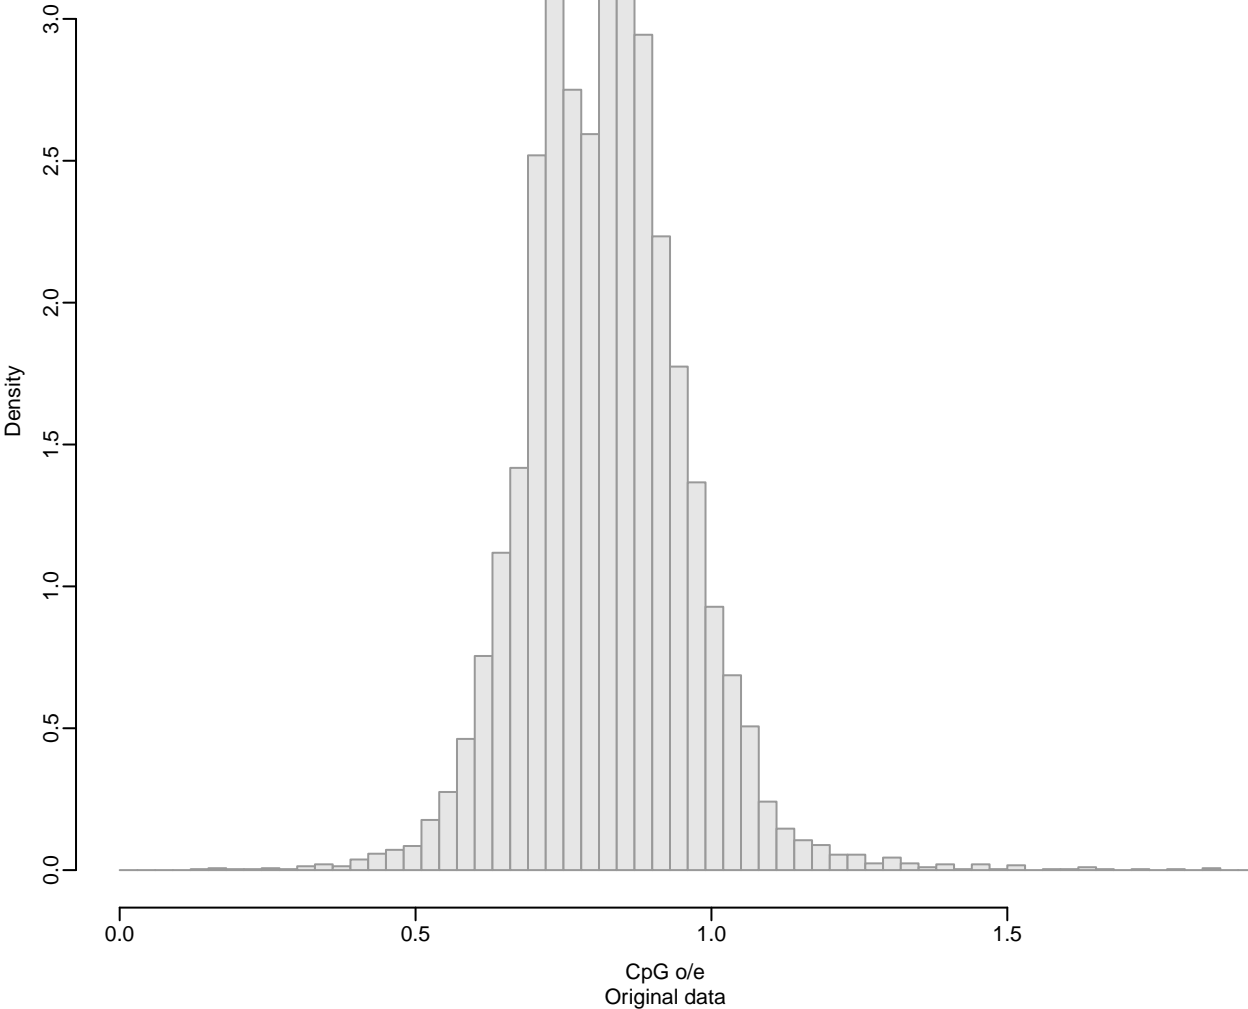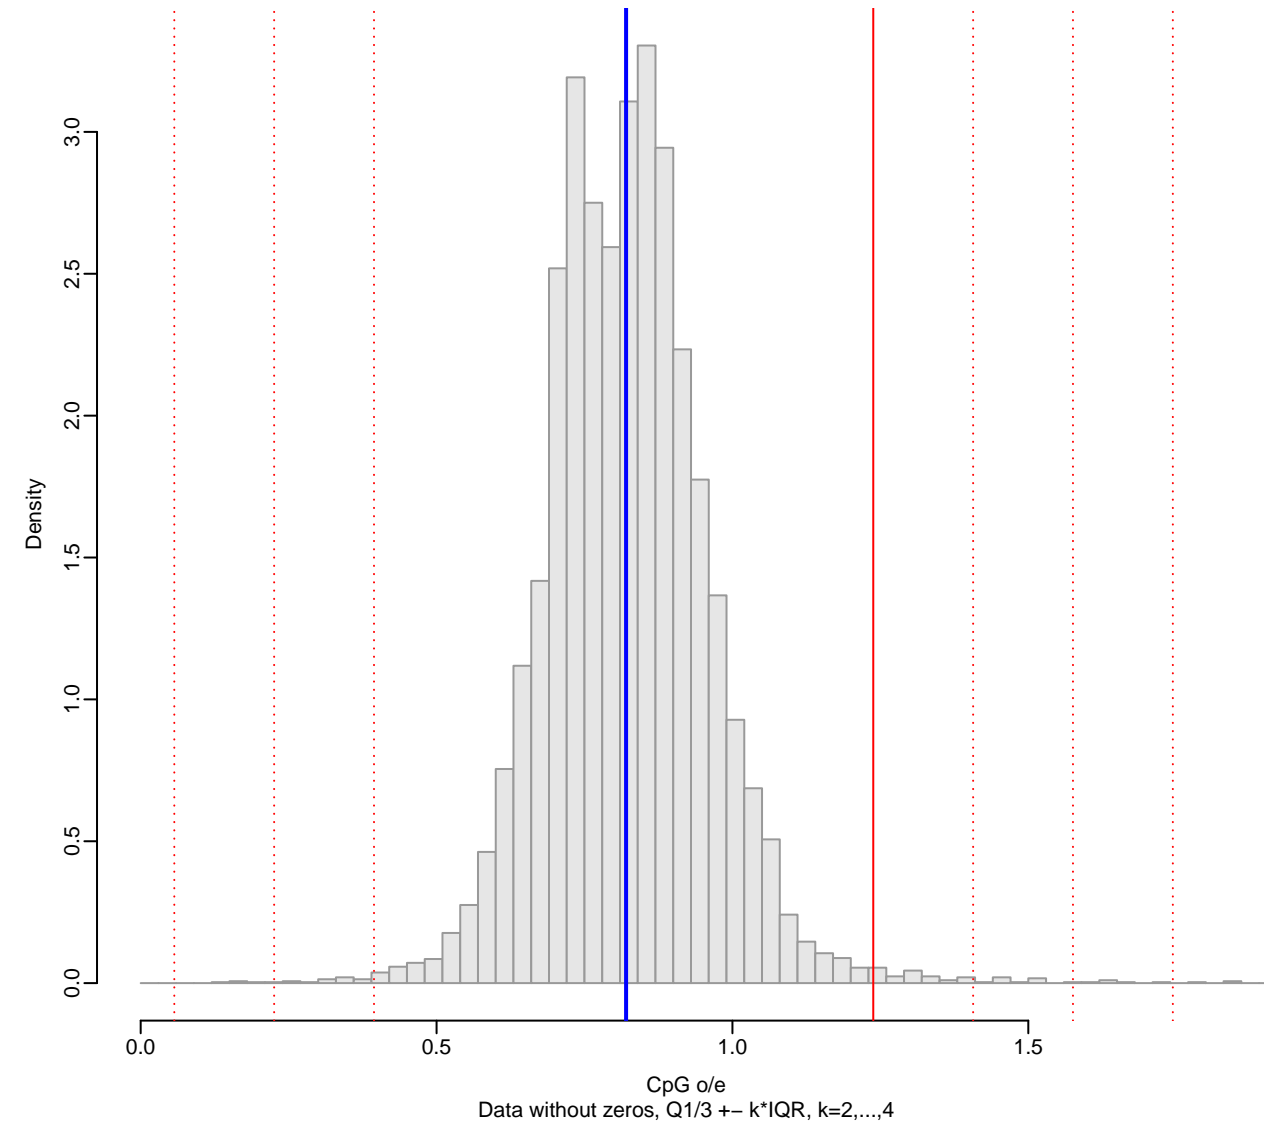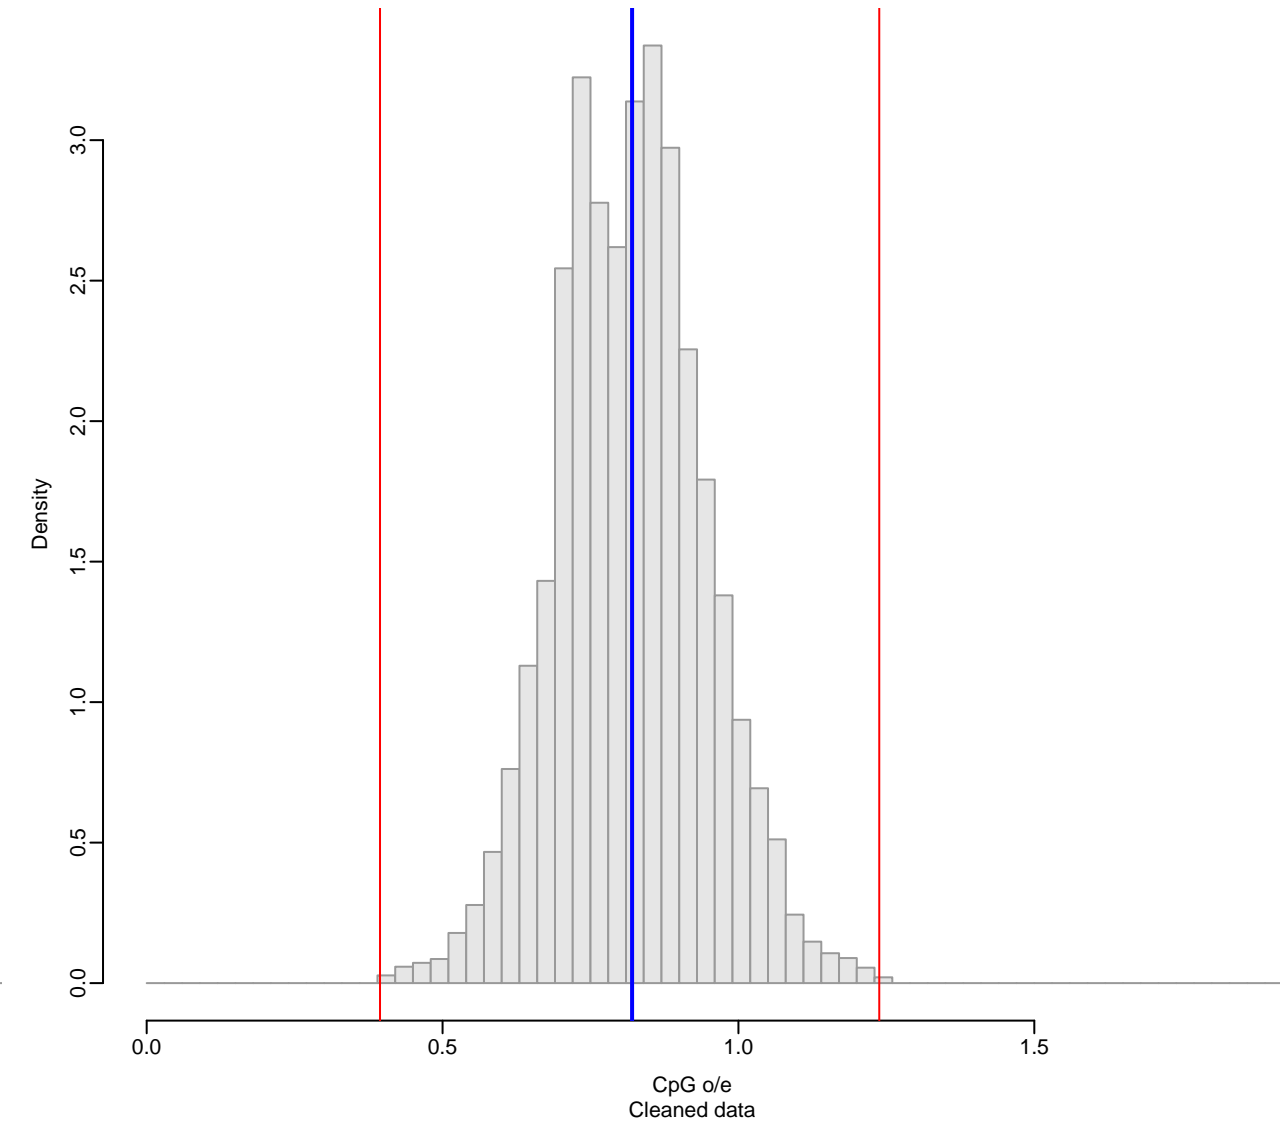



# Alexandrium\_minutum

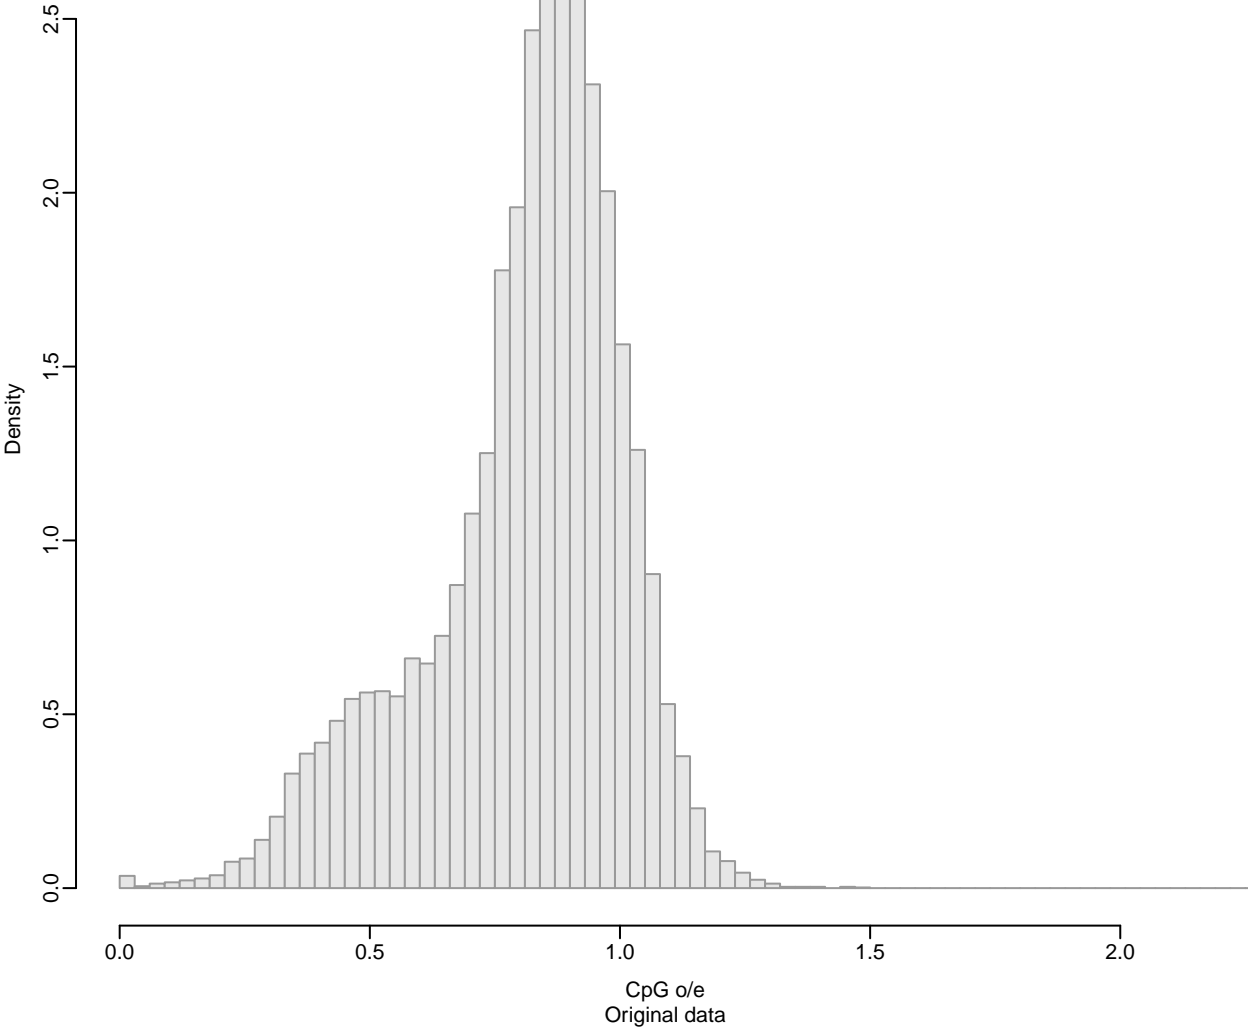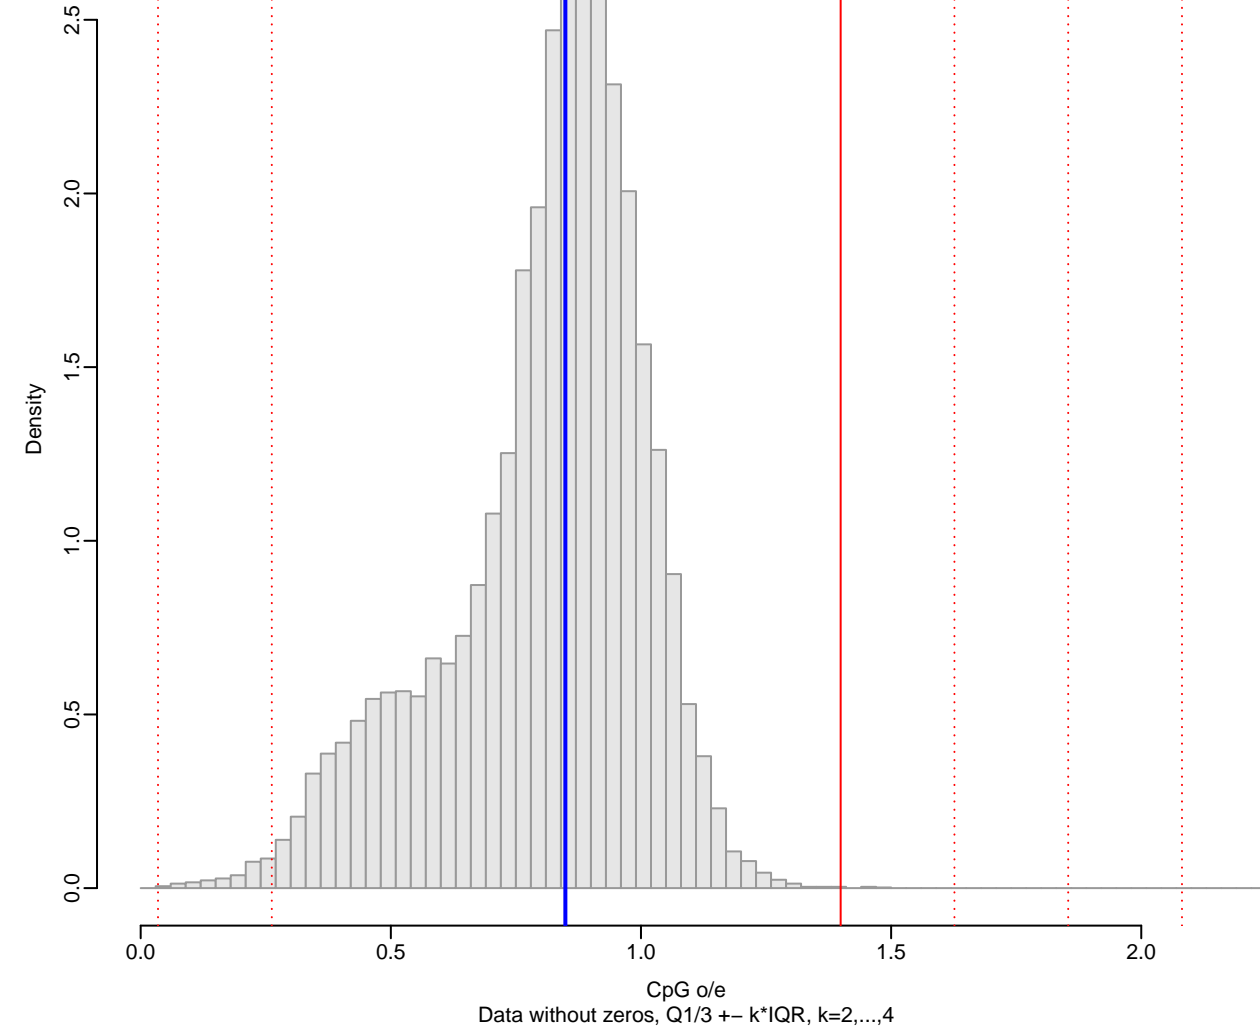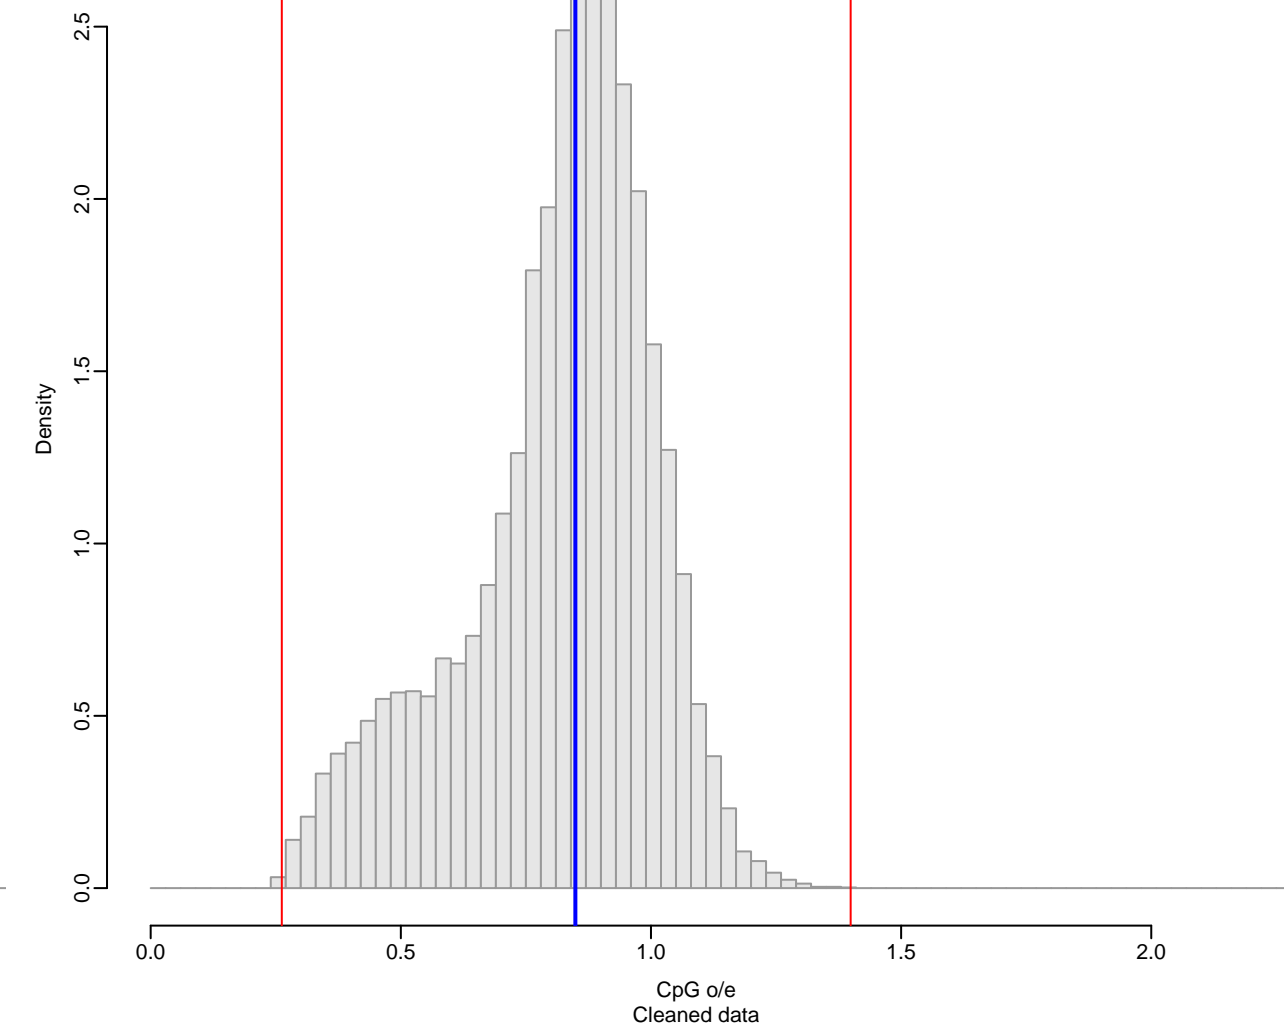

Alexandrium\_ostensefeldii

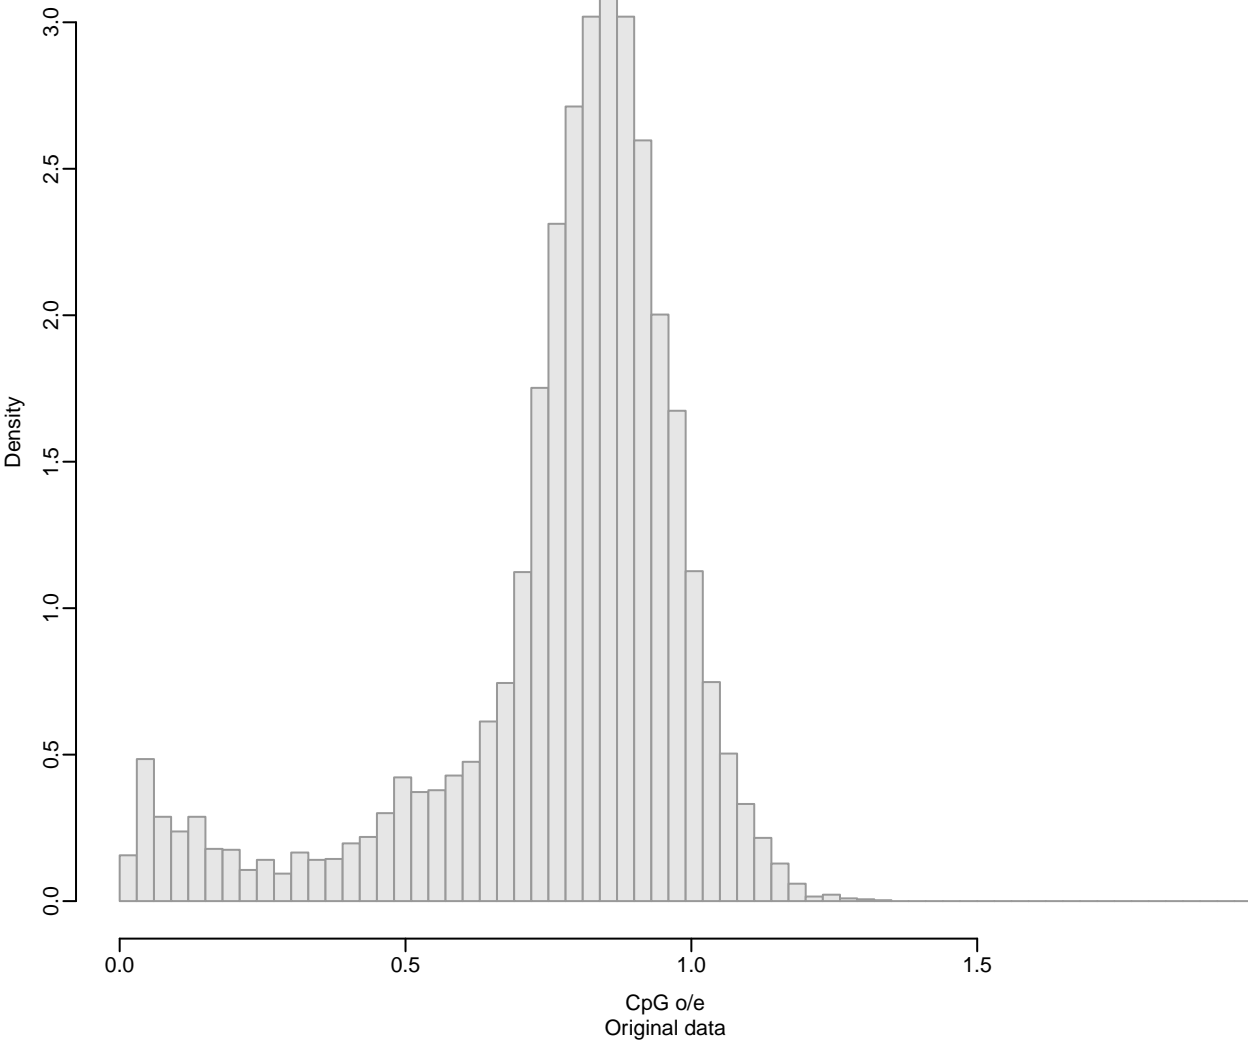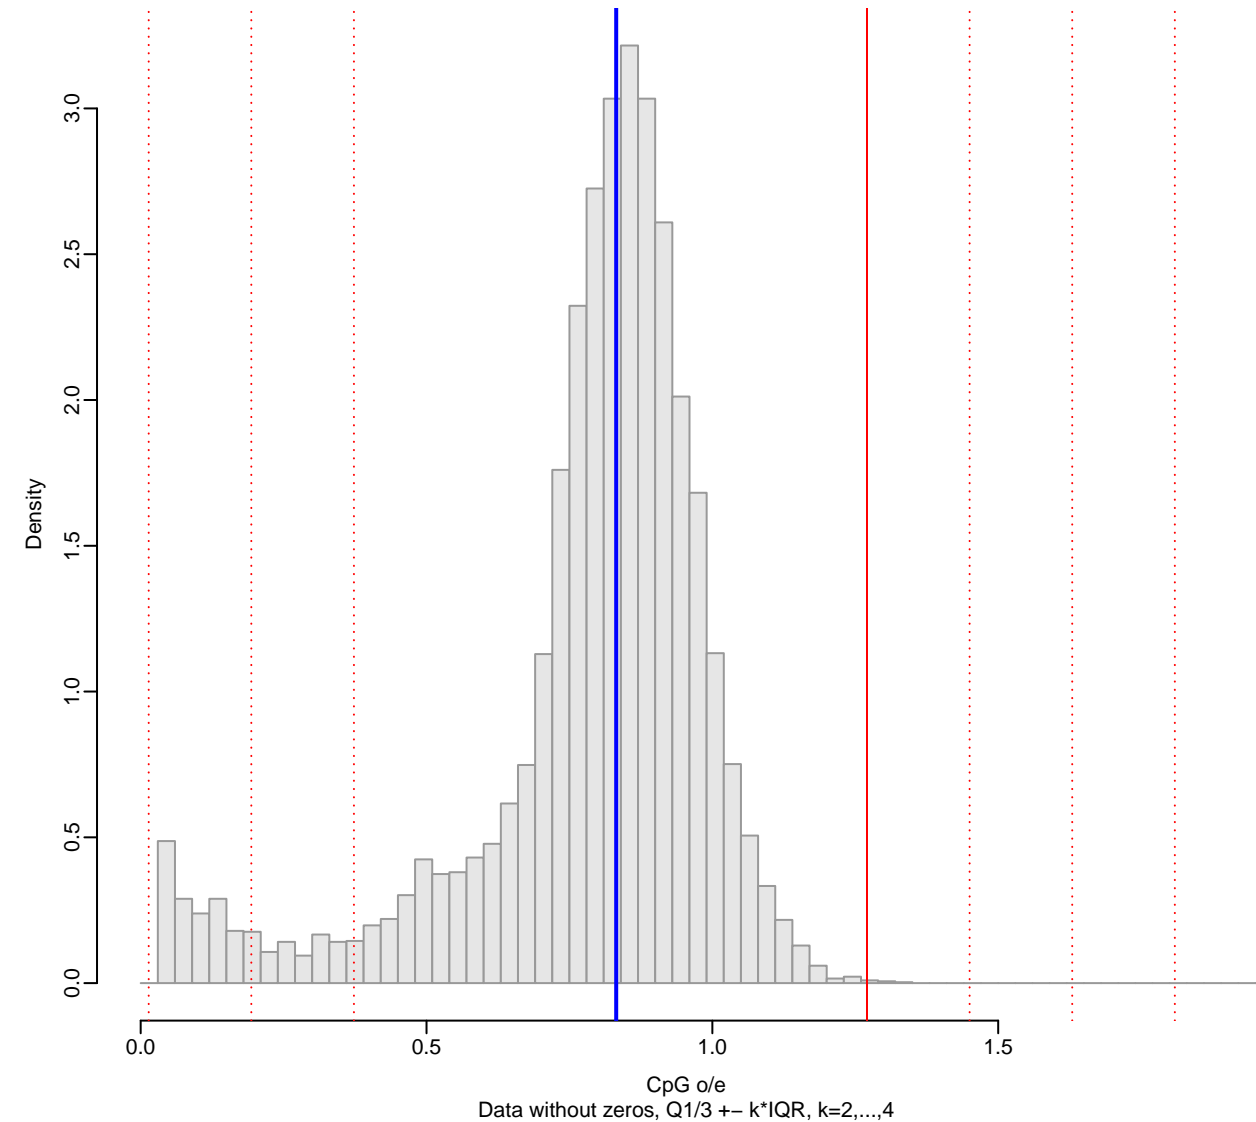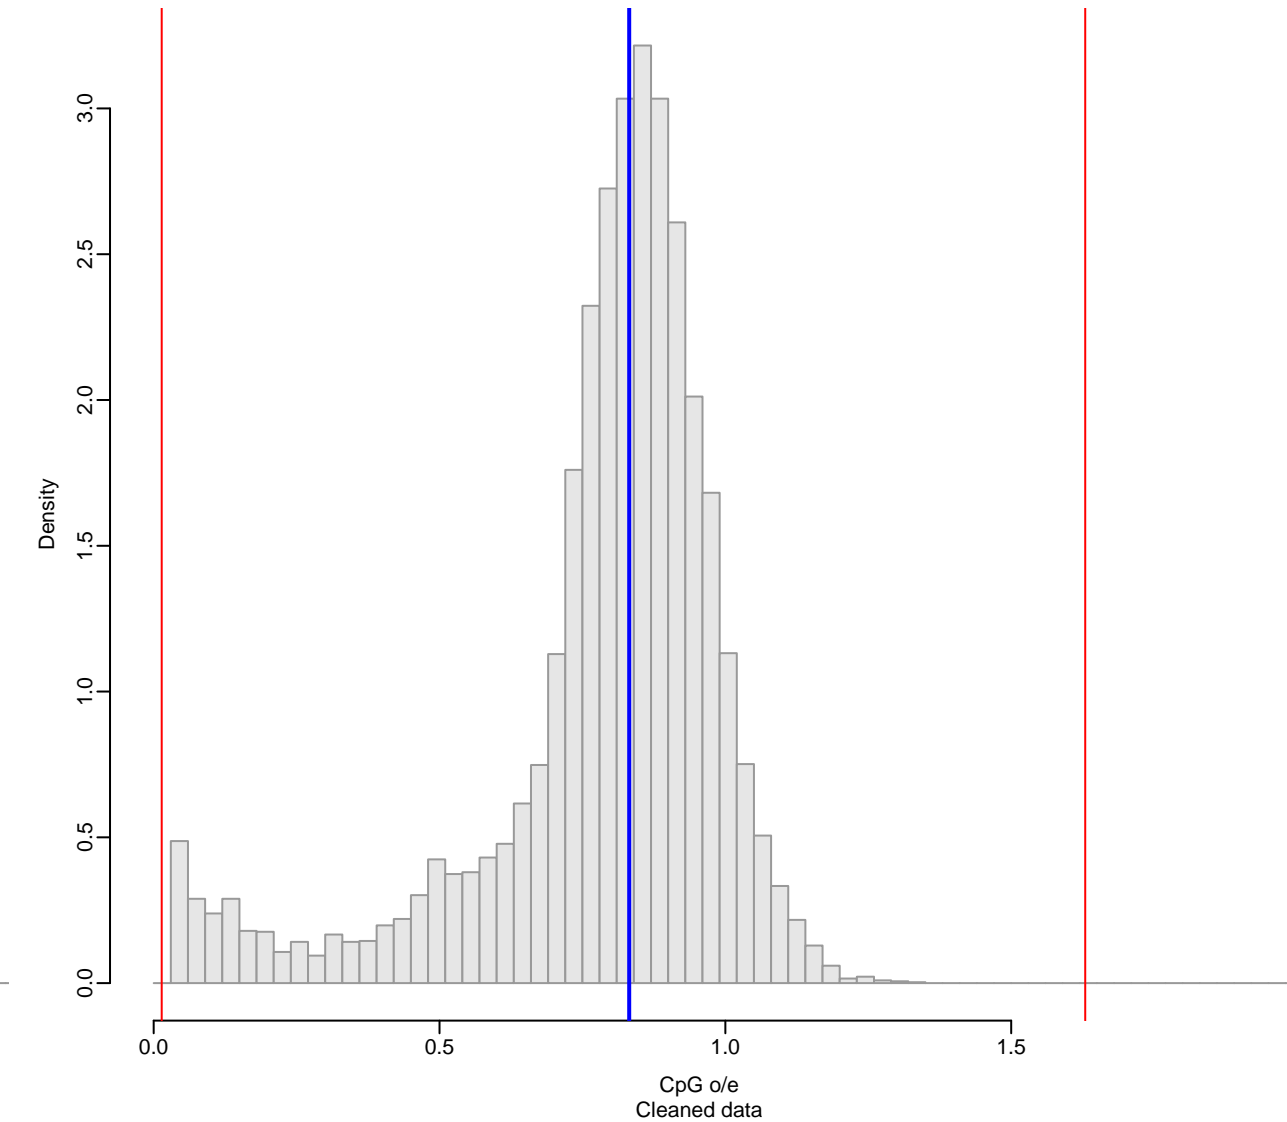

Alexandrium\_tamarensis

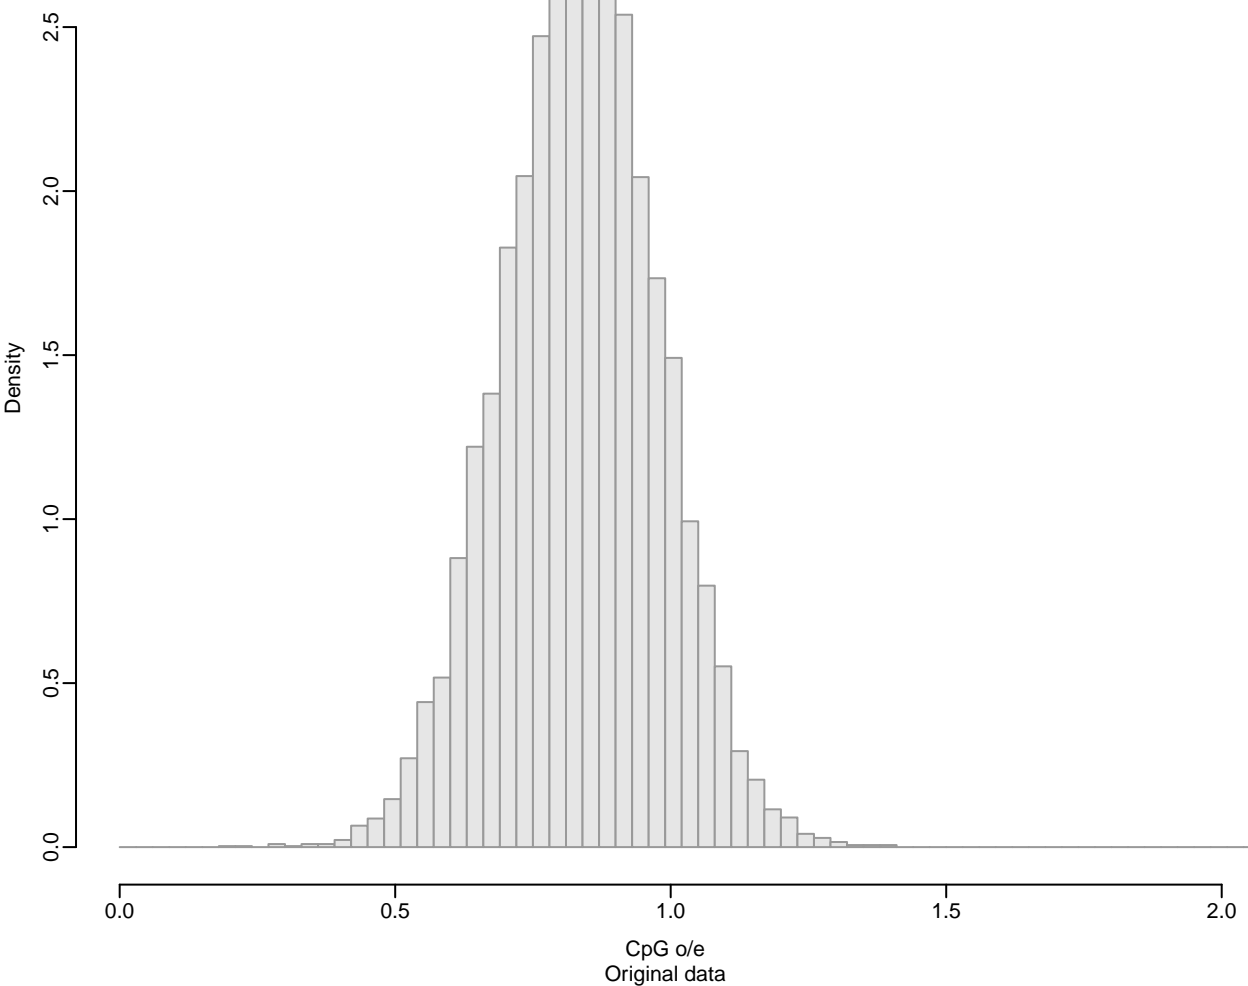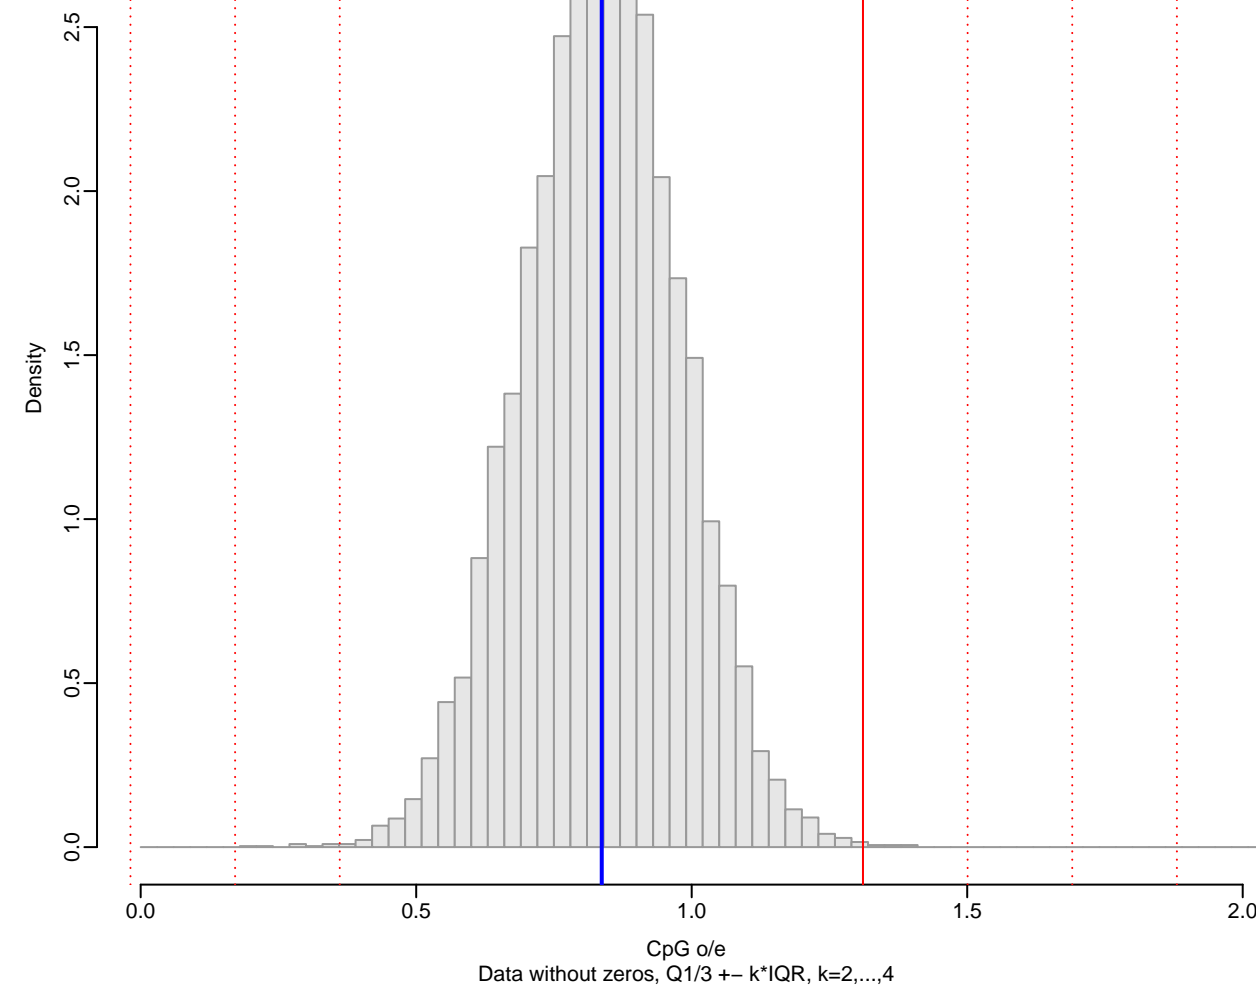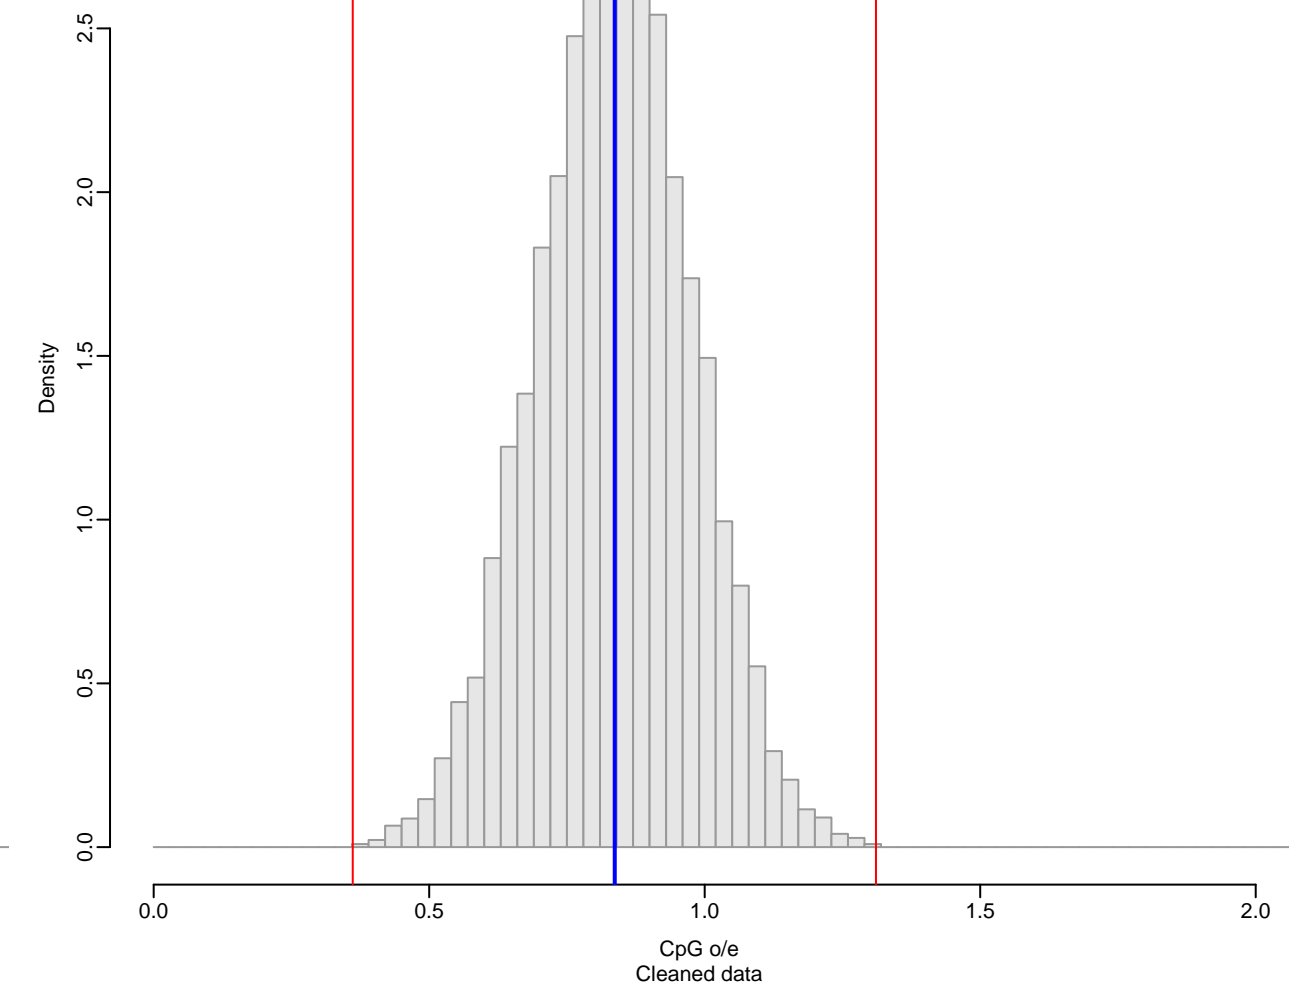

Alligator\_mississippiensis

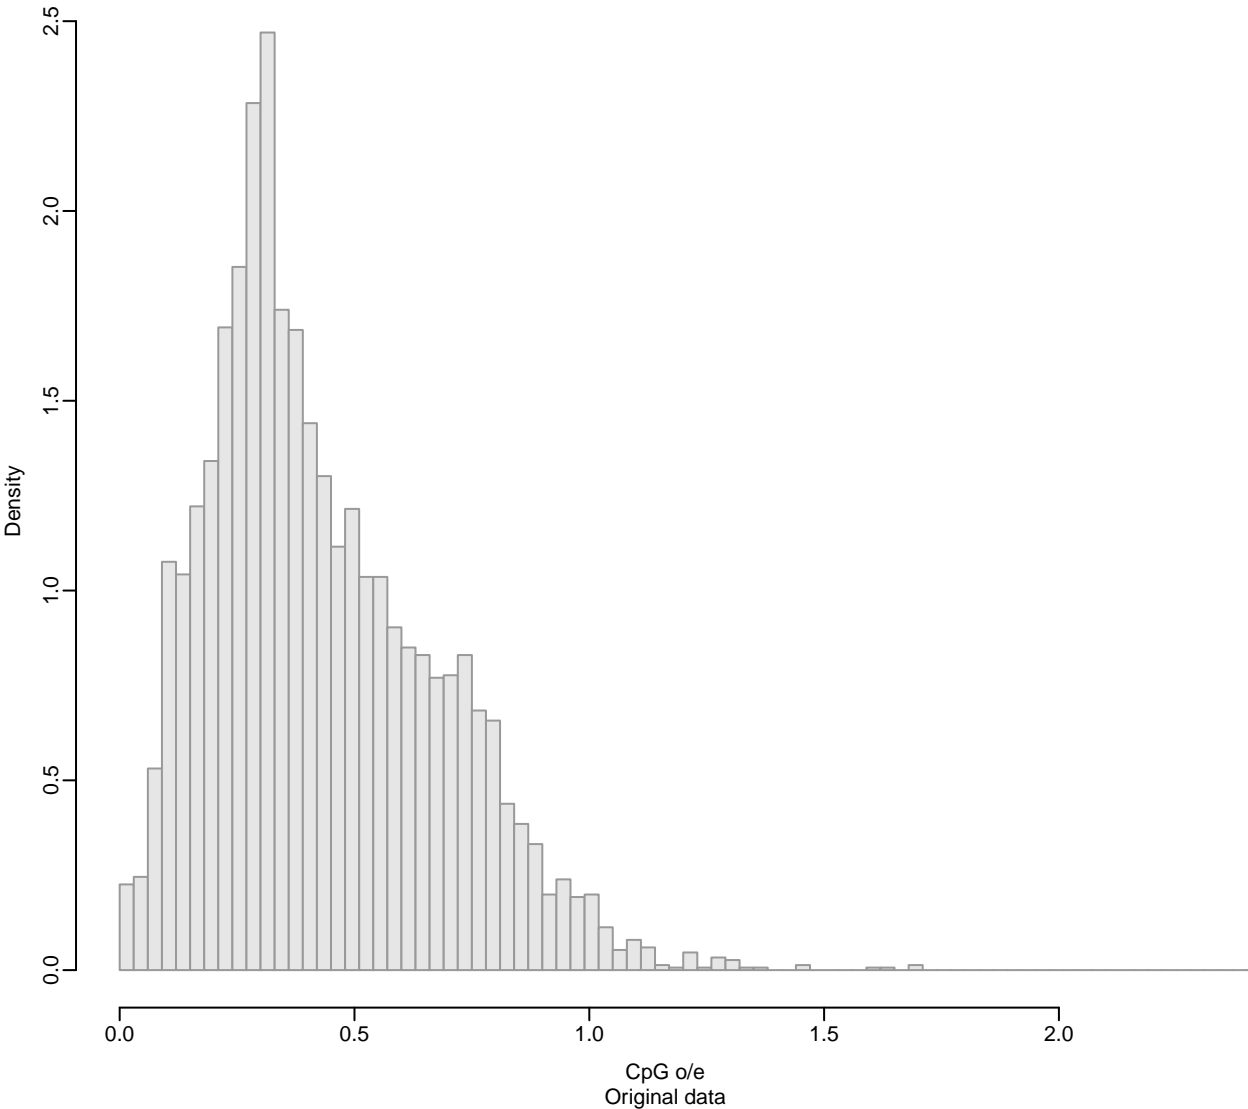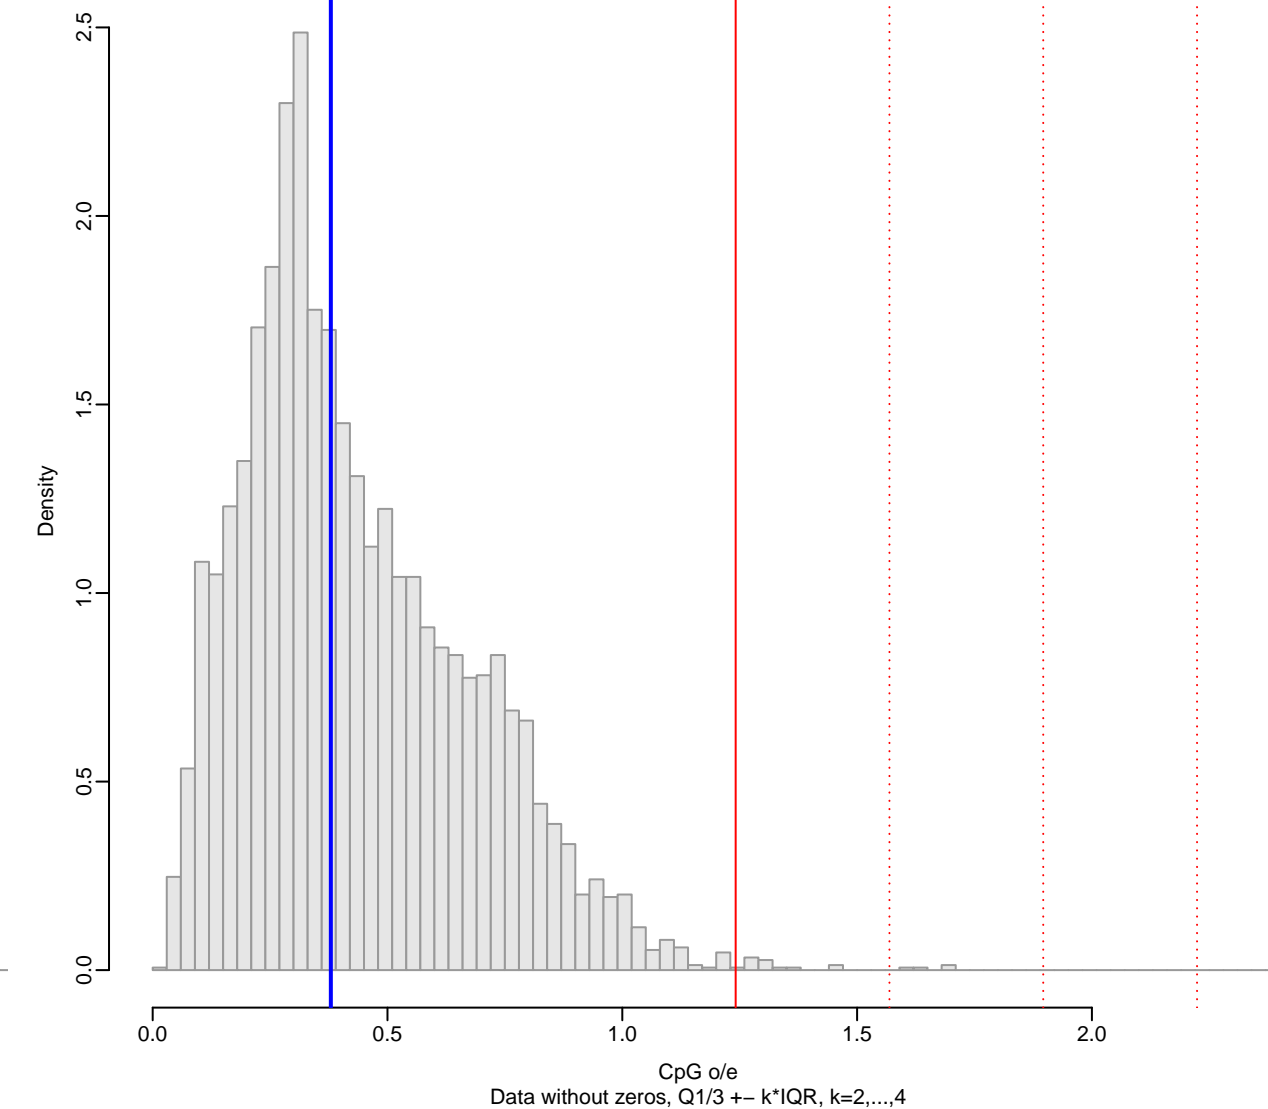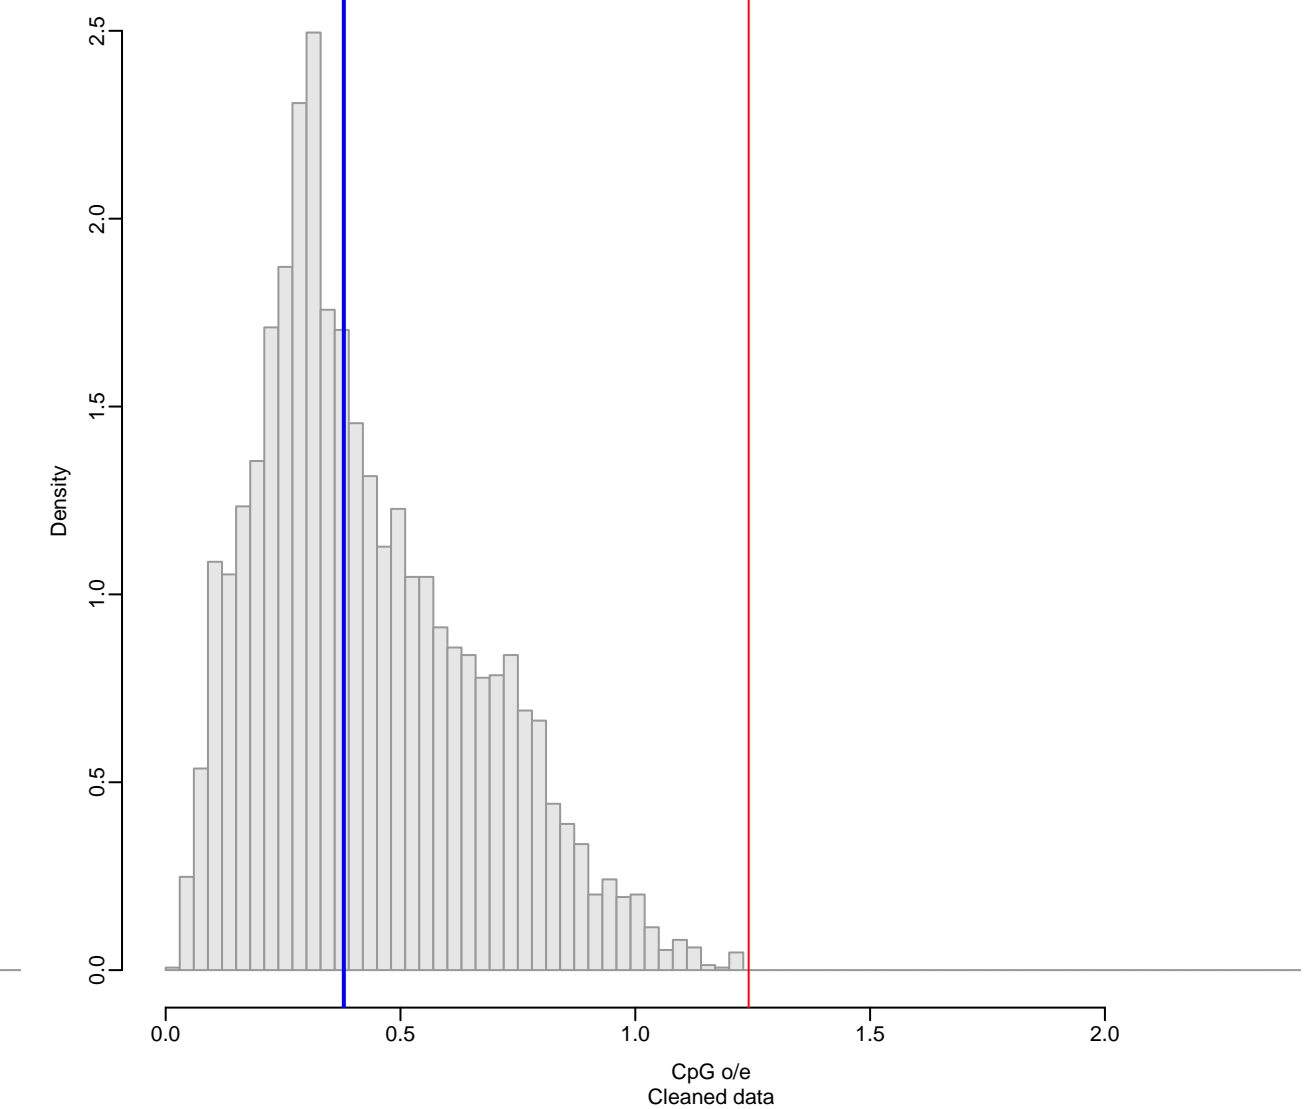

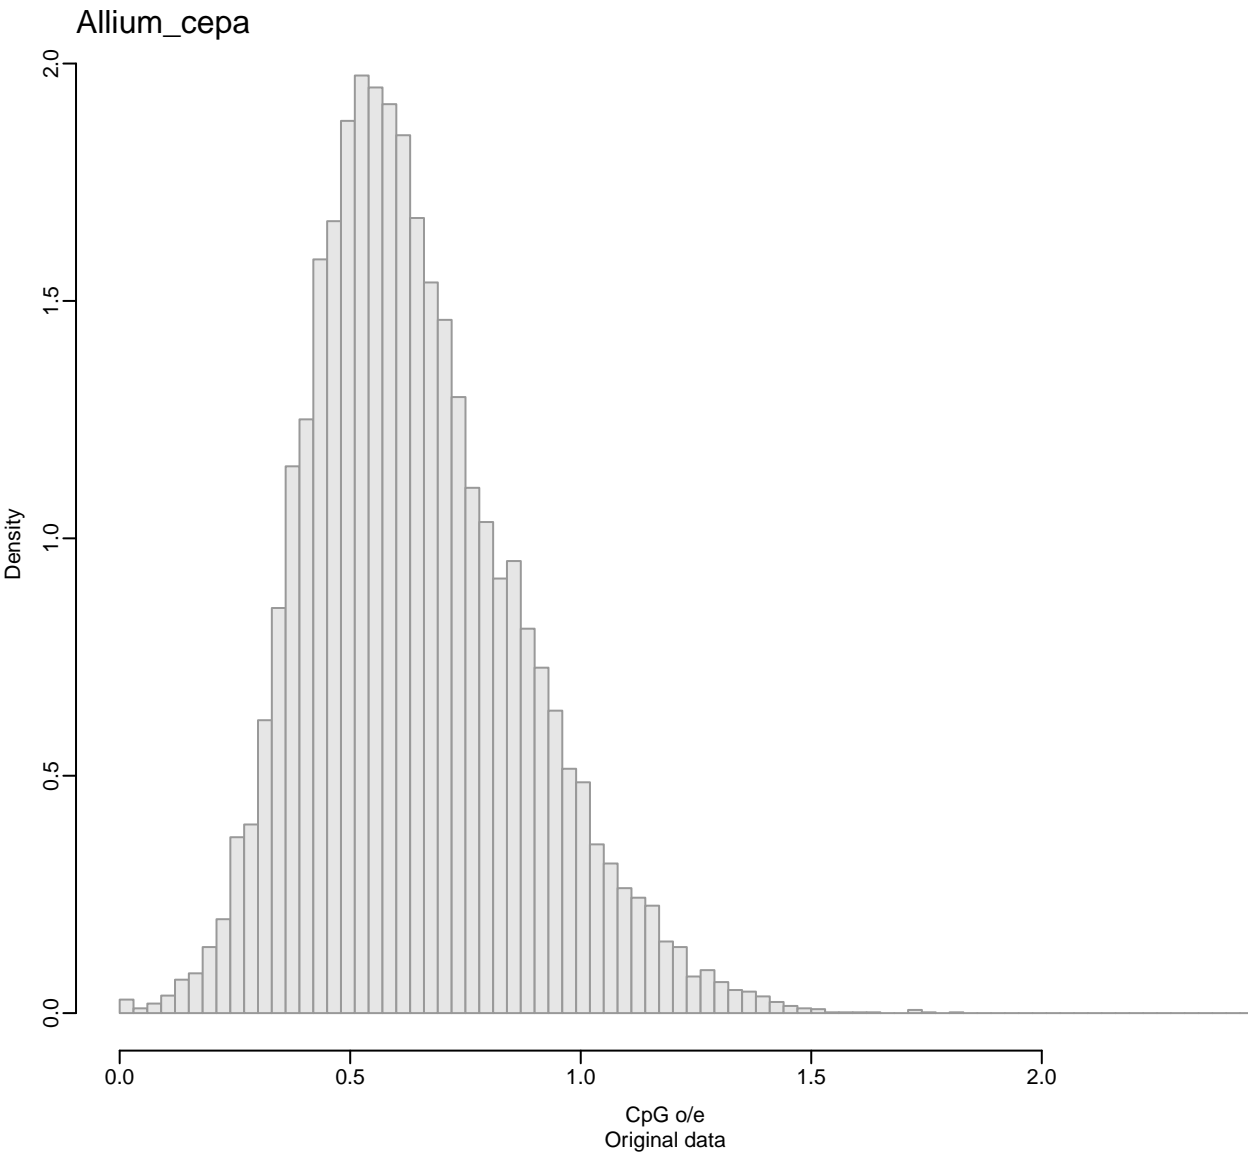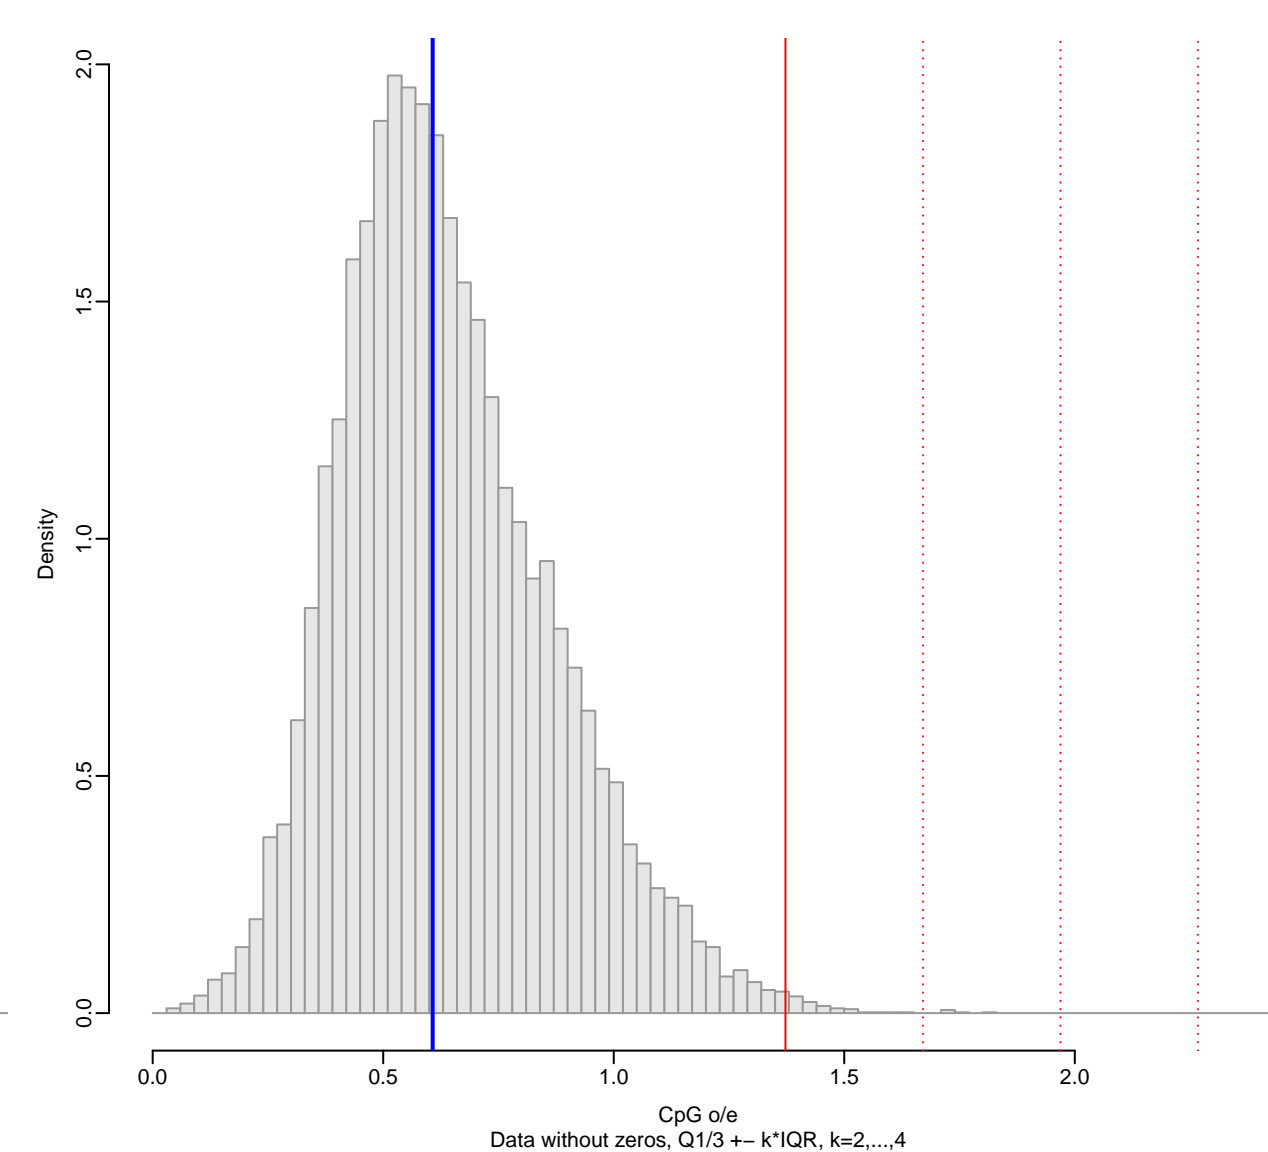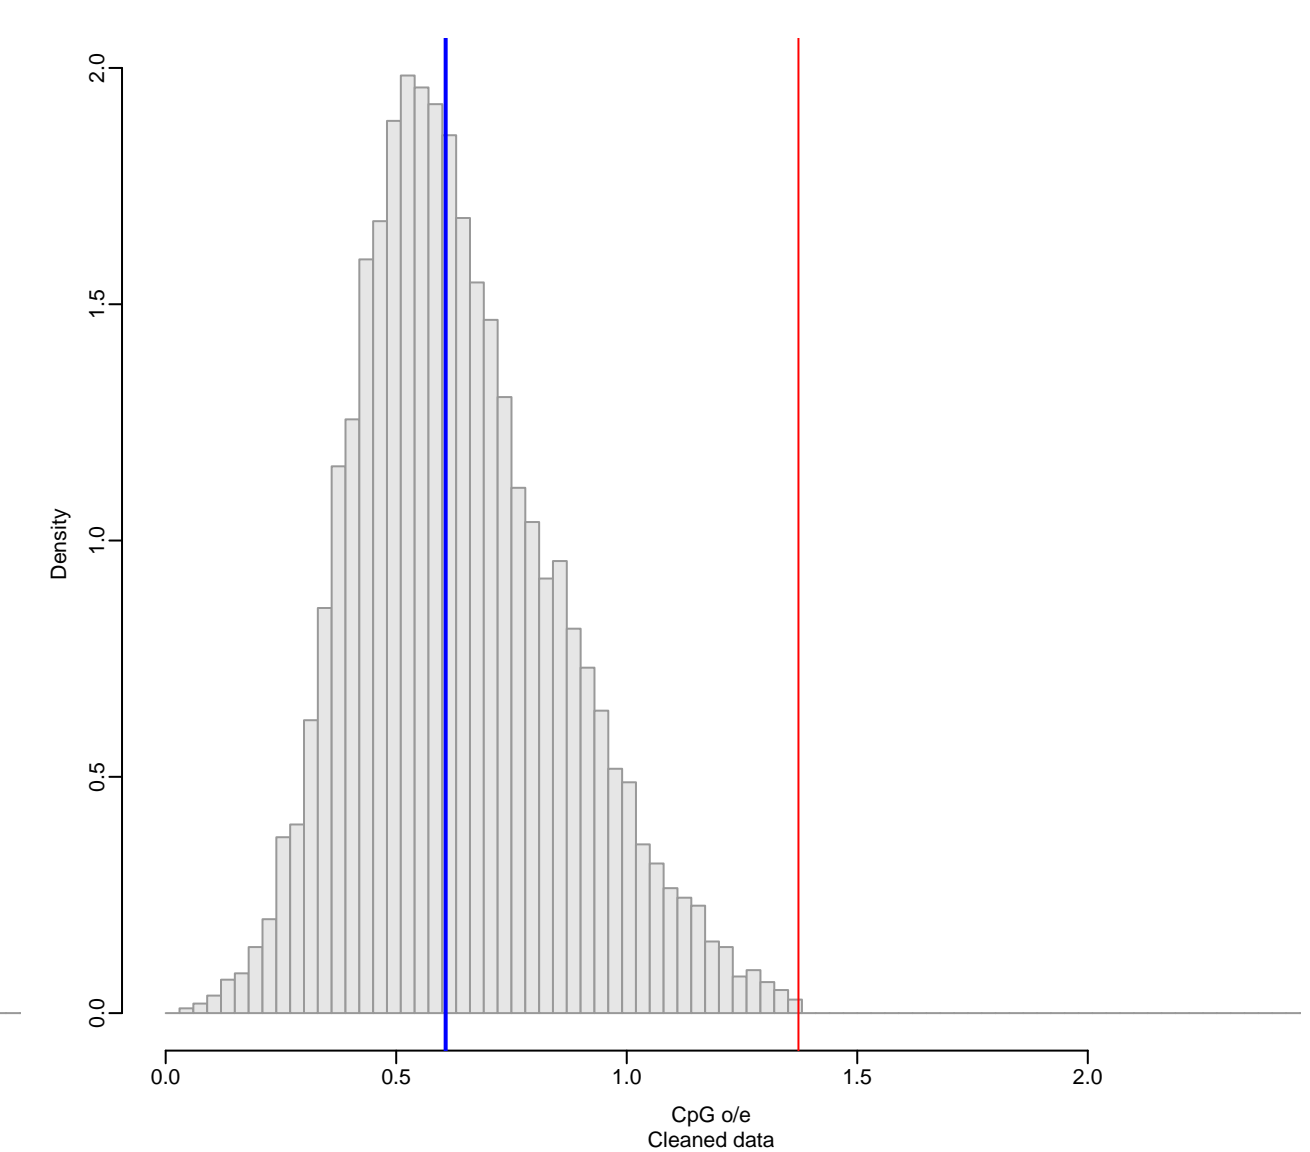

Allium\_sativum

Density

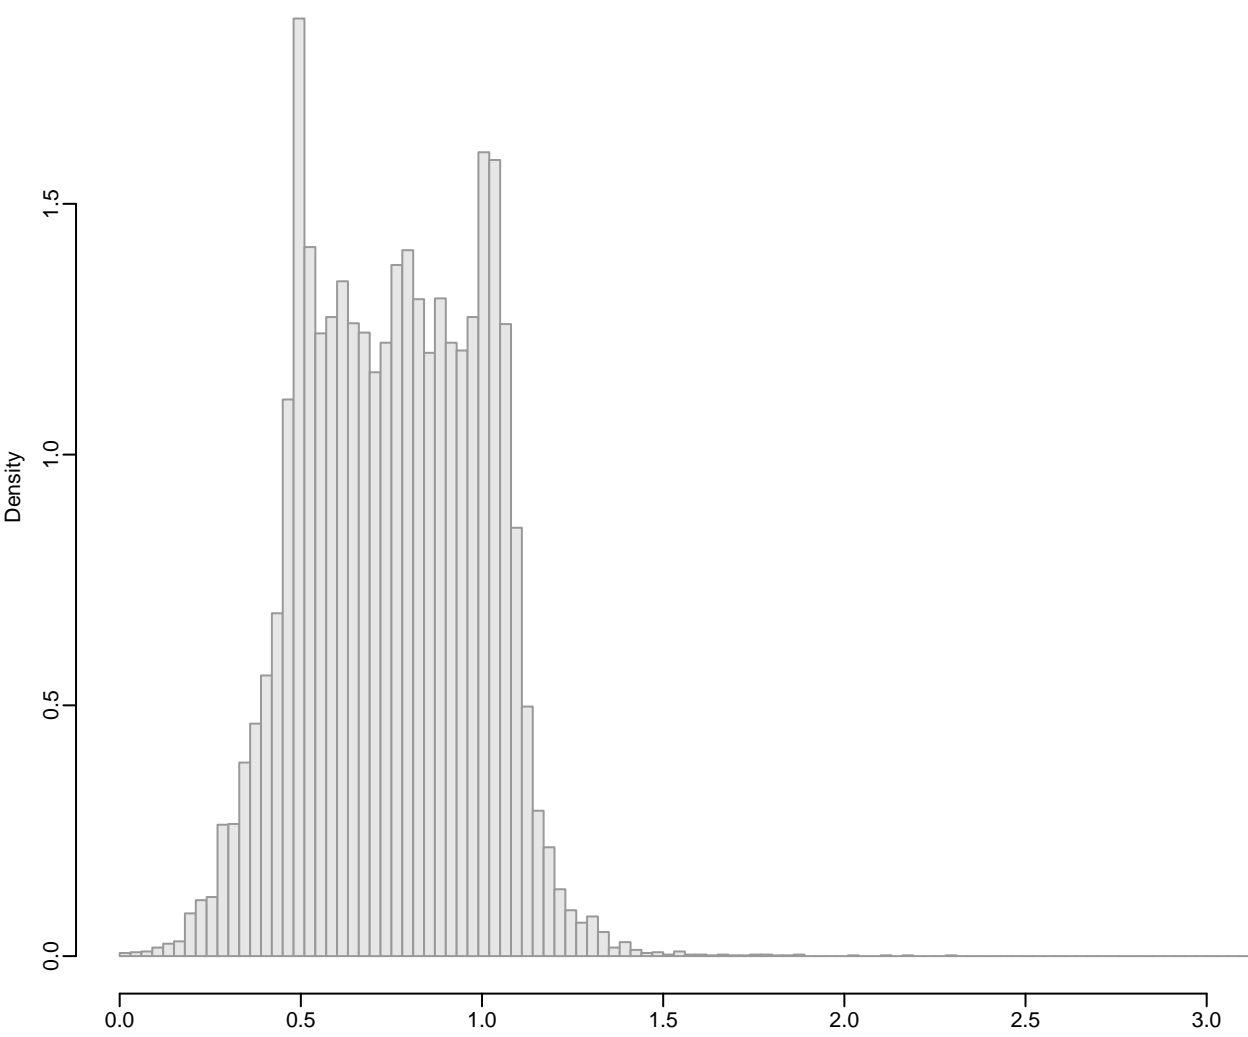

CpG o/e  
Original data

Density

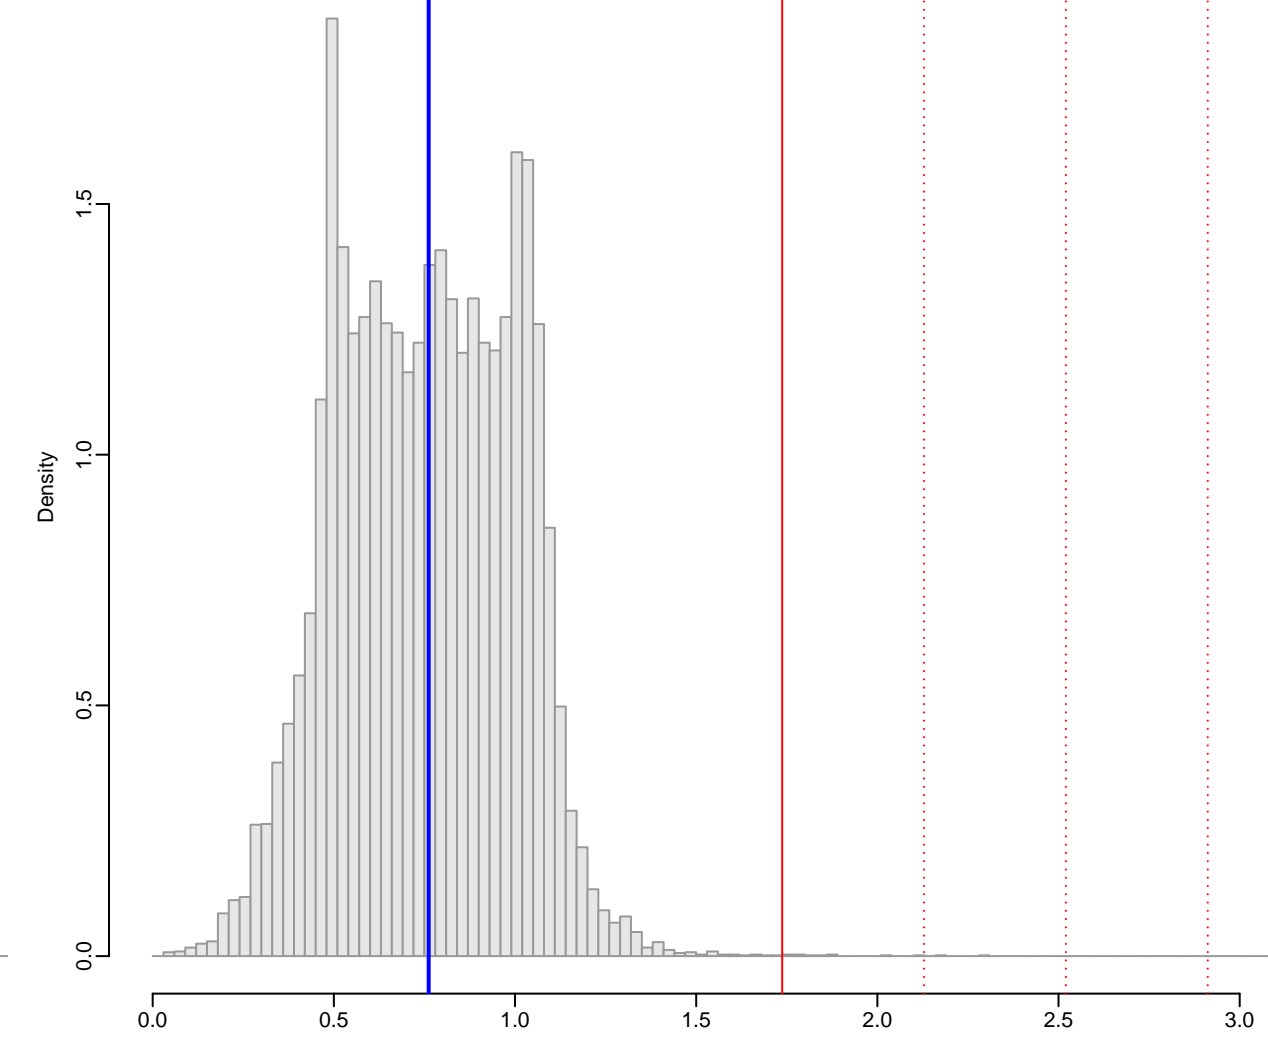

CpG o/e  
Data without zeros,  $Q1/3 \pm k \cdot IQR$ ,  $k=2, \dots, 4$

Density

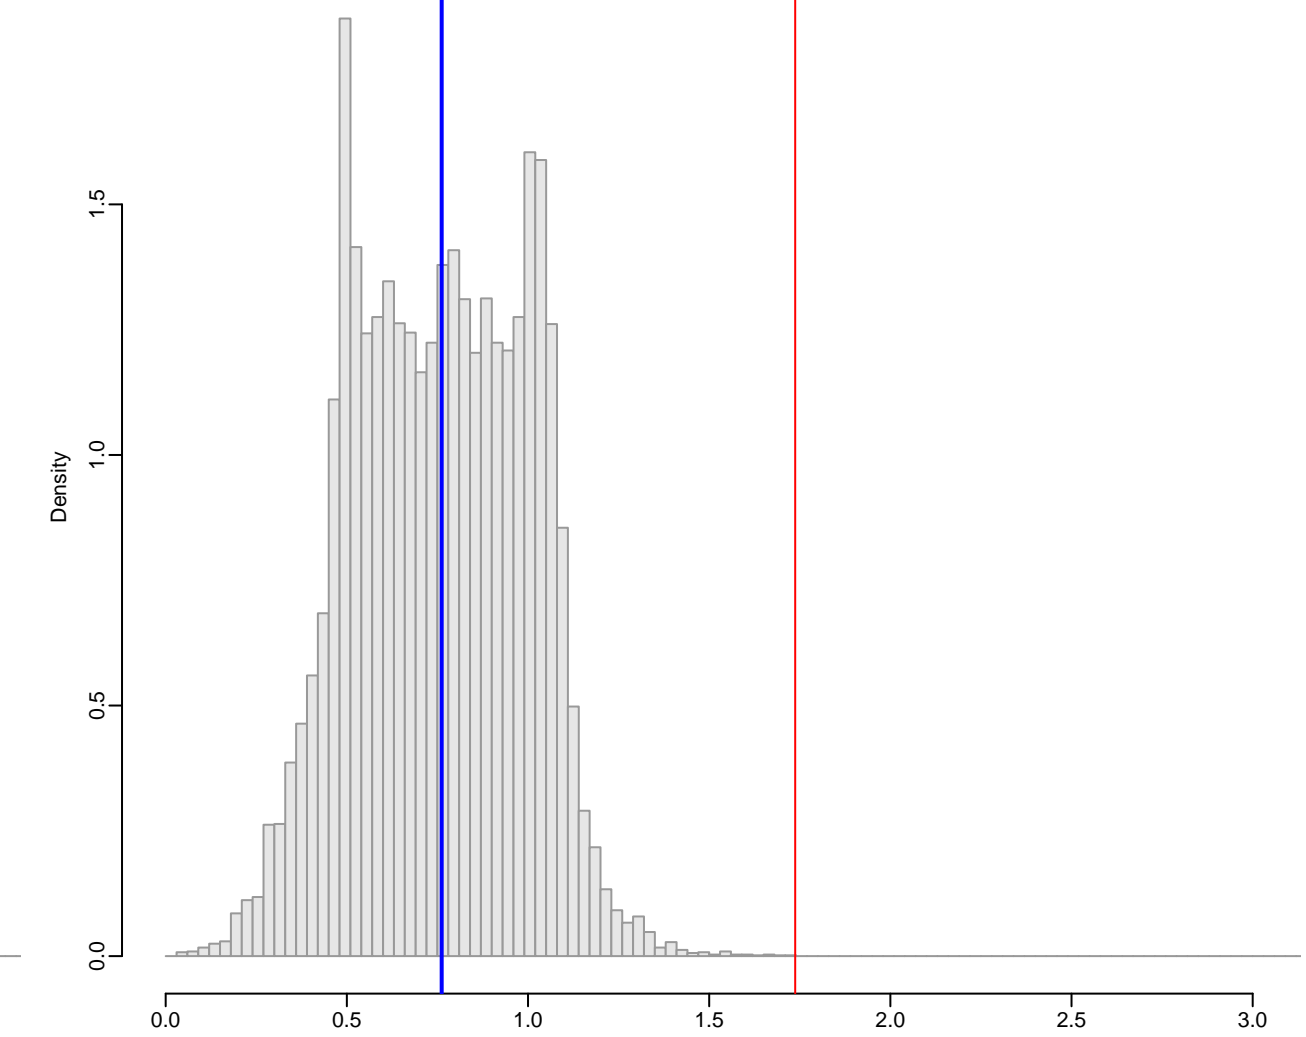

CpG o/e  
Cleaned data

Allomyces\_macrognus

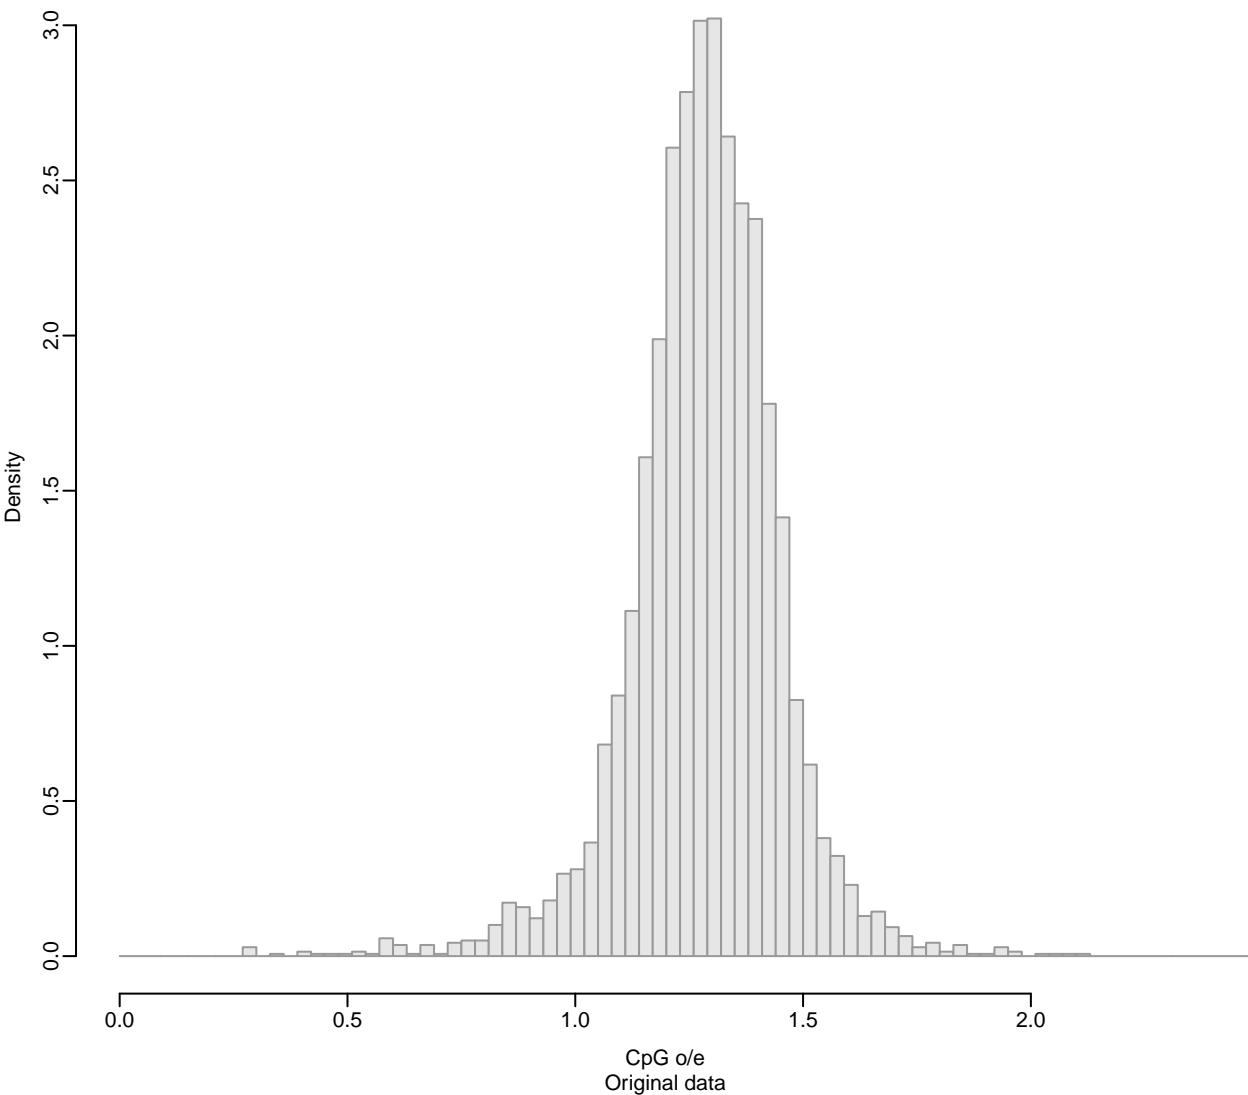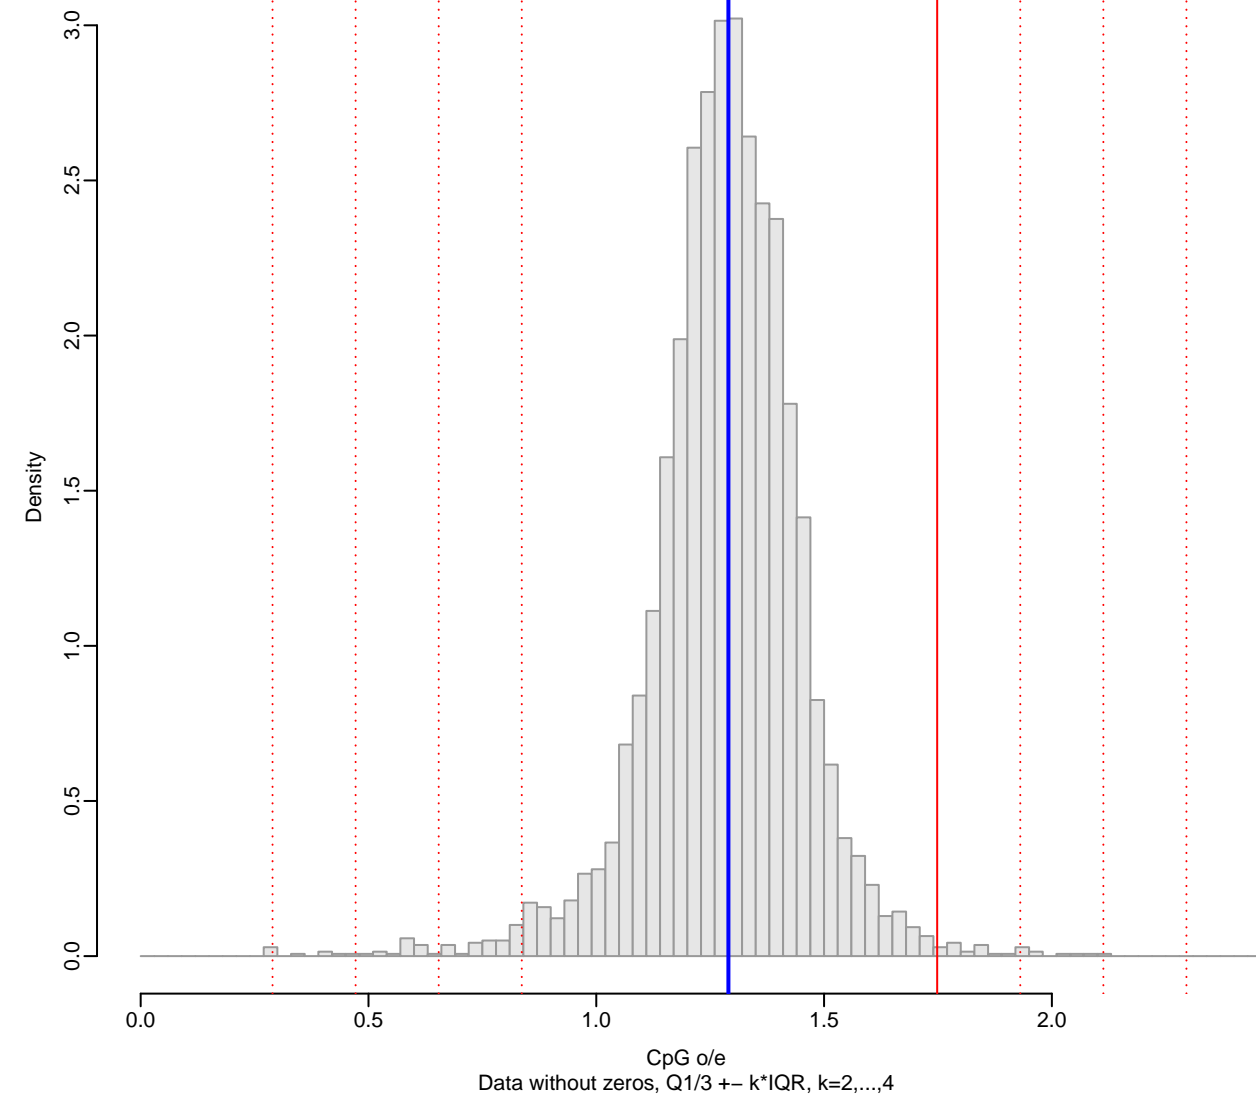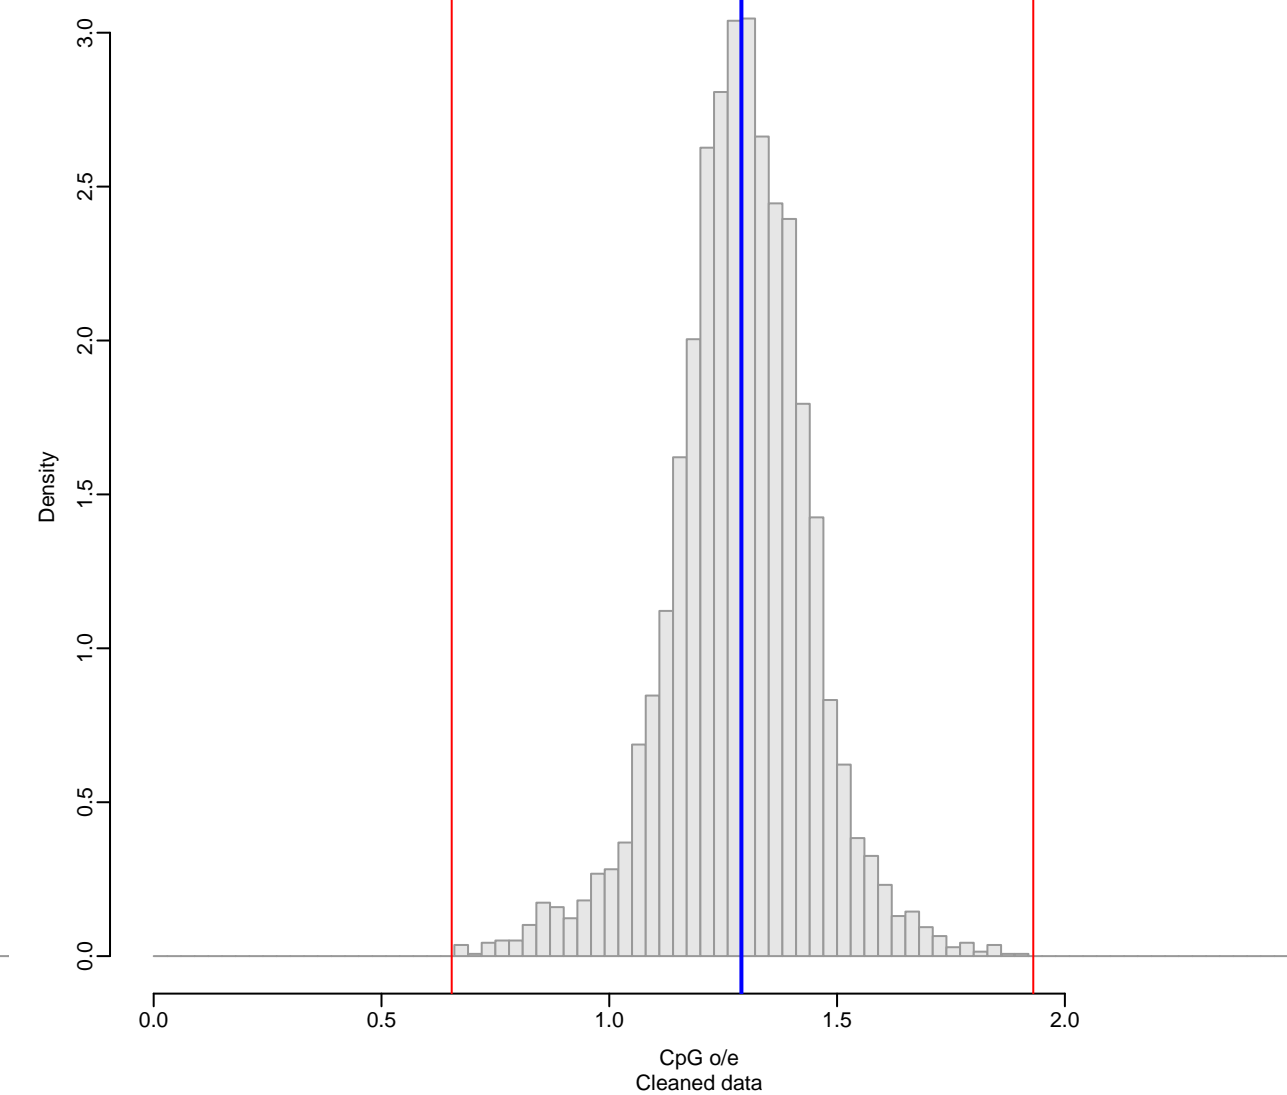

Amblyomma\_variegatum

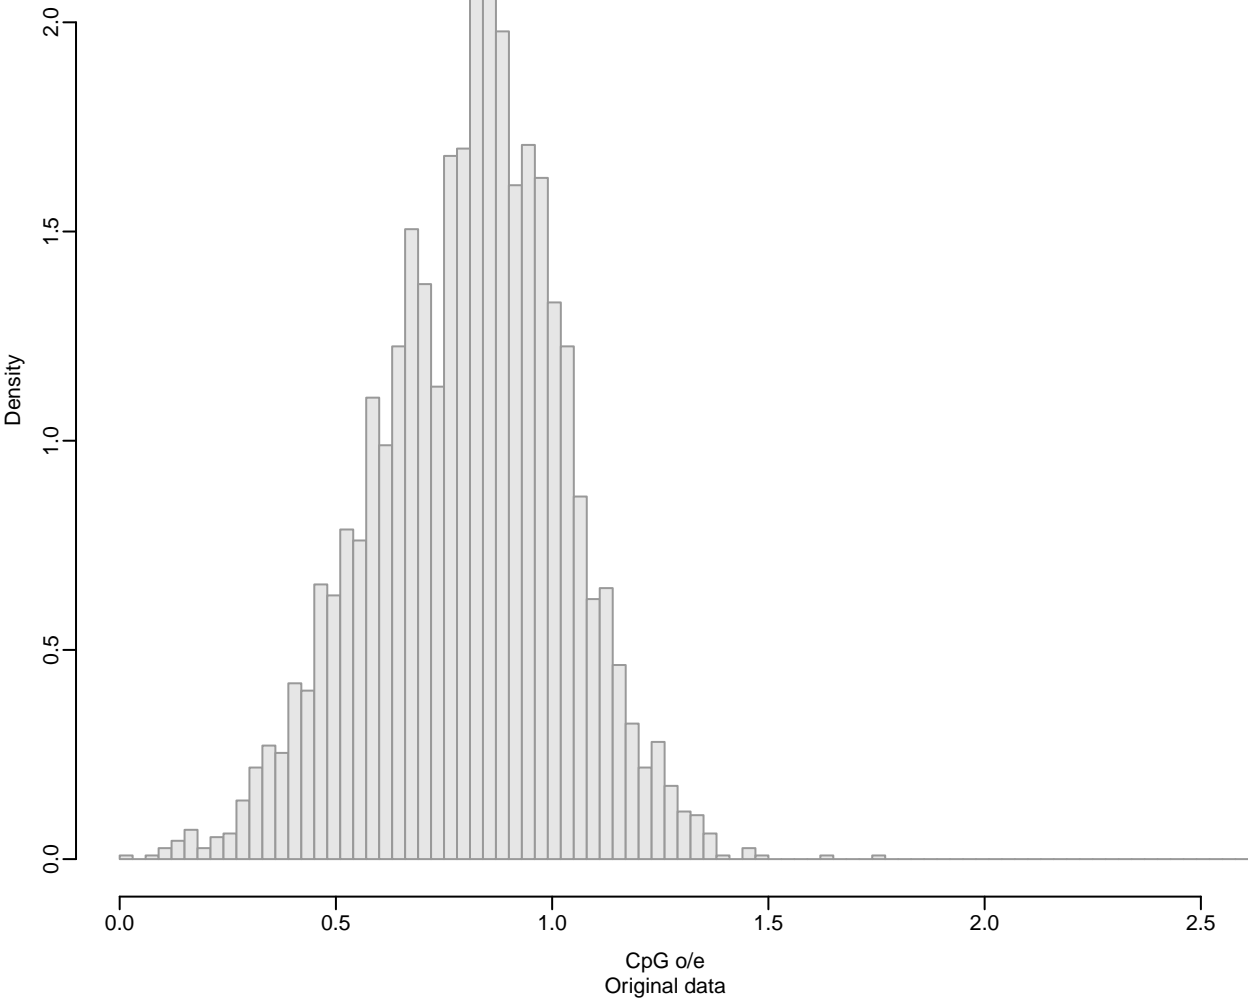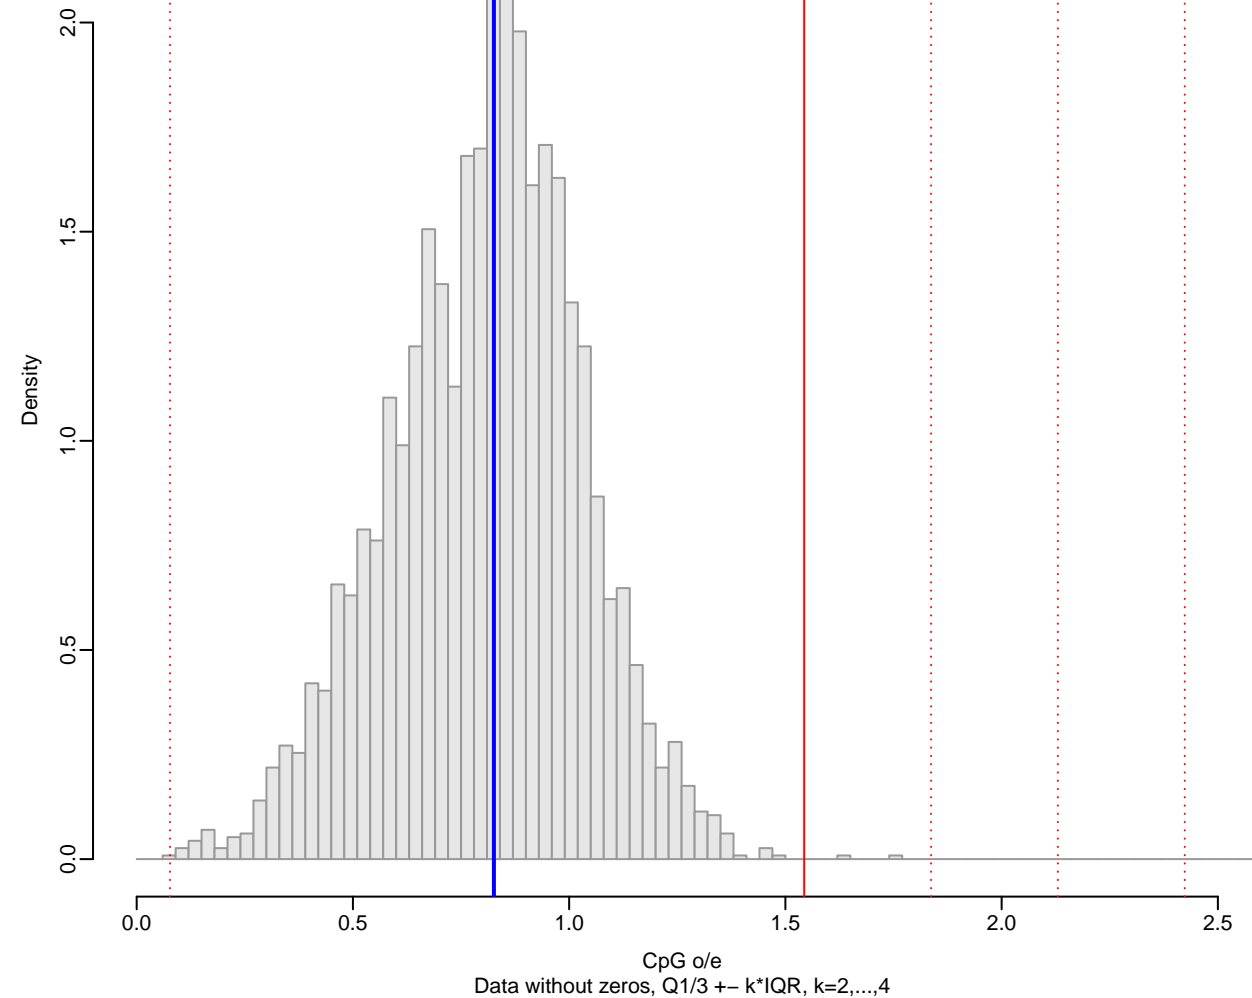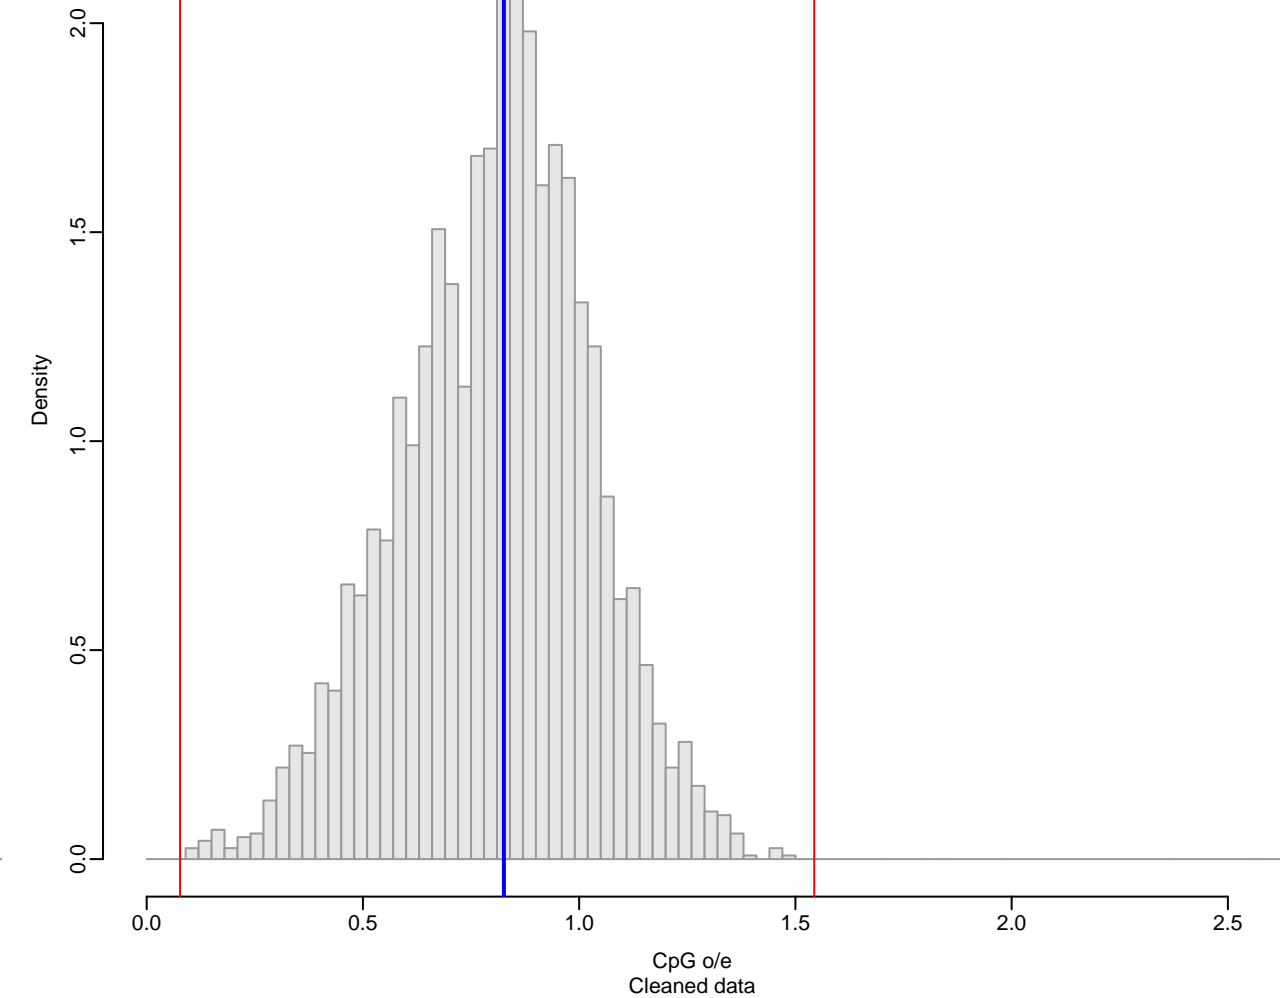



Ambystoma\_mexicanum

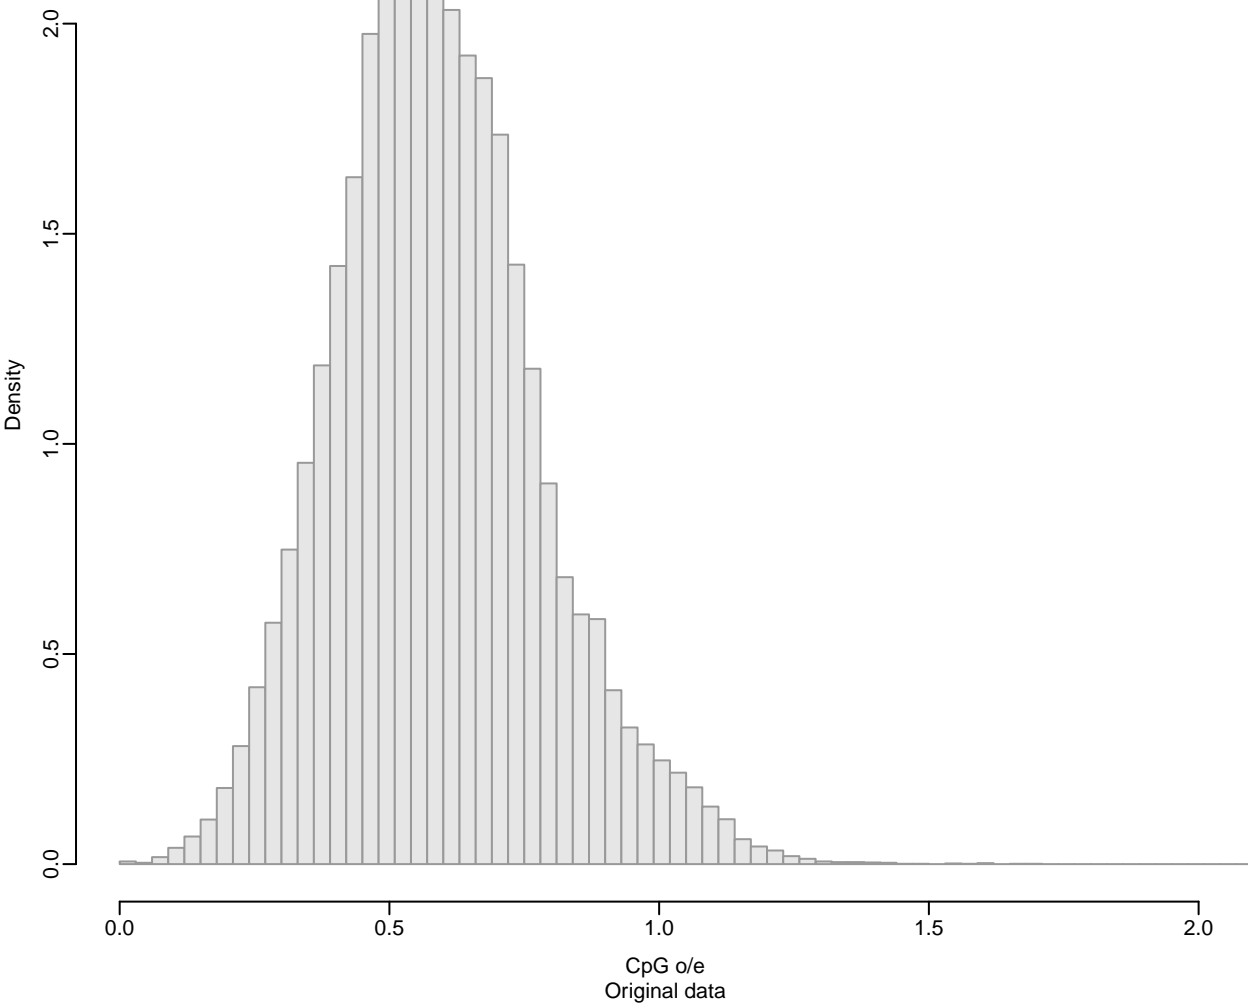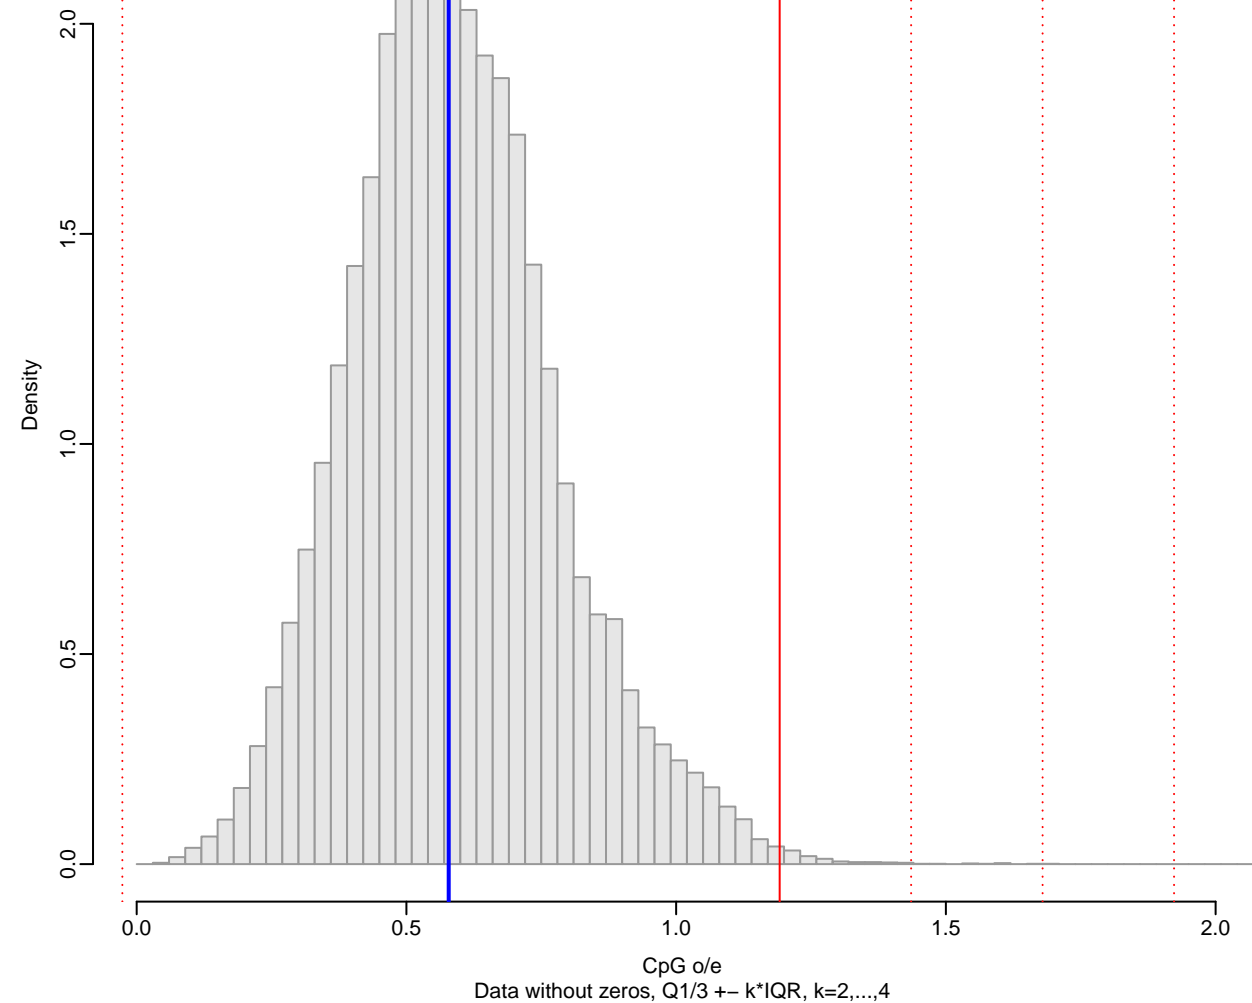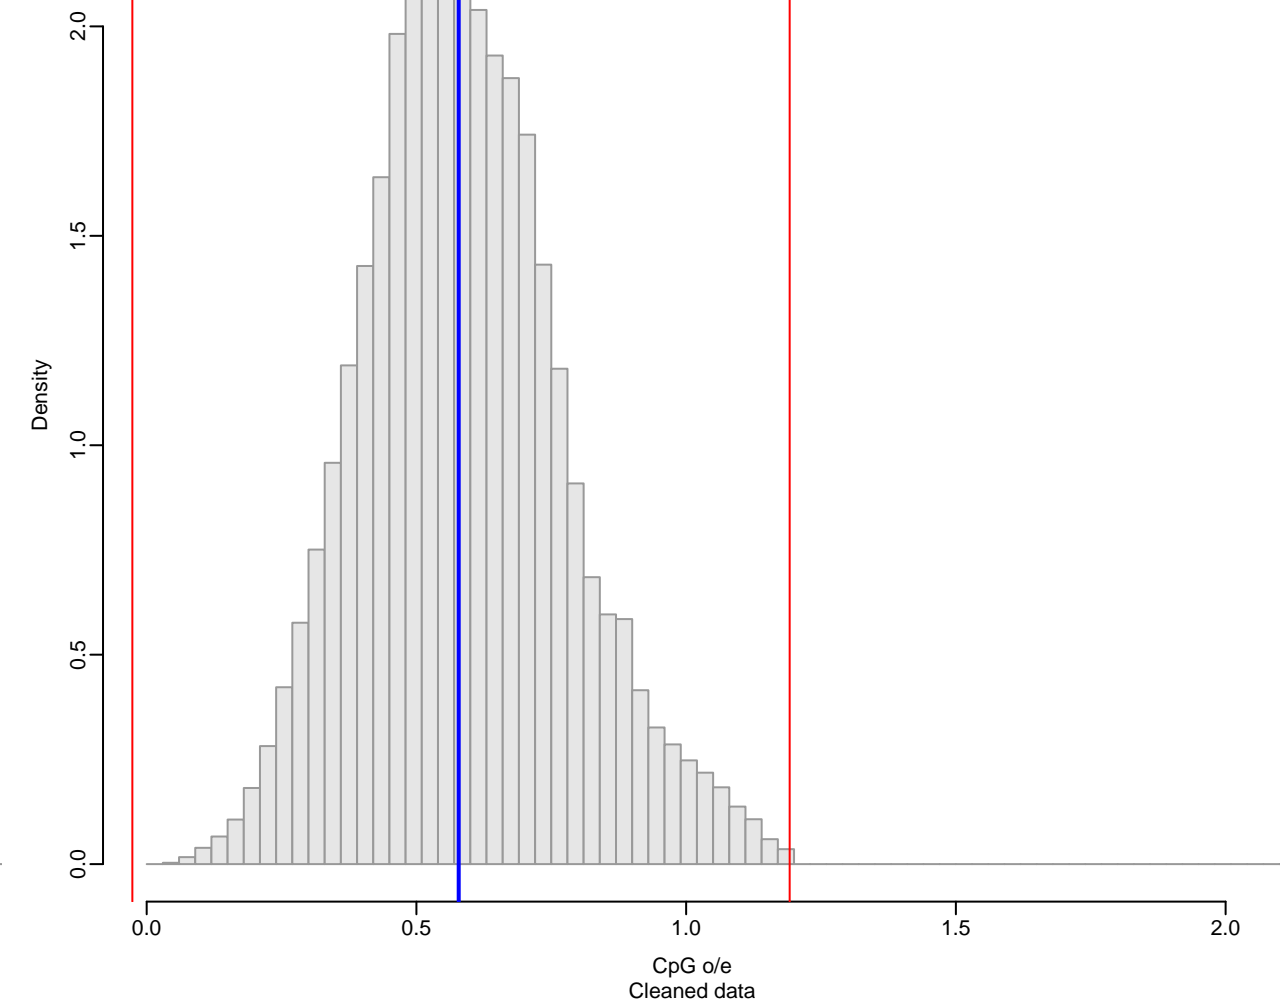

Ambystoma\_tigrinum\_tigrinum

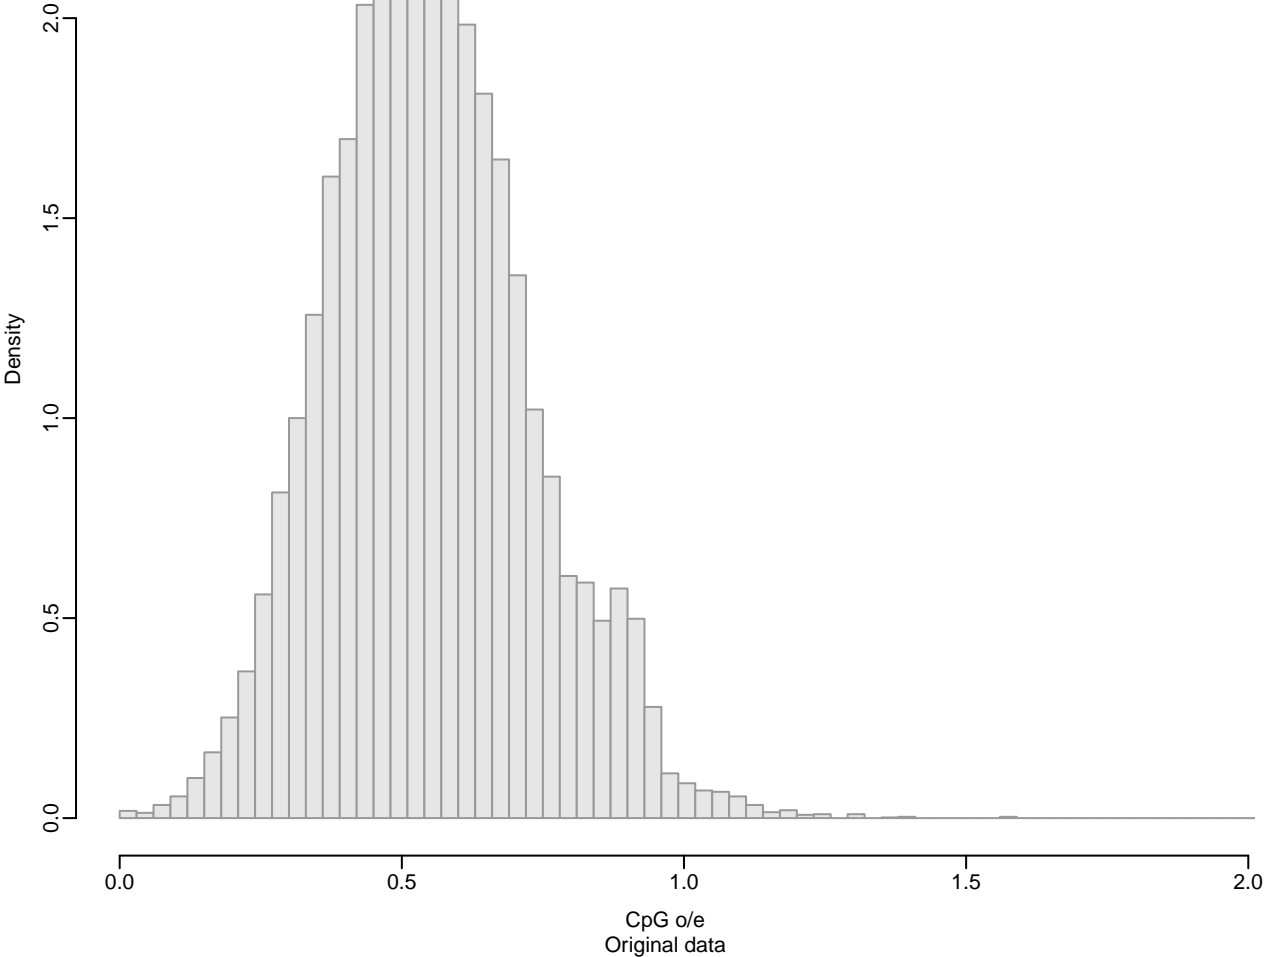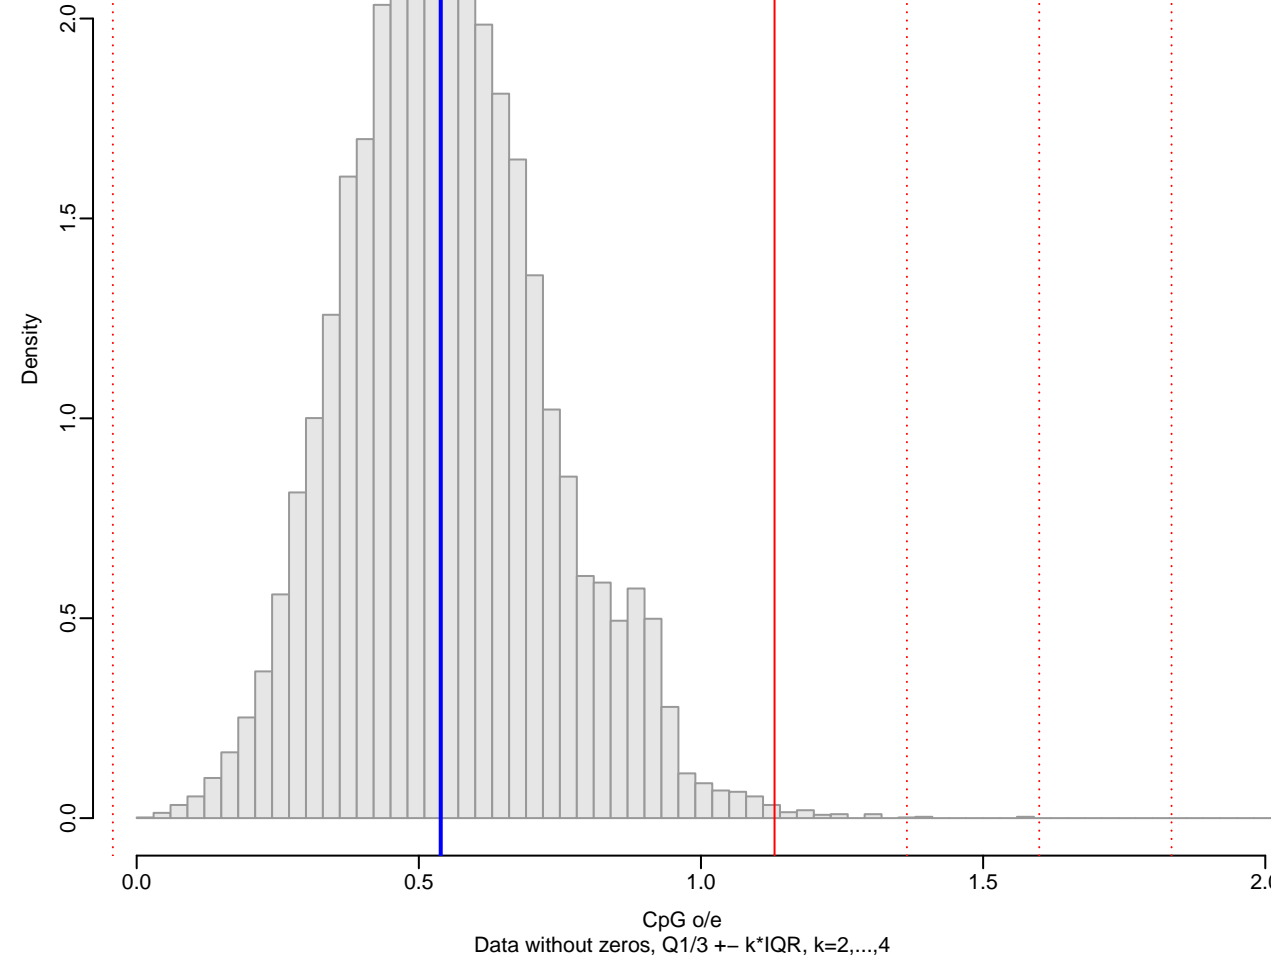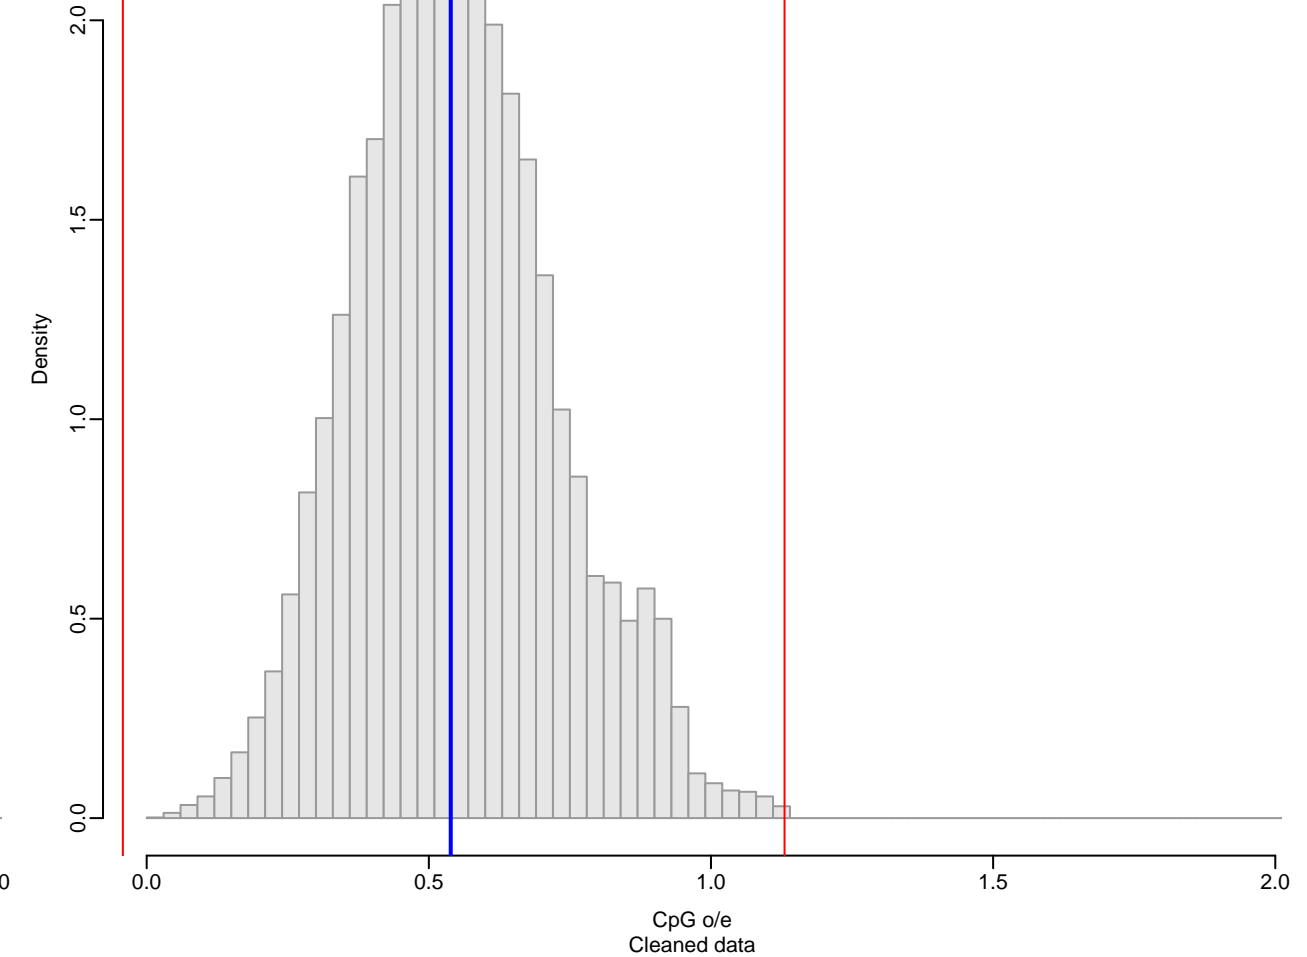

Ampelisca\_abdita

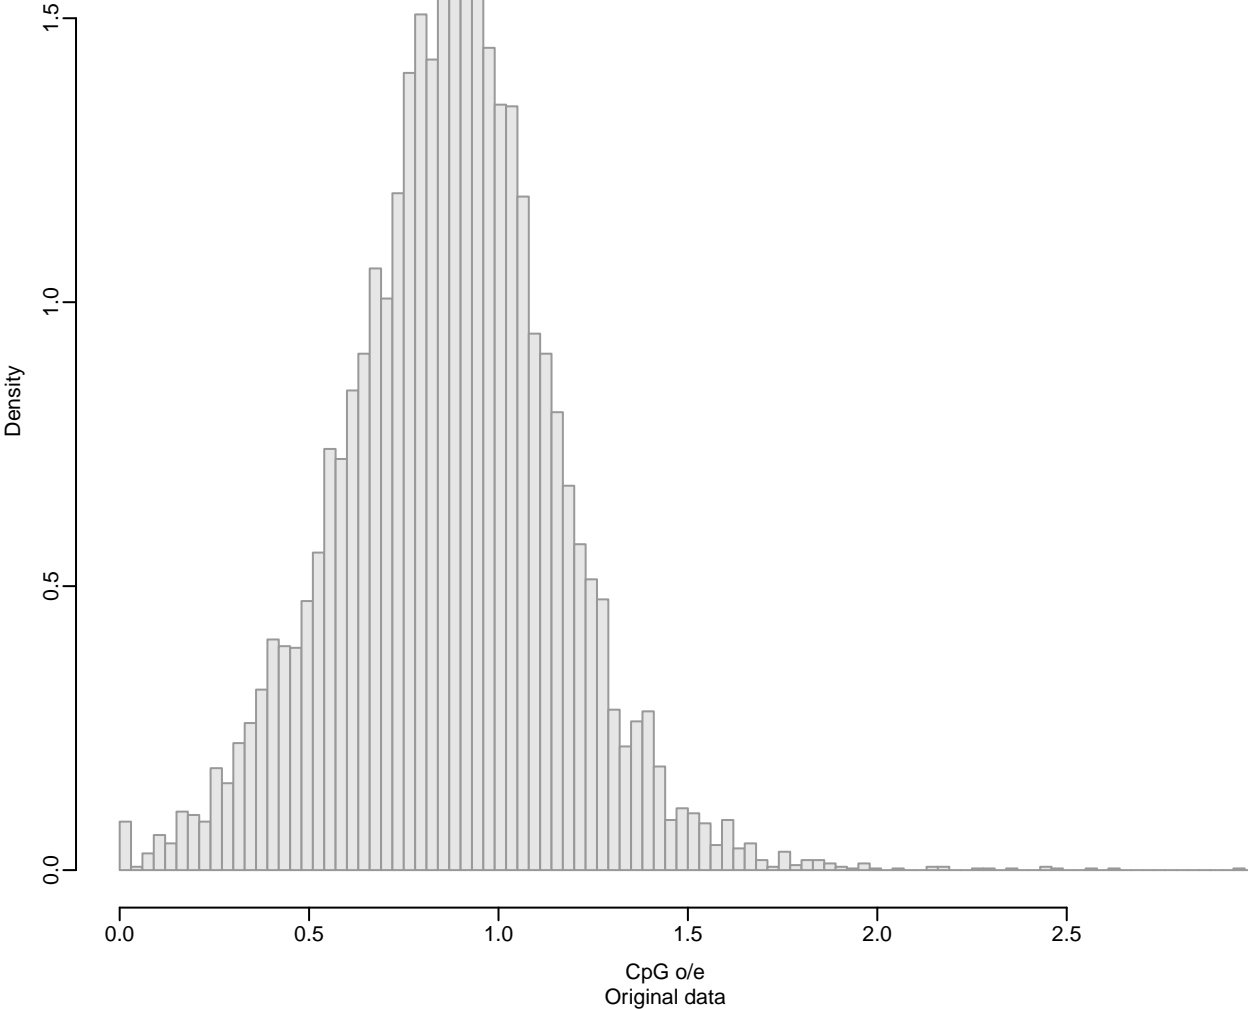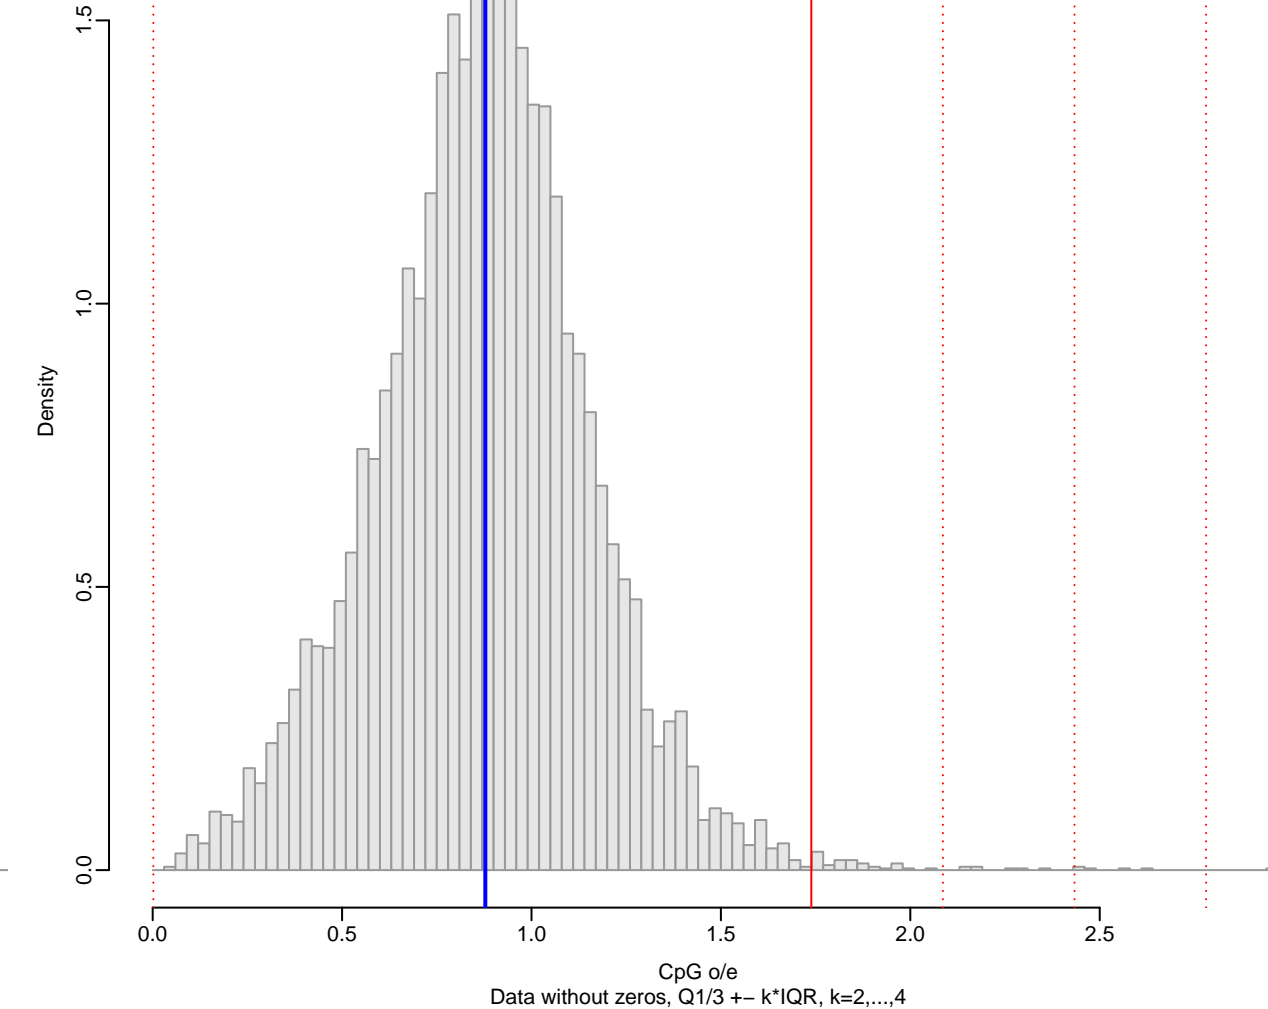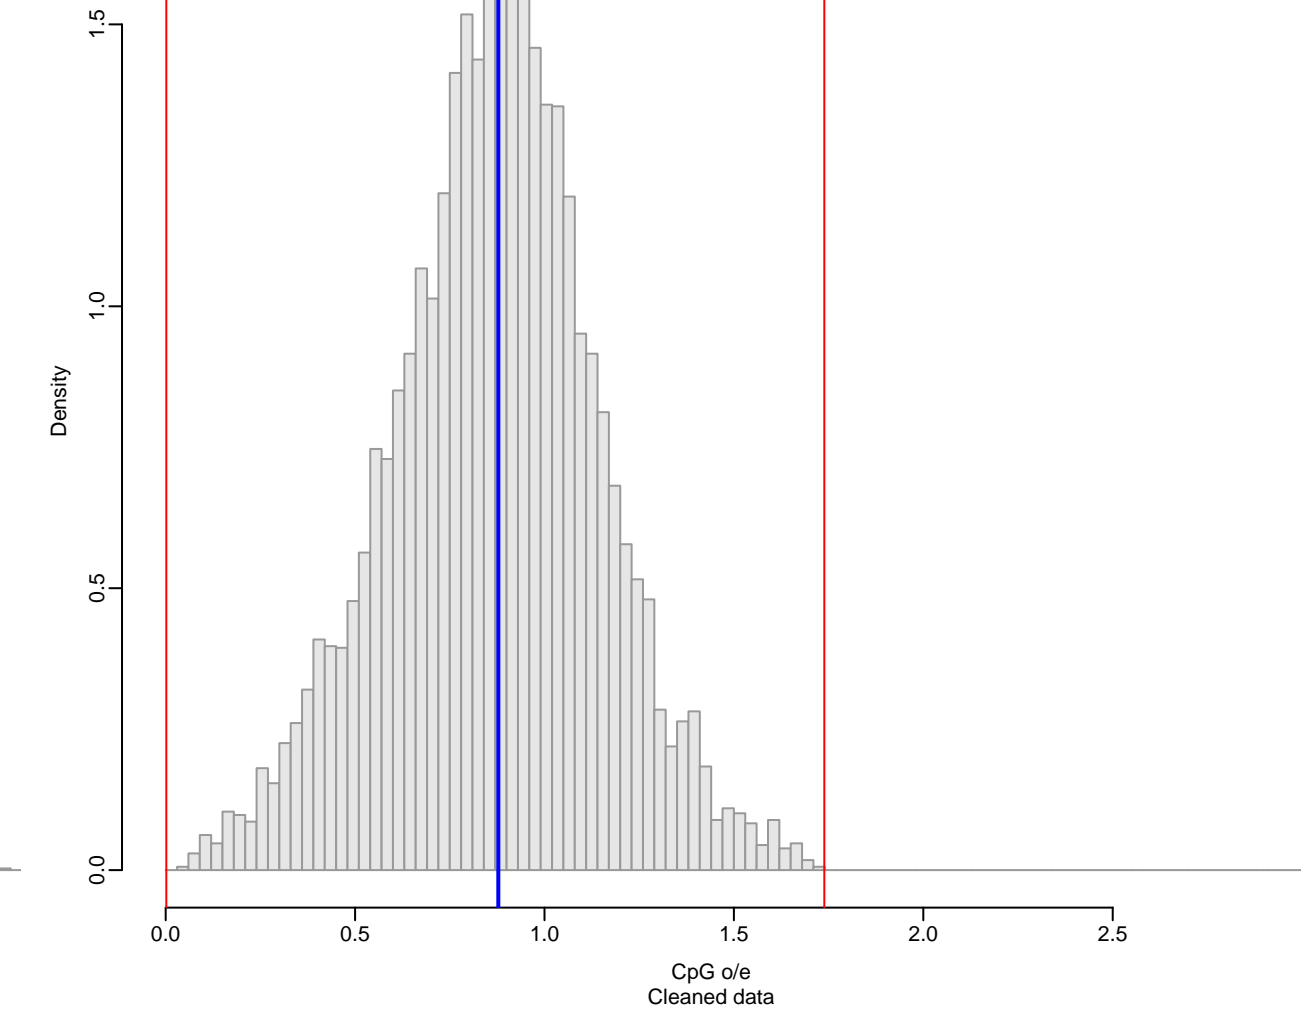

Amphimedon\_queenslandica

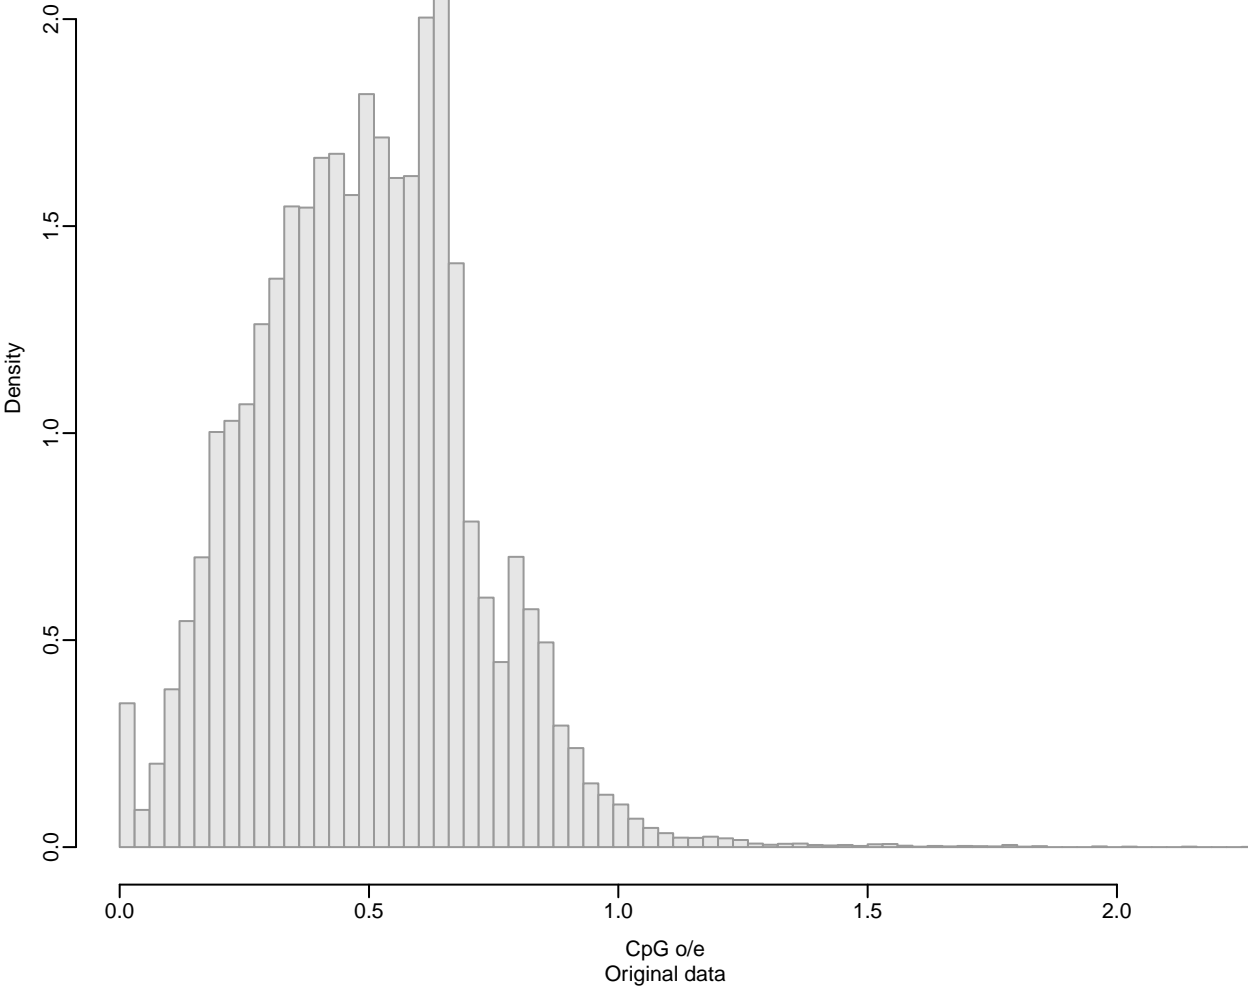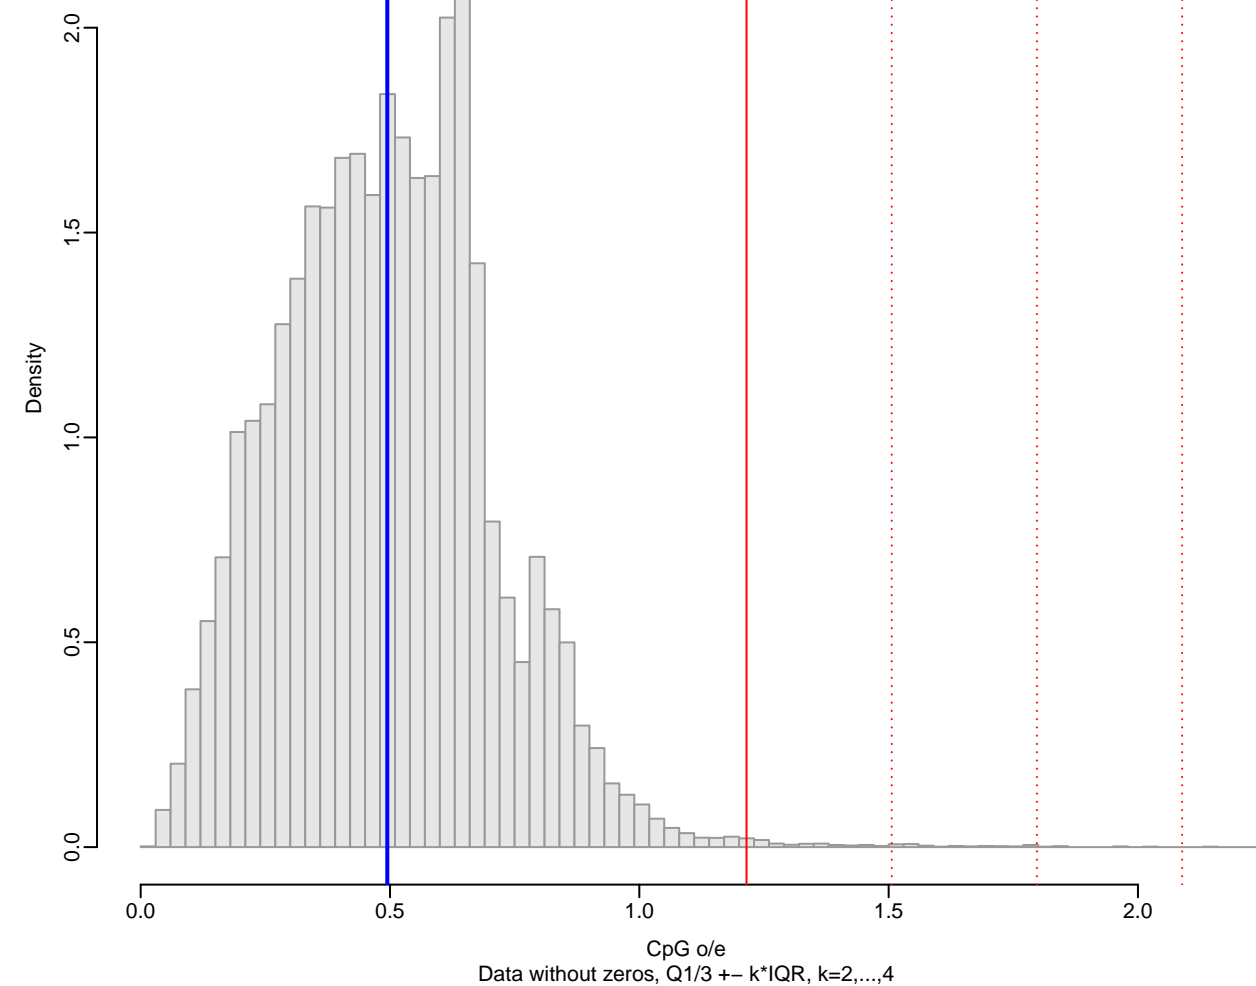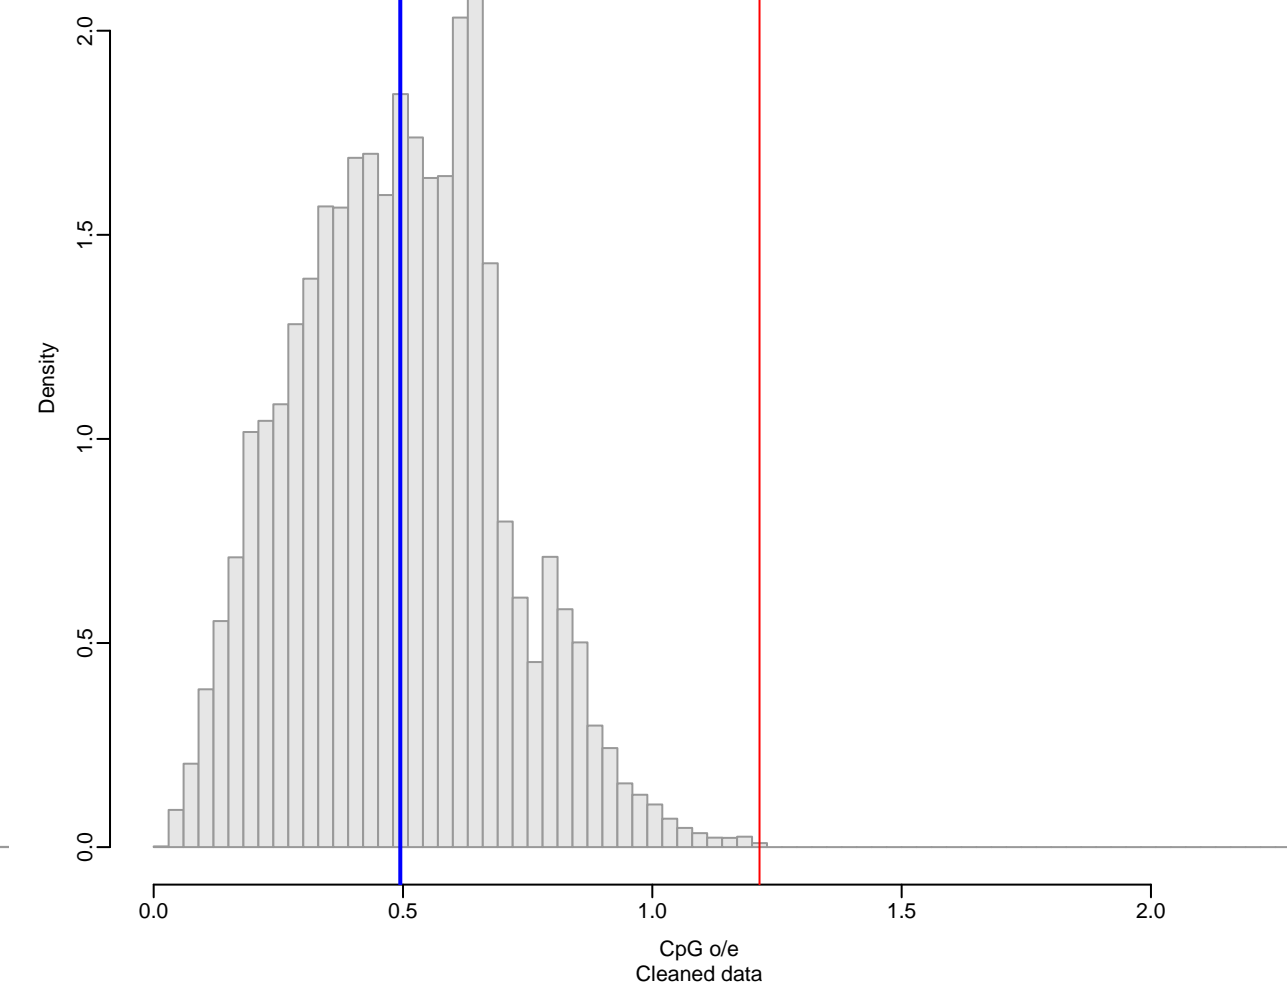

Amphiura\_filiformis

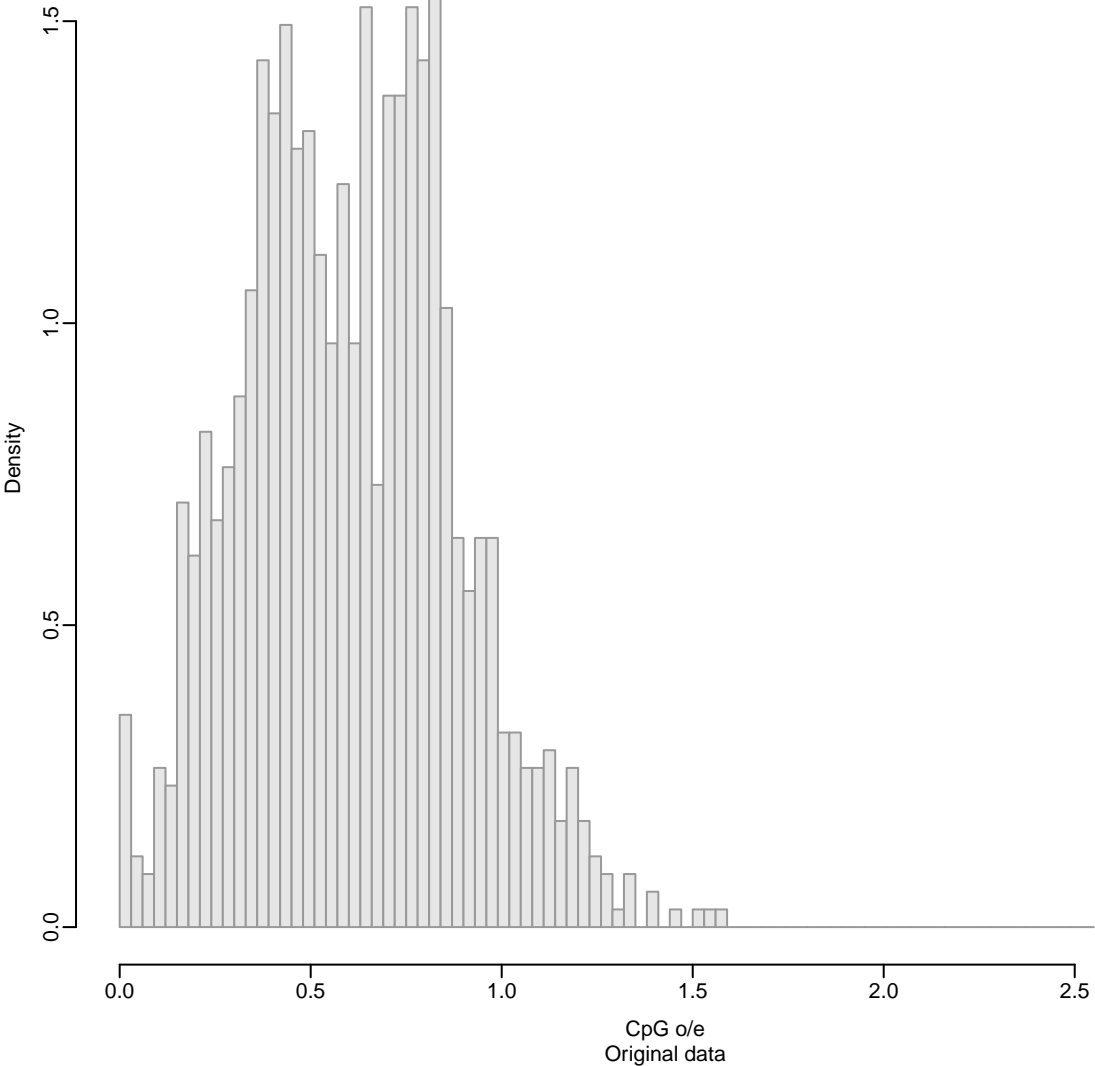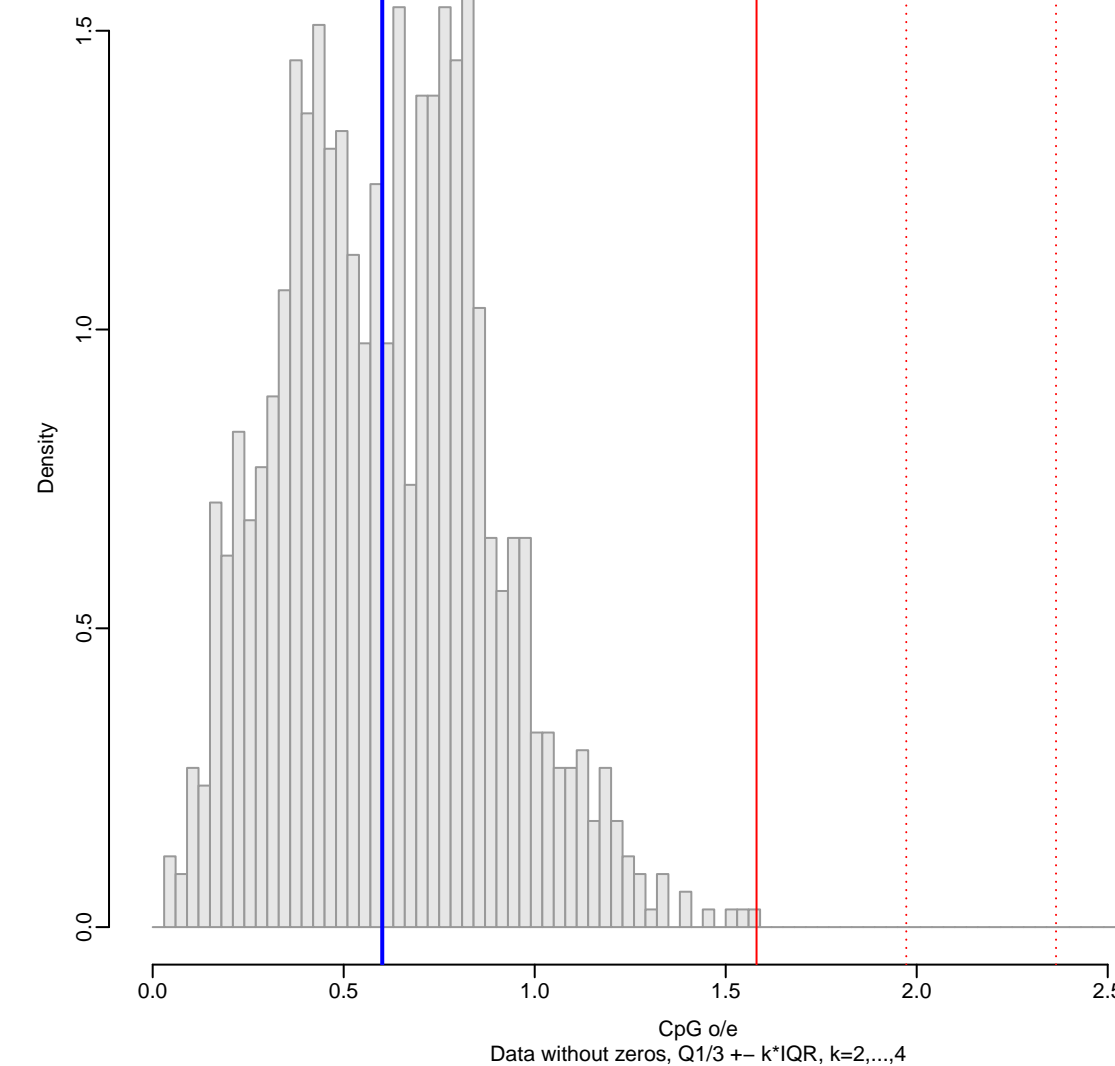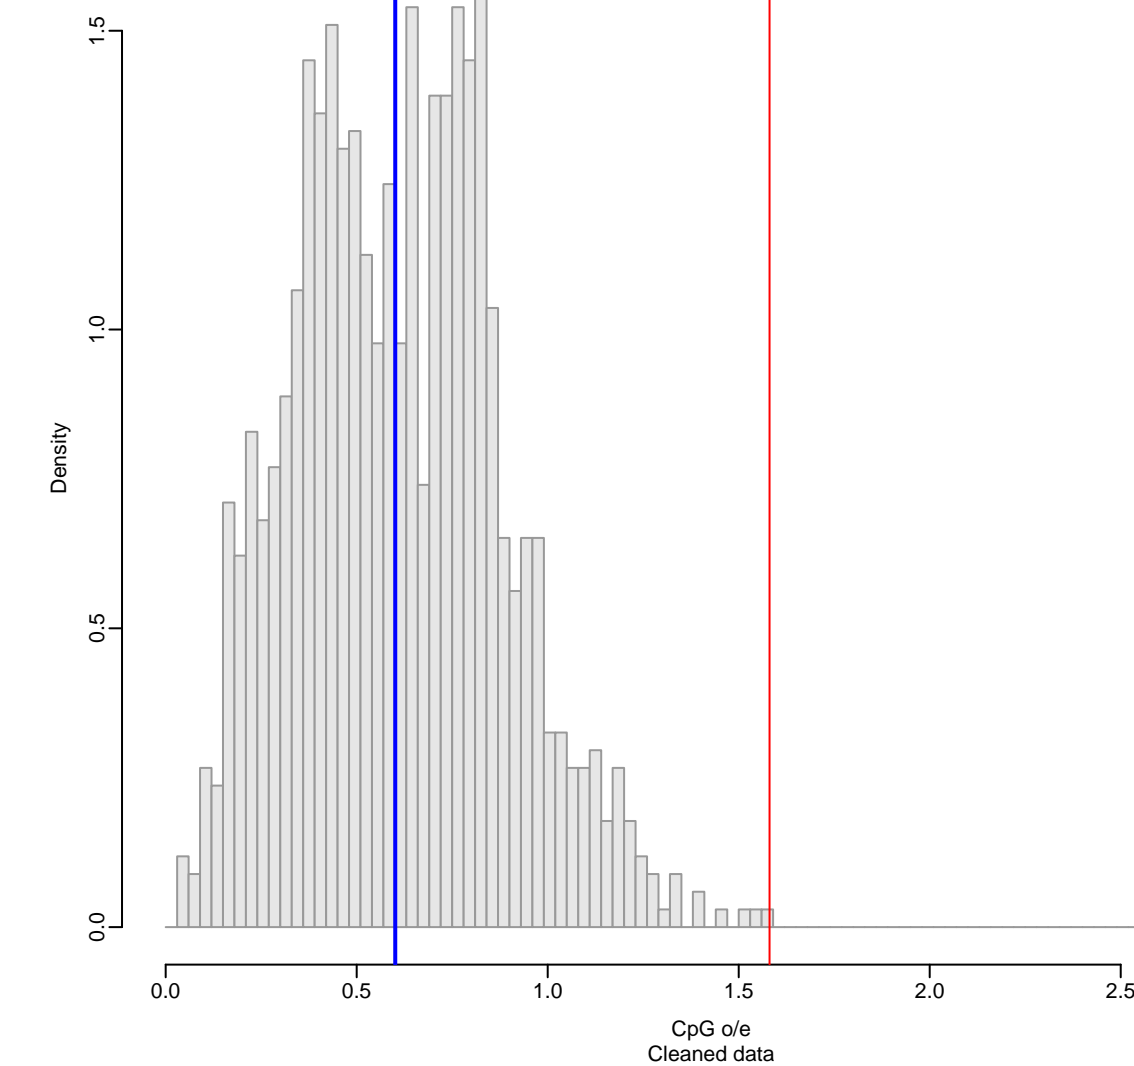

Anas\_platyrhynchos

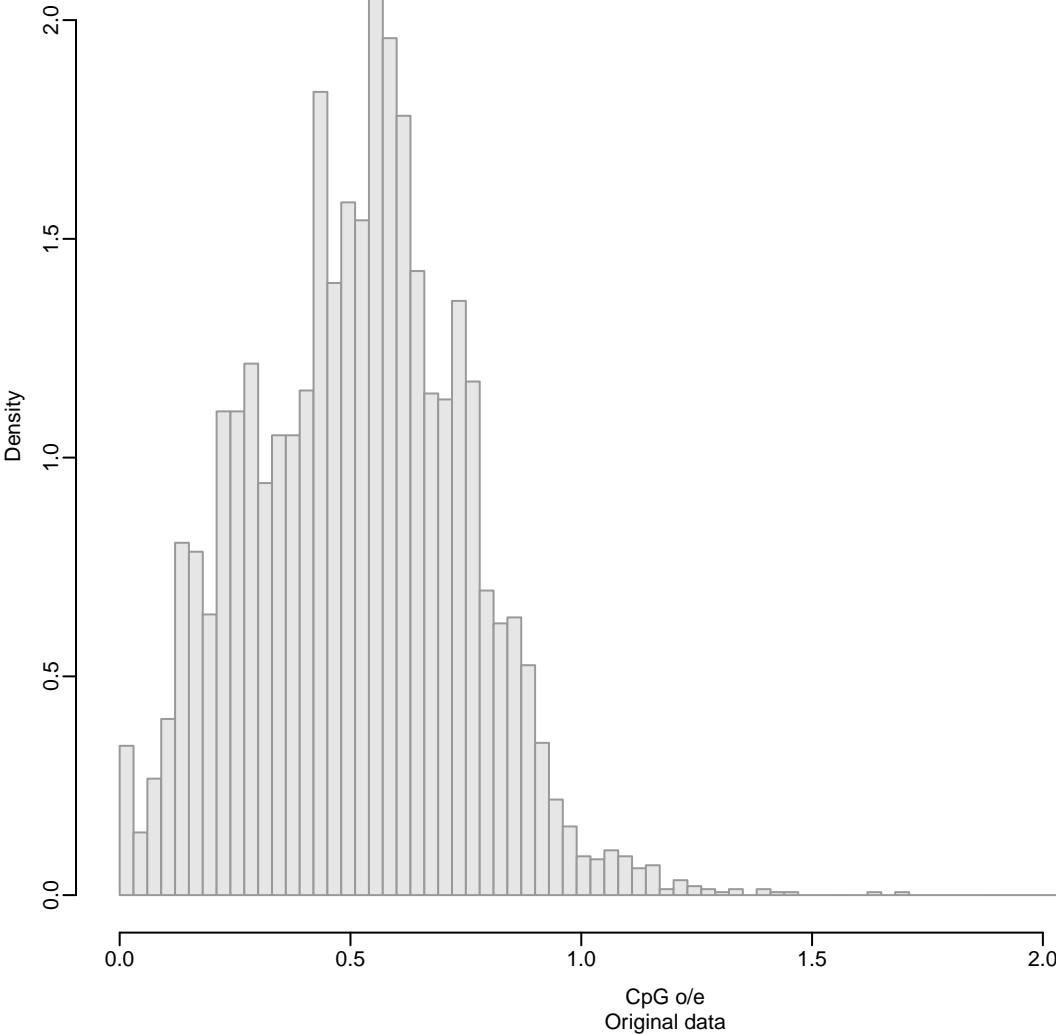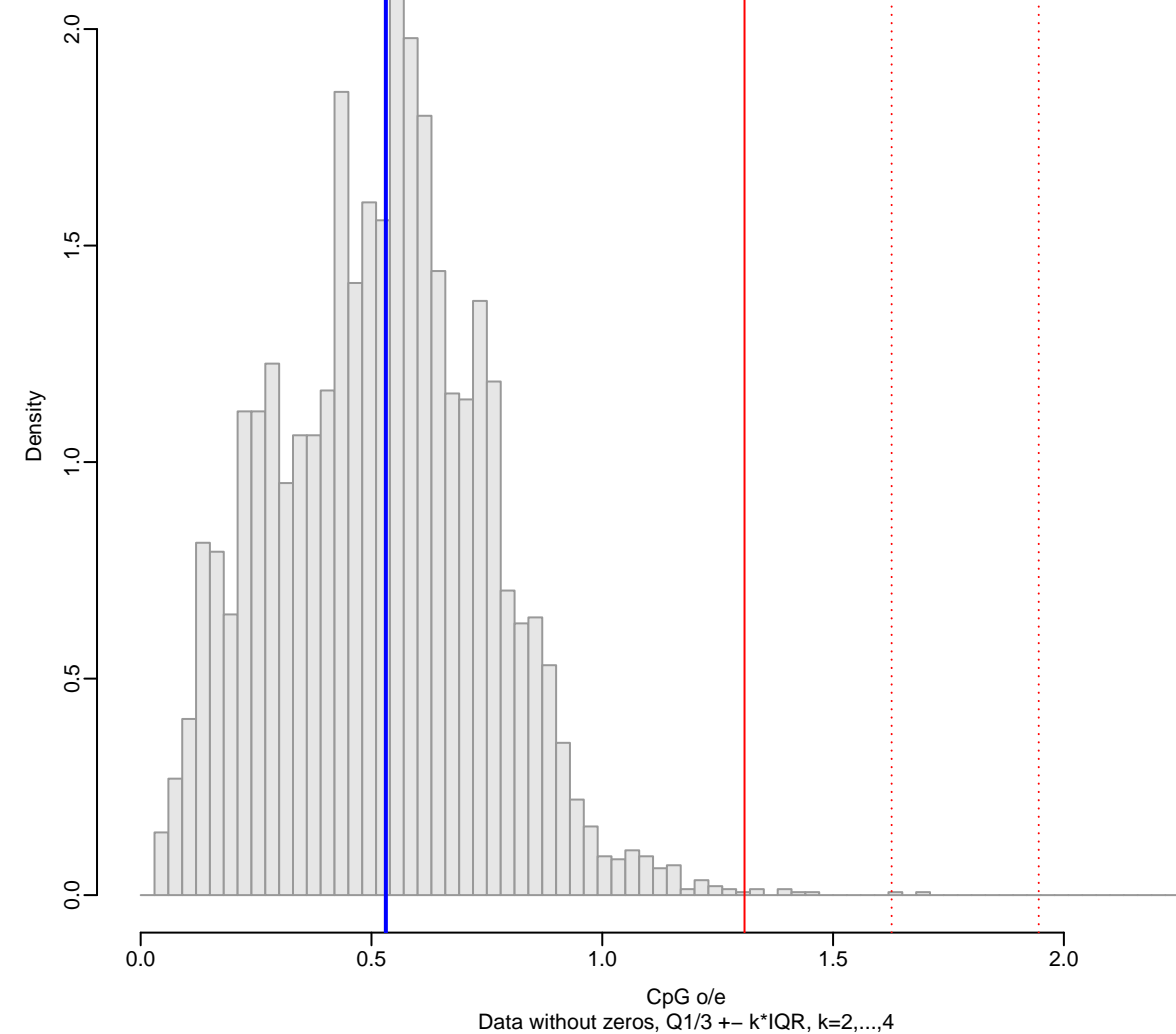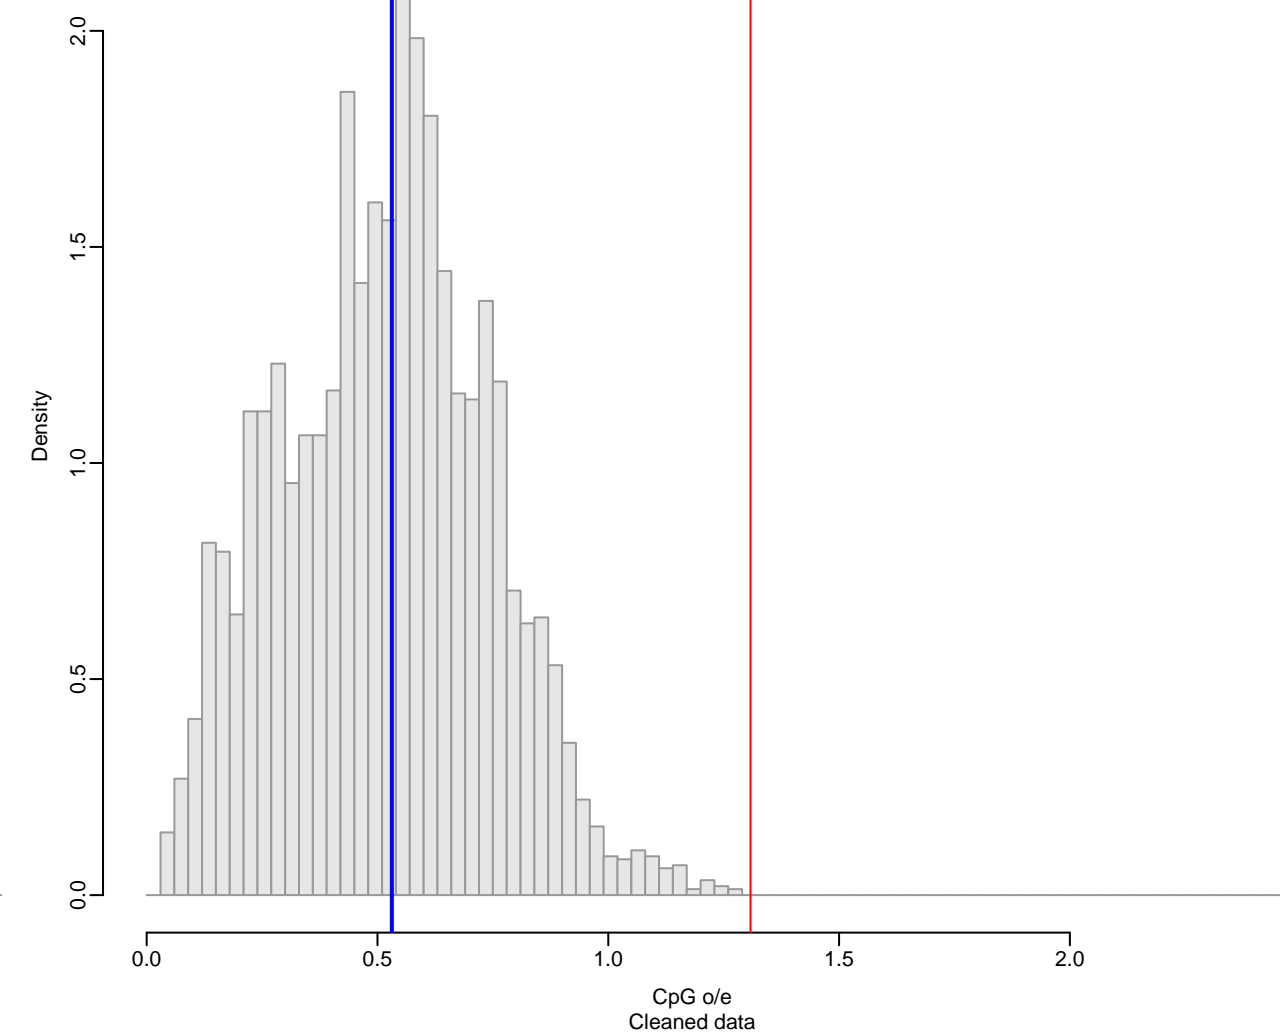

Ancylostoma\_caninum

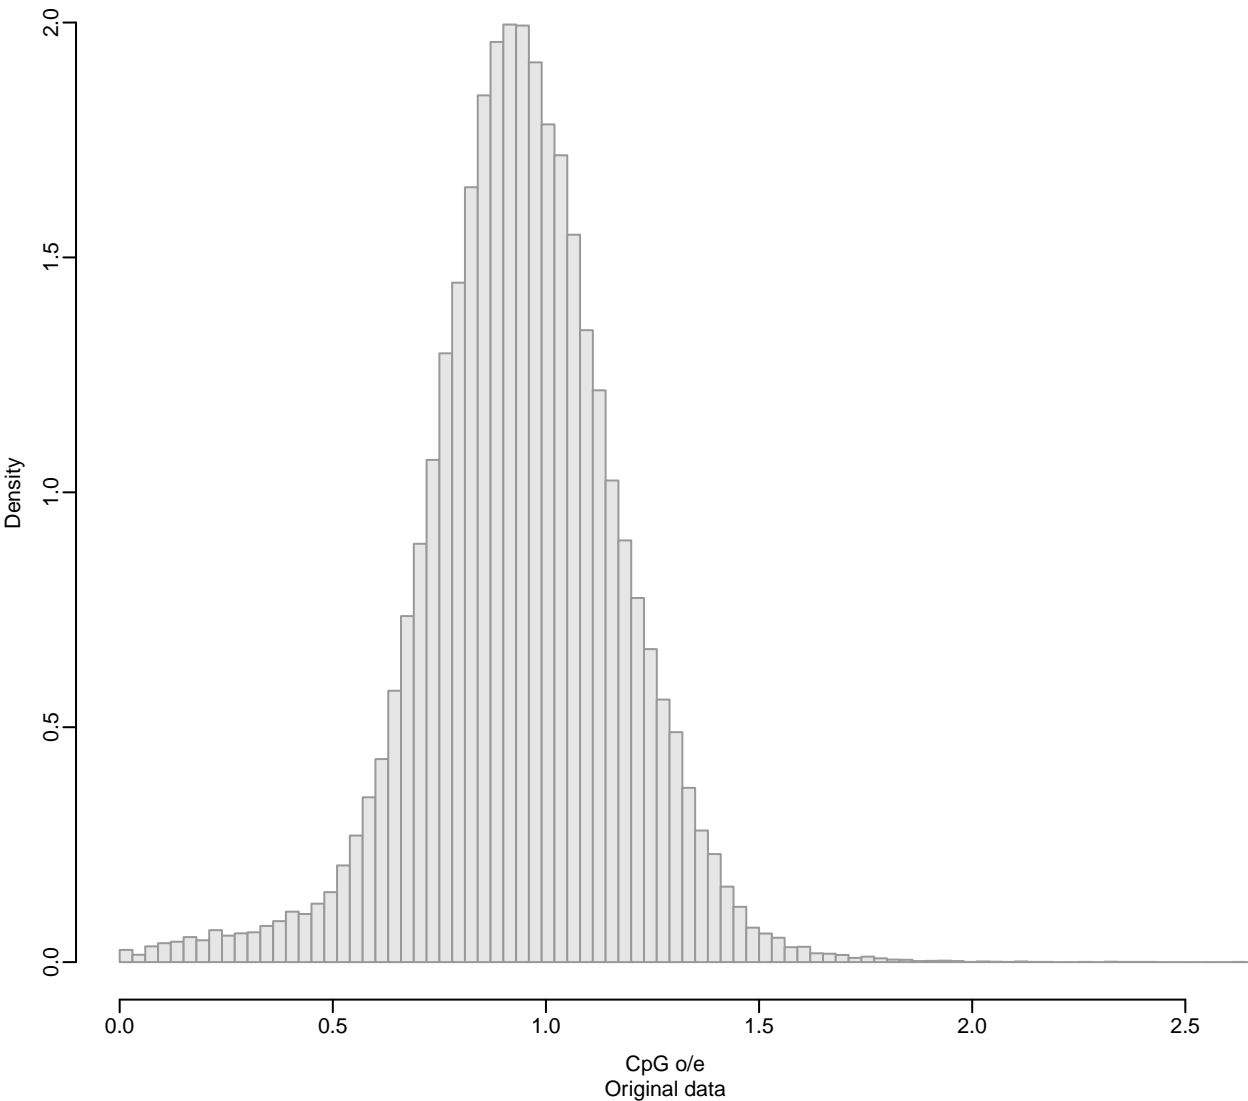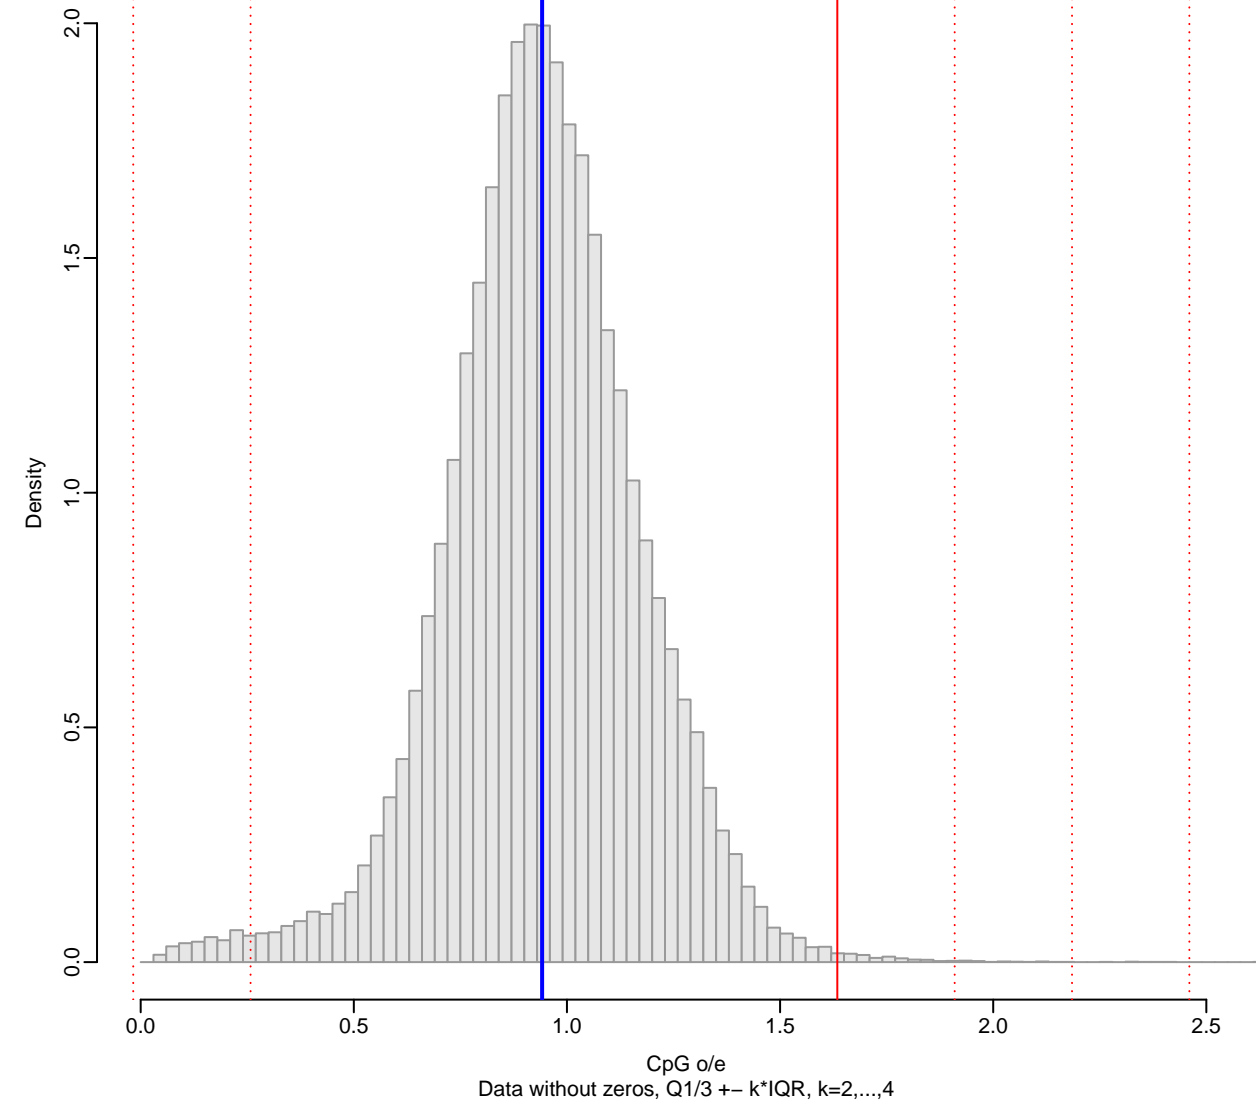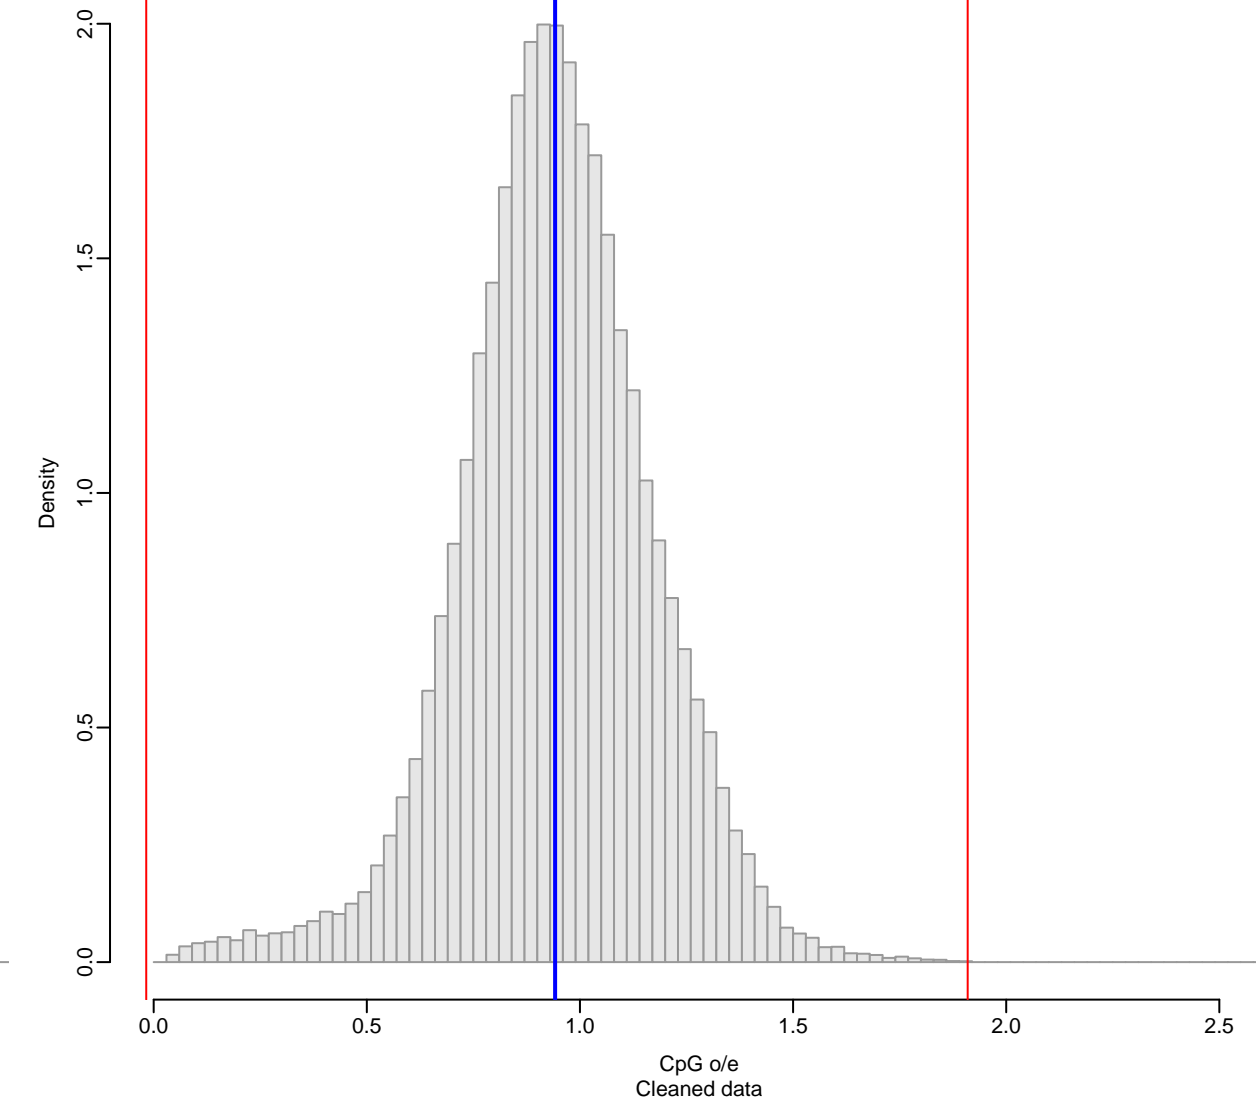

Ancylostoma\_ceylanicum

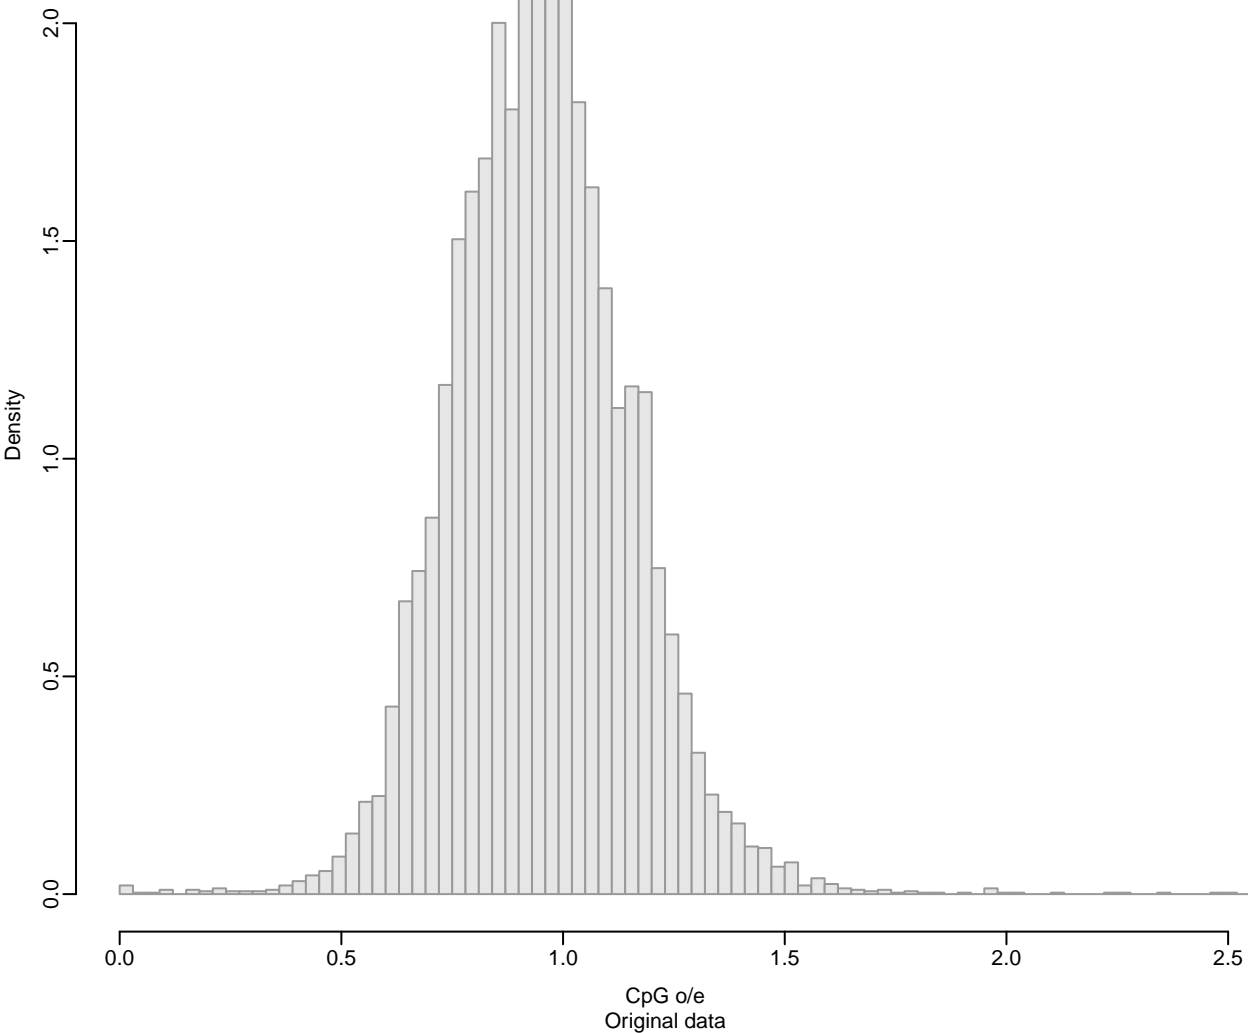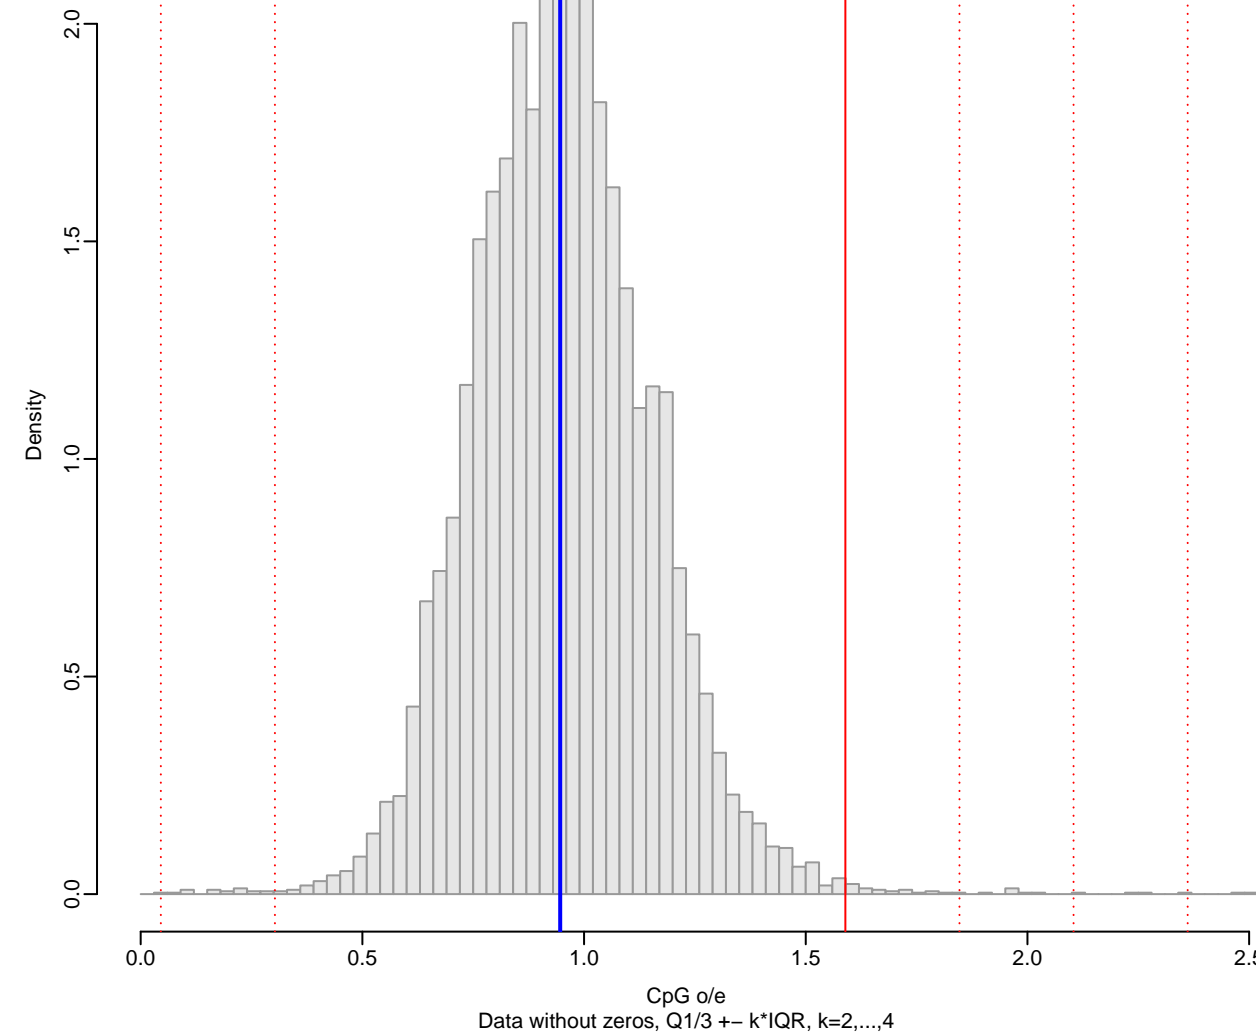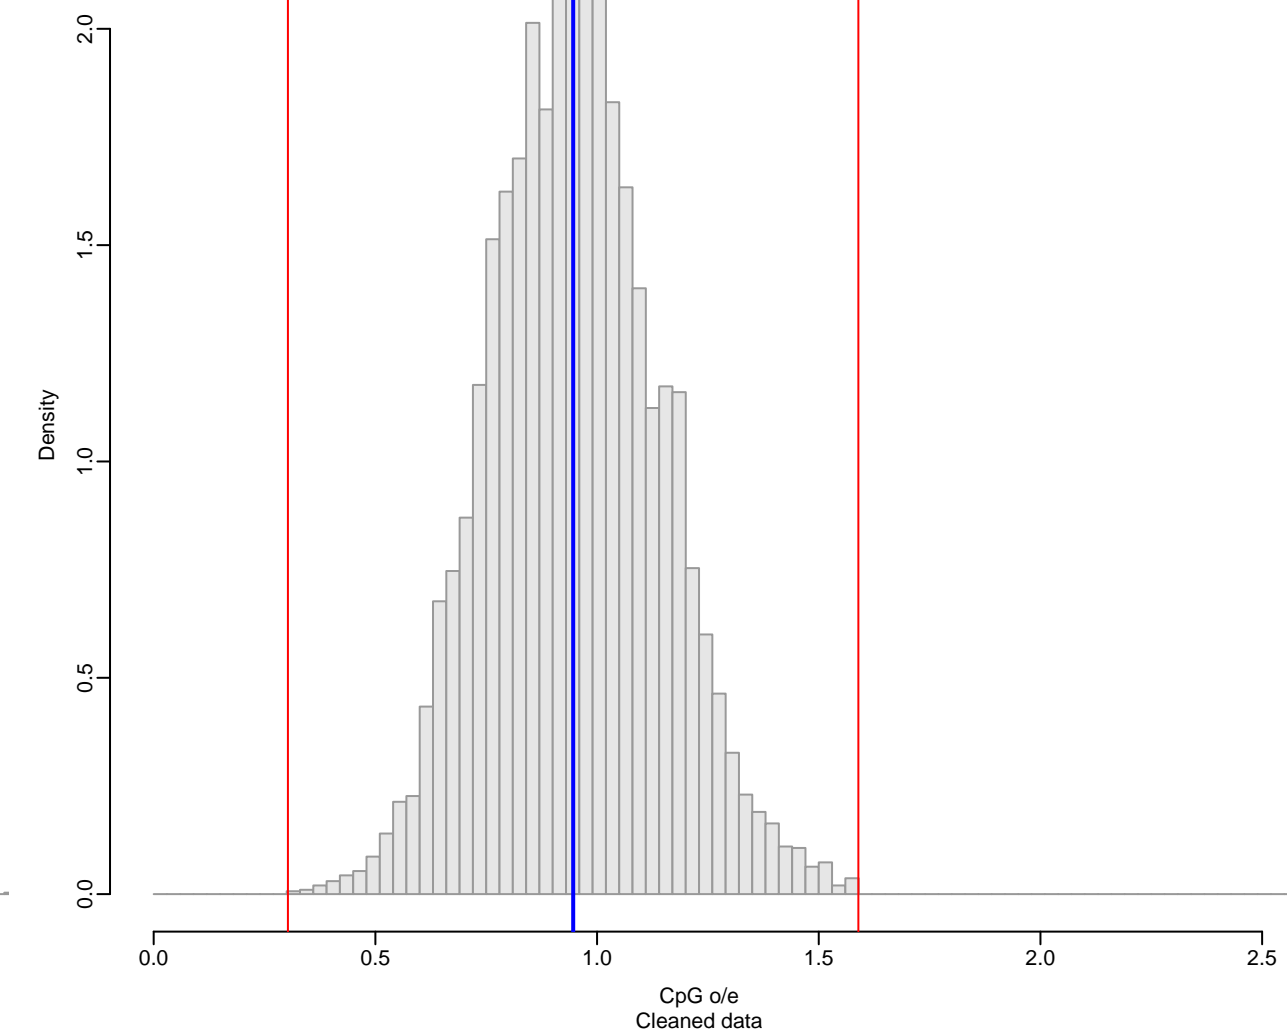



# Anemonia\_viridis

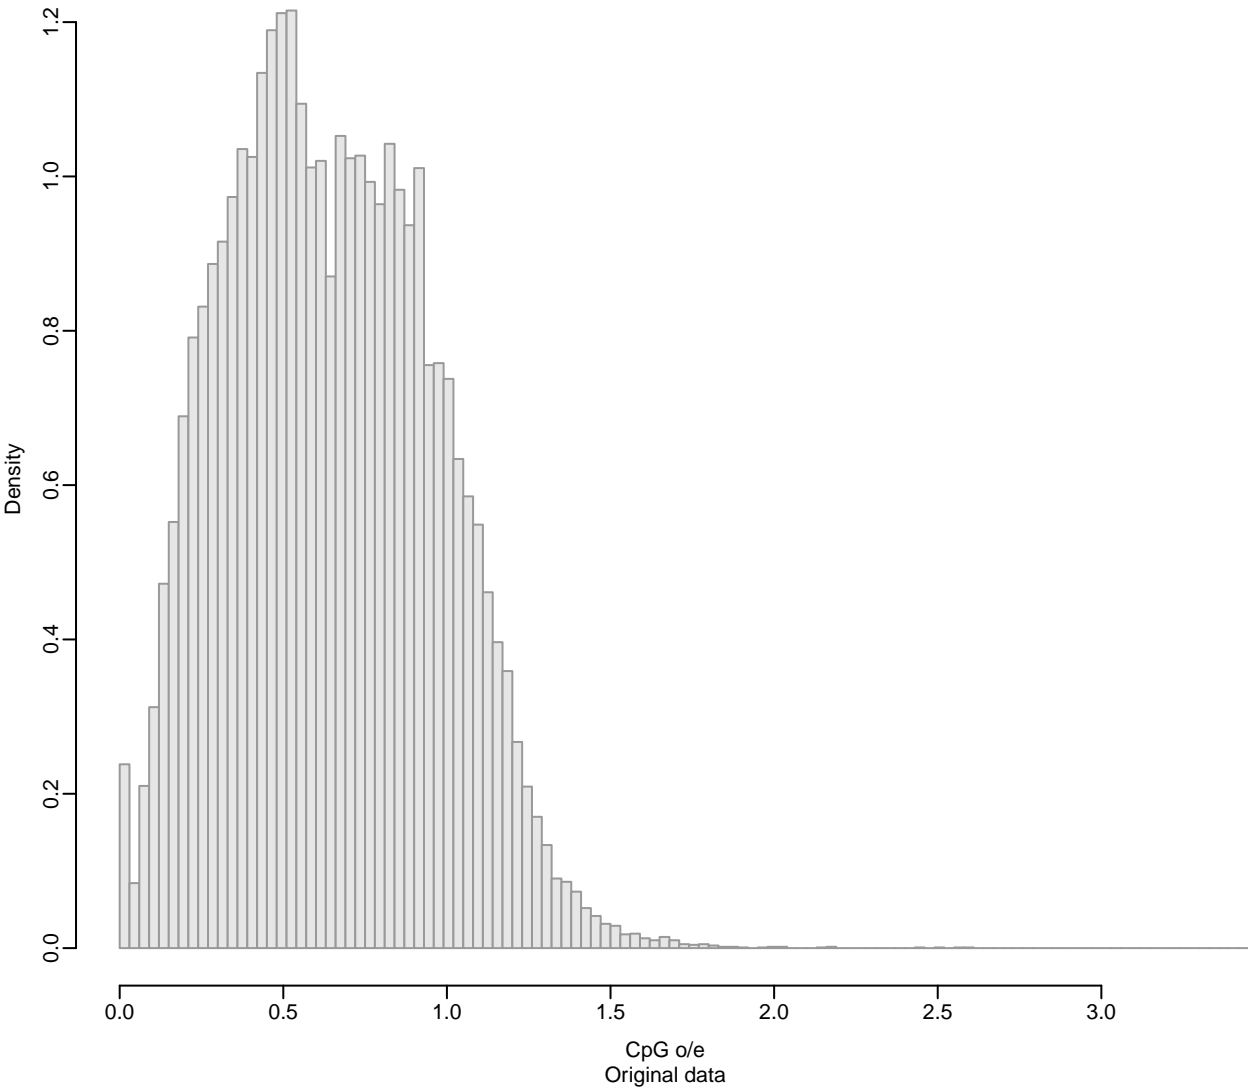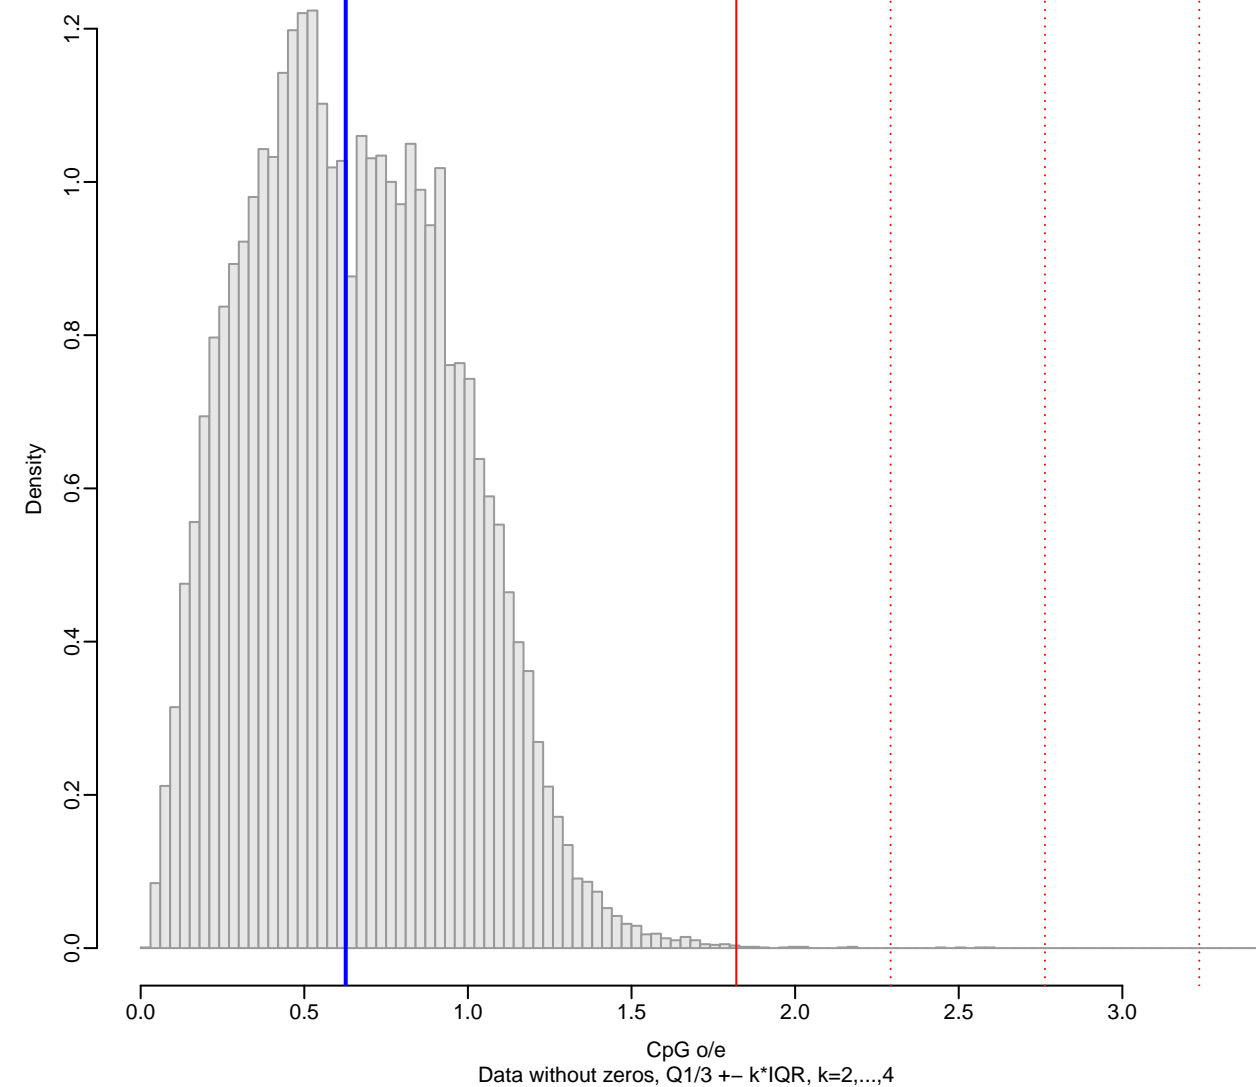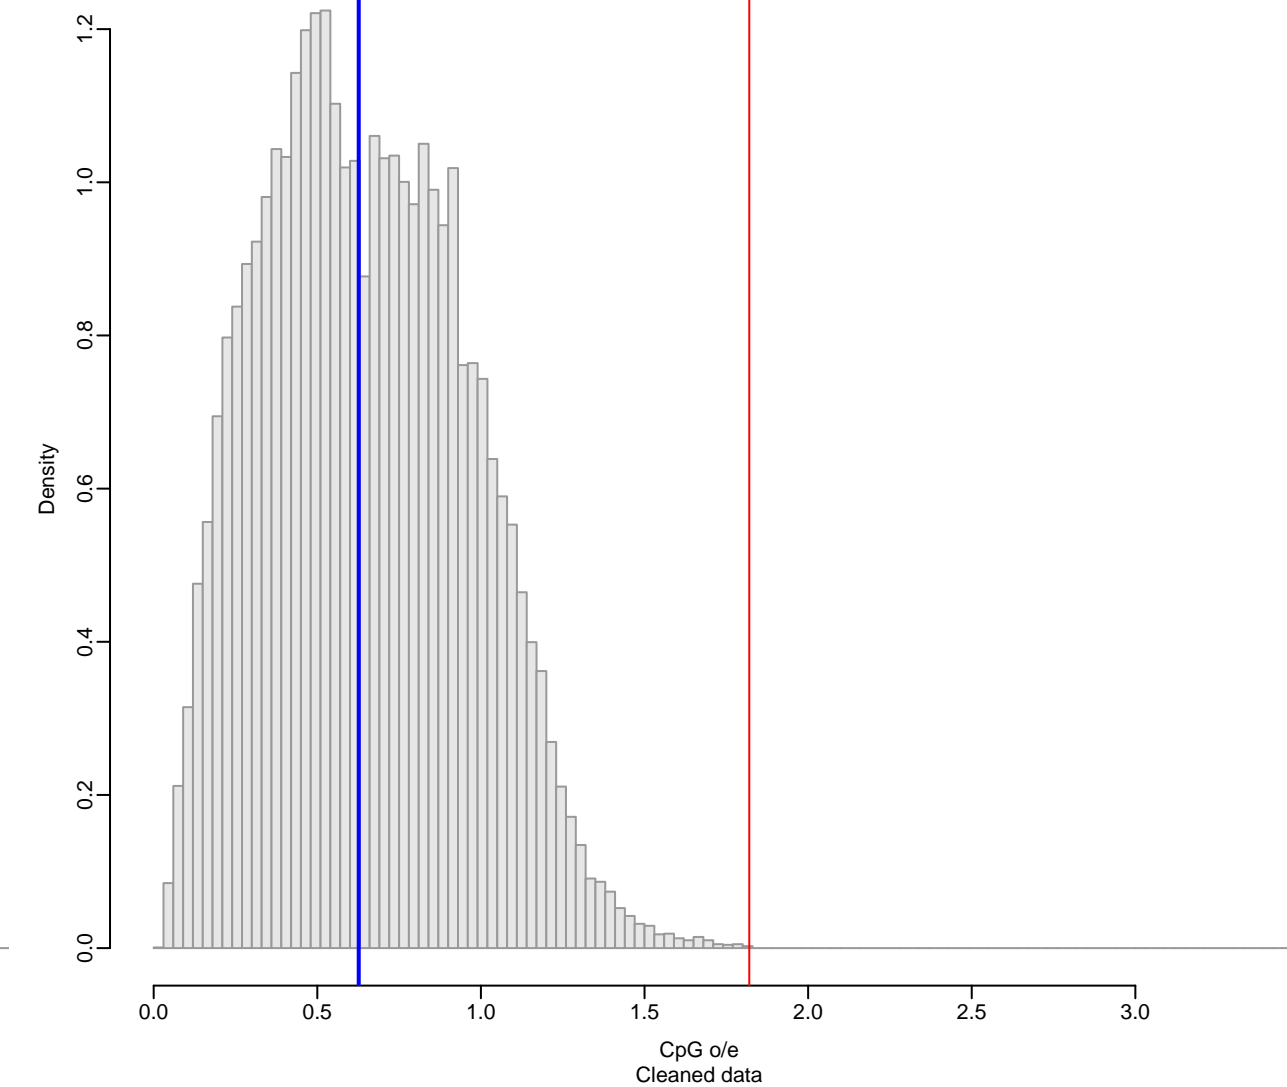

Anolis\_carolinensis

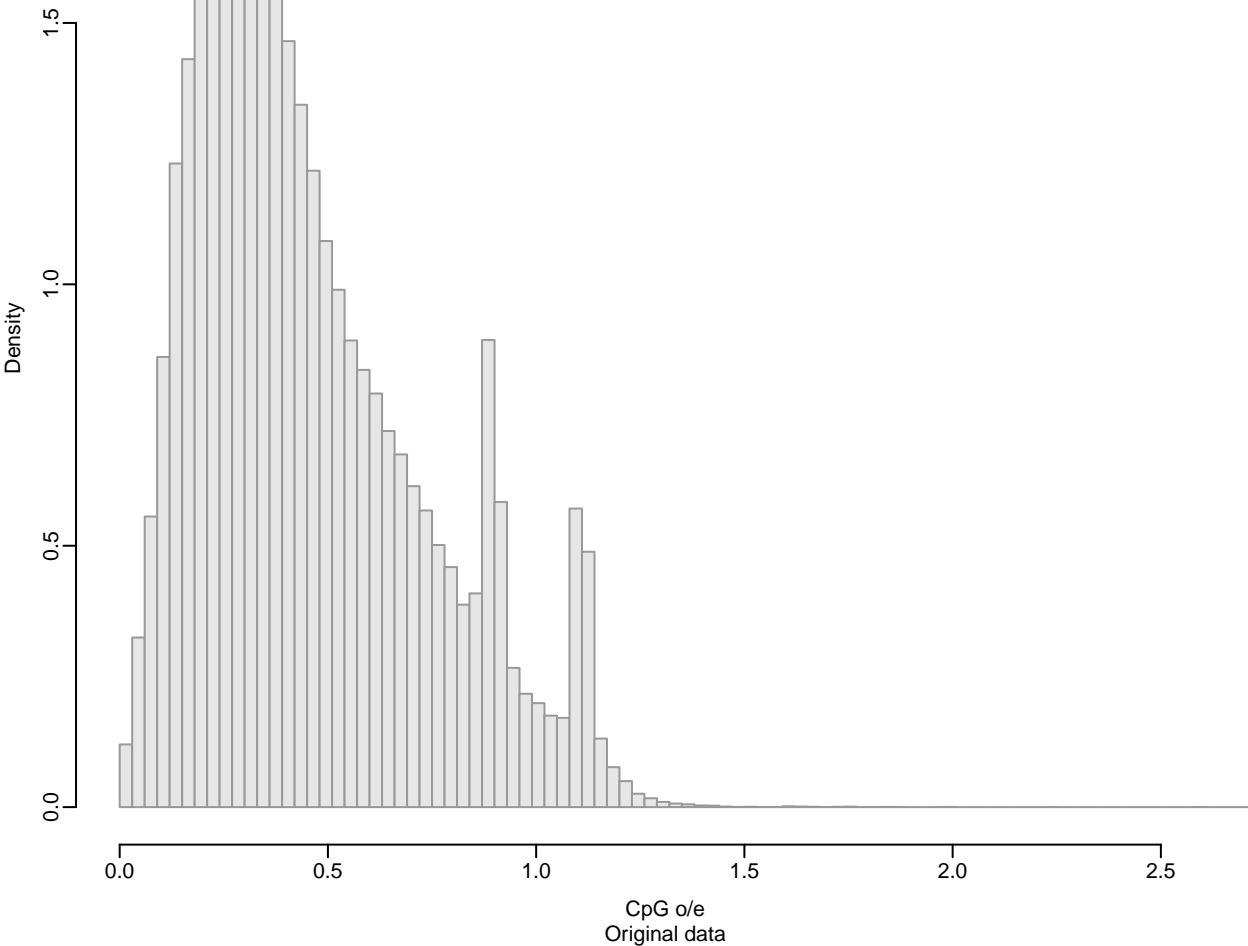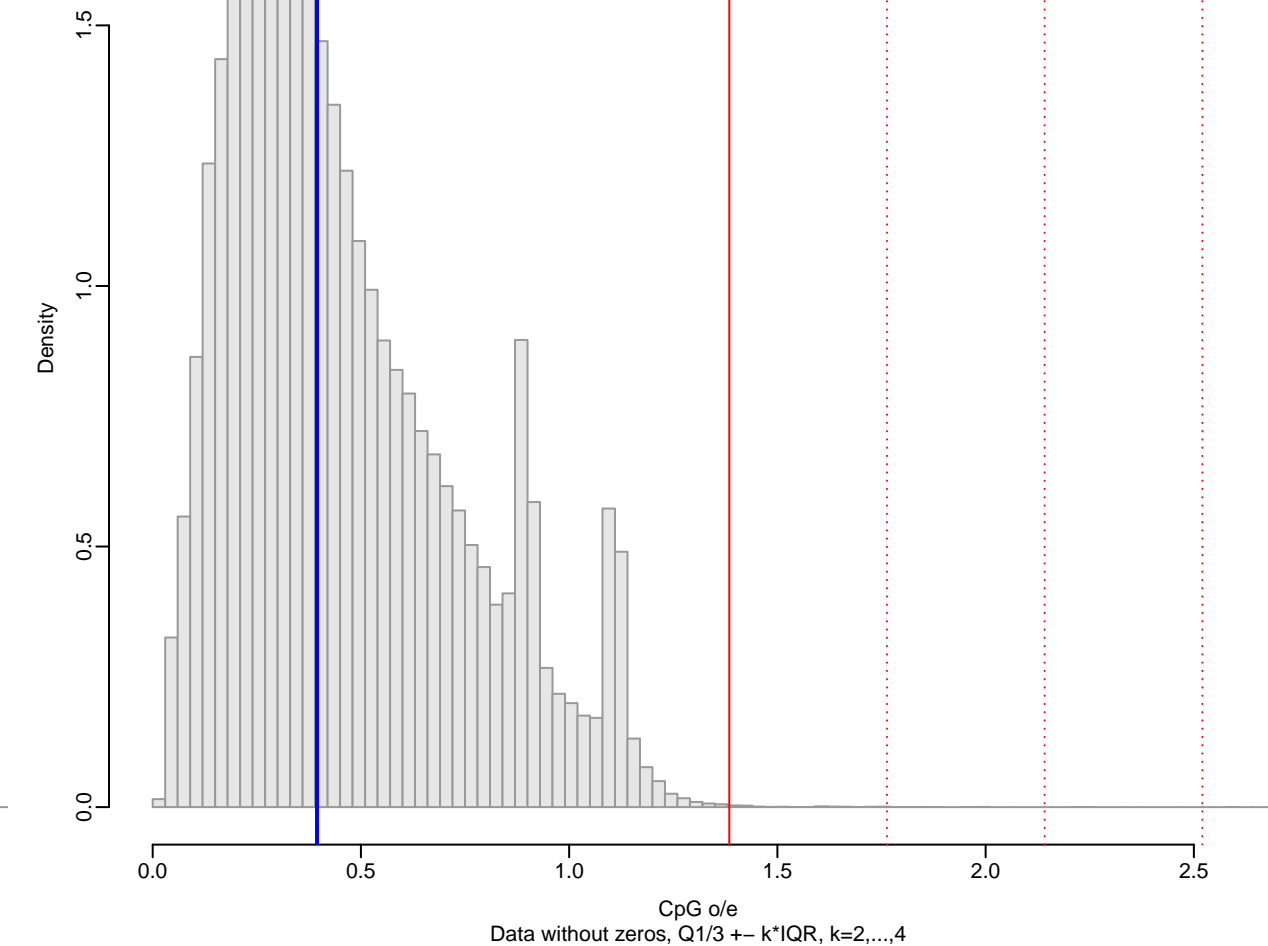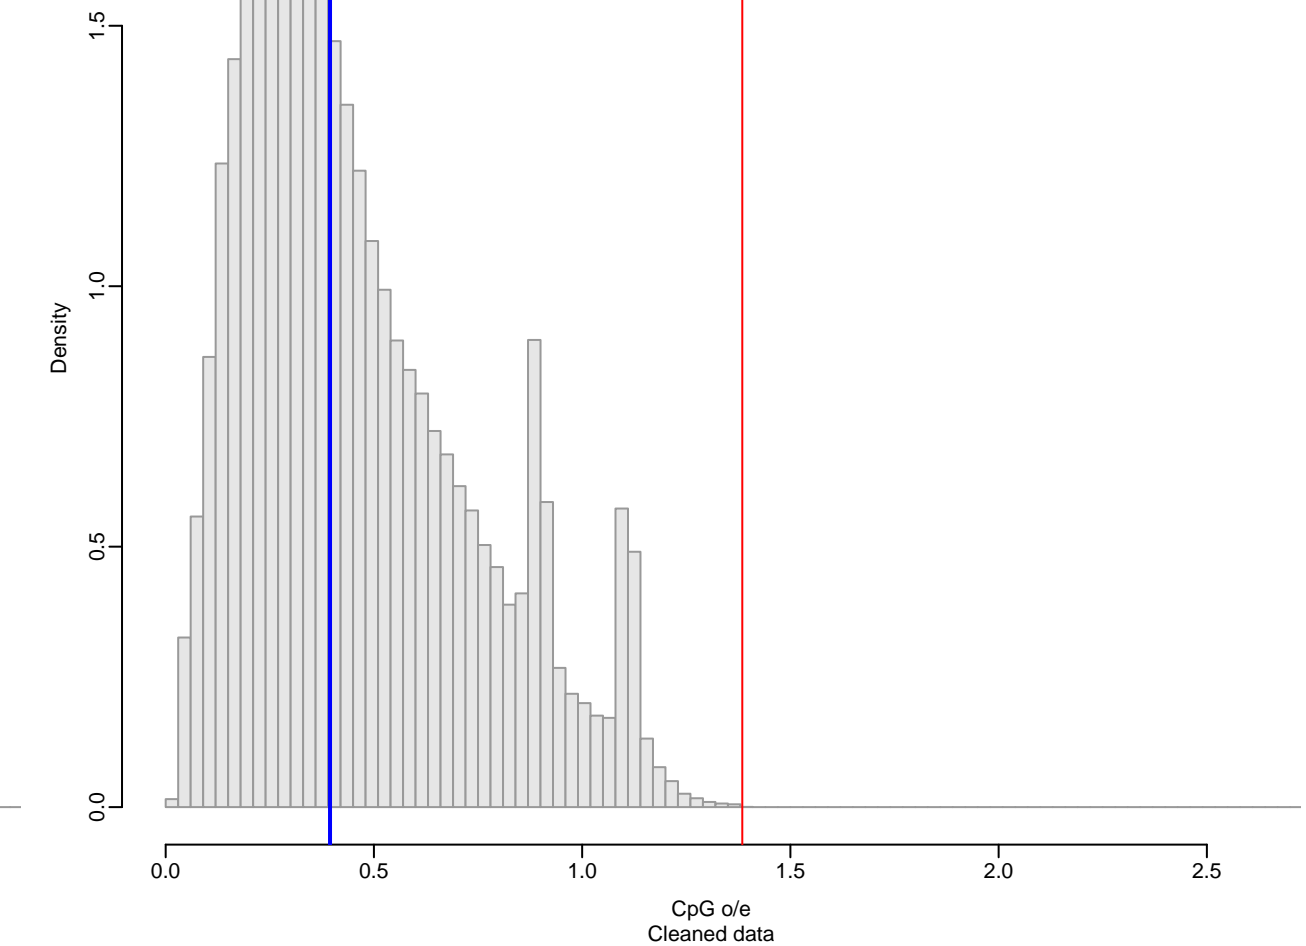

# Anopheles\_albimanus

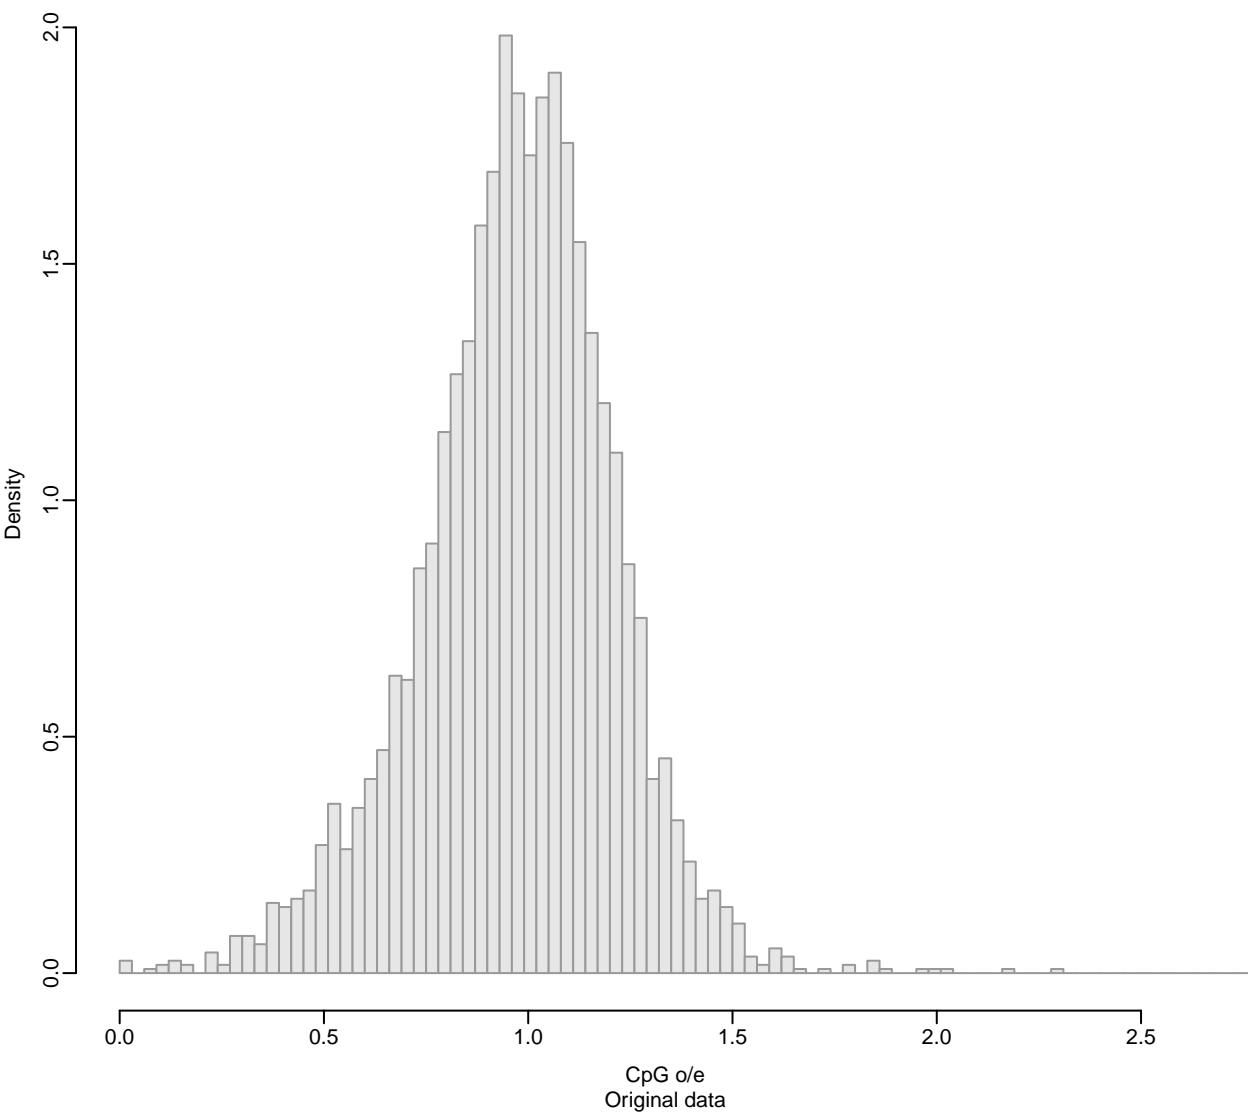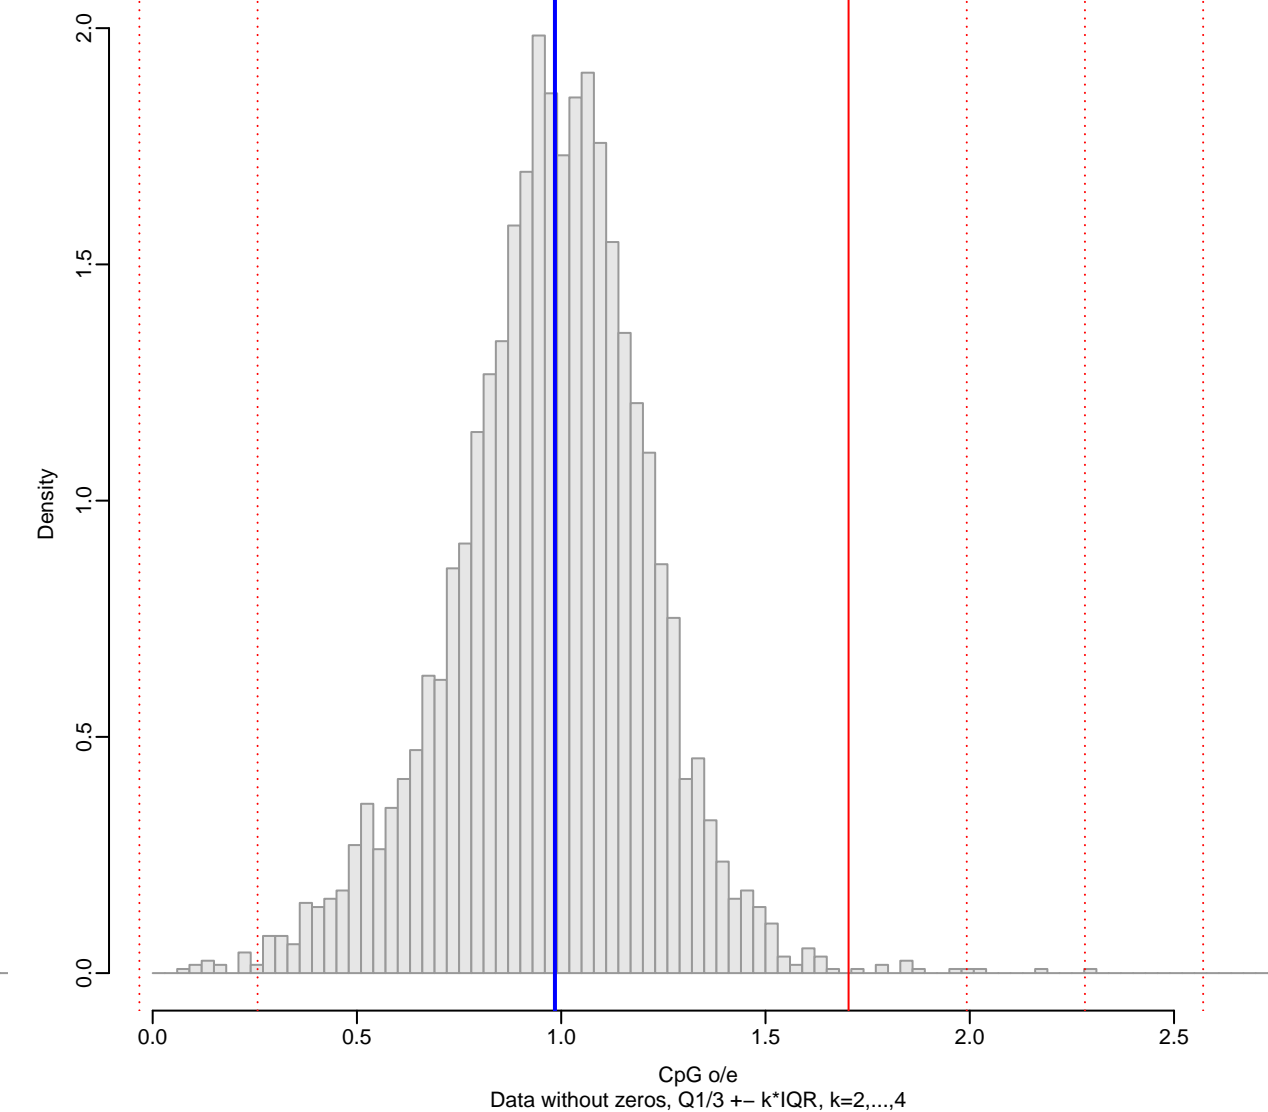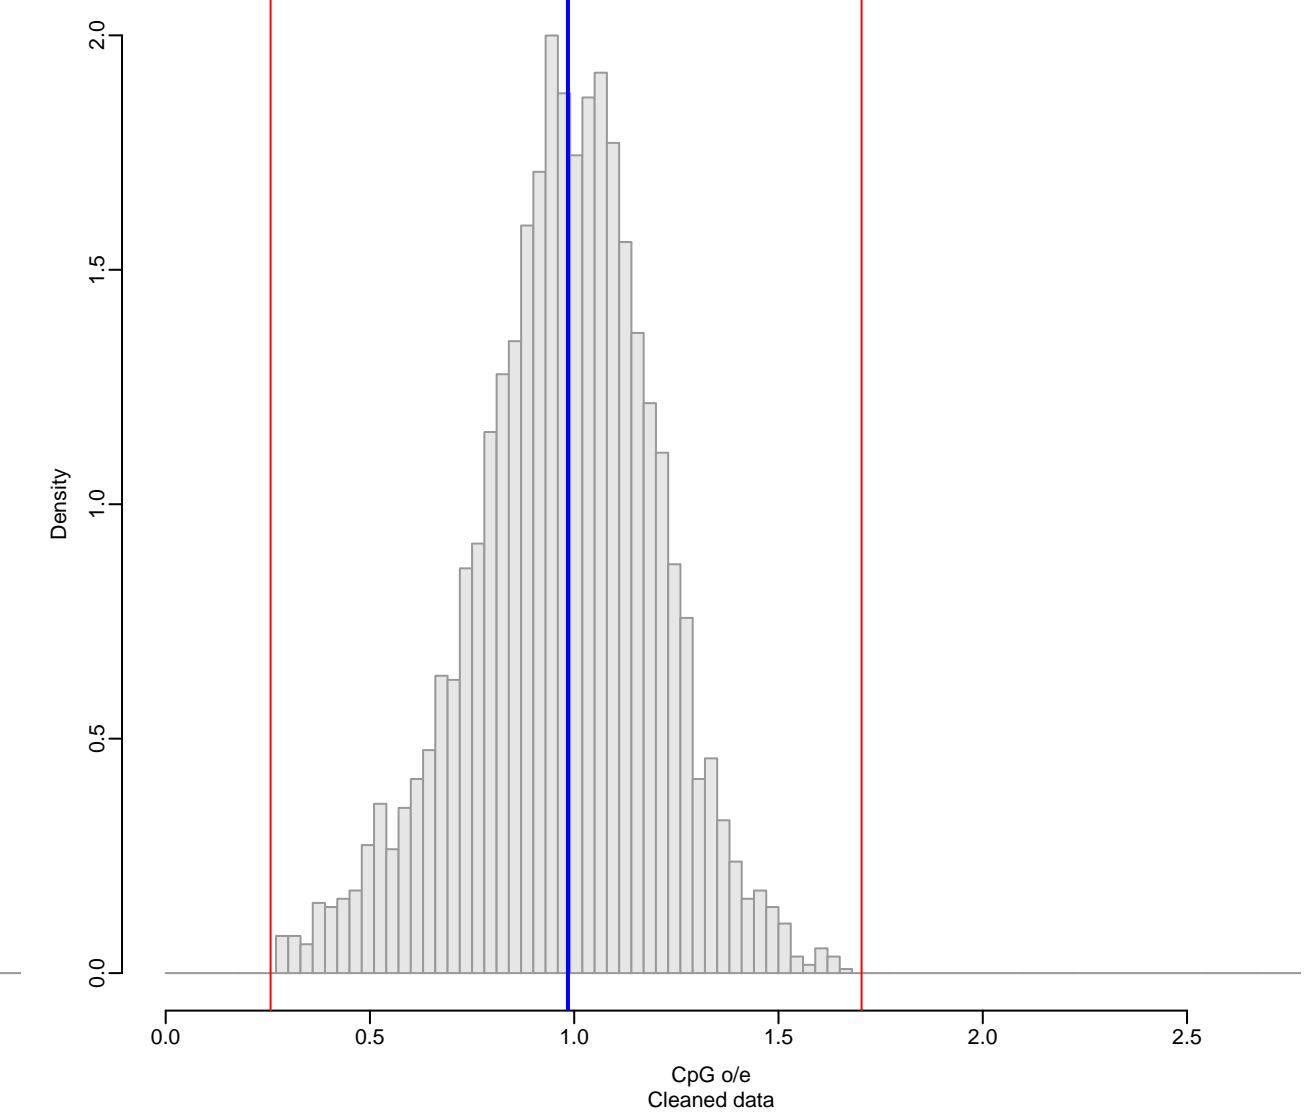

# Anopheles\_darlingi

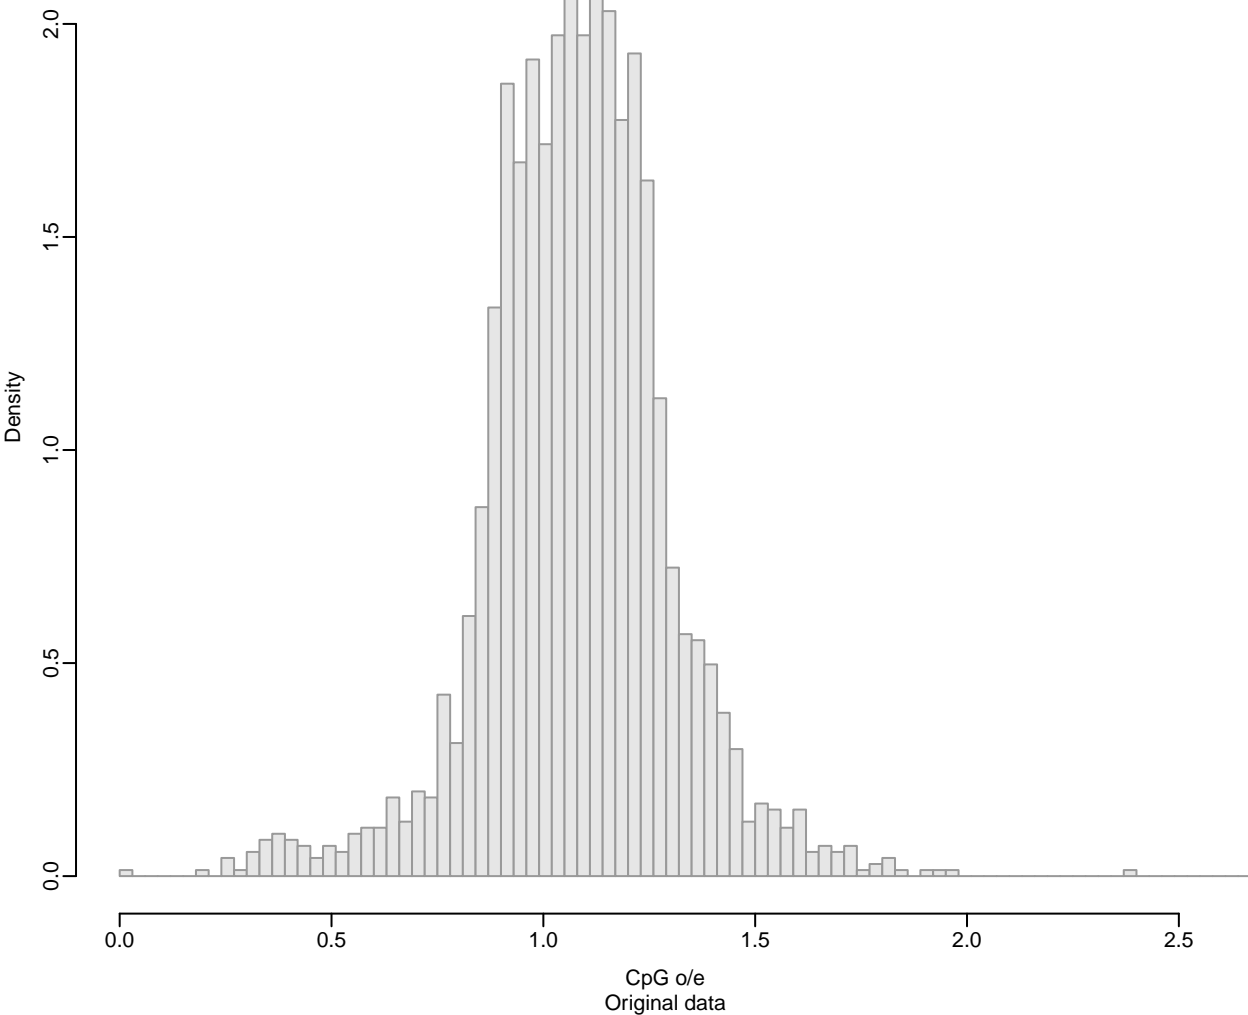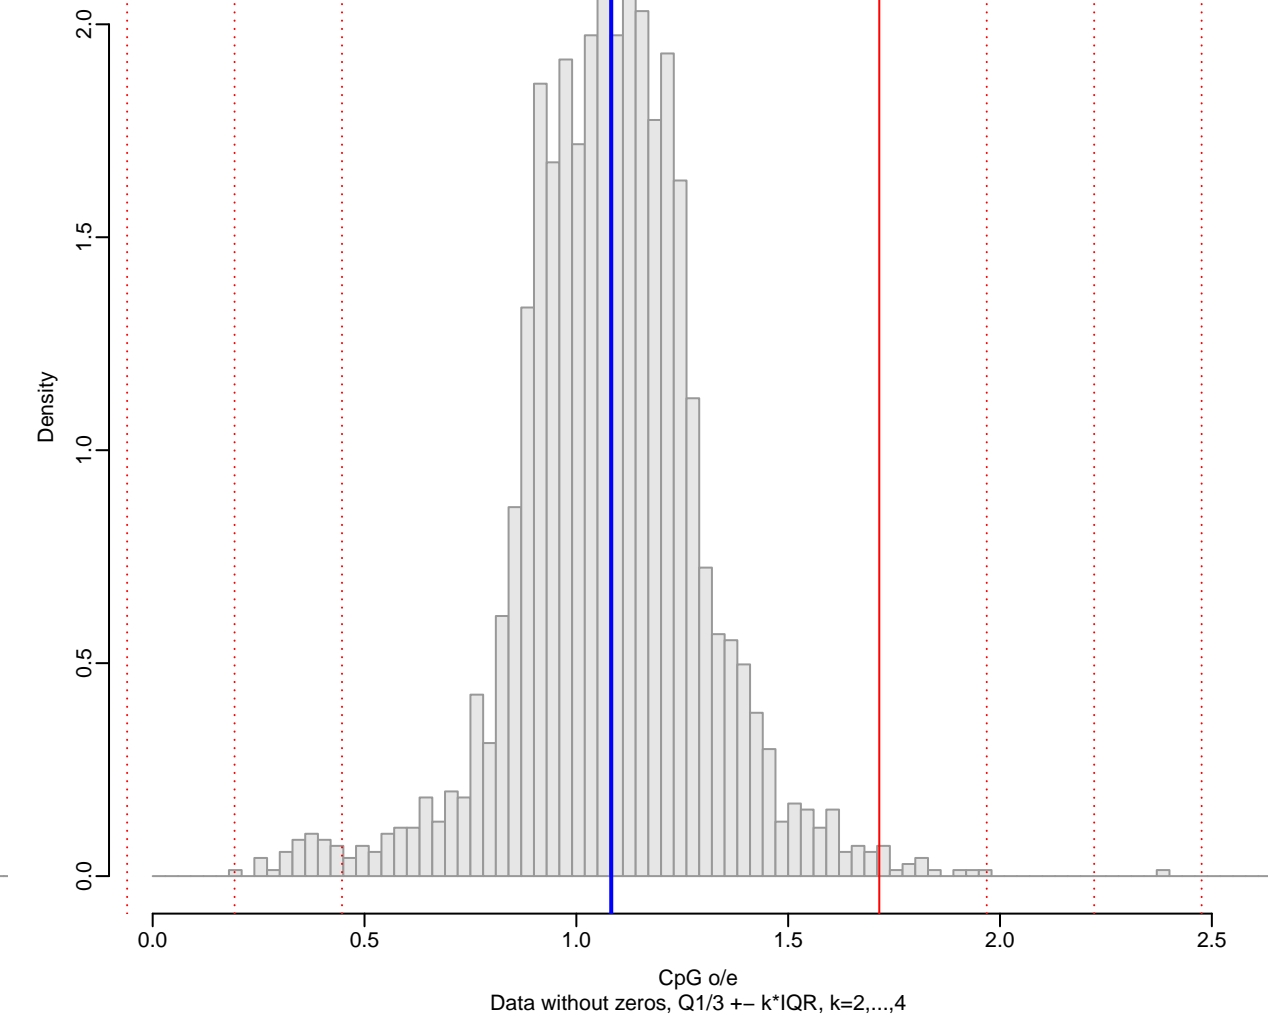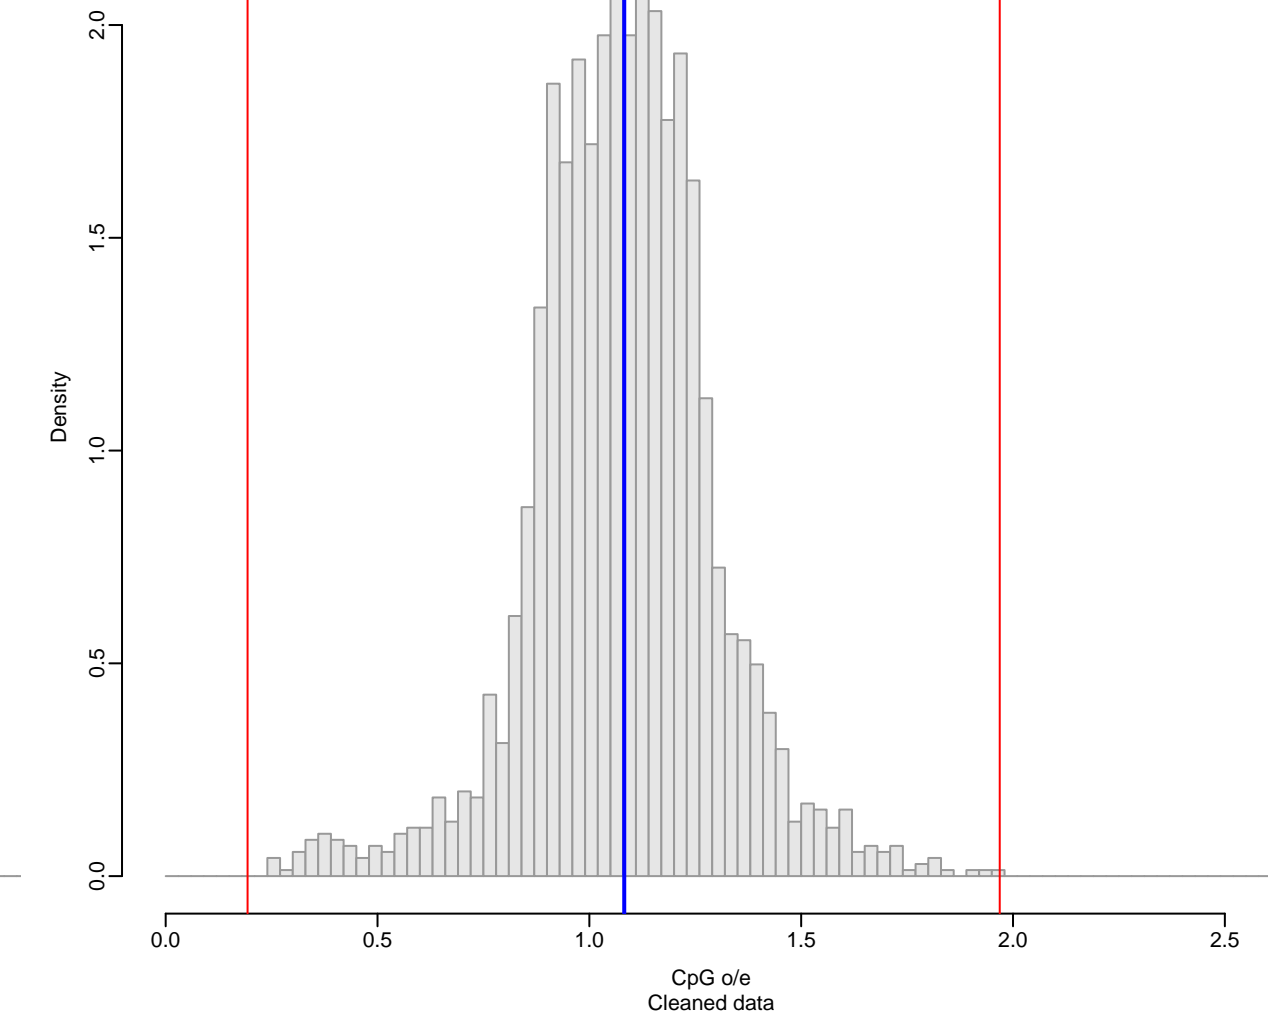

Anopheles\_gambiae

Density

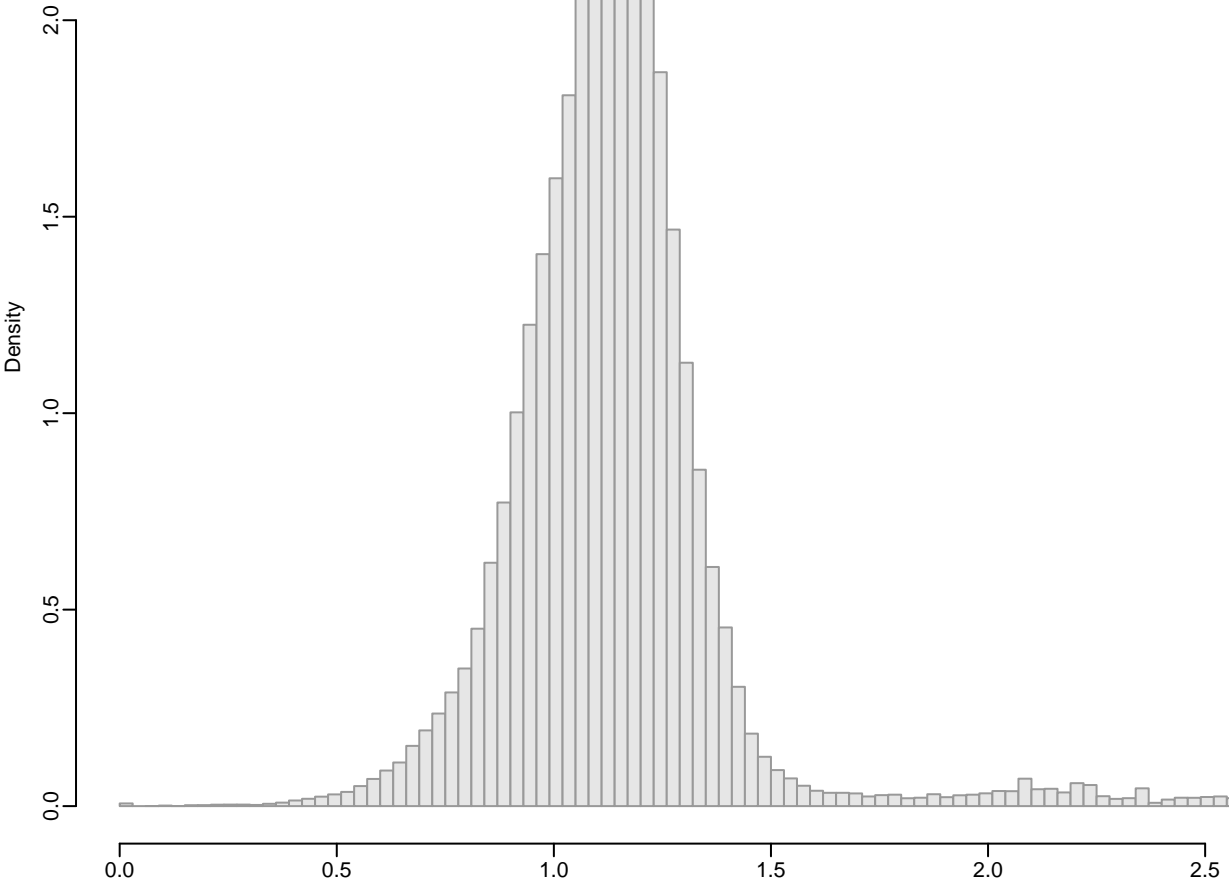

Density

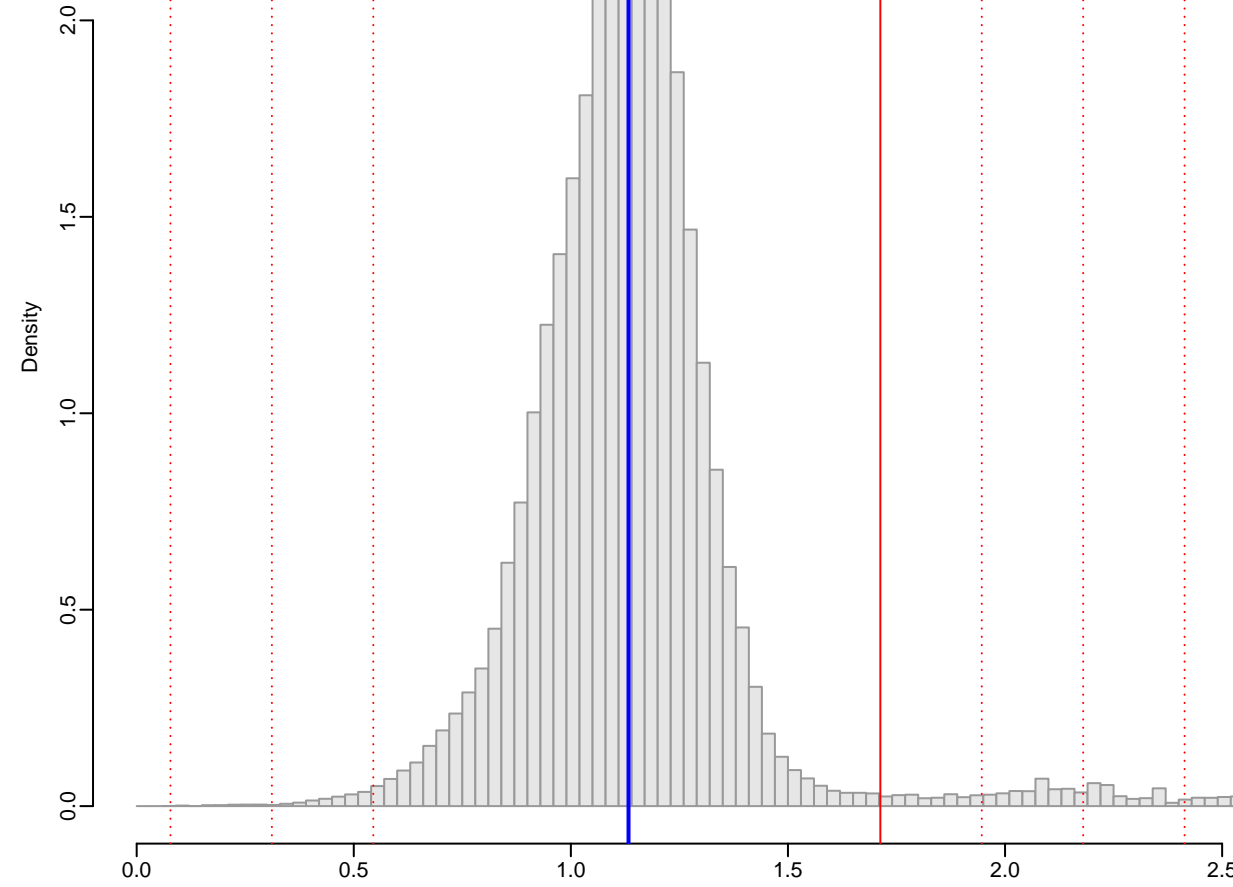

Density

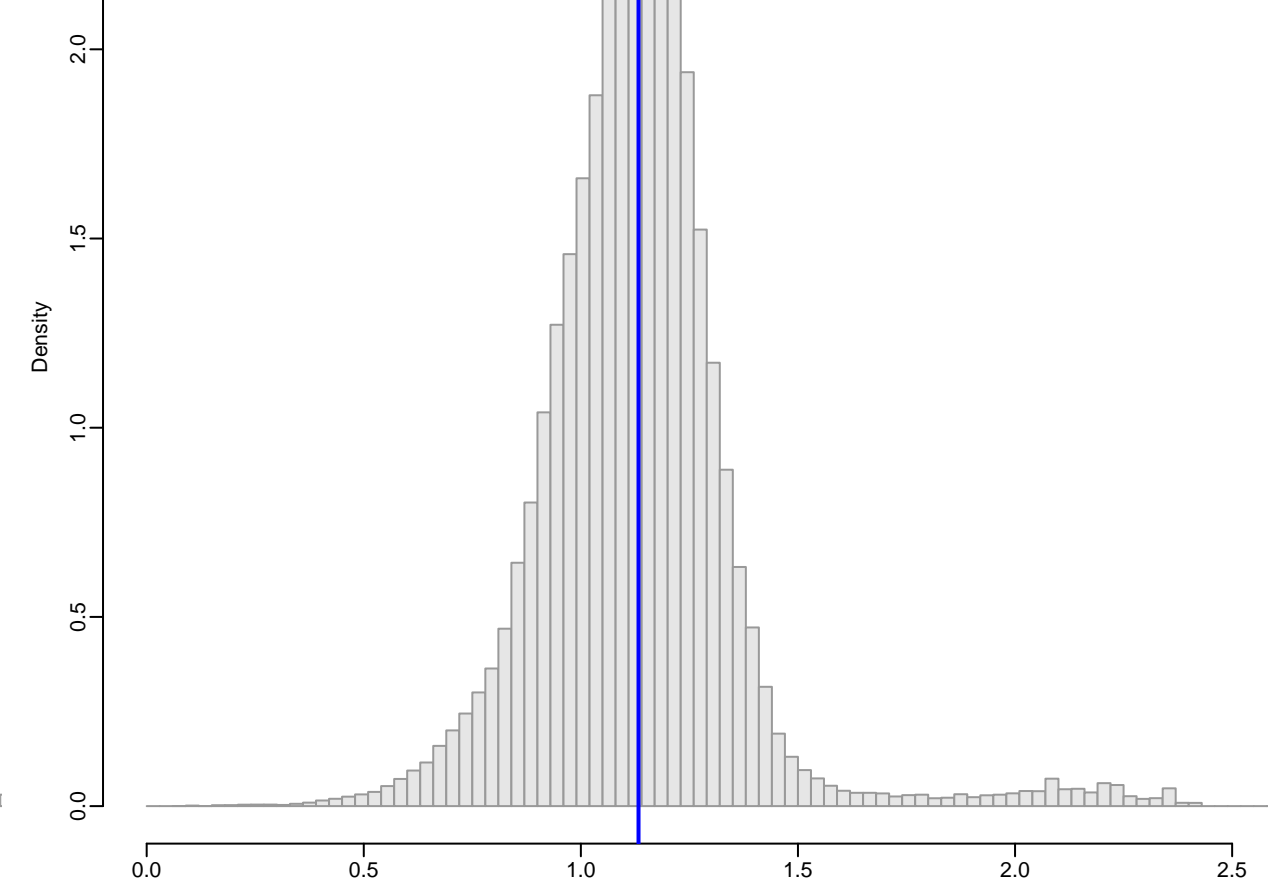

# Anopheles\_stephensi

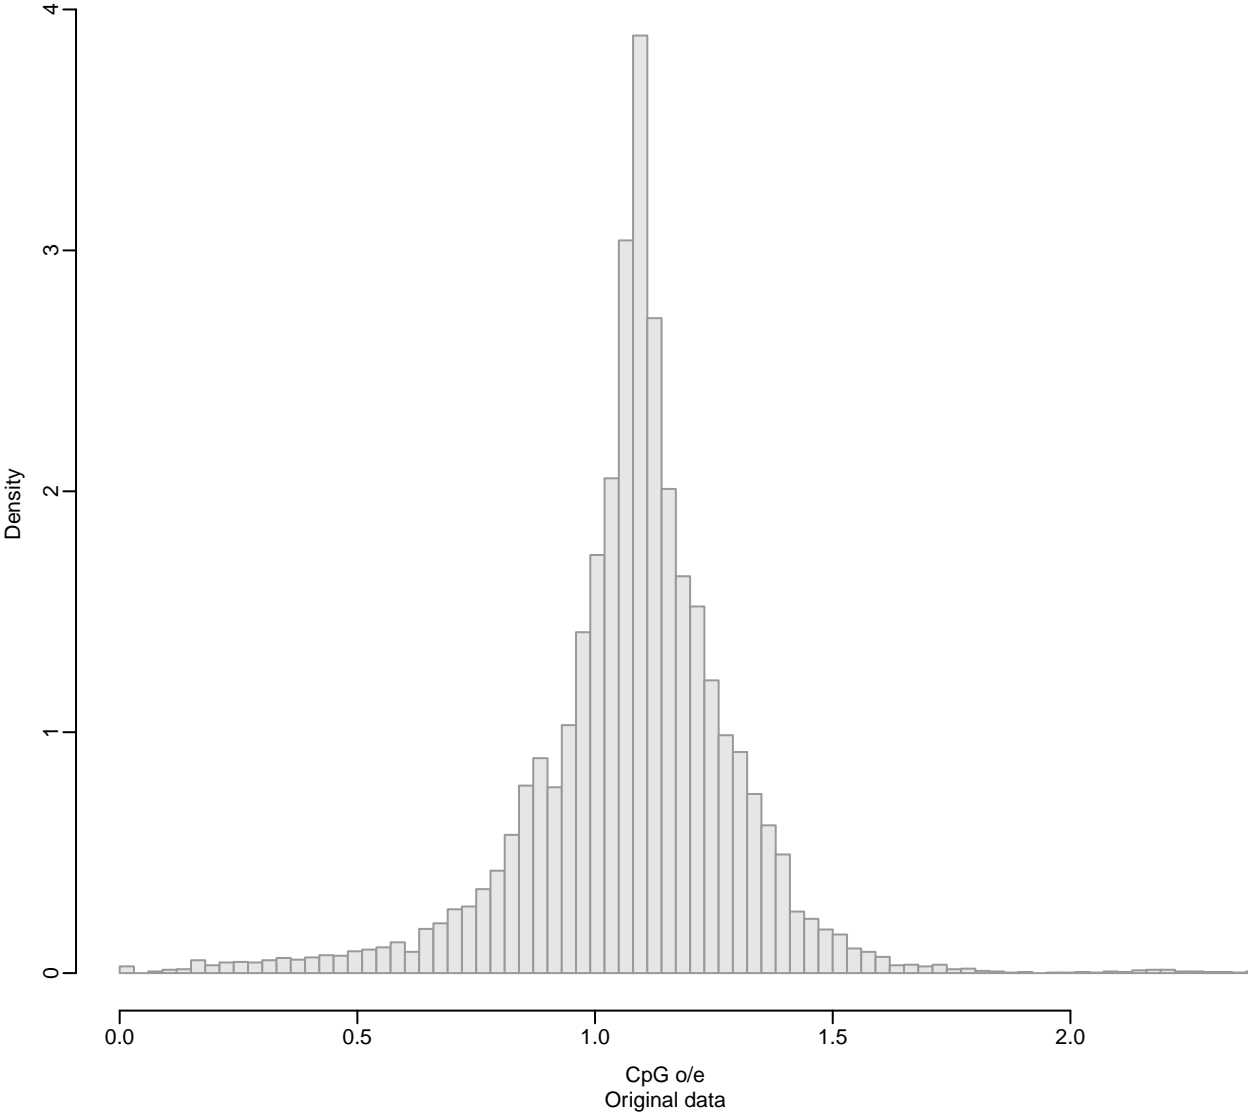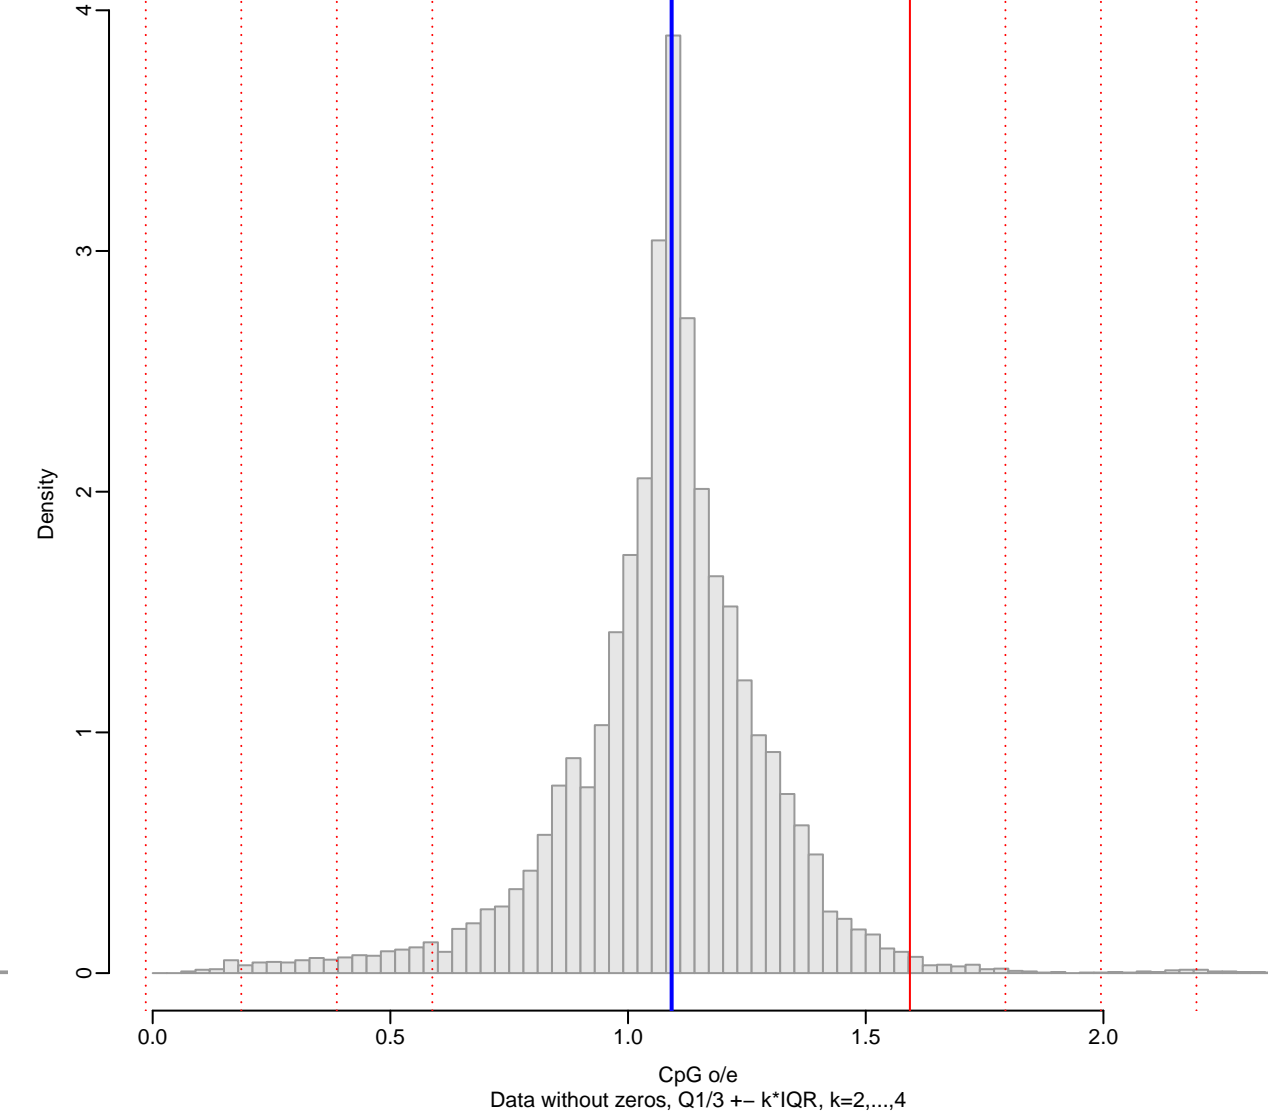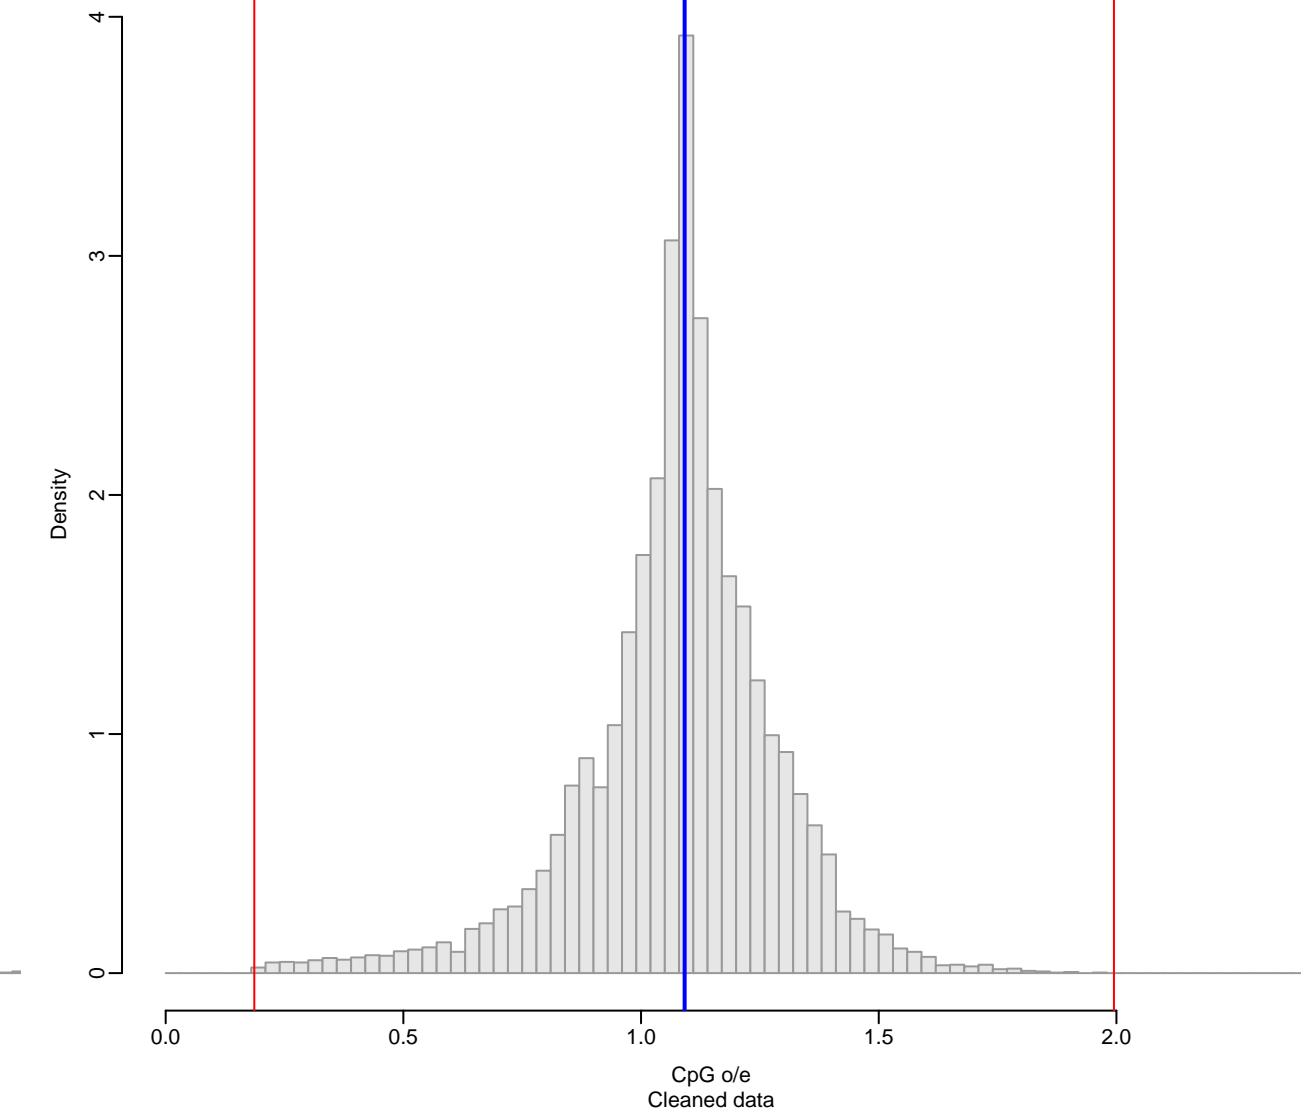

# Anophryoides\_haemophila

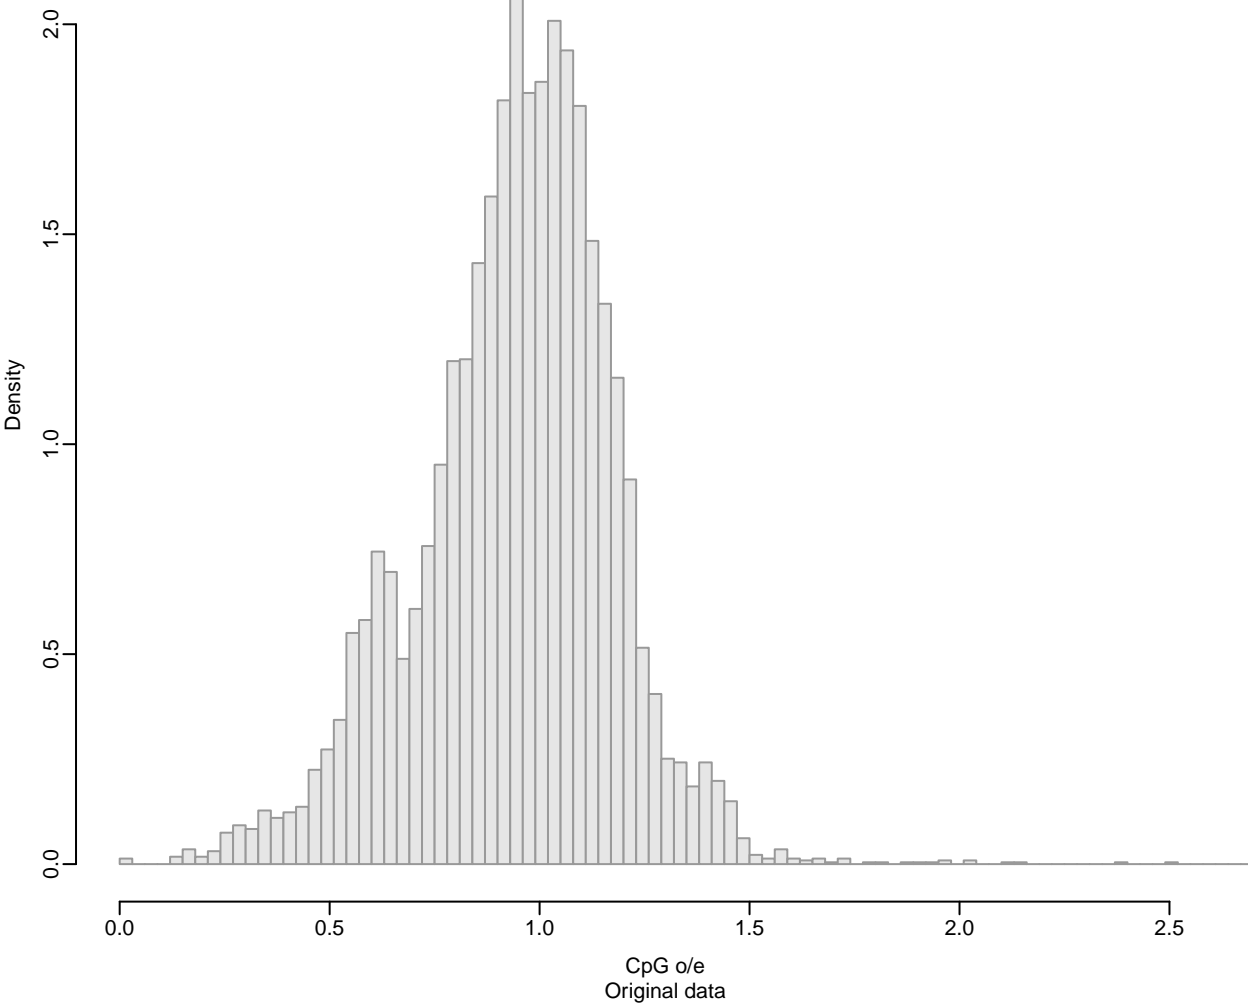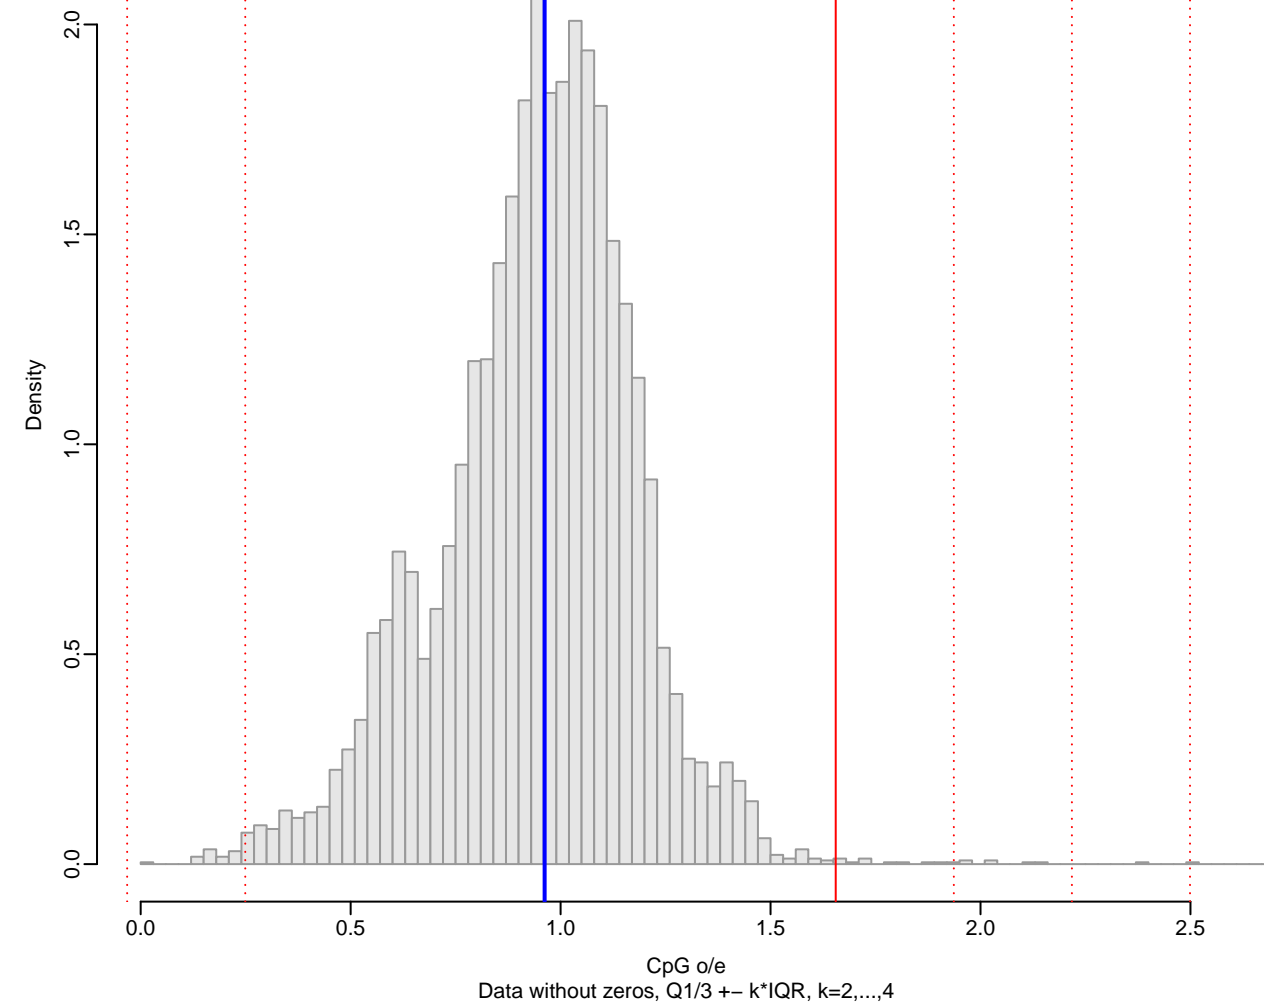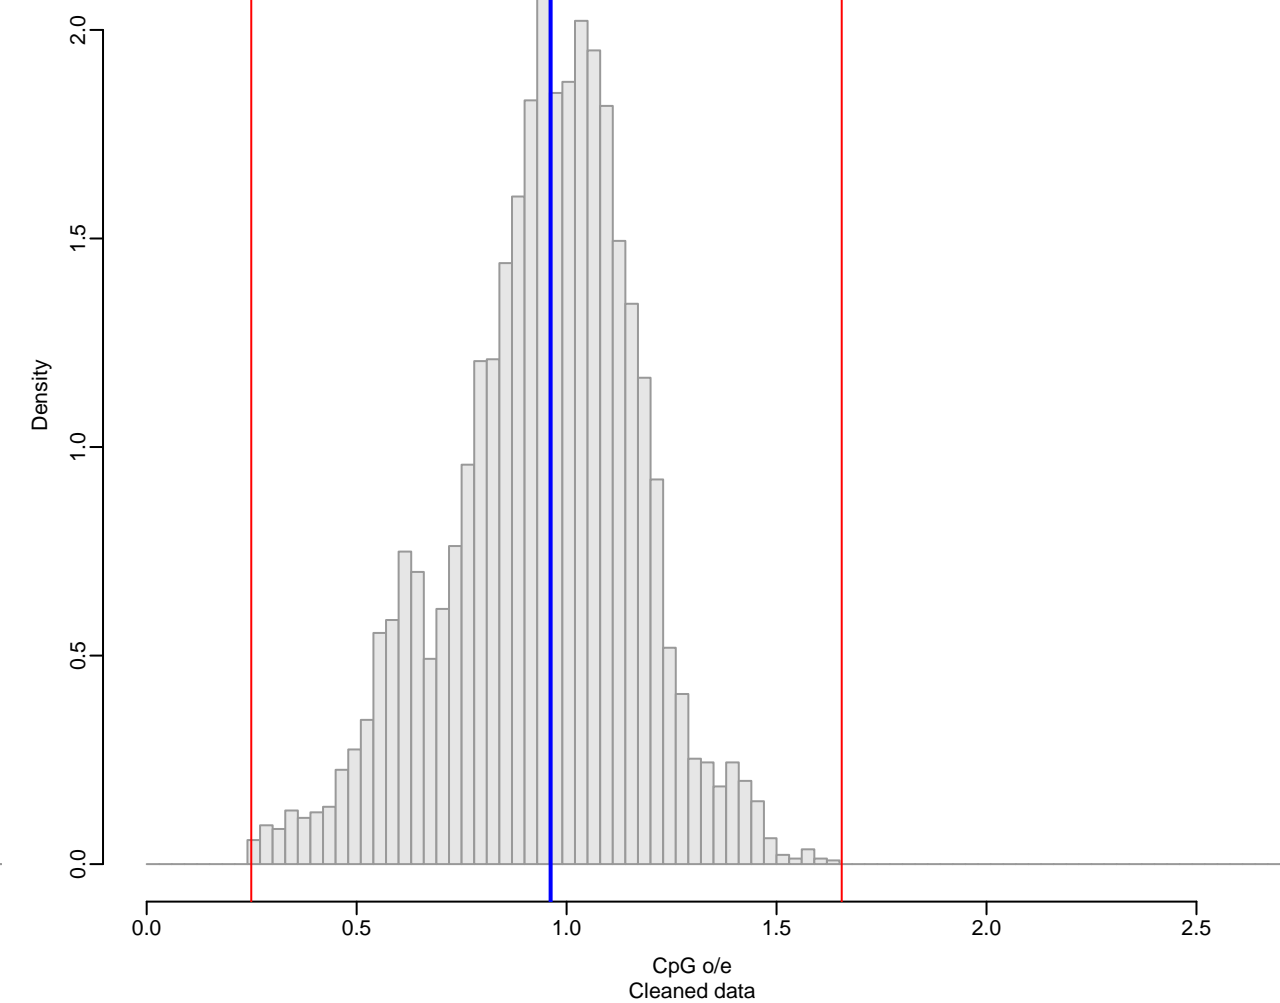

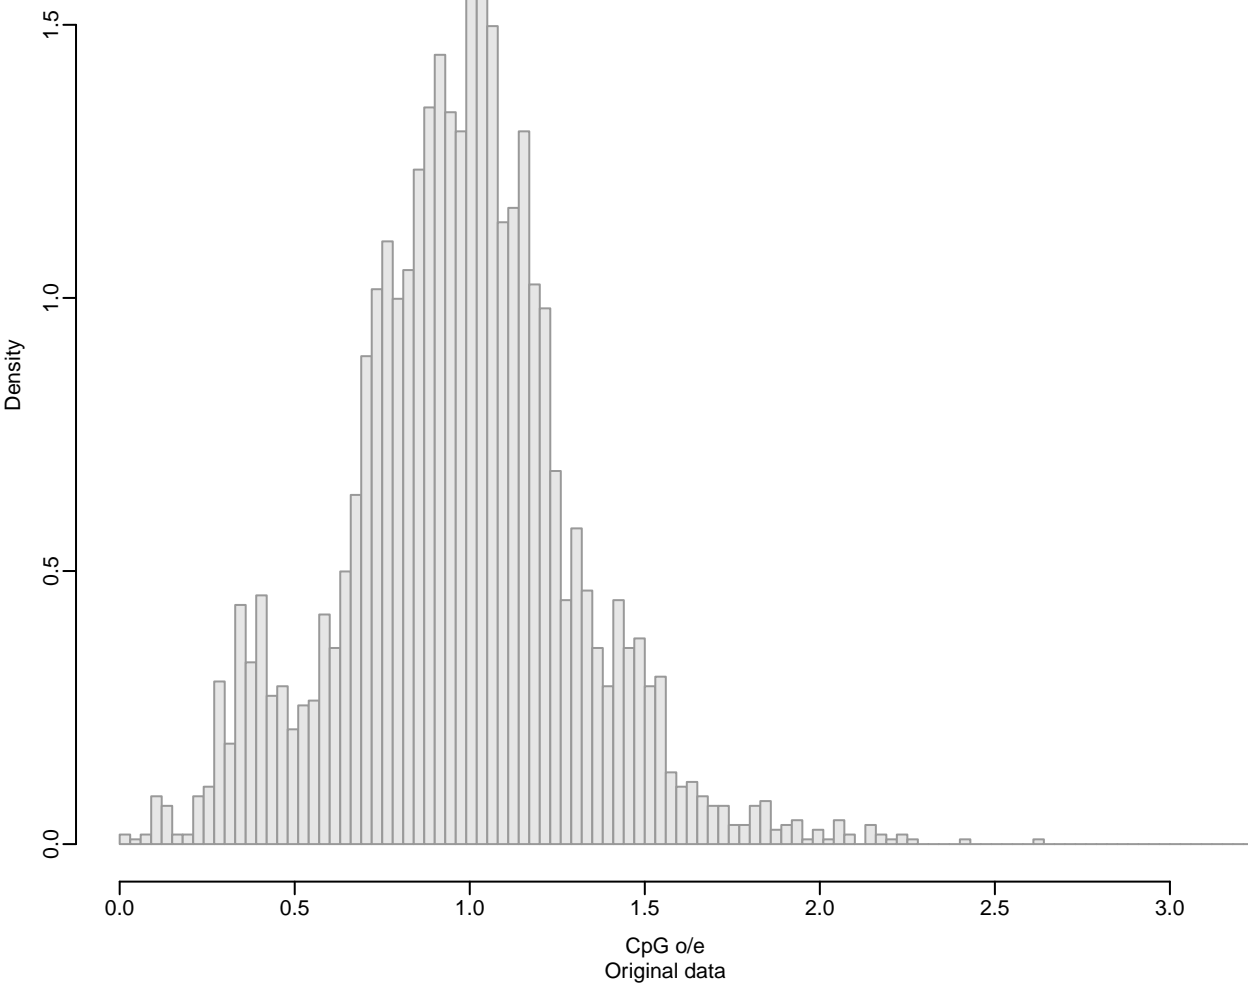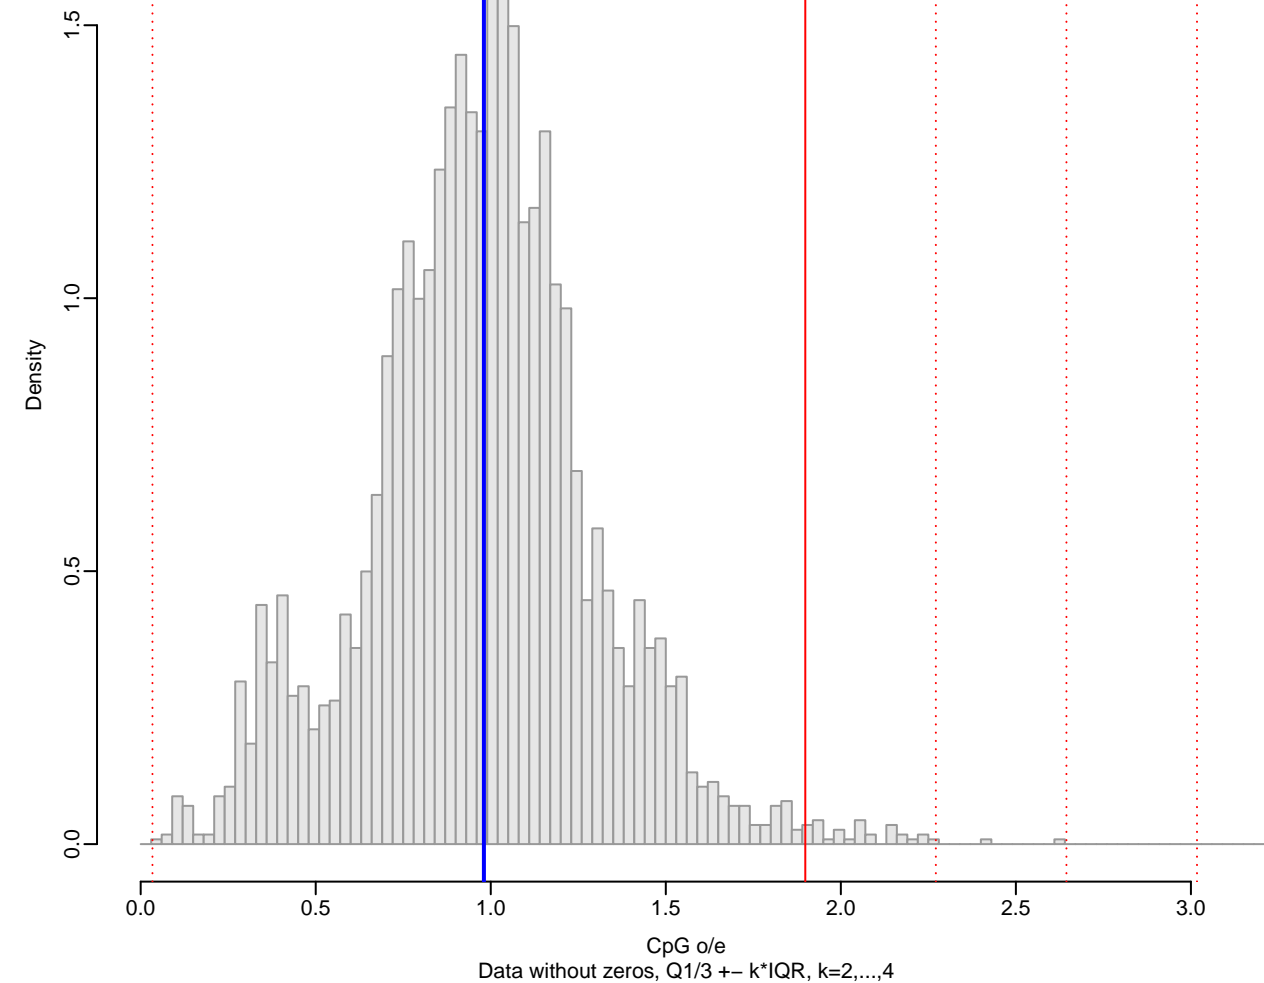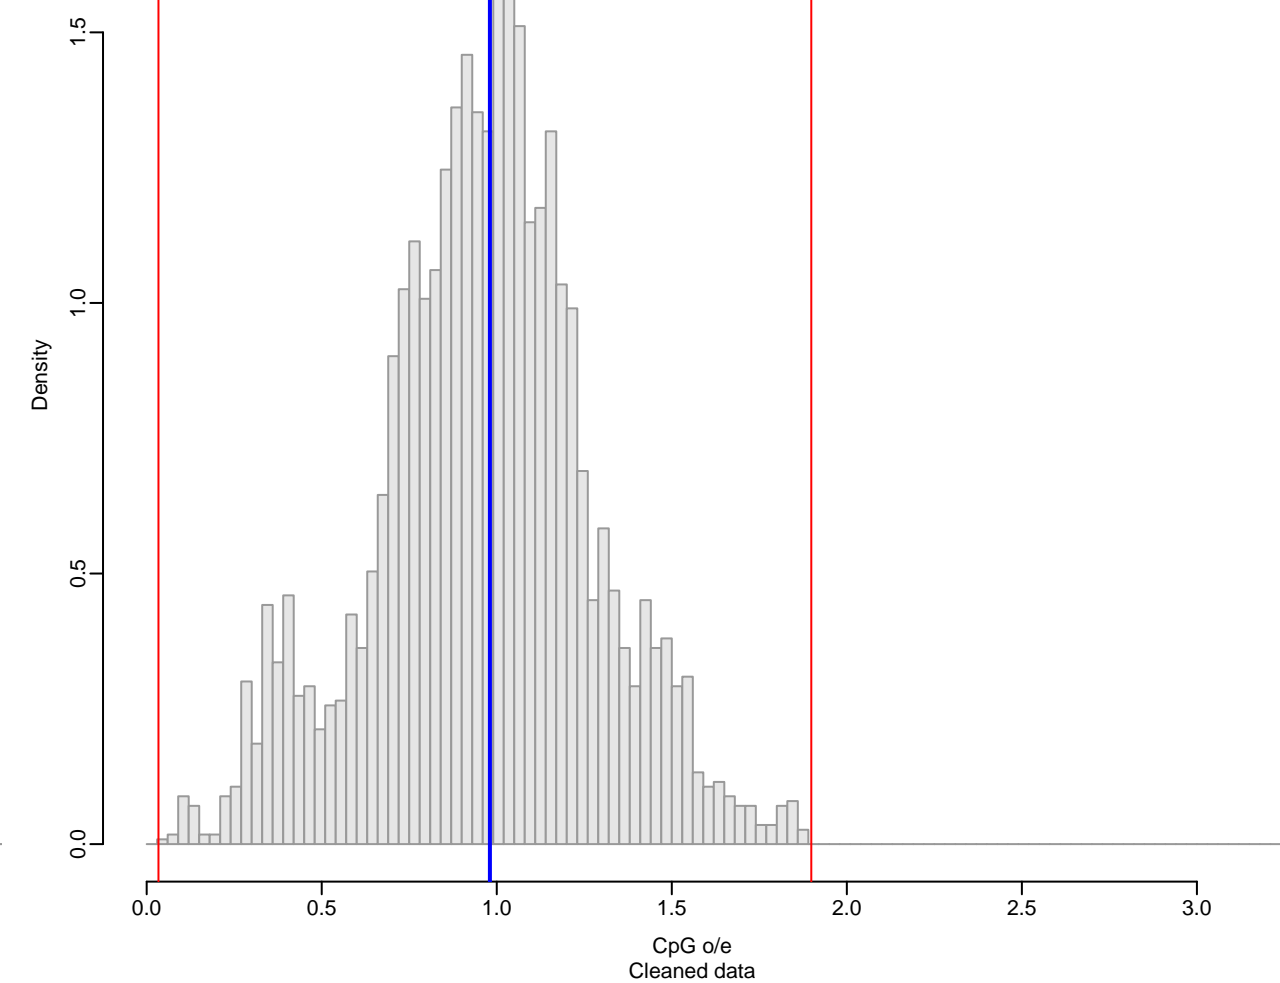



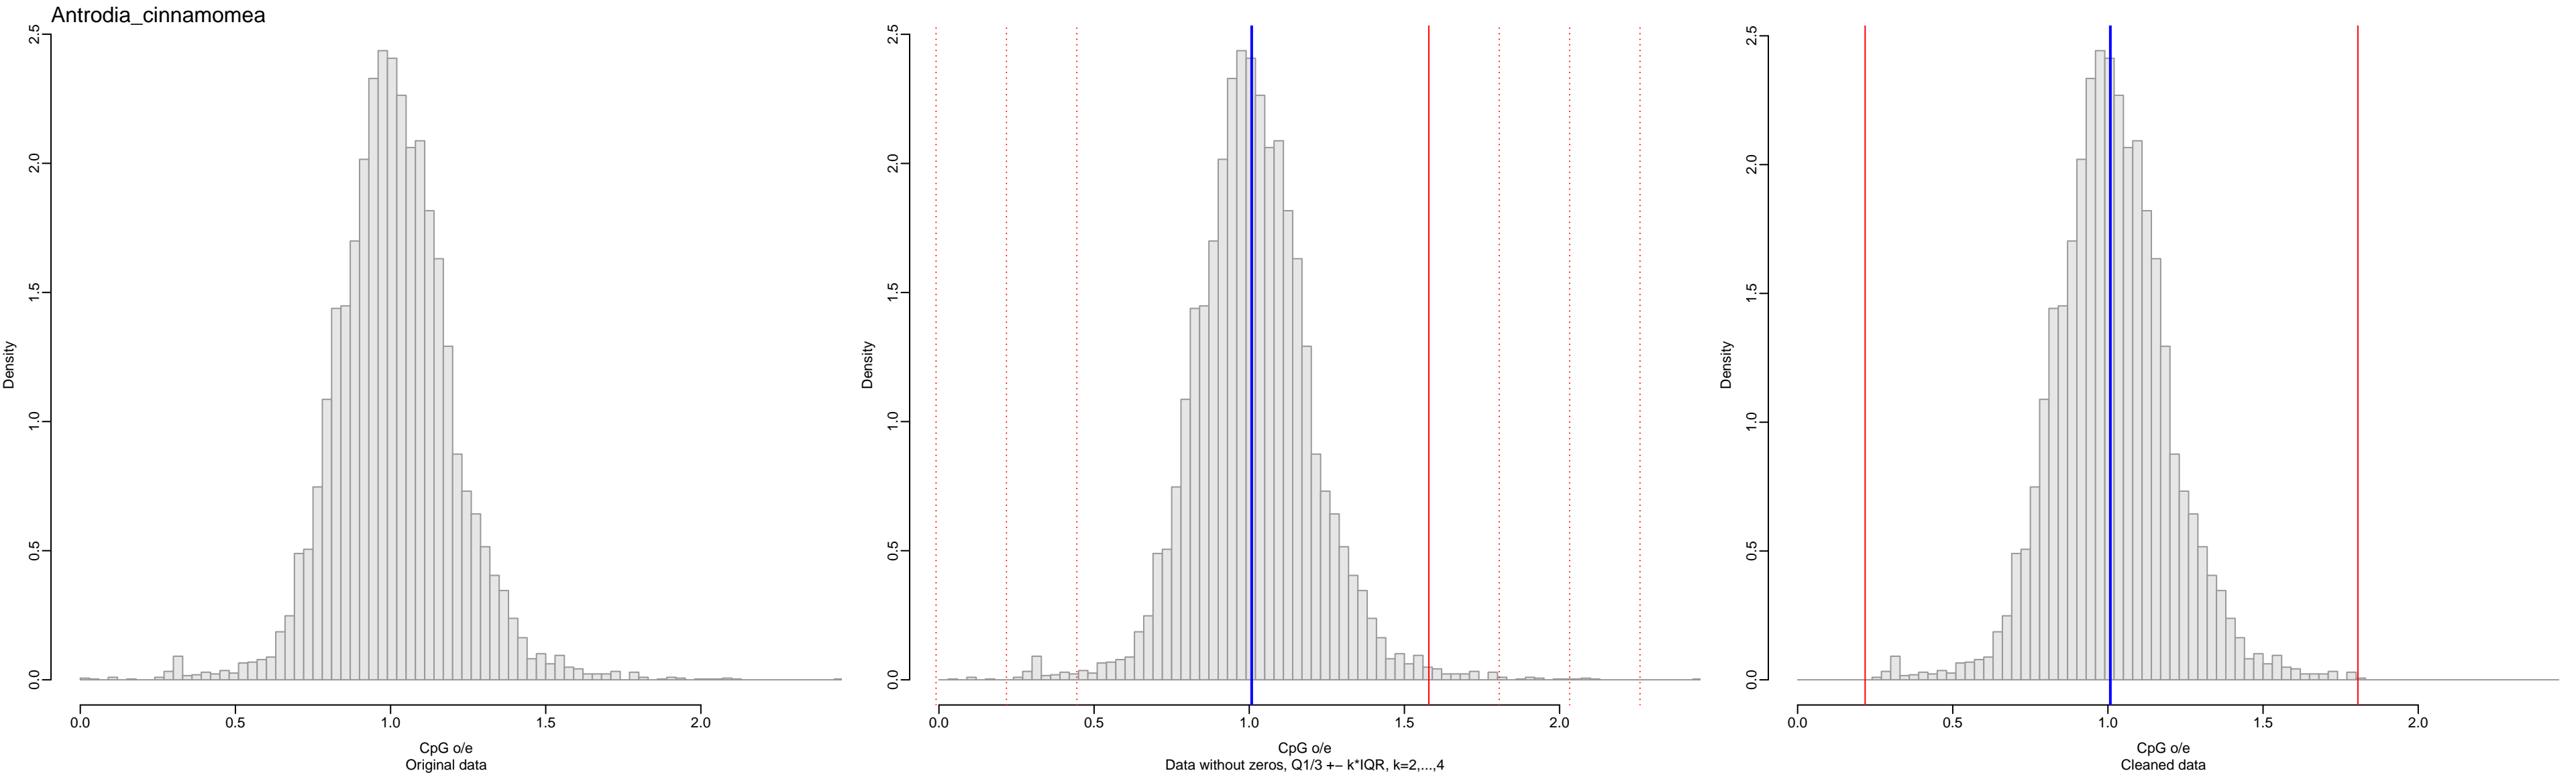

# Anurida\_maritima

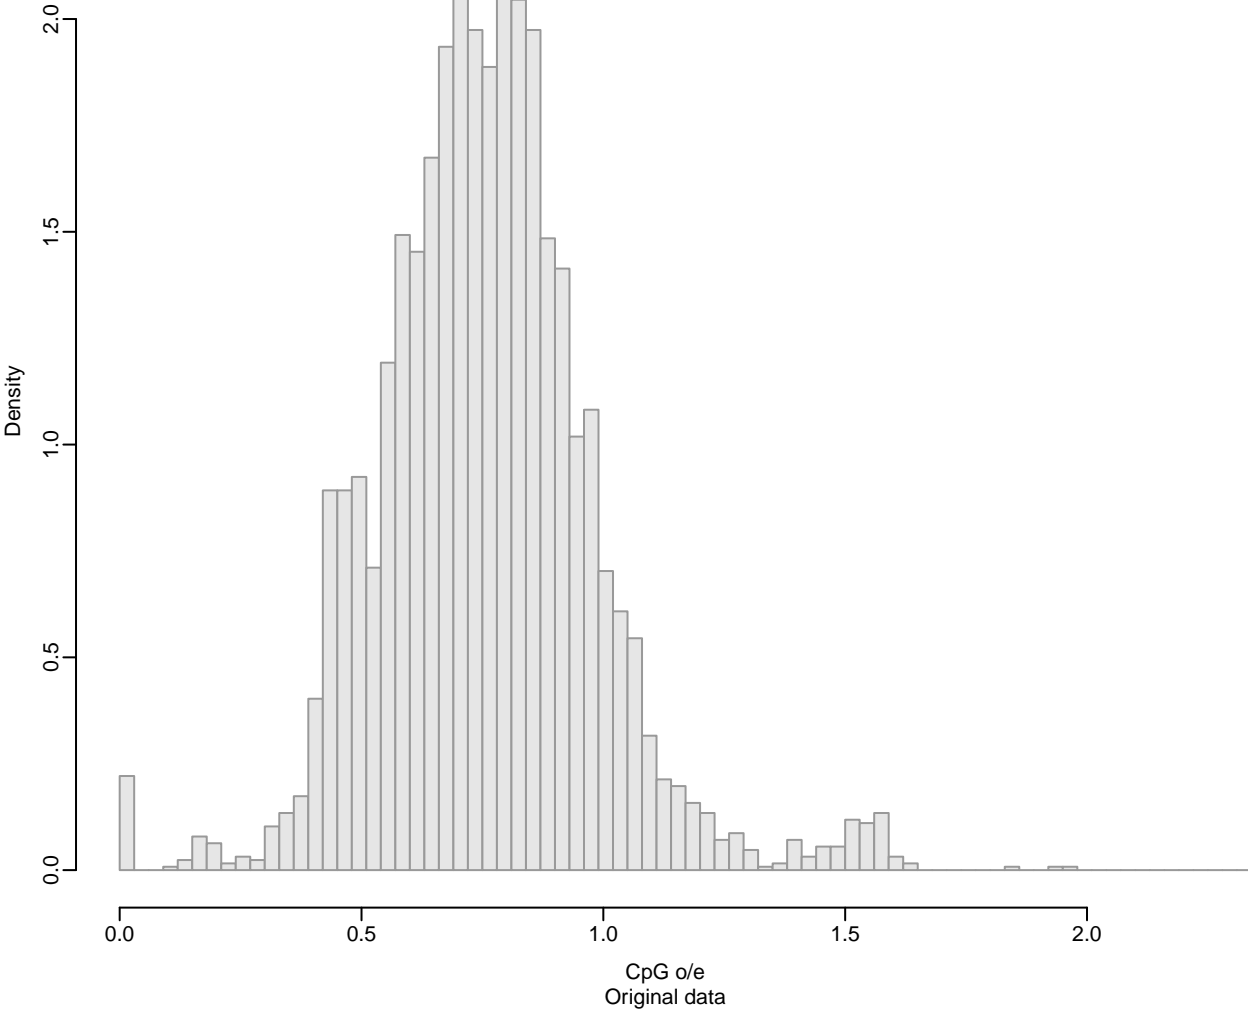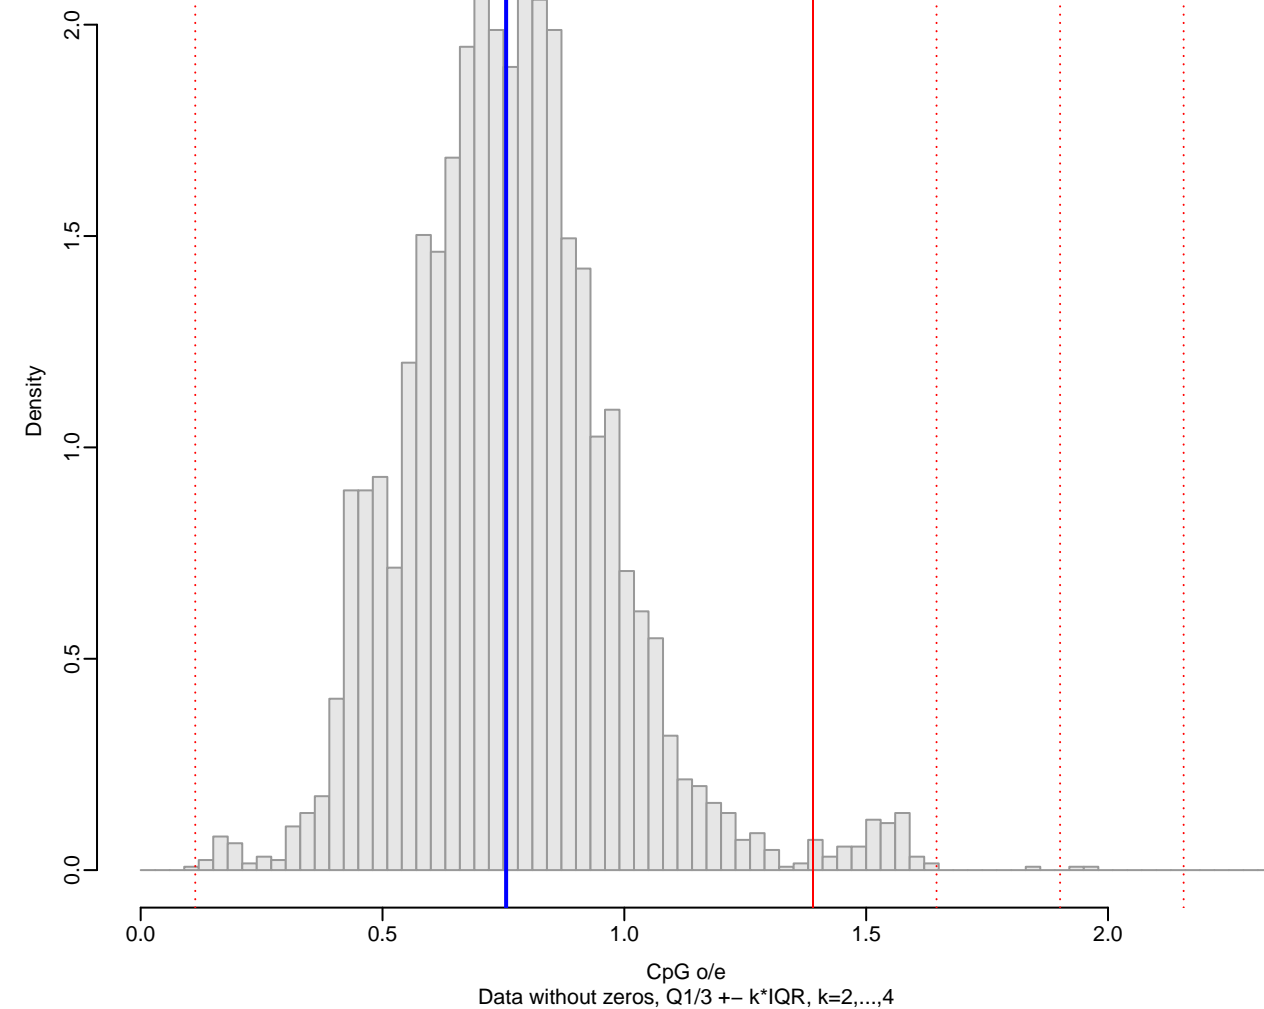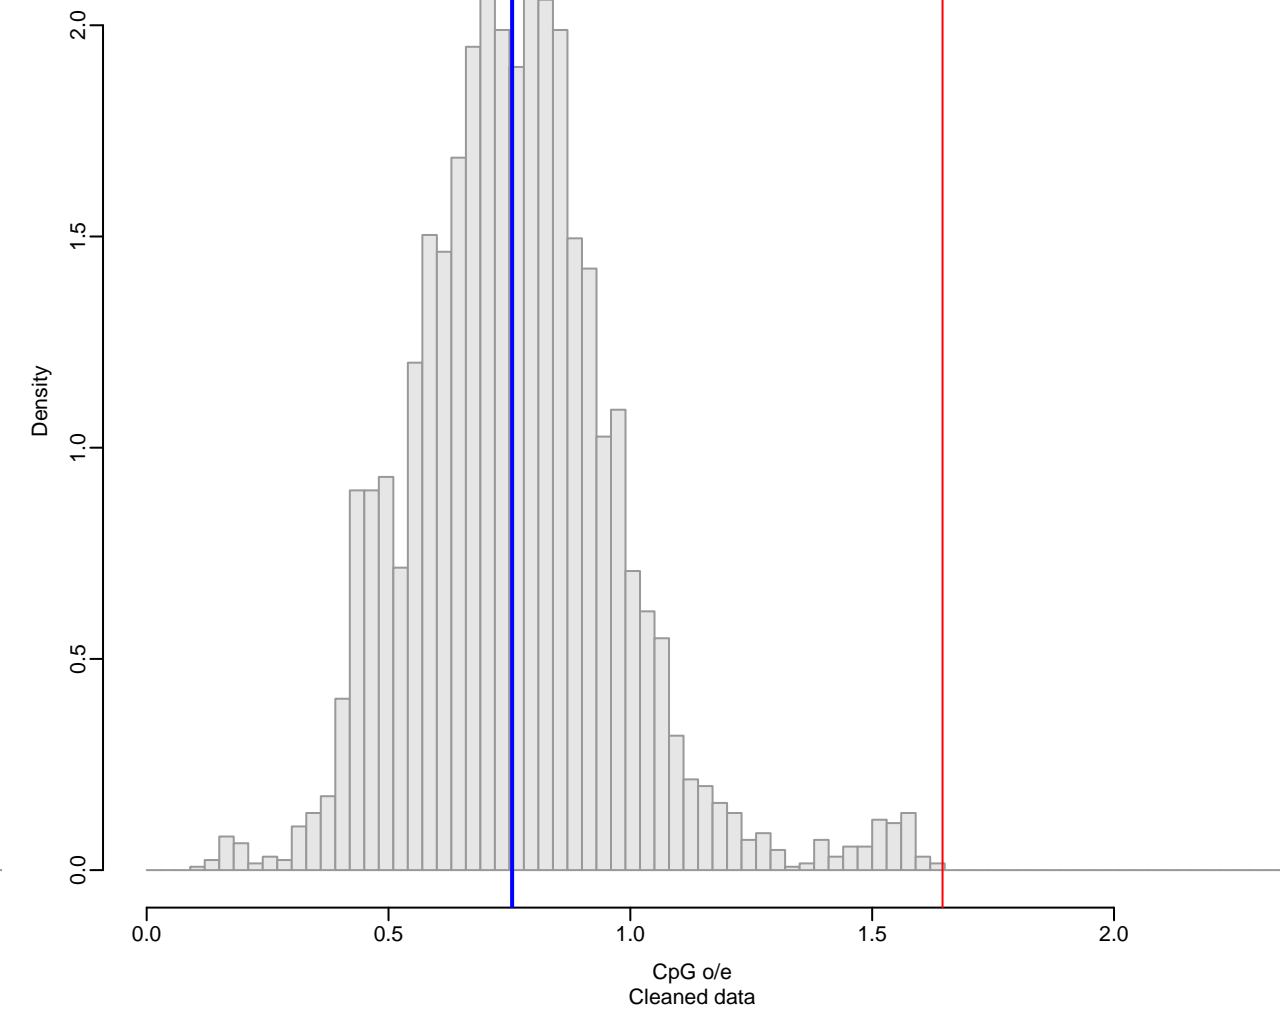

Apis\_mellifera

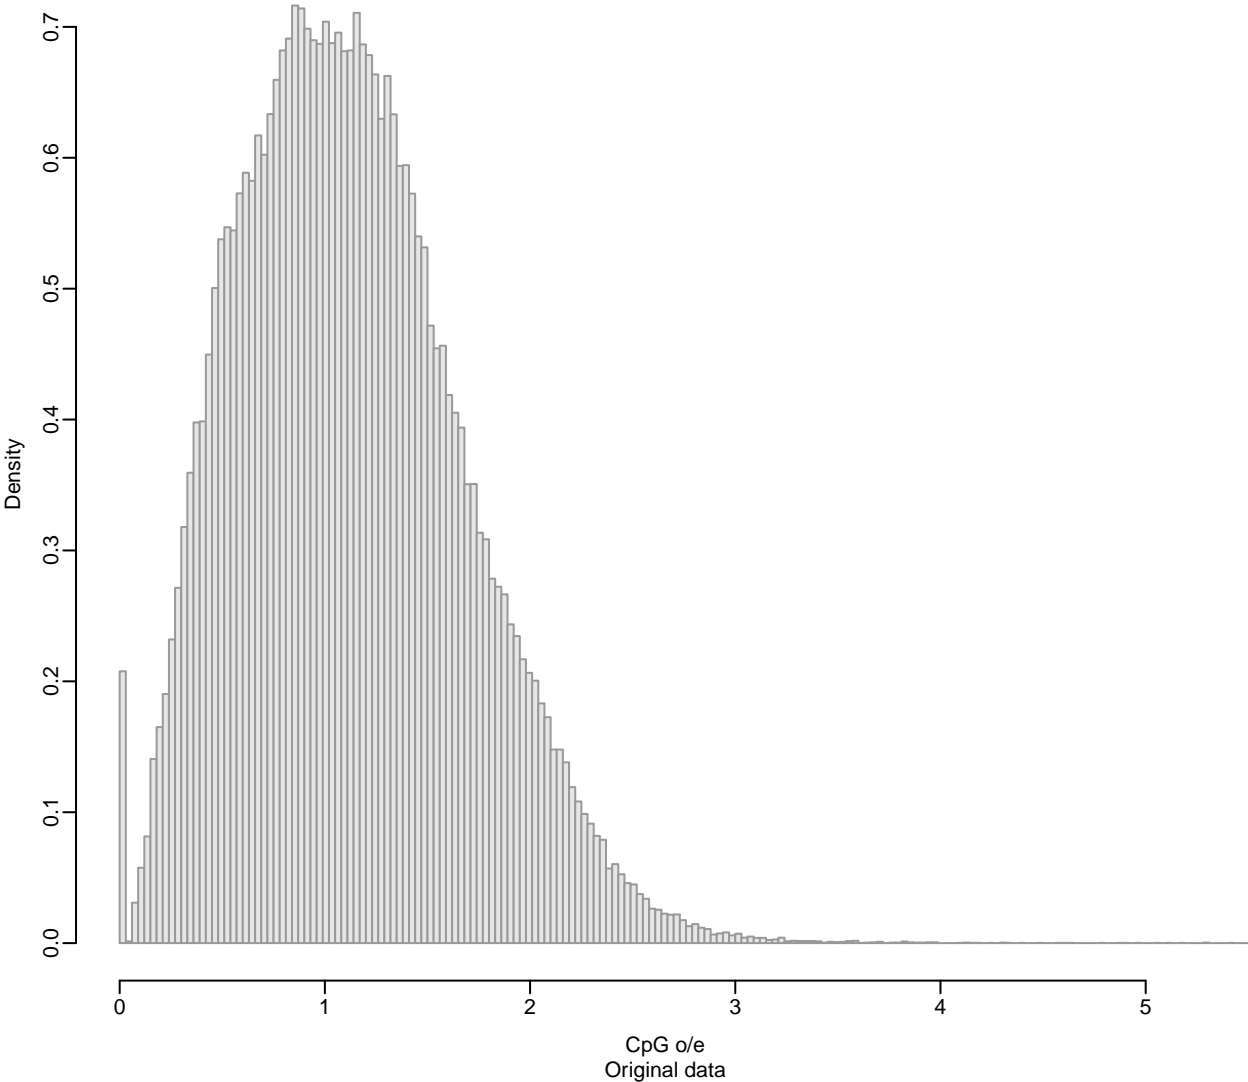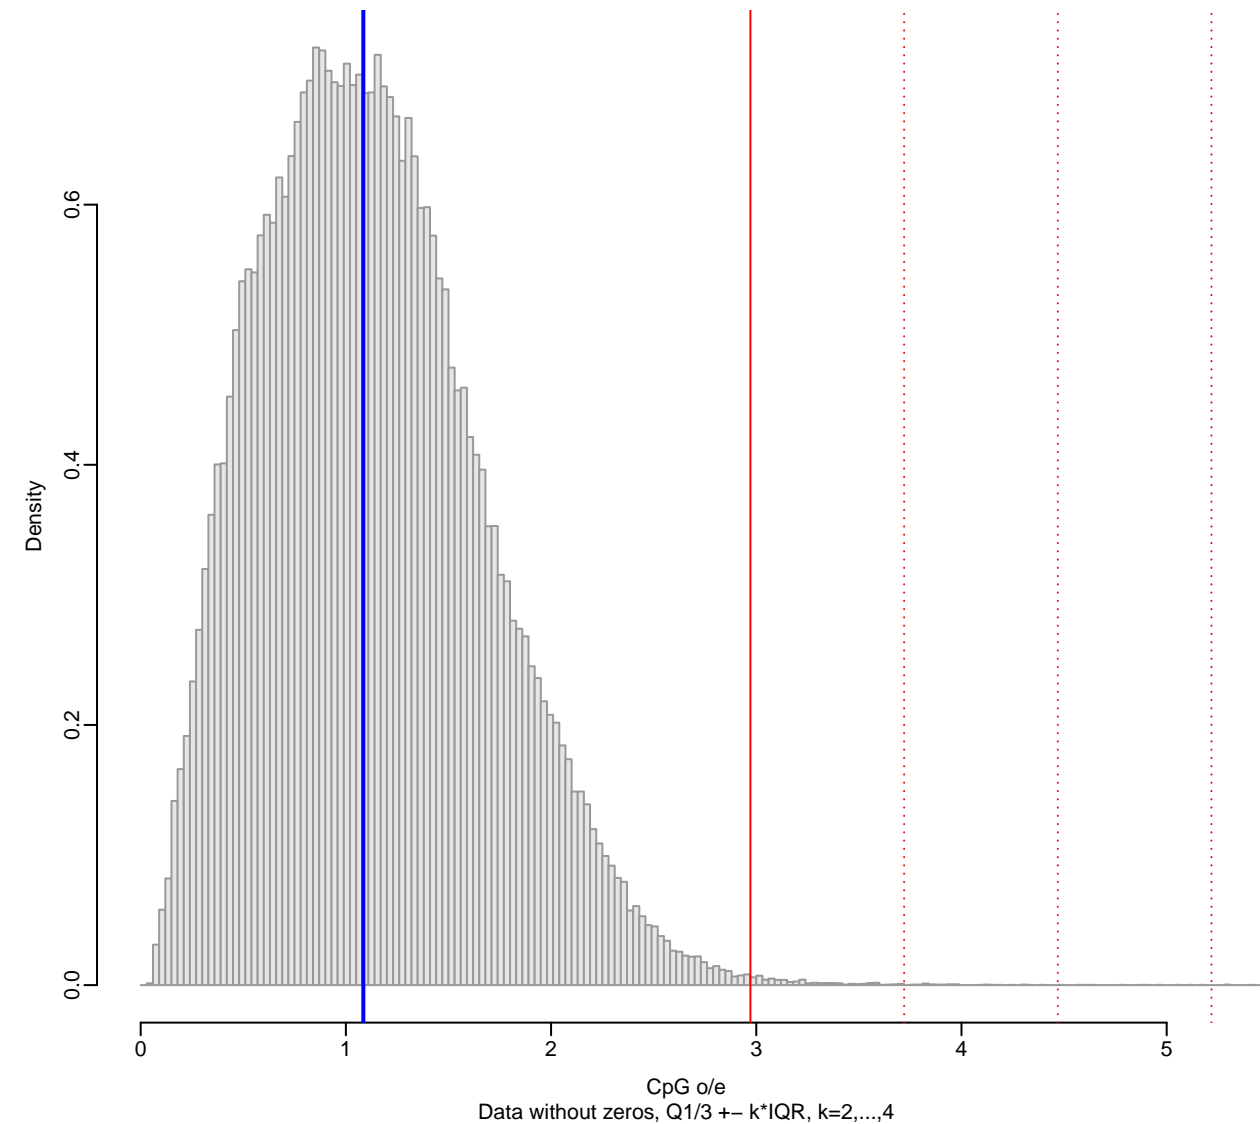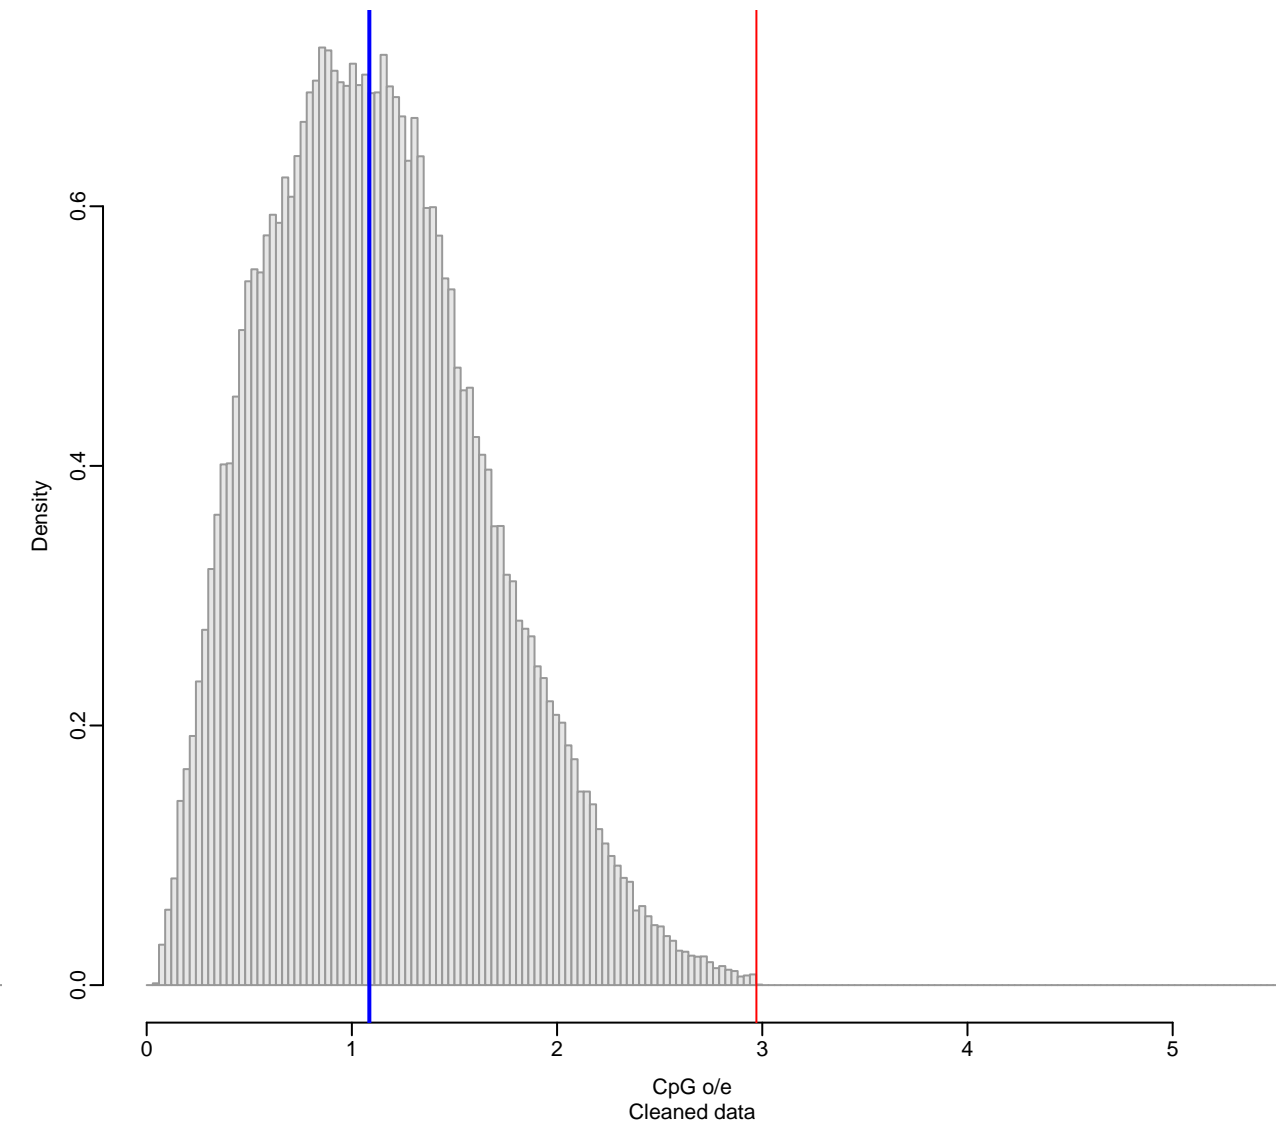

*Aplysia\_californica*

Density

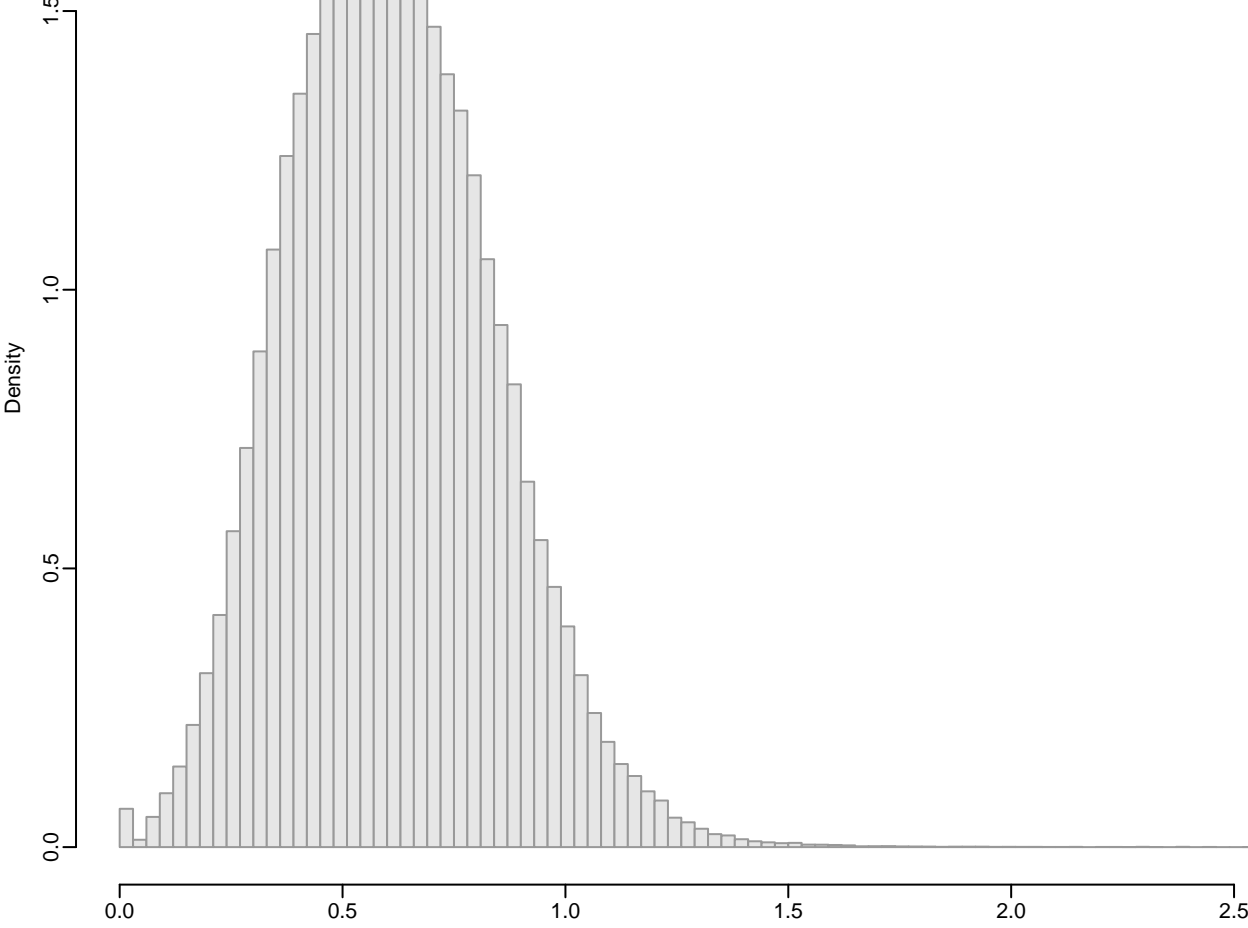

Density

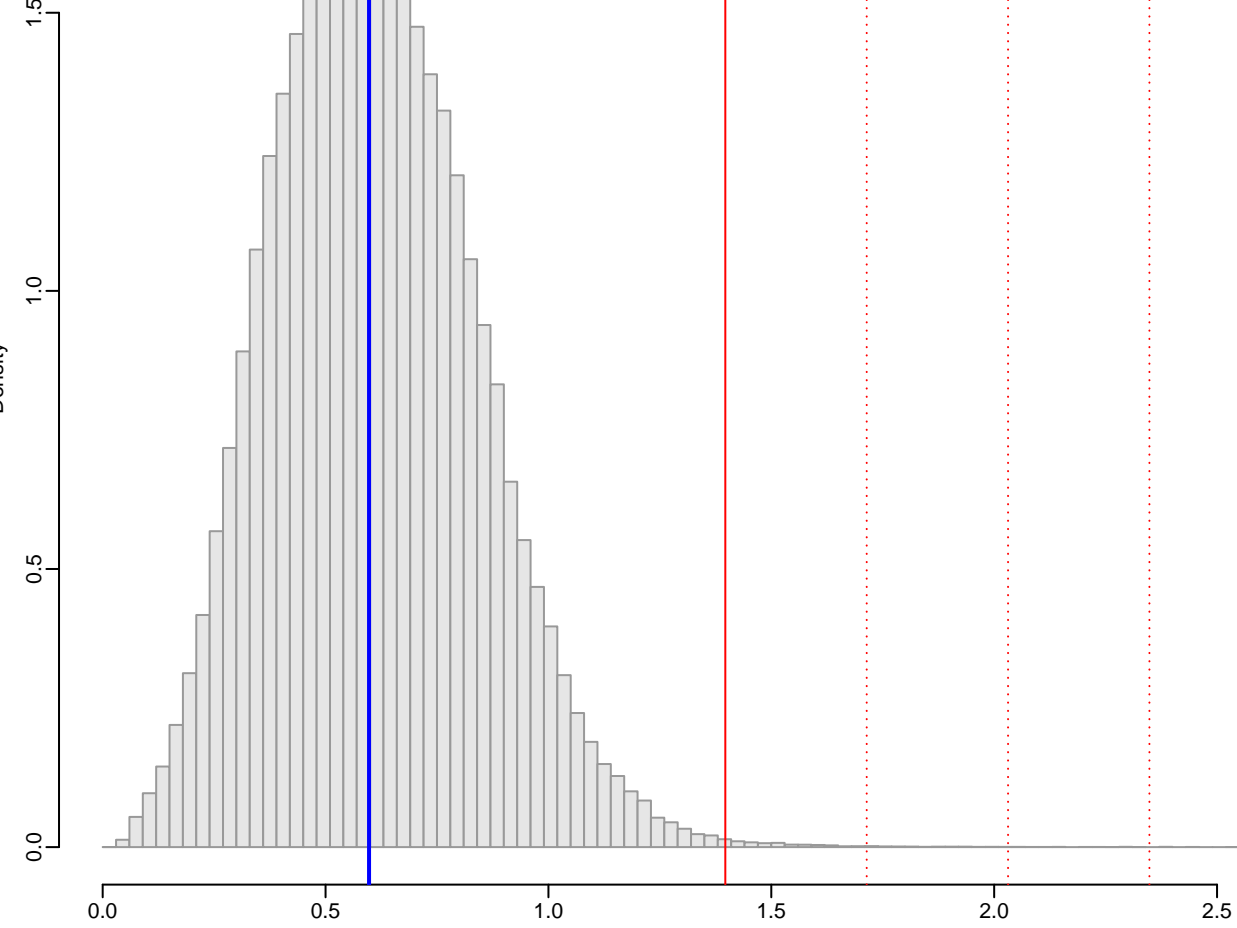

Density

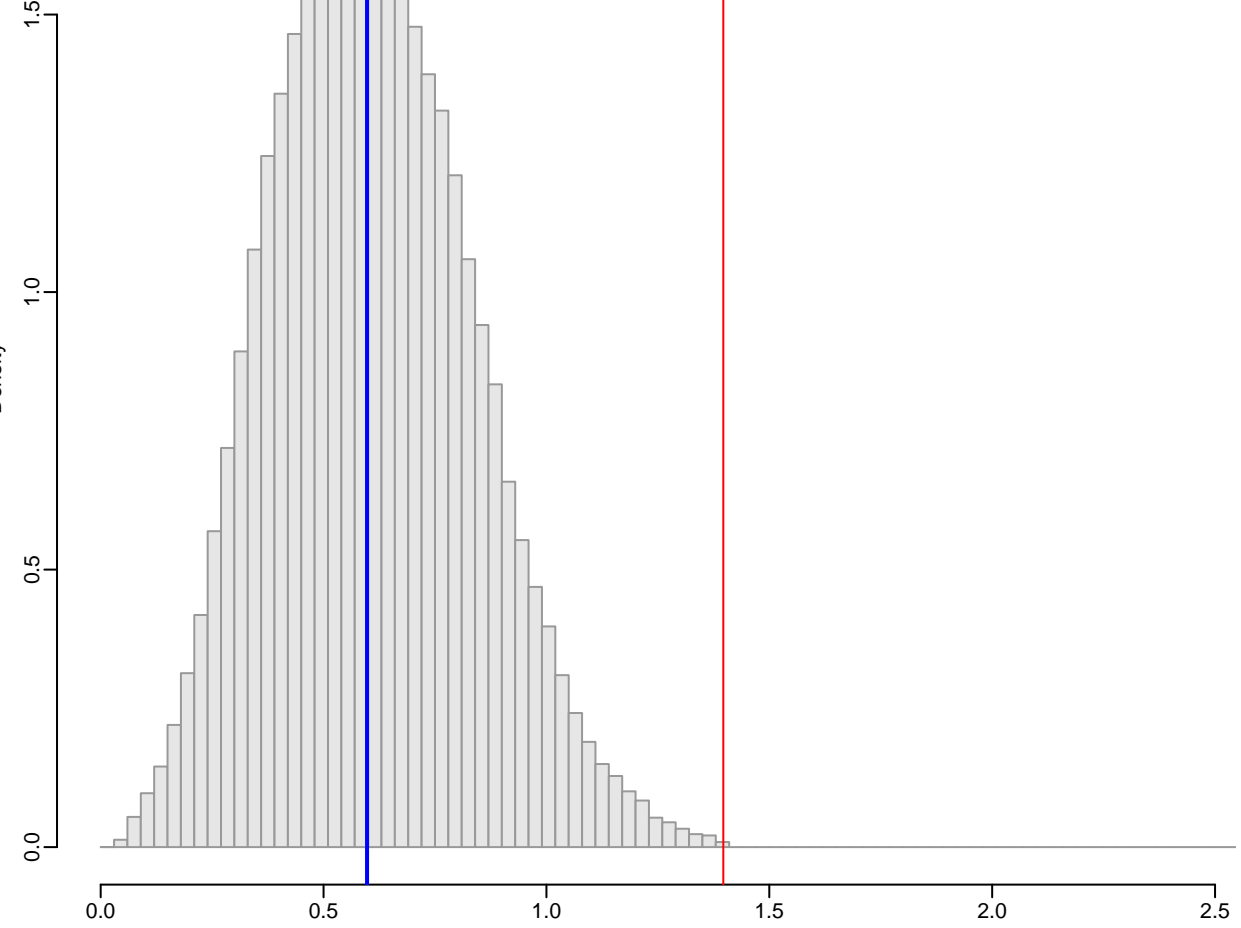

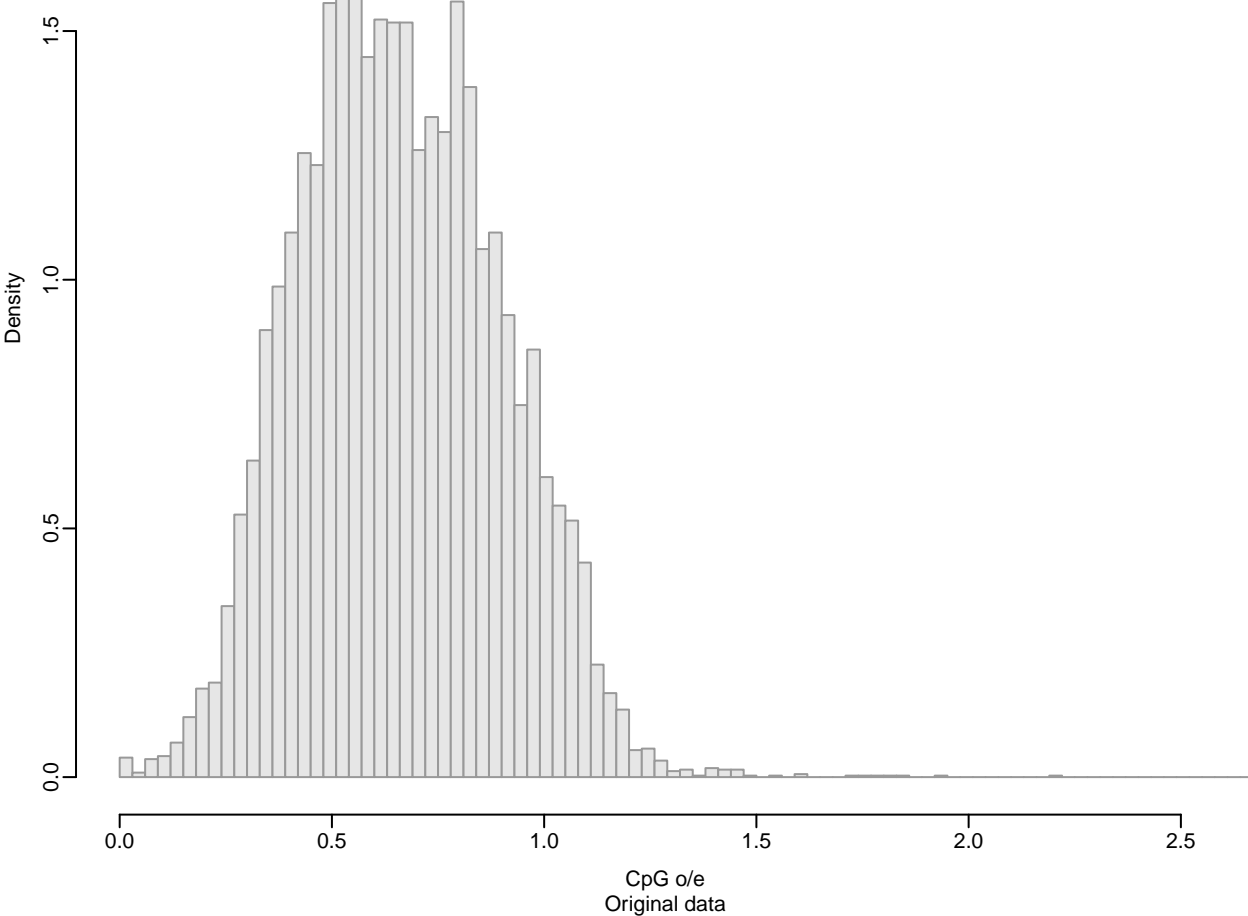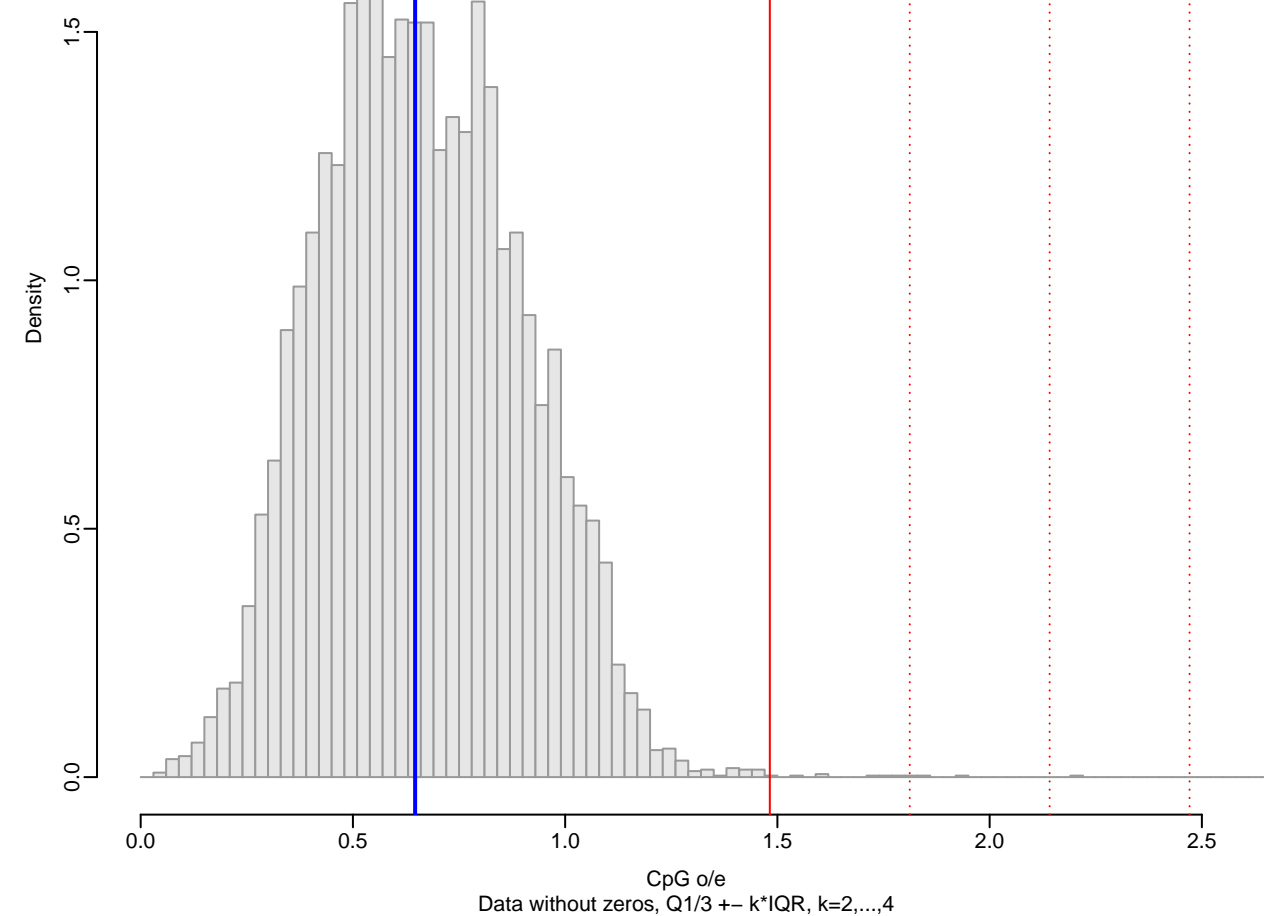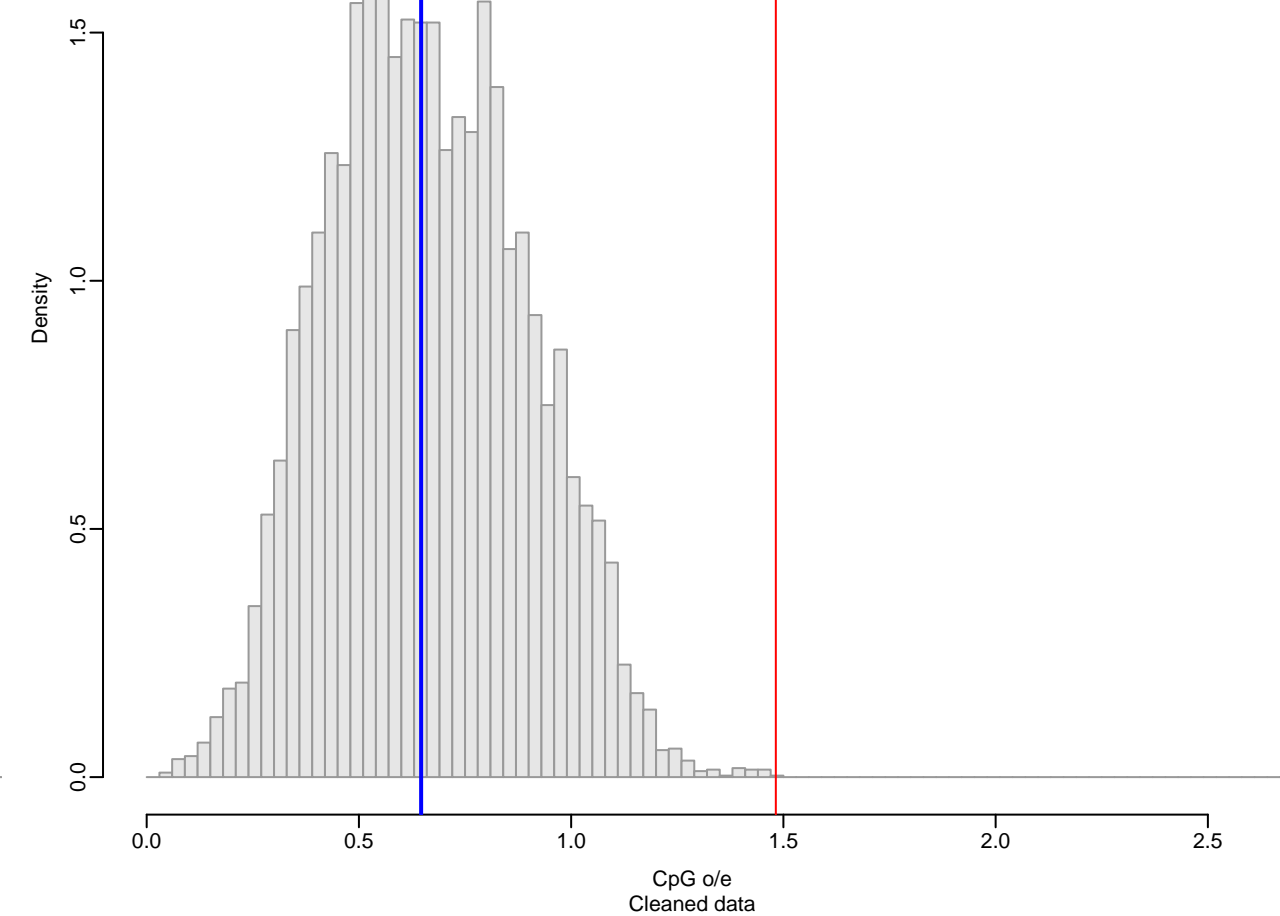

Apostichopus\_japonicus

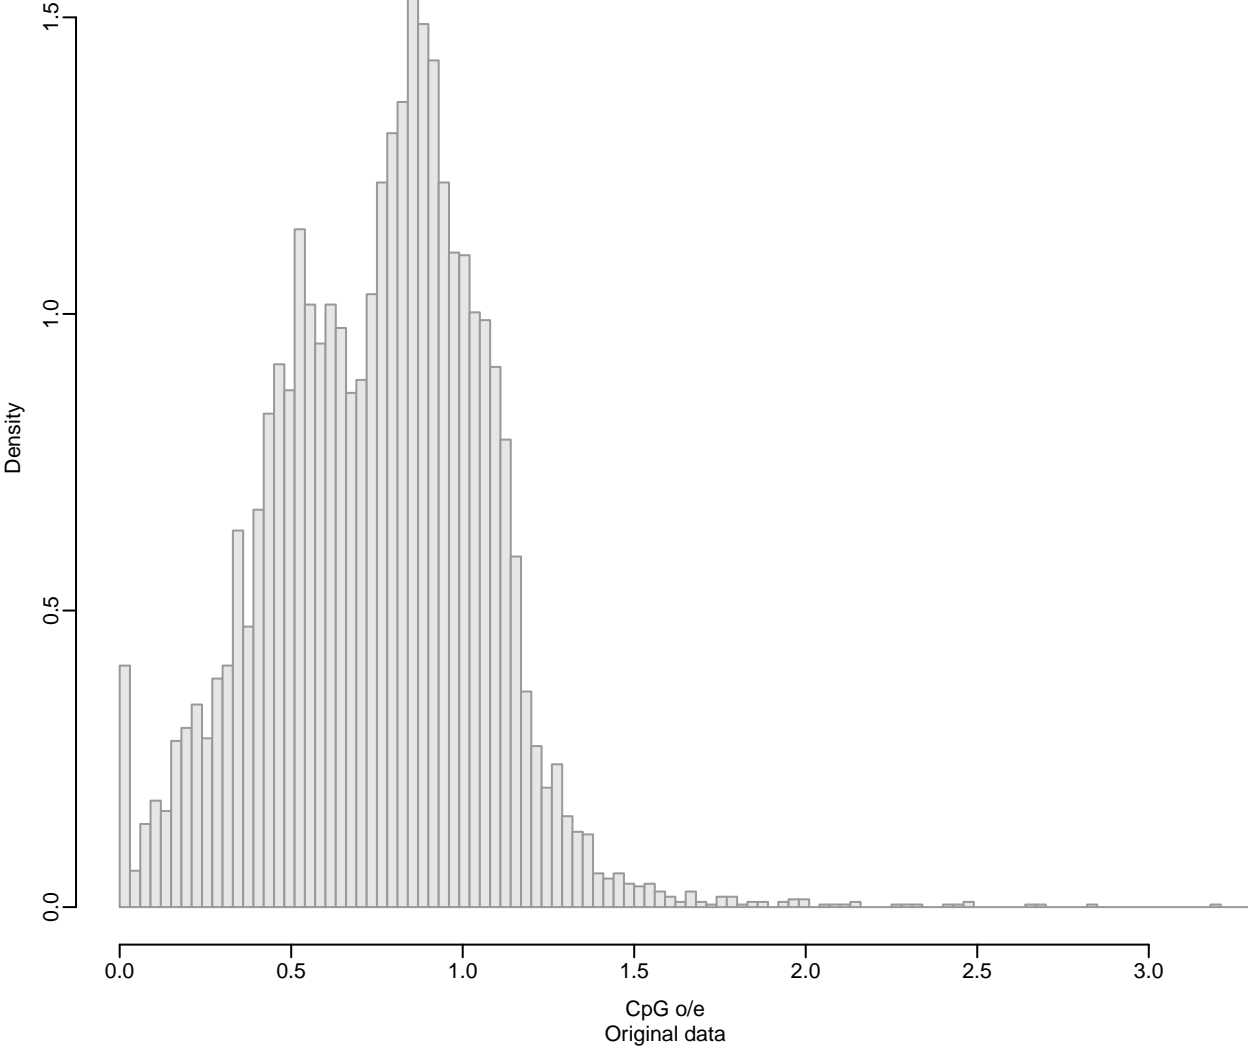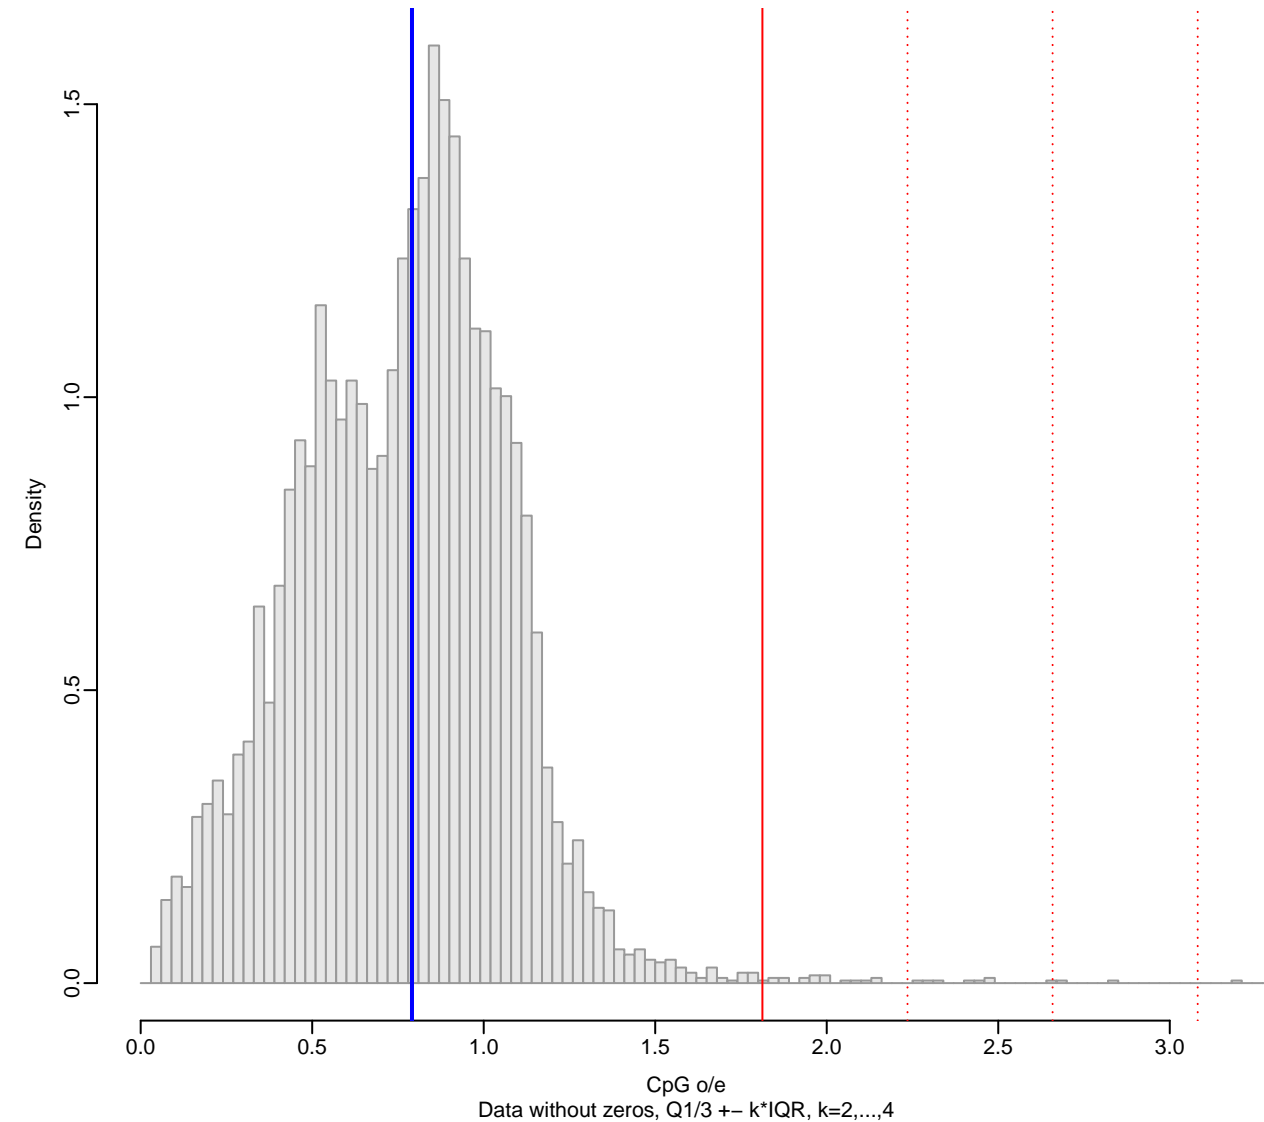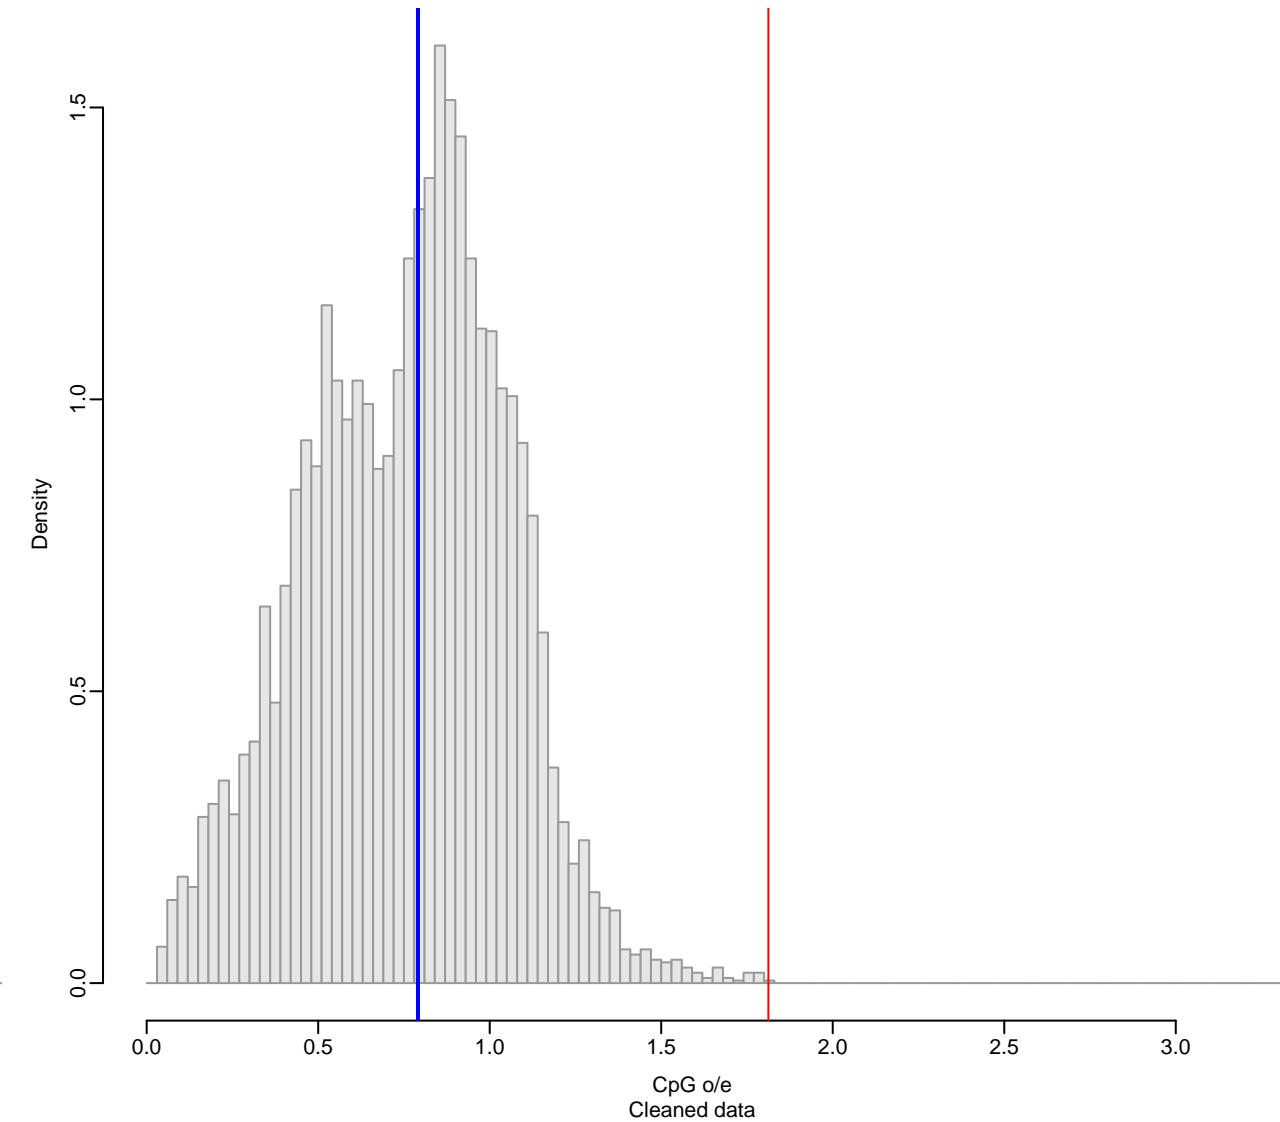

Arabidopsis\_thaliana

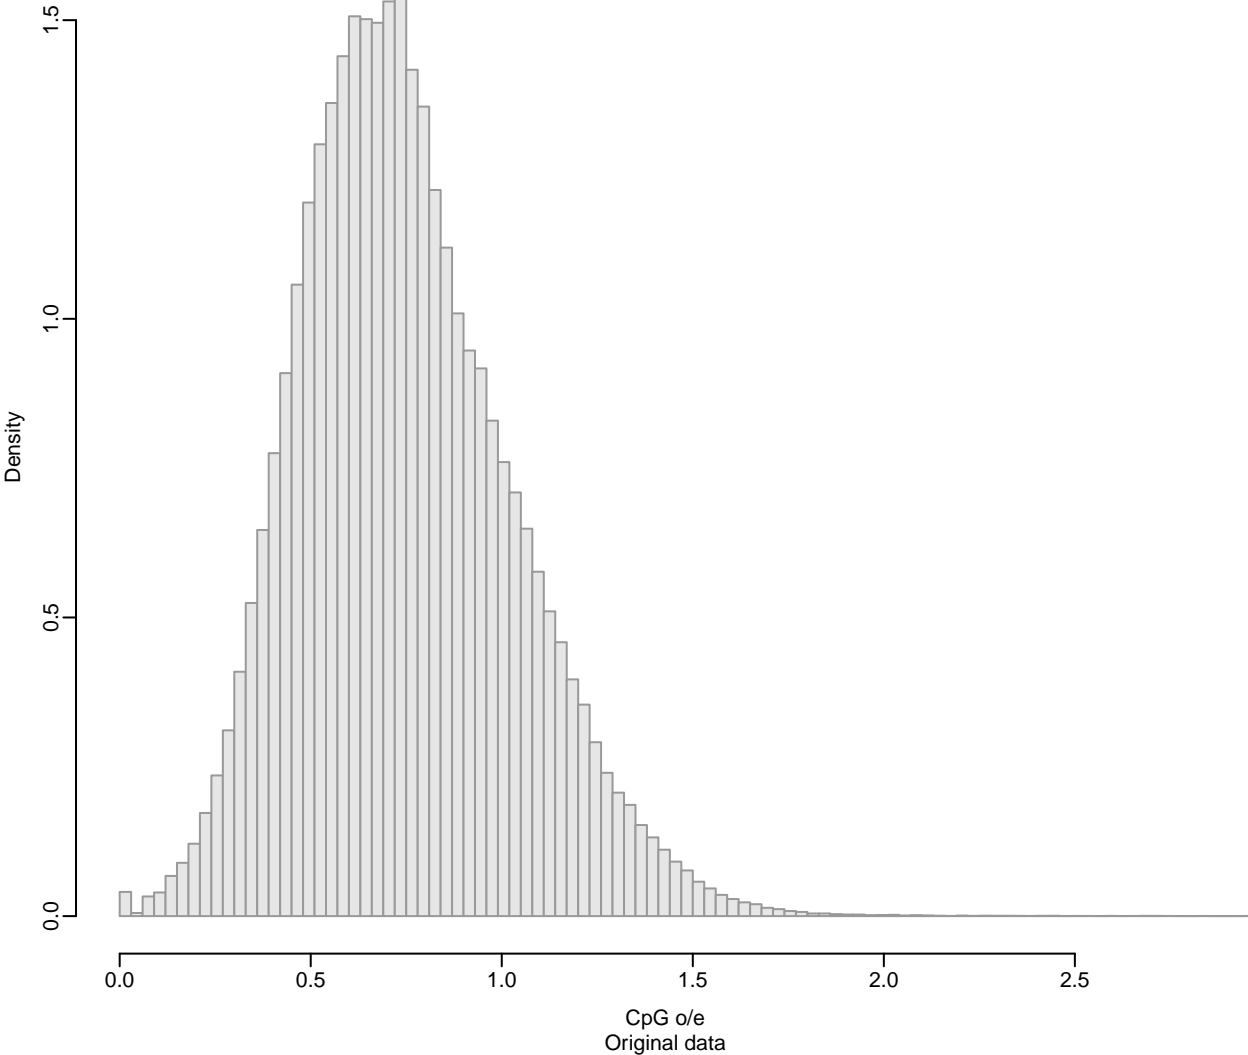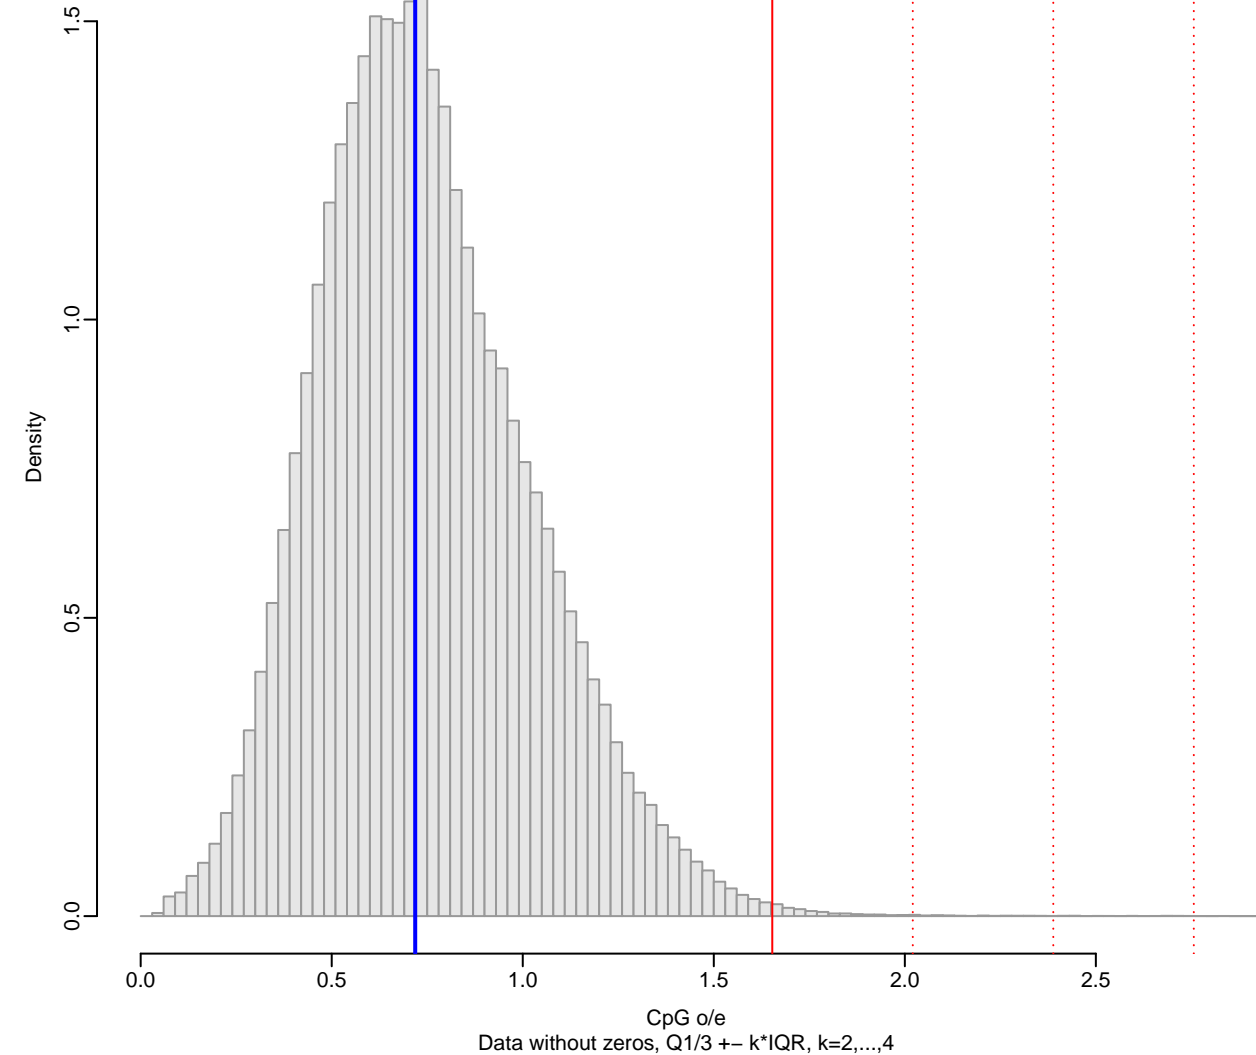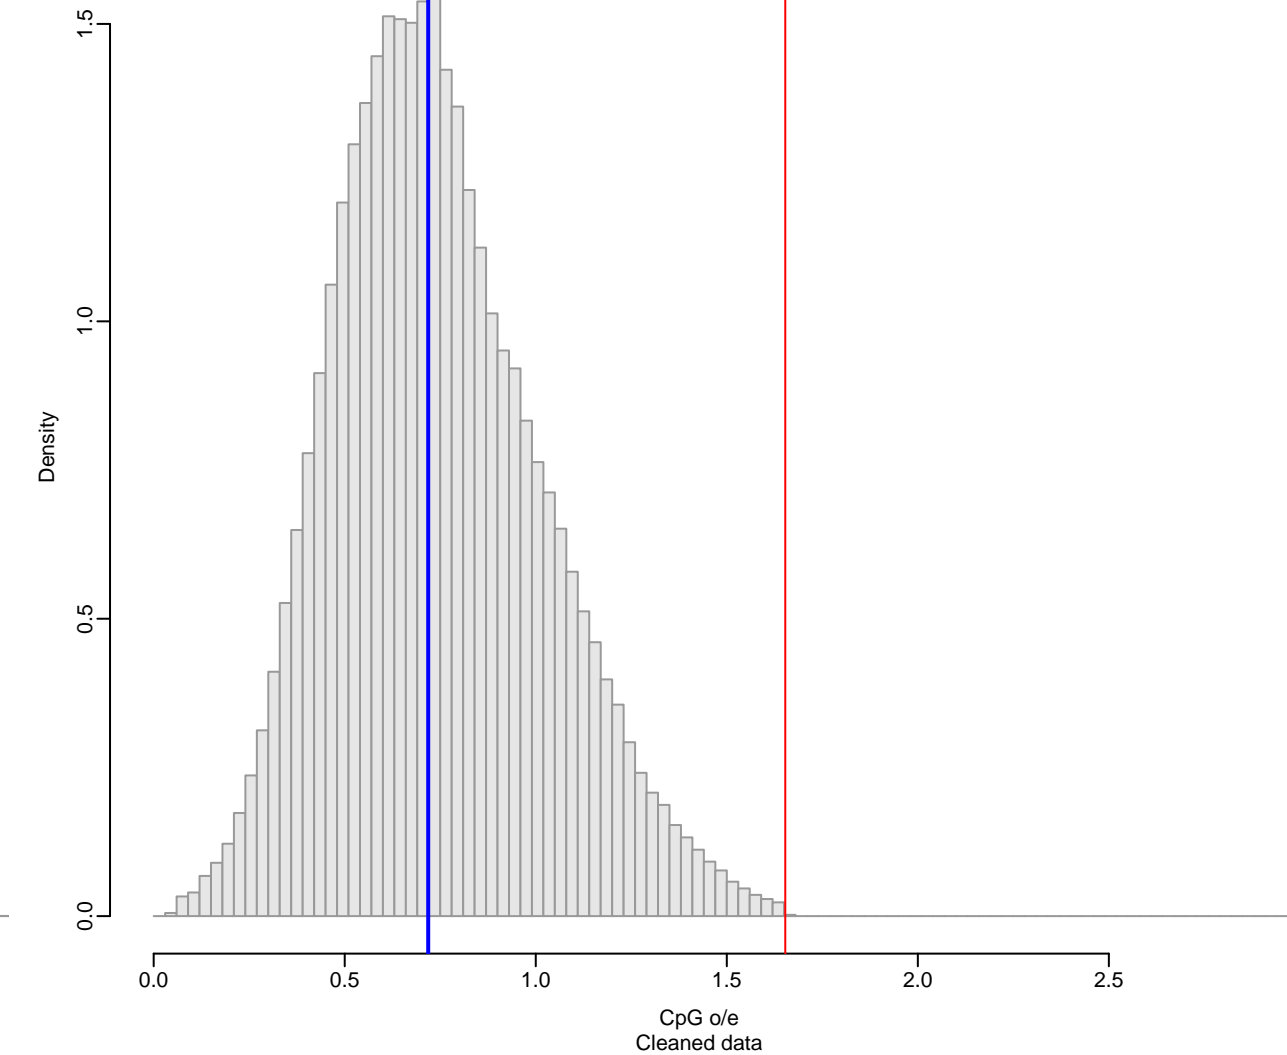

Arachis\_hypogaea

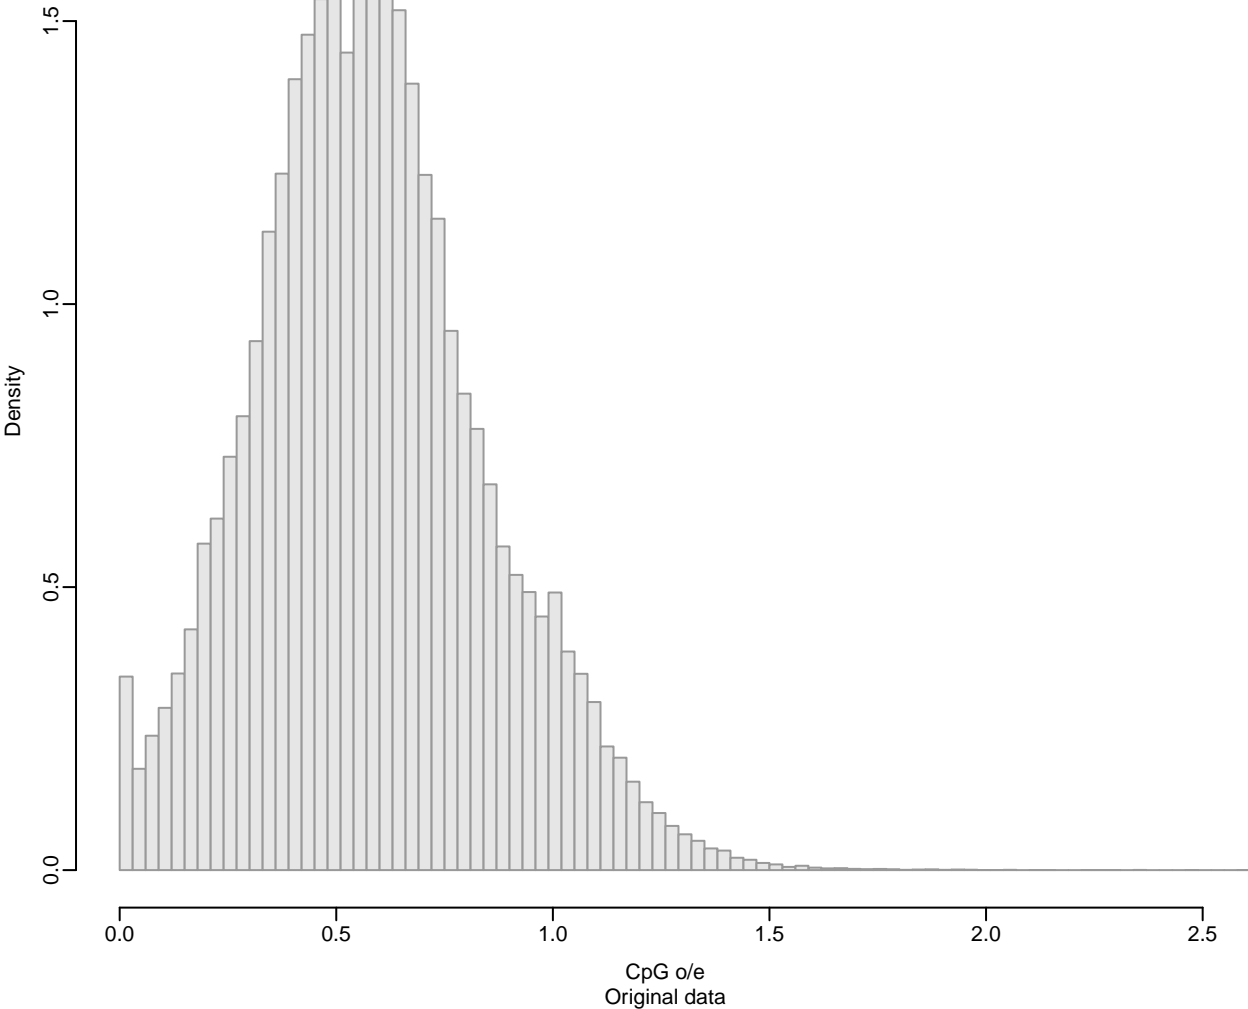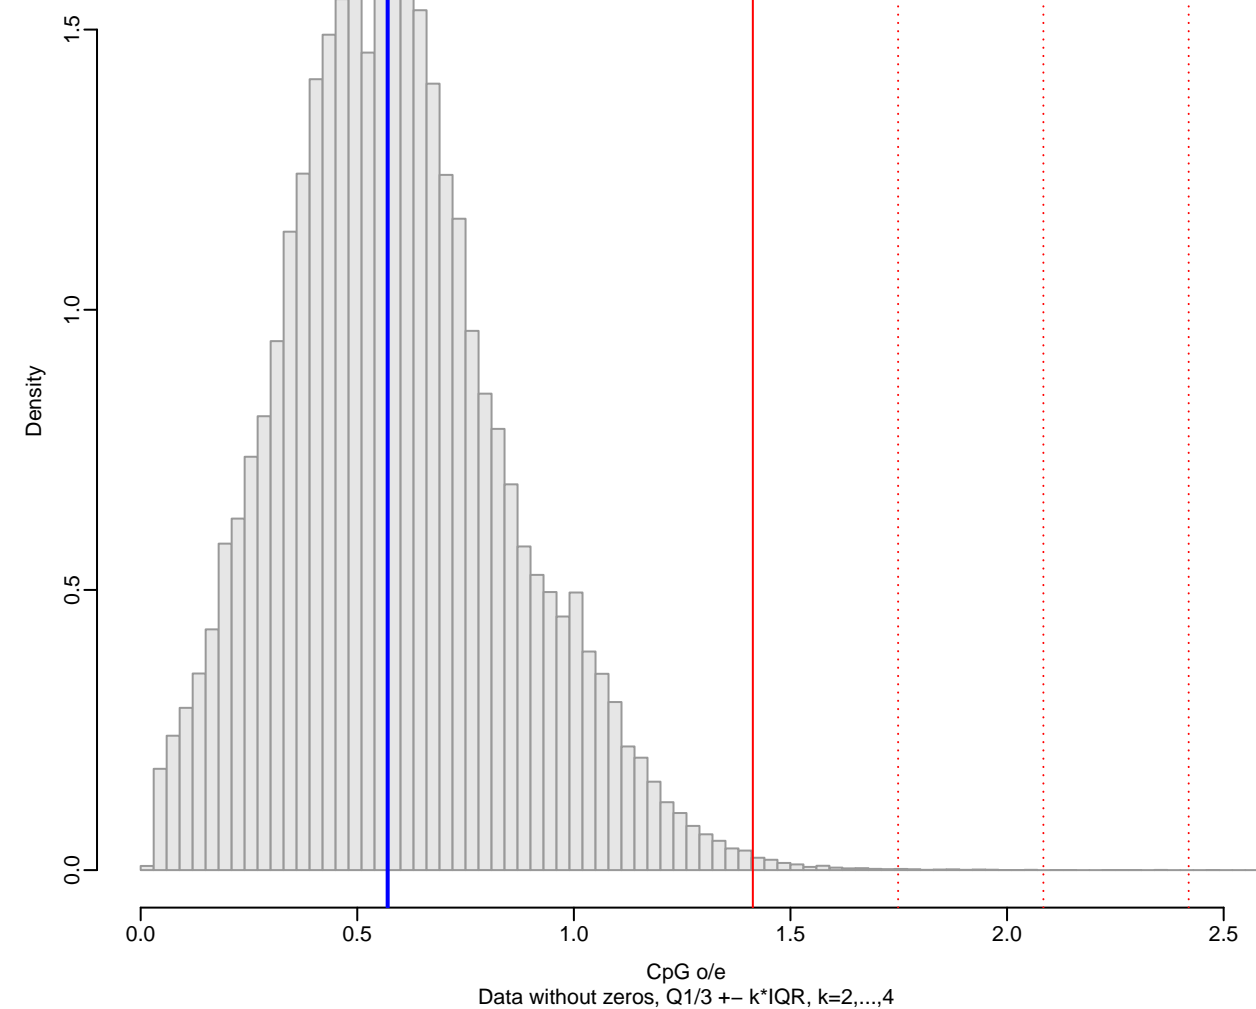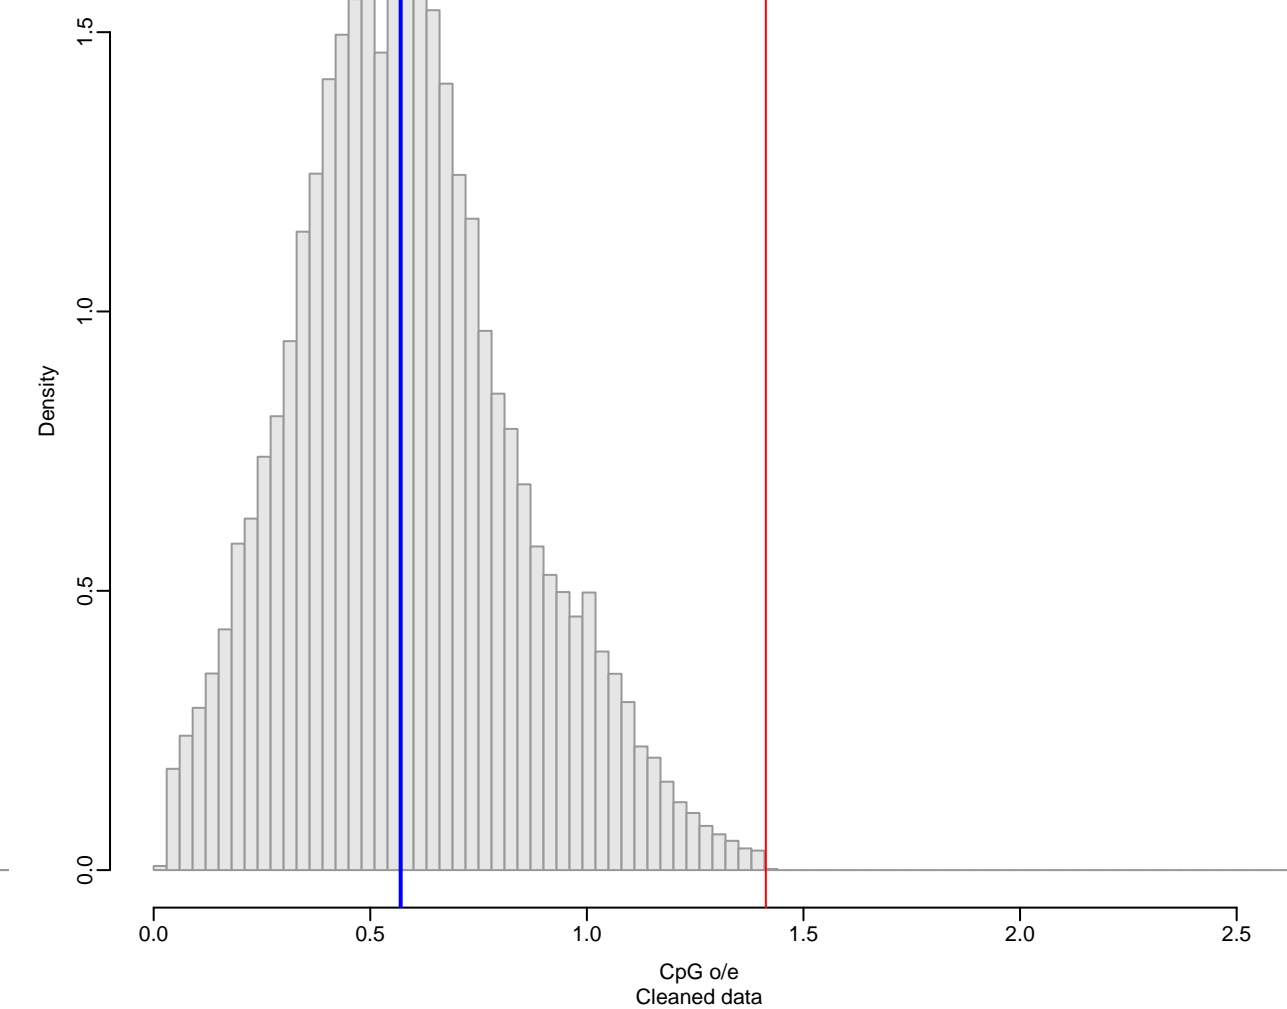



Archispirostreptus\_gigas

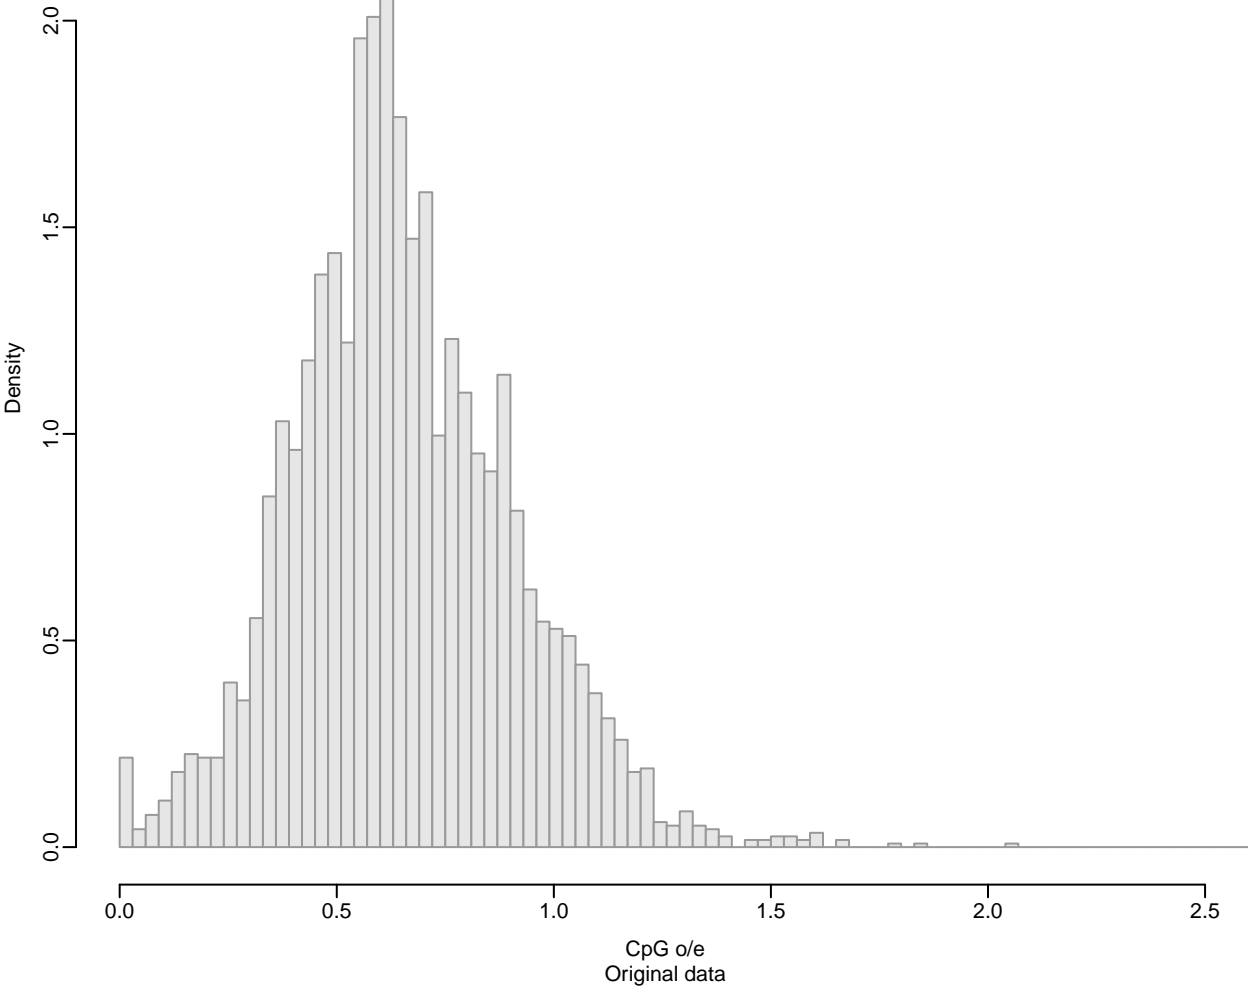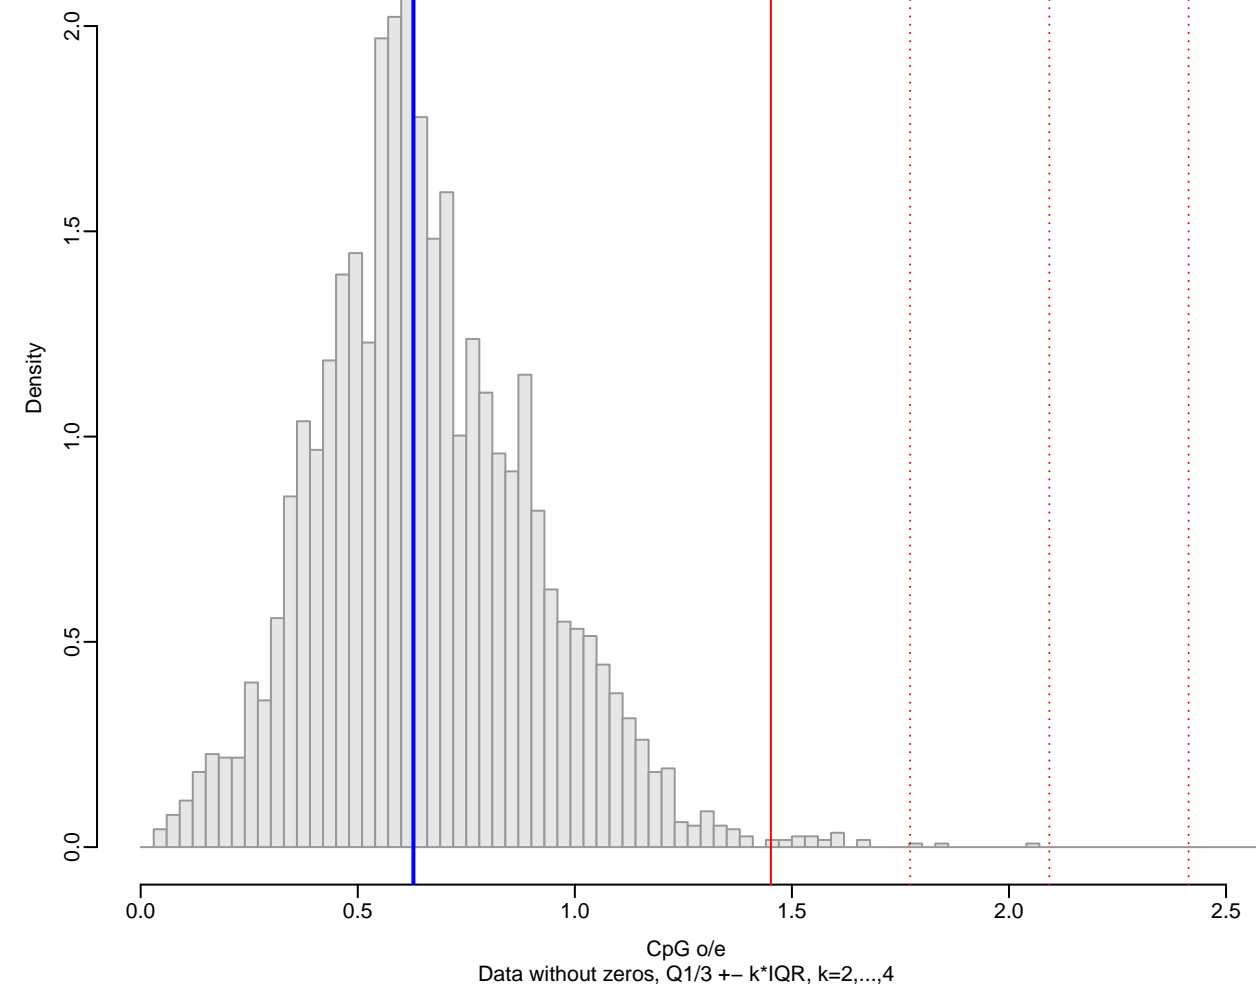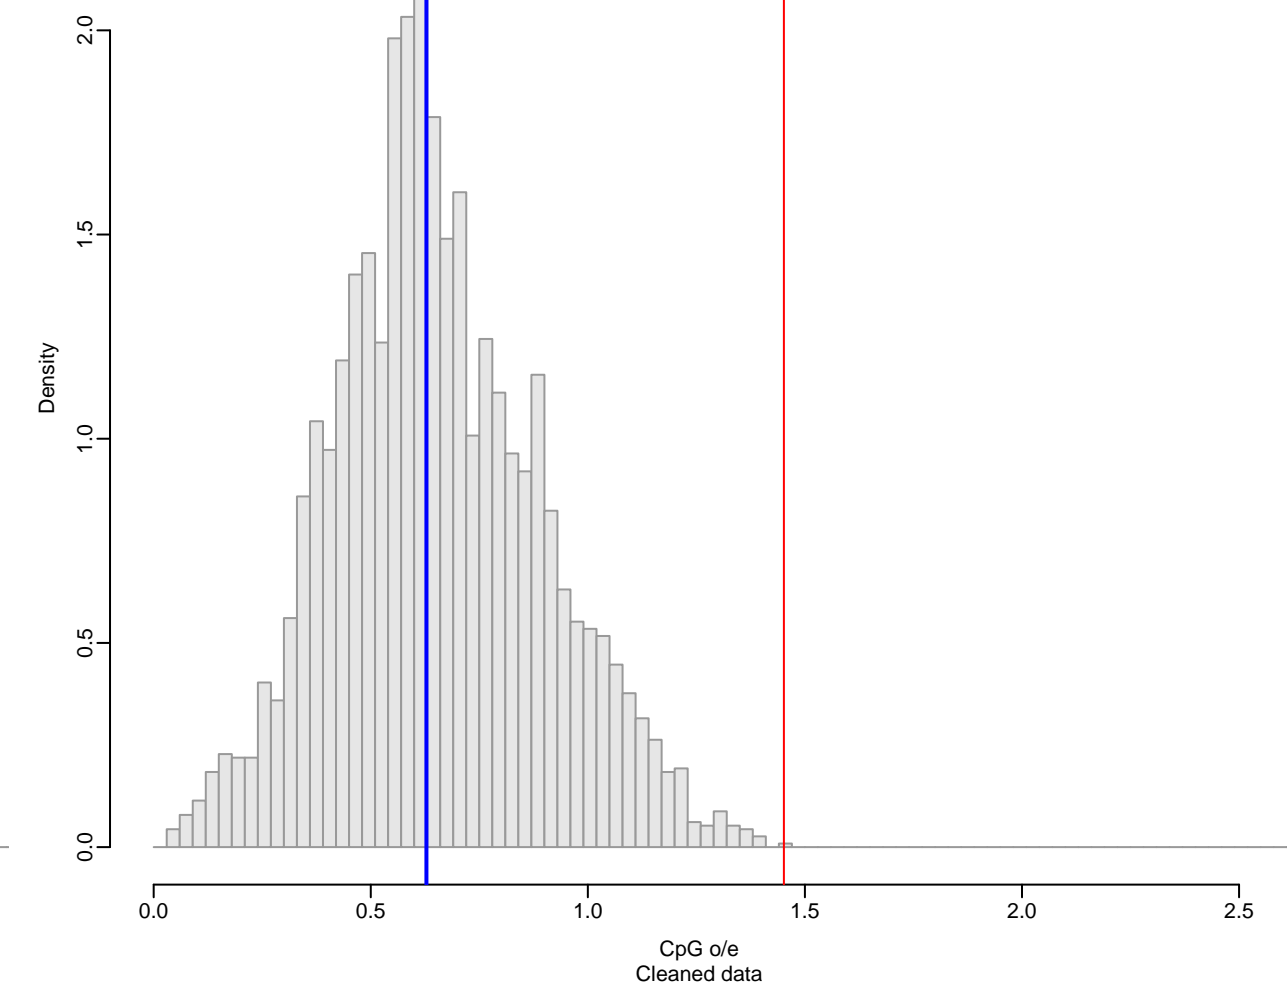

## Arenicola\_marina

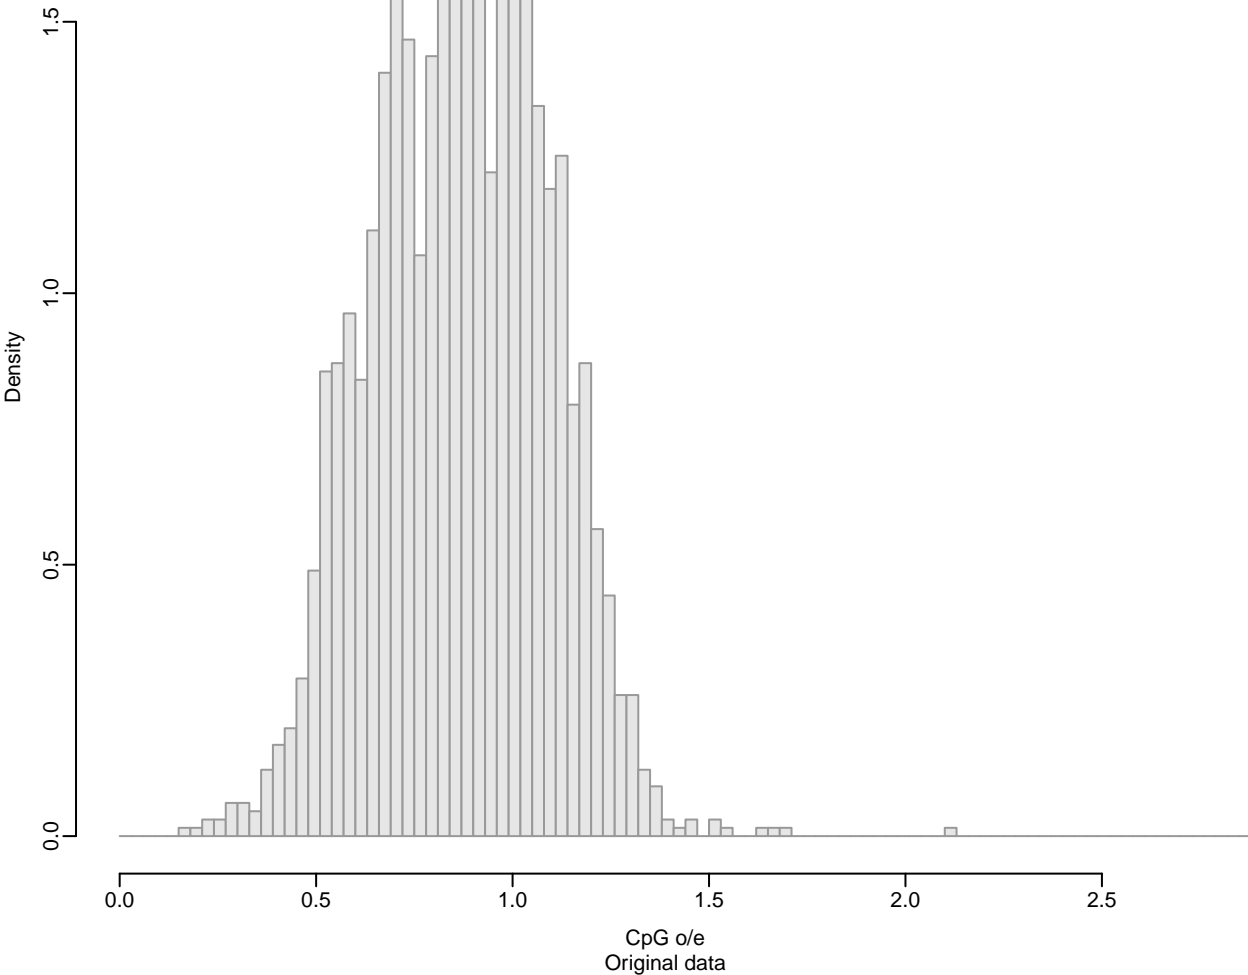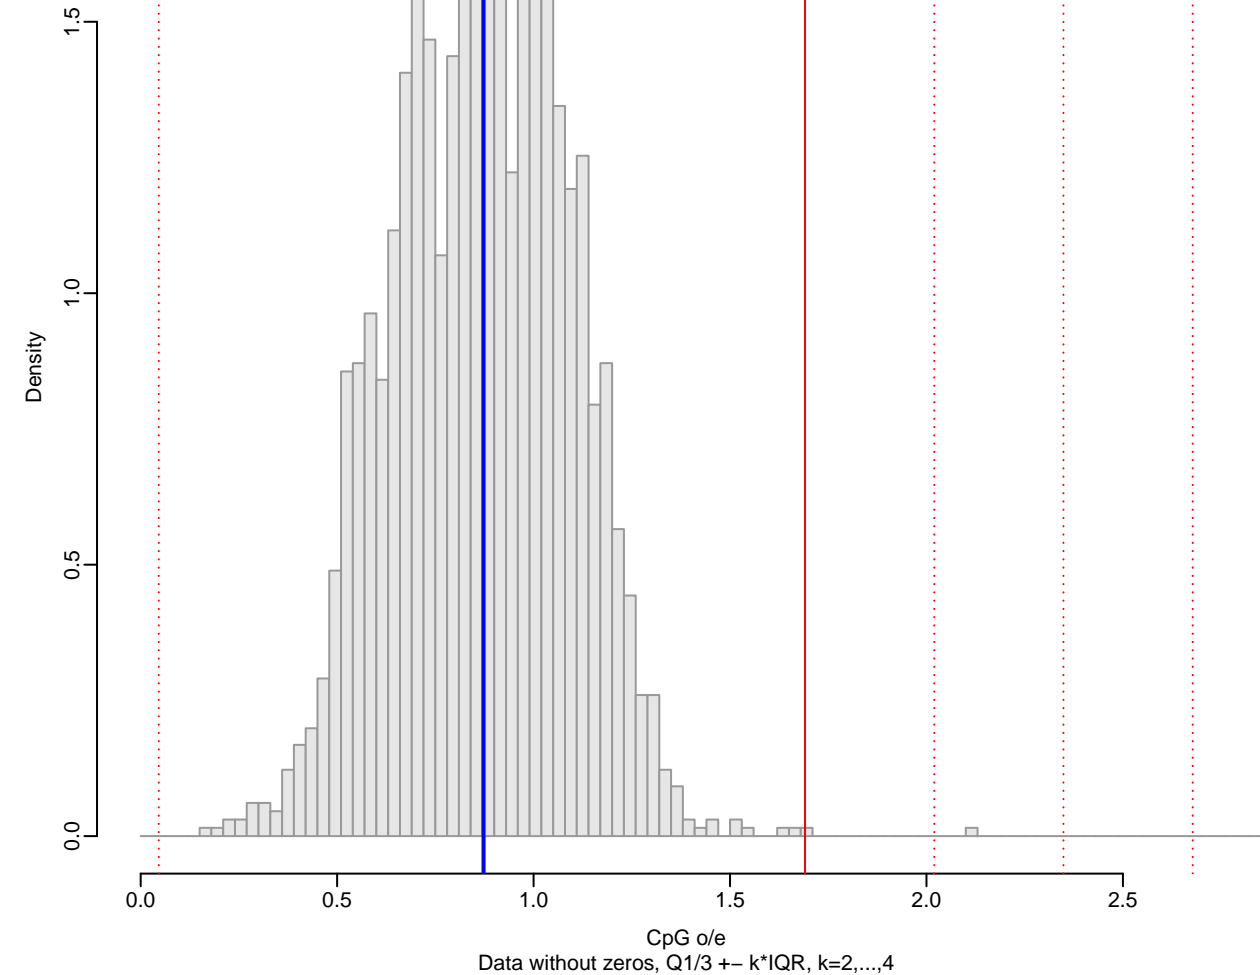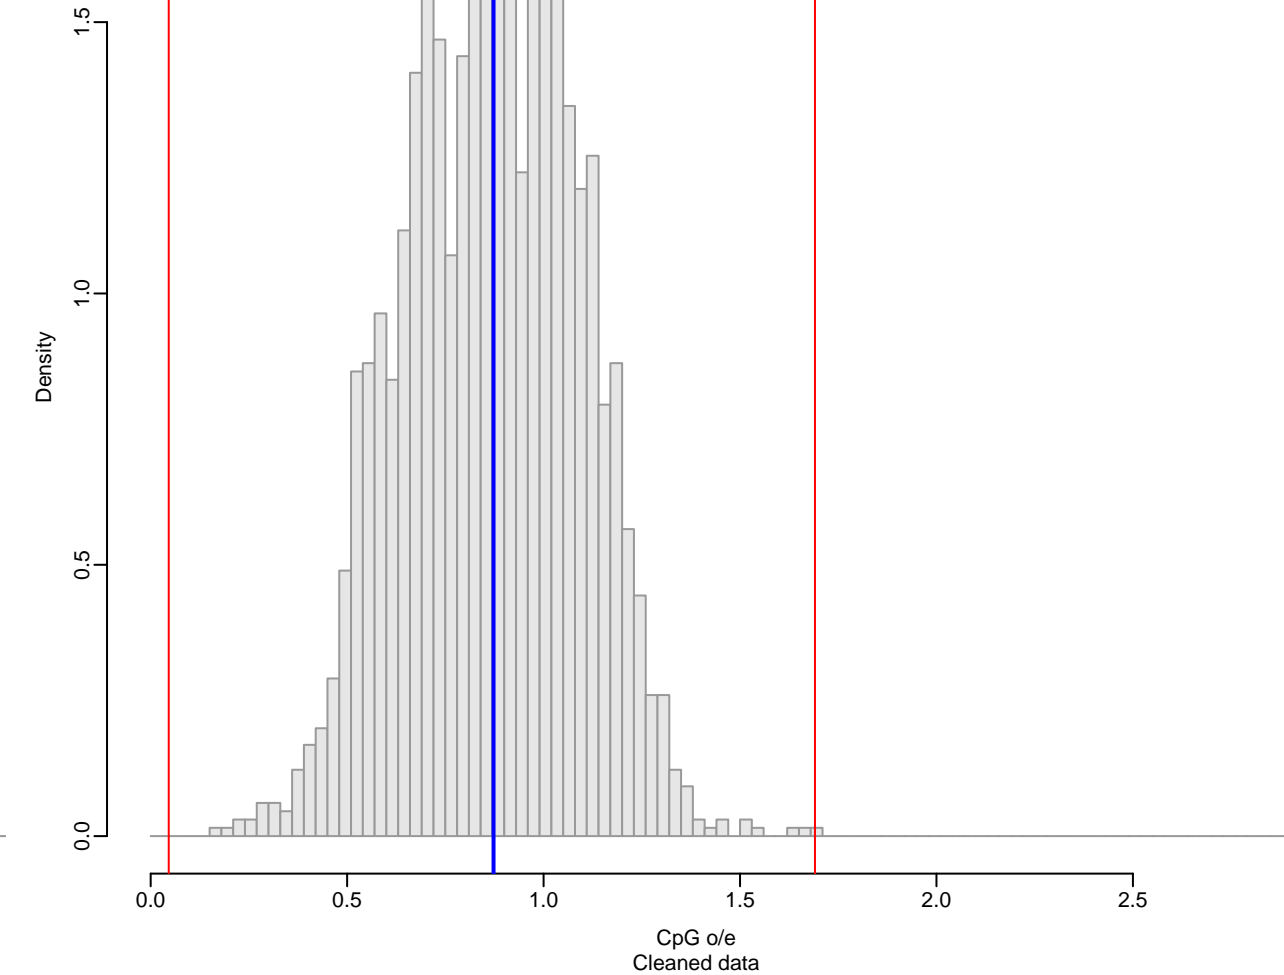

# Argopecten\_irradians

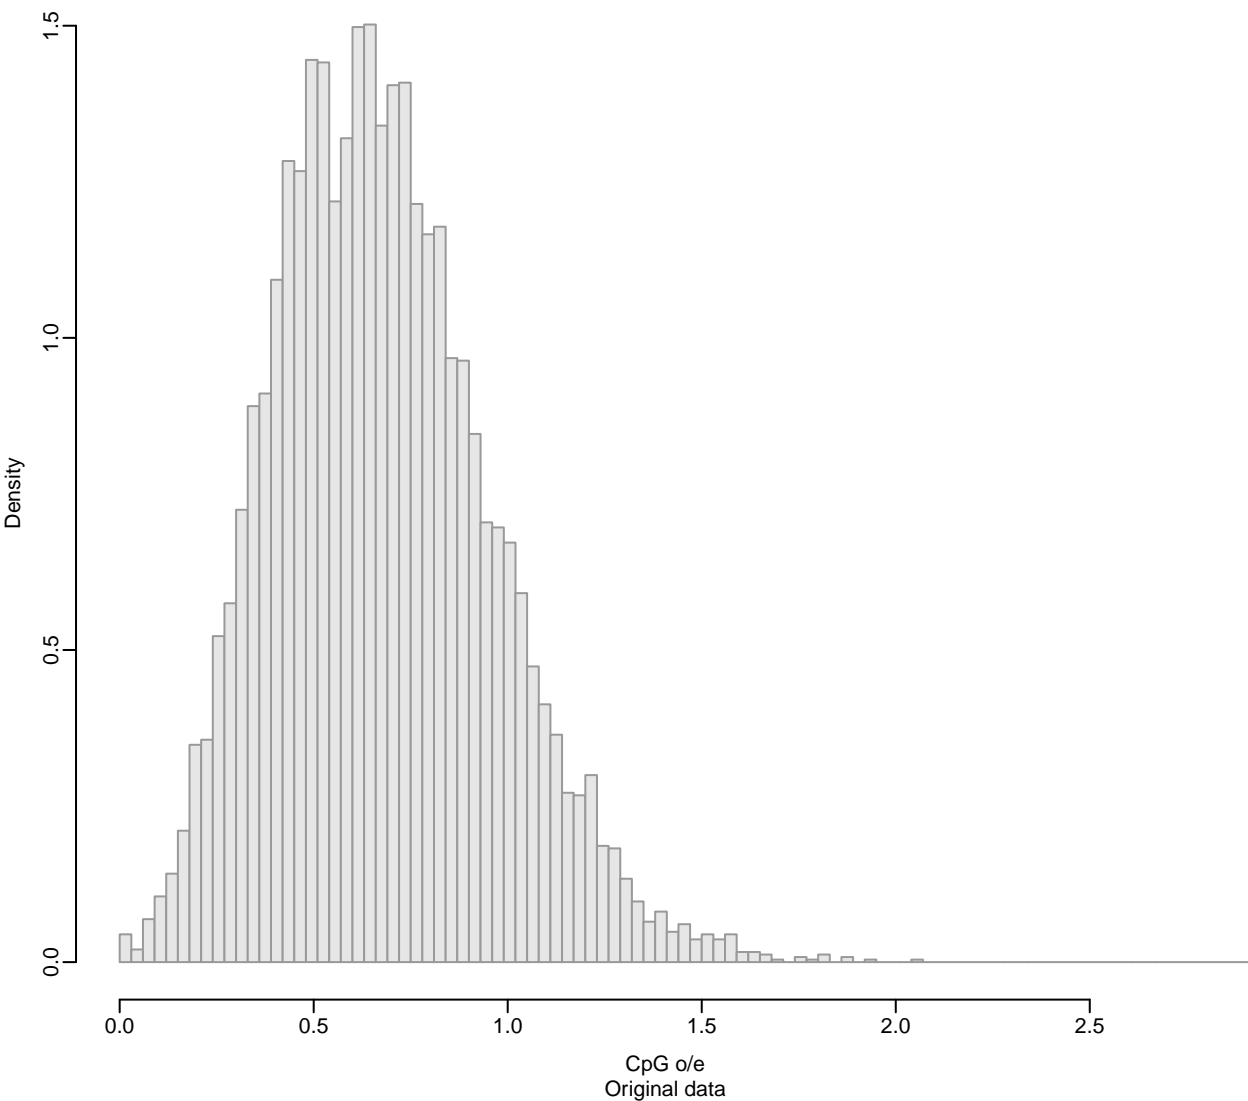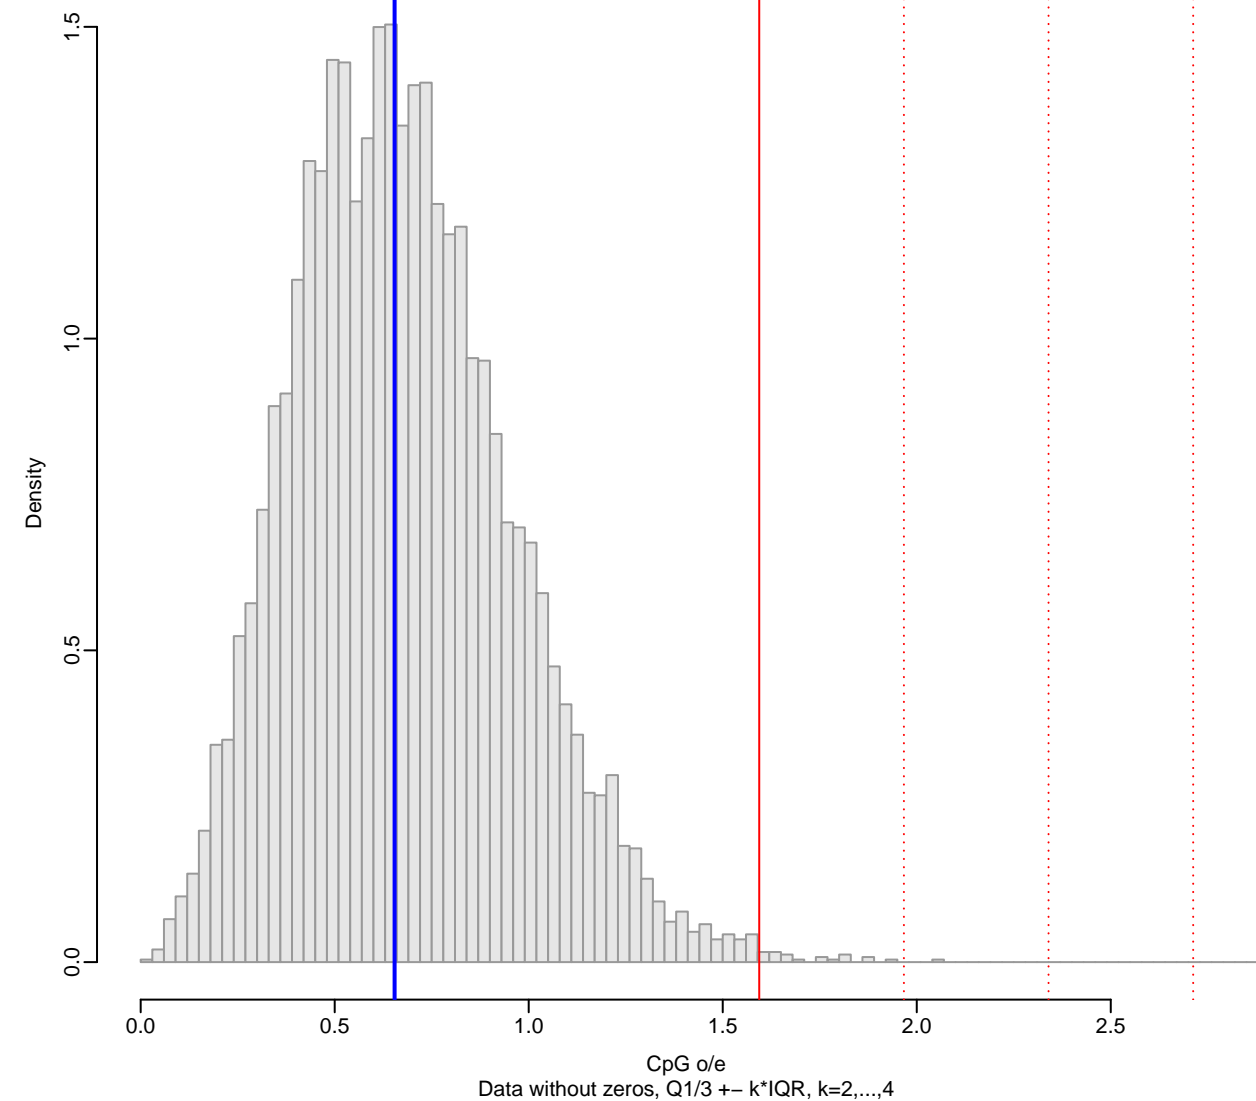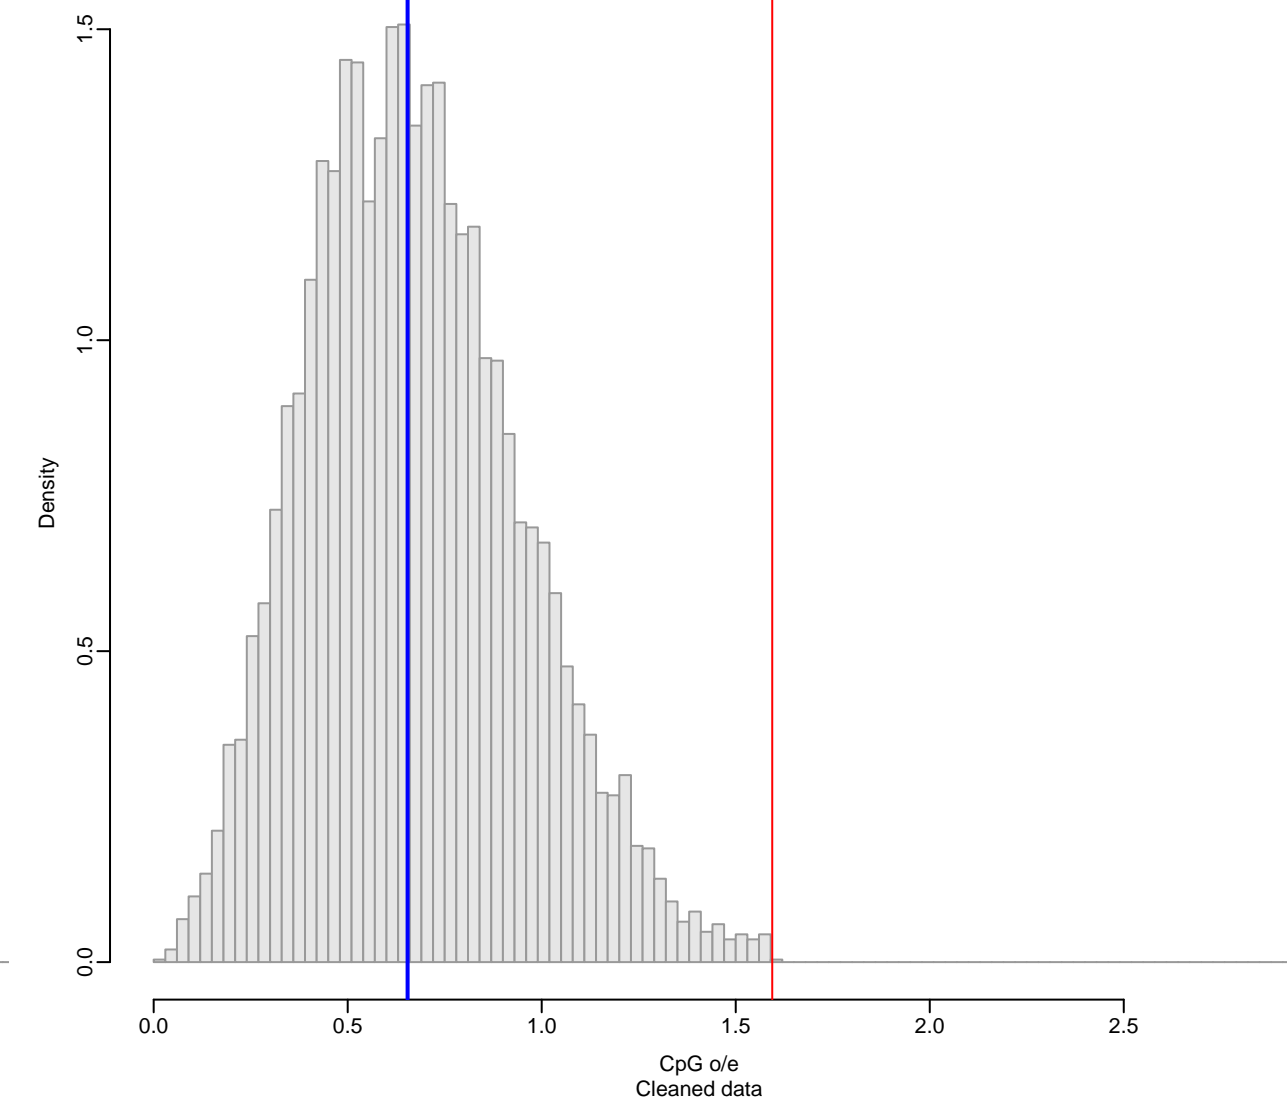

# Armadillidium\_vulgare

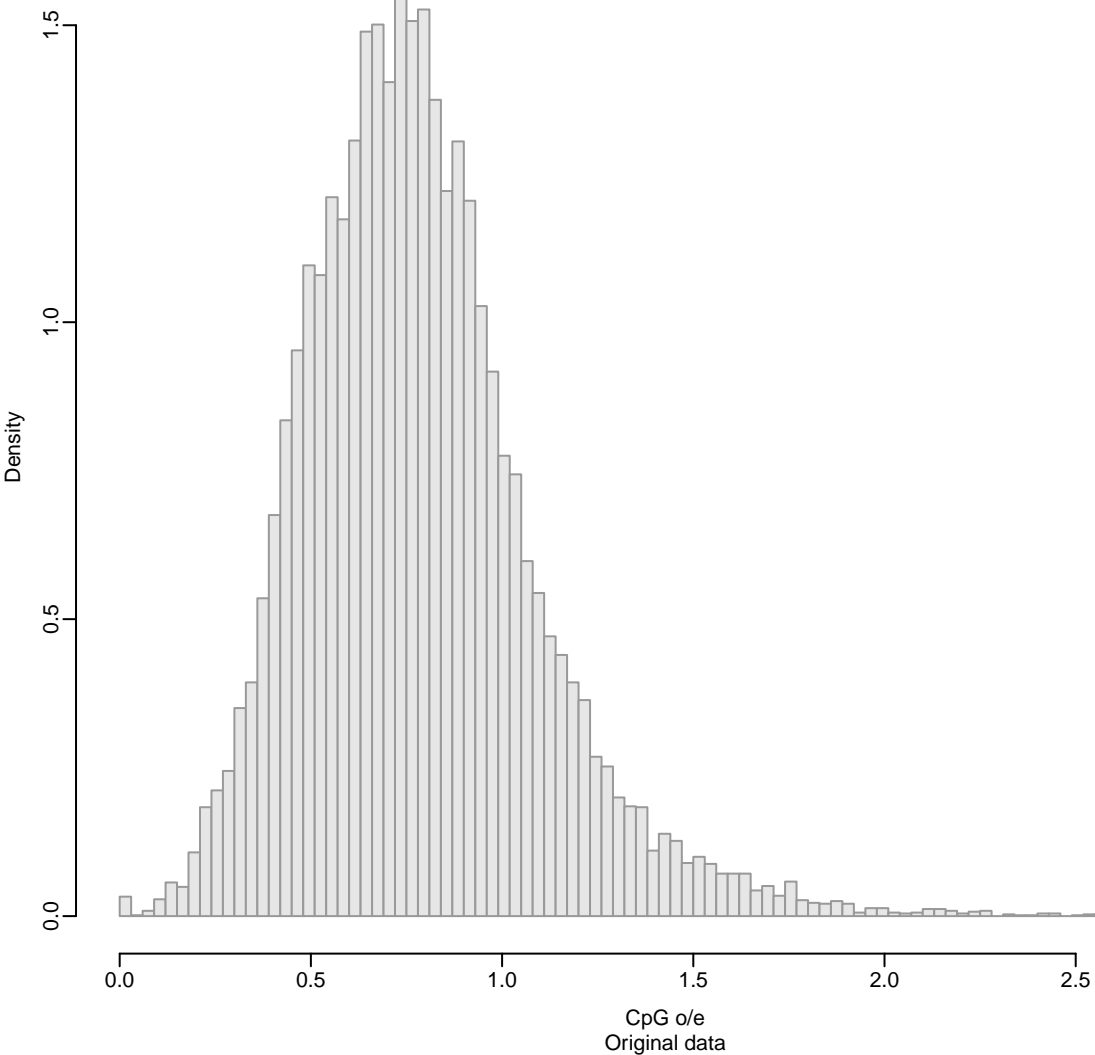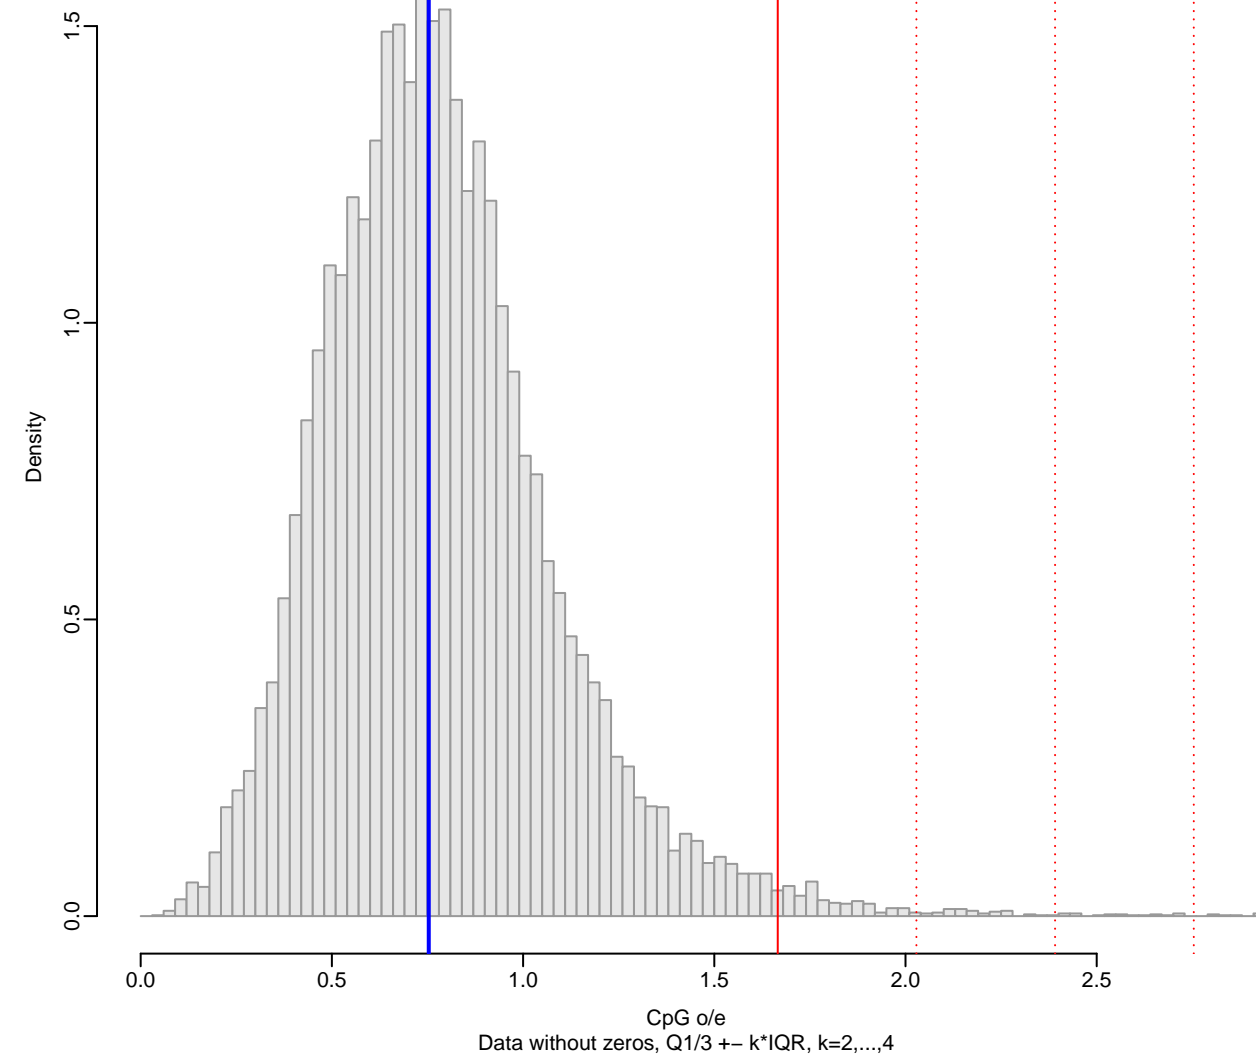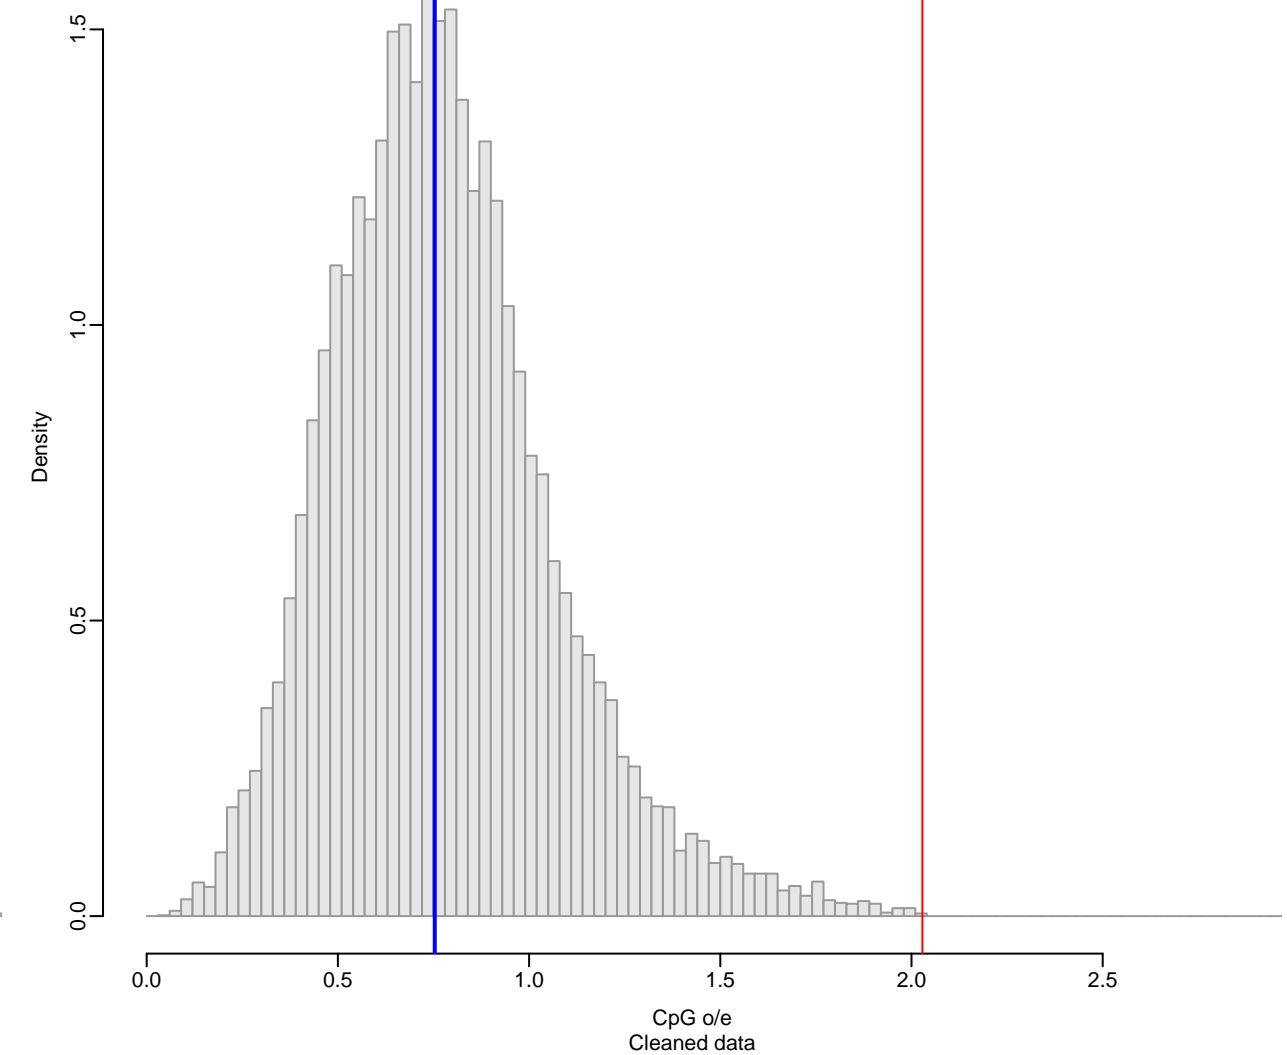

Artemia\_franciscana

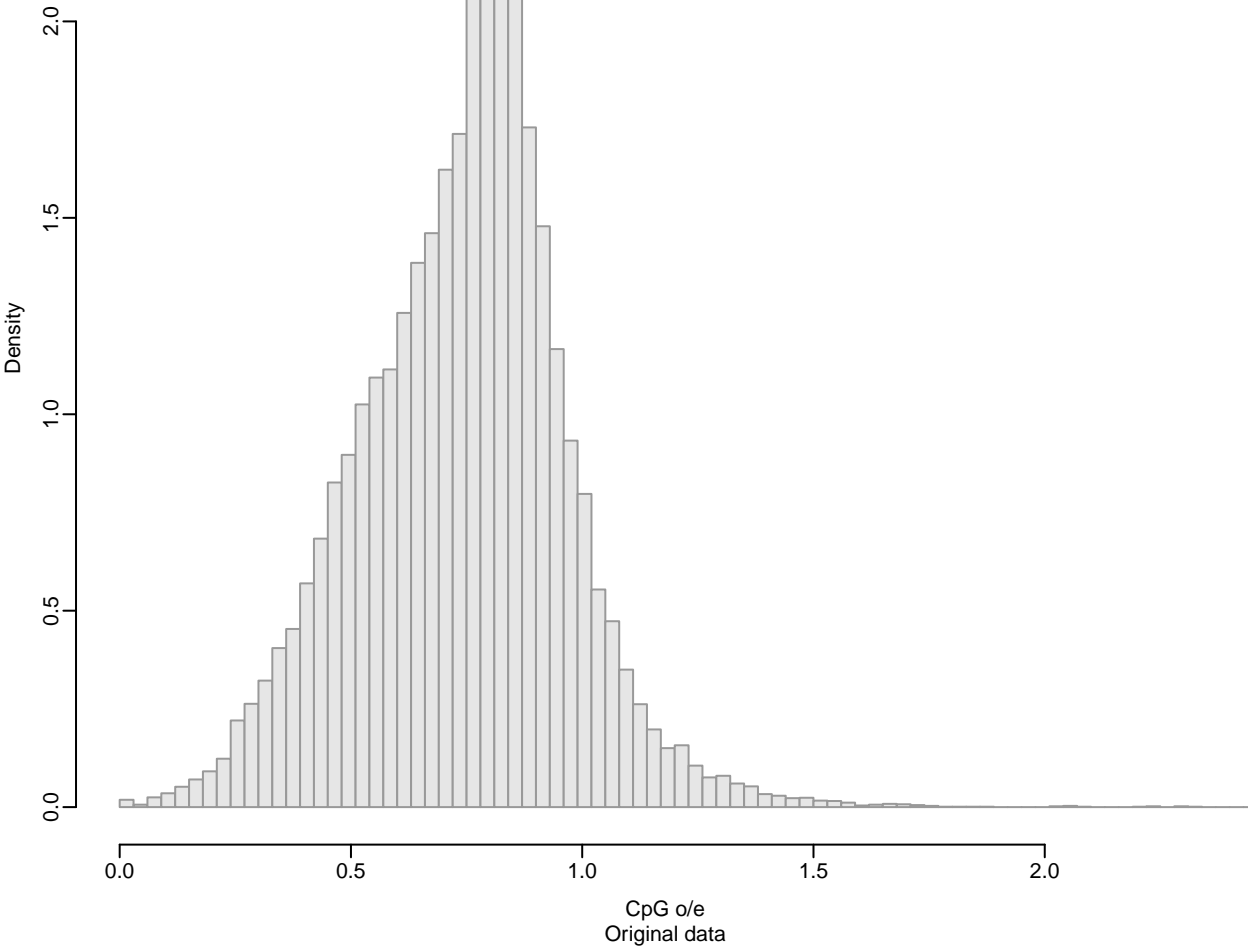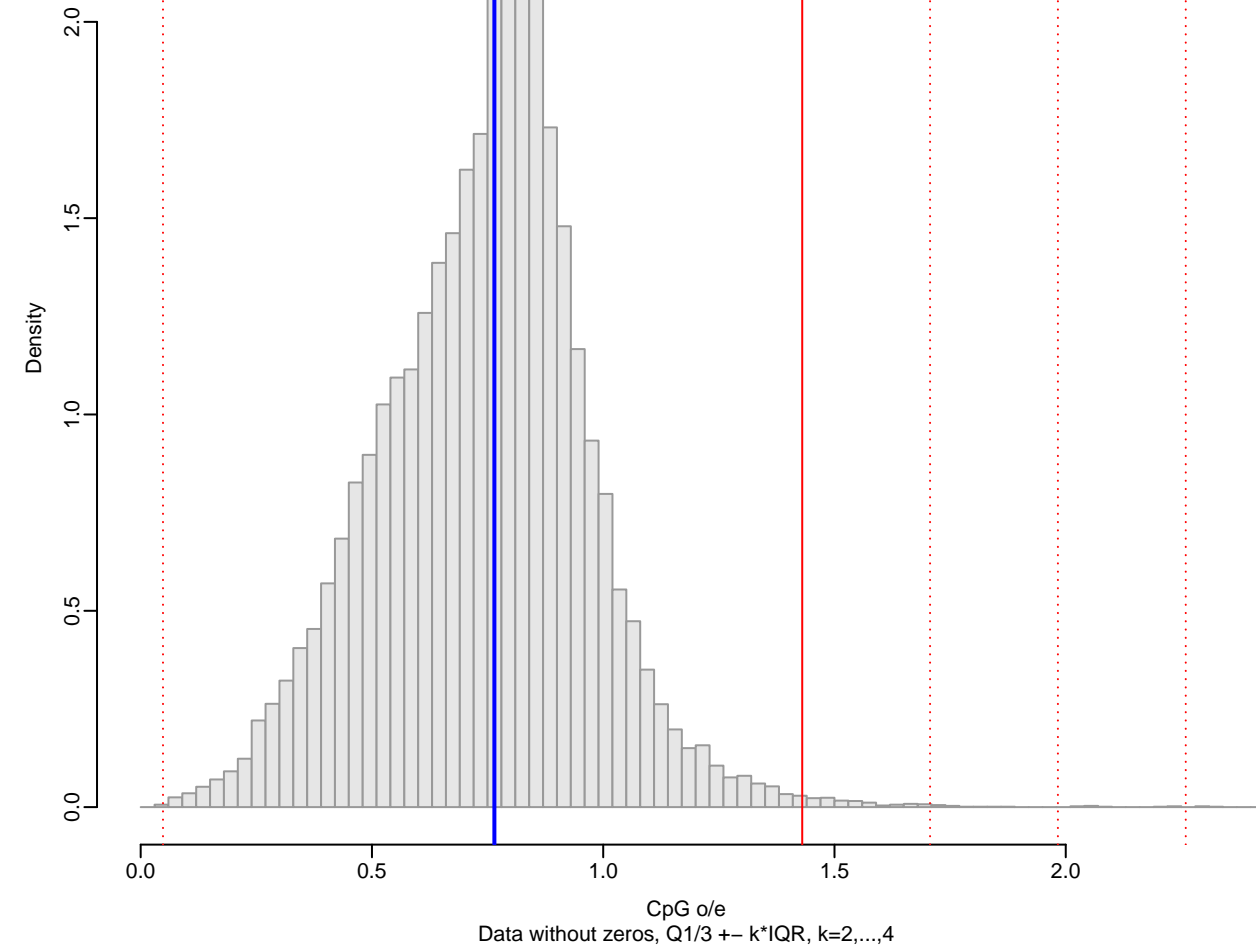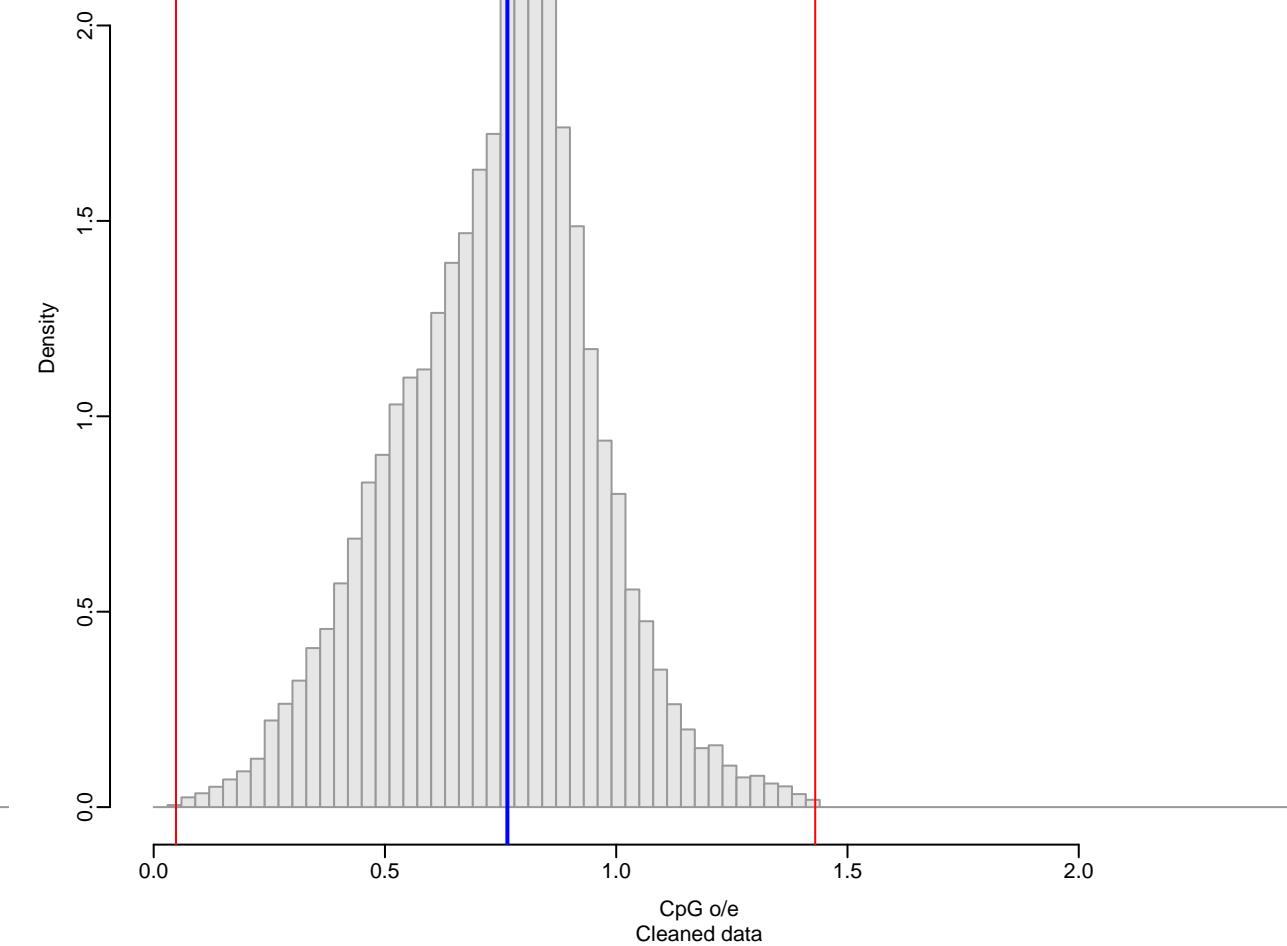

Artemisia\_annua

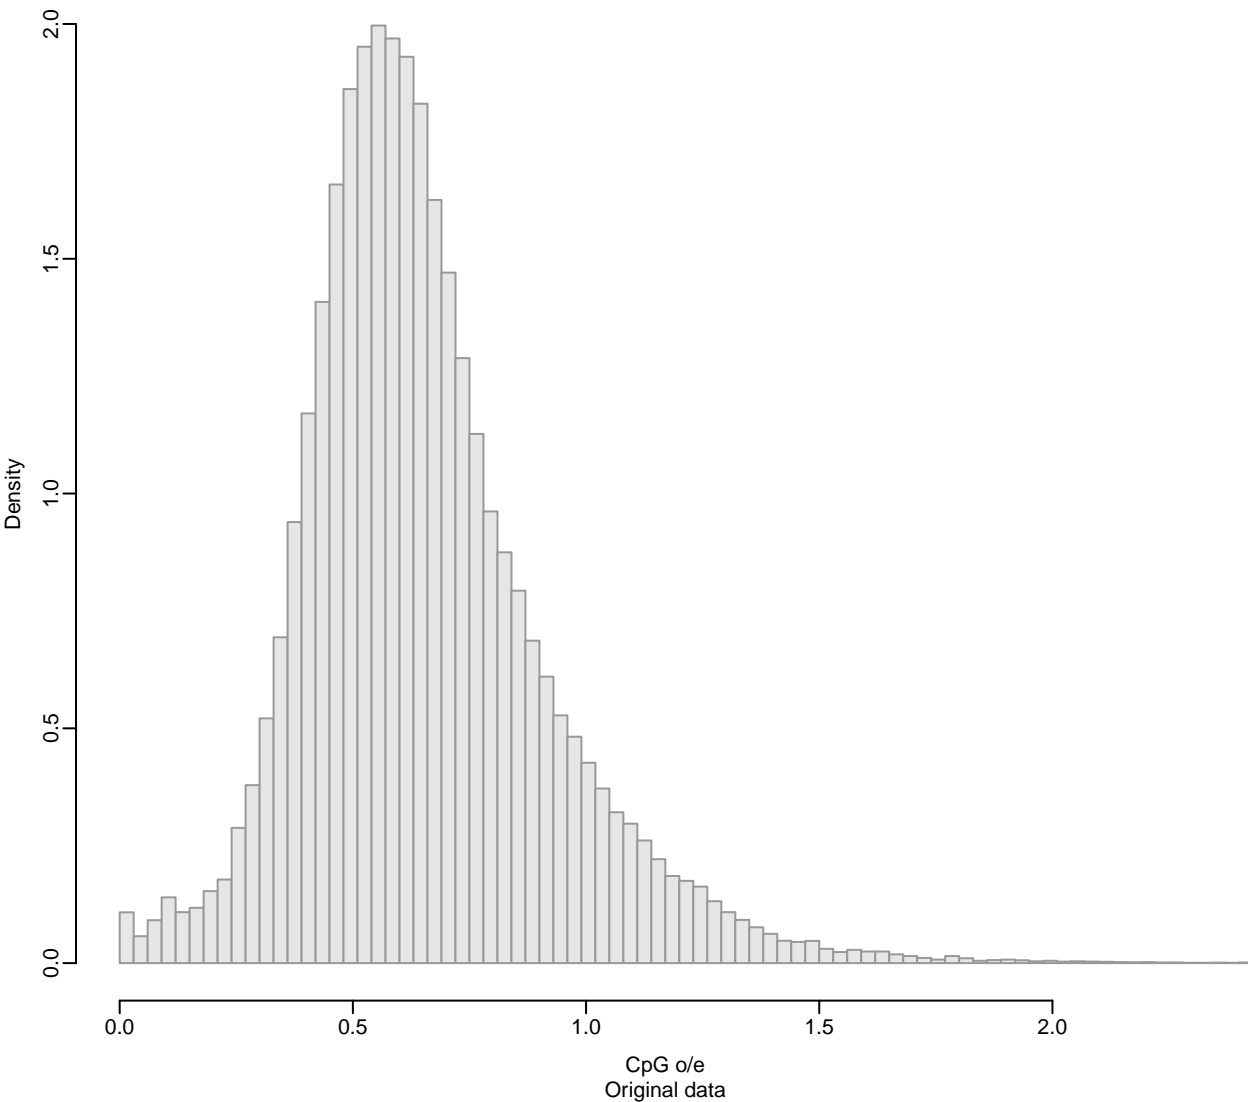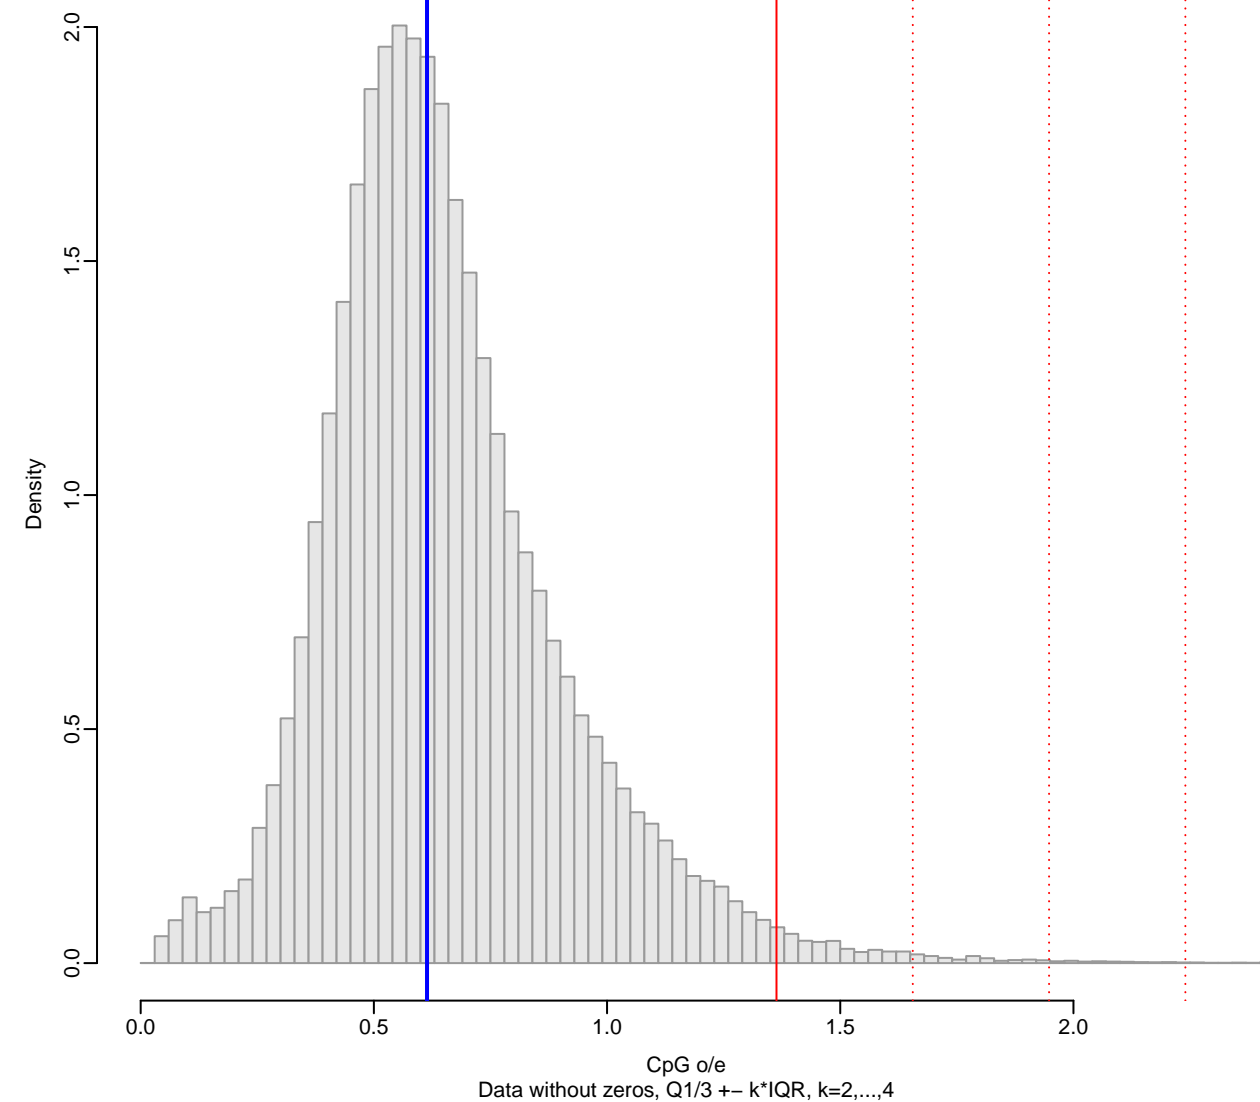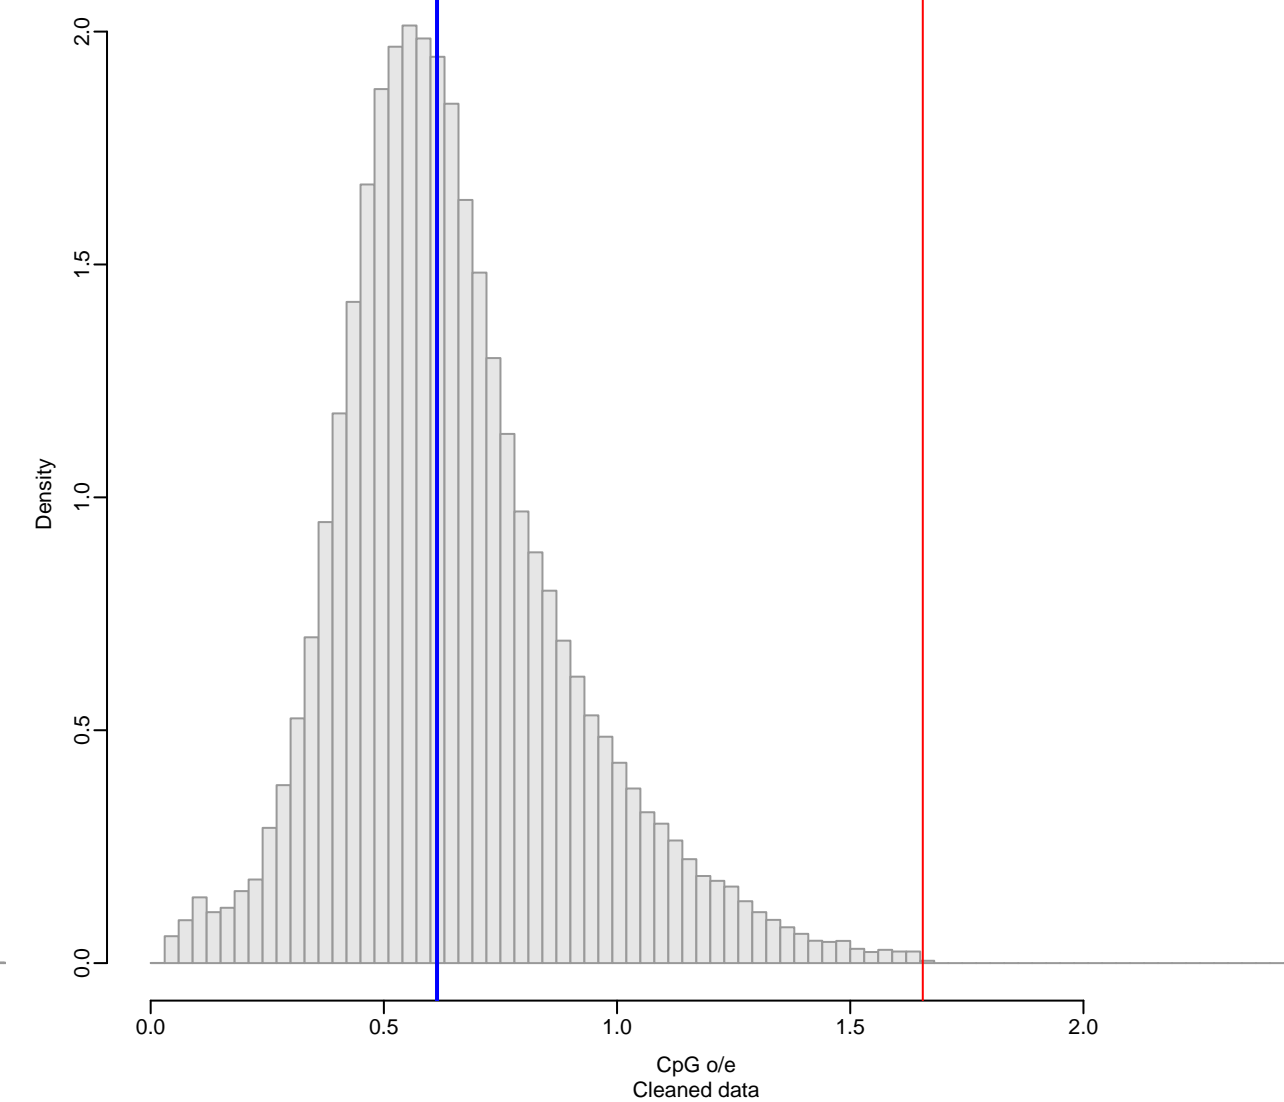

Asparagus\_officialis

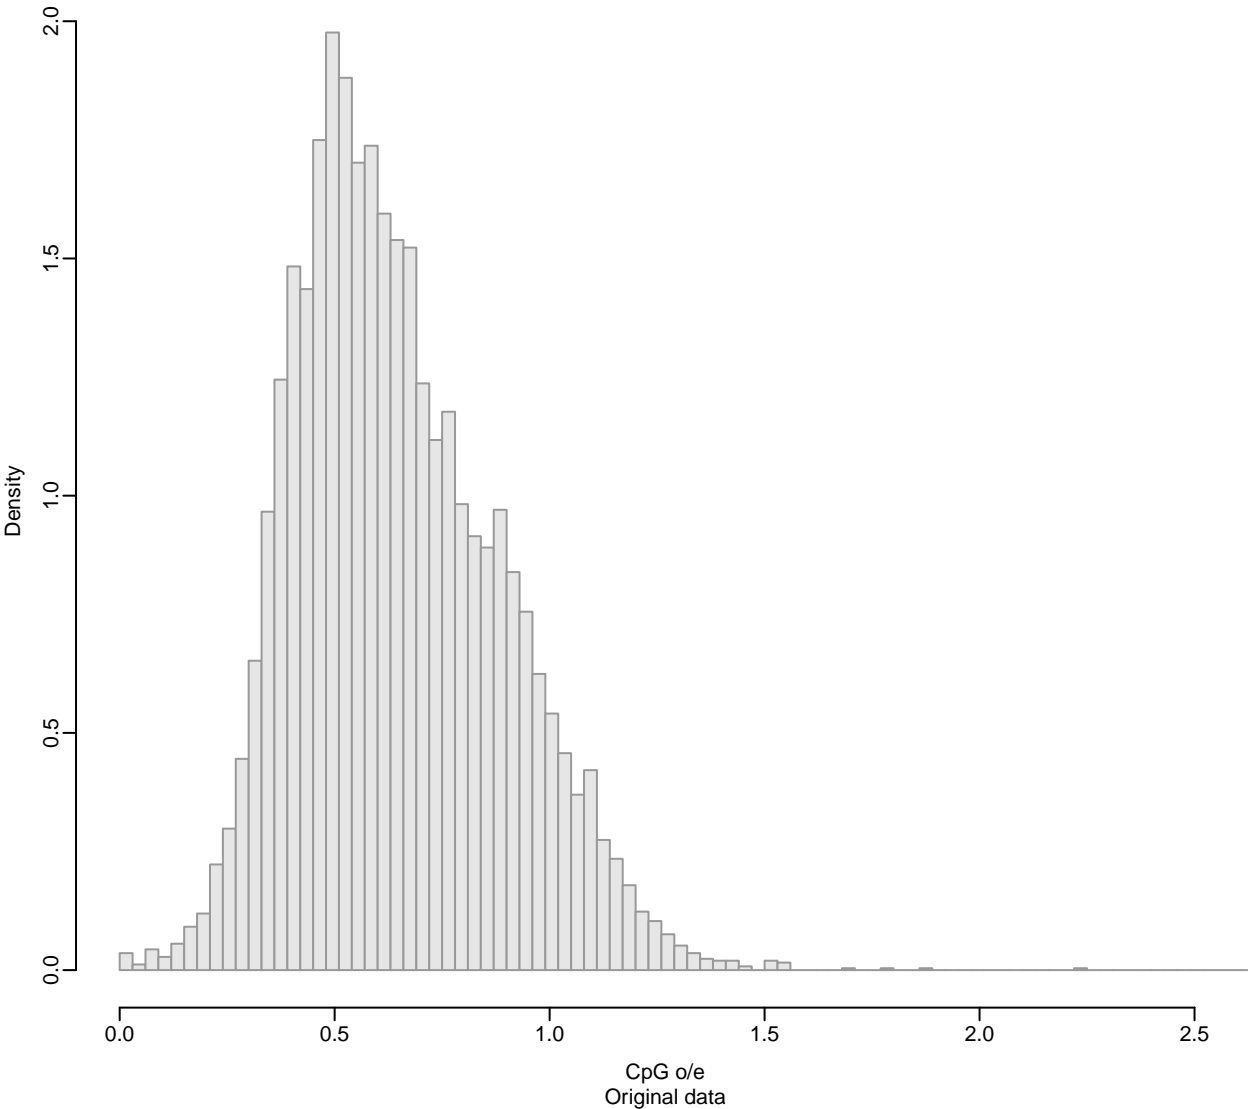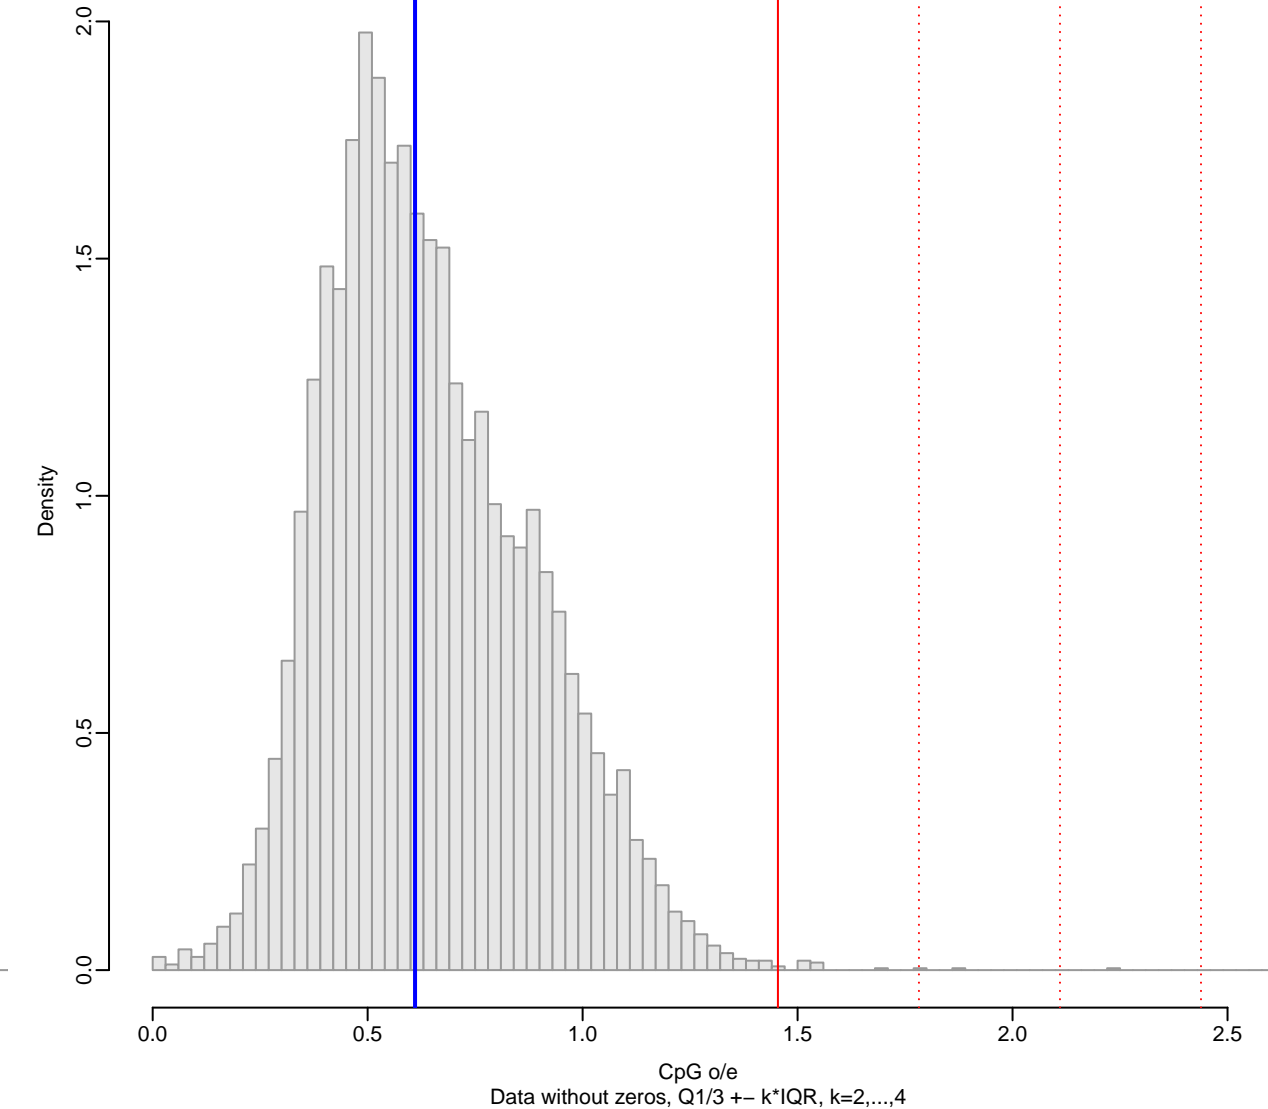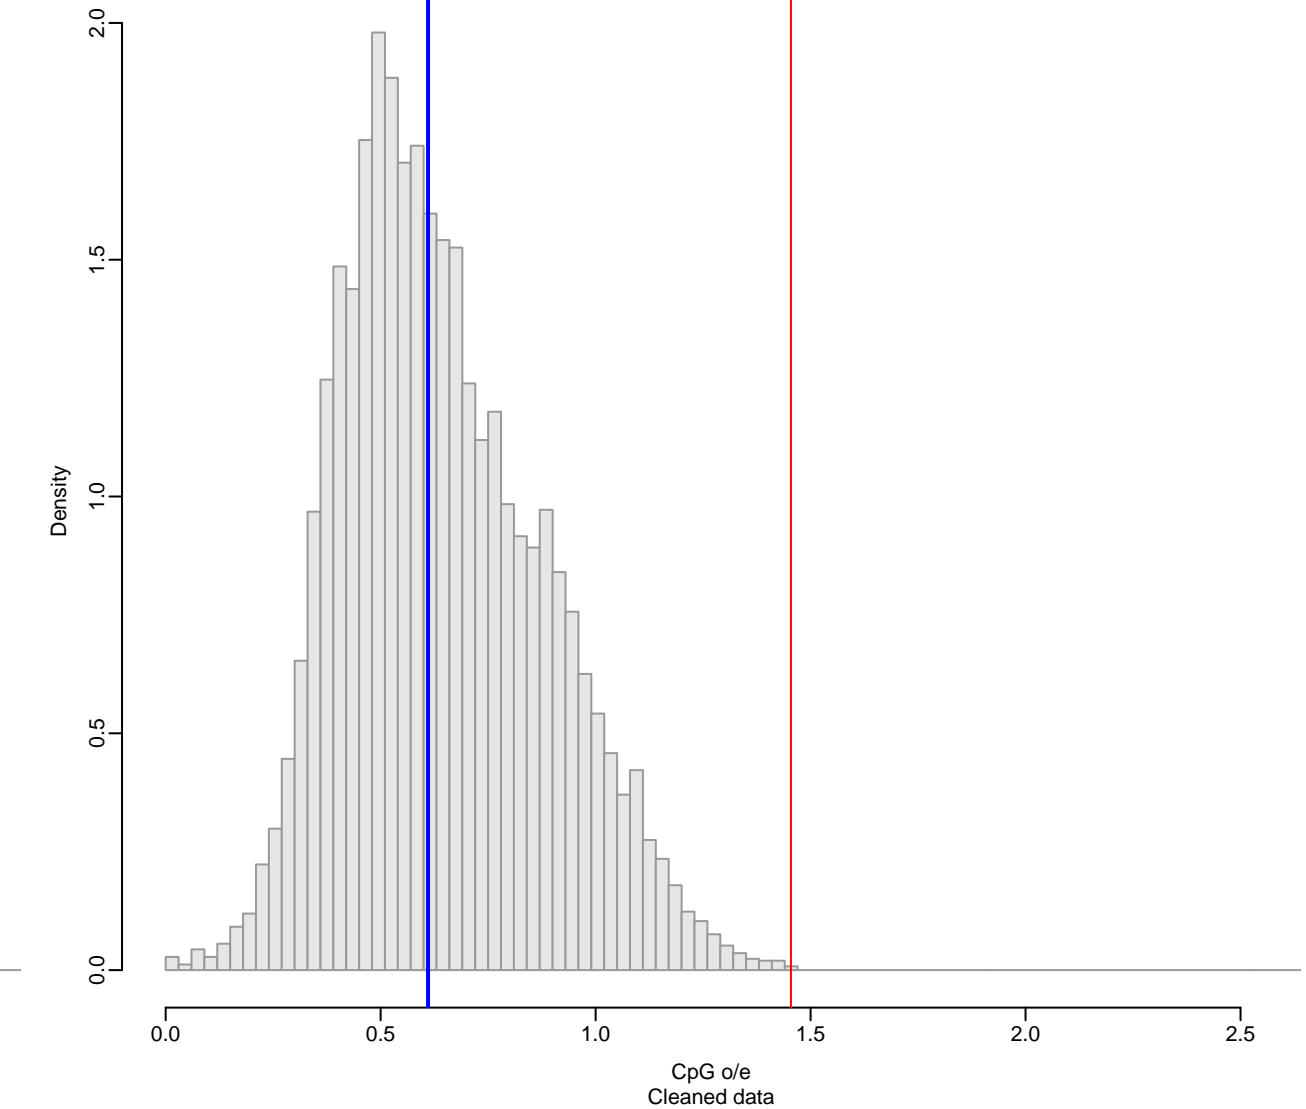

Aspergillus\_flavus

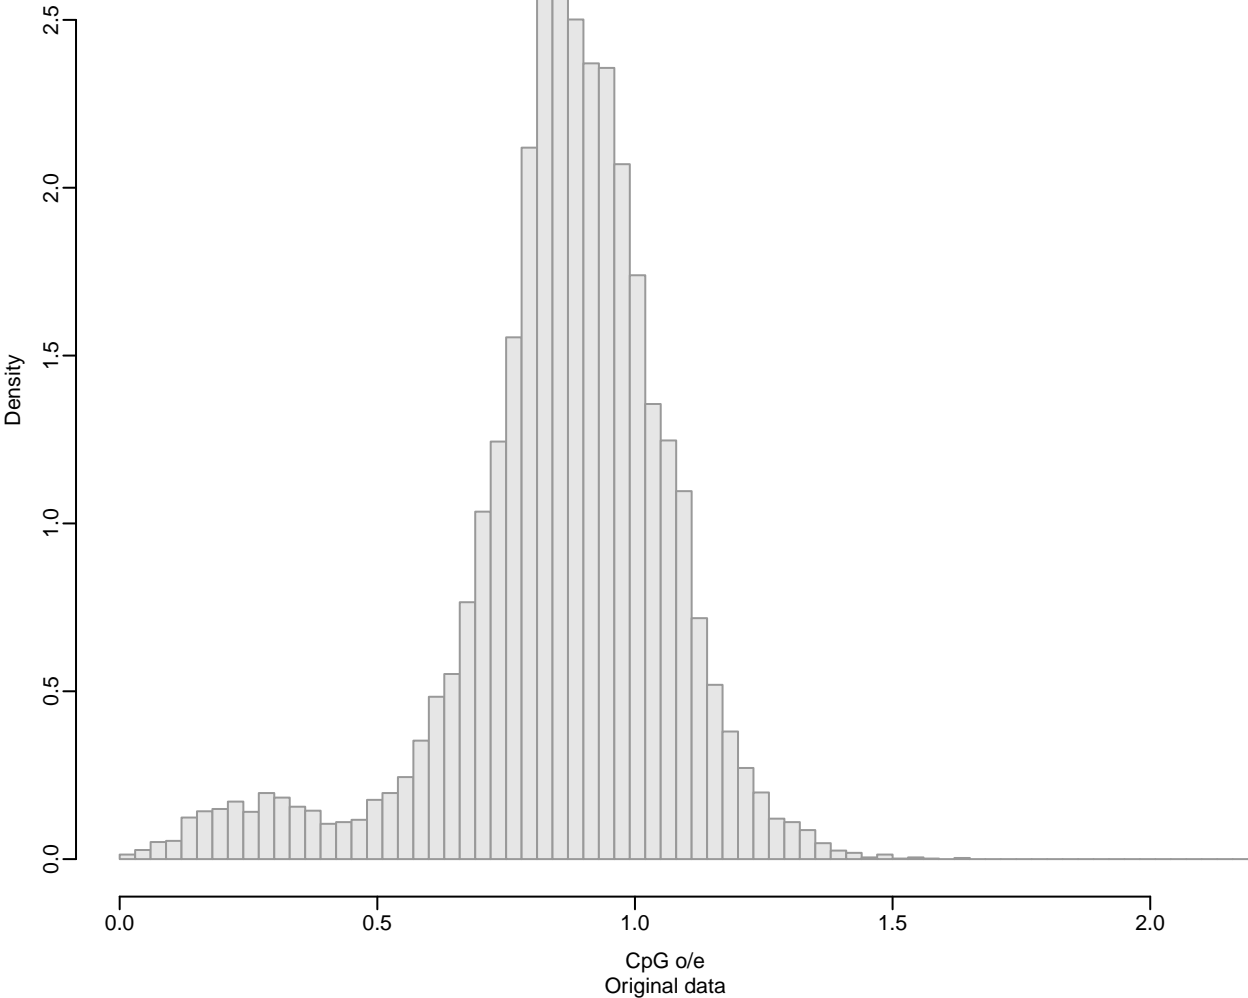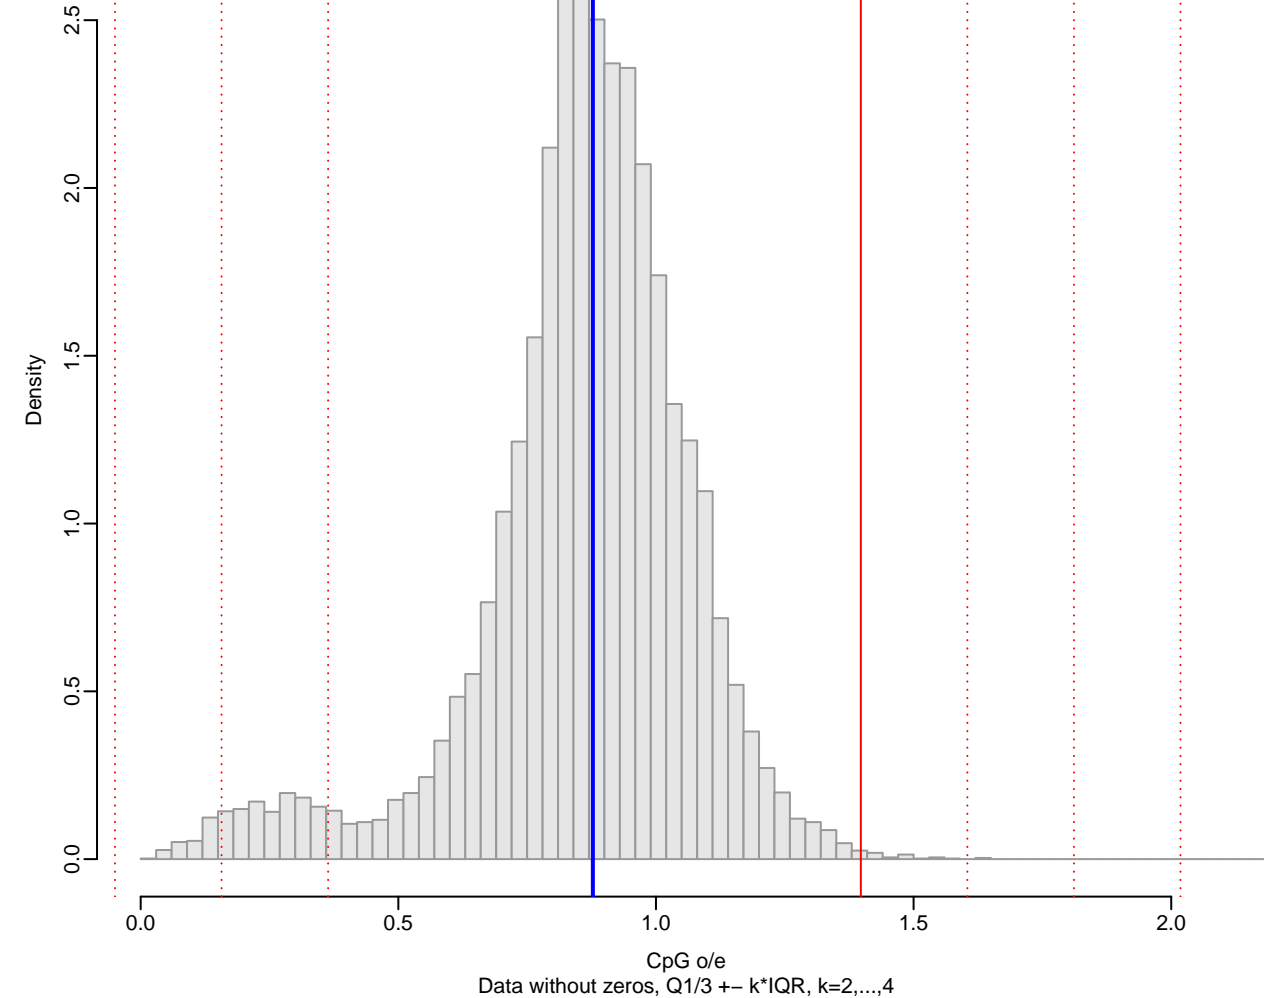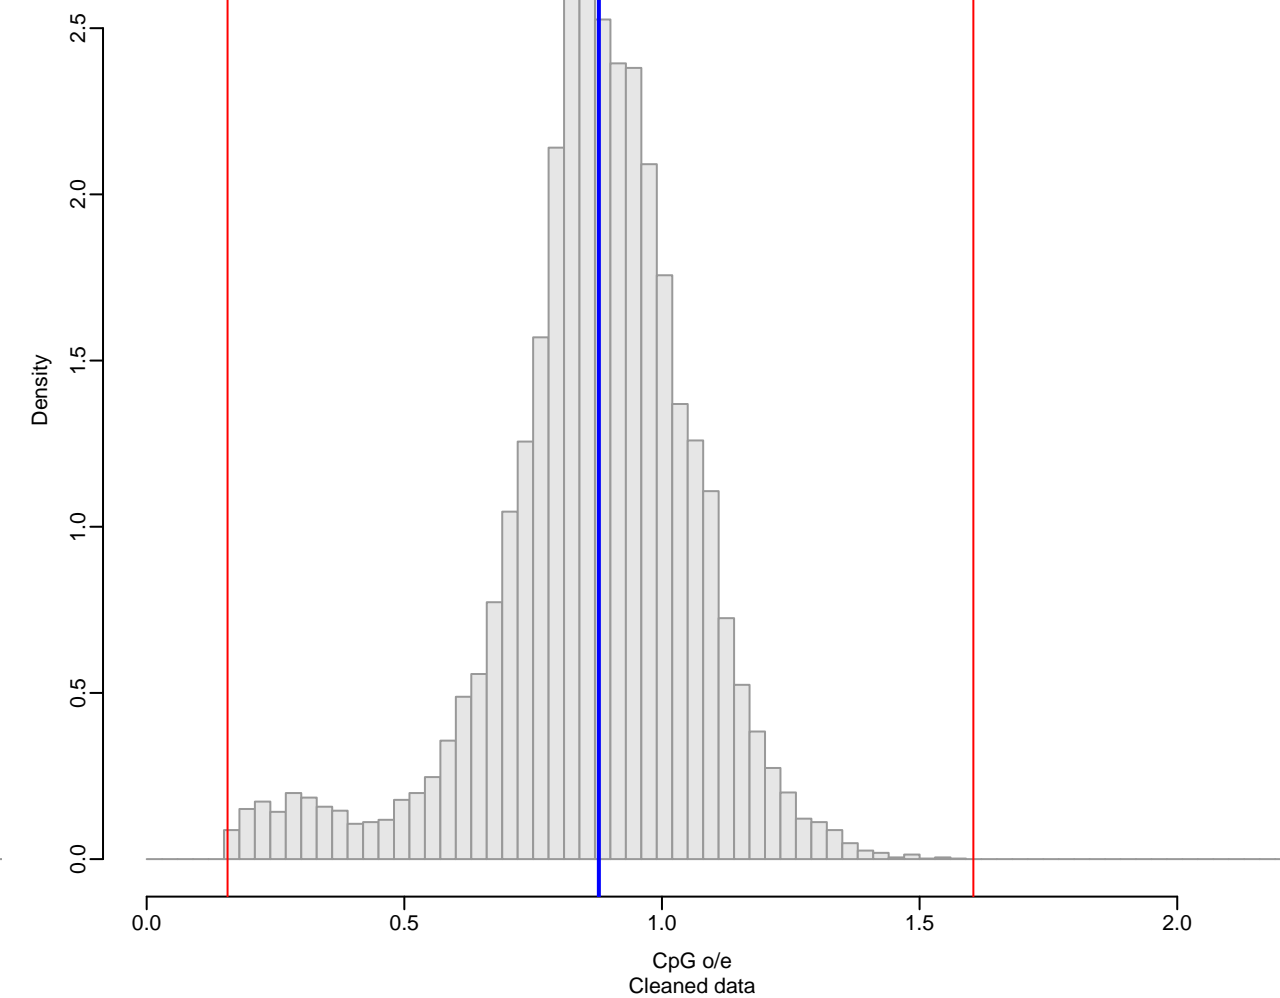



Aspergillus\_niger

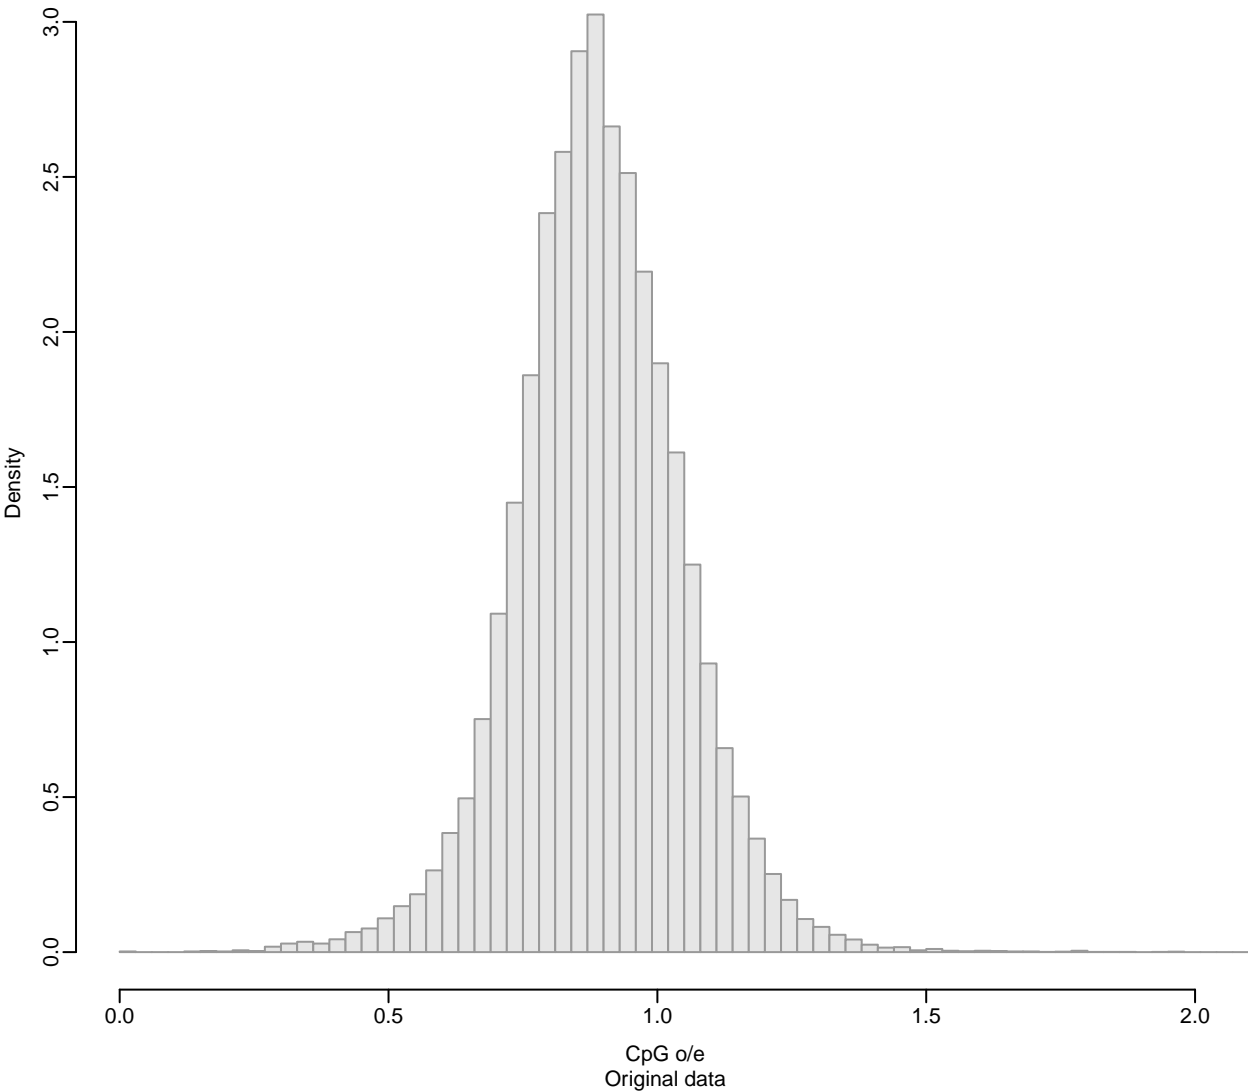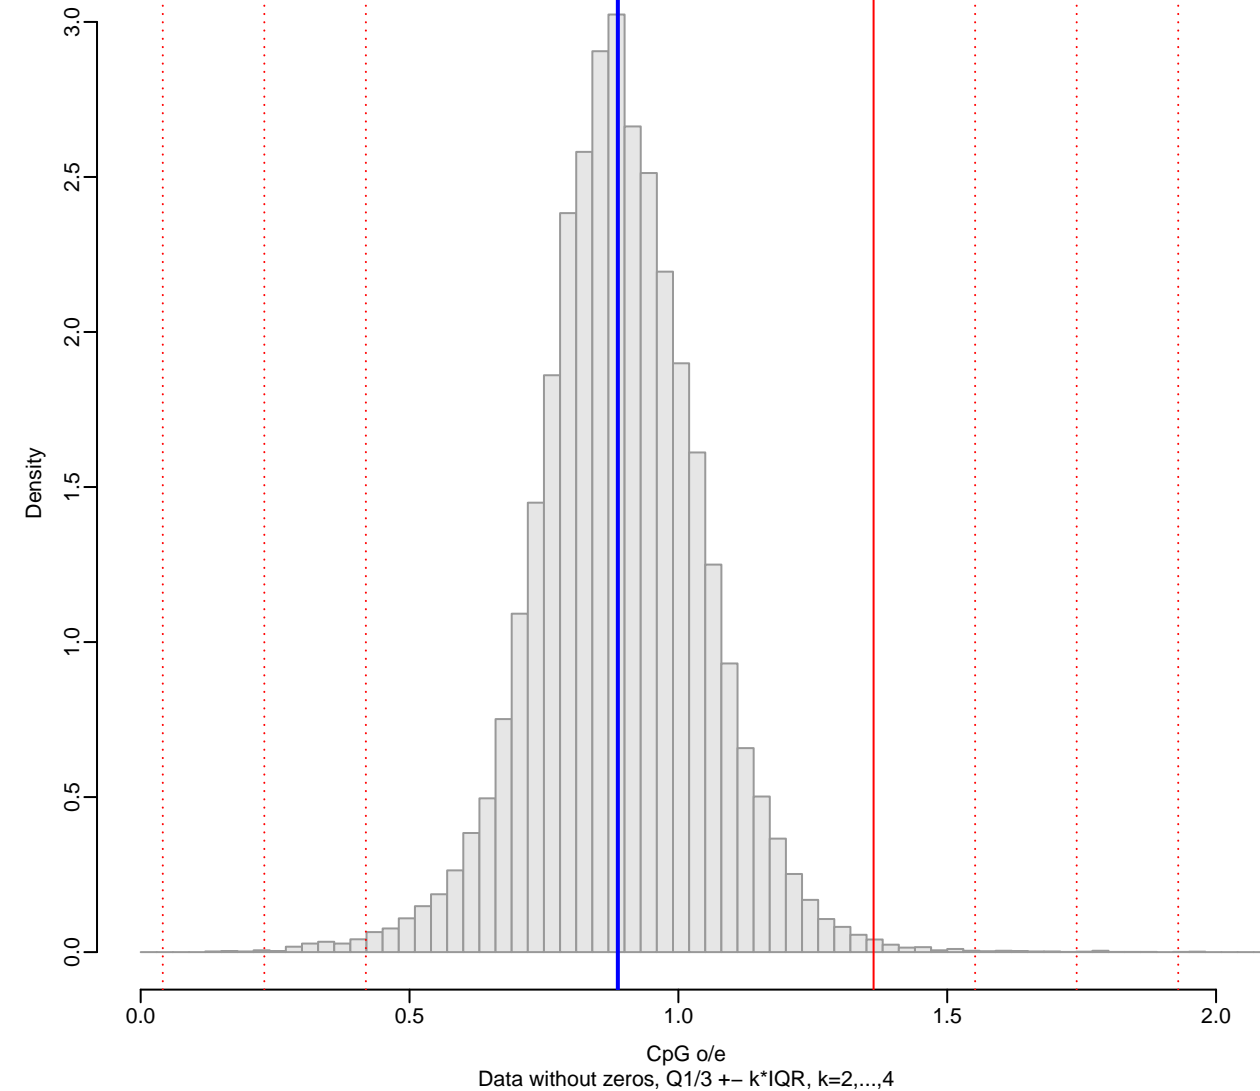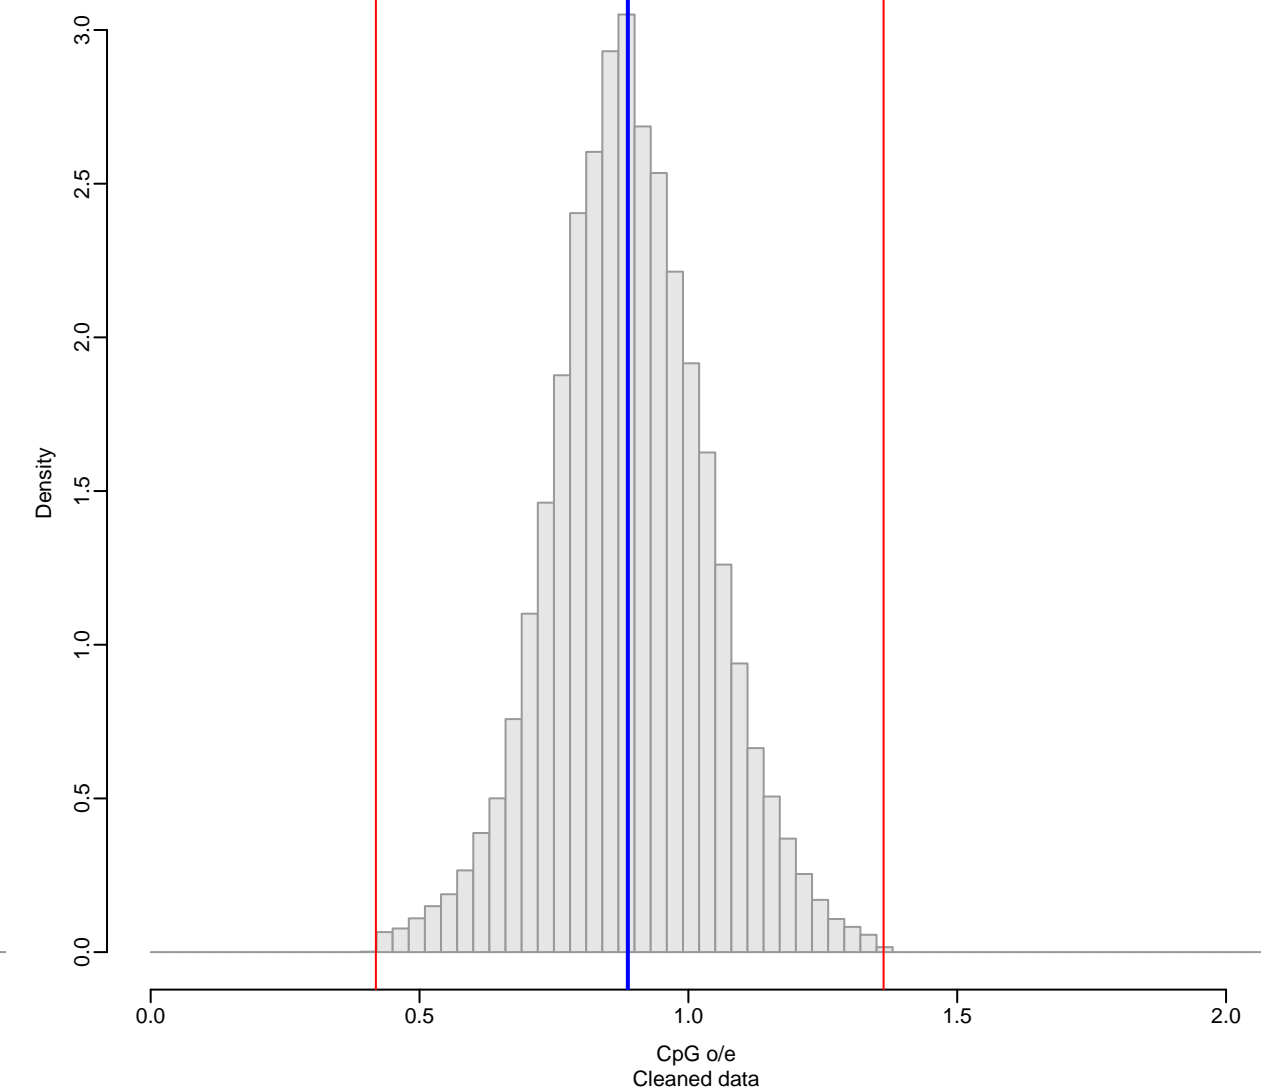

*Aspergillus\_oryzae*

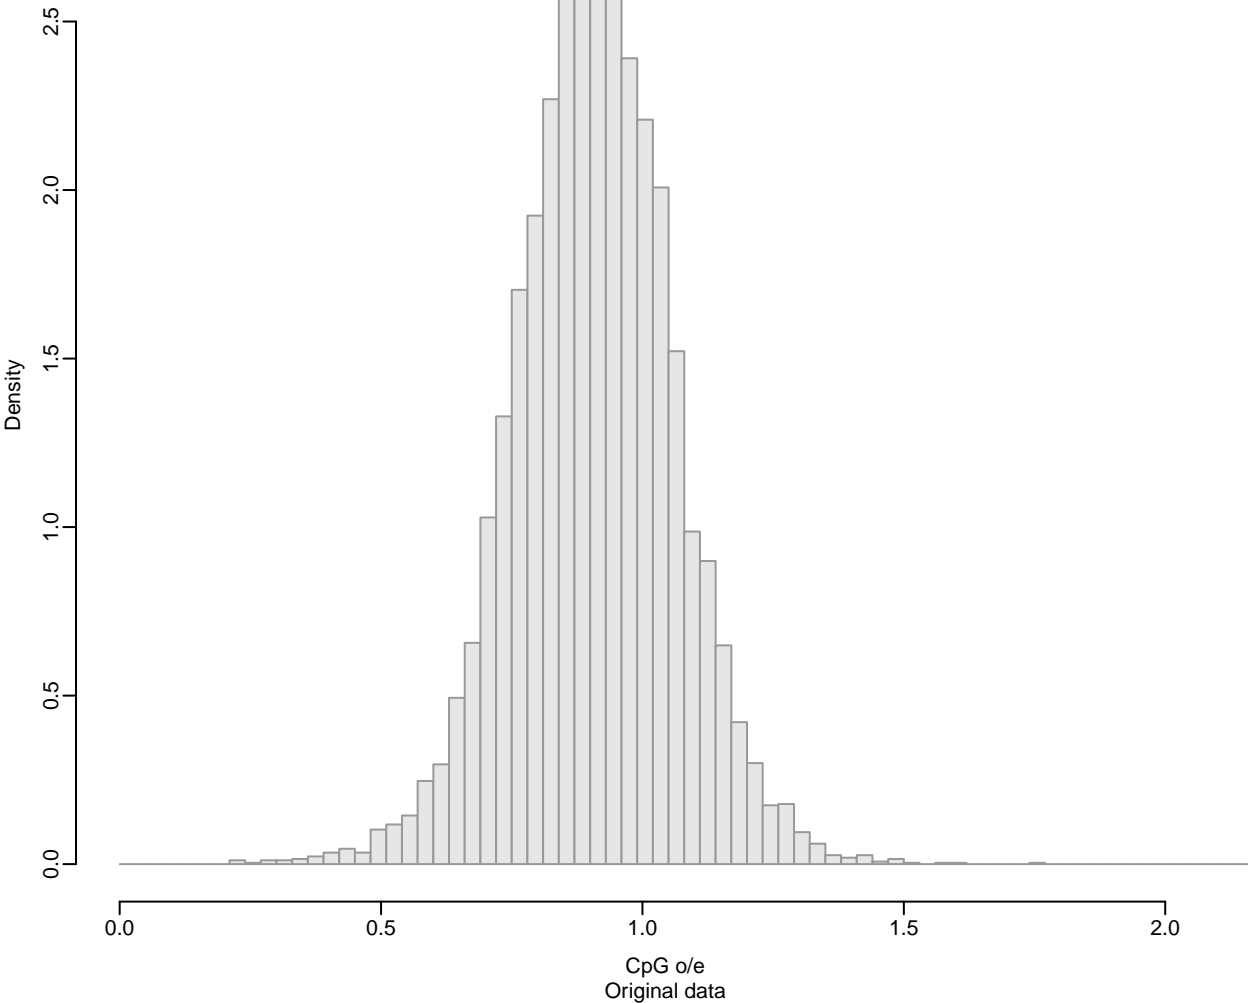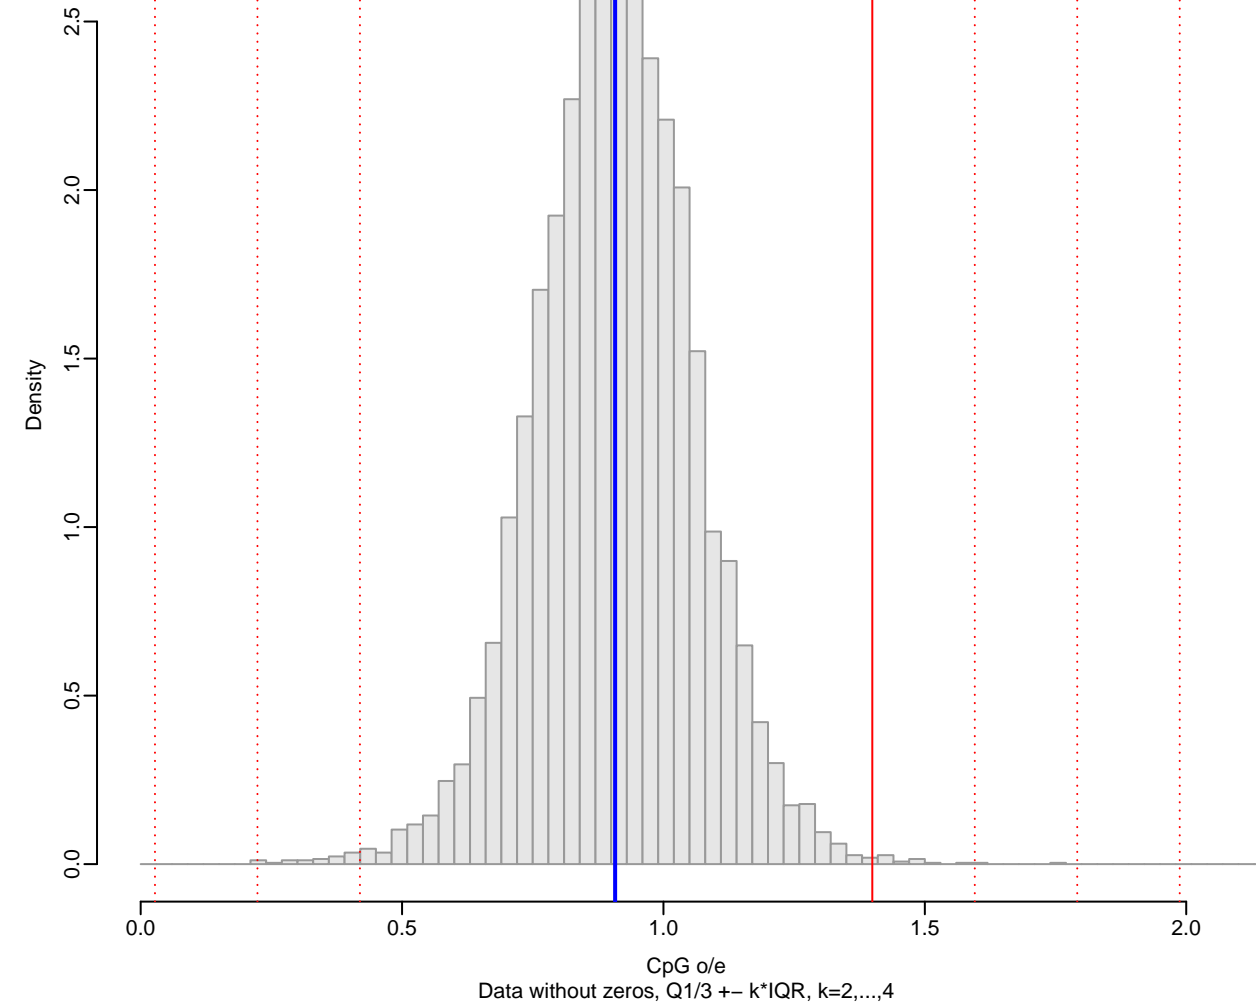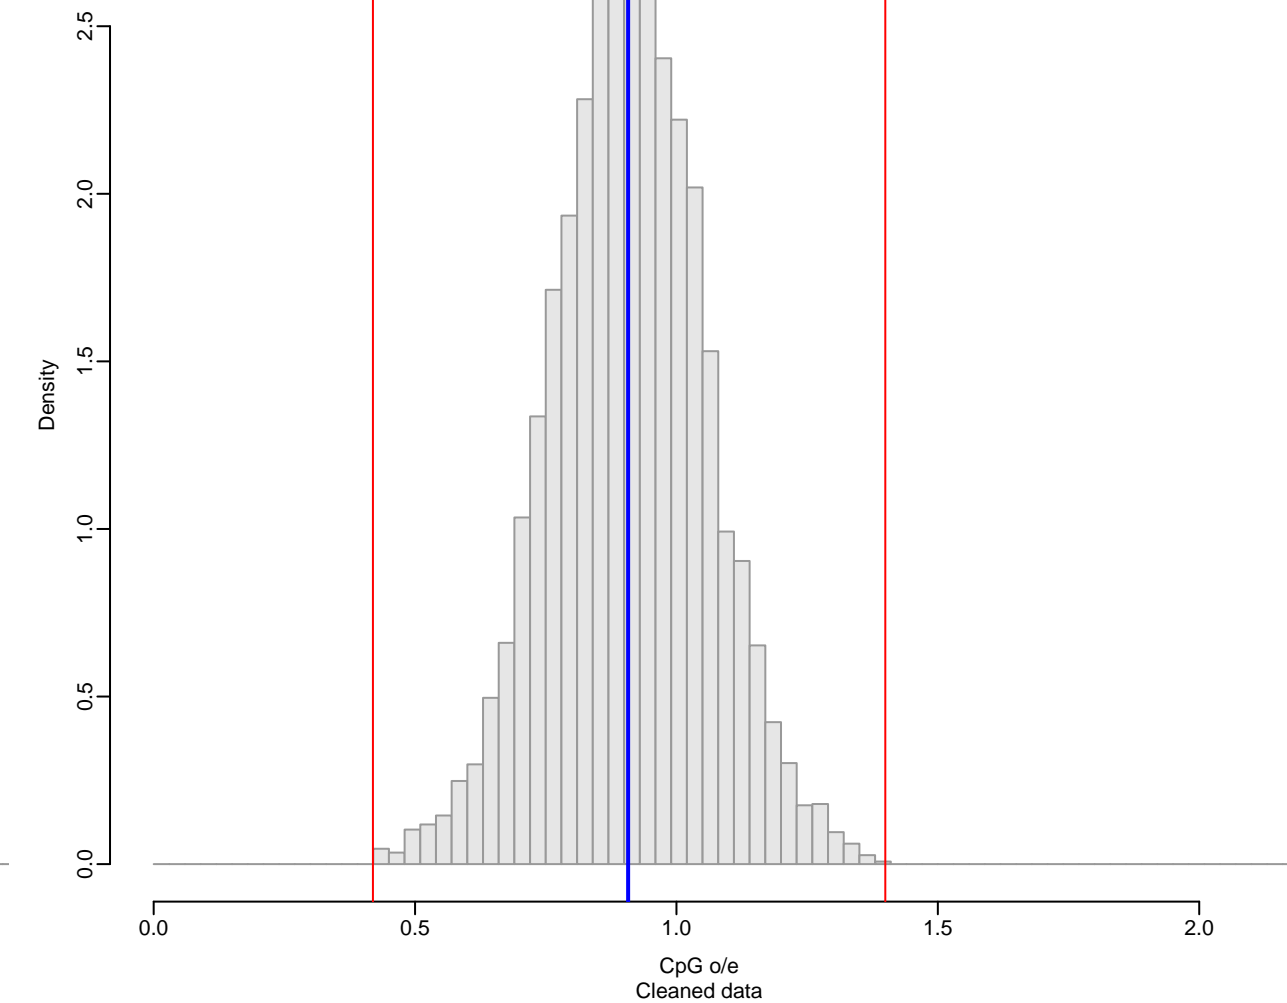

Aspergillus\_terreus

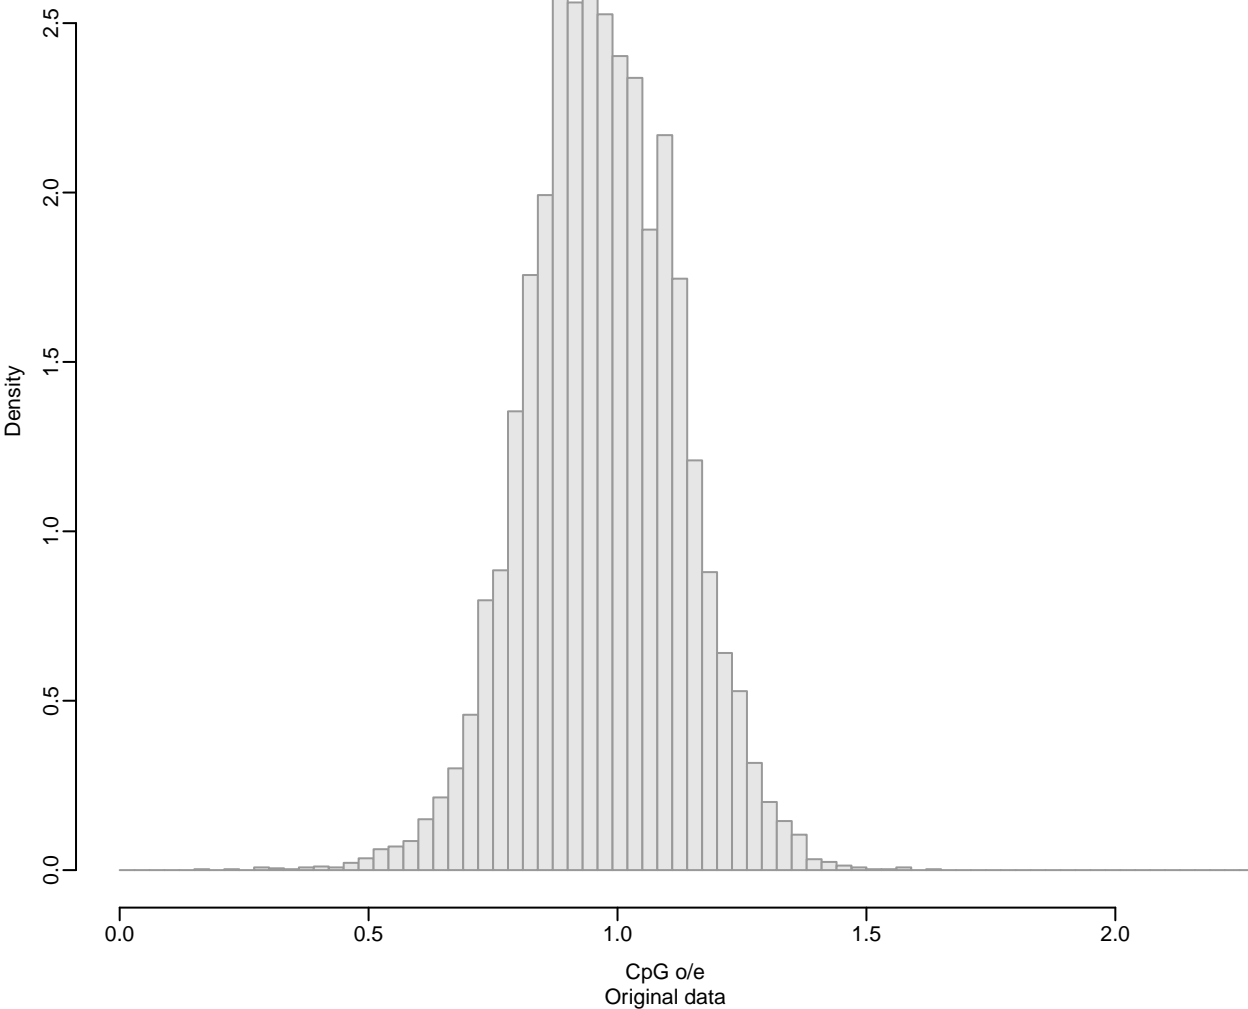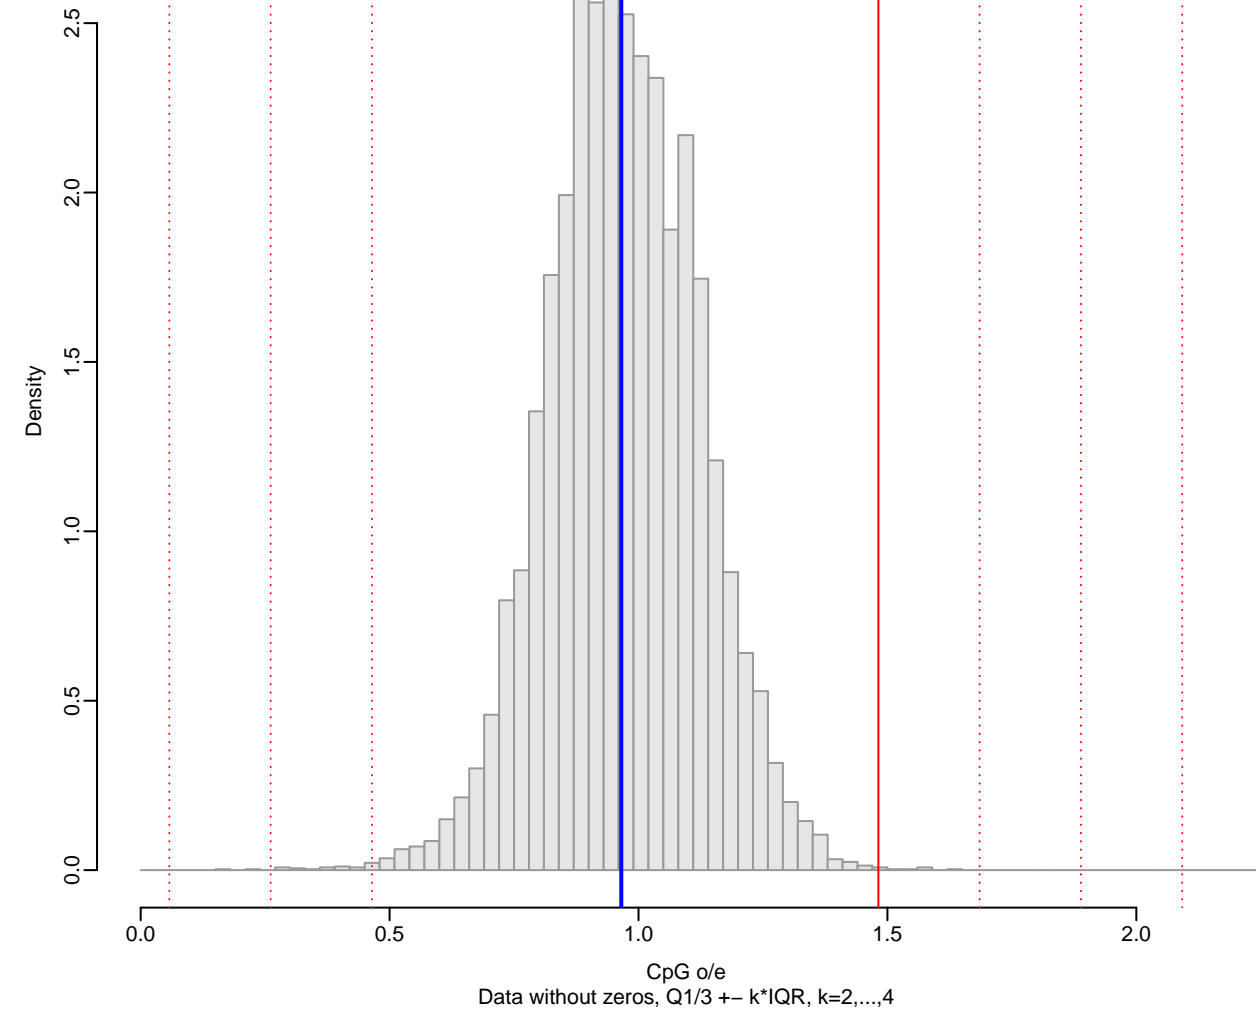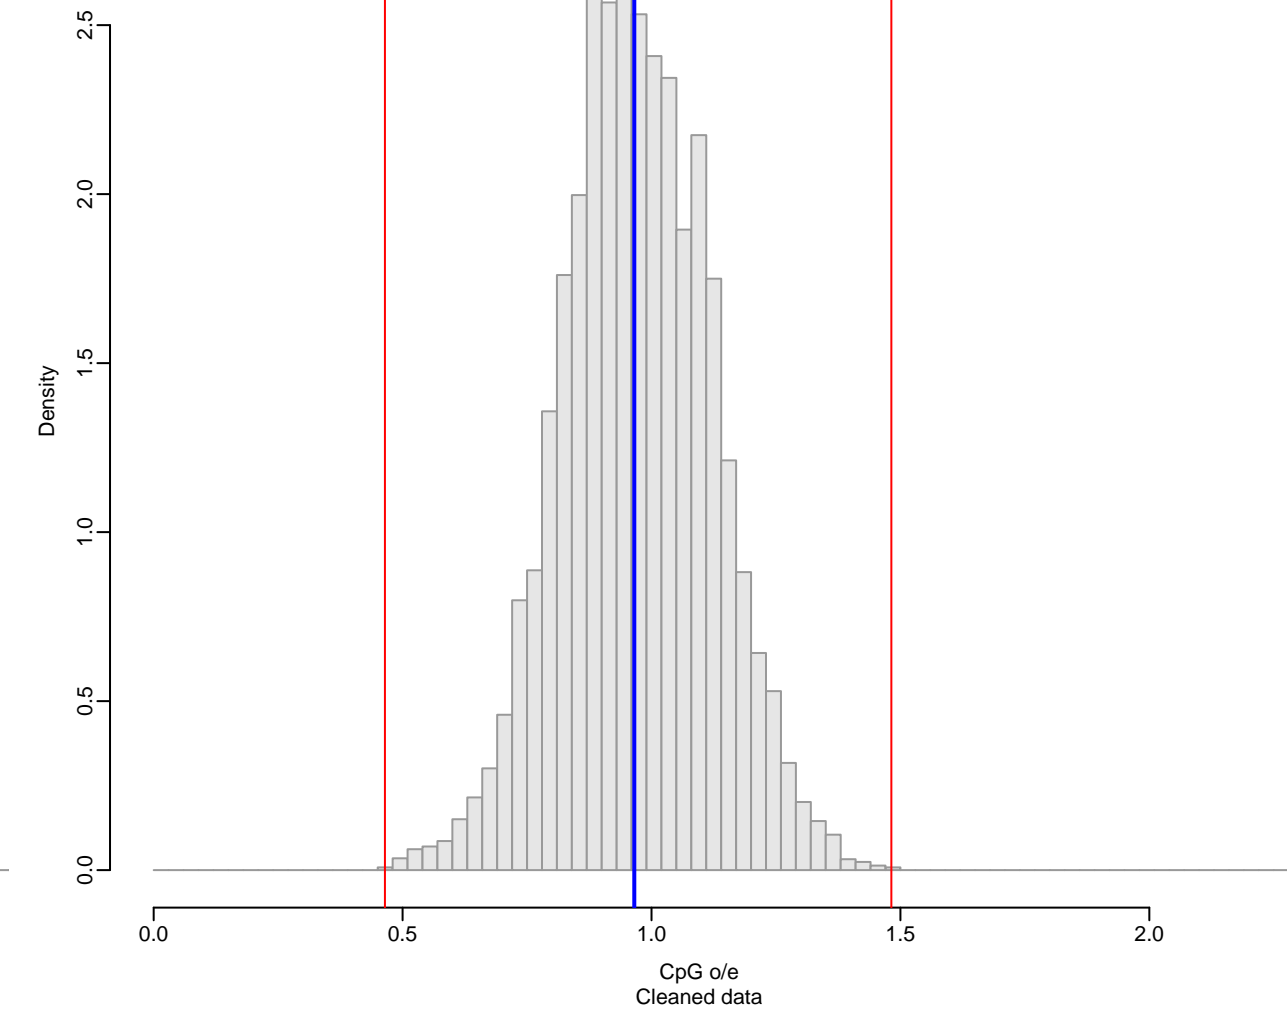

Astatotilapia\_burtoni

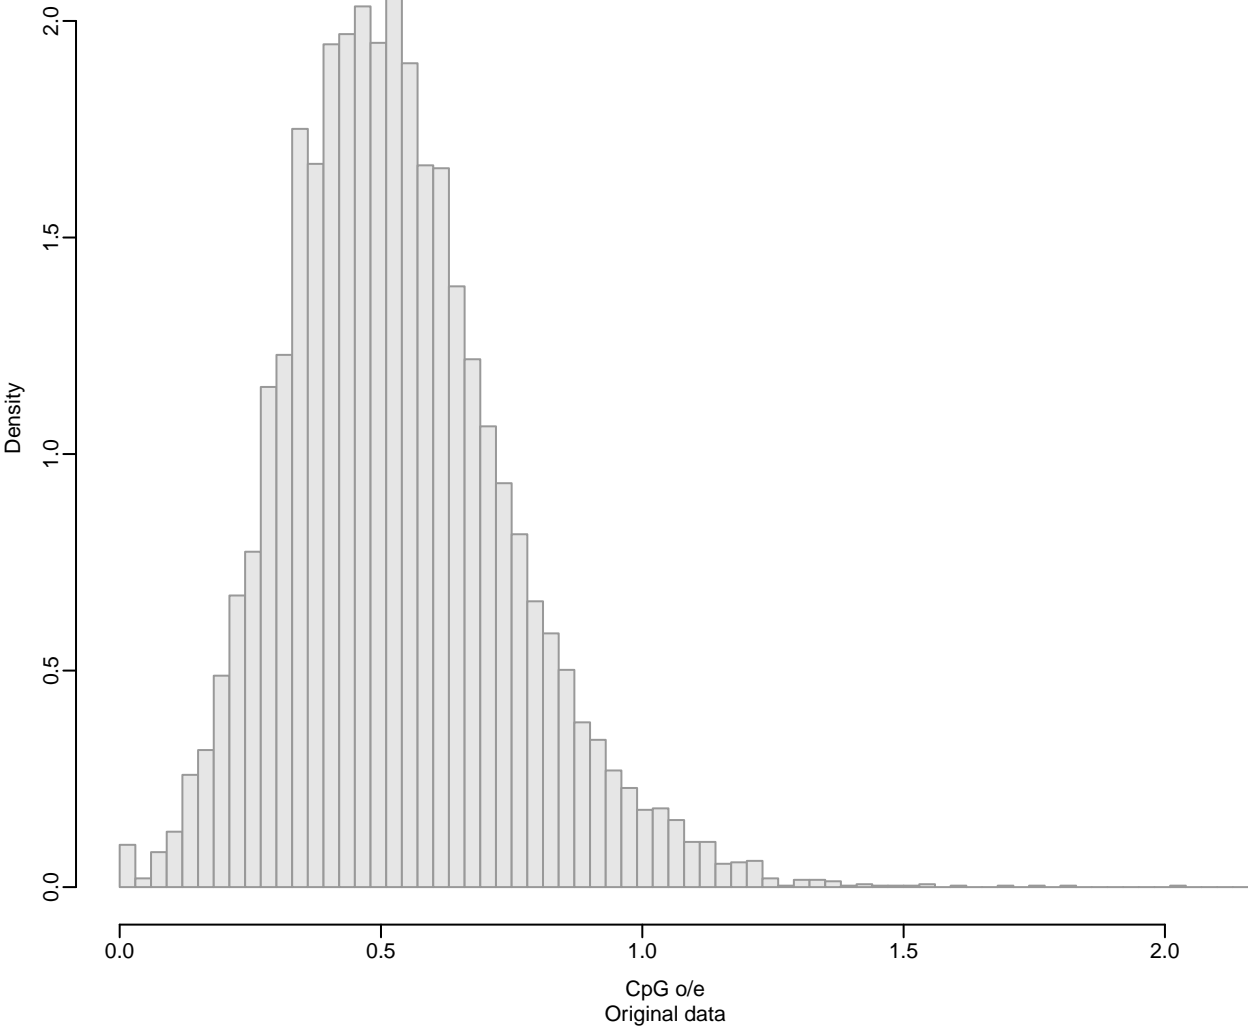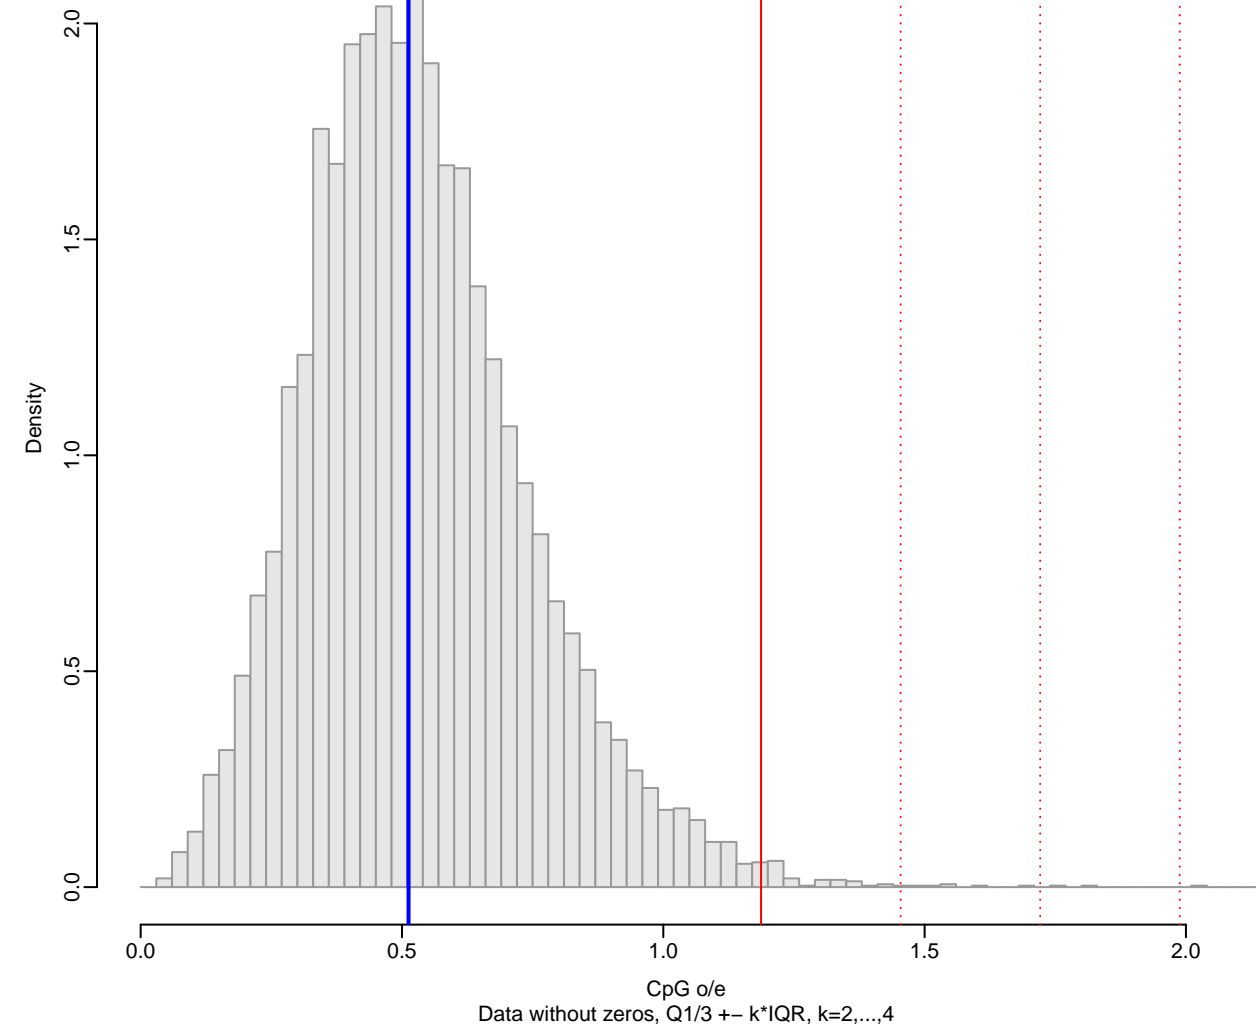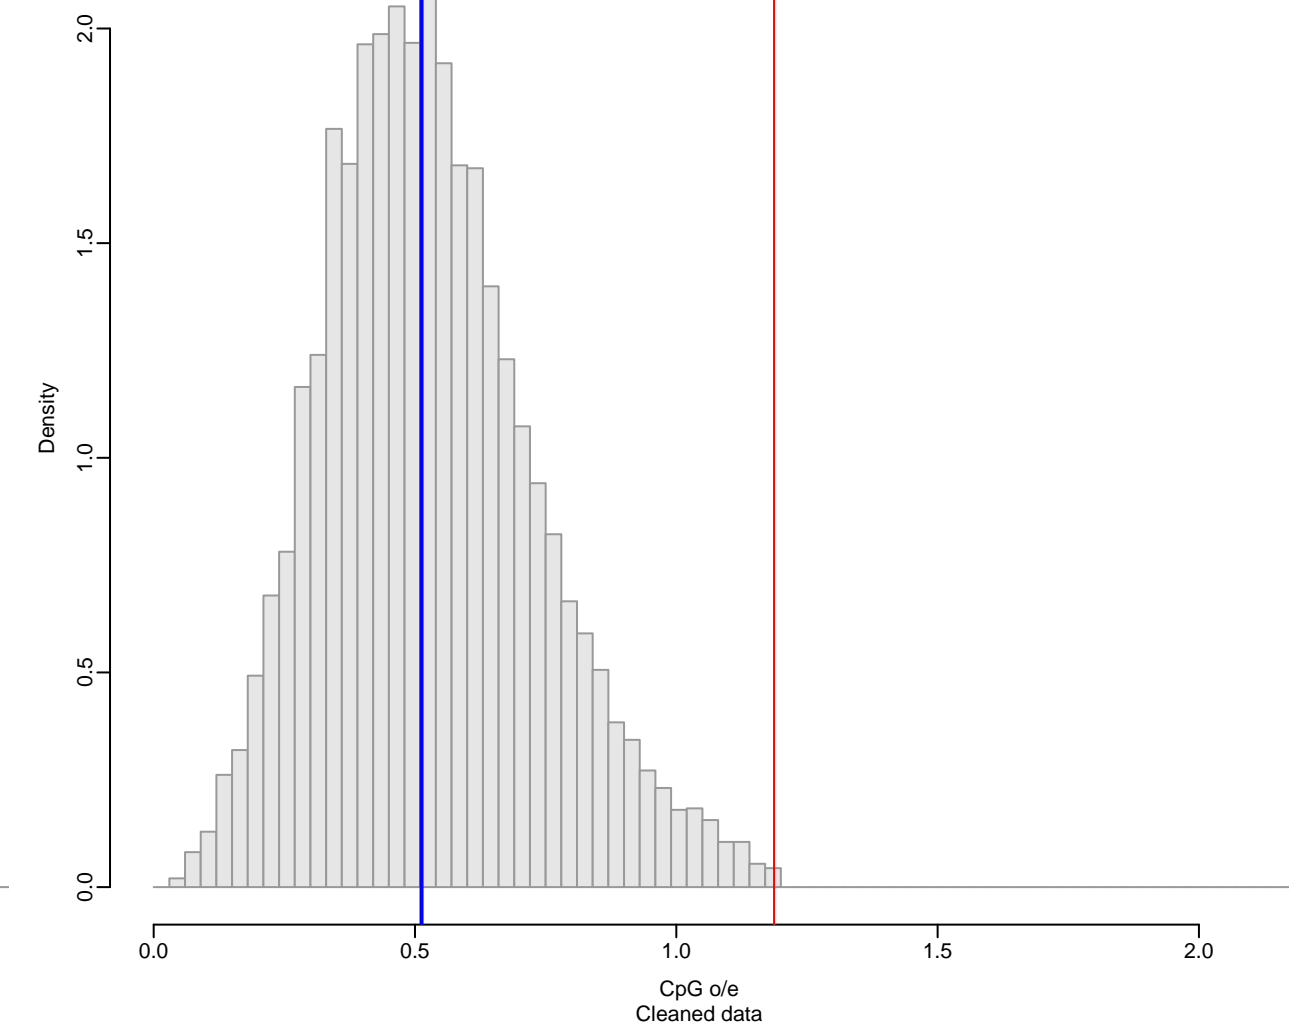

*Astyanax\_mexicanus*

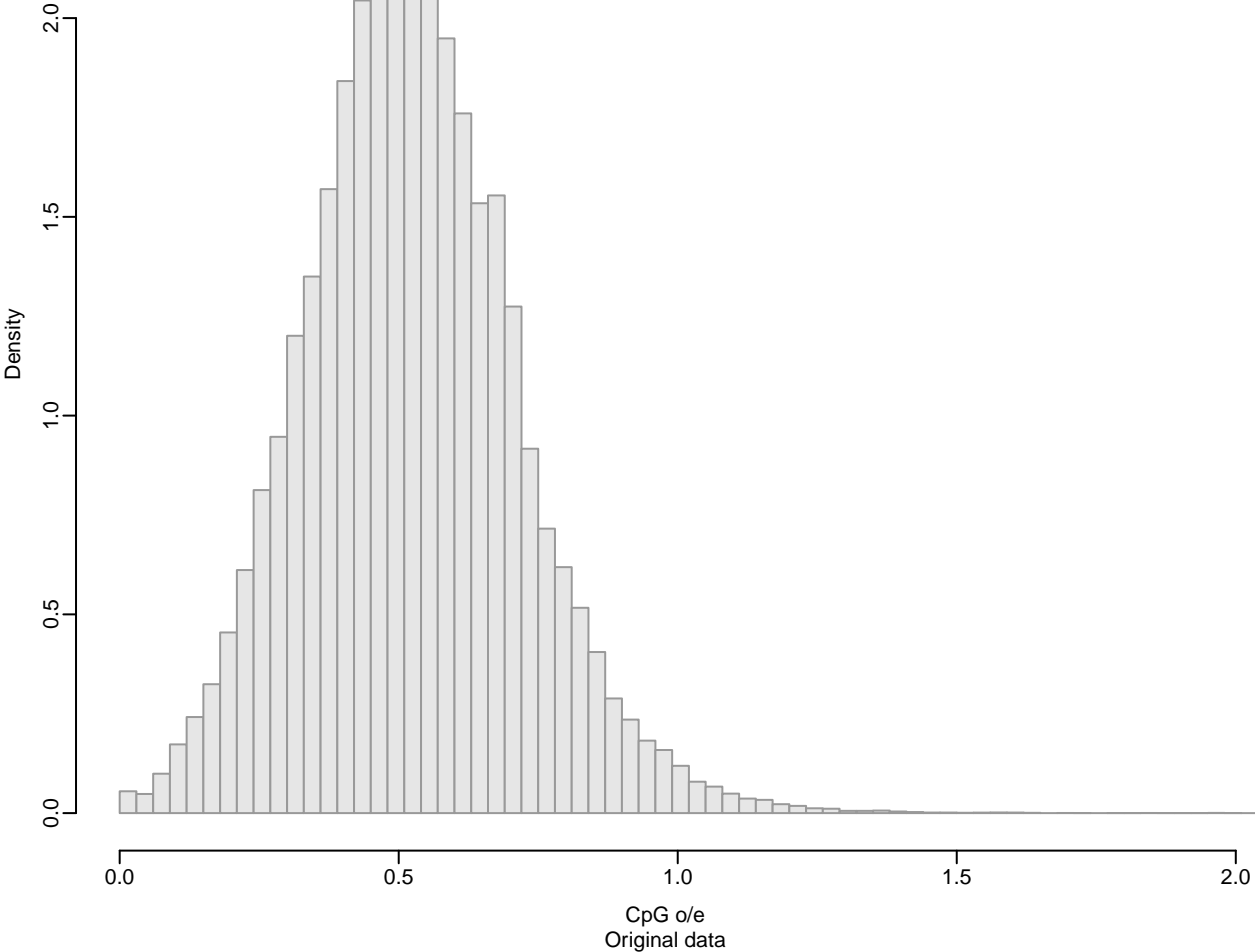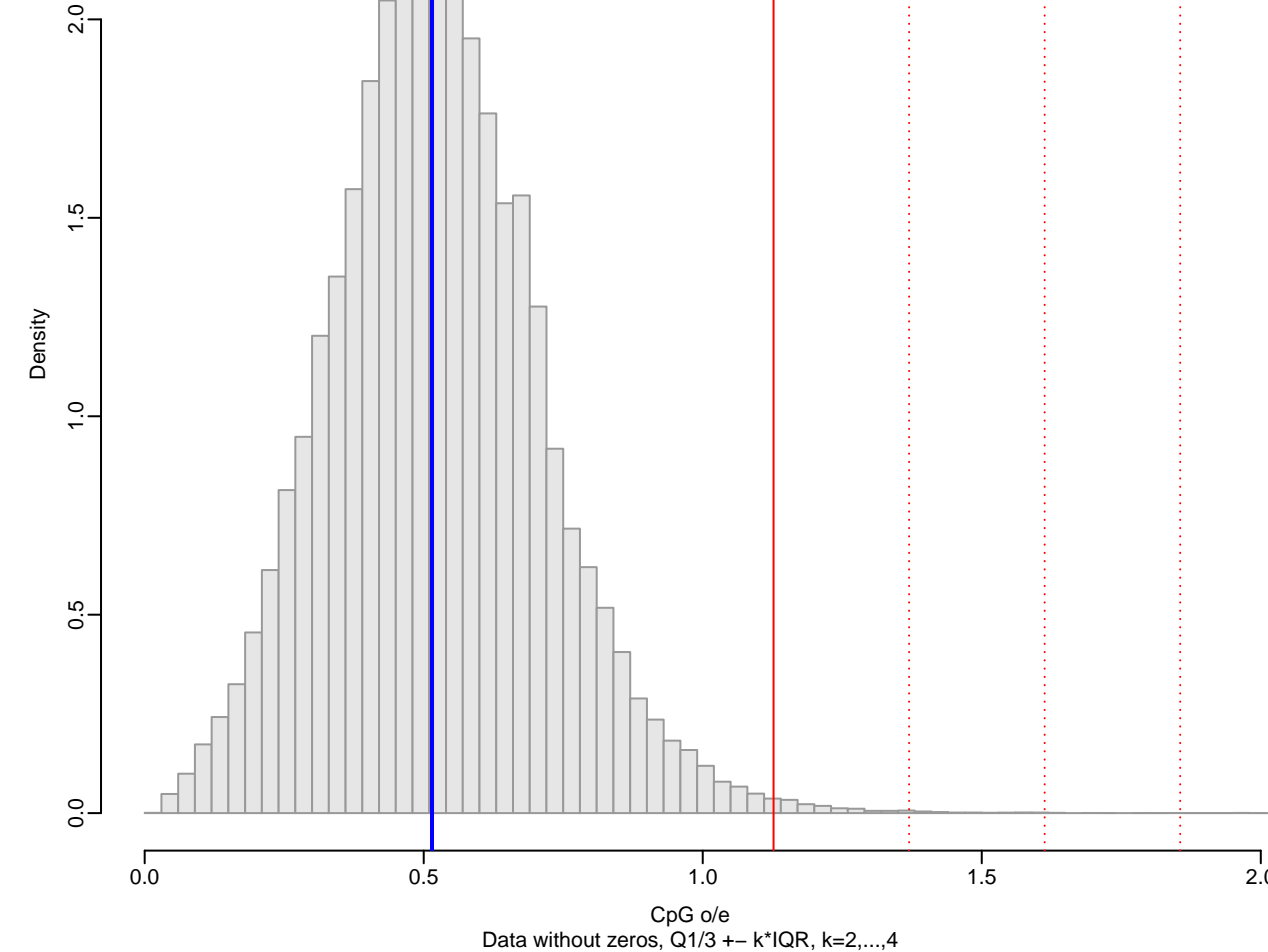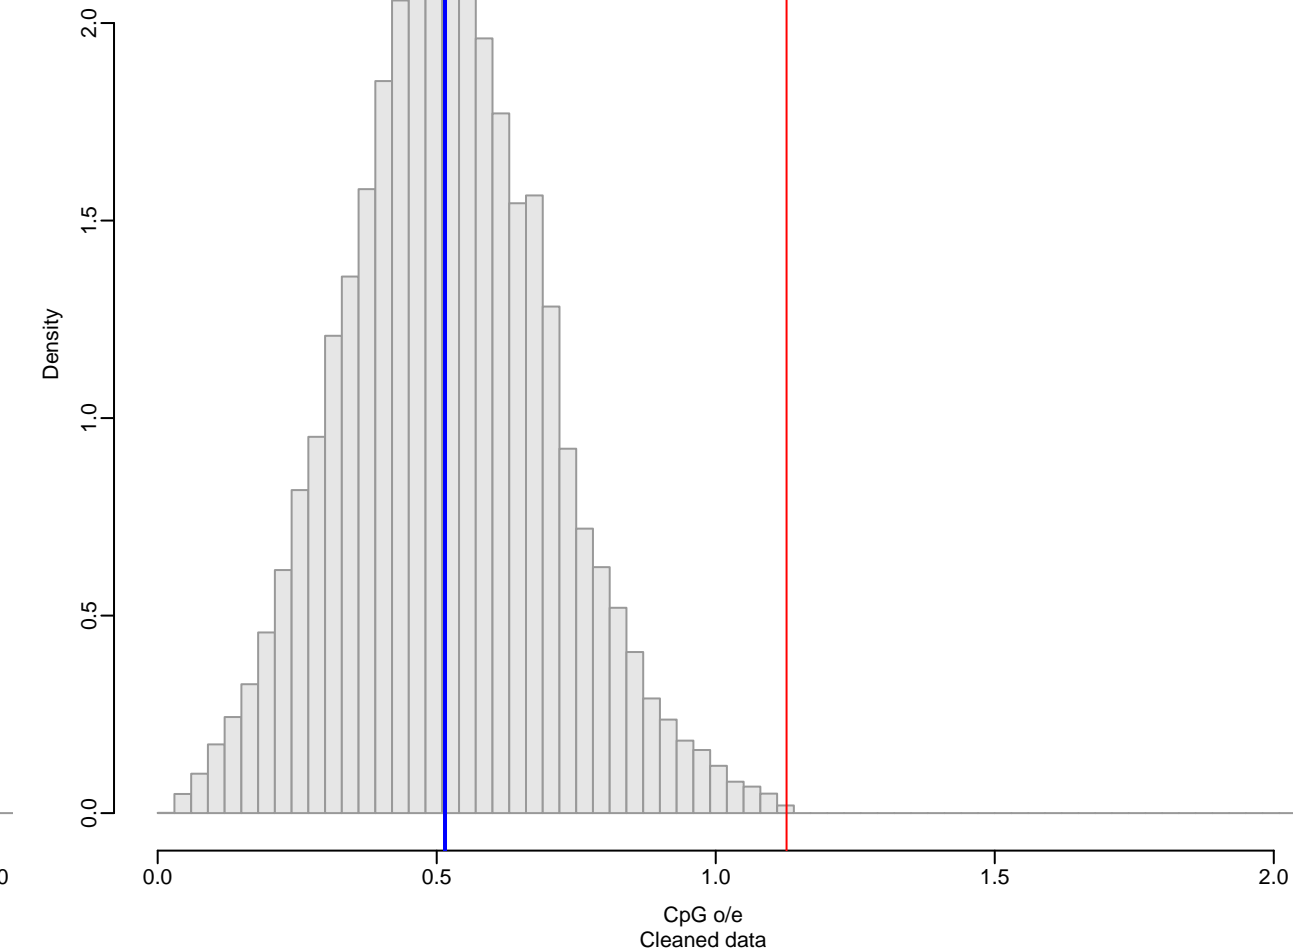

Atta\_laevigata

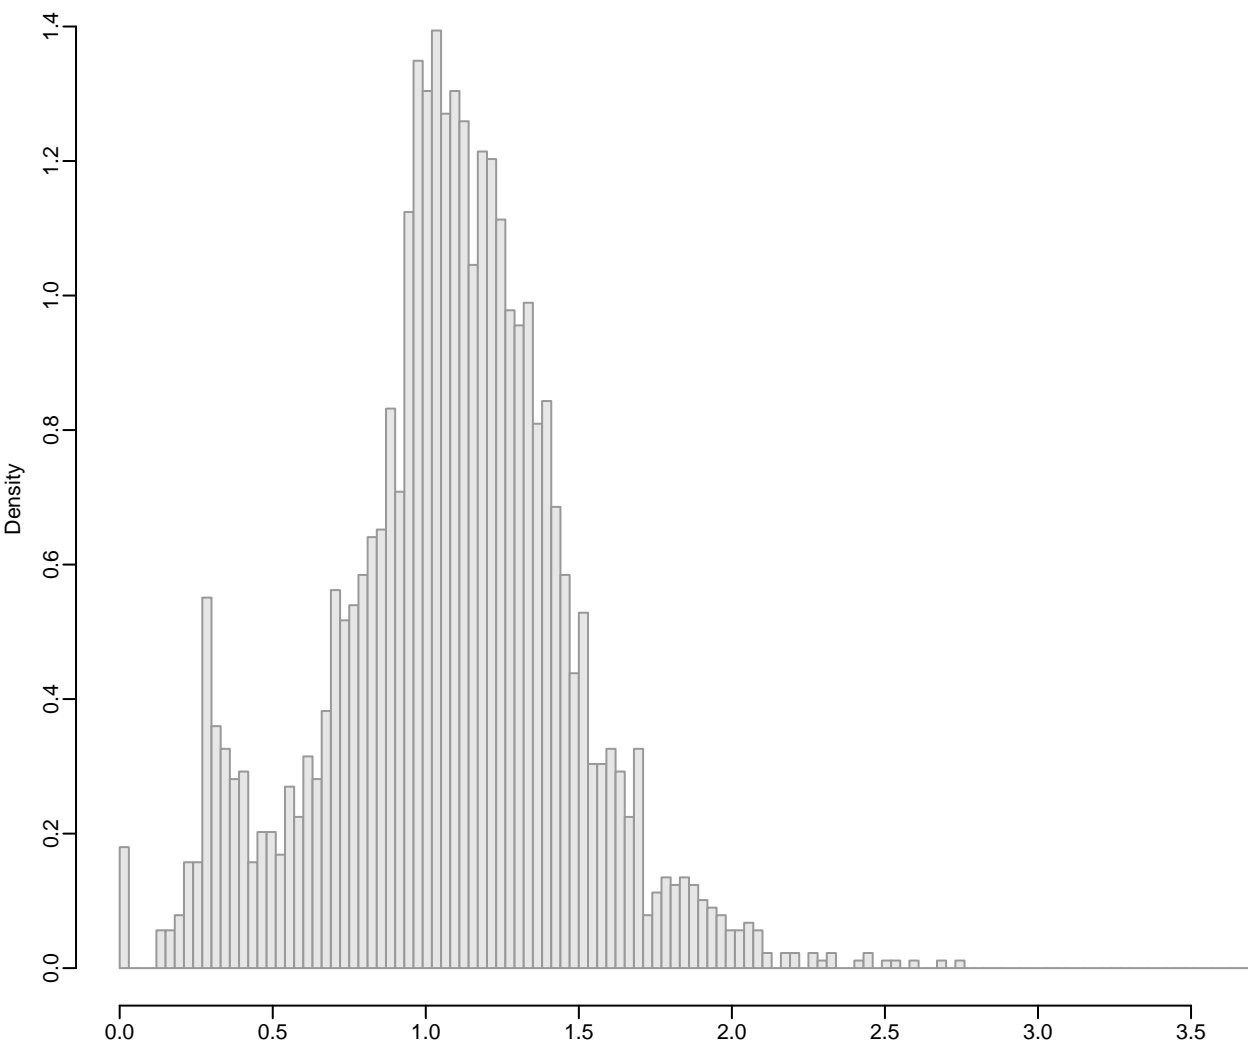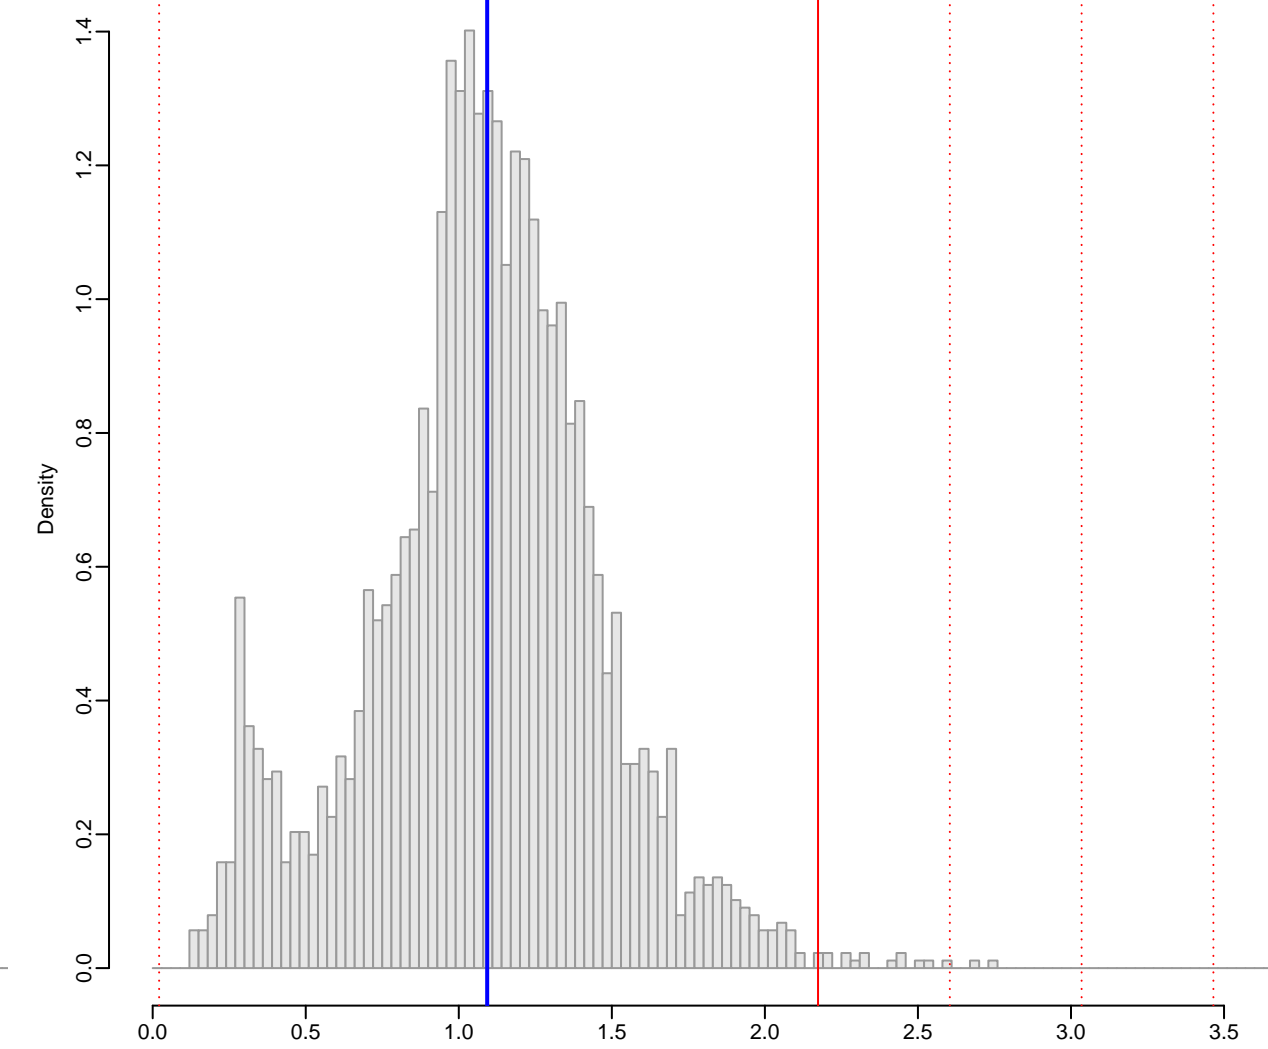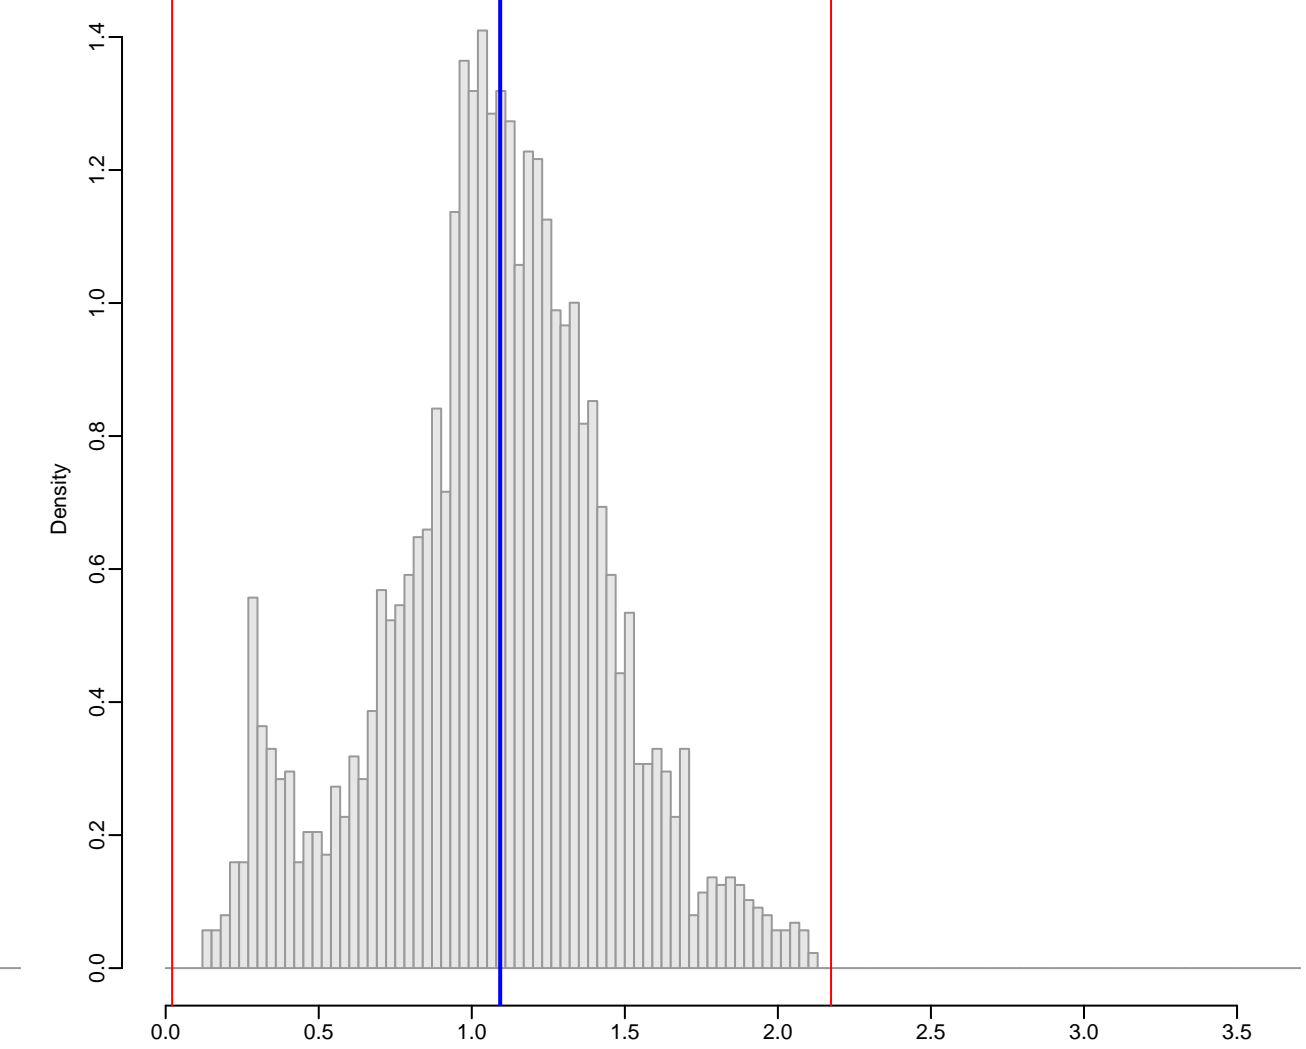

Aureobasidium\_pullulans

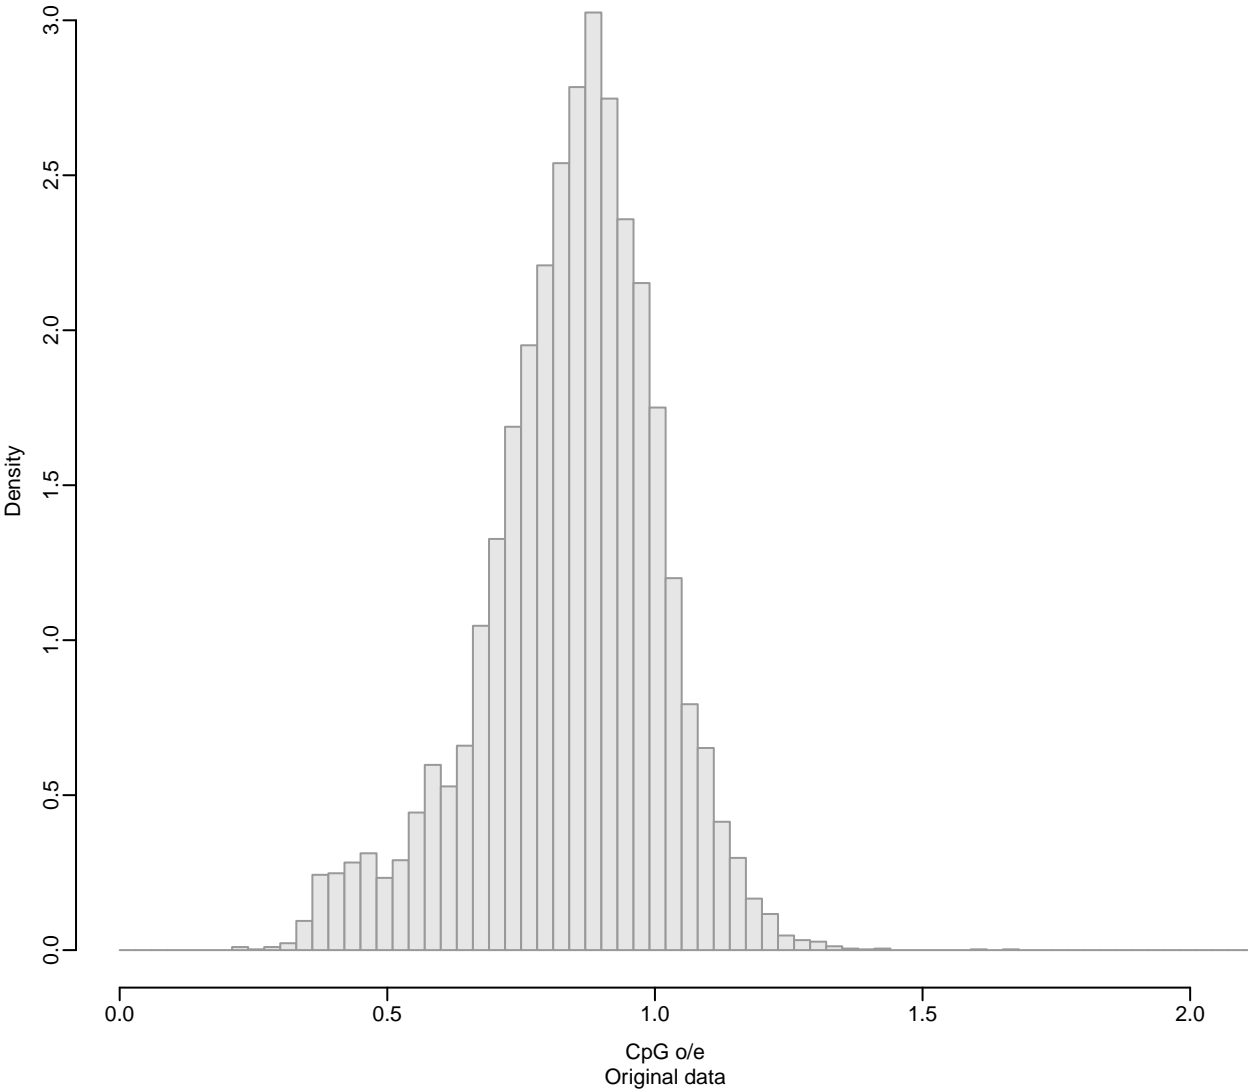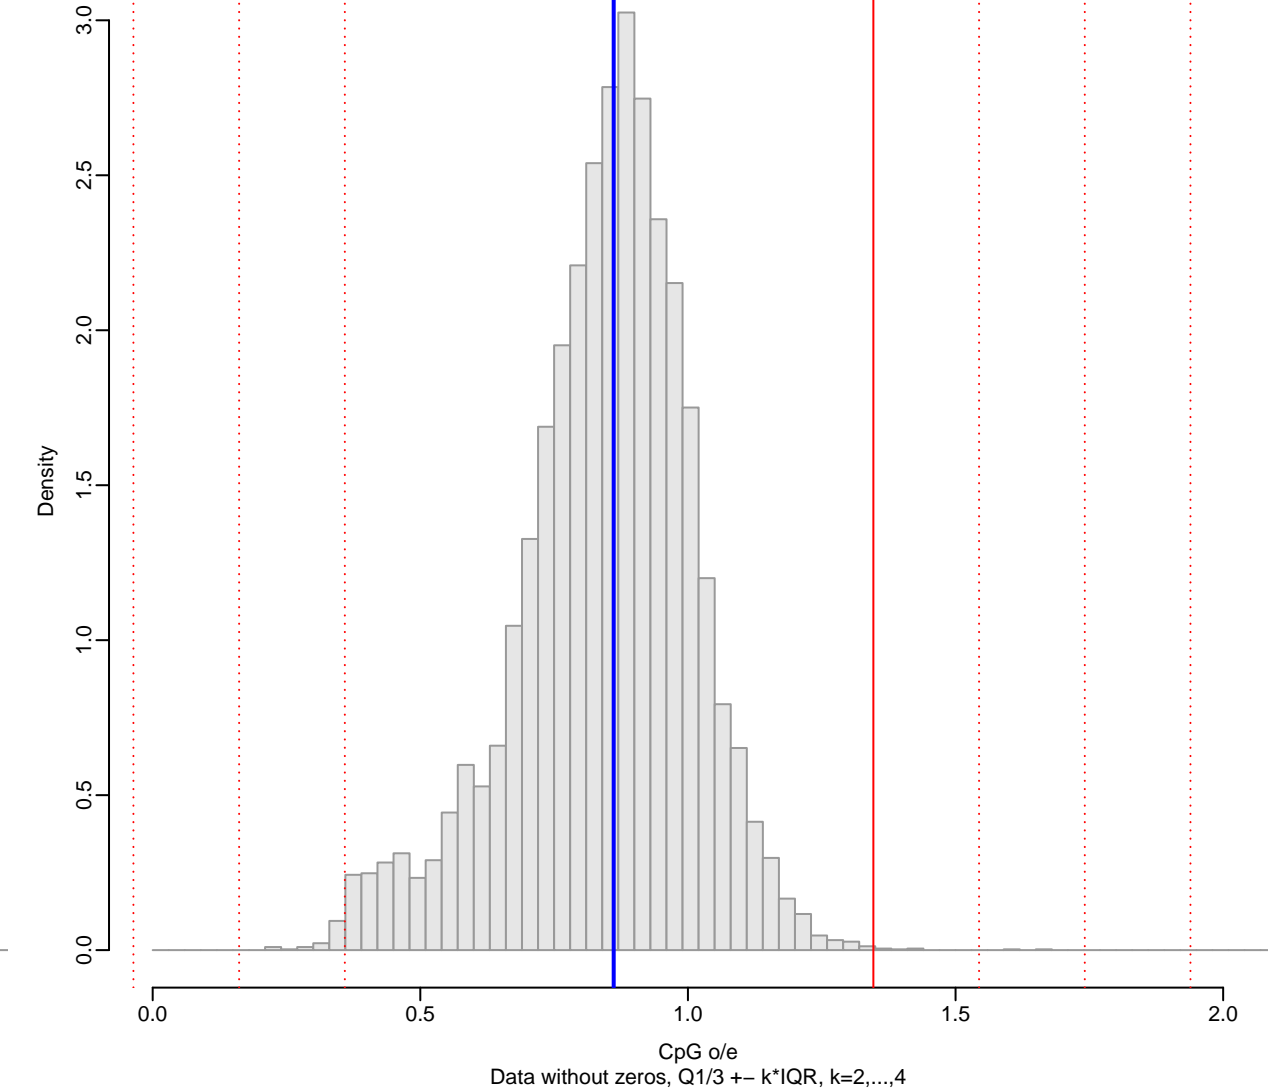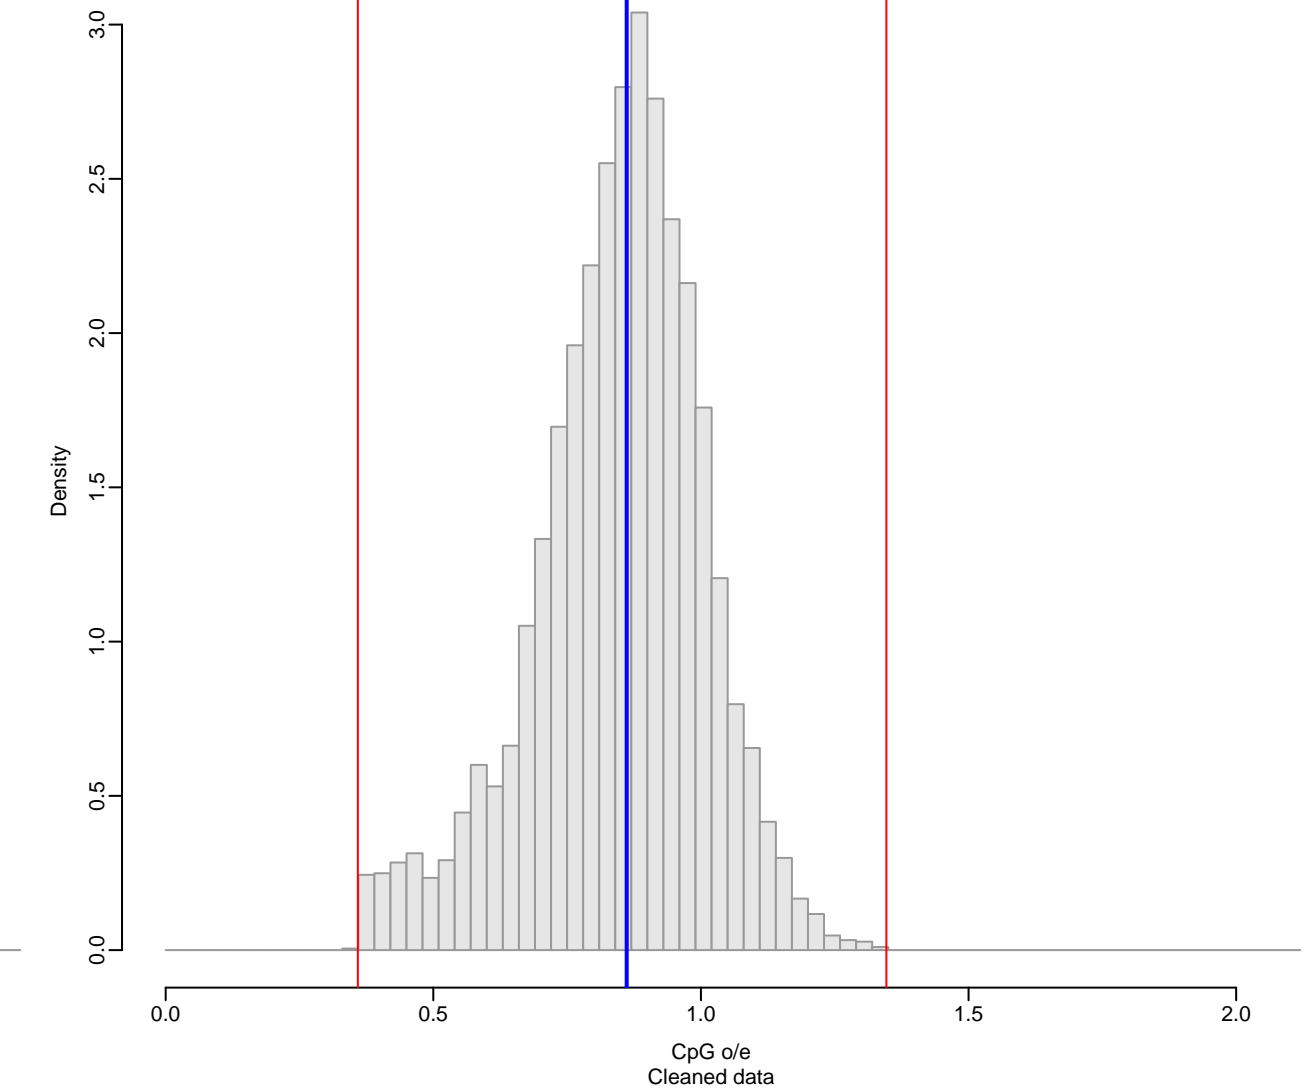

Avena\_barbata

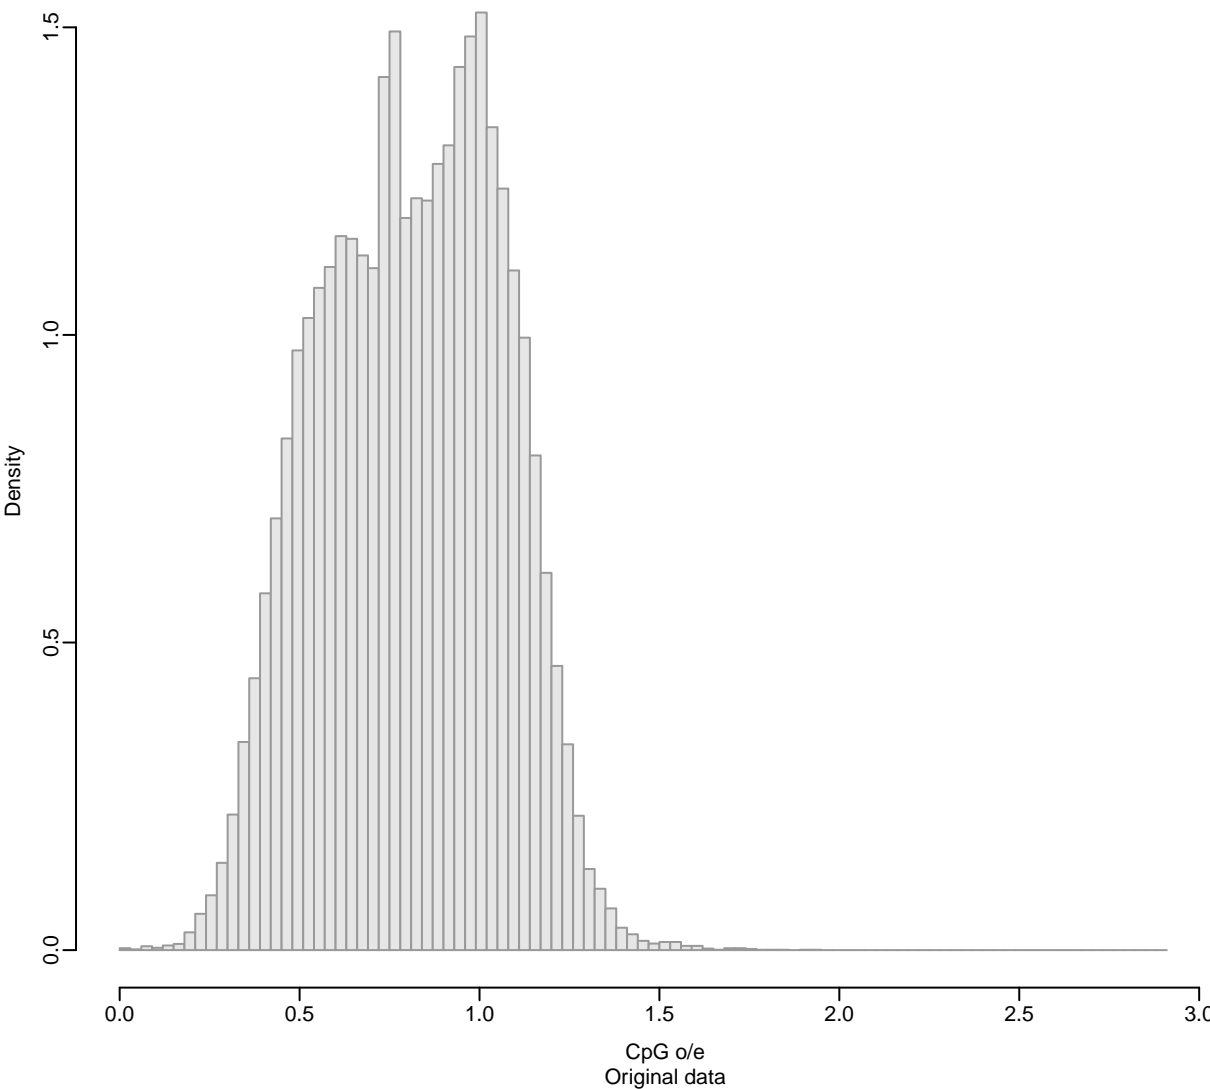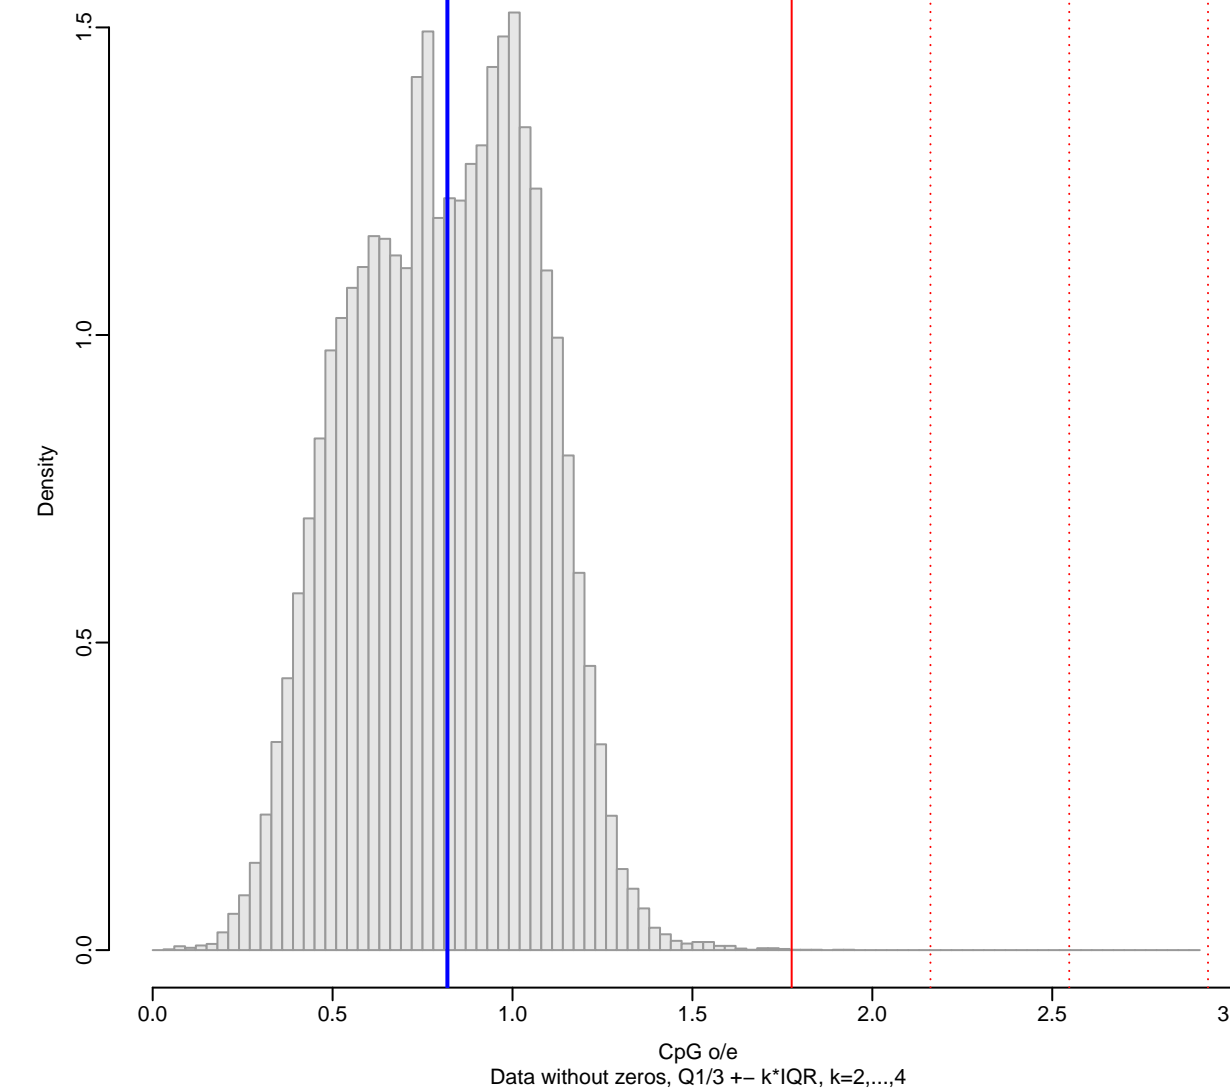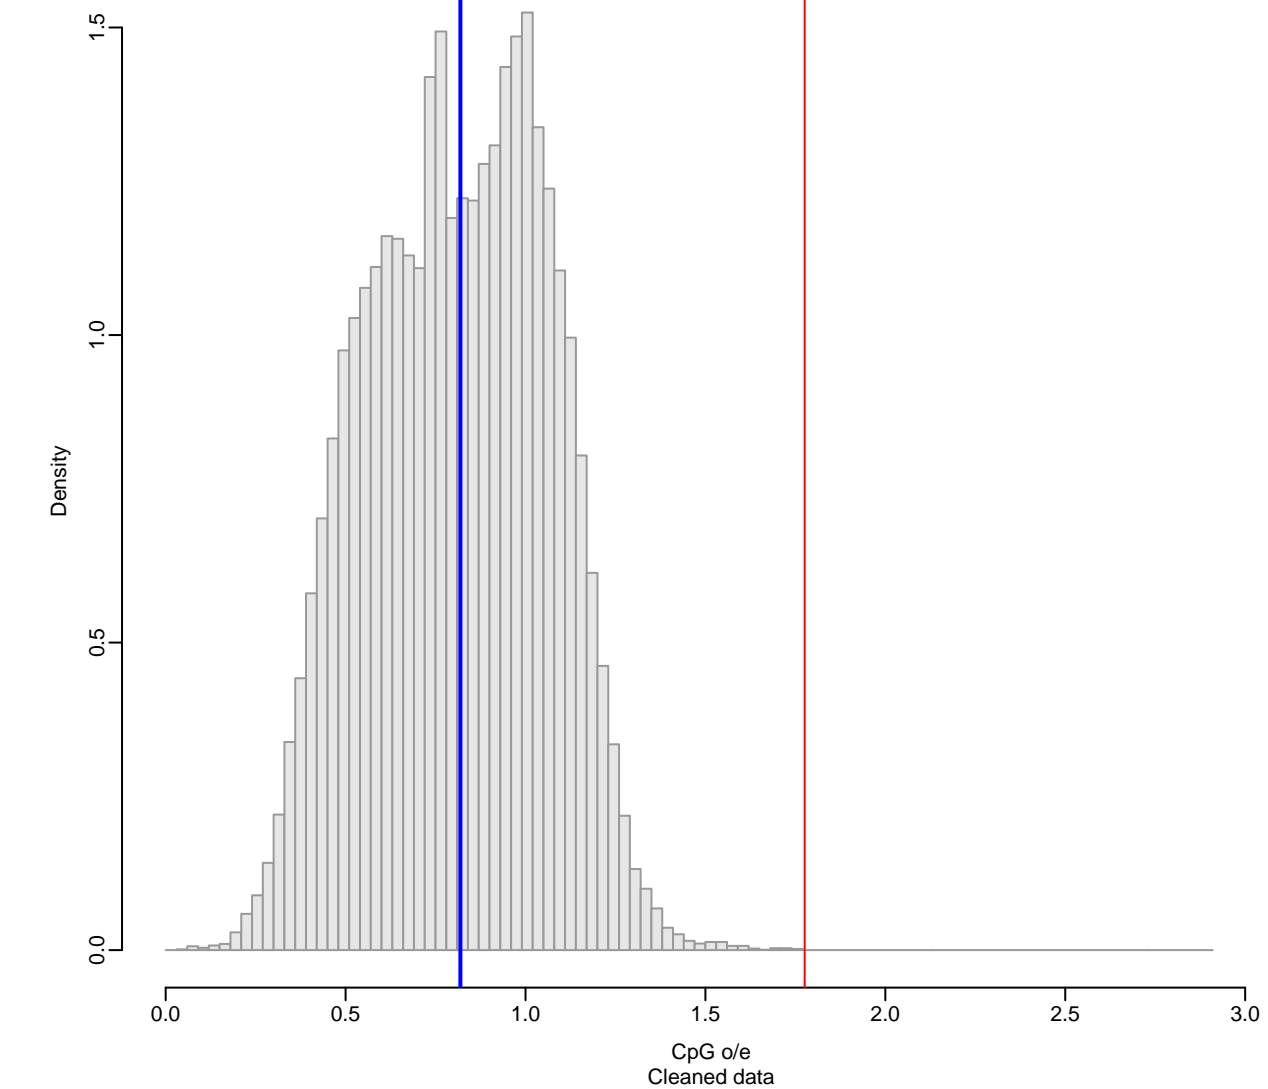



Babesia\_equi

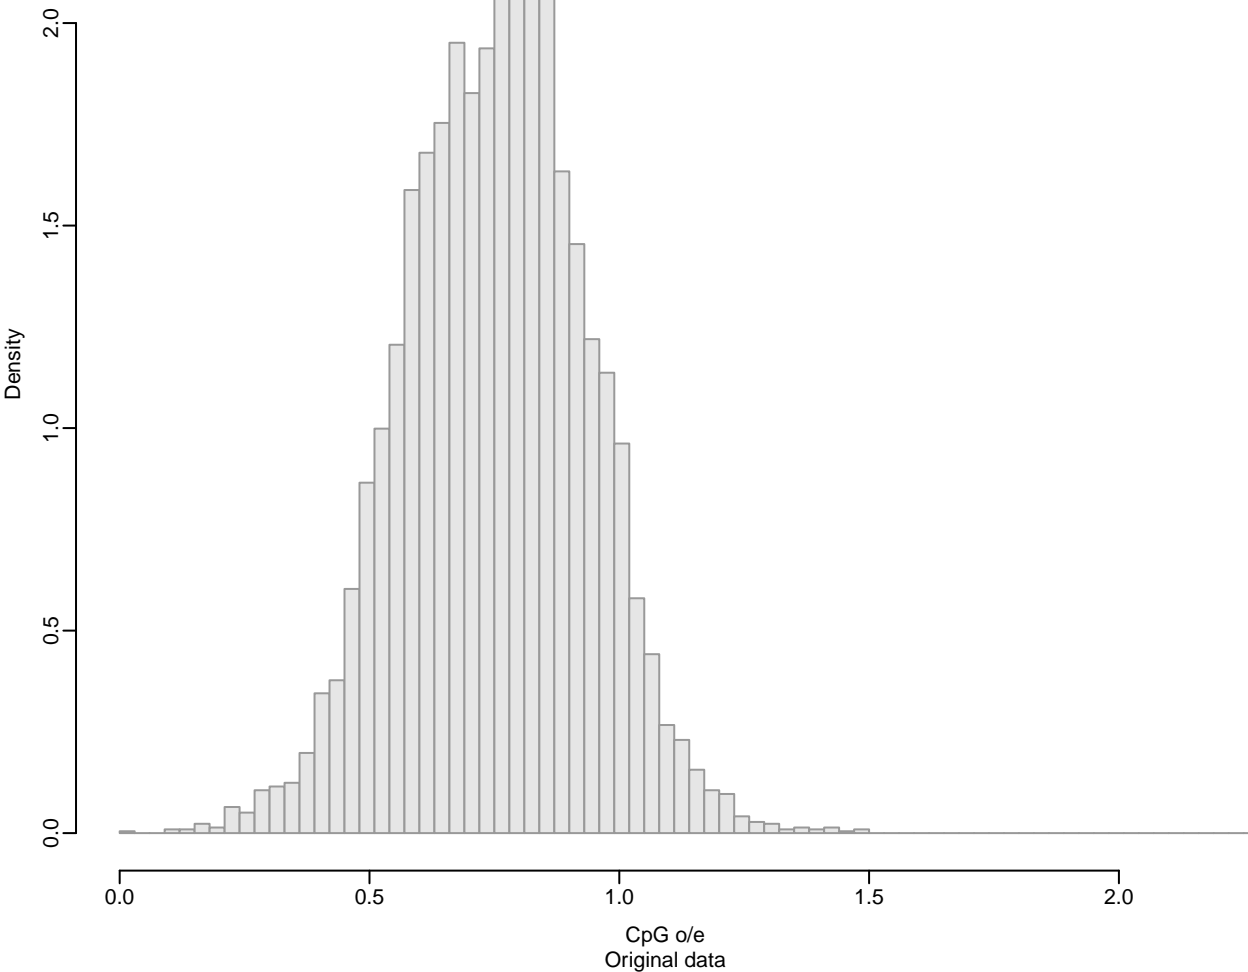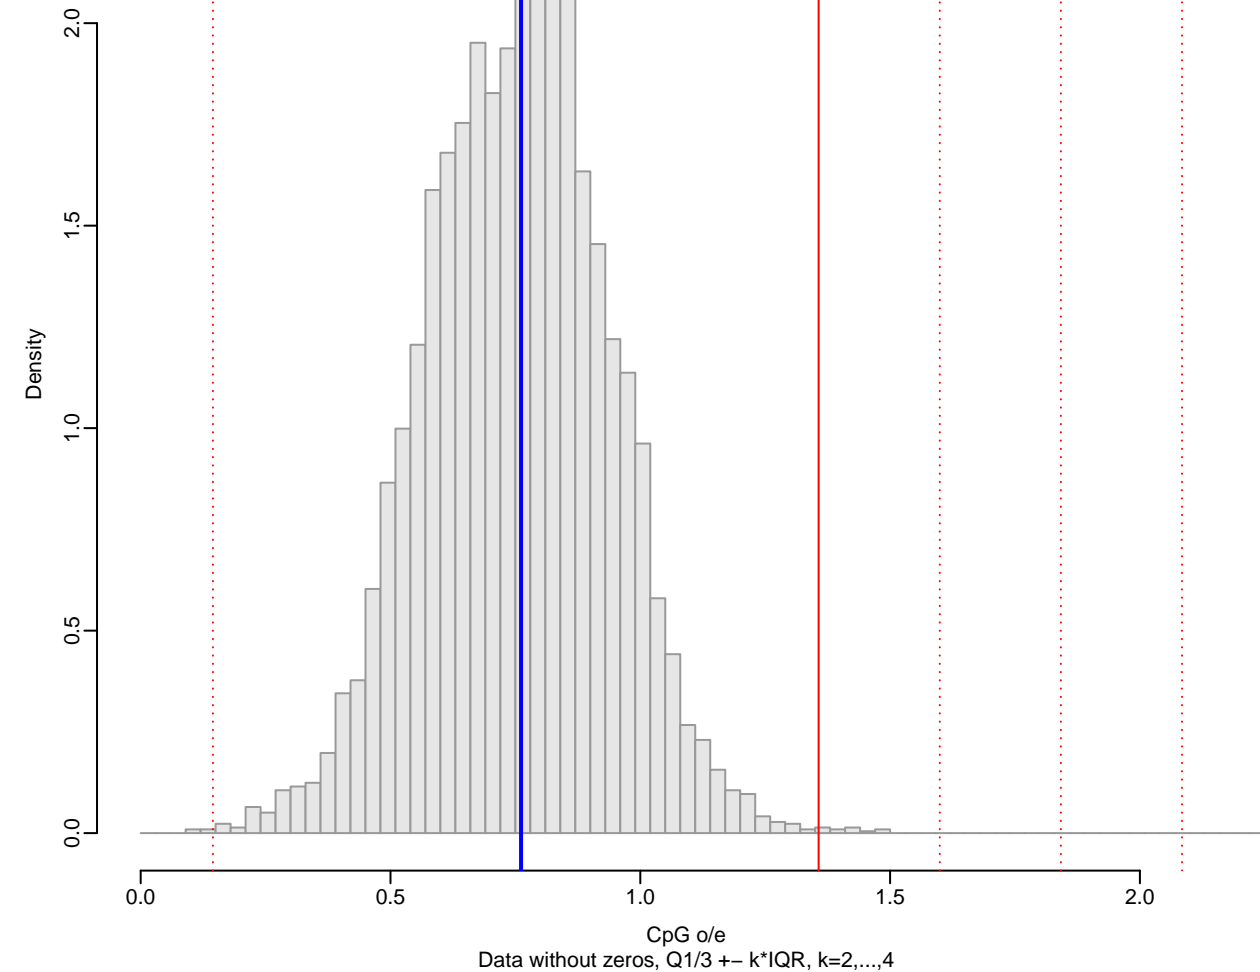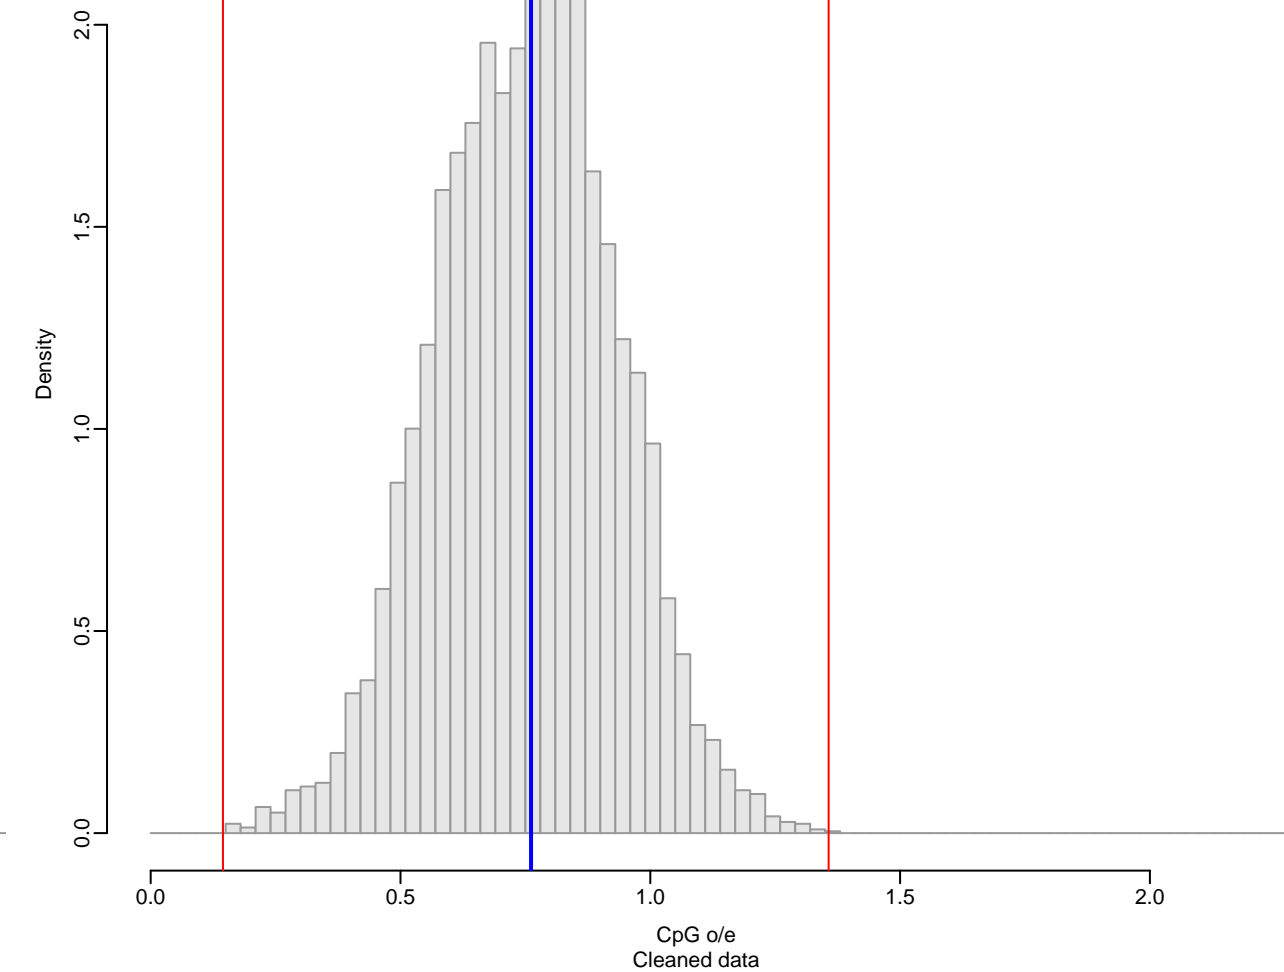

Balanoglossus\_clavigerus

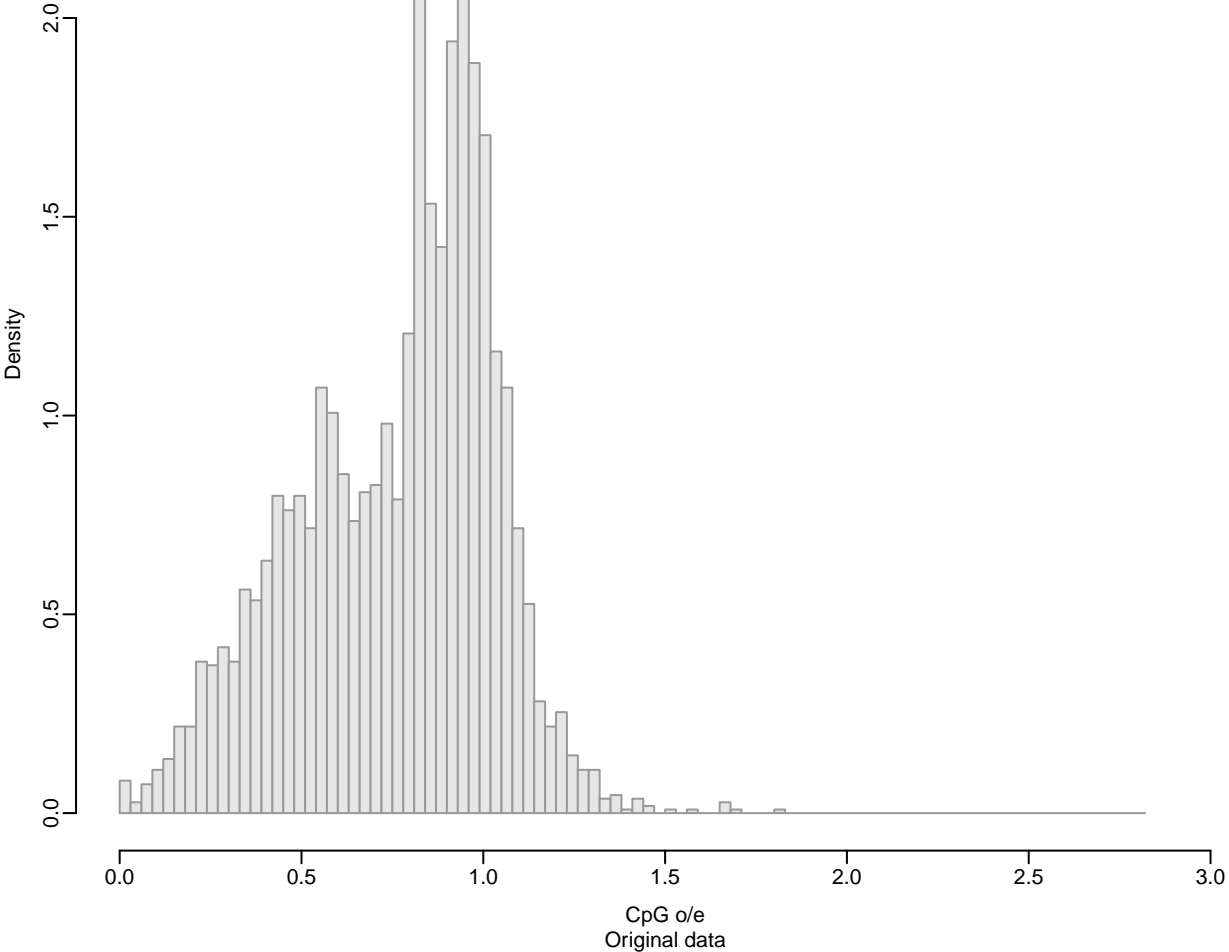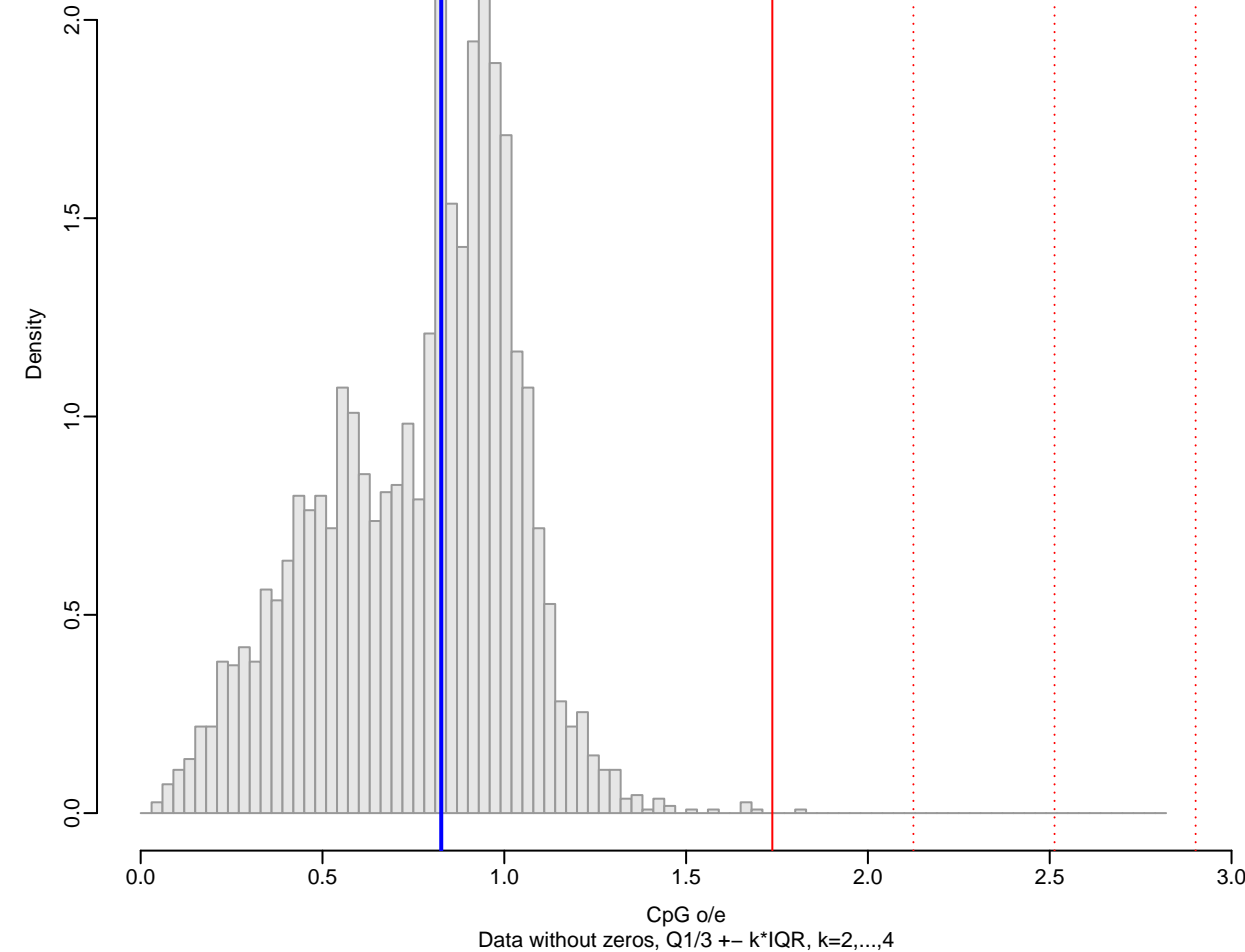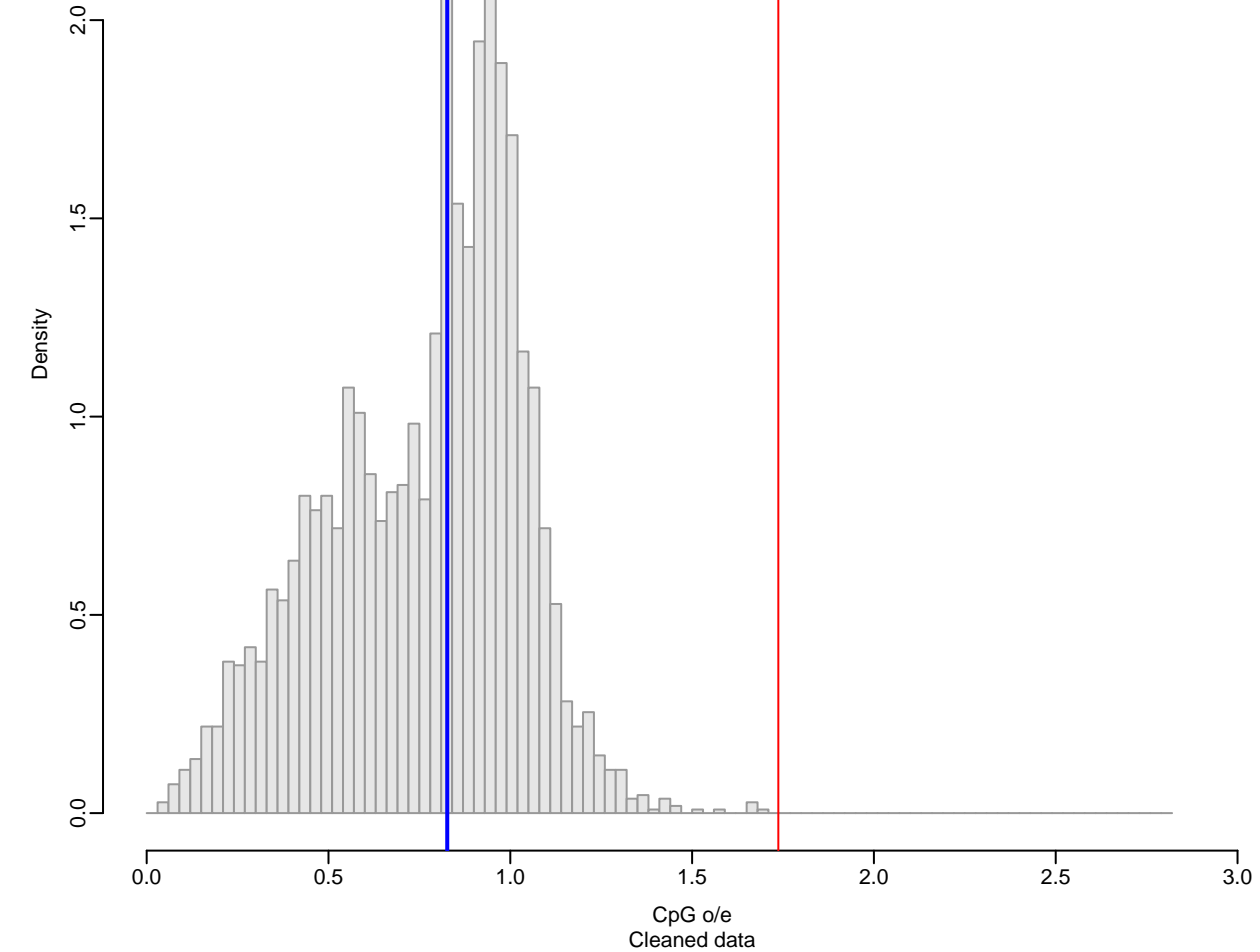

Betula\_platyphylla

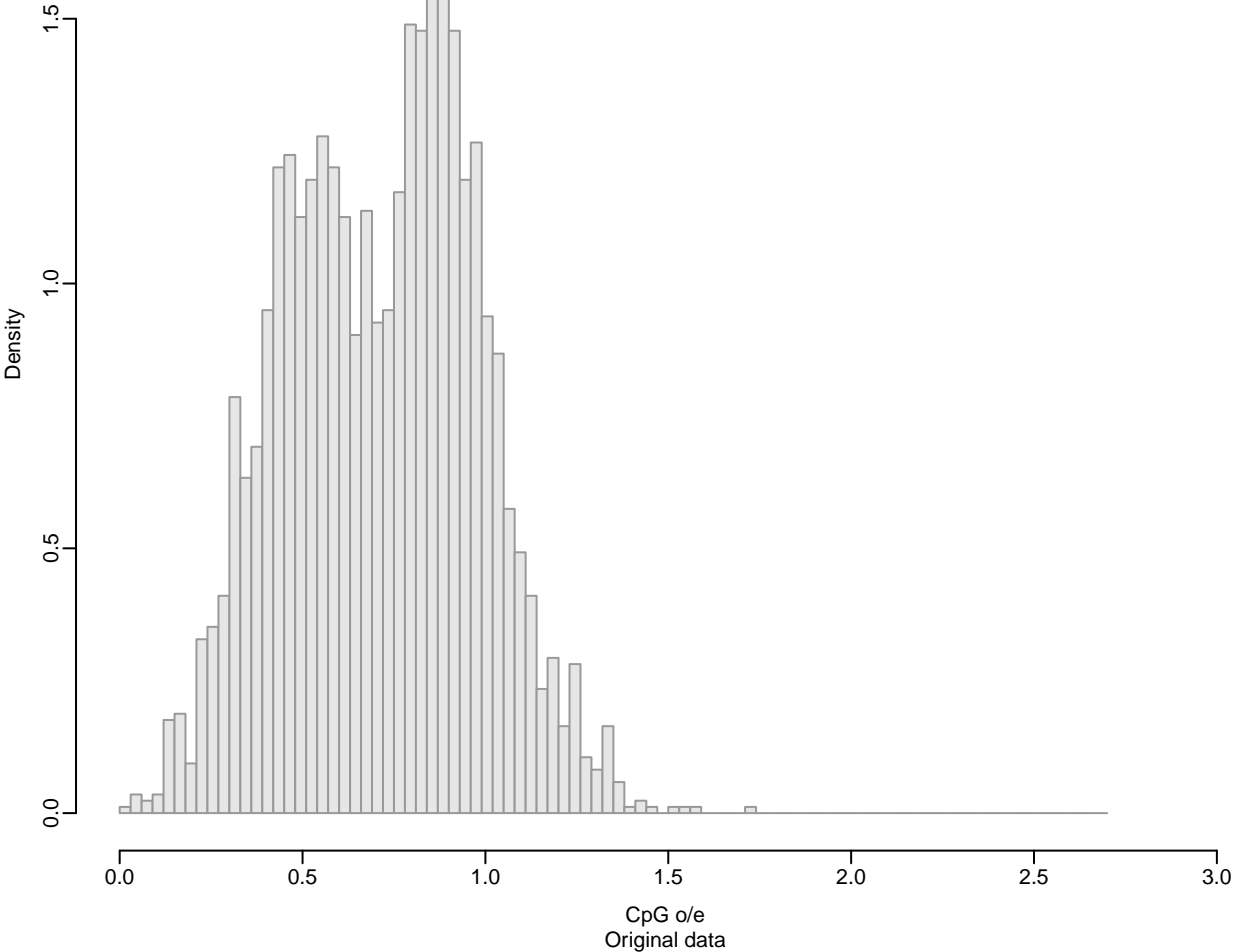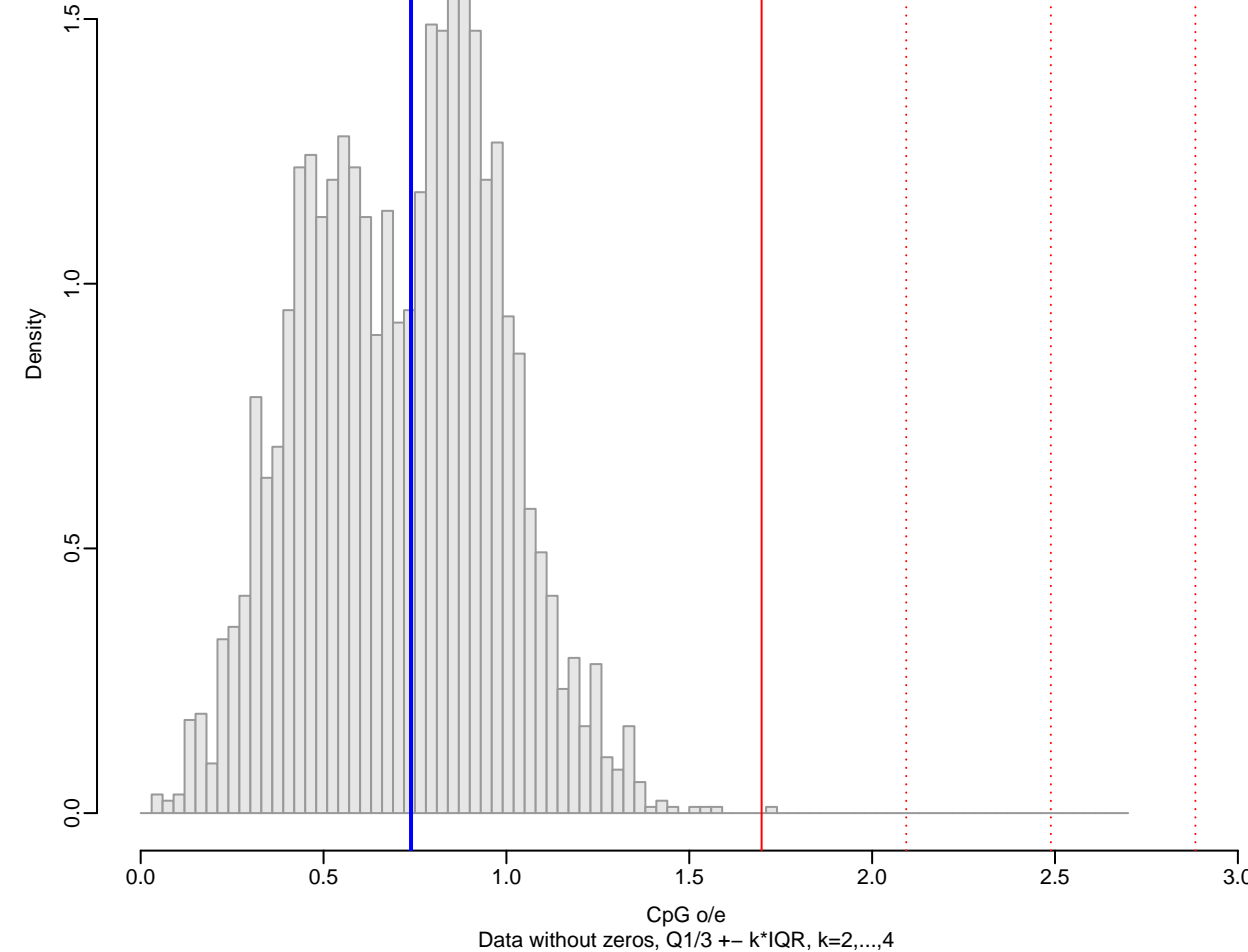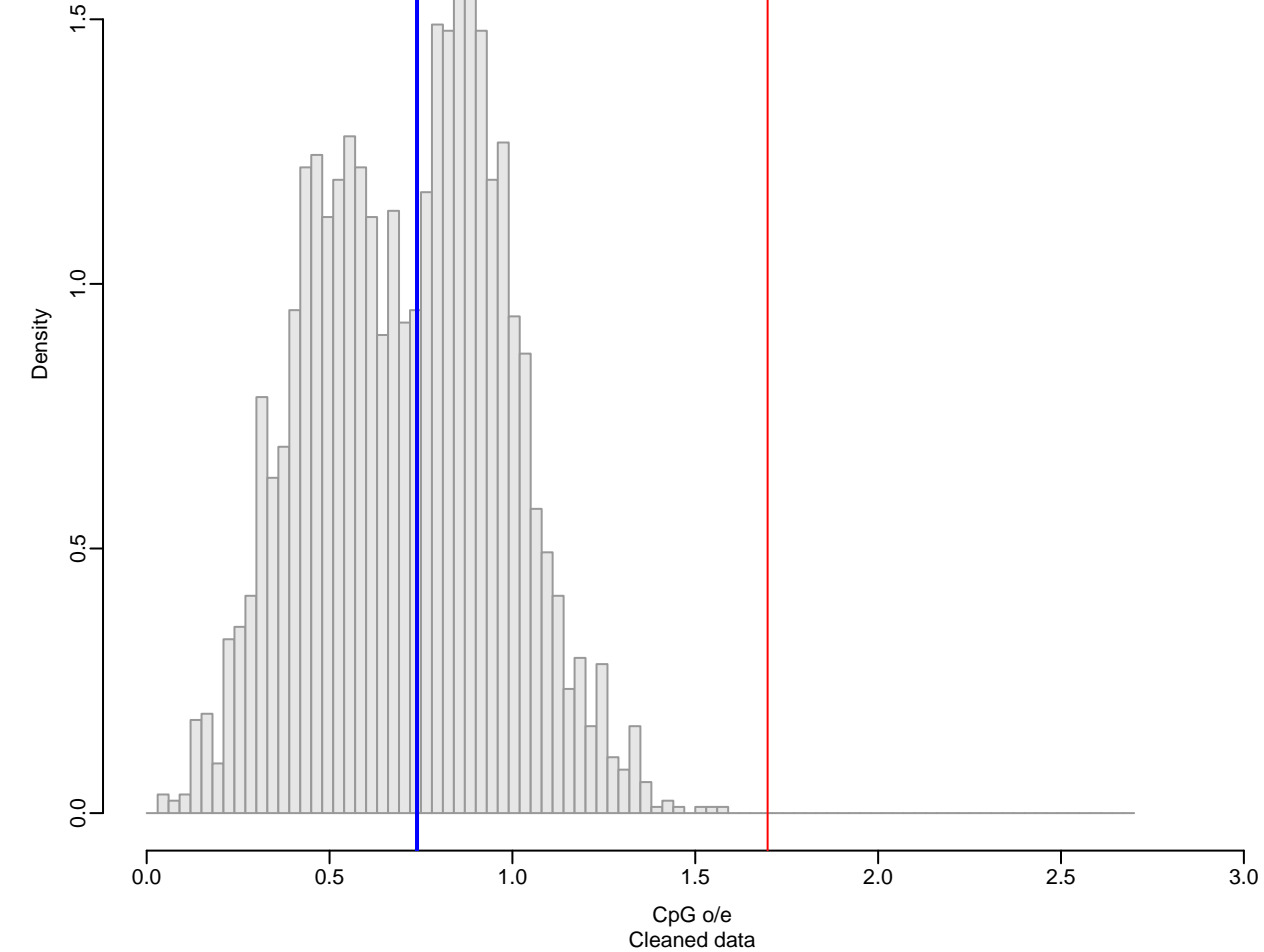

Bicyclus\_anyana

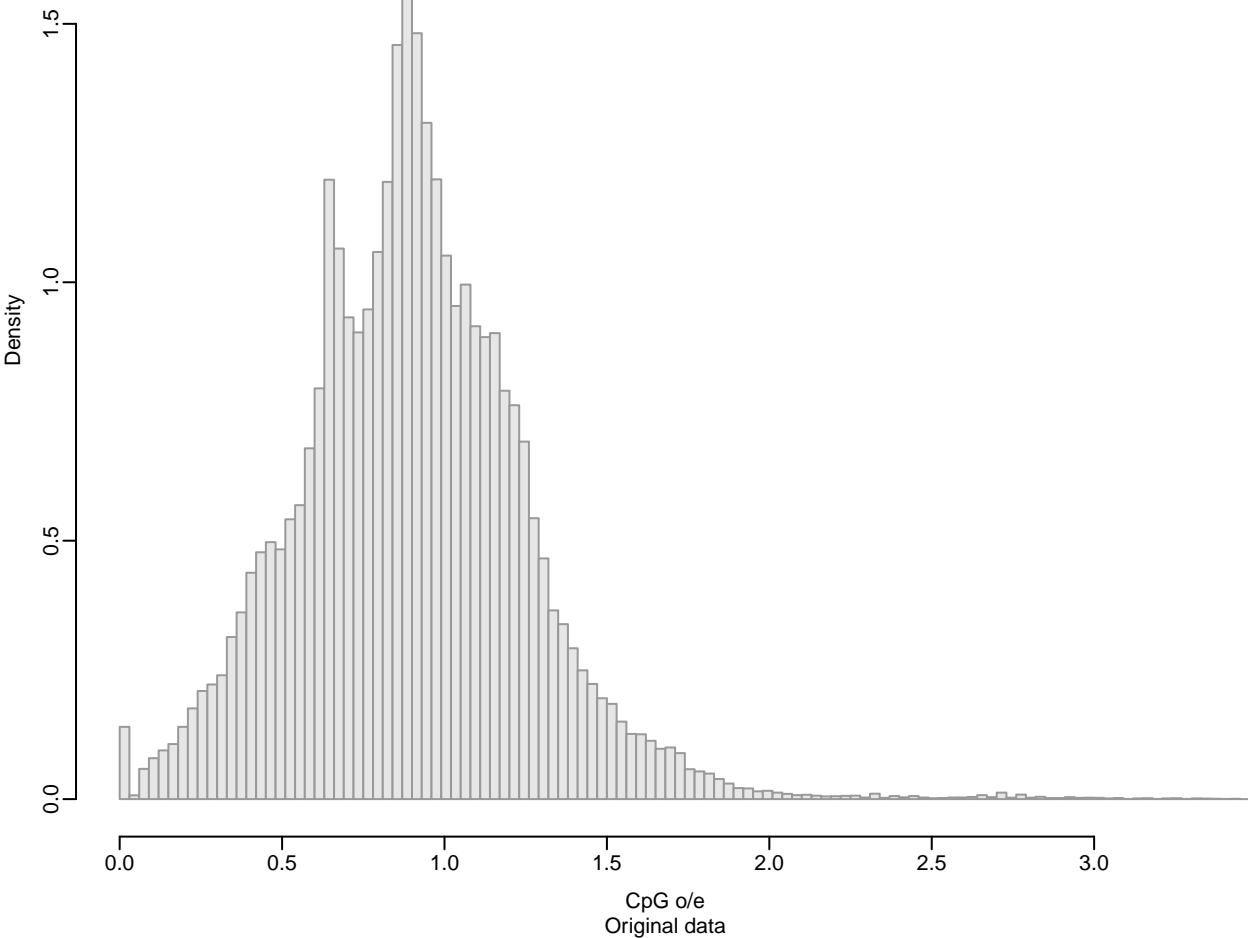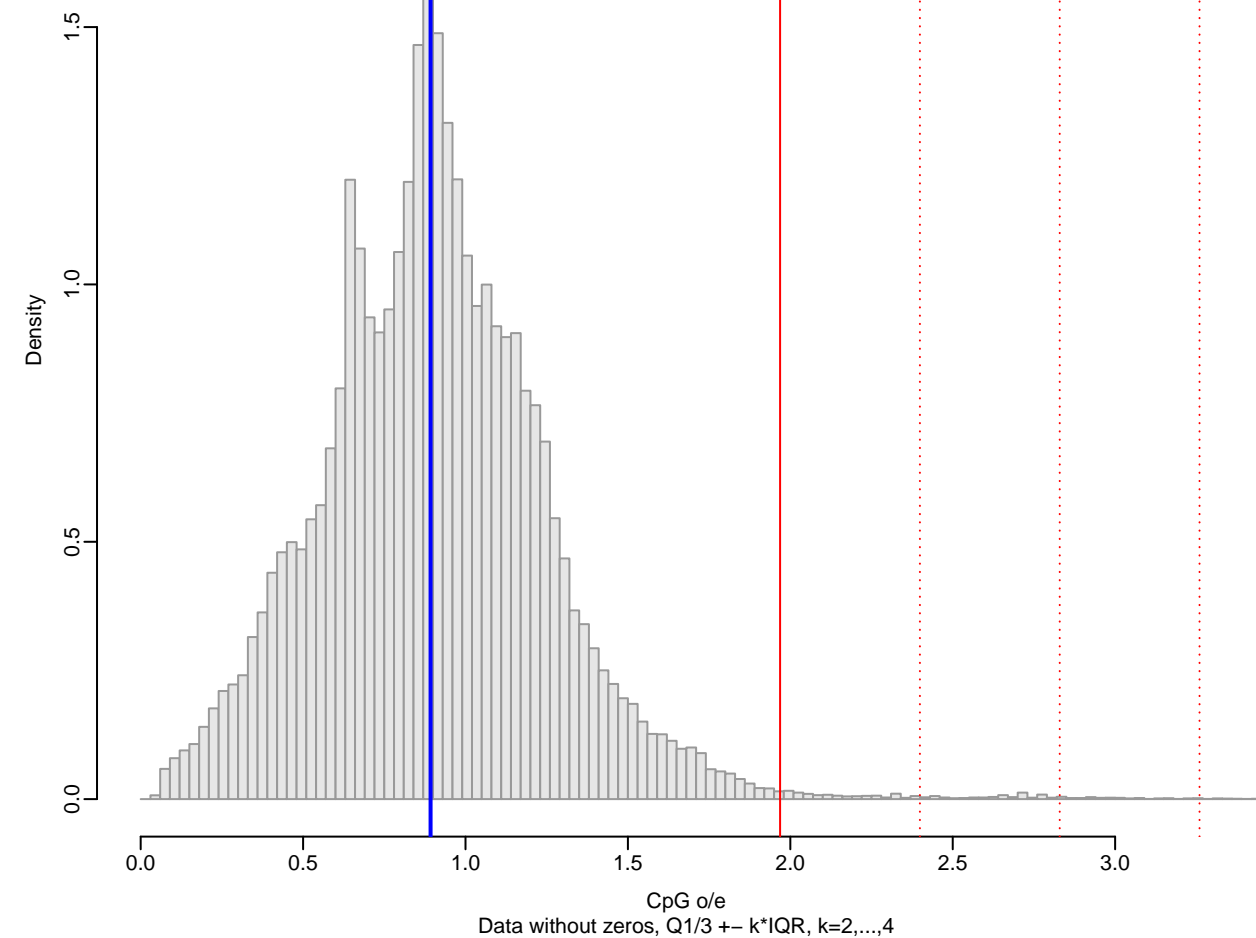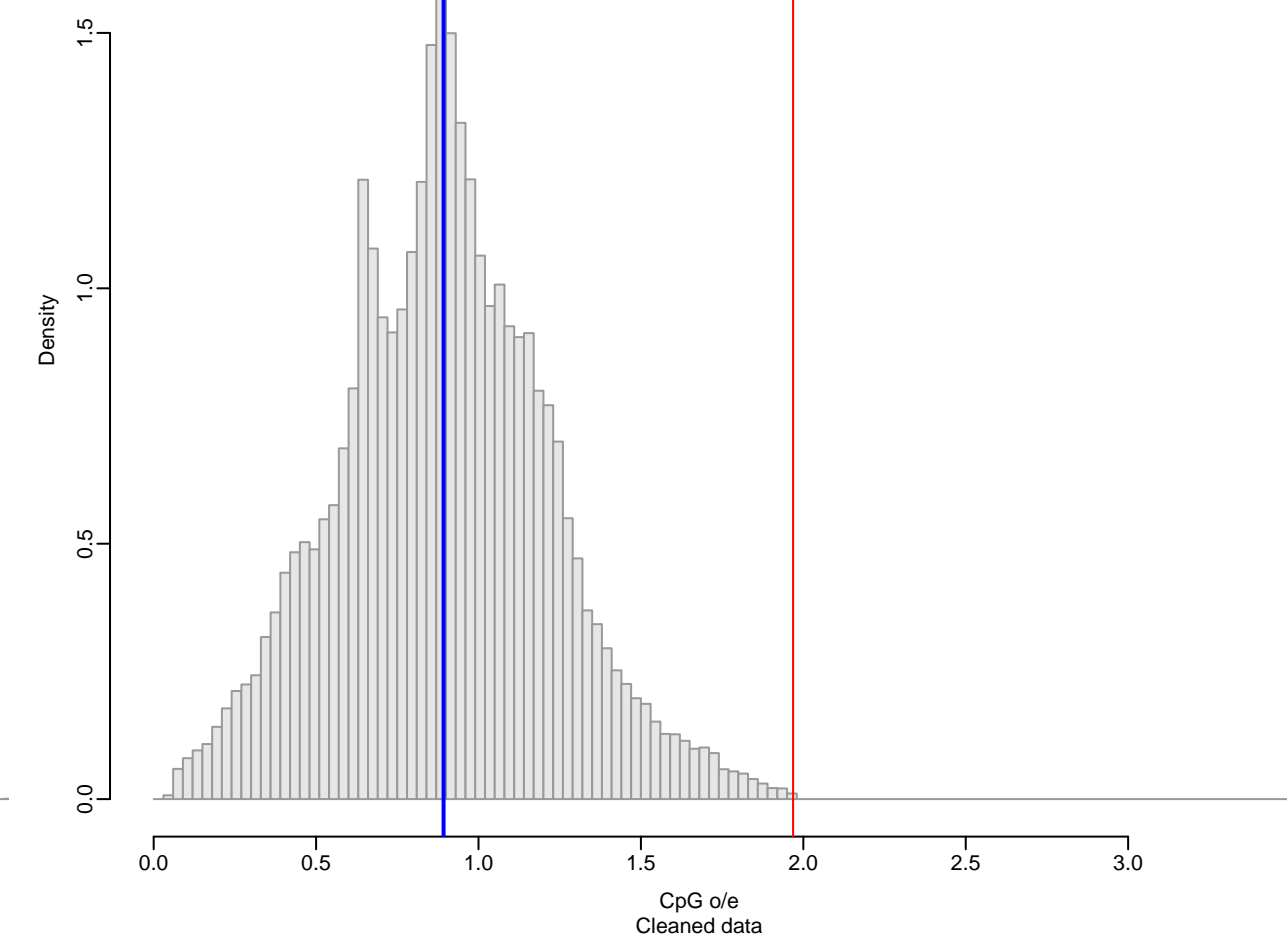

Biomphalaria\_glabrata

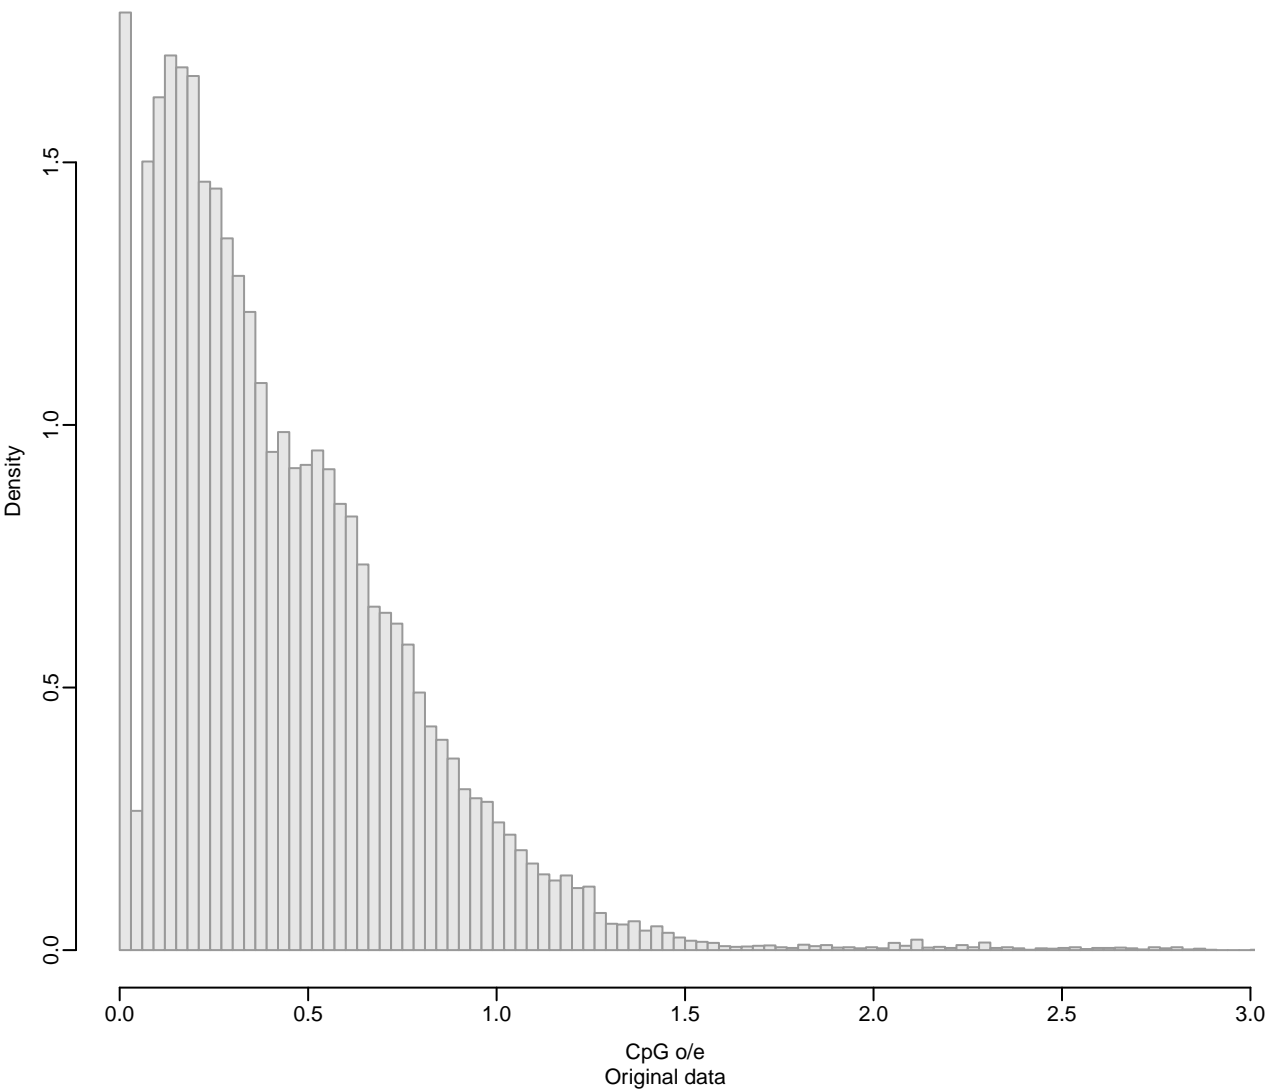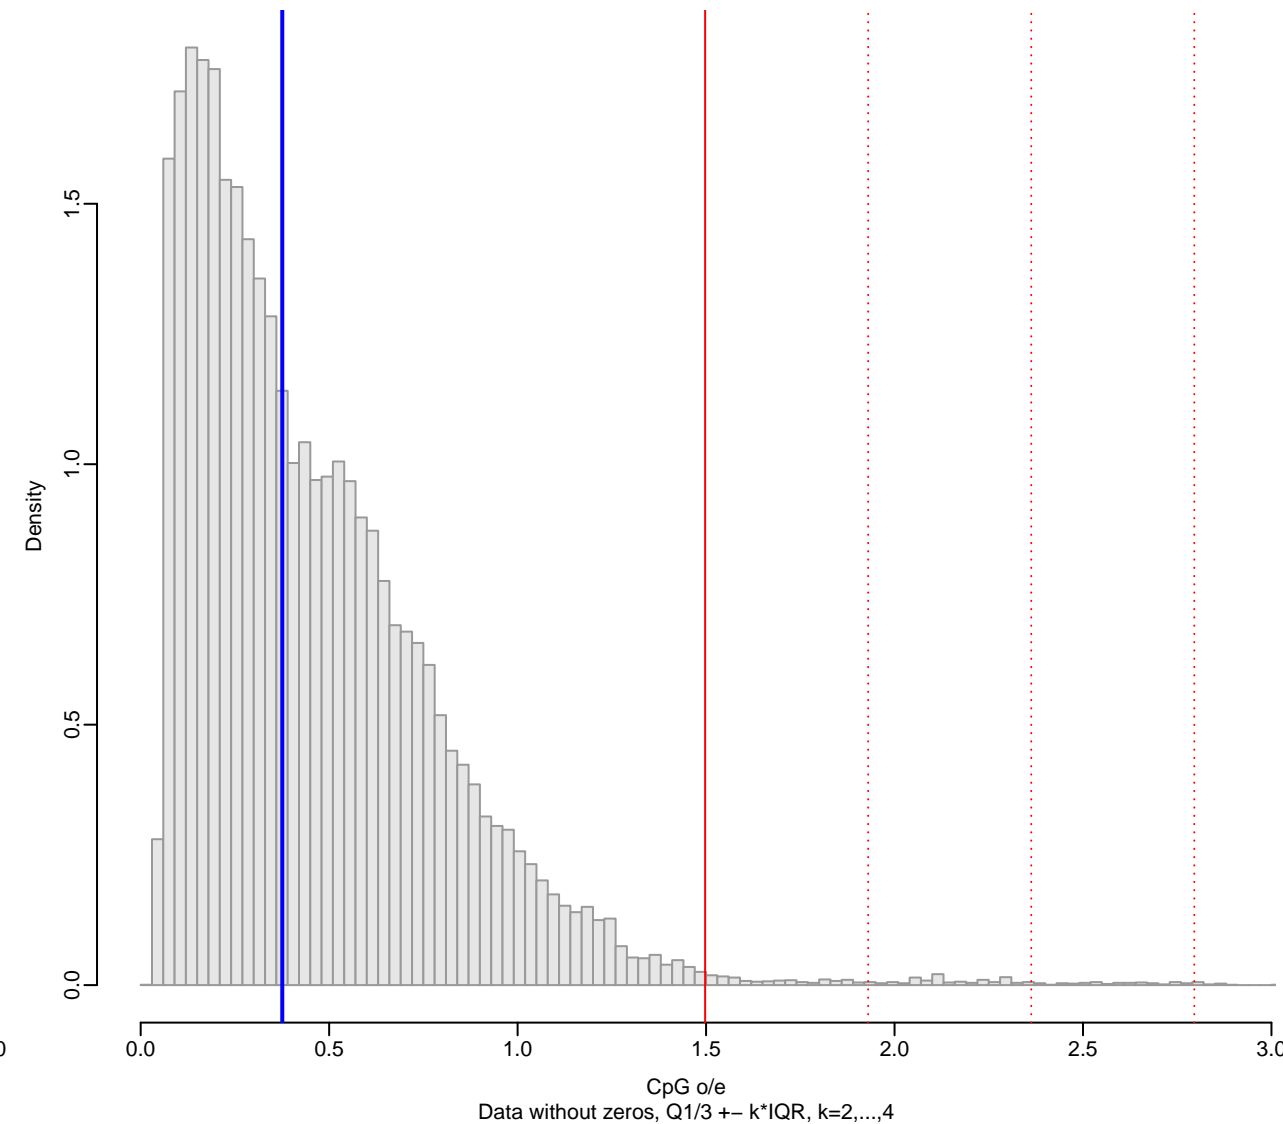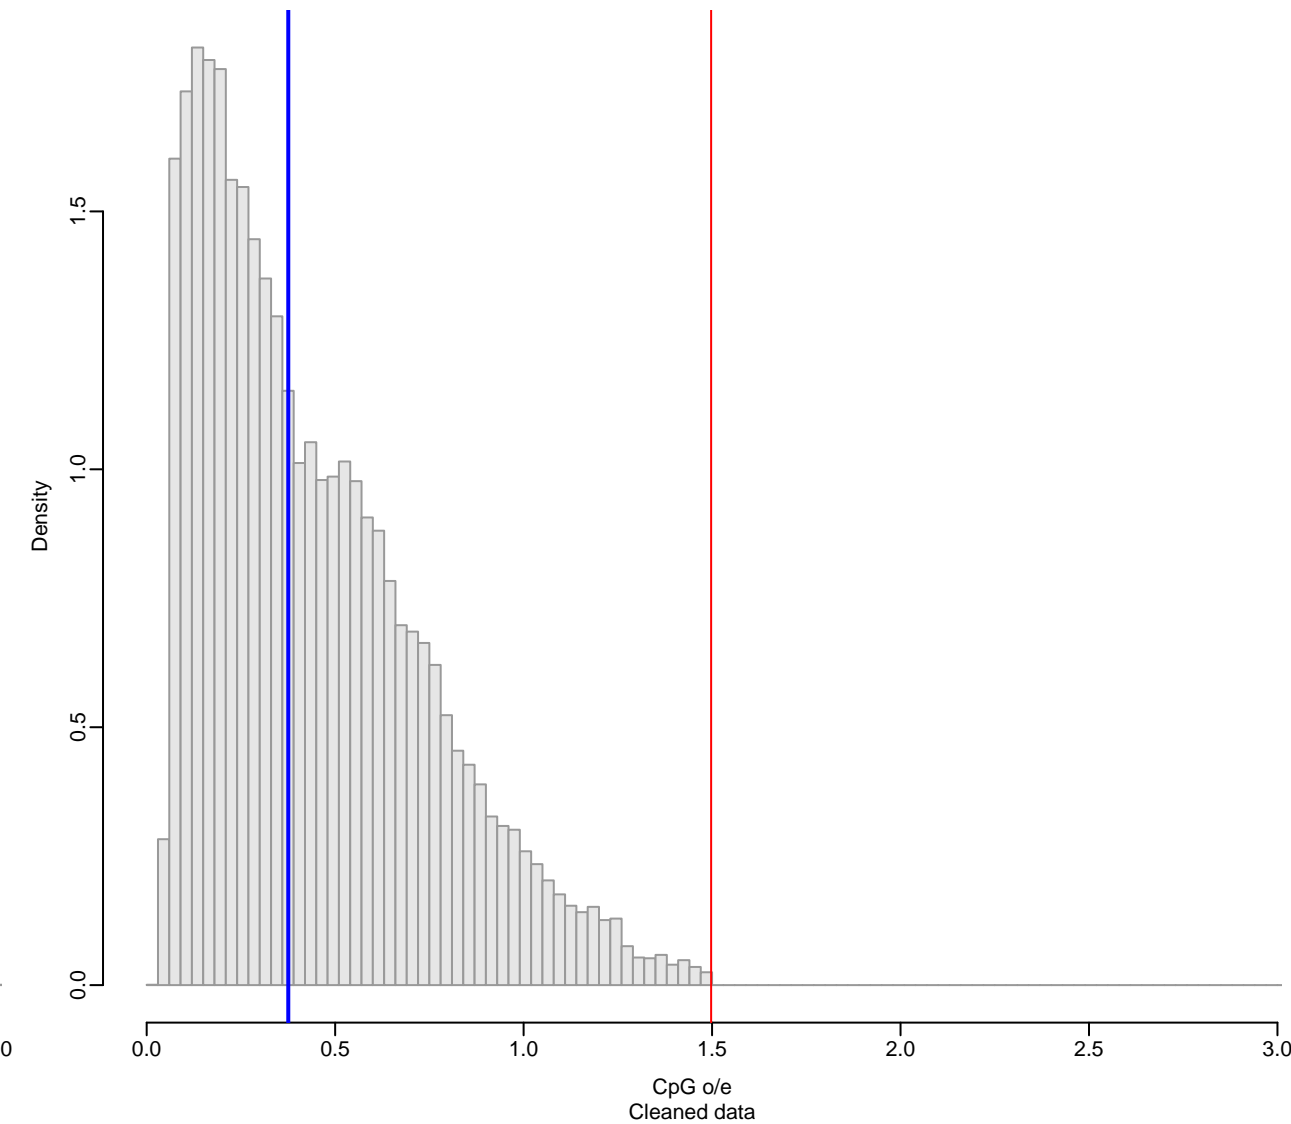

Blomia\_tropicalis

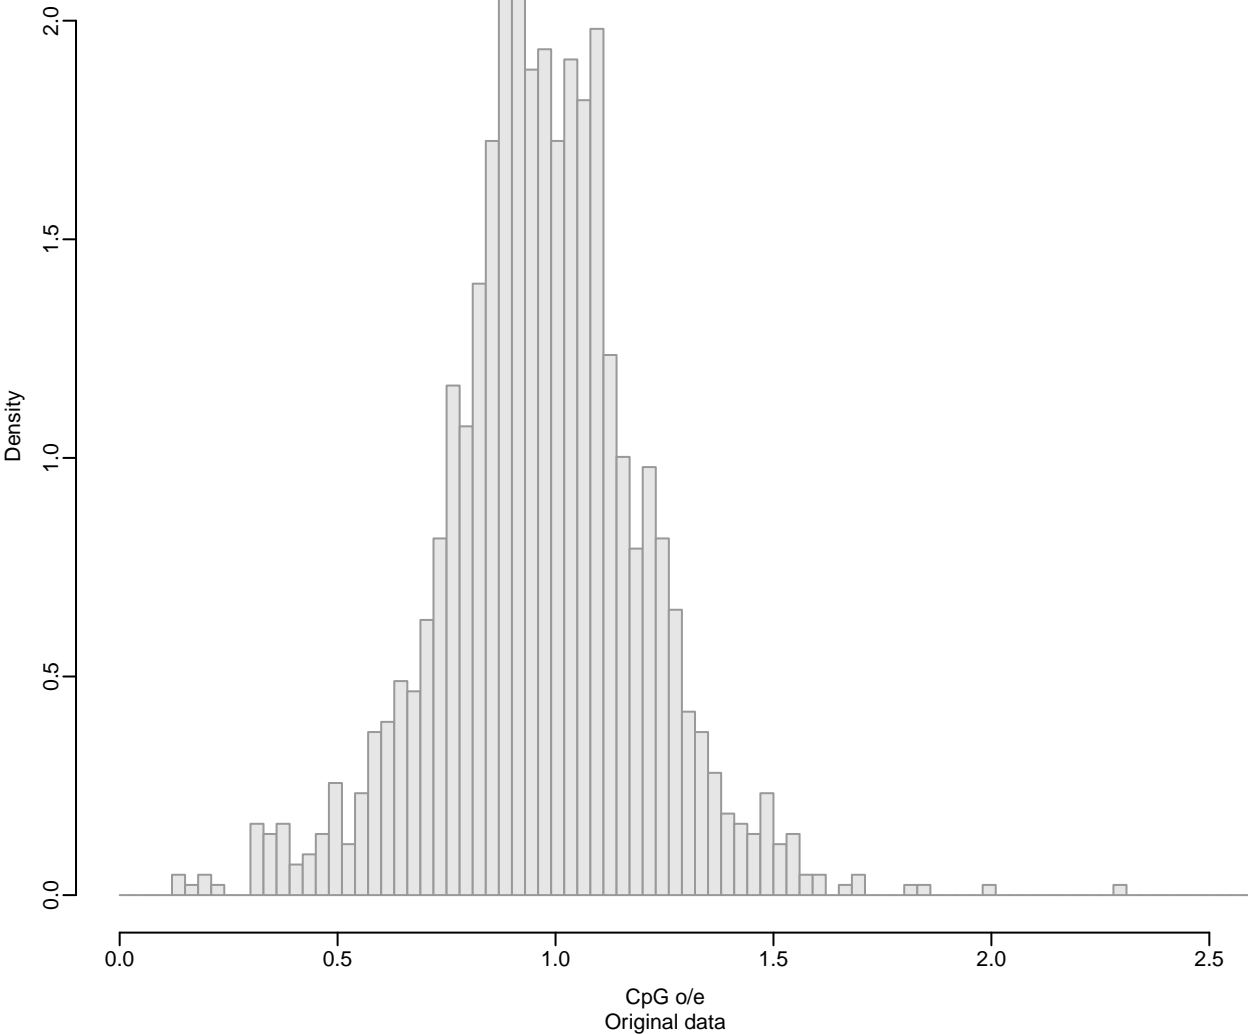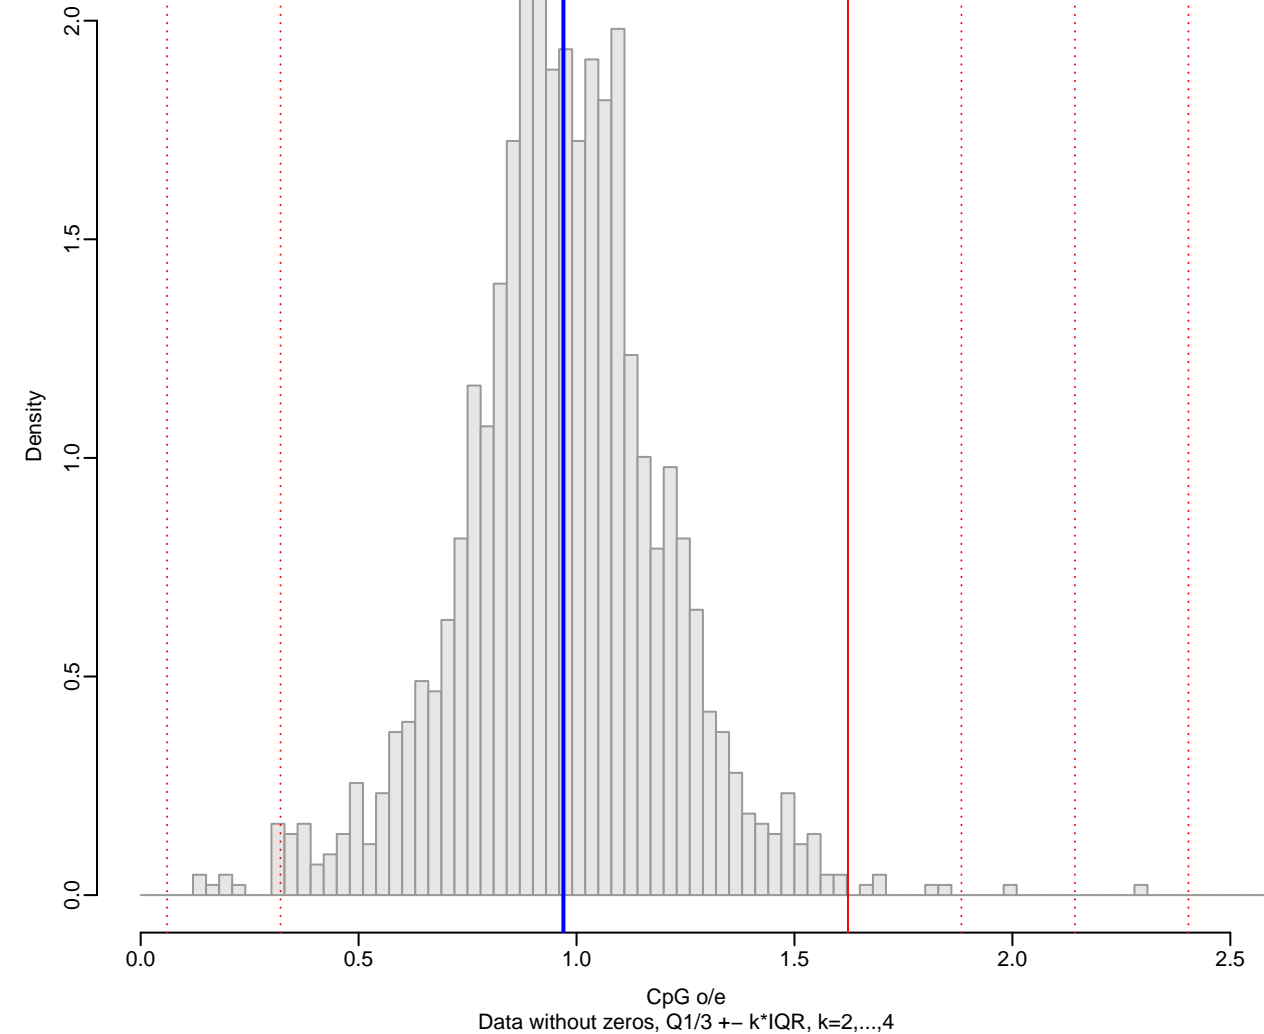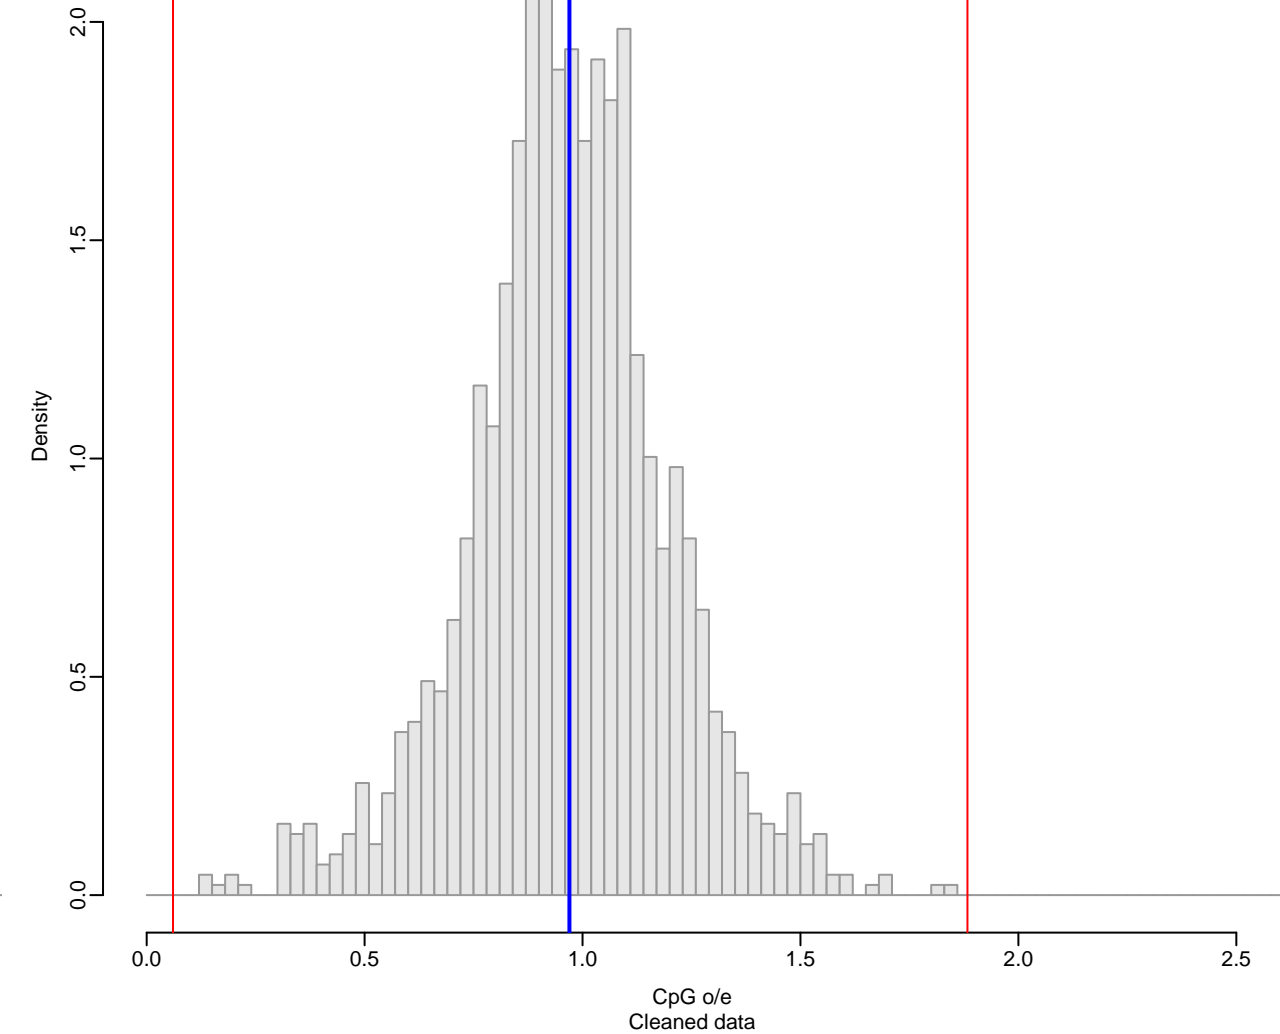

# Bombus\_terrestris

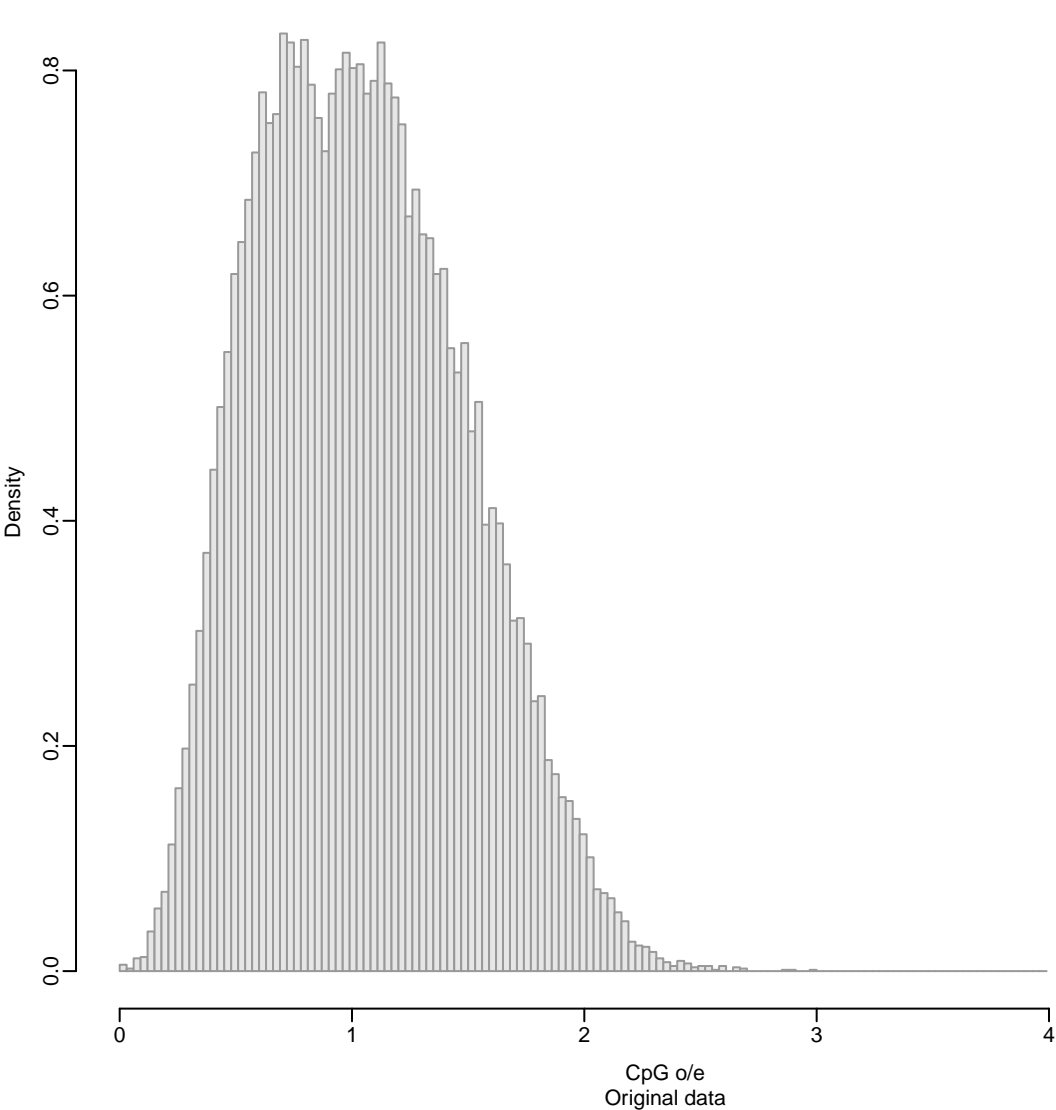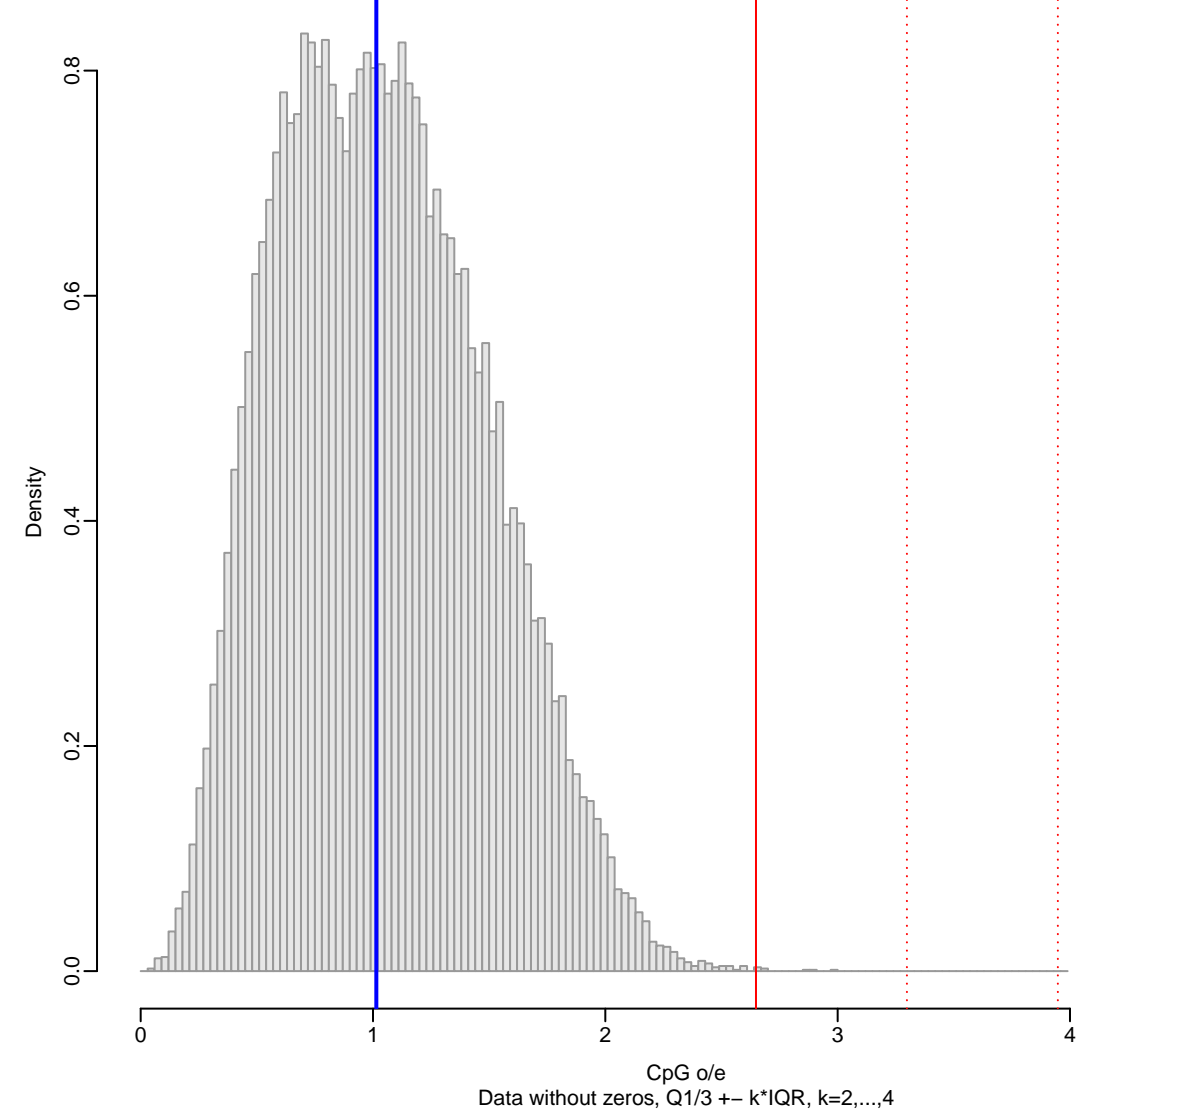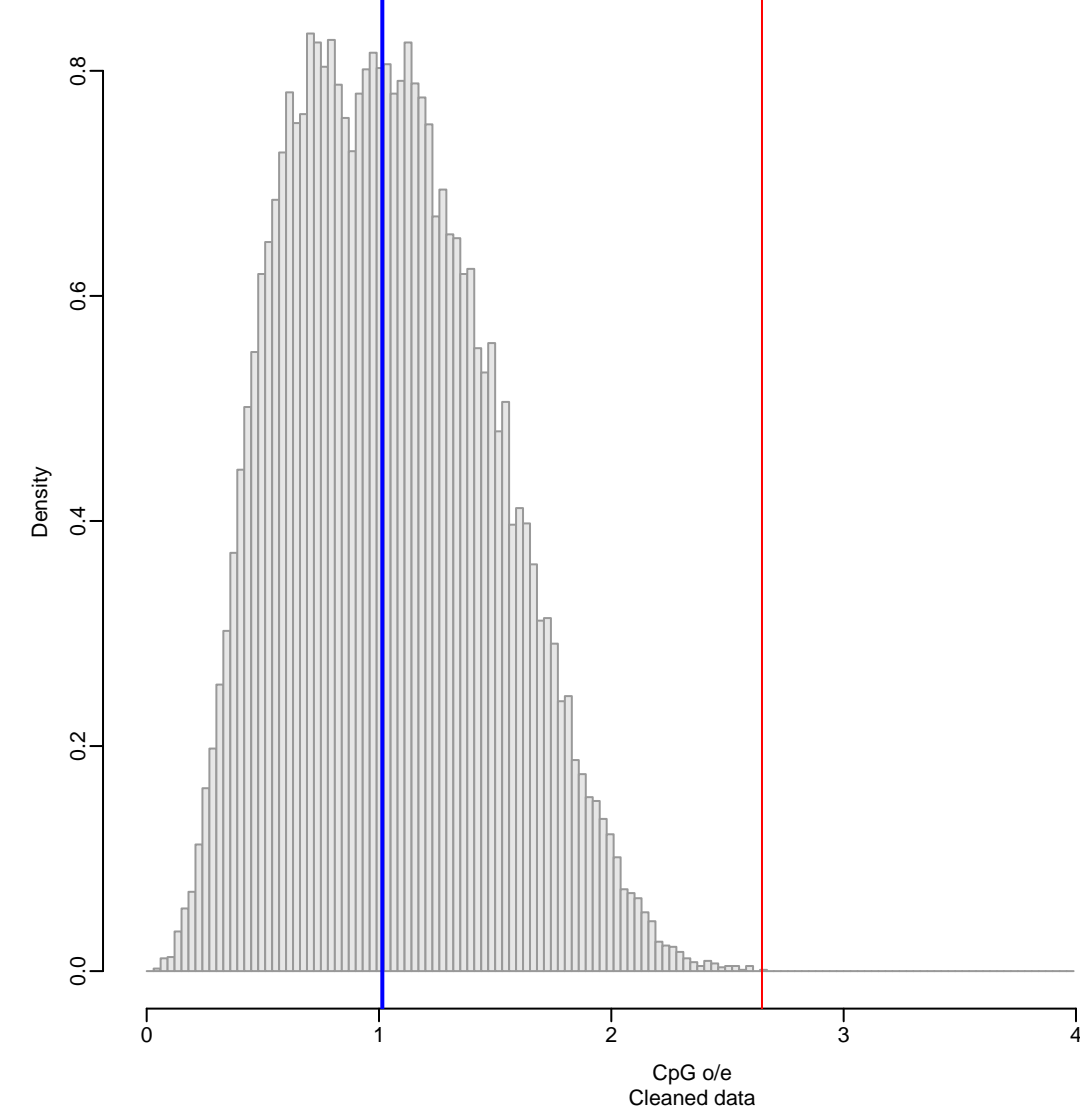

Bombyx\_mori

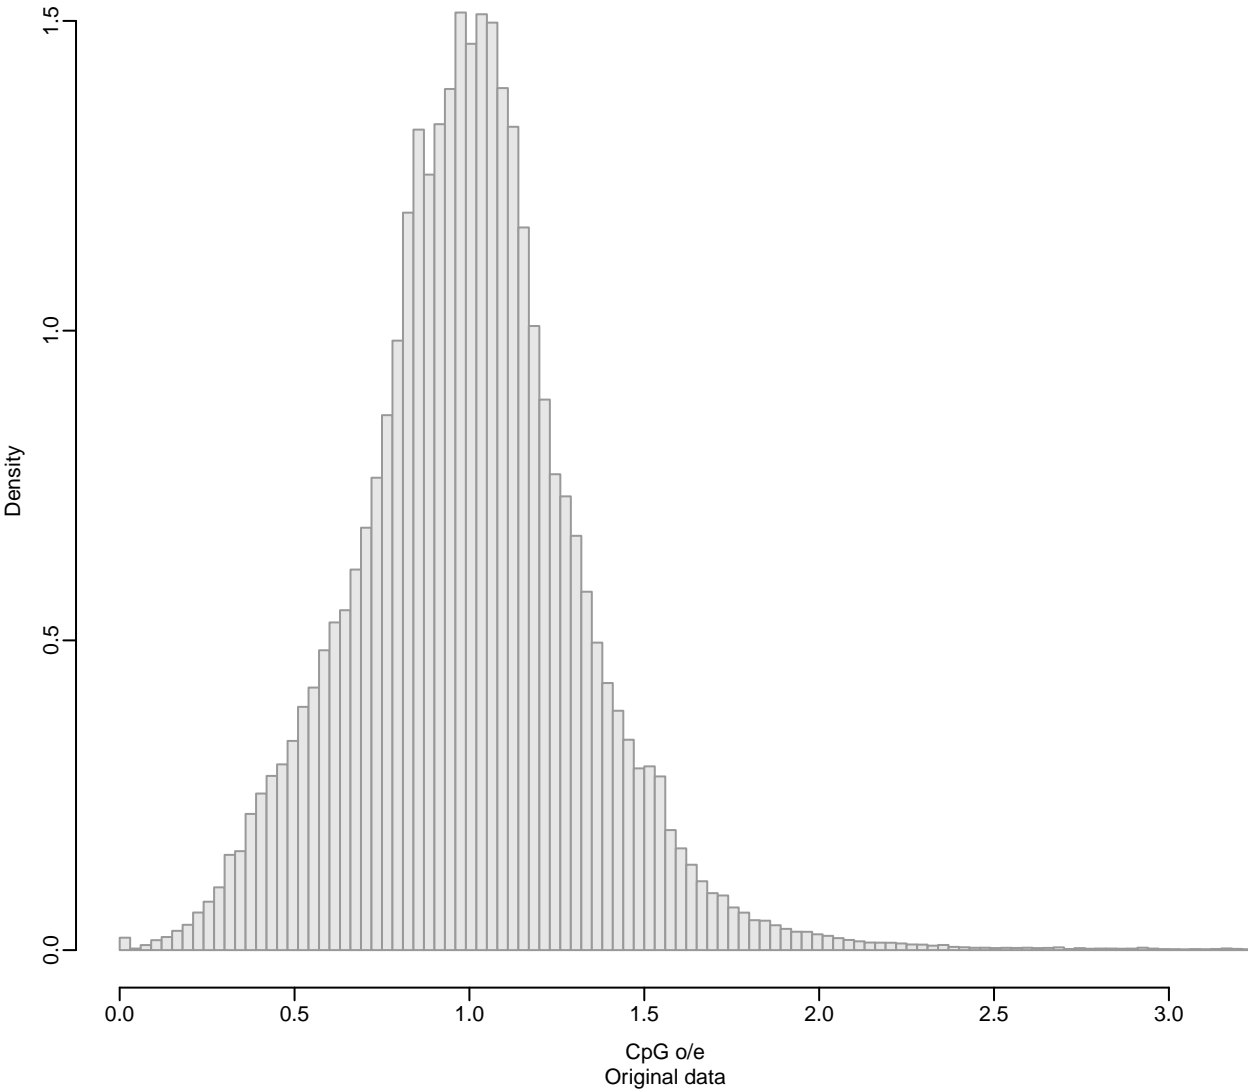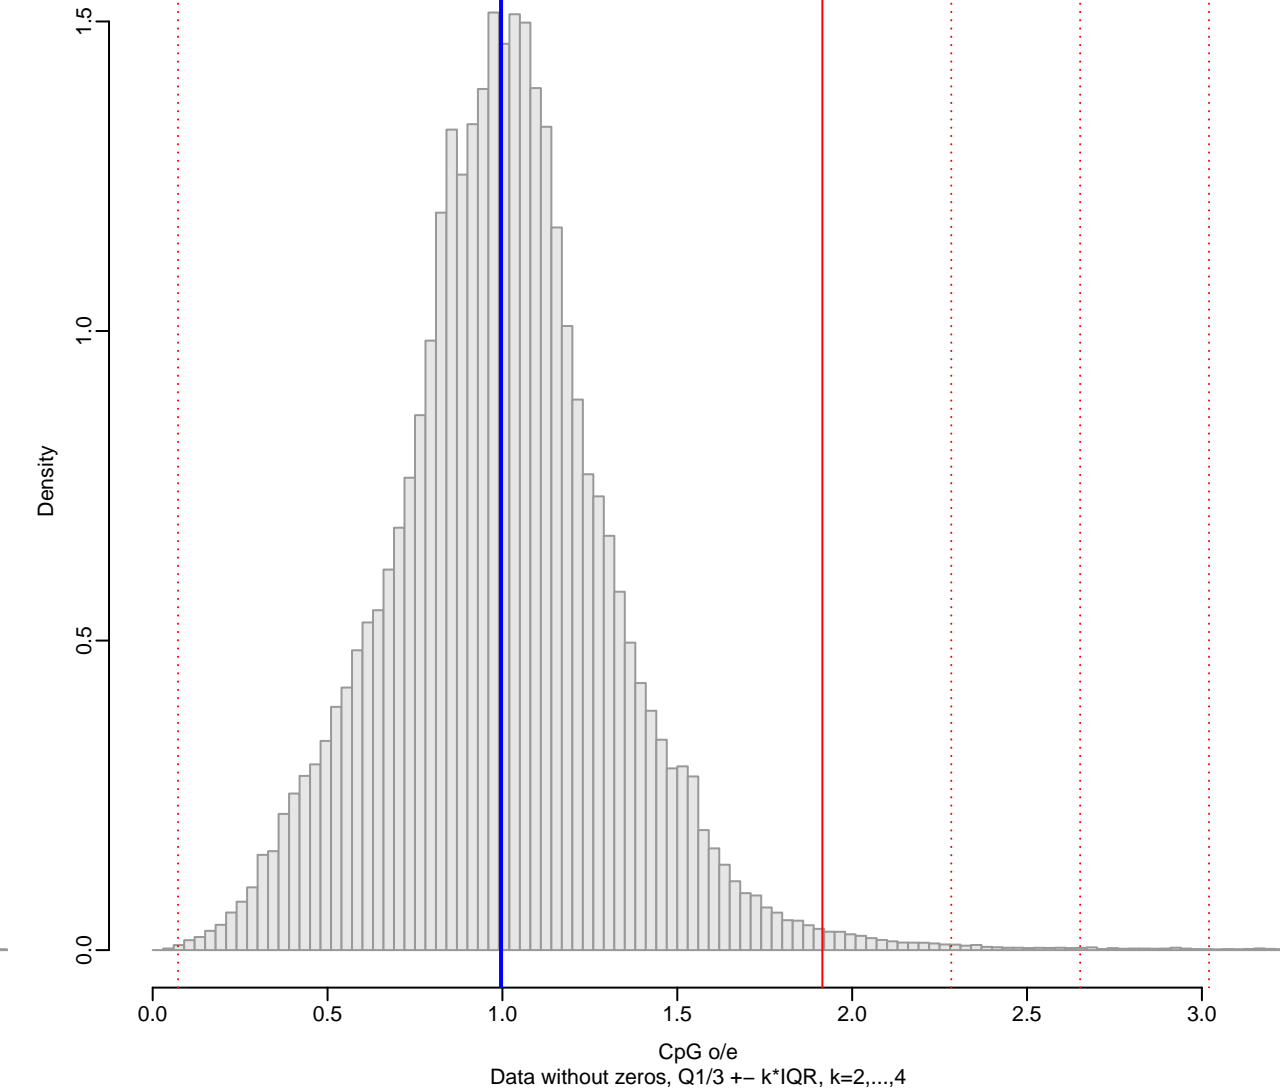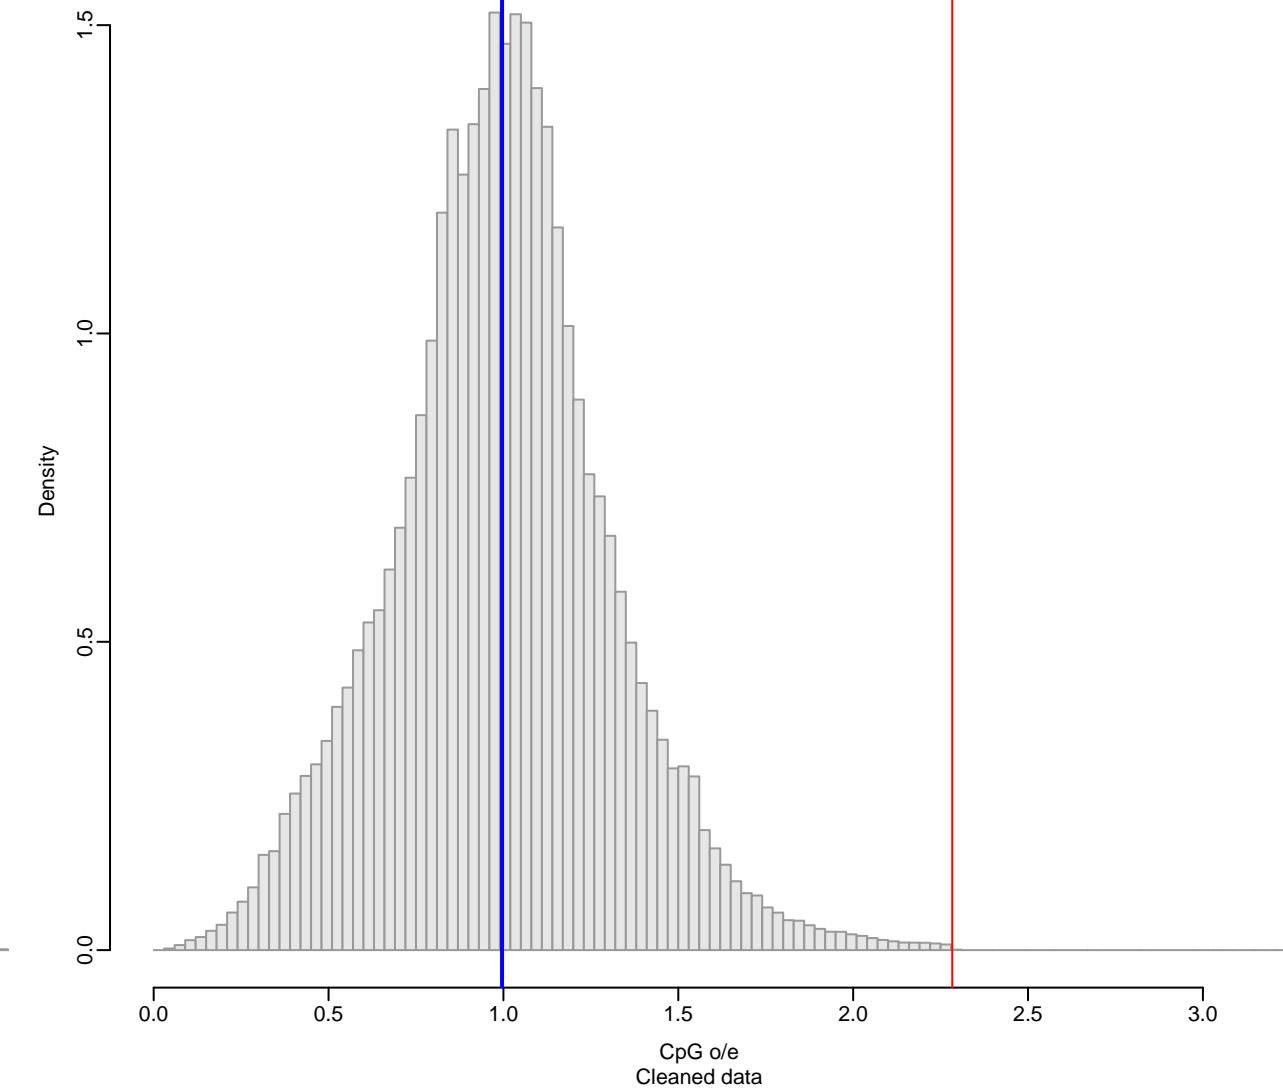



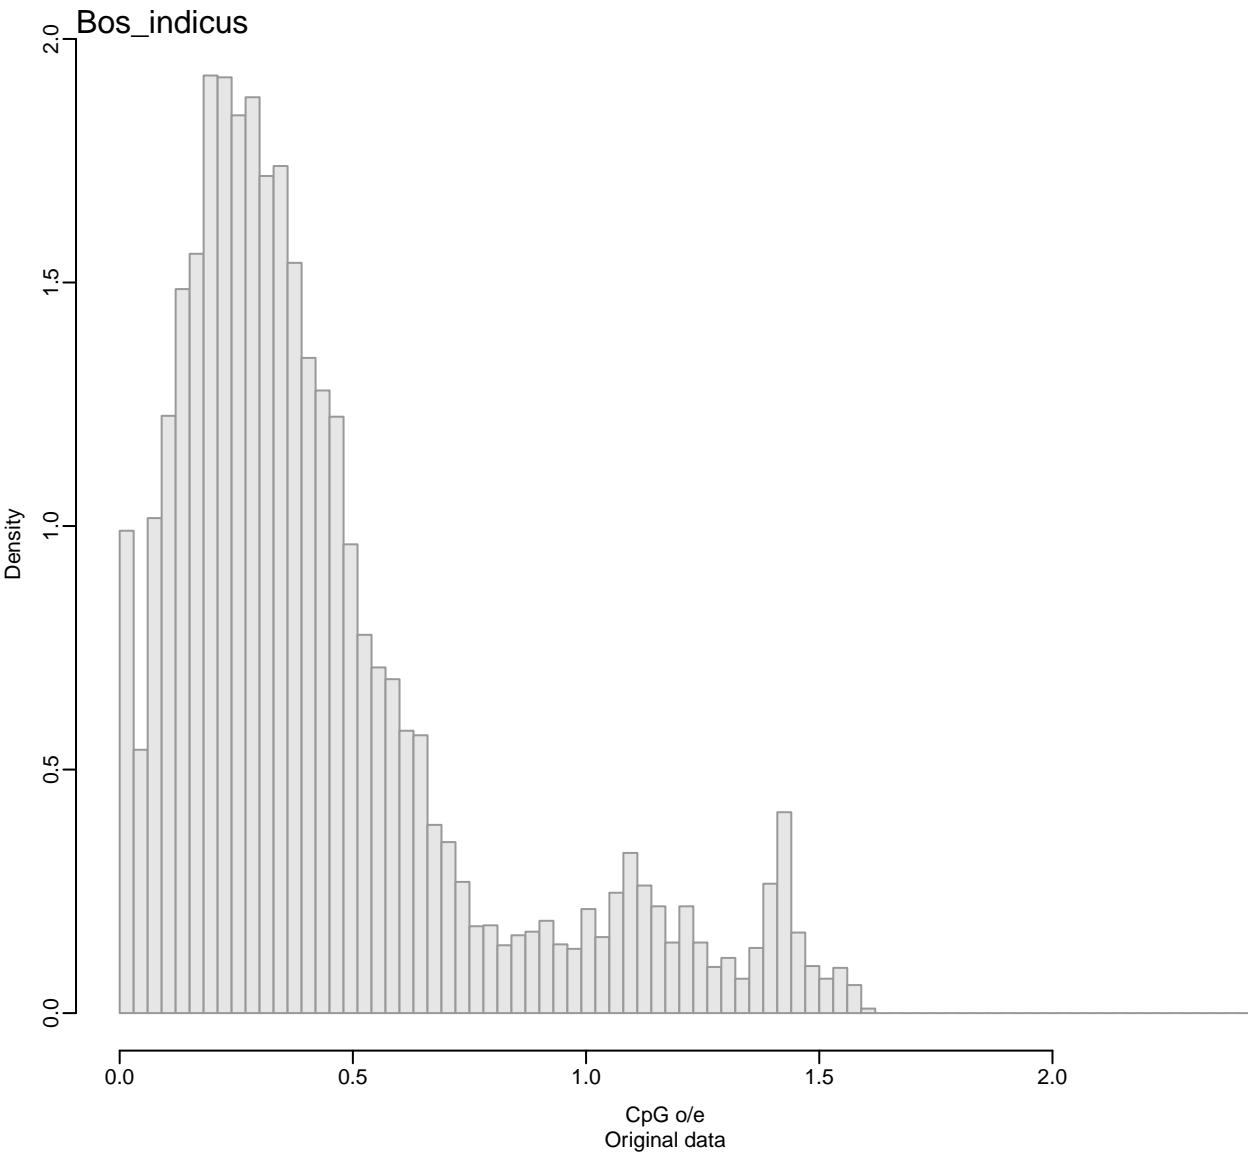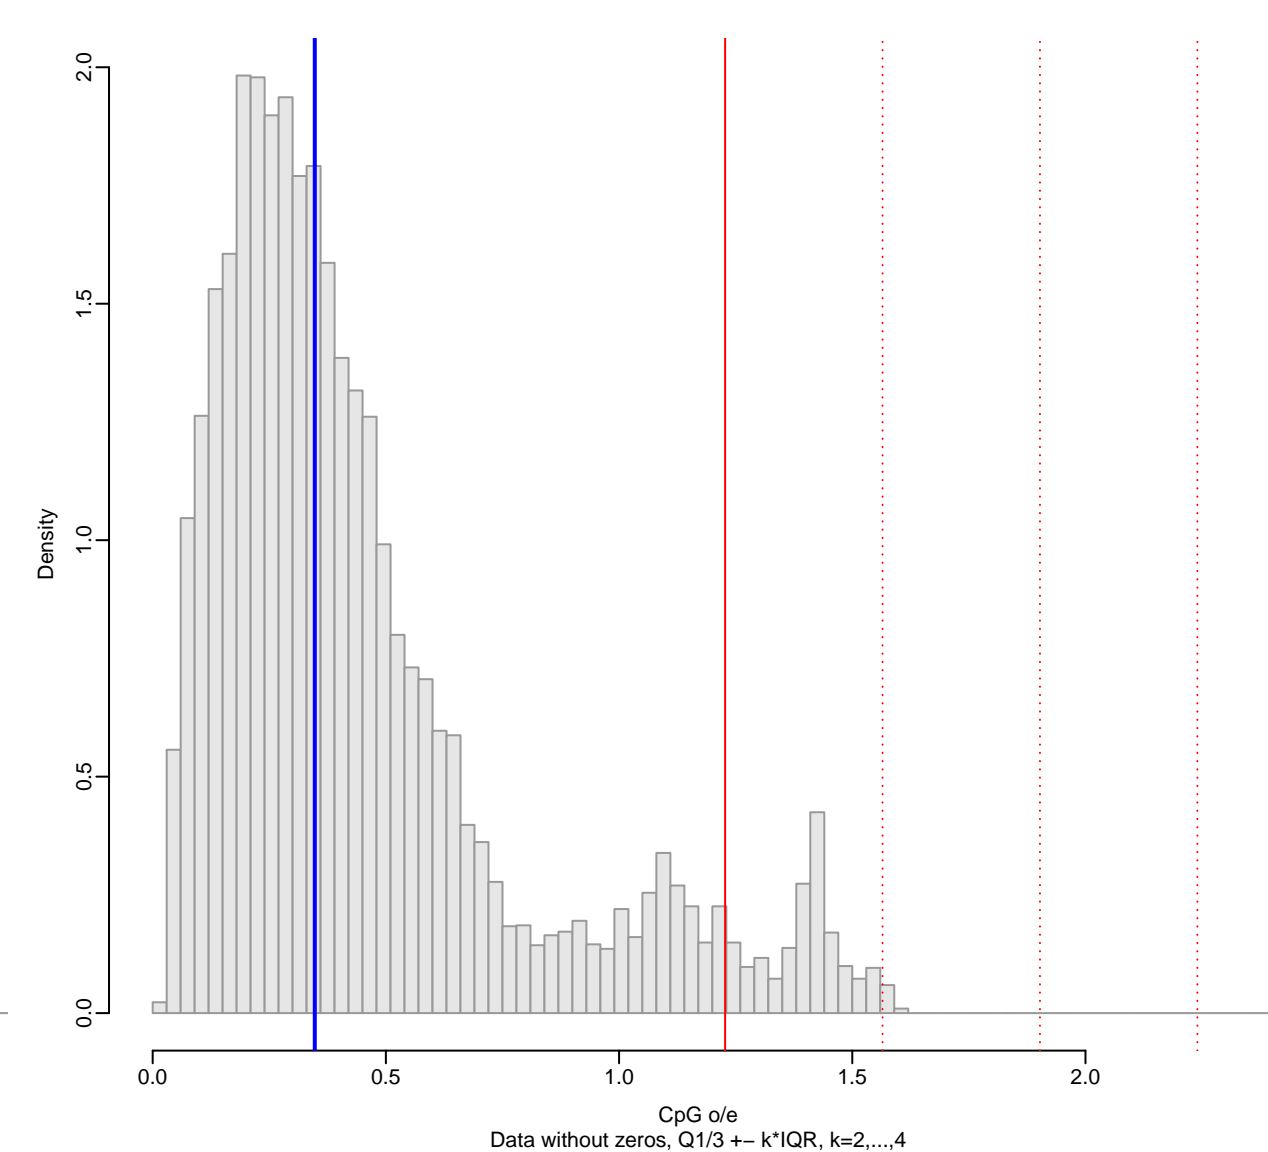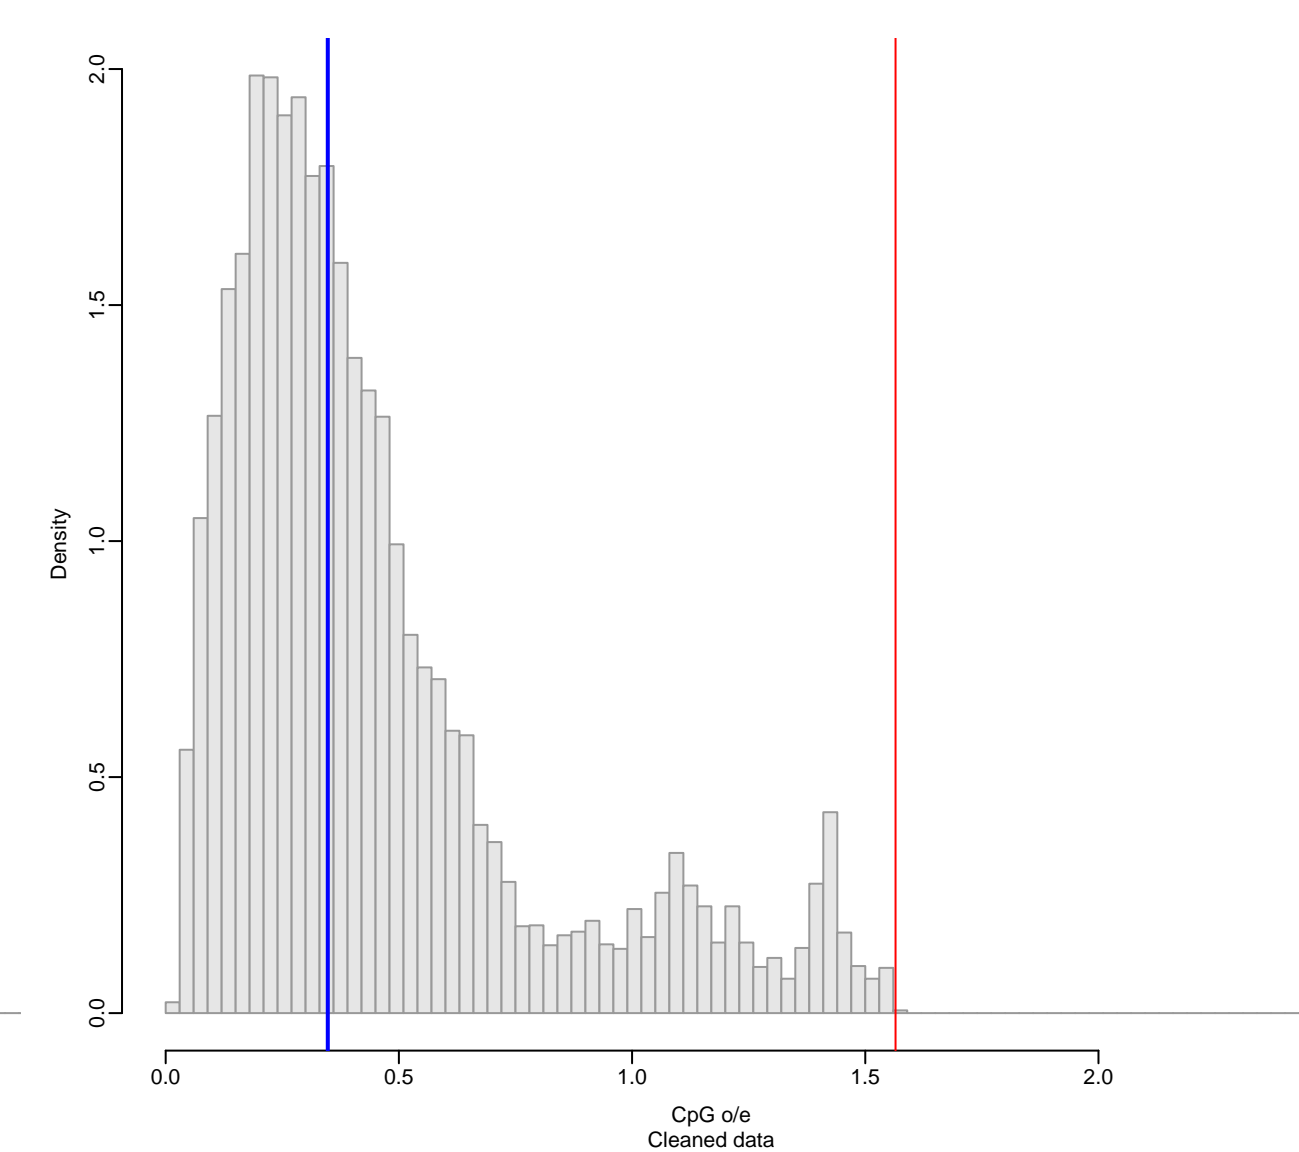

Bos\_taurus

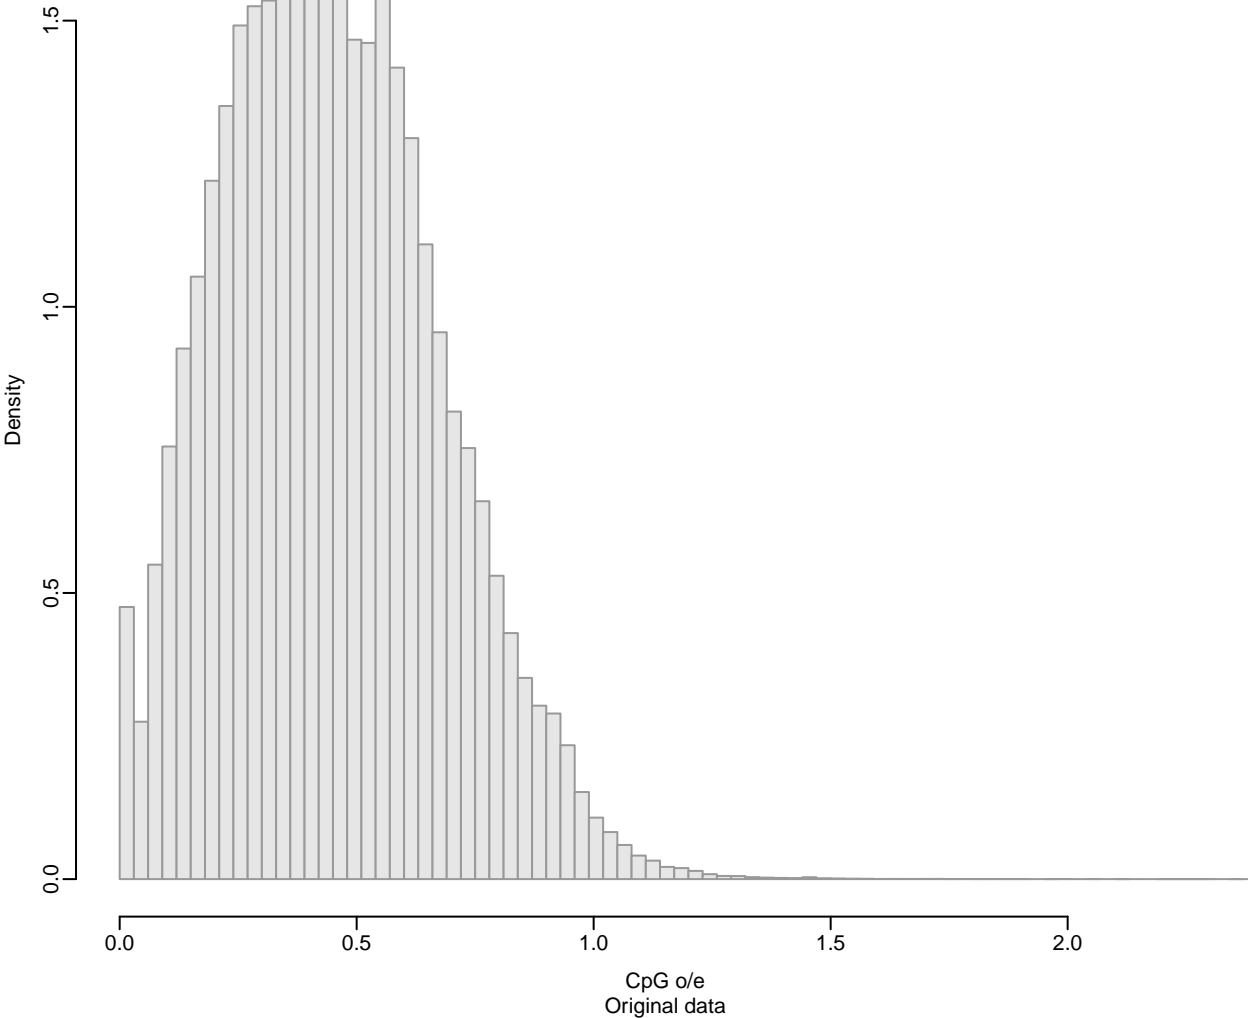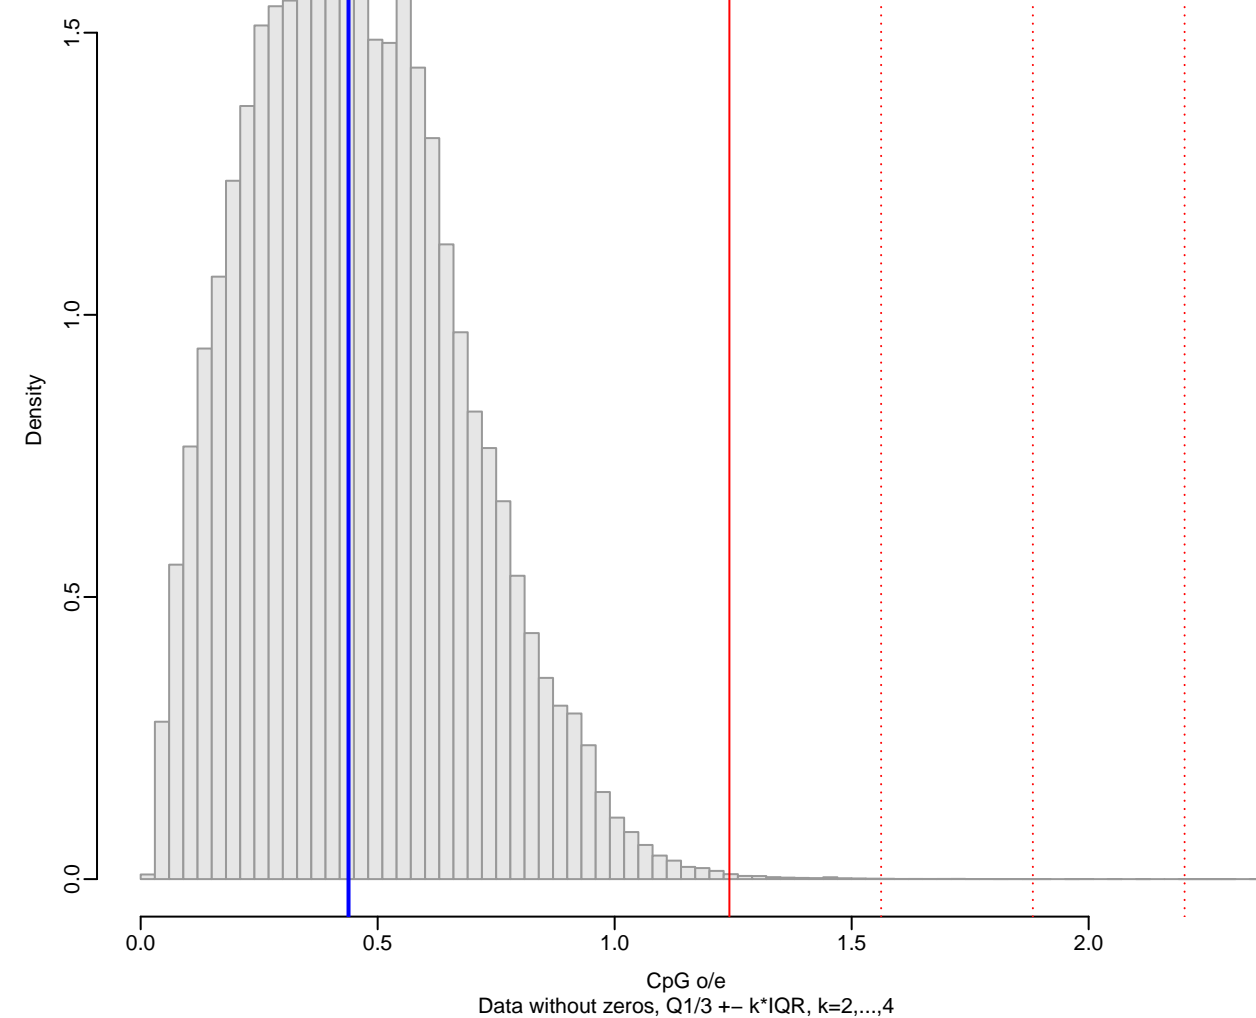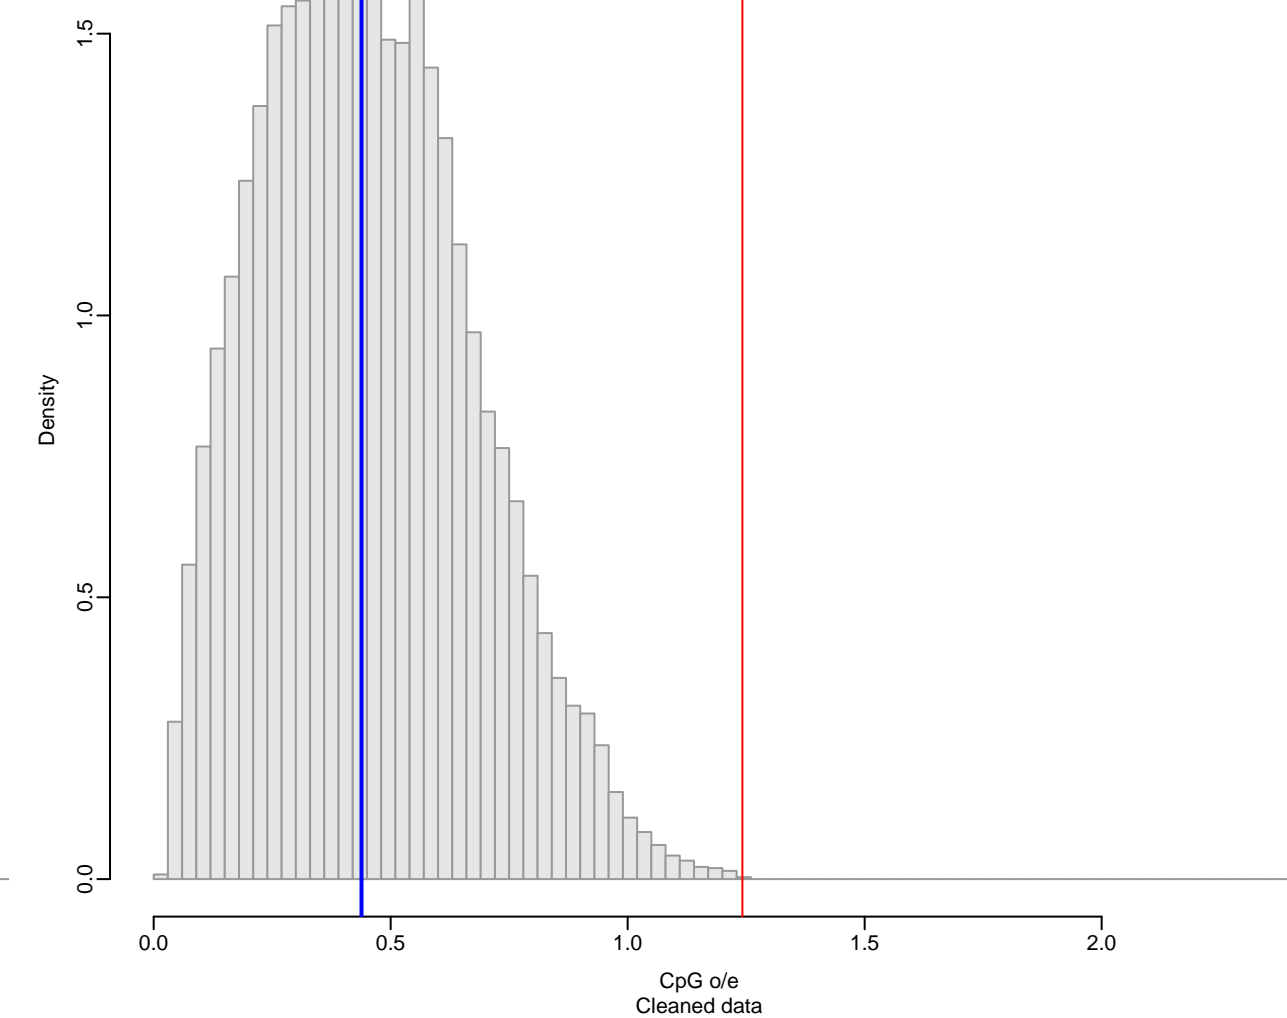

# Bothrops\_alternatus

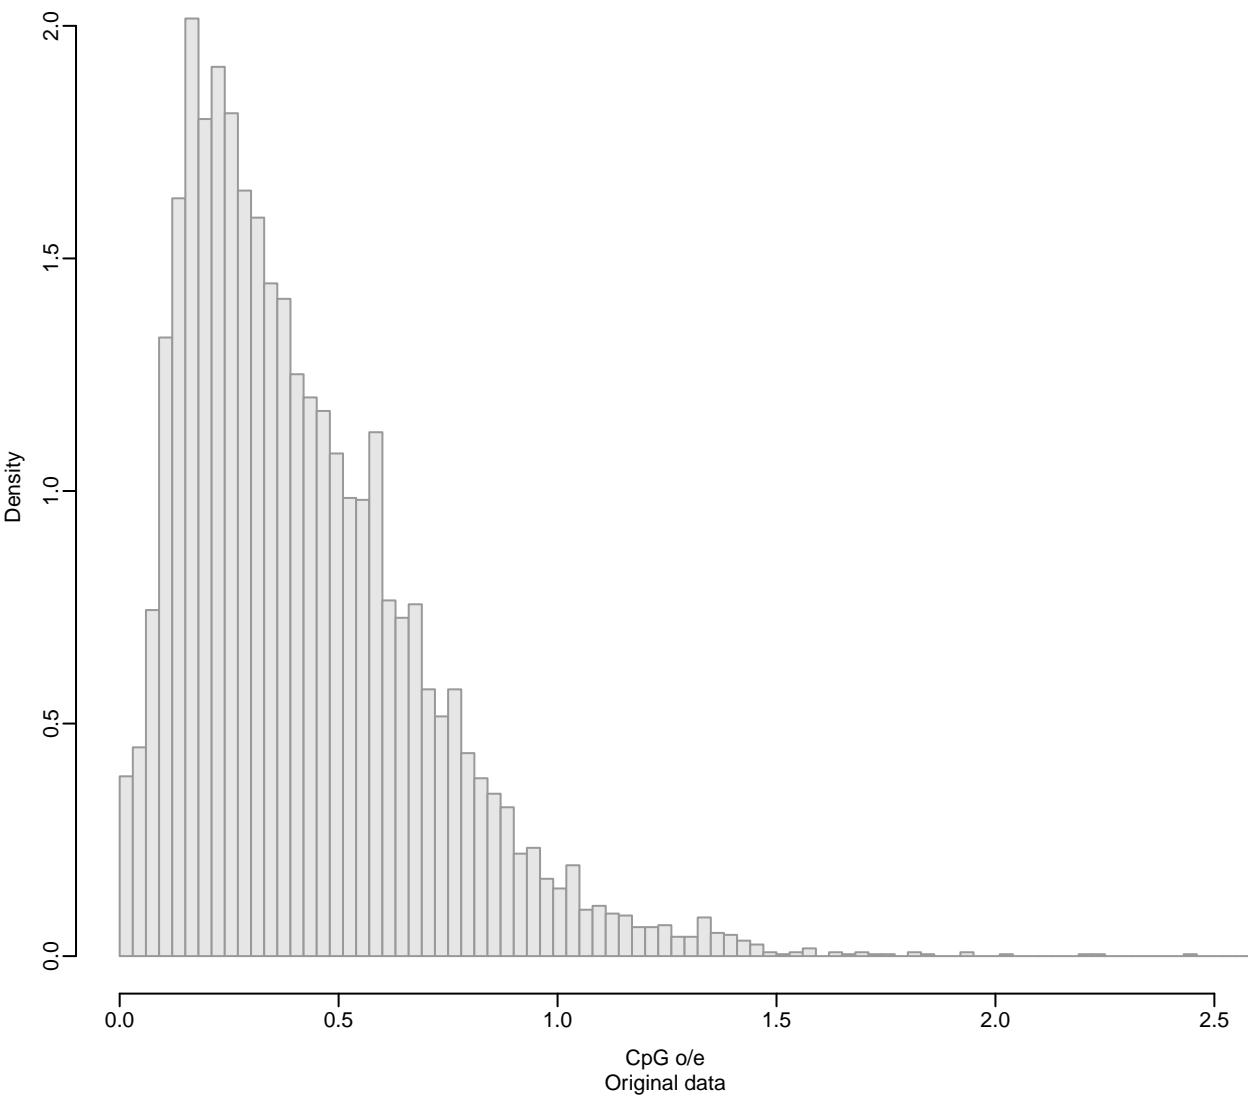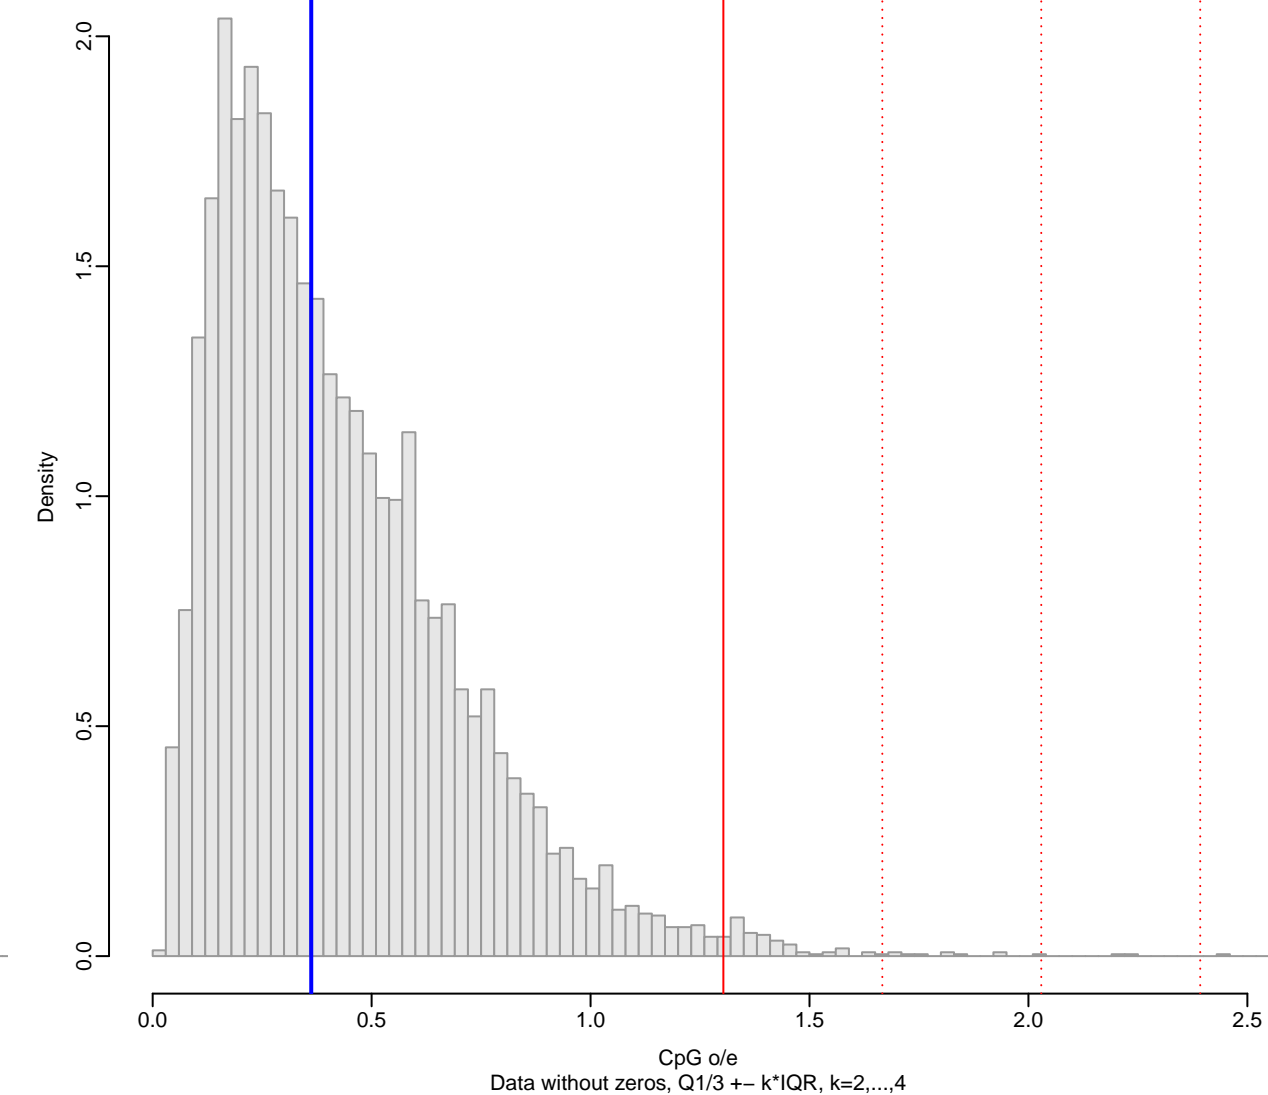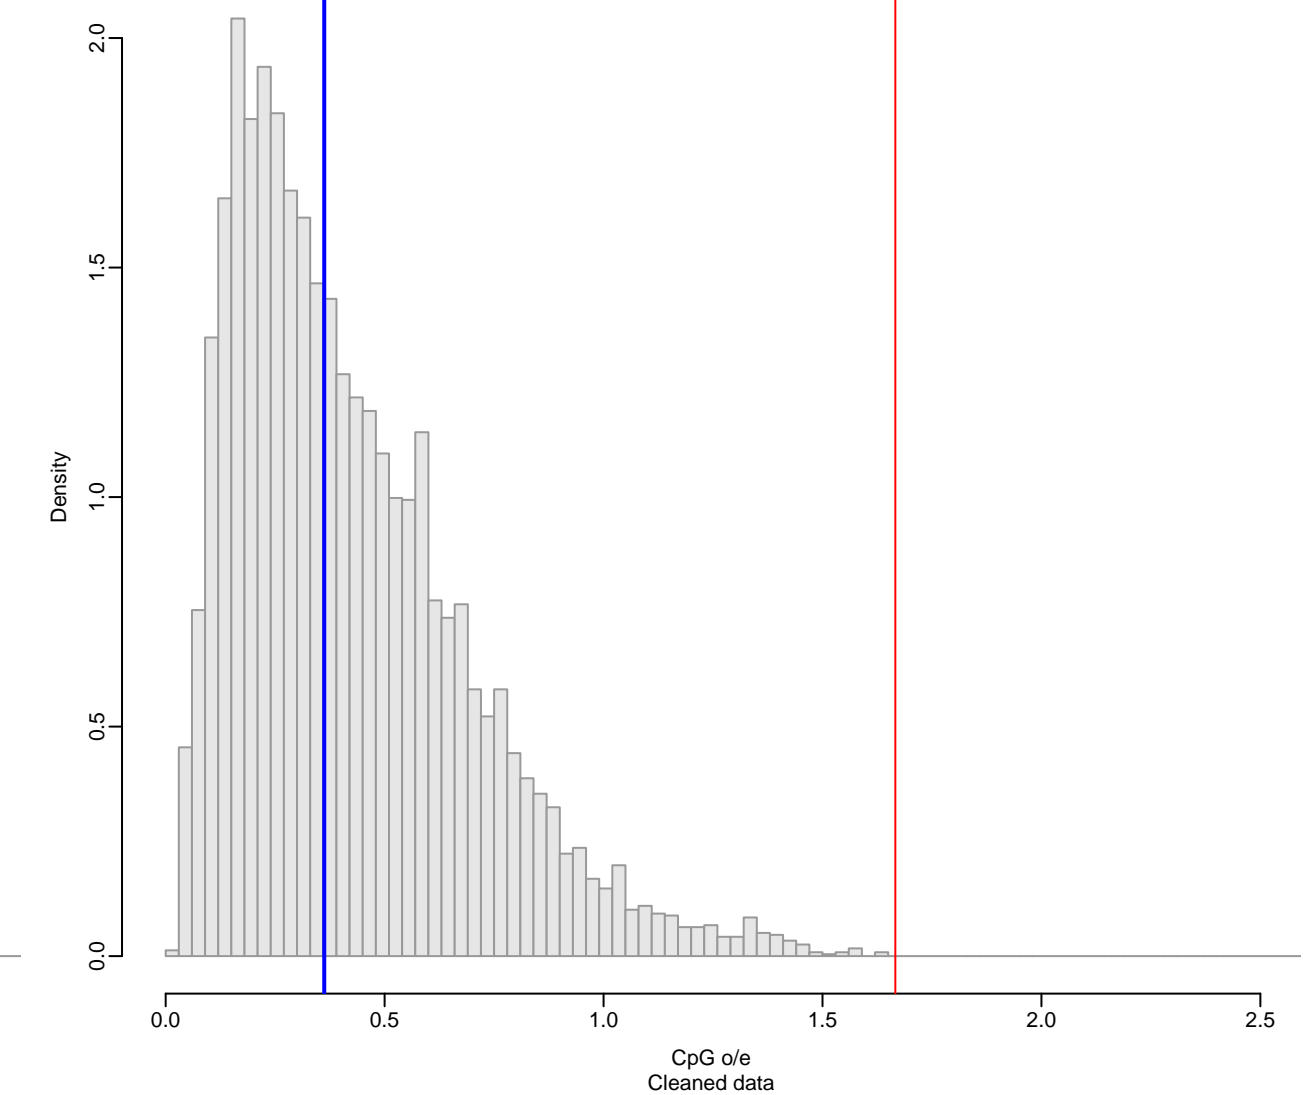

Bothrops\_jararaca

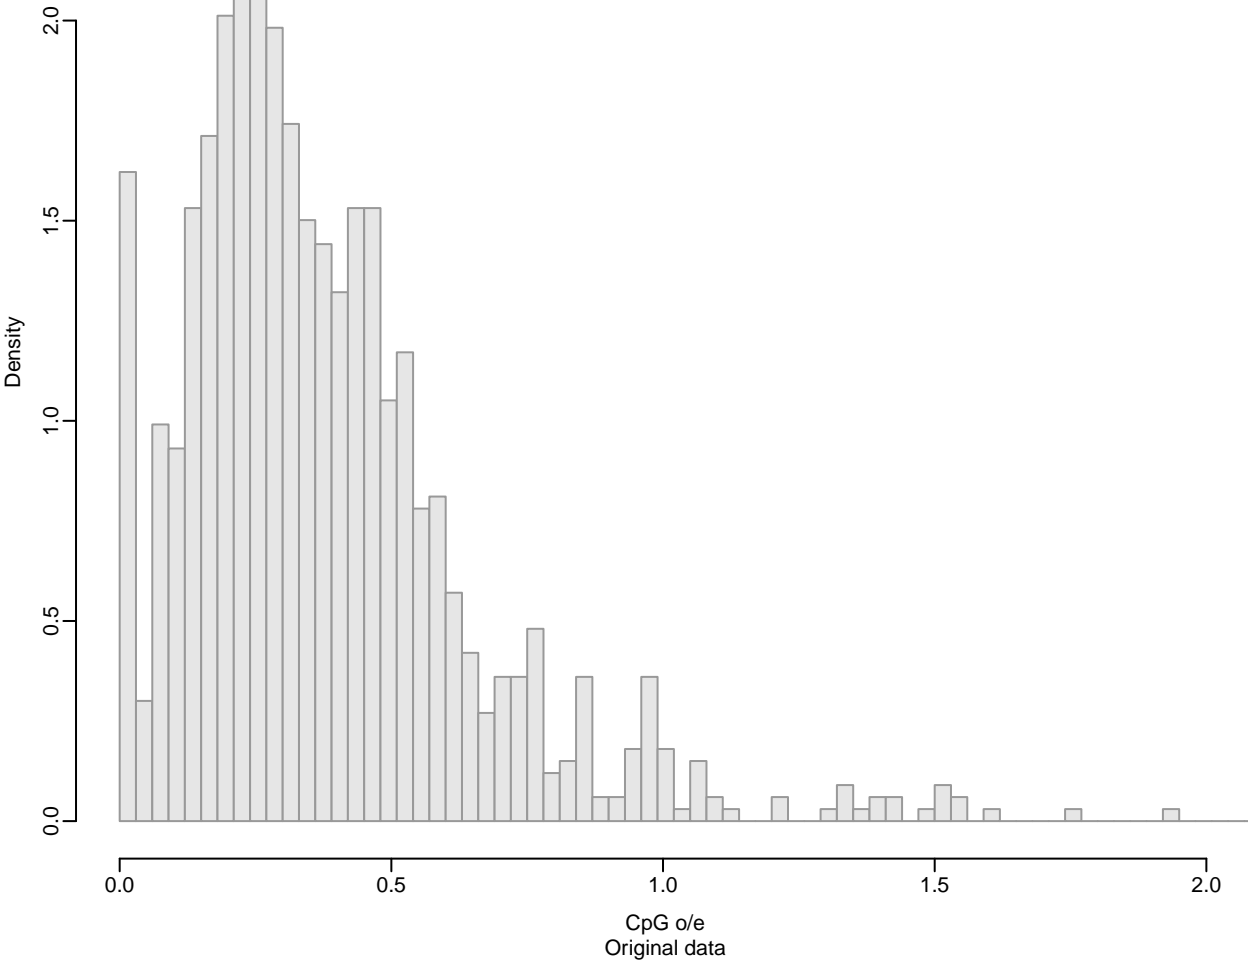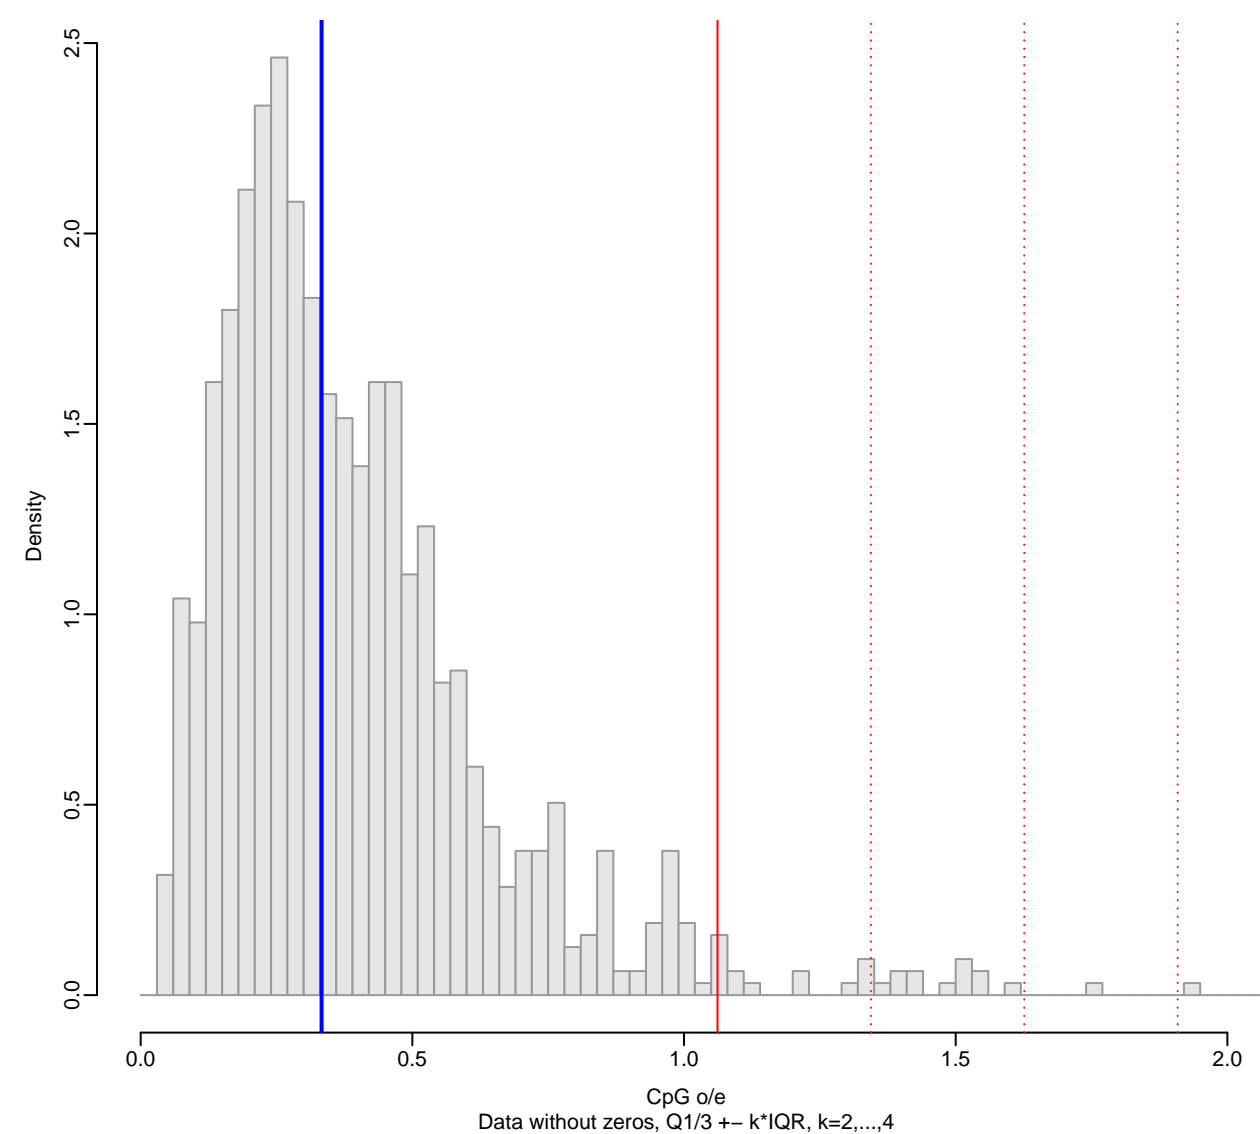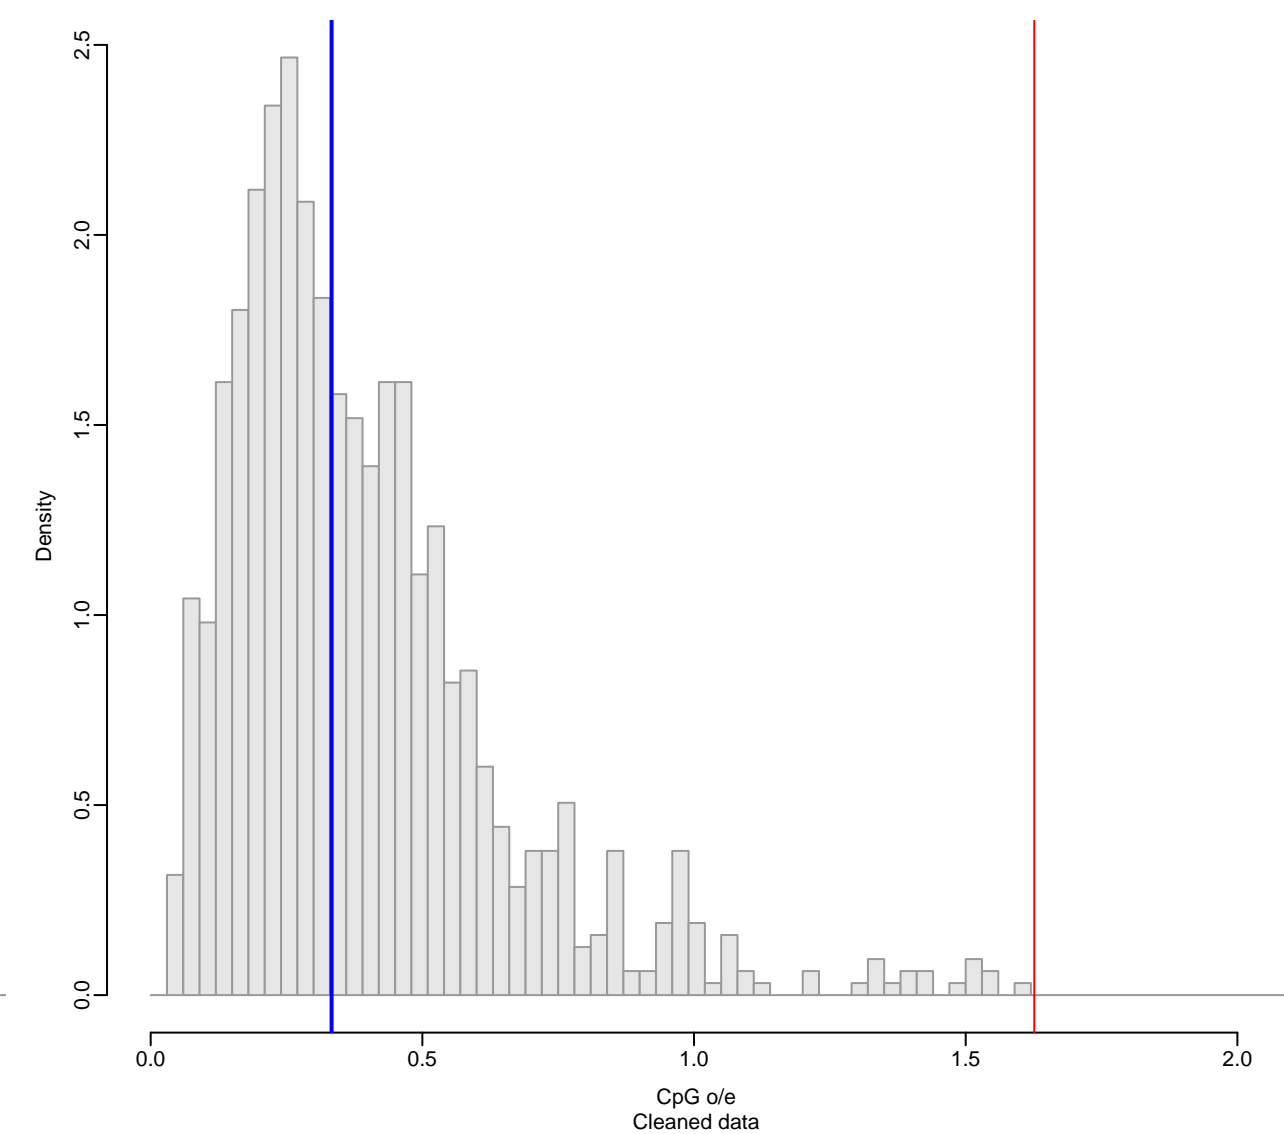

Botryllus\_schlosseri

Density

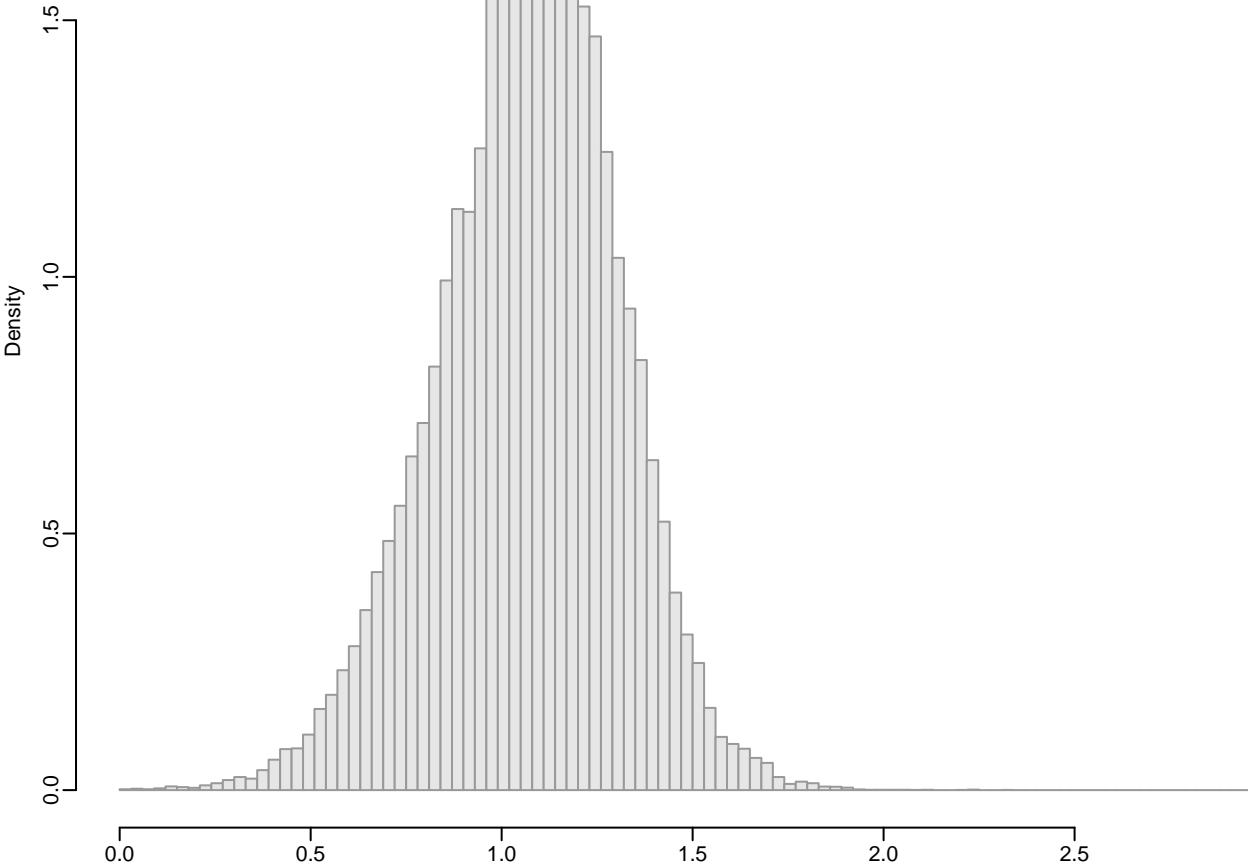

Density

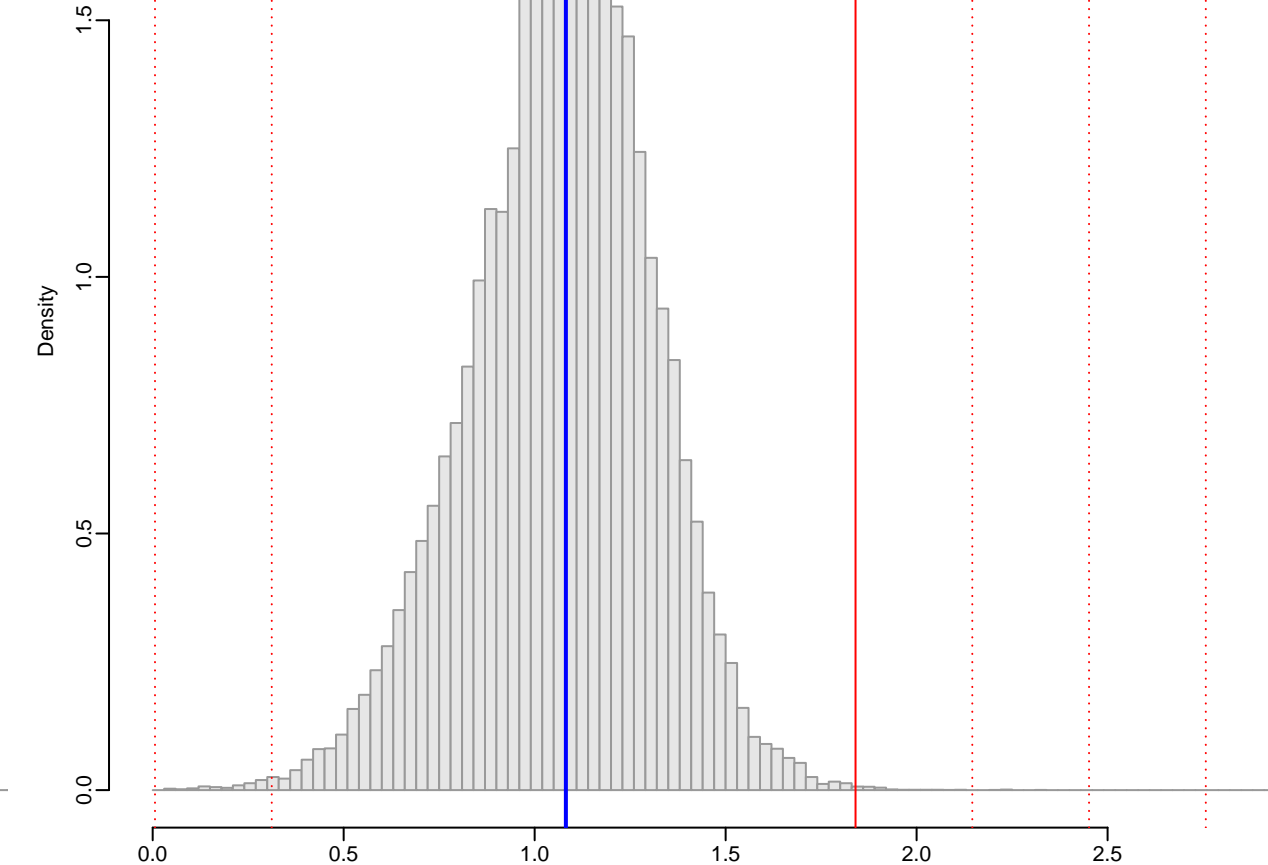

Density

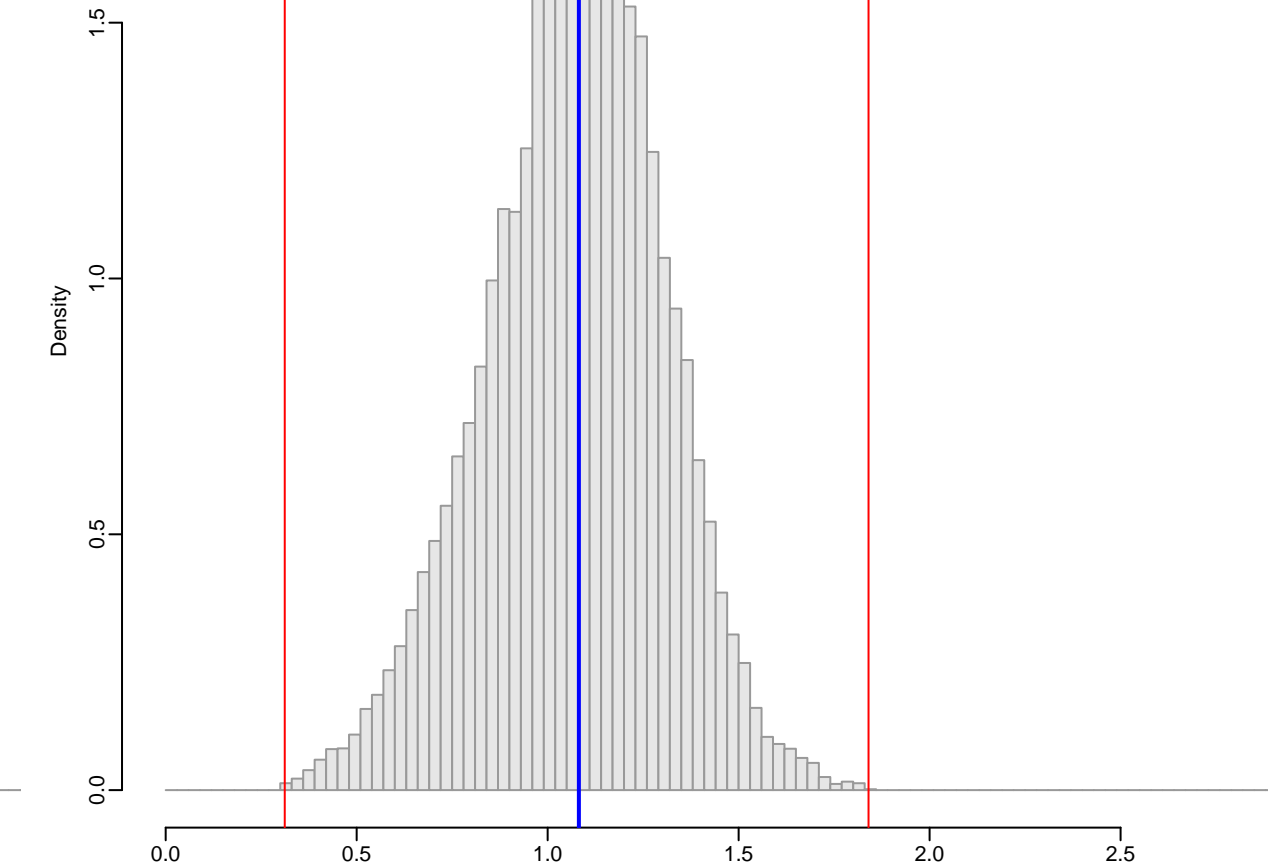

Botryococcus\_braunii

Density

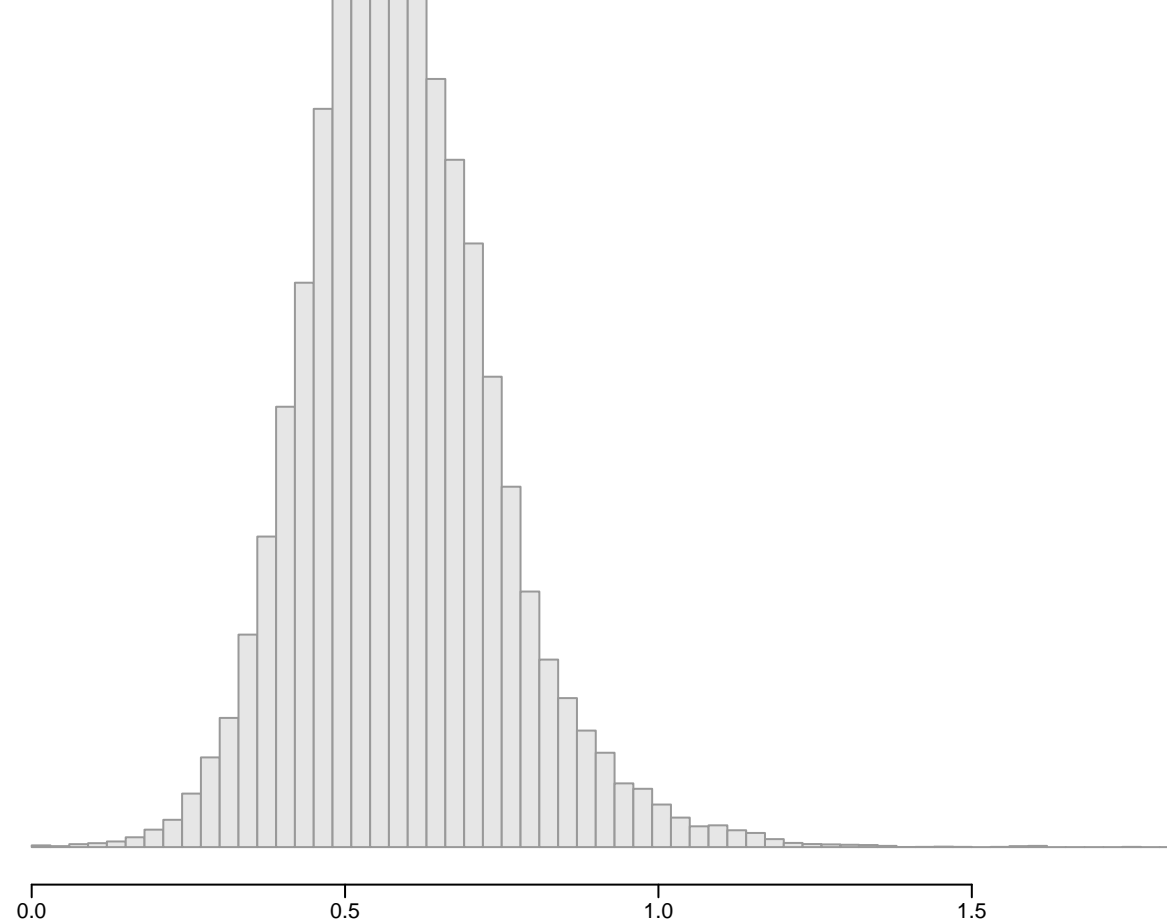

CpG o/e  
Original data

Density

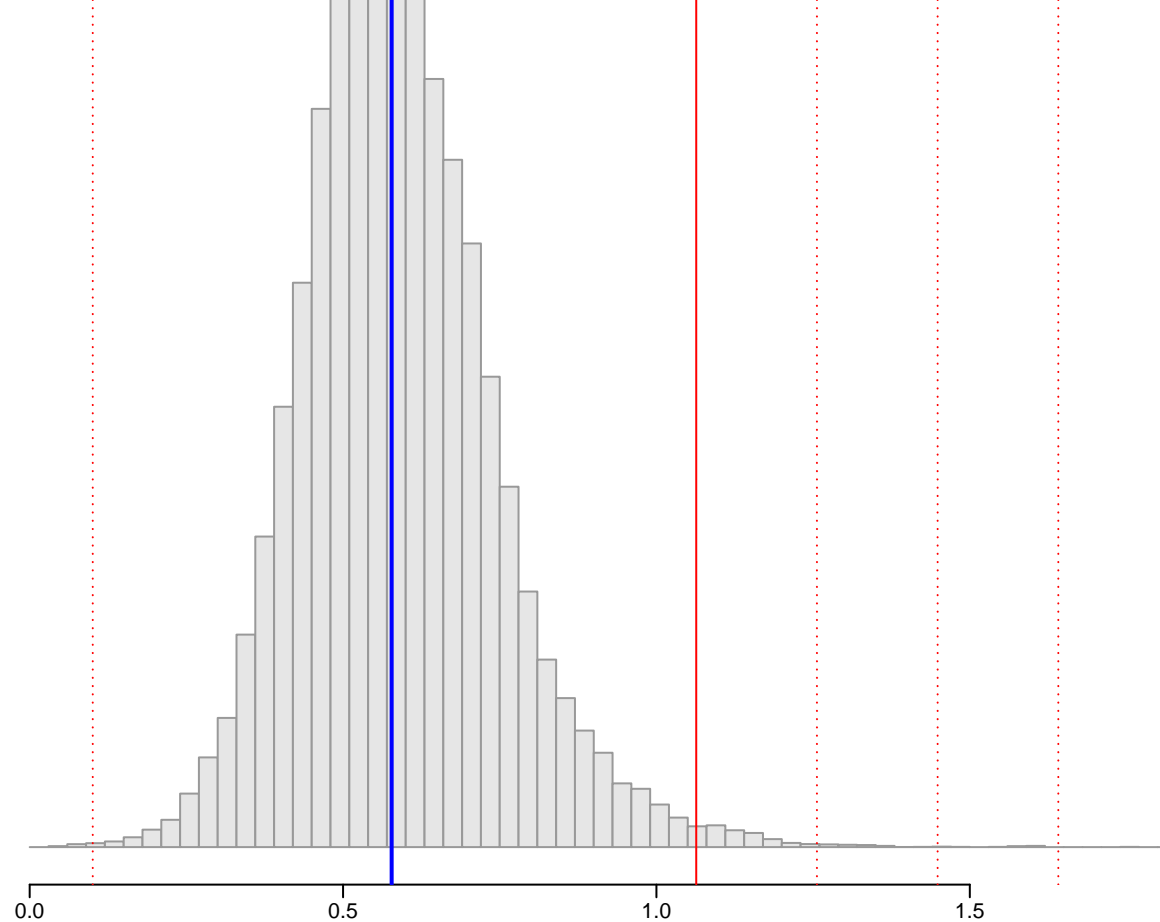

CpG o/e  
Data without zeros,  $Q1/3 \pm k \cdot IQR$ ,  $k=2, \dots, 4$

Density

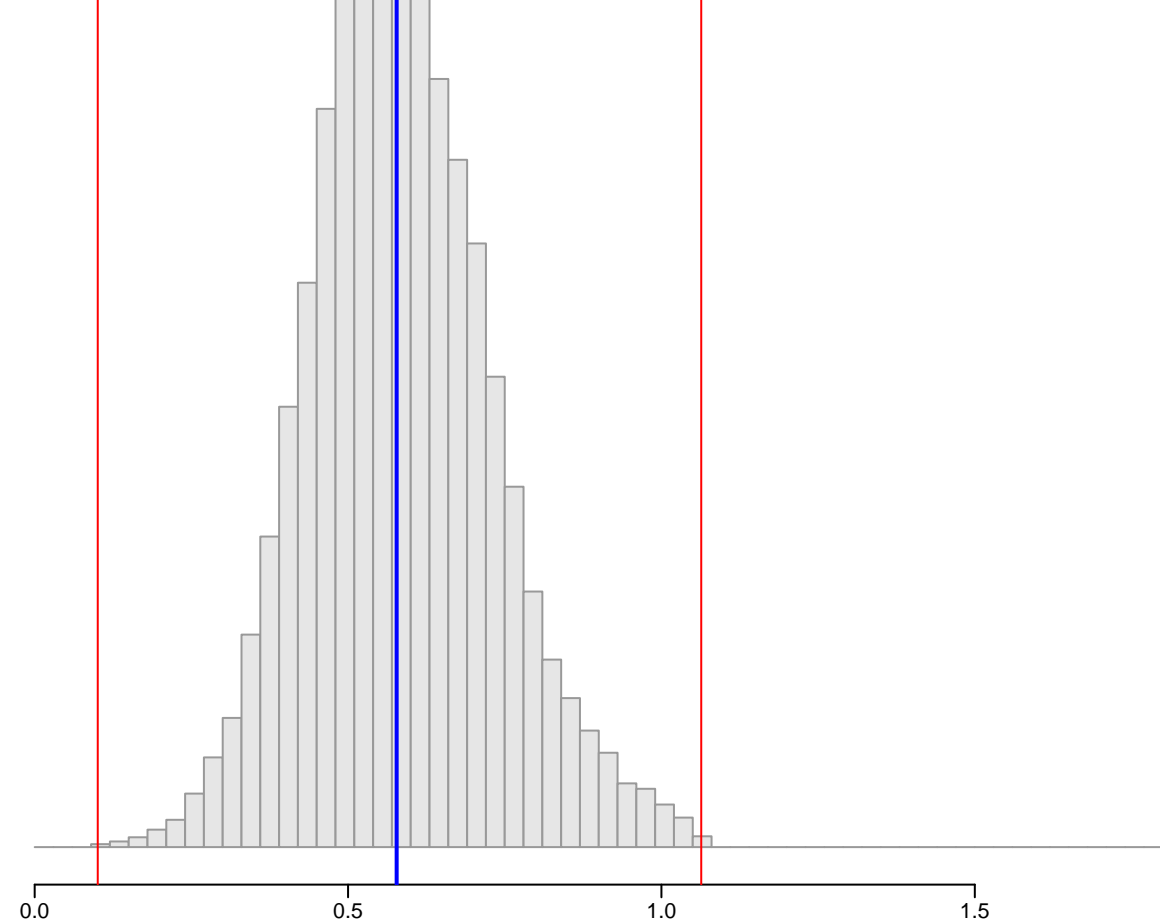

CpG o/e  
Cleaned data

Botryotinia\_fuckeliana

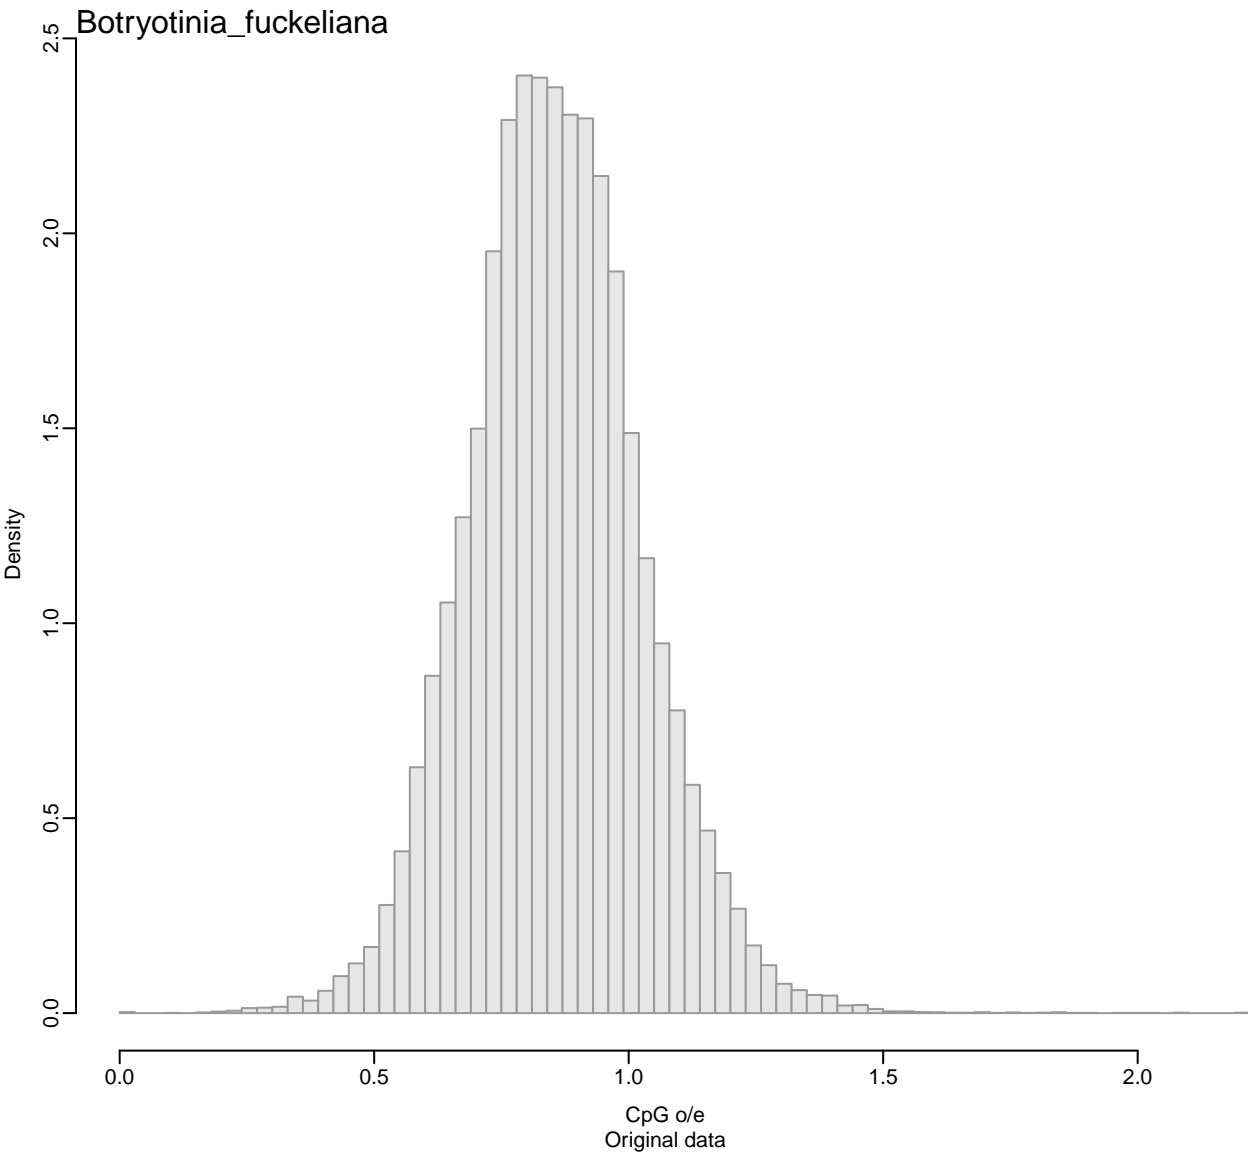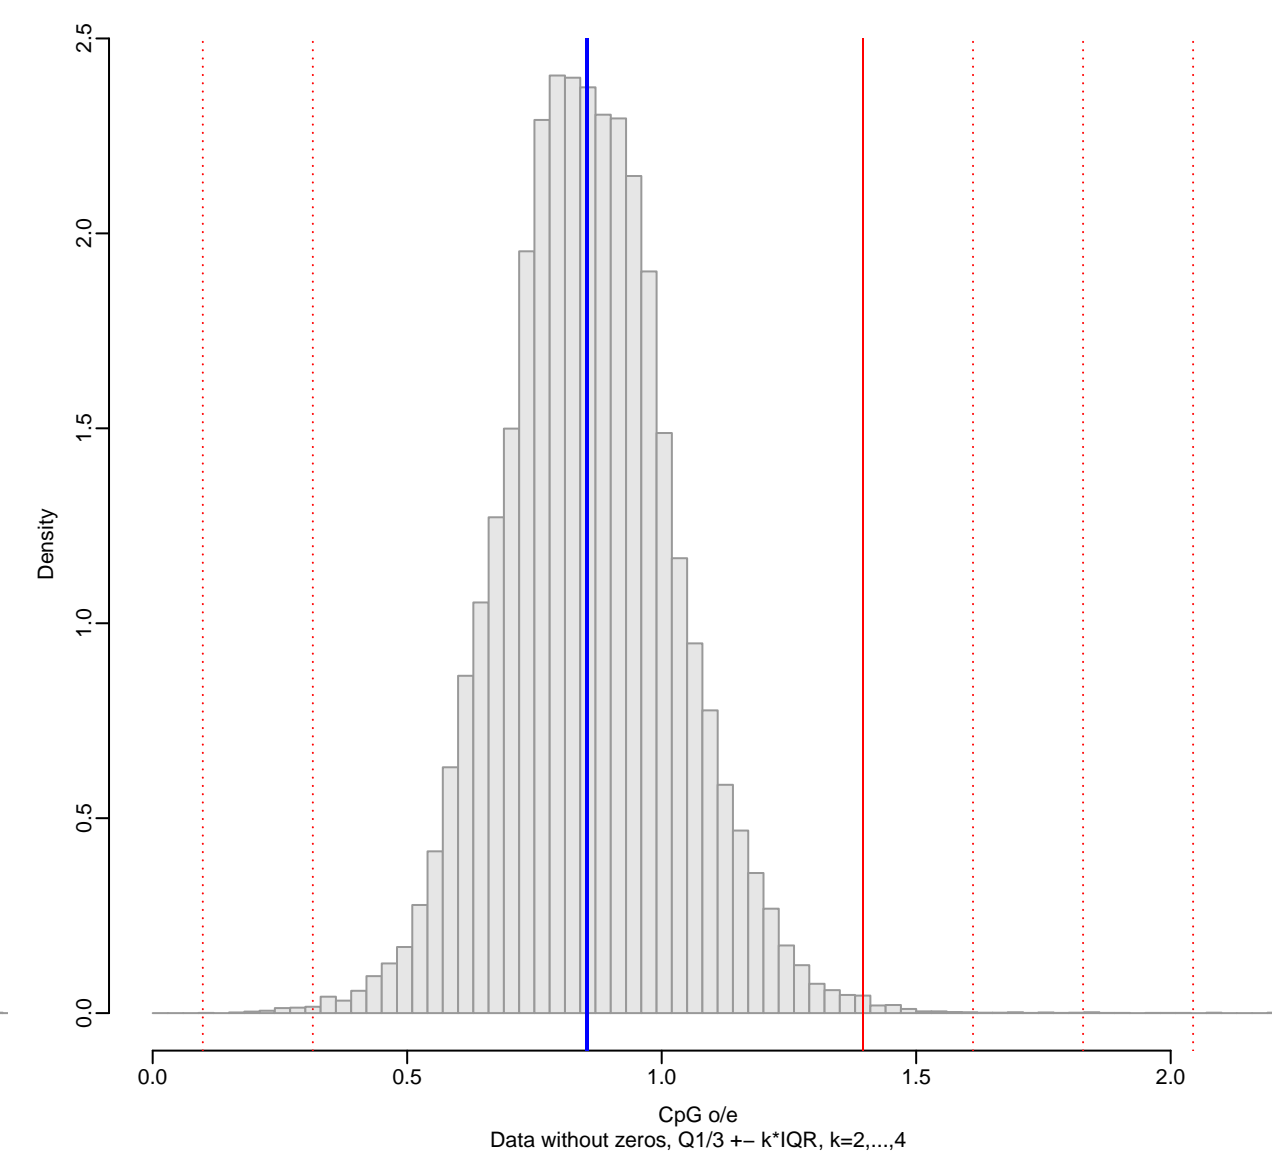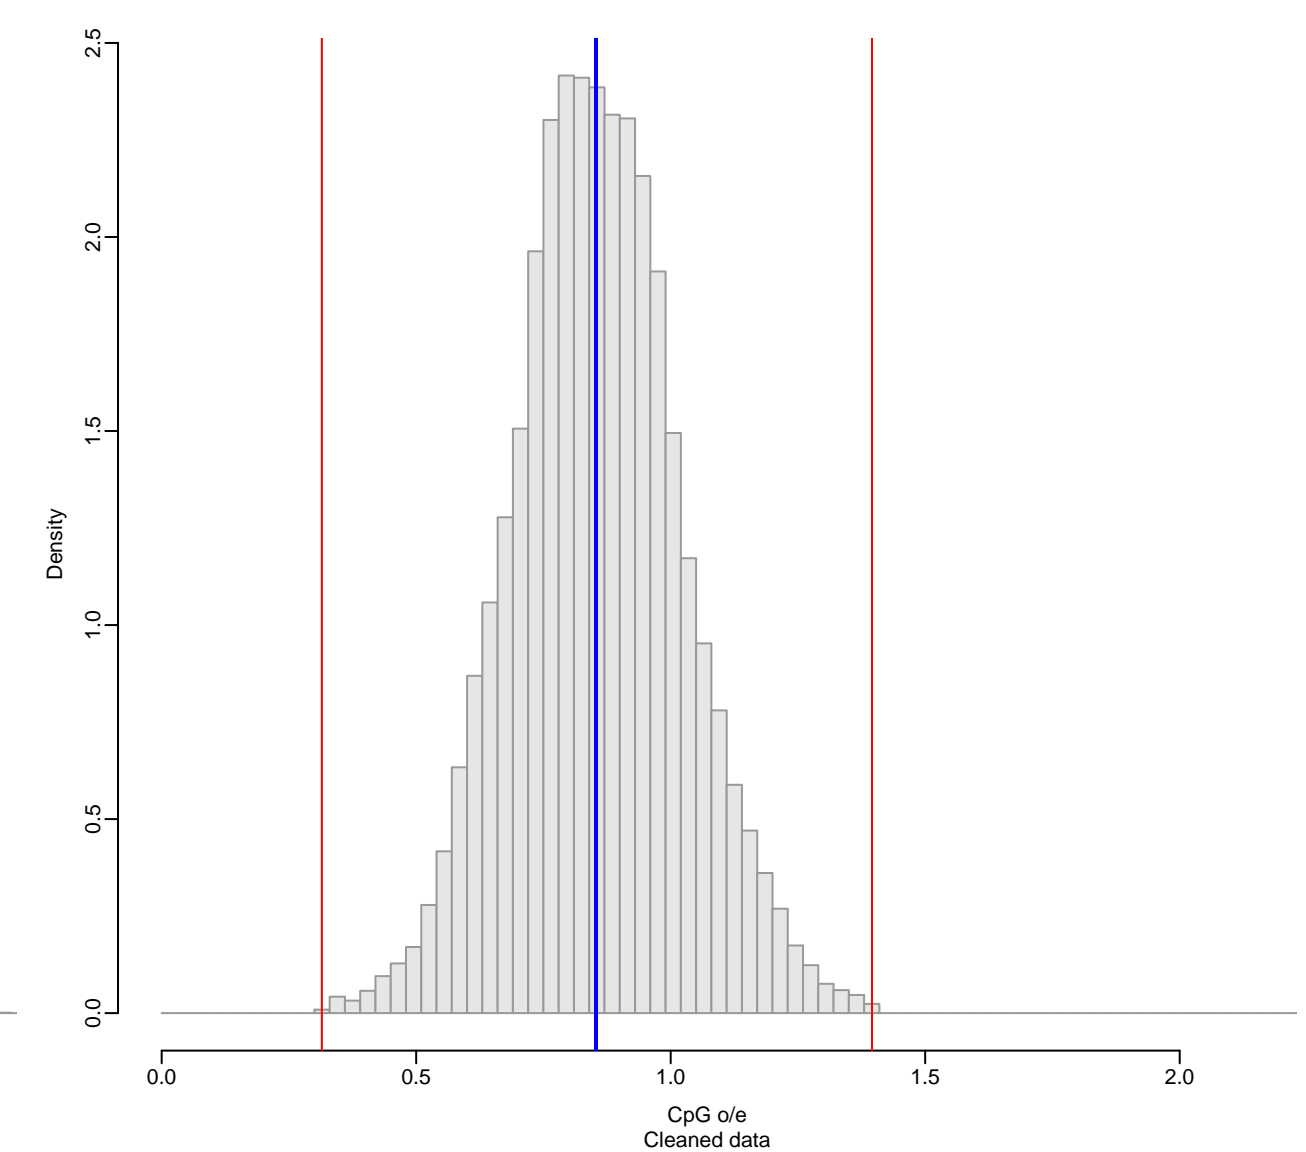

Brachionus\_plicatilis

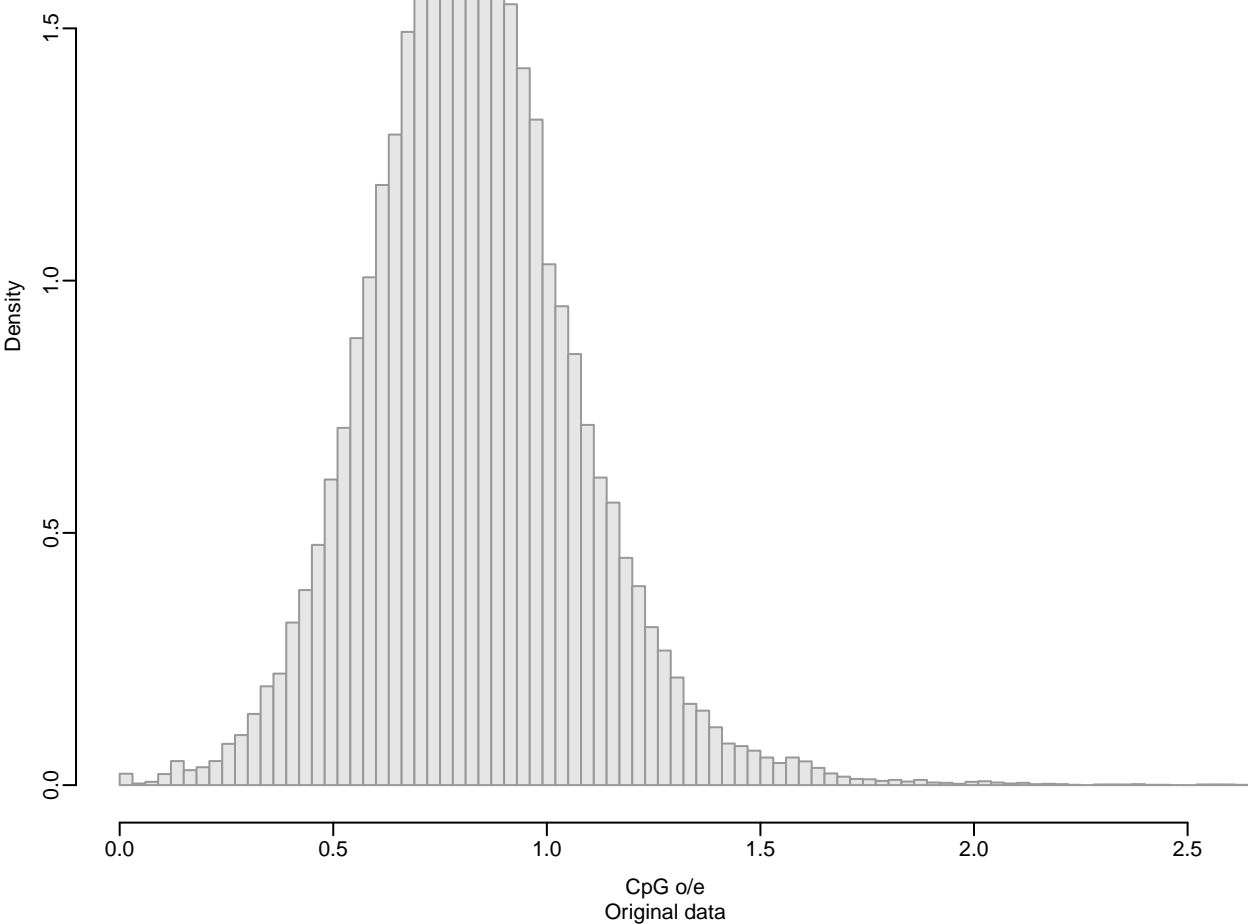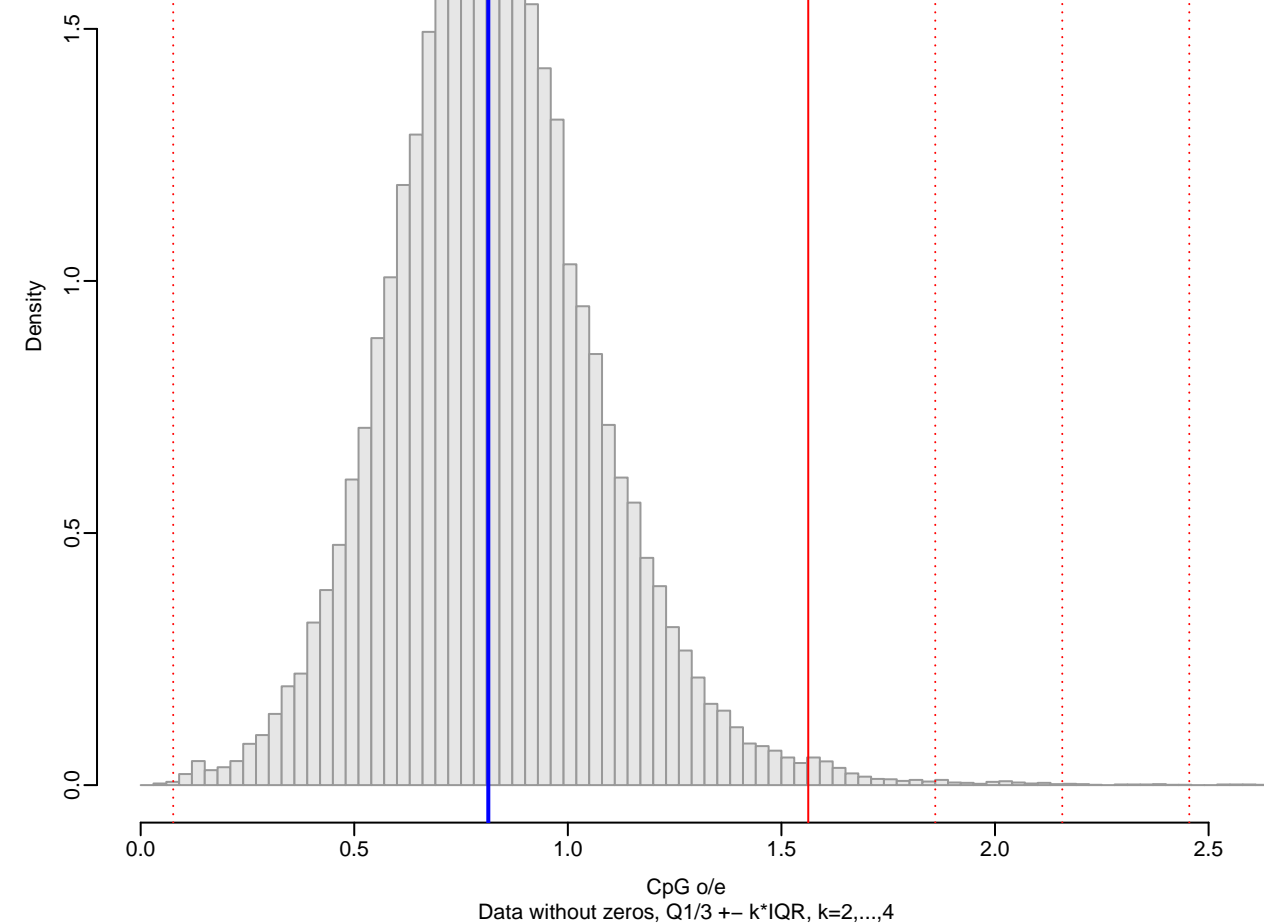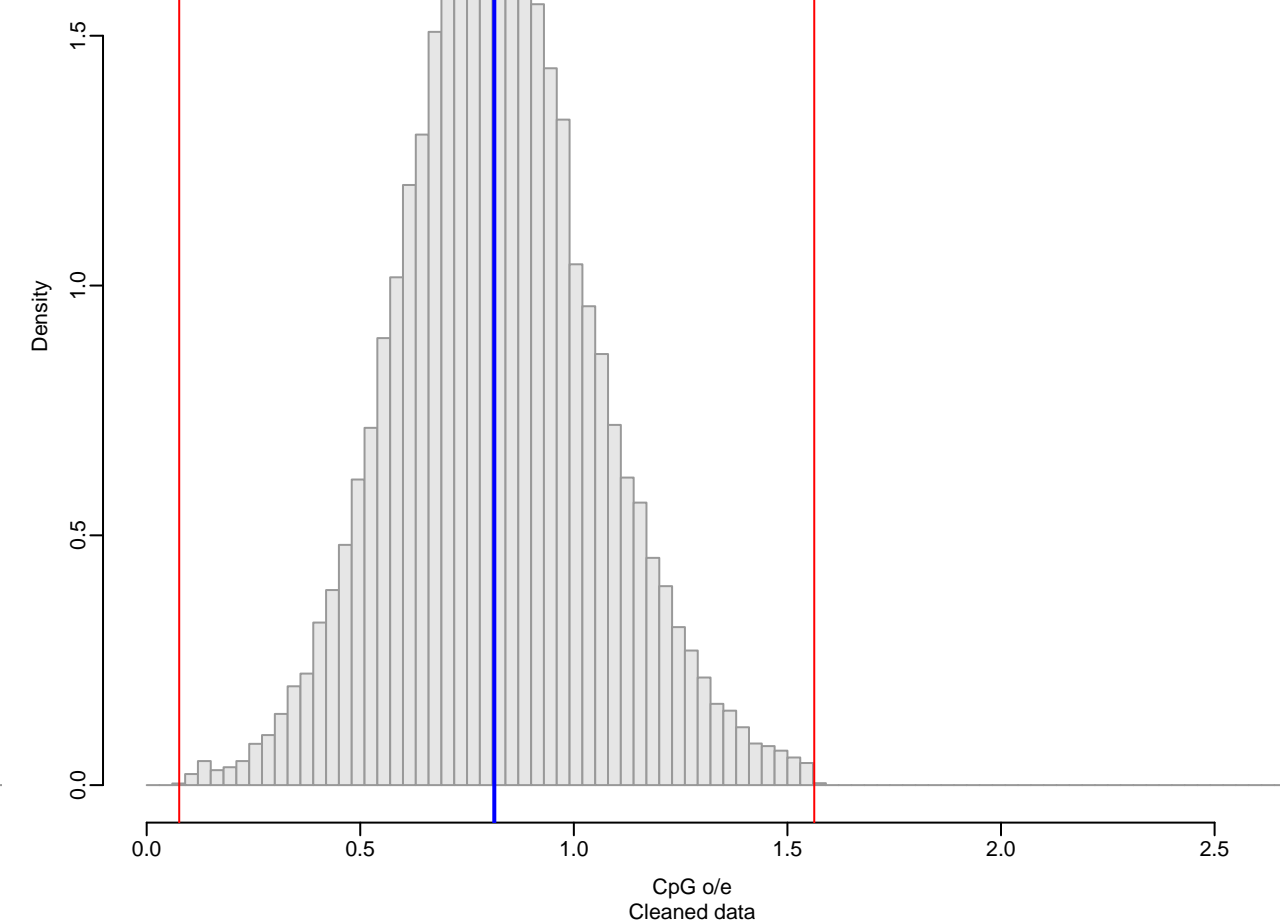



Branchiostoma\_floridae

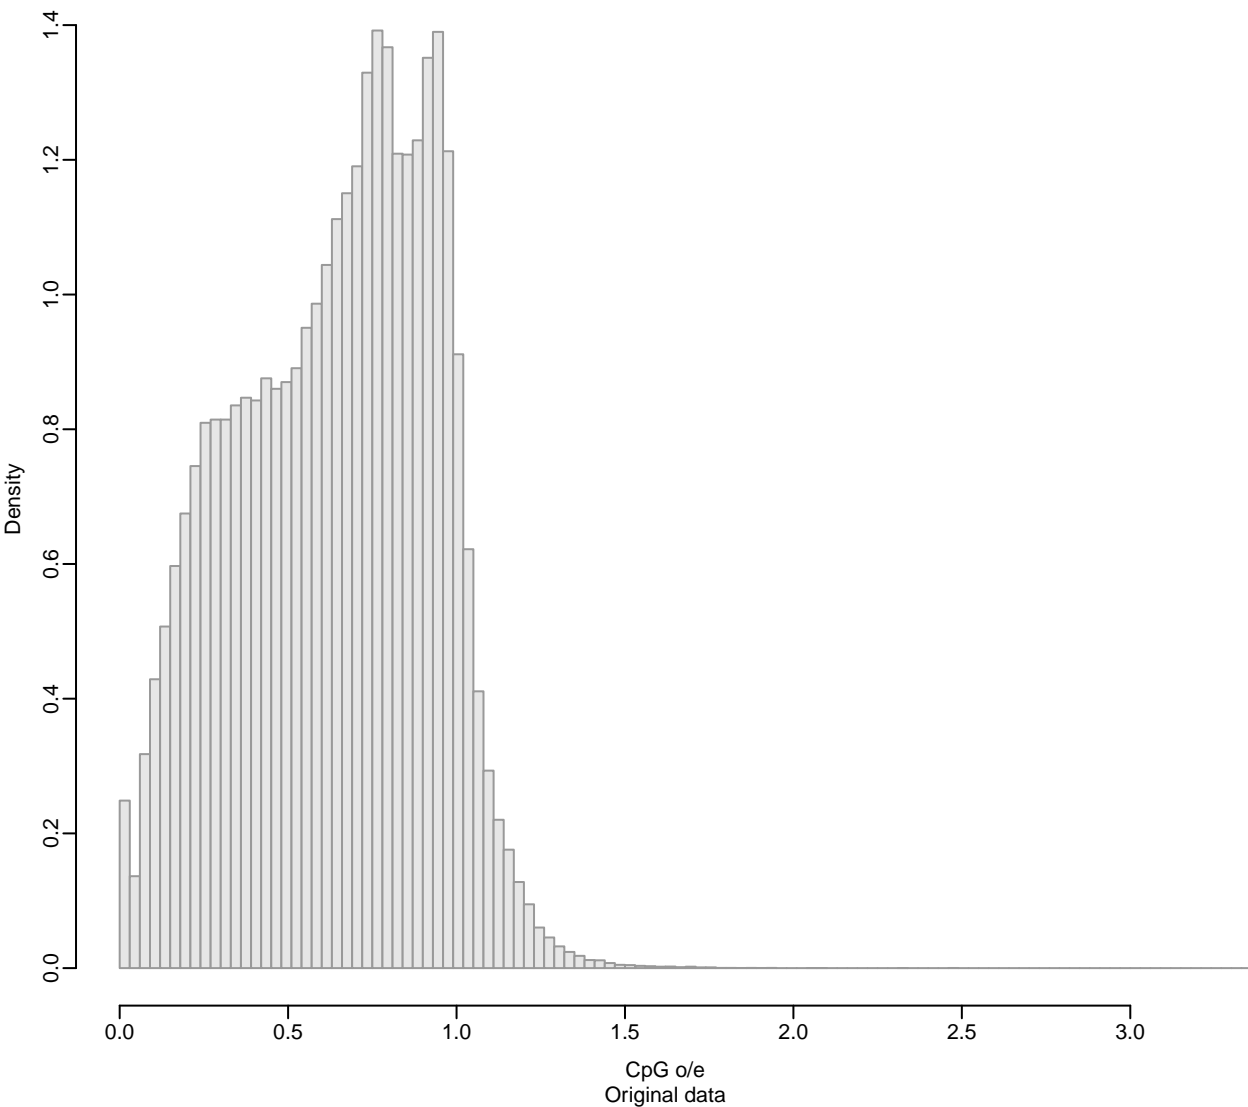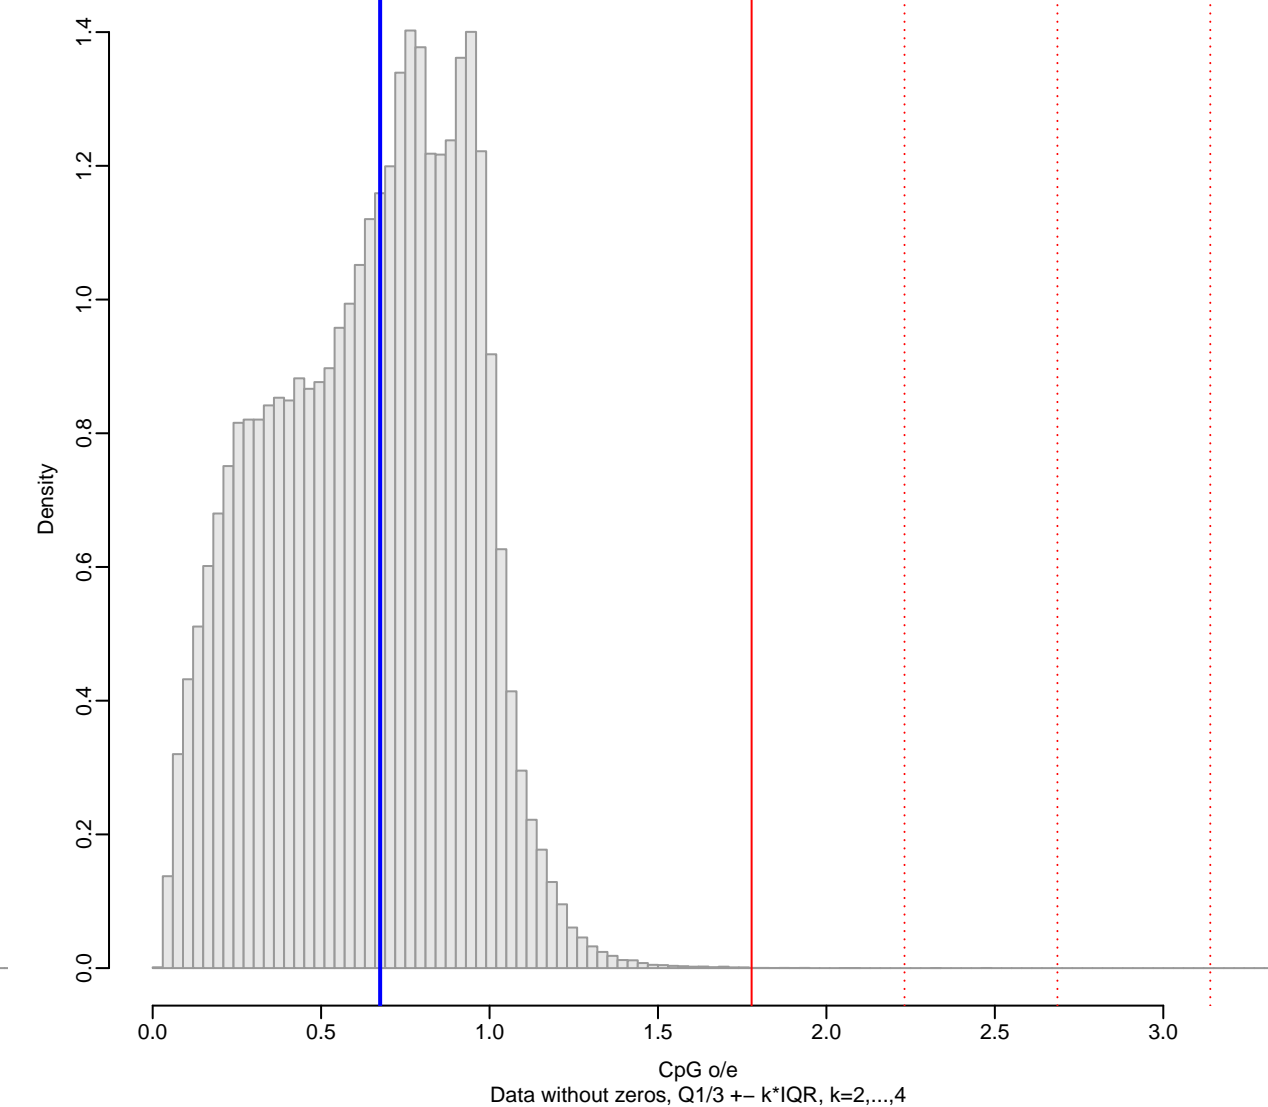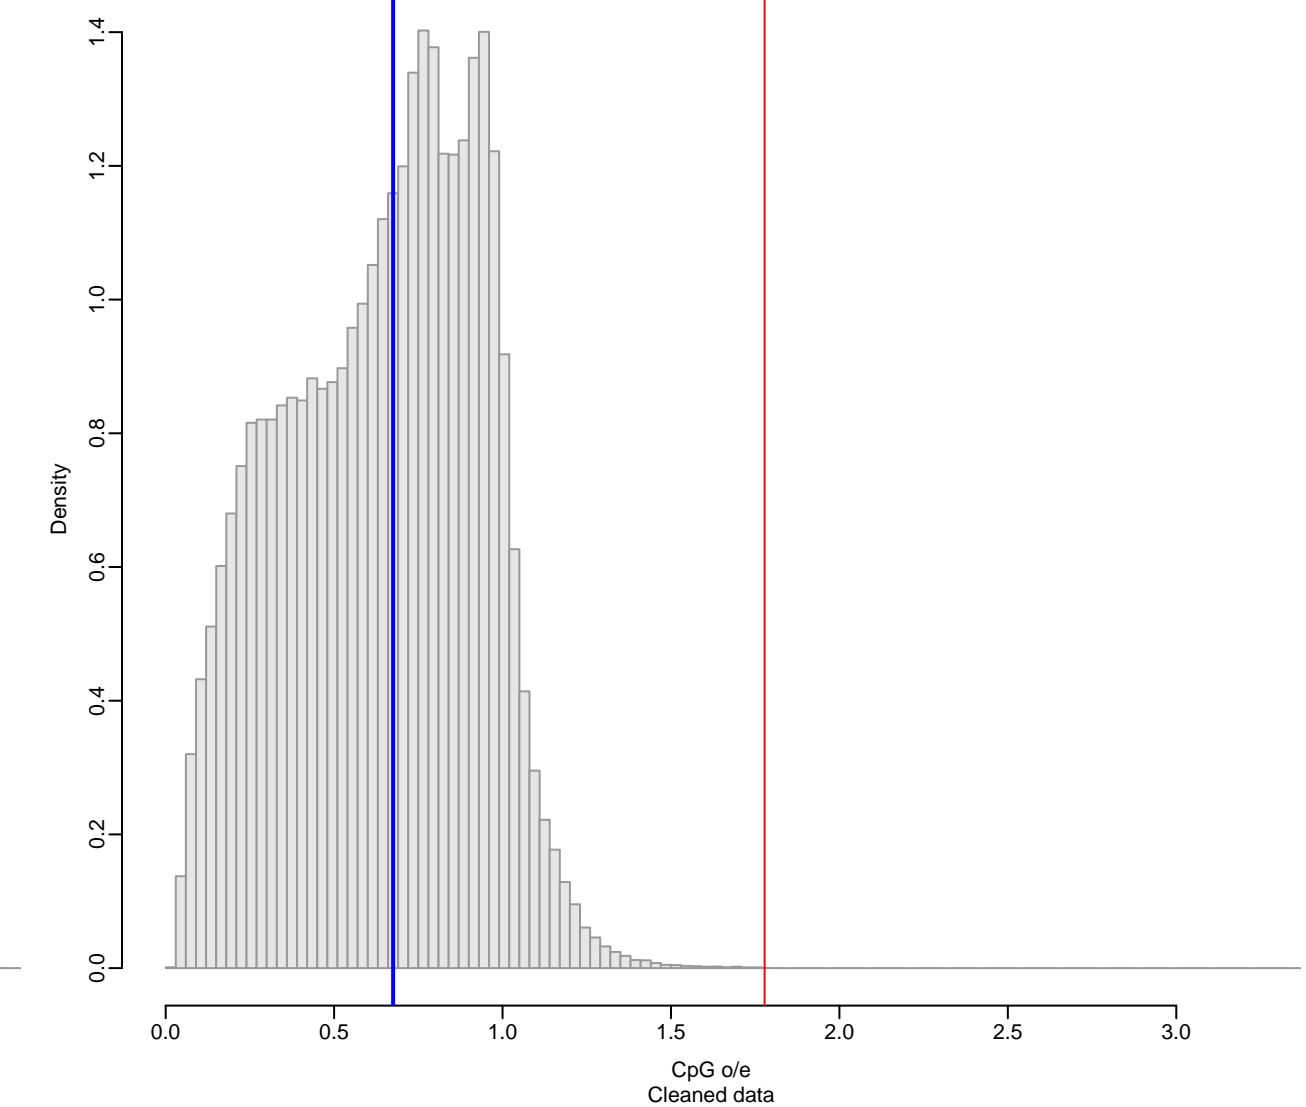

## Brassica\_napus

Density

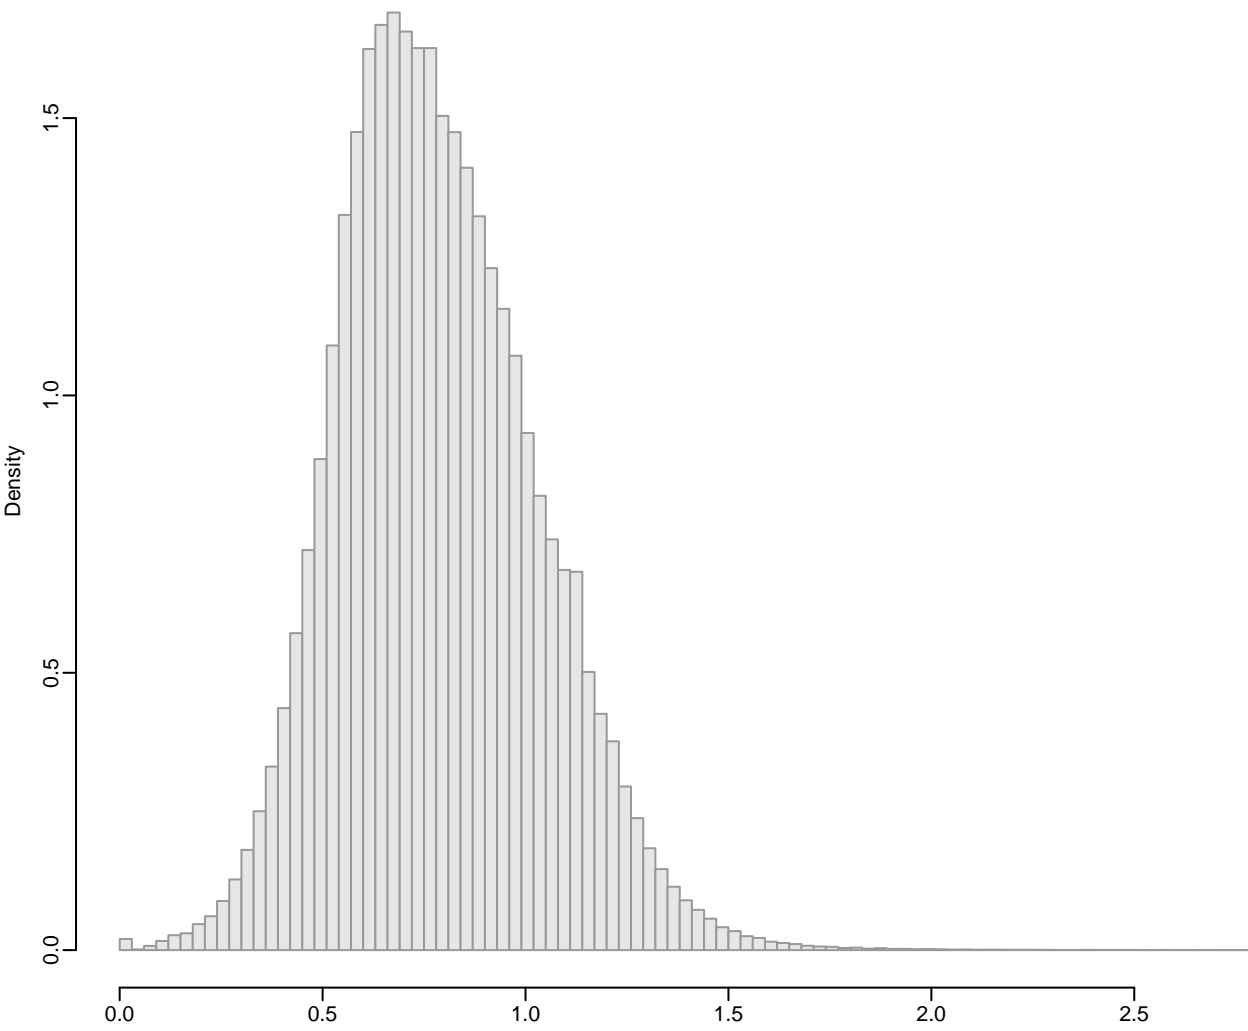

Density

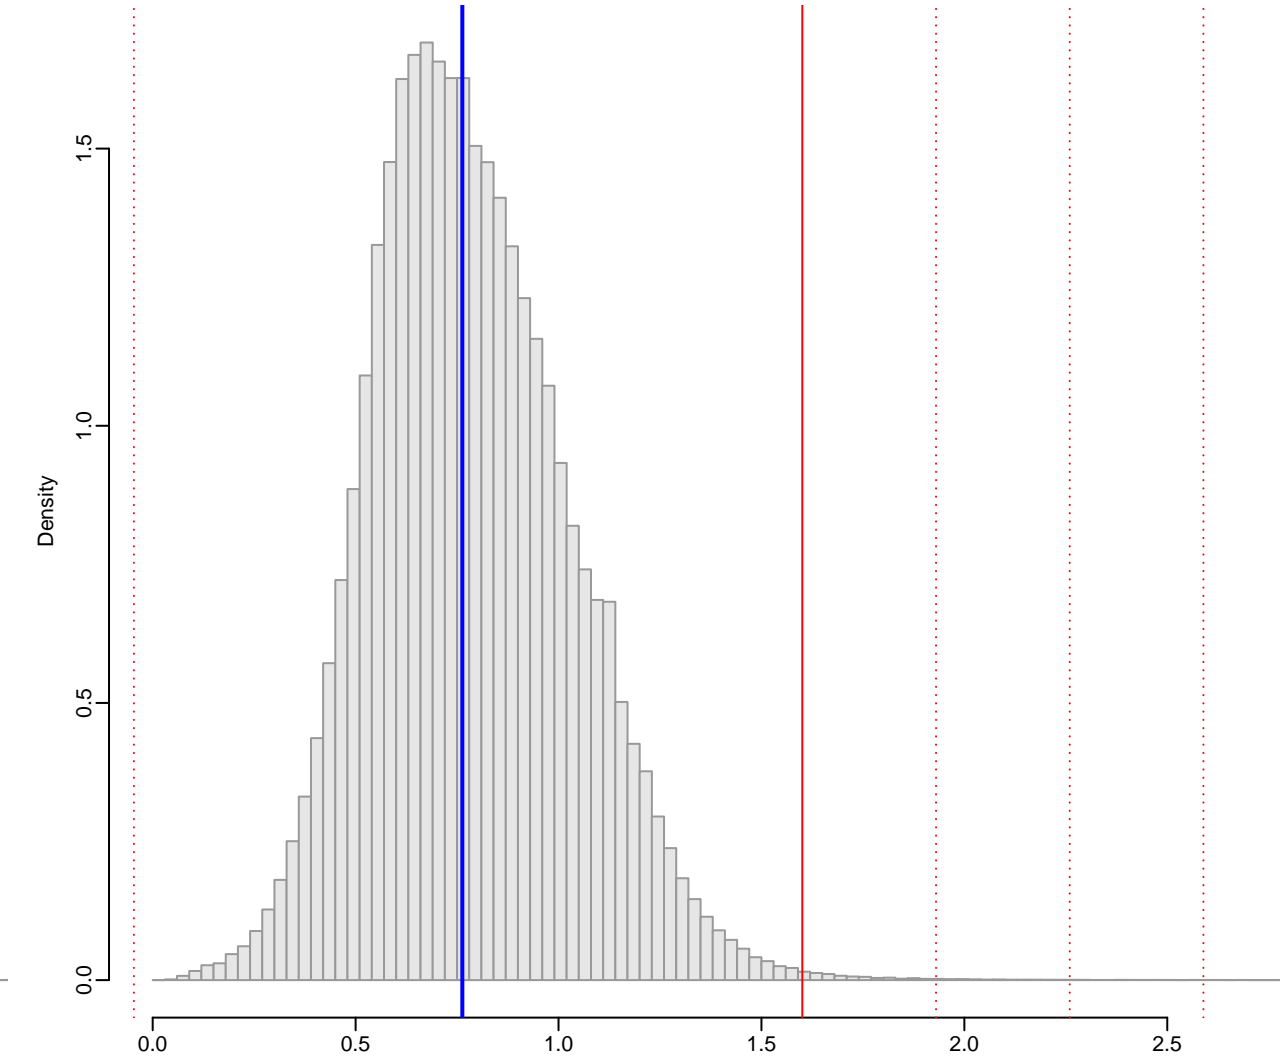

Density

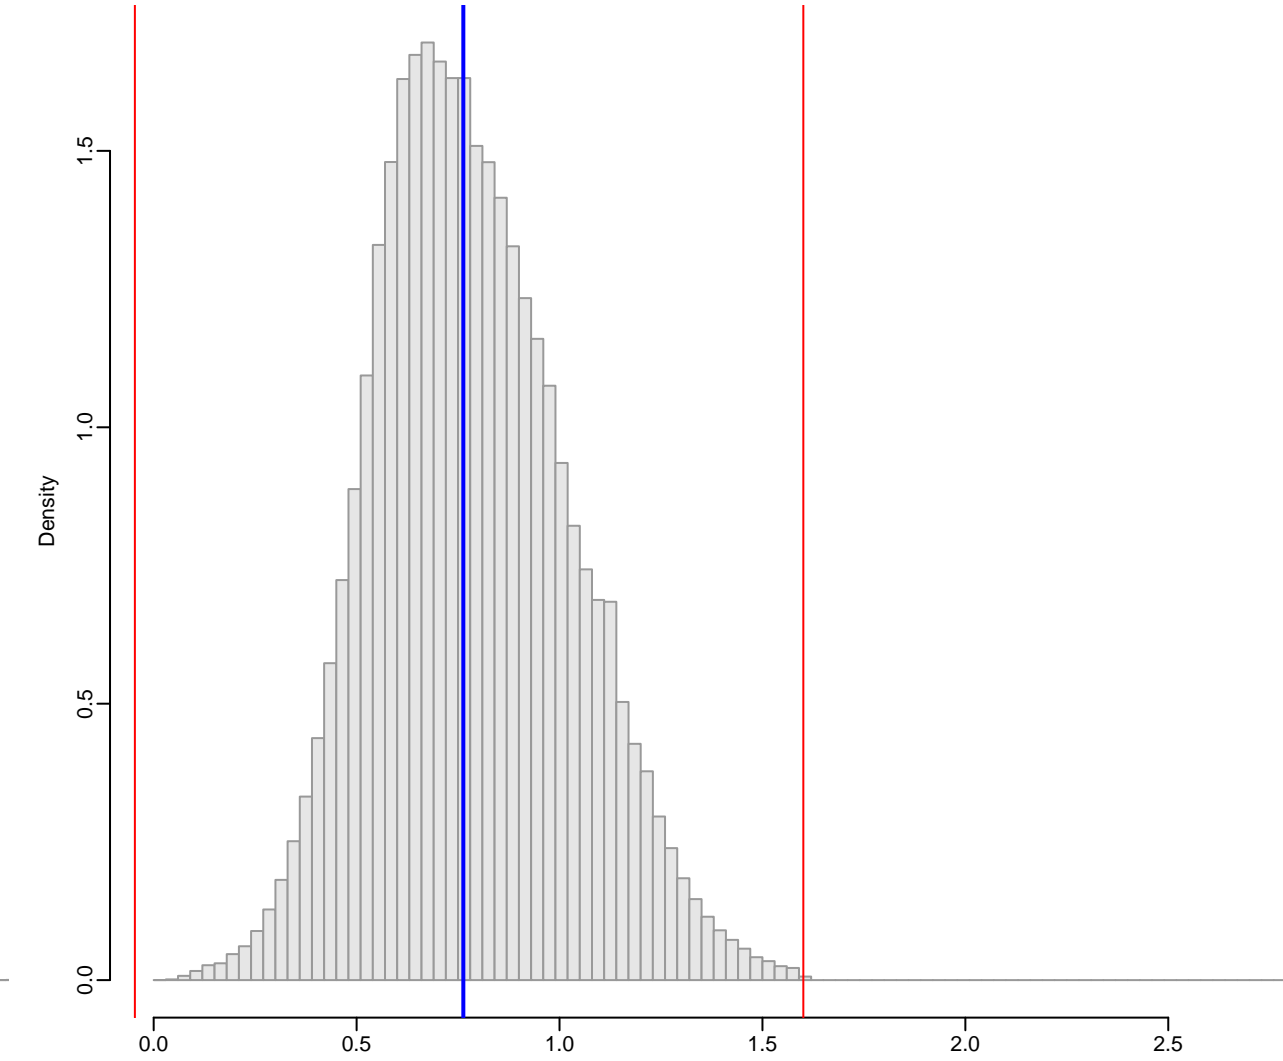

Brassica\_oleracea

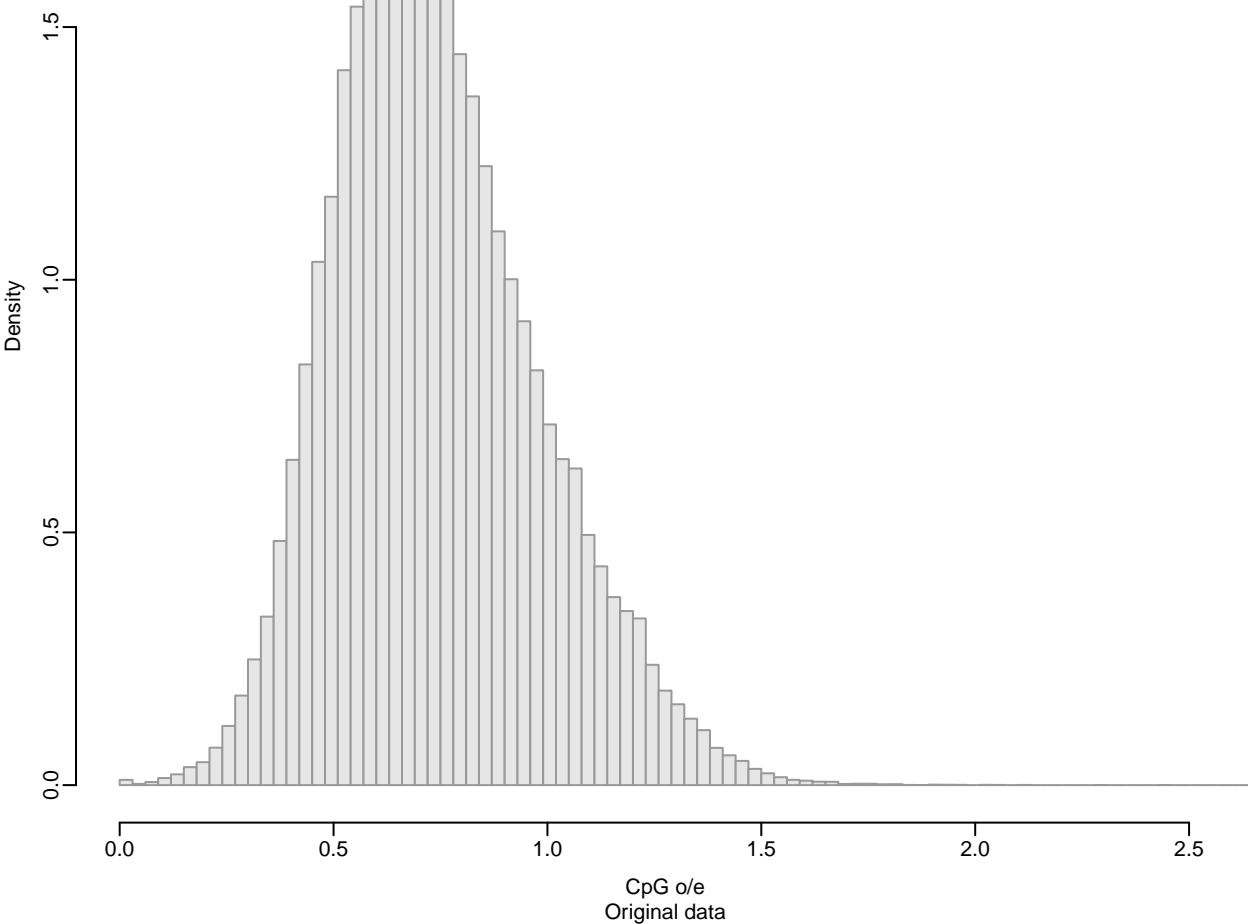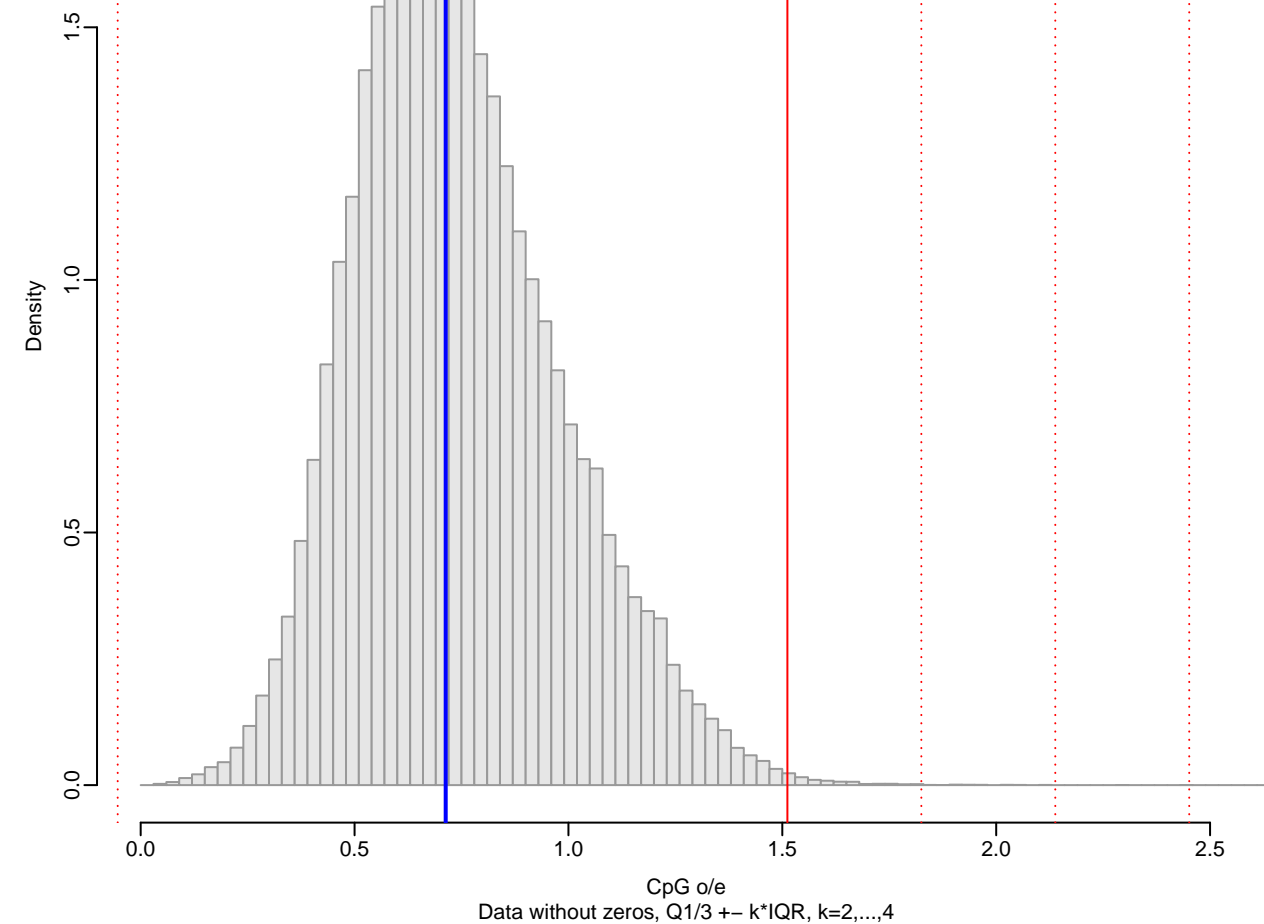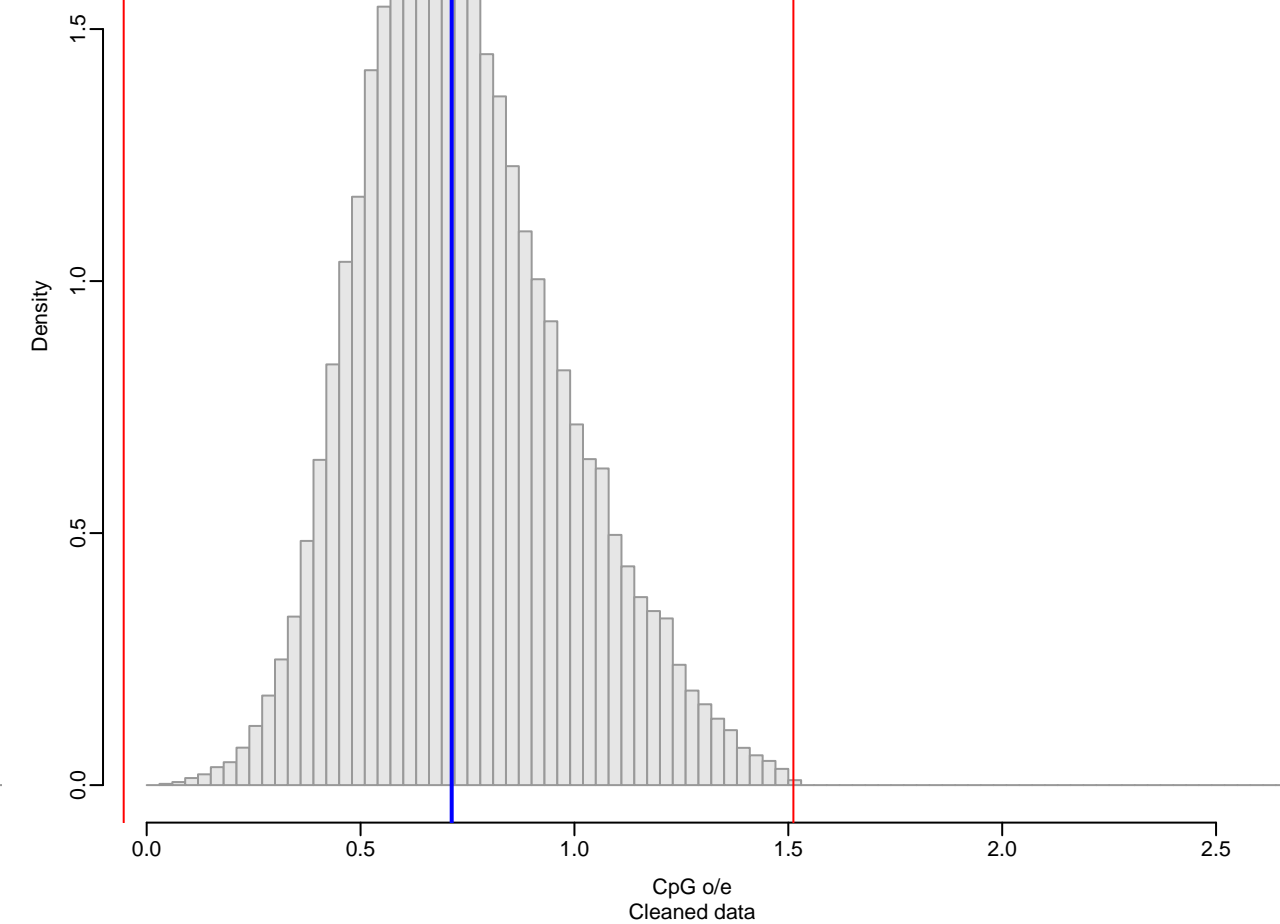

Brassica\_rapa

Density

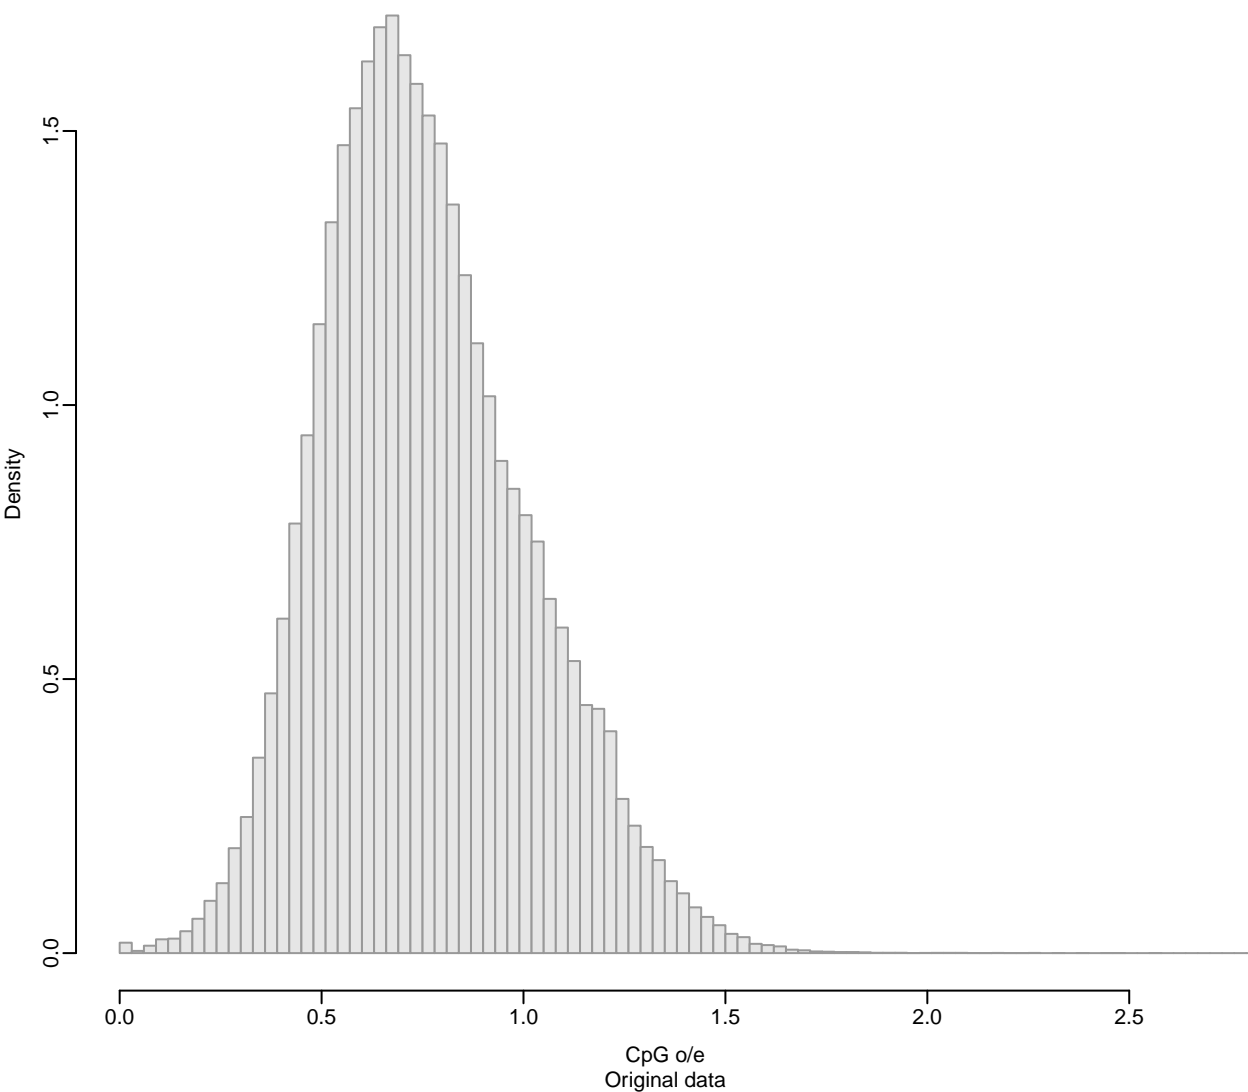

Density

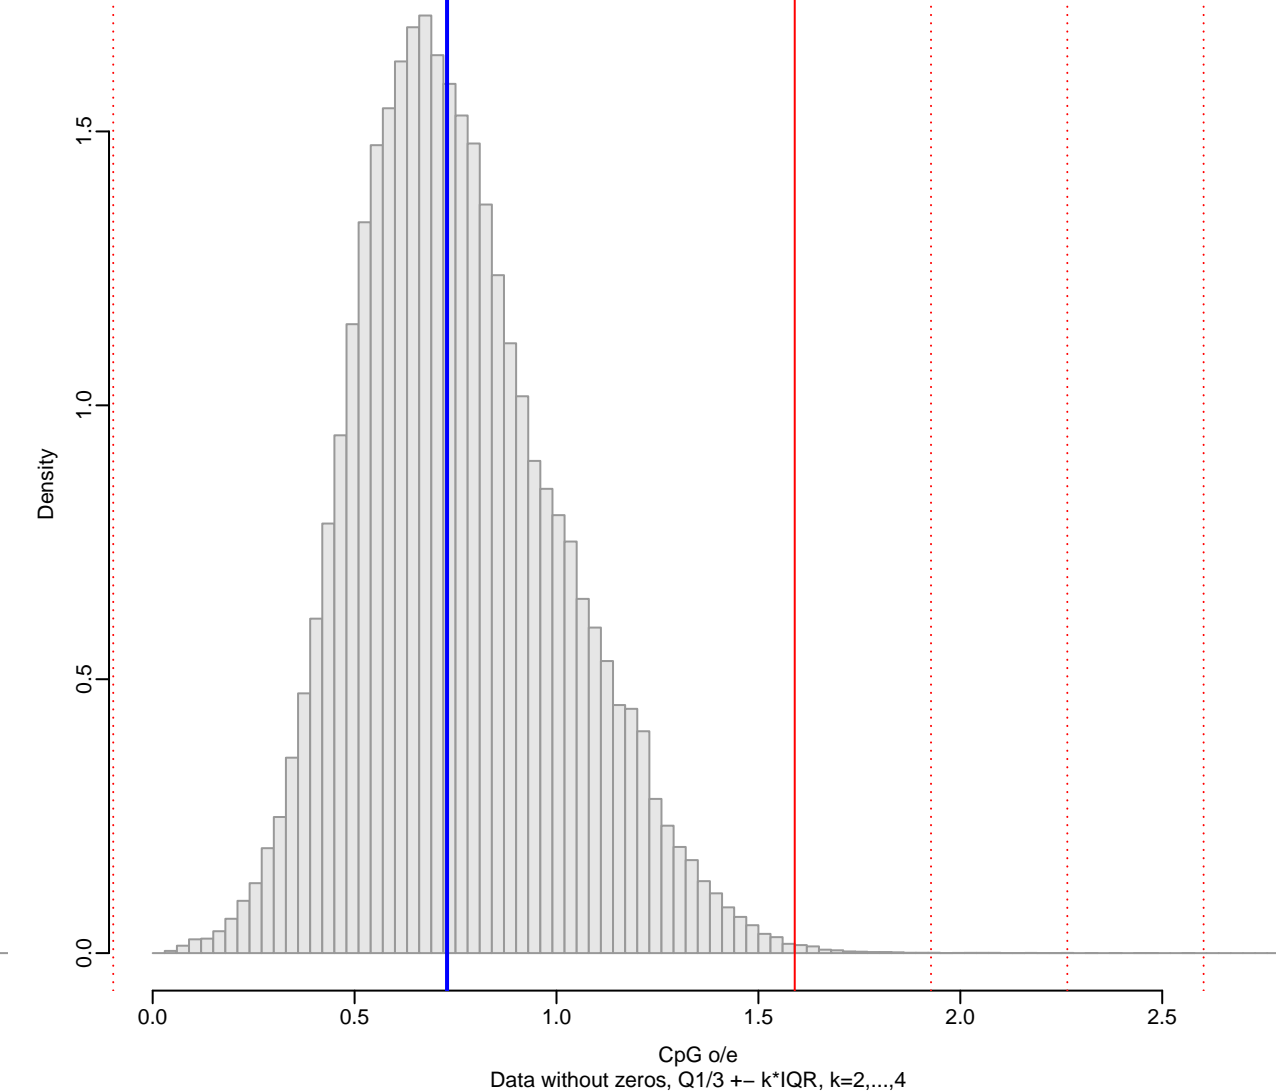

Density

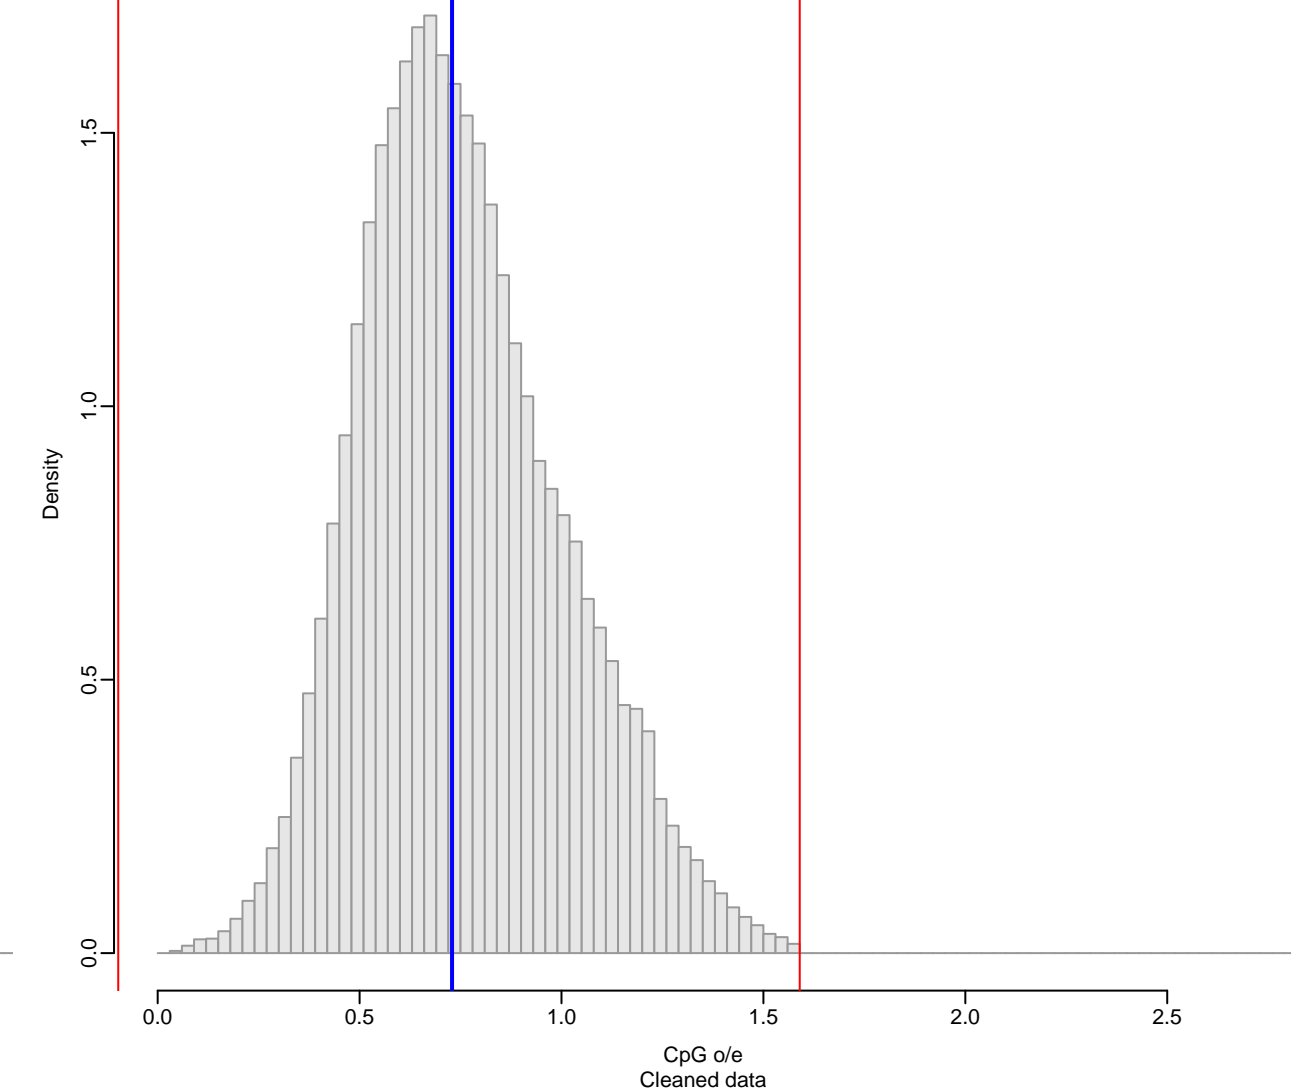

Brugia\_malayi

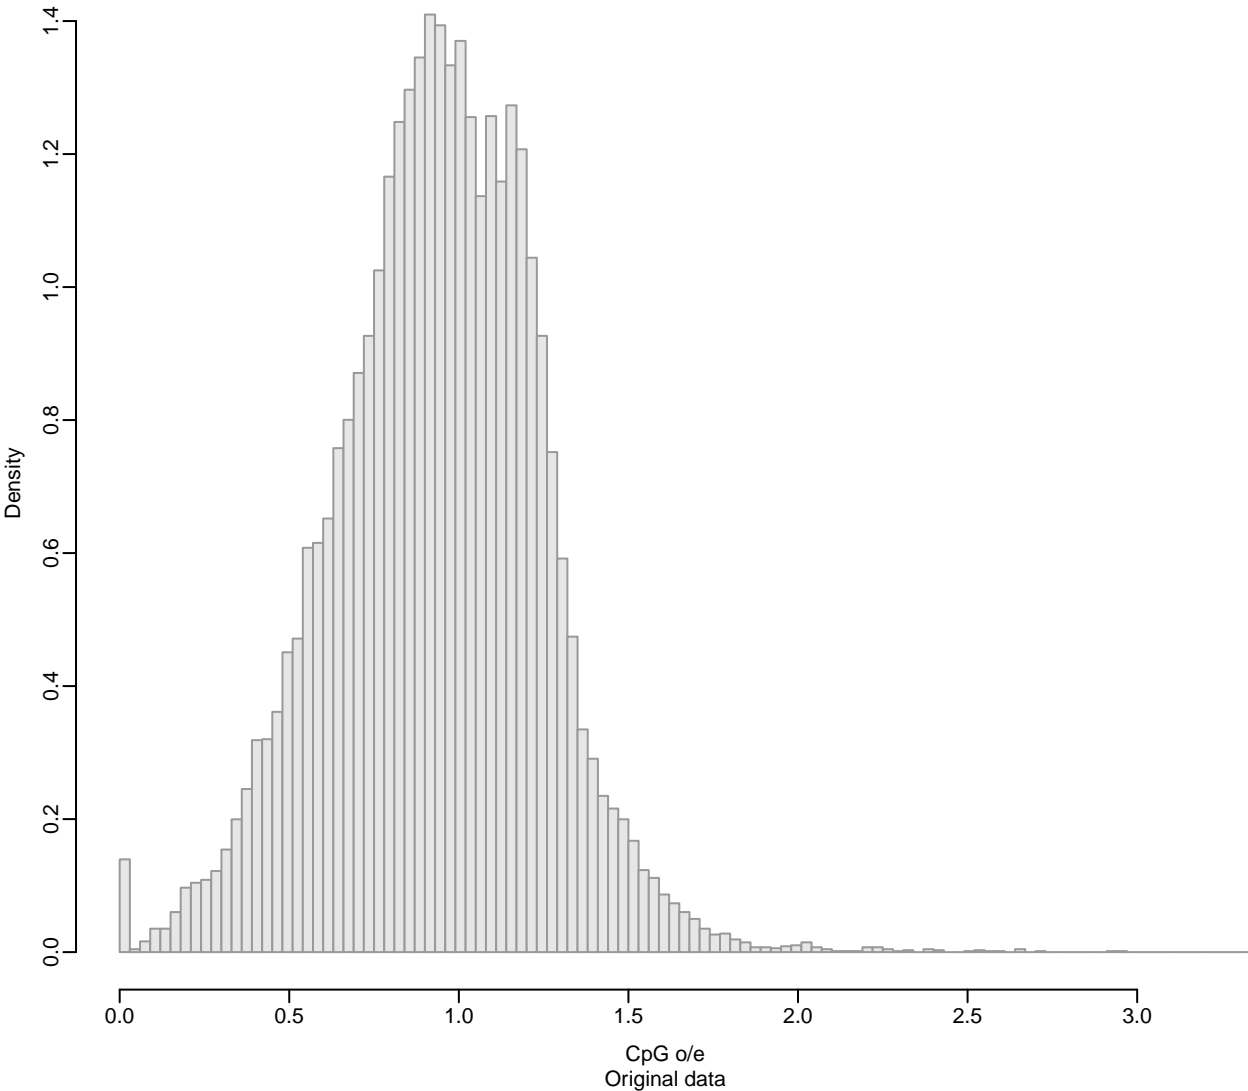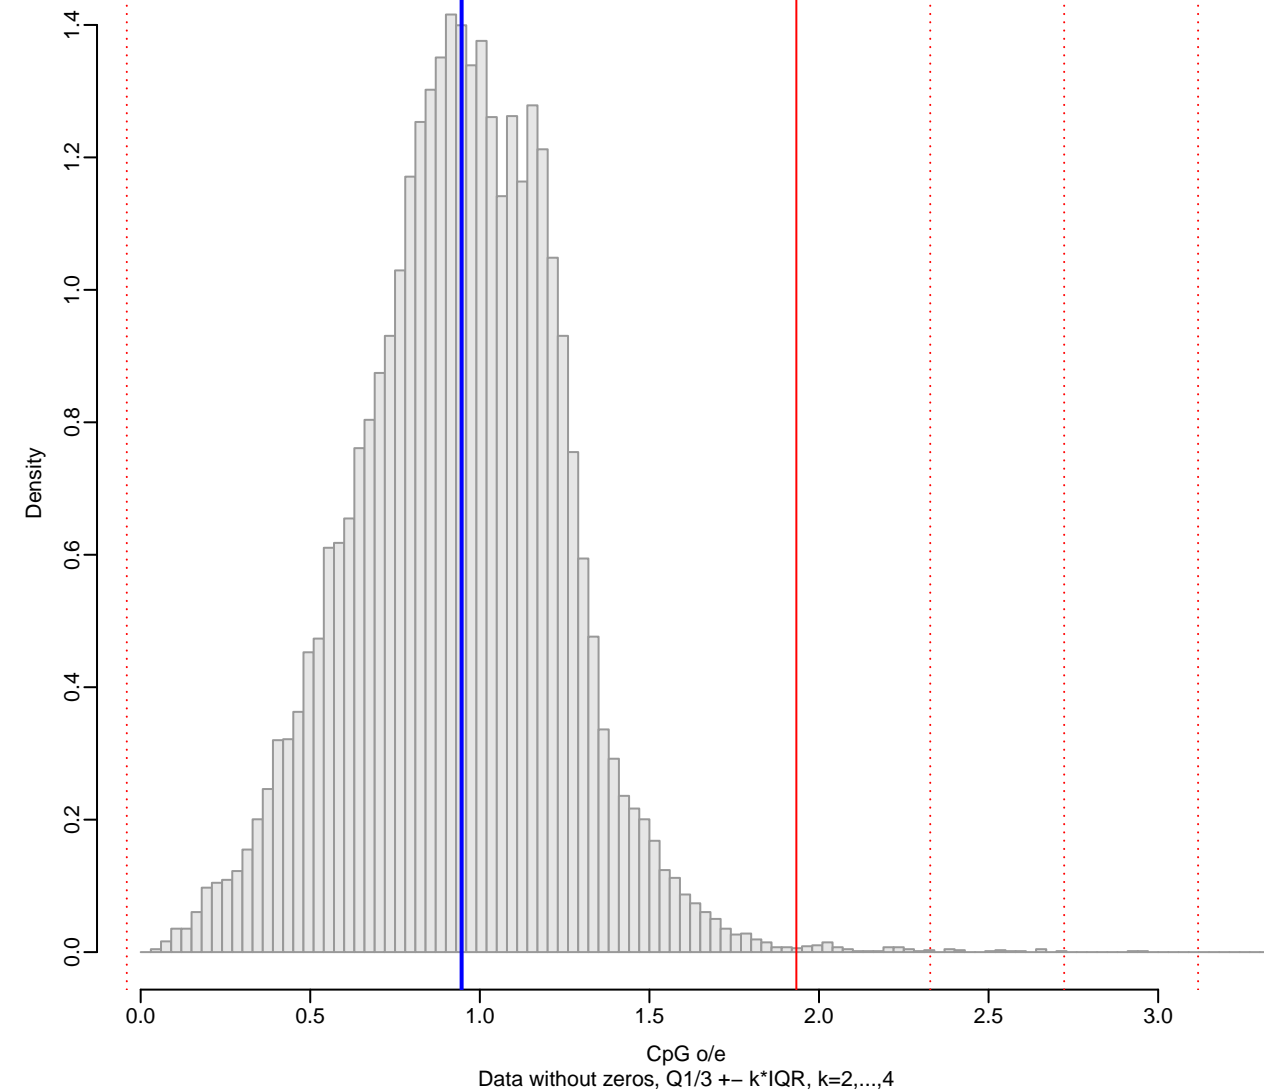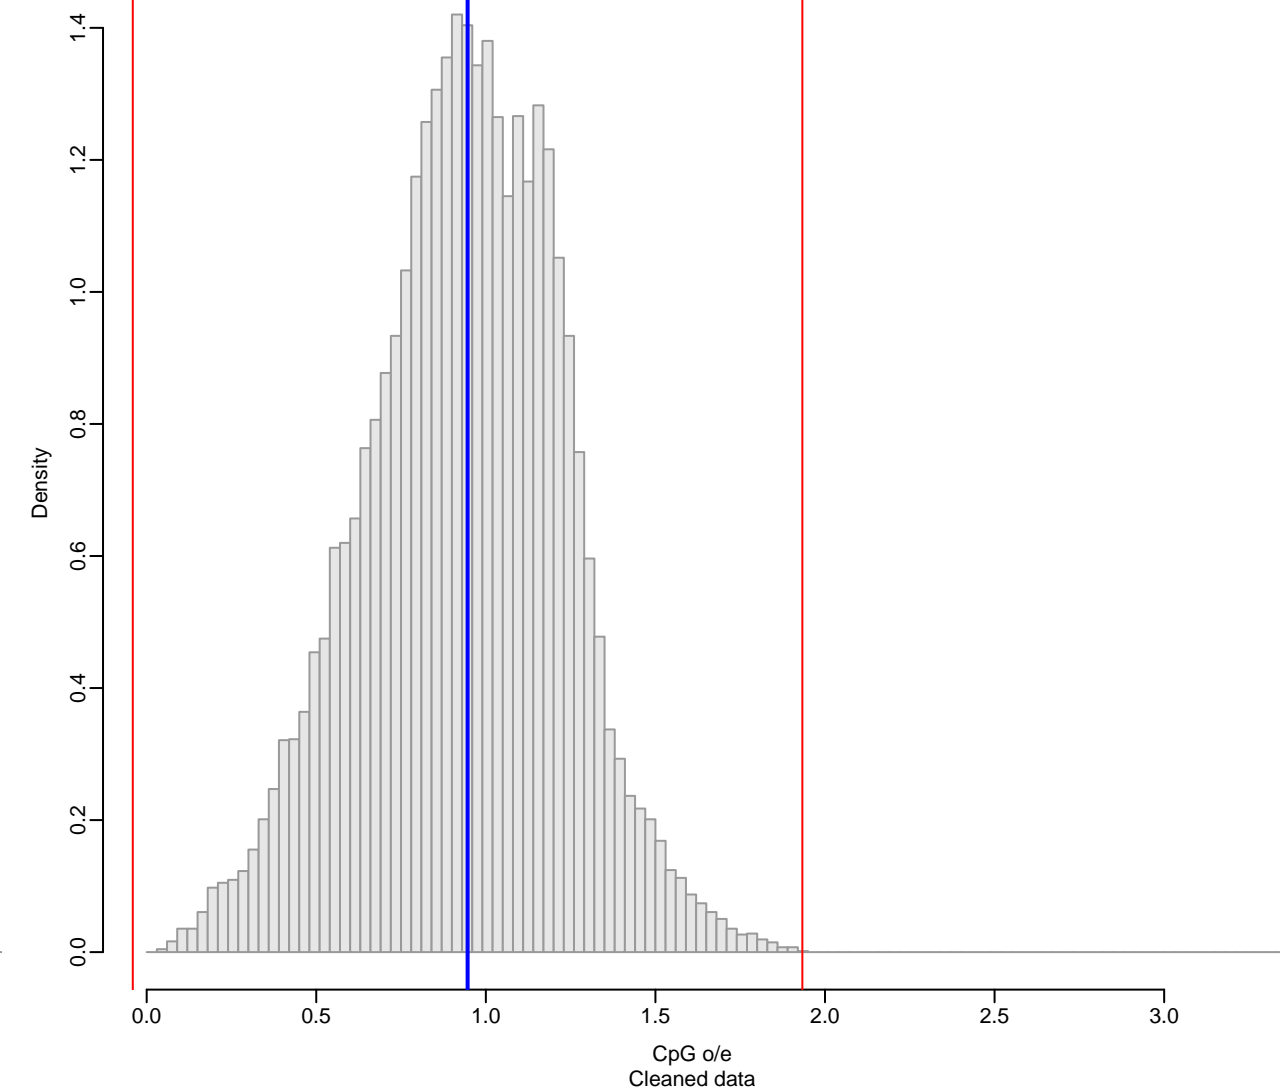

Caenorhabditis\_brenneri

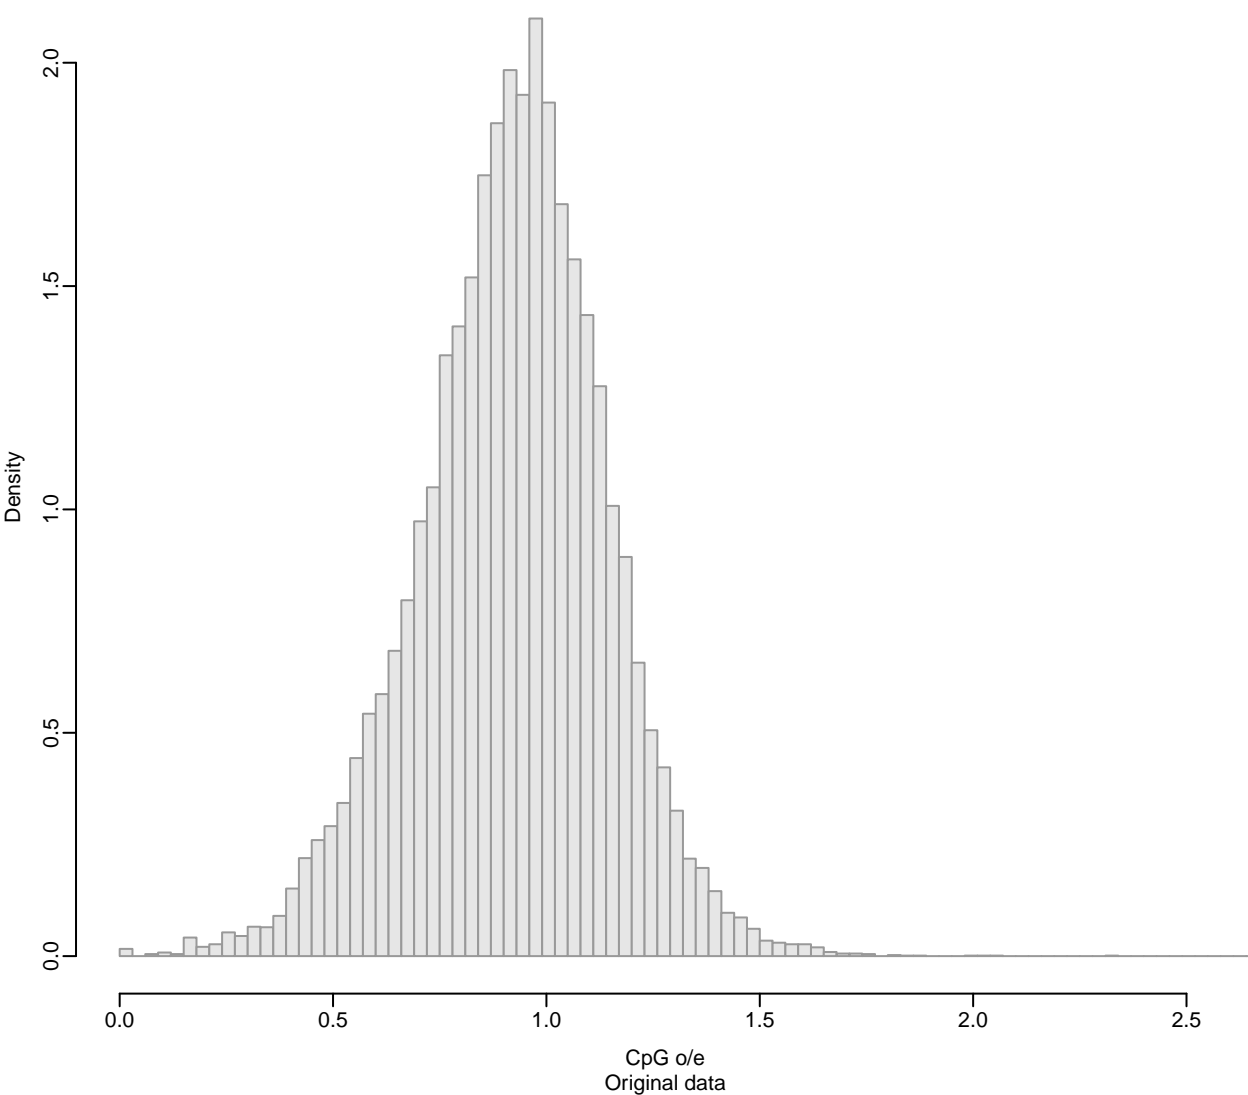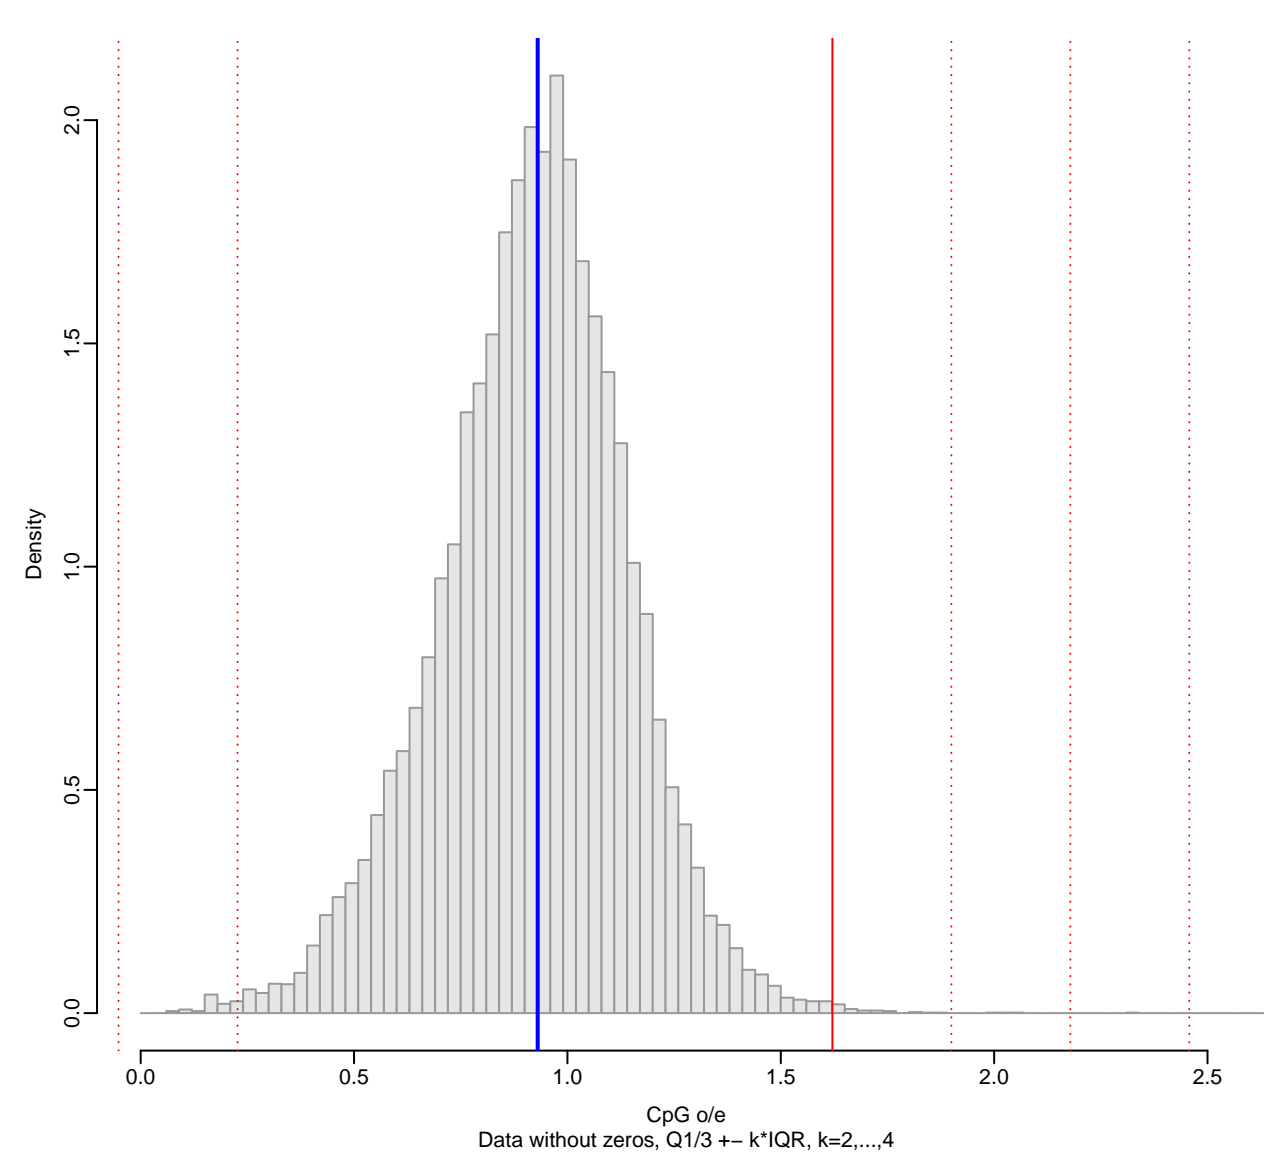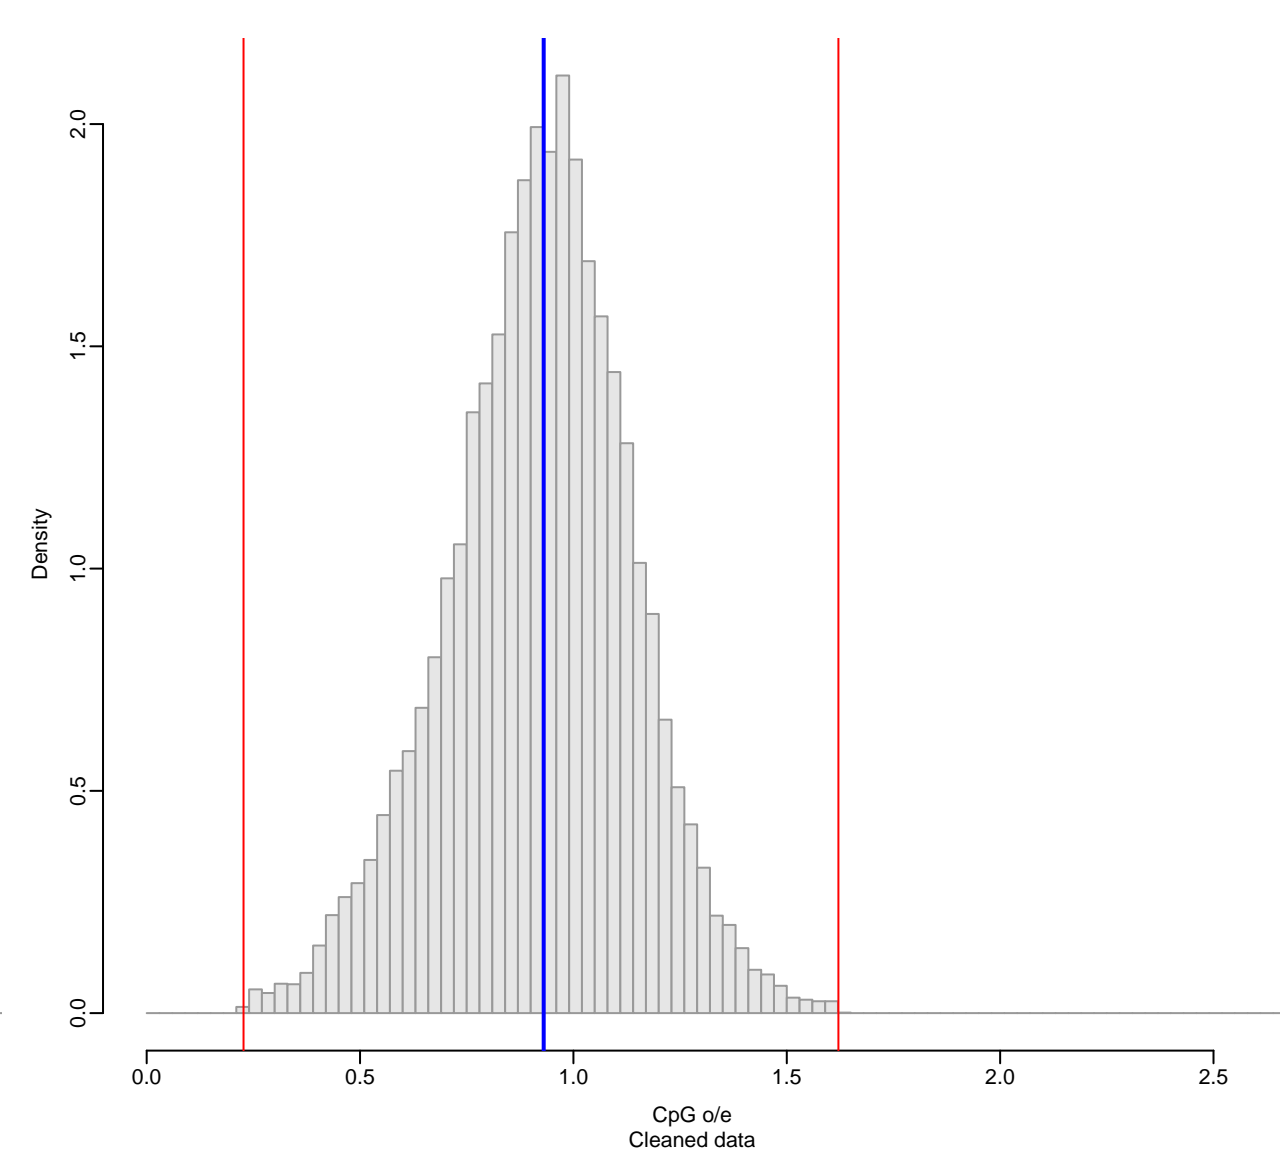

Caenorhabditis\_briggsae

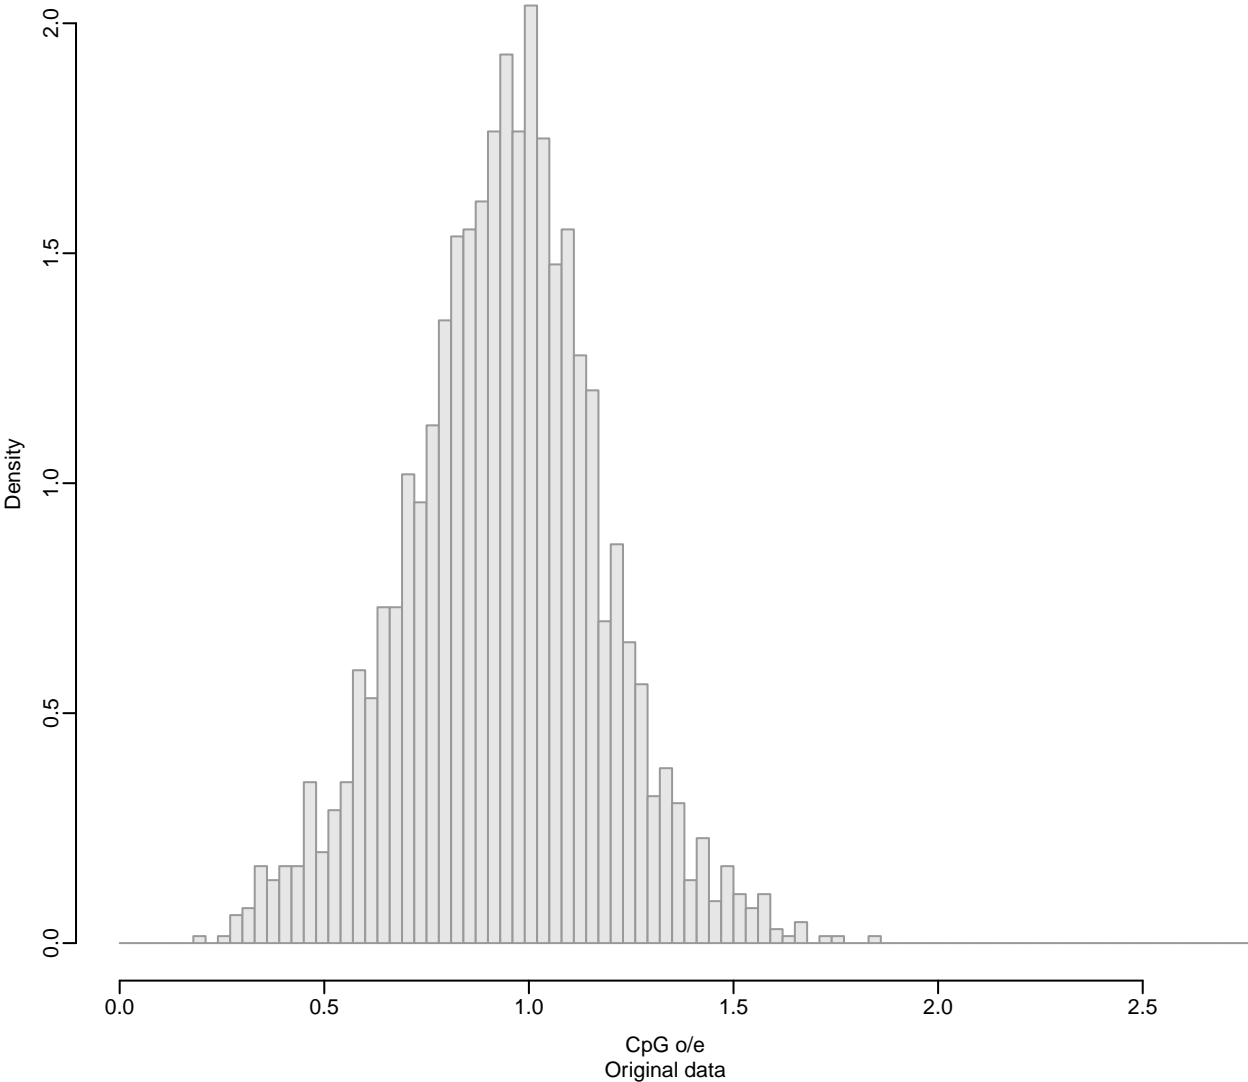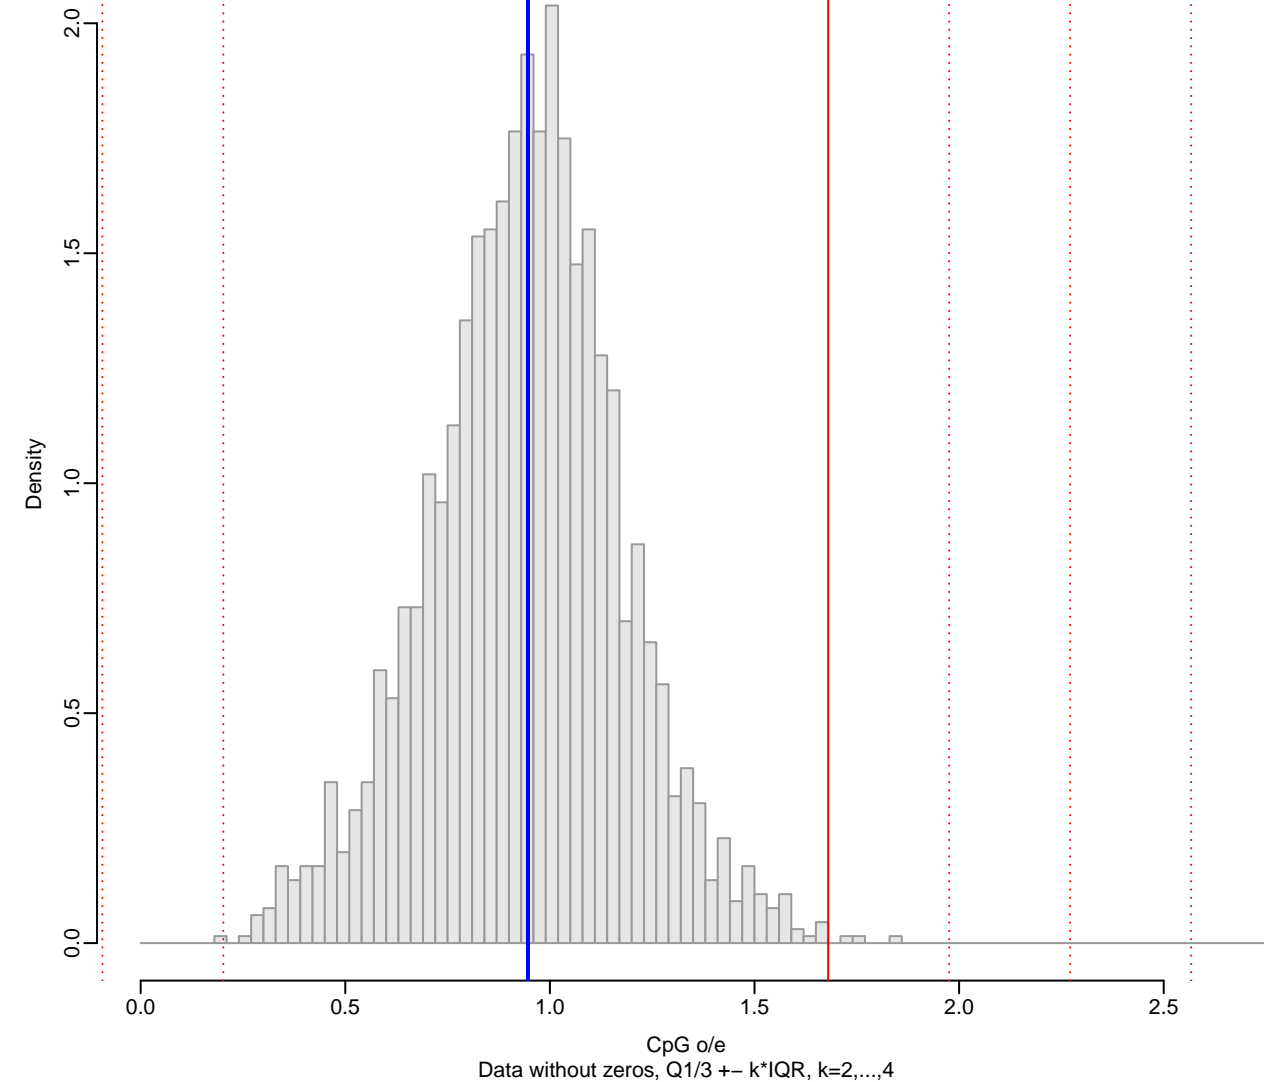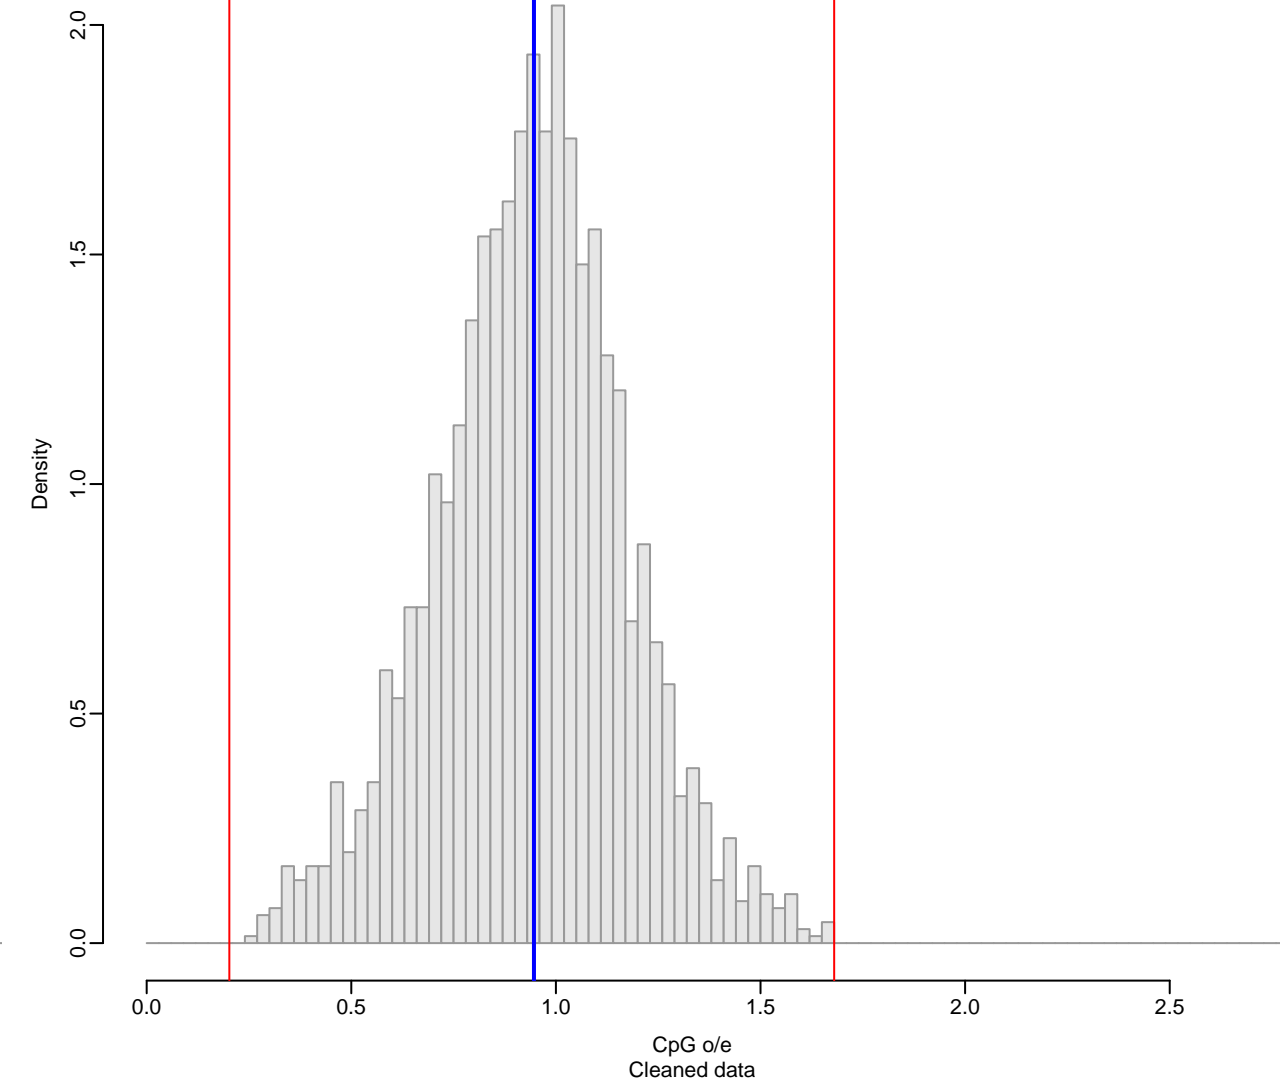

Caenorhabditis\_elegans

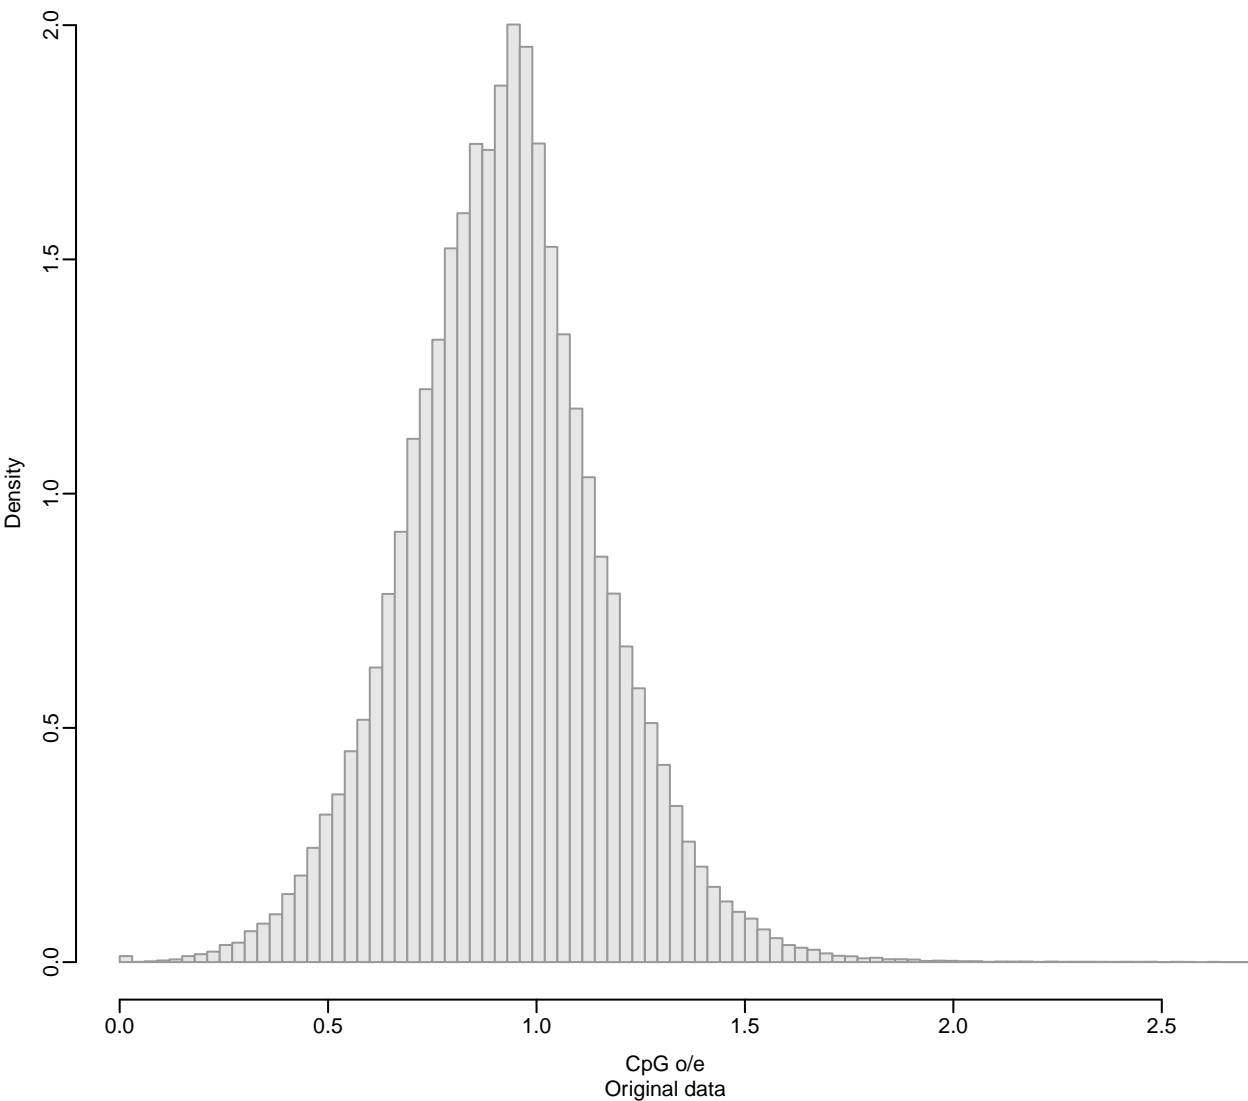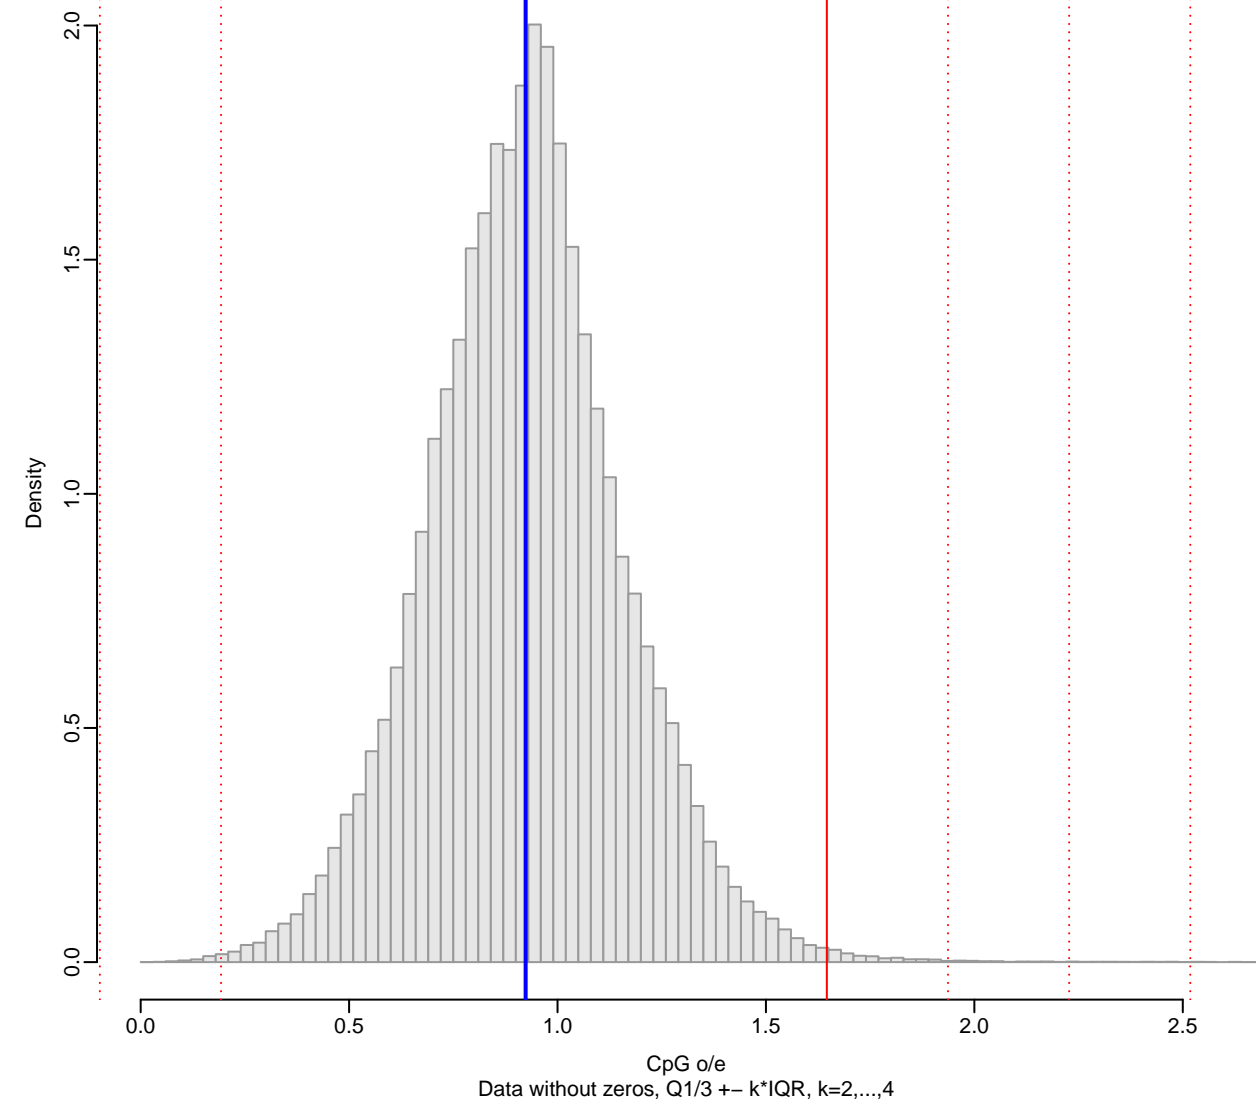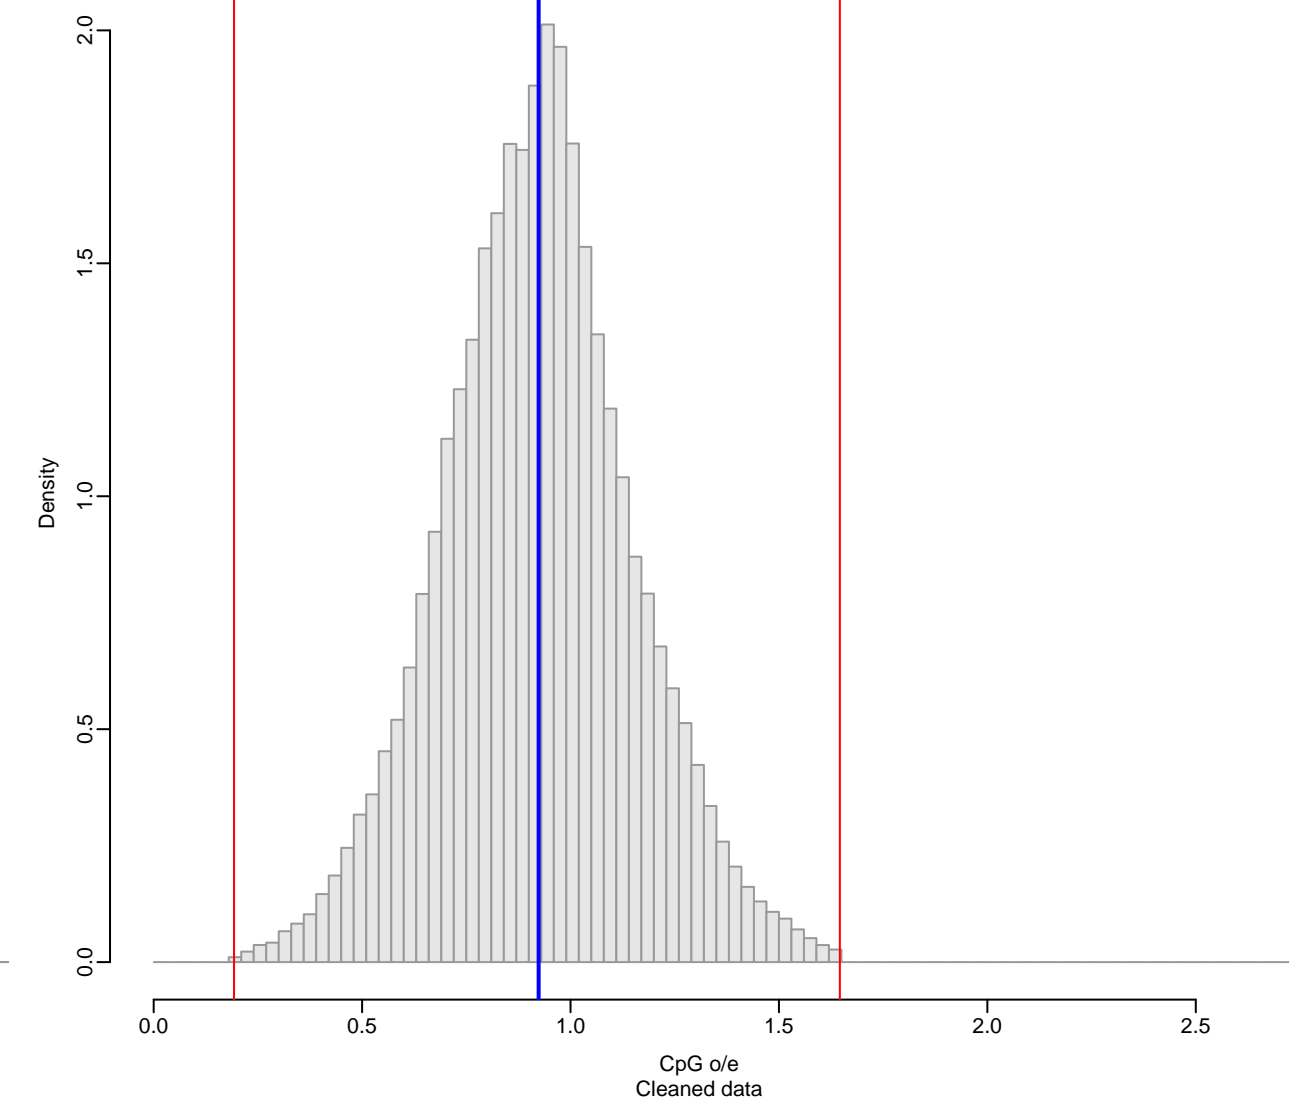



Caenorhabditis\_japonica

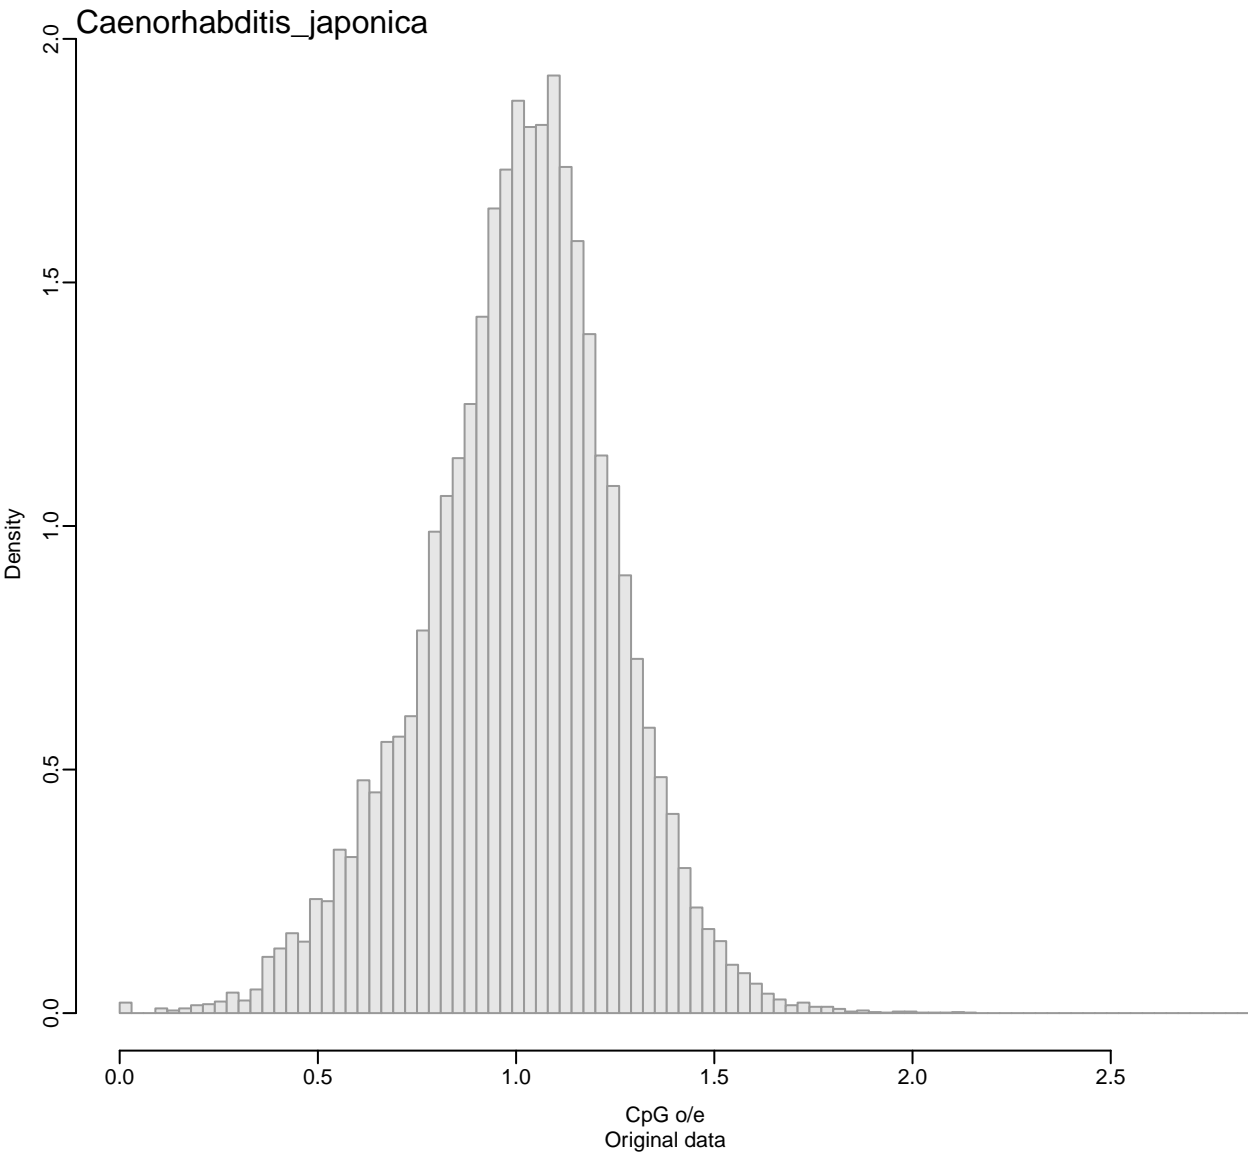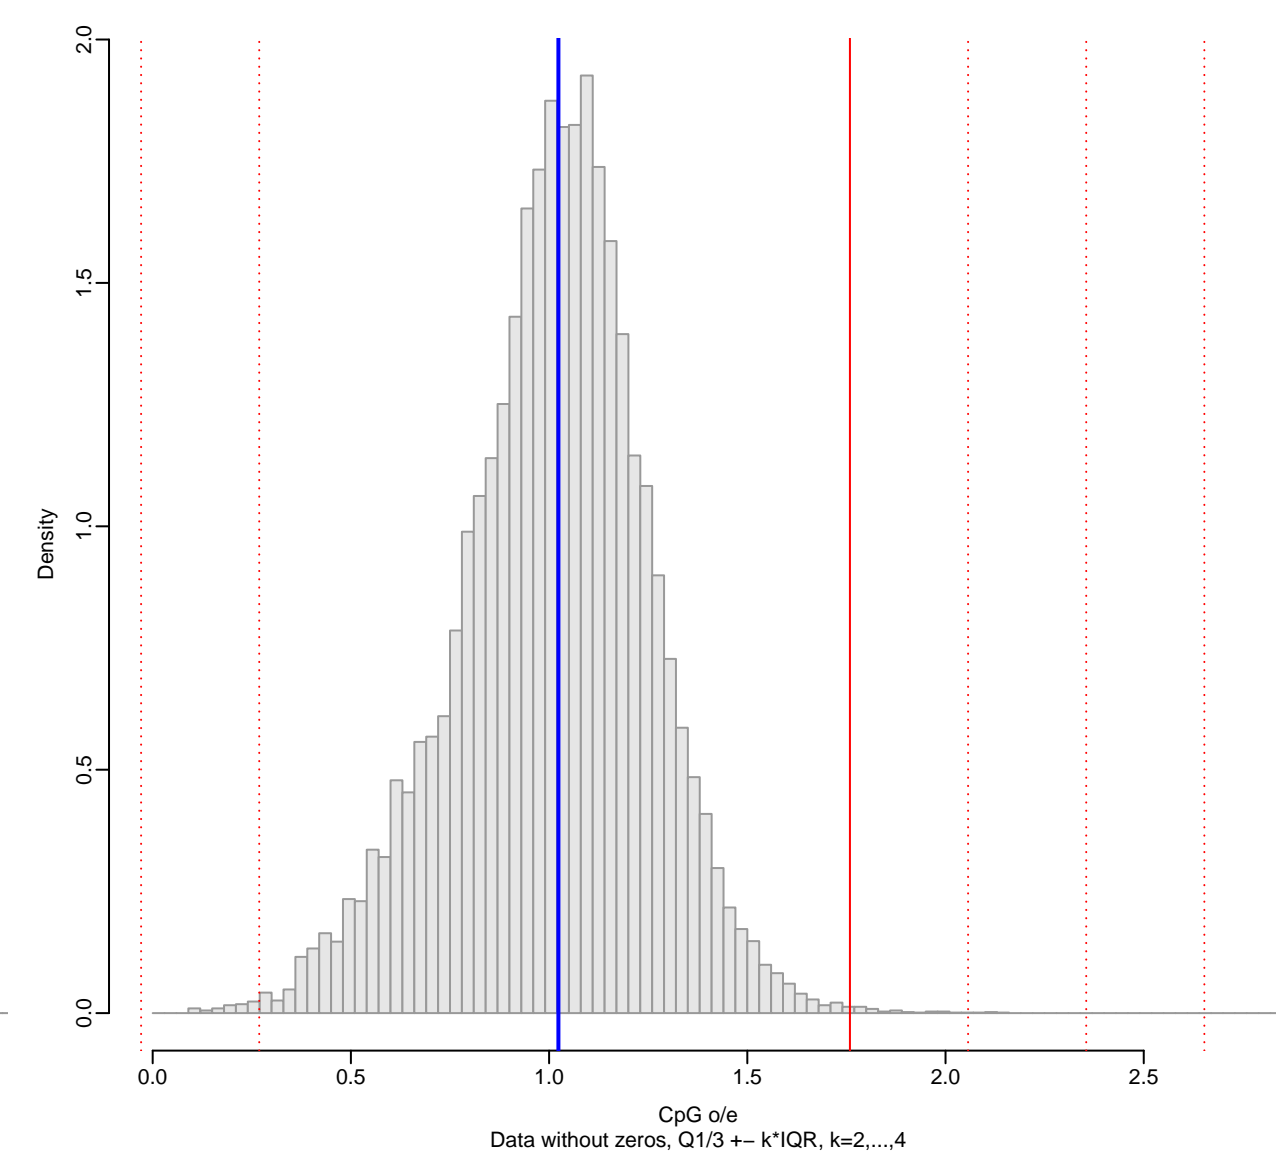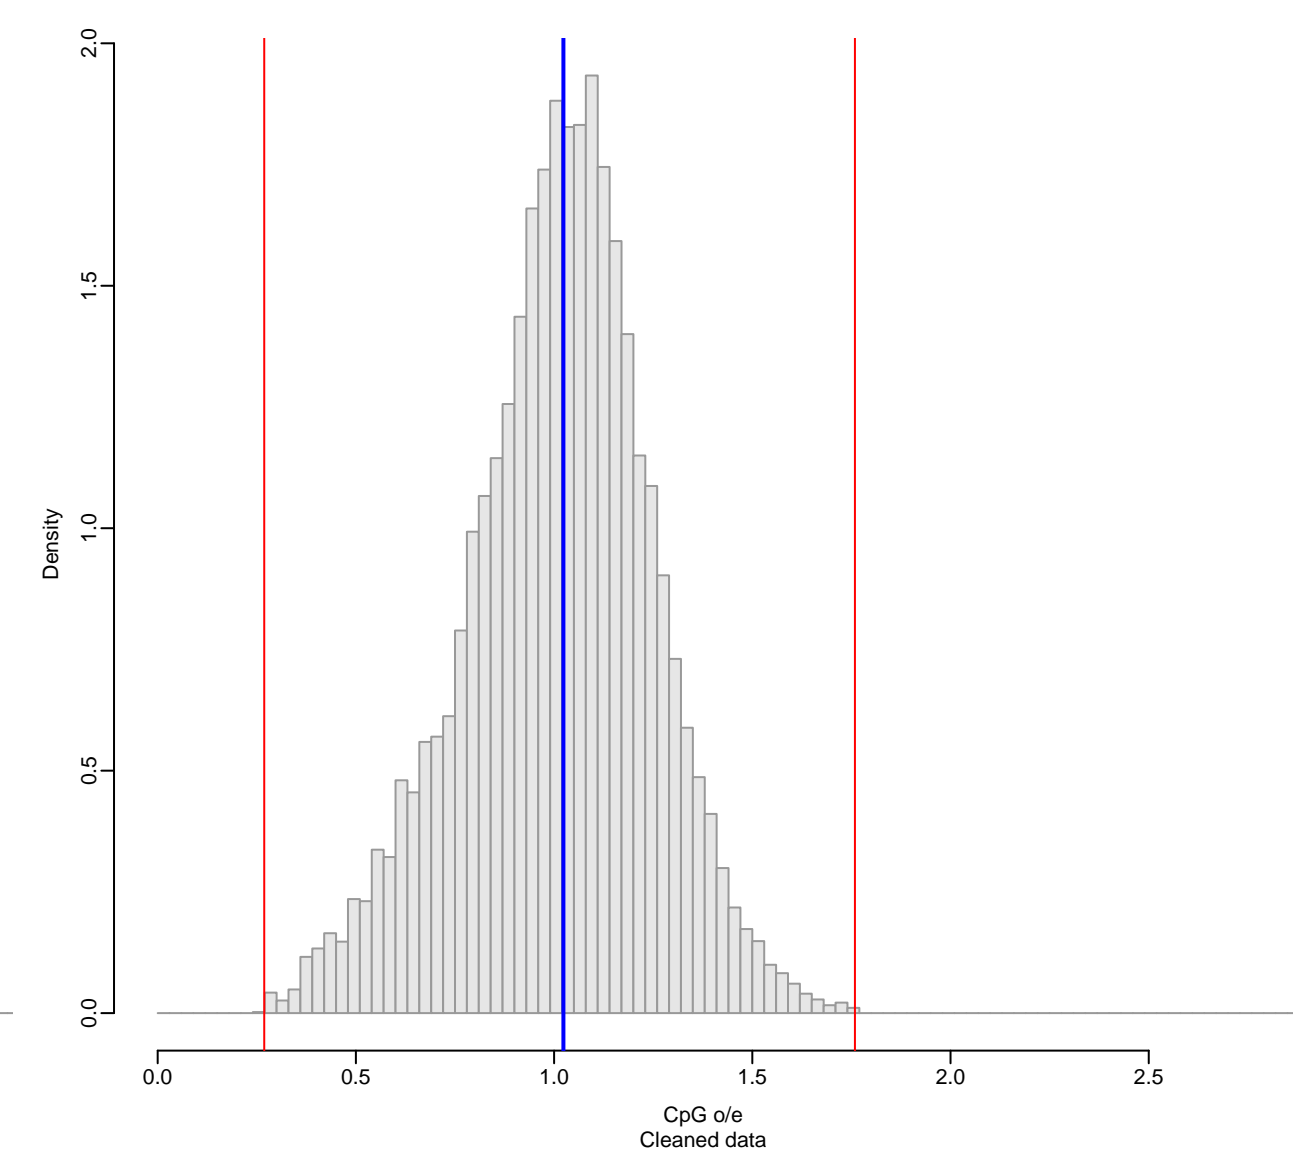

Caenorhabditis\_remanei

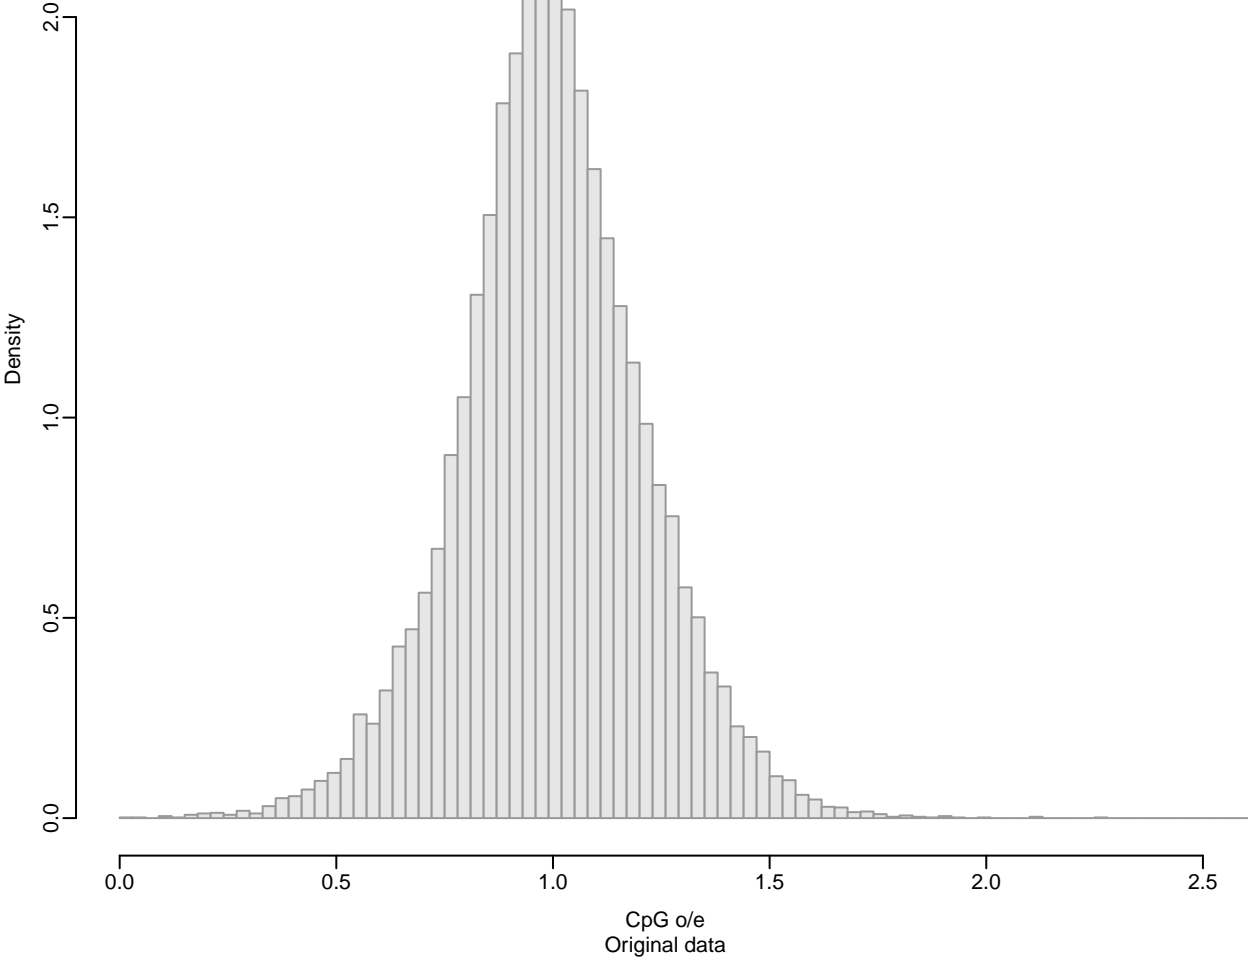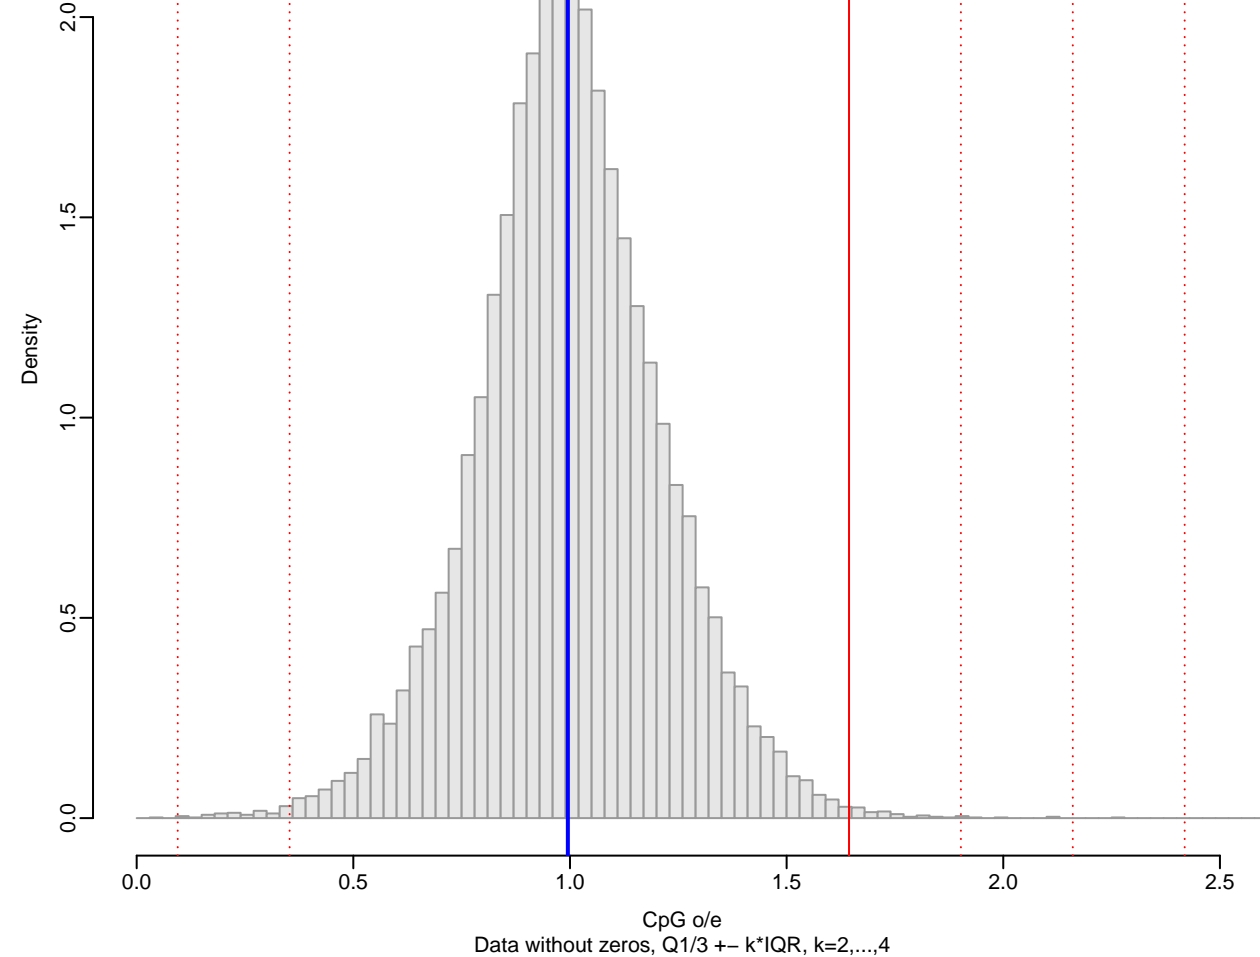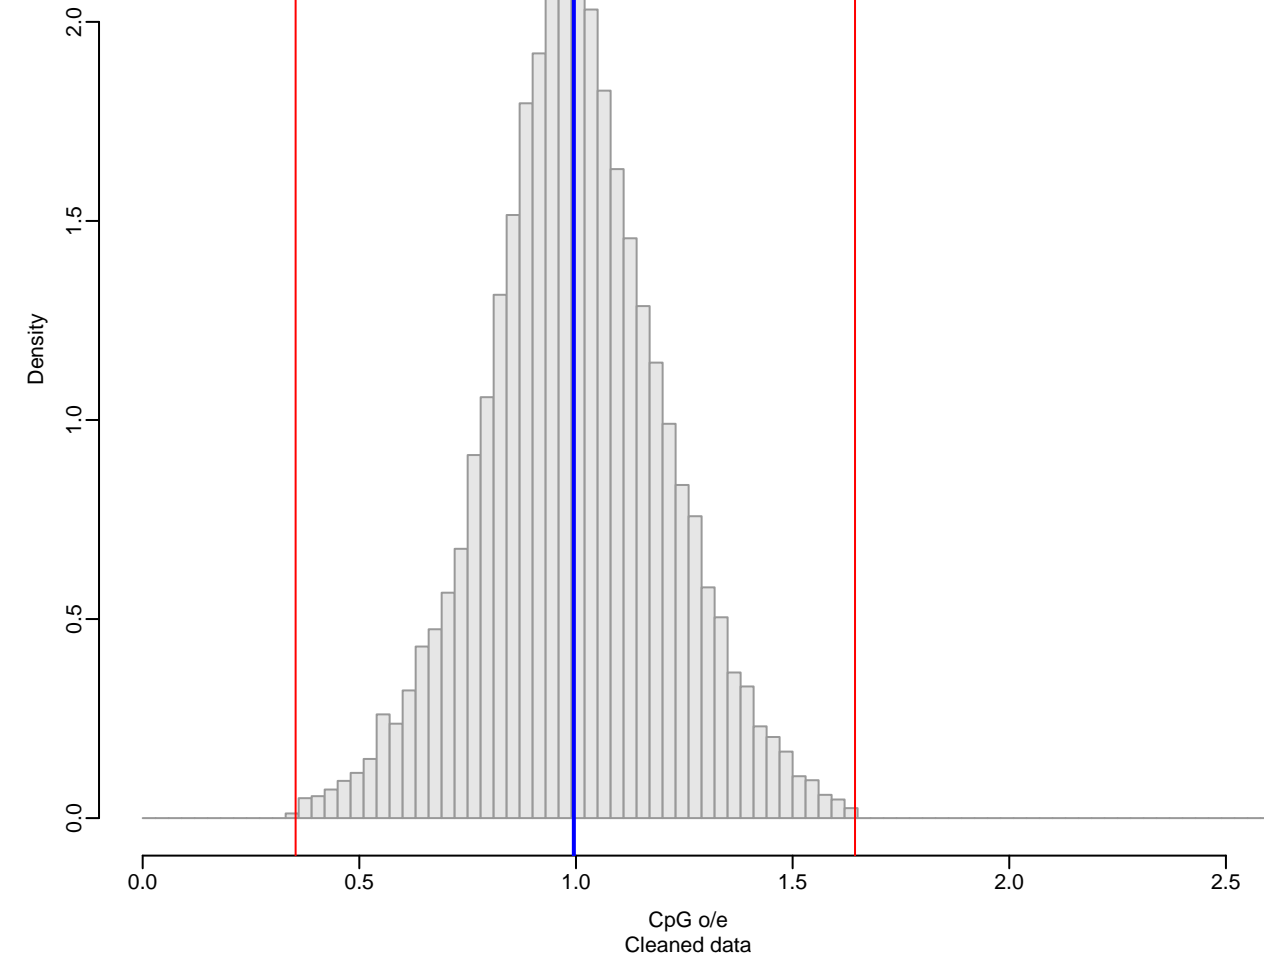

Callinectes\_sapidus

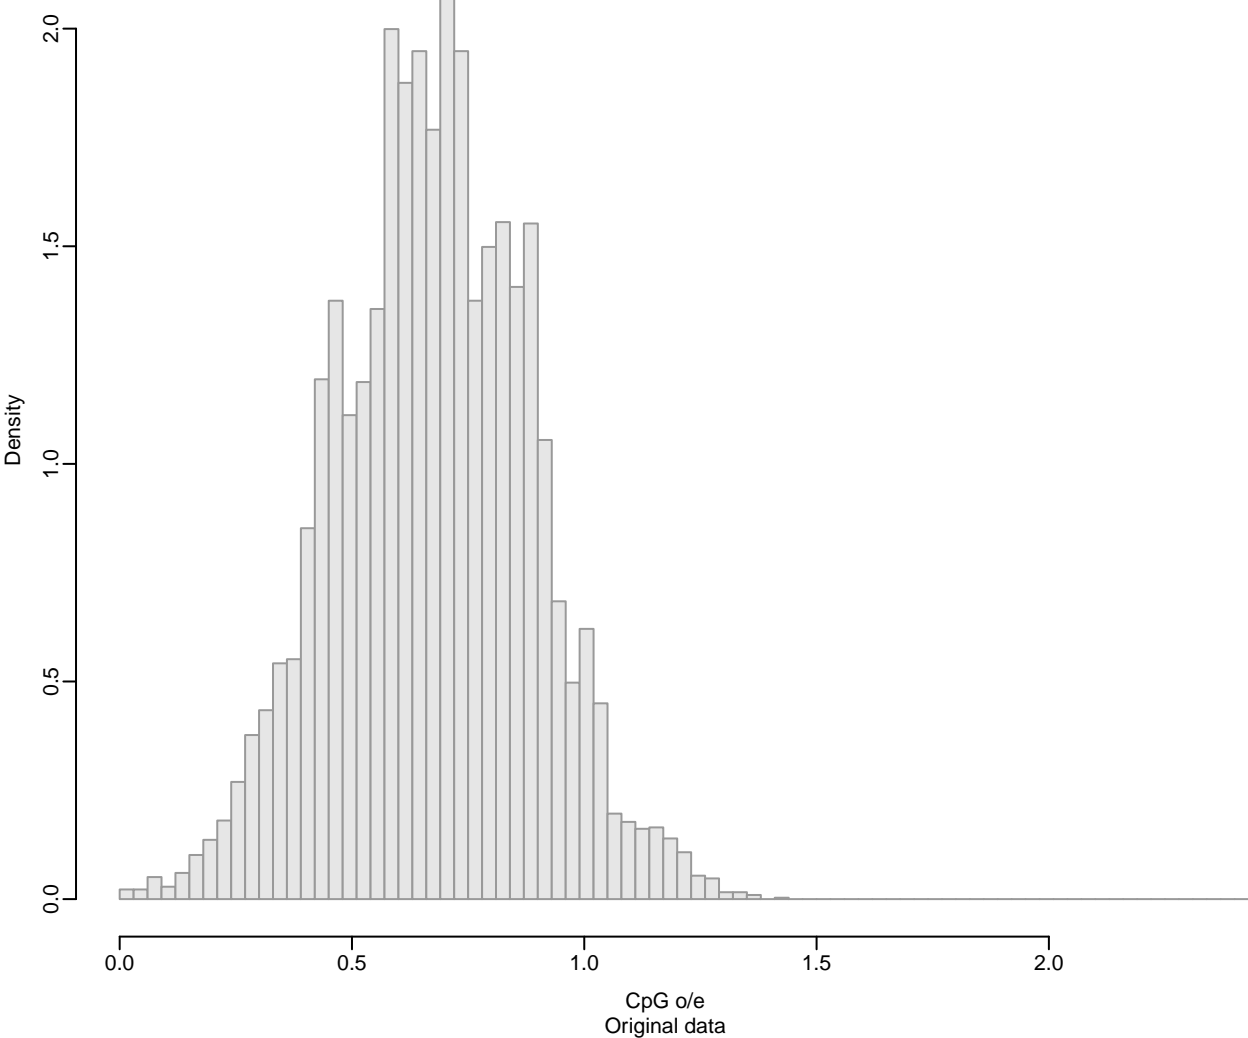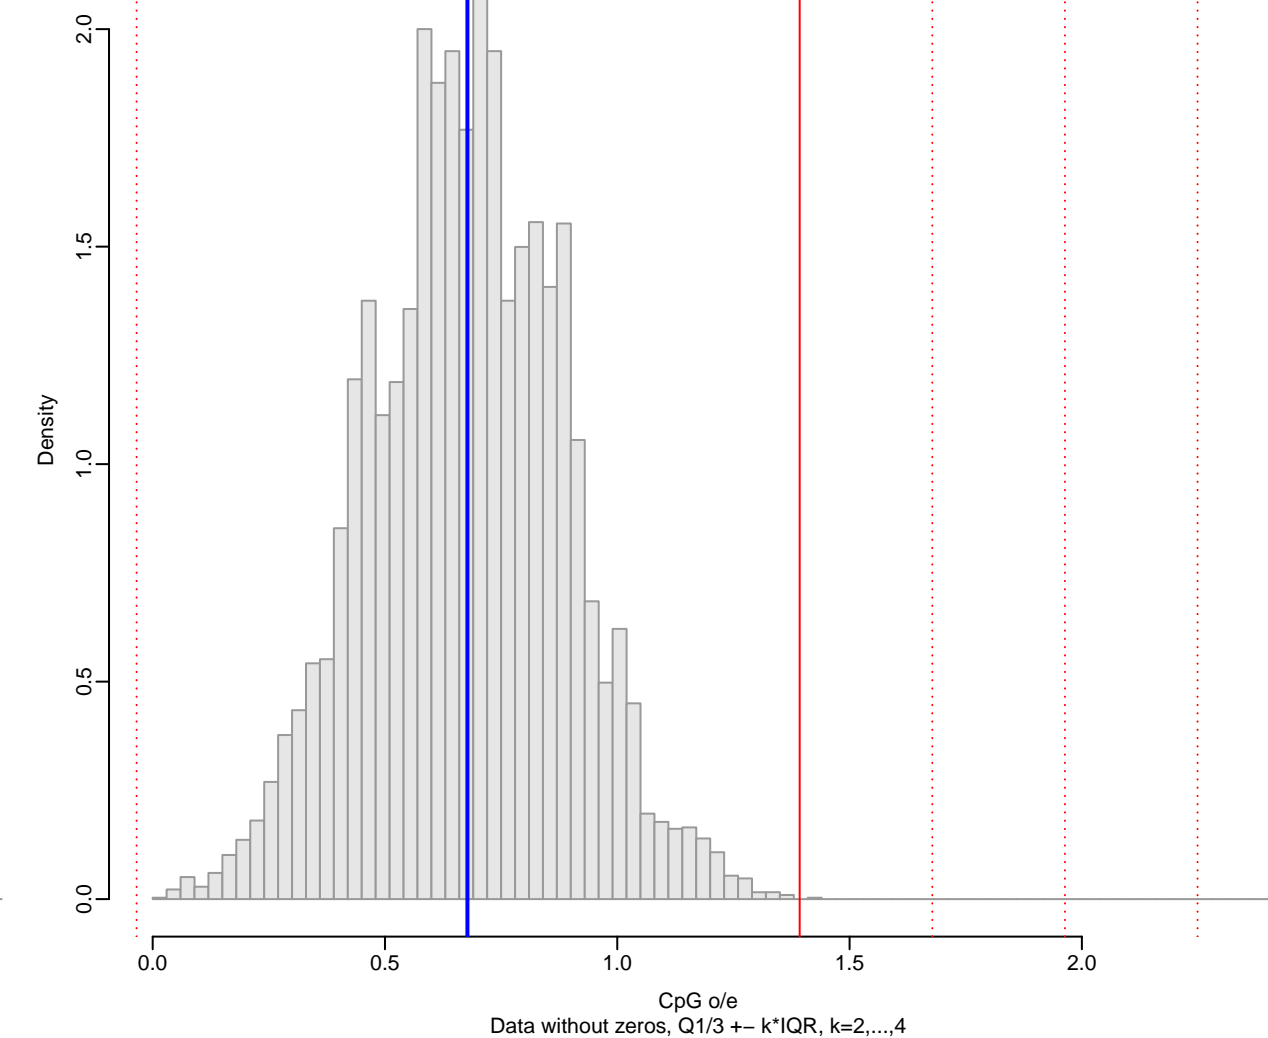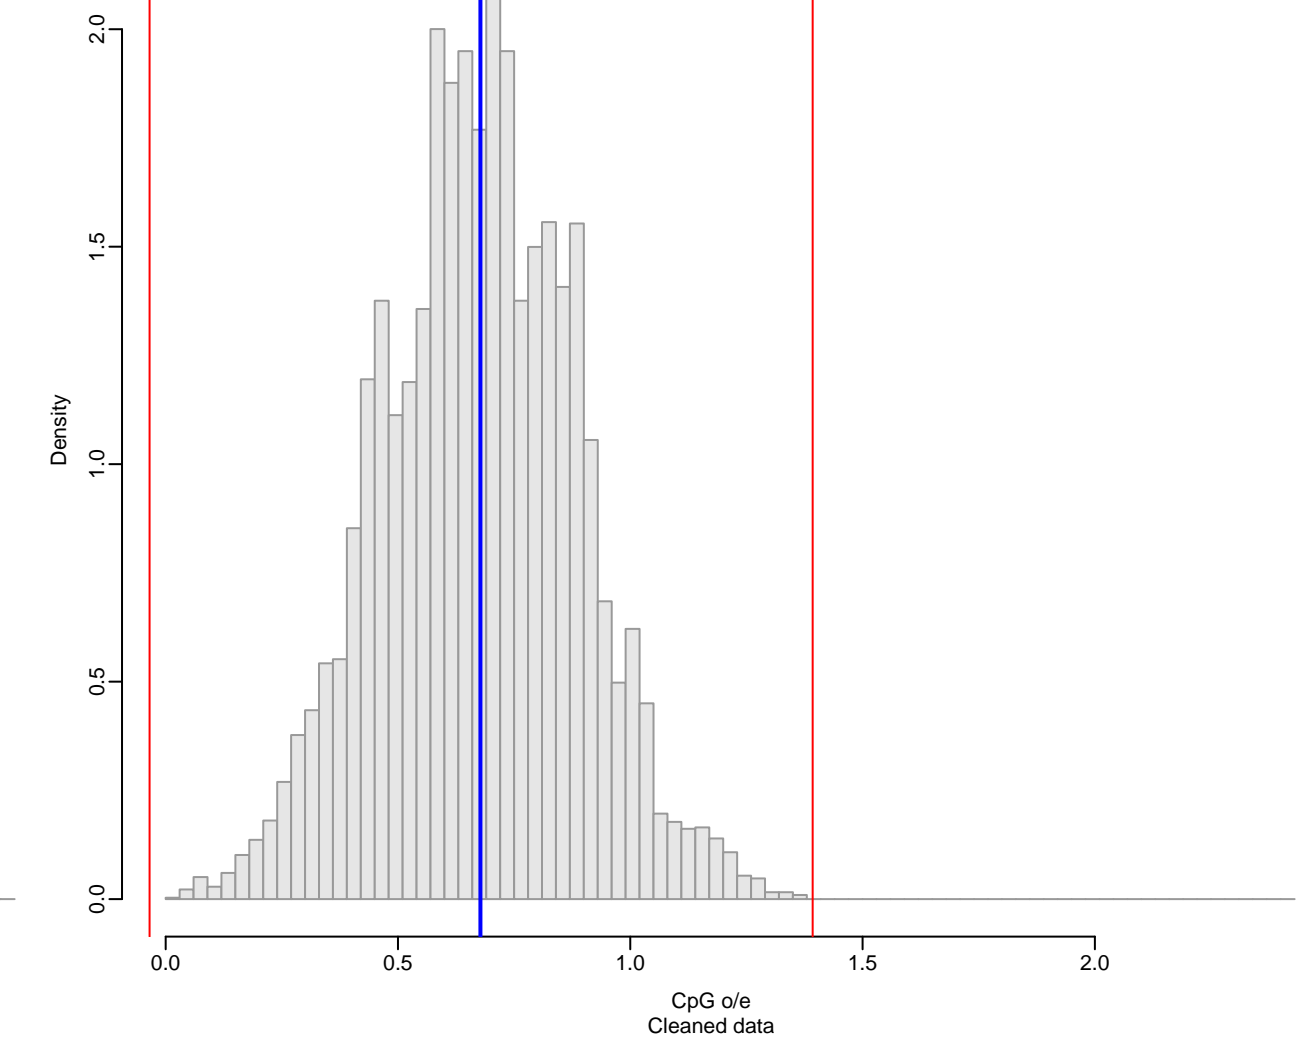

Callorhinchus\_milii

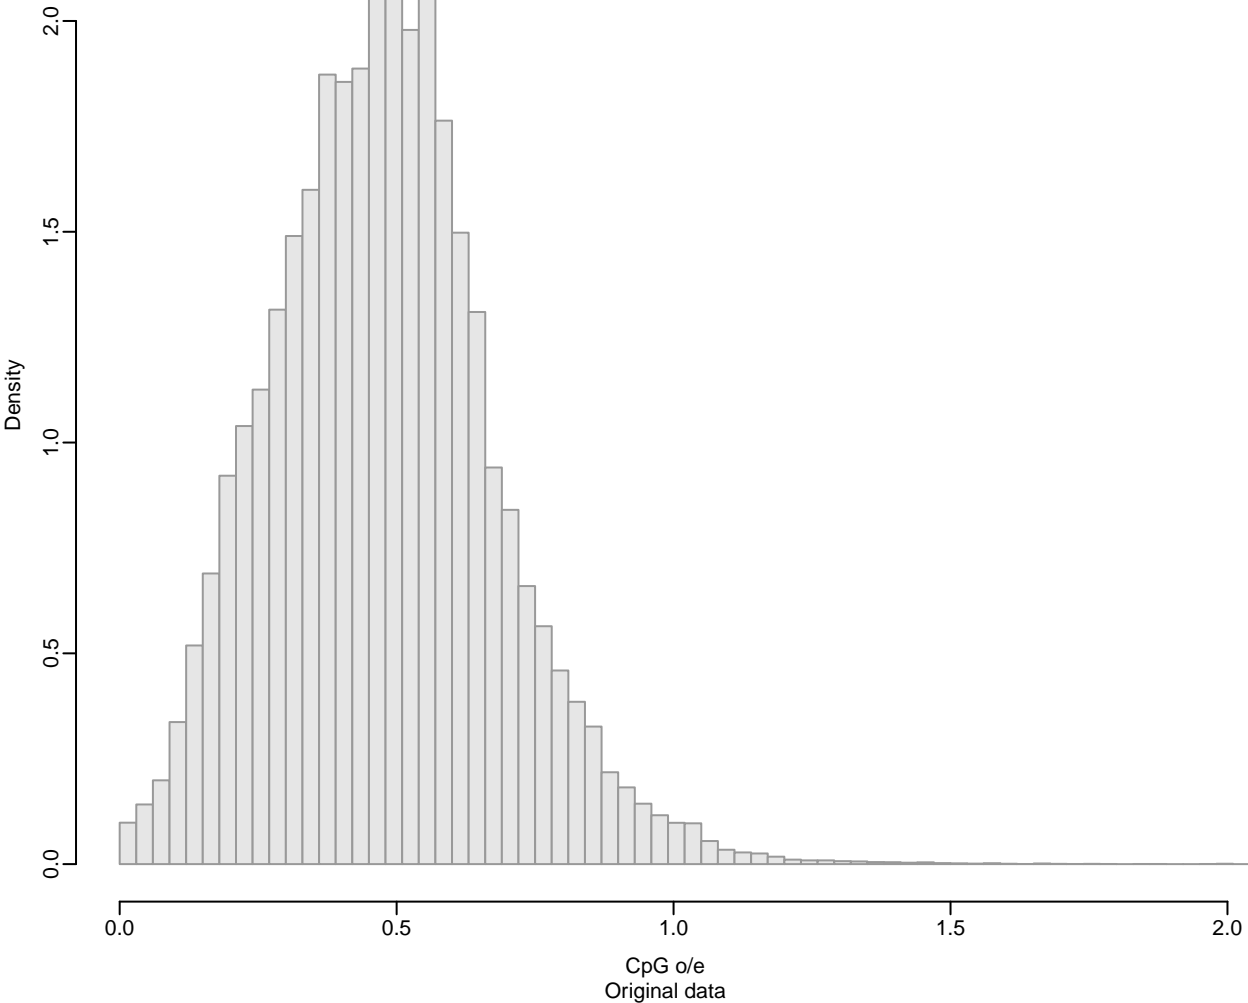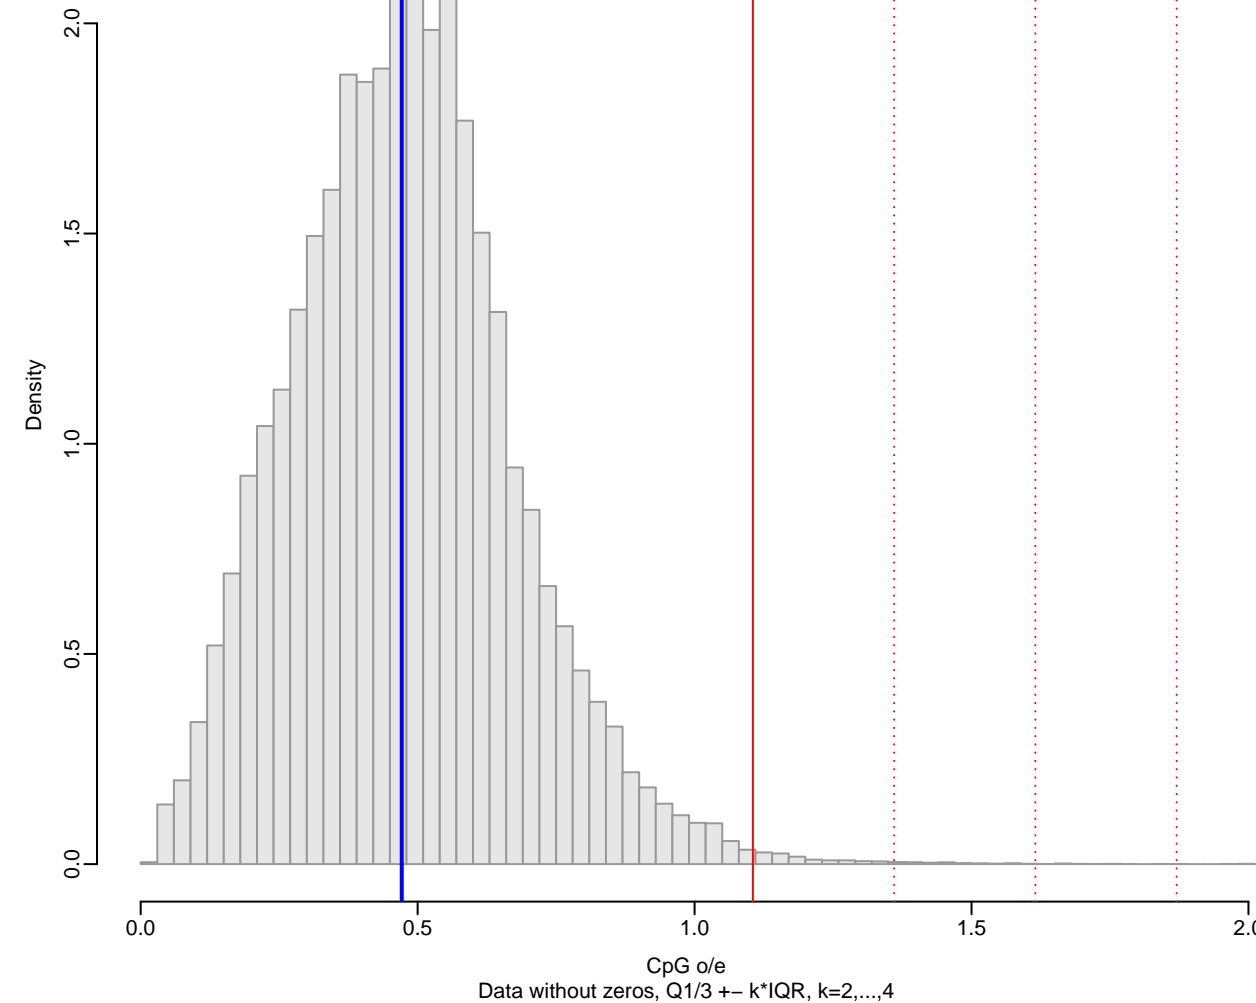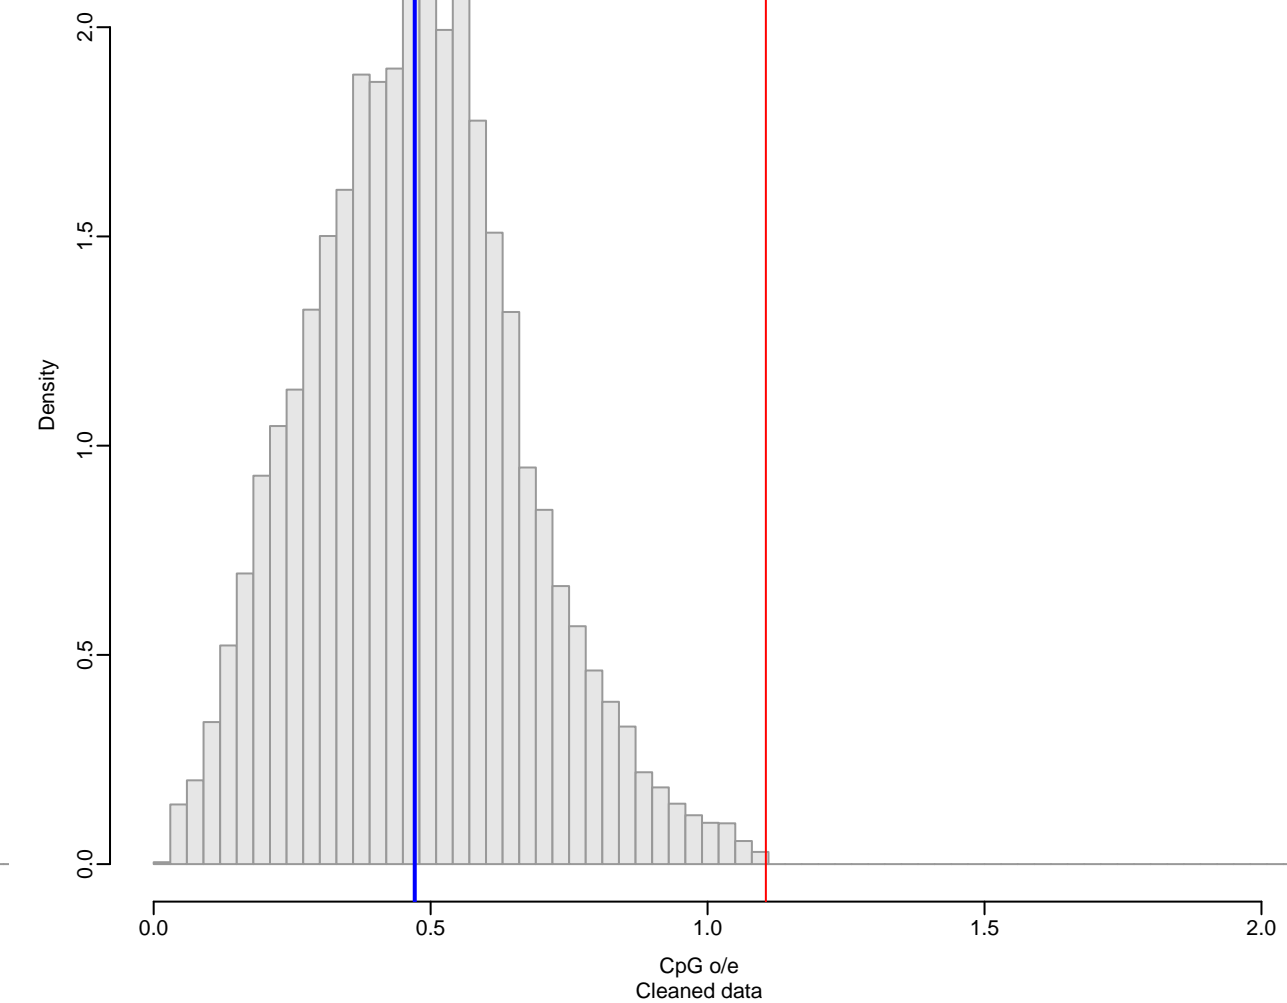

Campodea\_fragilis

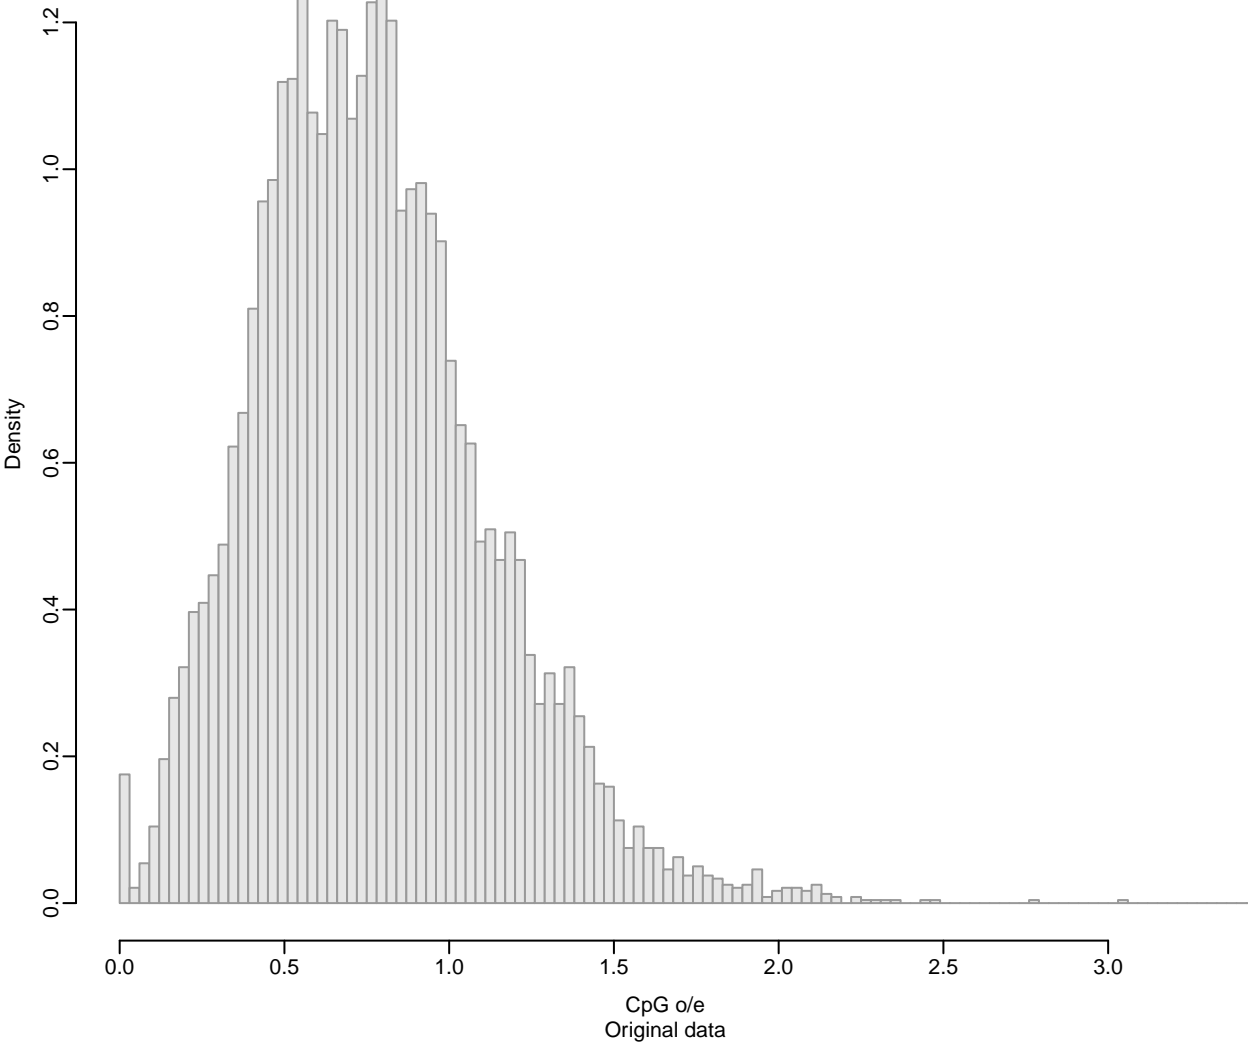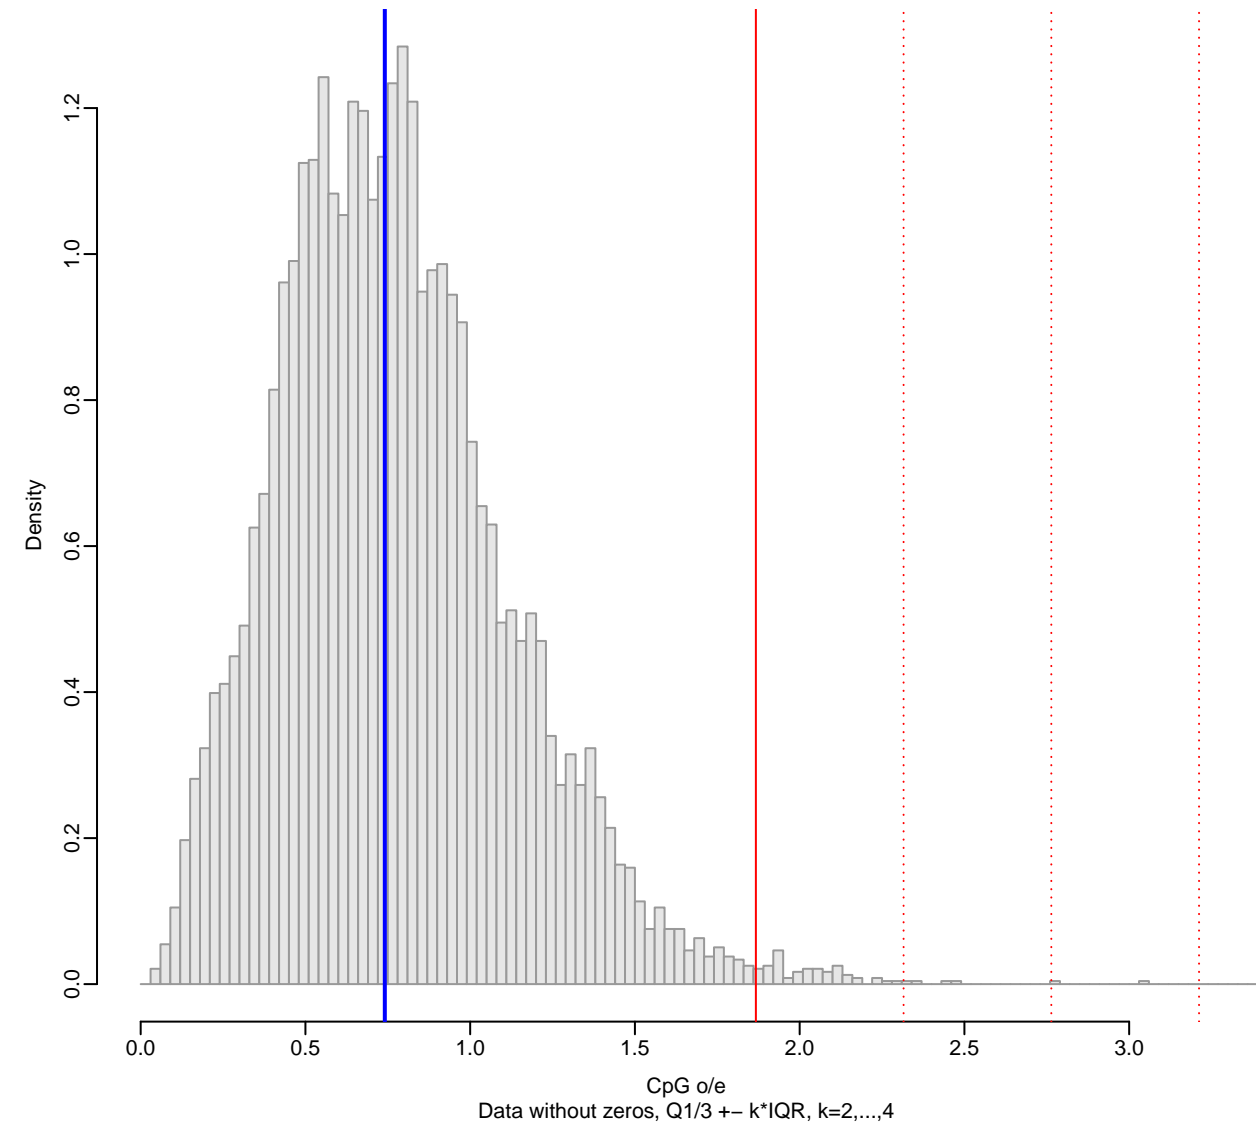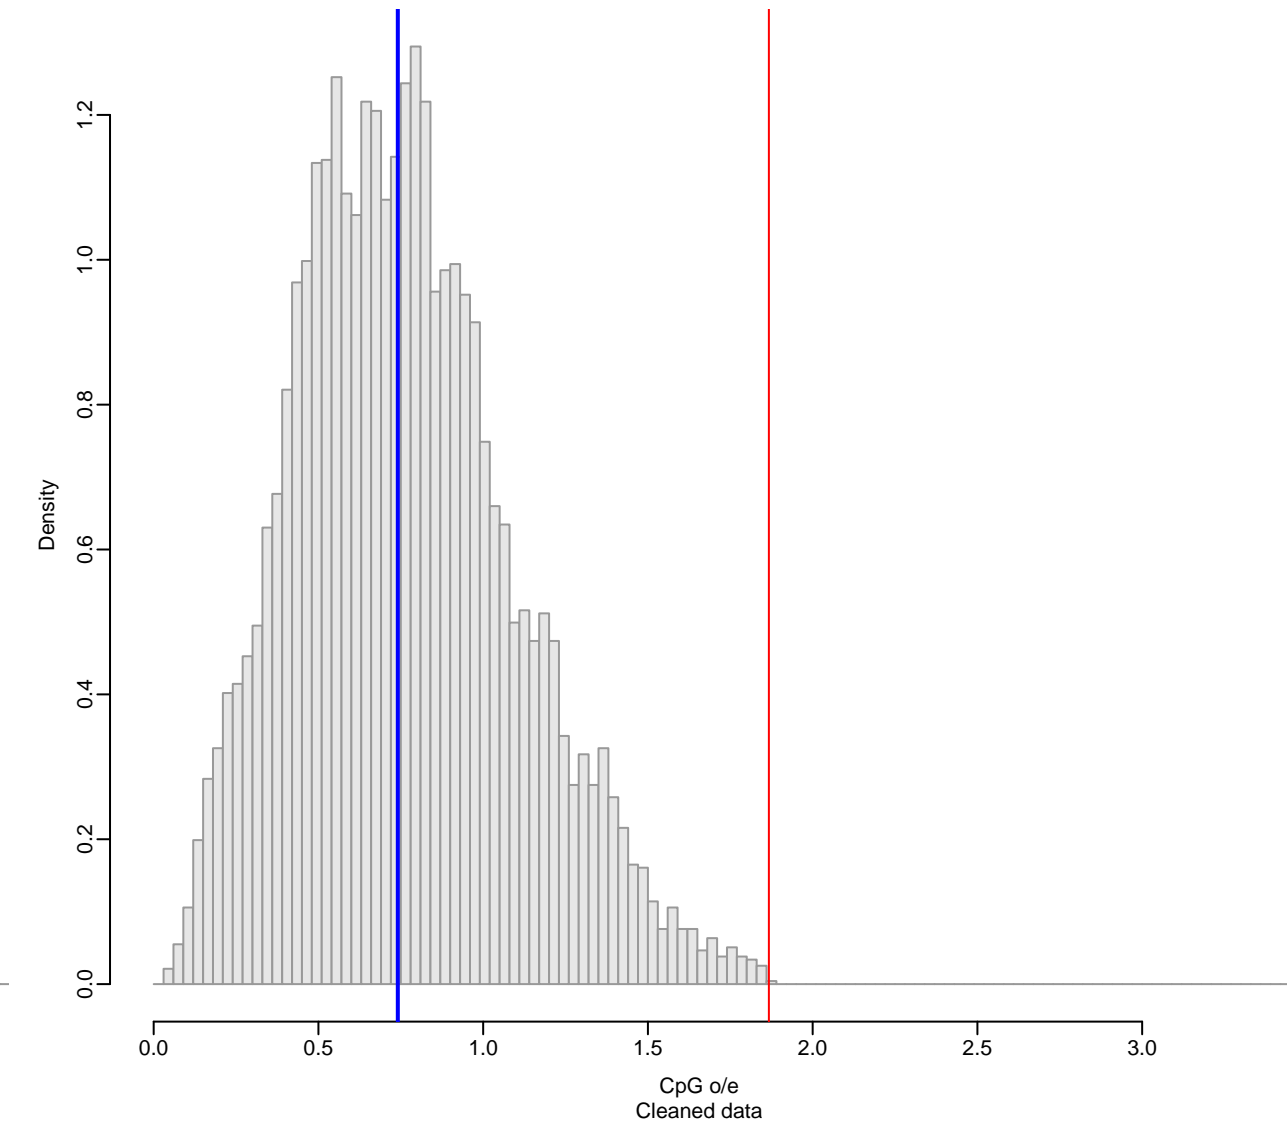

Cancer\_magister

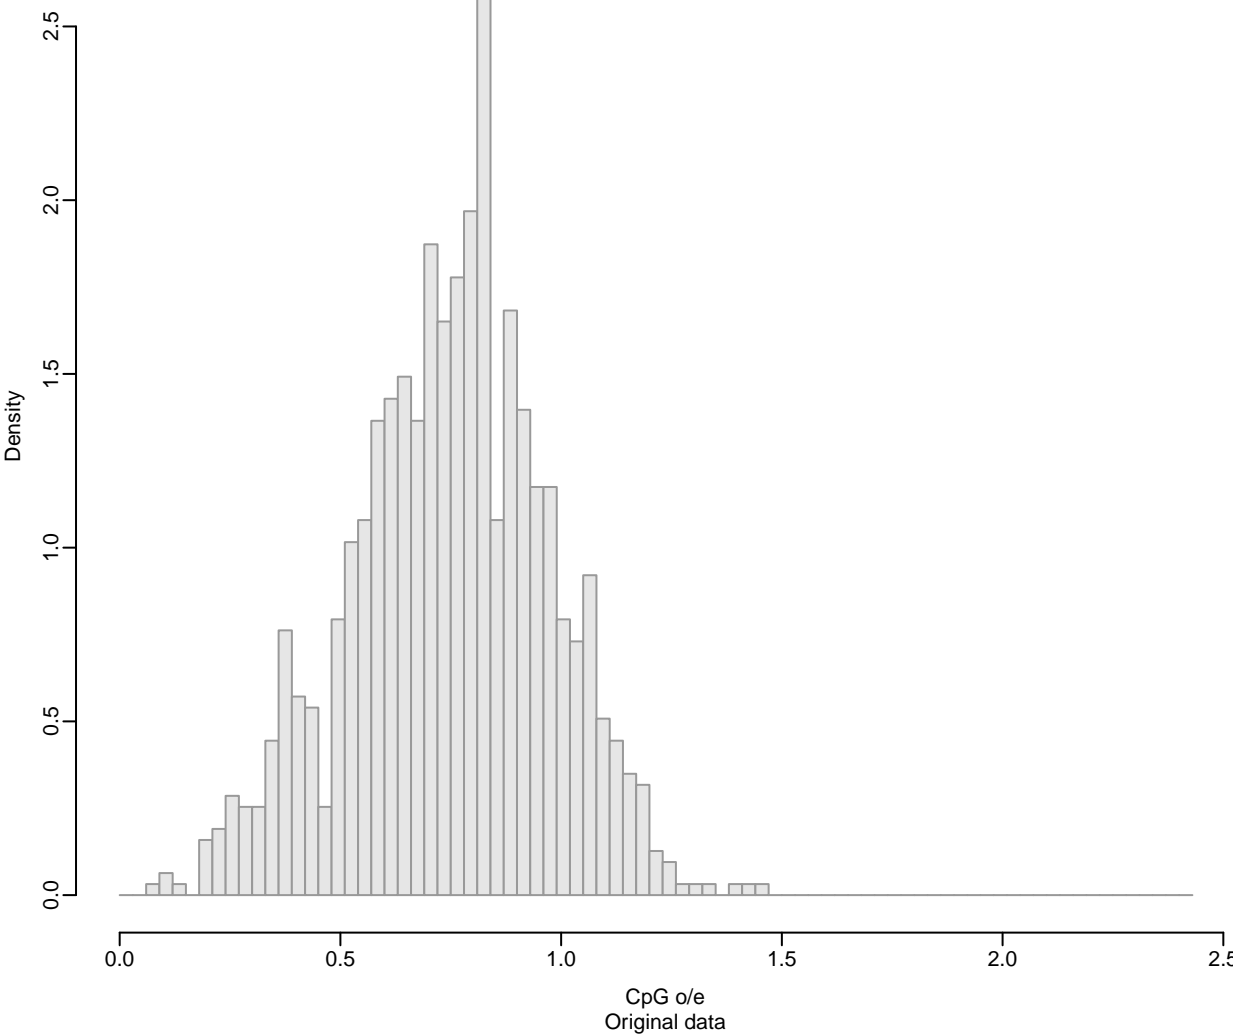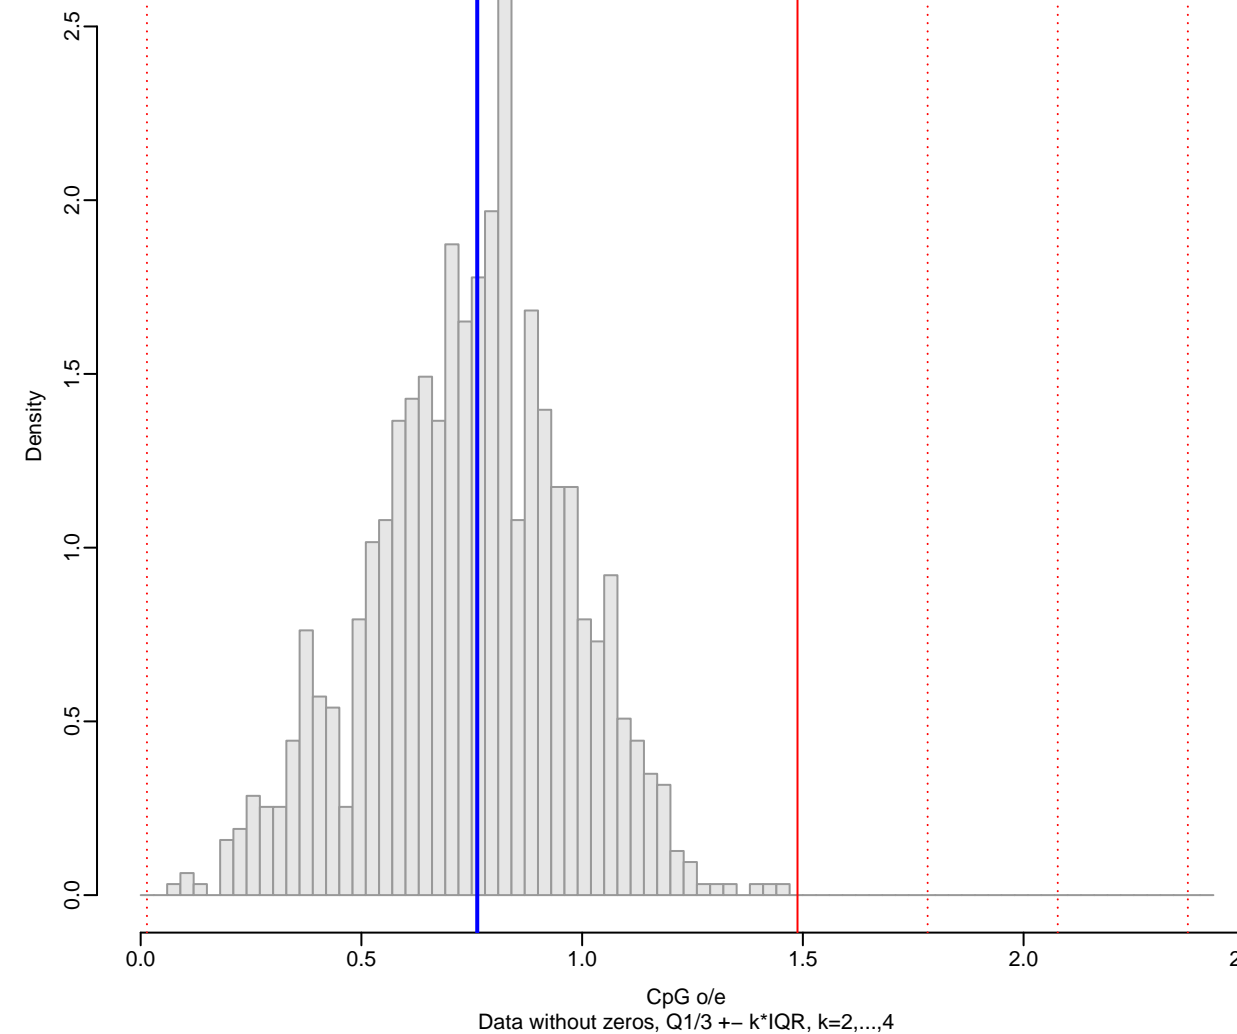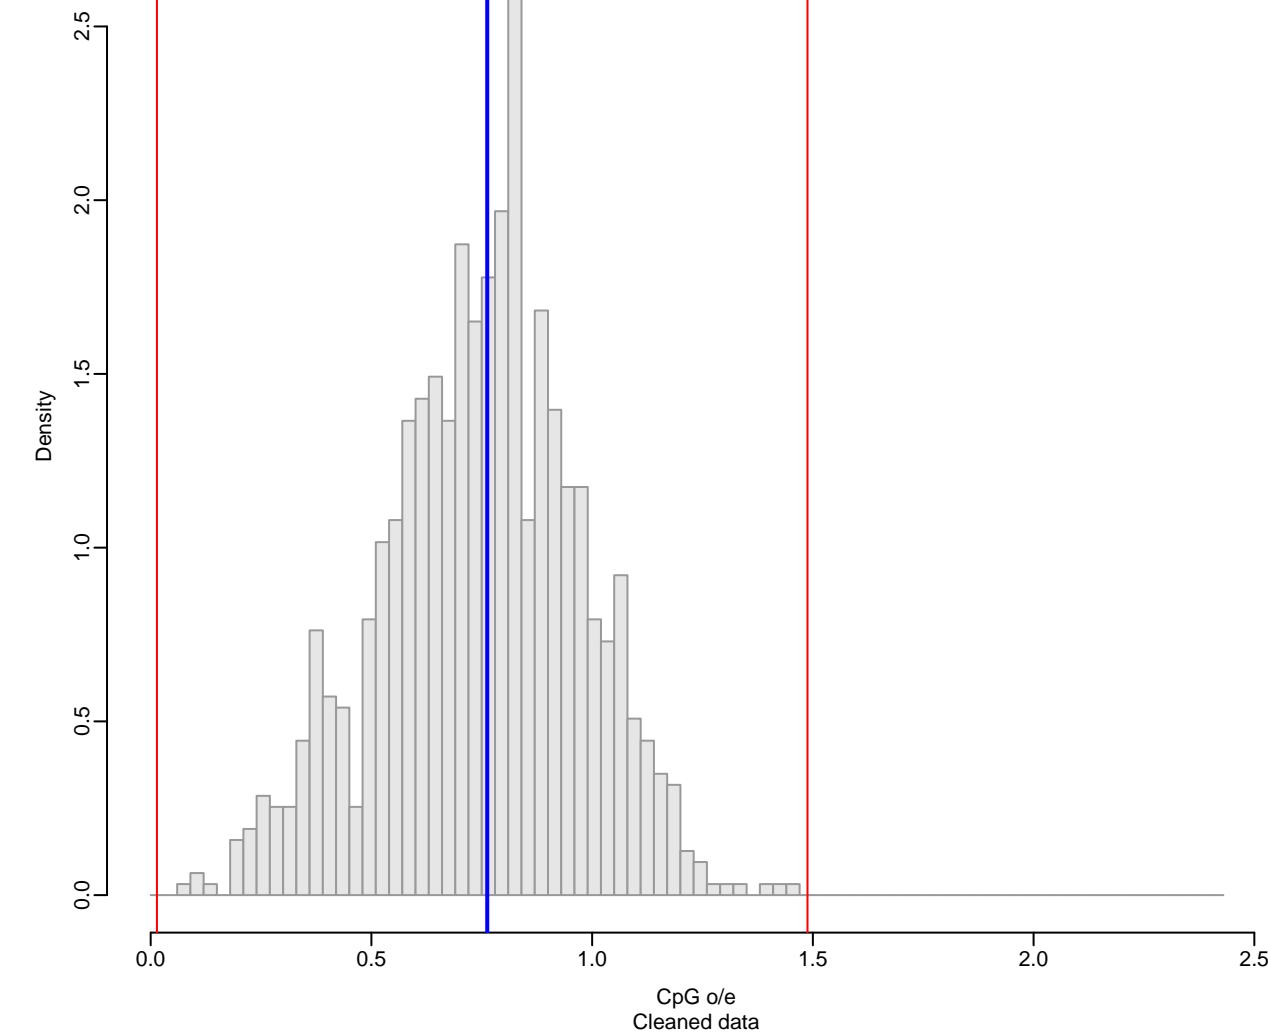

Canis\_lupus

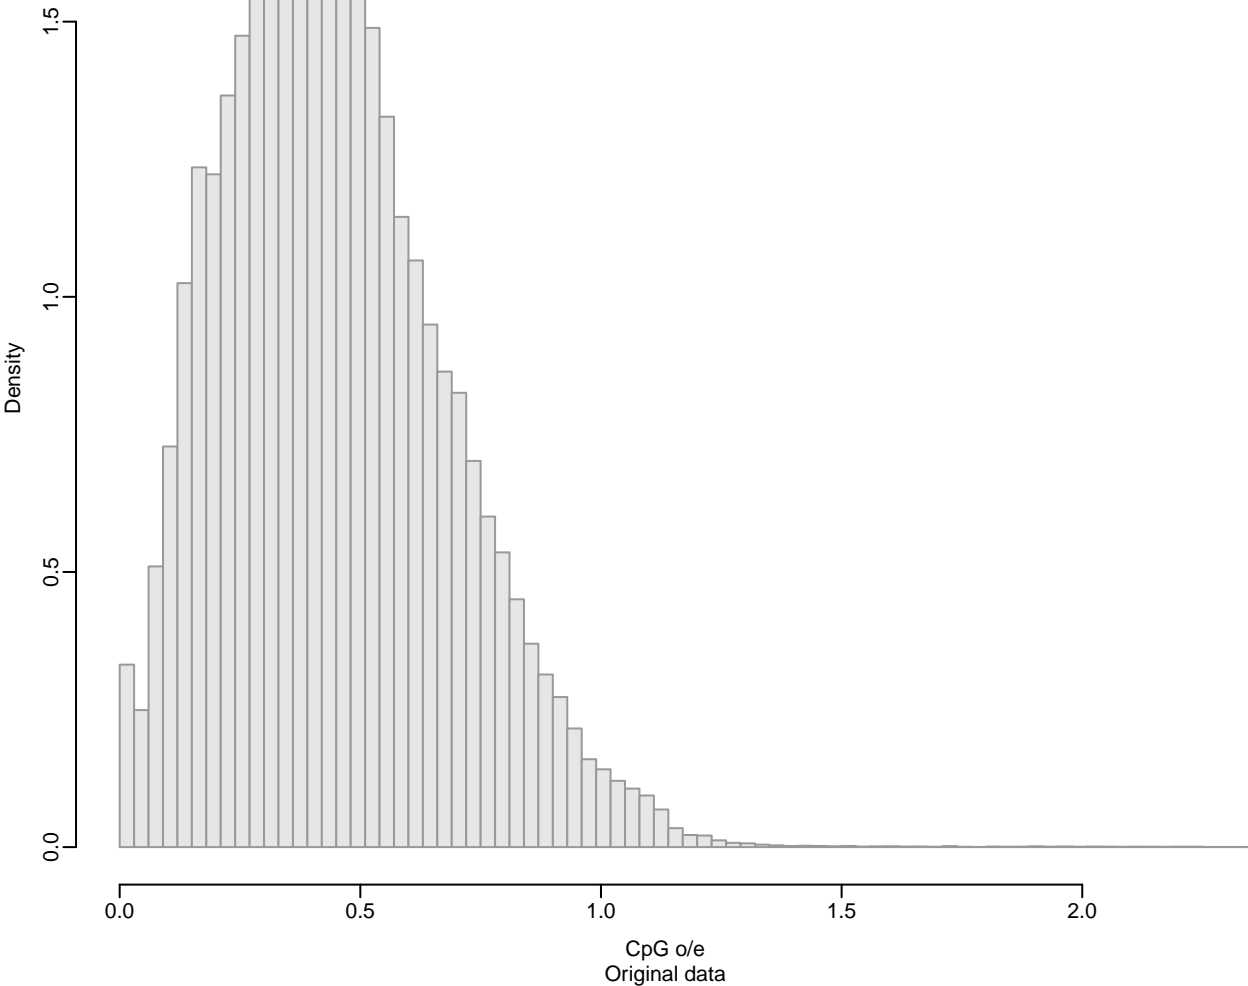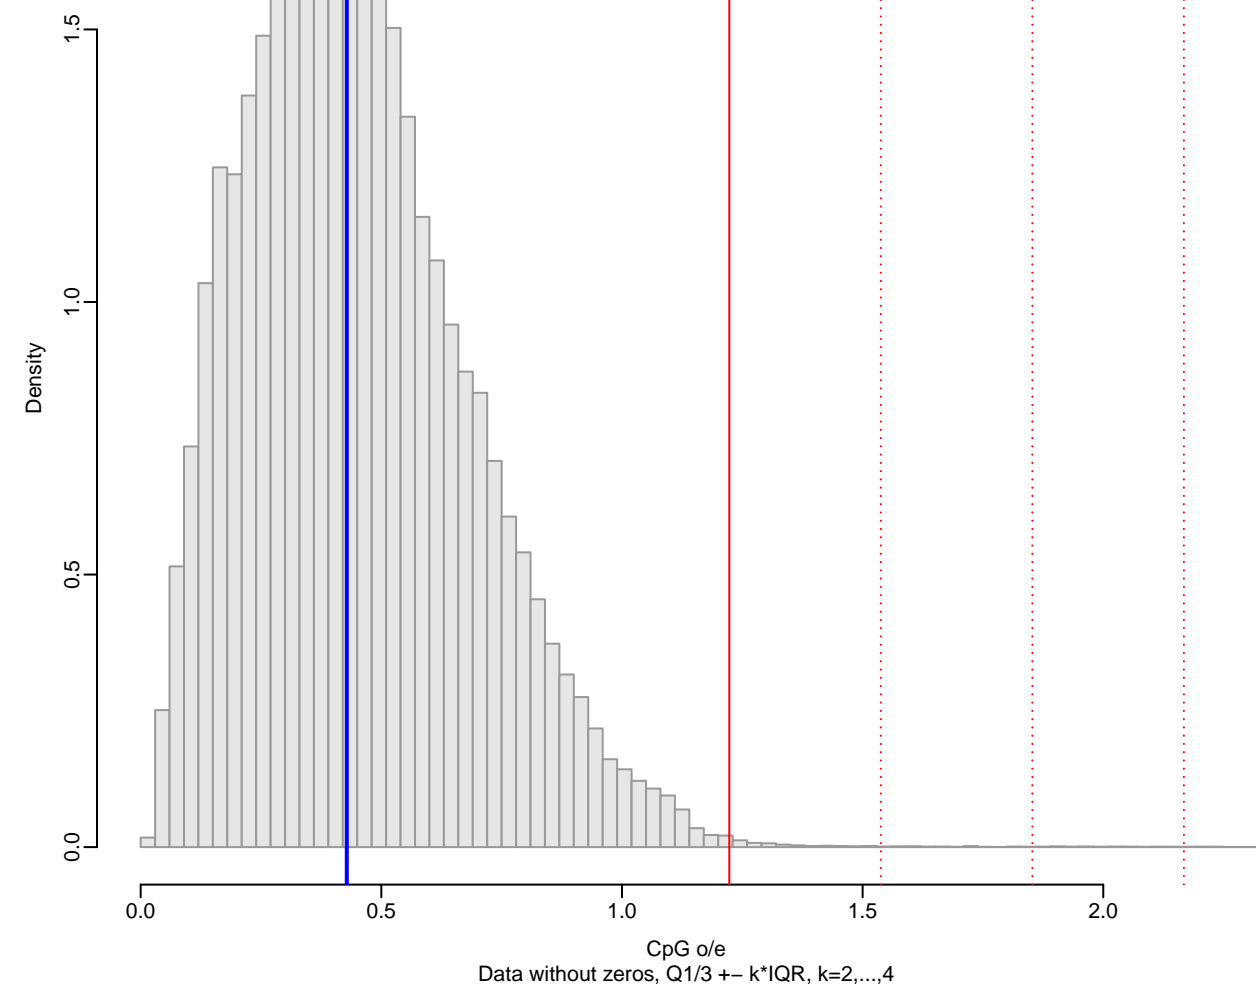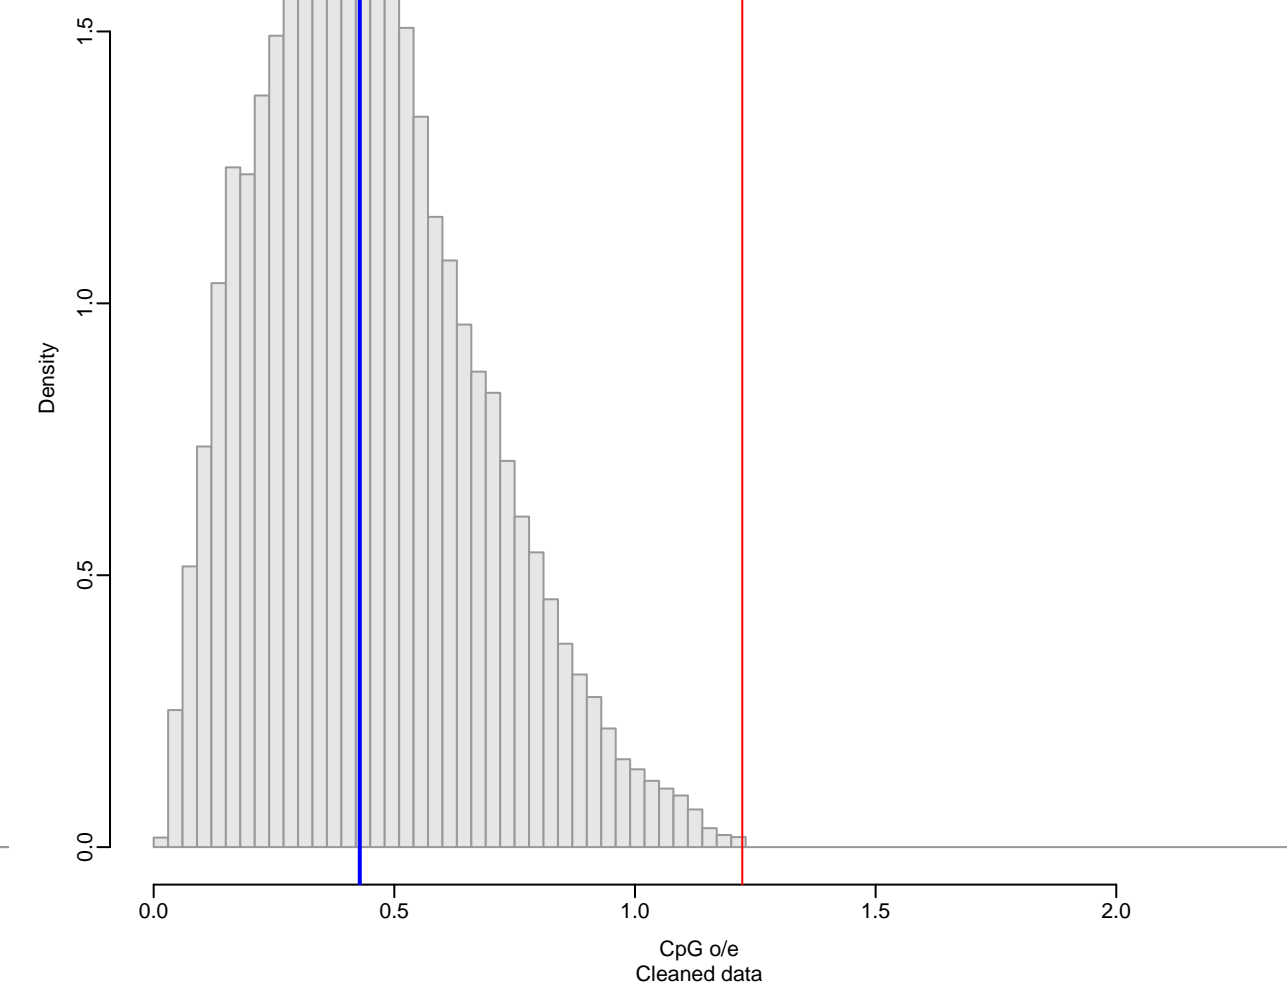

Canis\_lupus\_familiaris





Cannabis\_sativa

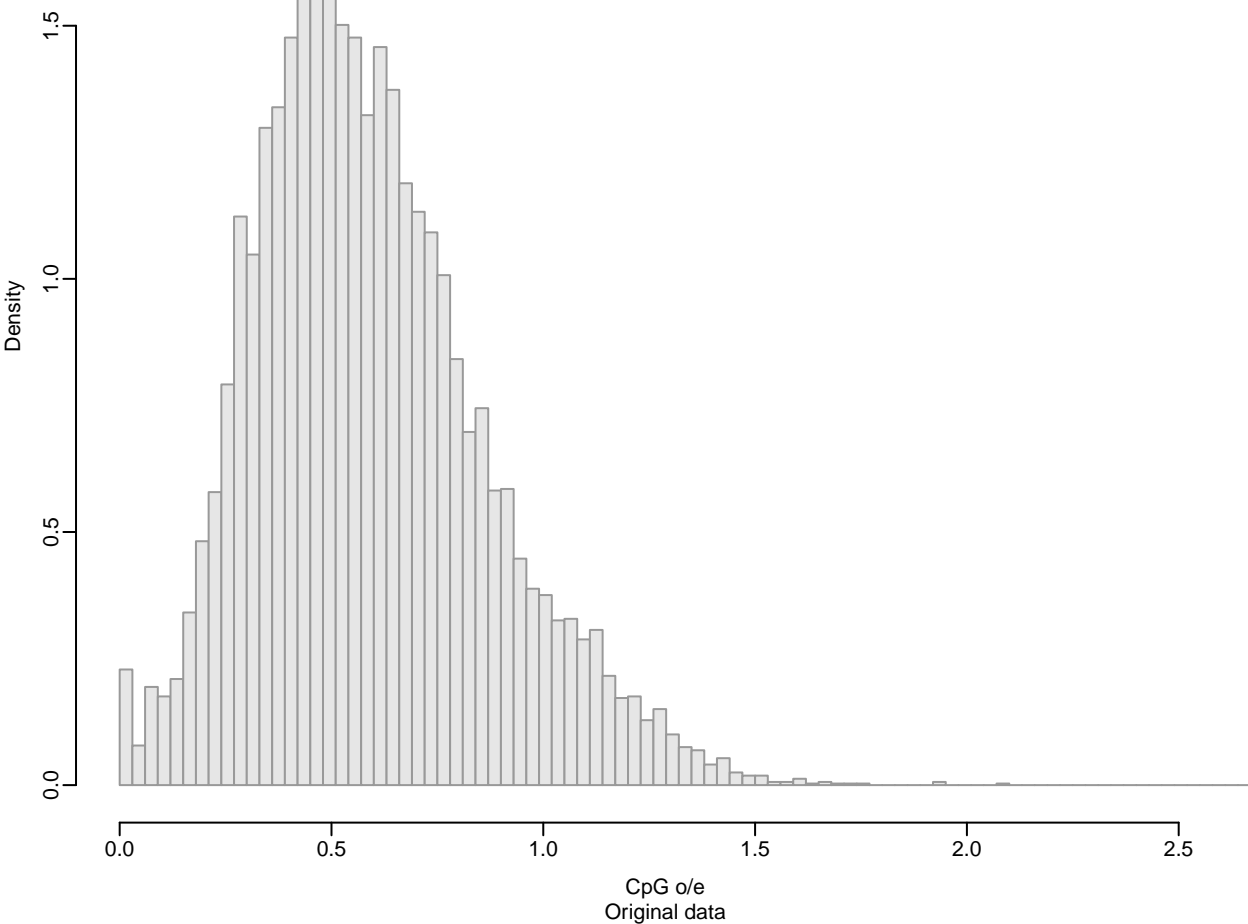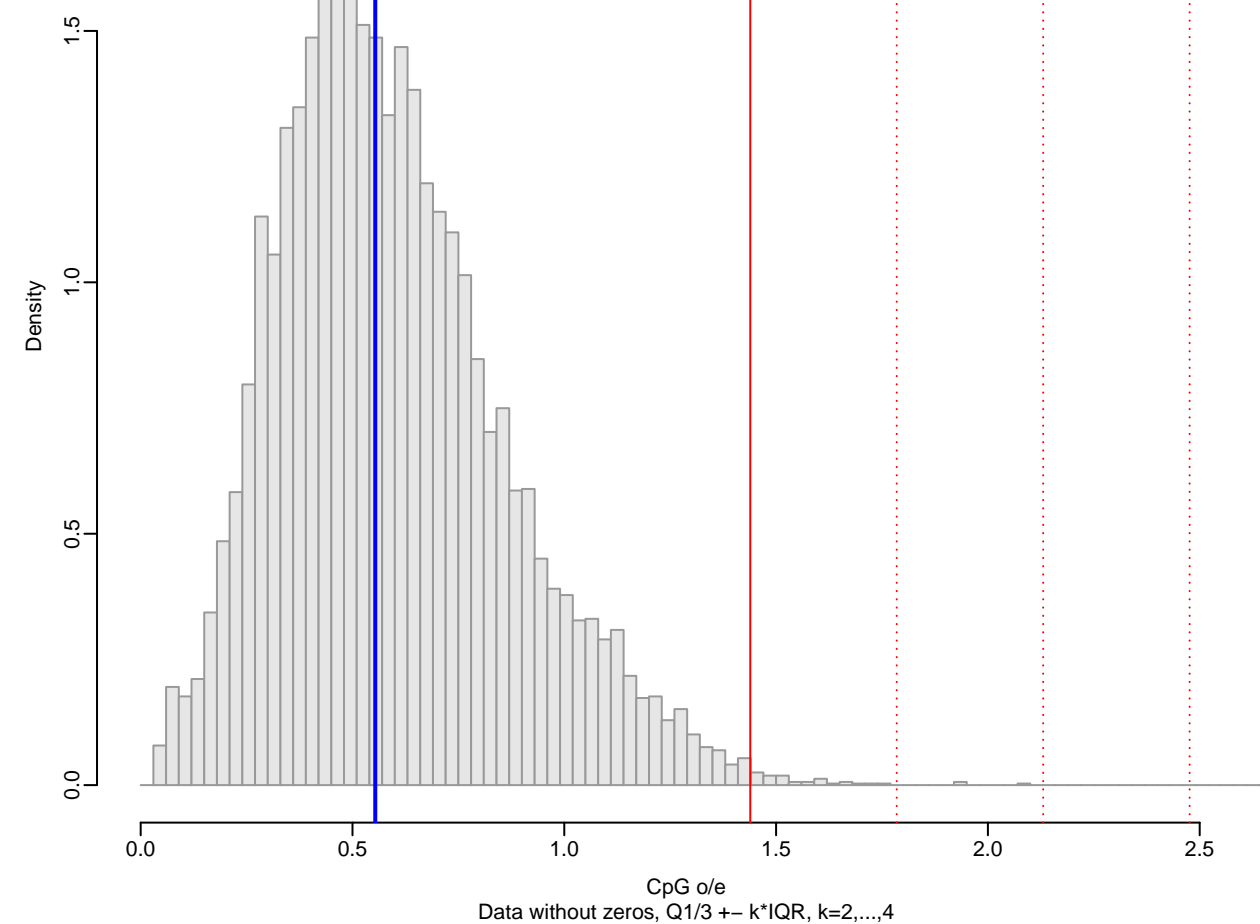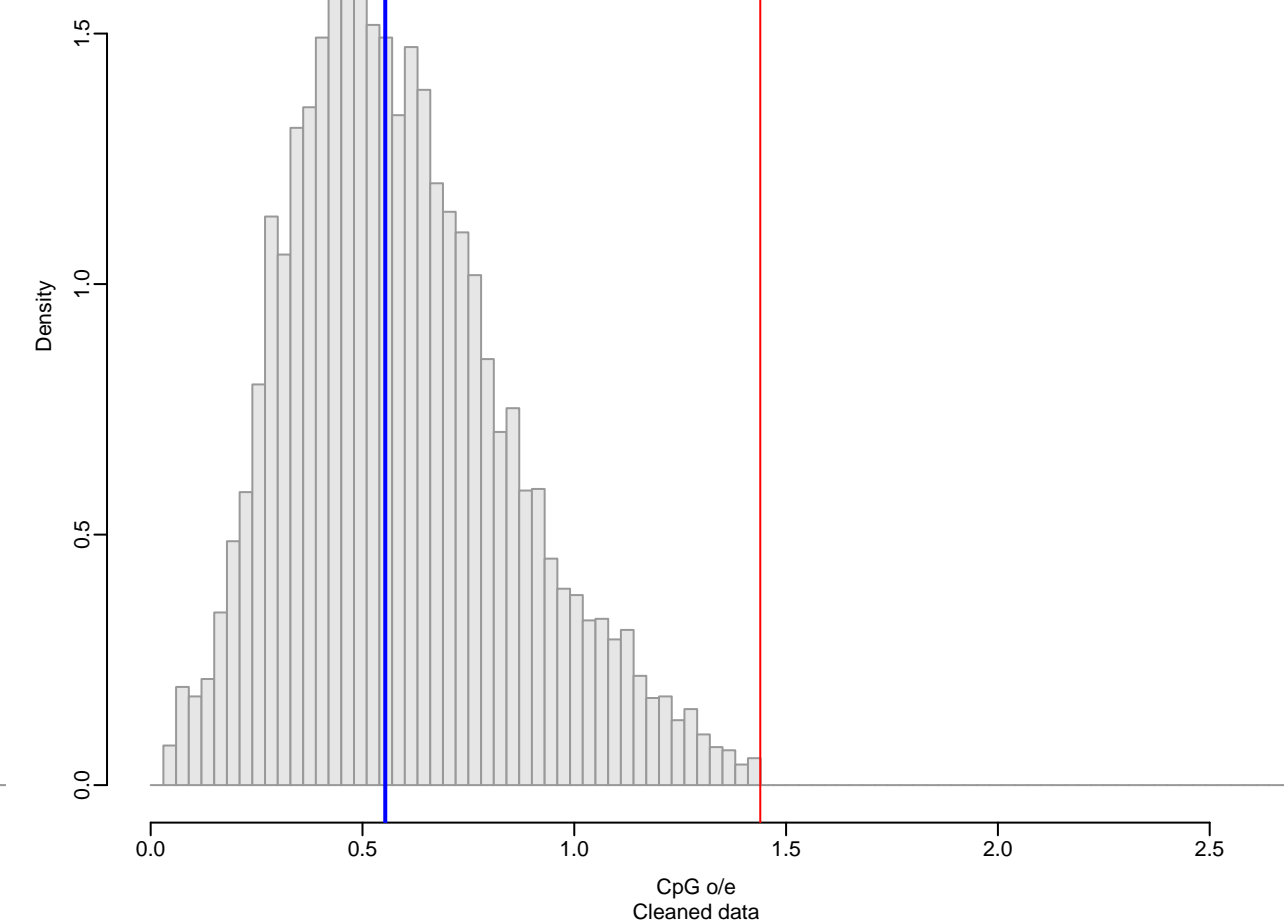

Capra\_hircus

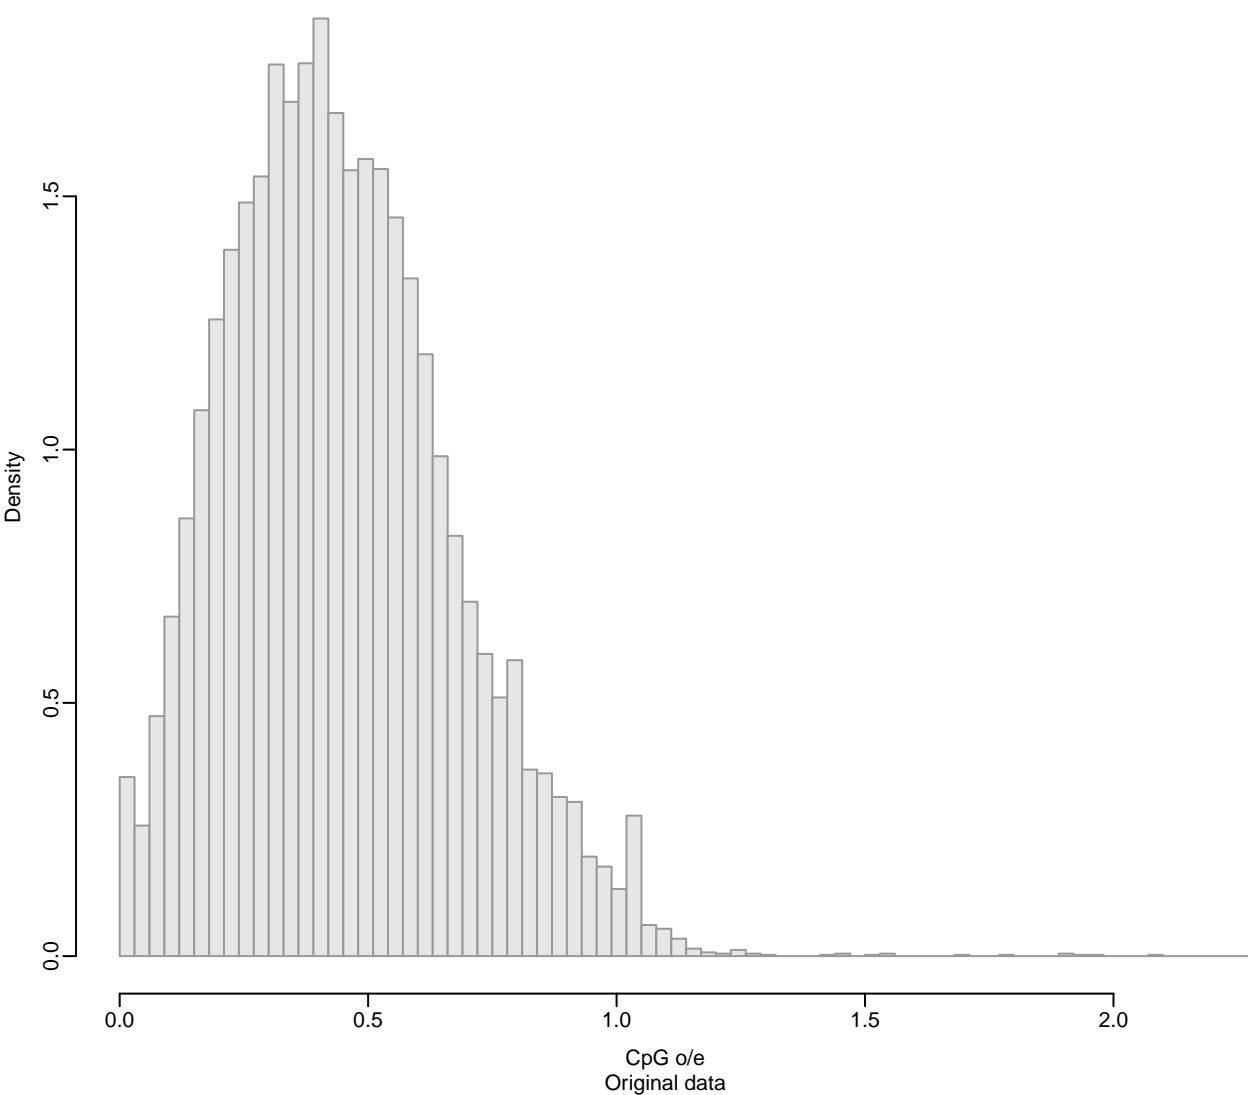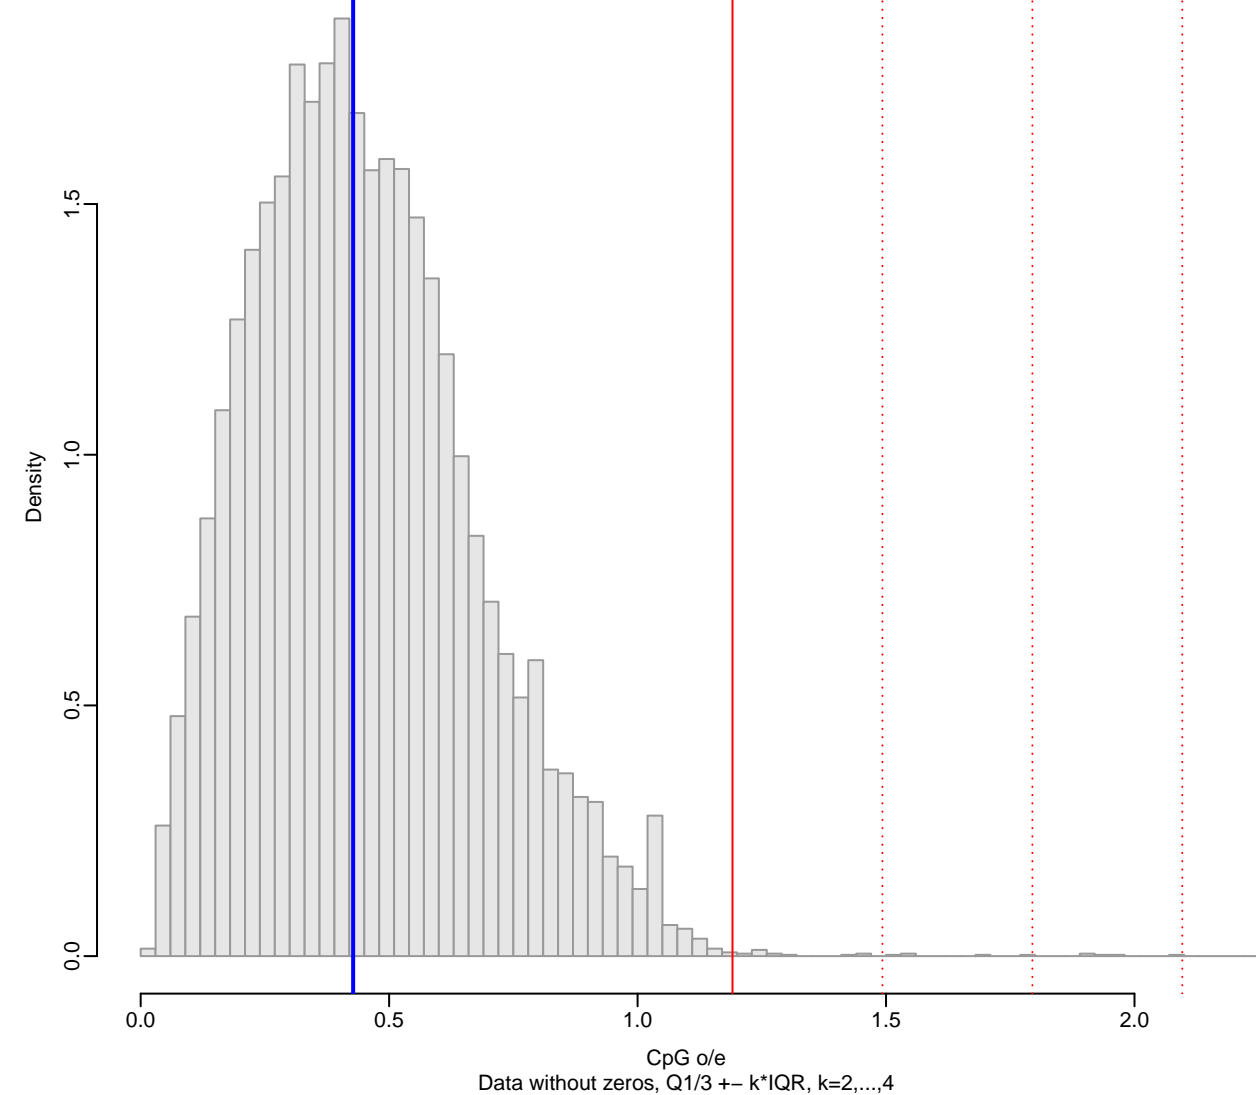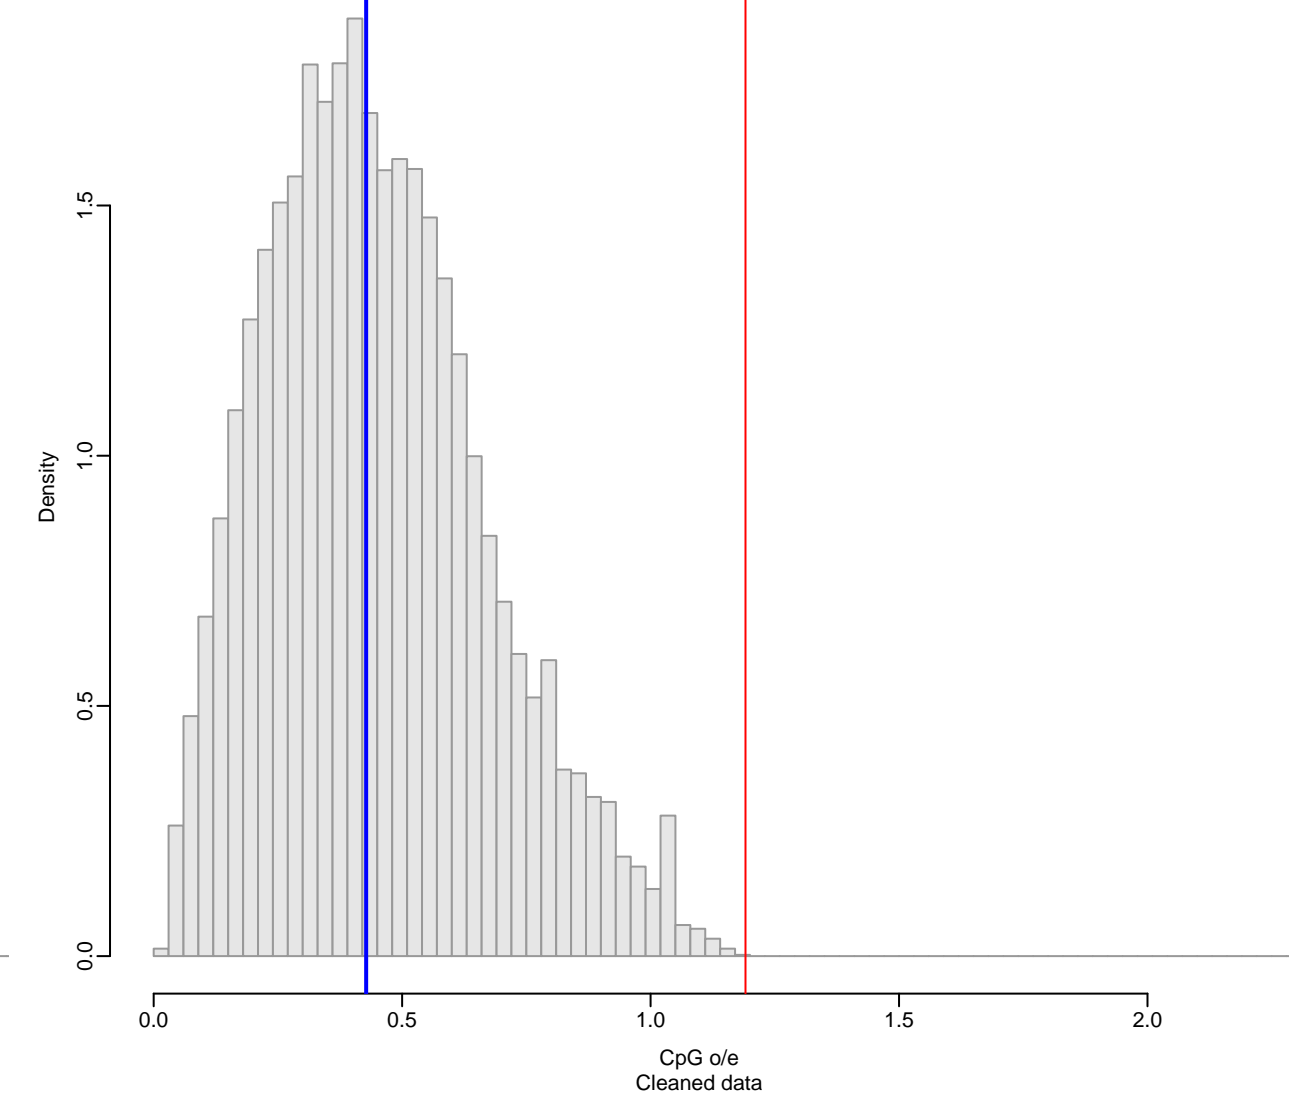

Capsicum\_annuum

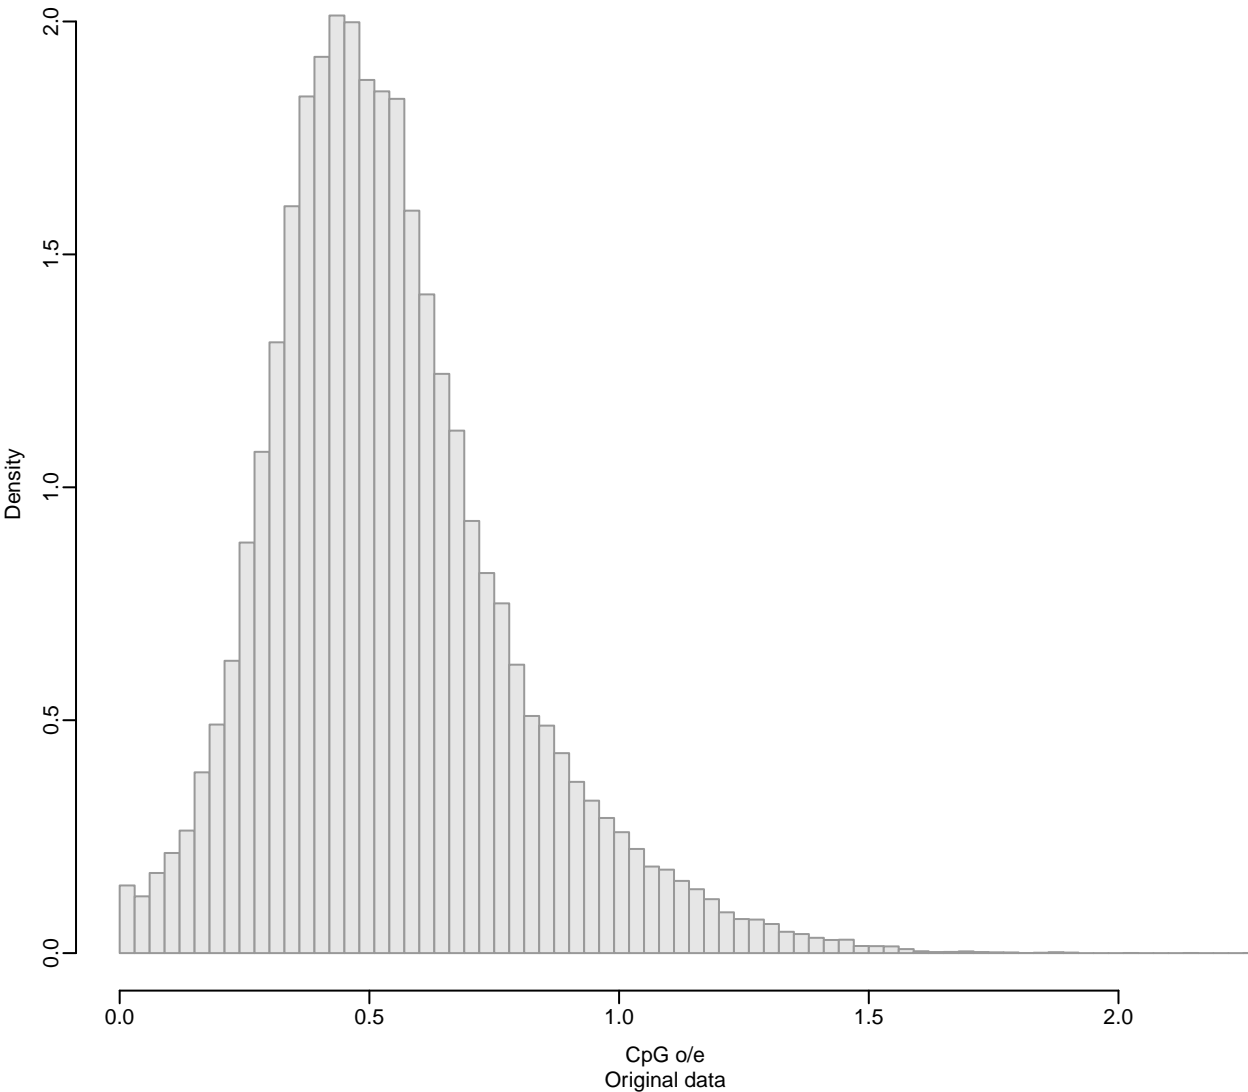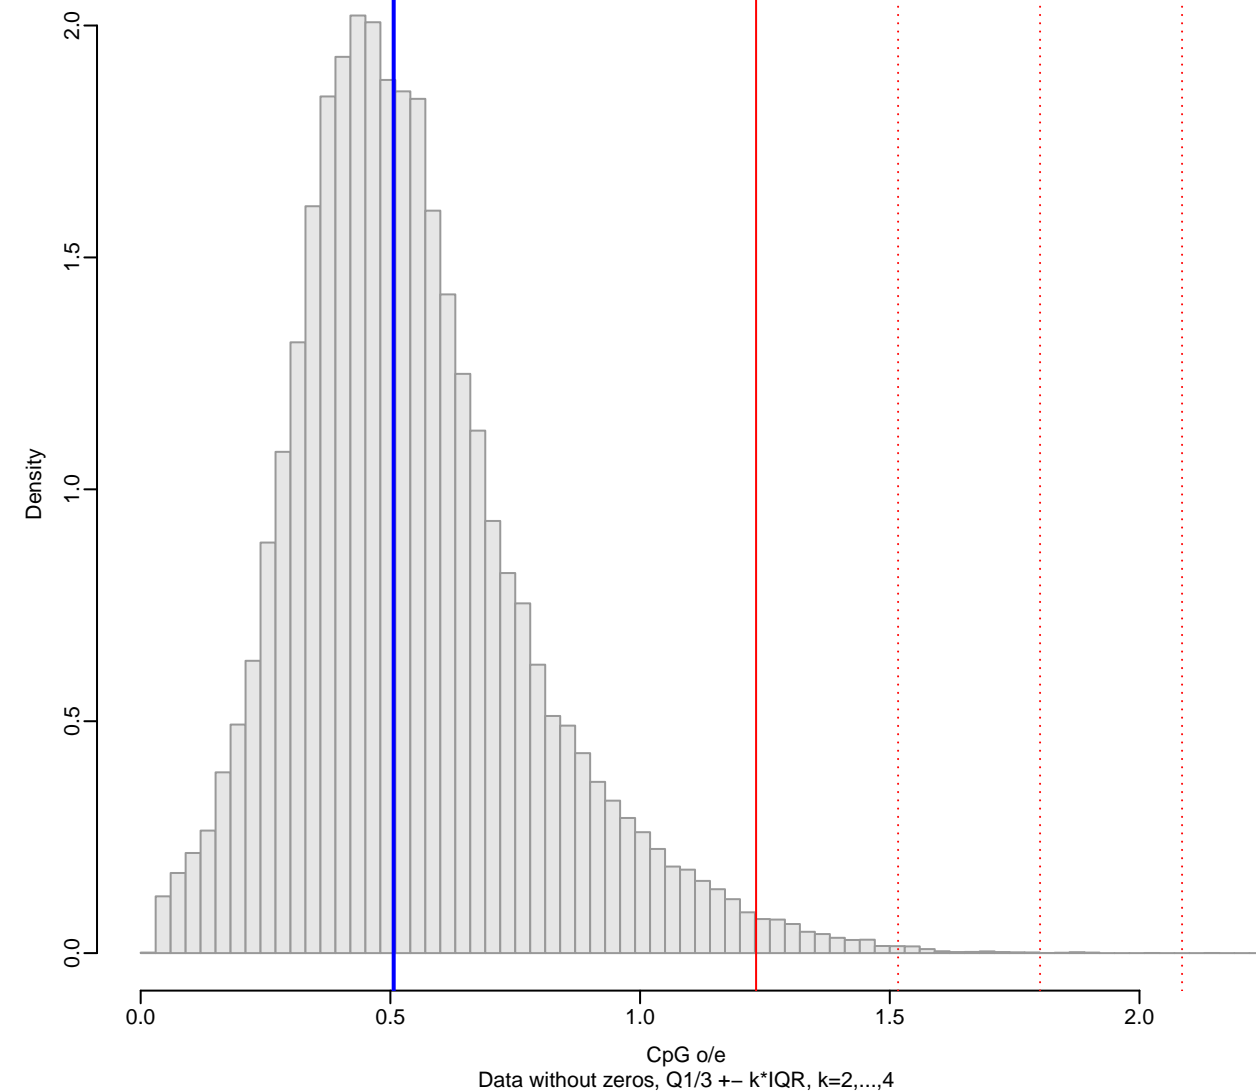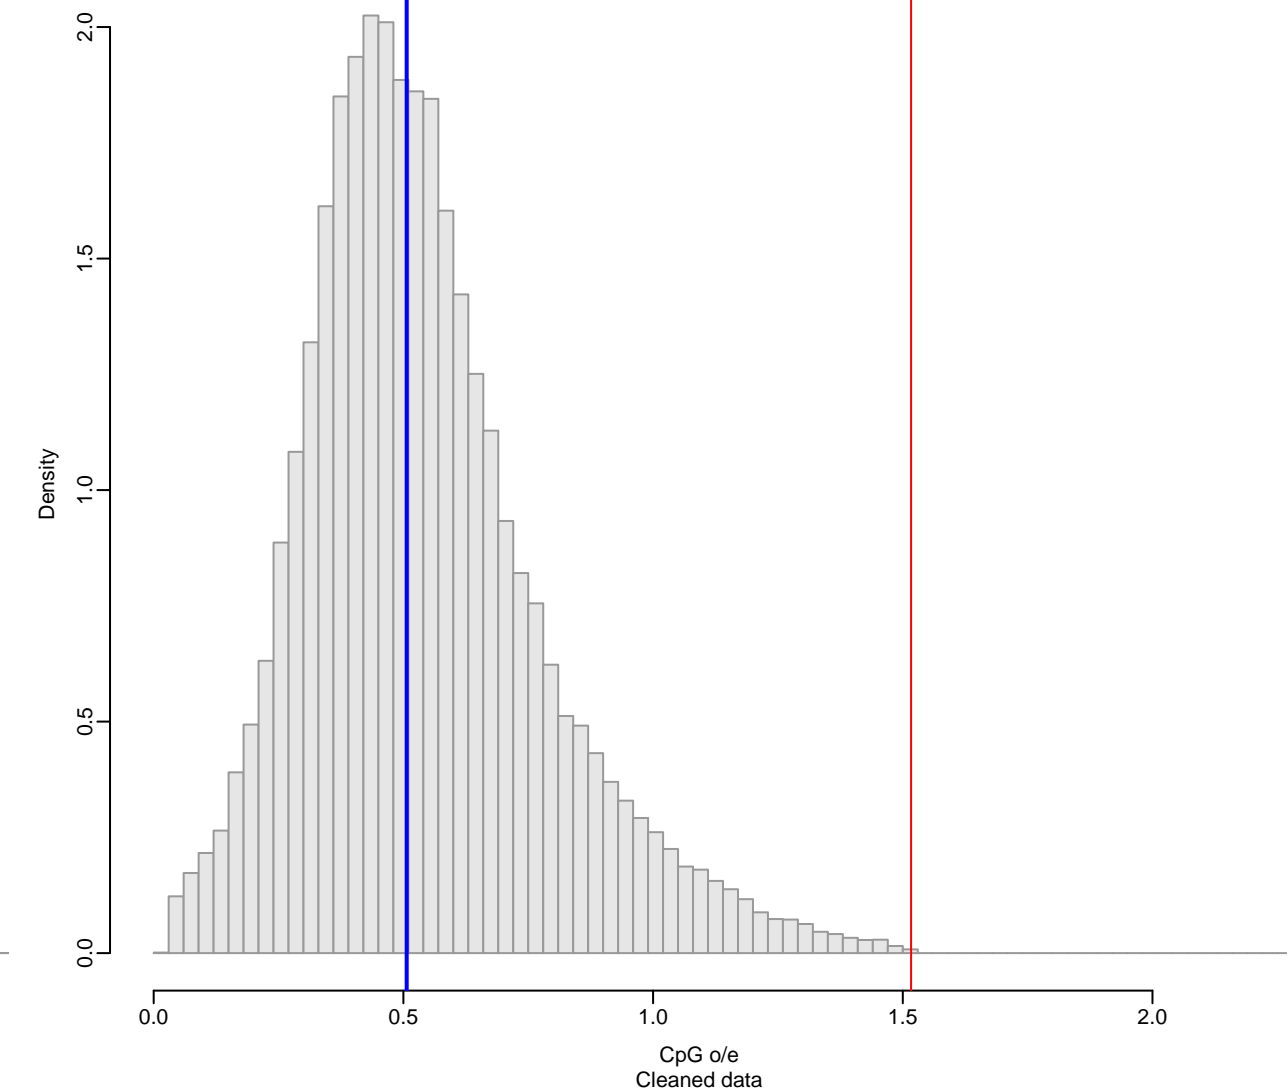

Carassius\_auratus

Density

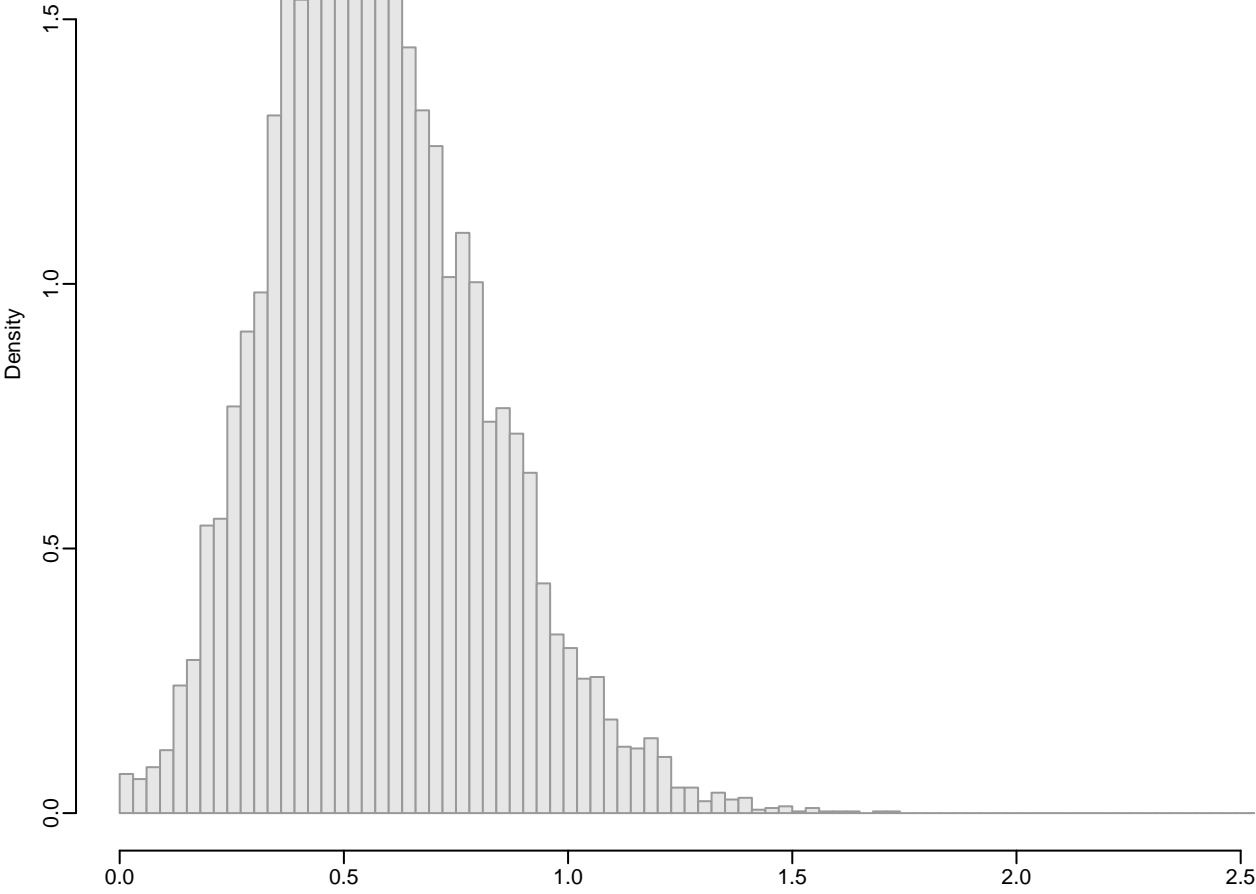

Density

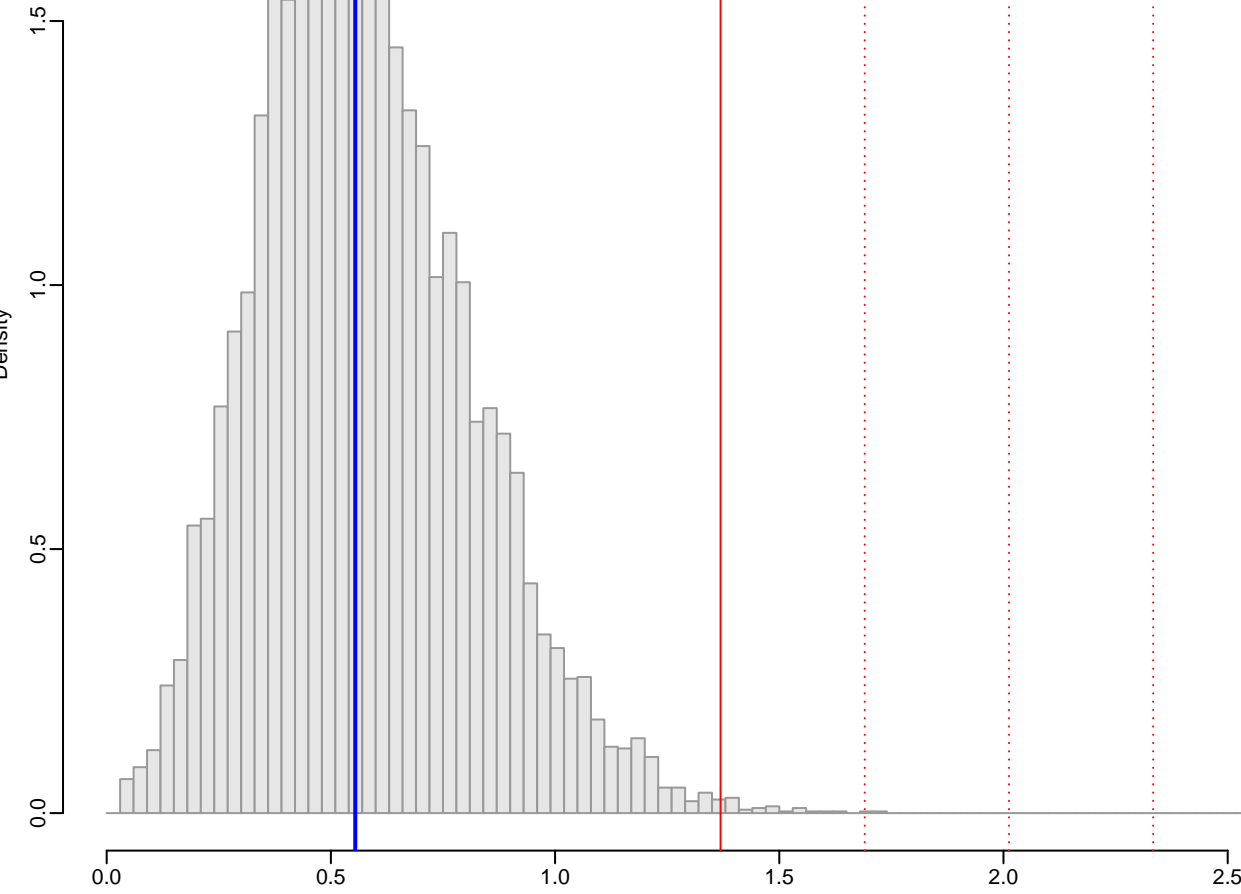

Density

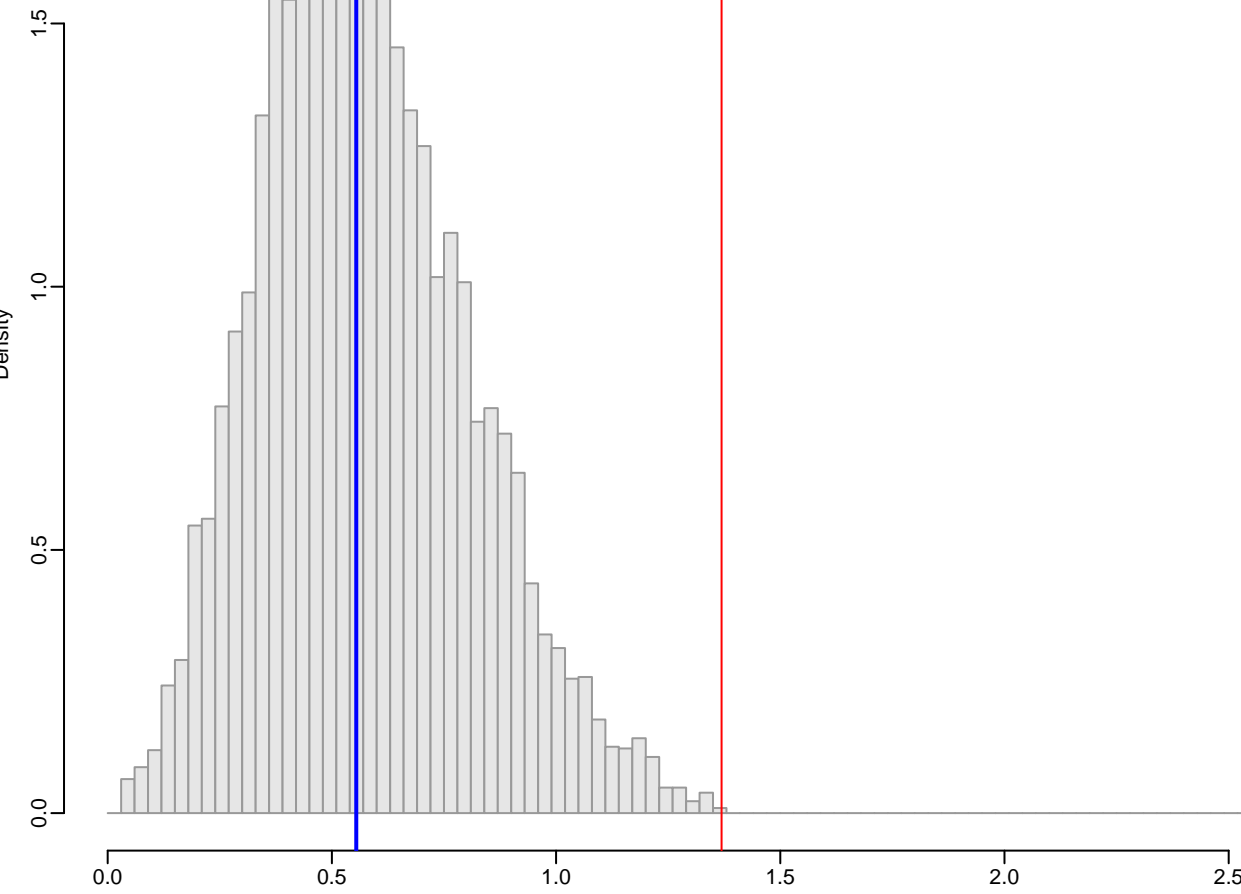

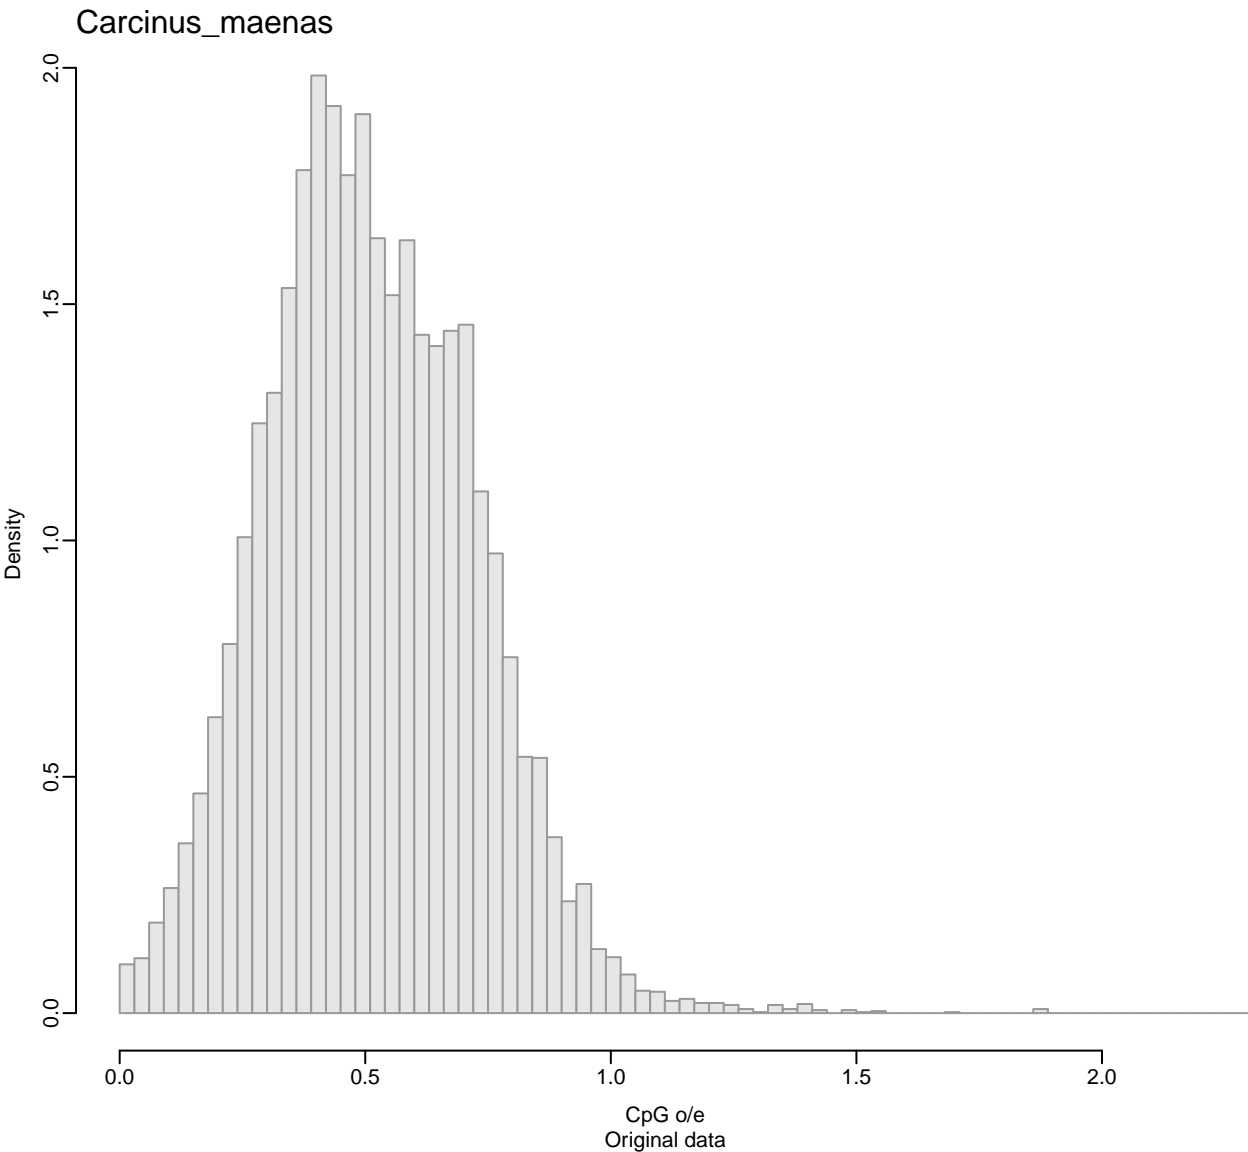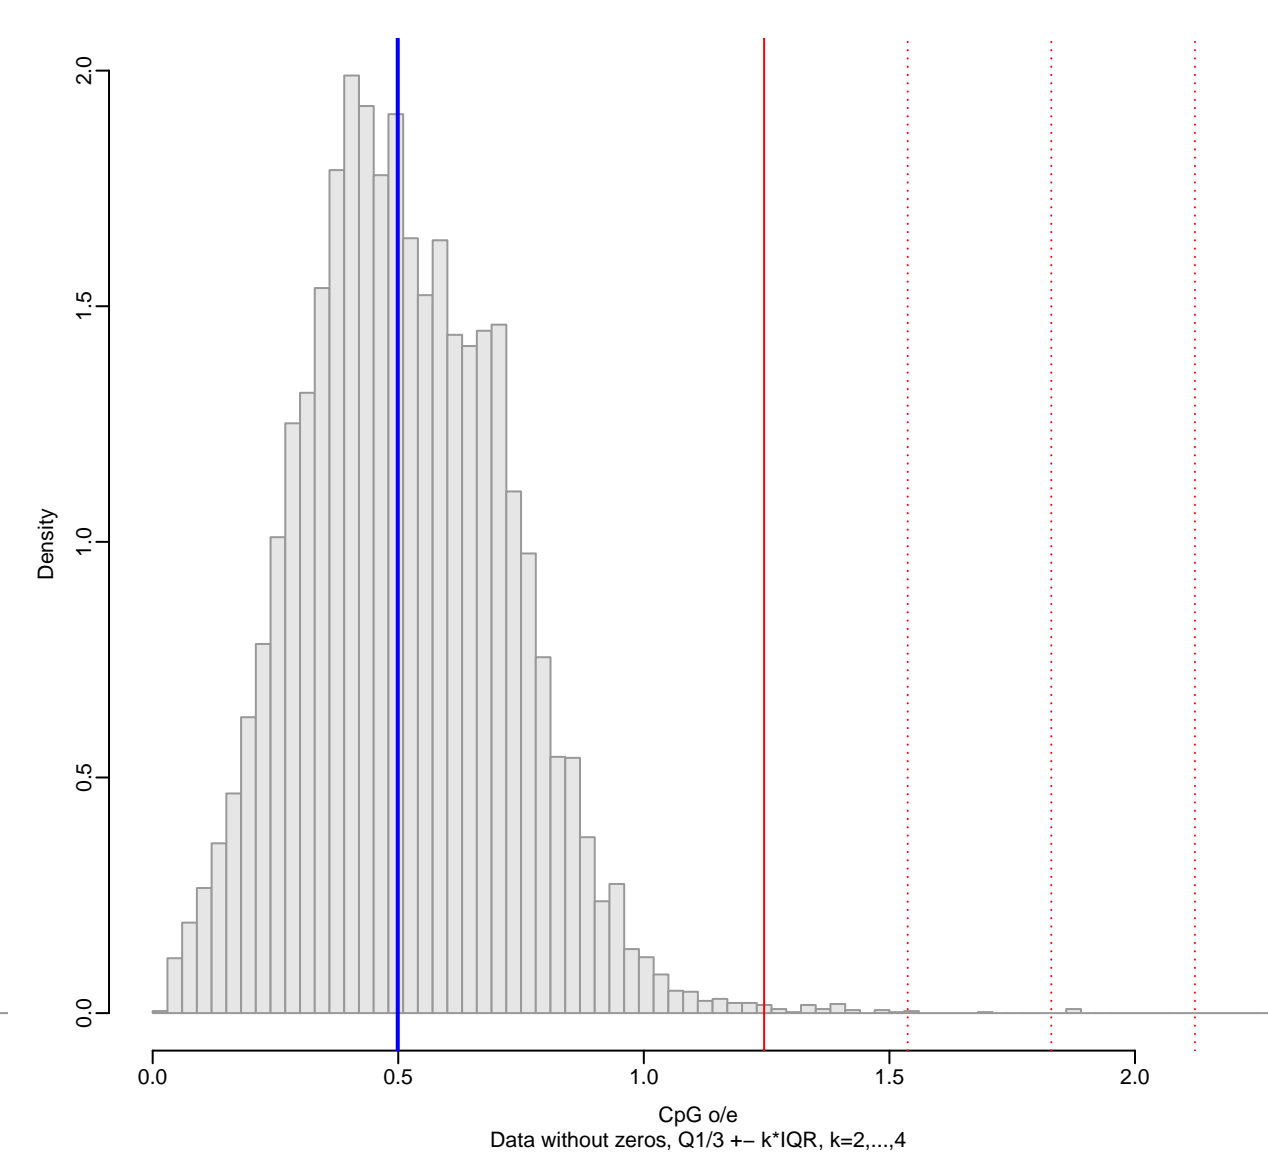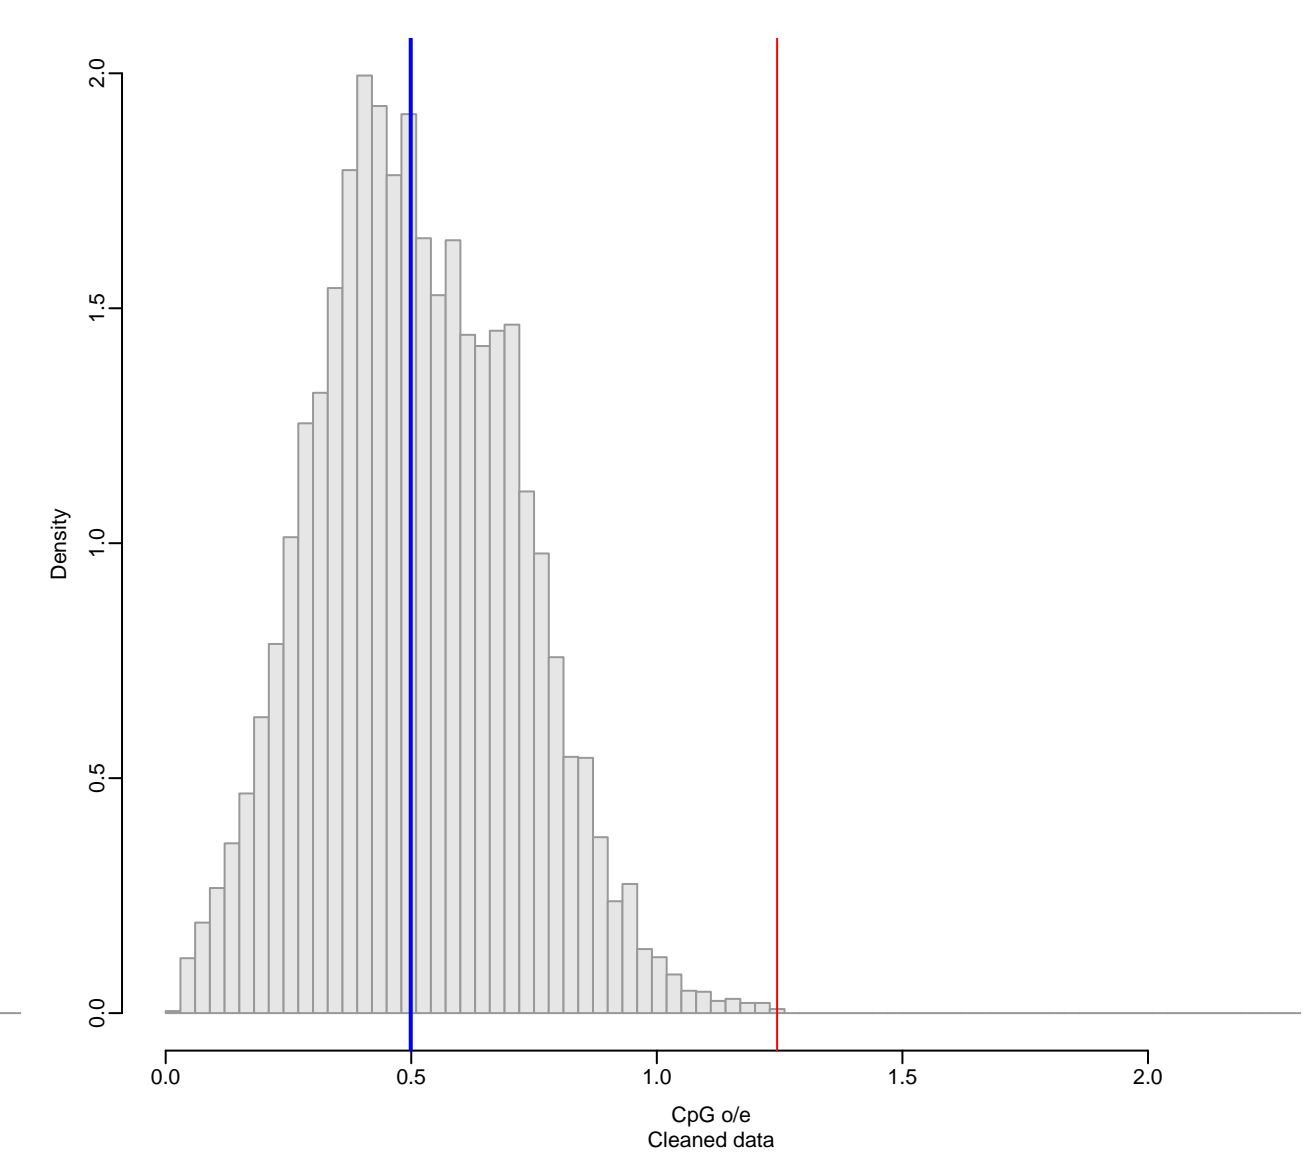

# Carica\_papaya

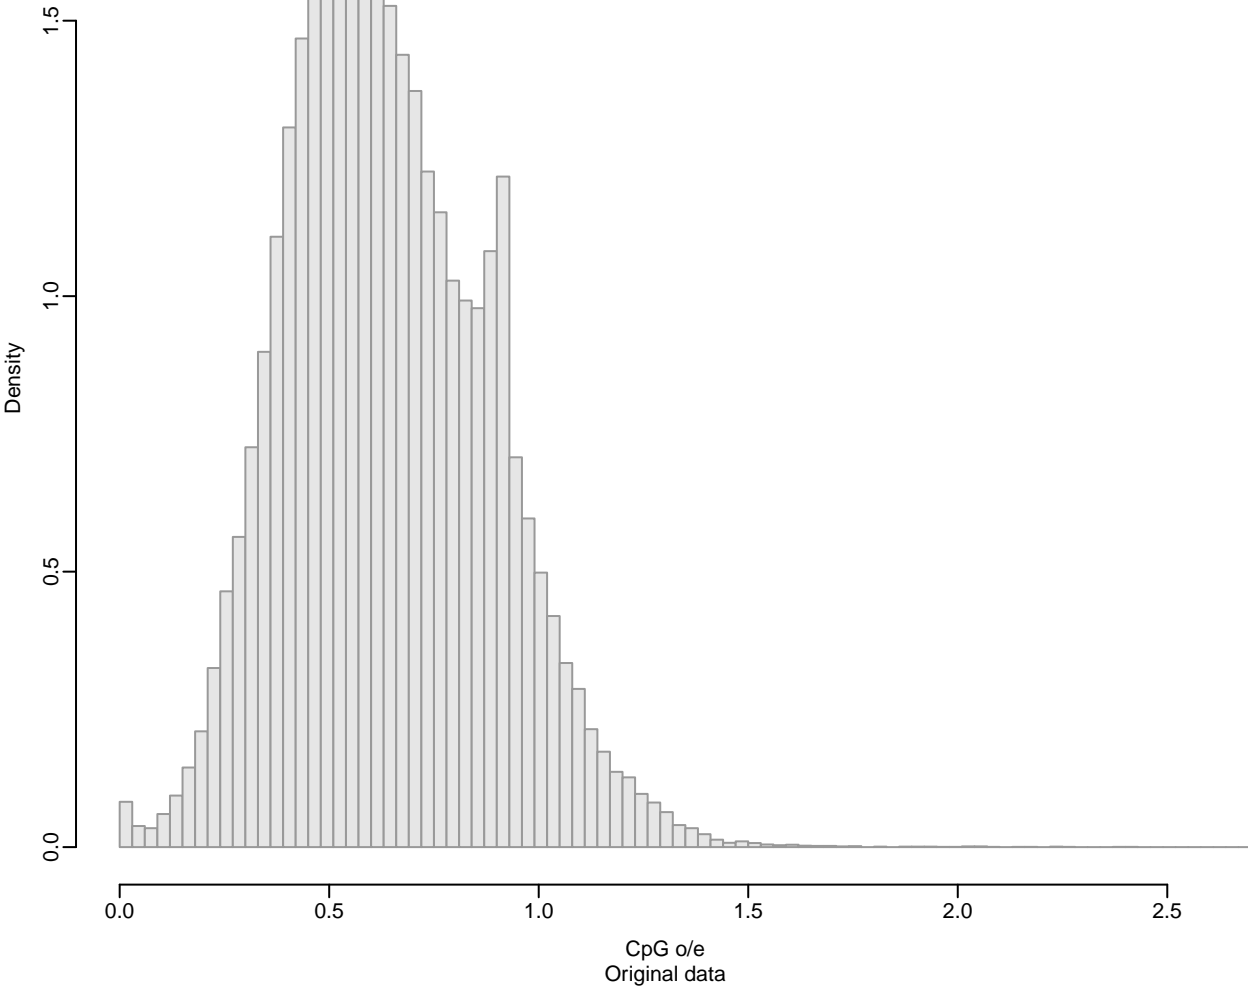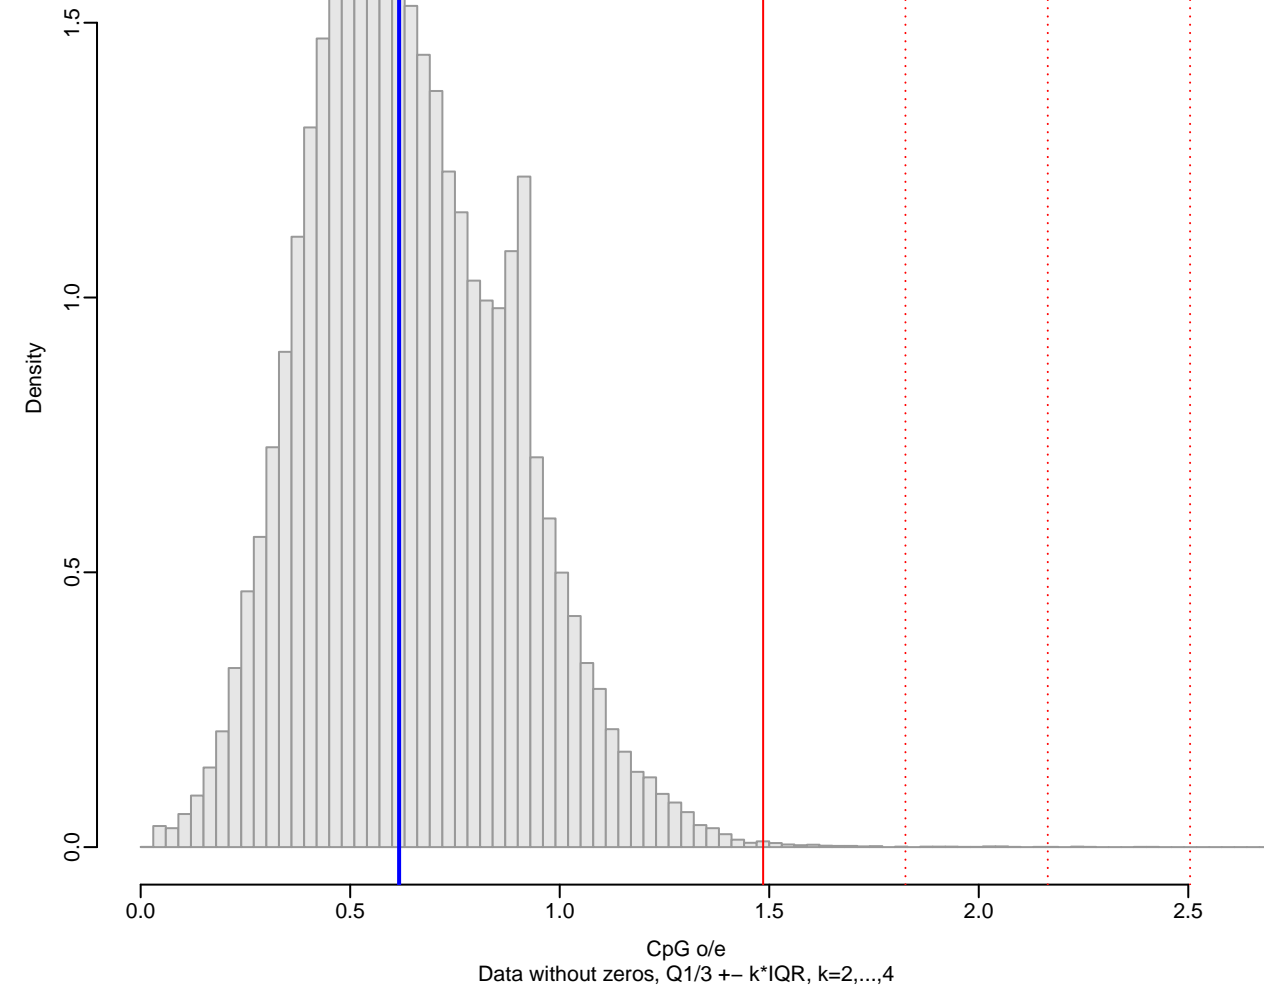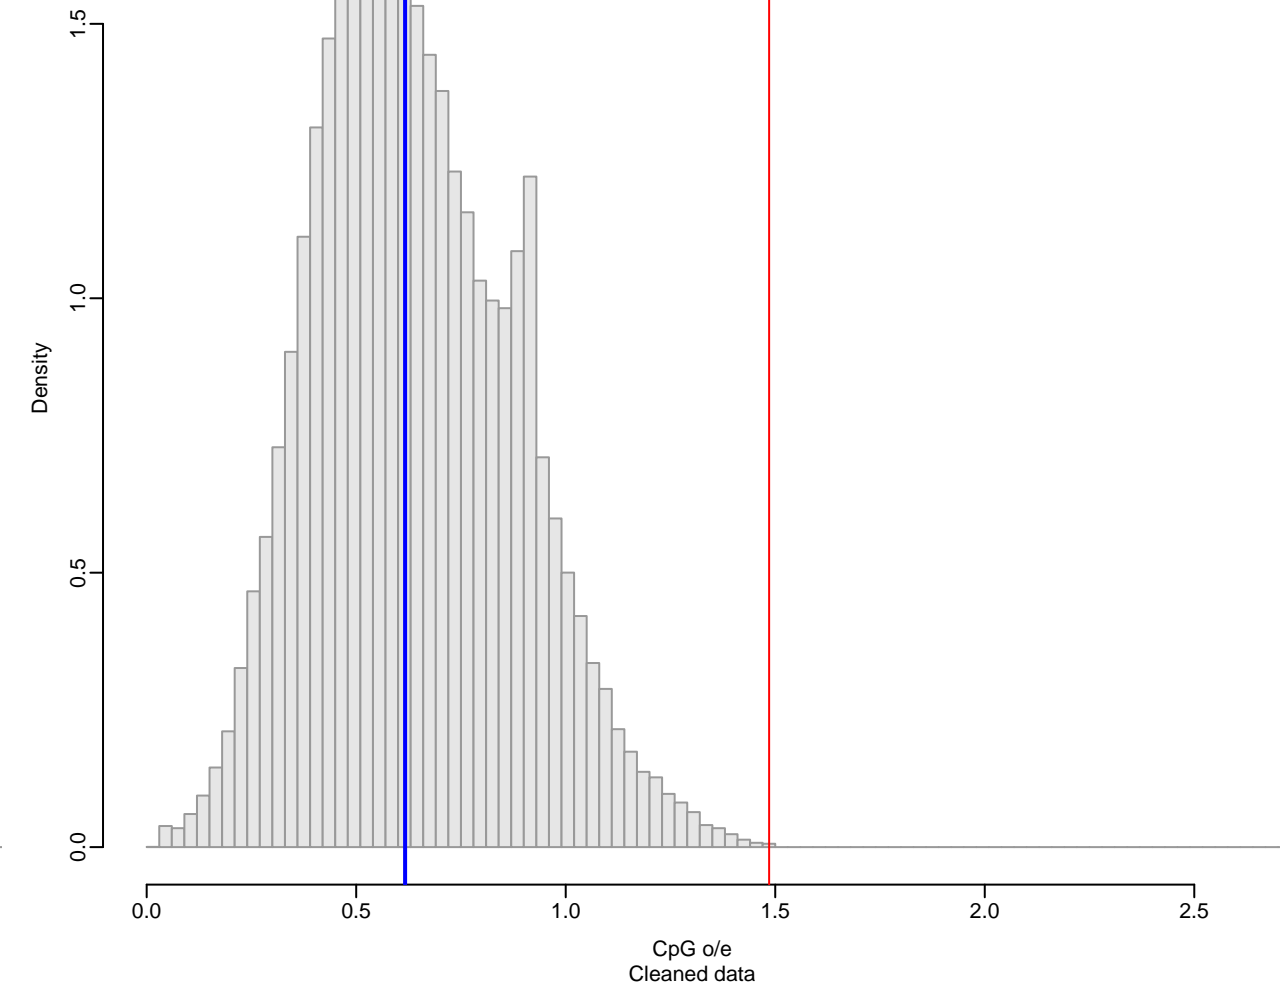

Carteriospongia\_foliascens



# Carthamus\_tinctorius

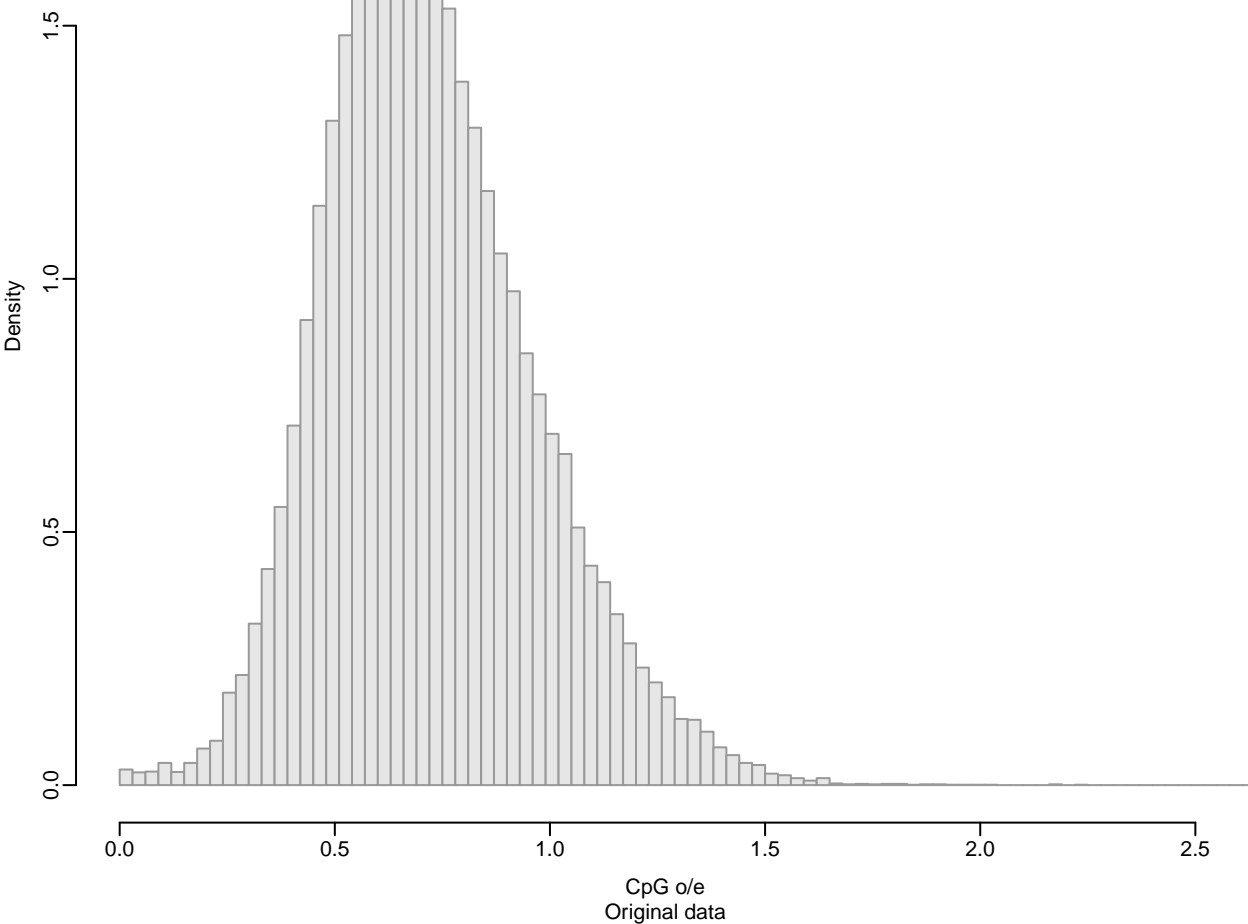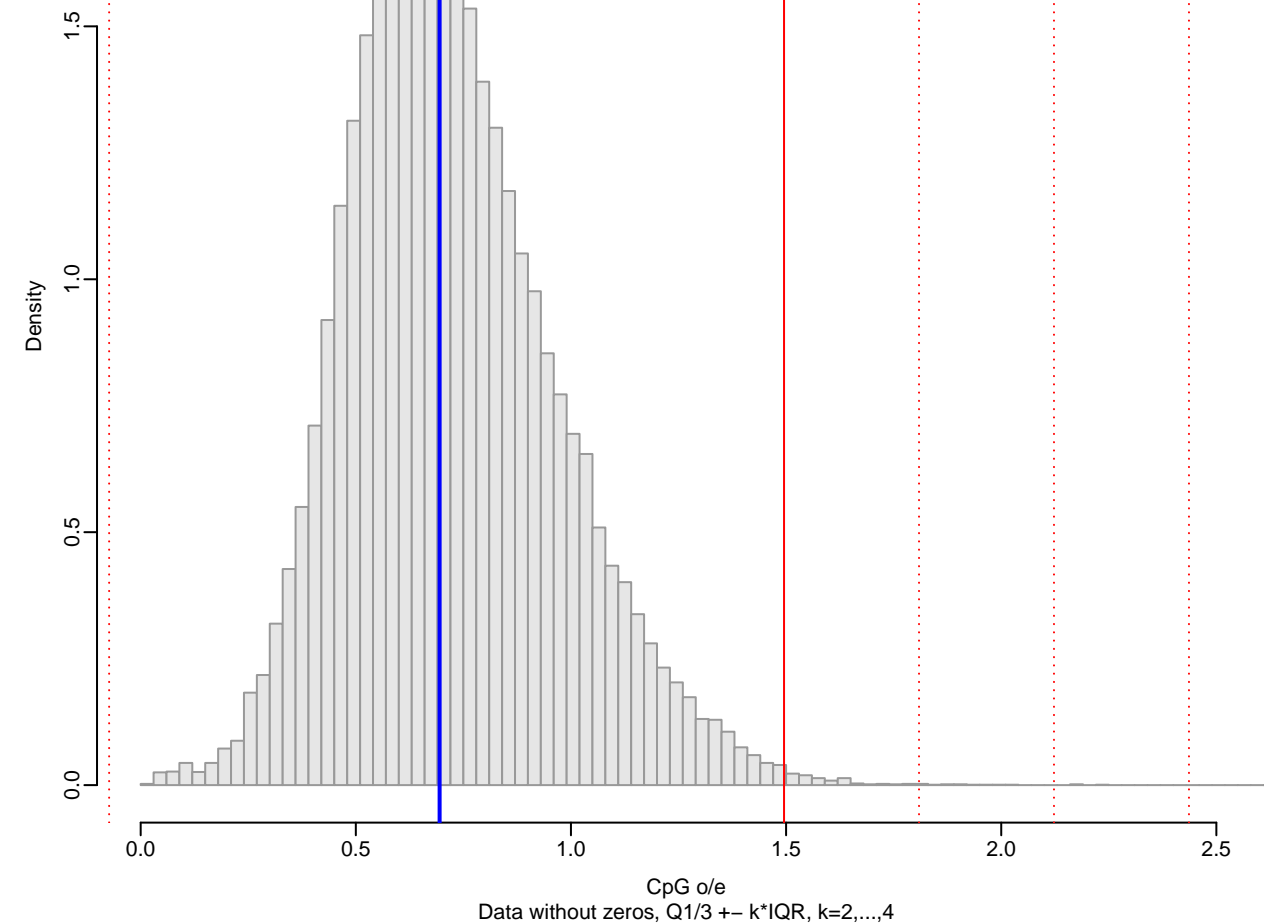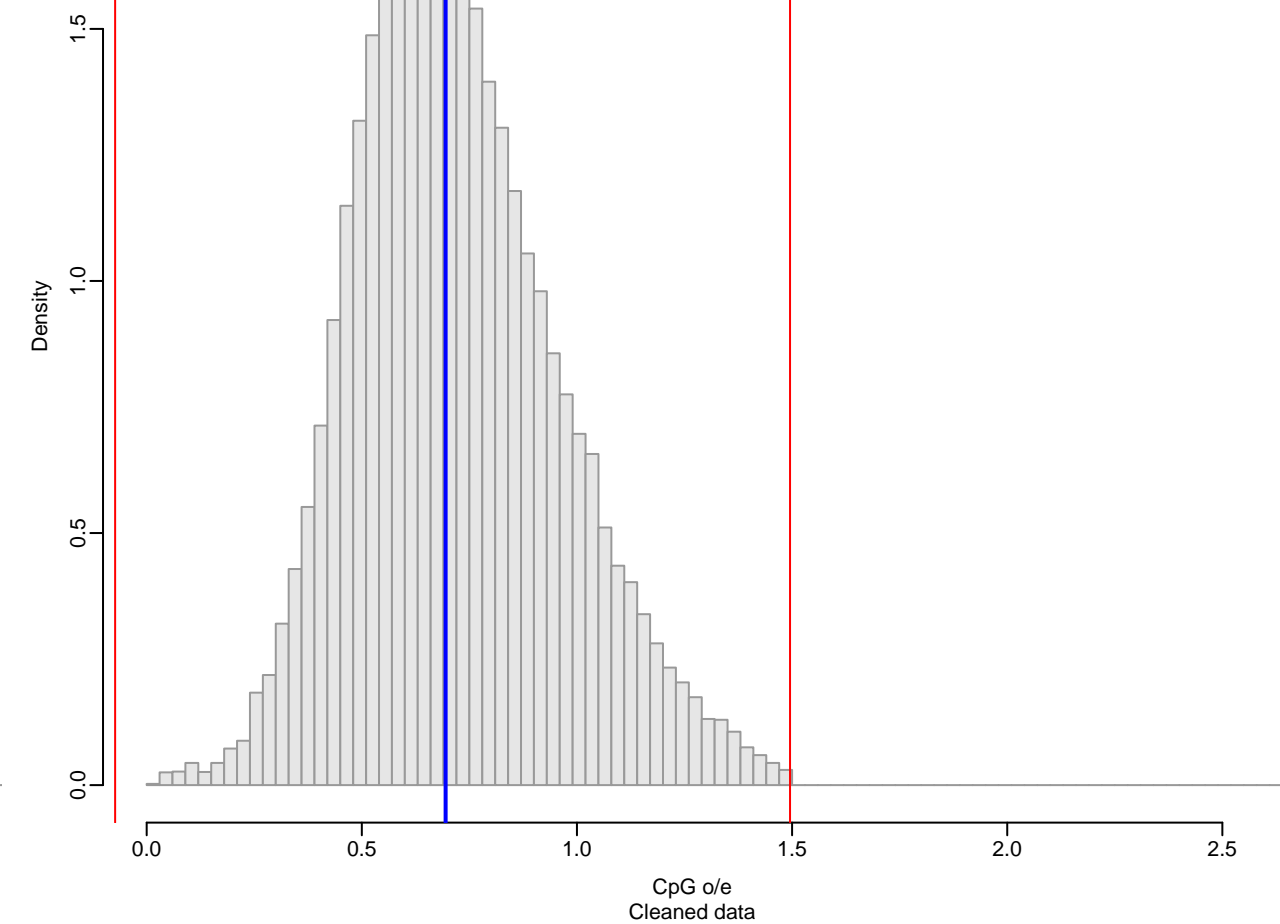



*Castanopsis sieboldii*

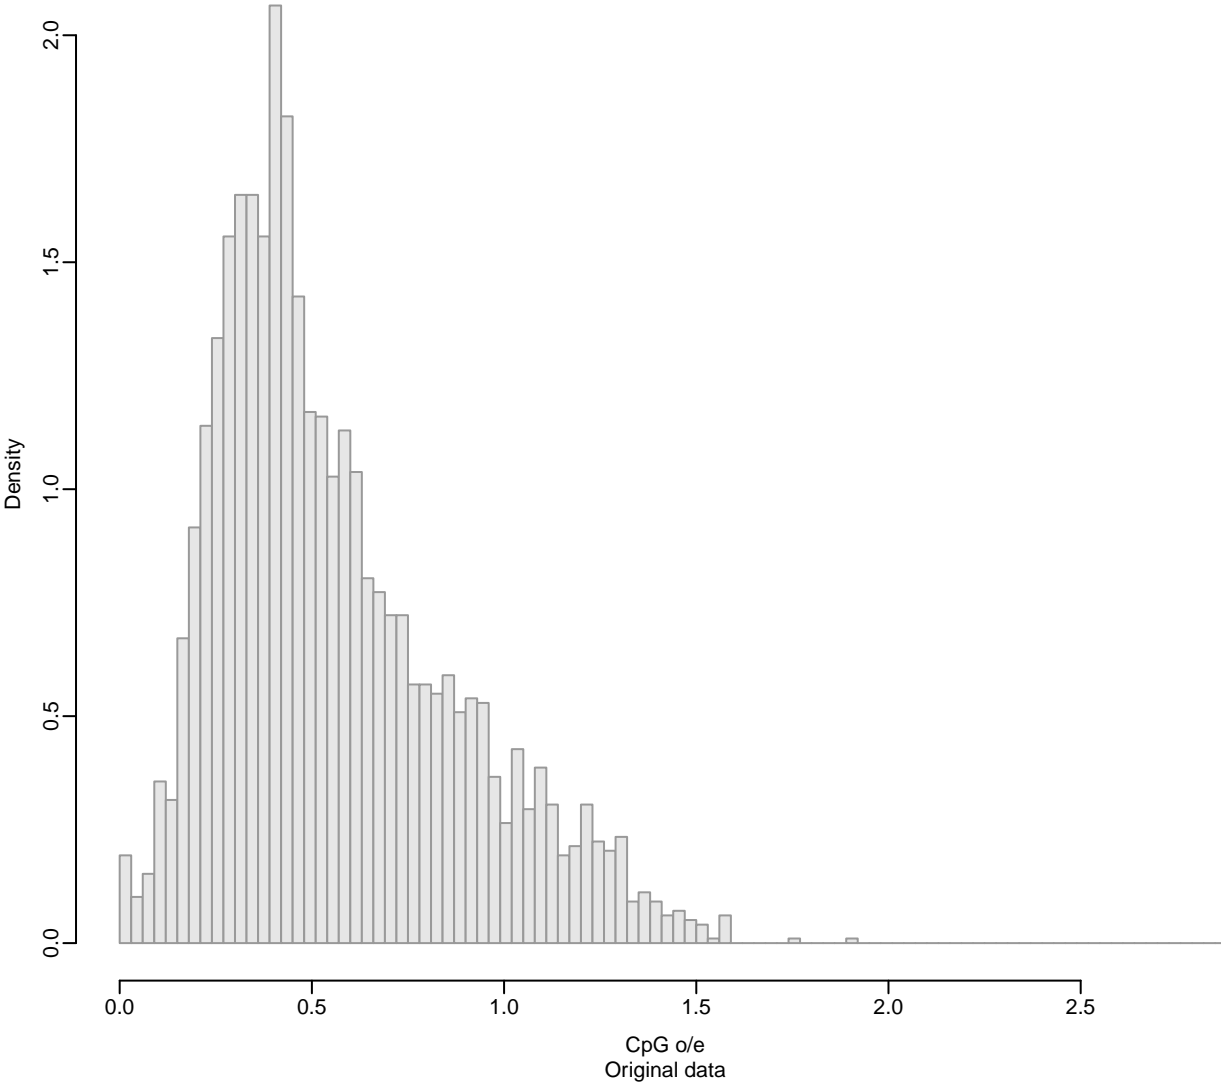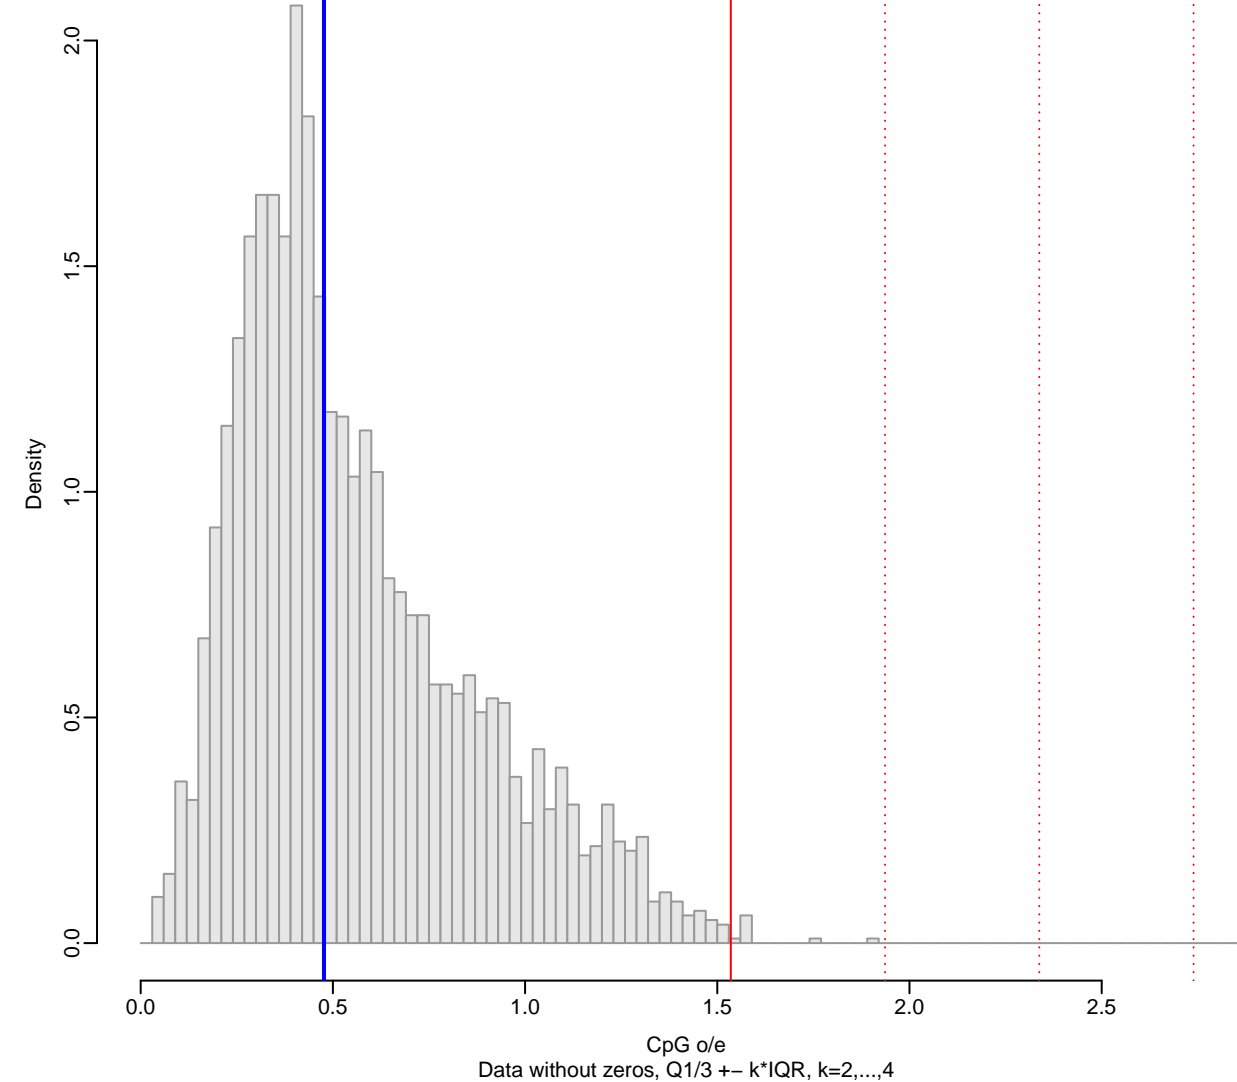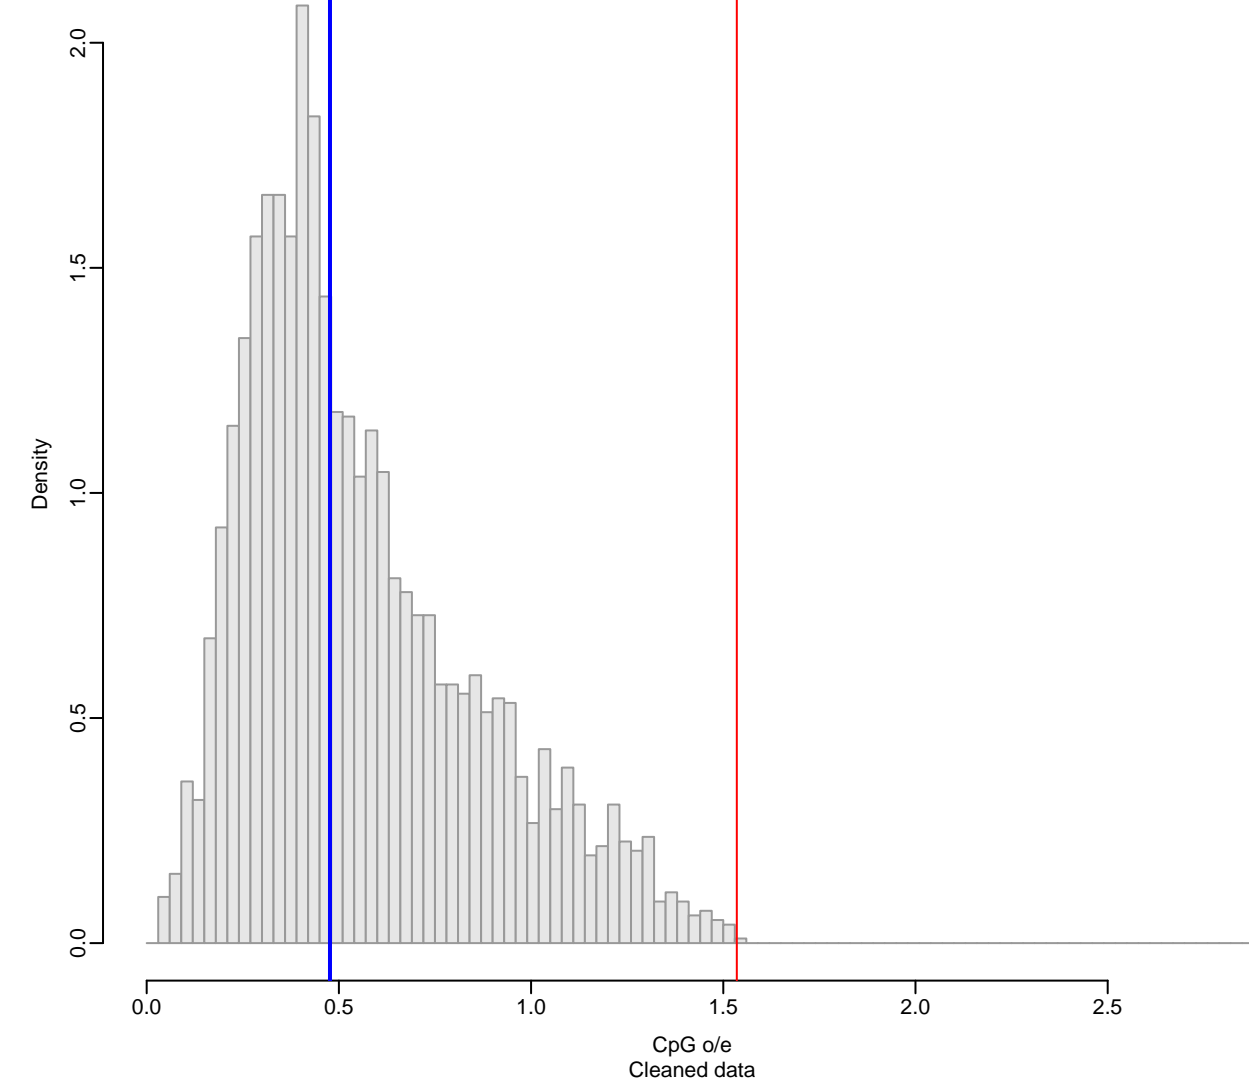

# Cavia\_porcellus

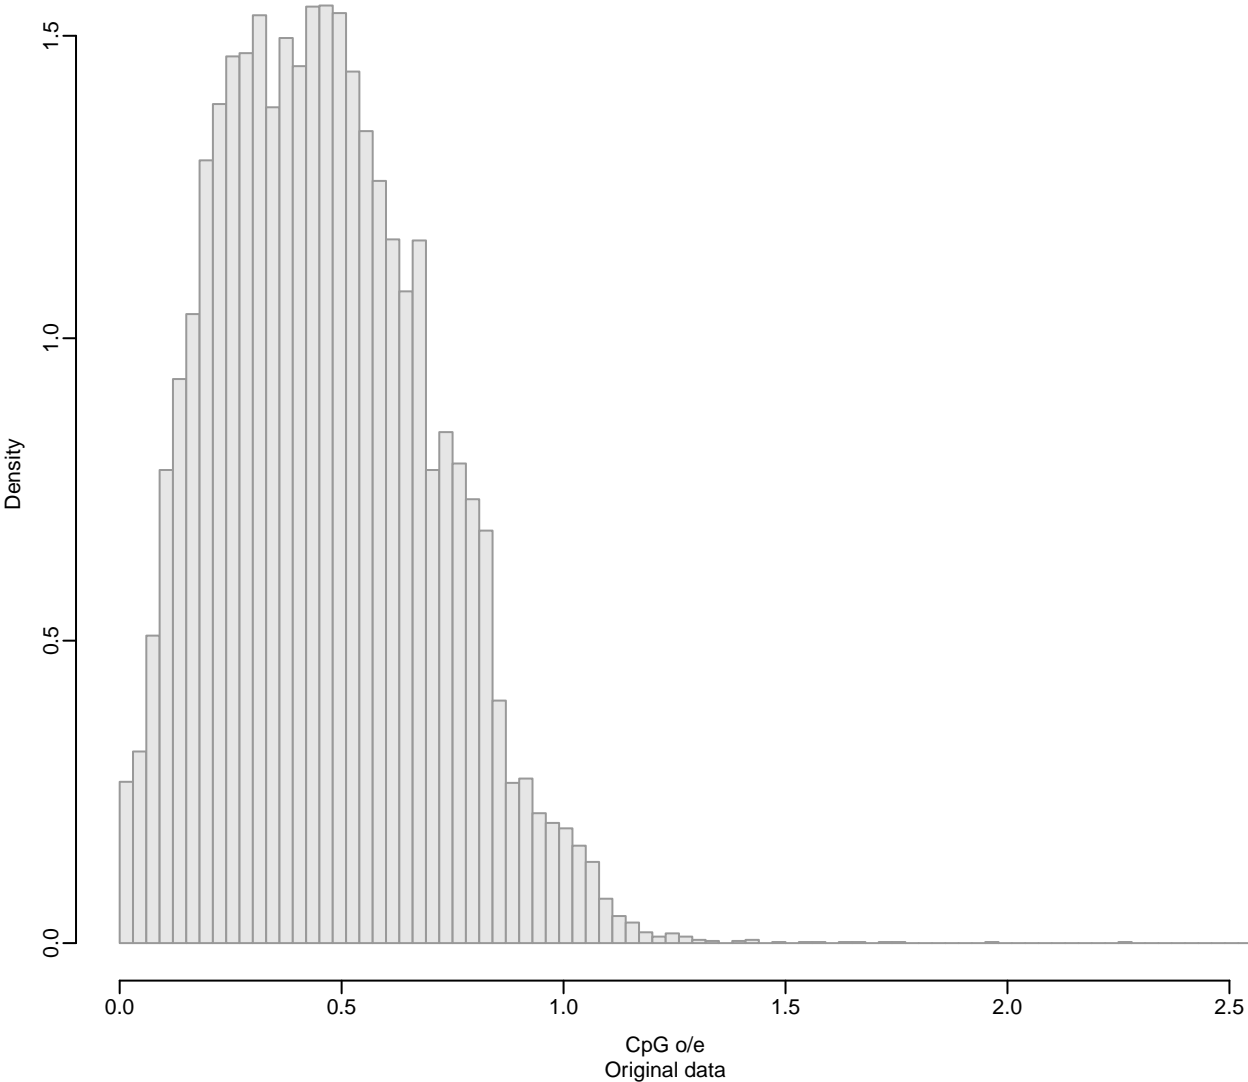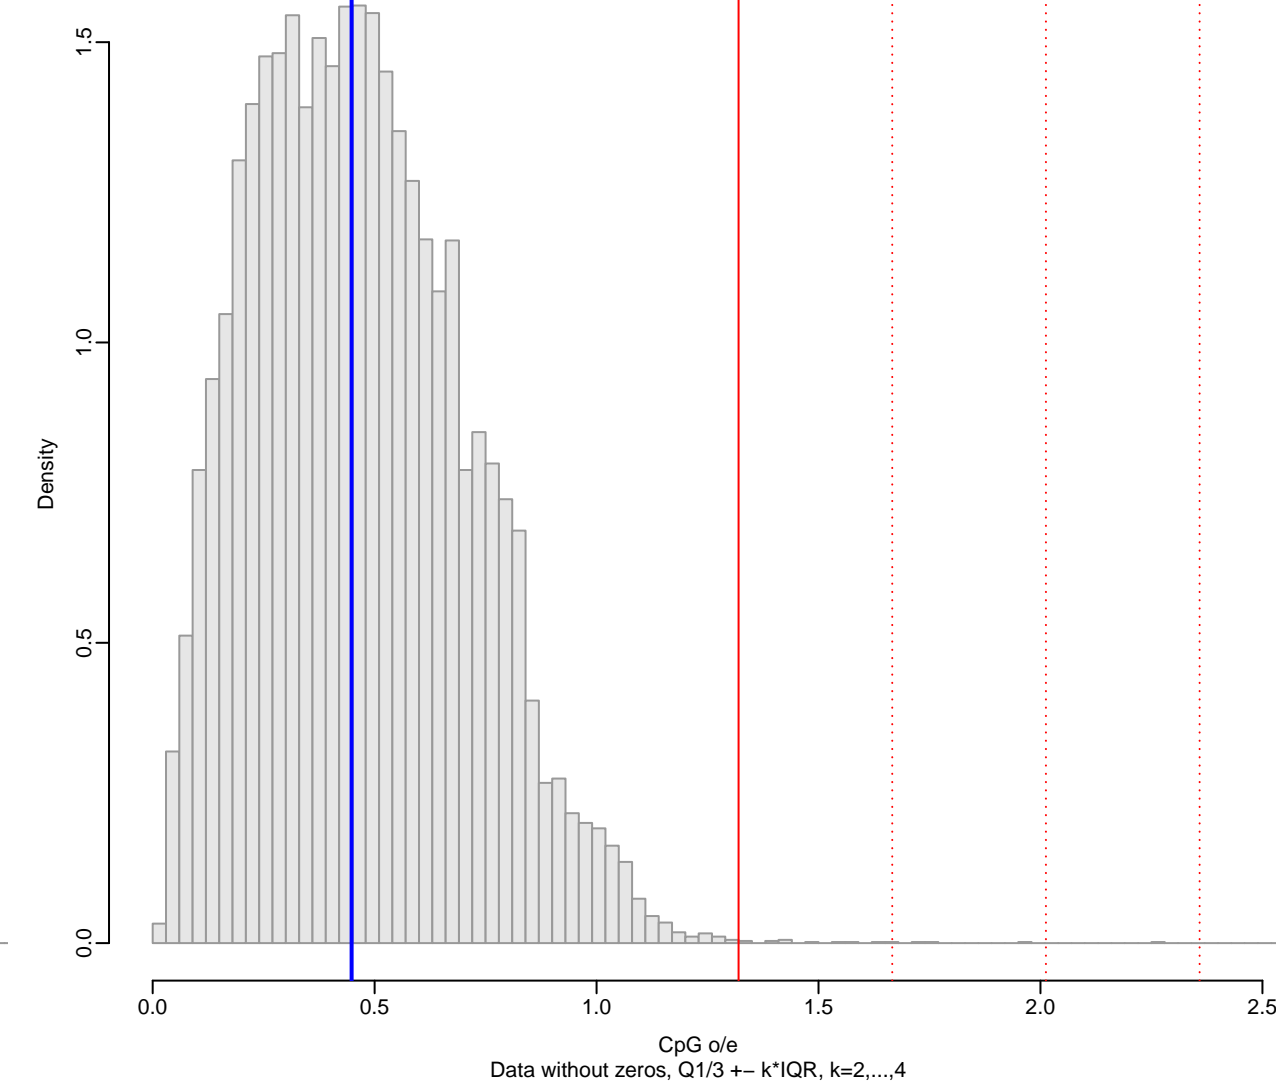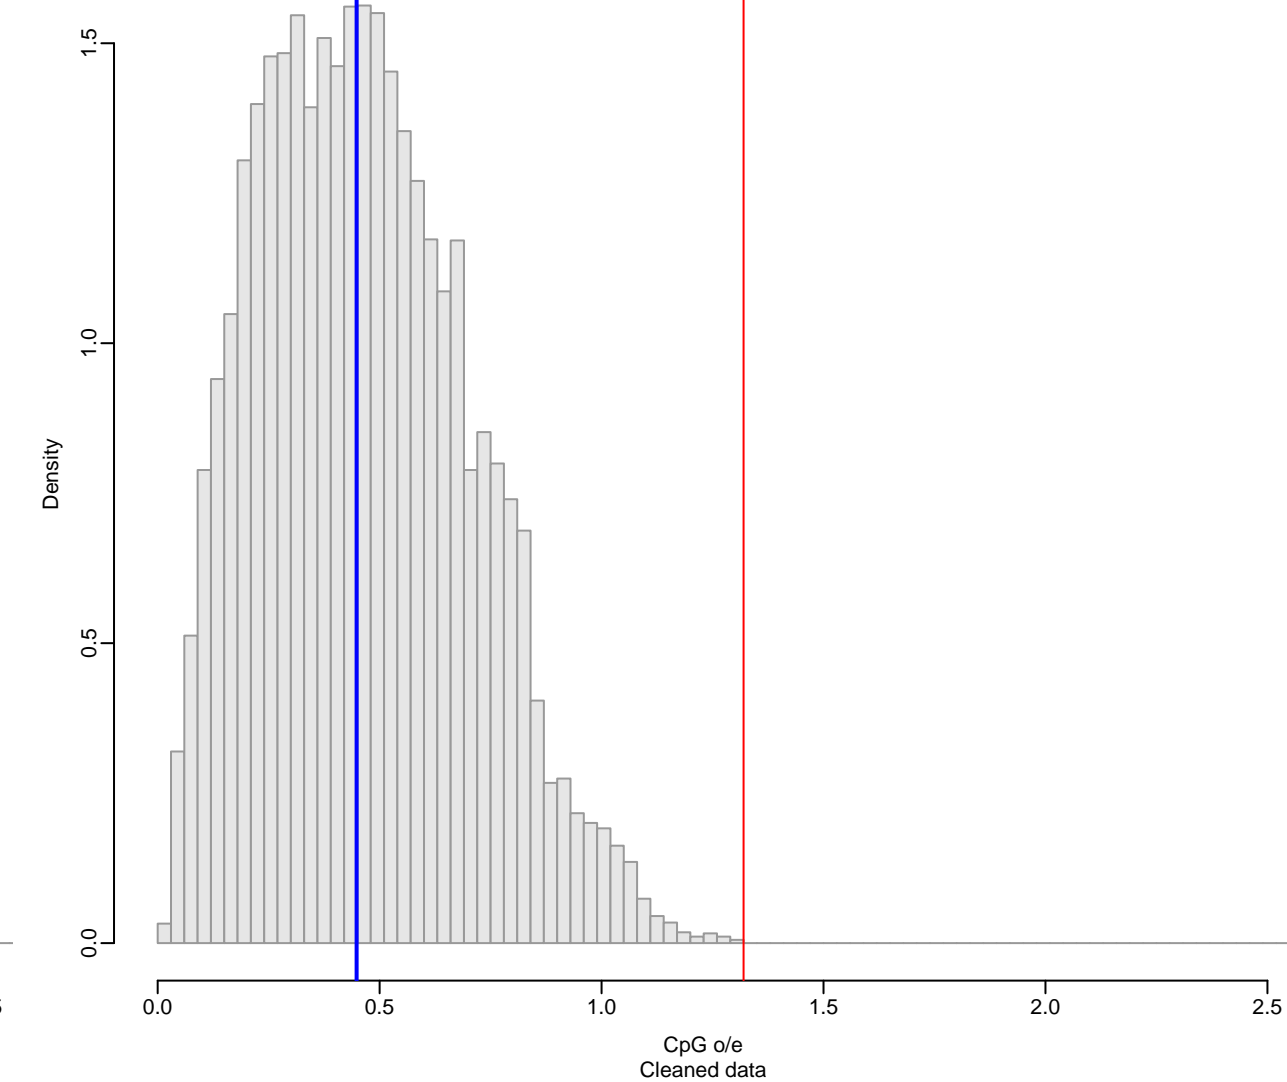

Celuca\_pugilator

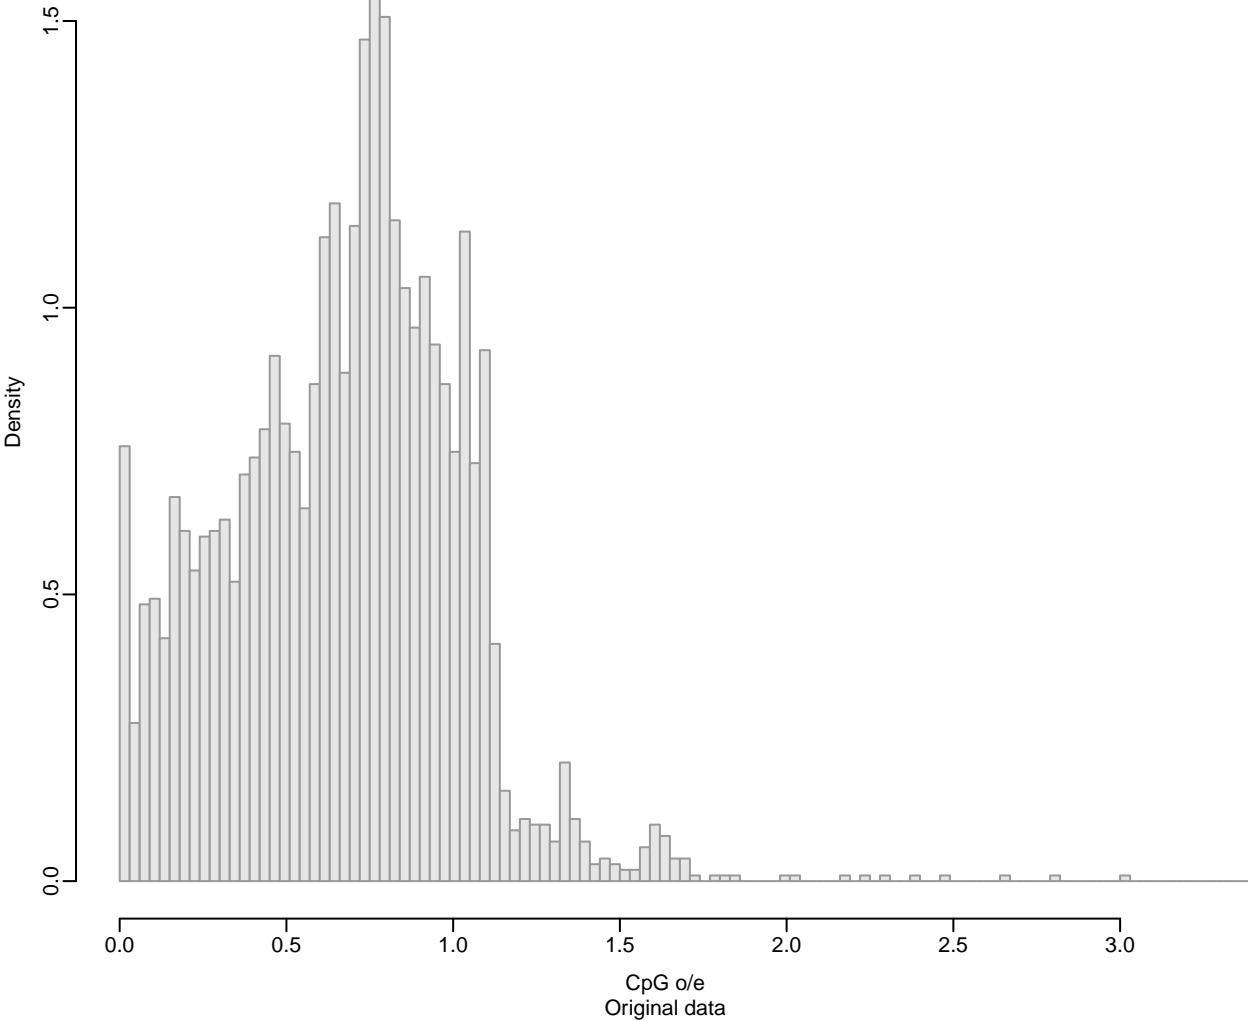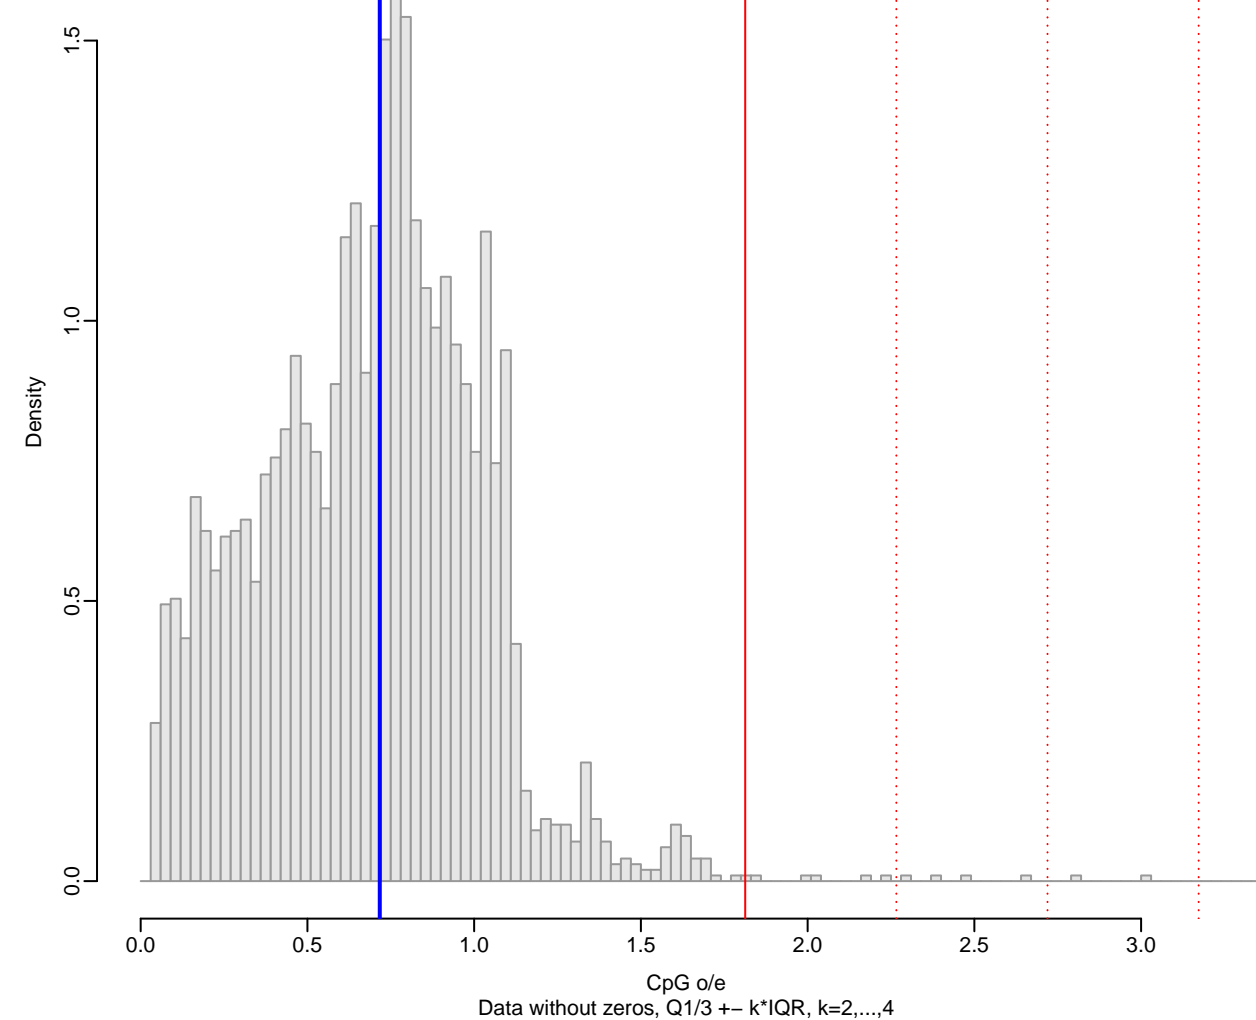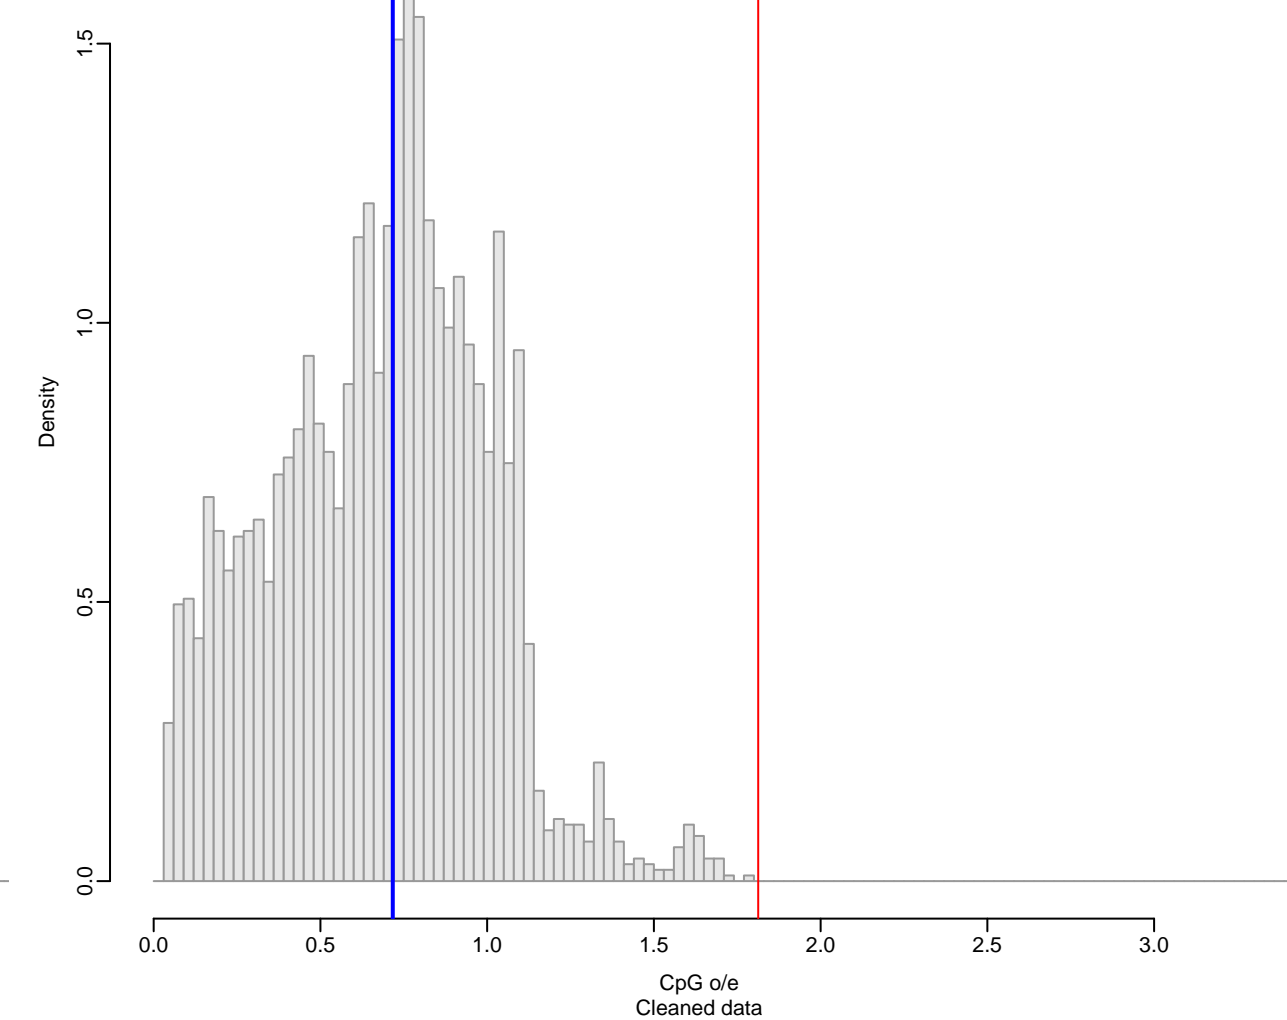

Centaurea\_maculosa

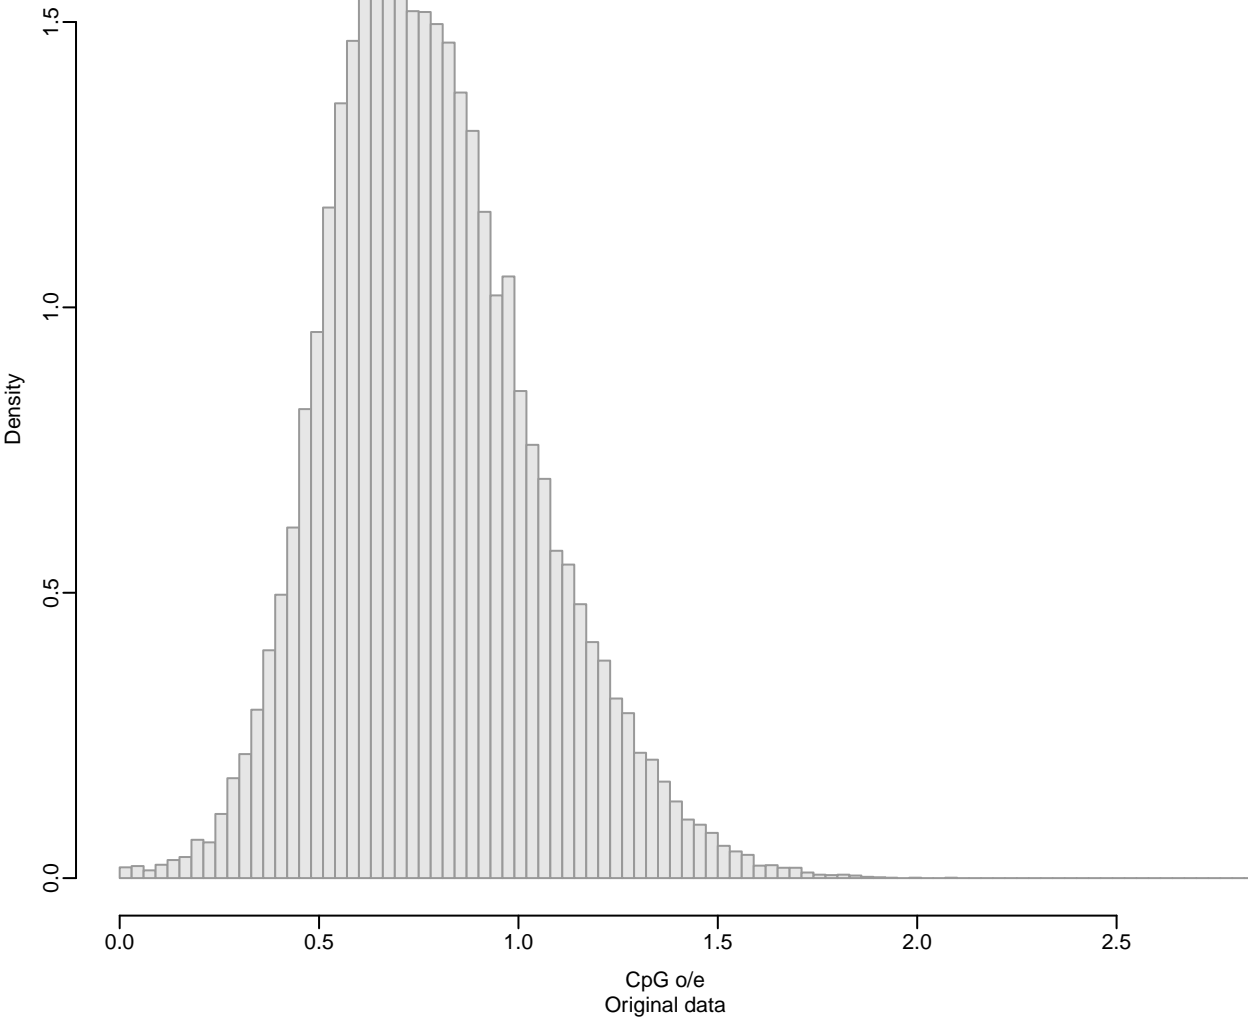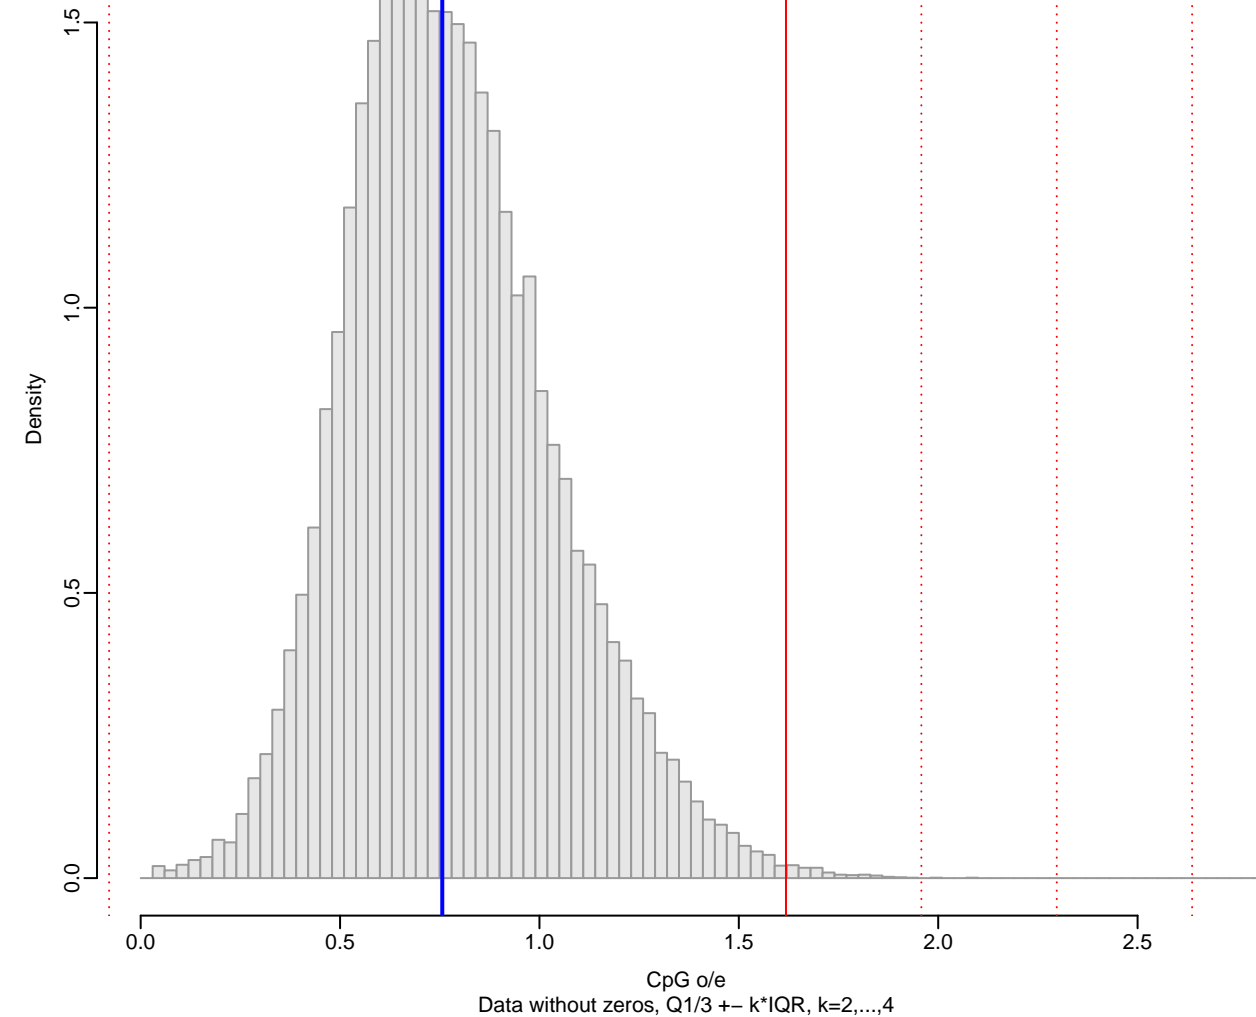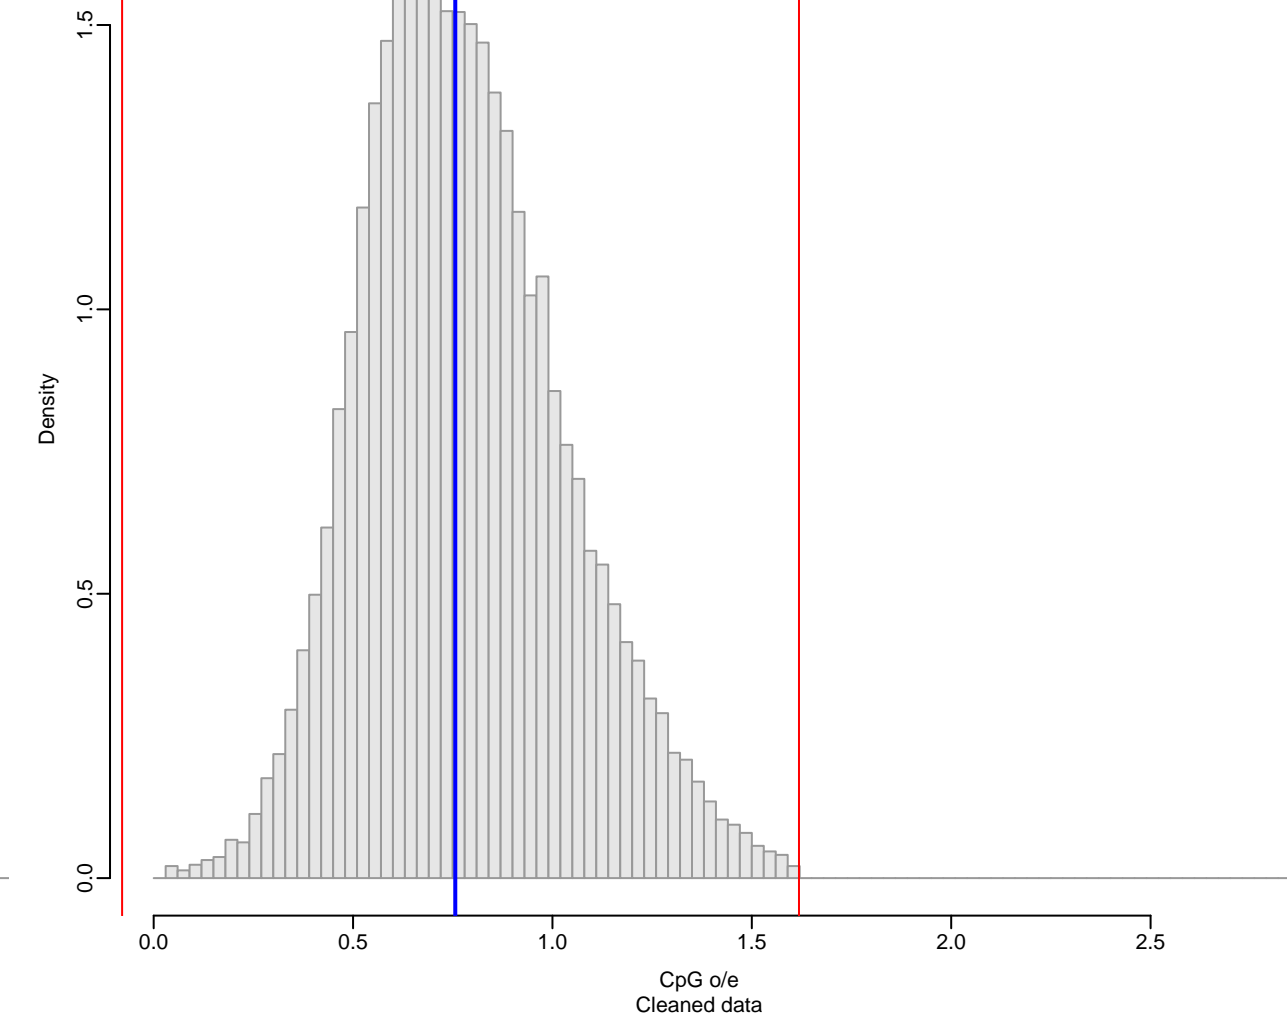

Centella\_asiatica

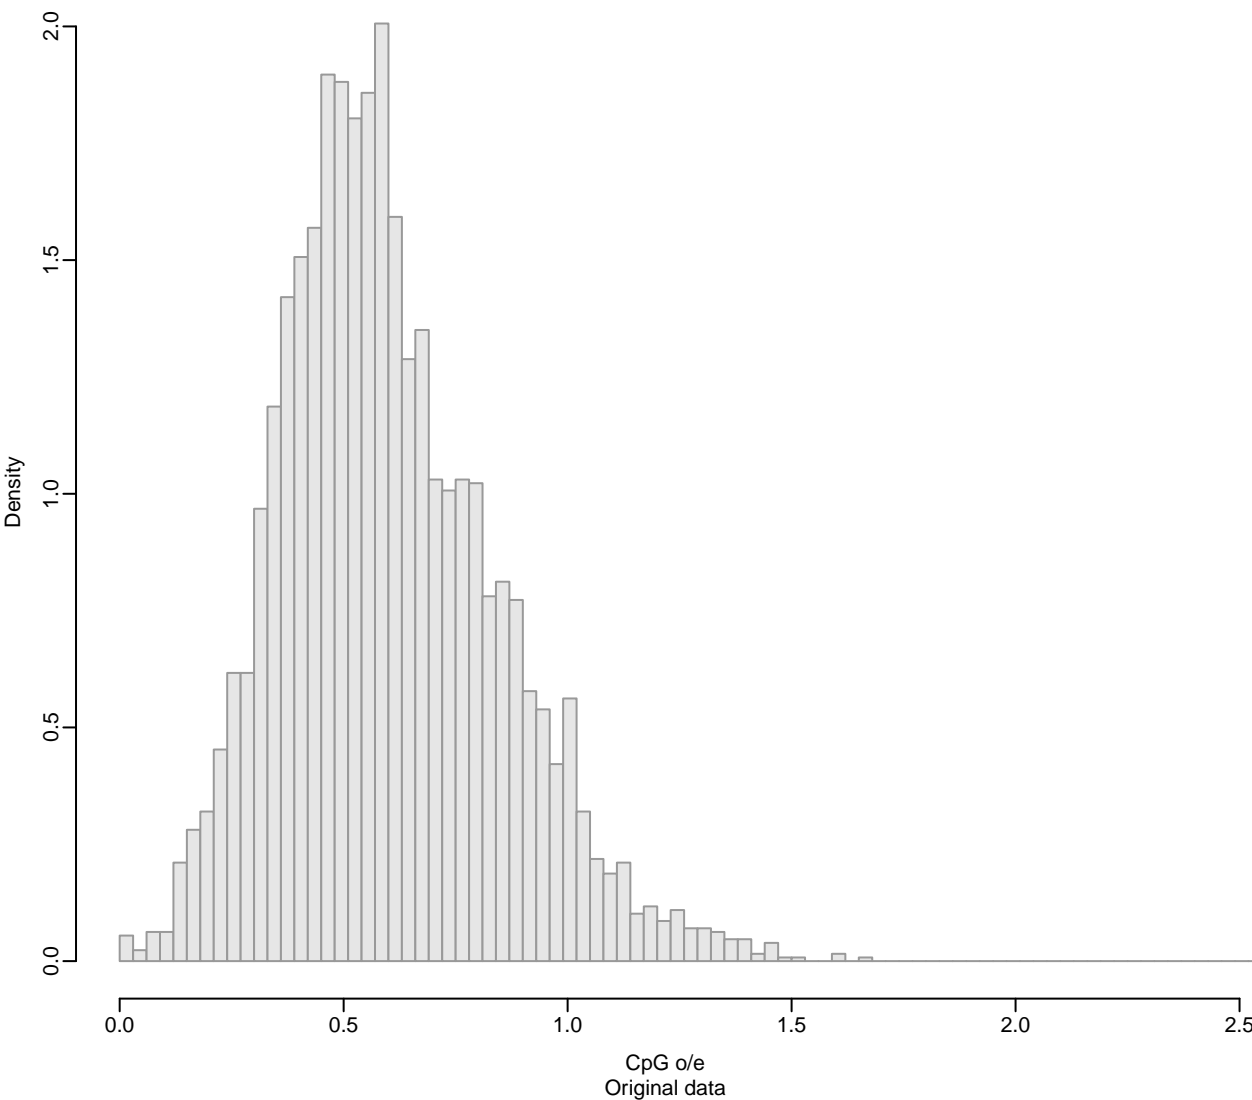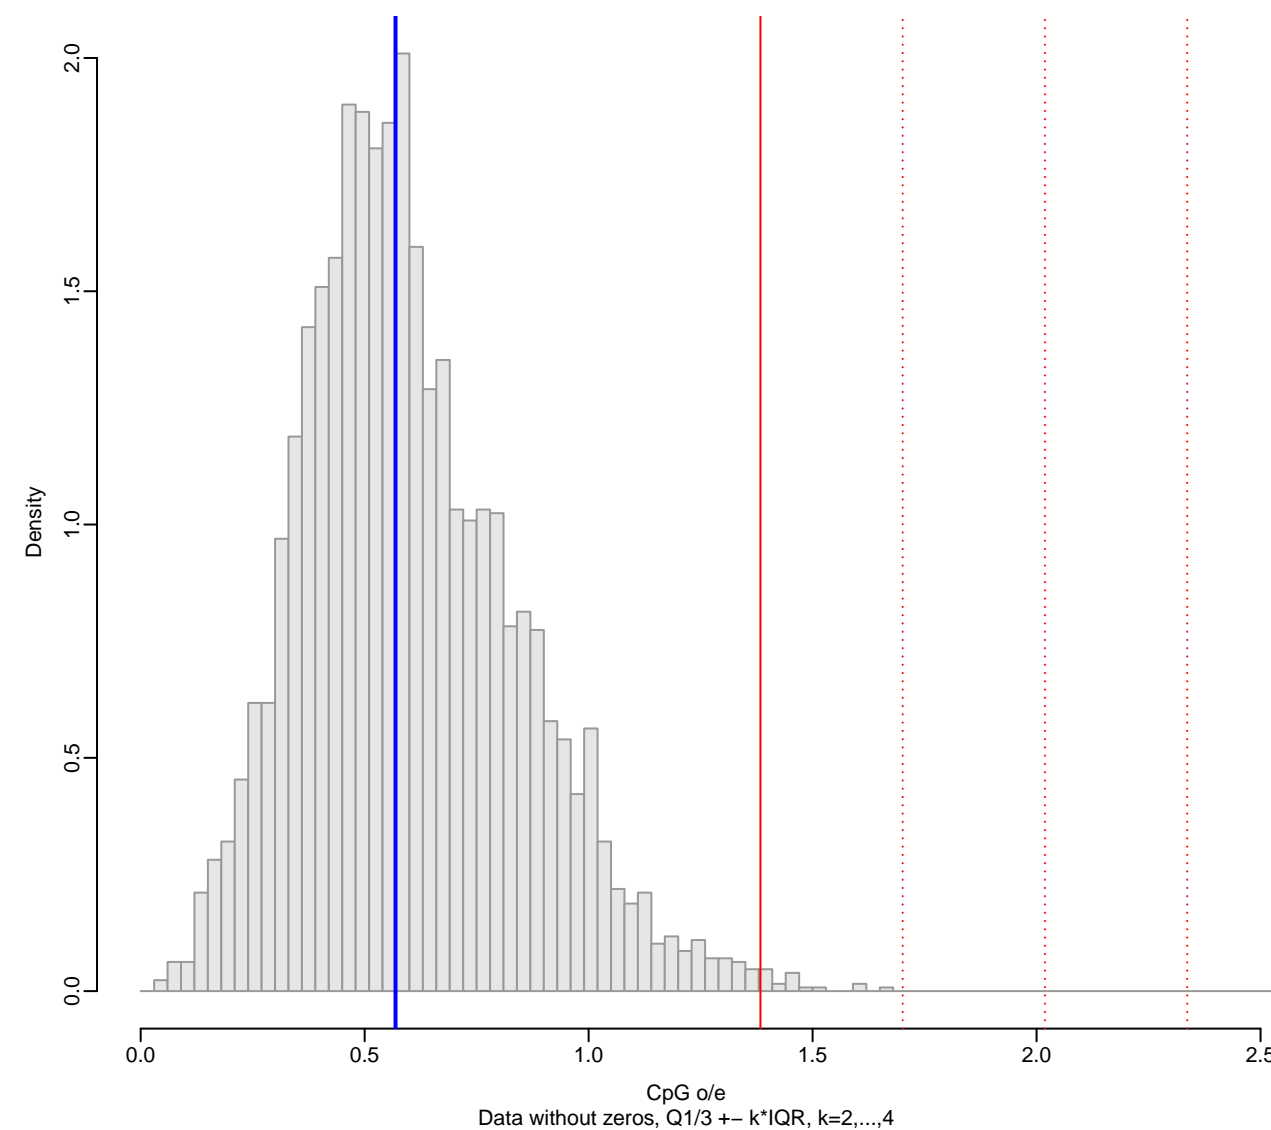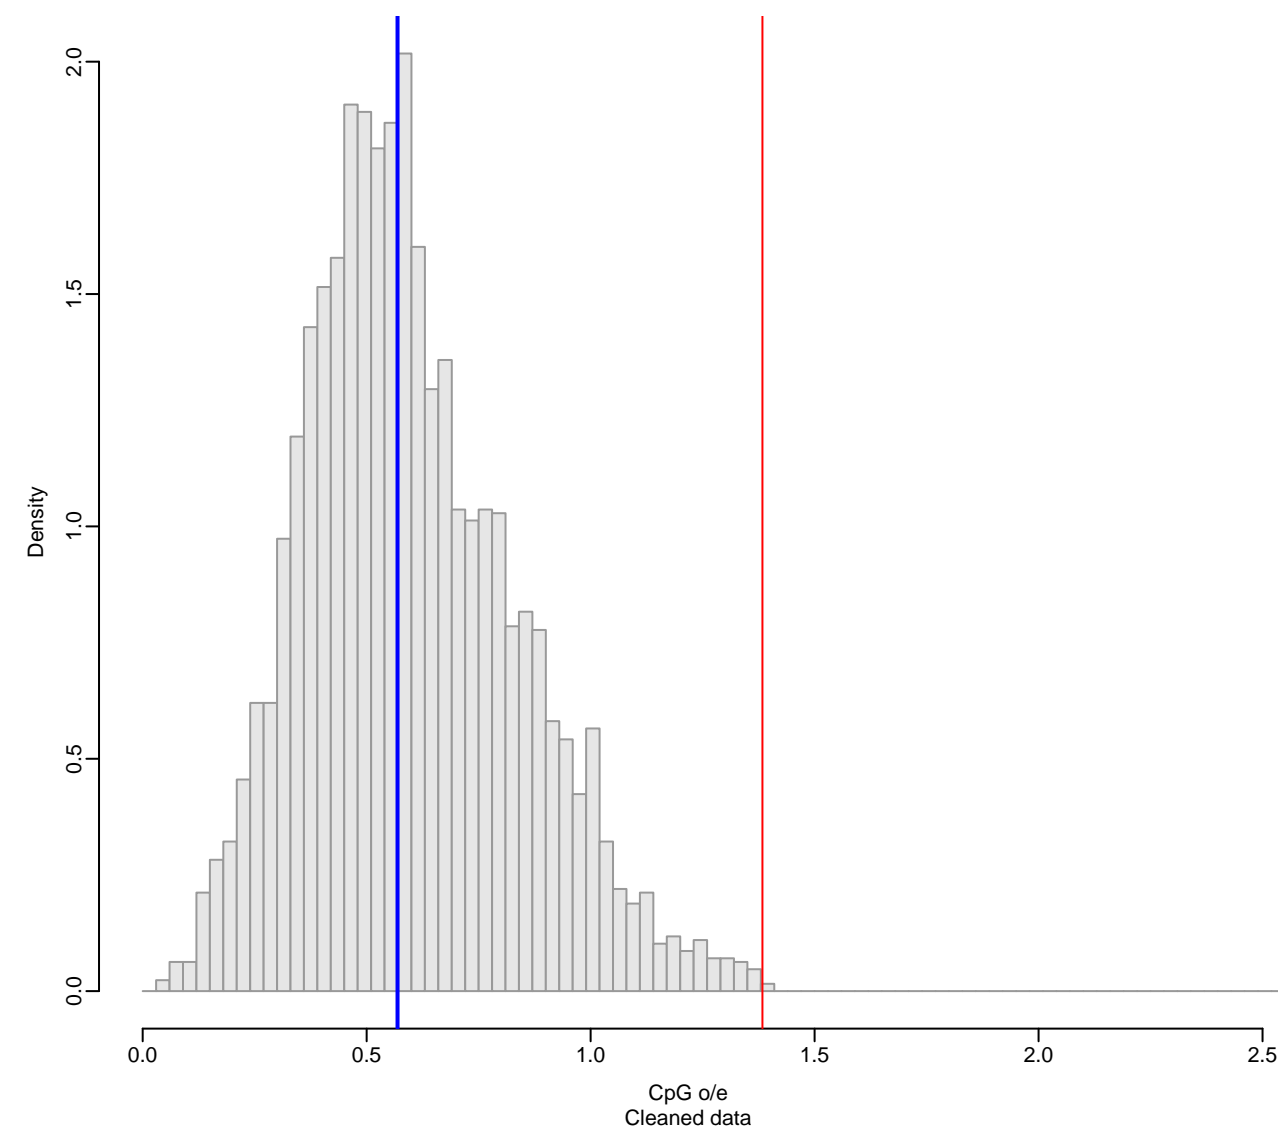

Ceratopteris\_richardii

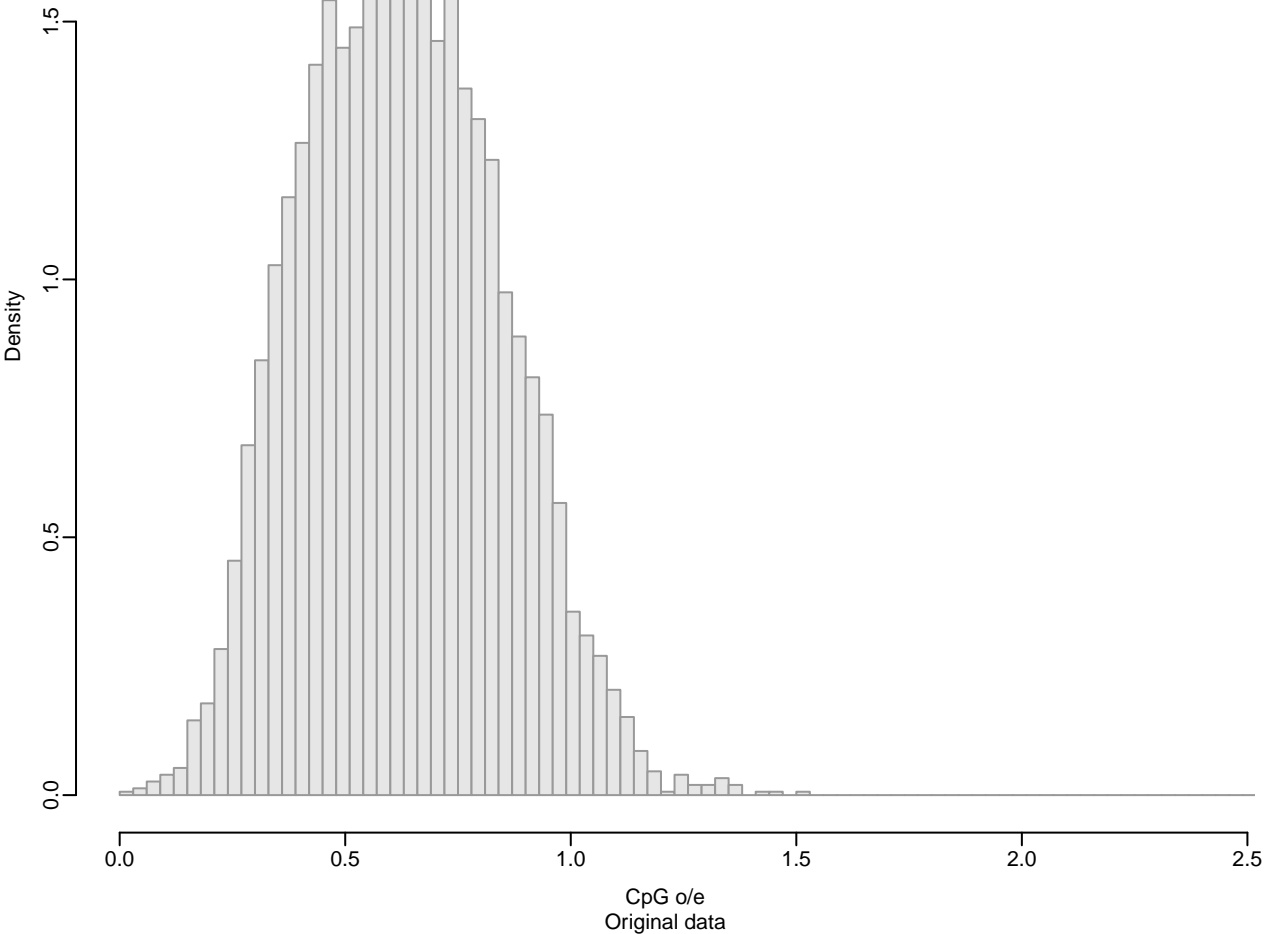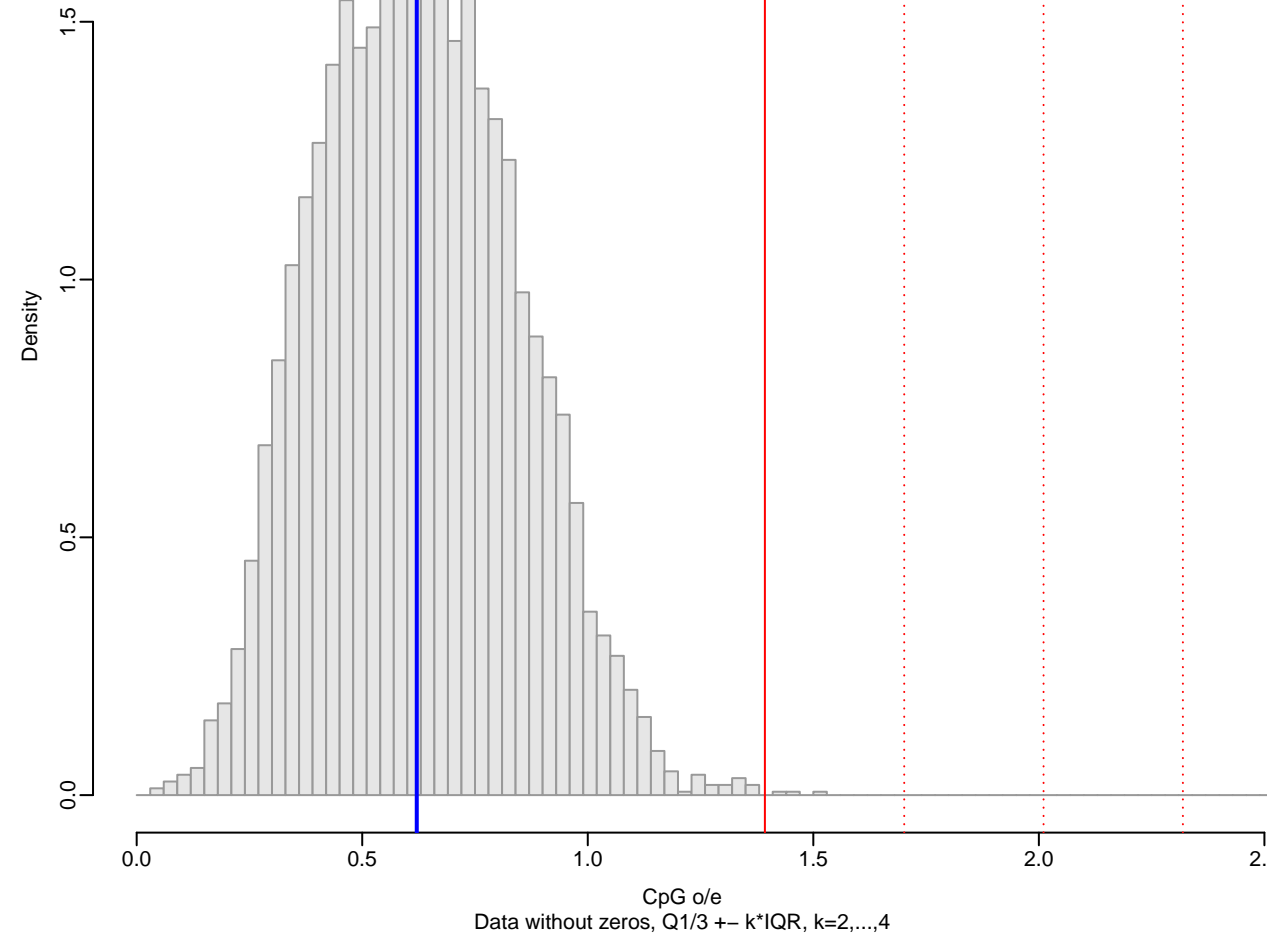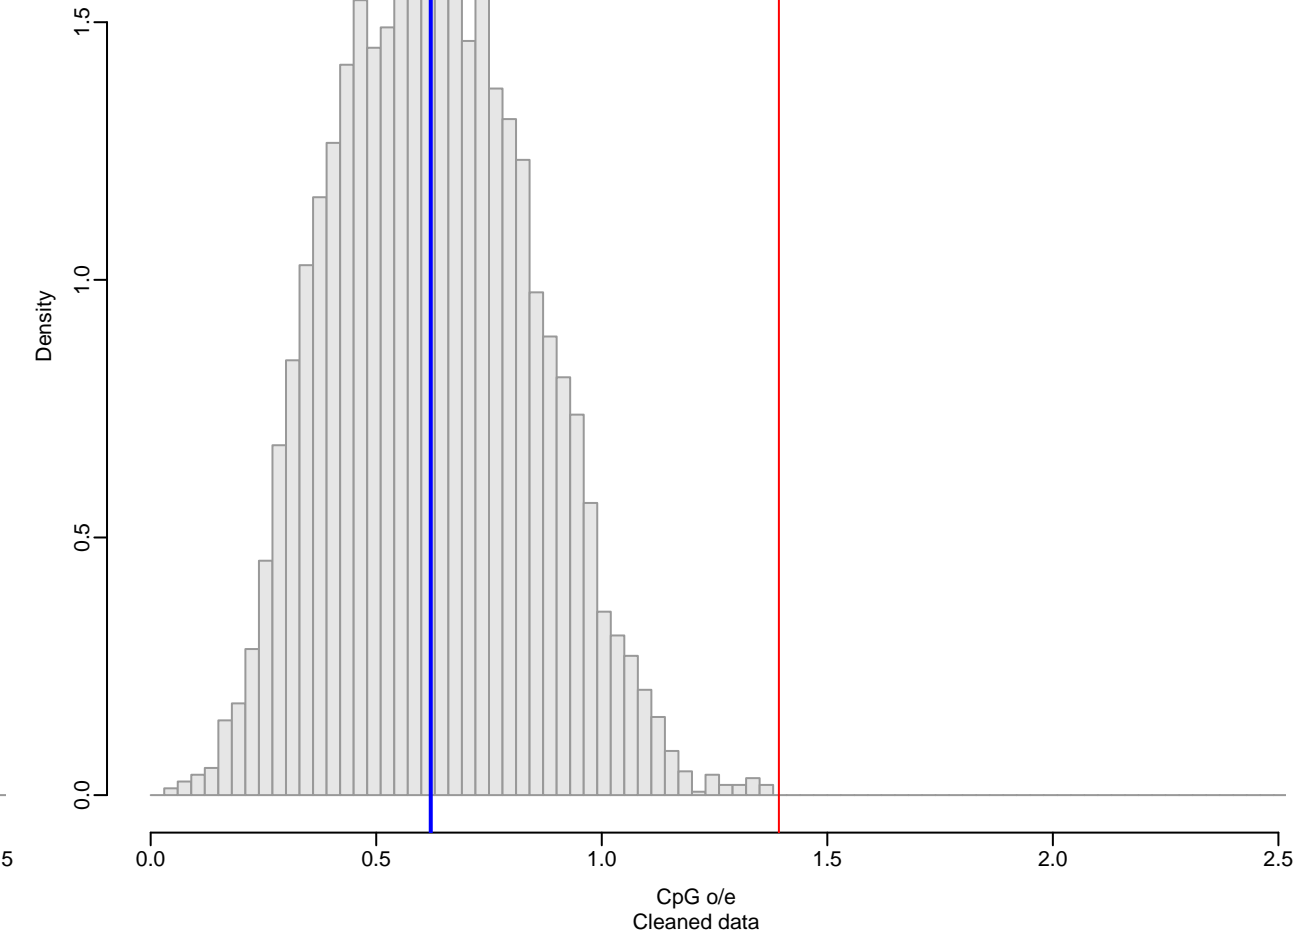

# Chaetomium\_cupreum

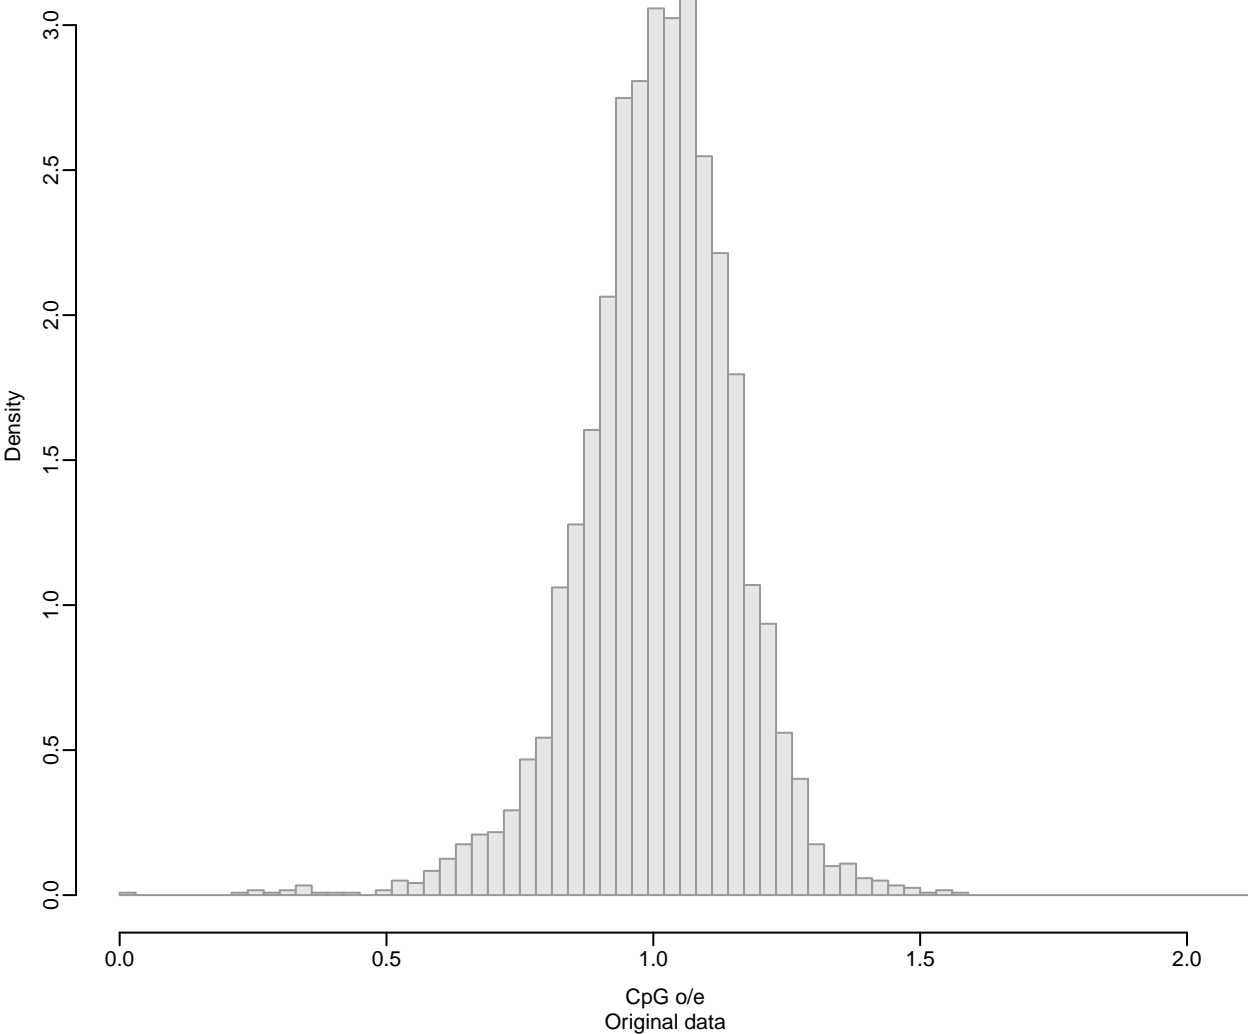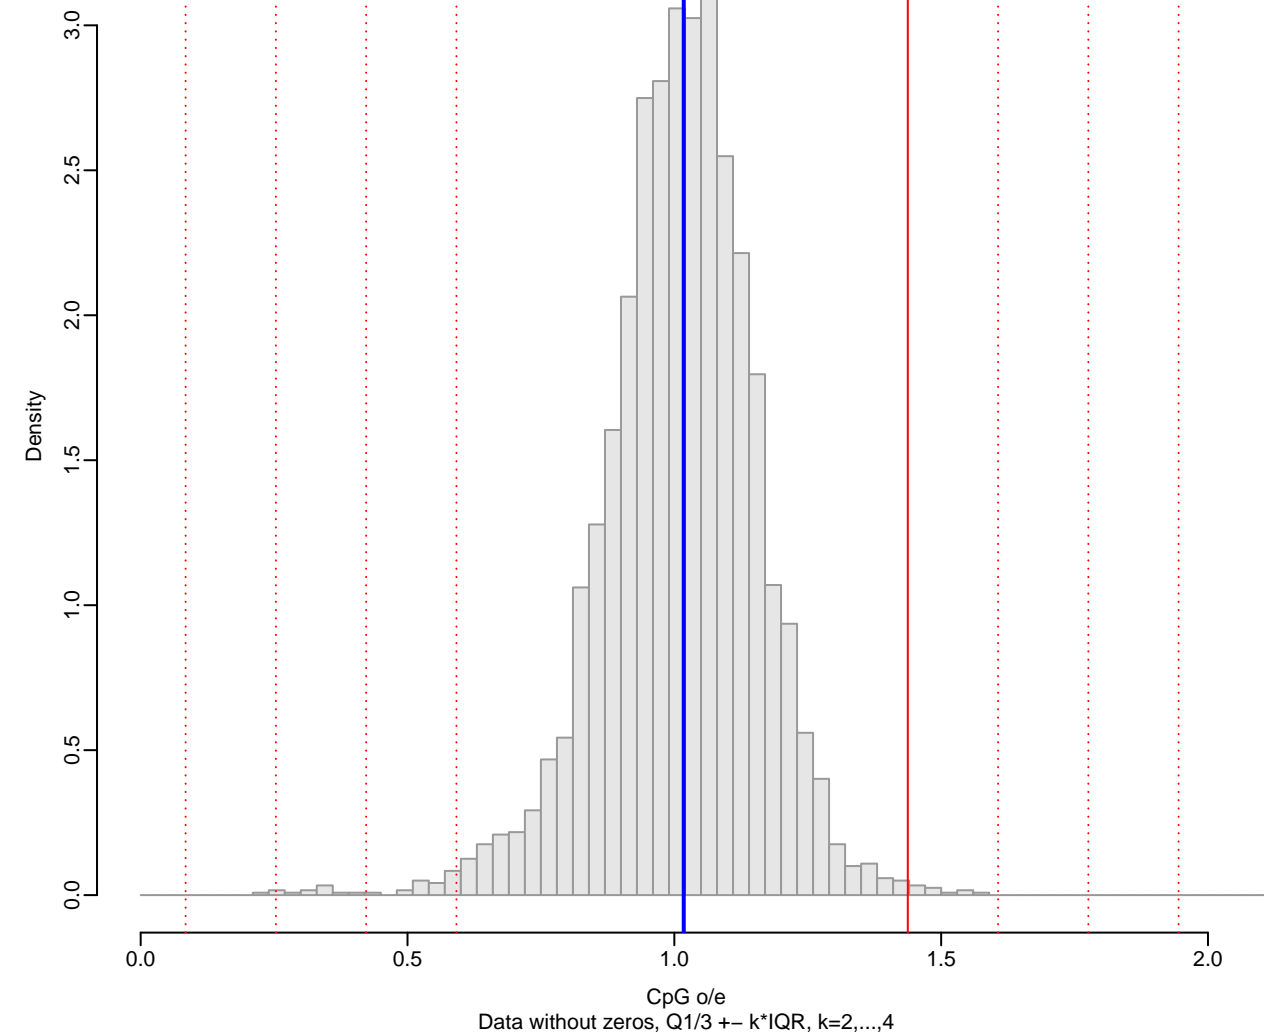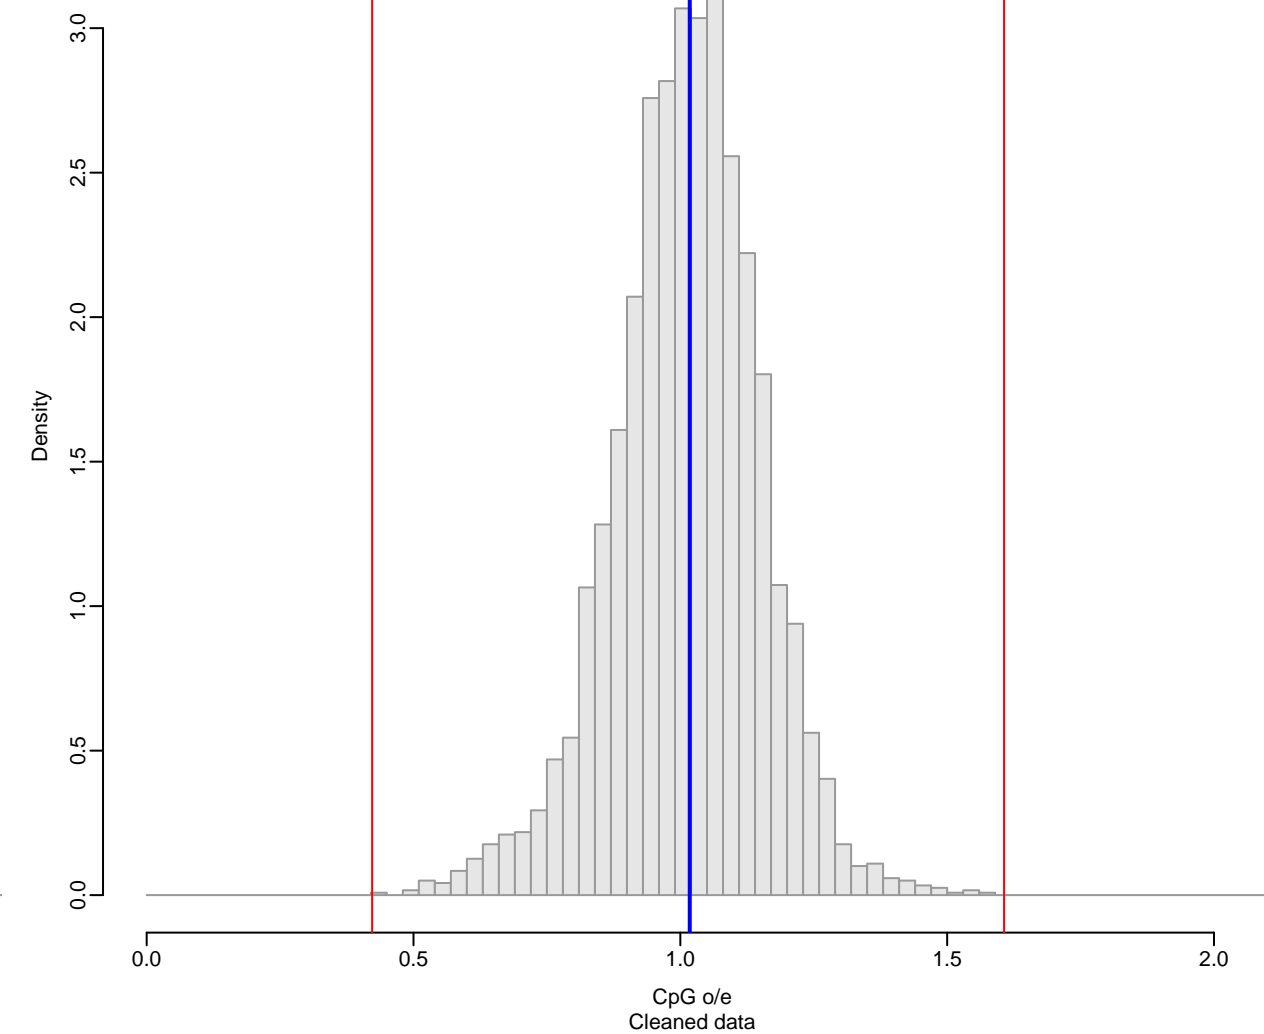

# Chironomus\_tentans

Density

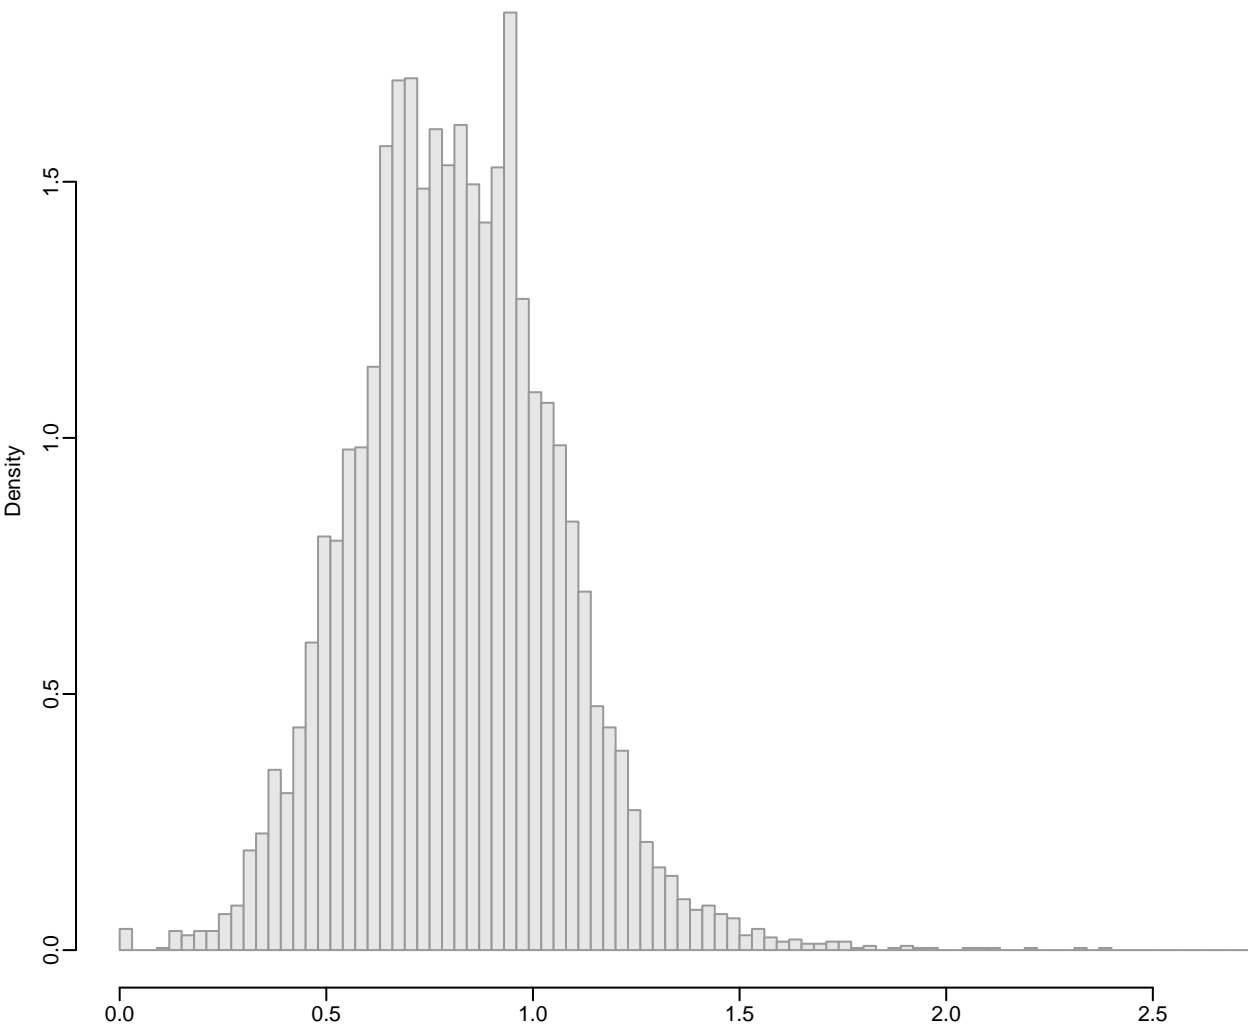

CpG o/e  
Original data

Density

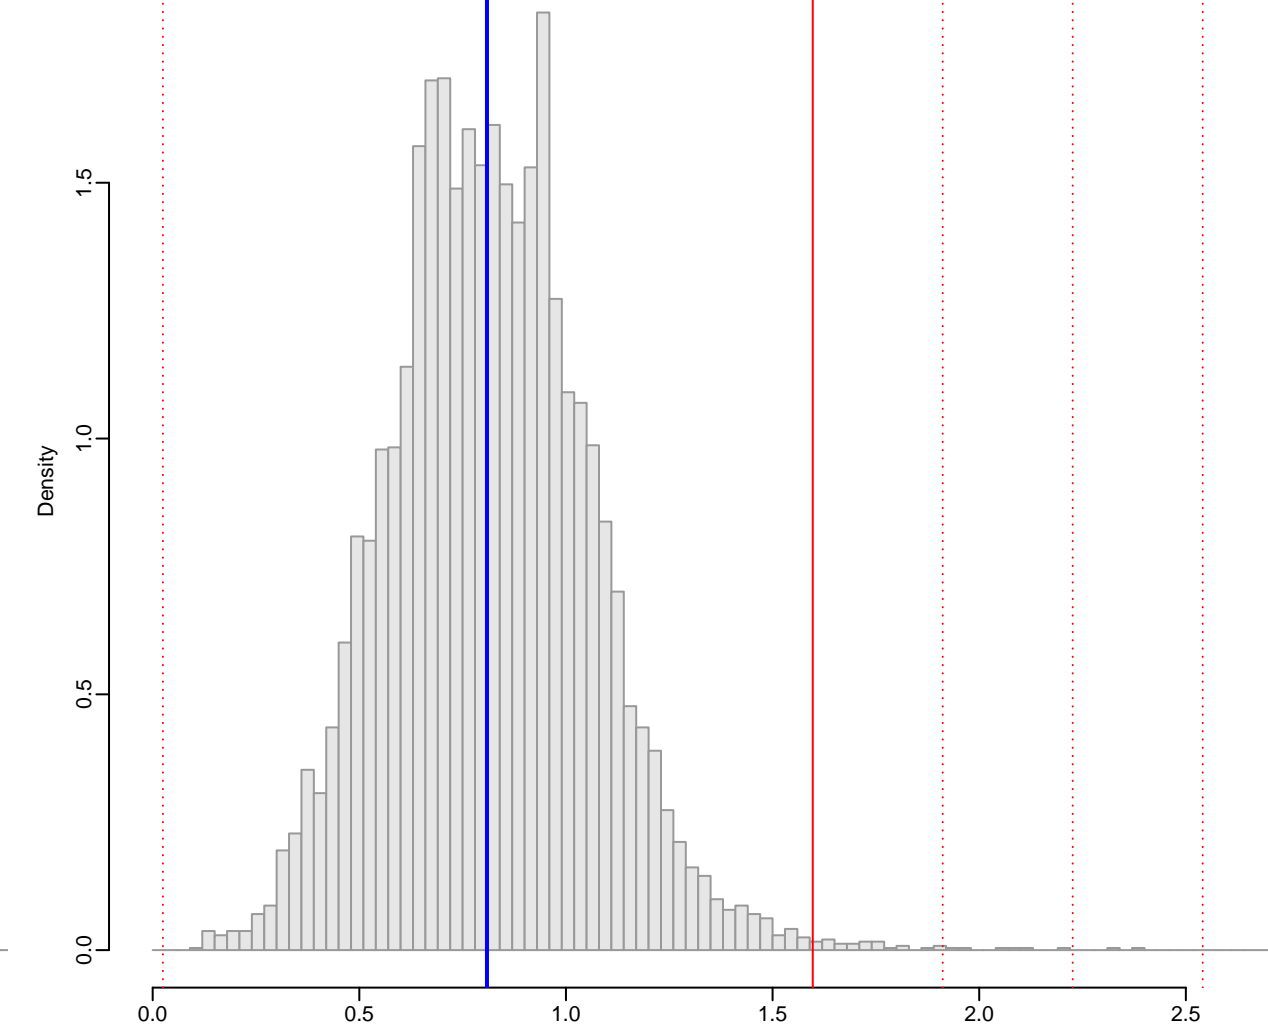

CpG o/e  
Data without zeros,  $Q1/3 \pm k \cdot IQR$ ,  $k=2, \dots, 4$

Density

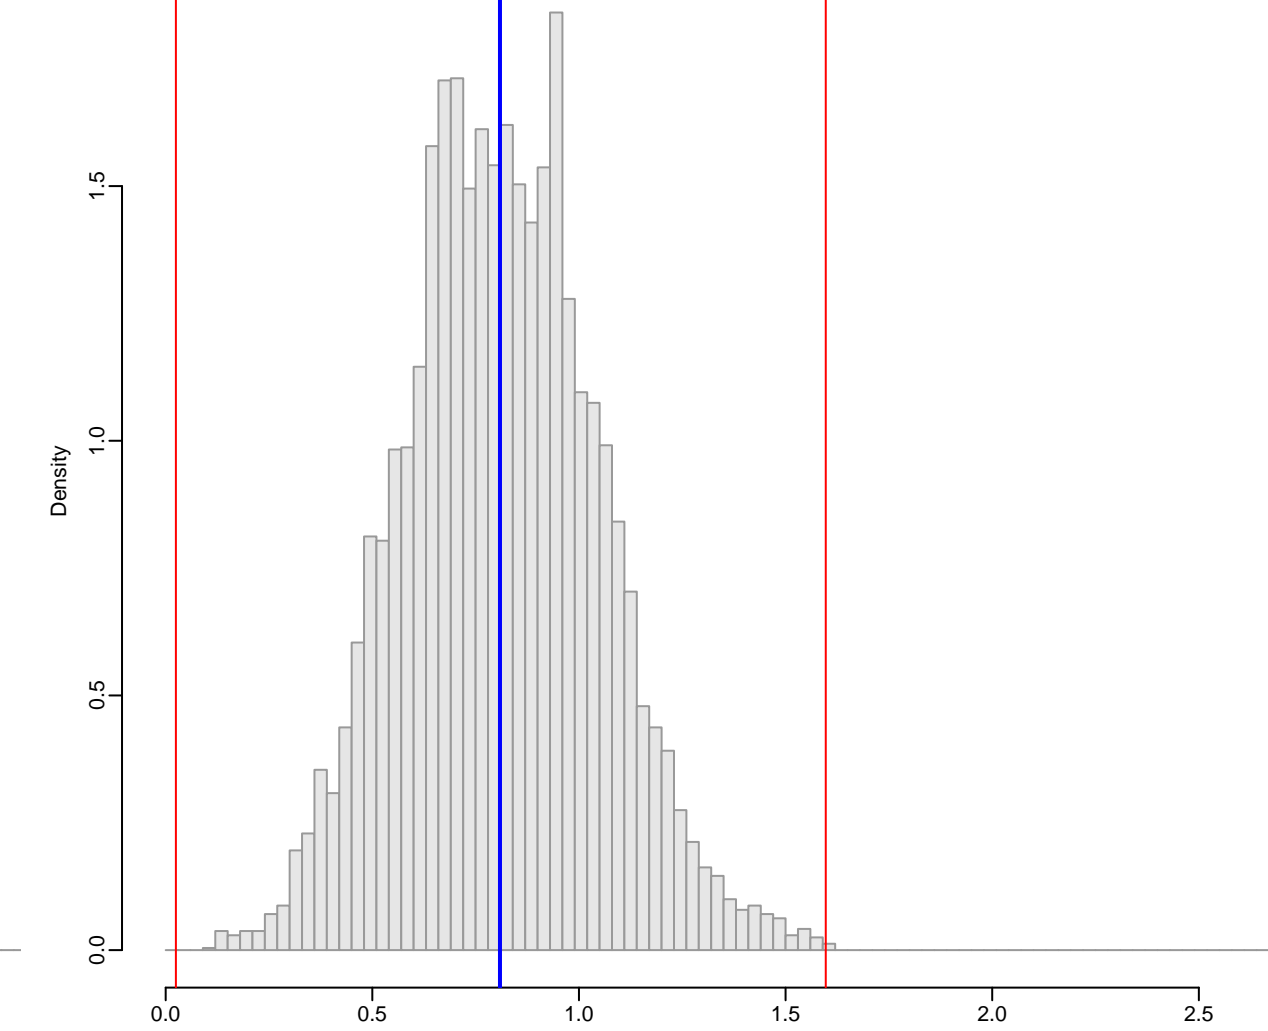

CpG o/e  
Cleaned data



*Chlamydomonas\_incerta*

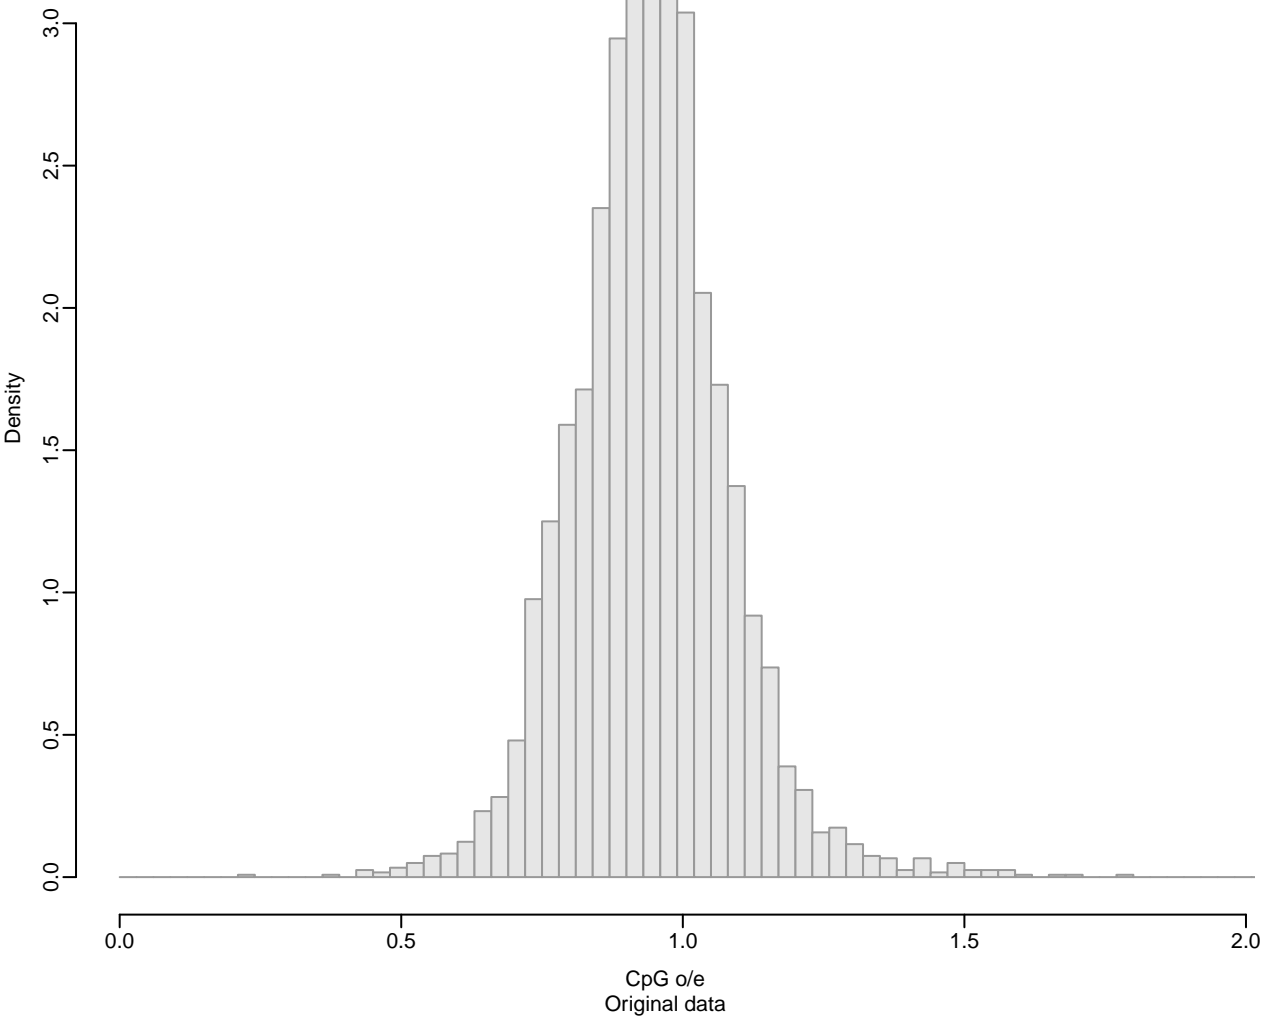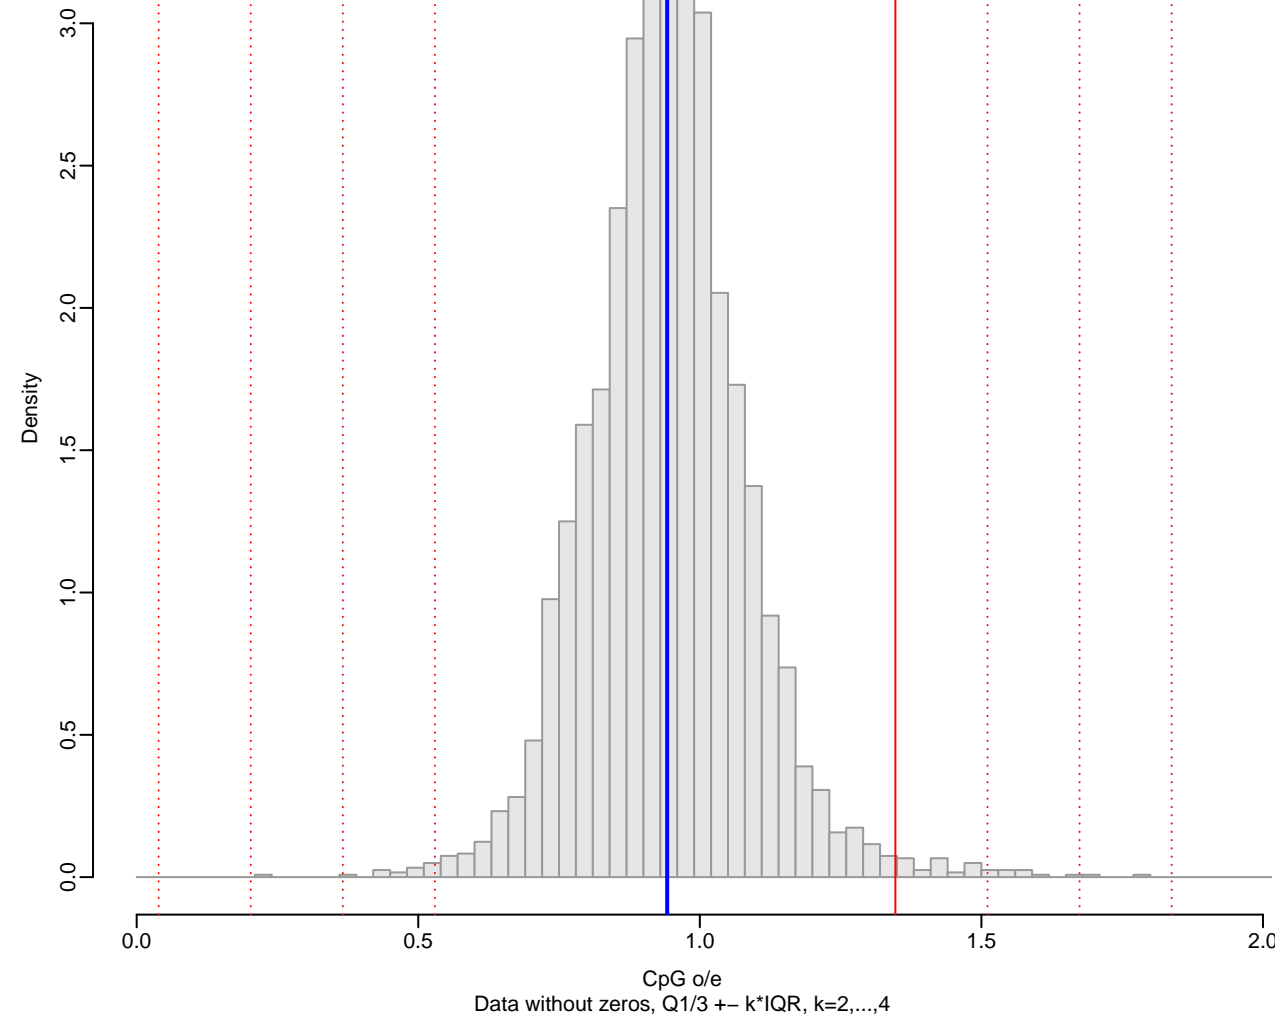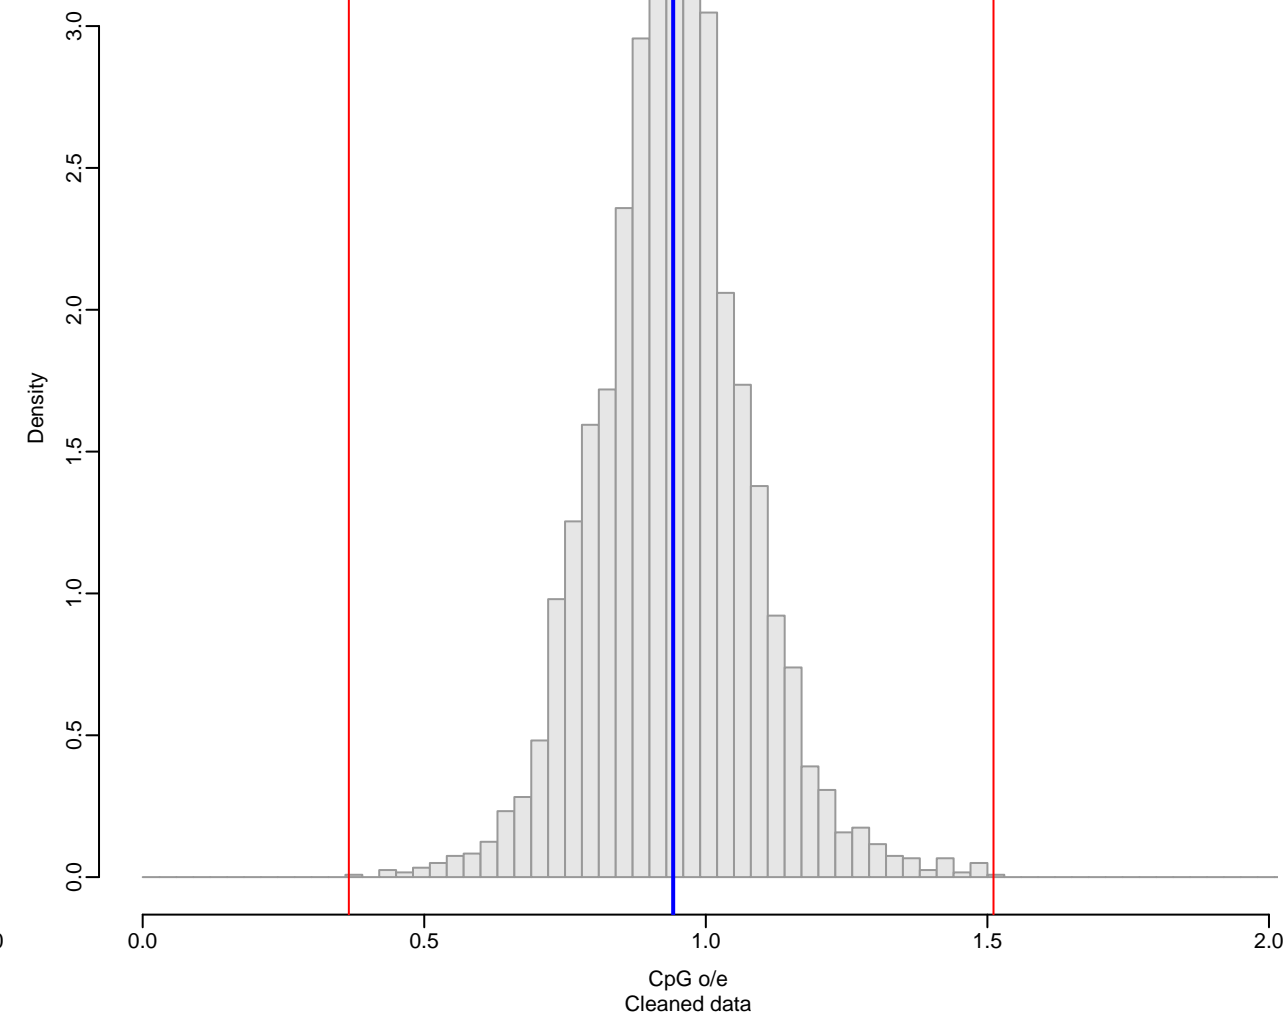

Chlamydomonas\_reinhardtii

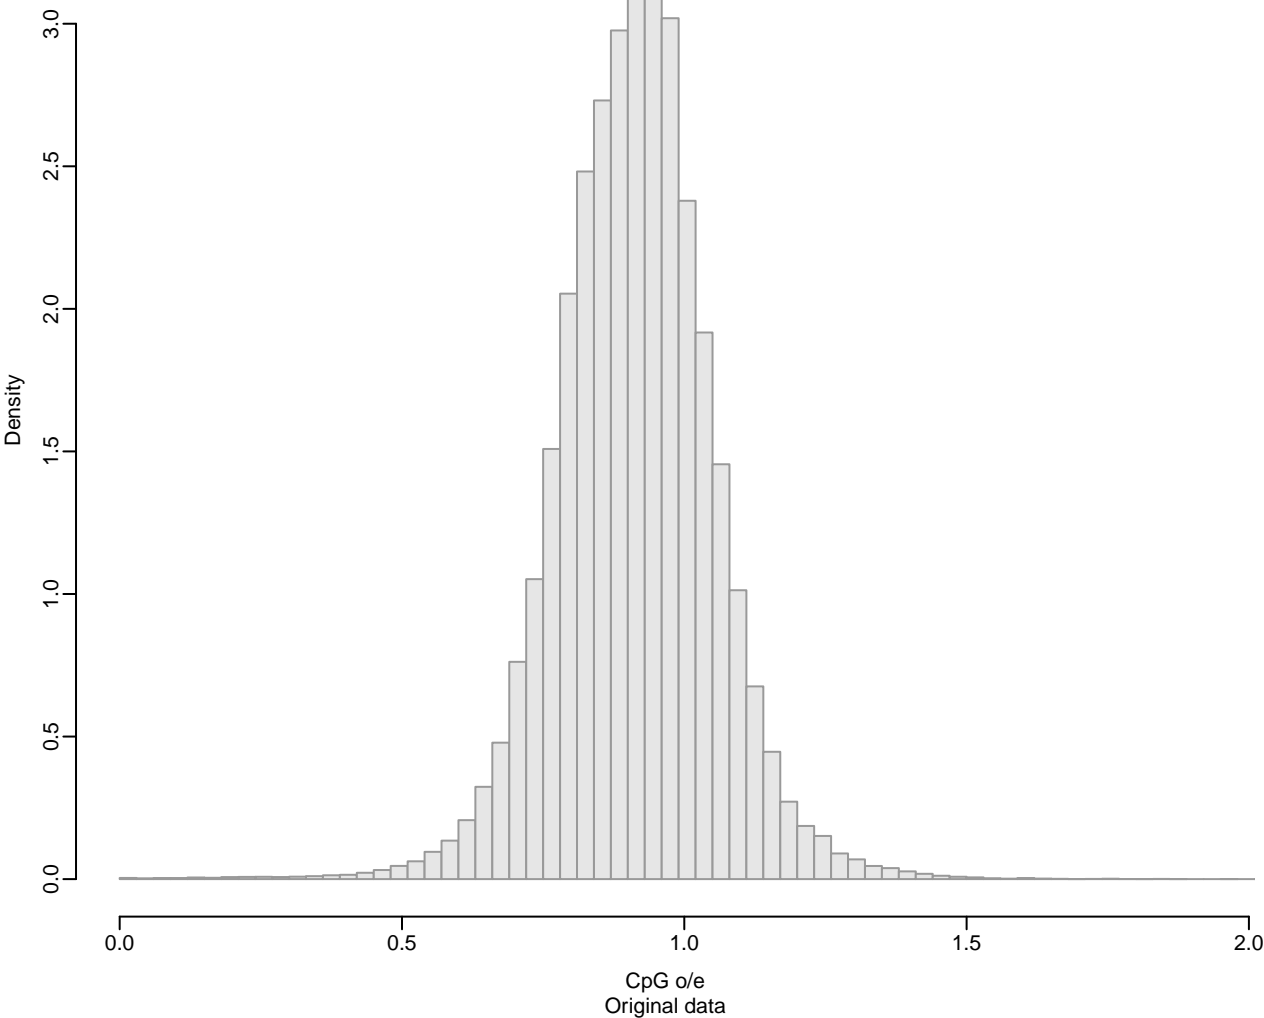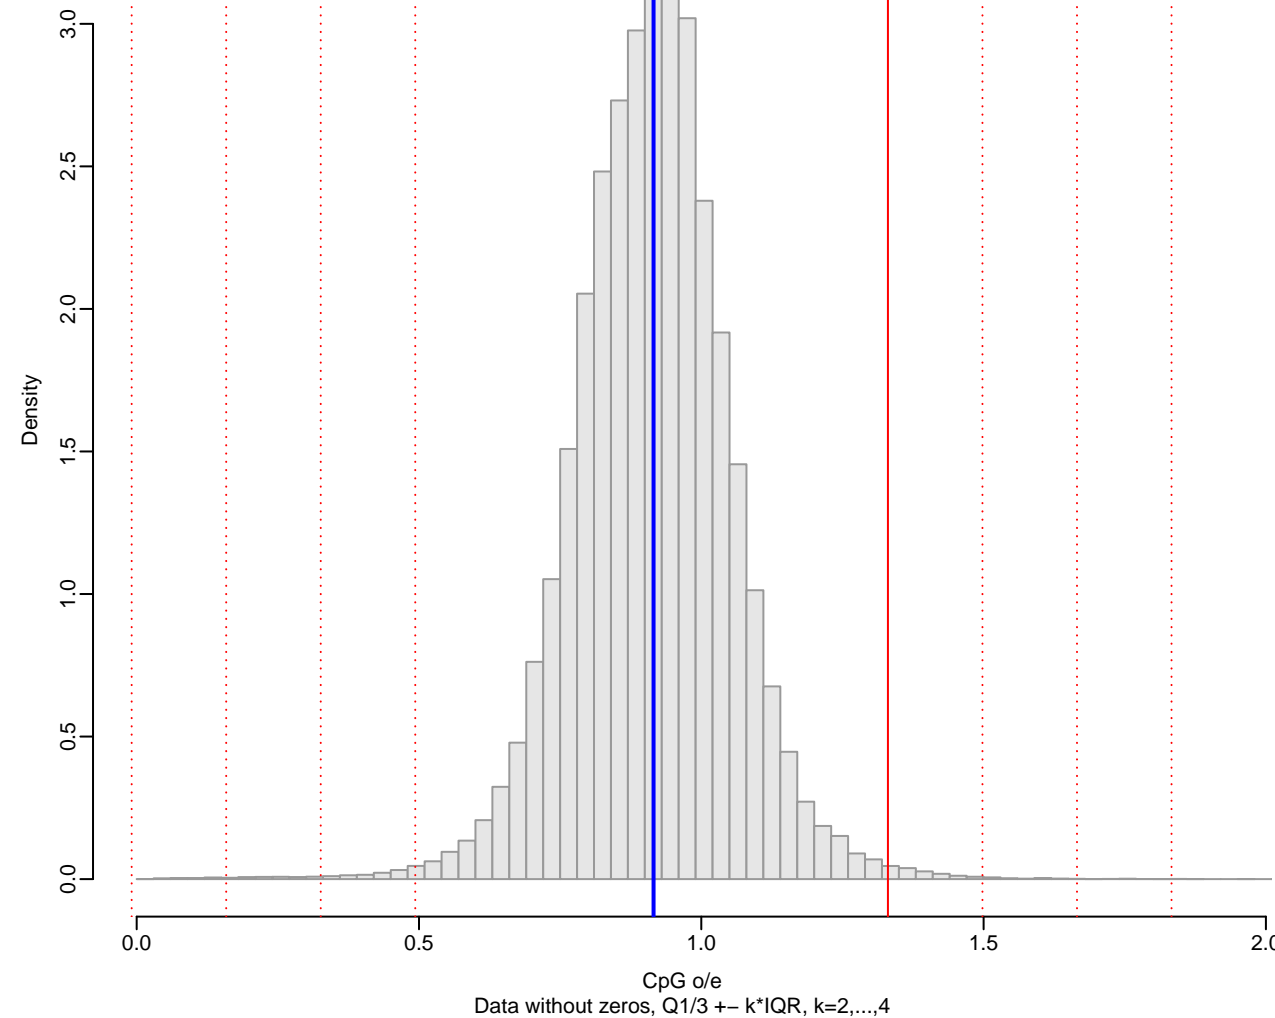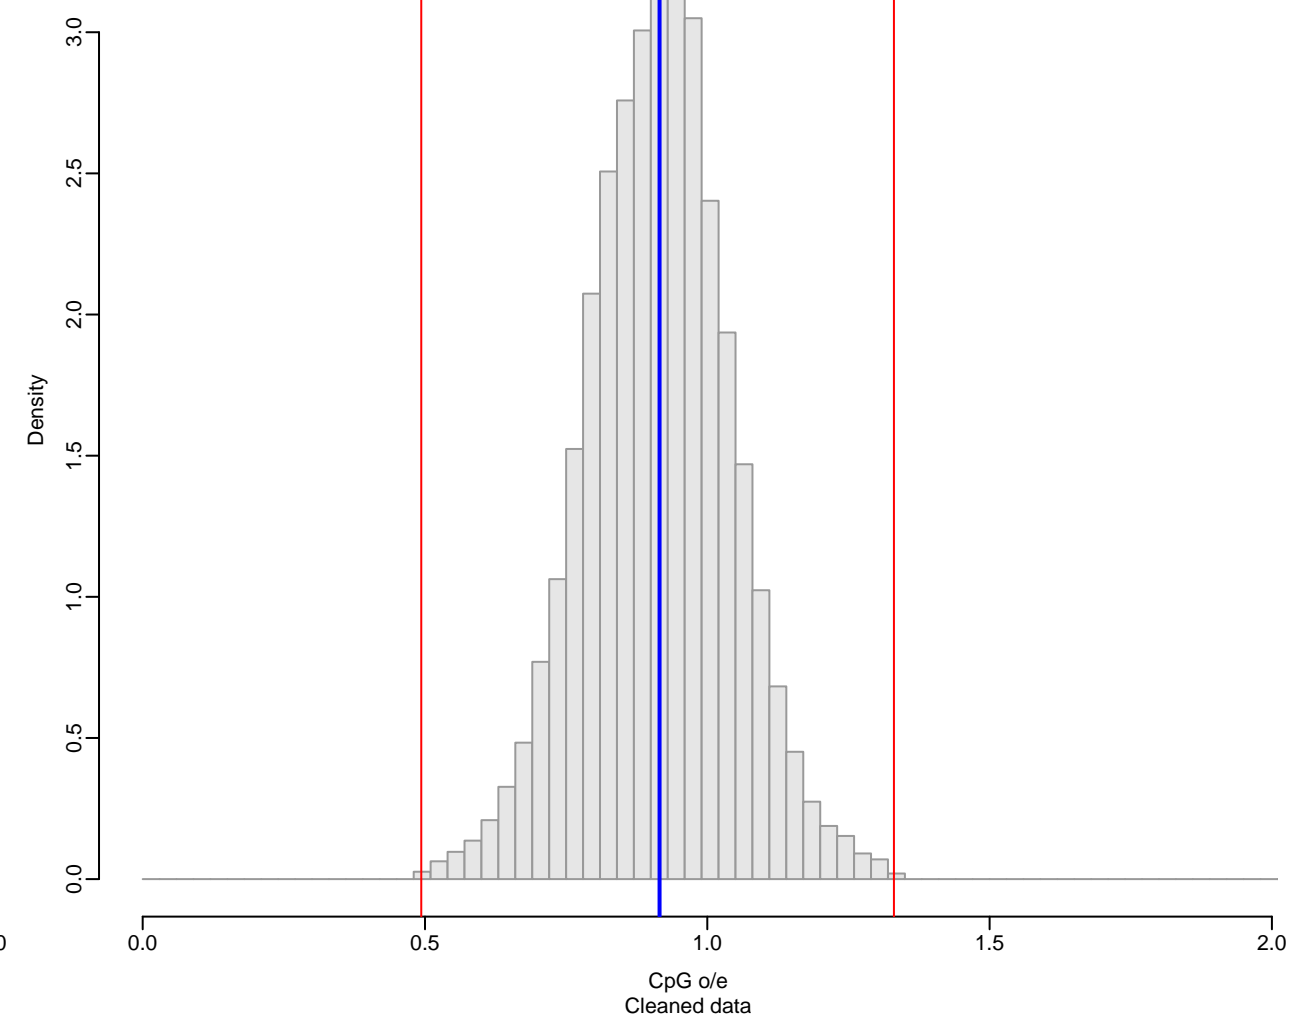

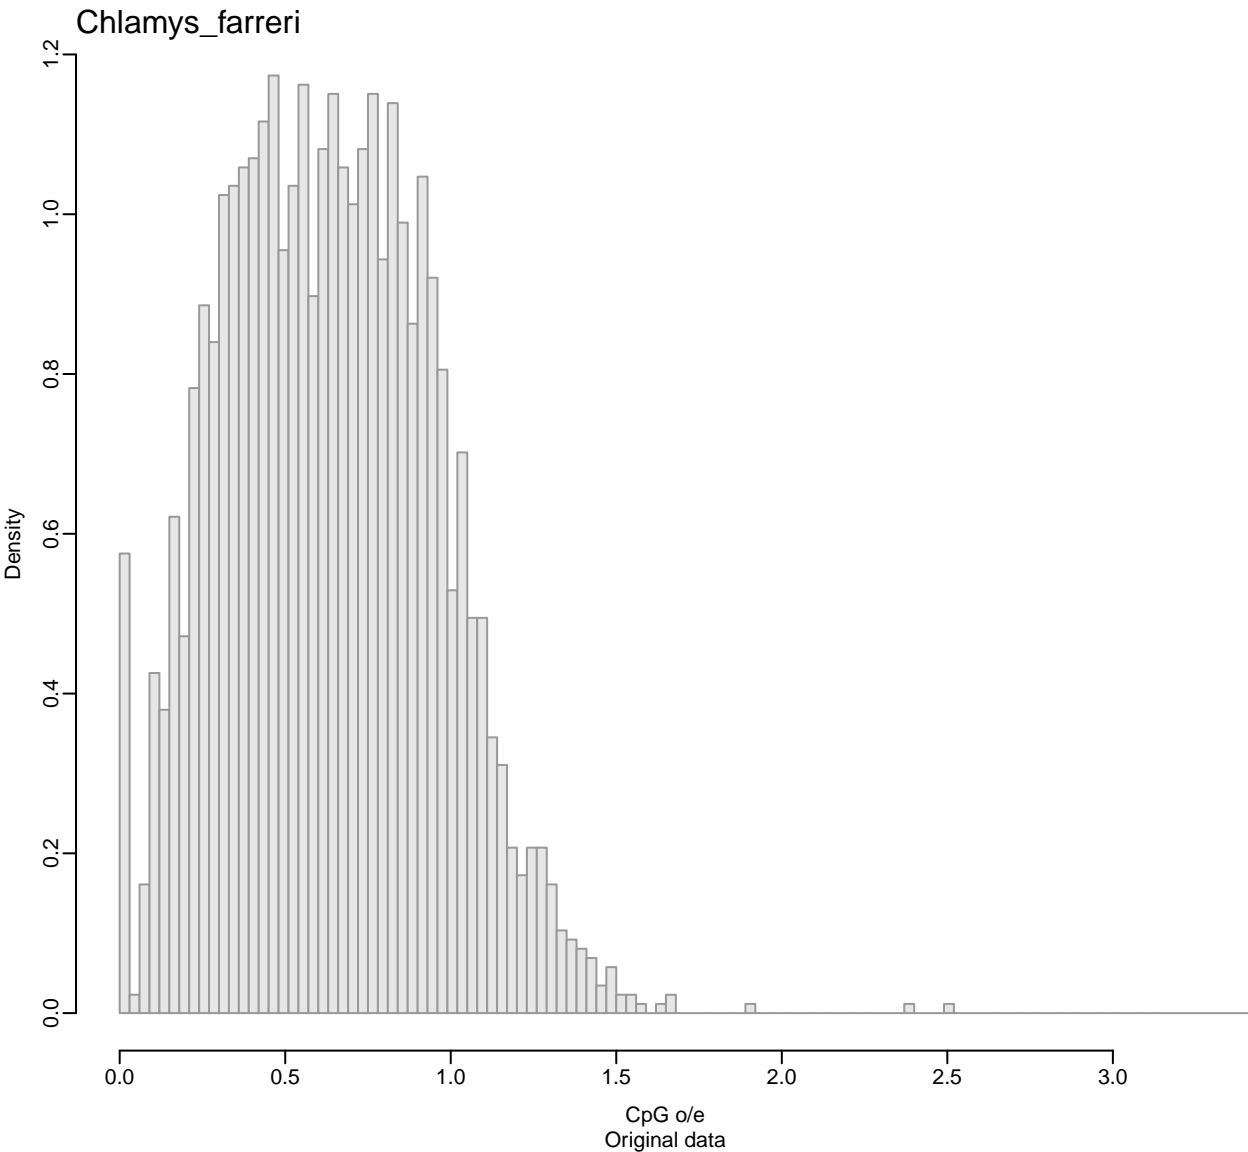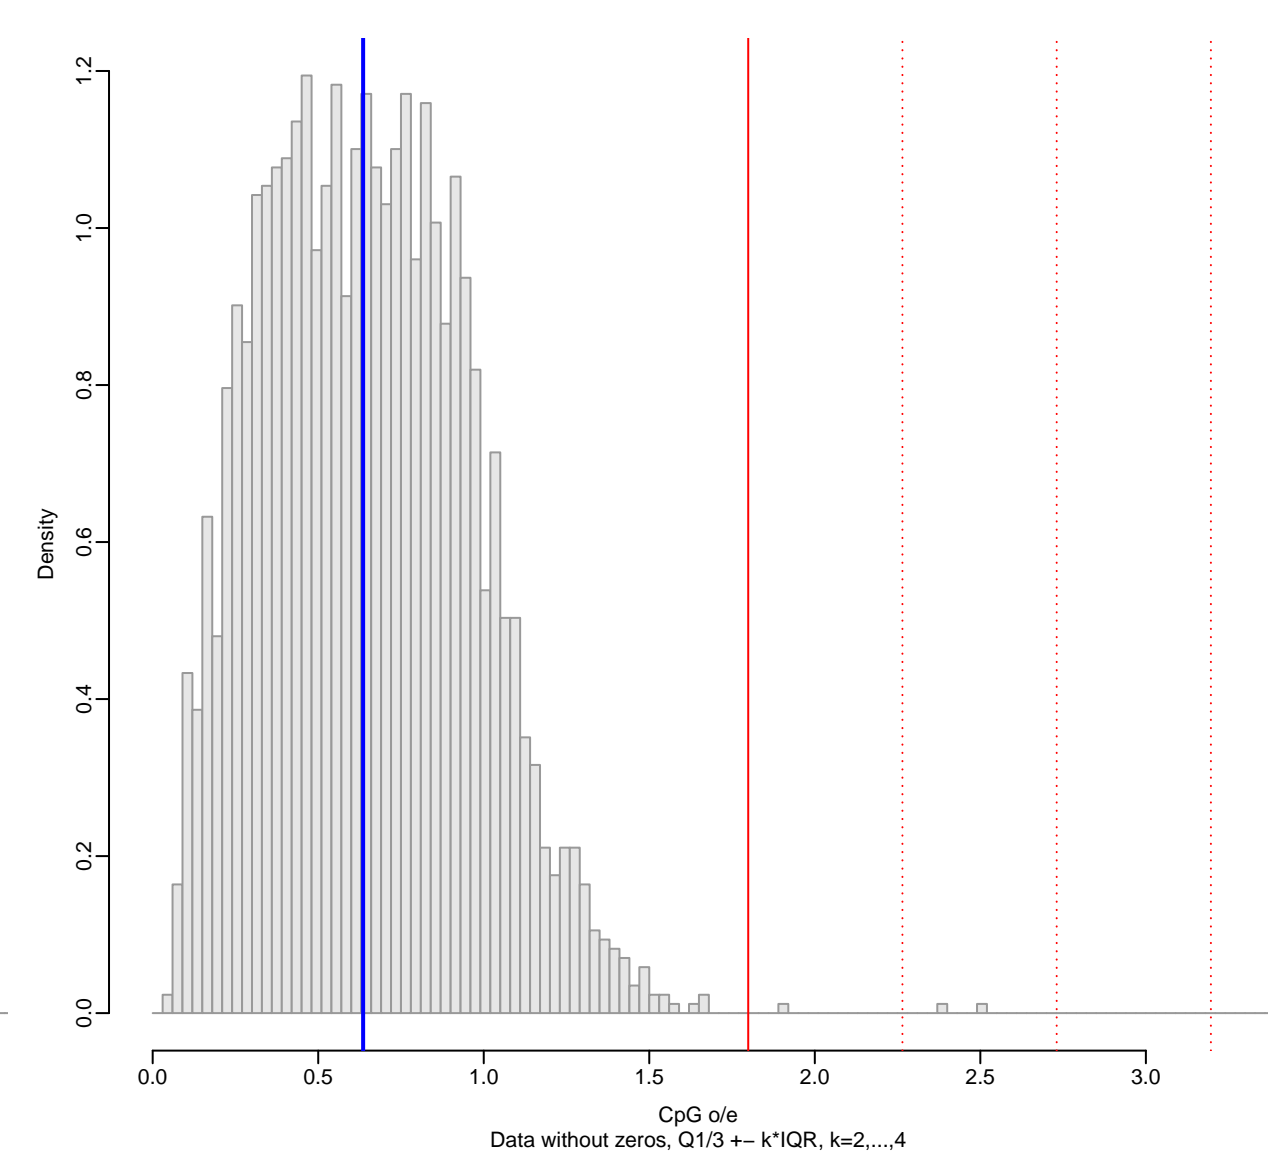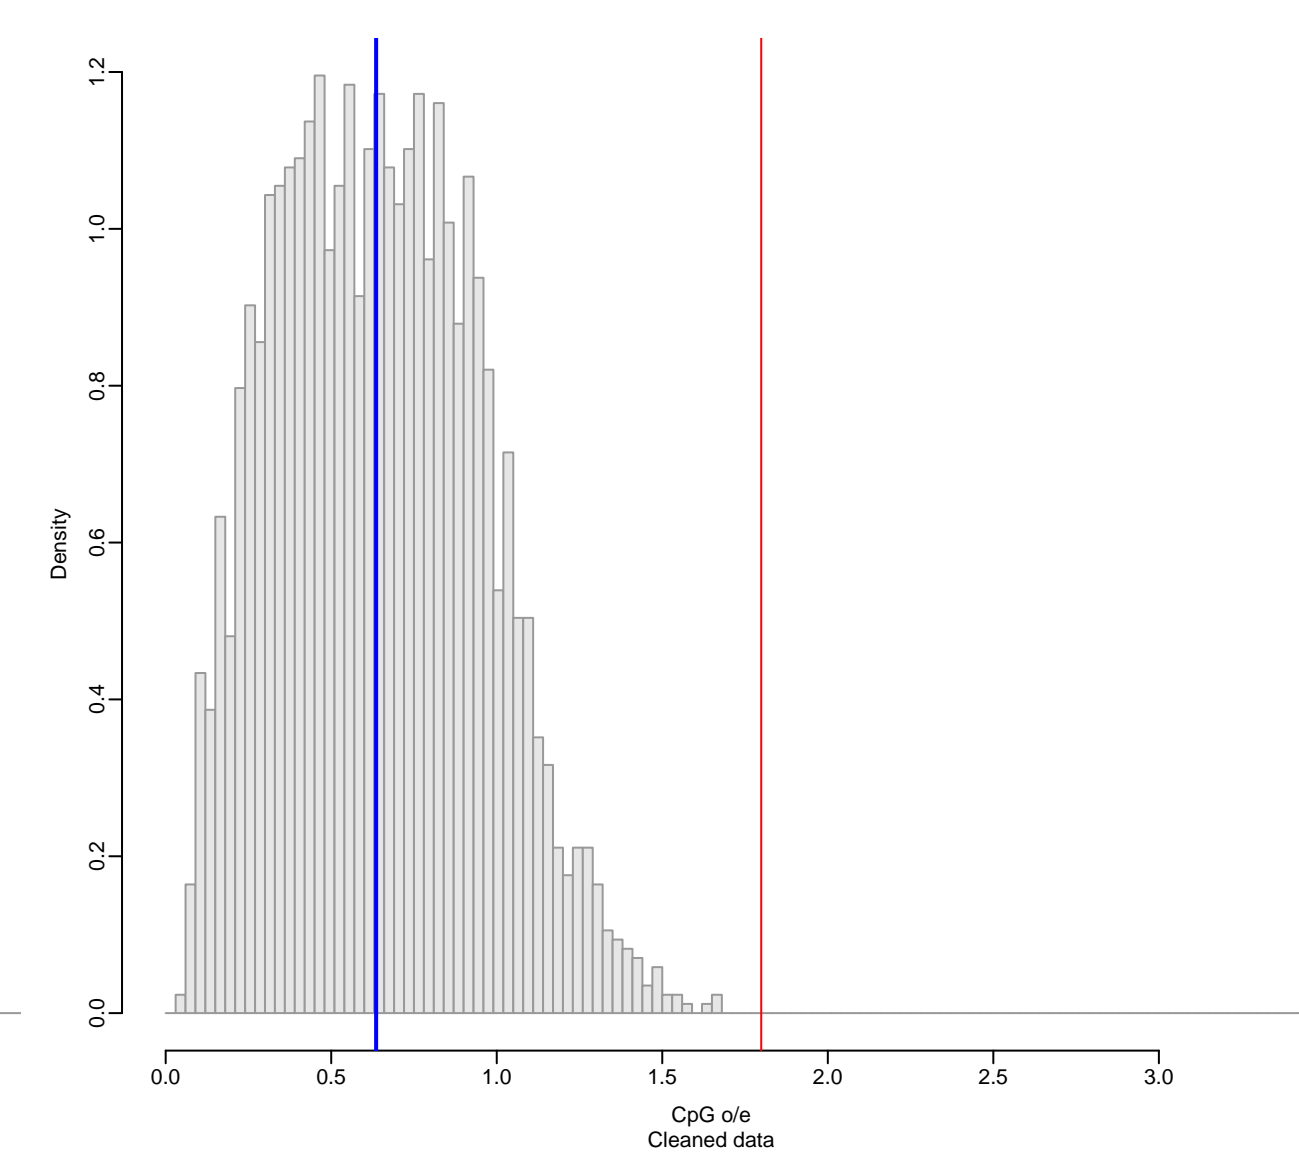

# Chlorocebus\_sabaeus

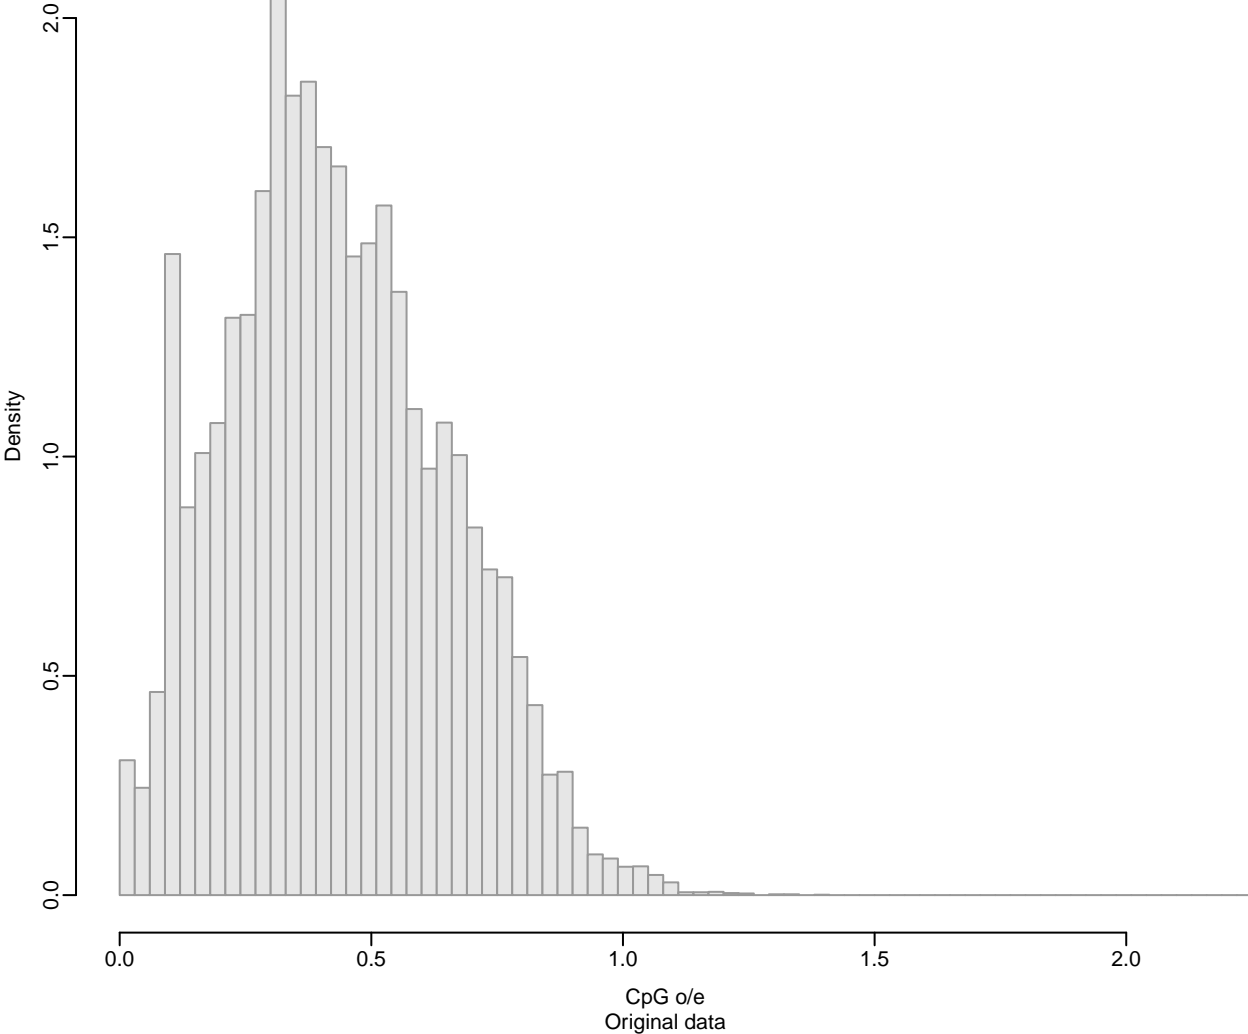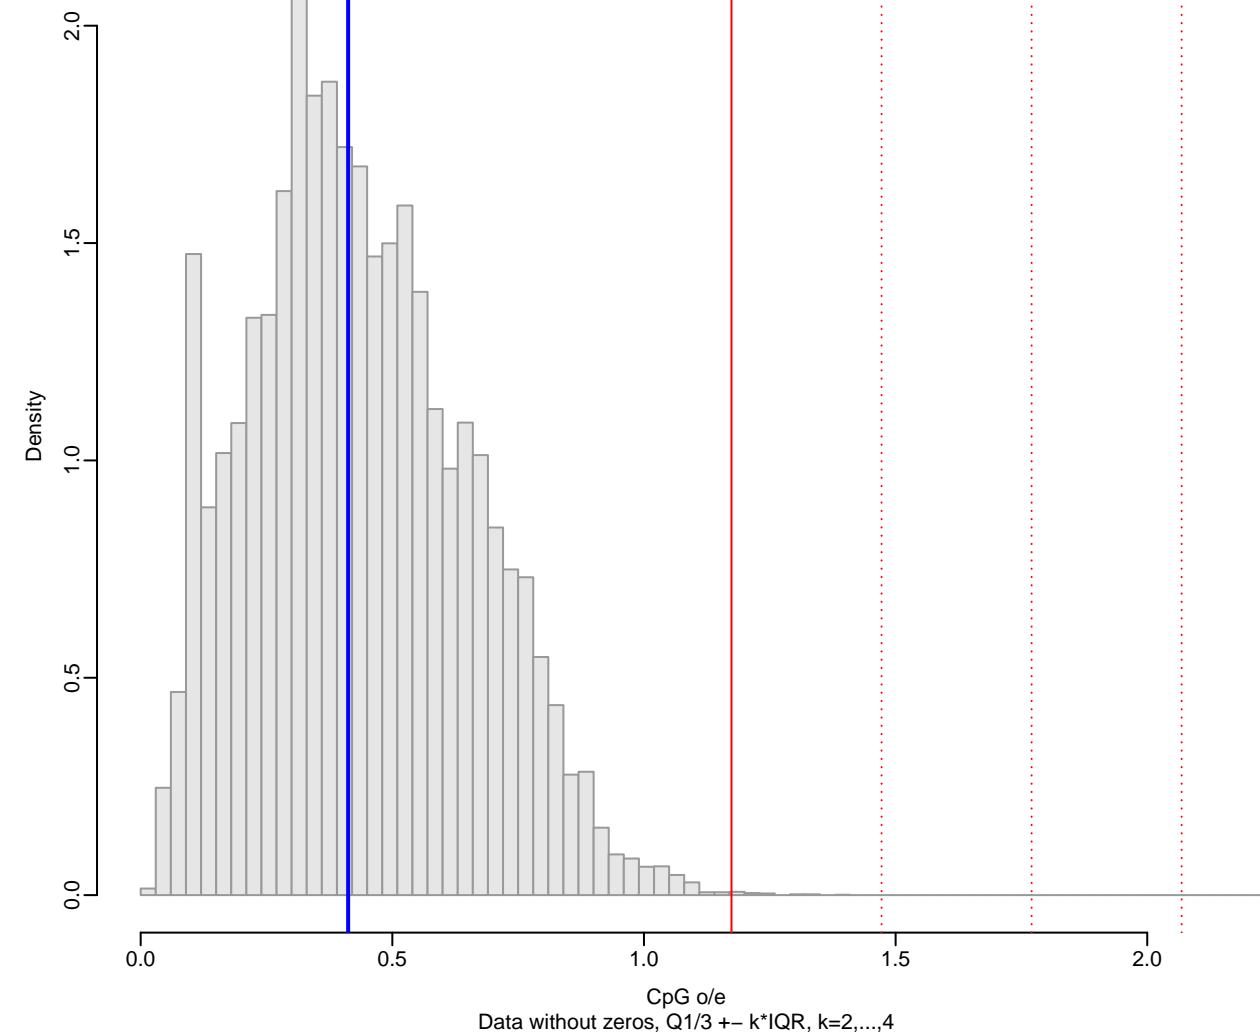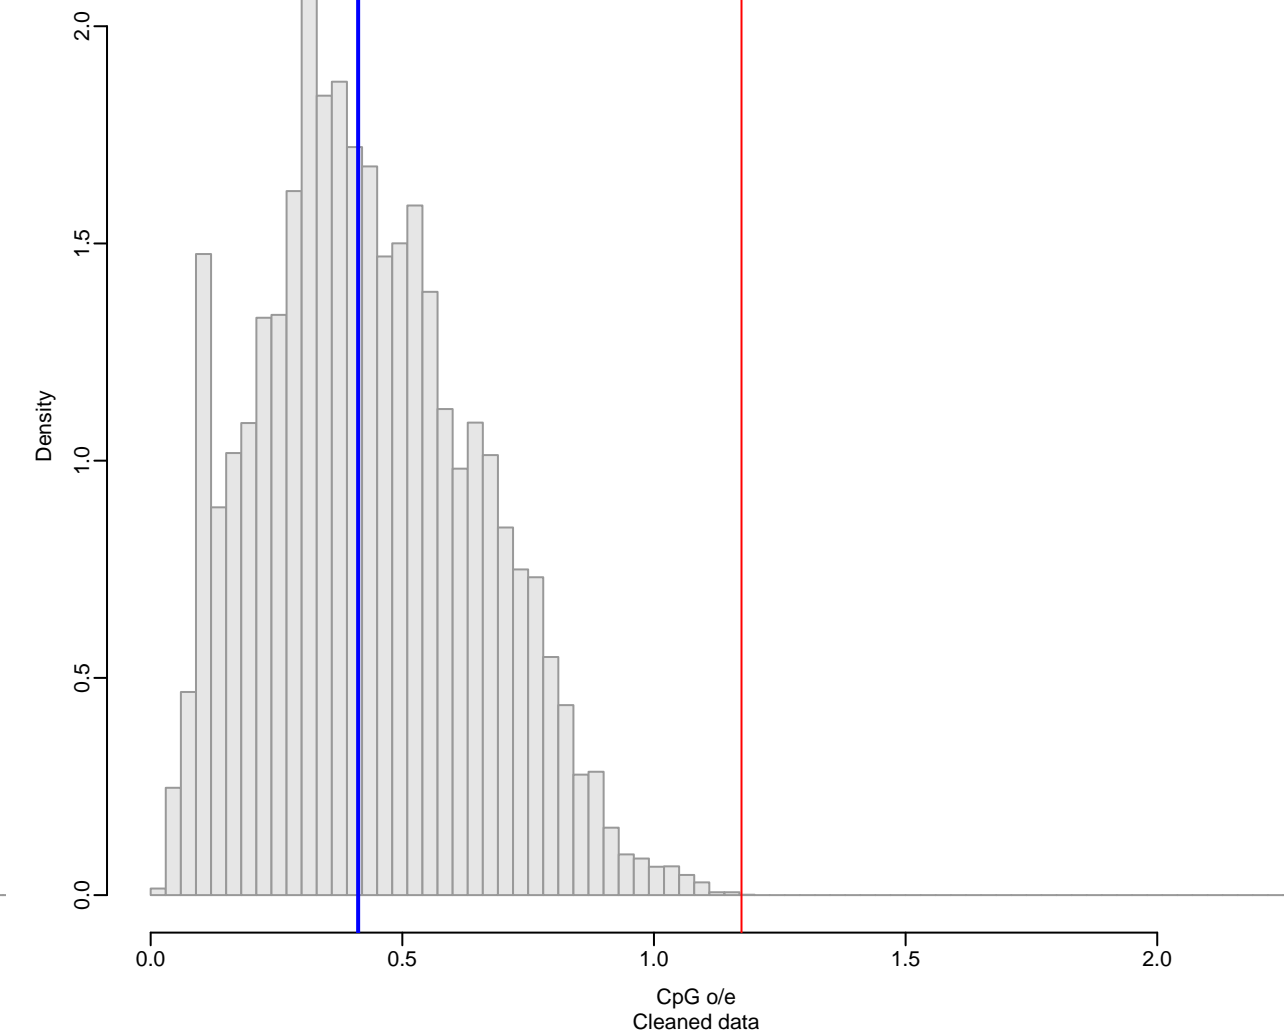

# Chlorokybus\_atmophyticus

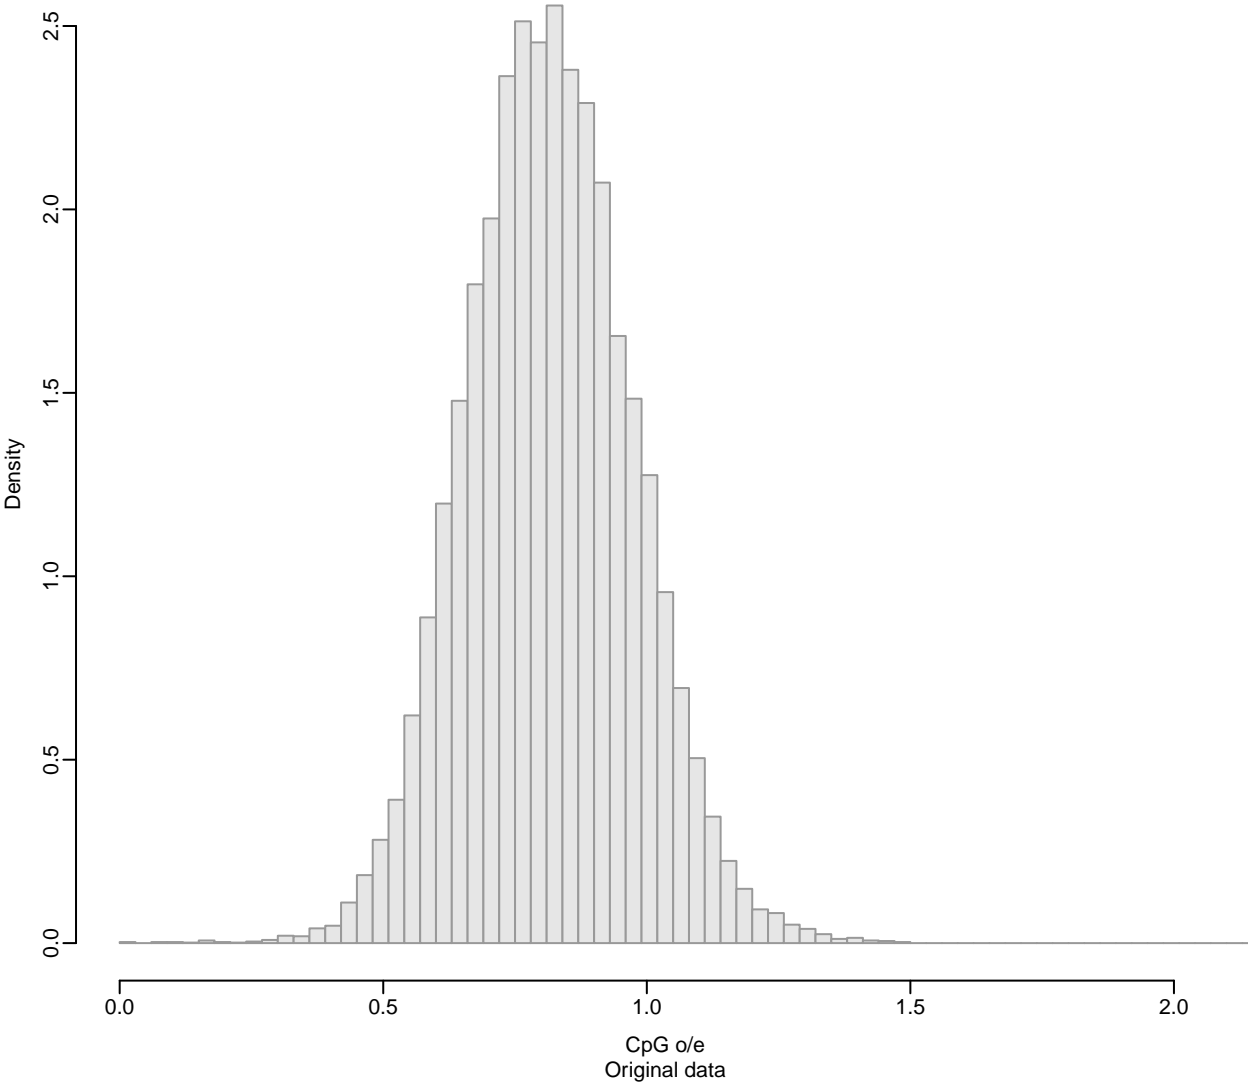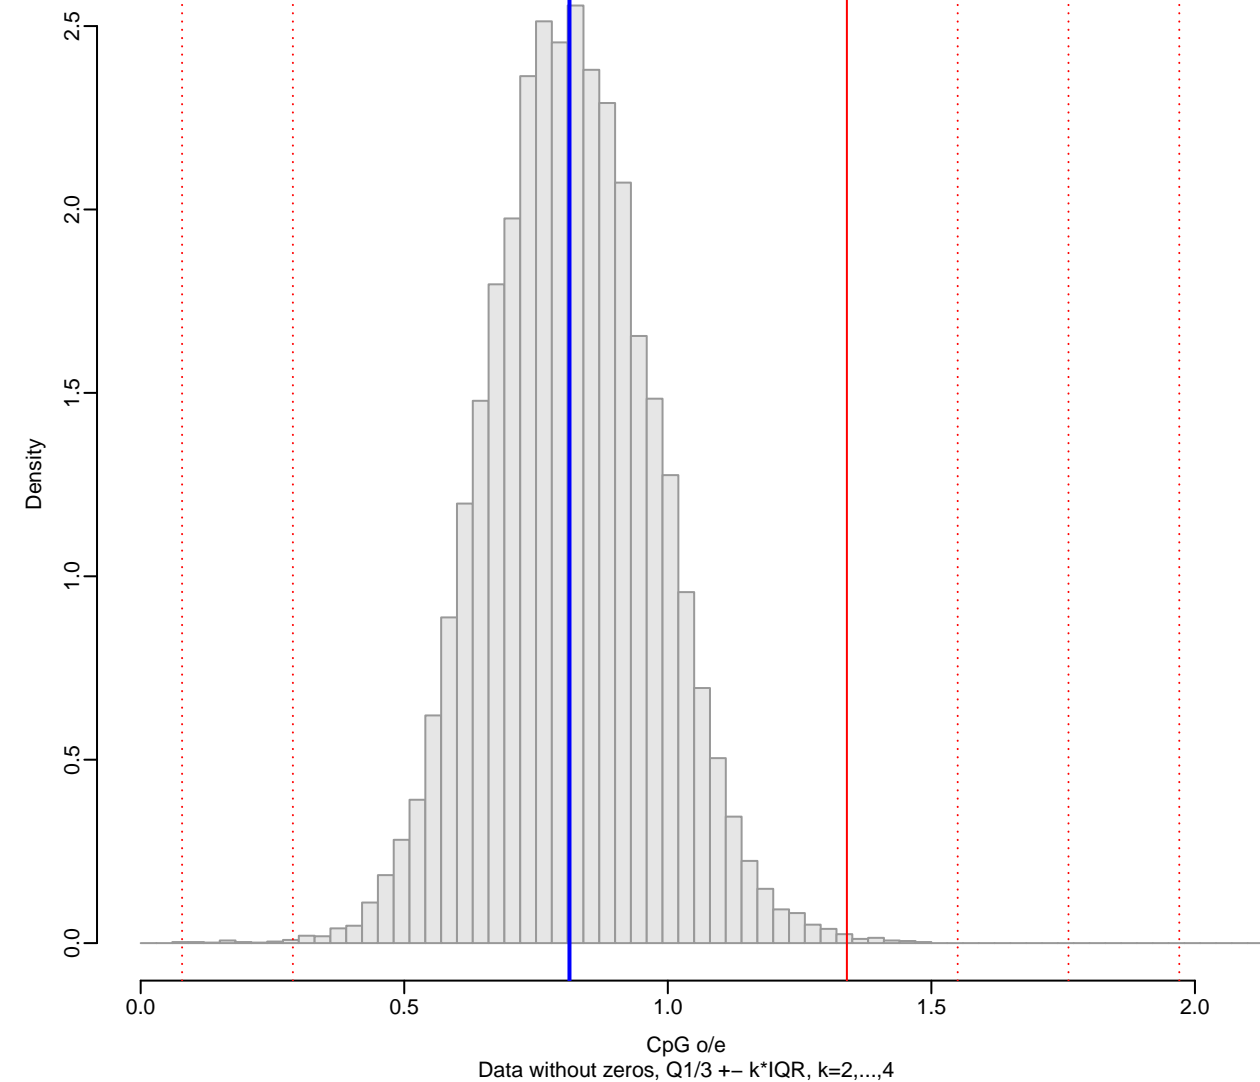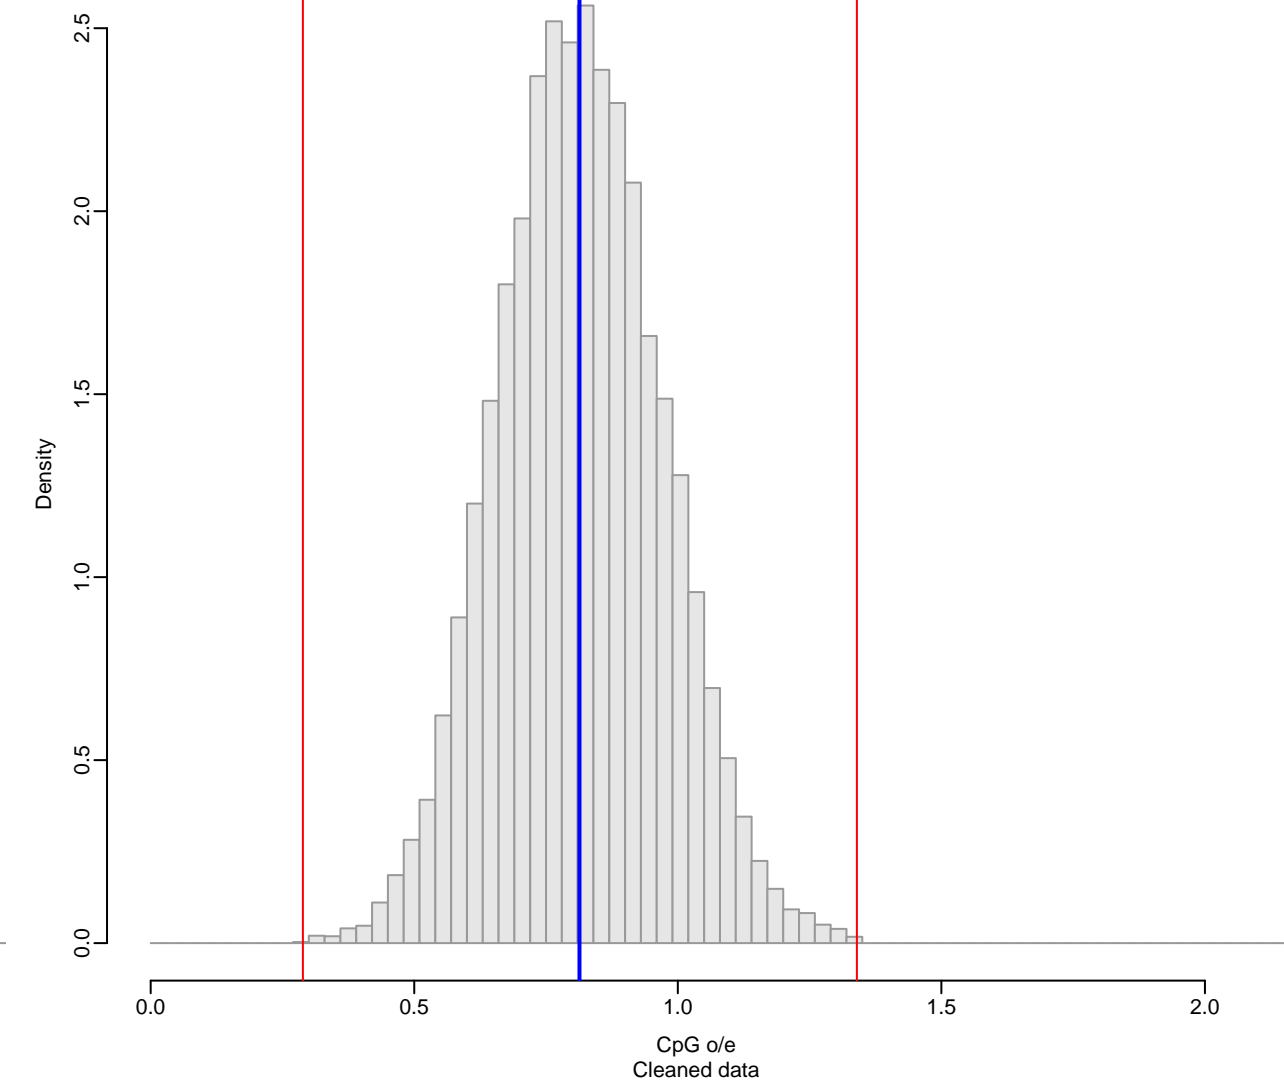

# Chondrus\_crispus

Density

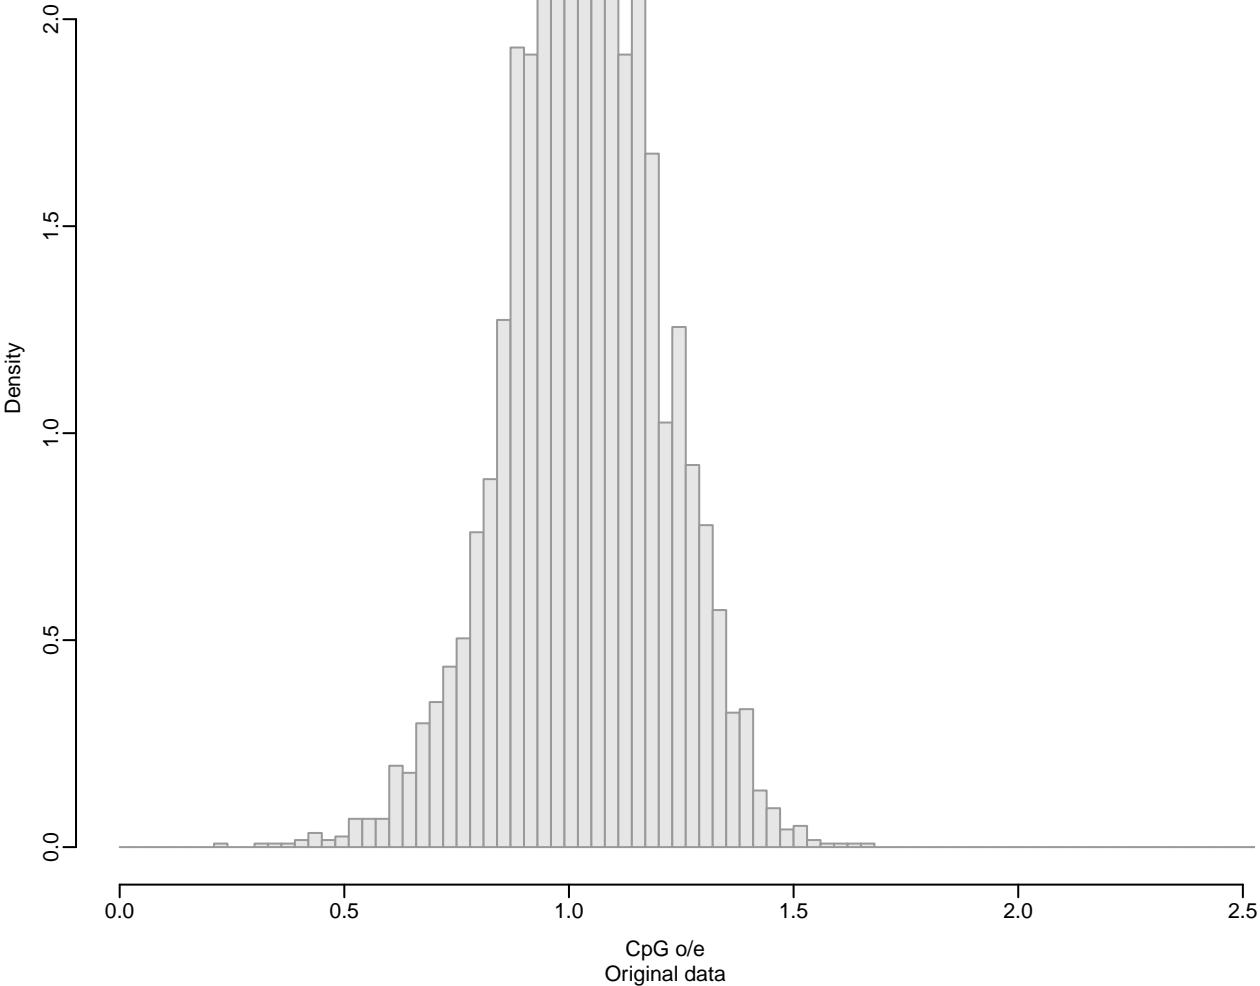

Density

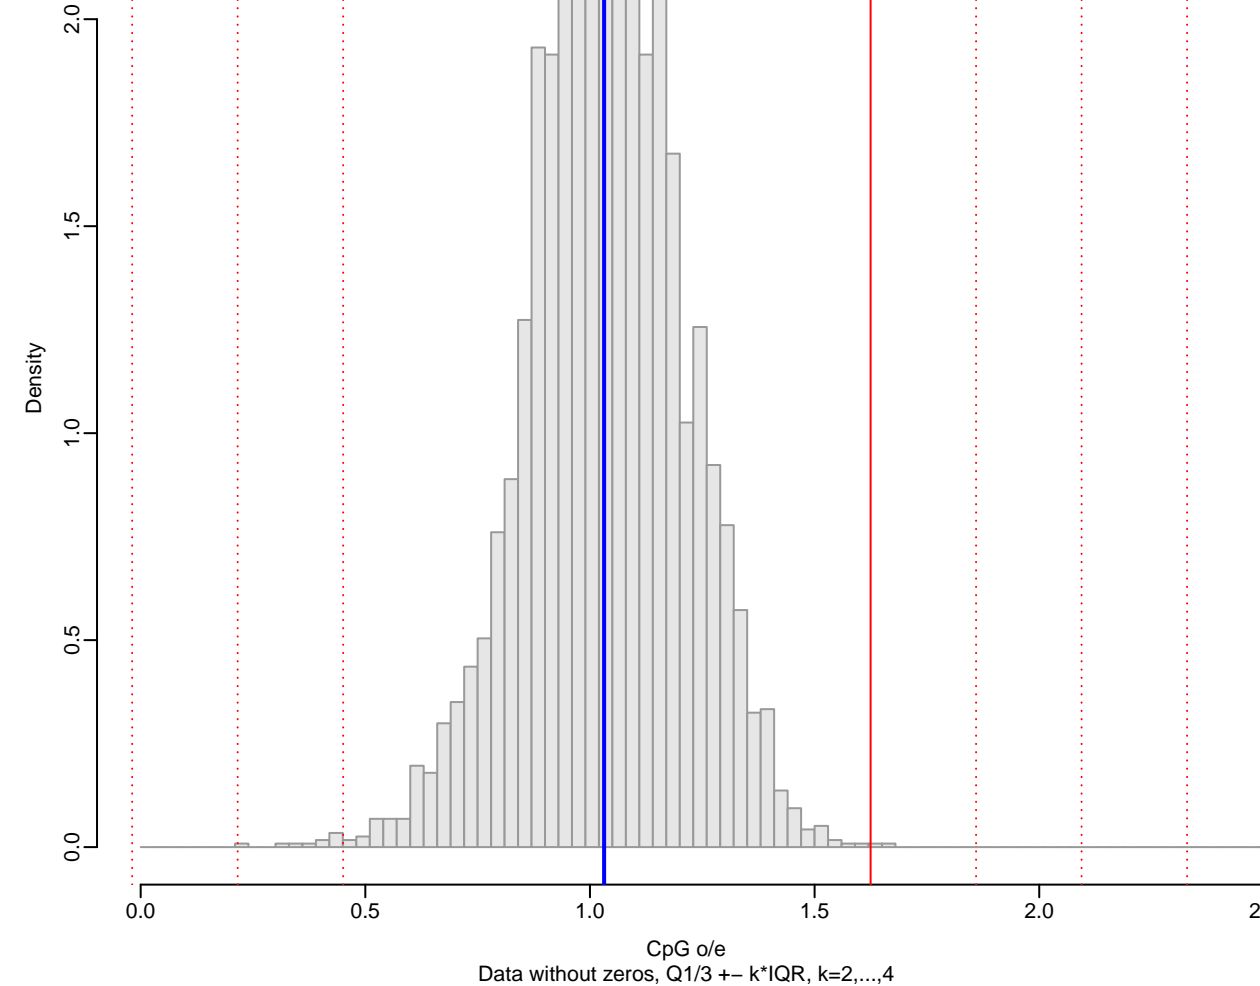

Density

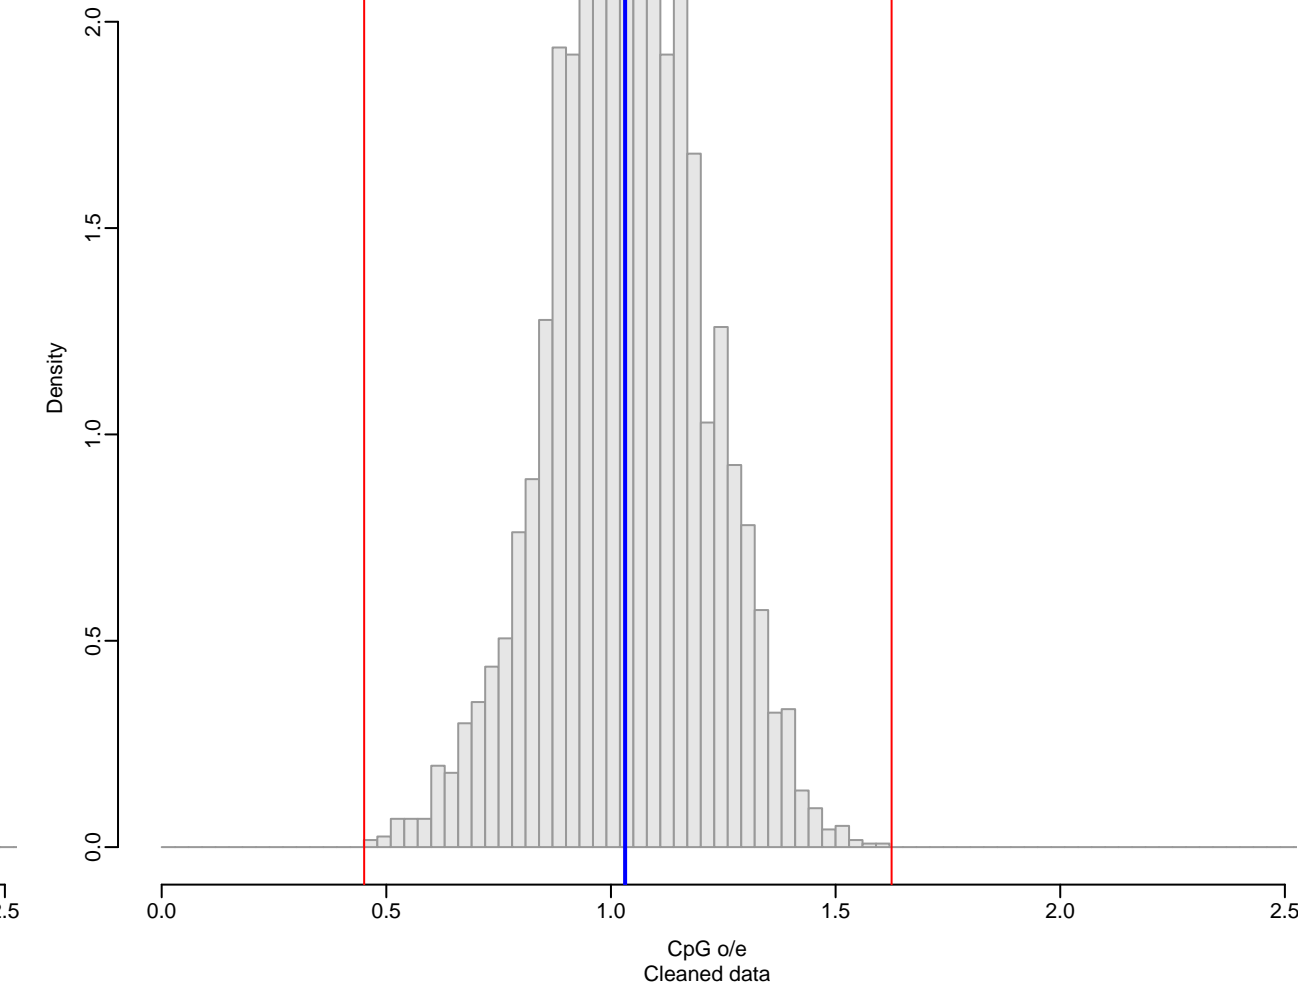

Choristoneura\_fumiferana

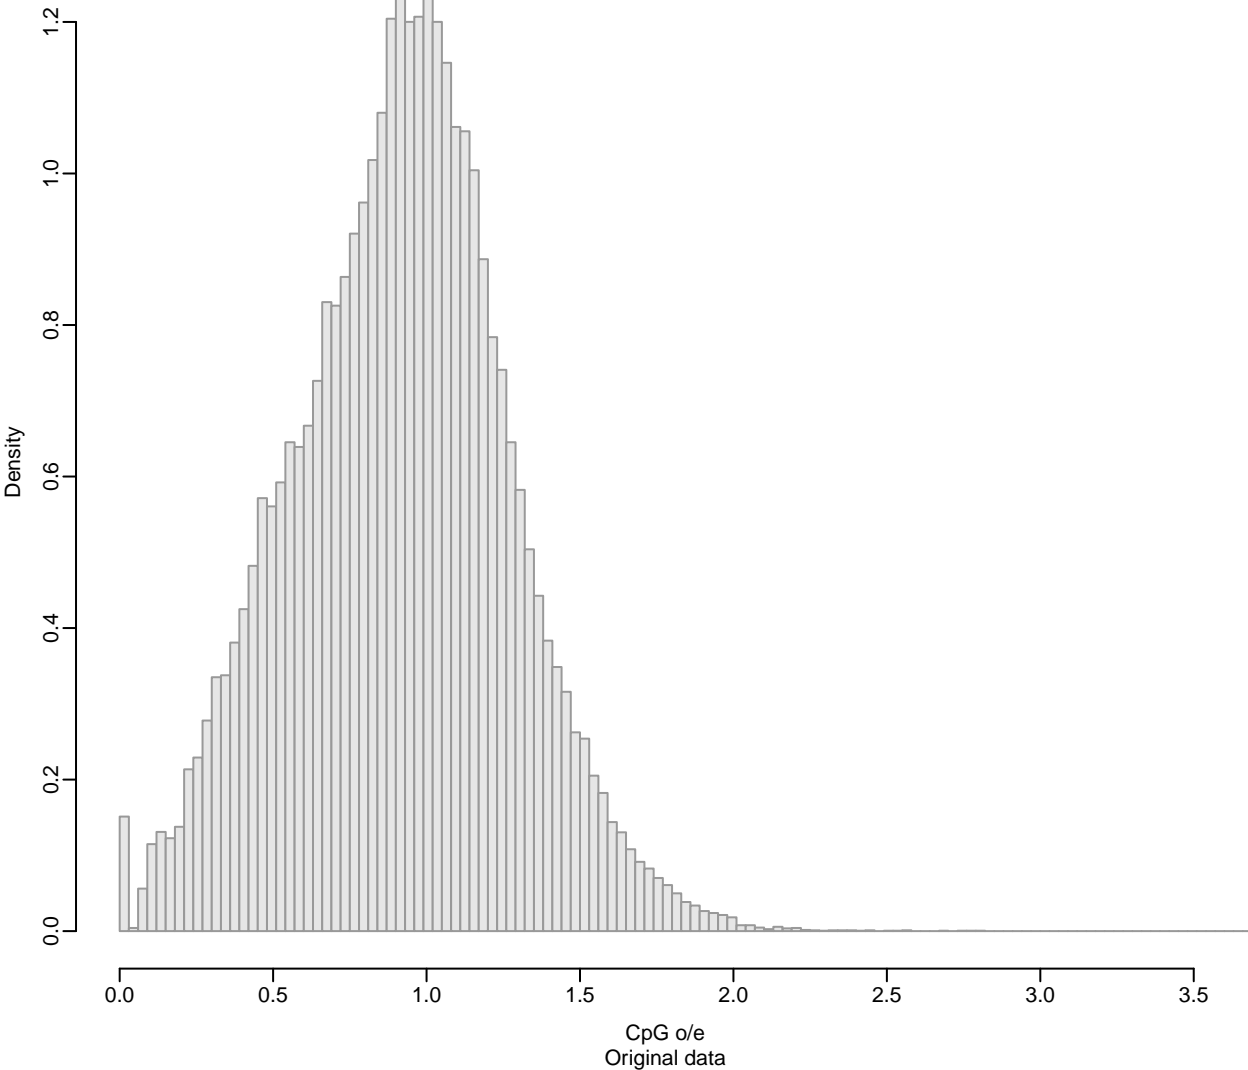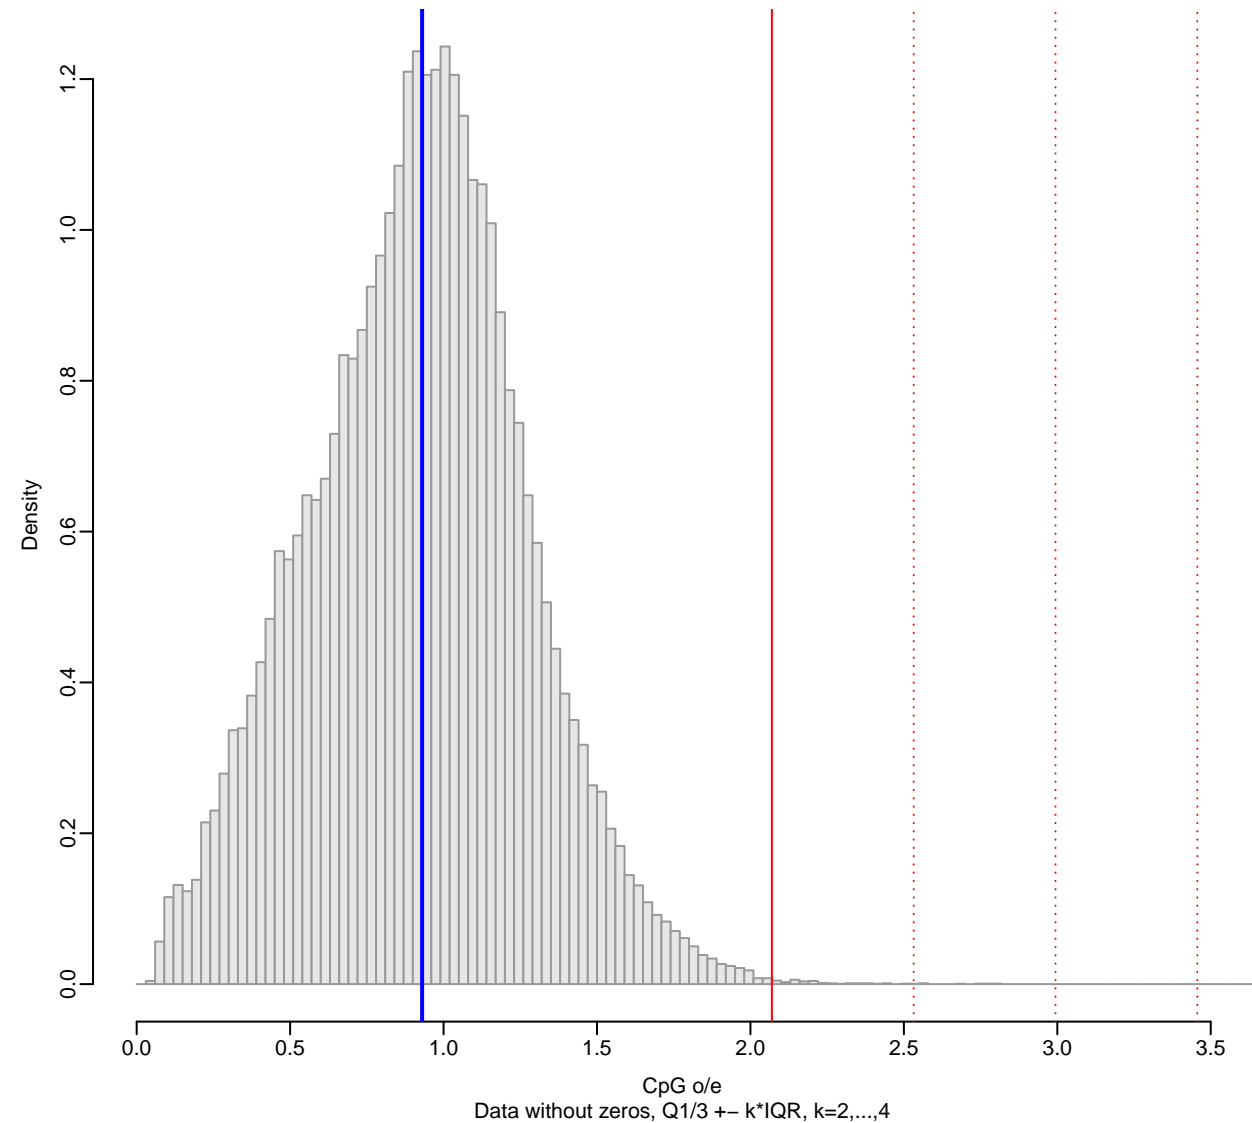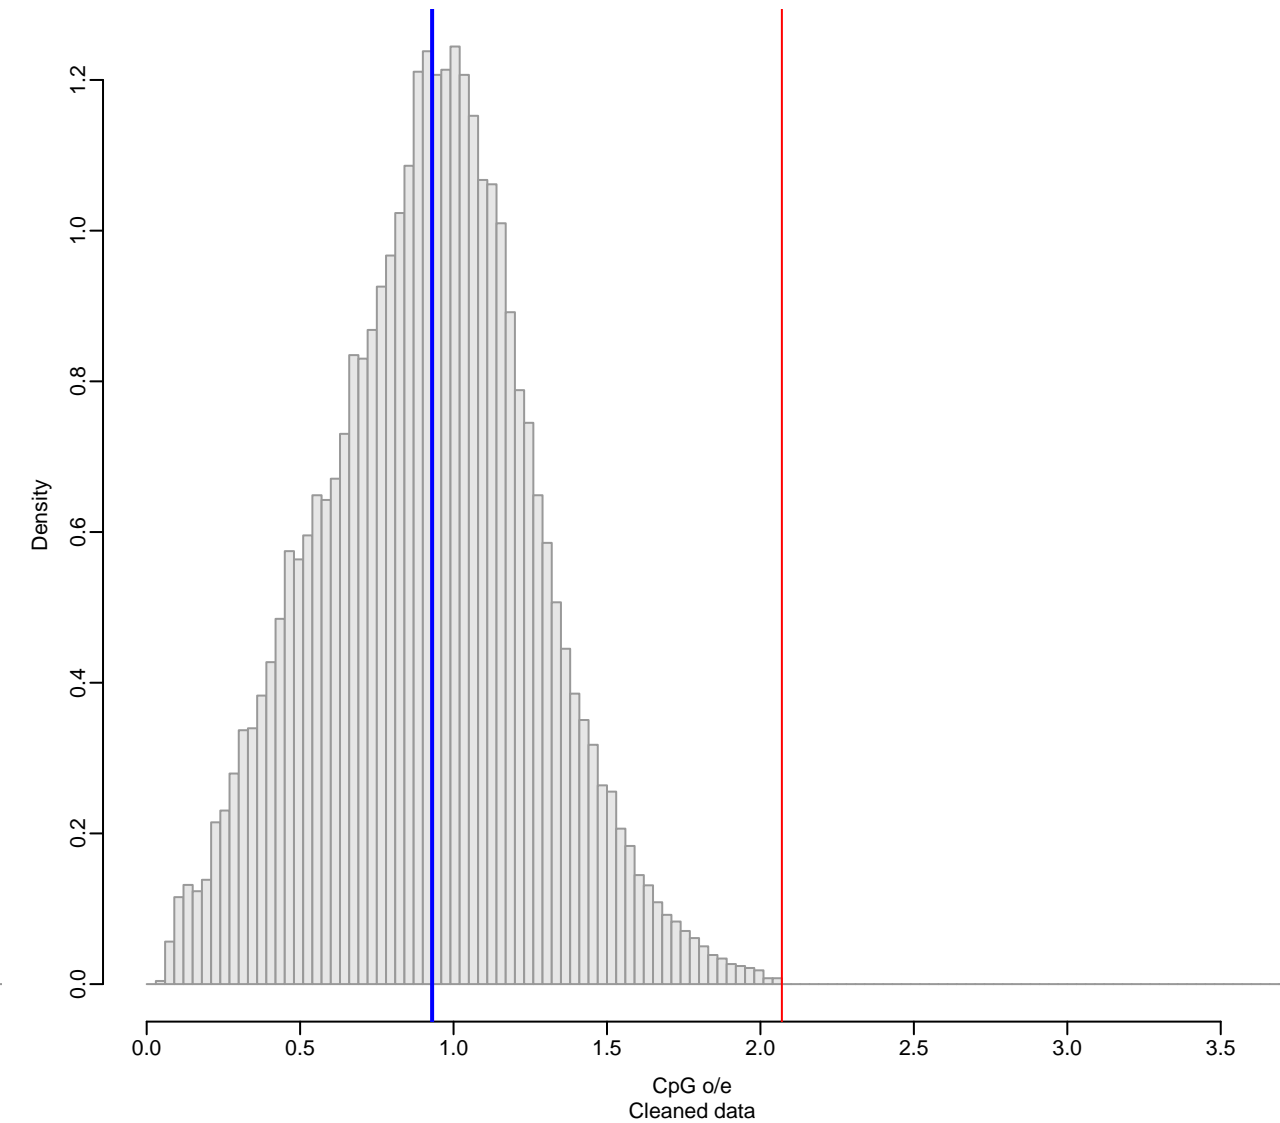

# Cicer\_arietinum

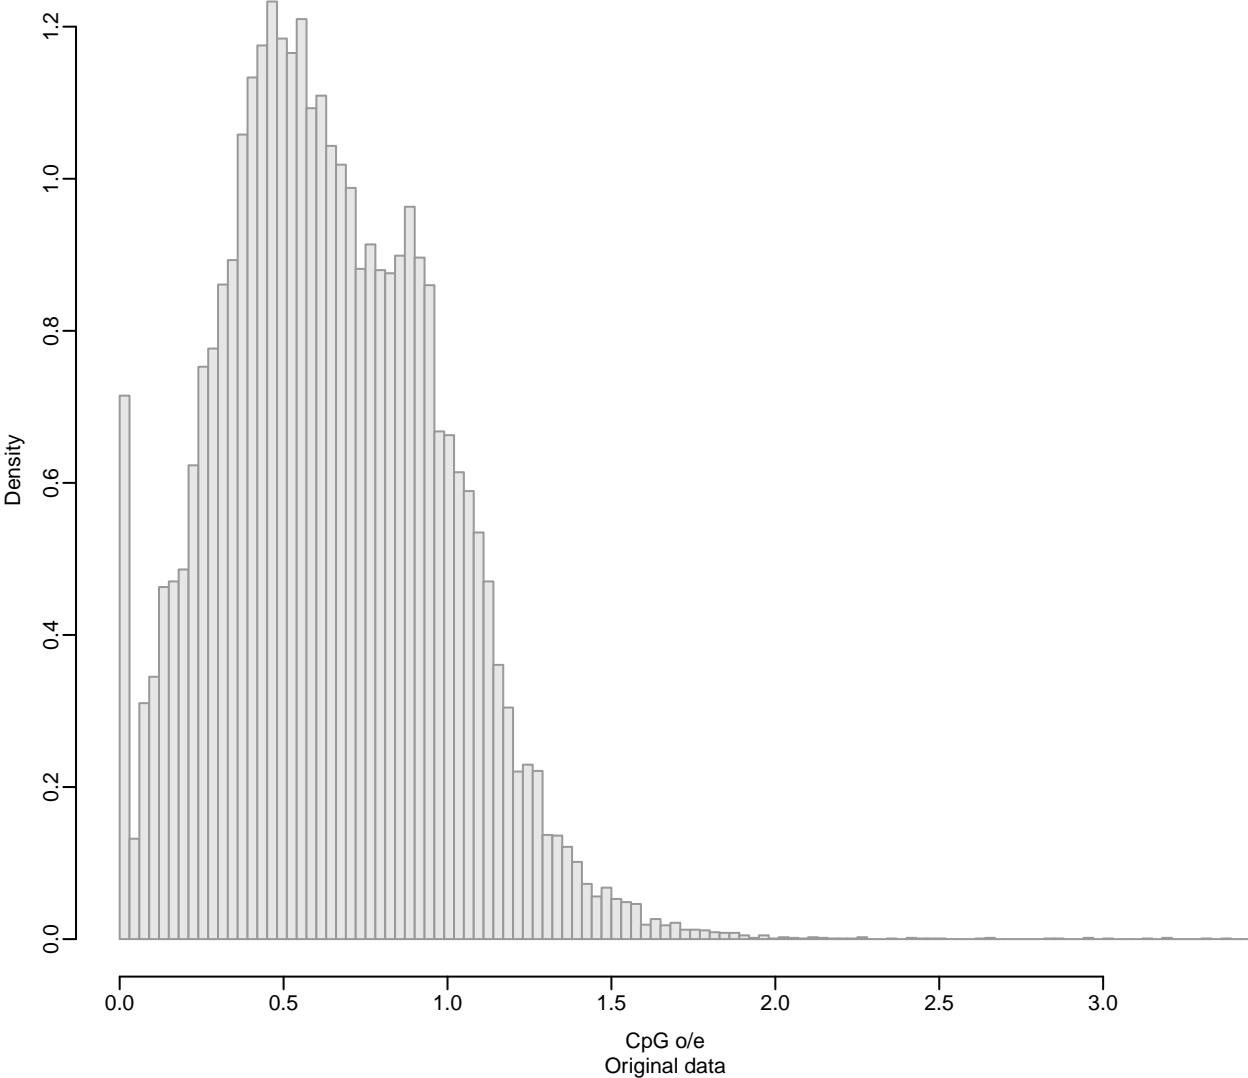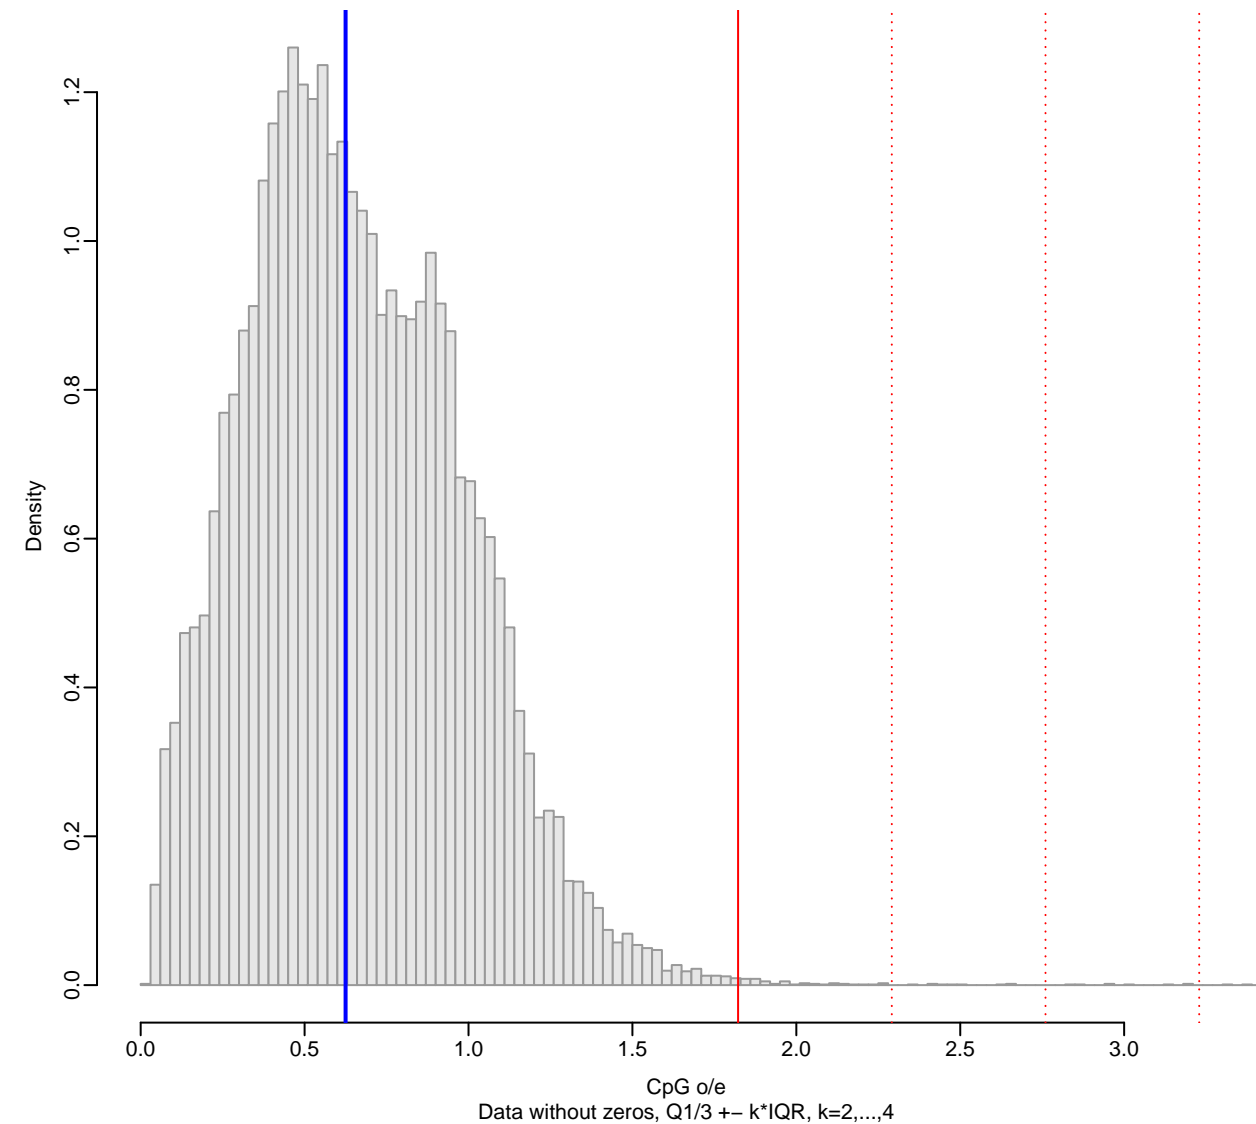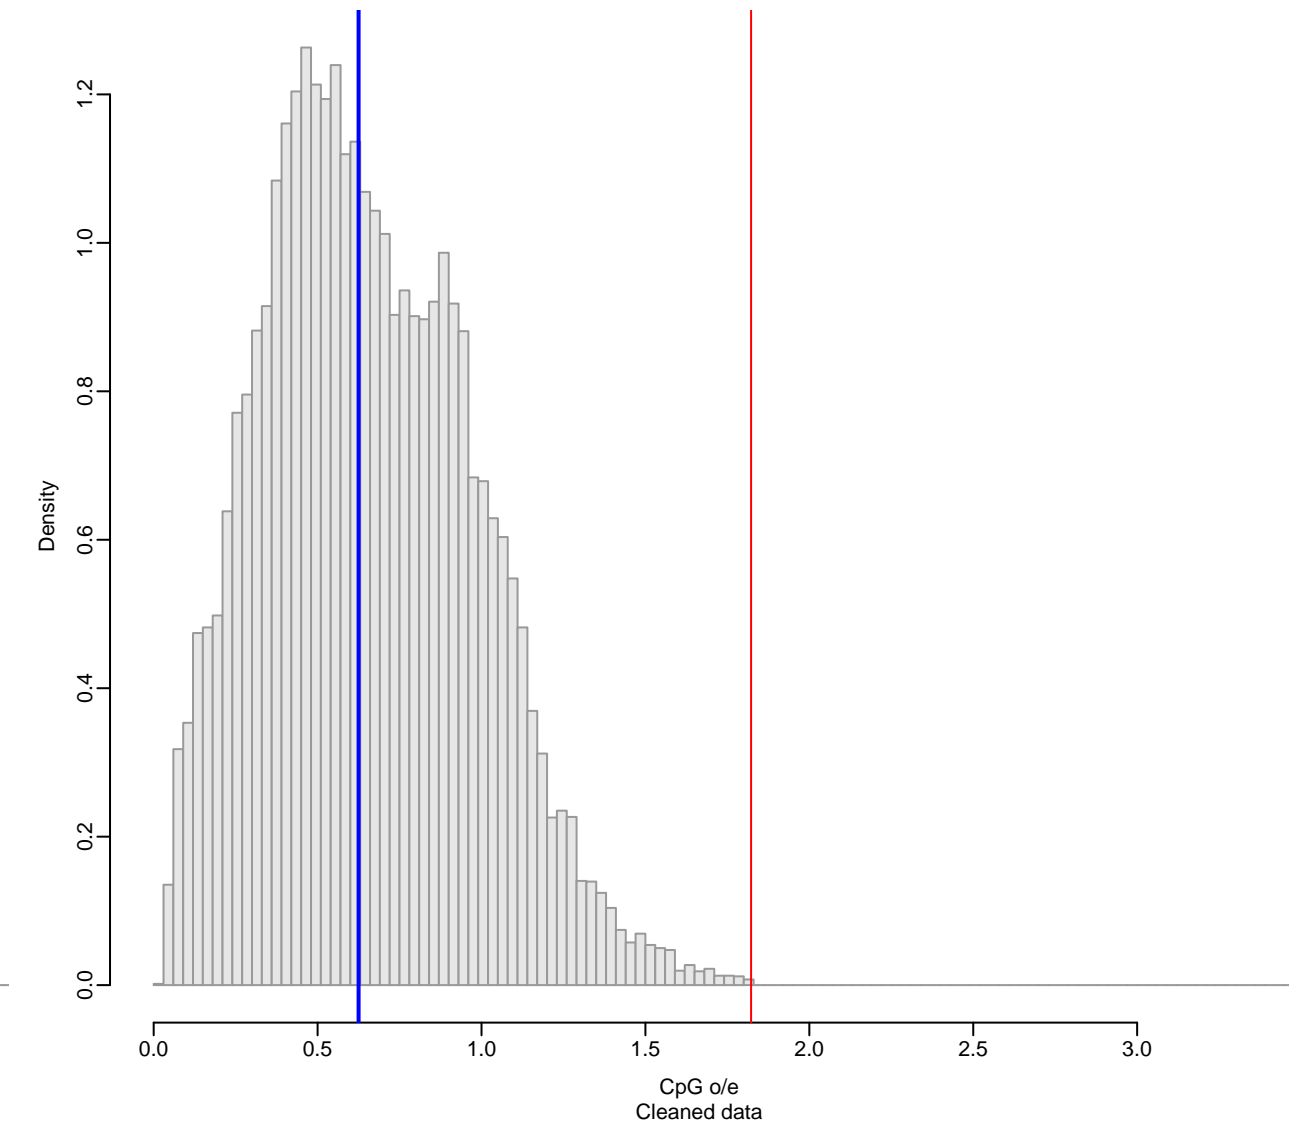



# Cichorium\_intybus

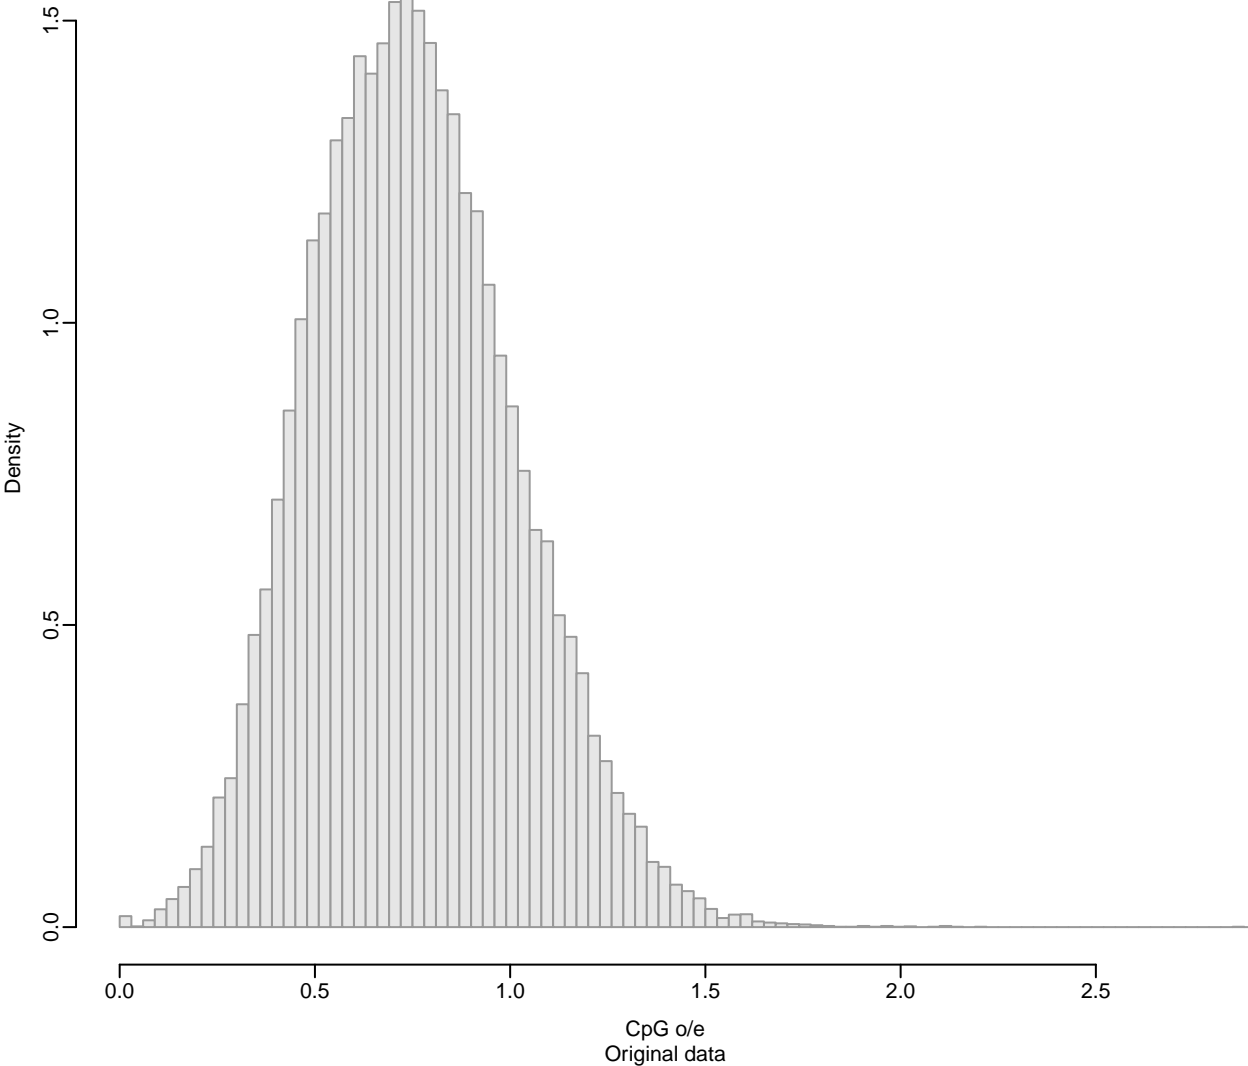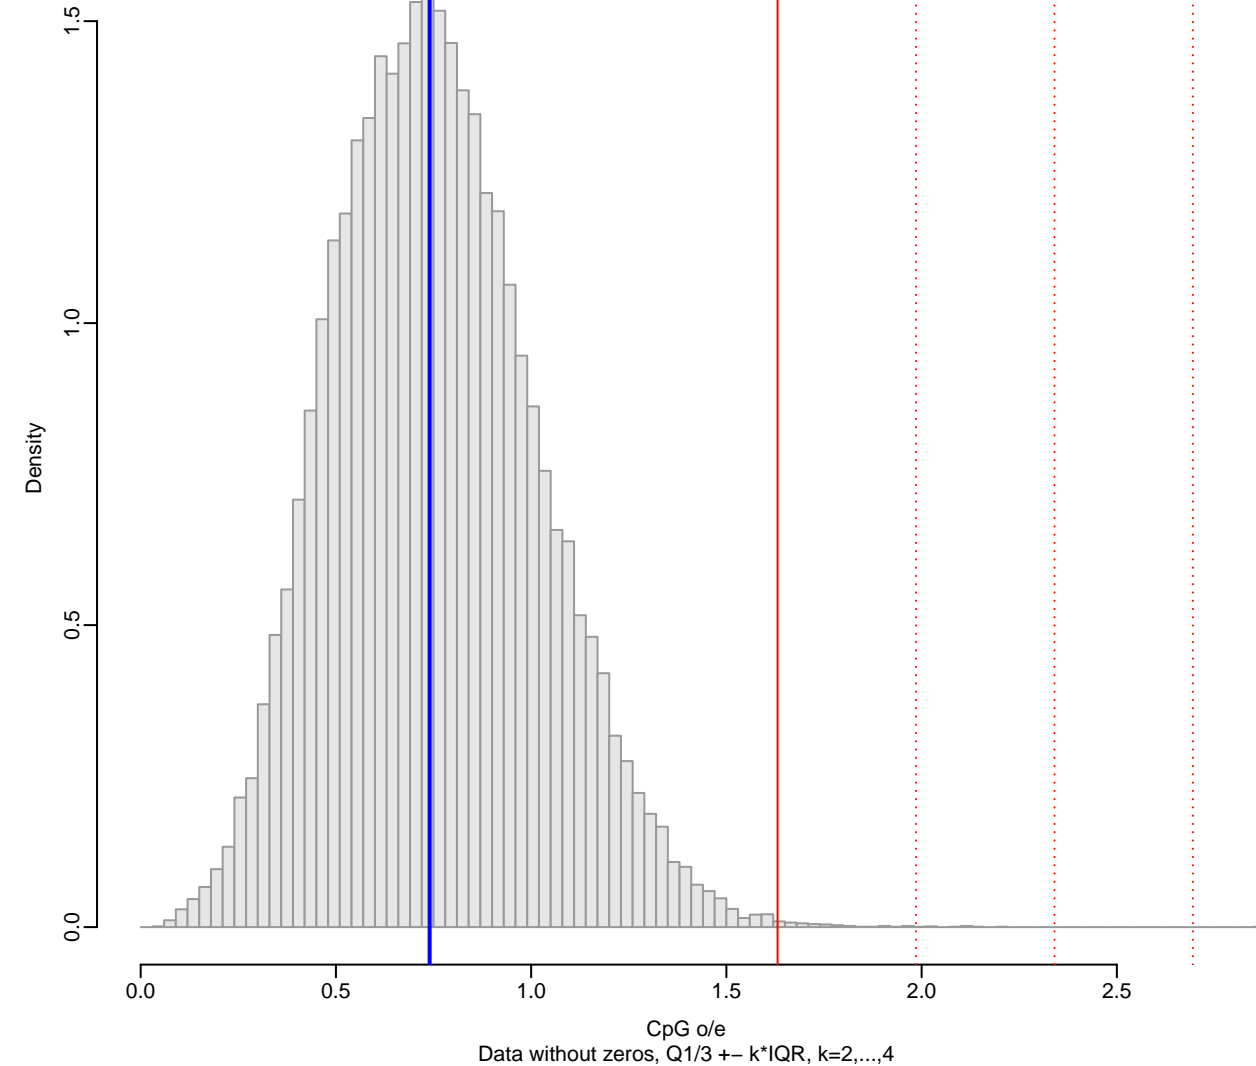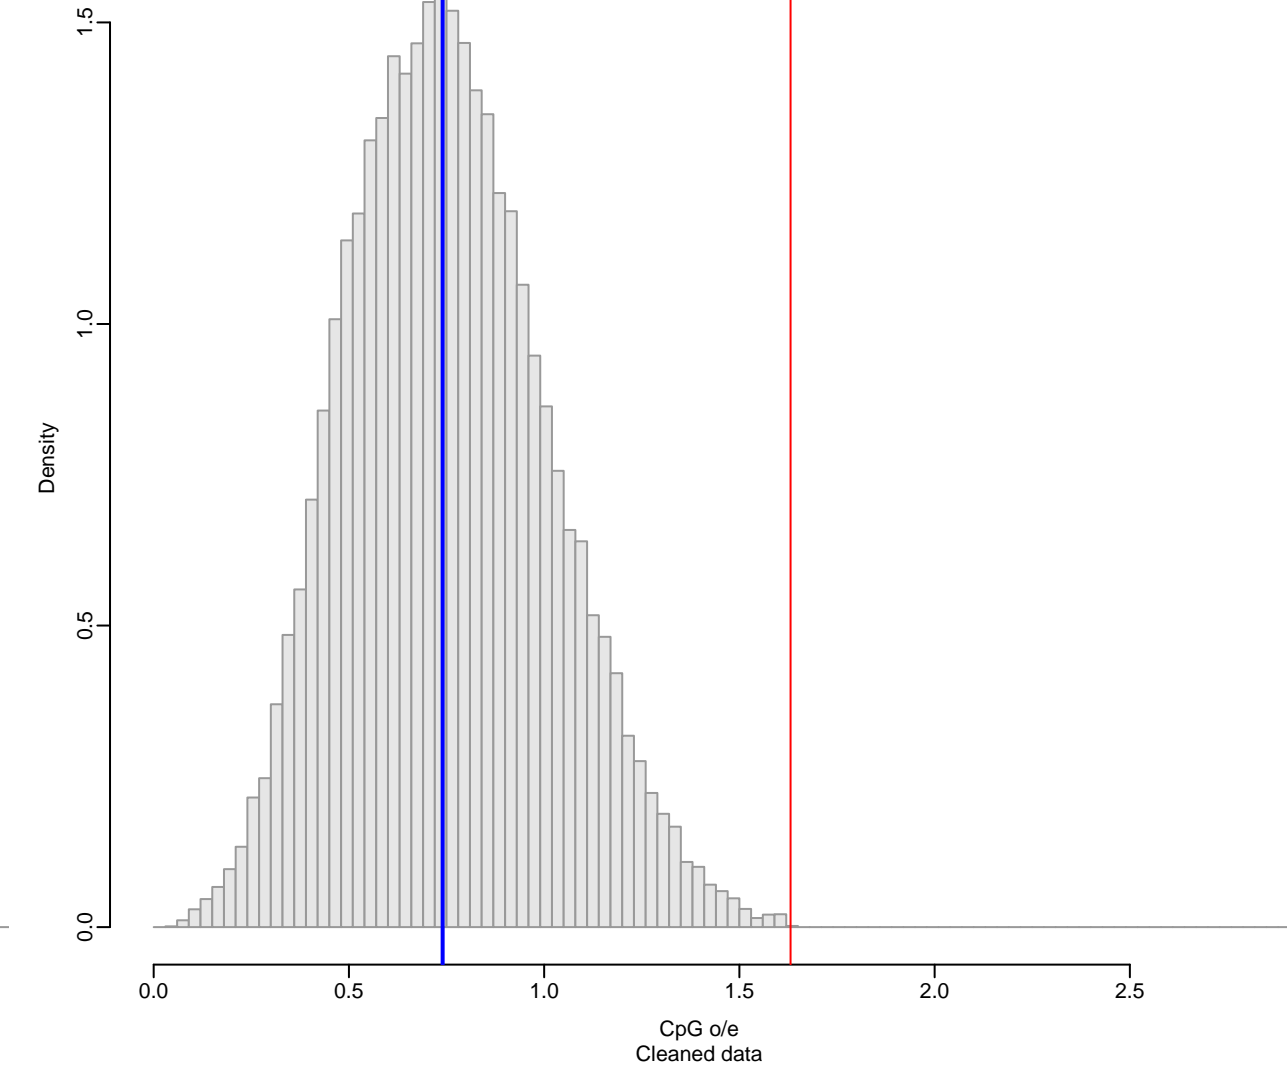

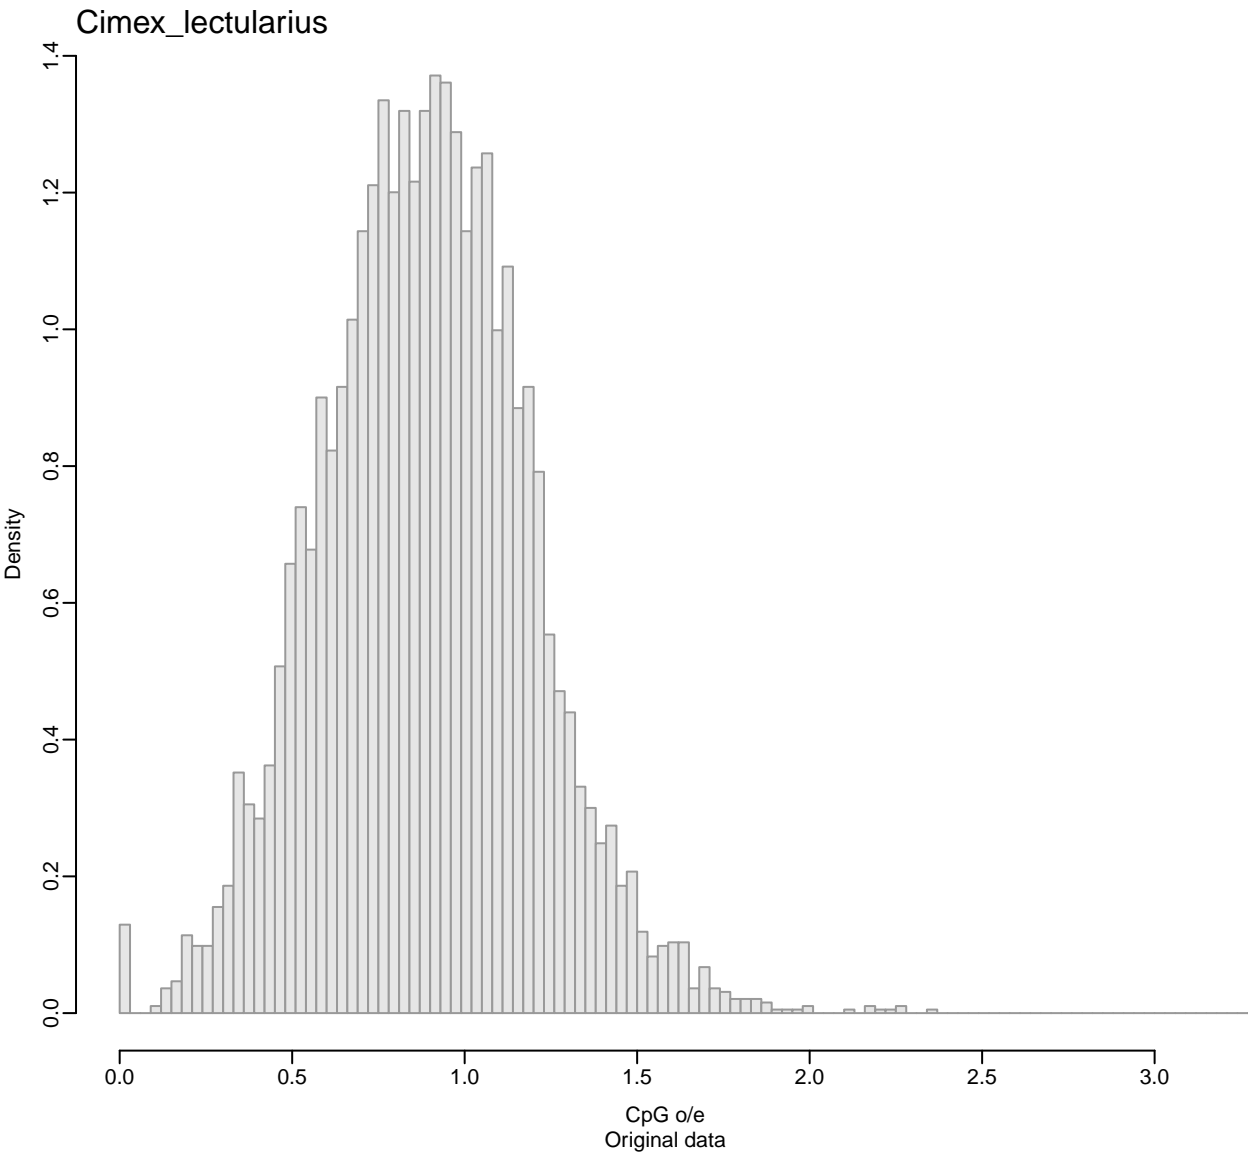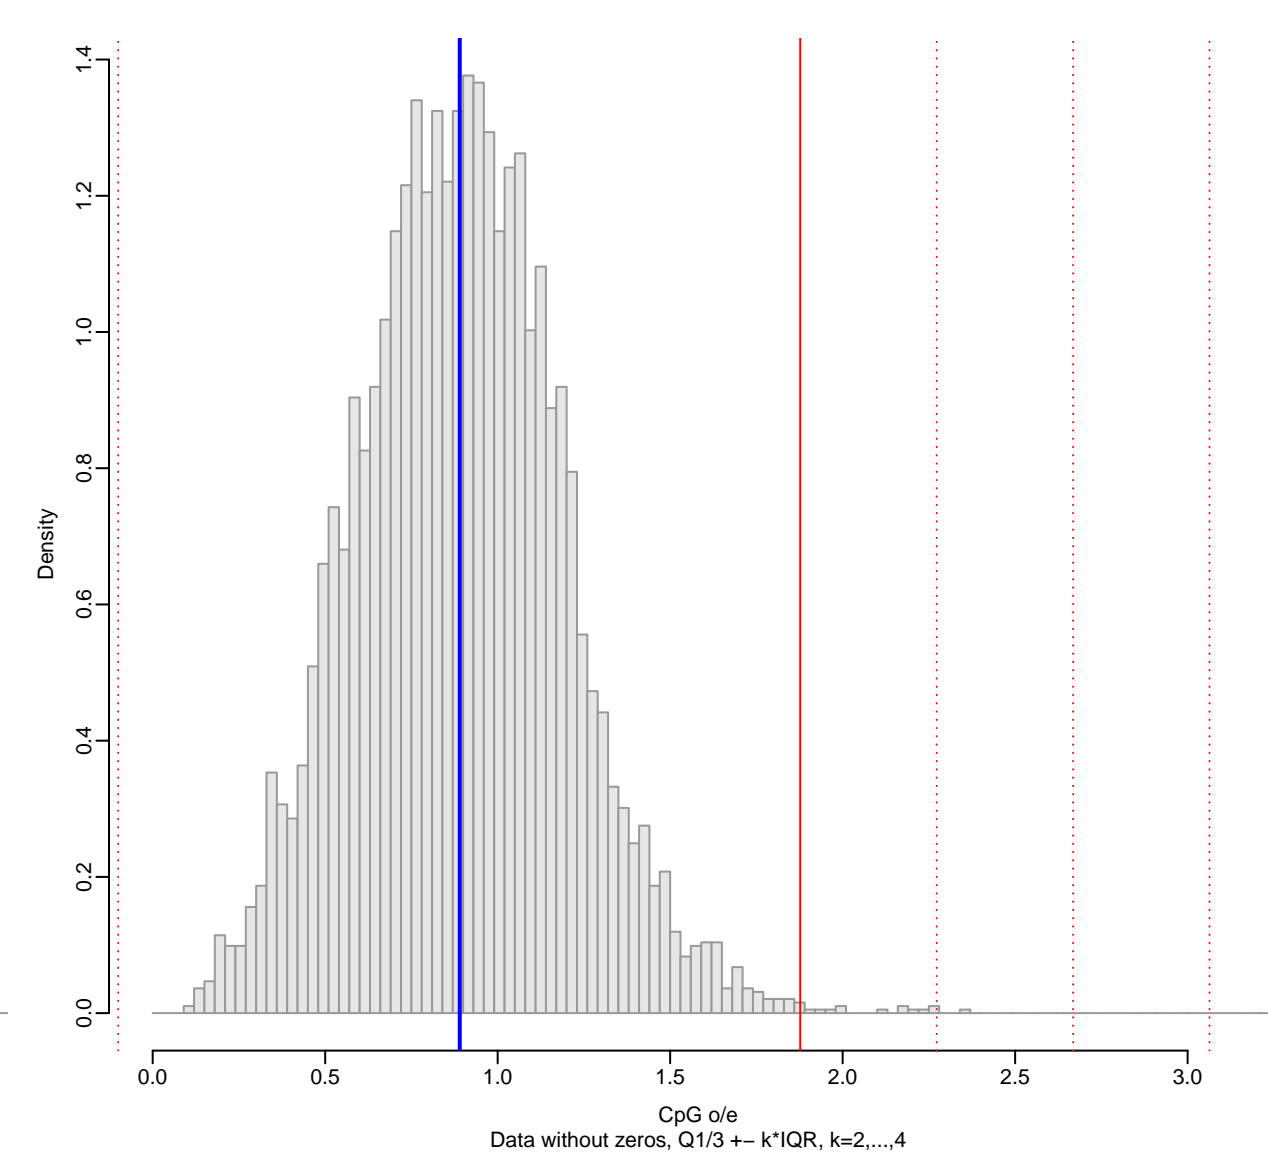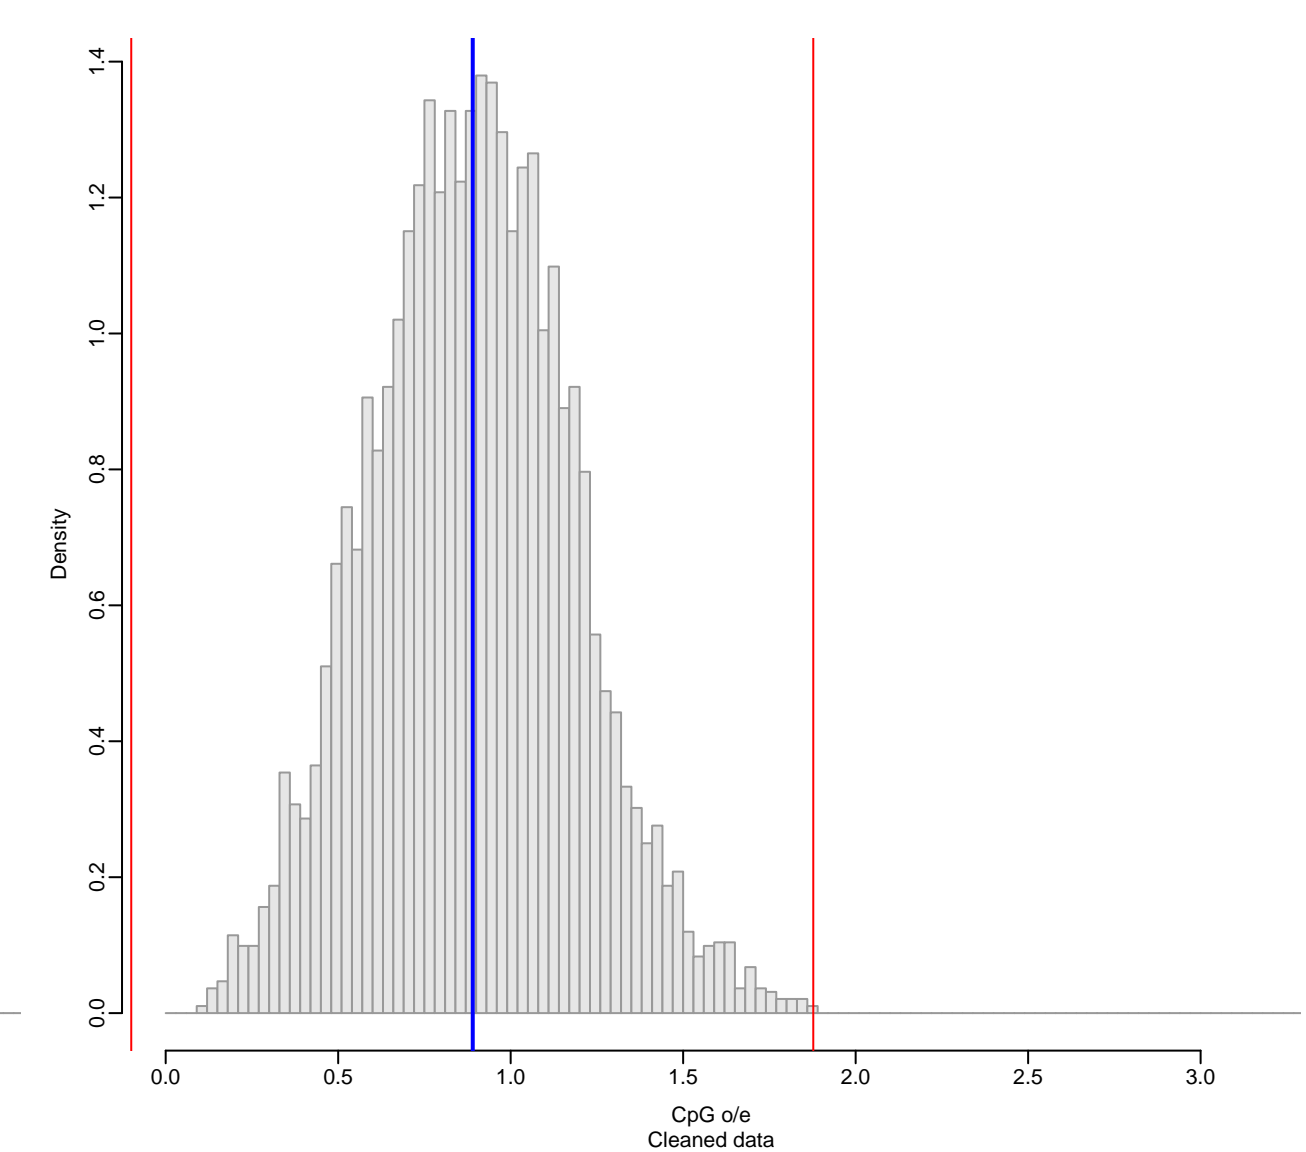

Ciona\_intestinalis

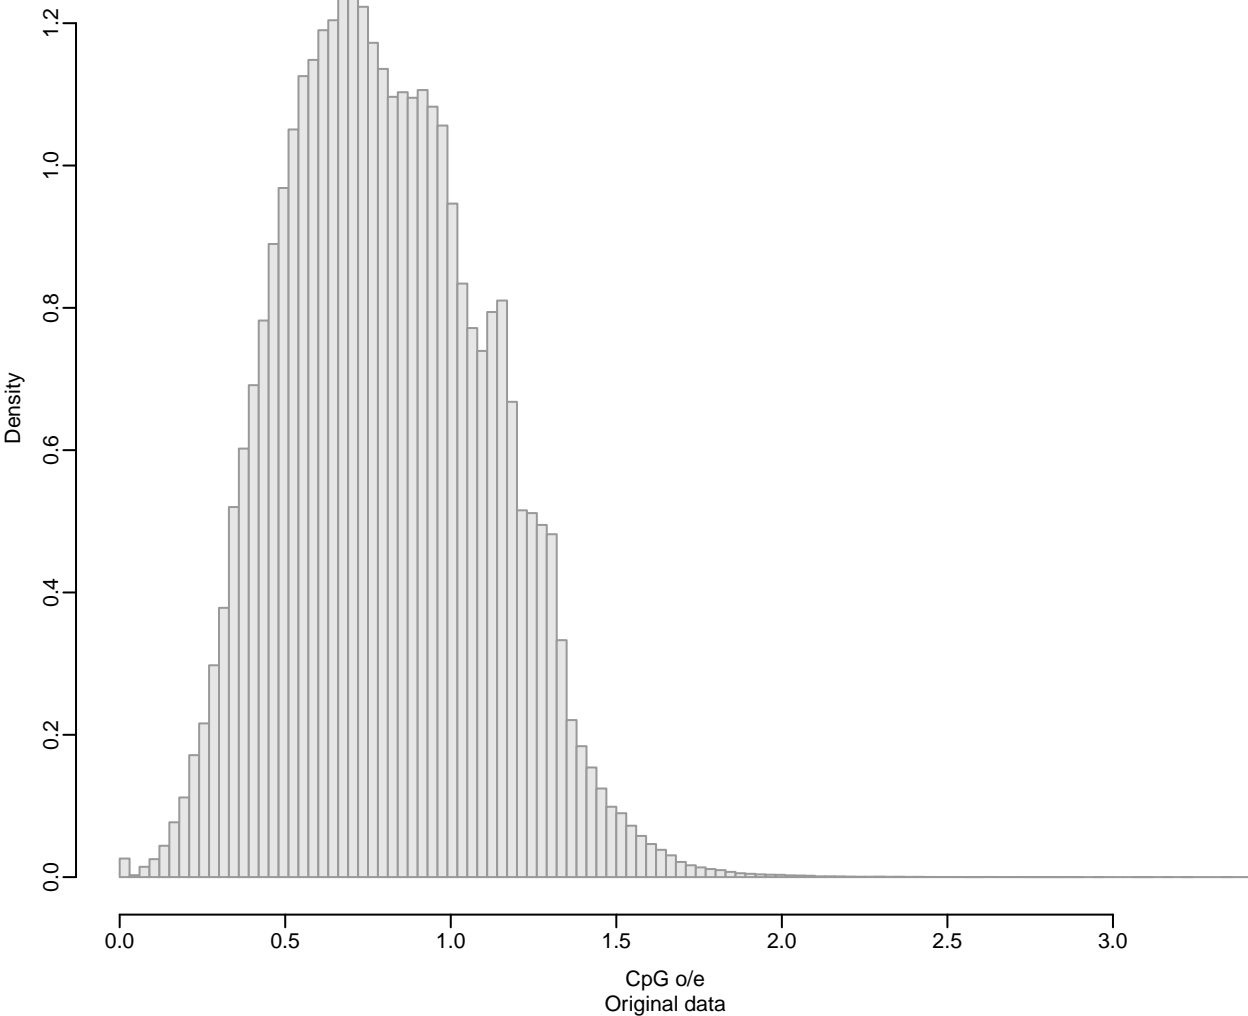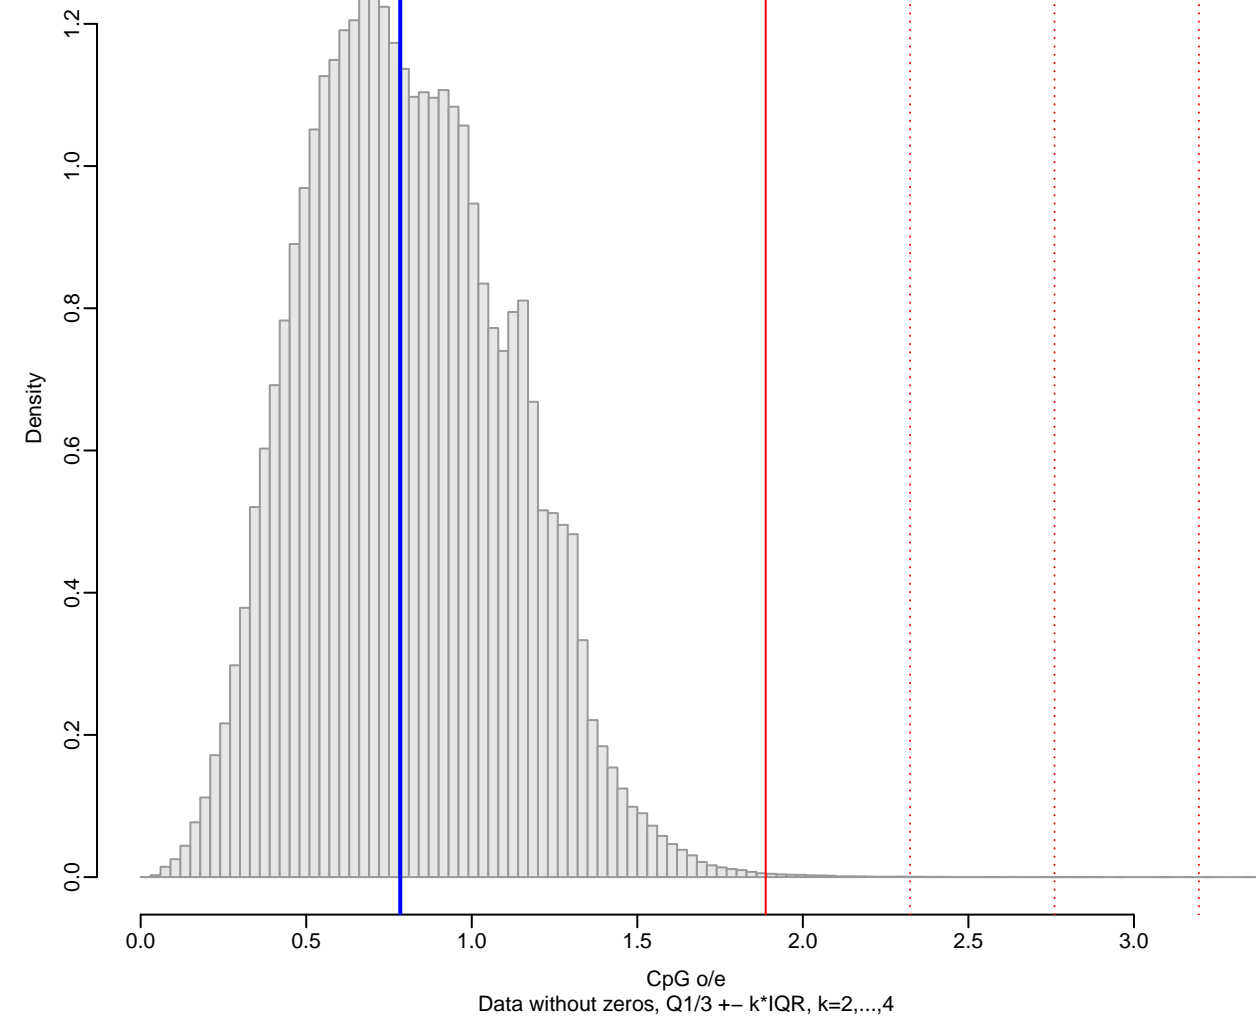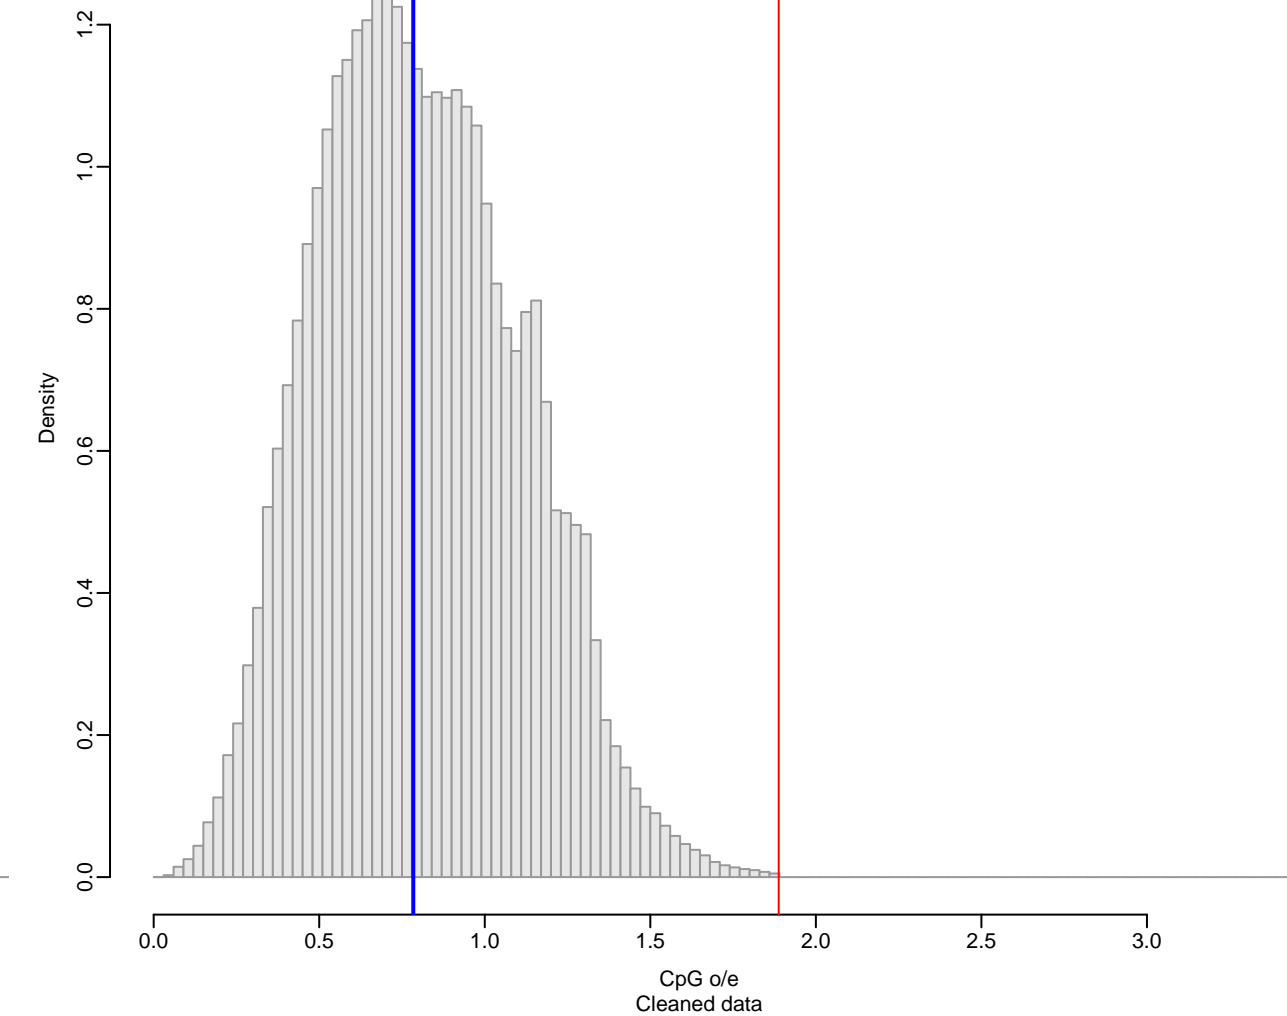

Ciona\_savignyi

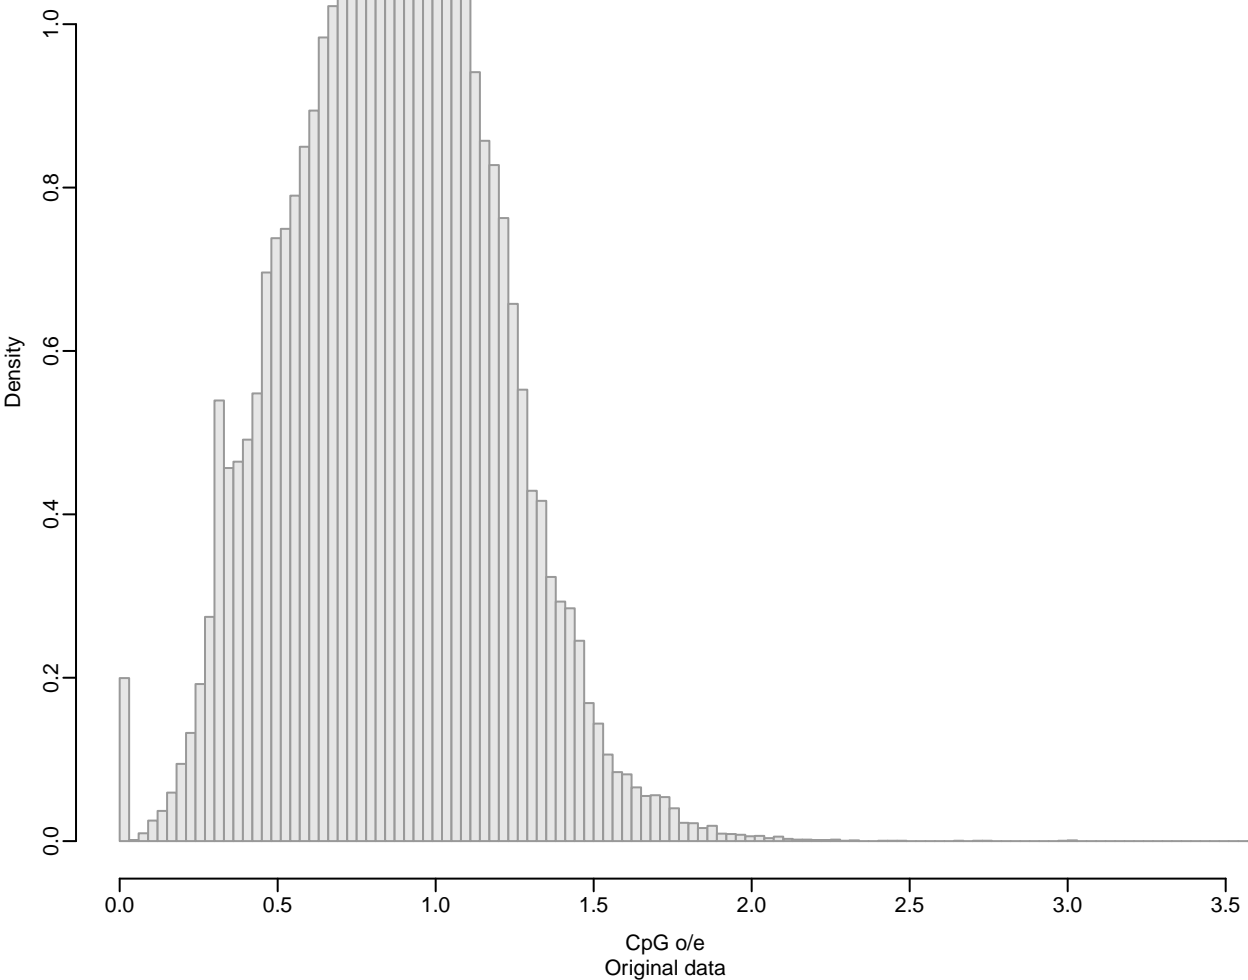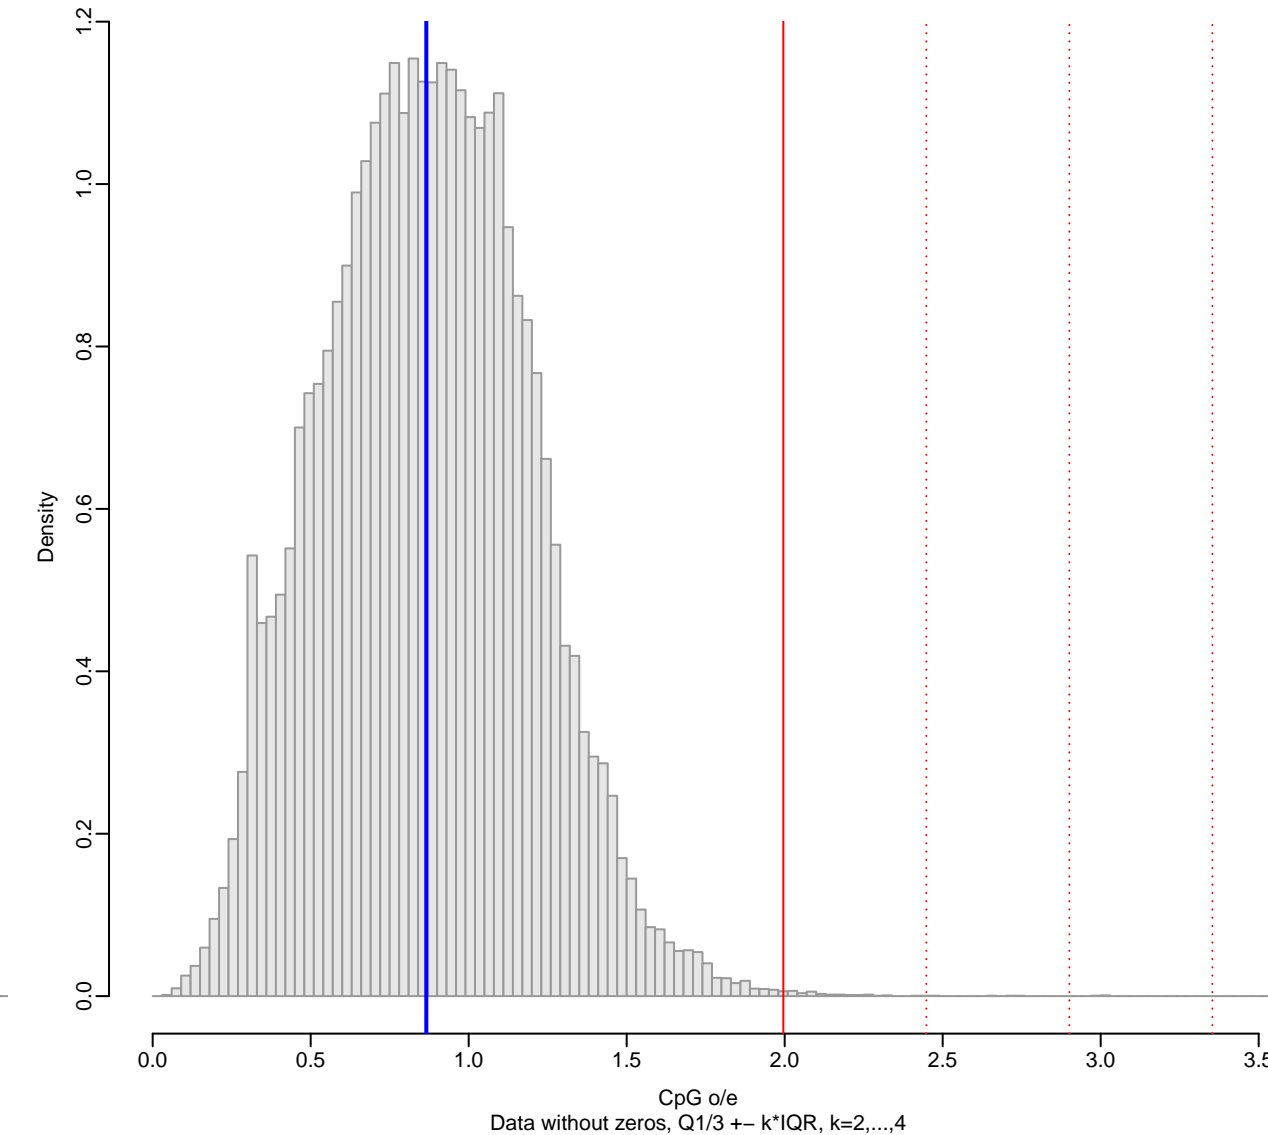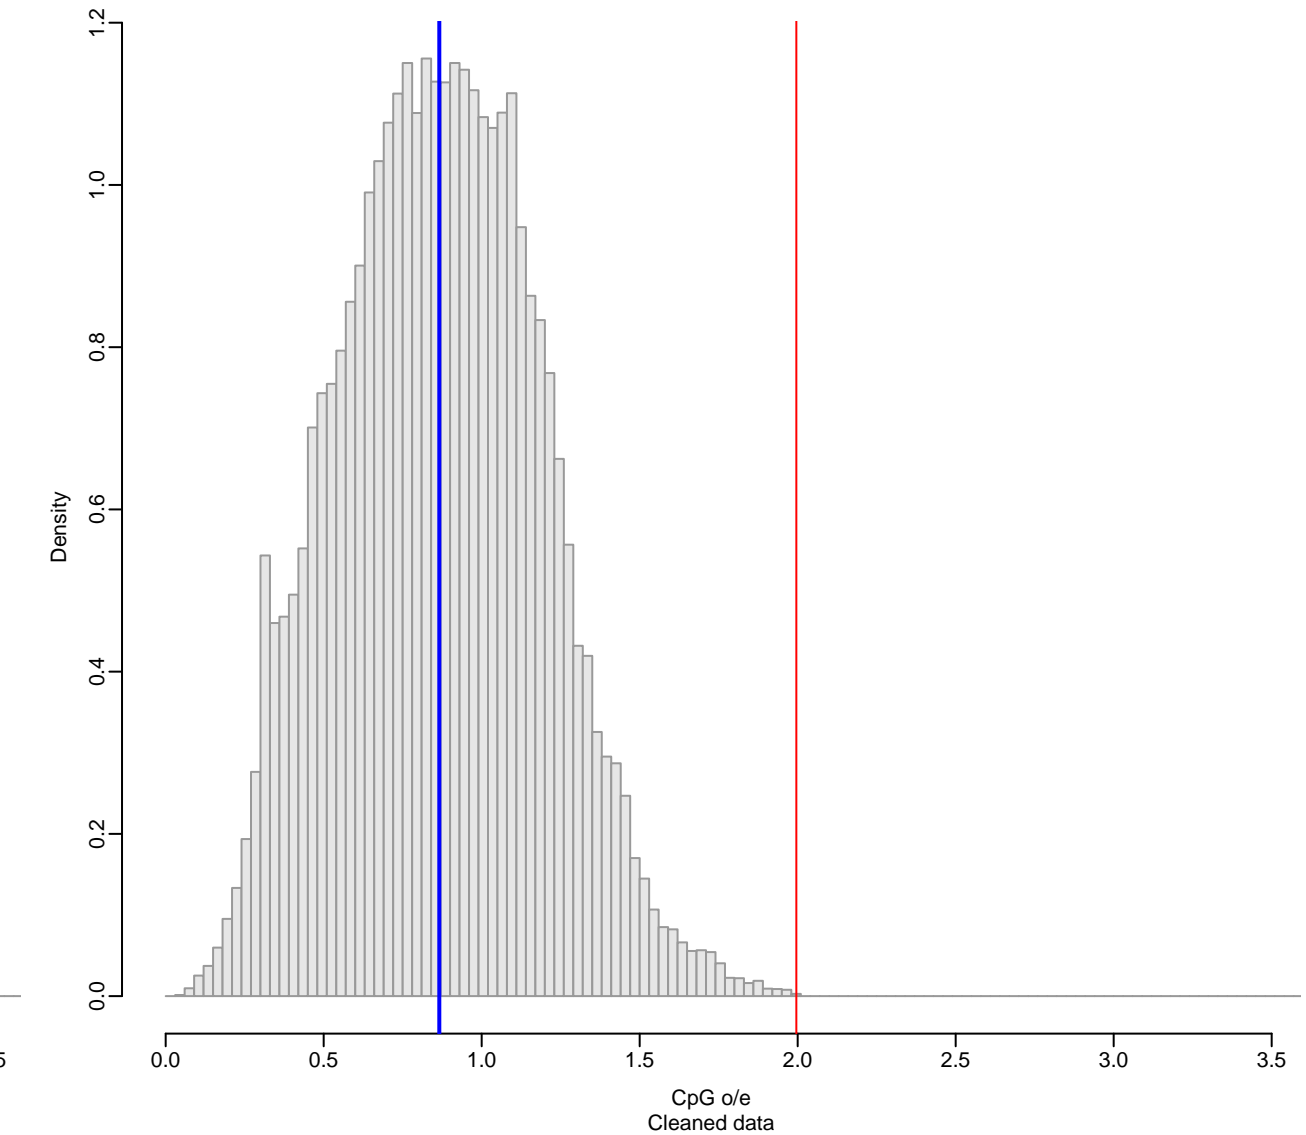

Citrus\_aurantiifolia

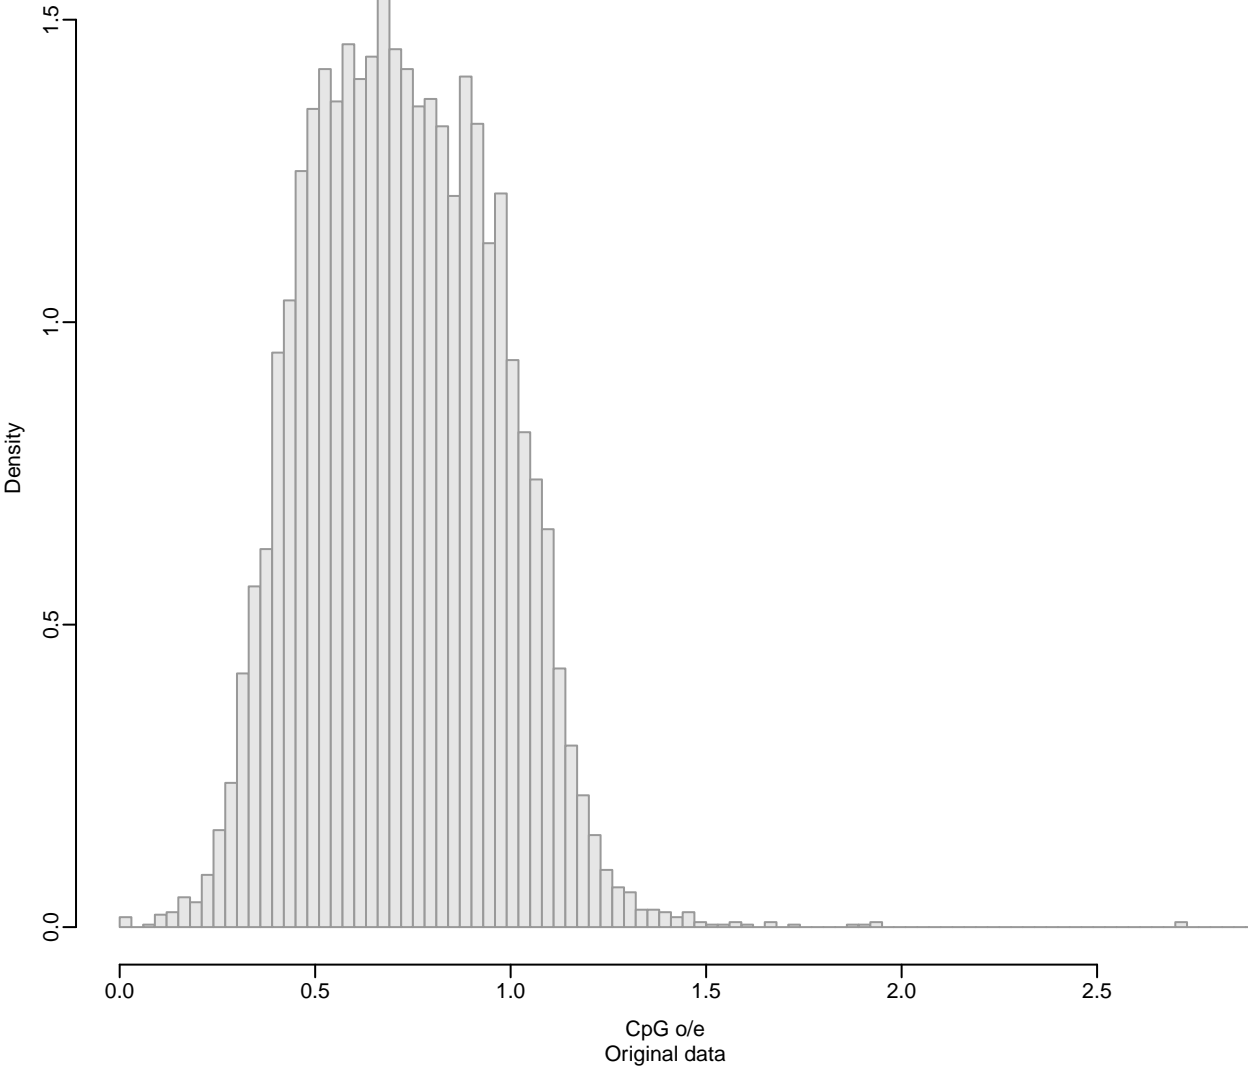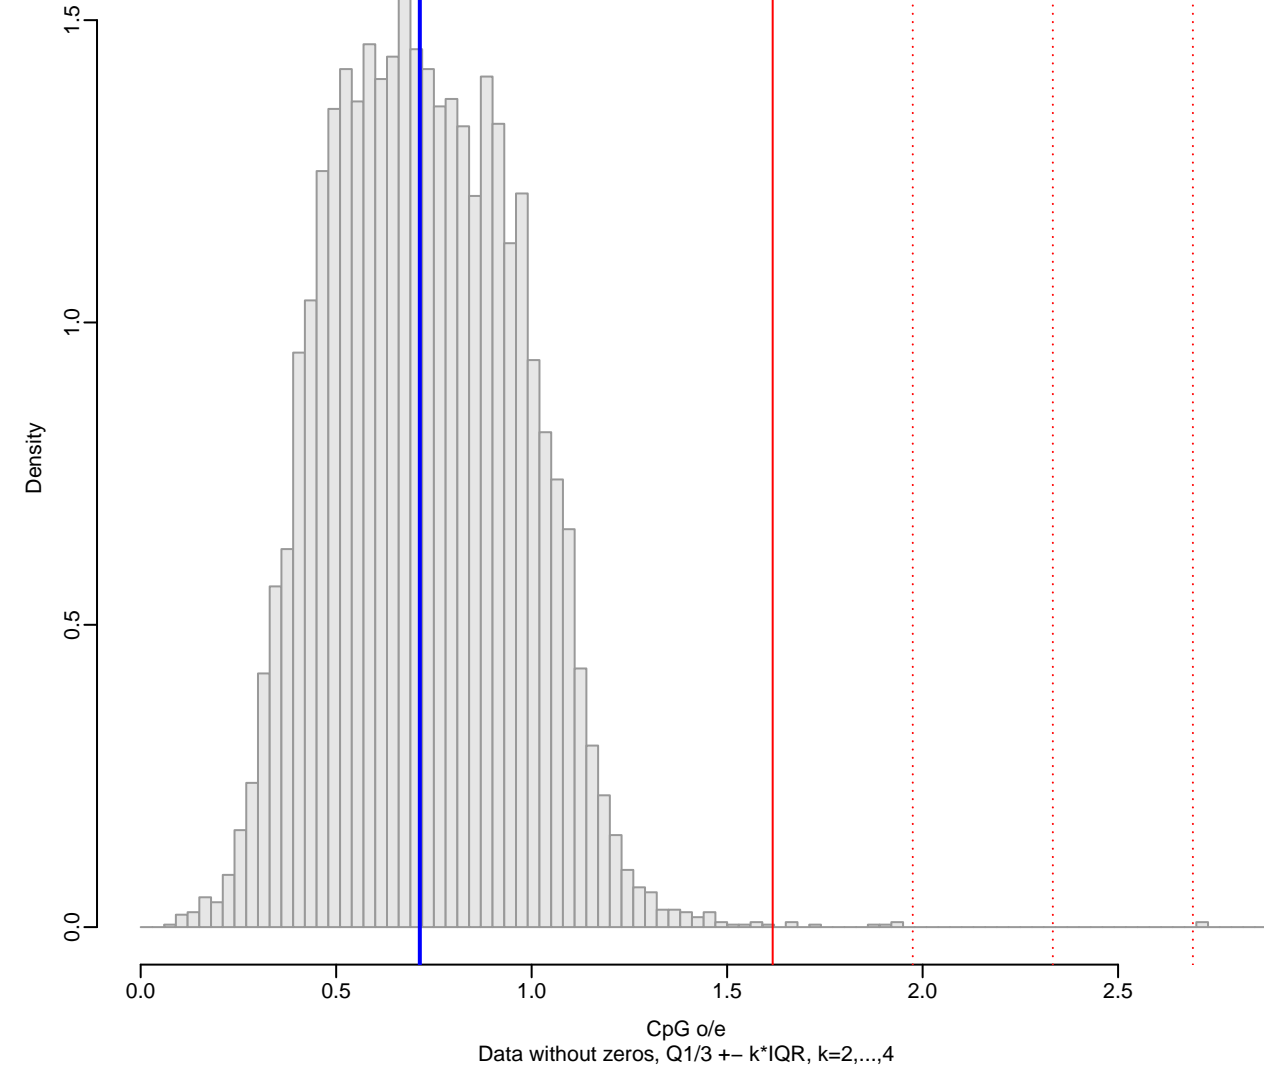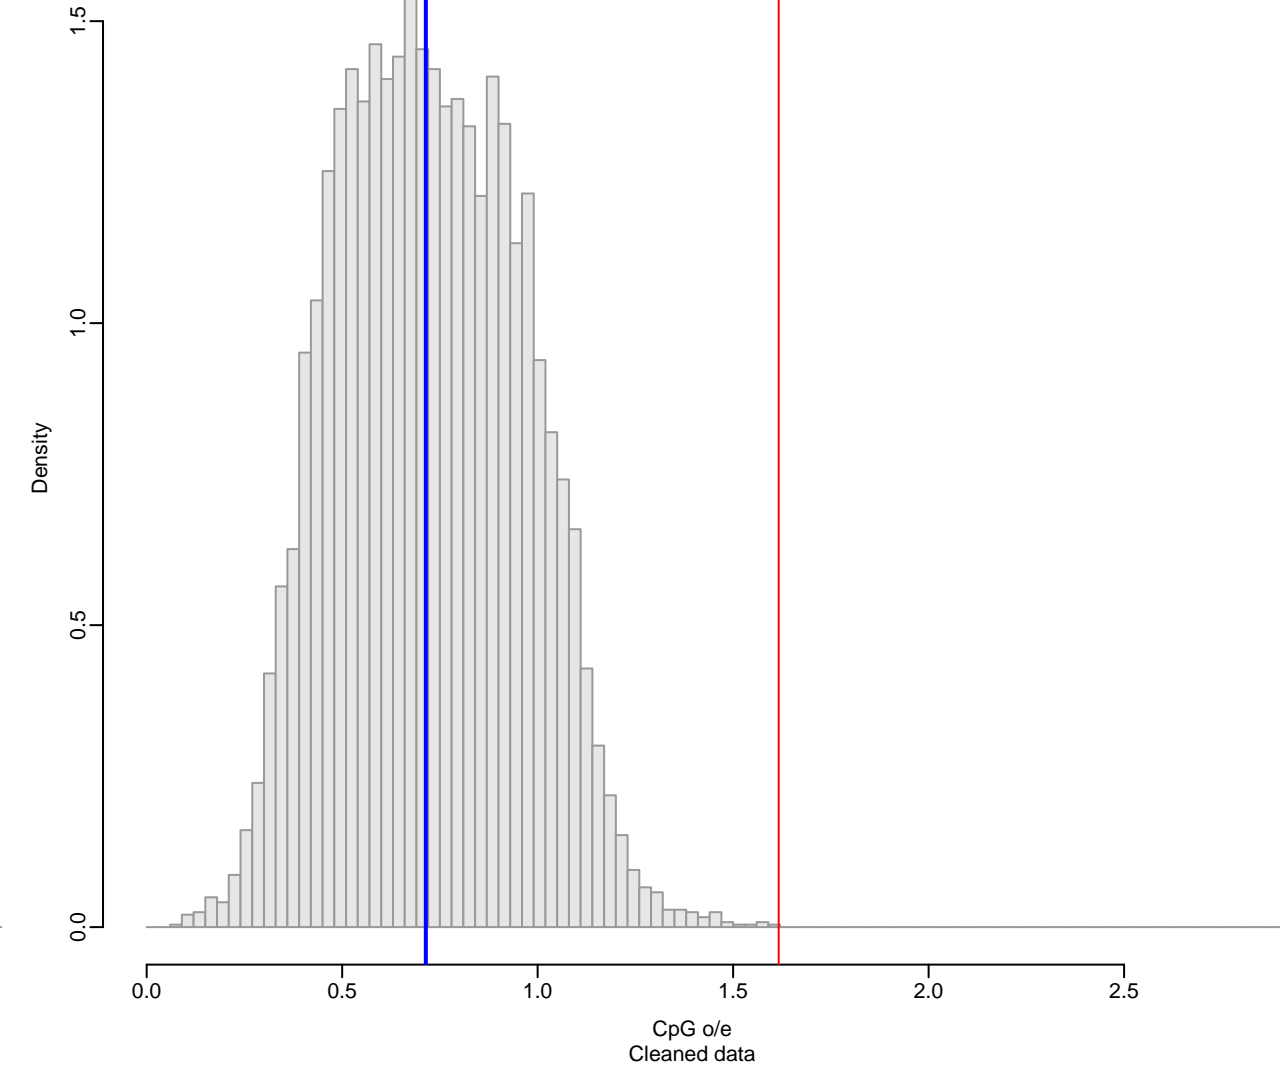

Citrus\_aurantium

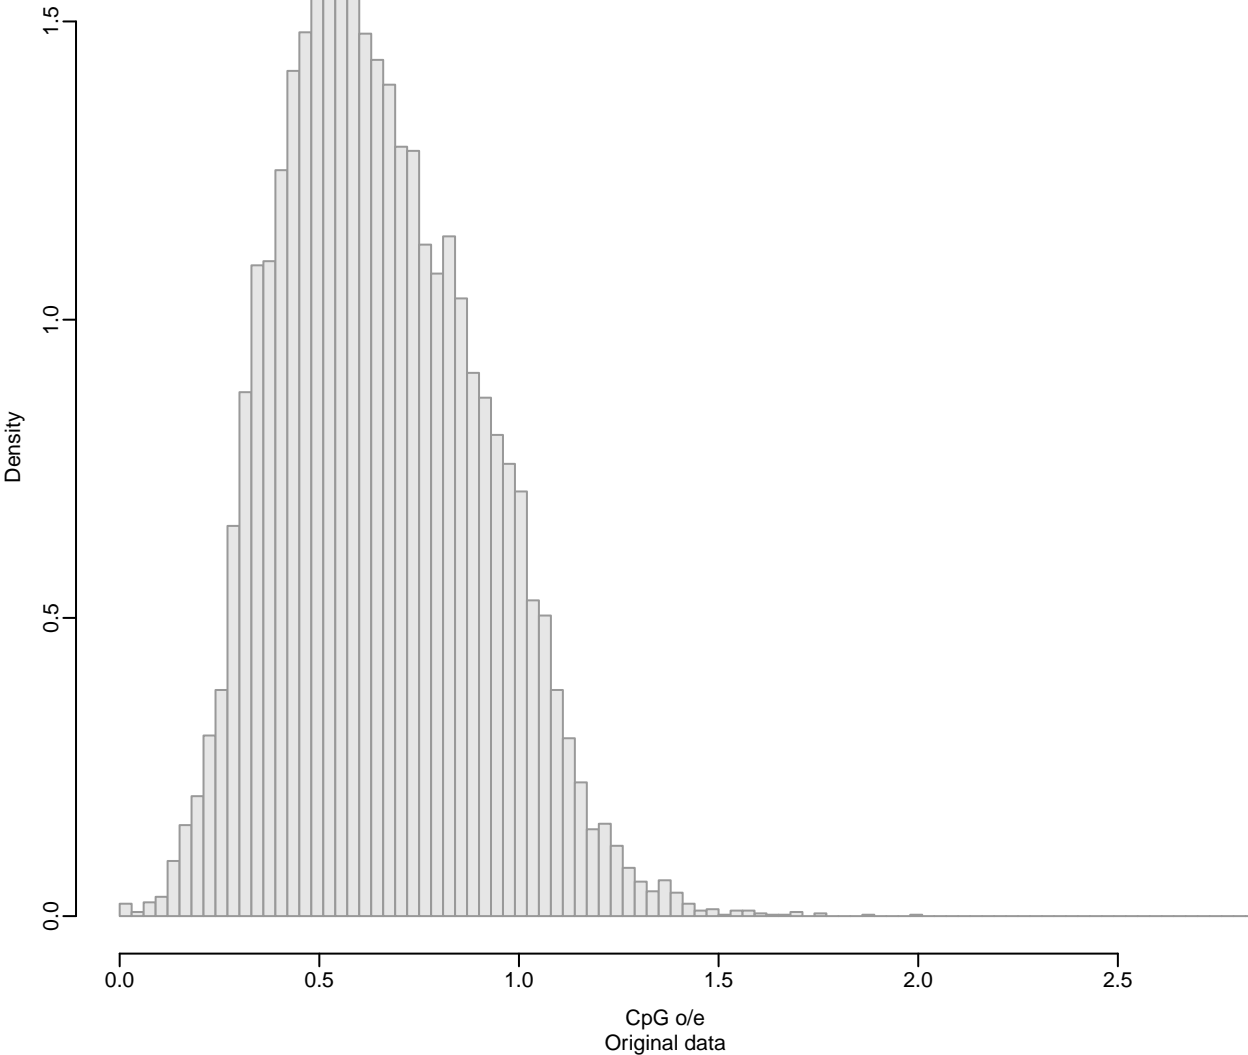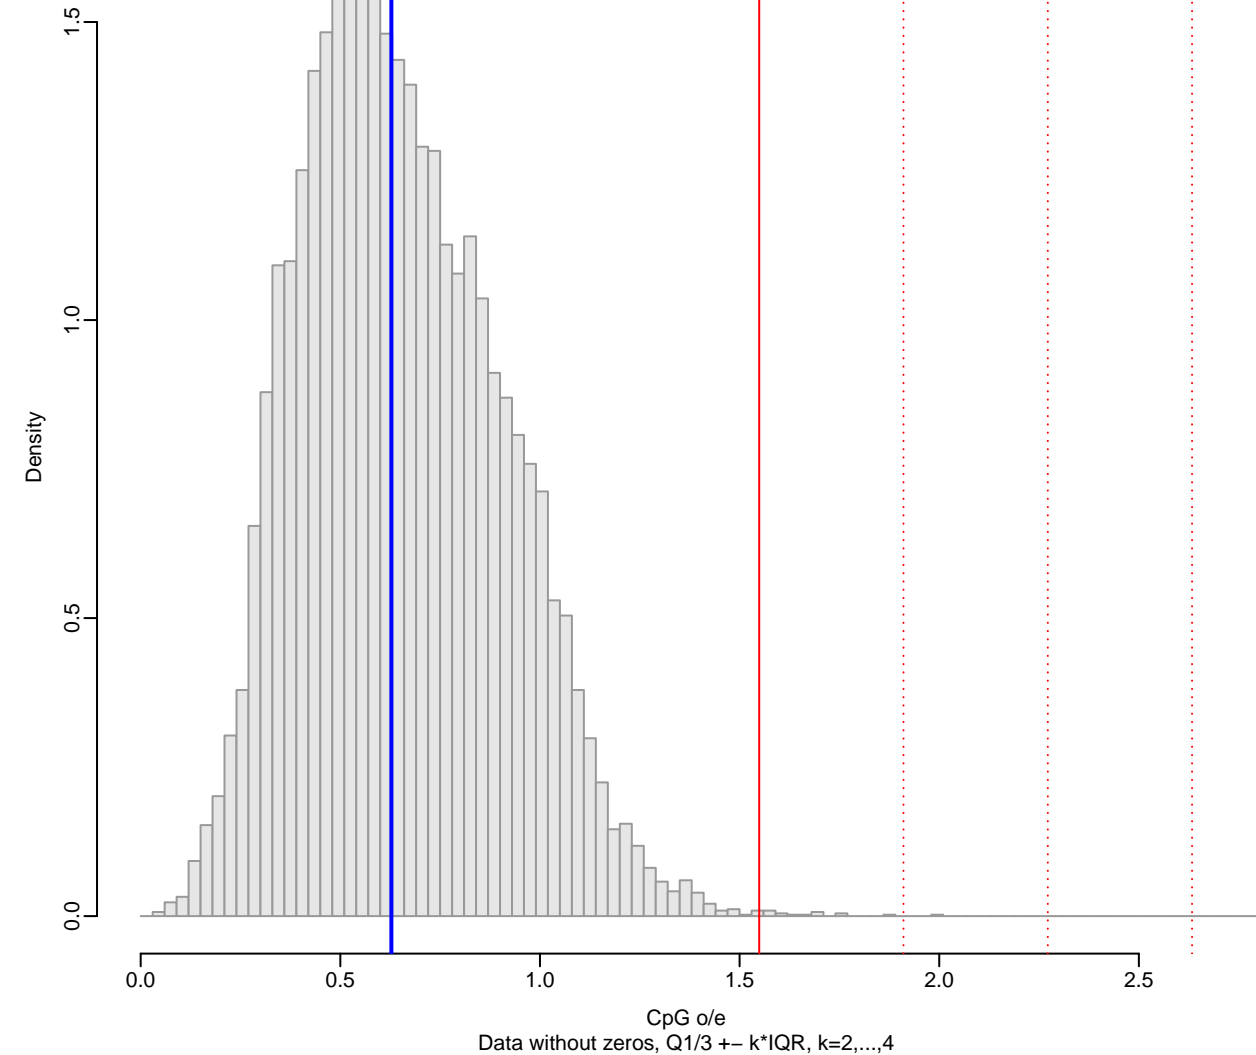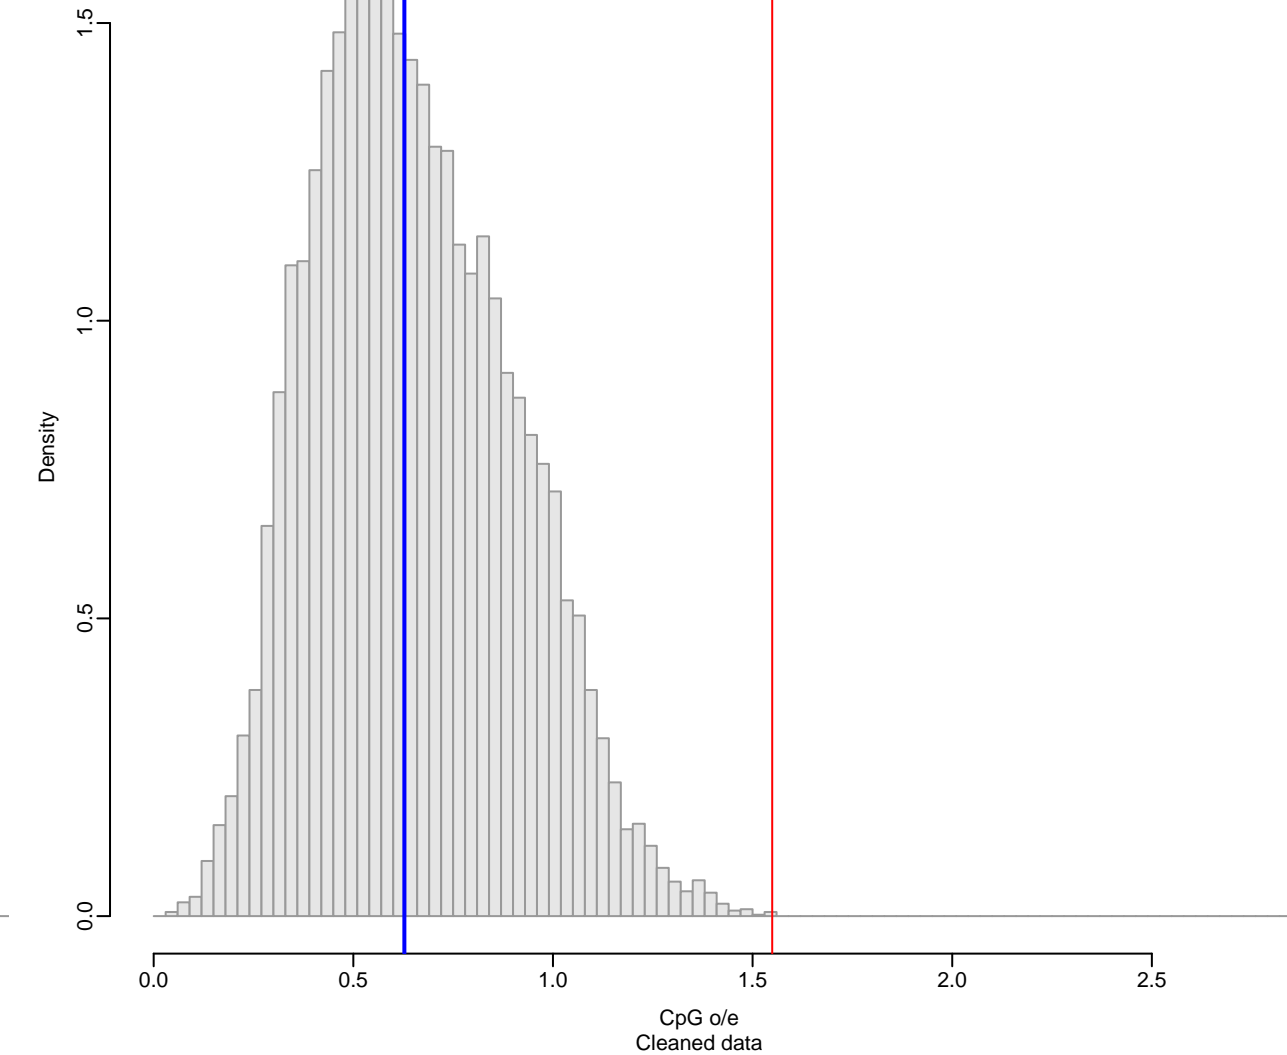

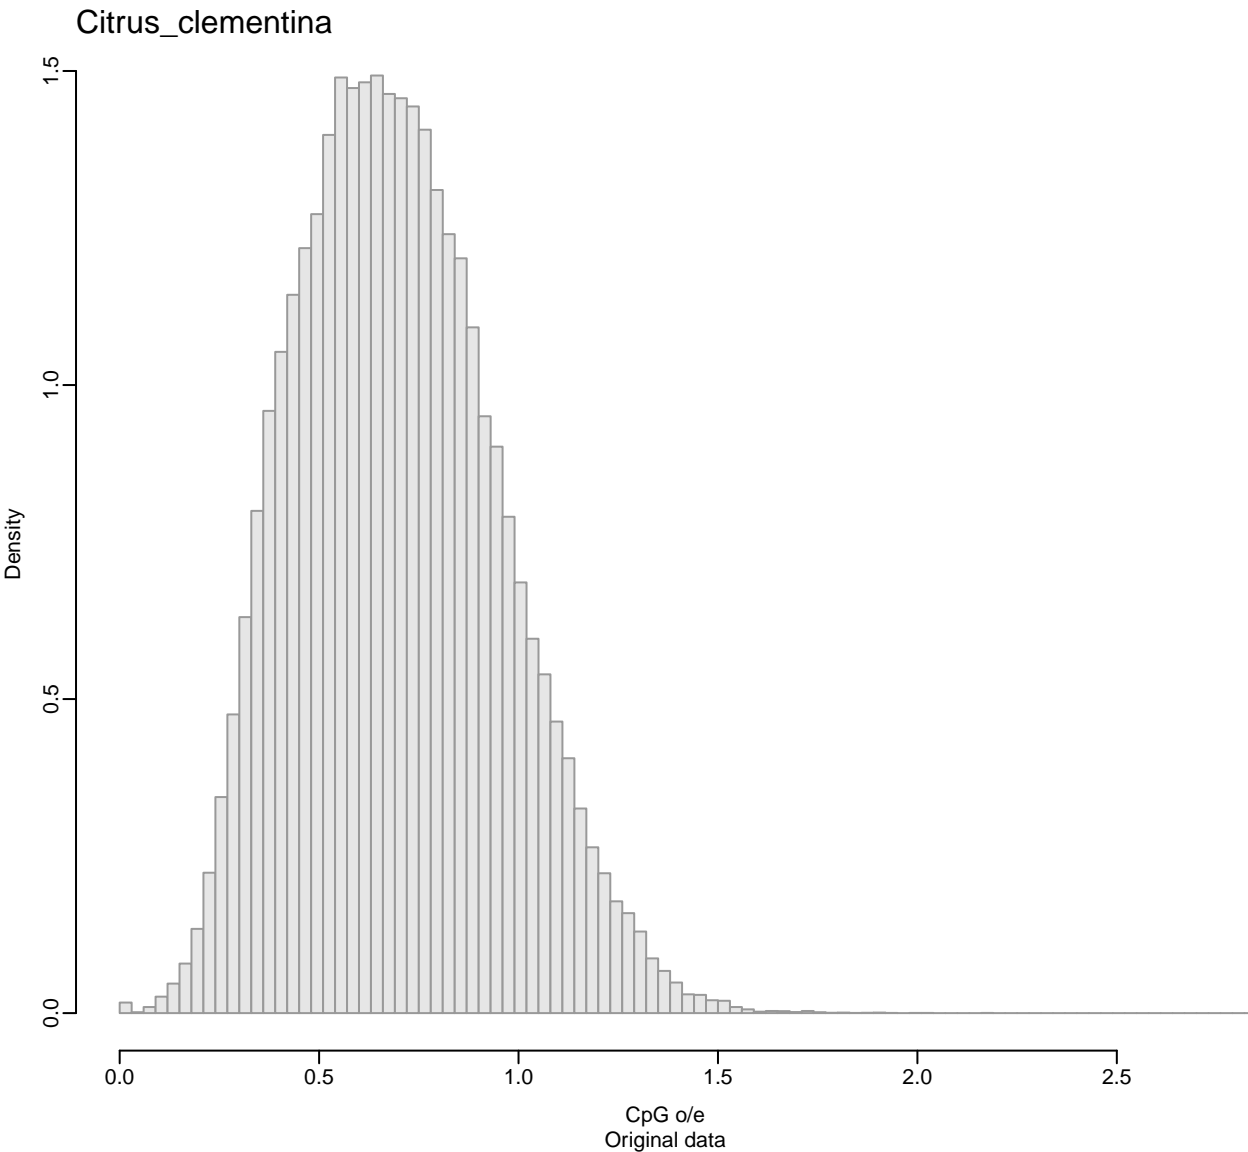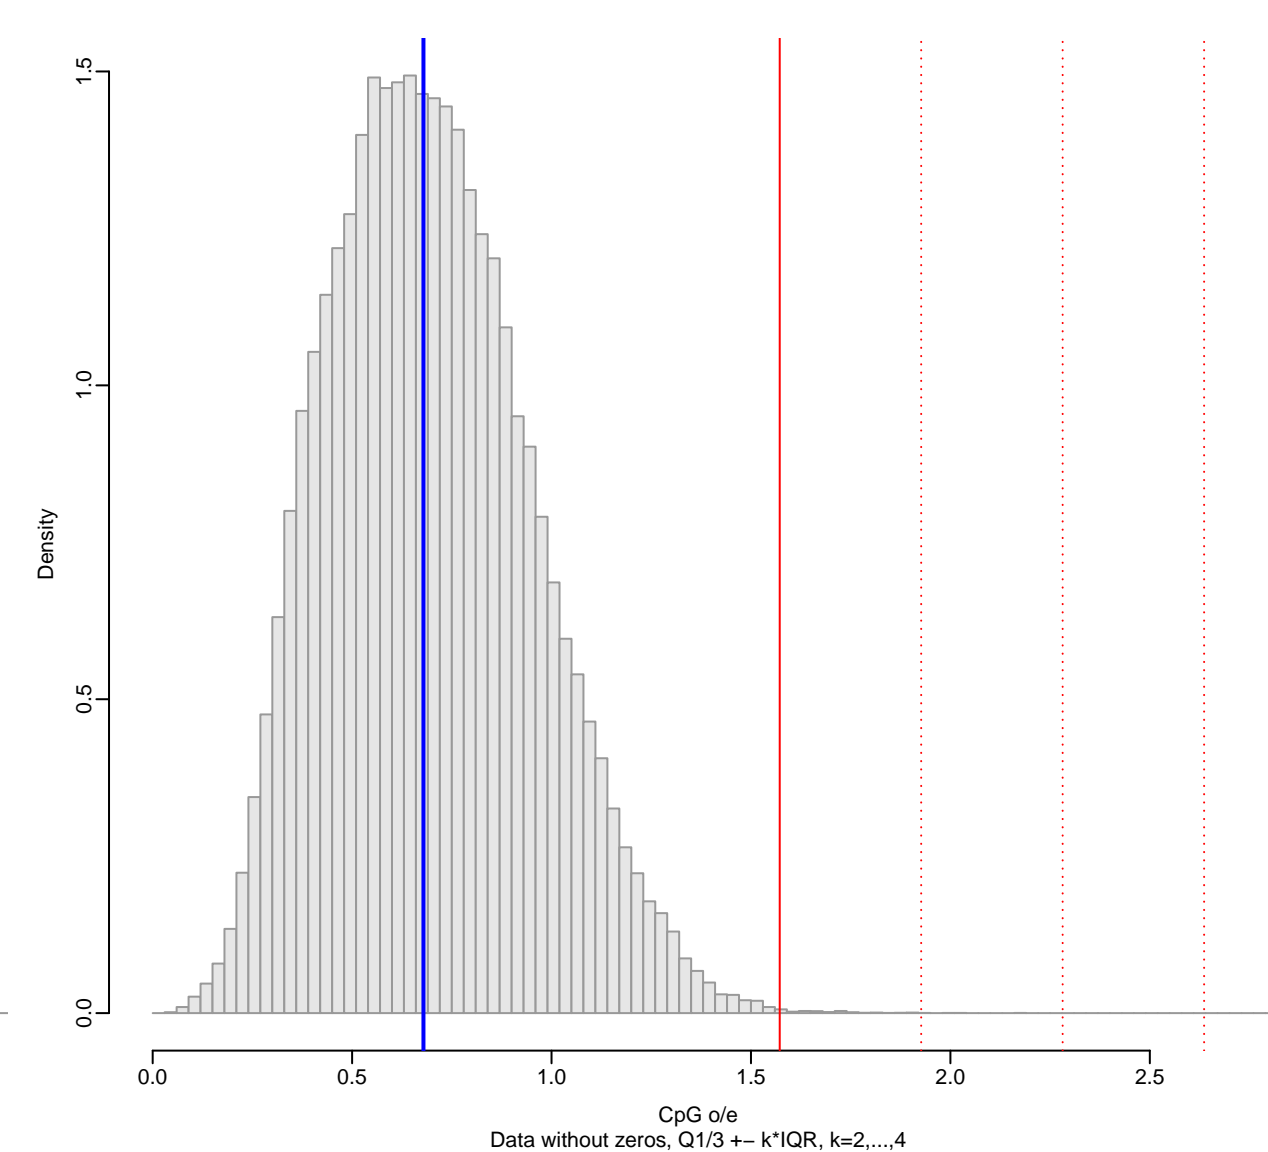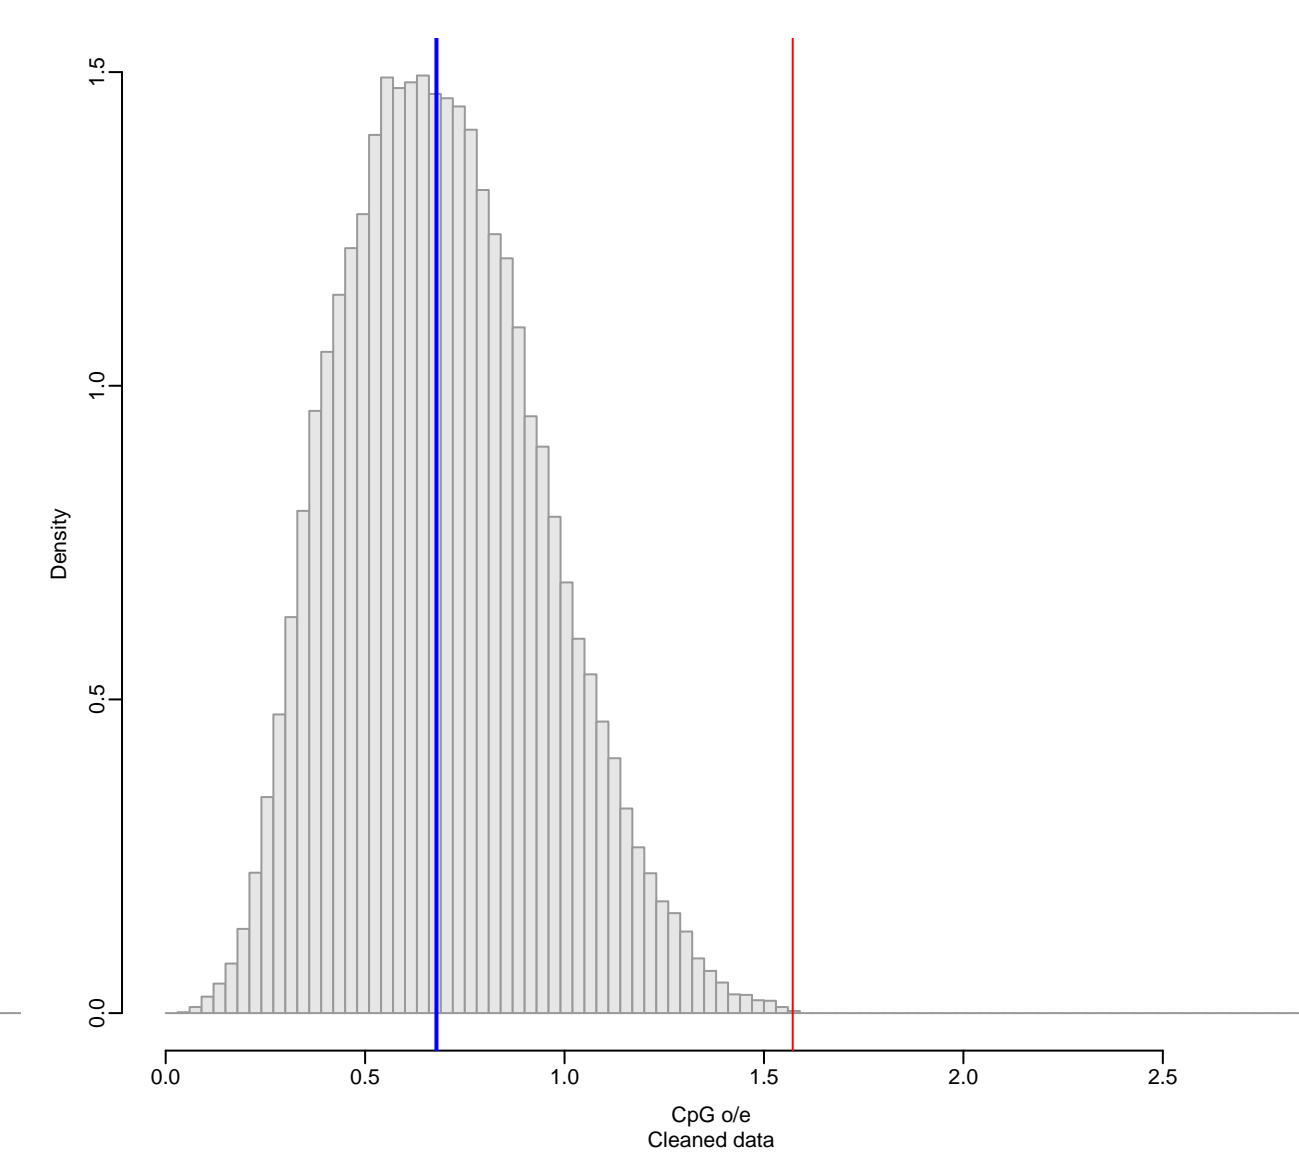

Citrus\_jambhiri

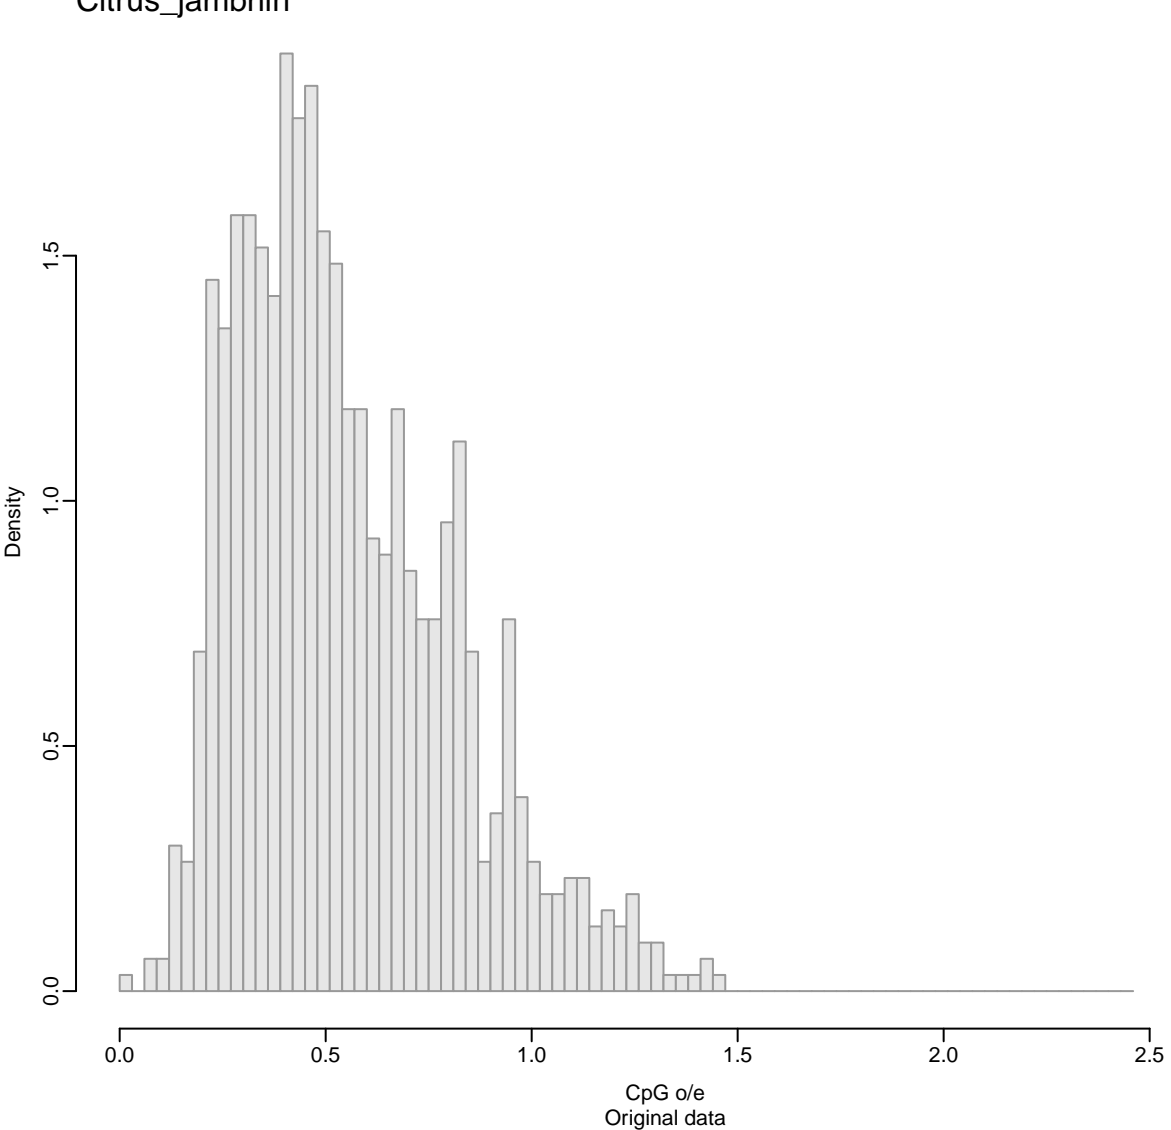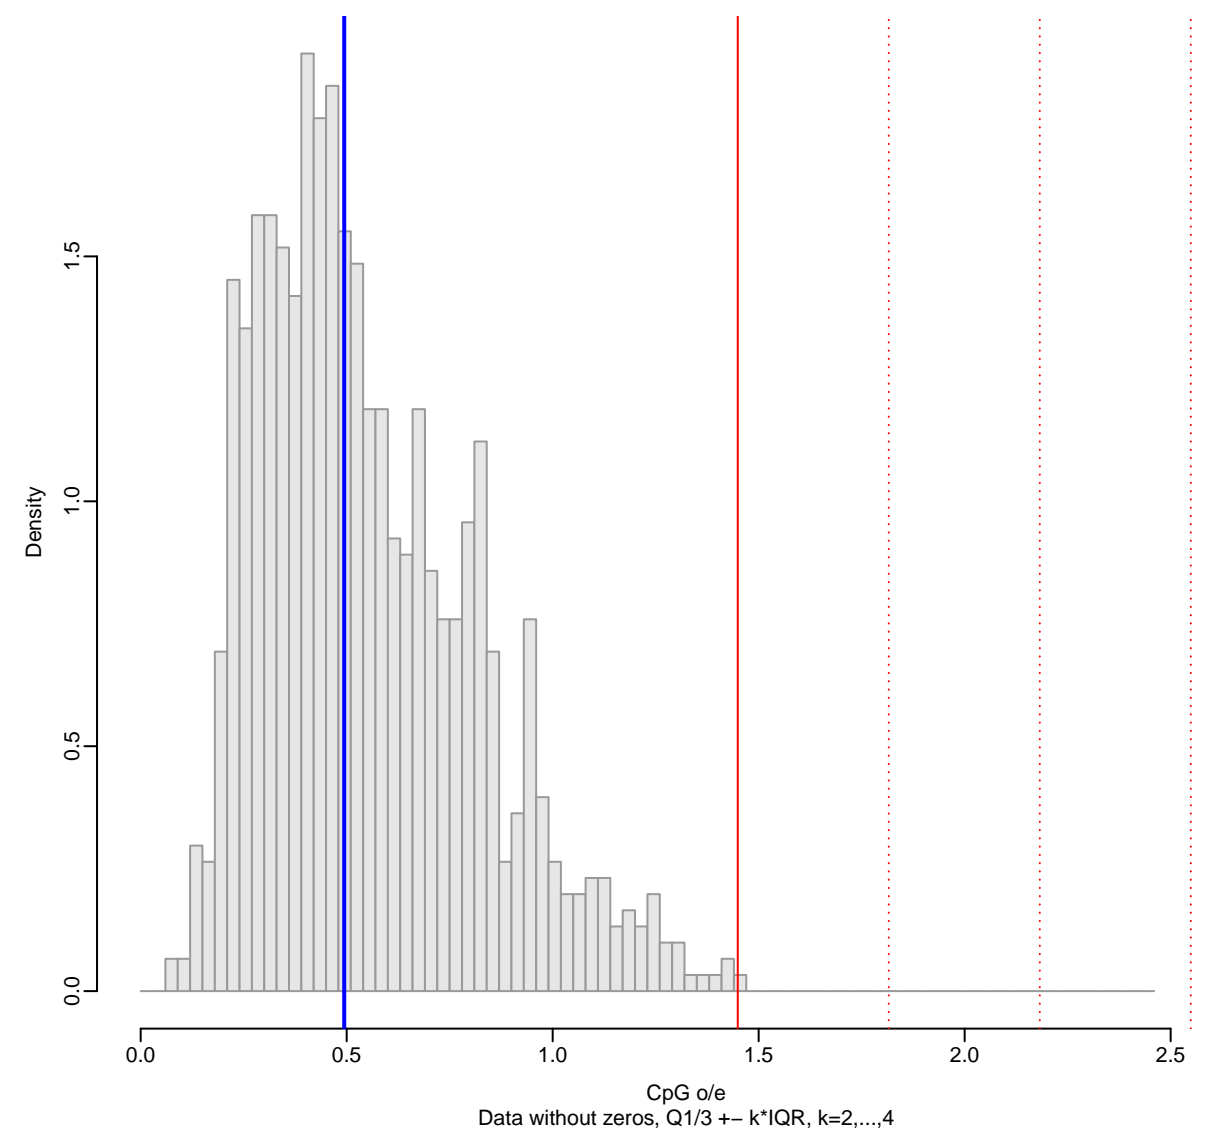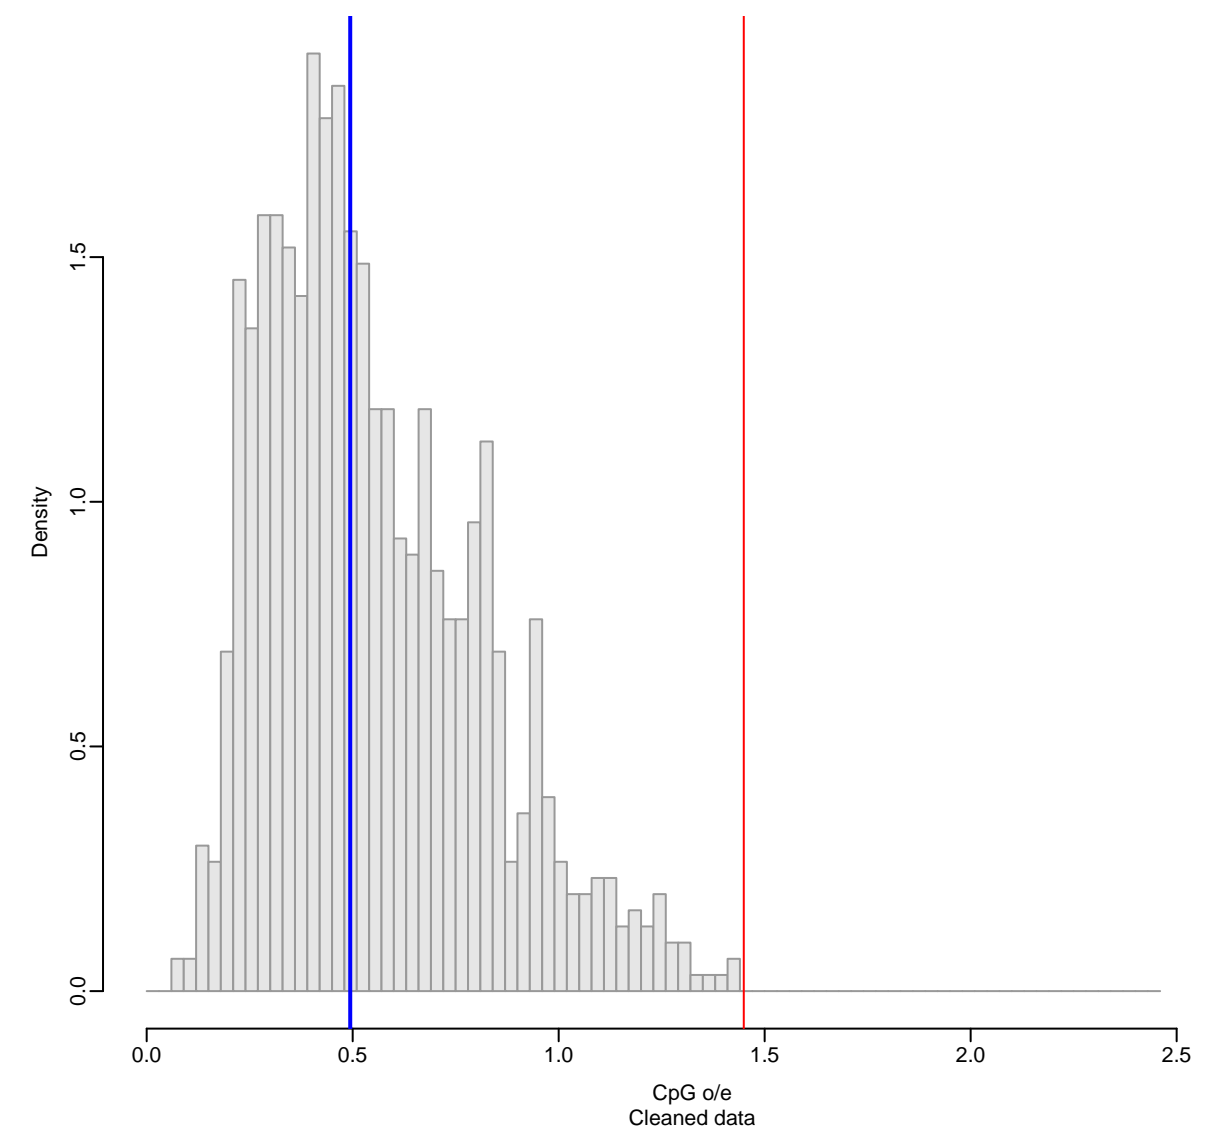



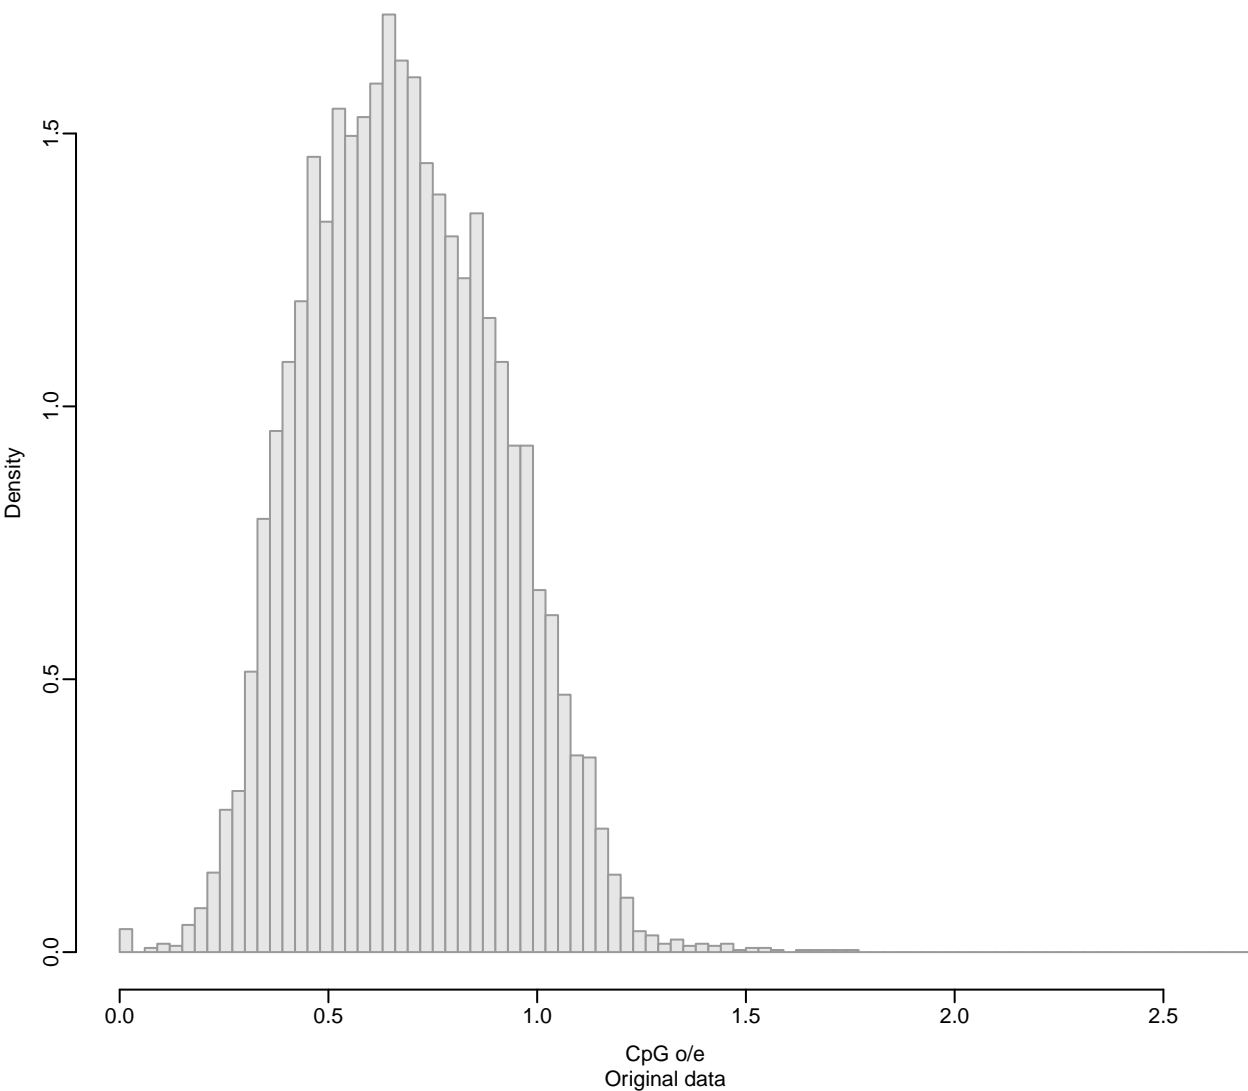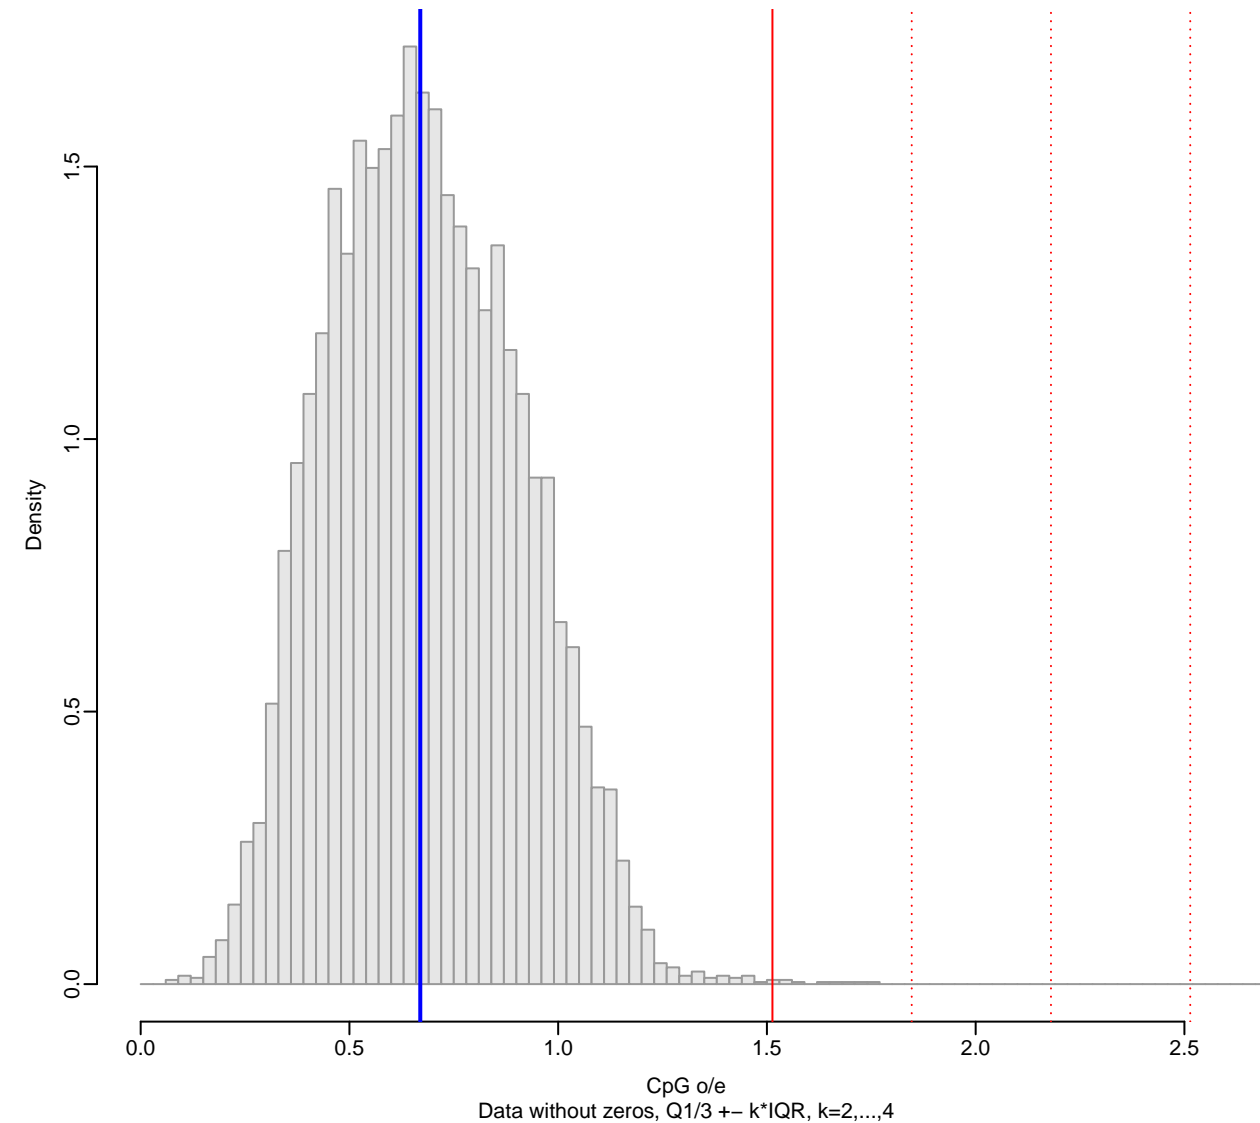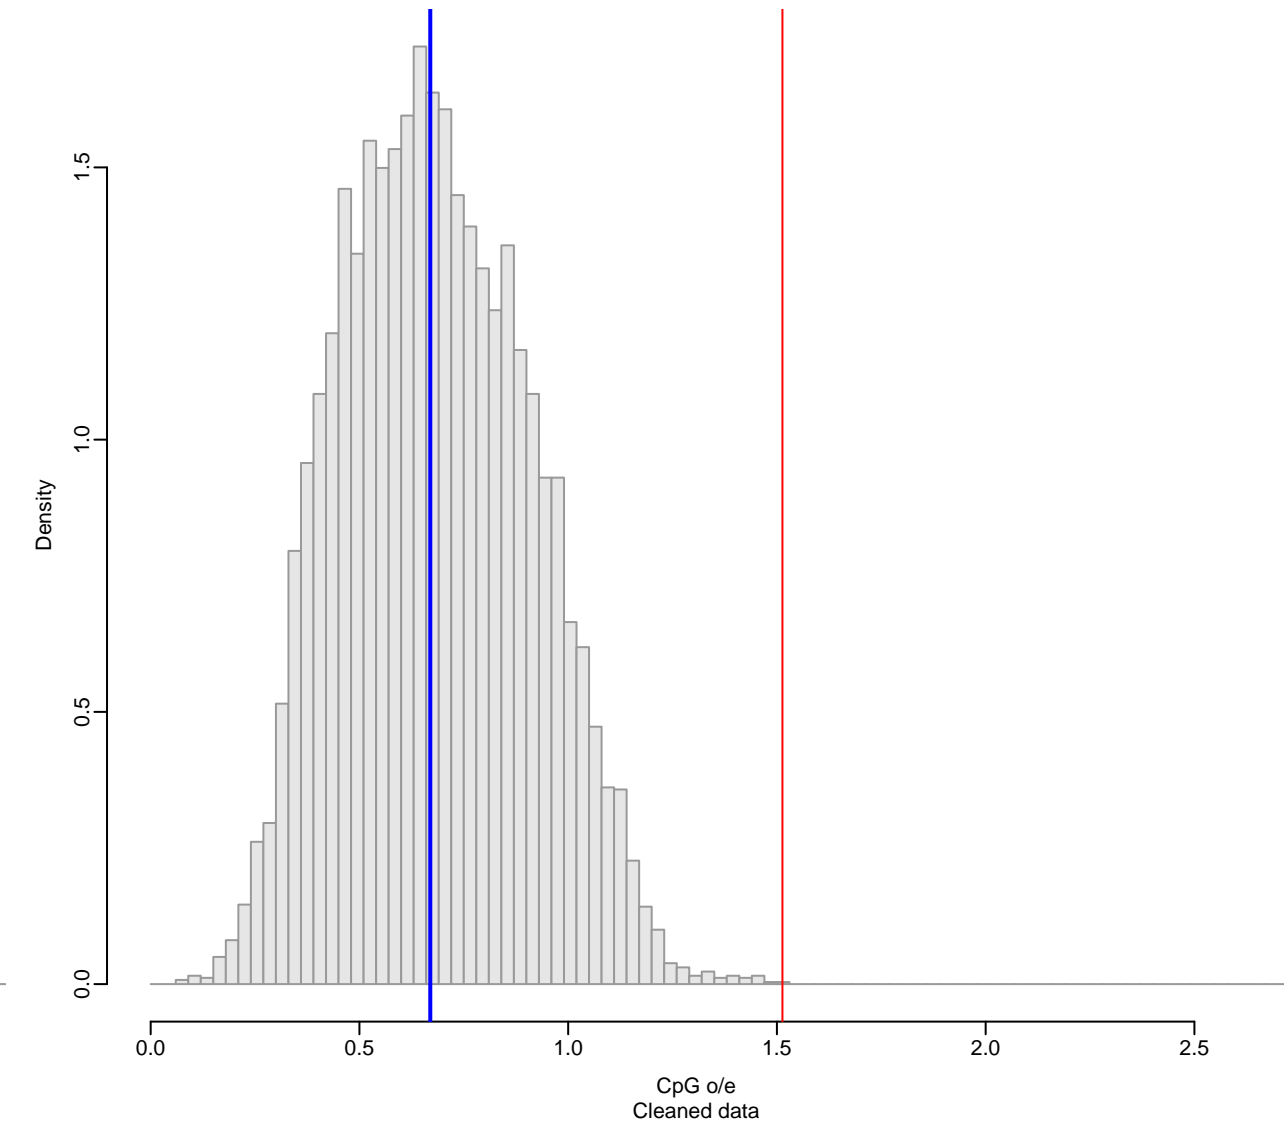

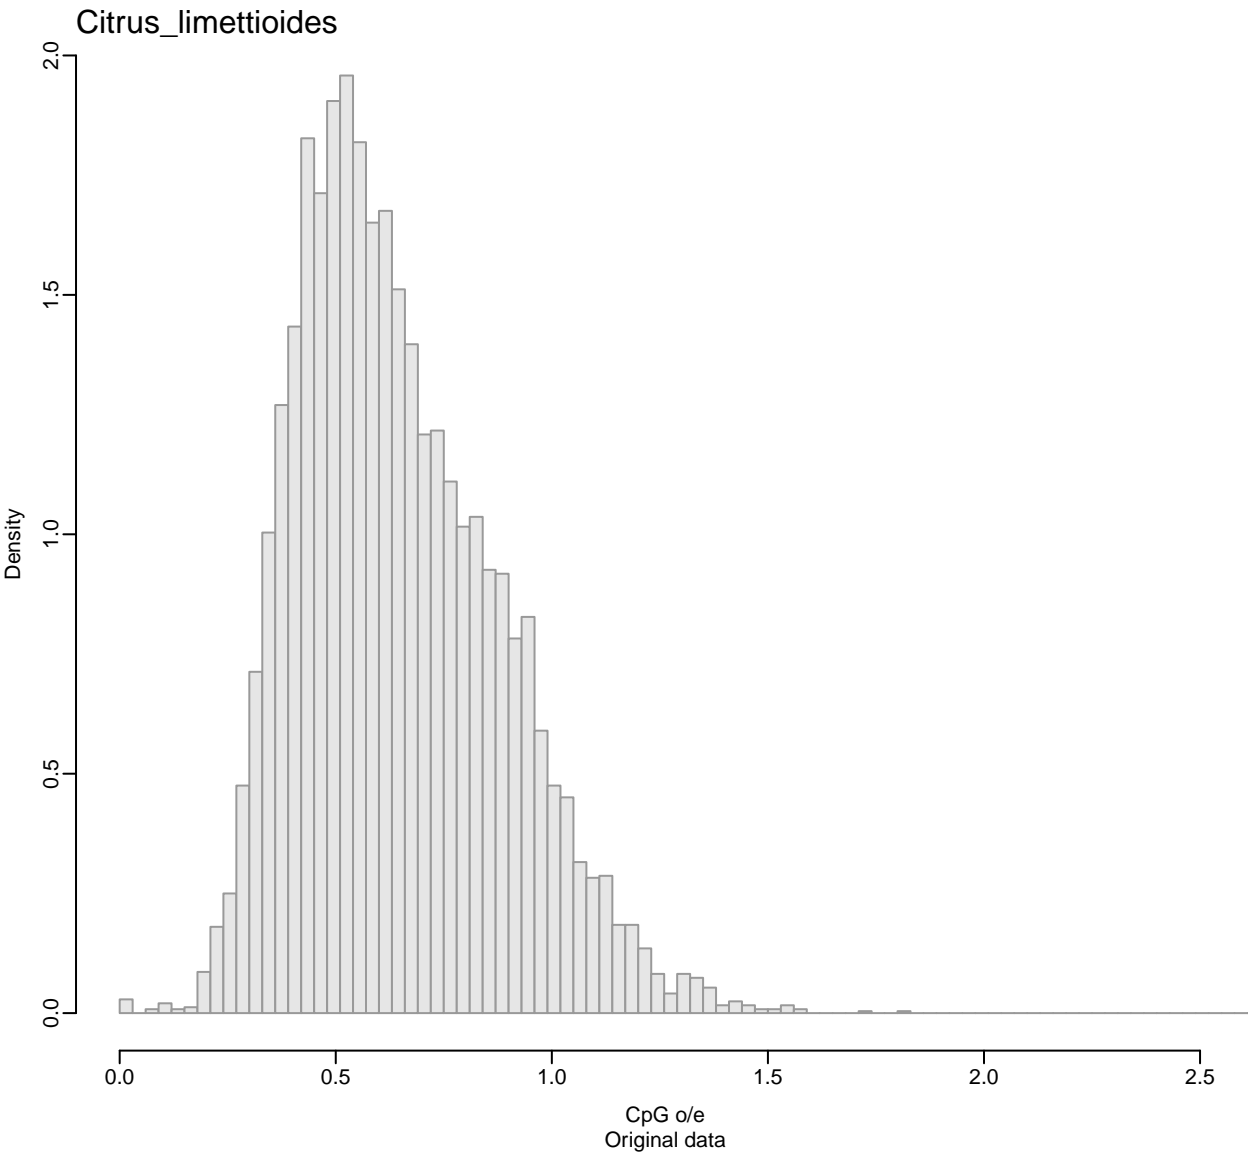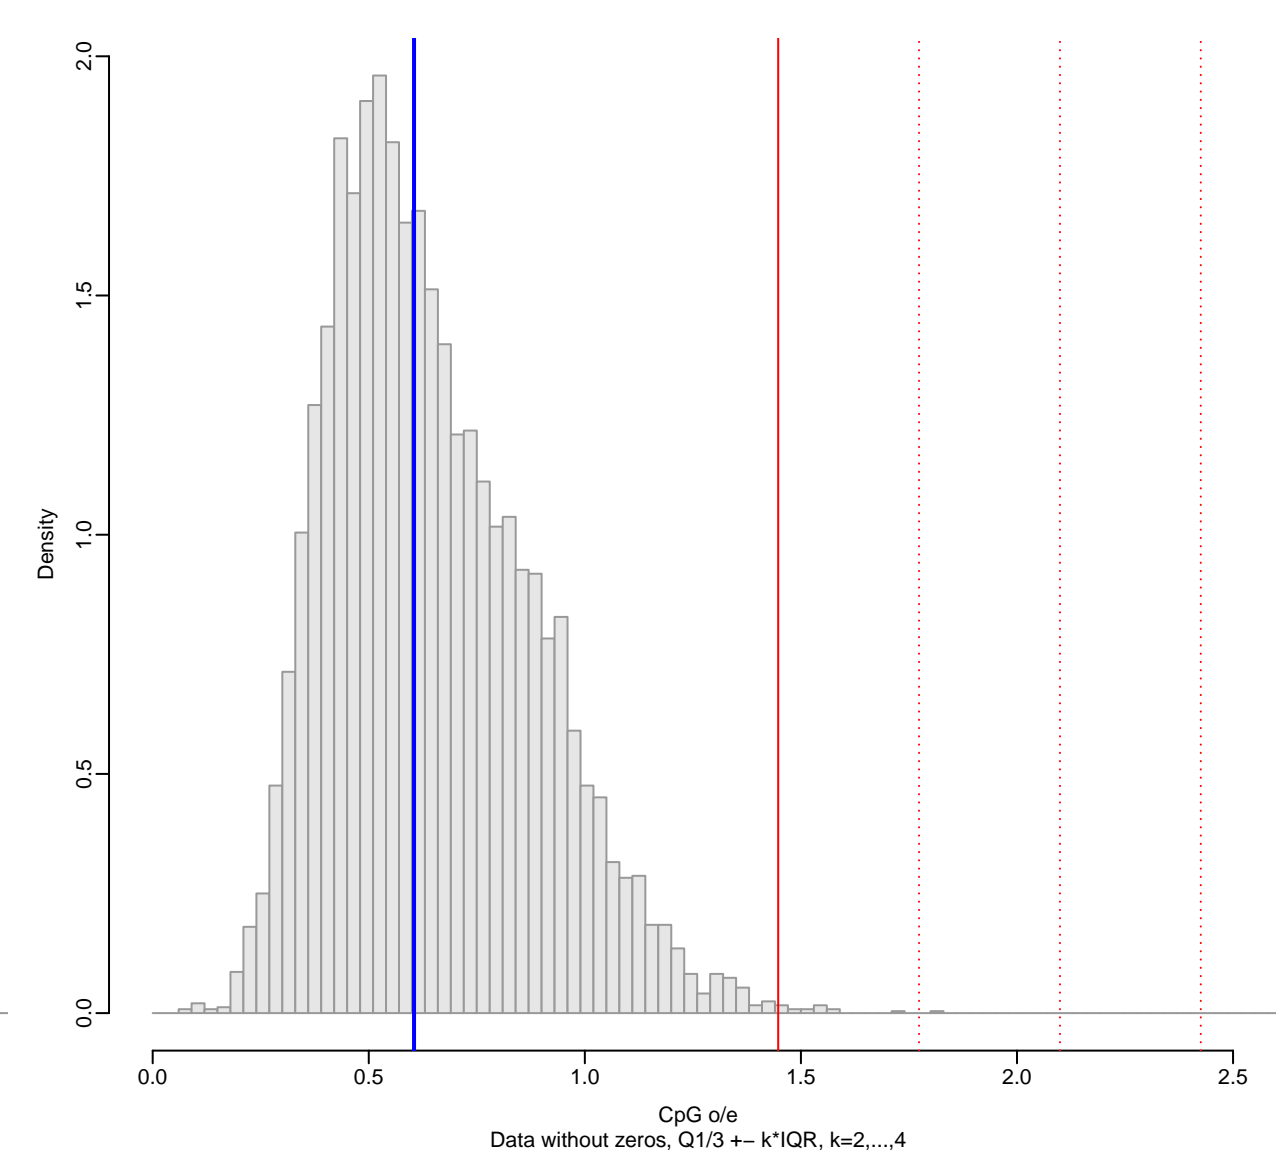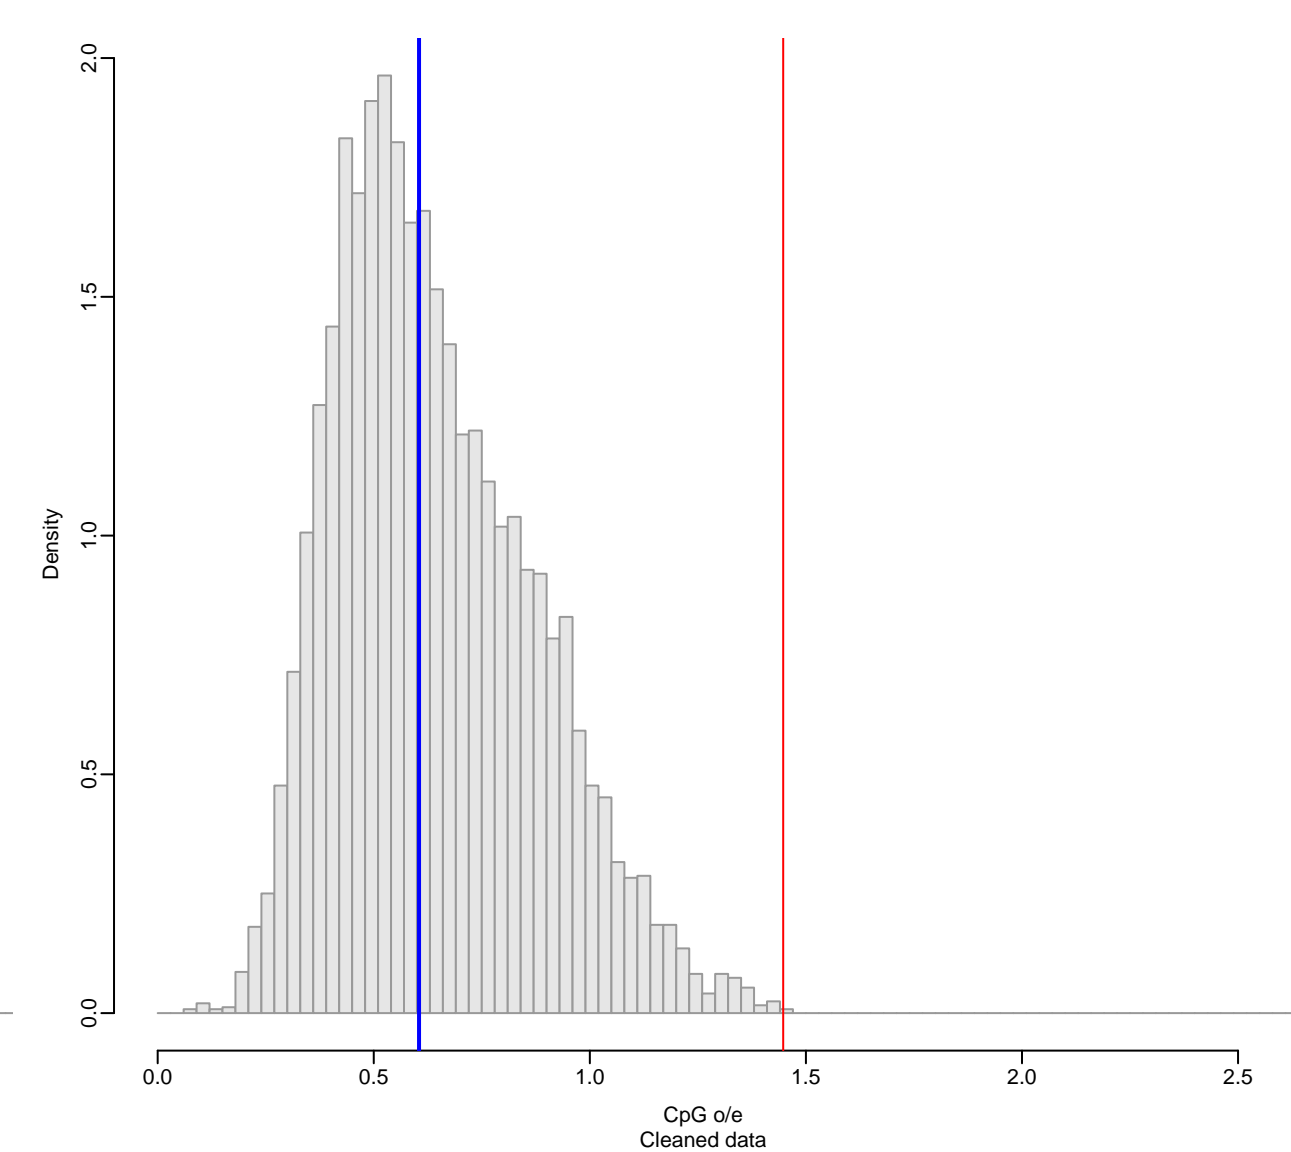

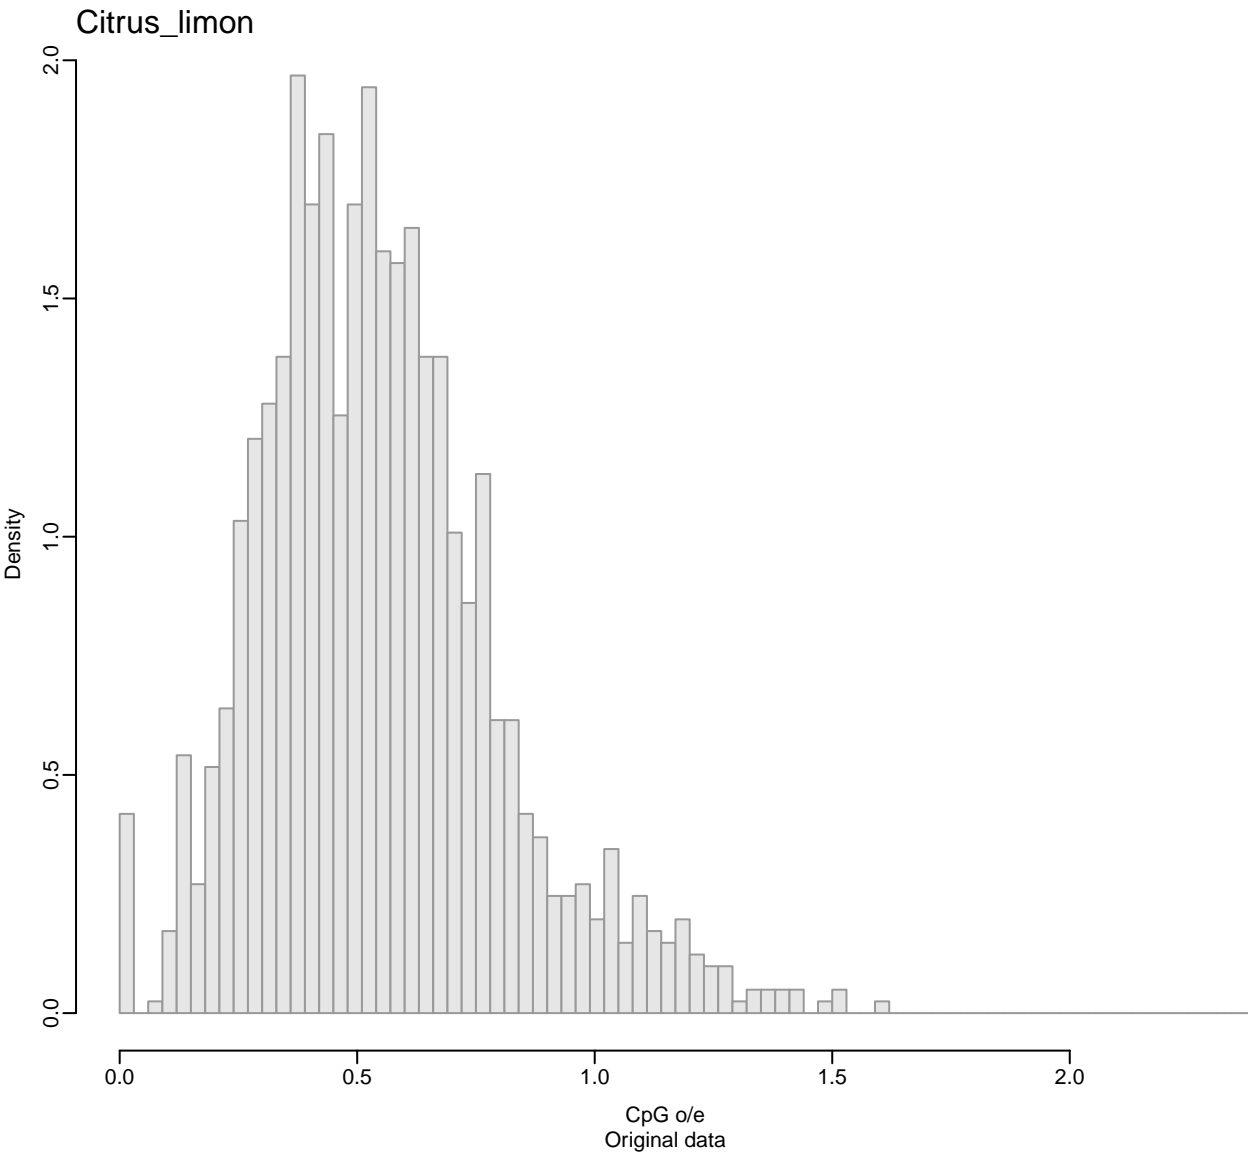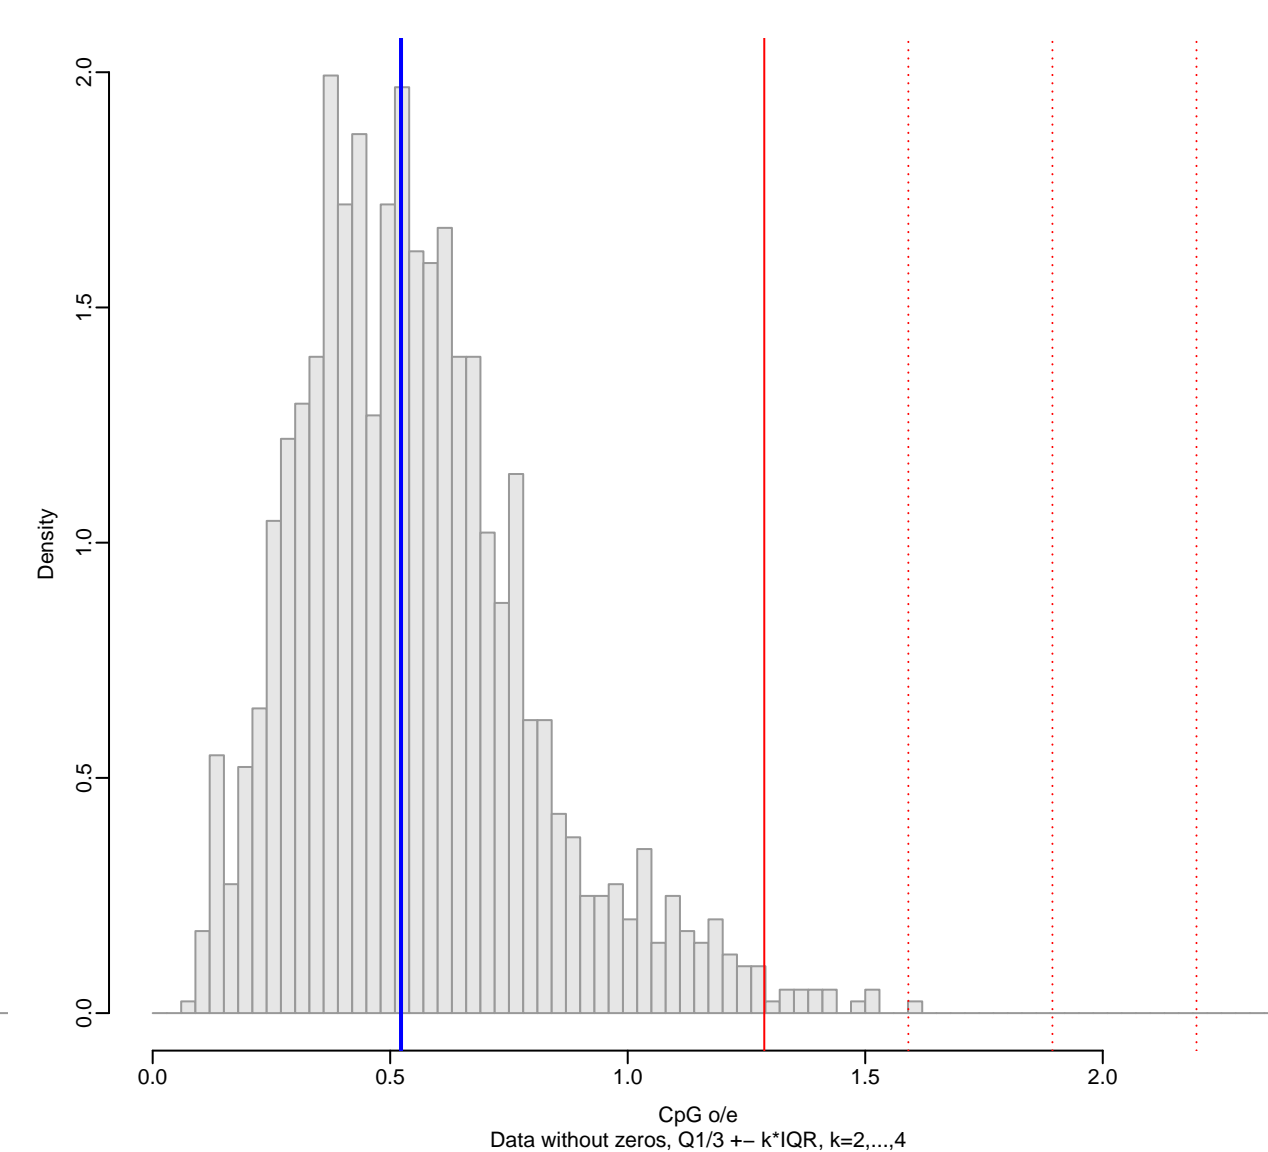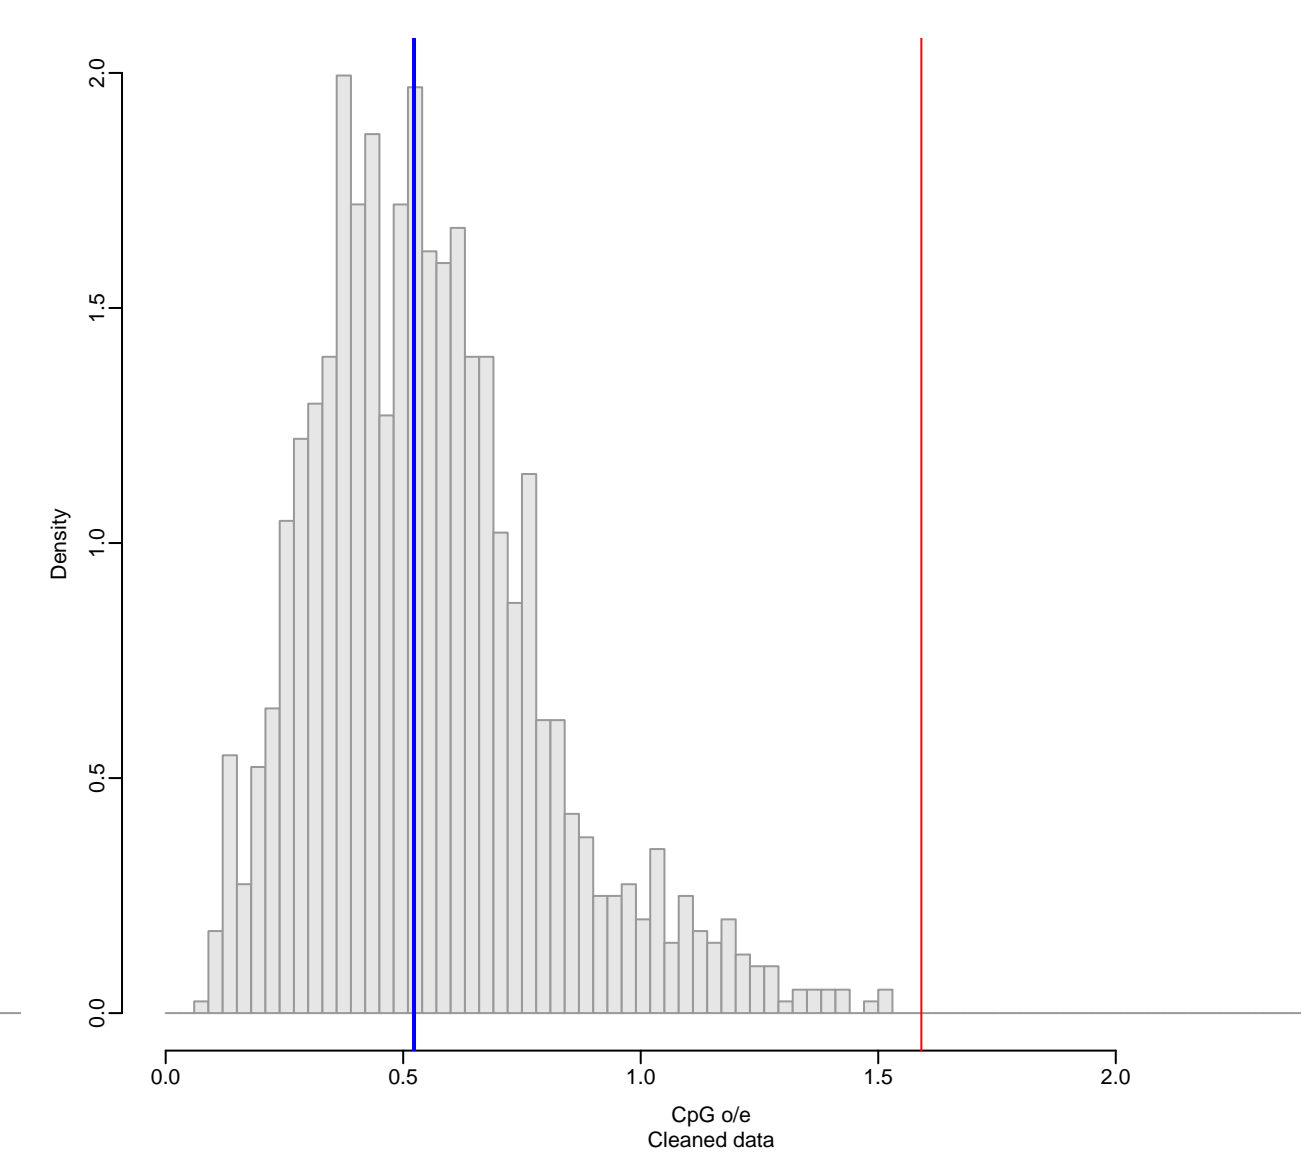

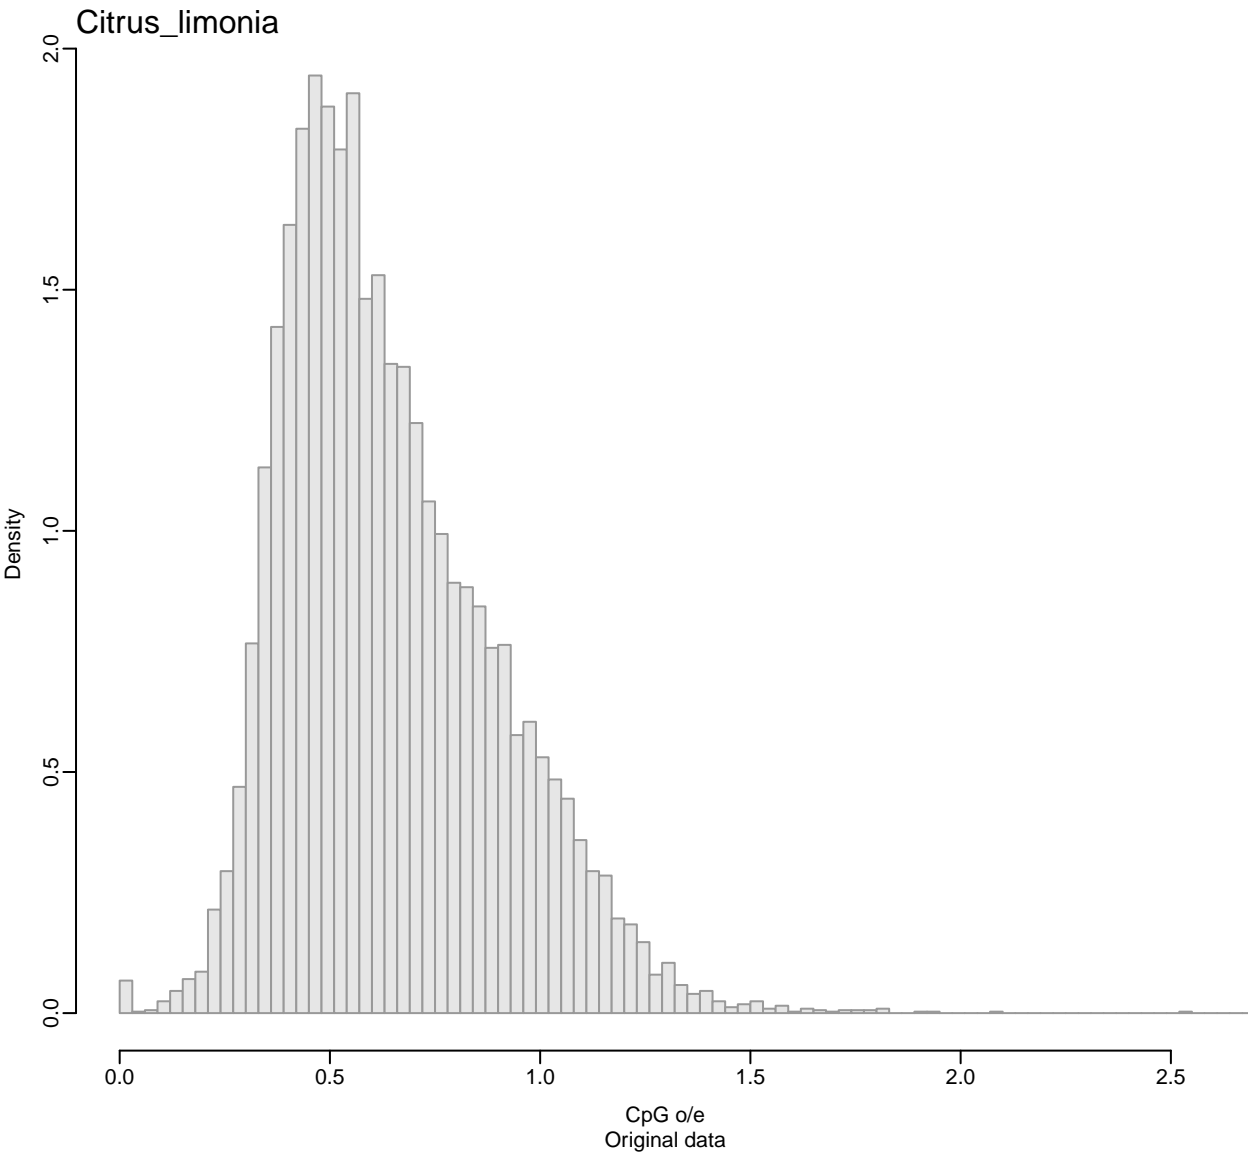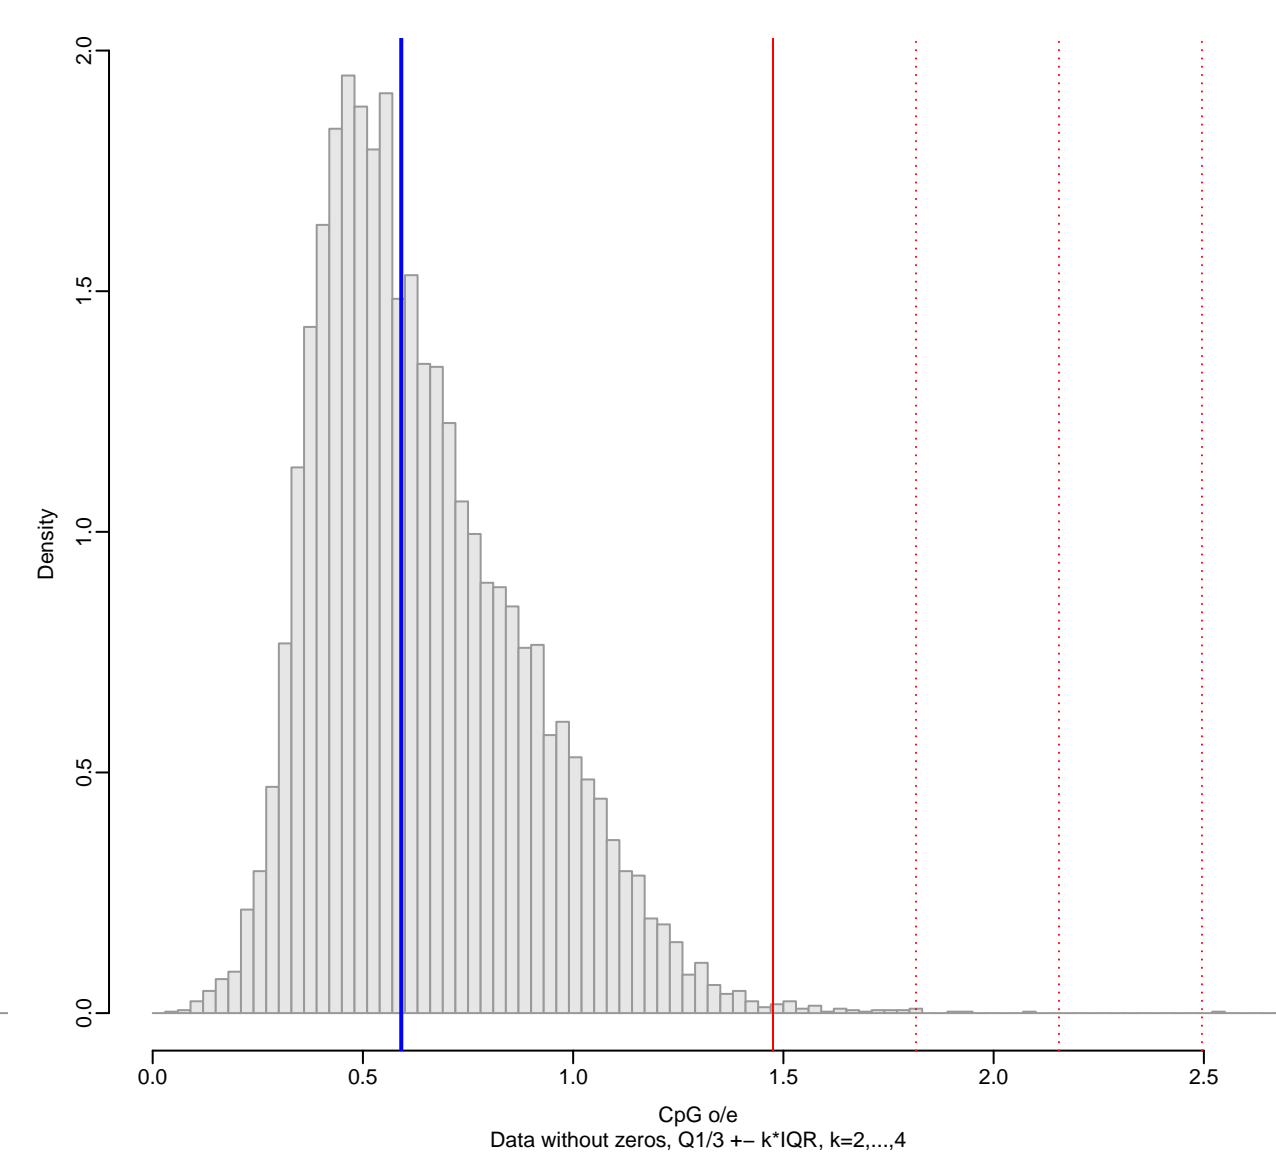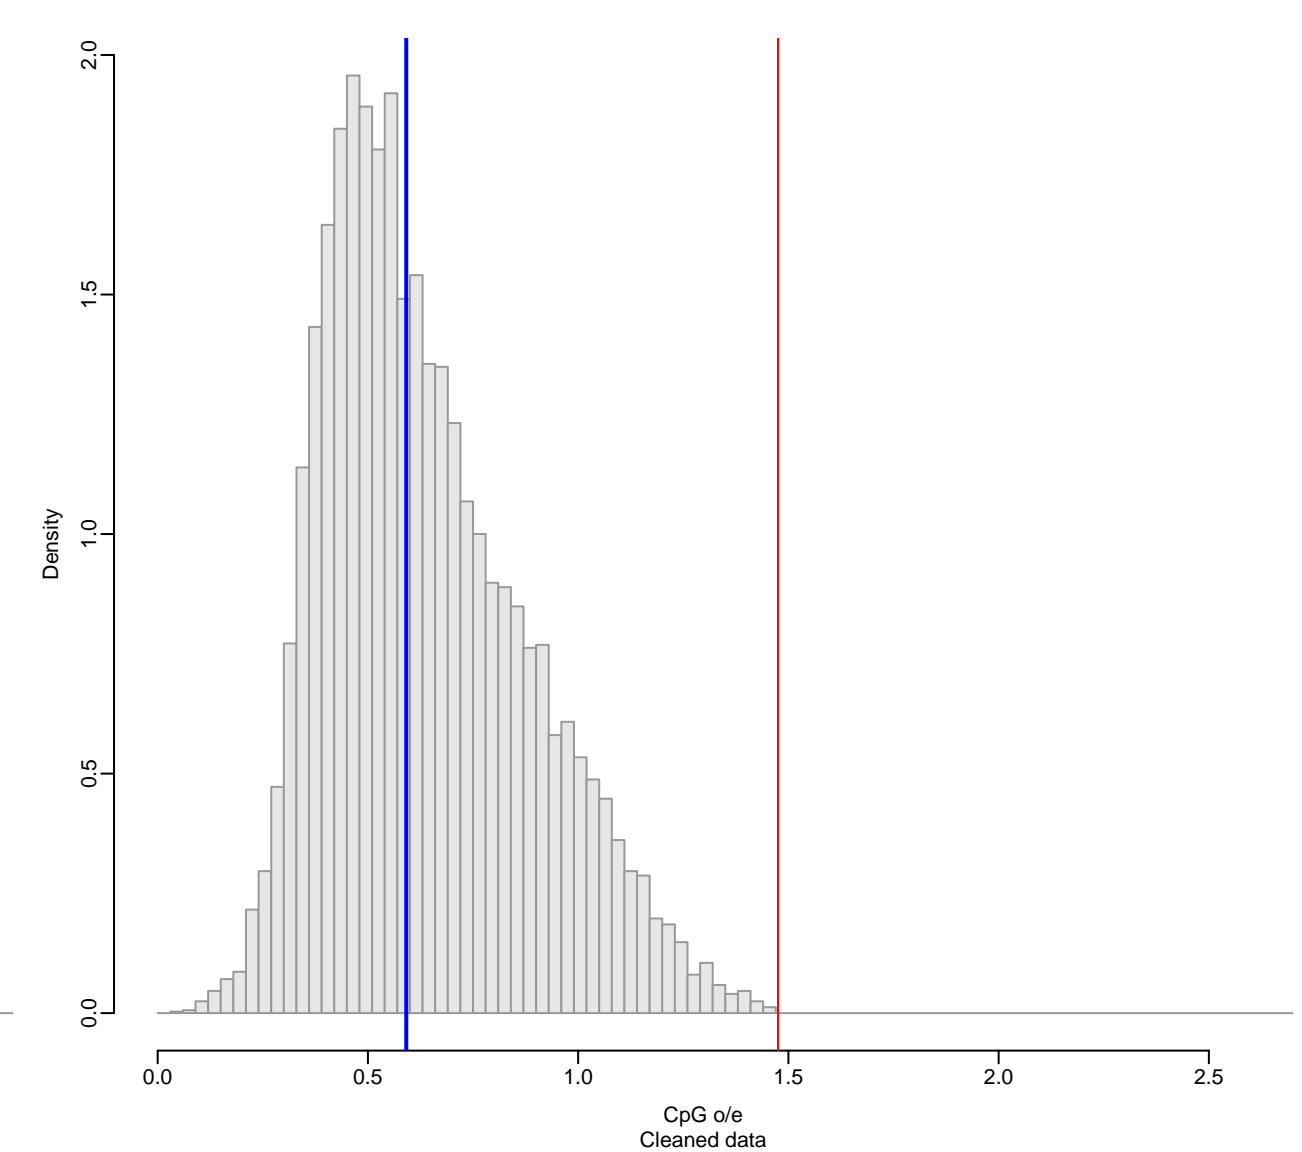

Citrus\_macrophylla

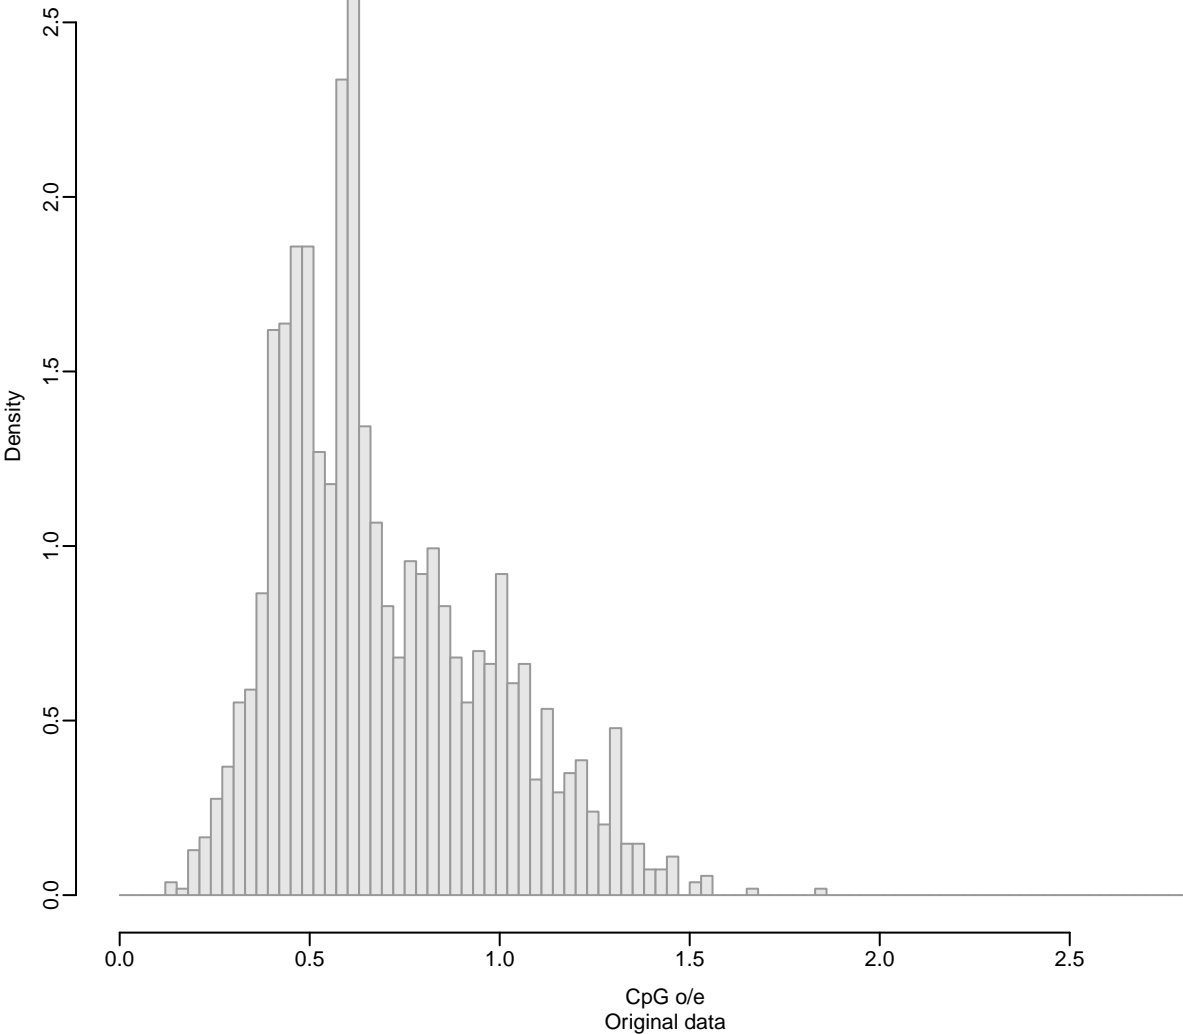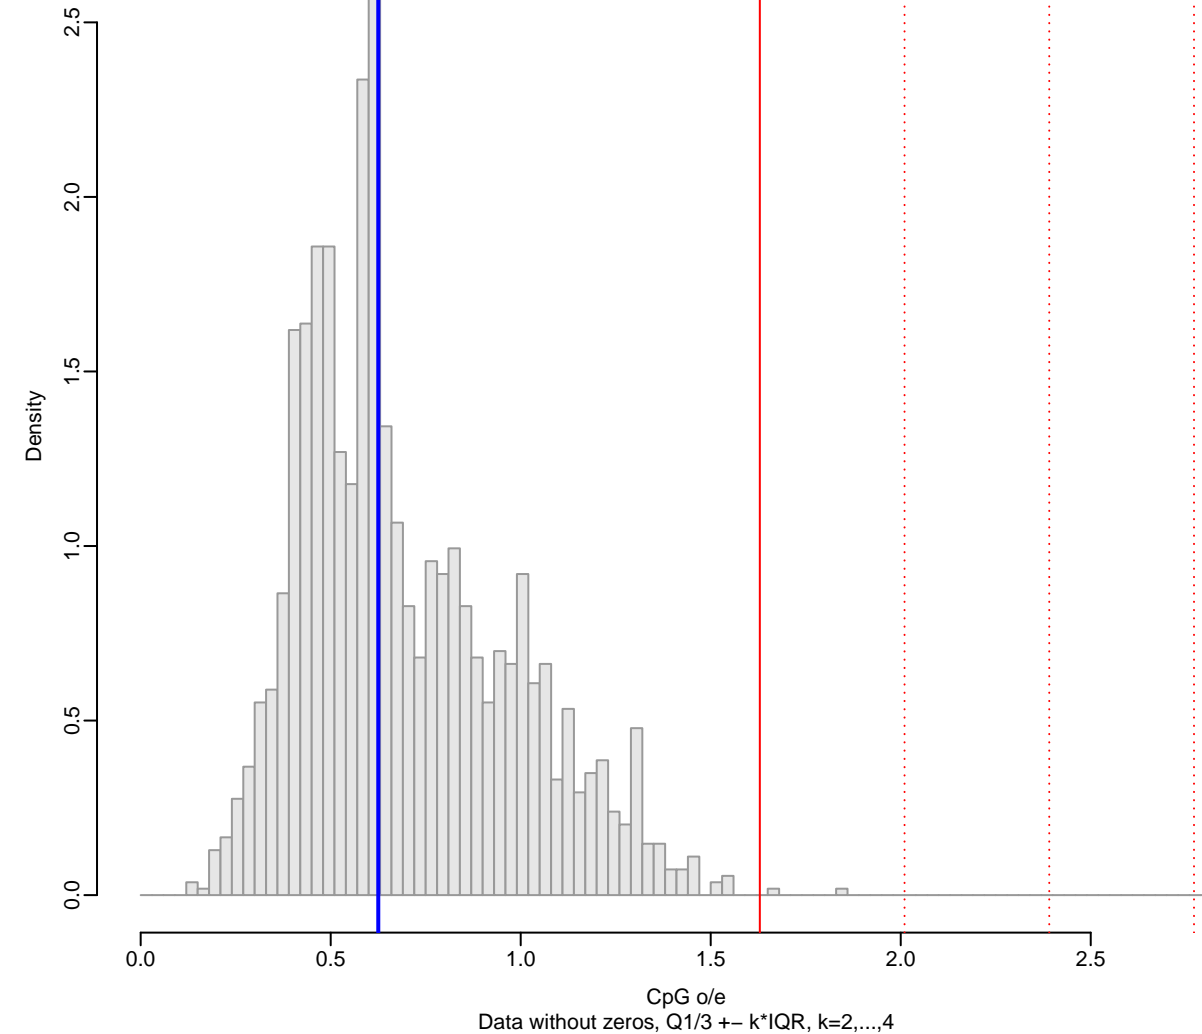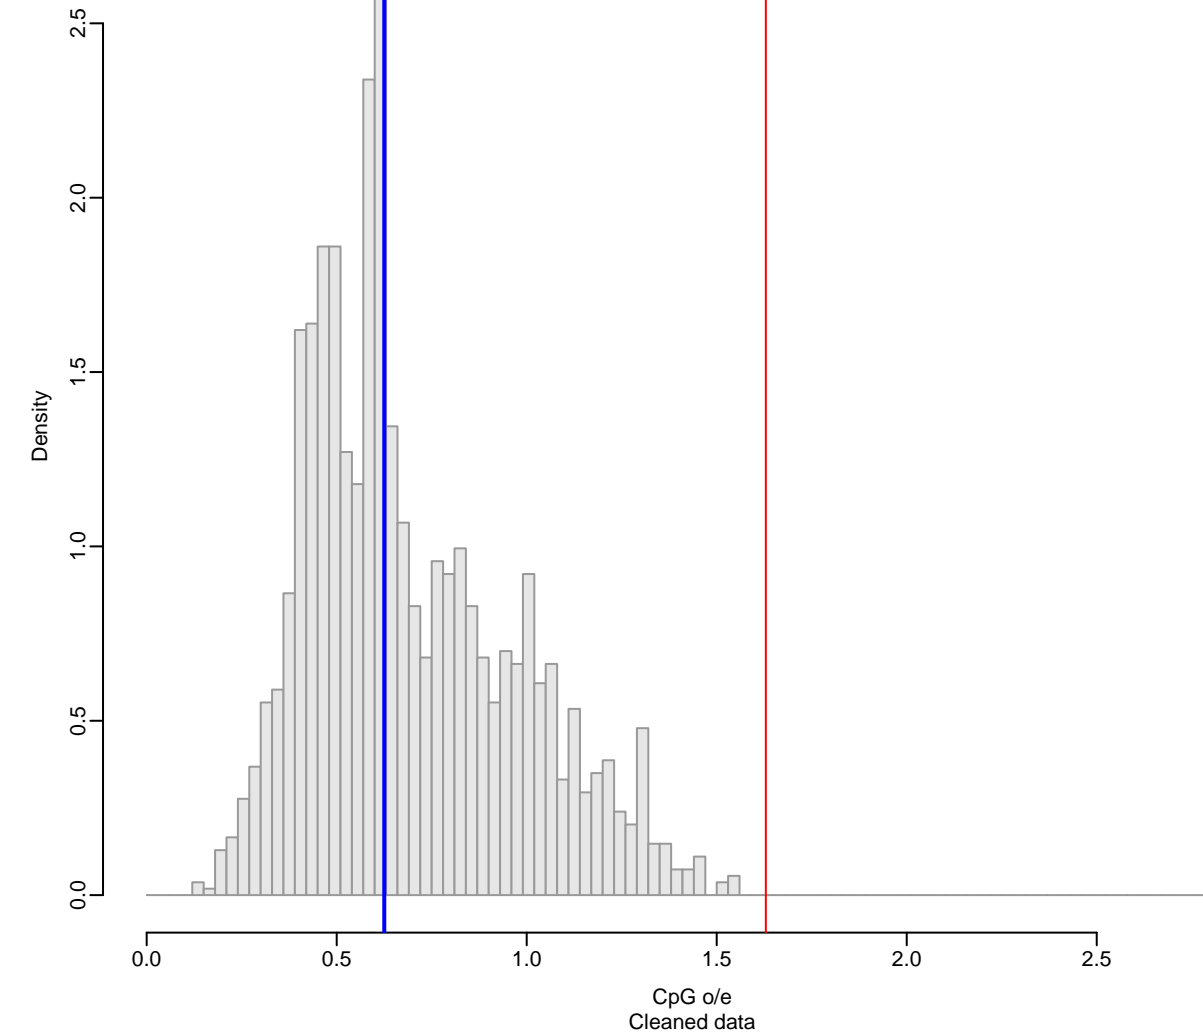

Citrus\_medica

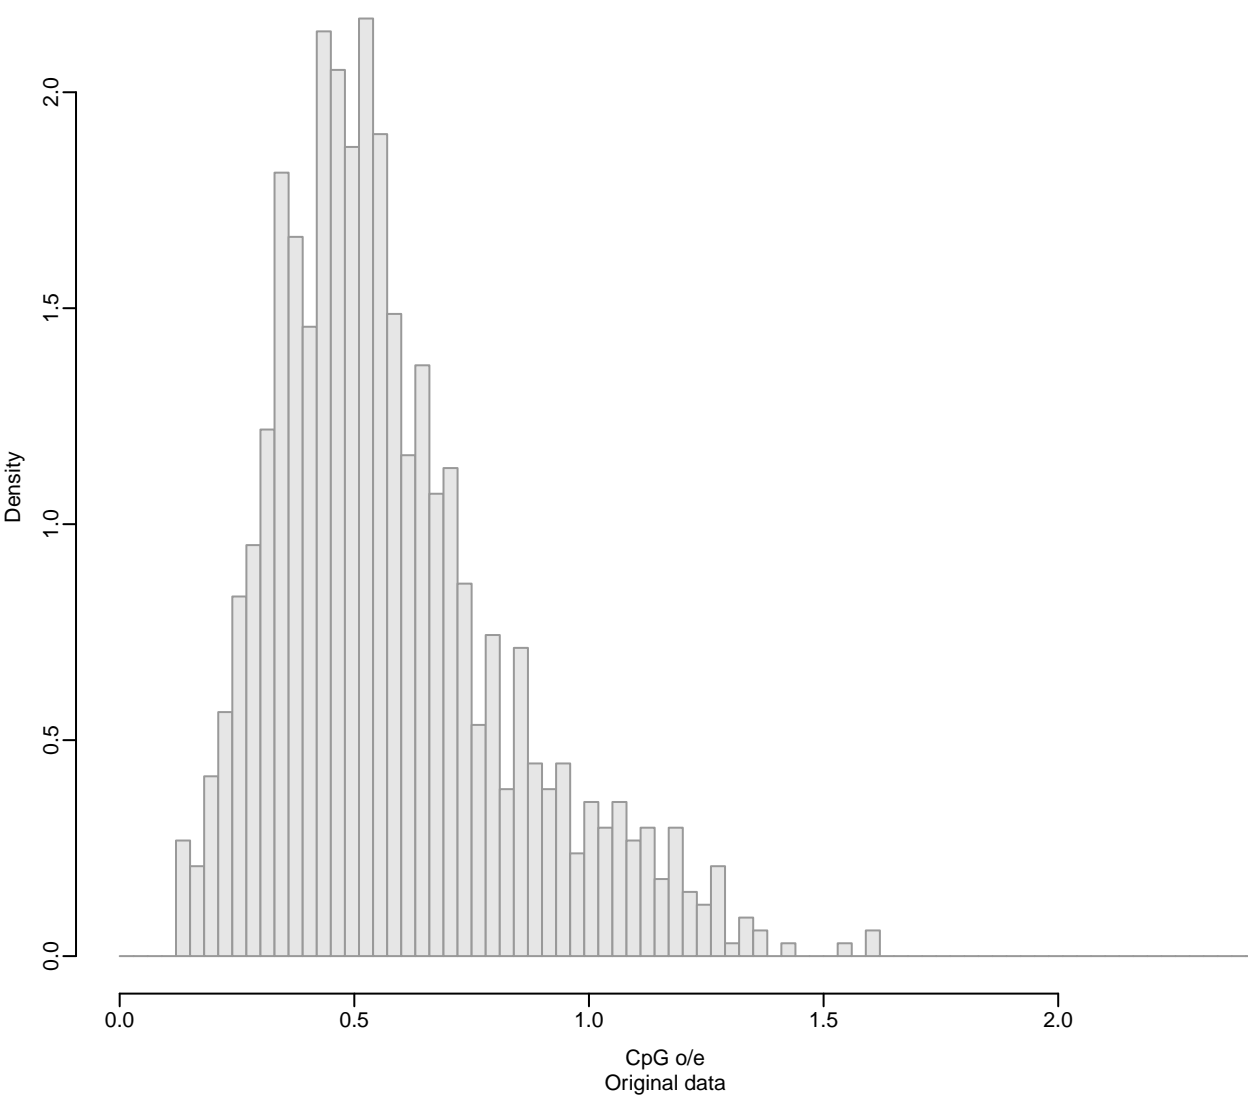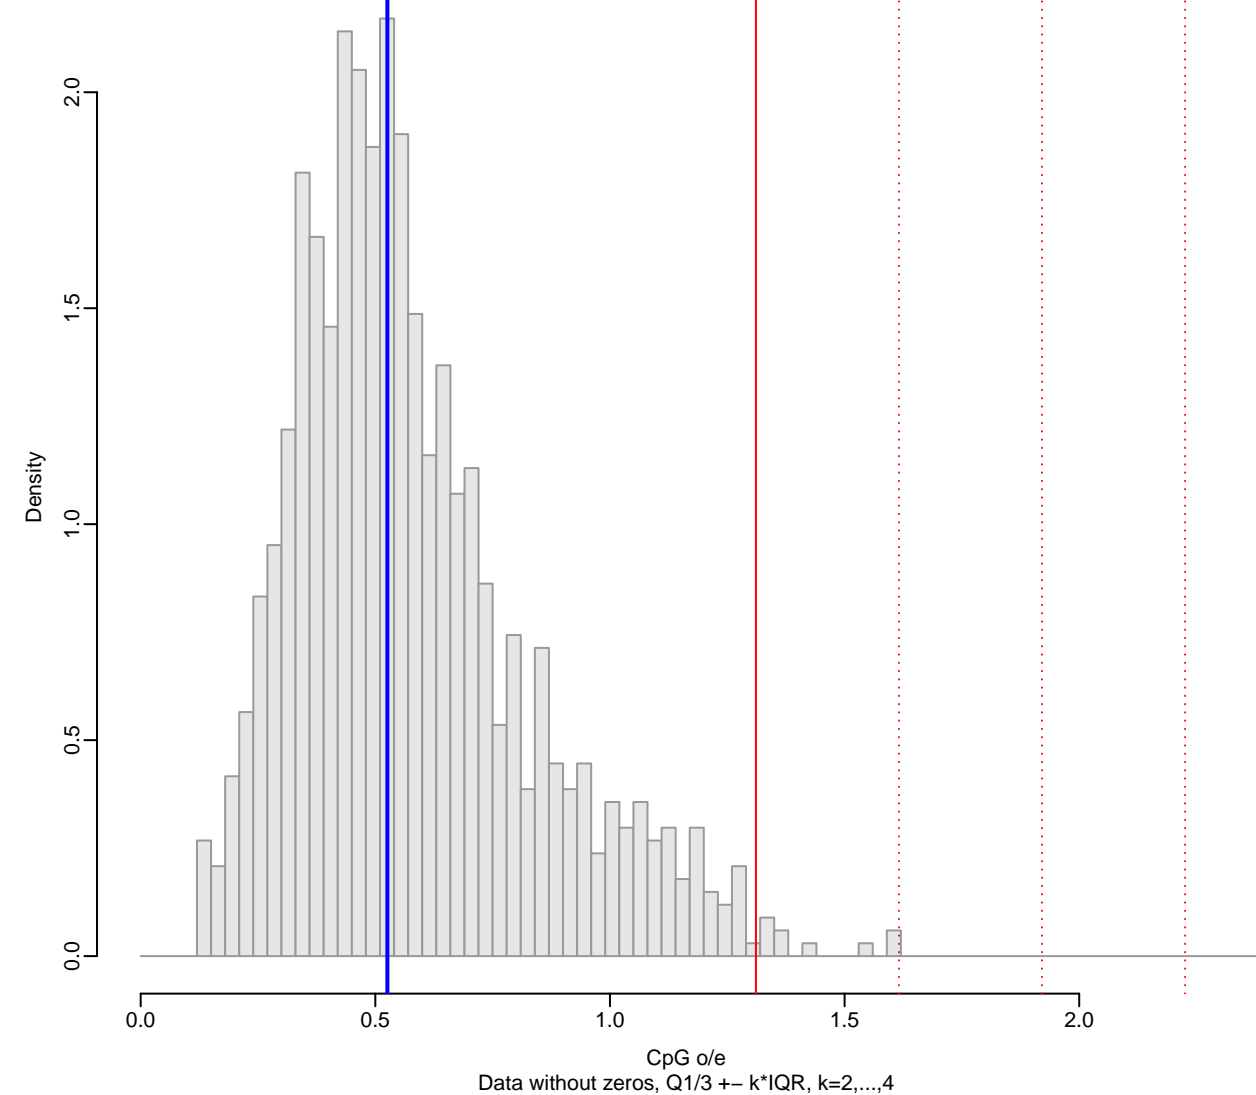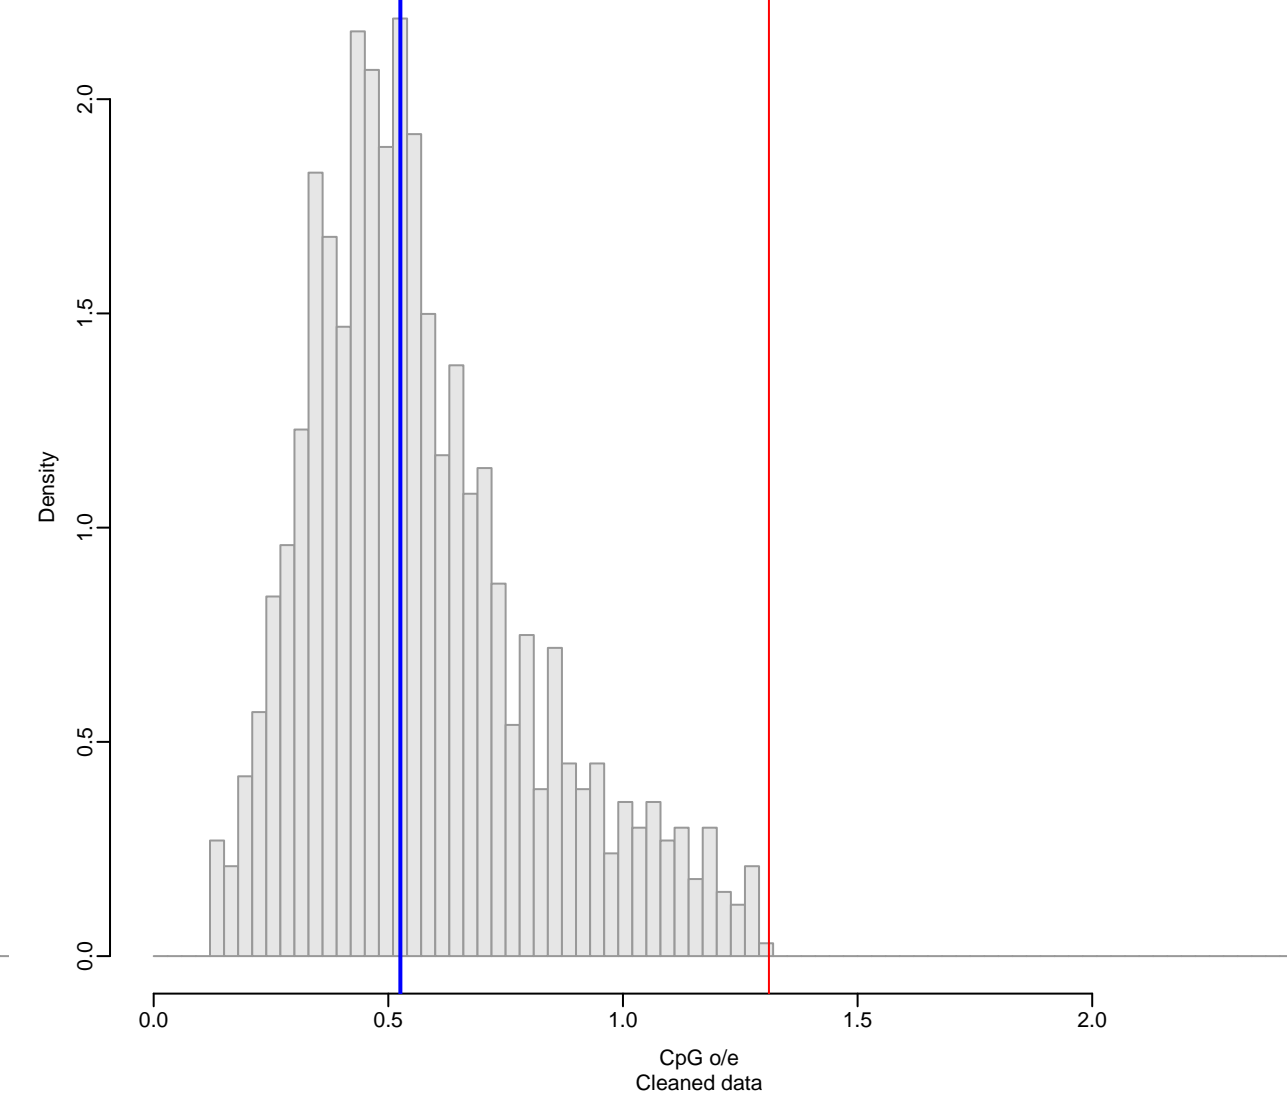

Citrus\_reszni

Density

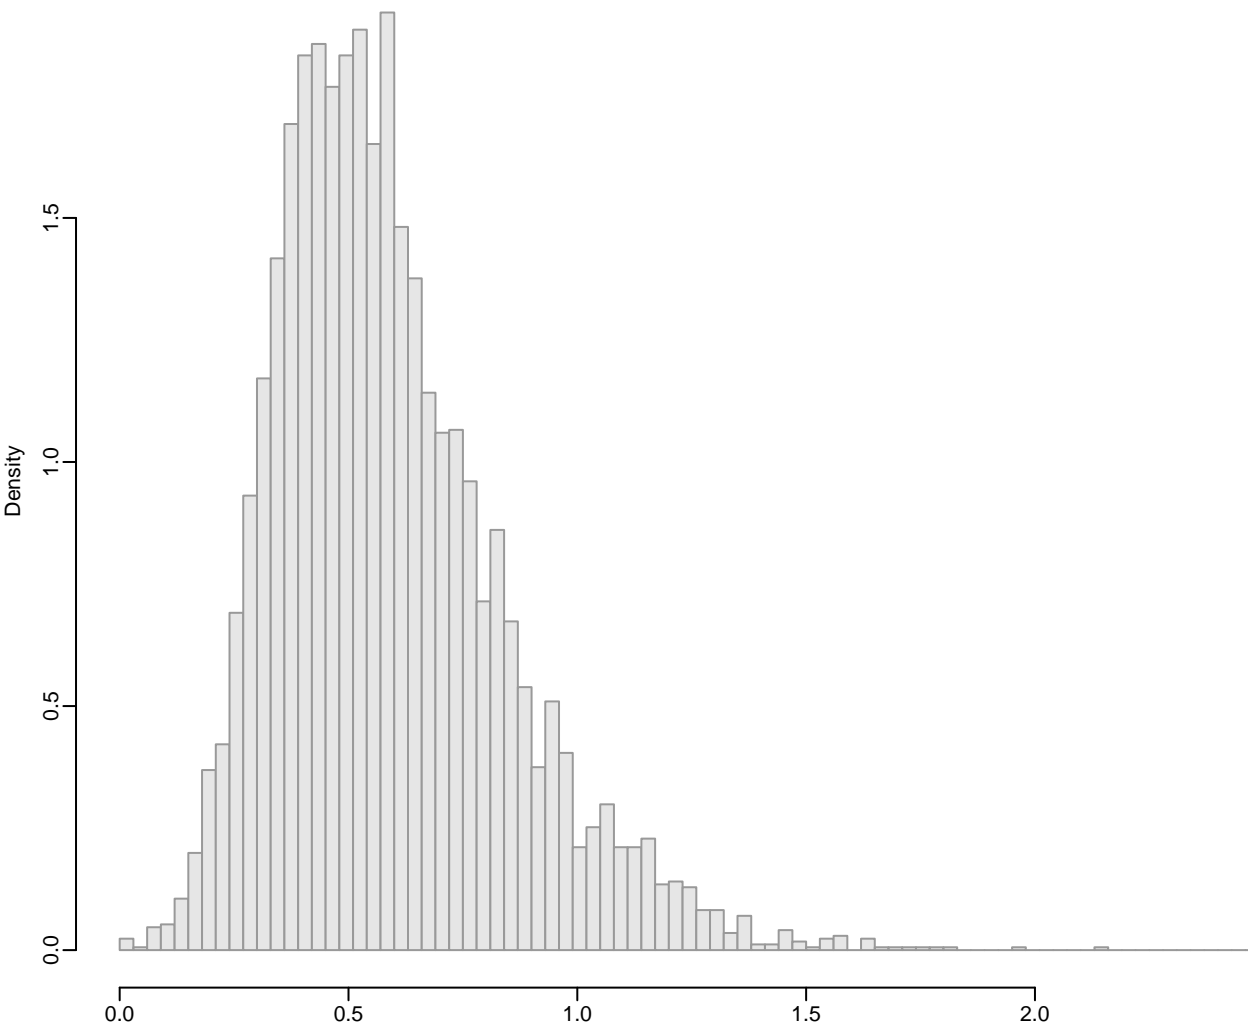

Density

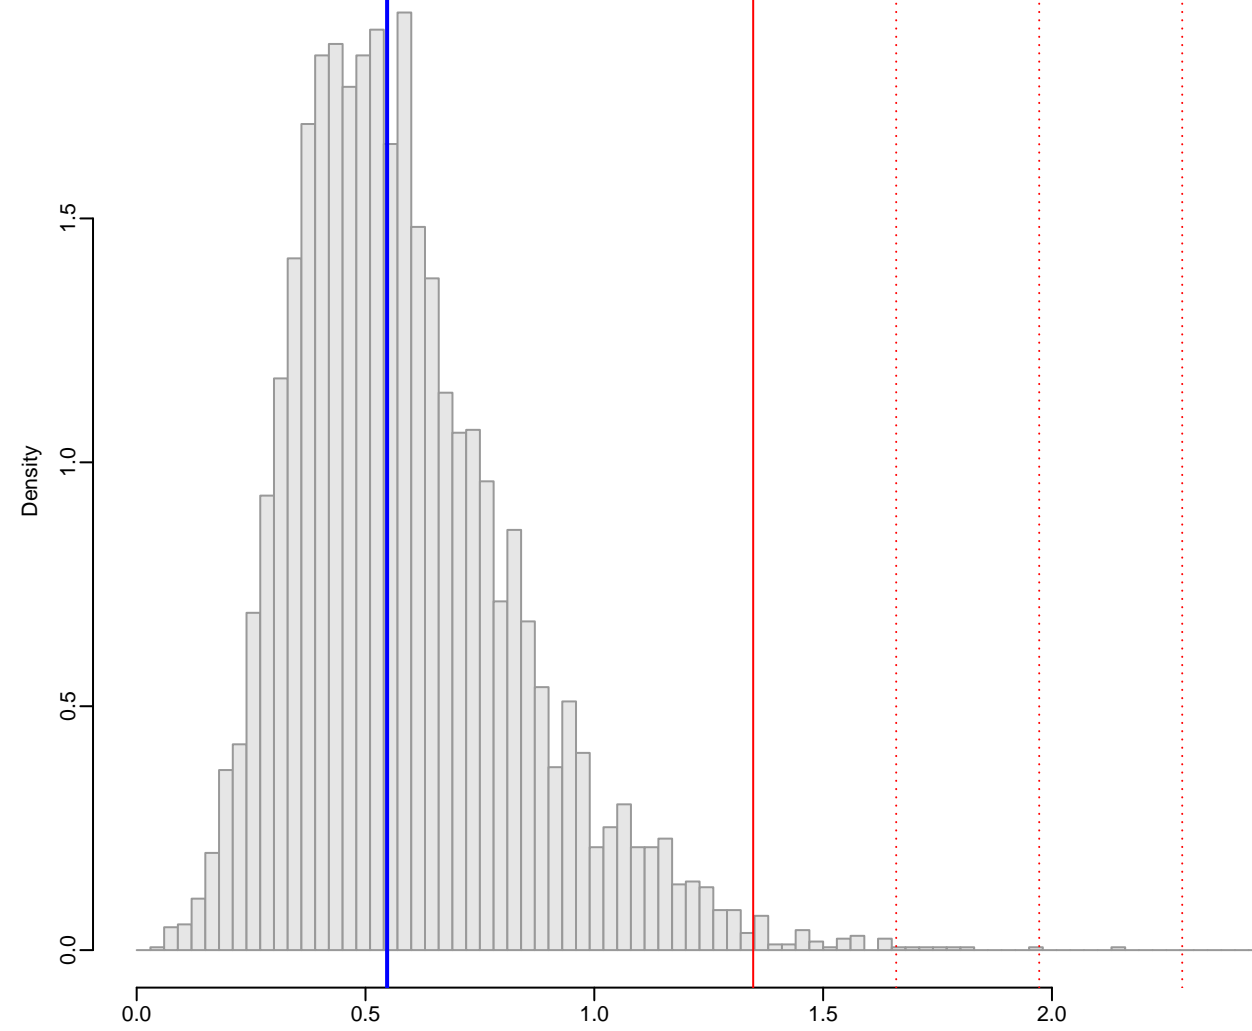

Density

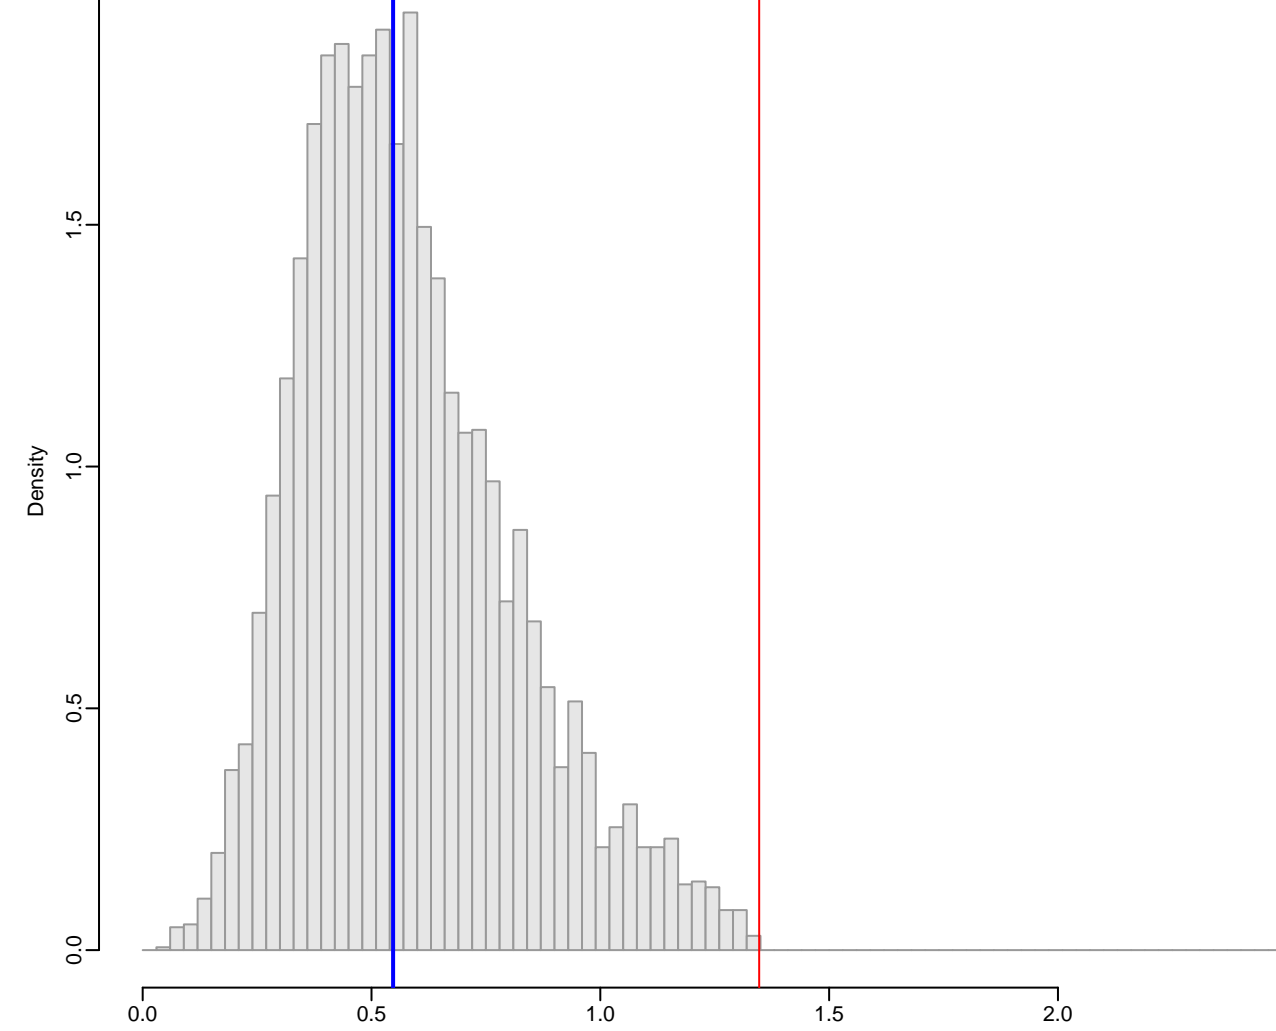

Citrus\_reticulata

Density

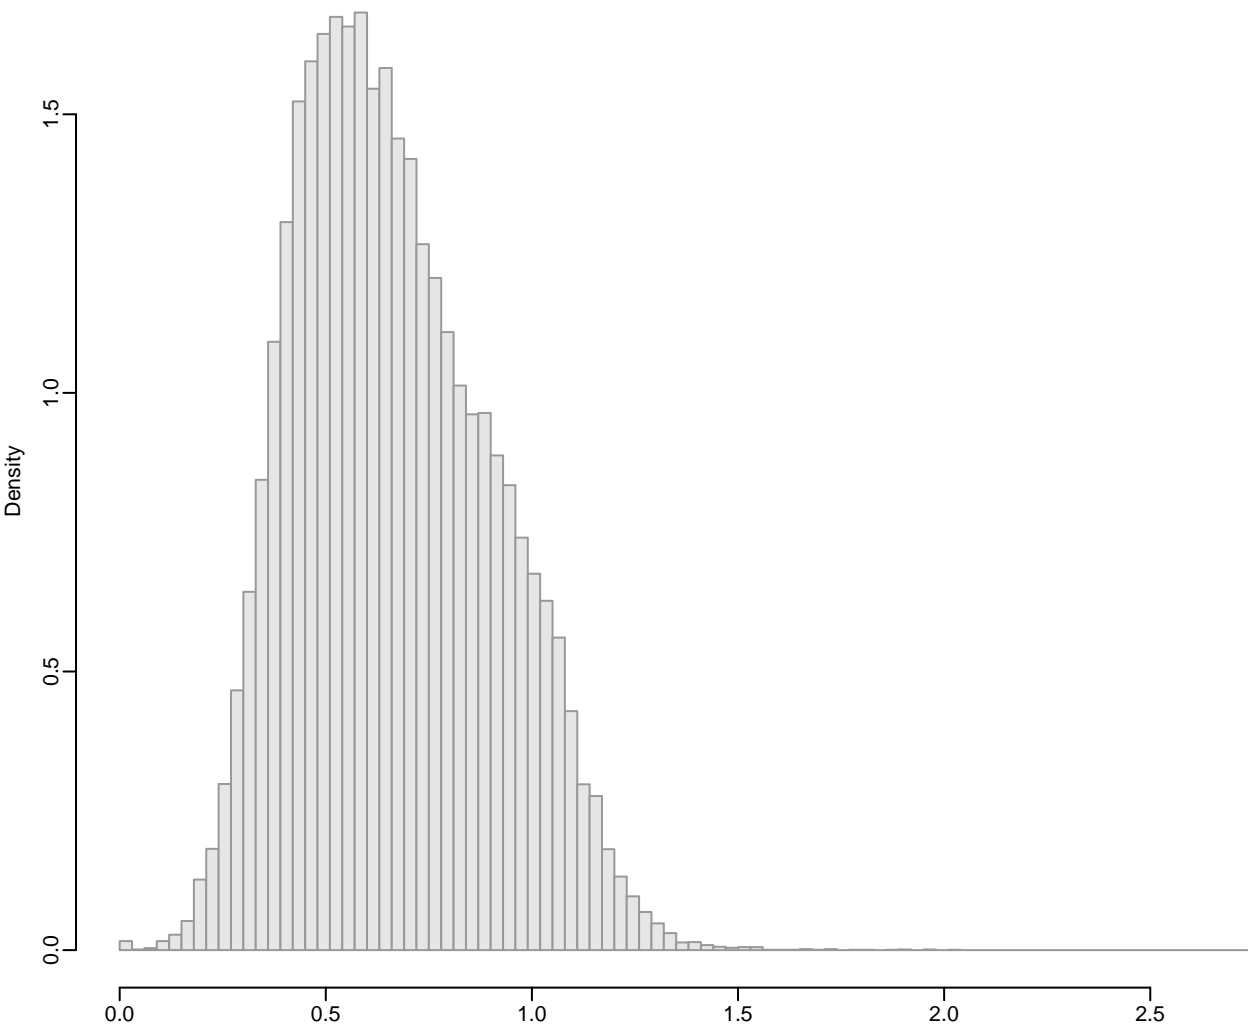

Density

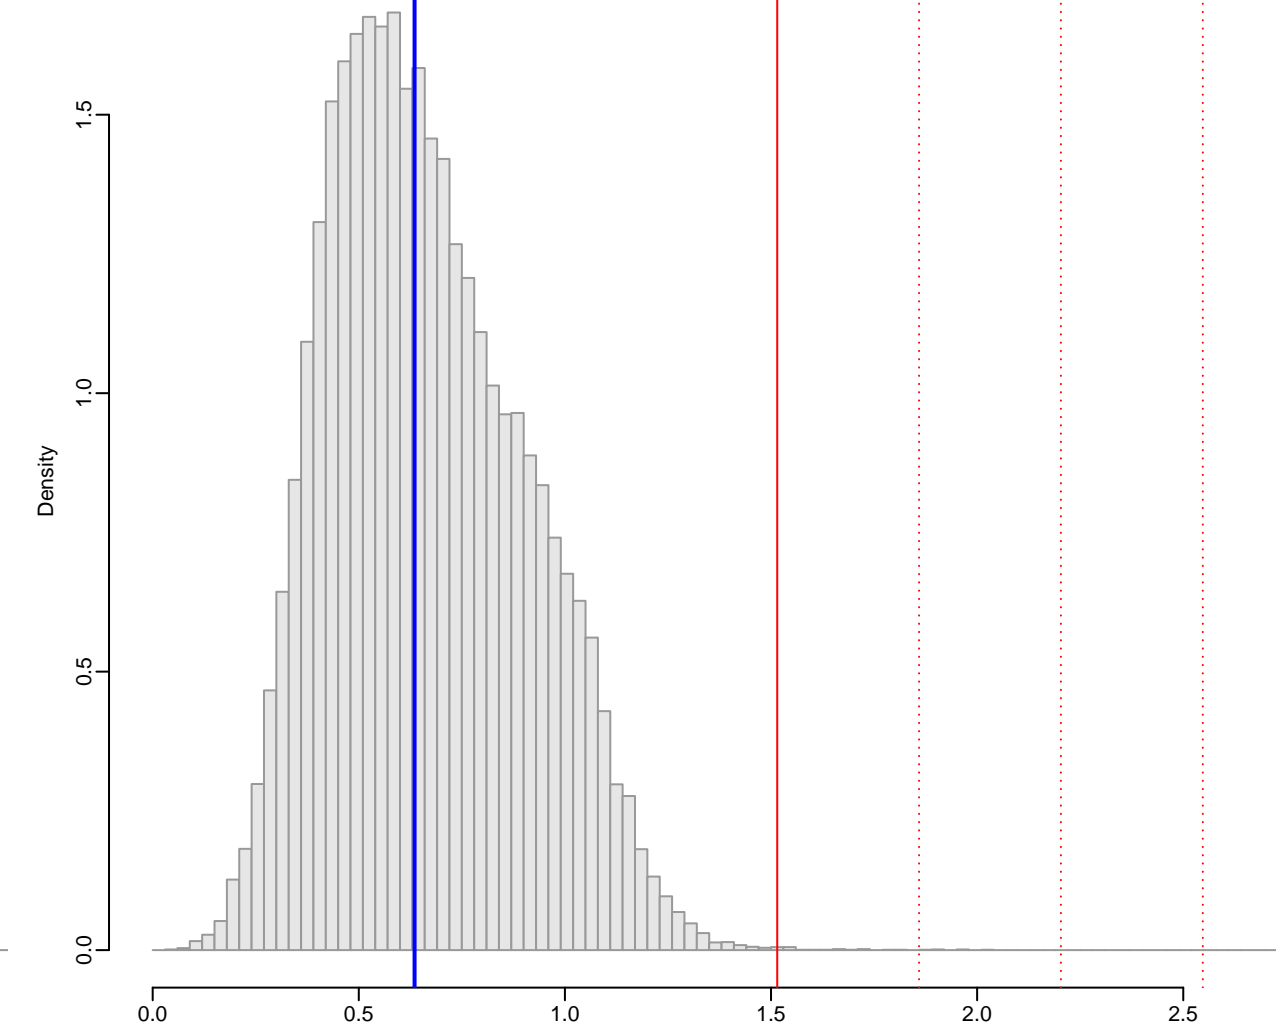

Density

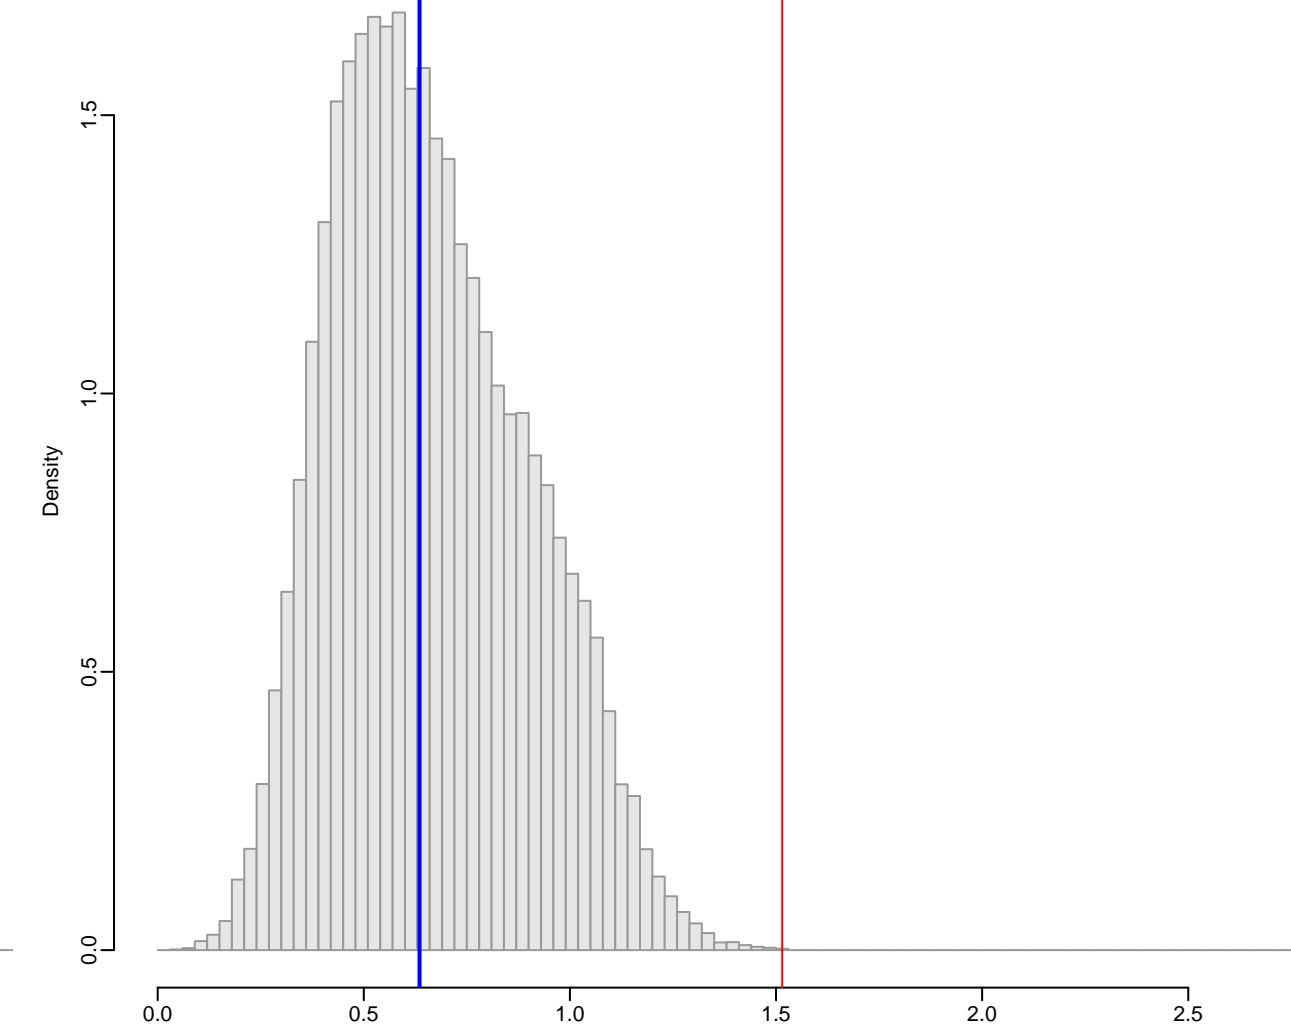



Citrus\_sinensis

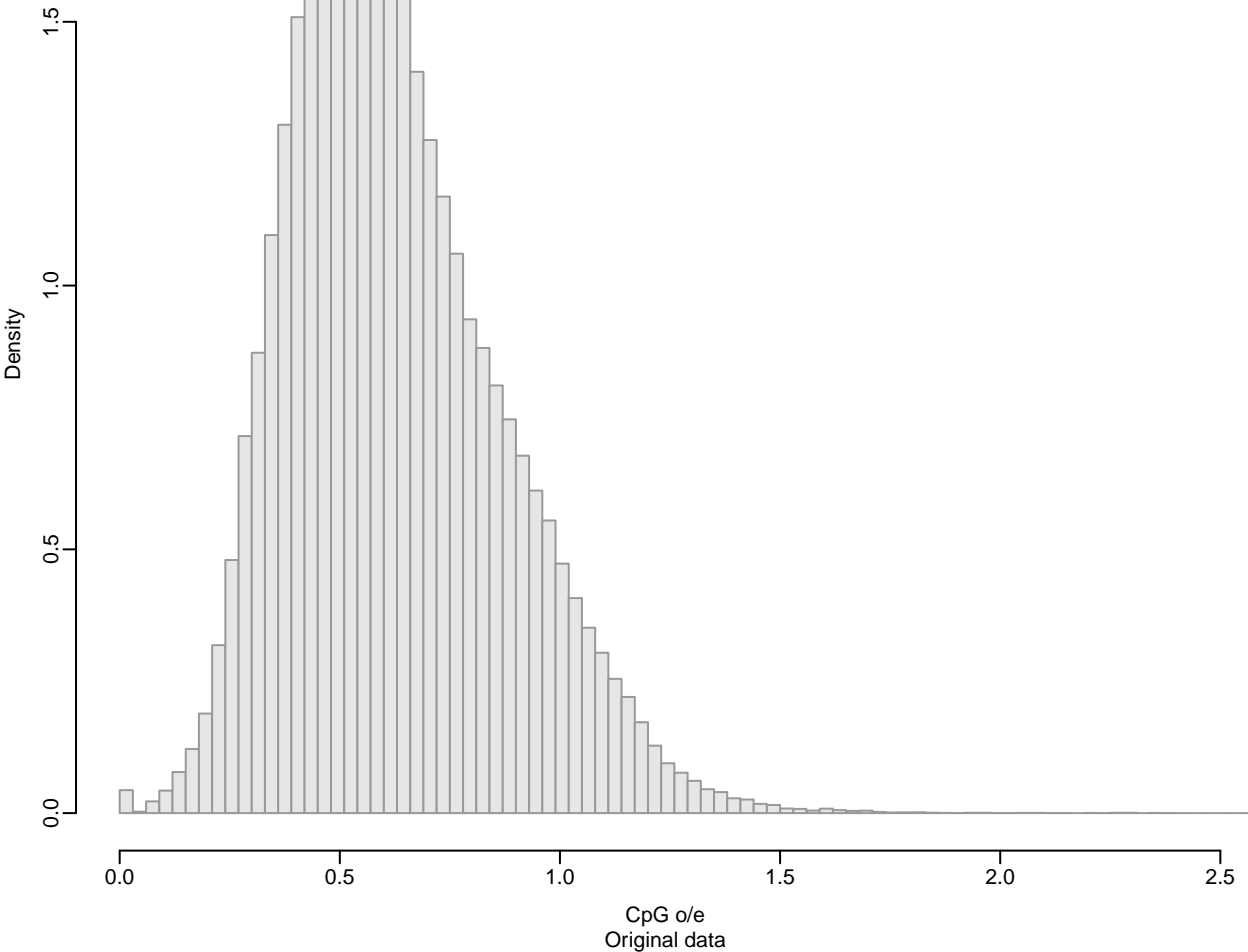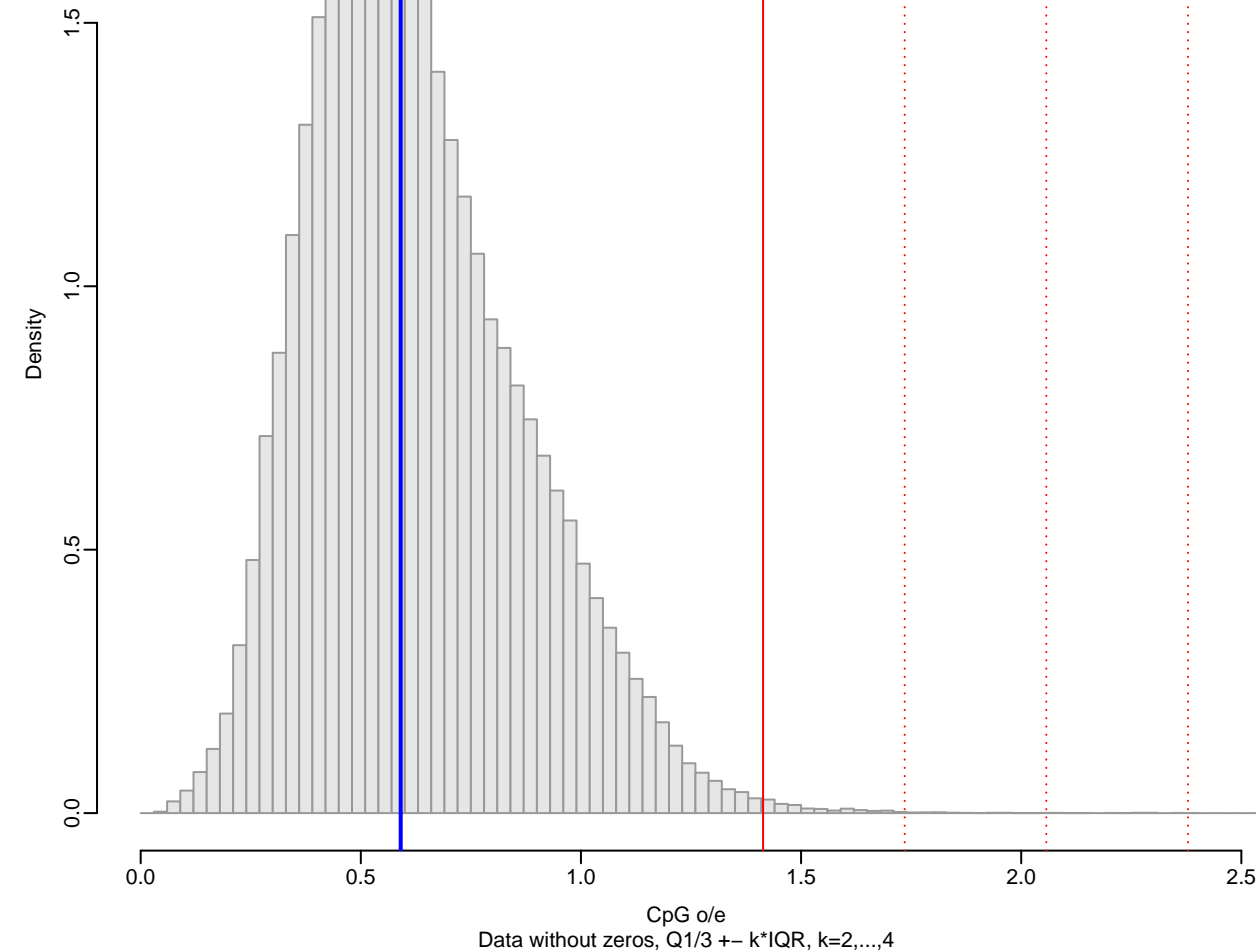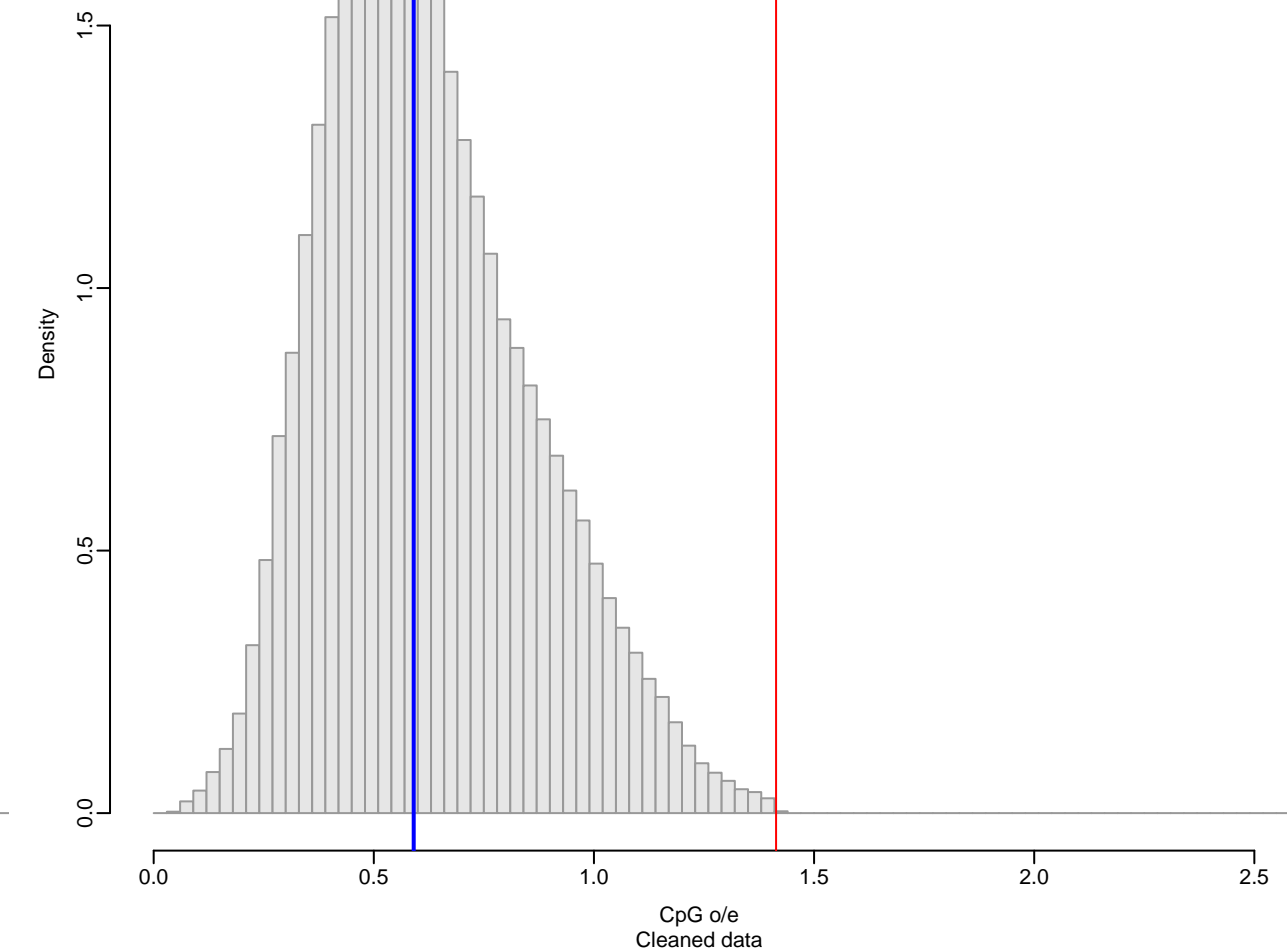

Citrus\_sunki

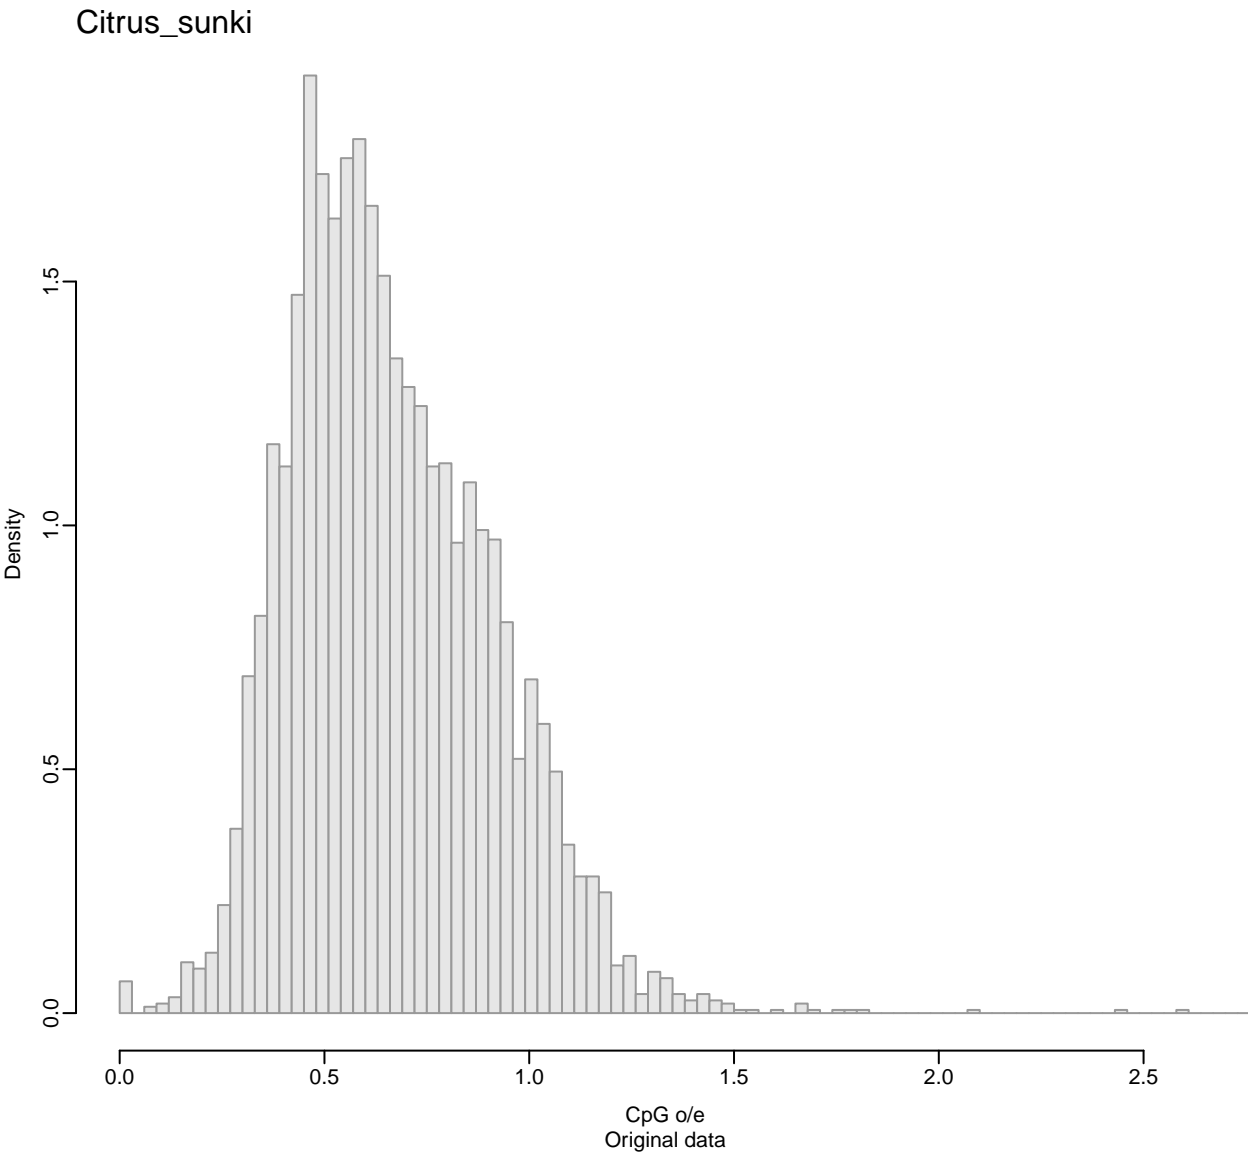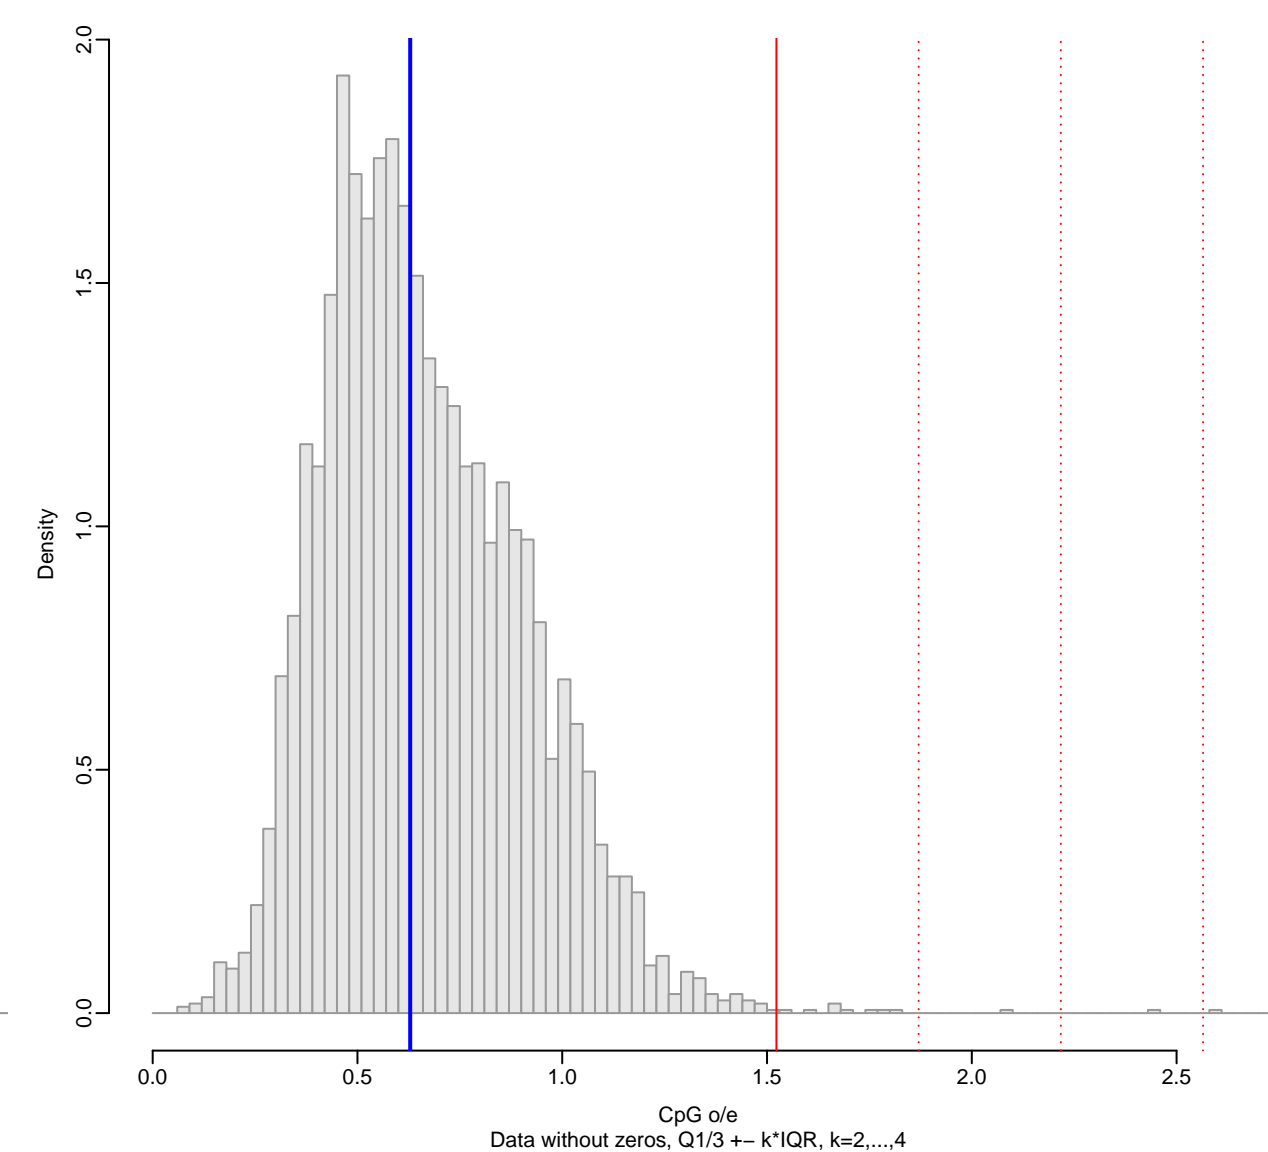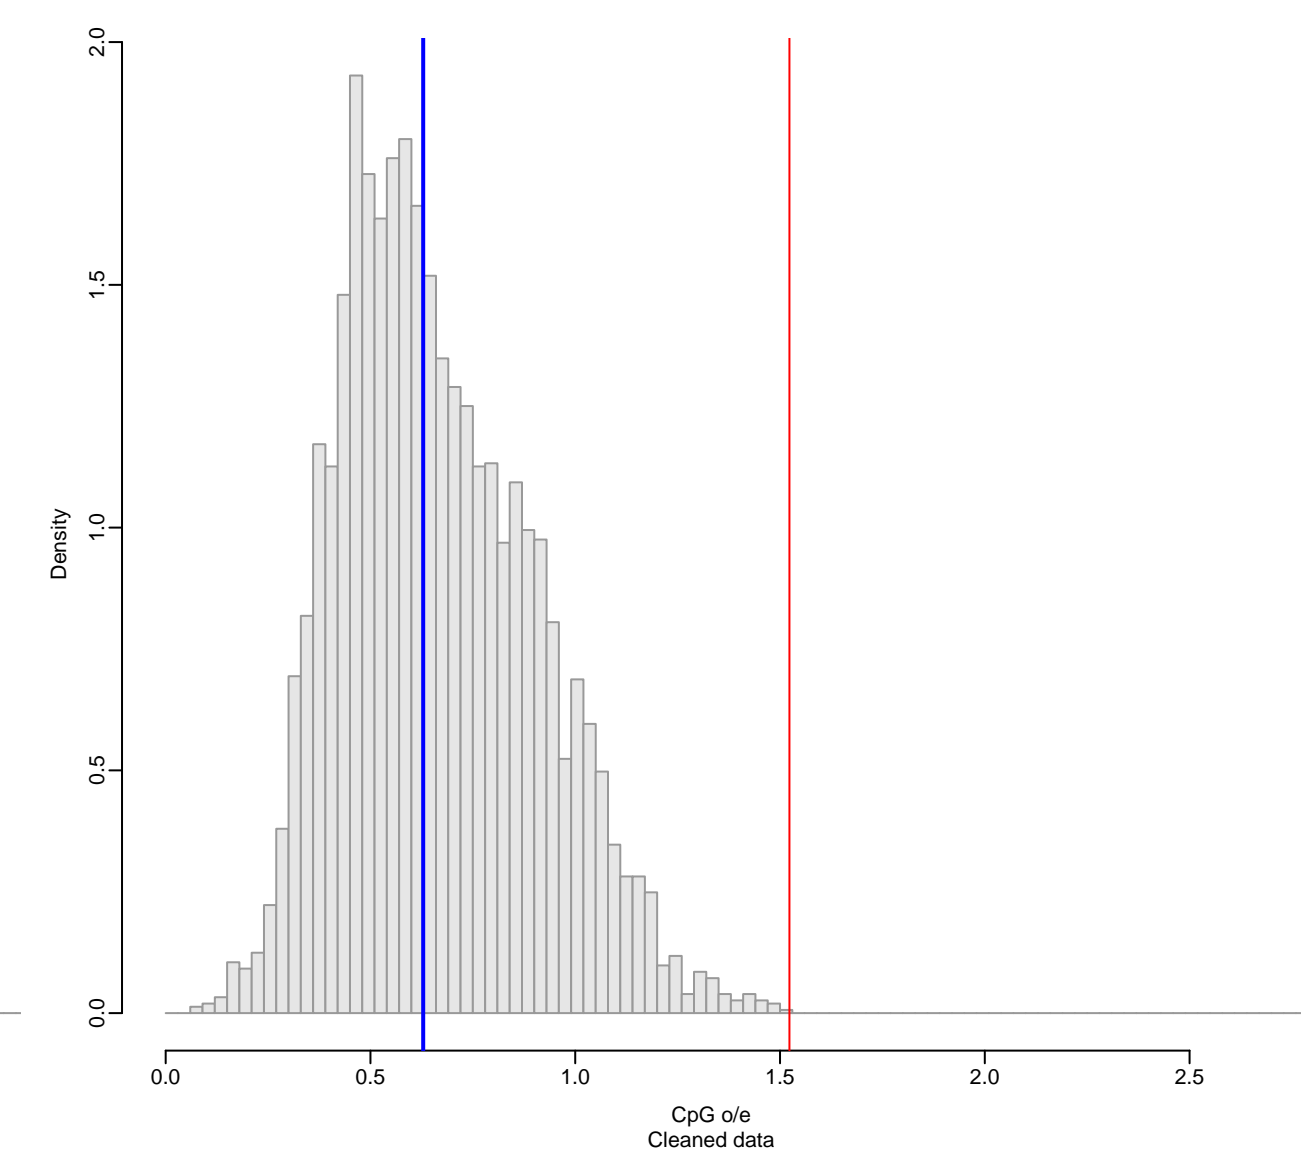

Citrus\_unshiu

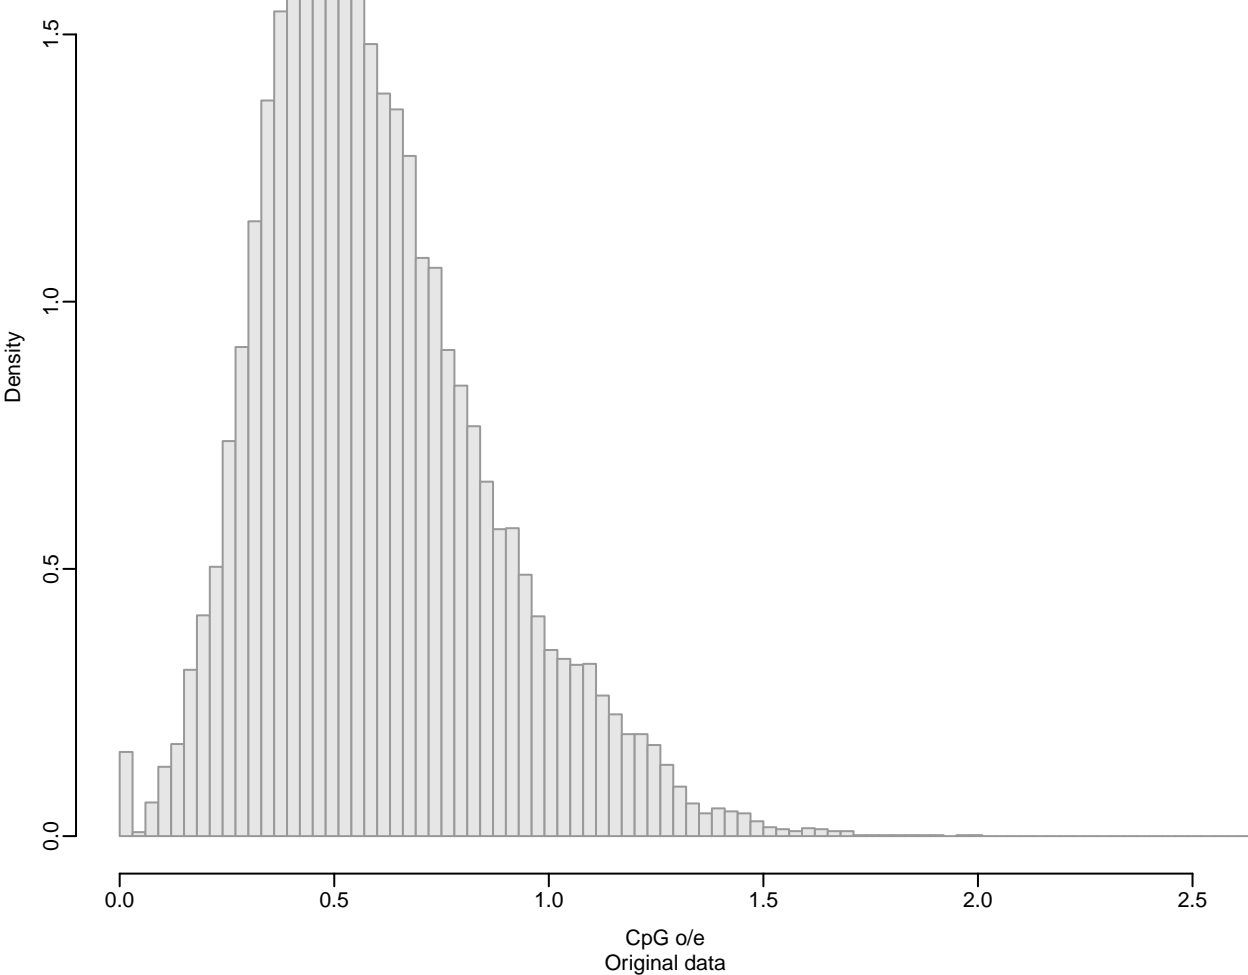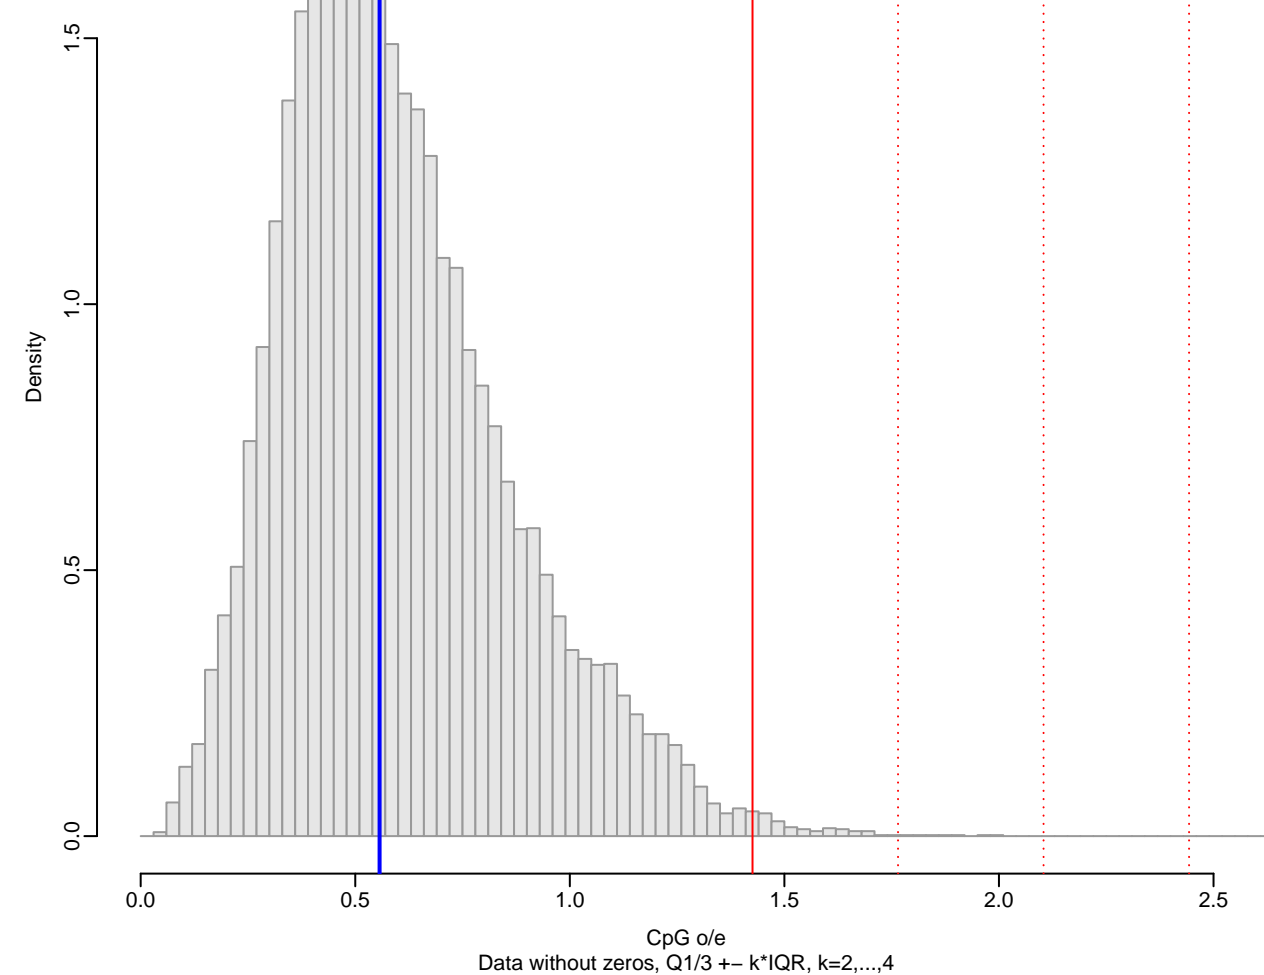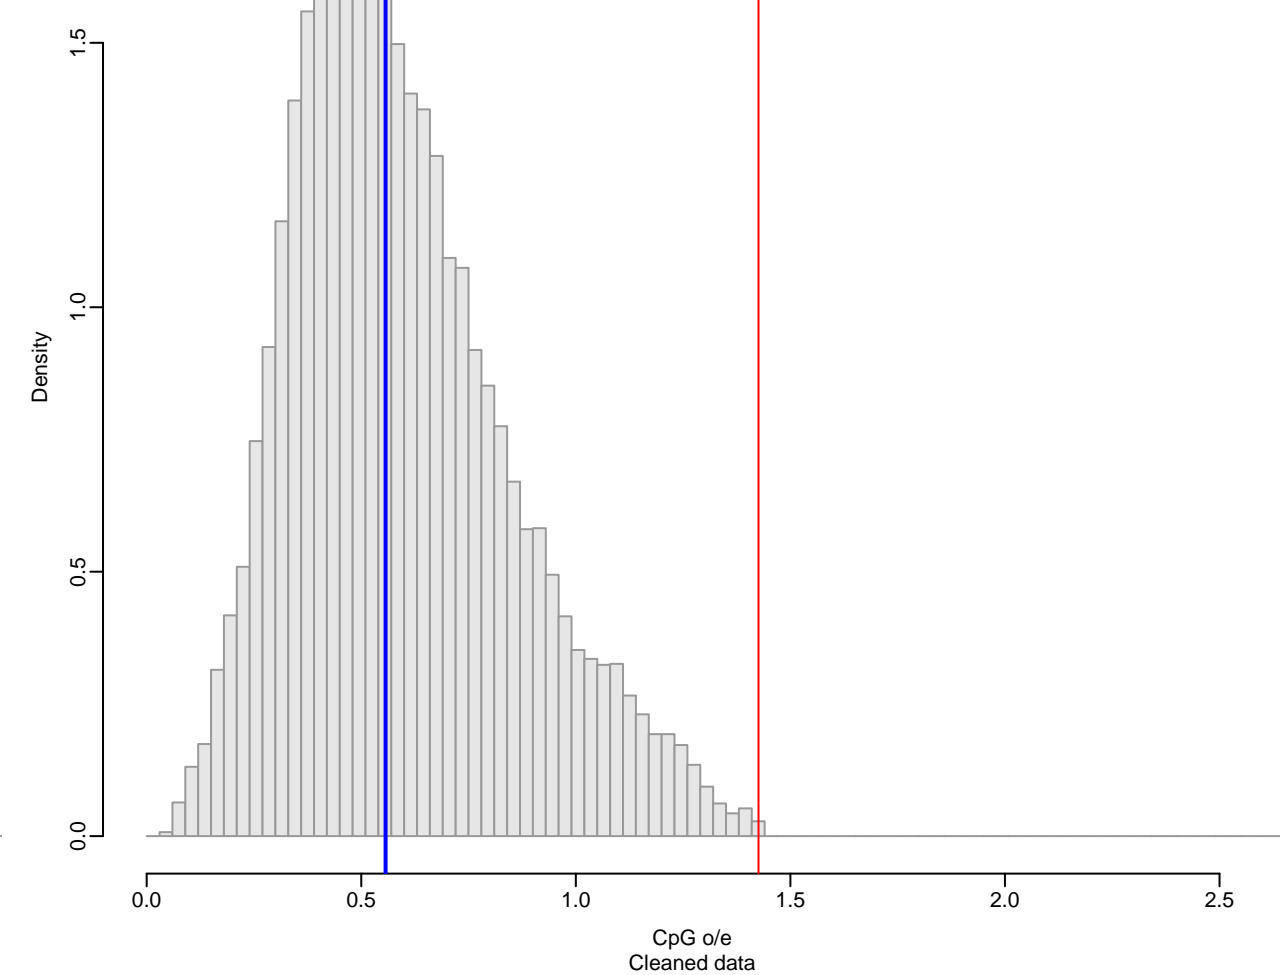

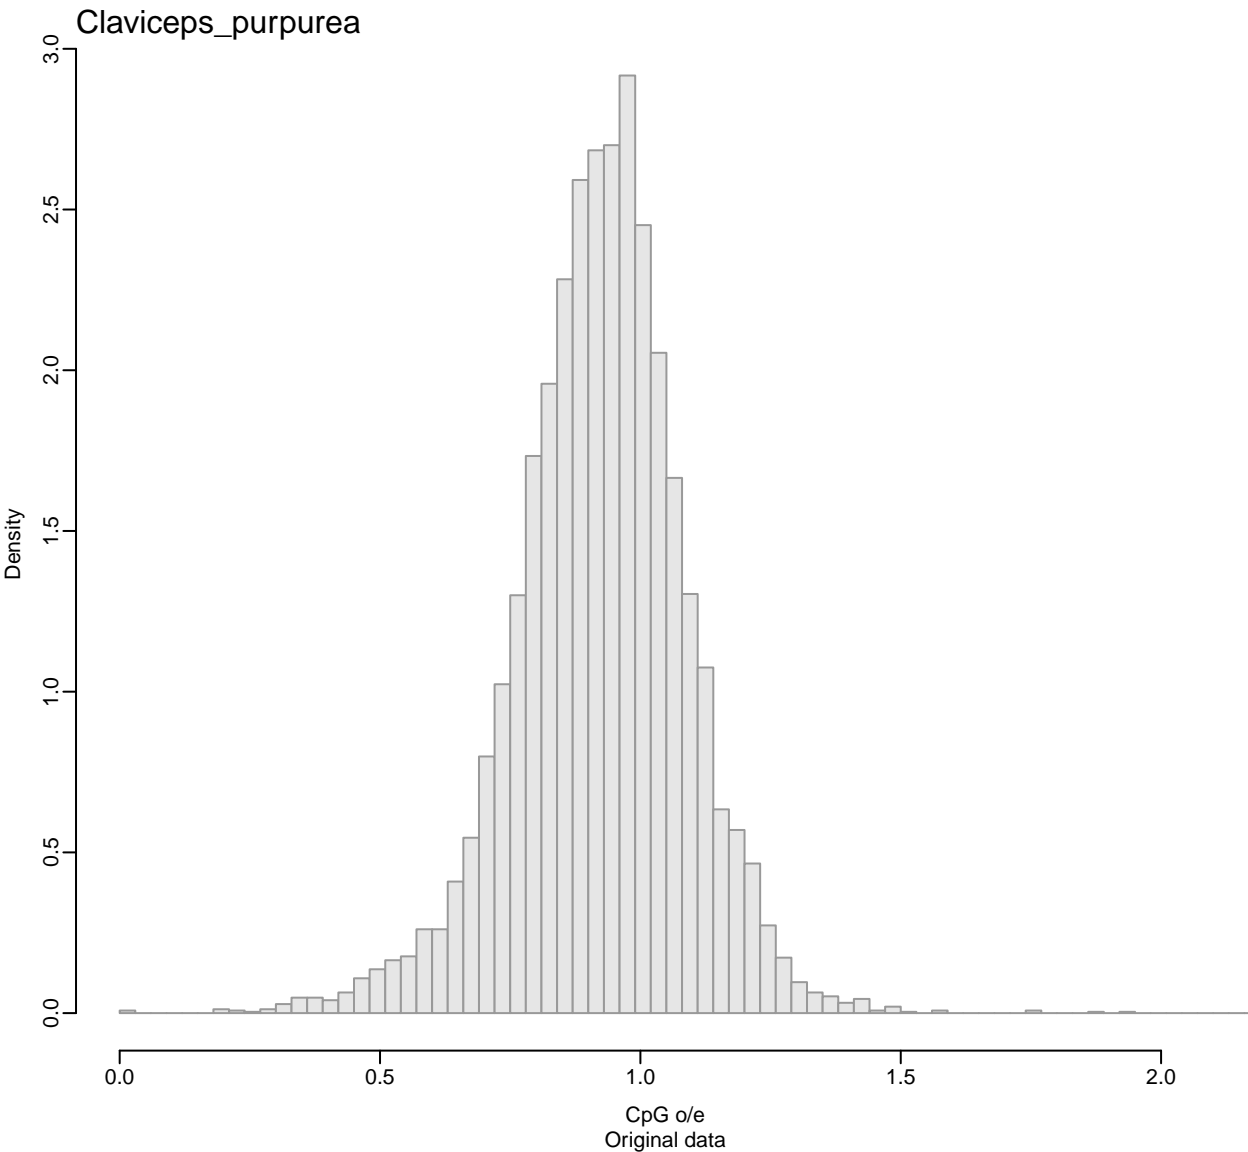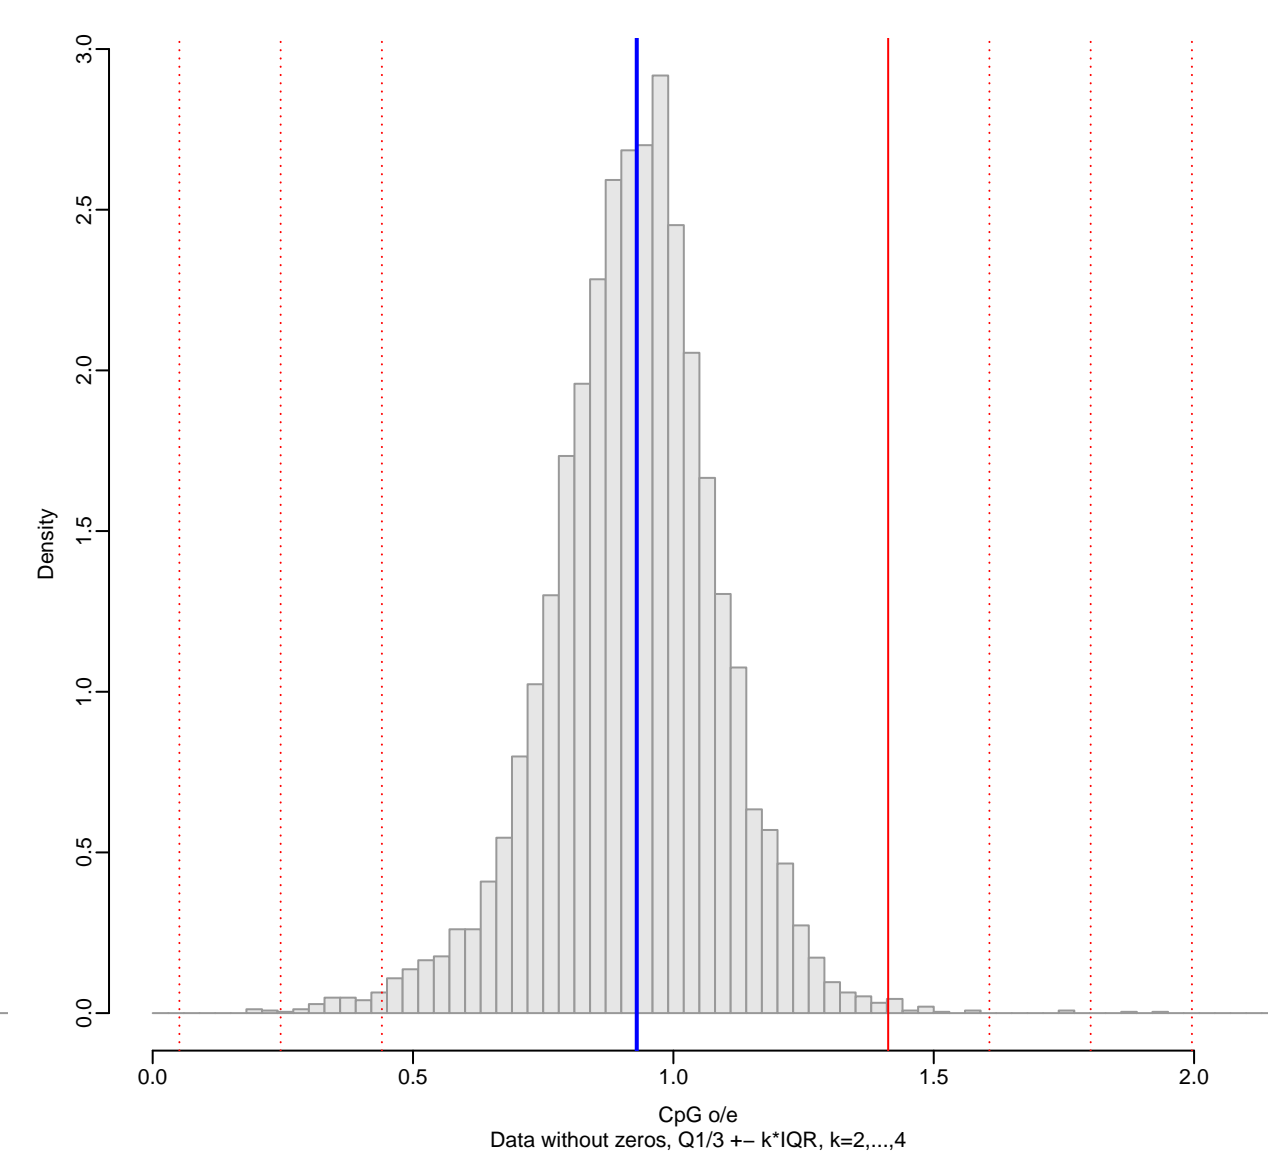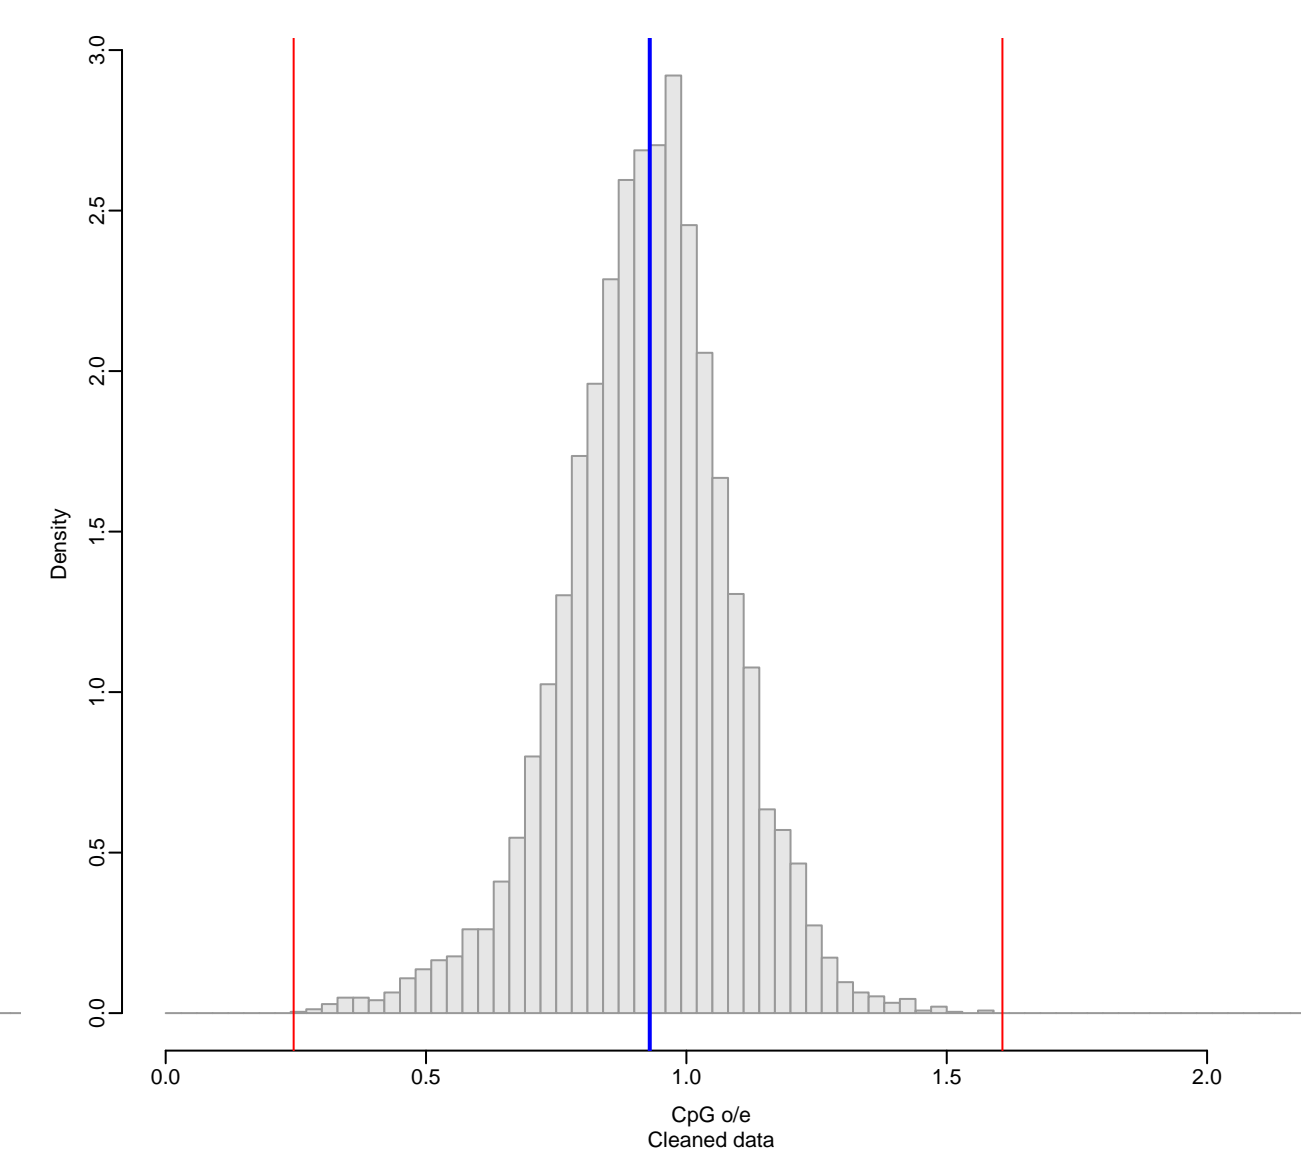

Clonorchis\_sinensis

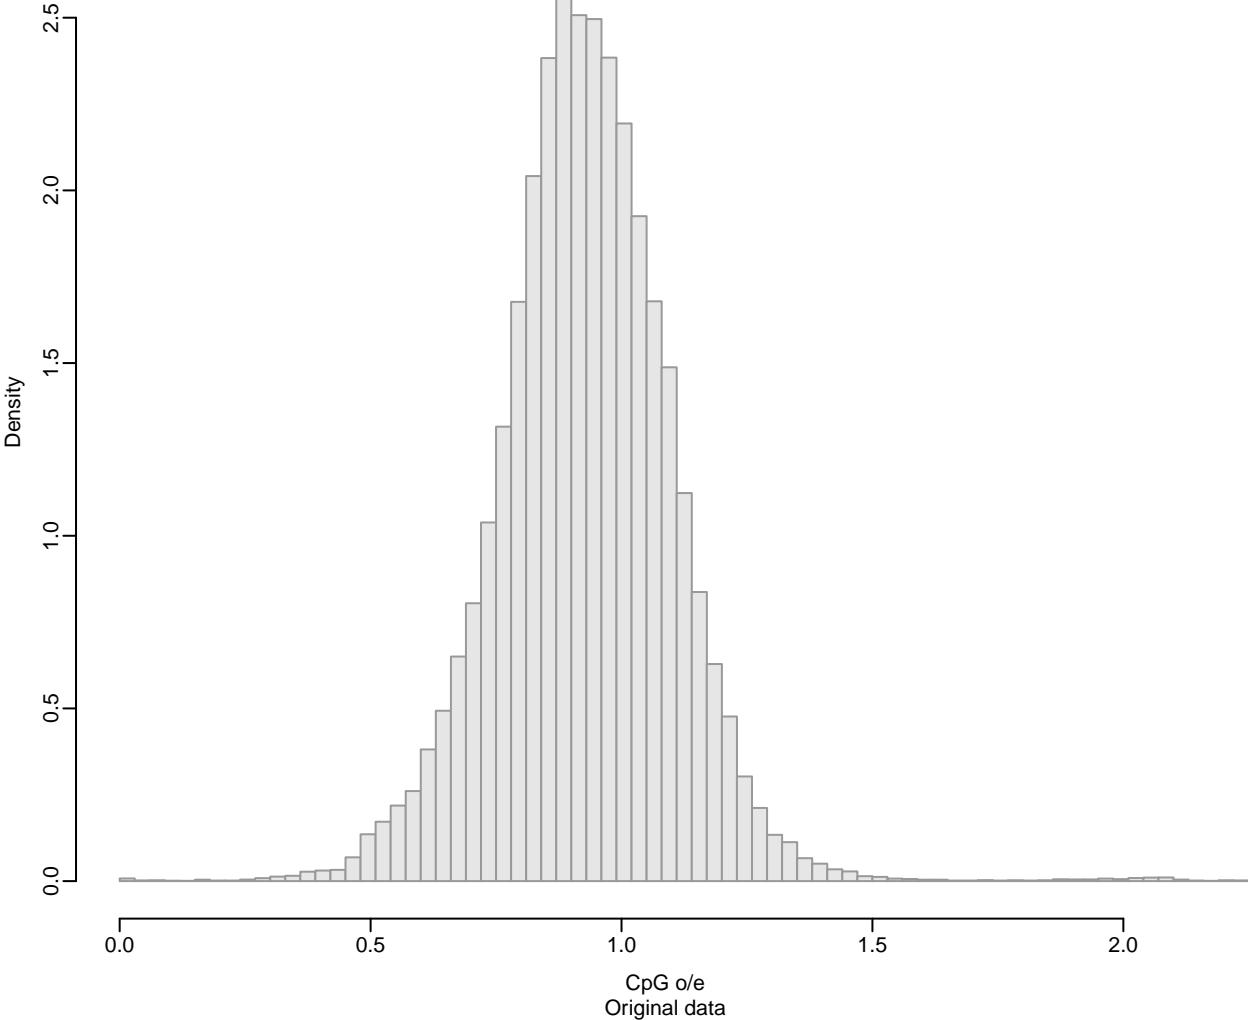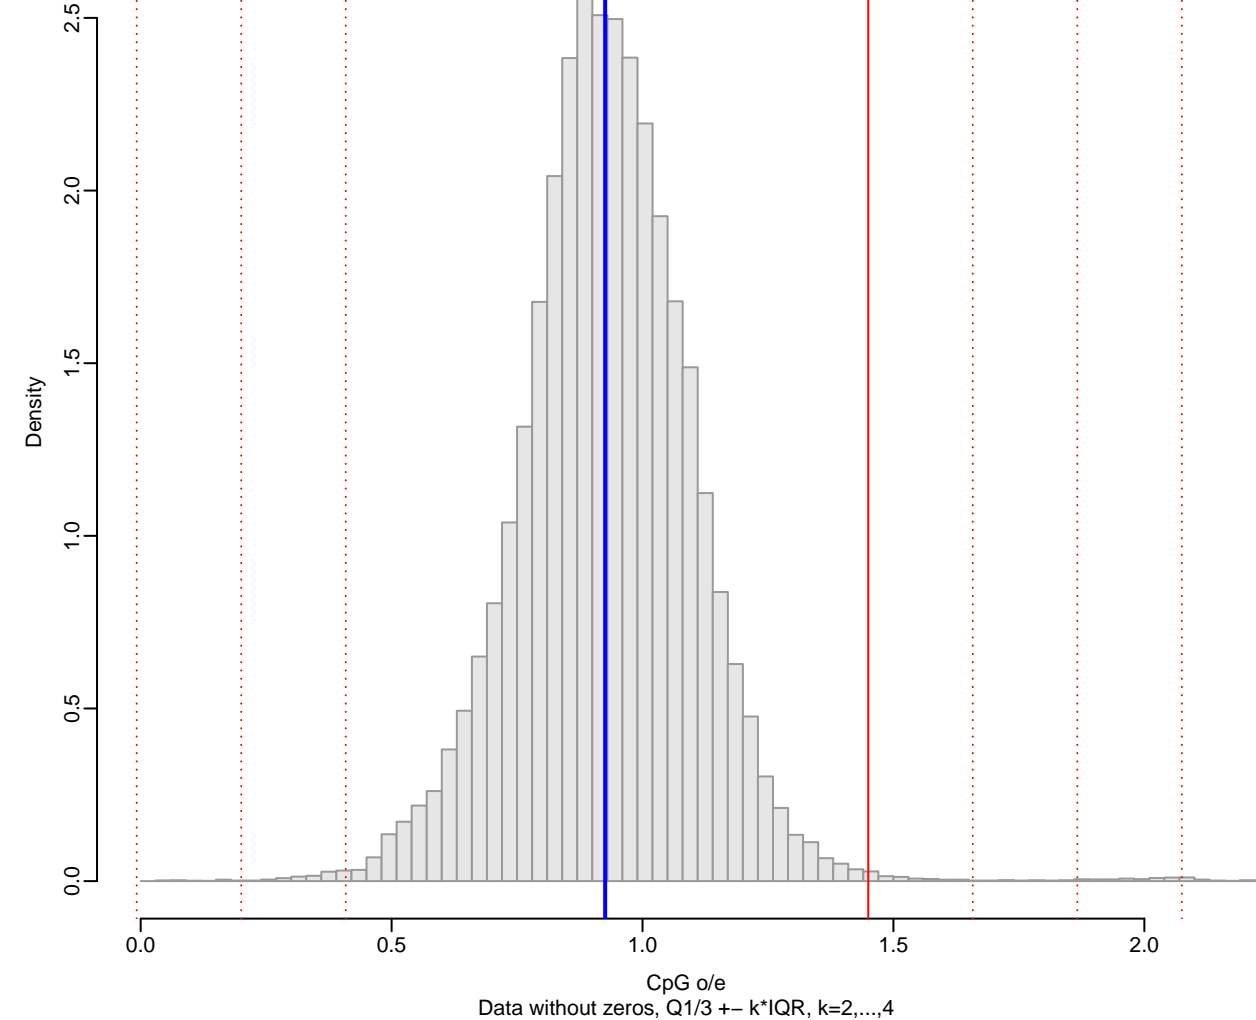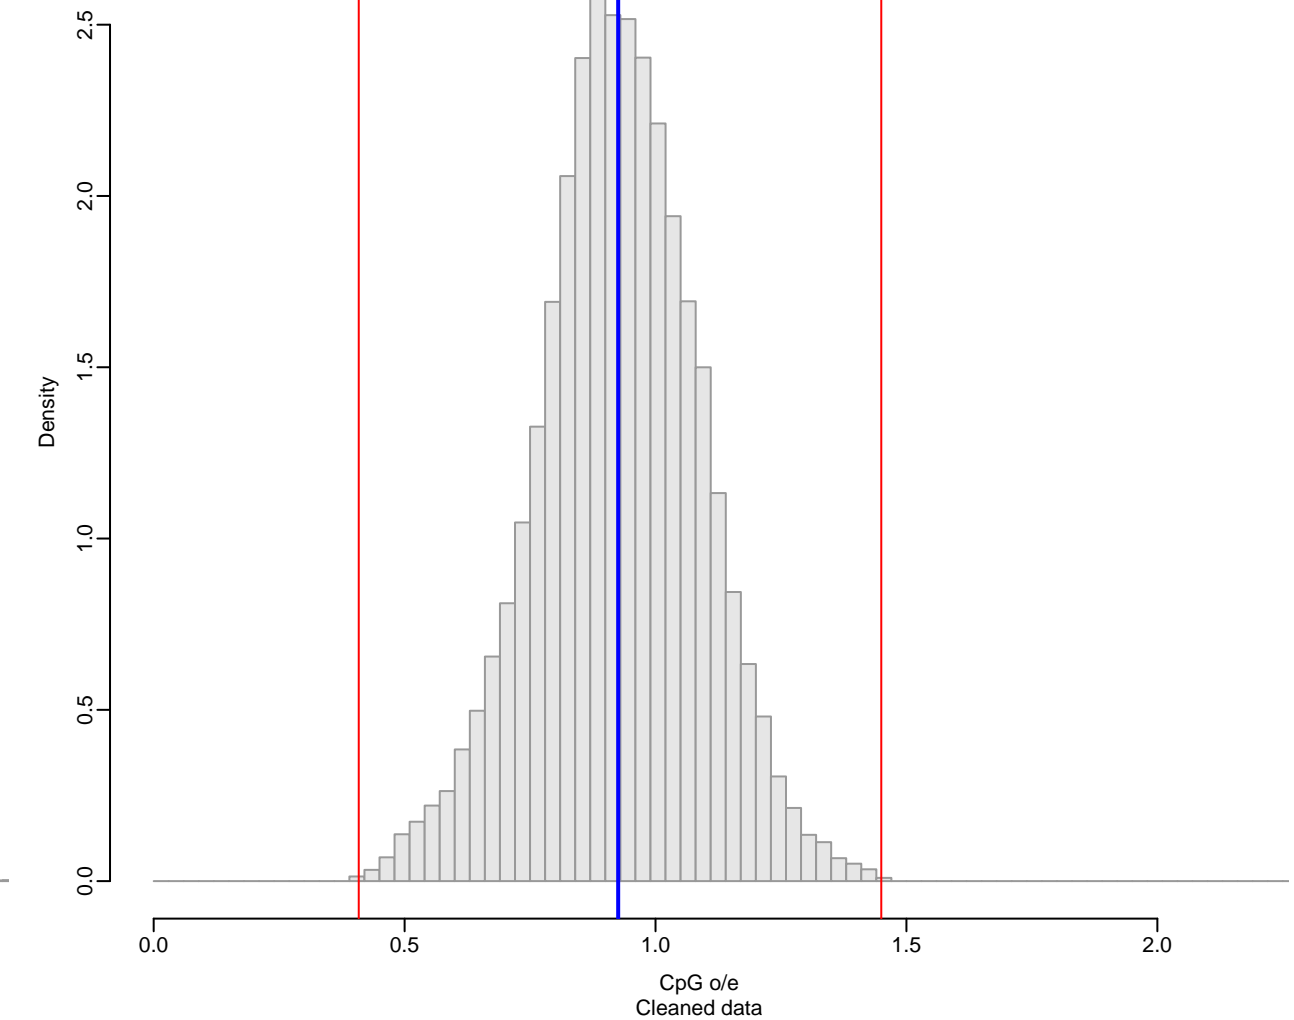

Clytia\_hemisphaerica

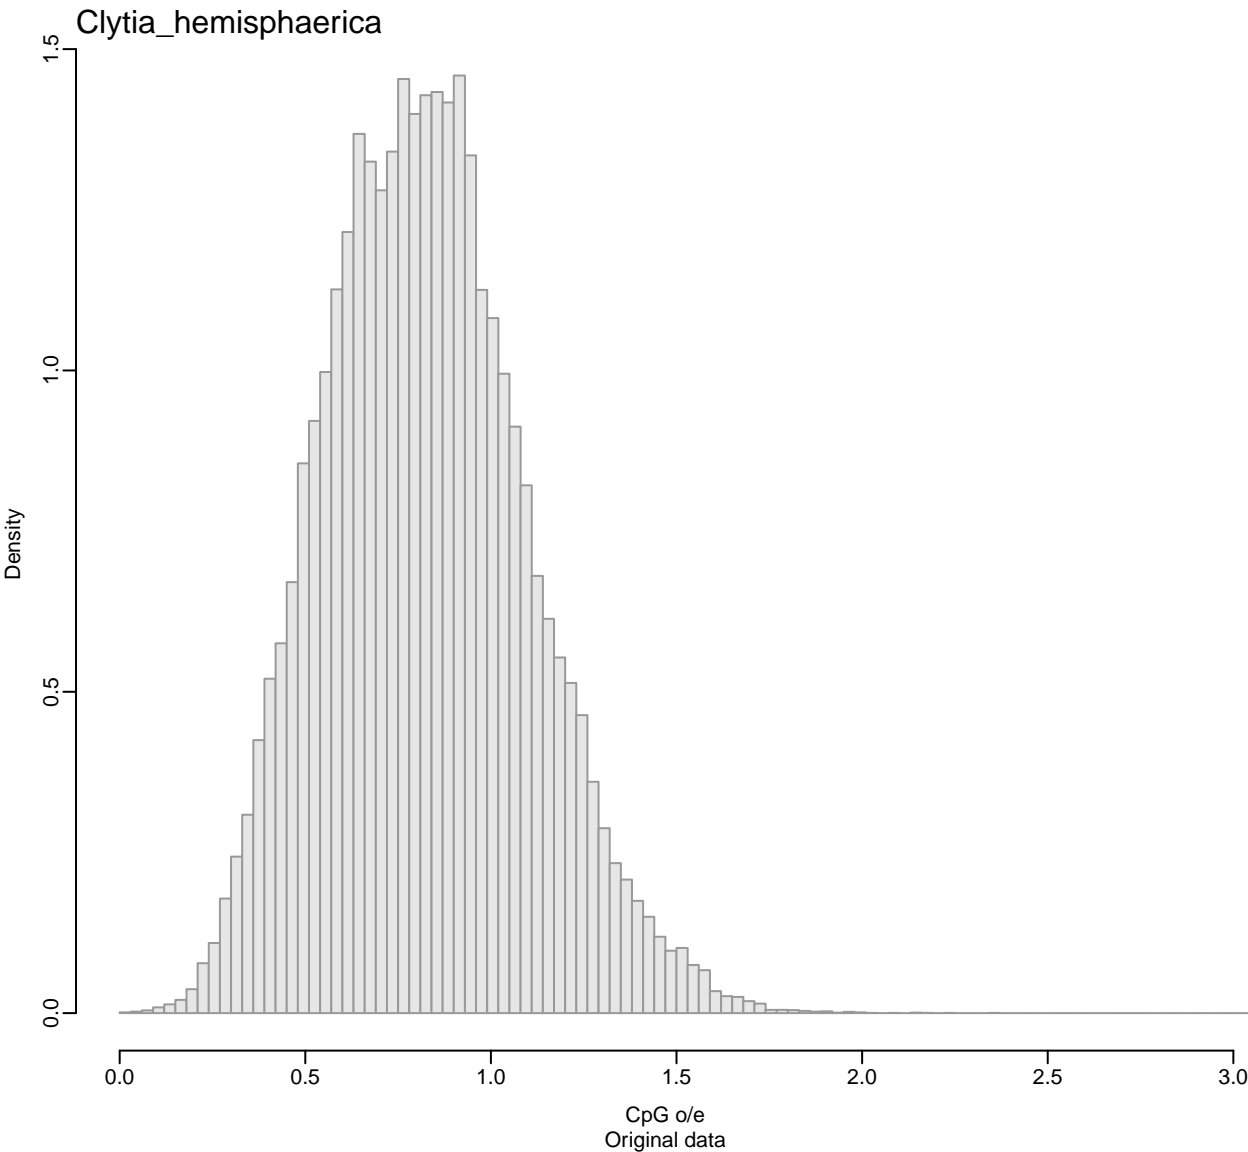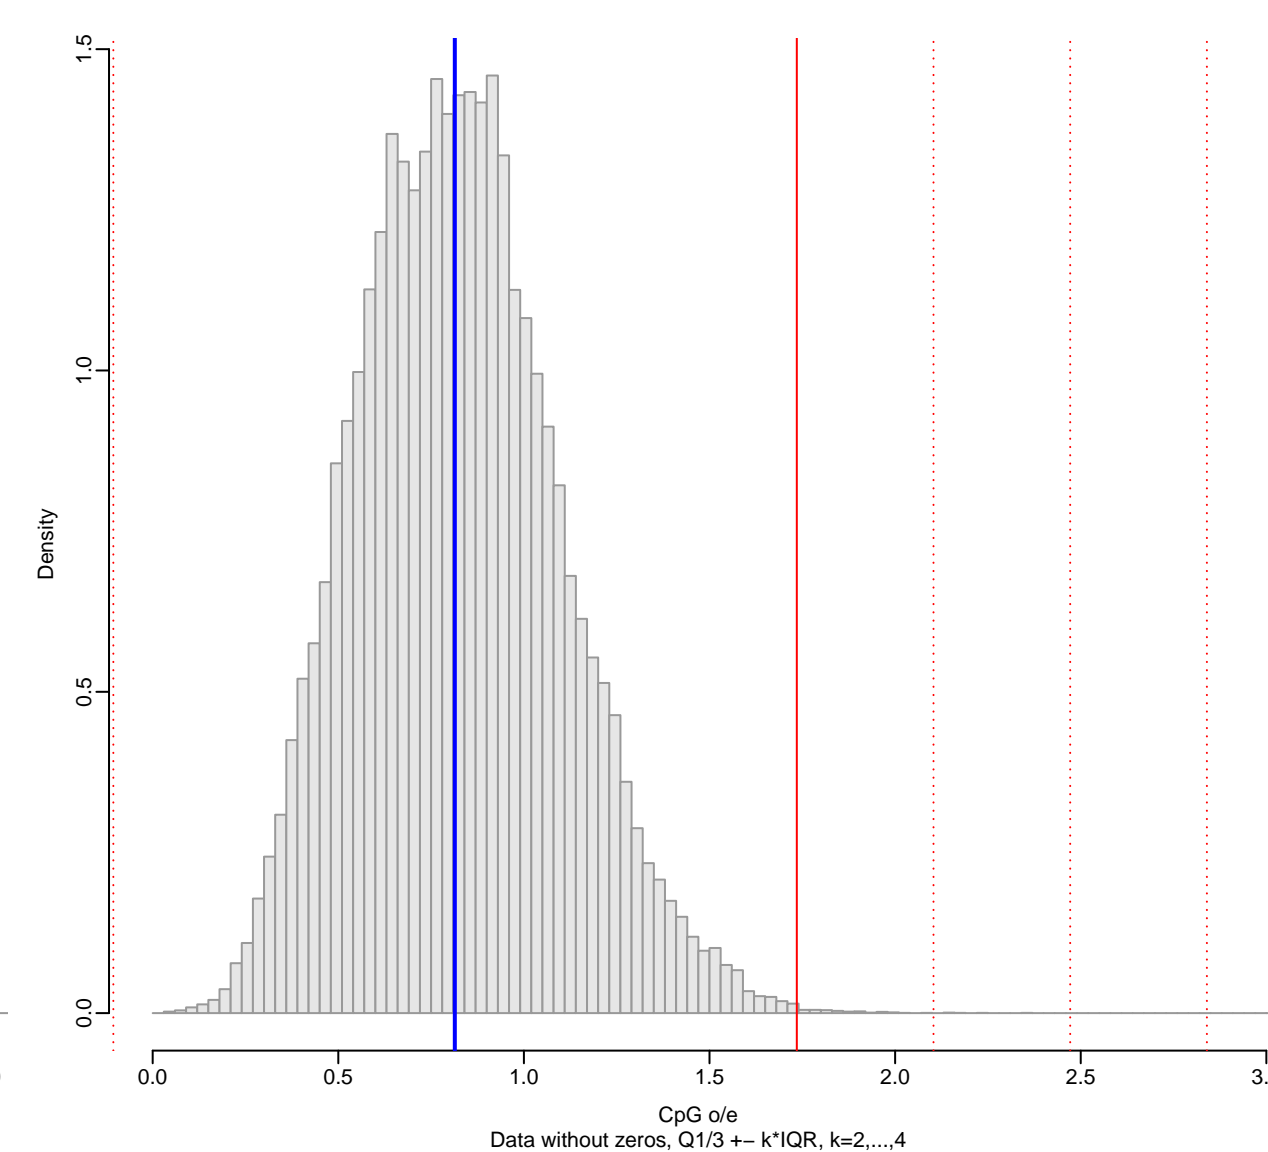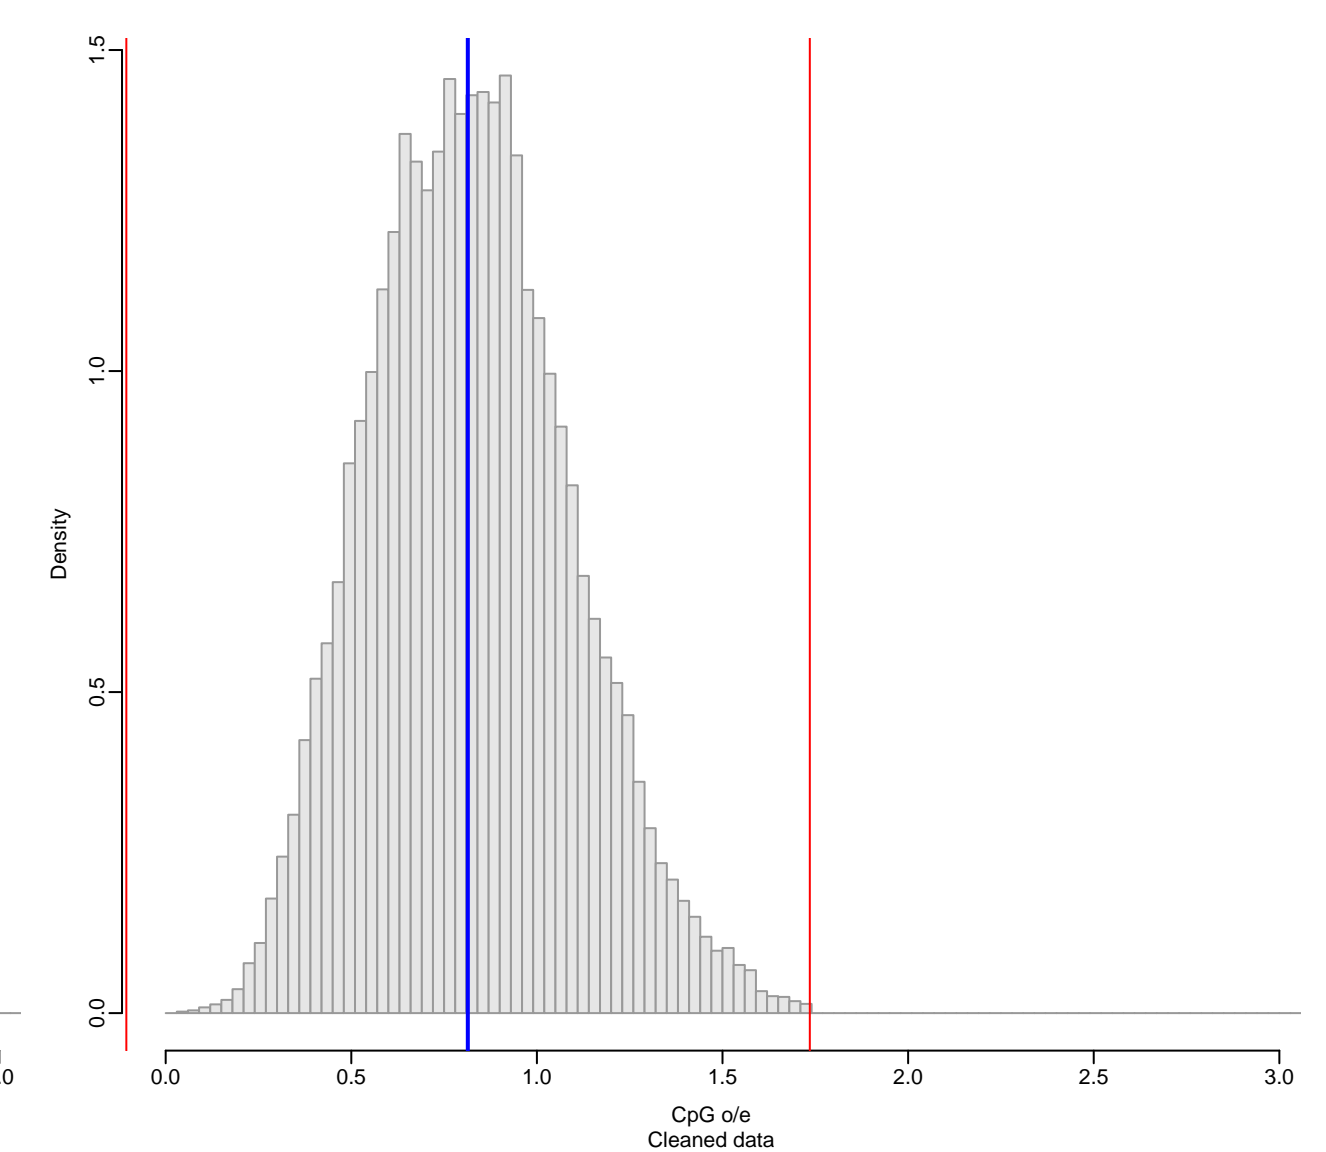

Coccidioides\_posadasii

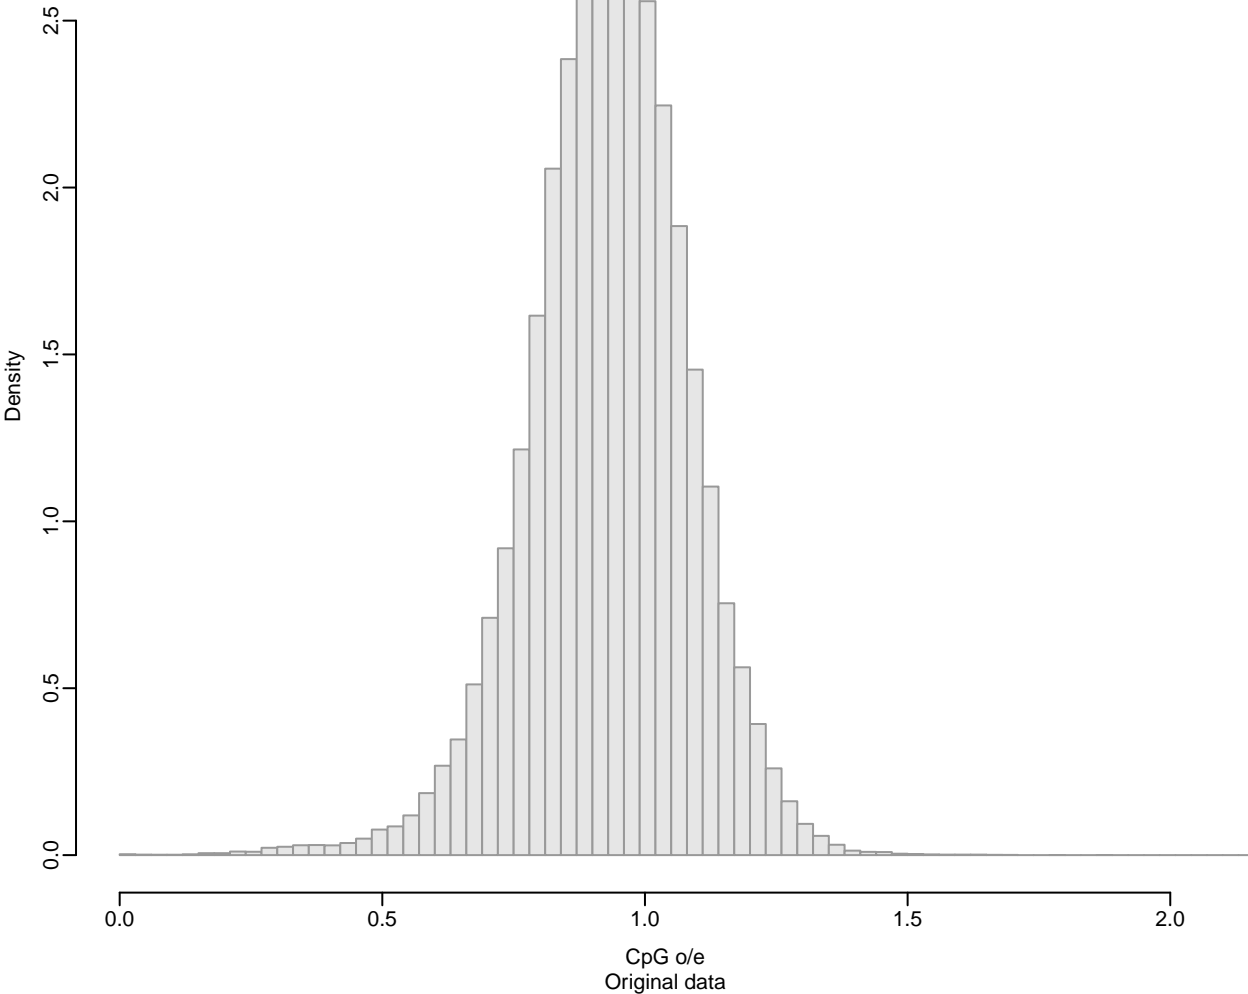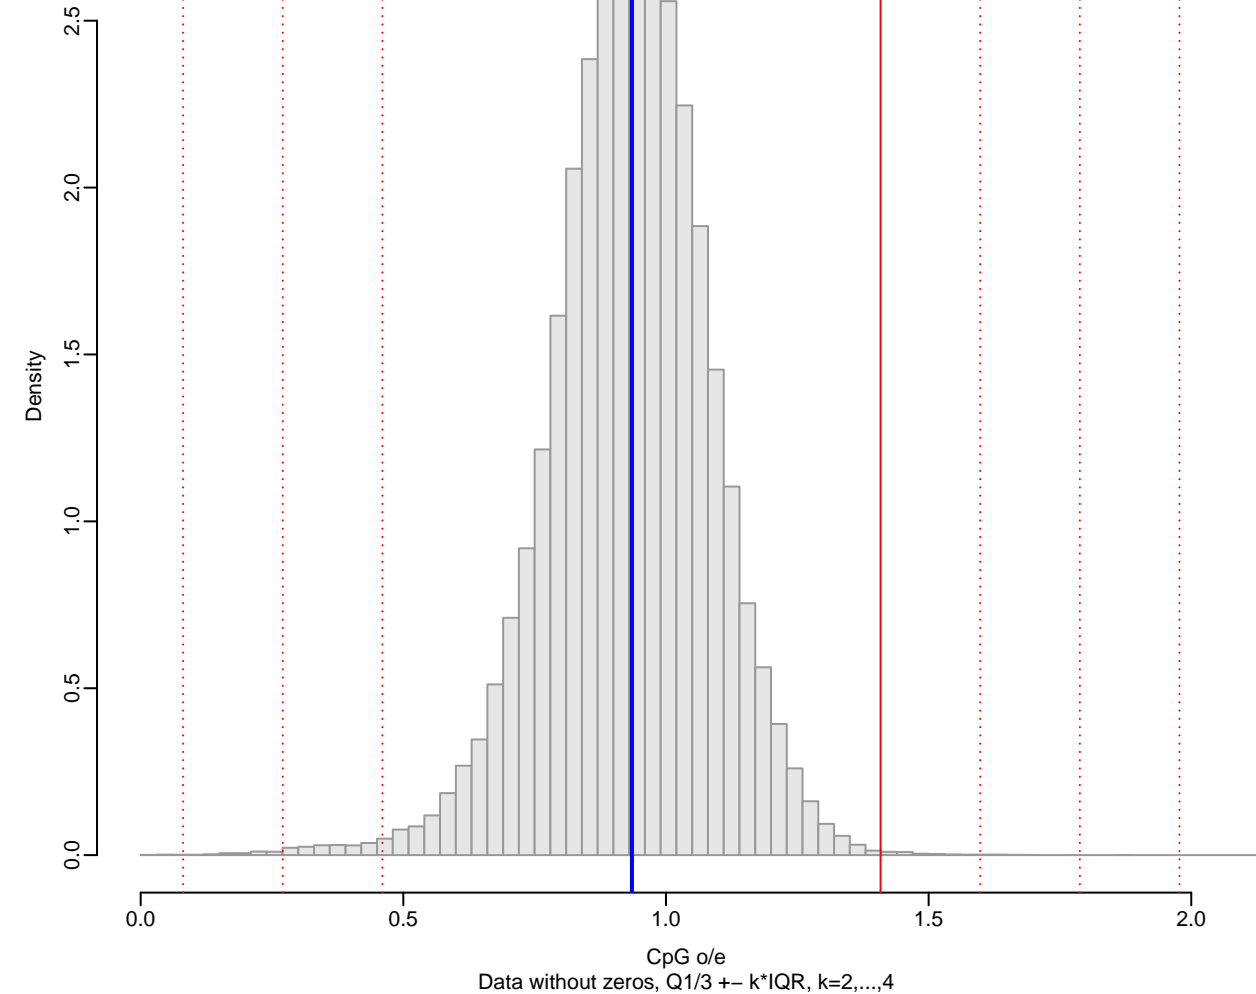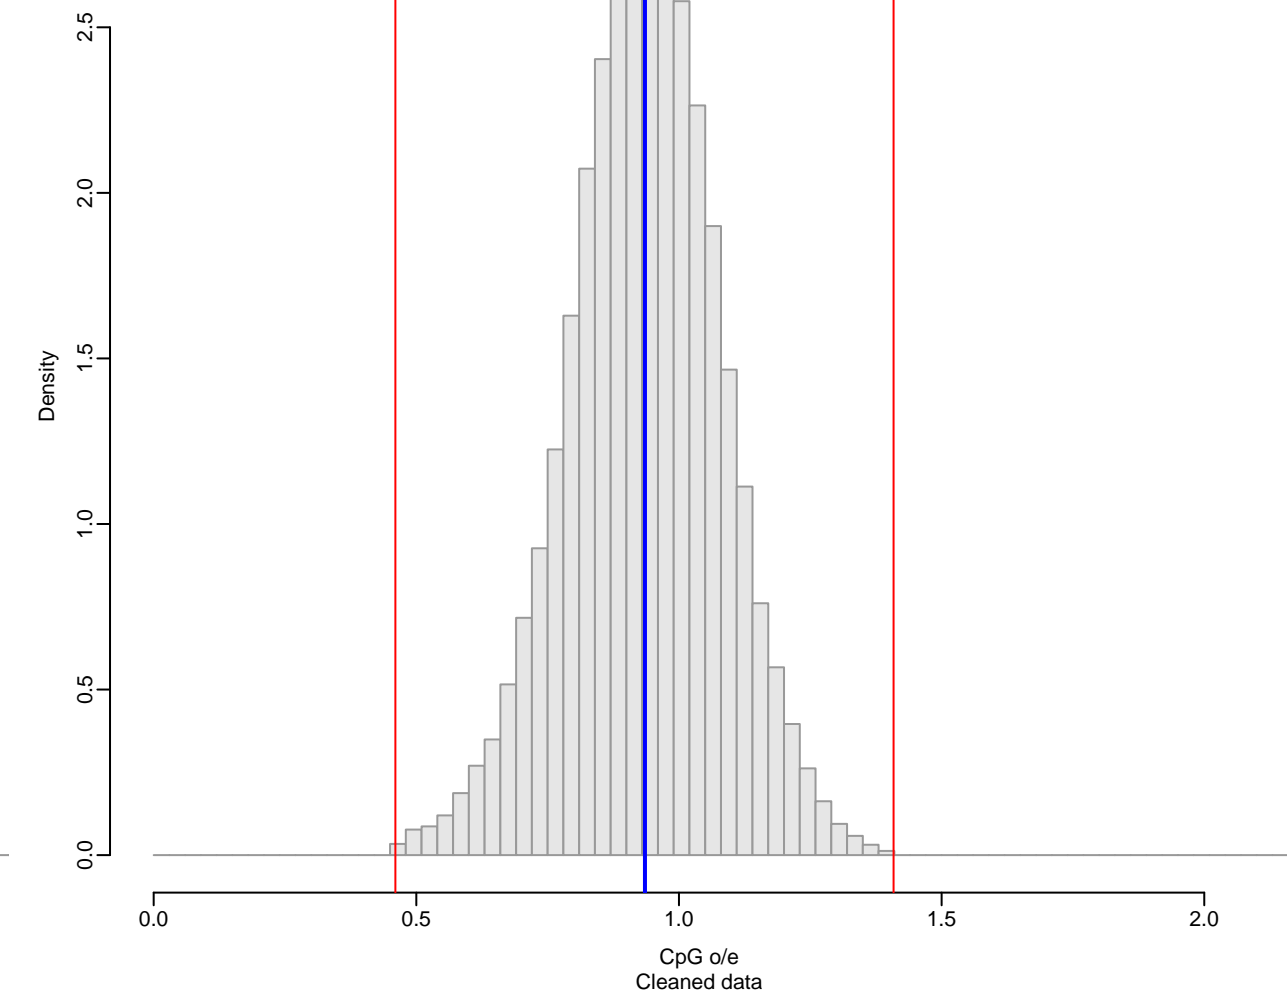

Cochliomyia\_hominivorax

Density

0.0

0.5

1.0

1.5

0.0 0.5 1.0 1.5 2.0 2.5

CpG o/e  
Original data

Density

0.0

0.5

1.0

1.5

0.0 0.5 1.0 1.5 2.0 2.5

CpG o/e  
Data without zeros,  $Q1/3 \pm k \cdot IQR$ ,  $k=2, \dots, 4$

Density

0.0

0.5

1.0

1.5

0.0 0.5 1.0 1.5 2.0 2.5

CpG o/e  
Cleaned data

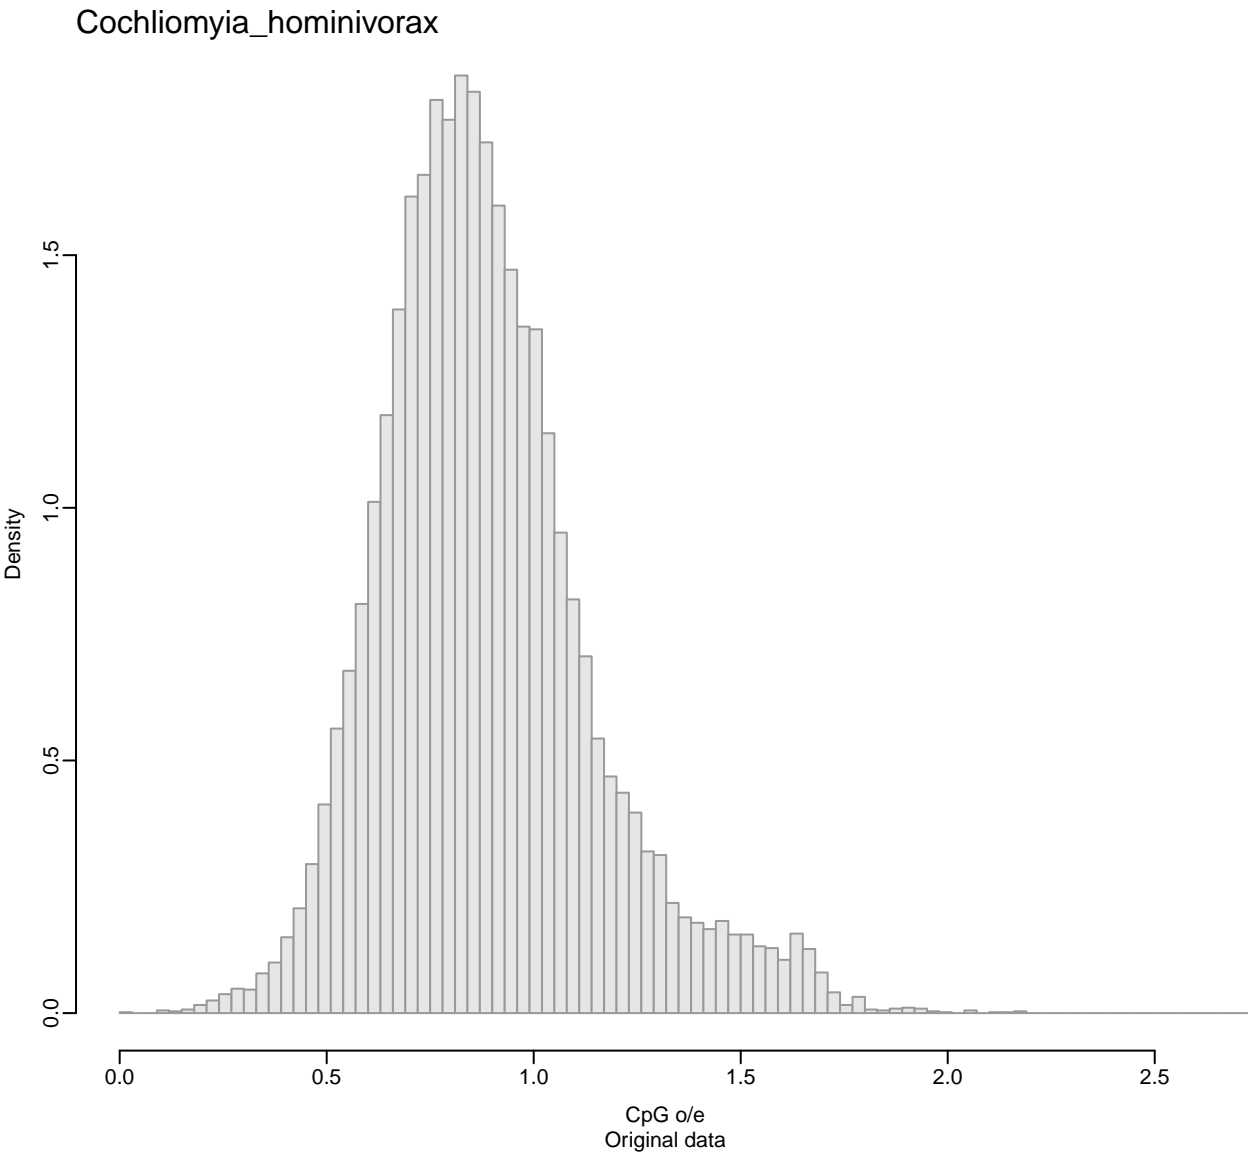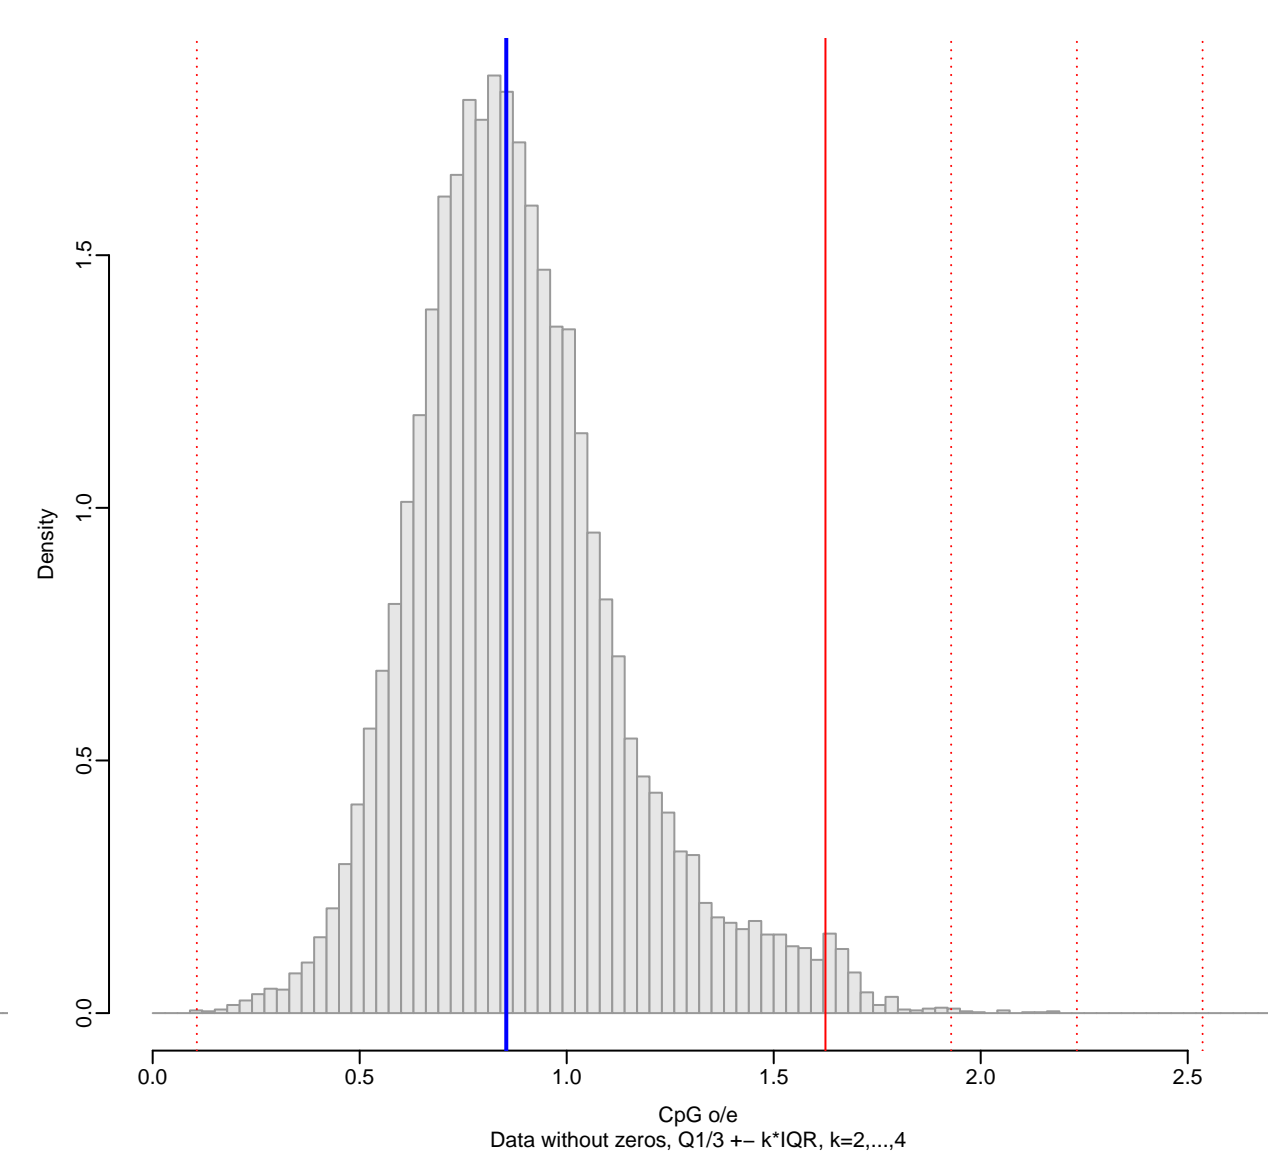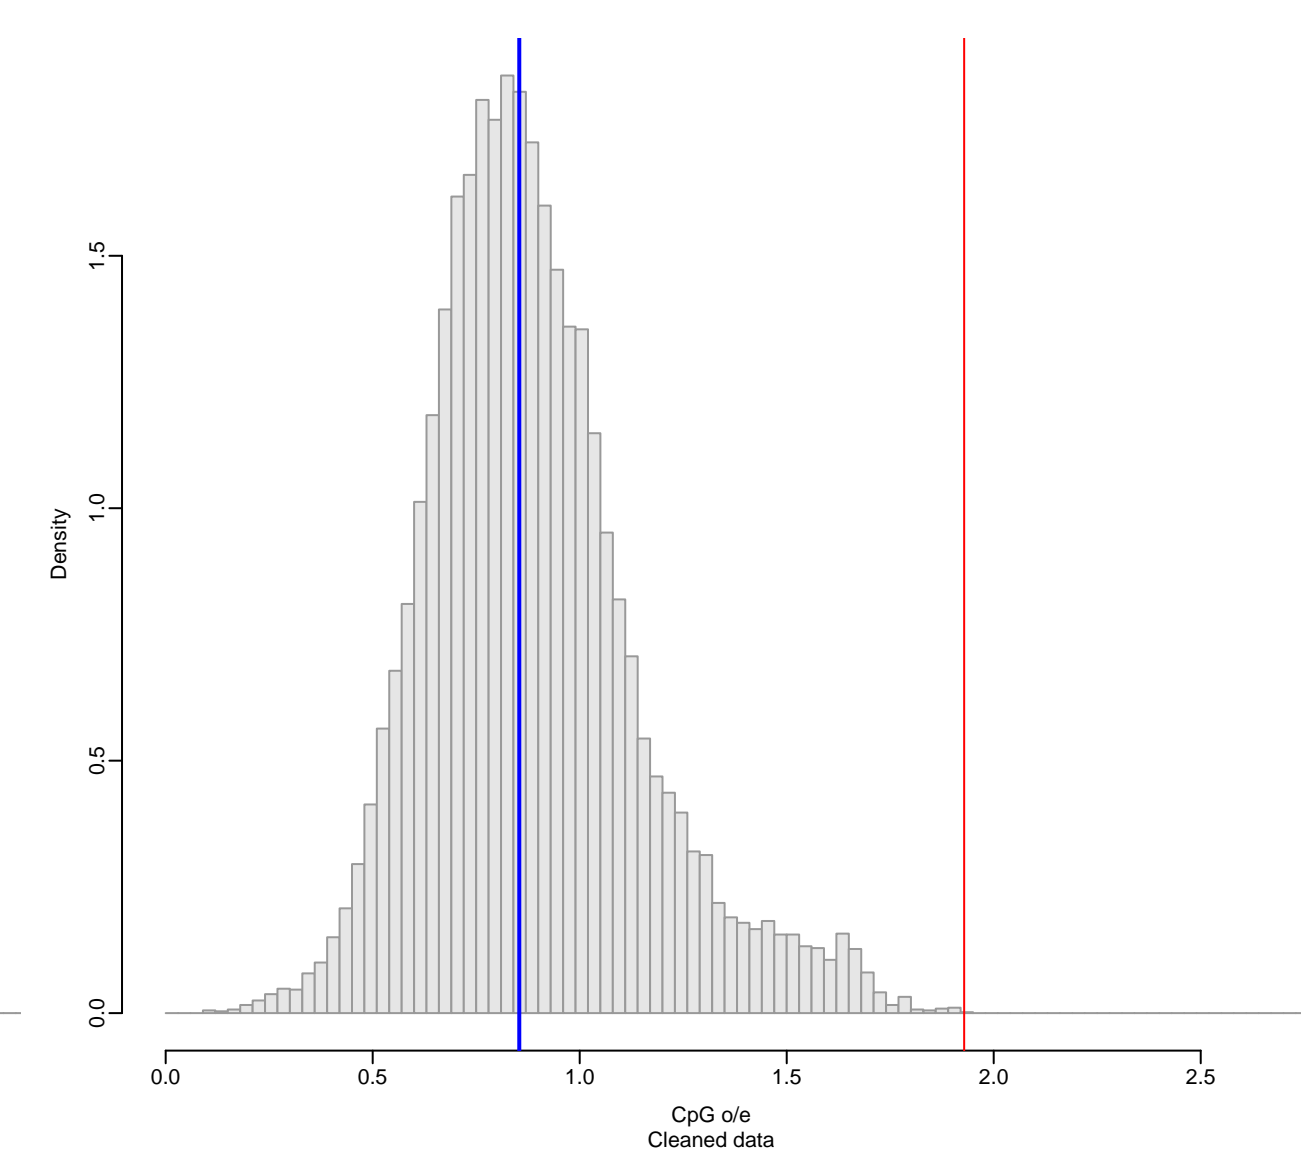



Coffea\_canephora

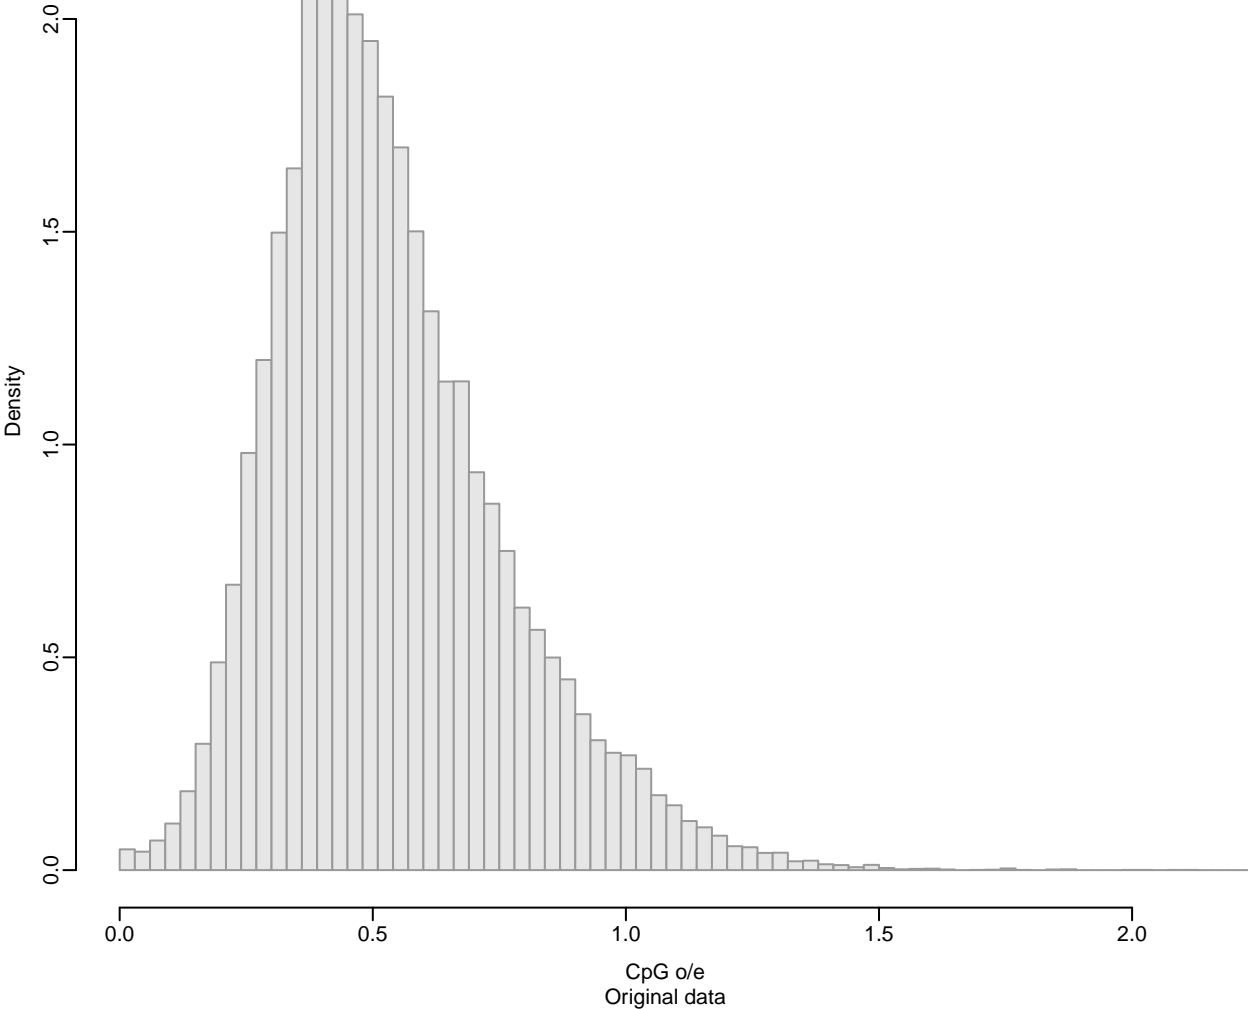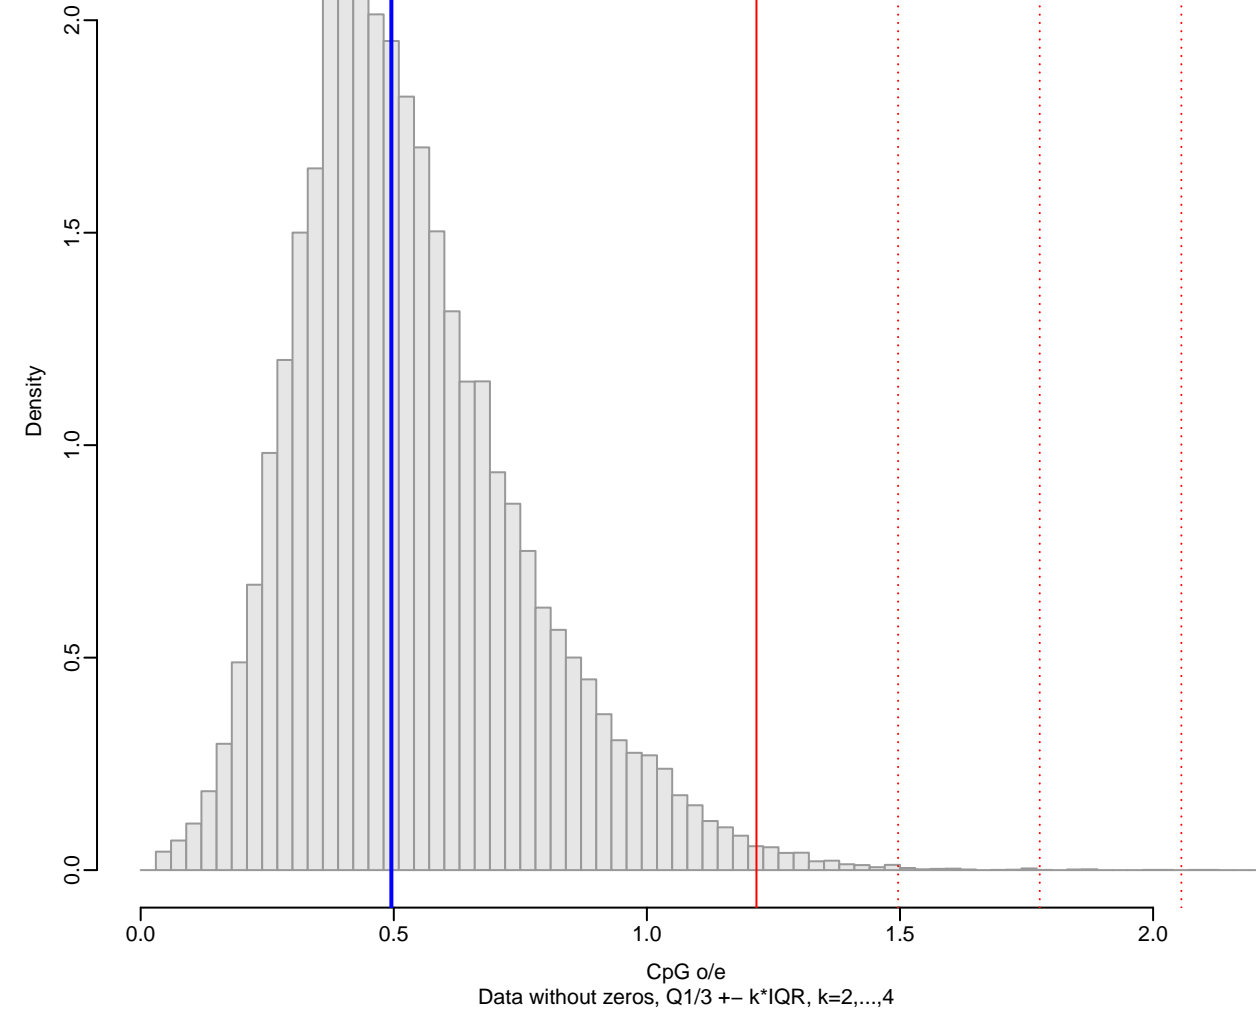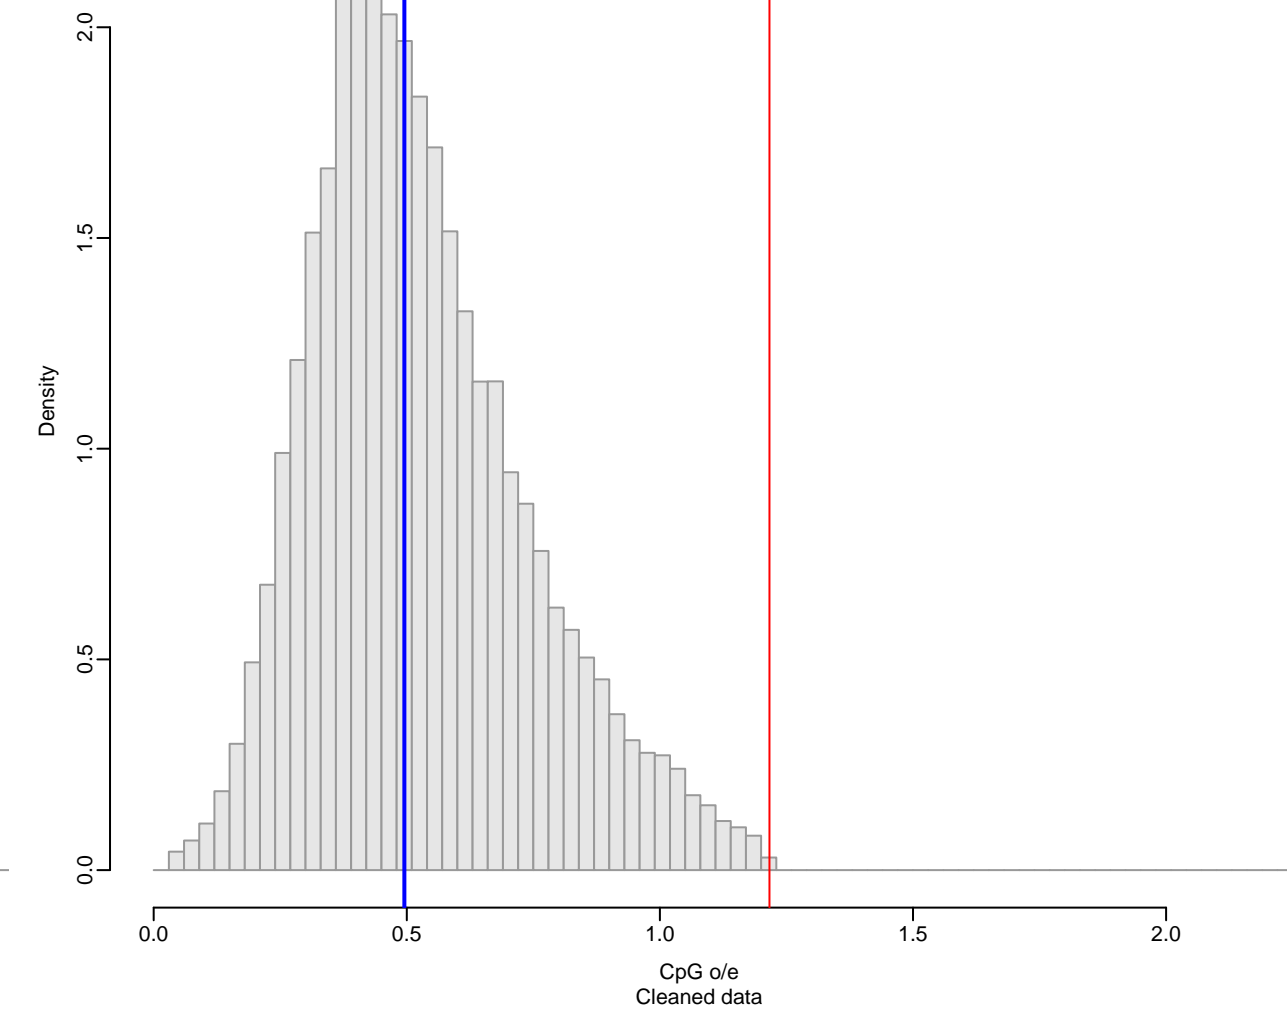

Coleochaete\_scutata

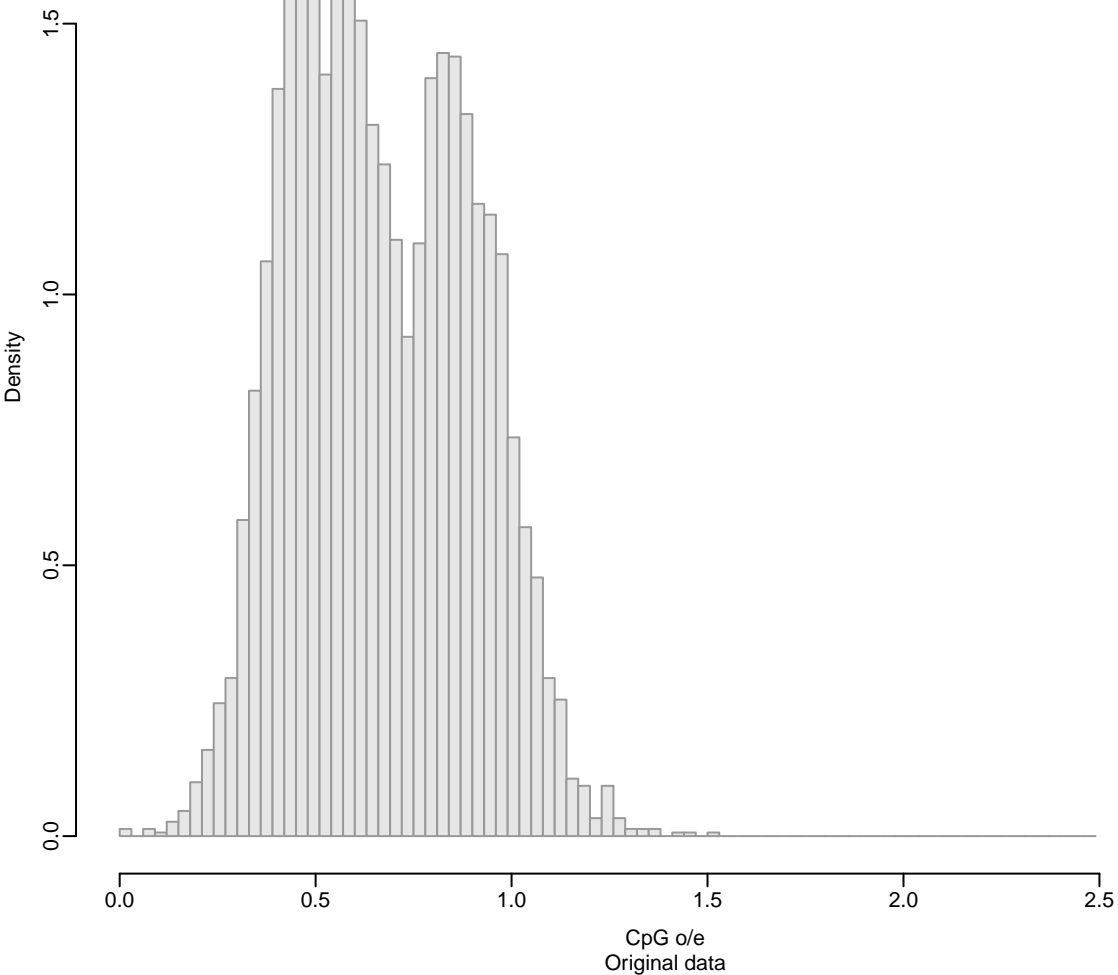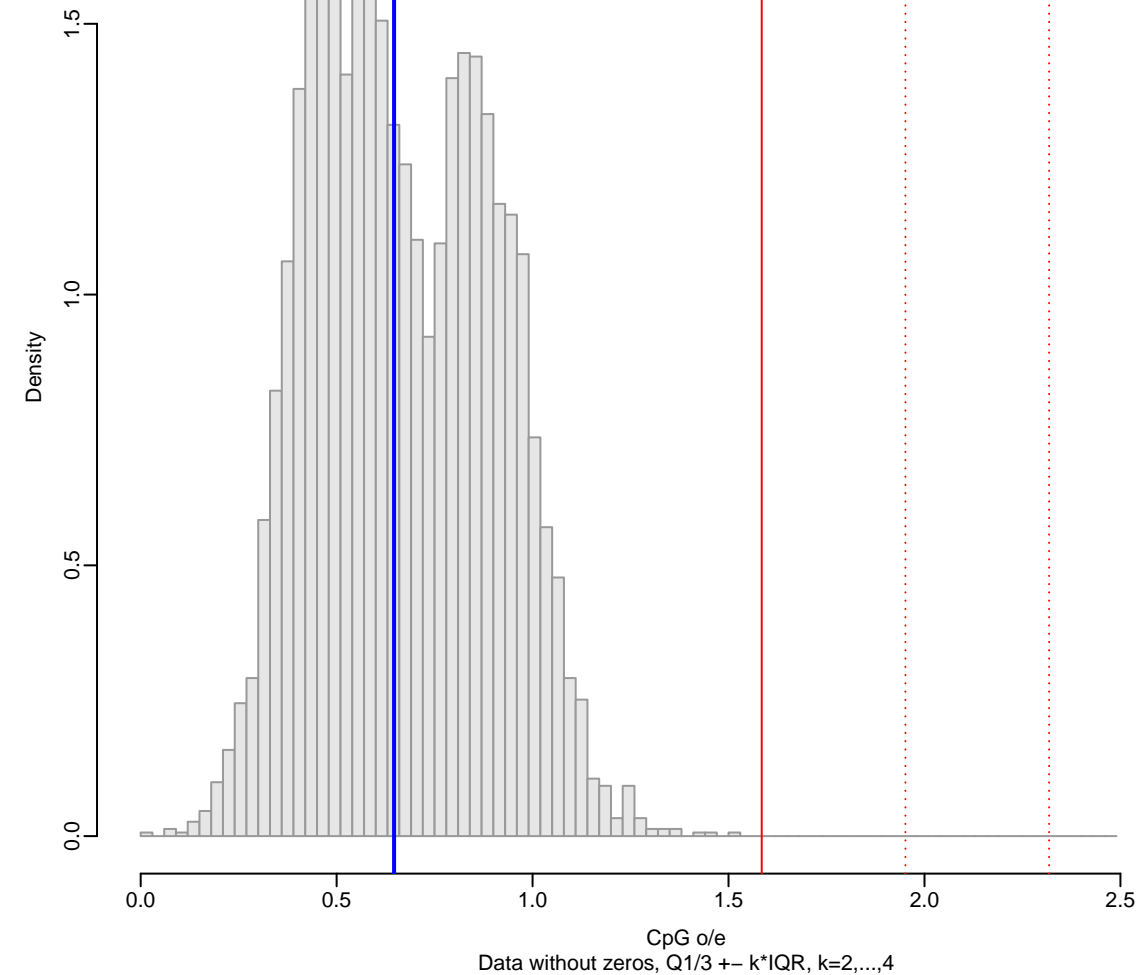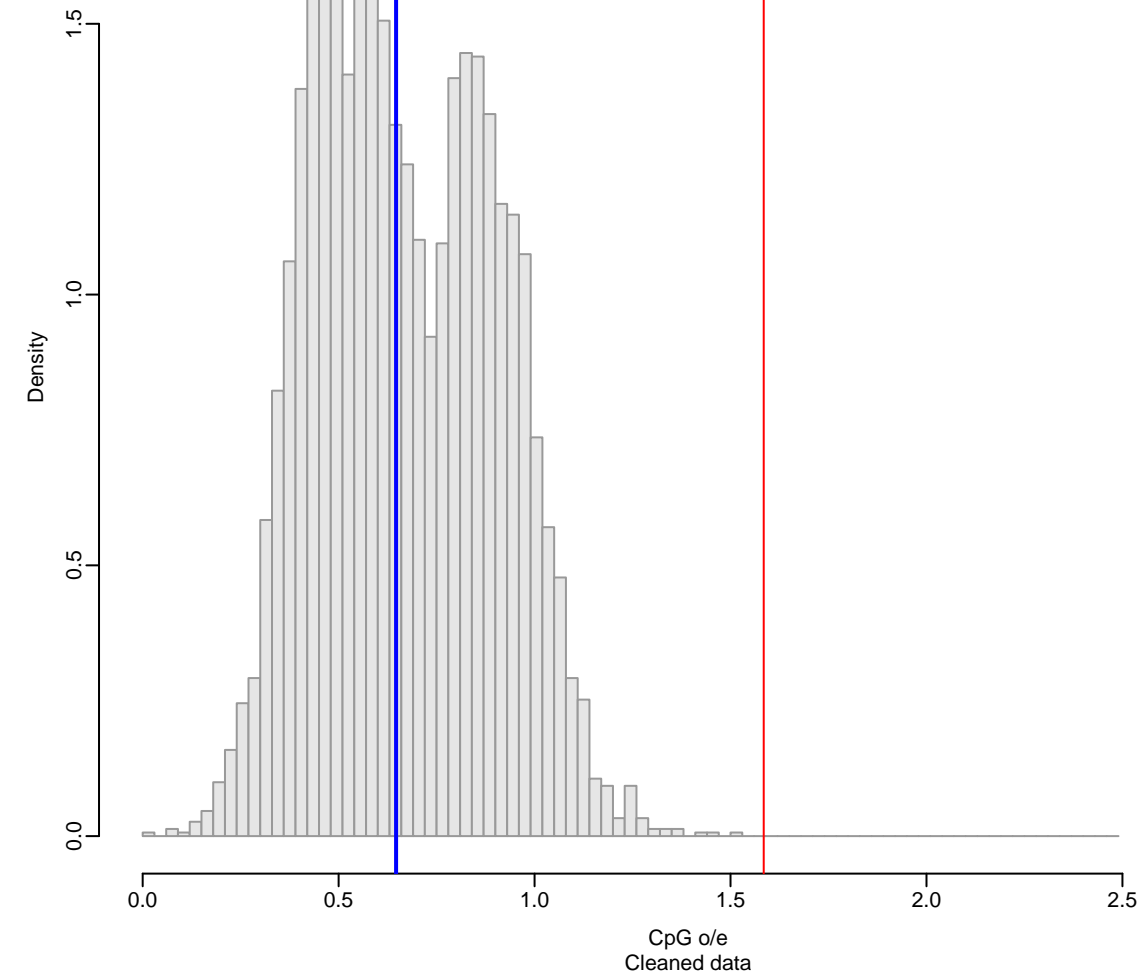

Coprinopsis\_cinerea

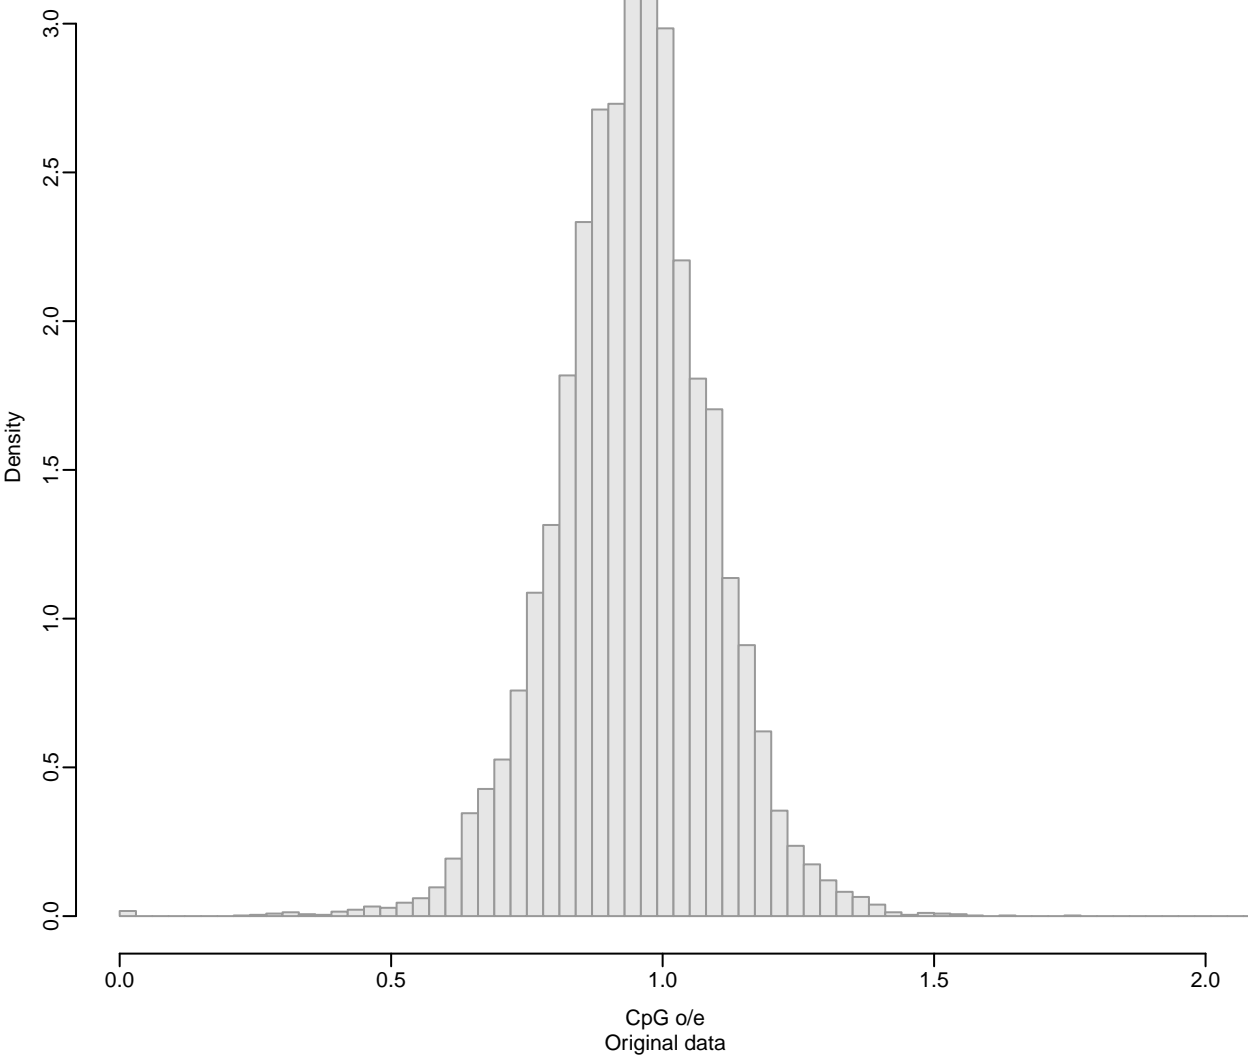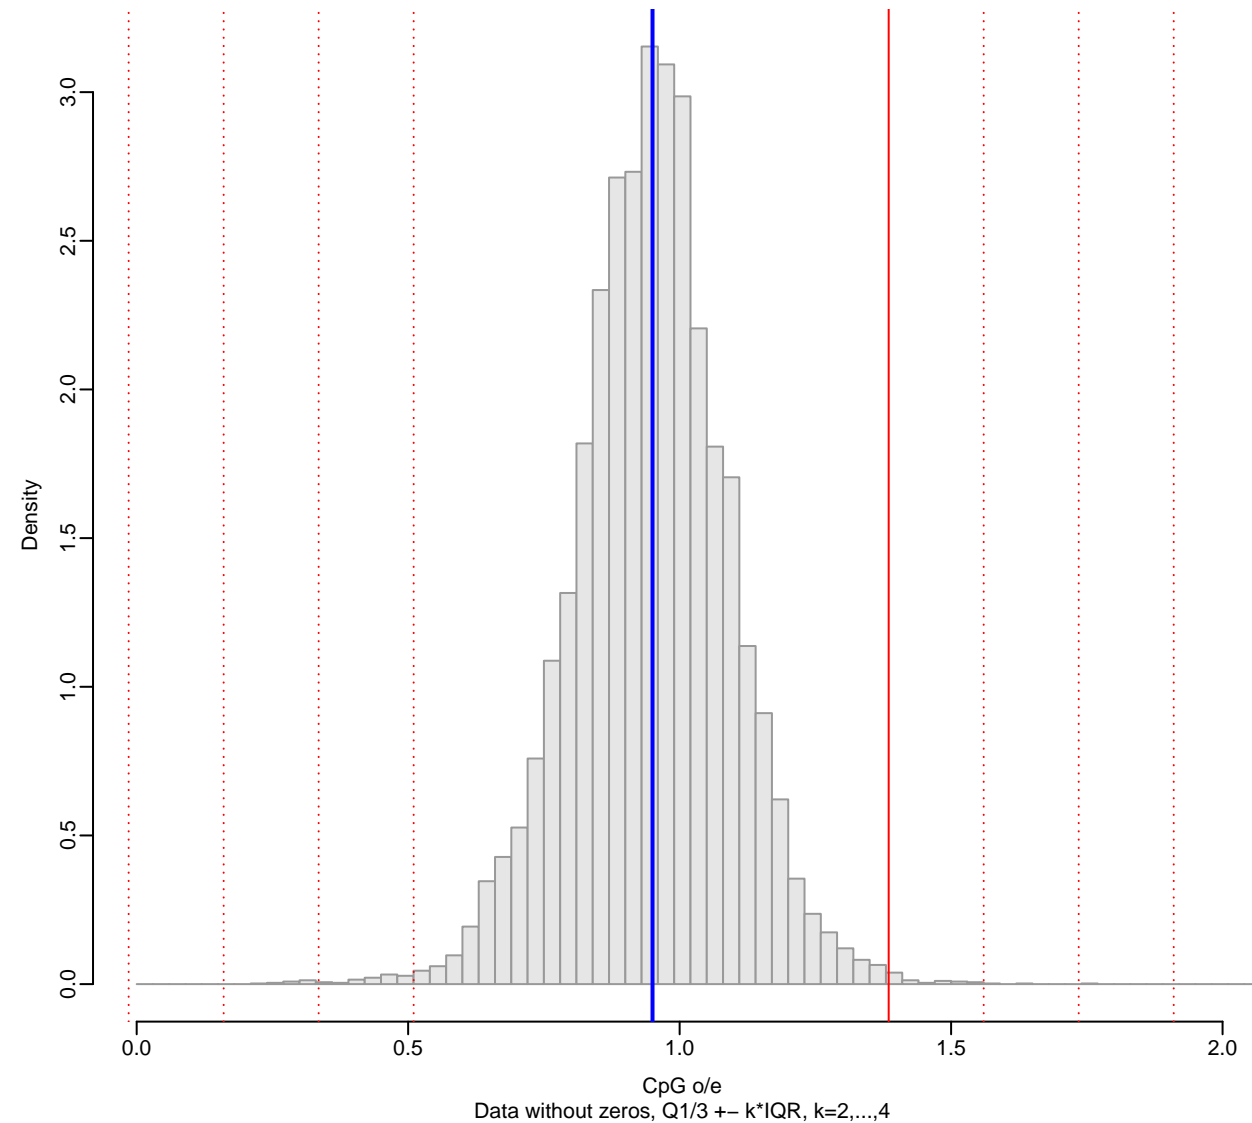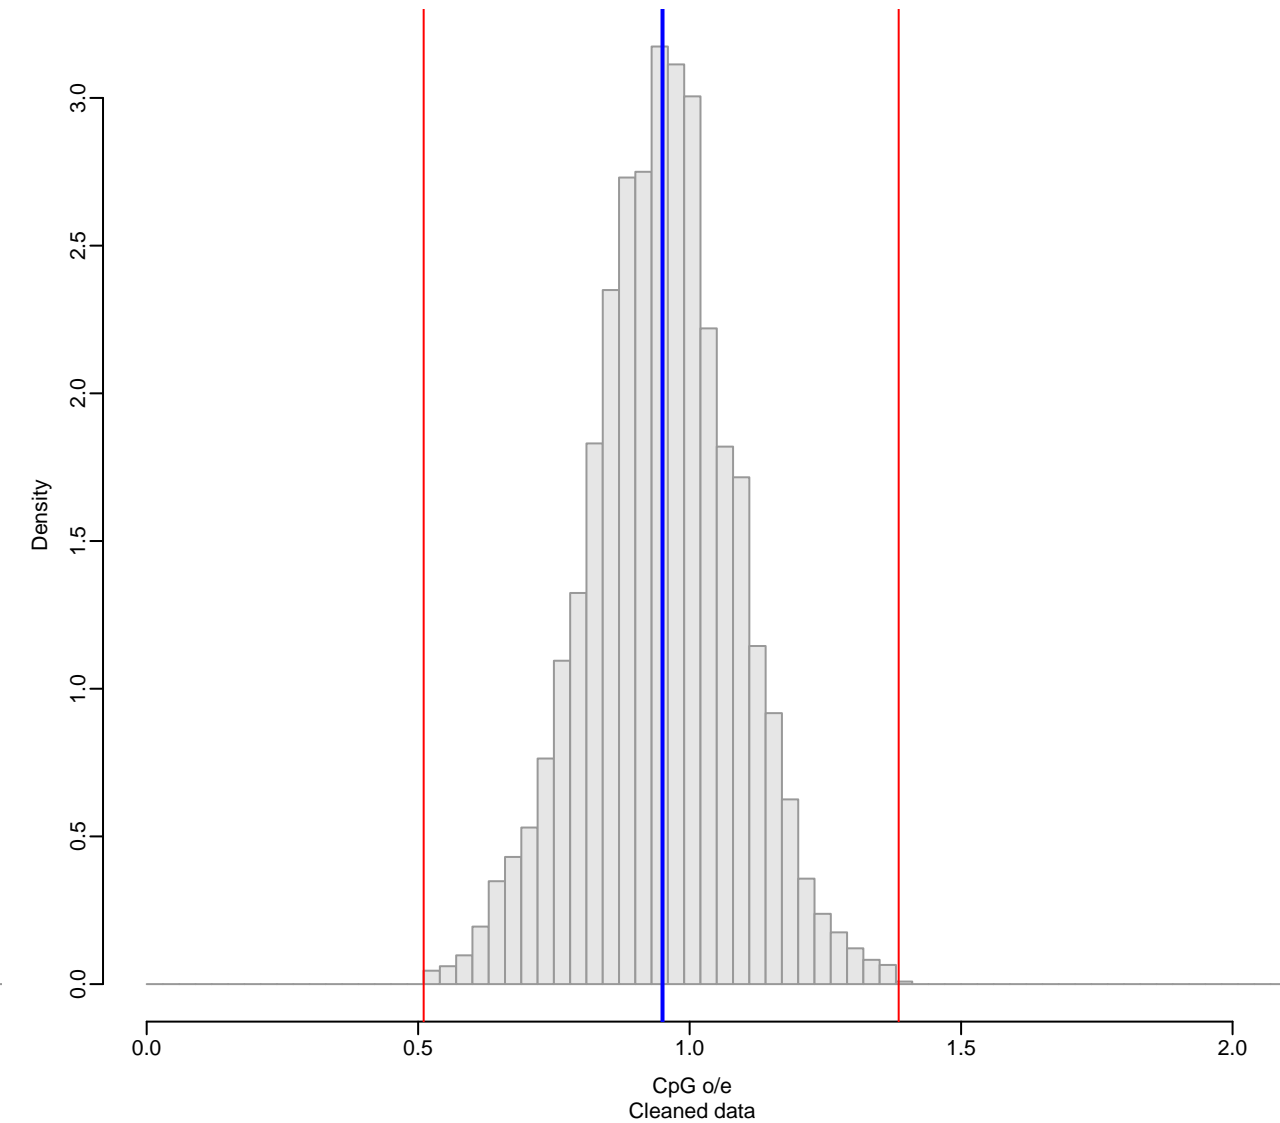

Coptotermes\_formosanus

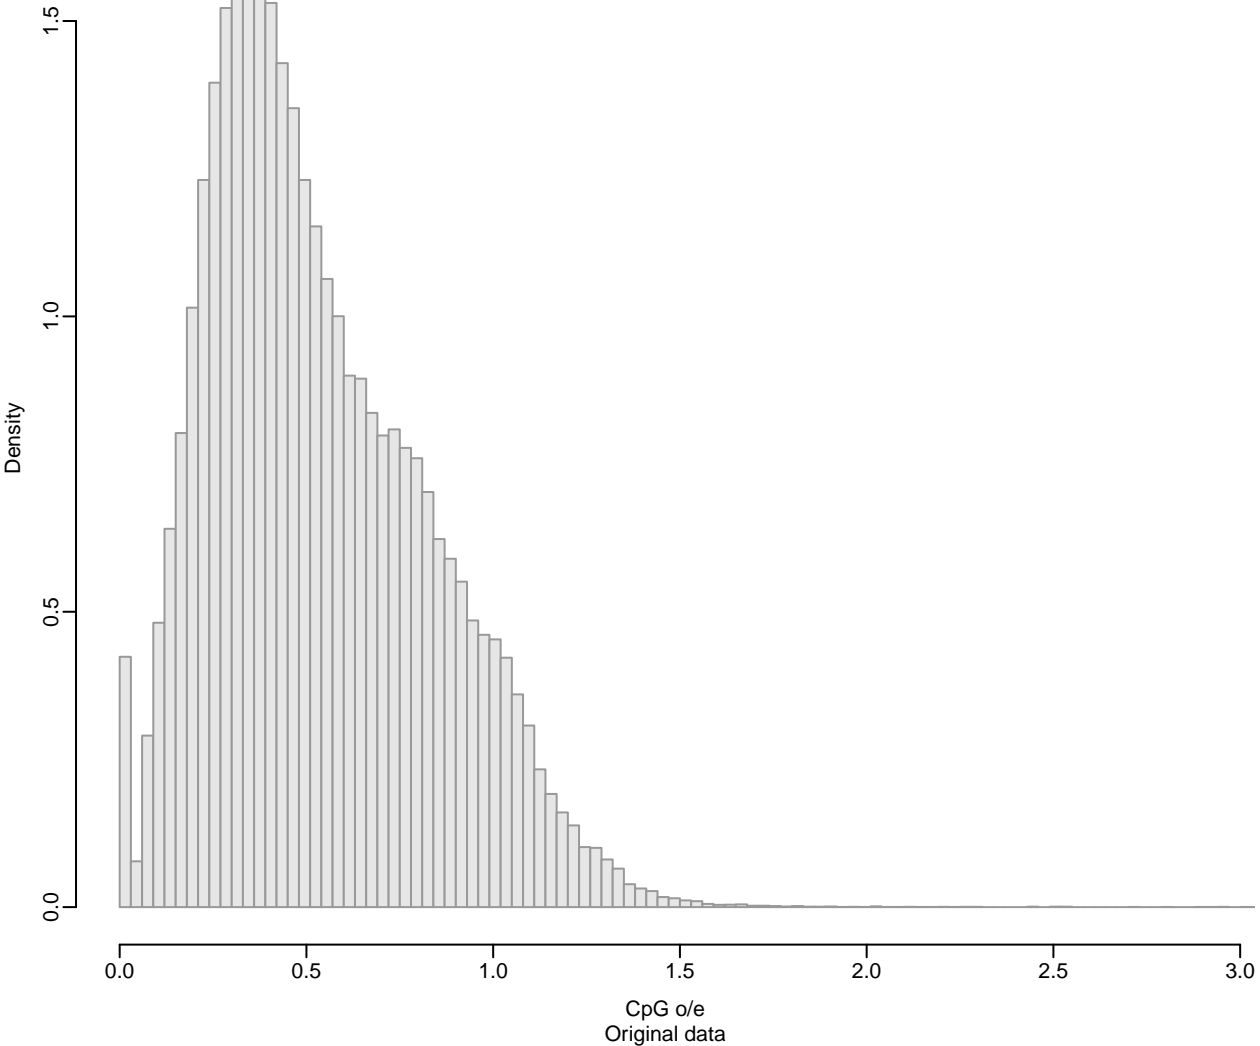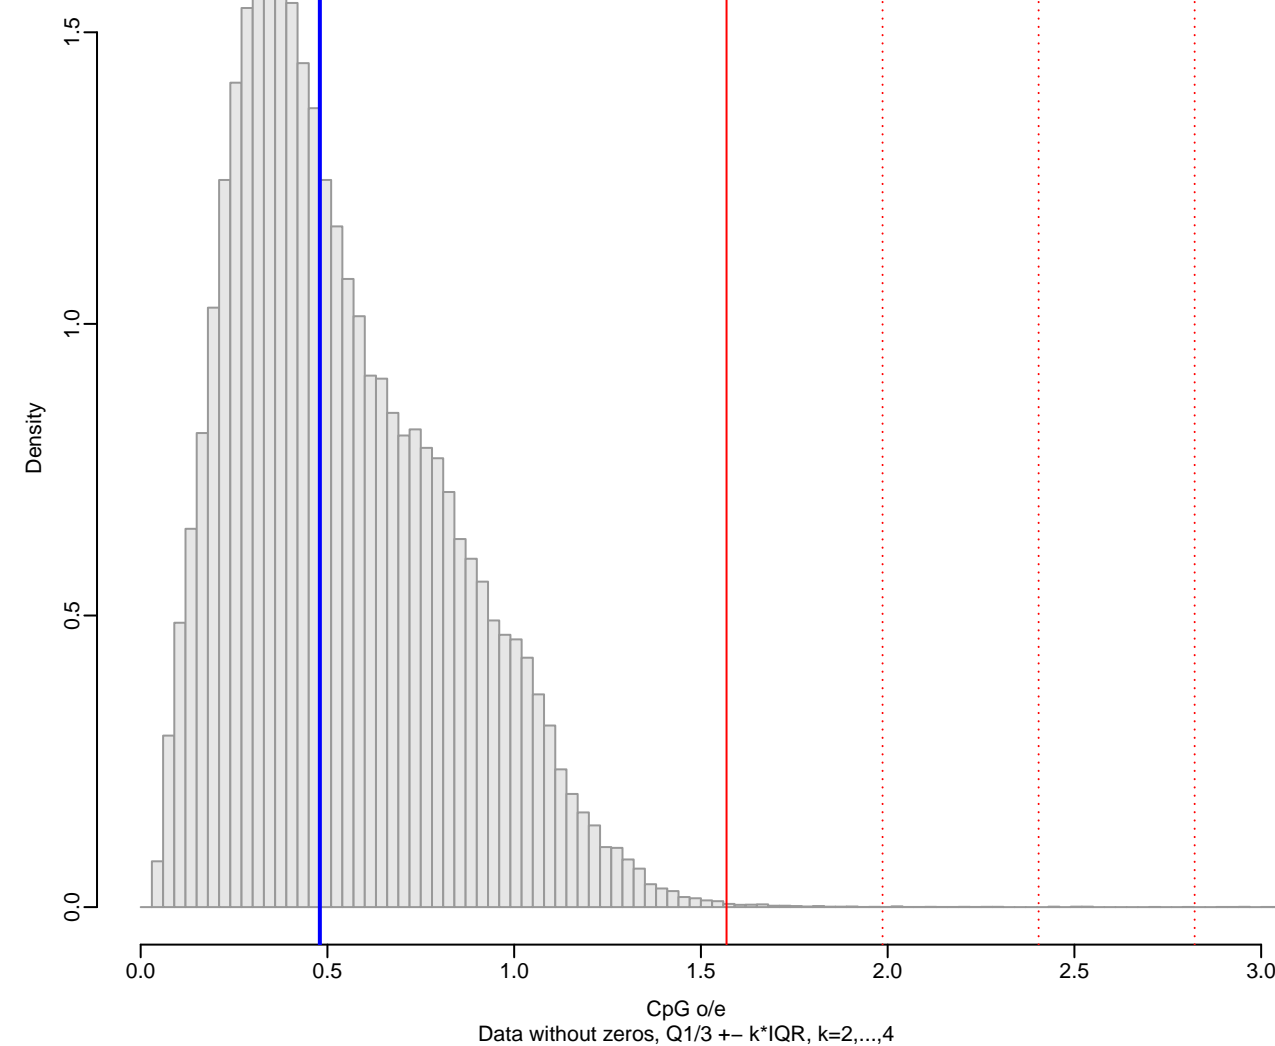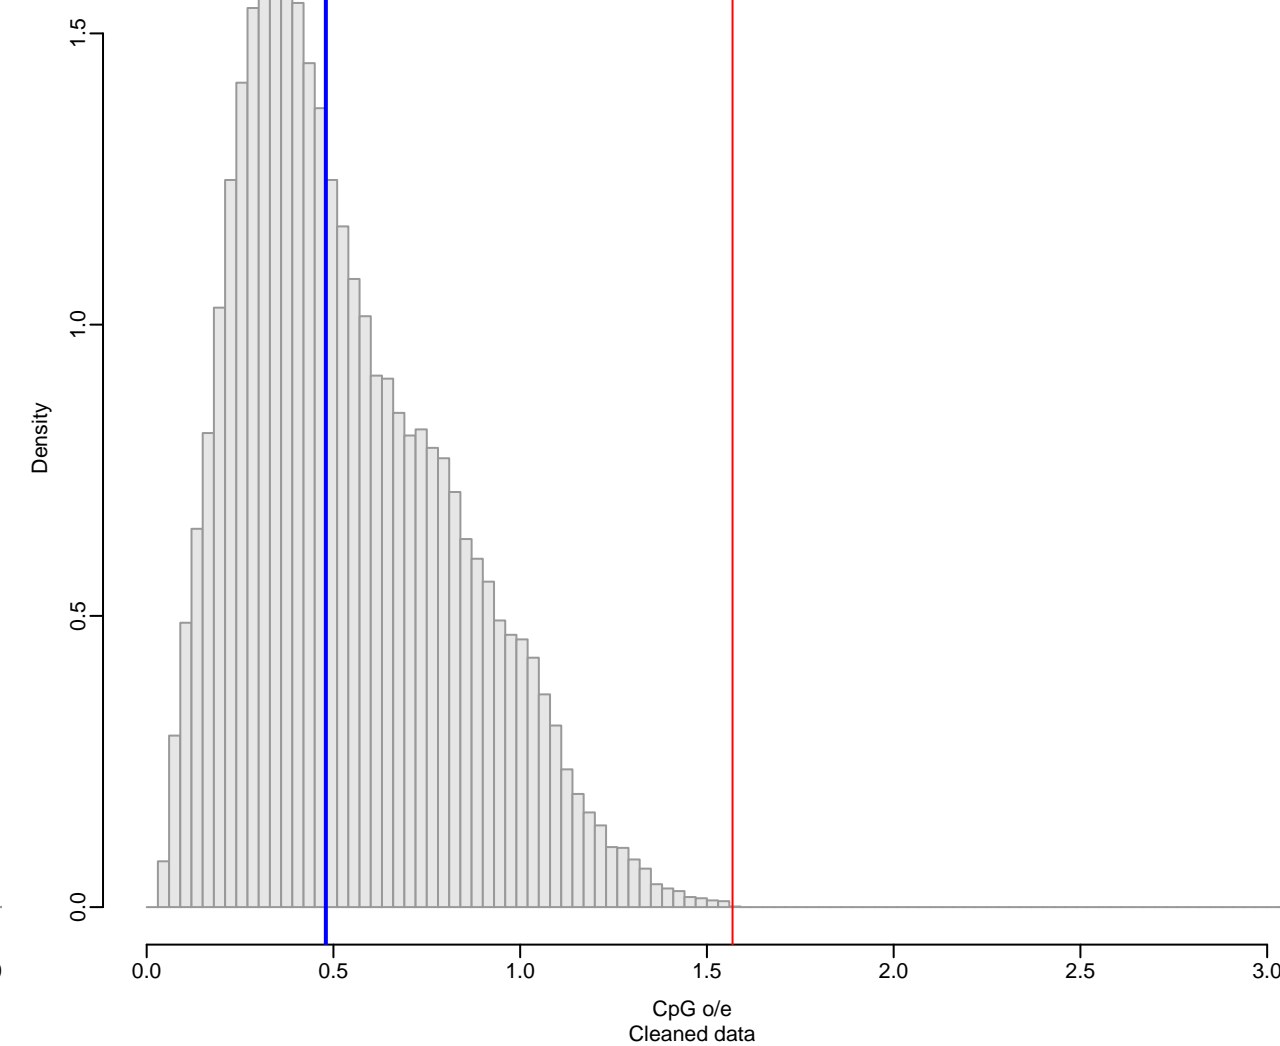

Cordyceps\_militaris

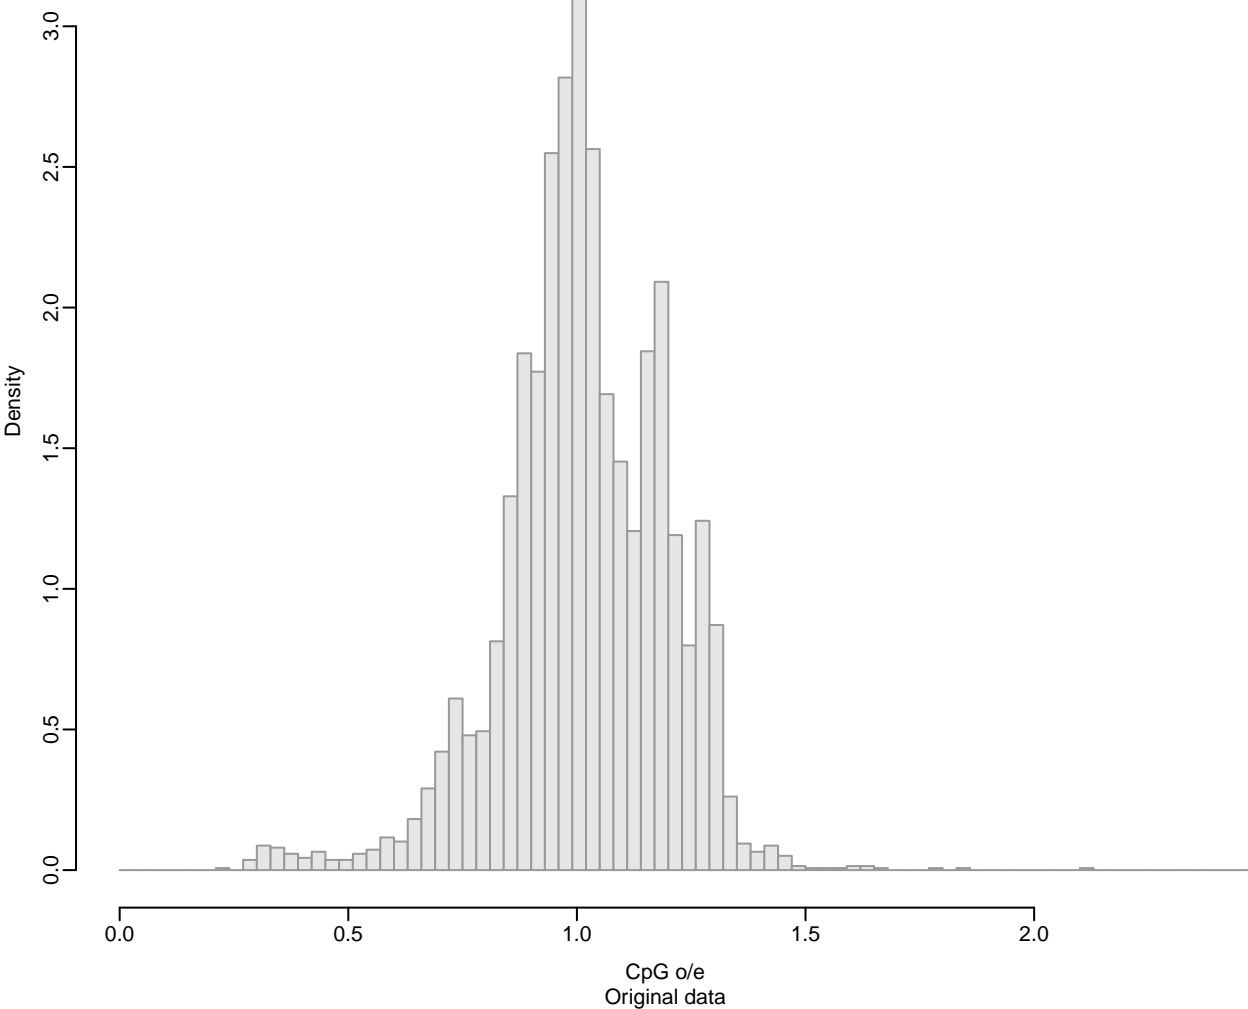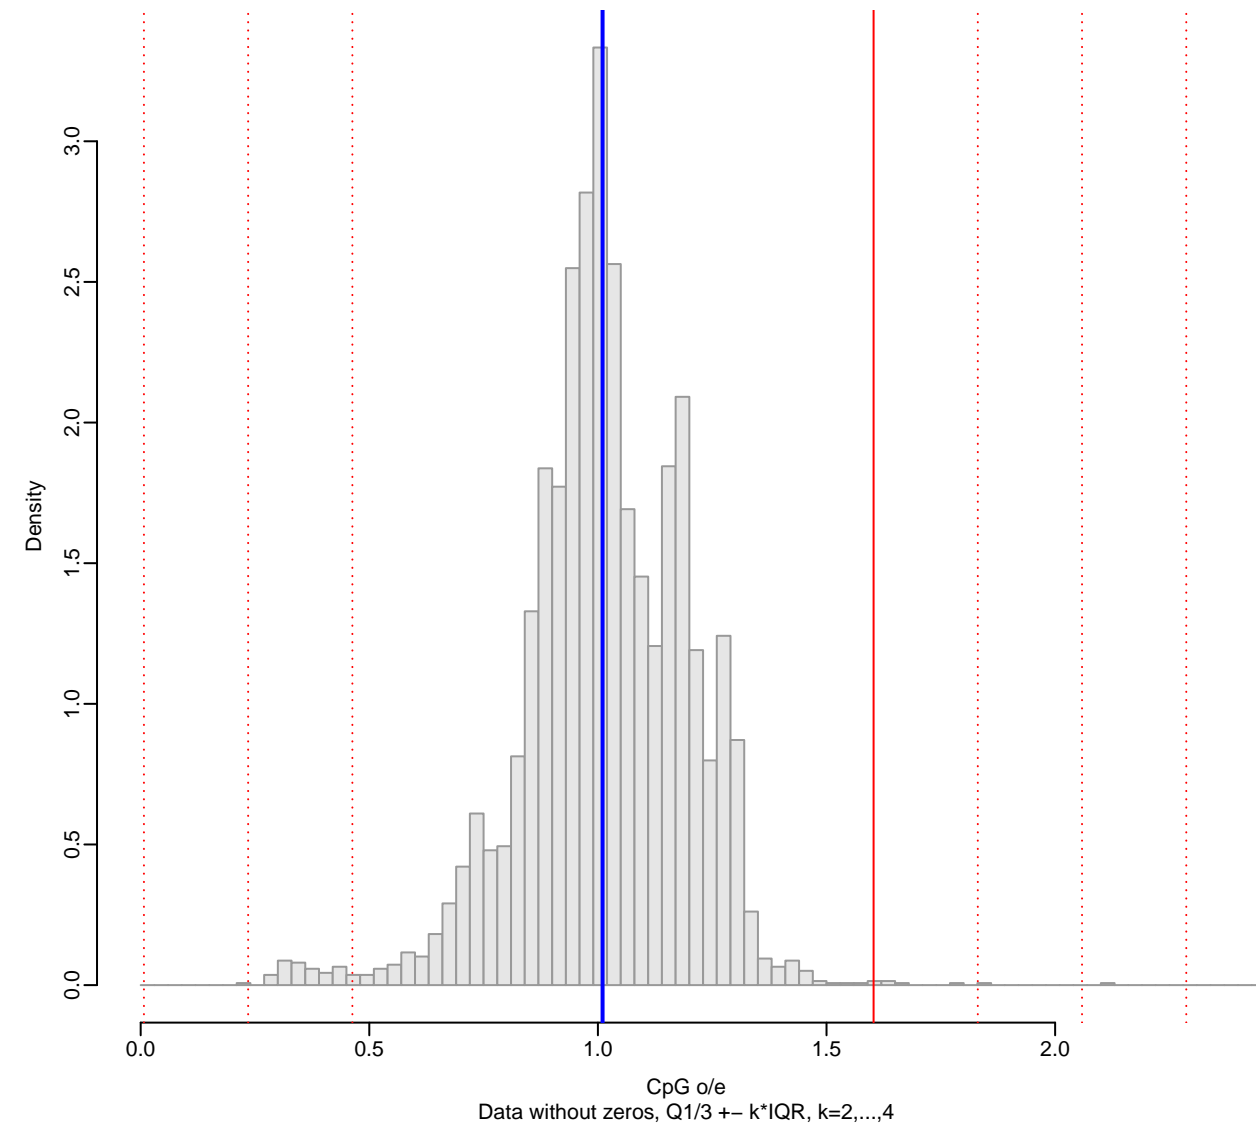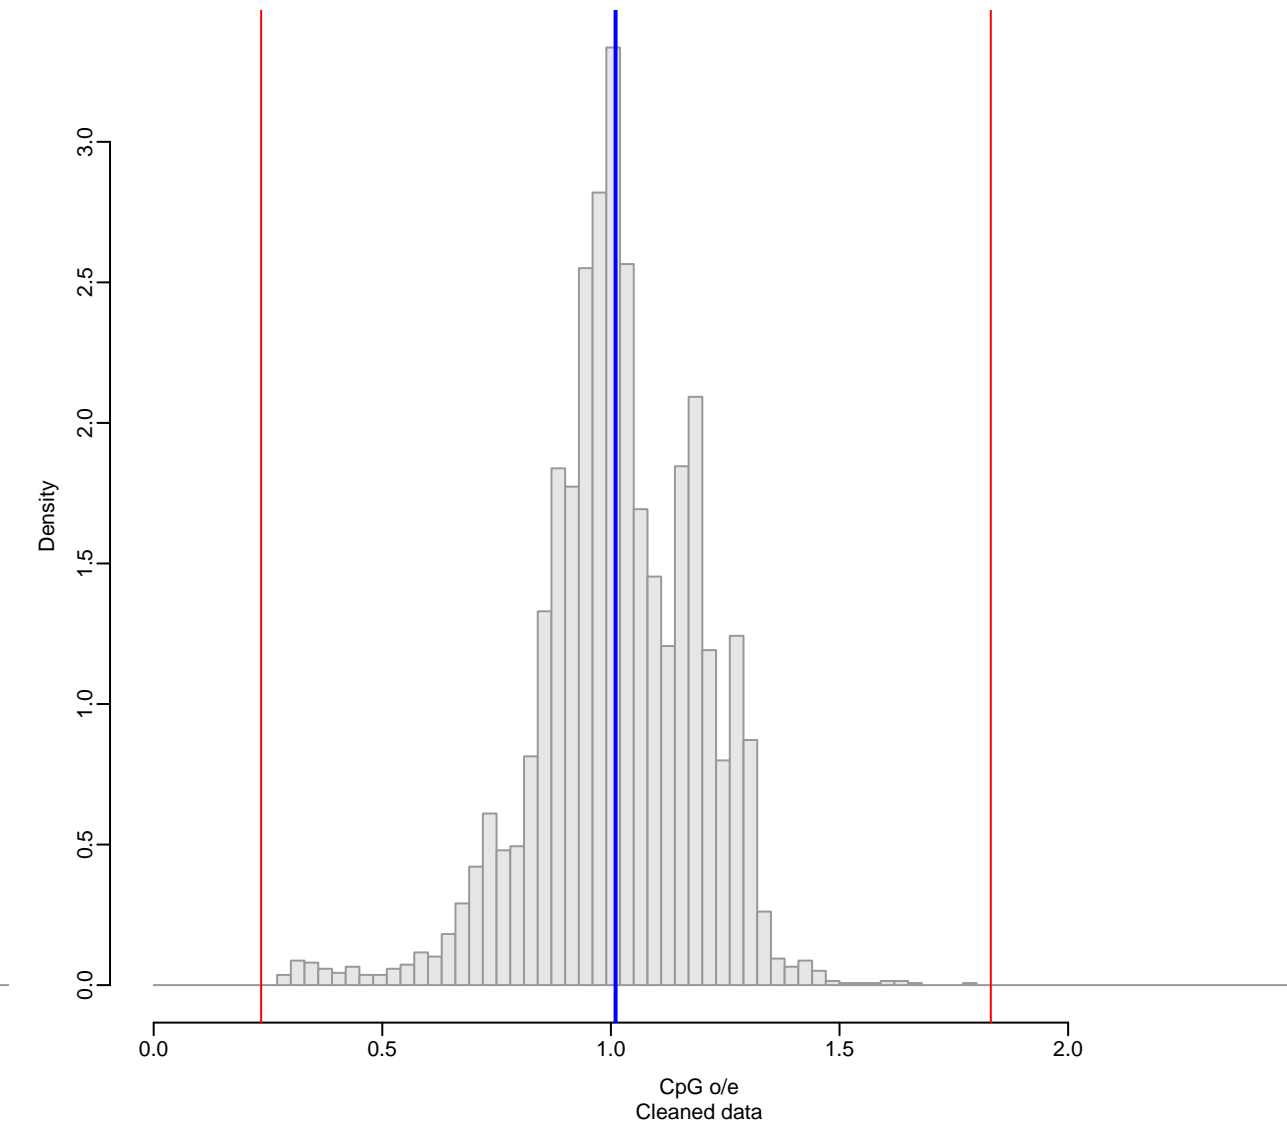

Coregonus\_clupeaformis

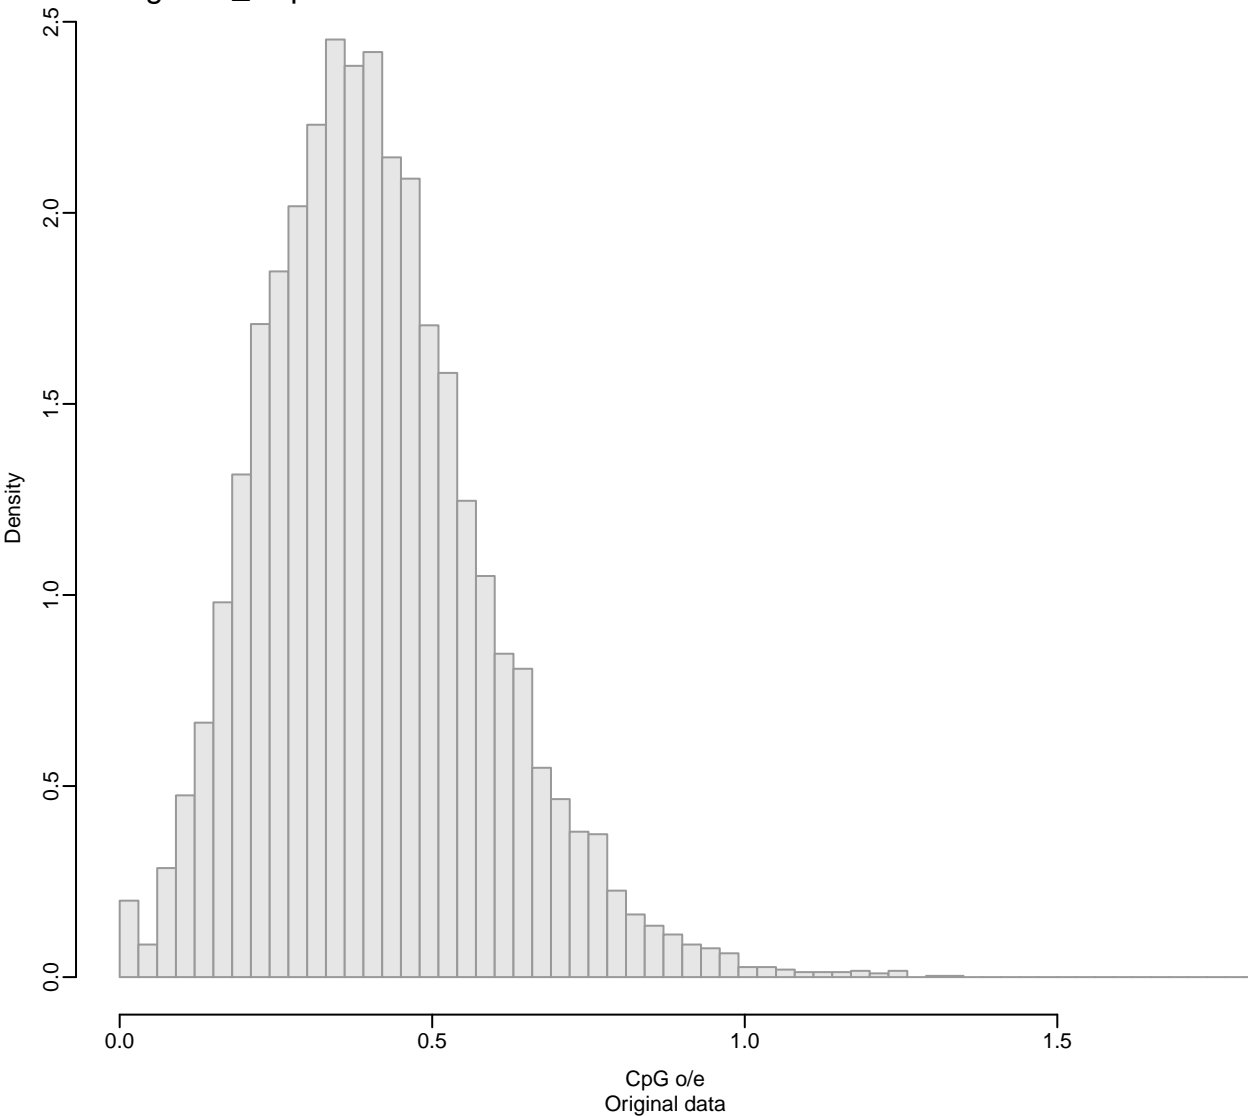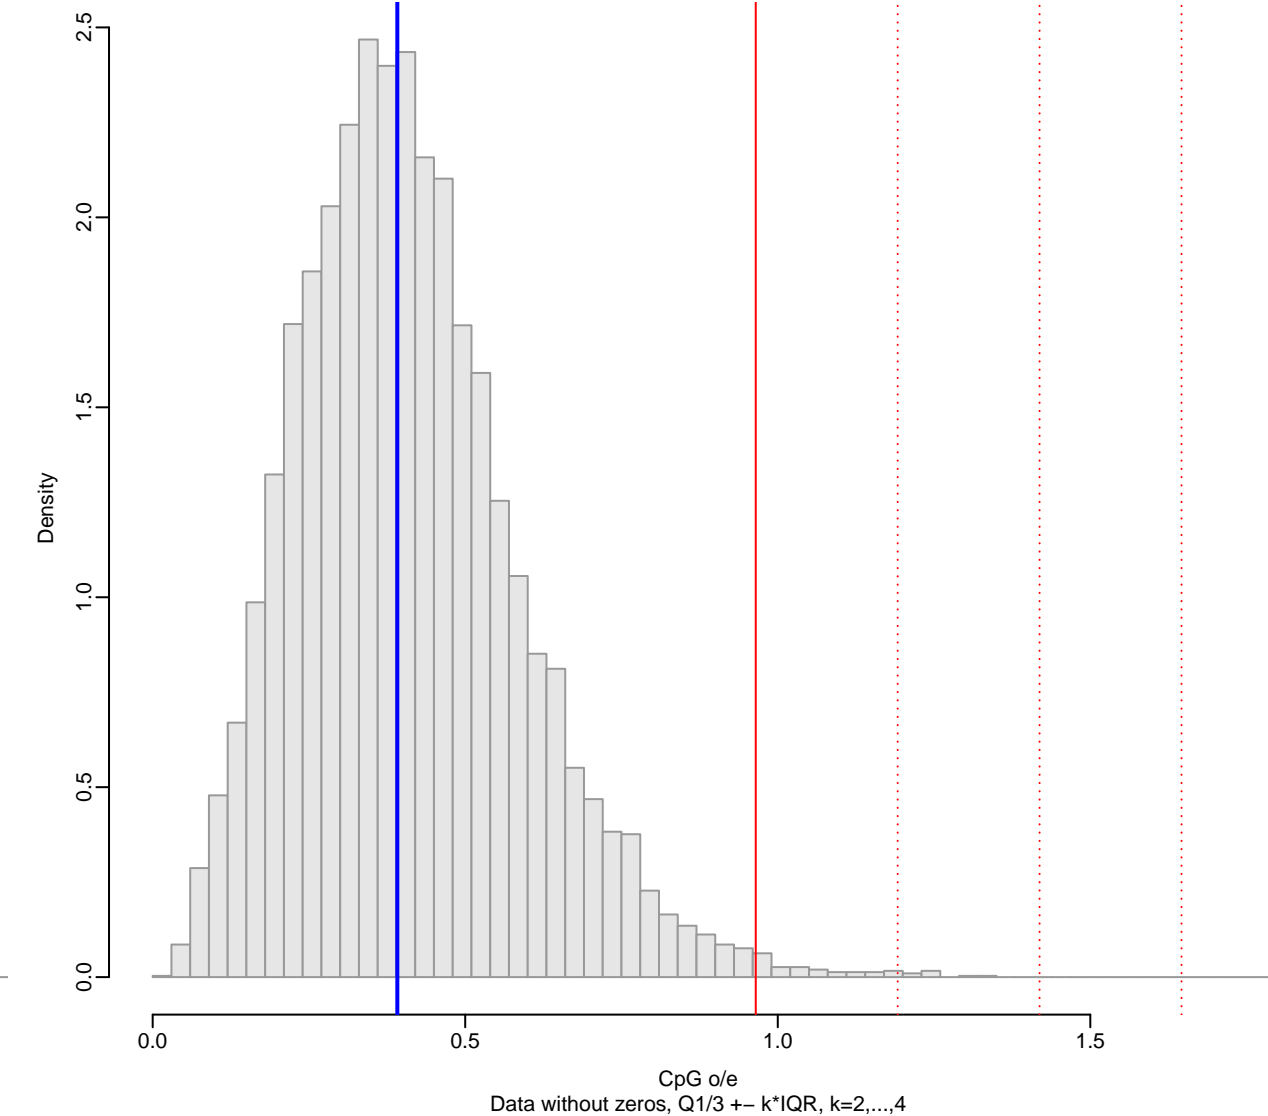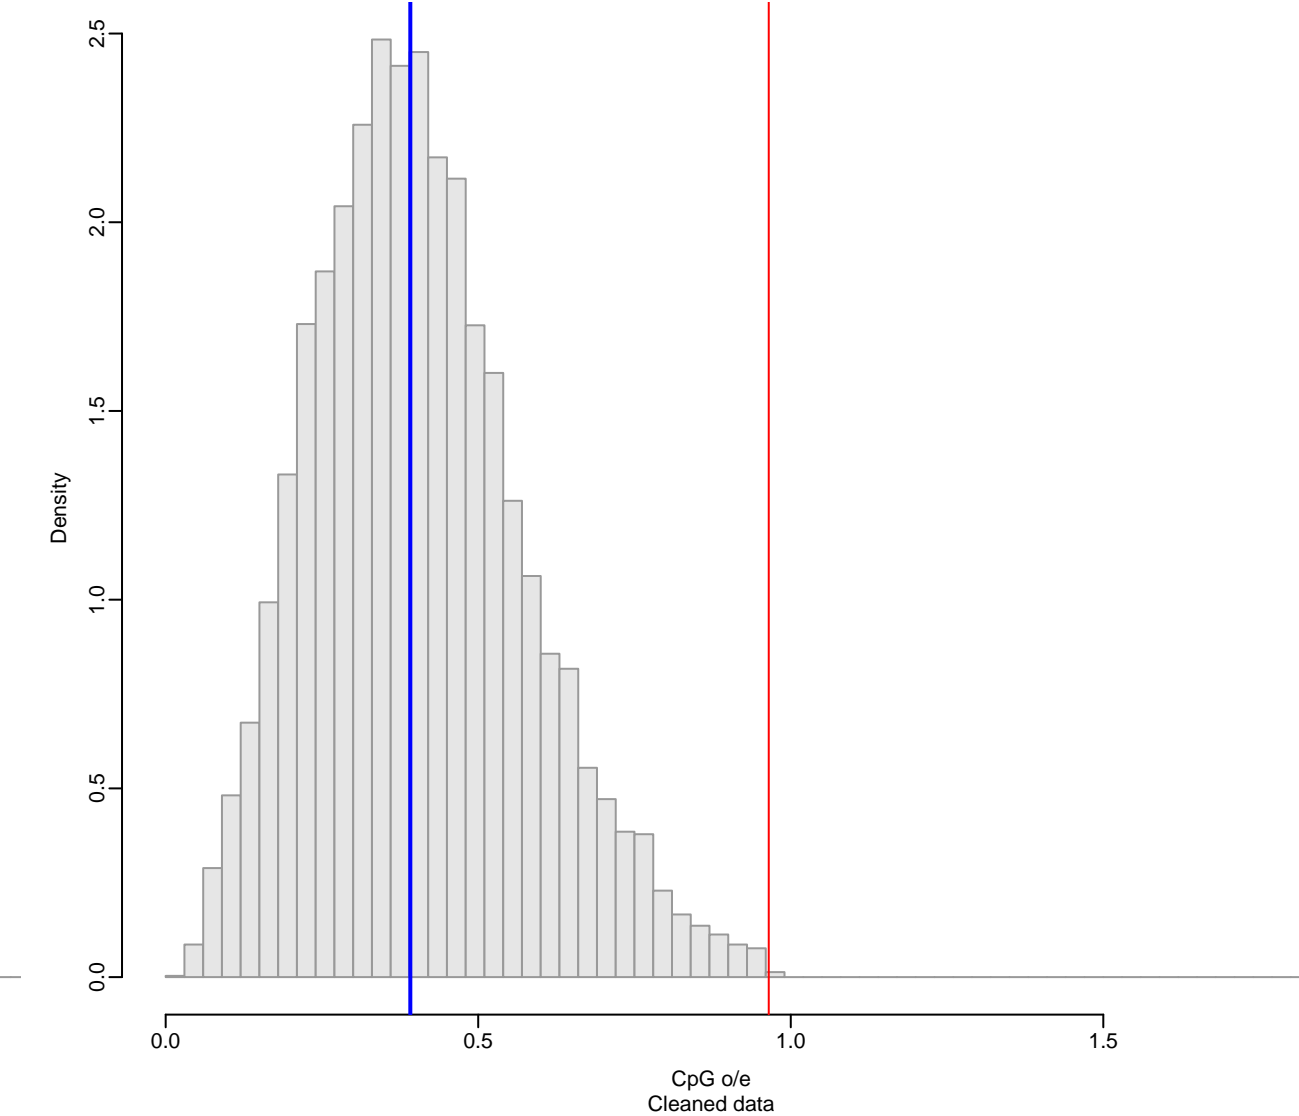

Crassostrea\_gigas

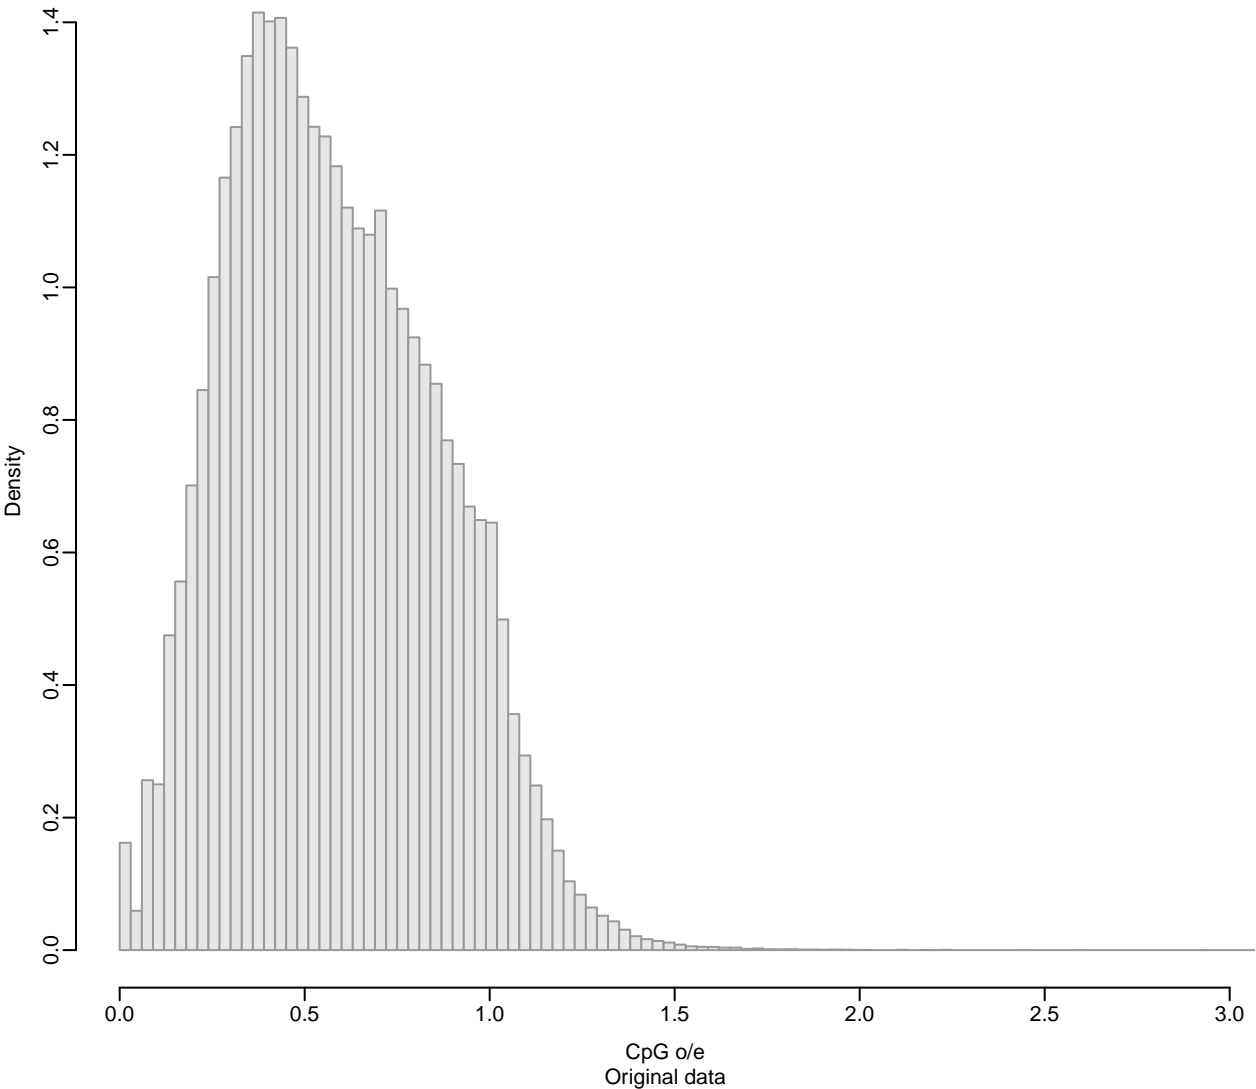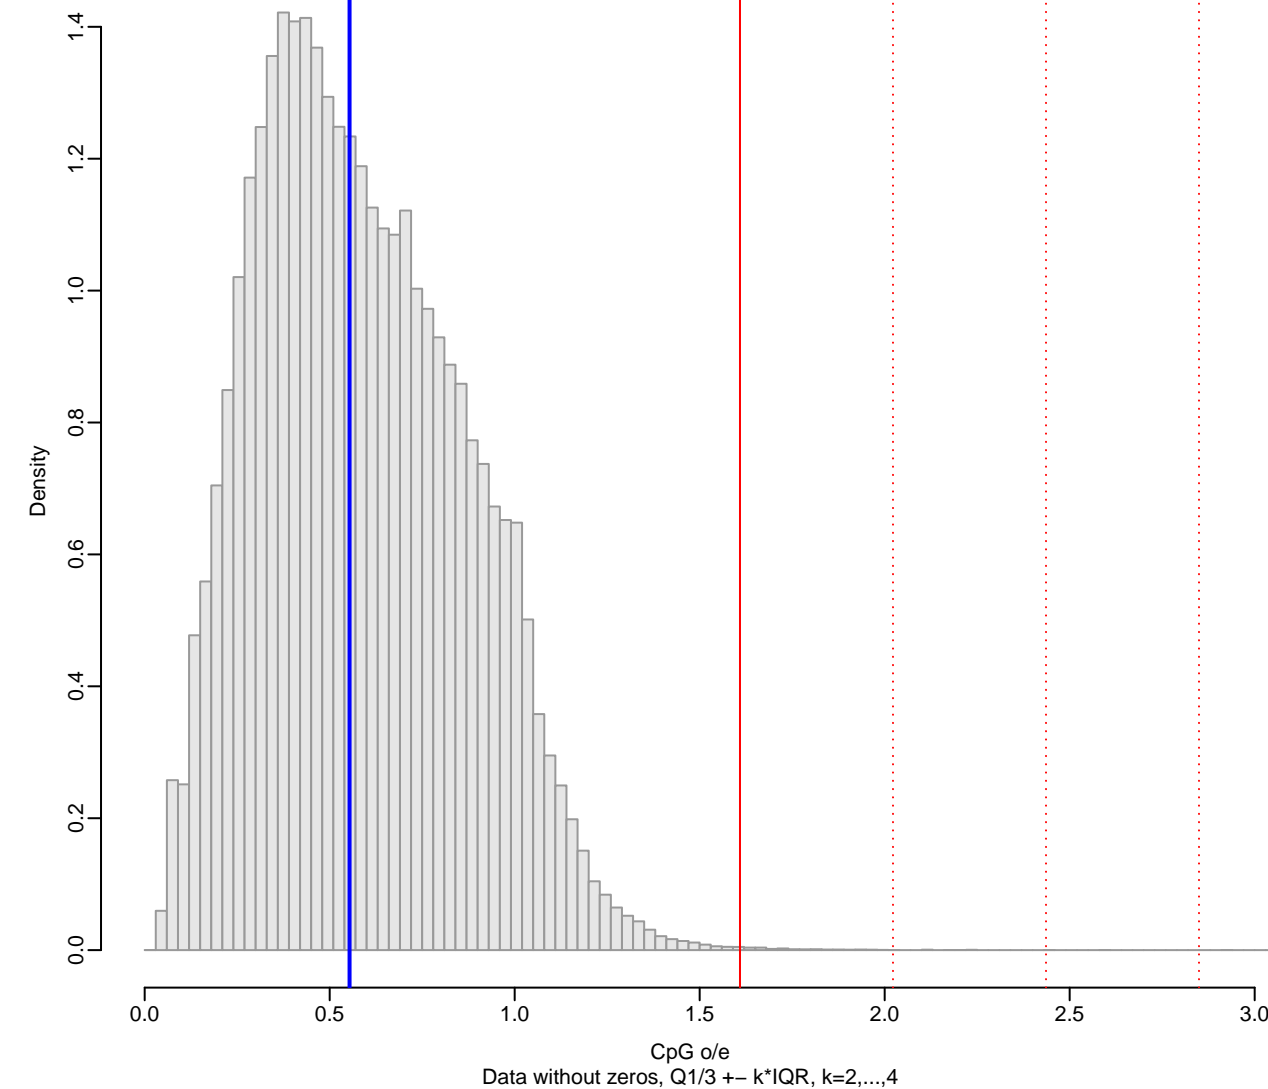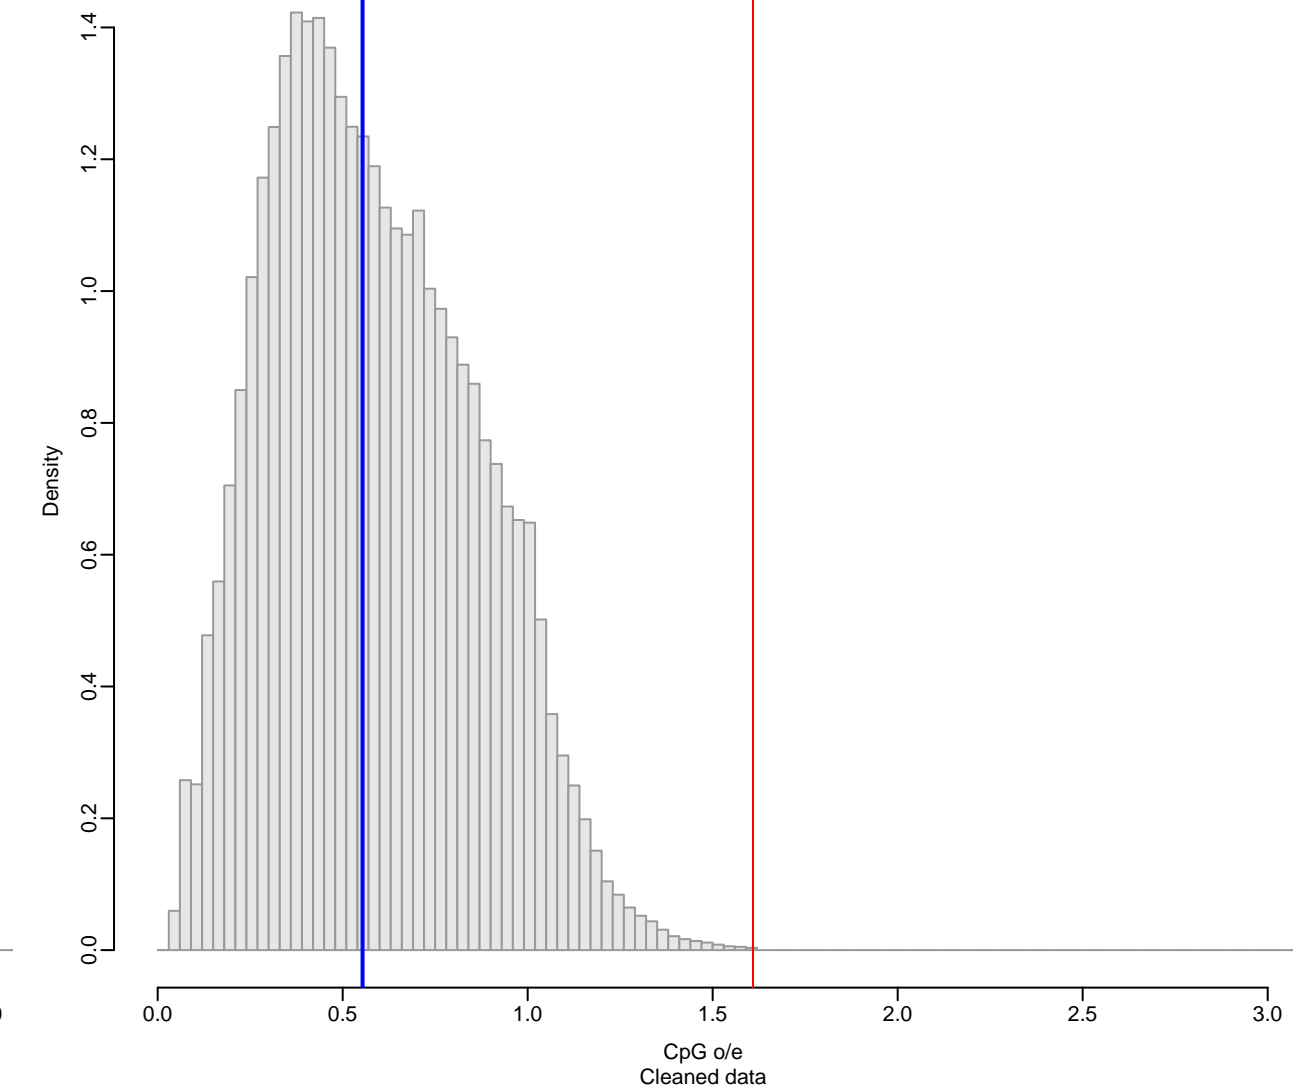

Crassostrea\_virginica

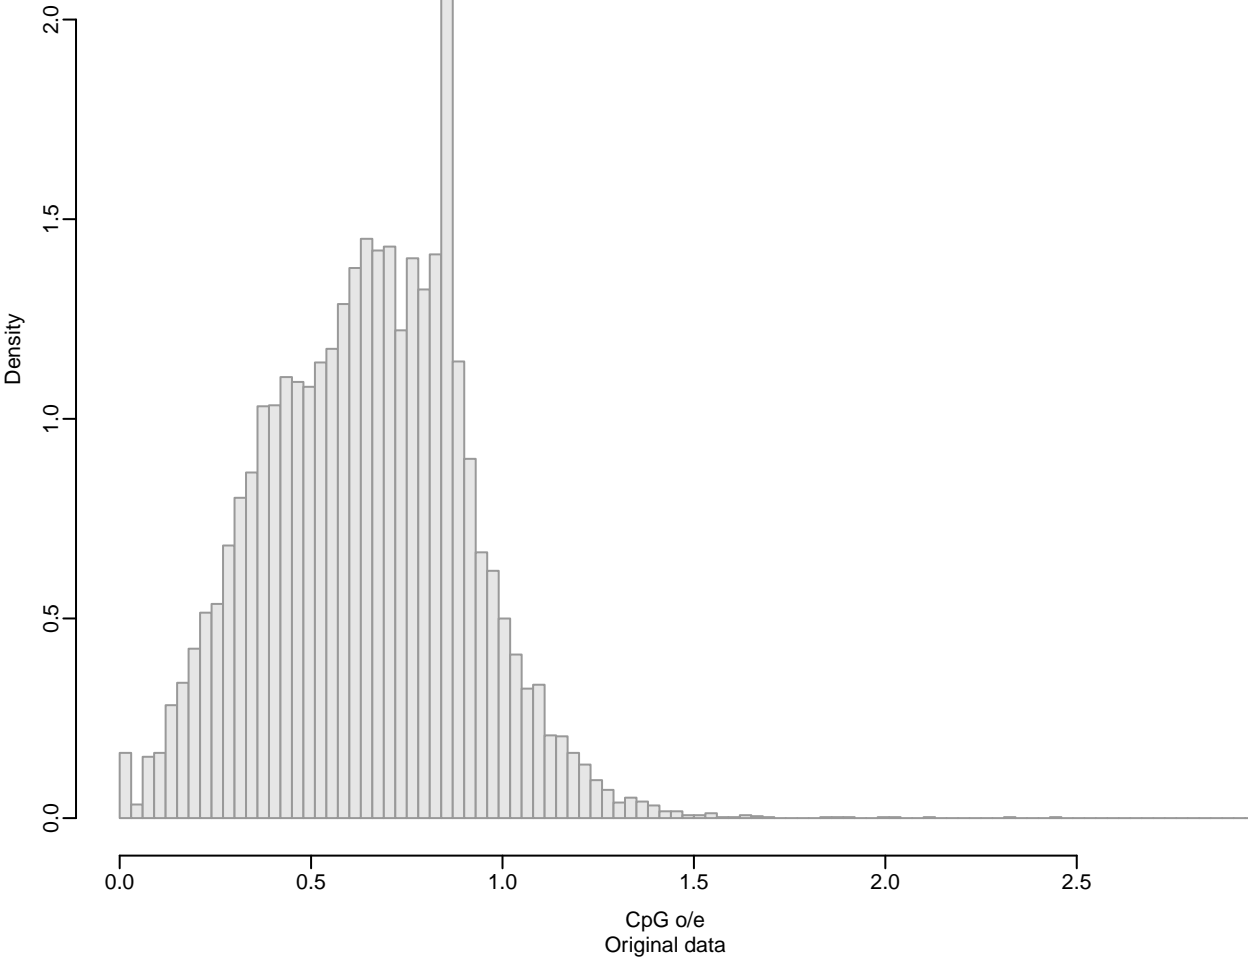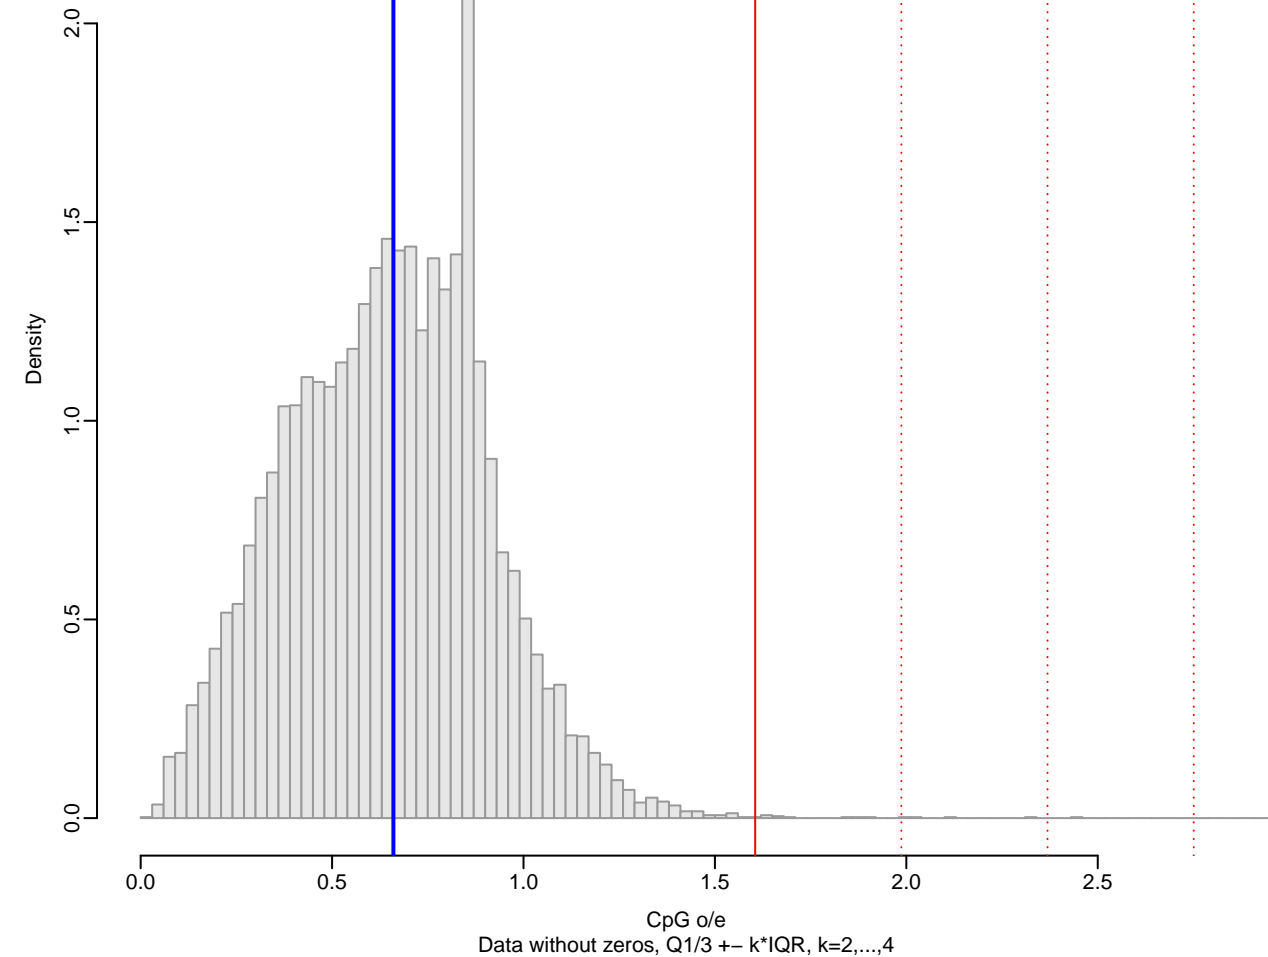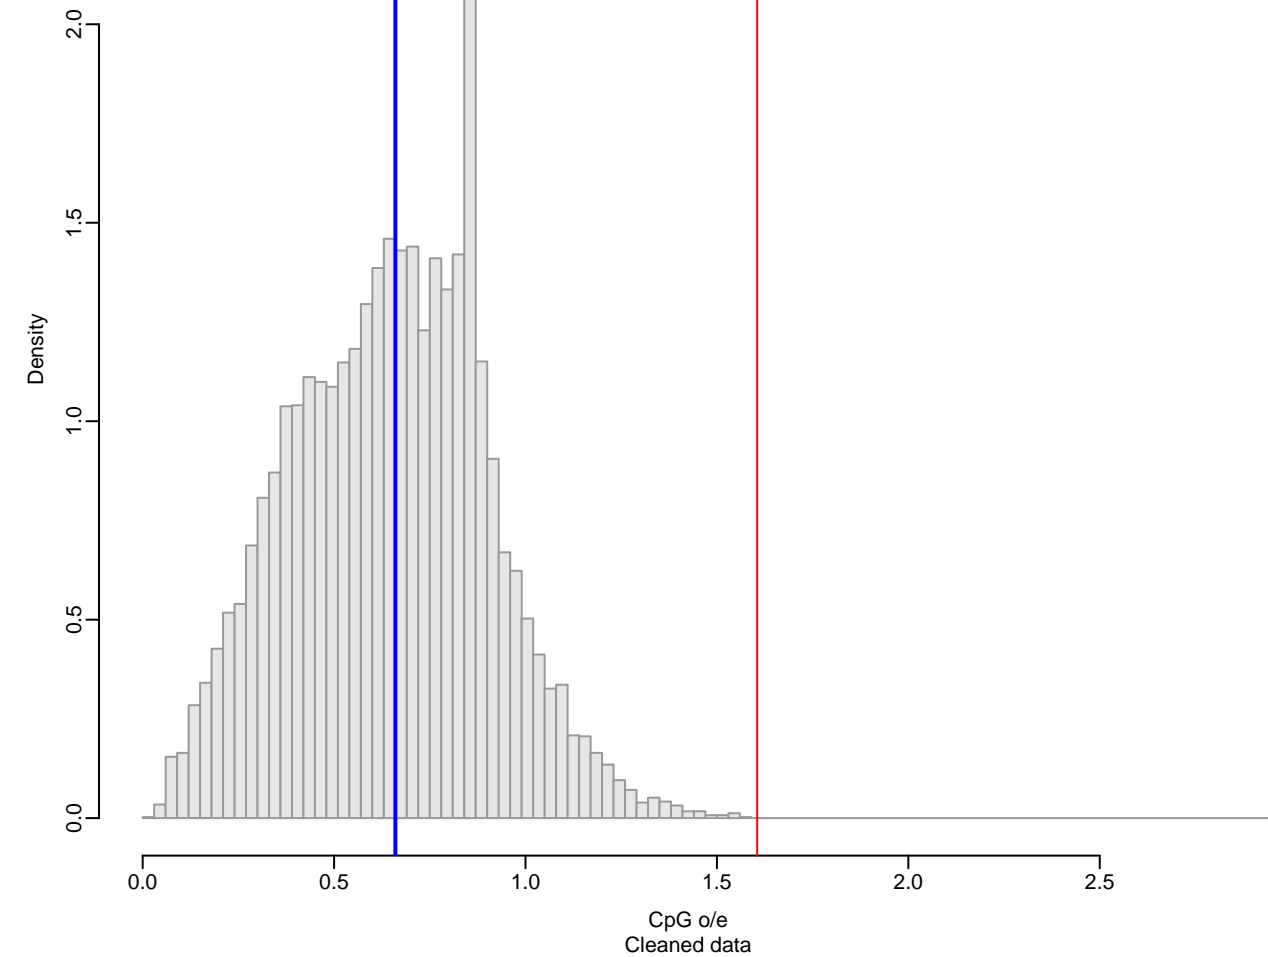



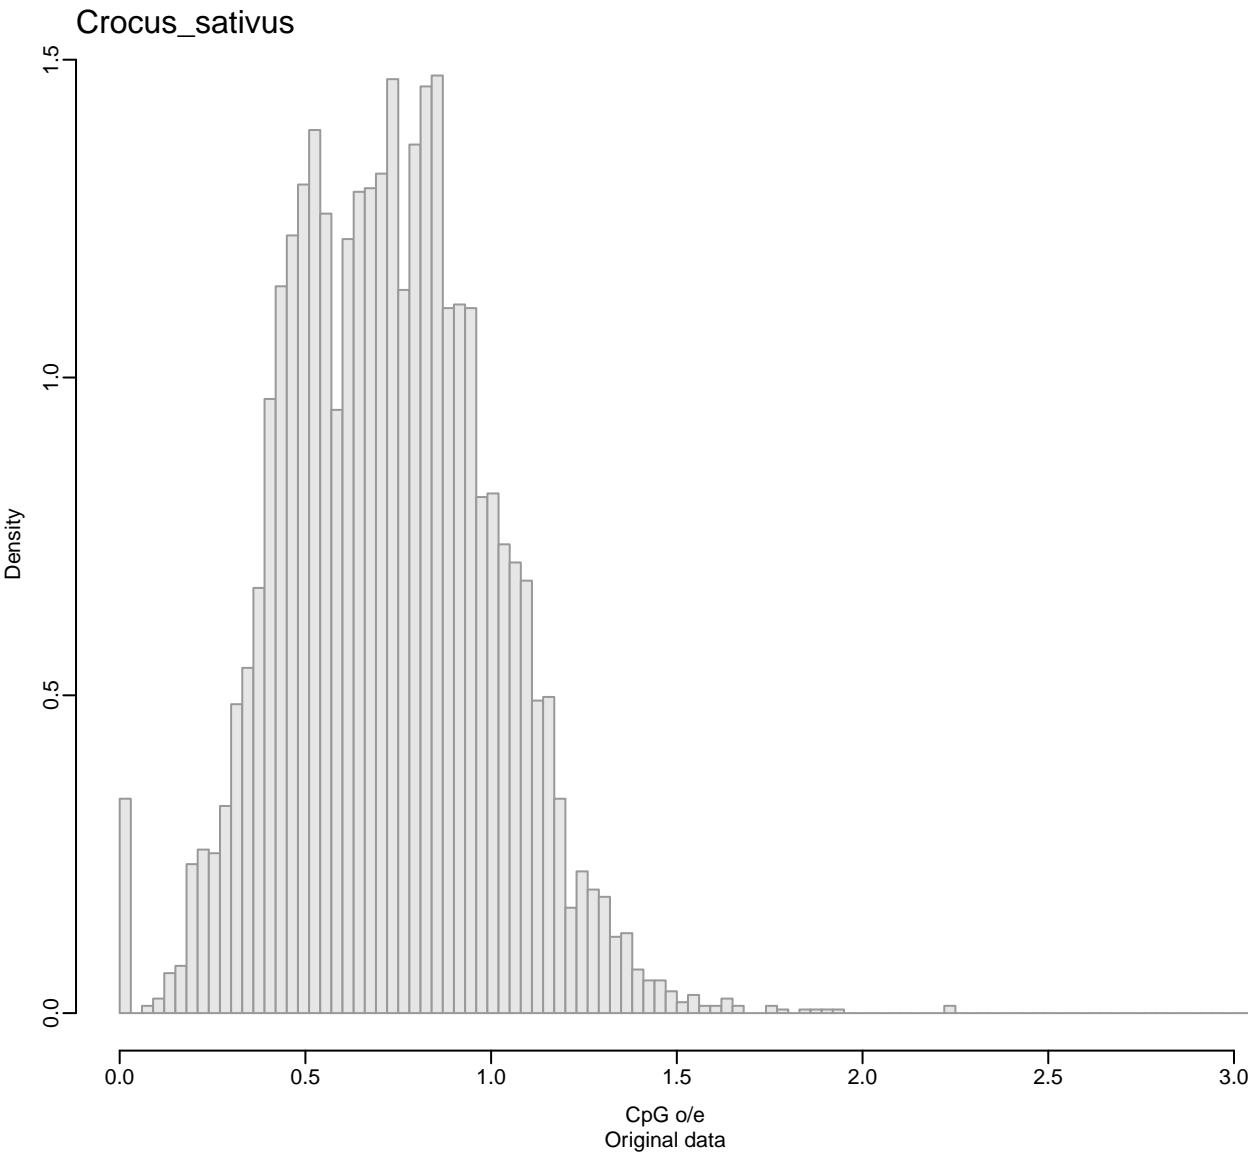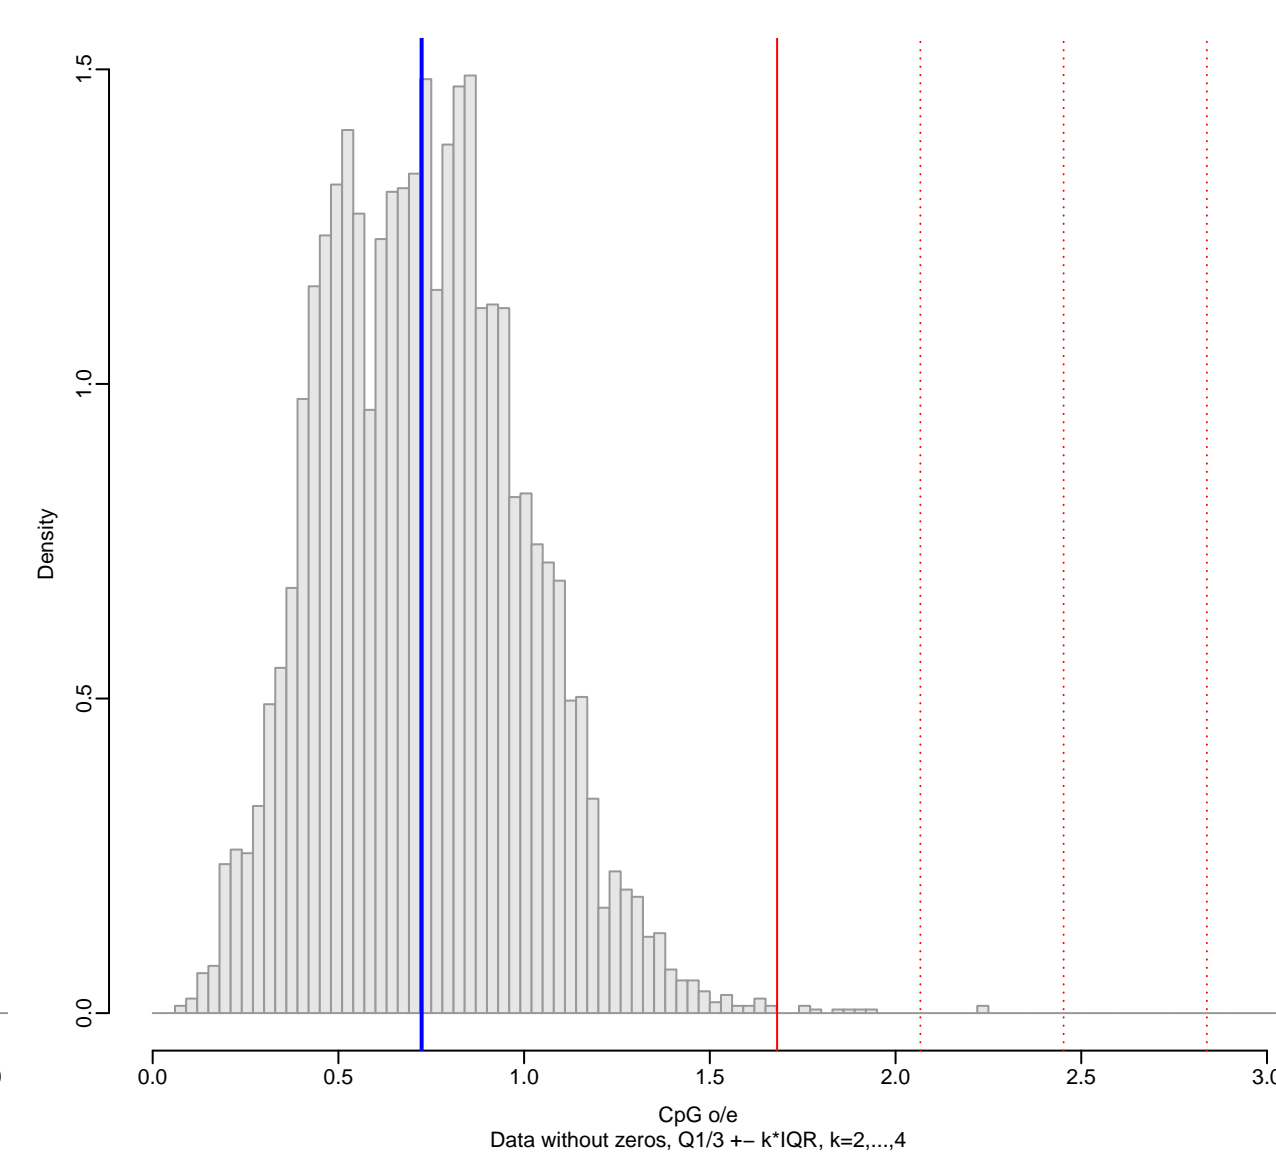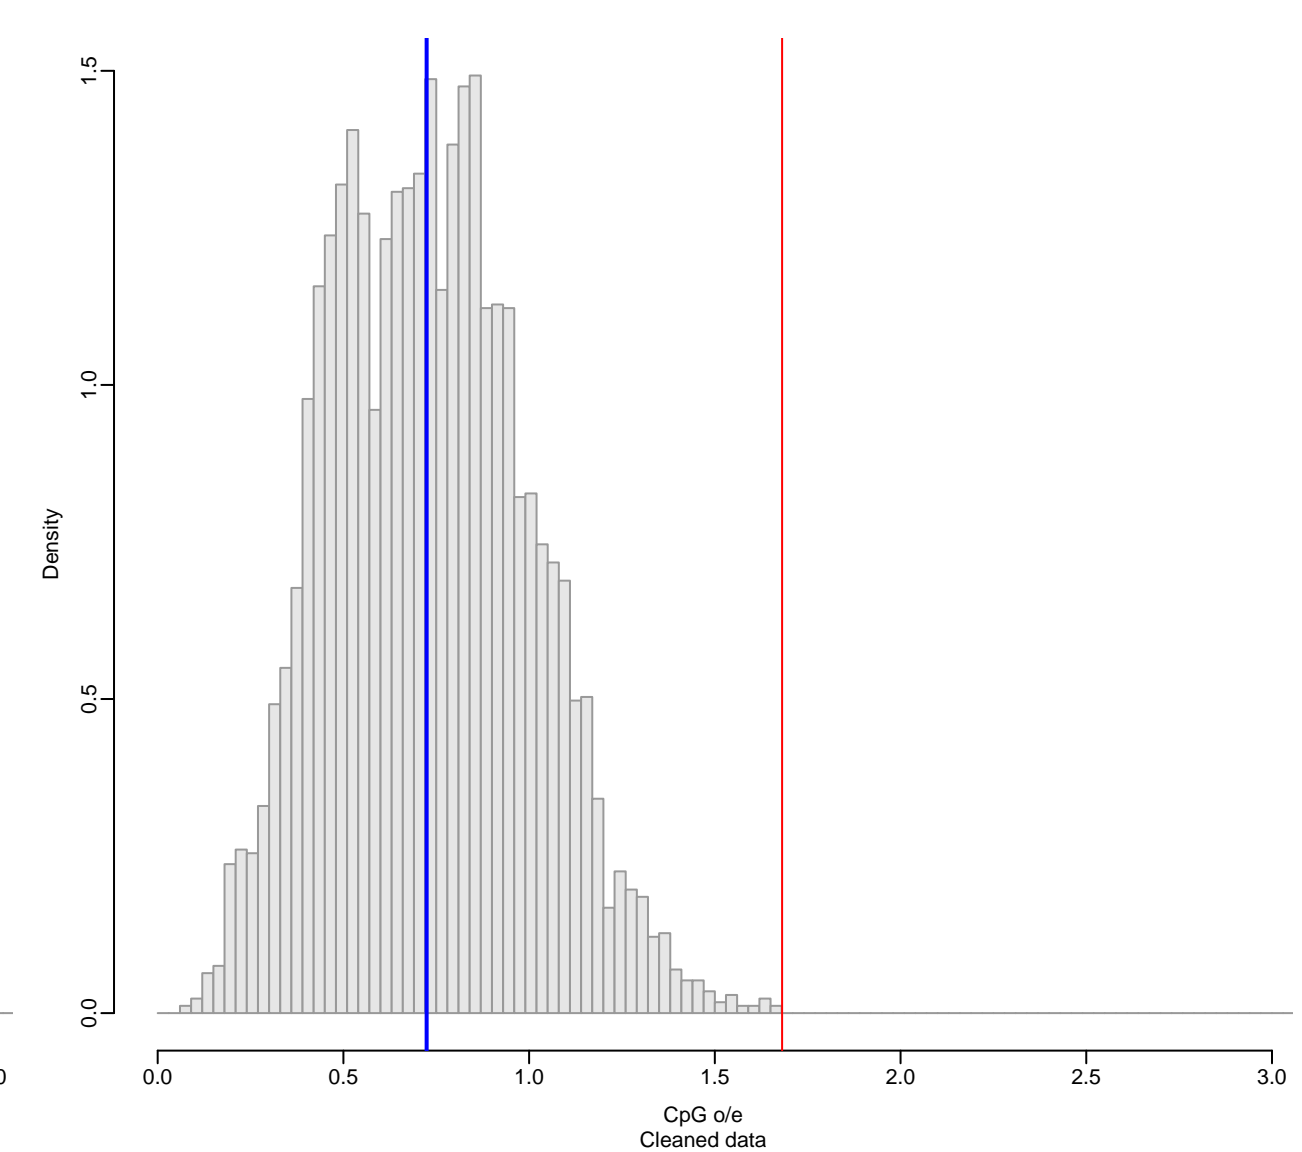

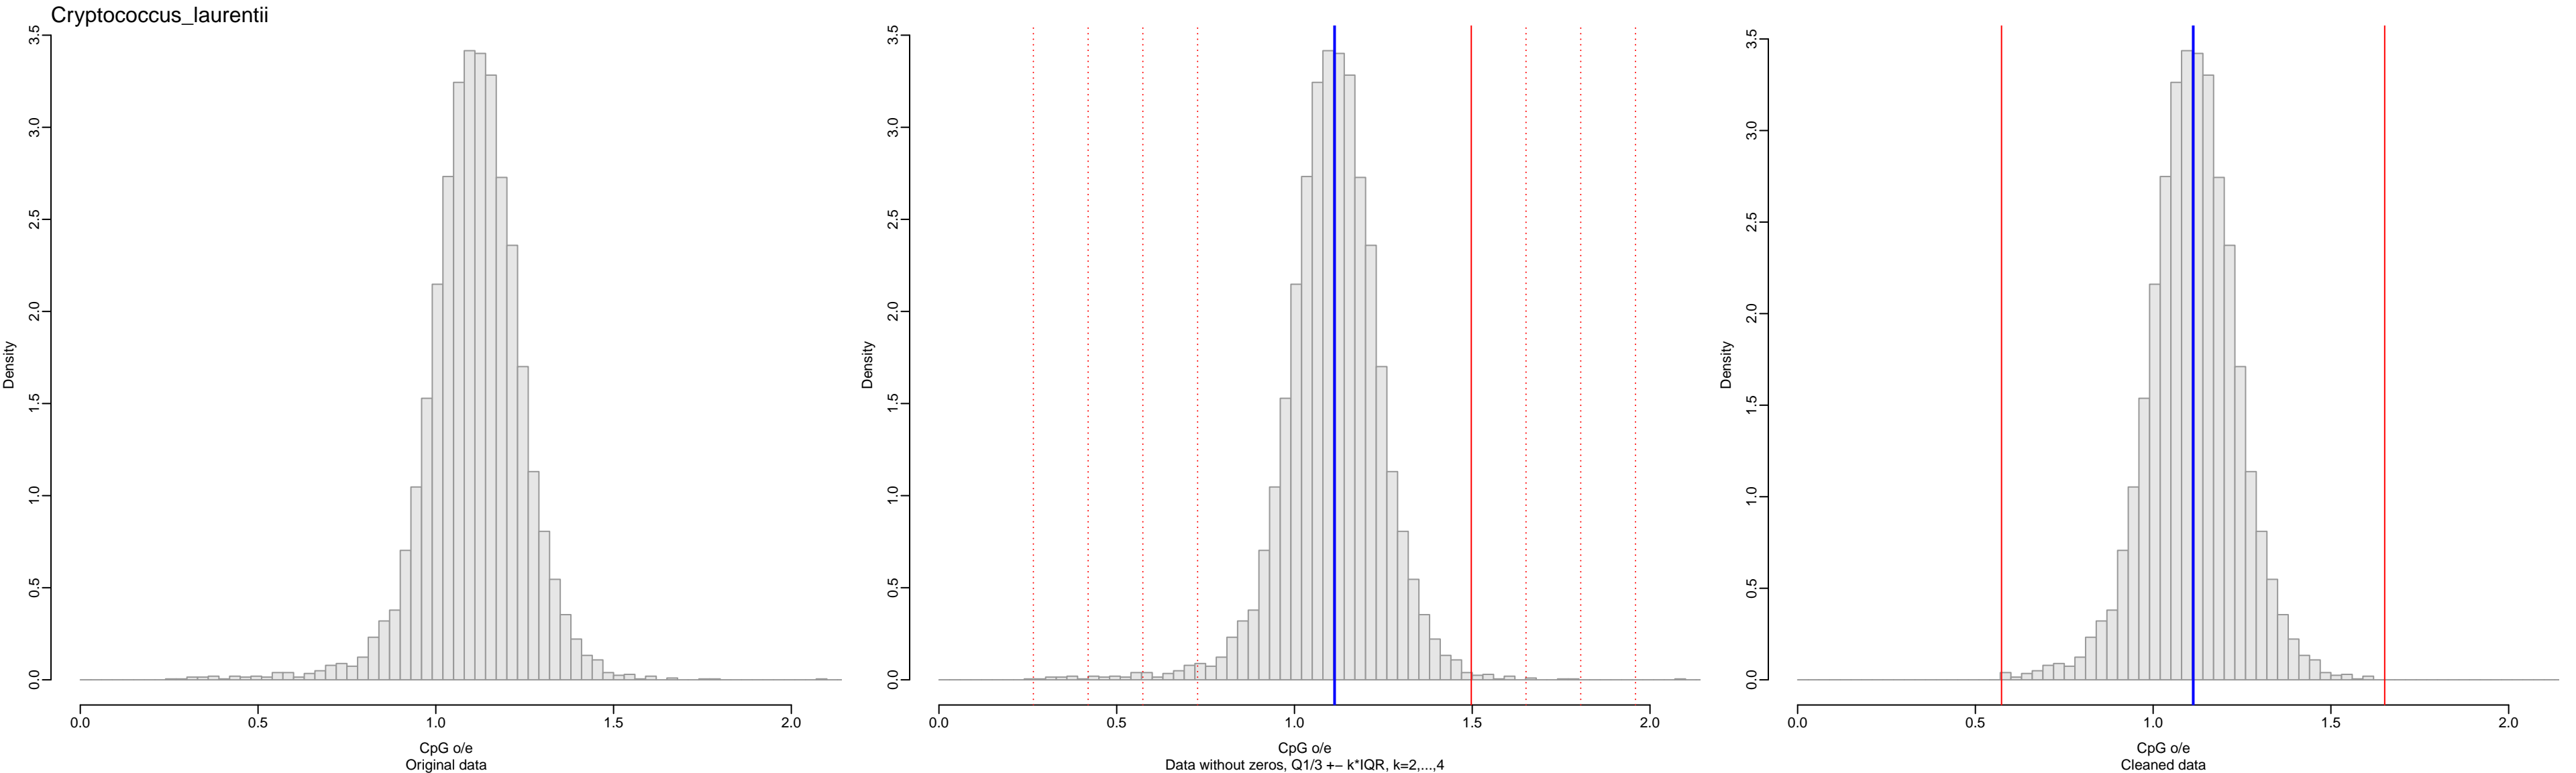

Cryptopygus\_antarcticus

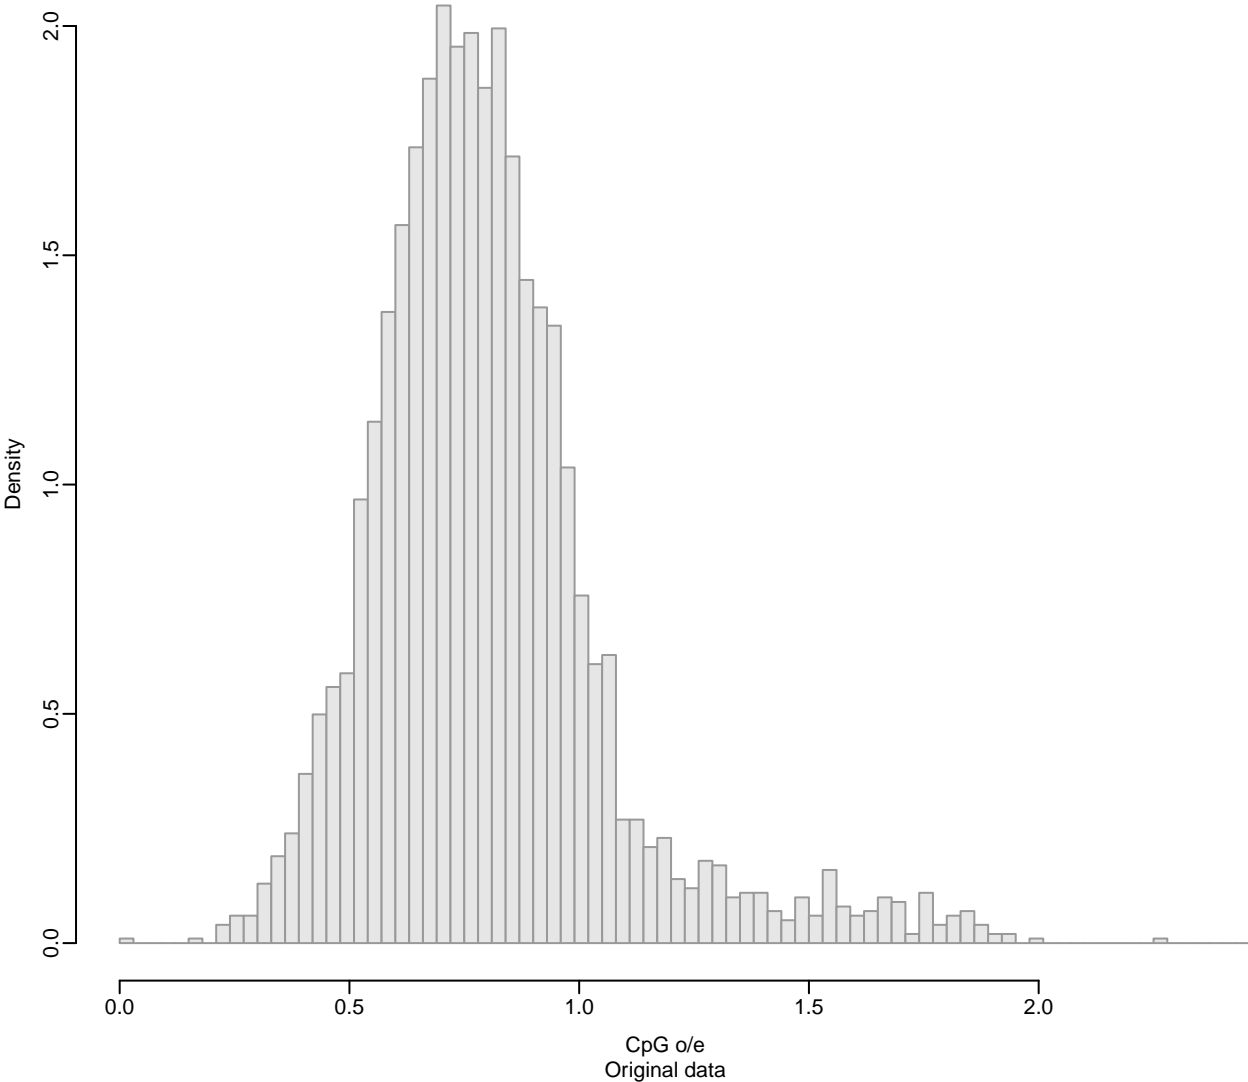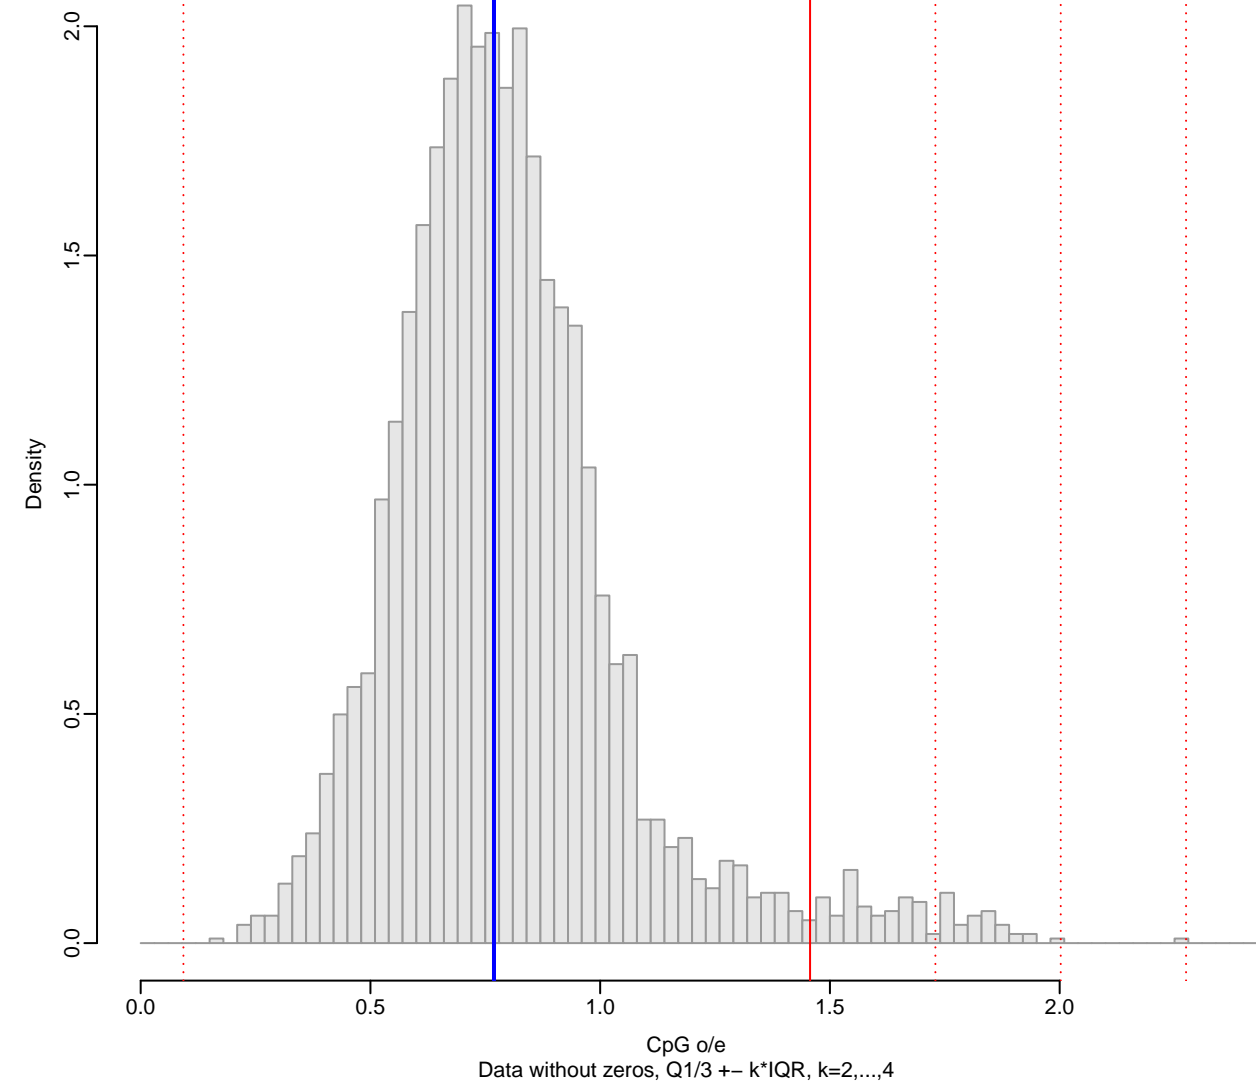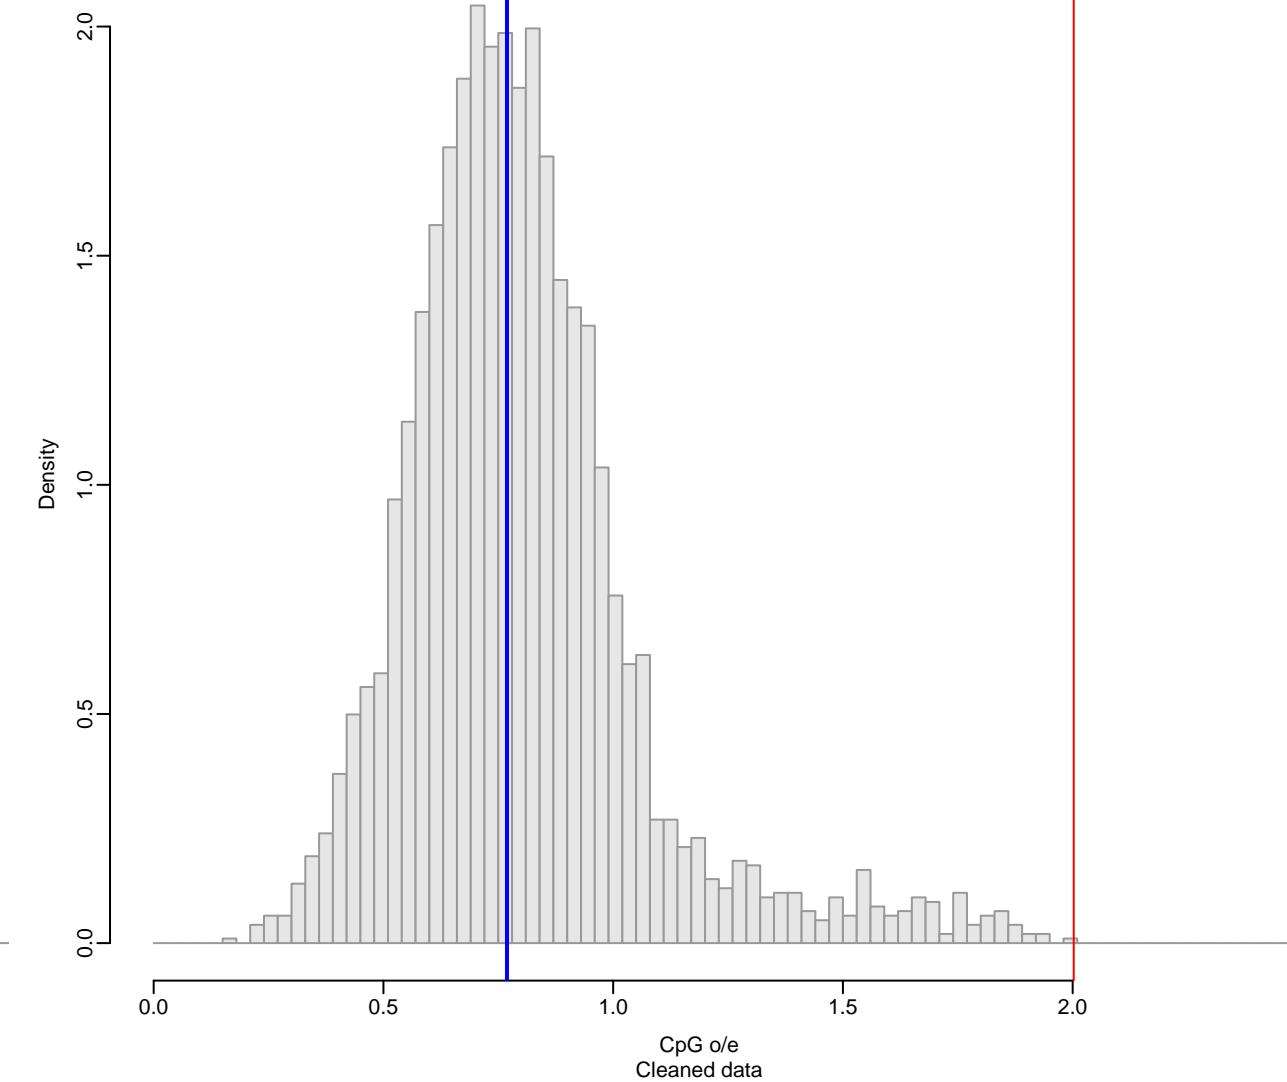

Cryptosporidium\_parvum

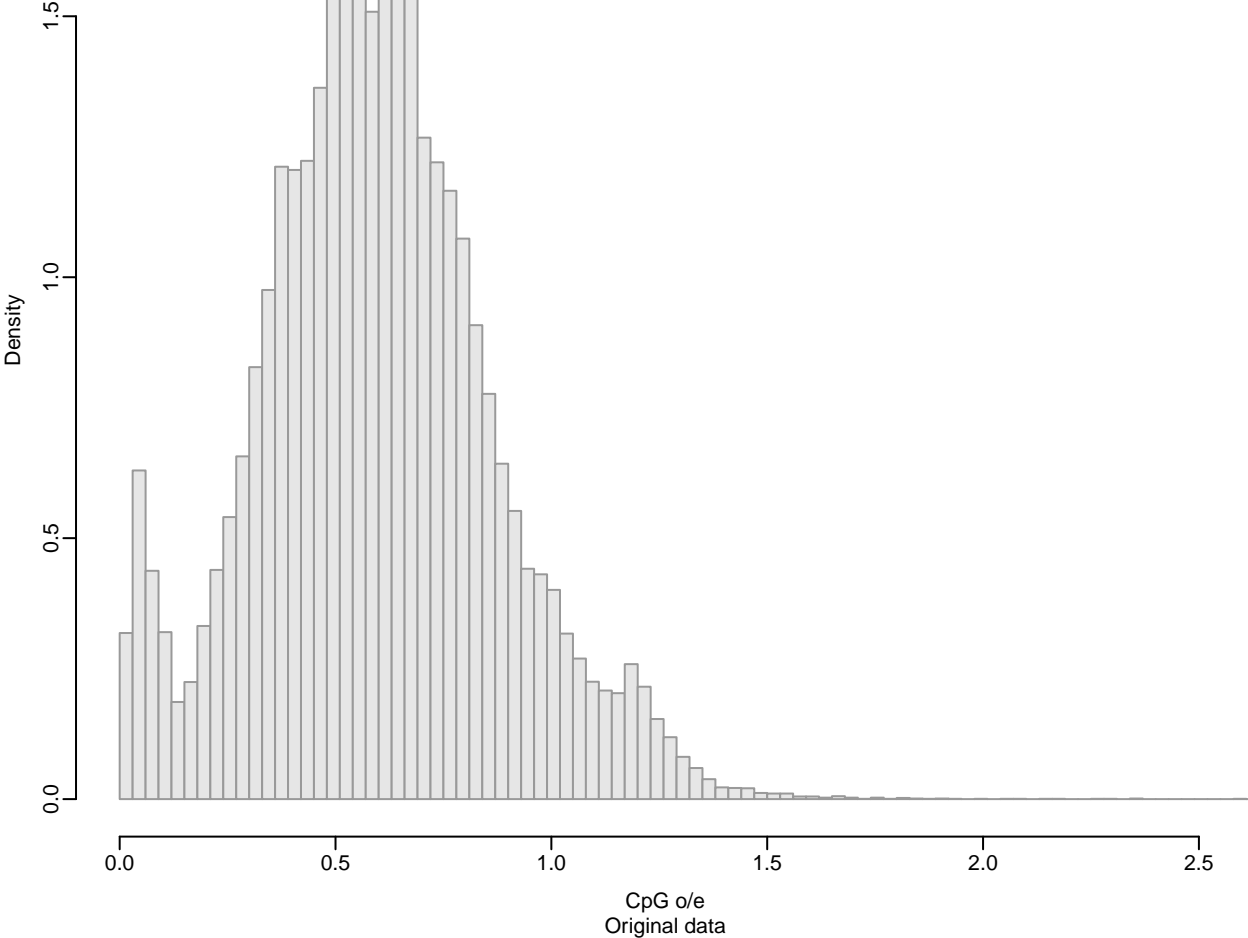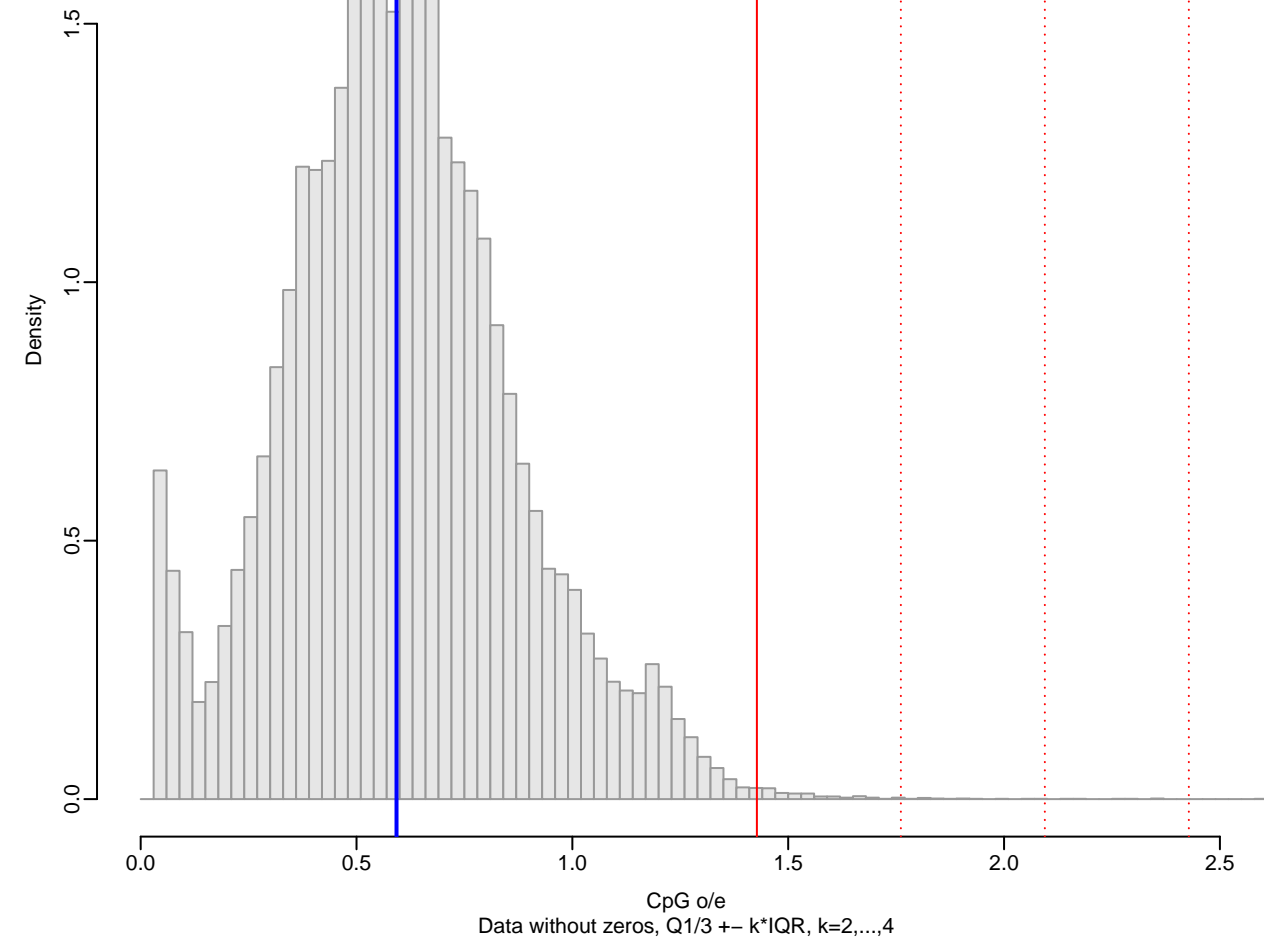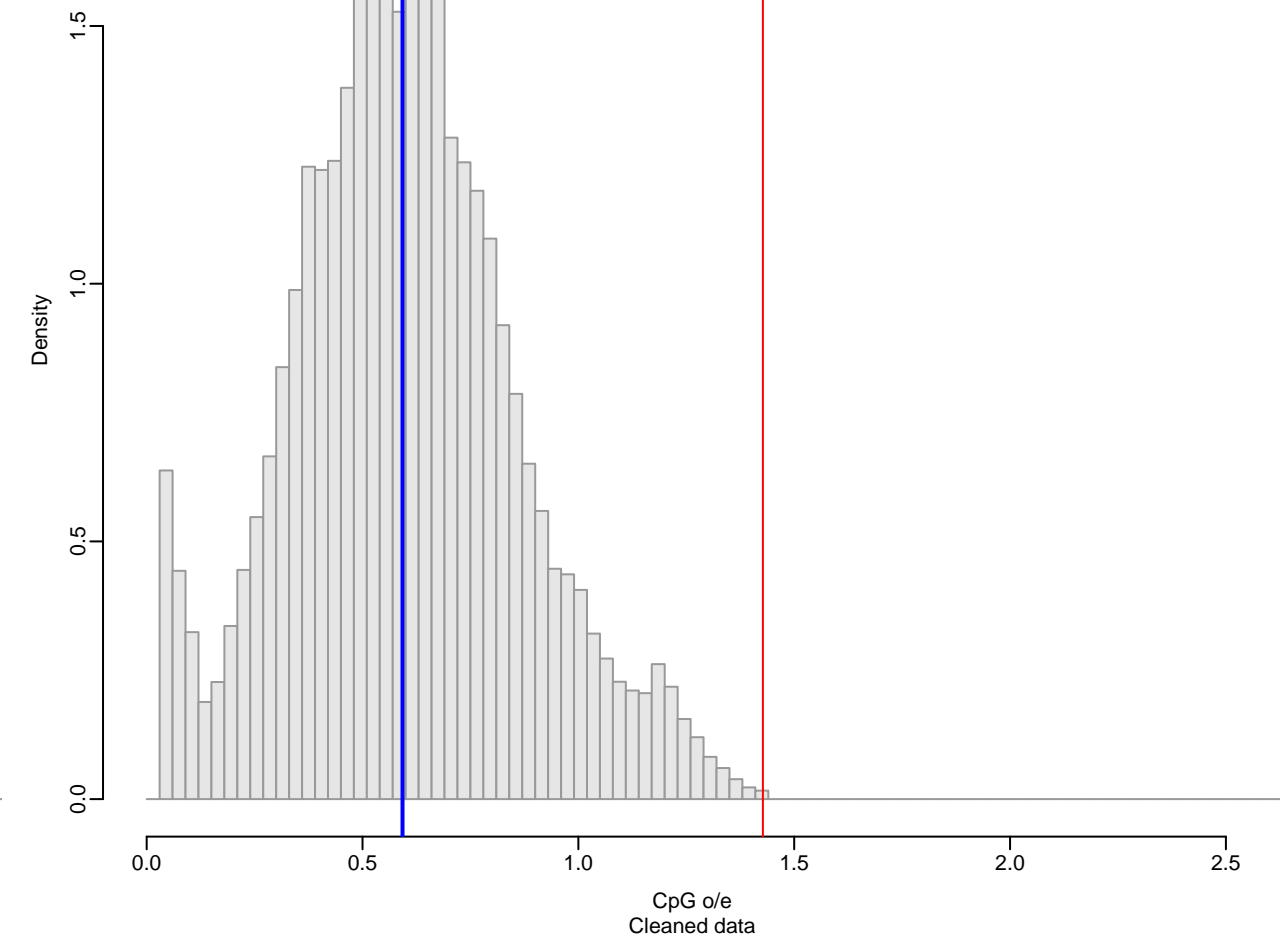

Cucumis\_melo

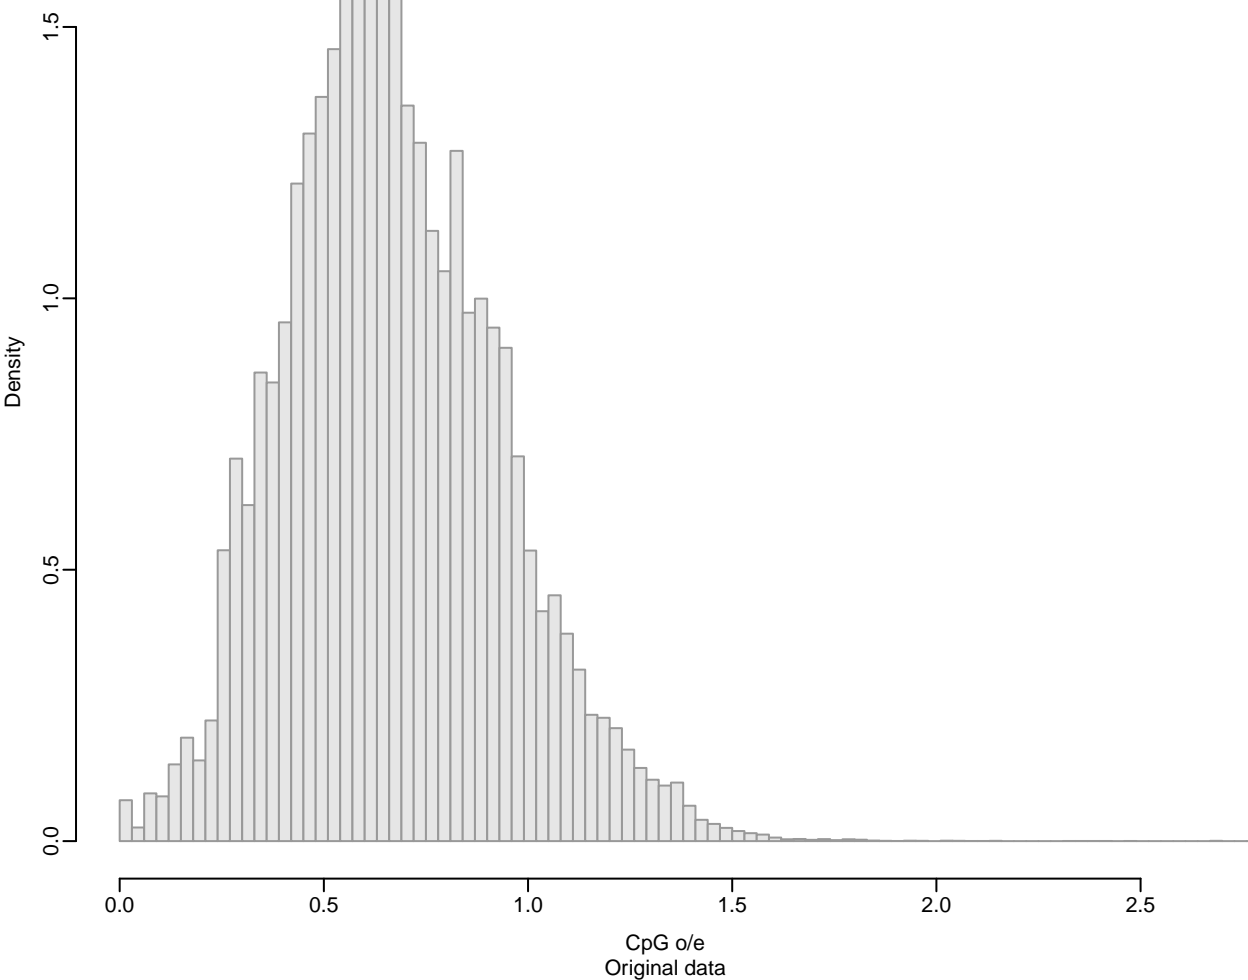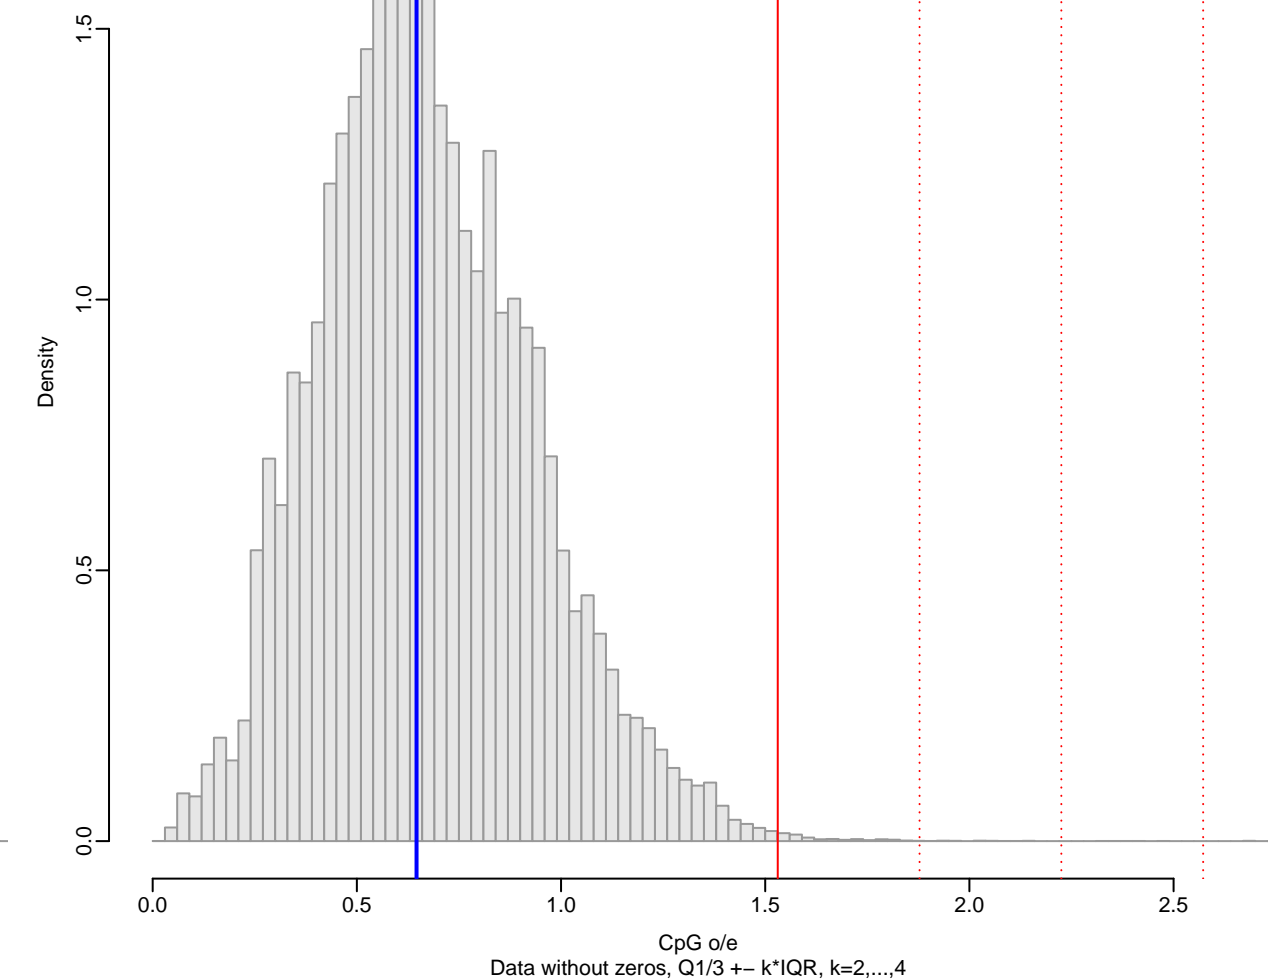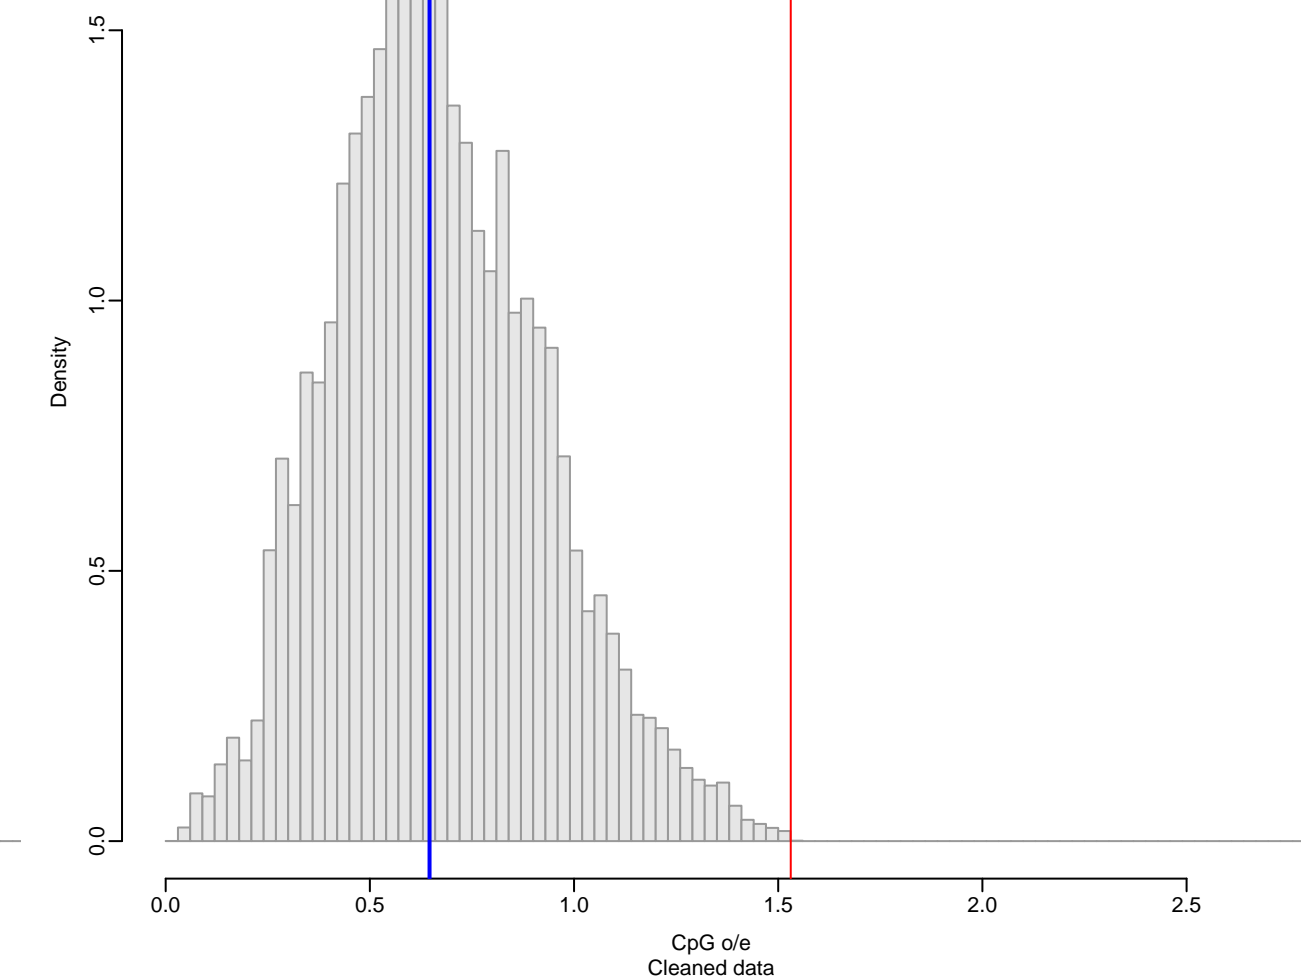

Cucumis\_sativus

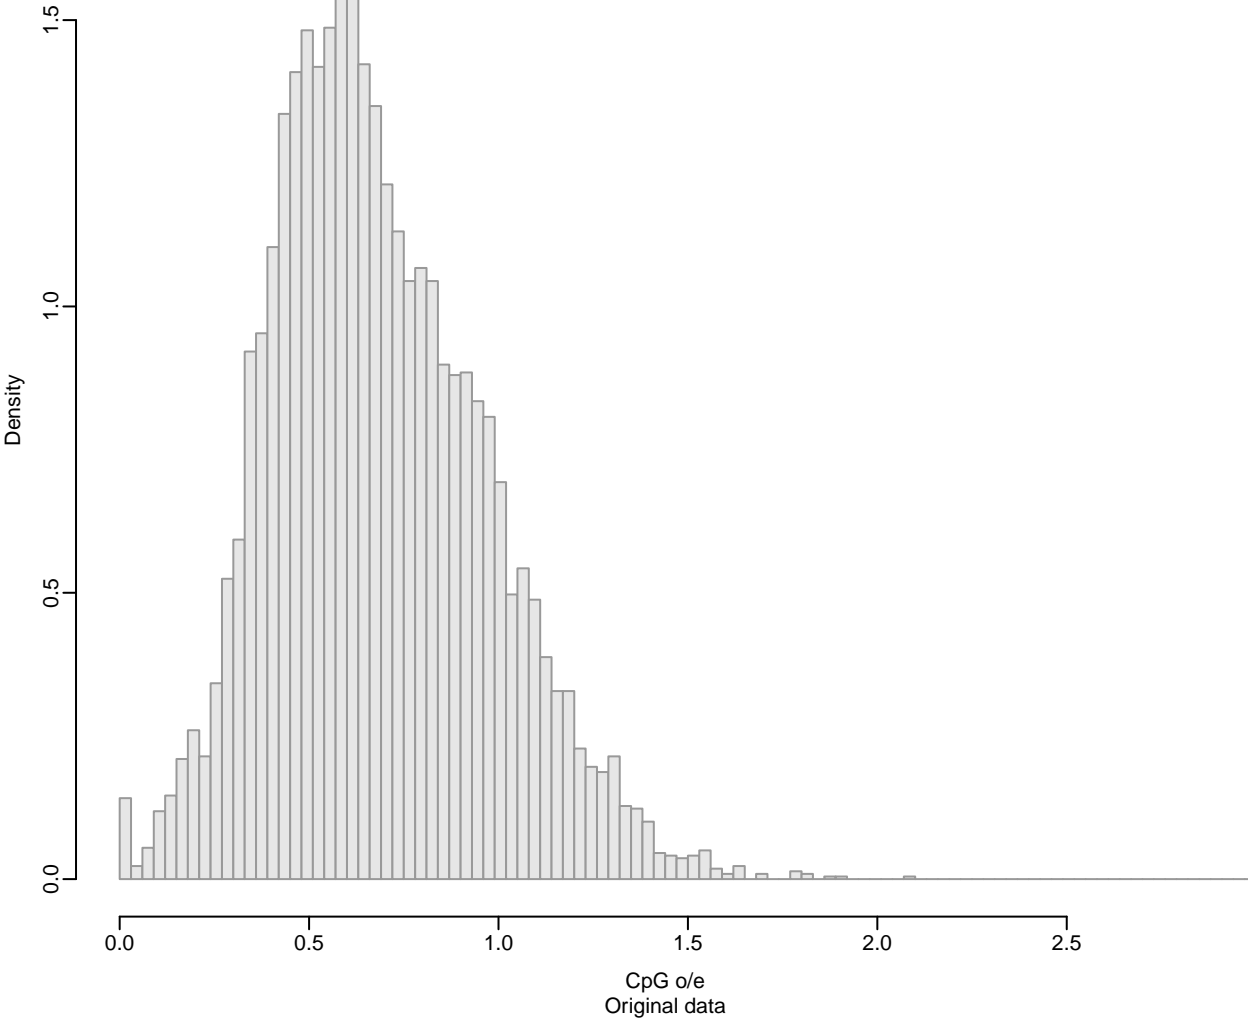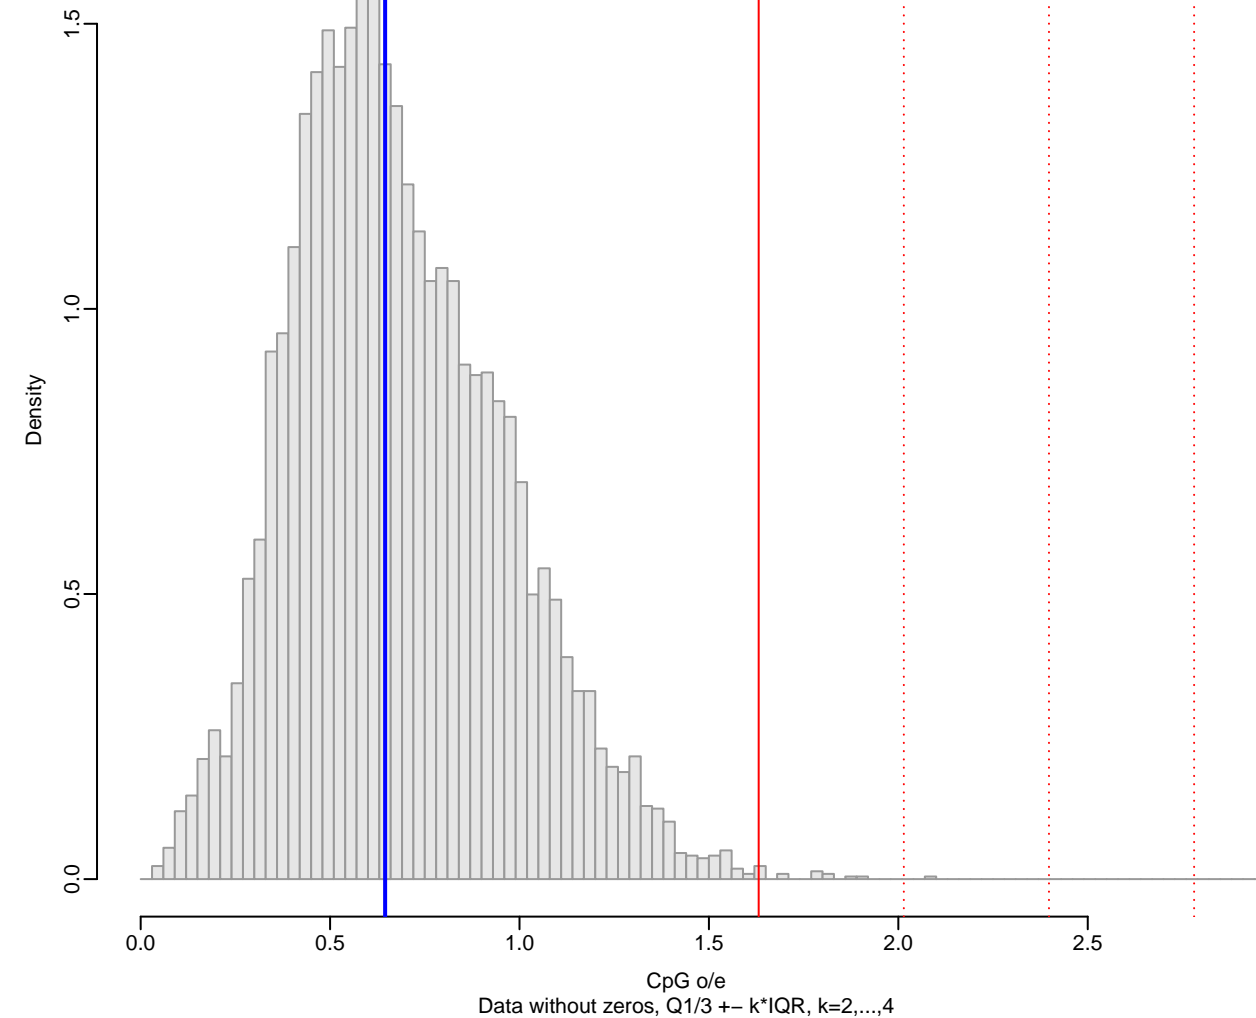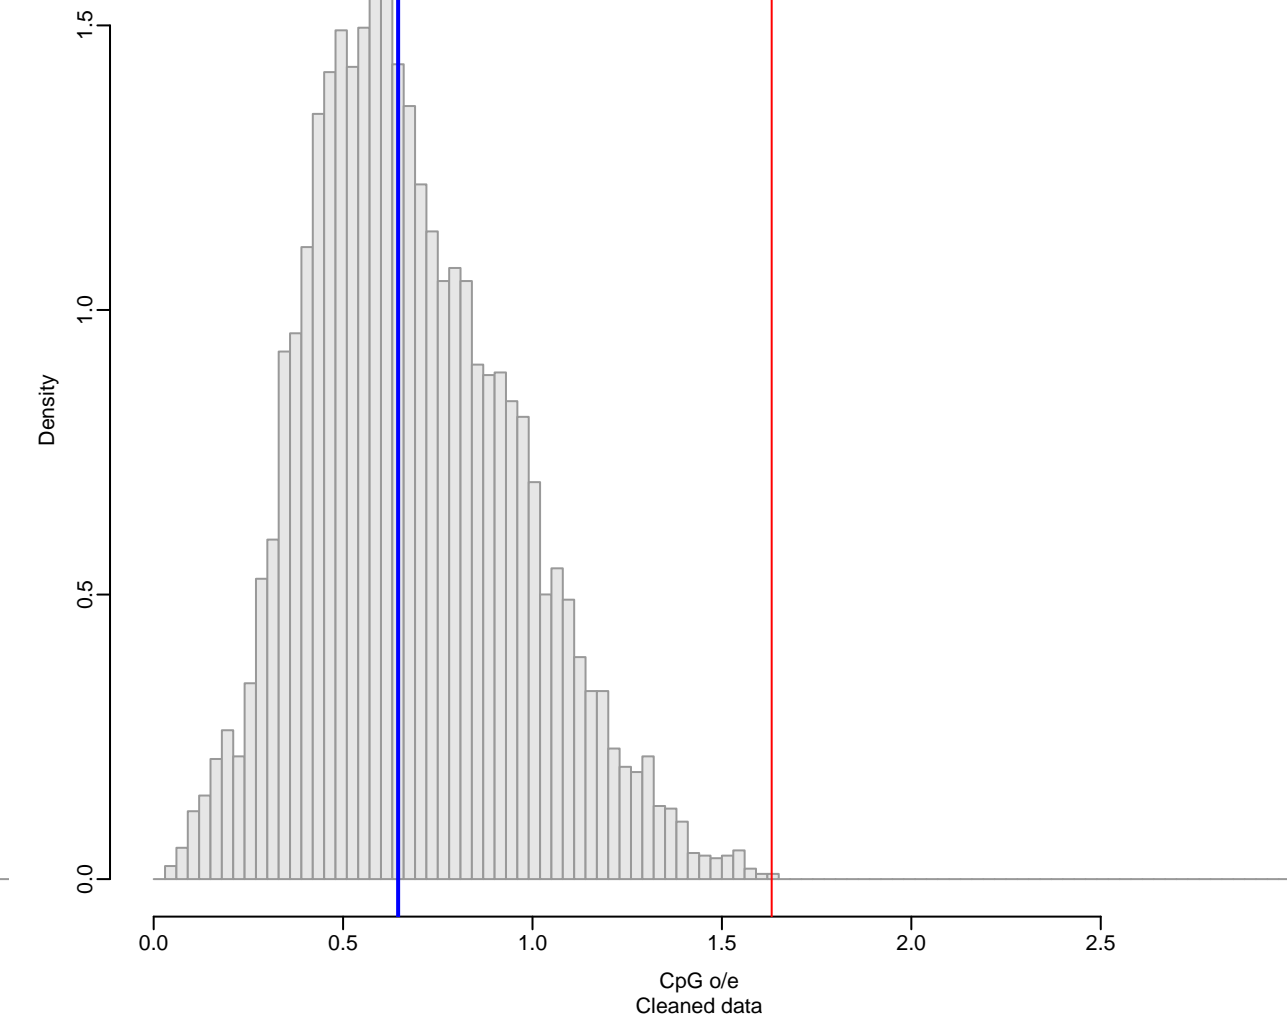

# Culex quinquefasciatus

Density

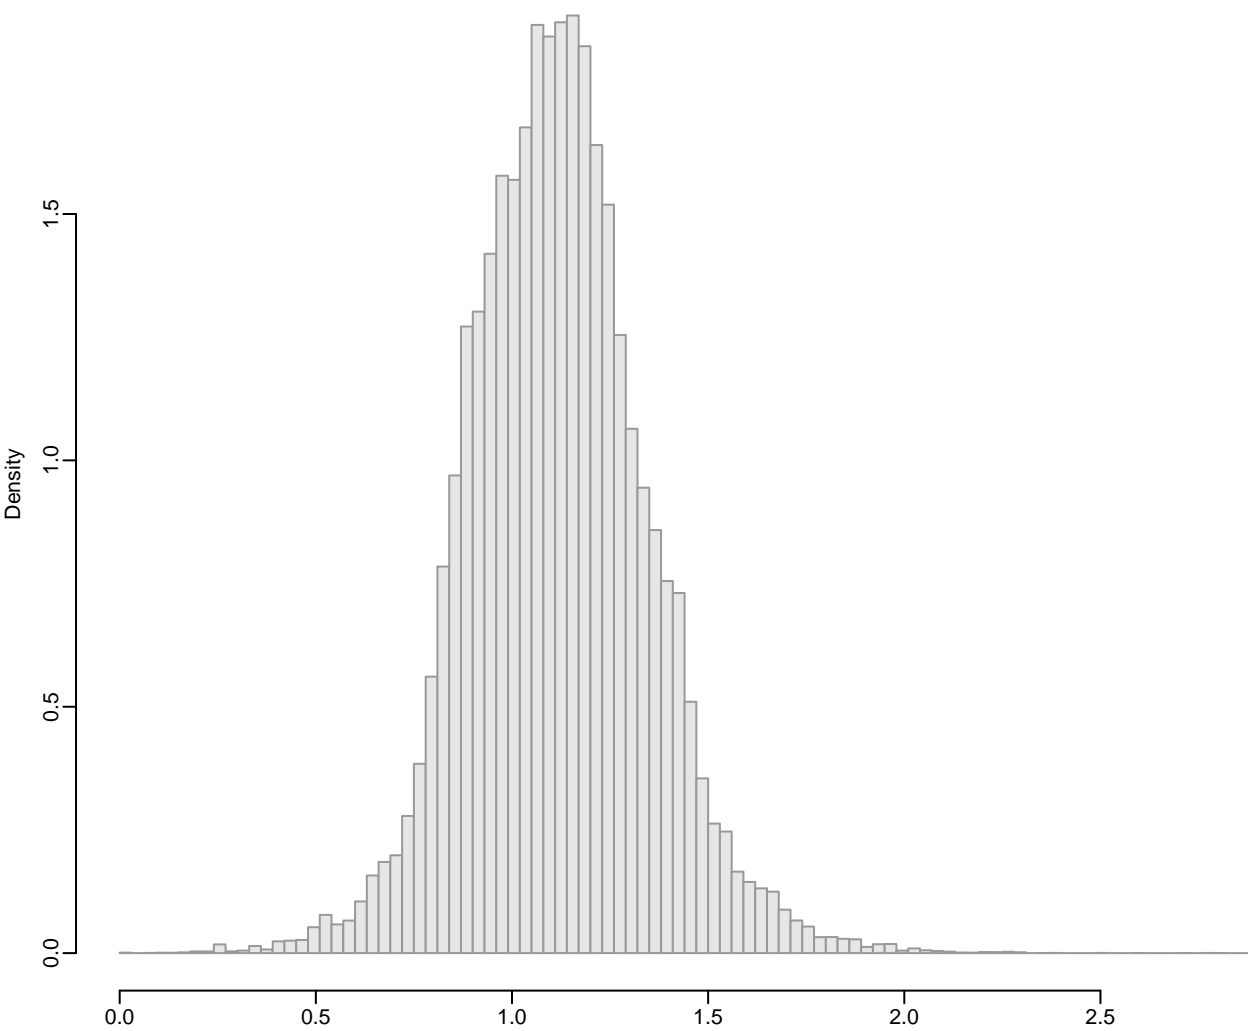

Density

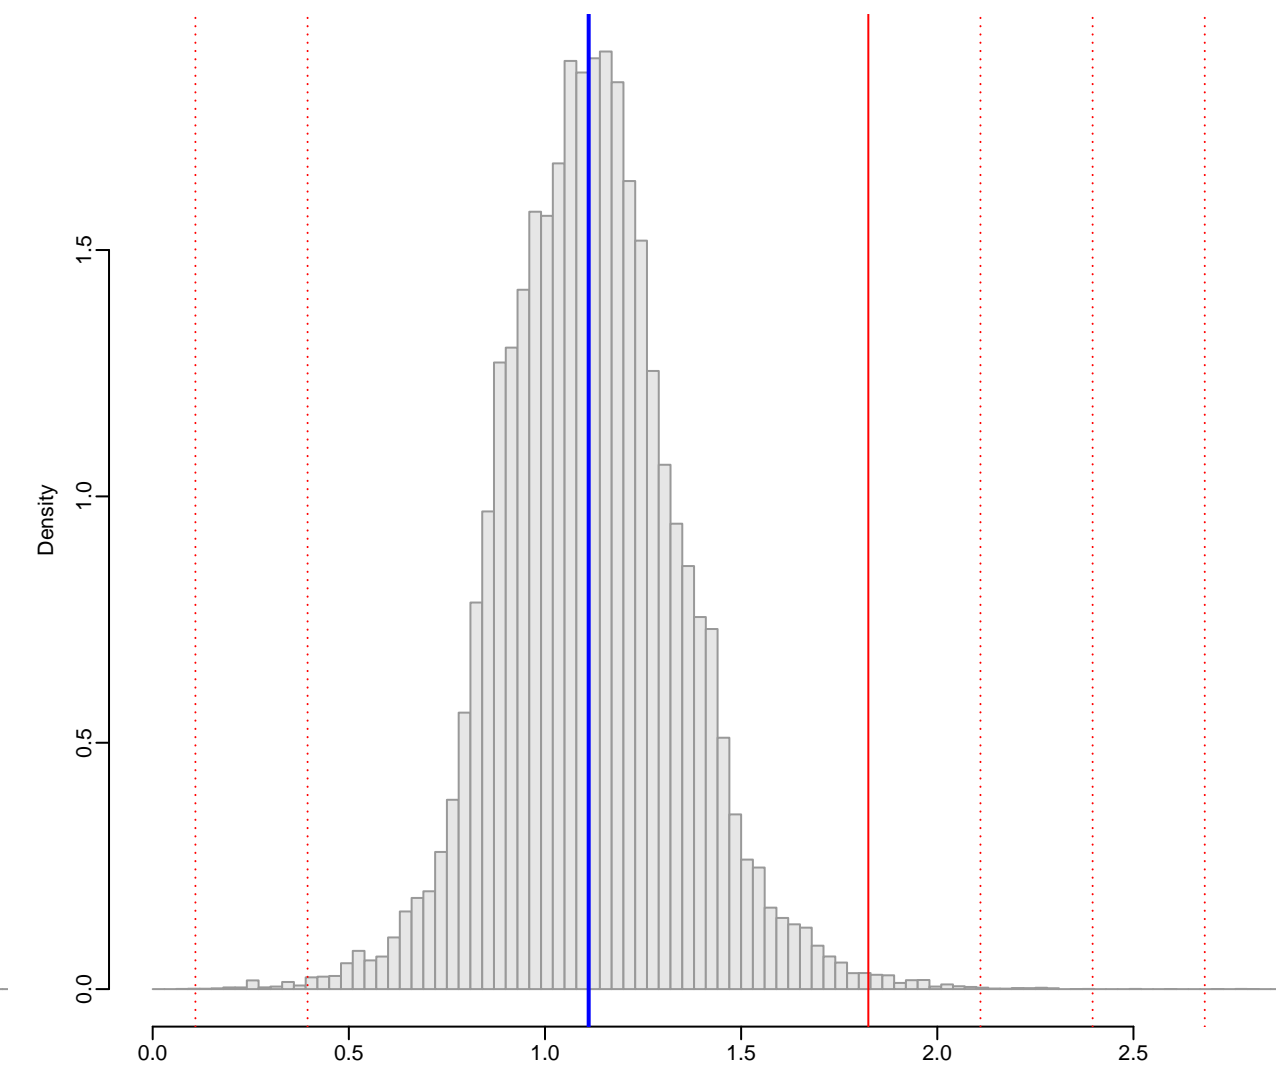

Density

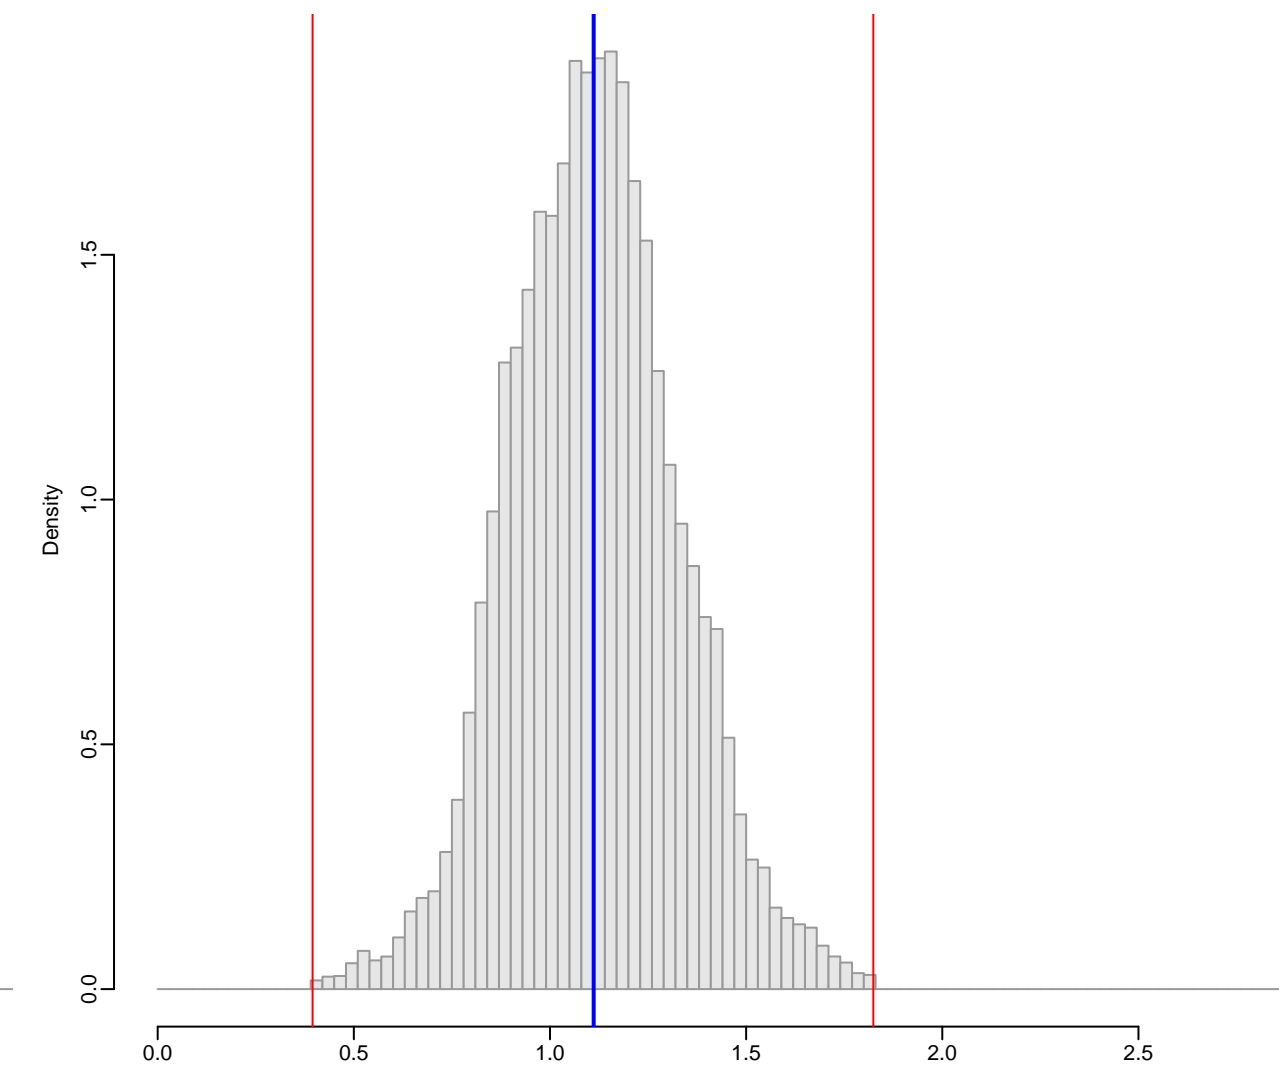

Culex\_tarsalis

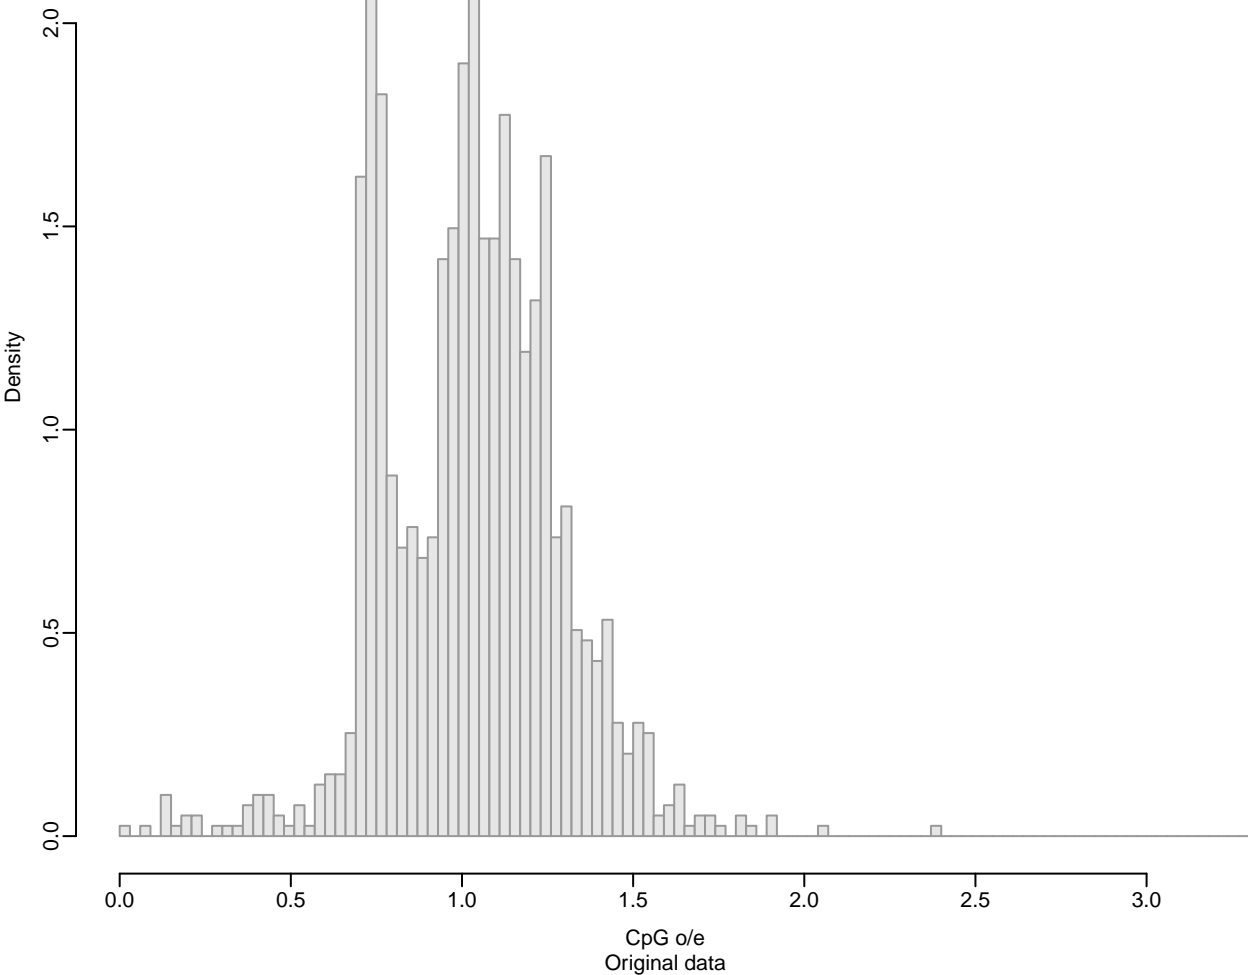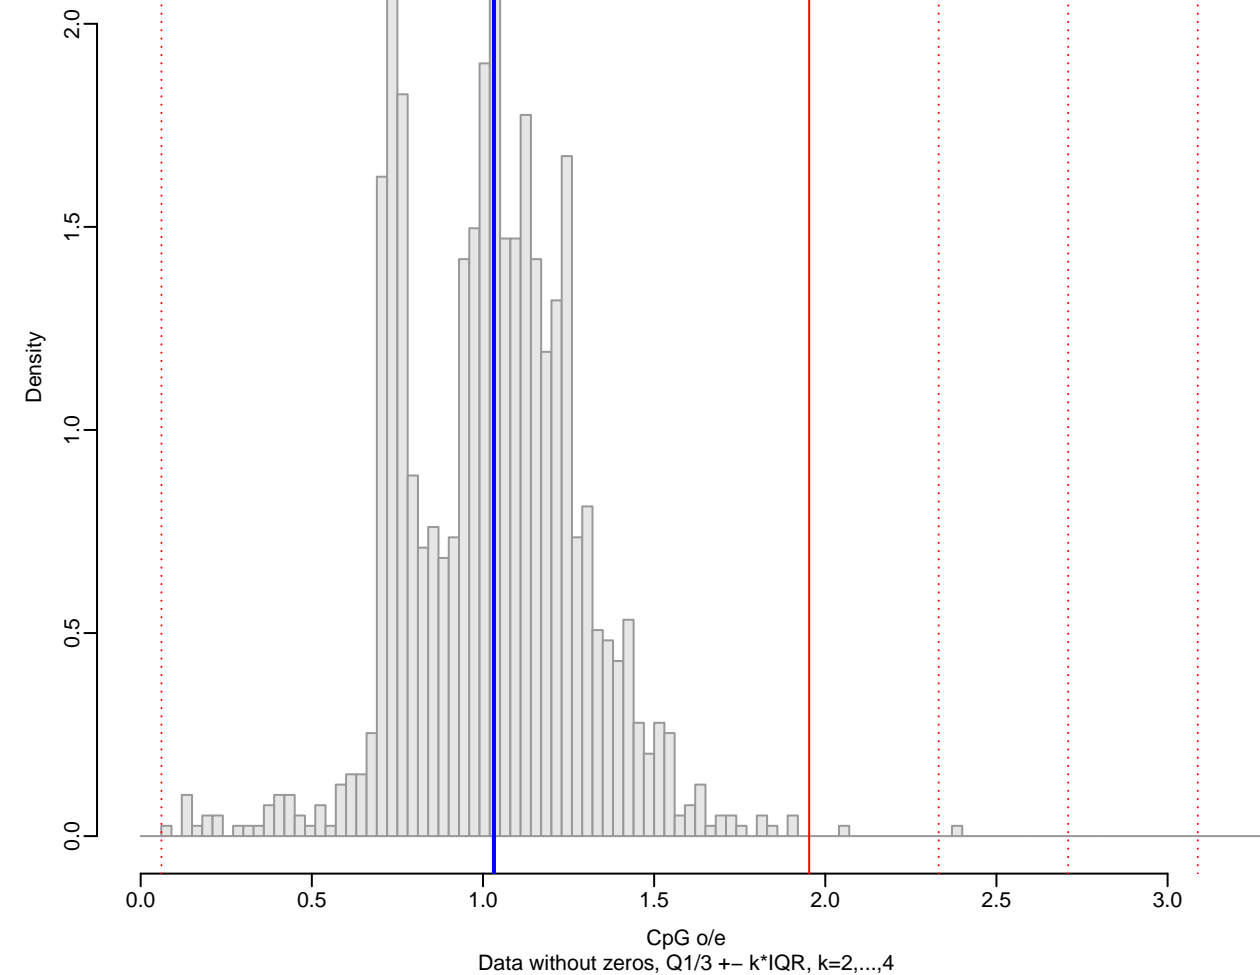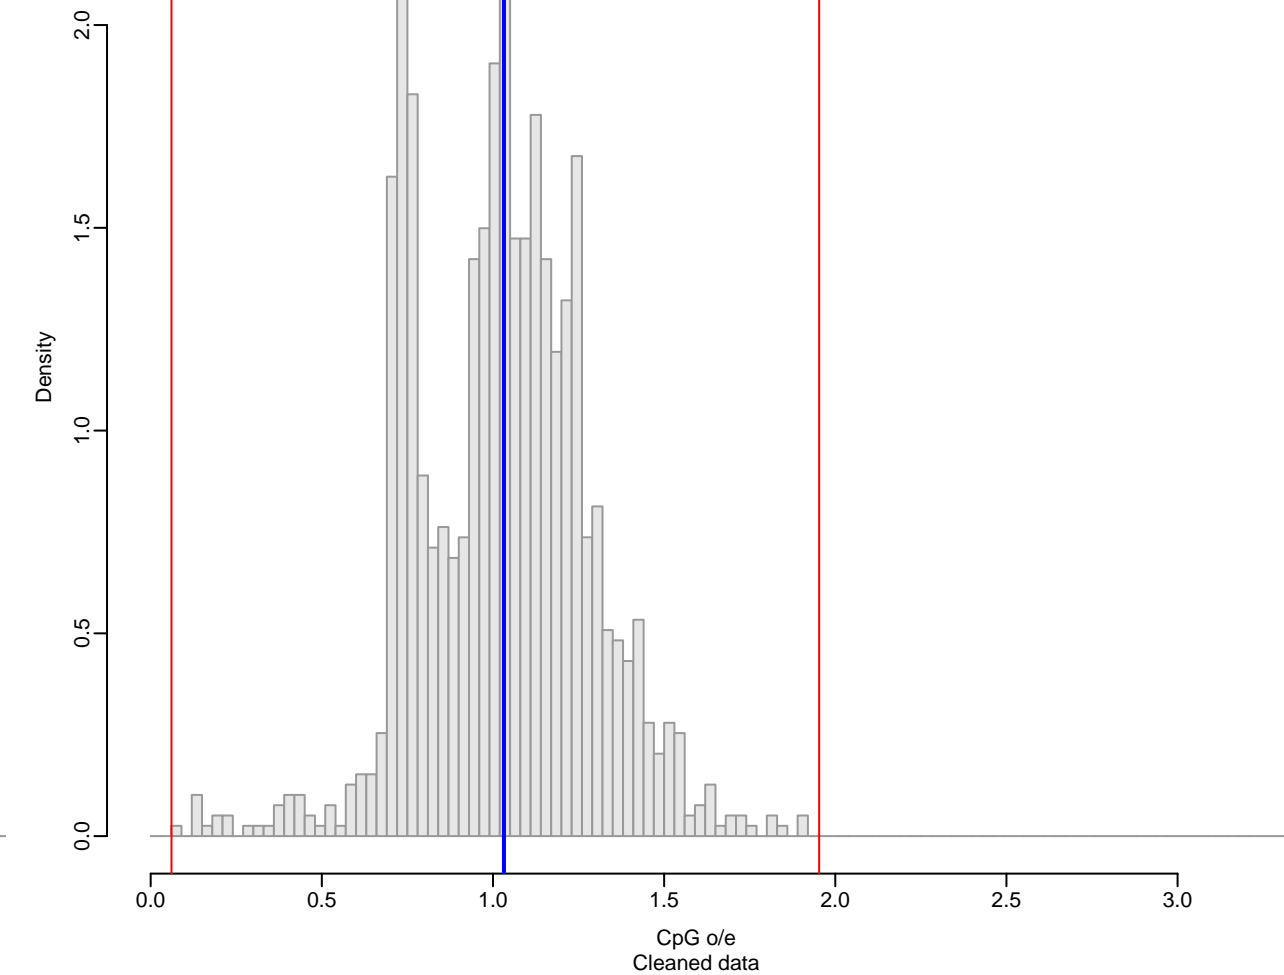



Curcuma\_longa

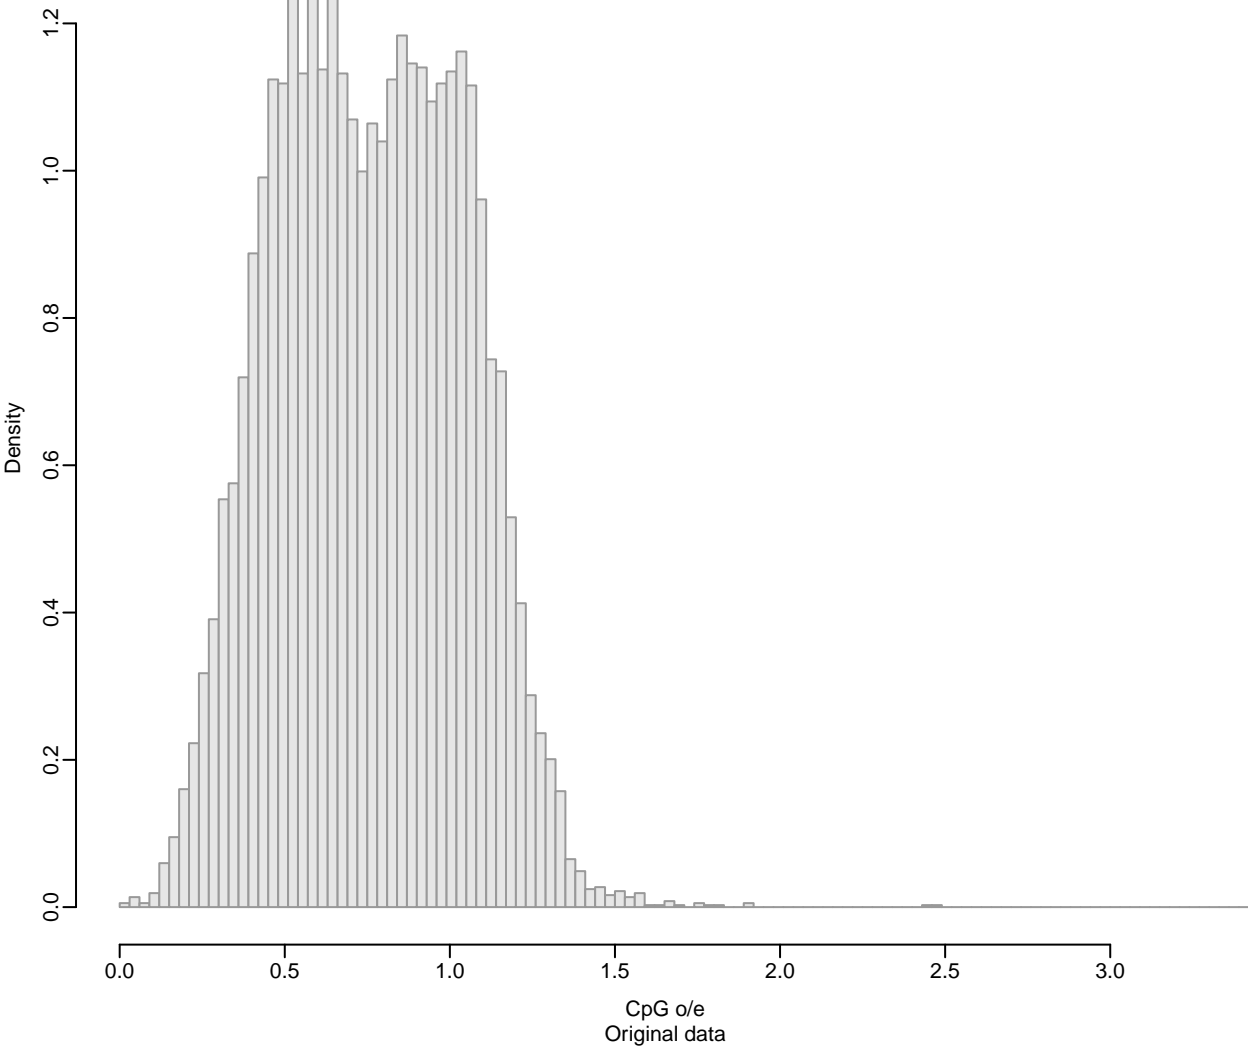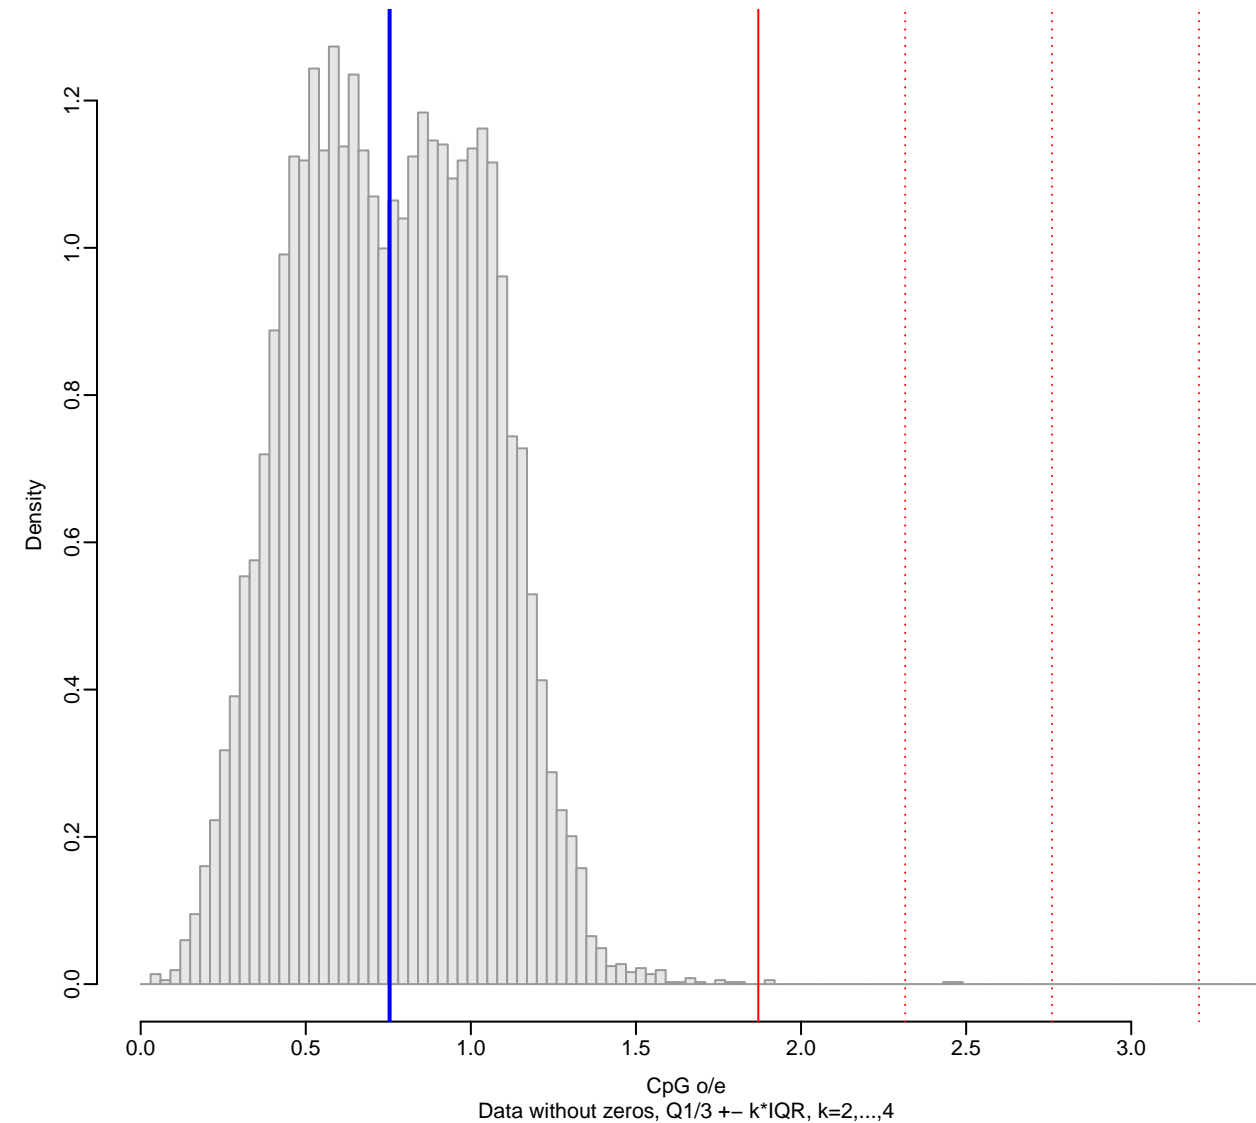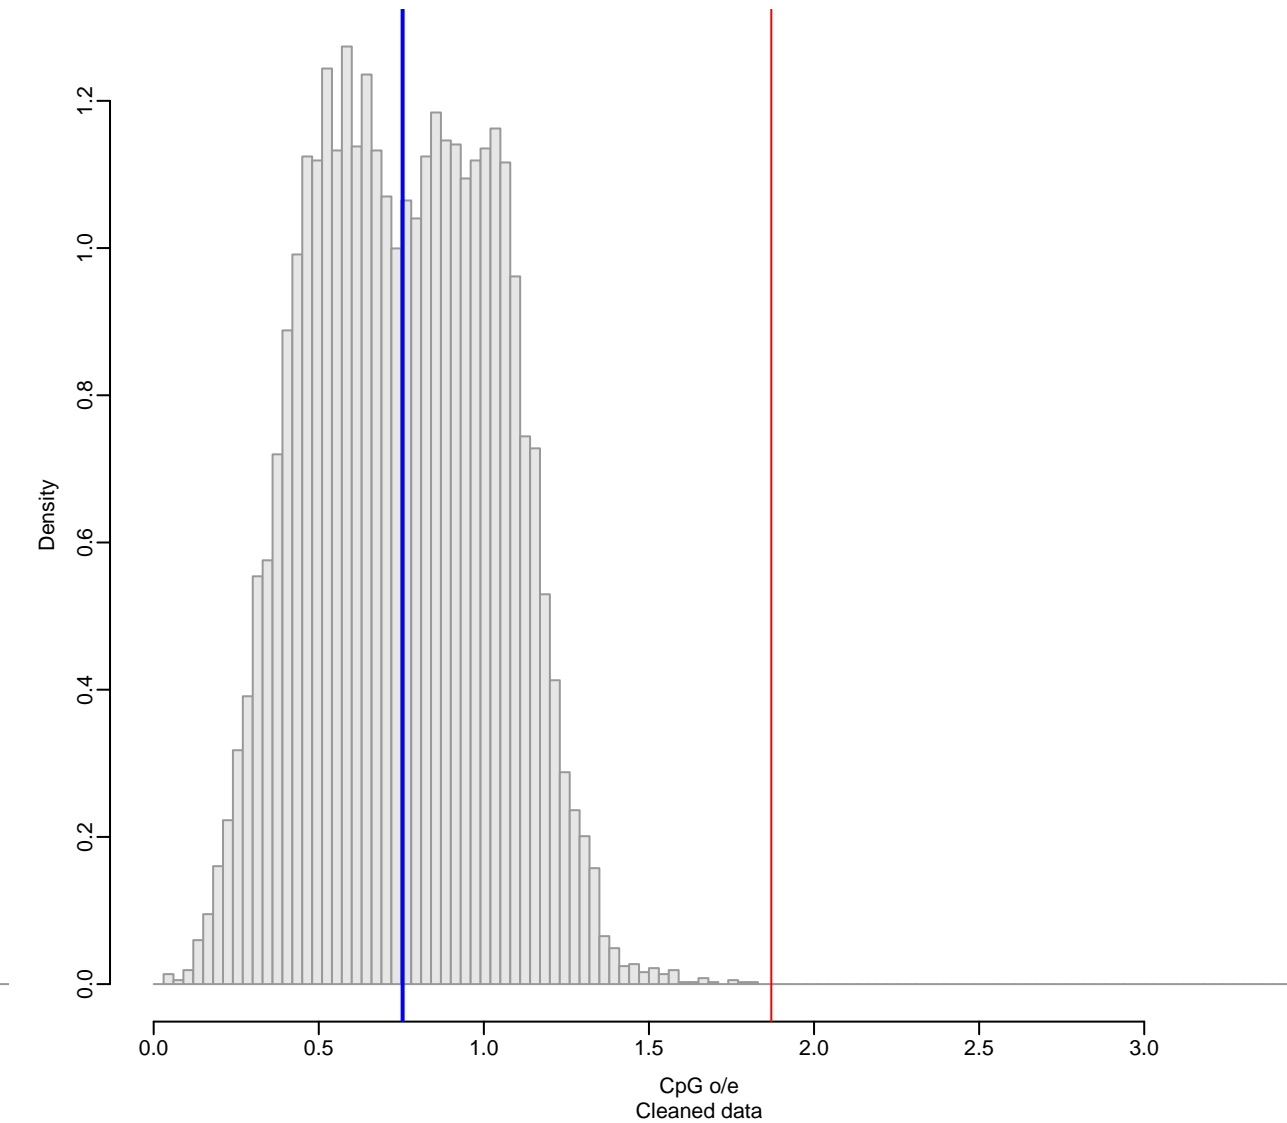

Curvularia\_protuberata

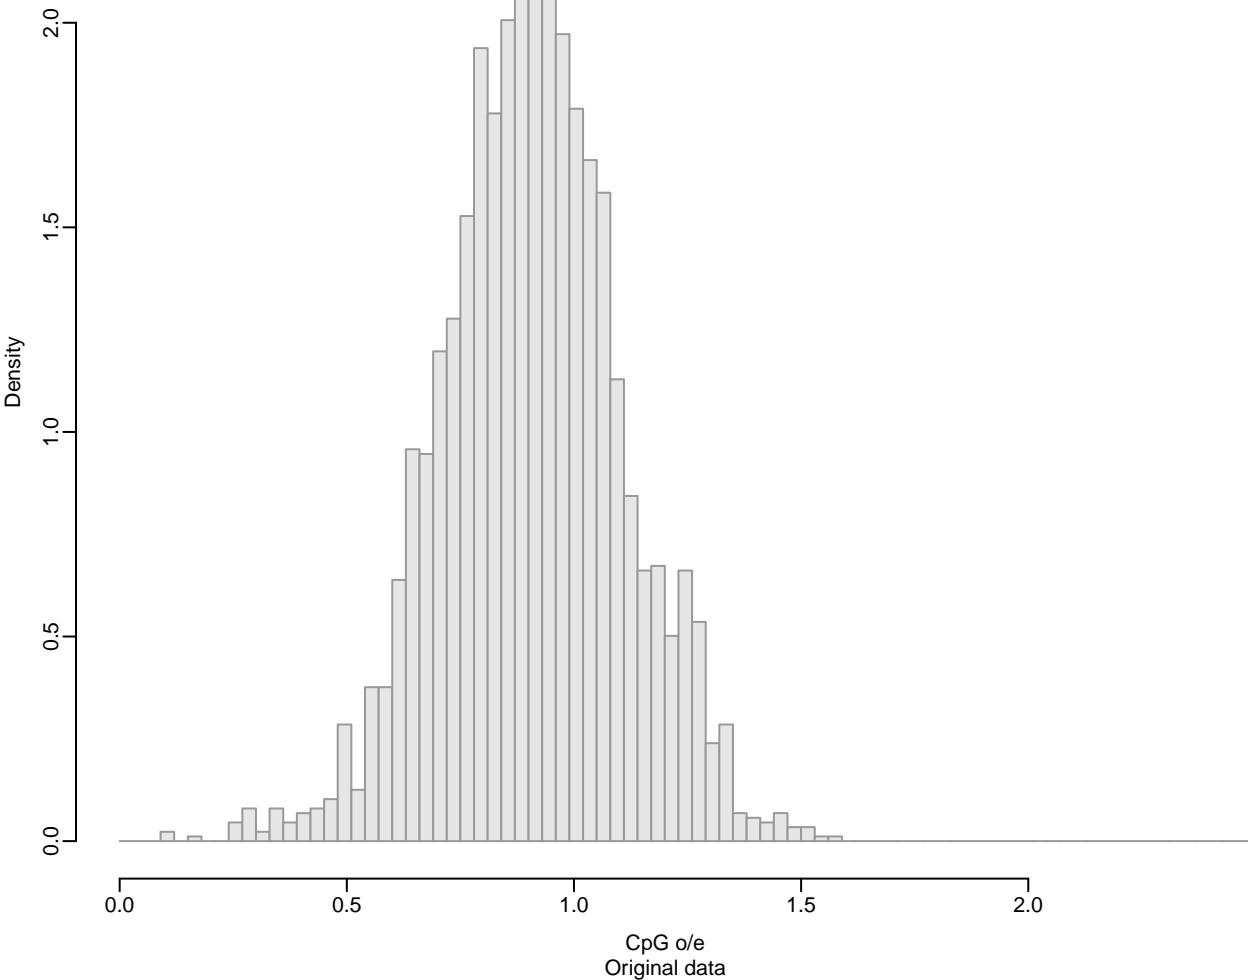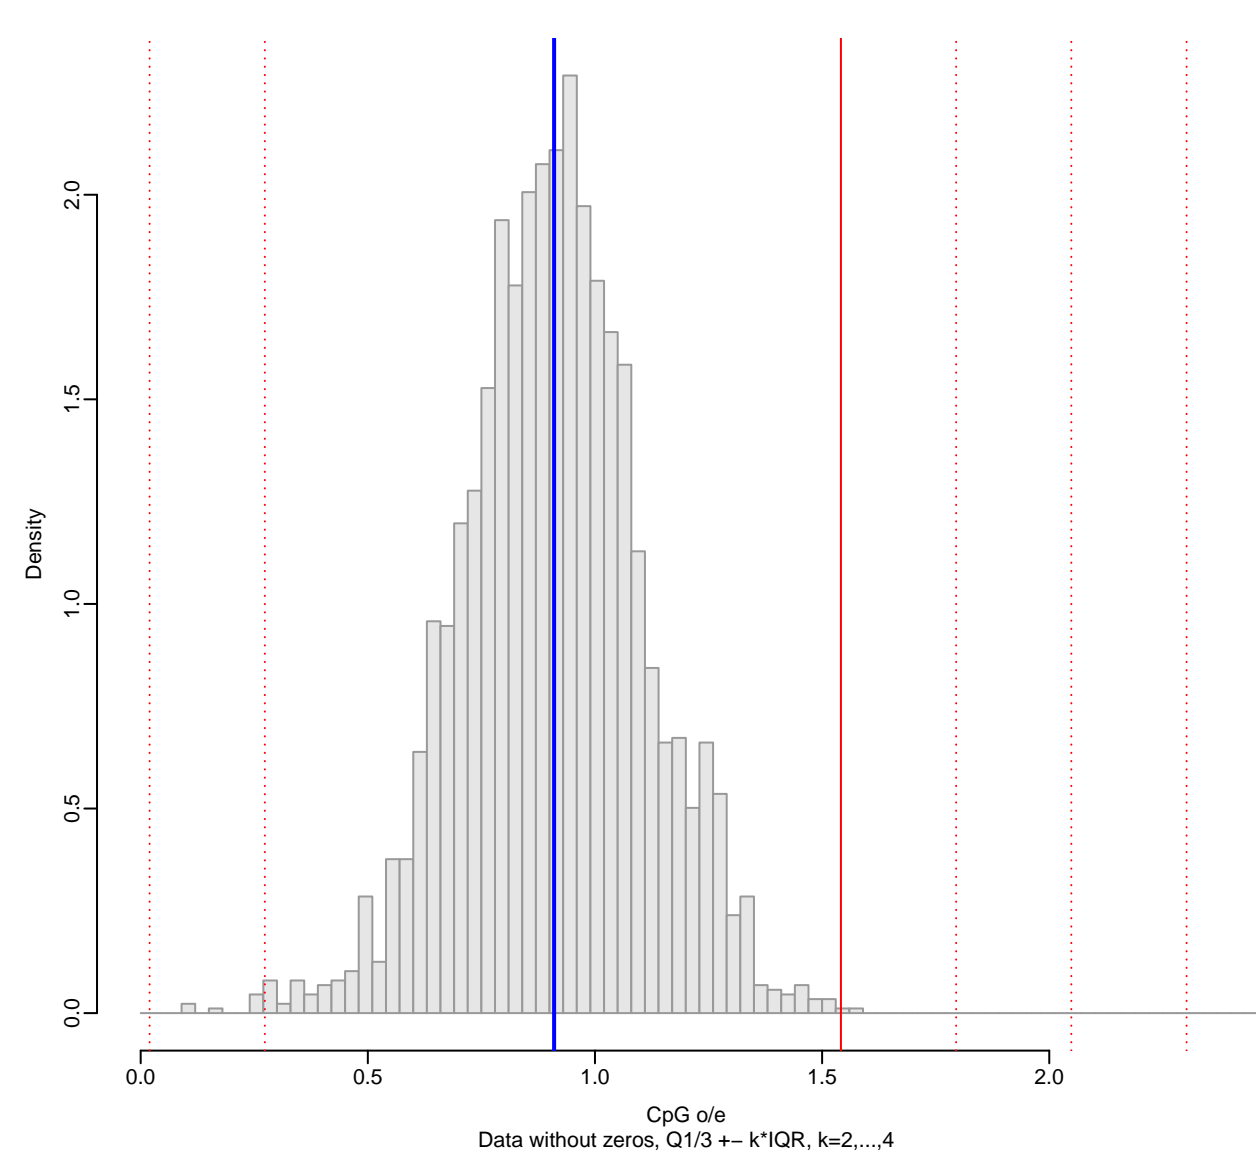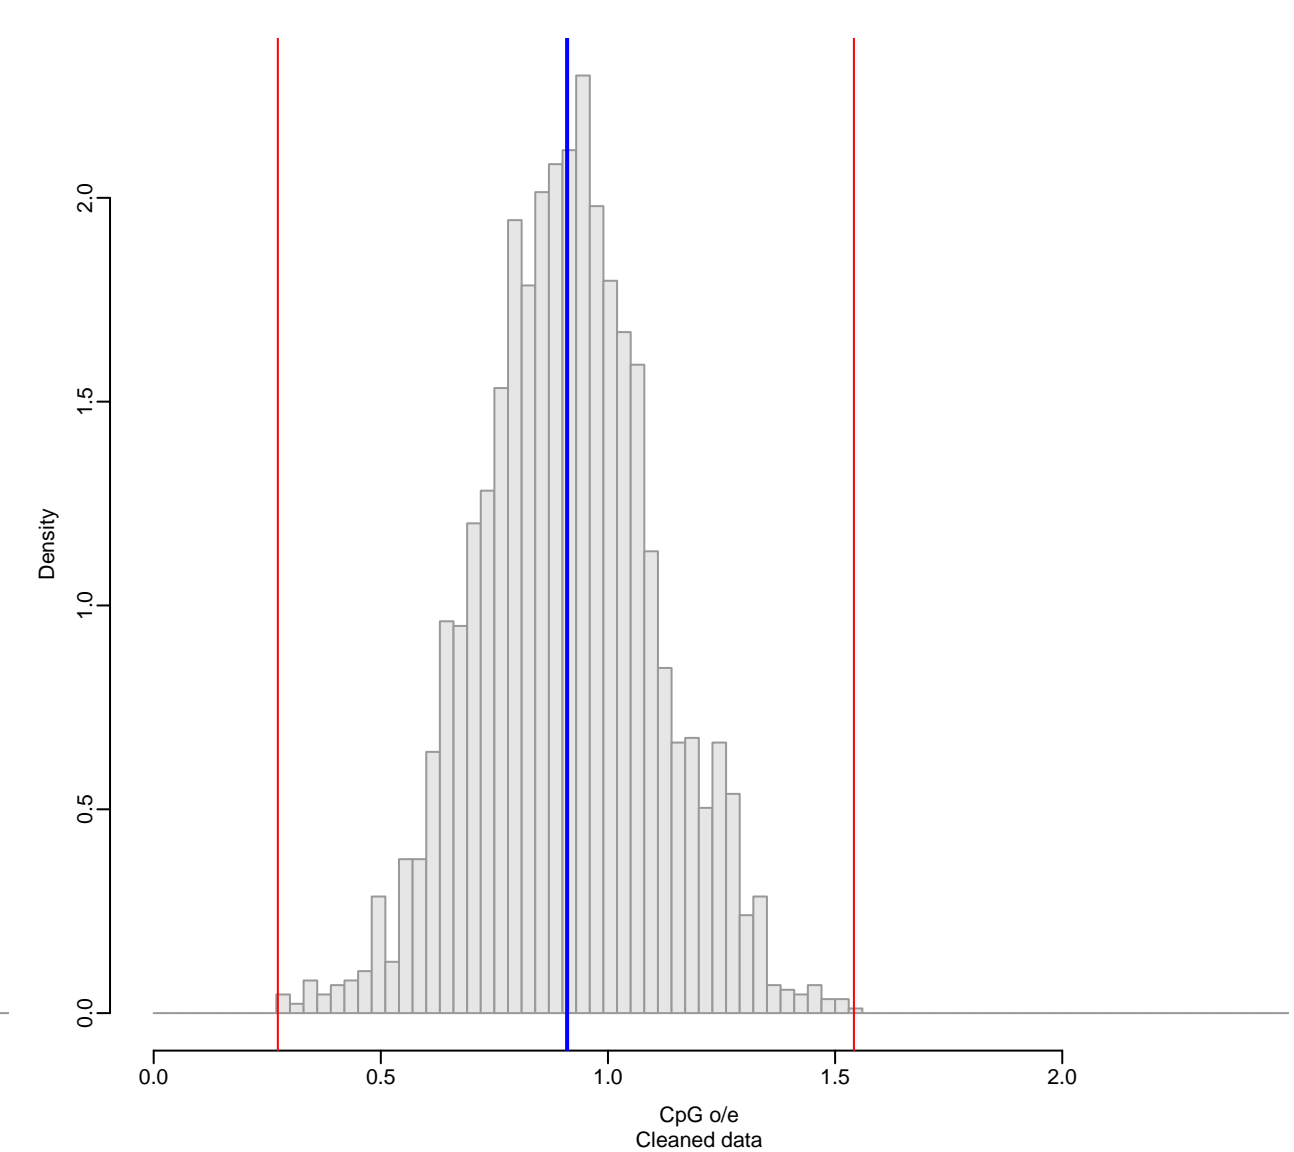

Cyamopsis\_tetragonoloba

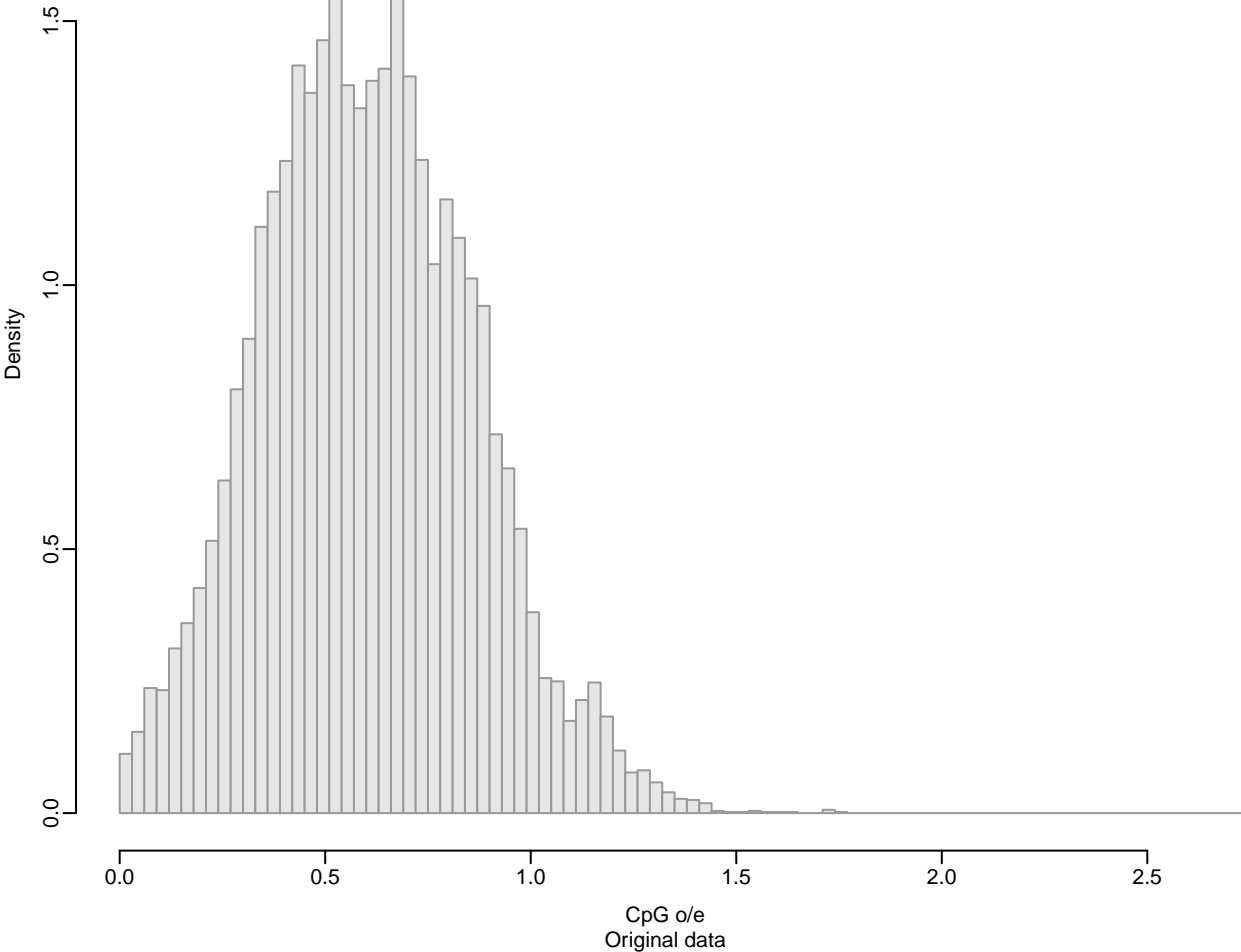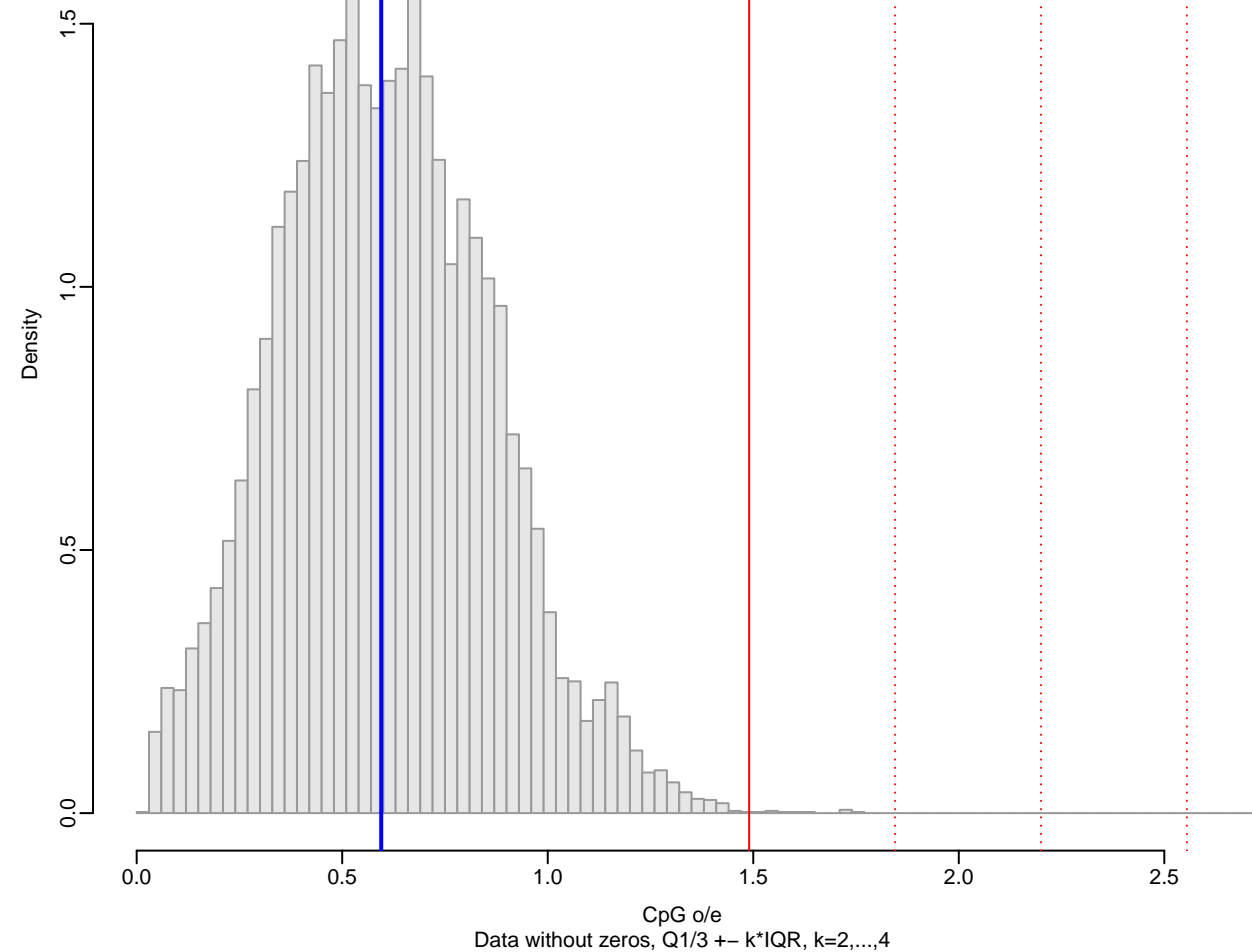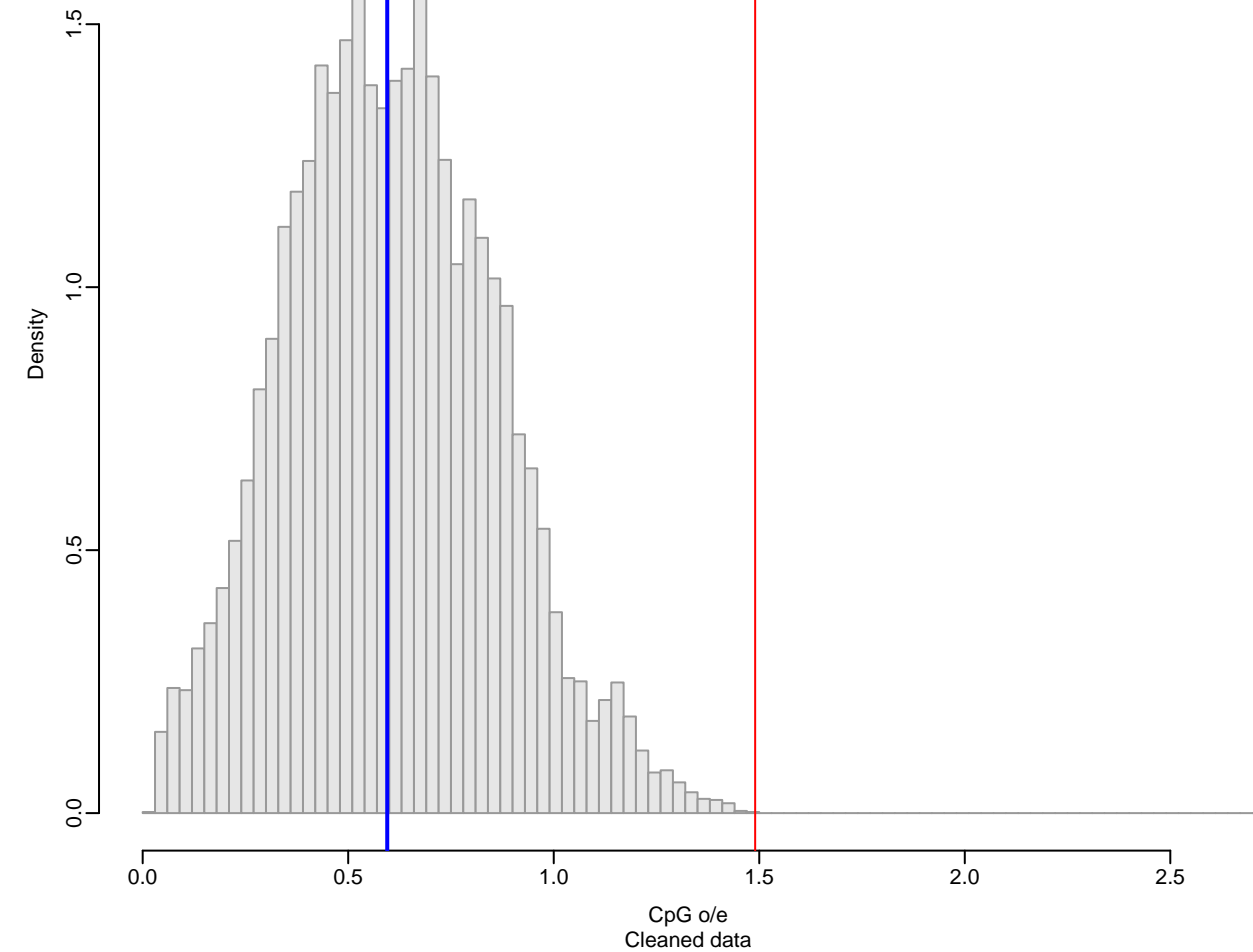

Cycas\_rumphii

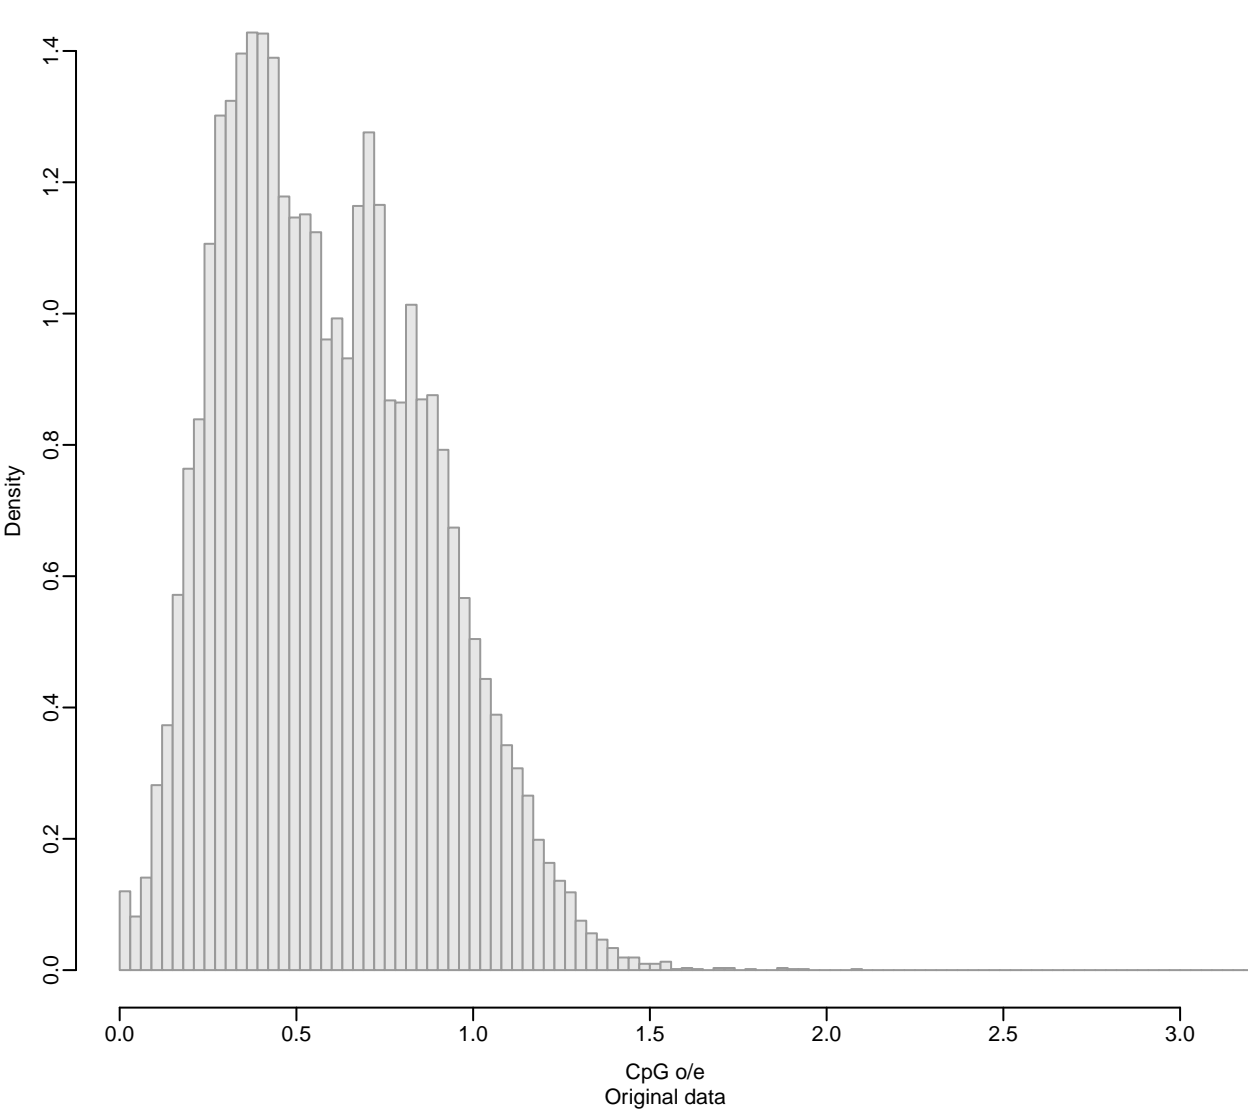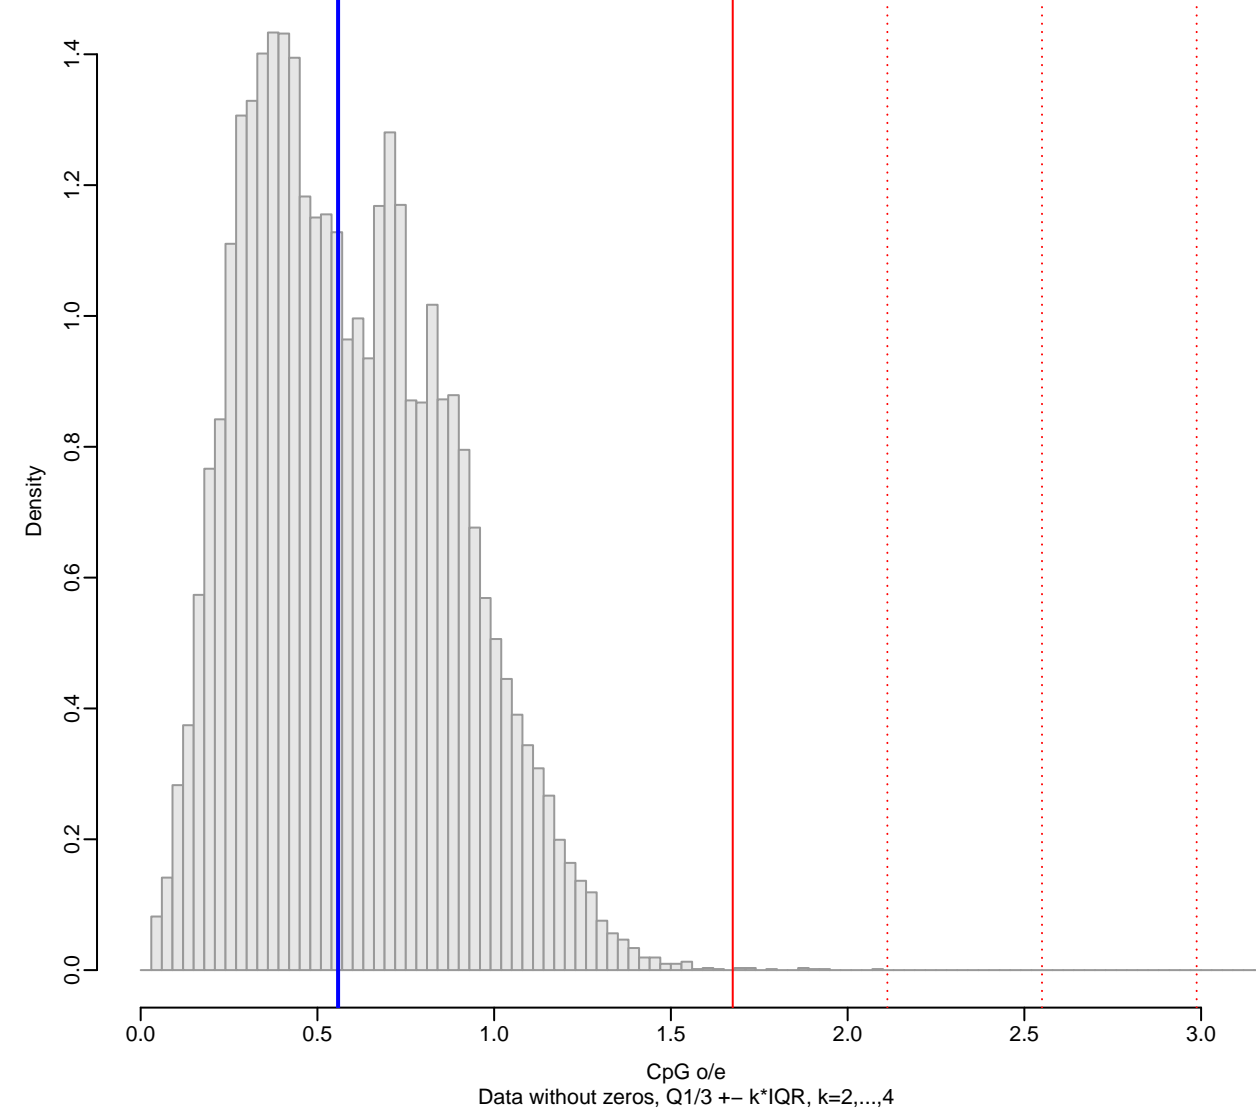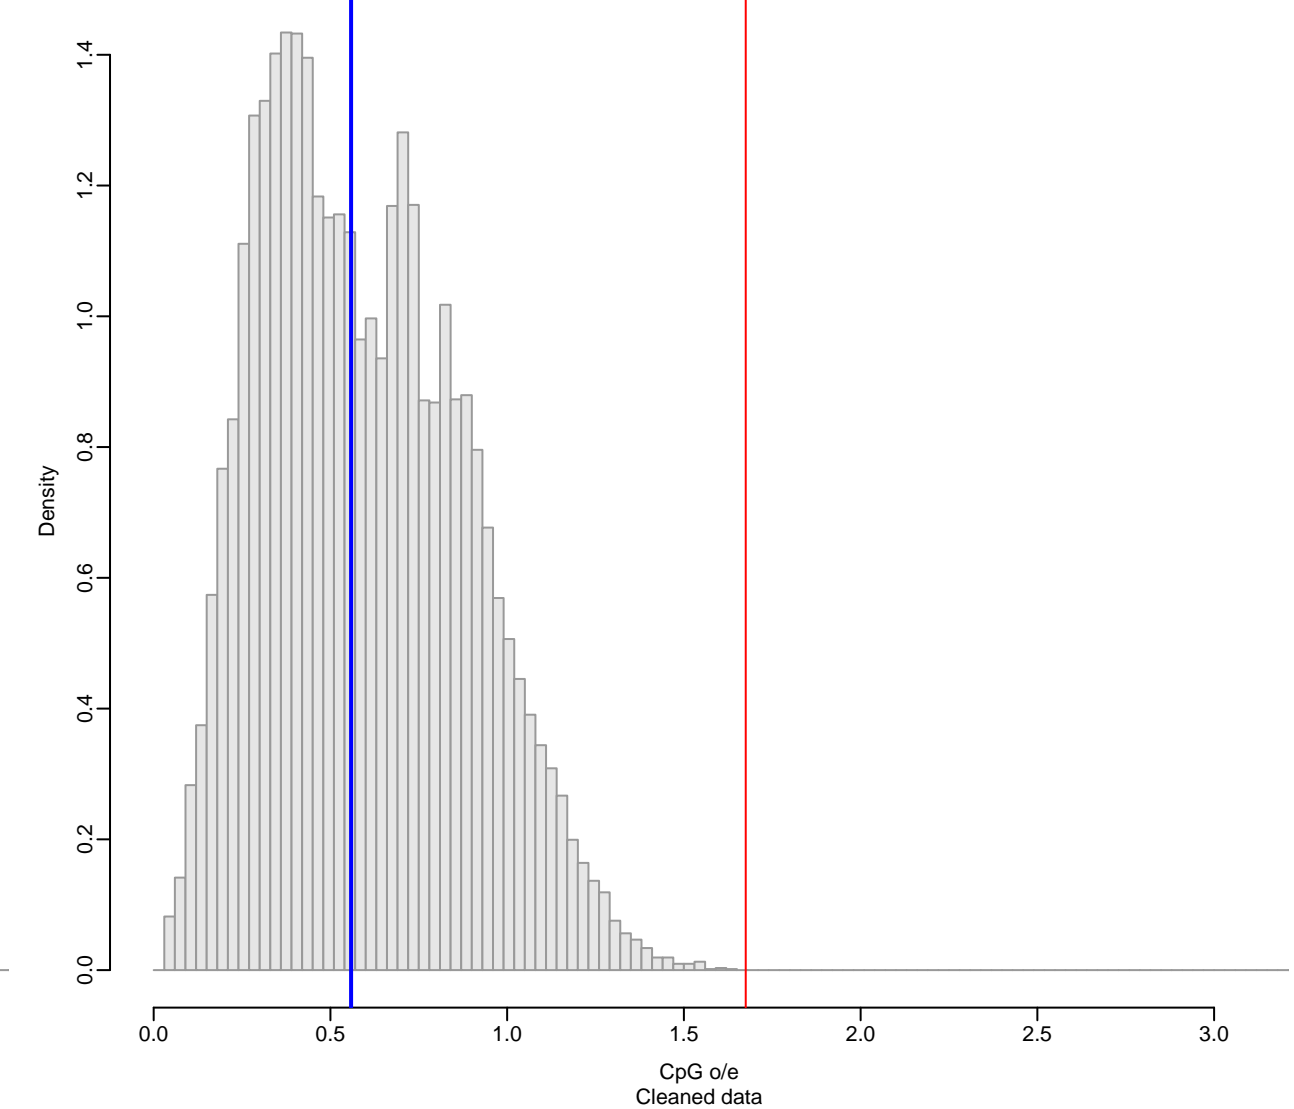

# Cynodon\_dactylon

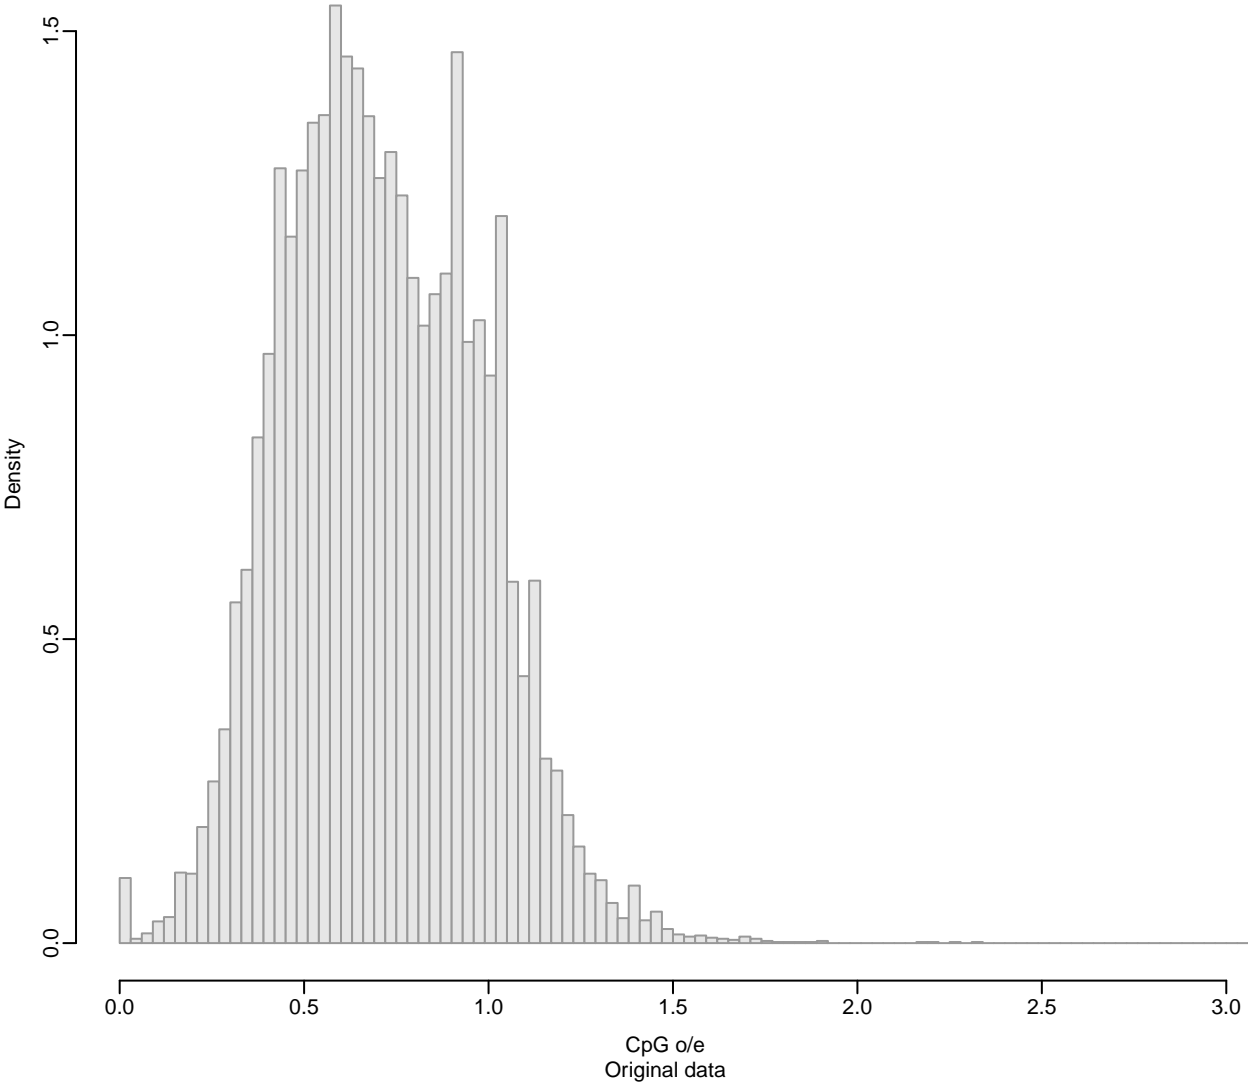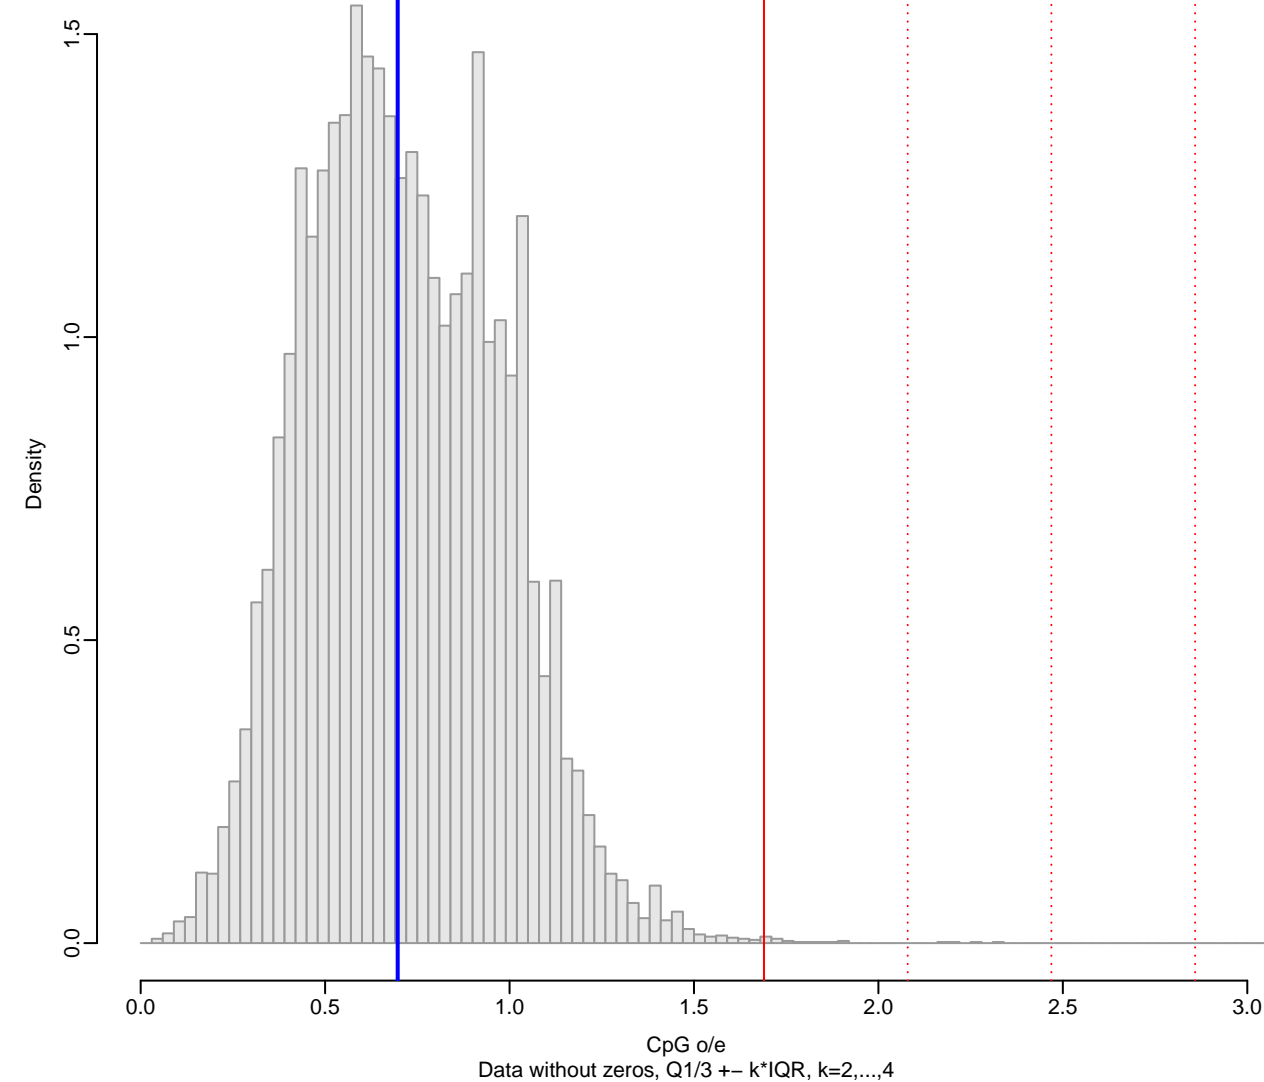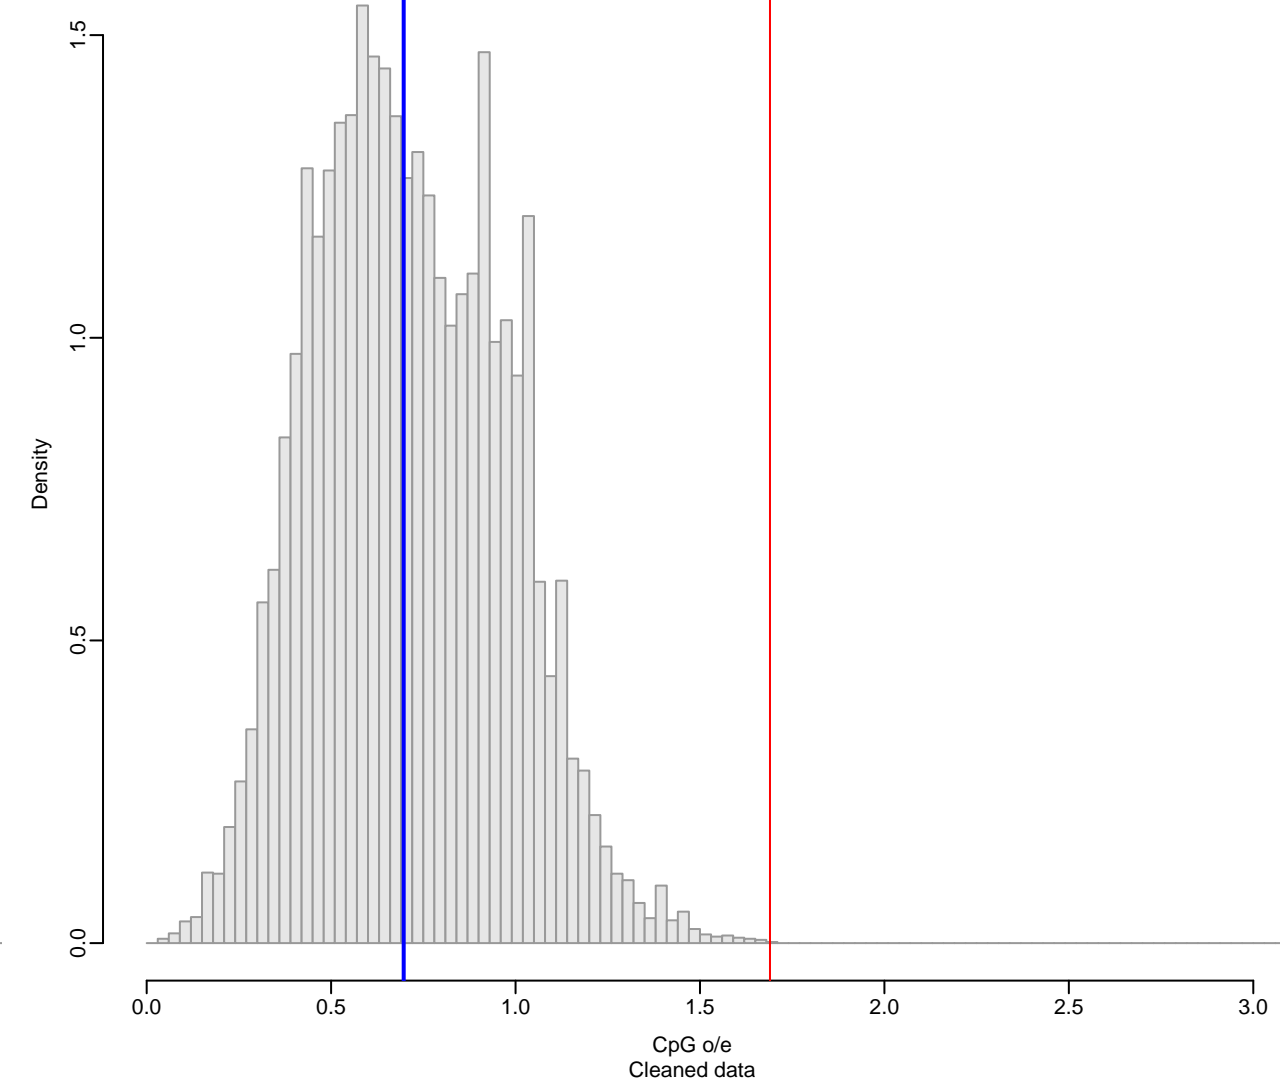

Cyprinodon\_variegatus

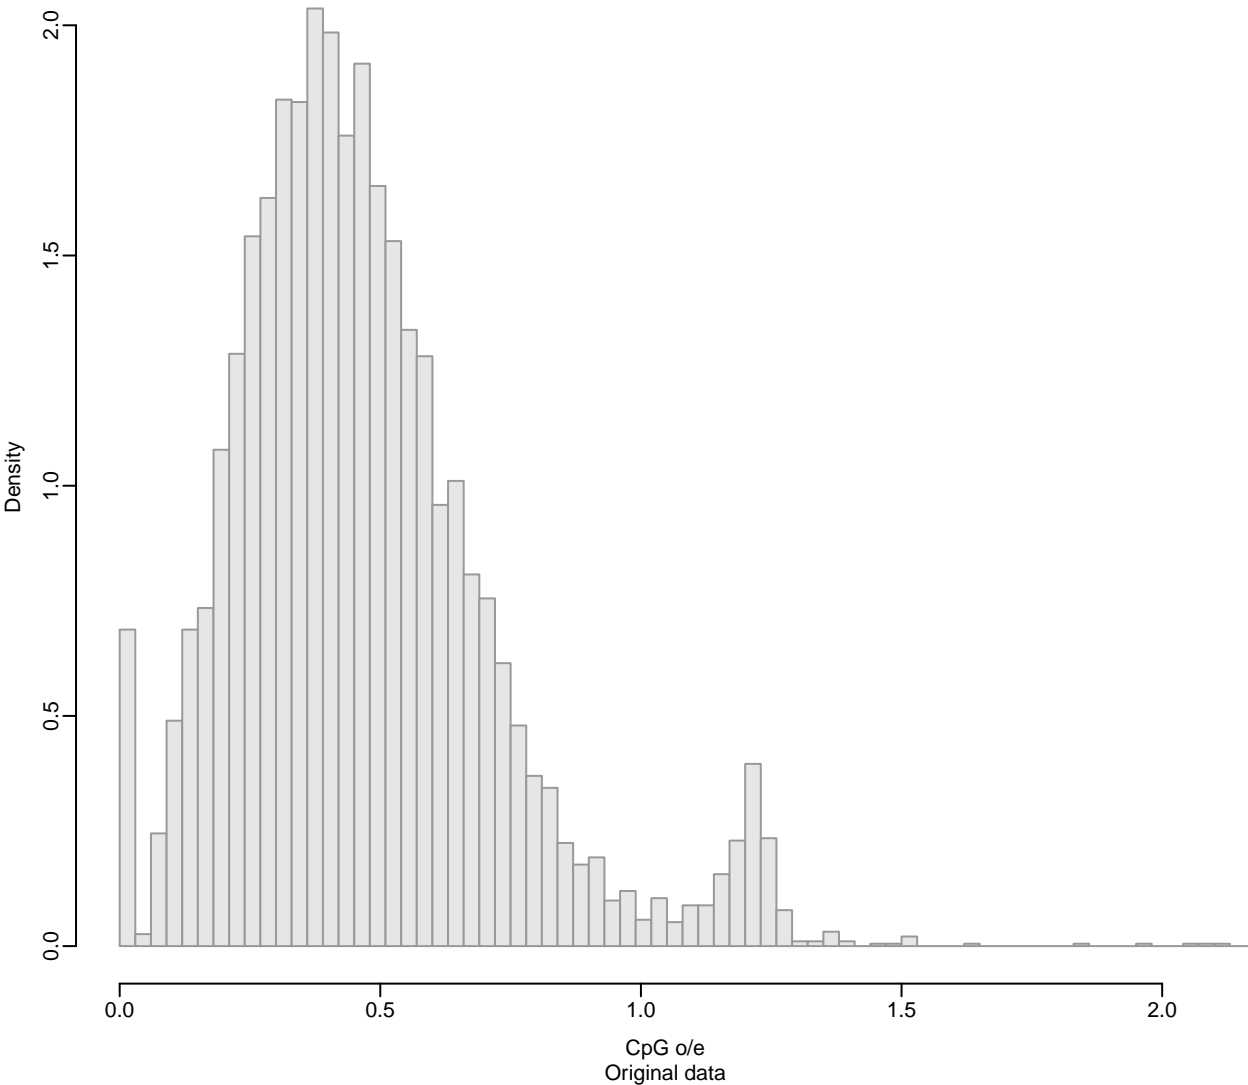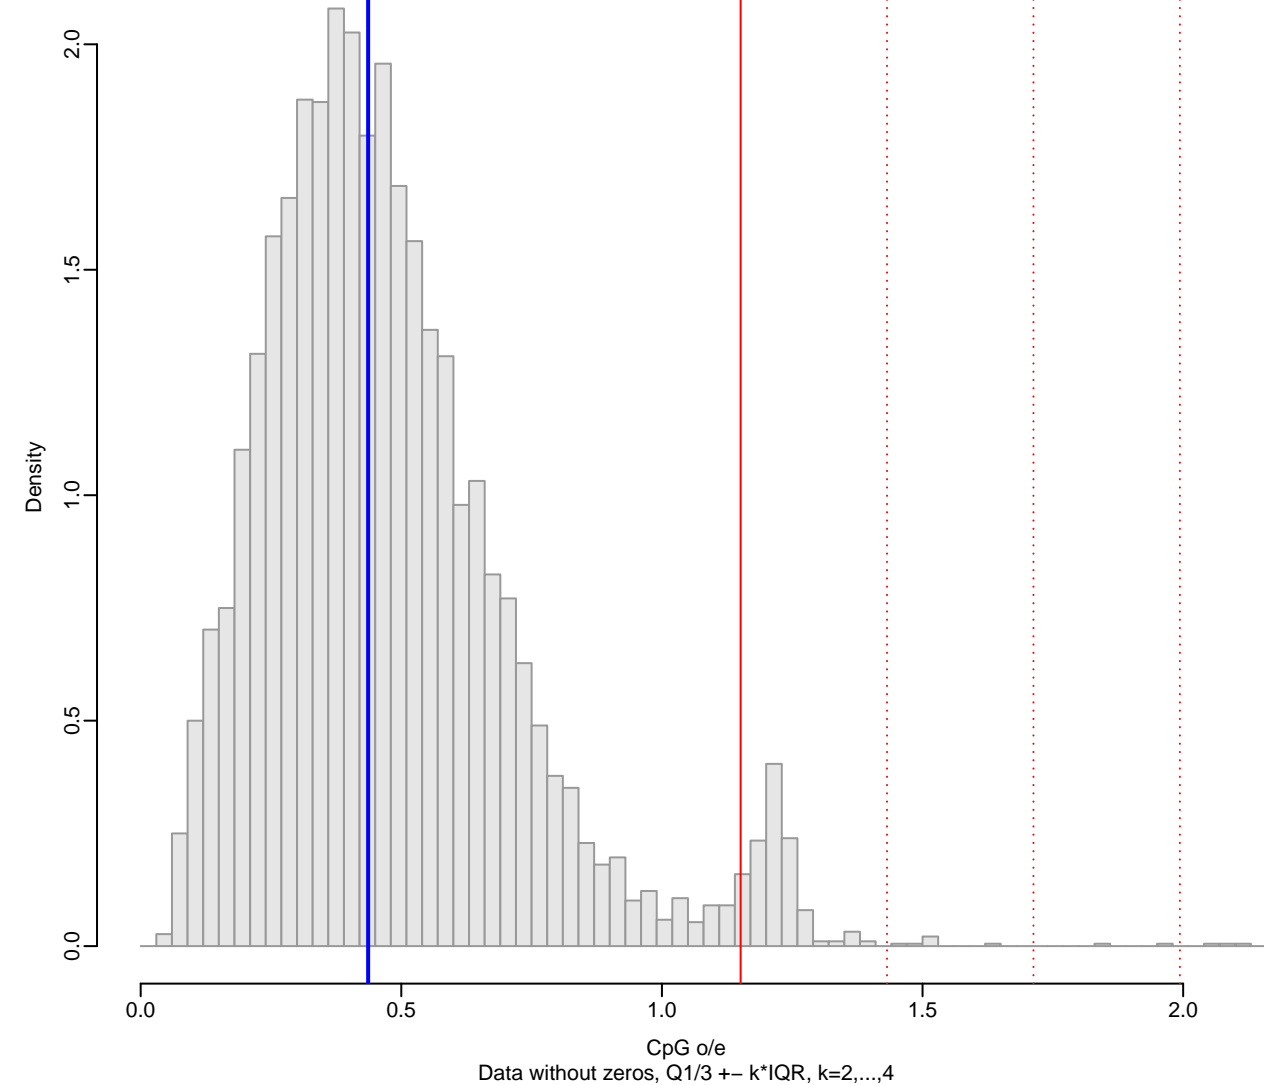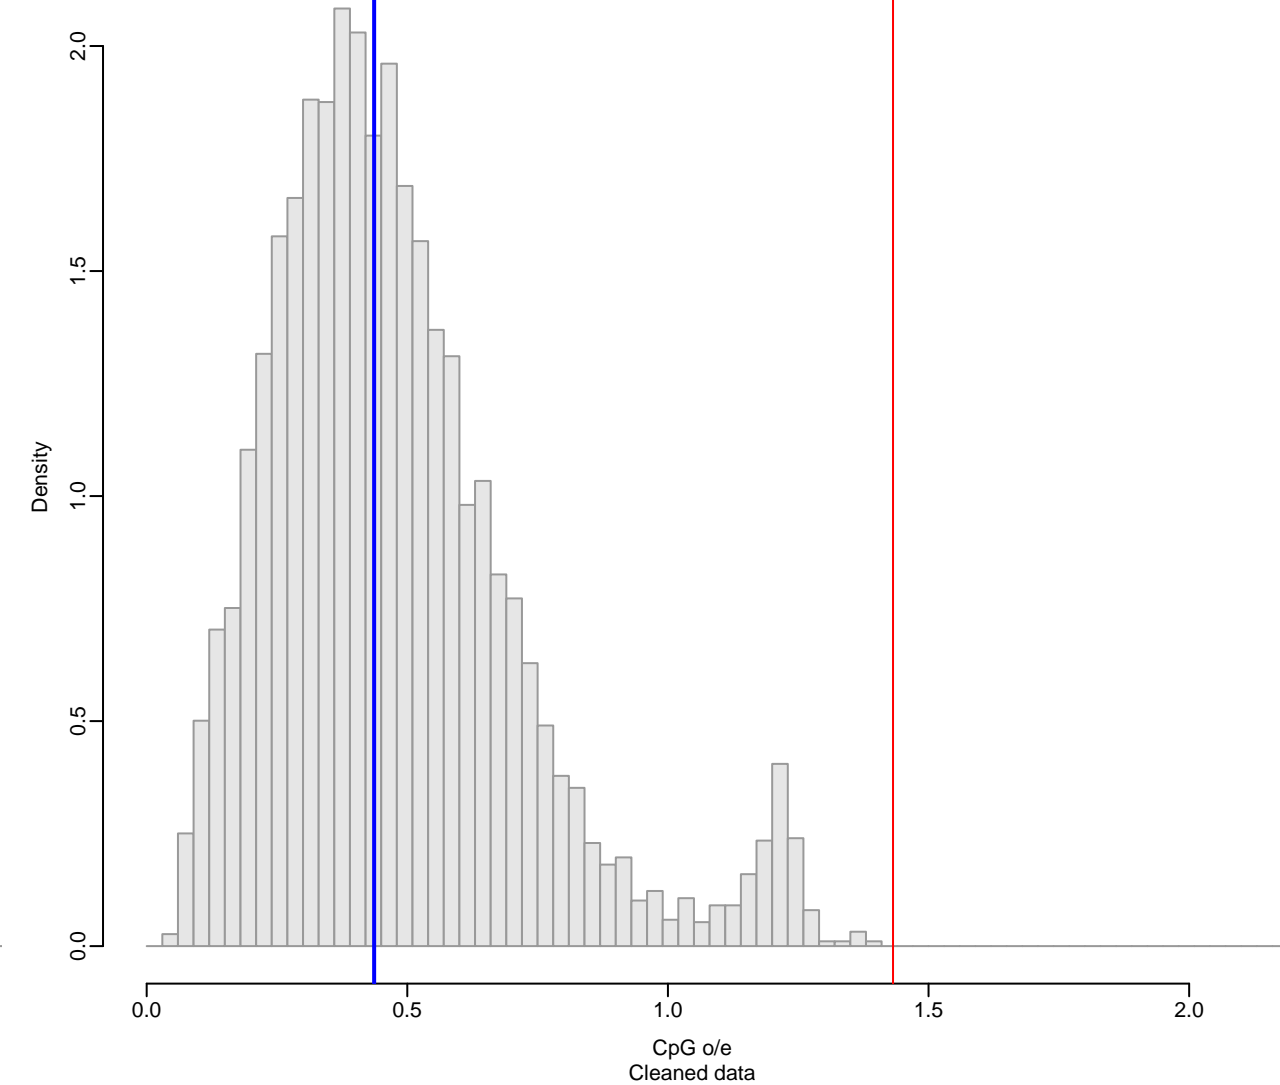

Dactylis\_glomerata

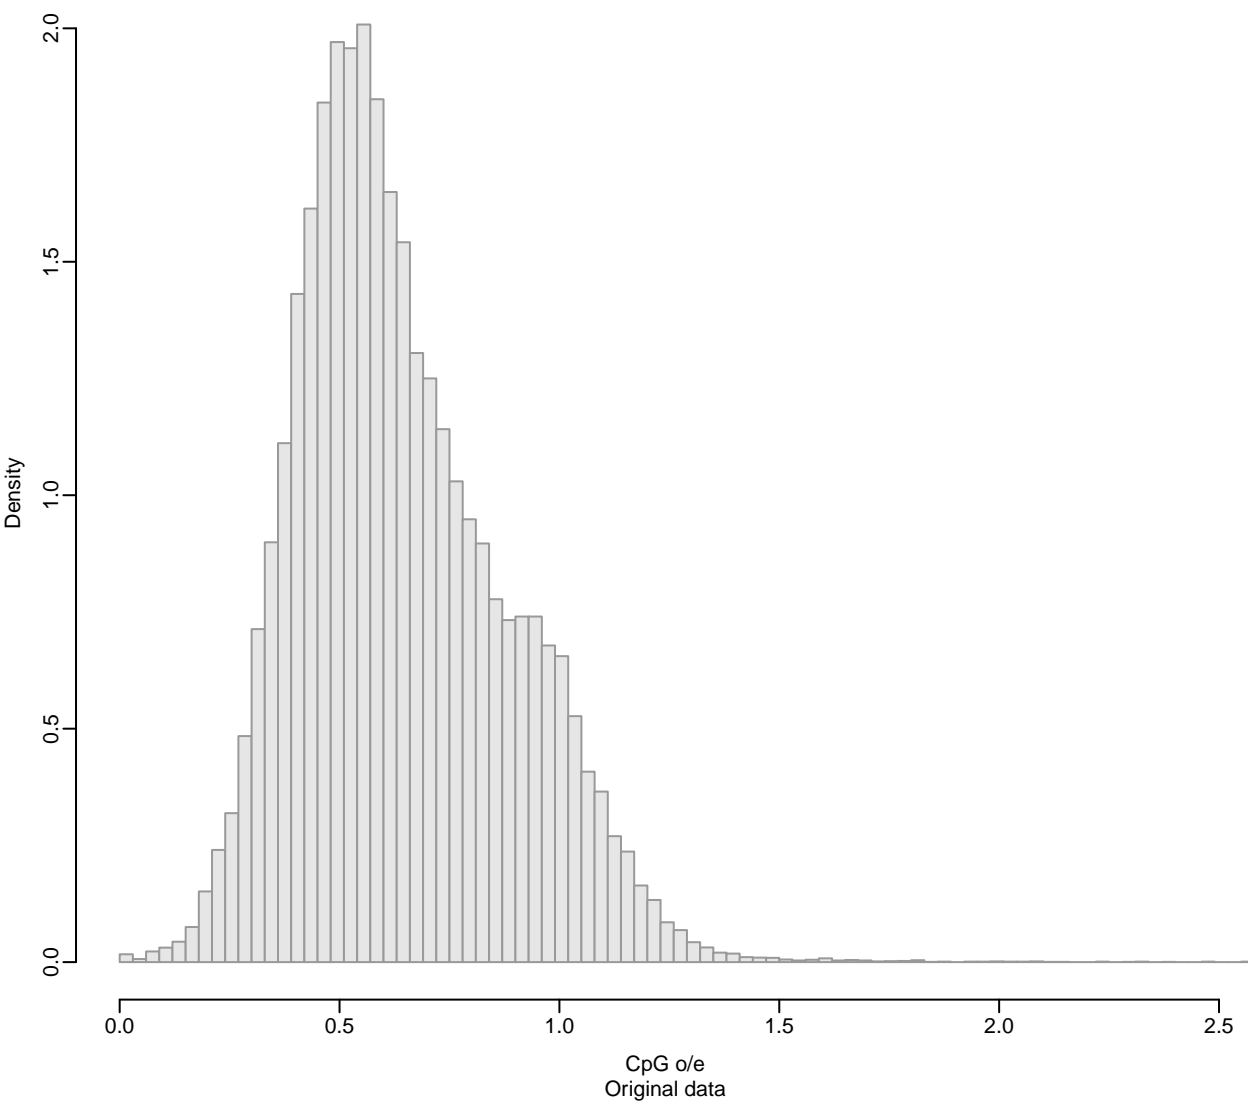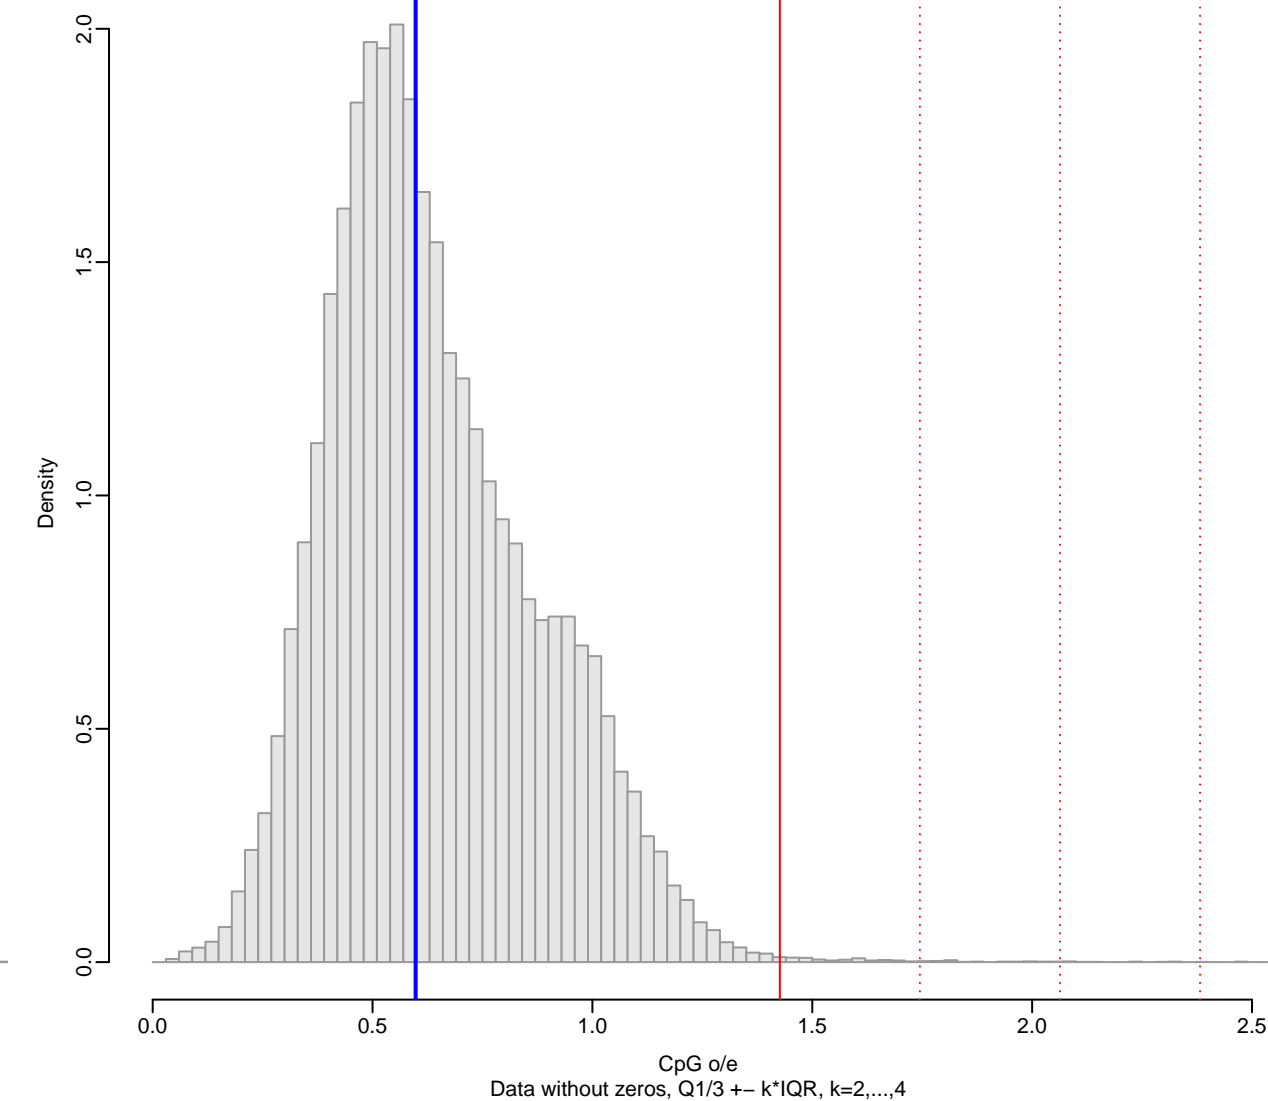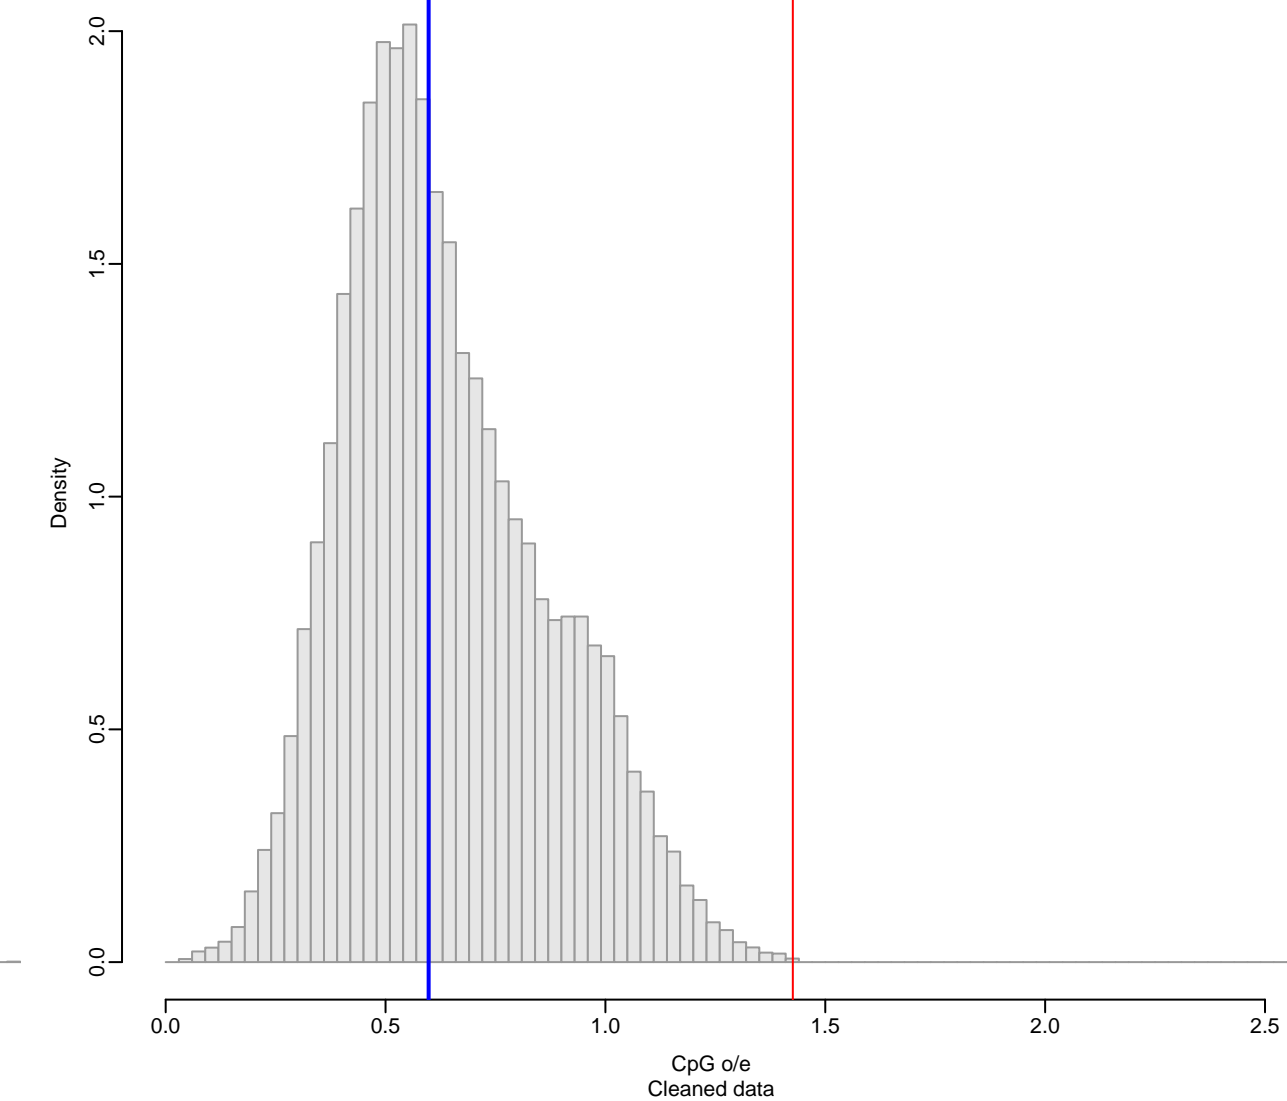

Danaus\_plexippus

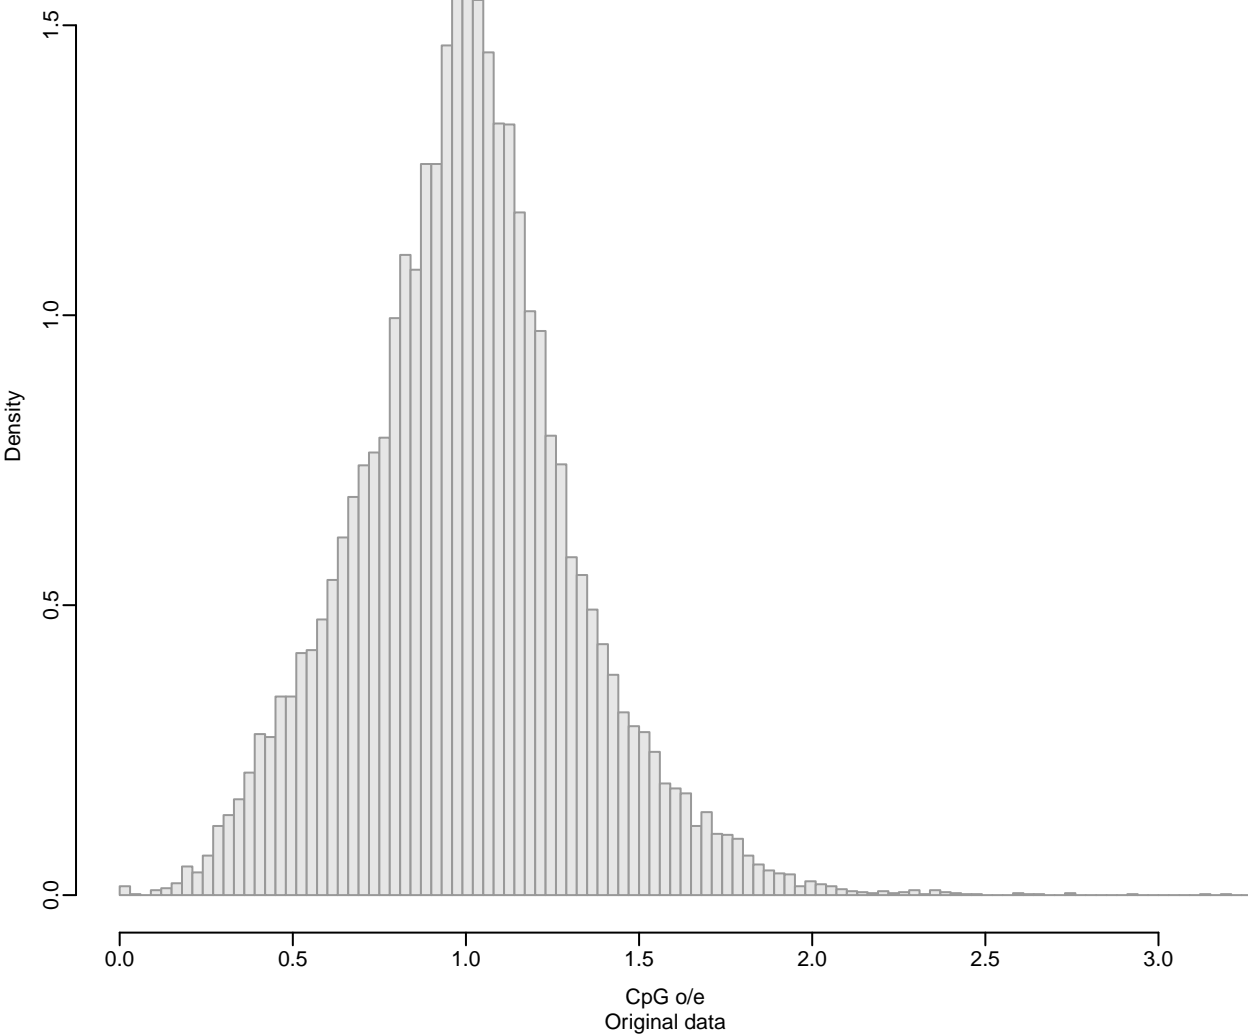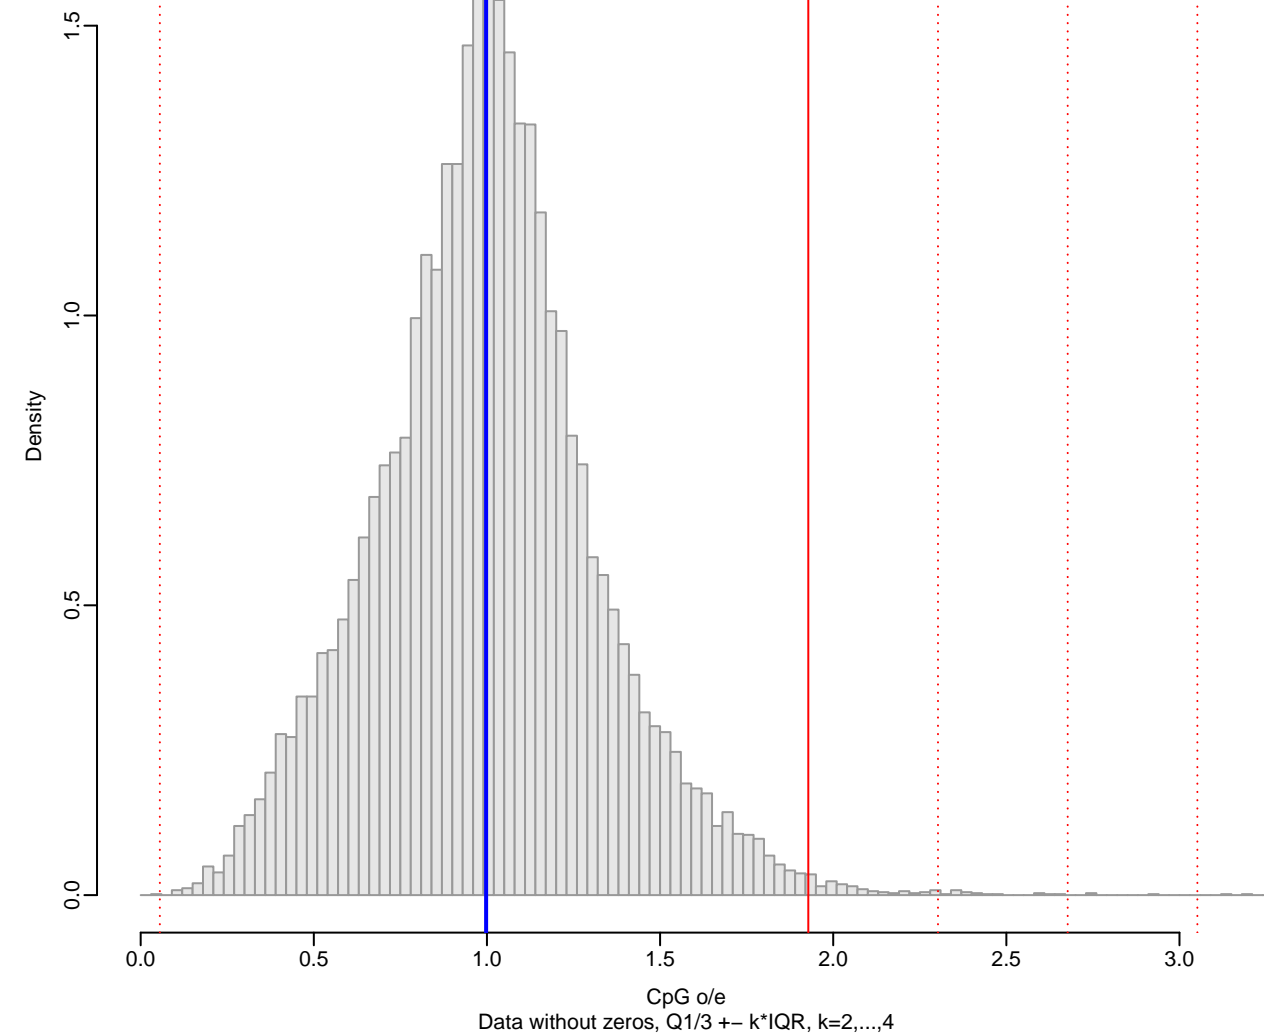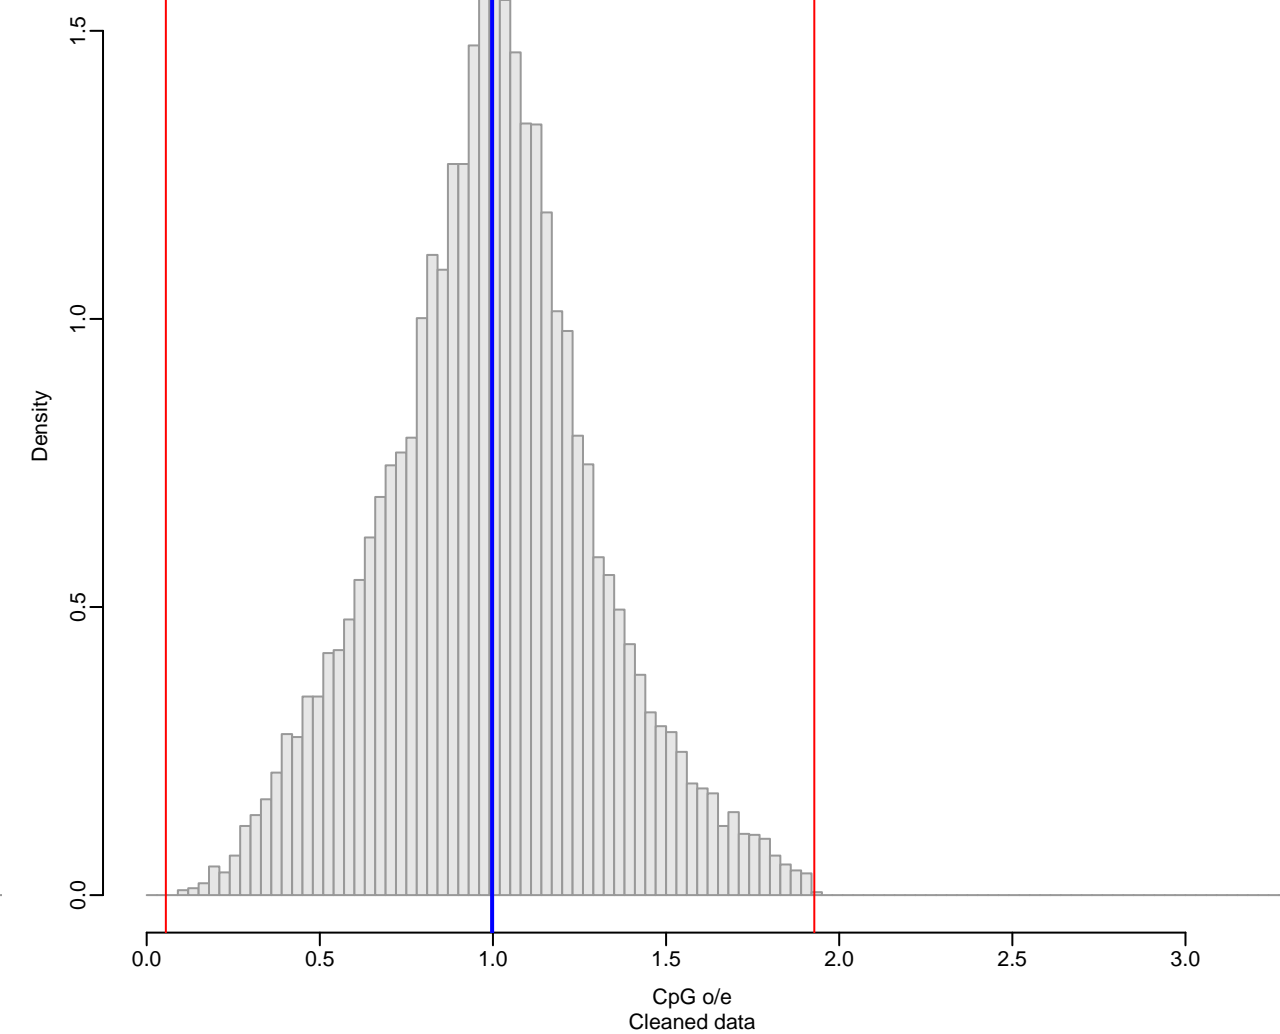



Danio\_rerio

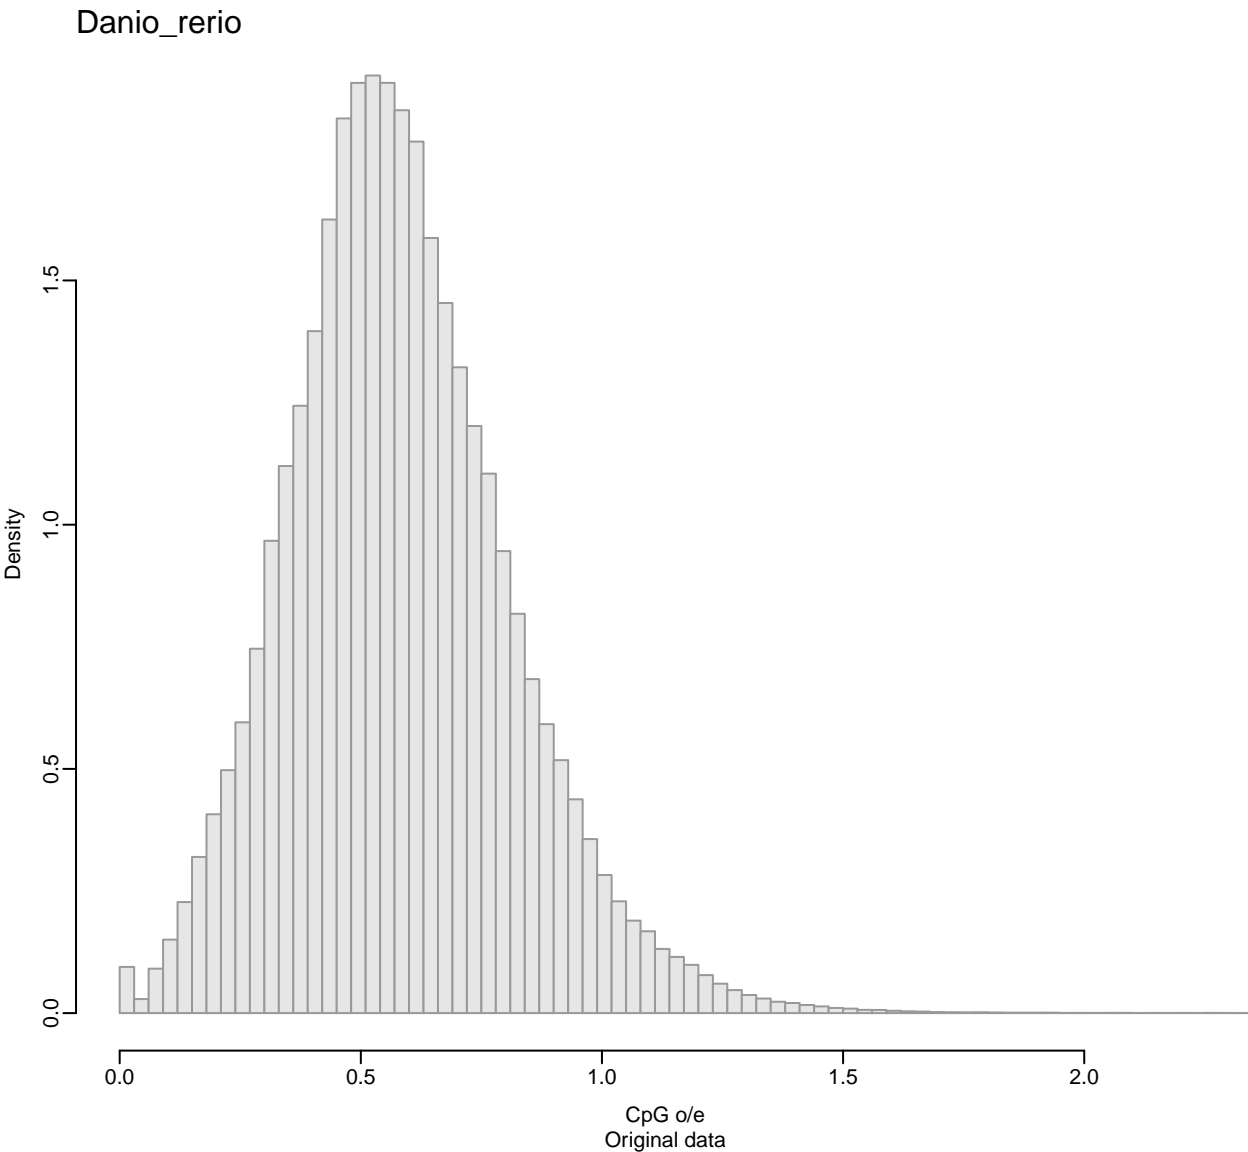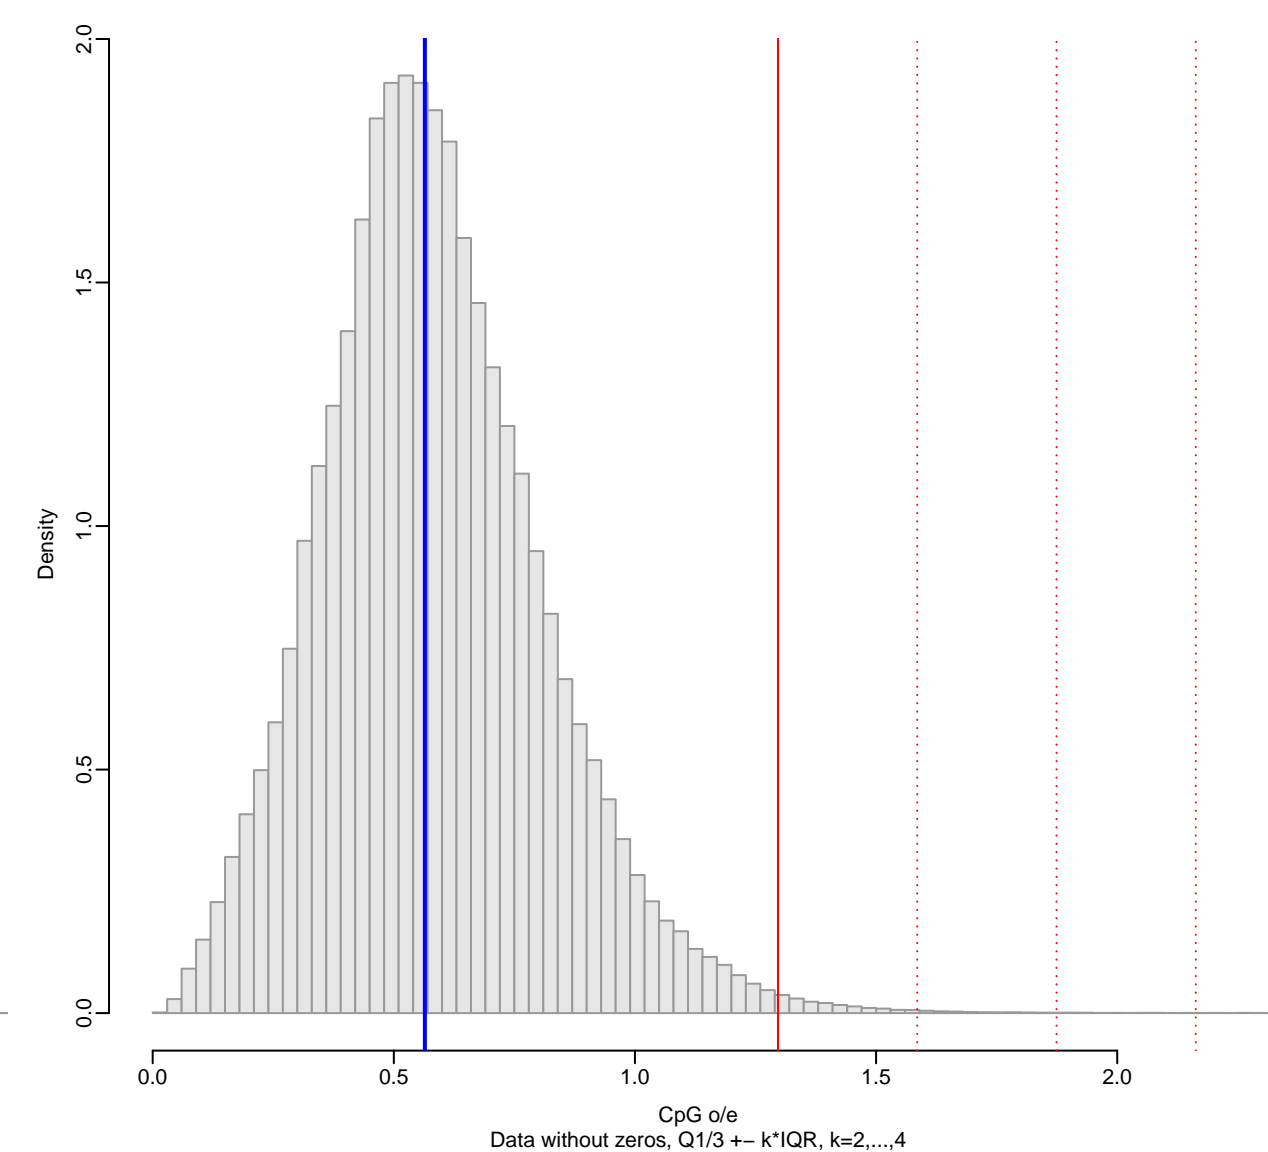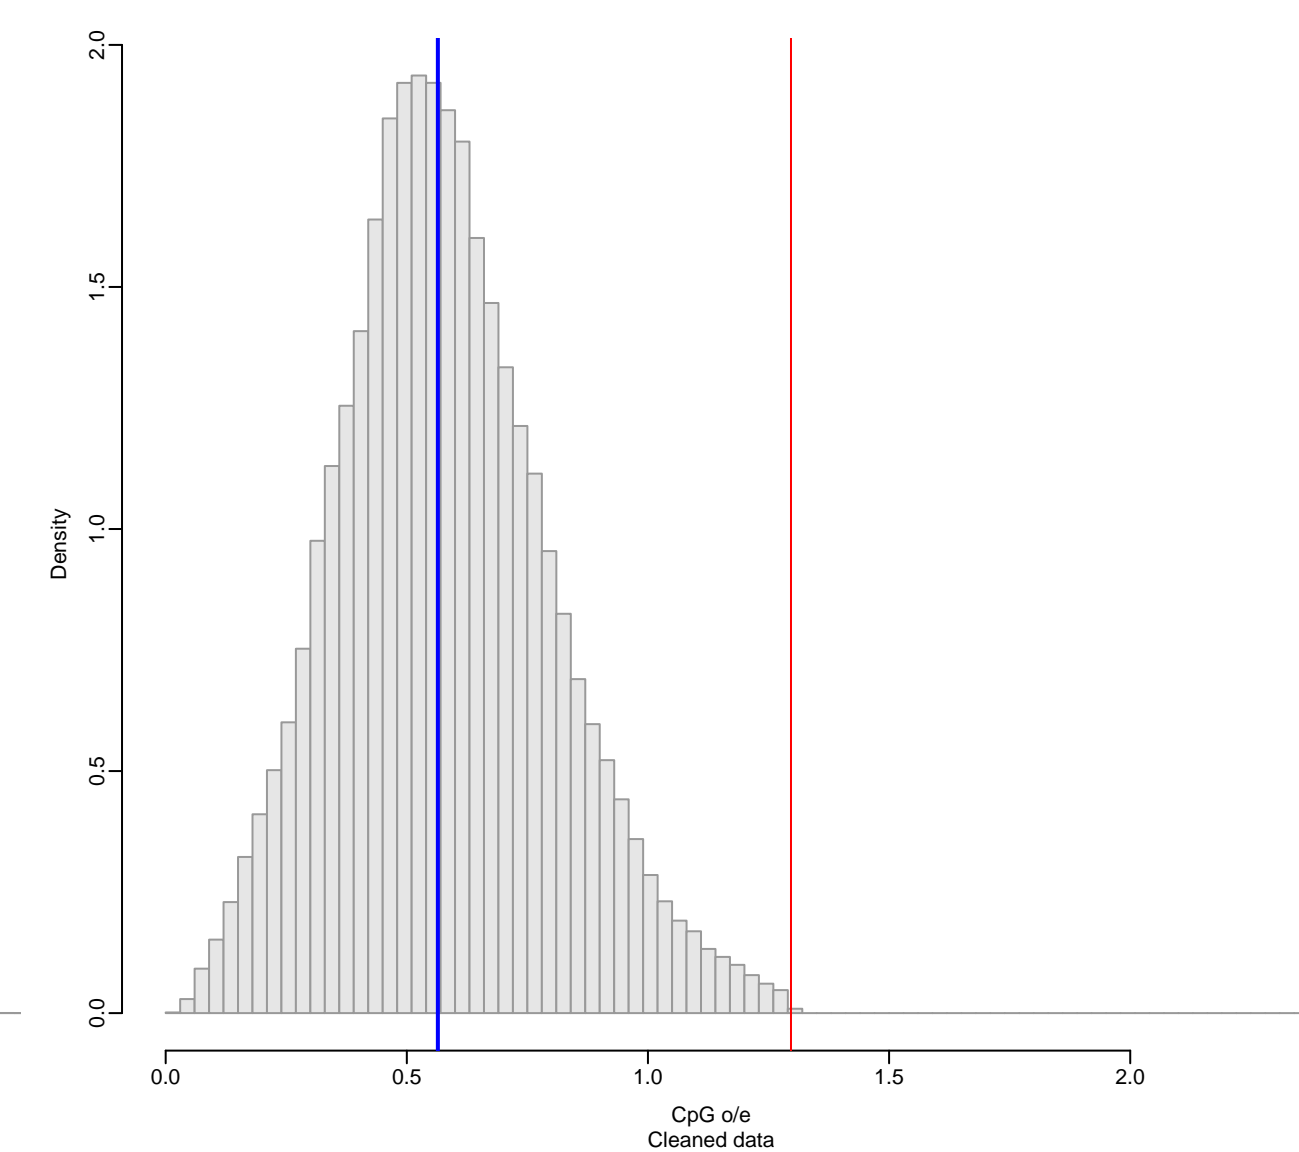

Daphnia\_magna

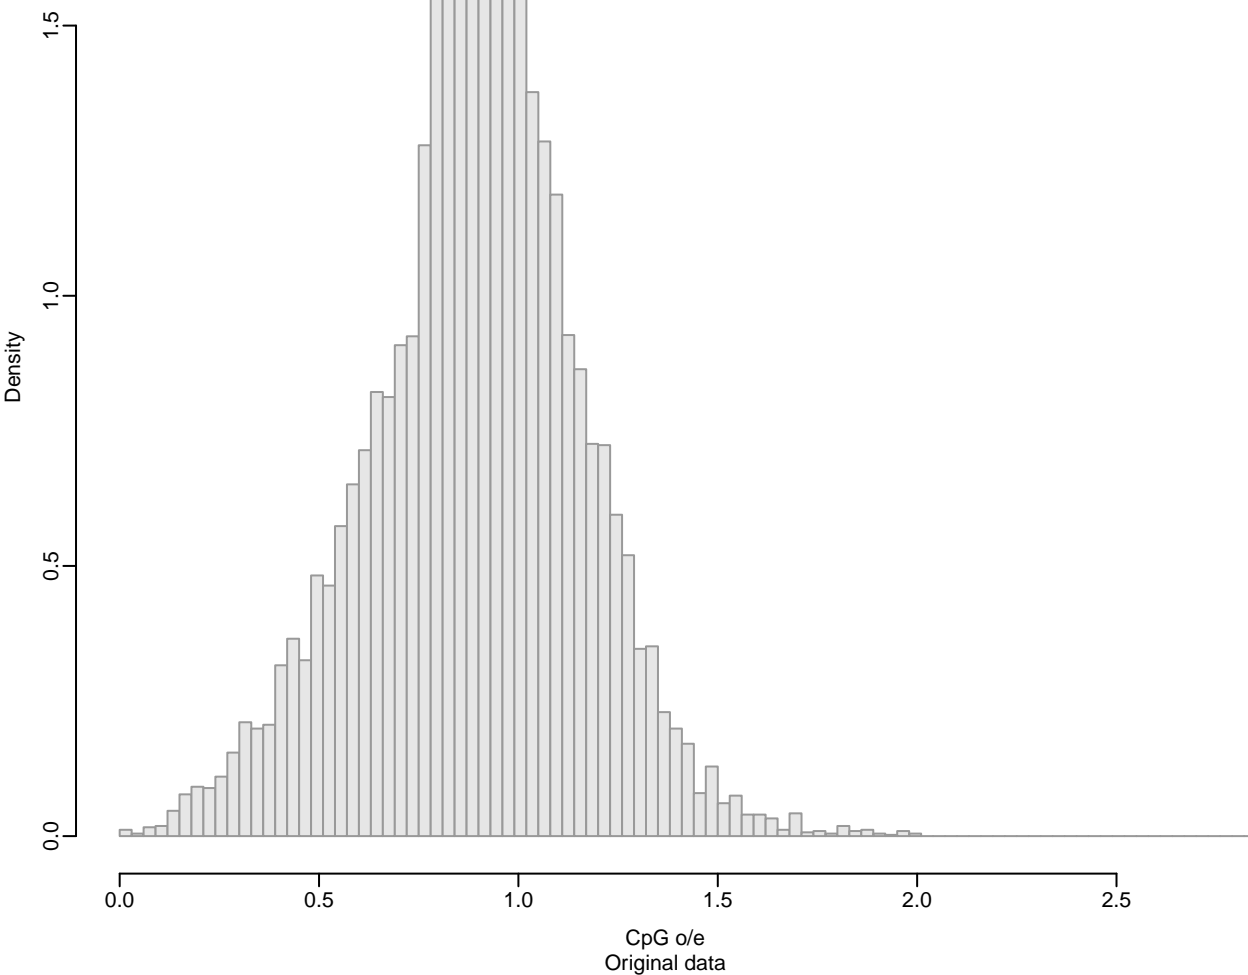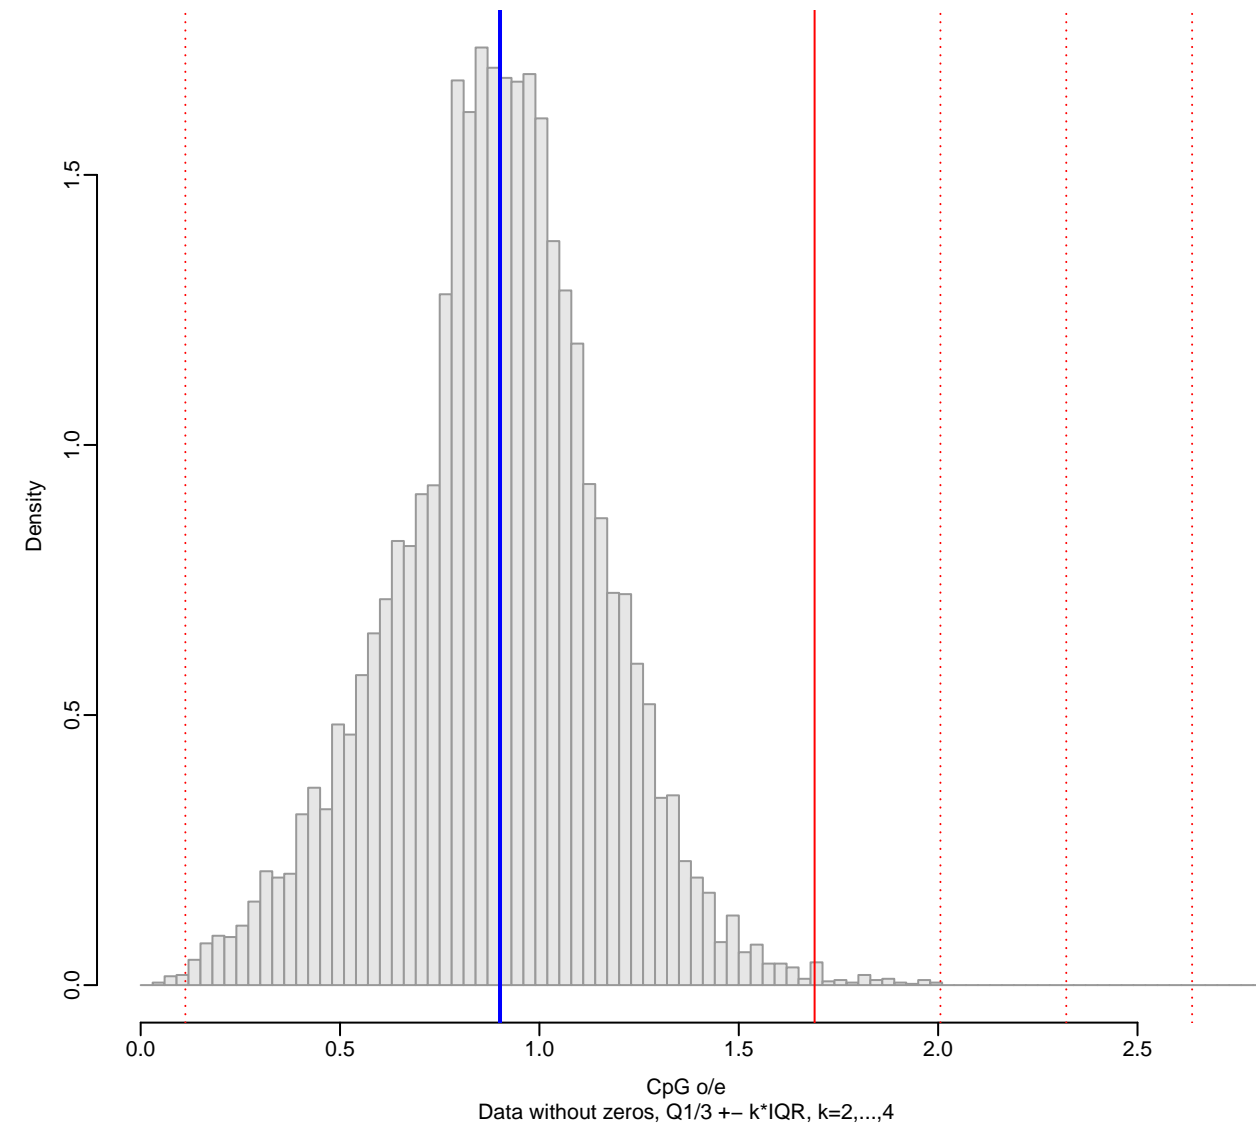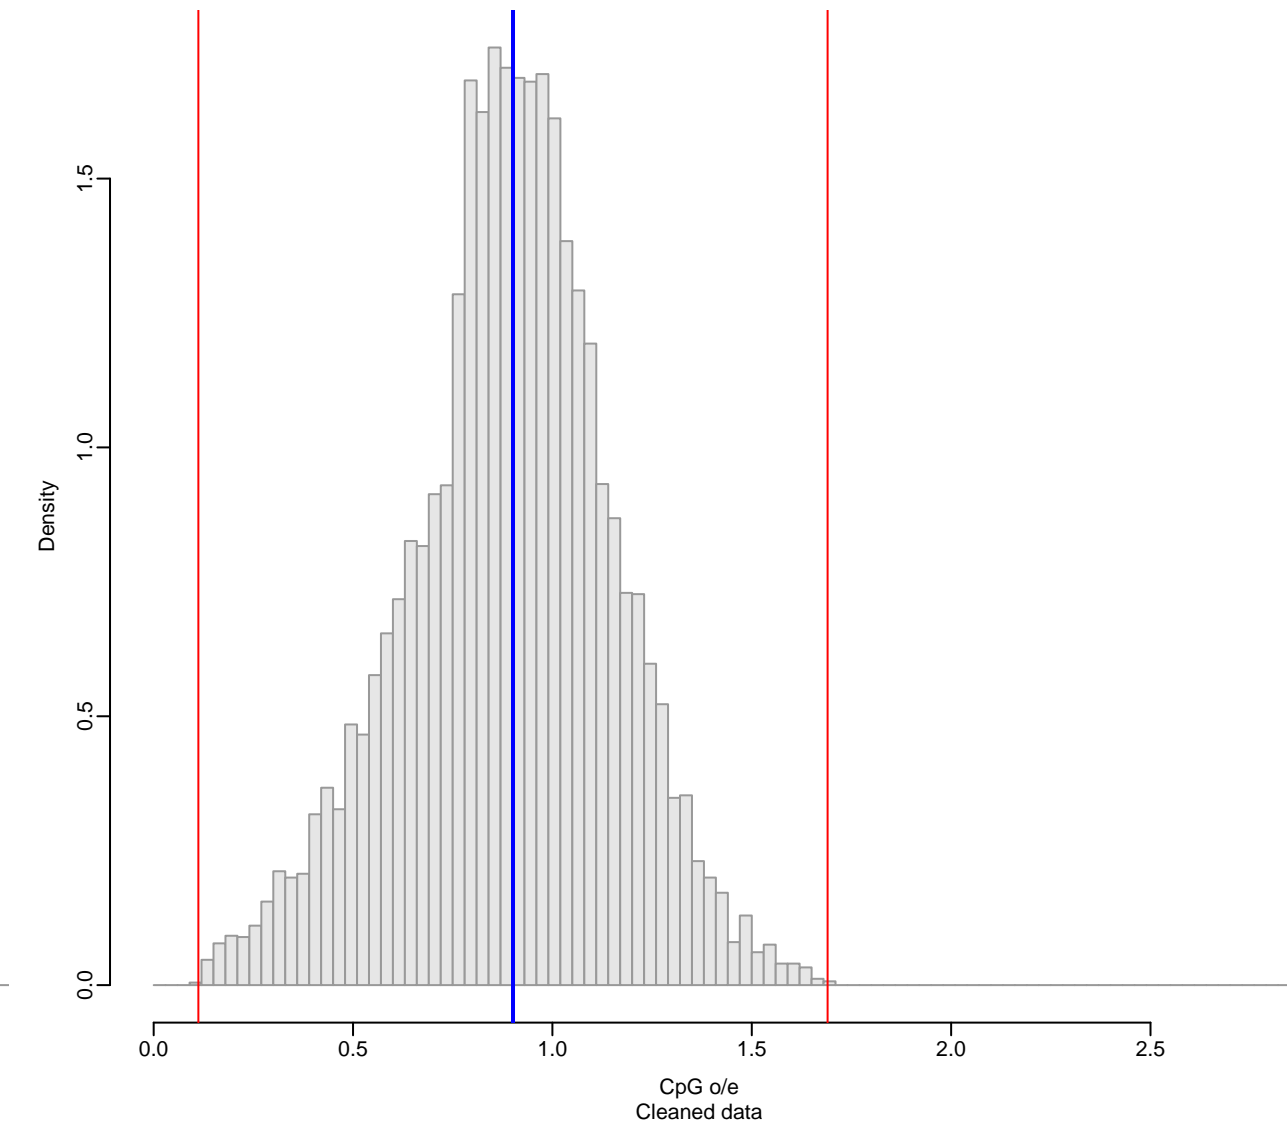

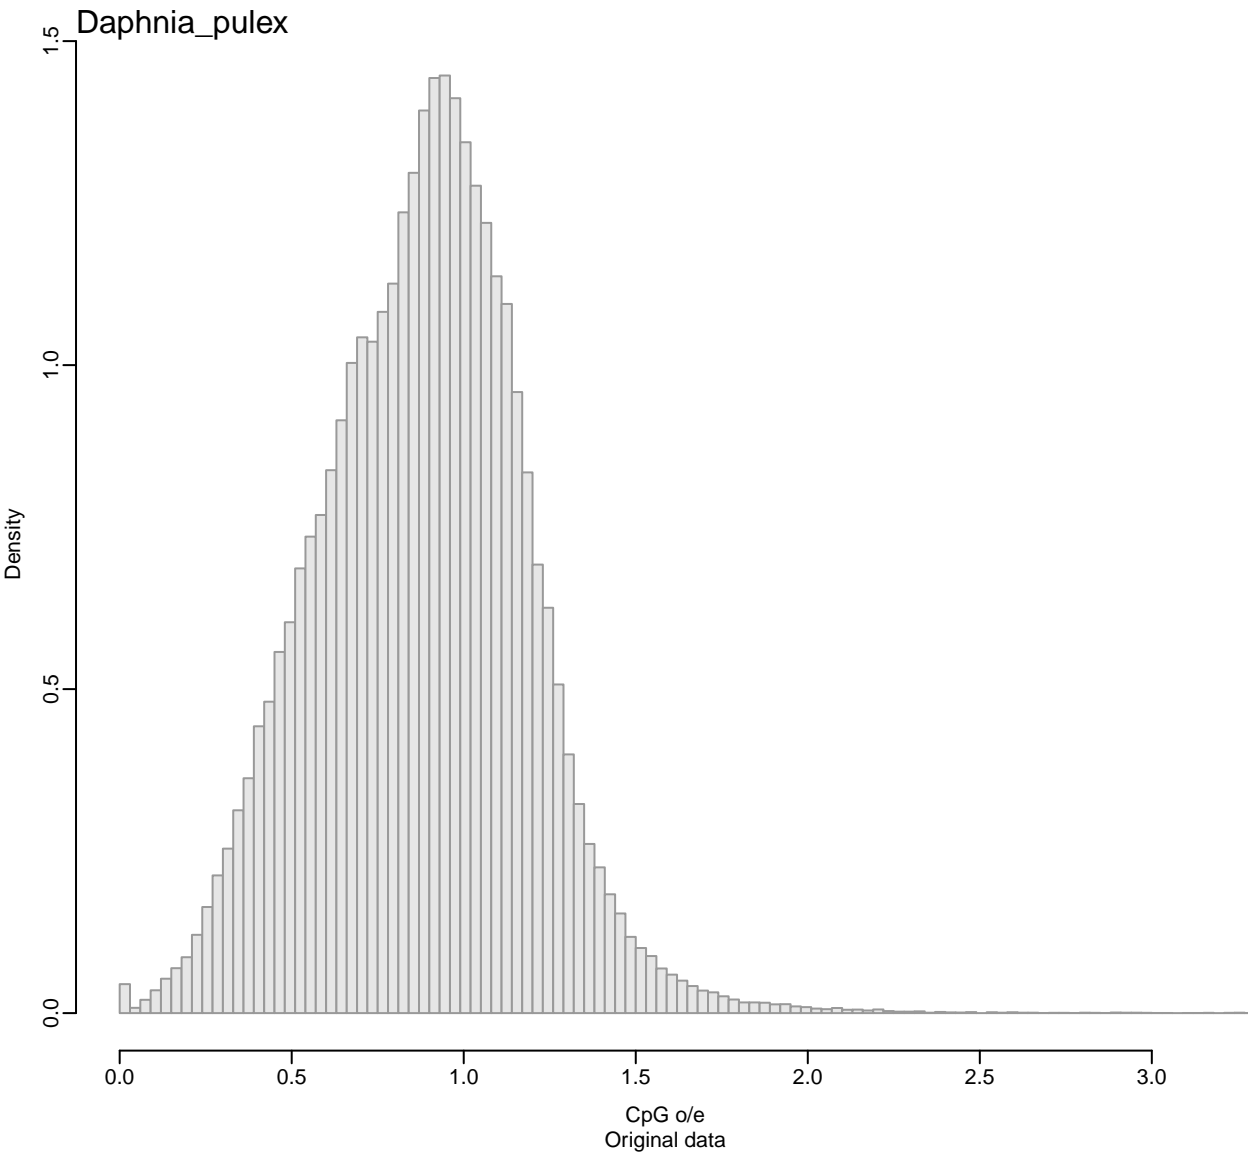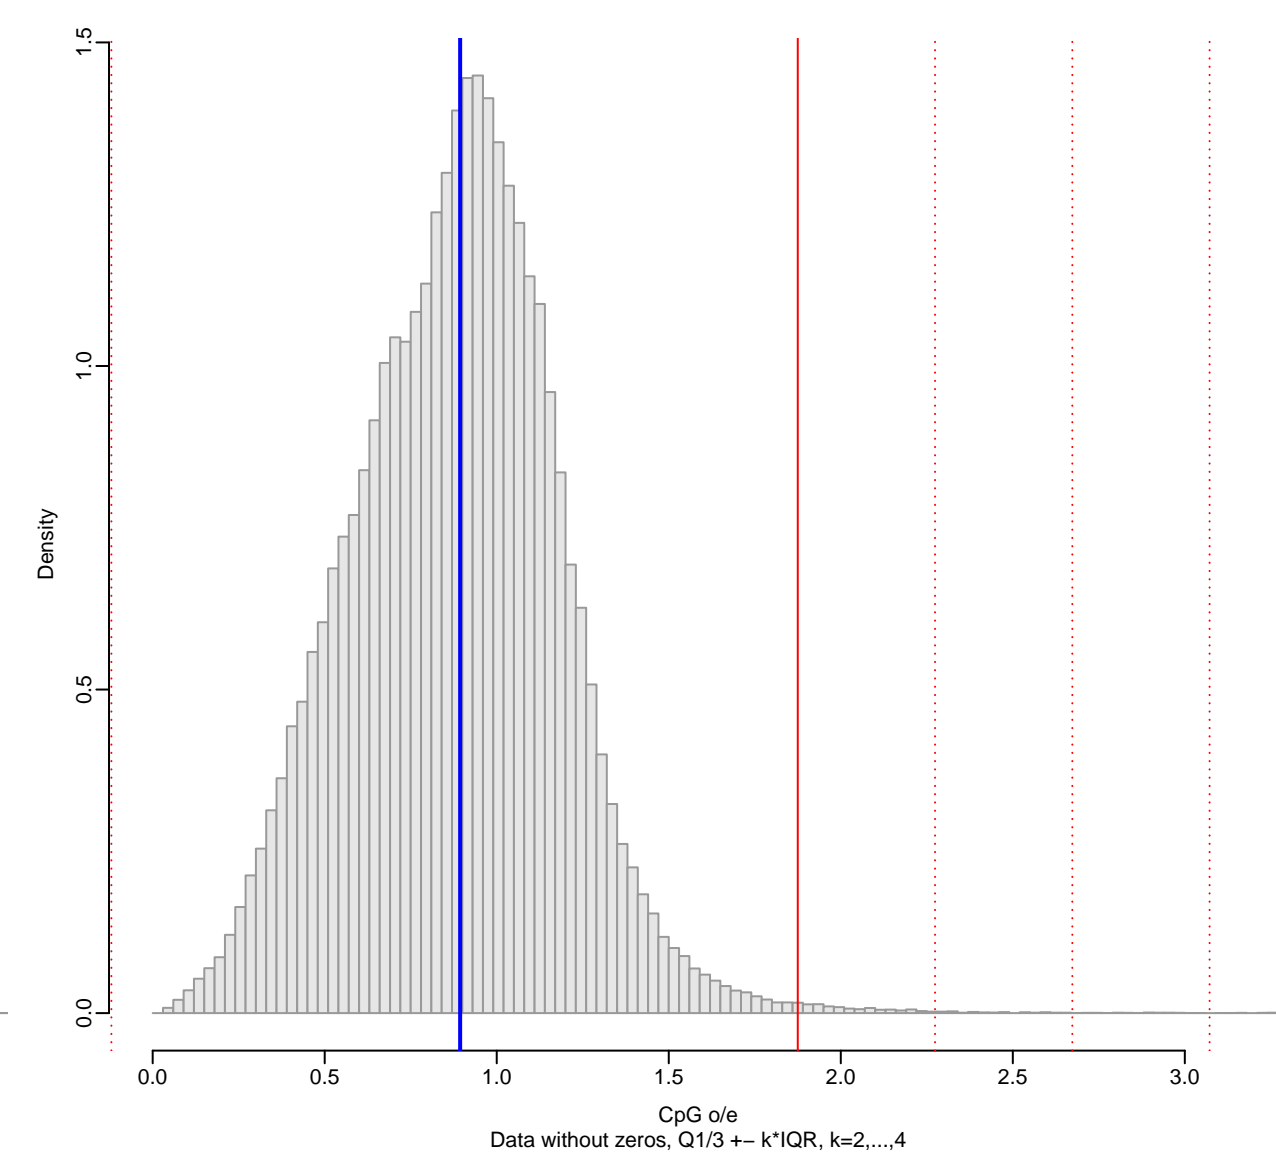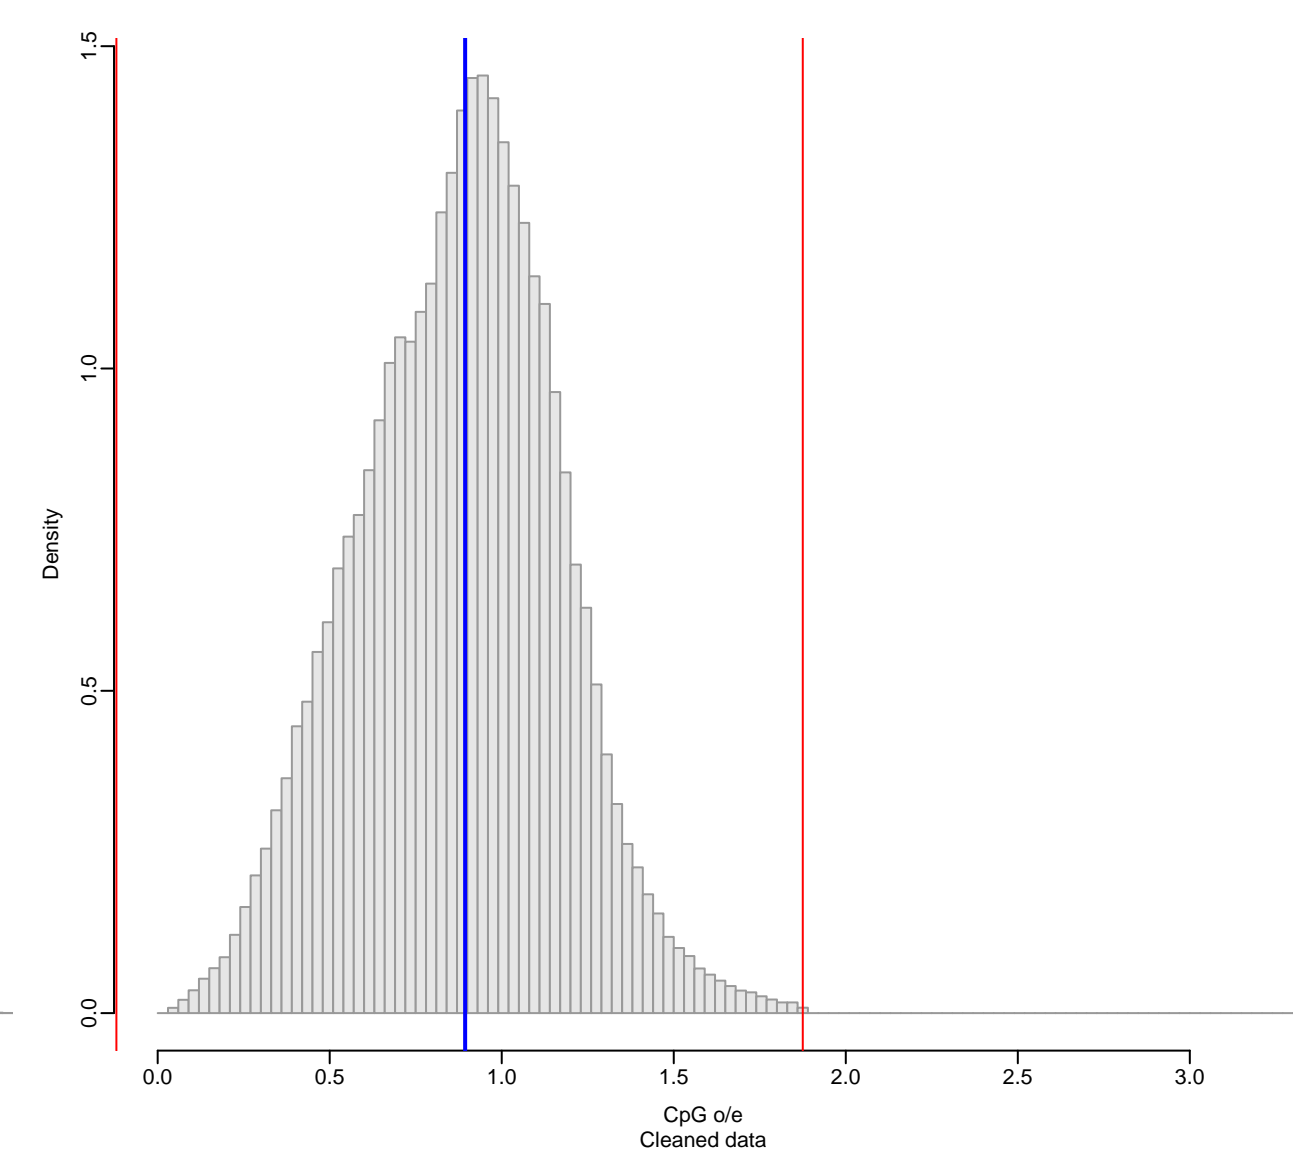

Deinagkistrodon\_acutus

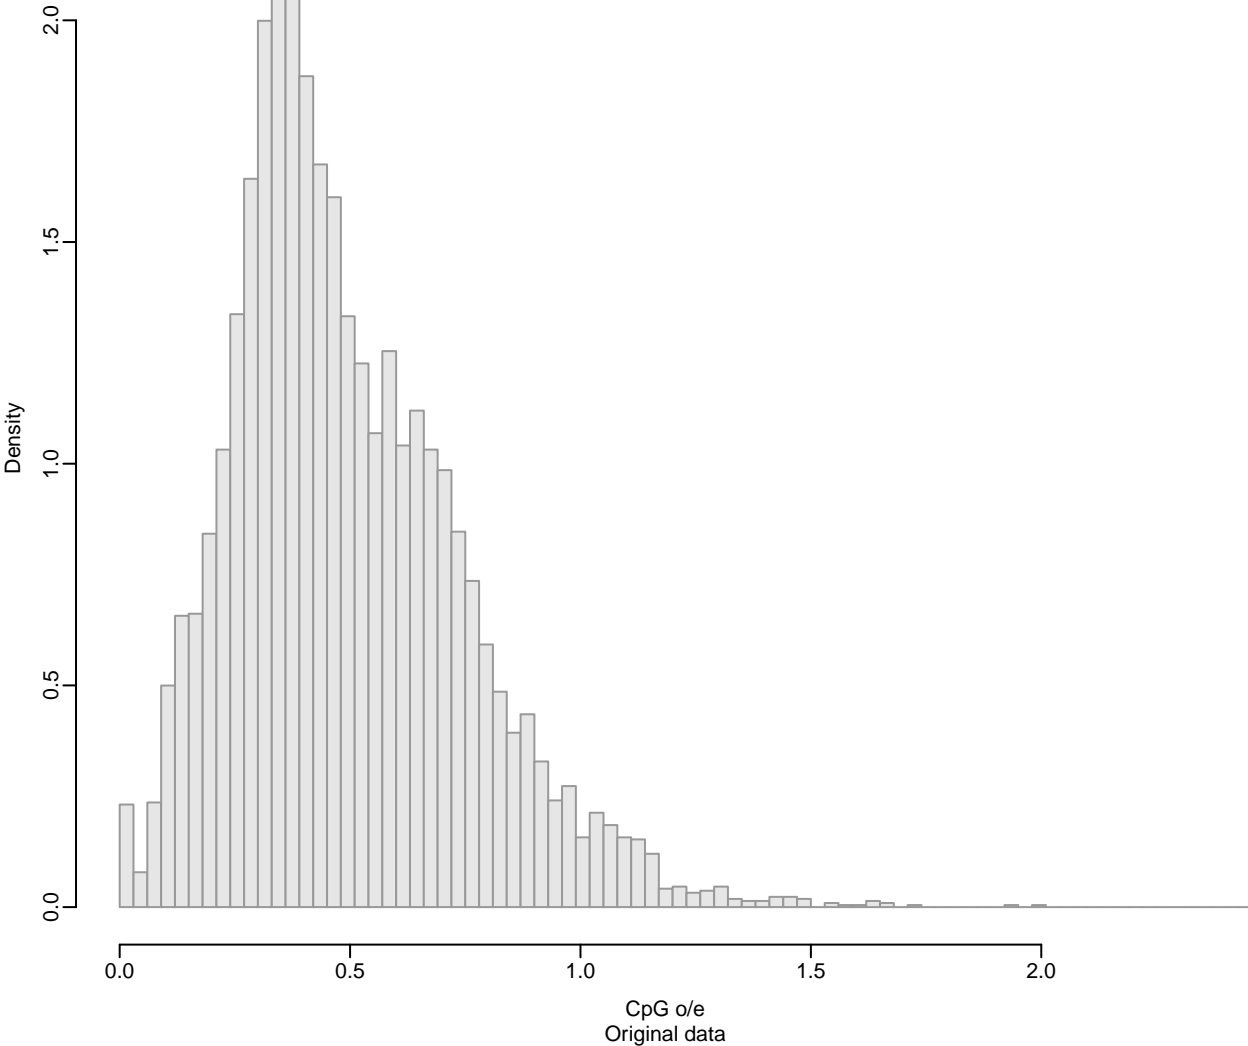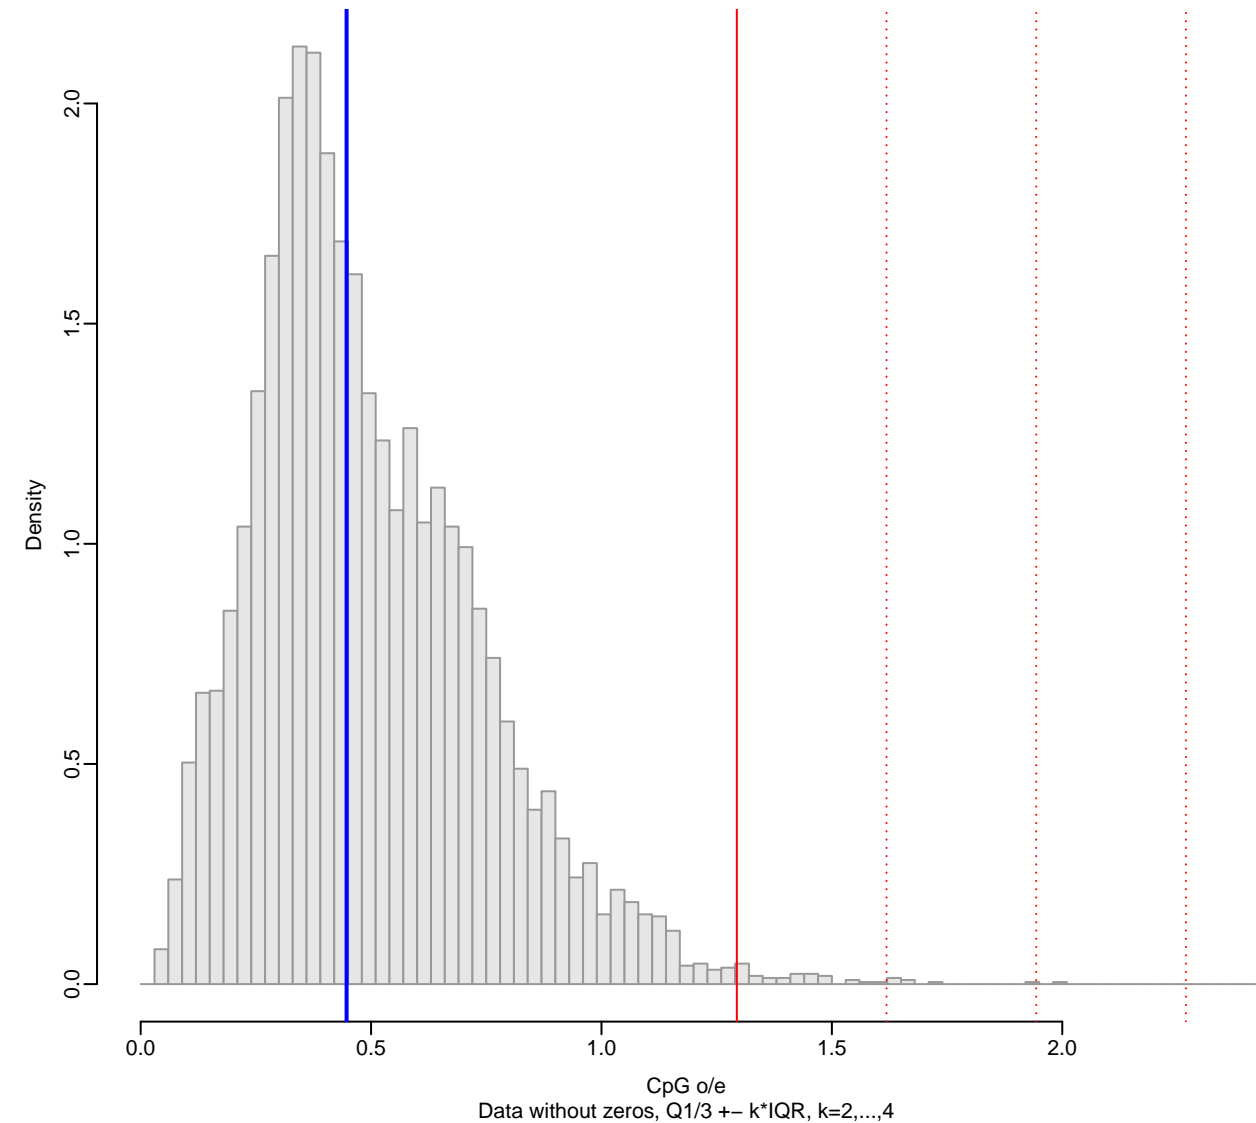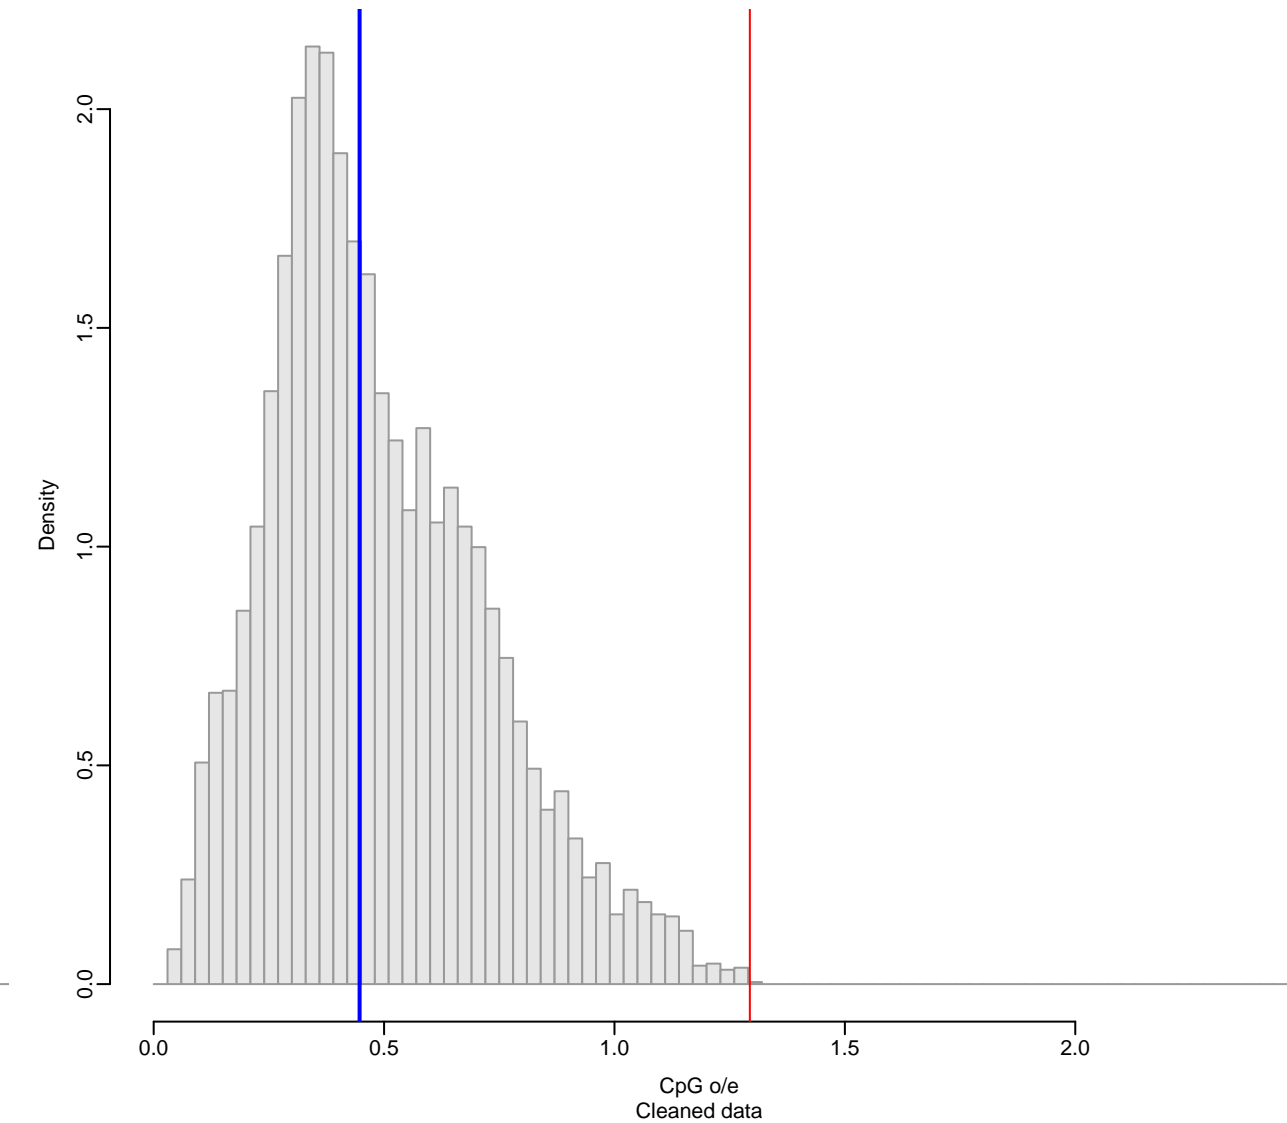

# Dendroctonus\_ponderosae

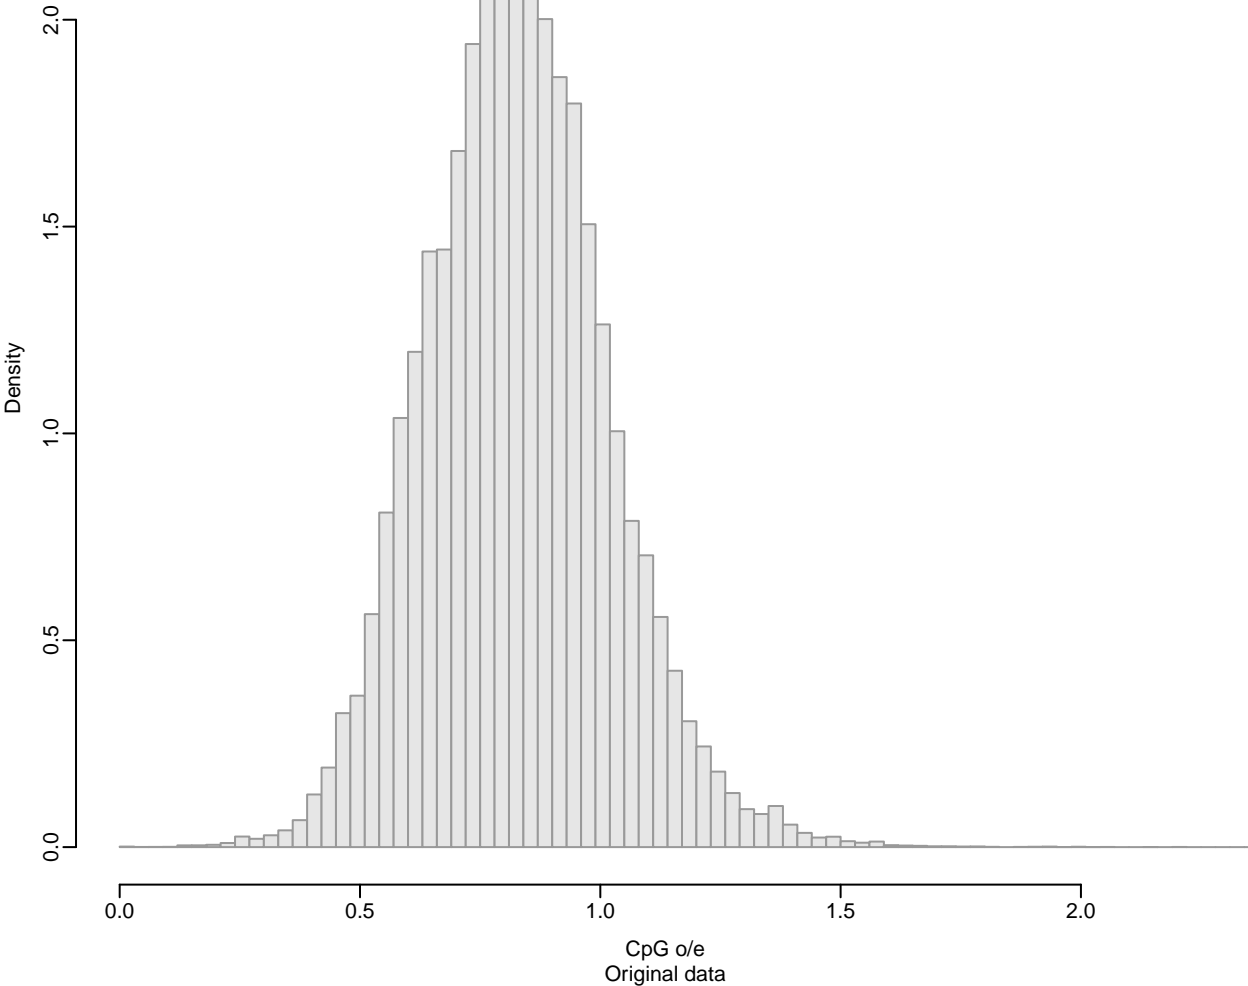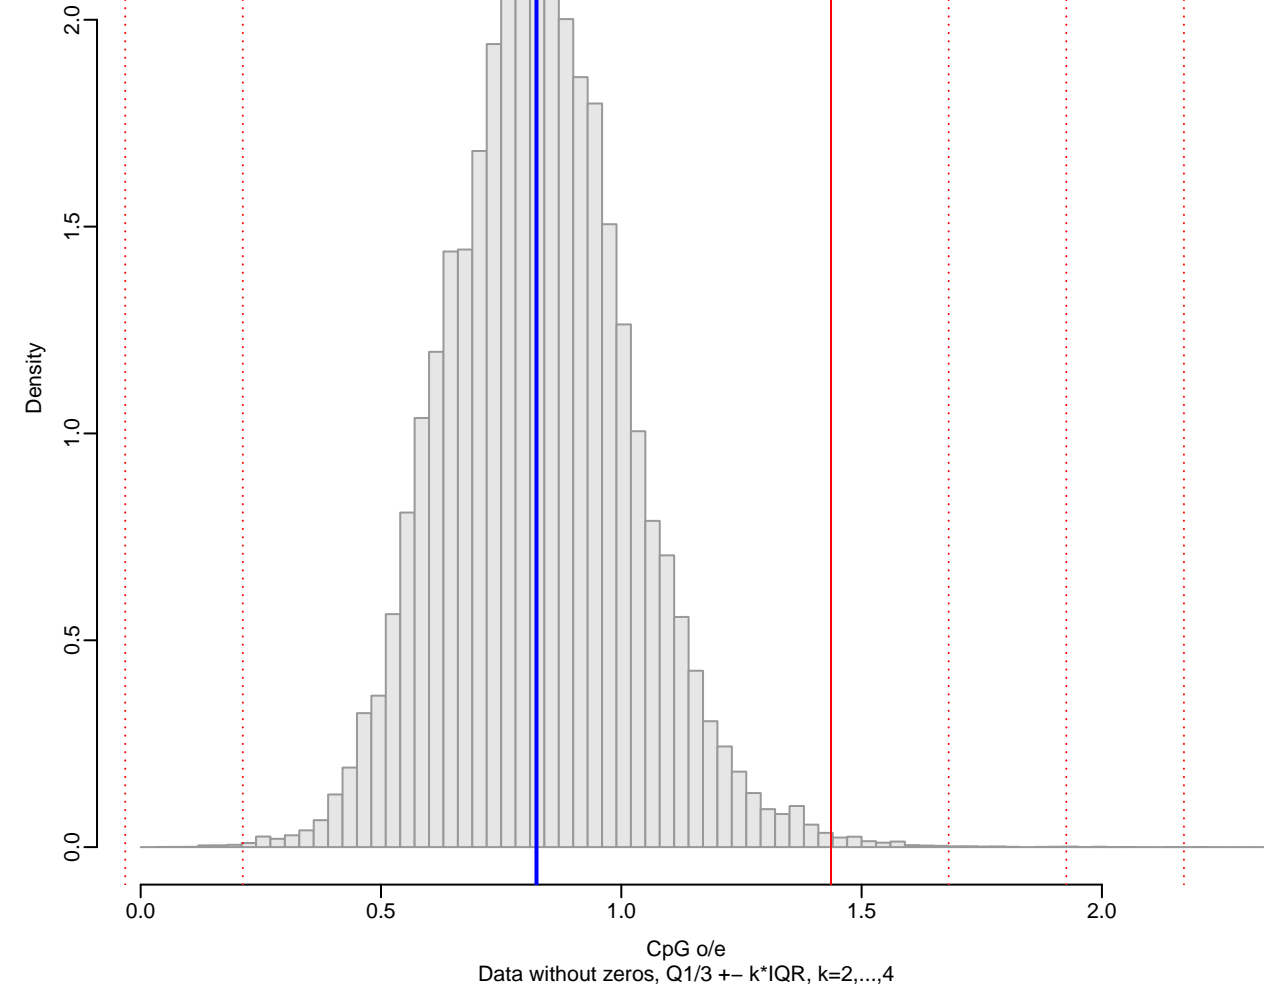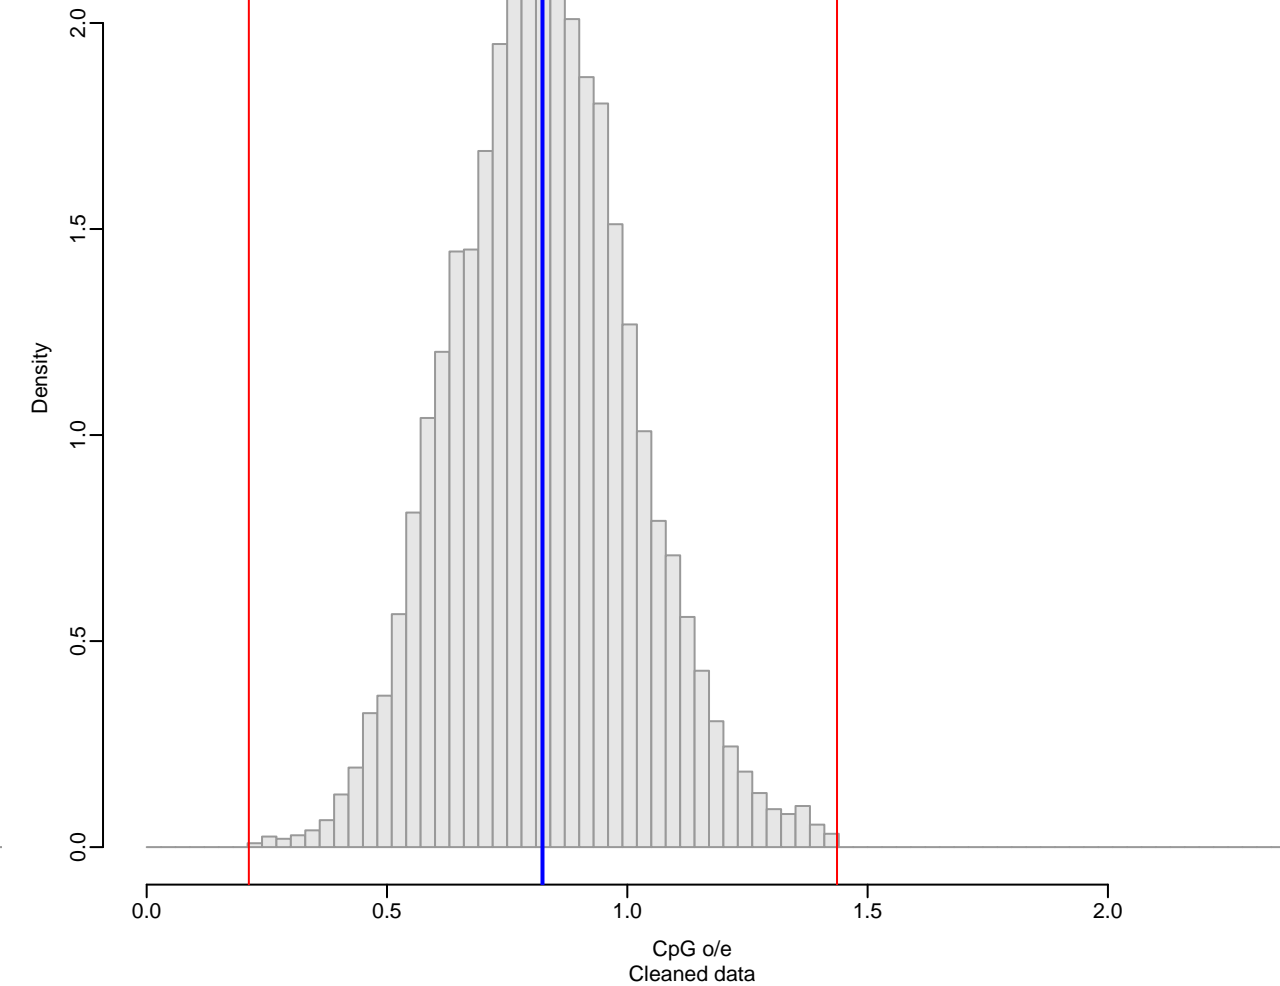

Dermacentor\_variabilis

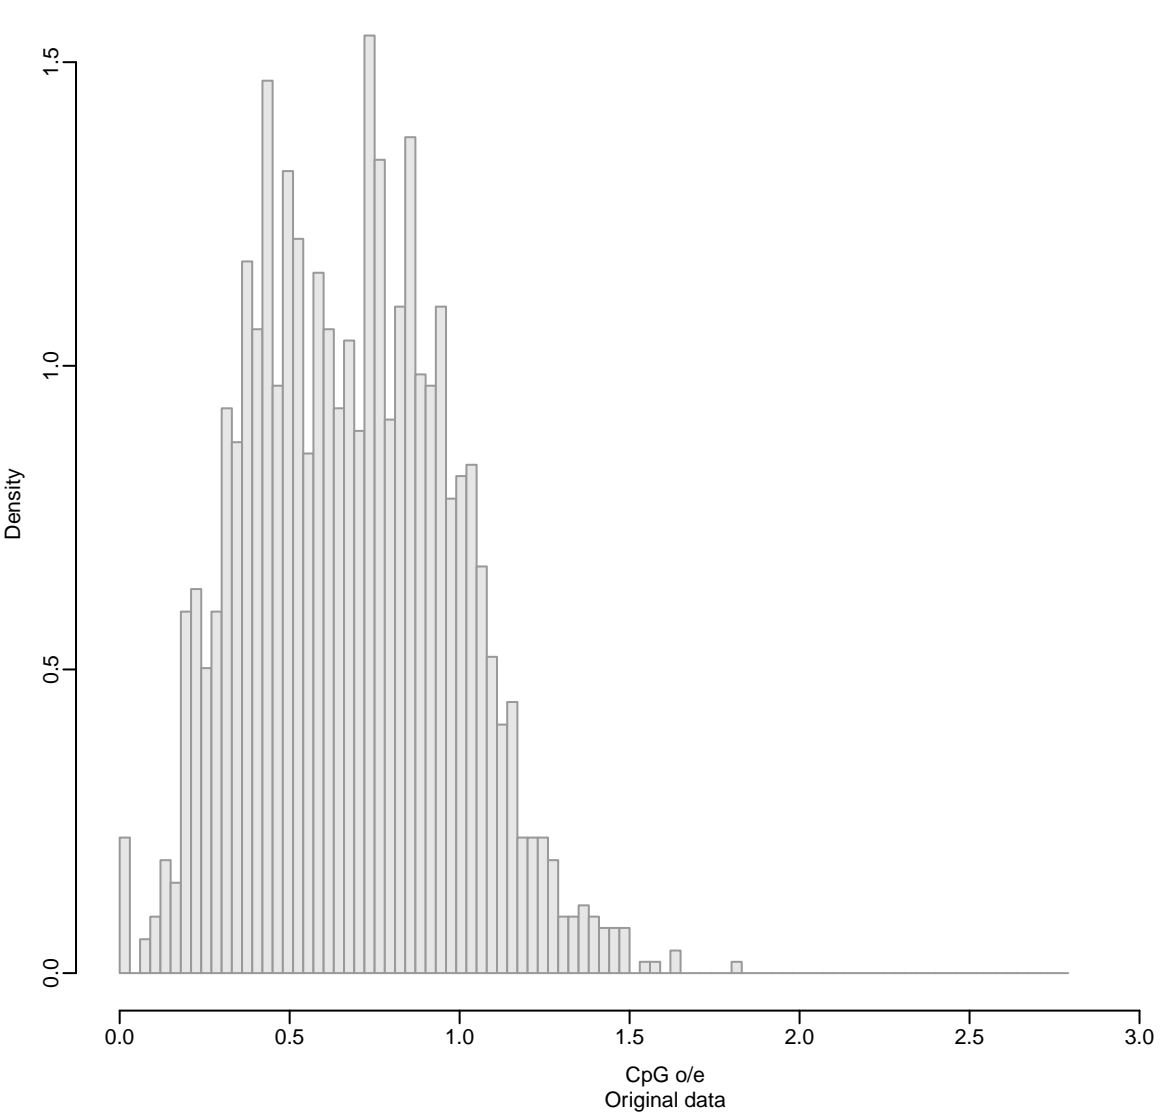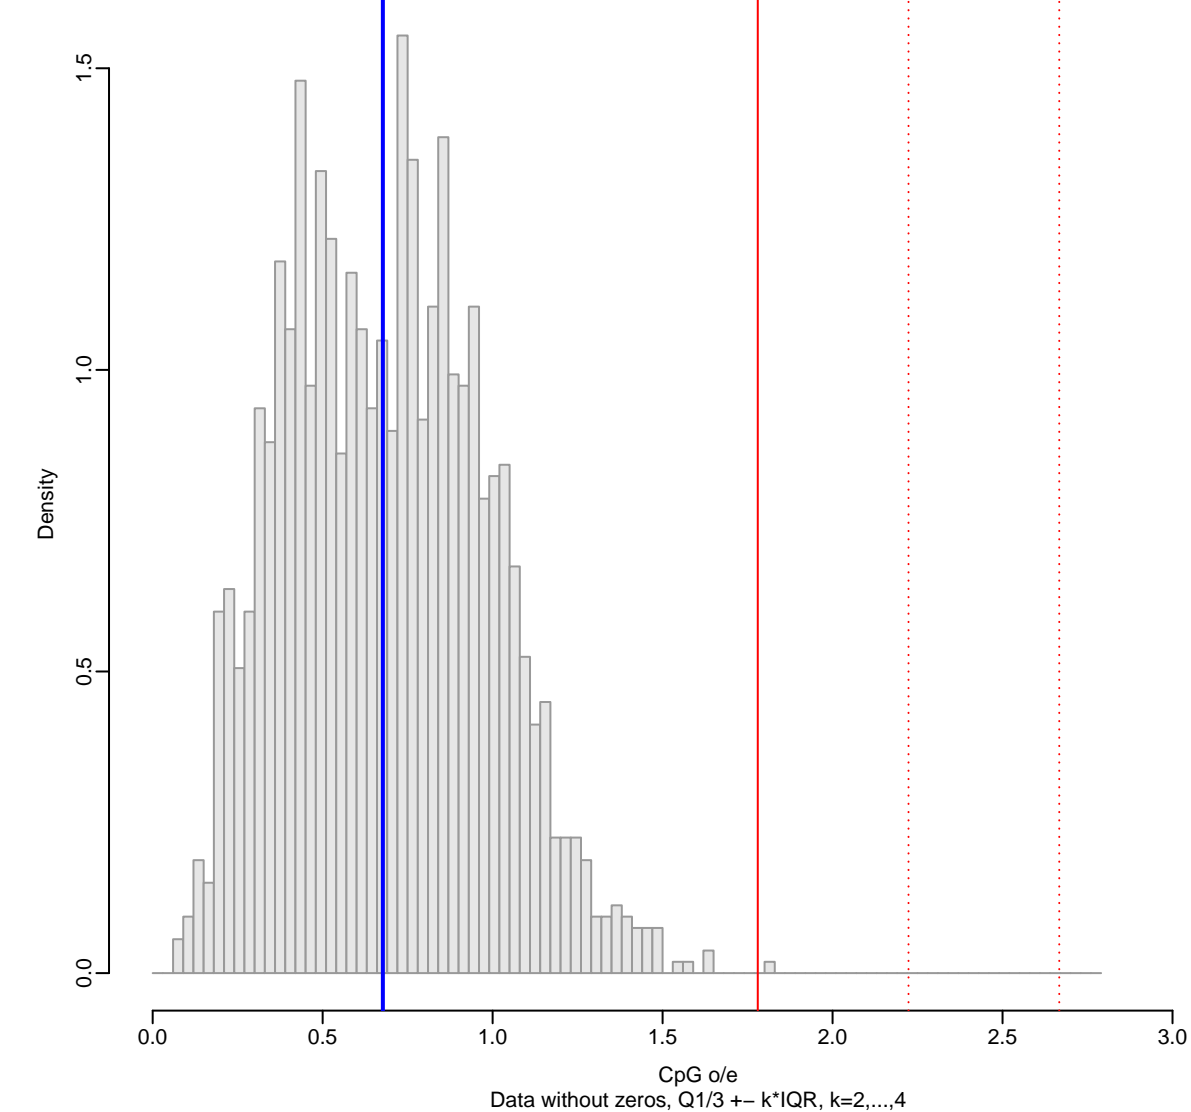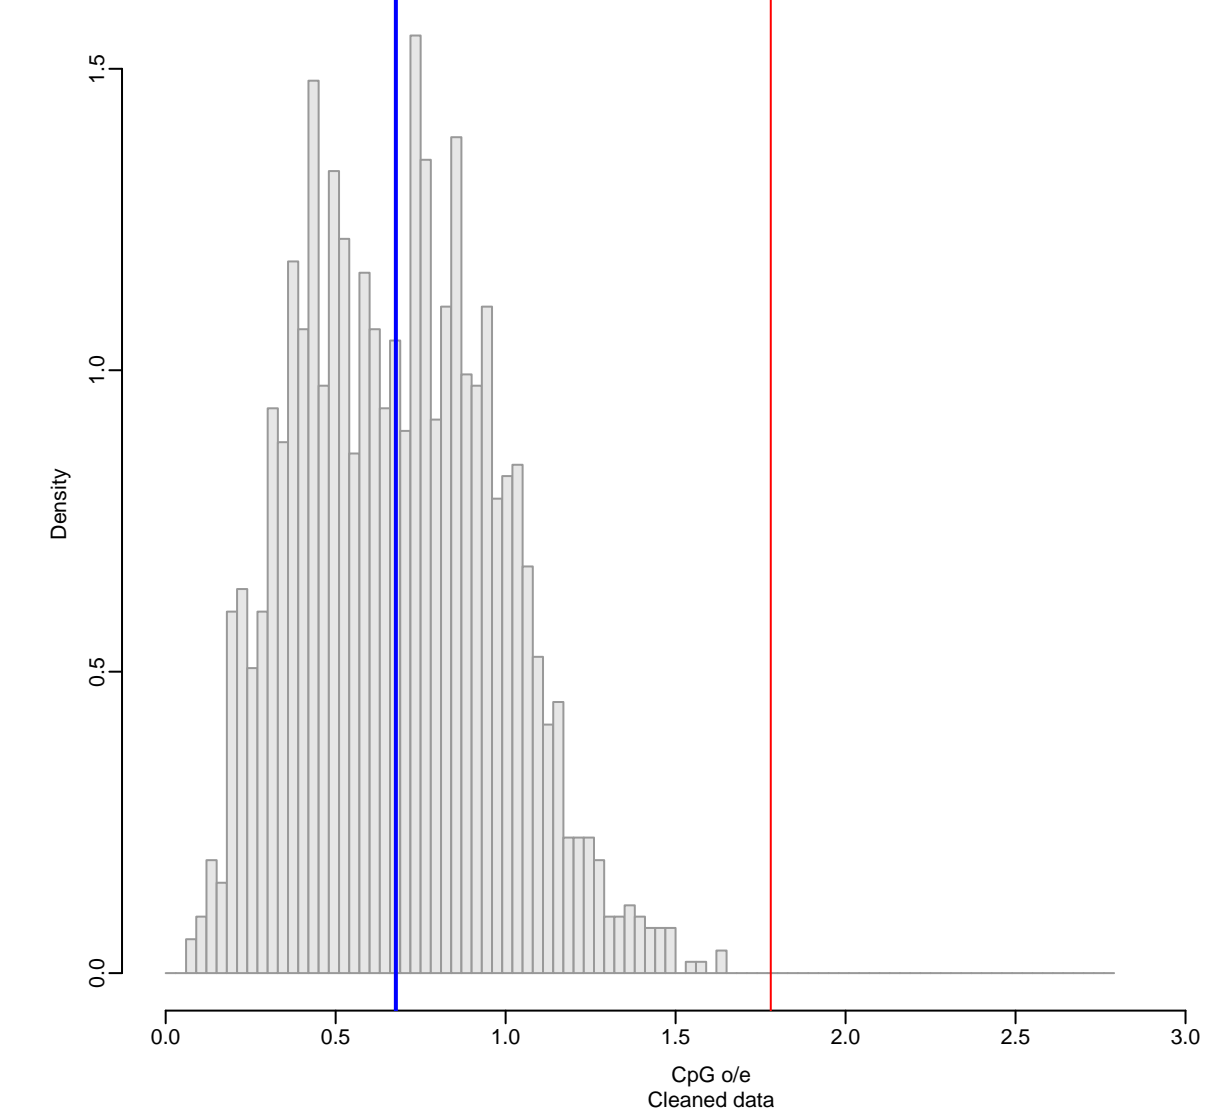

Diaphorina\_citri

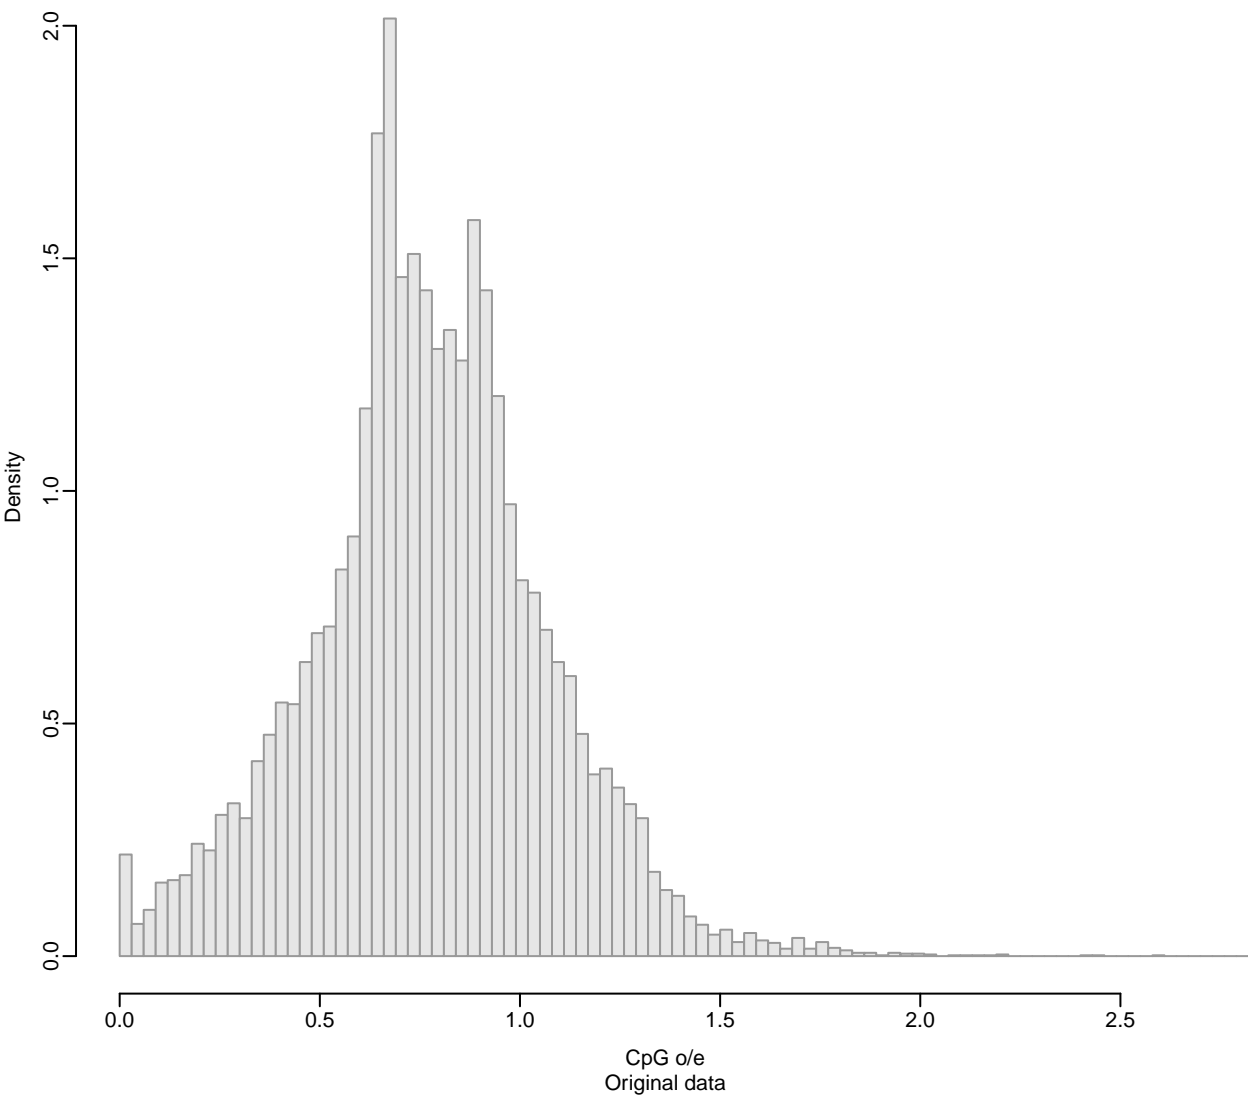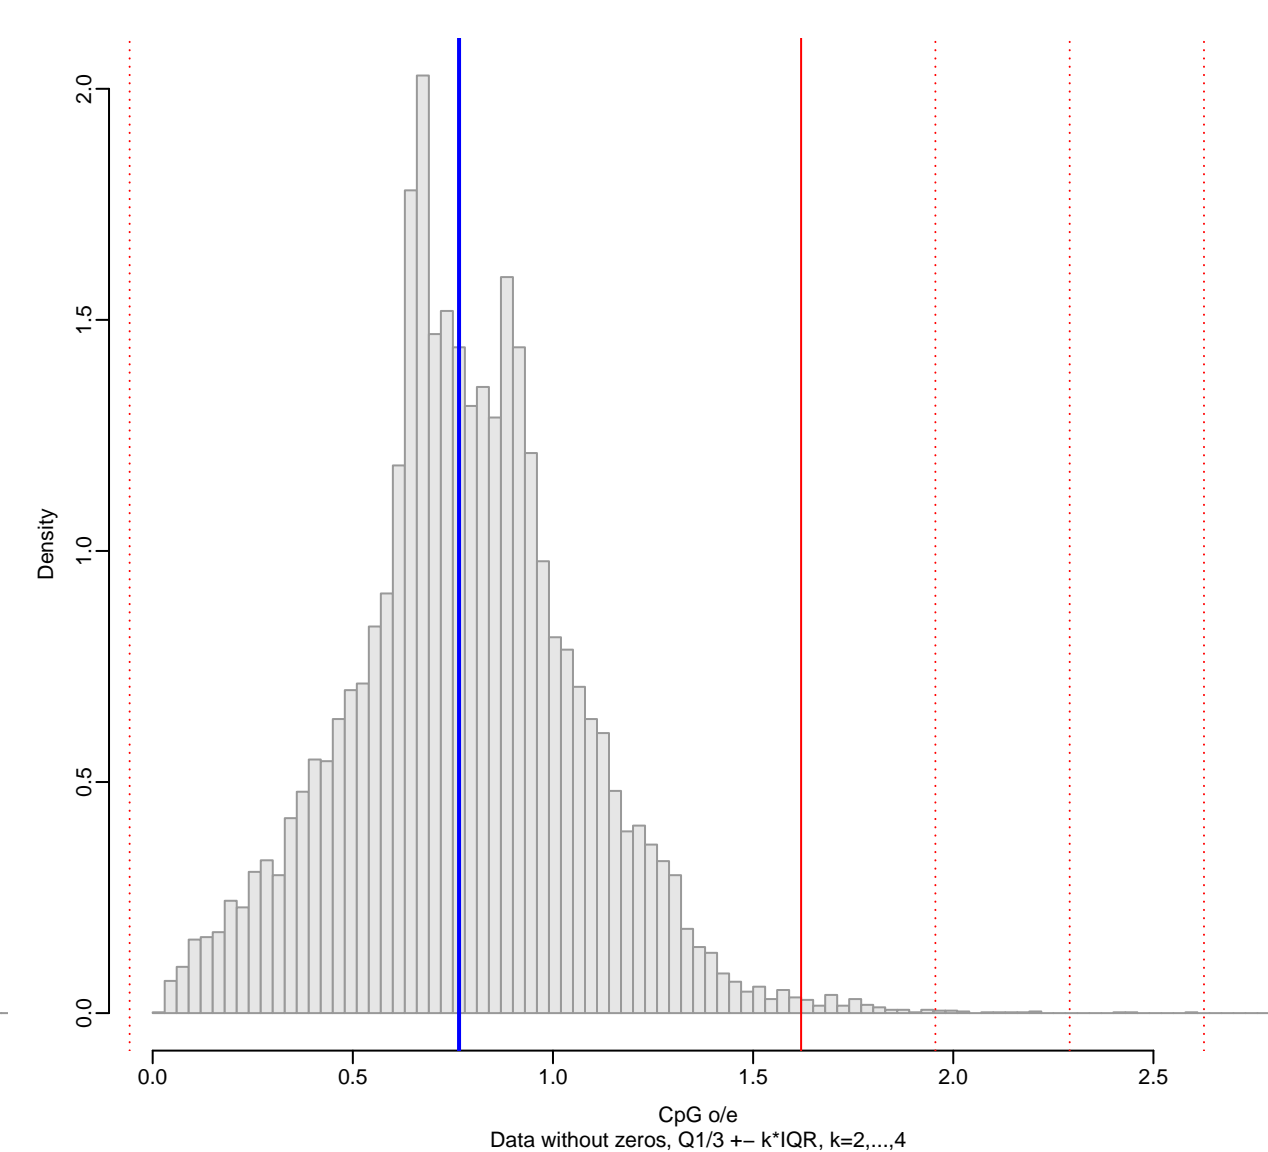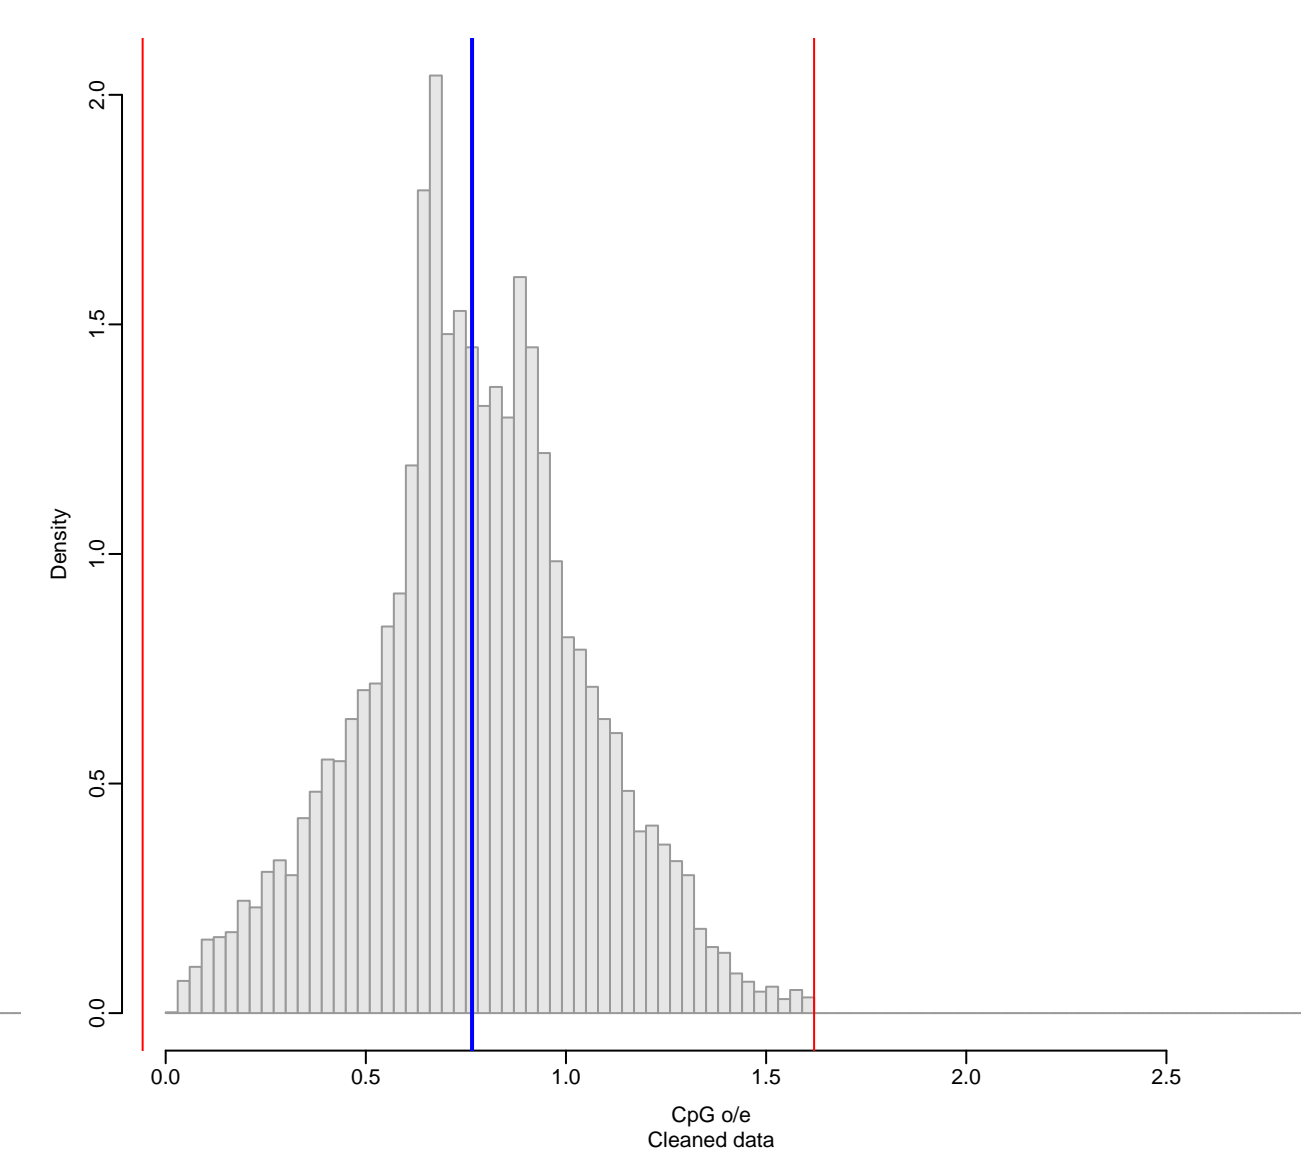

Dipetalogaster\_maxima

Density

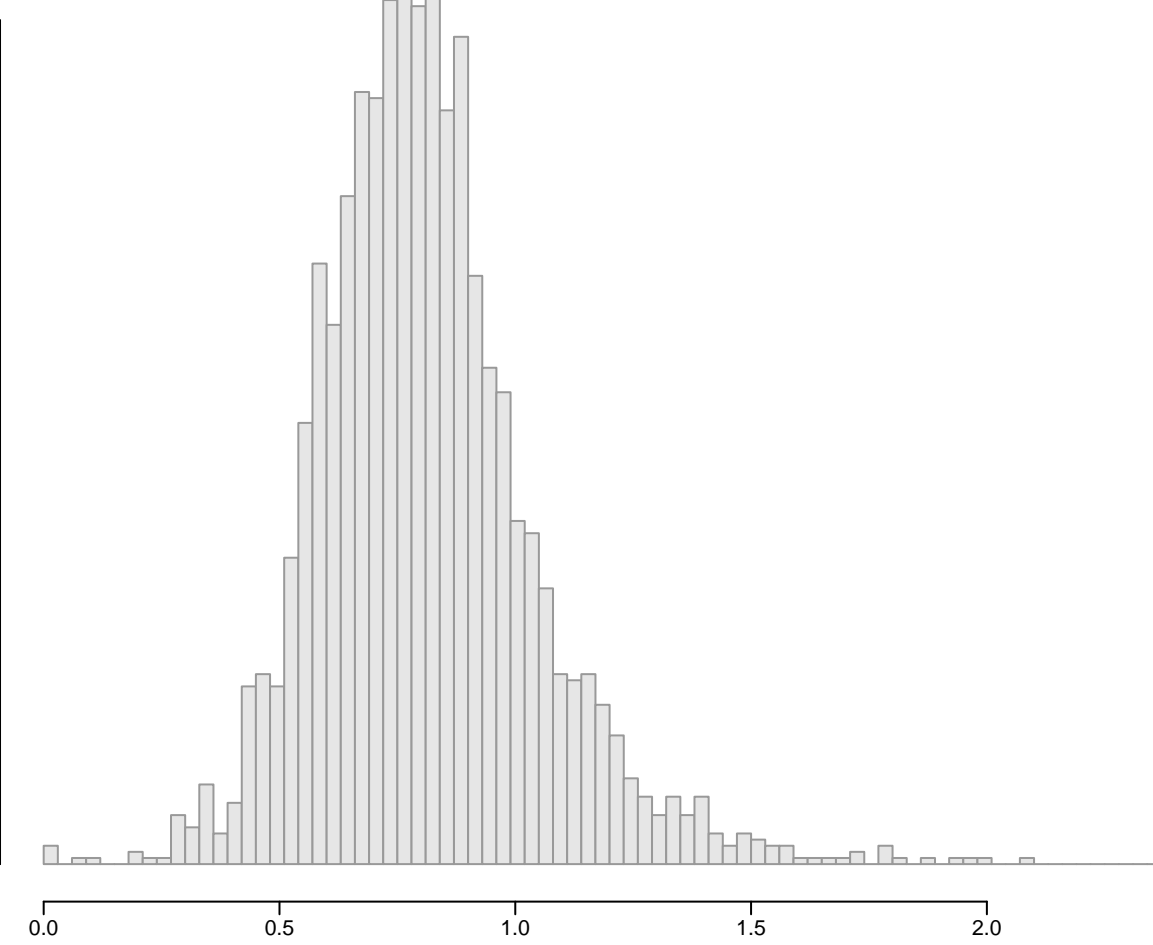

Density

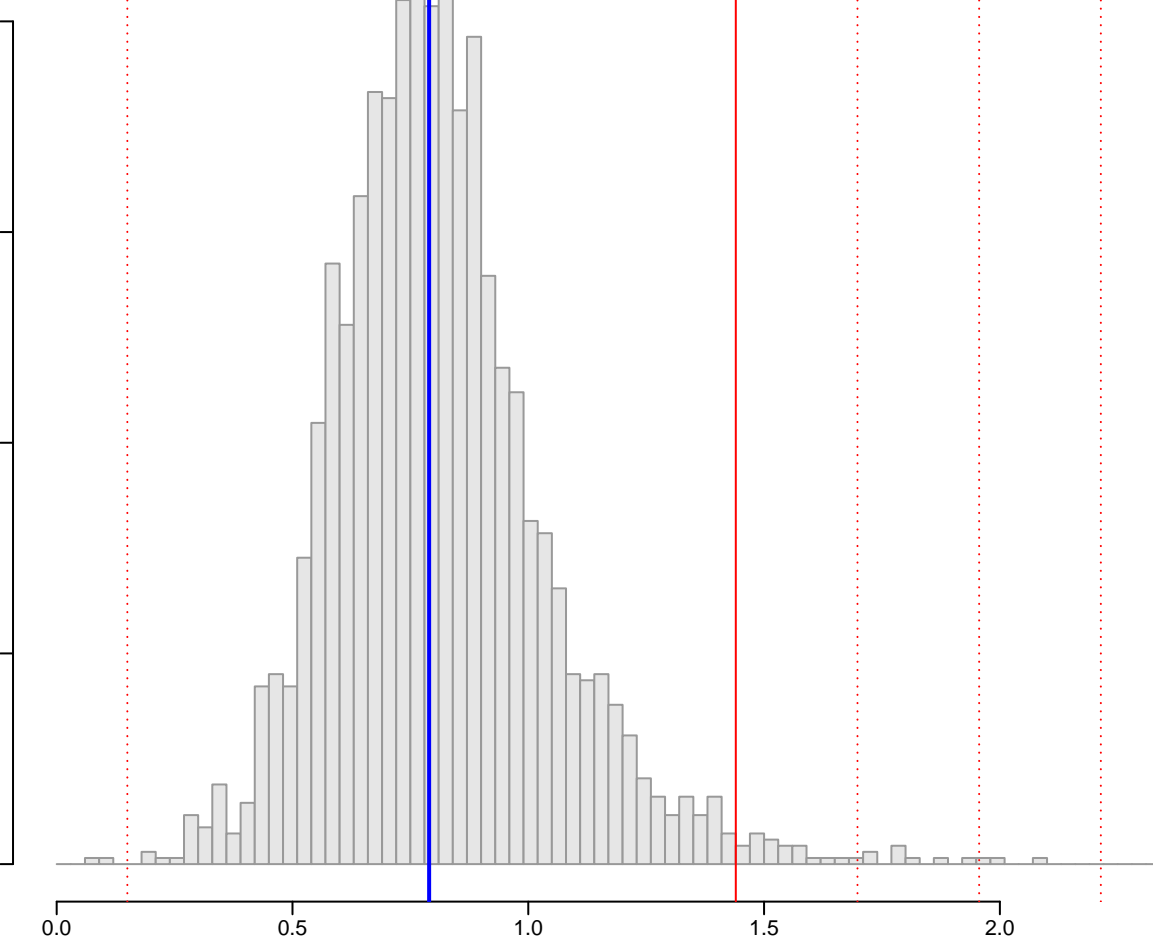

Density

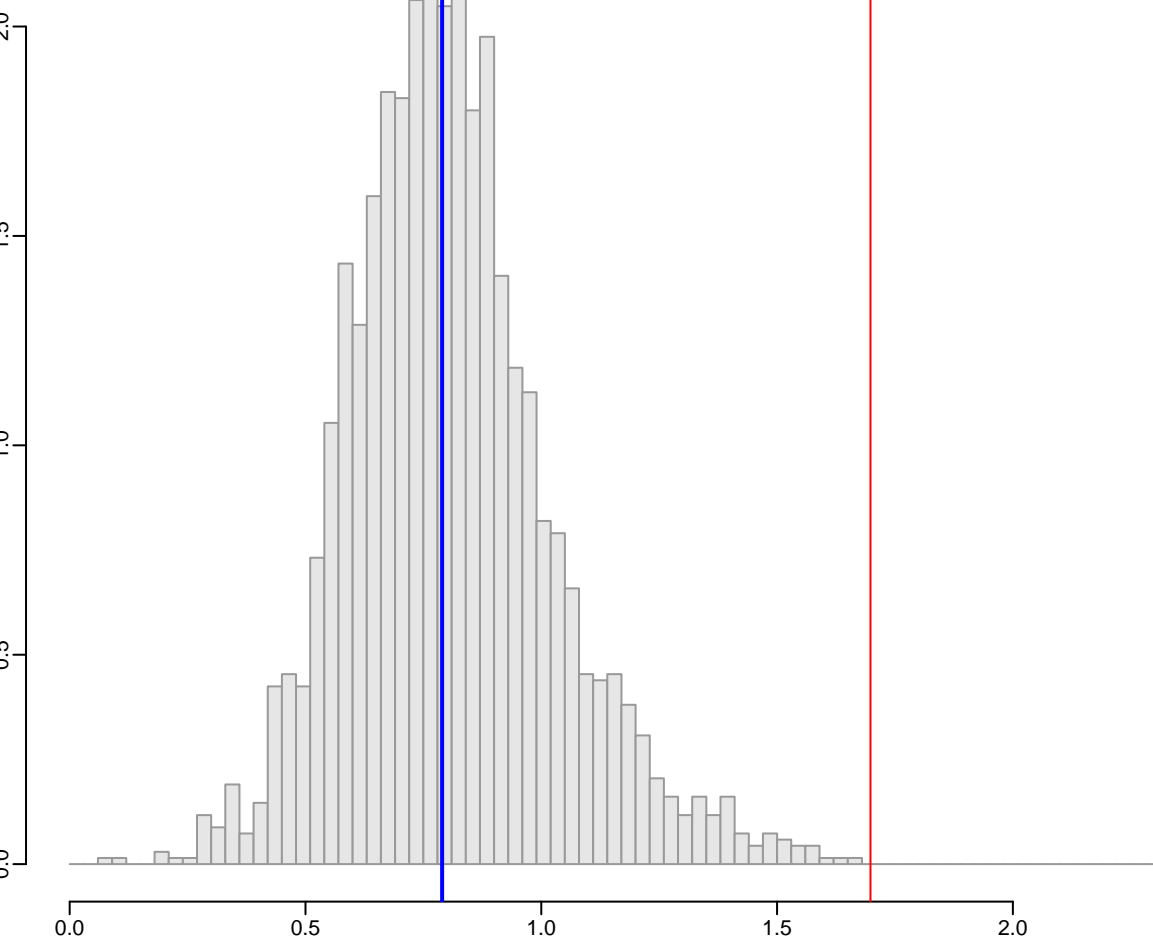



*Dirofilaria immitis*

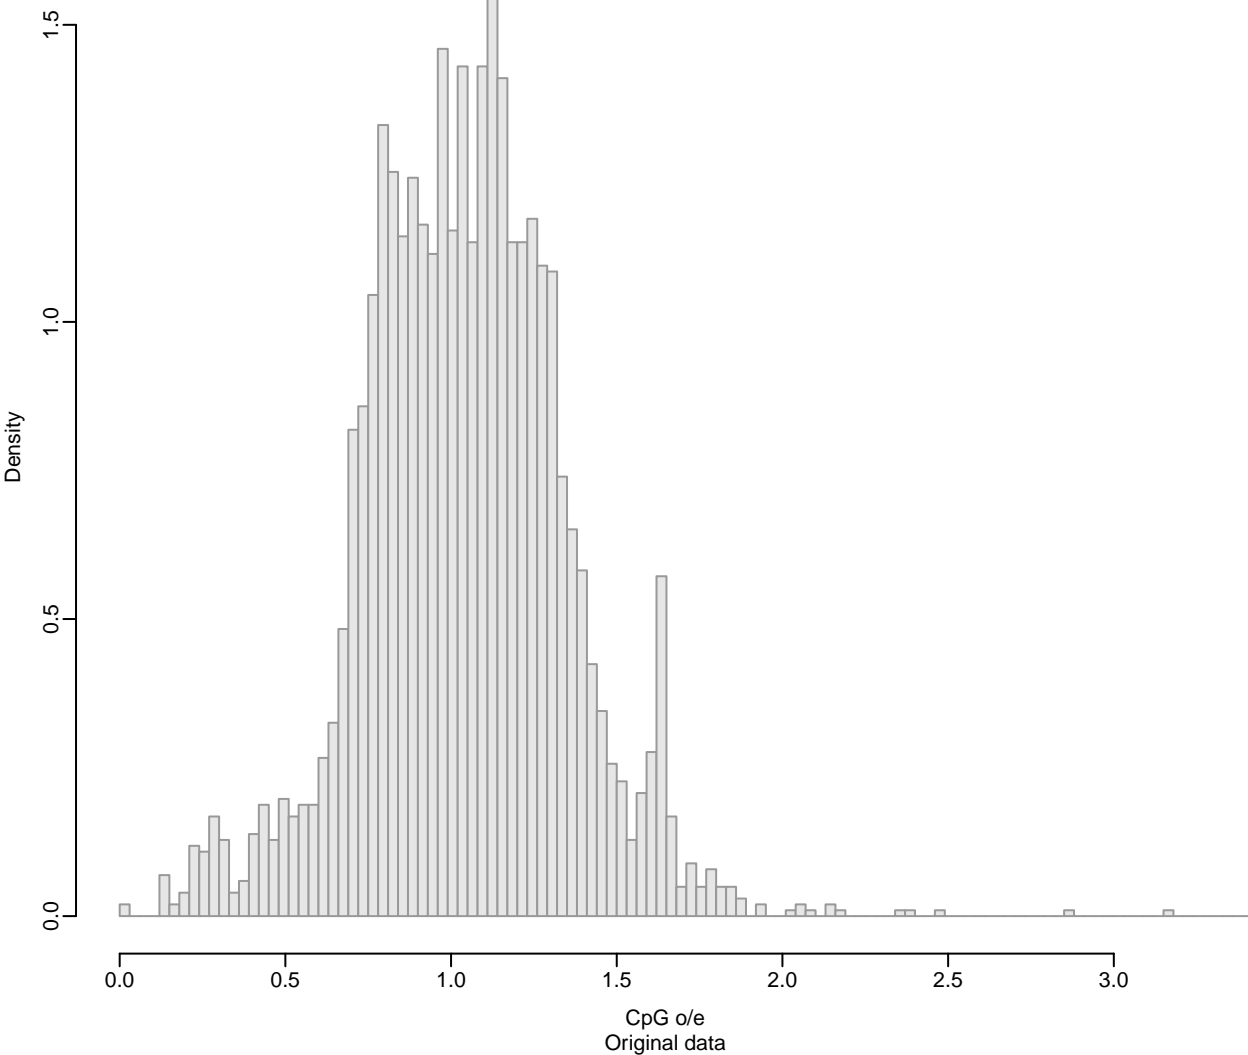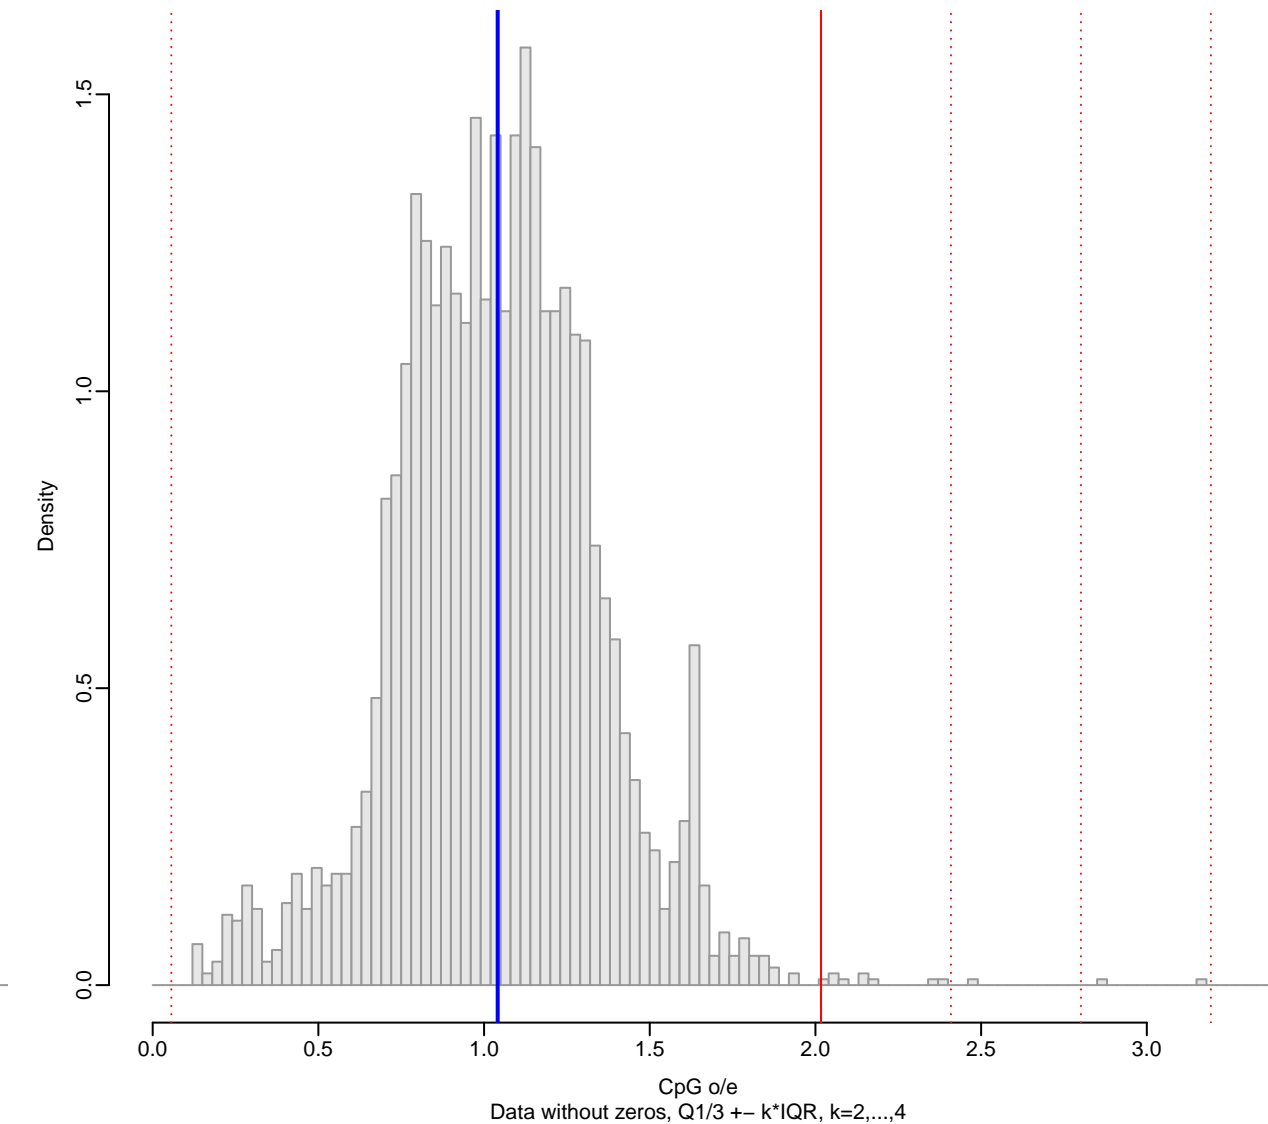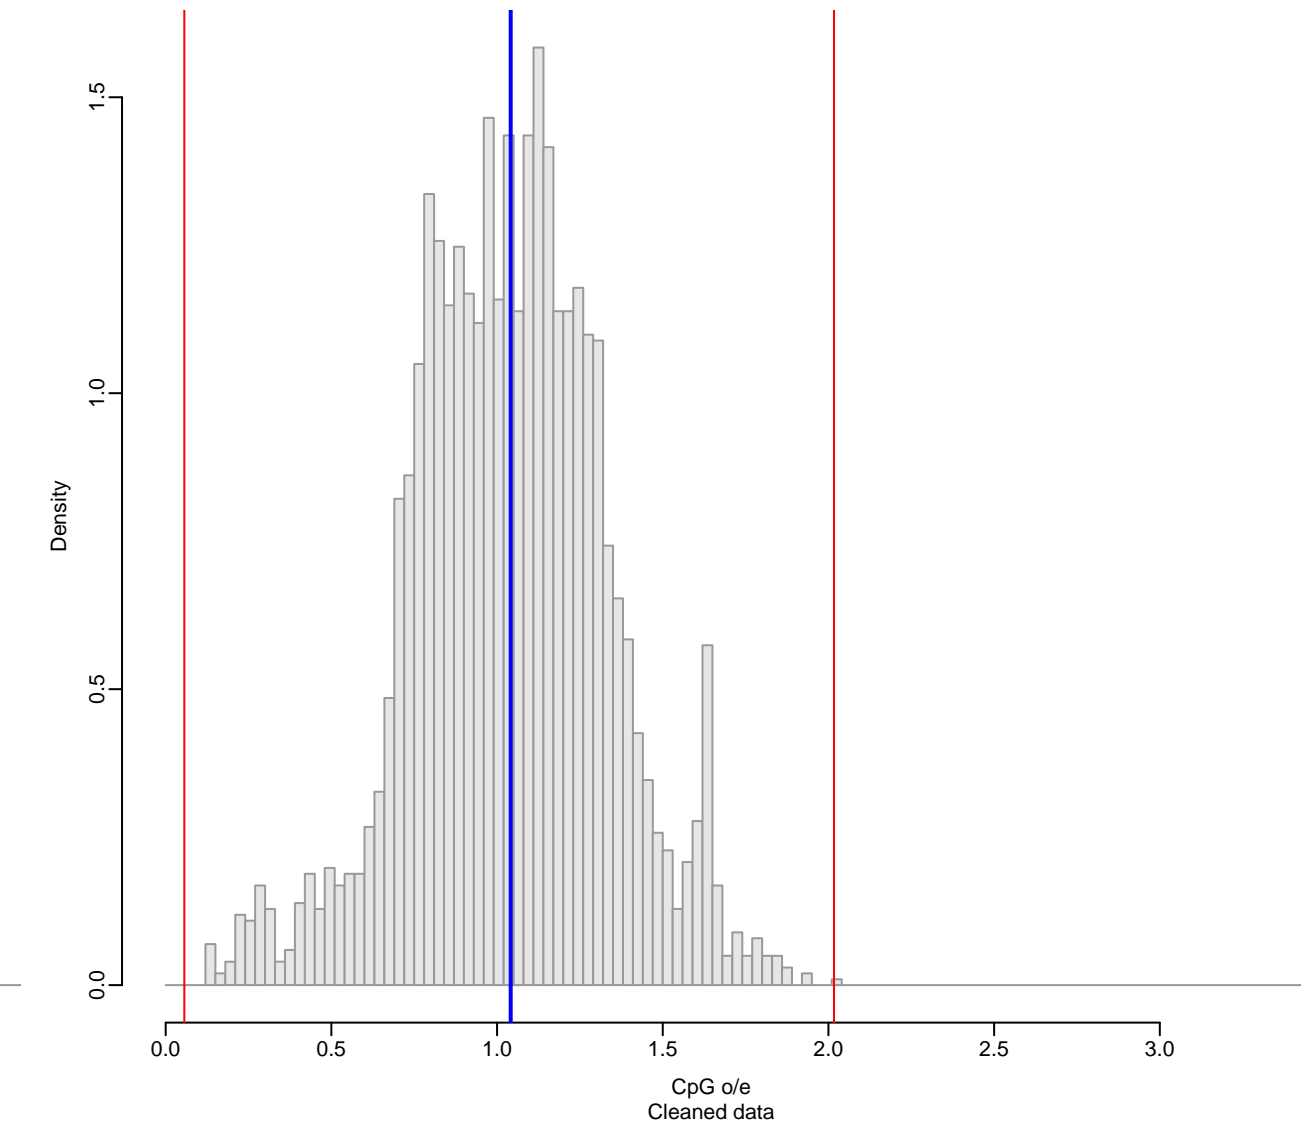

Dissostichus\_mawsoni

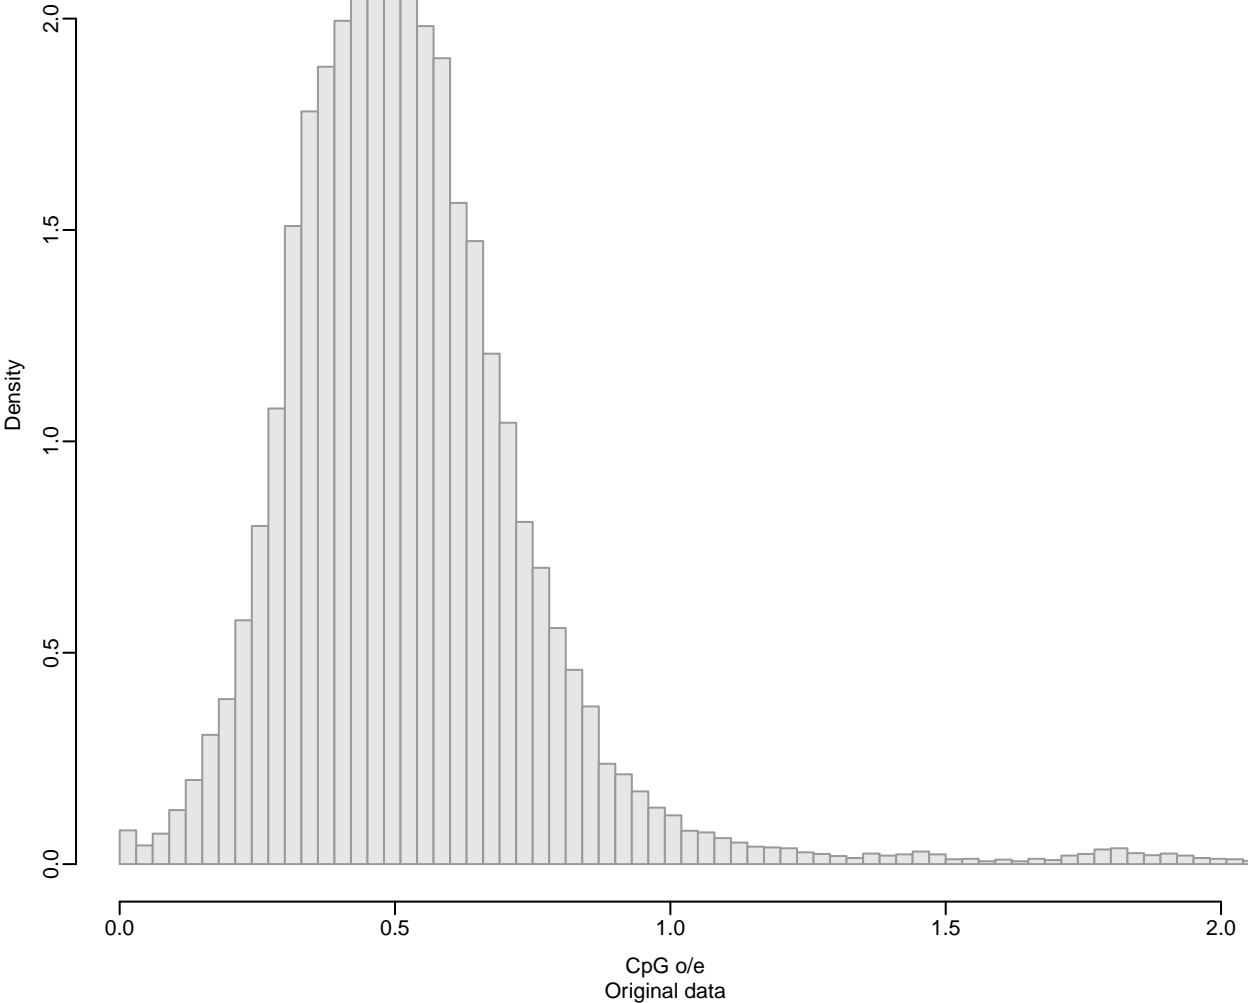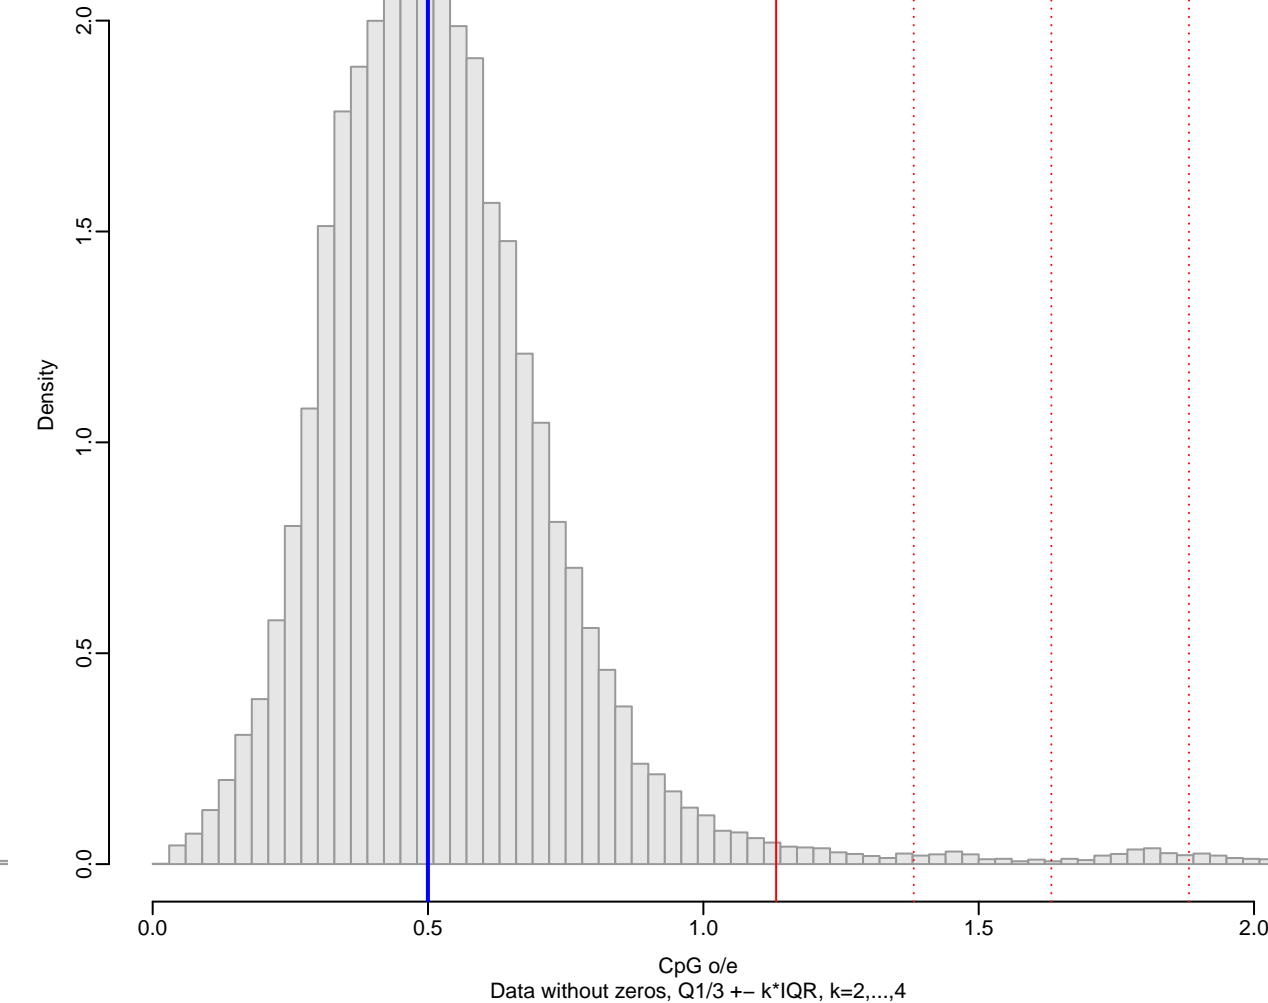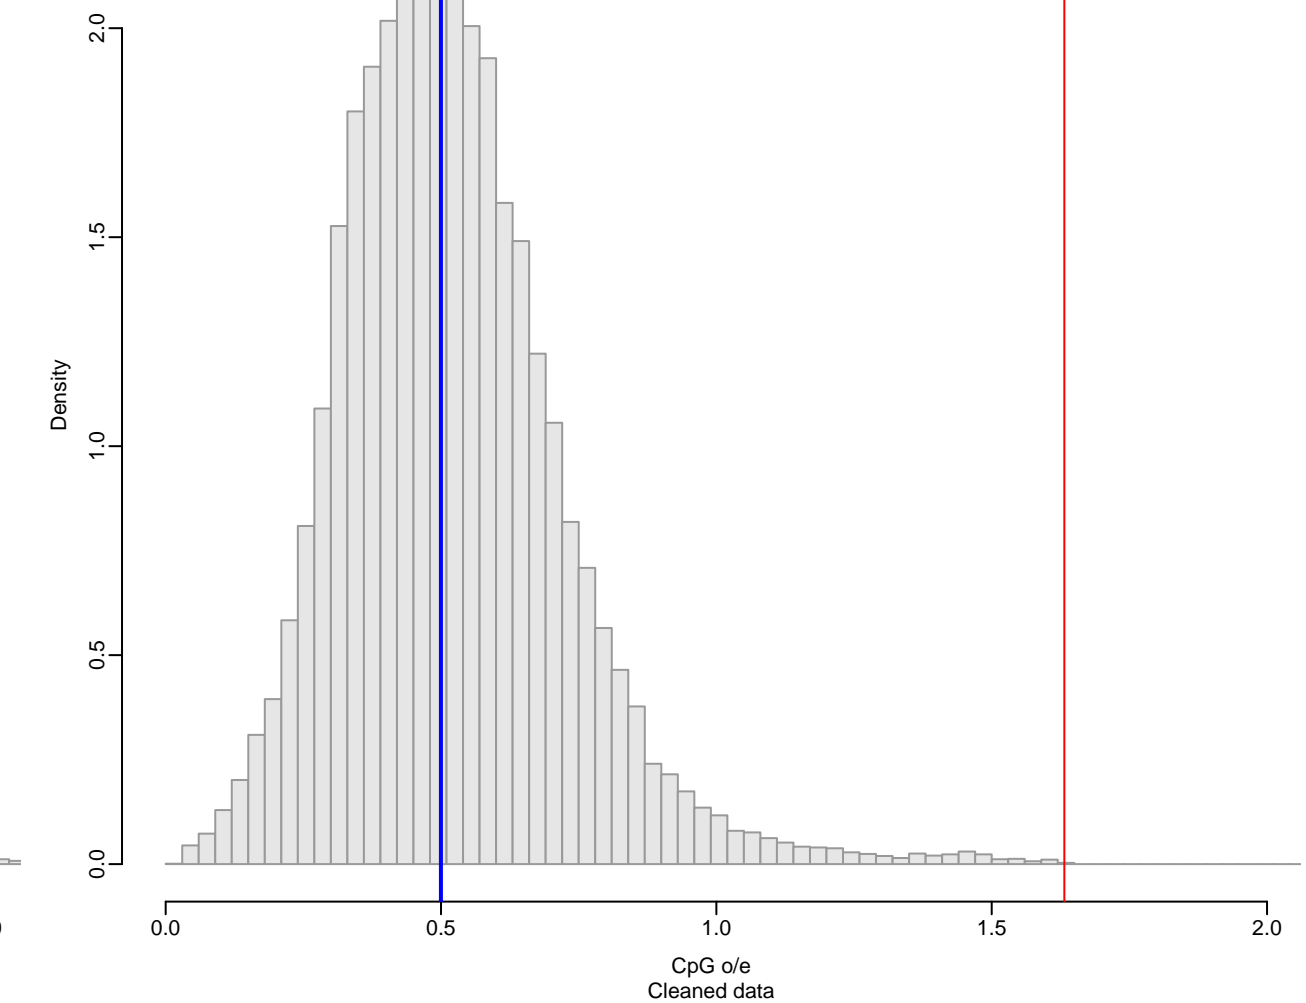

Ditylenchus\_africanus

Density

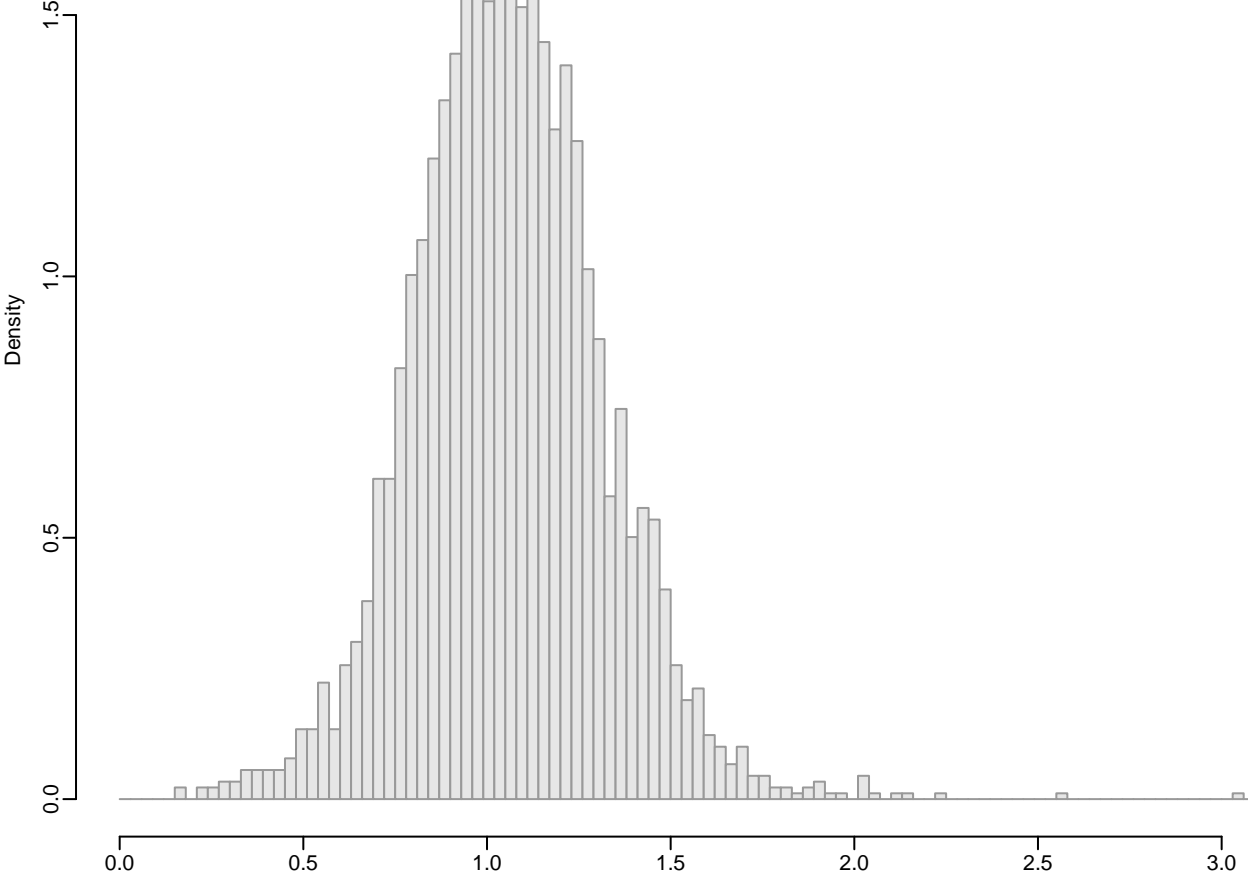

Density

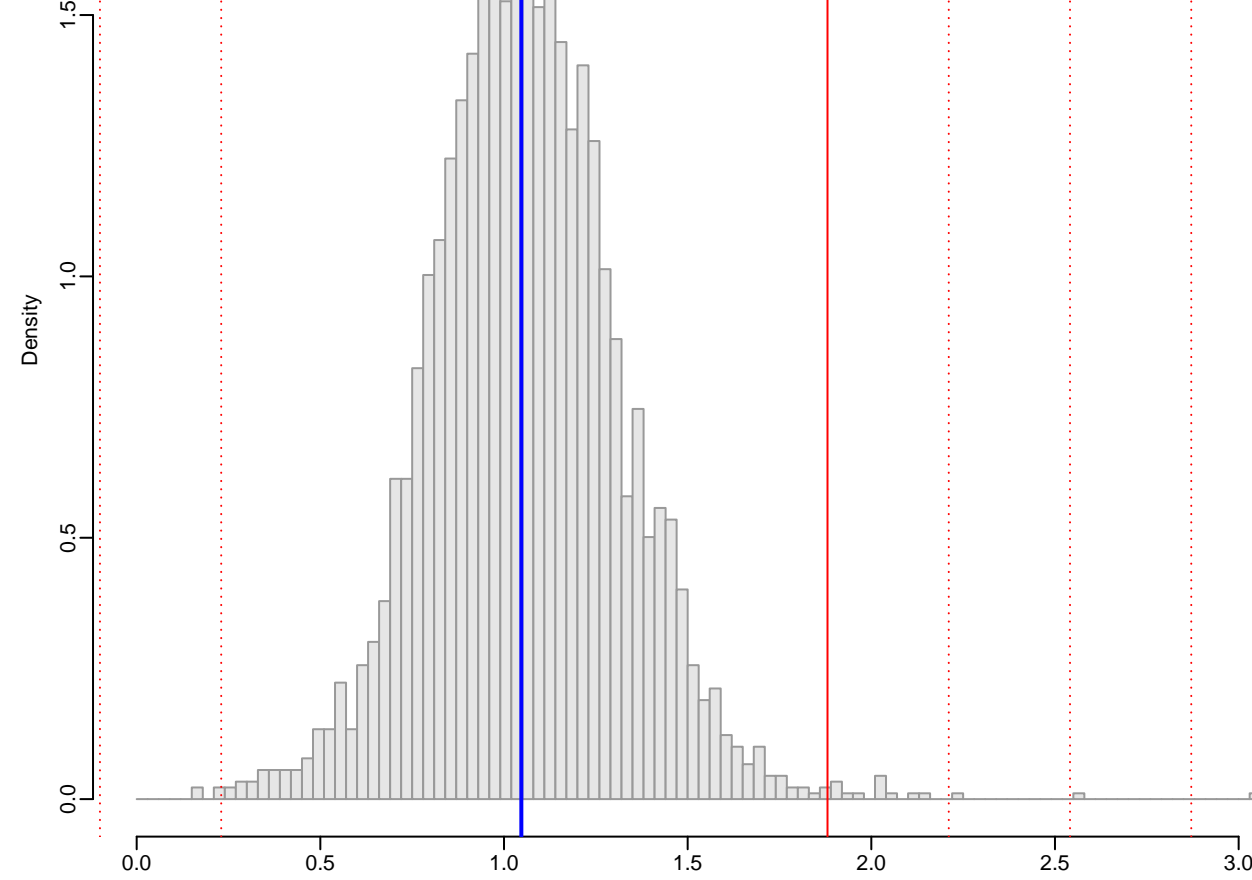

Density

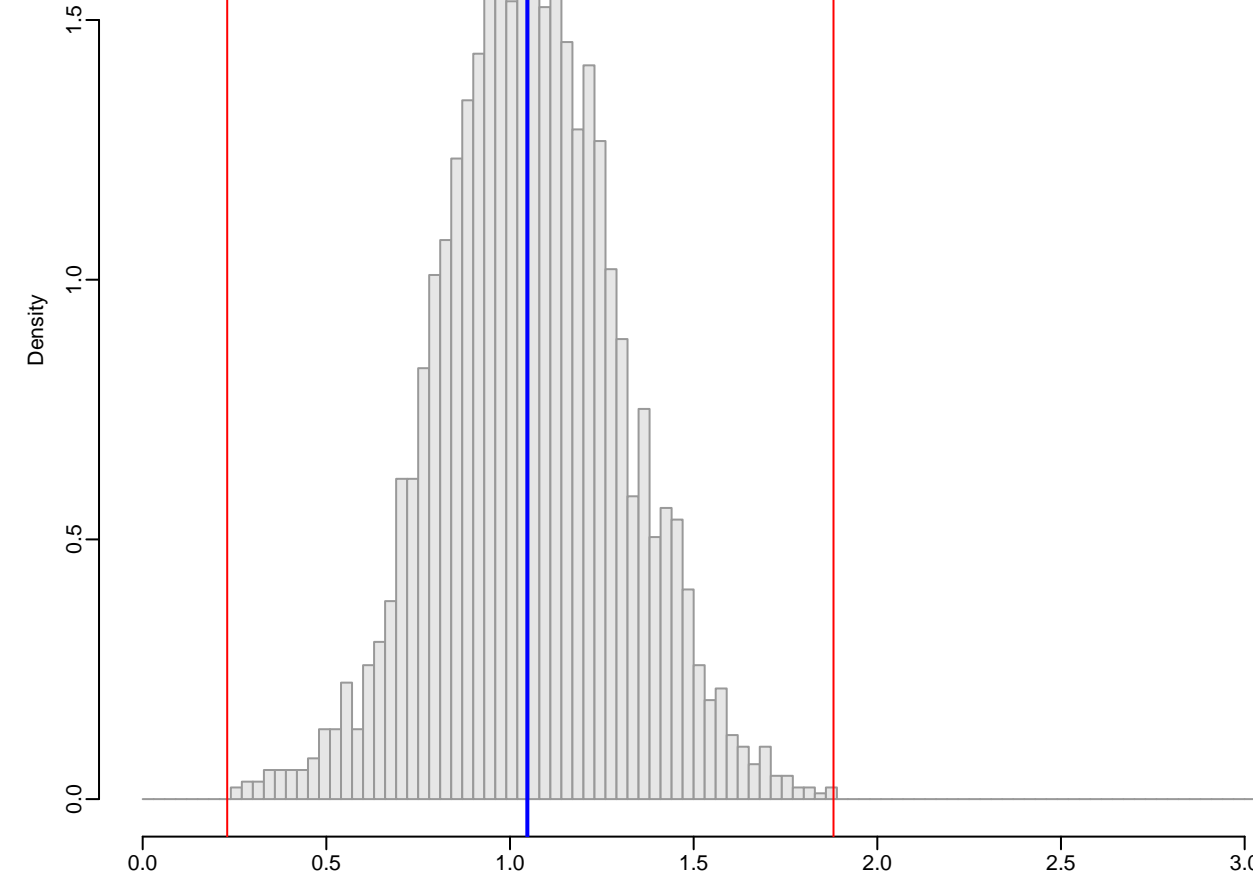

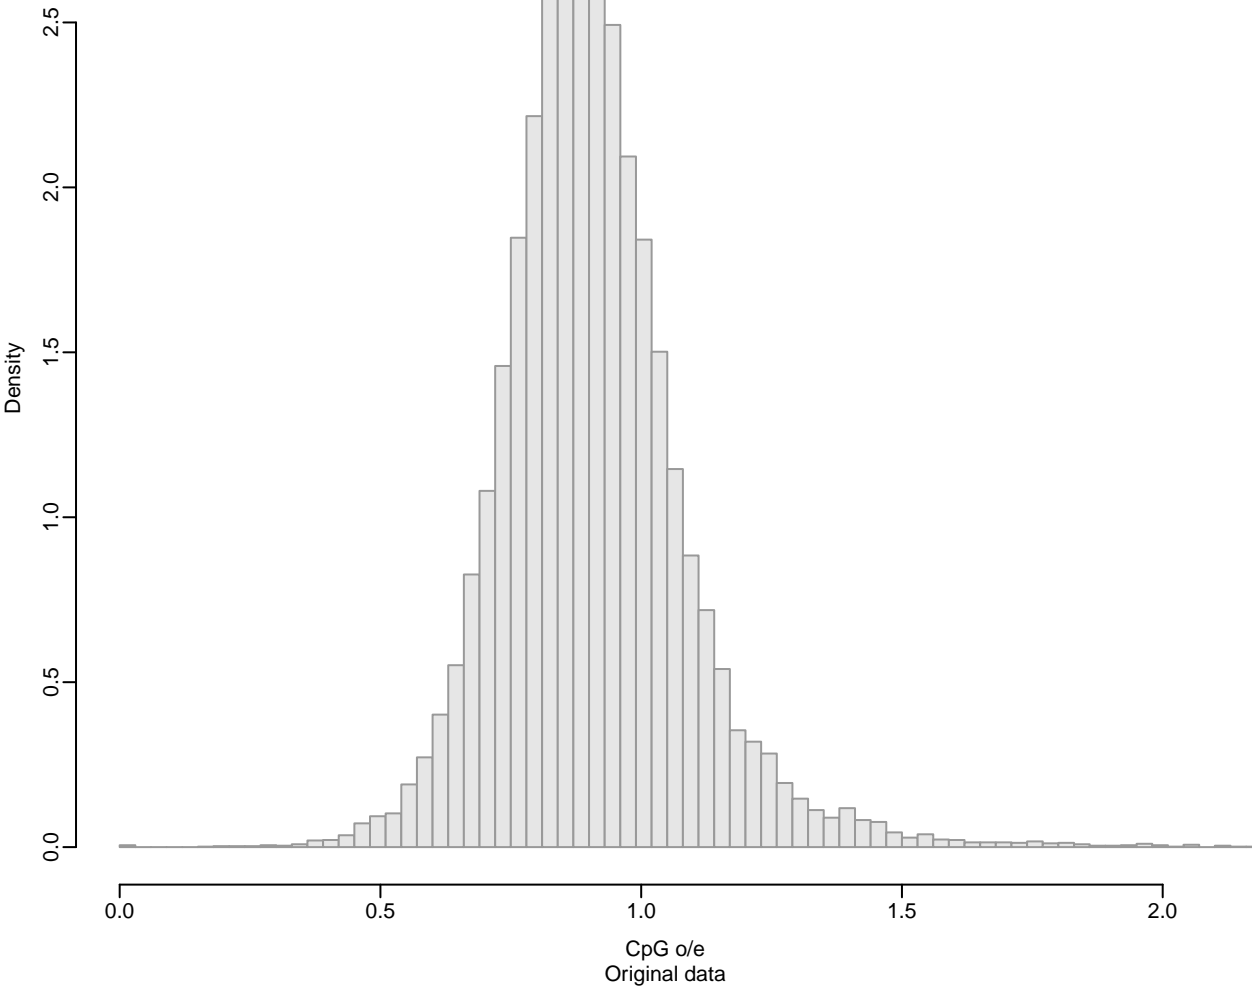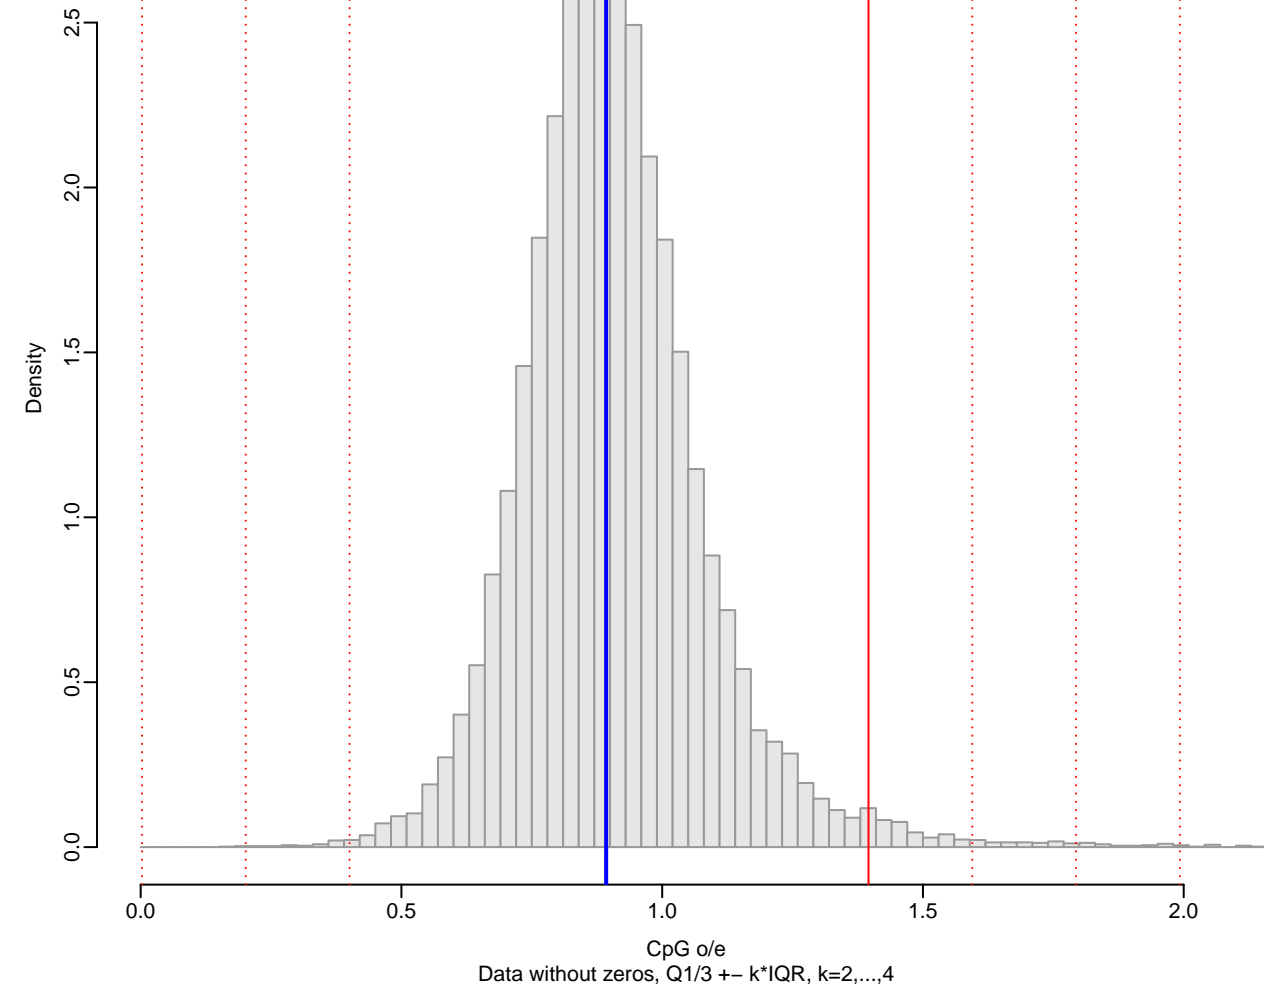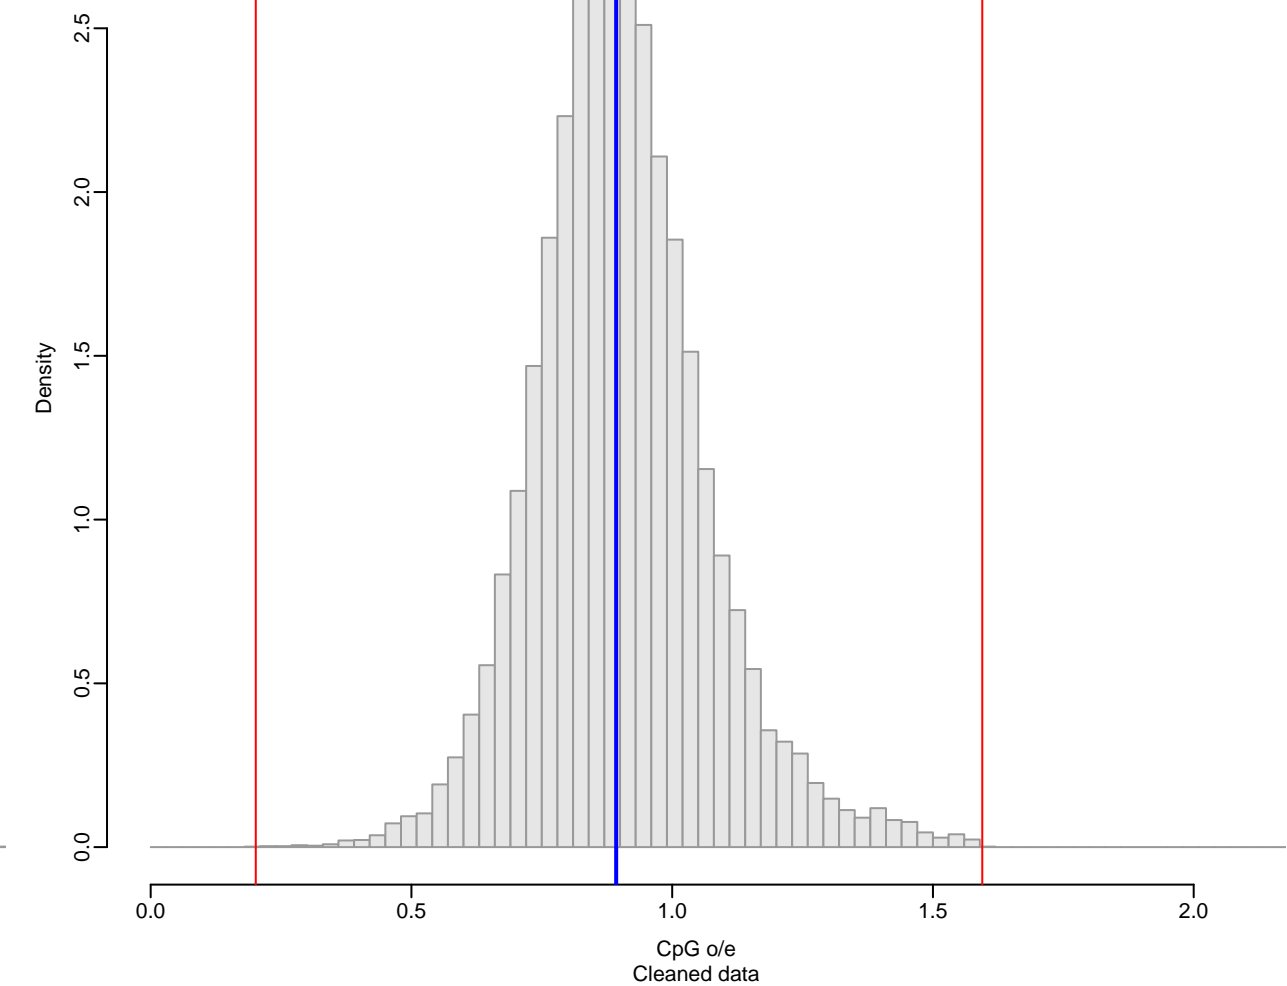

Drosophila\_auraria

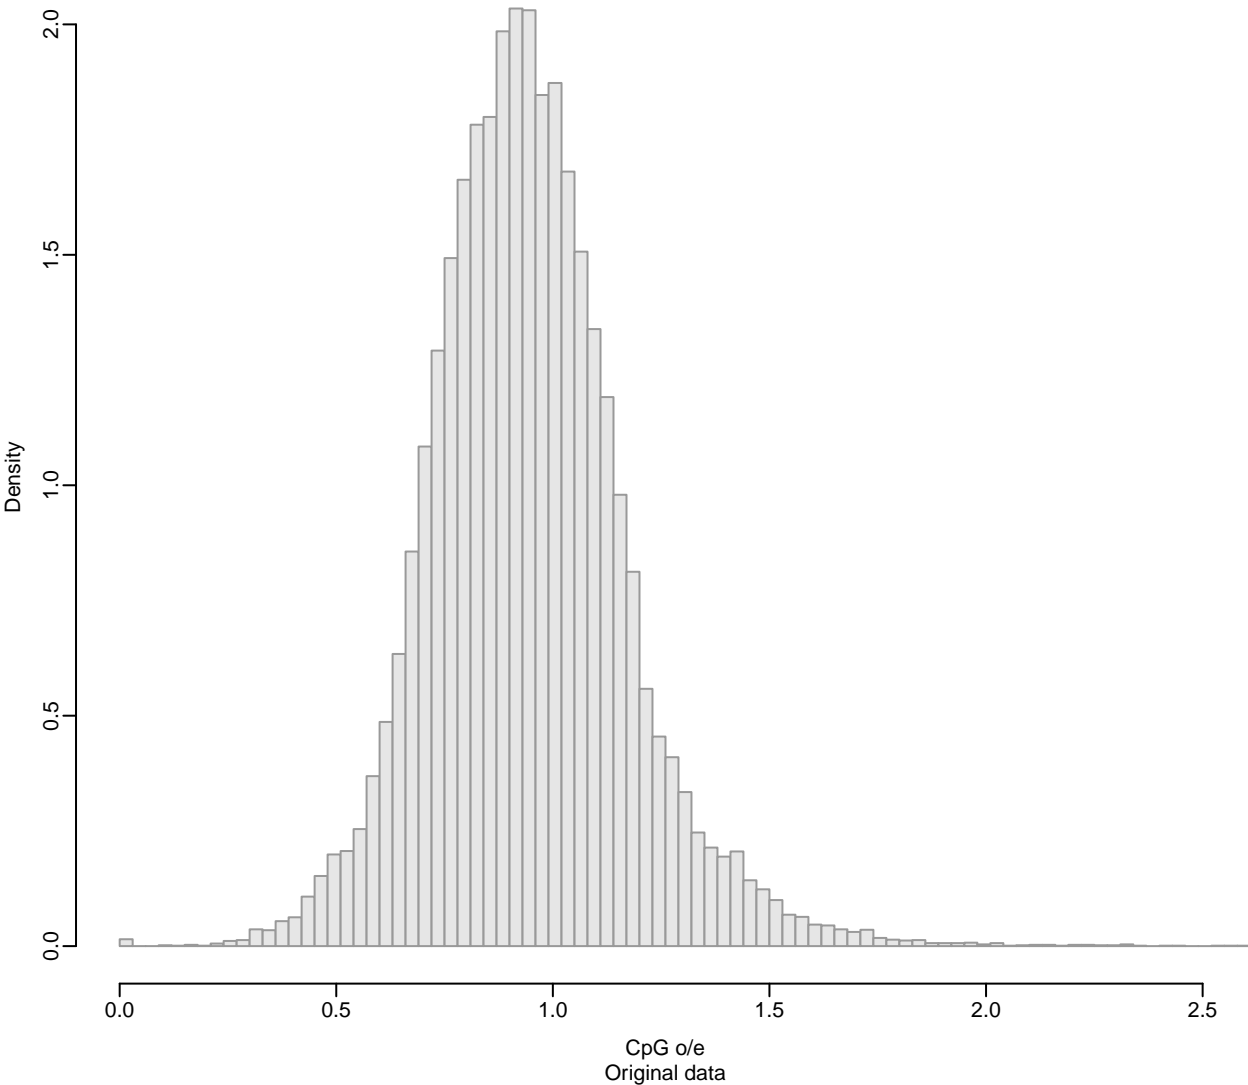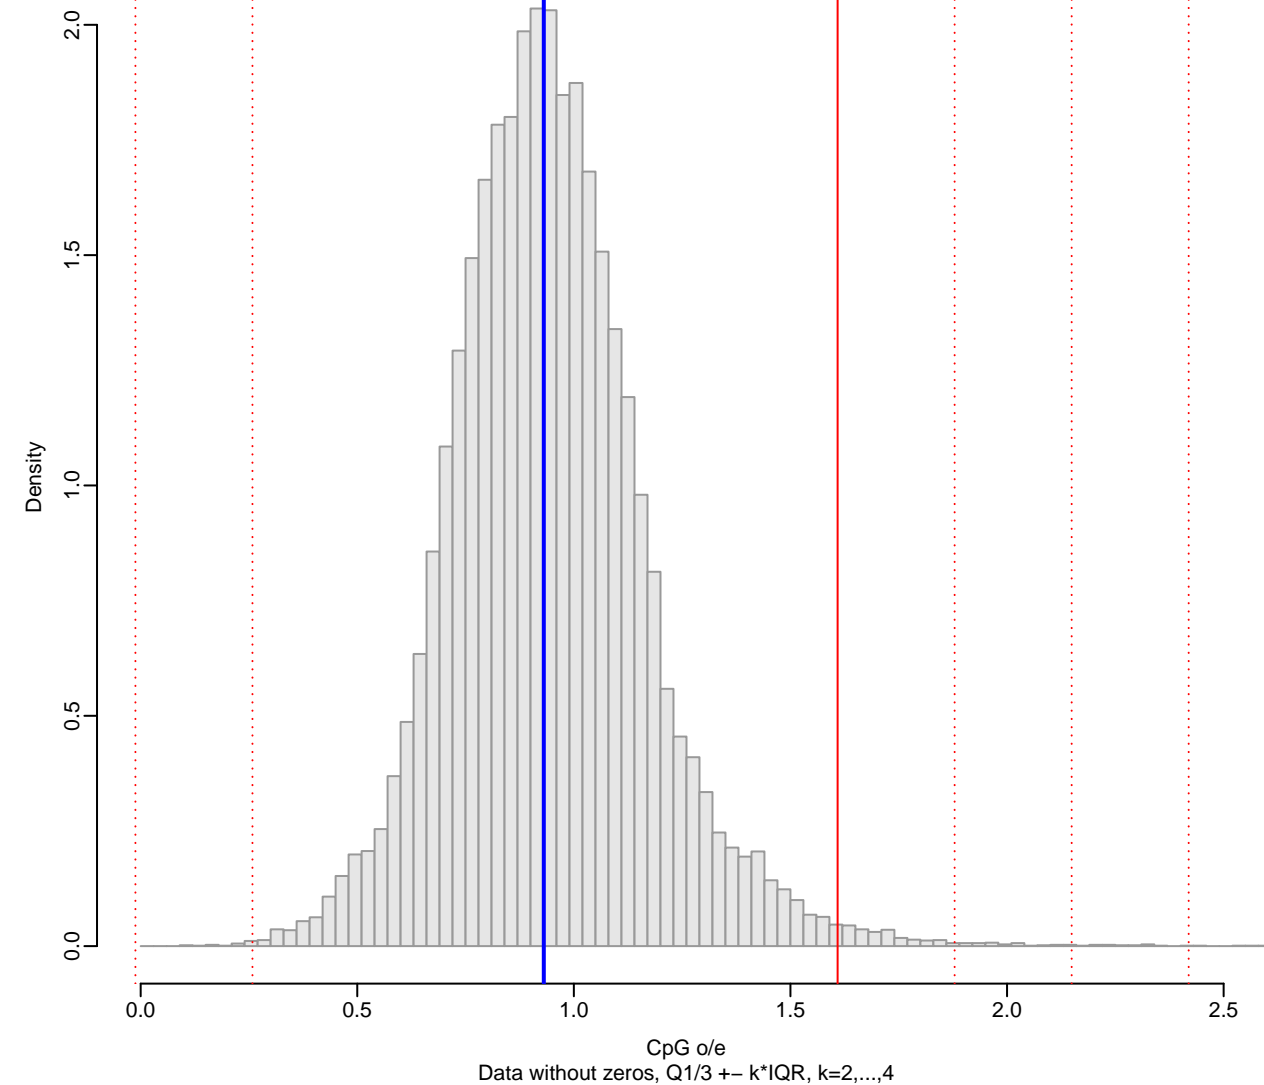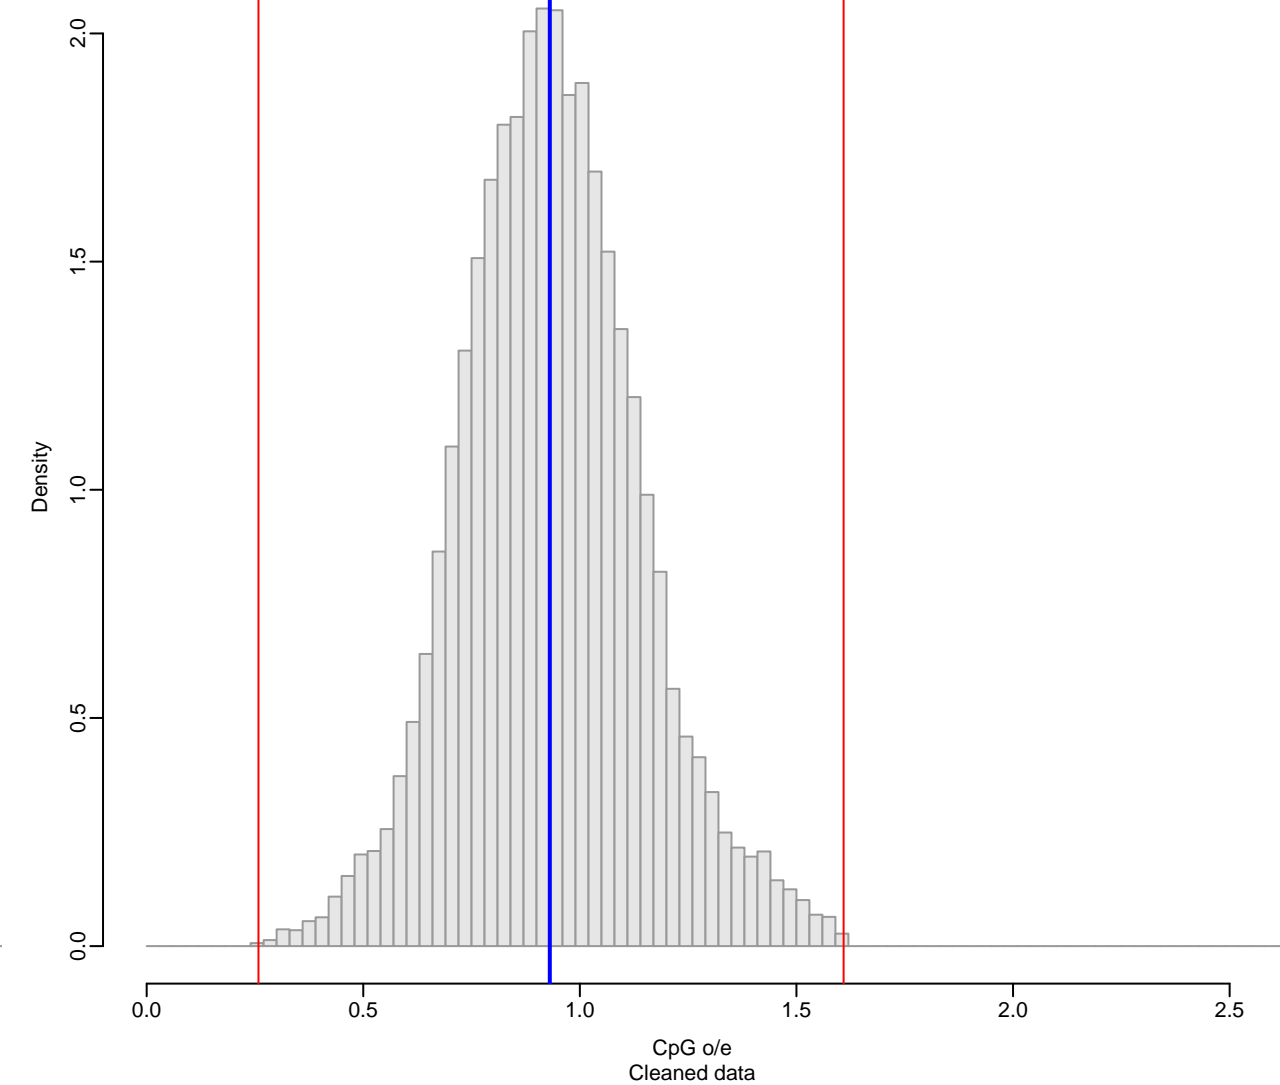

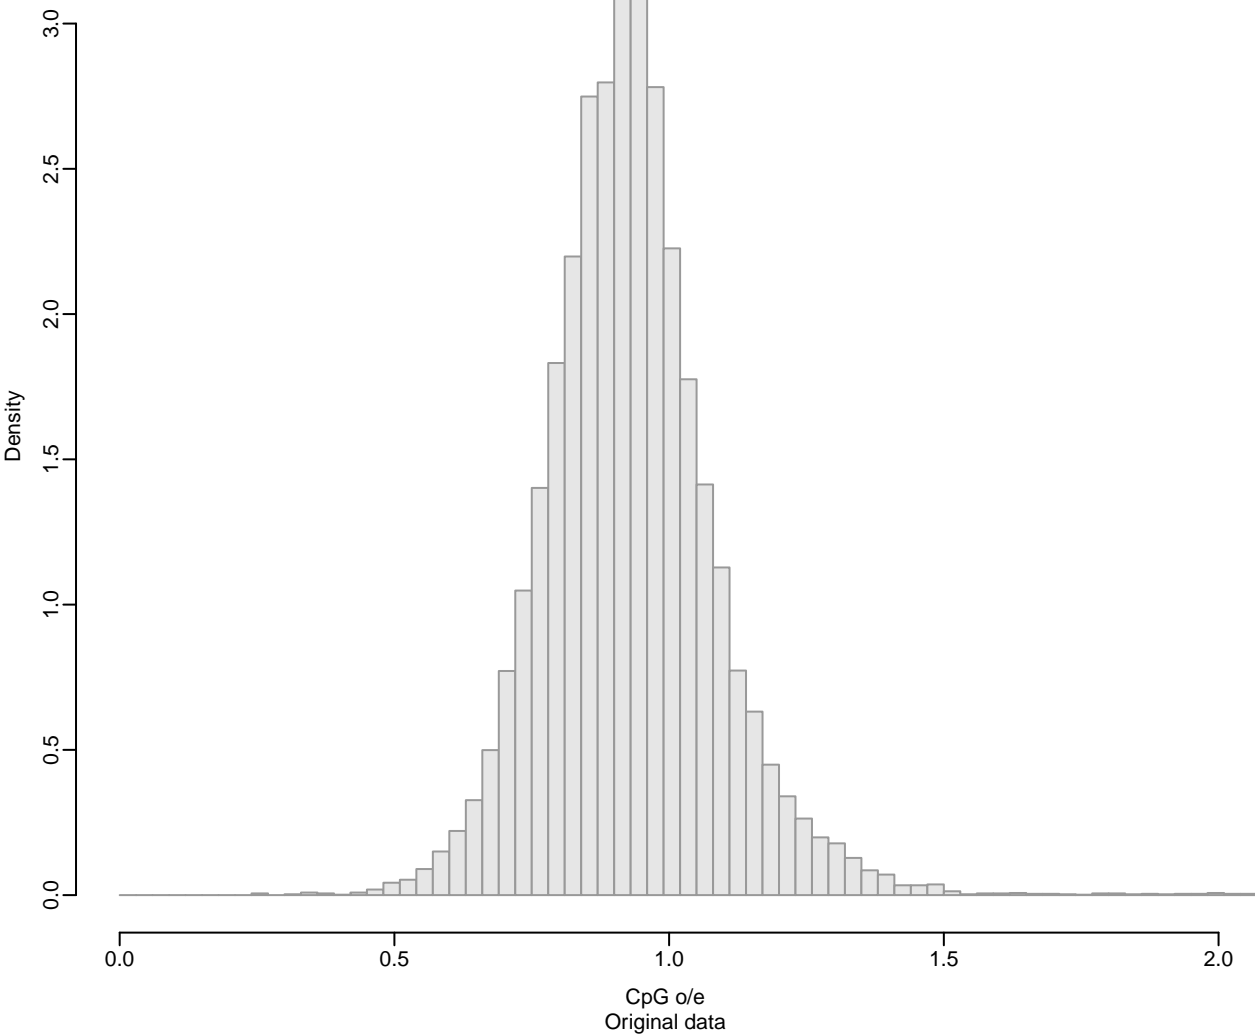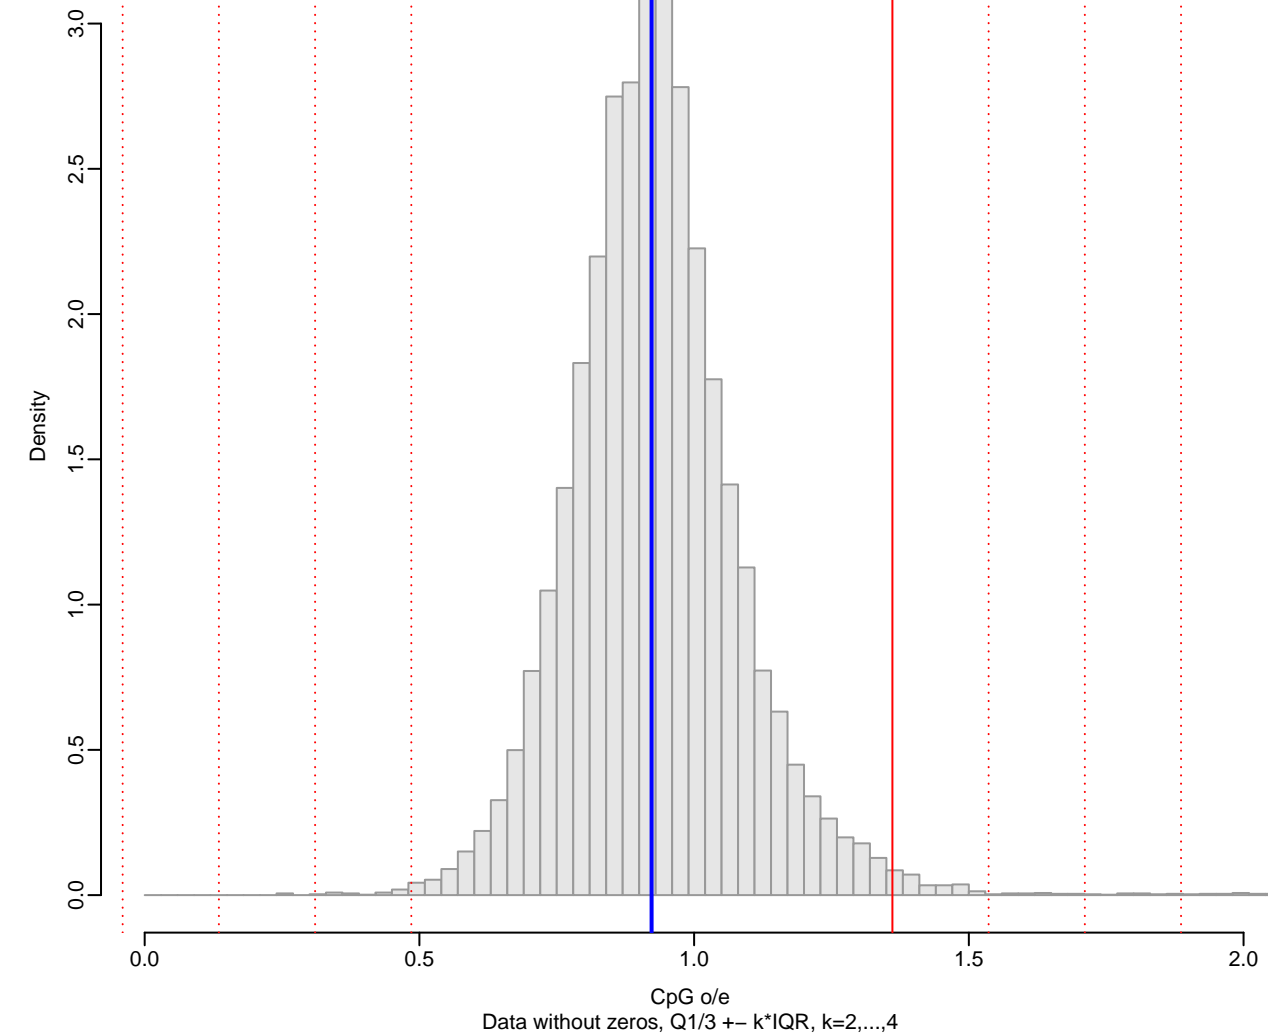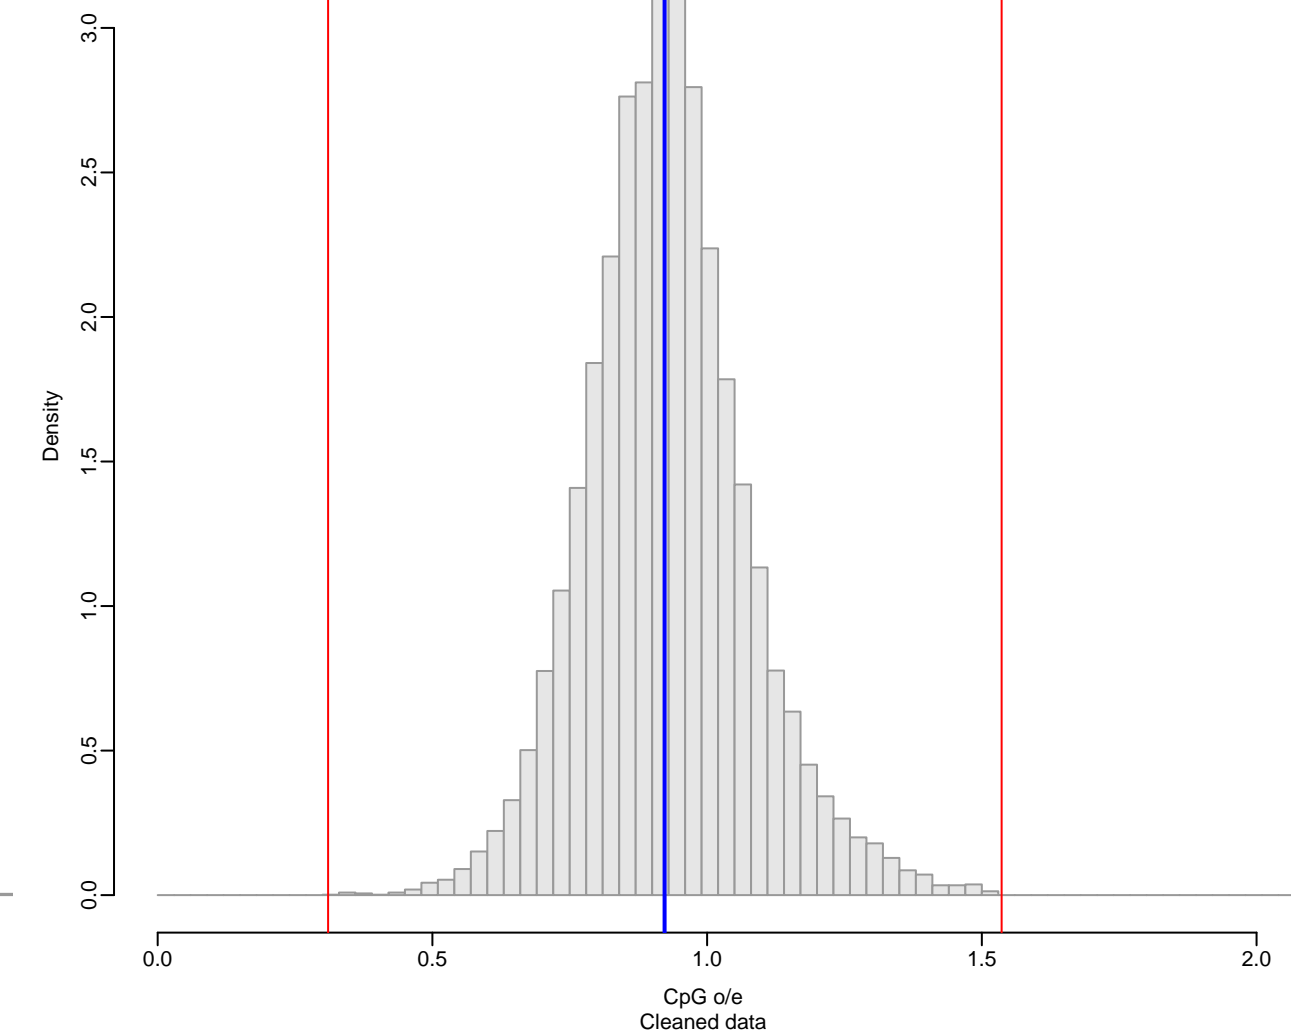

Drosophila\_grimshawi

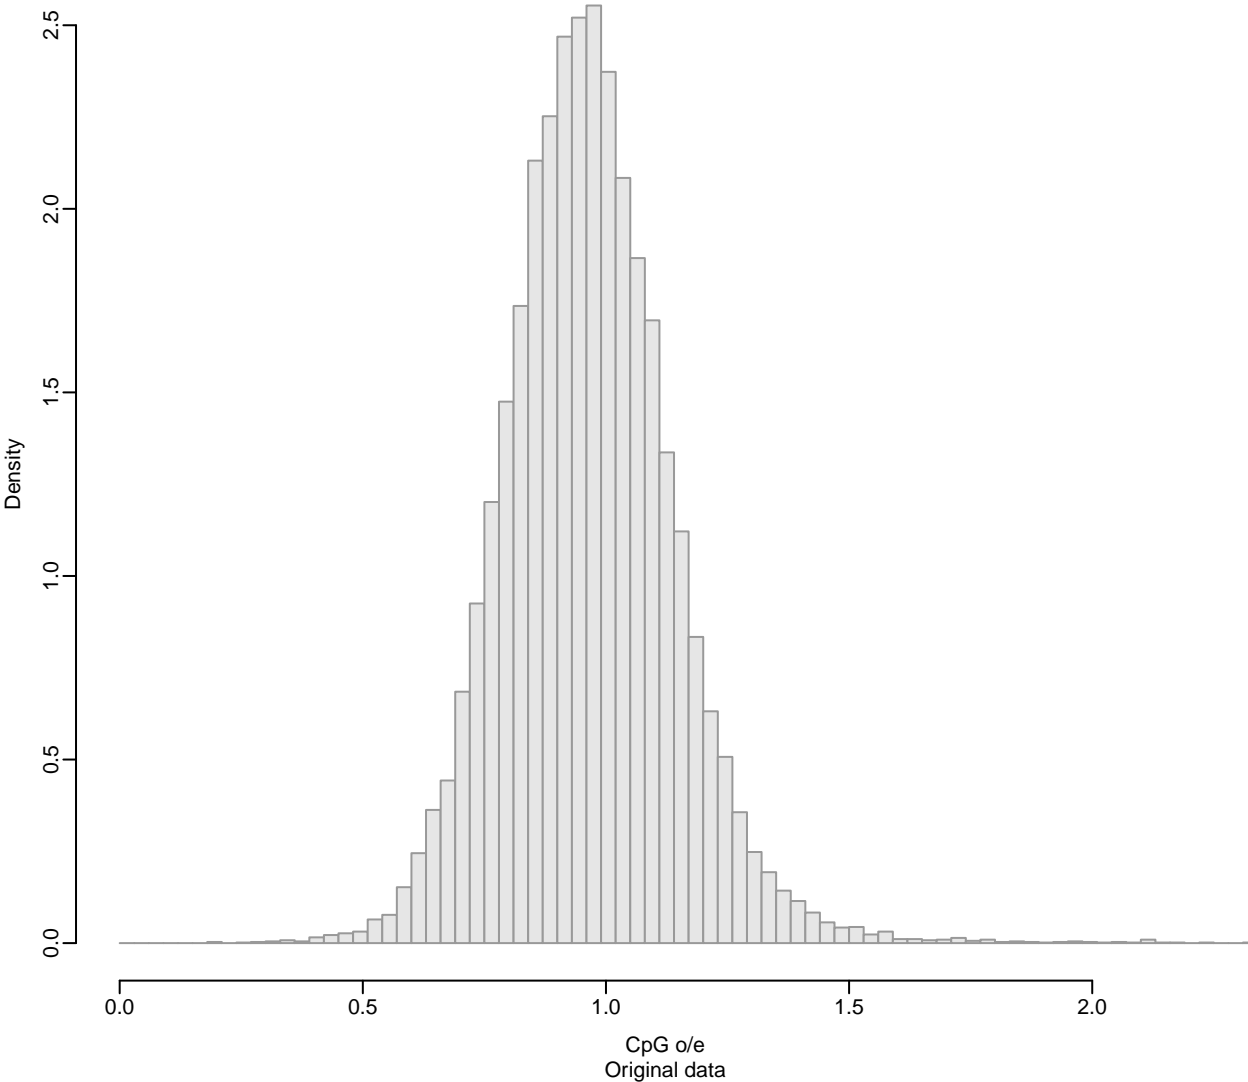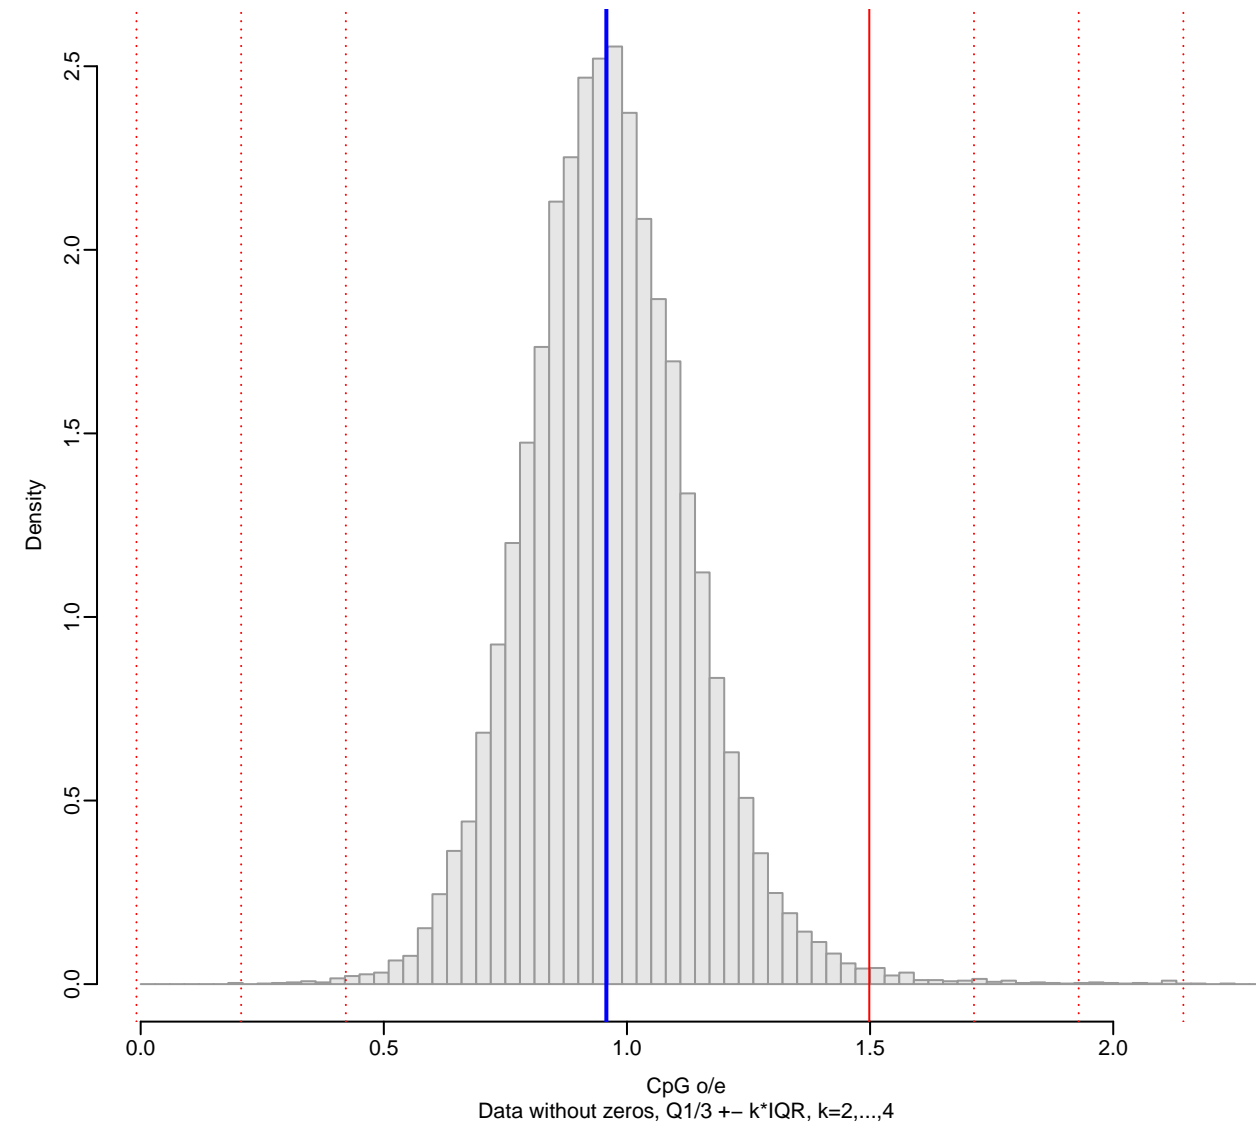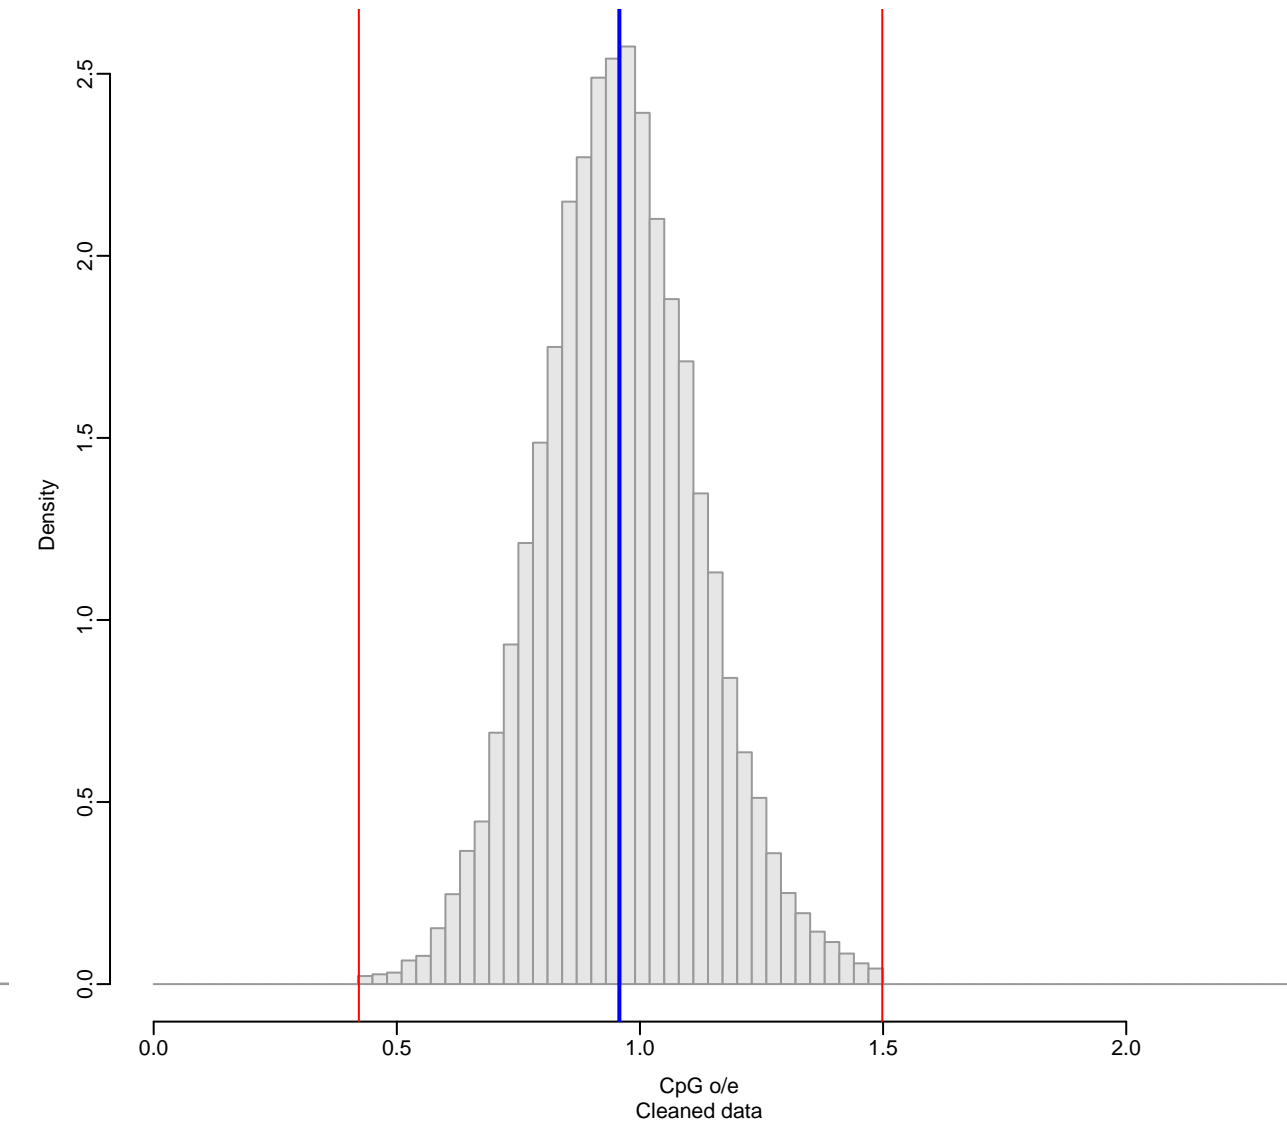

Drosophila\_melanogaster

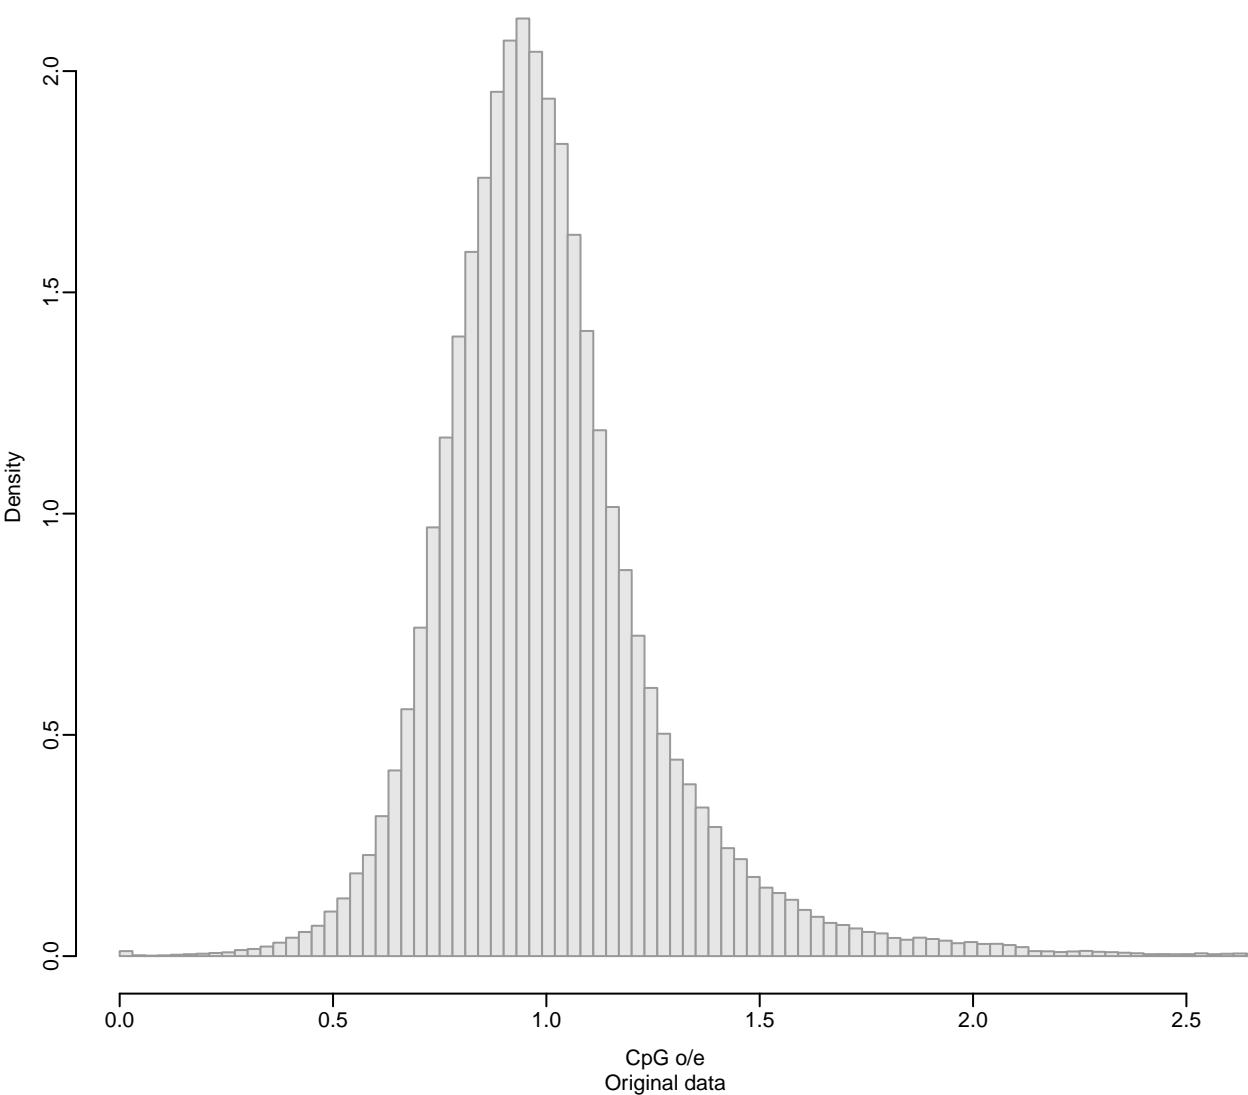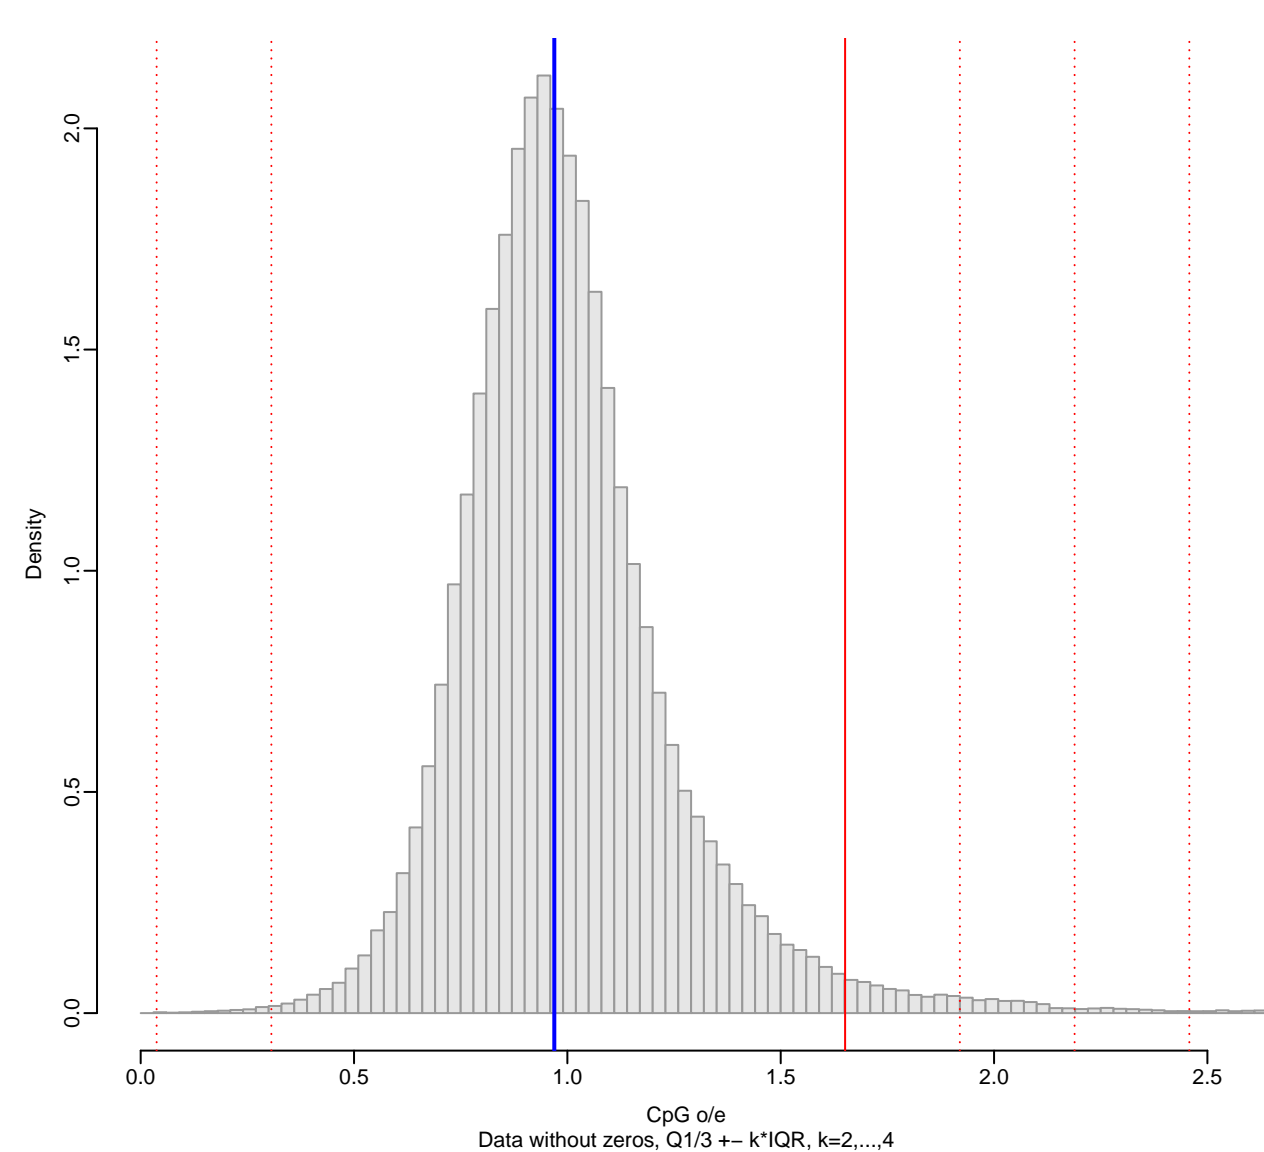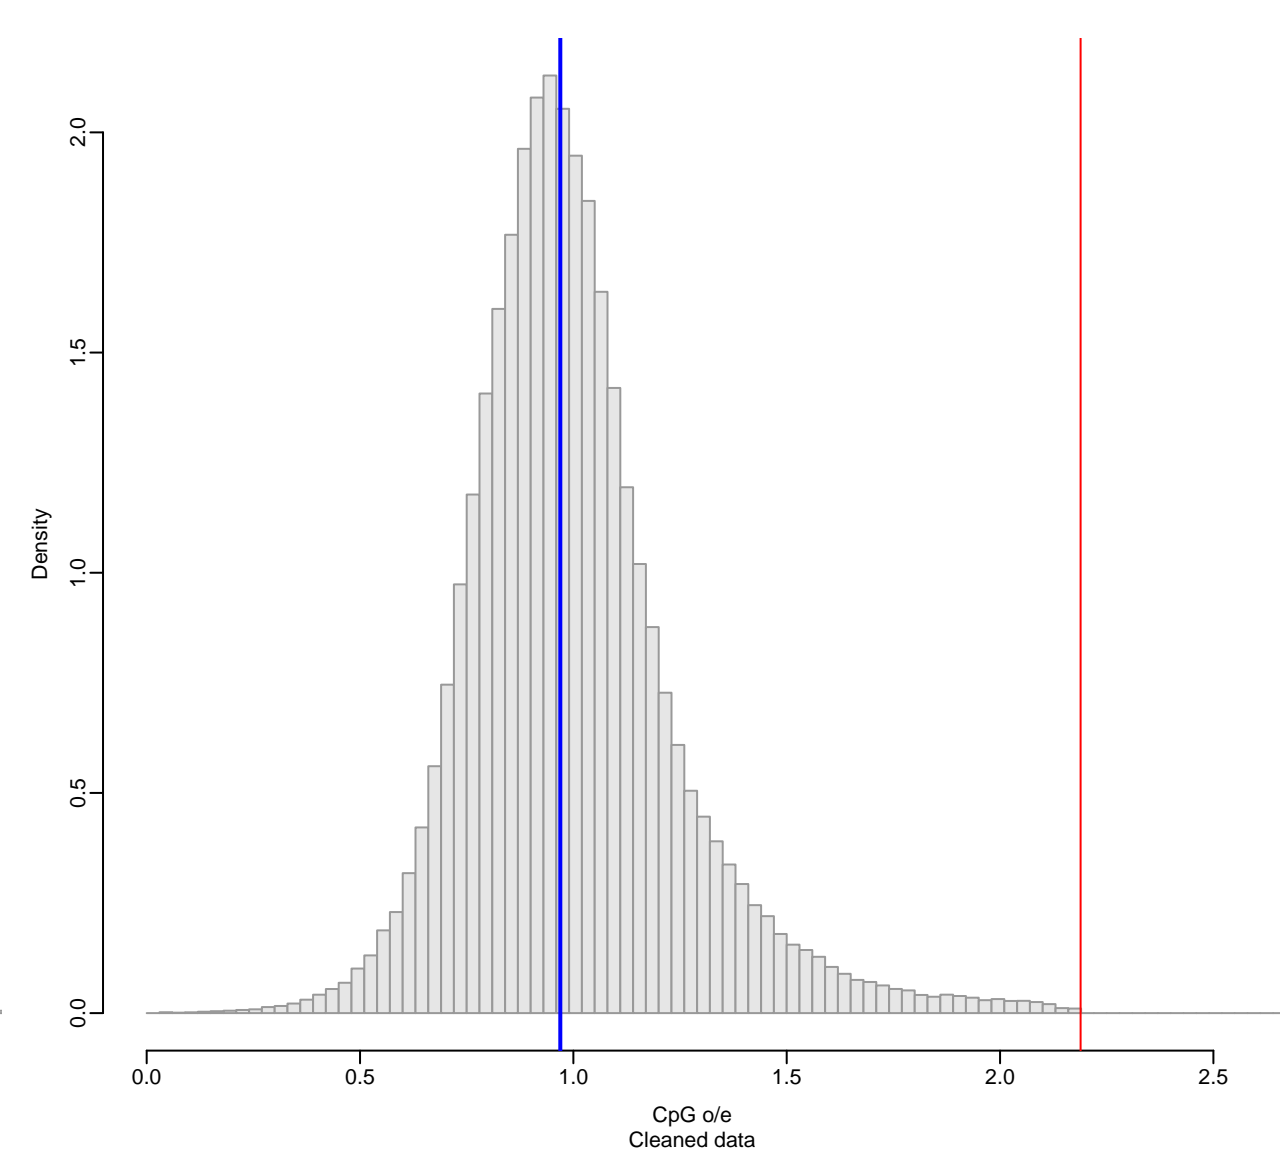



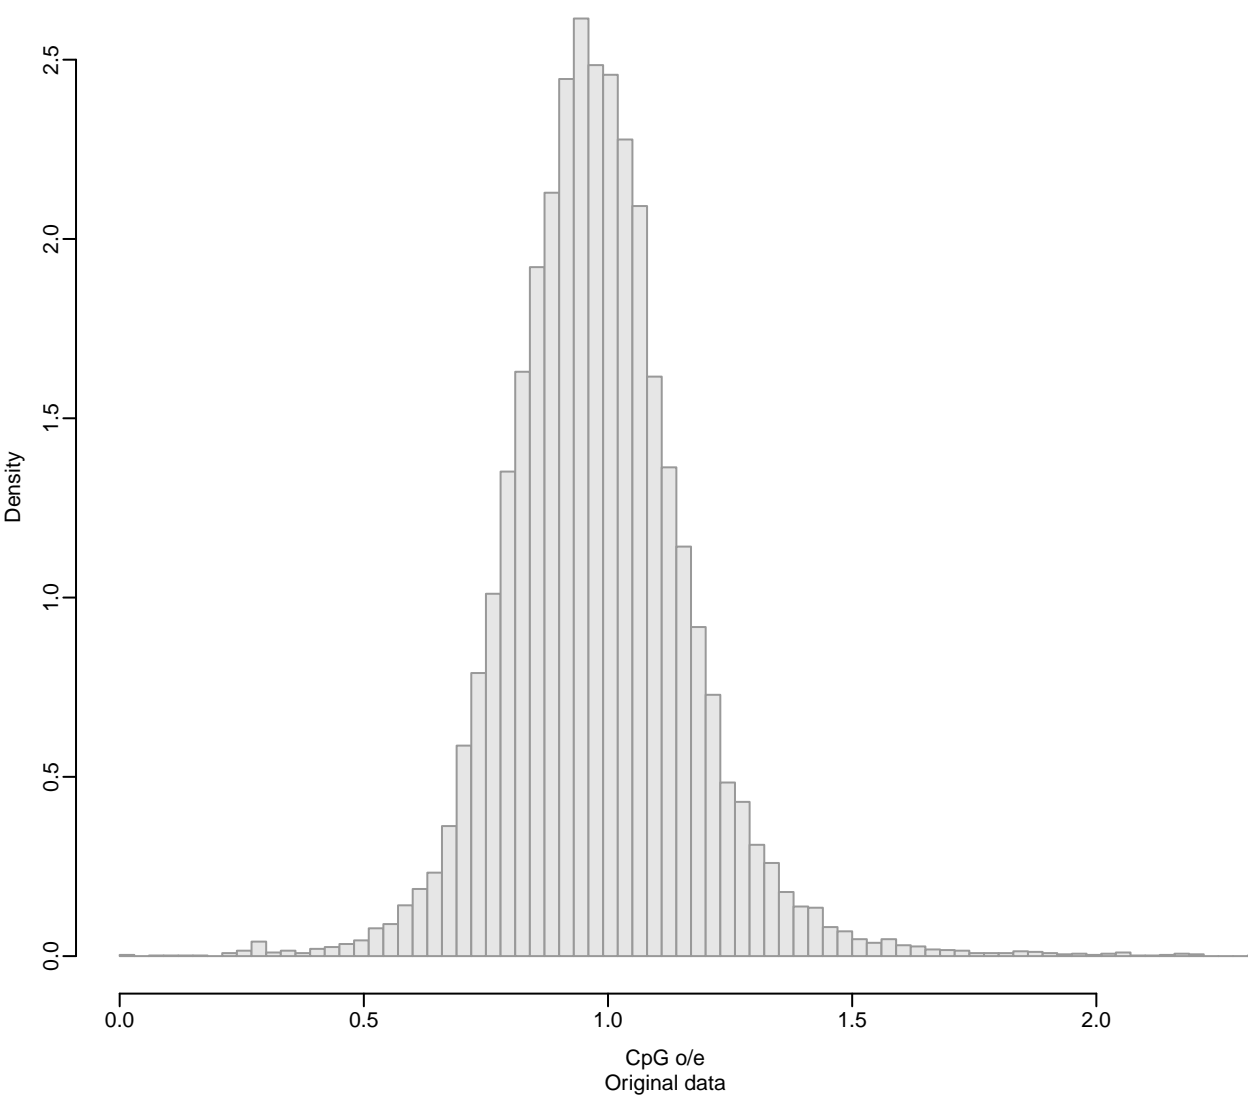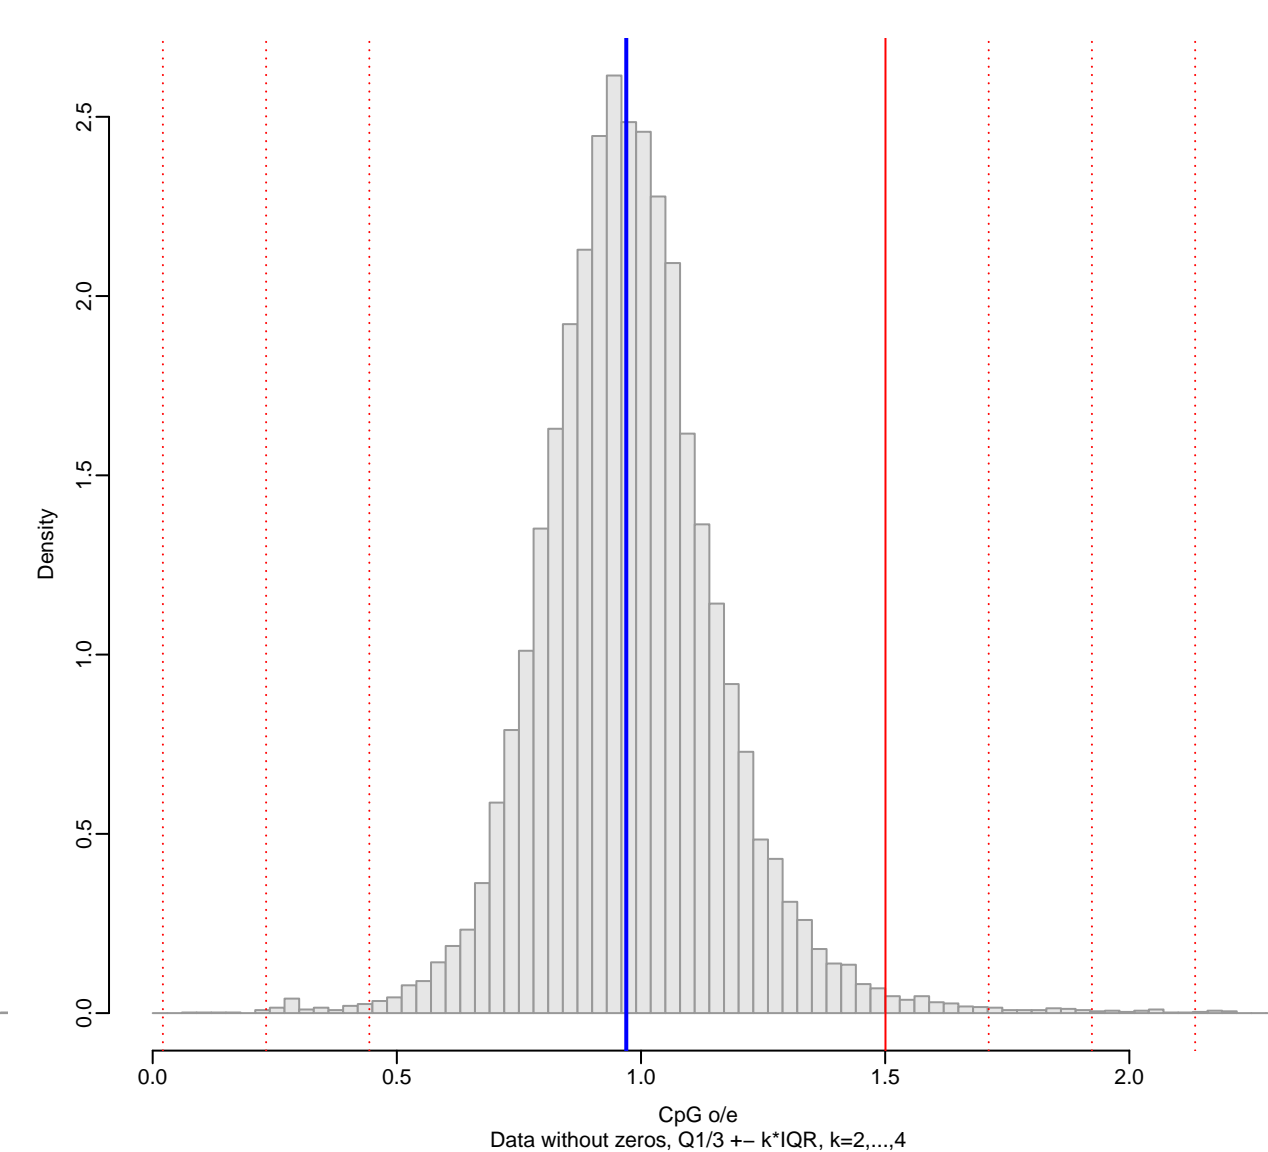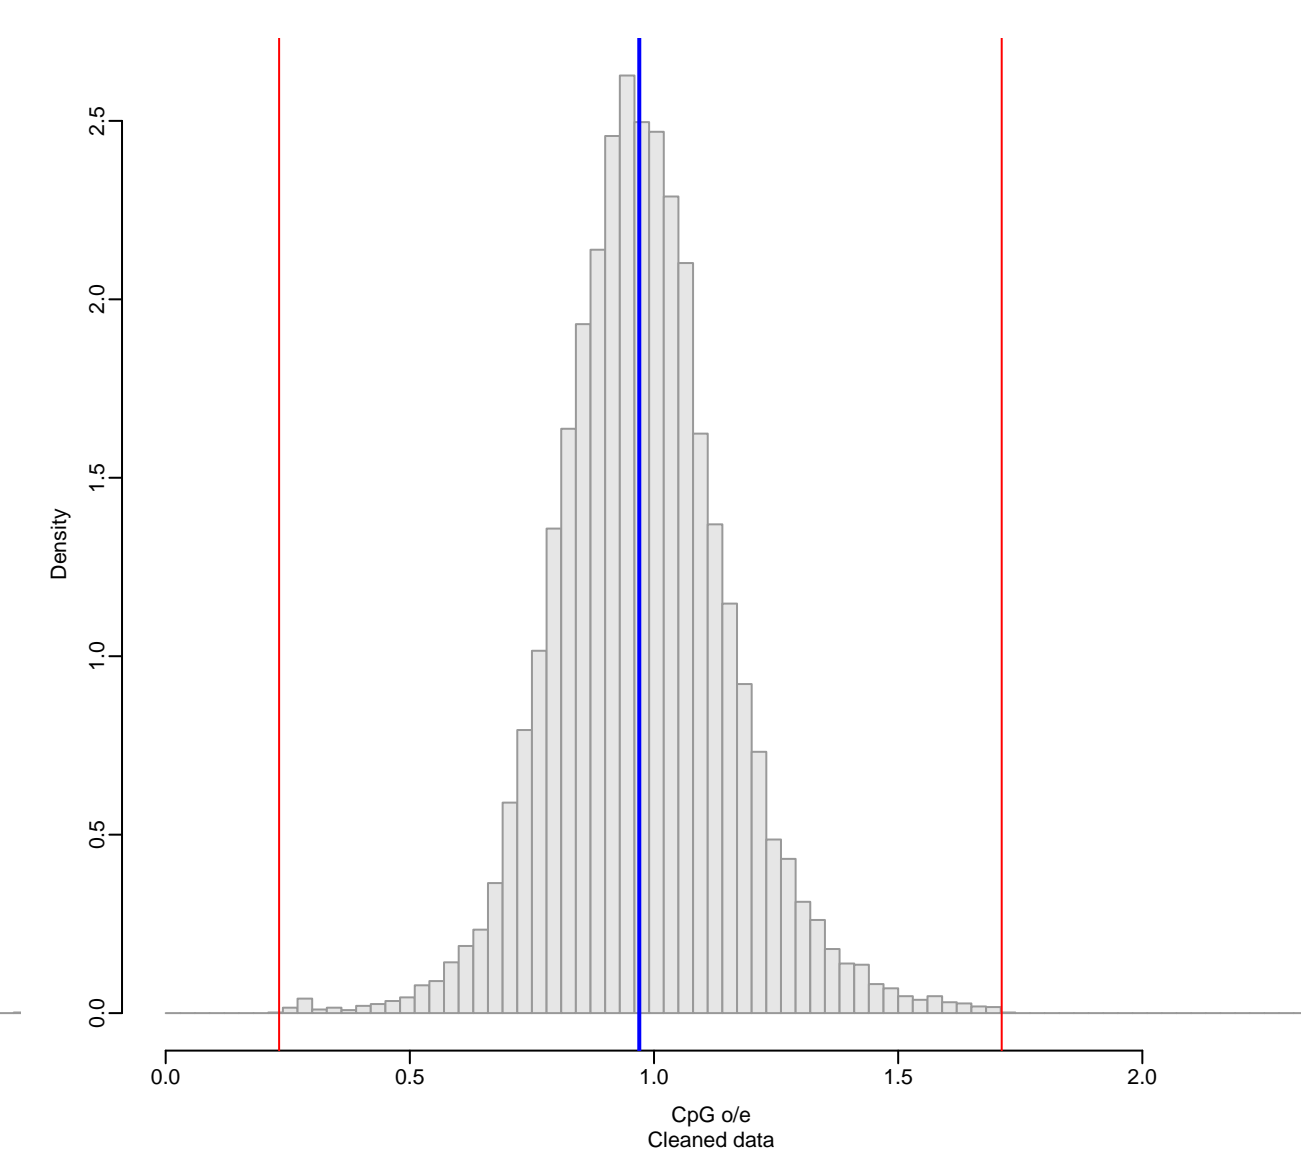

*Drosophila\_pseudoobscura*

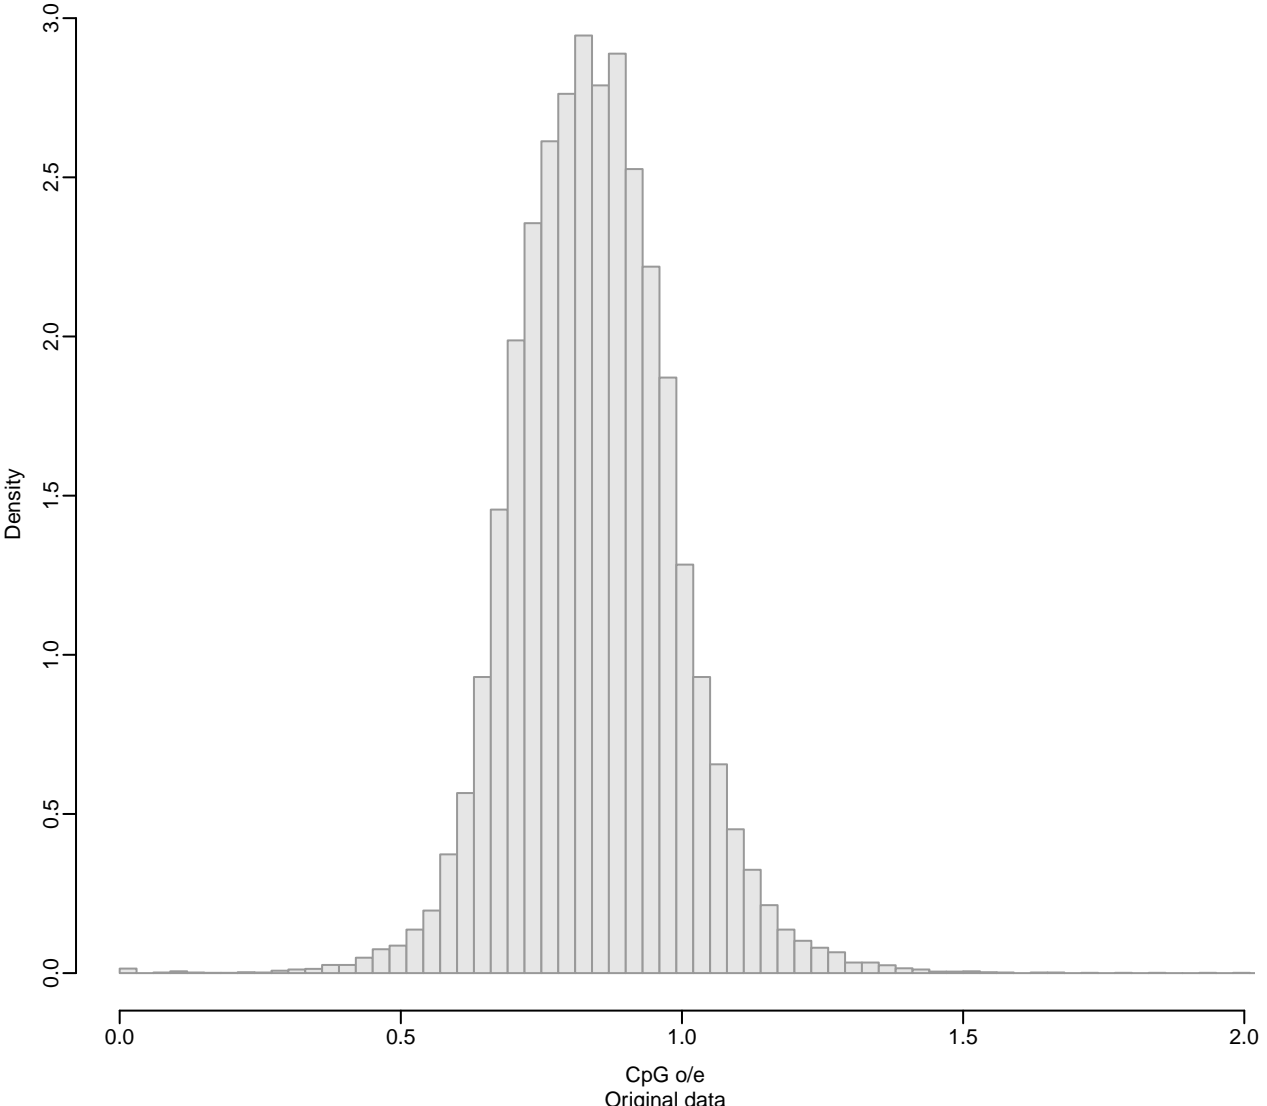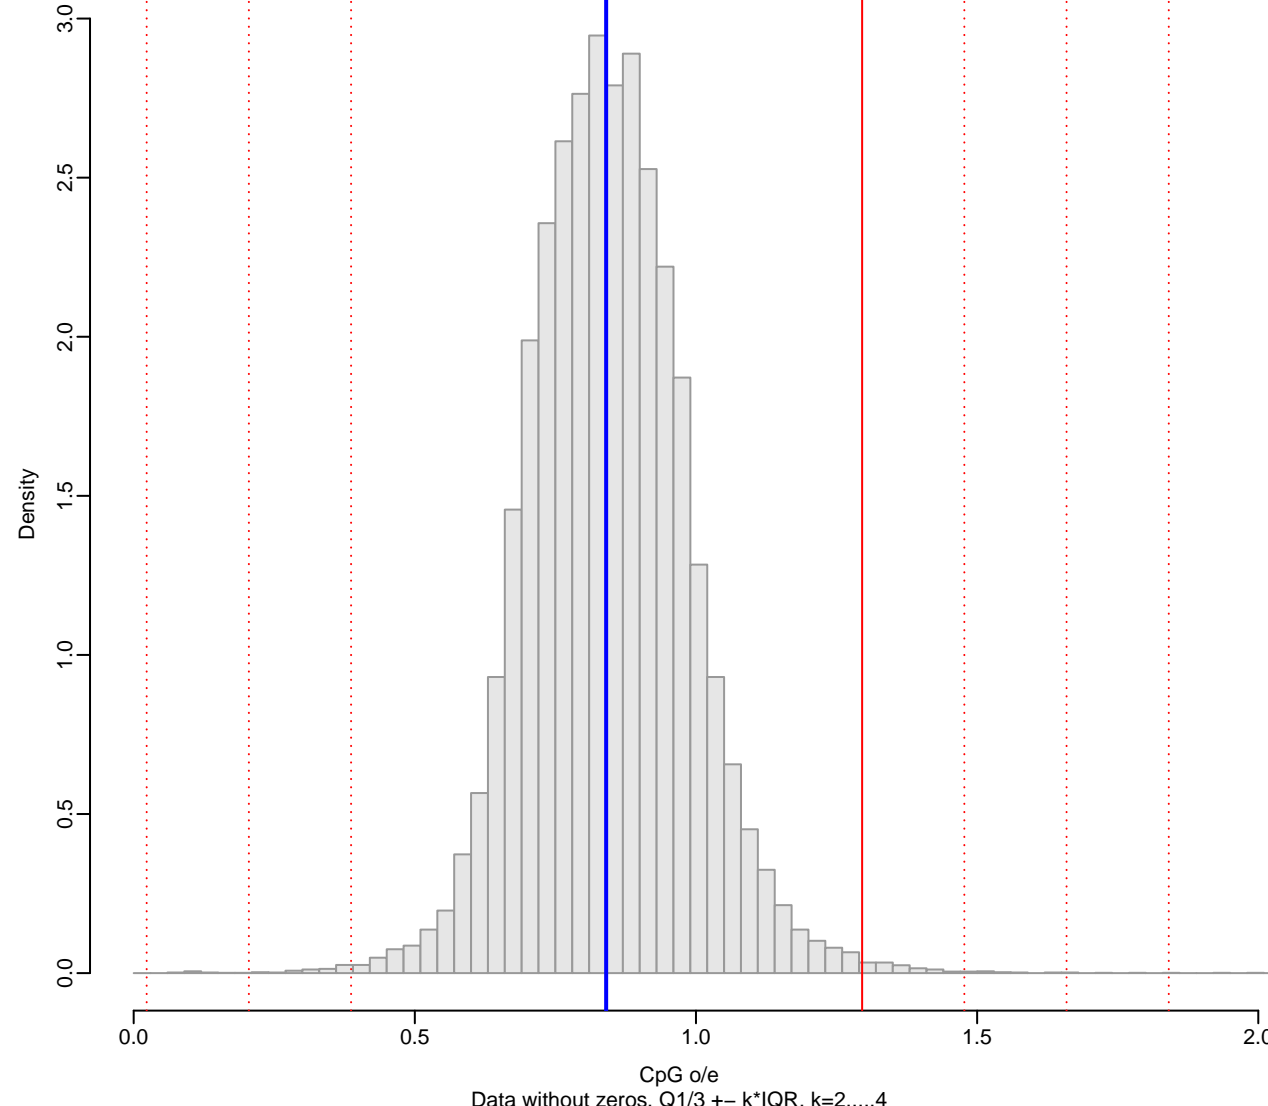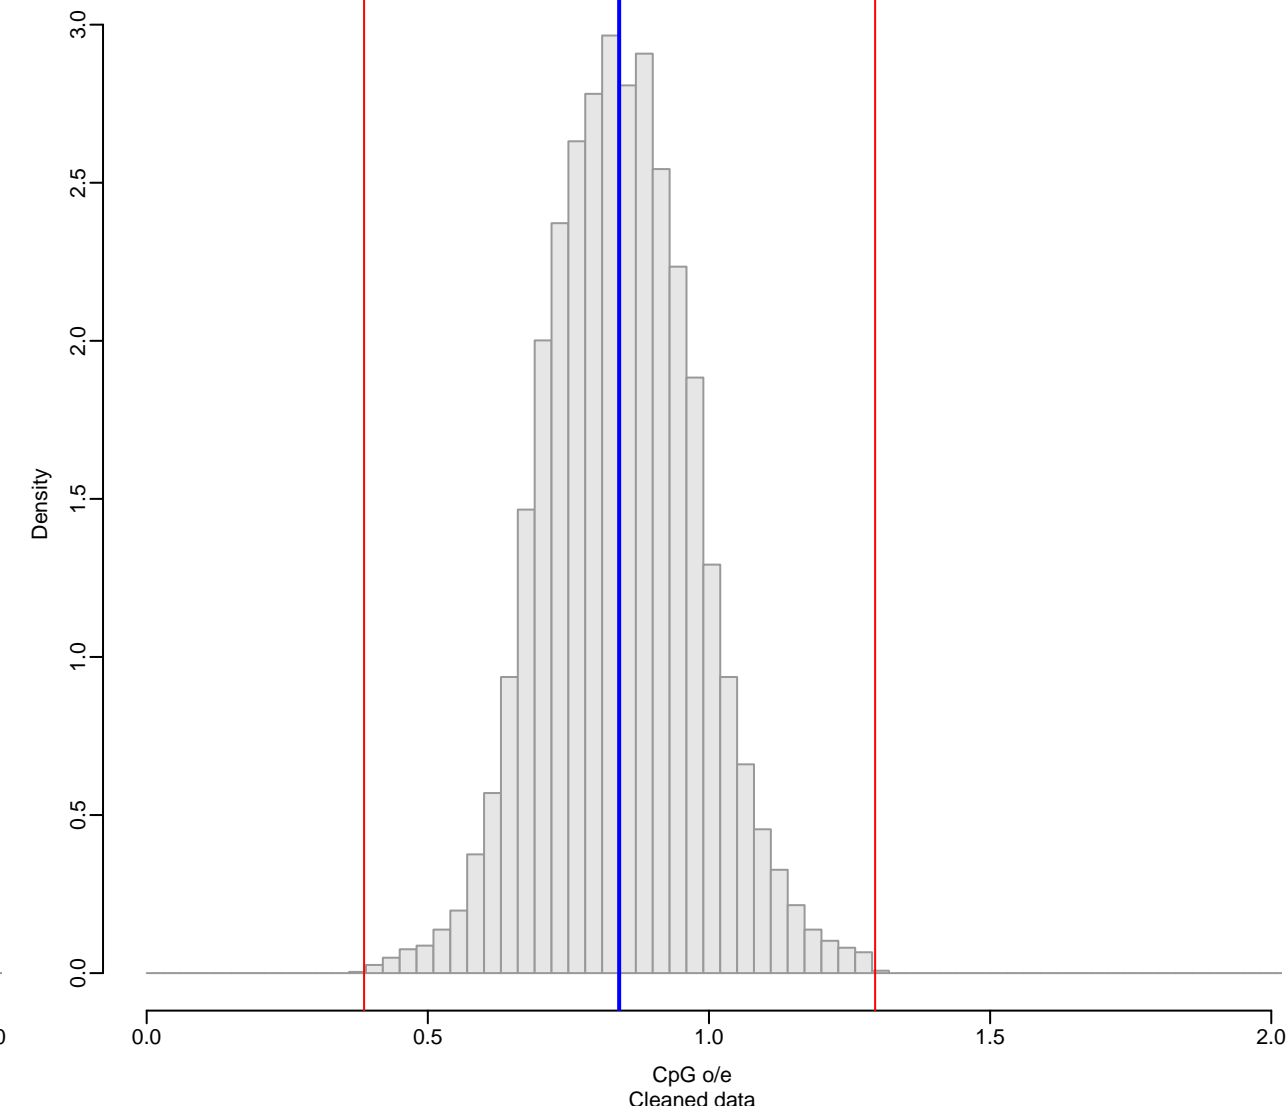

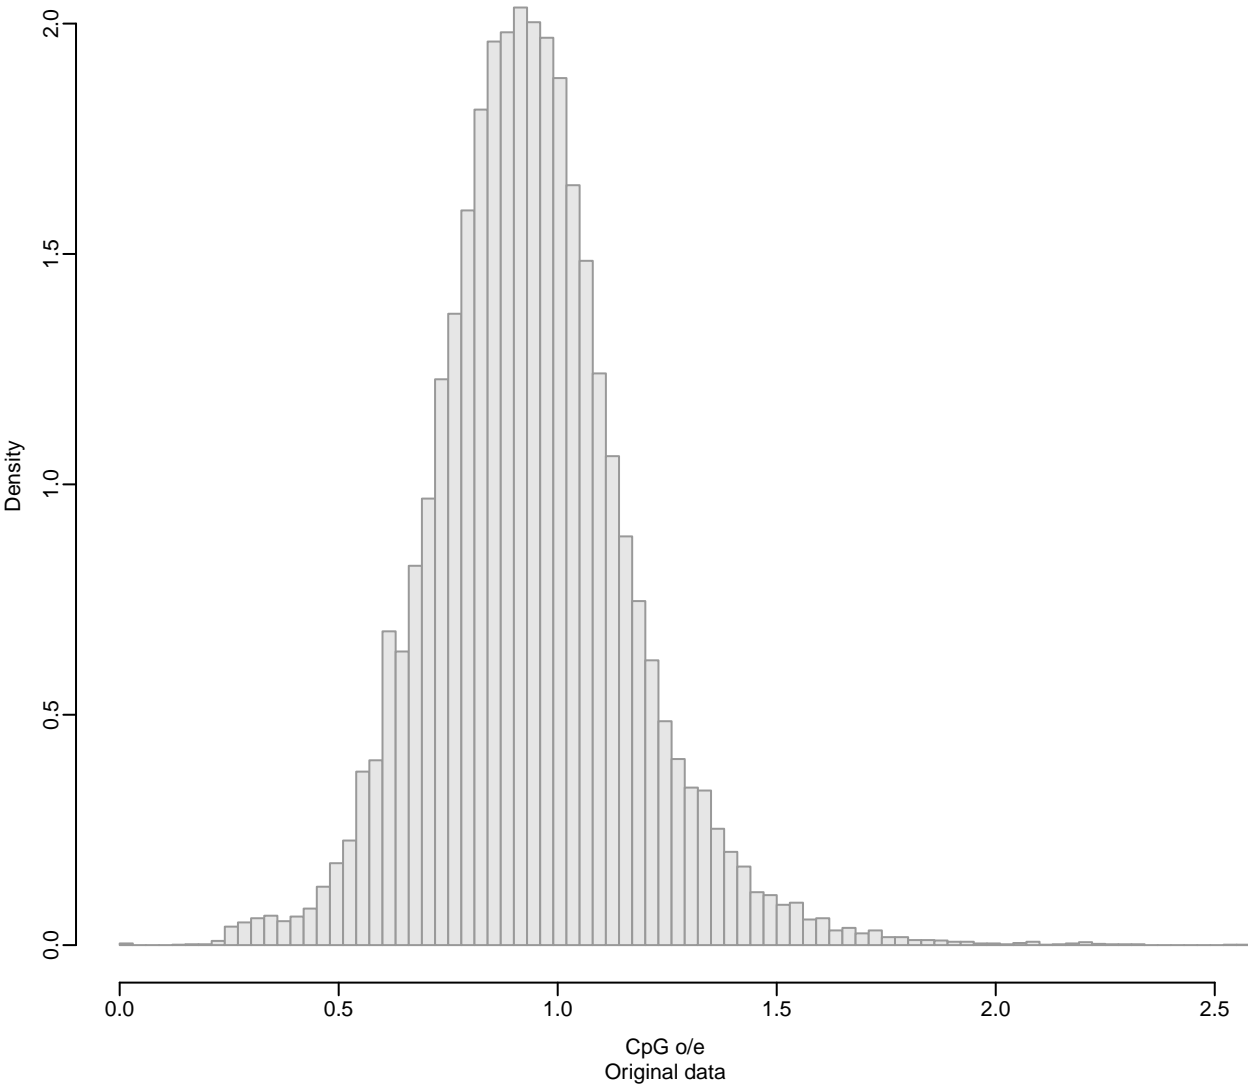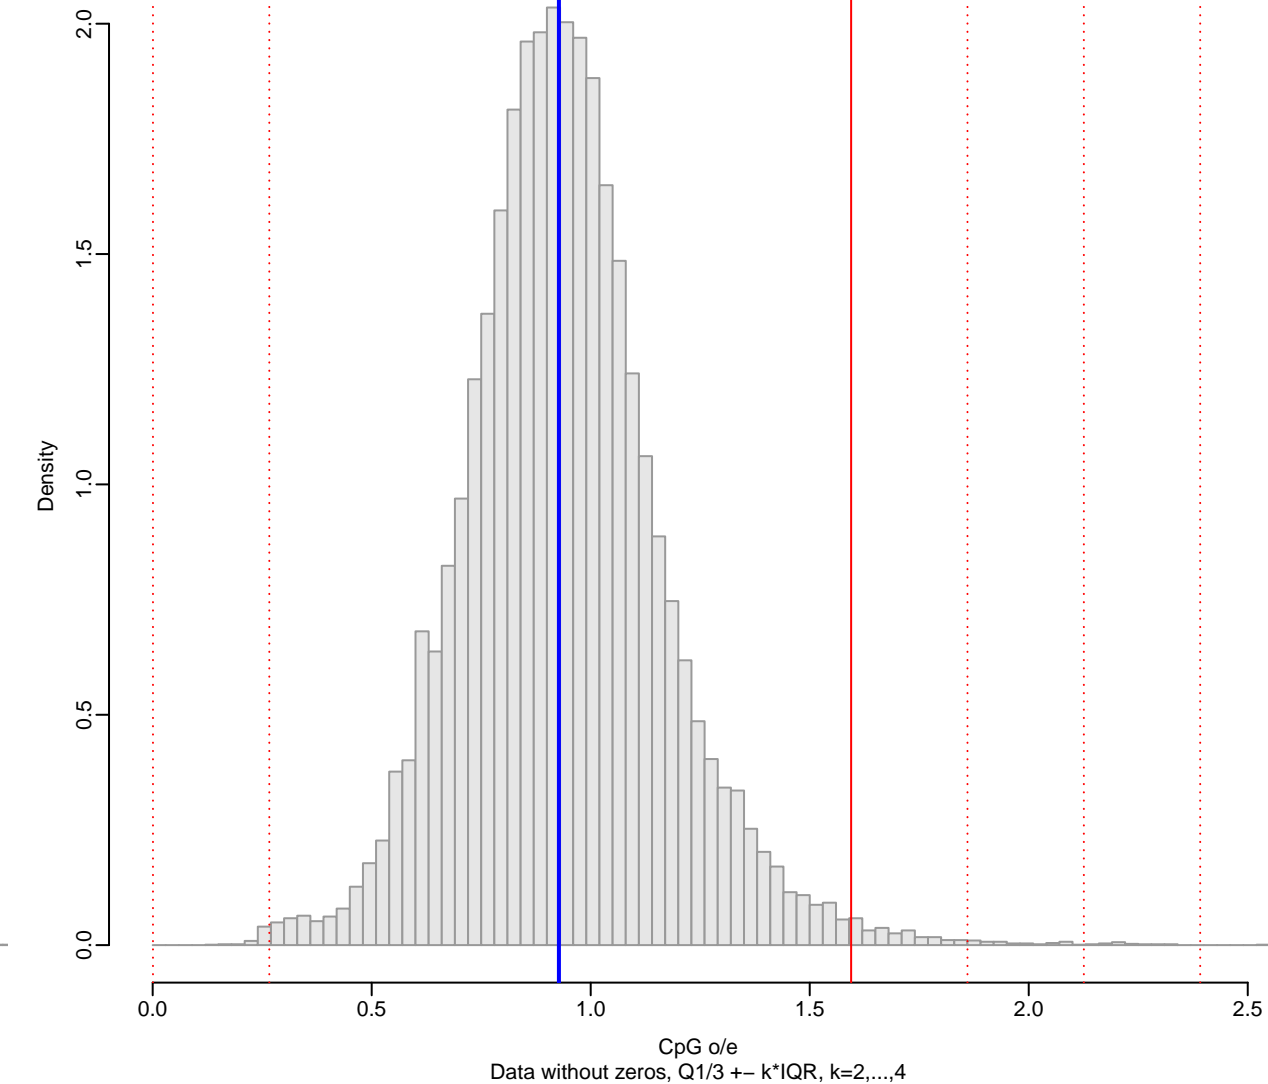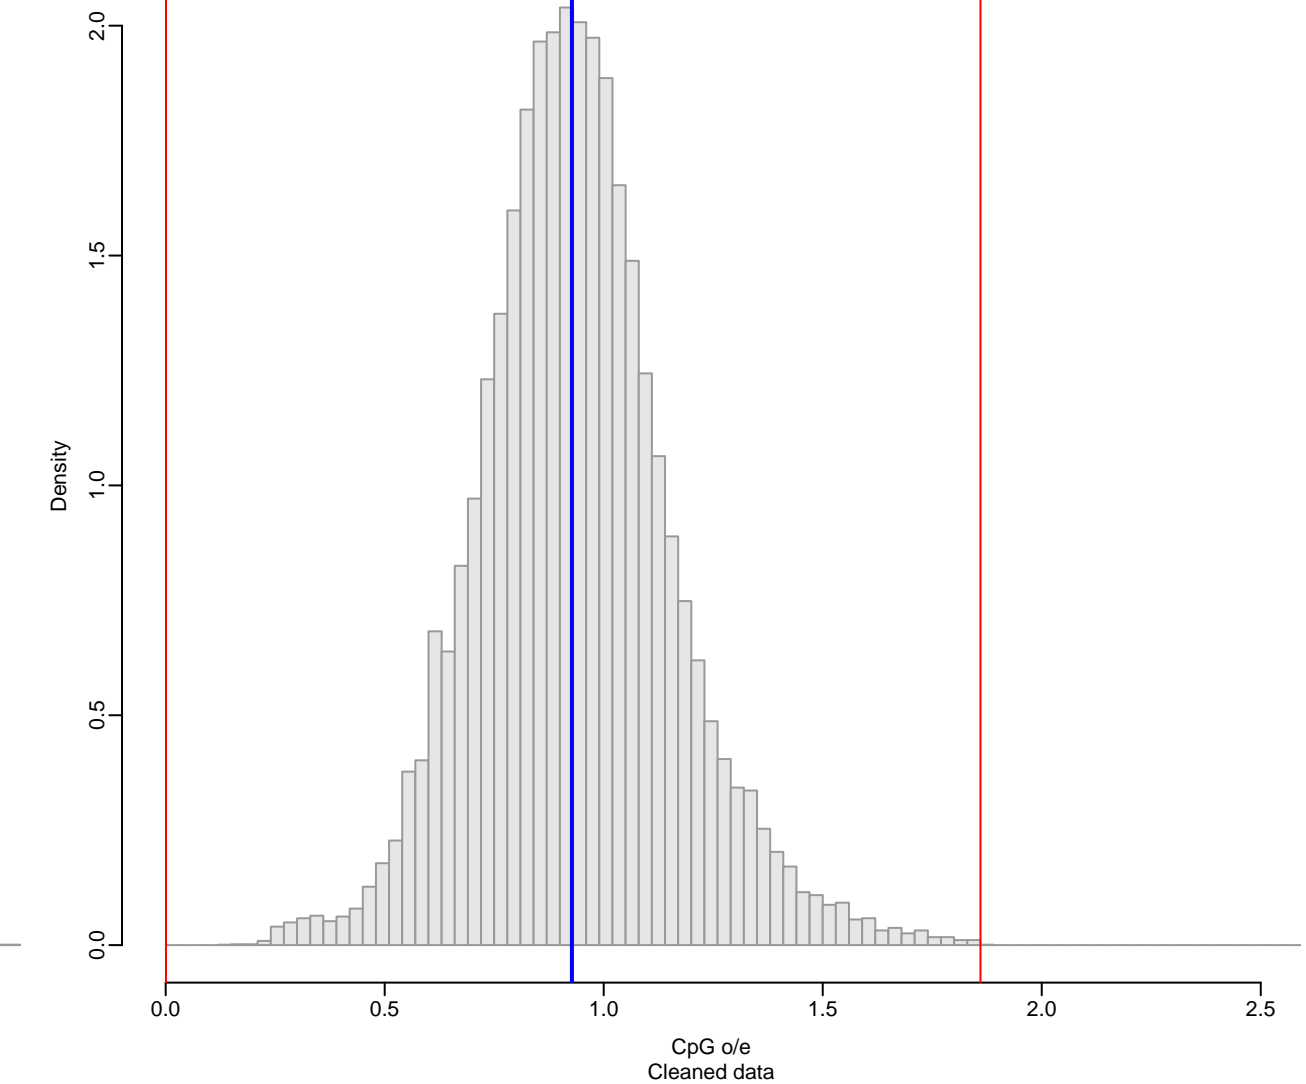

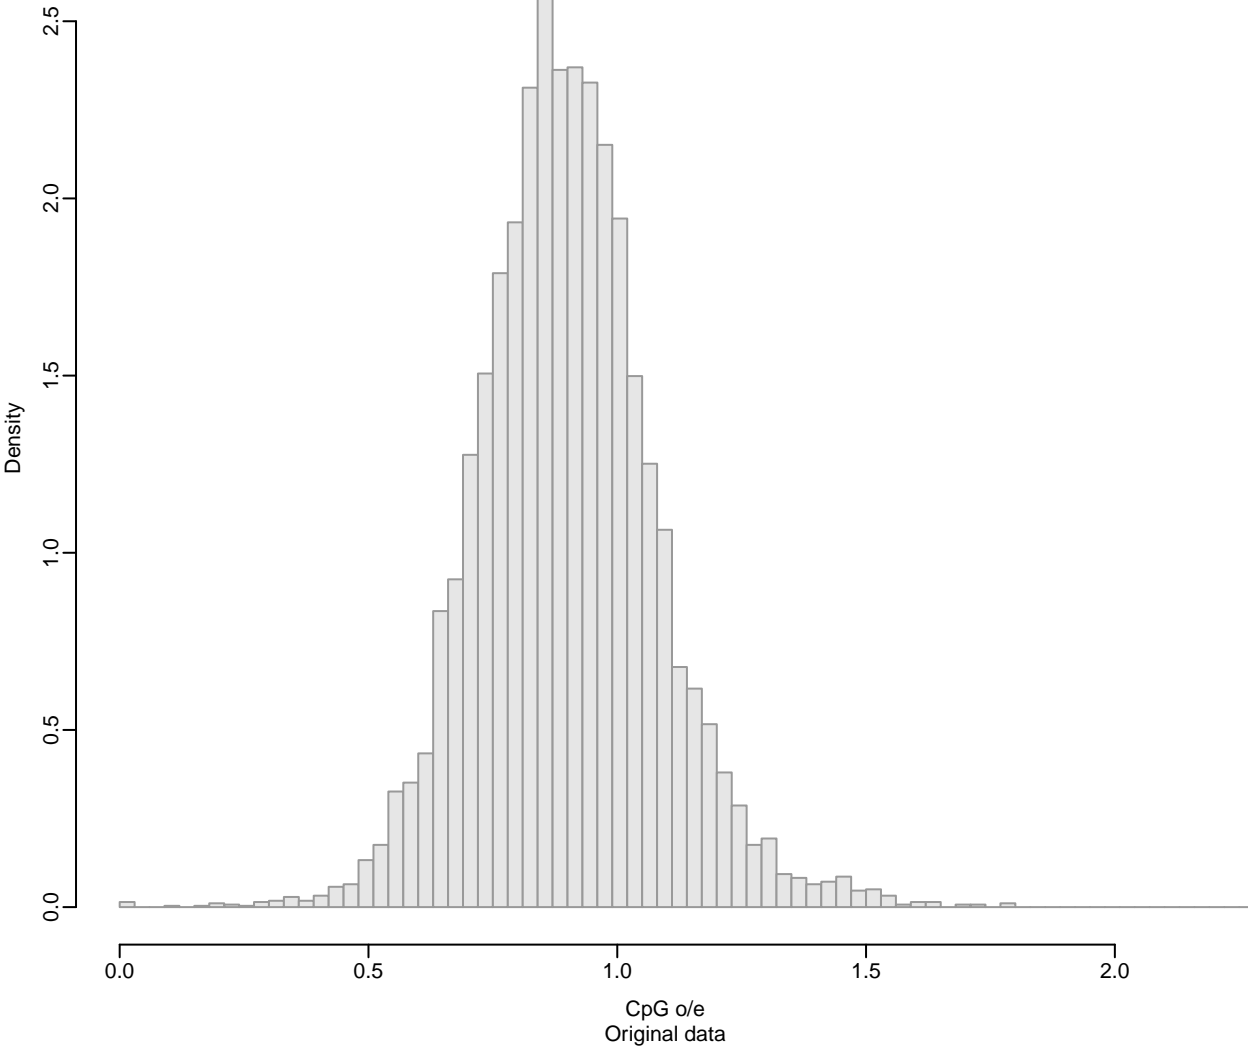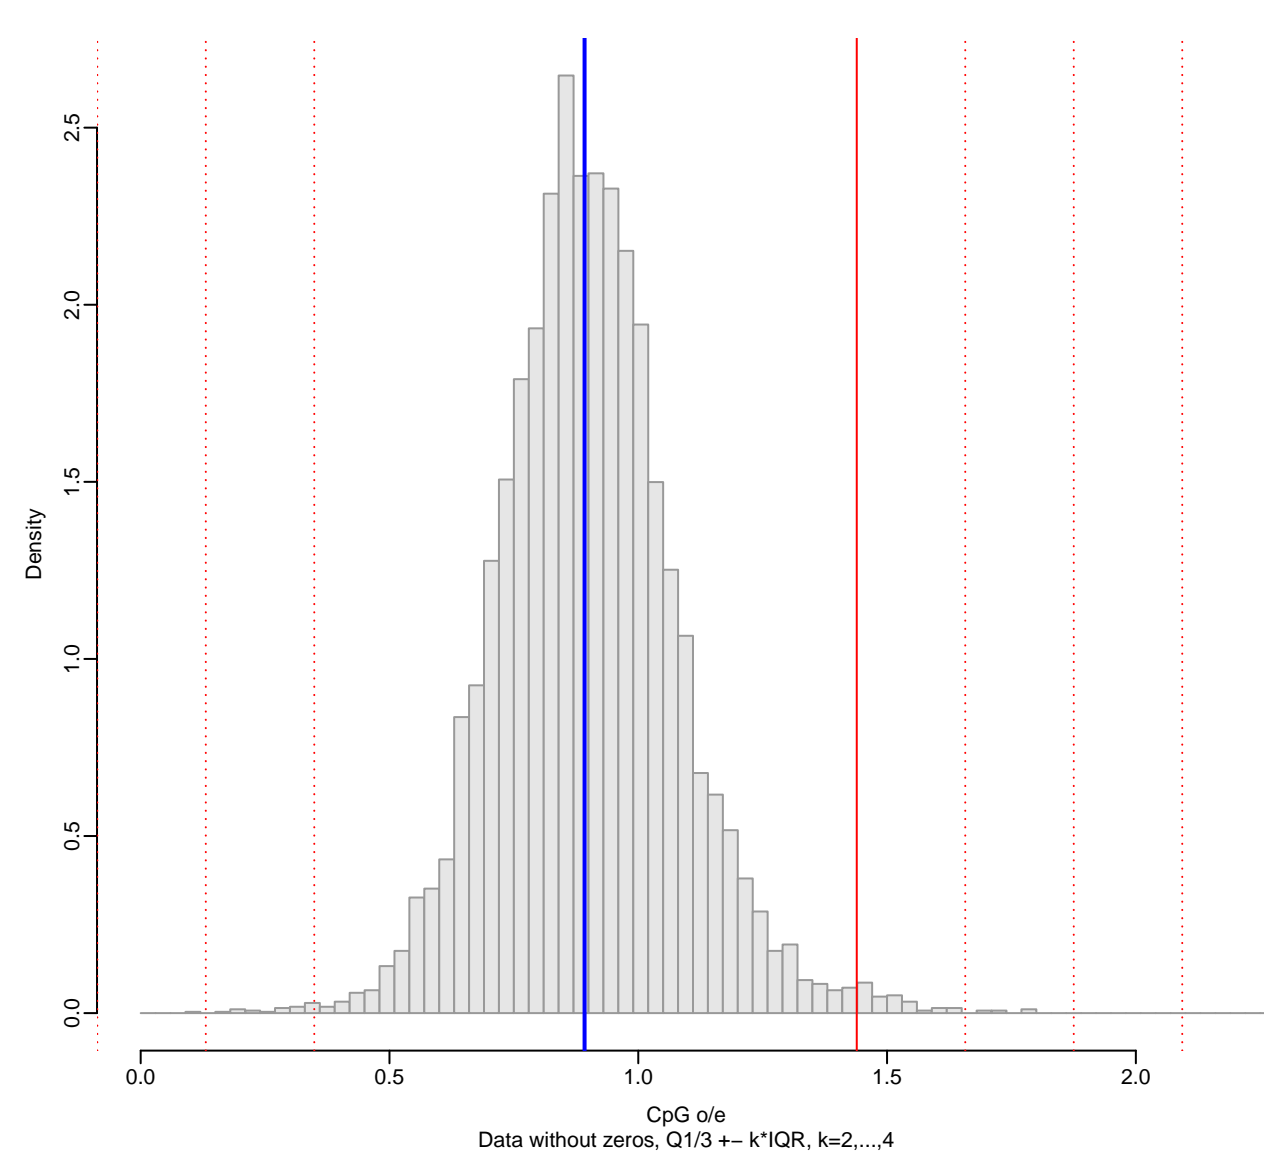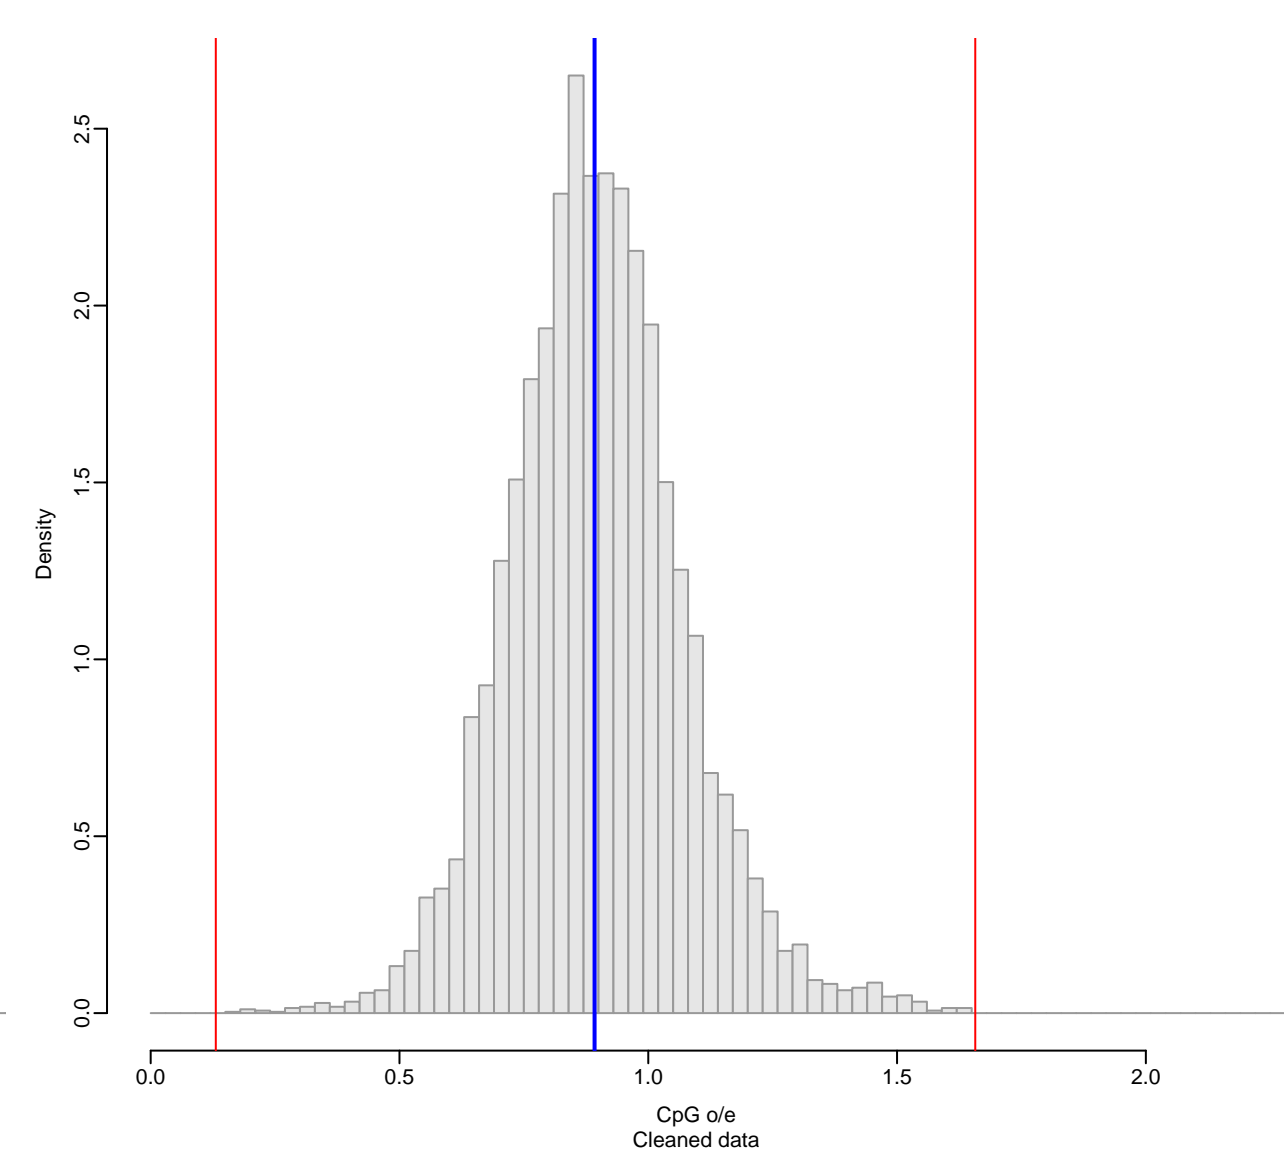

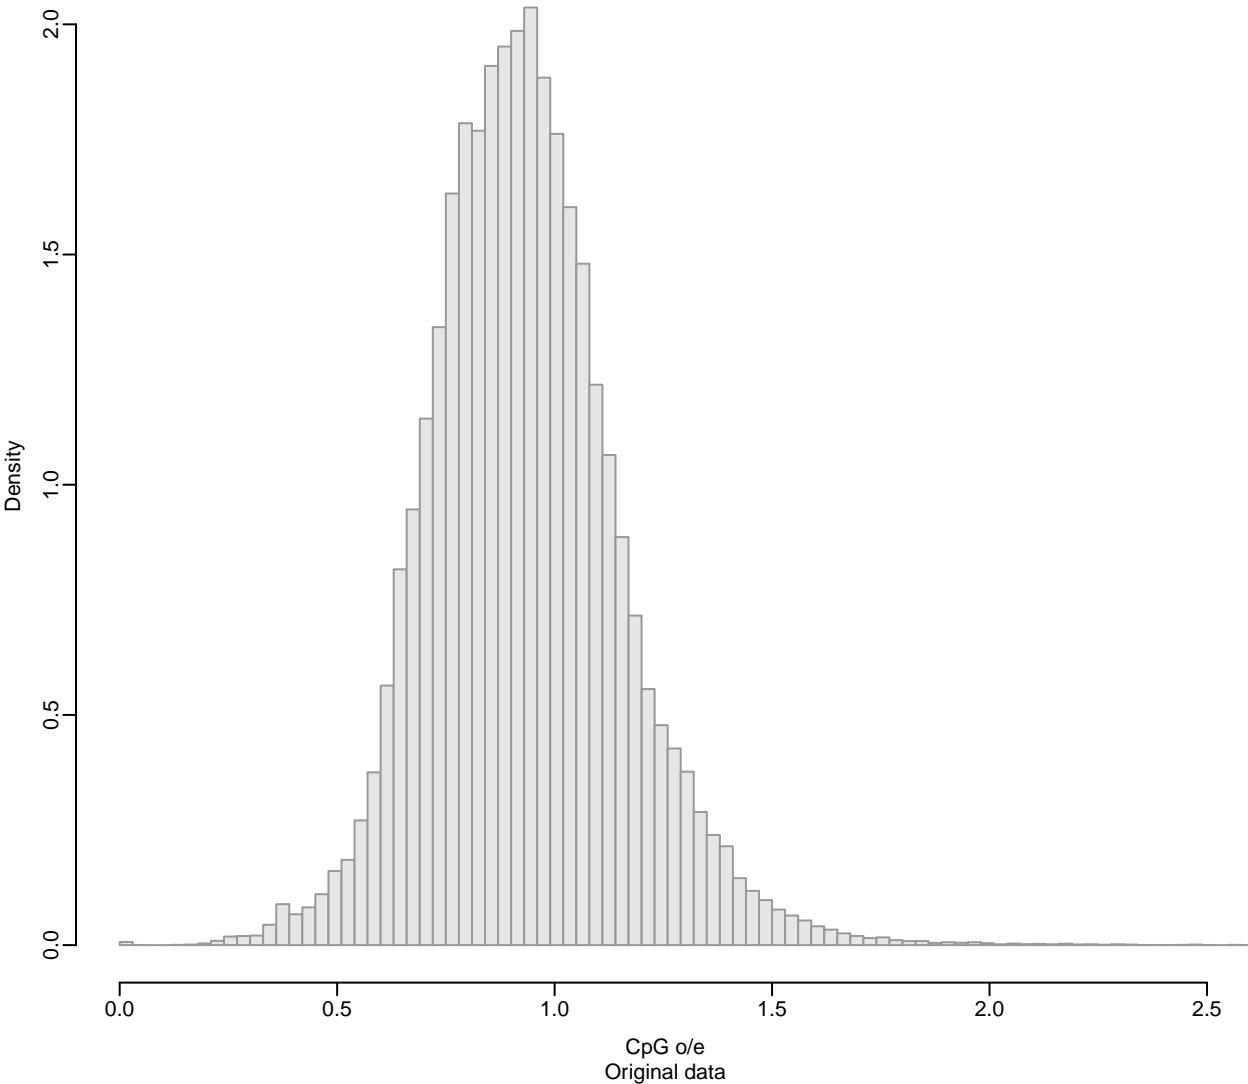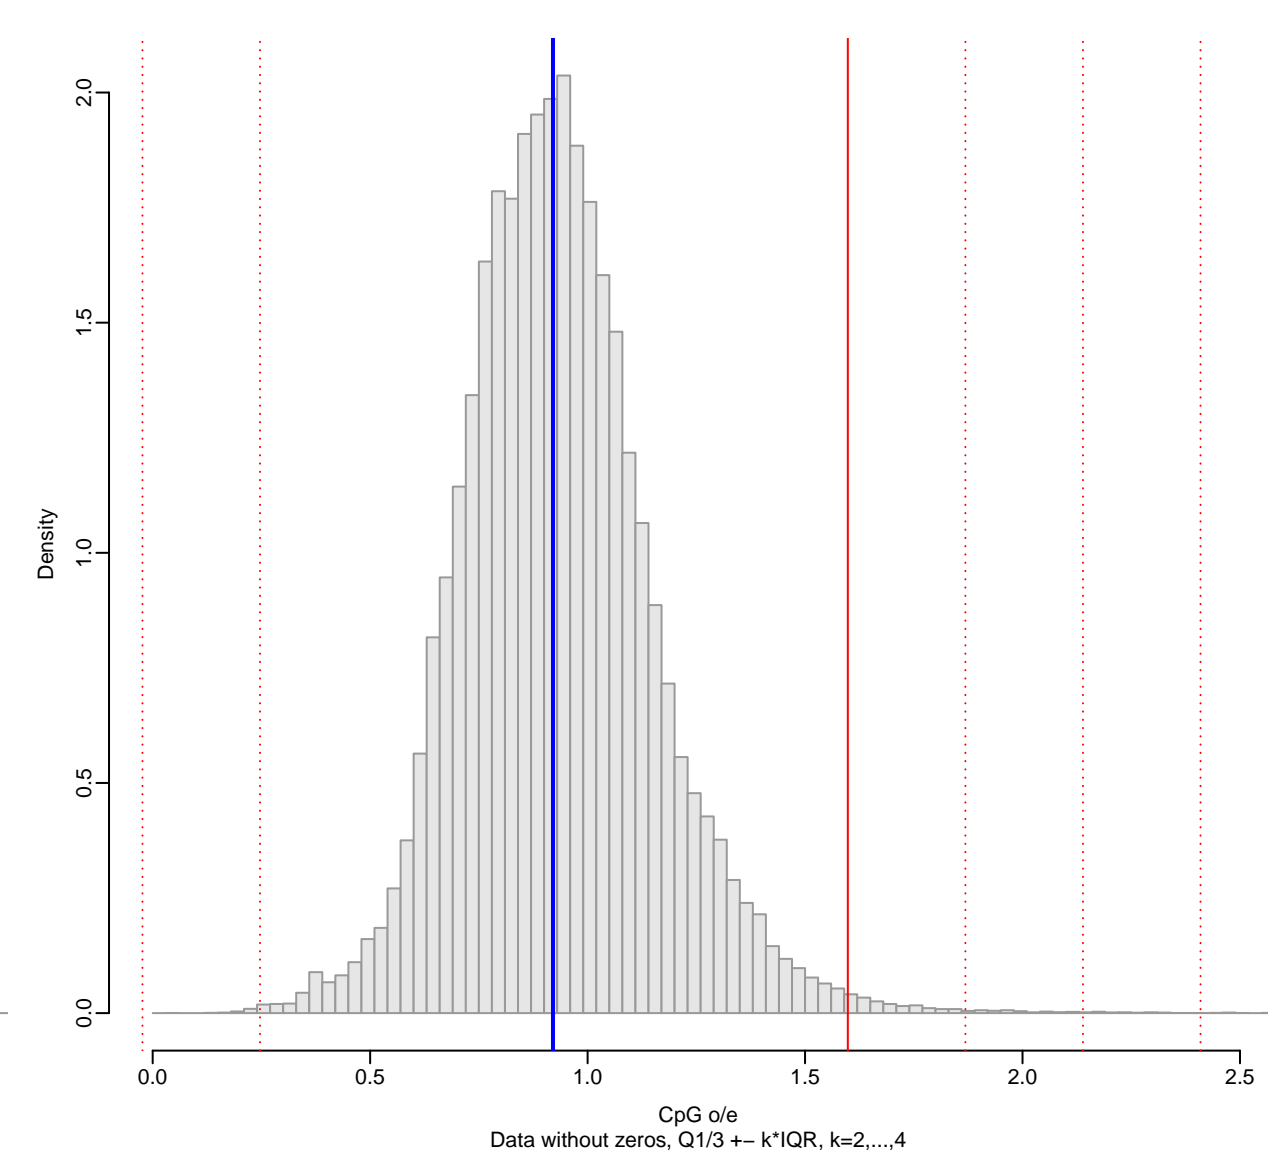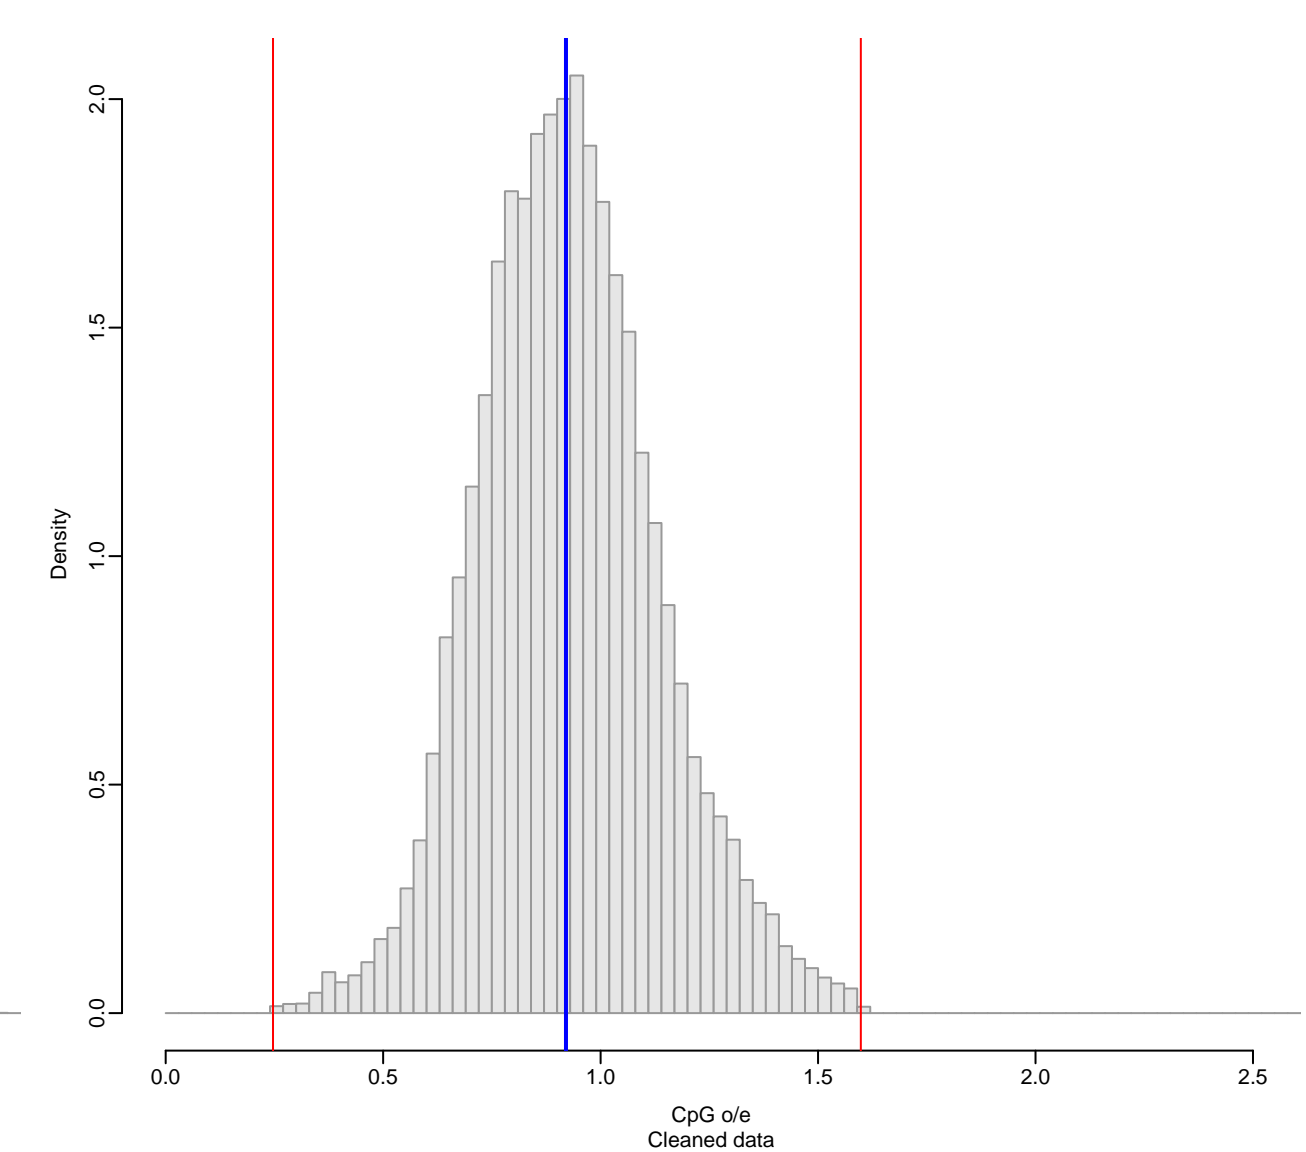

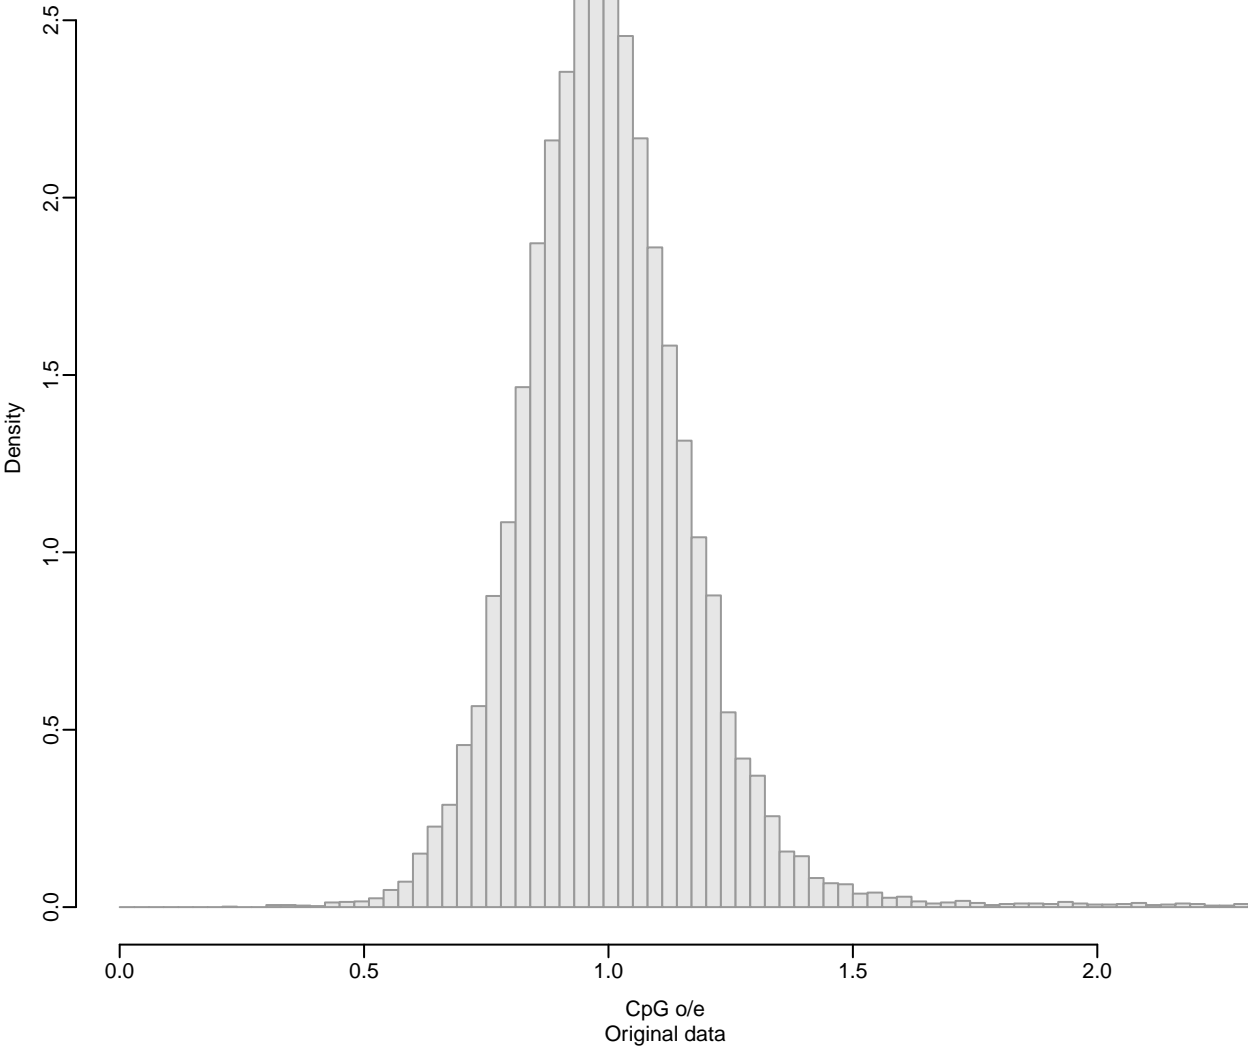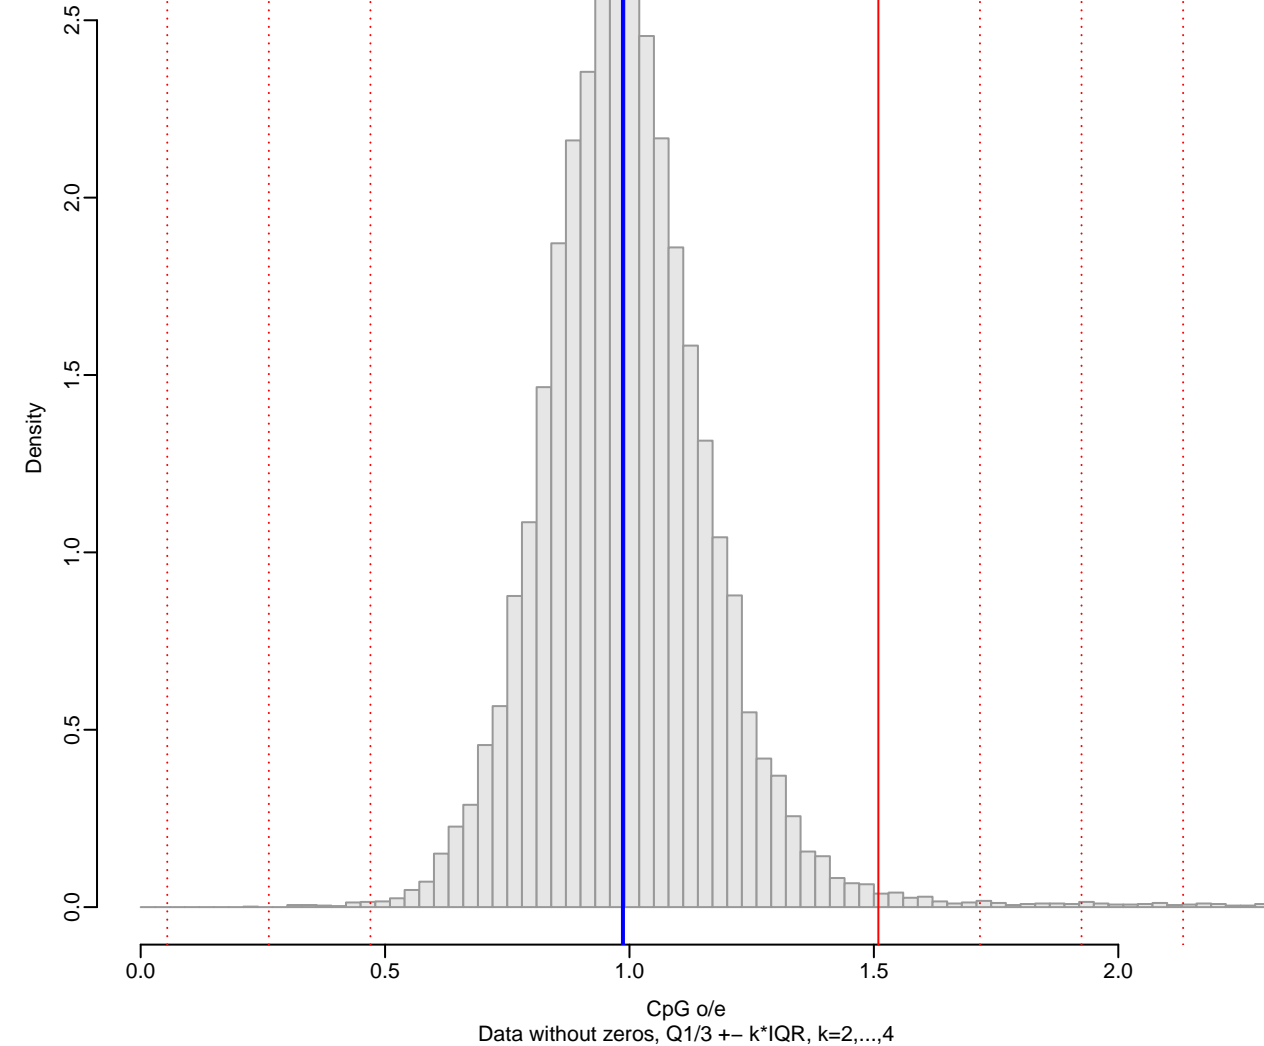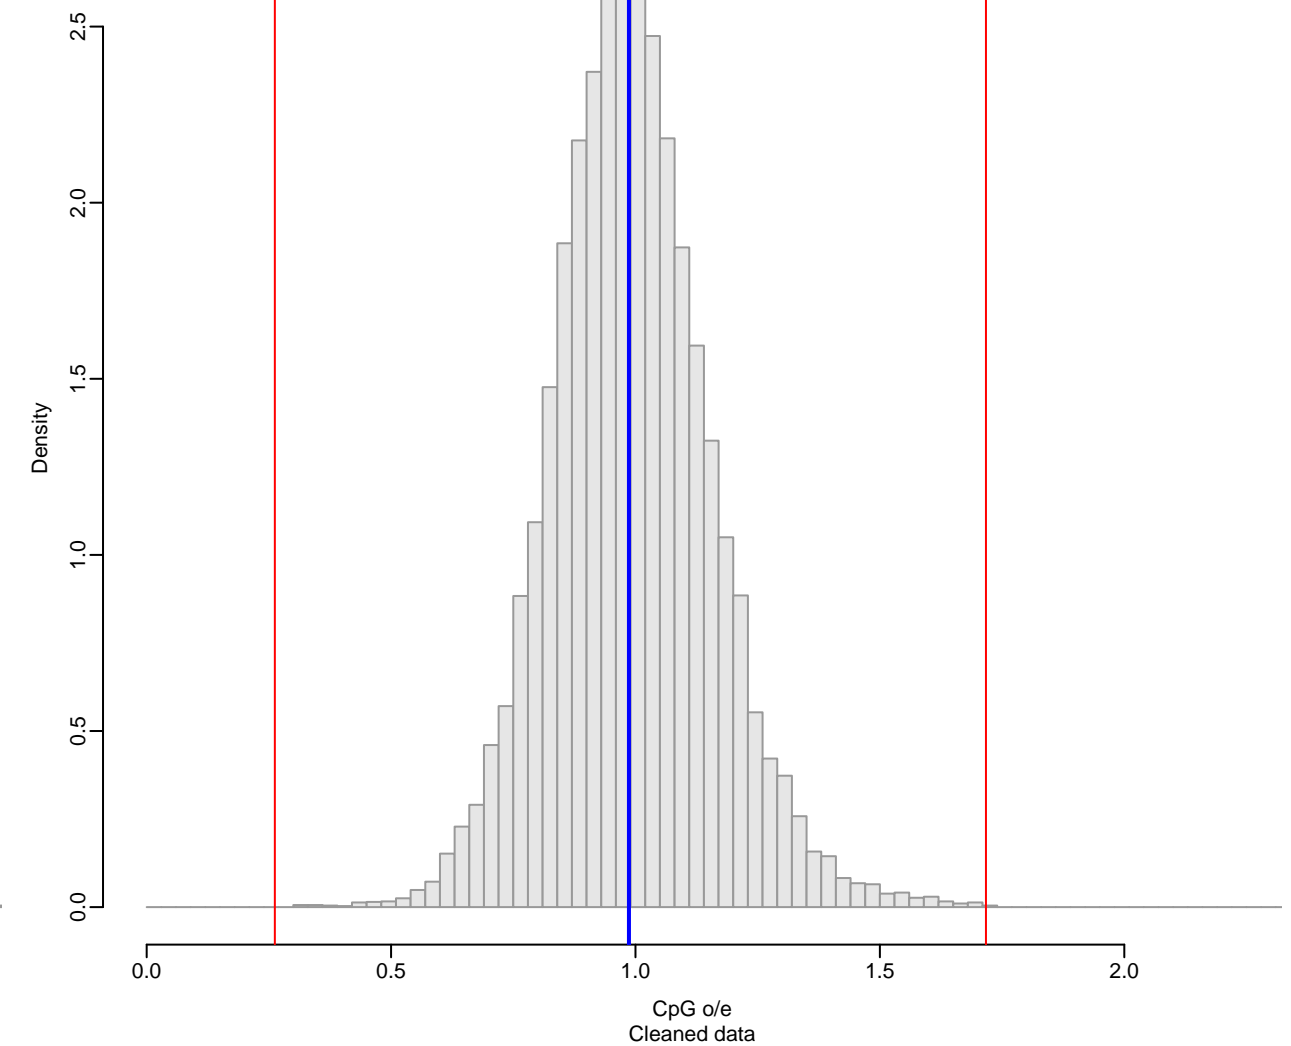

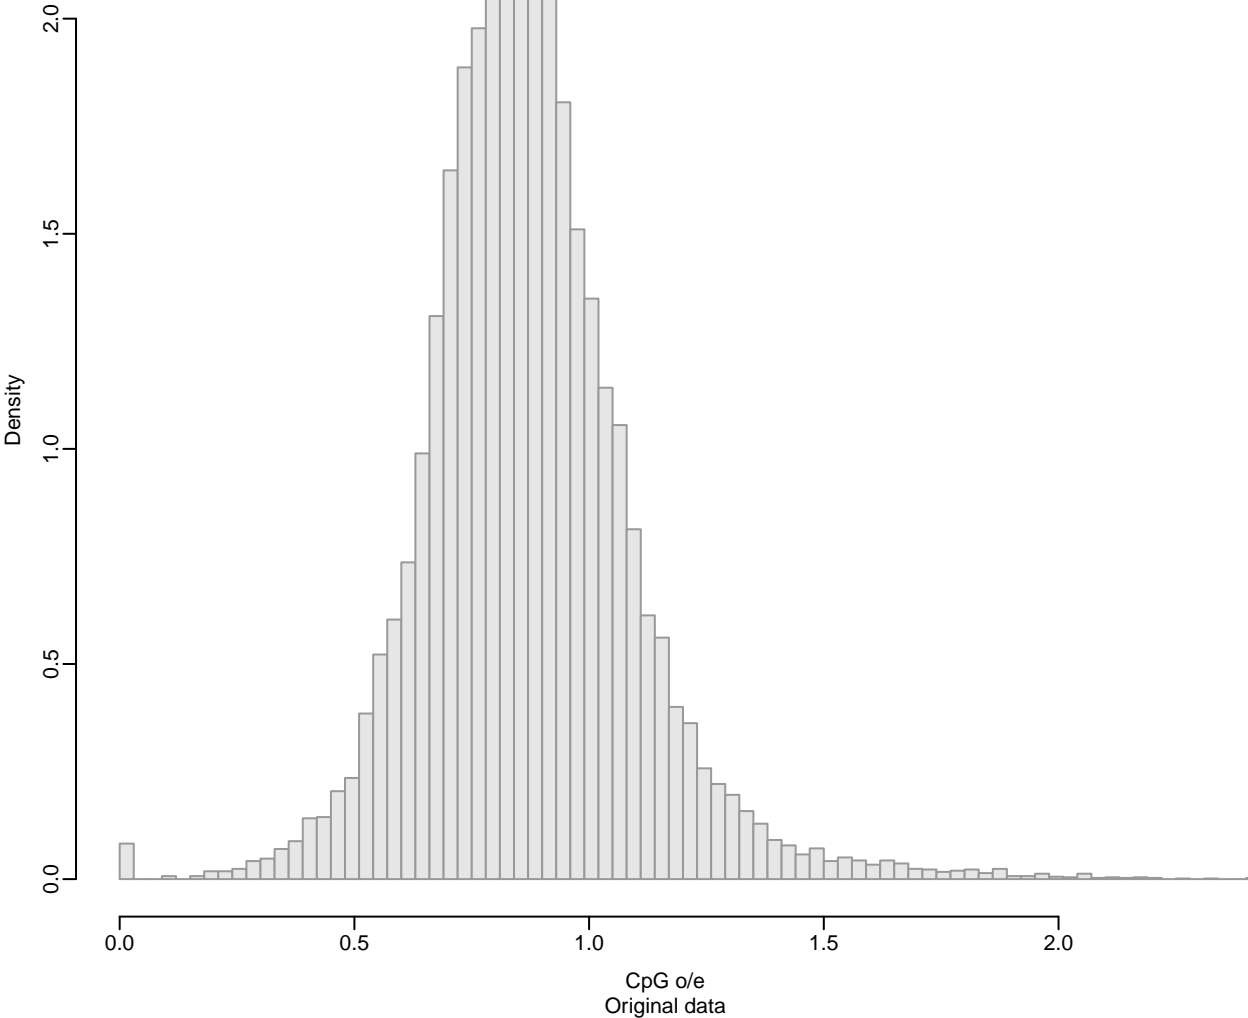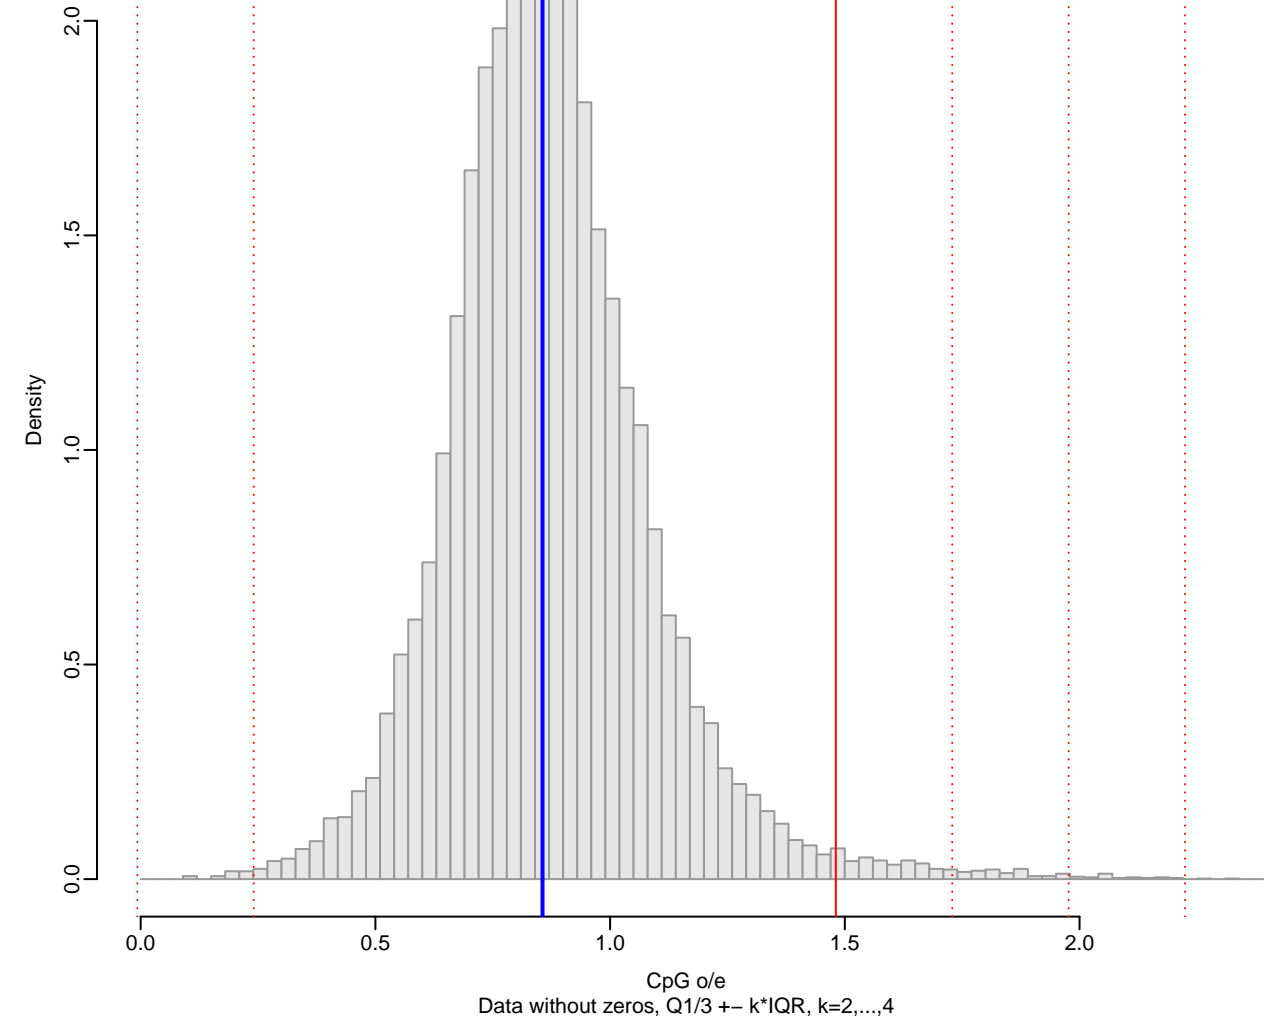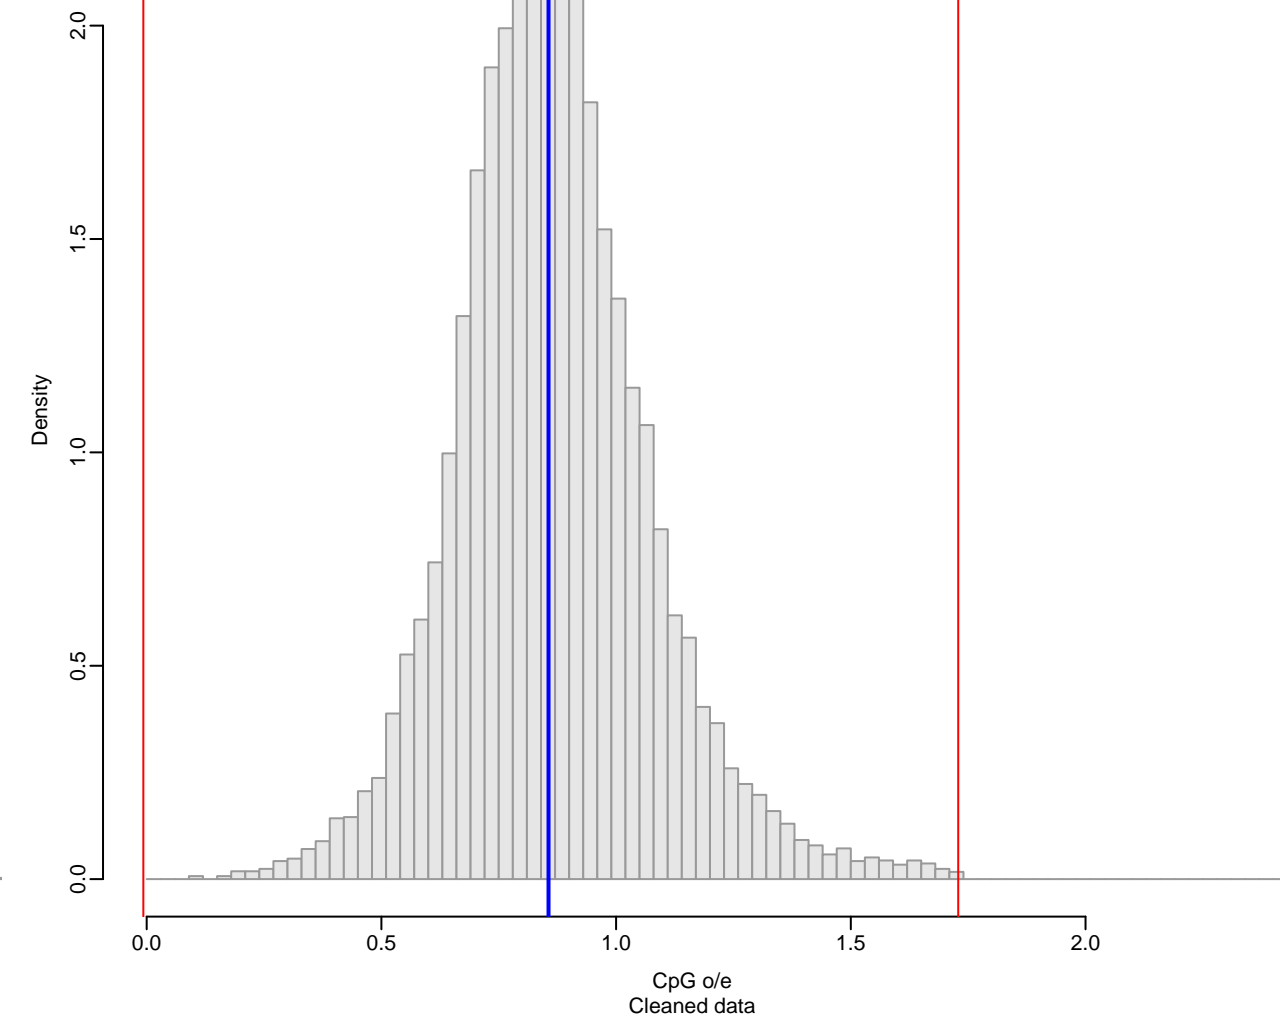

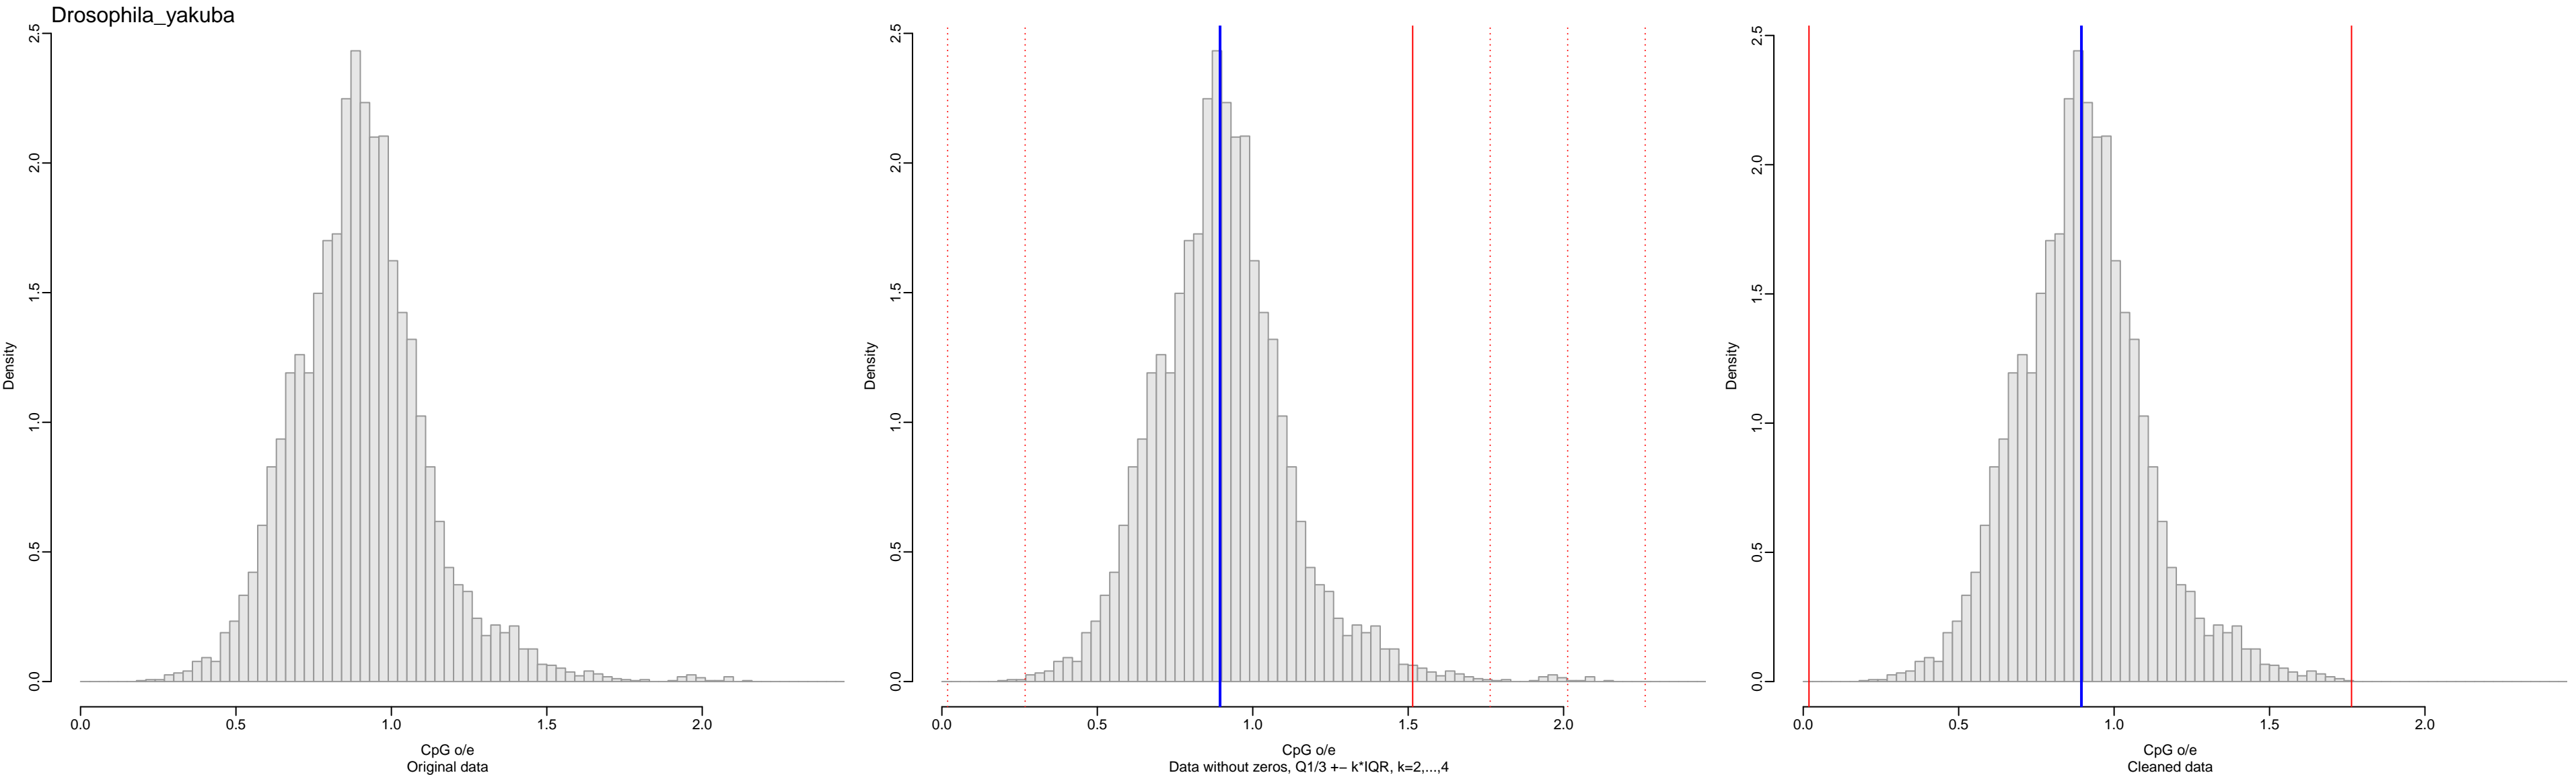



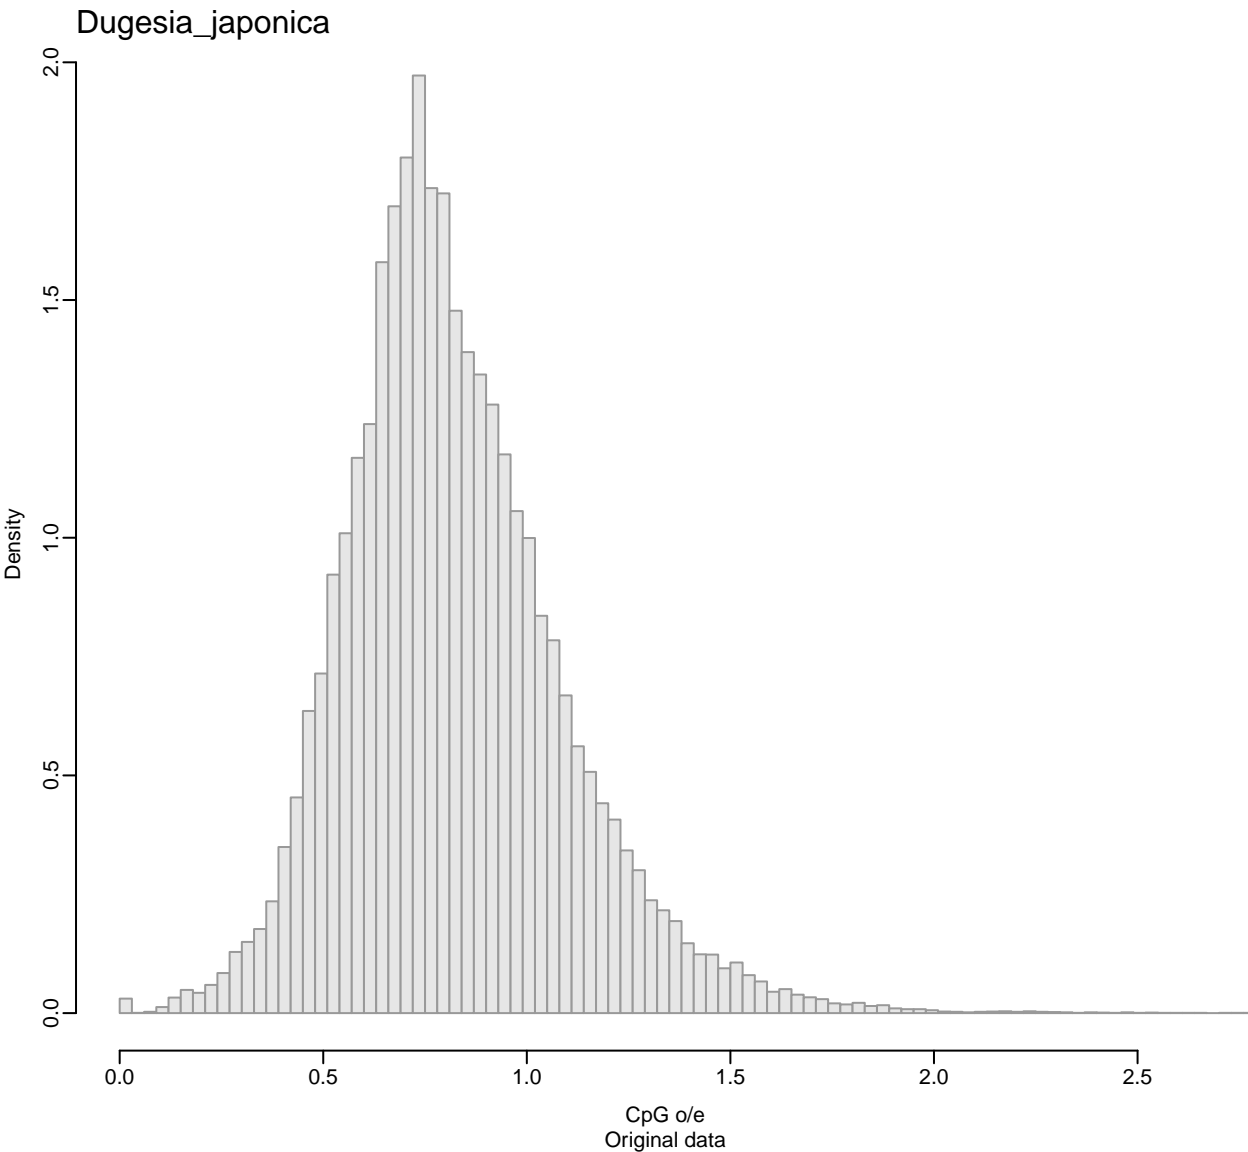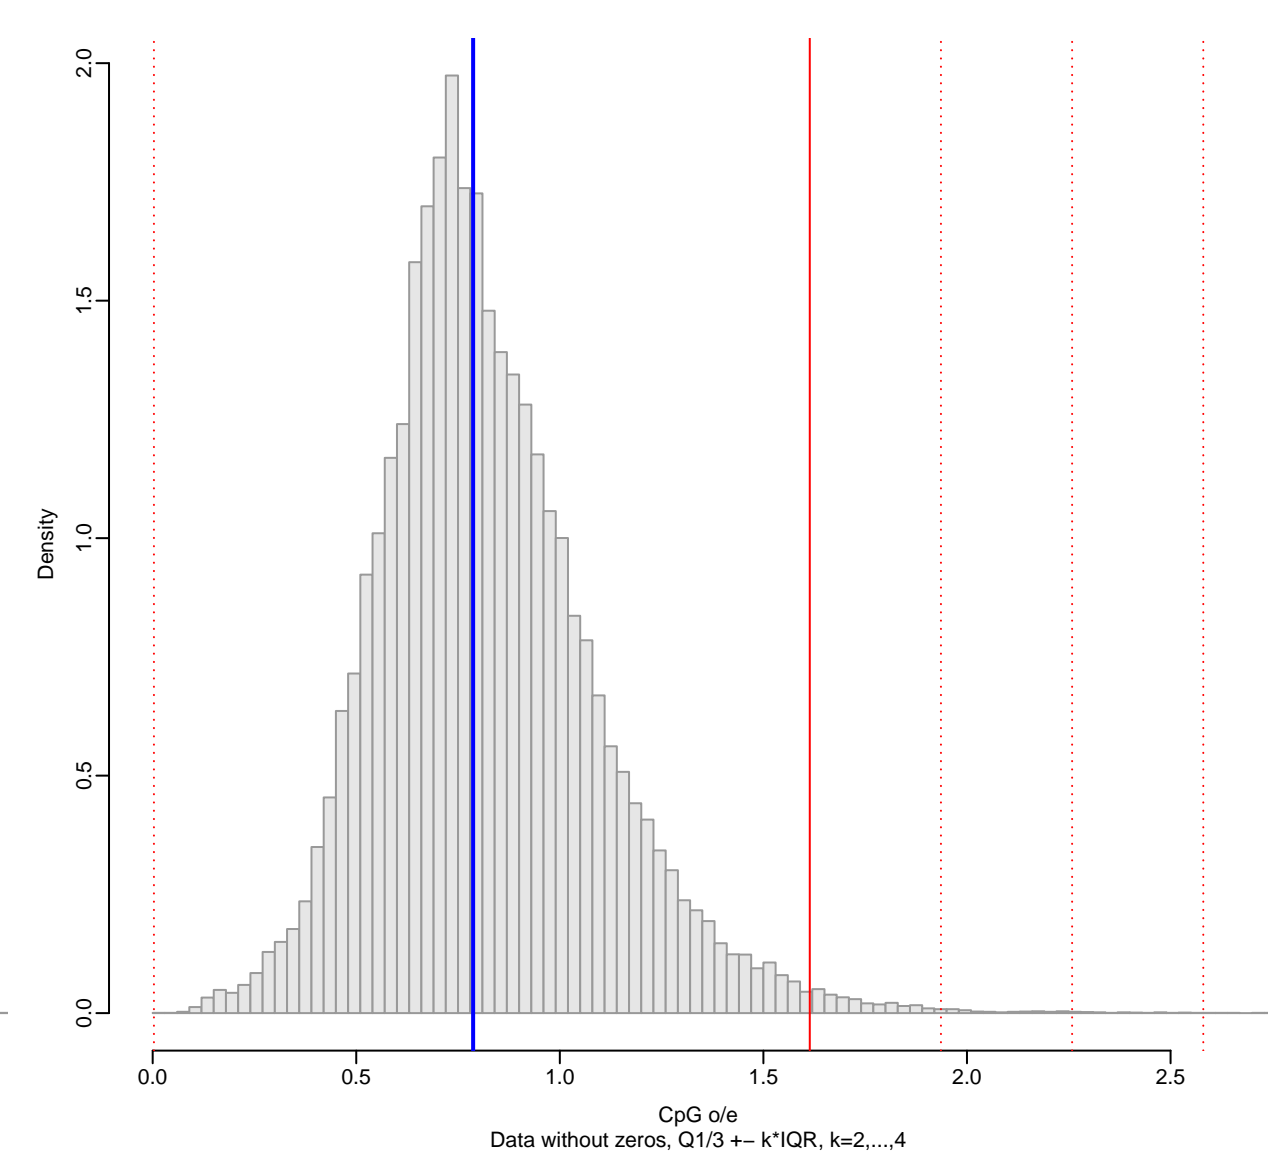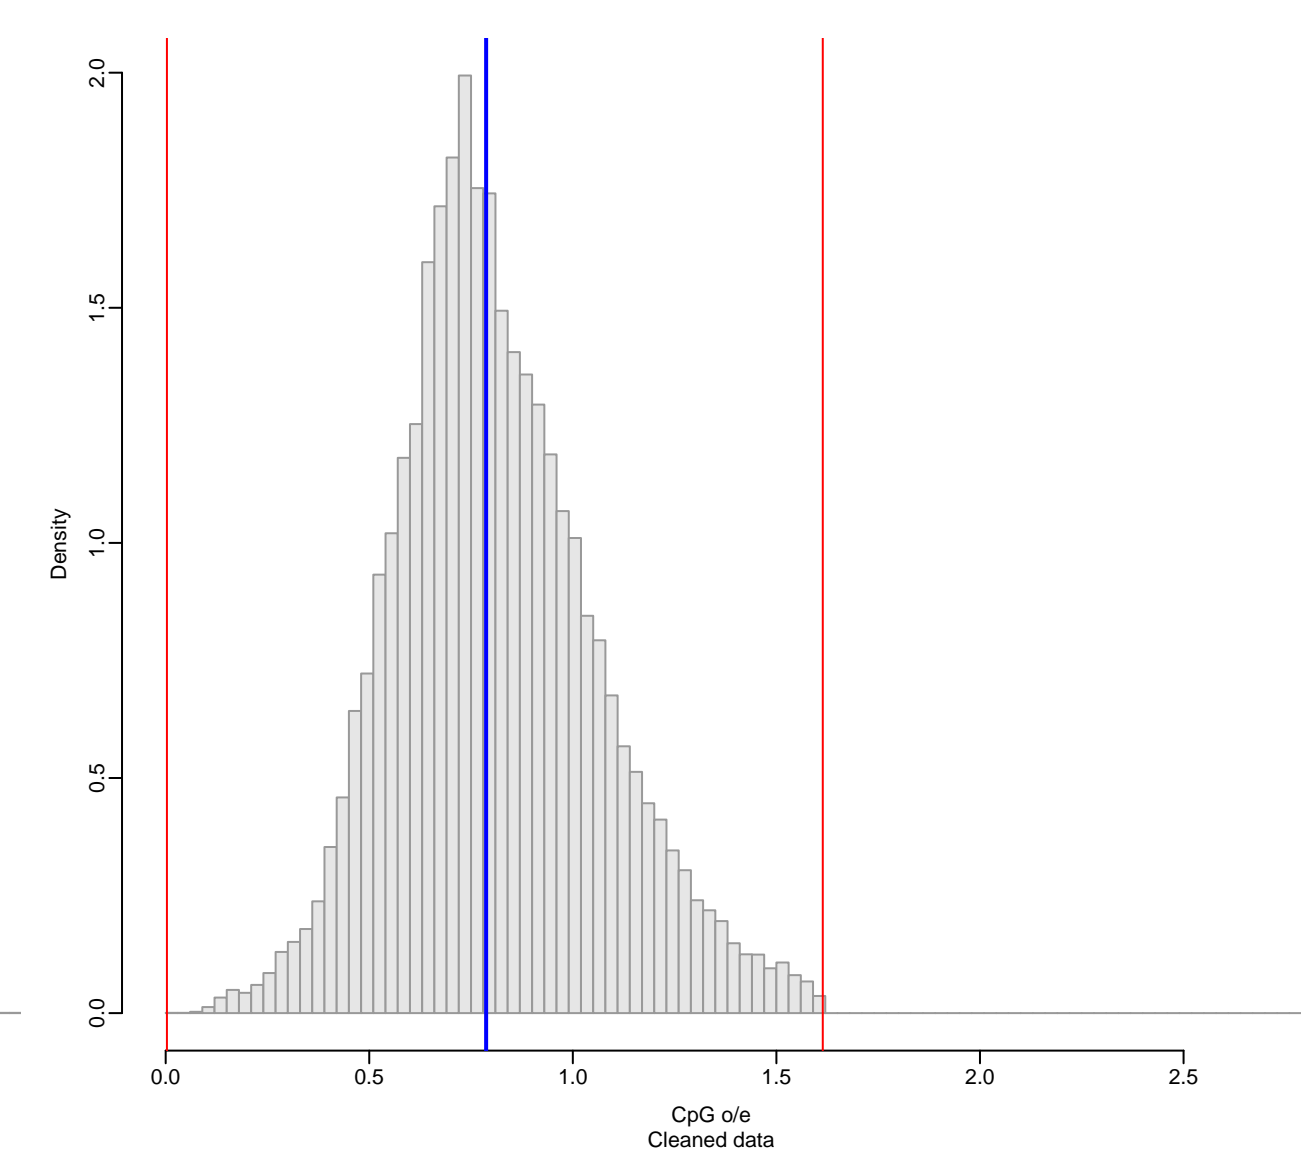

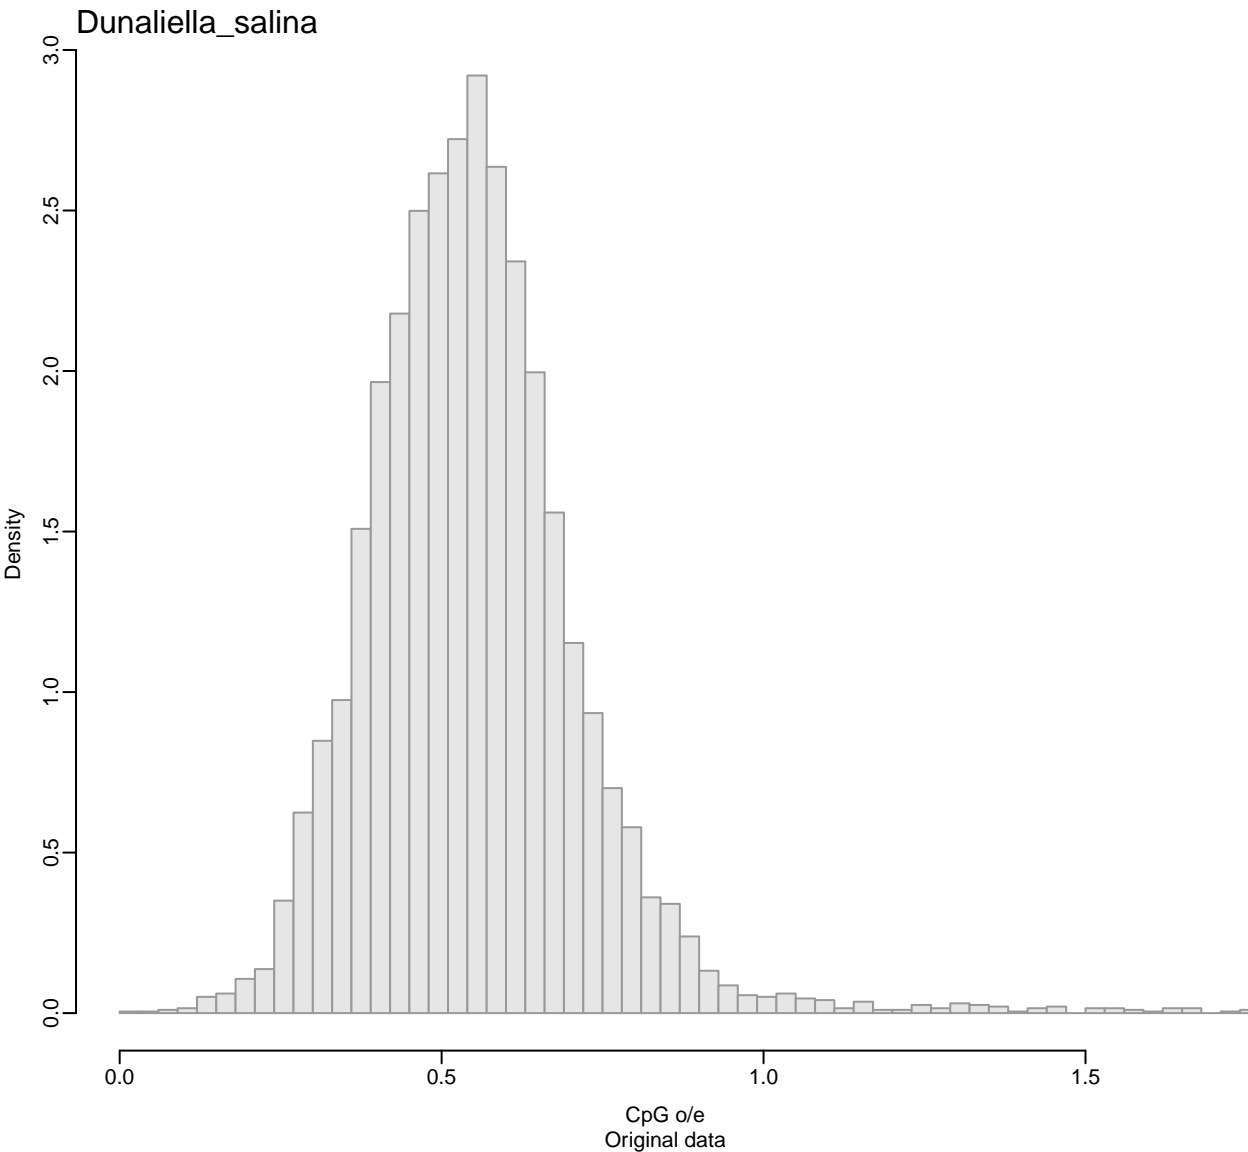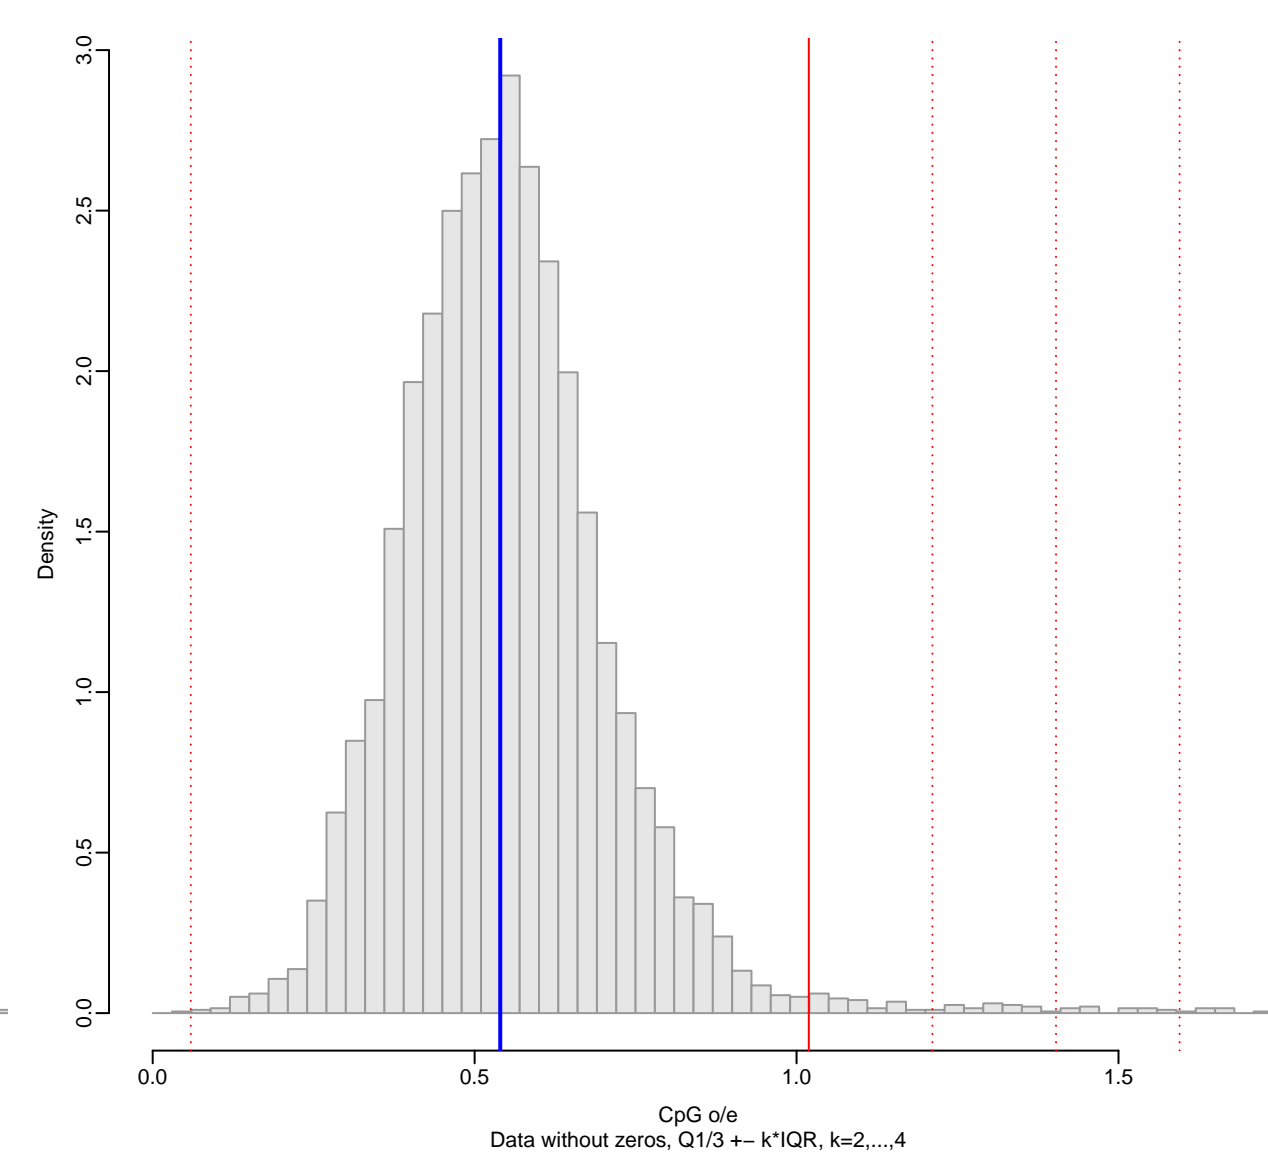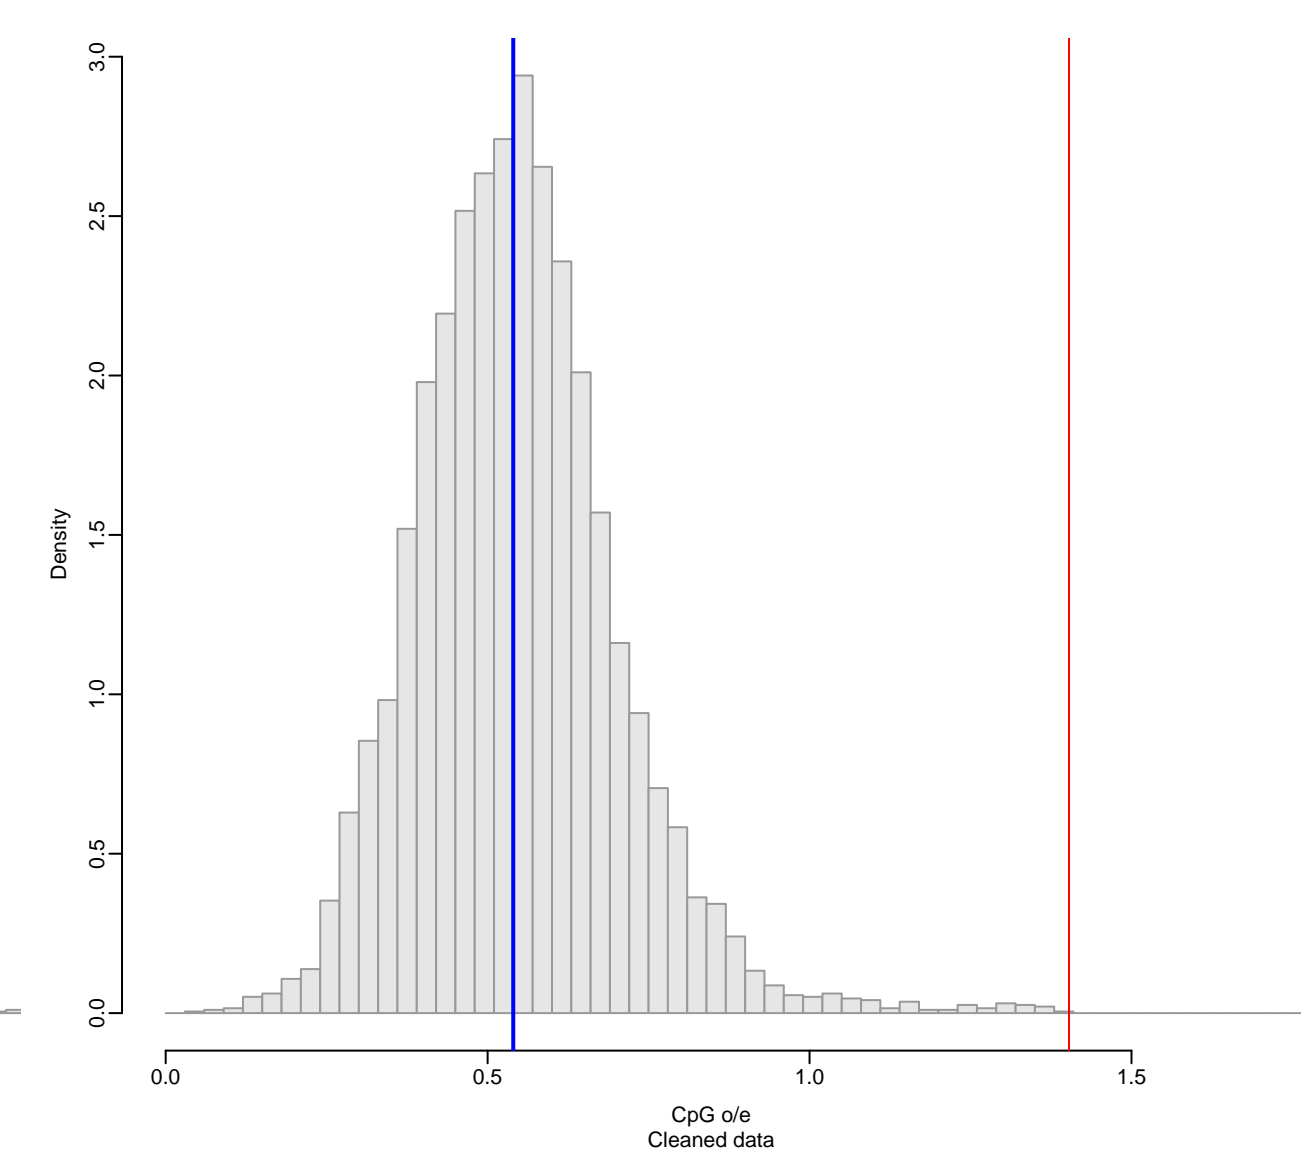

# Echinococcus\_granulosus

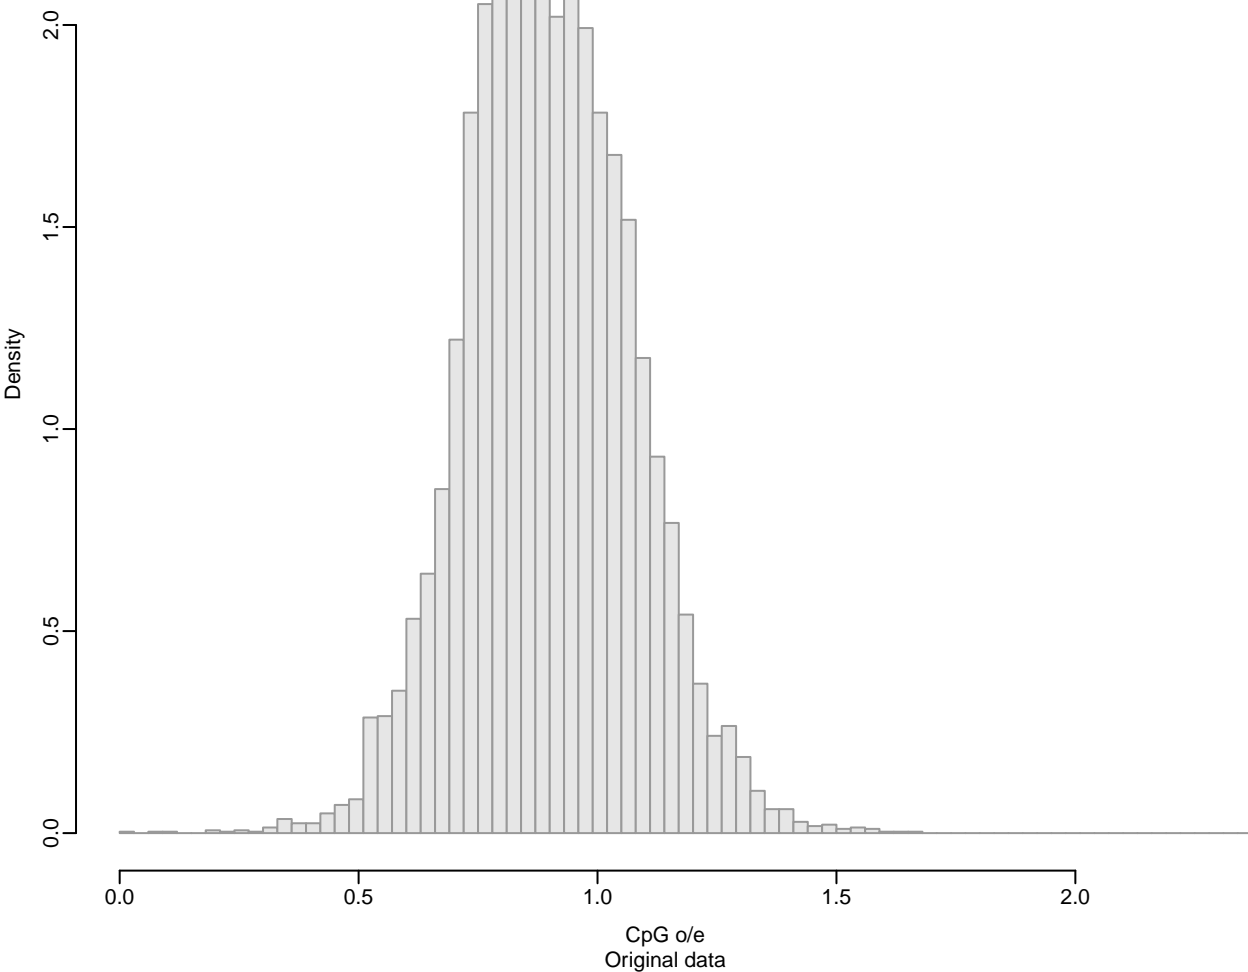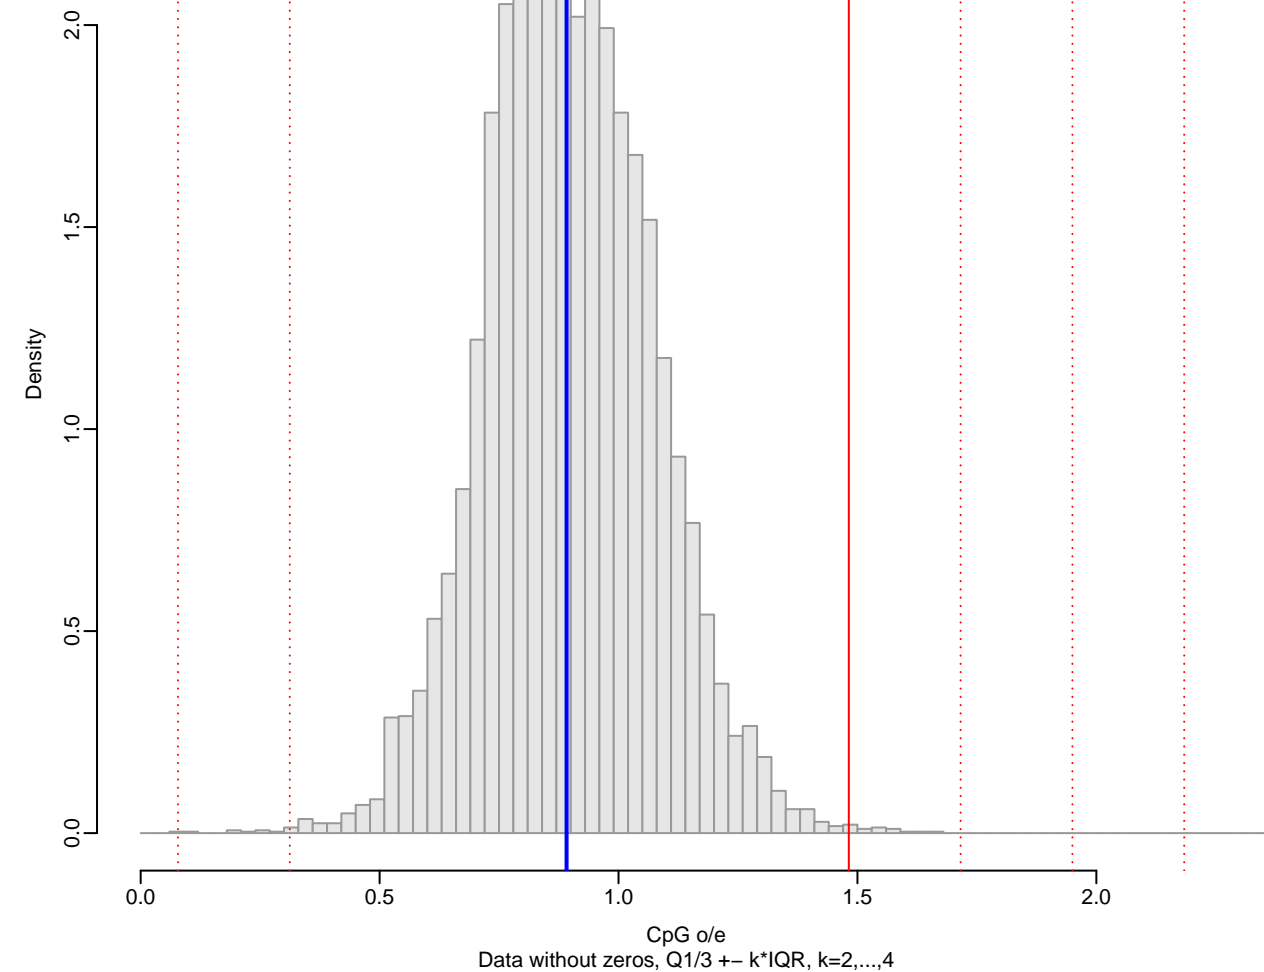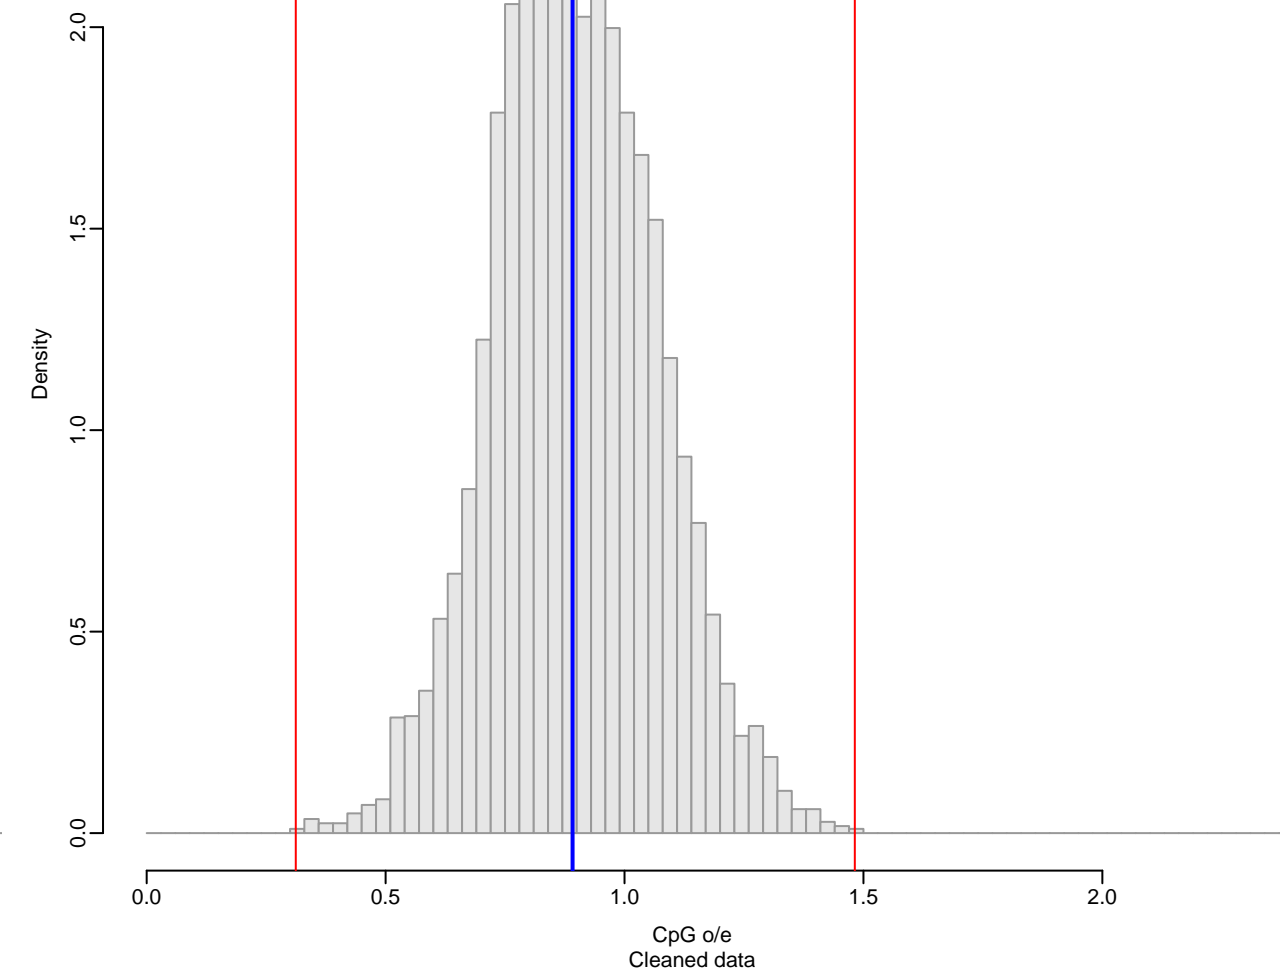

# Echinococcus\_multilocularis

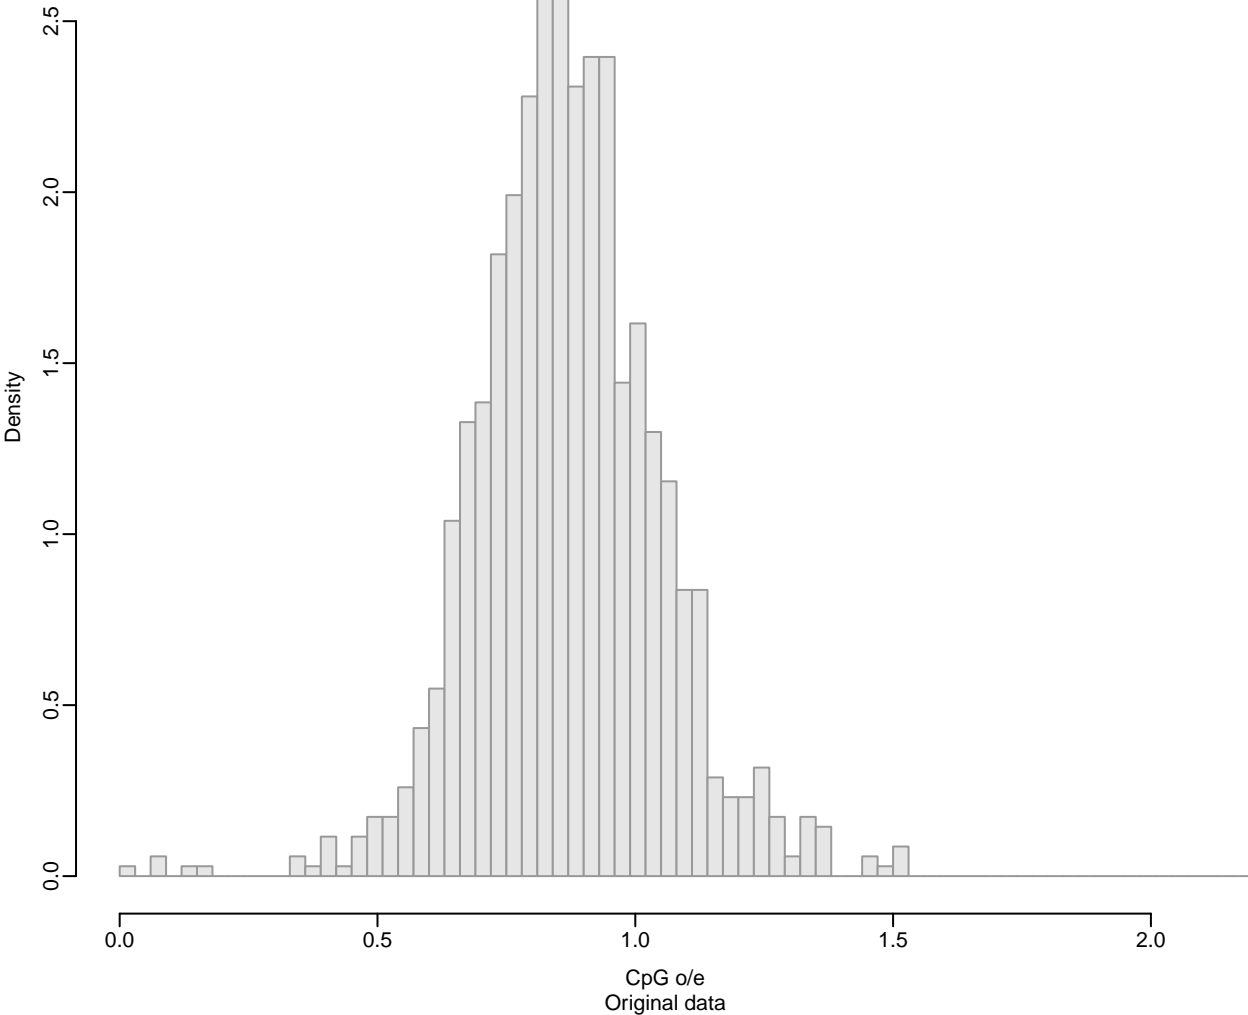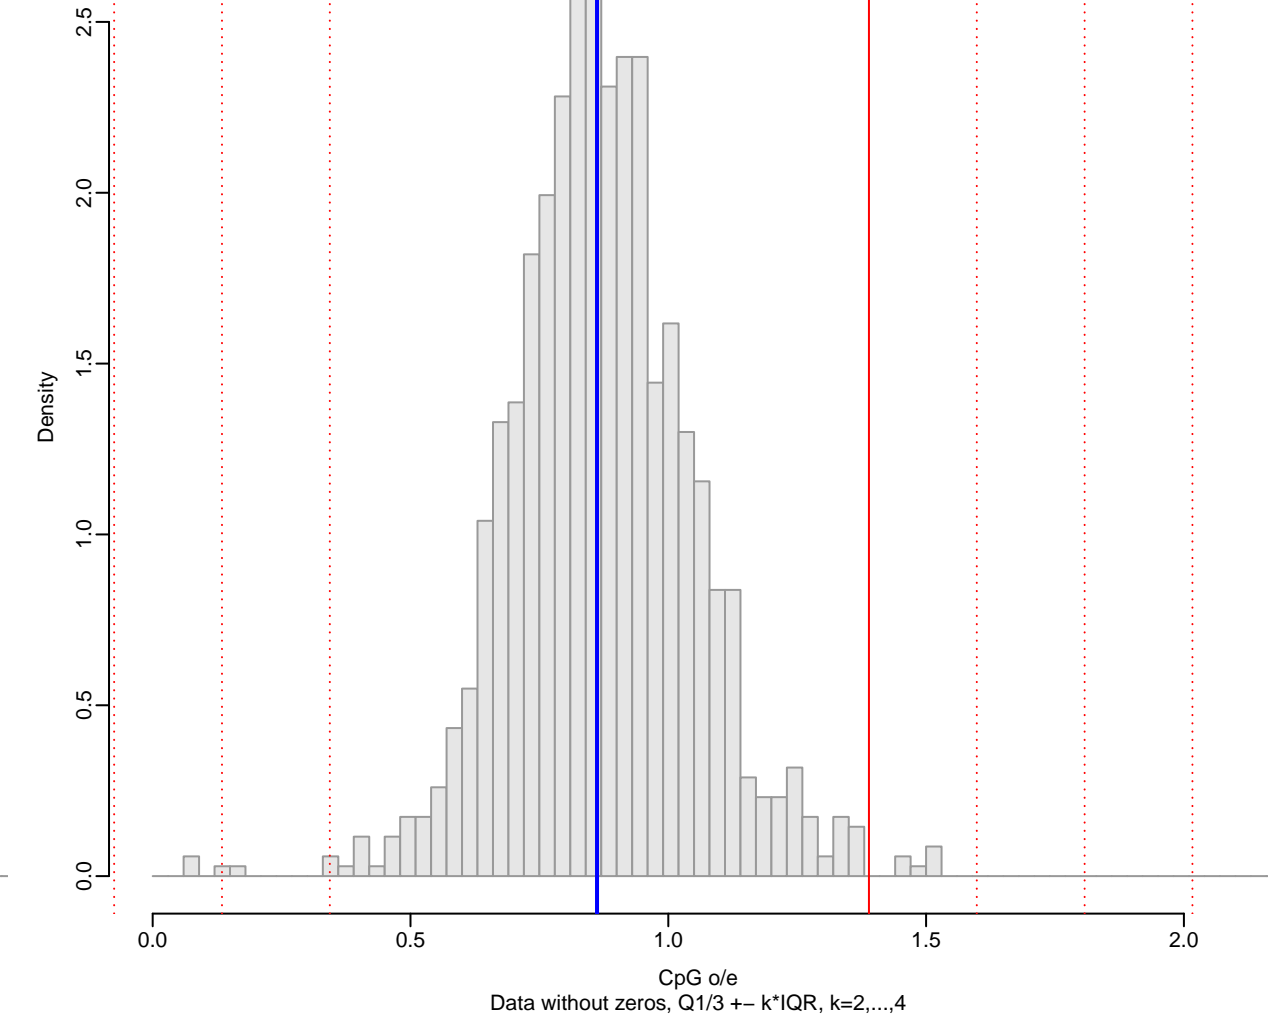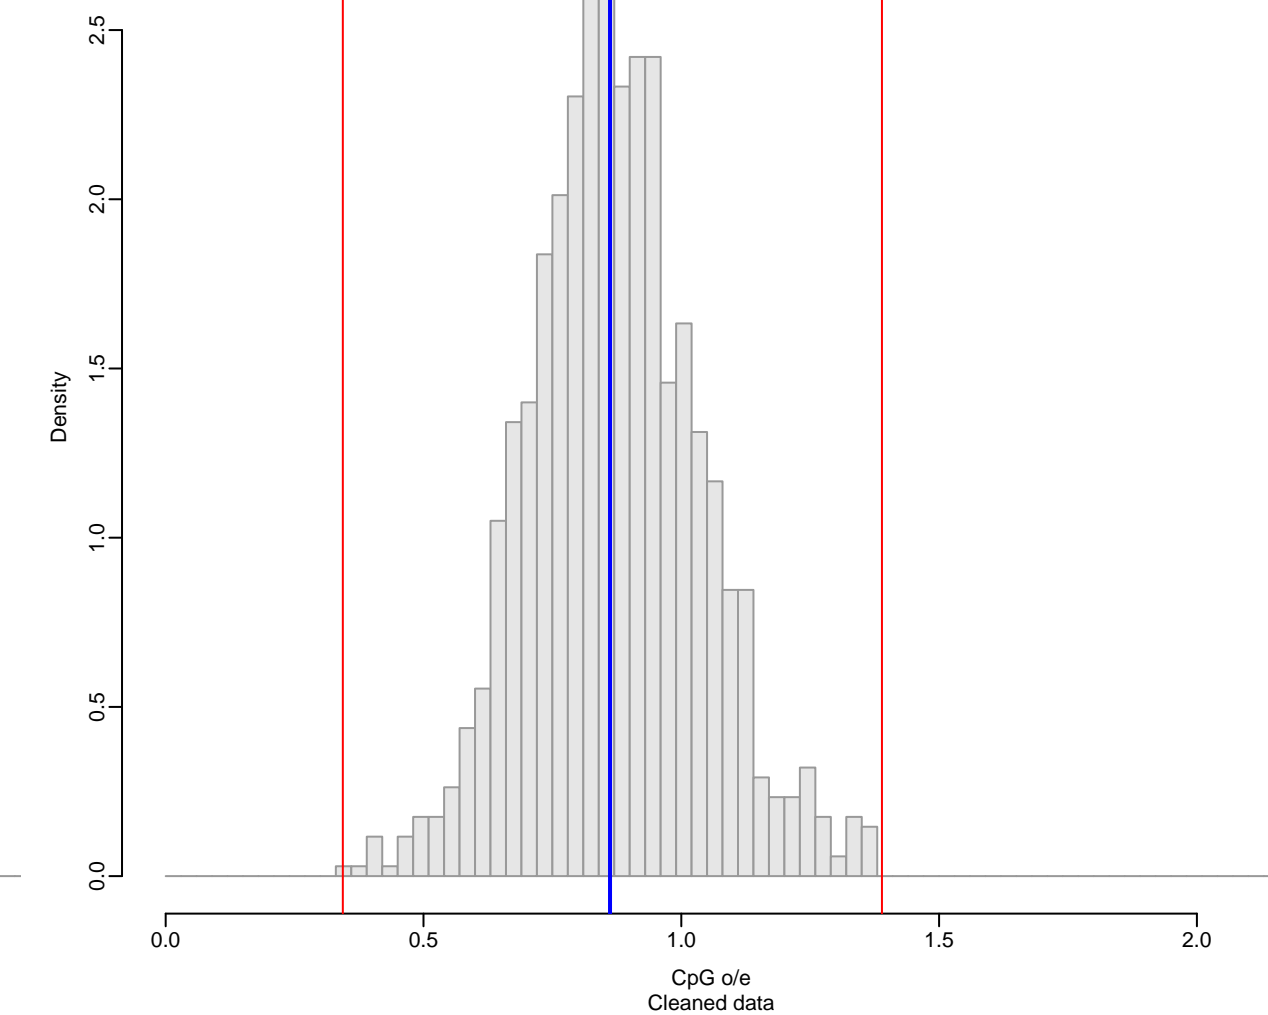

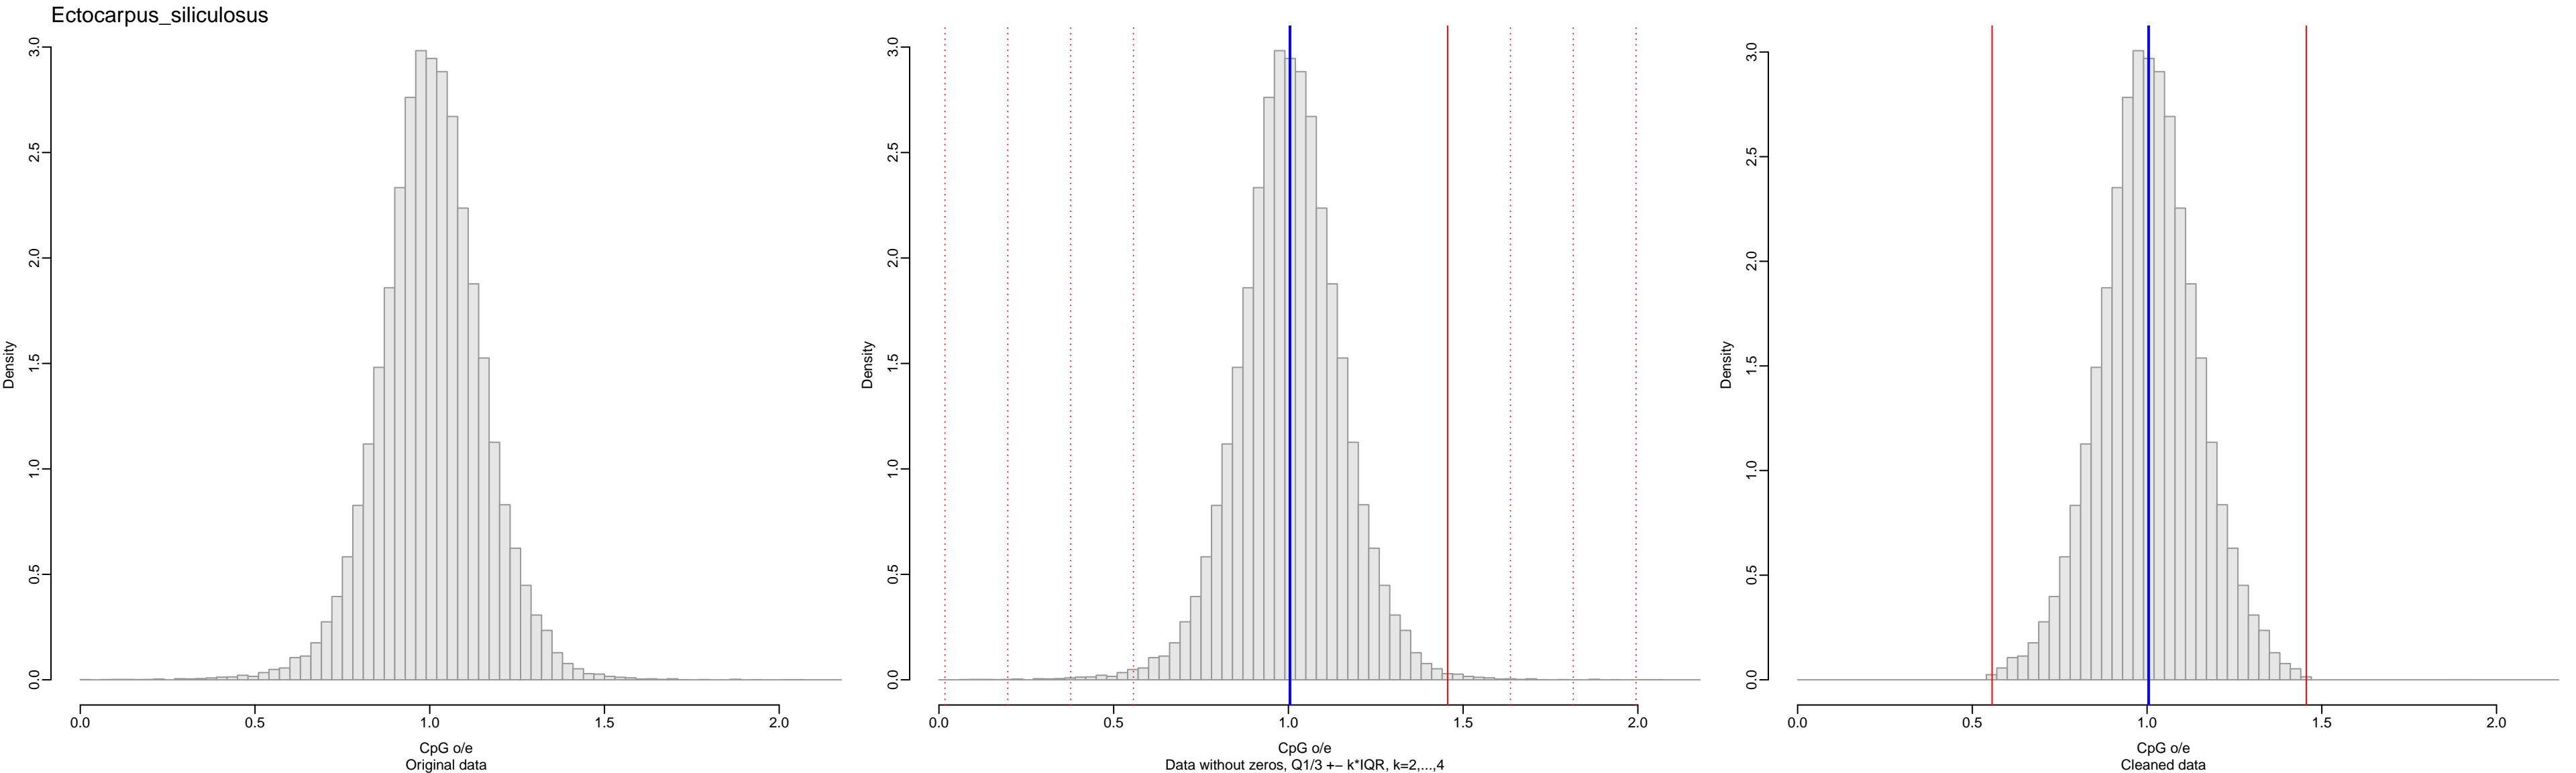

Eimeria\_acervulina

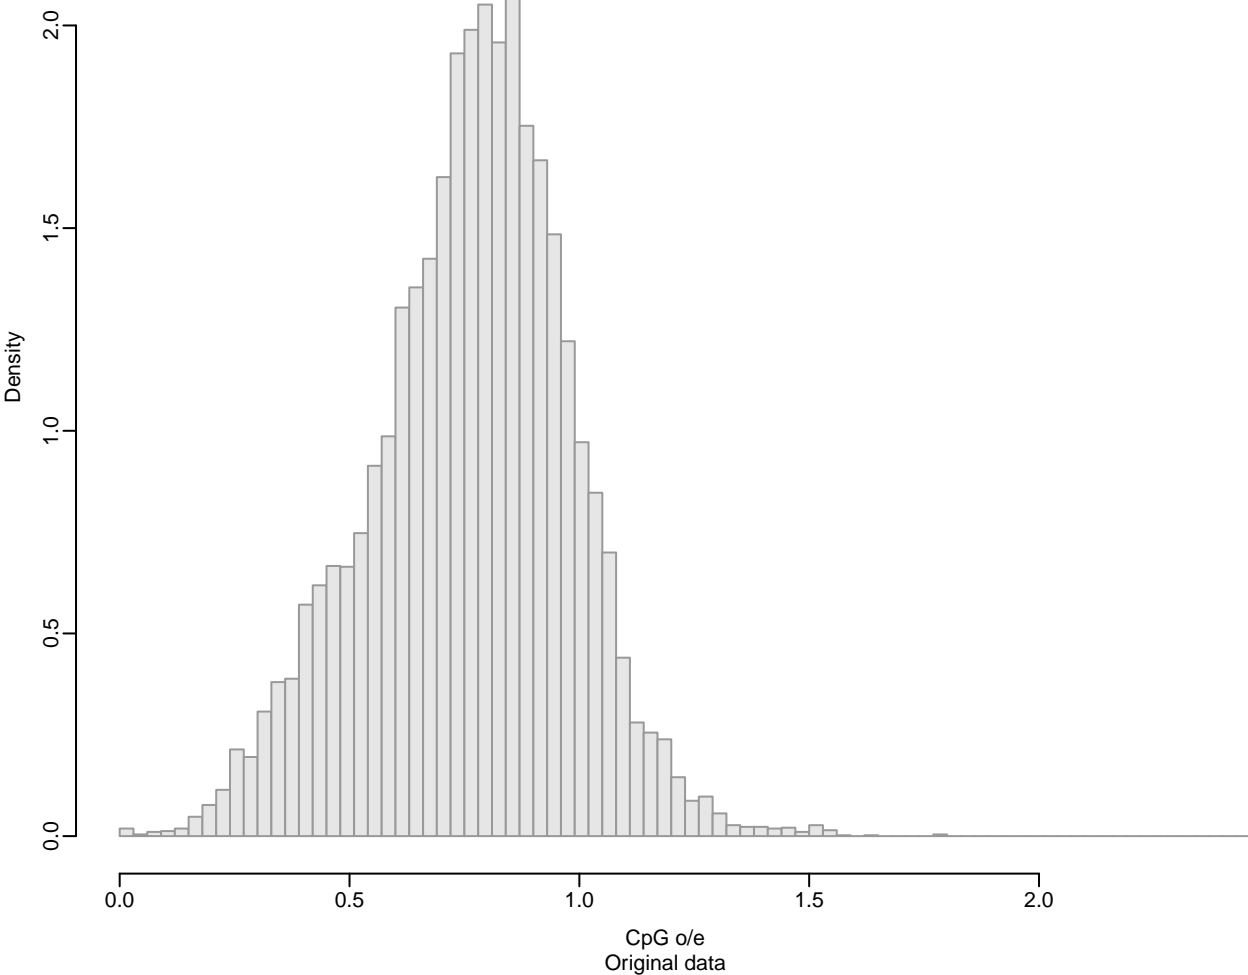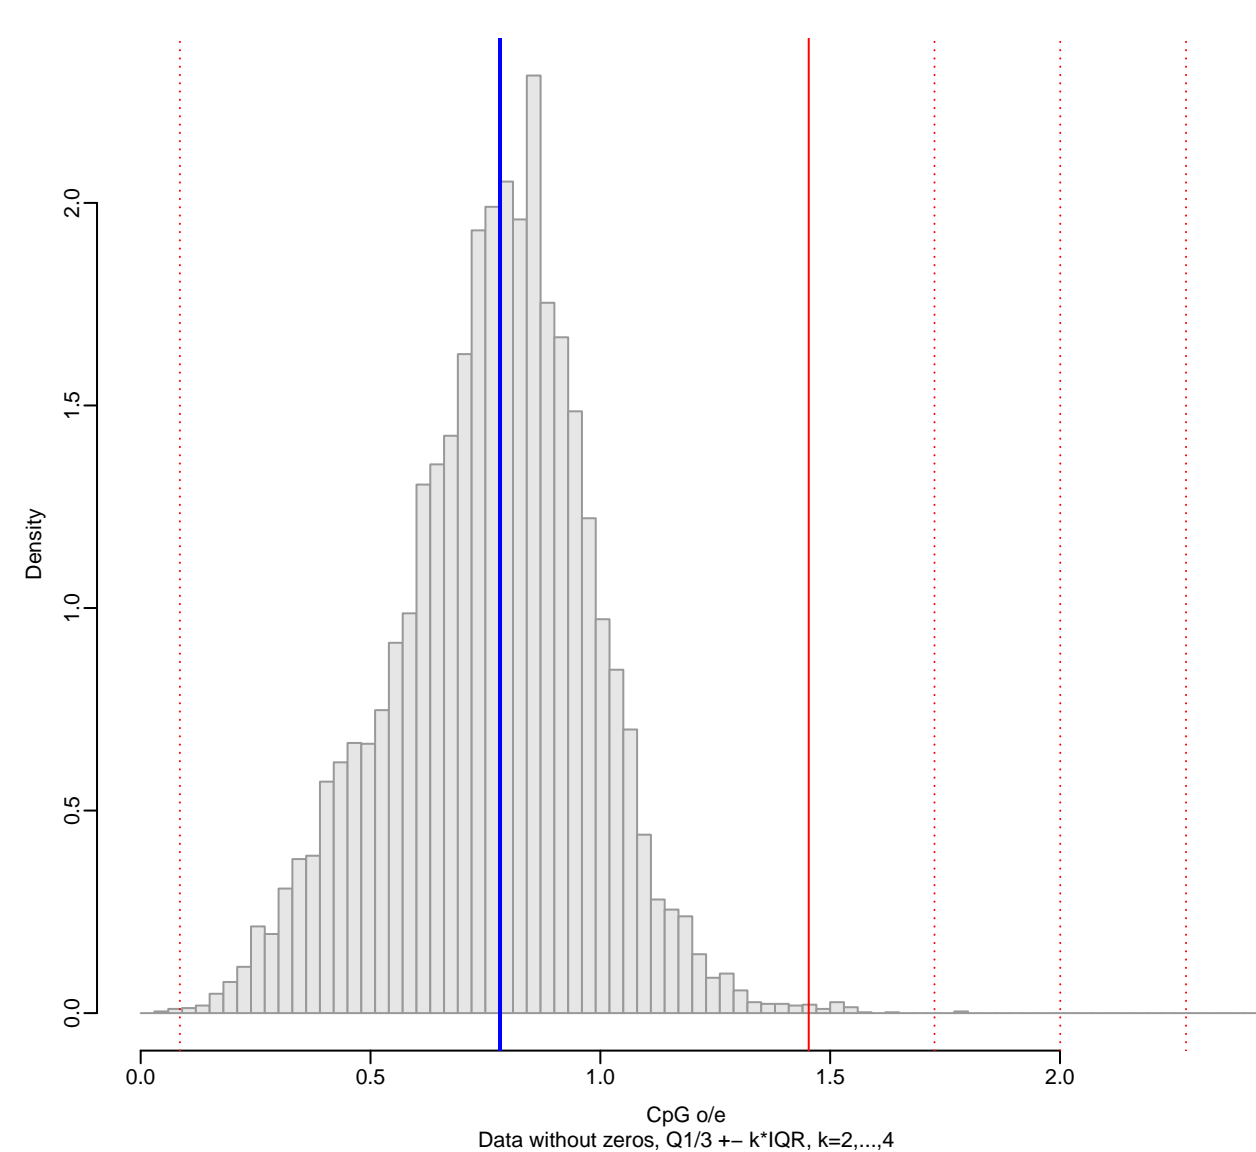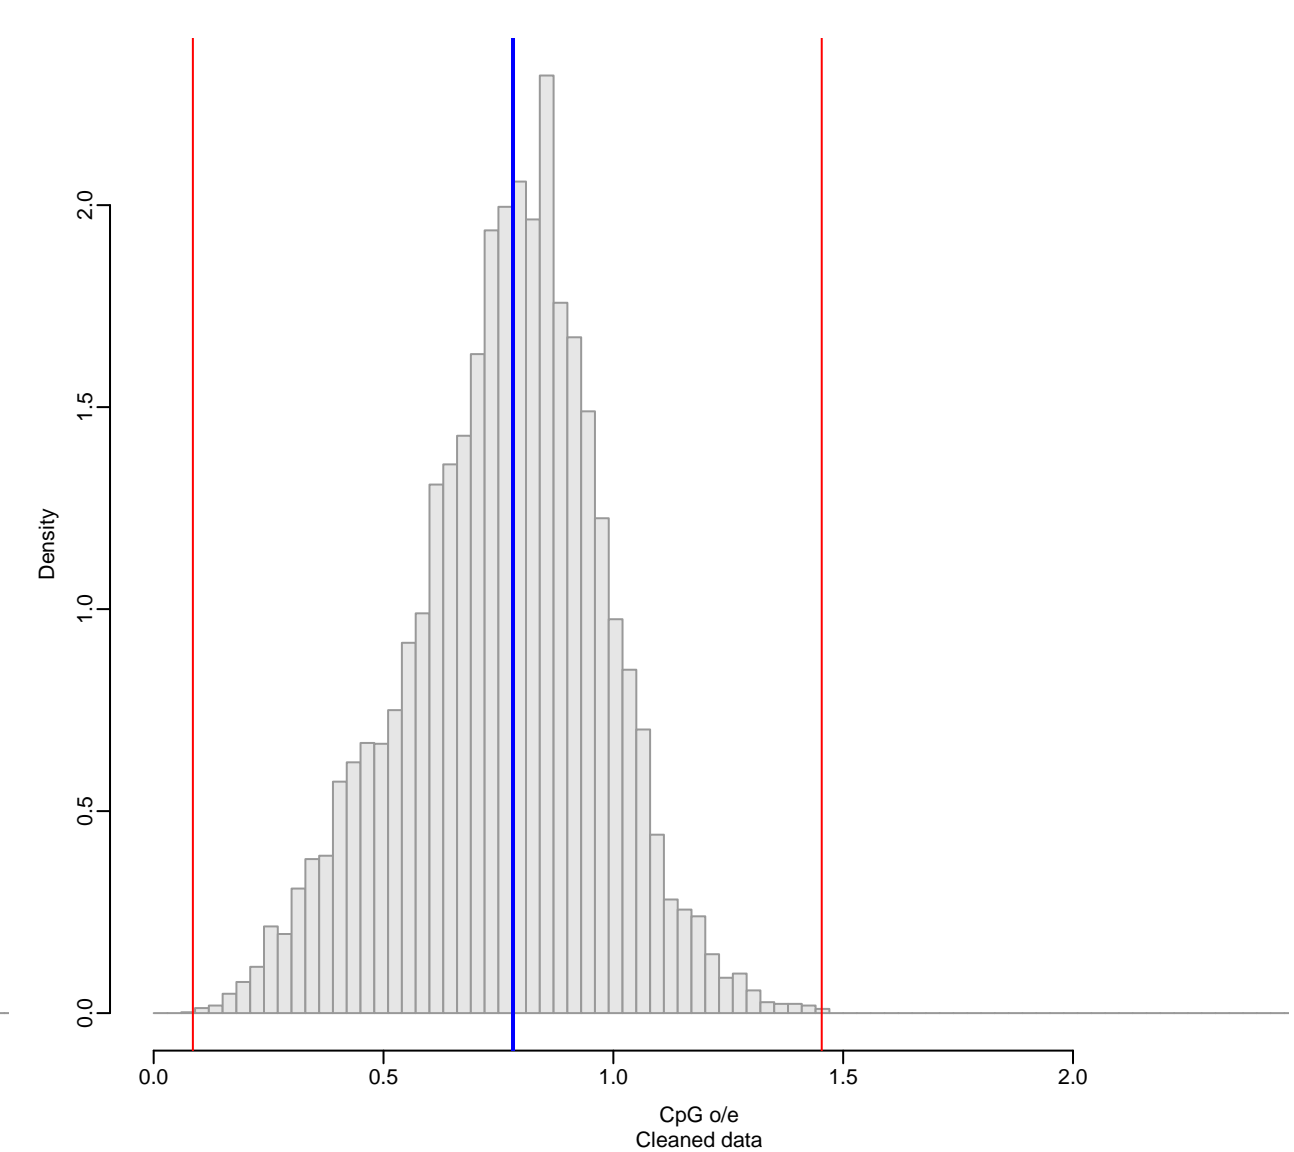

# Eimeria\_maxima

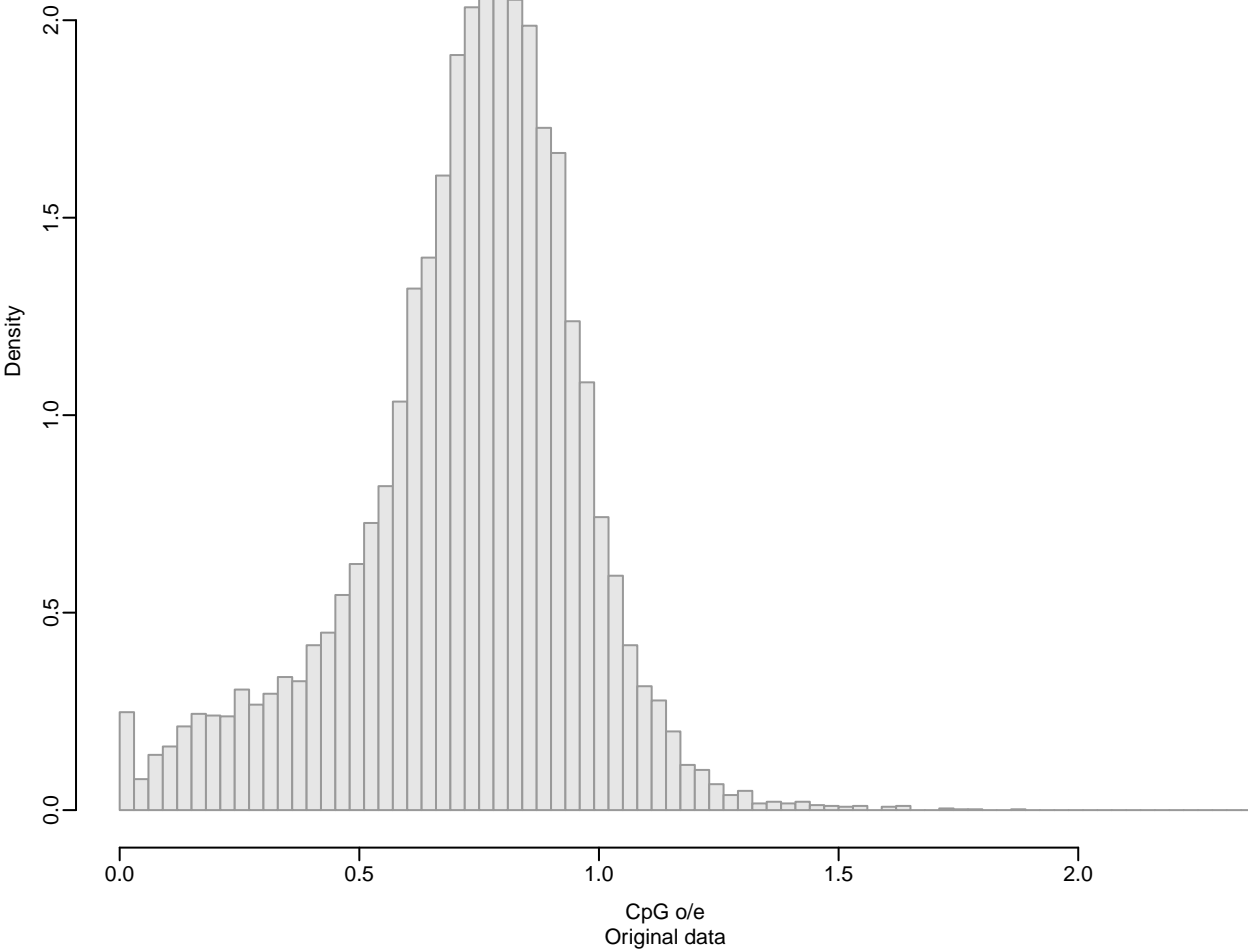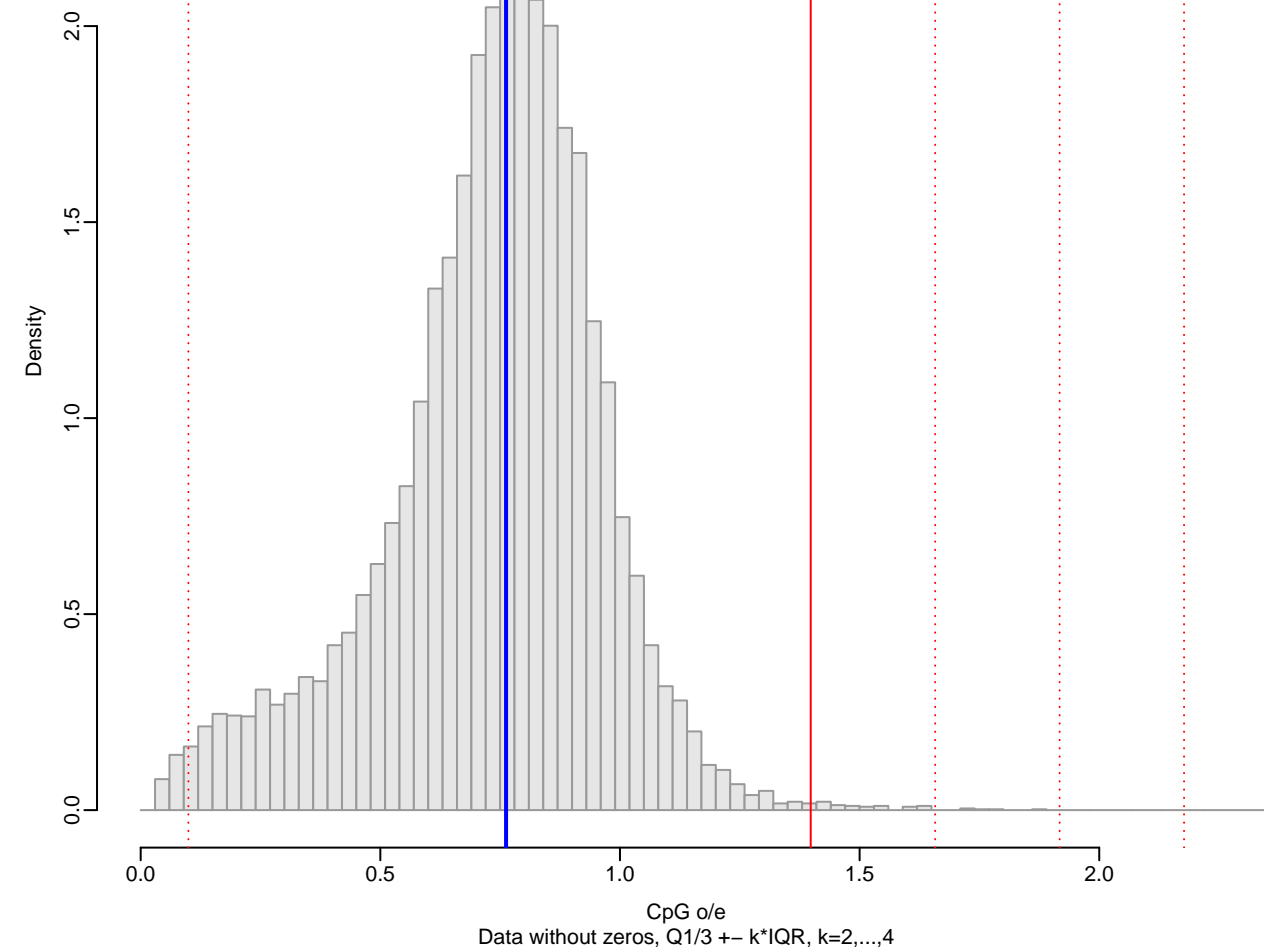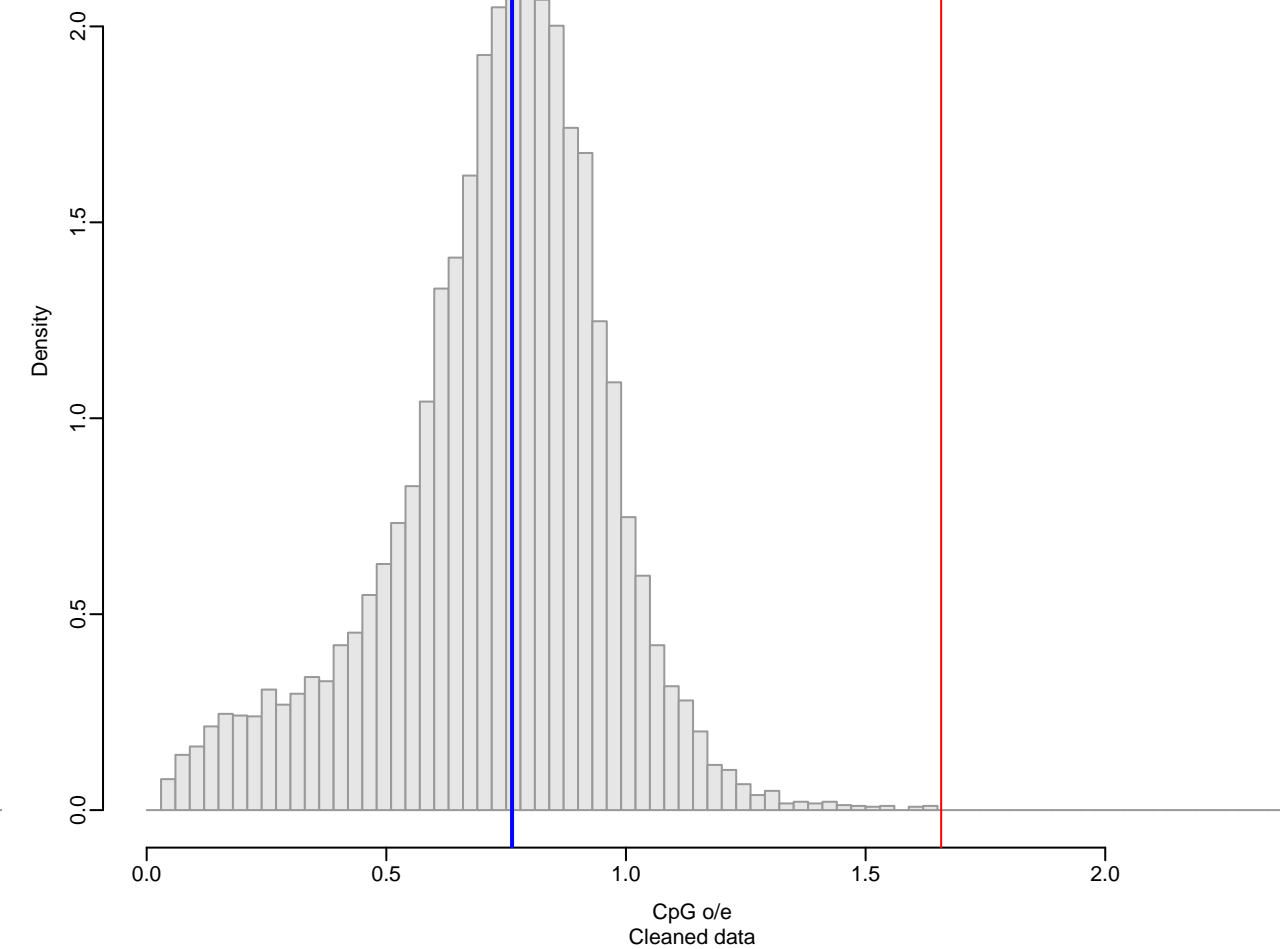

Eimeria\_tenella

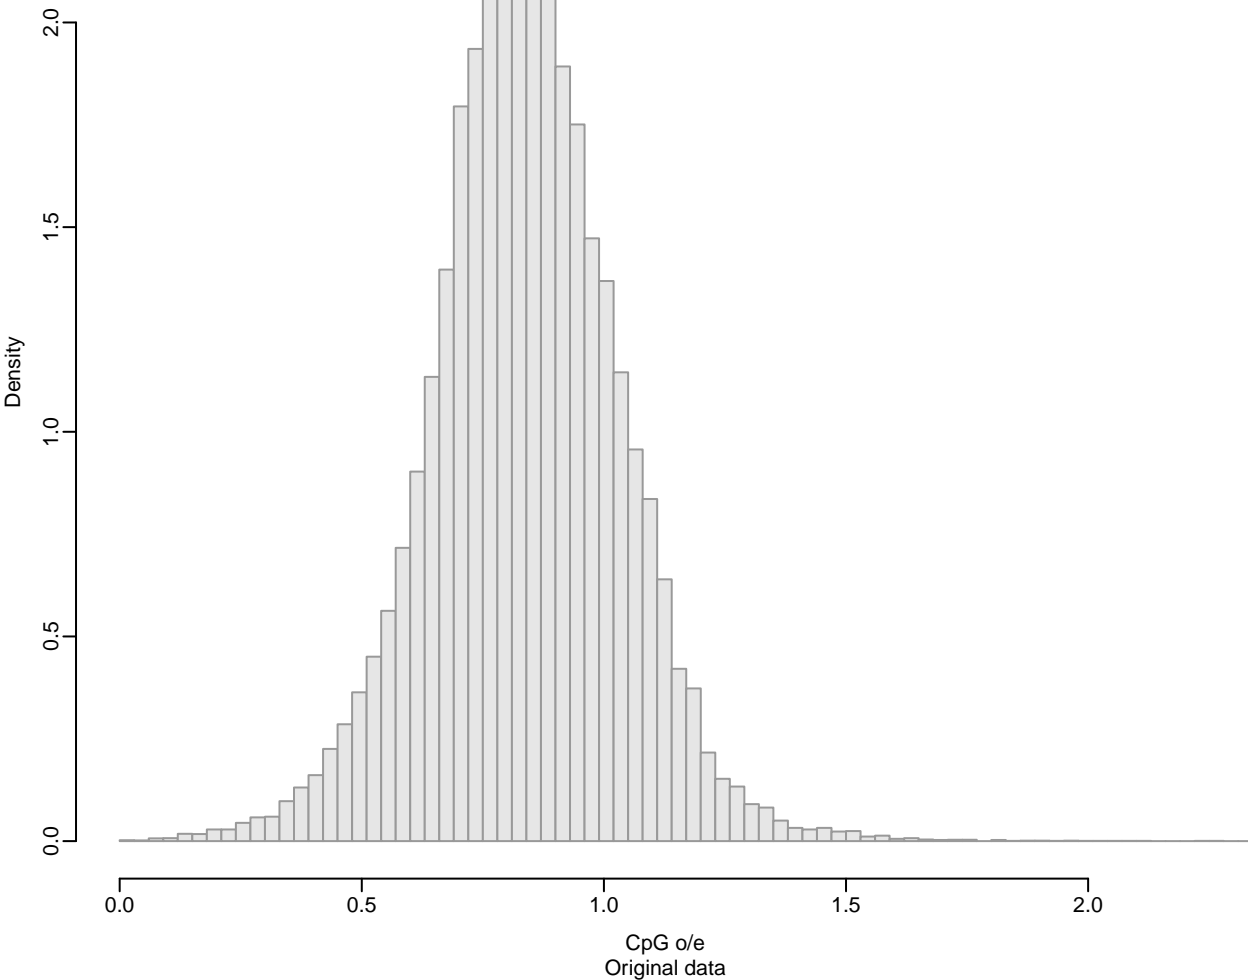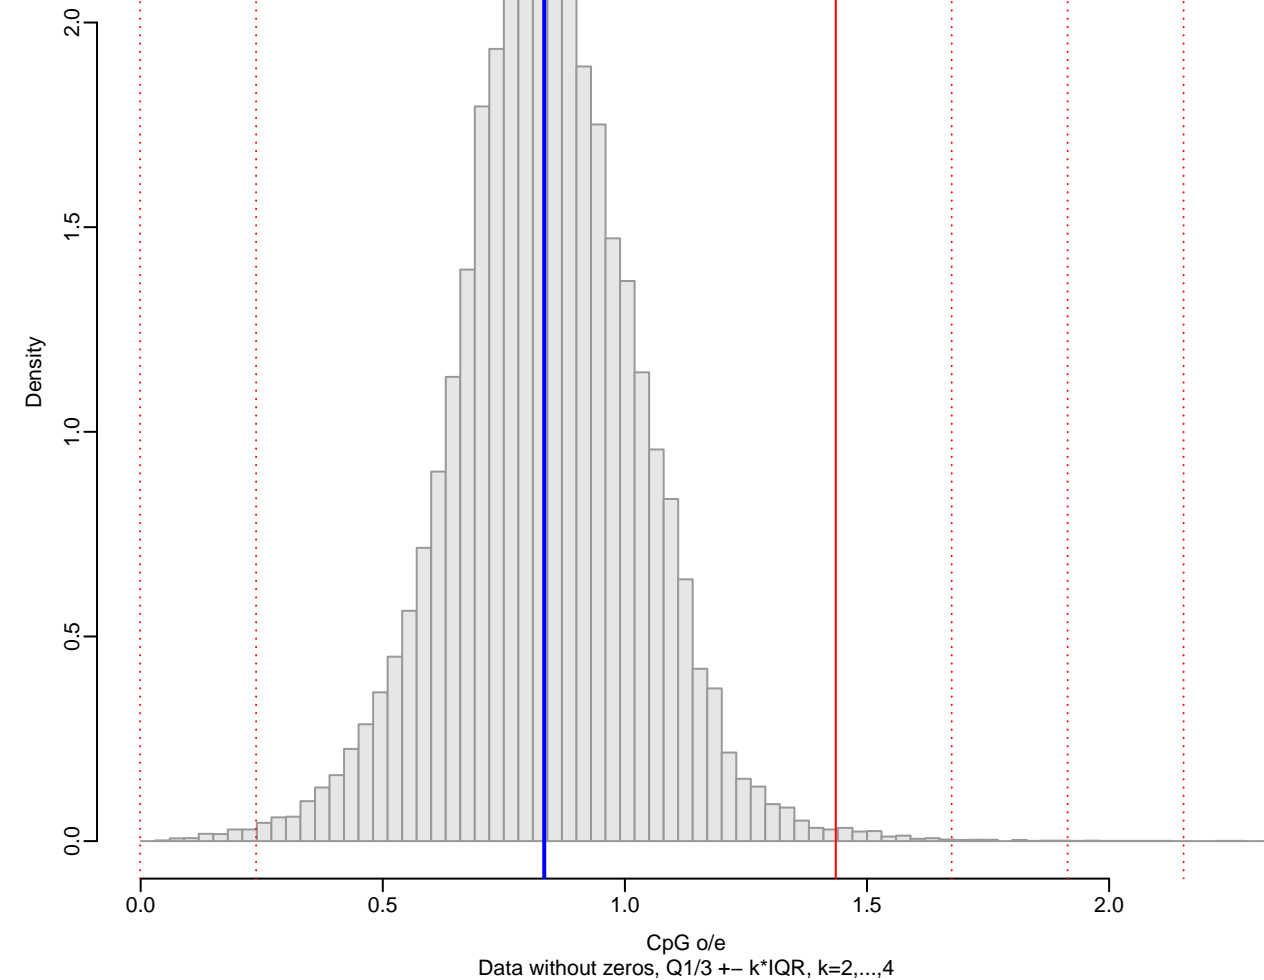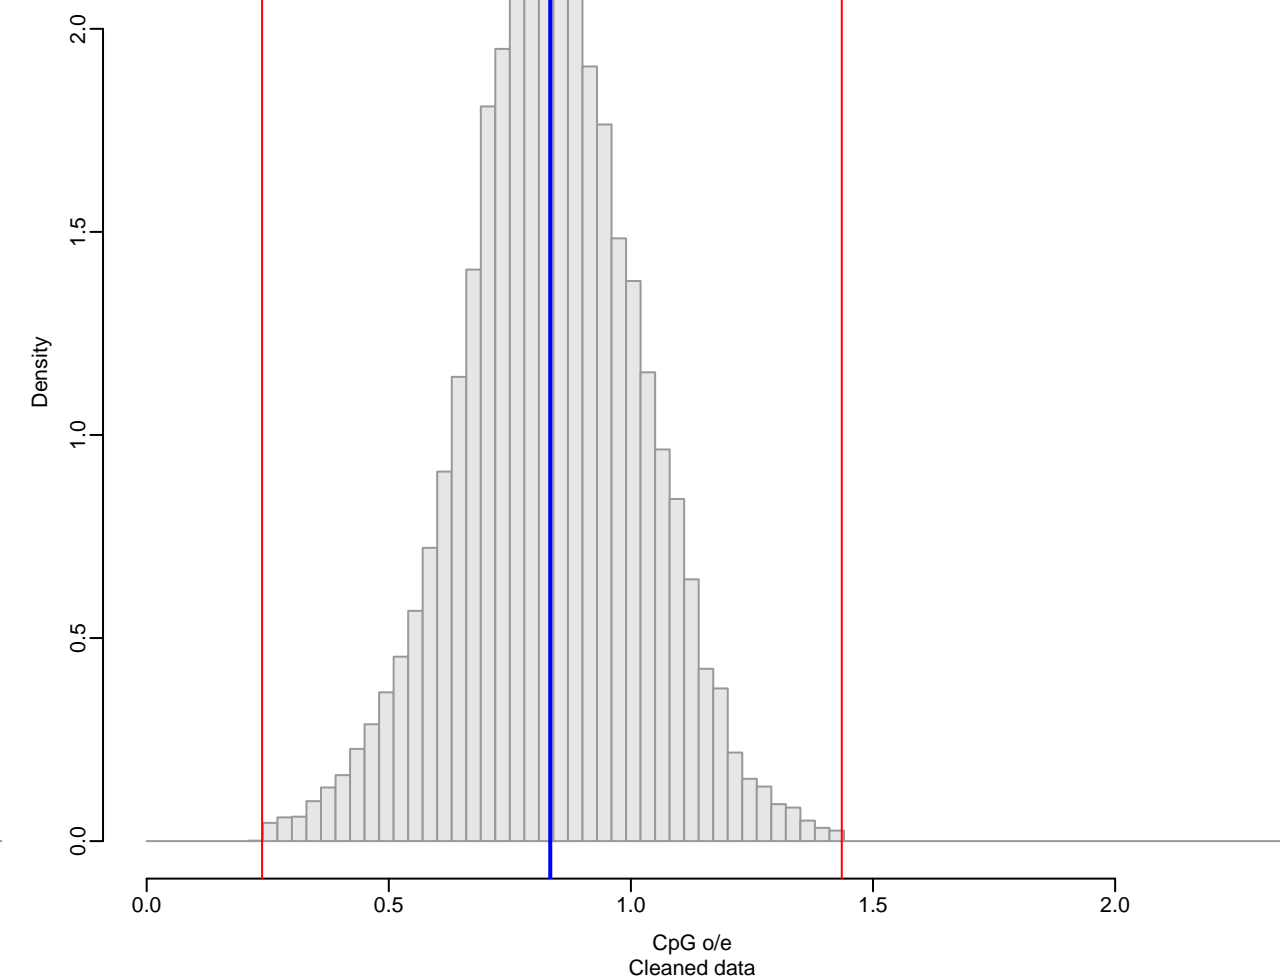



*Elaeis\_guineensis*

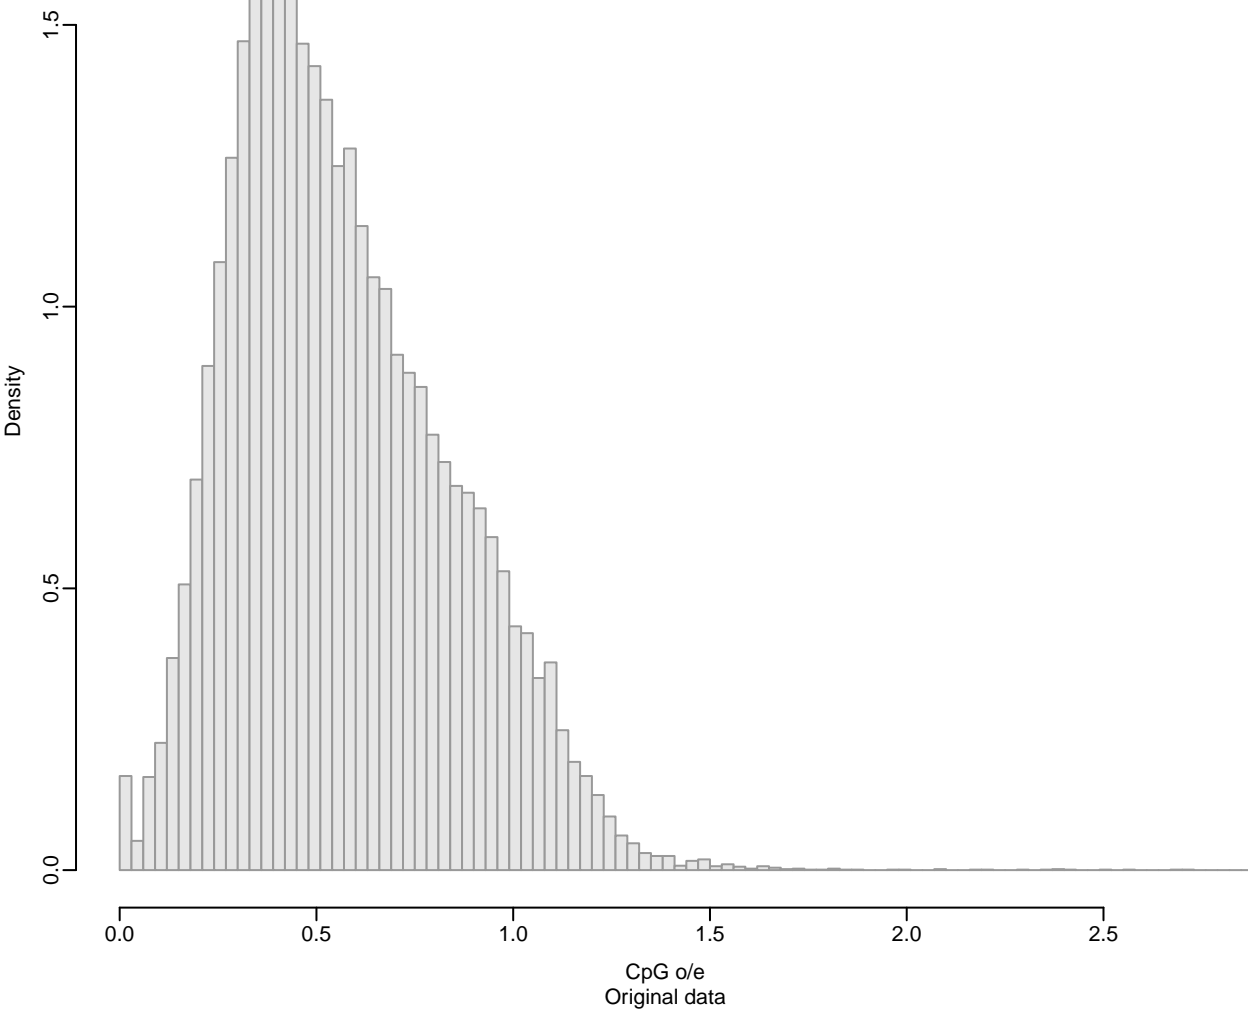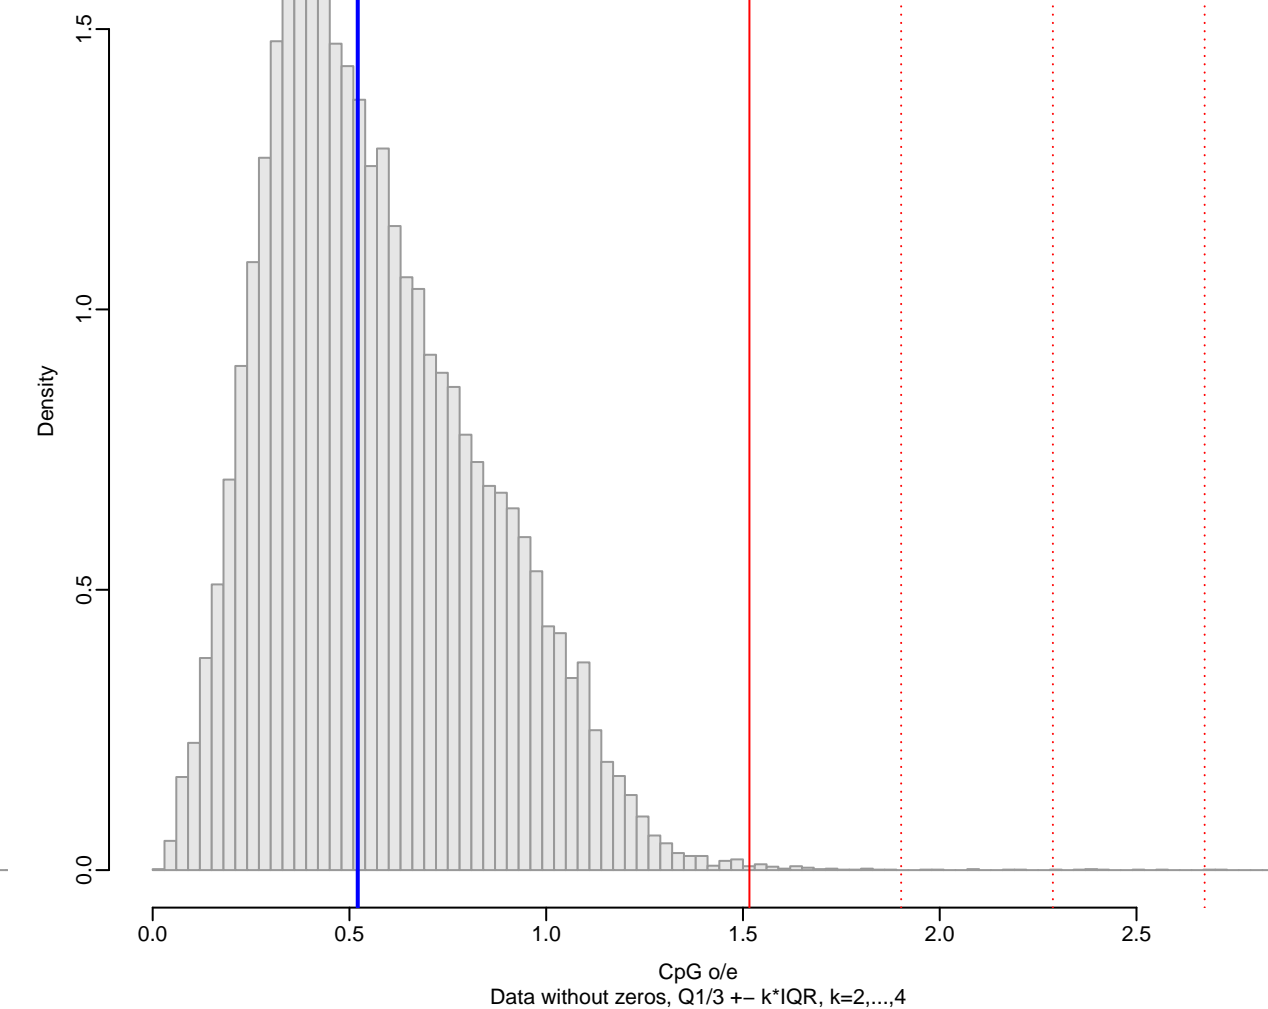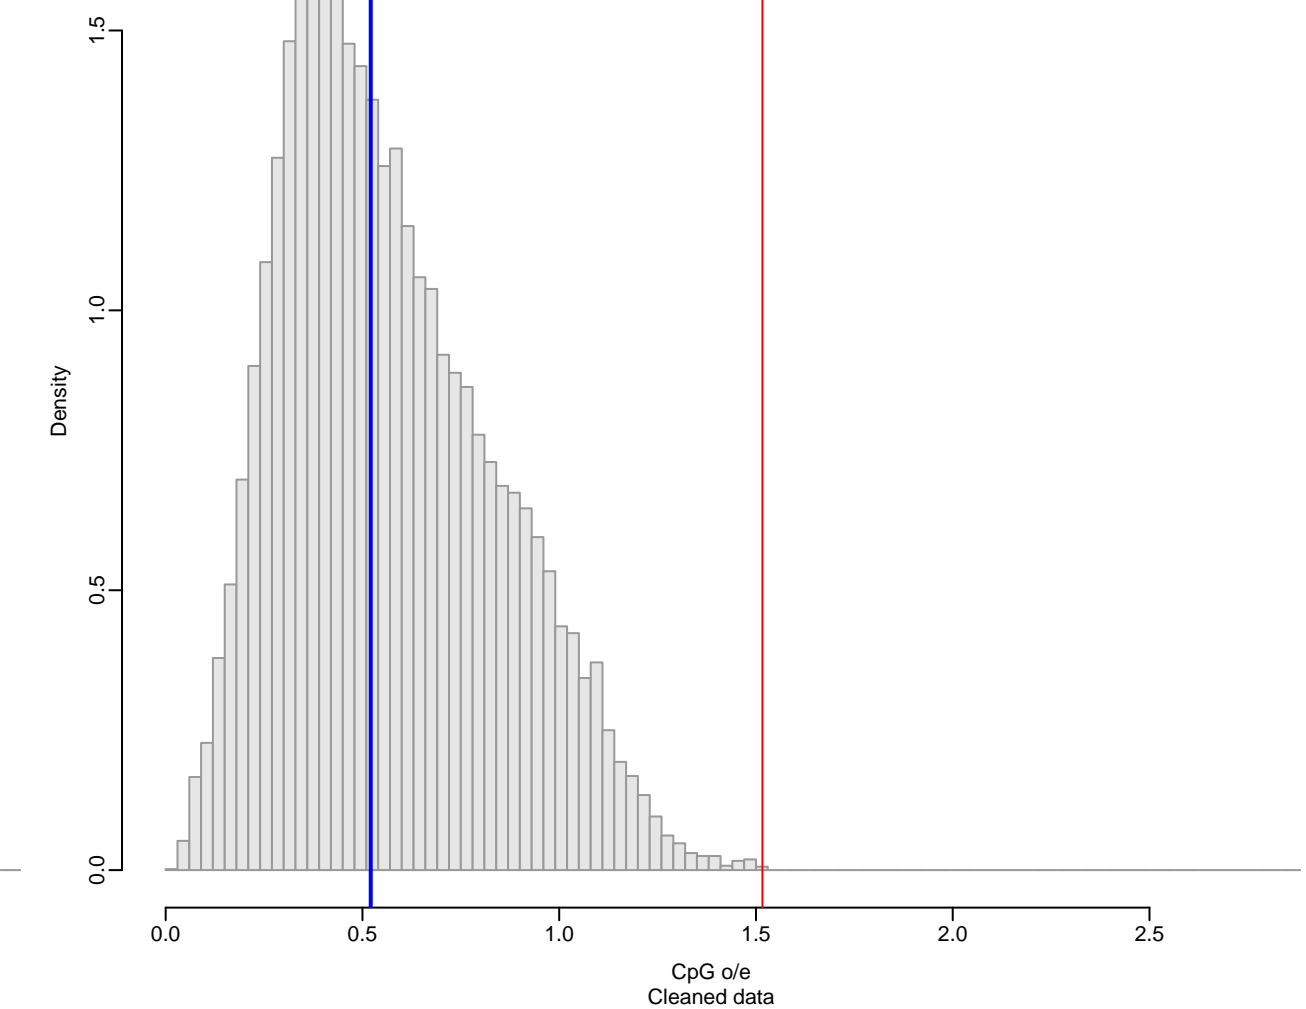

Elaphe\_quadrivirgata

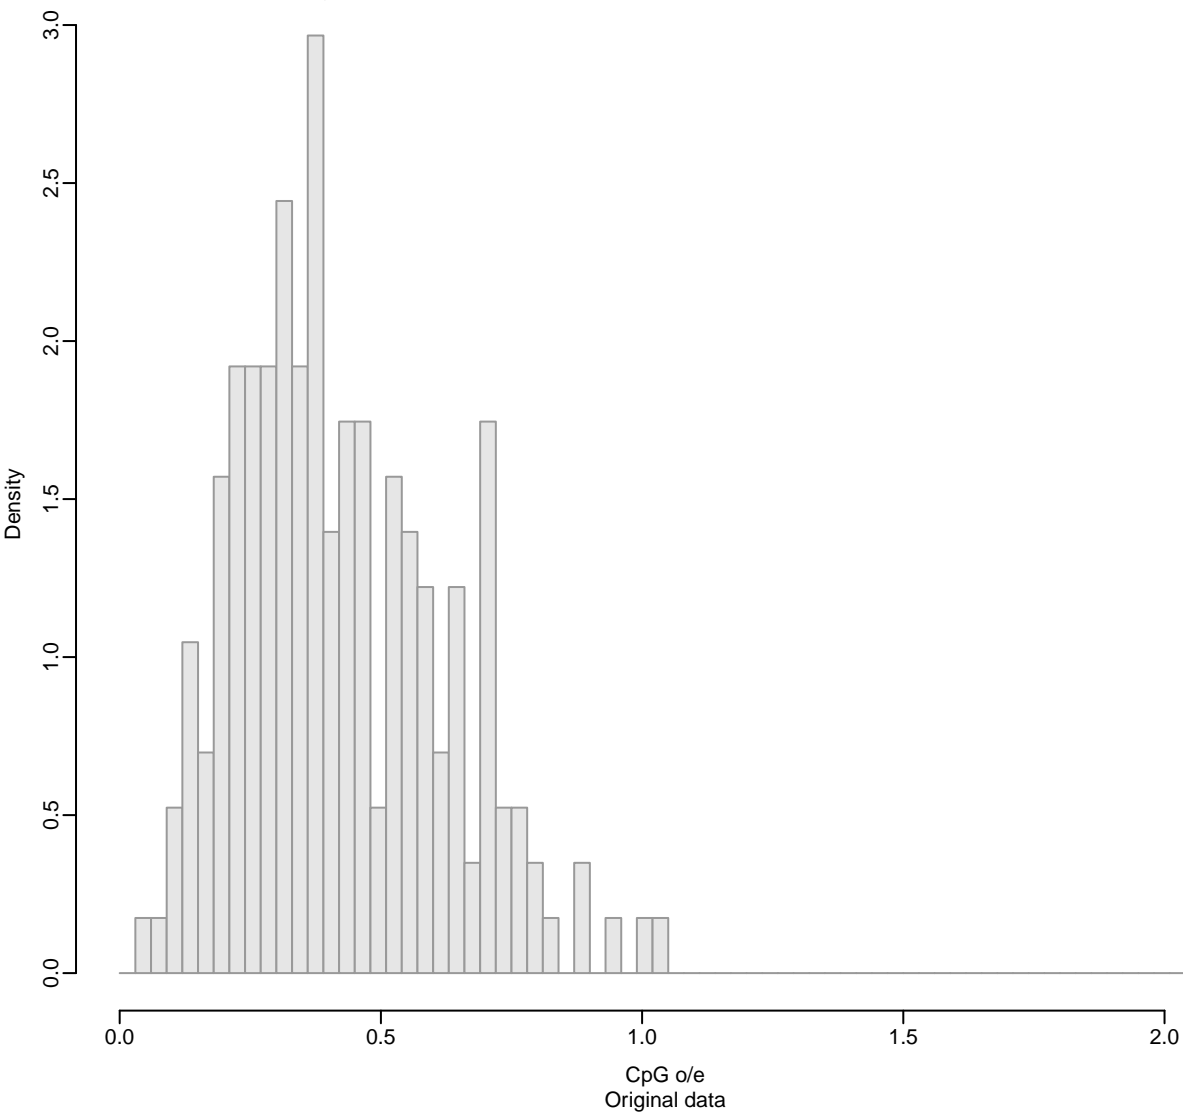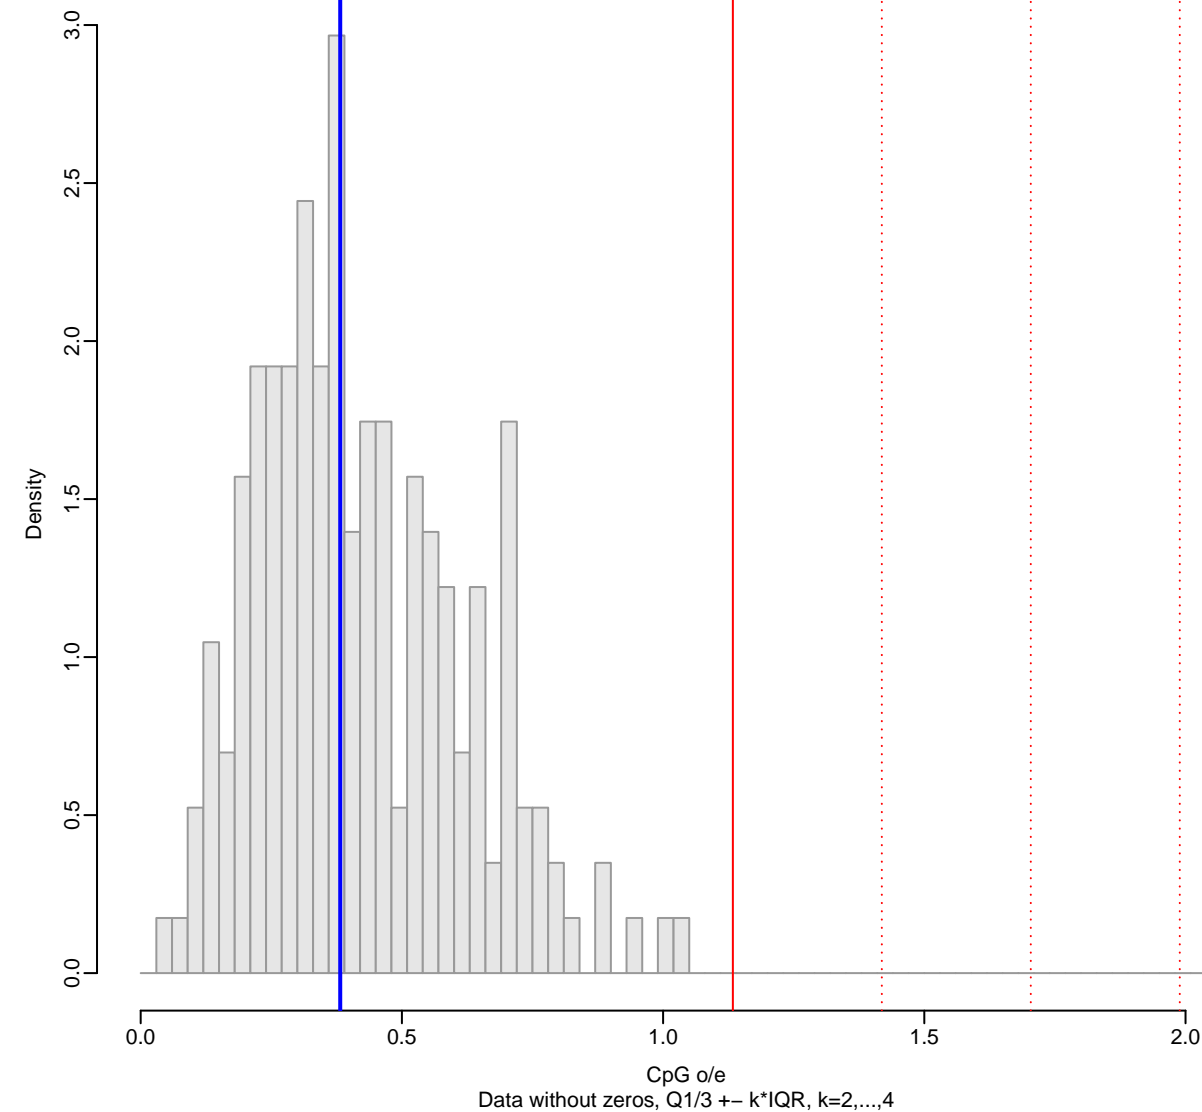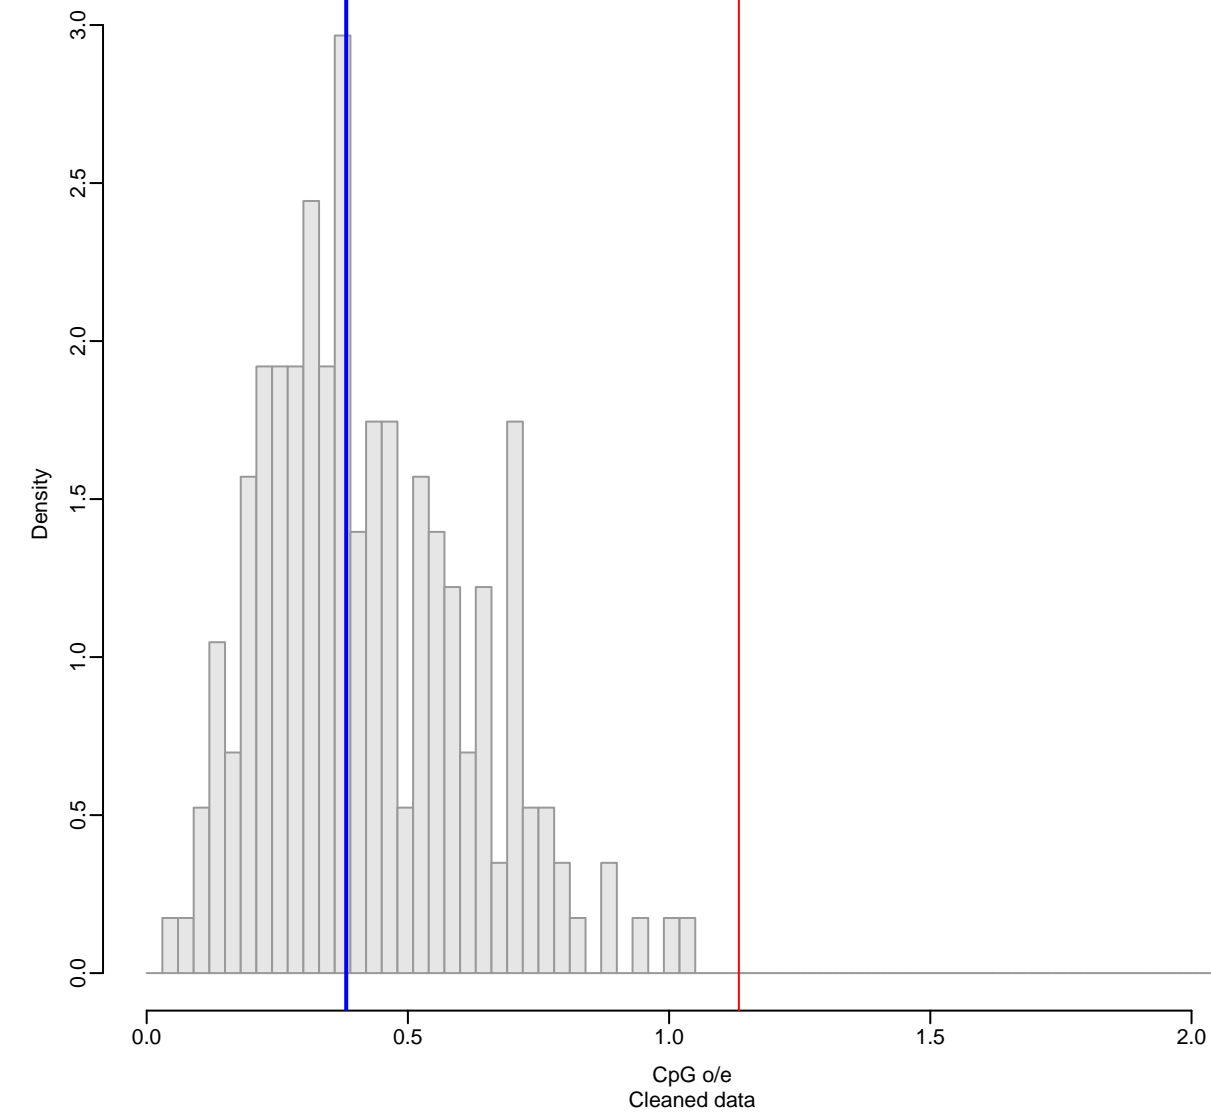

Emiliana\_huxleyi

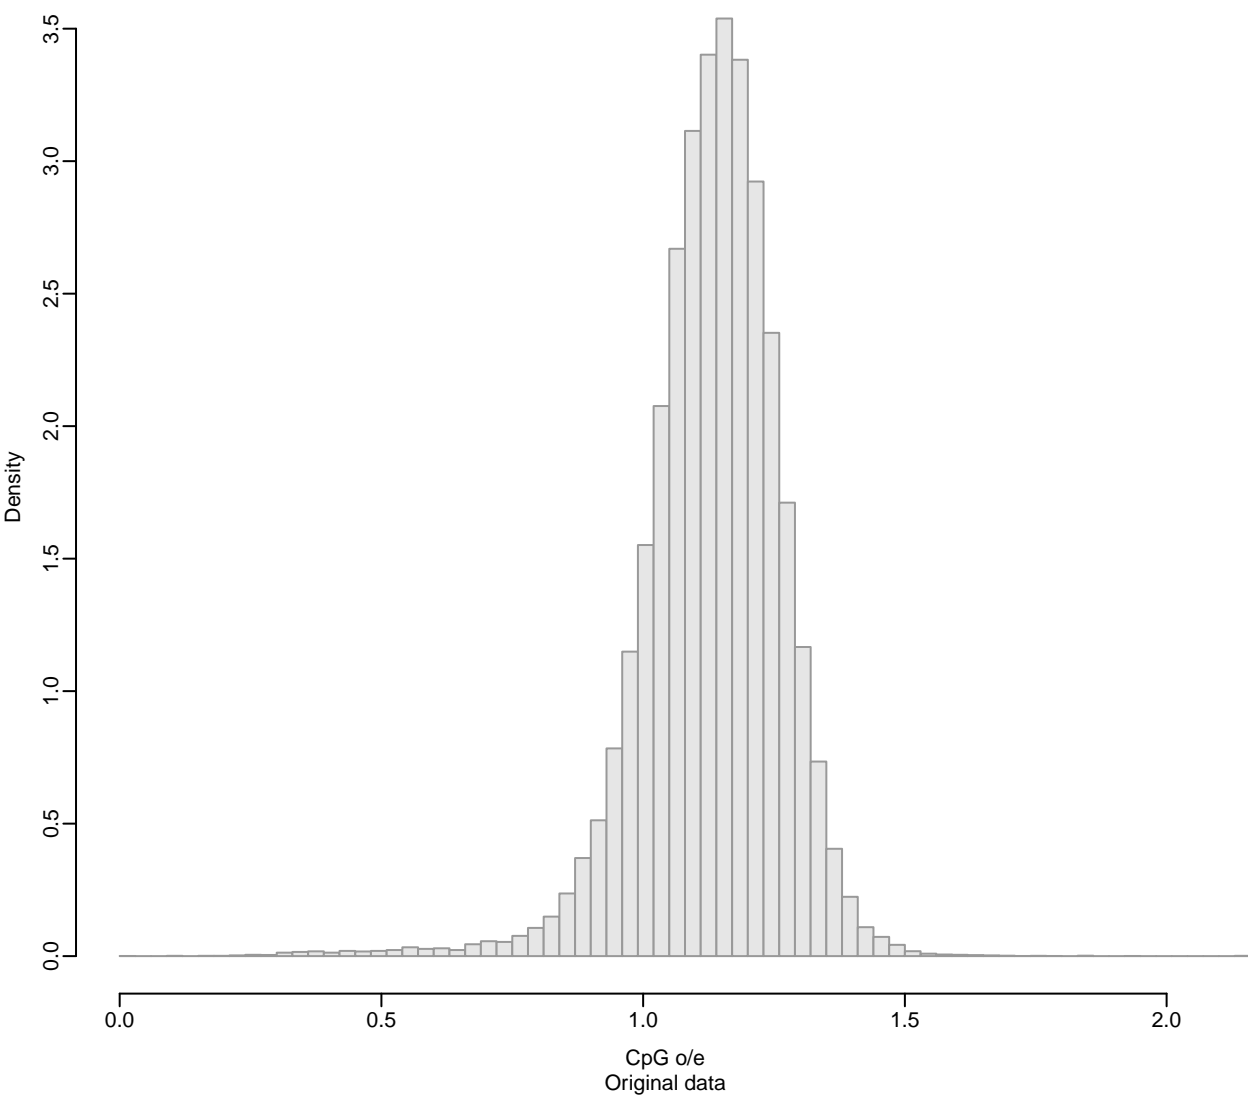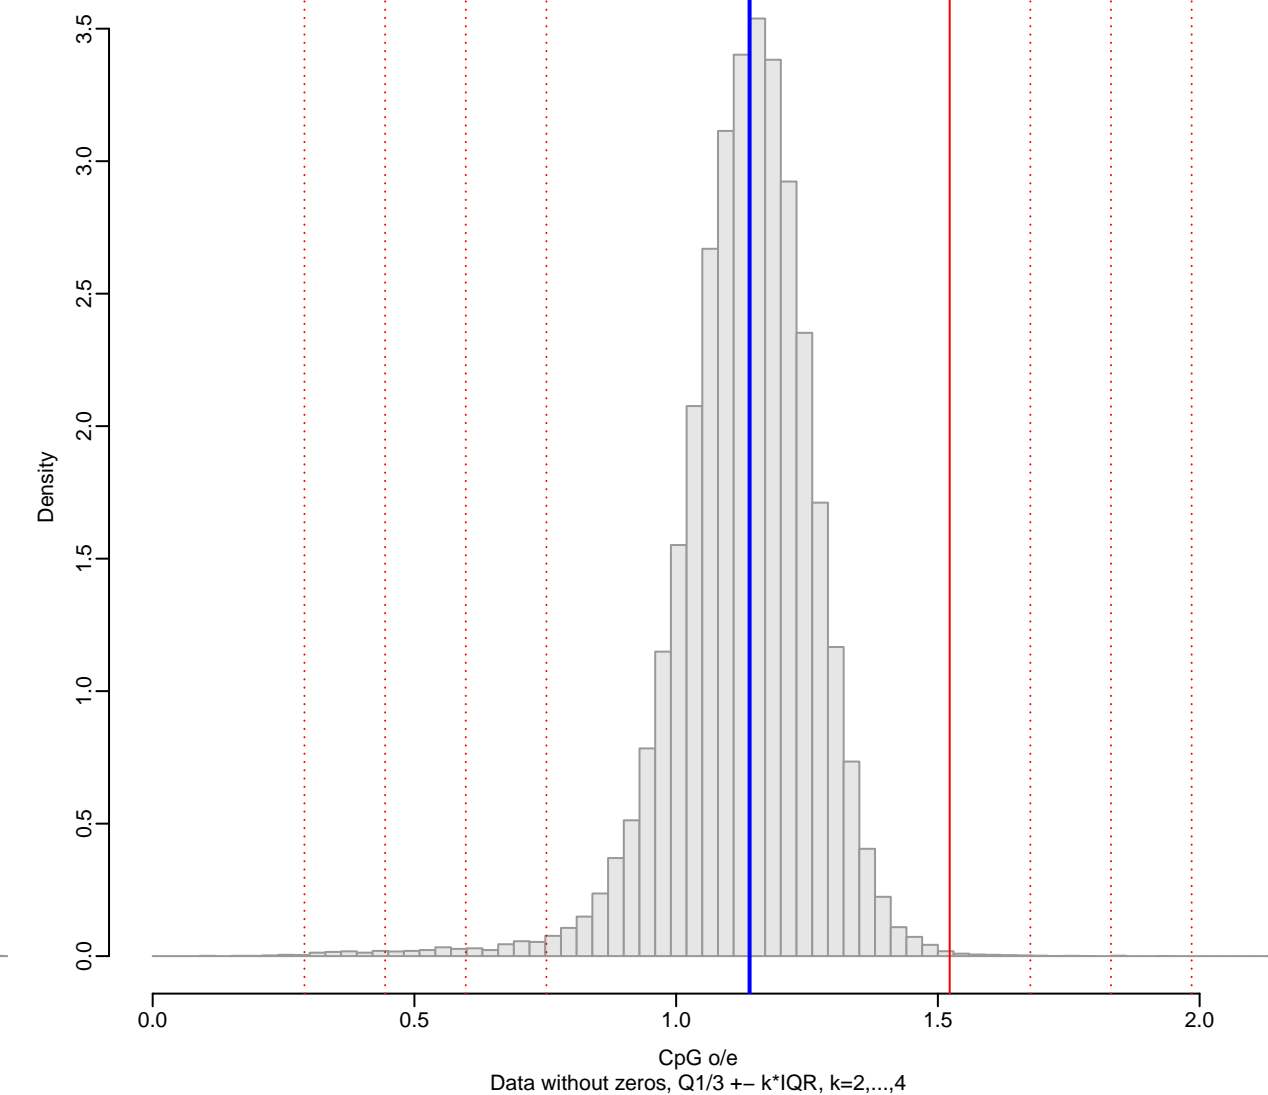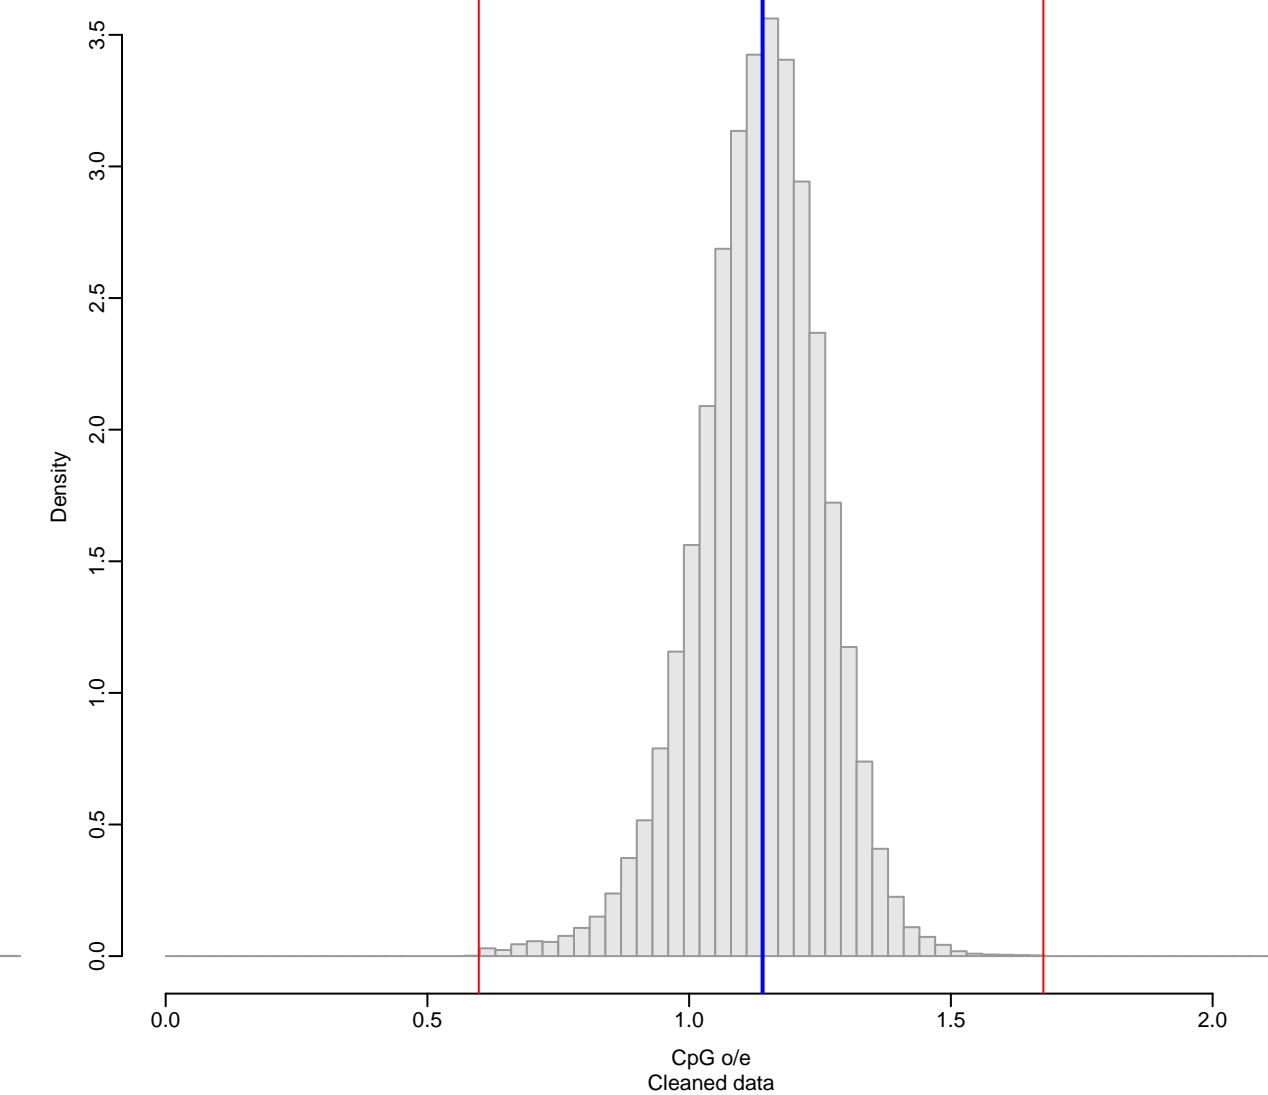

# Endeis\_spinosa

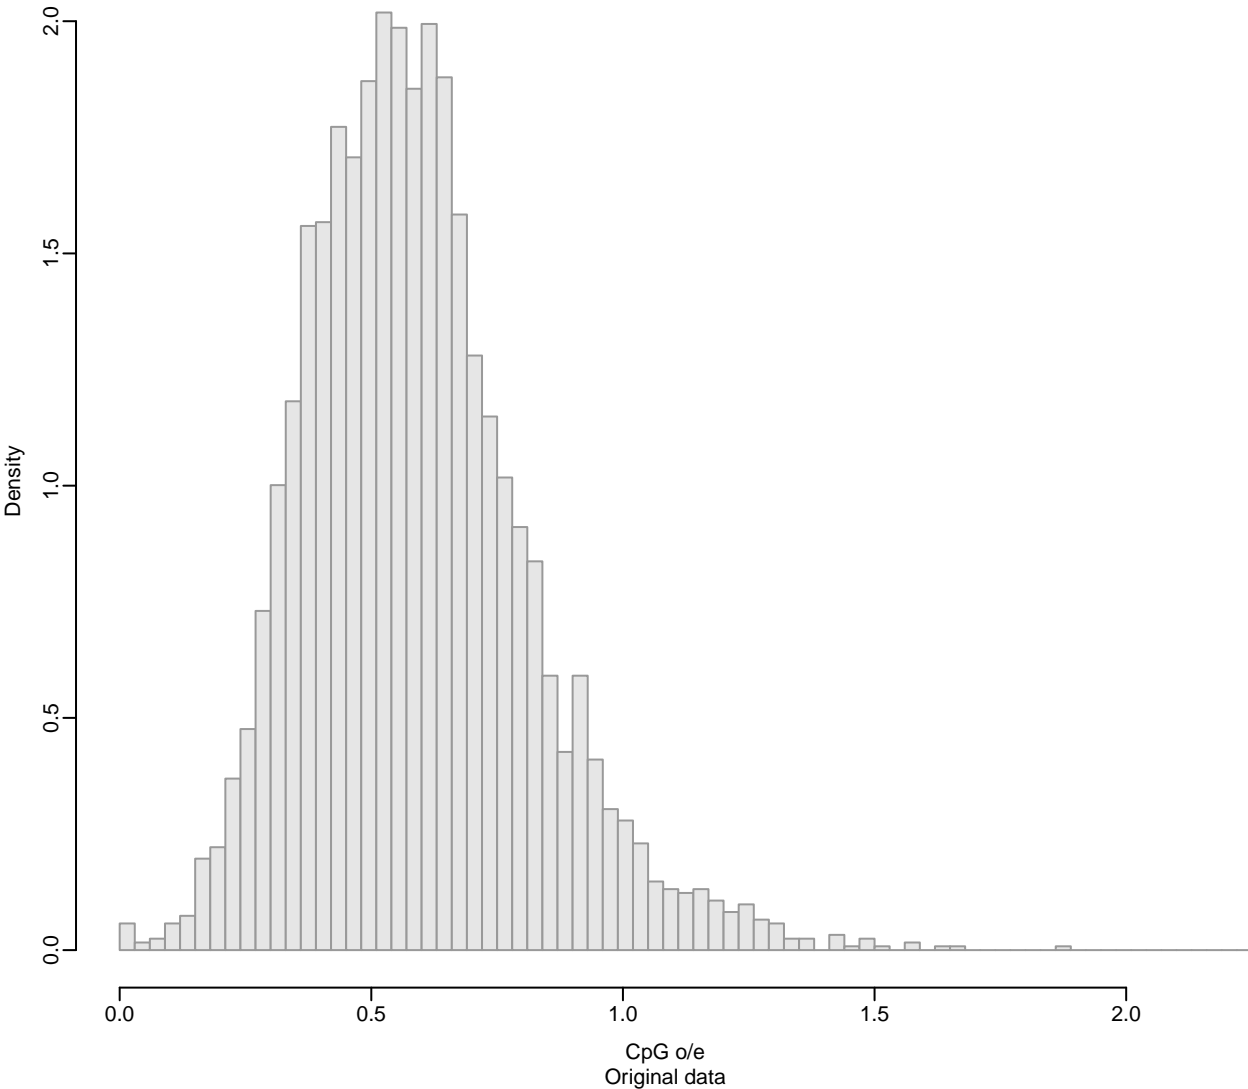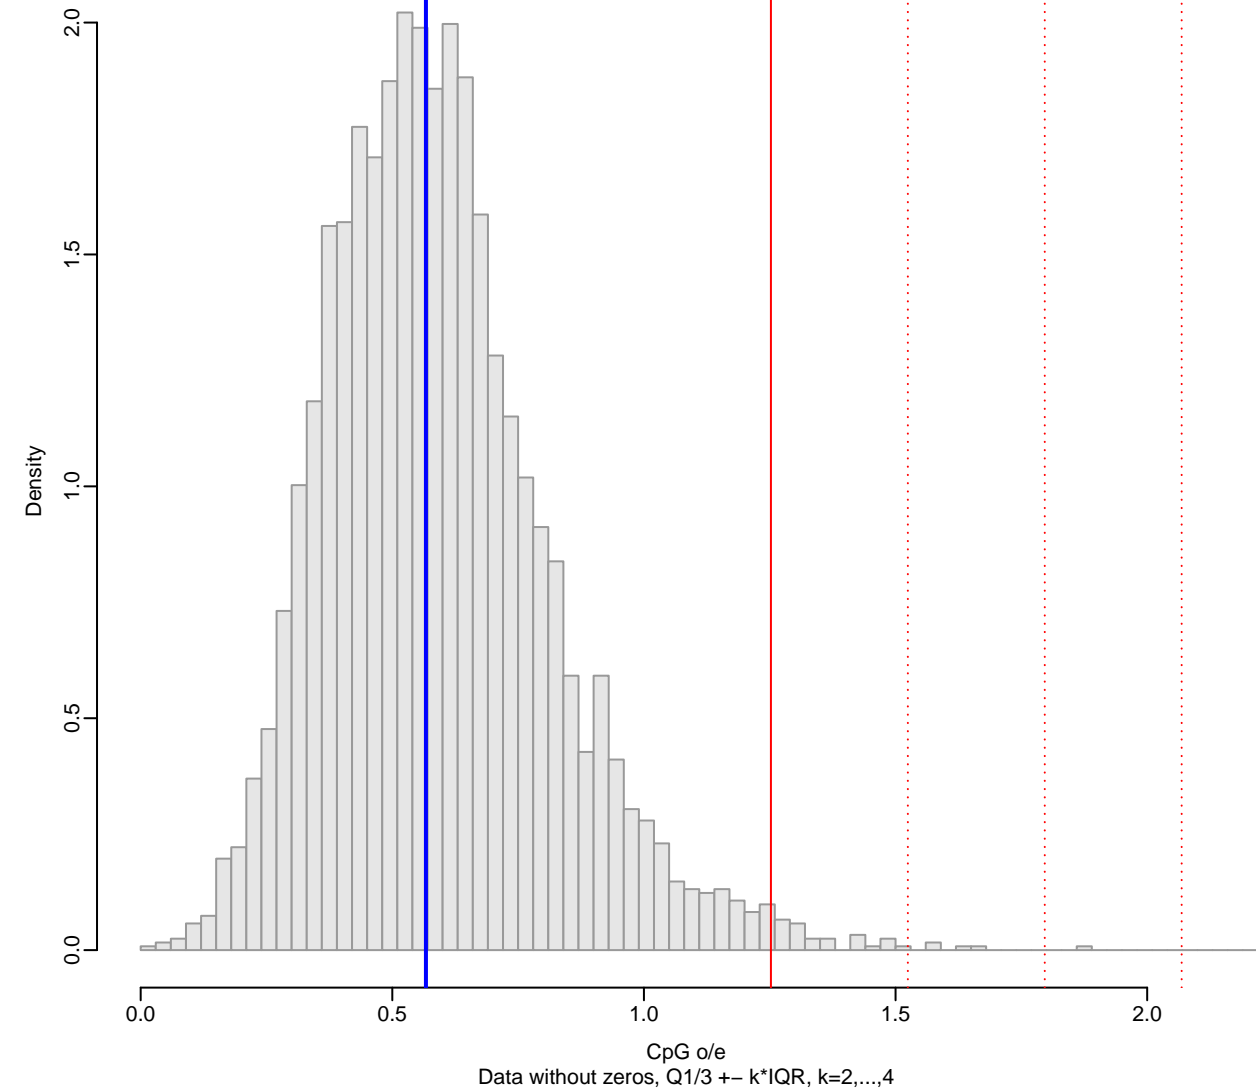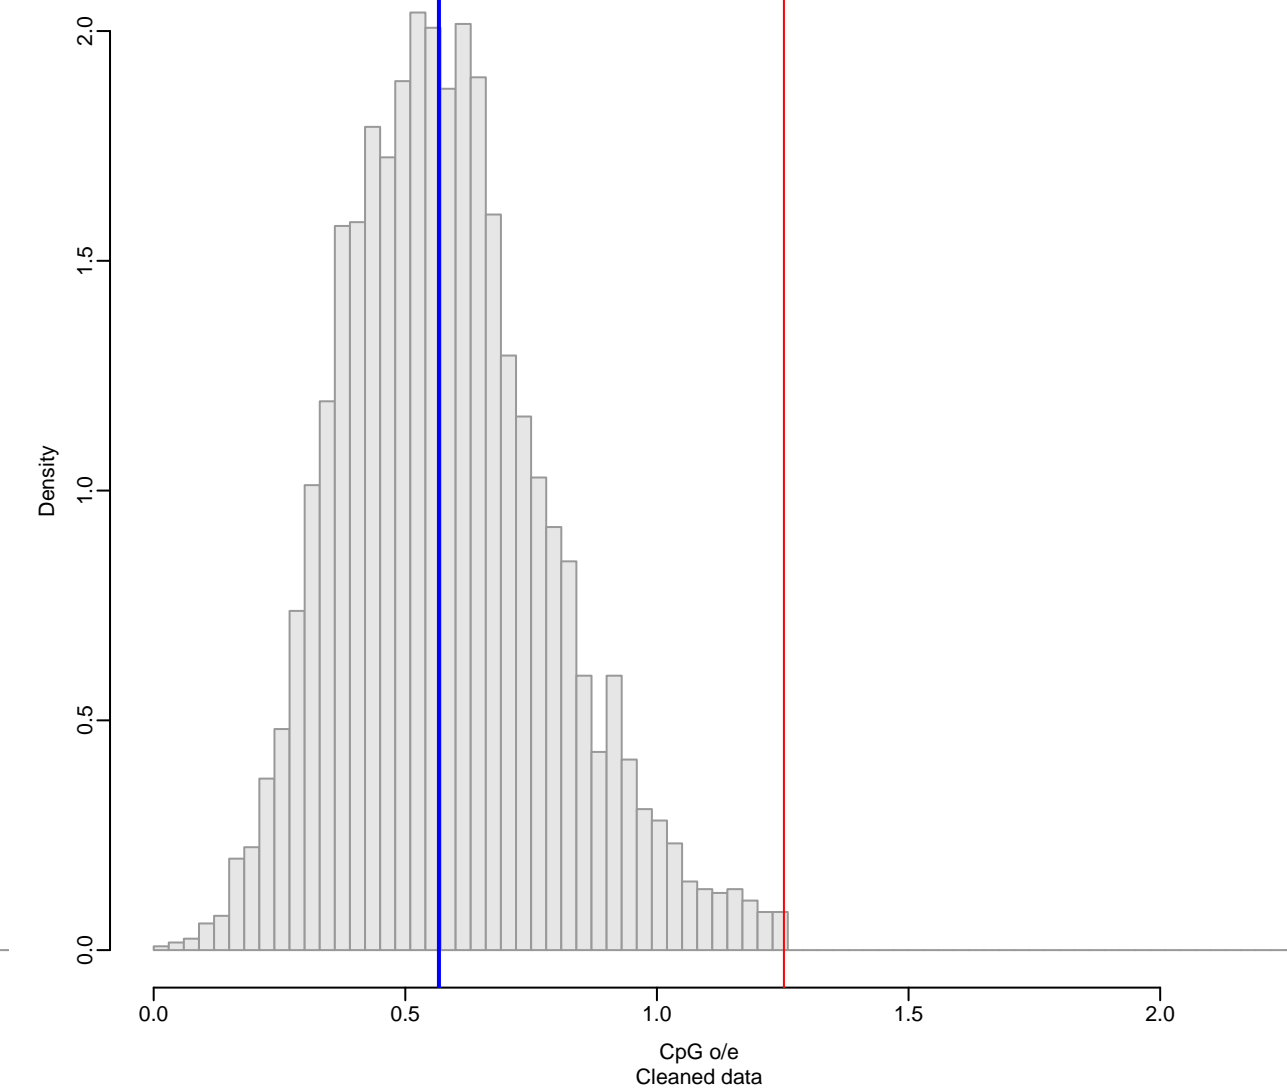

Entamoeba\_histolytica

Density

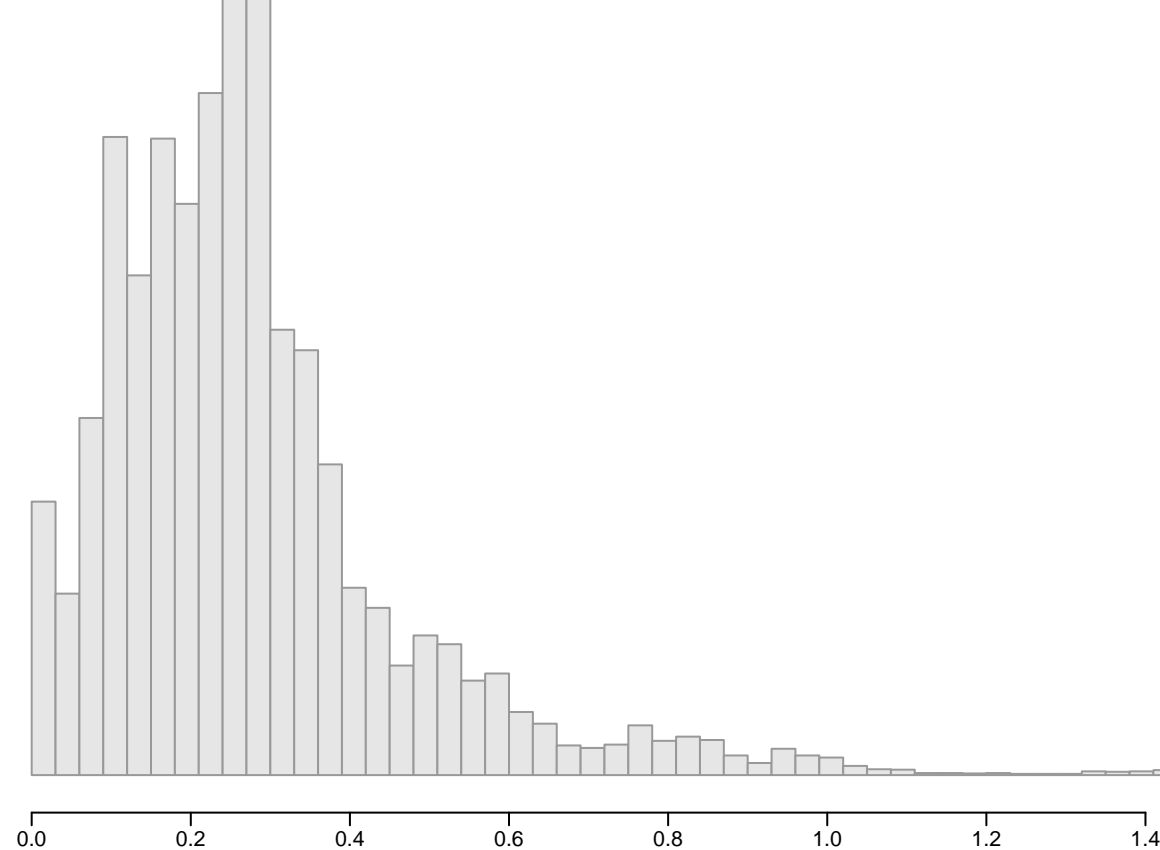

Density

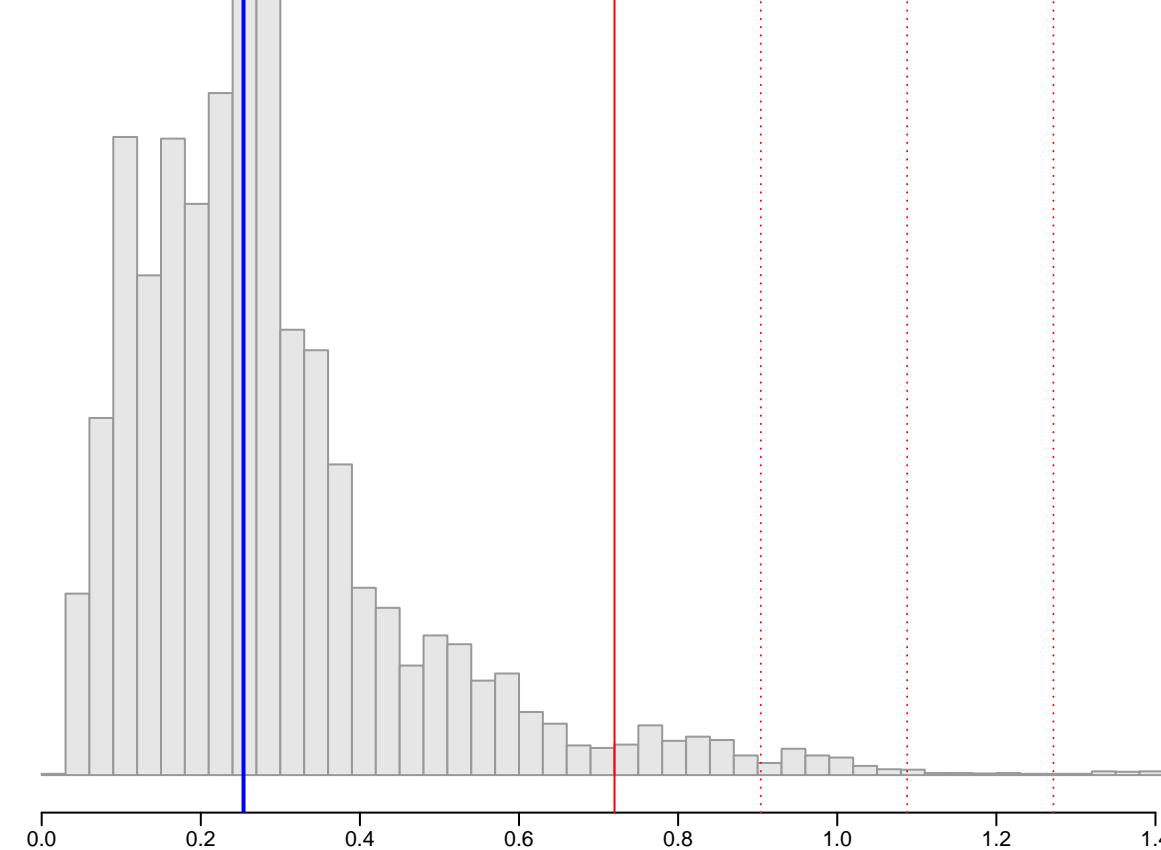

Density

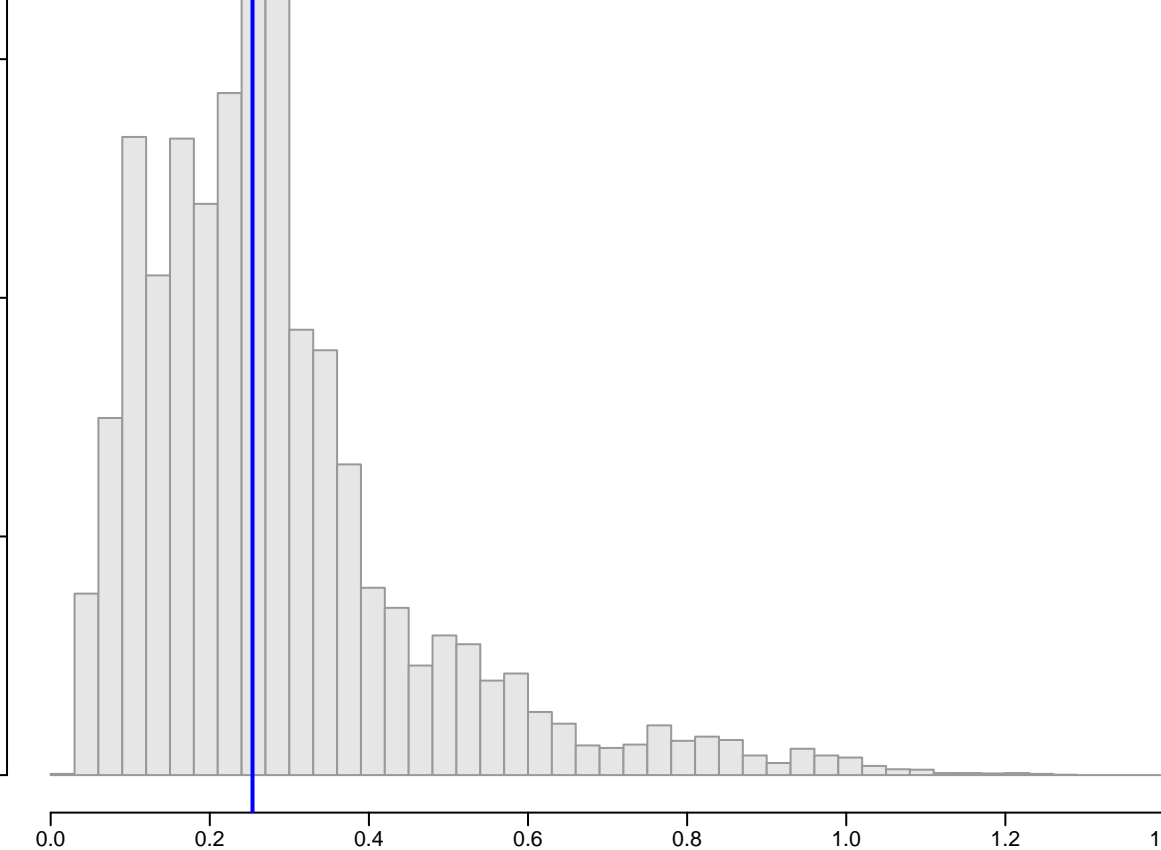

Ephedra\_distachya

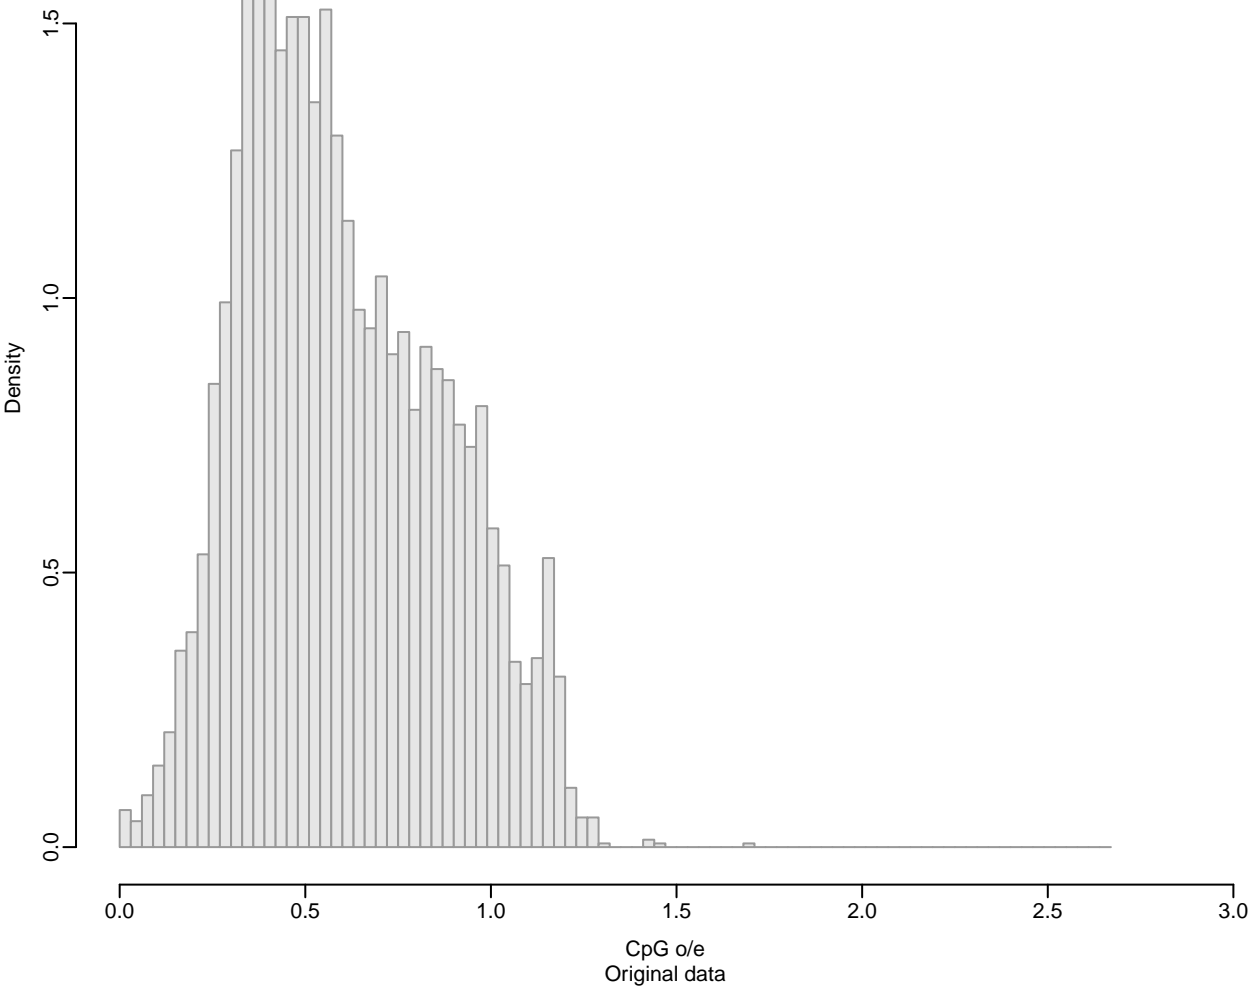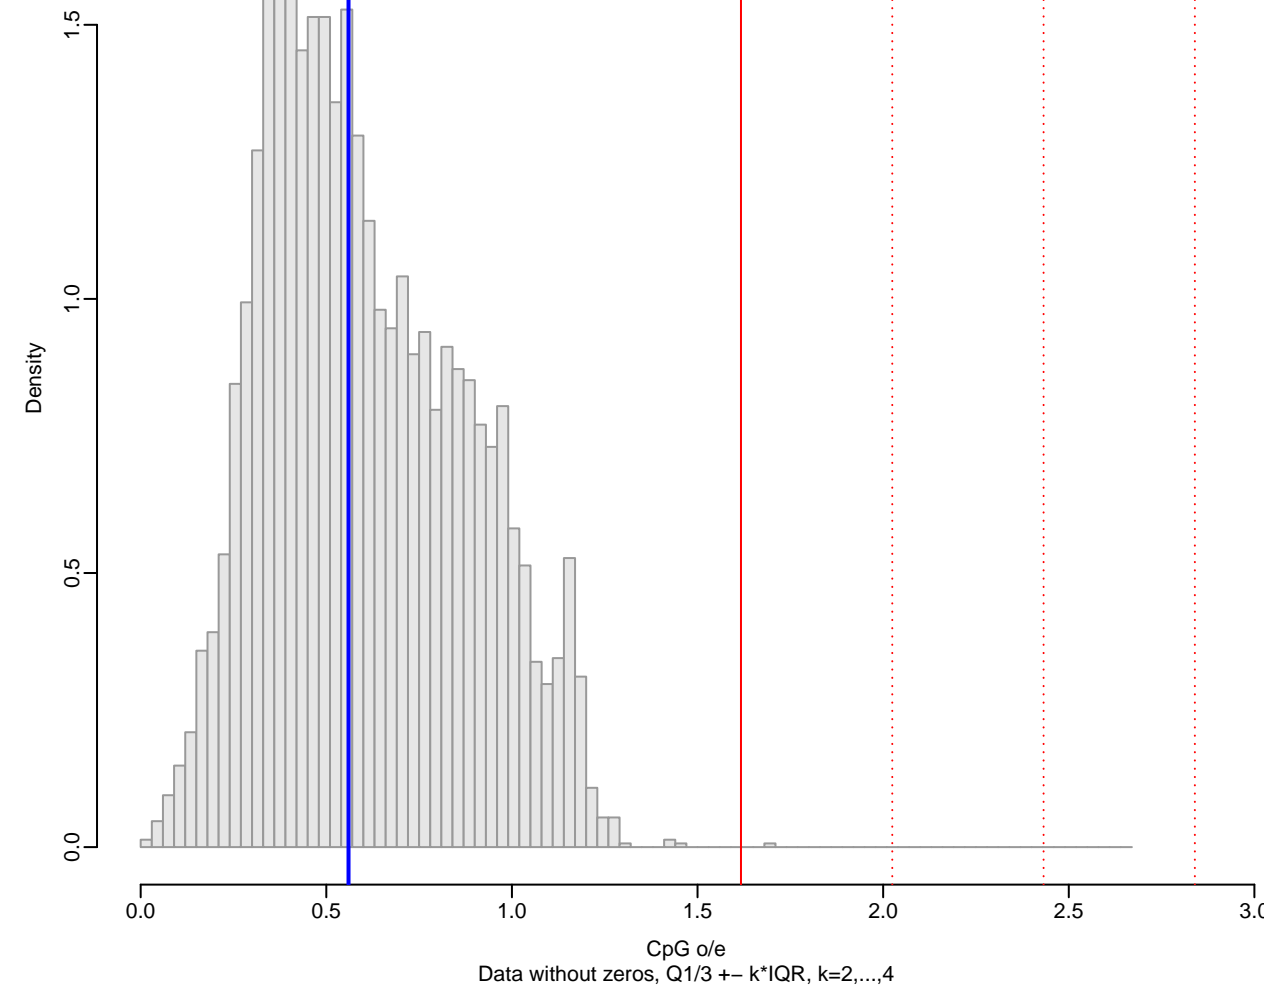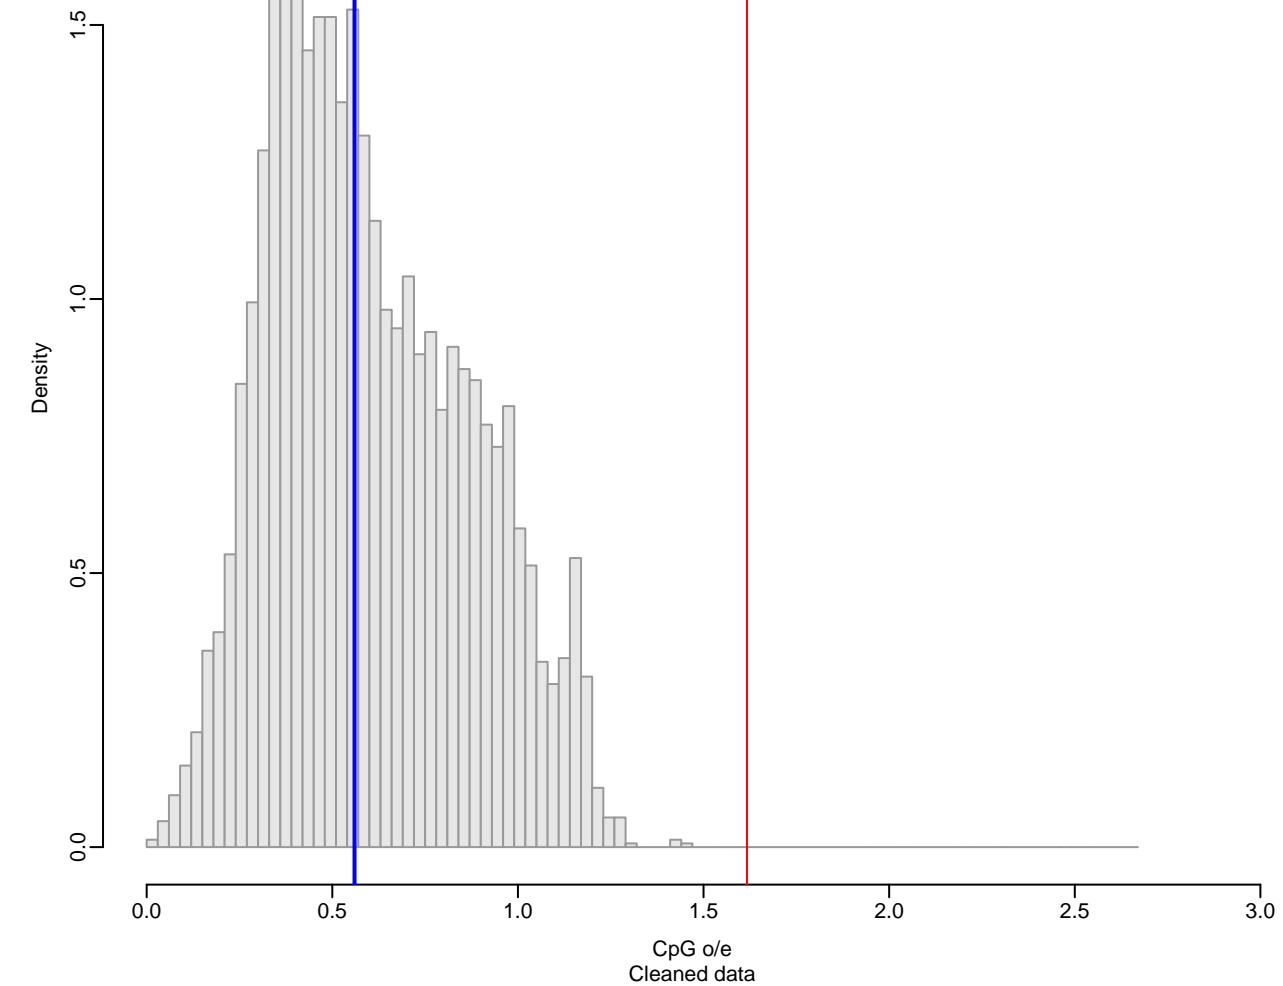

Epichloe\_festucae

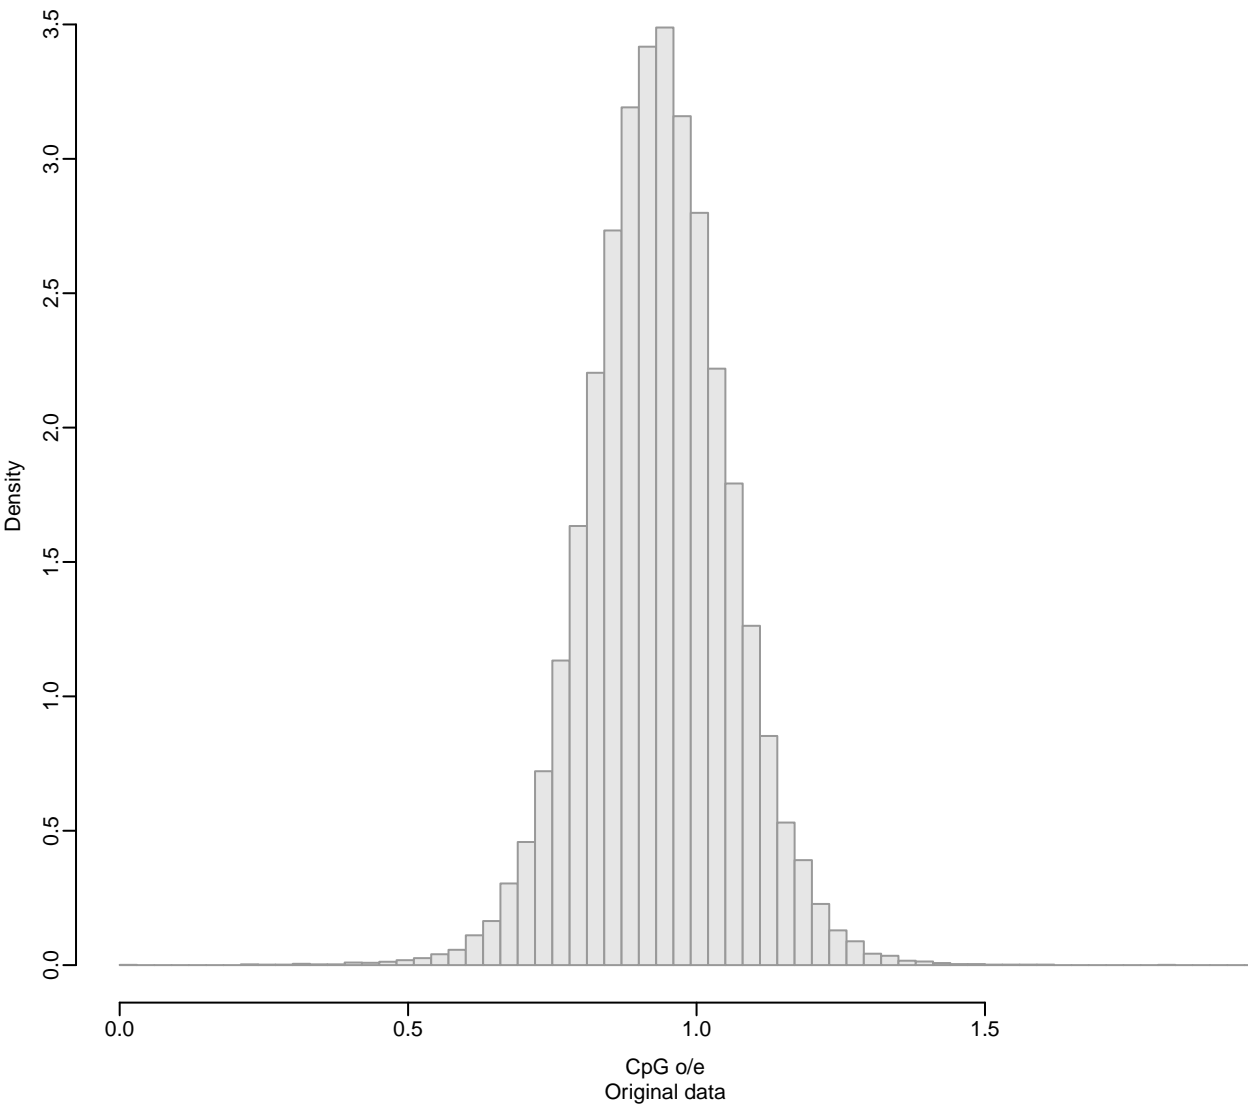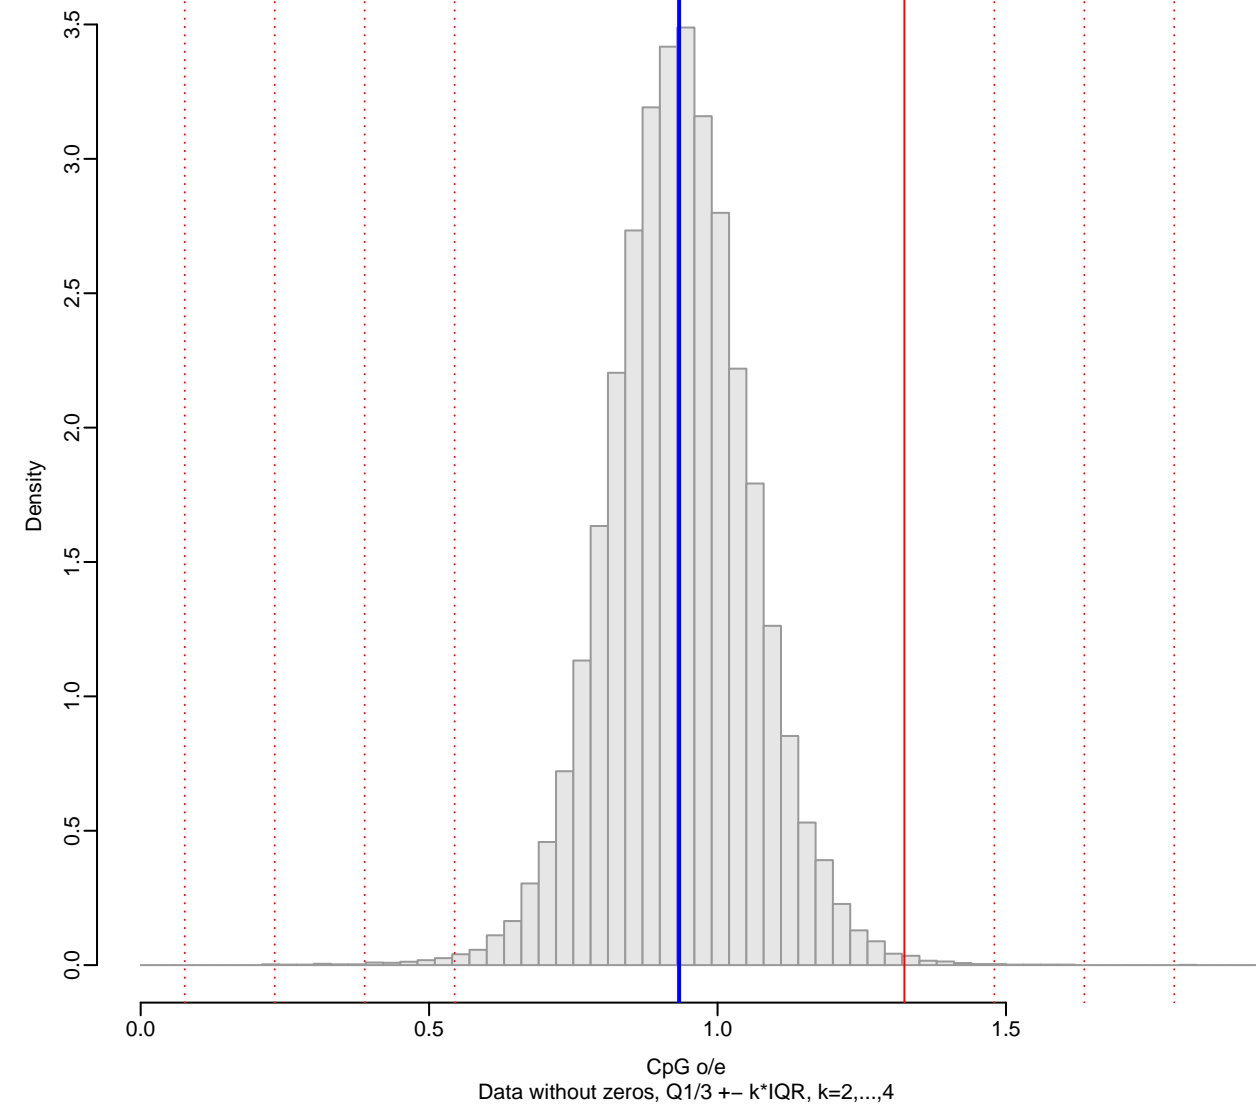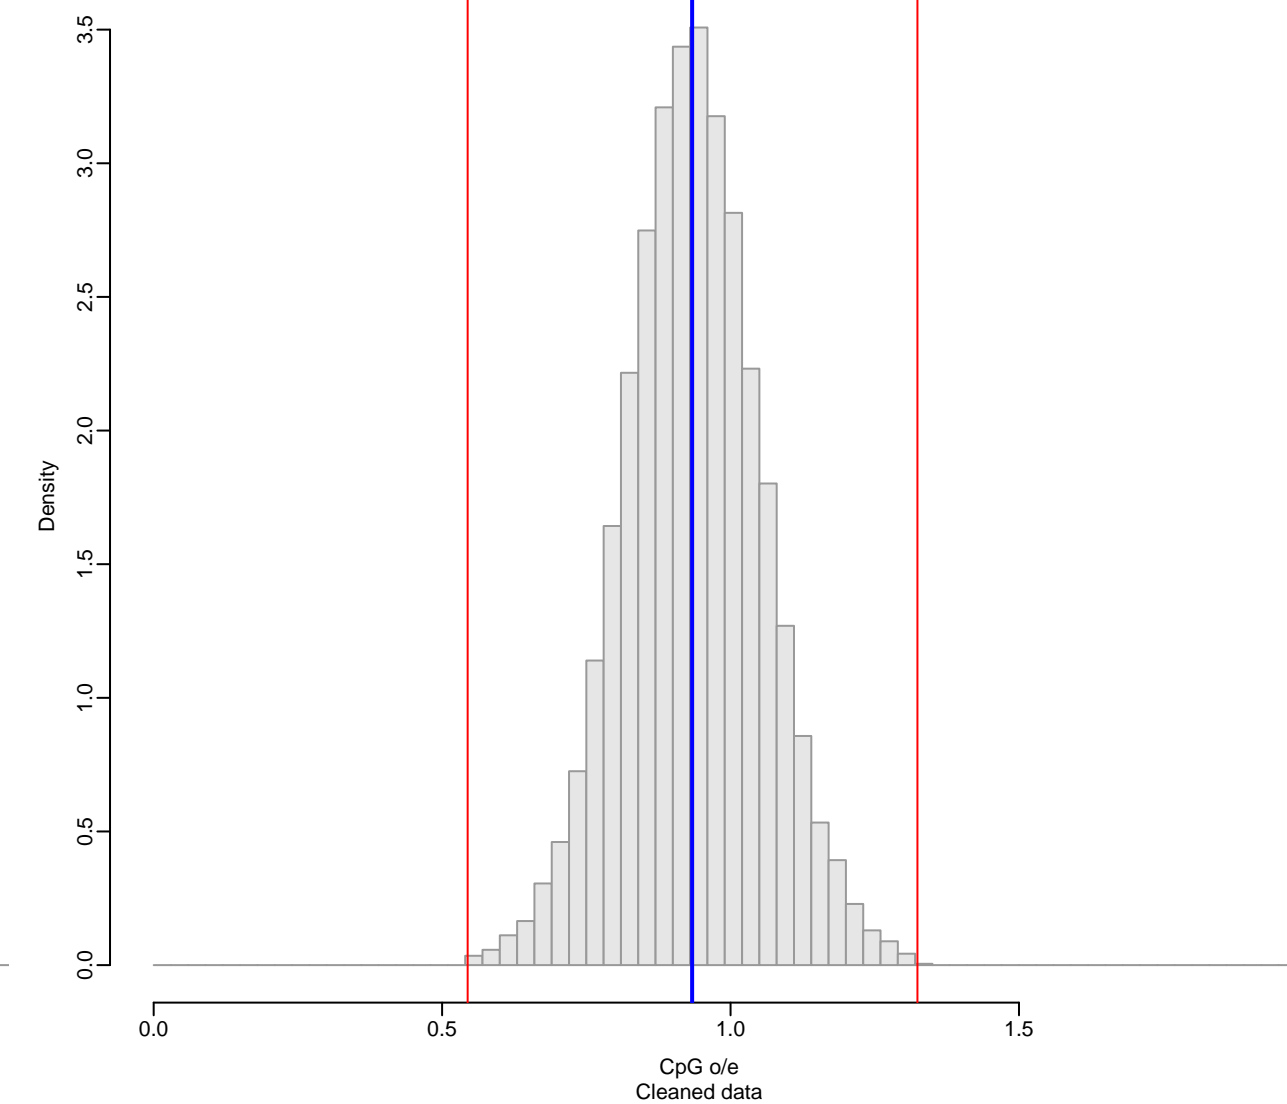

Equus\_caballus

Density

1.5  
1.0  
0.5  
0.0

0.0 0.5 1.0 1.5 2.0

CpG o/e  
Original data

Density

1.5  
1.0  
0.5  
0.0

0.0 0.5 1.0 1.5 2.0

CpG o/e  
Data without zeros, Q1/3 +− k\*IQR, k=2,...,4

Density

1.5  
1.0  
0.5  
0.0

0.0 0.5 1.0 1.5 2.0

CpG o/e  
Cleaned data

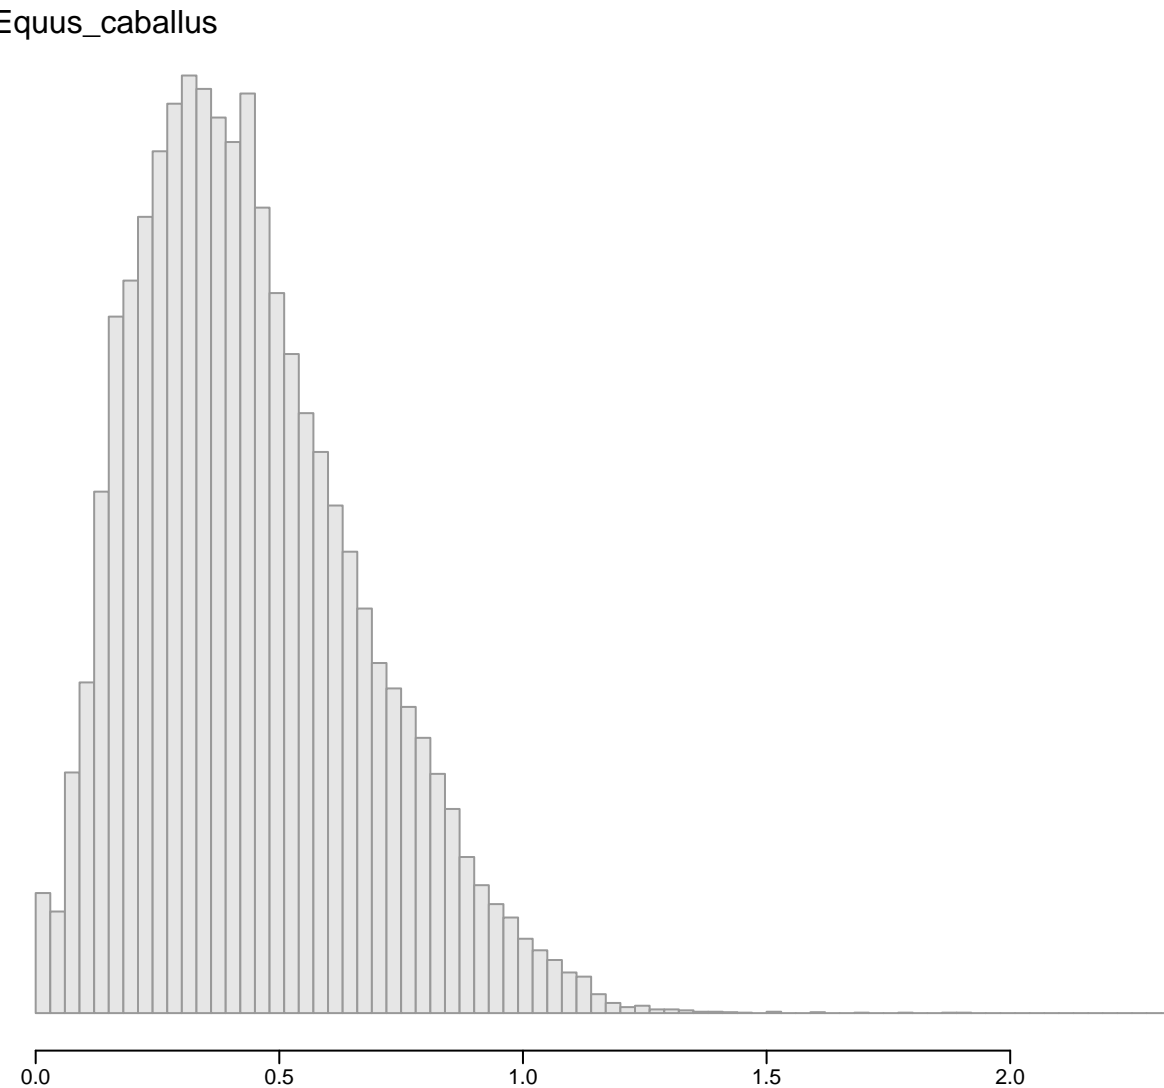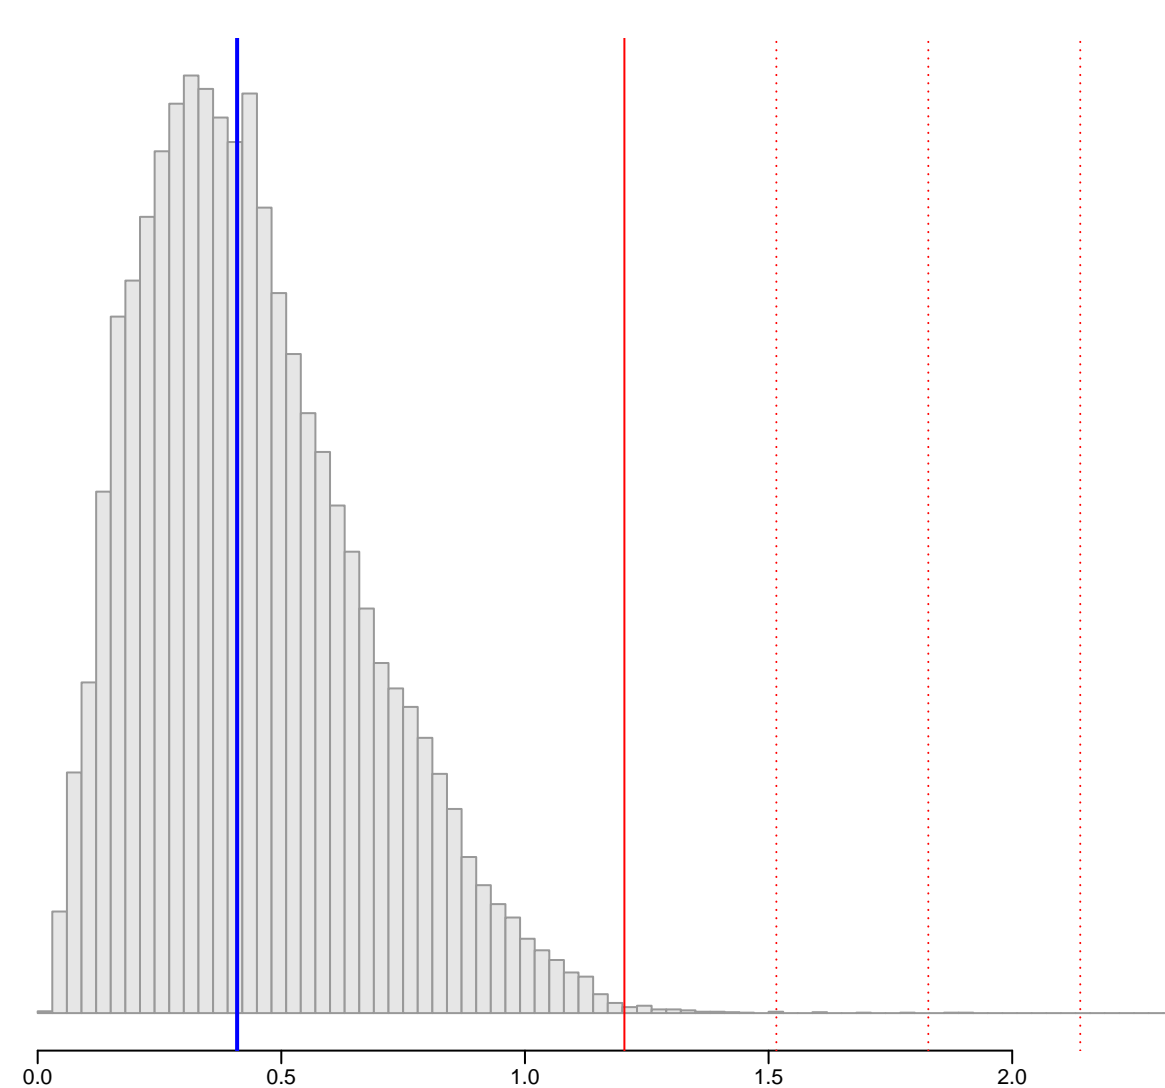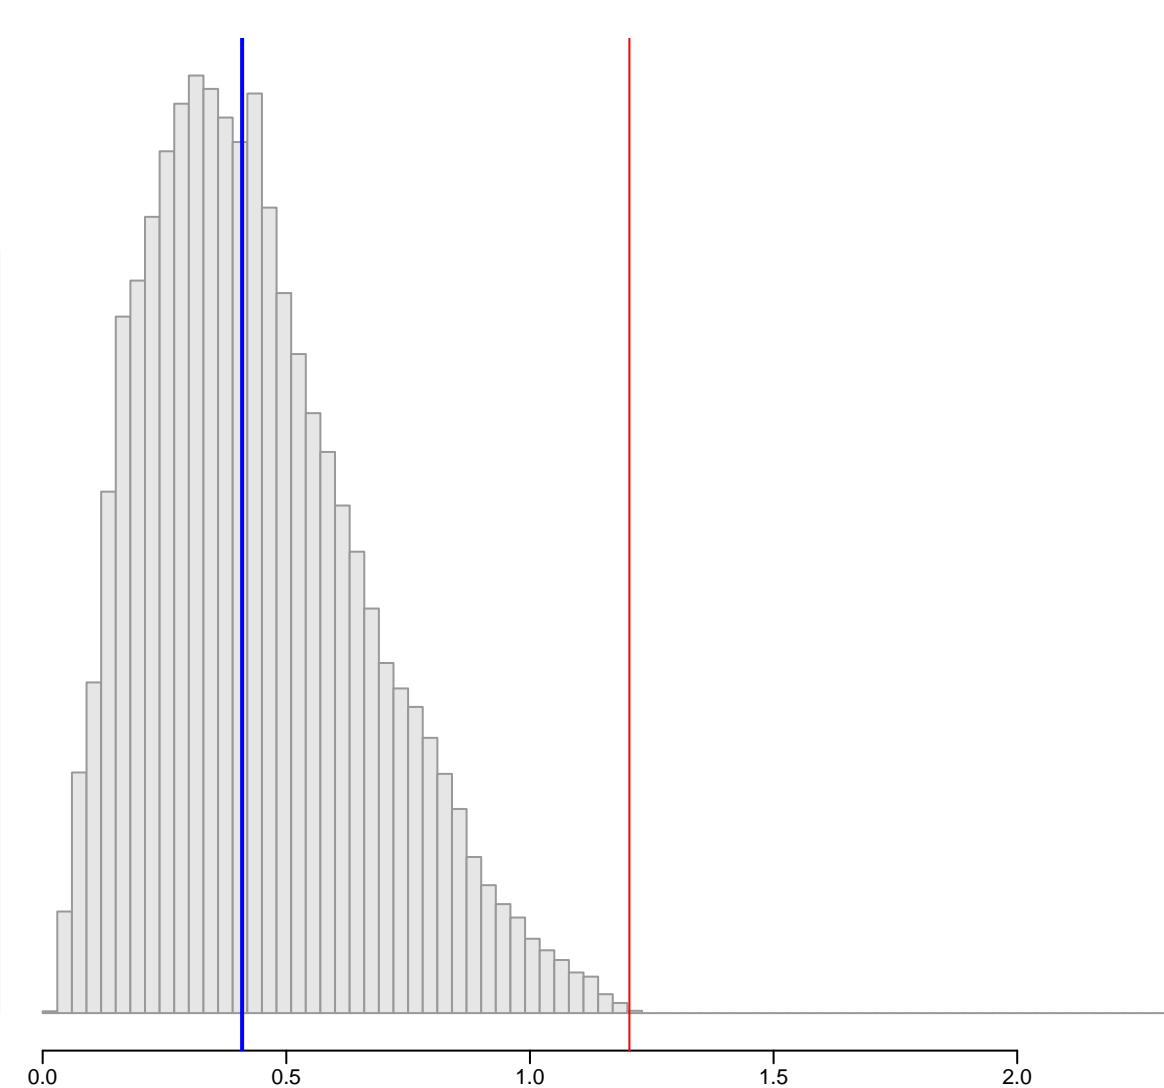



*Eriocheir sinensis*

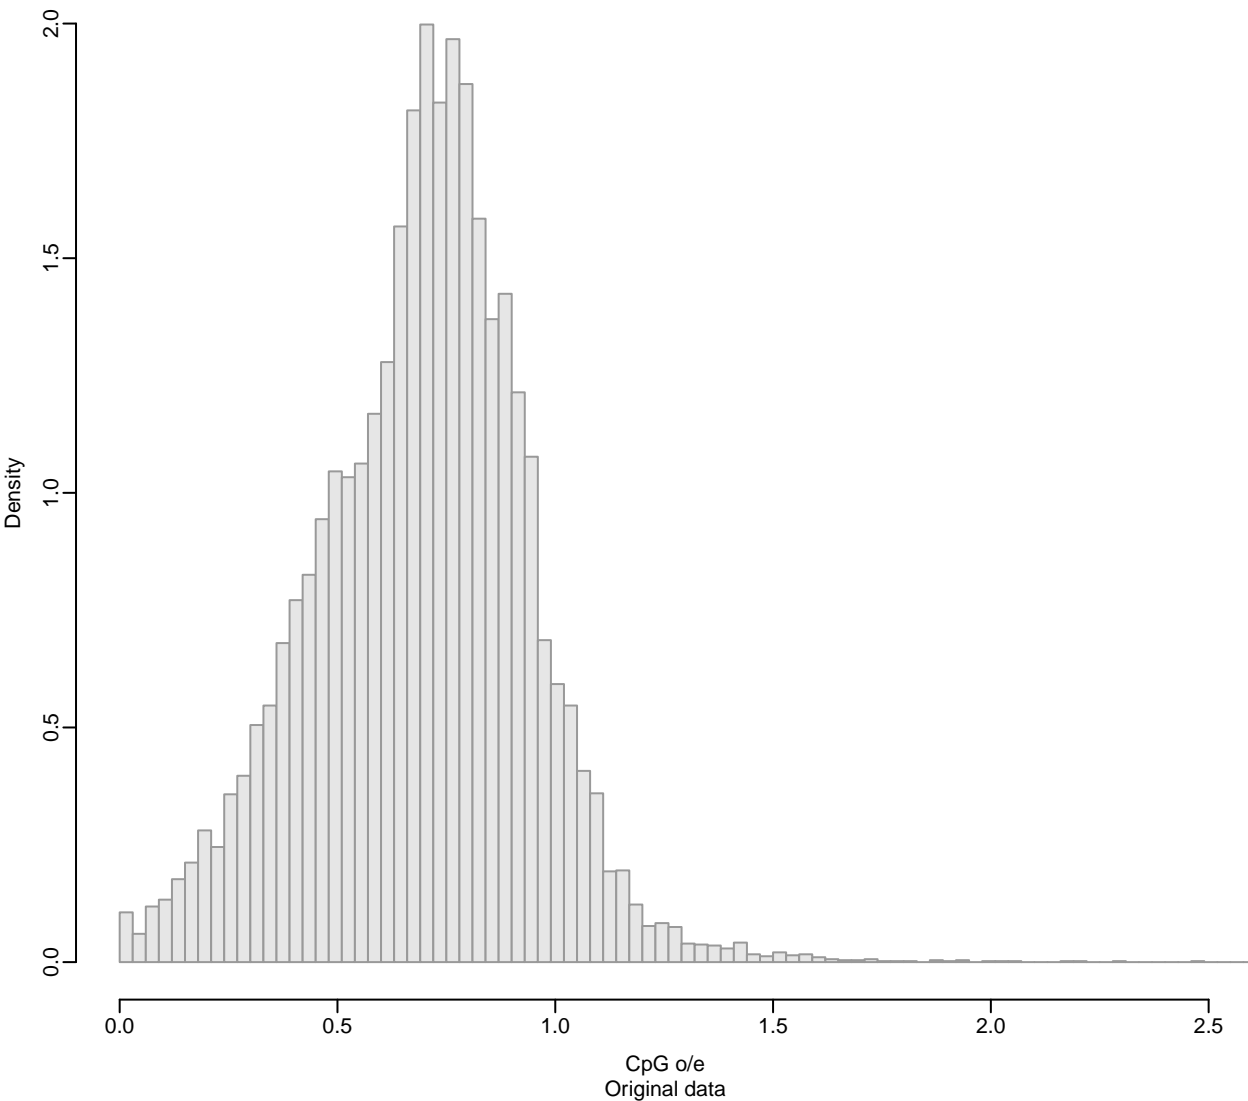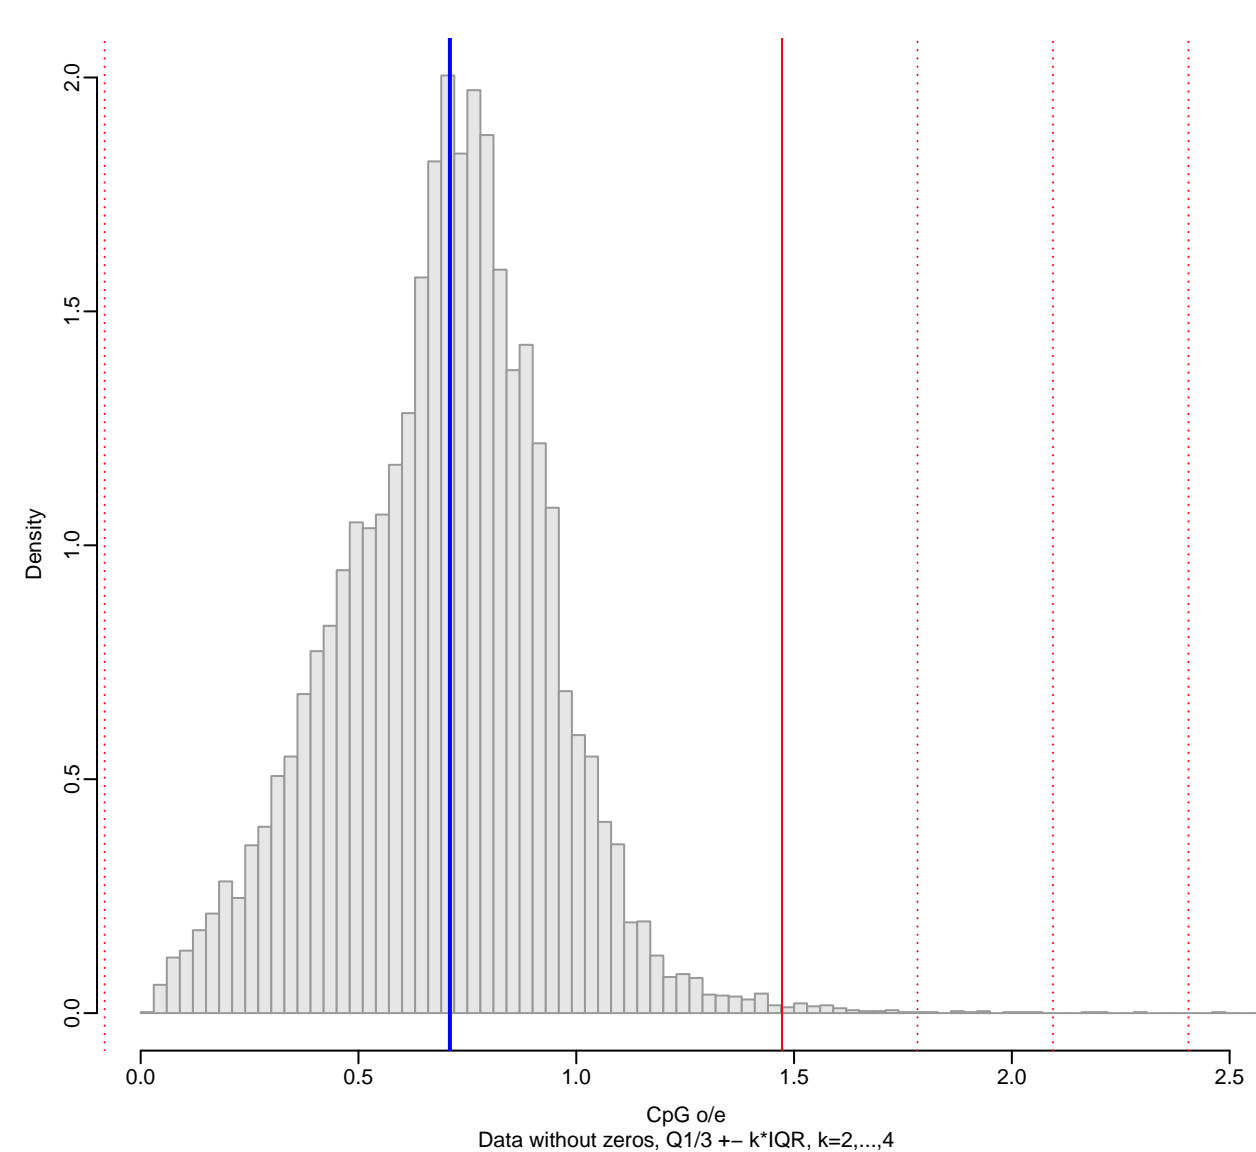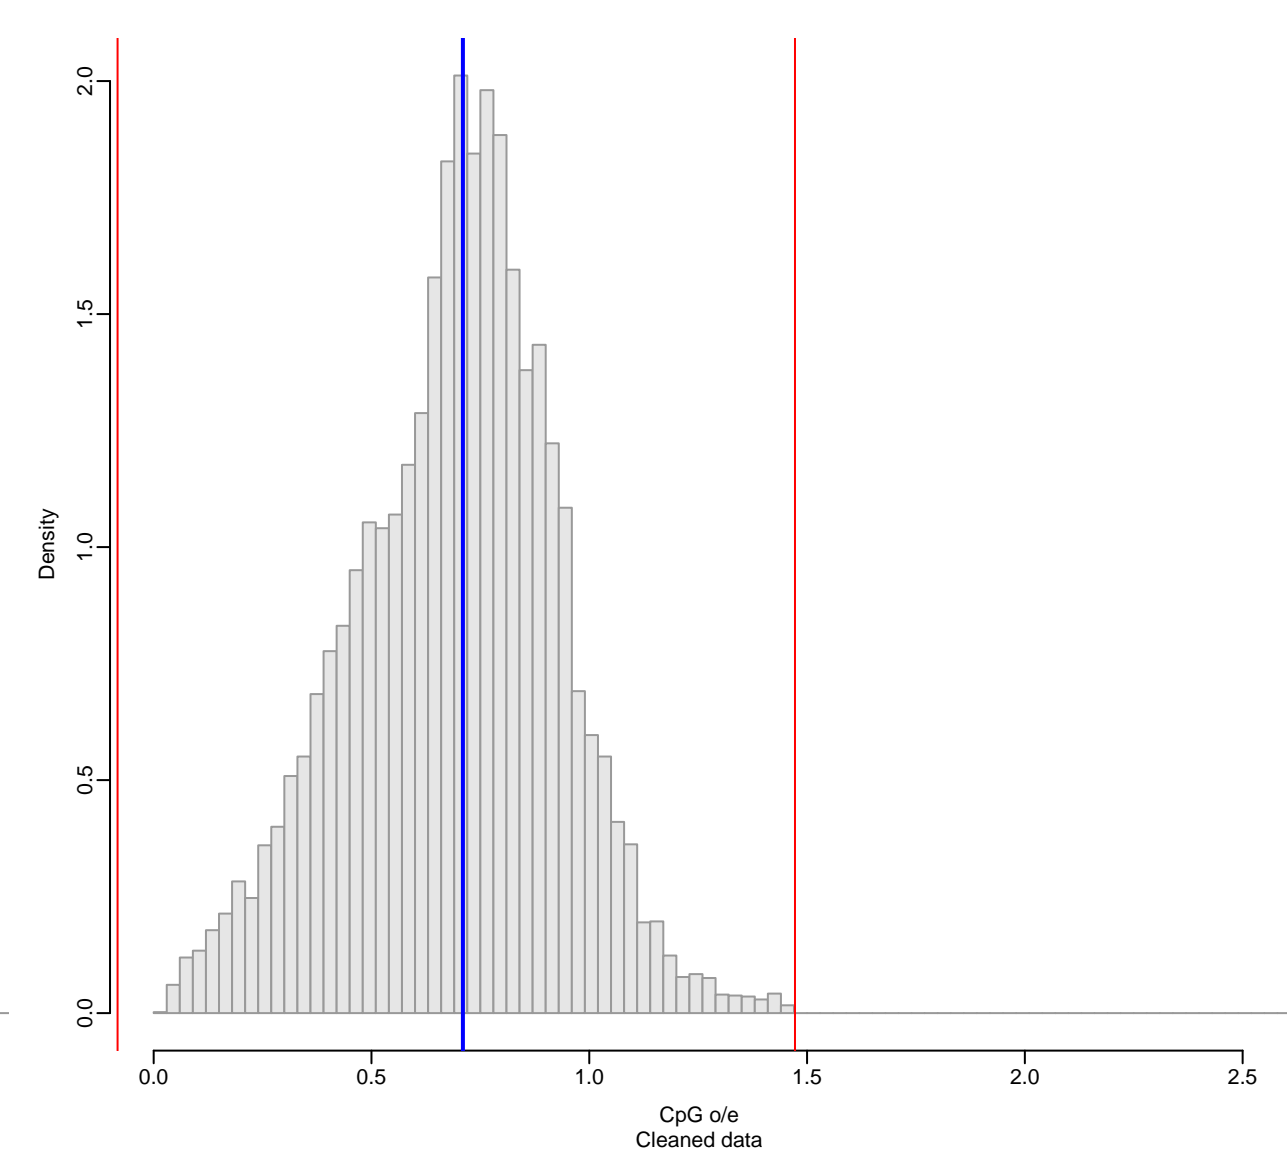

Eschscholzia\_californica

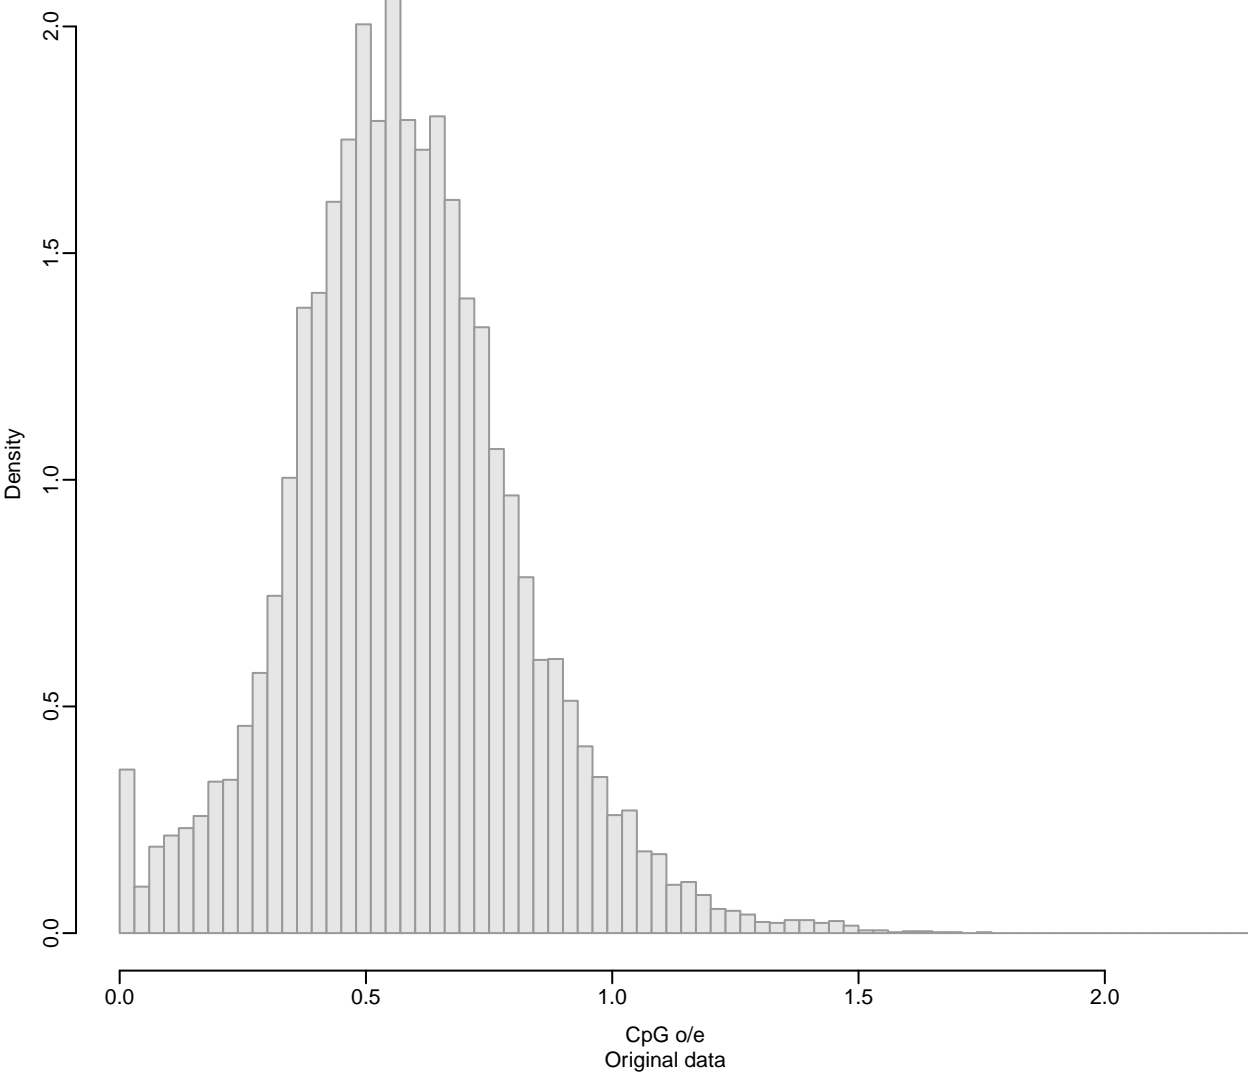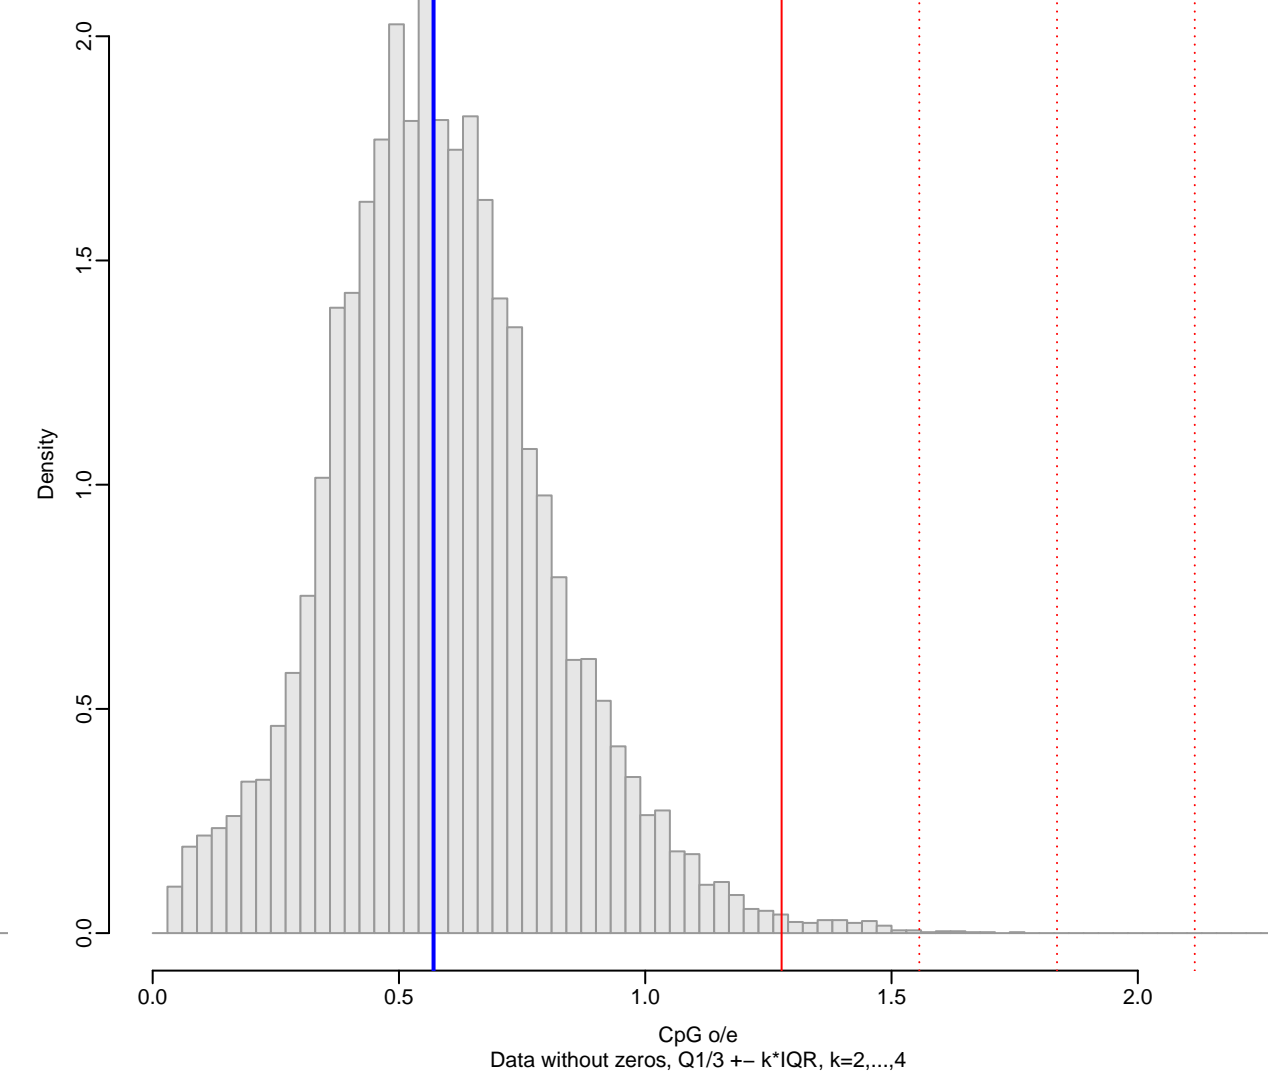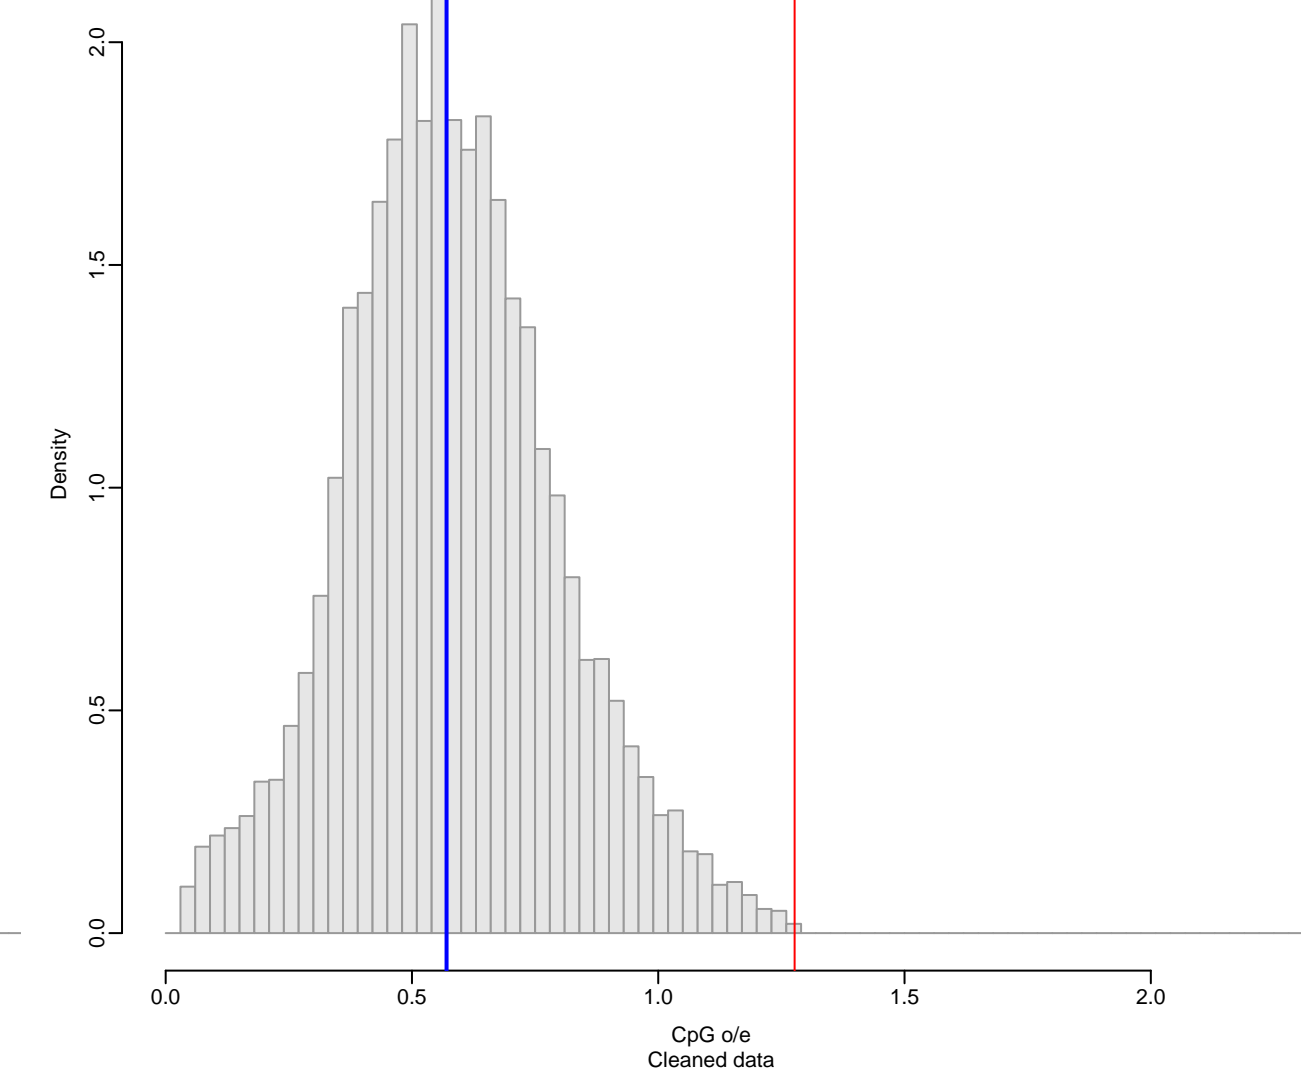

Eucalyptus\_camaldulensis

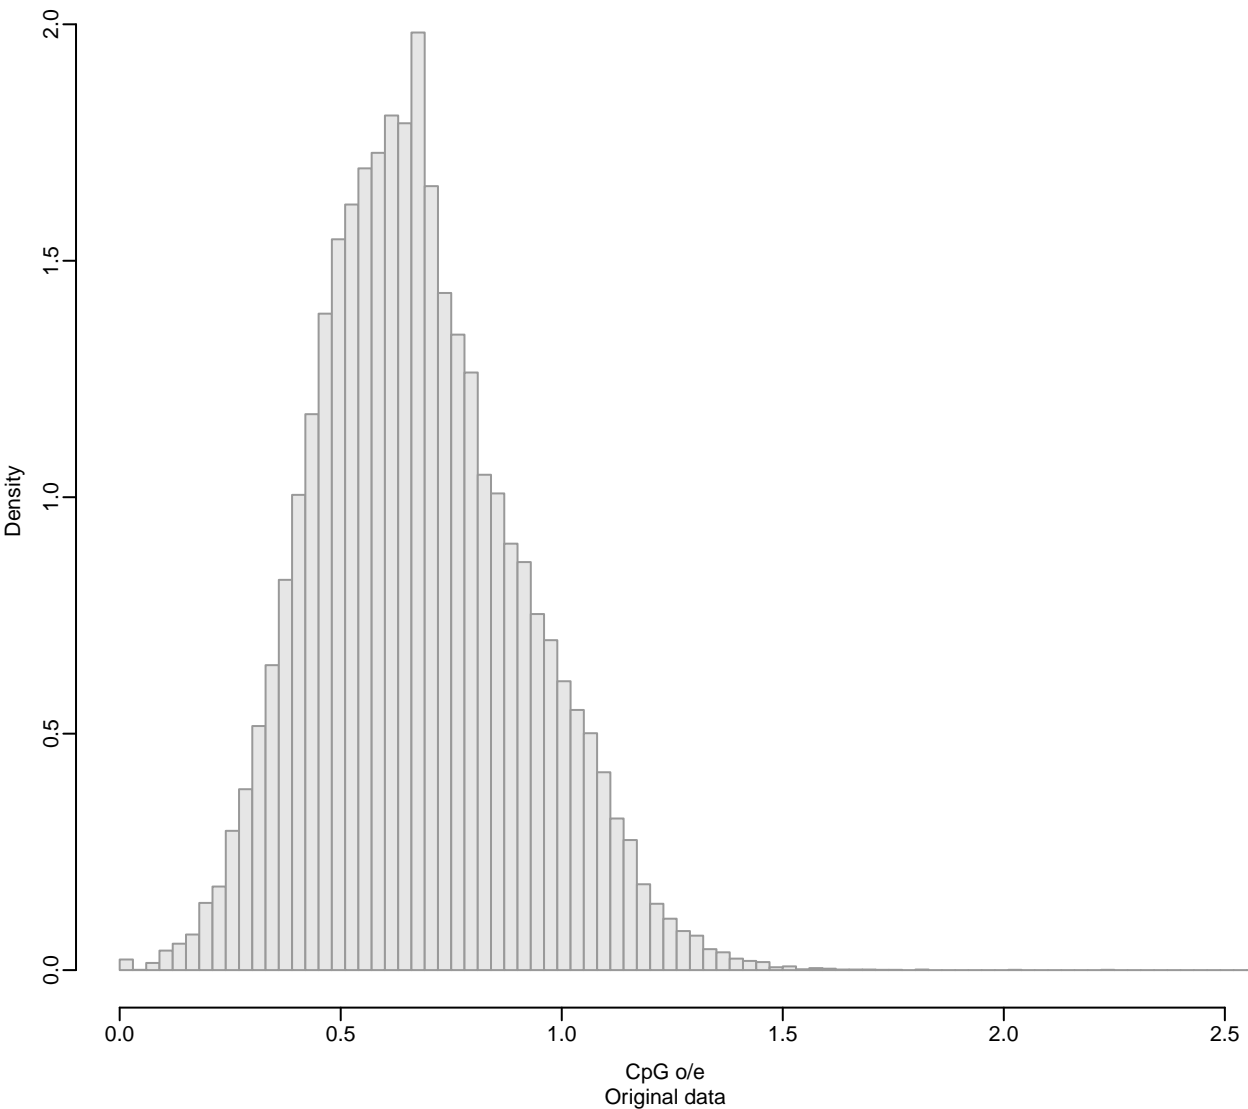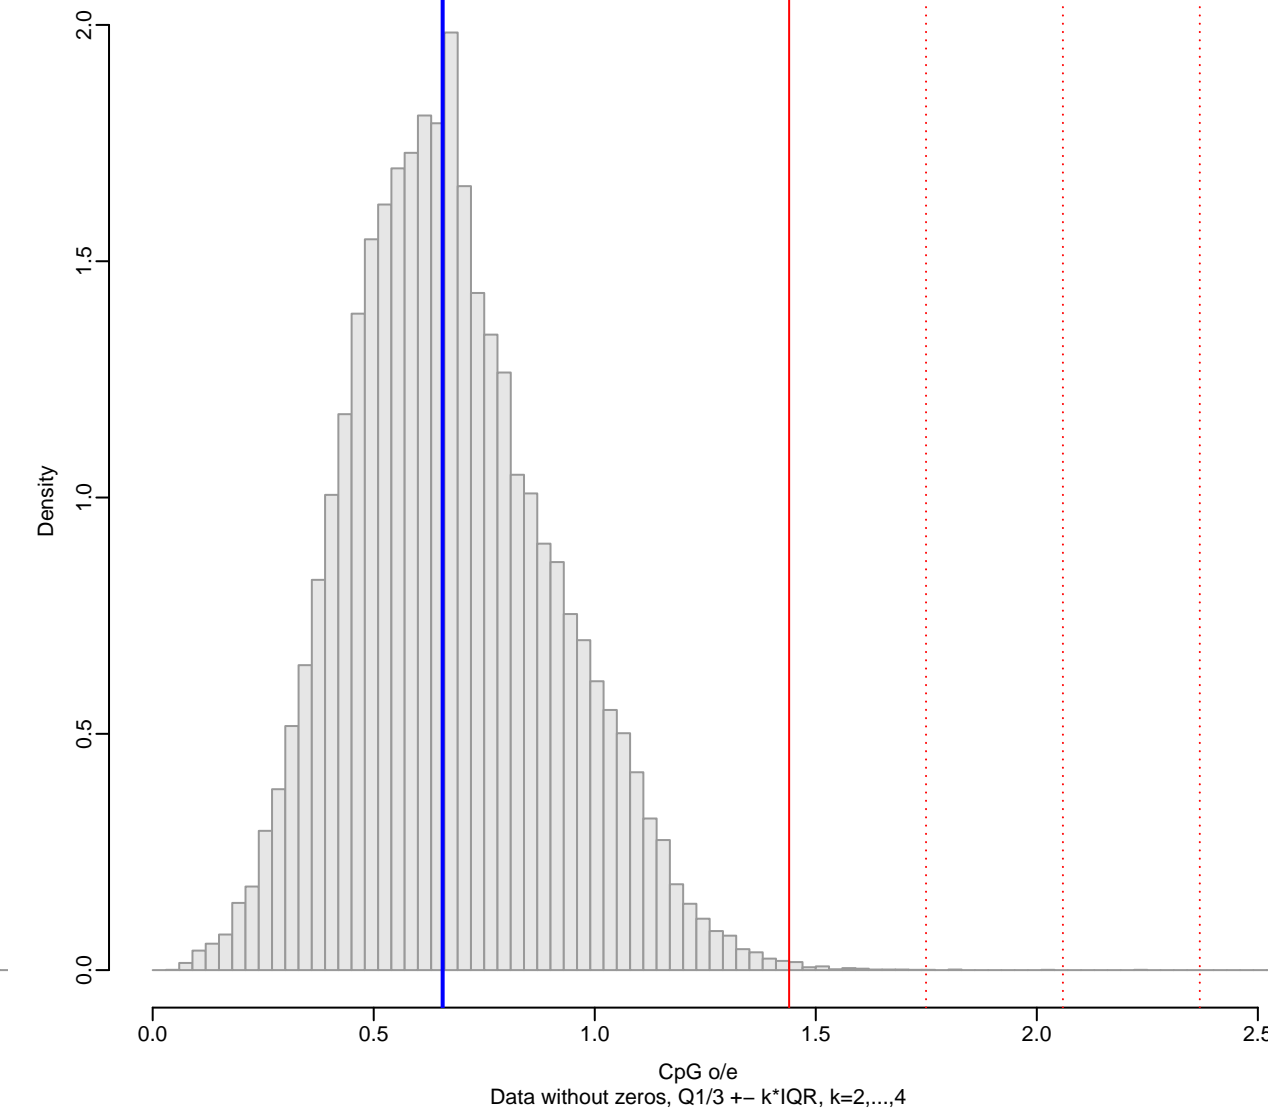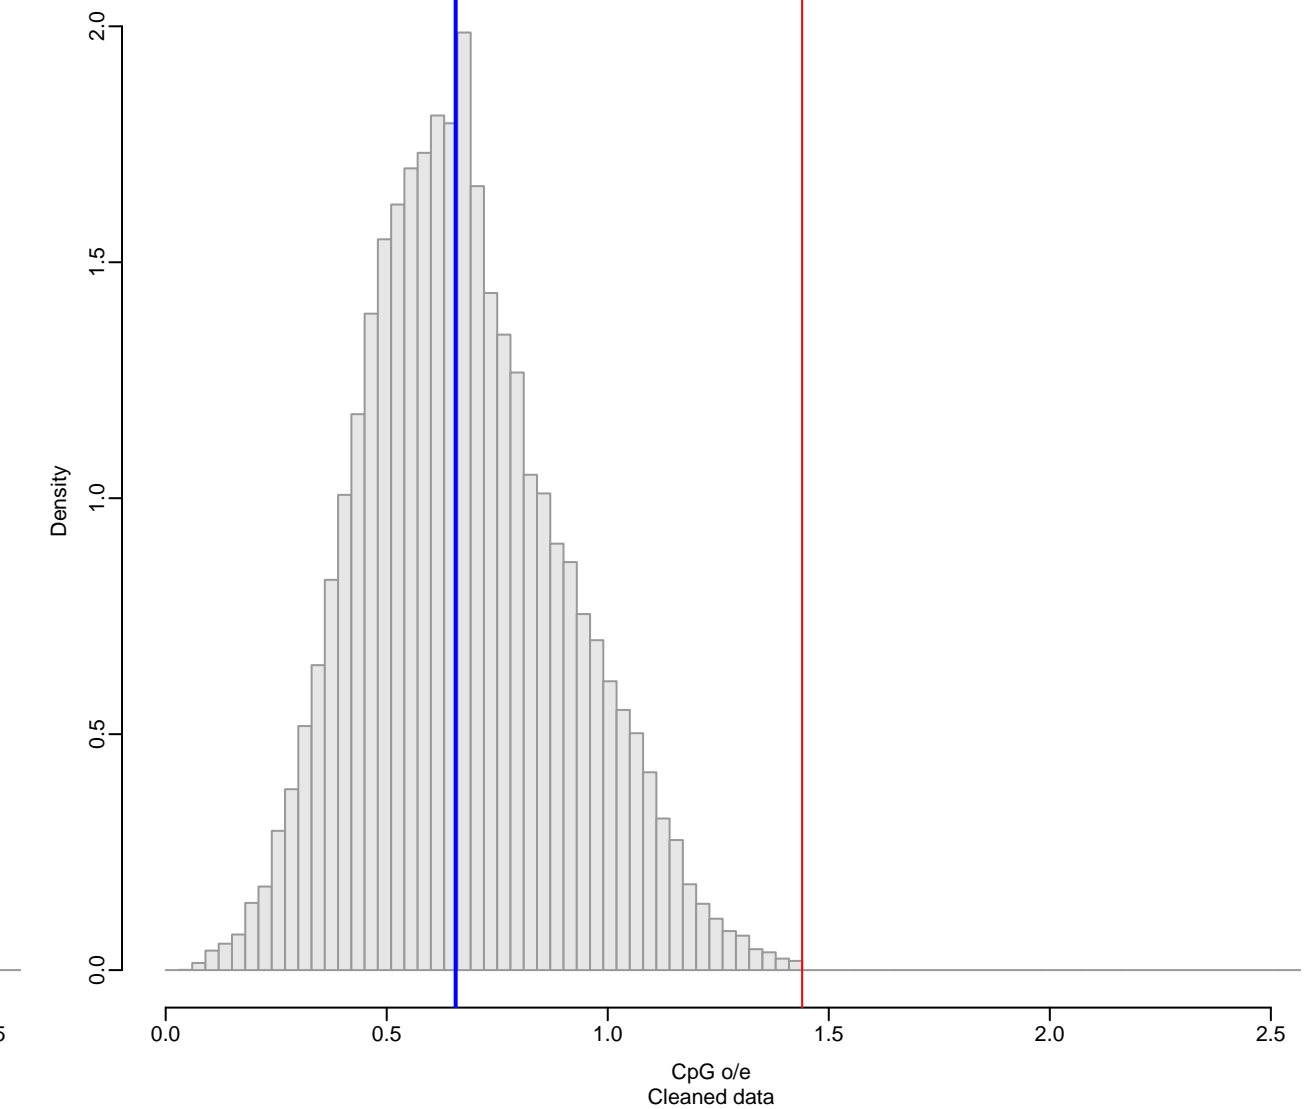

# Eucalyptus\_globulus

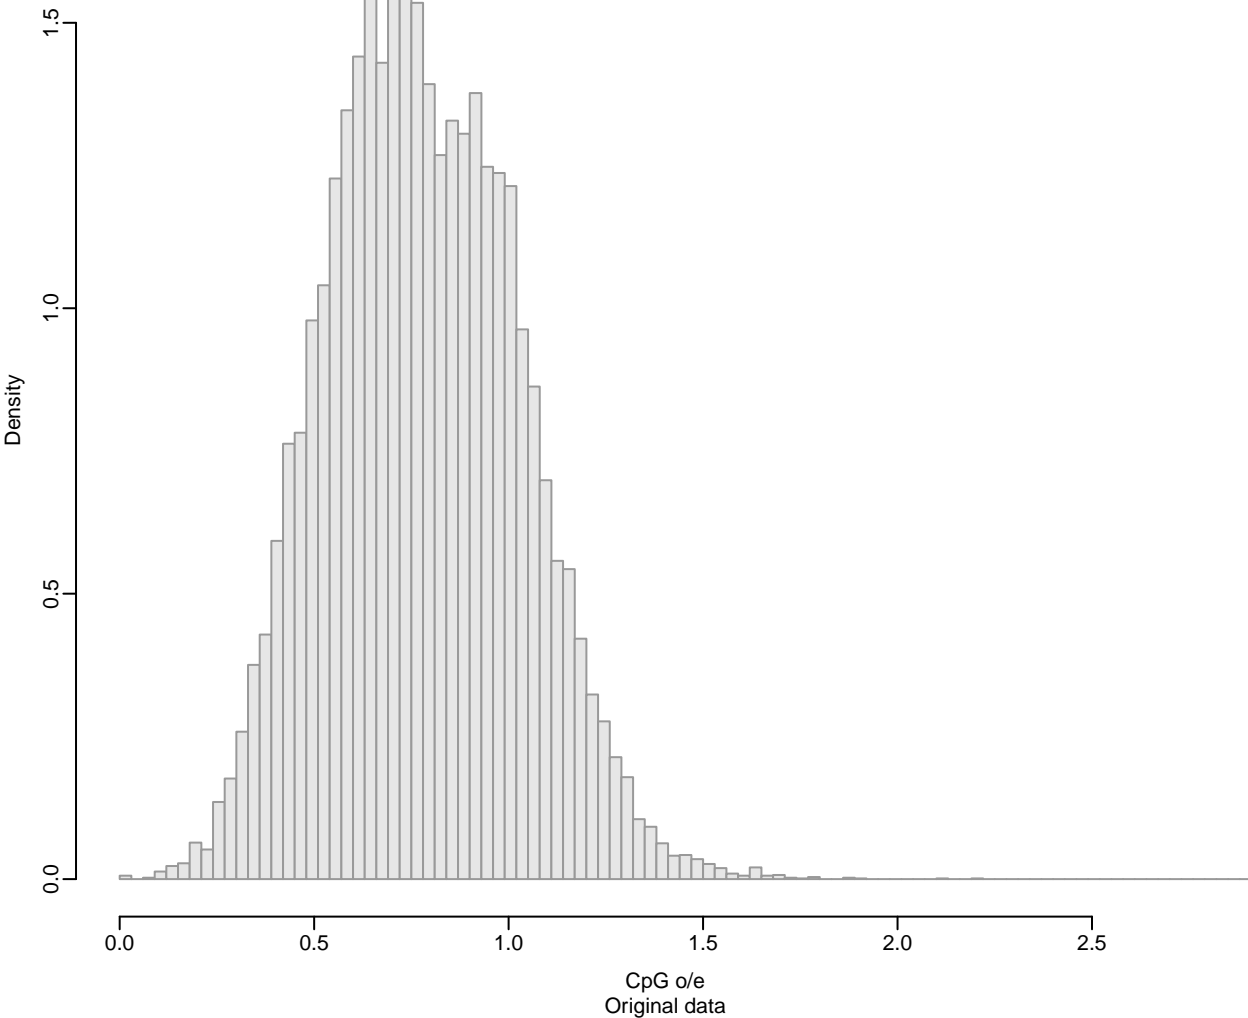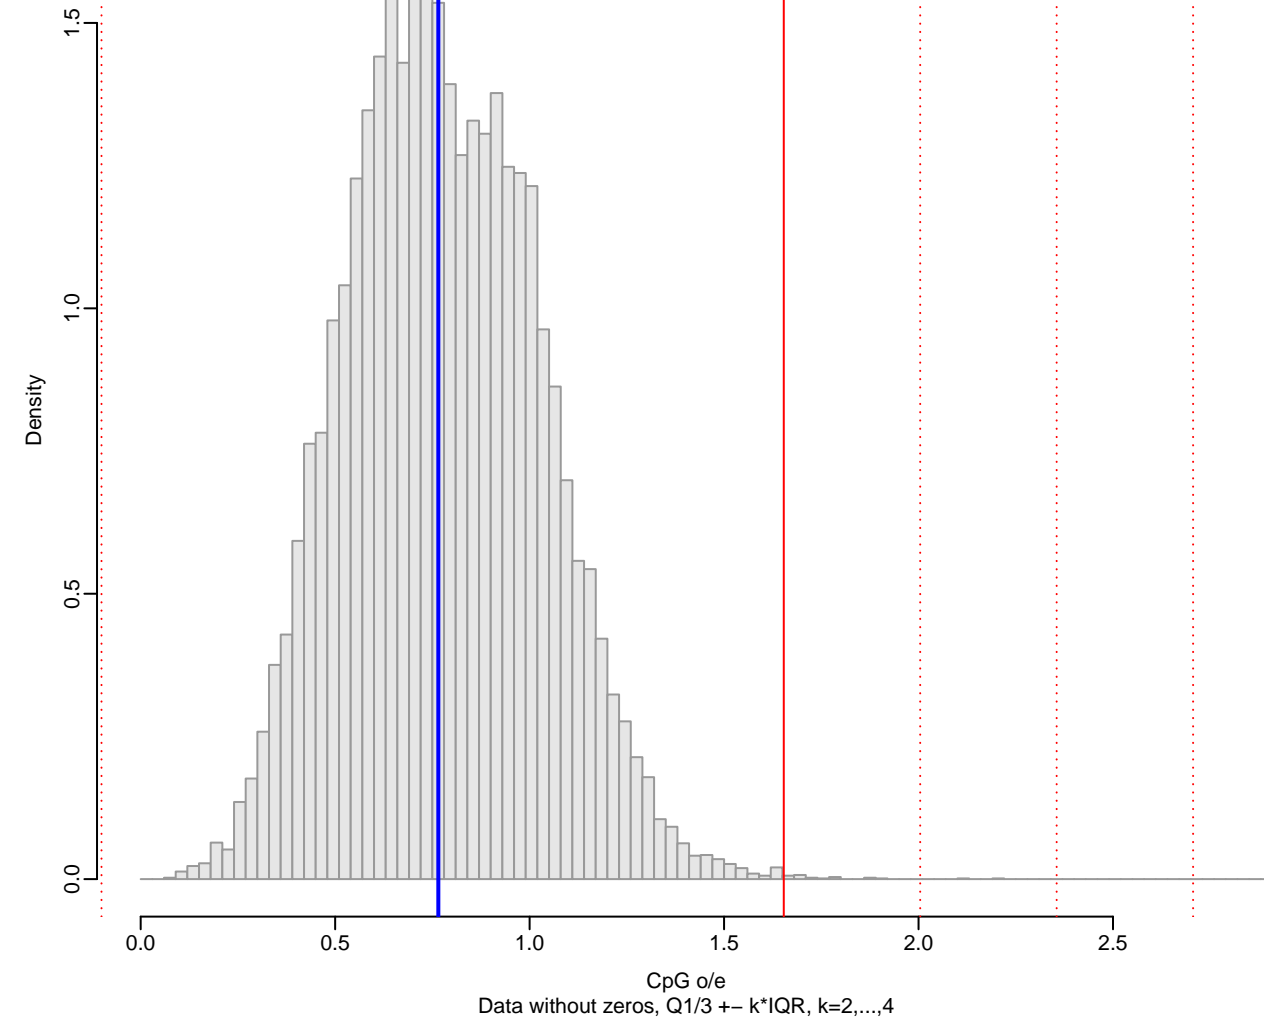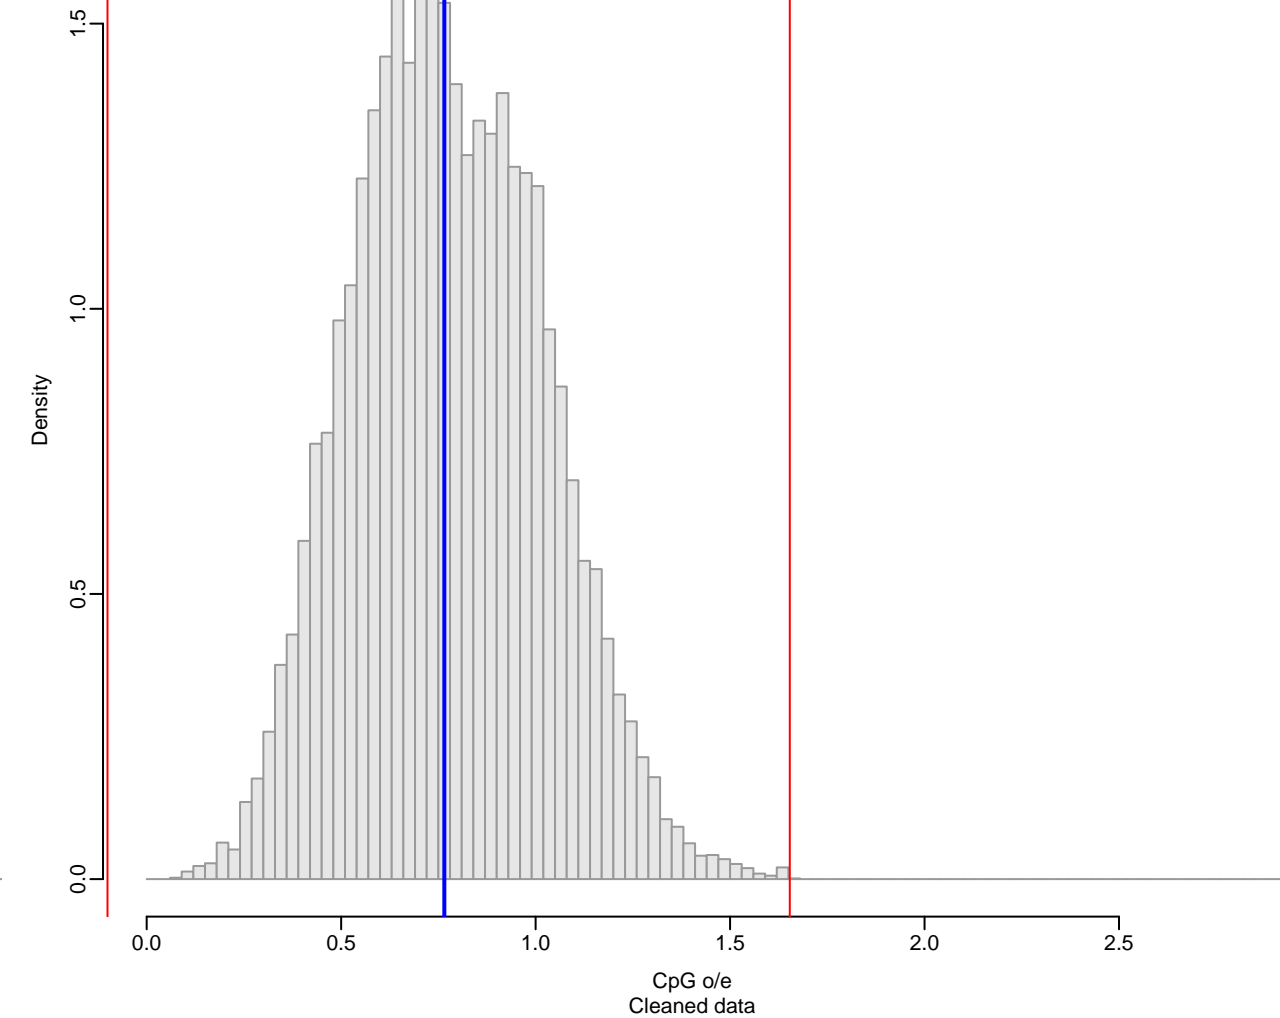

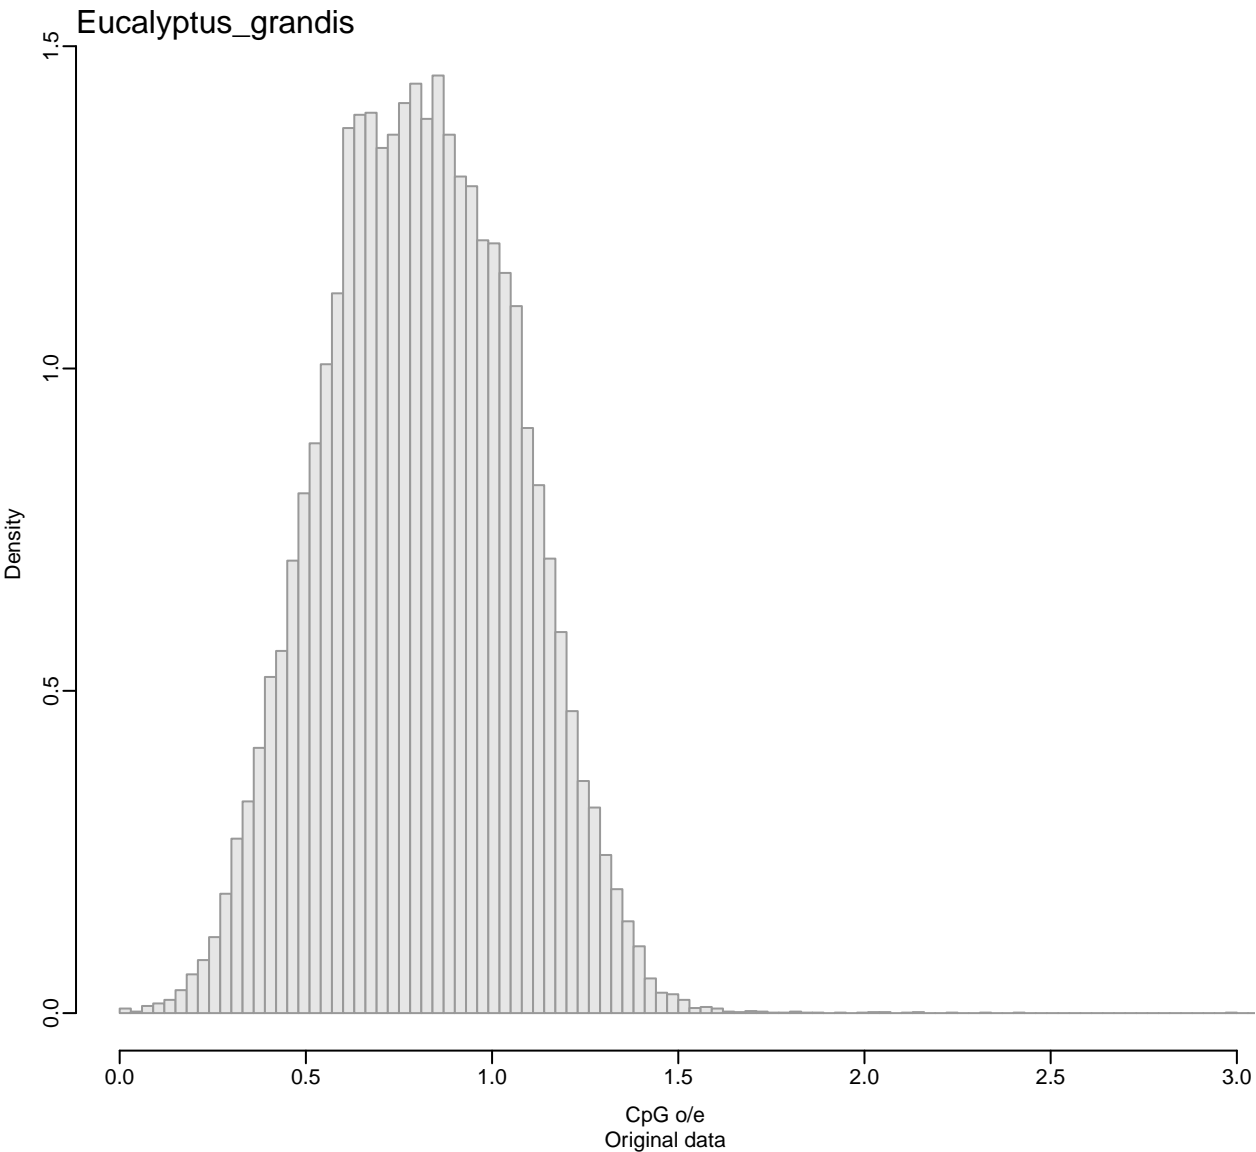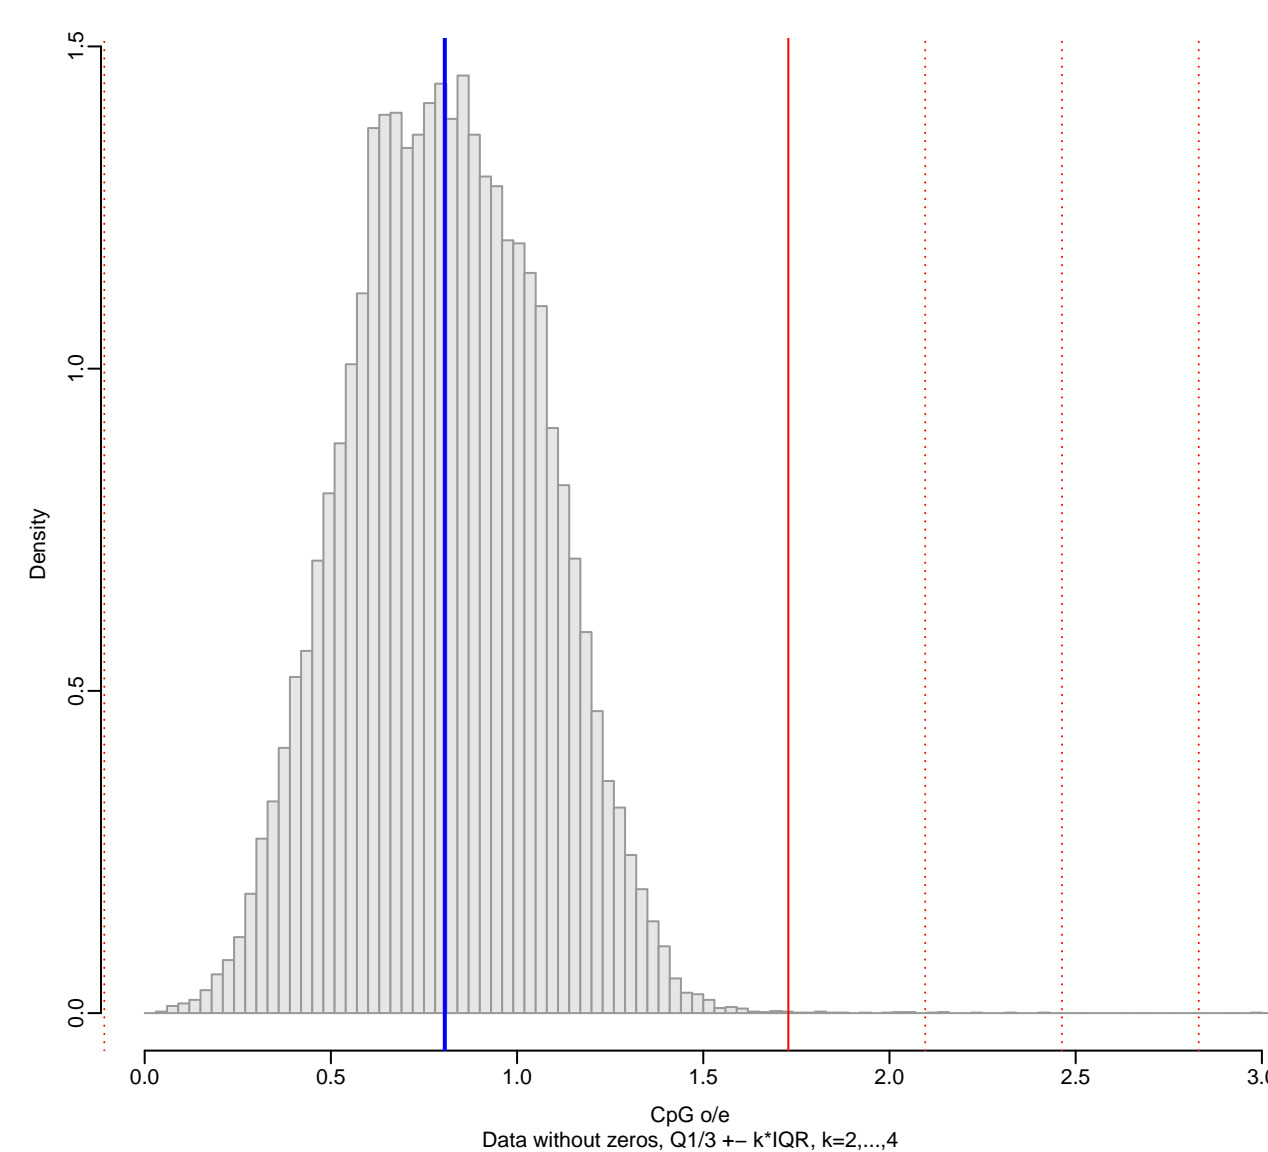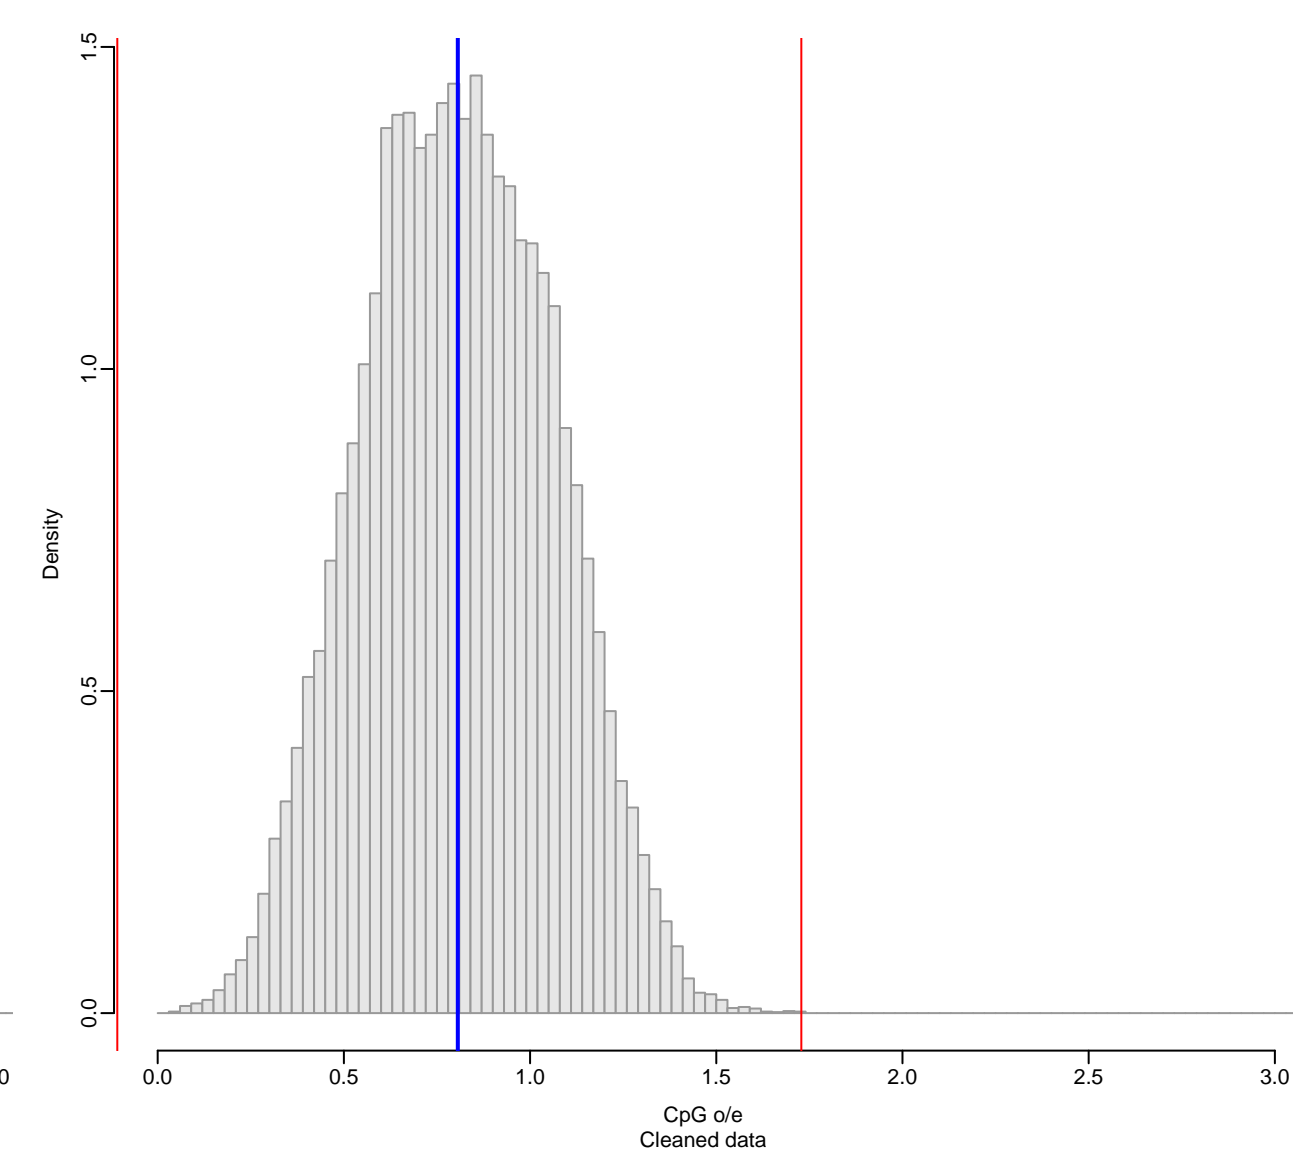

Eucalyptus\_gunii

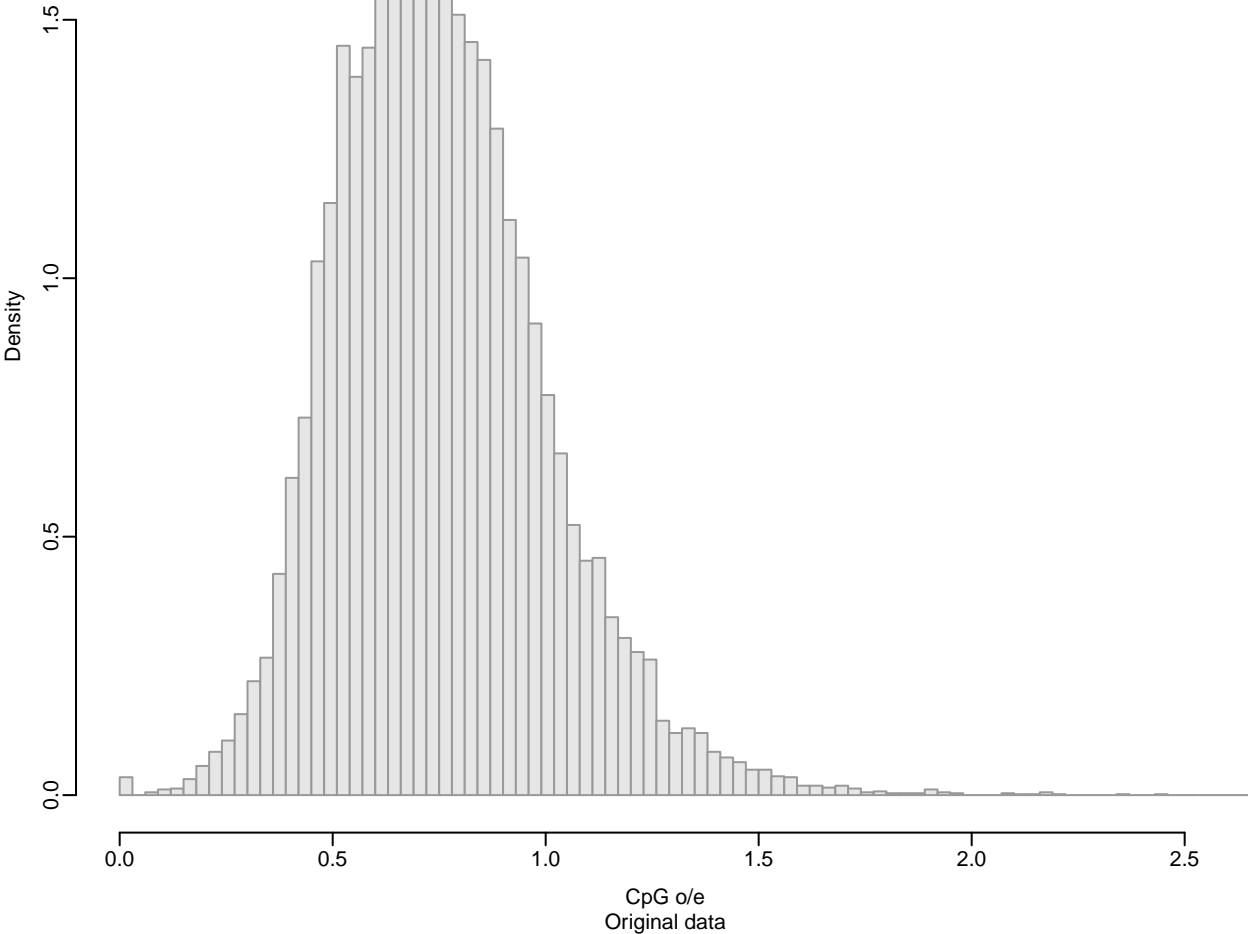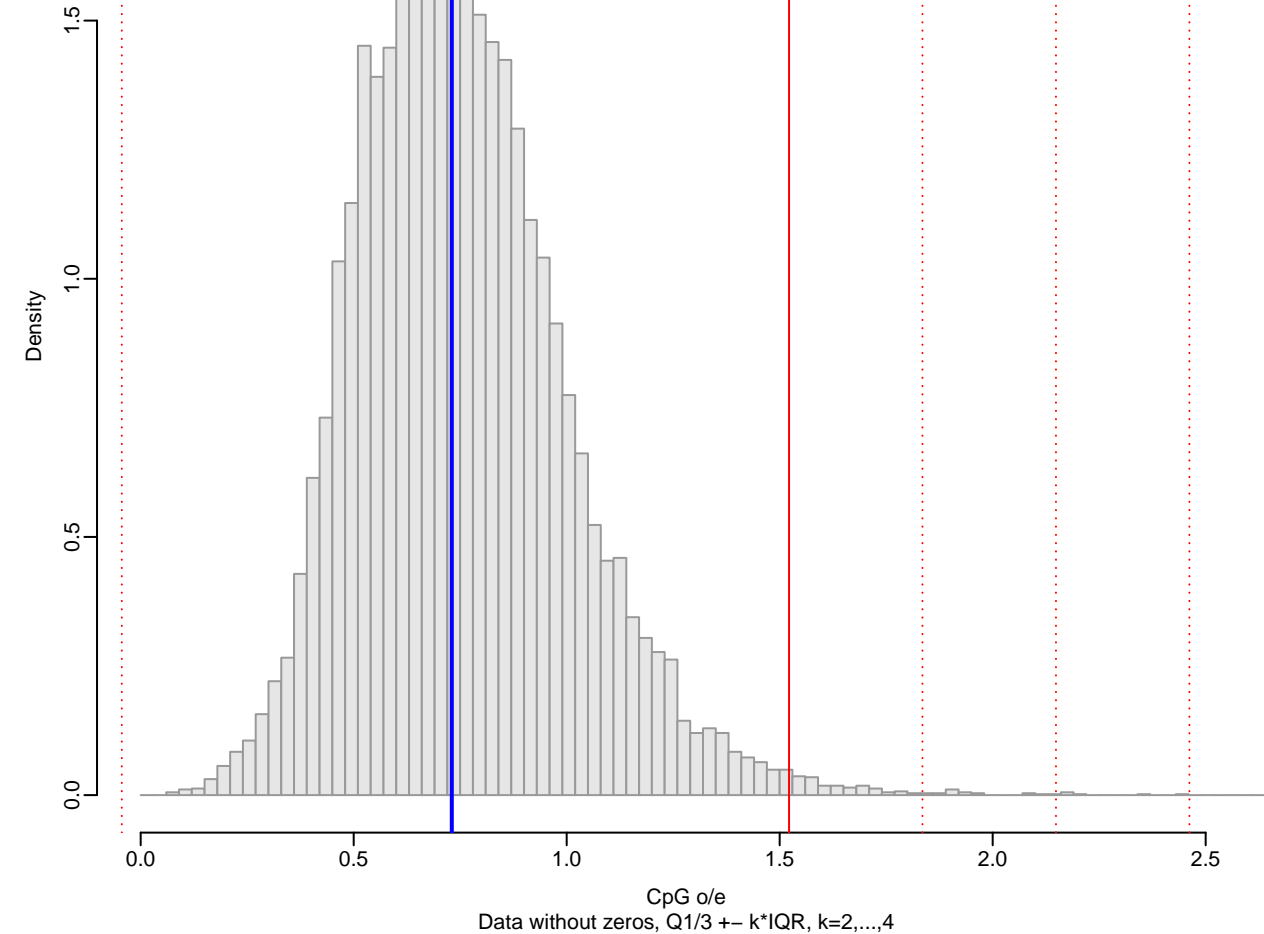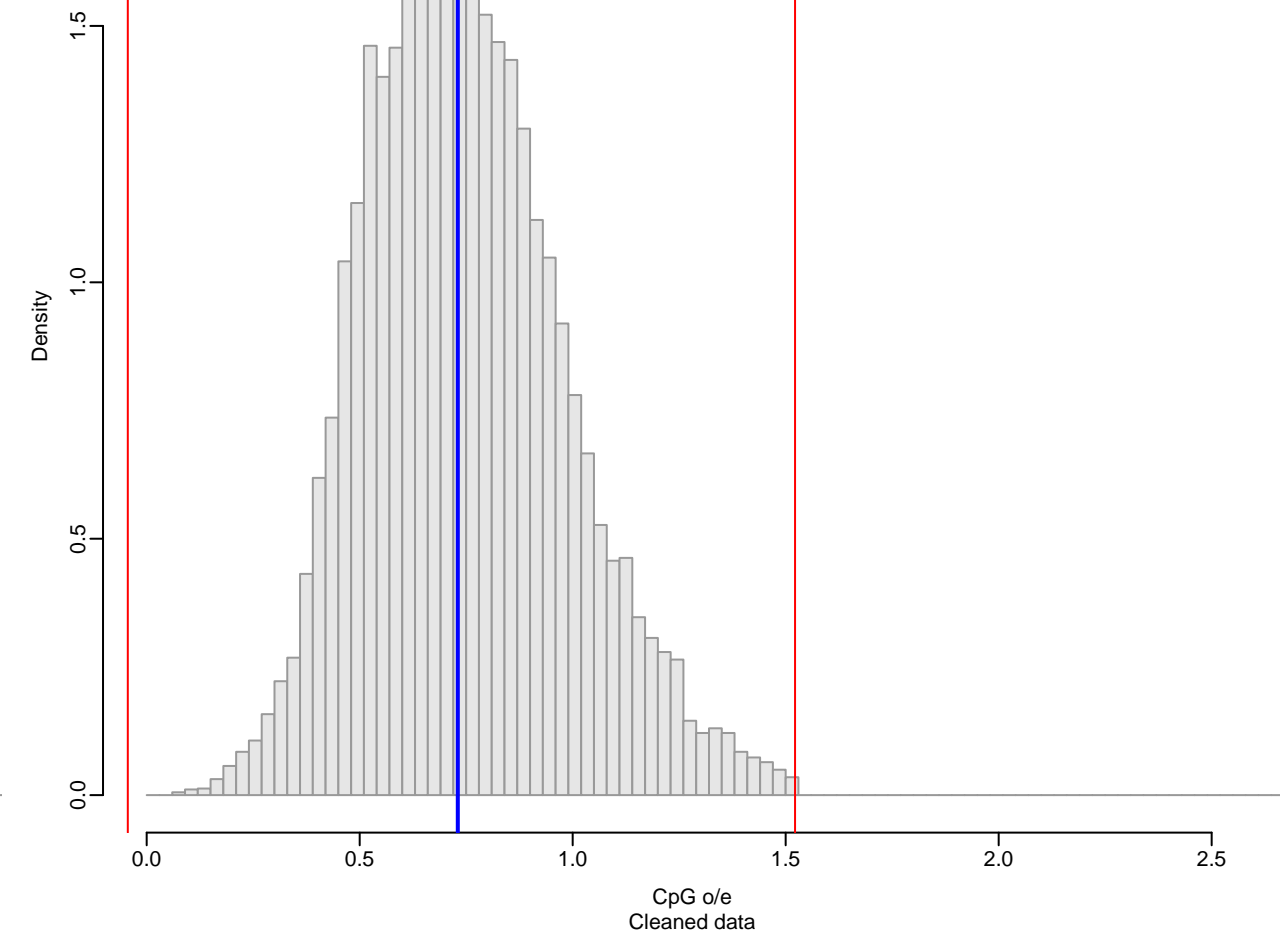

# Eucalyptus\_pellita

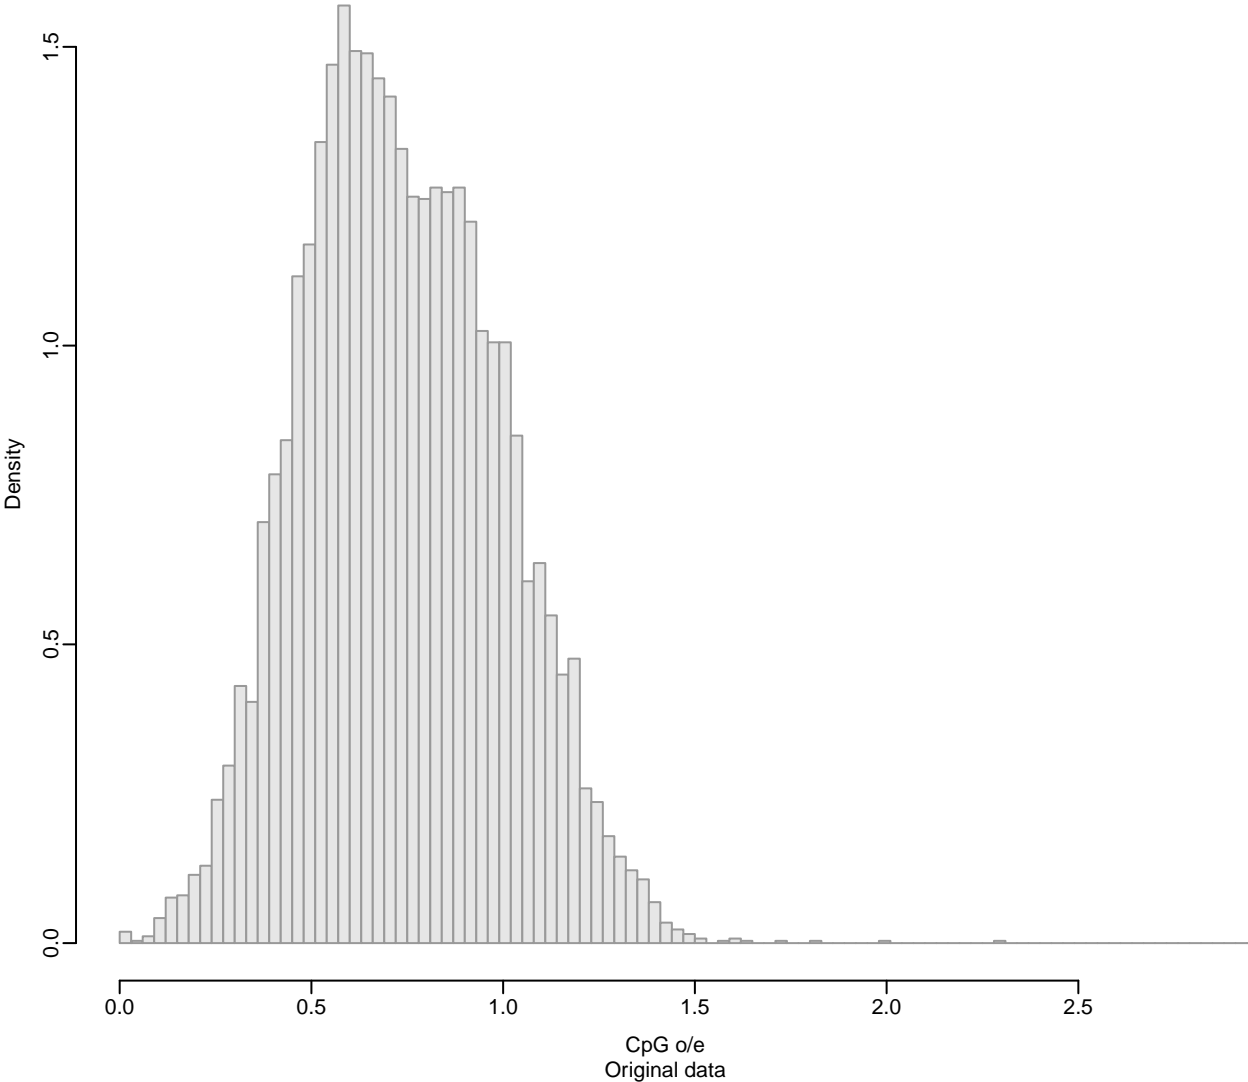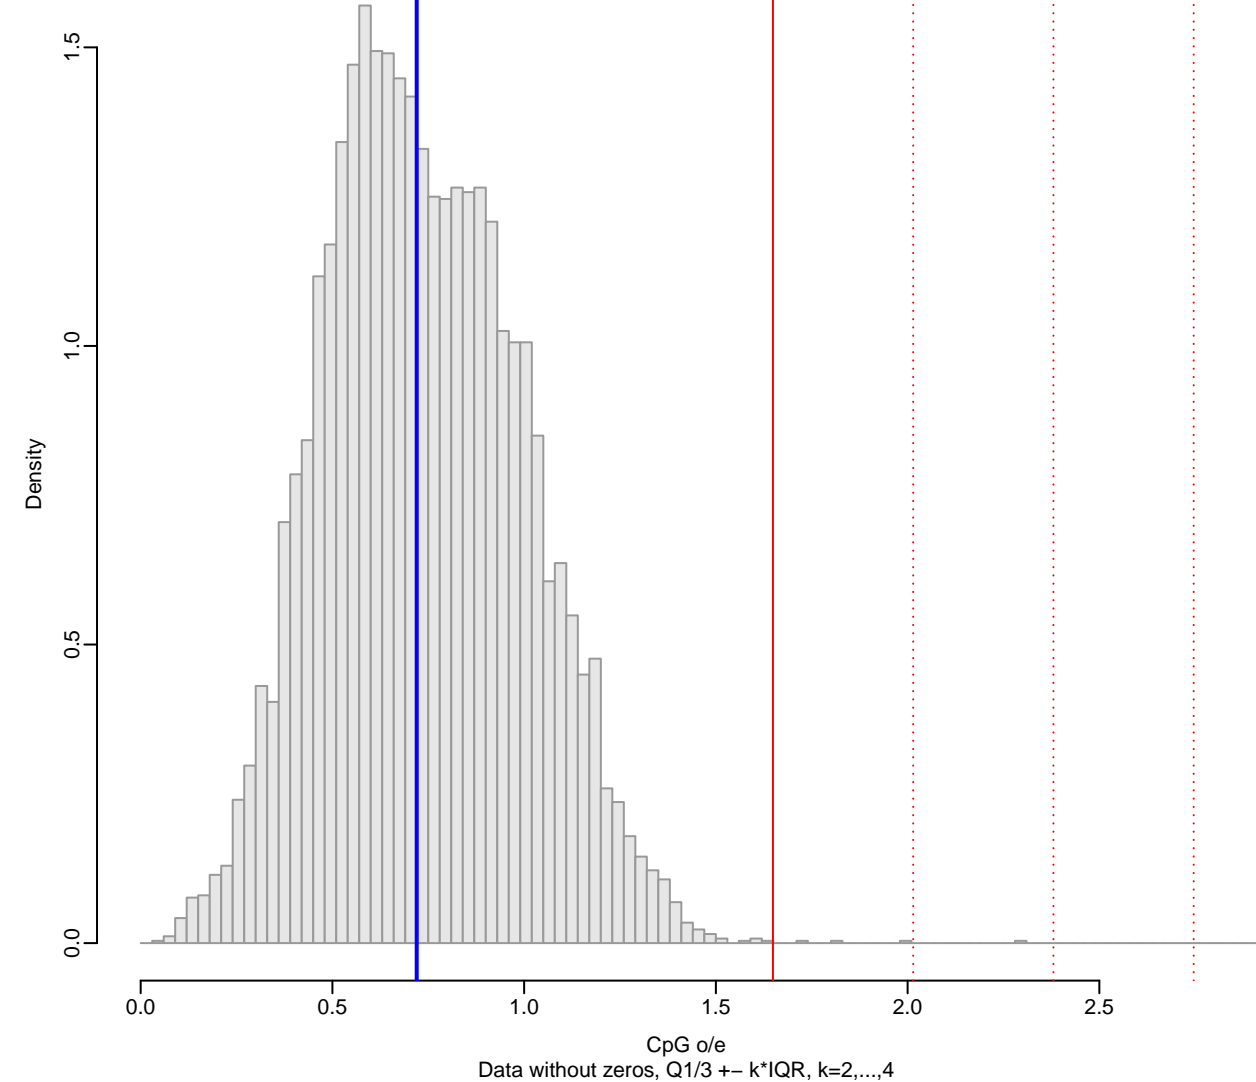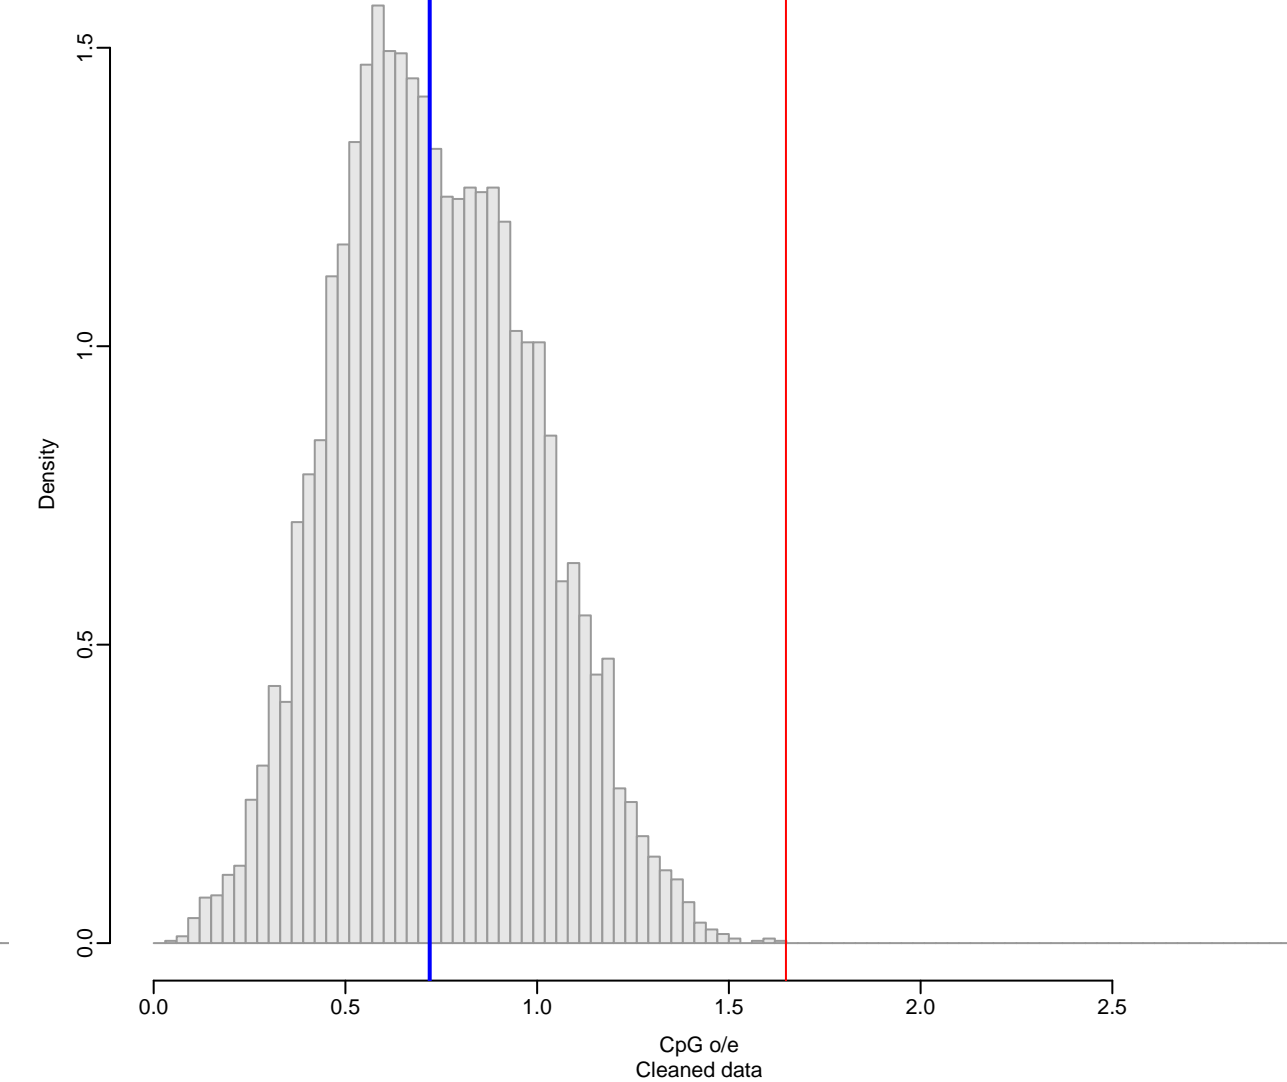

# Eucalyptus\_tereticornis

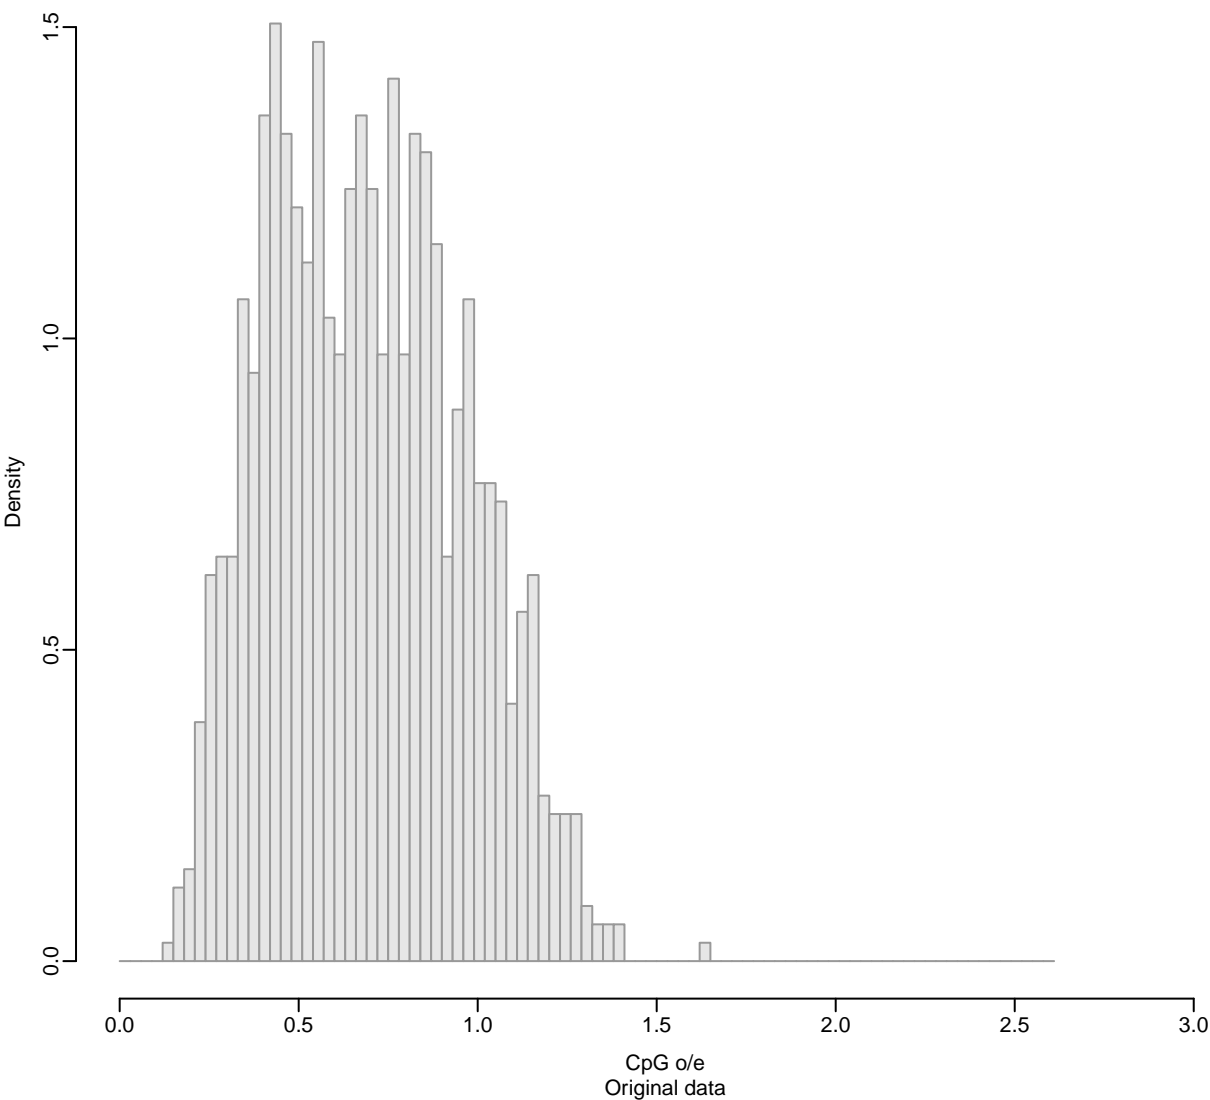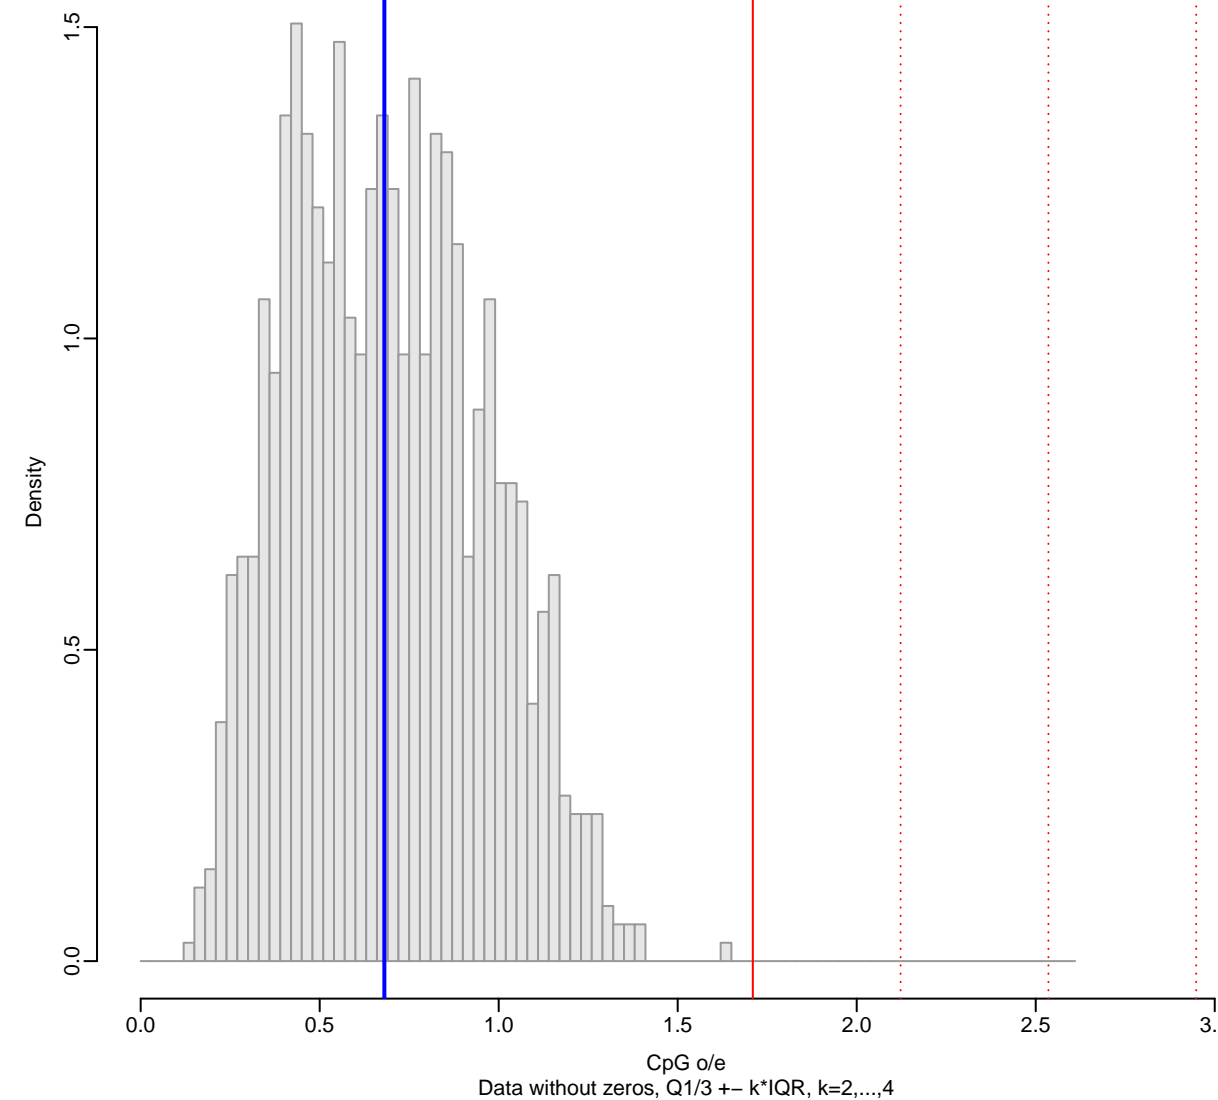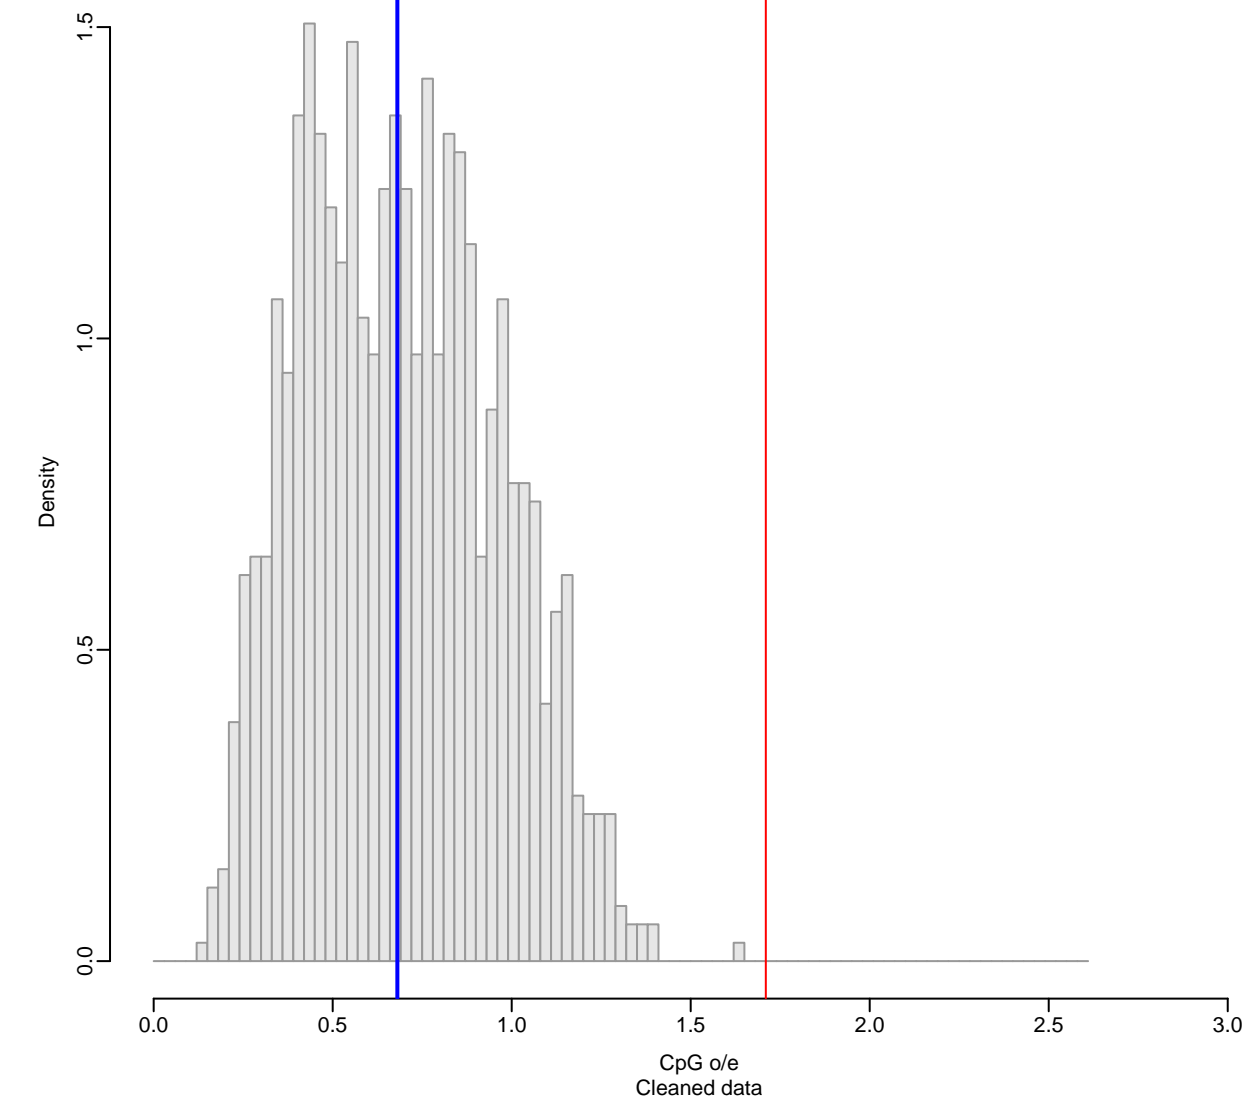



Eucalyptus\_urophylla

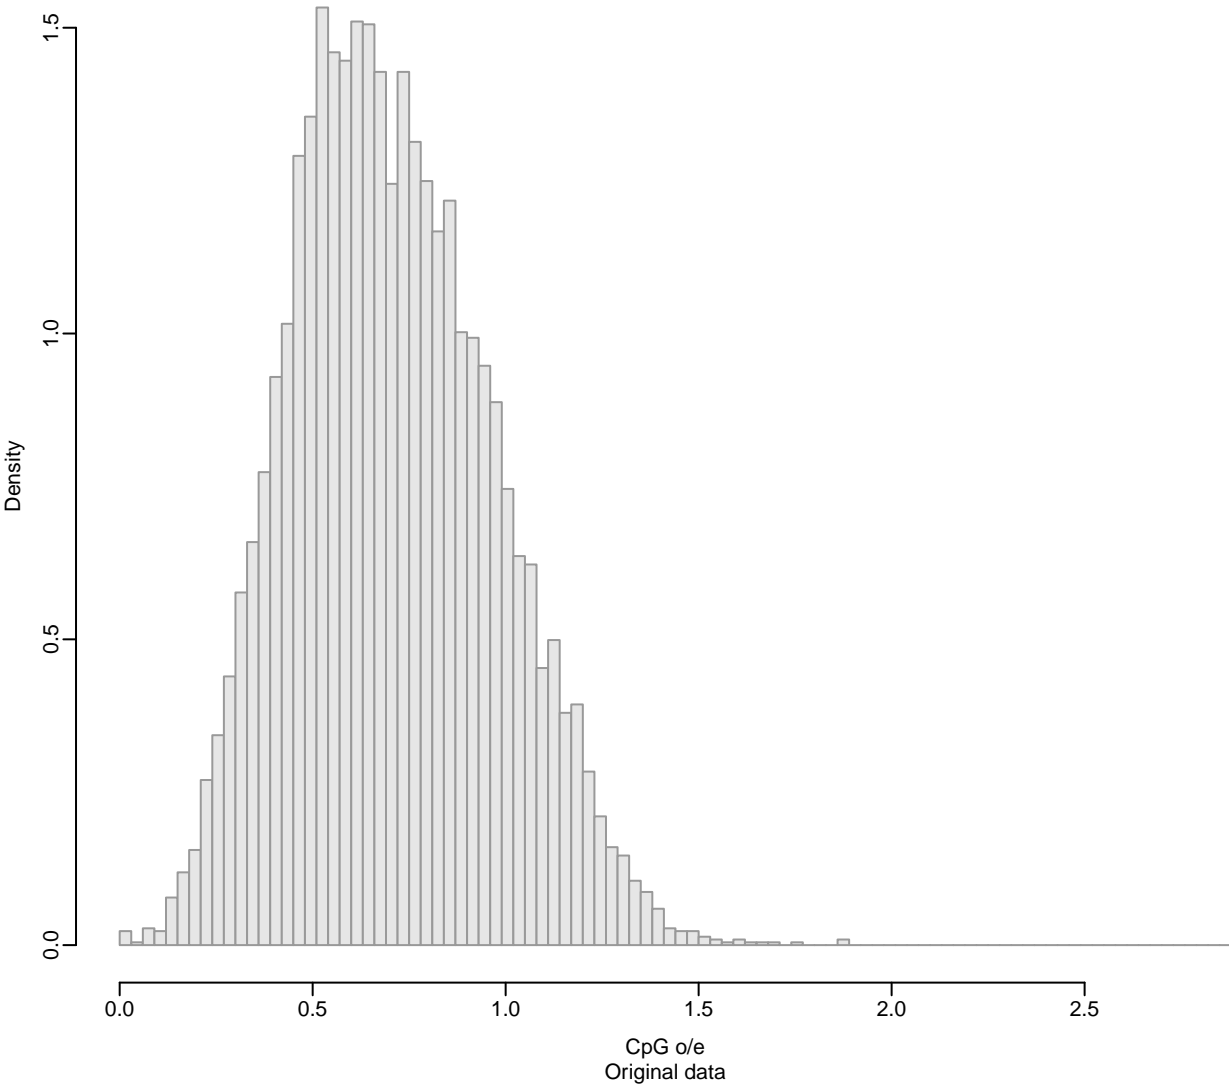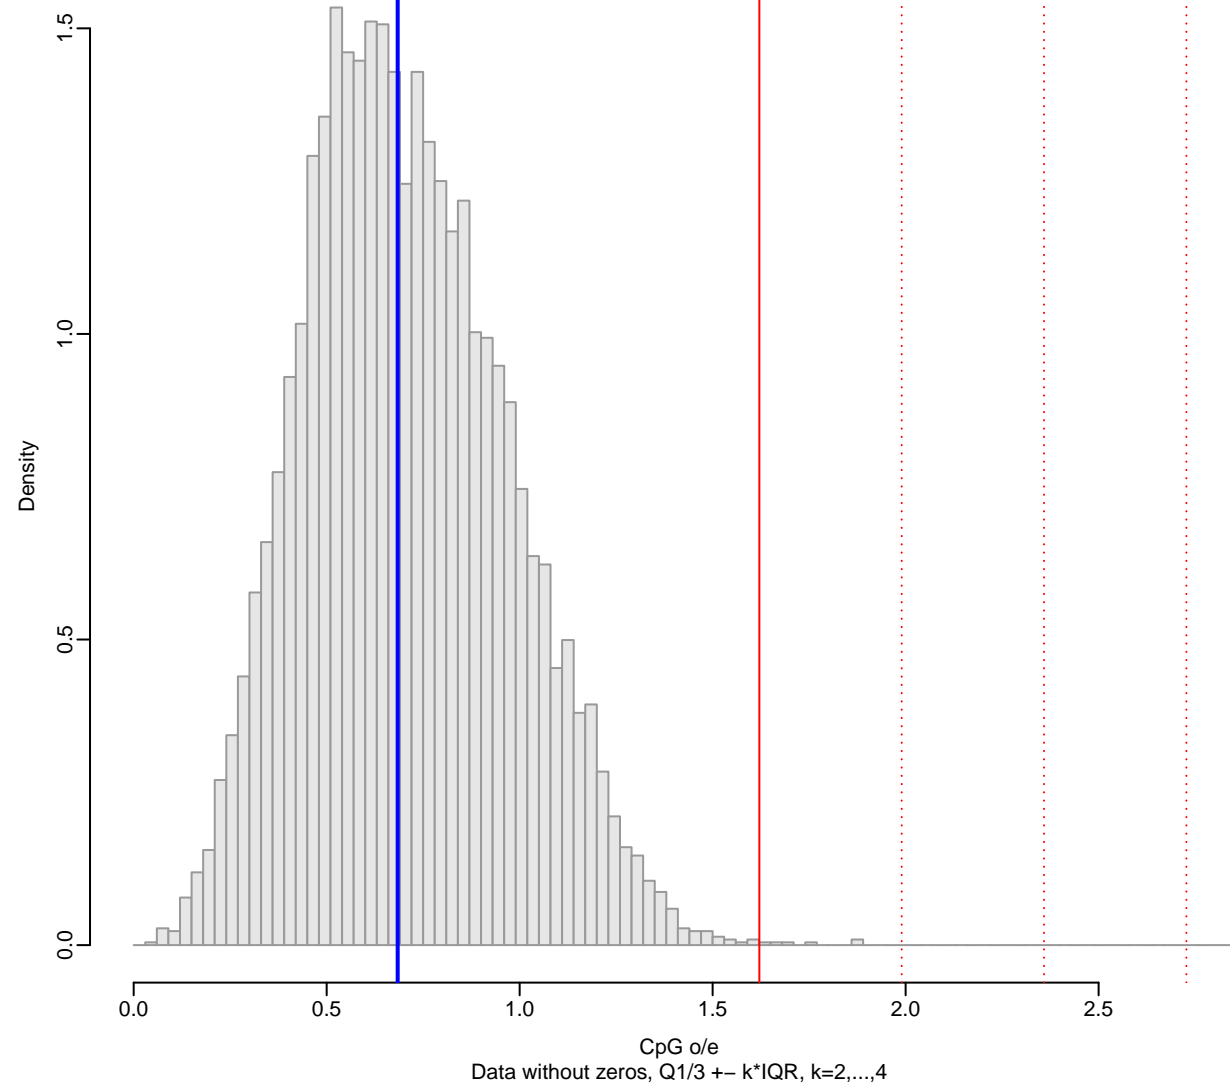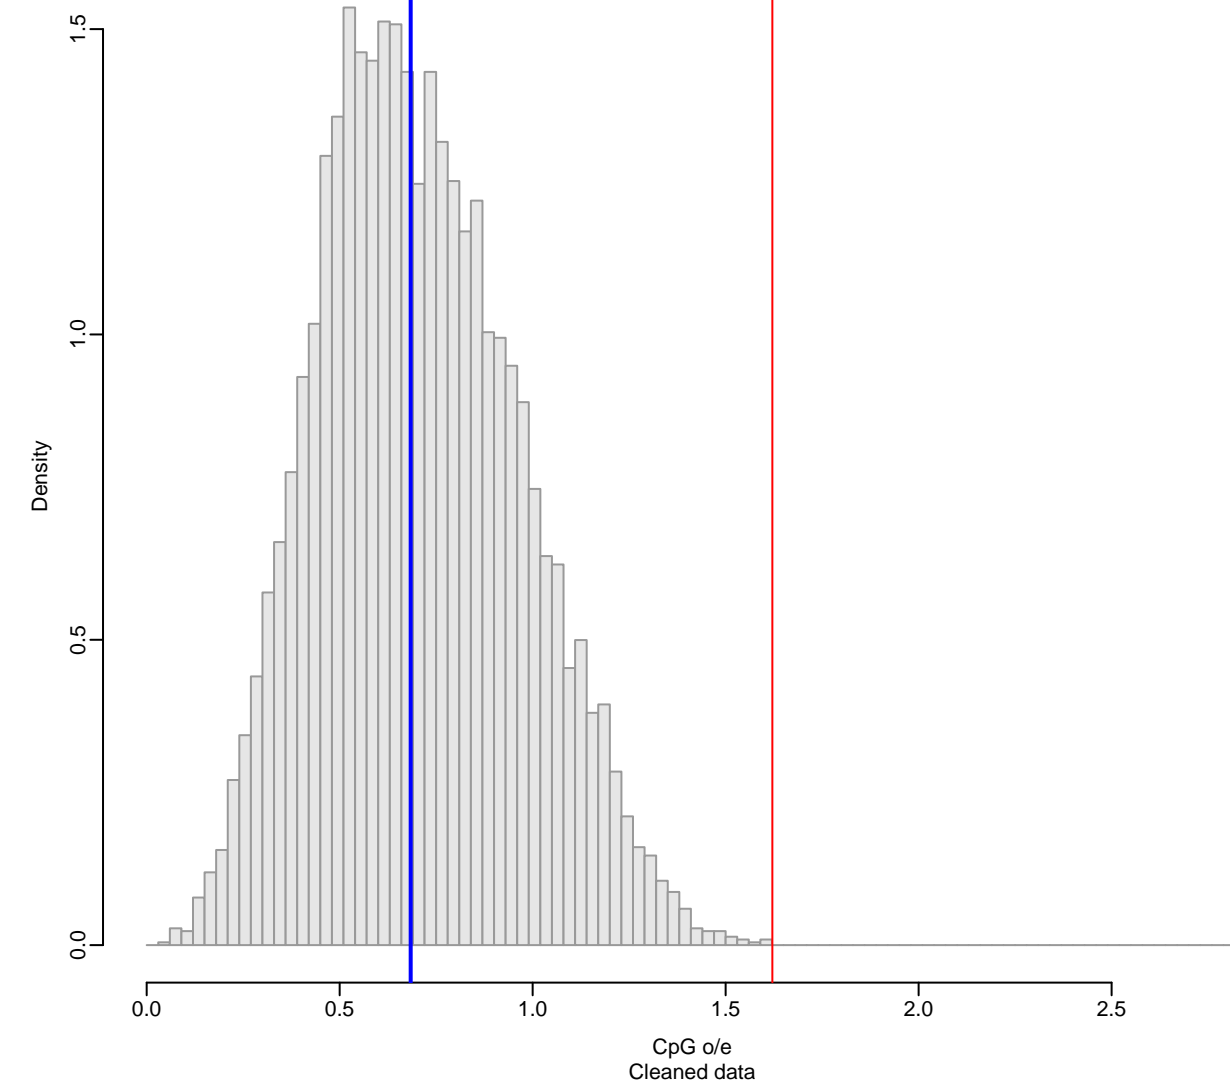

*Euglena\_gracilis*

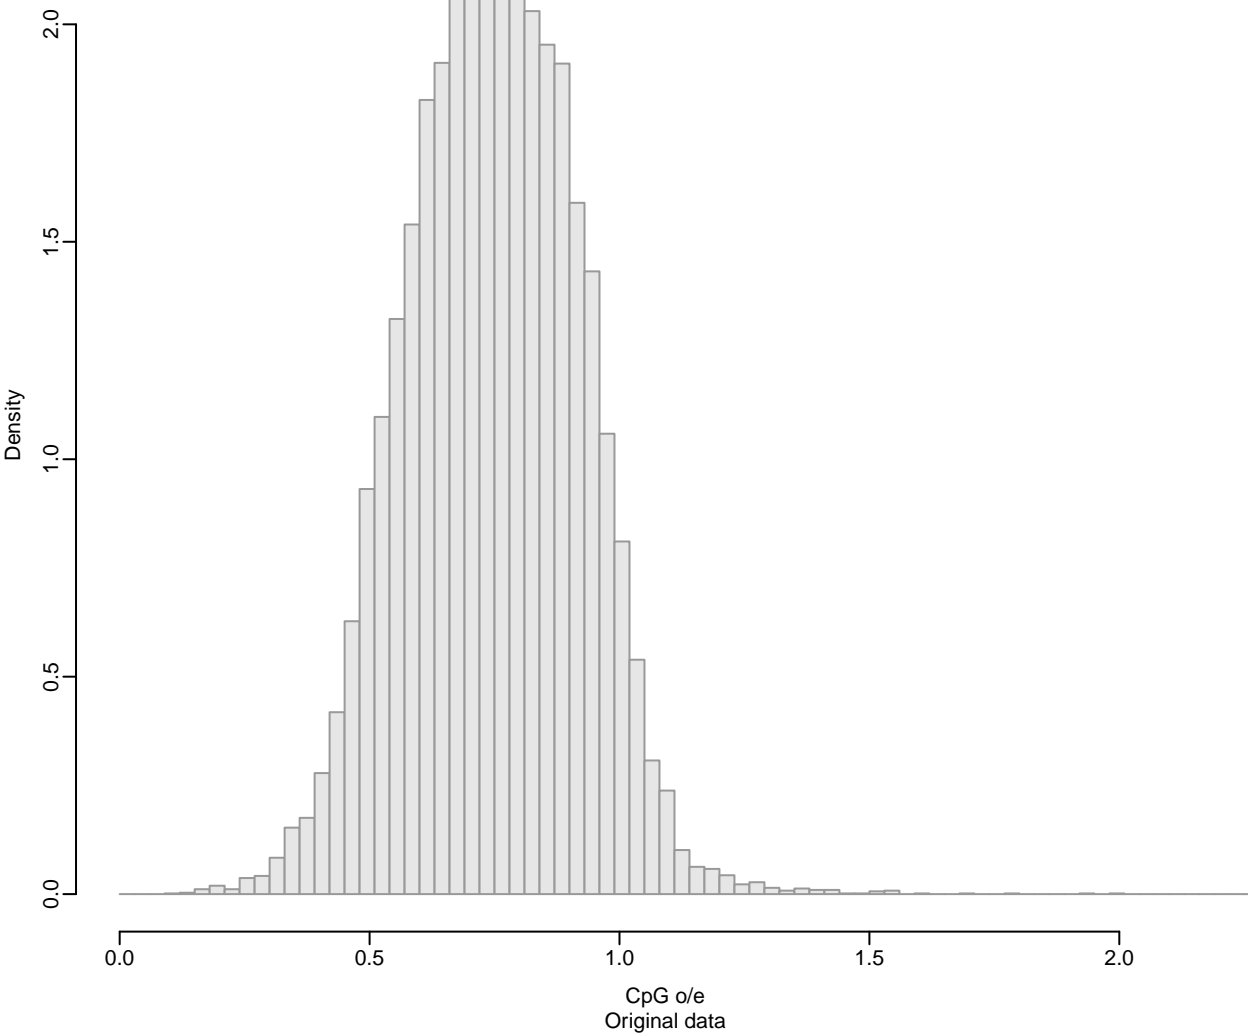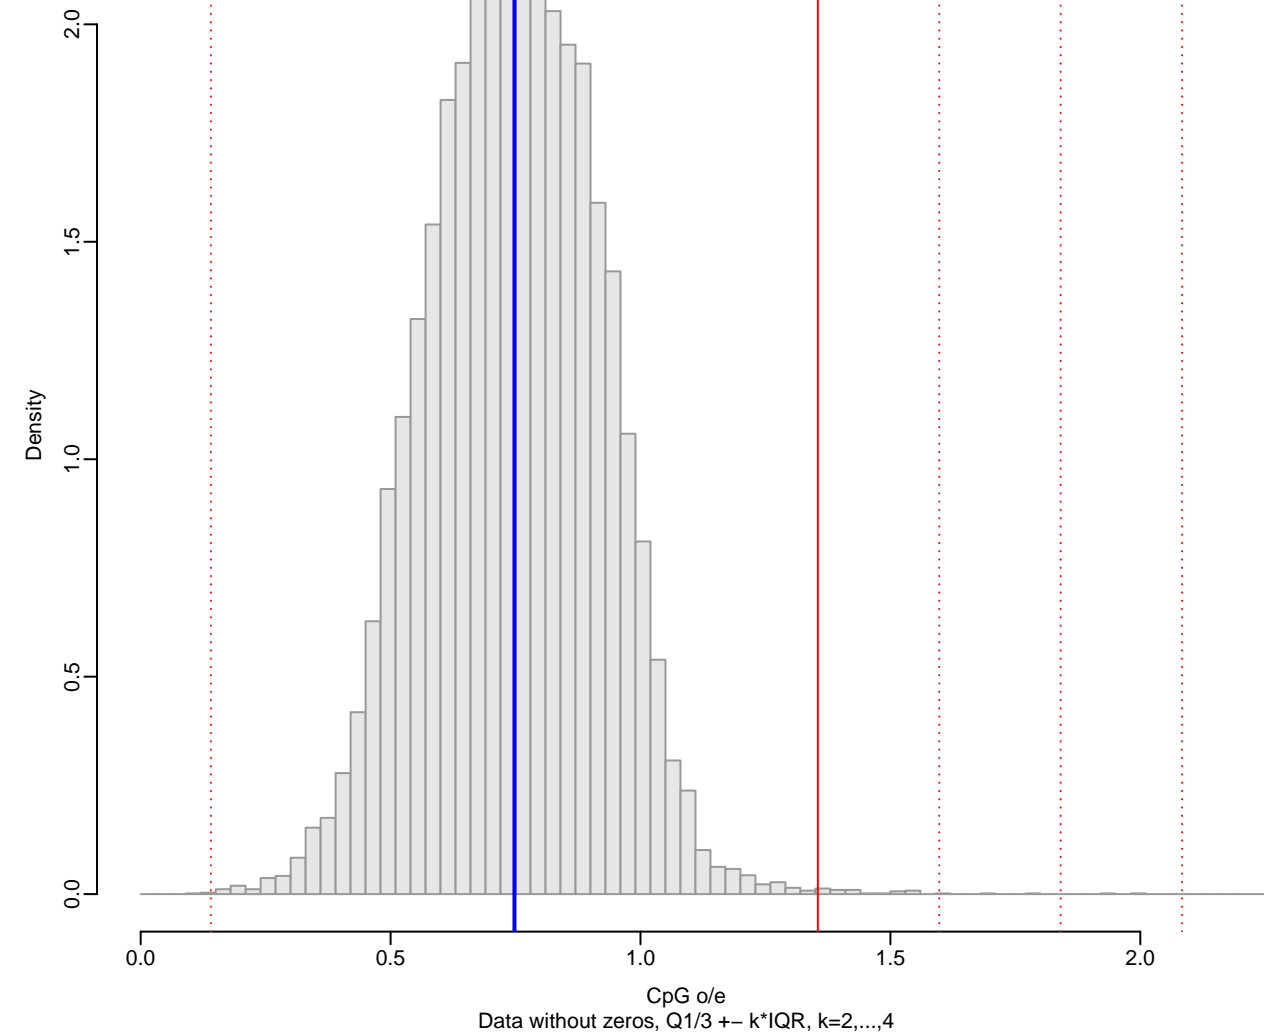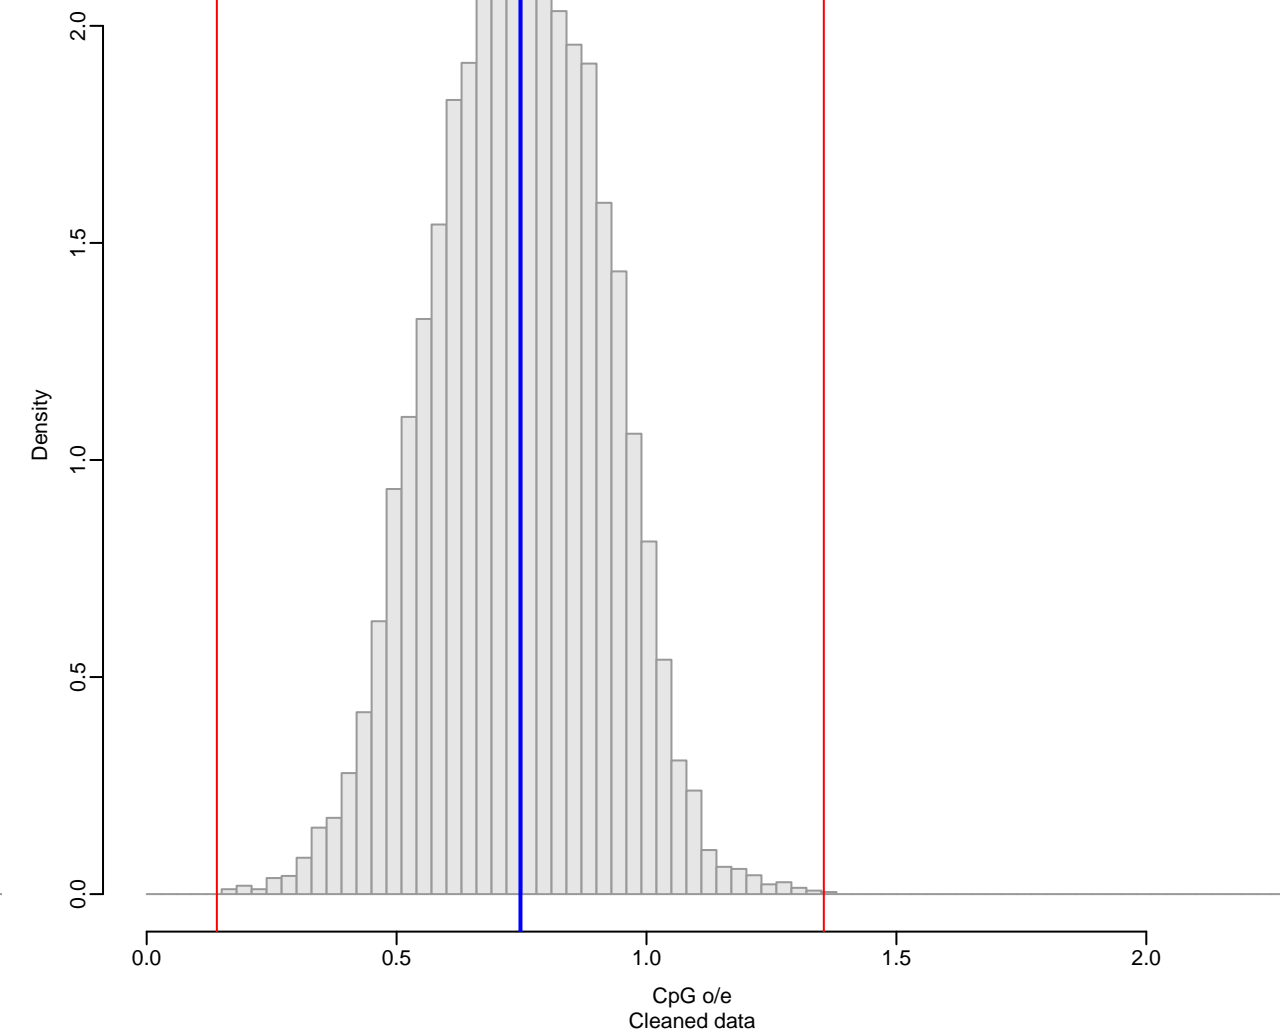

Euprymna\_scolopes

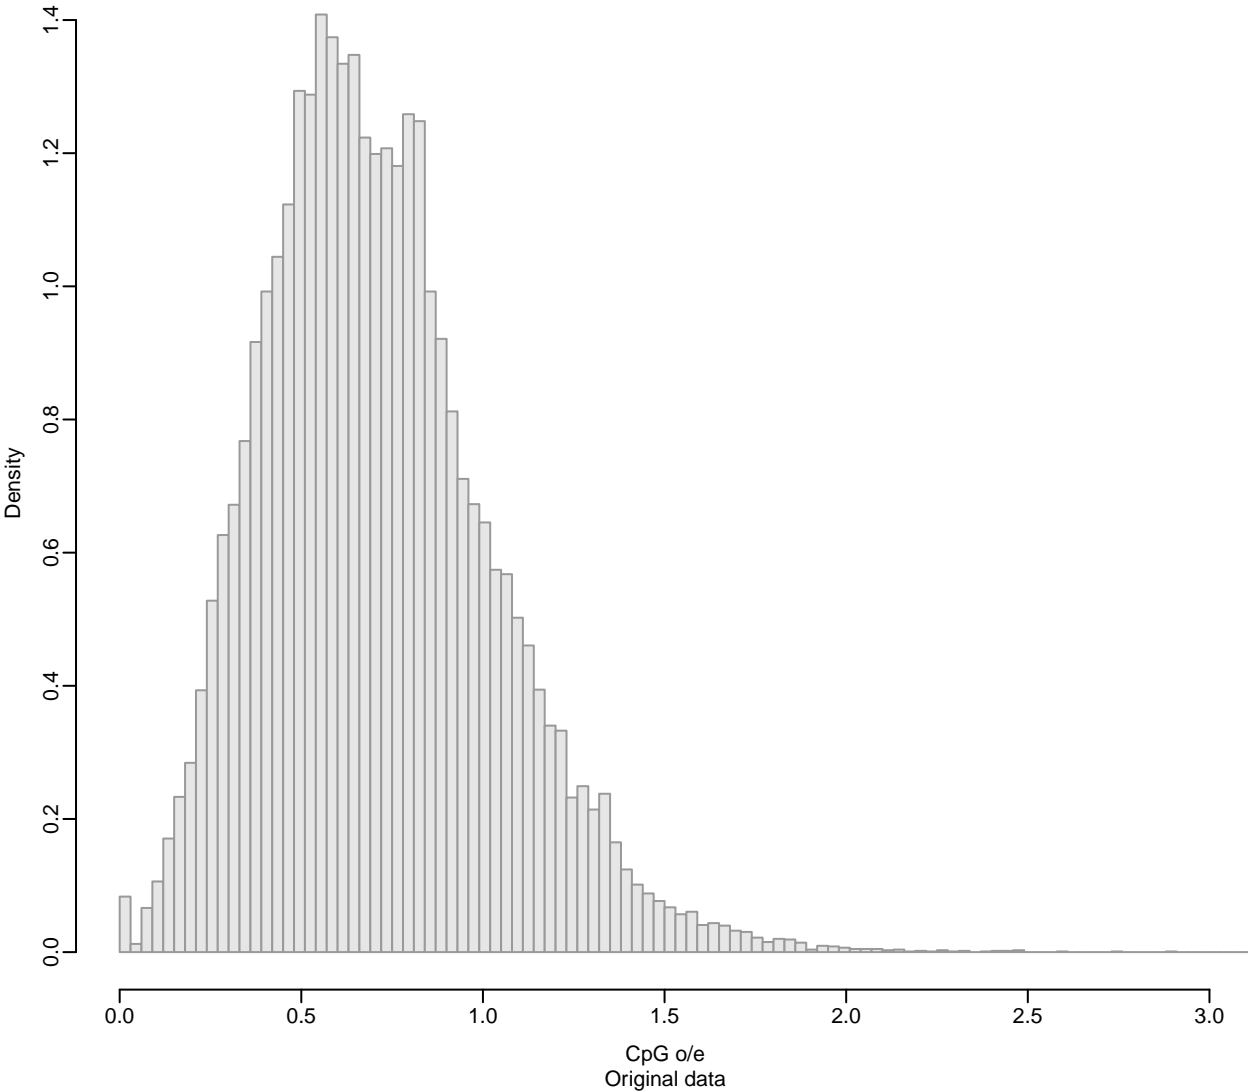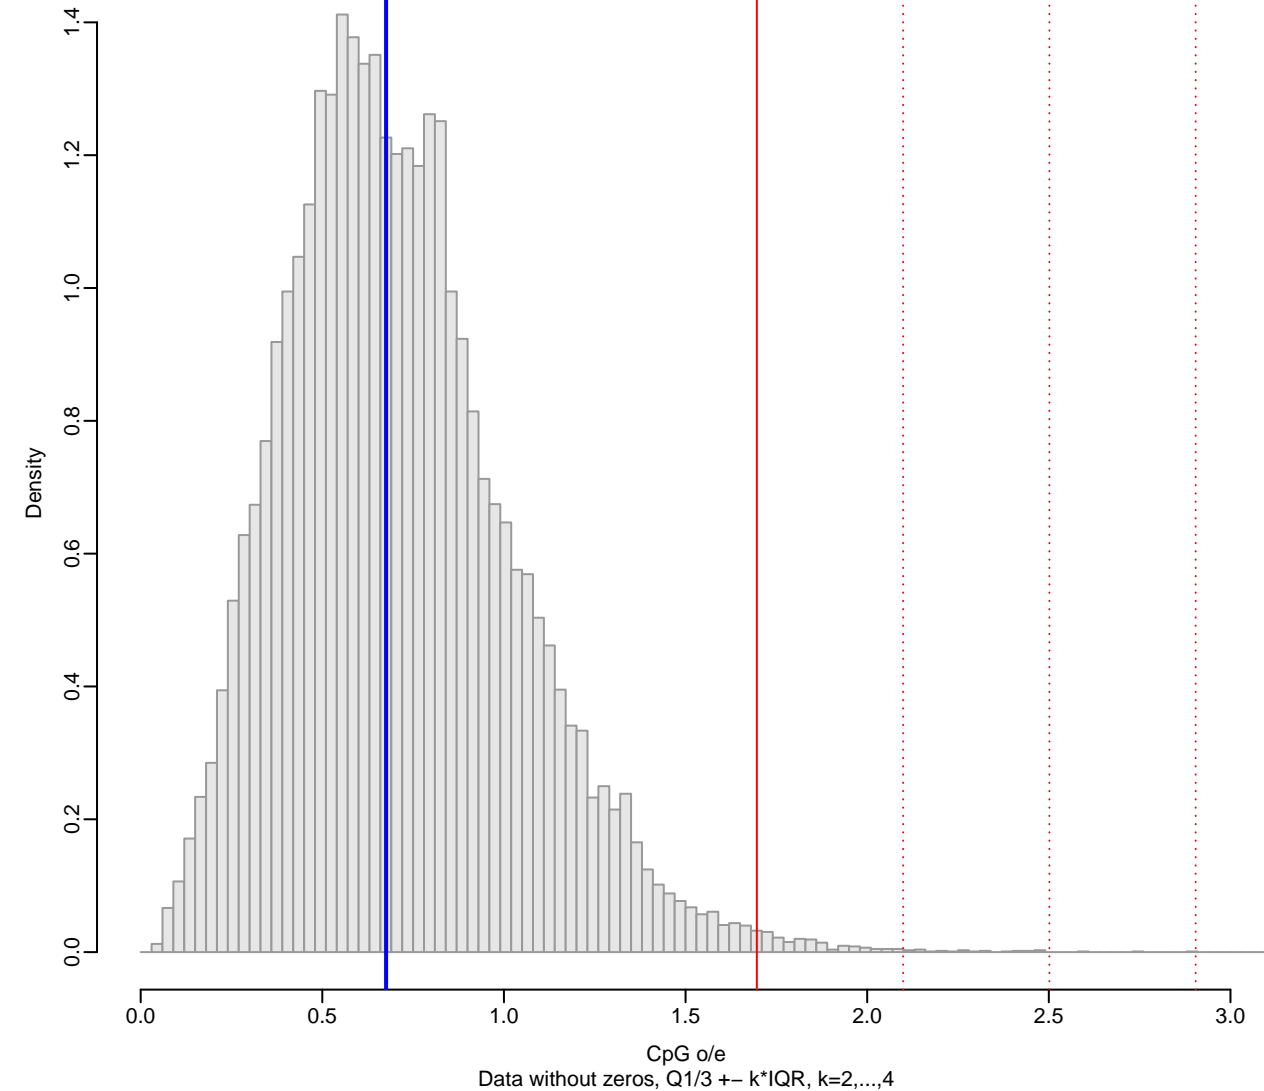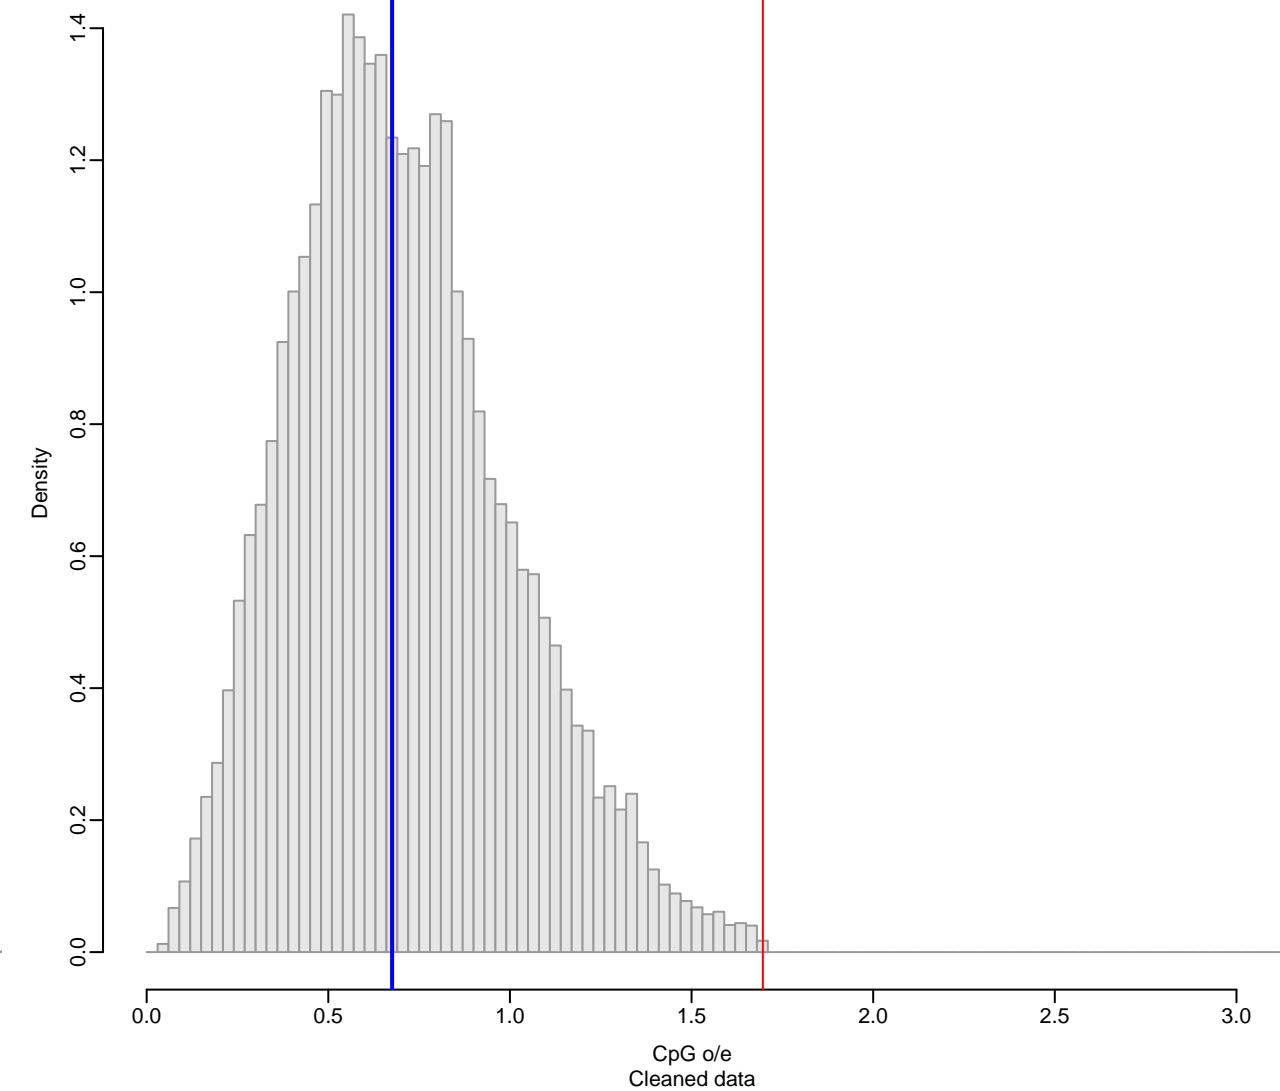

Fasciola\_gigantica

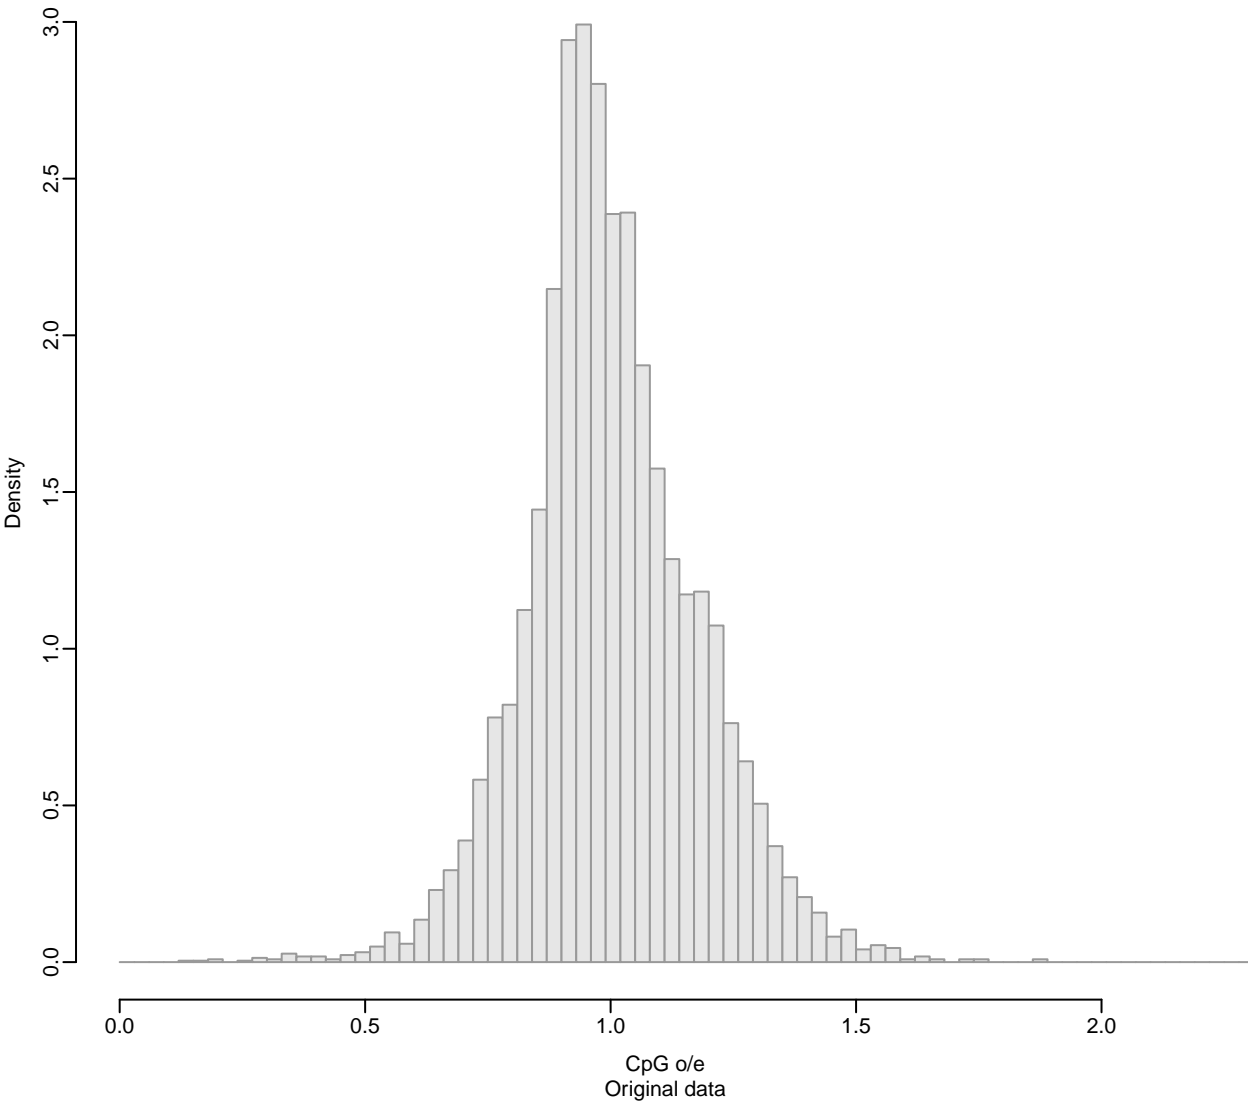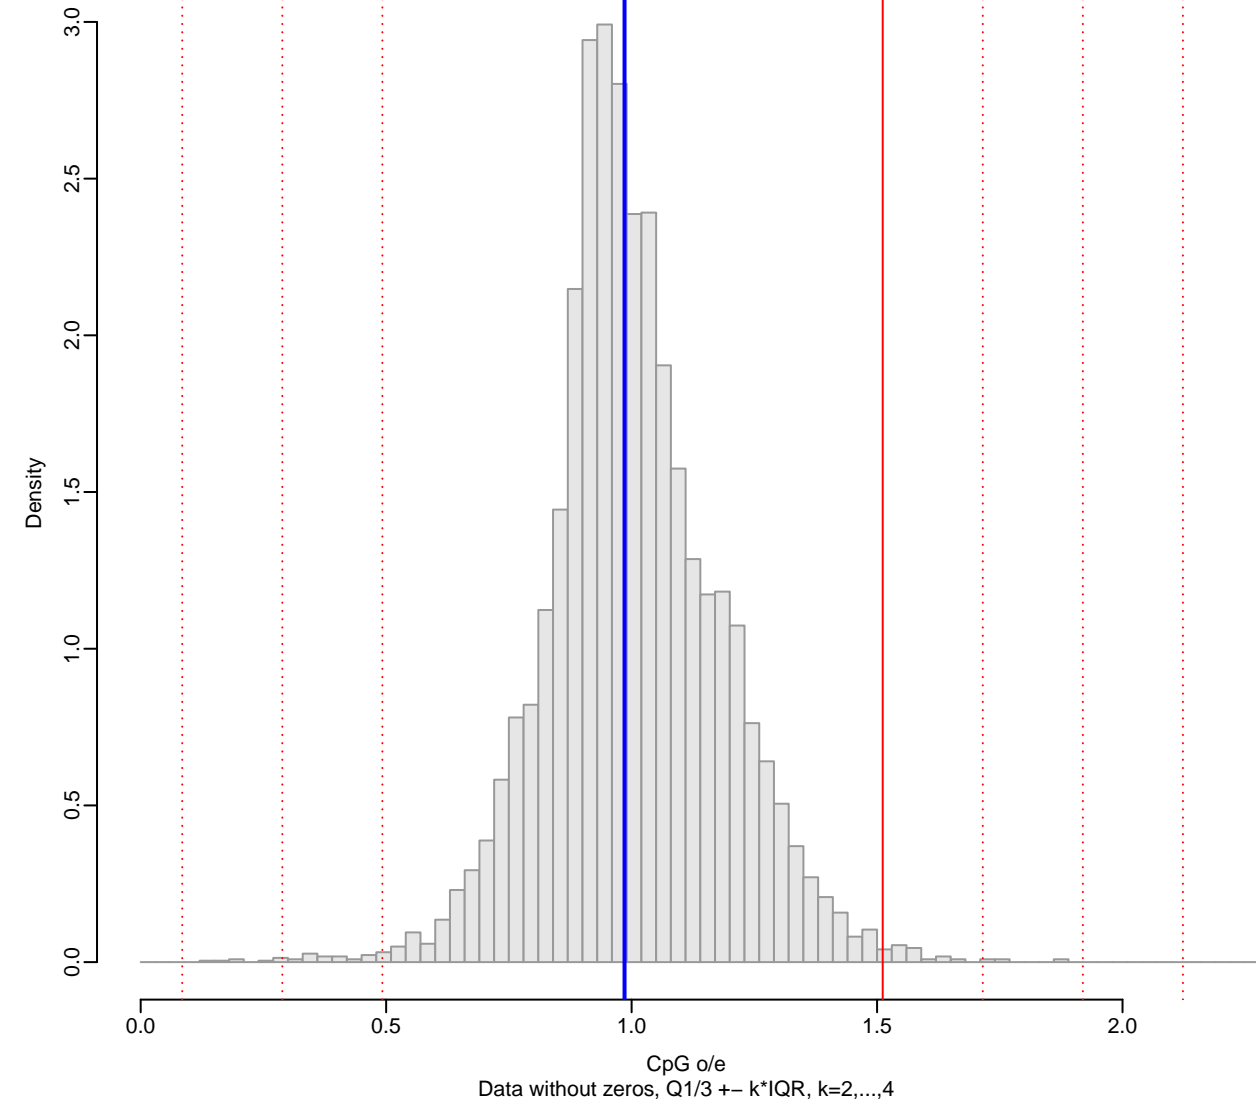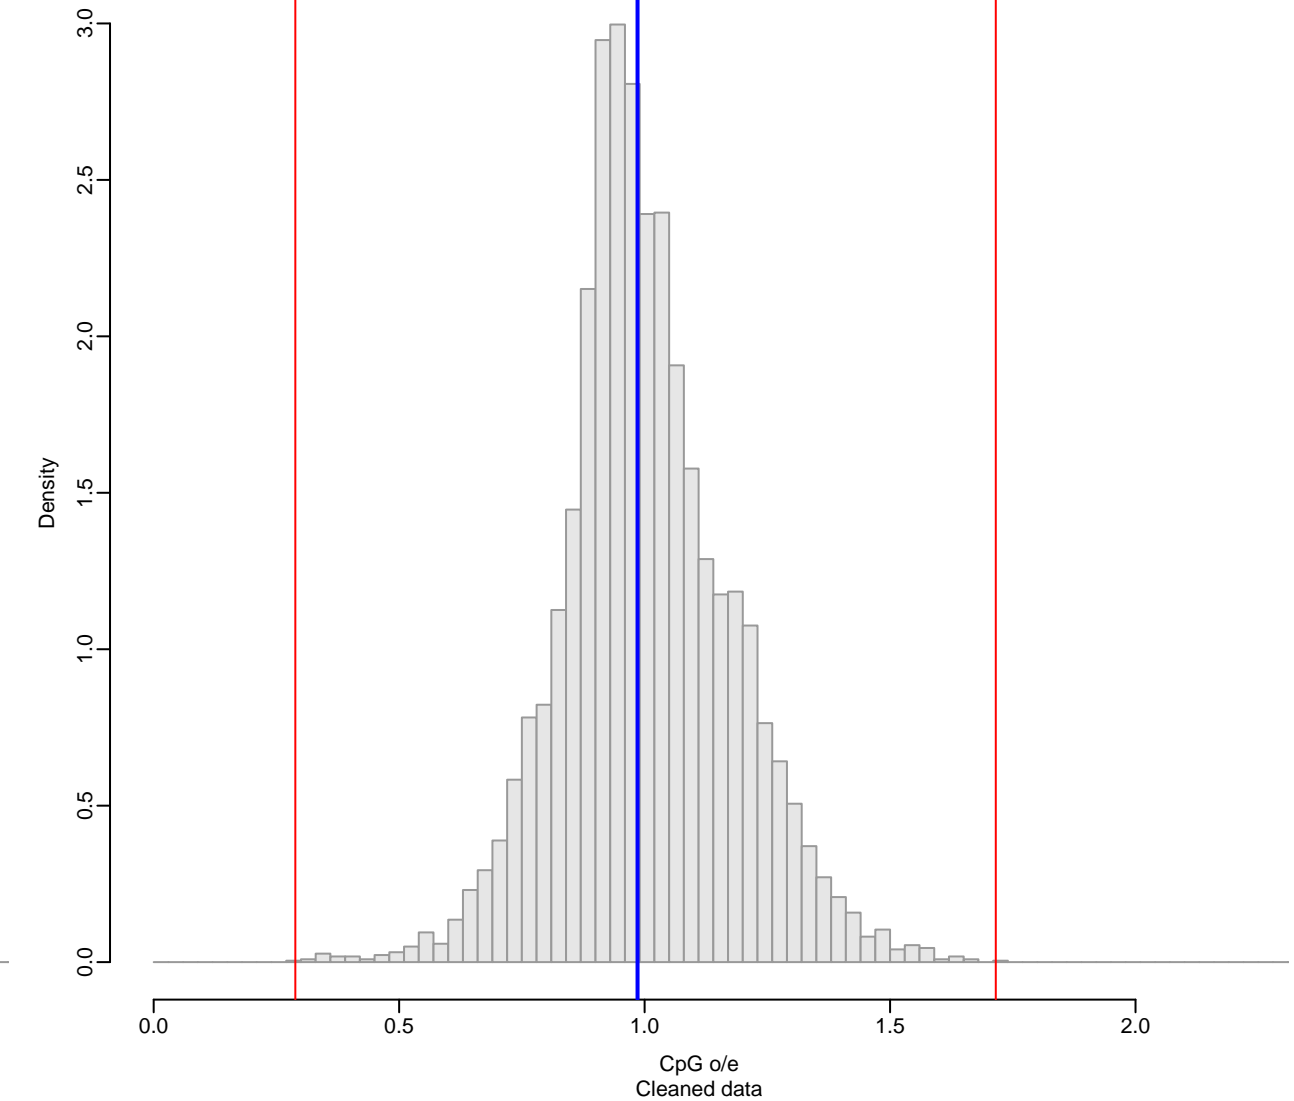

Fasciola\_hepatica

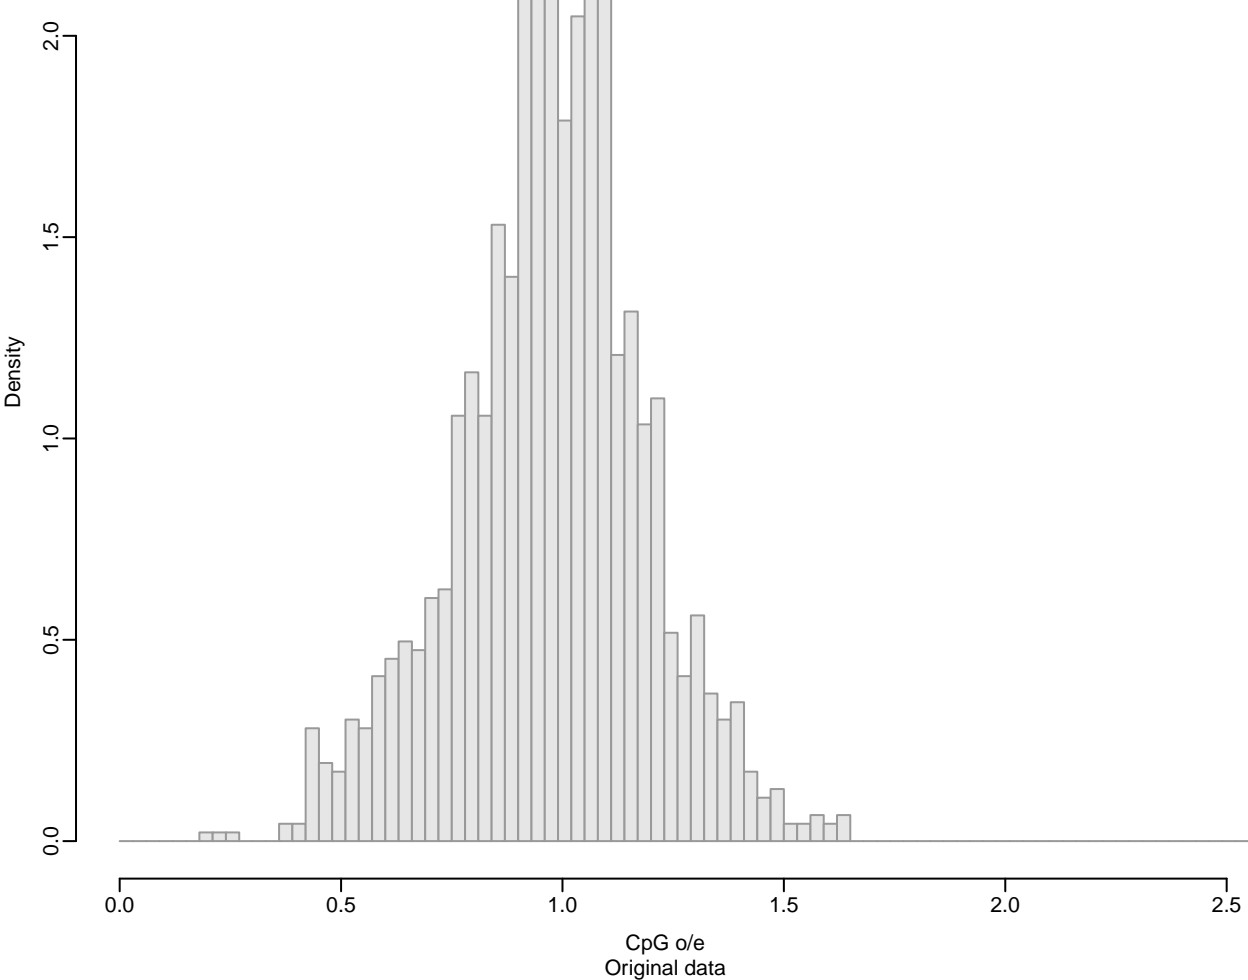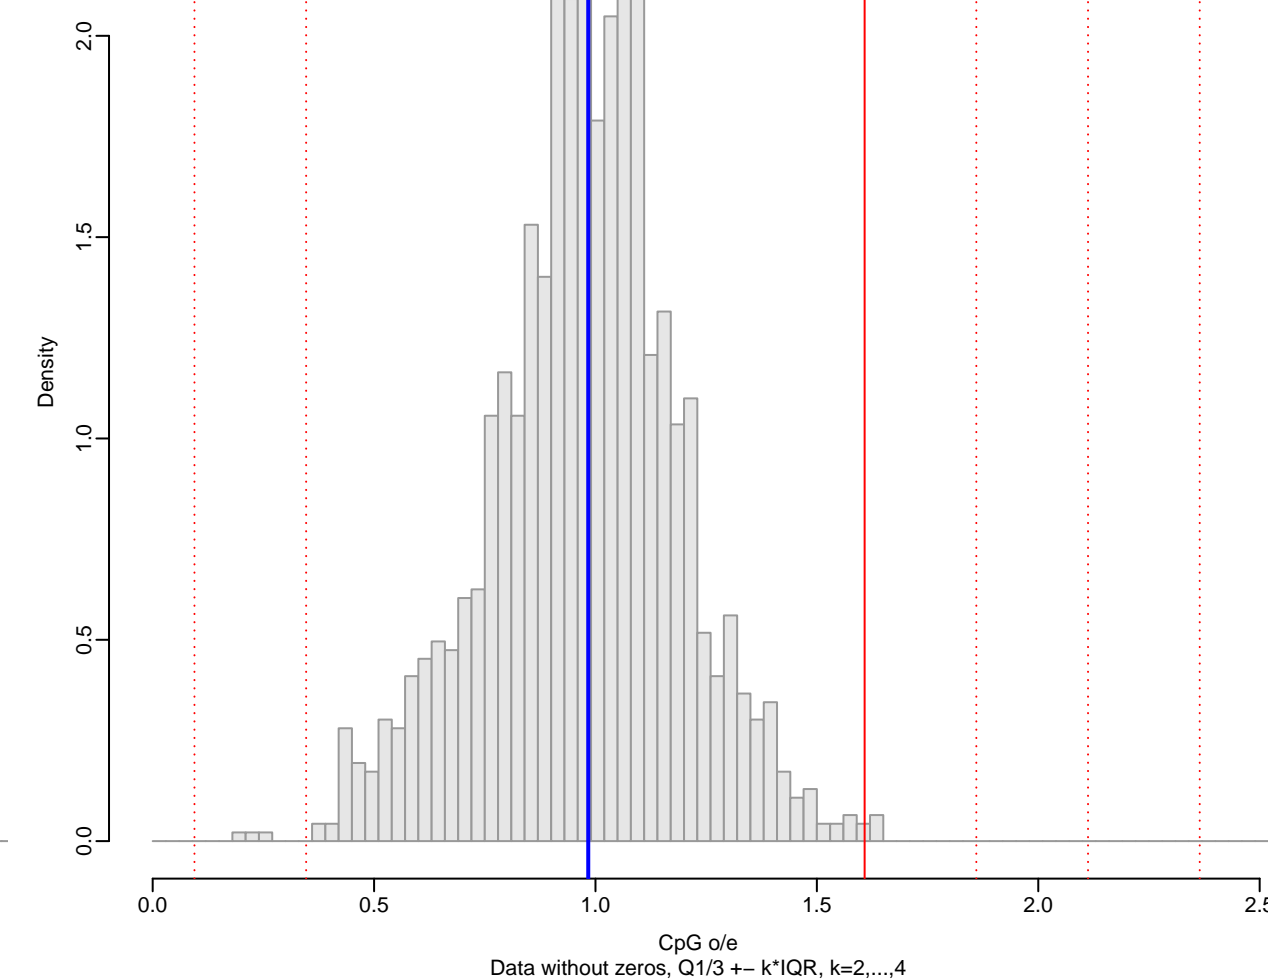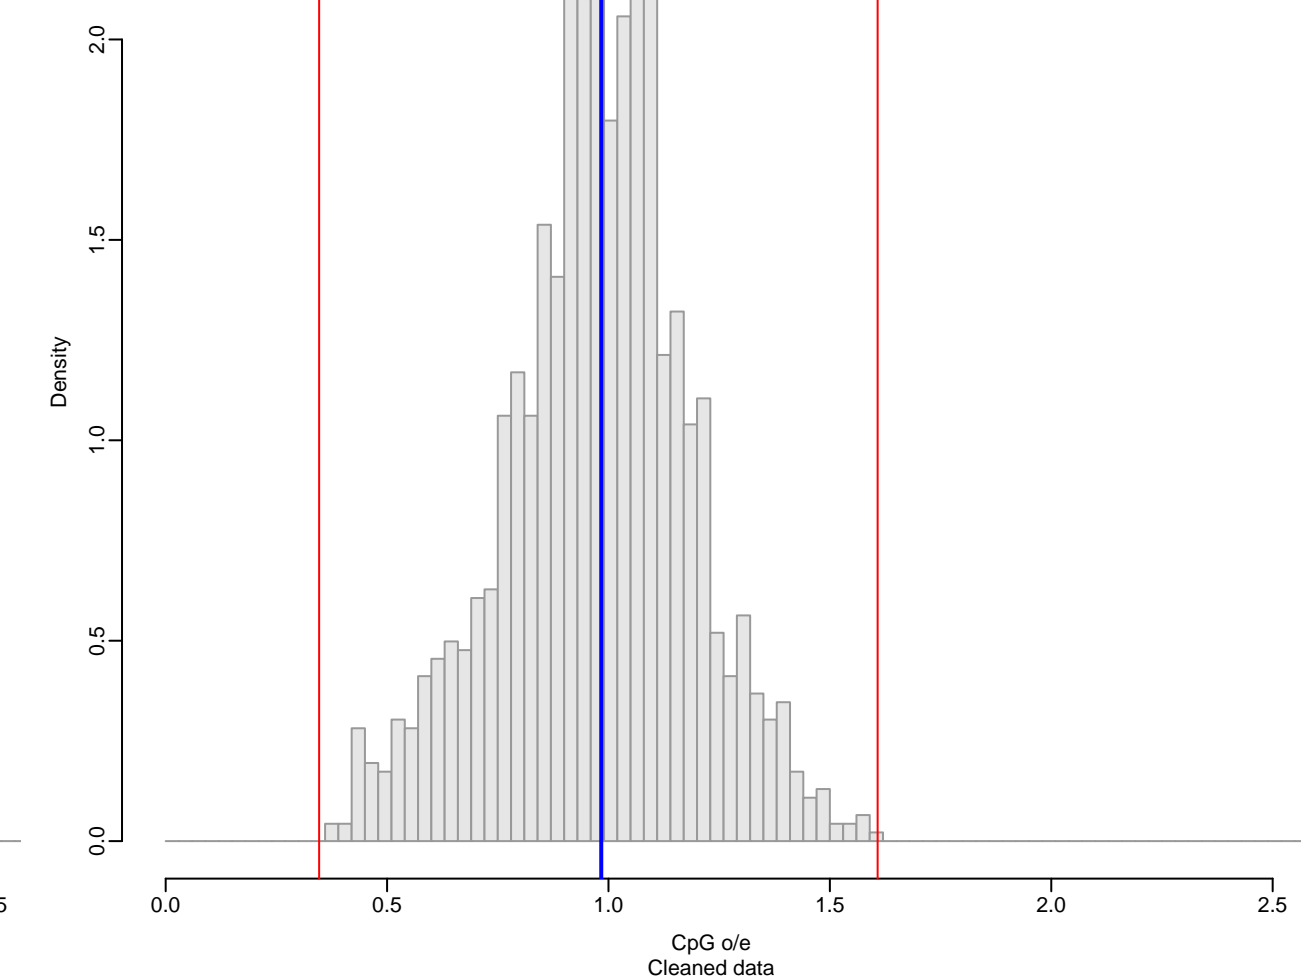

Fenneropenaeus\_chinensis

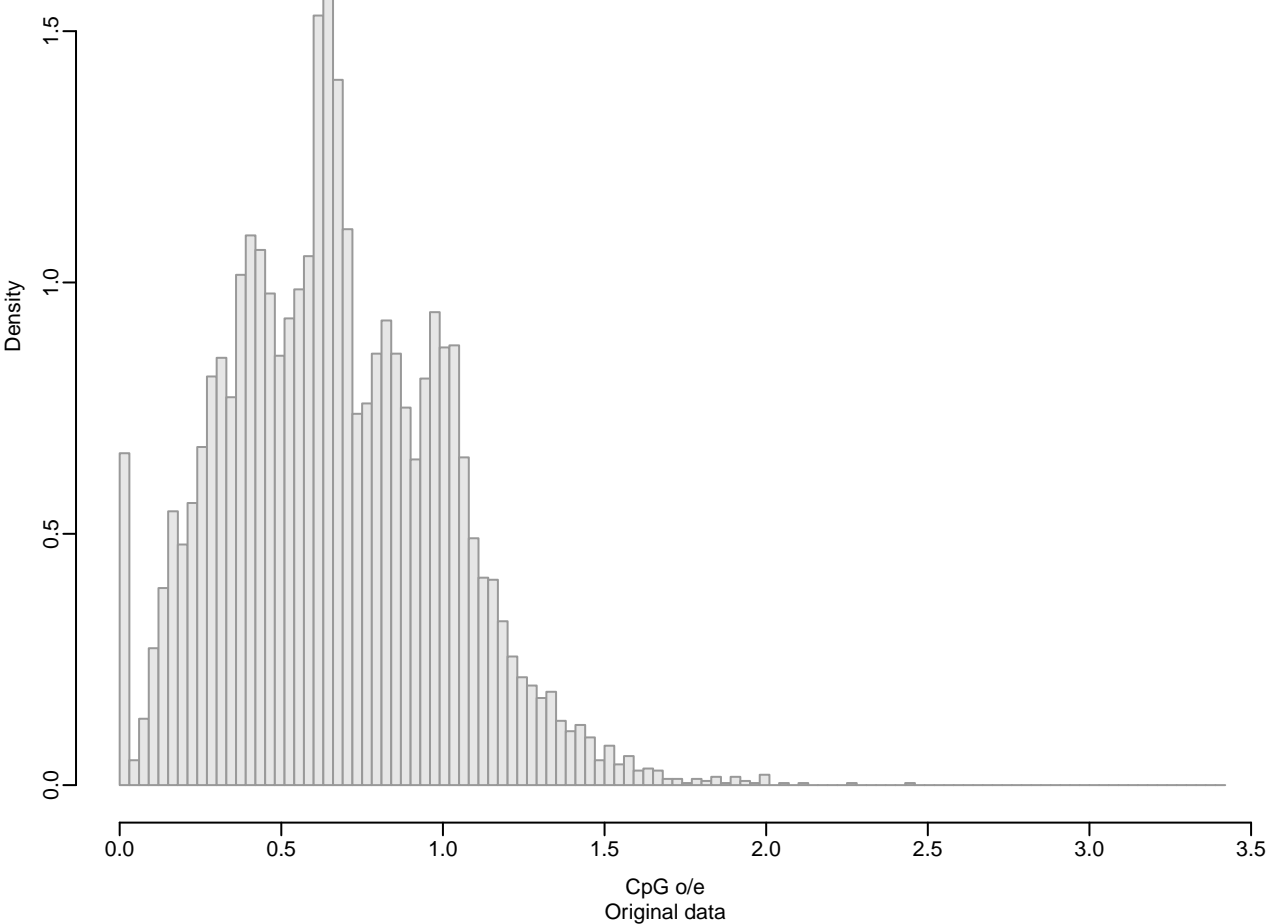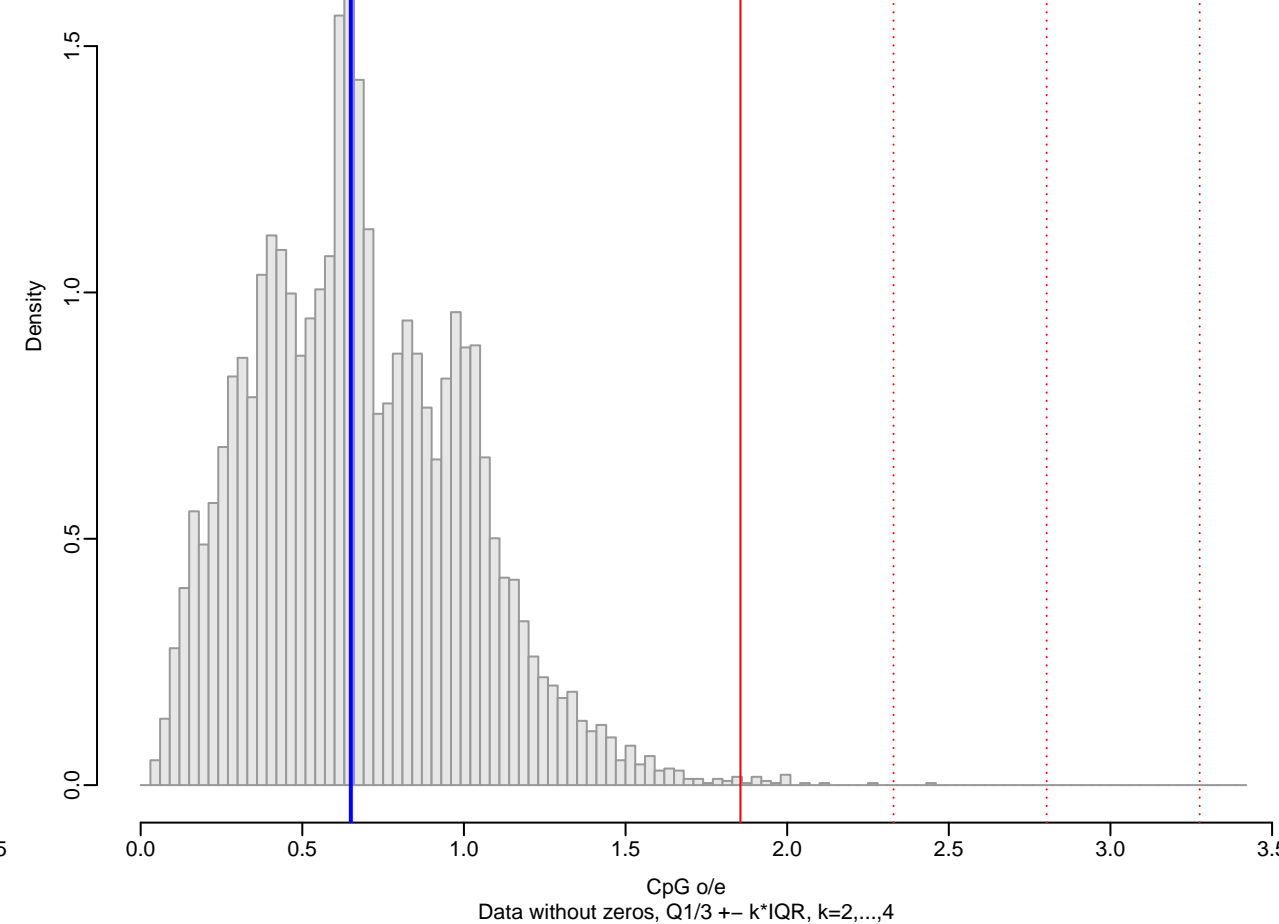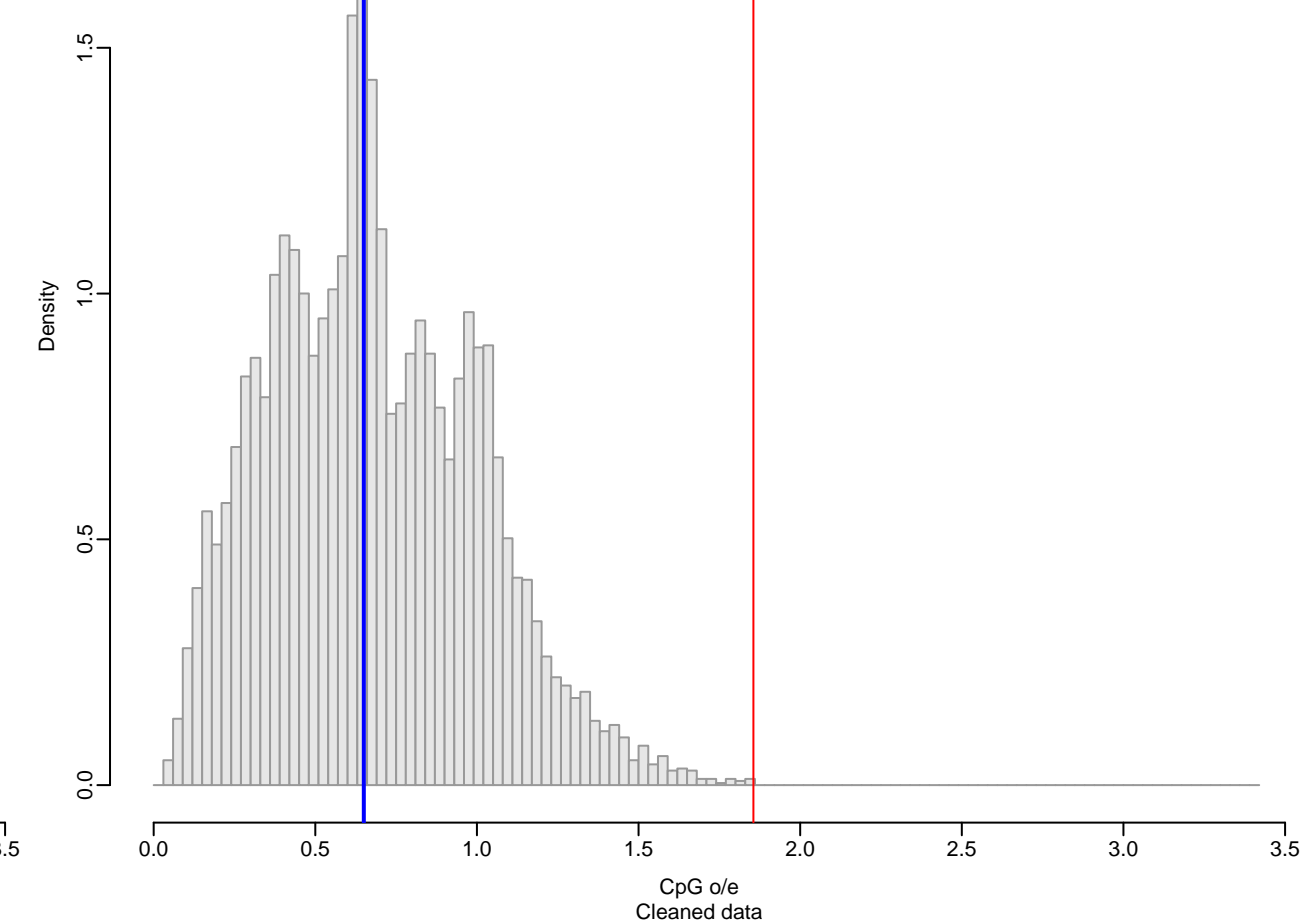

## Festuca\_pratensis

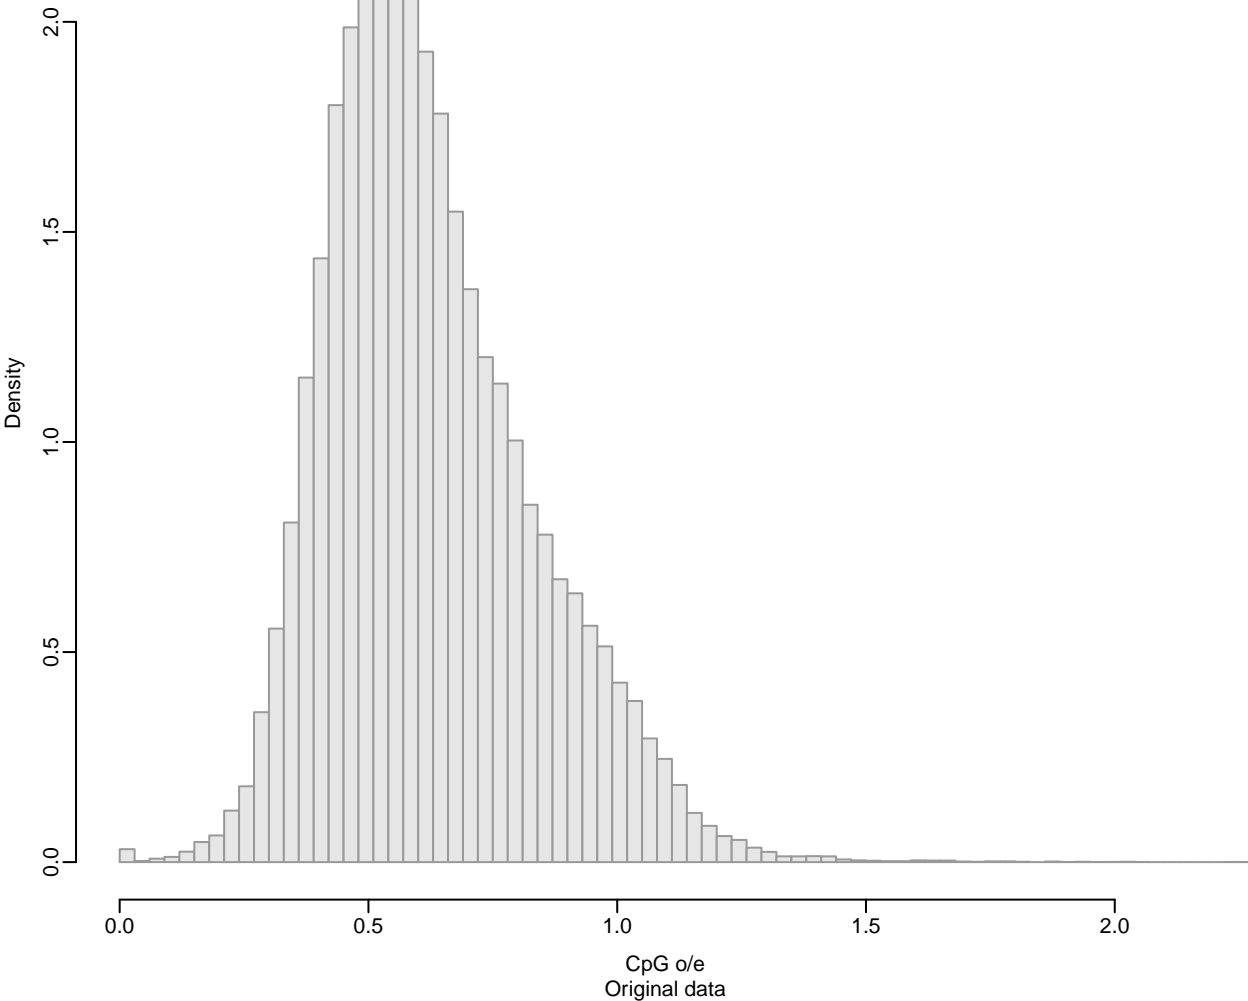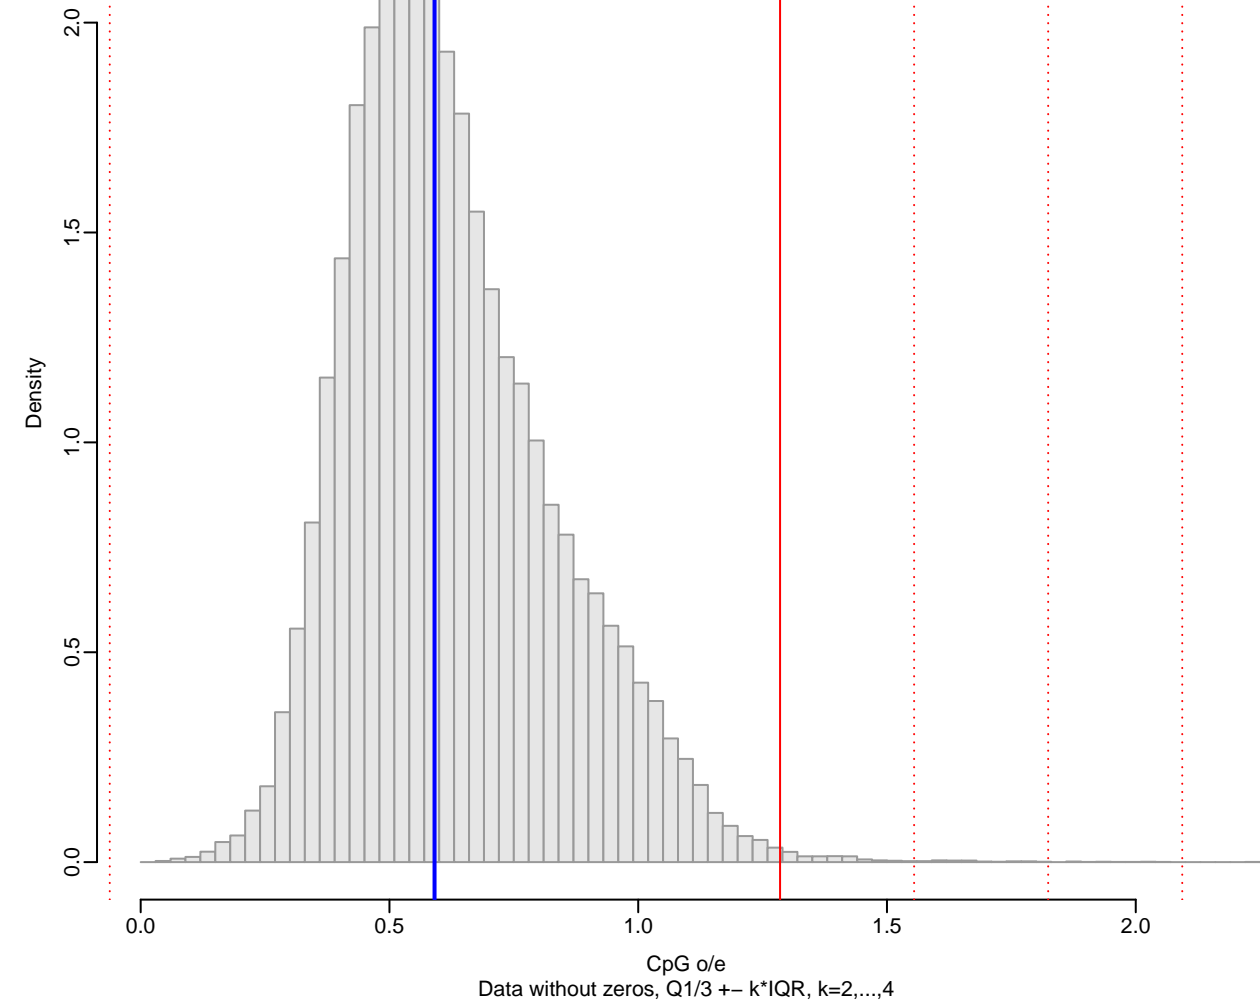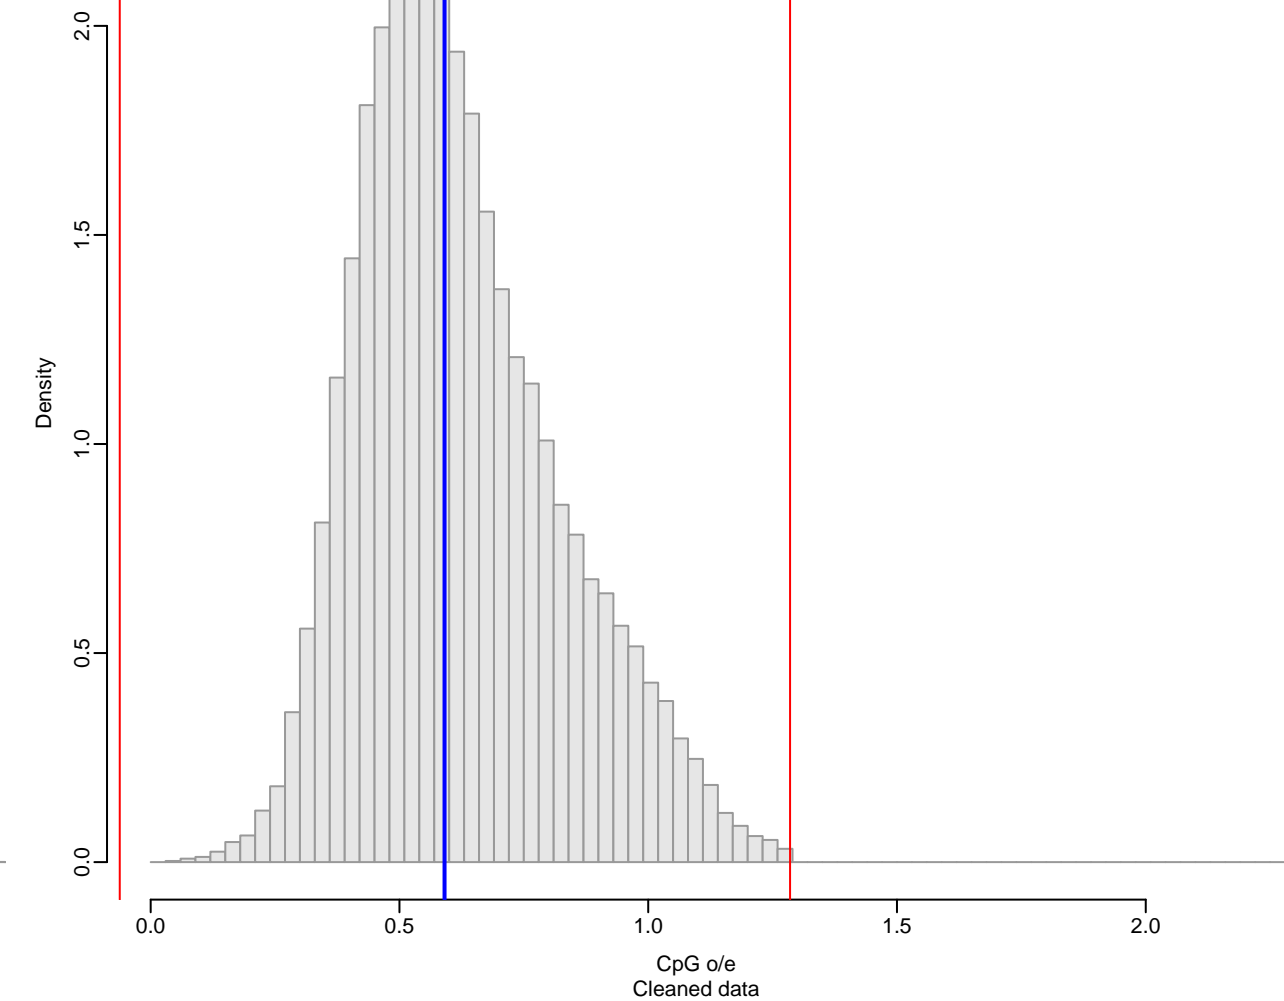

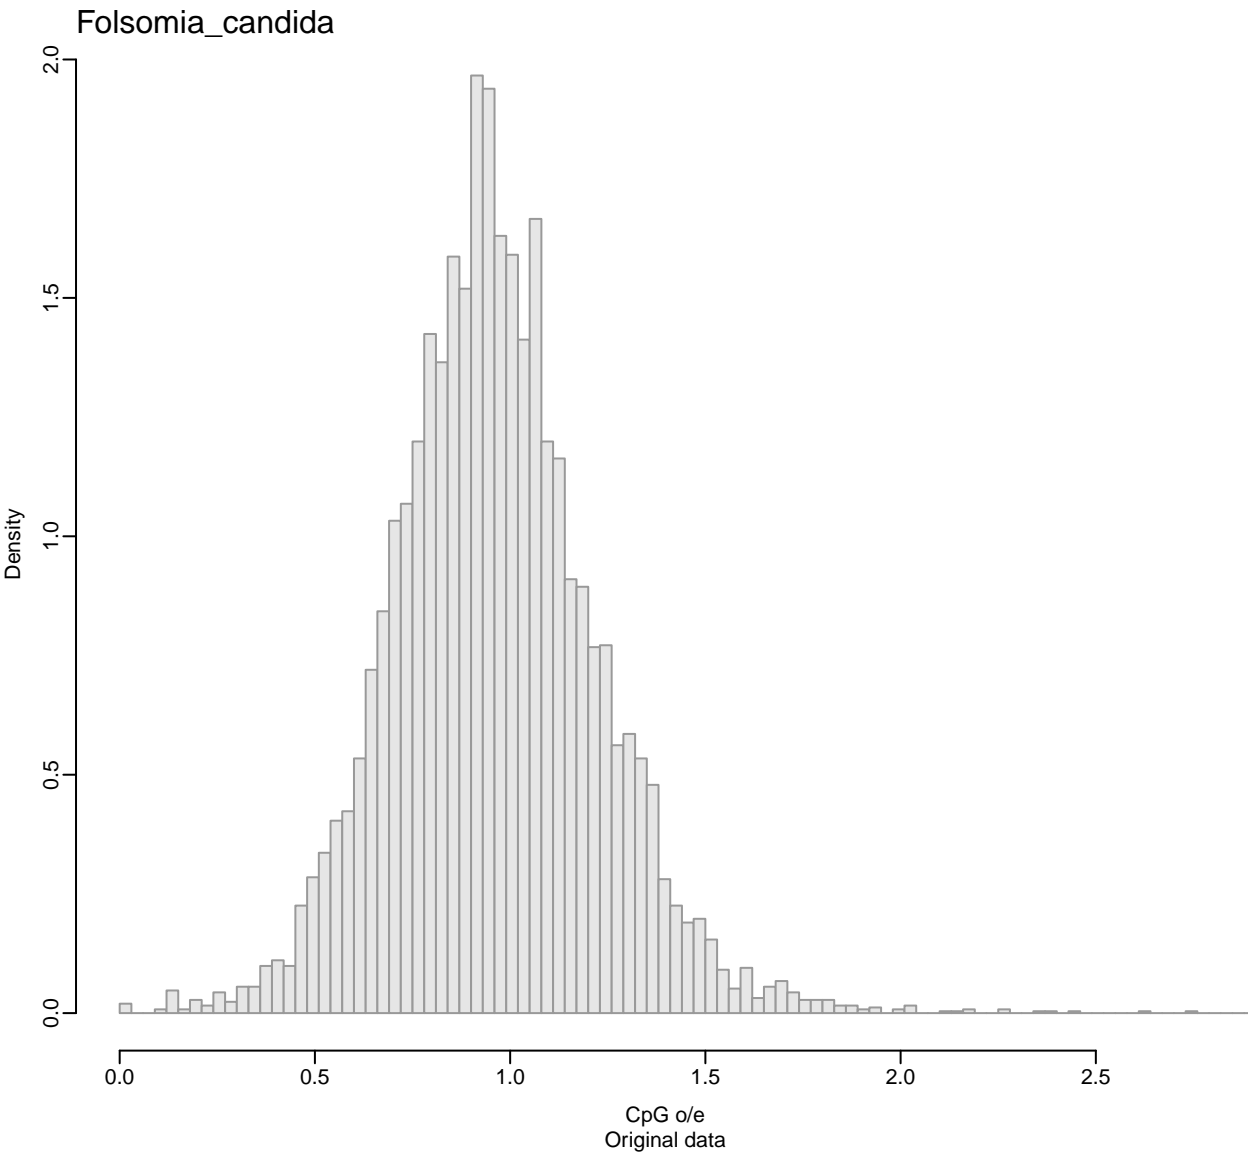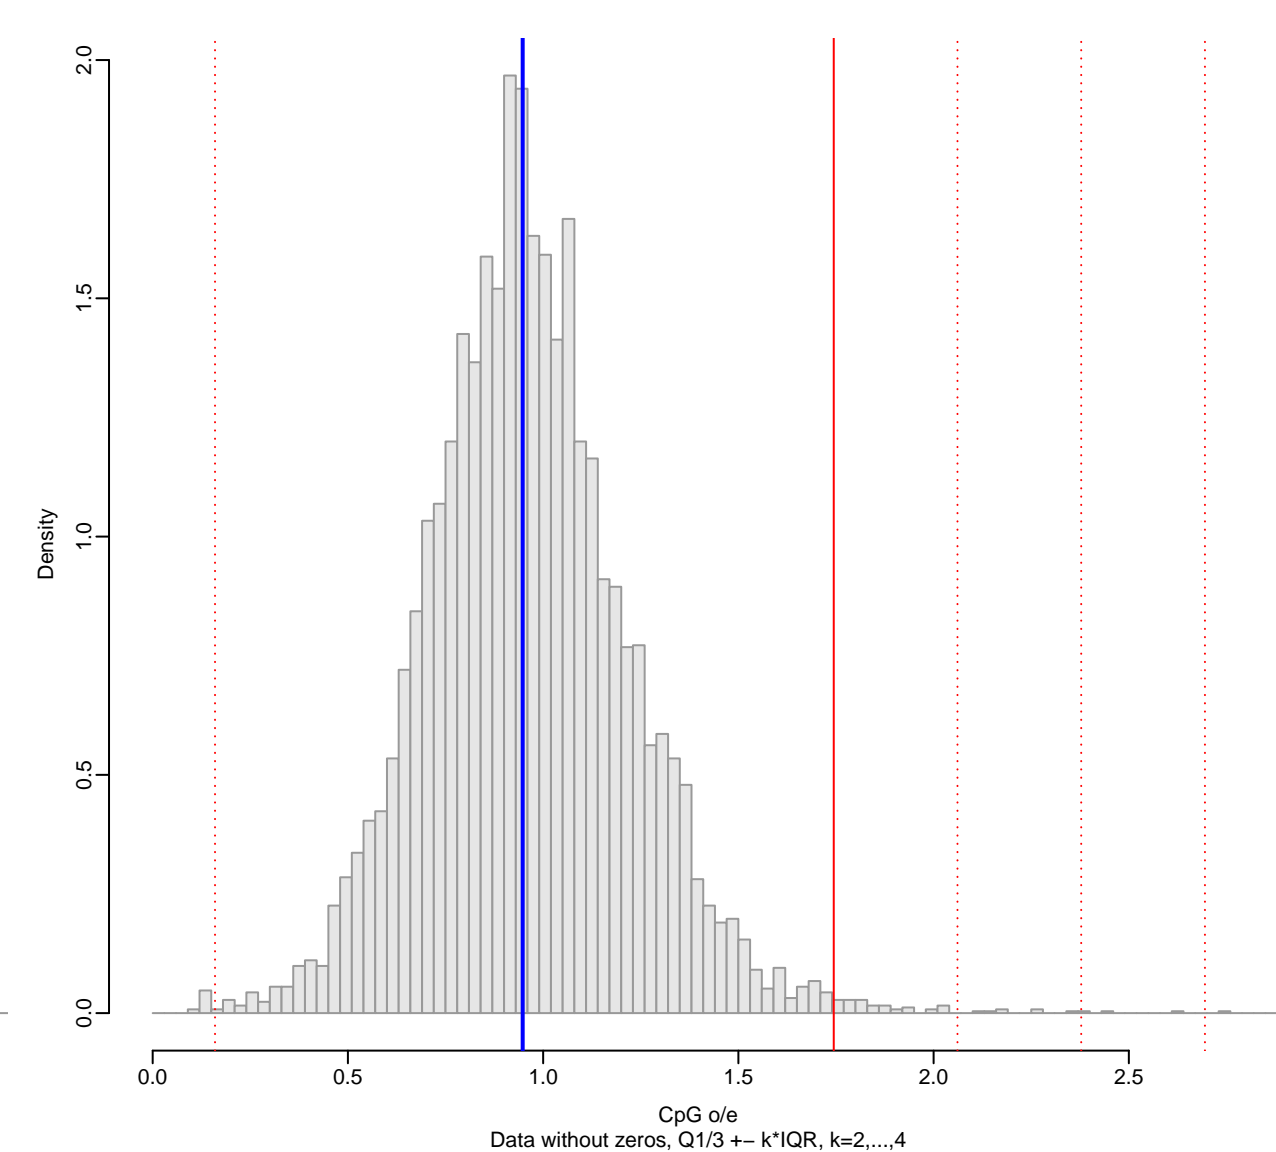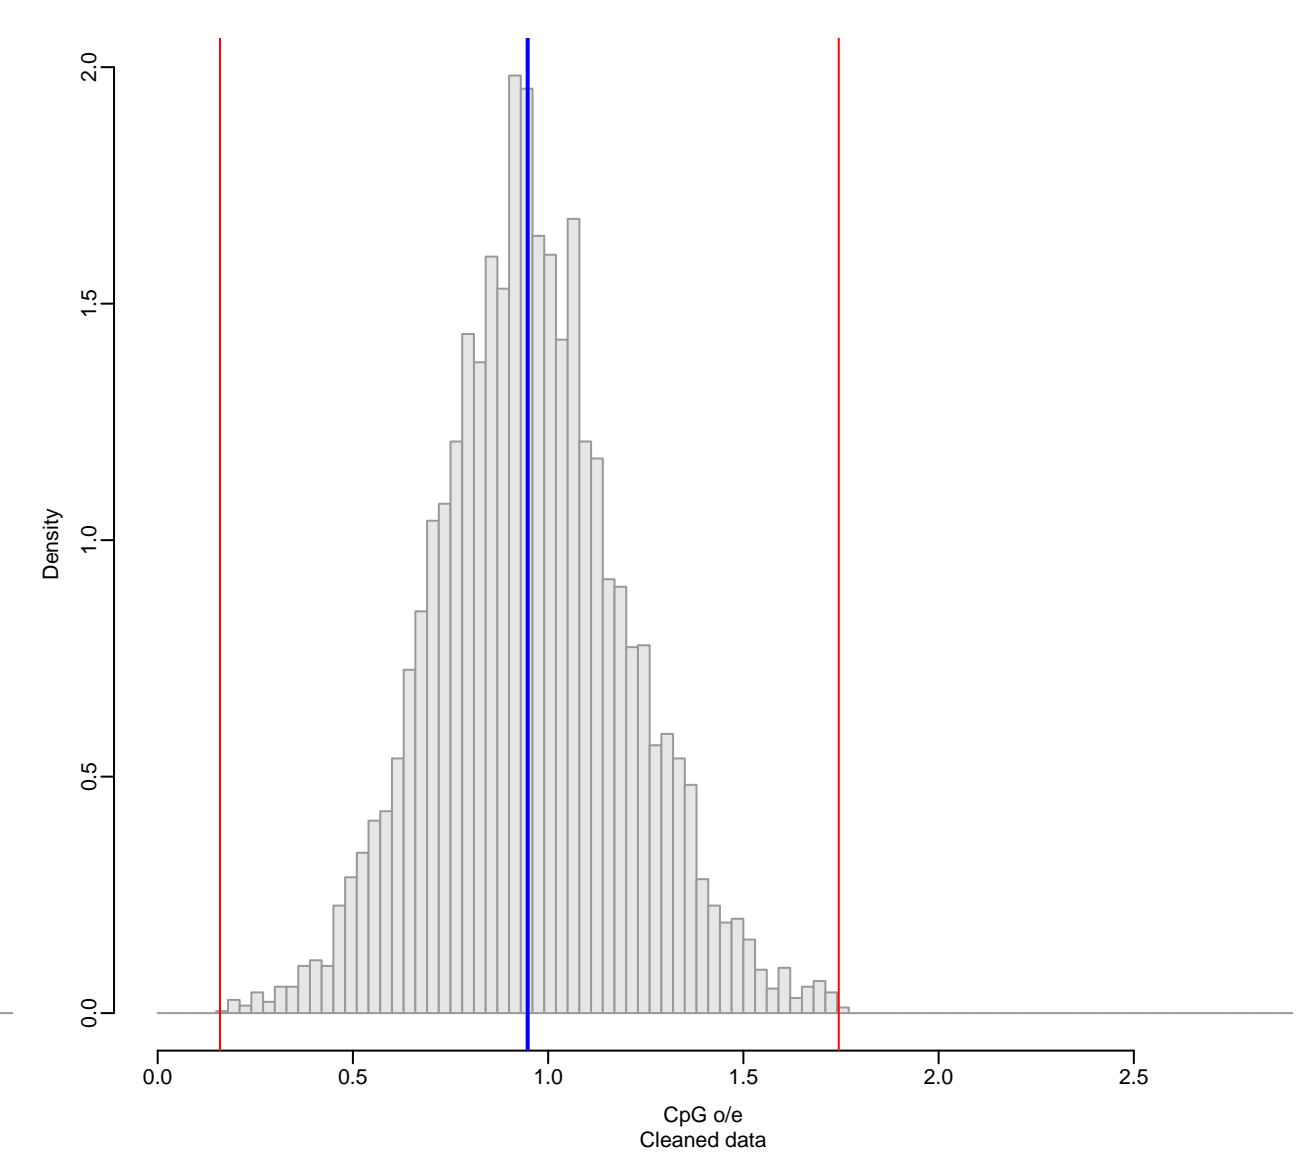



Fragaria\_vesca

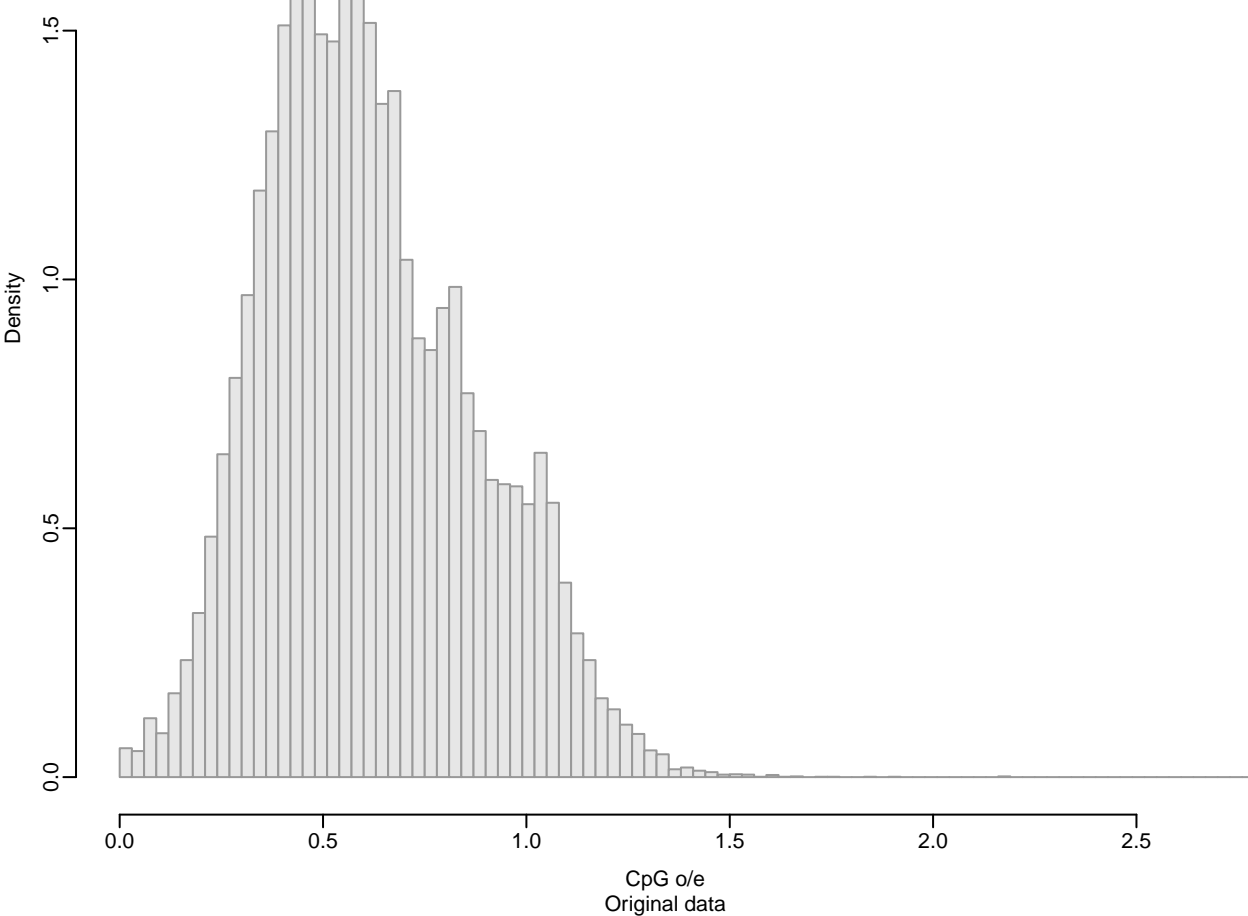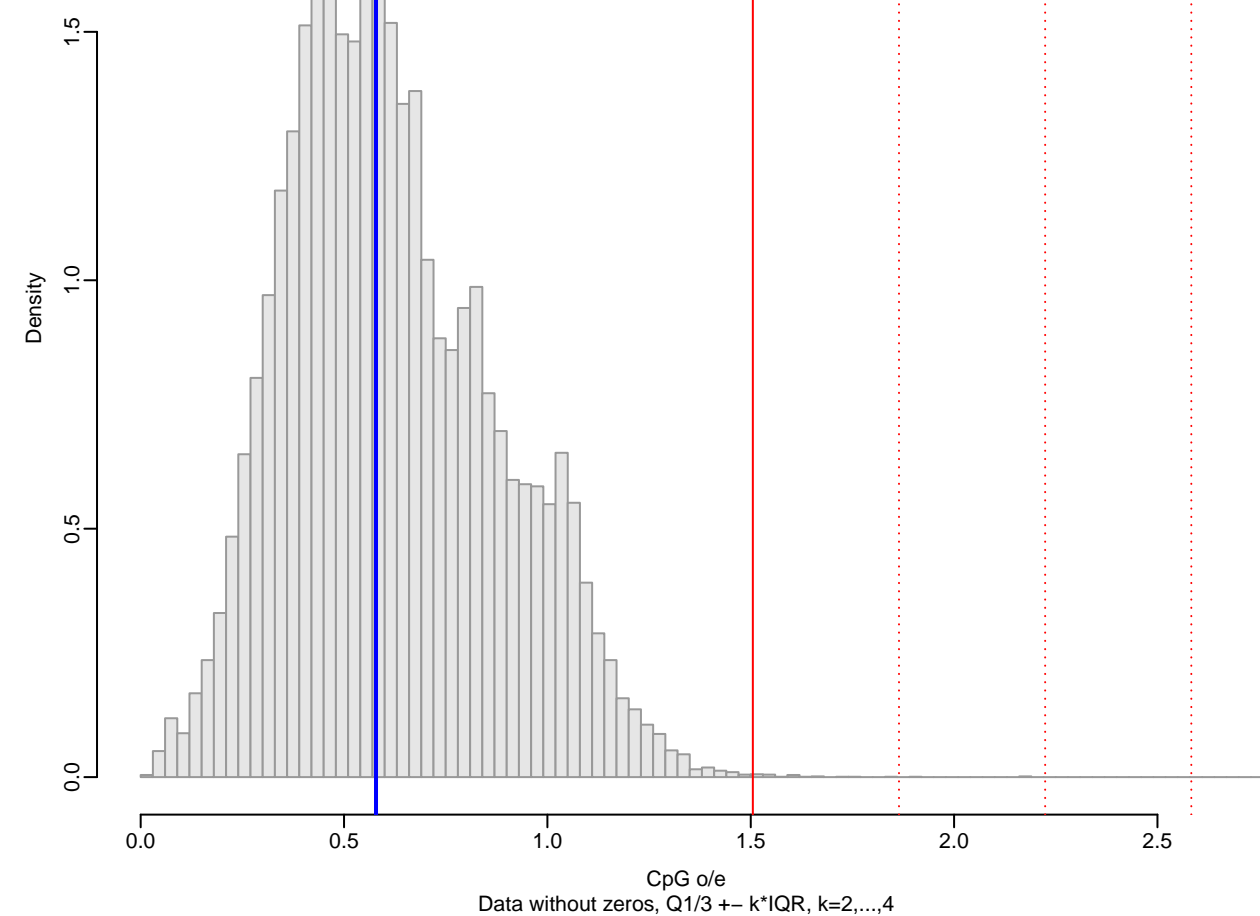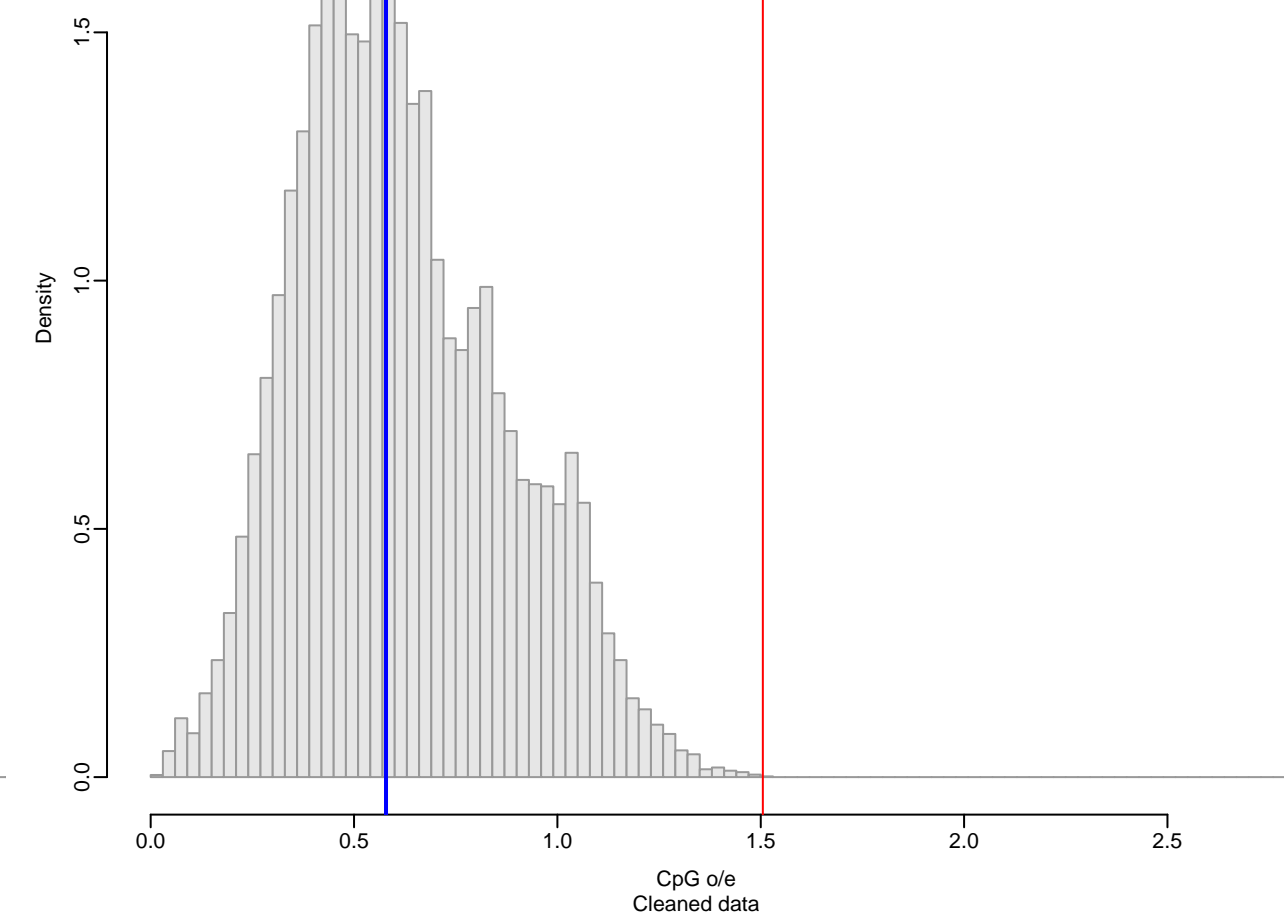

# Fucus\_serratus

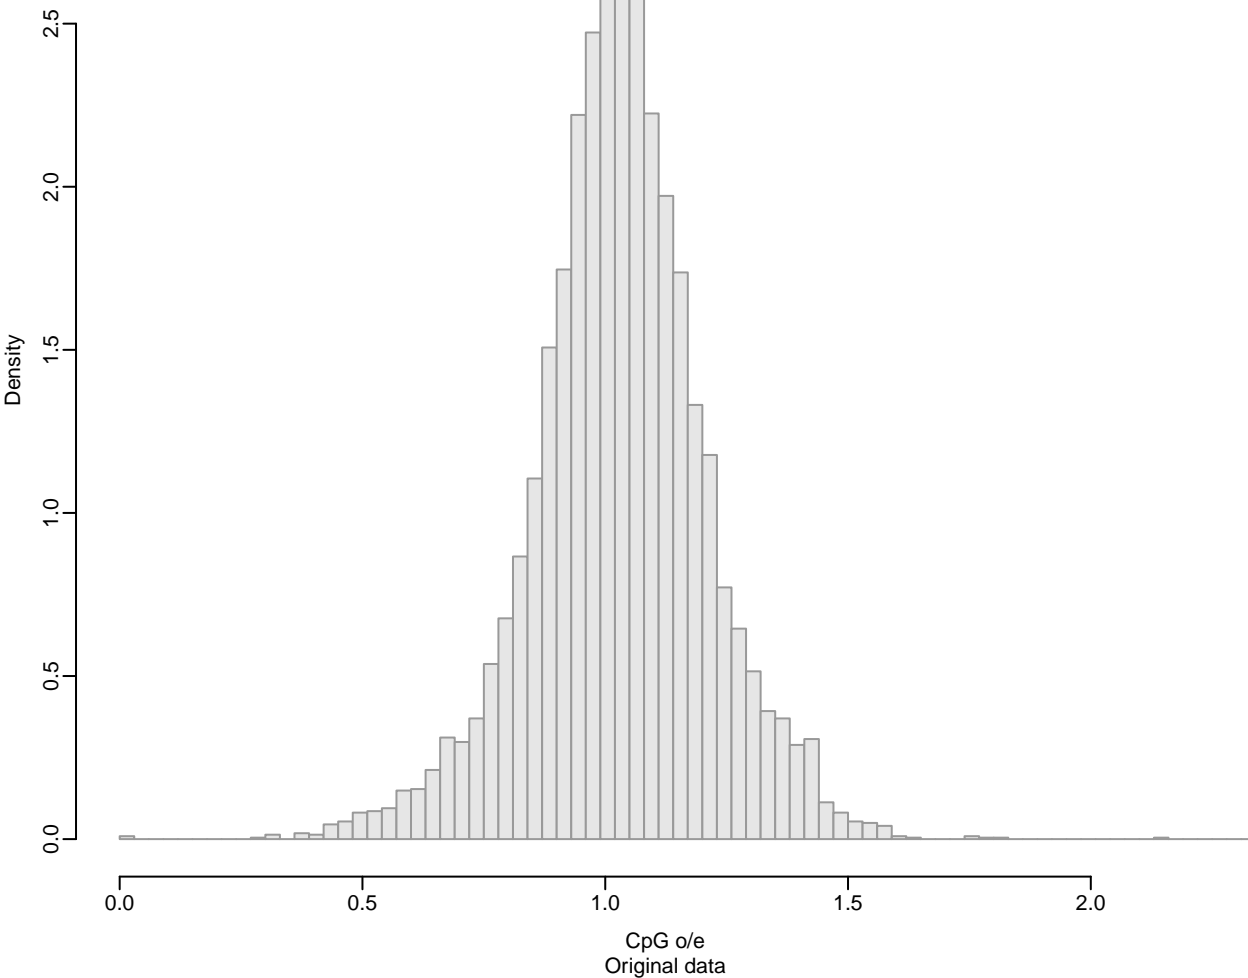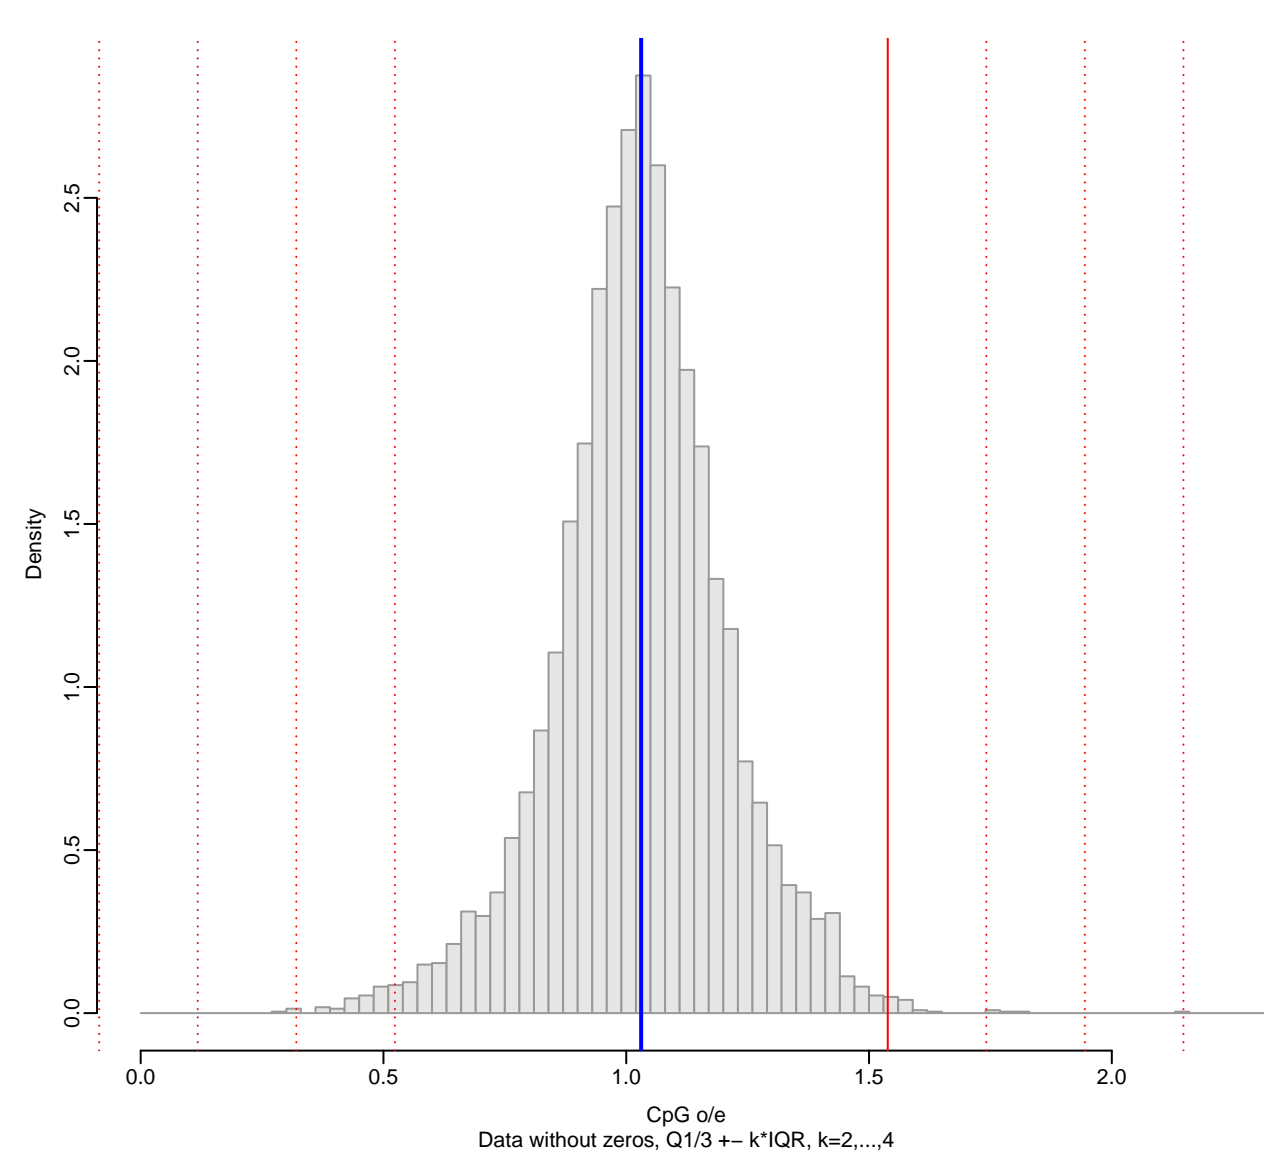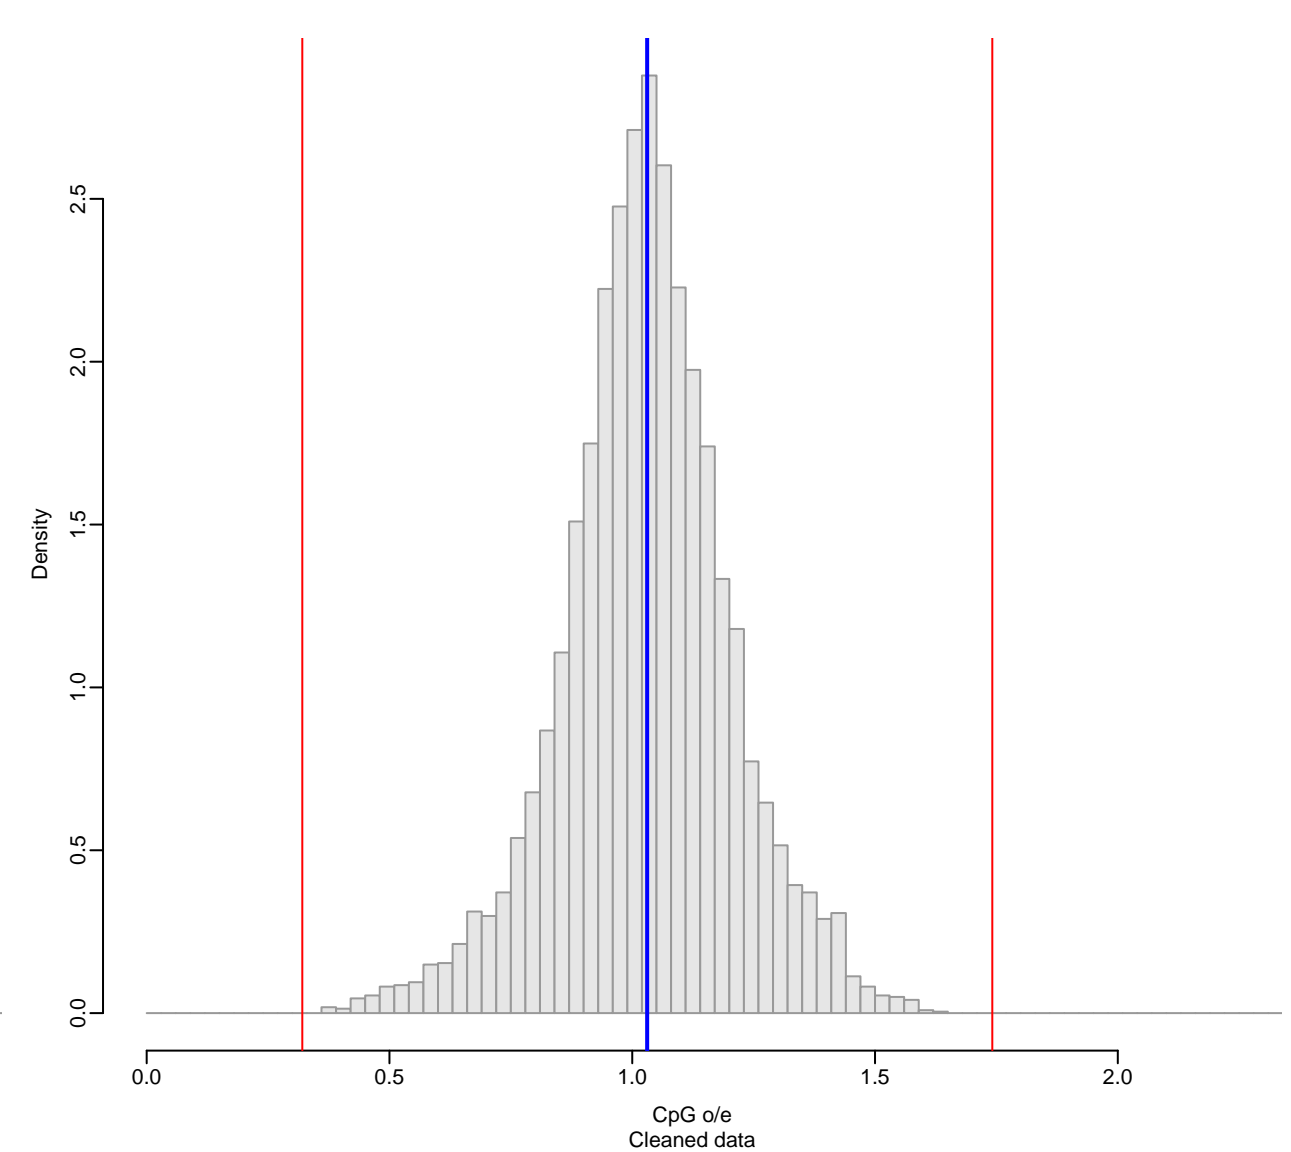

# Fucus\_vesiculosus

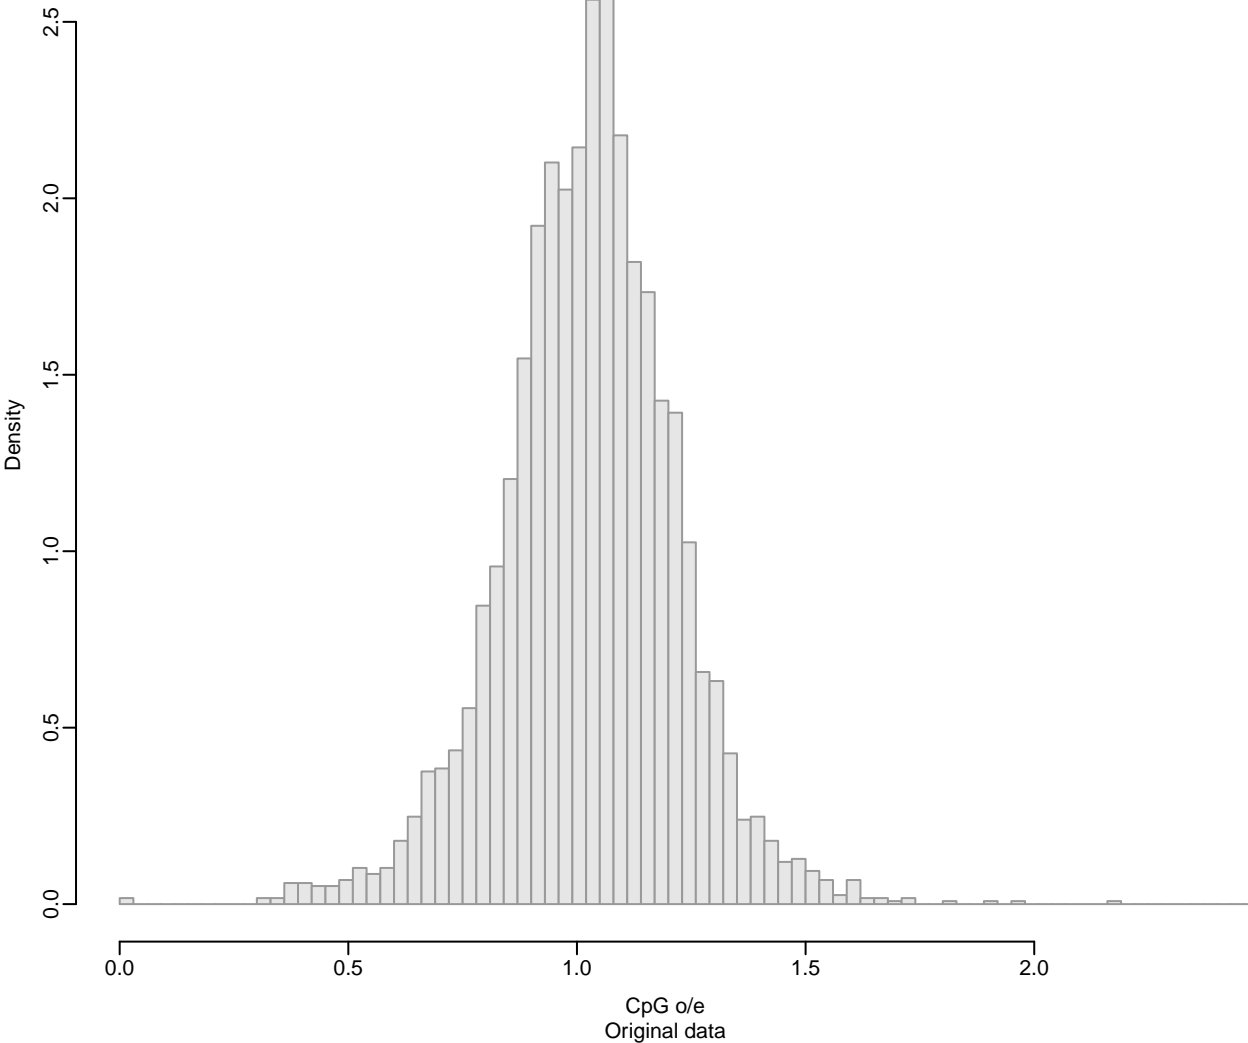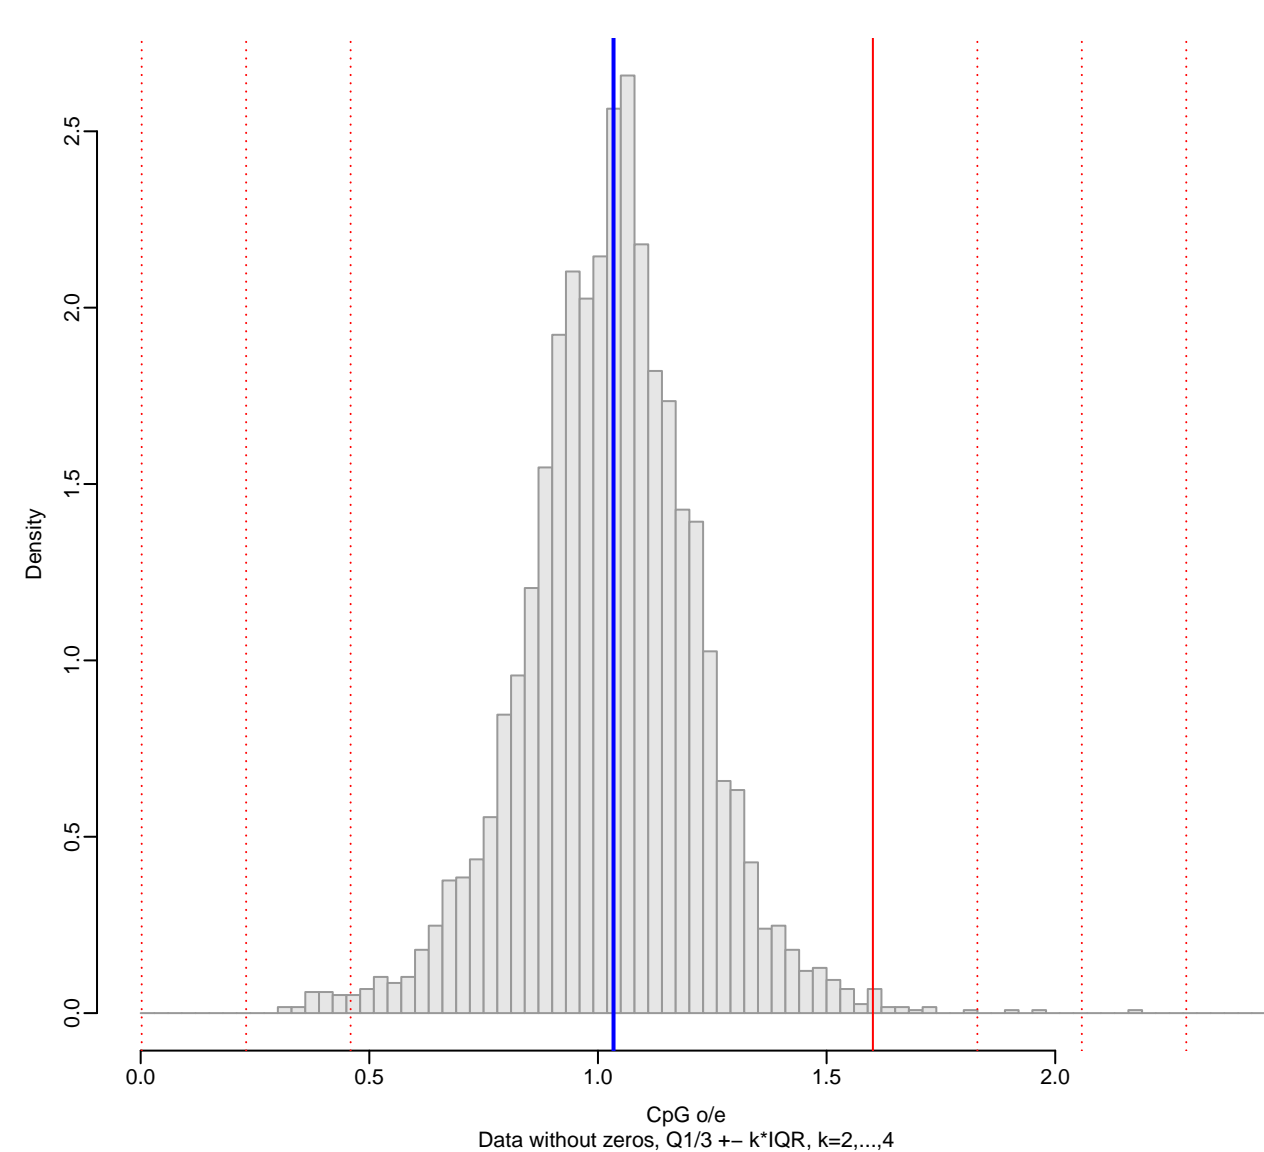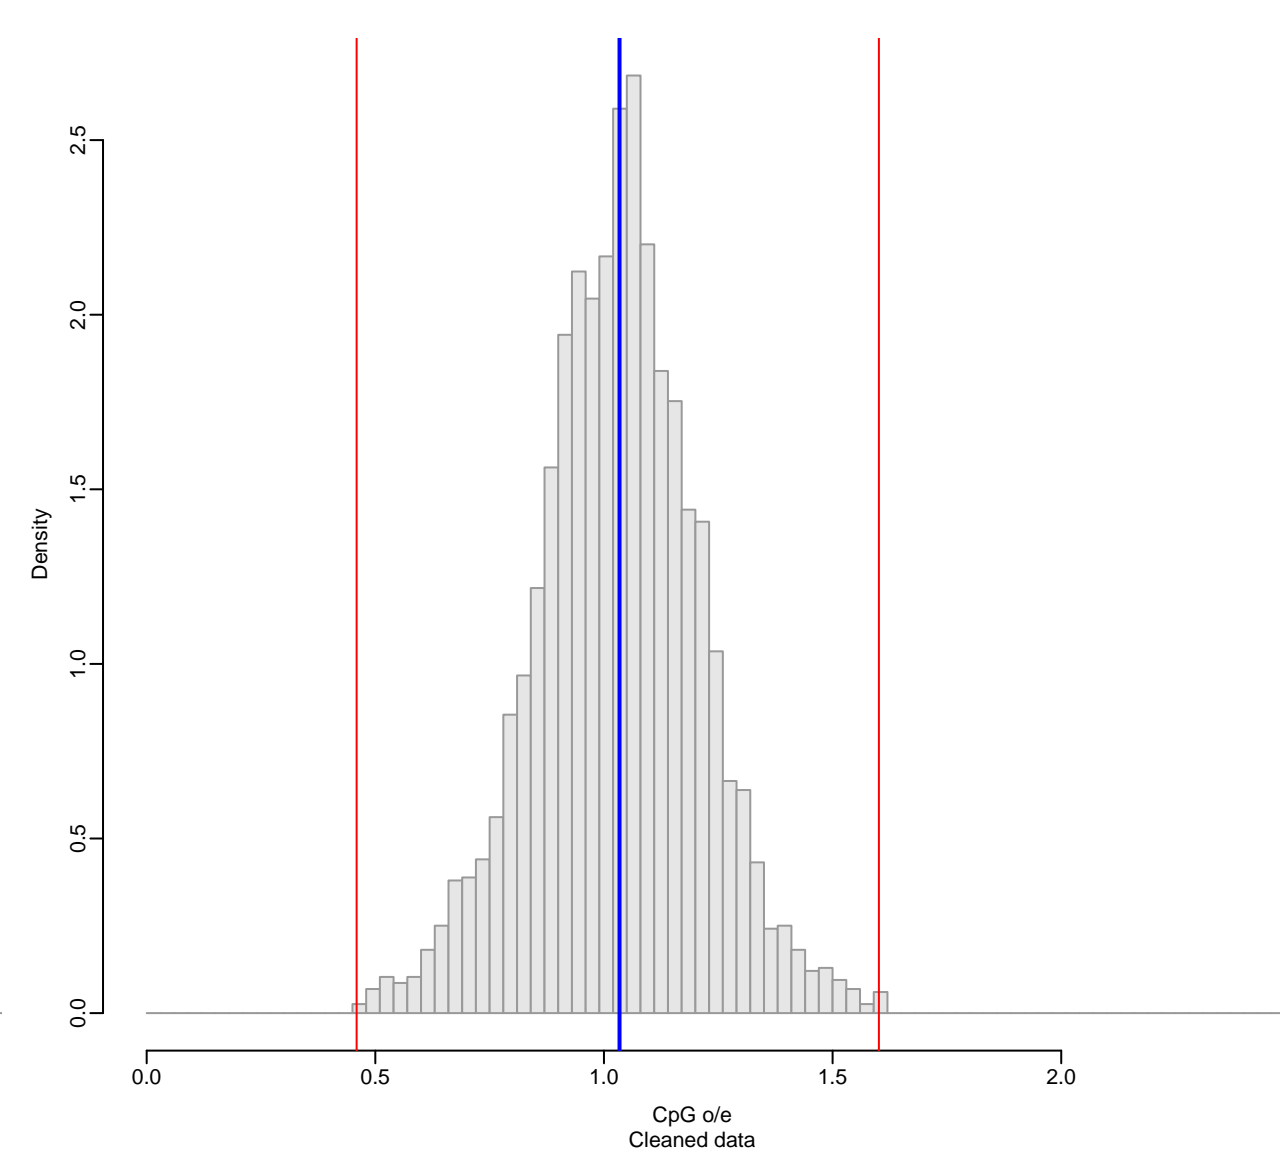

Fumaria\_officinalis

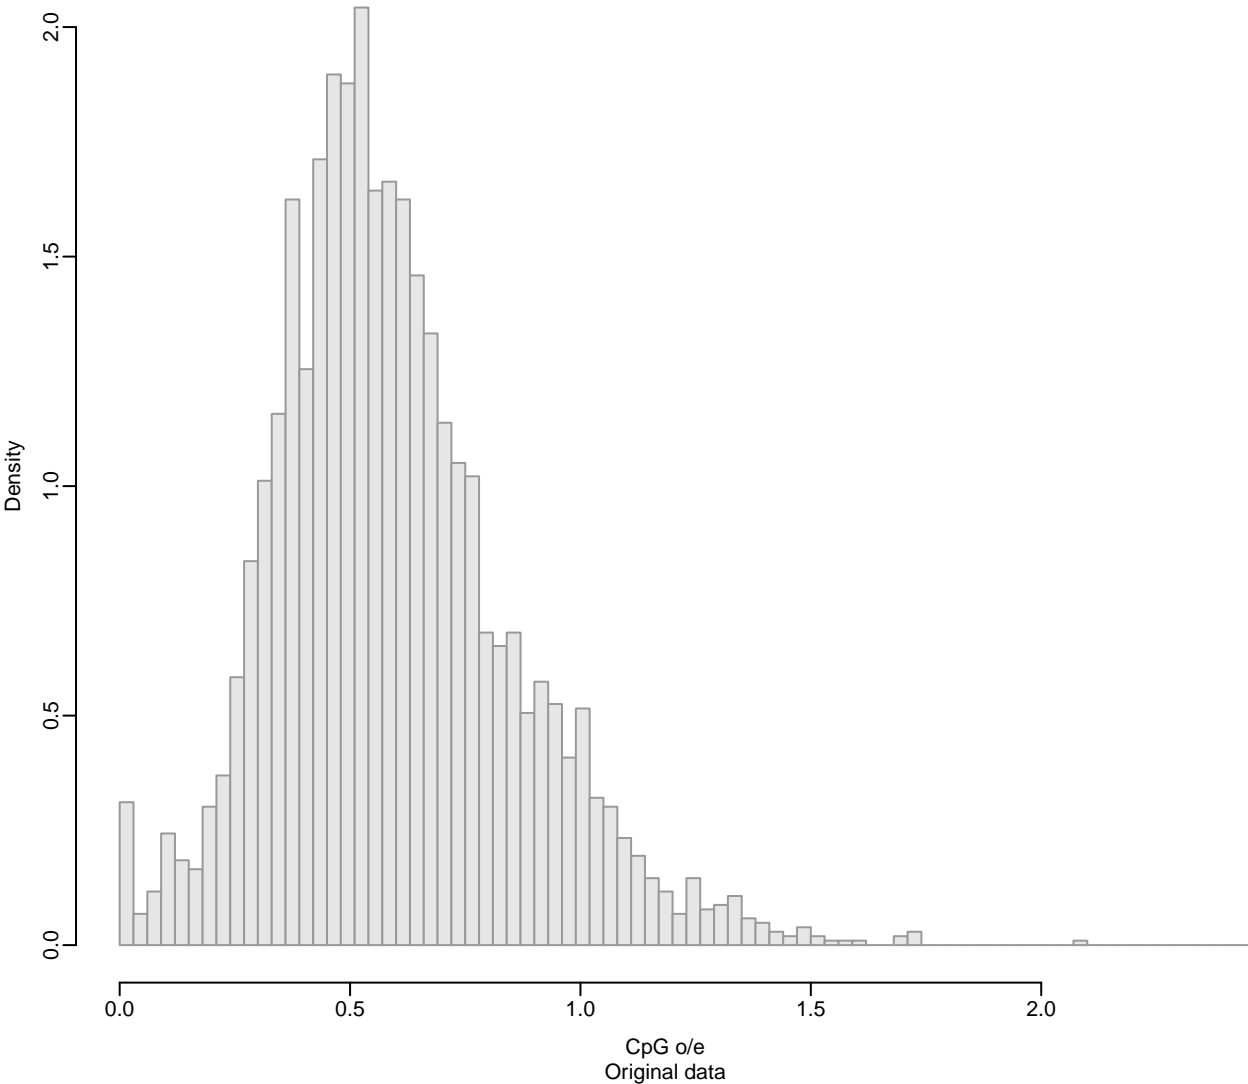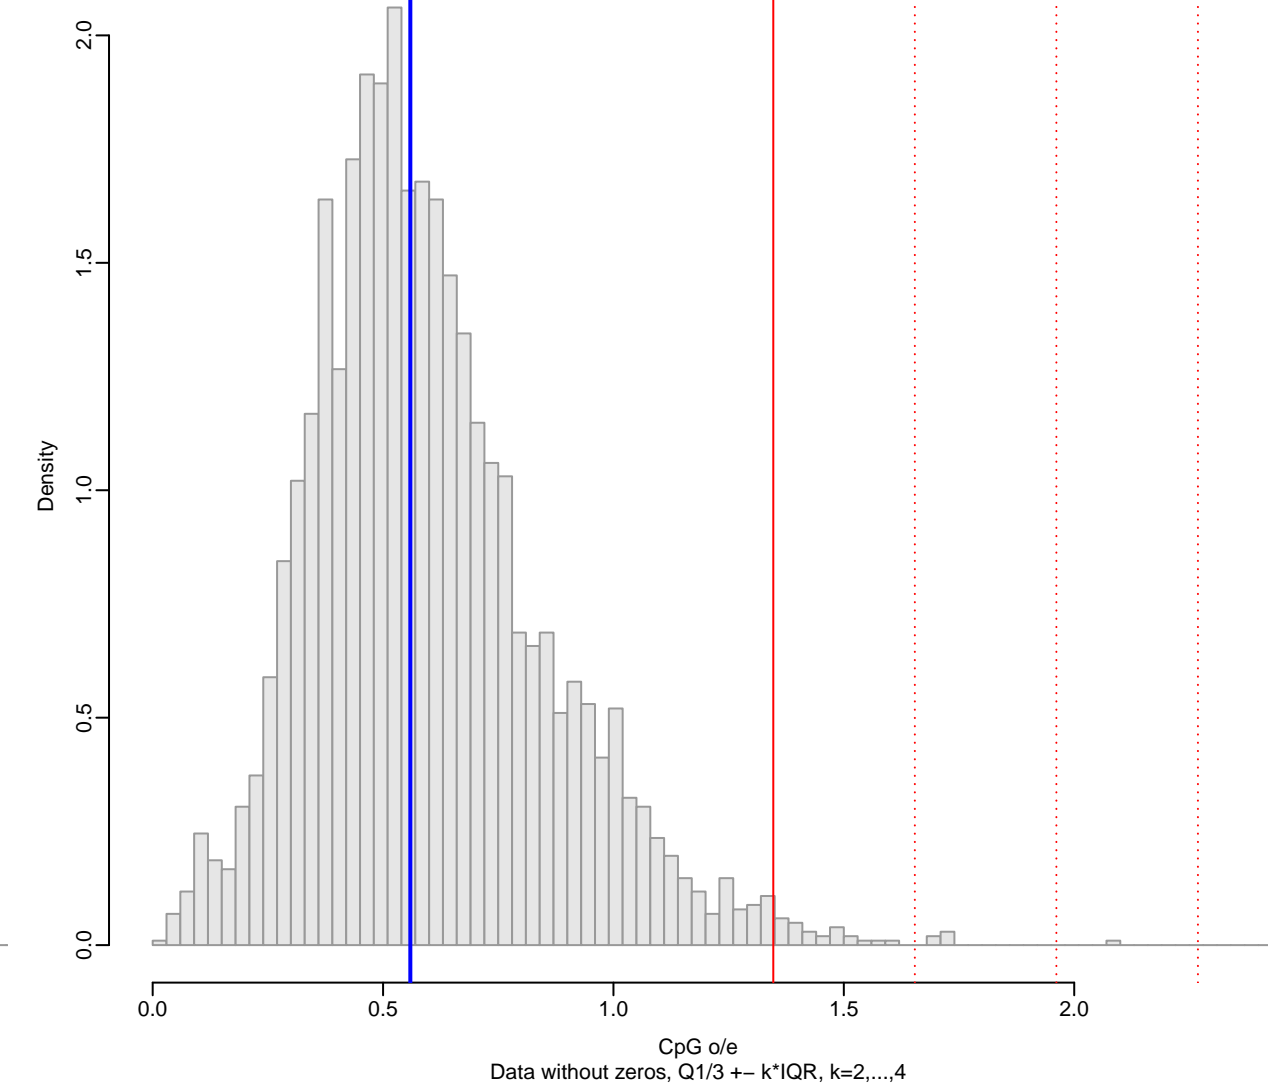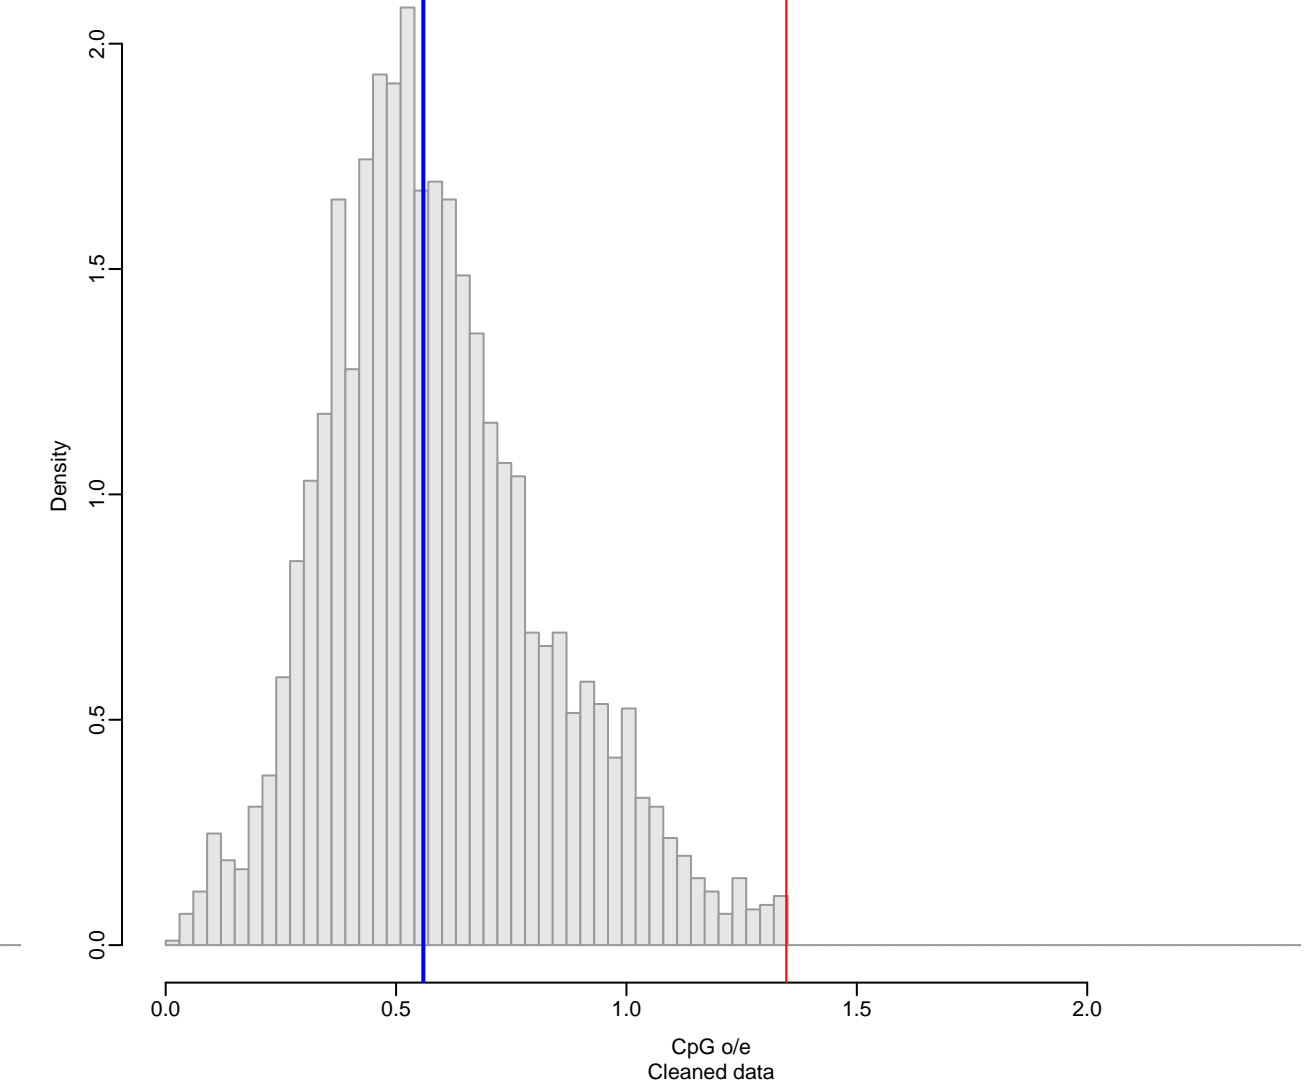

Furcellaria\_lumbricalis

Density

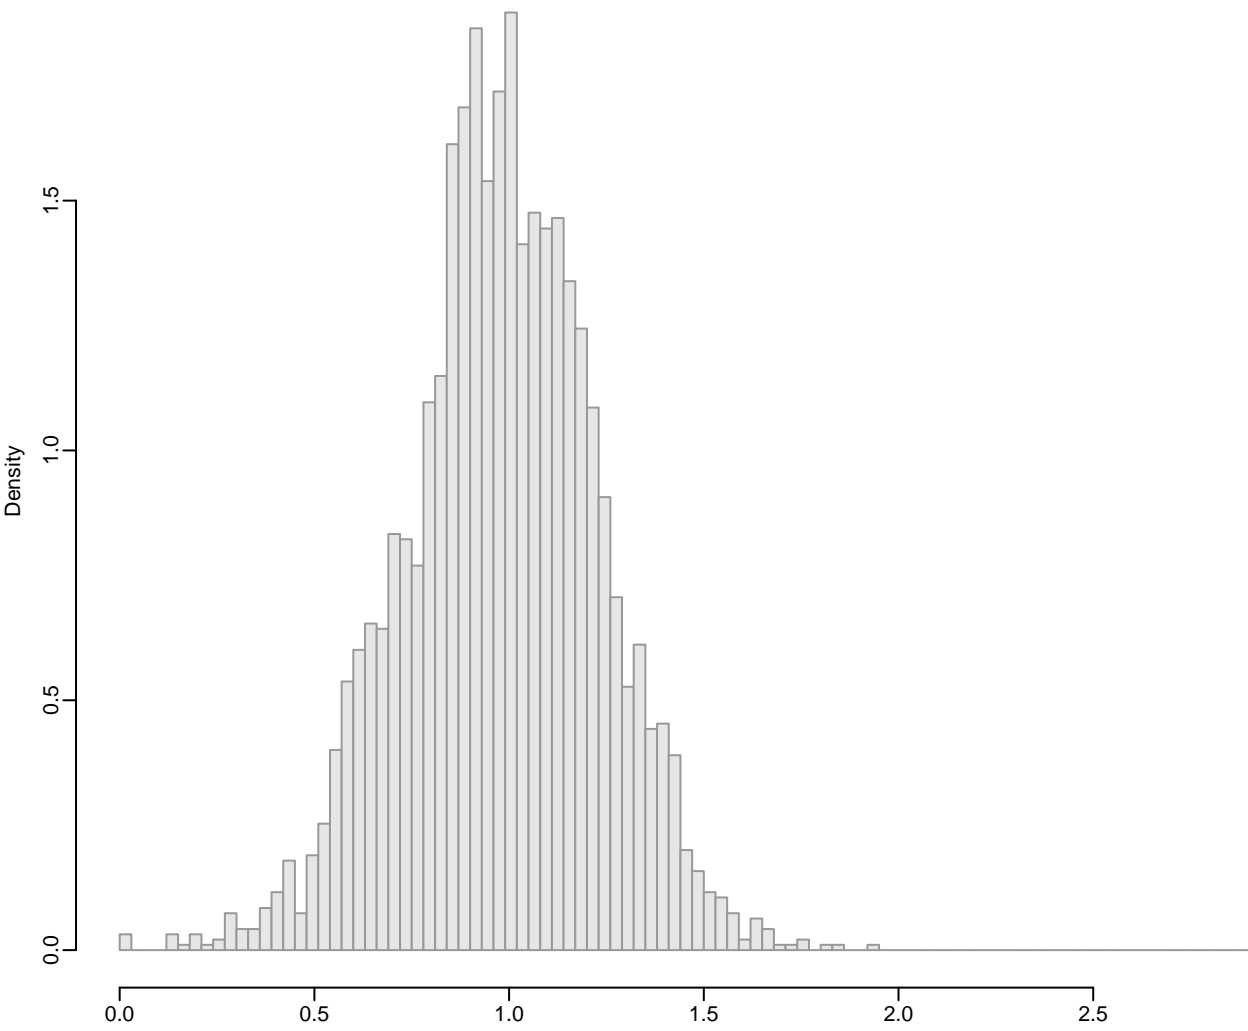

Density

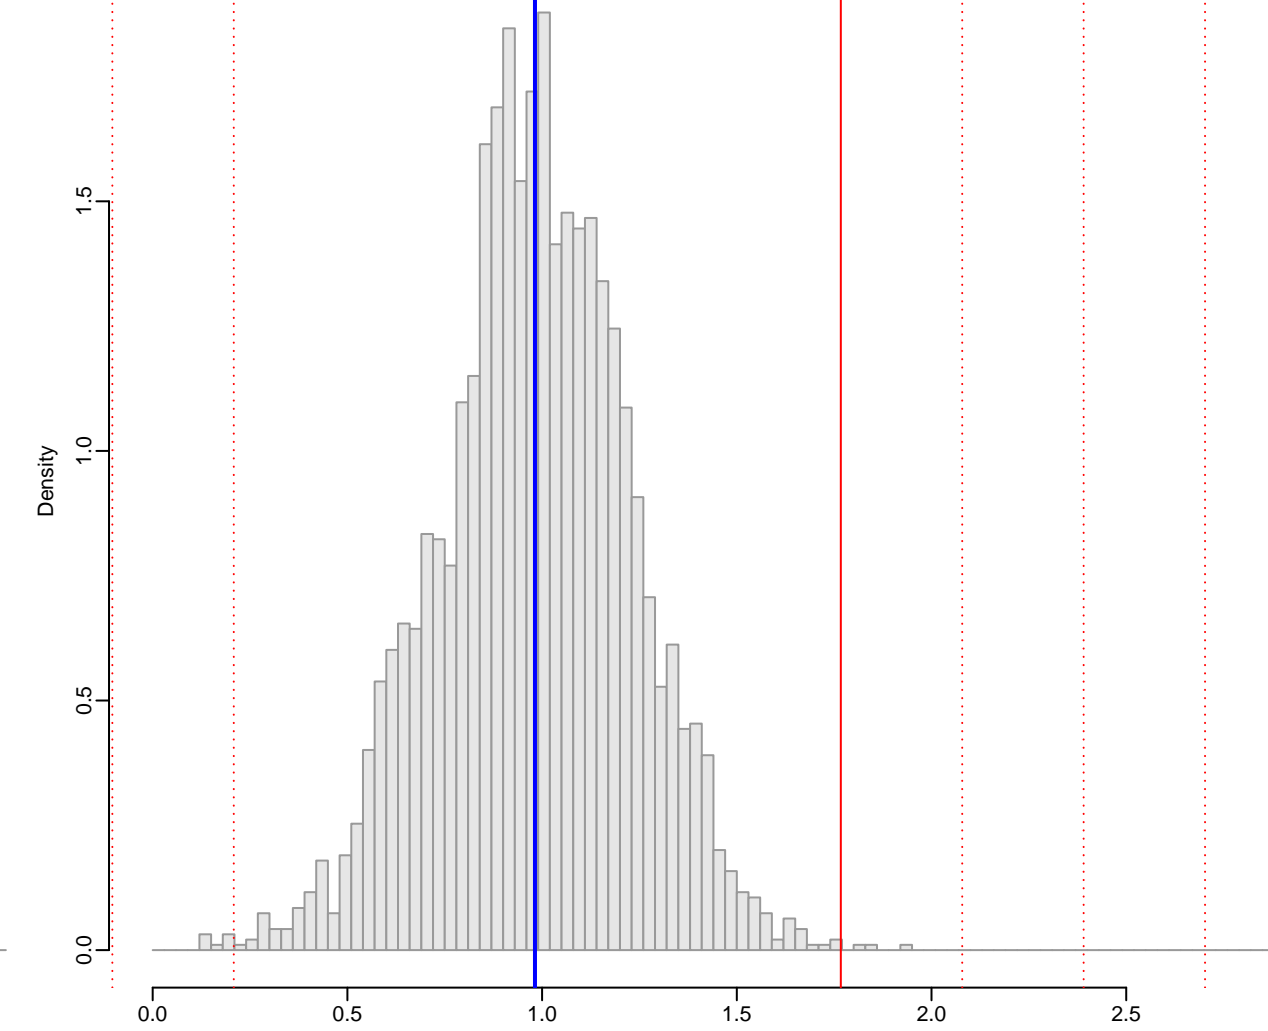

Density

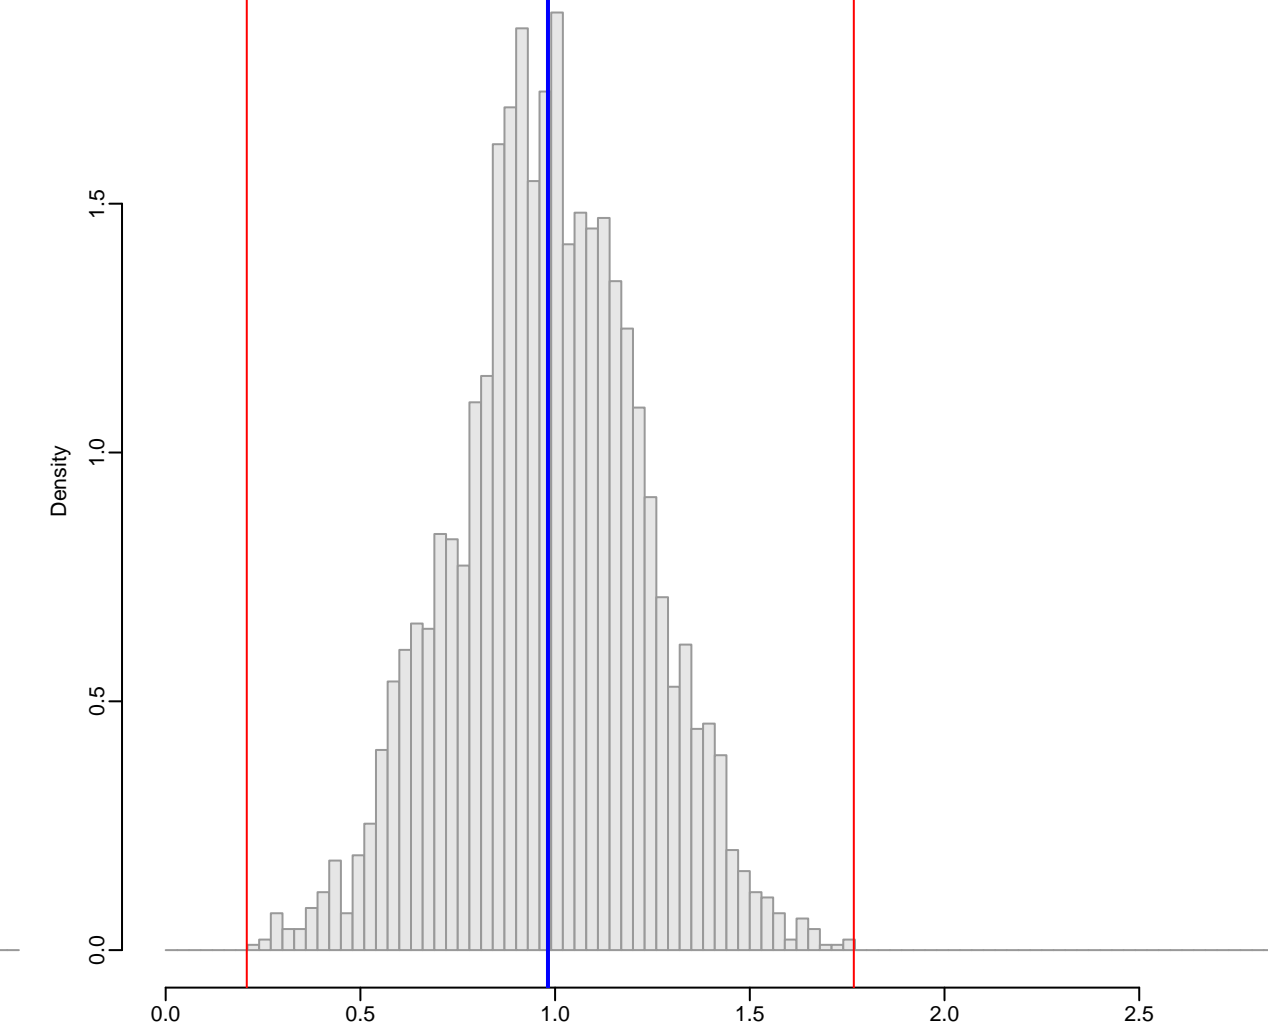

# Fusarium\_oxysporum

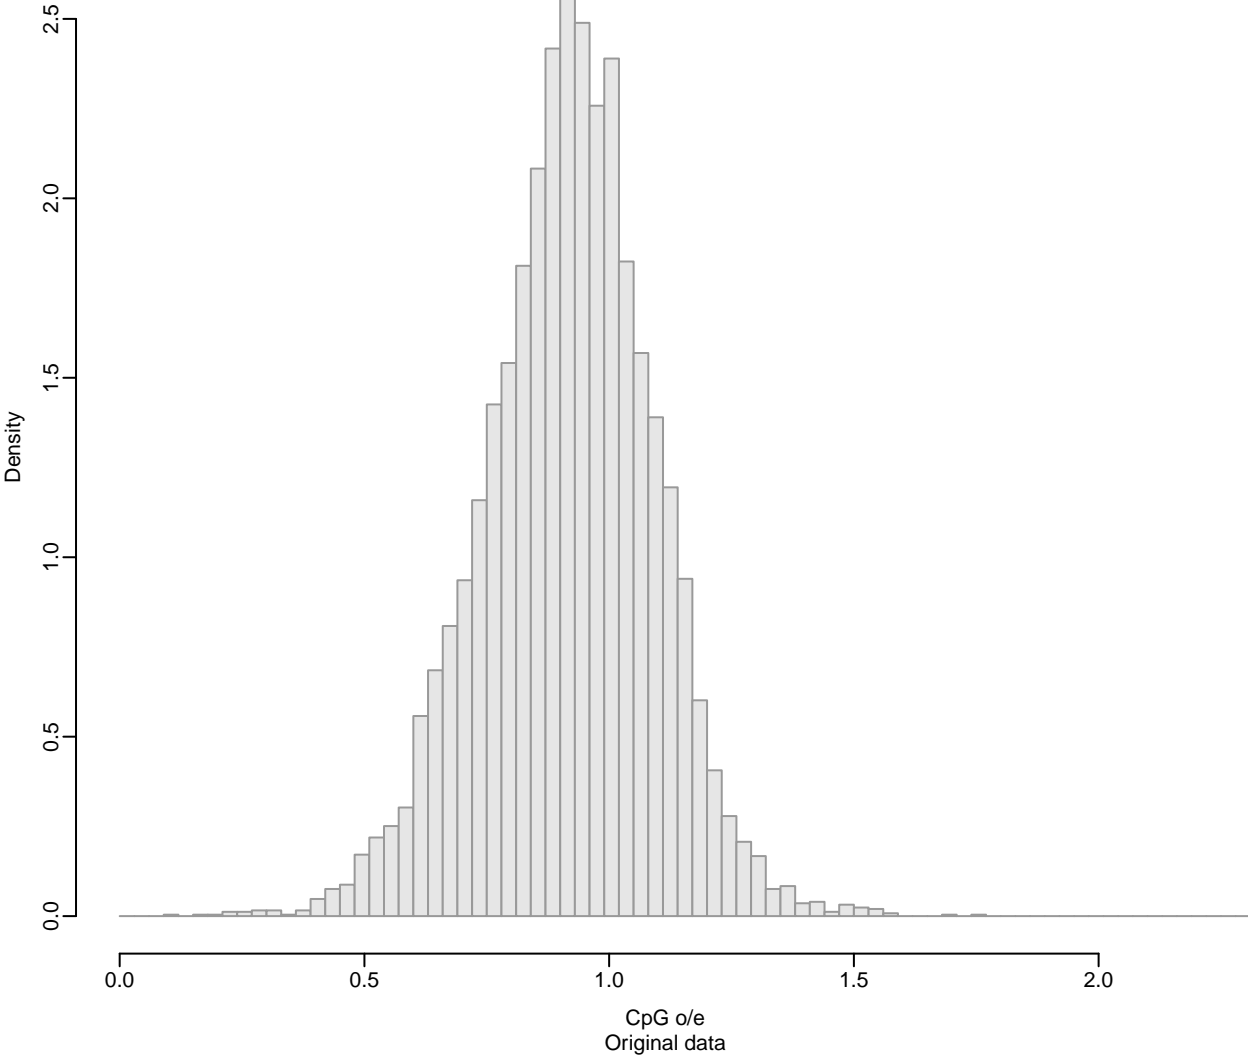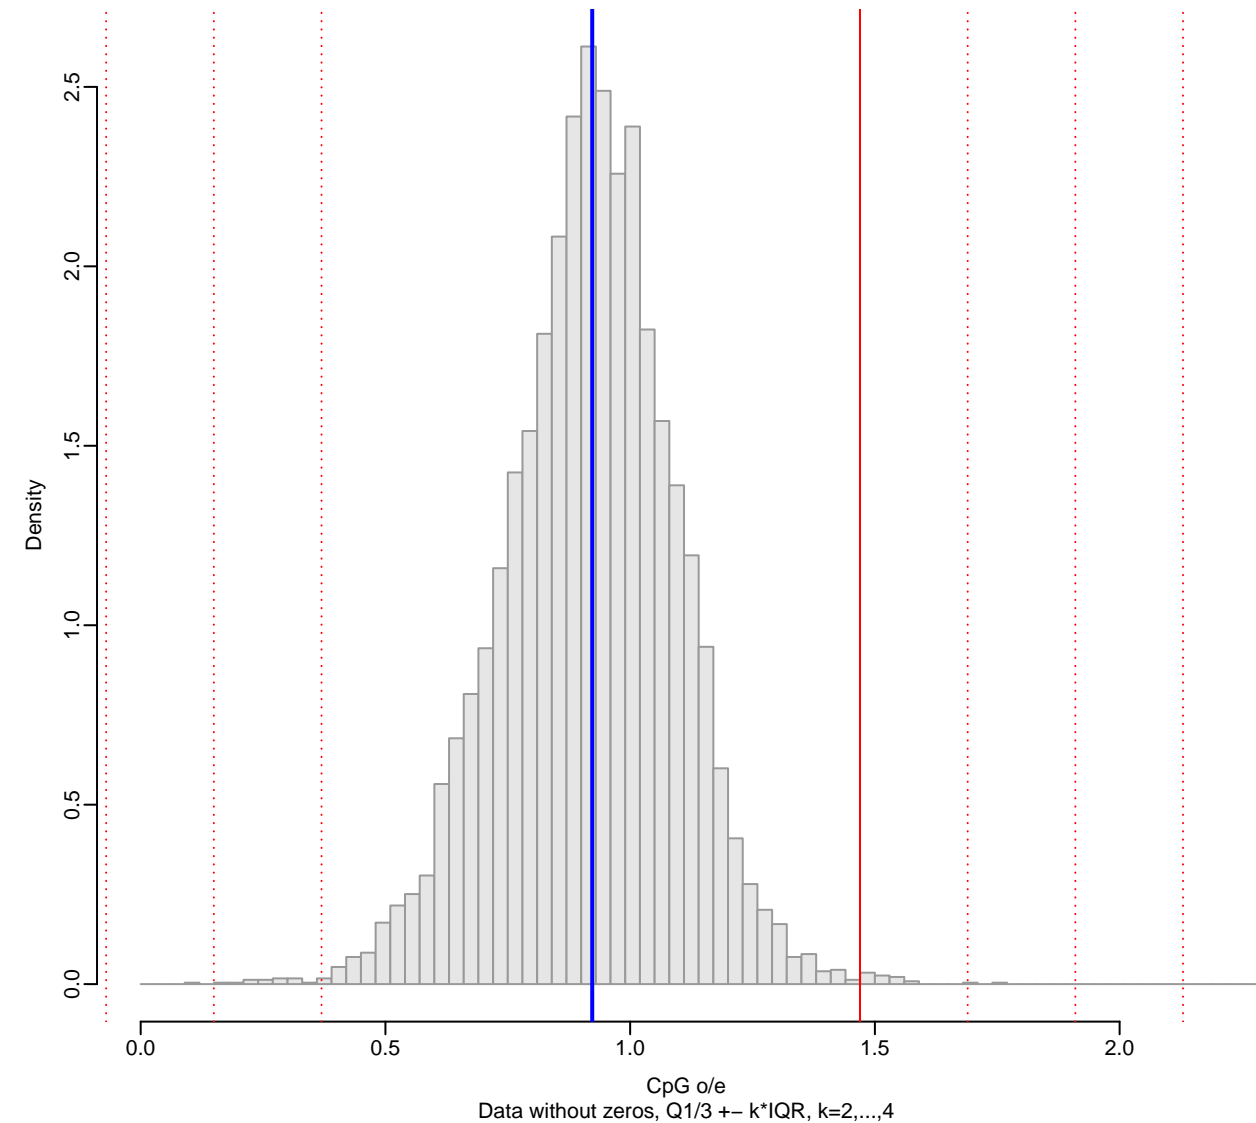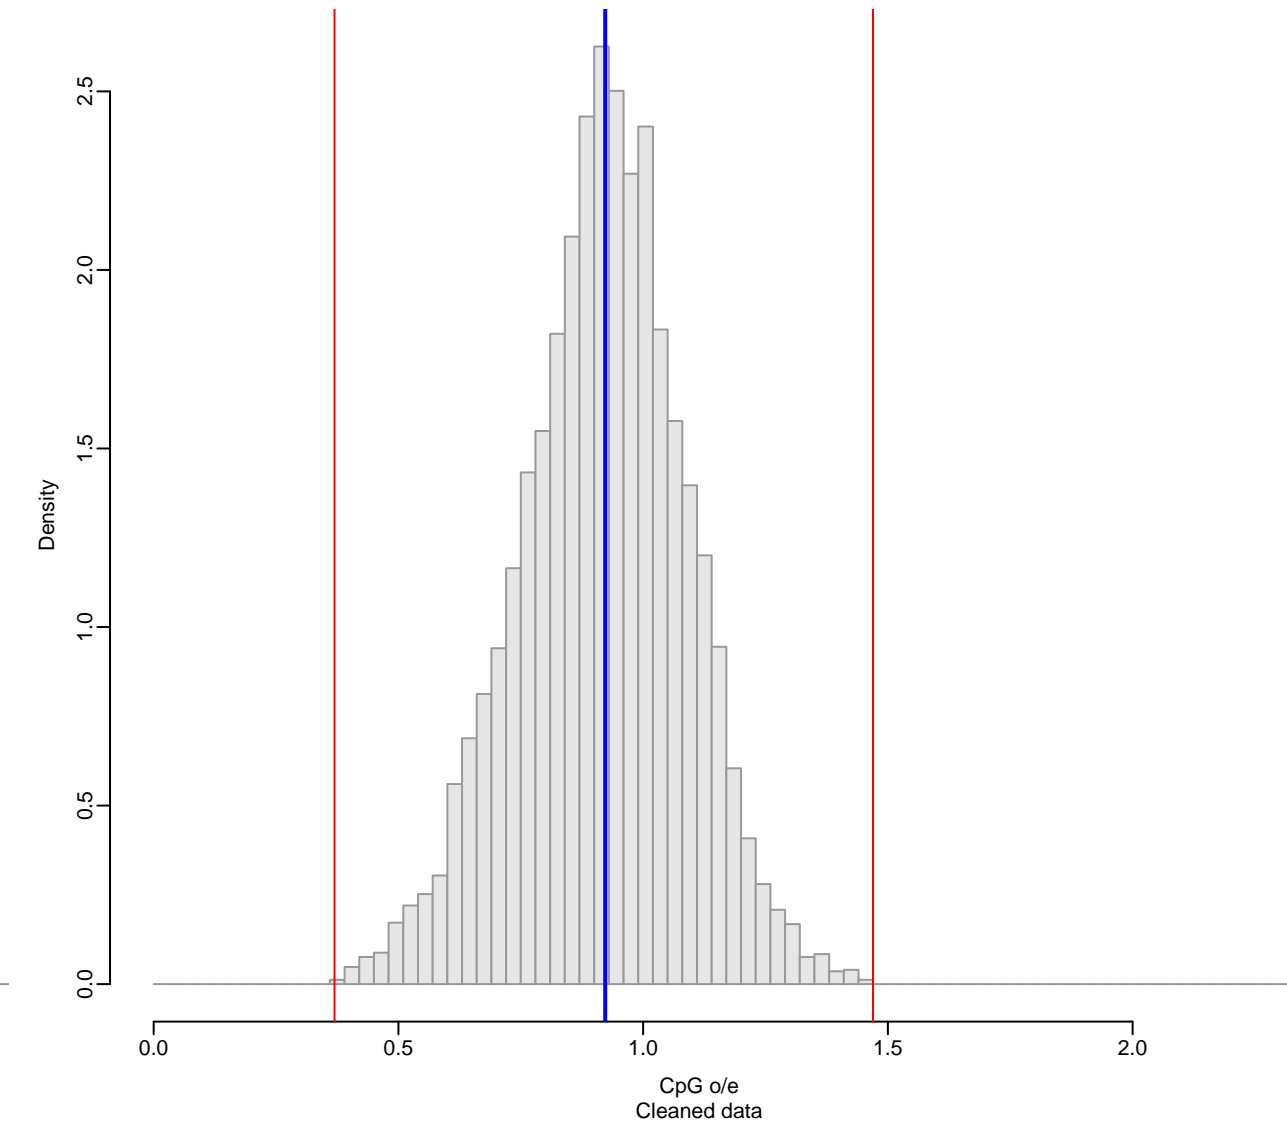

Fusarium\_sporotrichioides

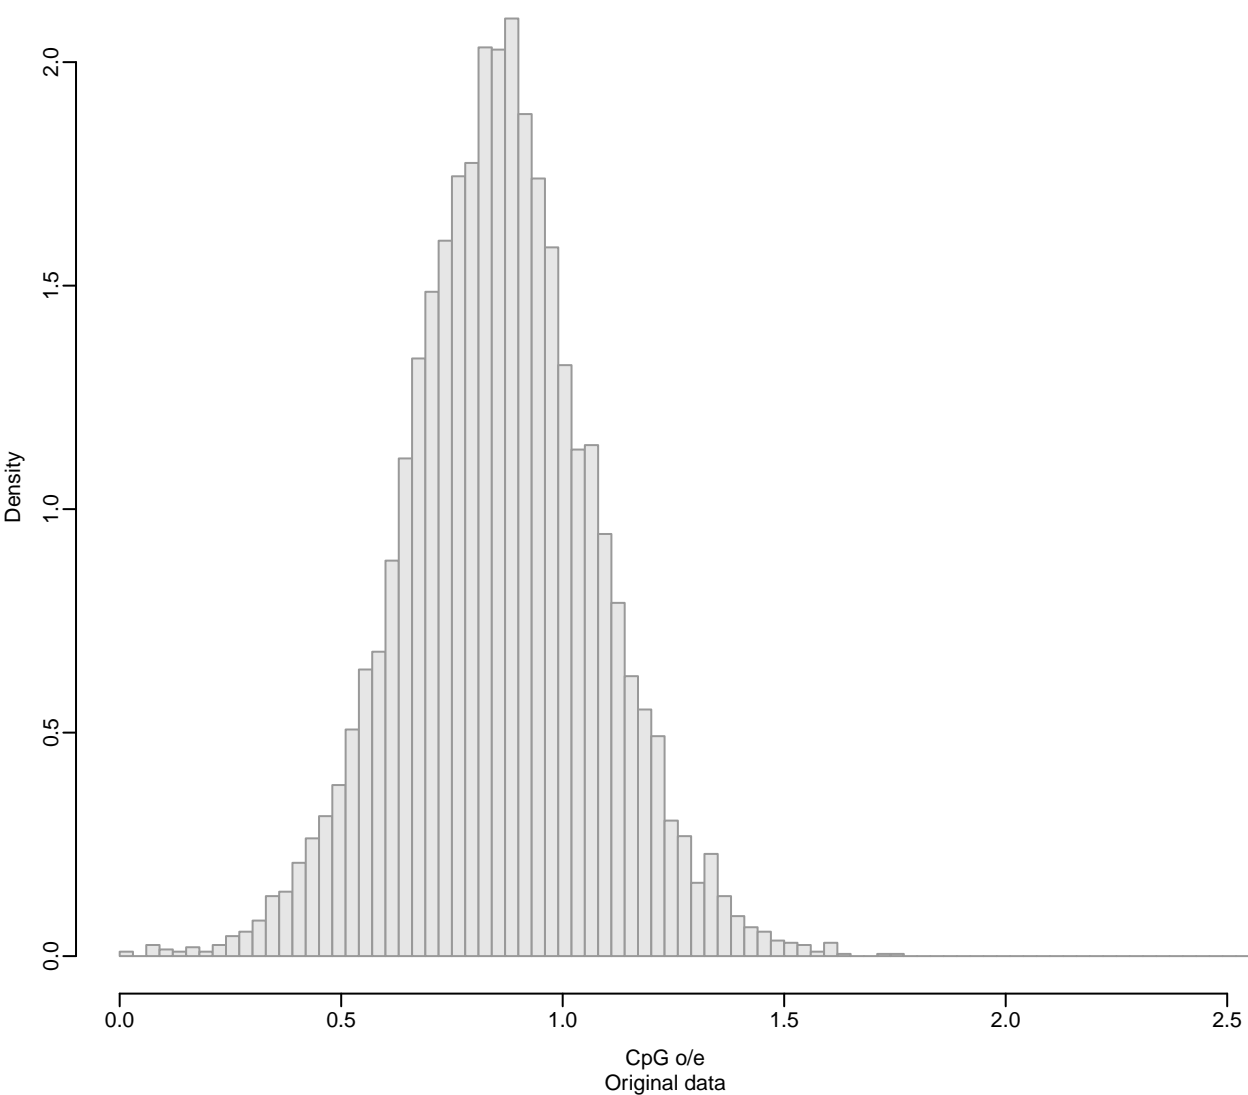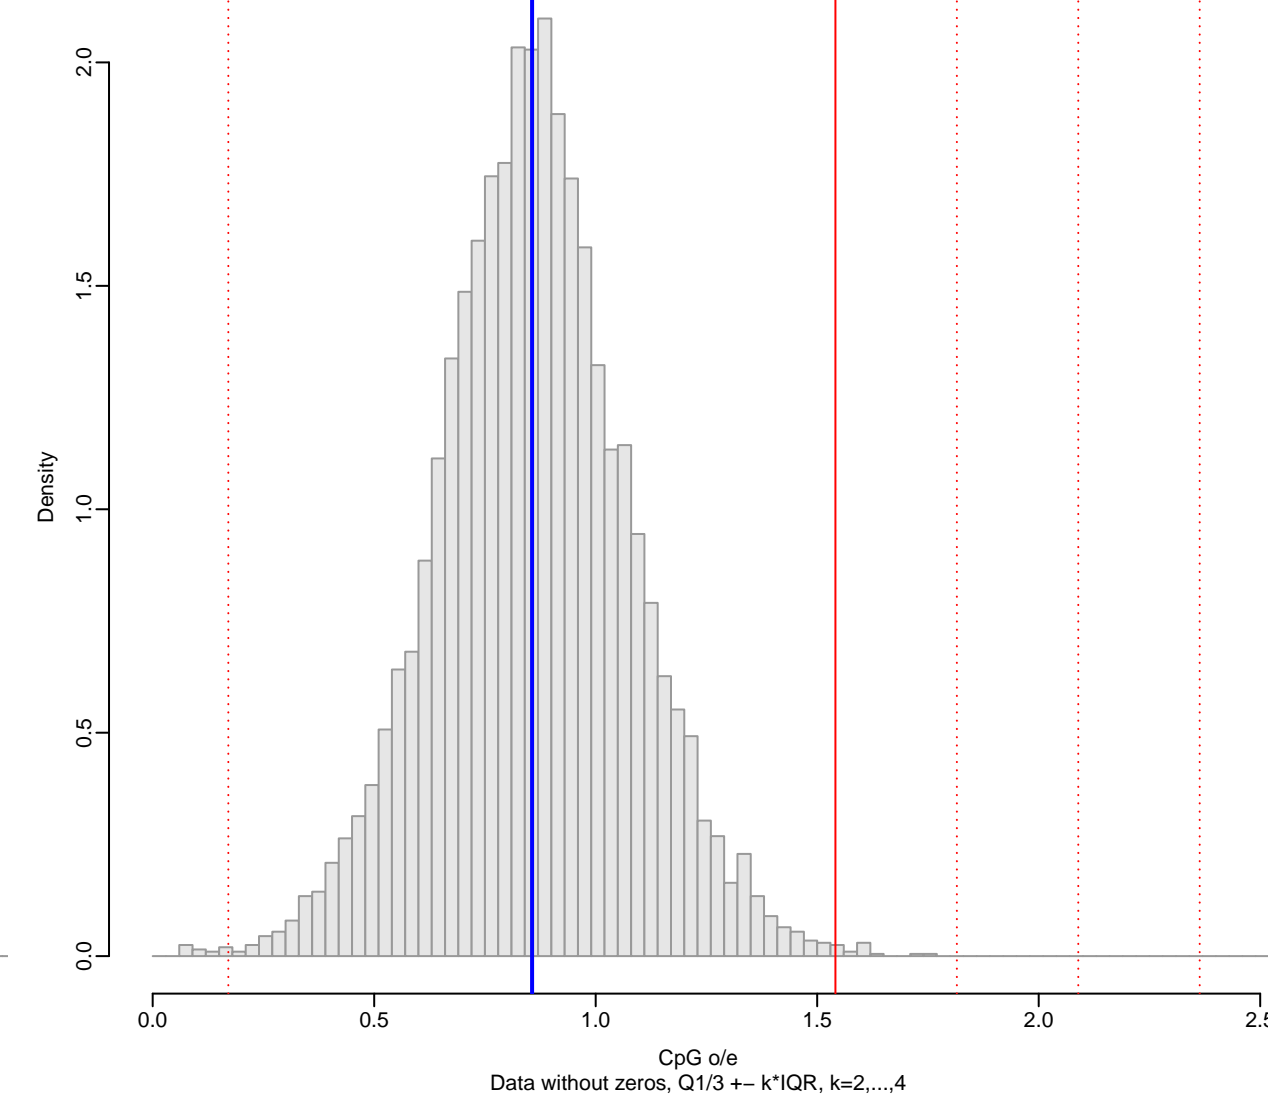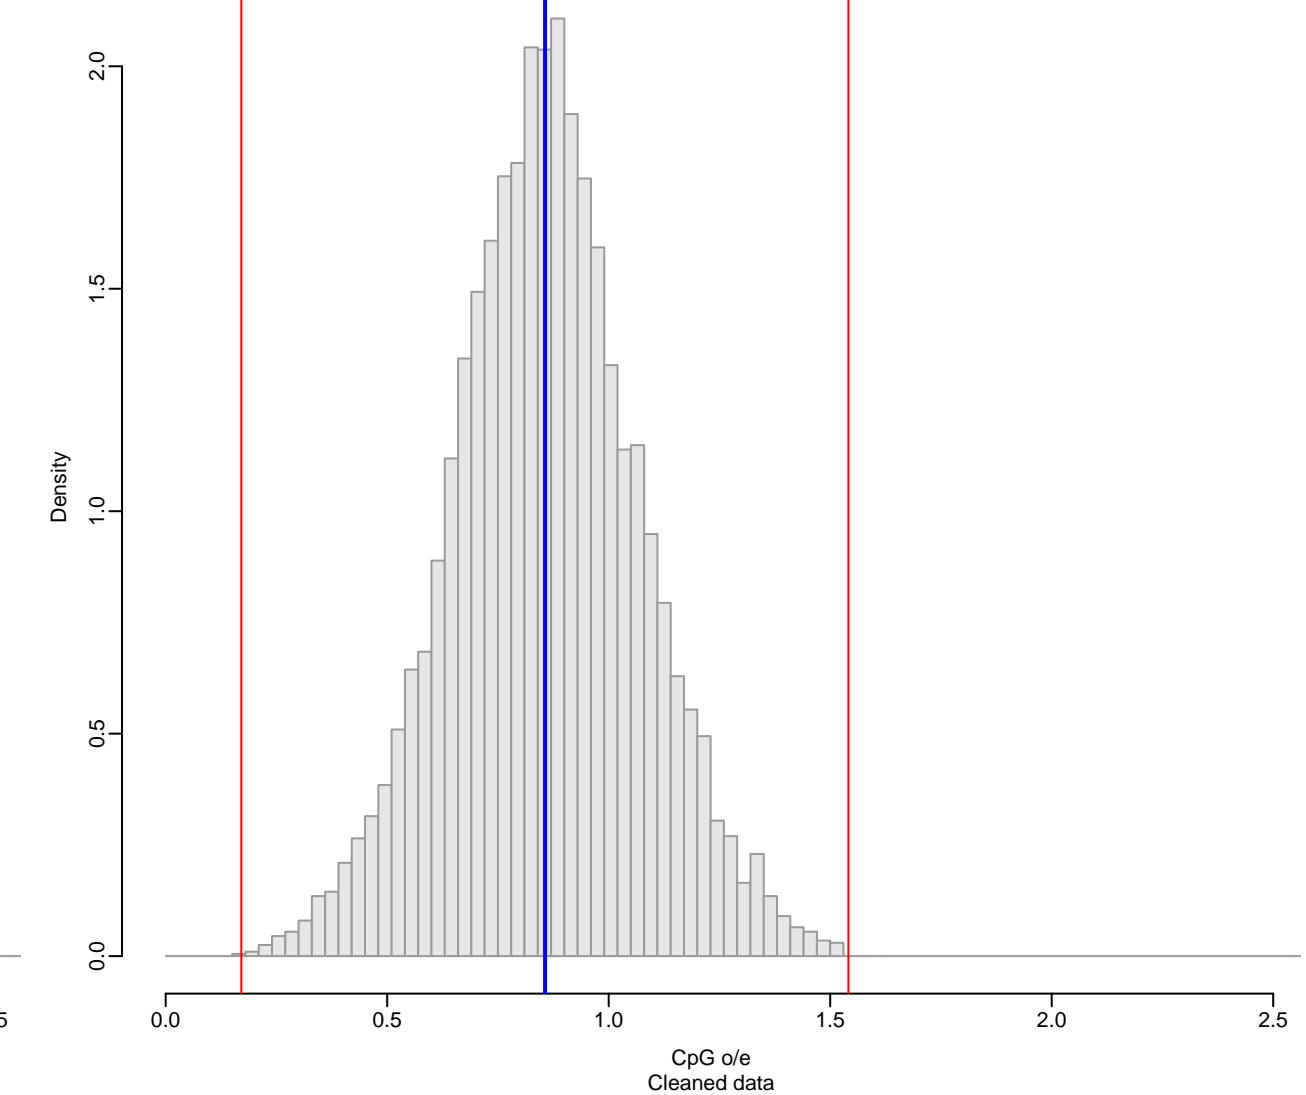

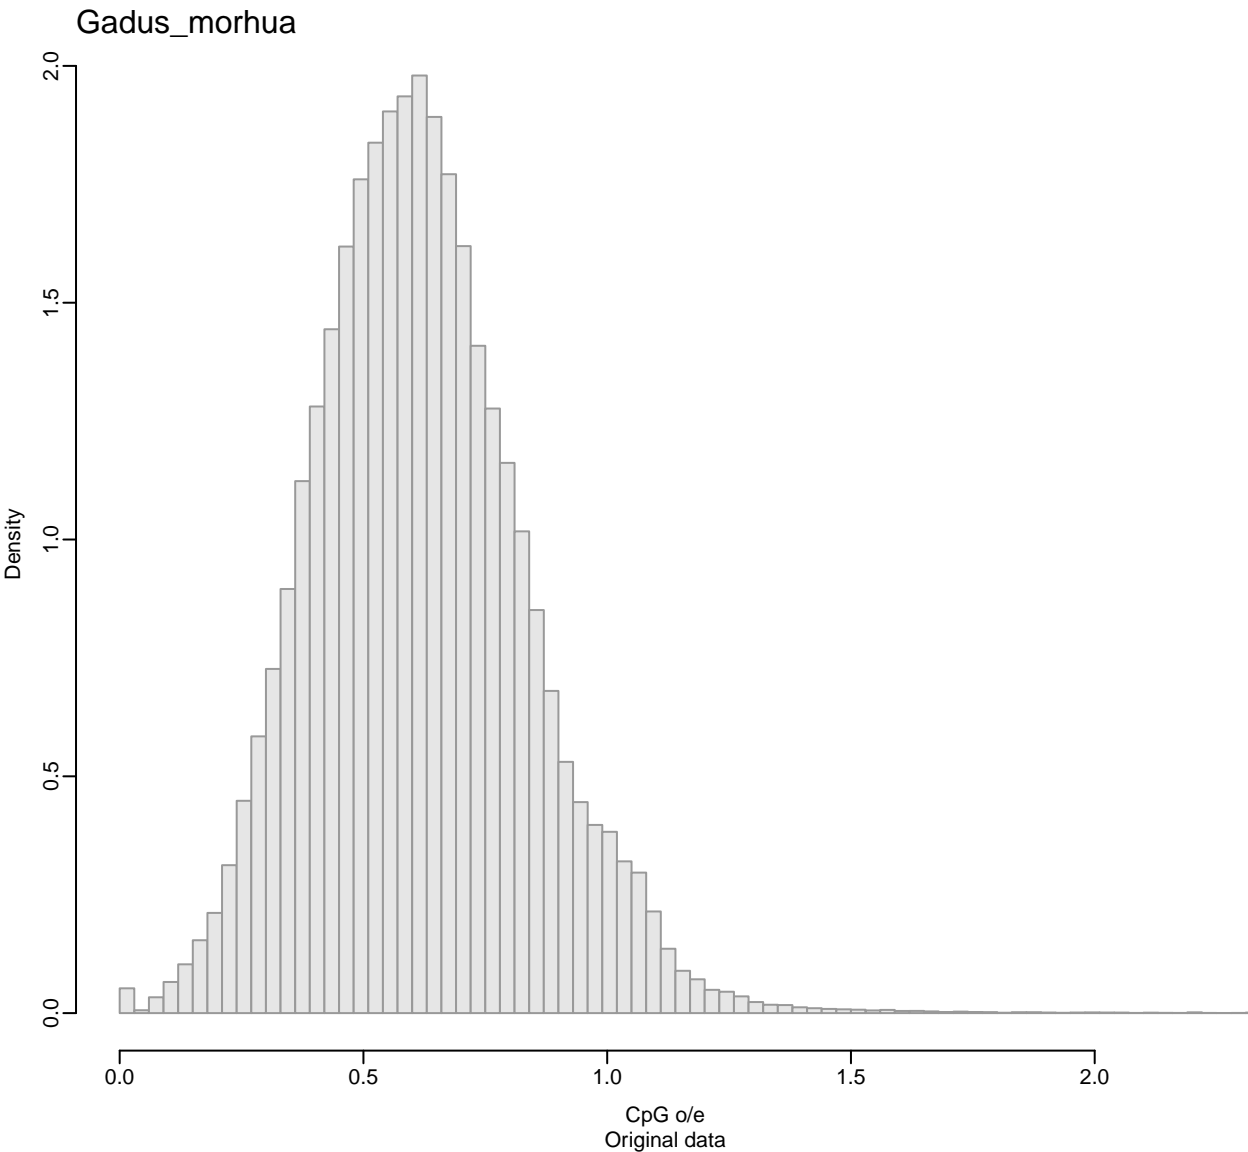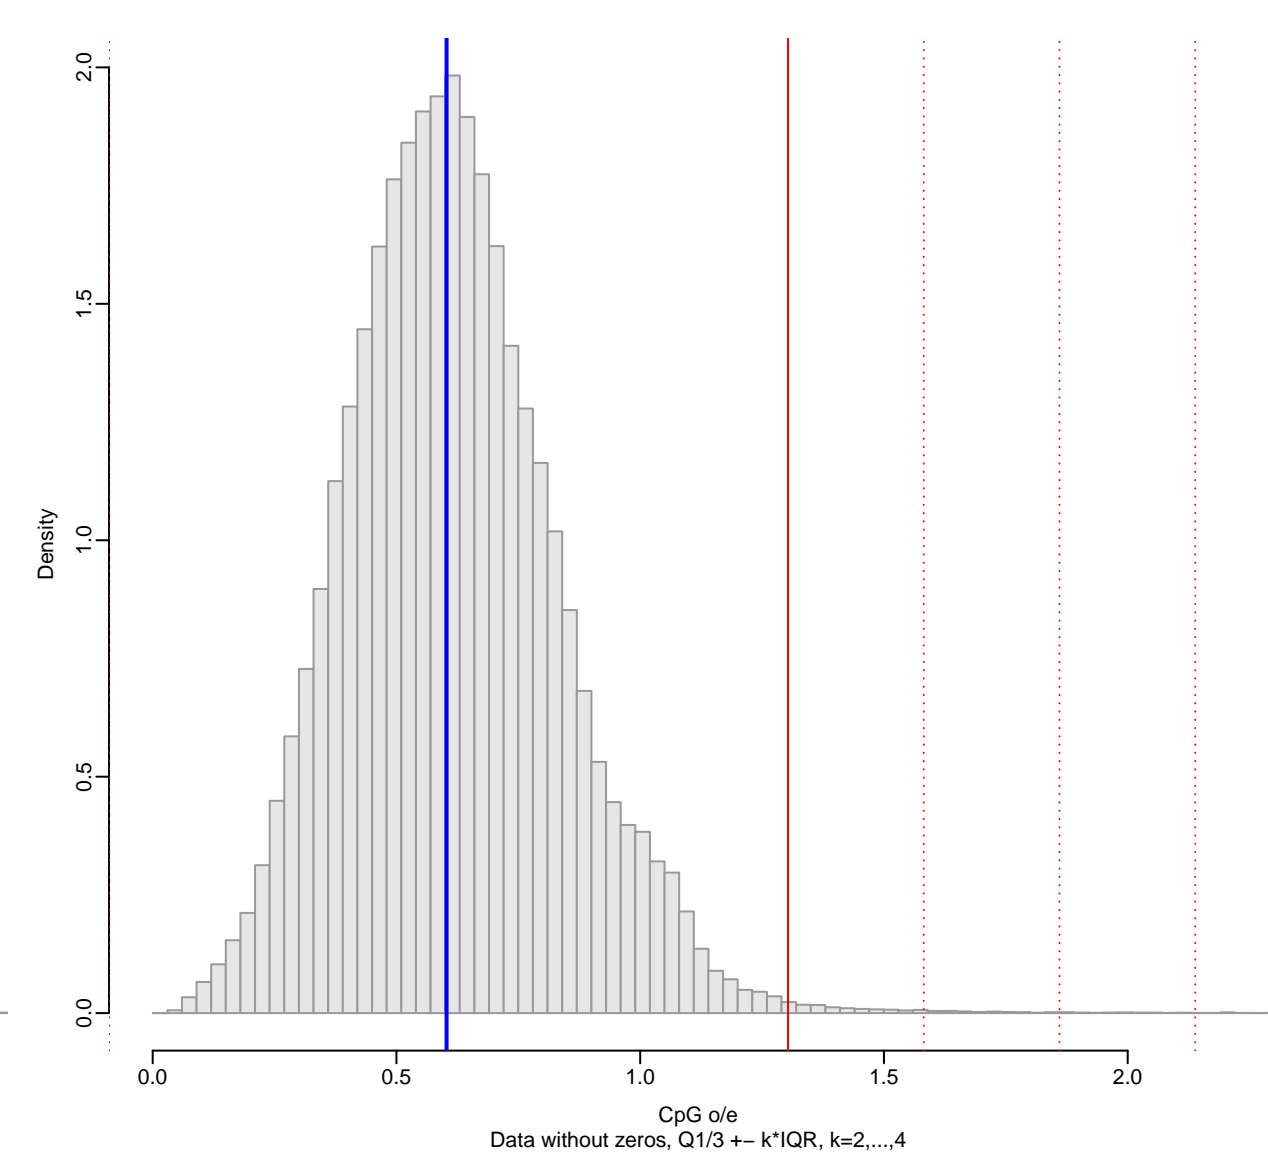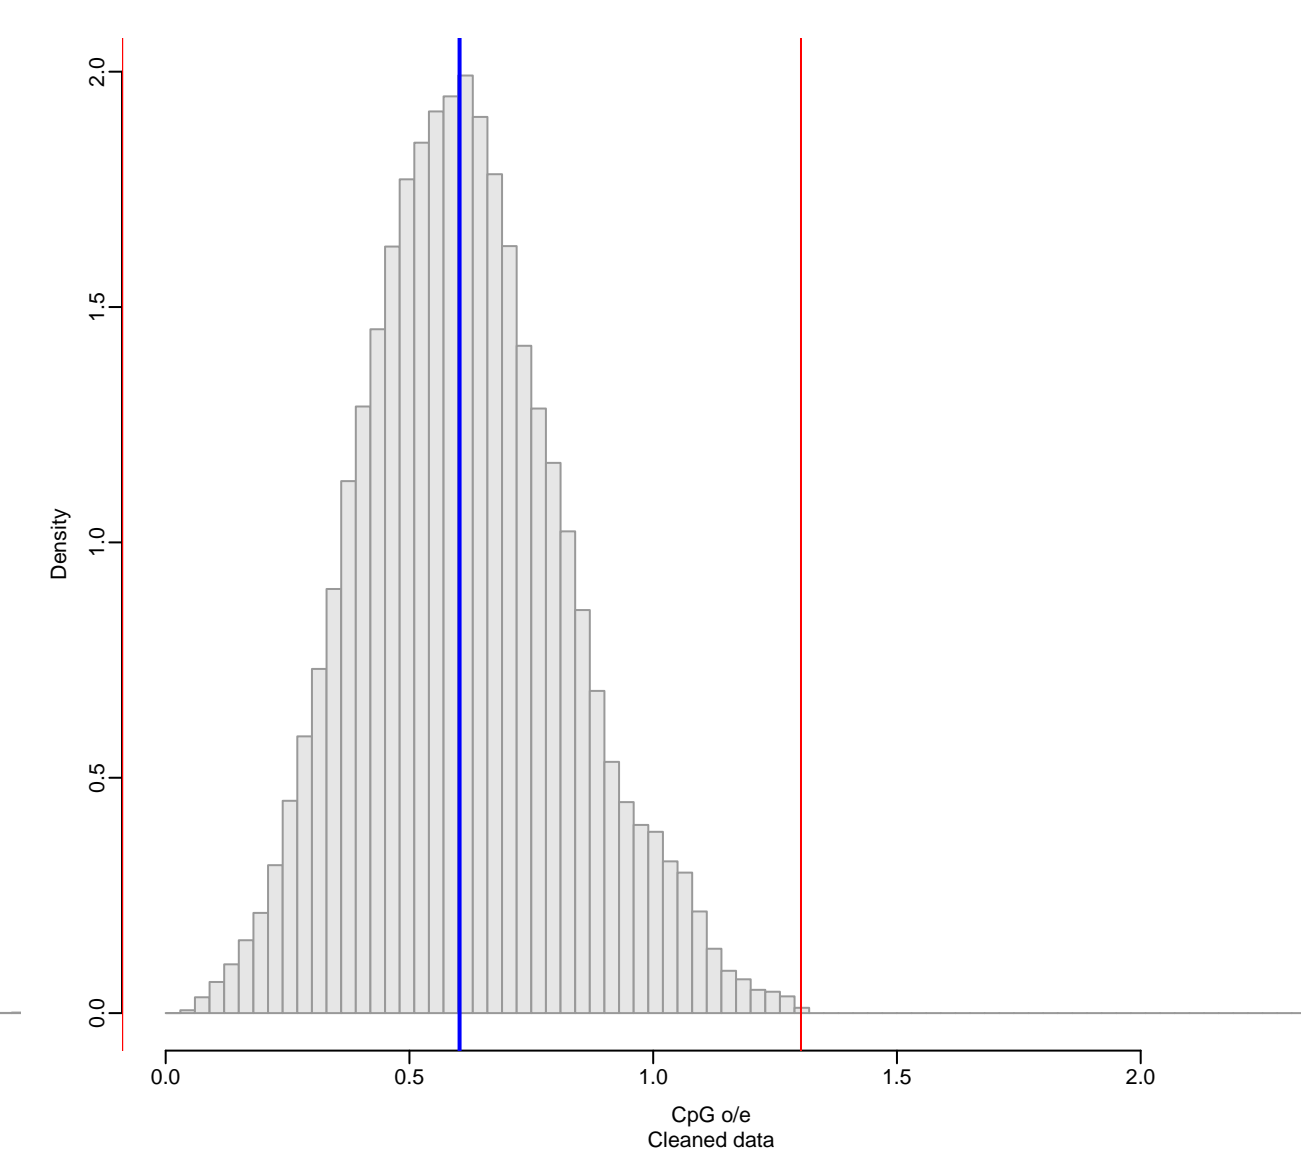



Gallus\_gallus

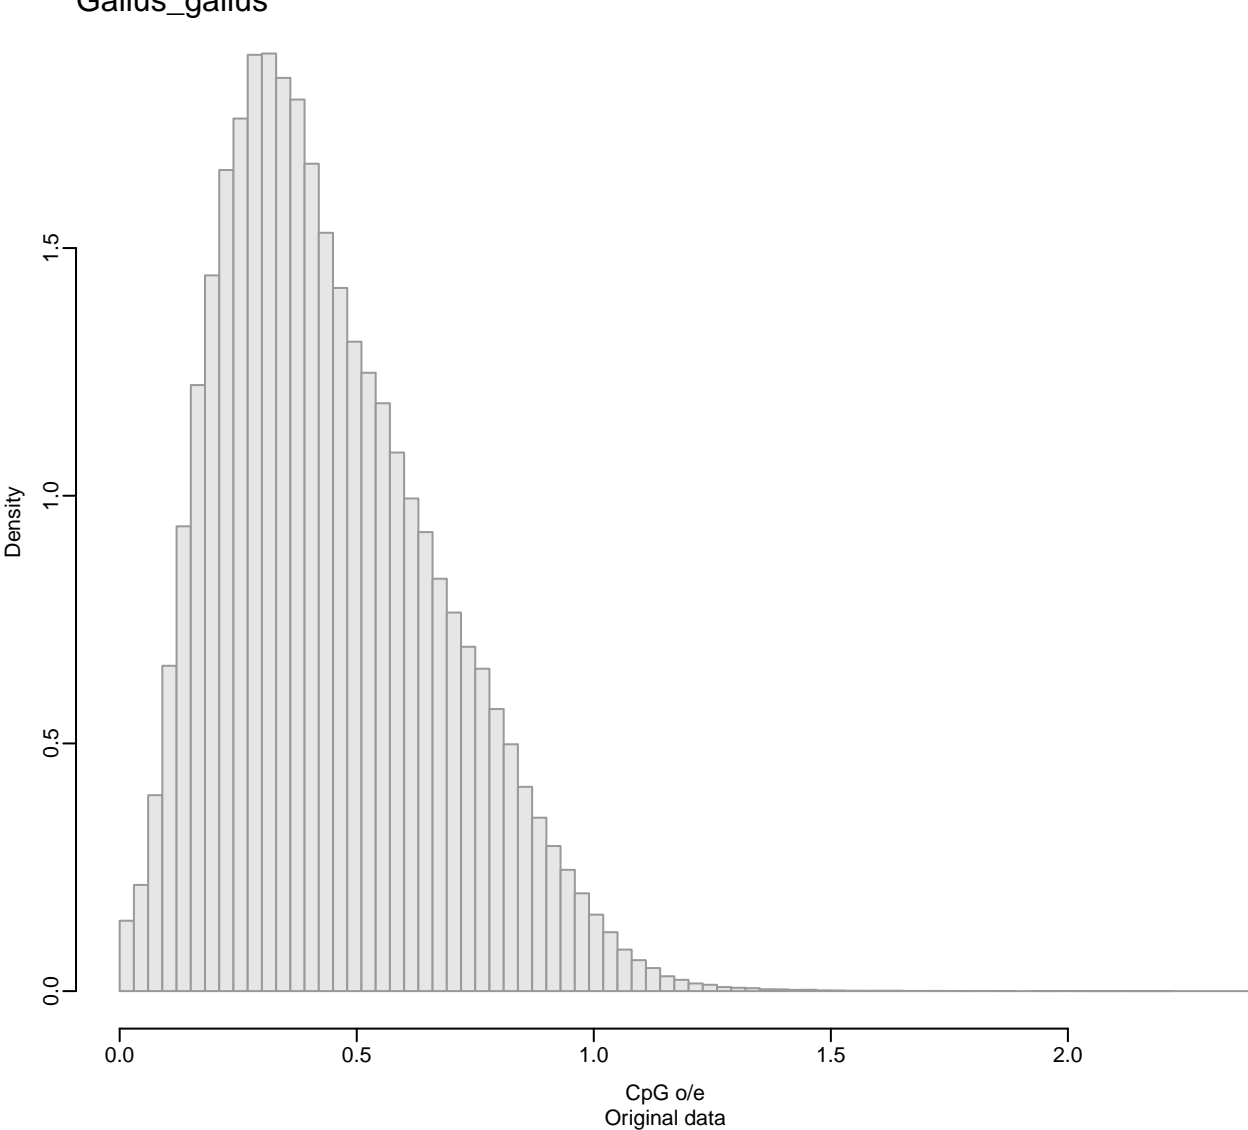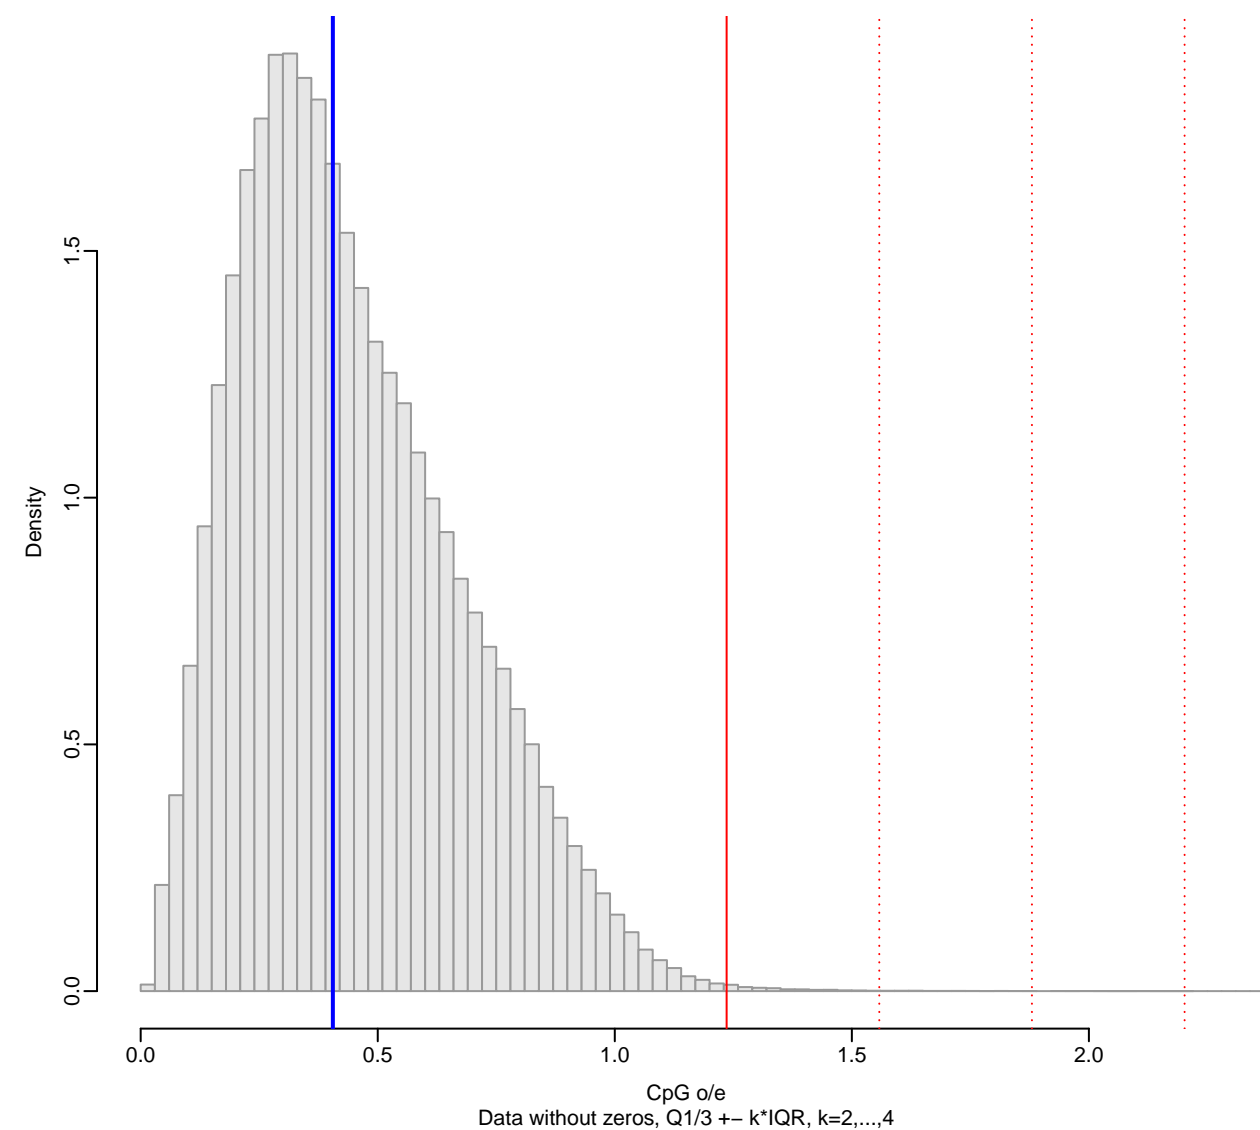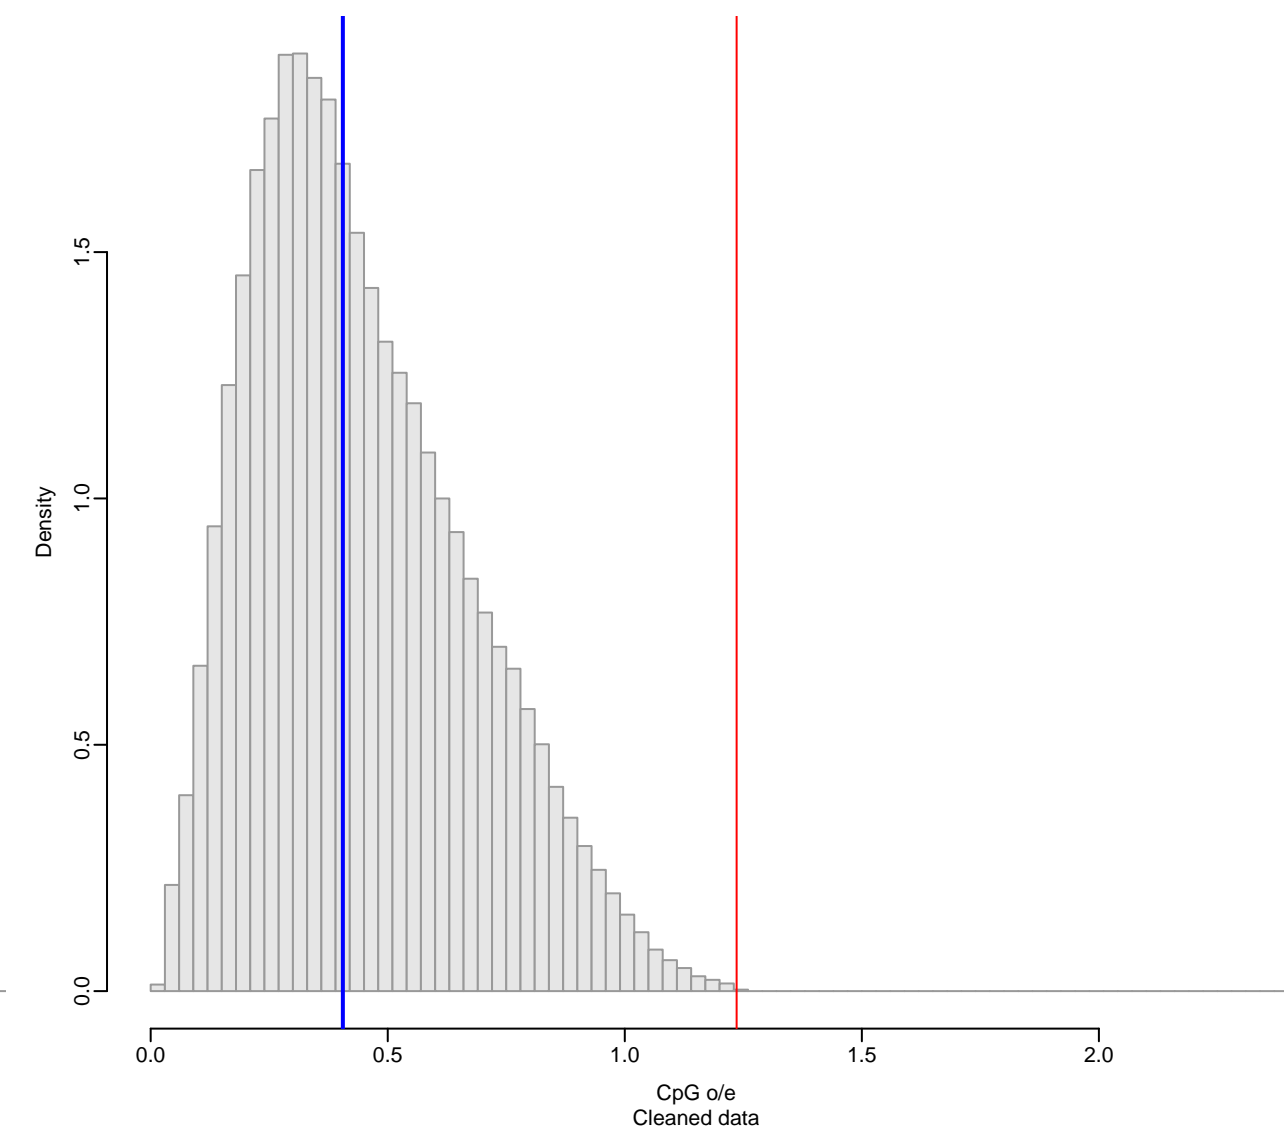

# Gammarus\_pulex

Density

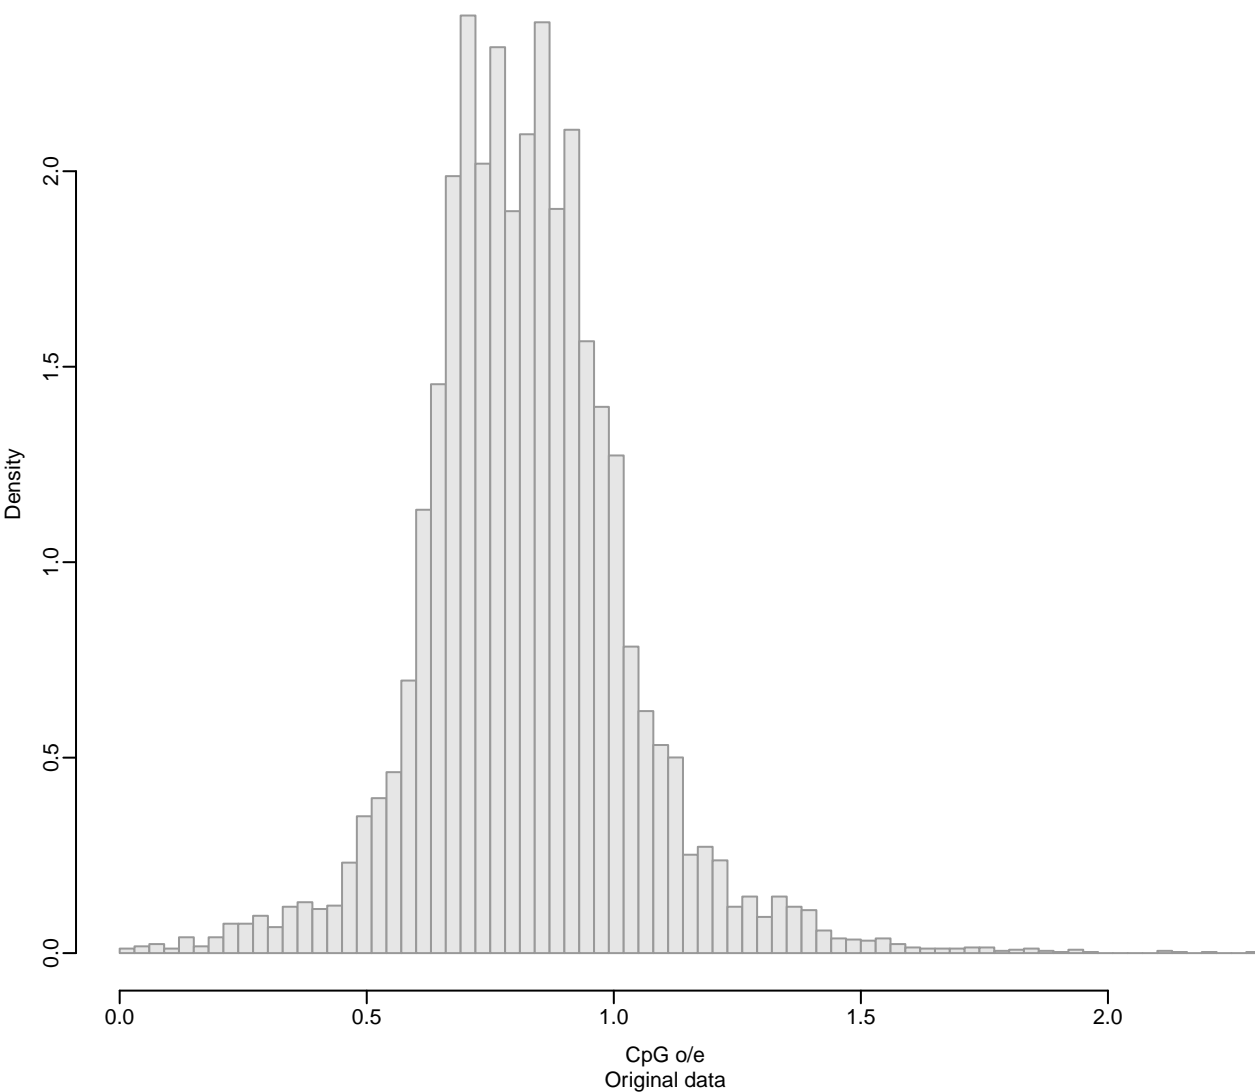

Density

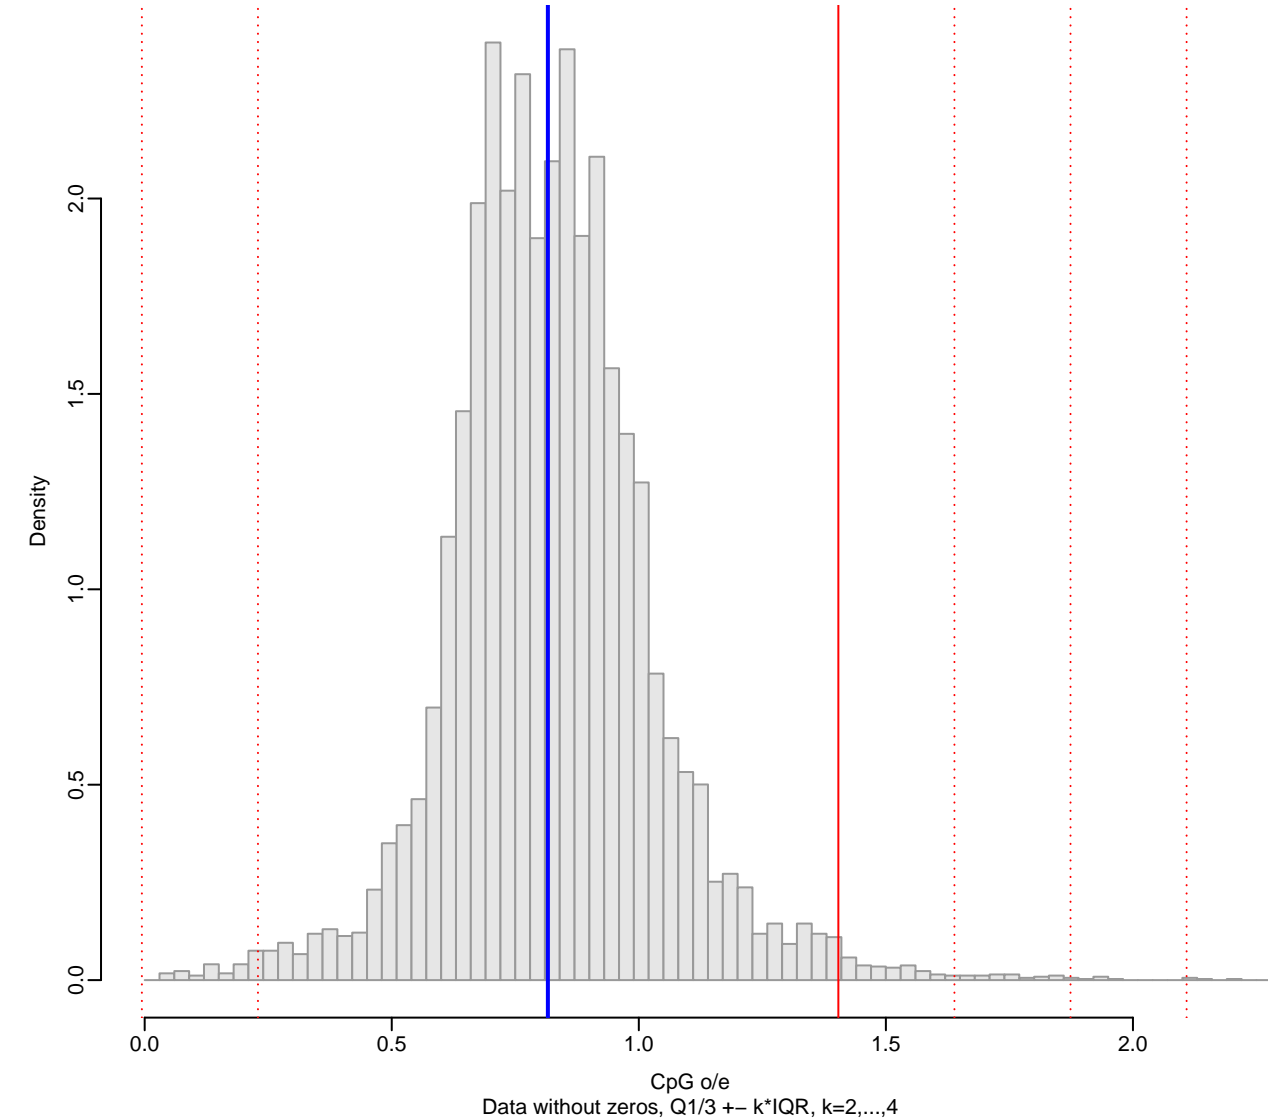

Density

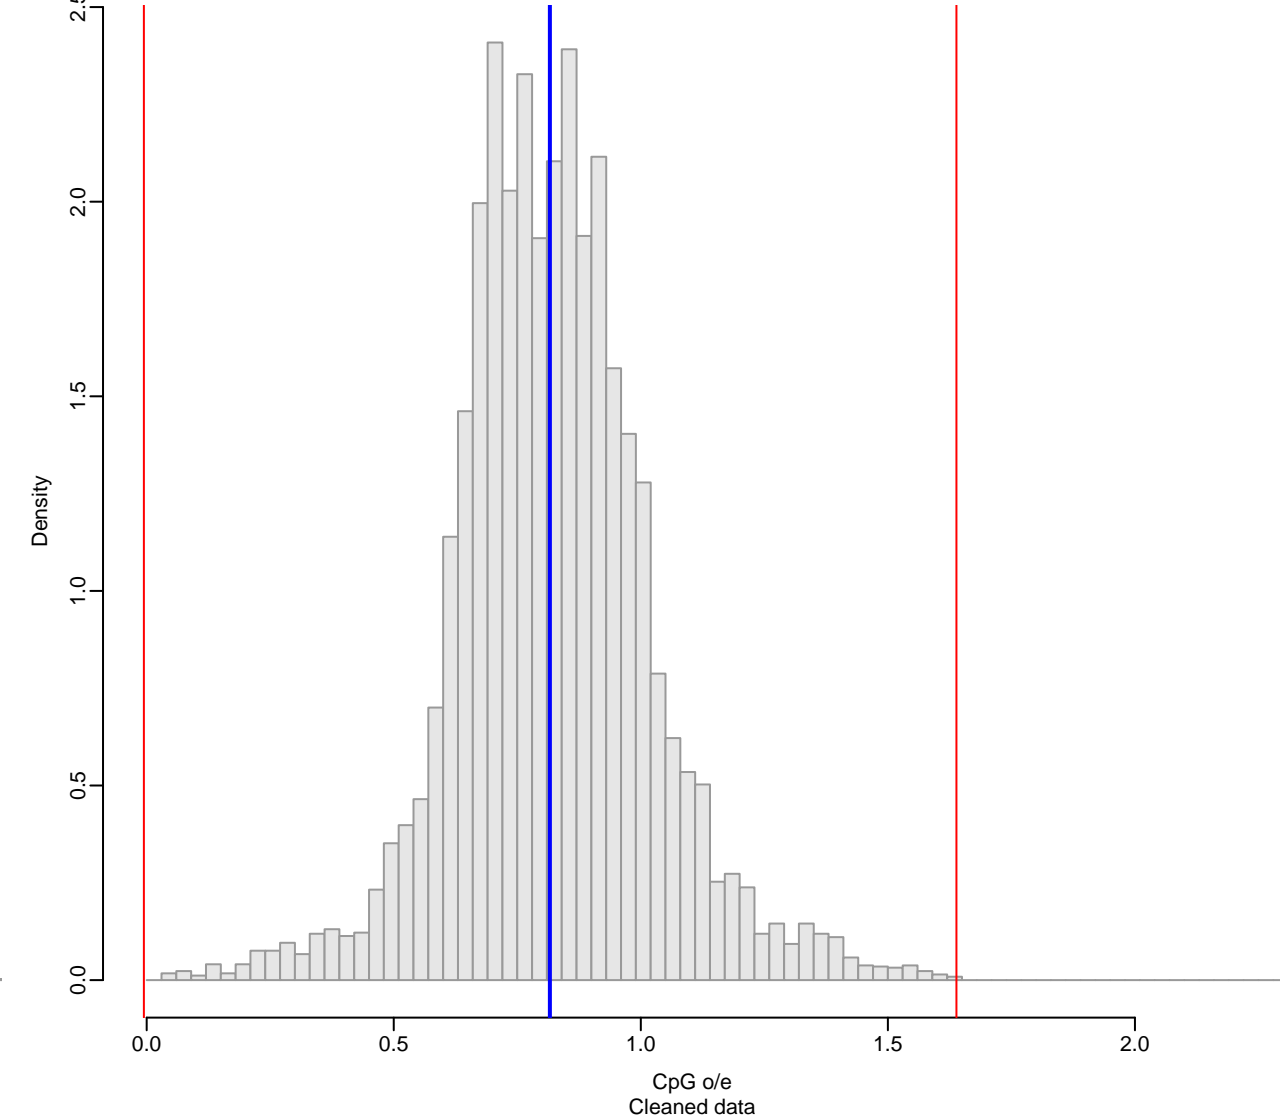

# Gasterosteus\_aculeatus

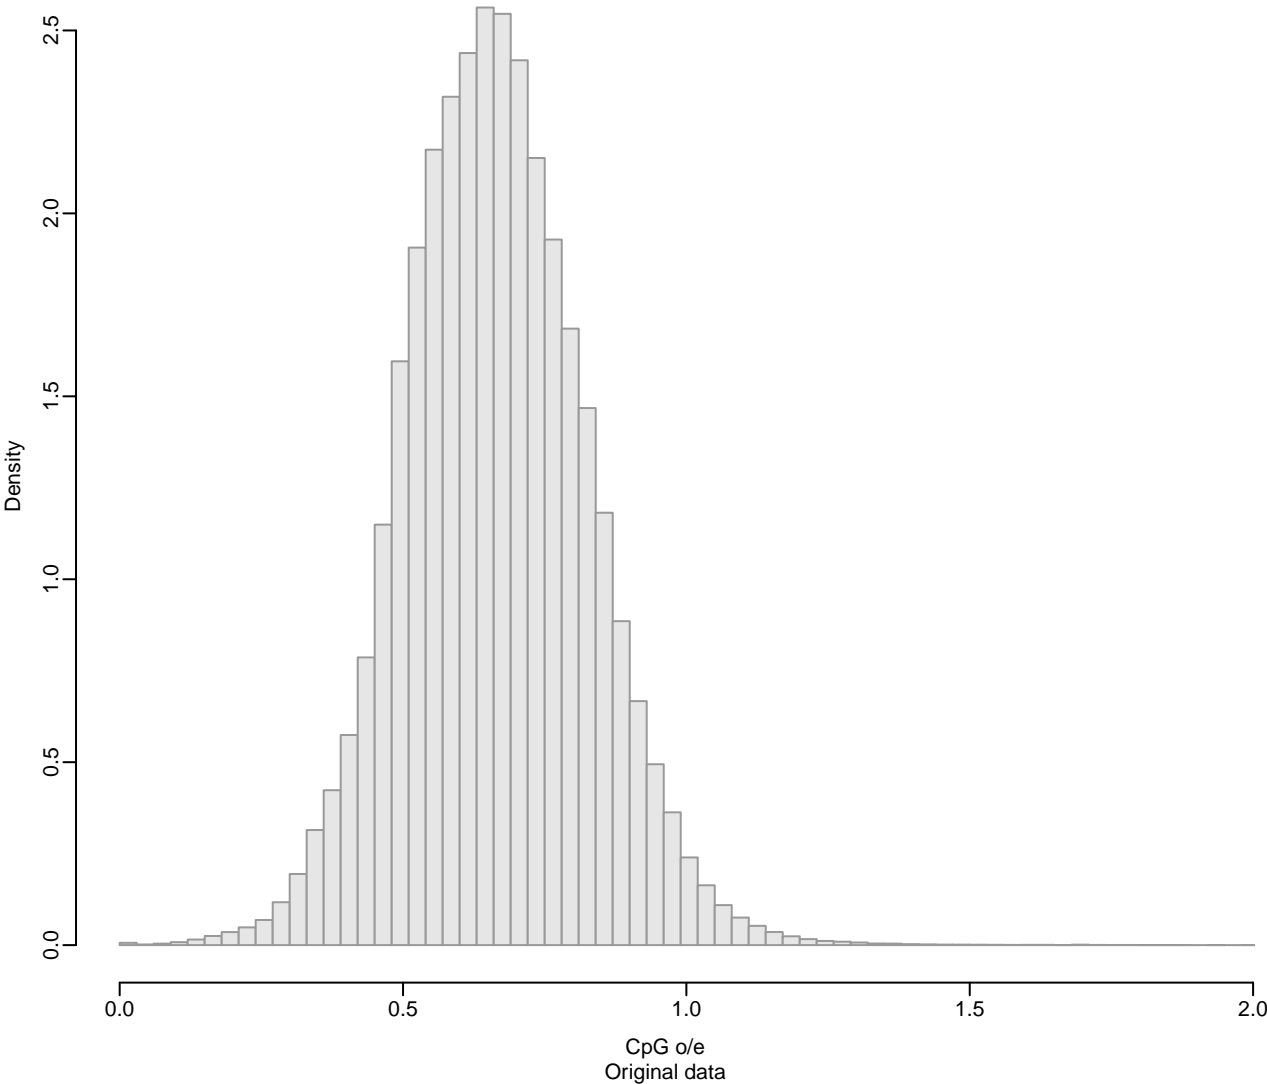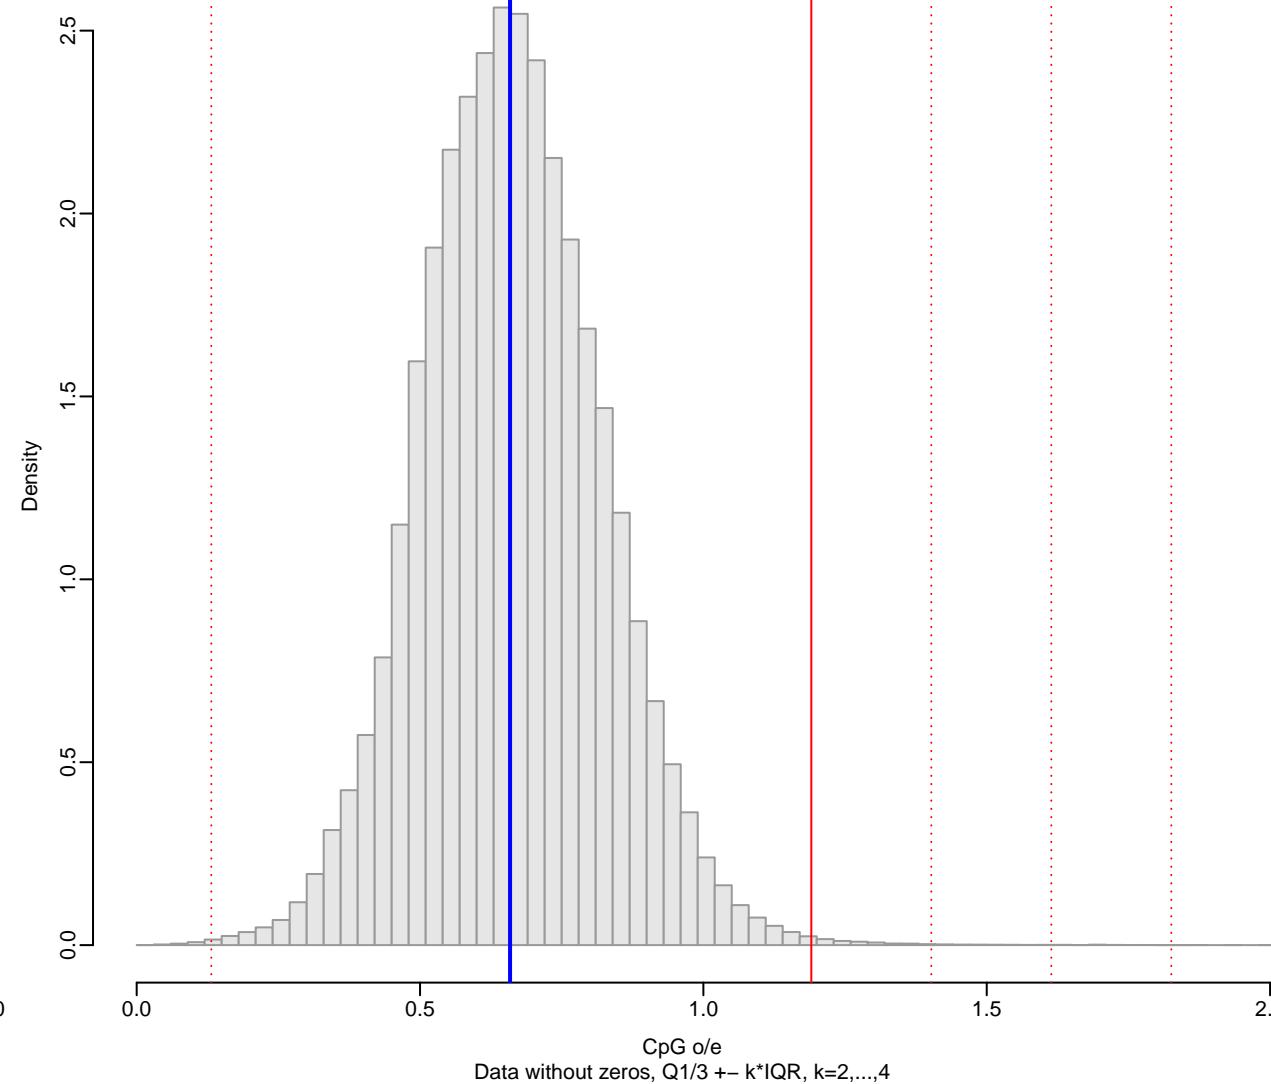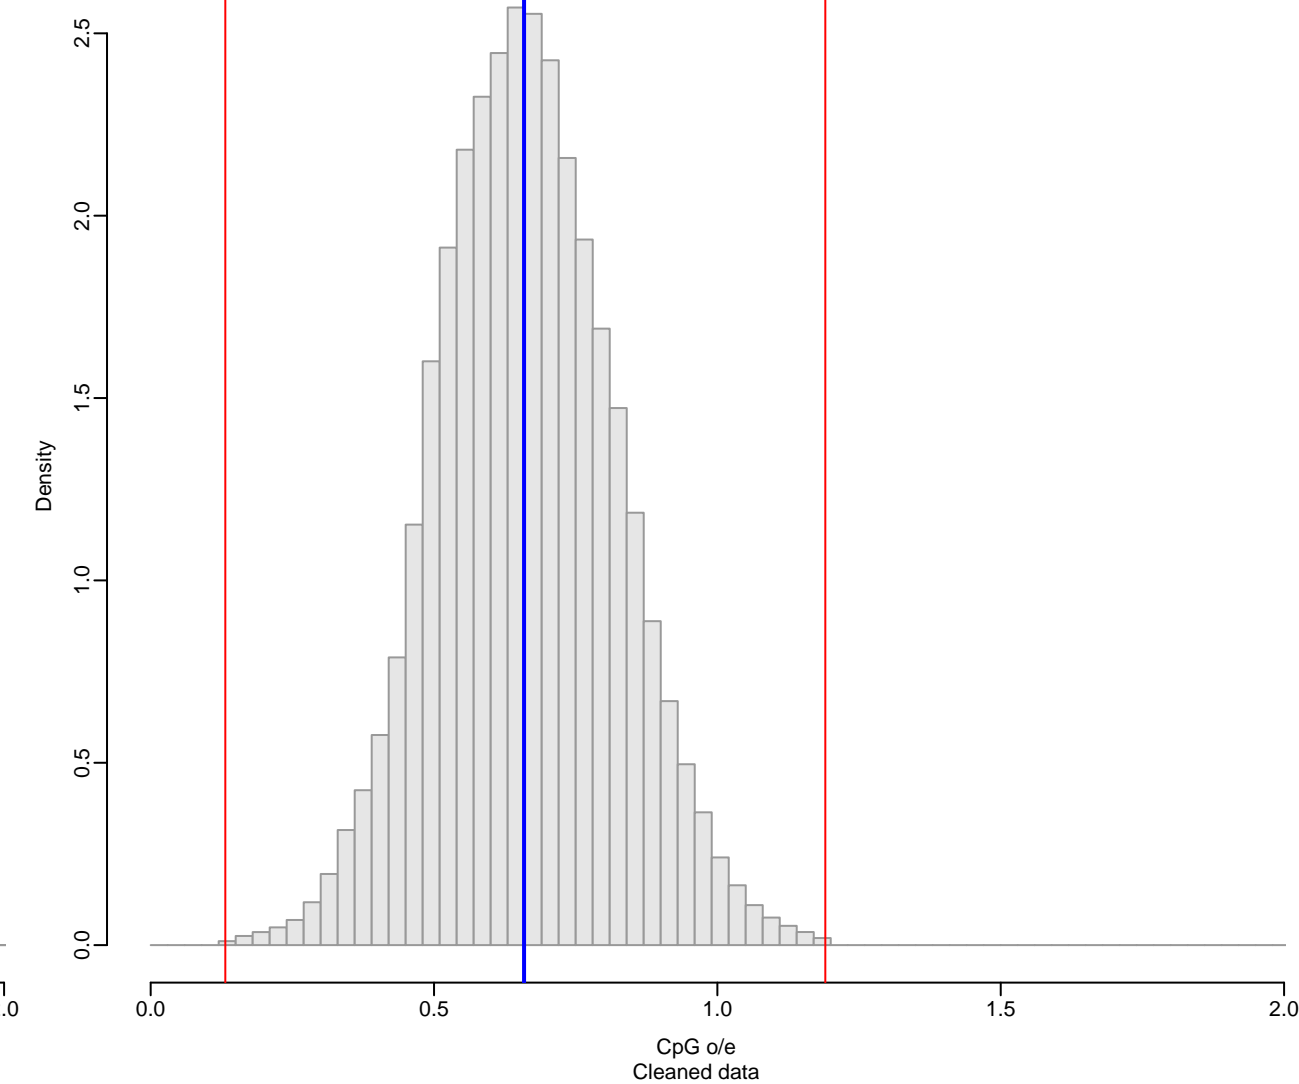

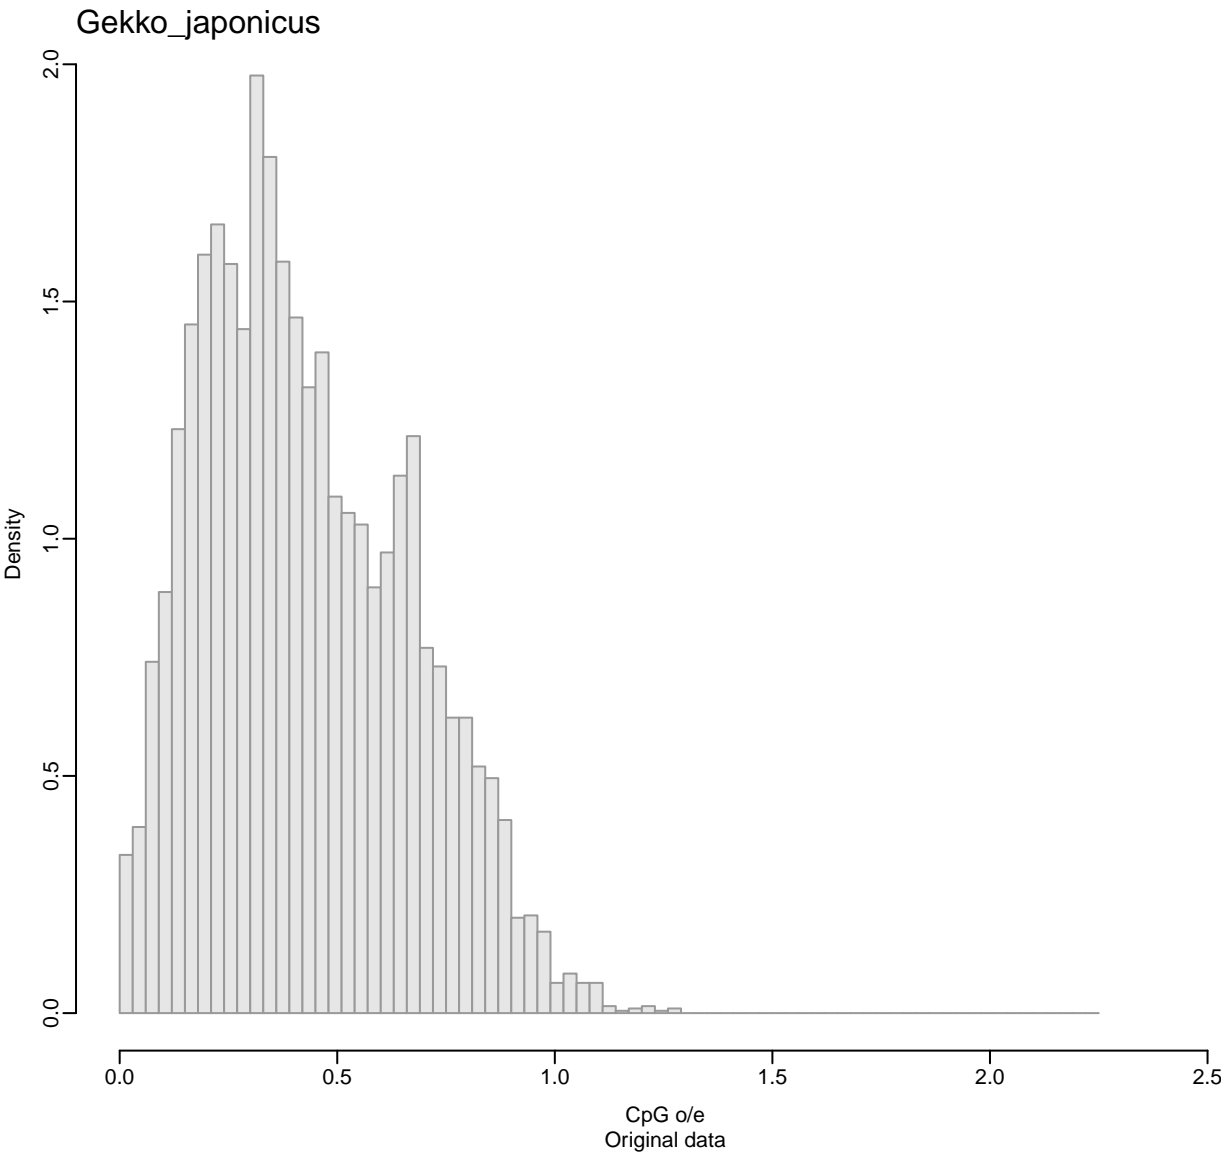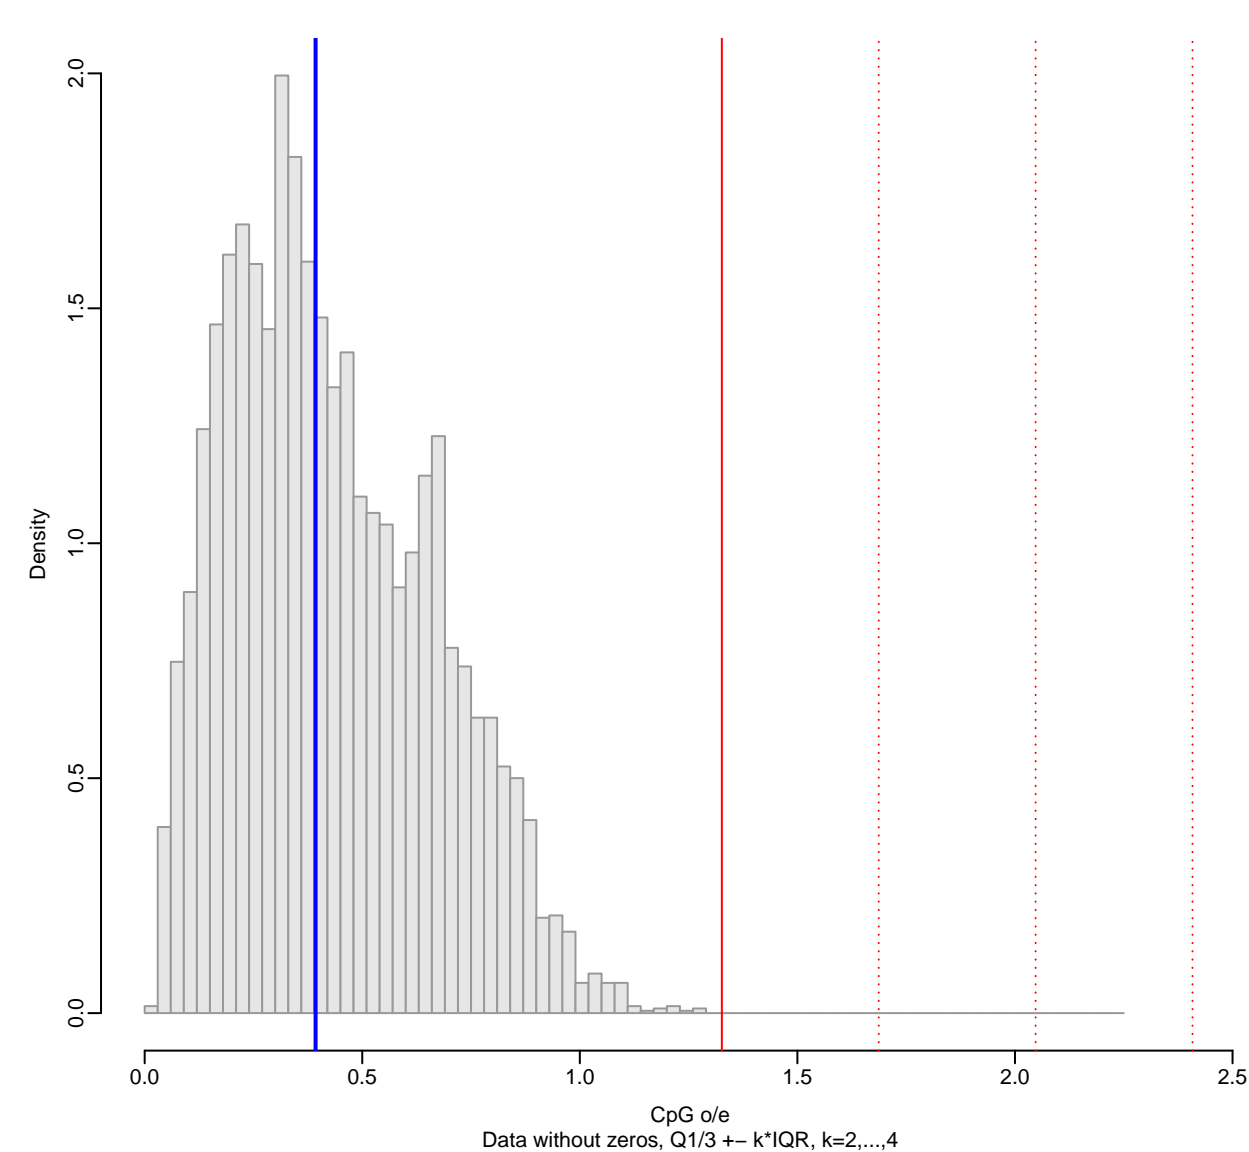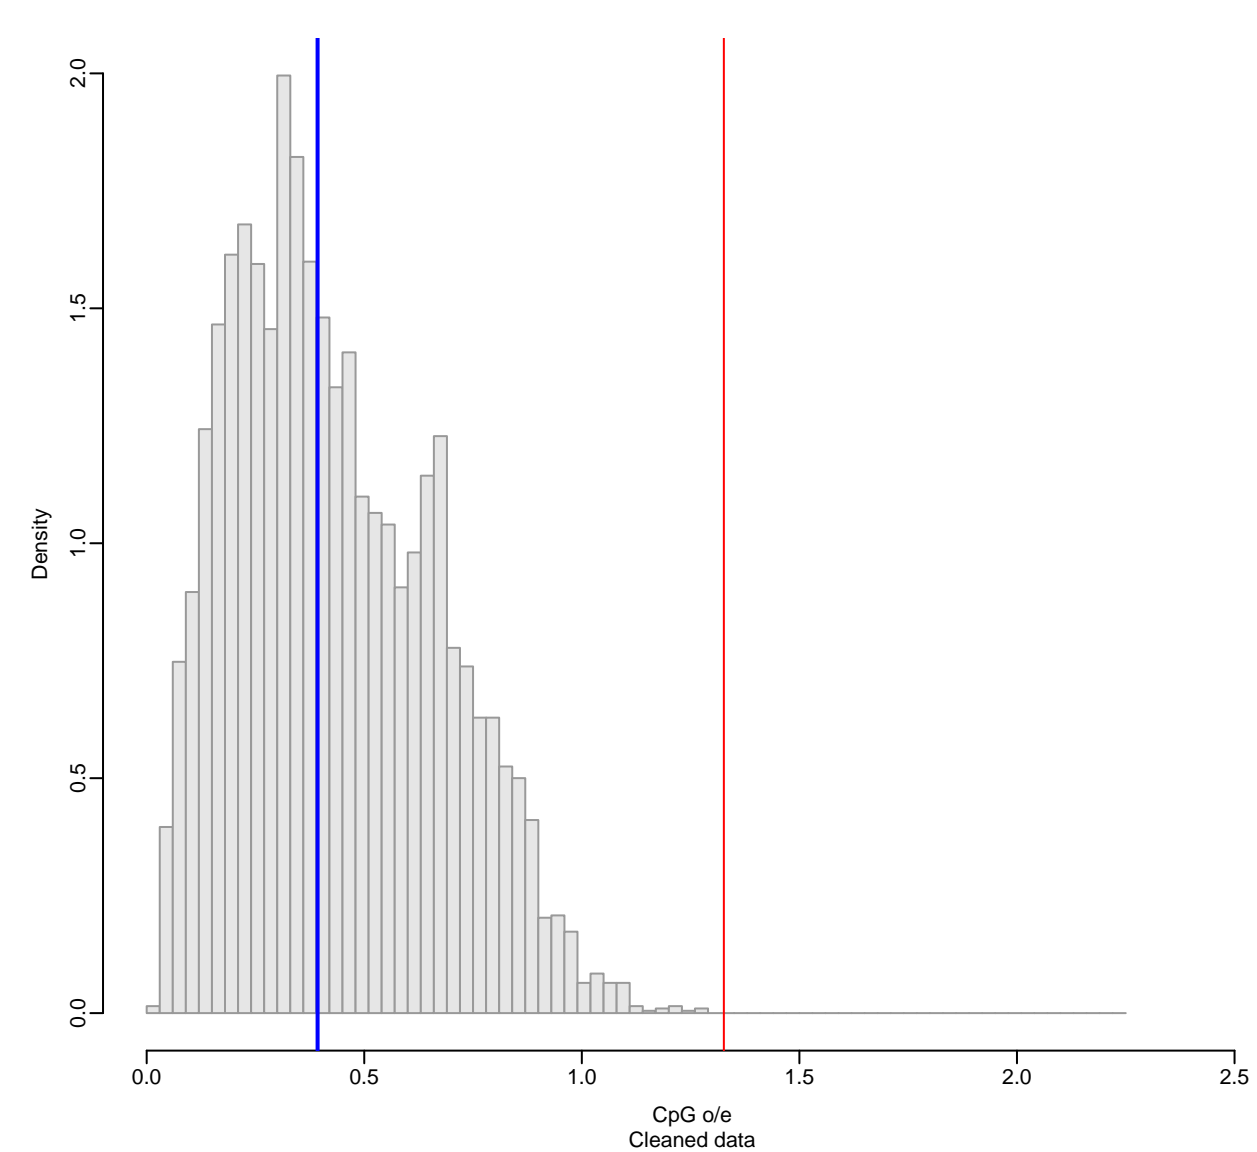

Giardia\_intestinalis

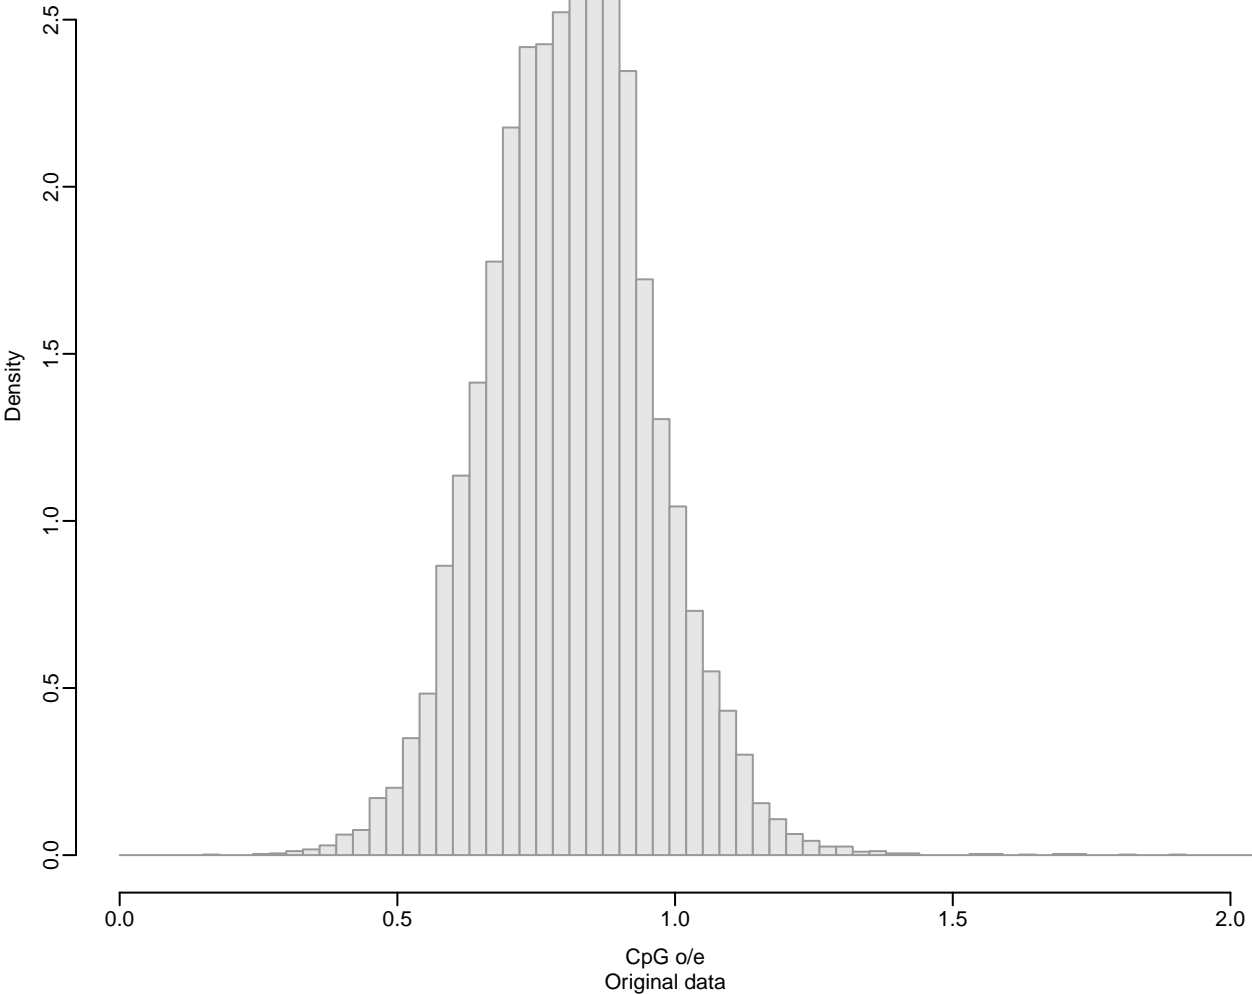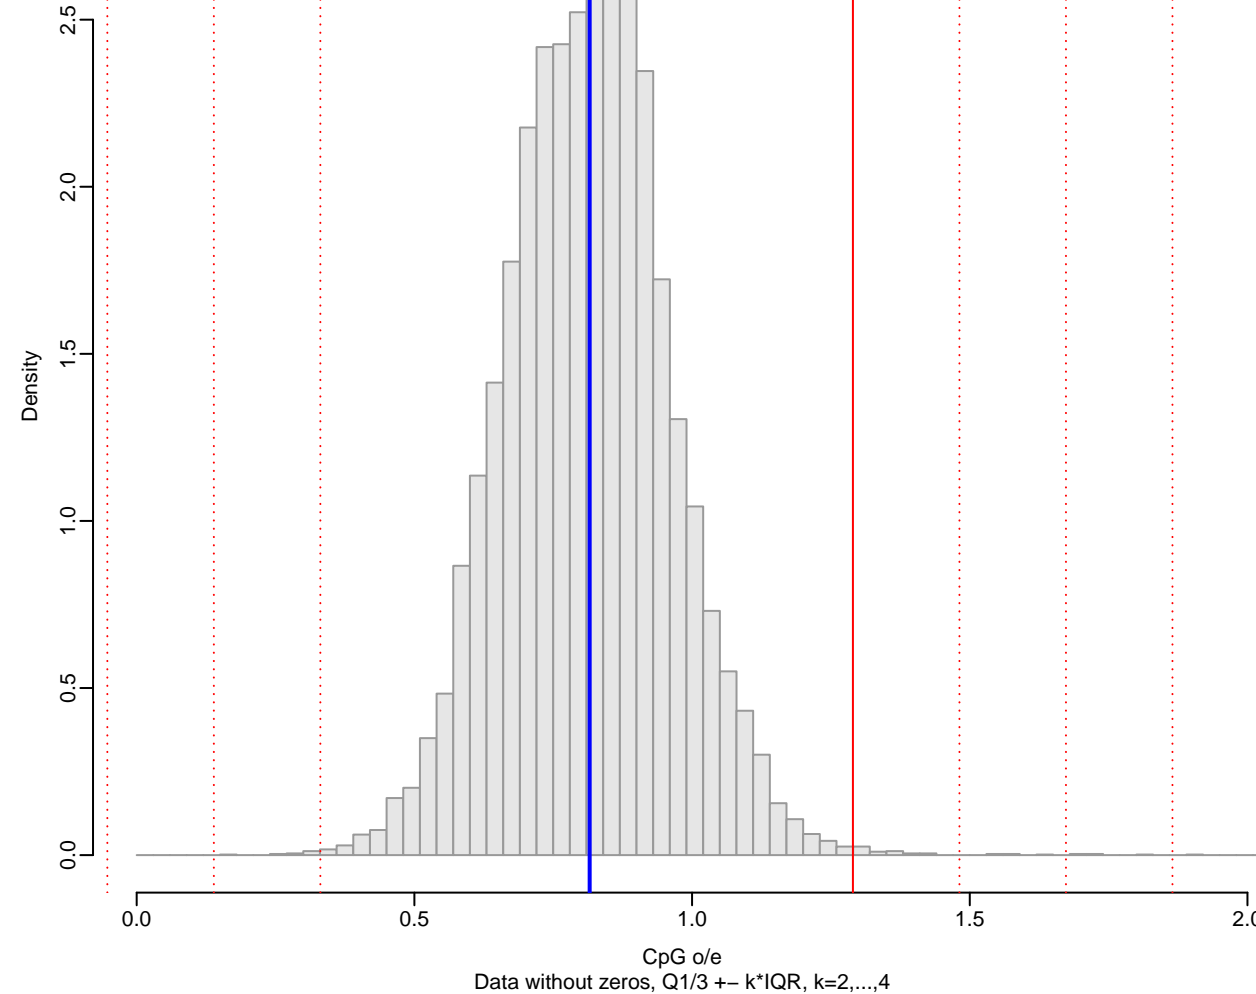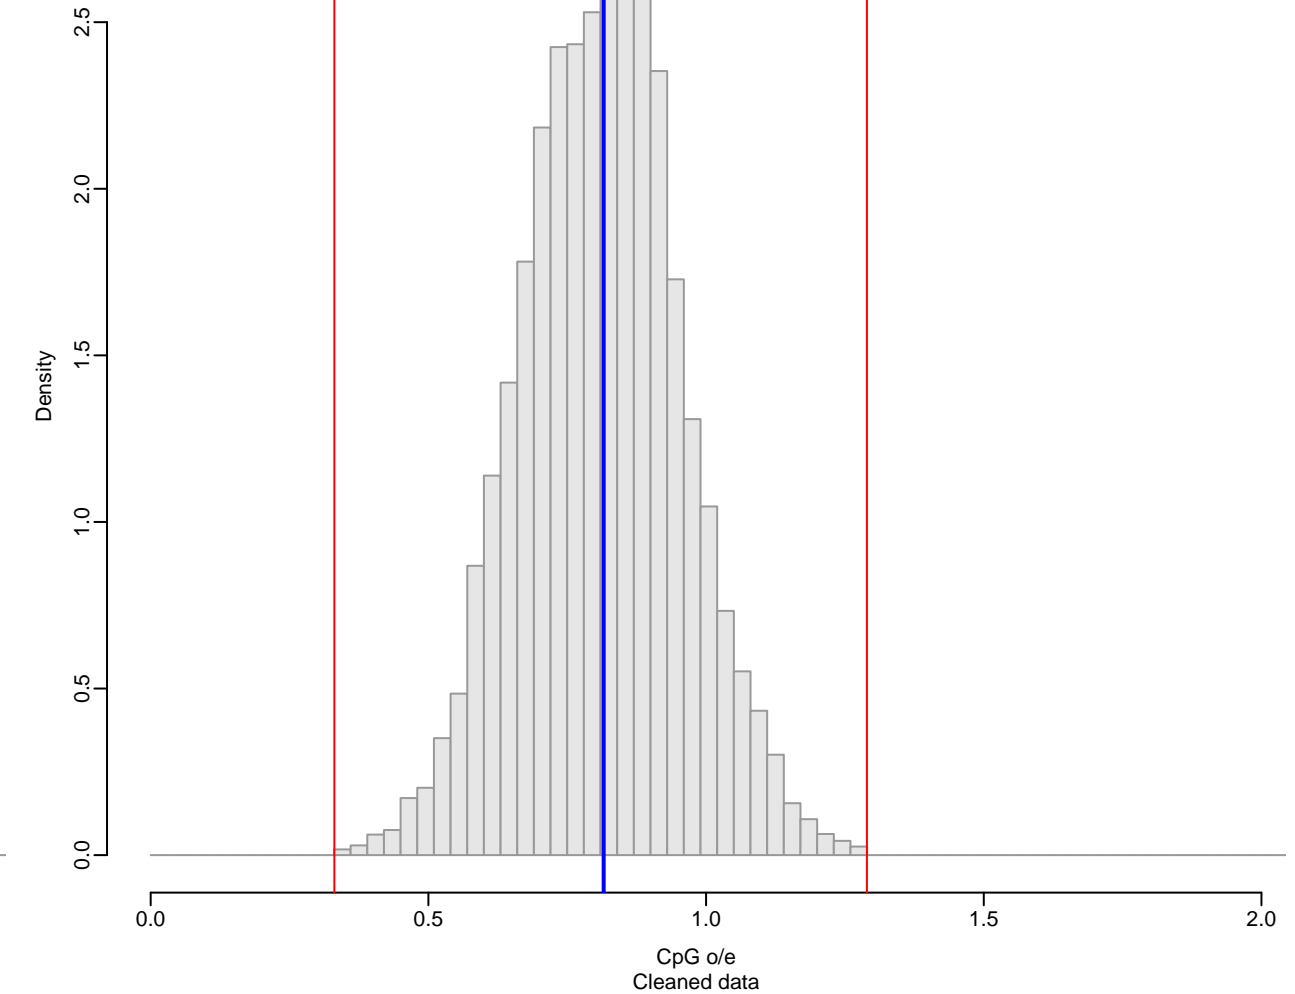

*Gibberella\_moniliformis*

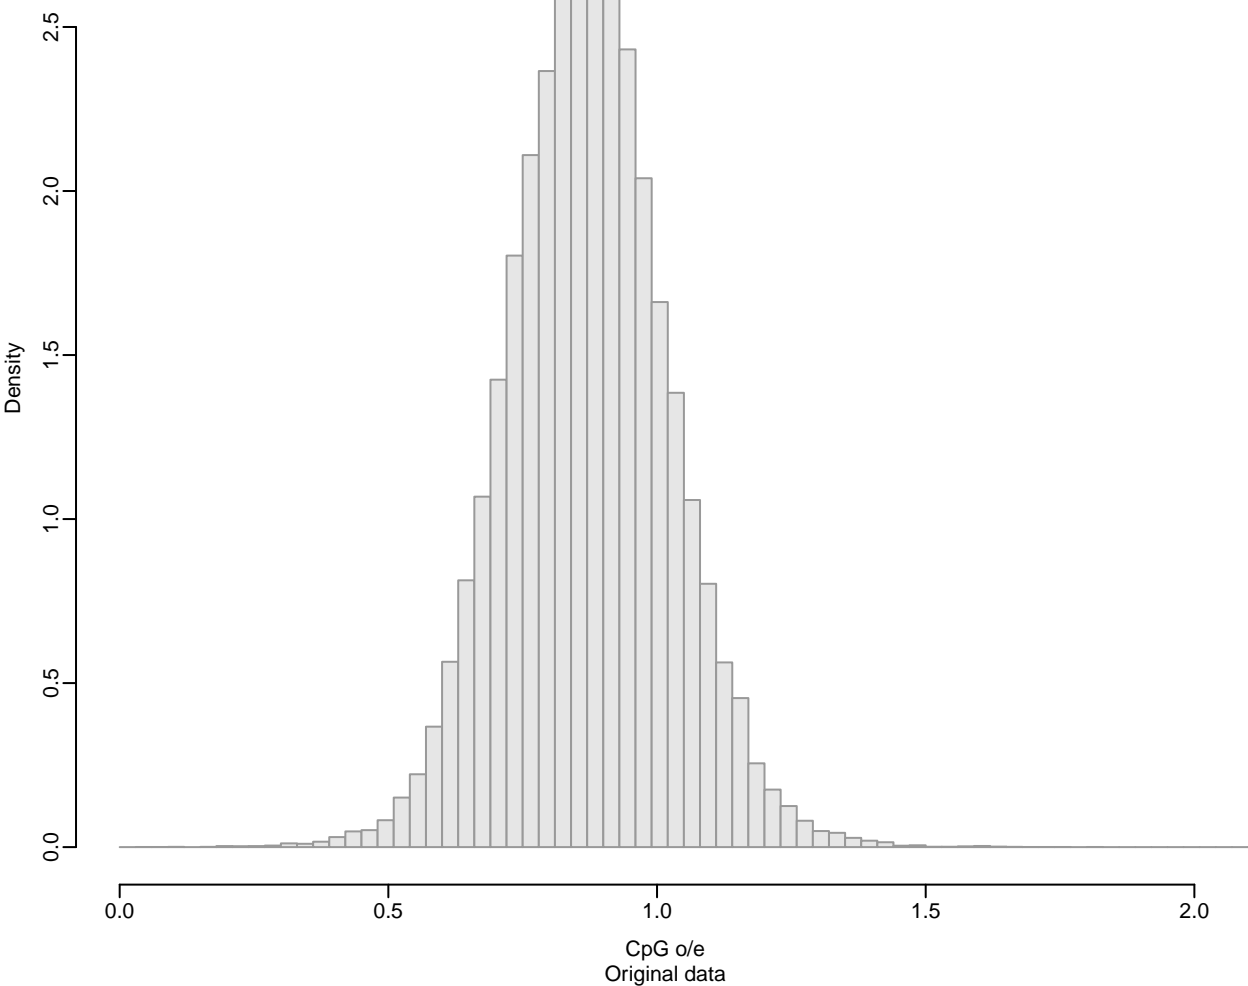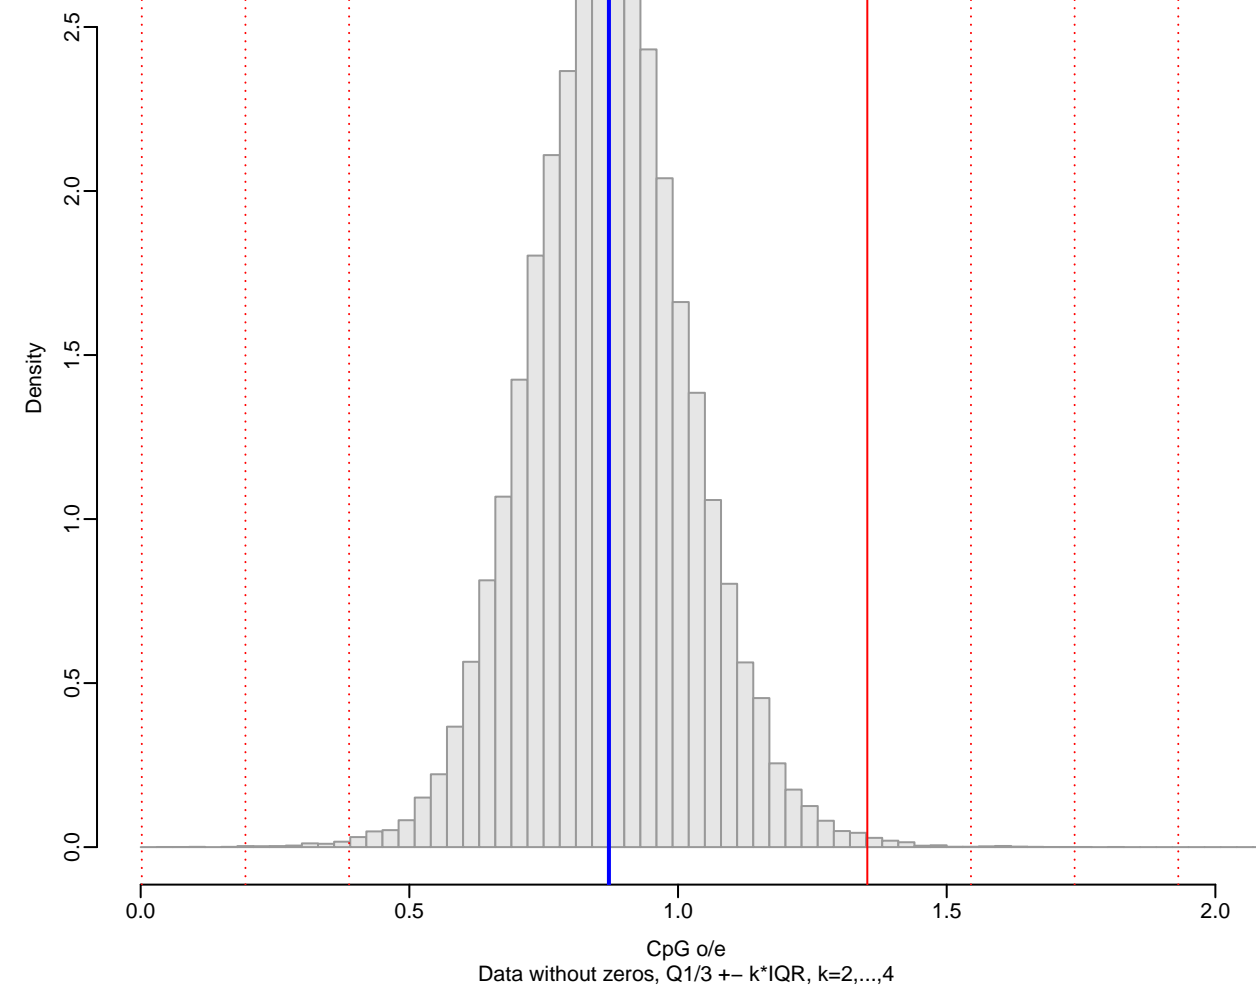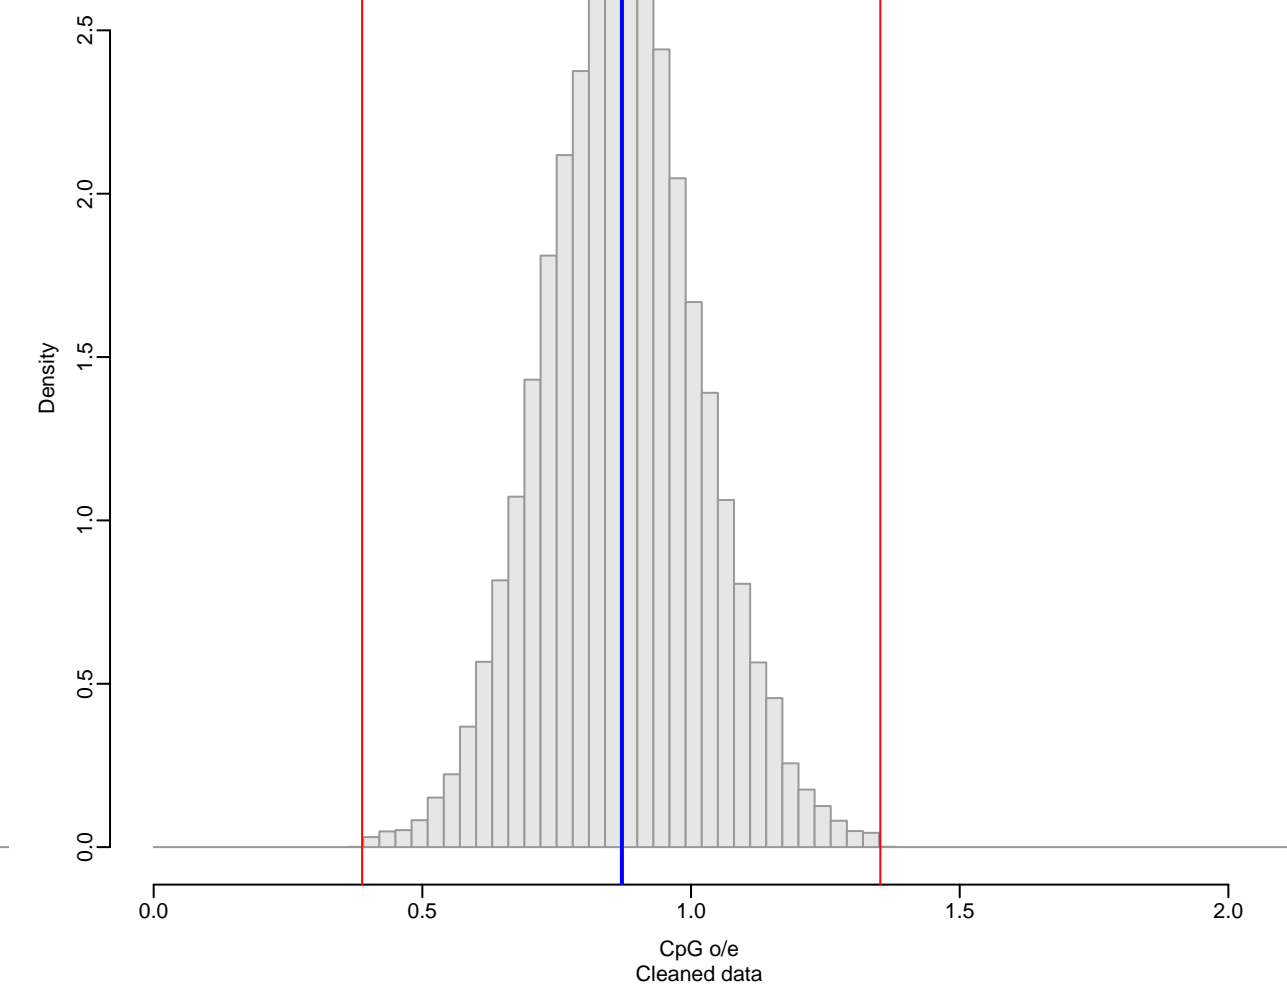

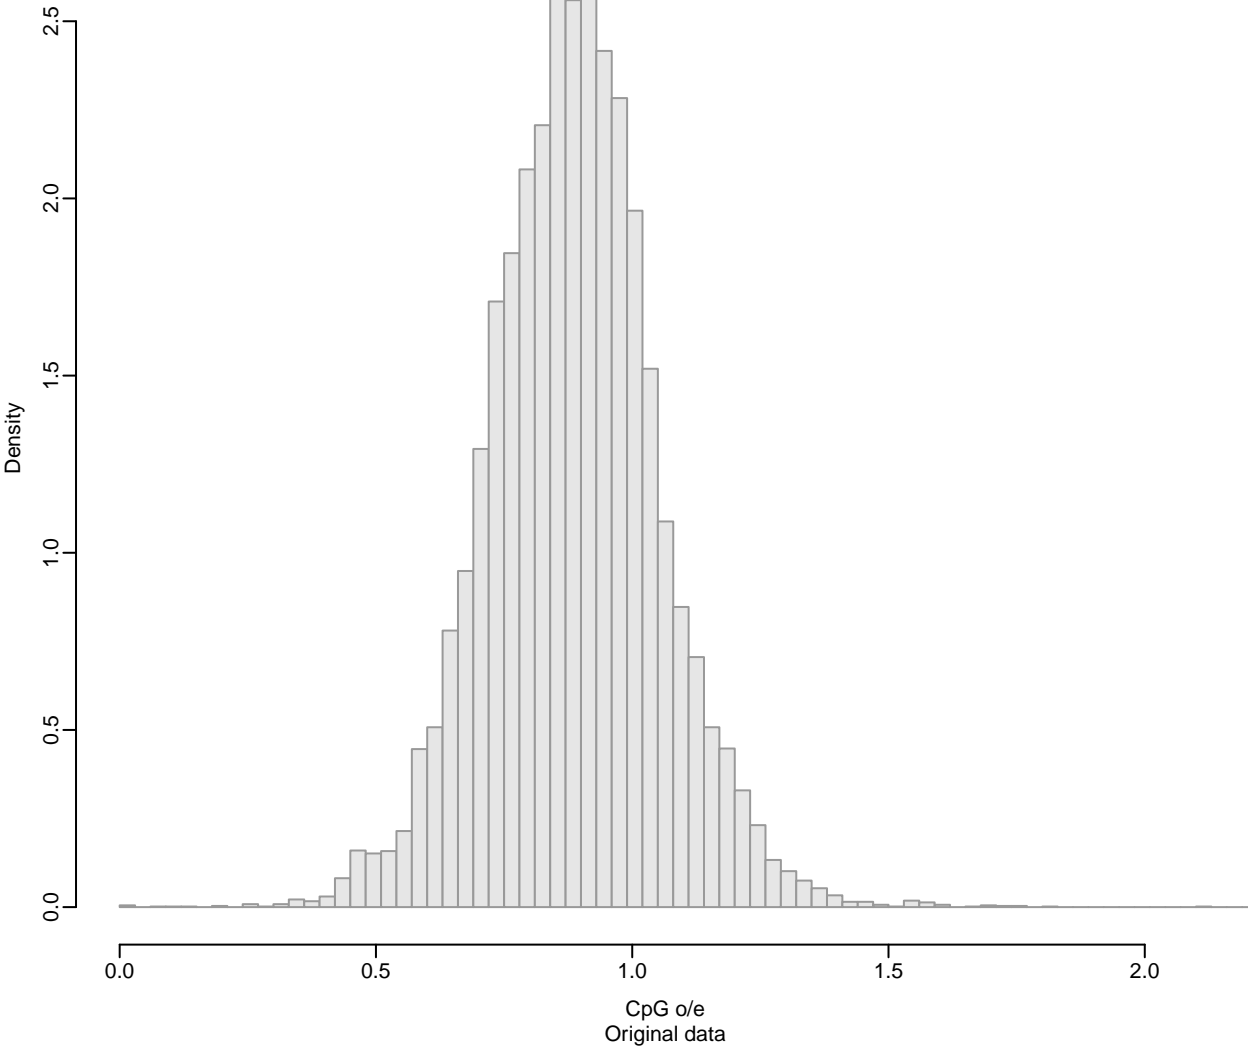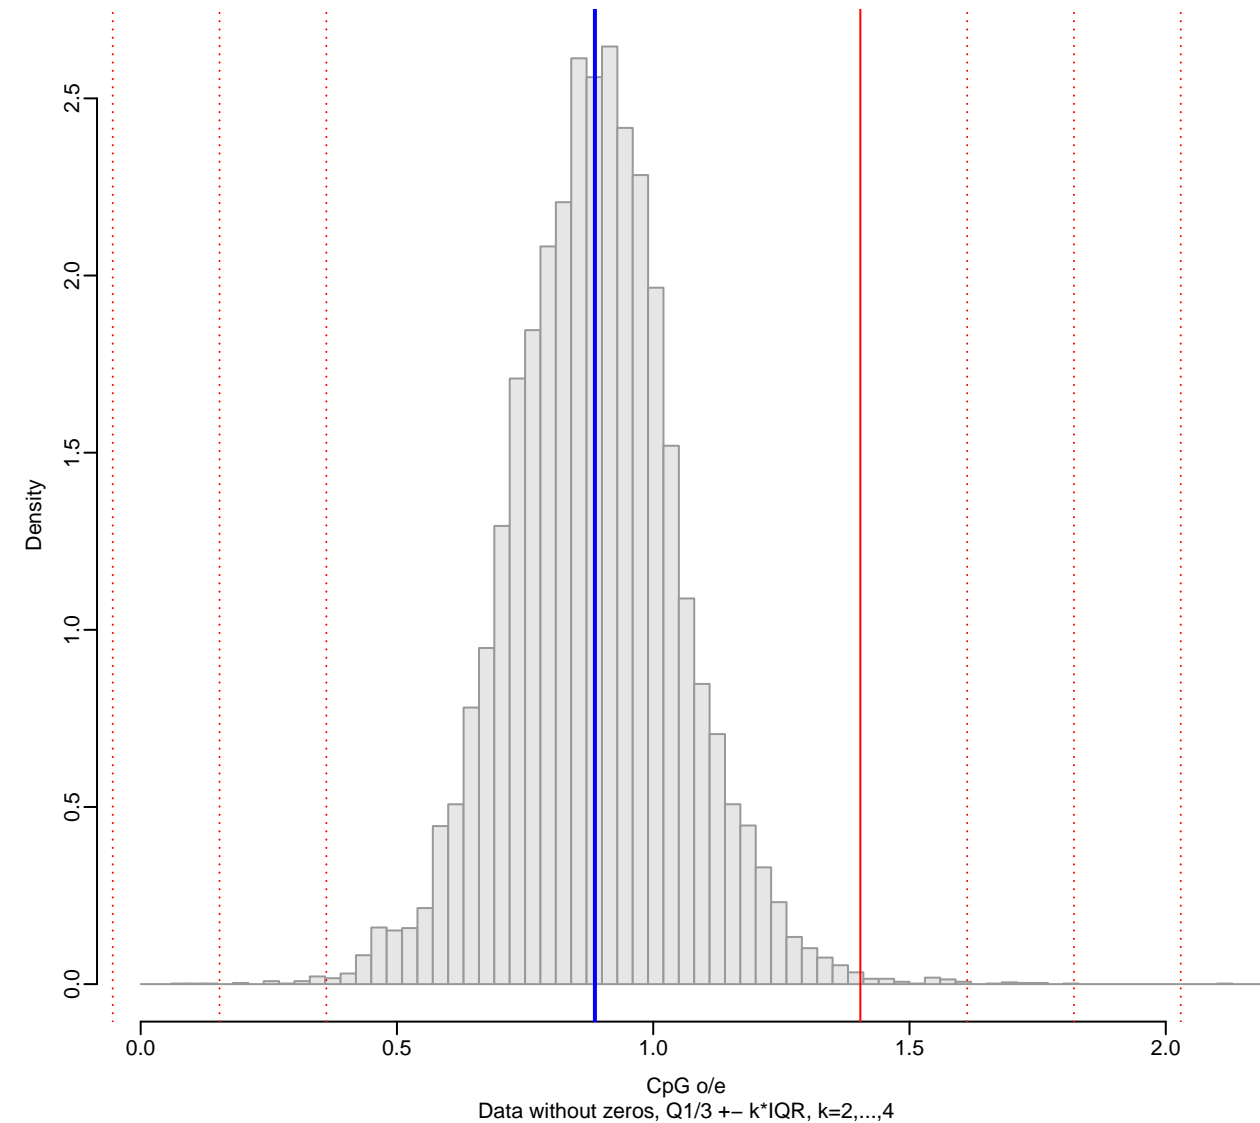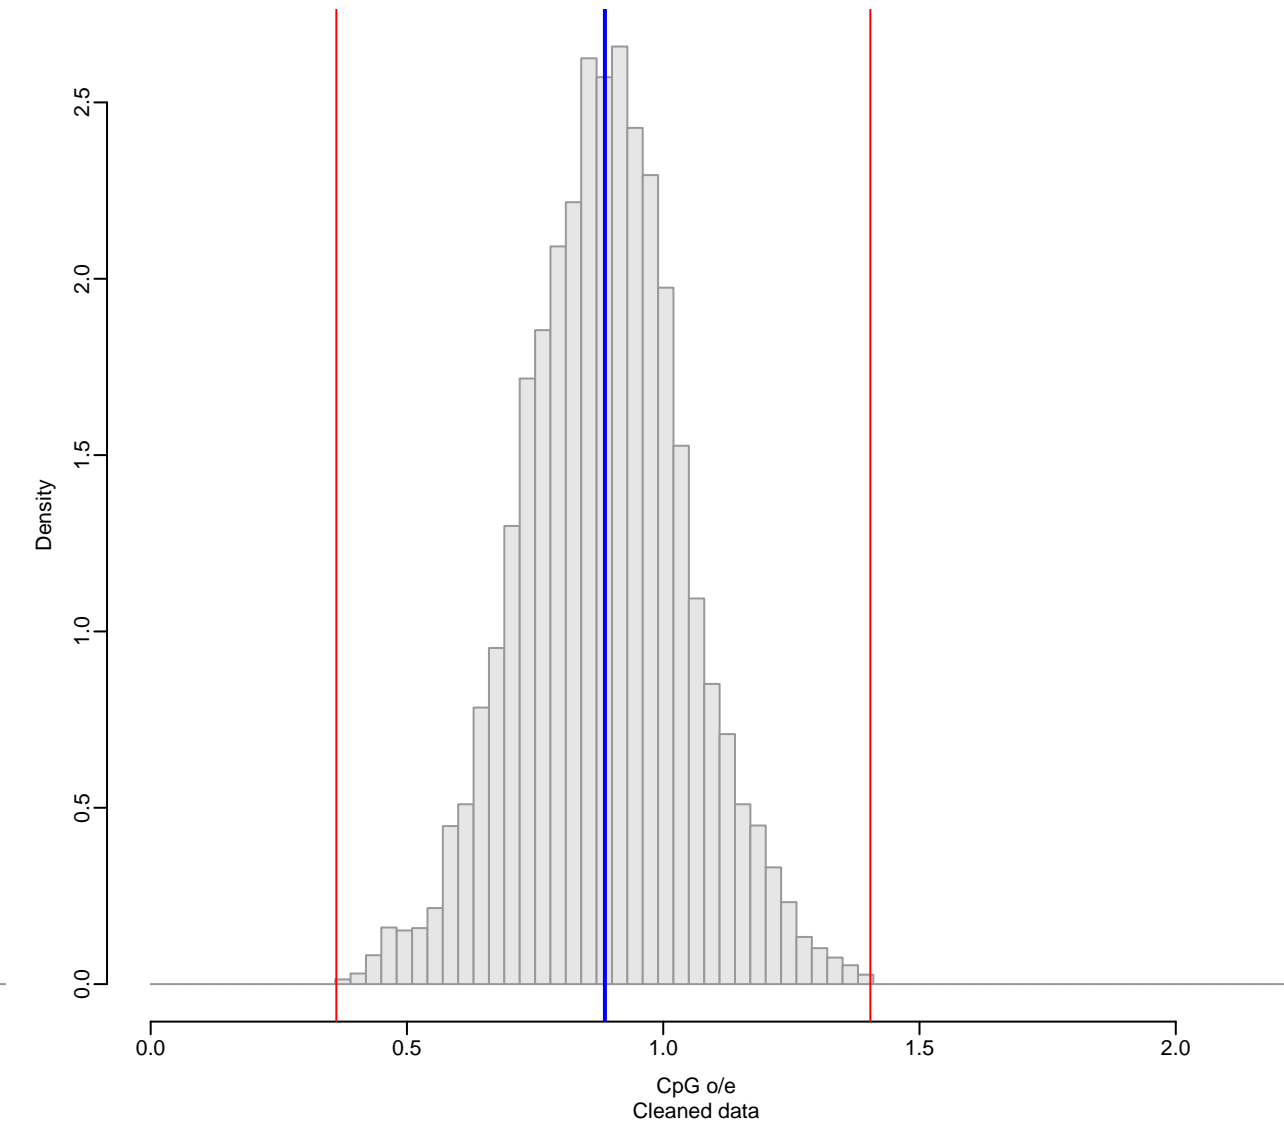

Gillichthys\_mirabilis

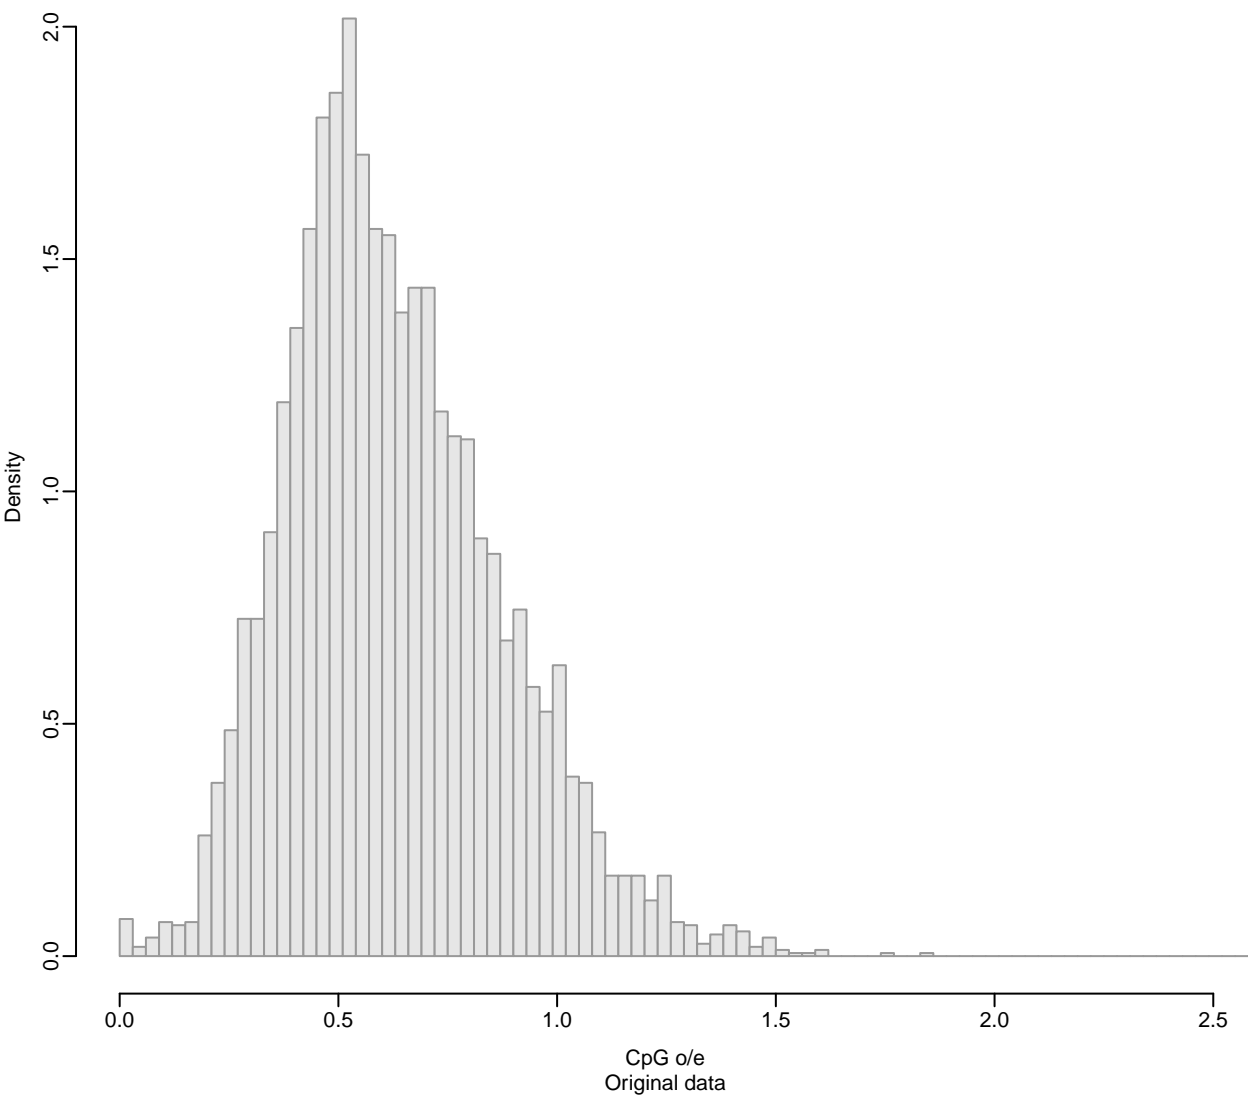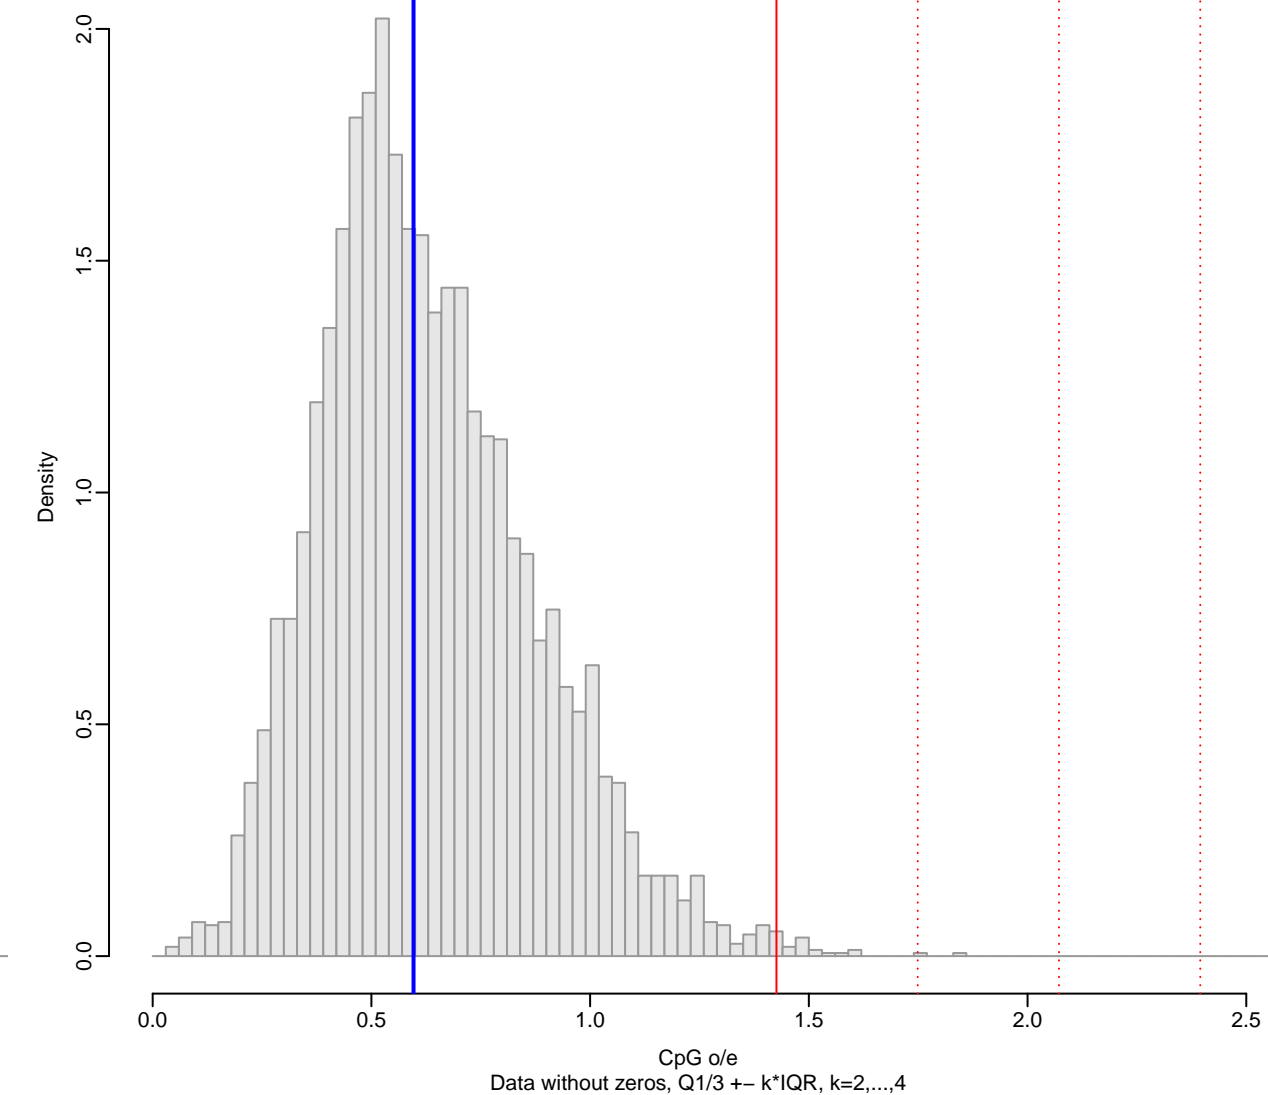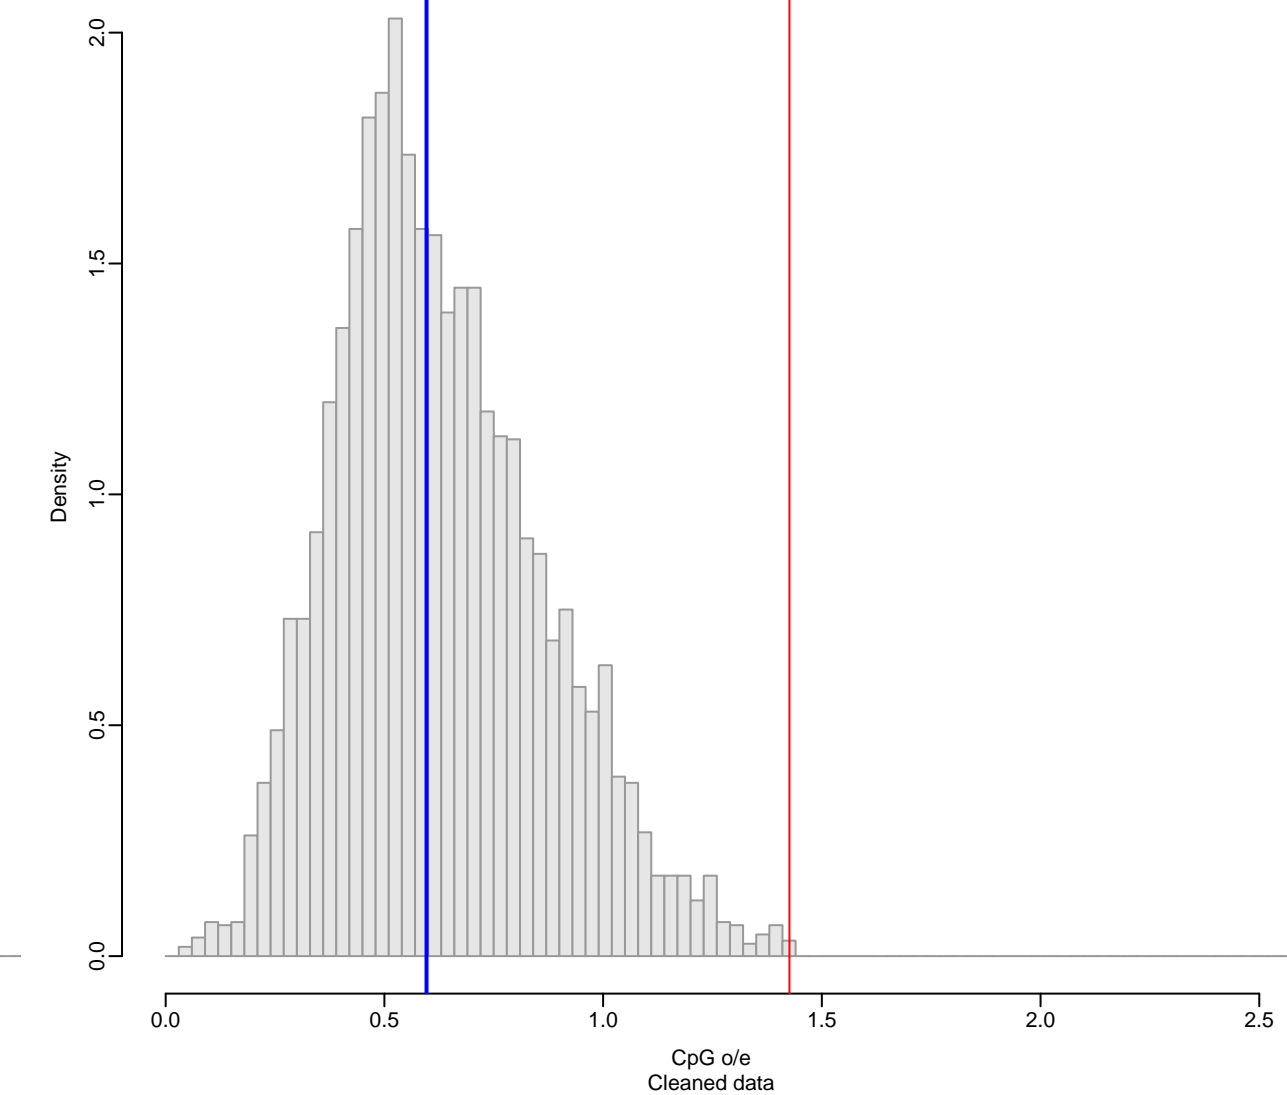



Ginkgo\_biloba

Density

0.0

0.5

1.0

1.5

0.0 0.5 1.0 1.5 2.0

CpG o/e  
Original data

Density

0.0

0.5

1.0

1.5

0.0 0.5 1.0 1.5 2.0

CpG o/e  
Data without zeros,  $Q1/3 \pm k \cdot IQR$ ,  $k=2, \dots, 4$

Density

0.0

0.5

1.0

1.5

0.0 0.5 1.0 1.5 2.0

CpG o/e  
Cleaned data

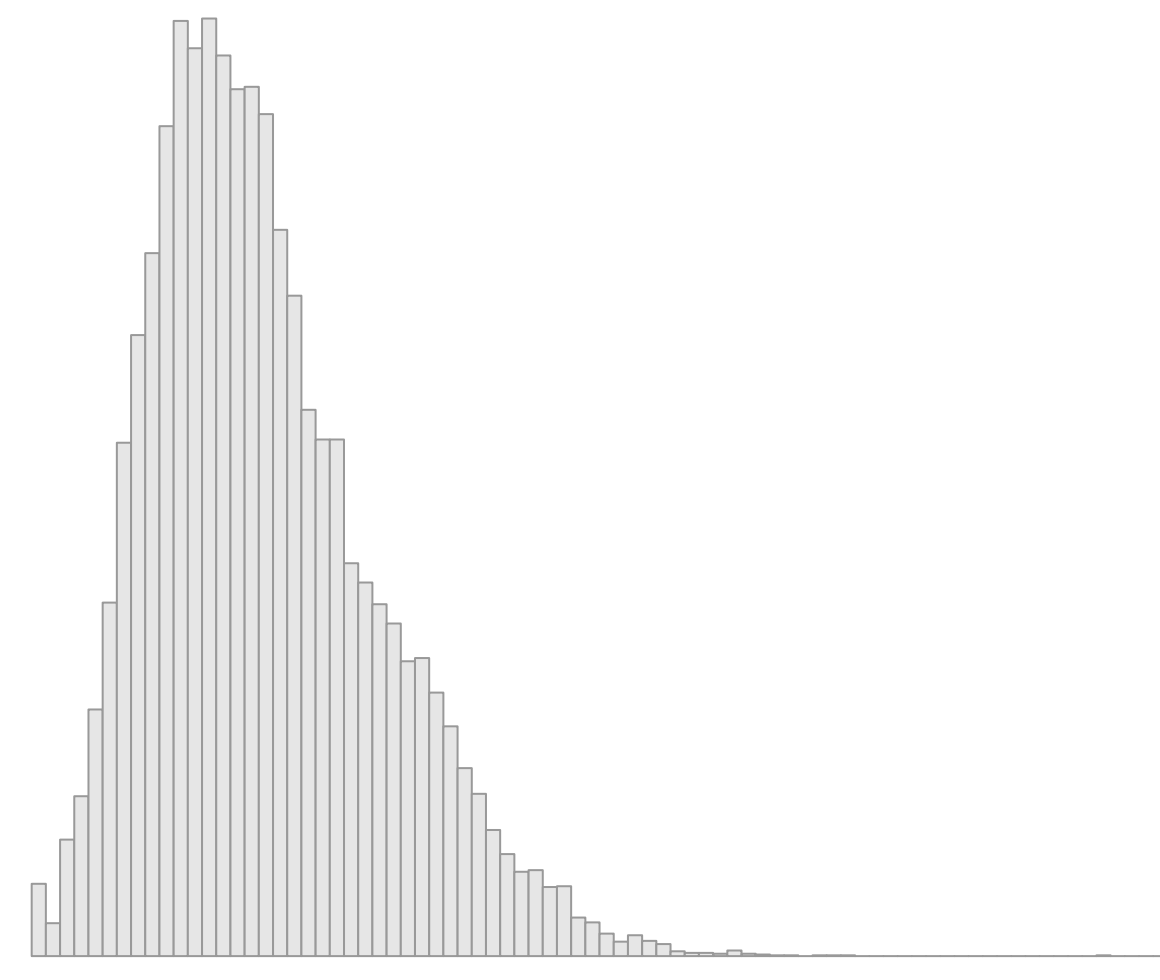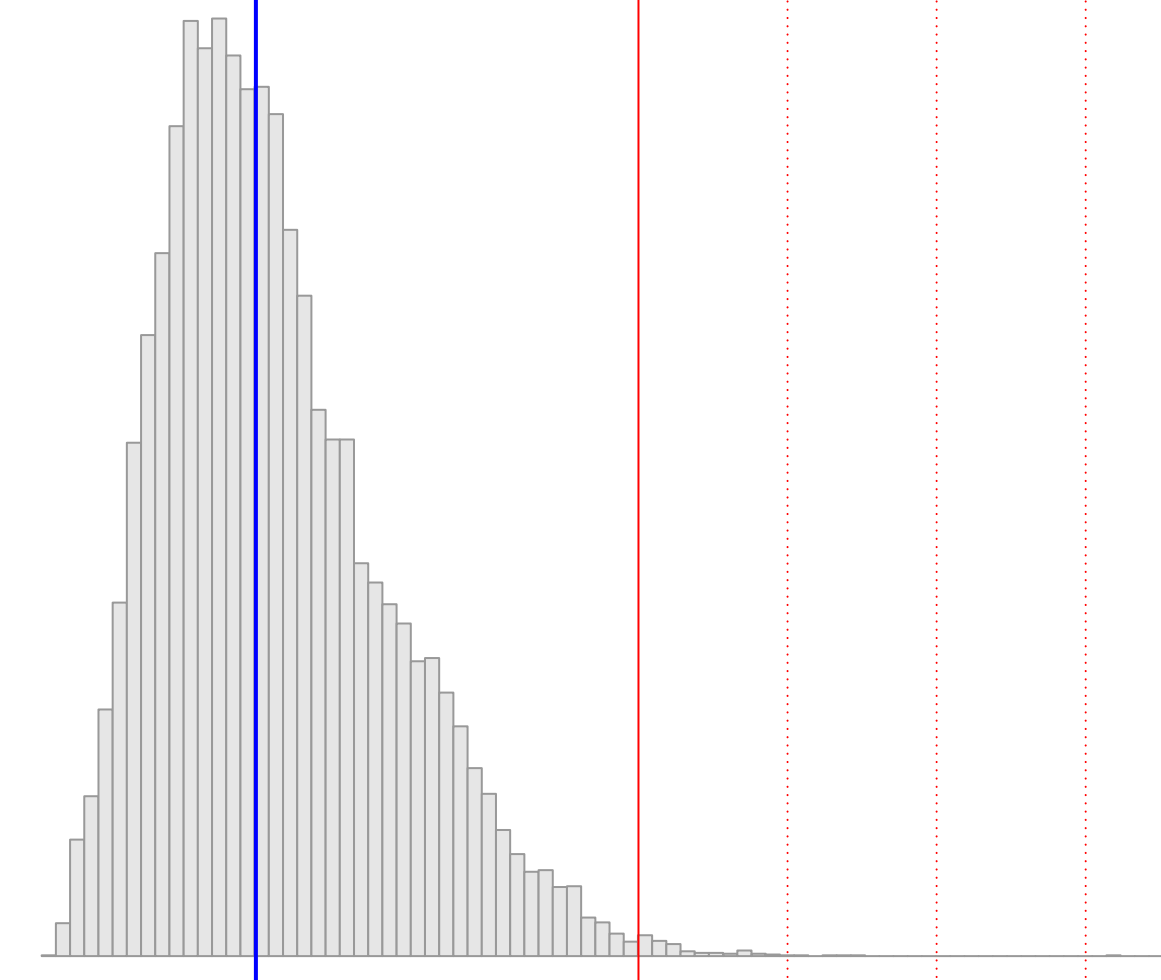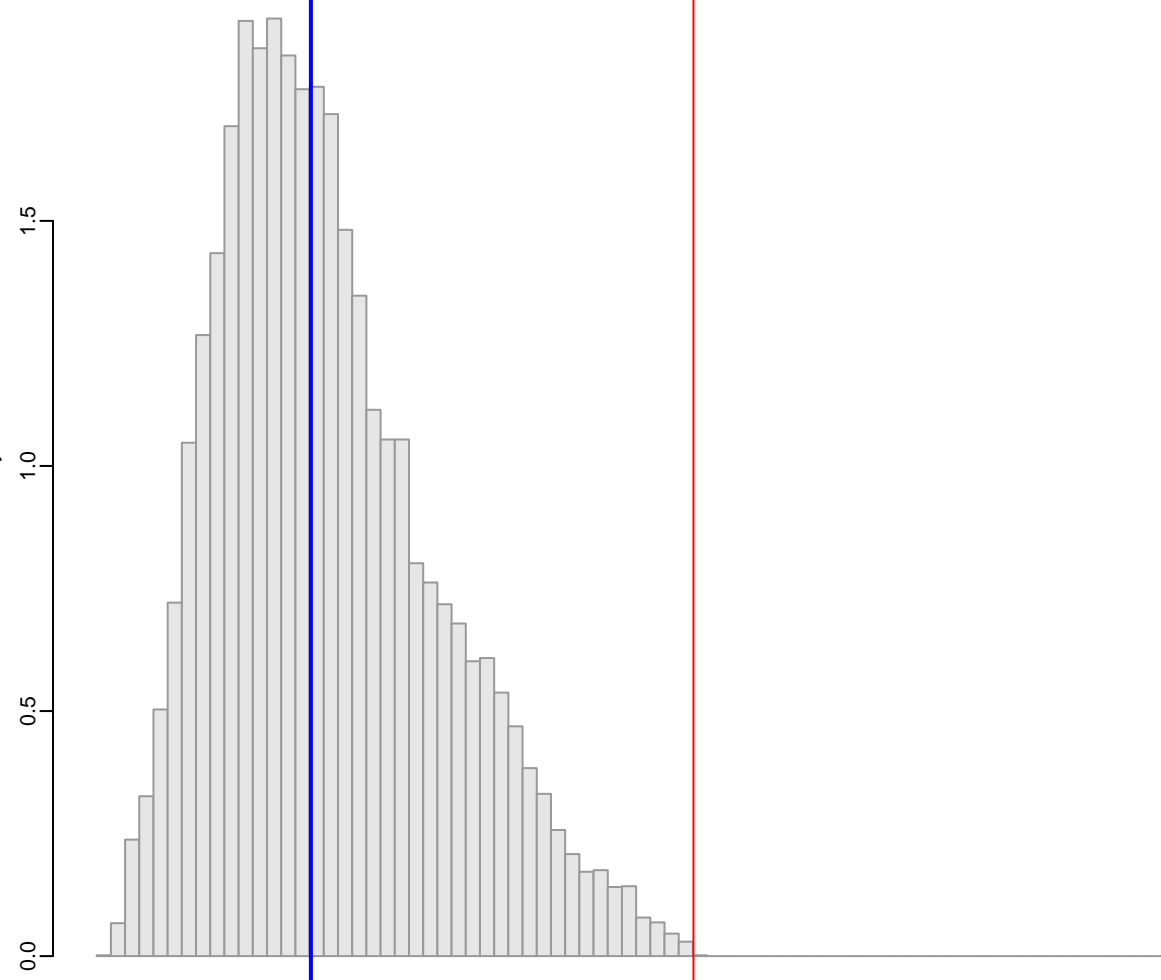

Glaucocystis\_nostochinearum

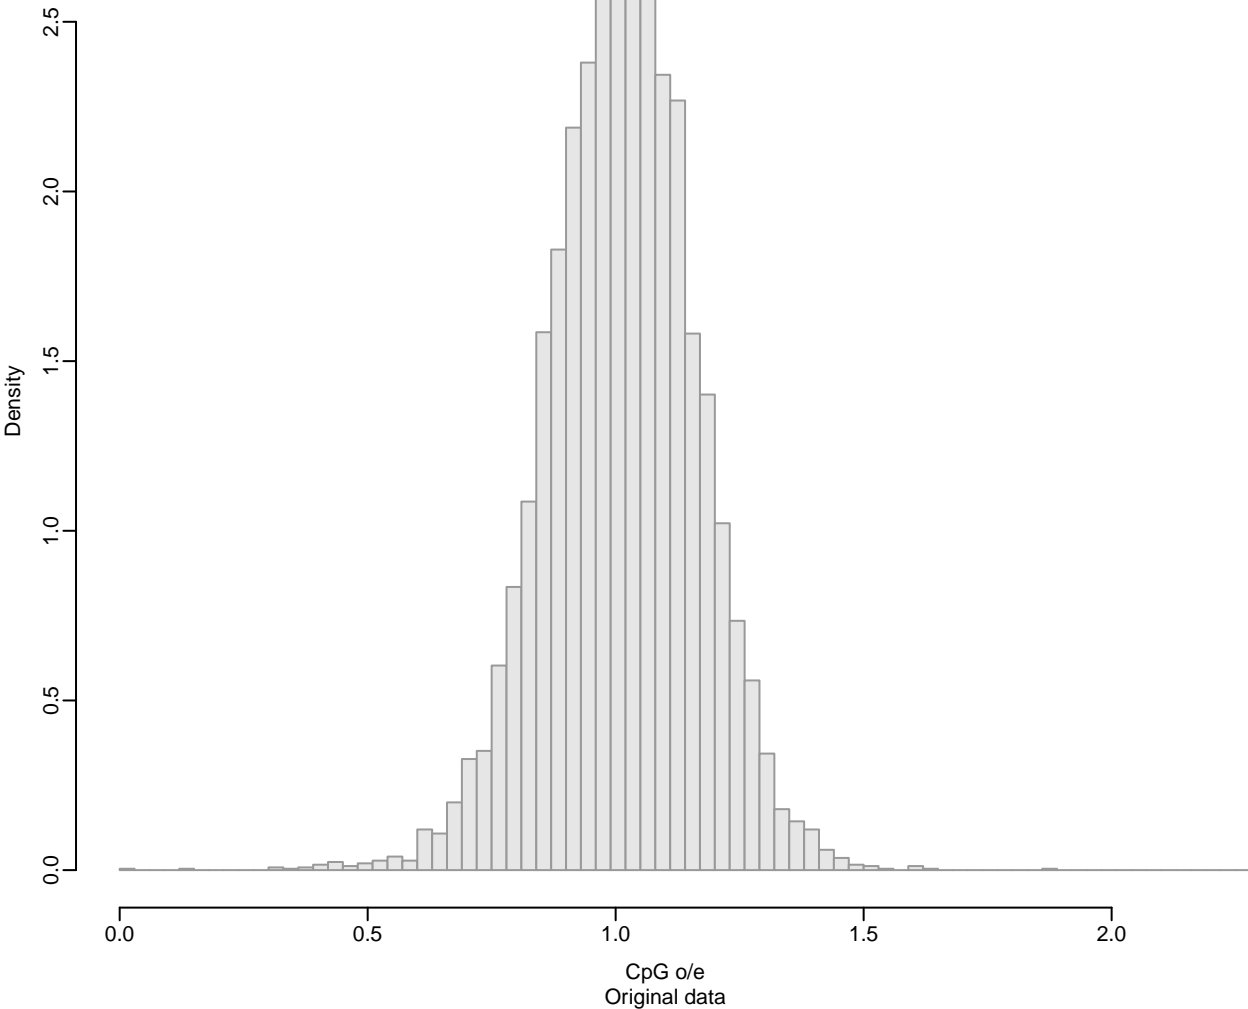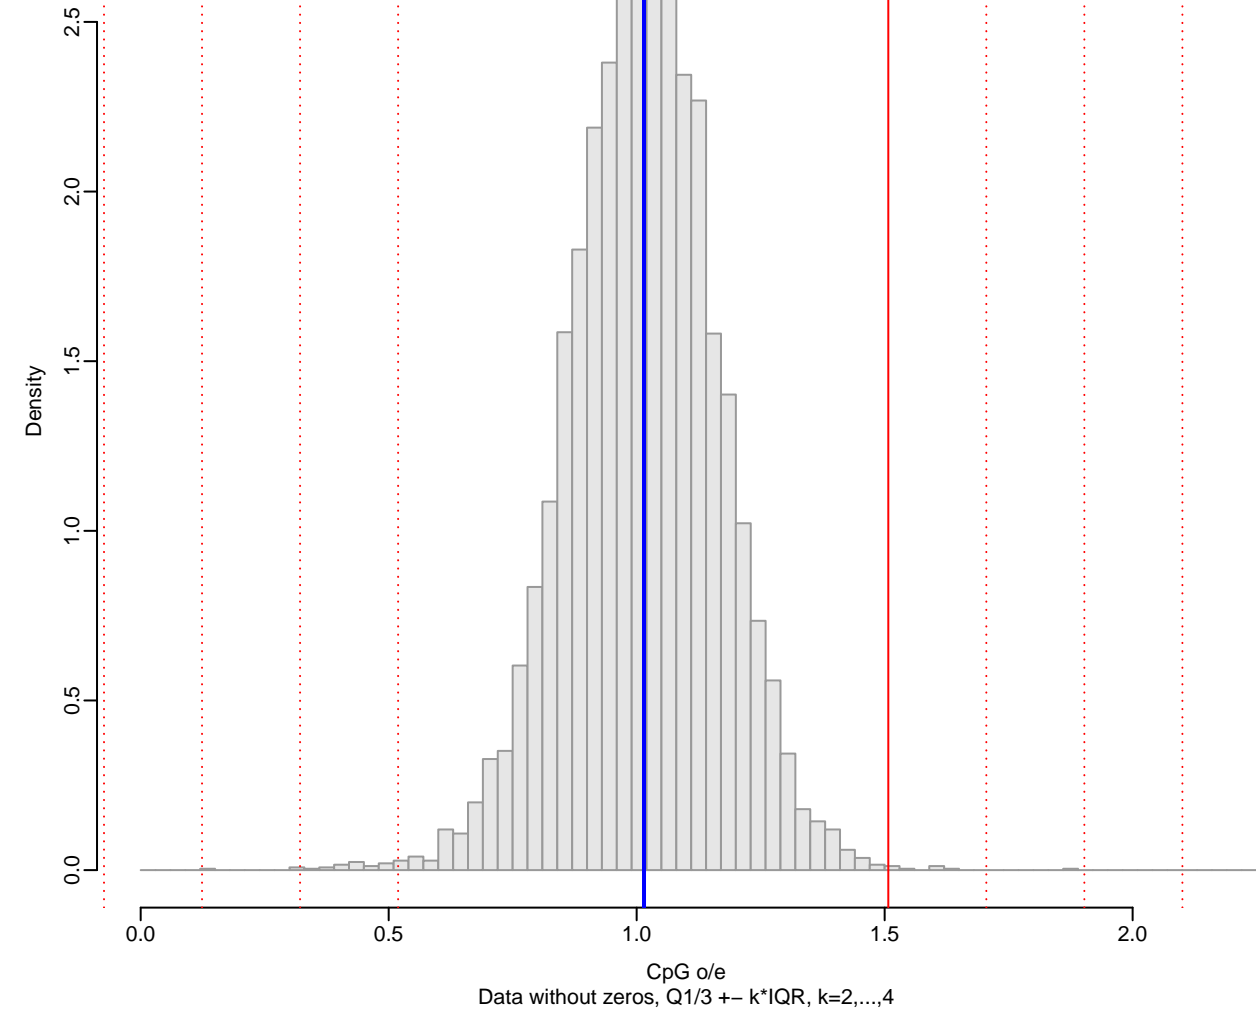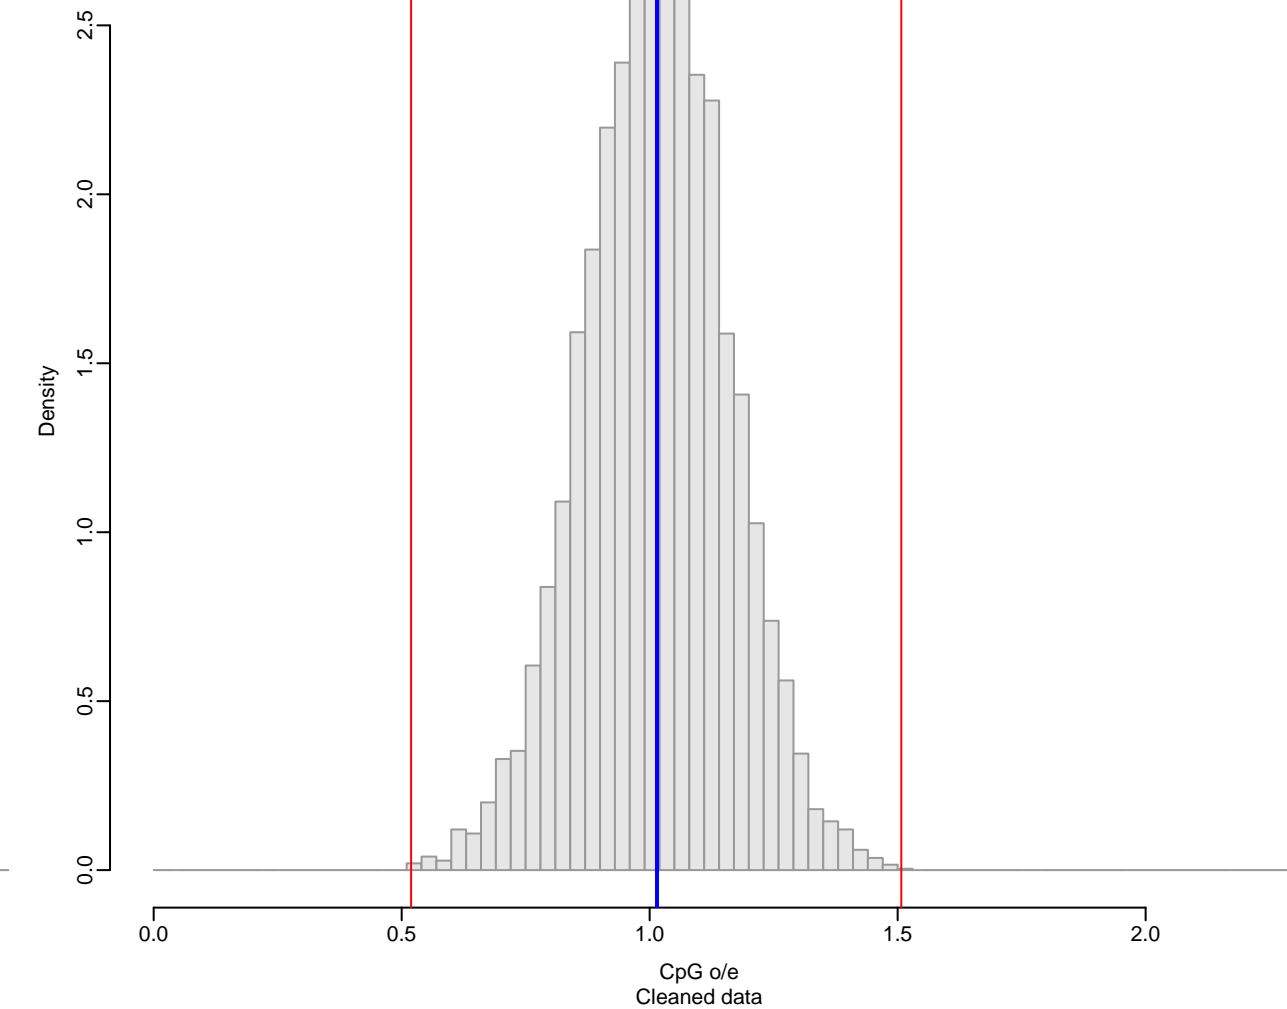

# Glomus\_intraradices

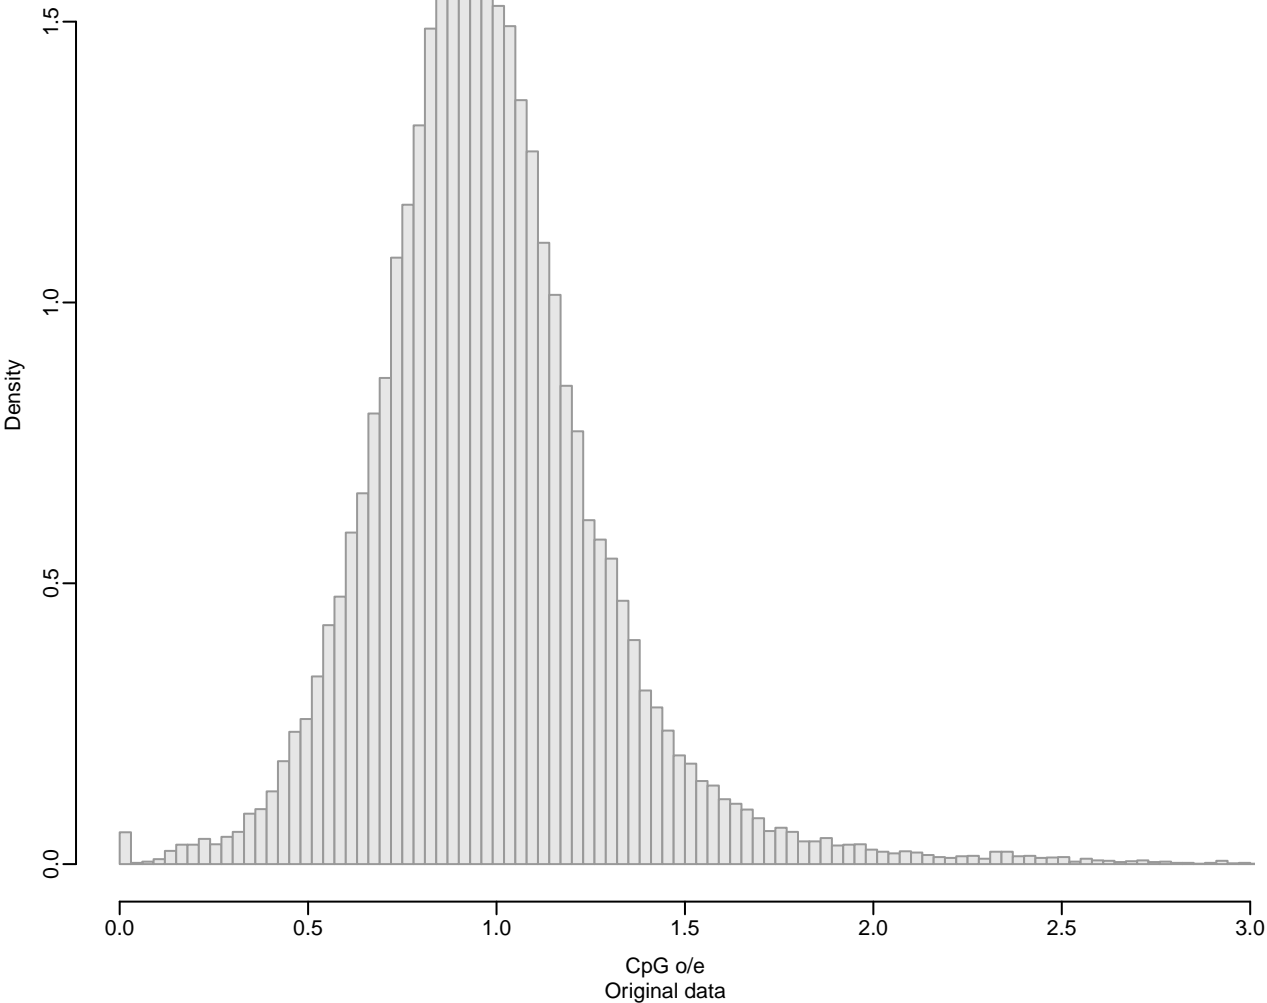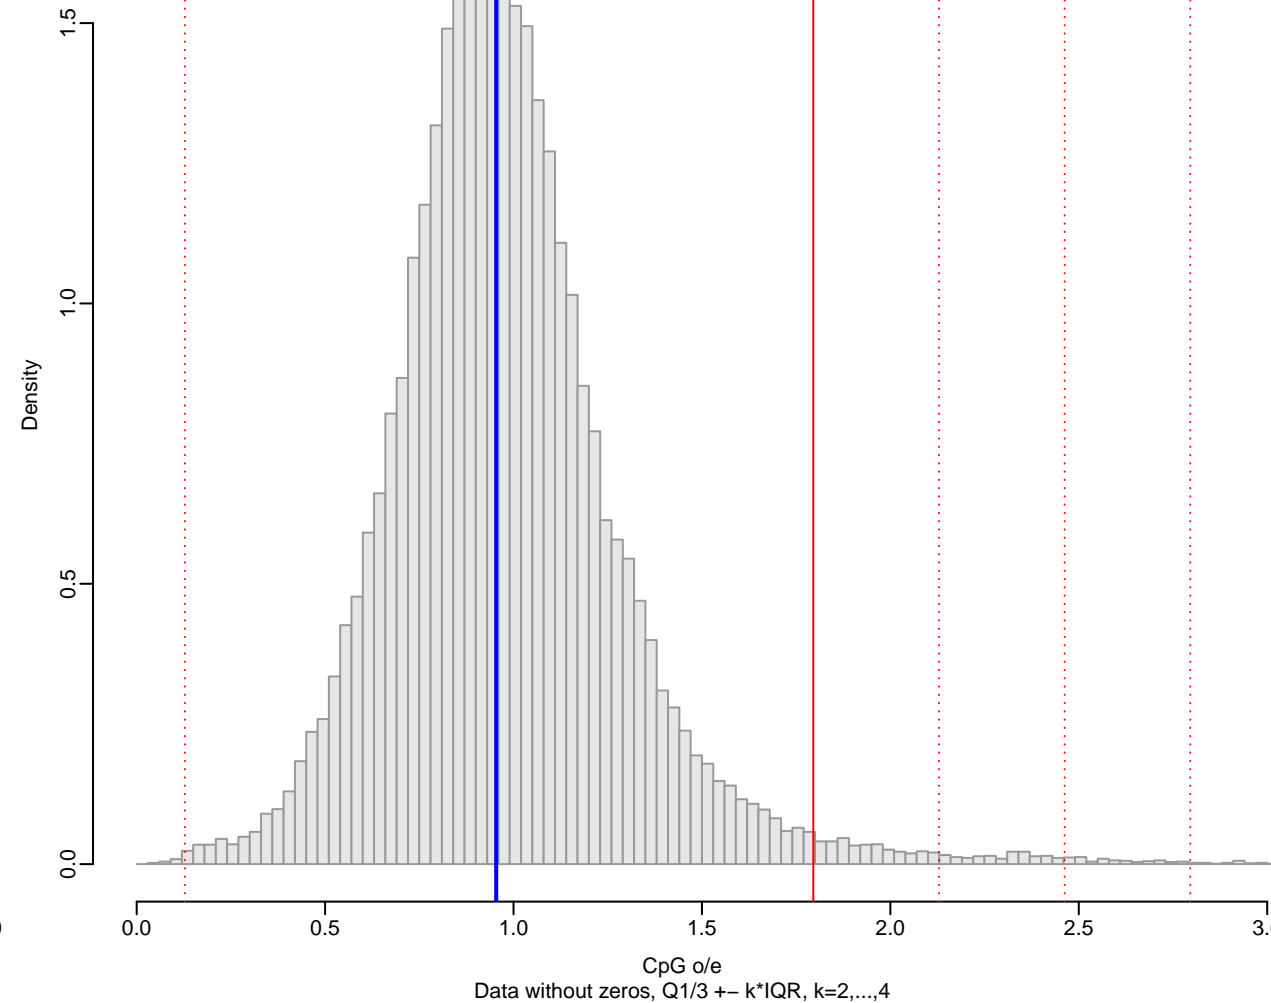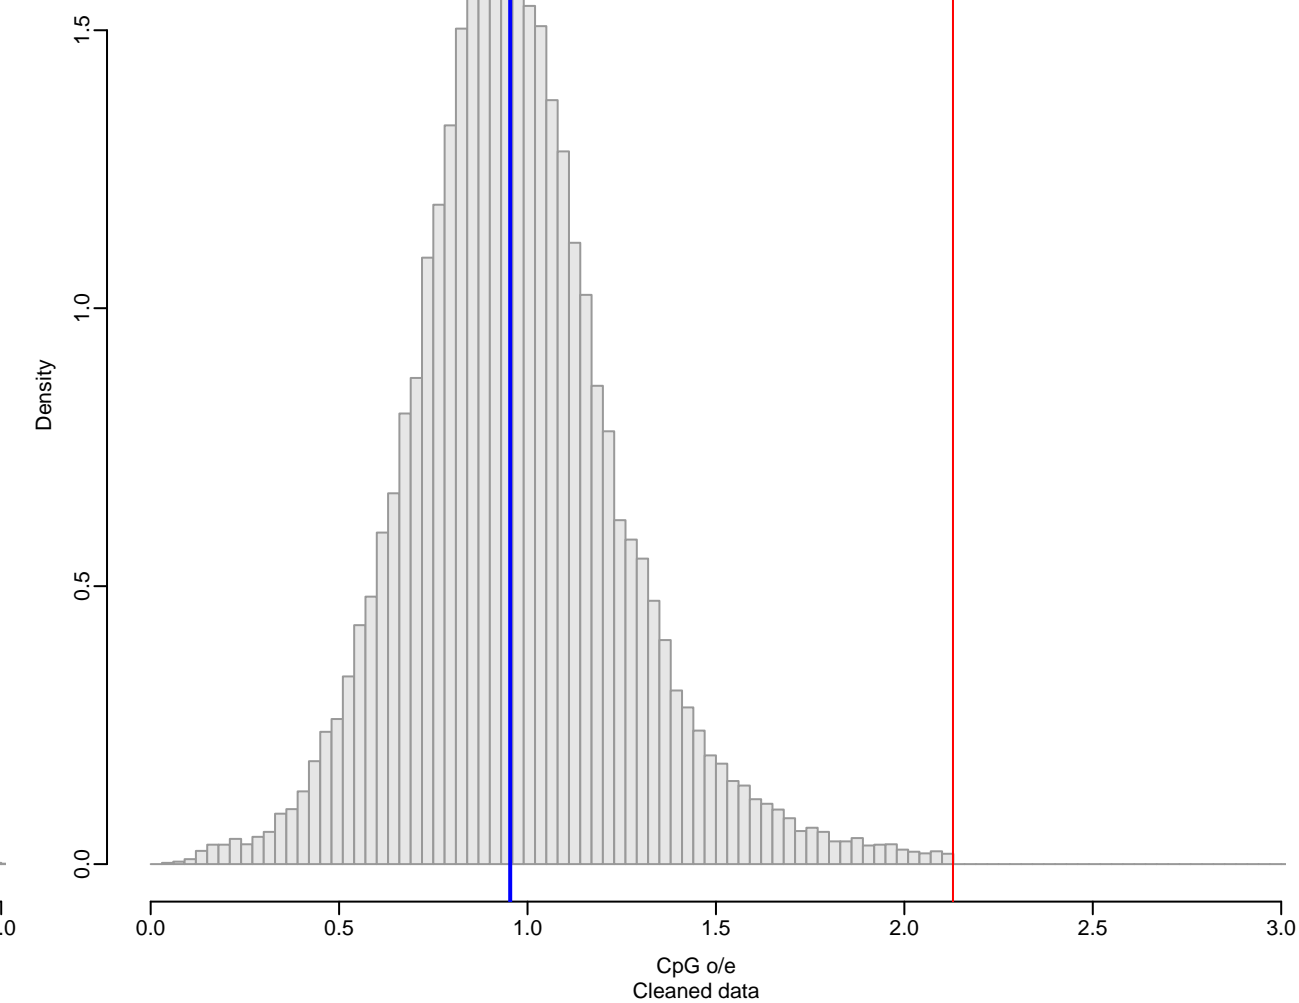

# Glossina\_morsitans\_morsitans

Density

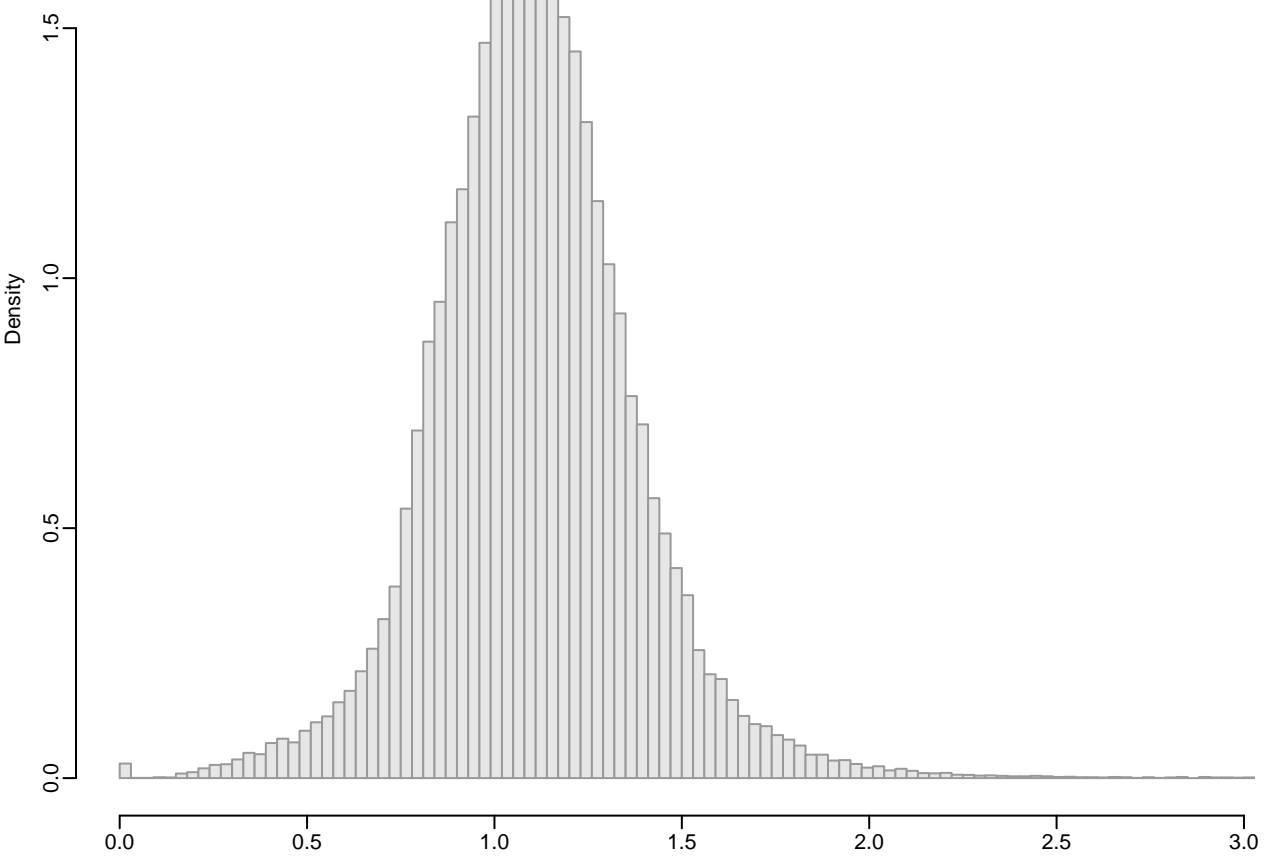

Density

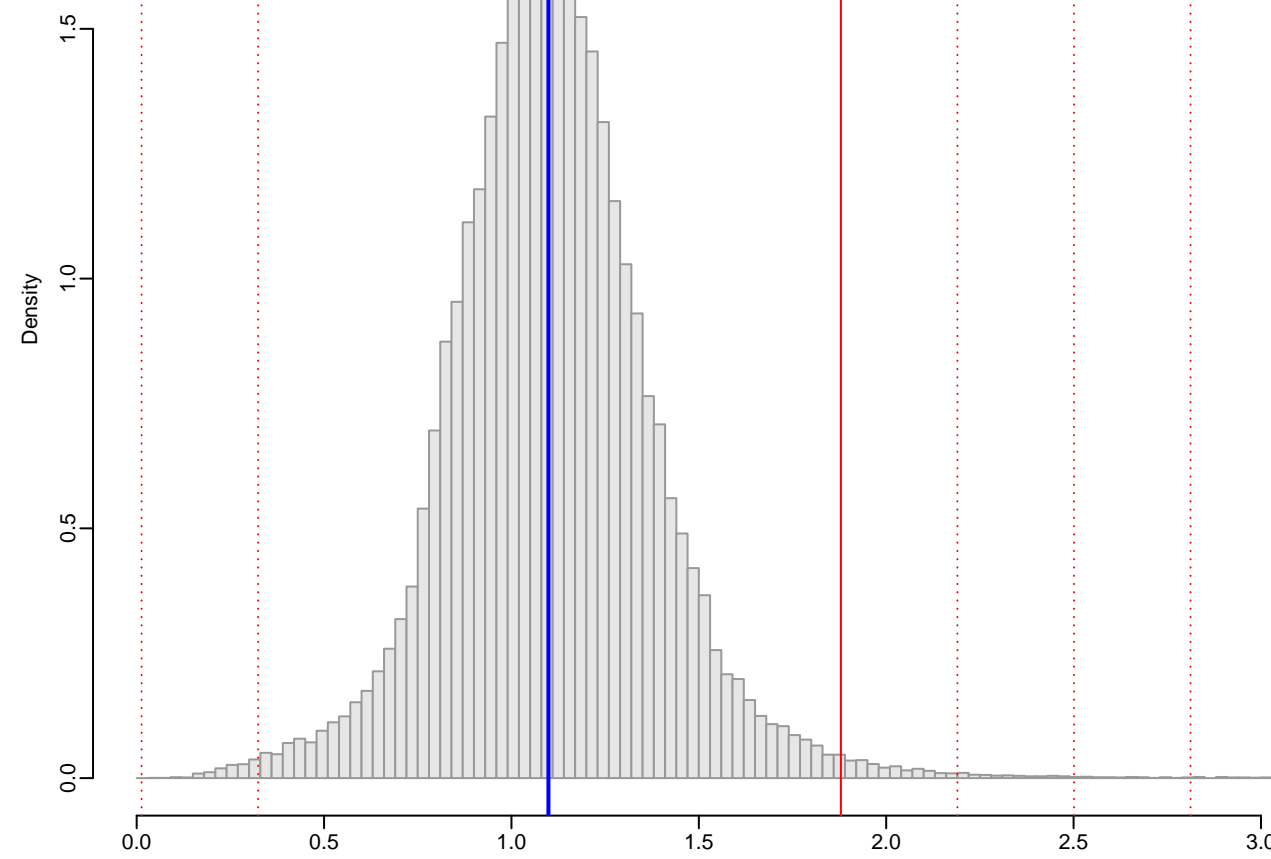

Density

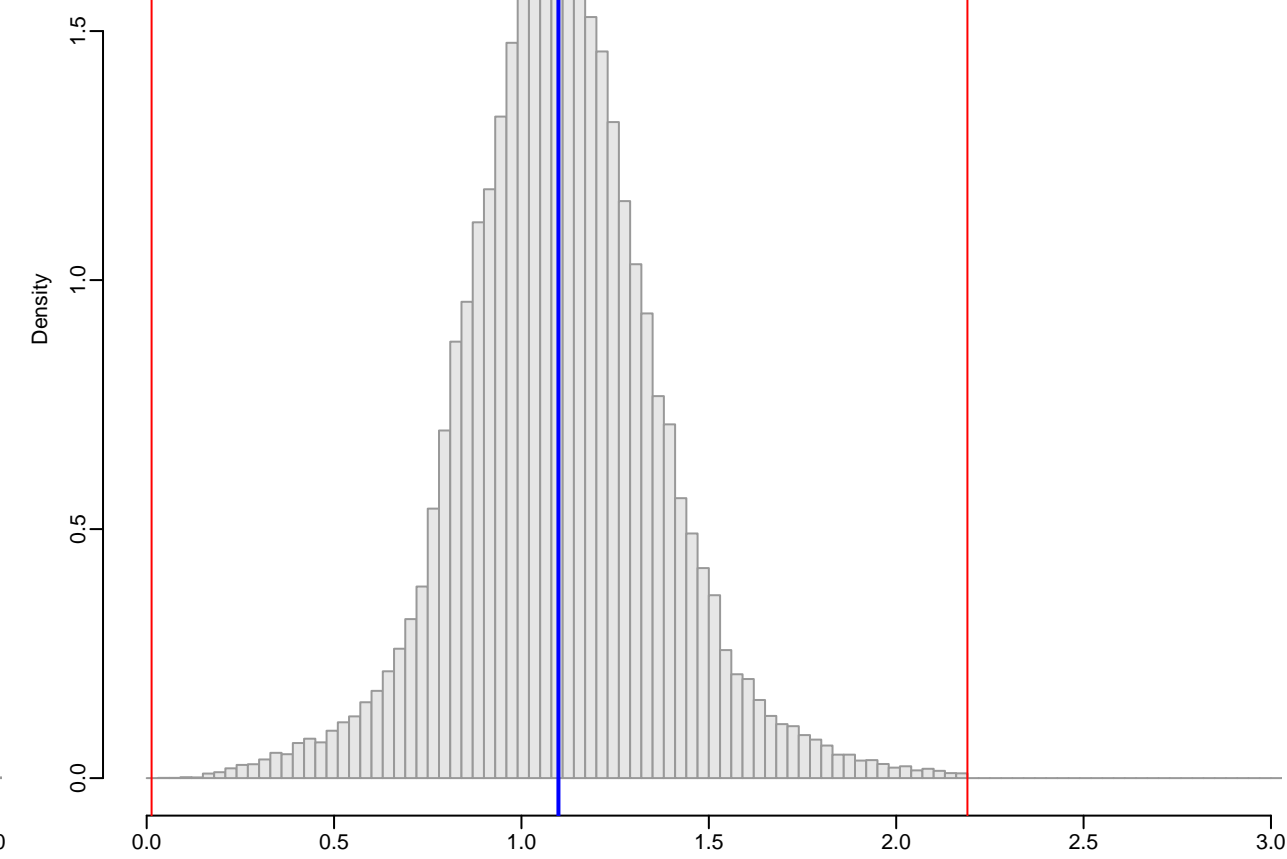

Glycine\_max

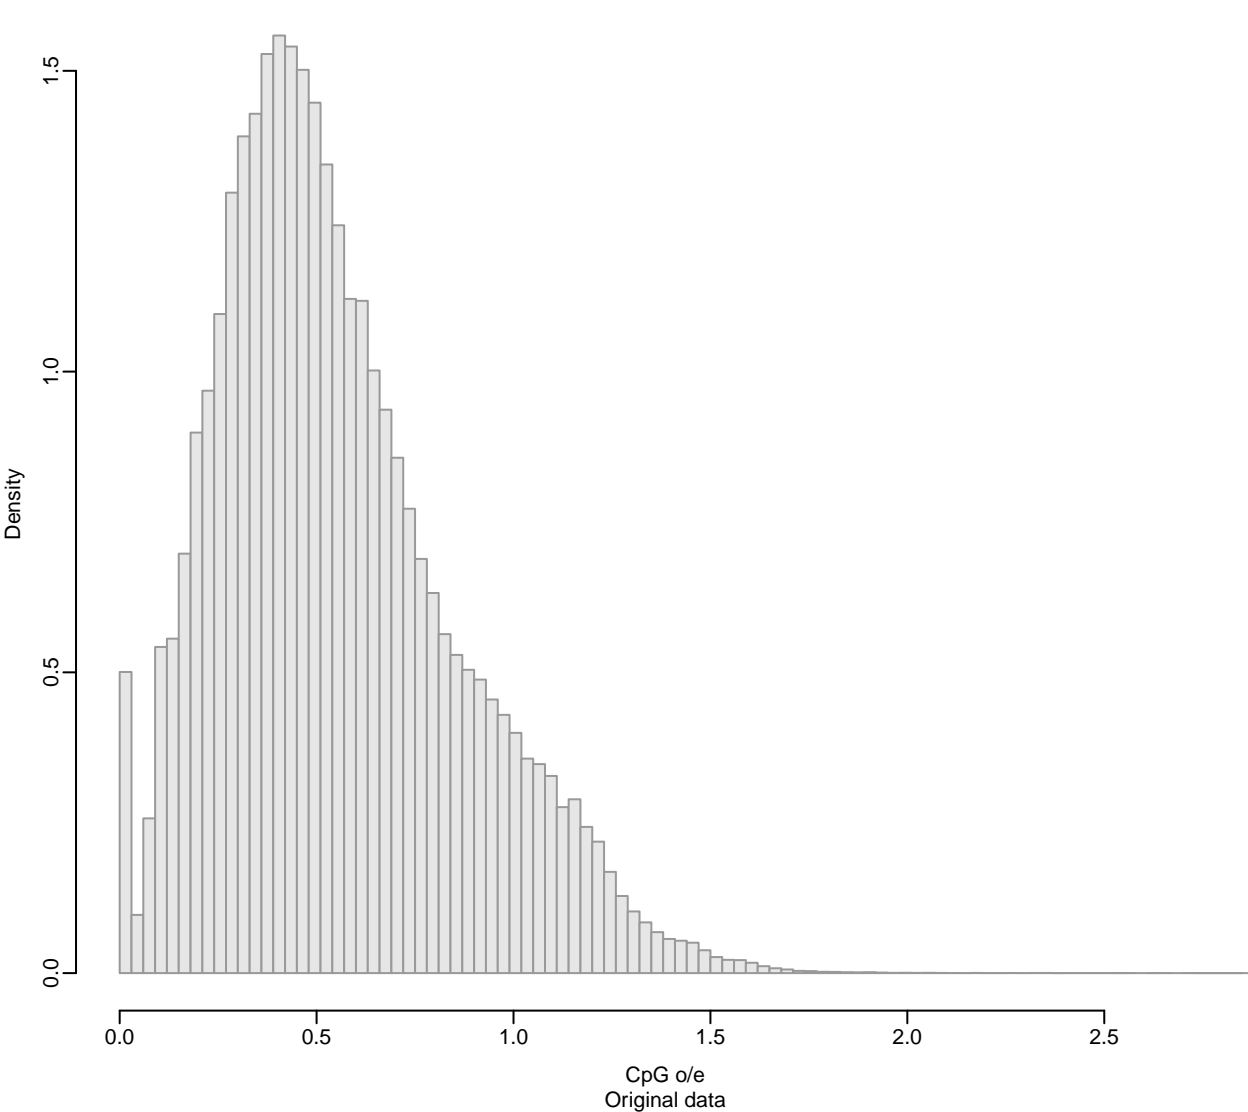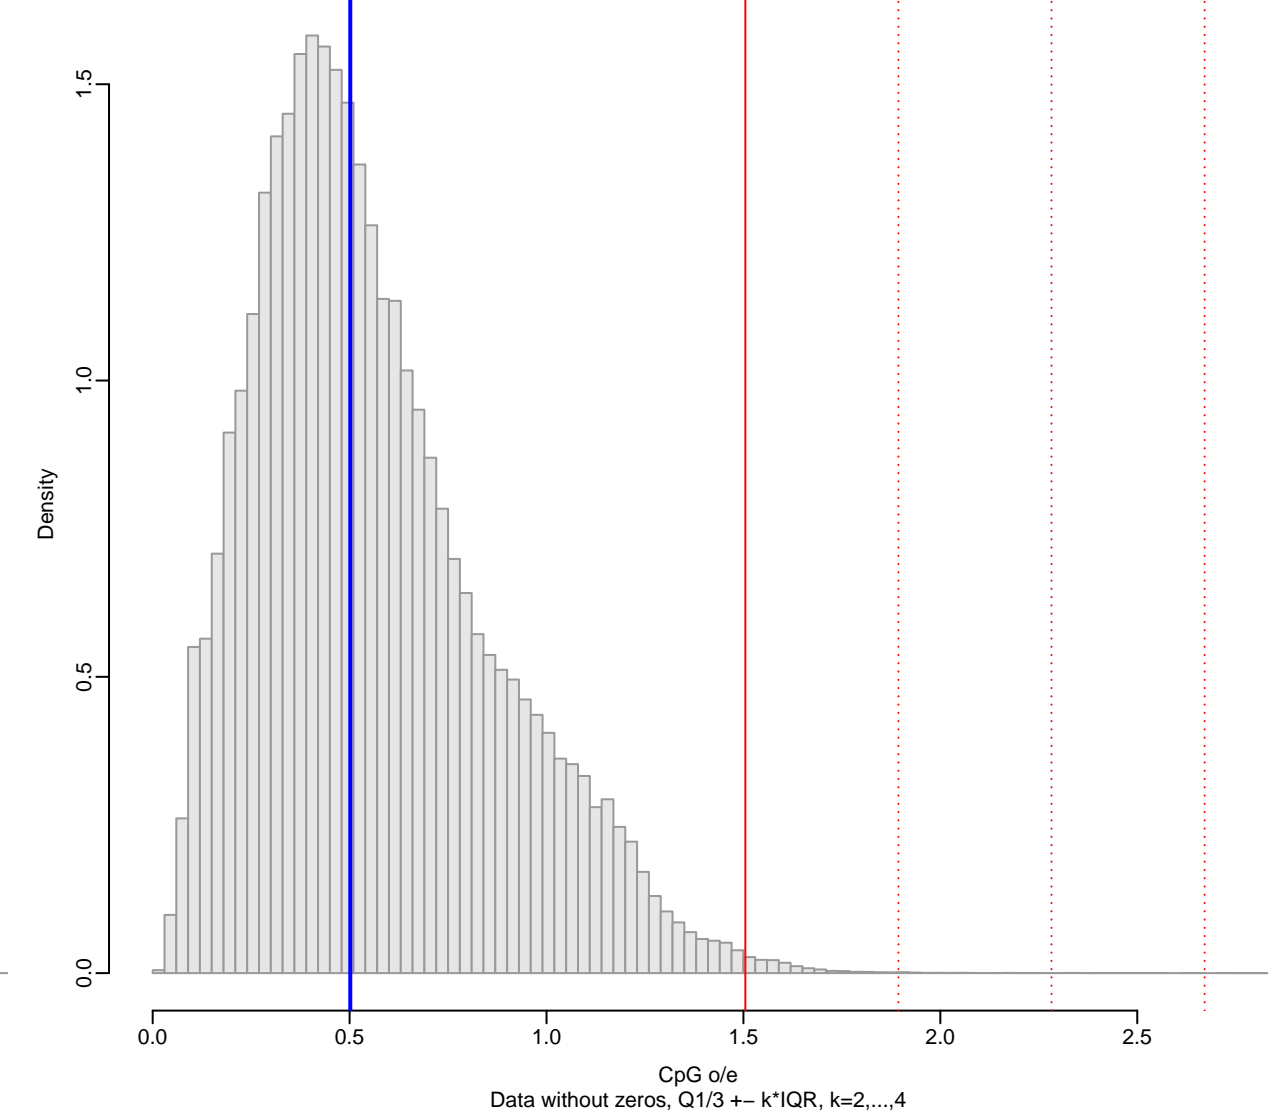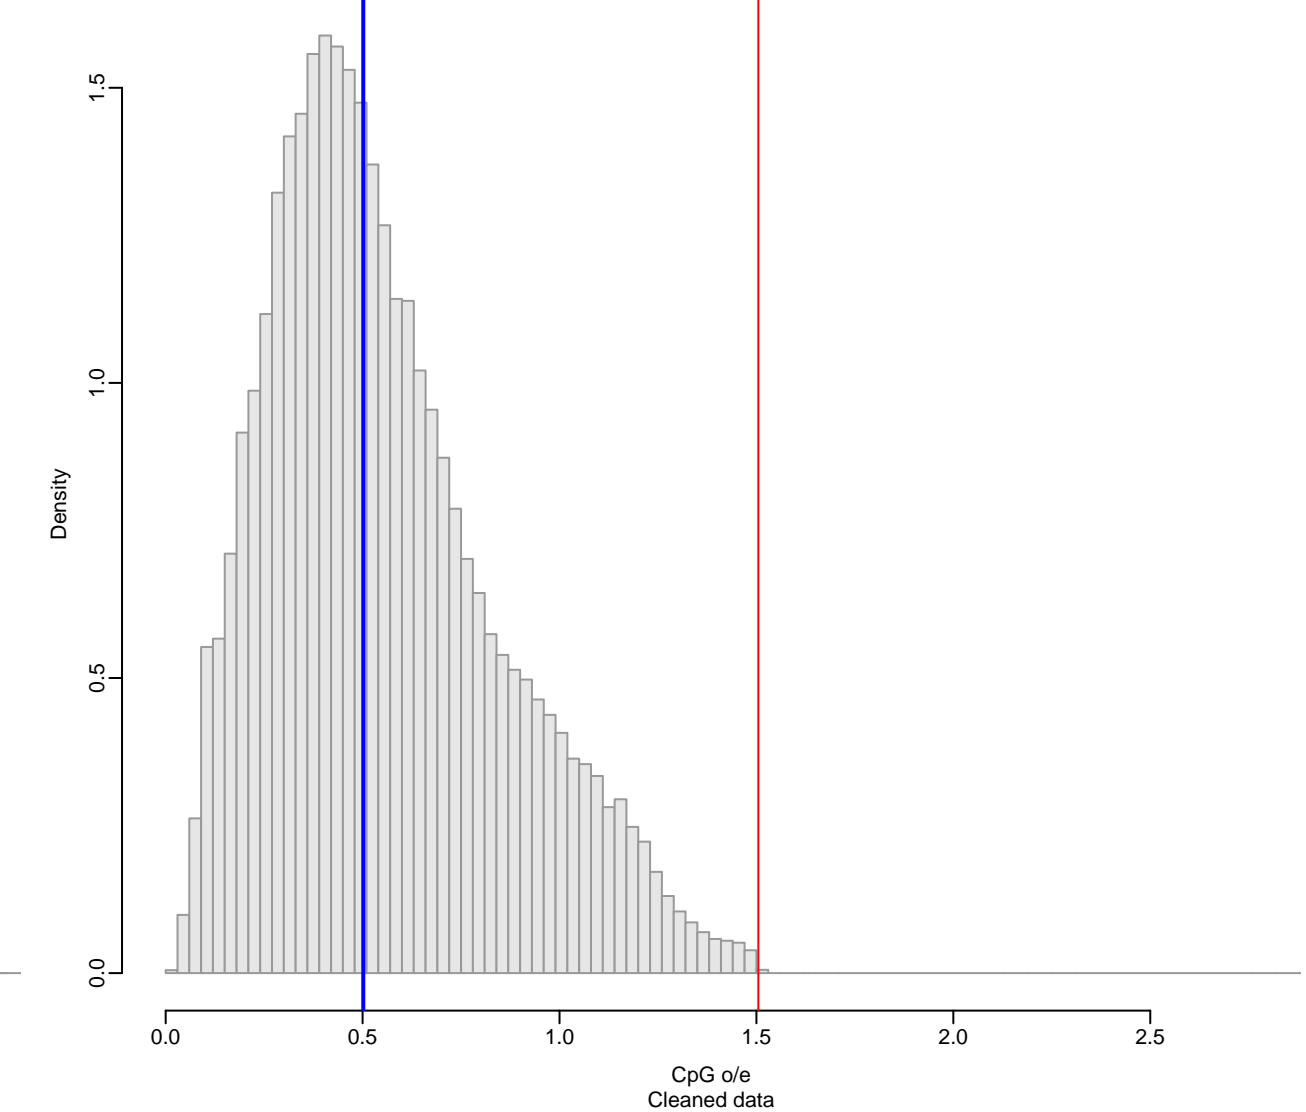

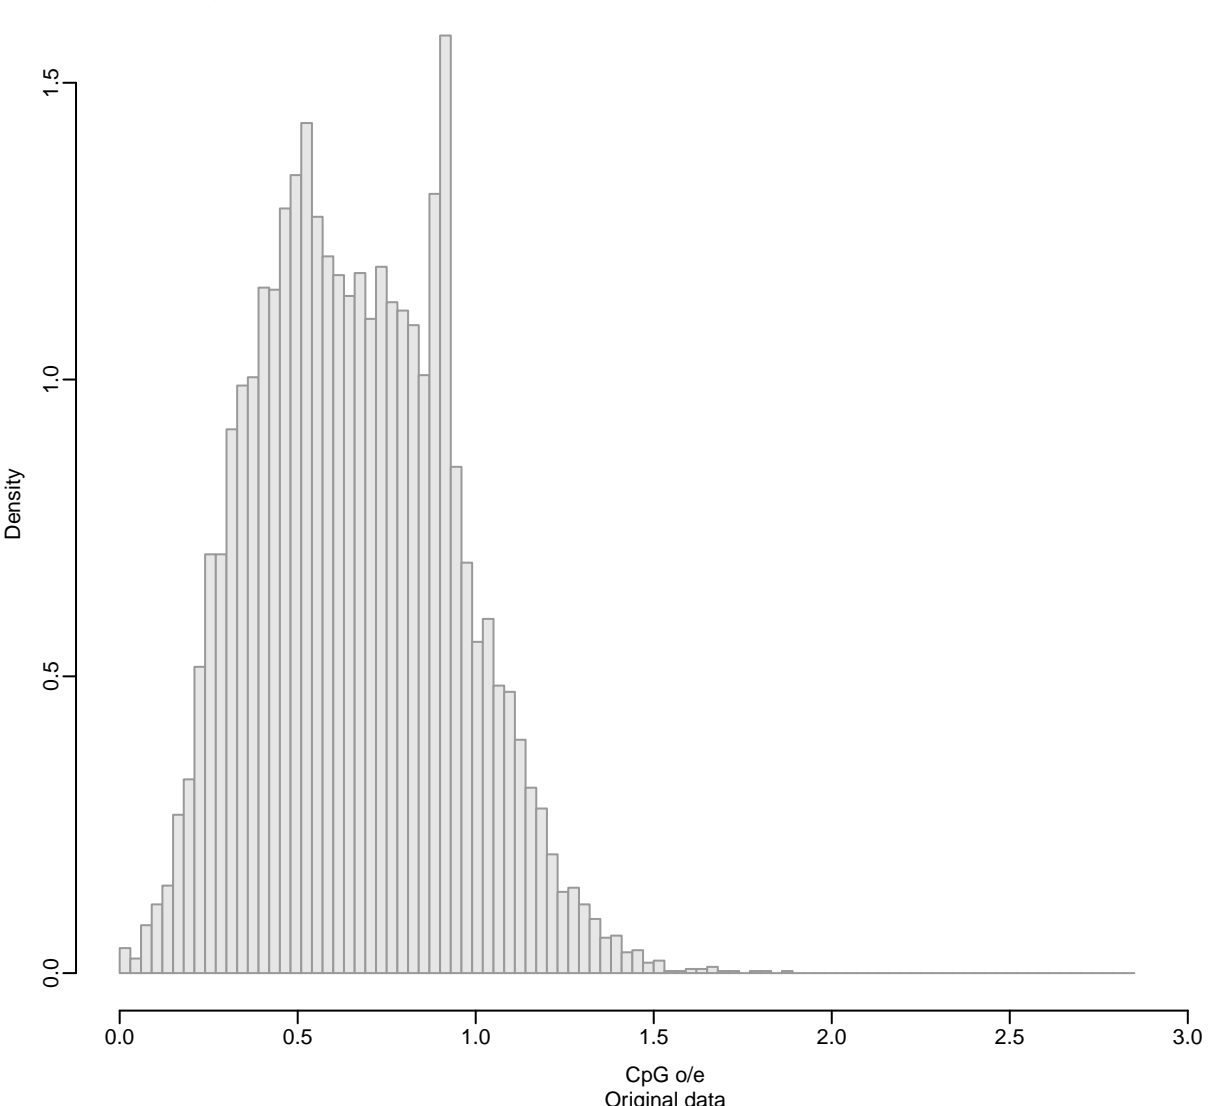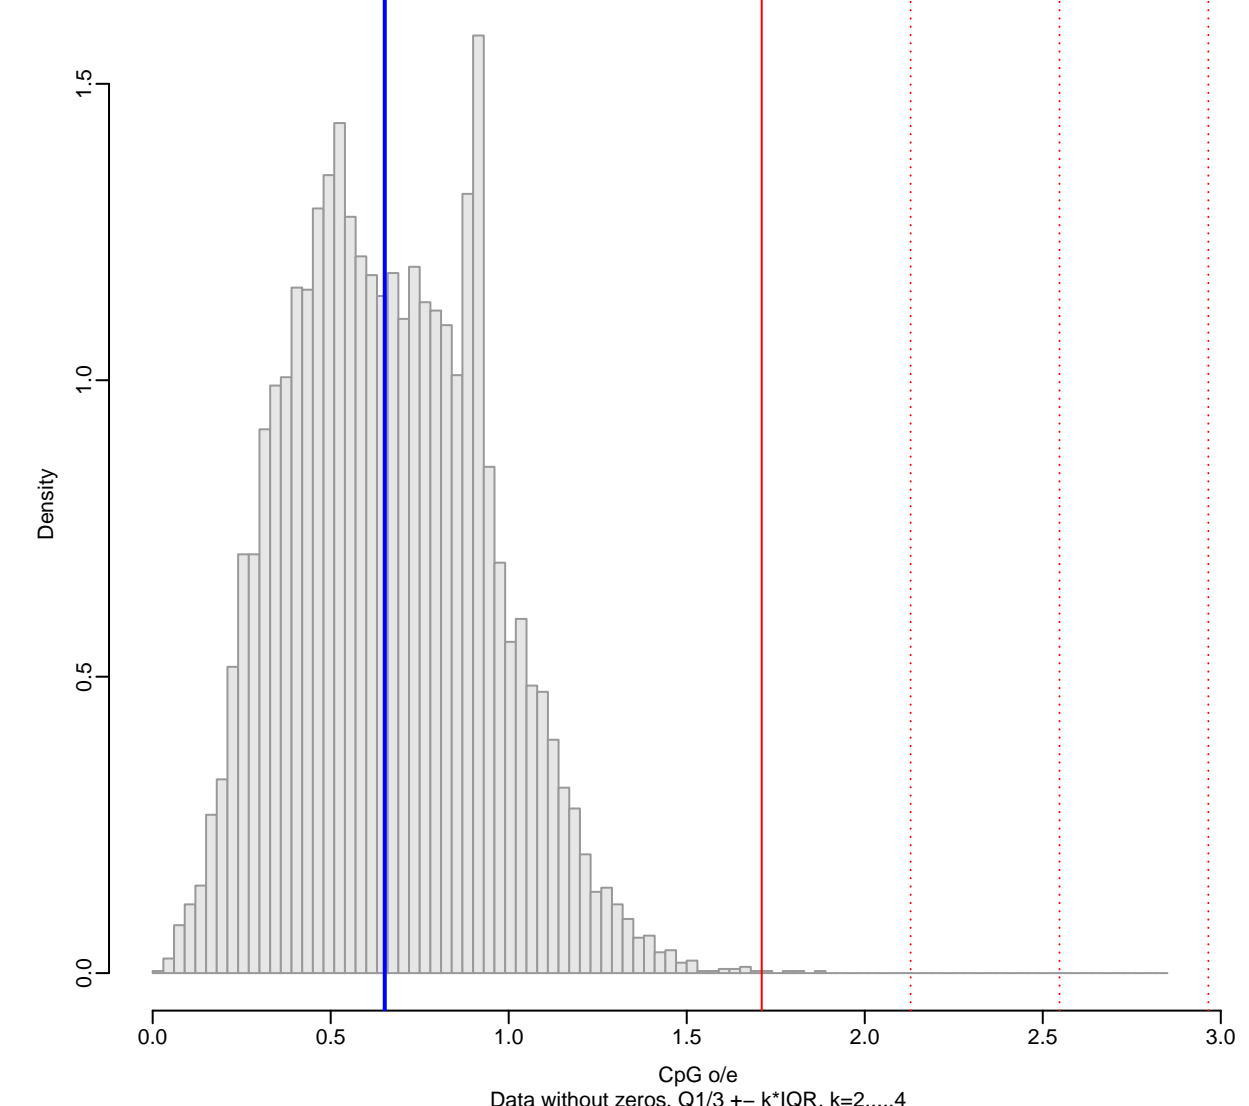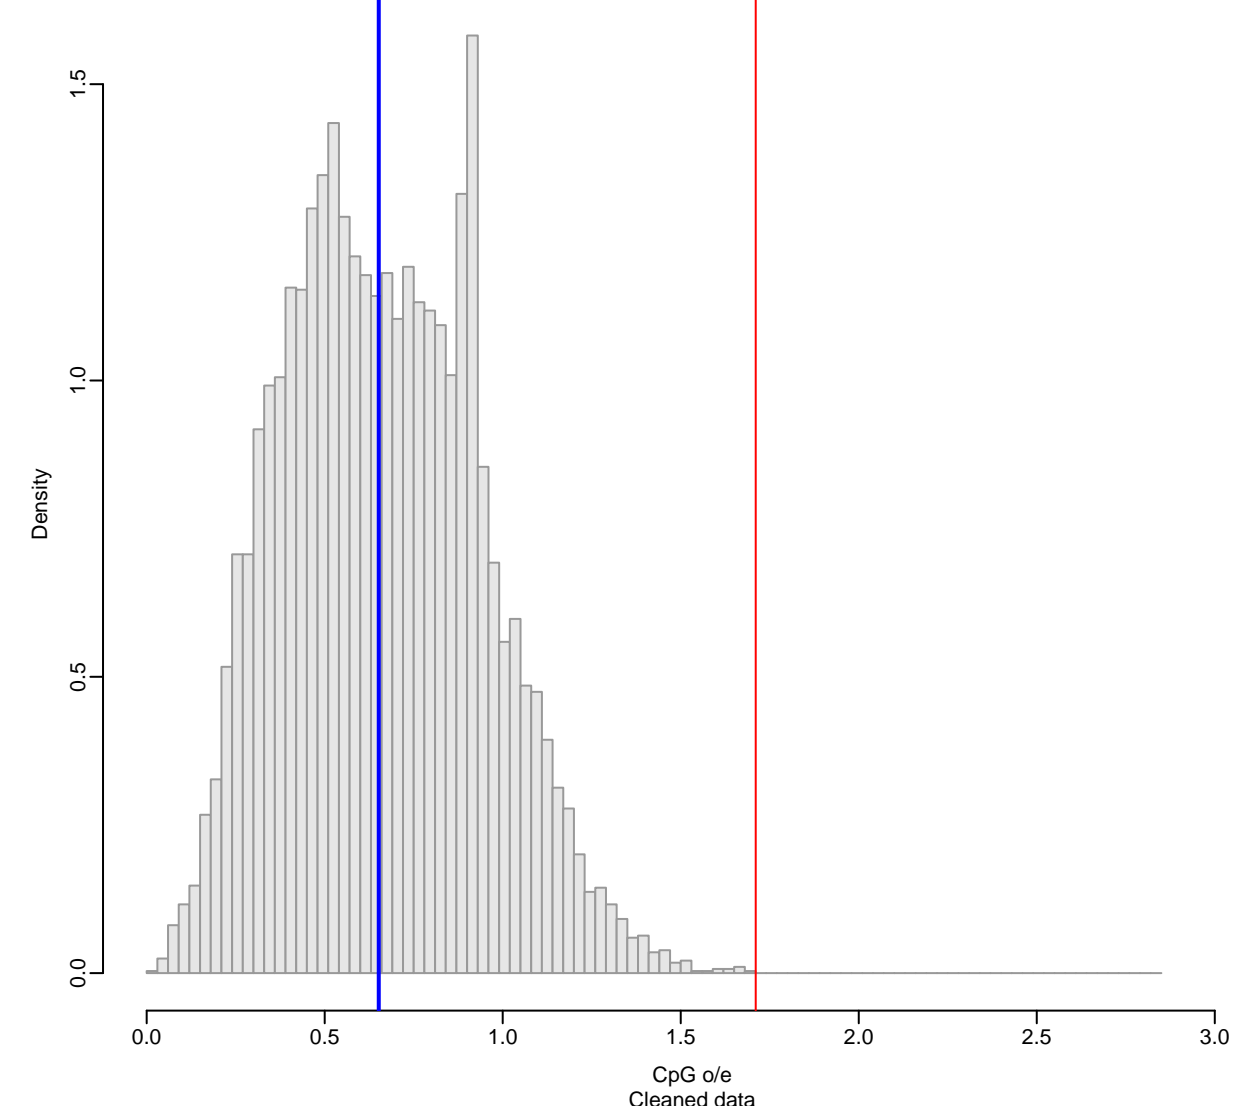

Gobiocypris\_rarus

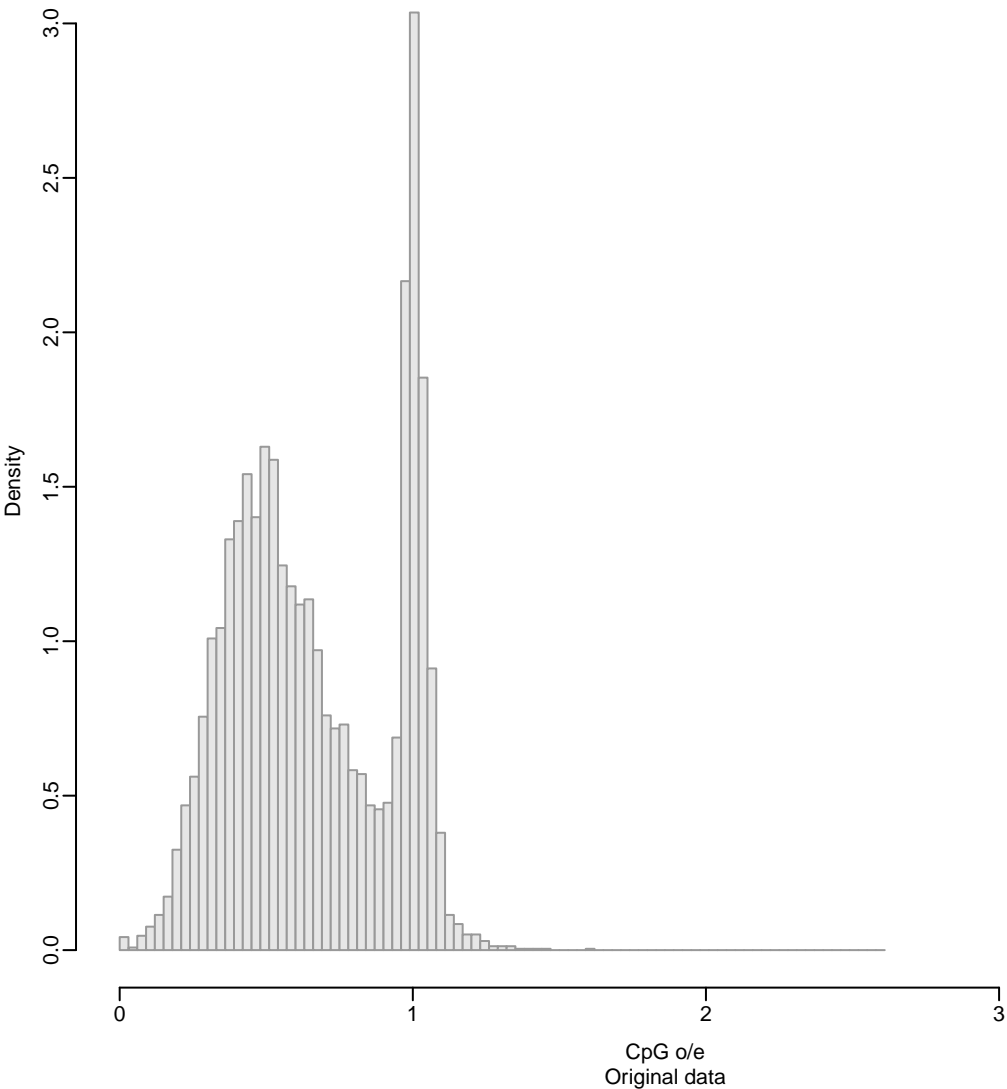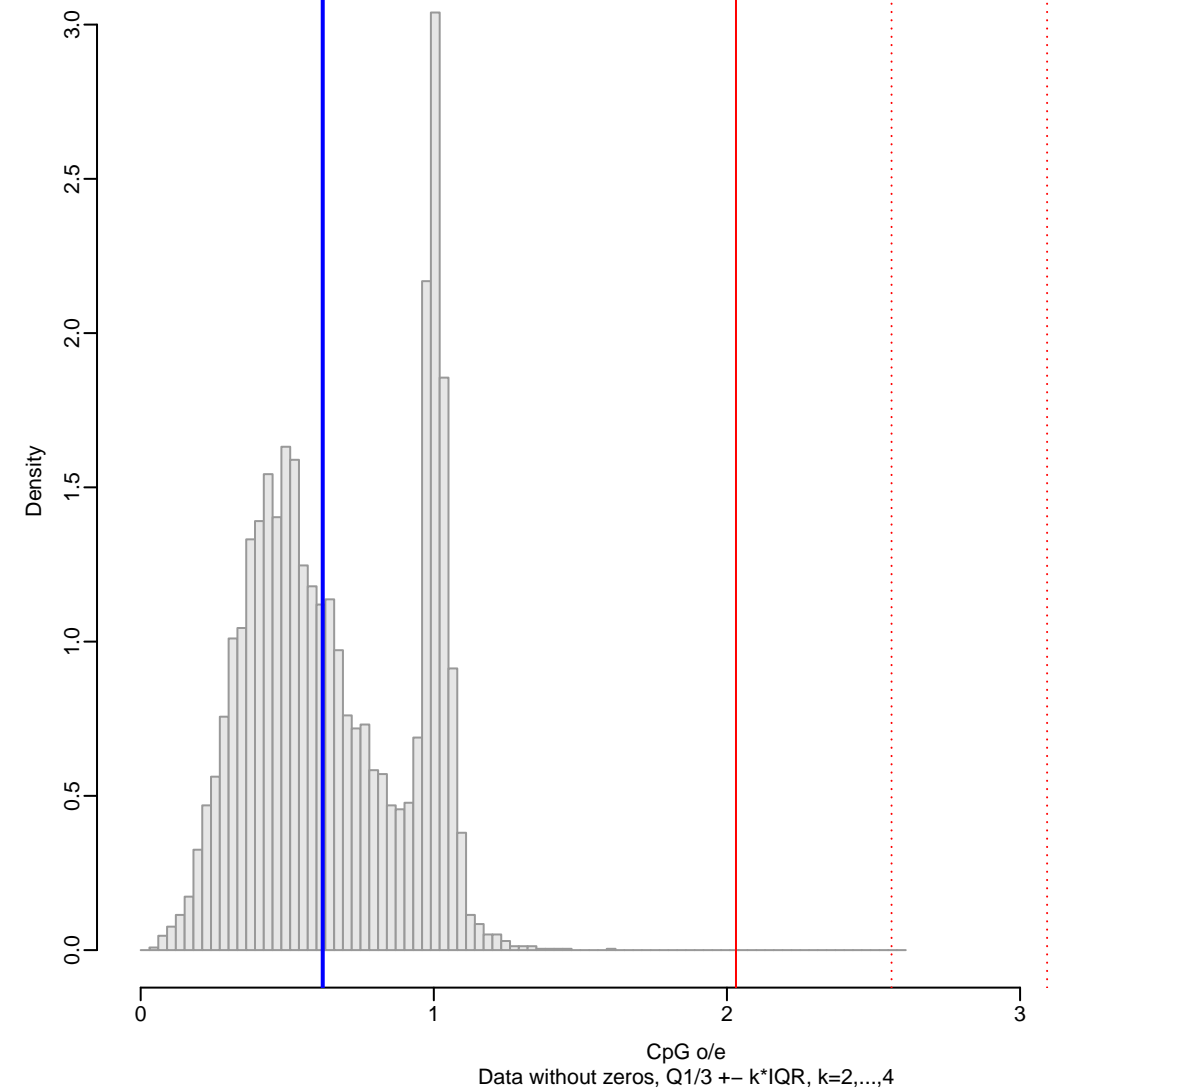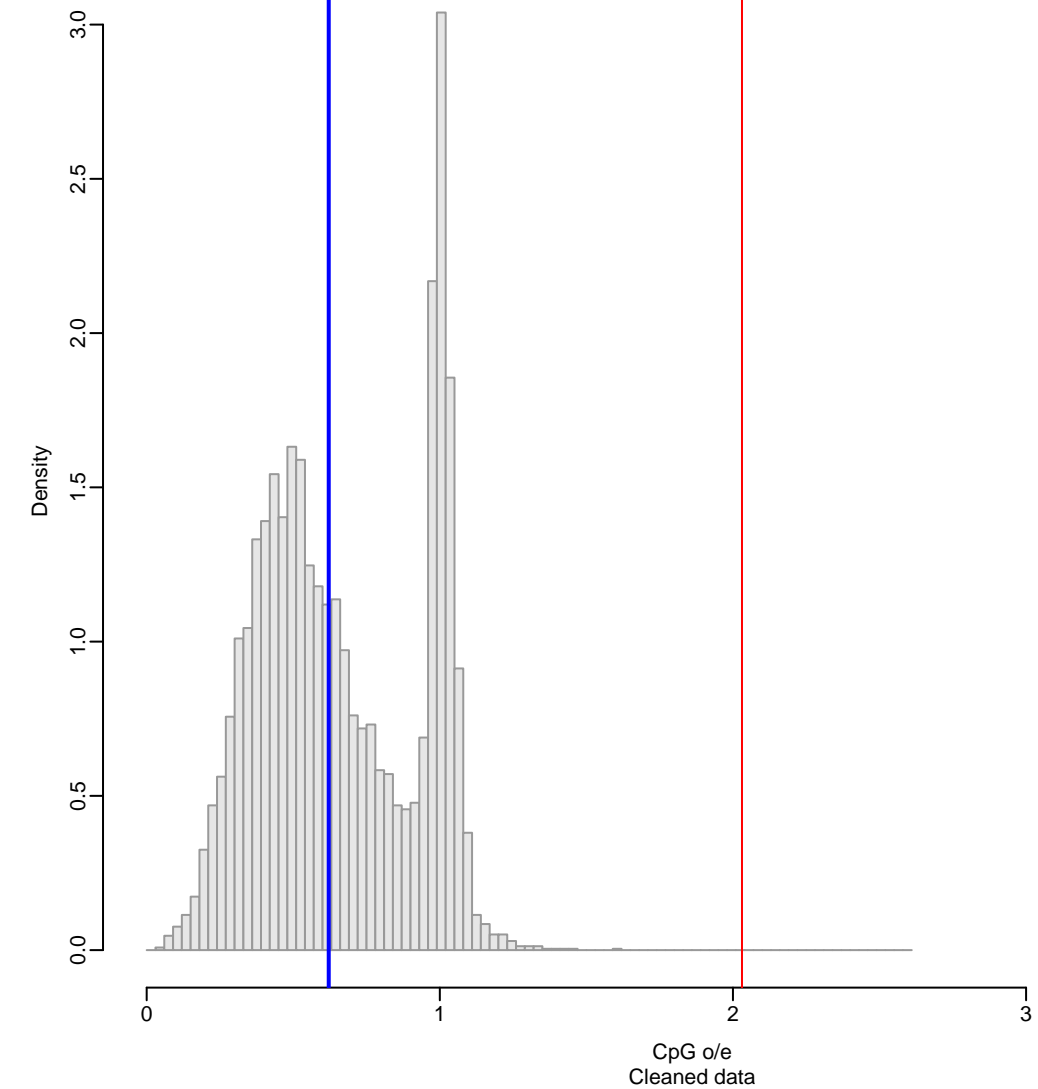

Gracilaria\_changii

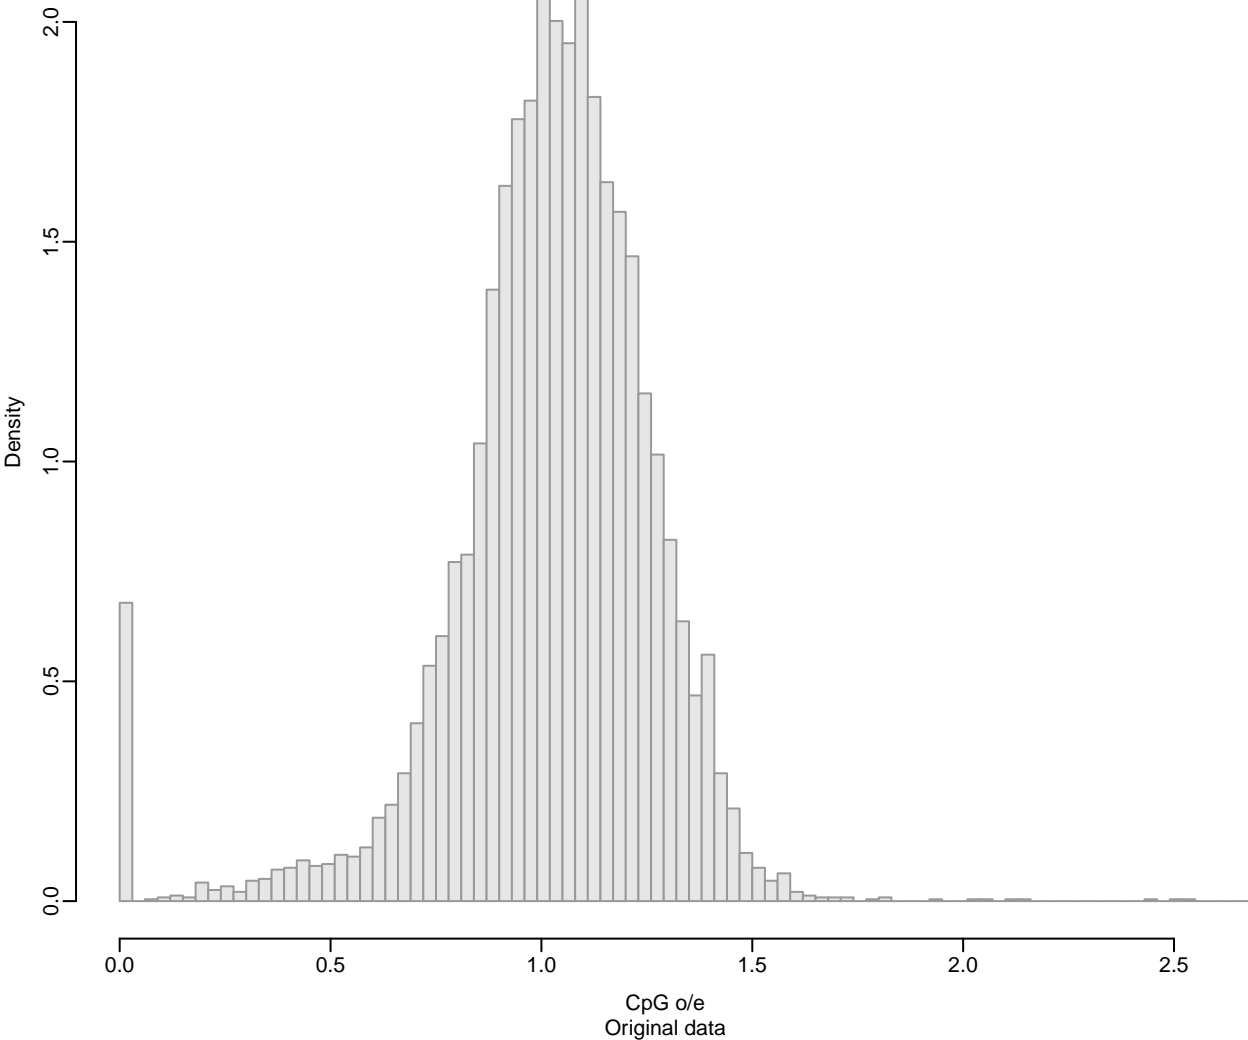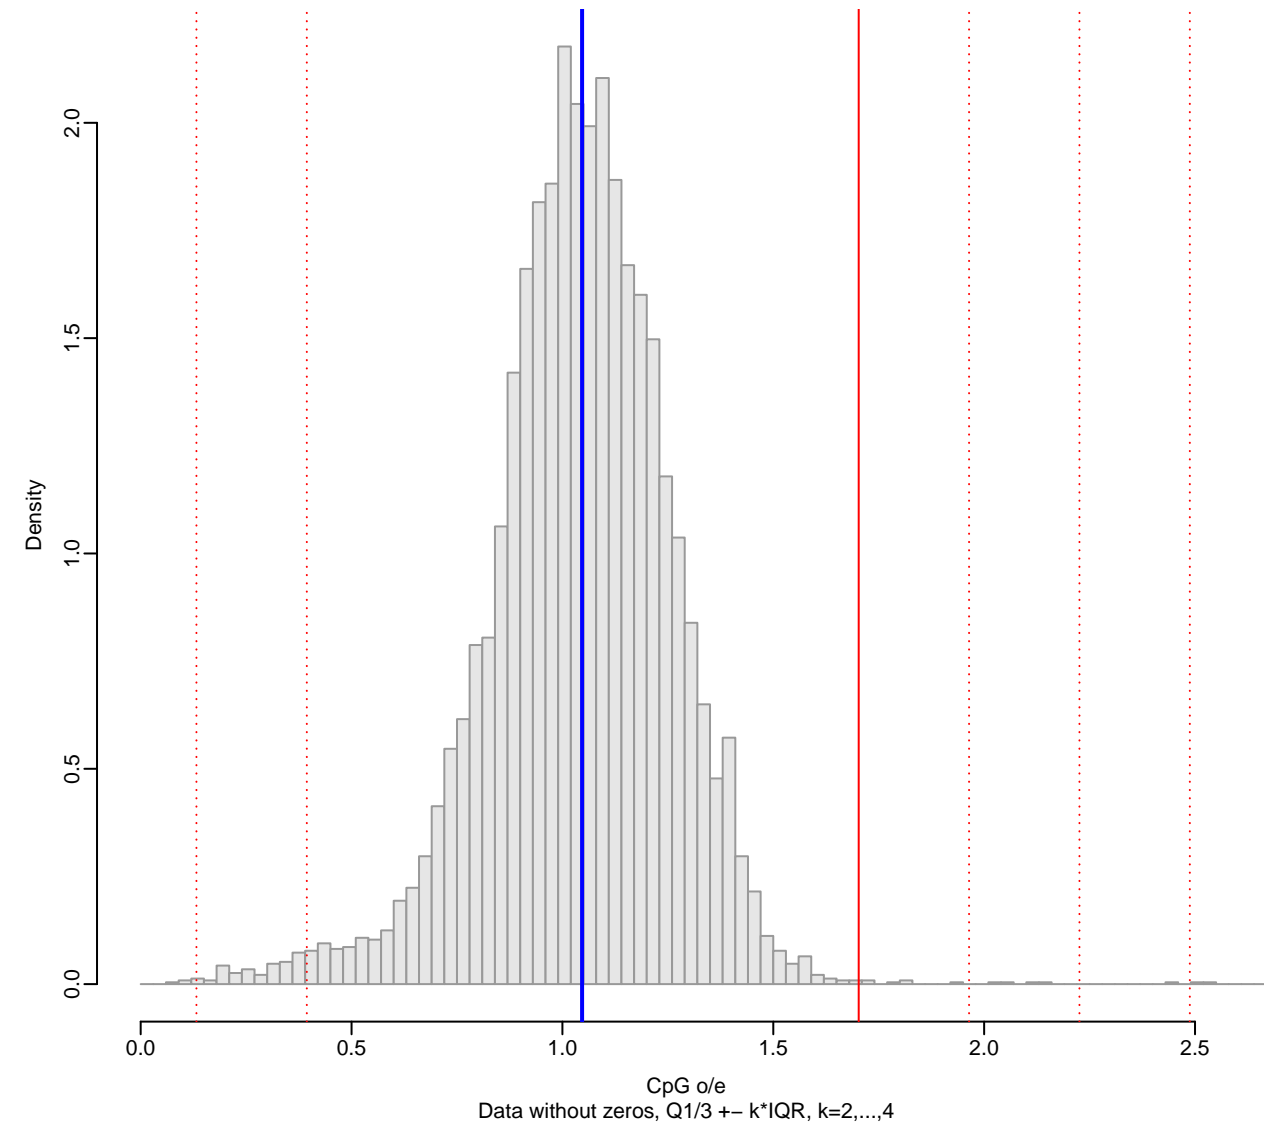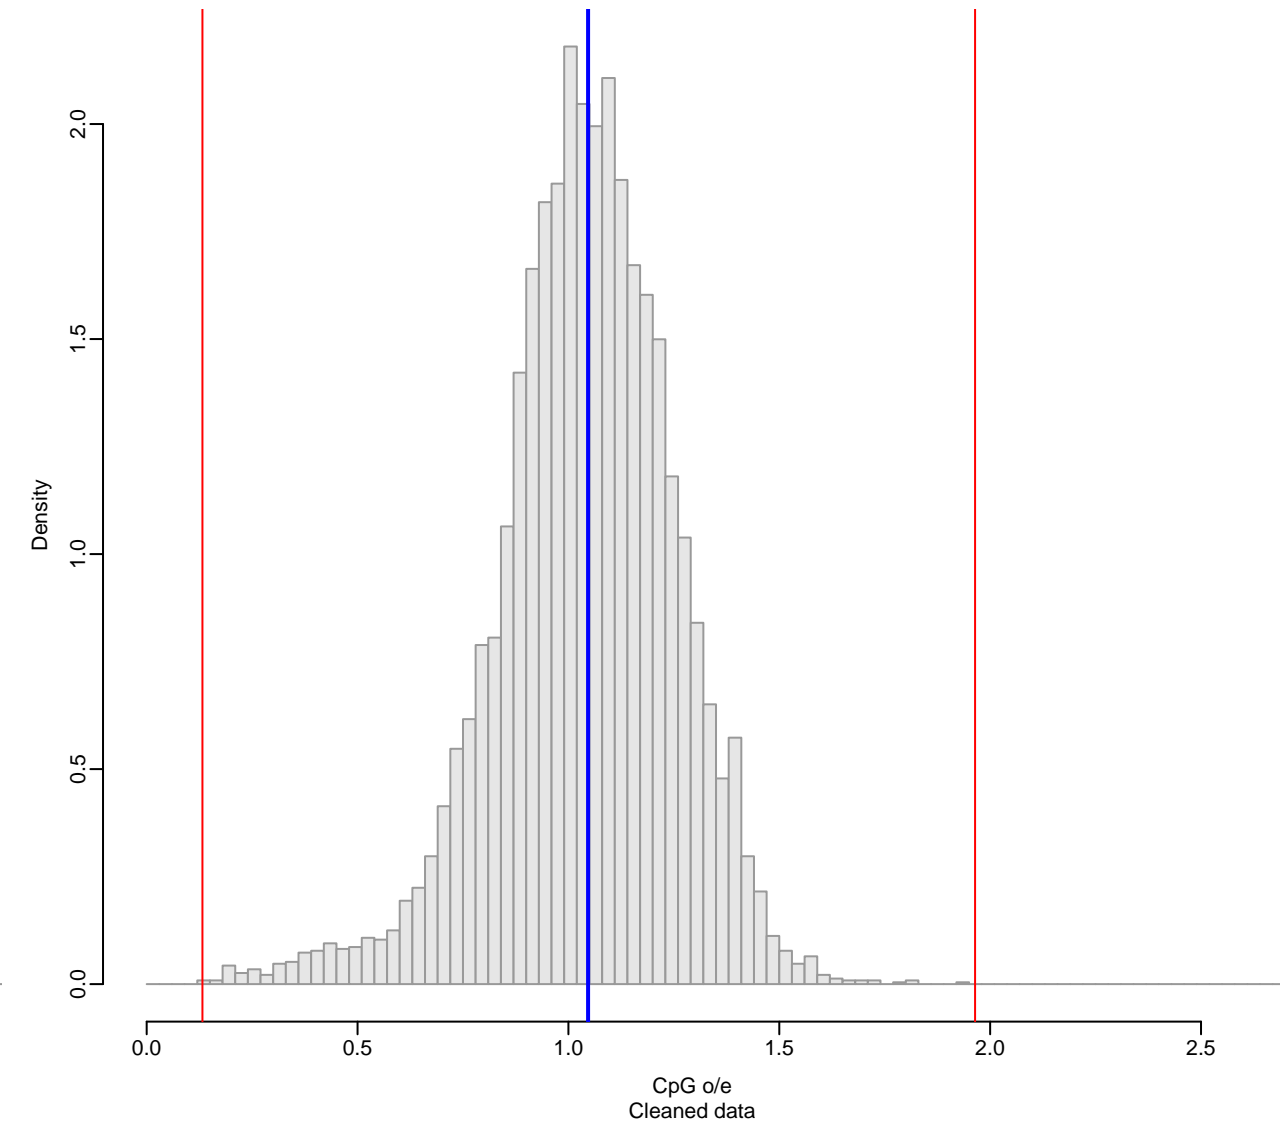



# Haematobia\_irritans\_irritans

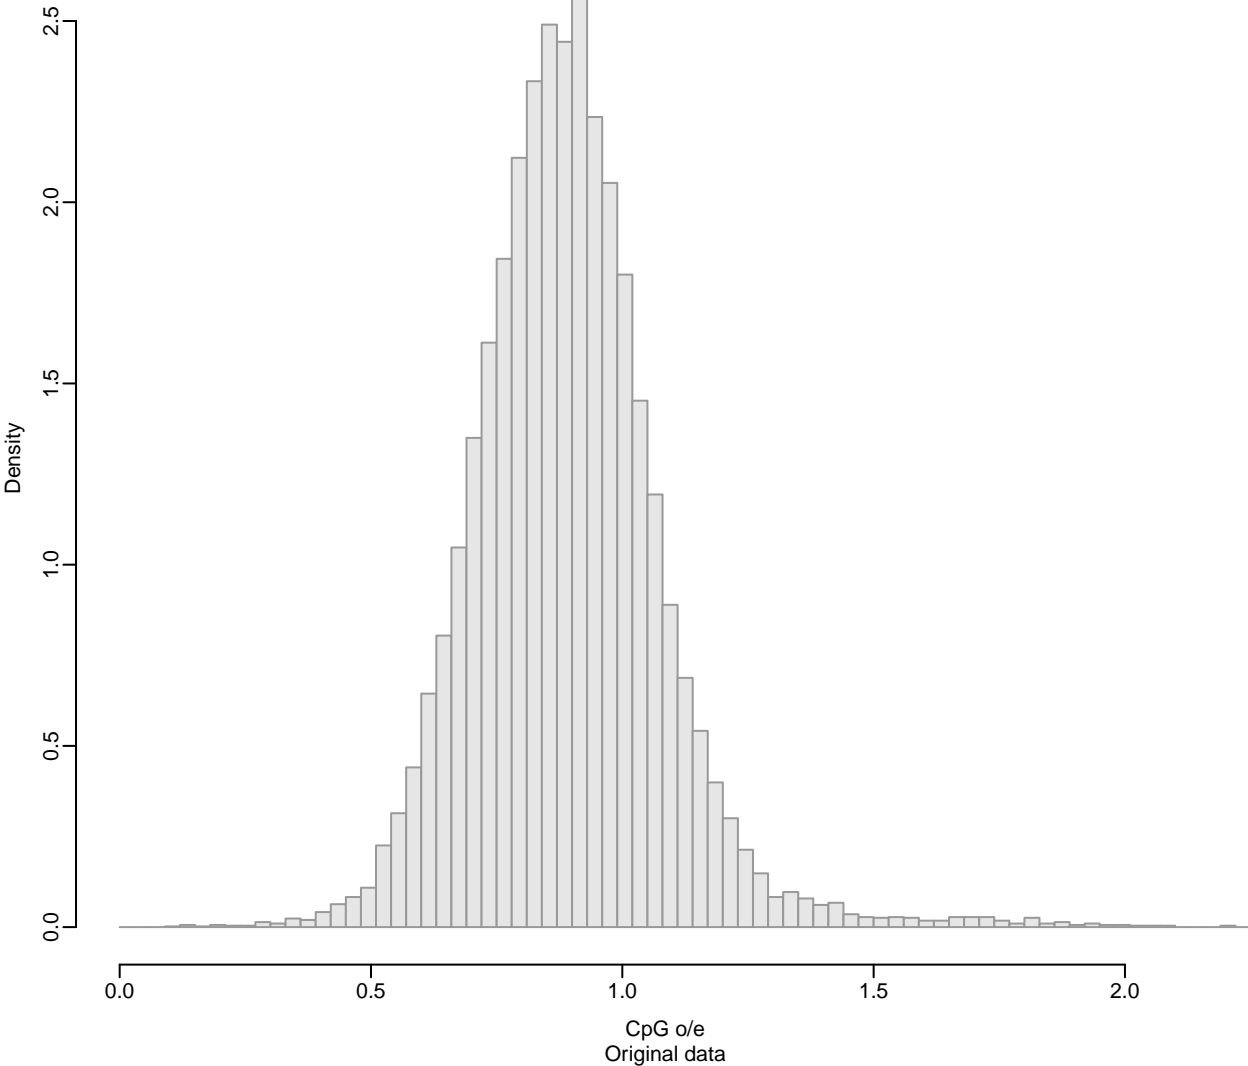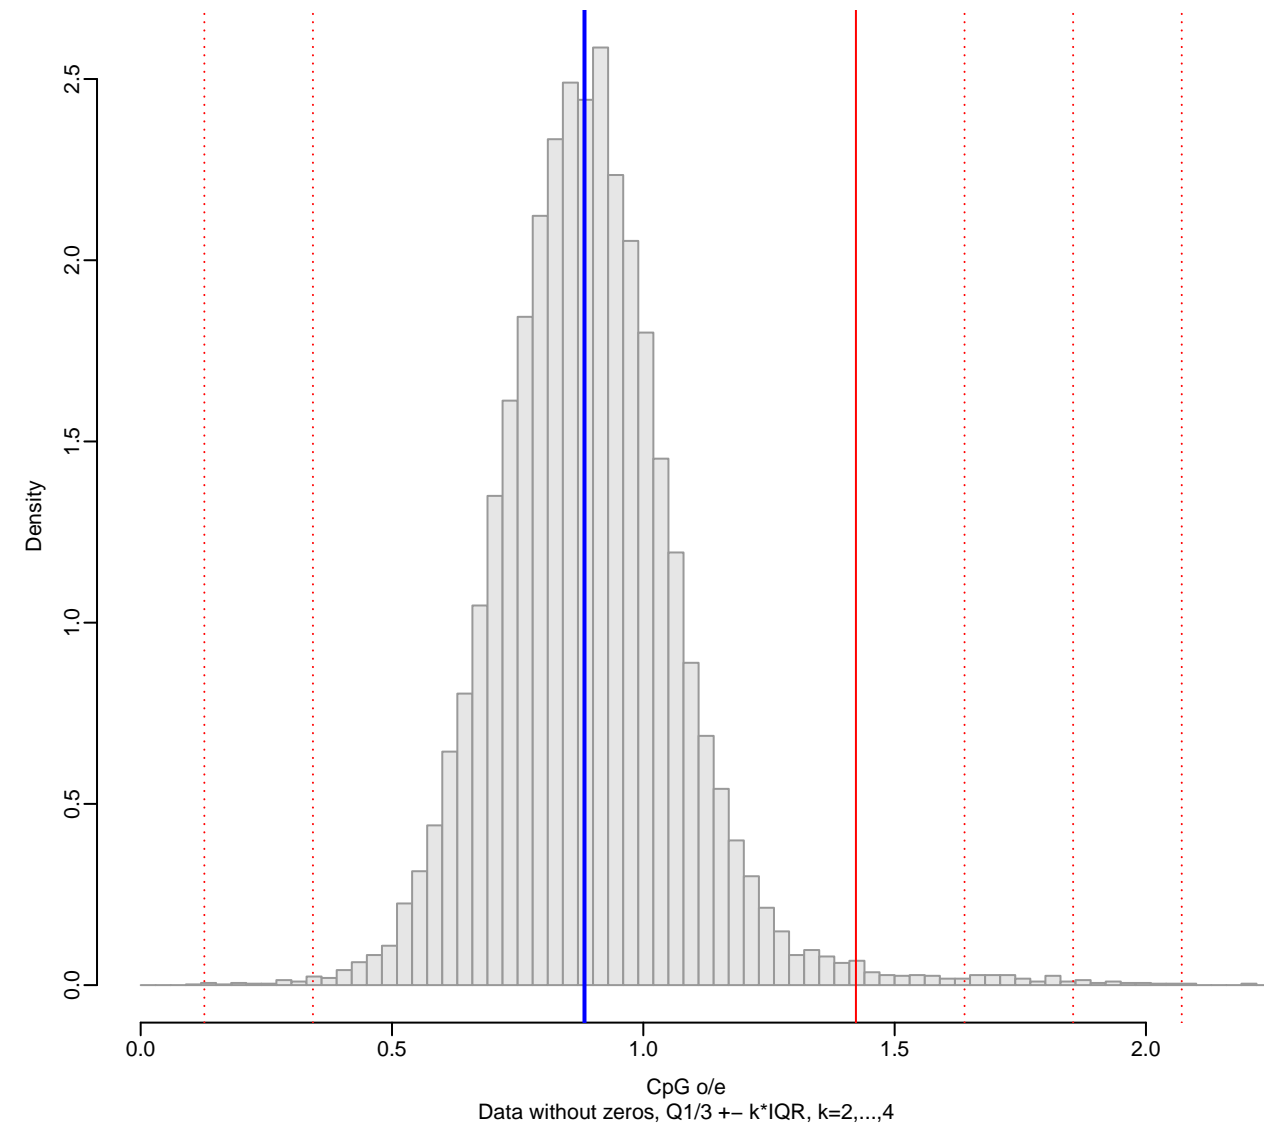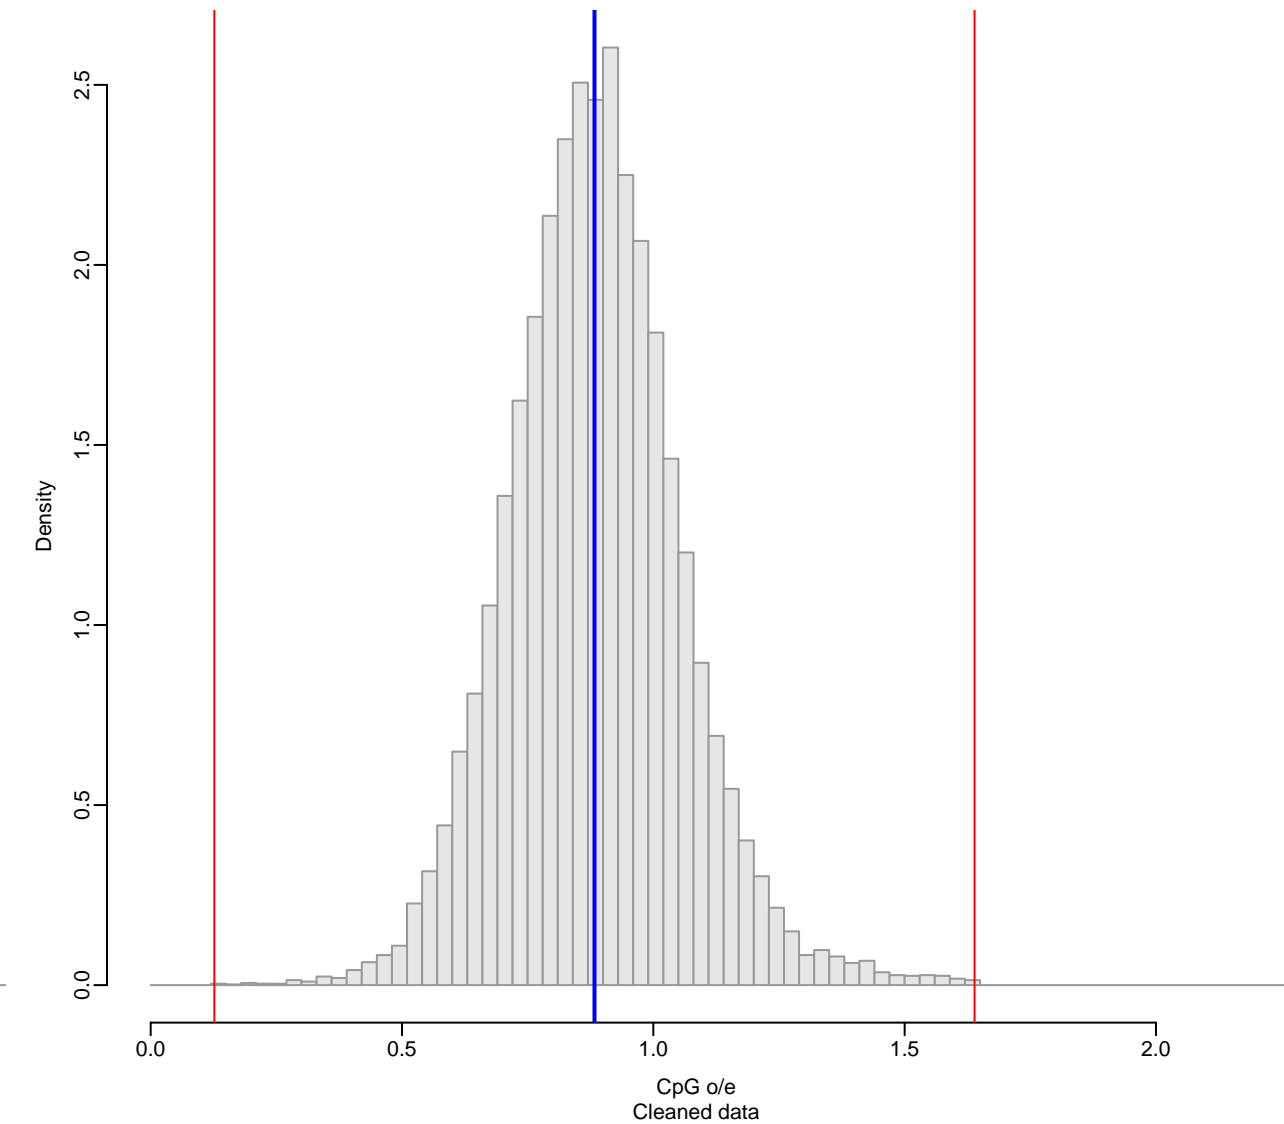

# Haemonchus\_contortus

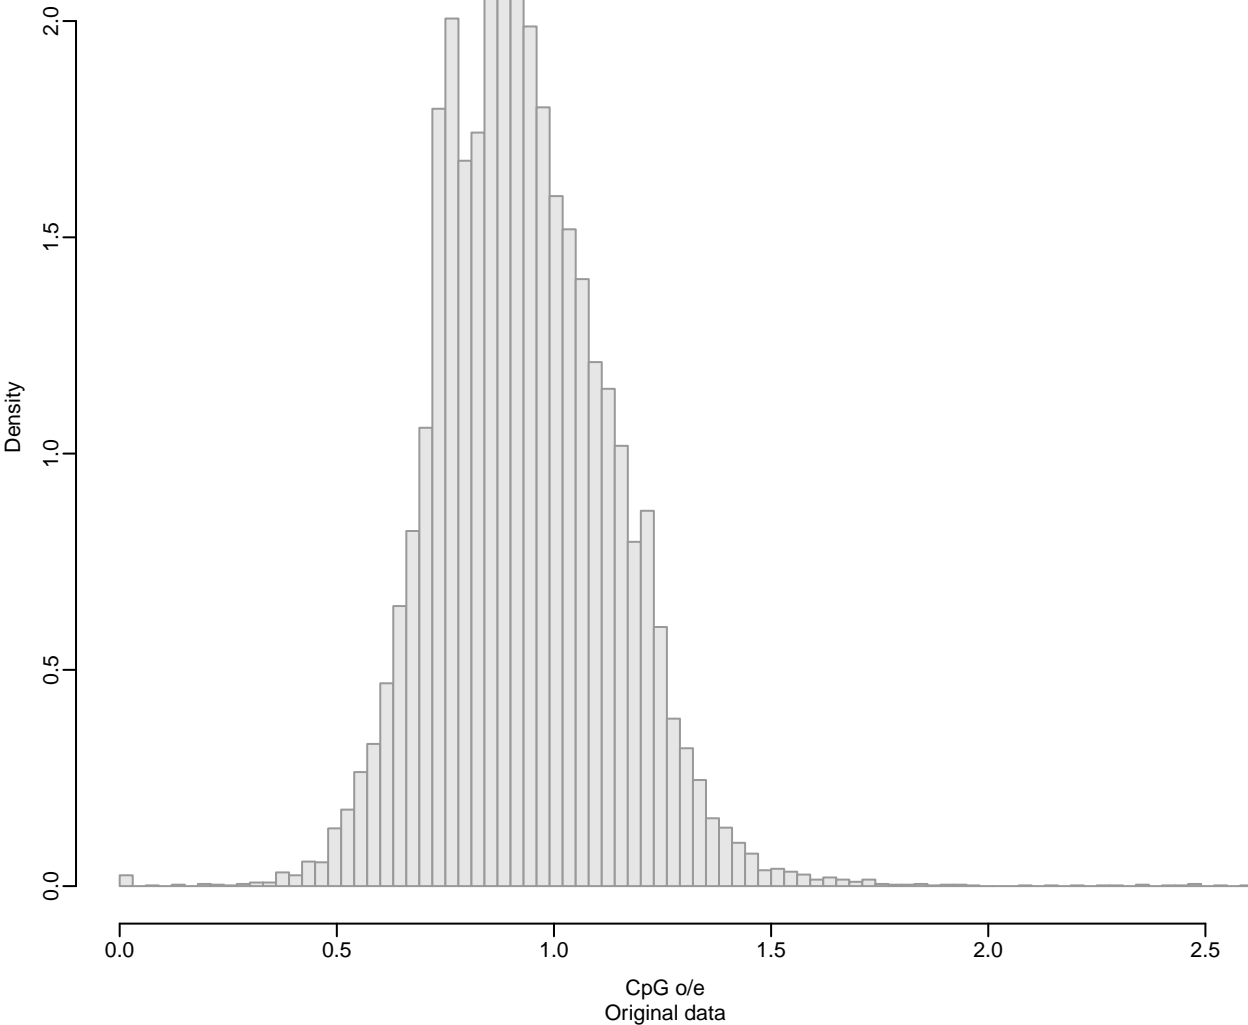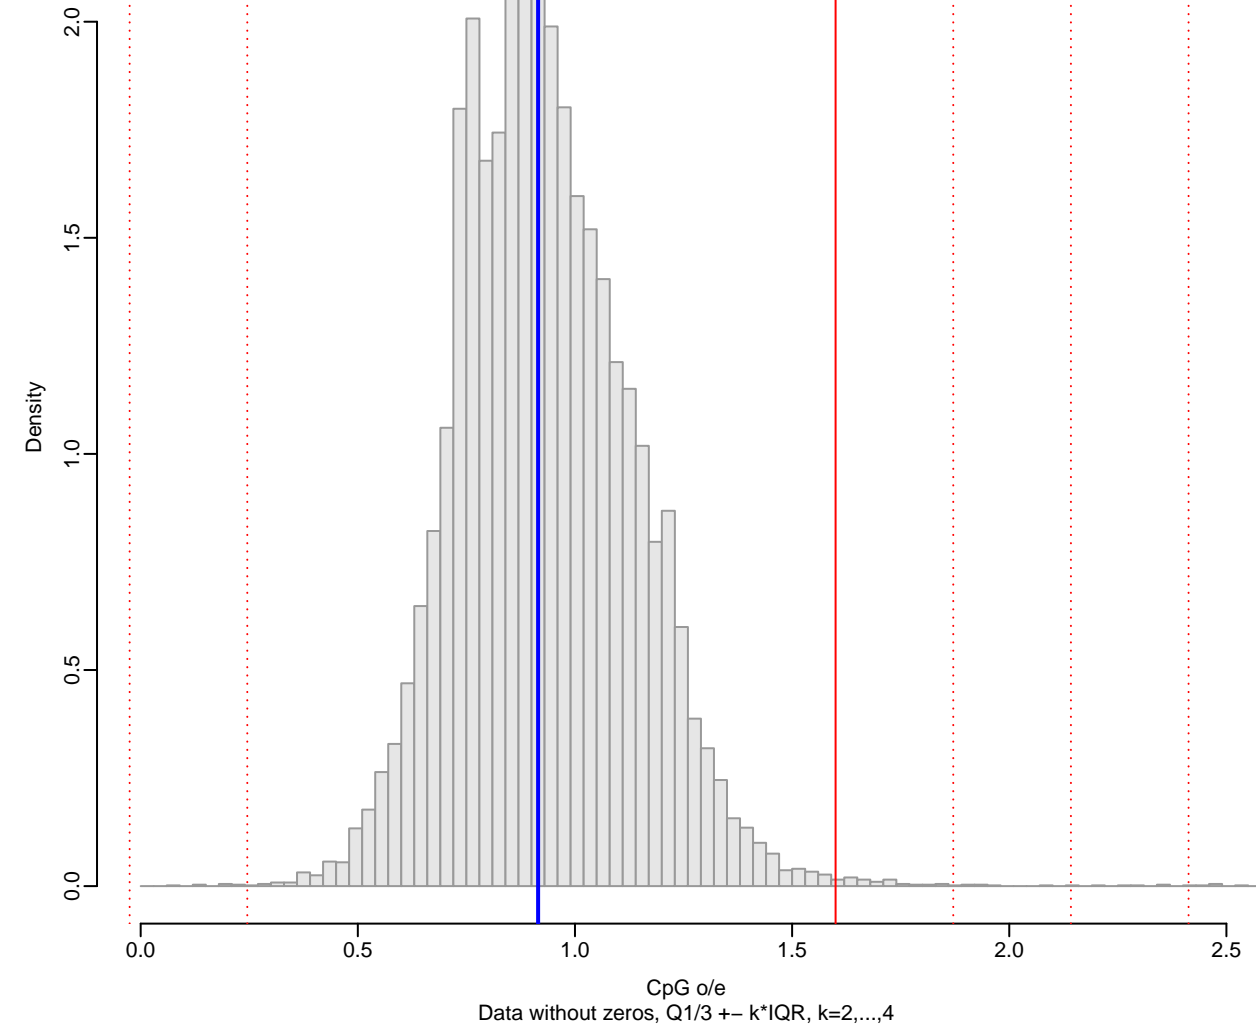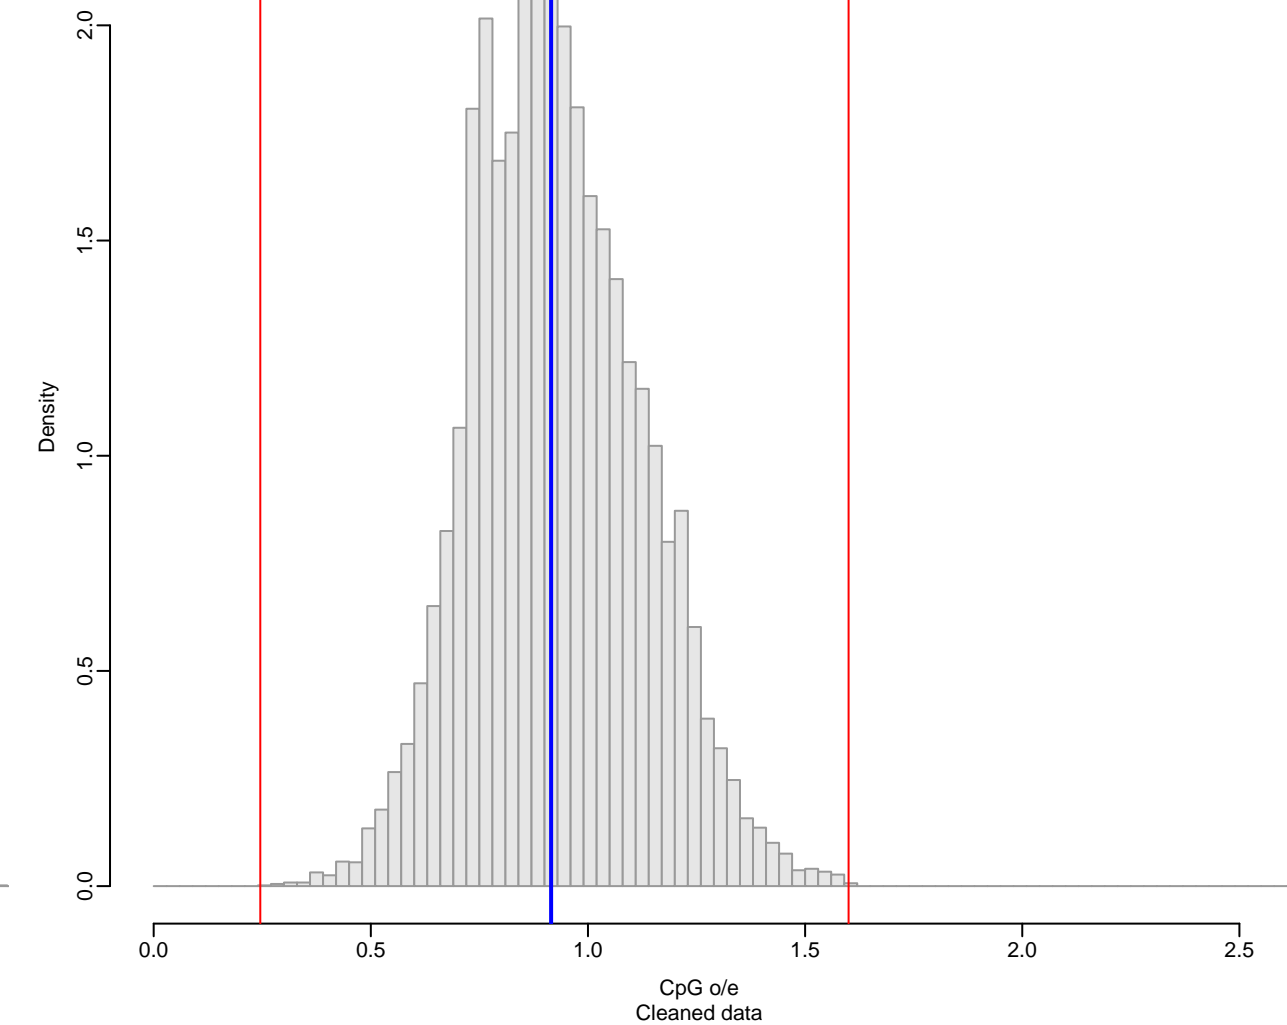

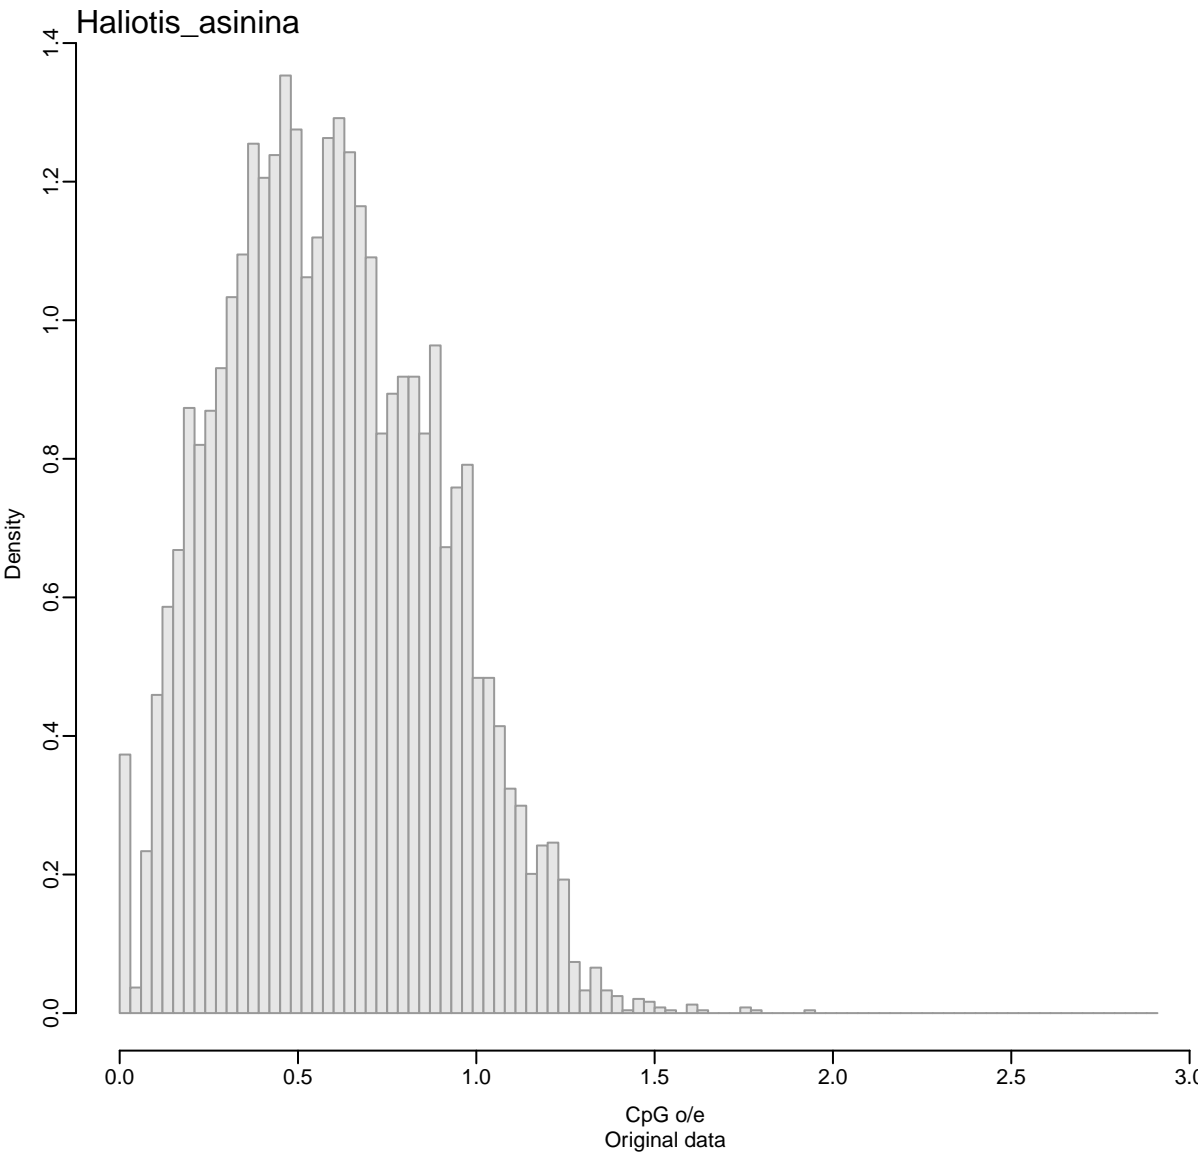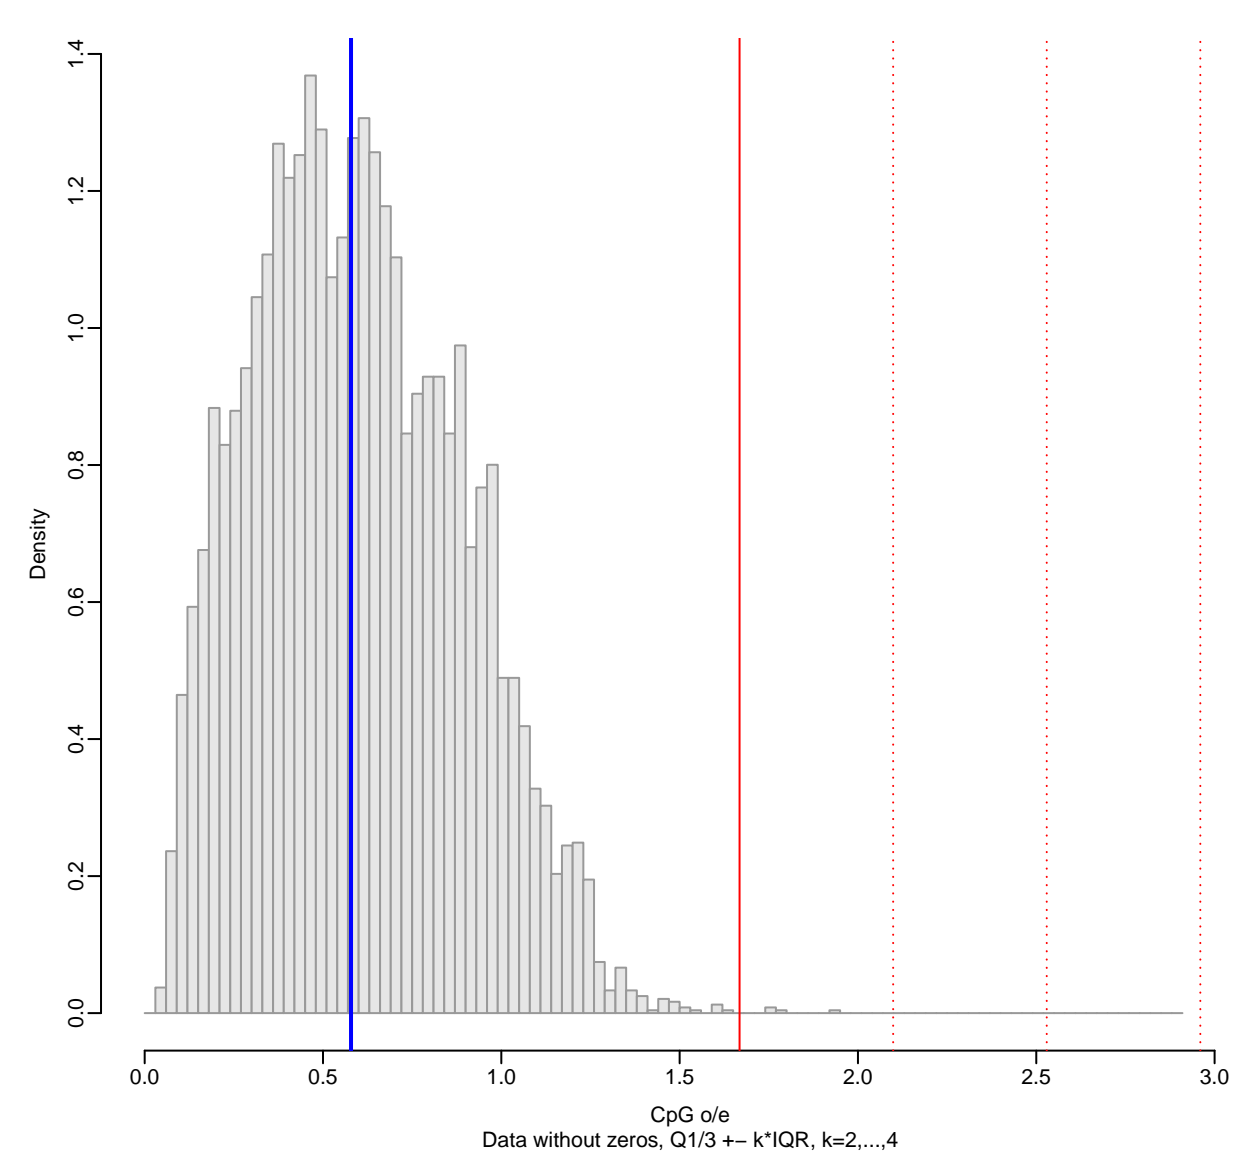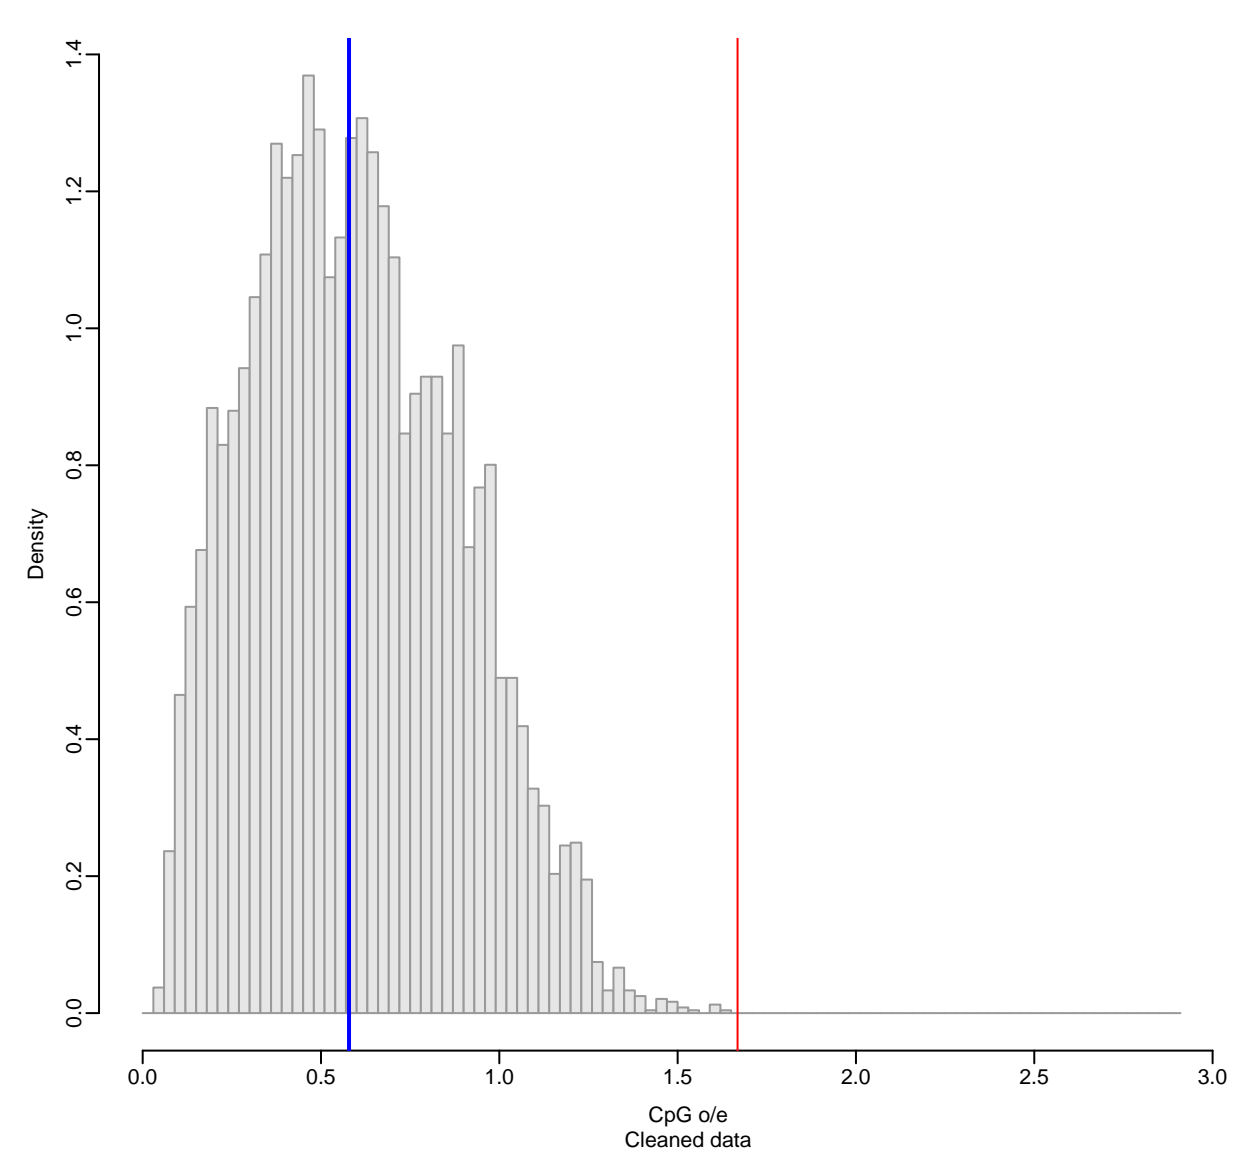

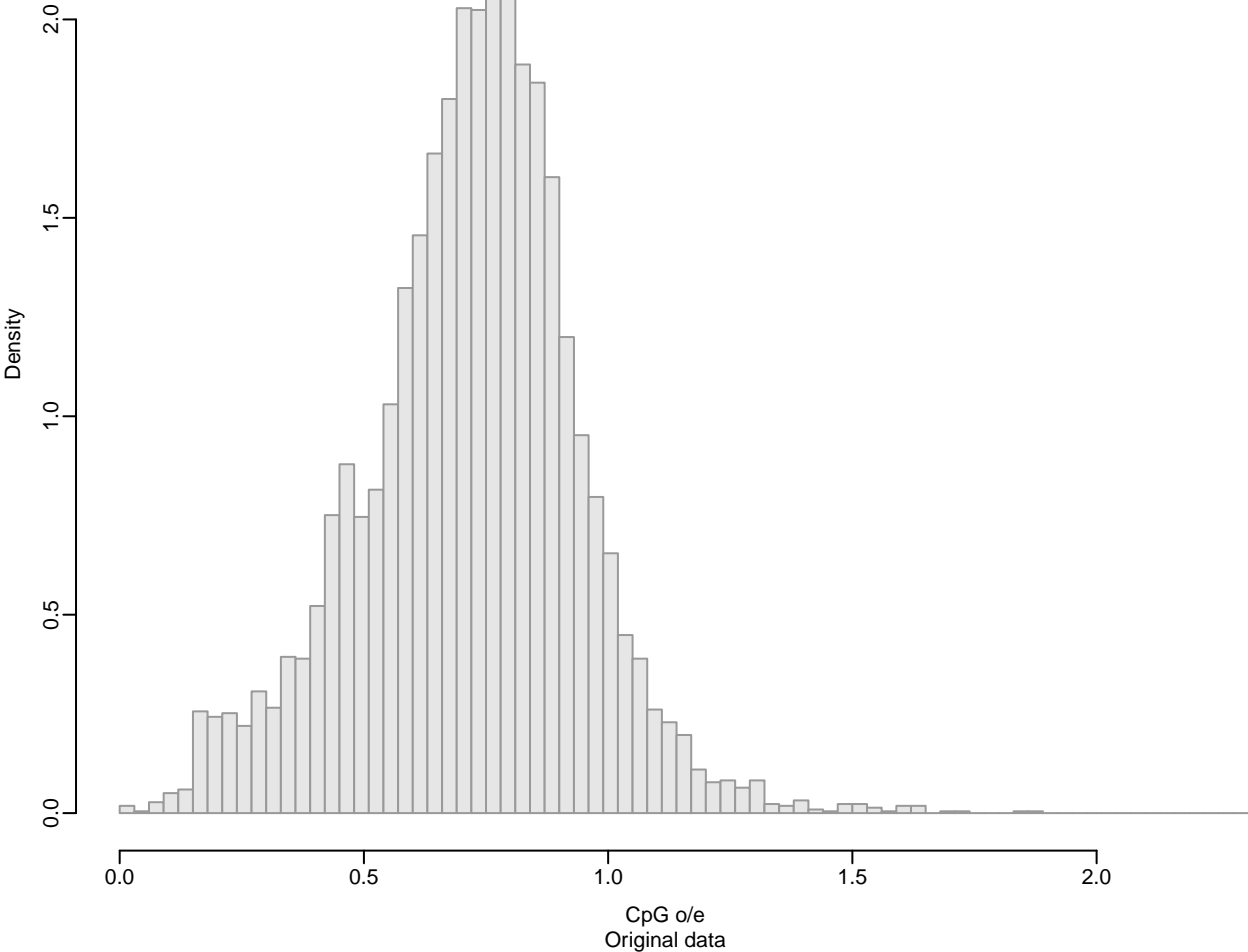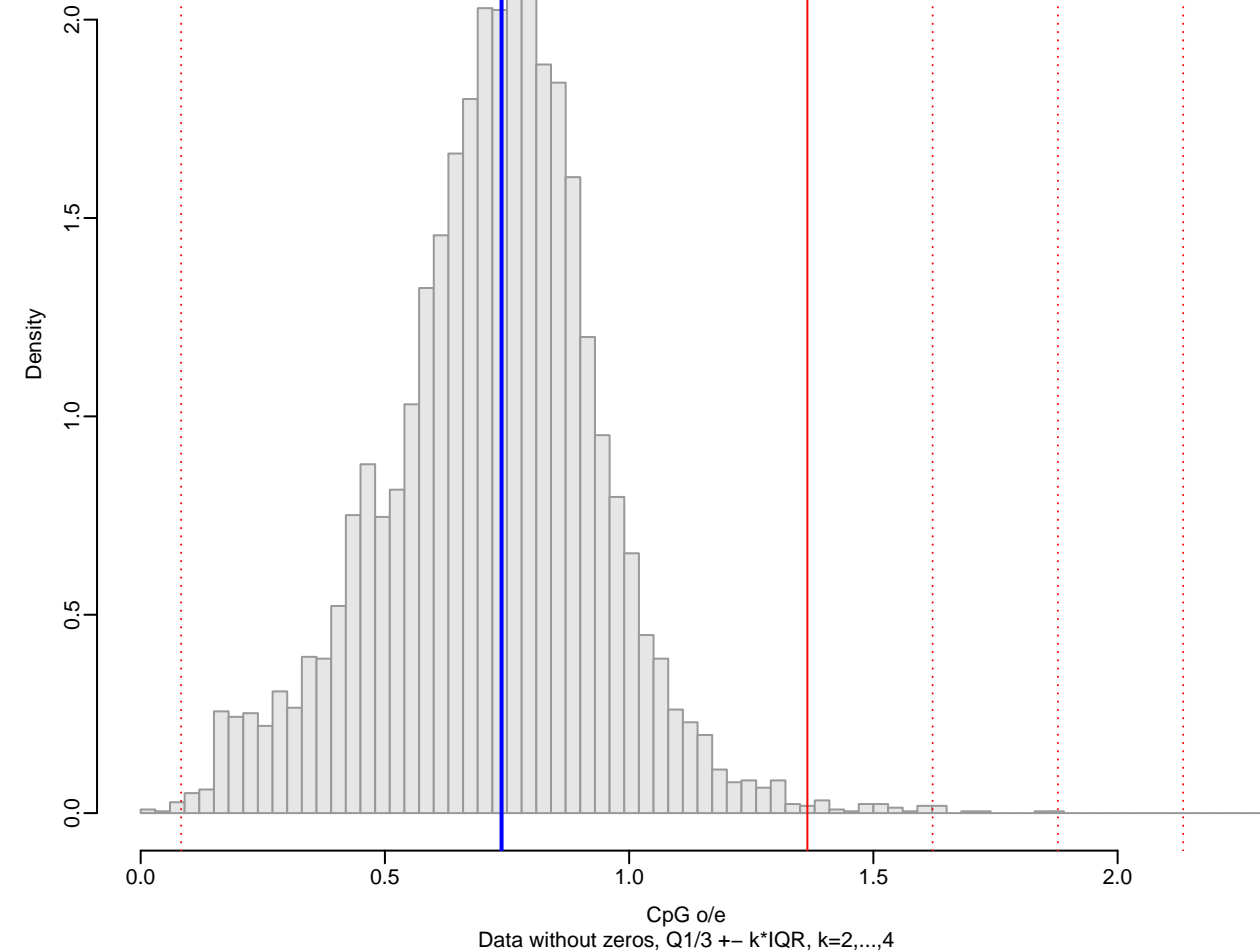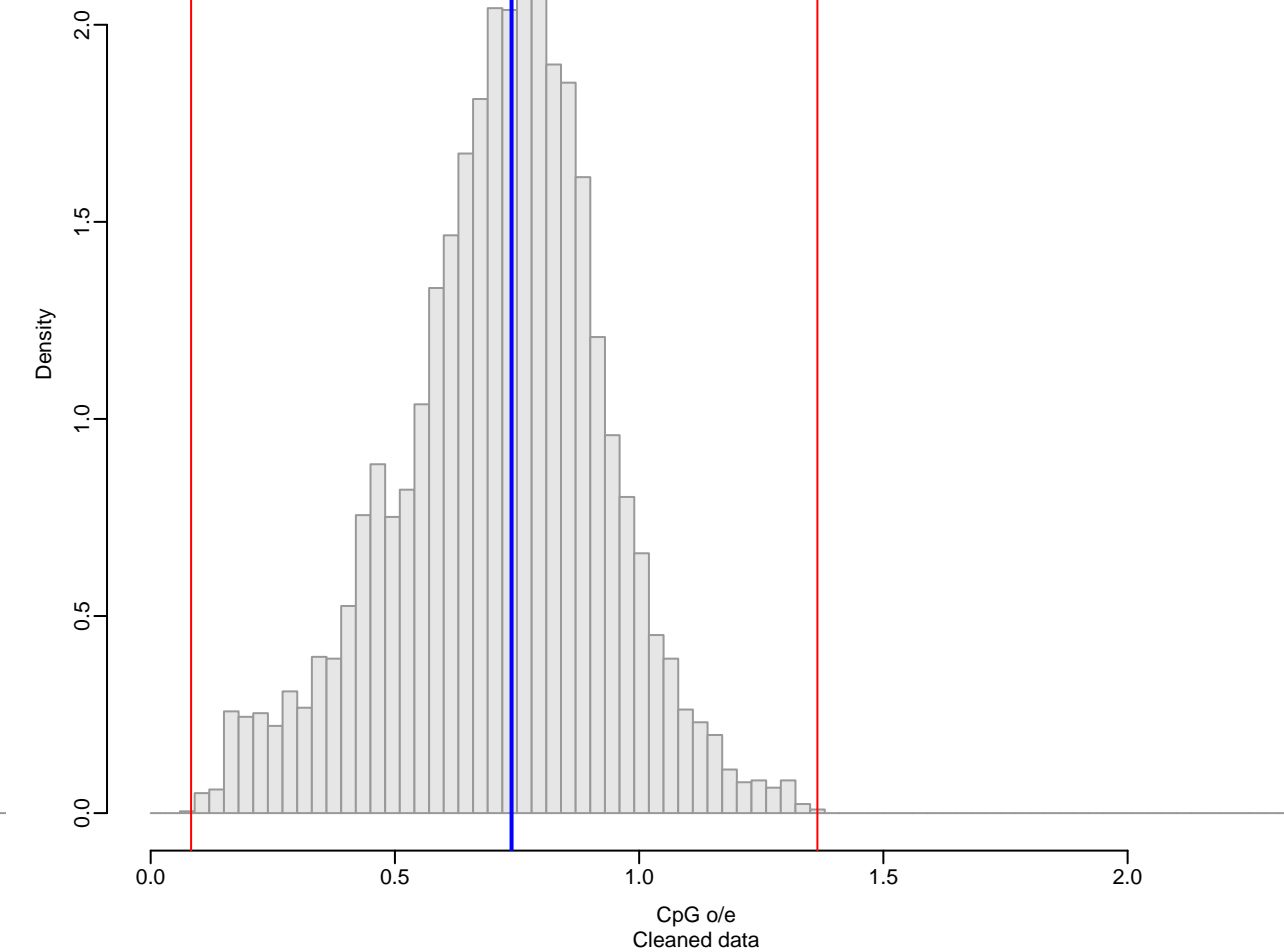

Haliotis\_discus\_hannai

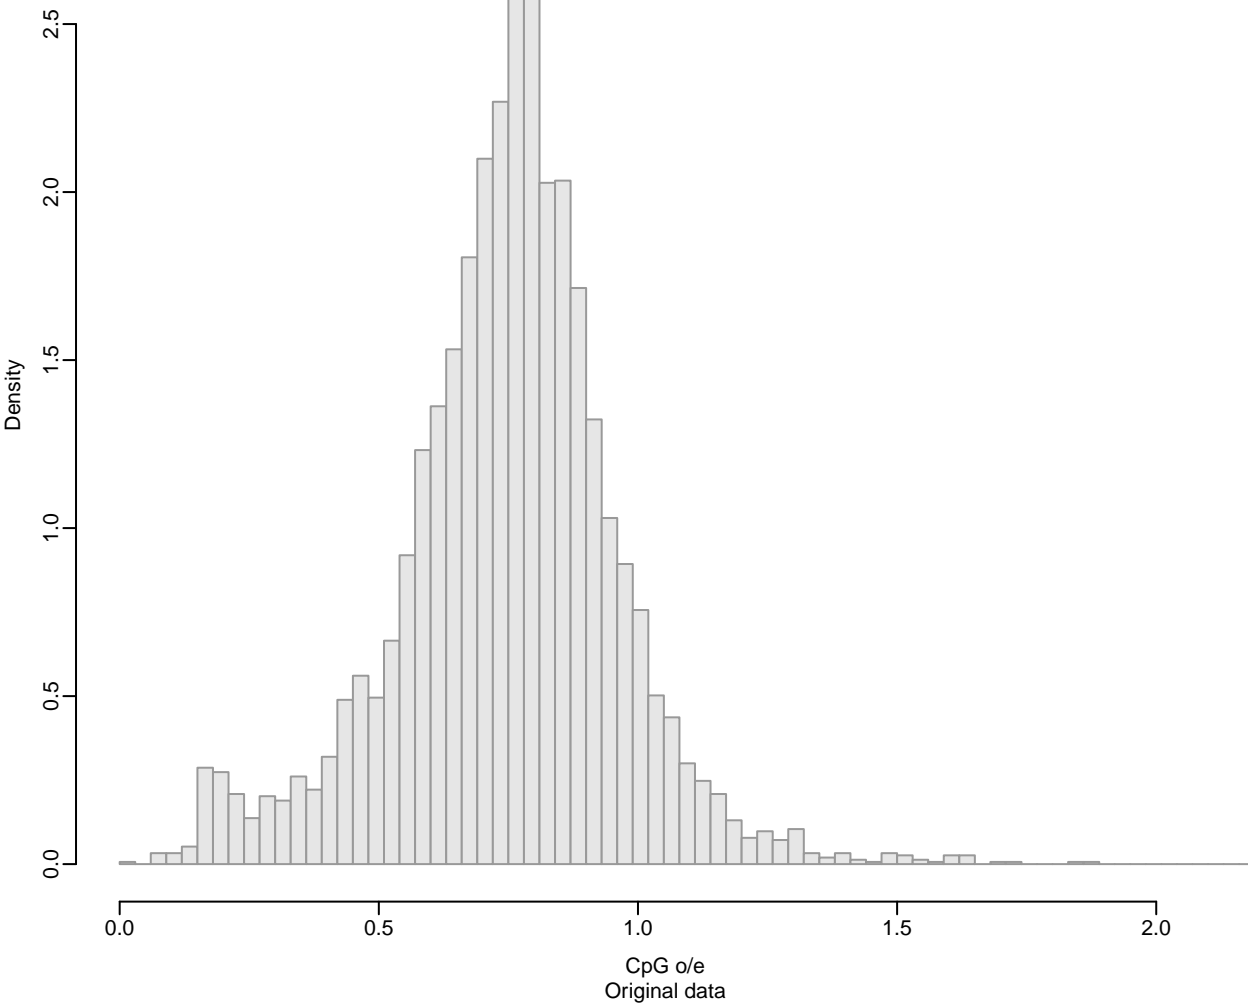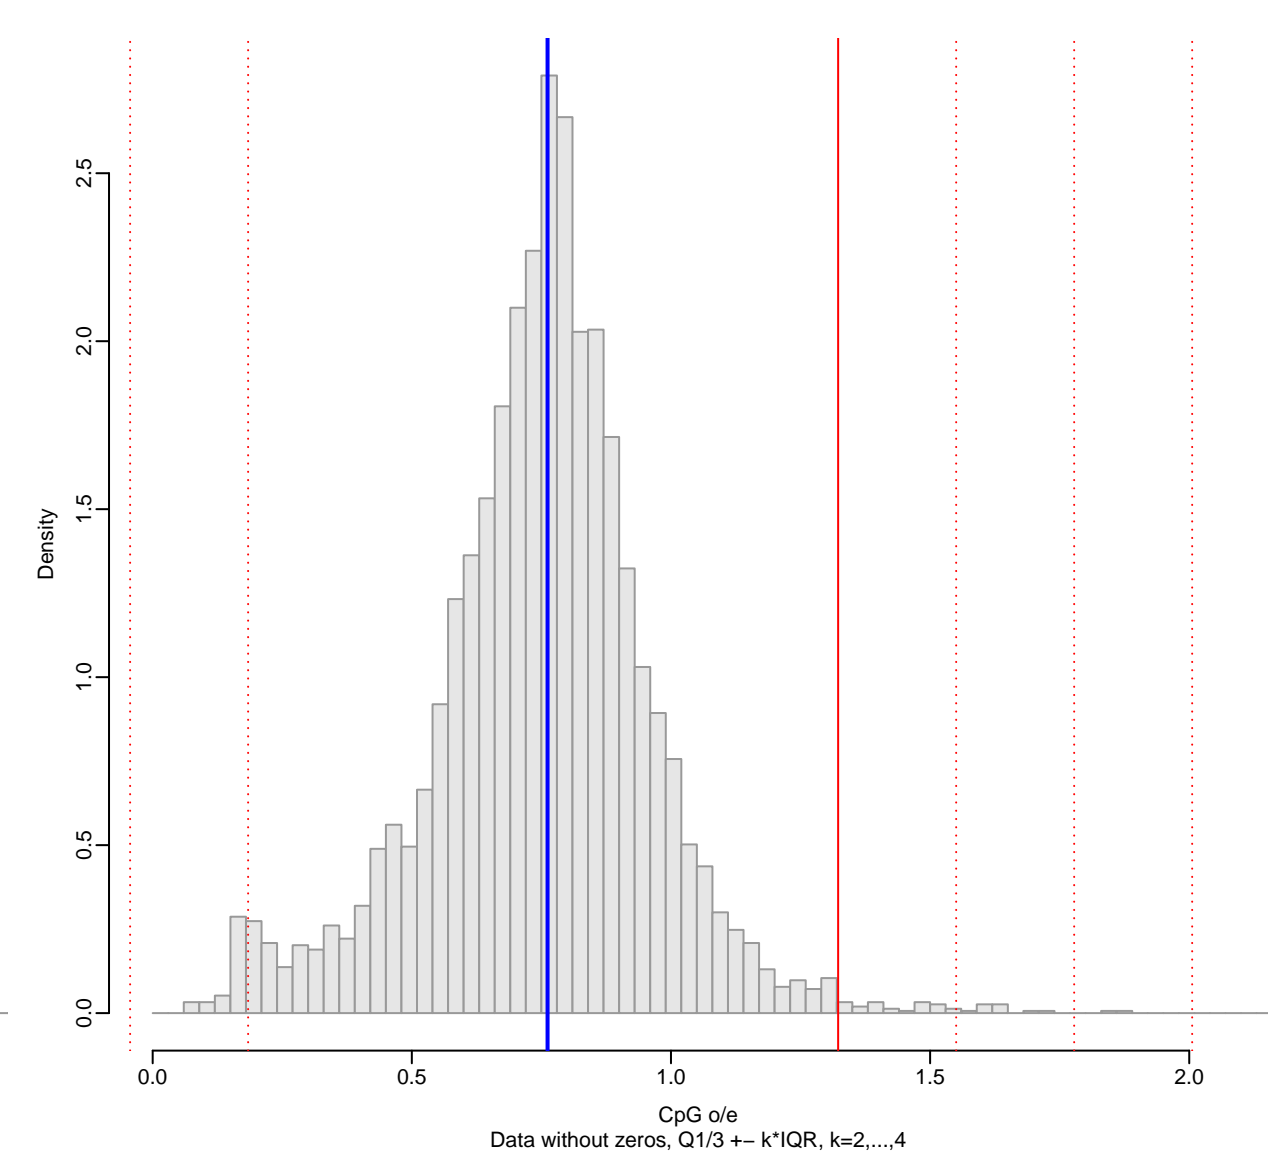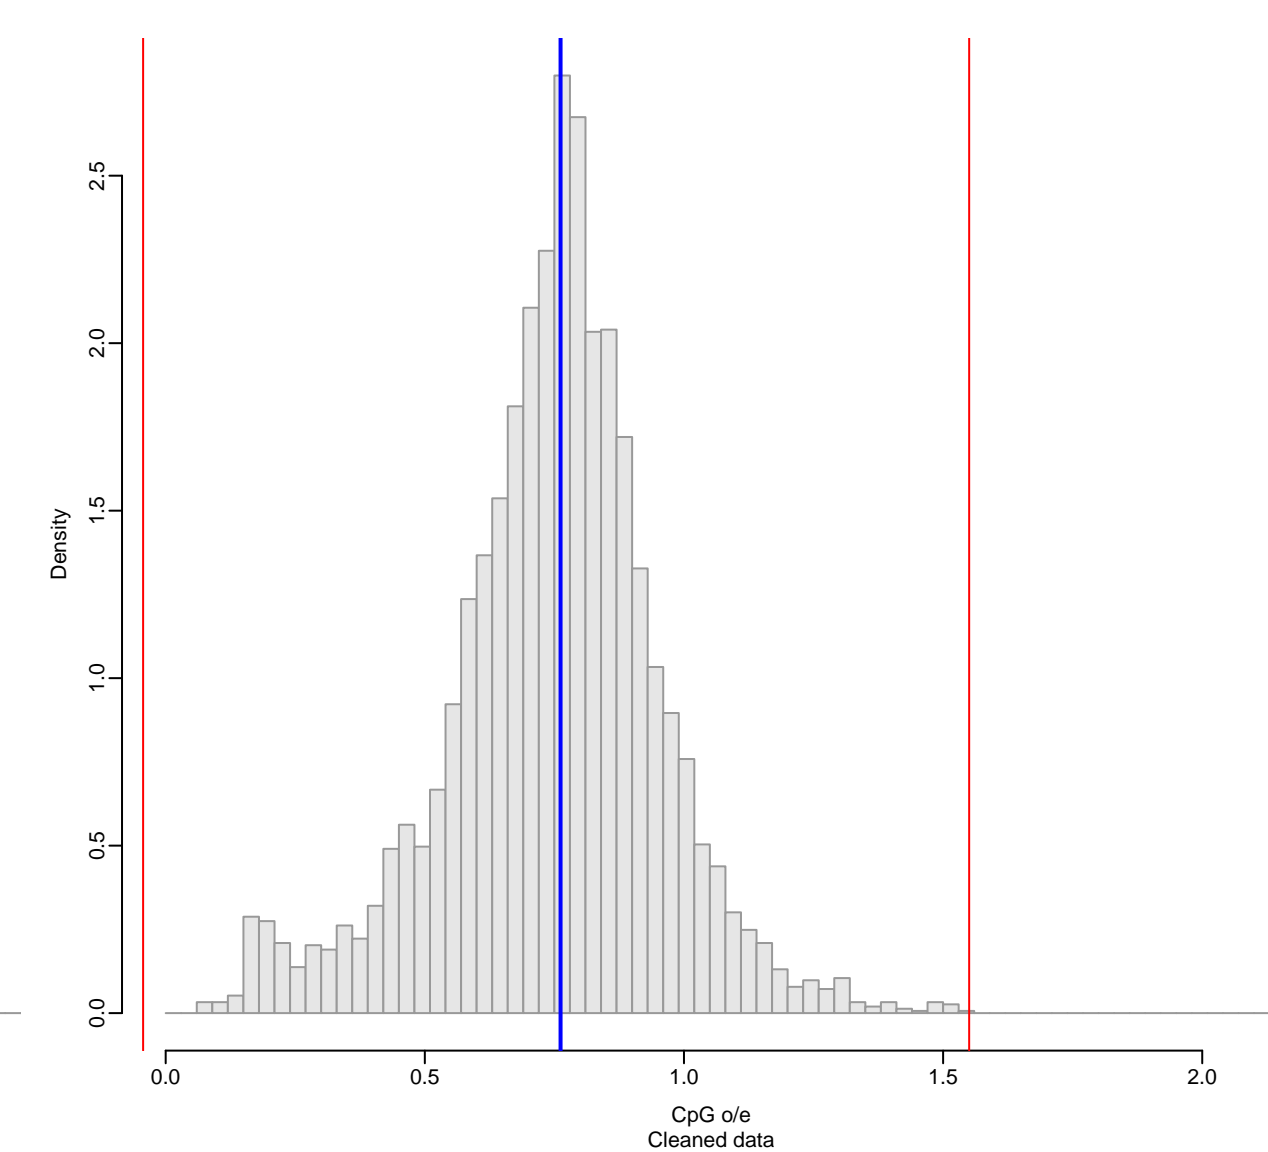

Haliotis\_diversicolor

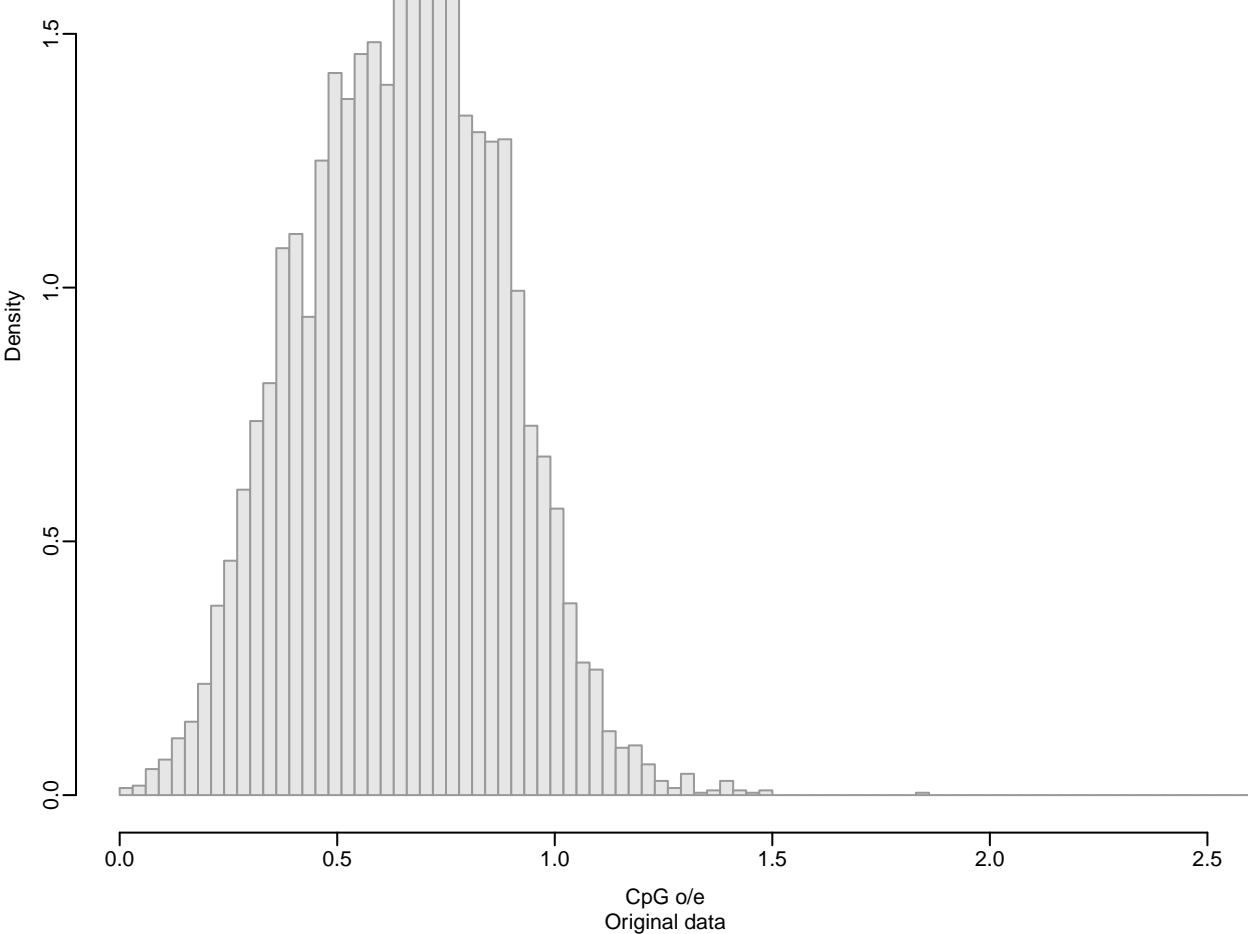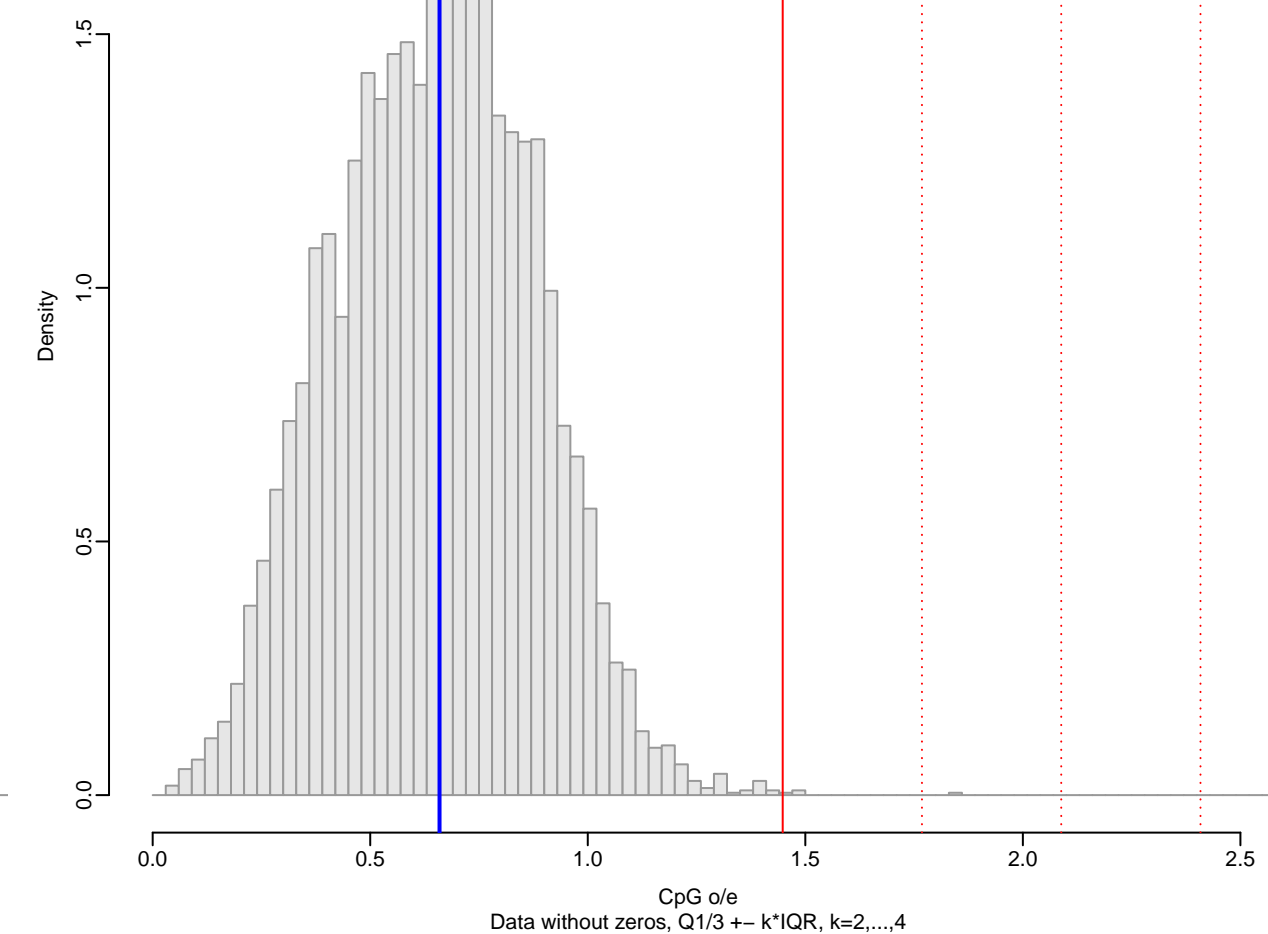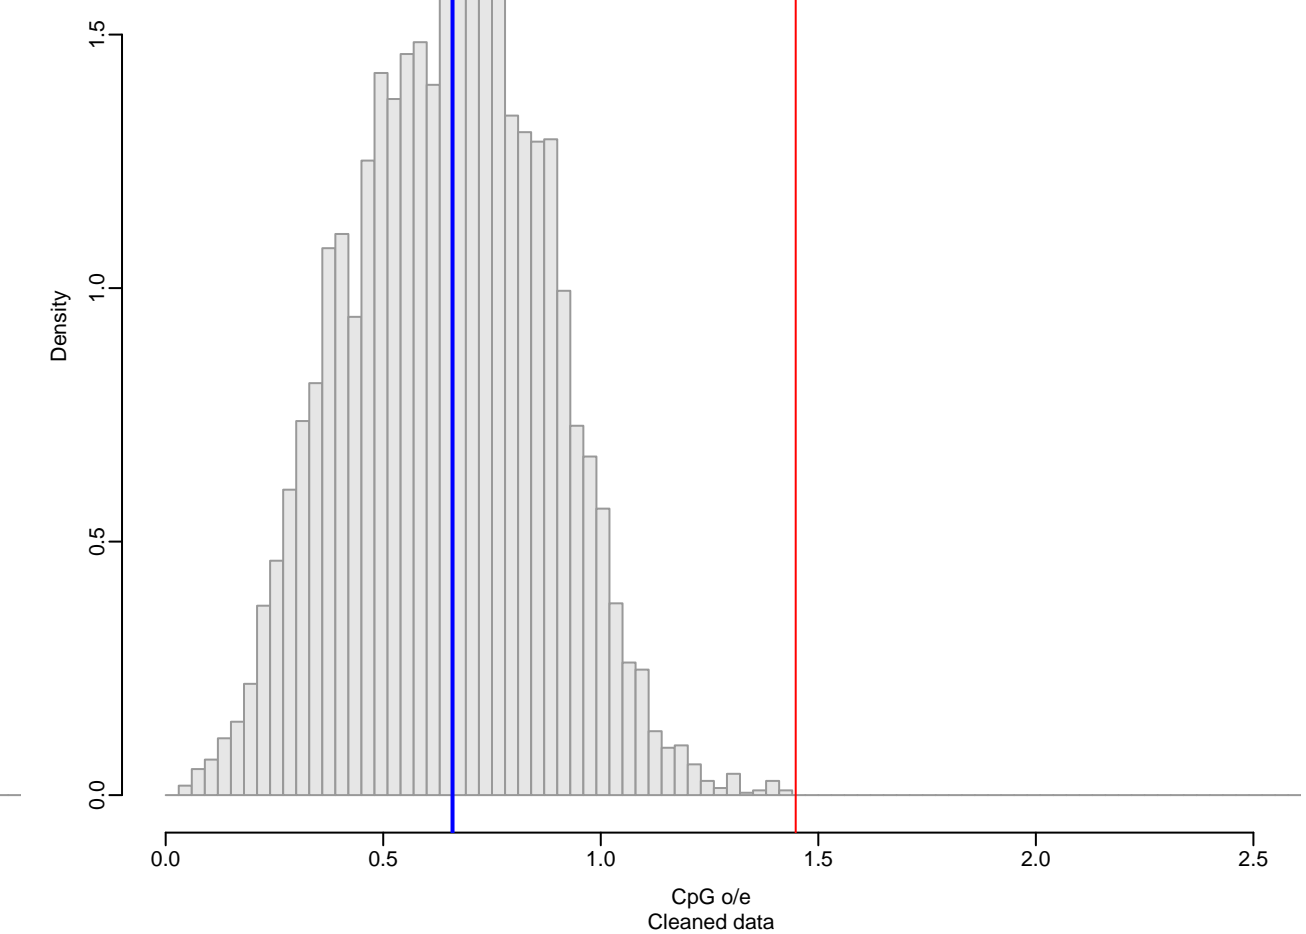

Halocynthia\_roretzi

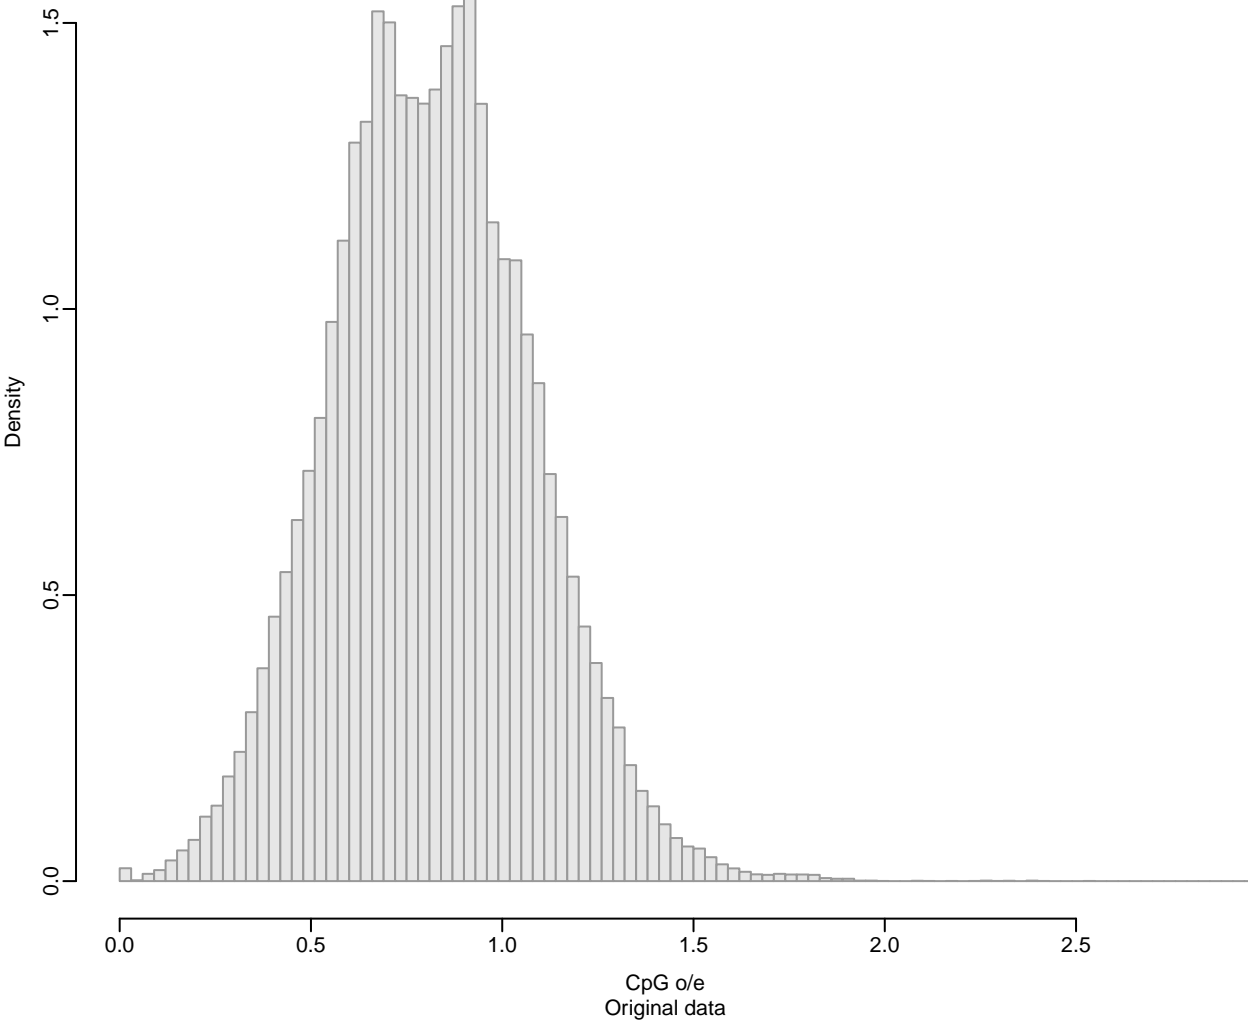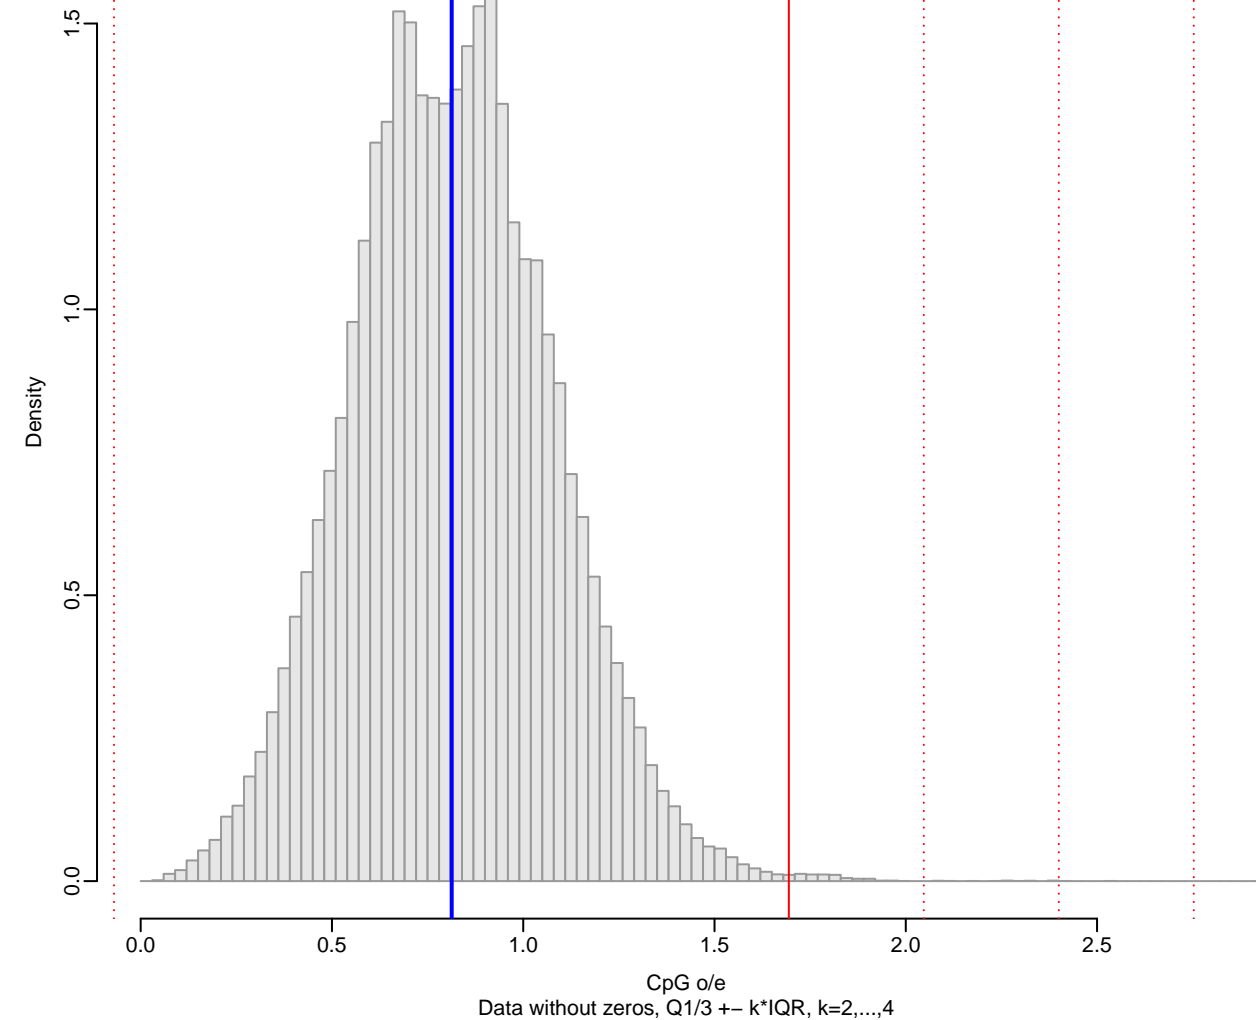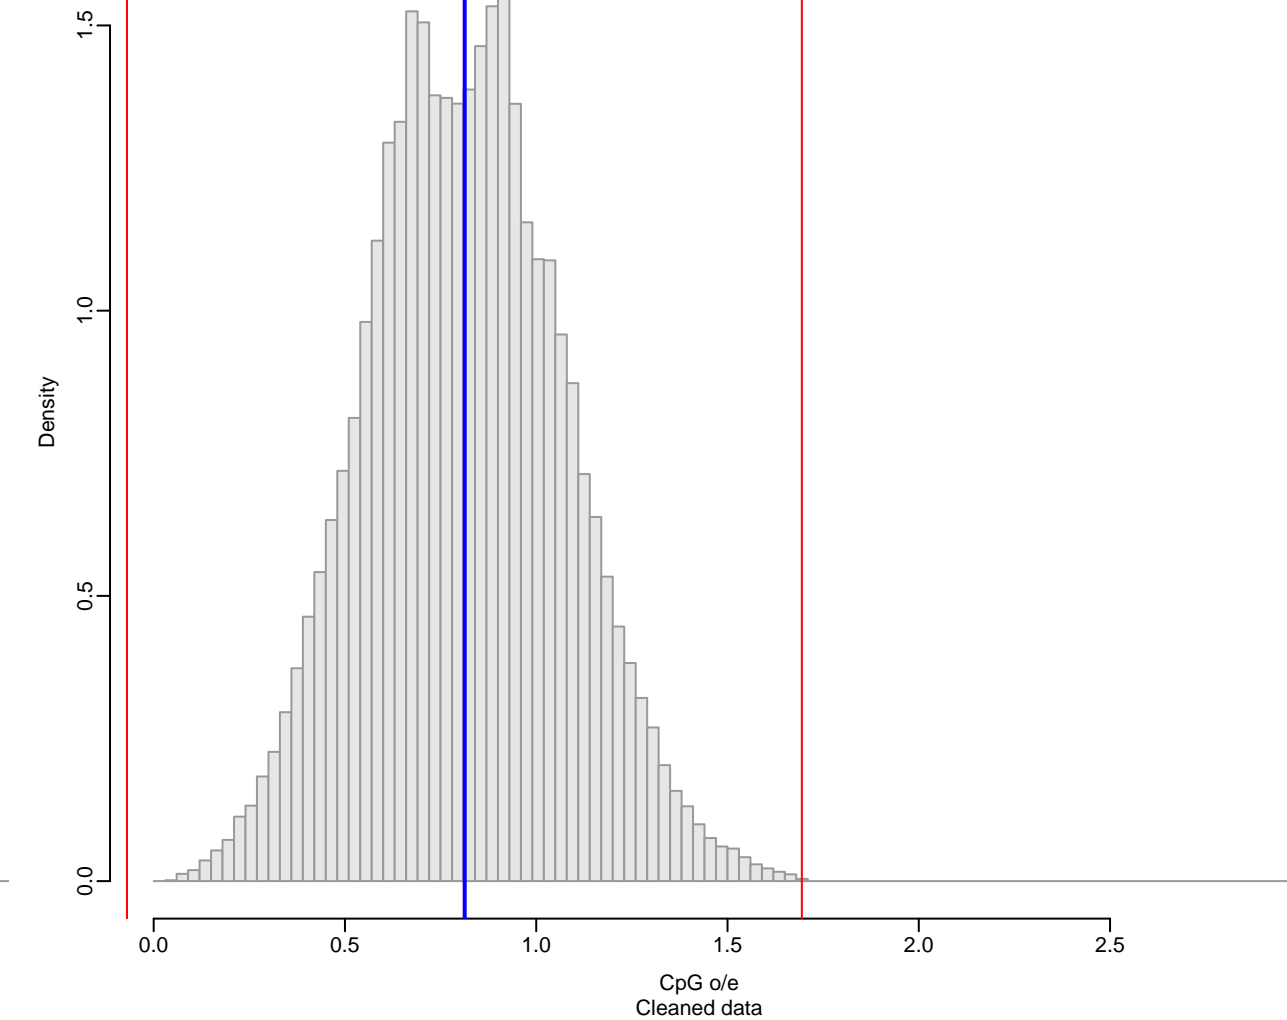

Hedyotis\_terminalis

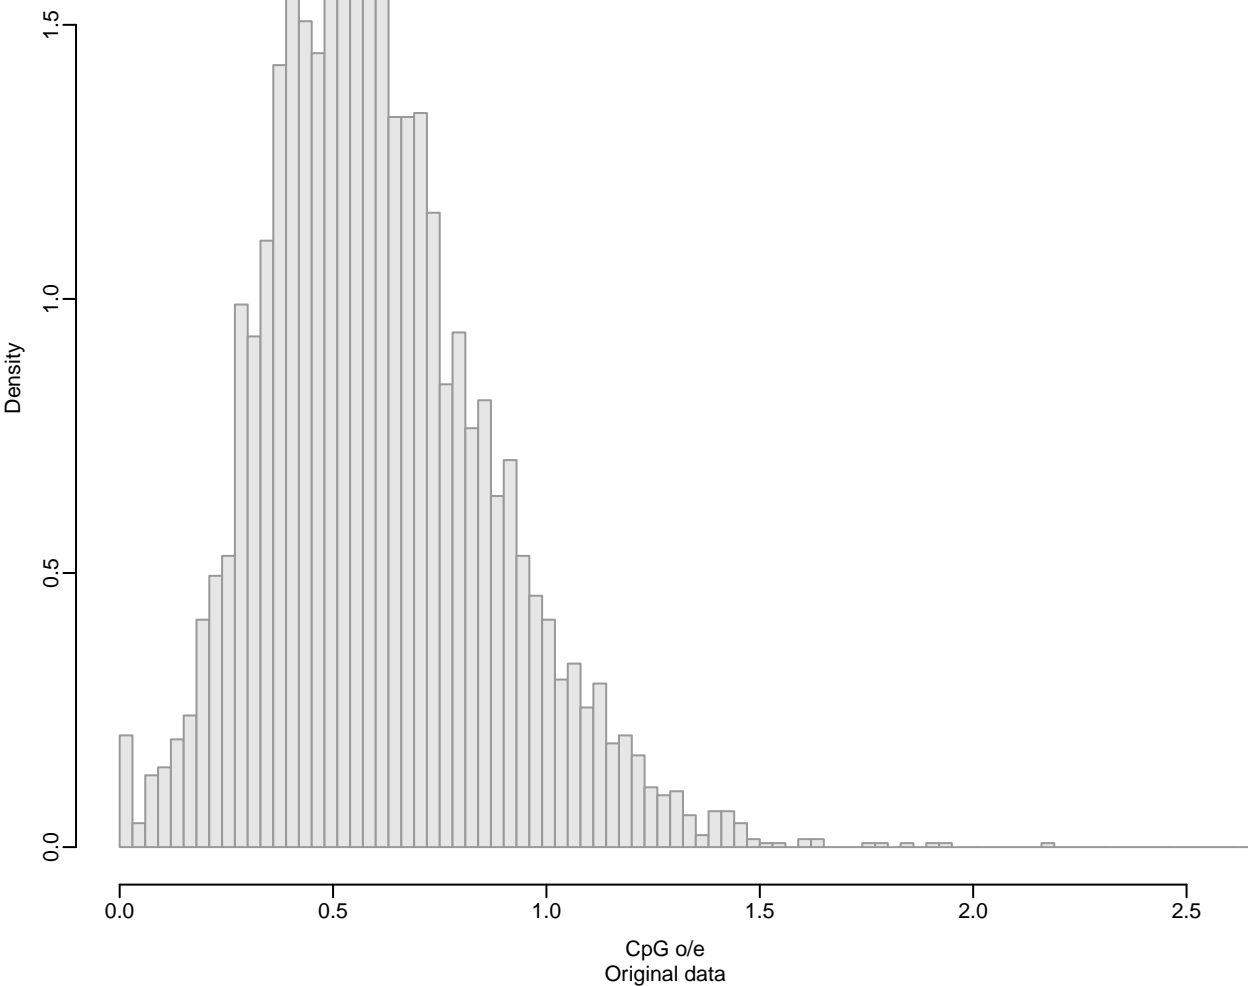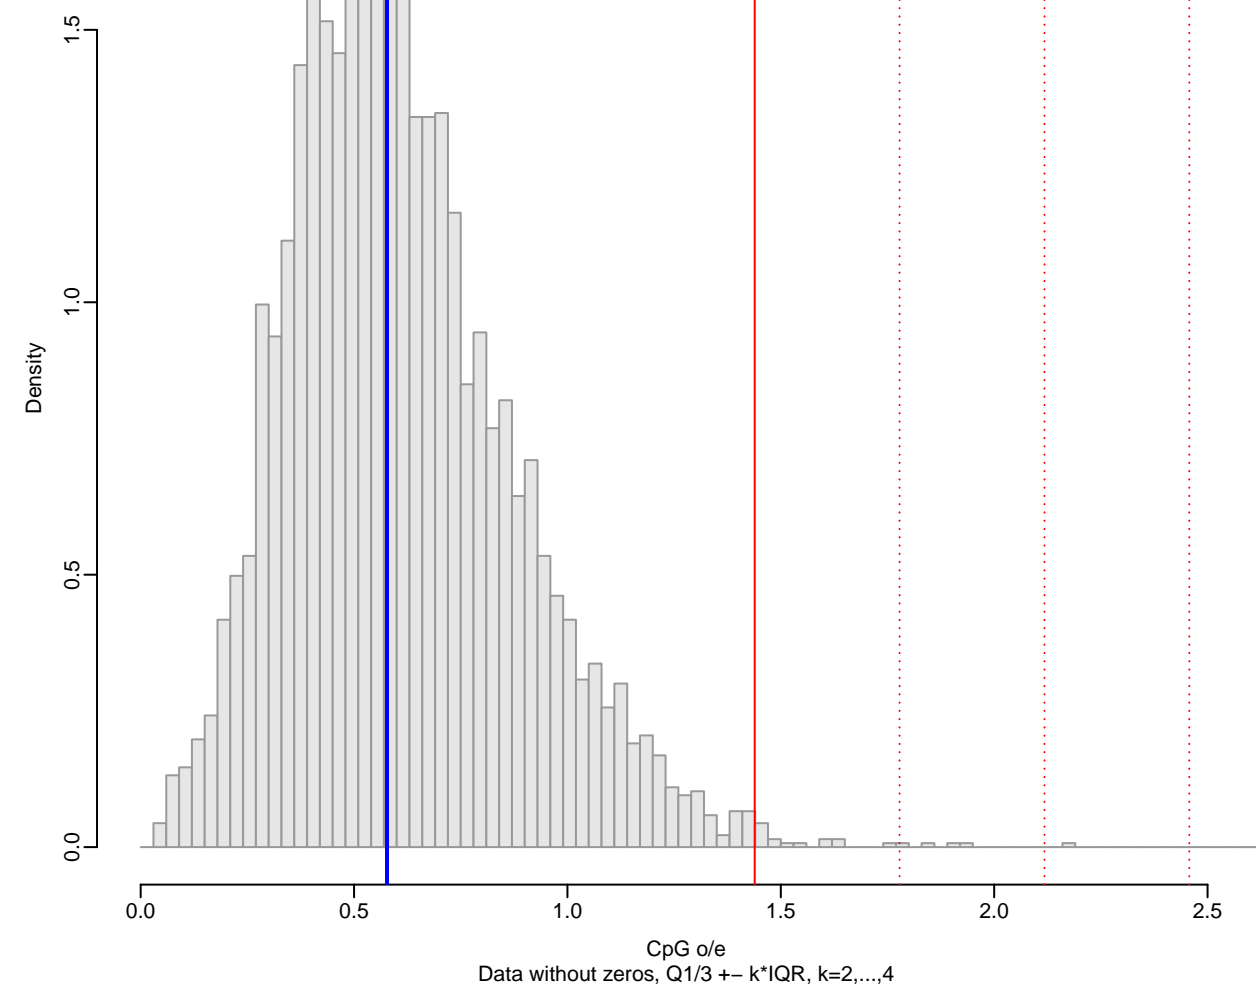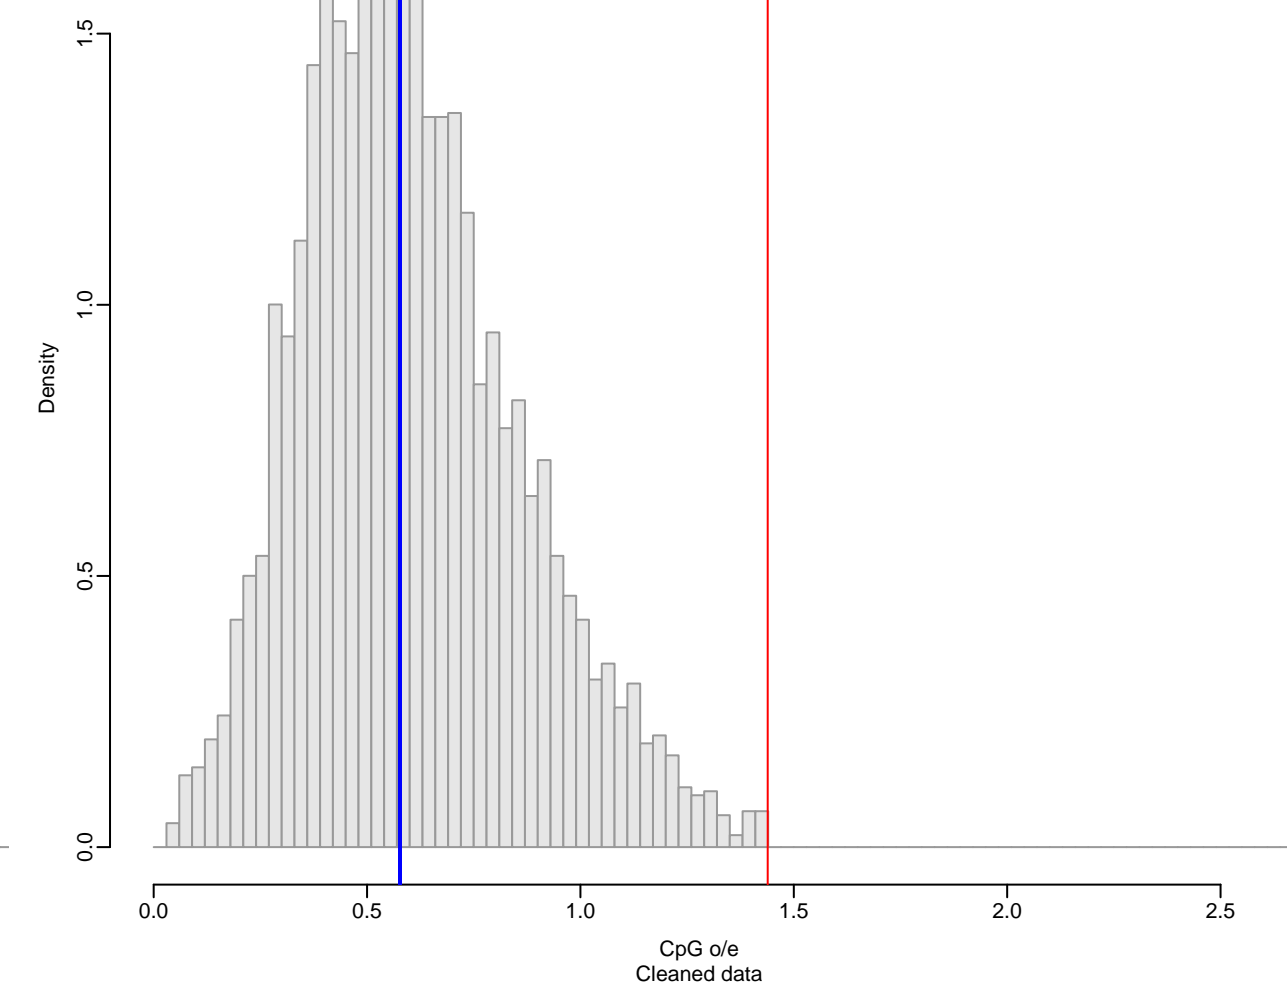



# Helianthus\_annuus

Density

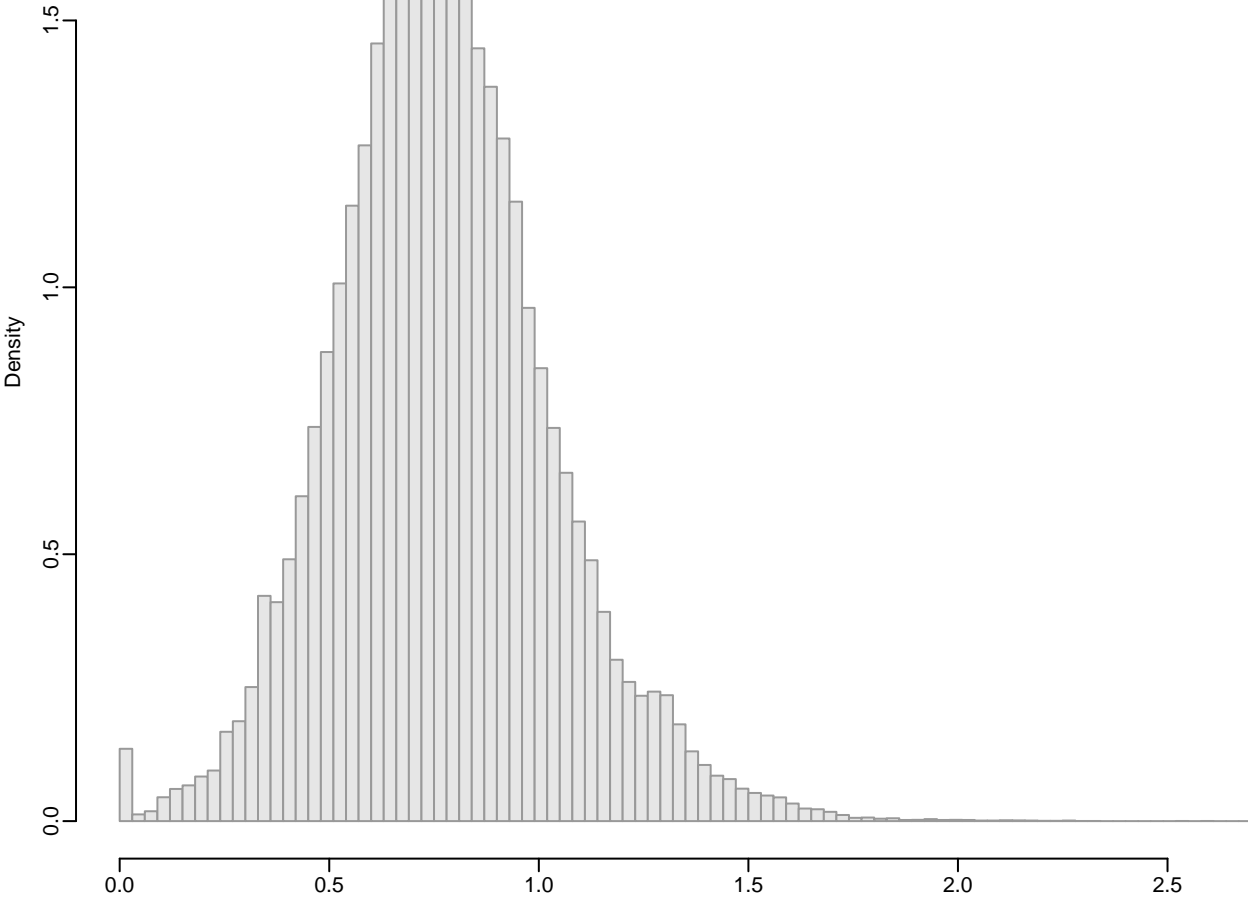

Density

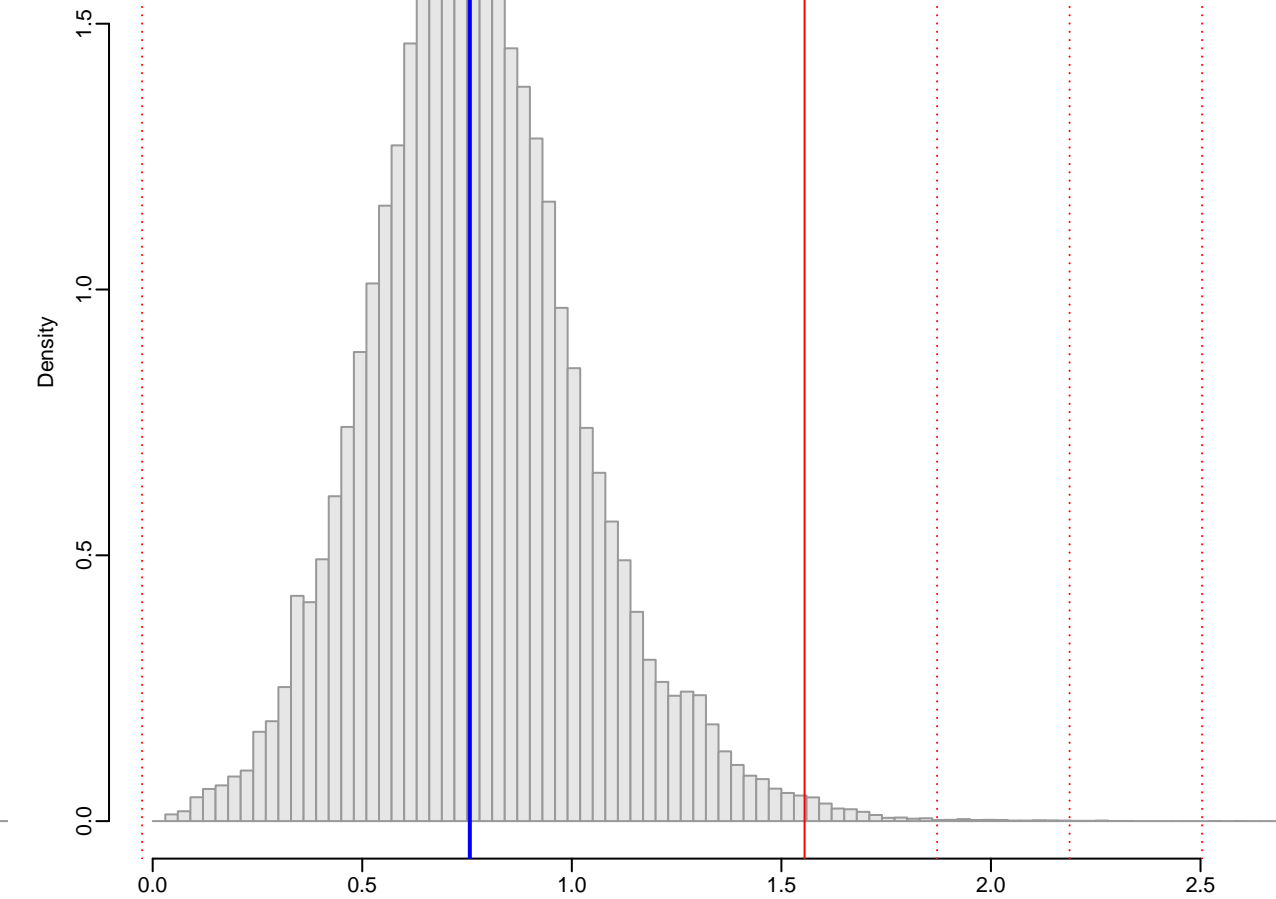

Density

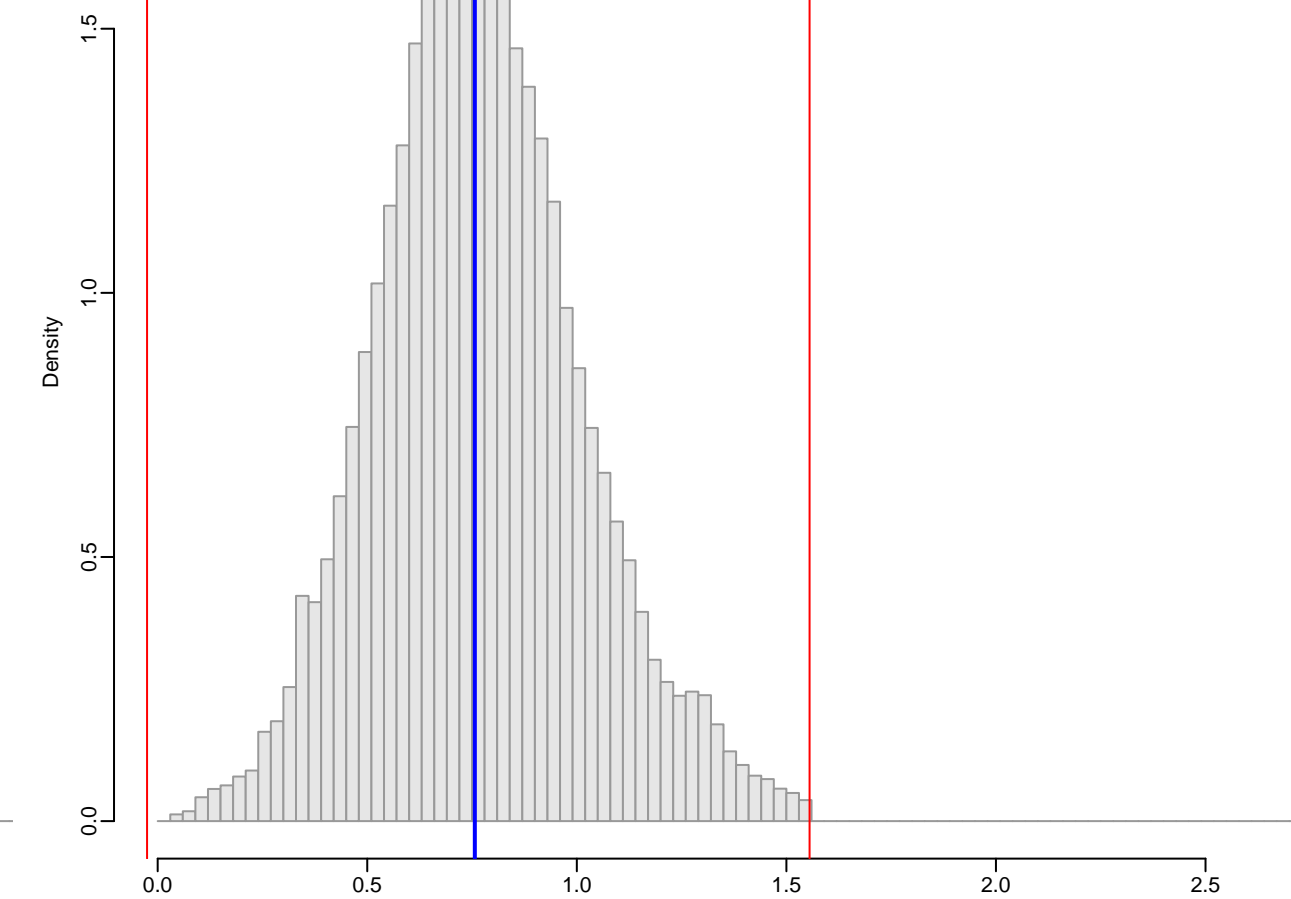

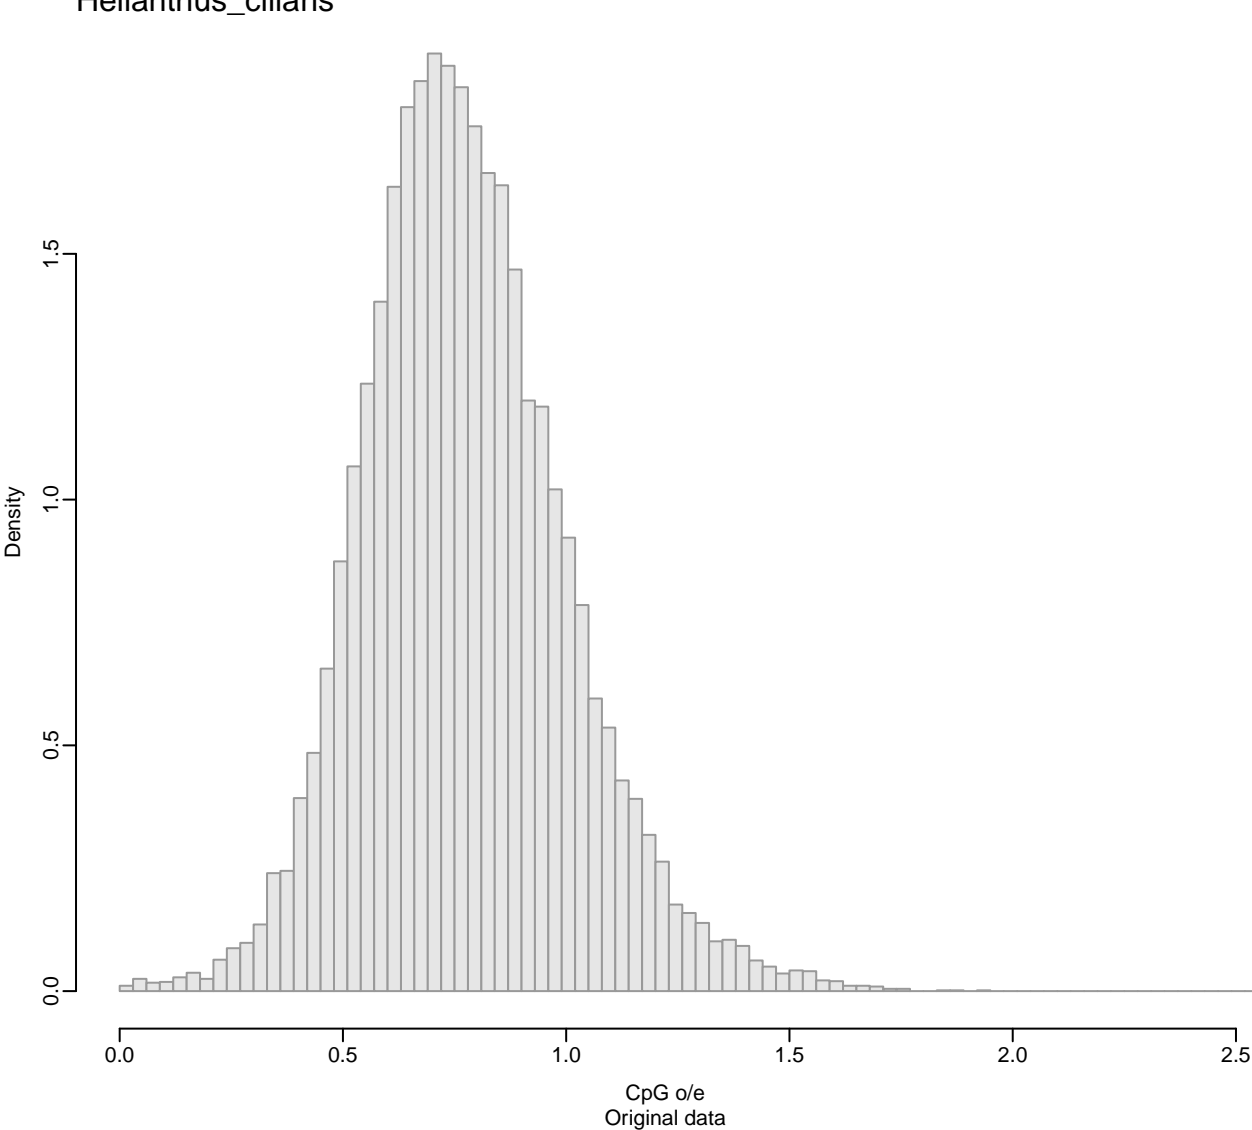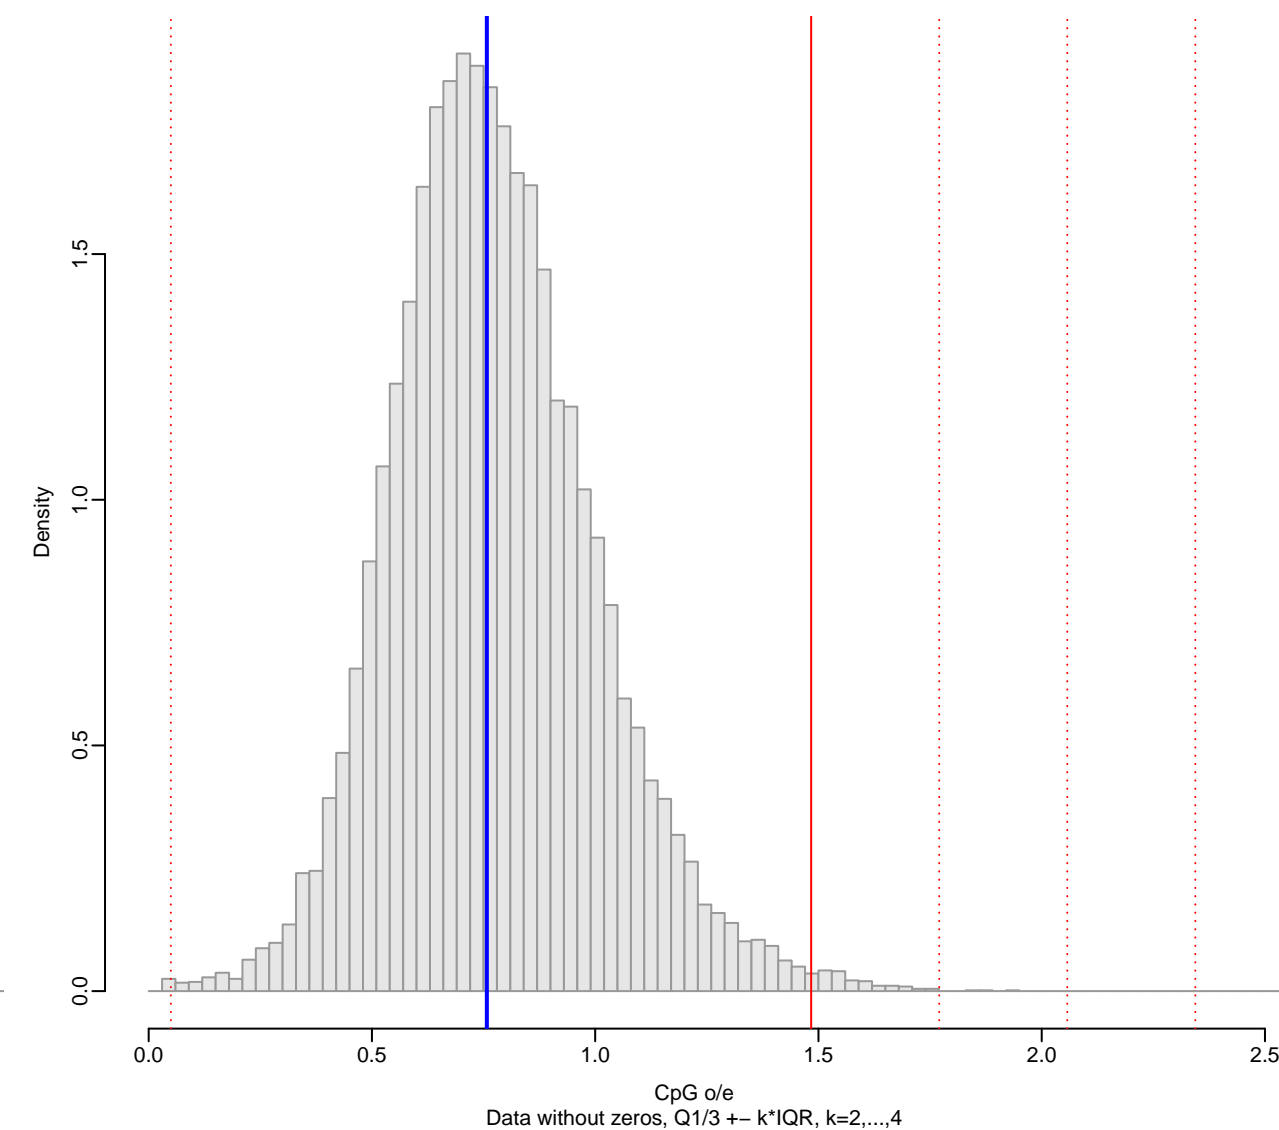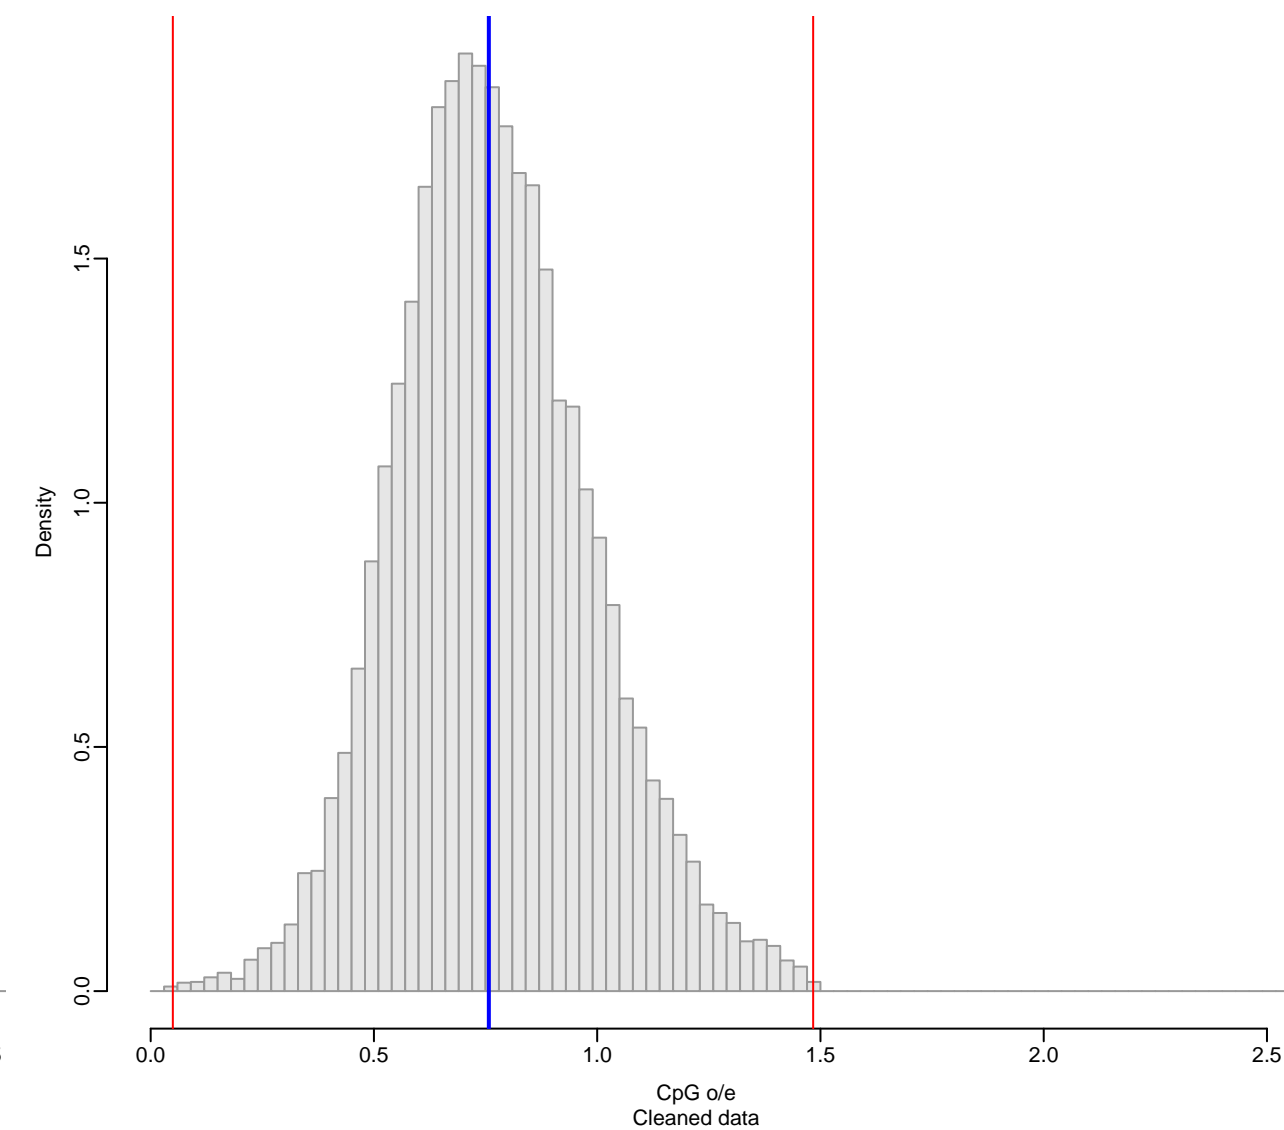

# Heliconius\_melpomene

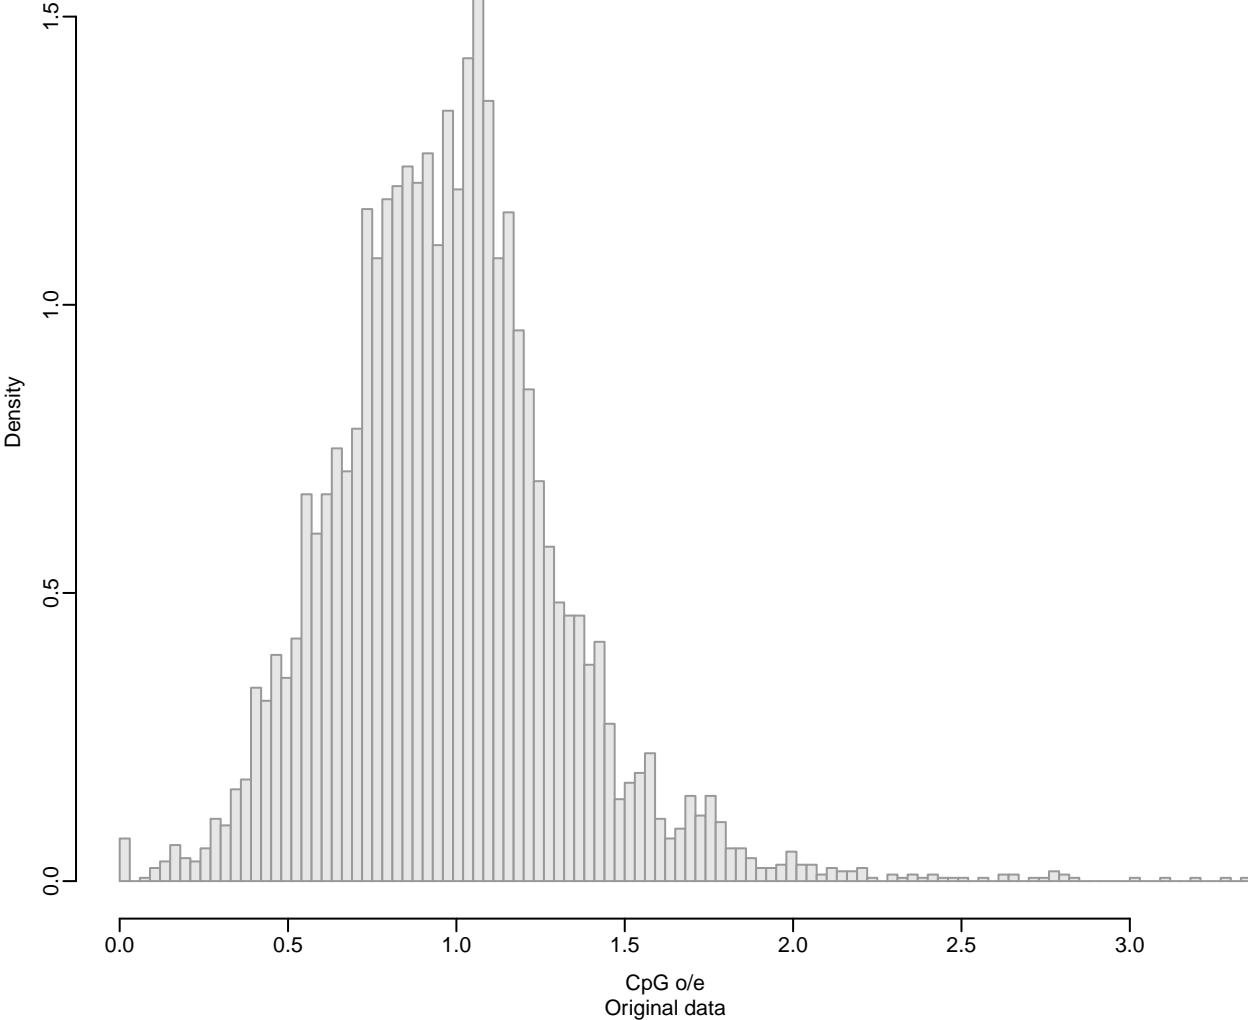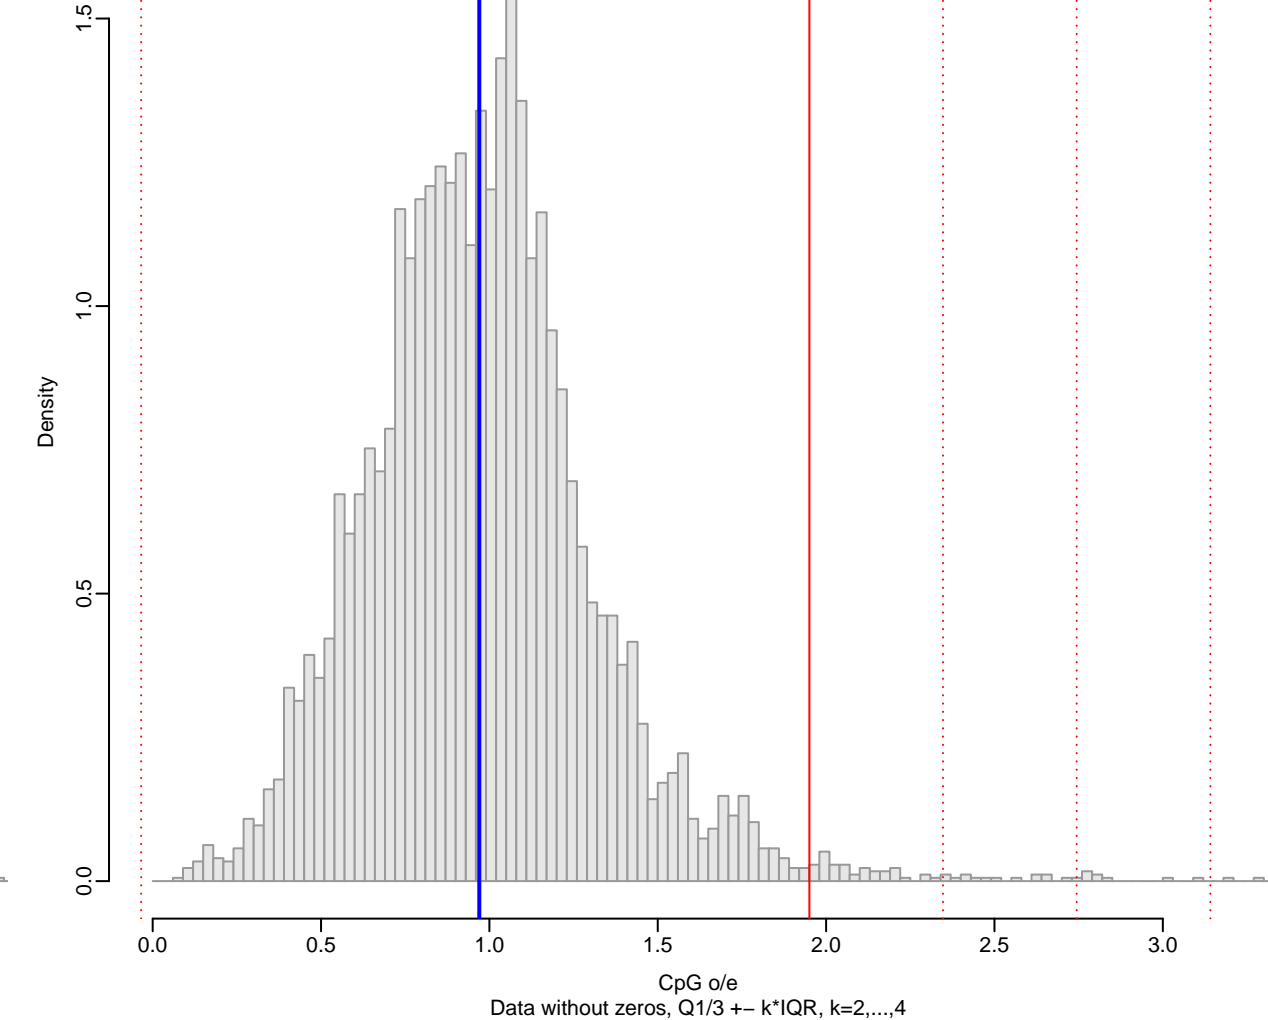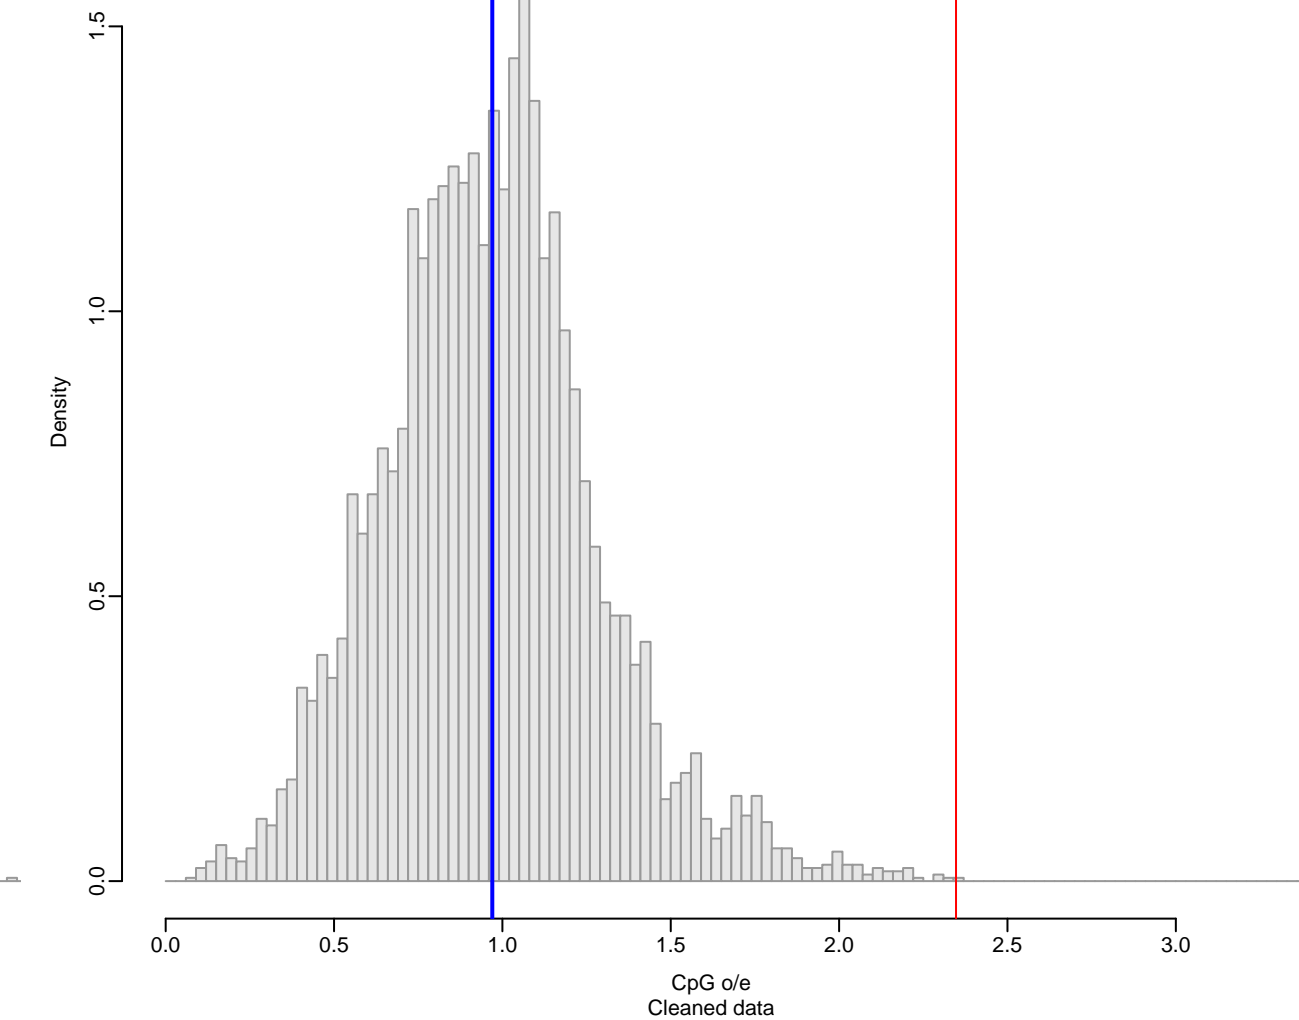

# Heliobasis\_virescens

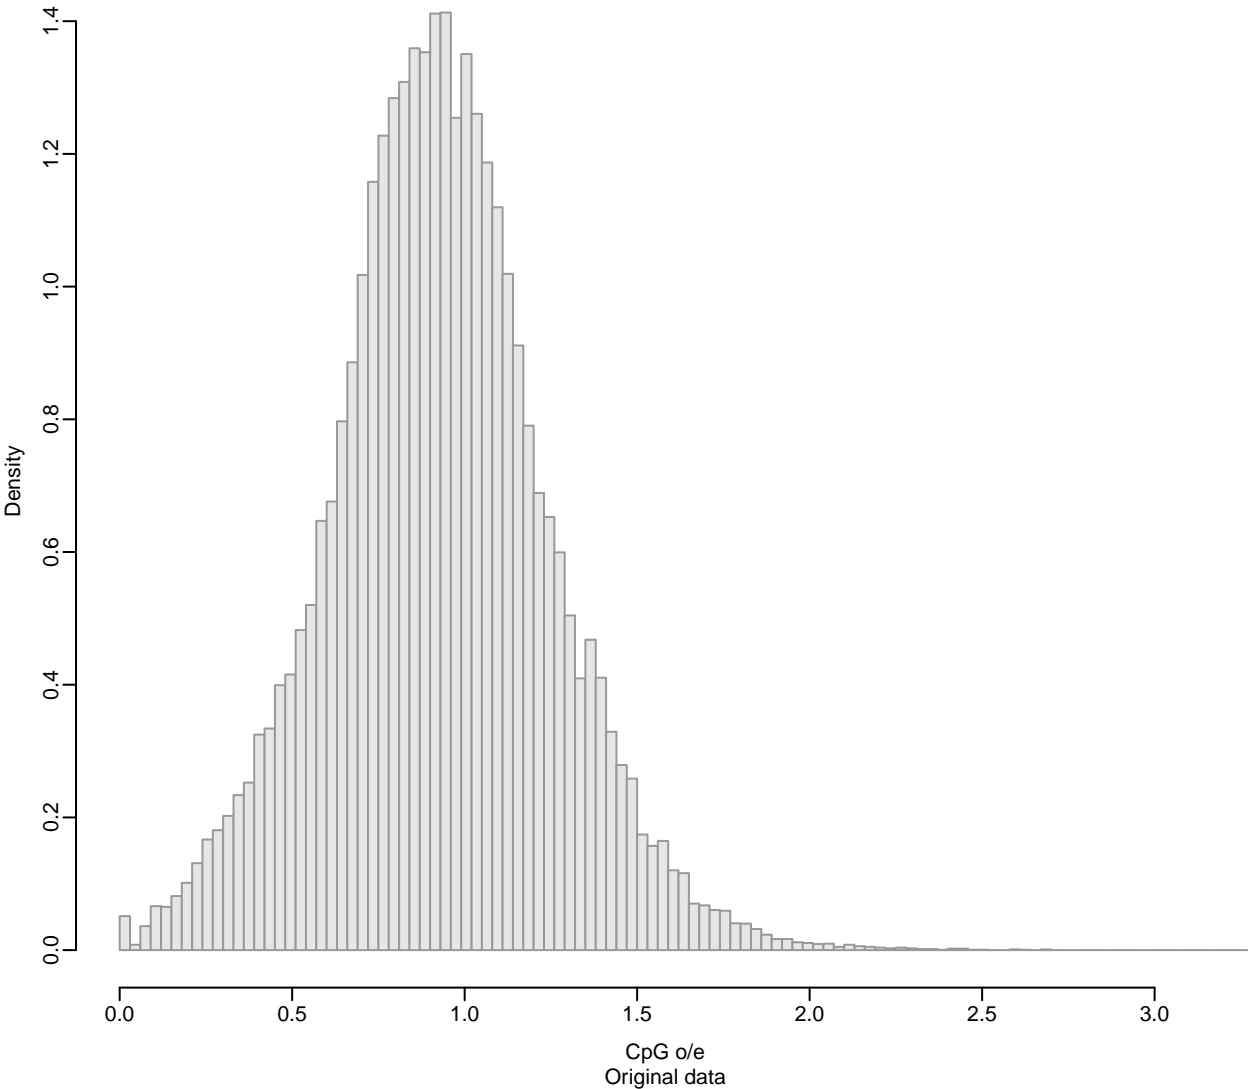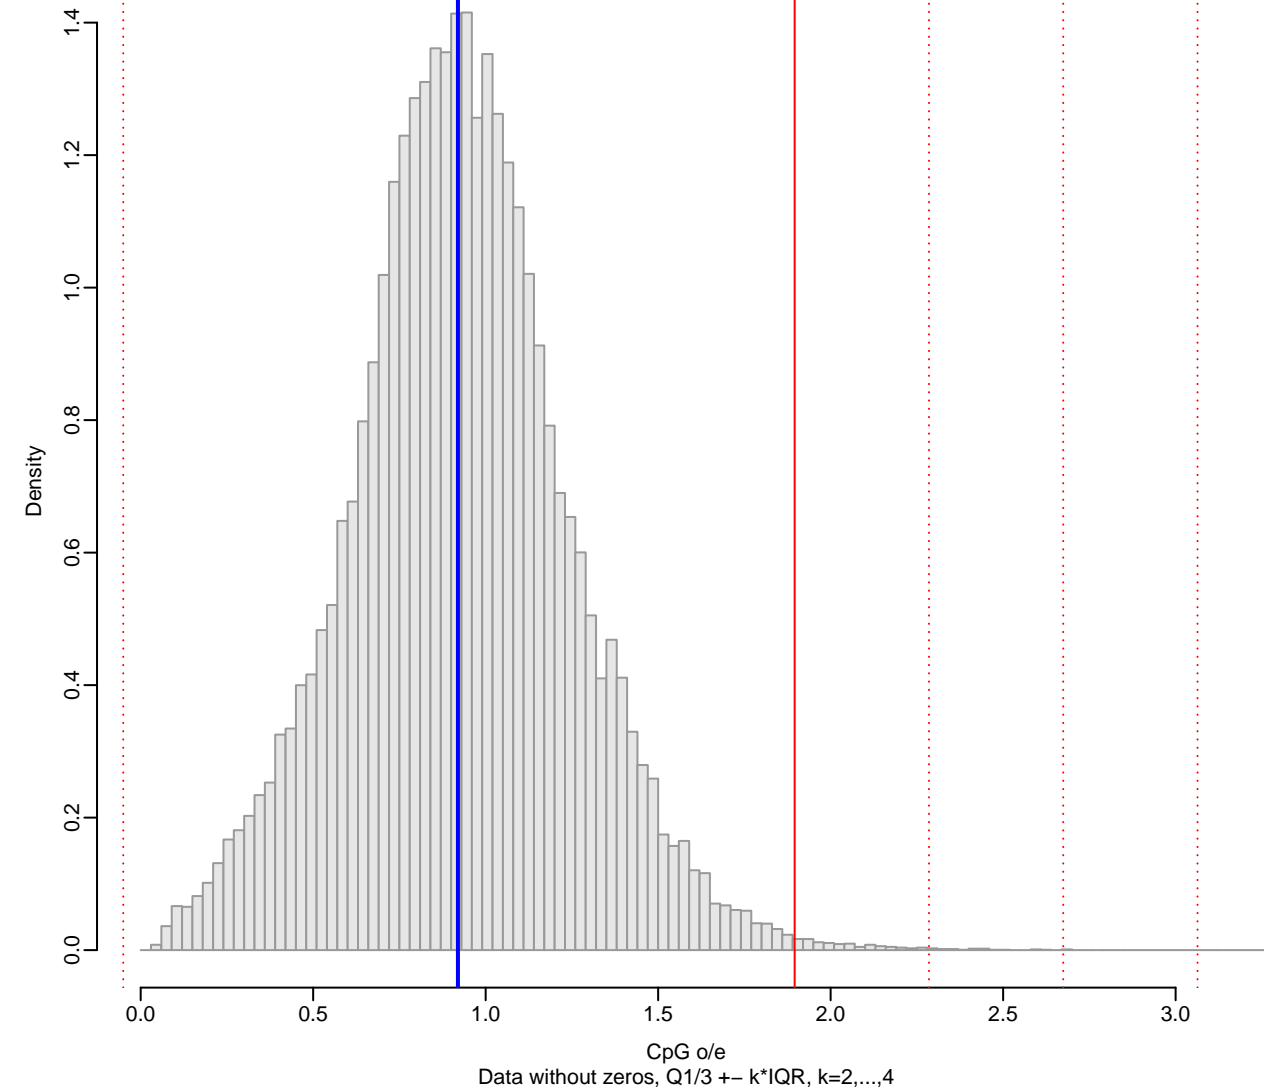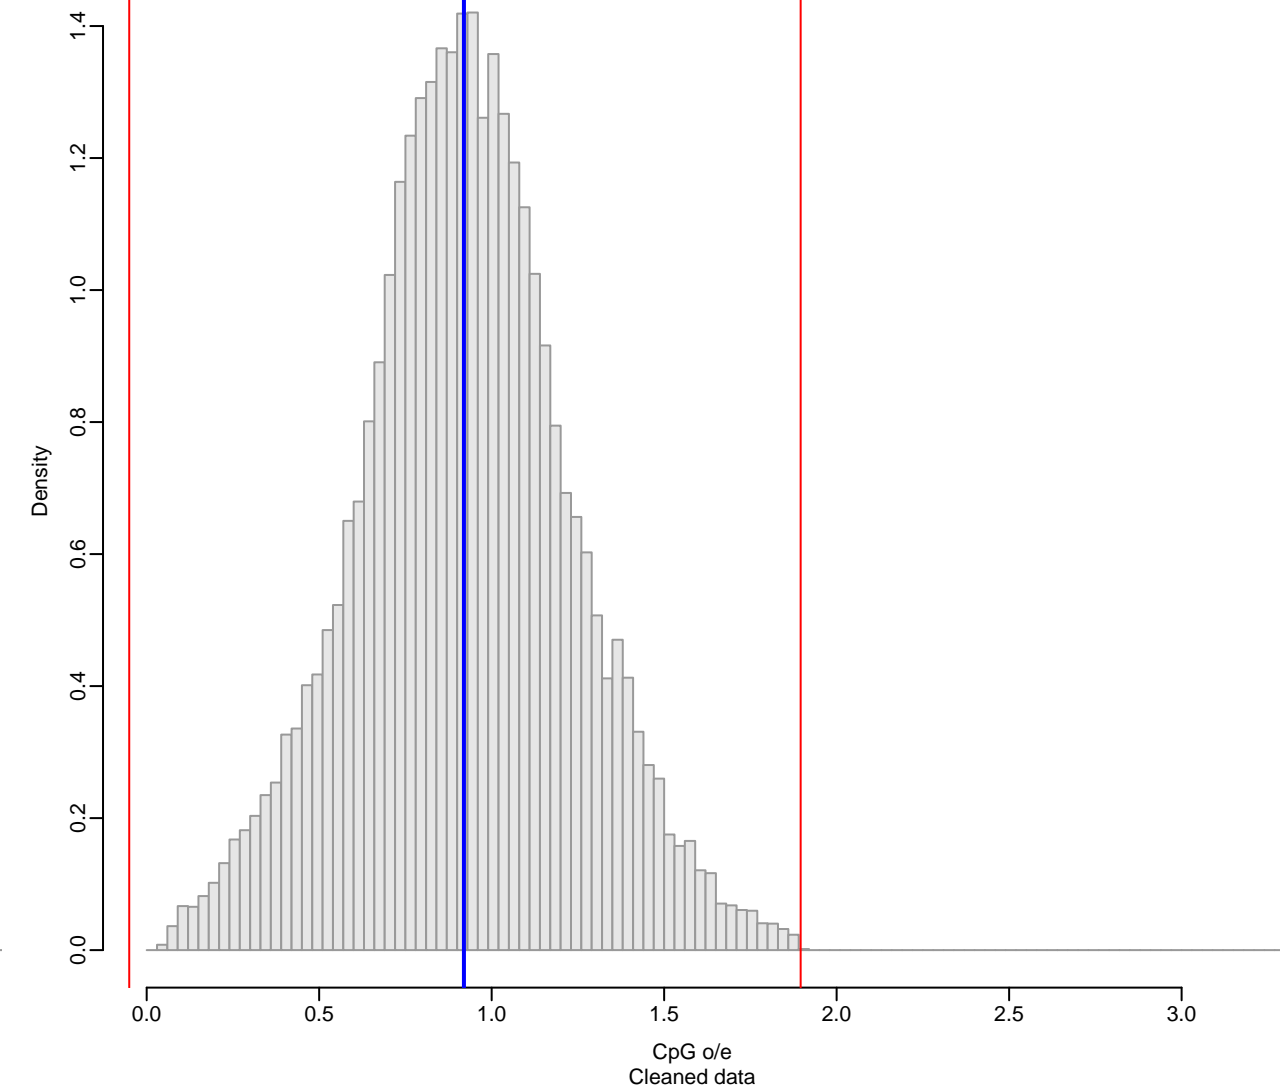

# Helobdella\_robusta

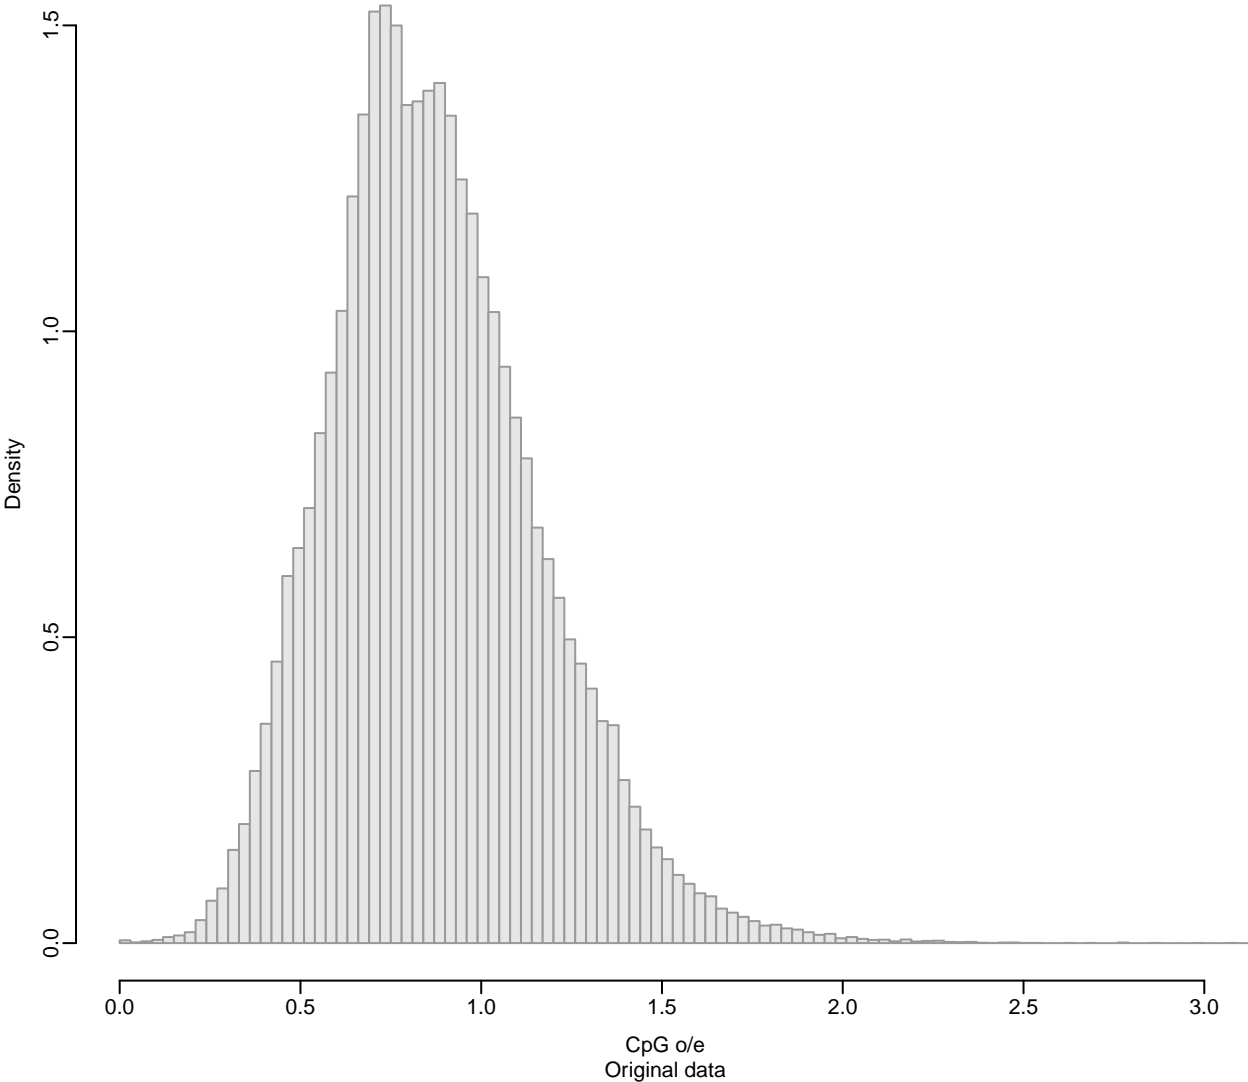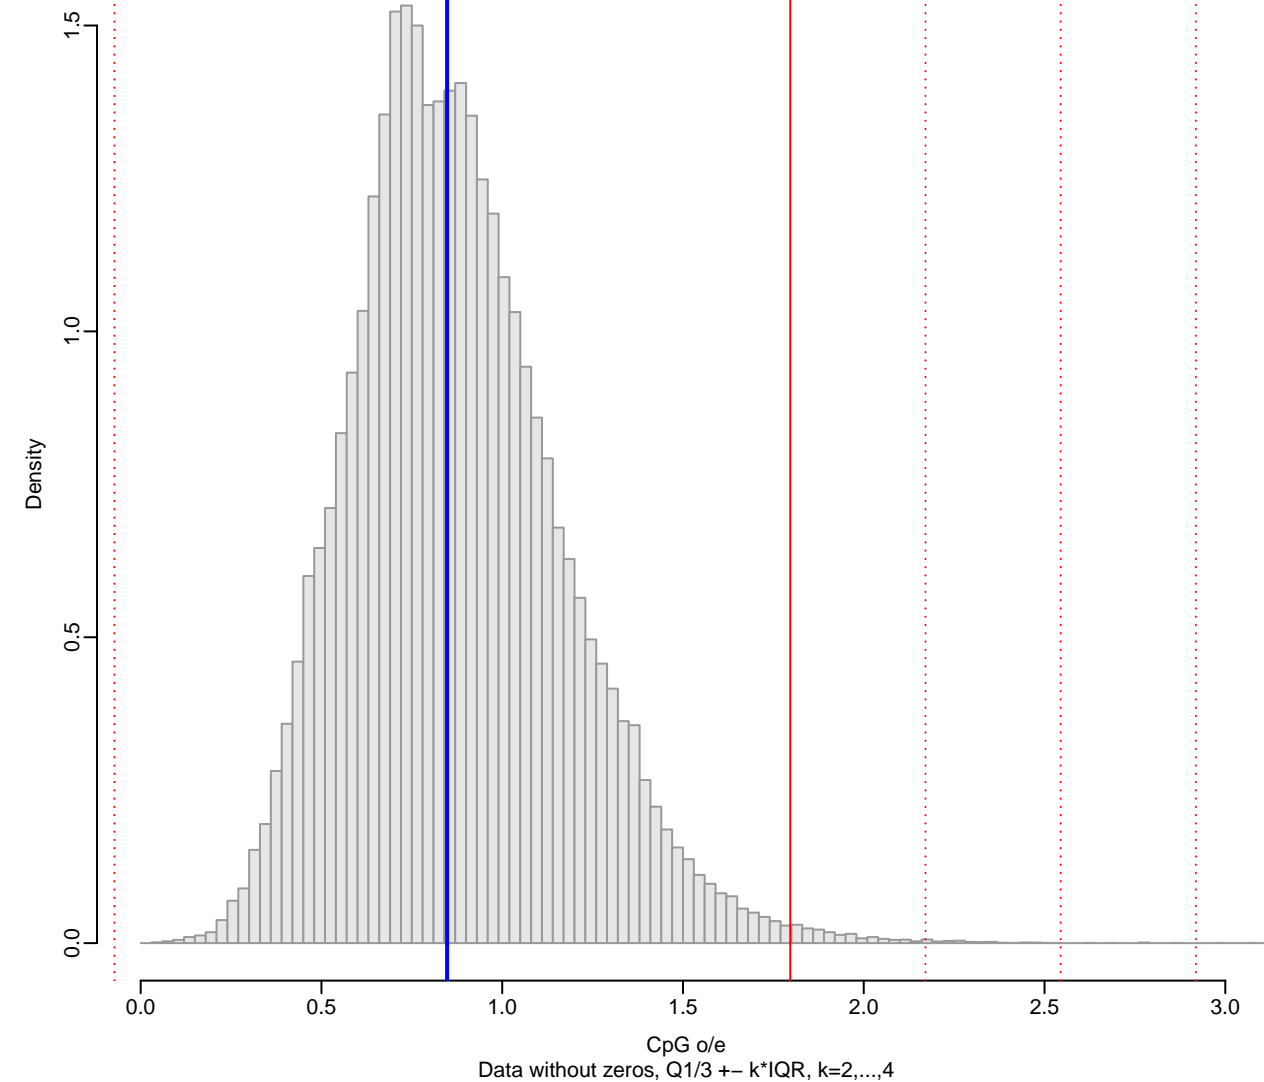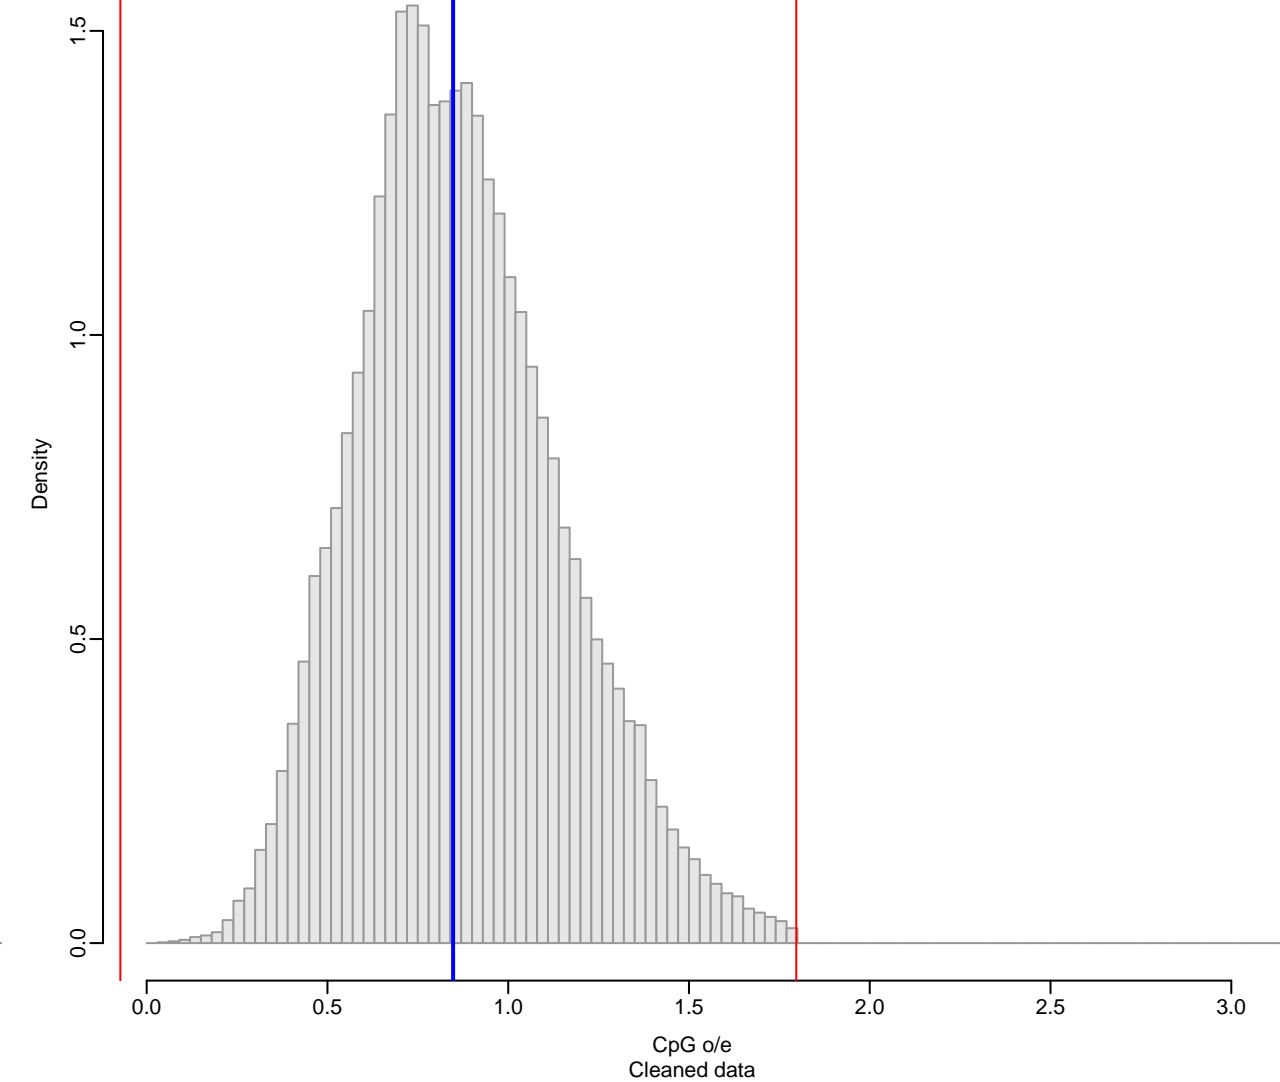

# Hemicentrotus\_pulcherrimus

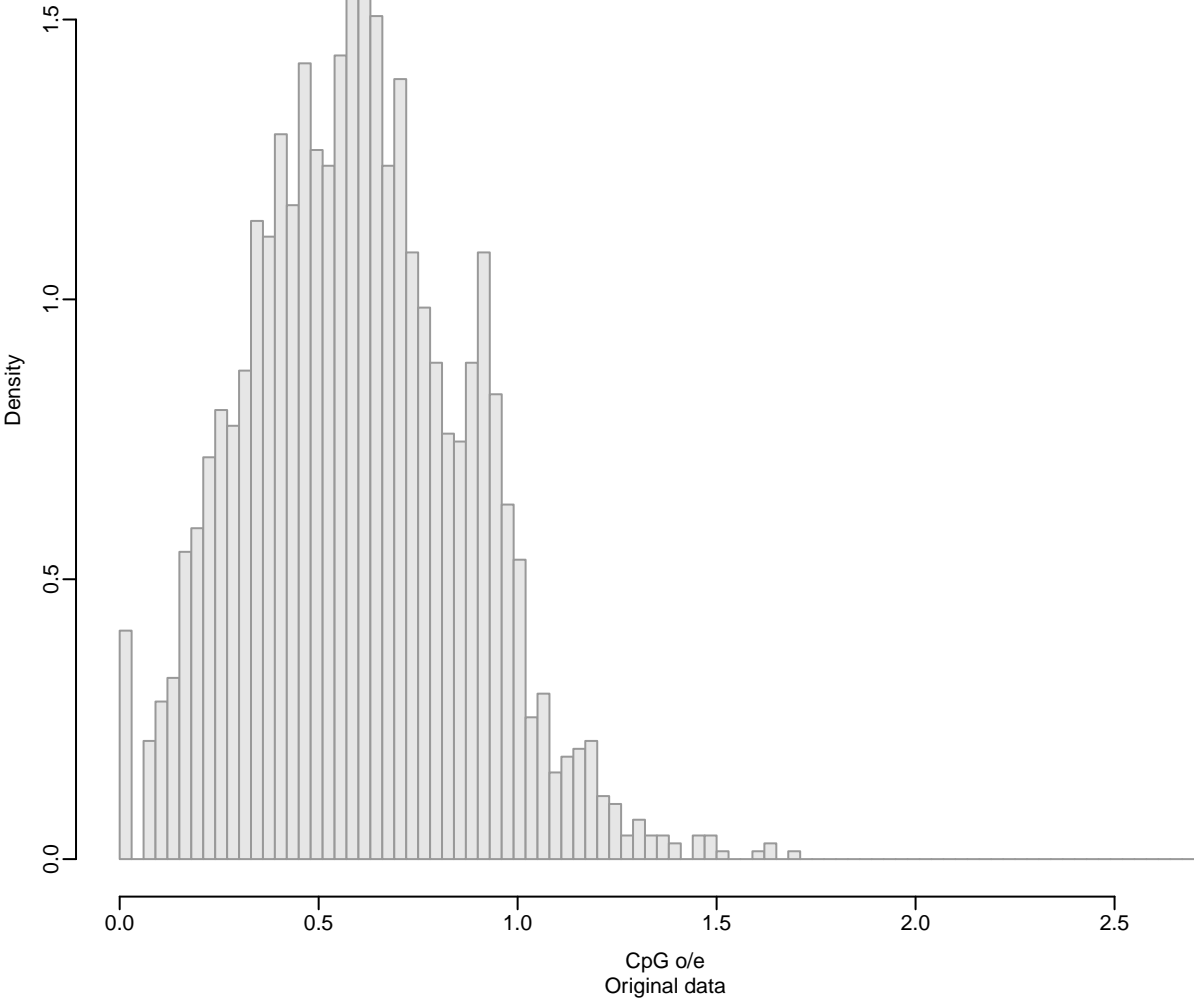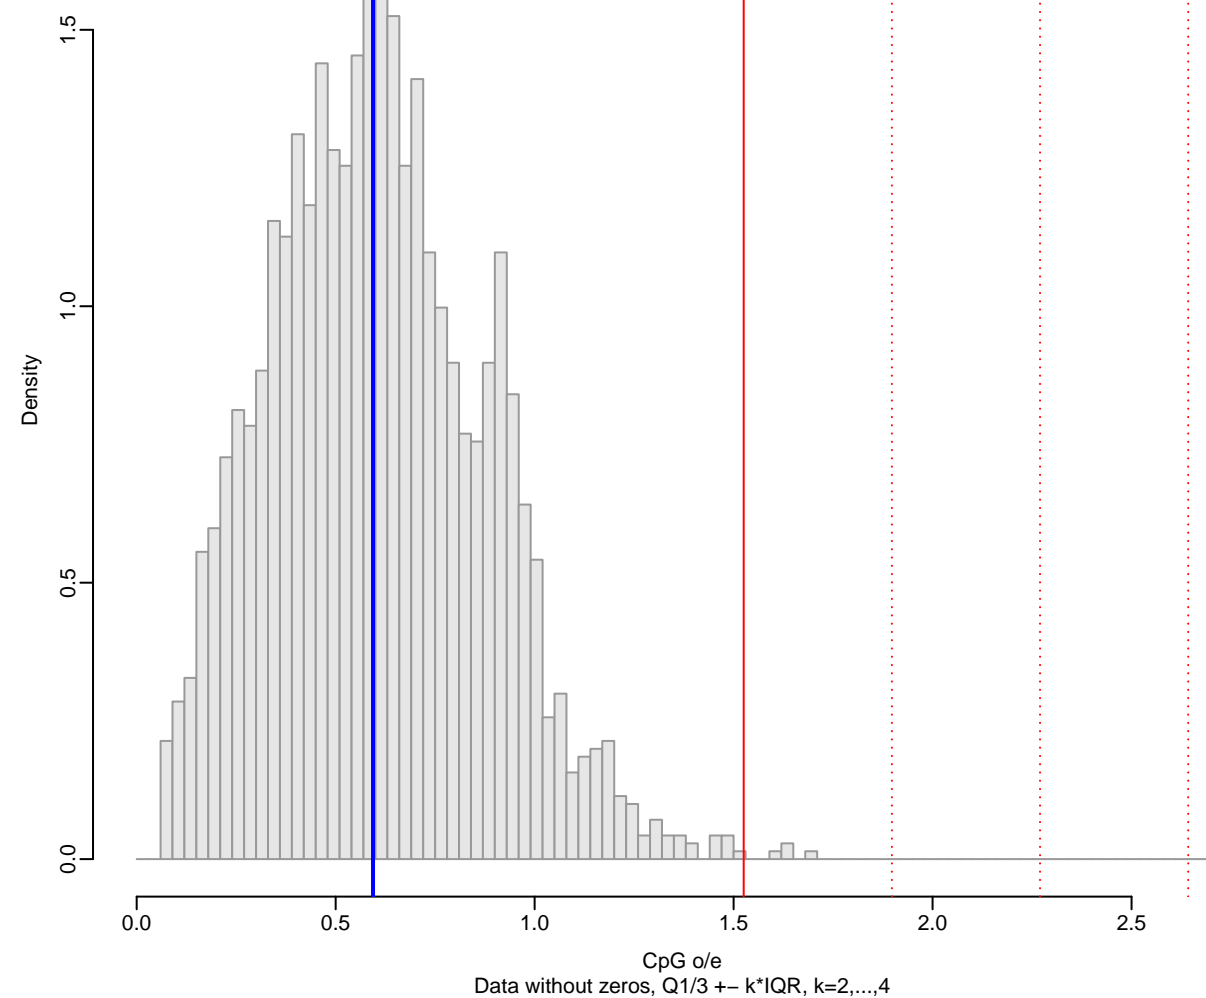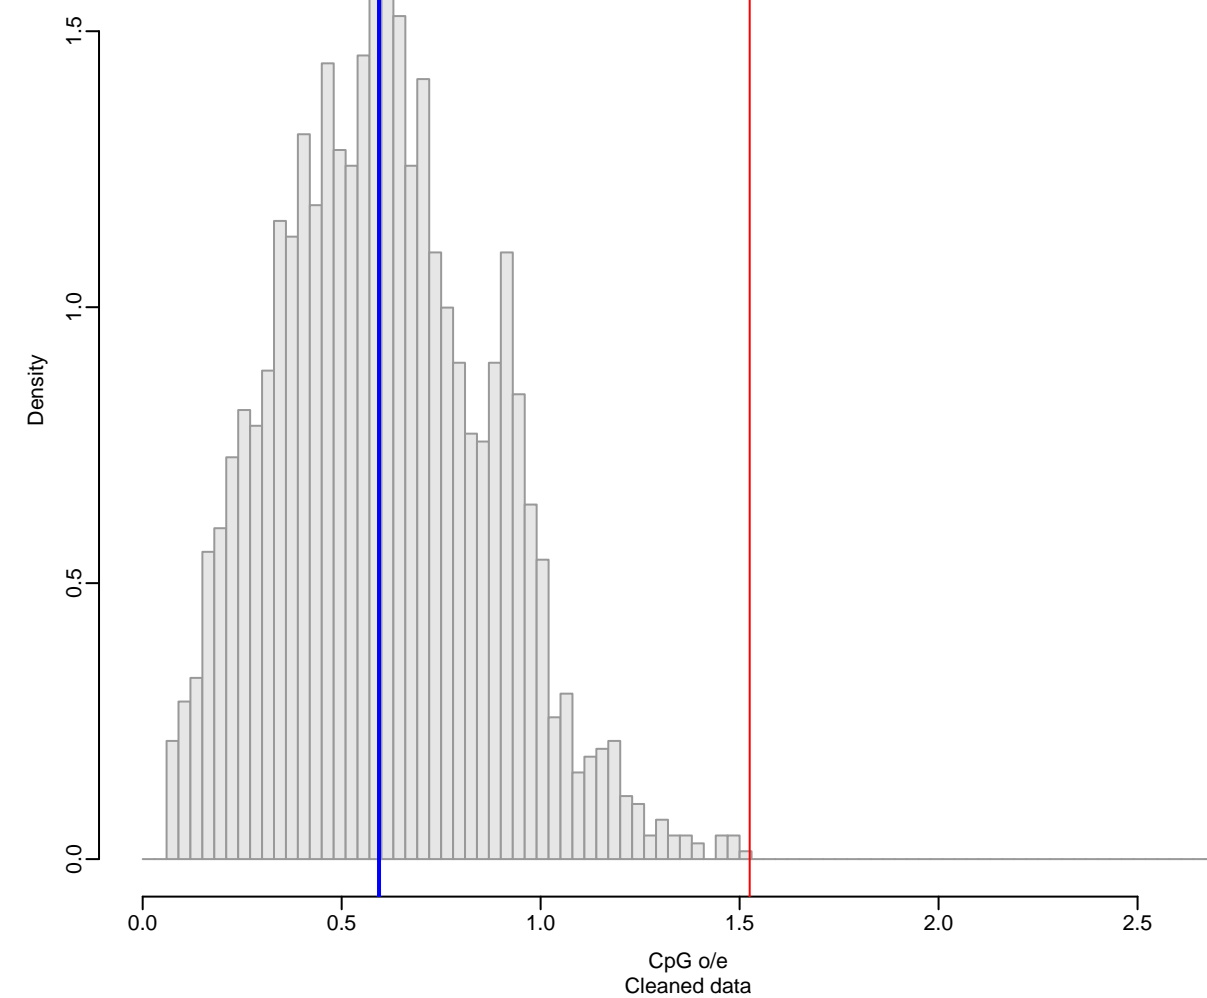

# Heterobasidion\_annosum

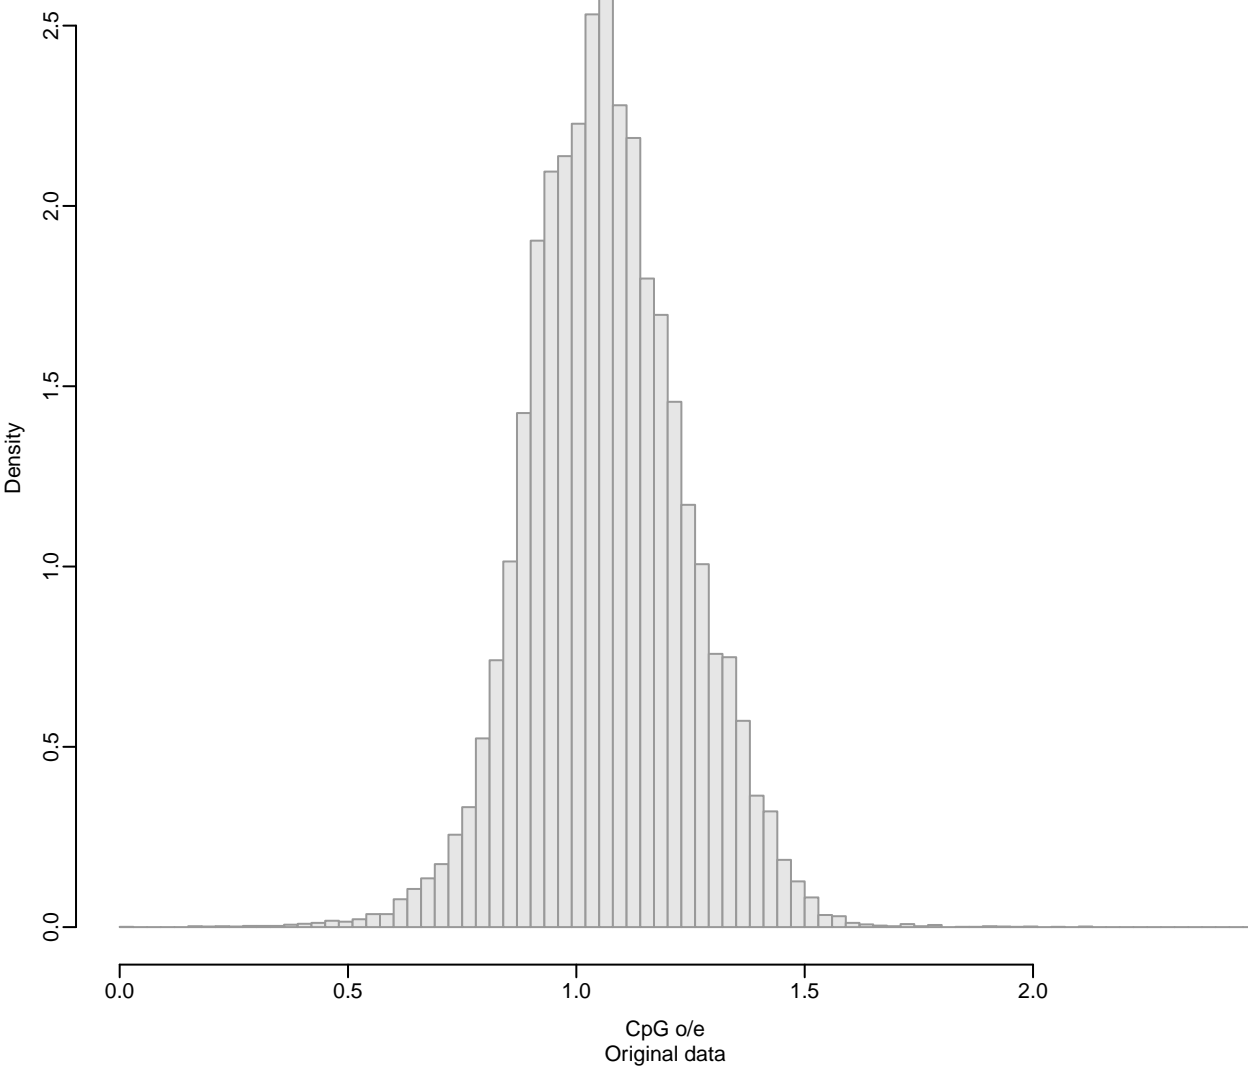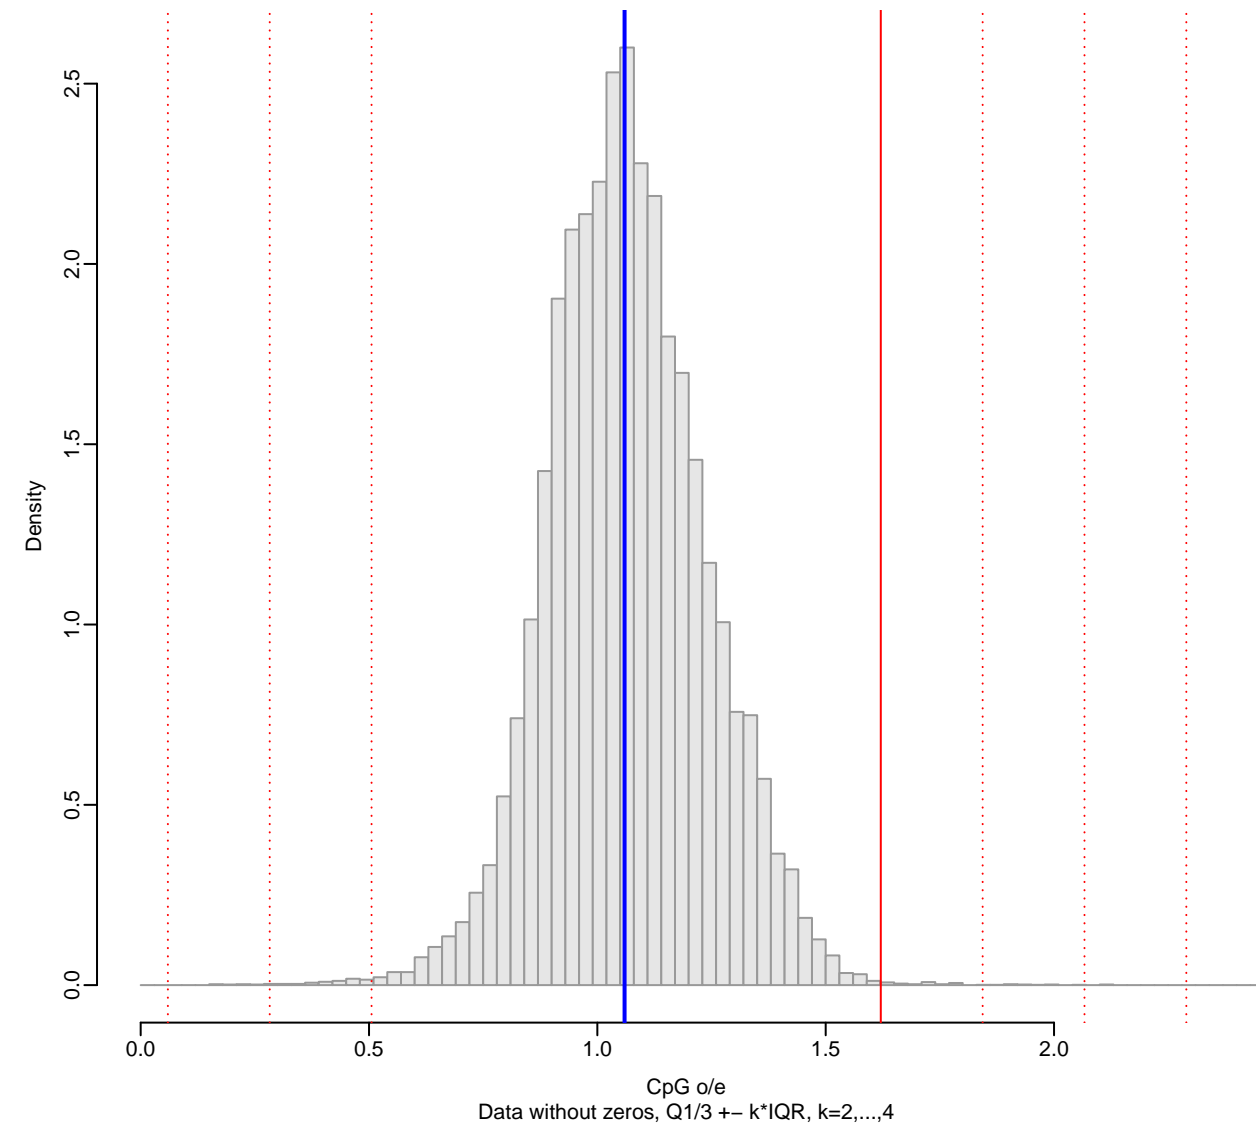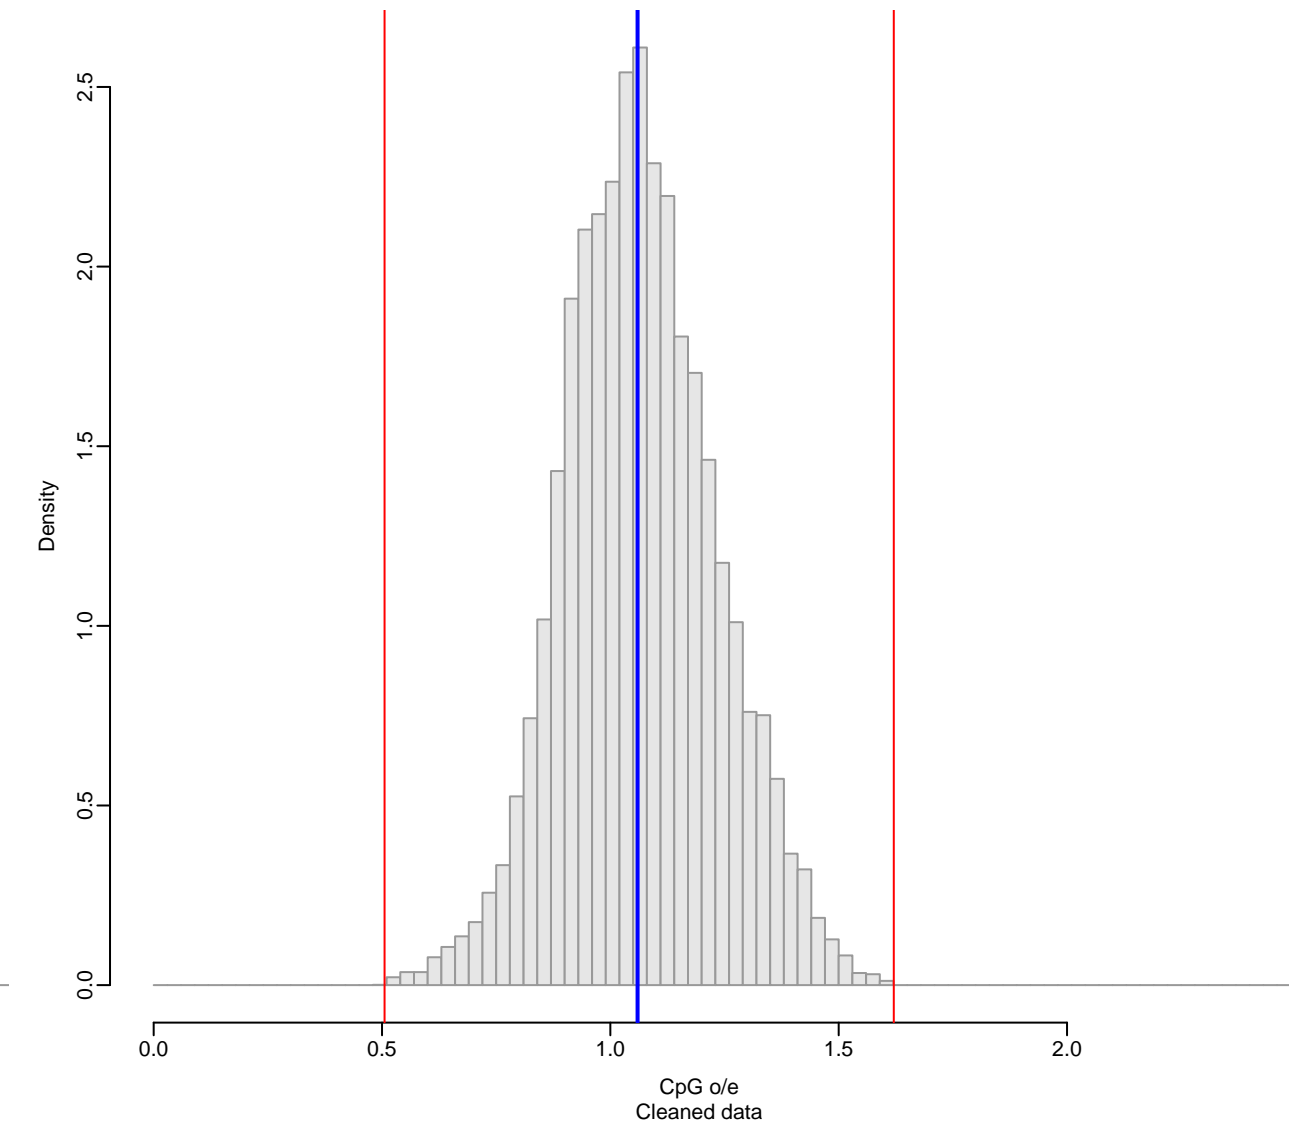

# Heterocapsa\_triquetra

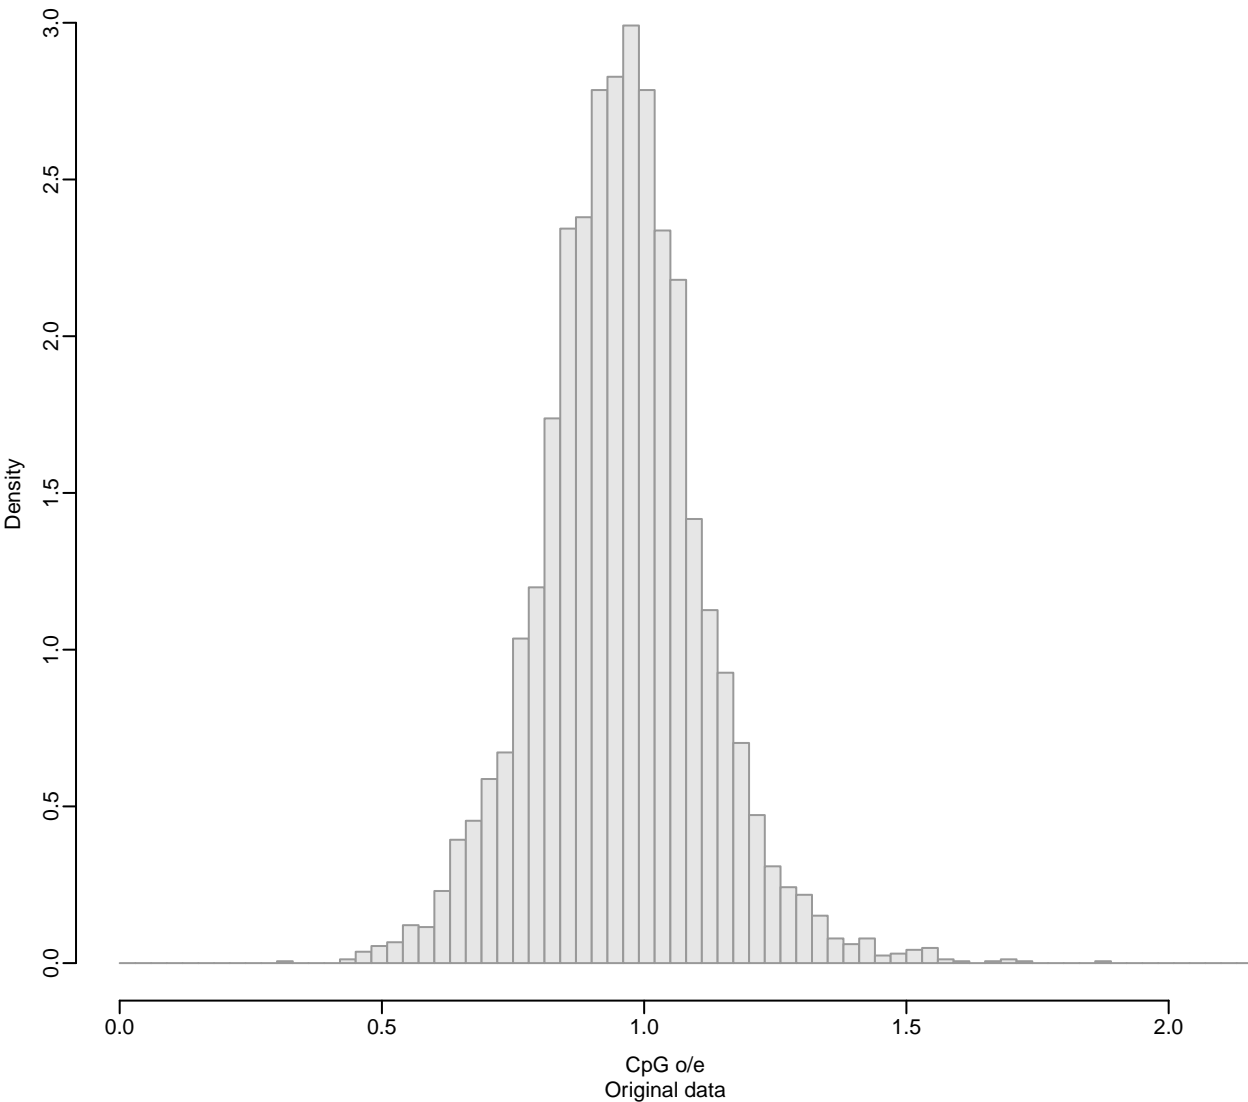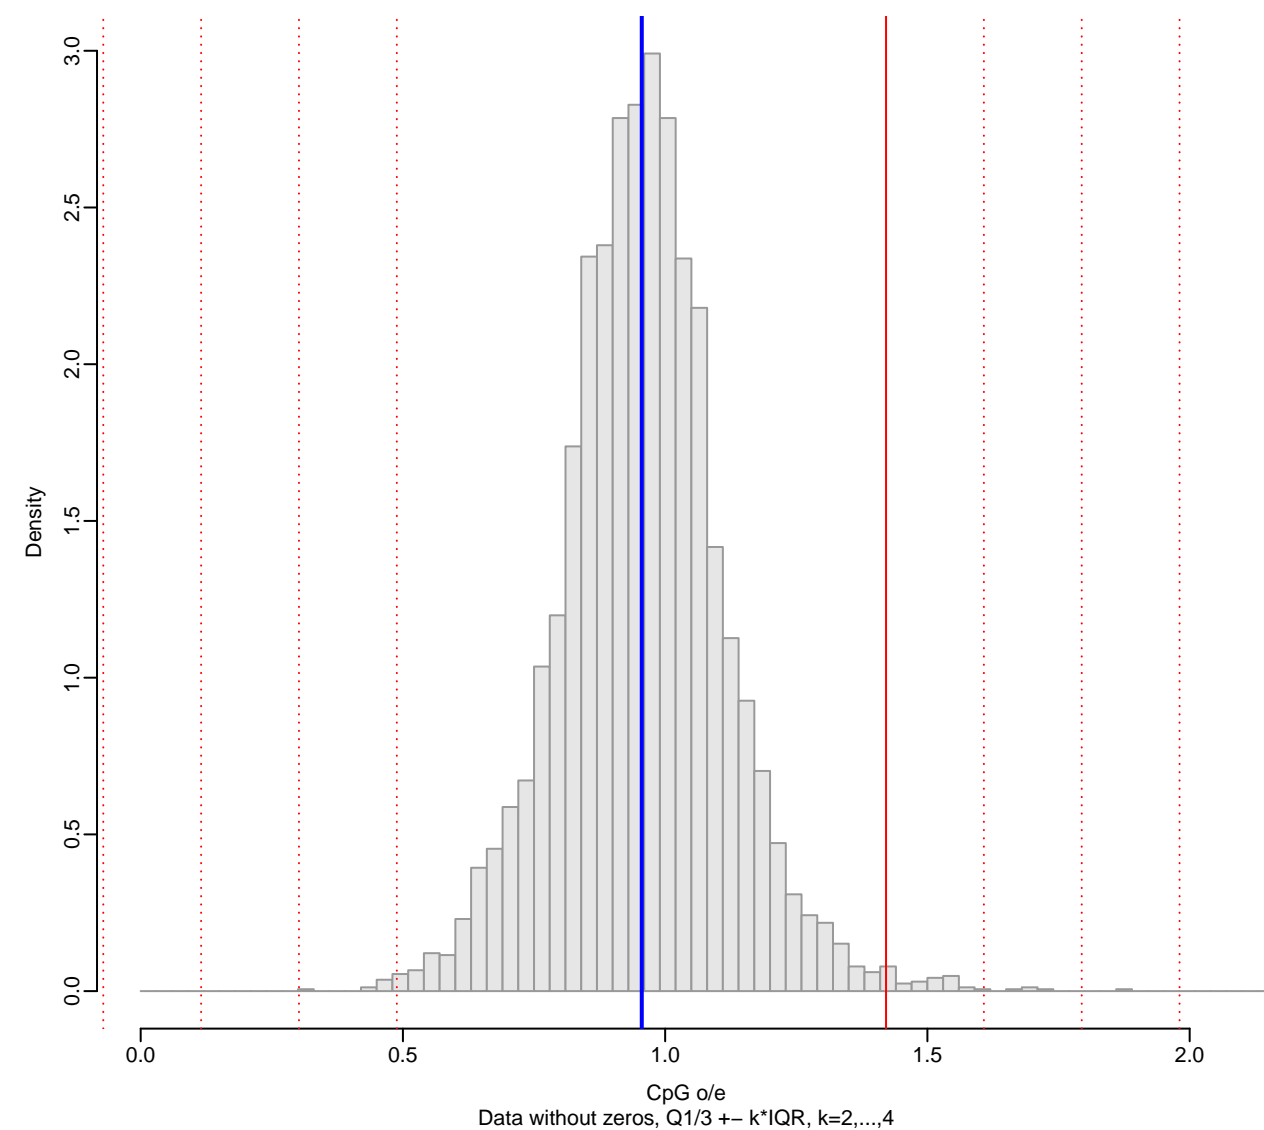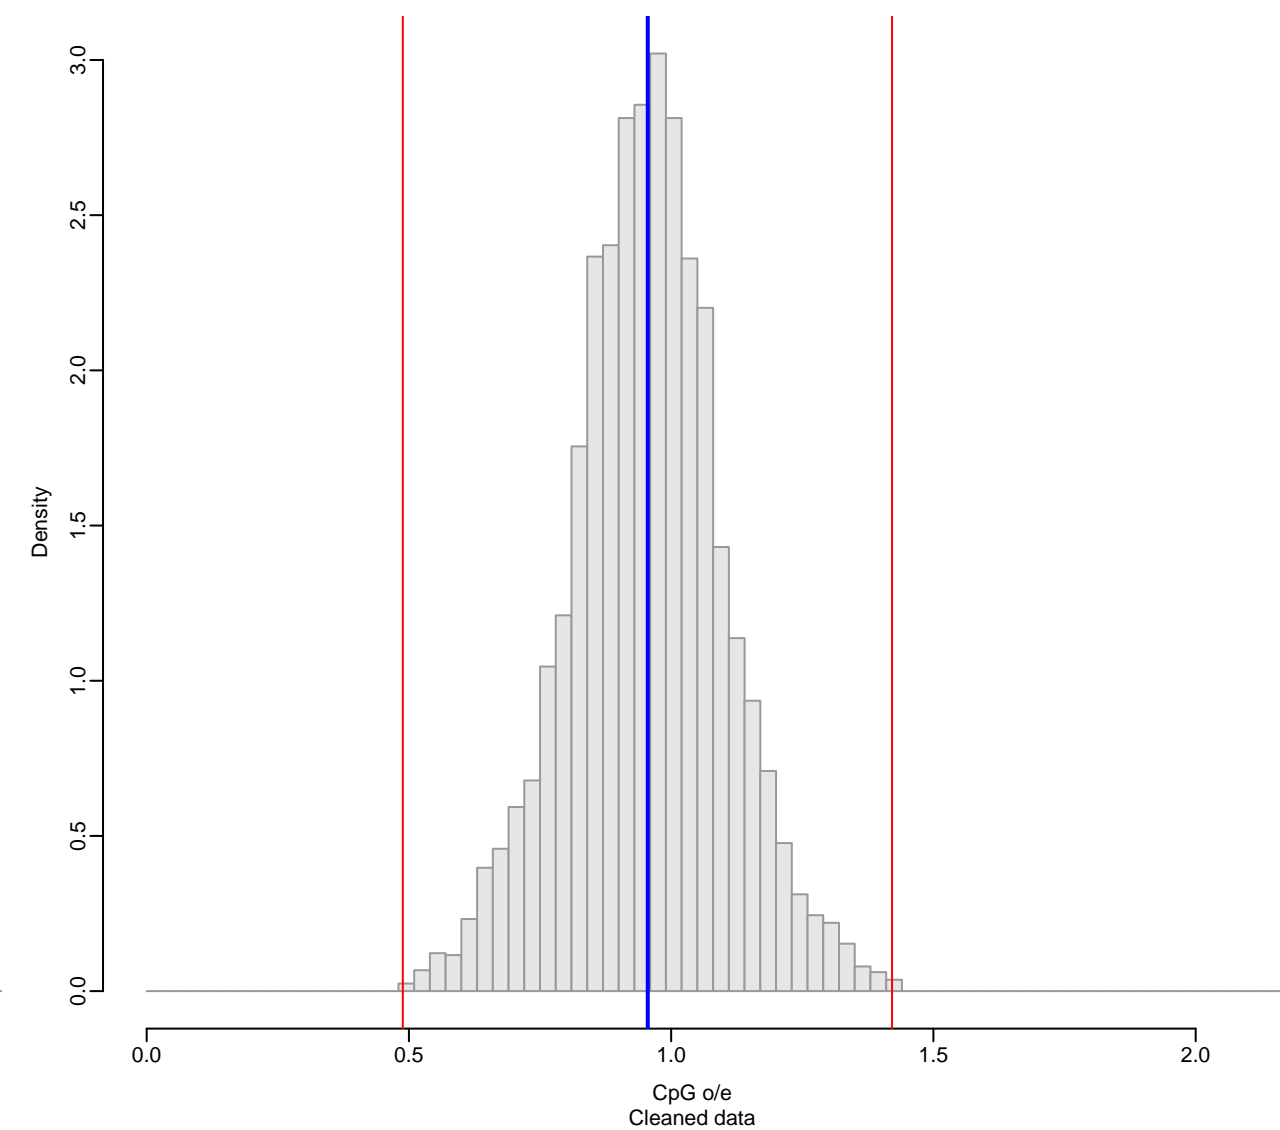



# Heterochone\_calyx

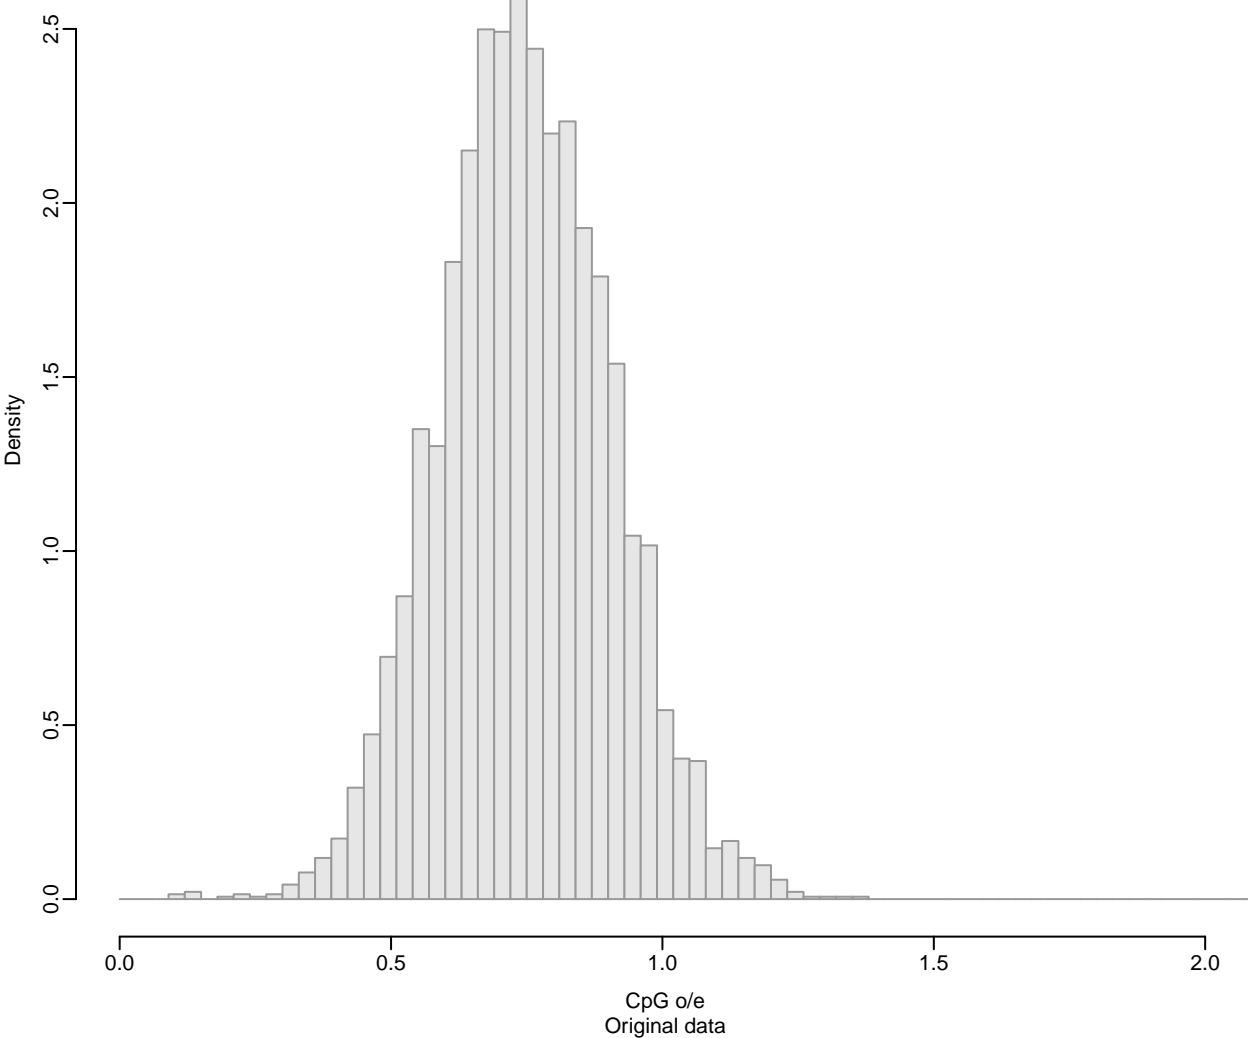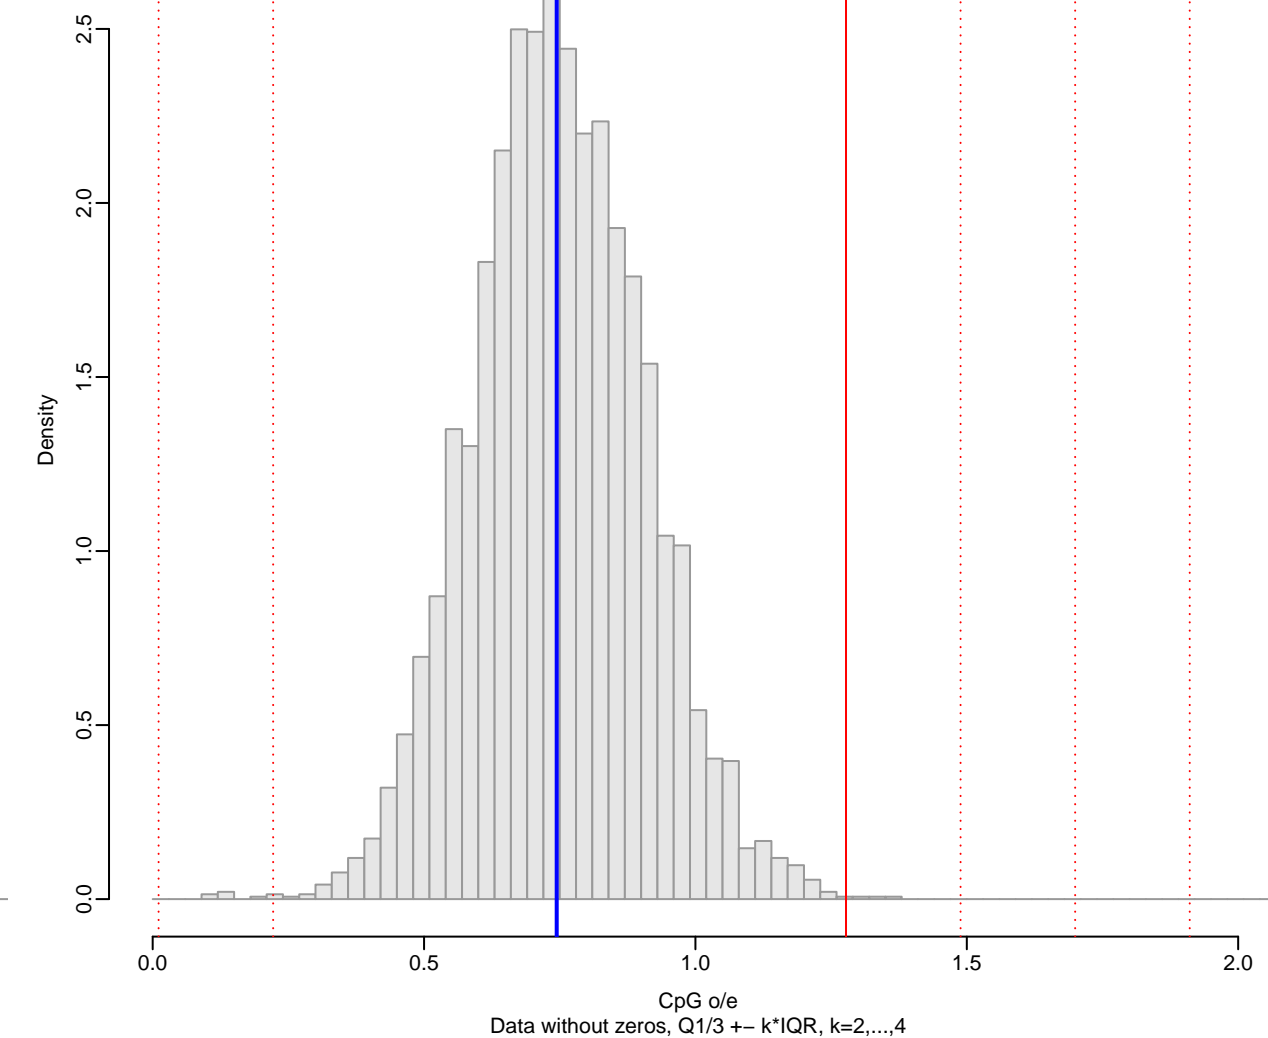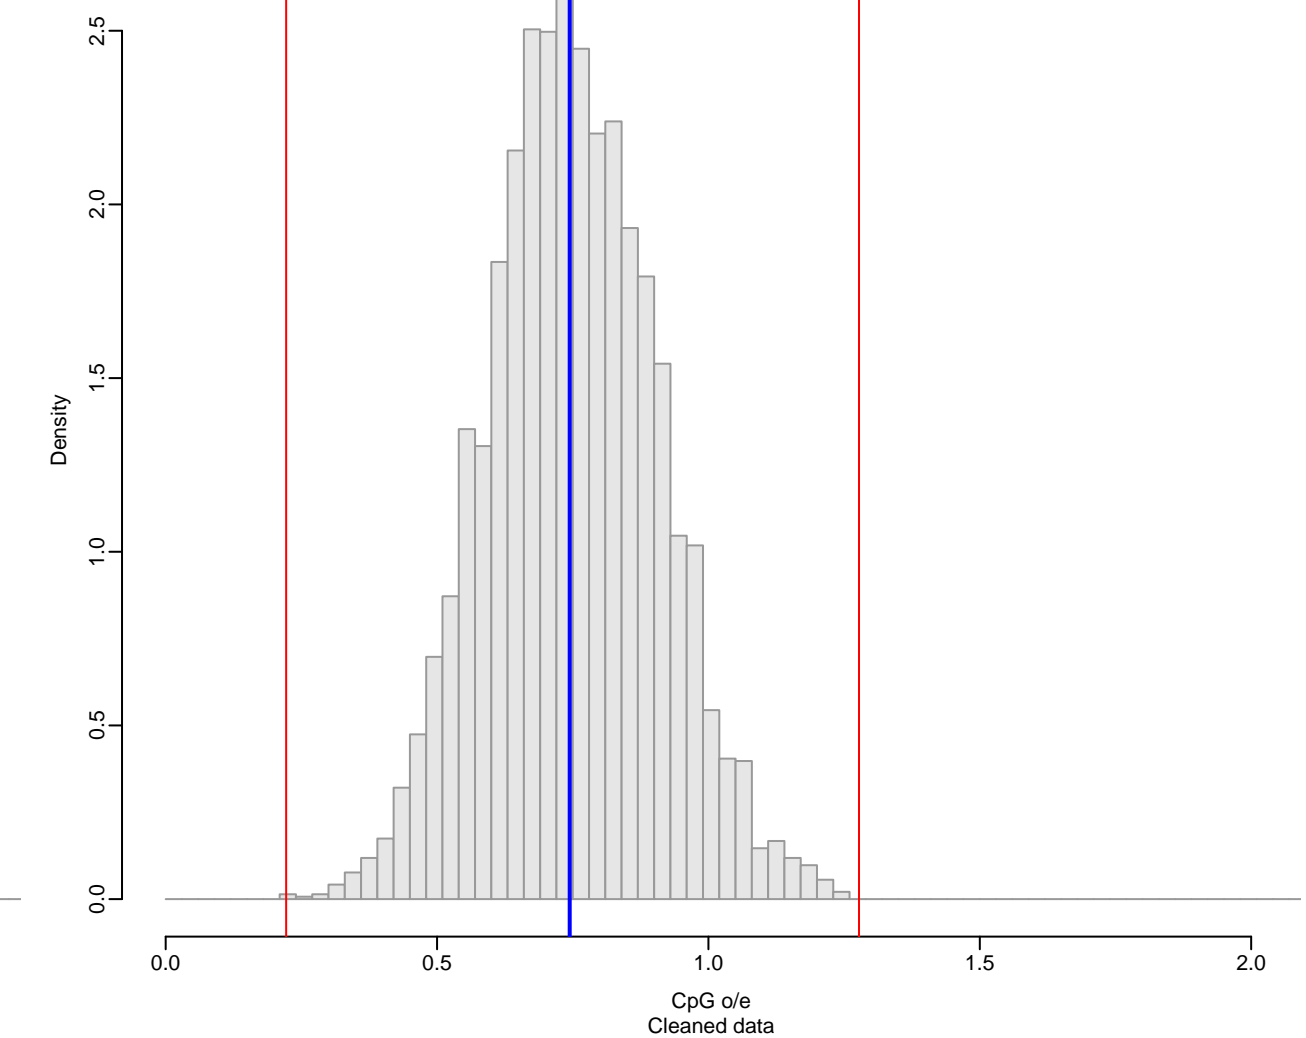

# Heterodera\_glycines

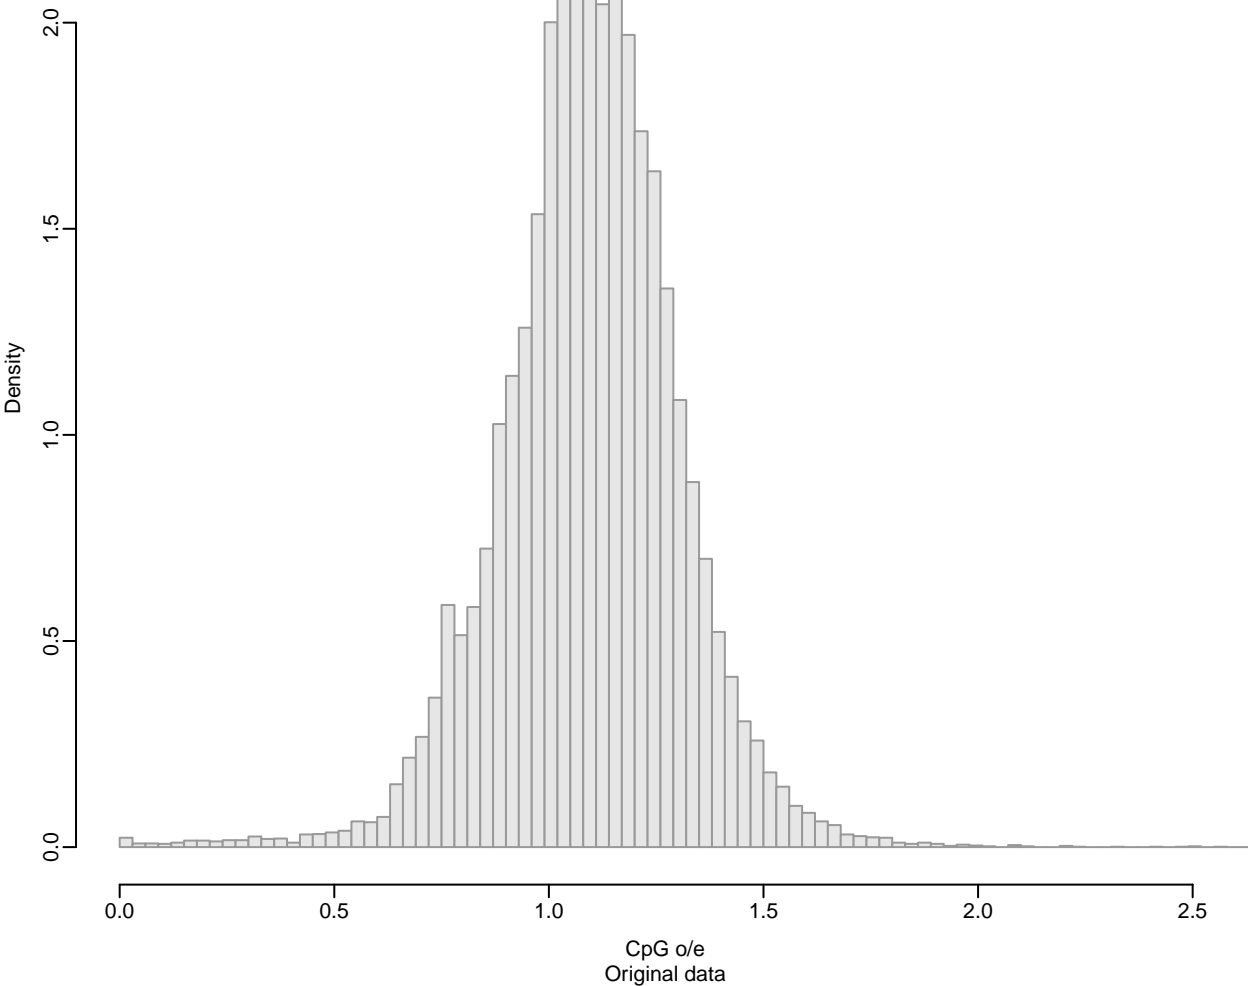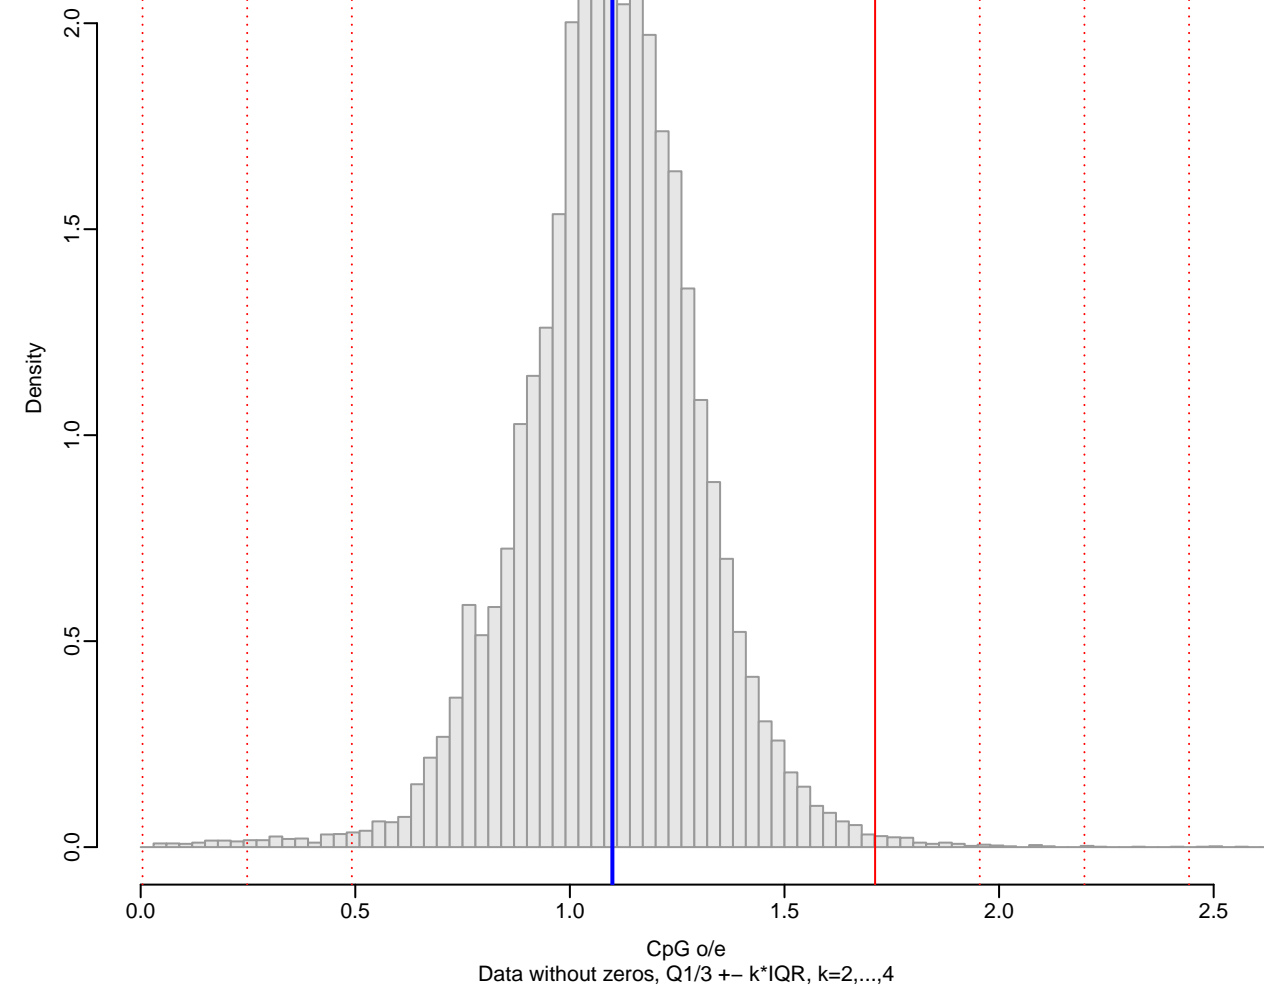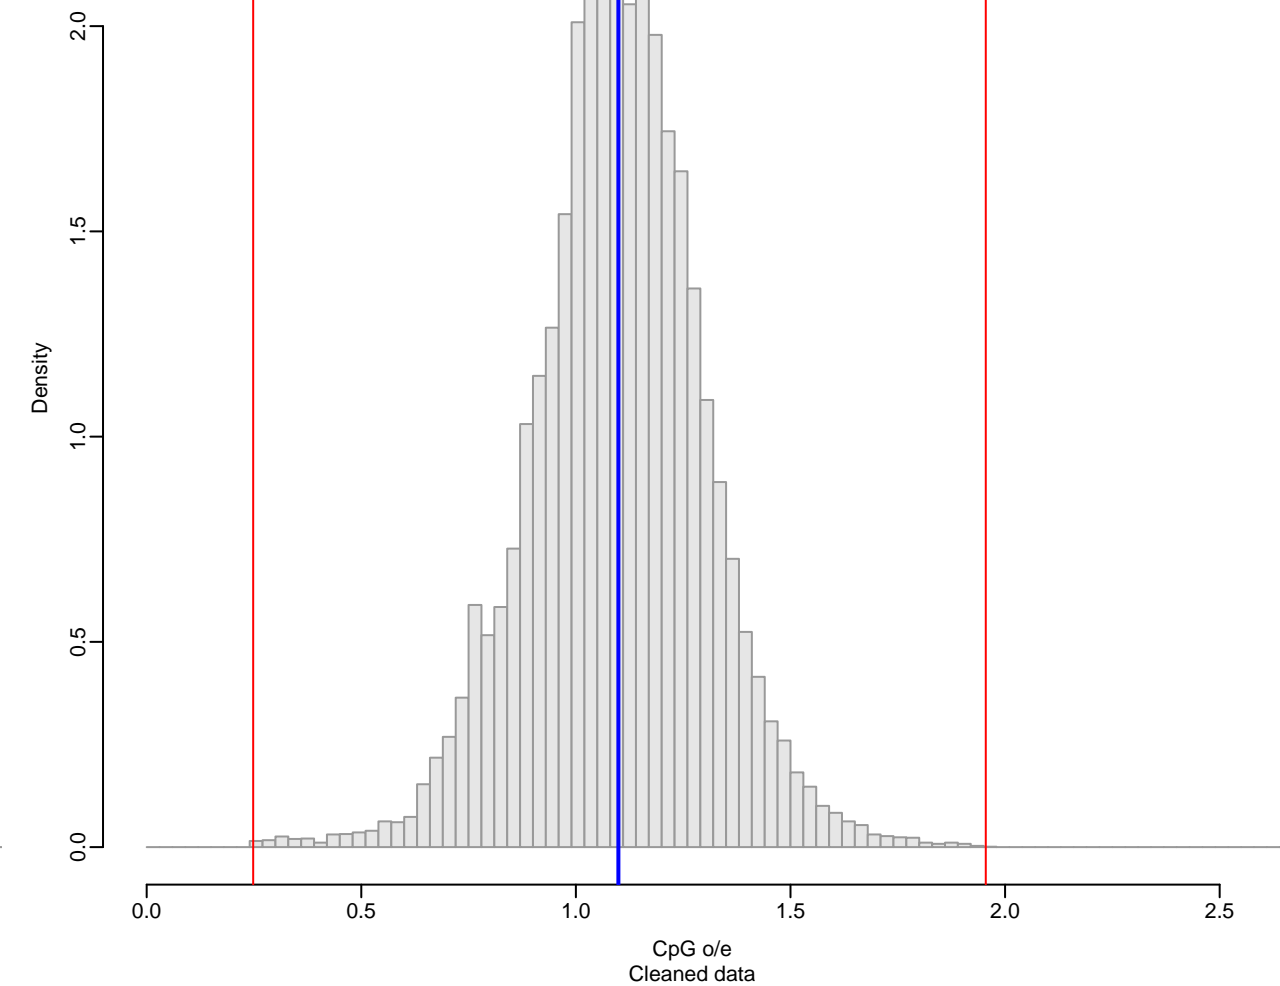

# Heterorhabditis\_bacteriophora

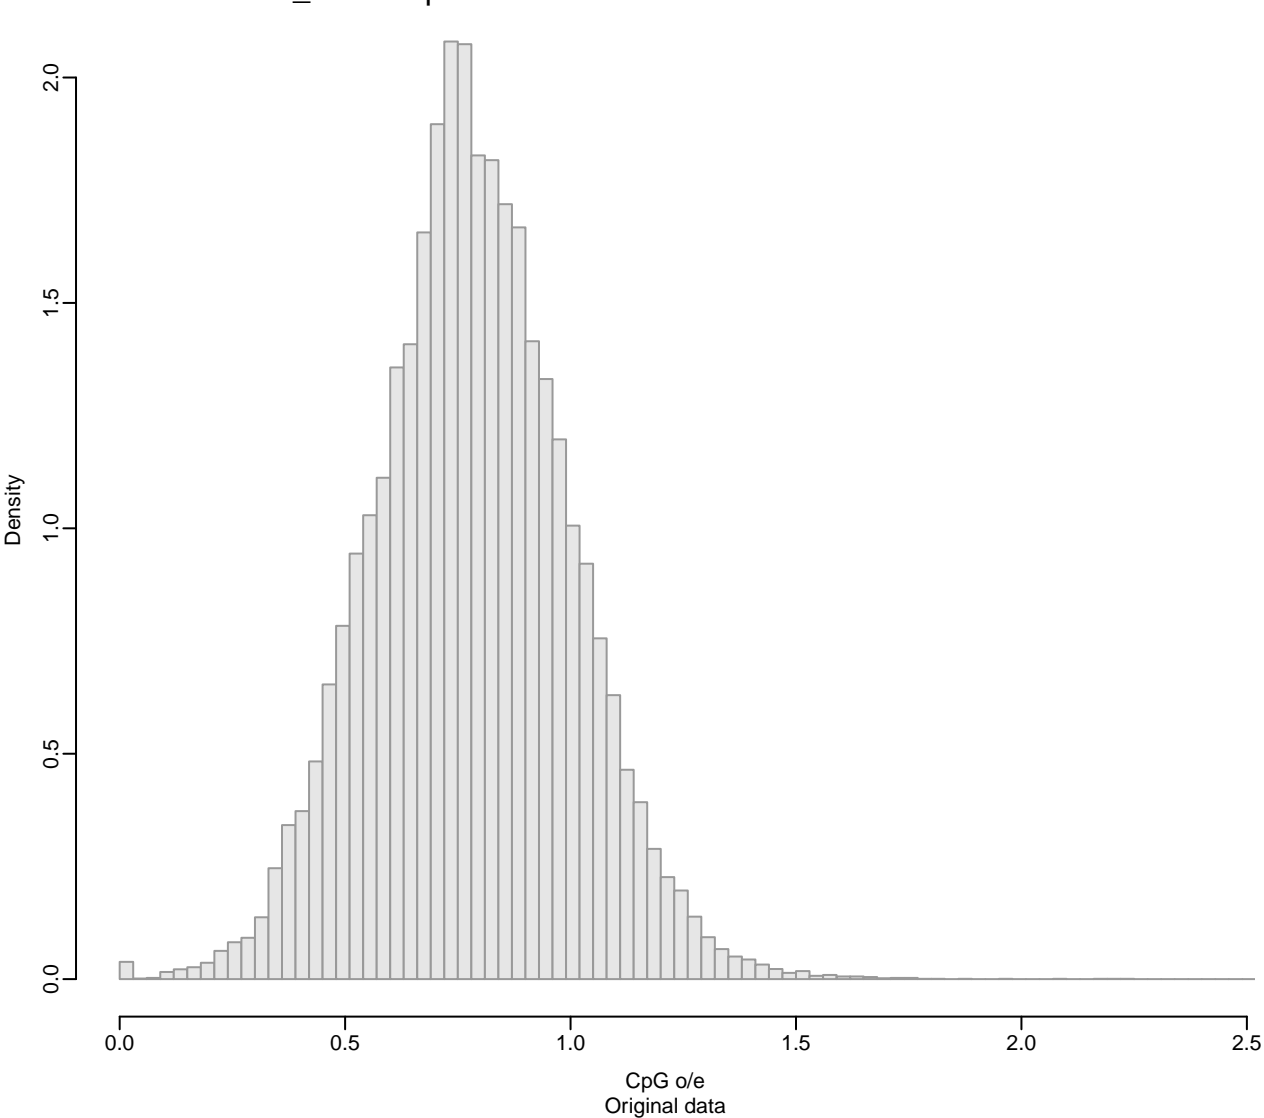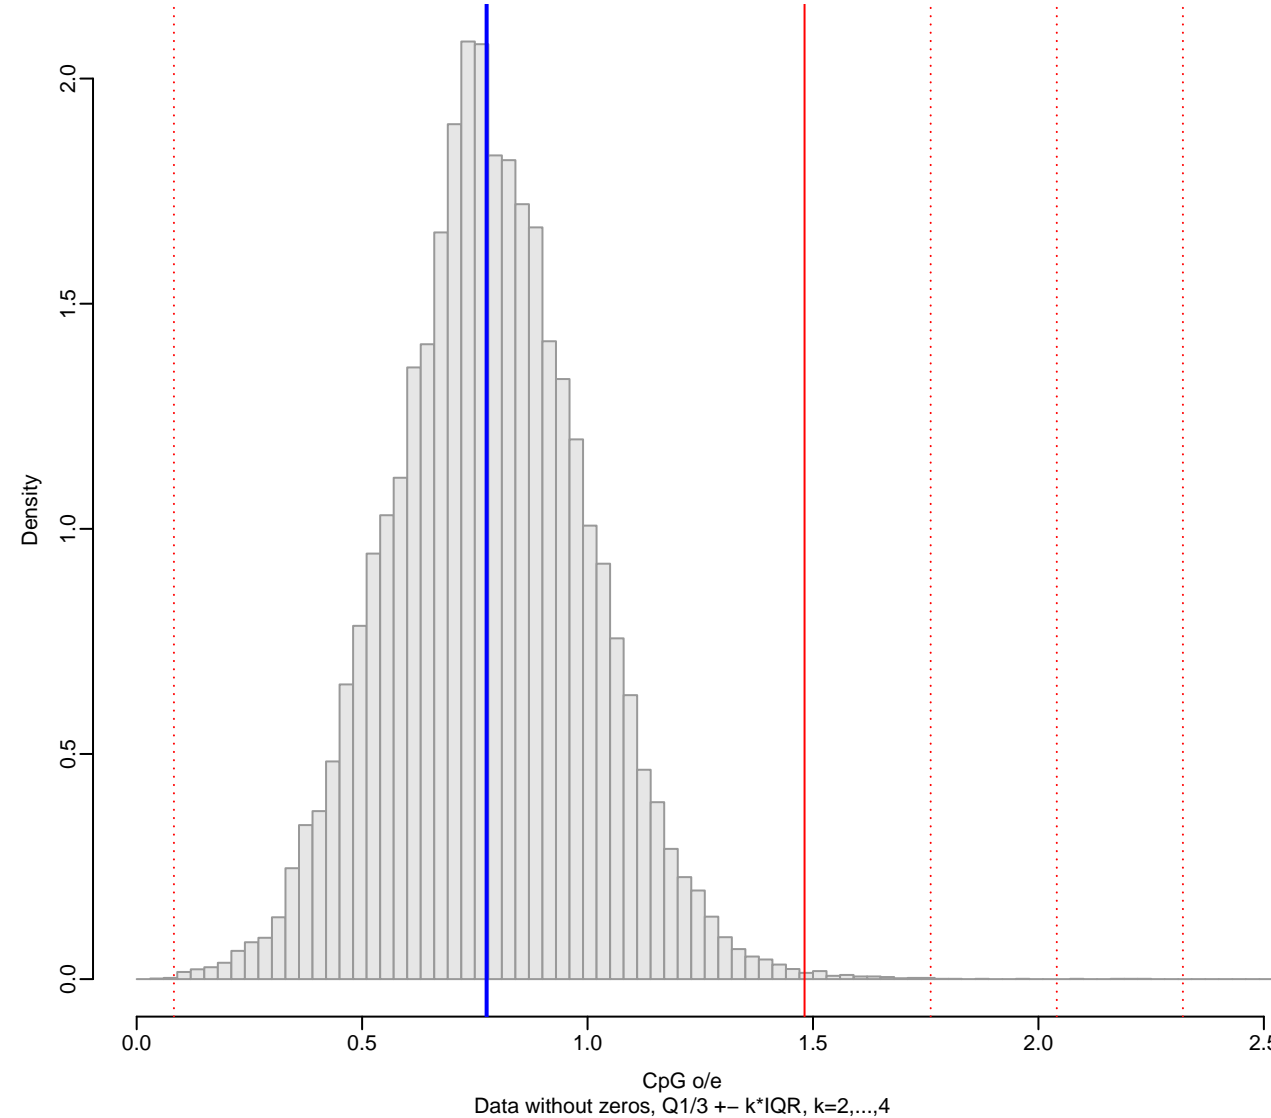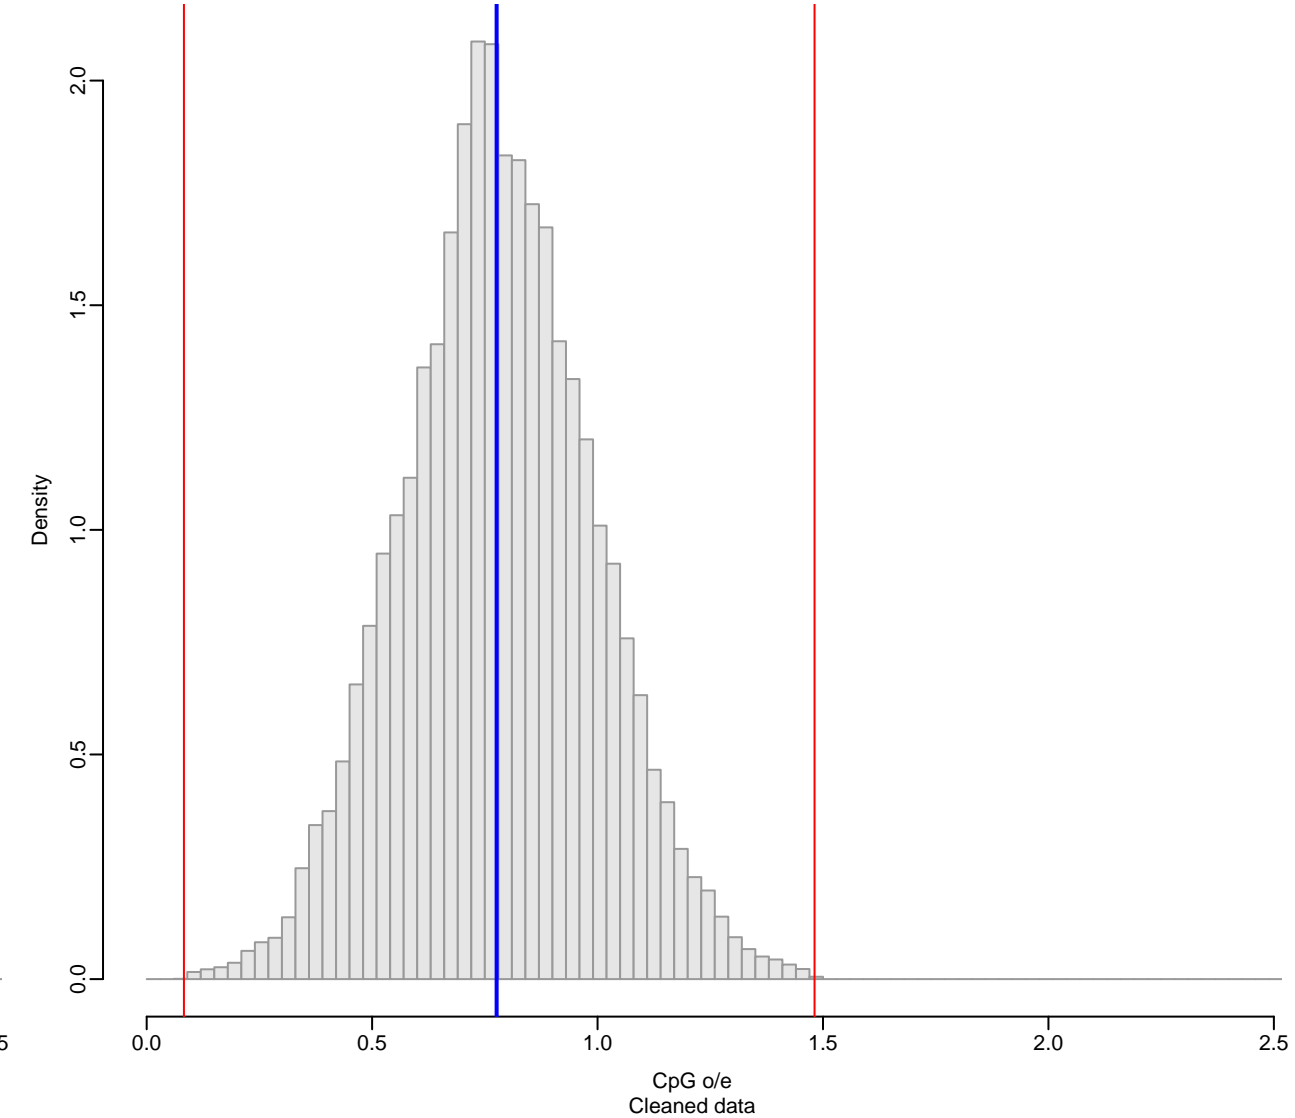

# Hippoglossus\_hippoglossus

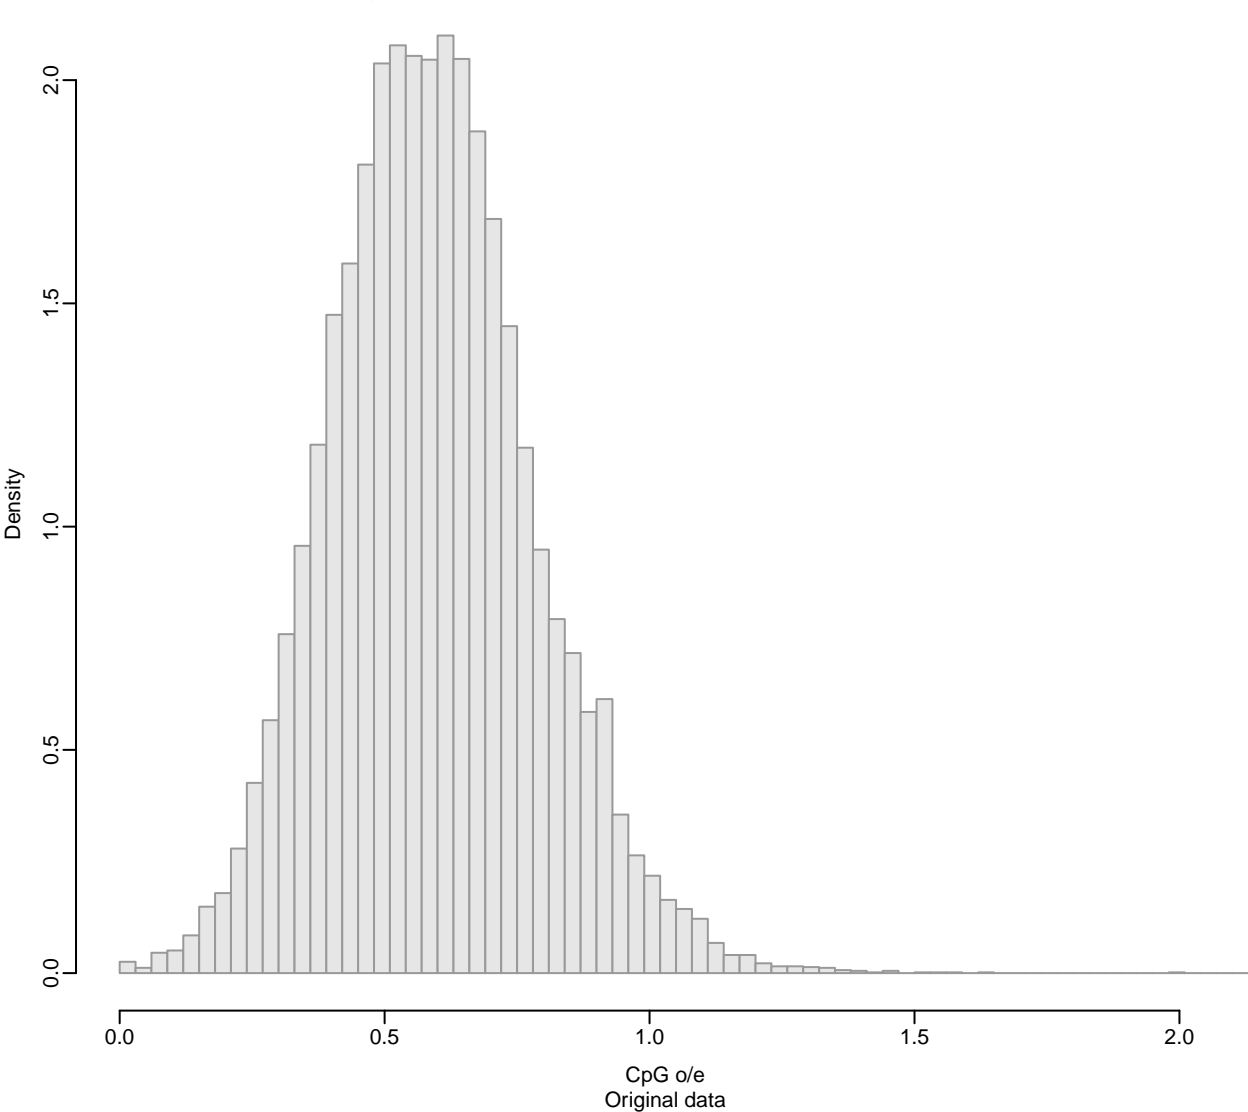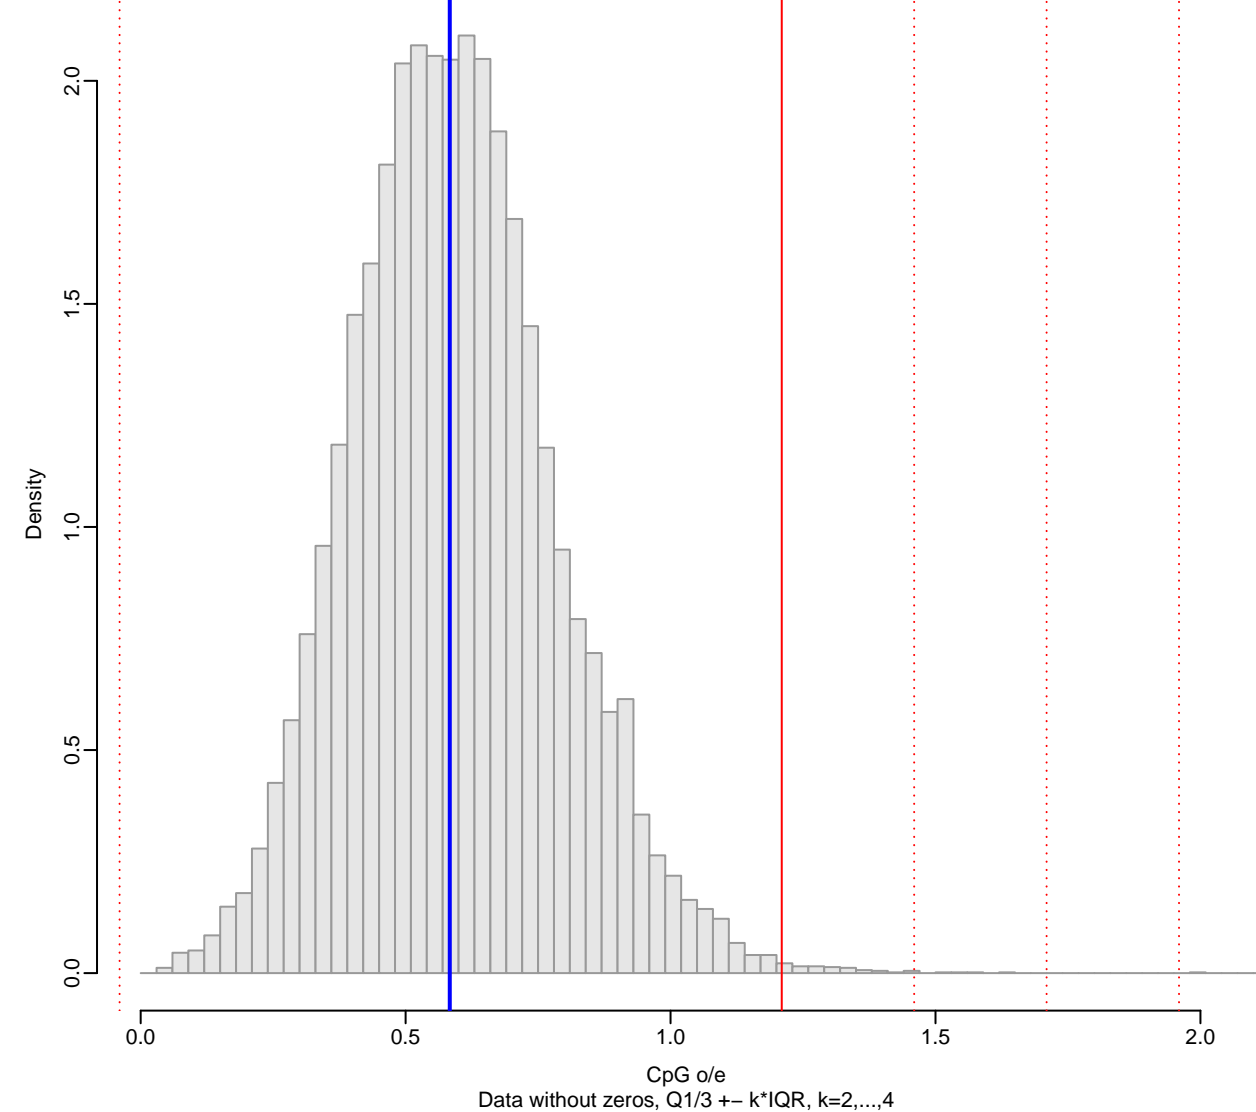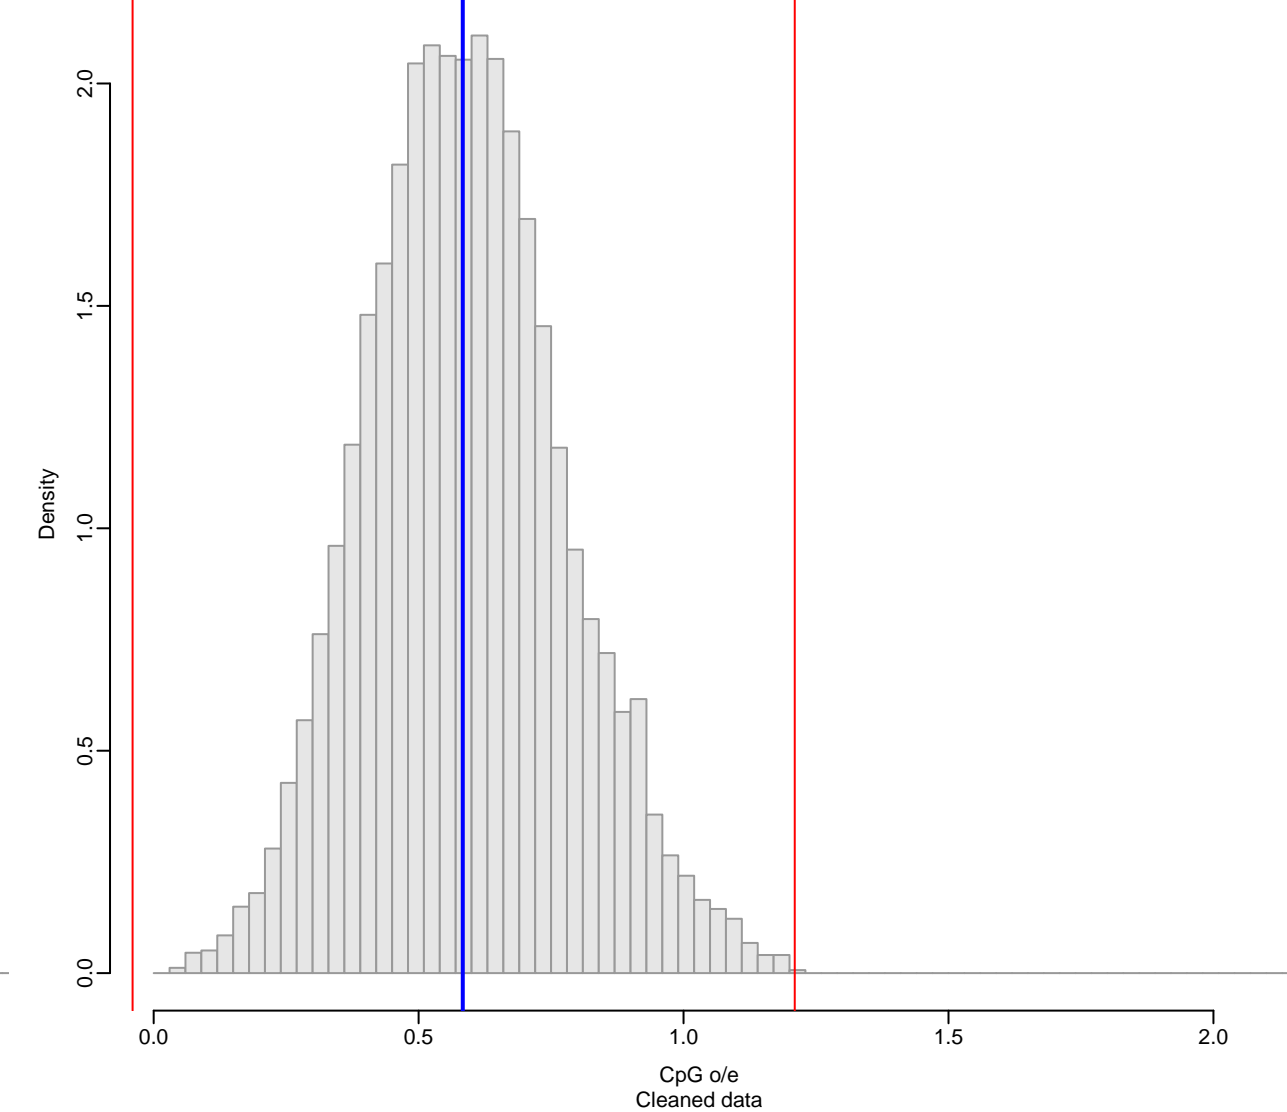

# Hirudo\_medicinalis

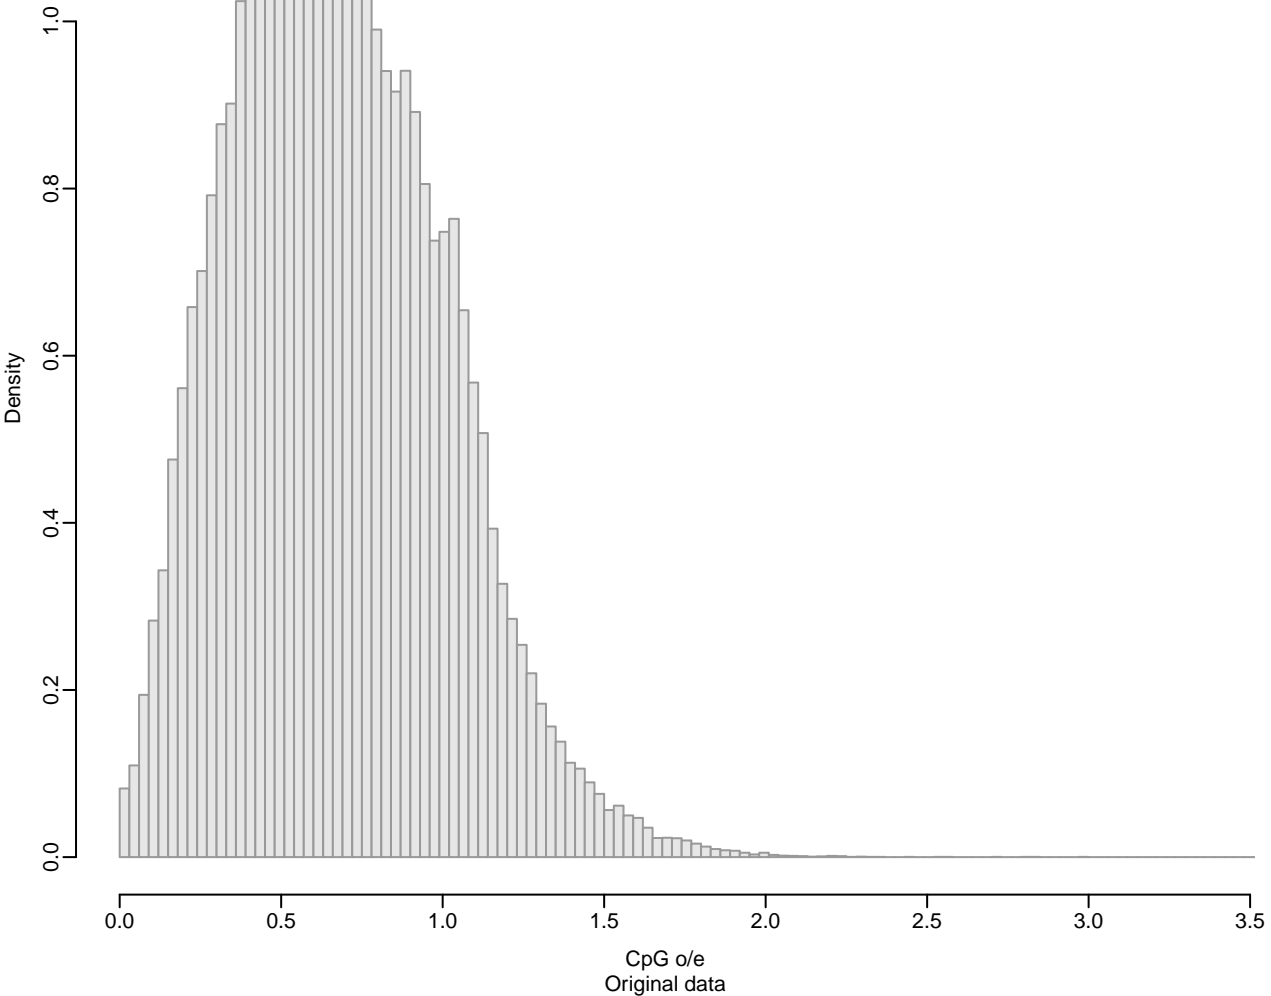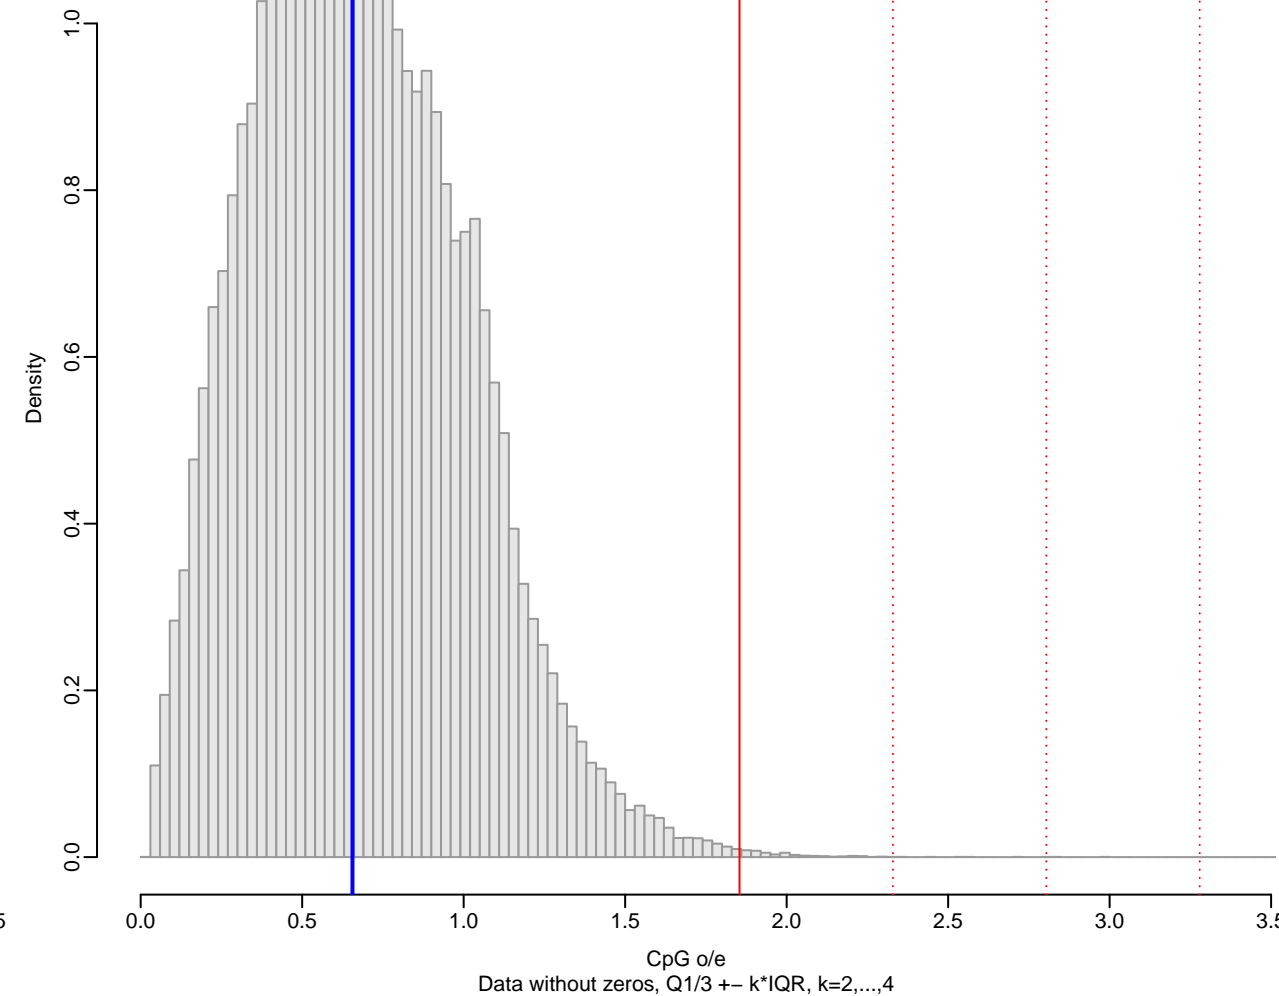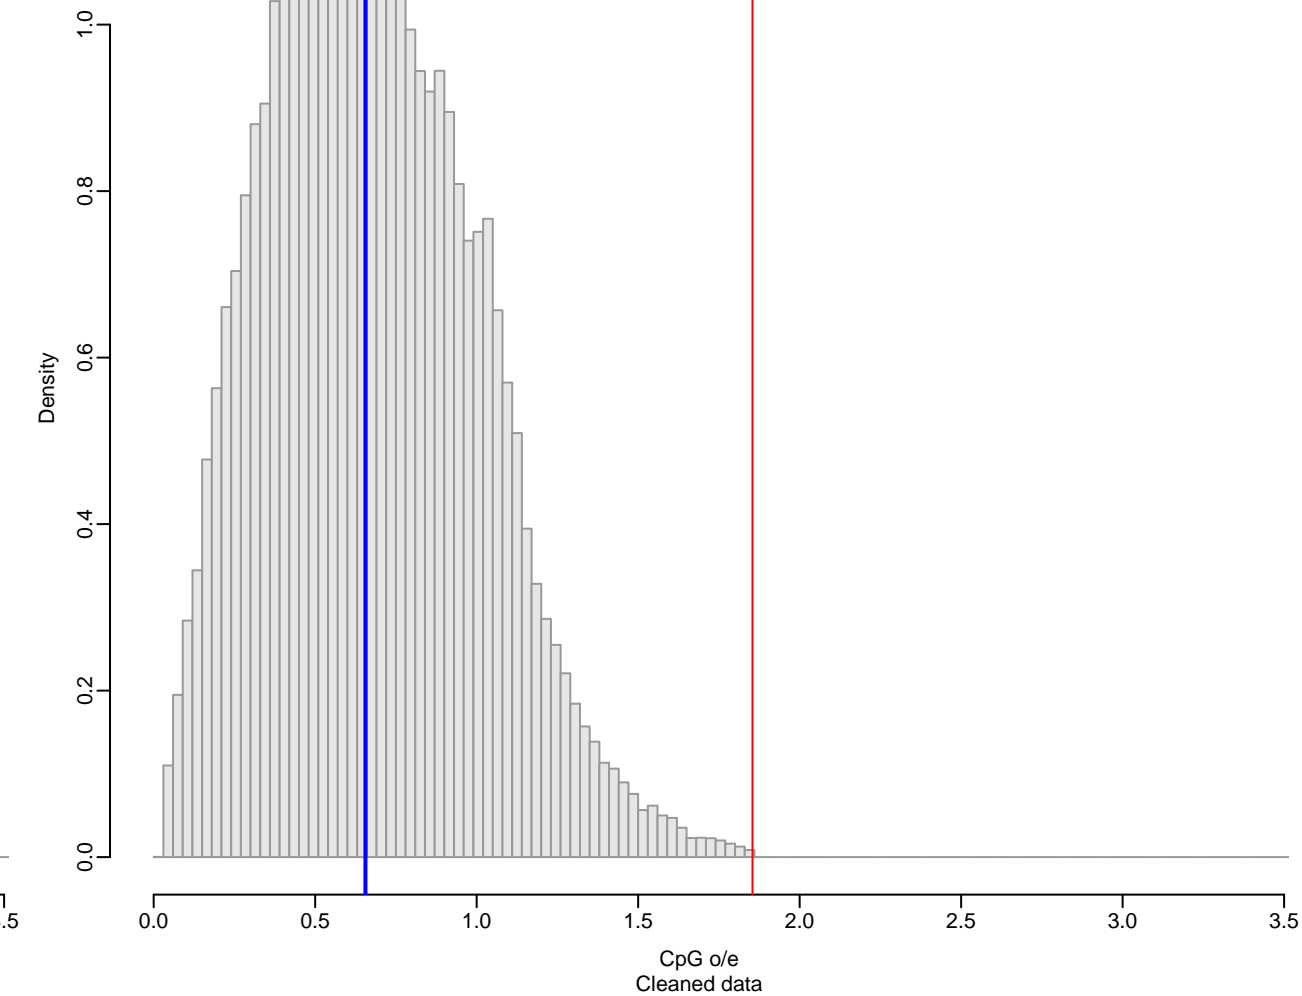

# Homalodisca\_coagulata

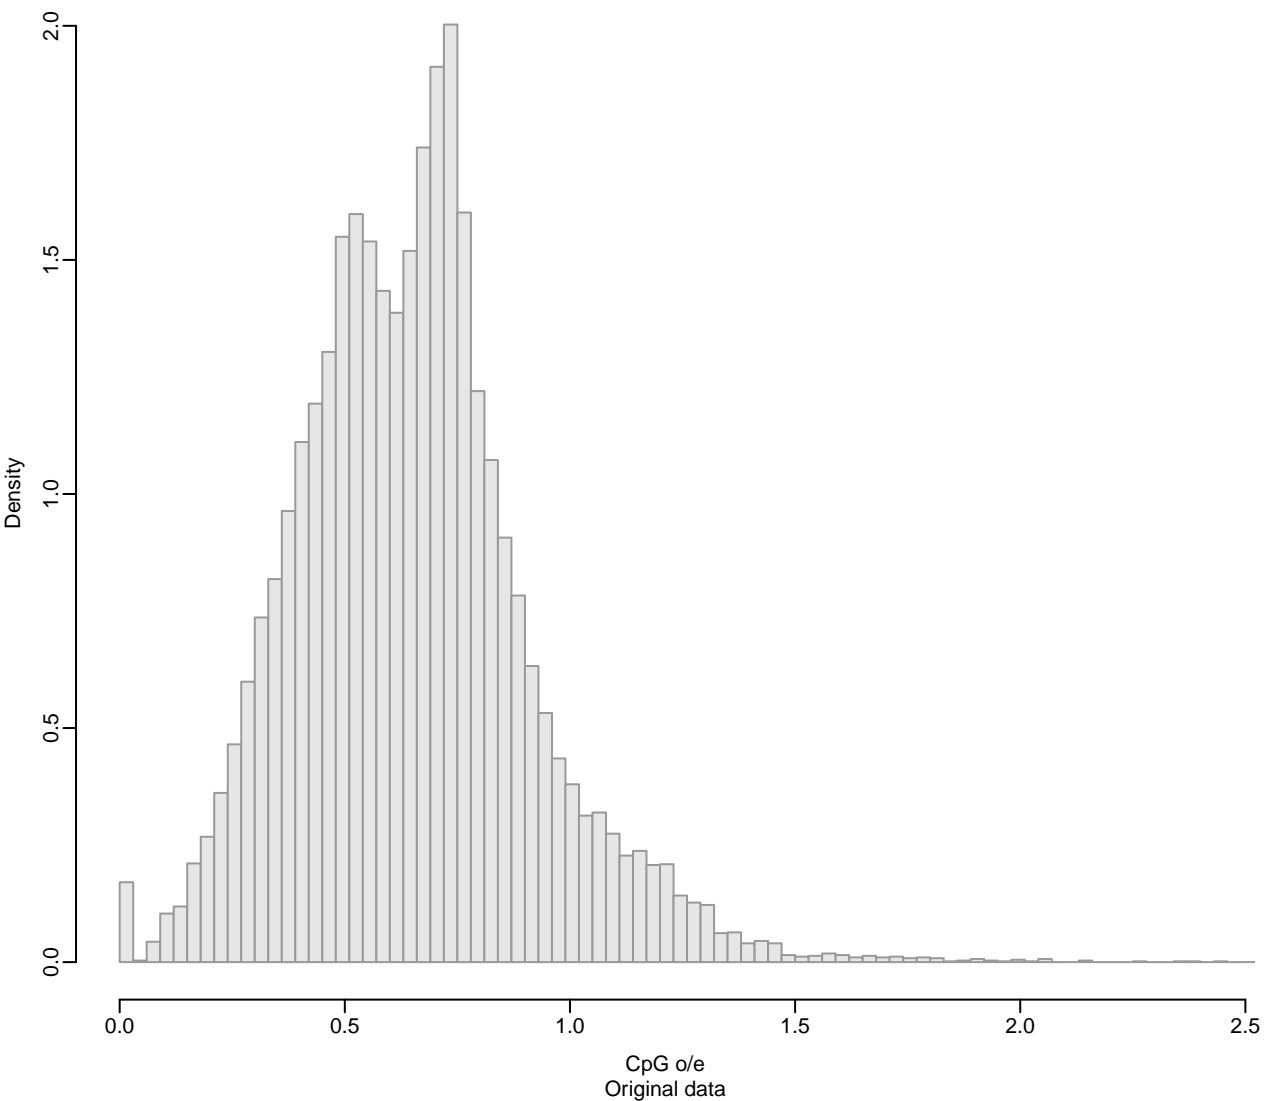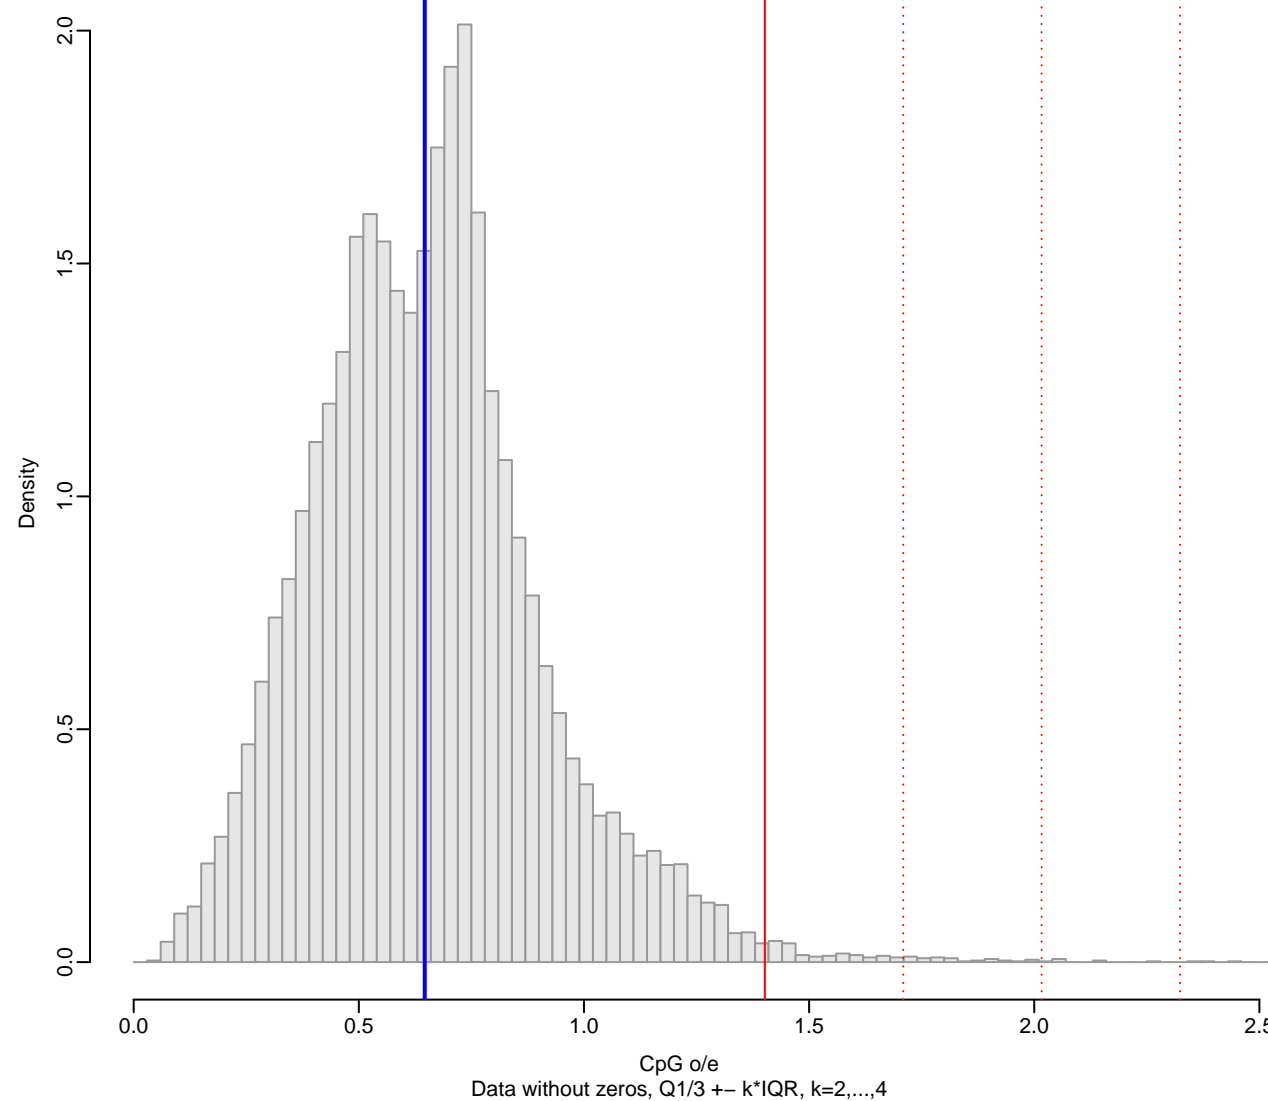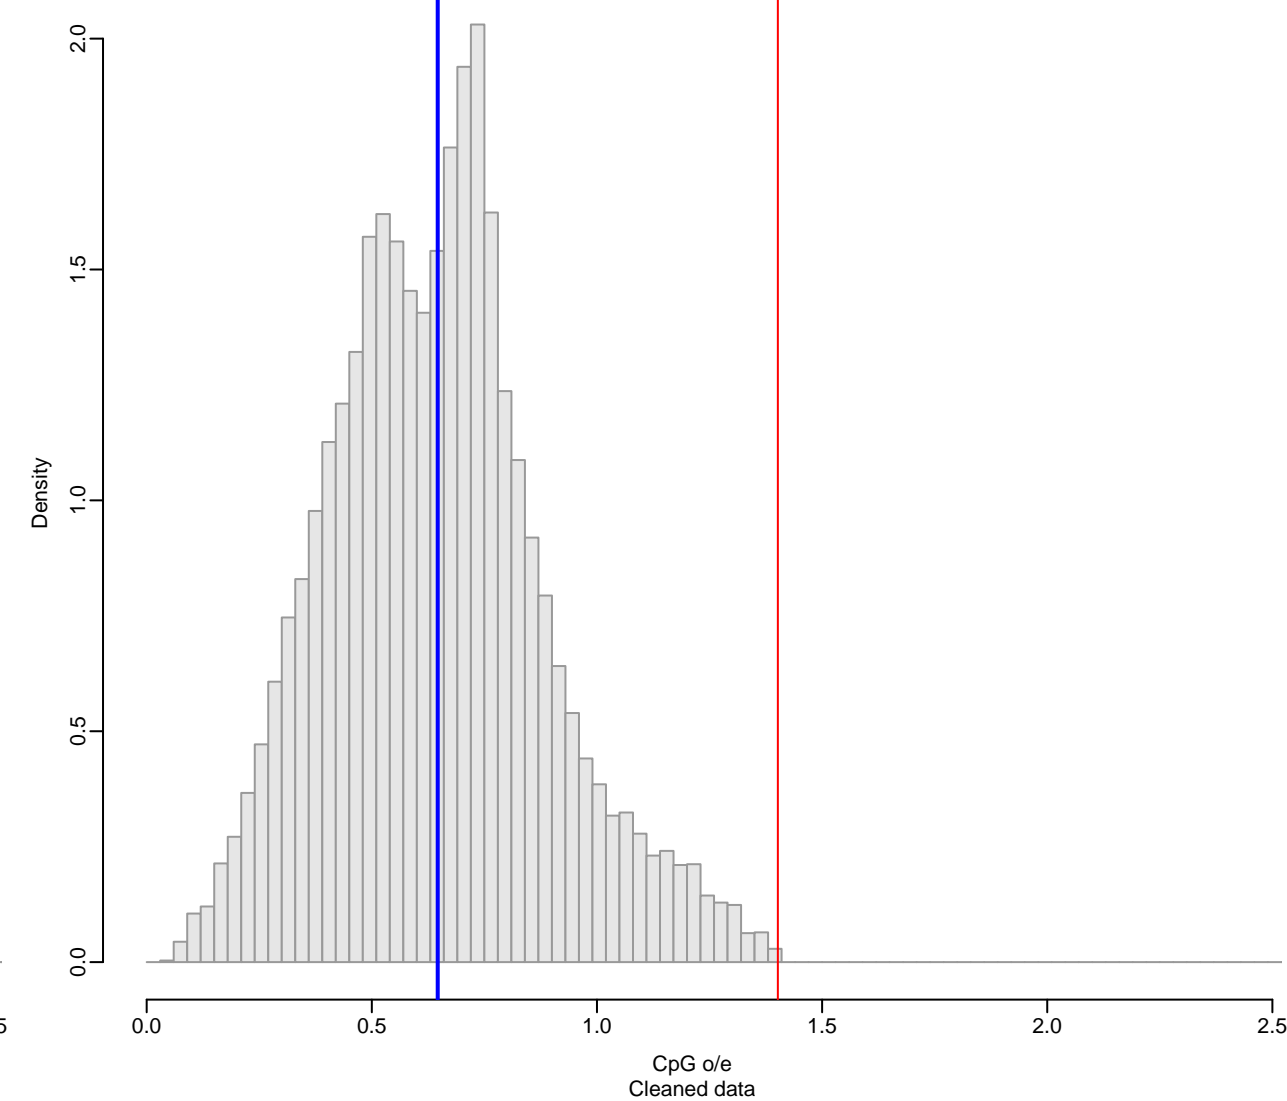

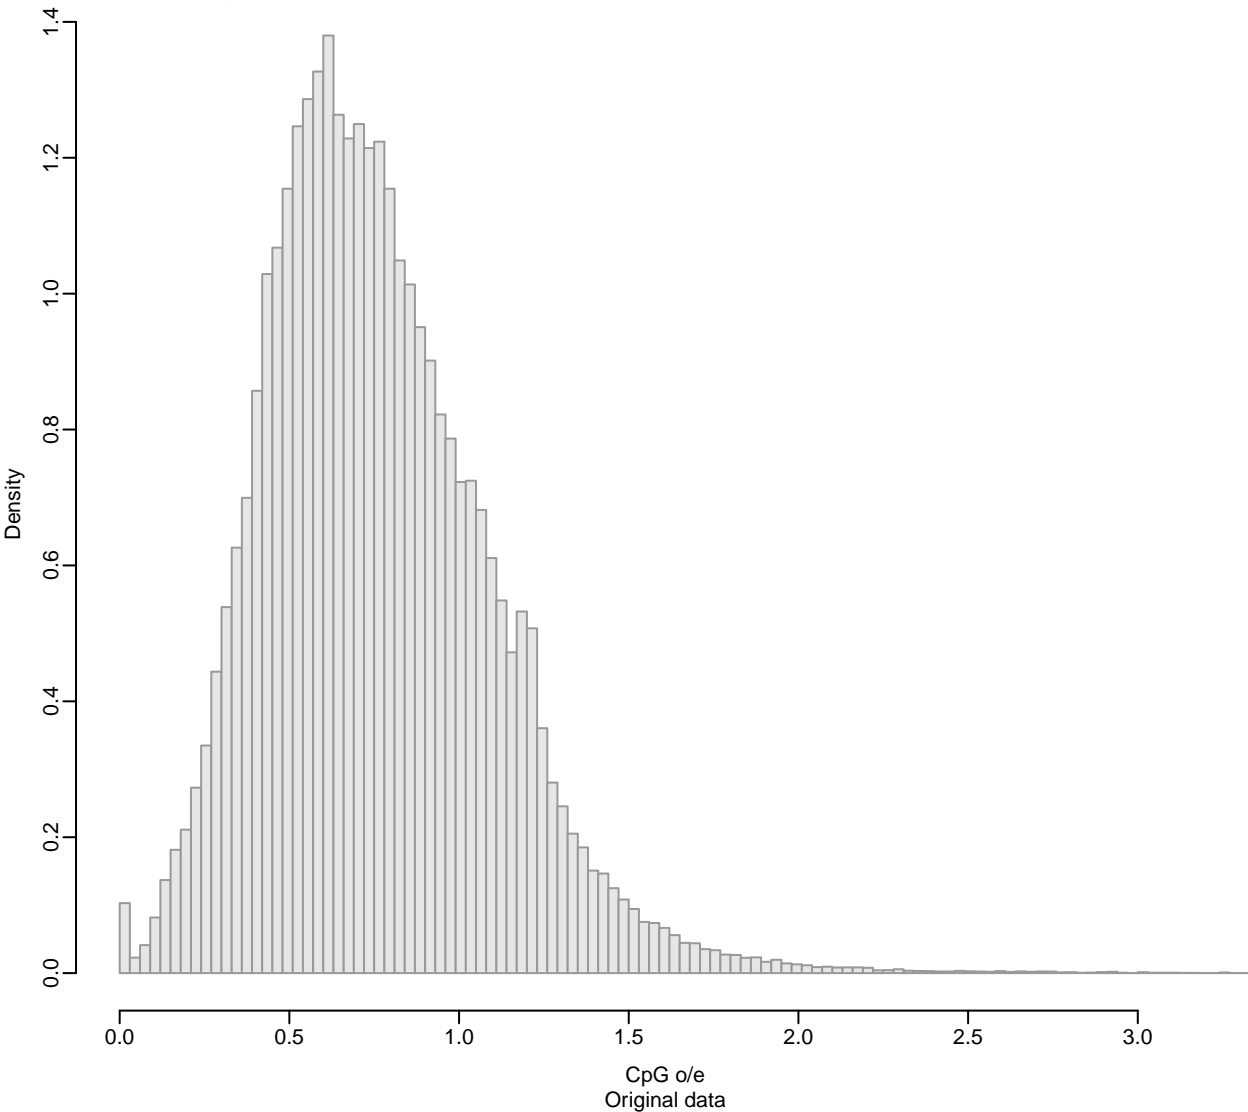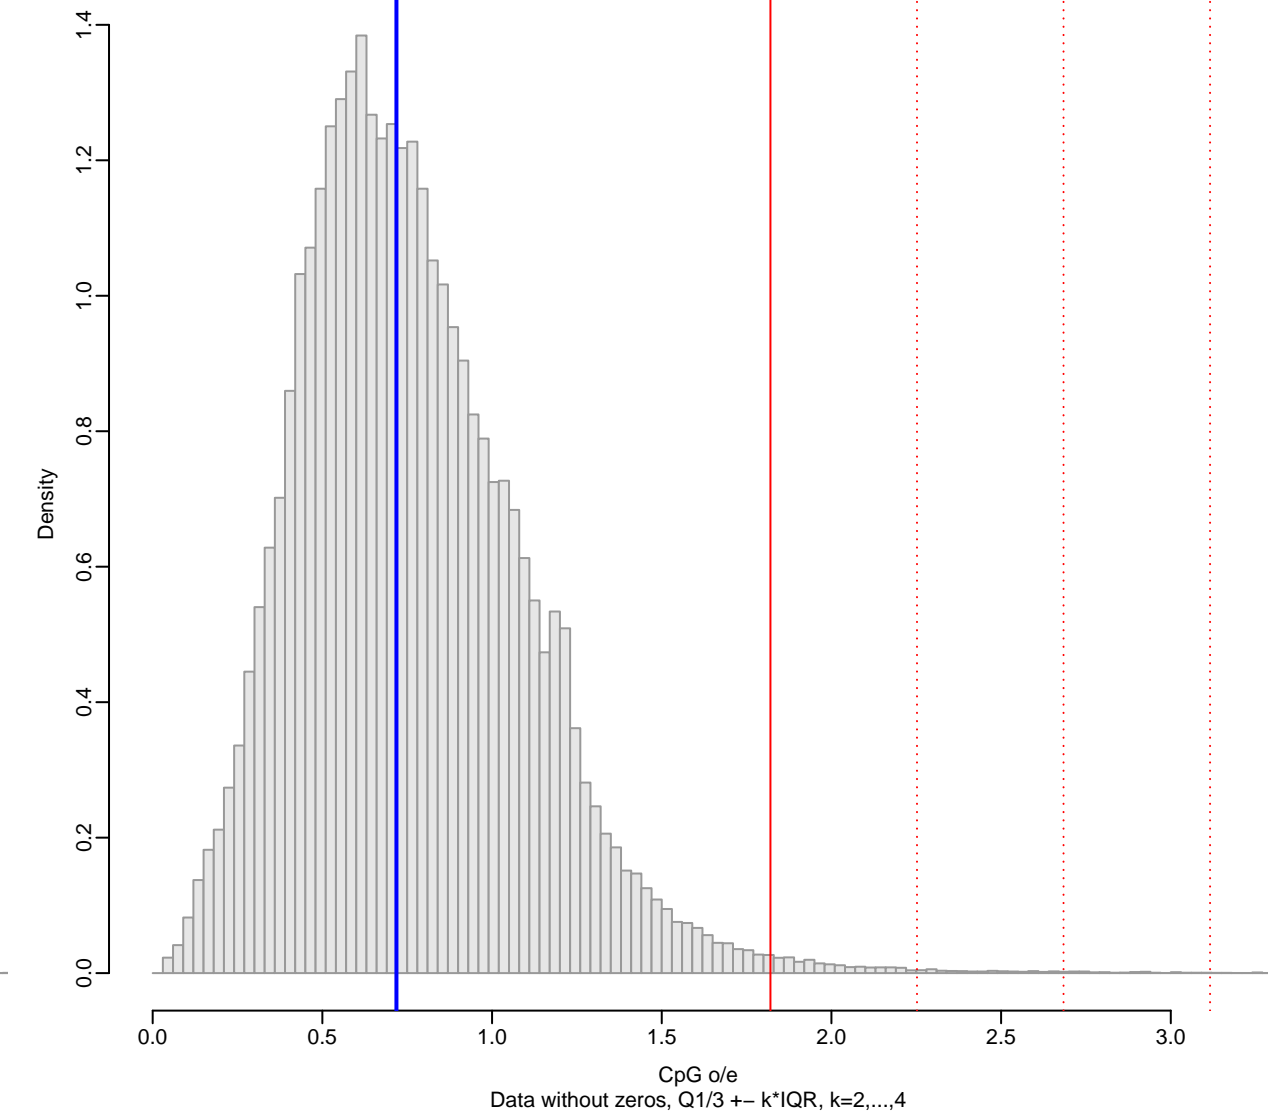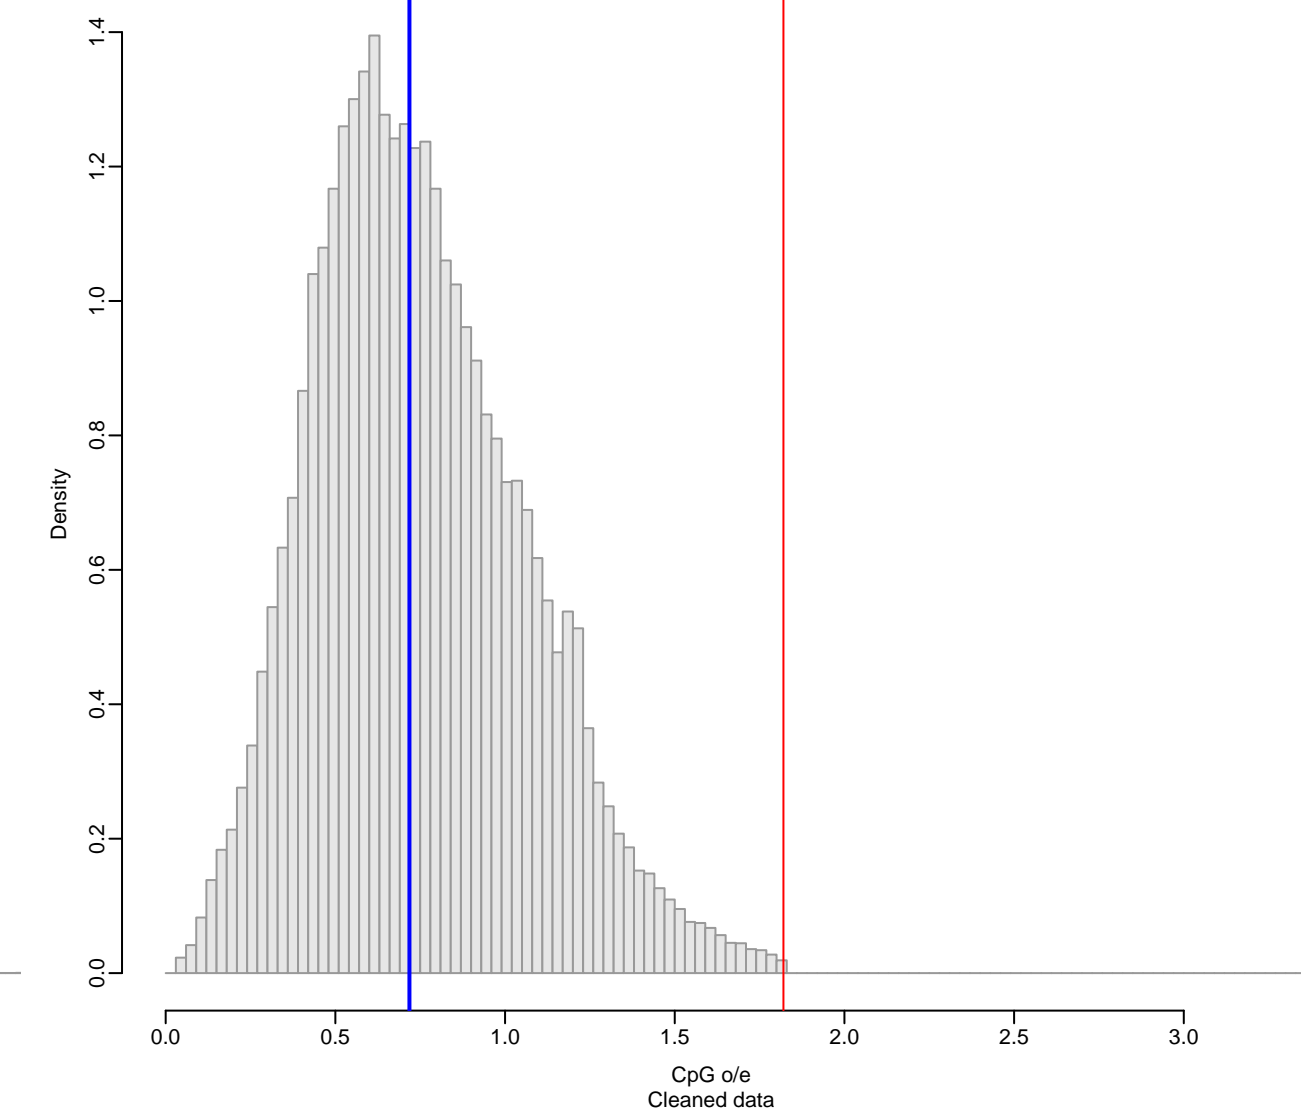

## Hydra\_oligactis

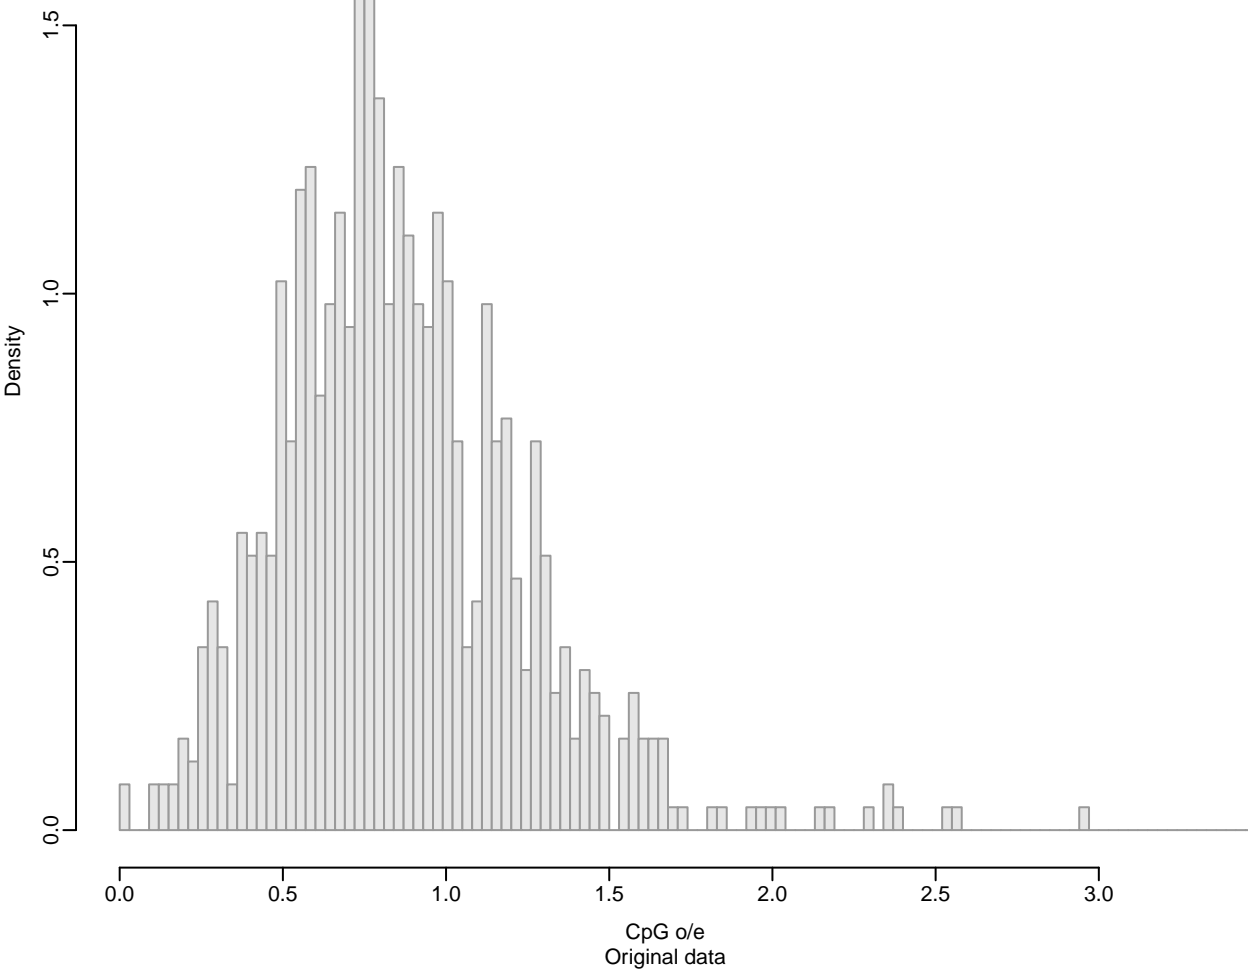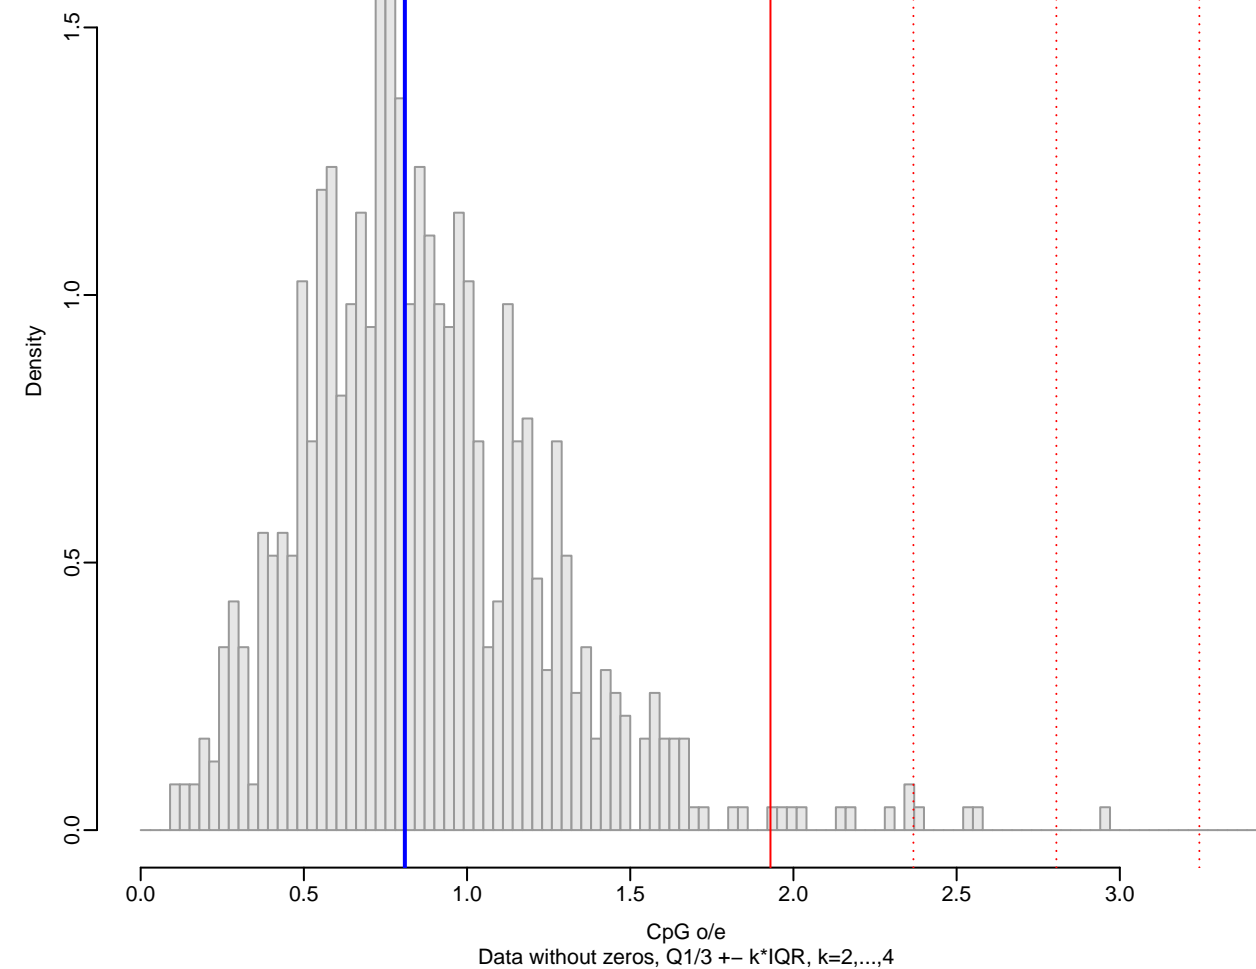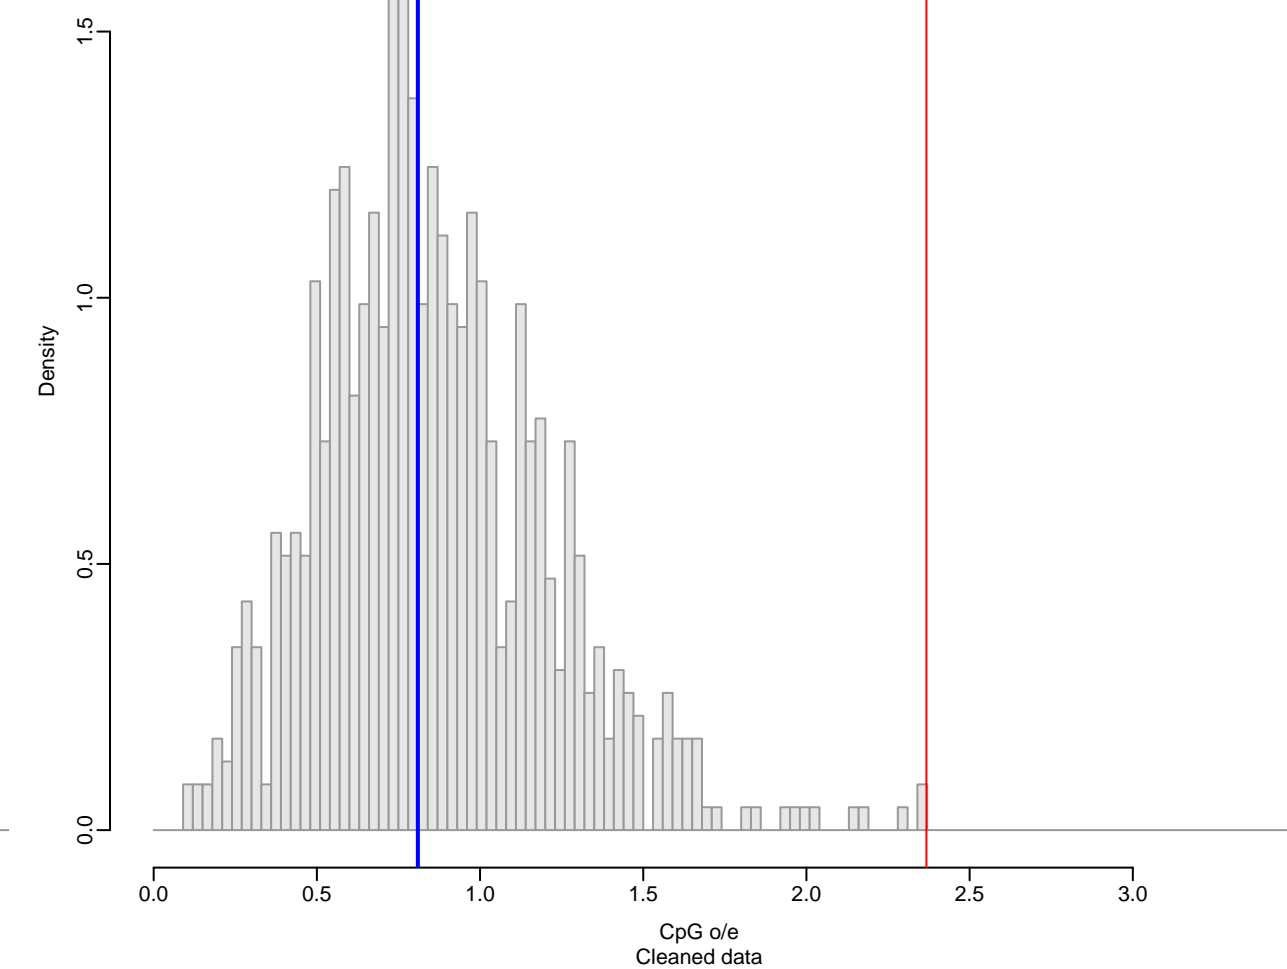



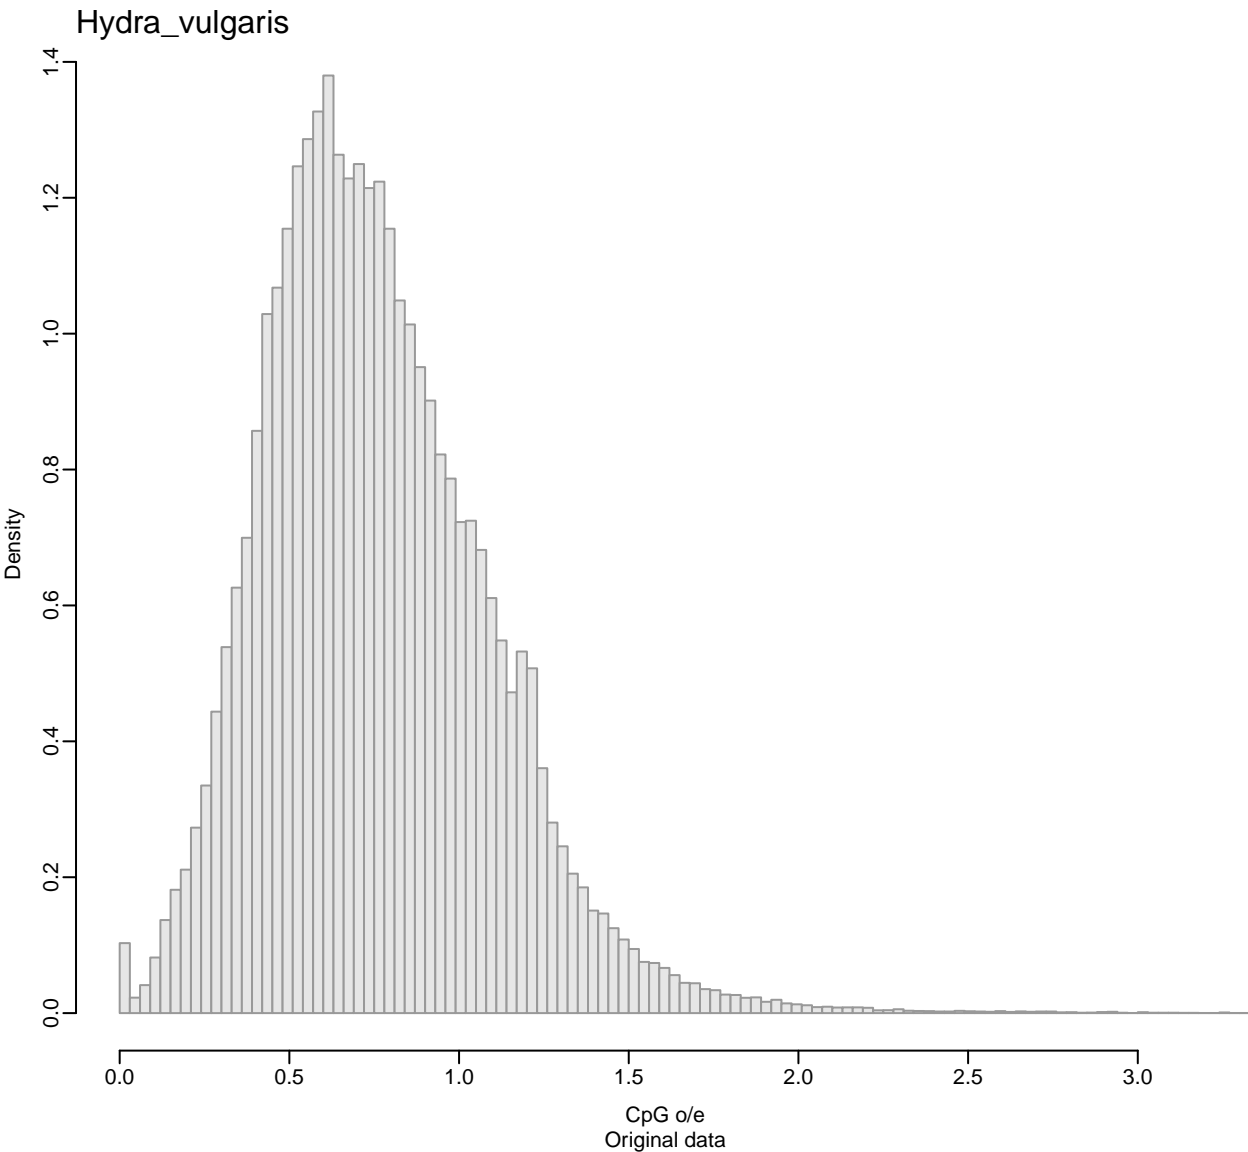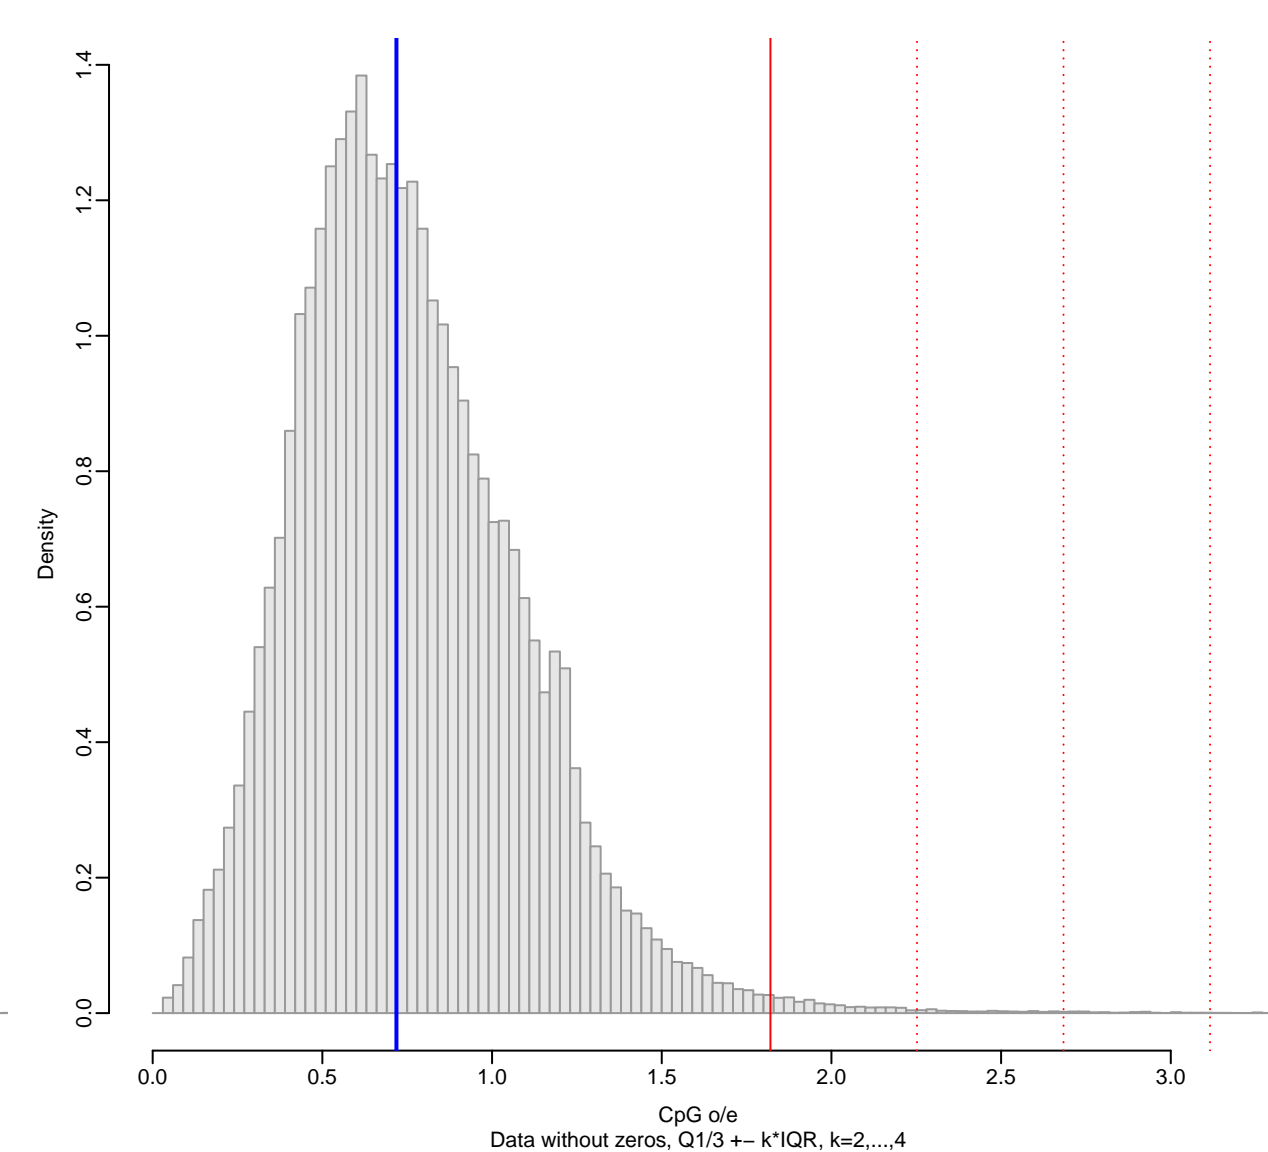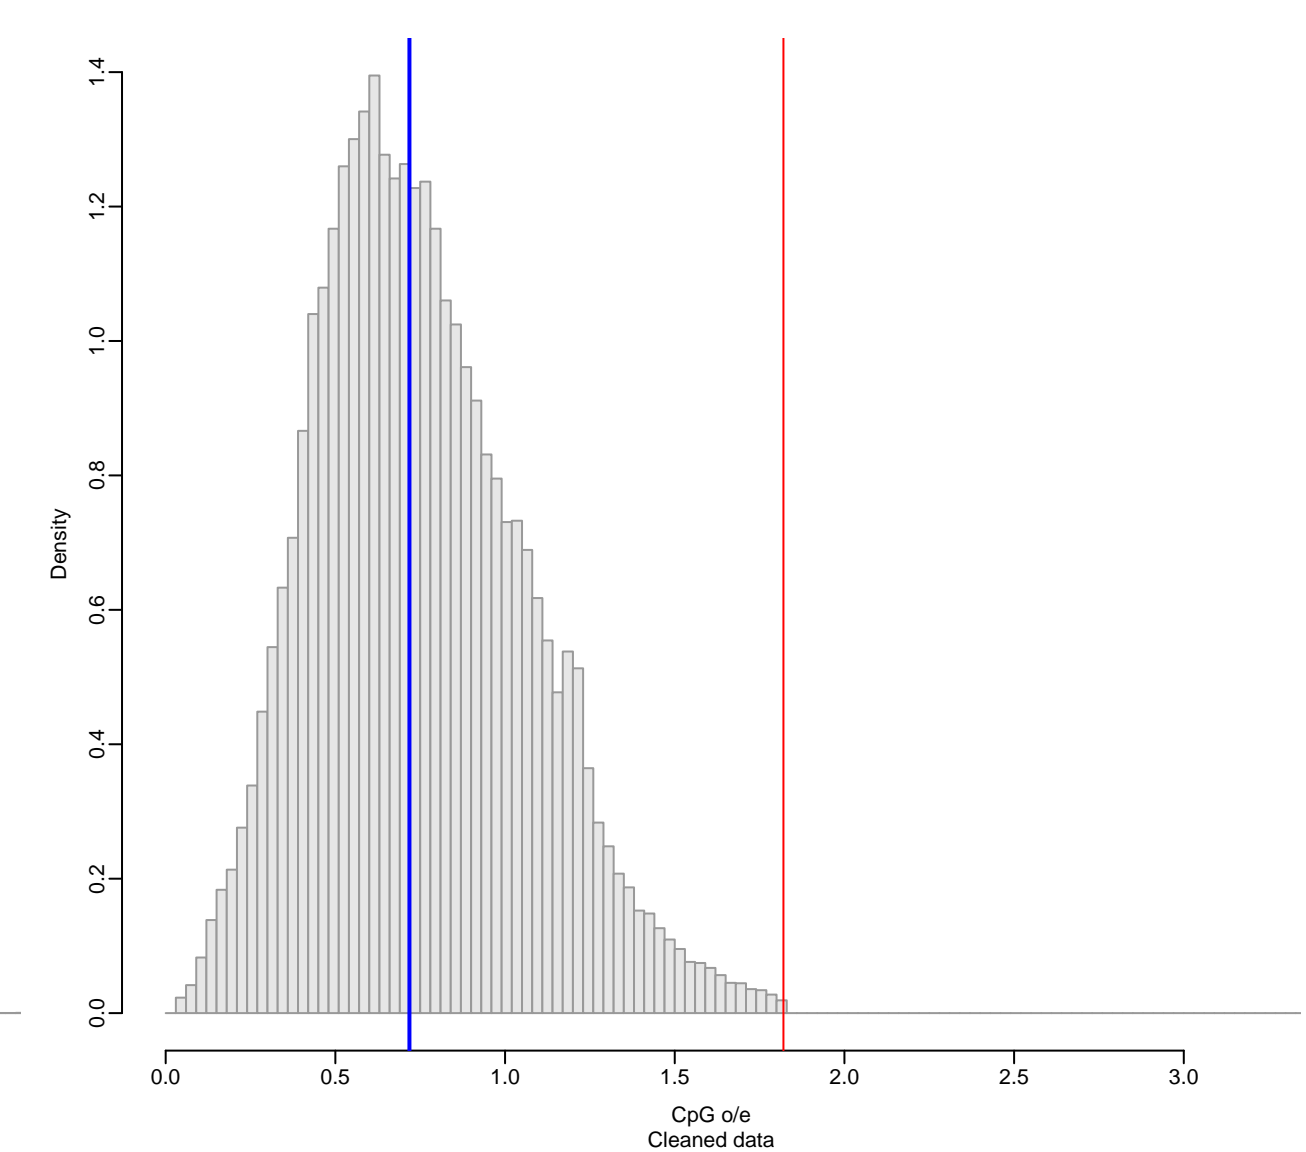

Hydractinia\_echinata

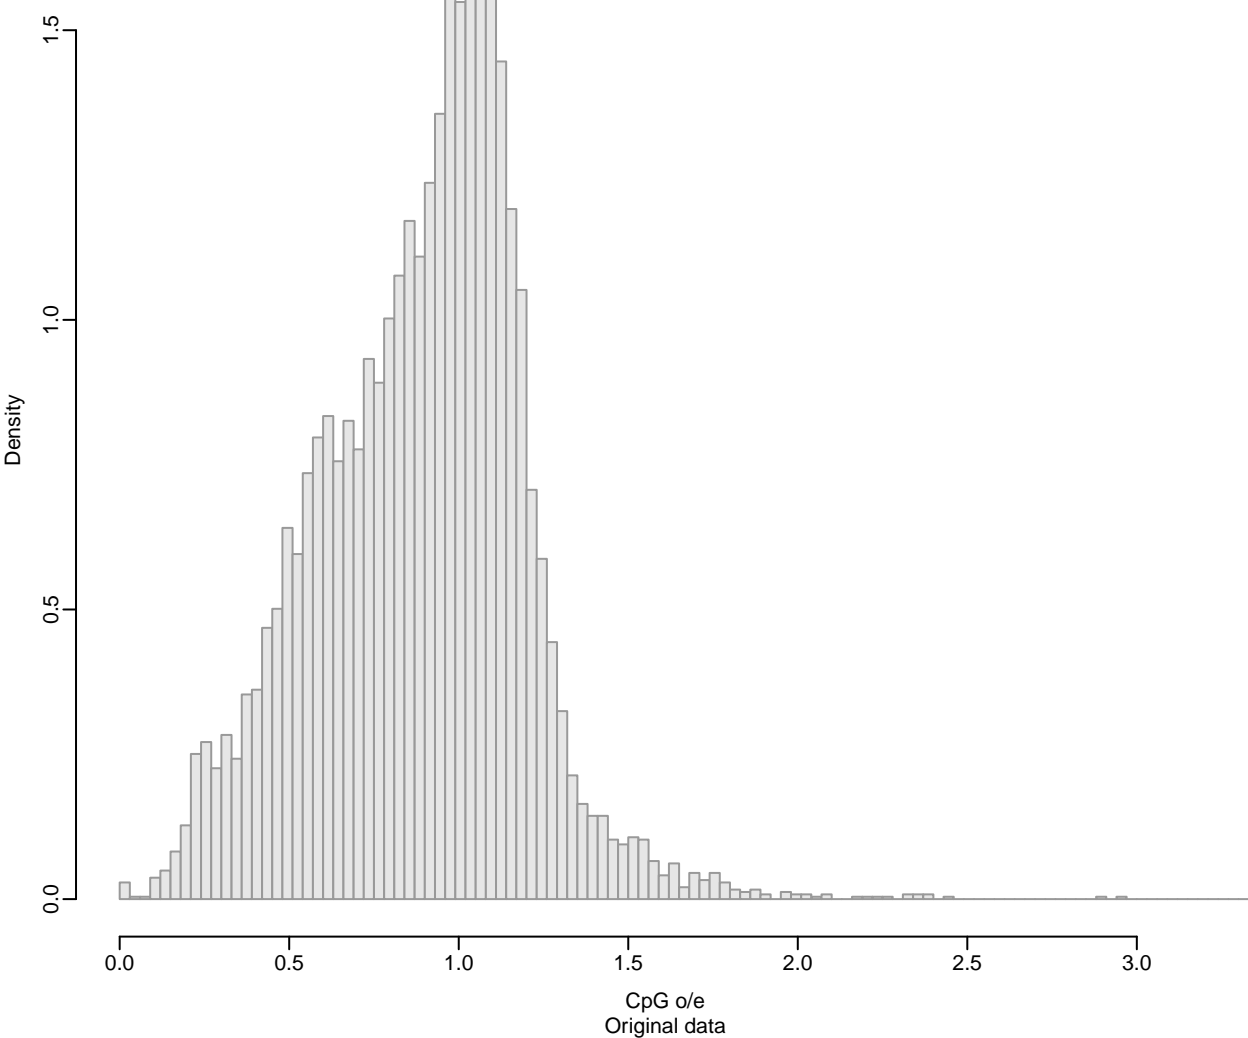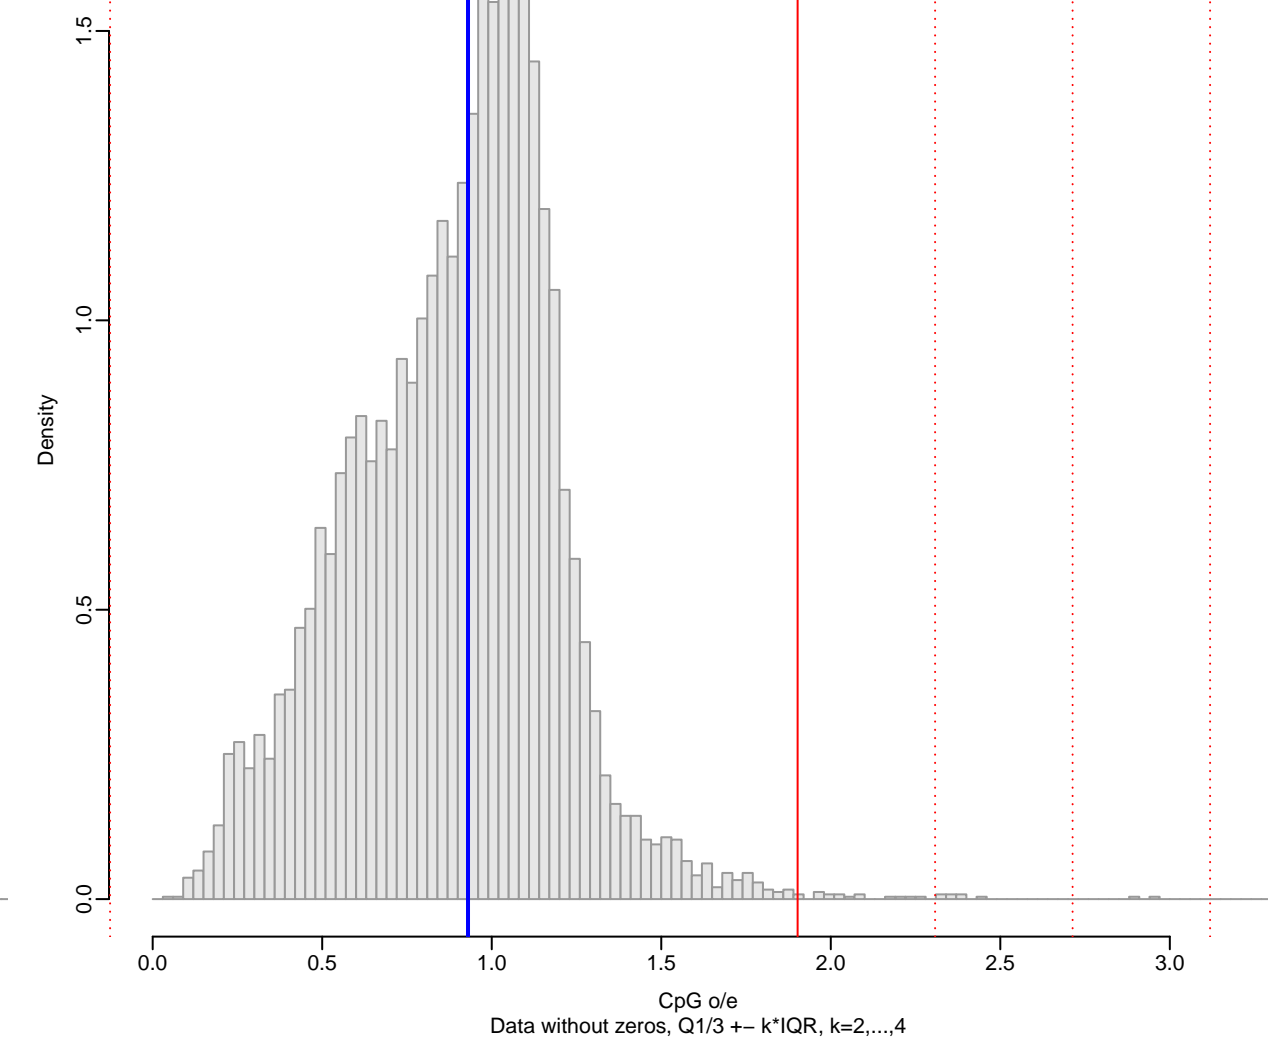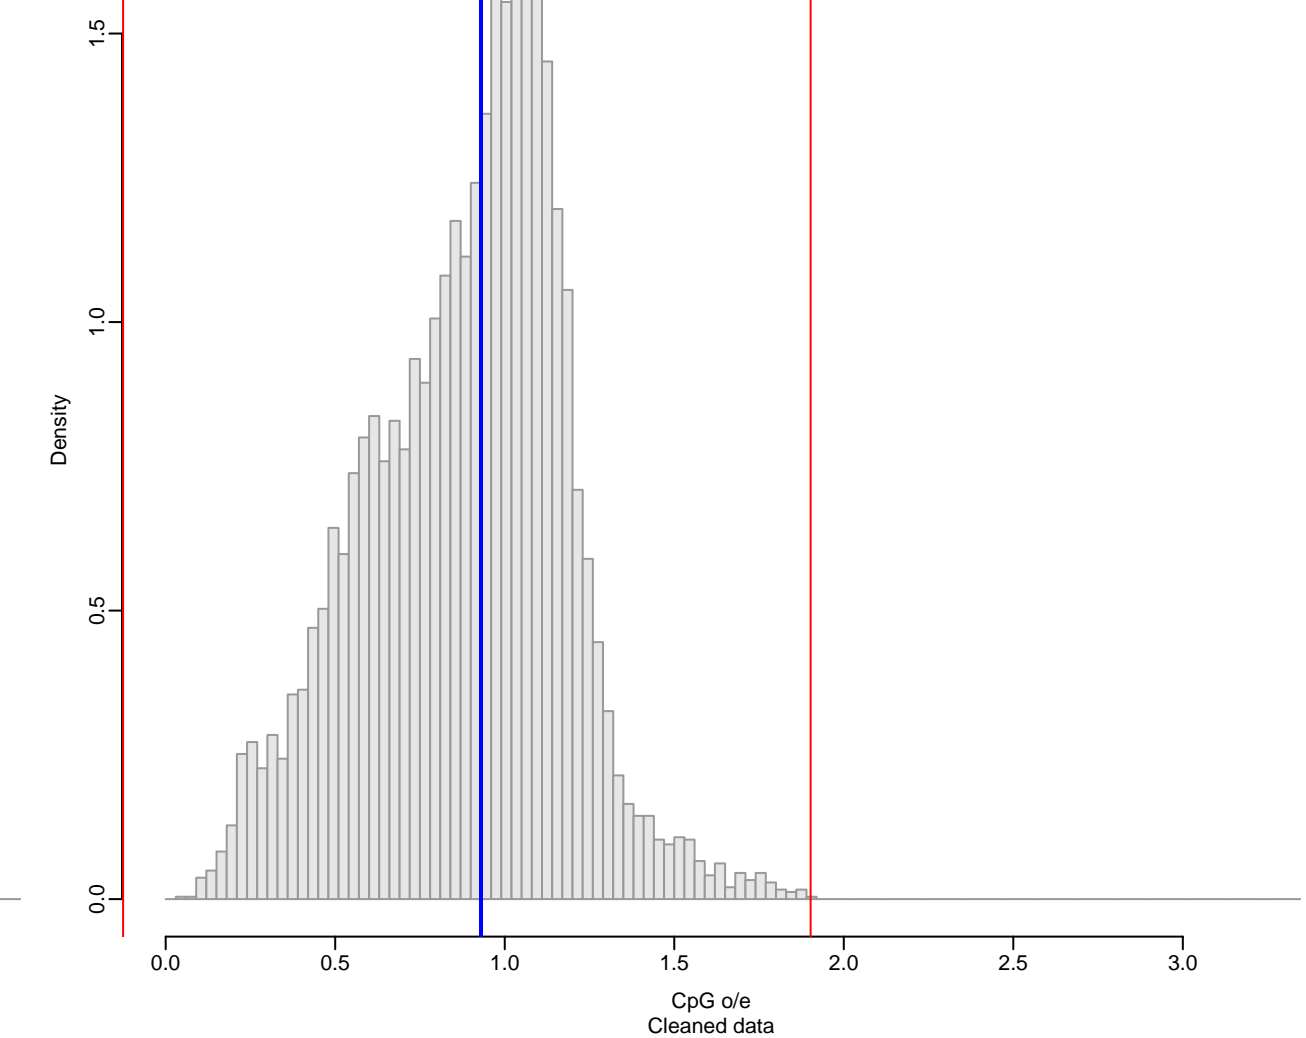

# Hyoscyamus\_niger

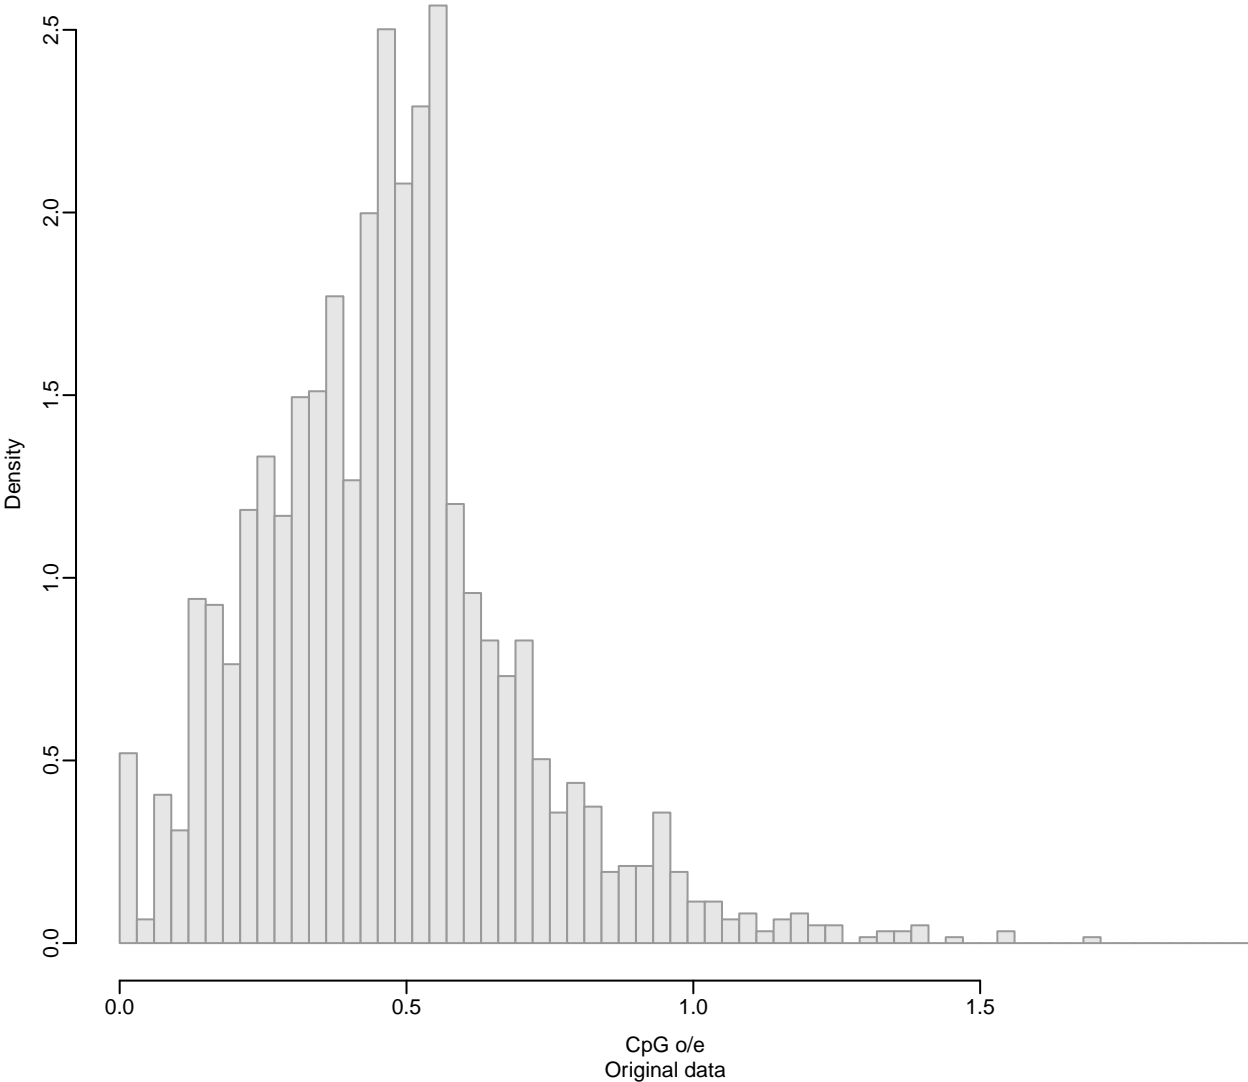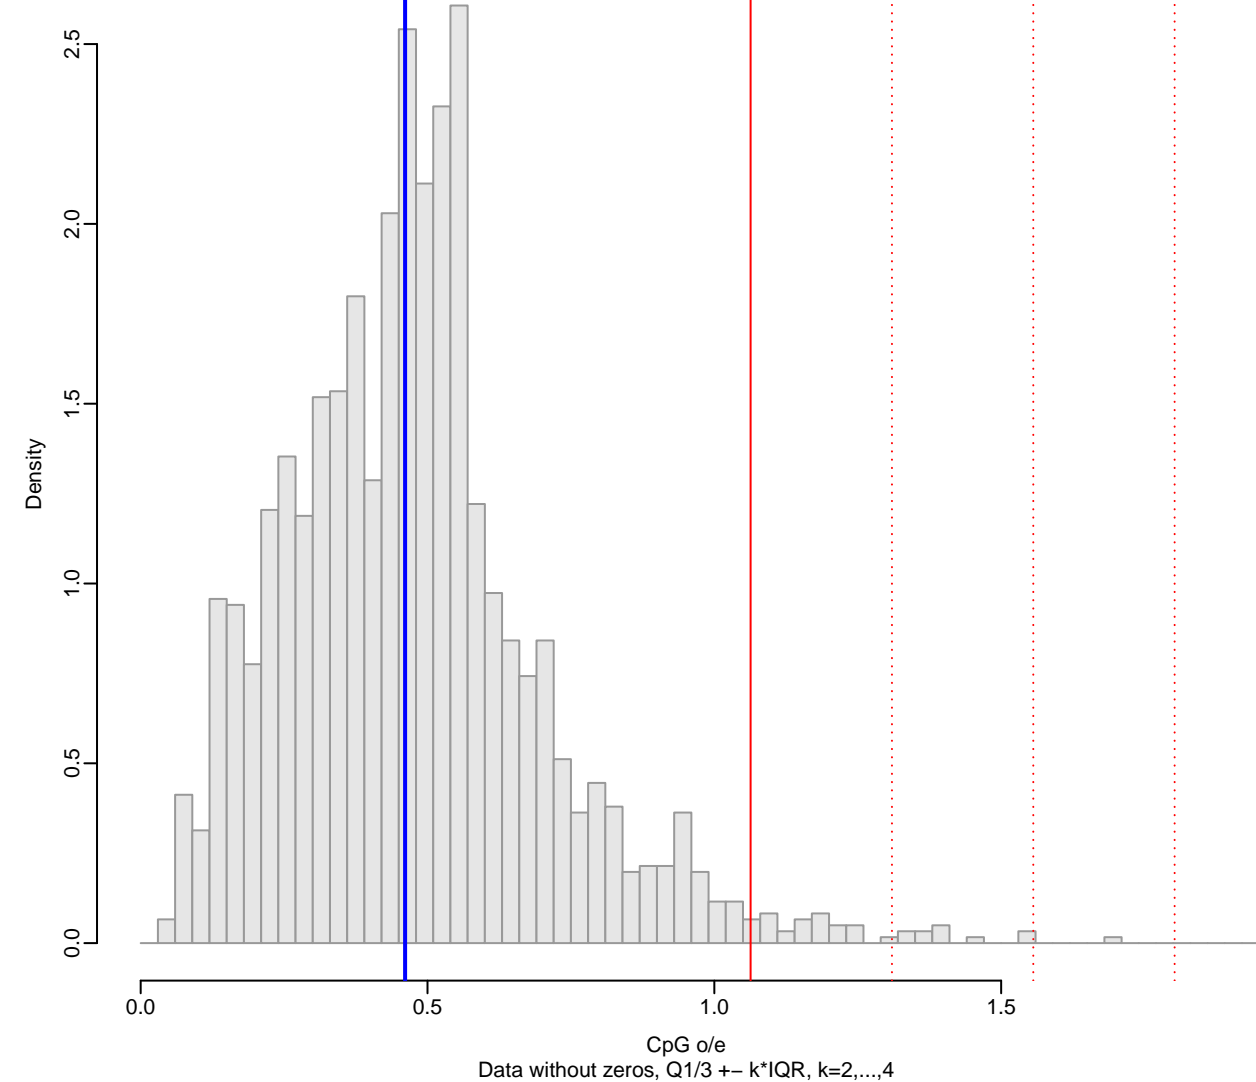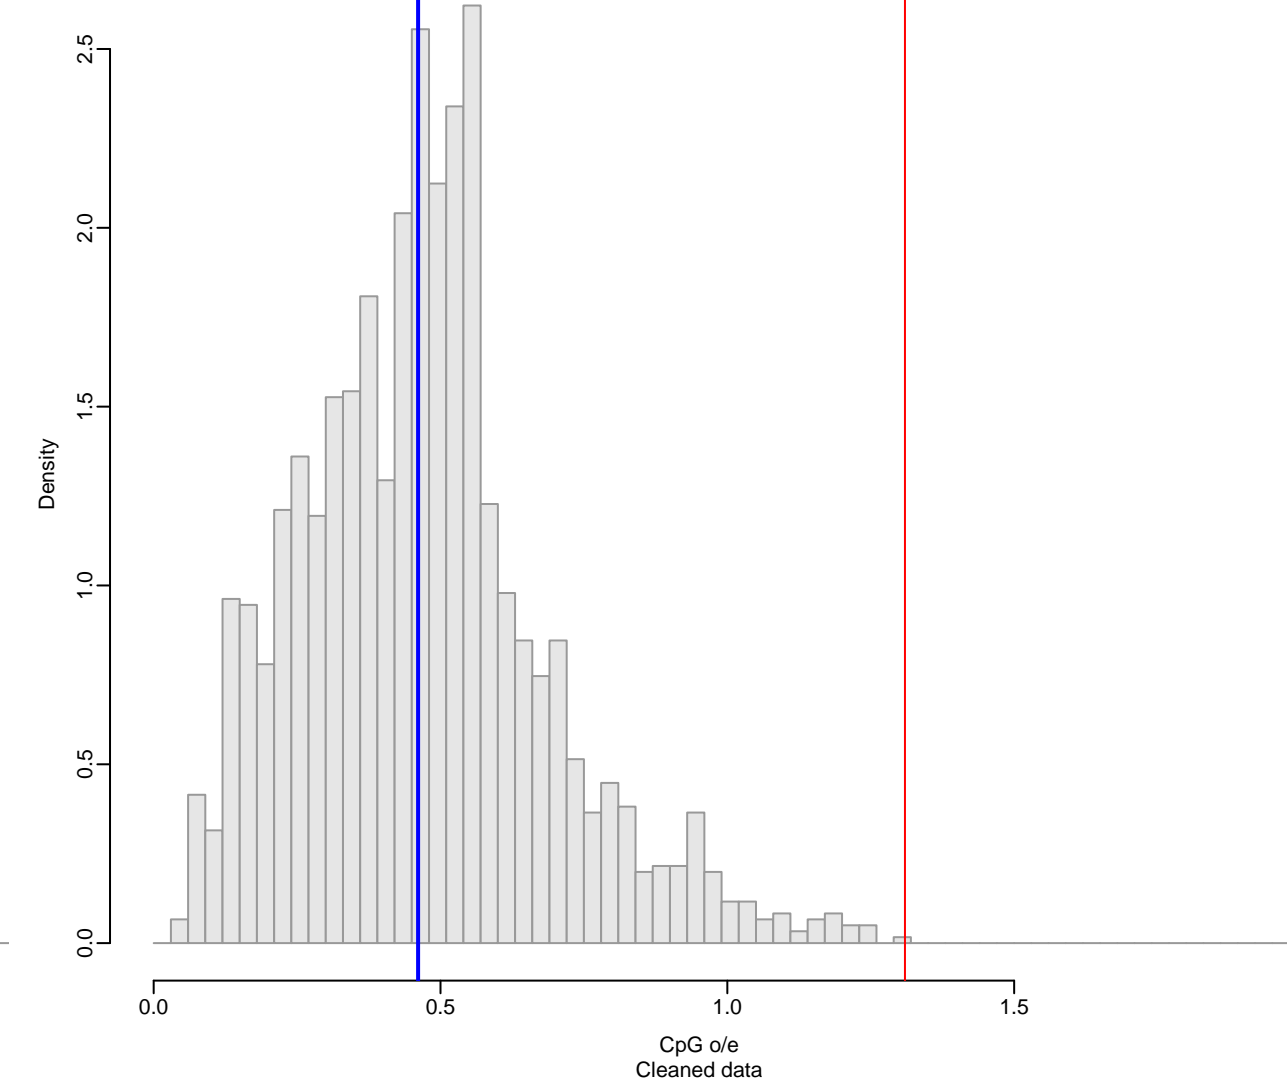

Hypocrea\_lixii

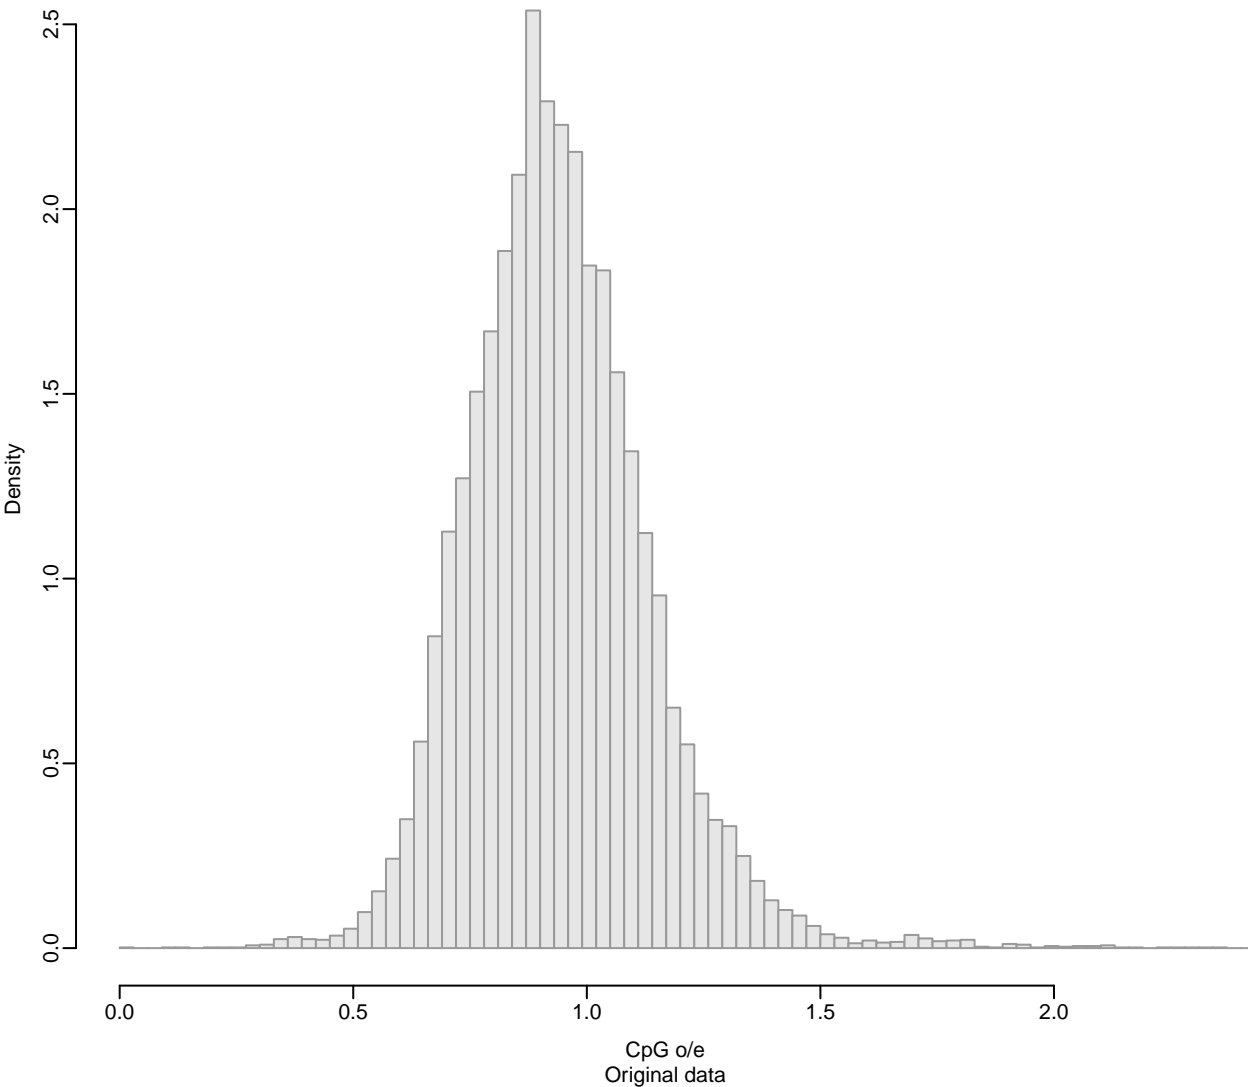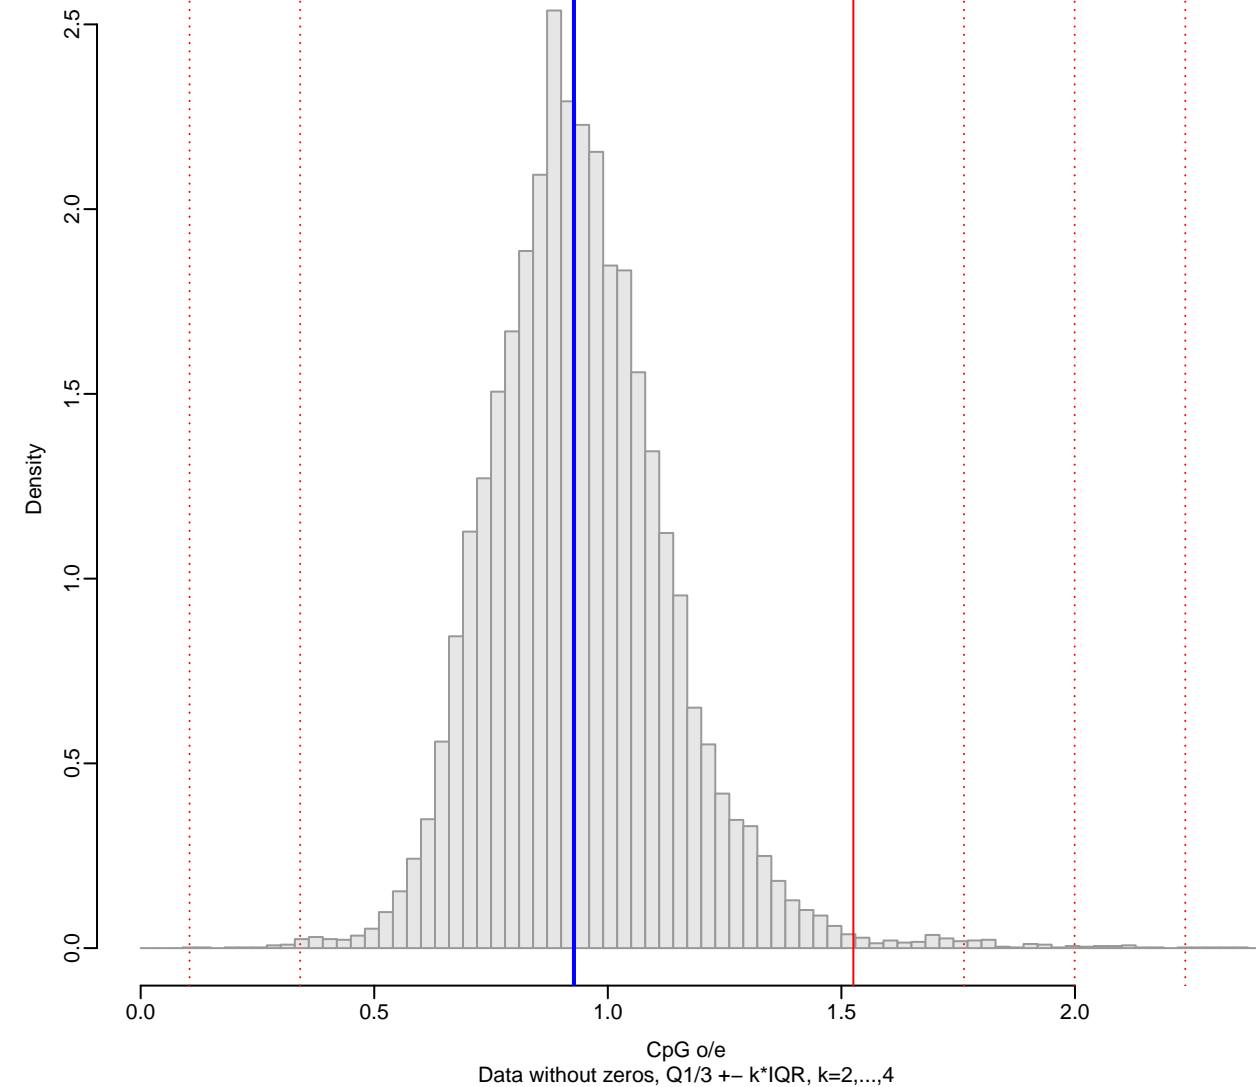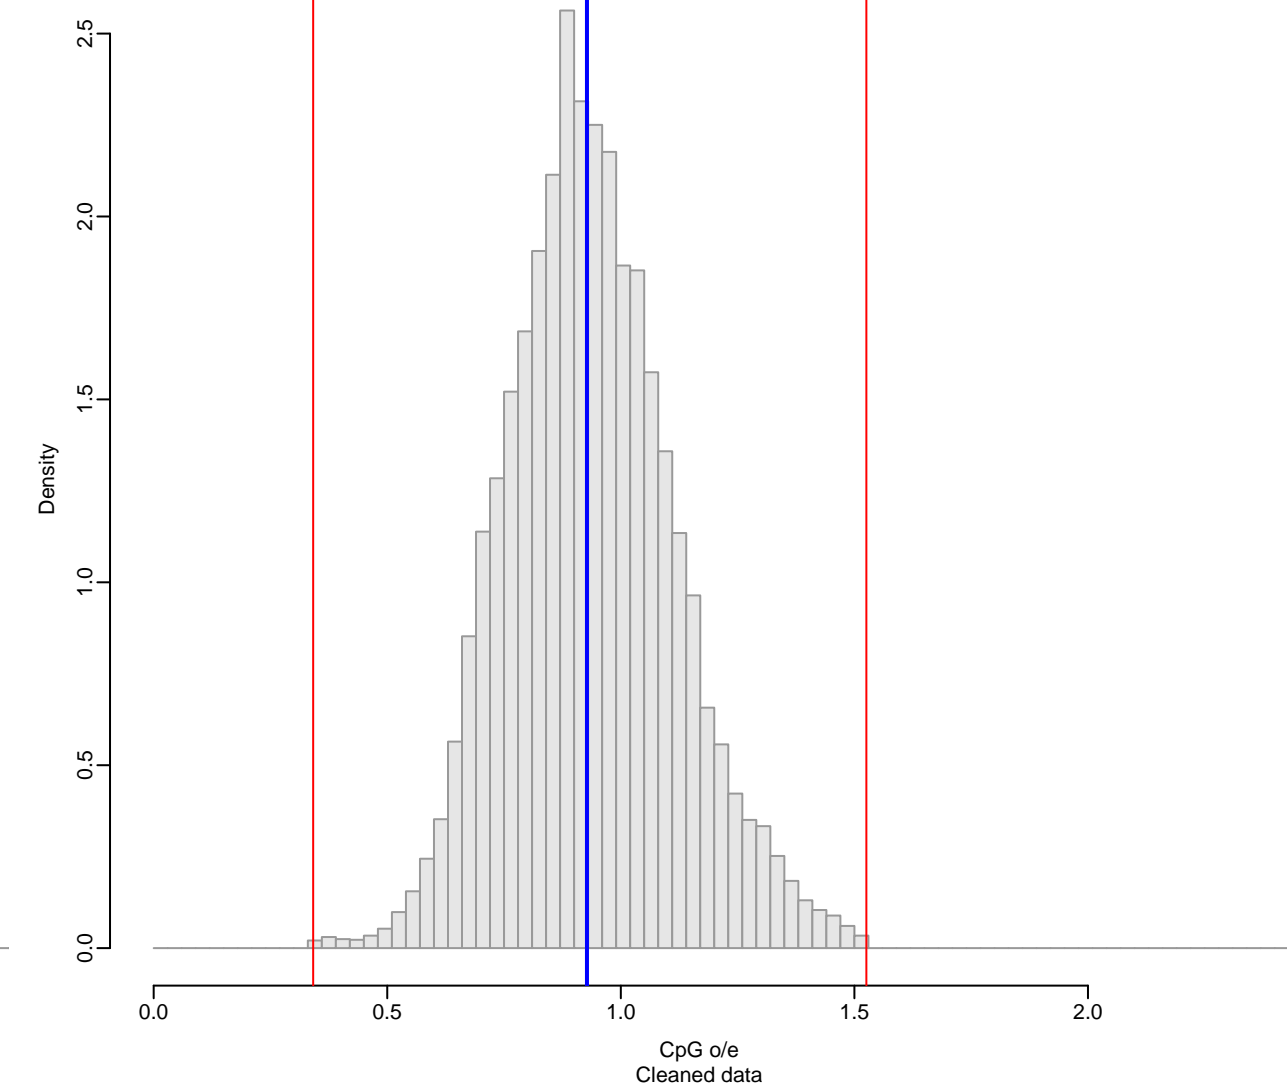

Hypocrea\_virens

Density

0.0 0.5 1.0 1.5 2.0 2.5

CpG o/e  
Original data

Density

0.0 0.5 1.0 1.5 2.0 2.5

CpG o/e  
Data without zeros,  $Q1/3 \pm k \cdot IQR$ ,  $k=2, \dots, 4$

Density

0.0 0.5 1.0 1.5 2.0 2.5

CpG o/e  
Cleaned data

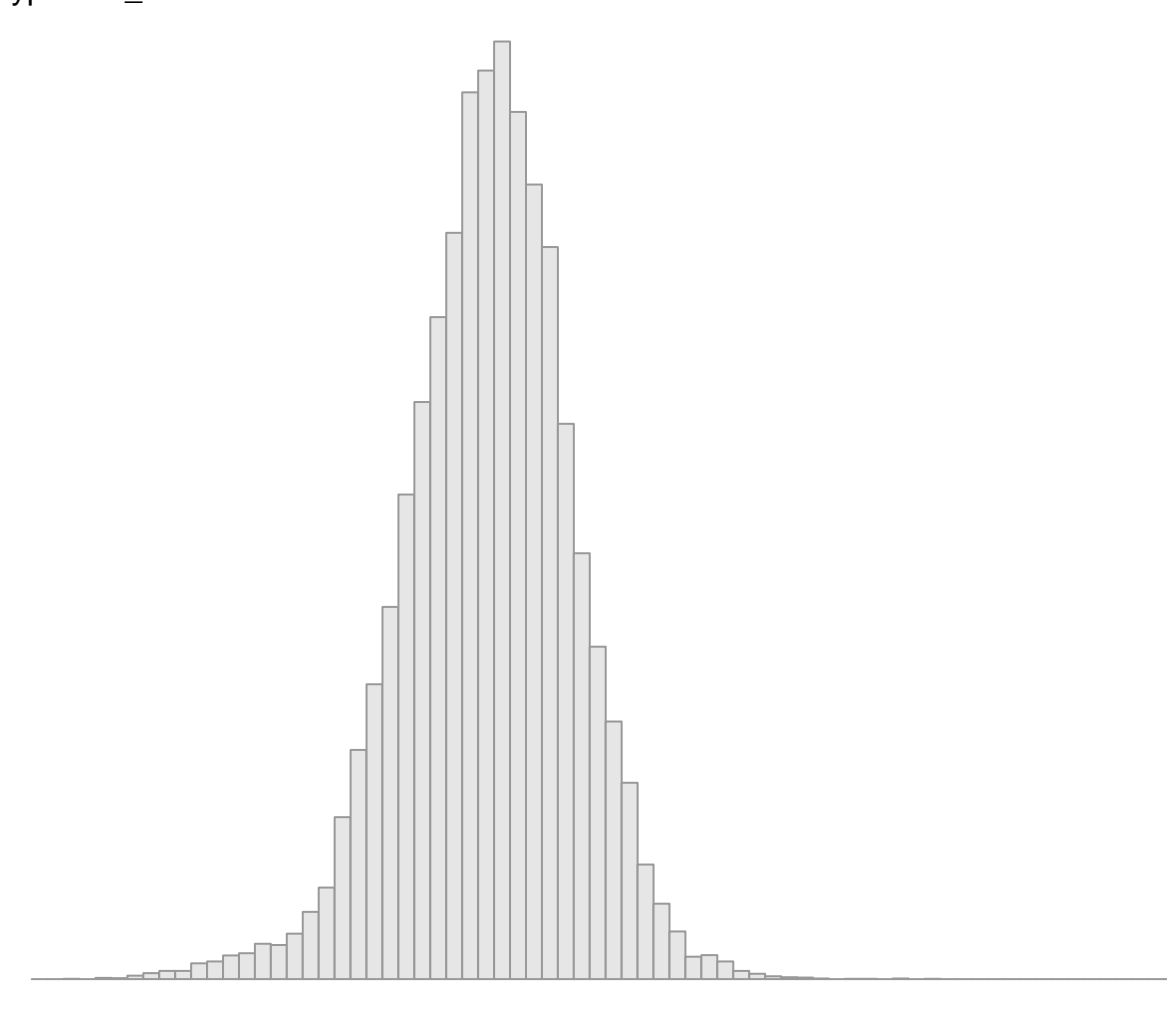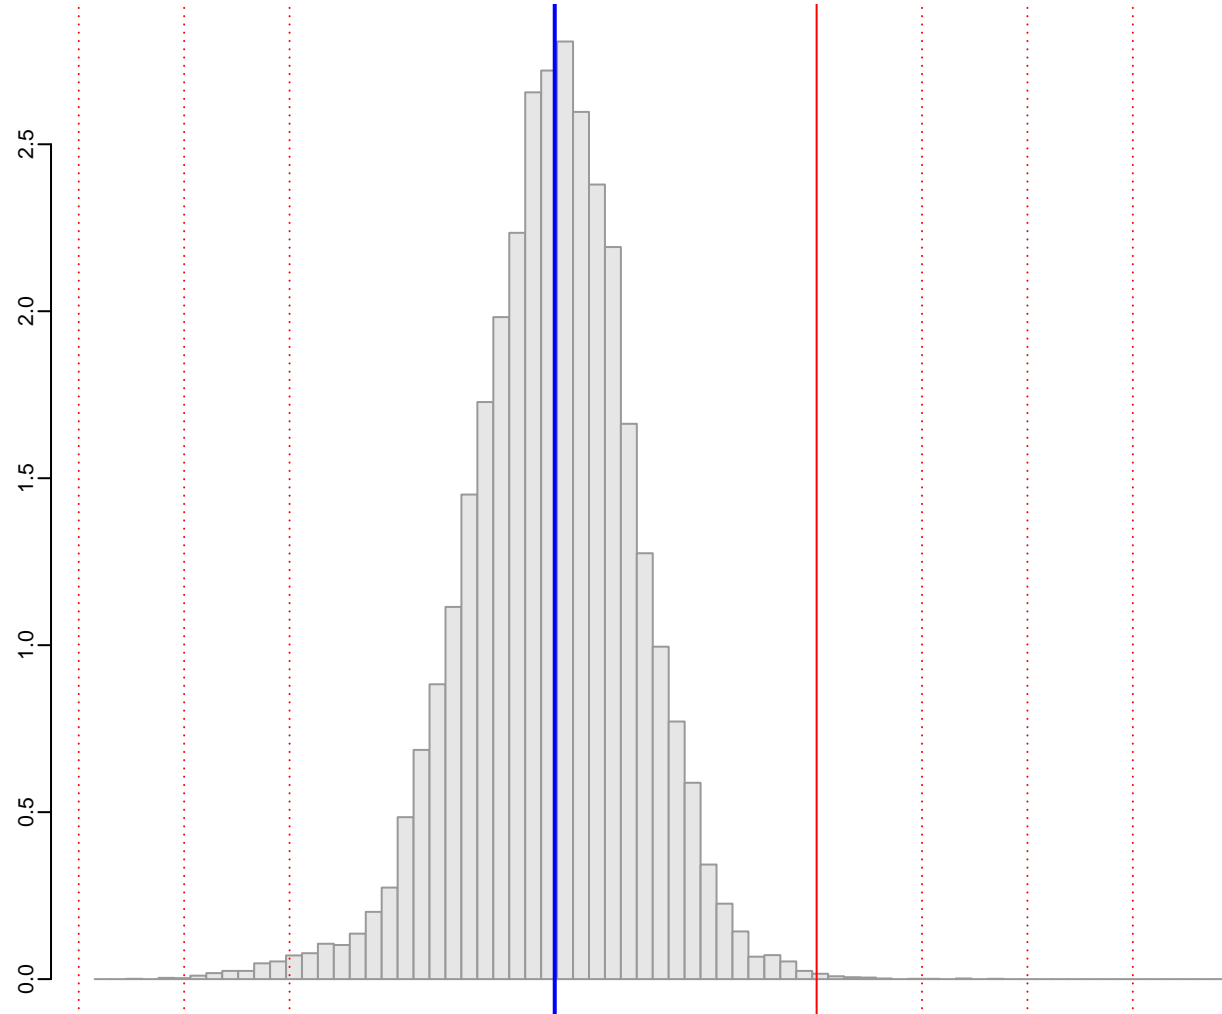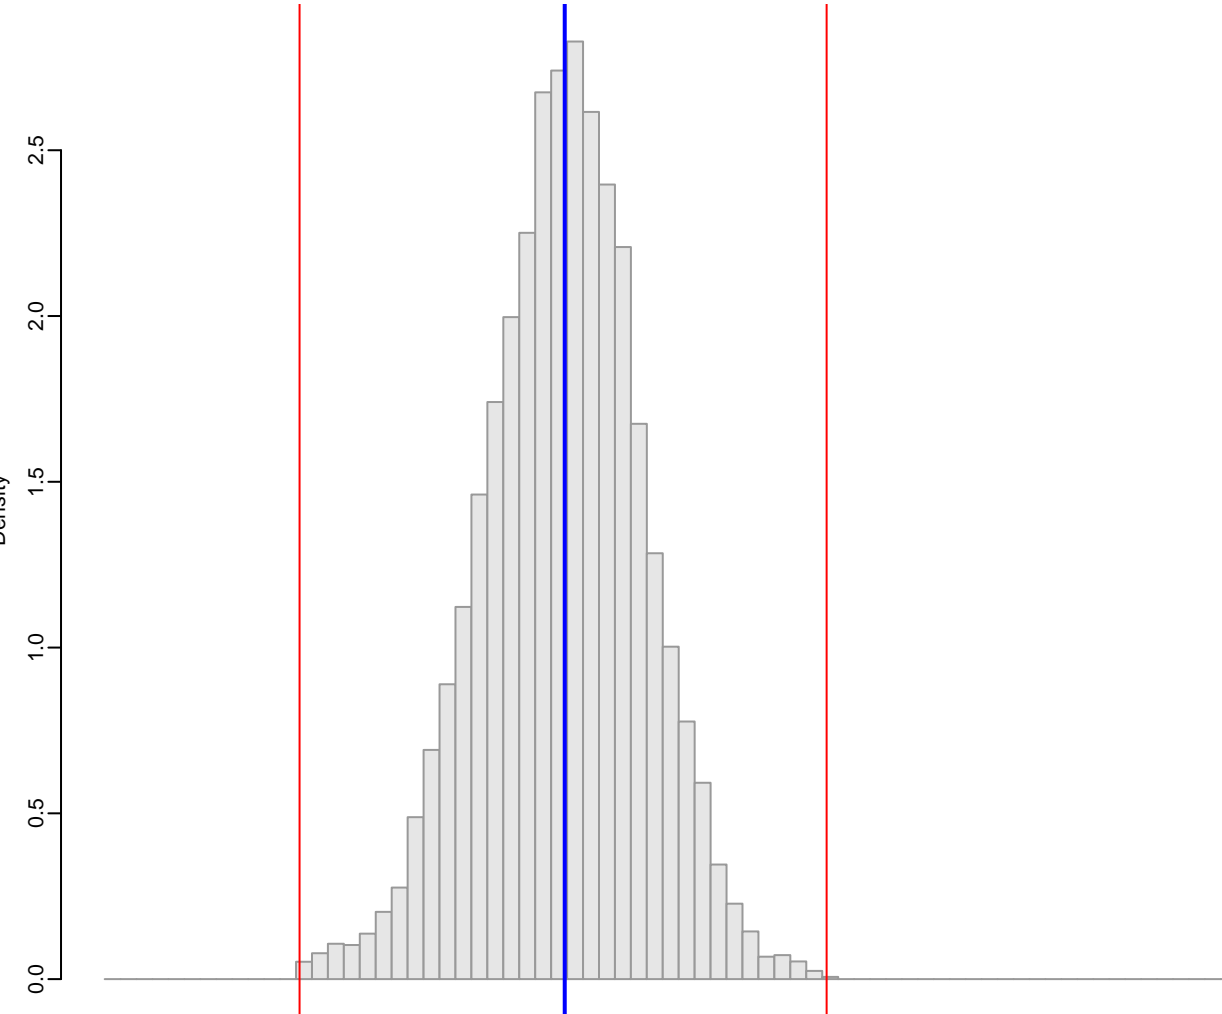

Hyriopsis\_cumingii

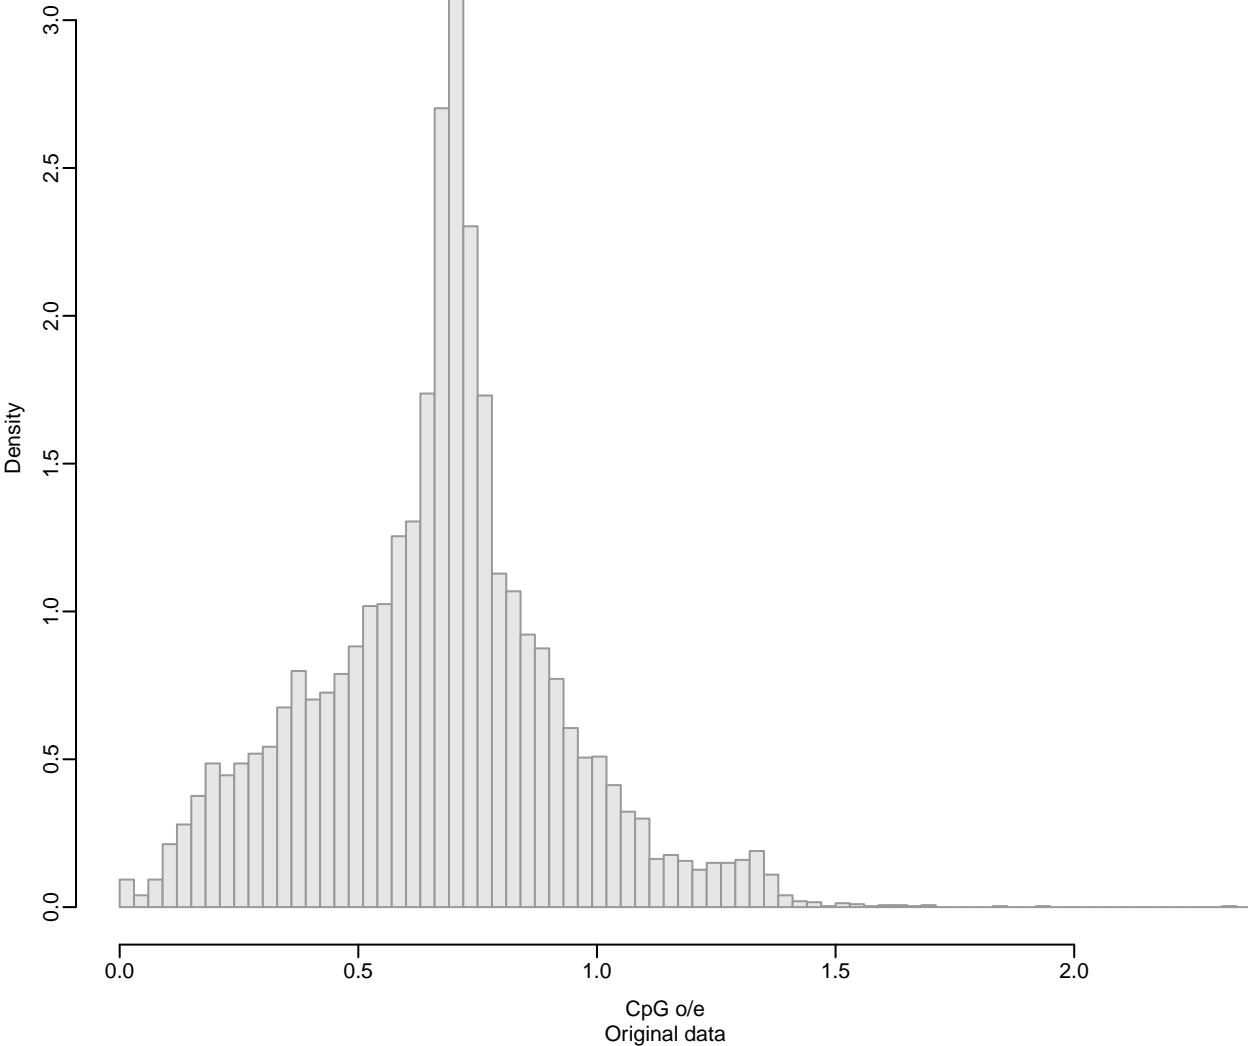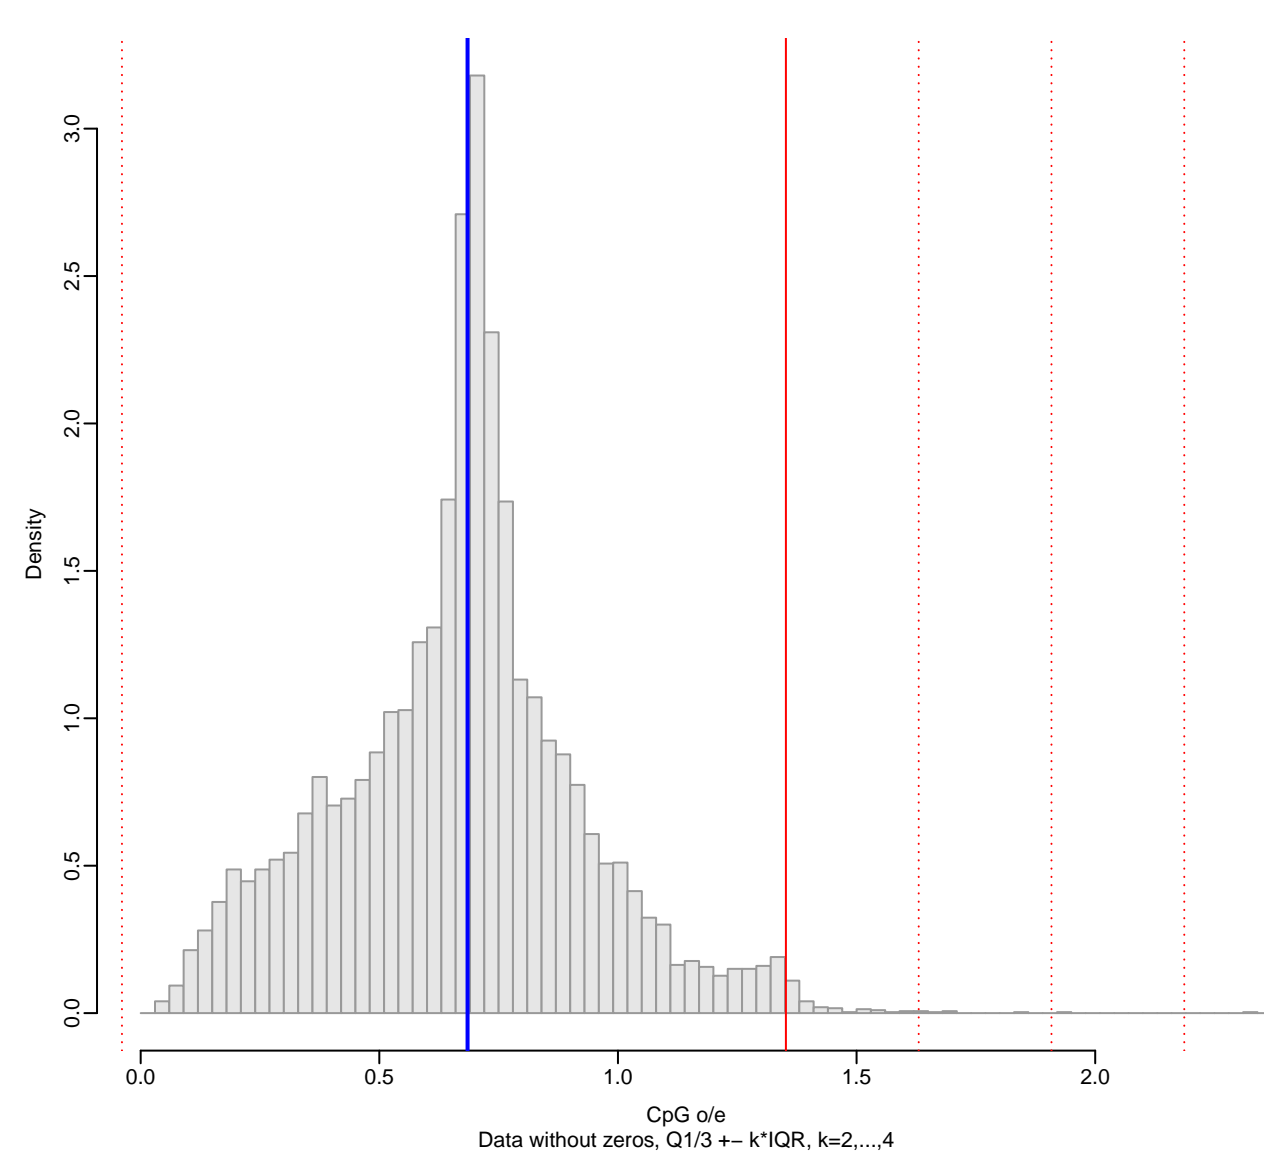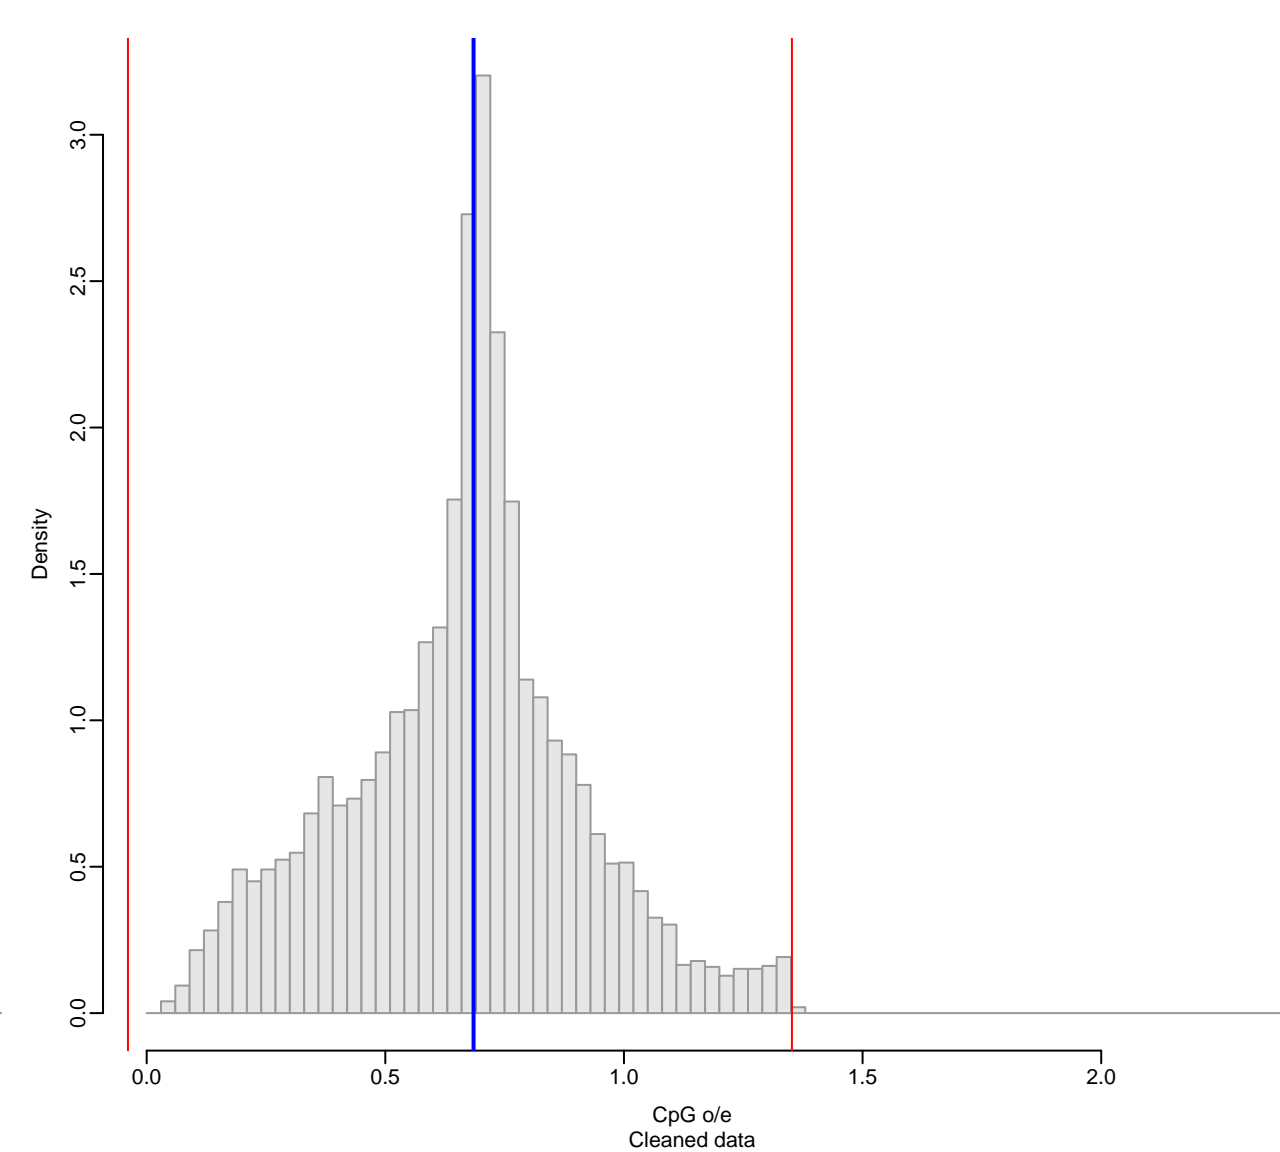

Ictalurus\_furcatus

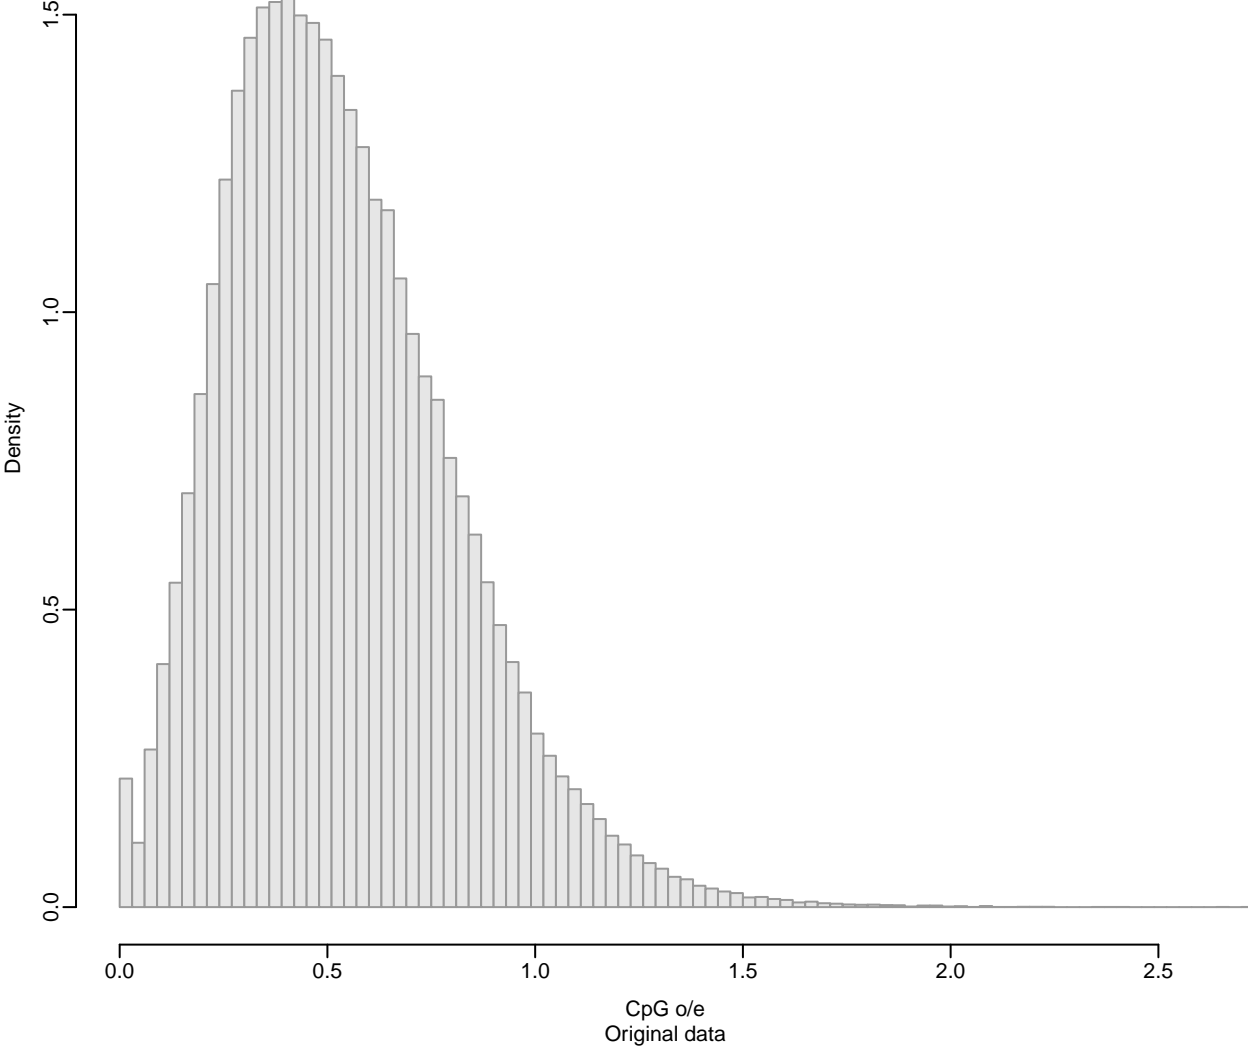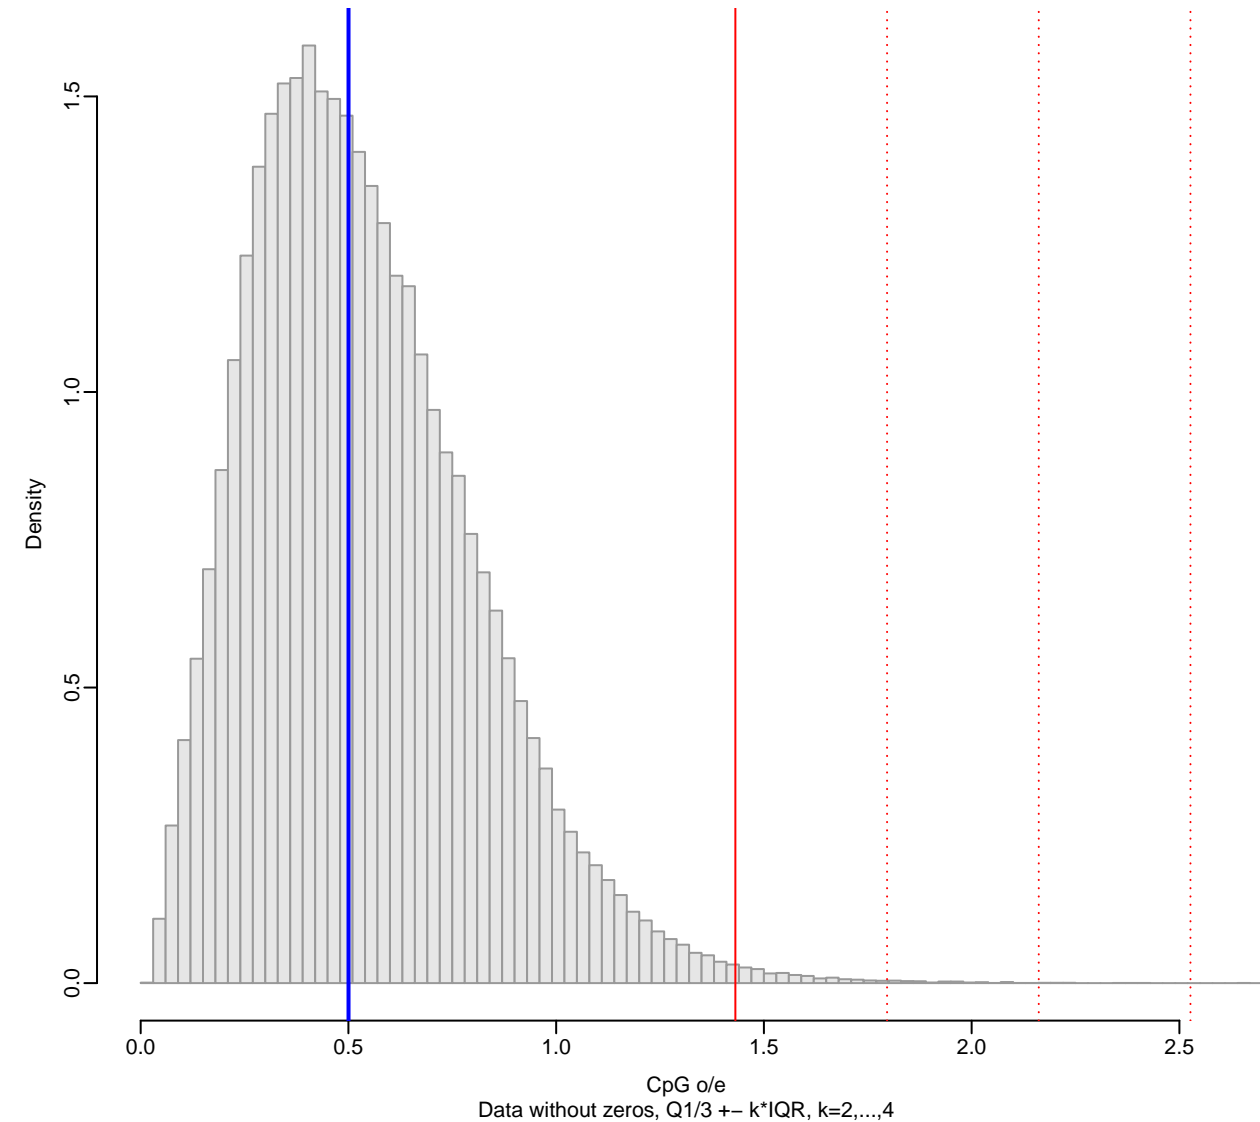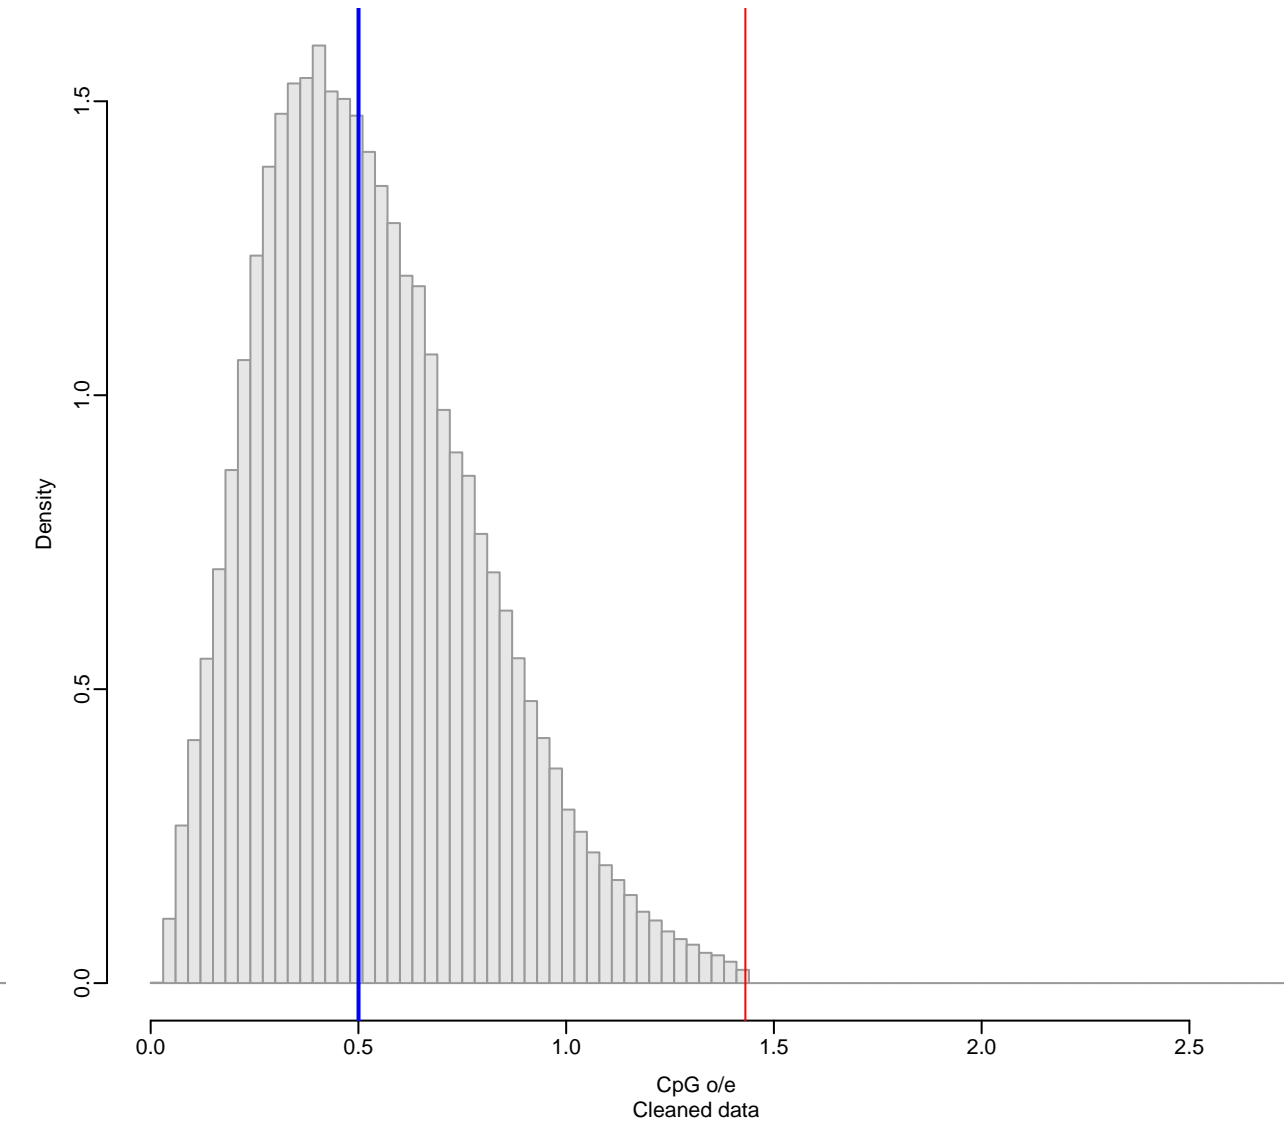

Ictalurus\_punctatus

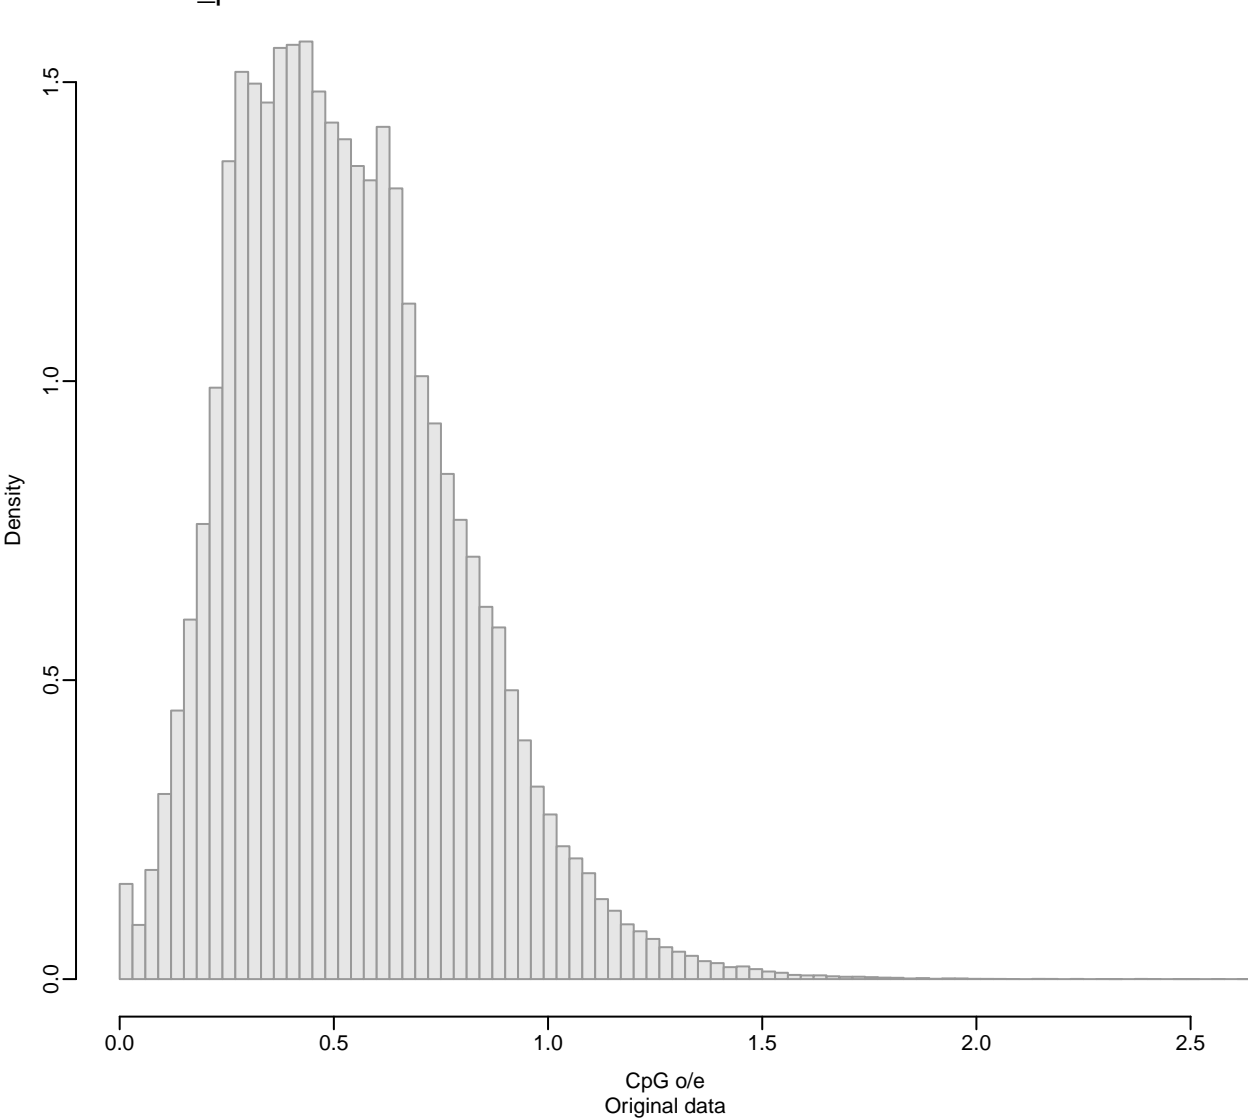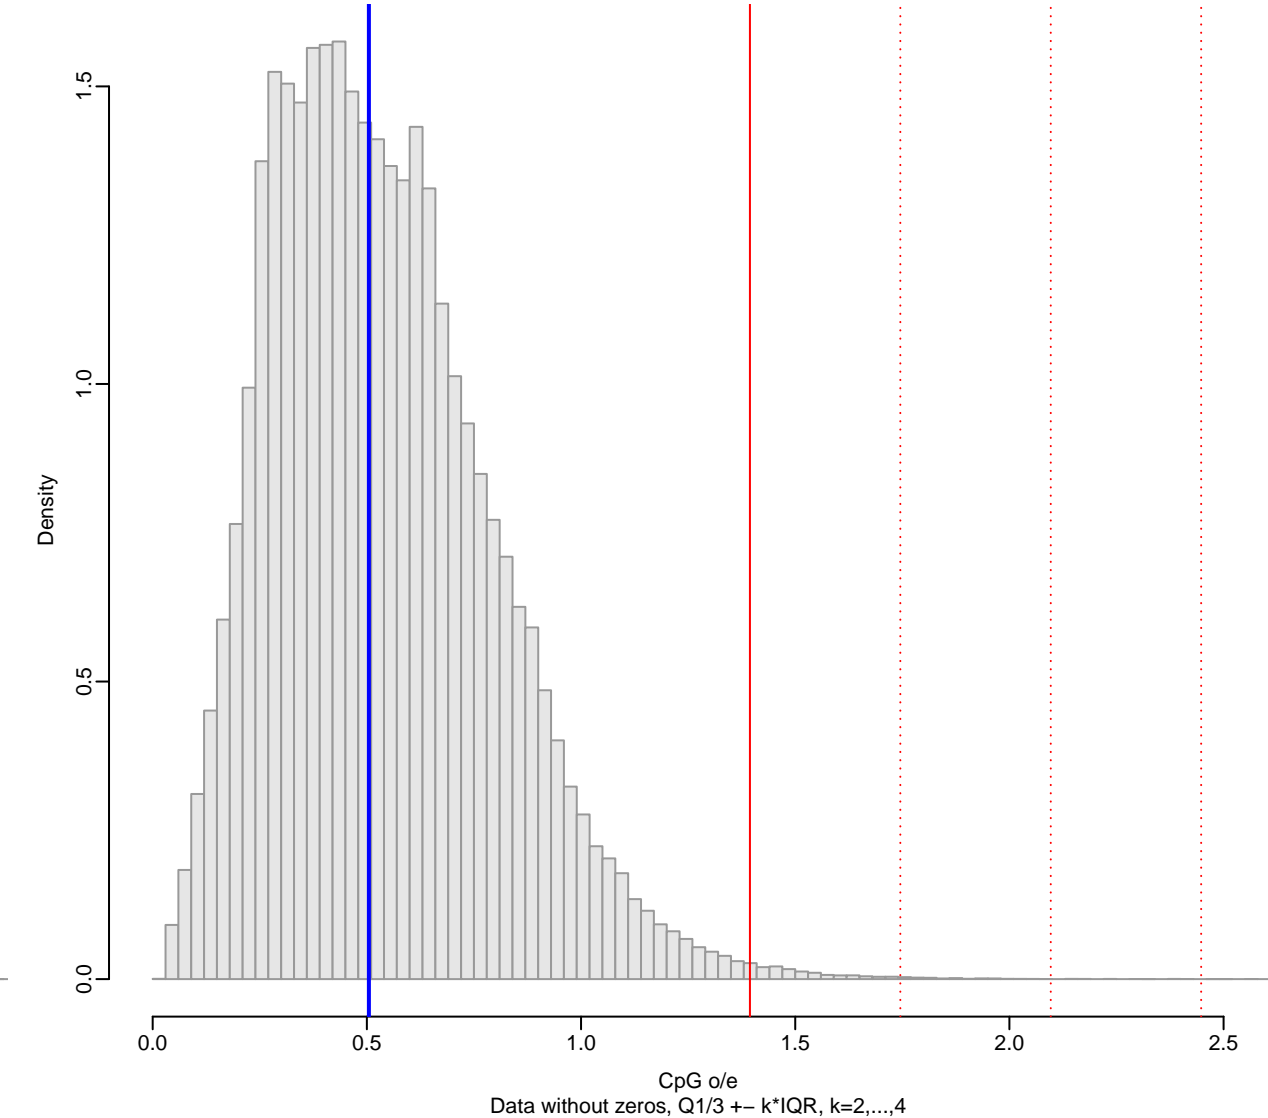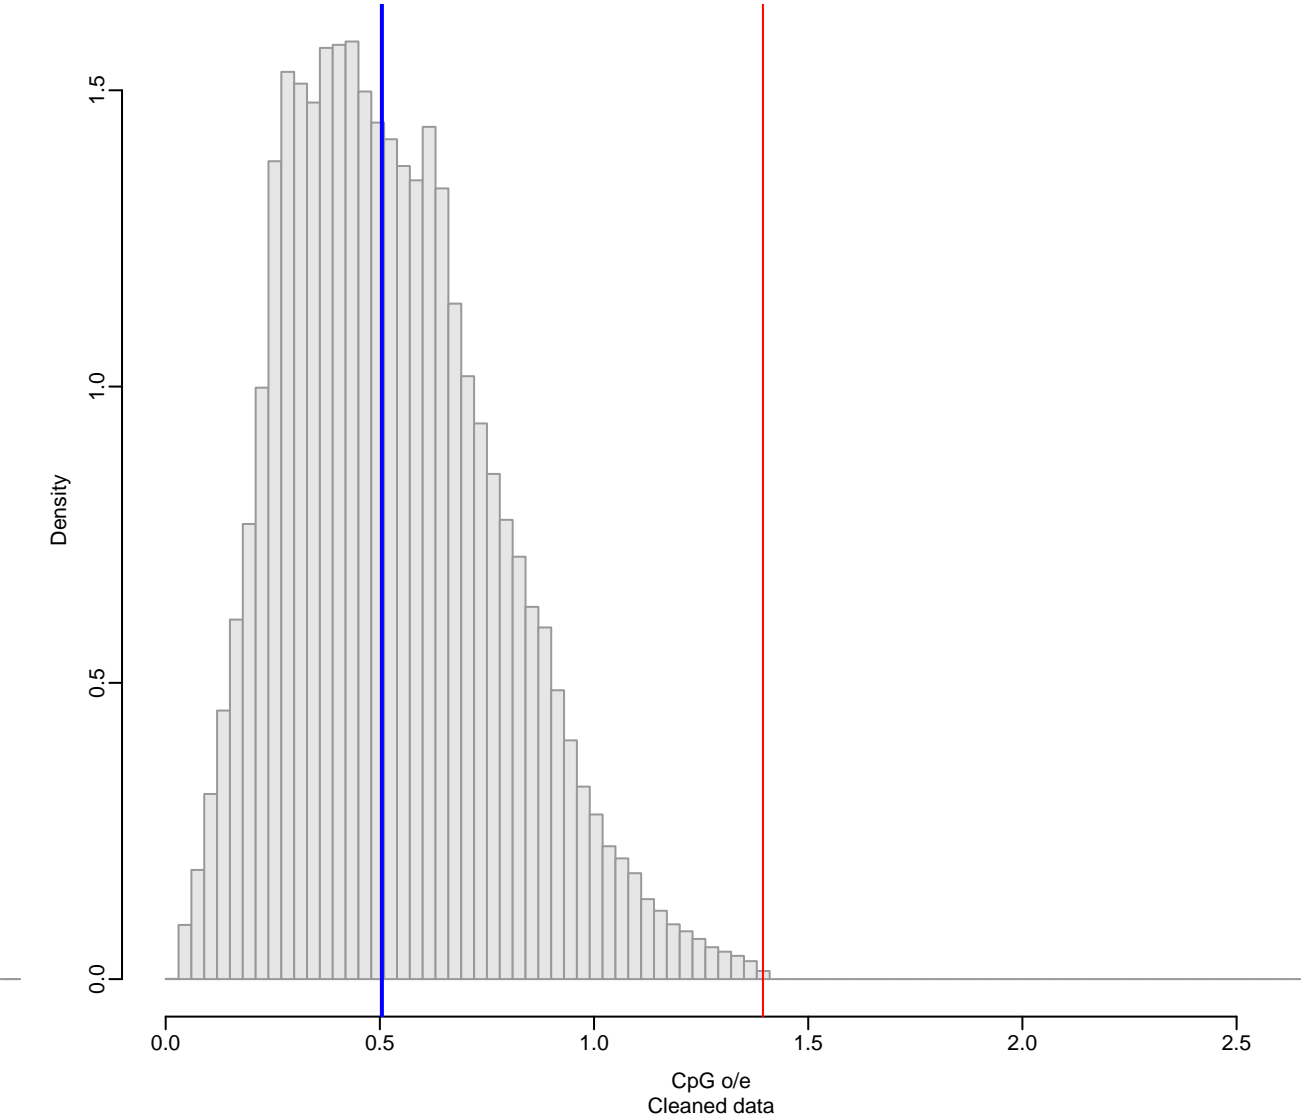



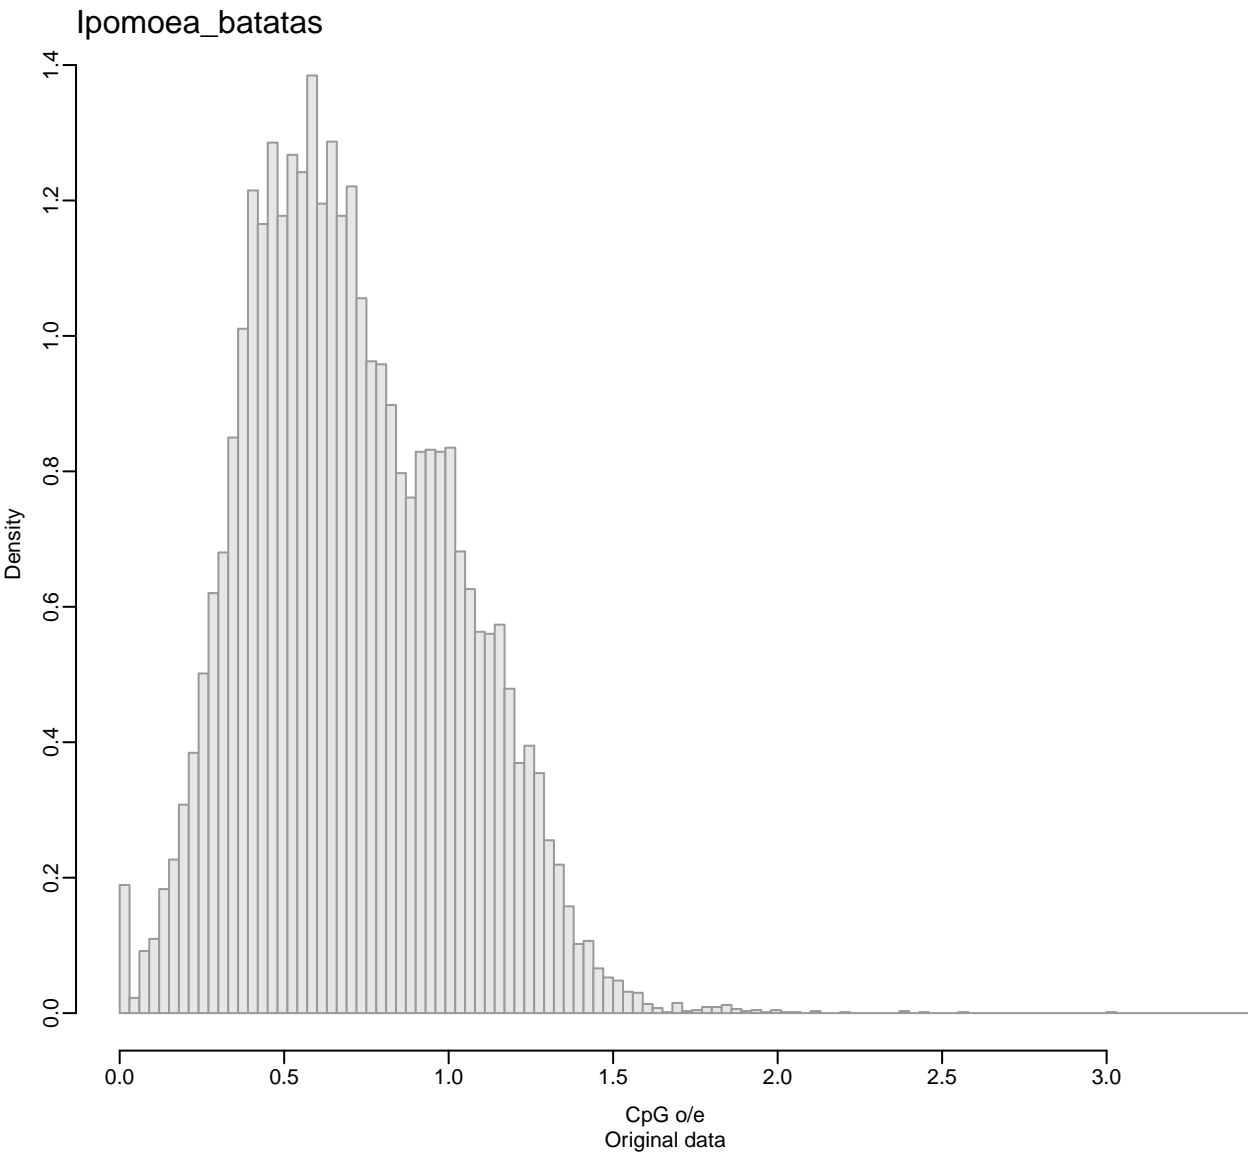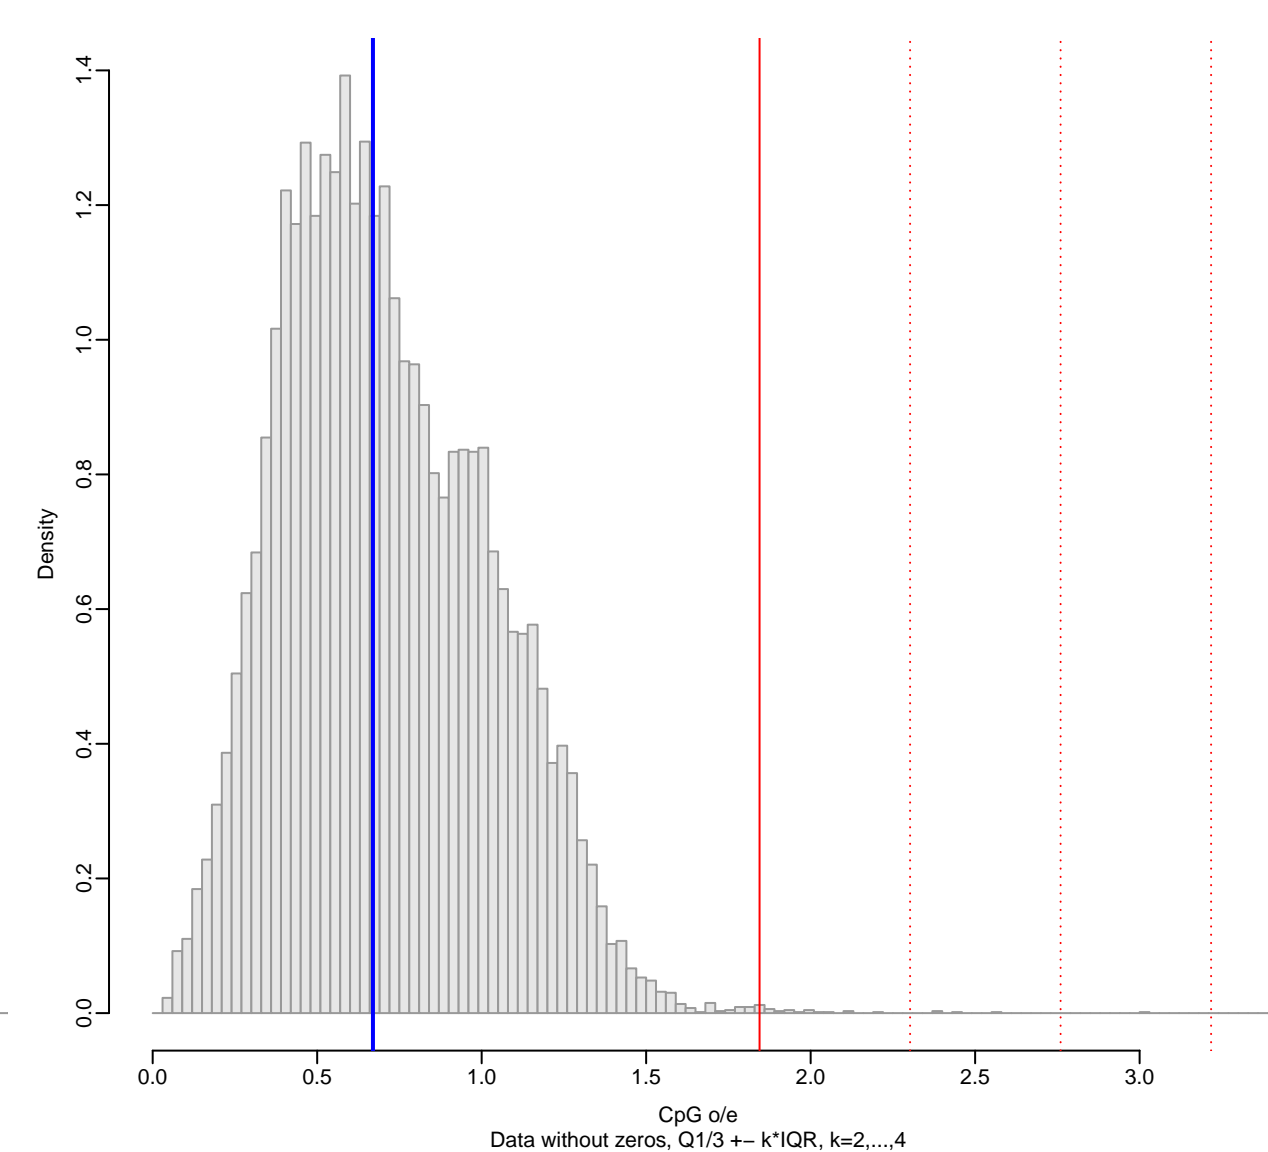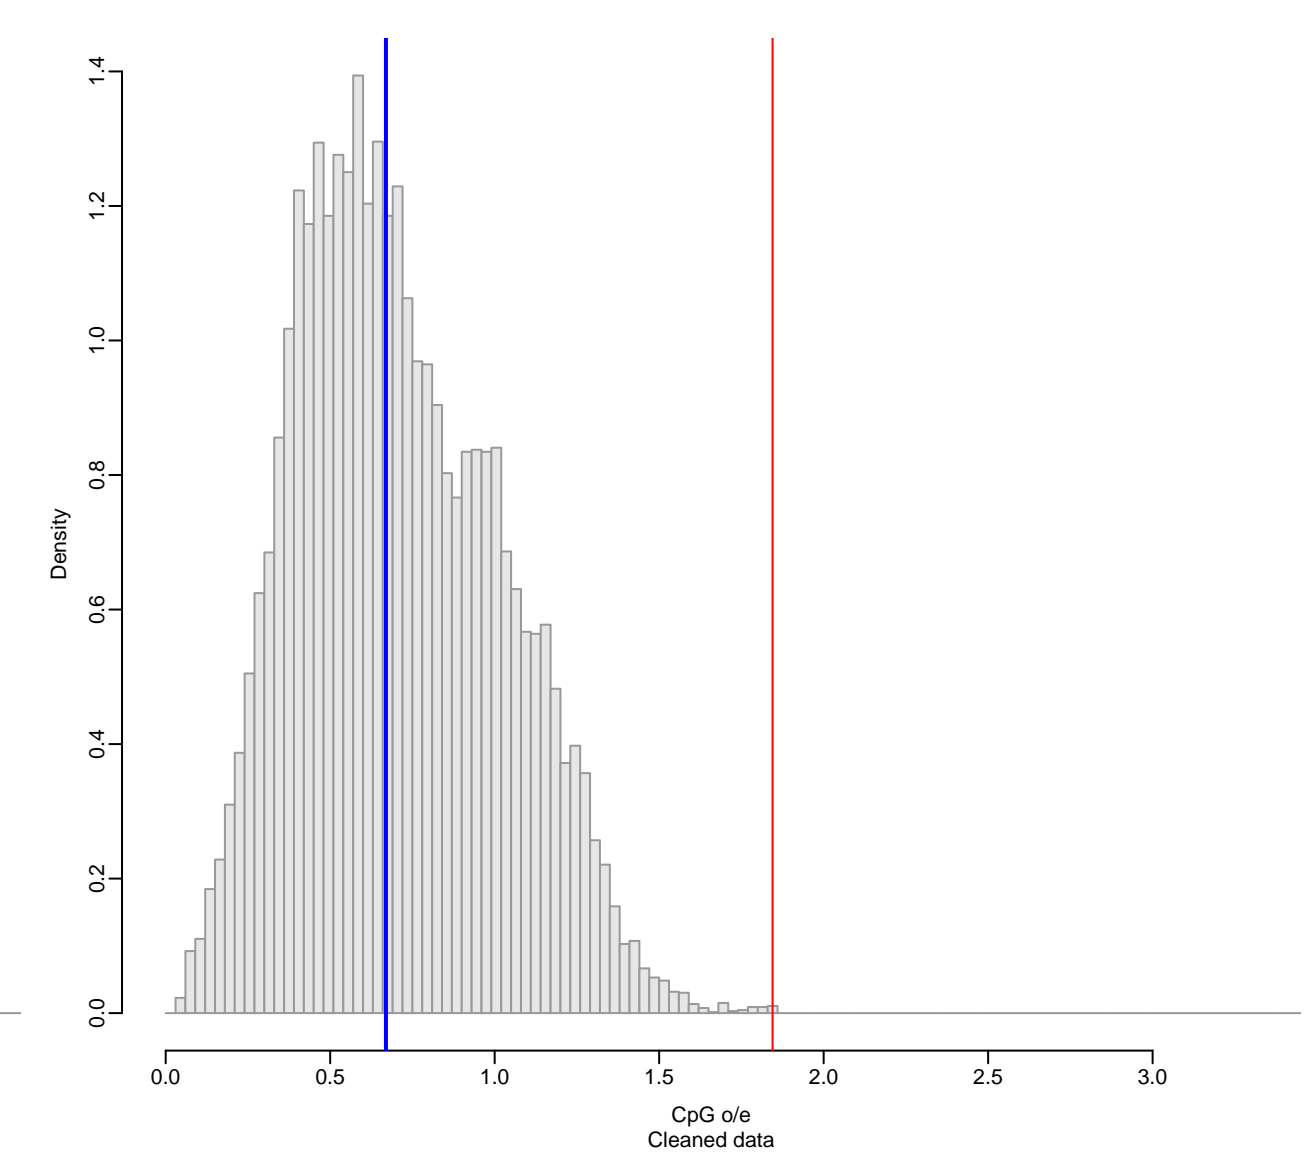

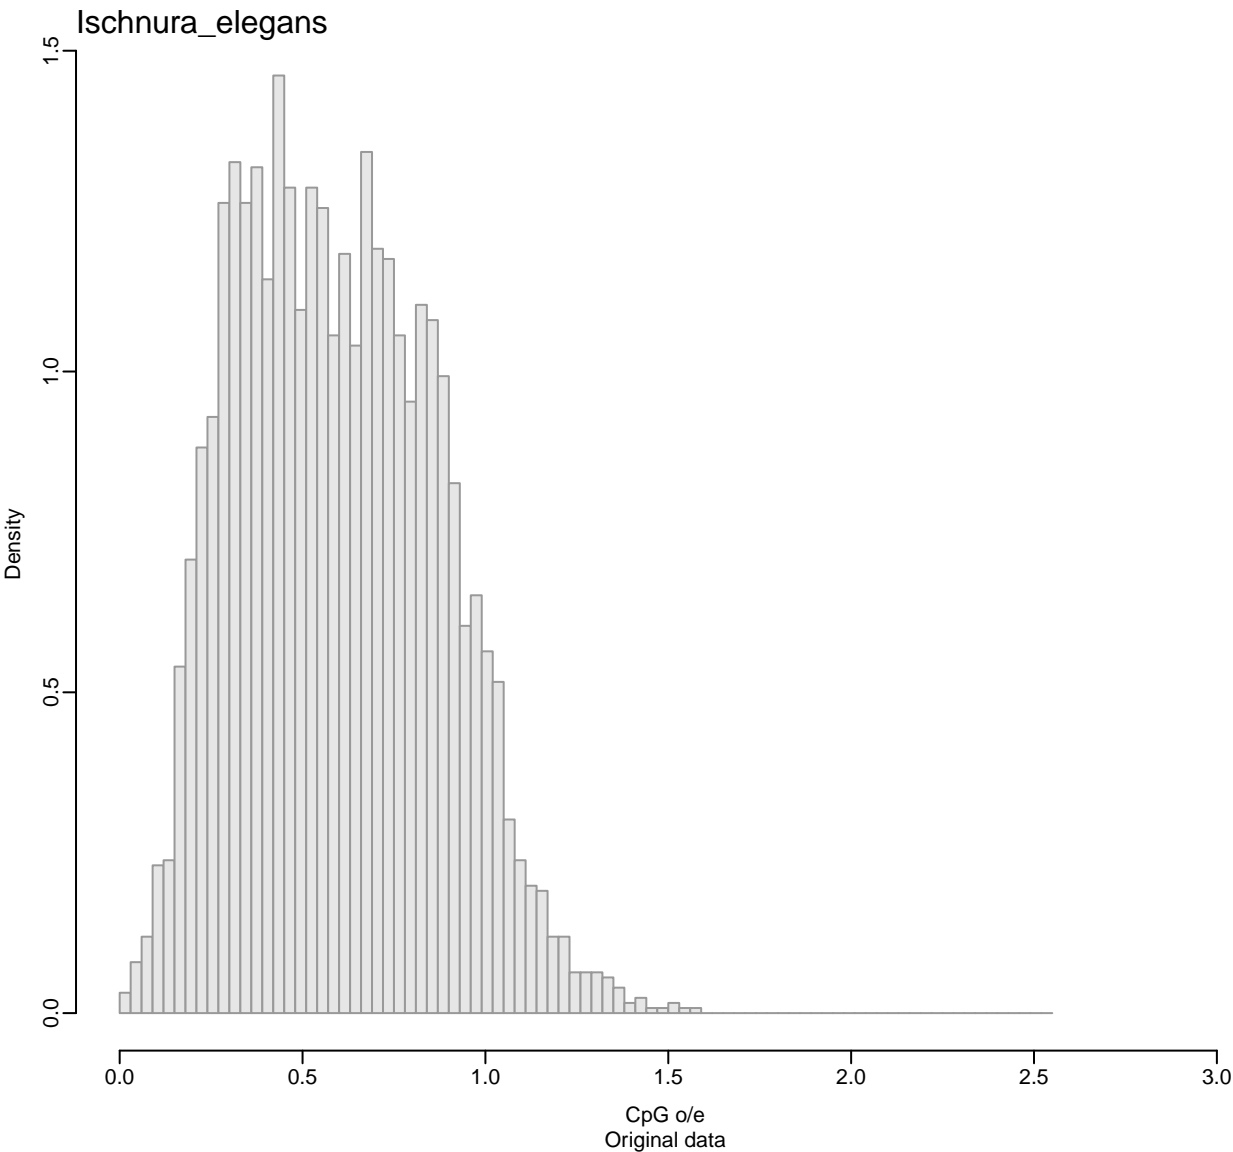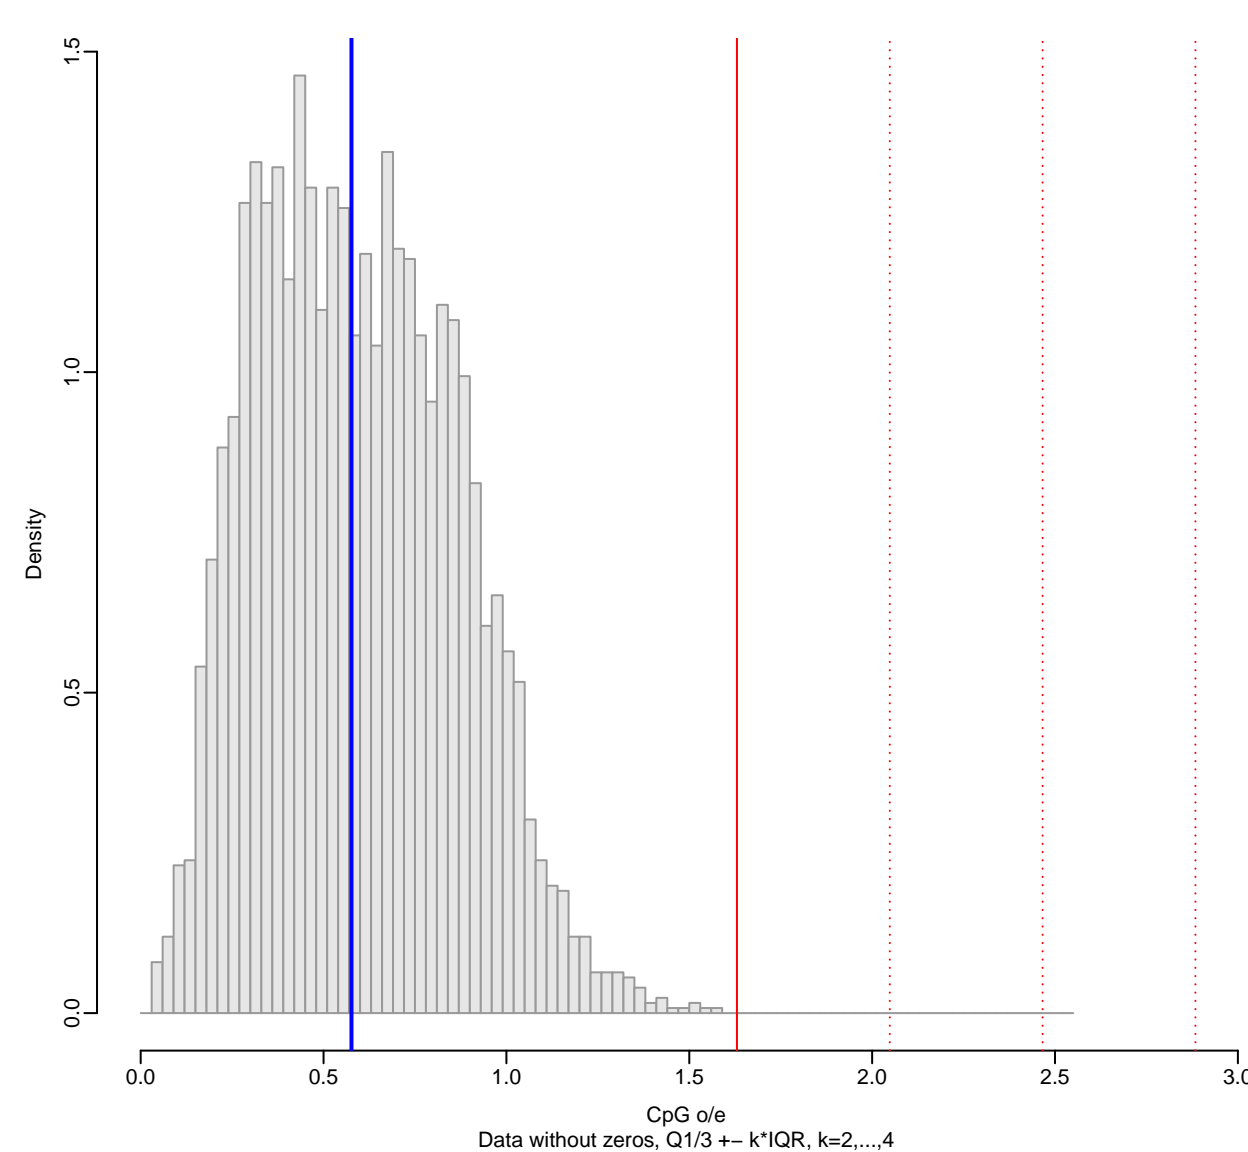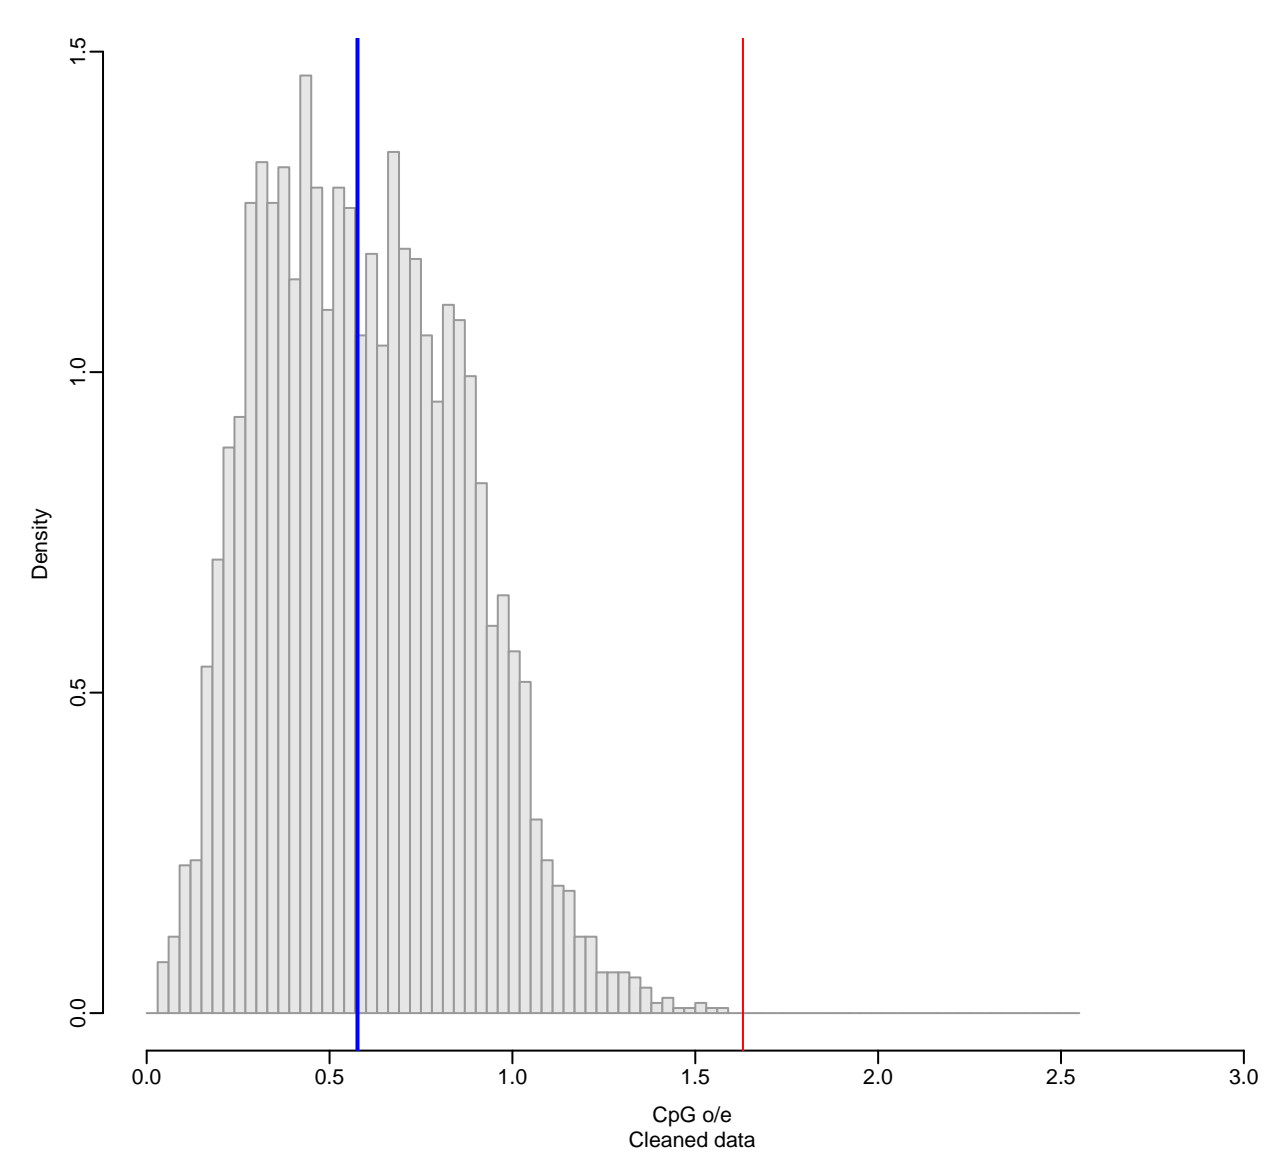

Ixodes\_ricinus

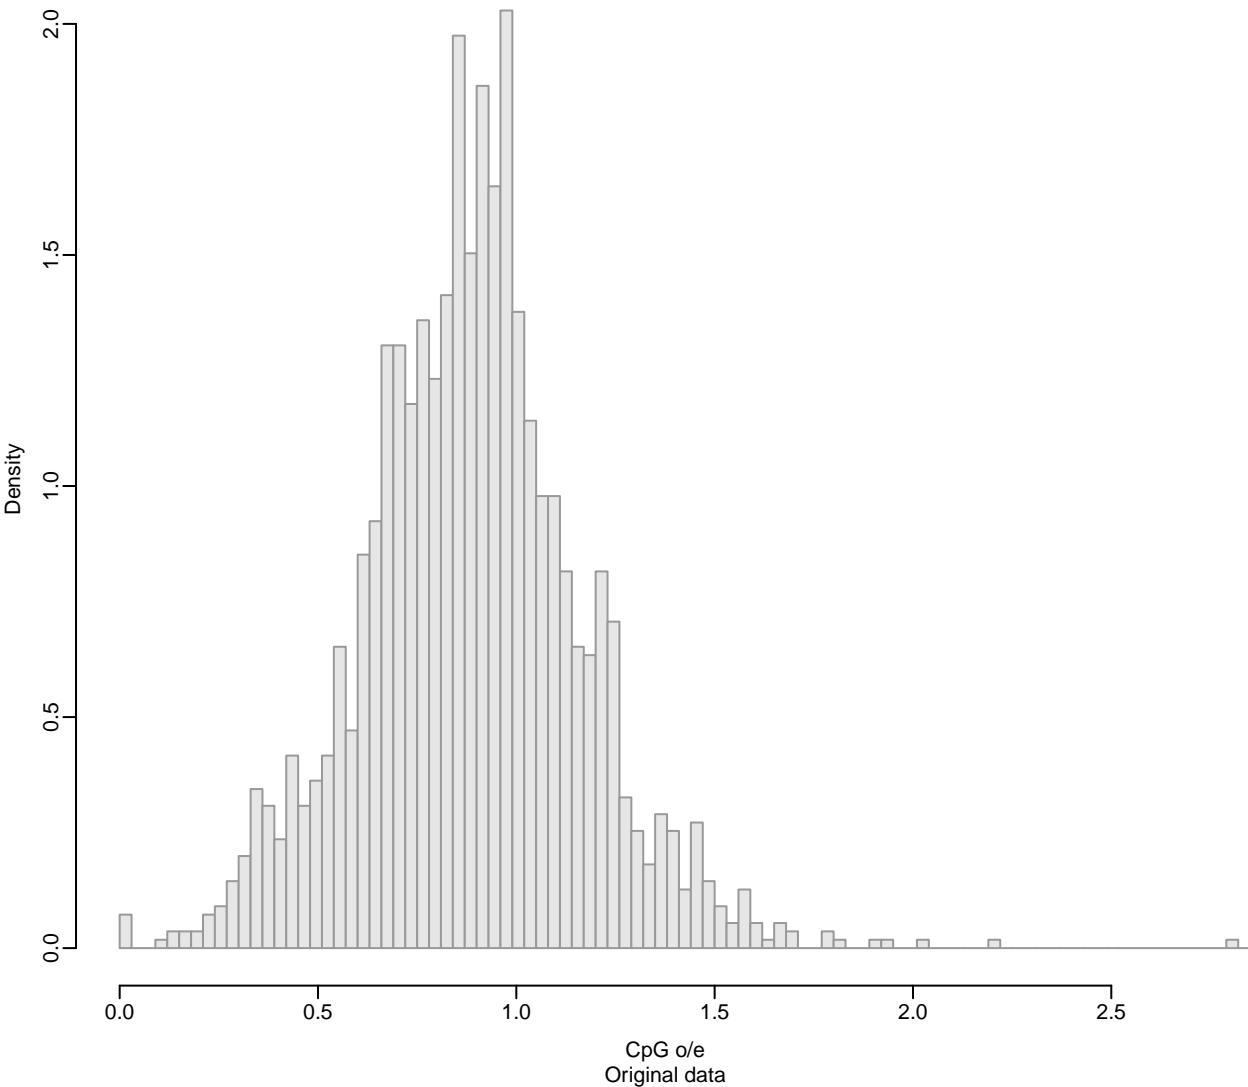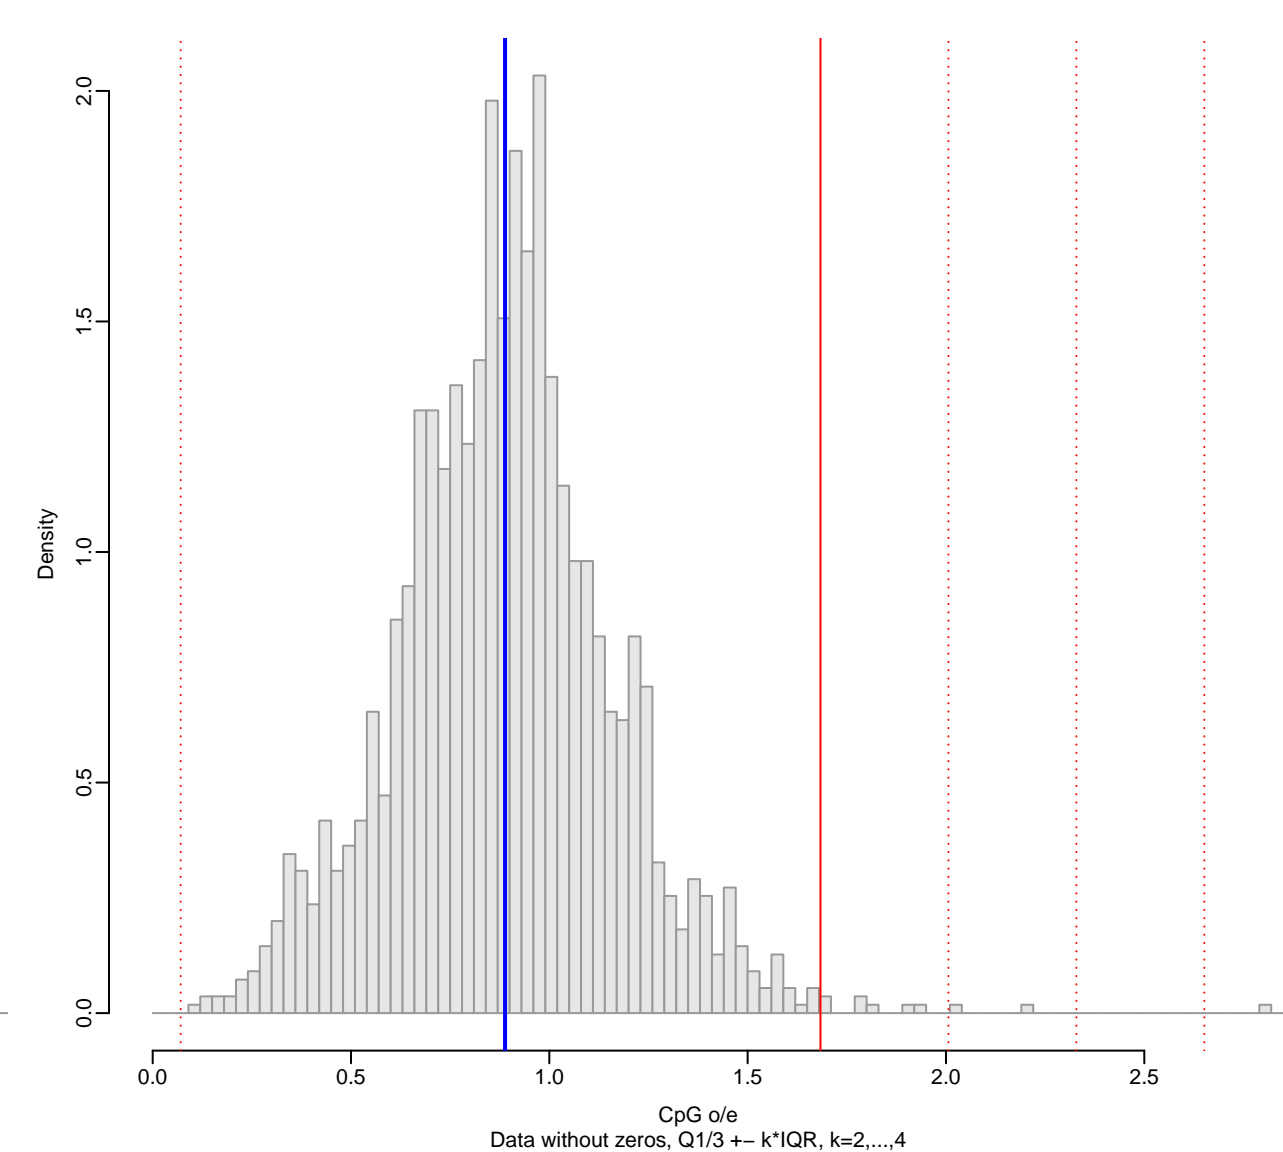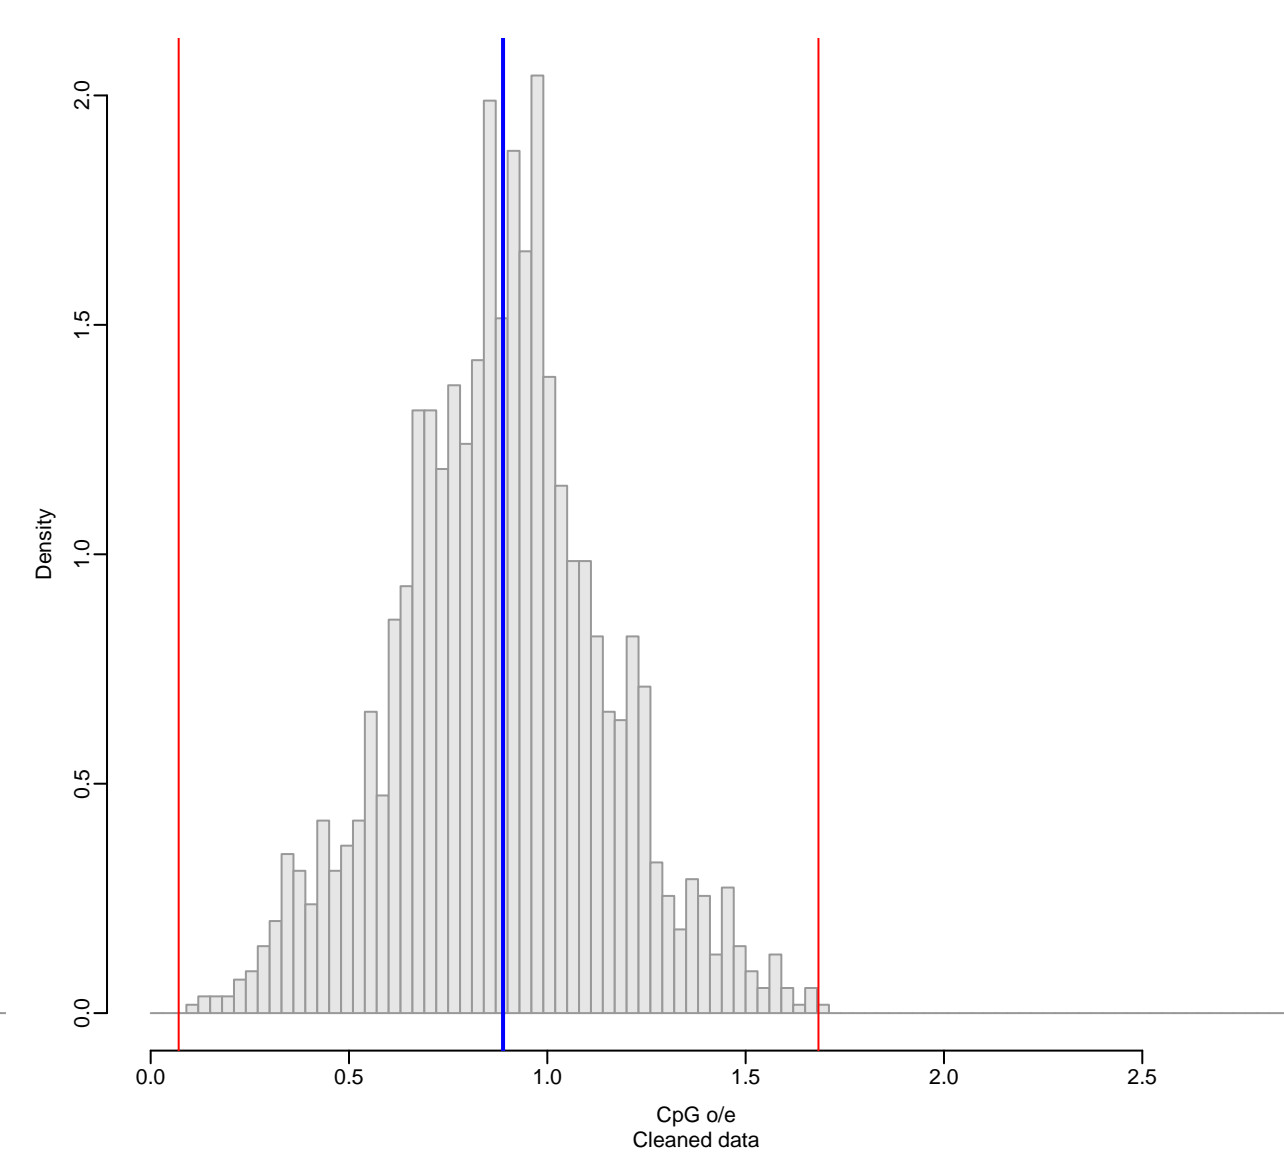

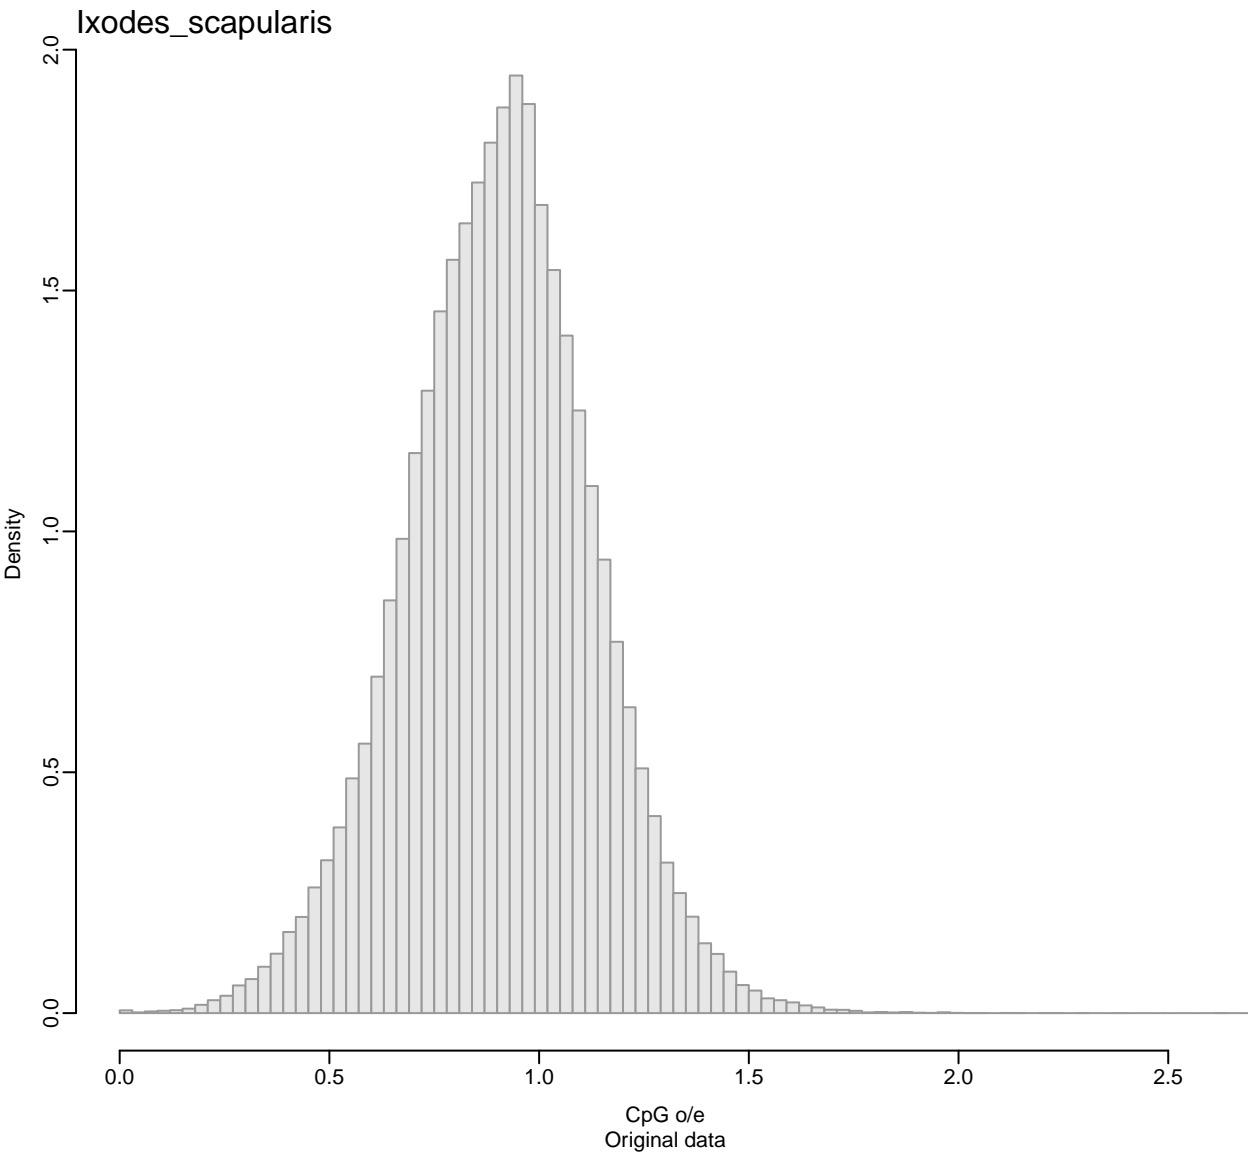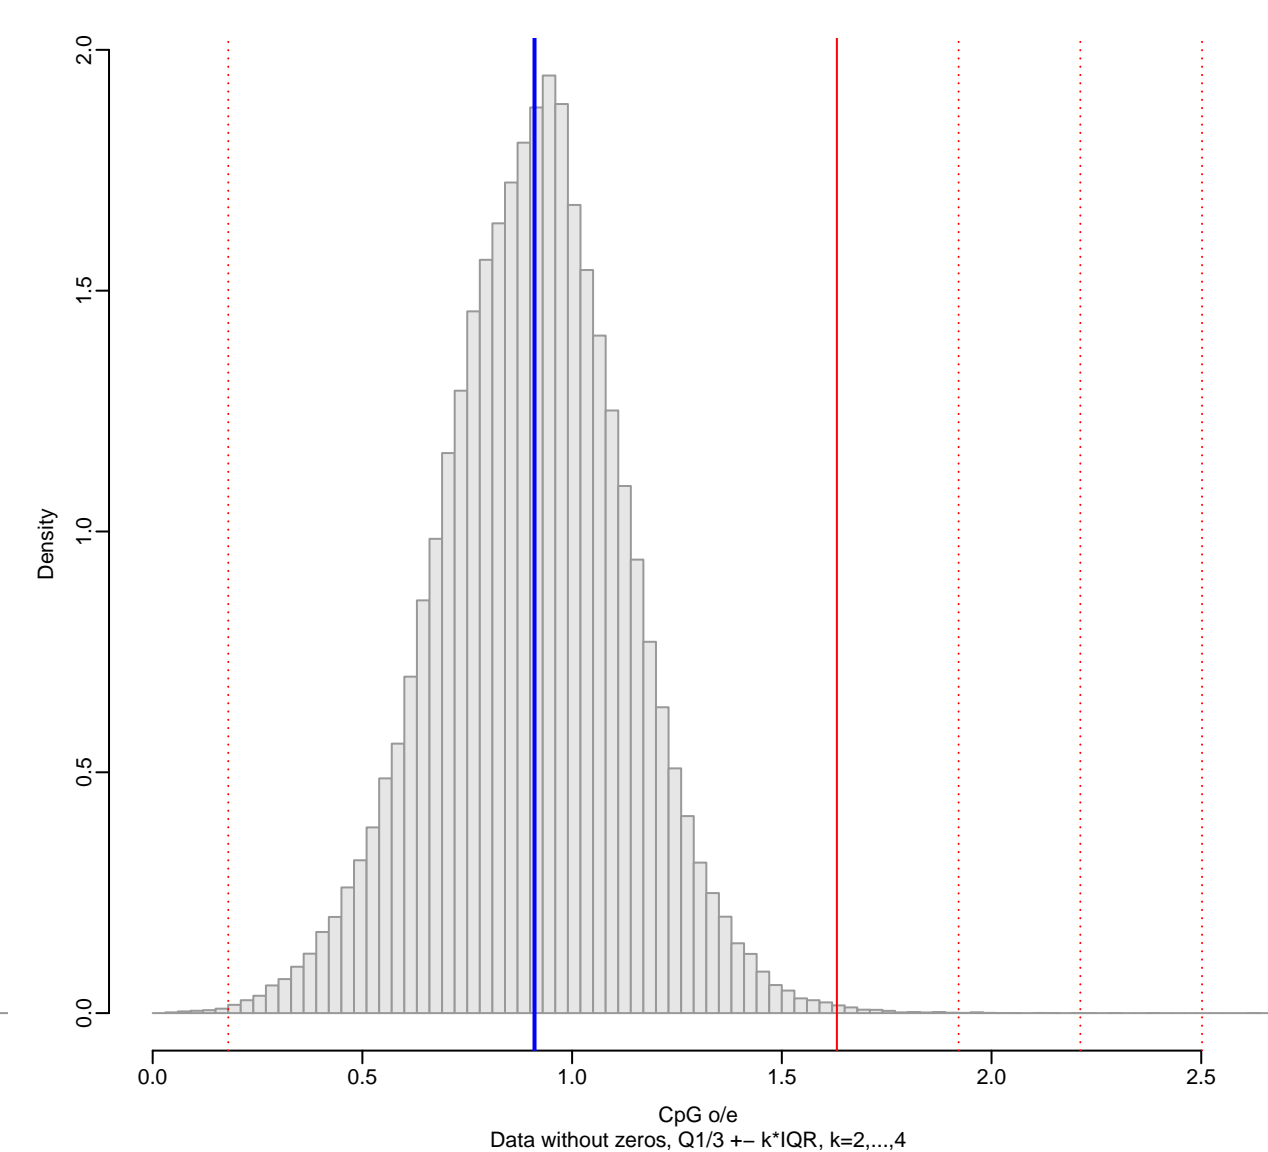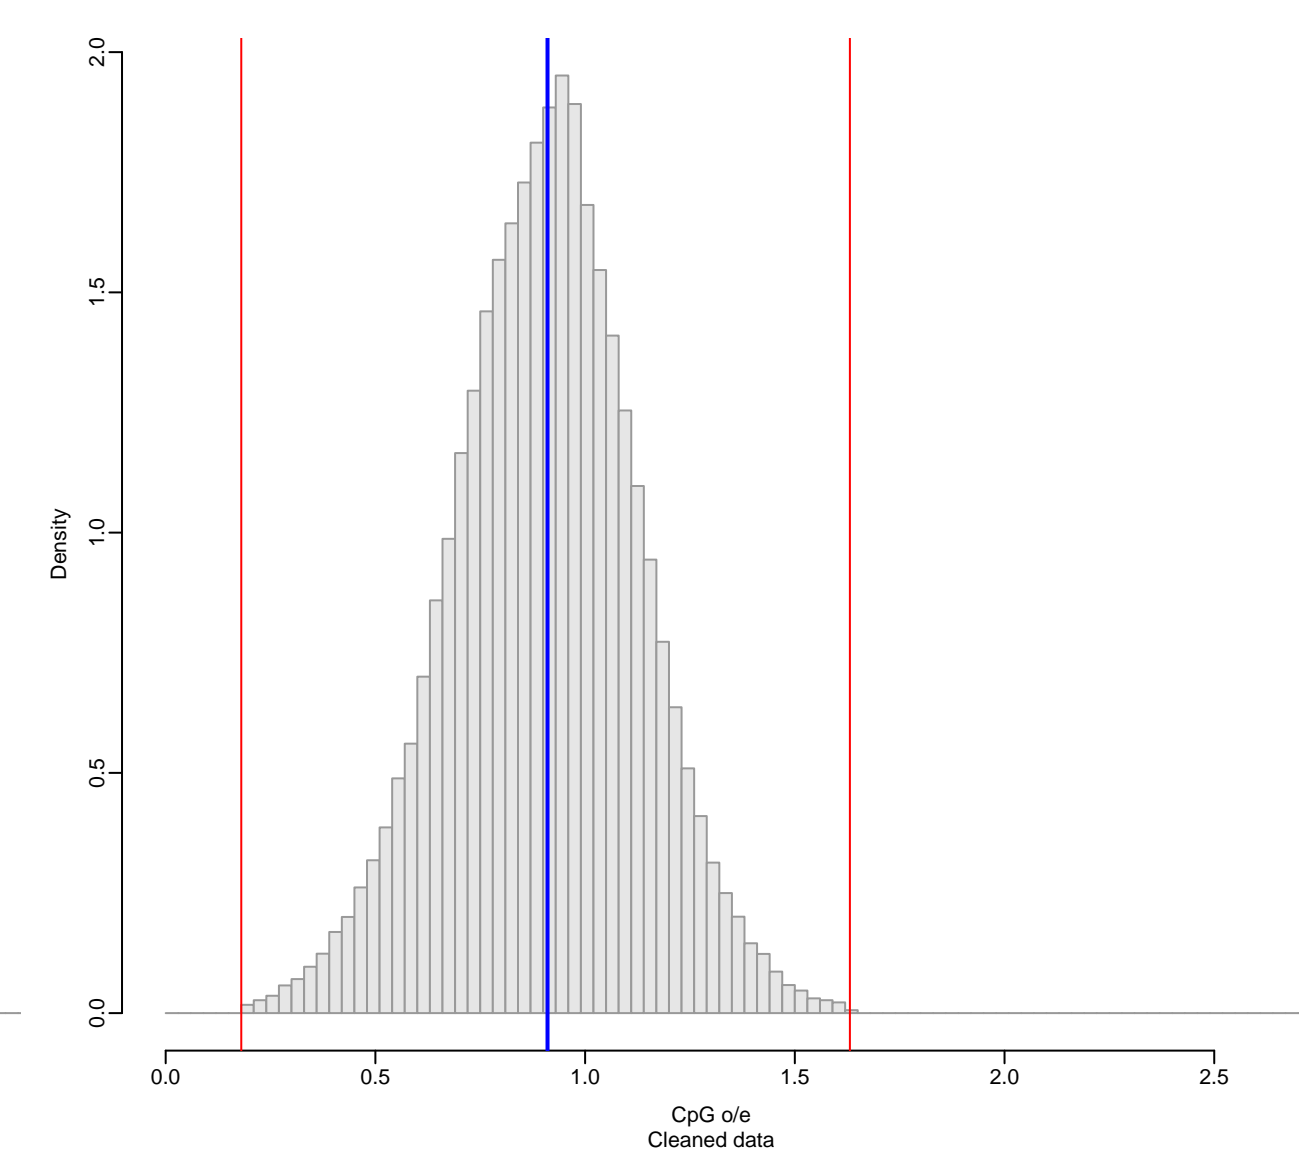

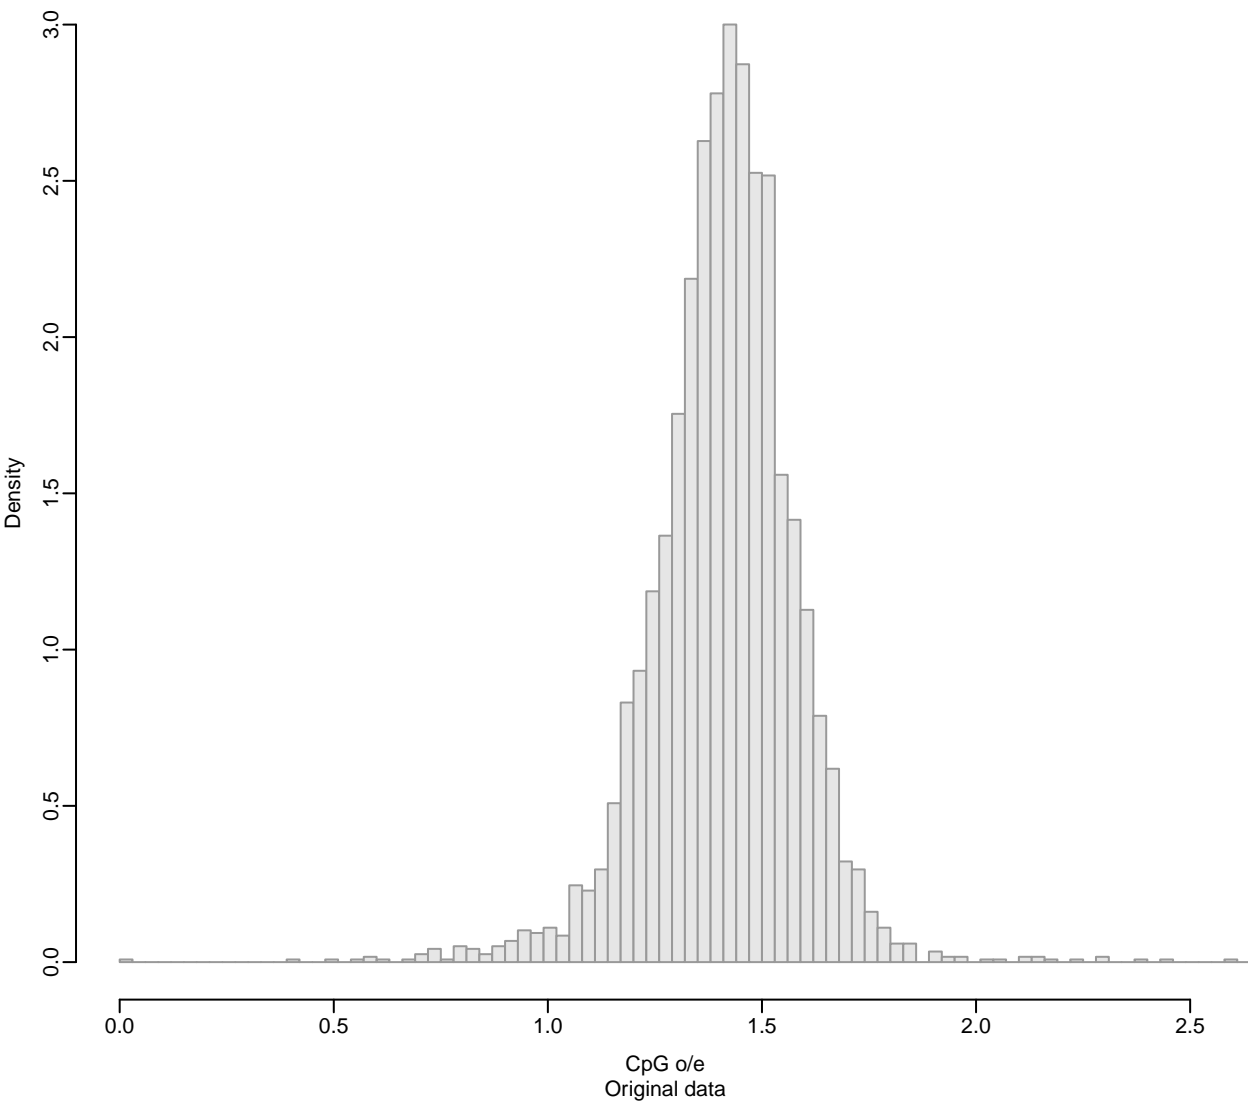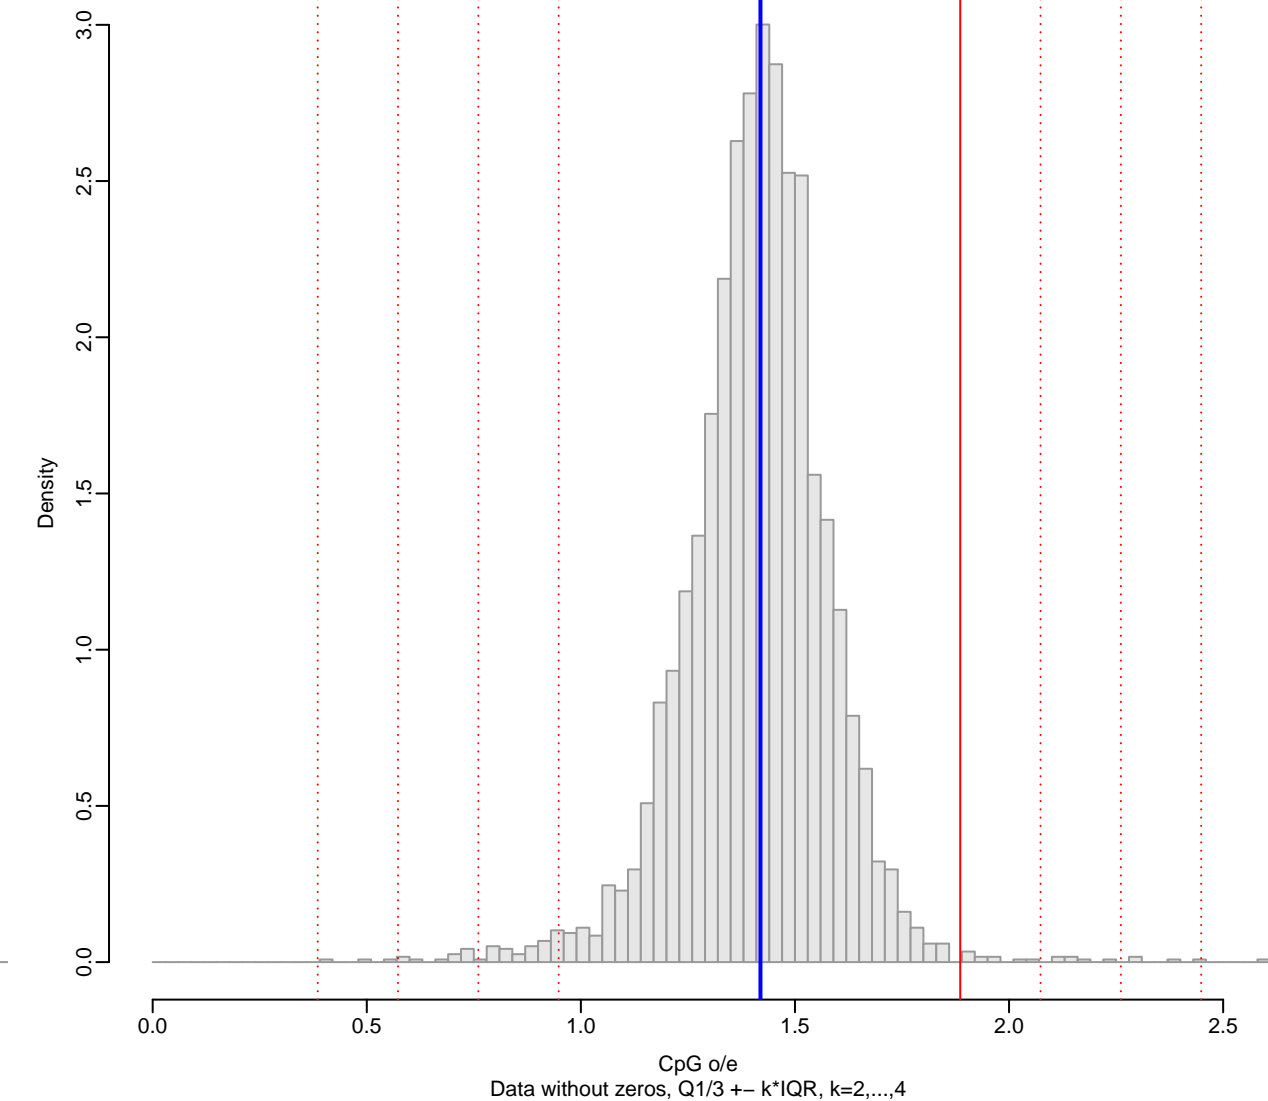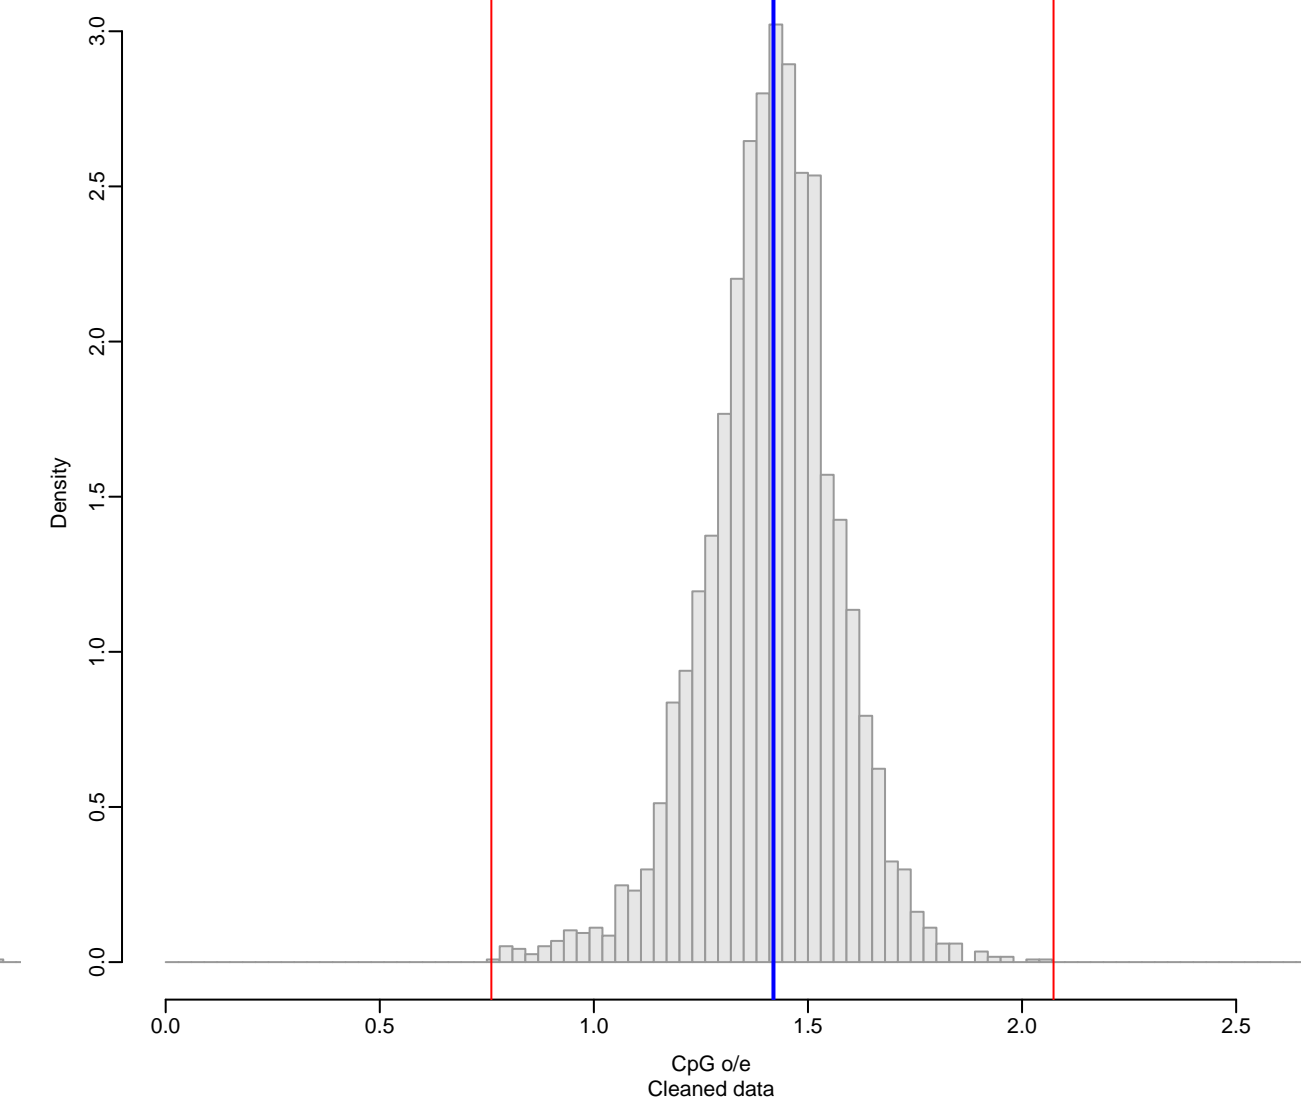

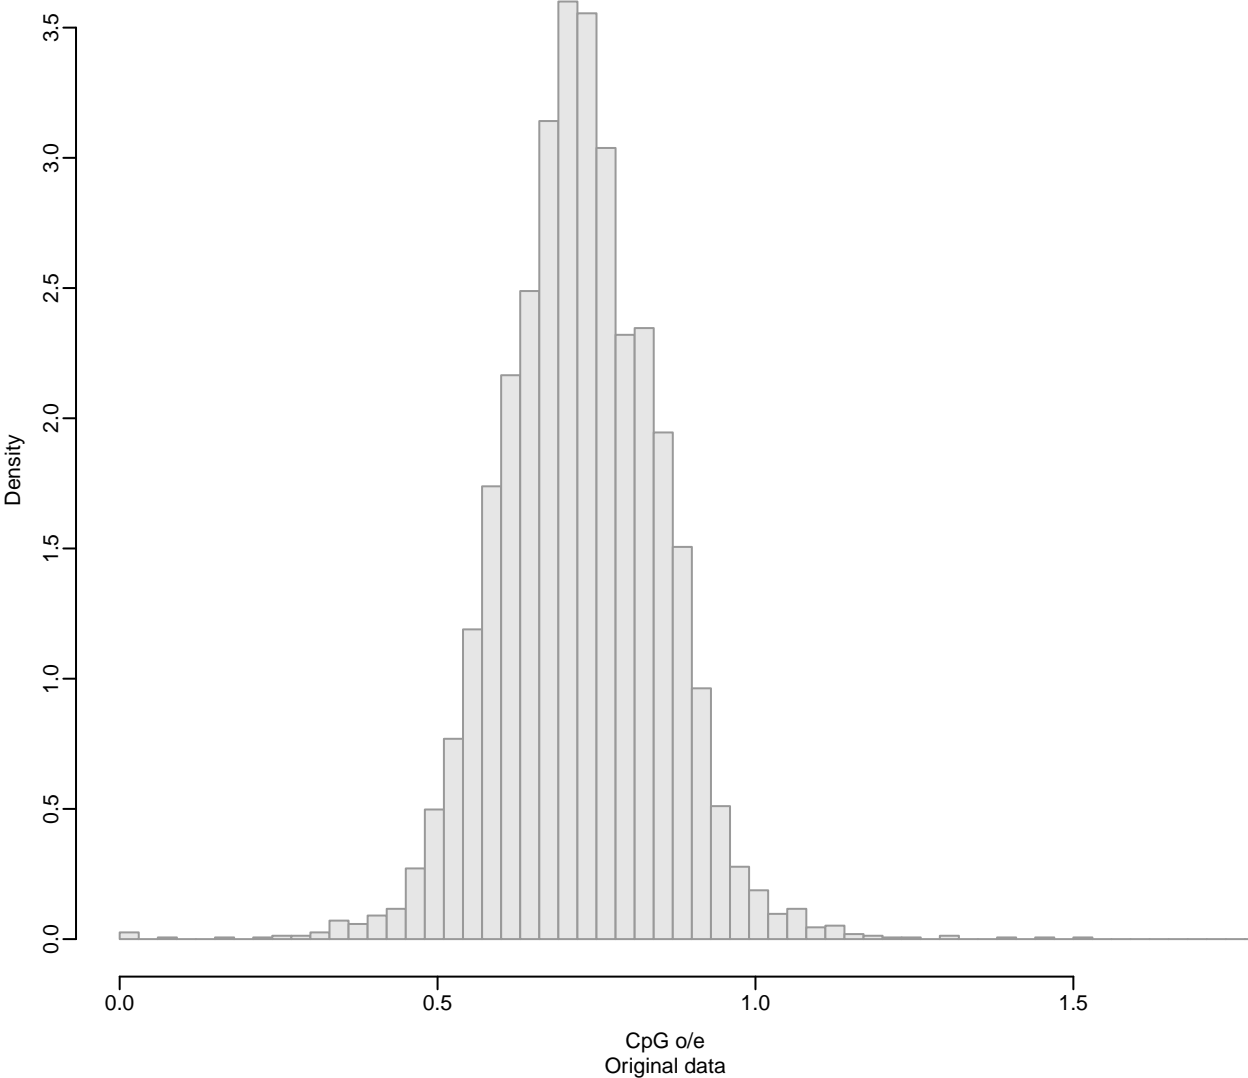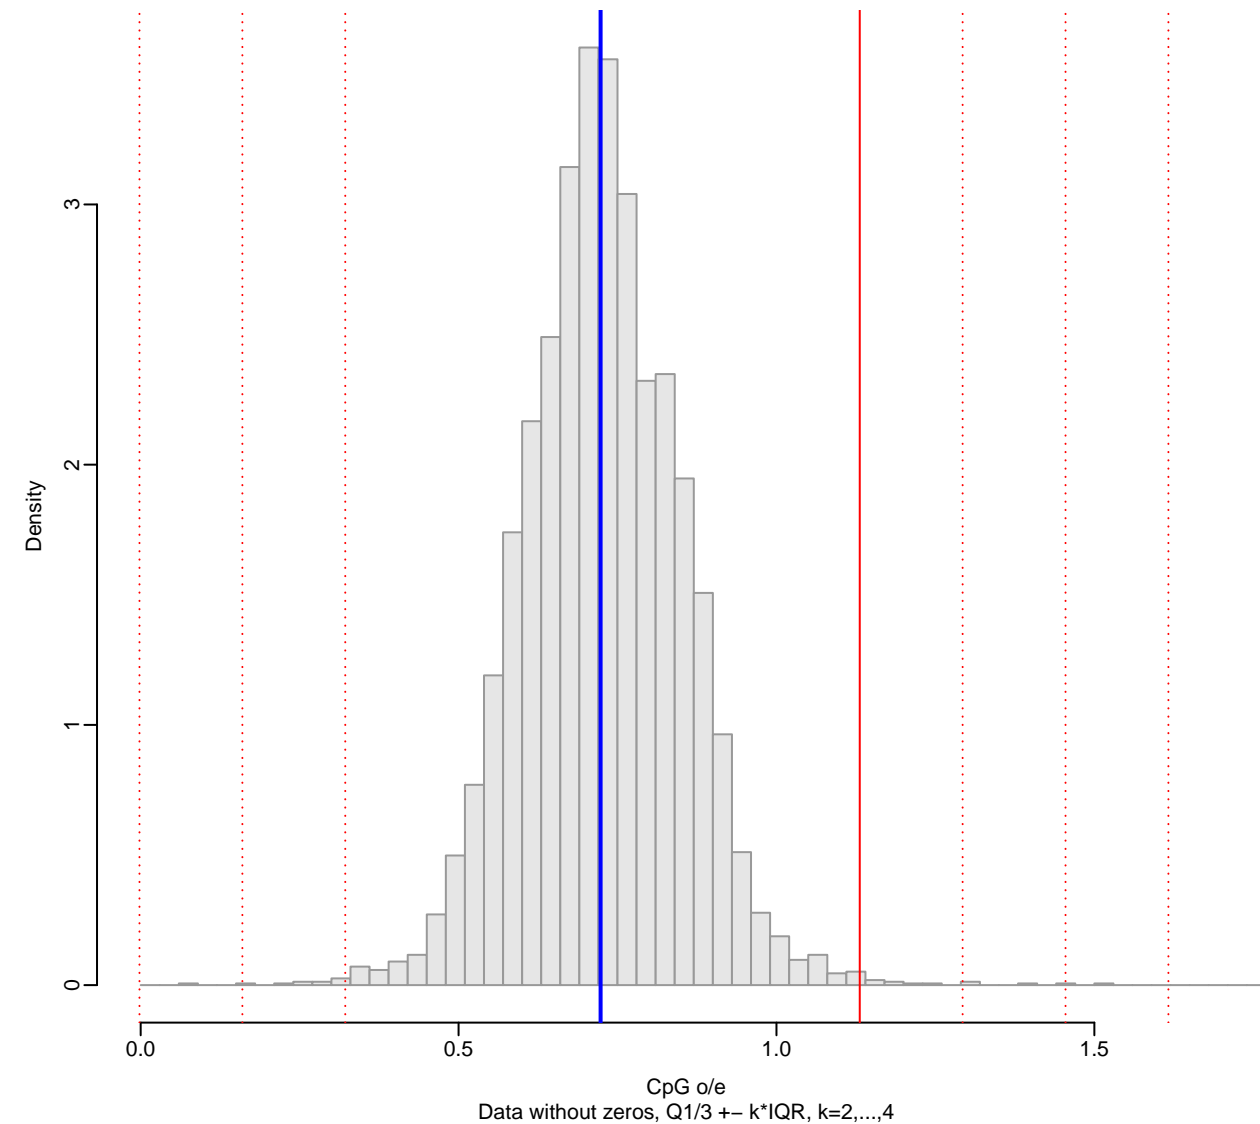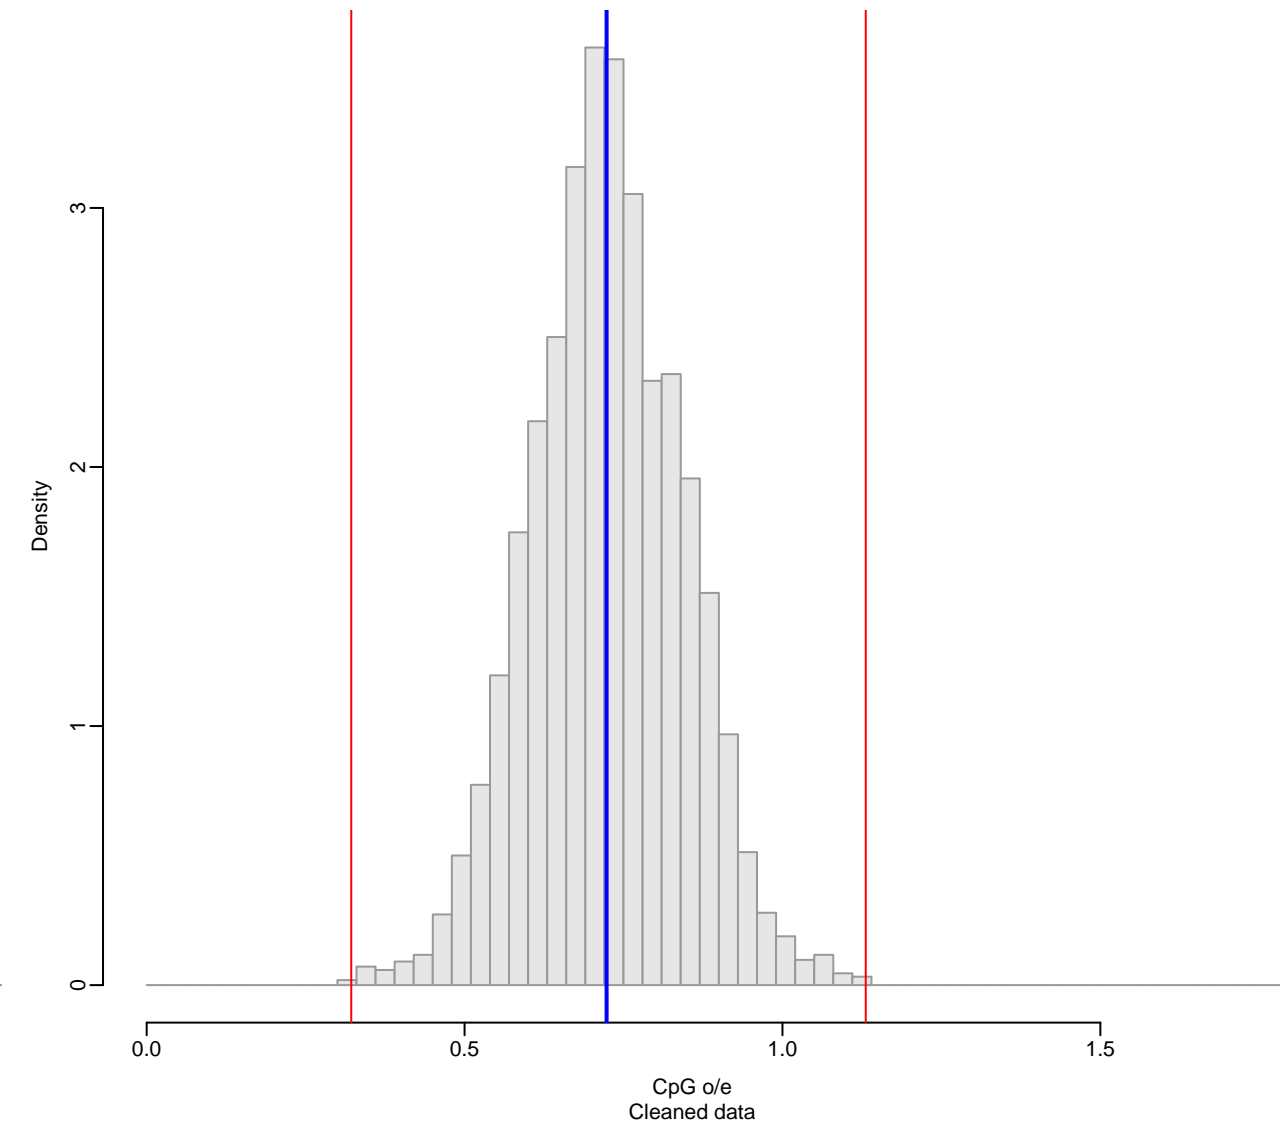

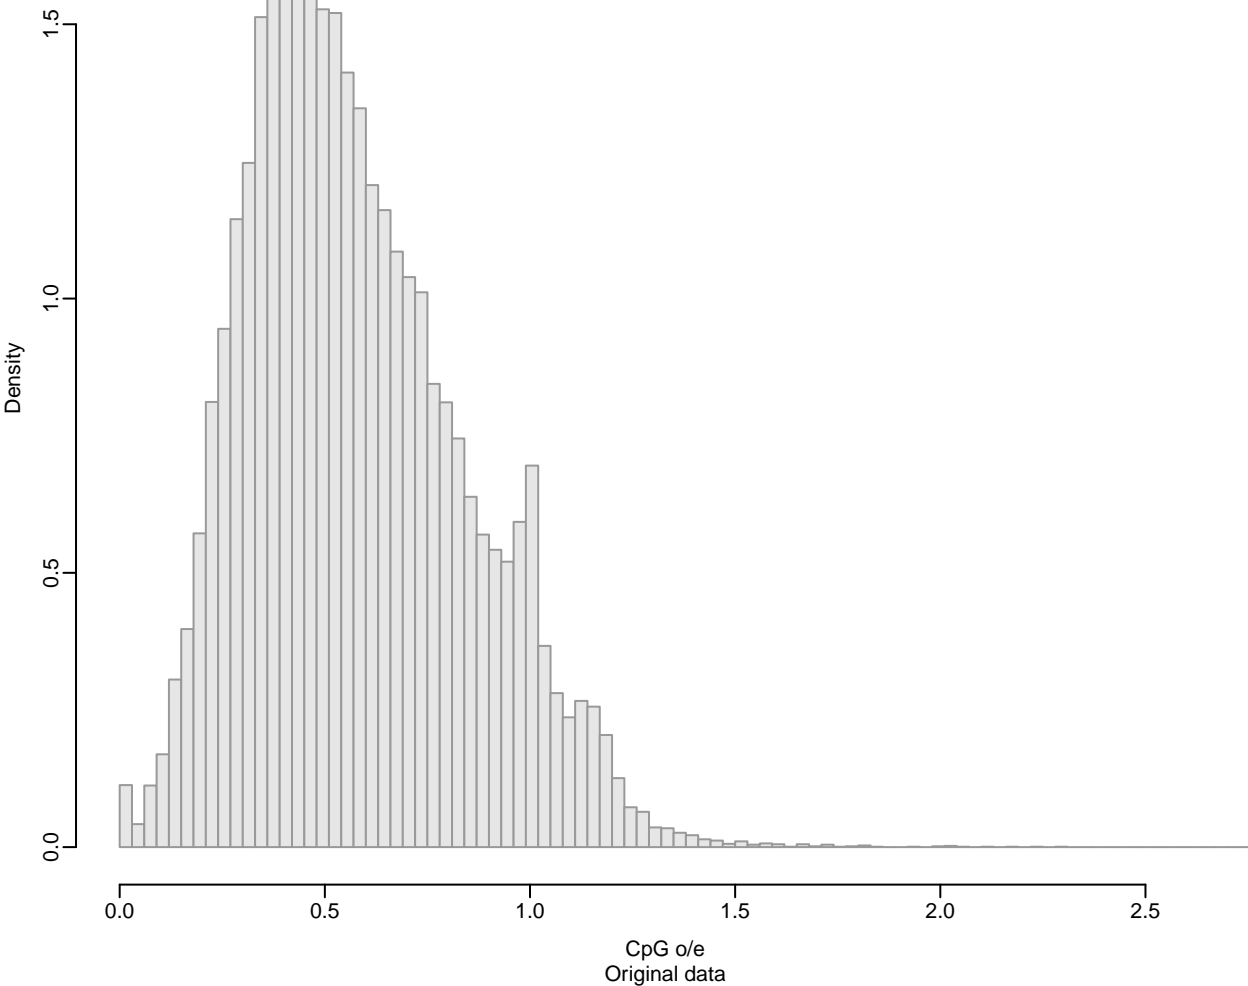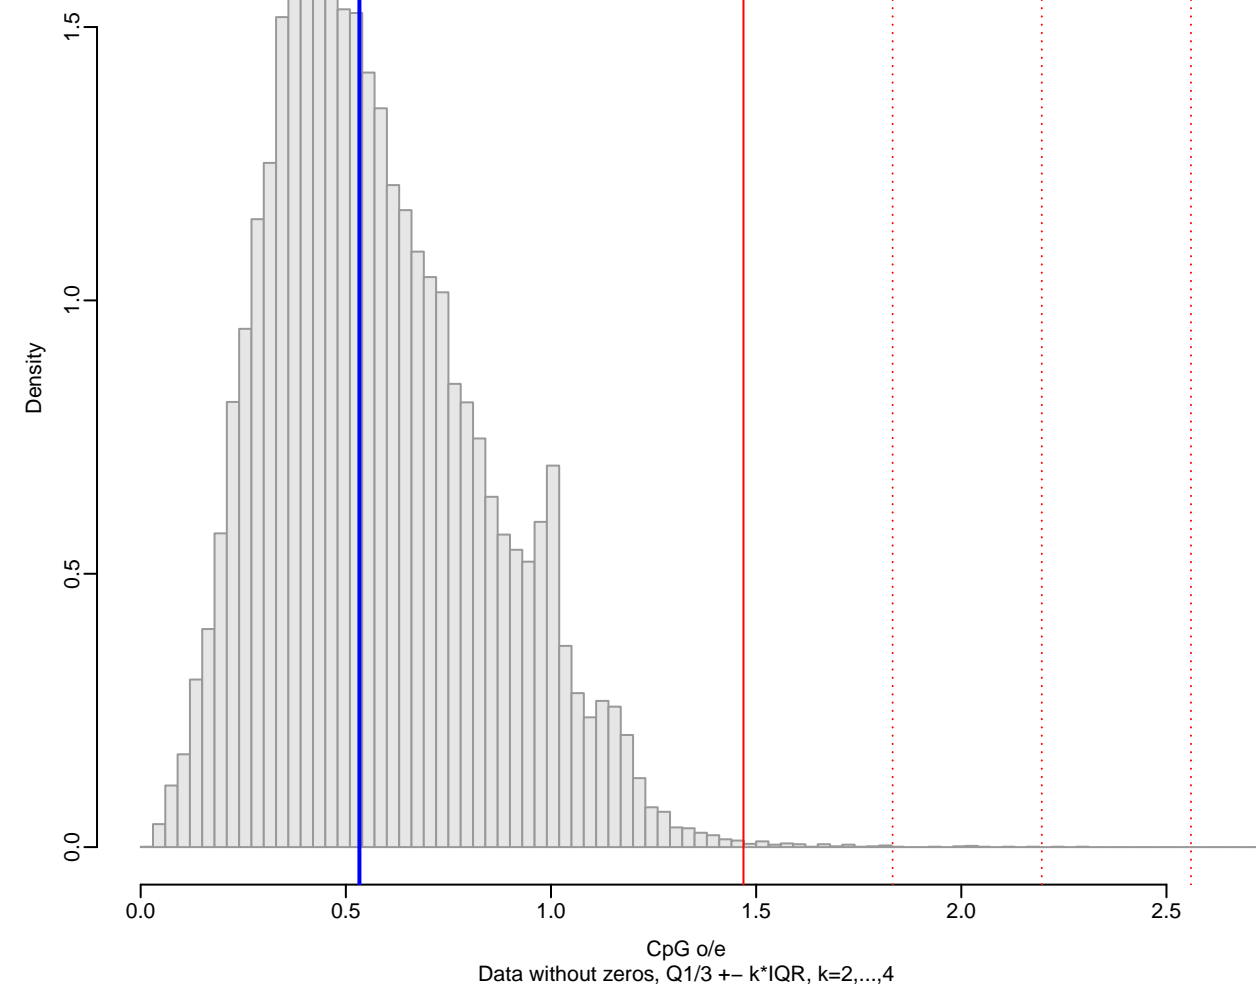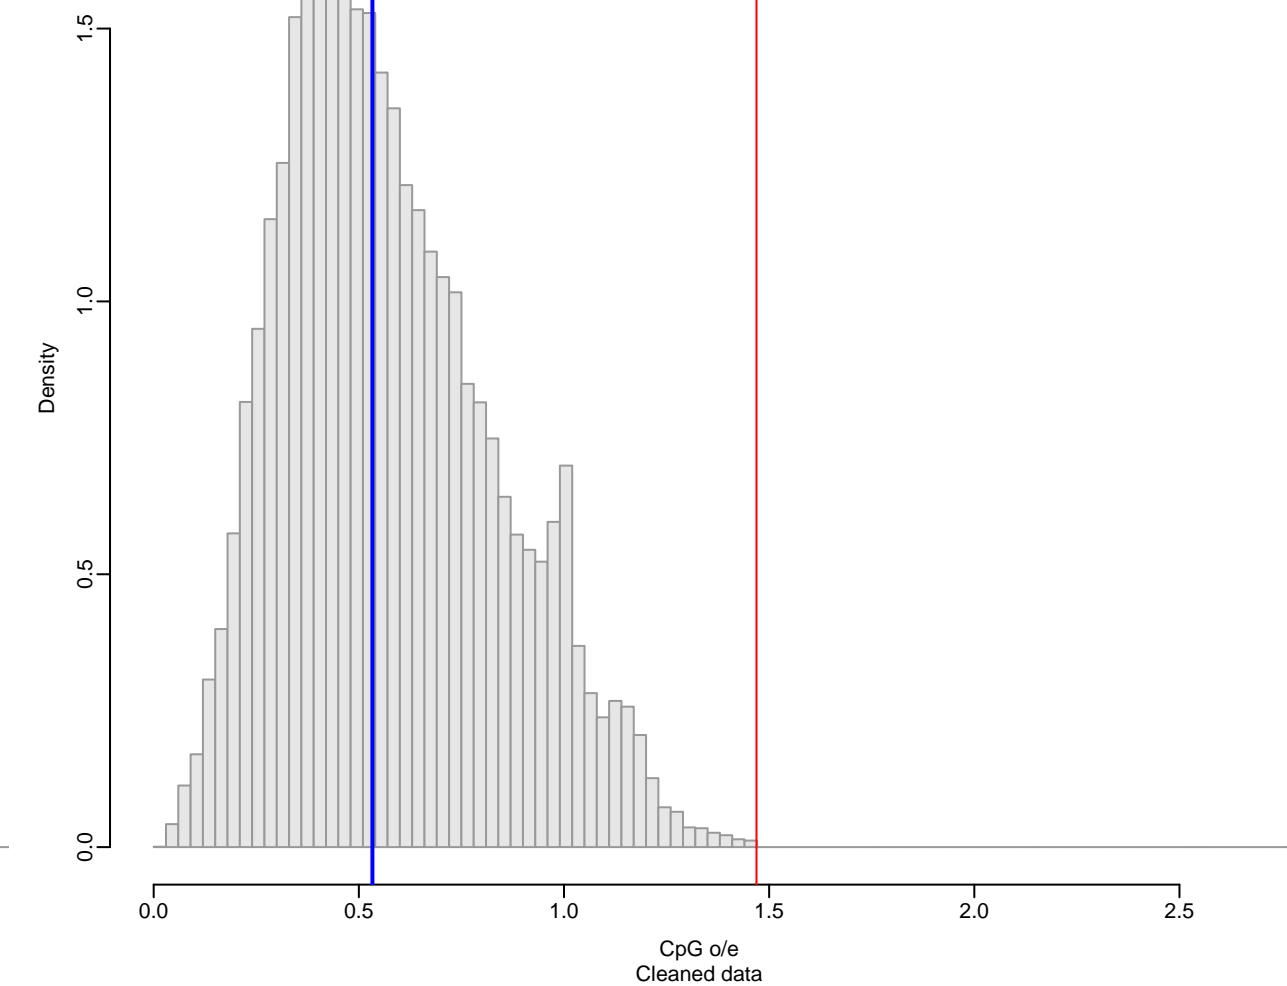

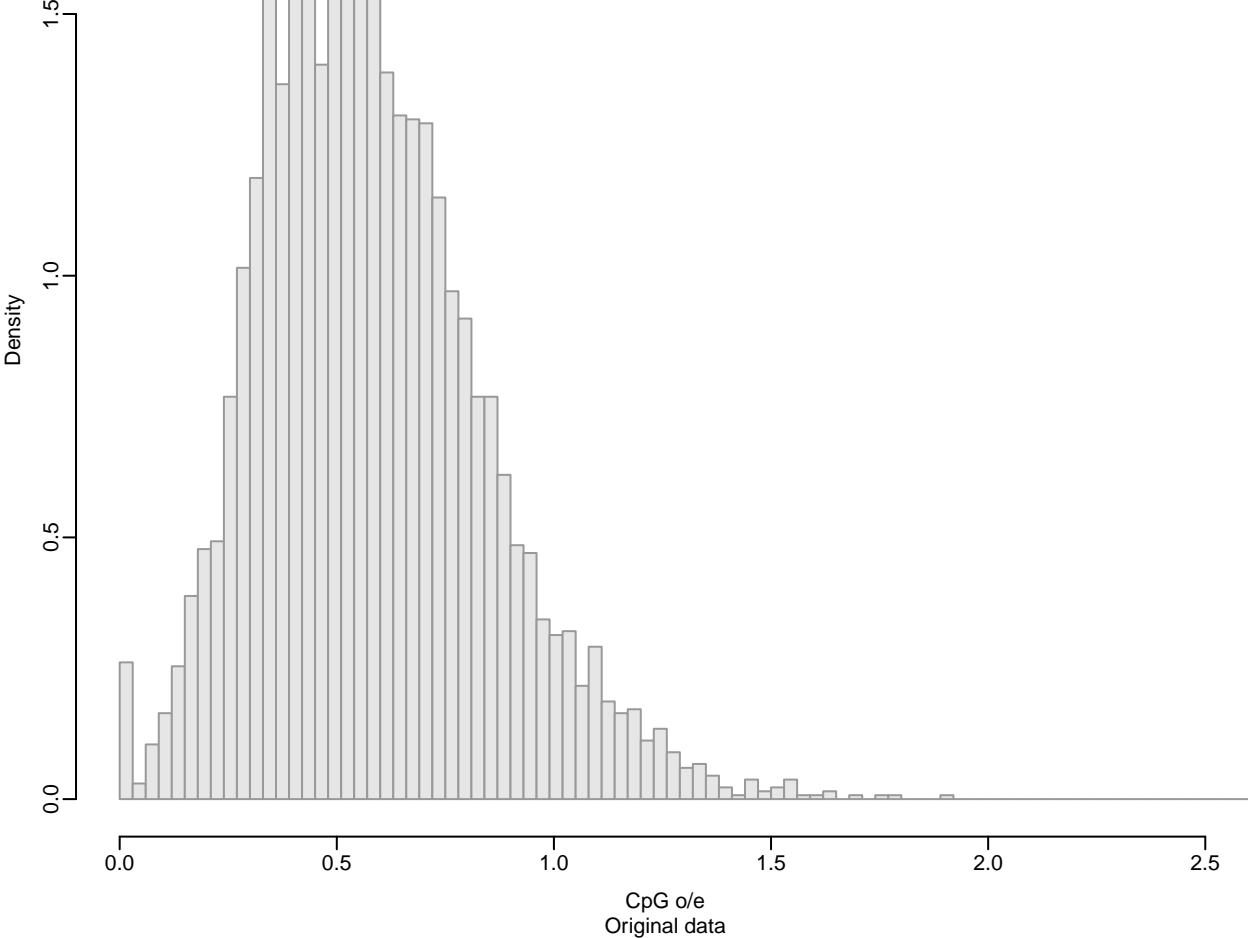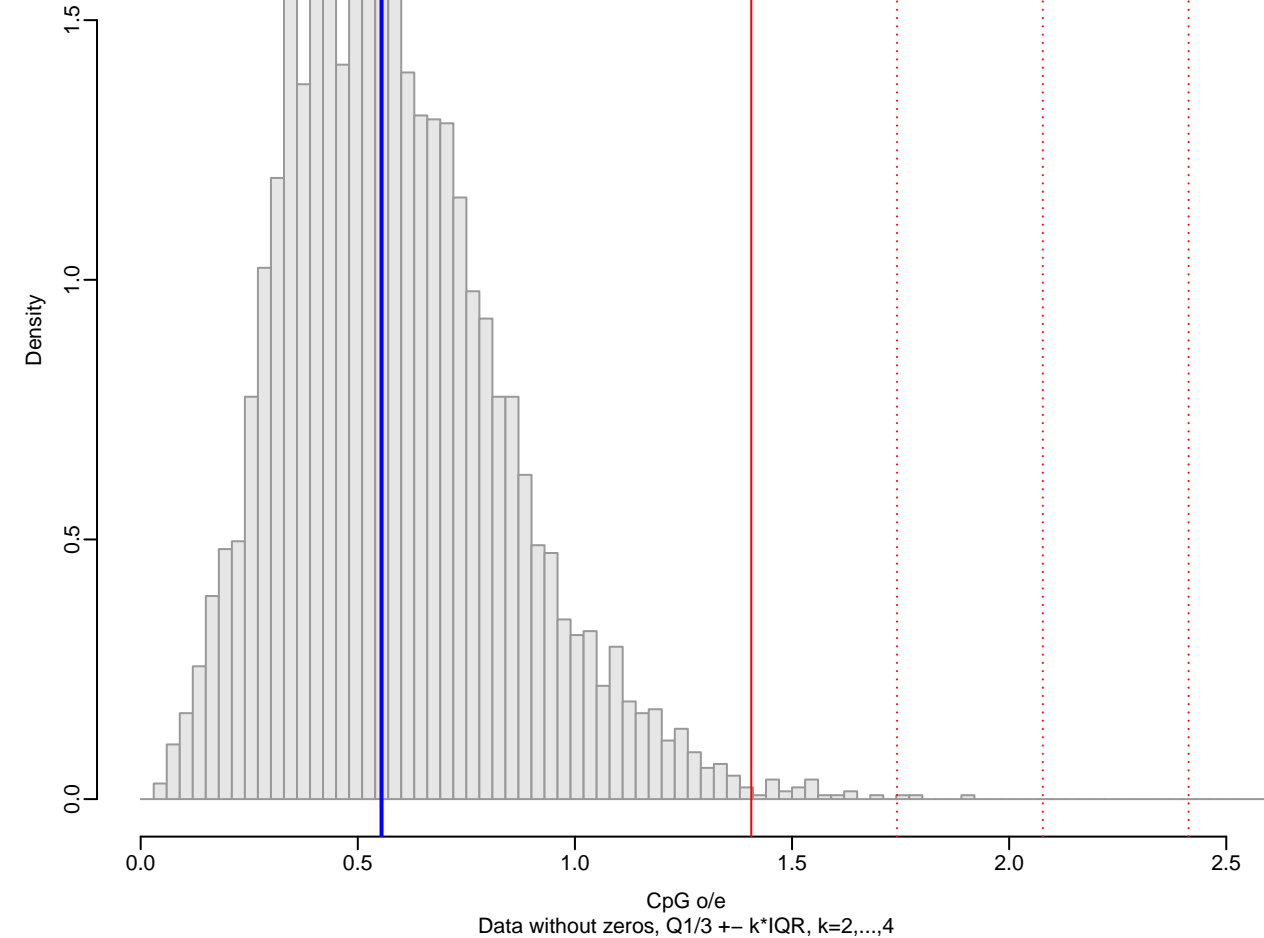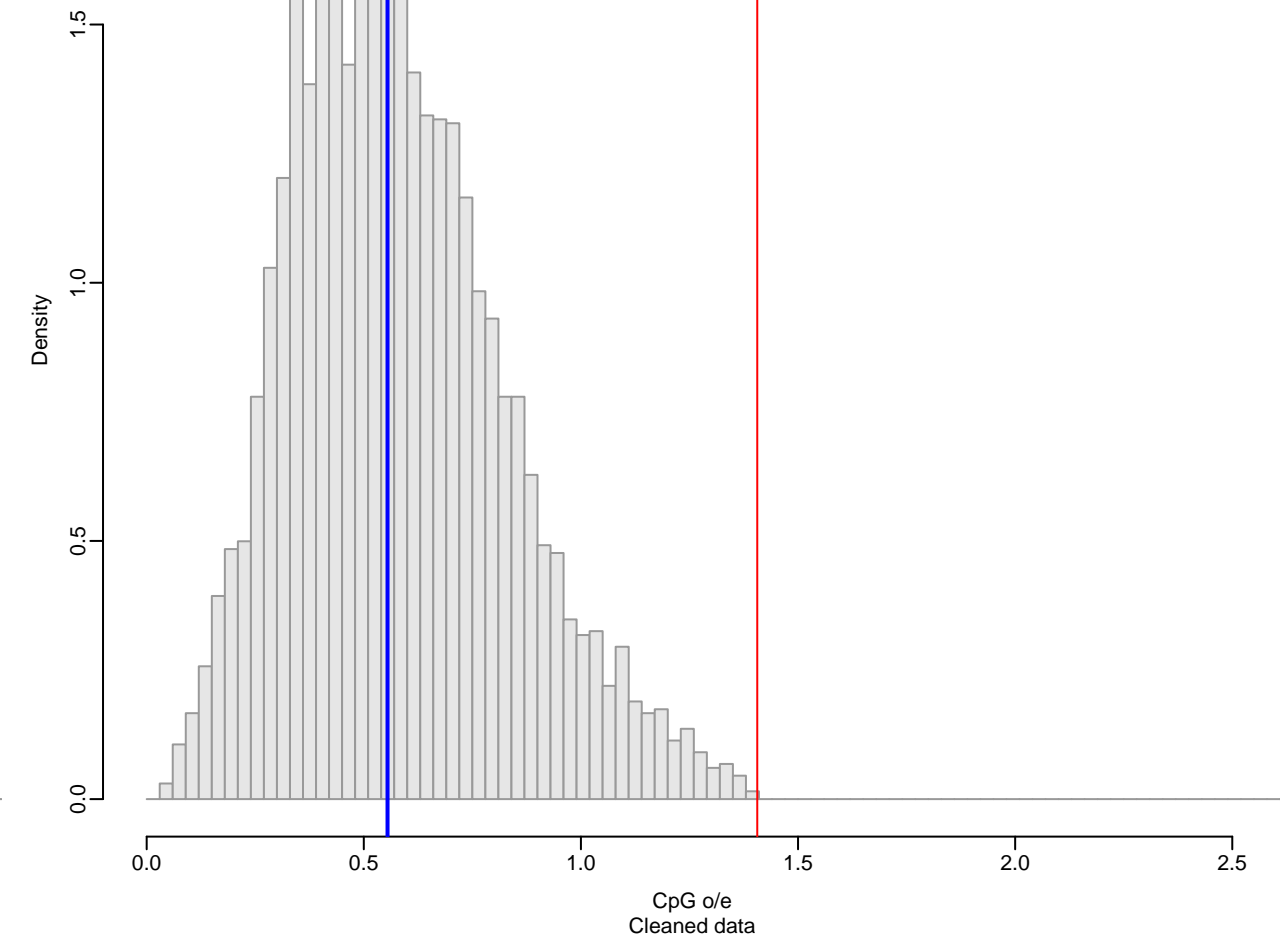



Lagopus\_lagopus\_scotica

Density

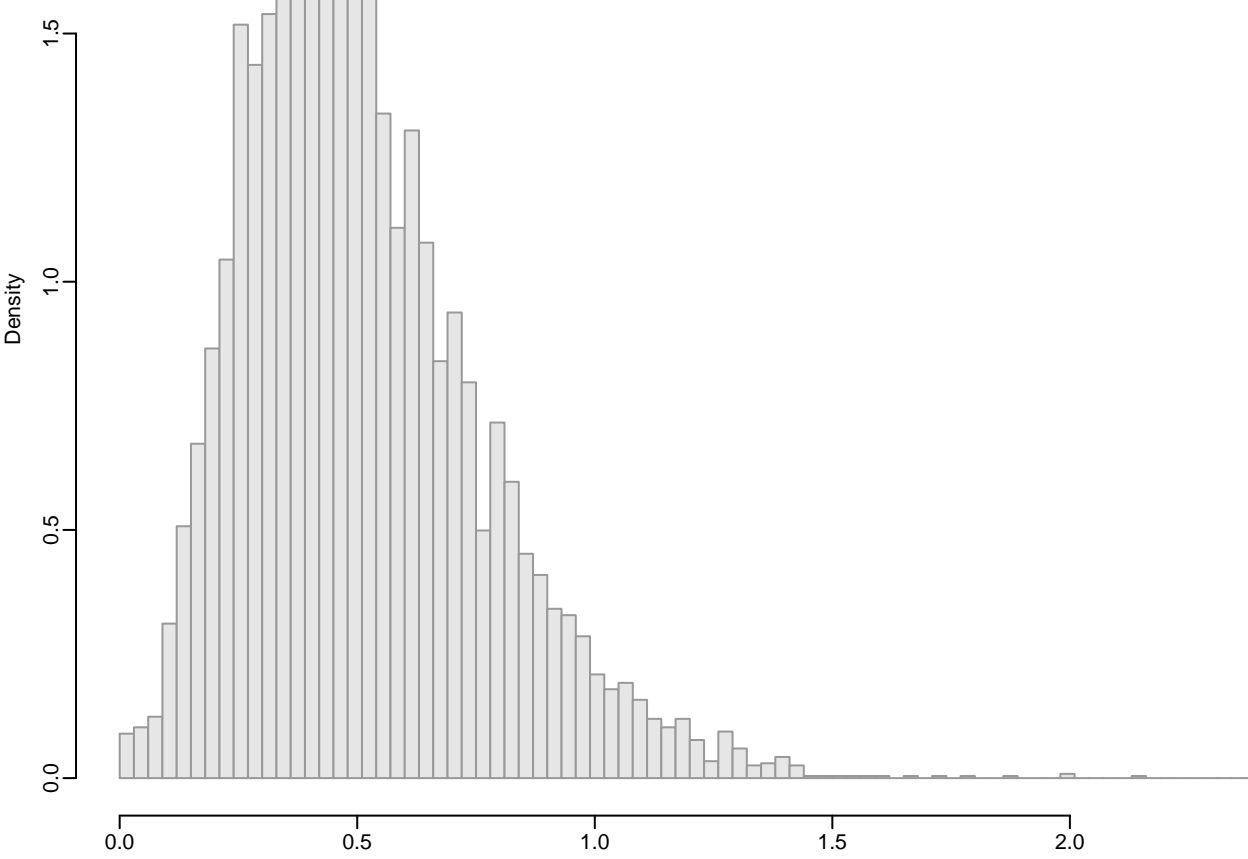

Density

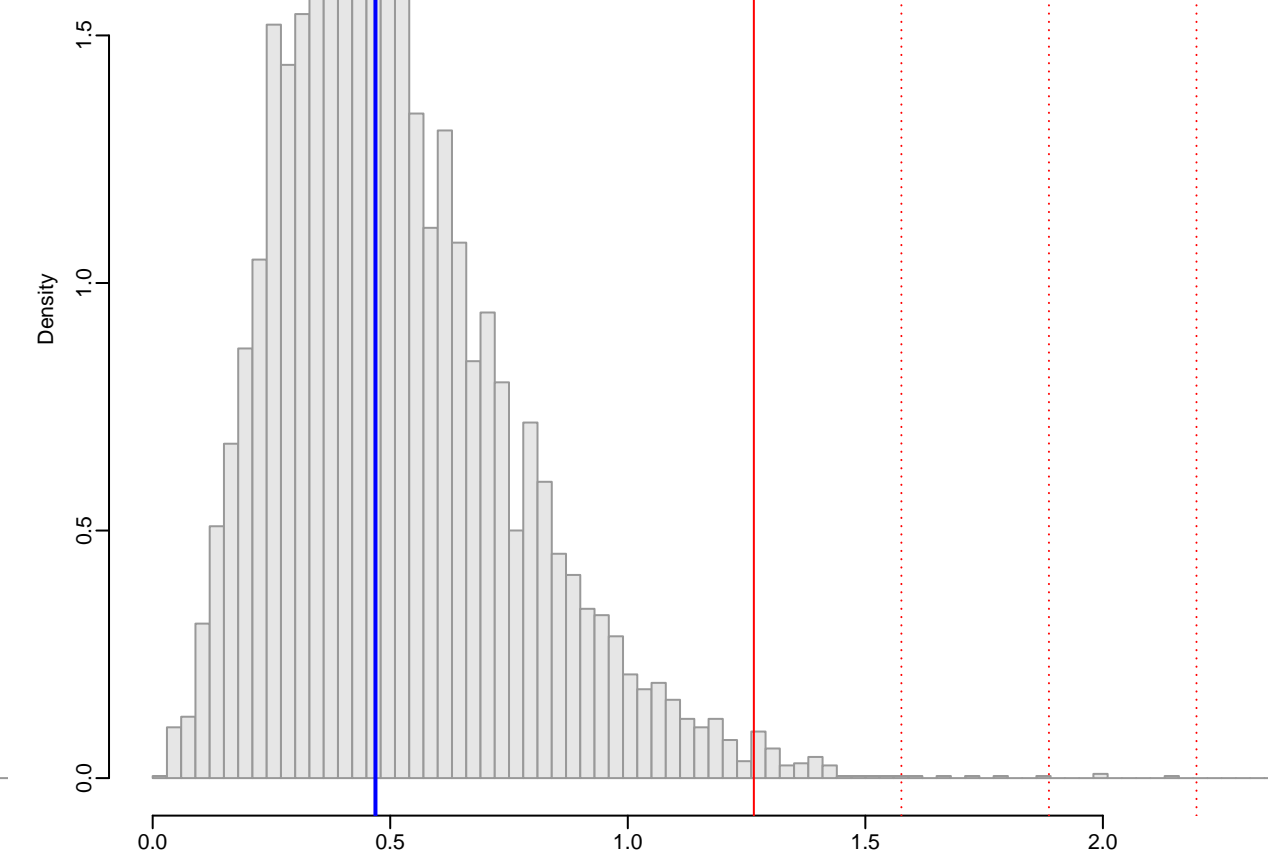

Density

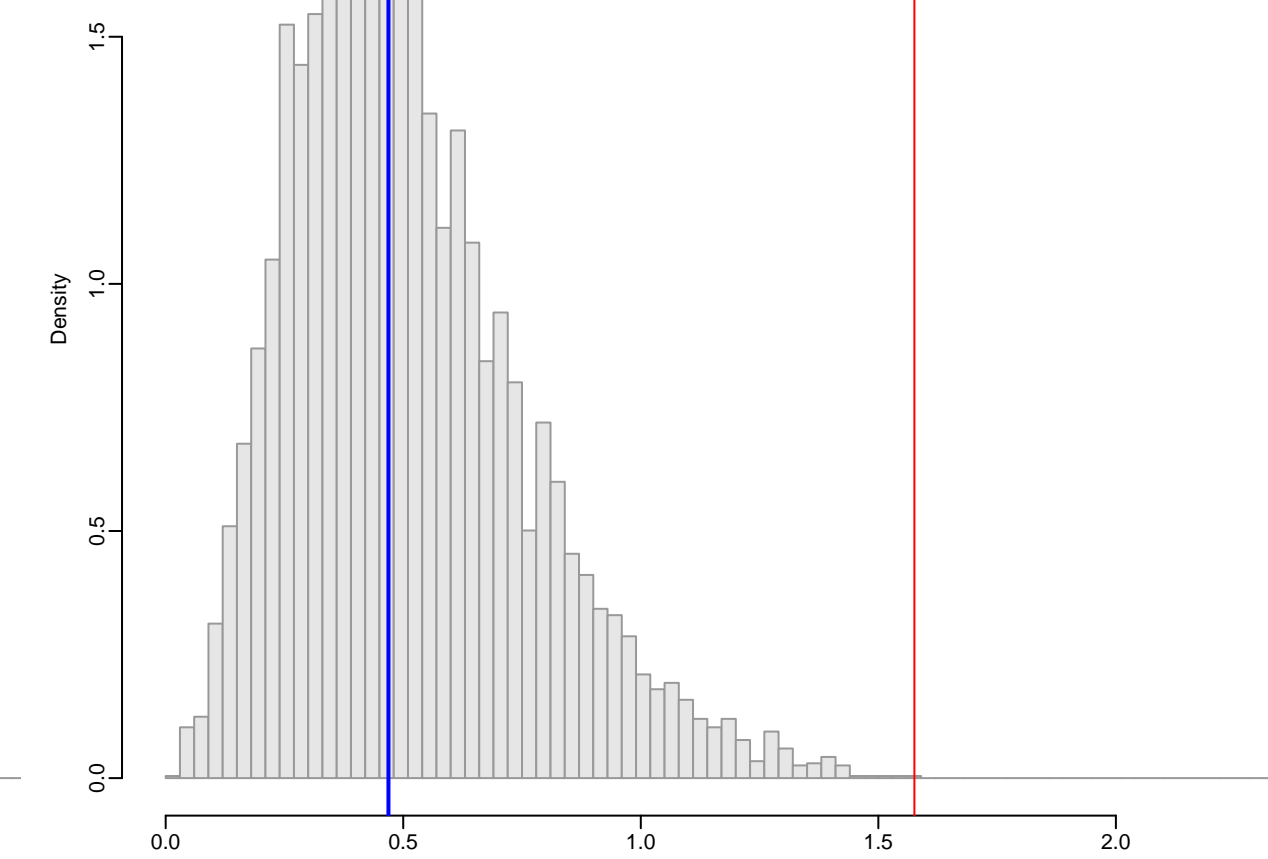

Lama\_pacos

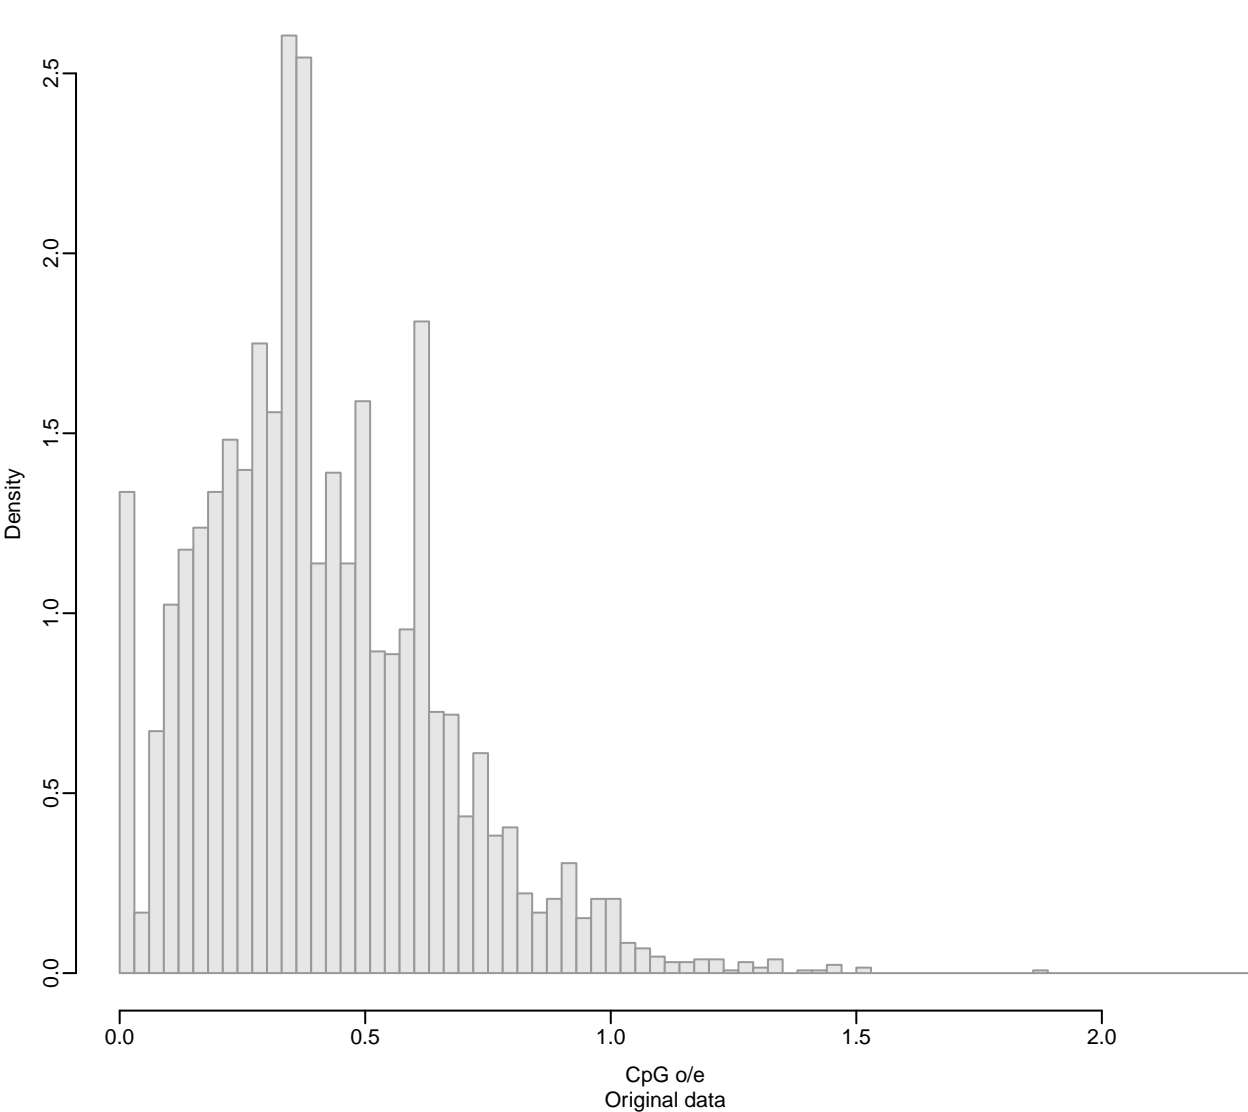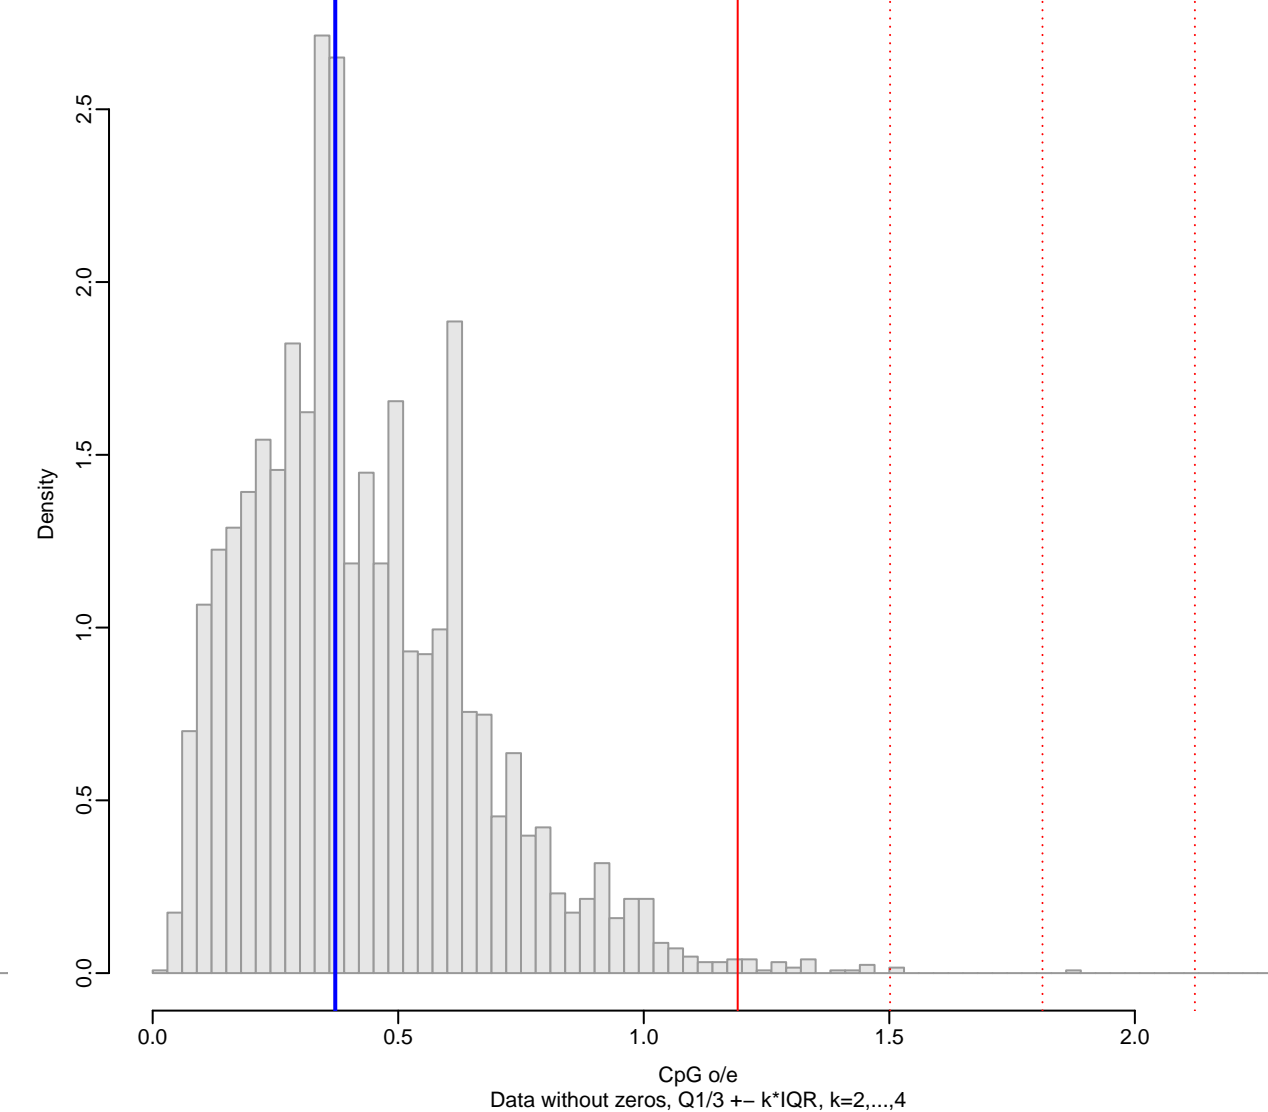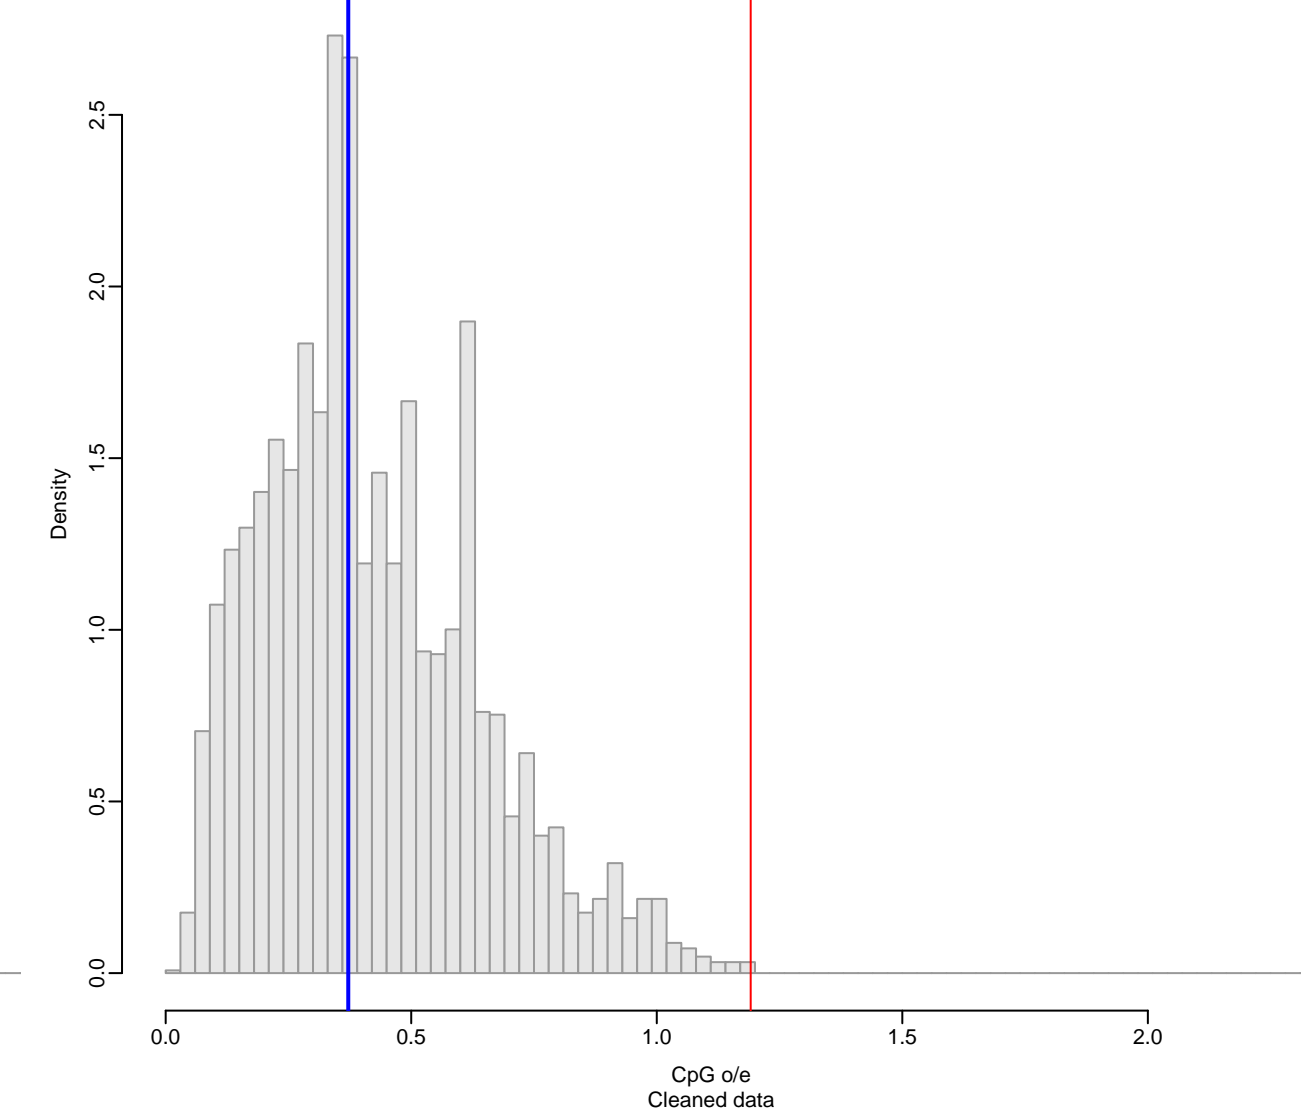

# Laminaria\_digitata

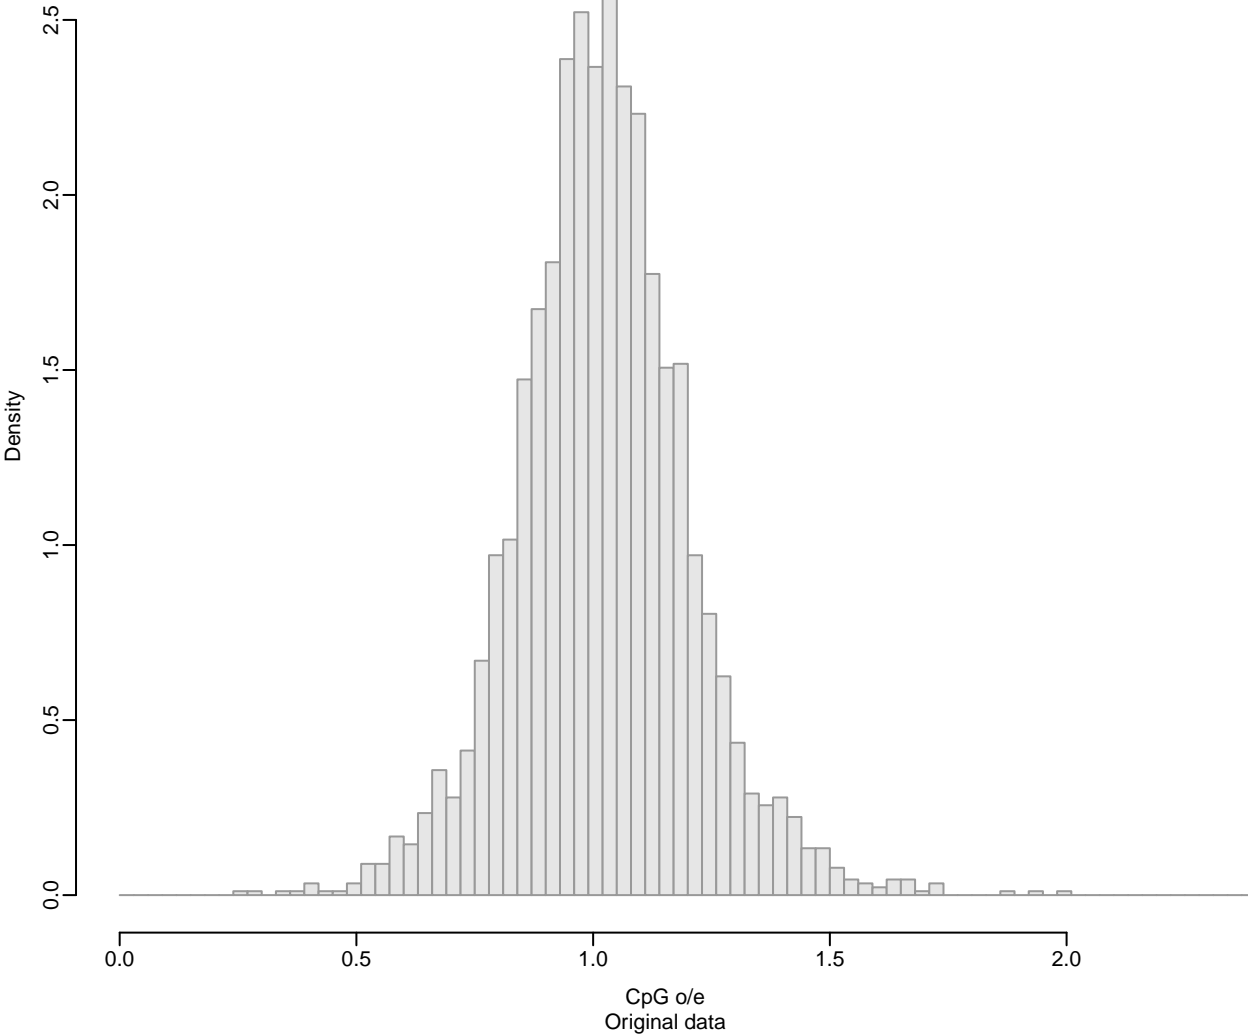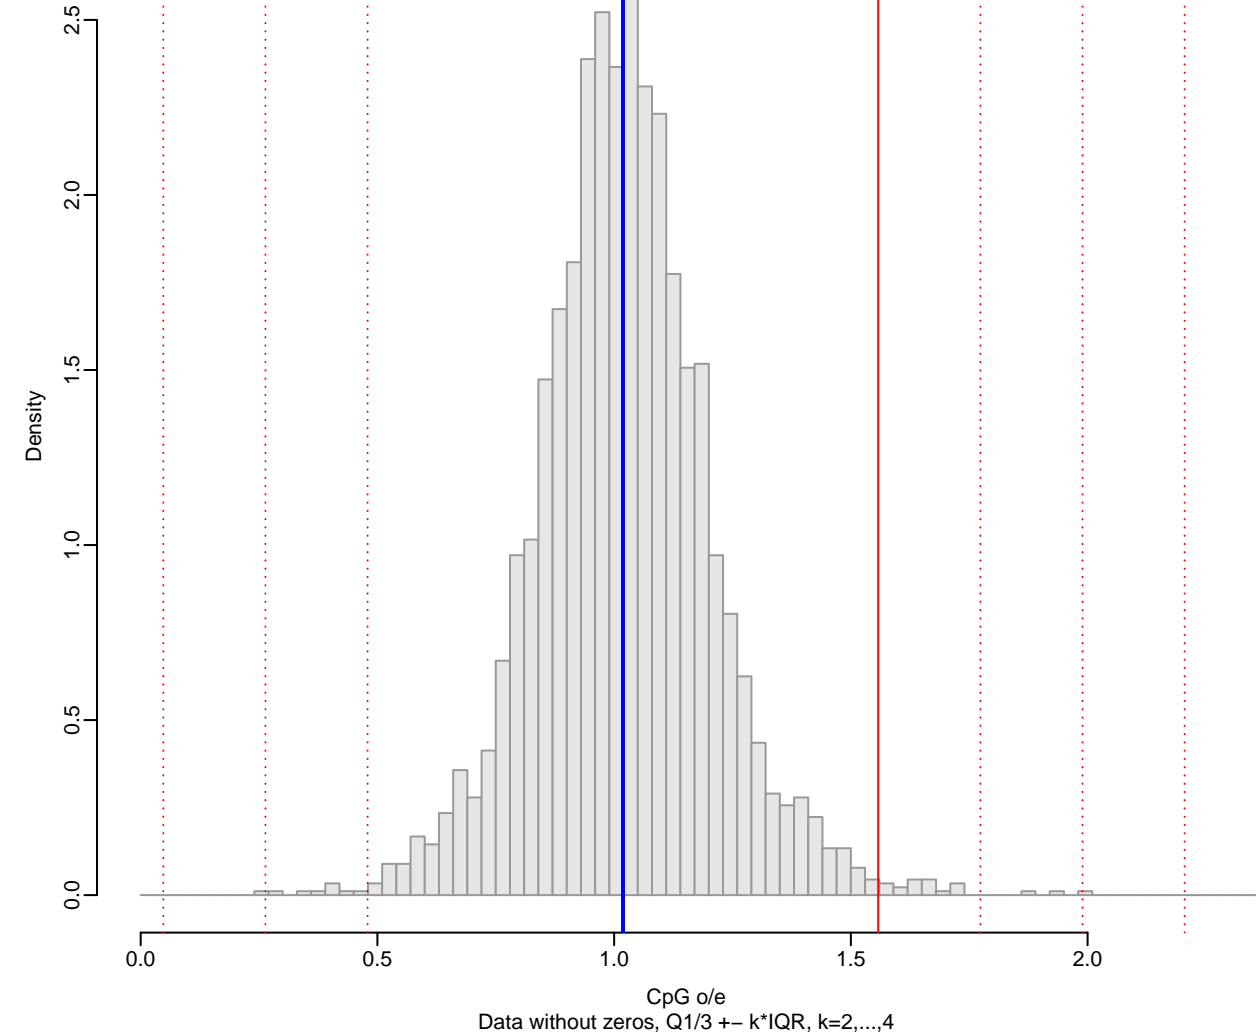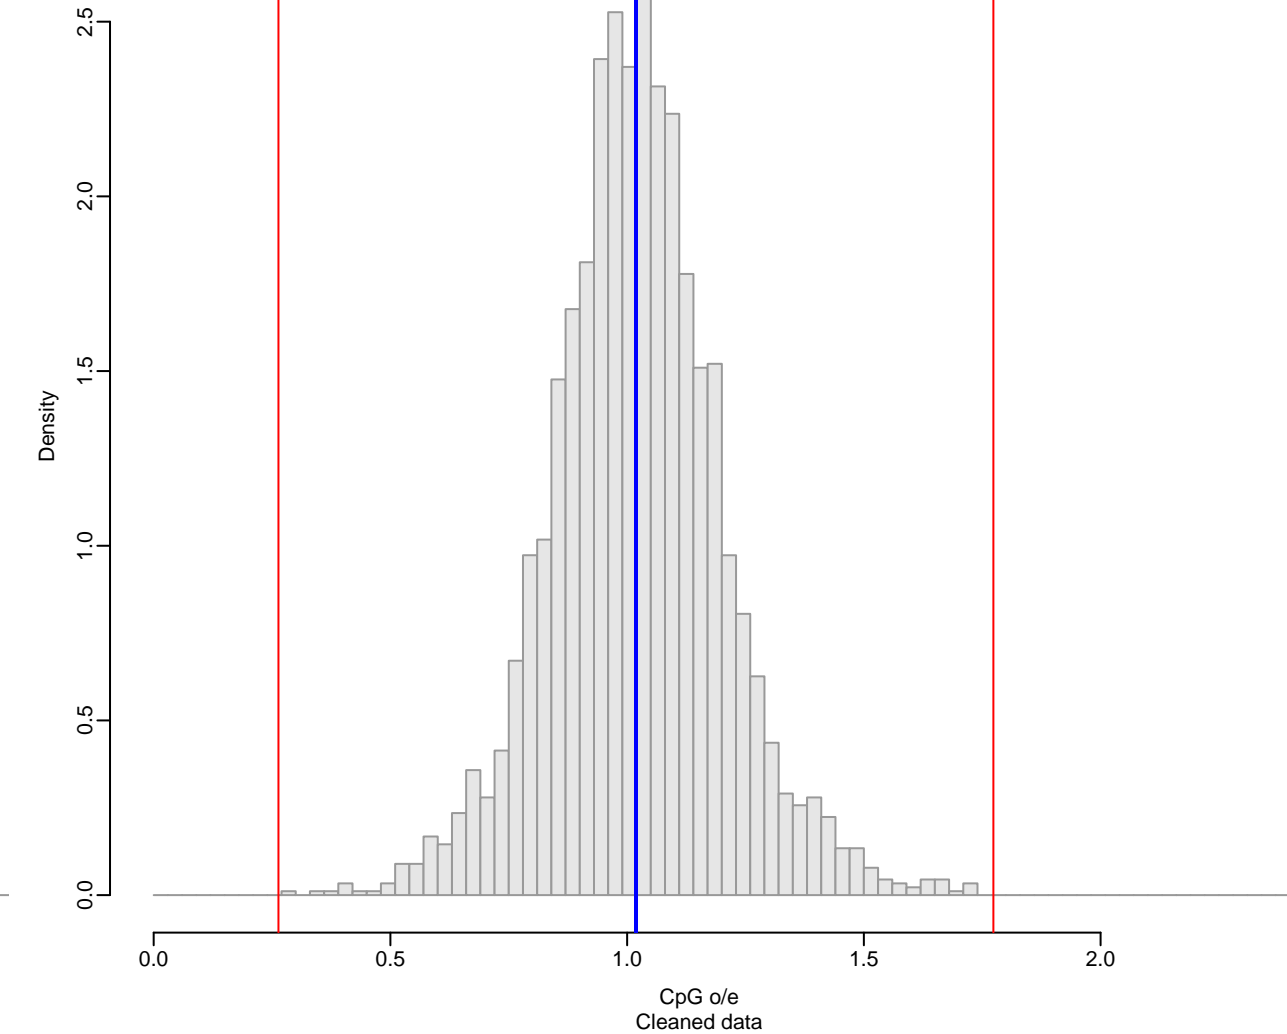

Larimichthys\_crocea

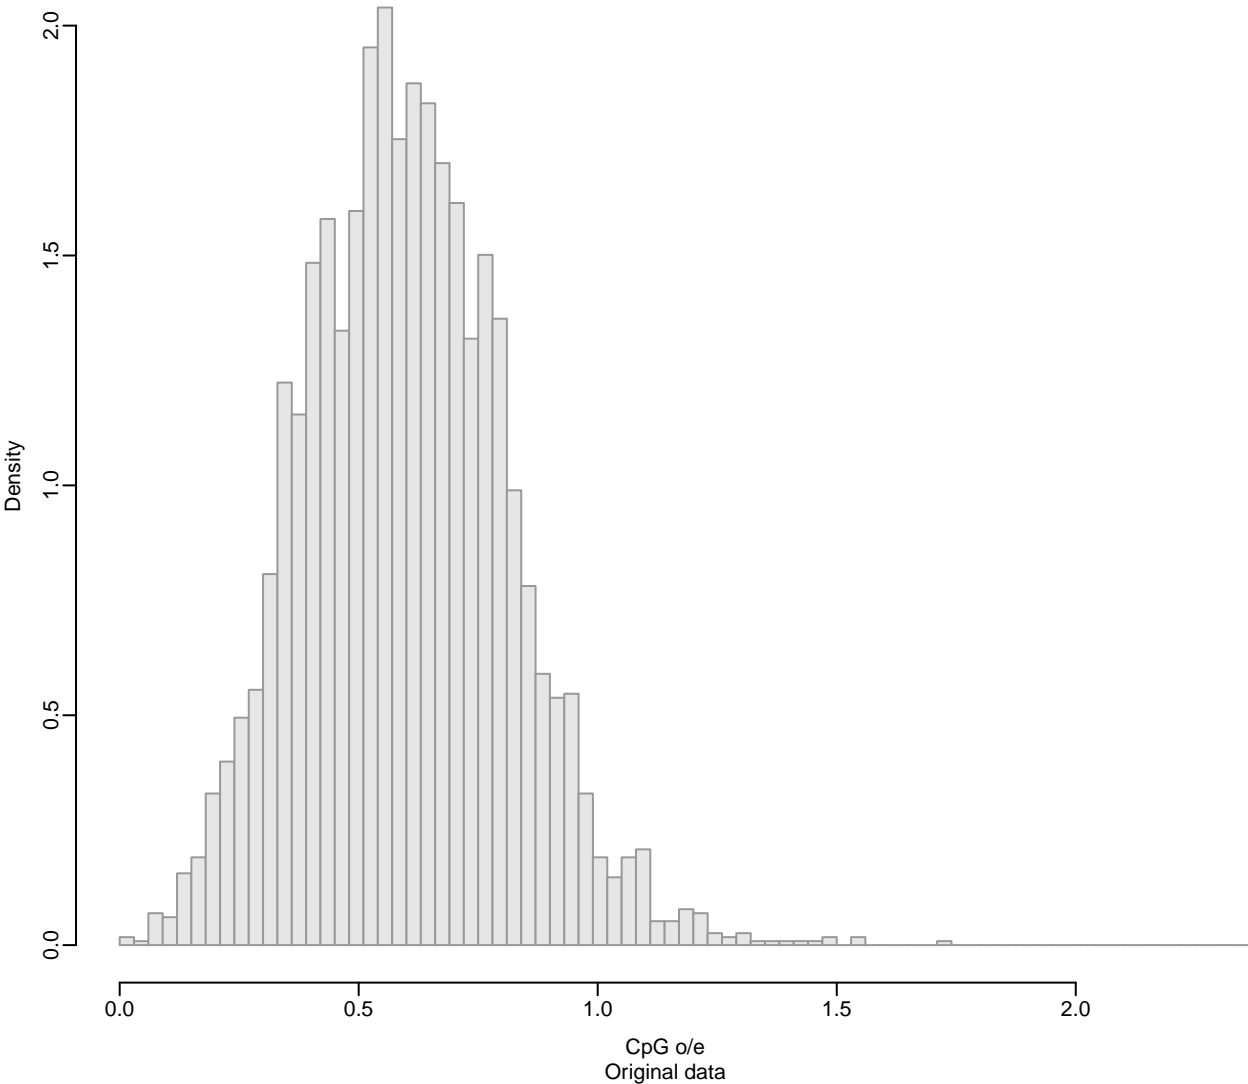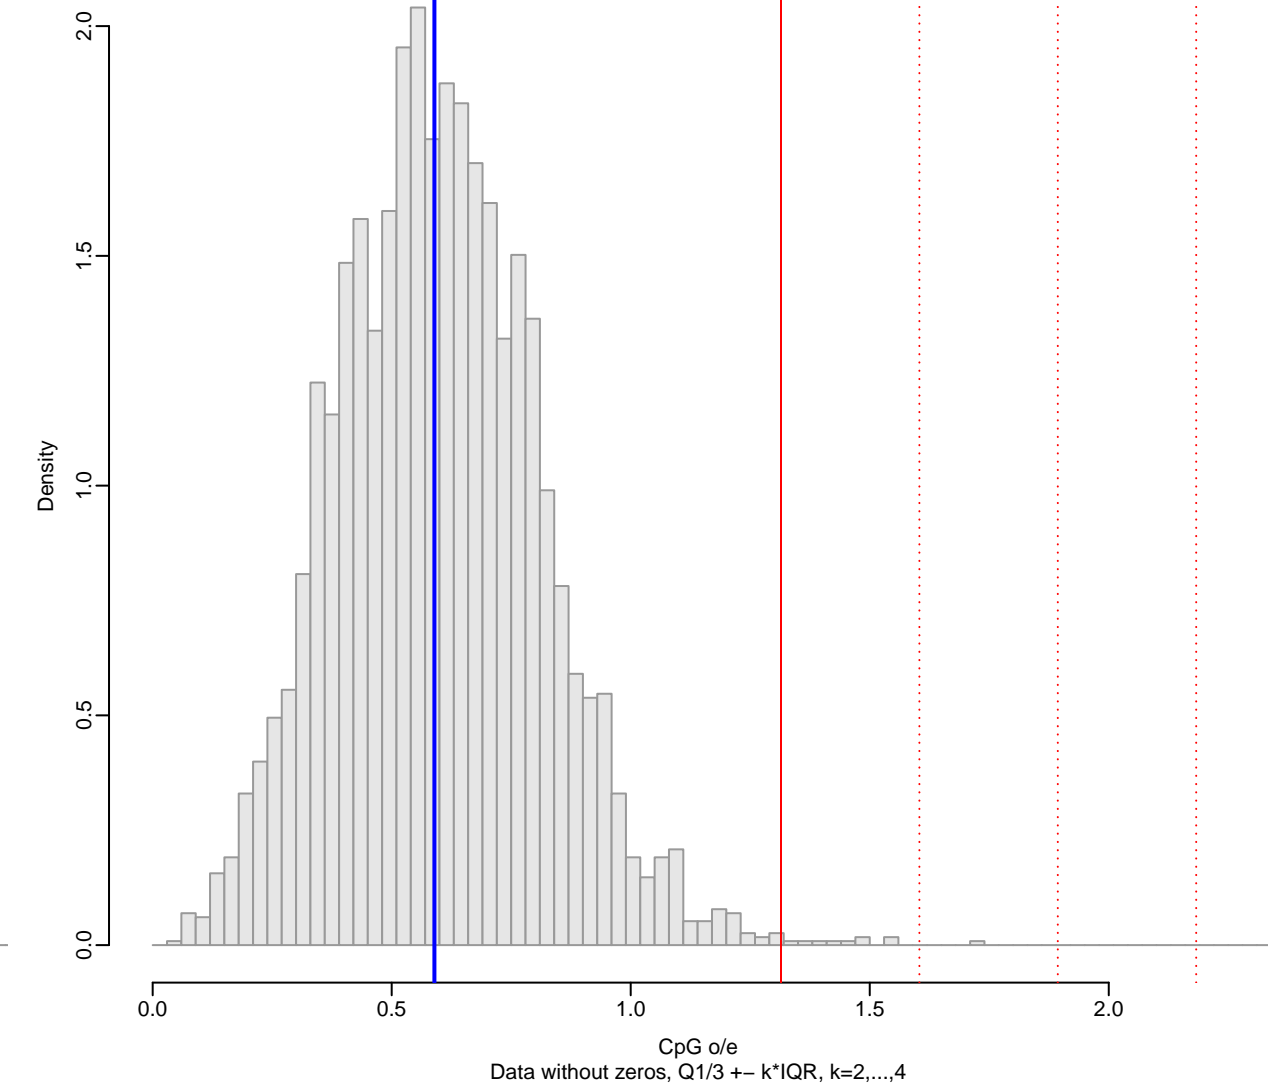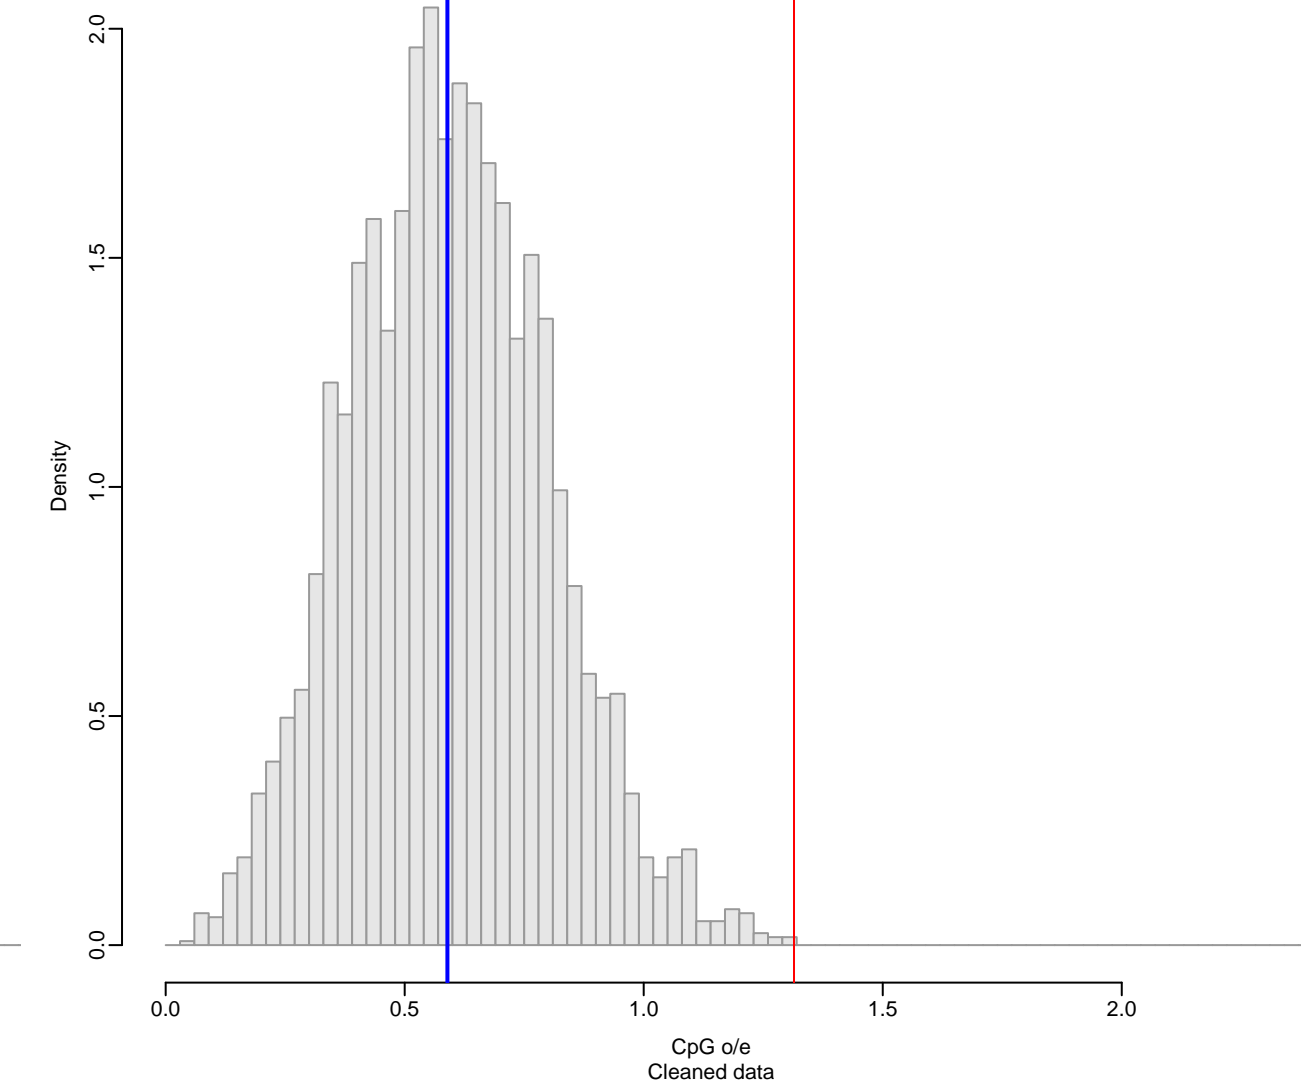

Lates\_calcarifer

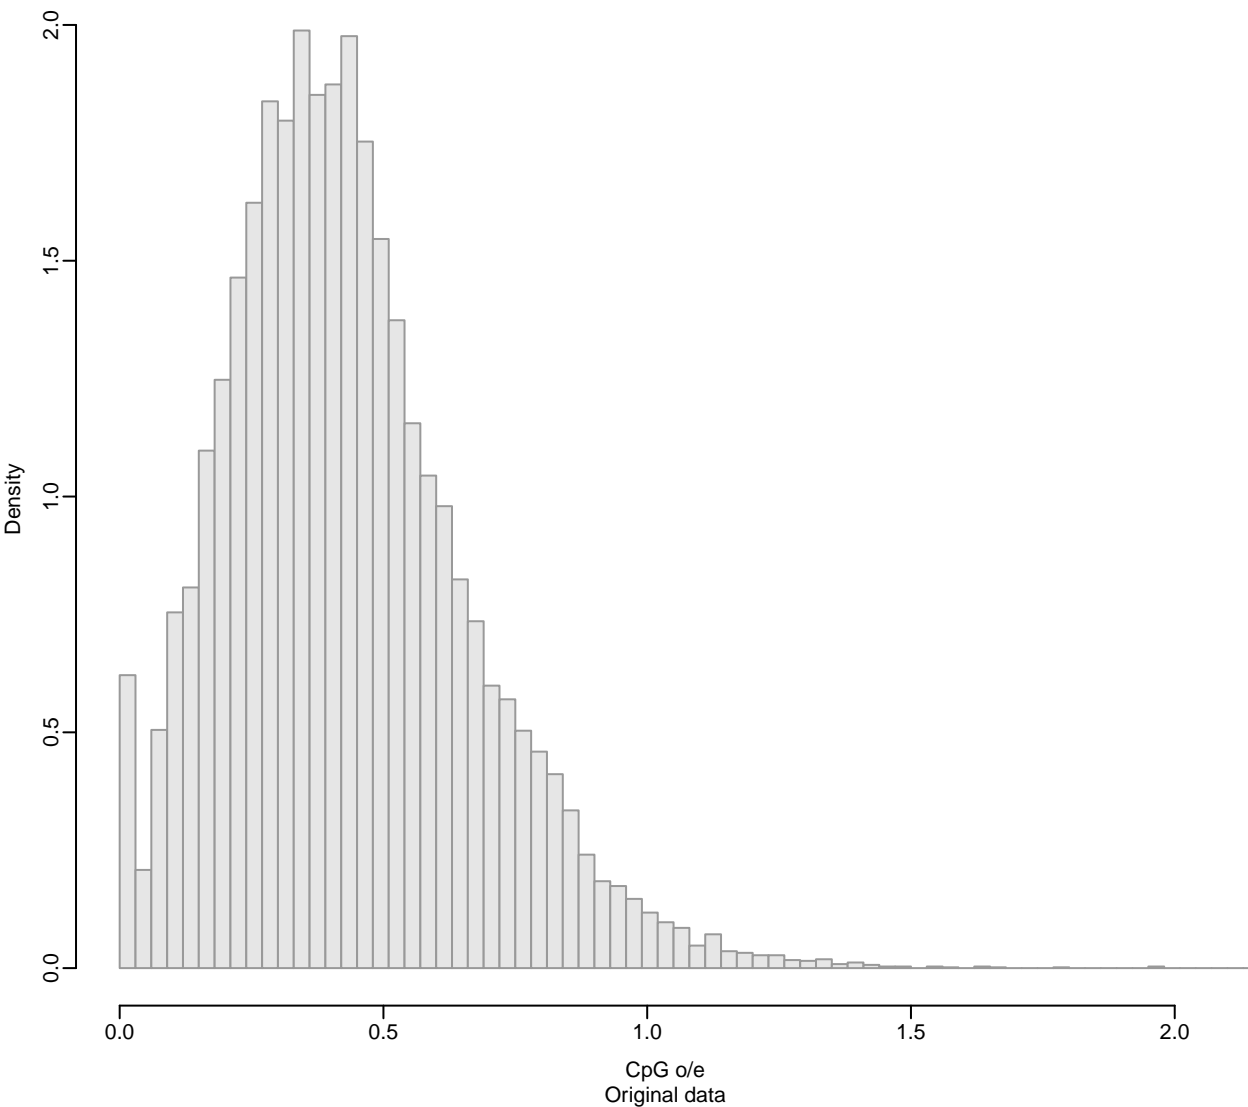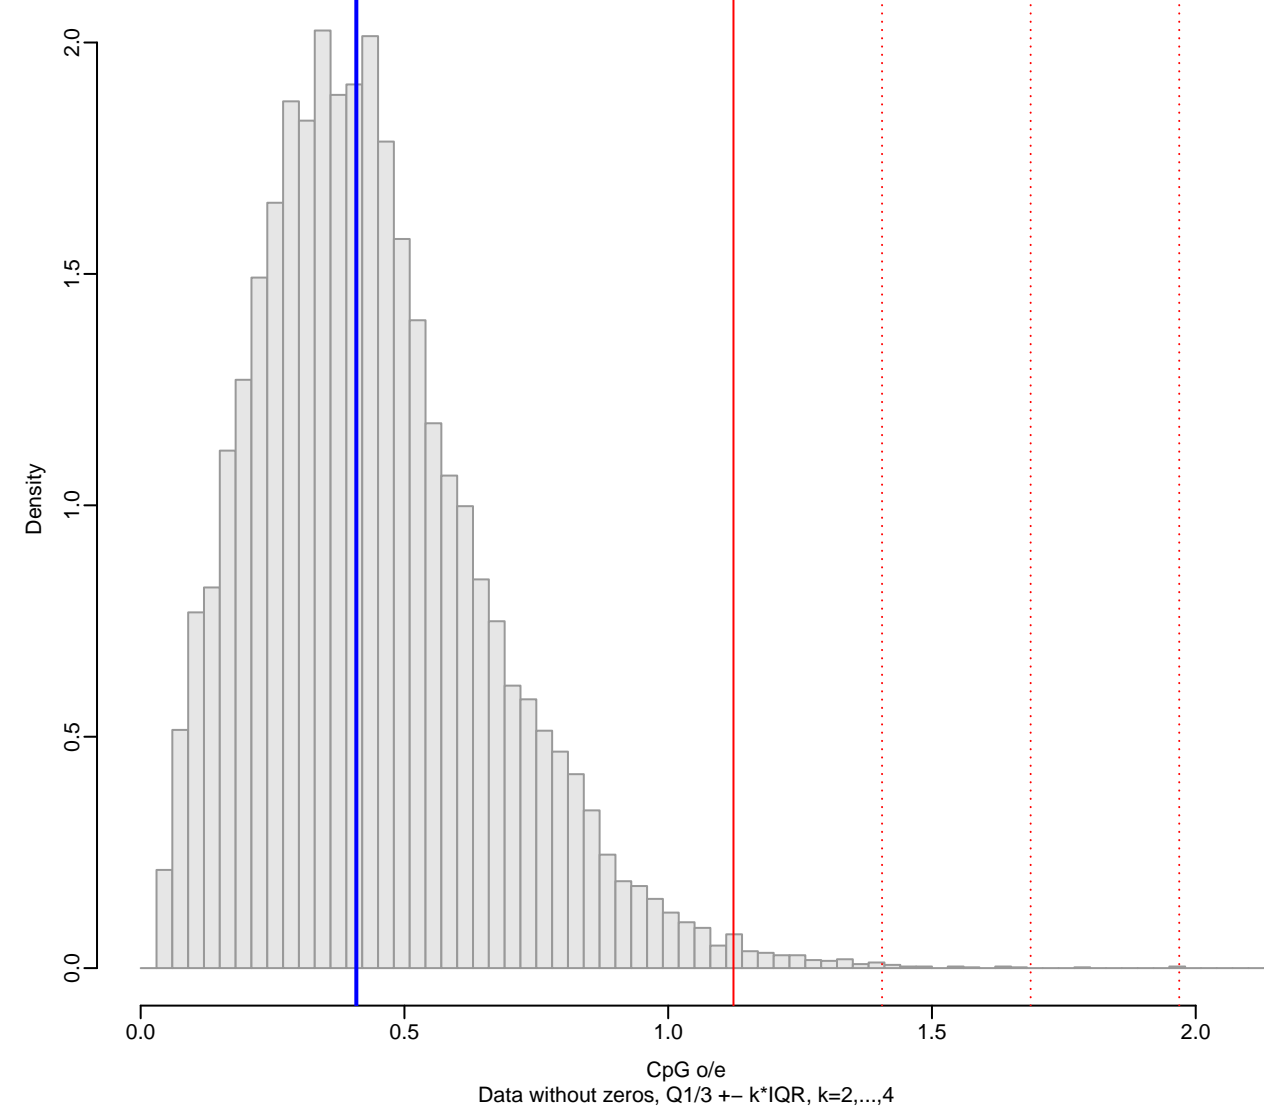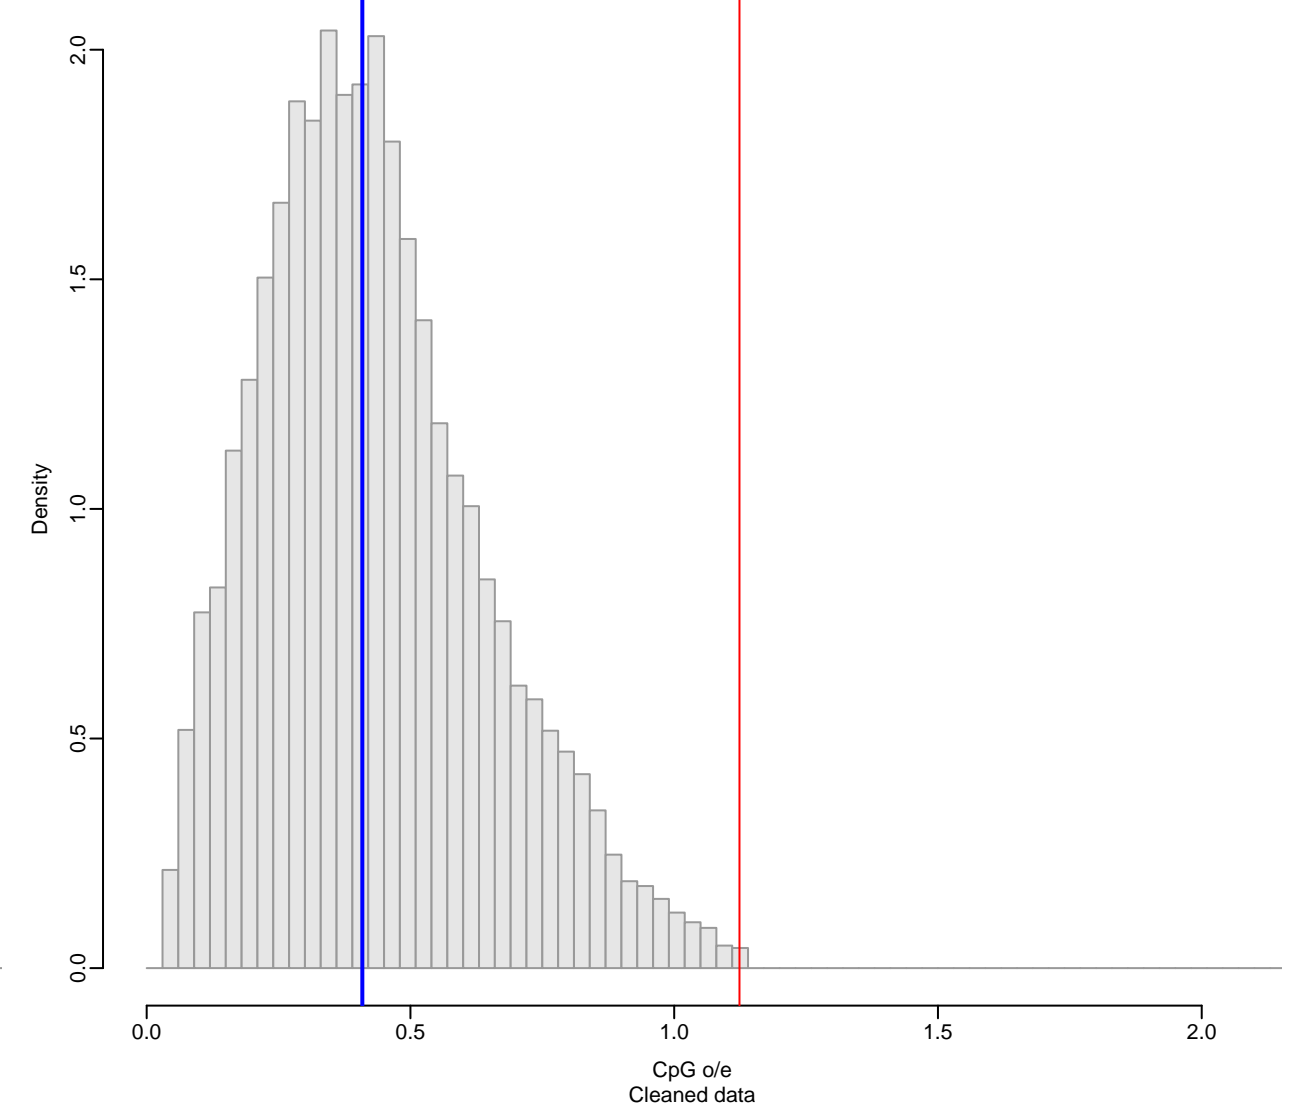

Lathyrus\_odoratus

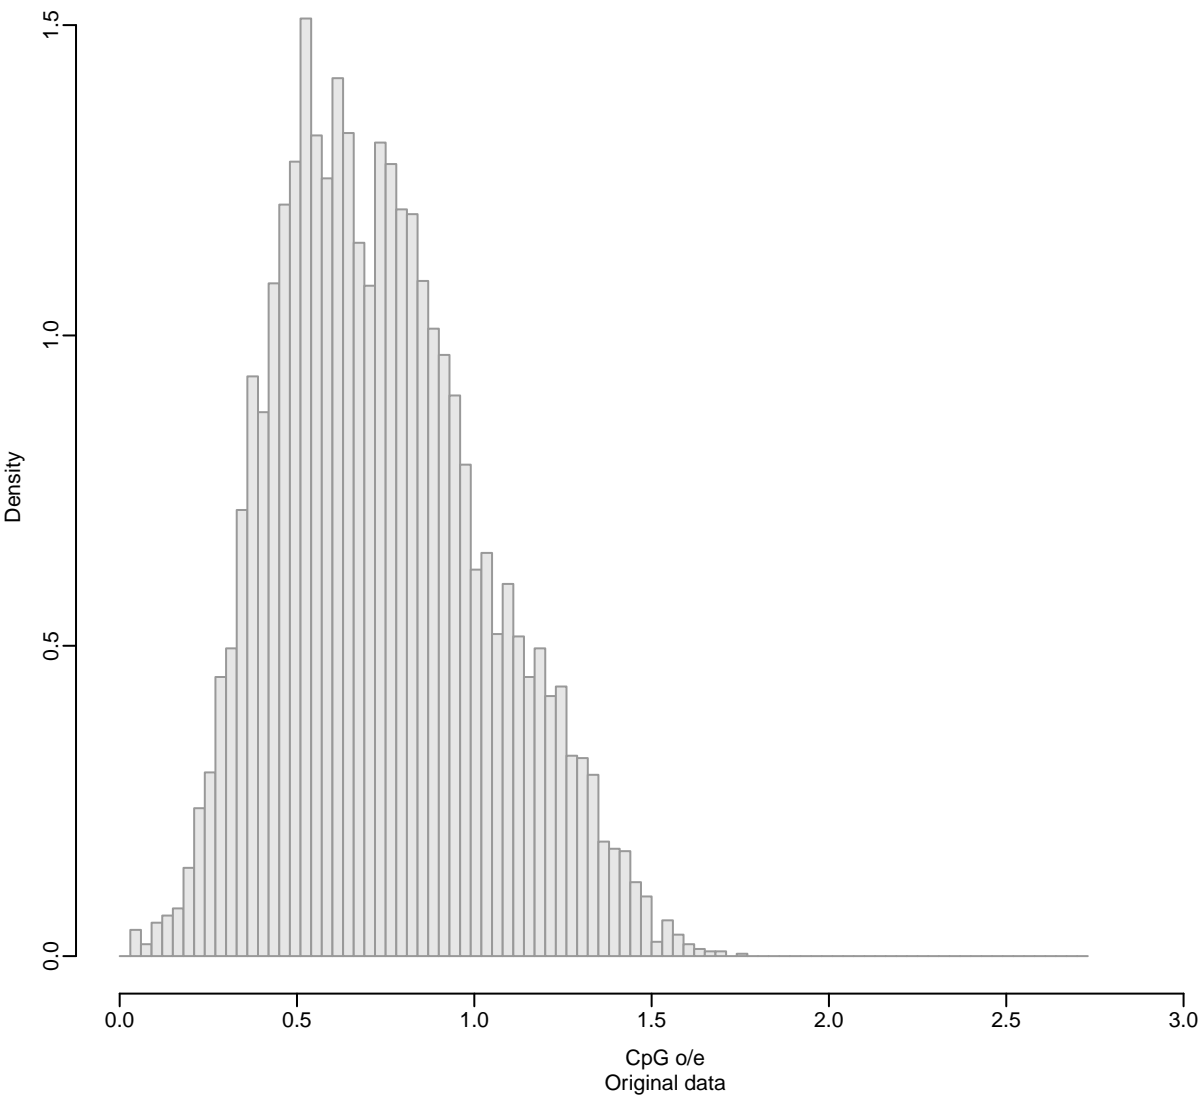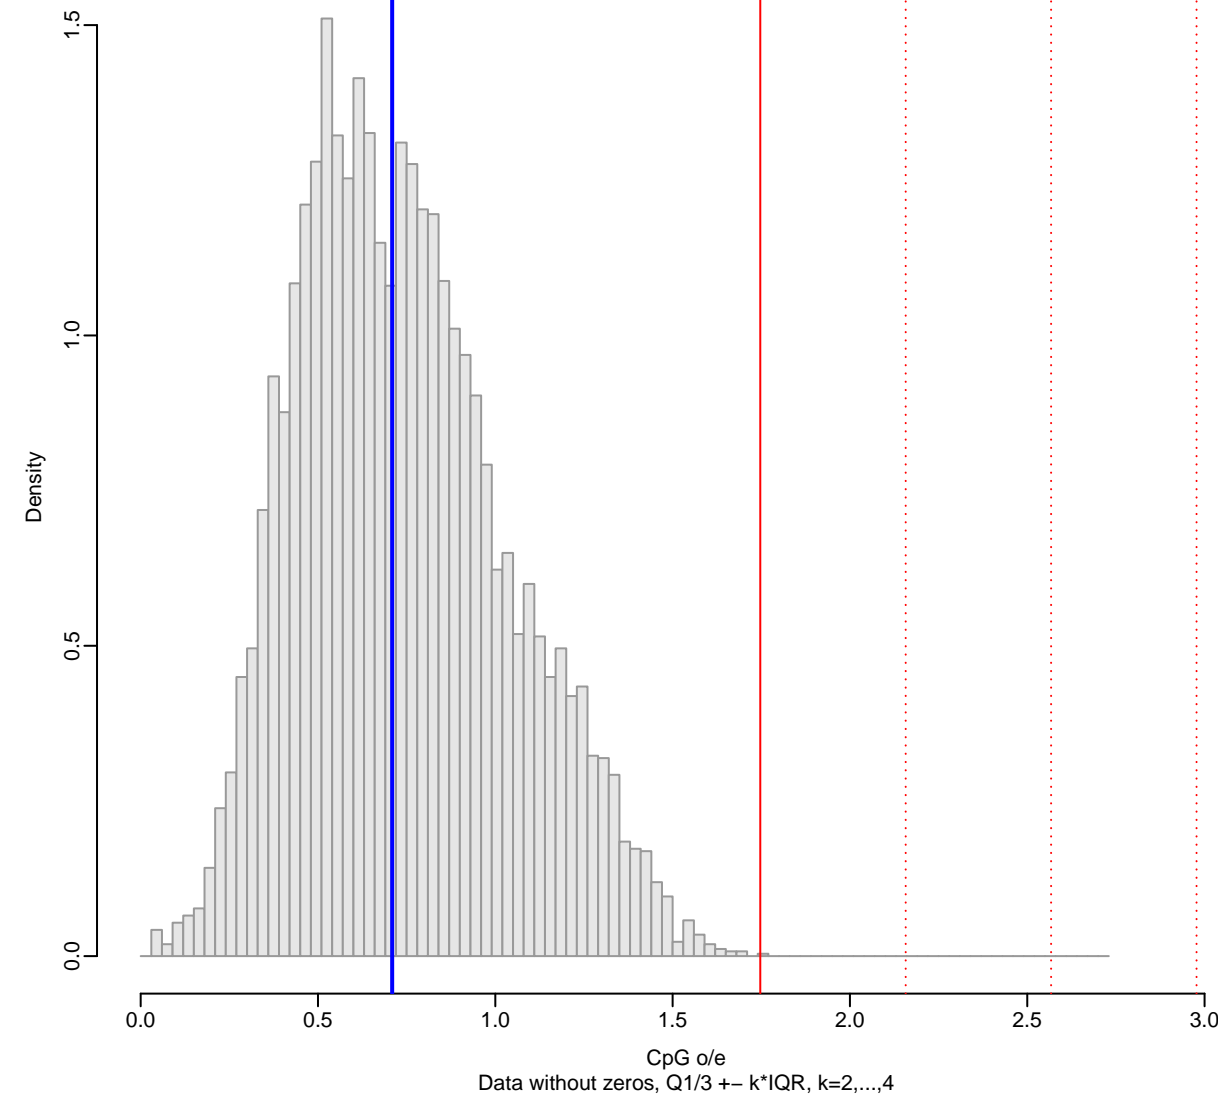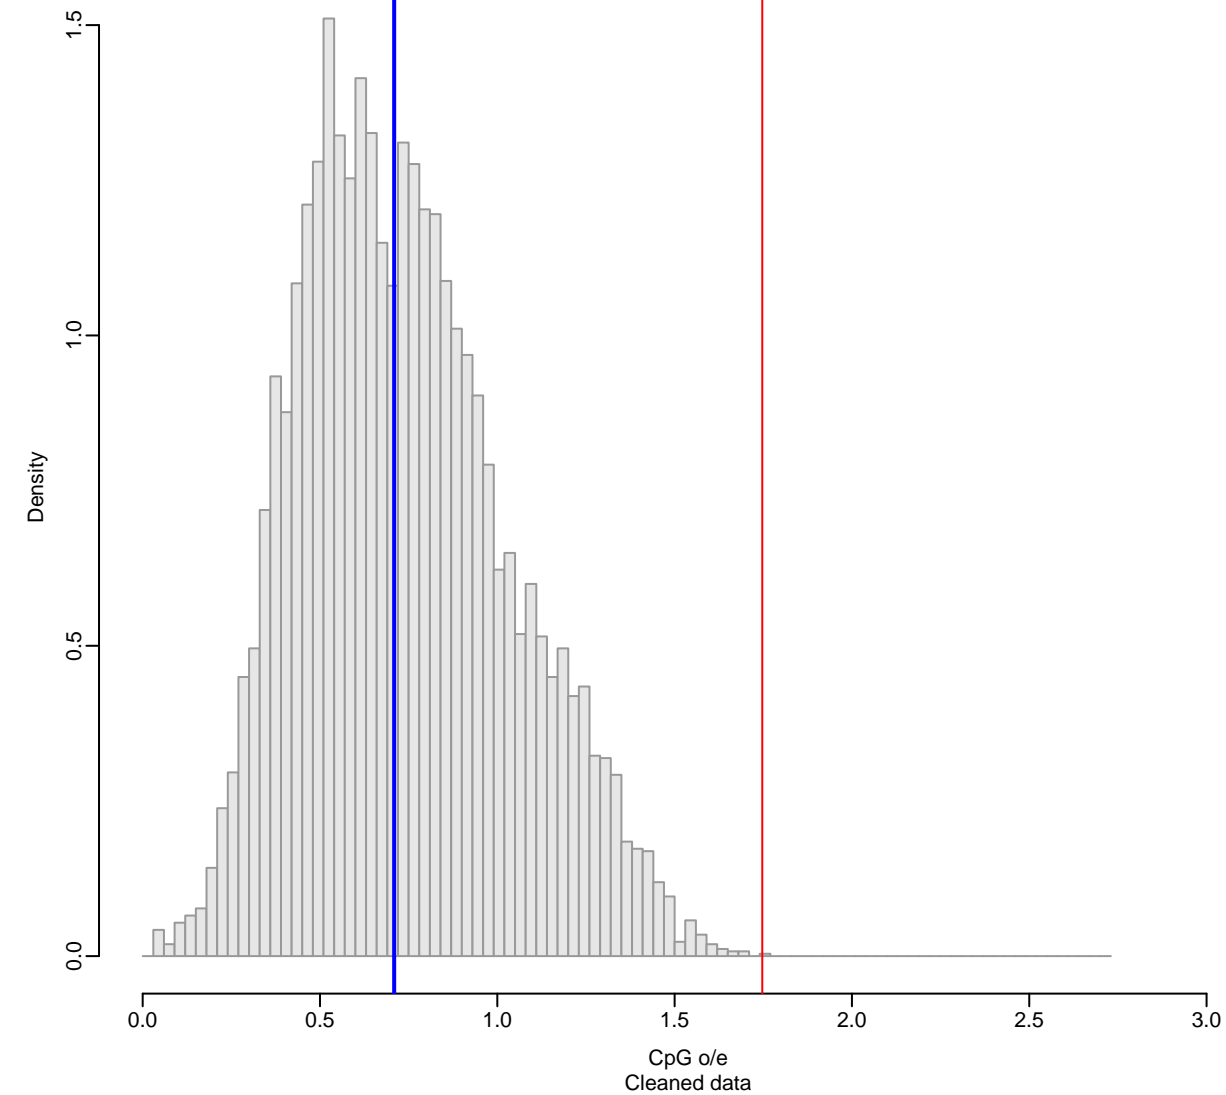

Laupala\_kohalensis

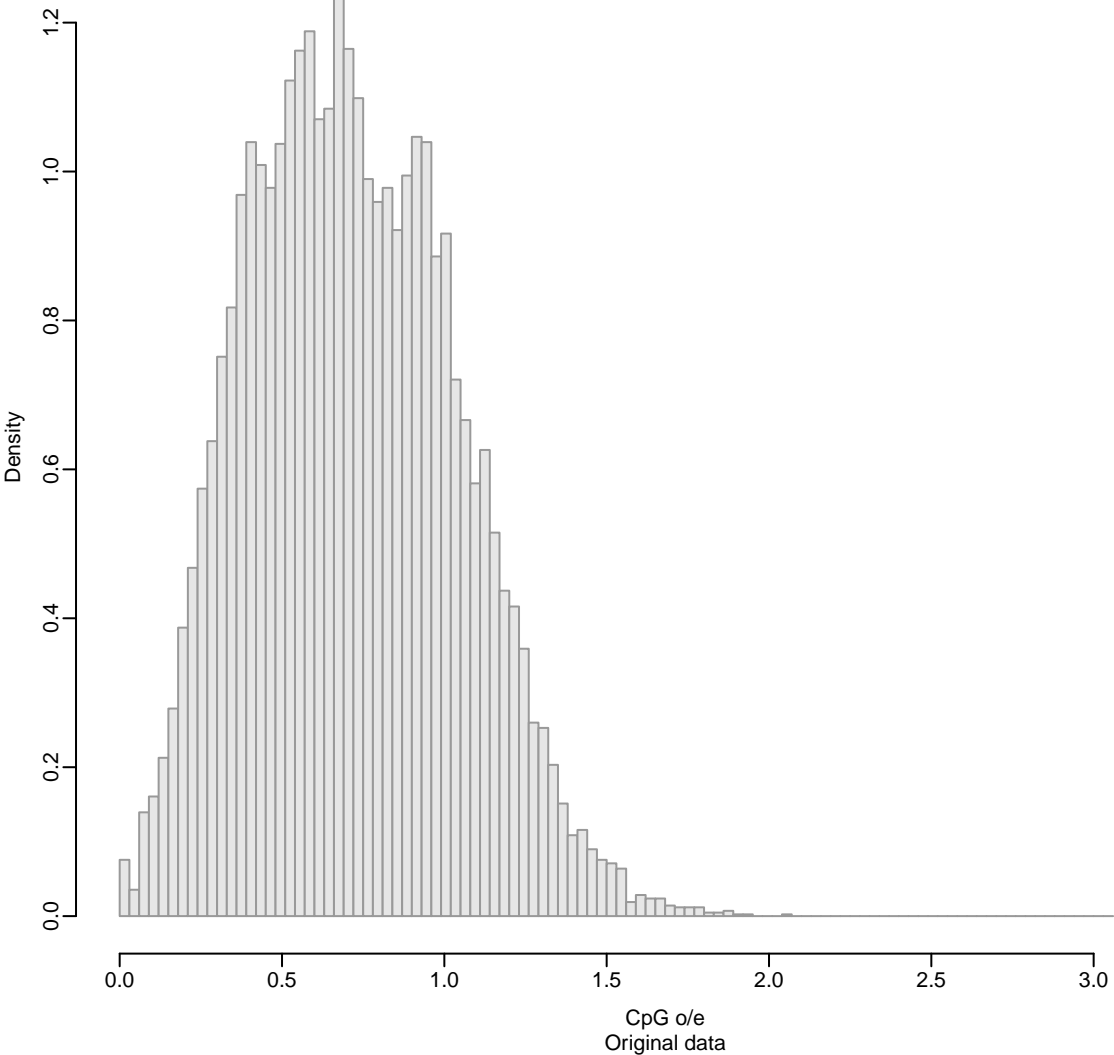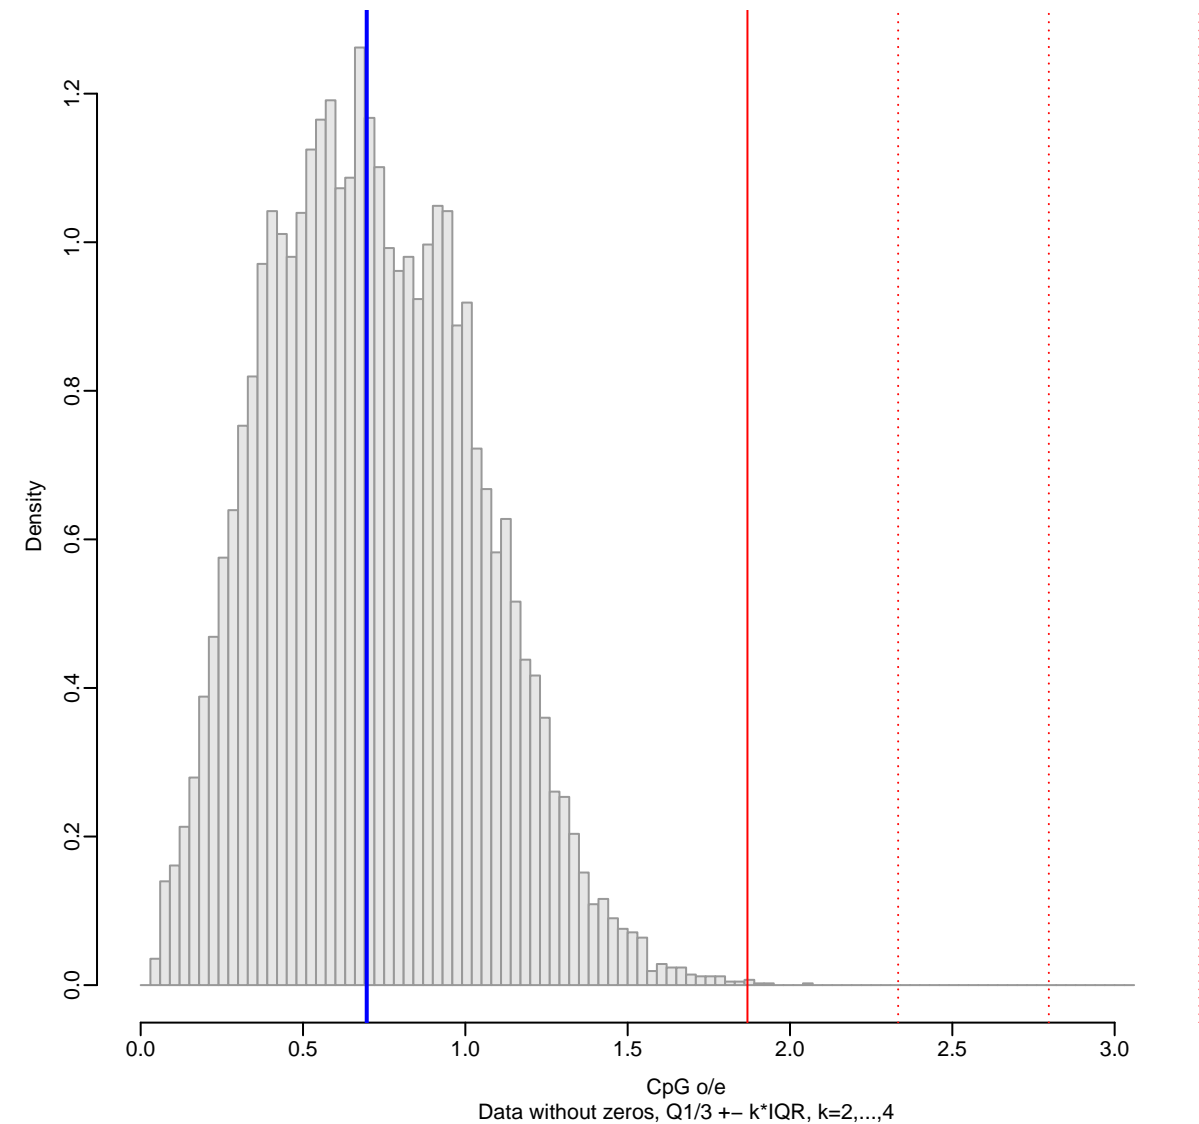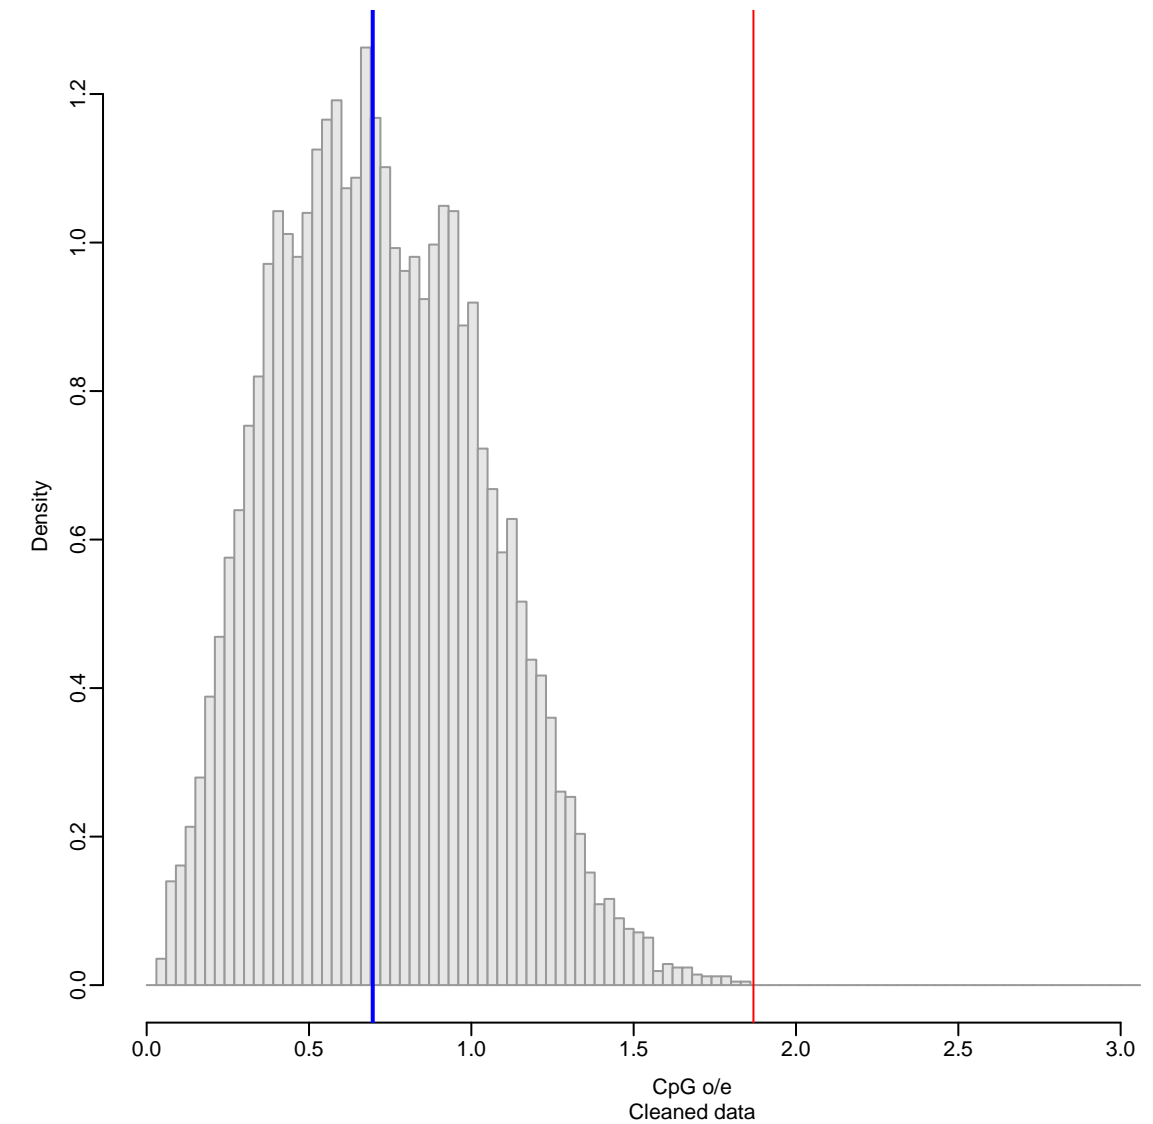

# Leishmania\_chagasi

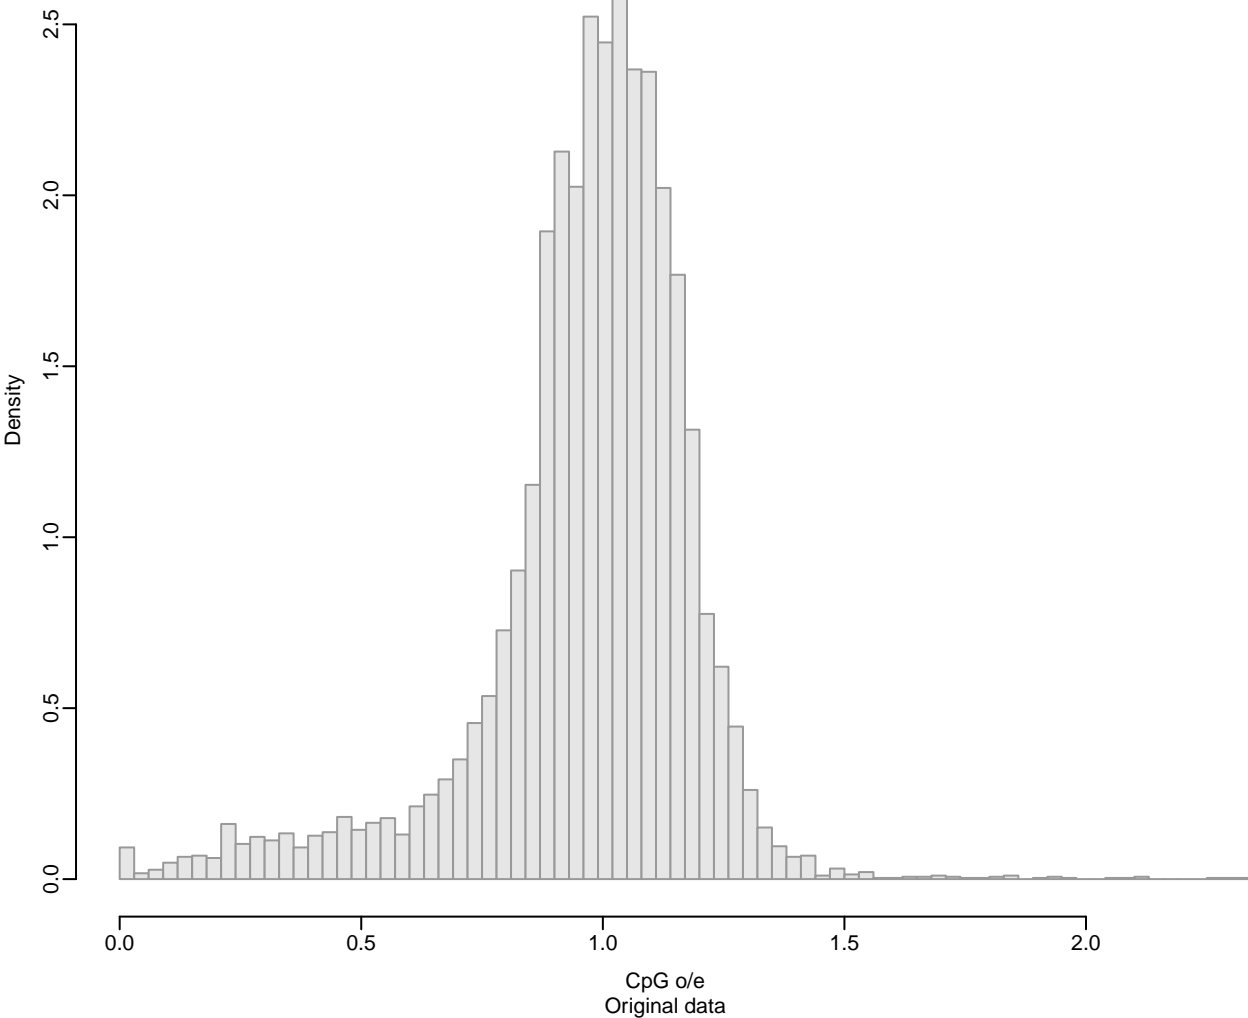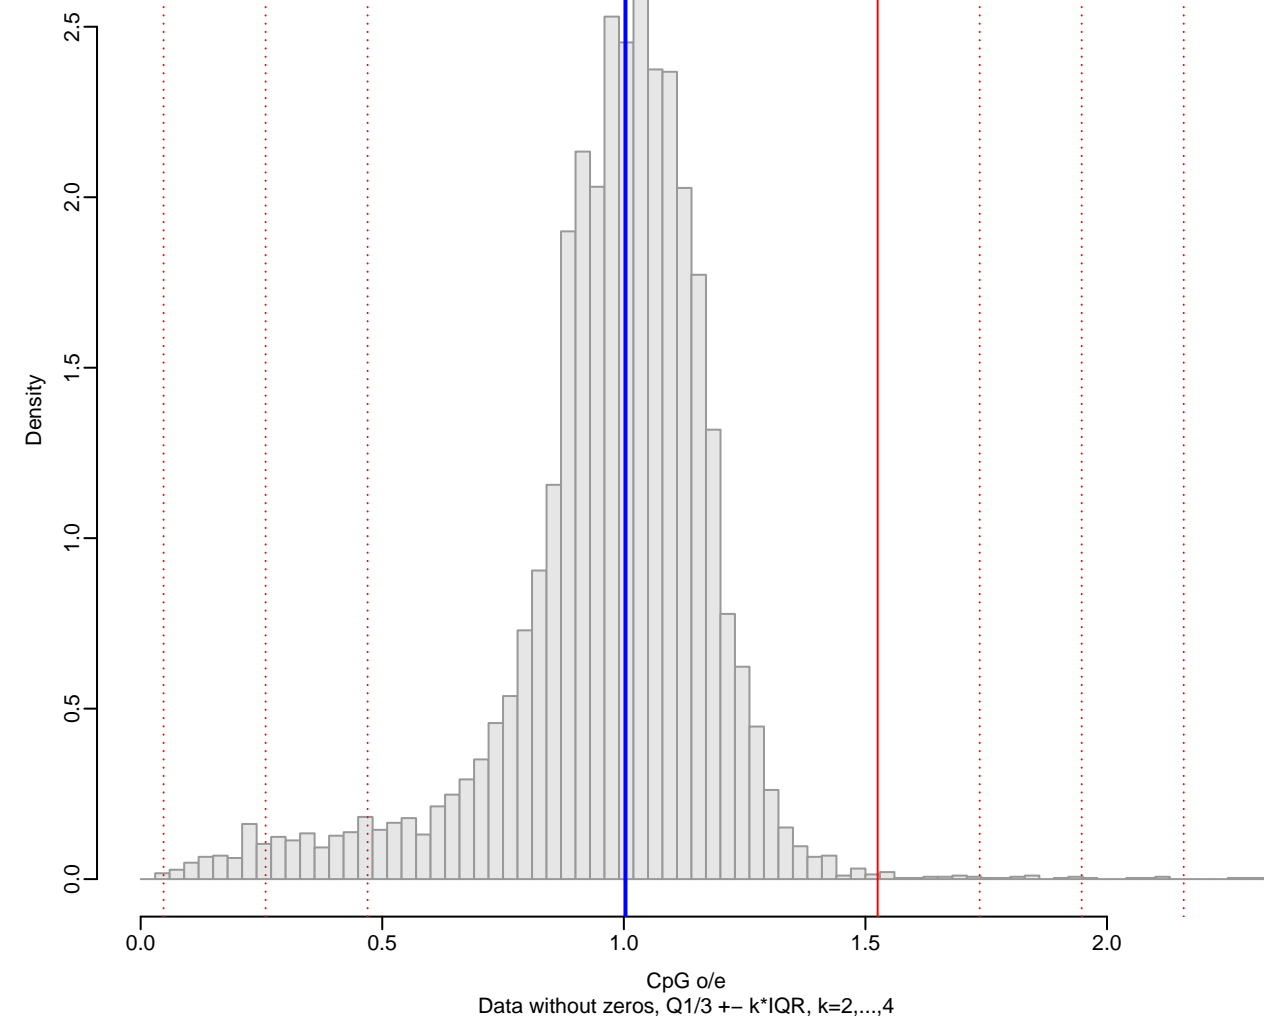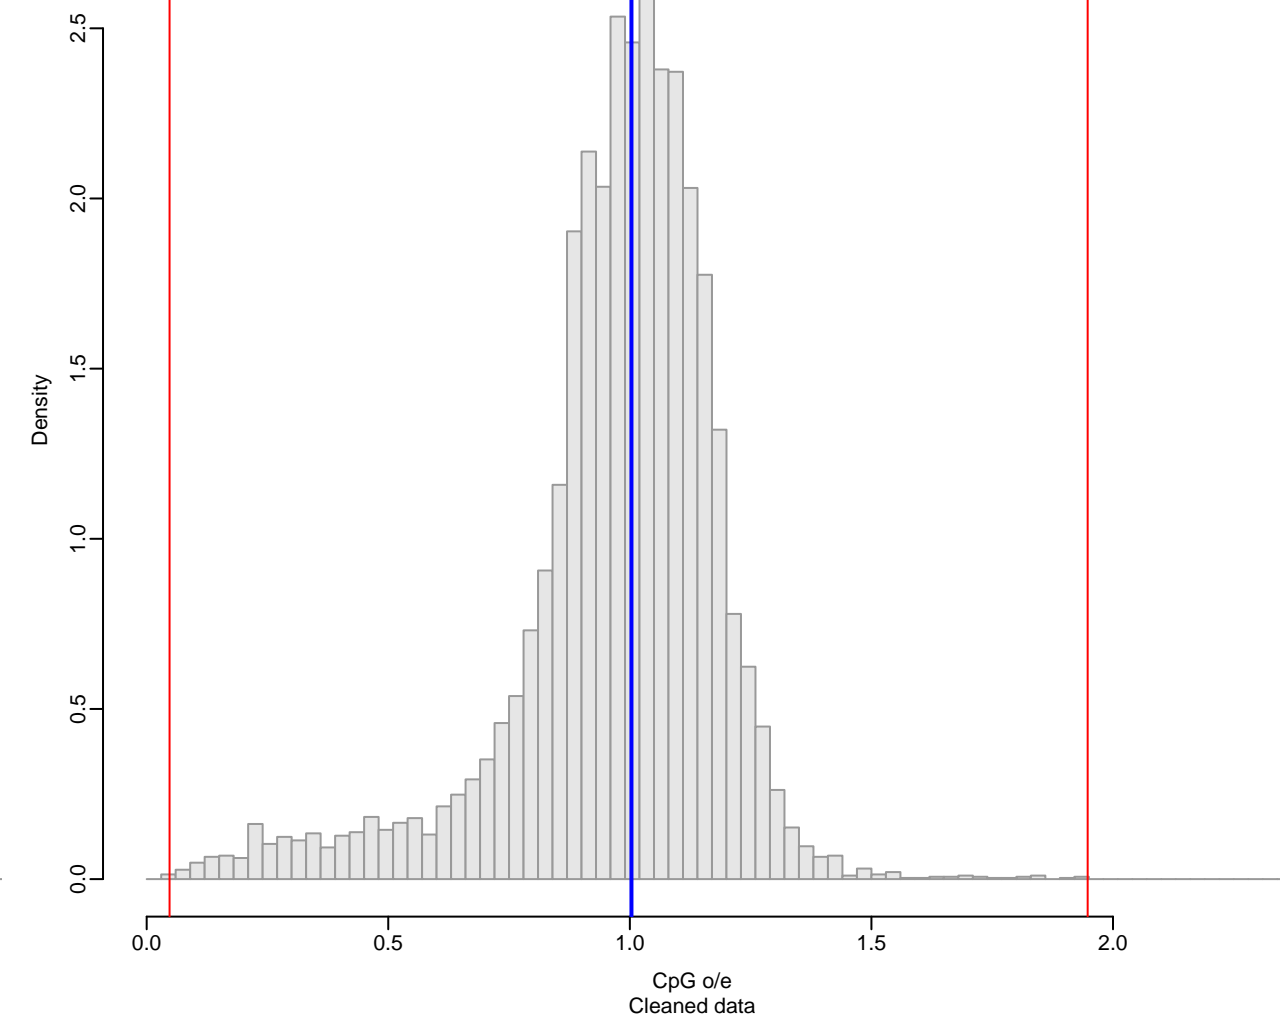



# Leishmania\_major

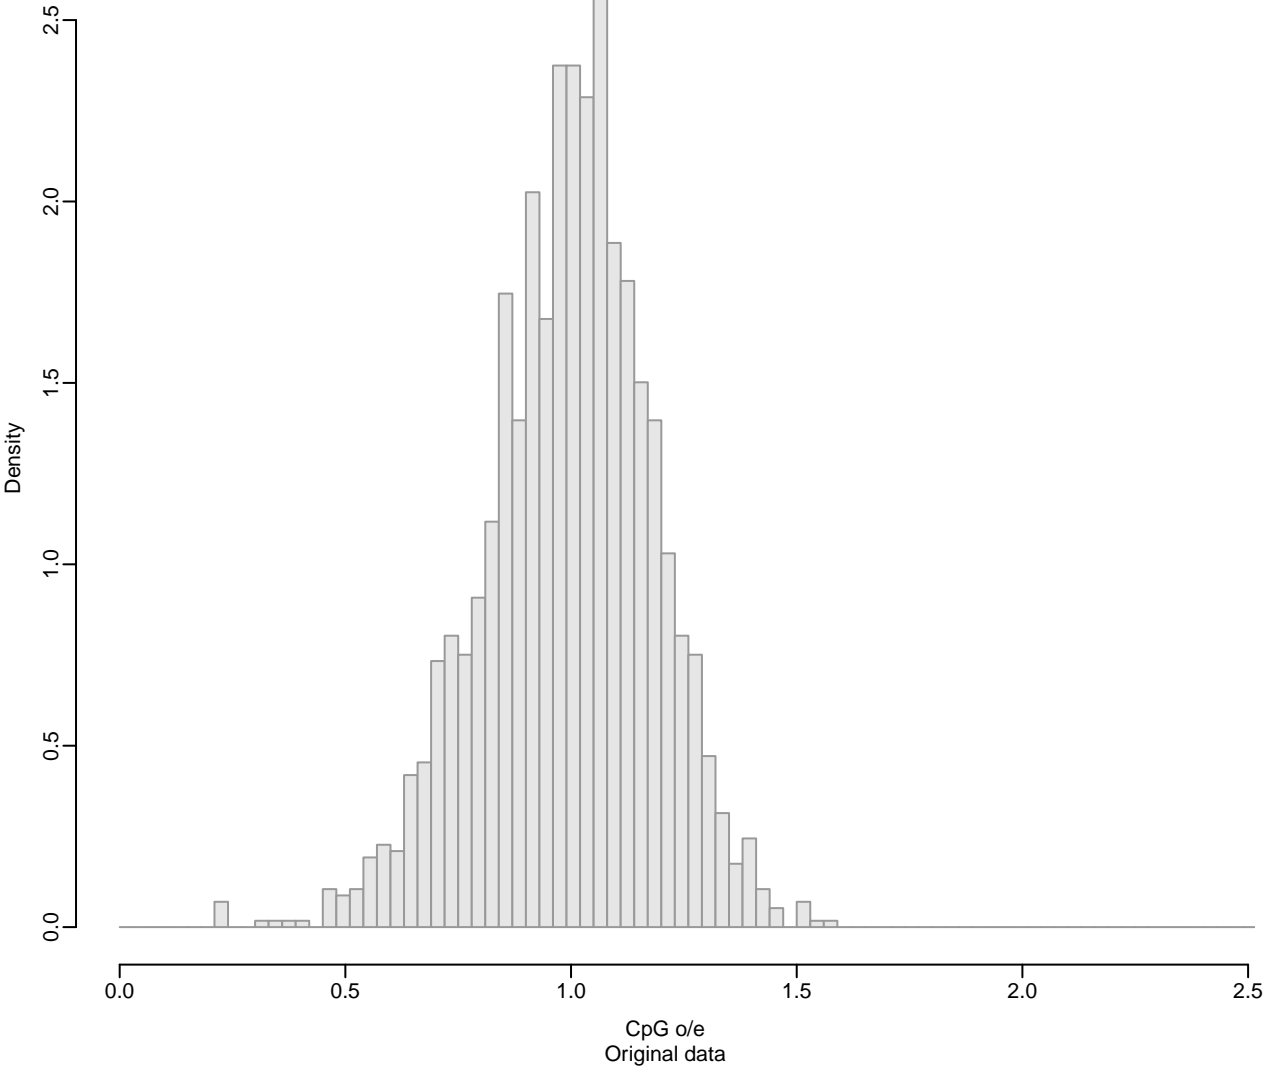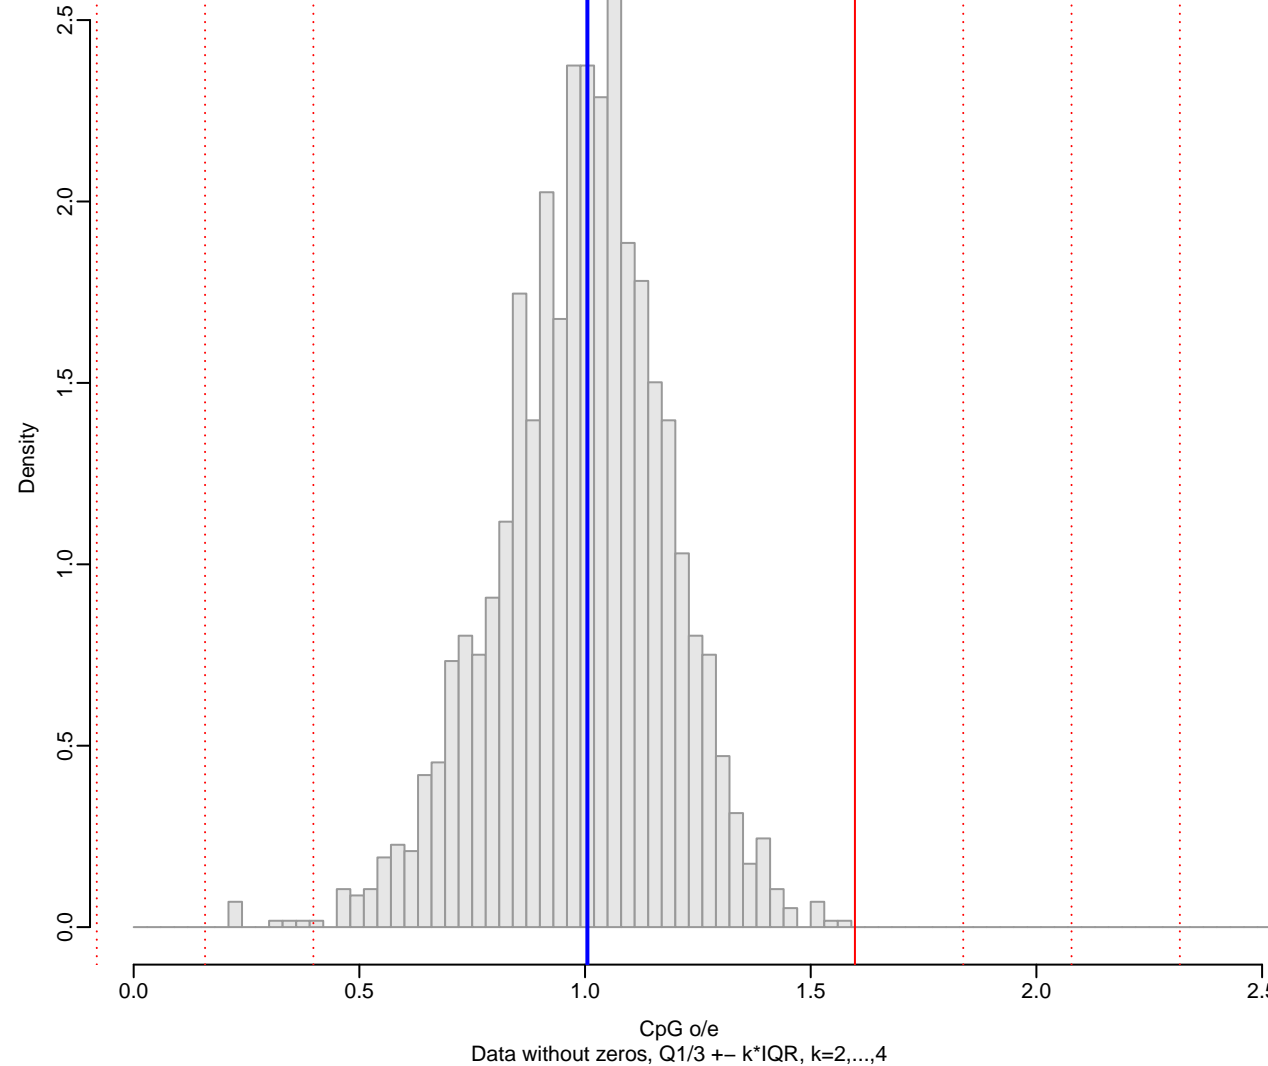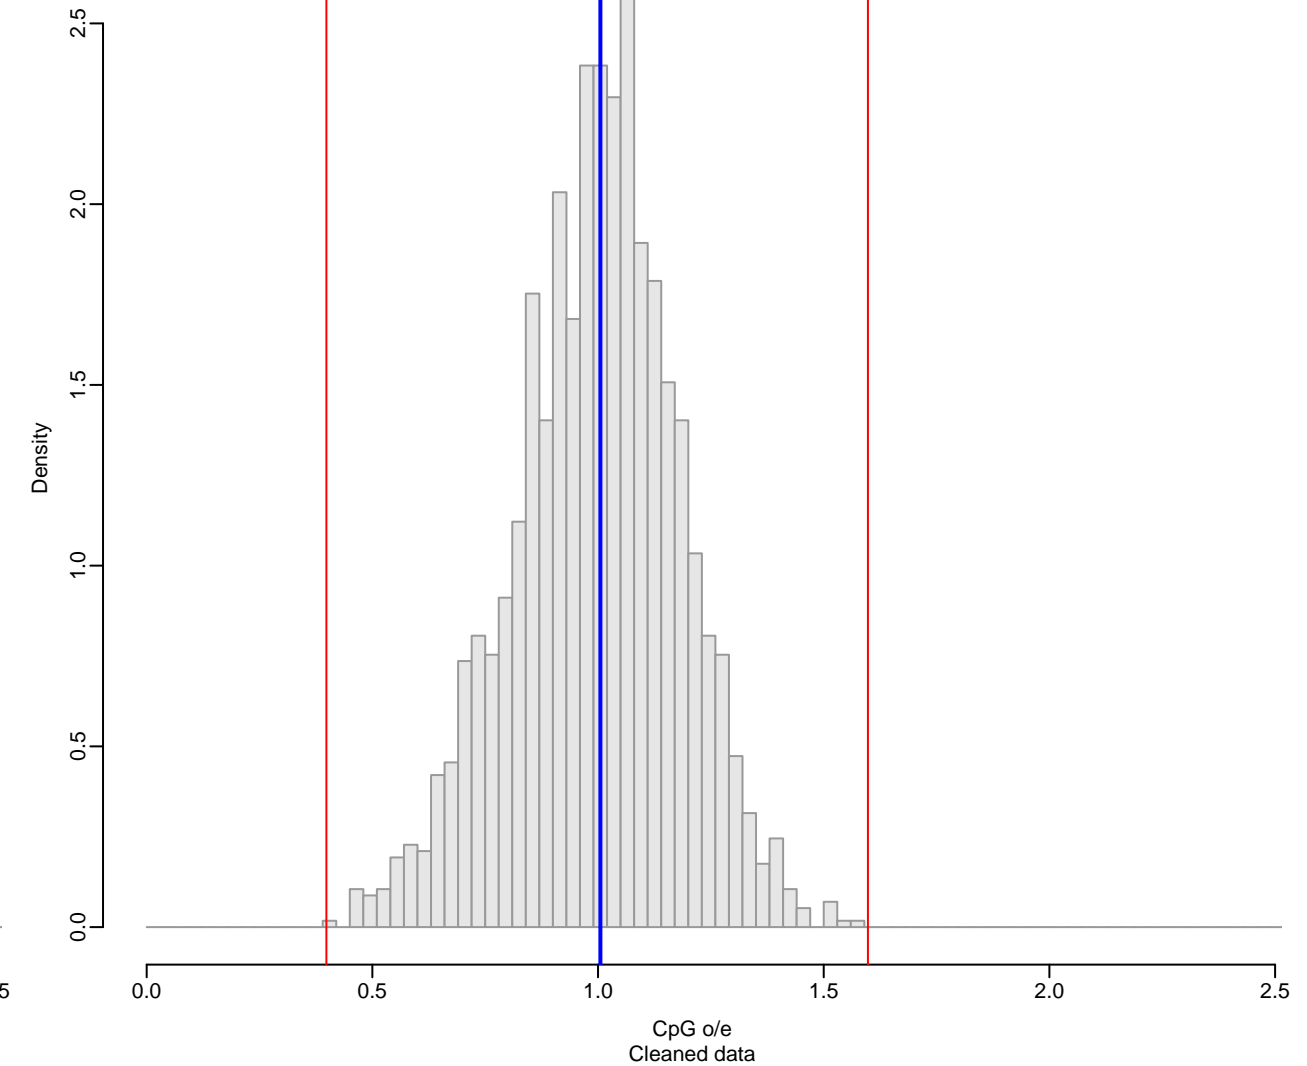

Lepeophtheirus\_salmonis

Density

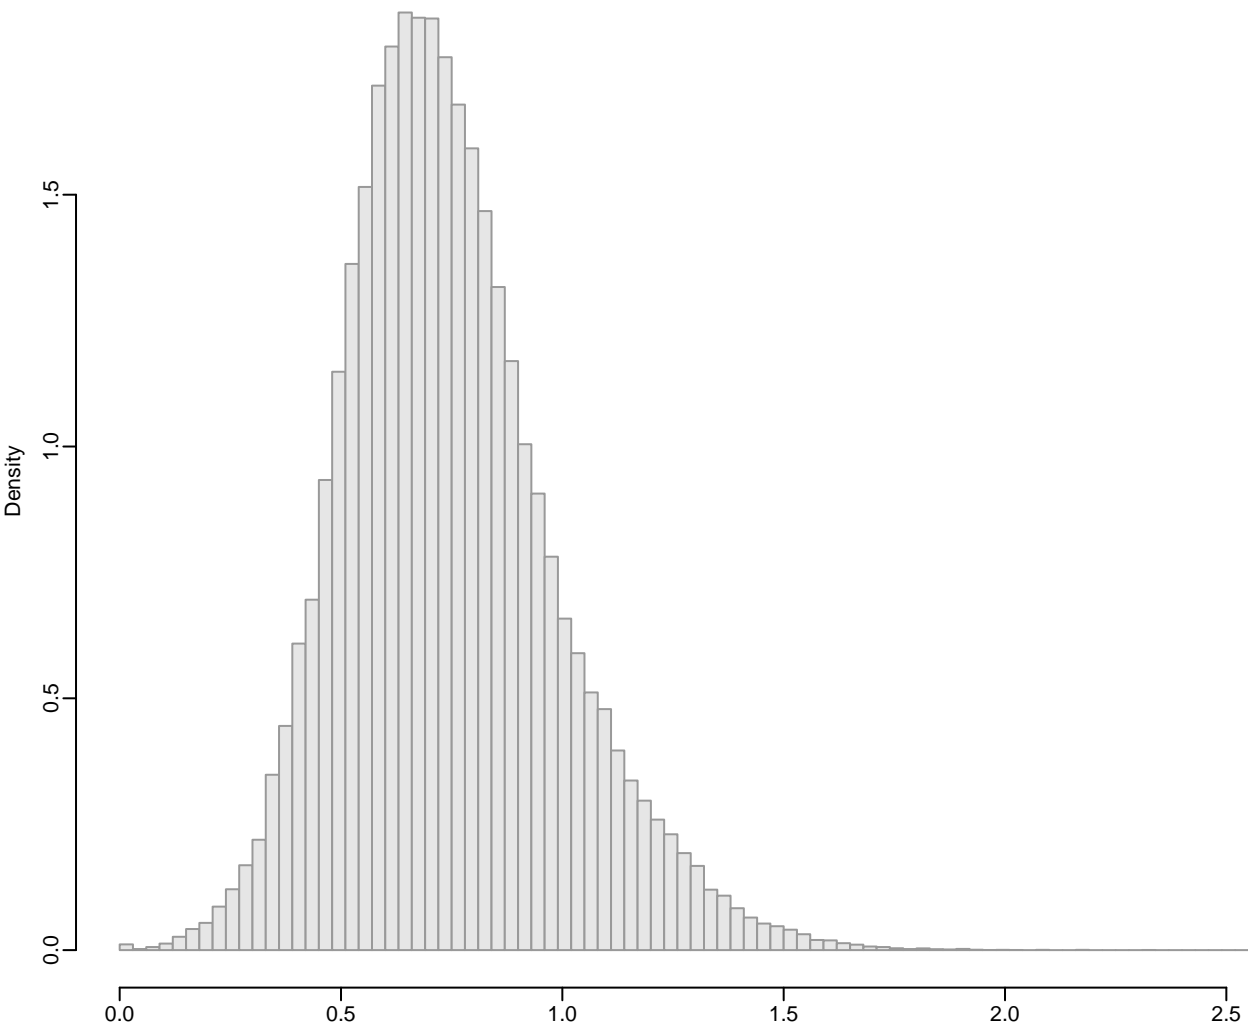

Density

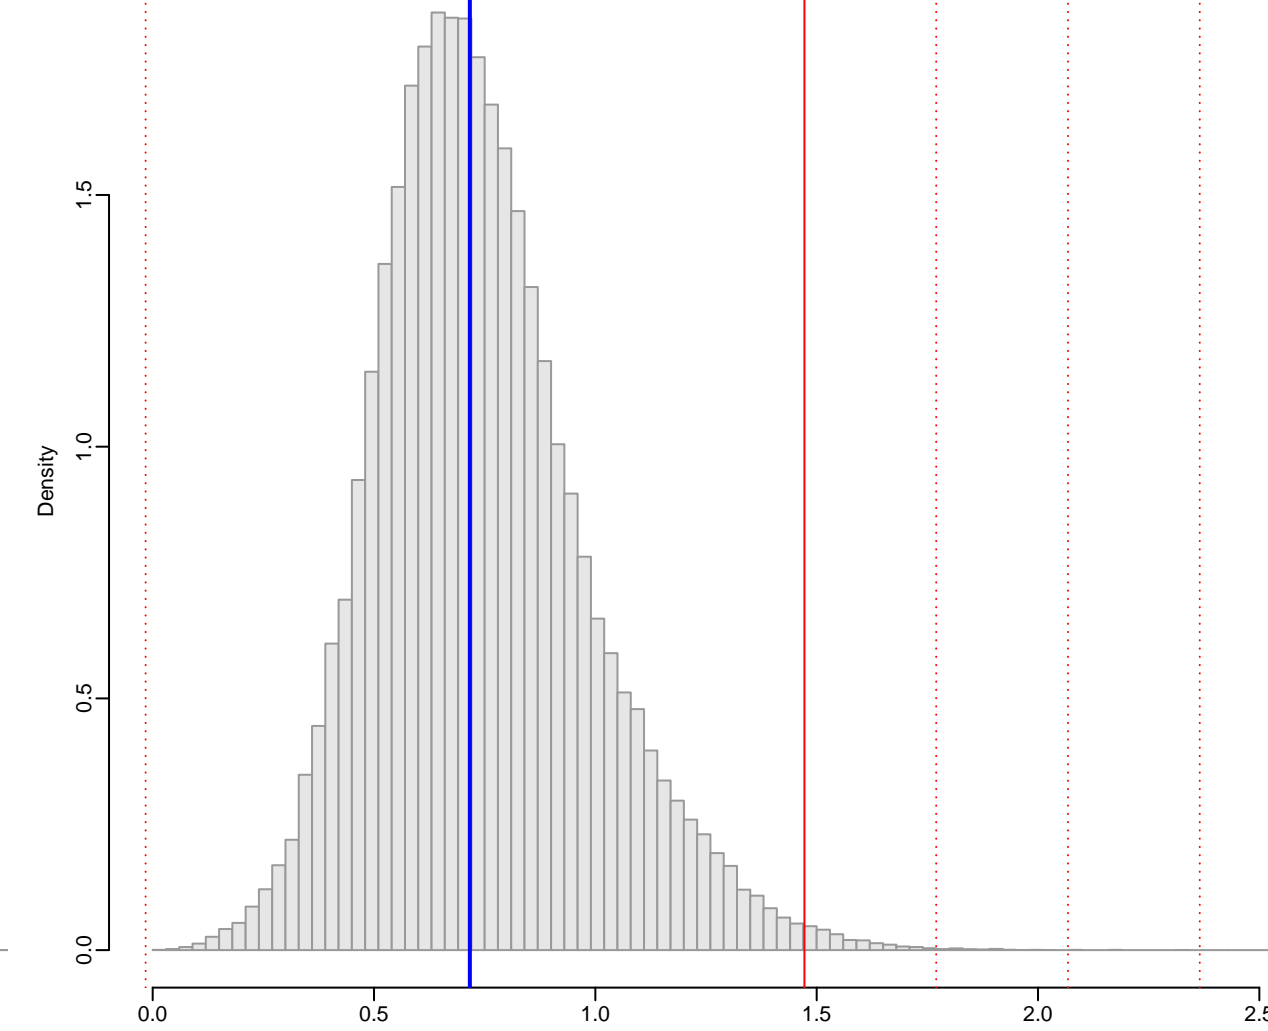

Density

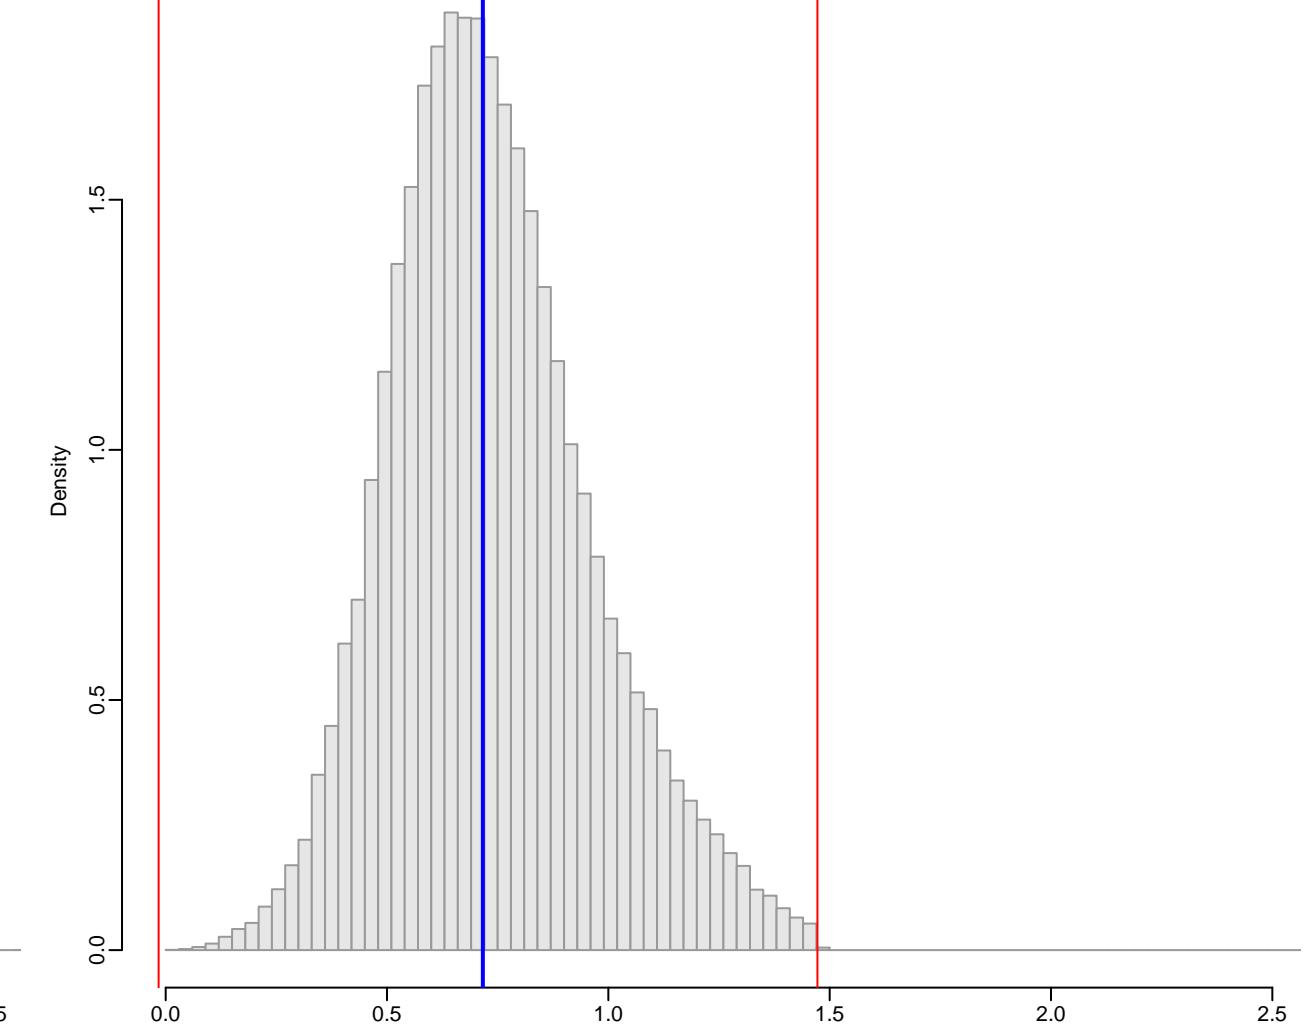

Lepismachilis\_y-signata

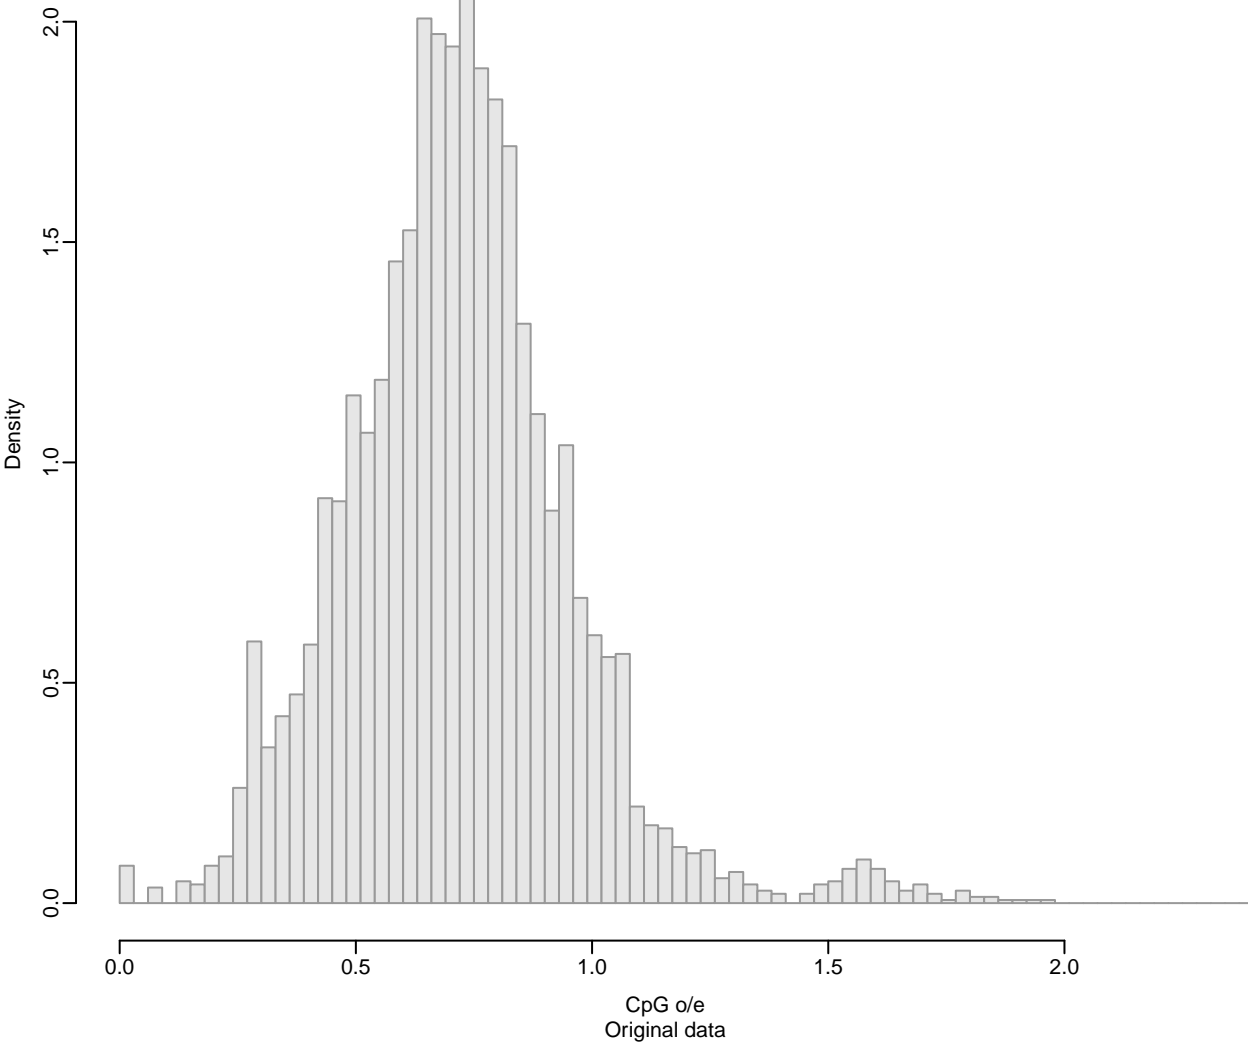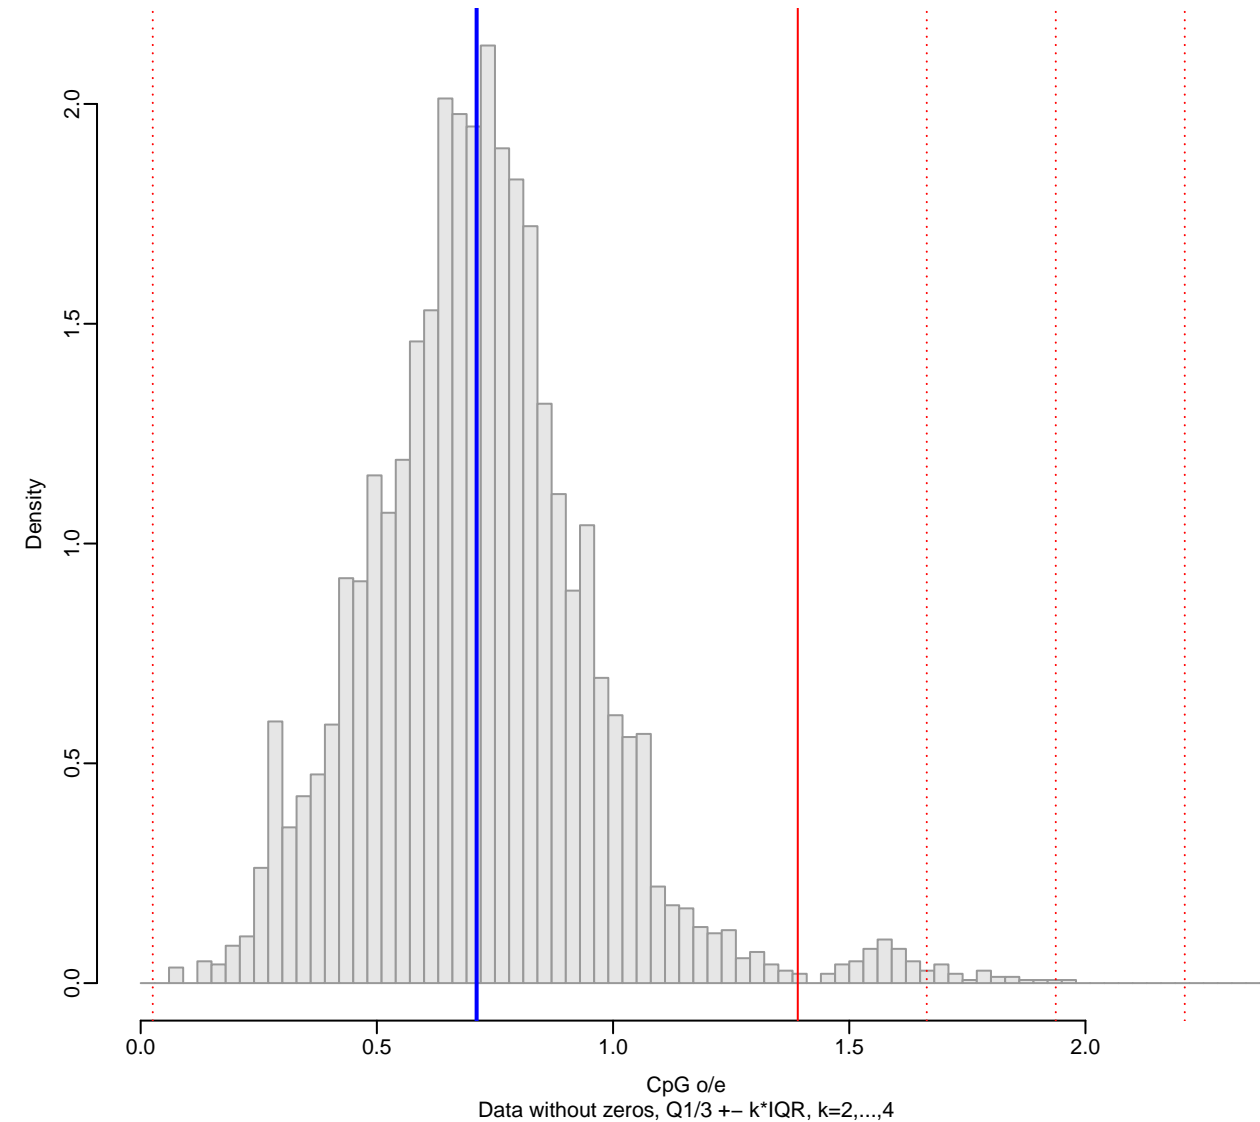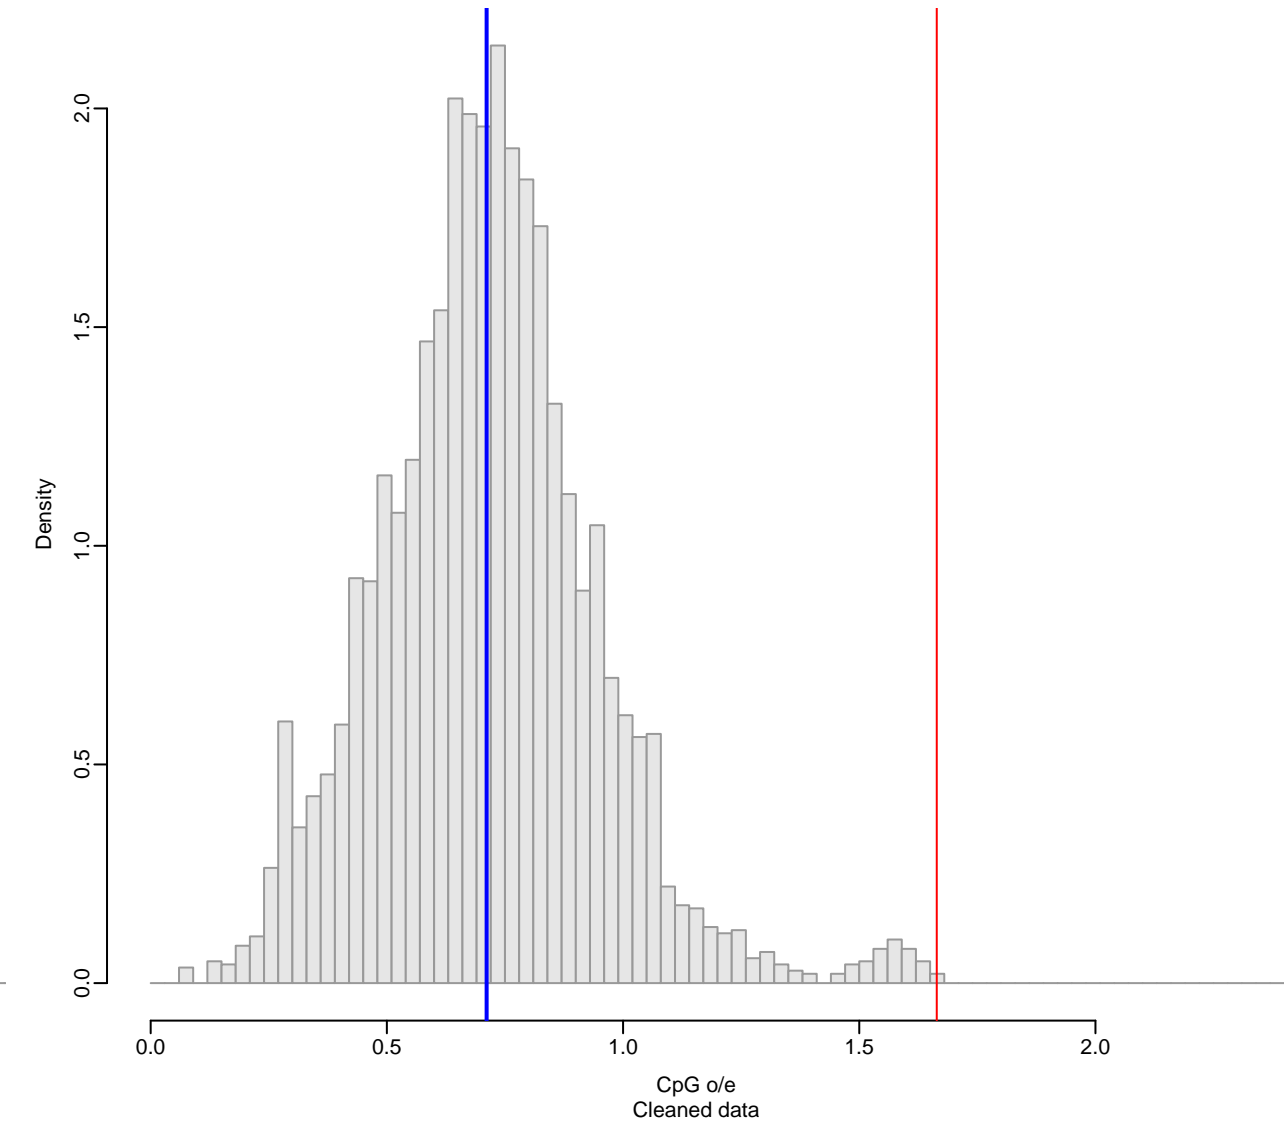

Leptinotarsa\_decemlineata

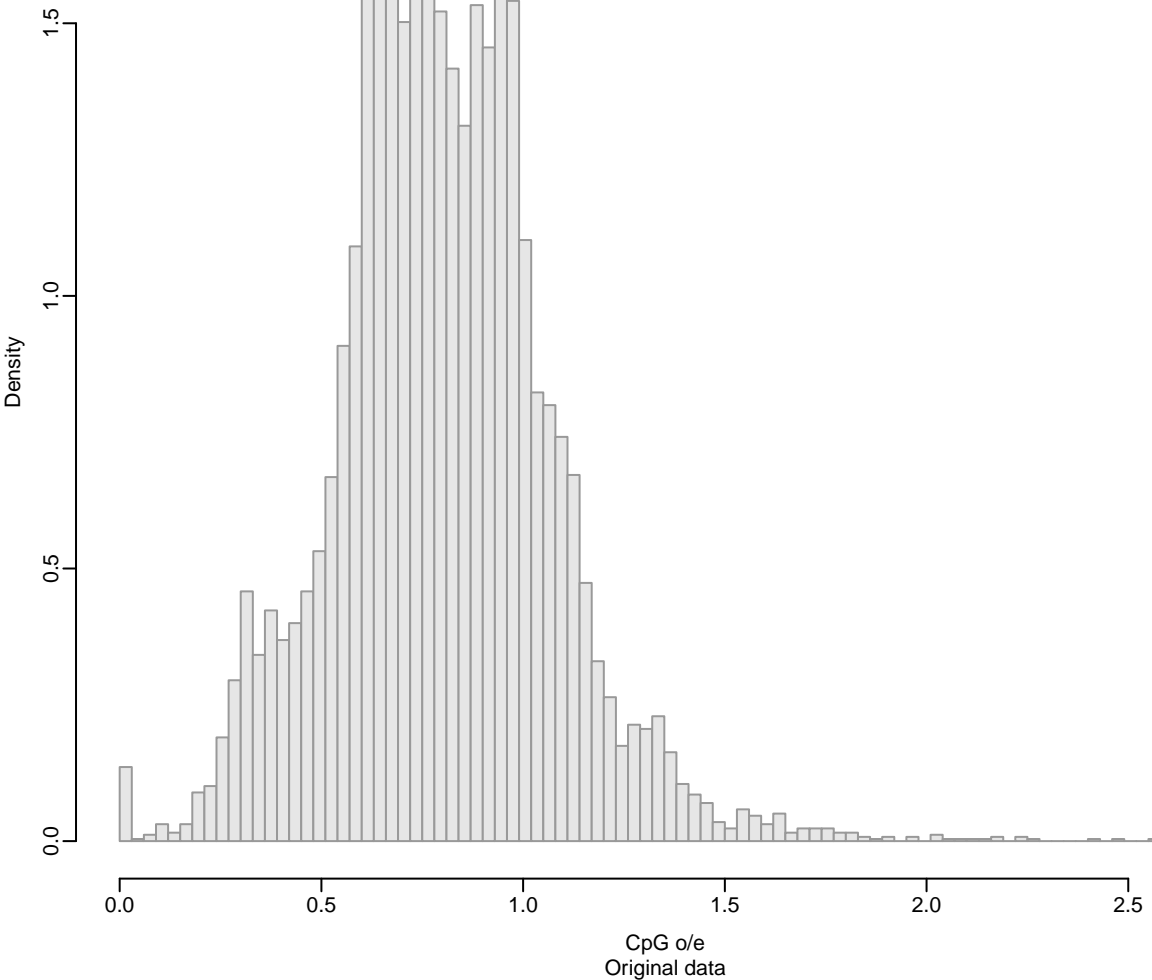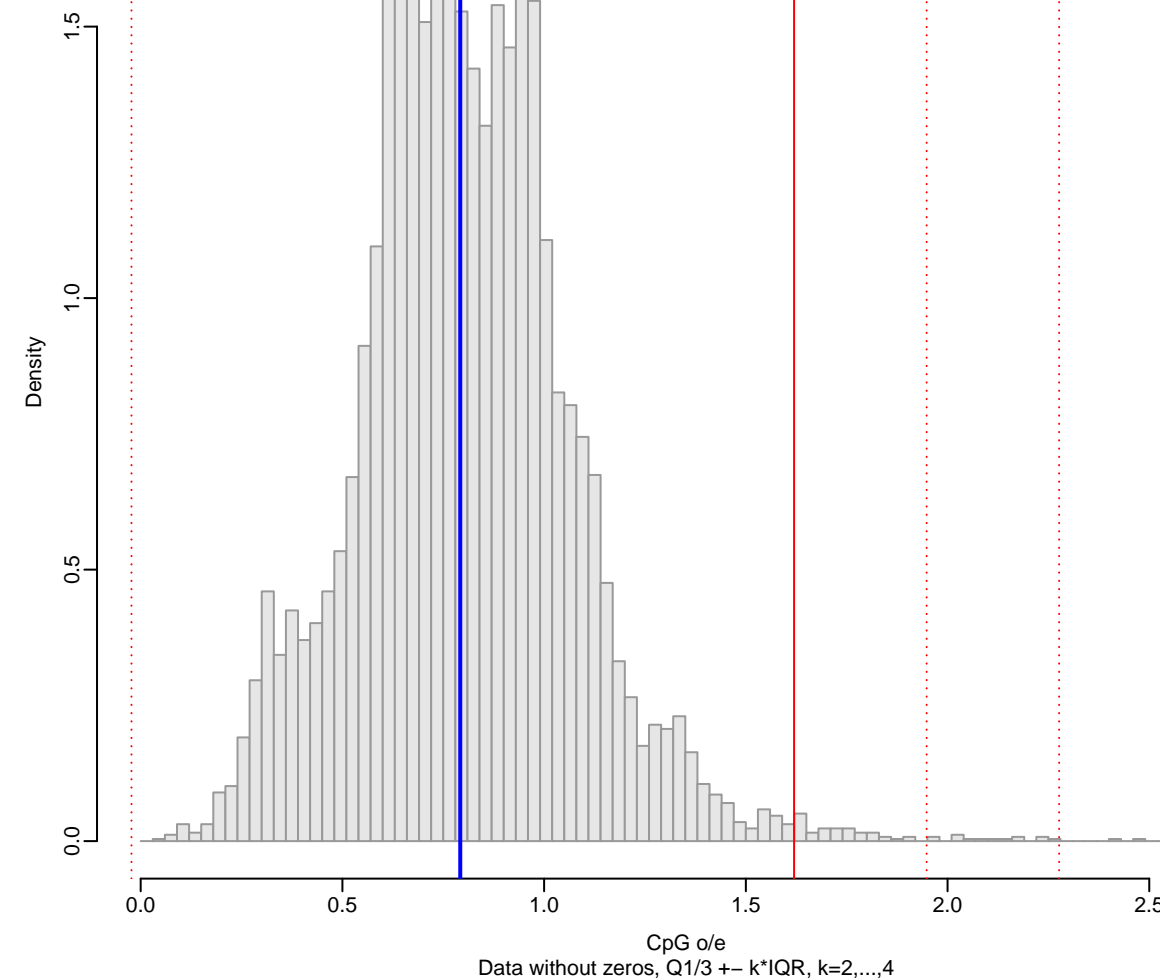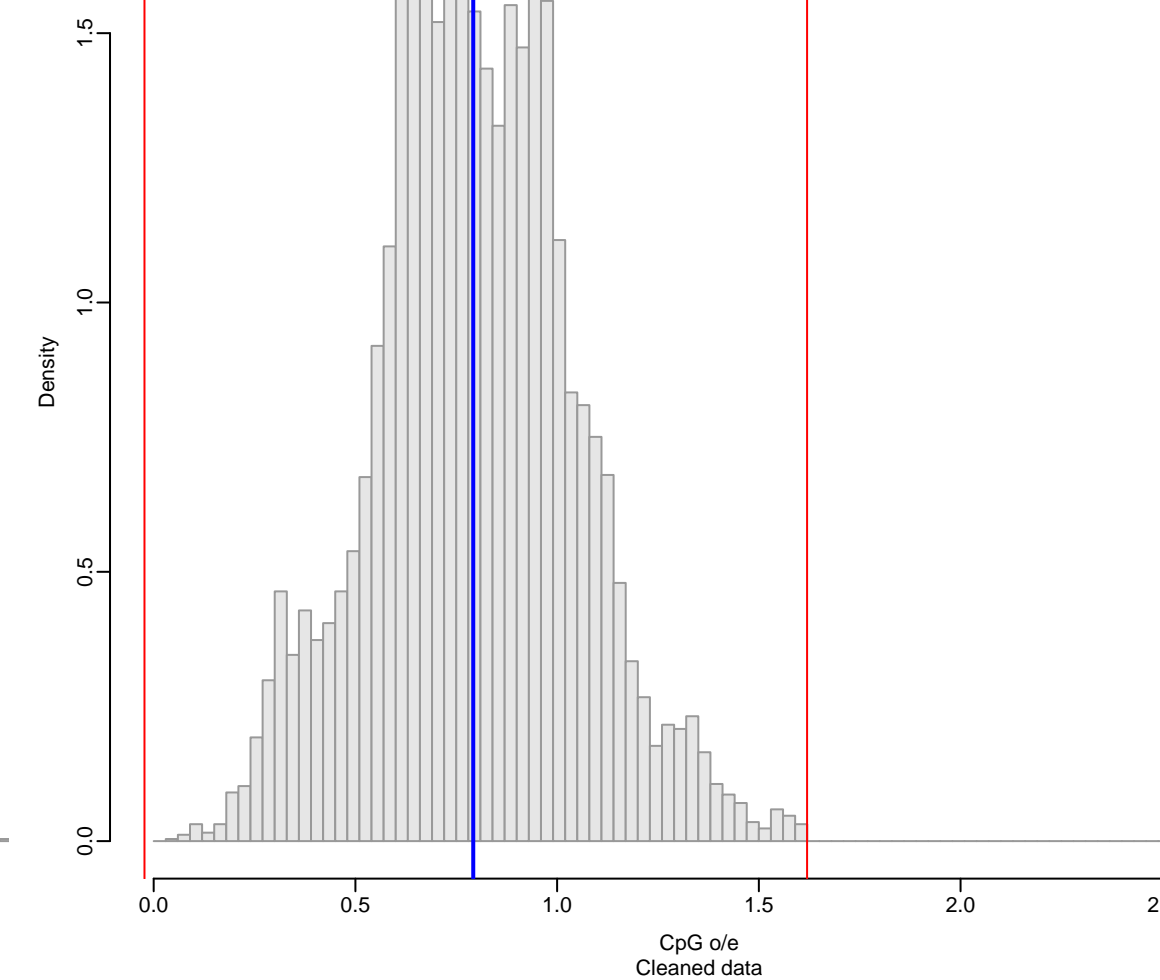

Lernaeocera\_branchialis

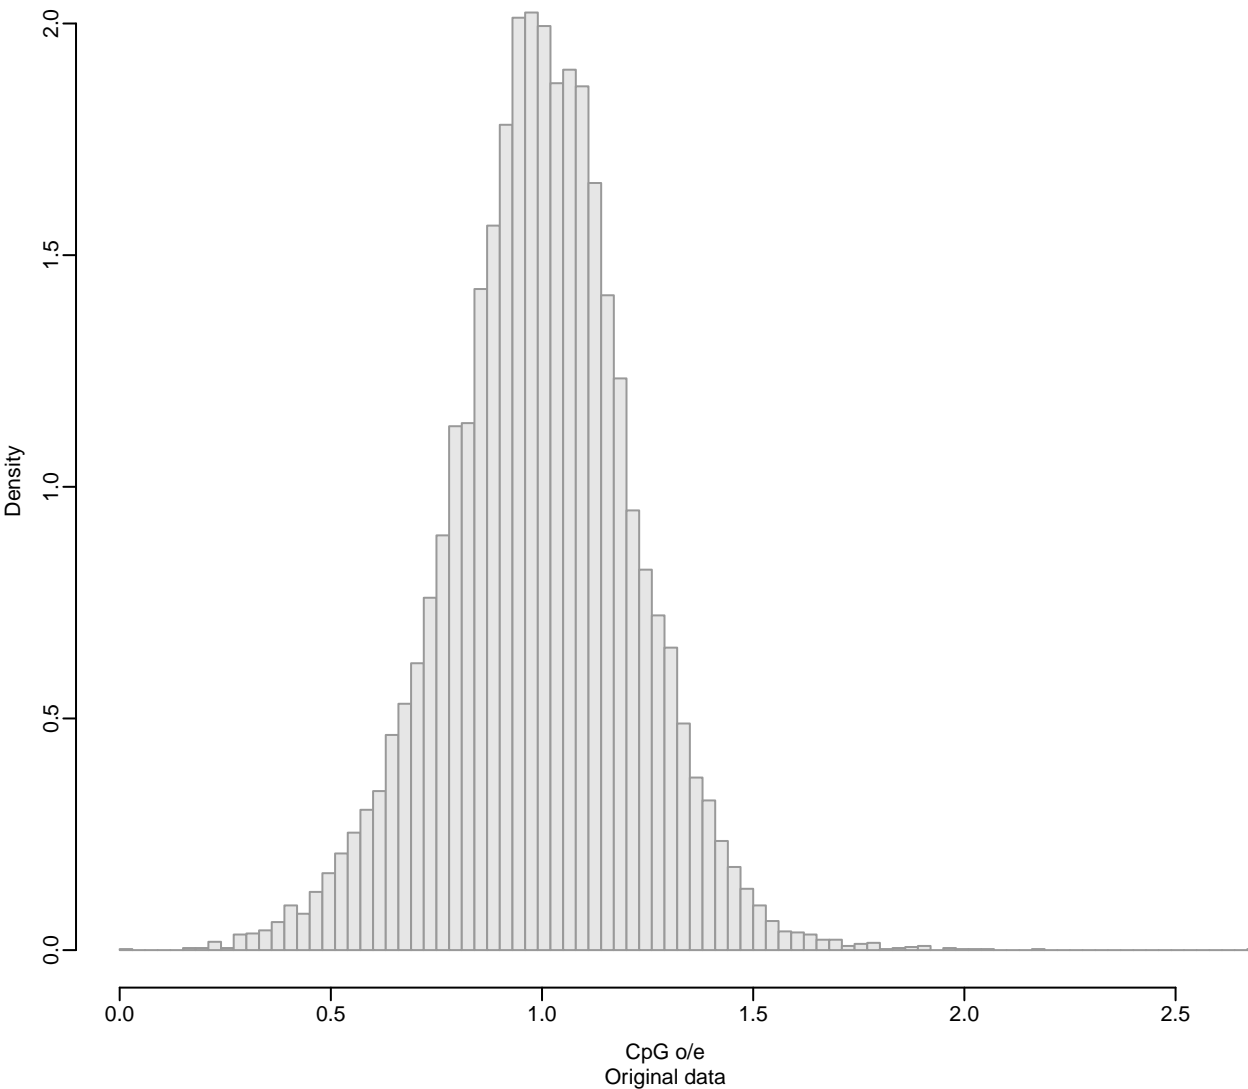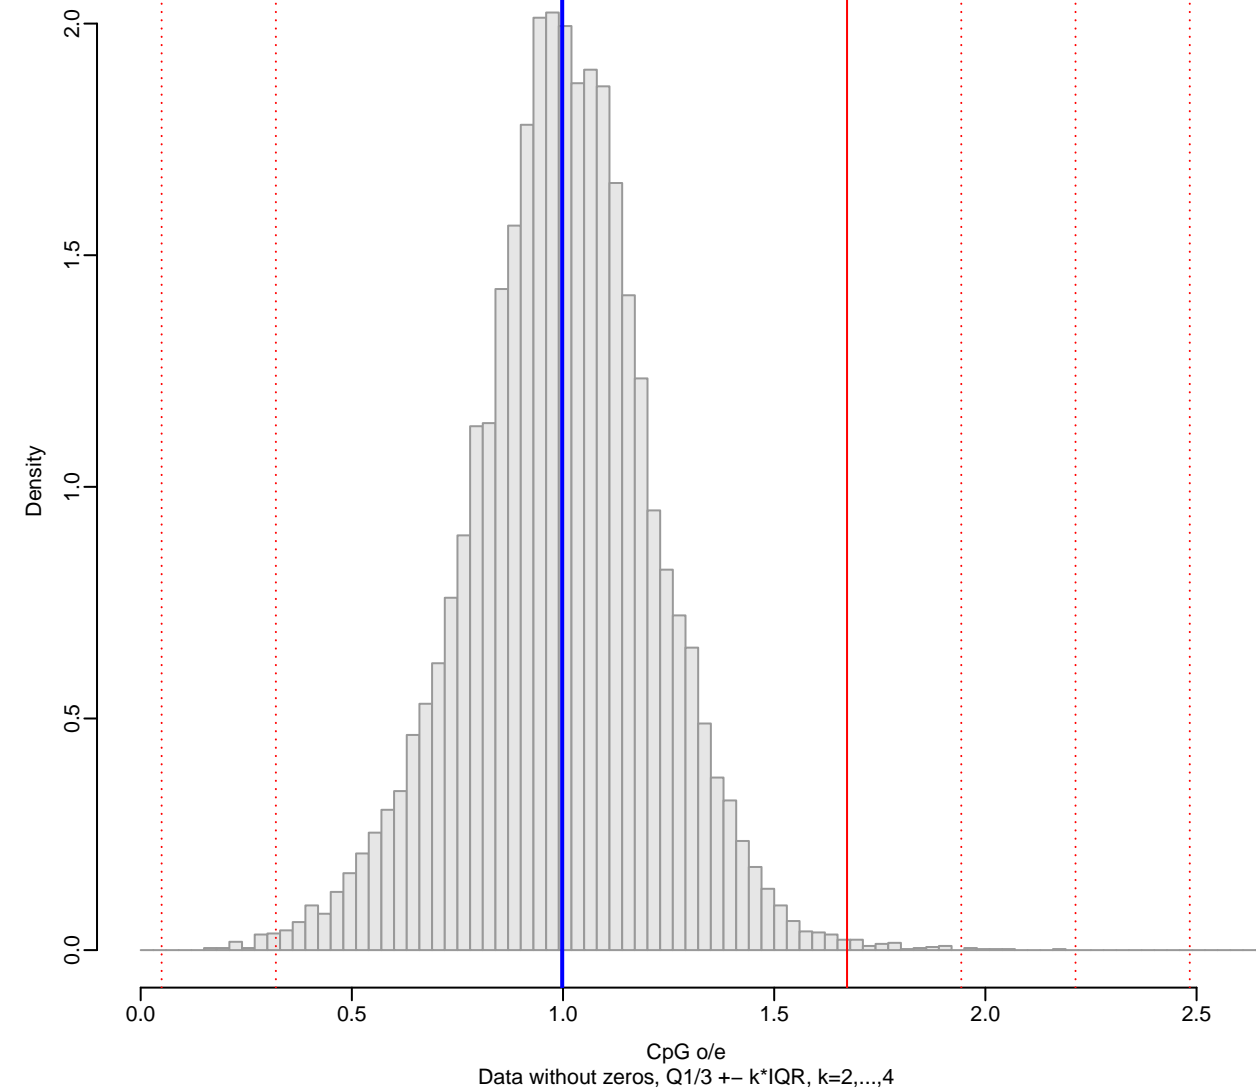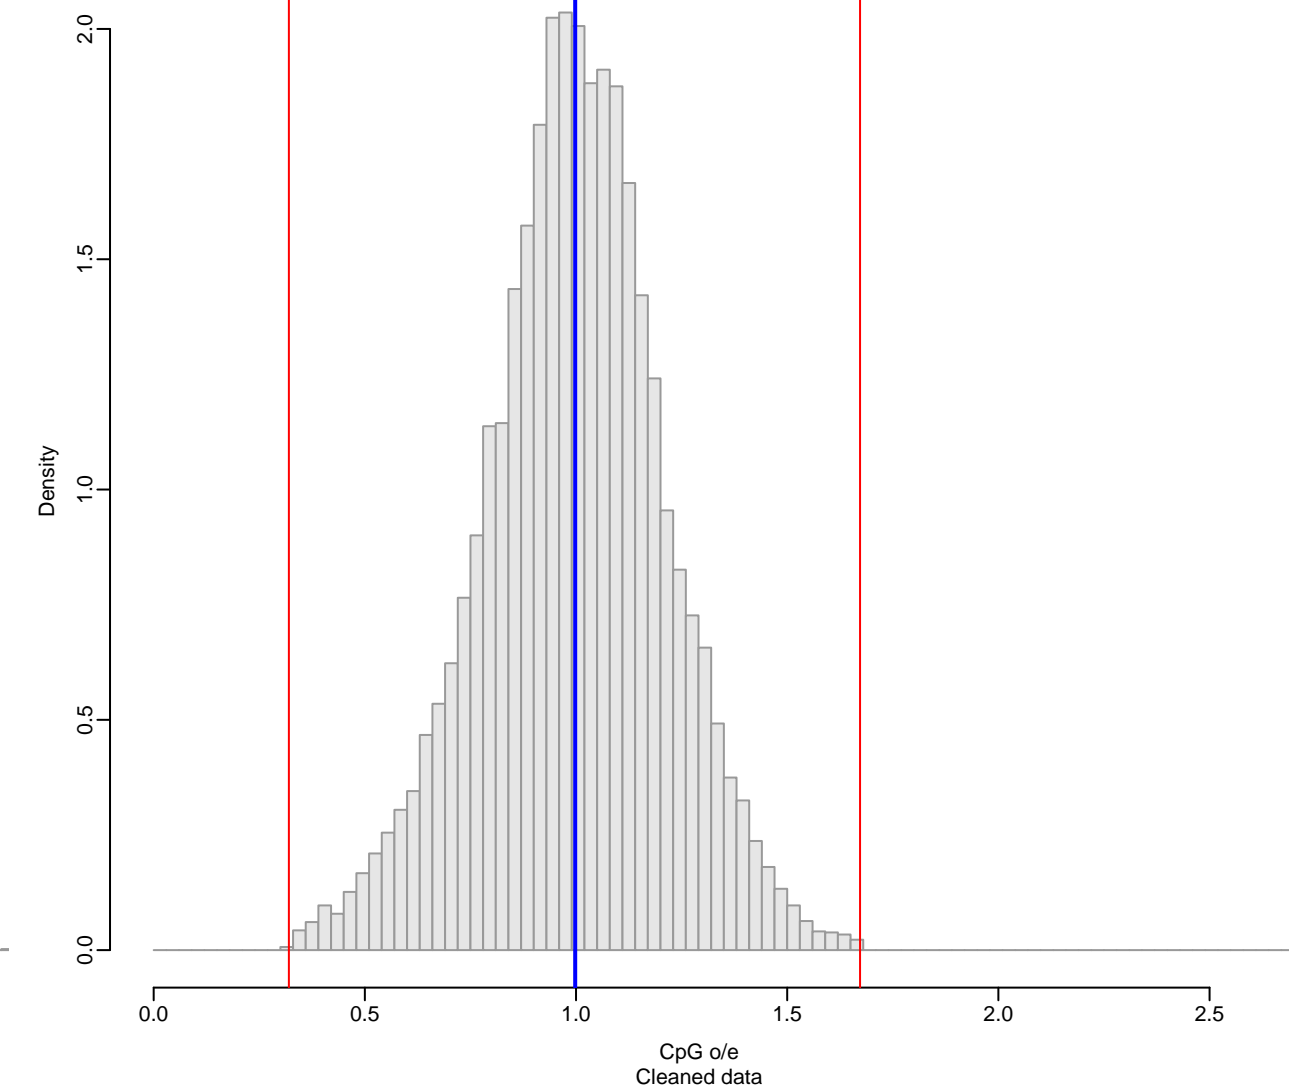

# Lethenteron\_camtschaticum

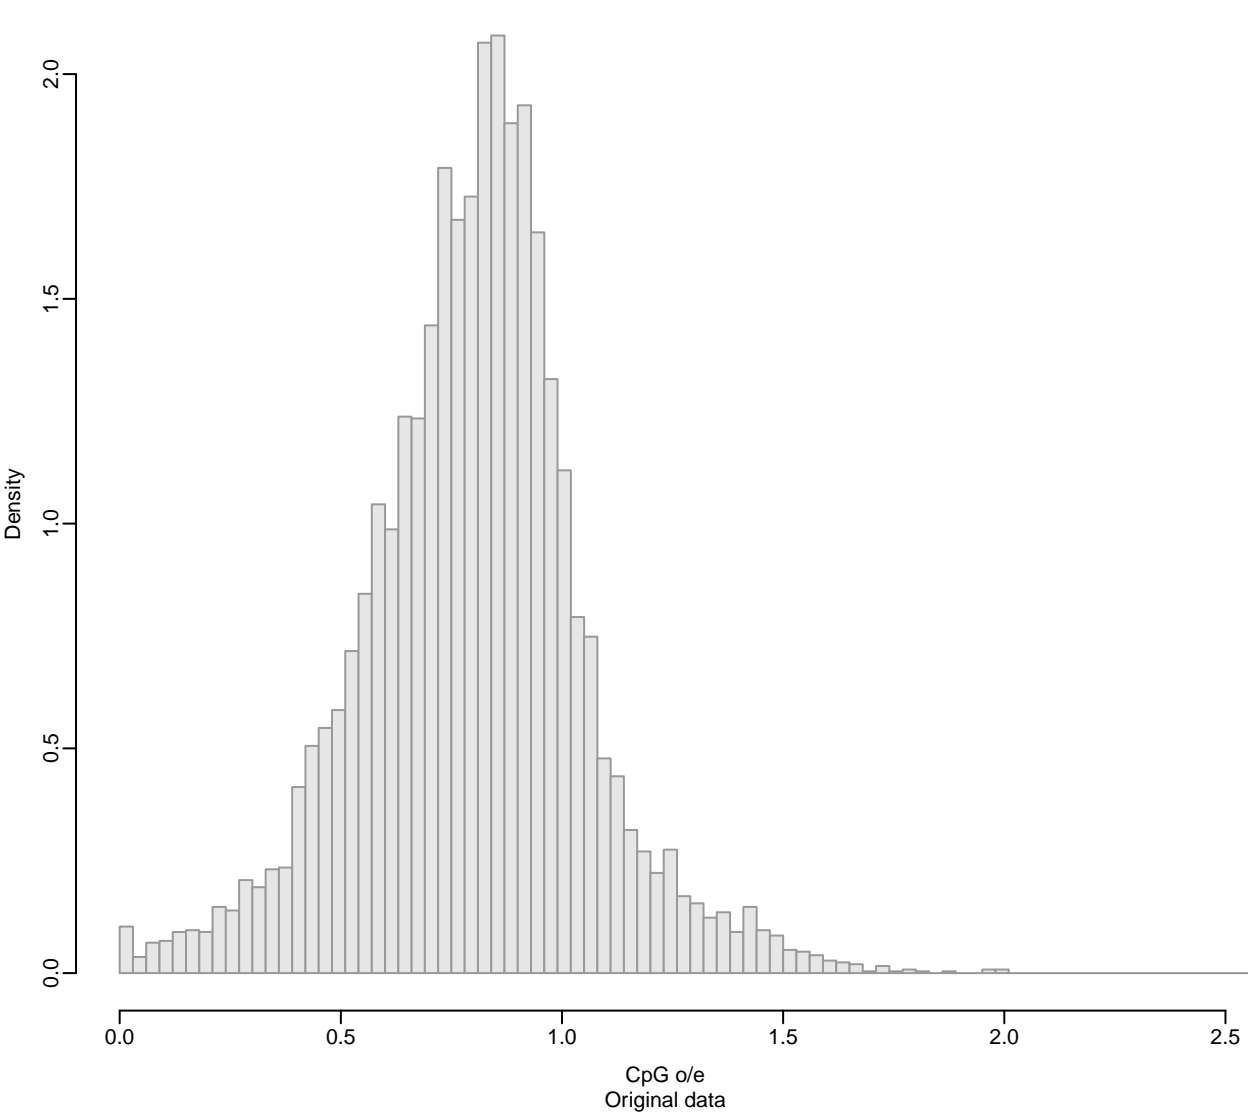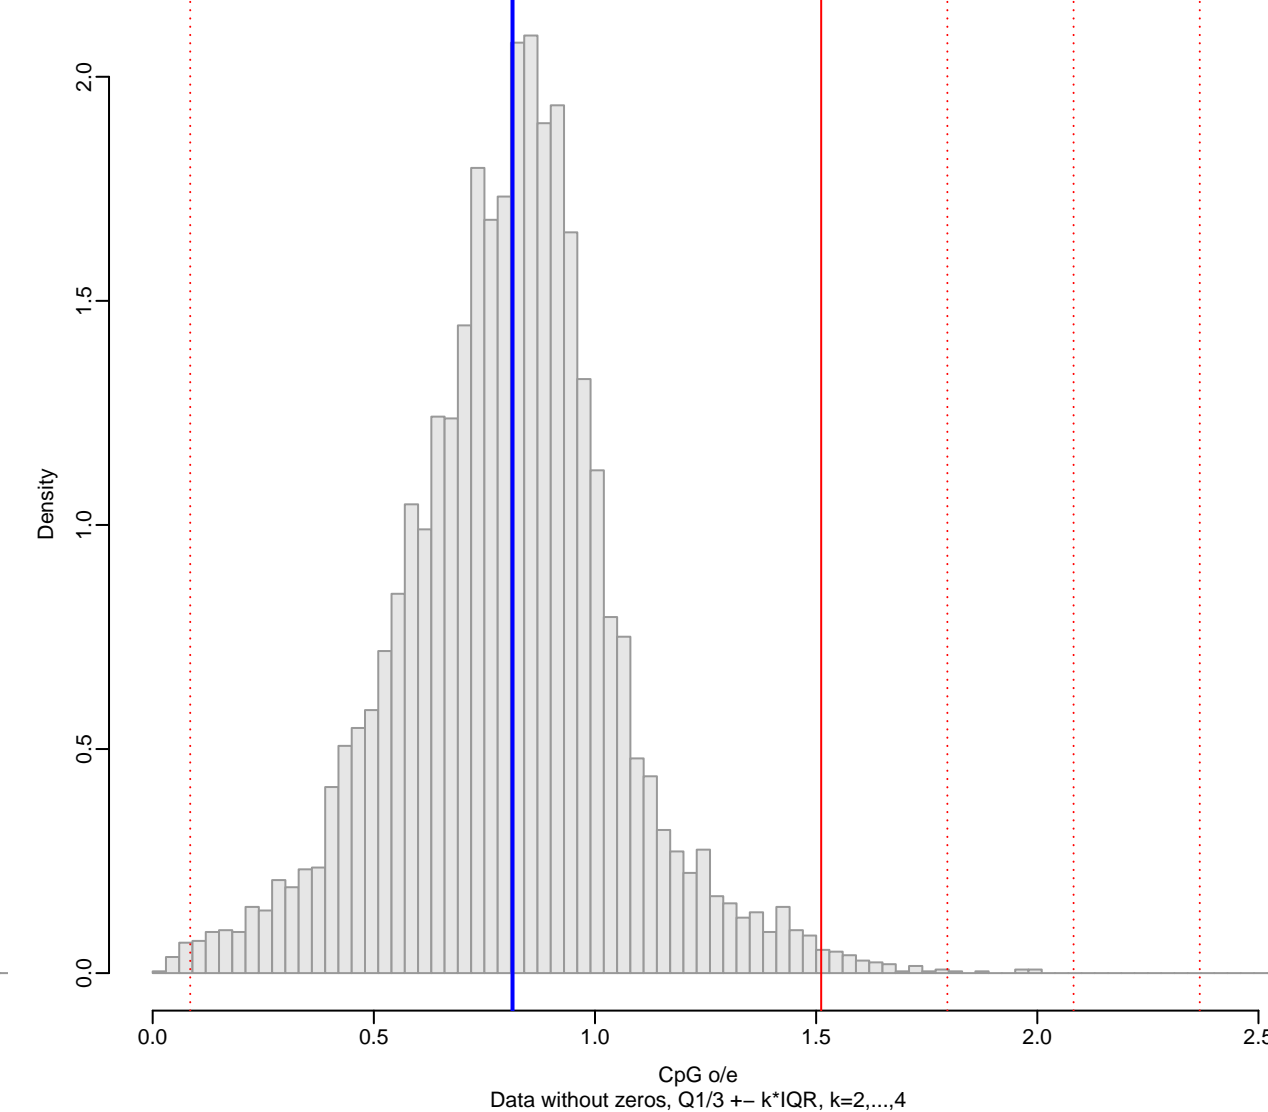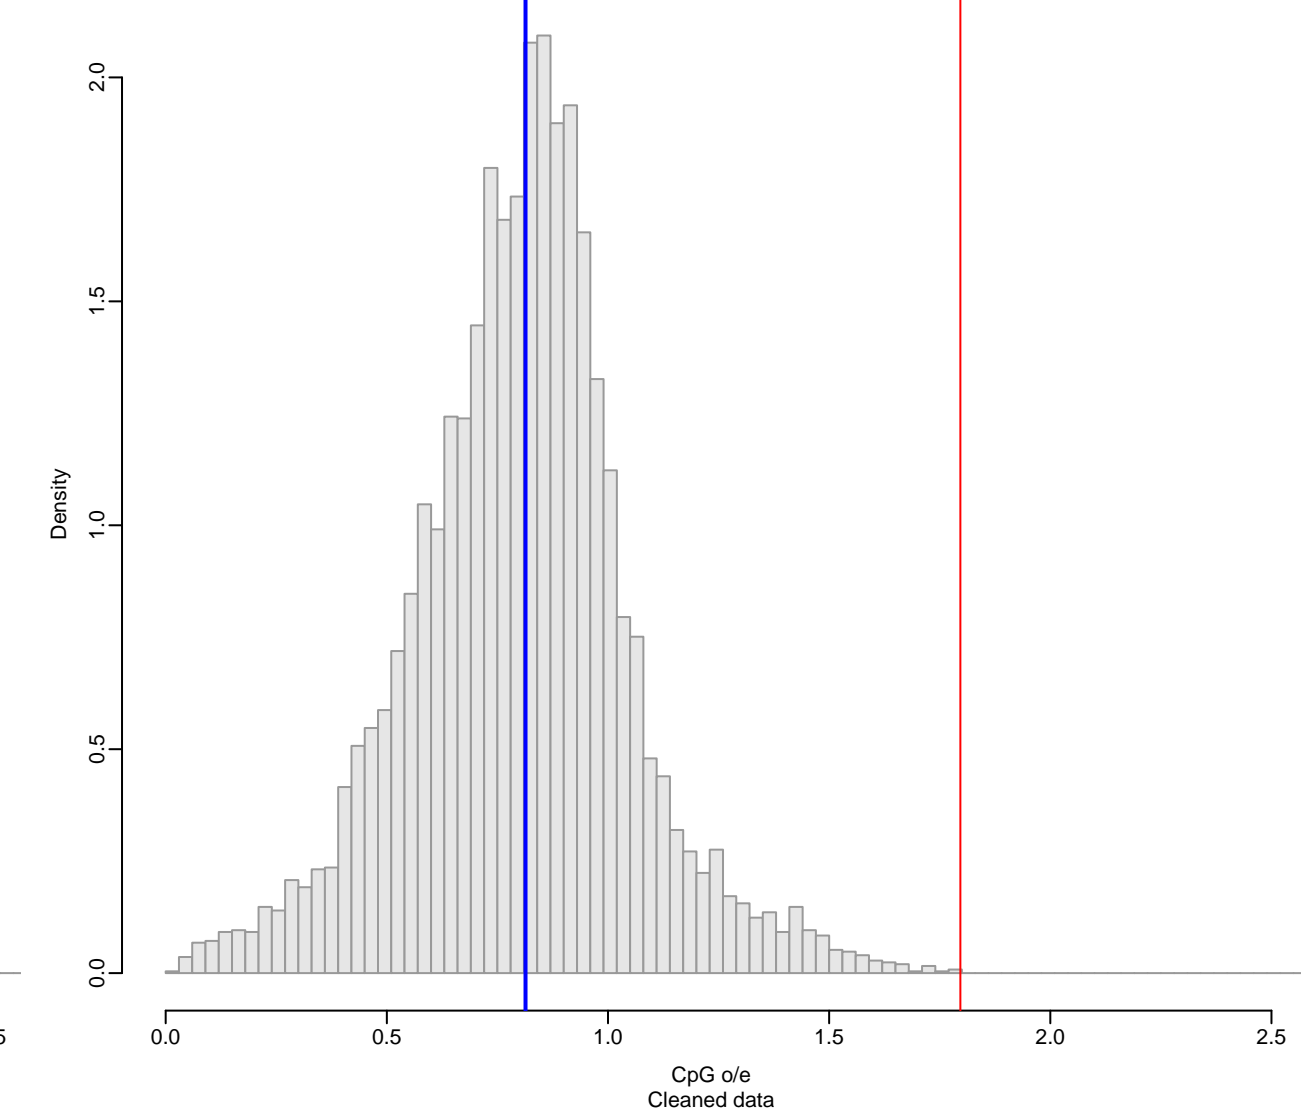

Leymus\_chinensis

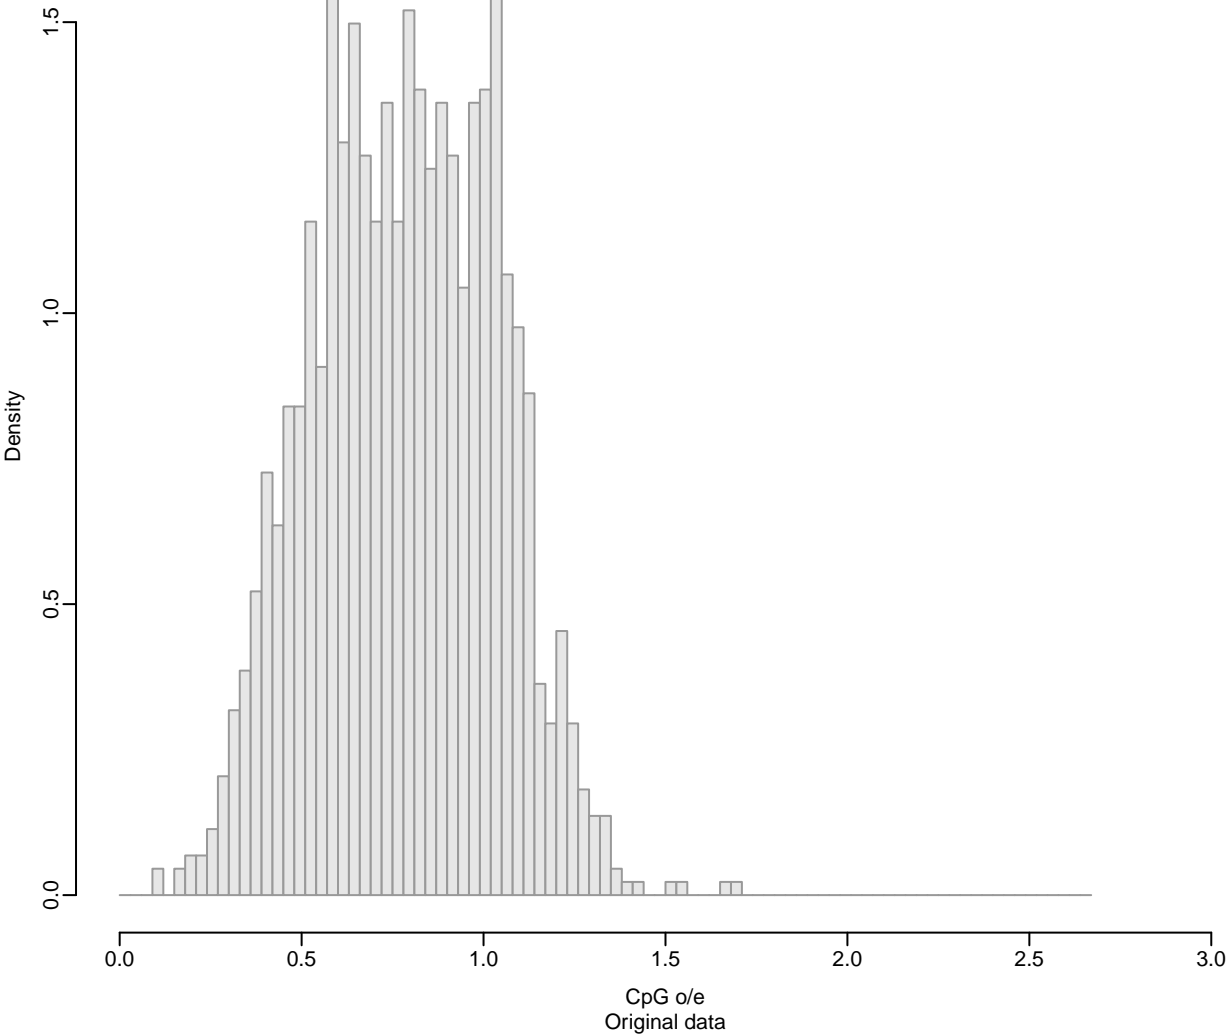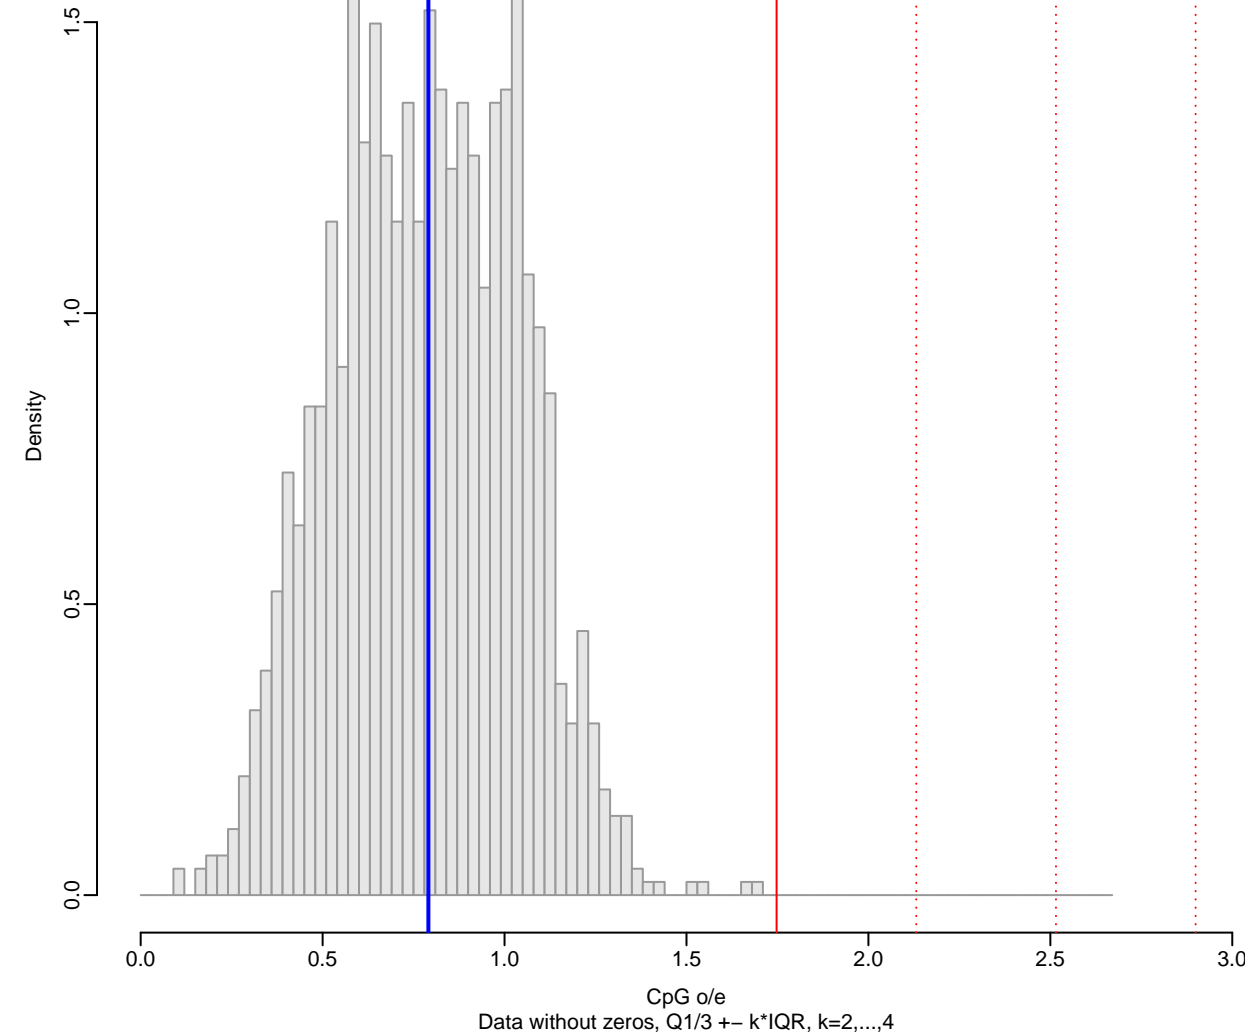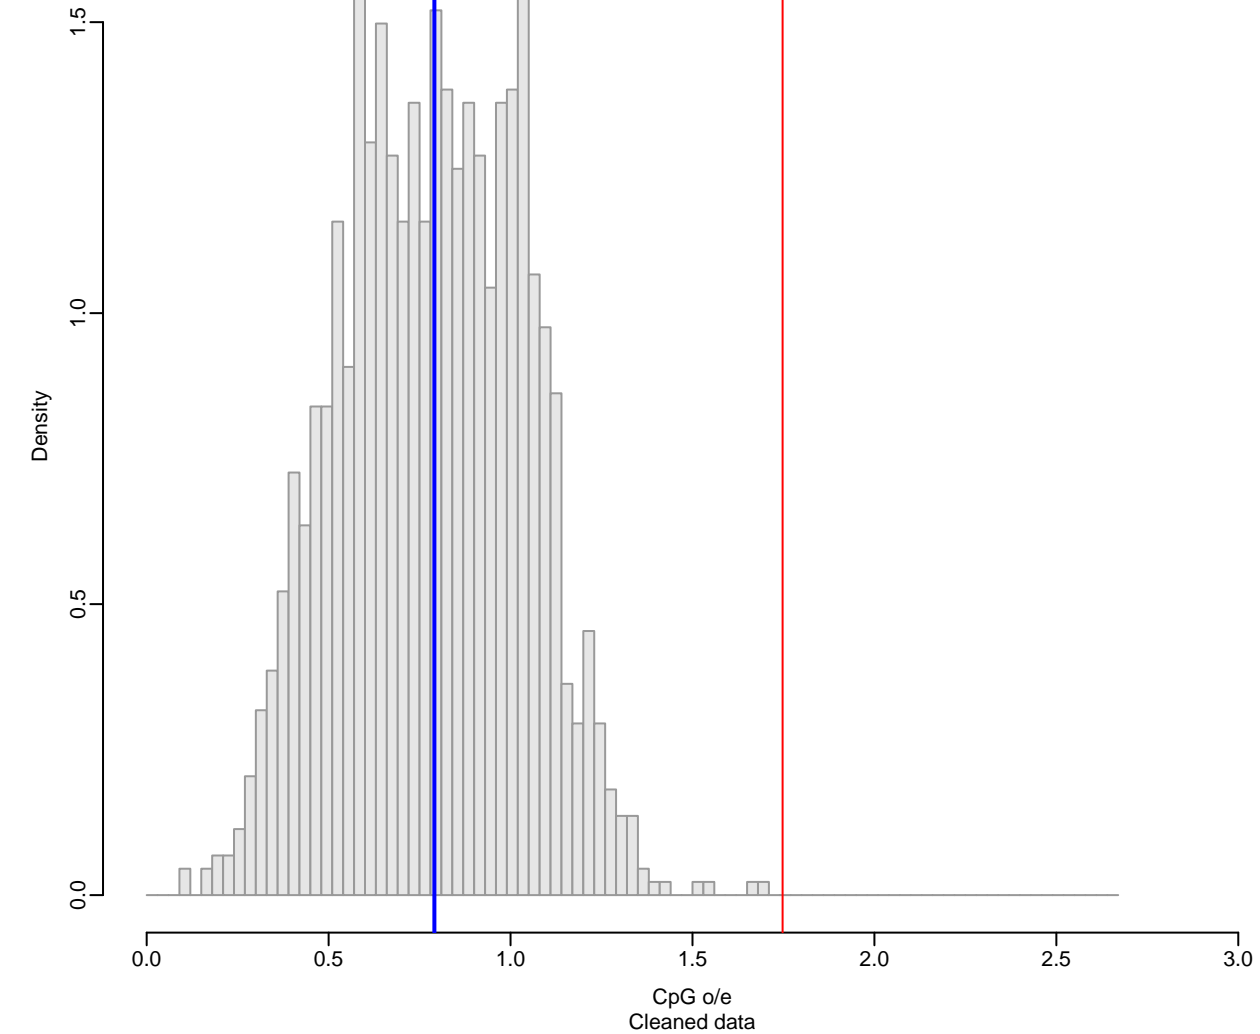

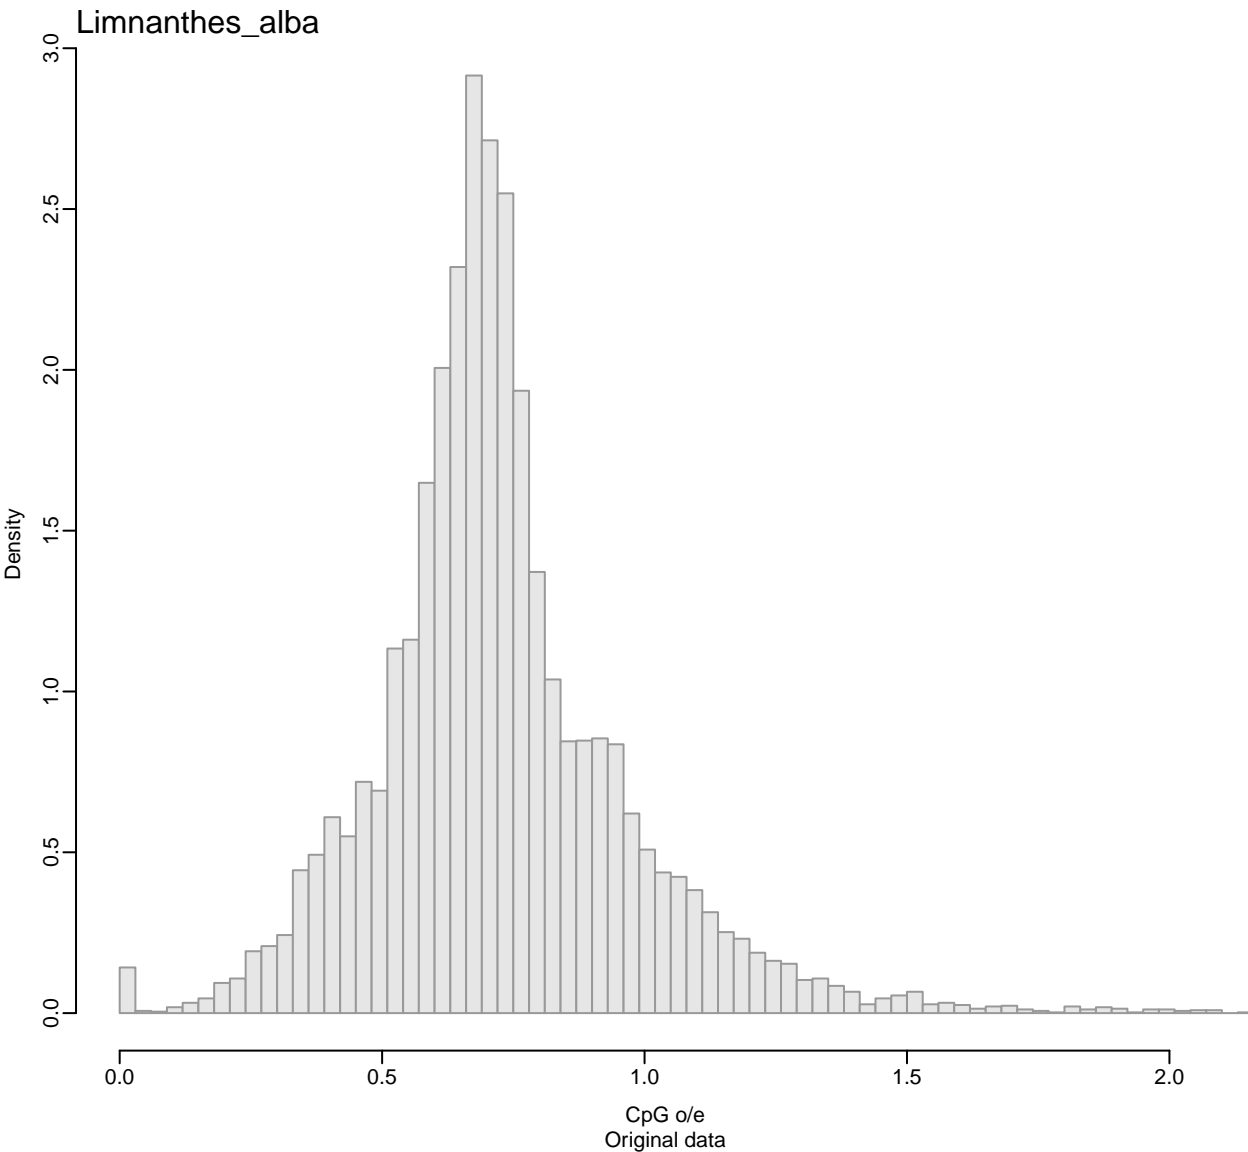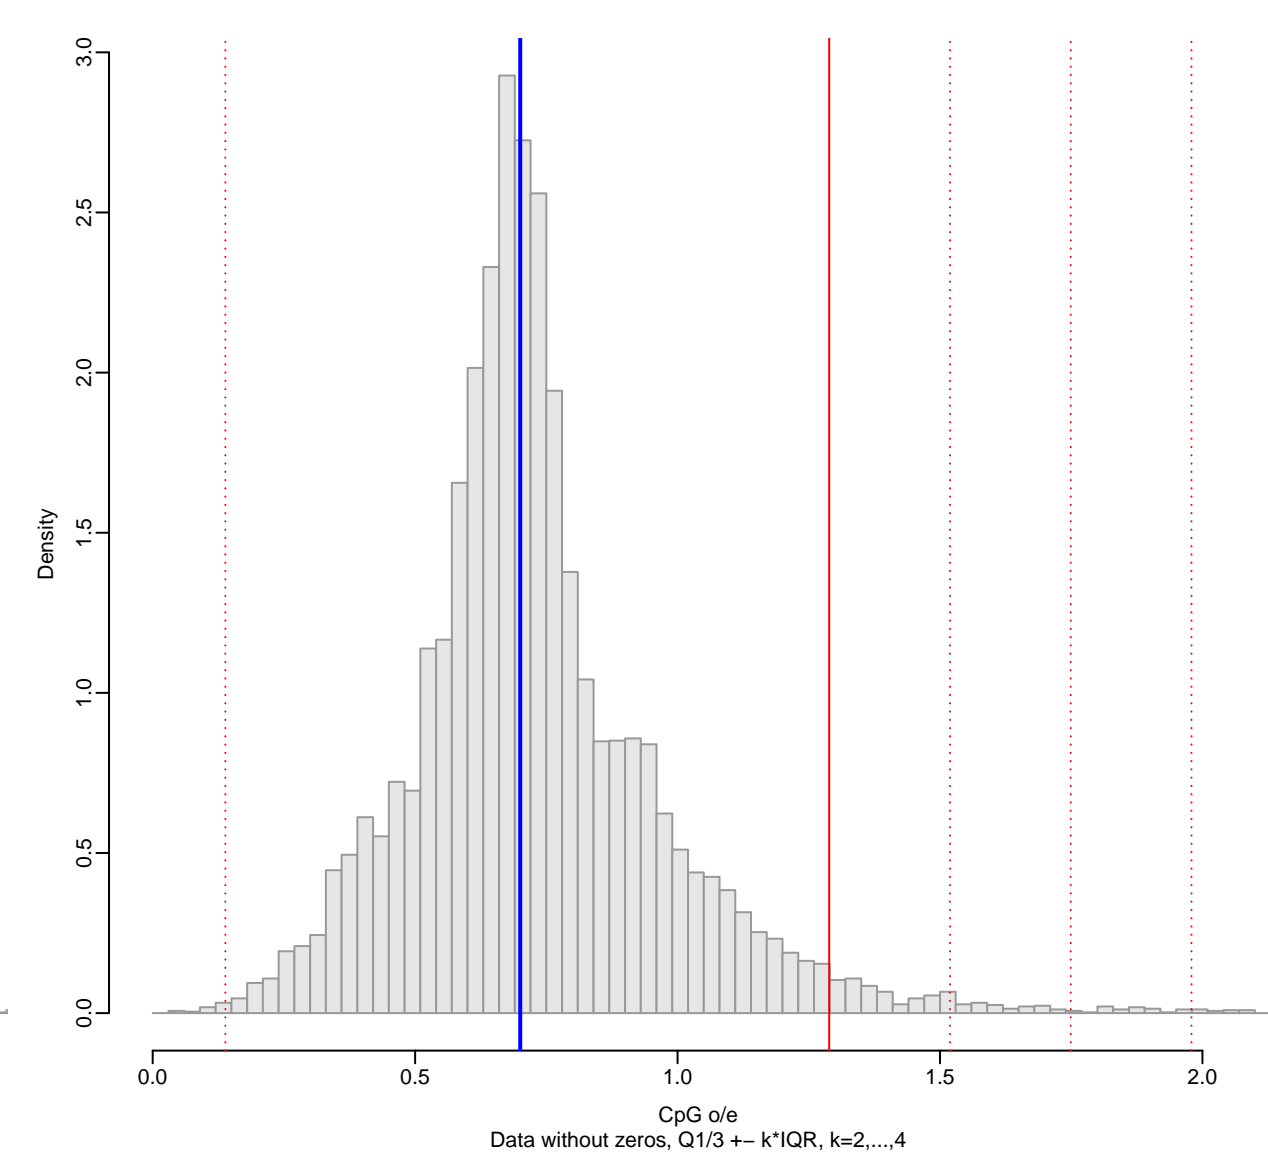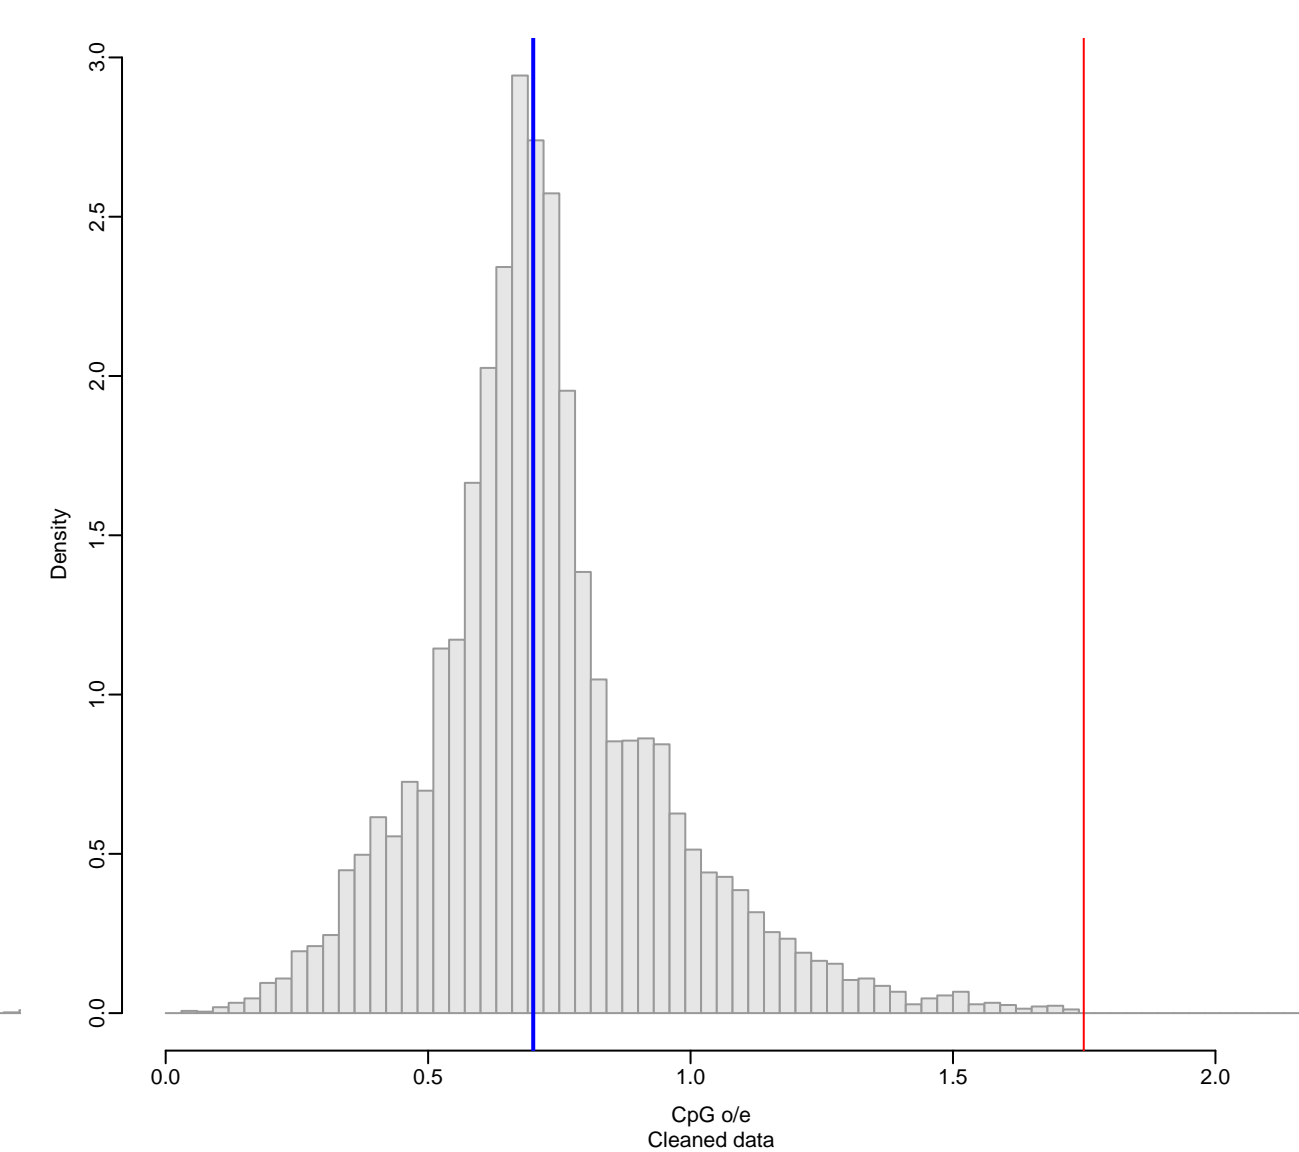



# Limonium\_bicolor

Density

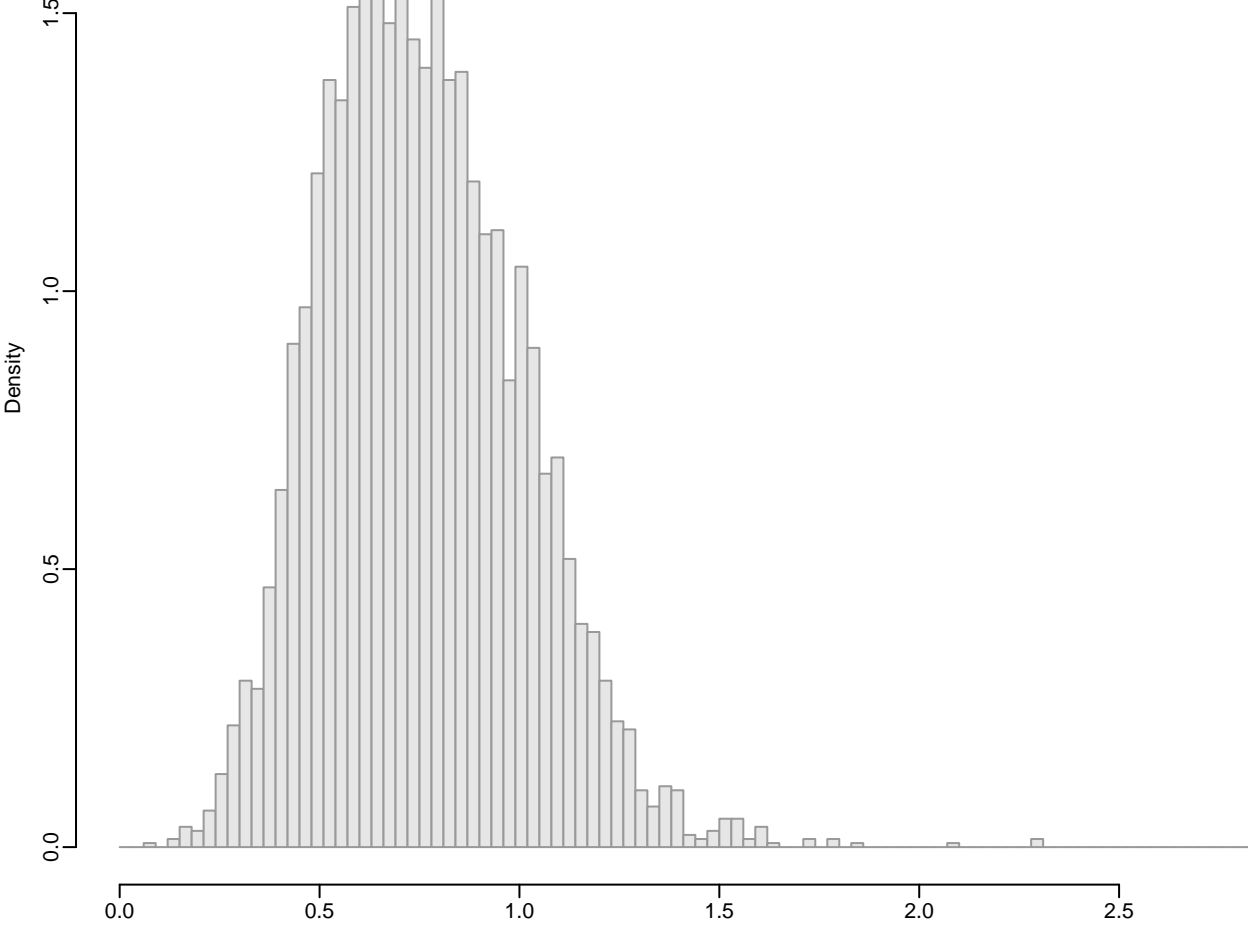

CpG o/e  
Original data

Density

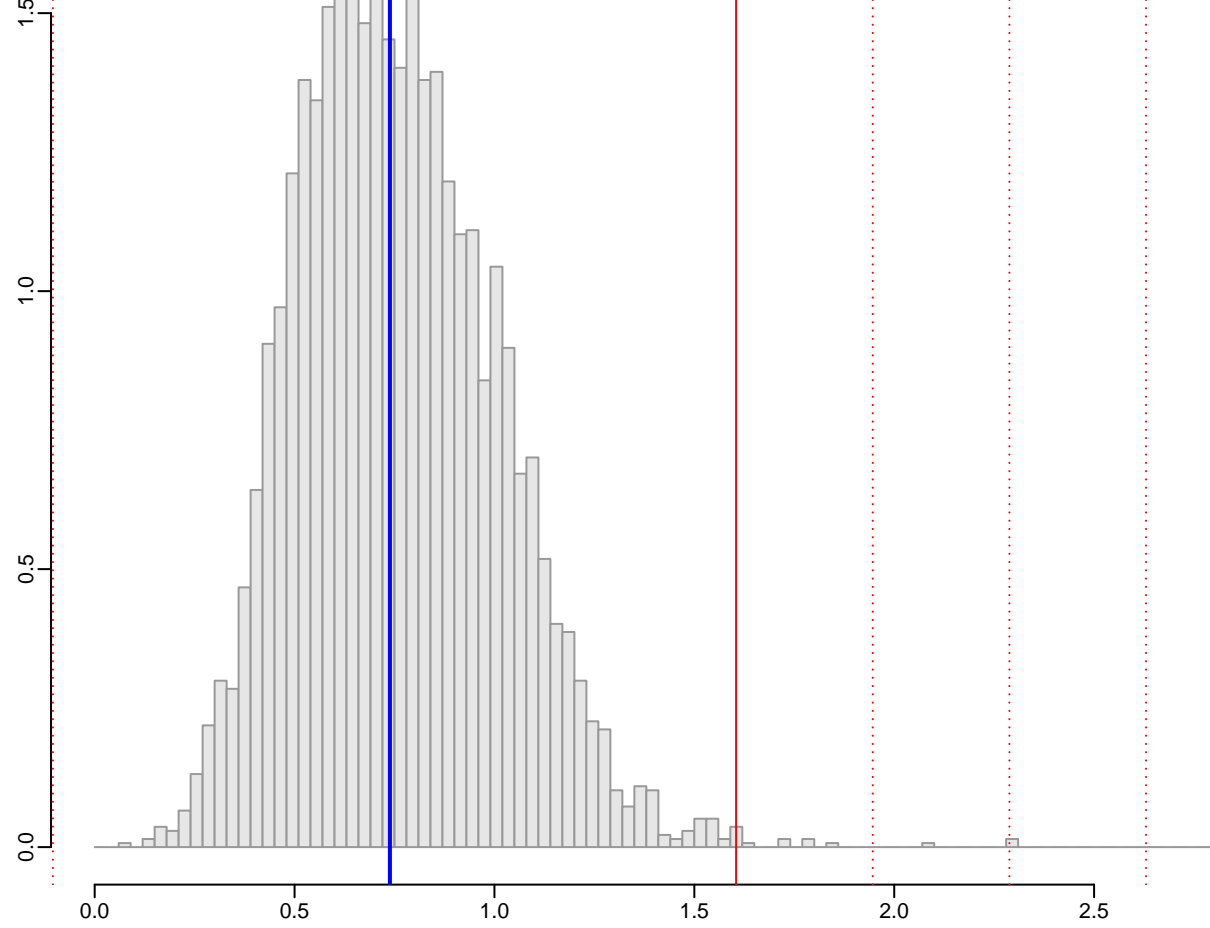

CpG o/e  
Data without zeros,  $Q1/3 \pm k \cdot IQR$ ,  $k=2, \dots, 4$

Density

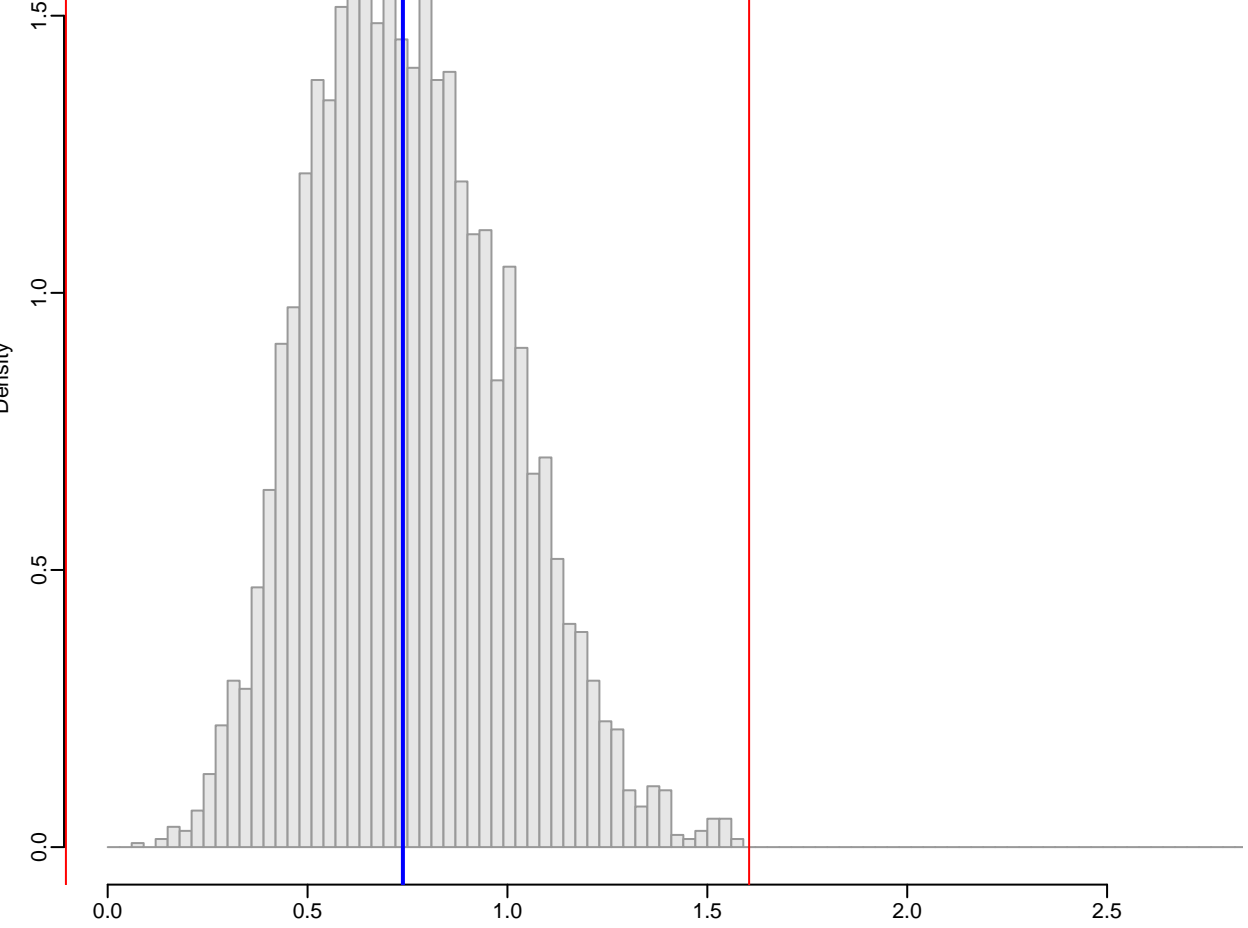

CpG o/e  
Cleaned data

Limulus\_polyphemus

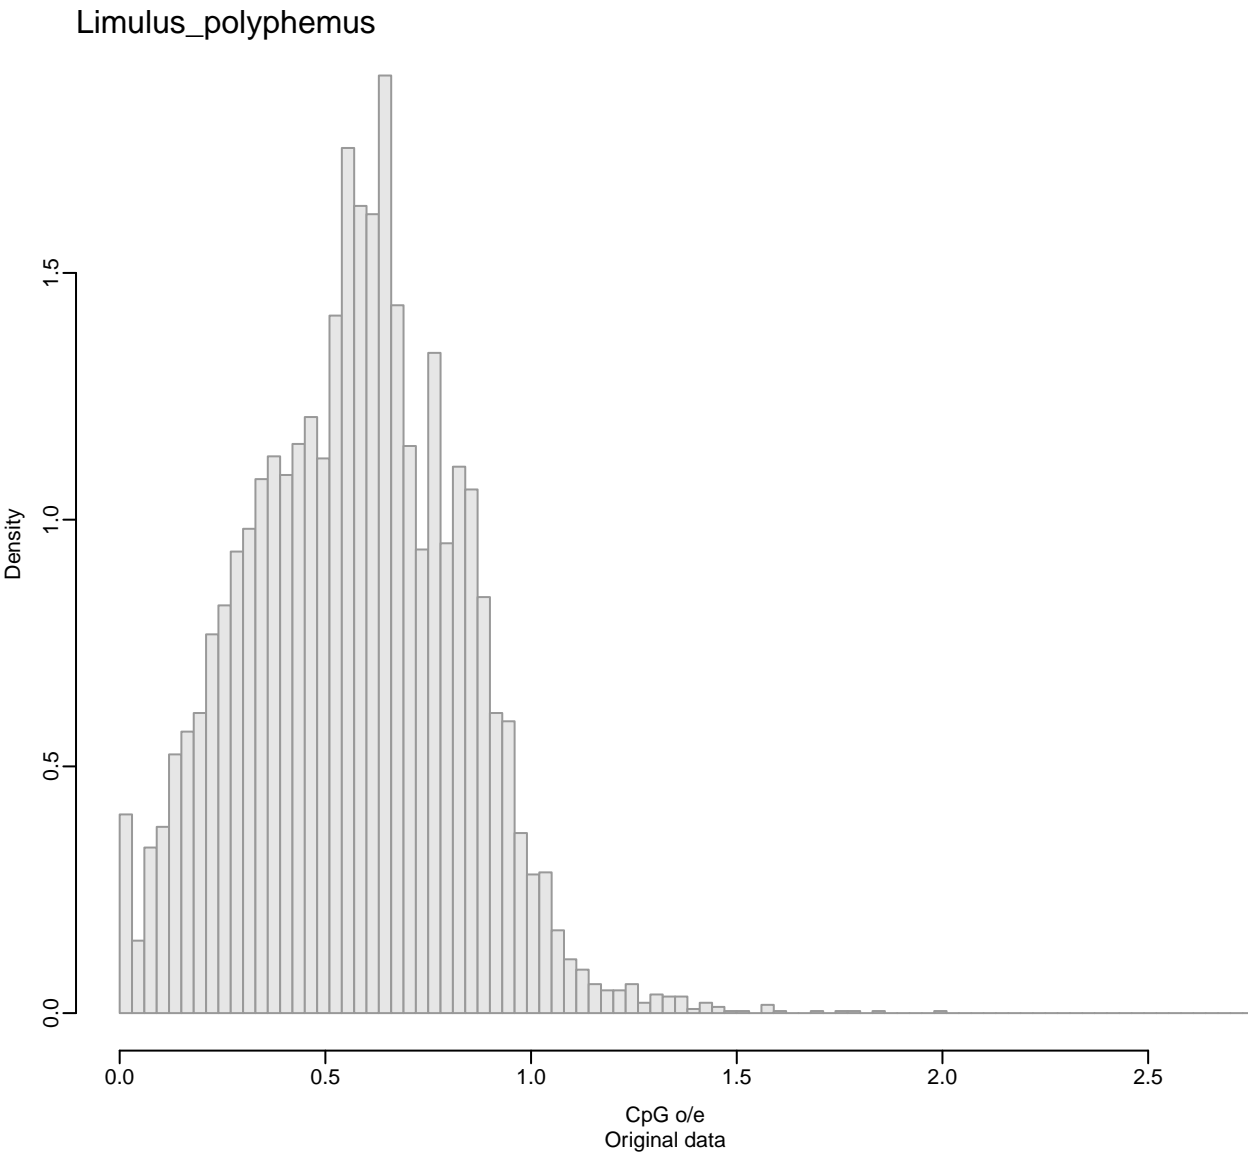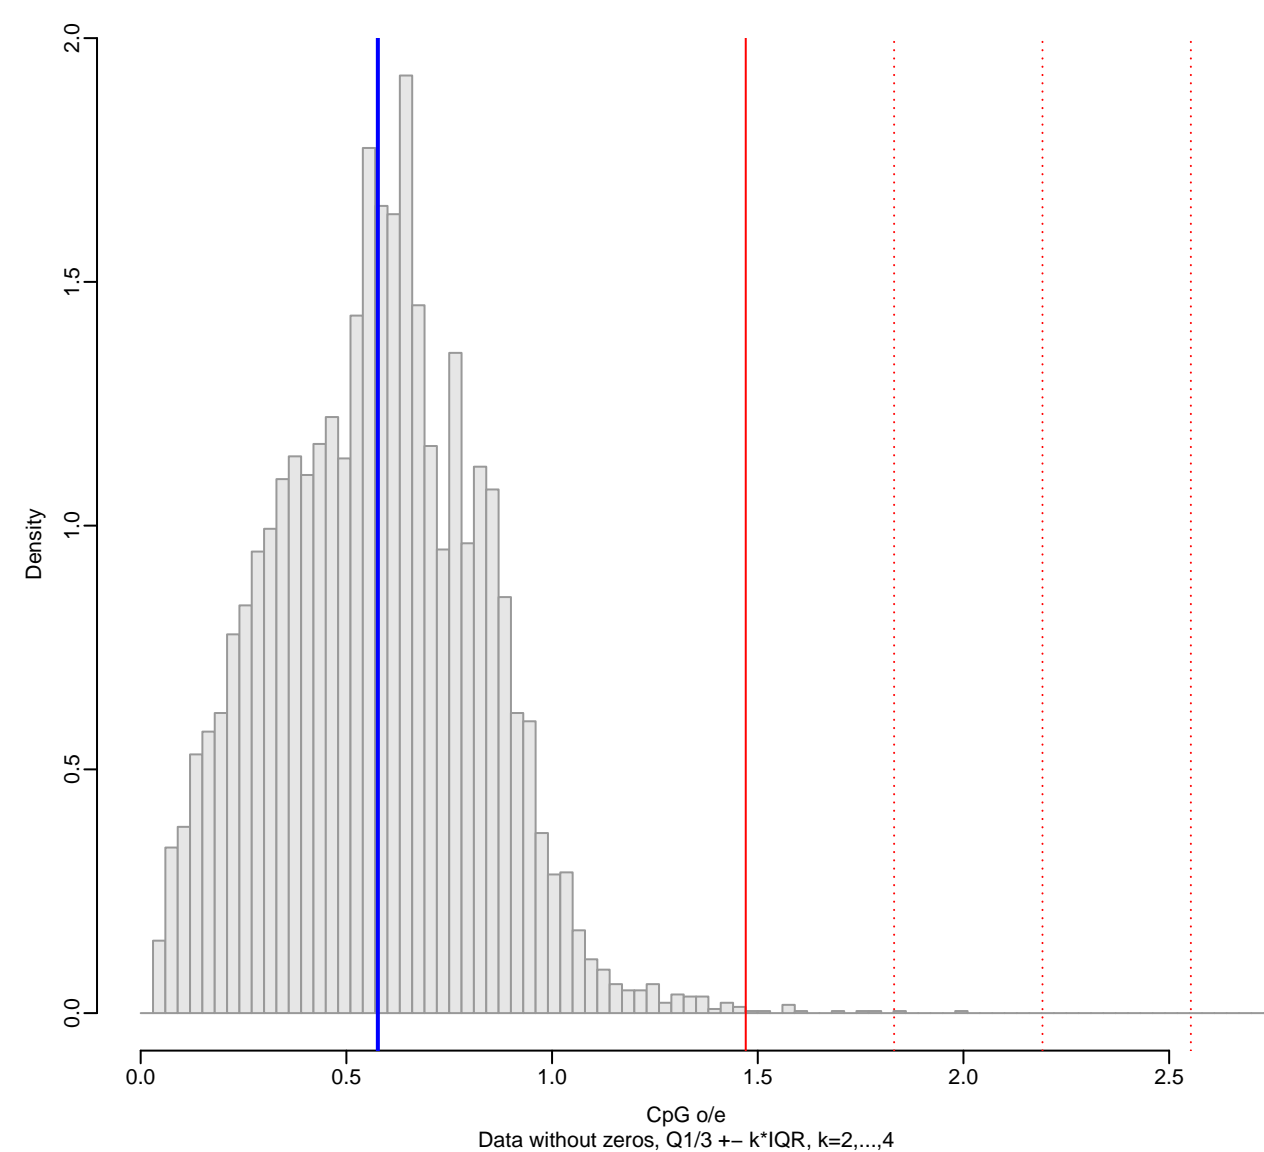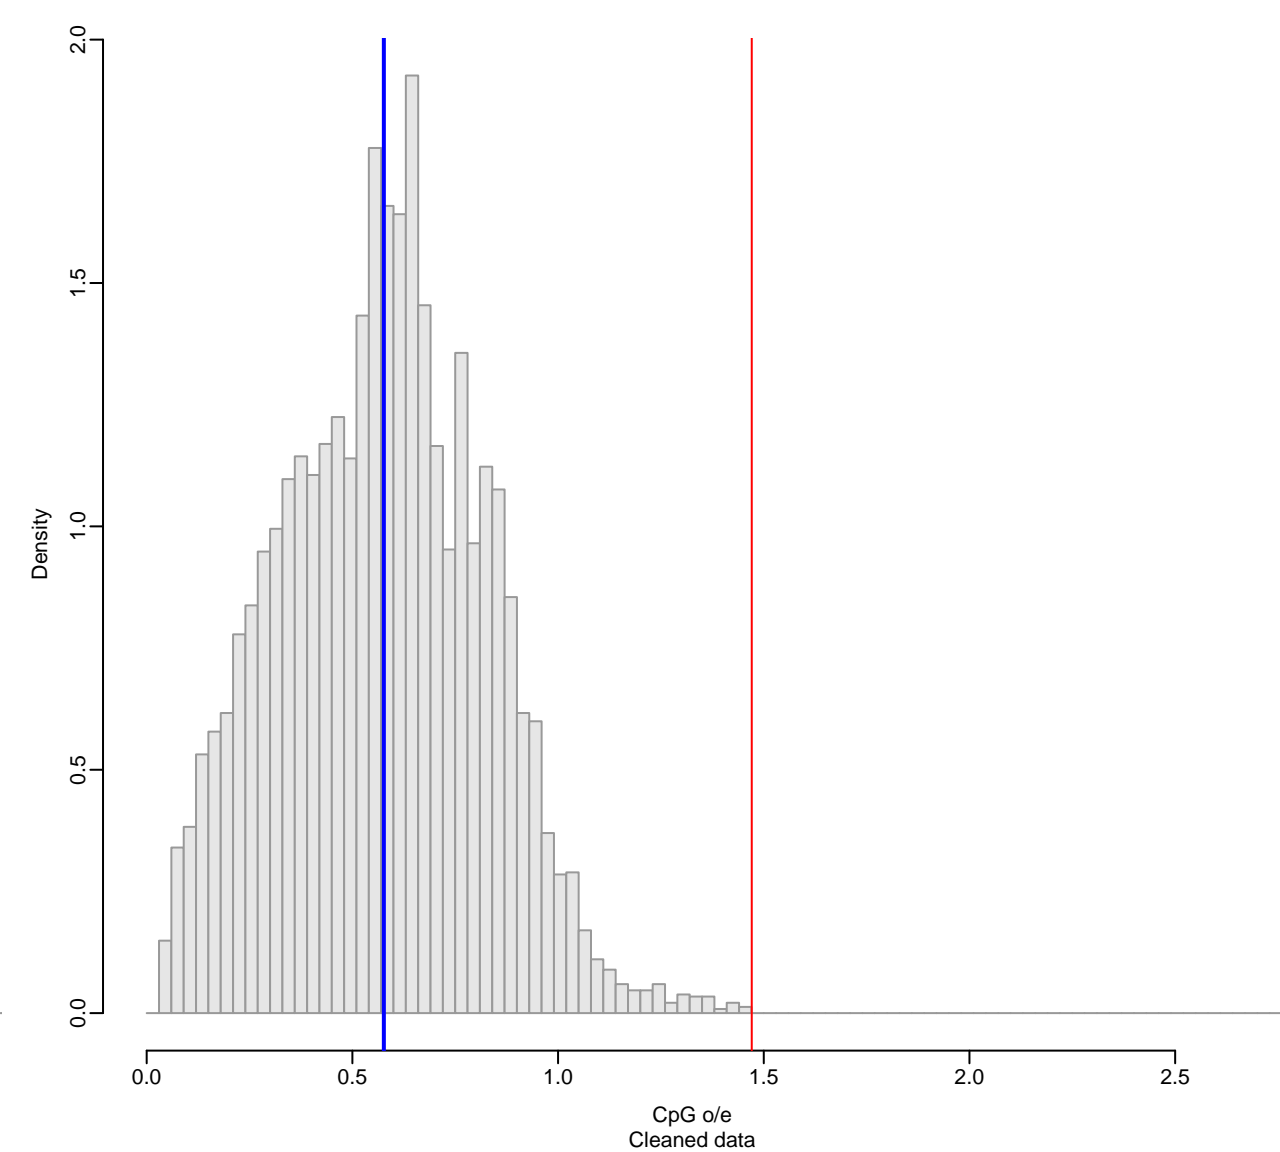

Lithognathus\_mormyrus

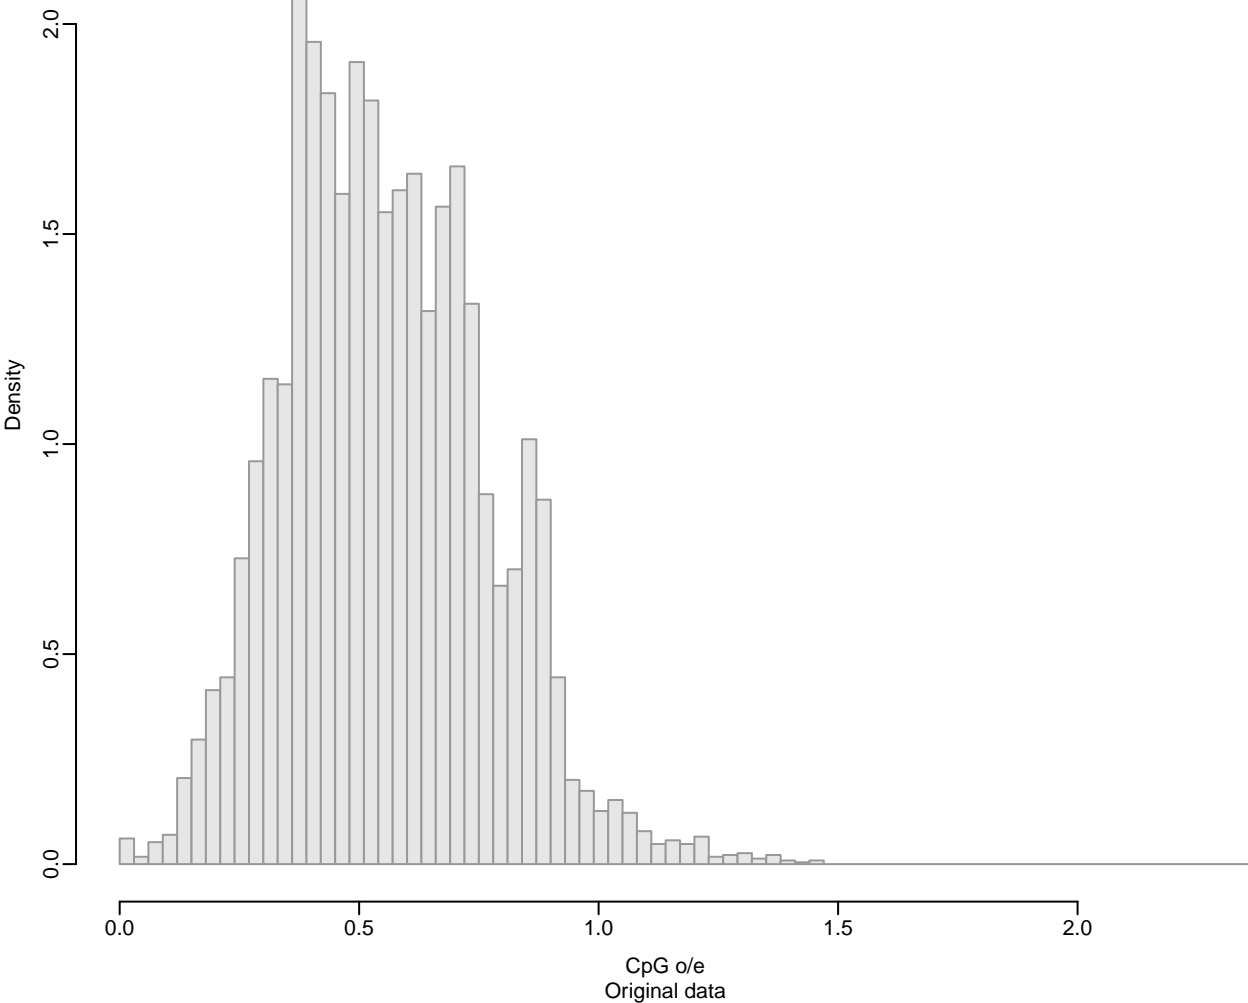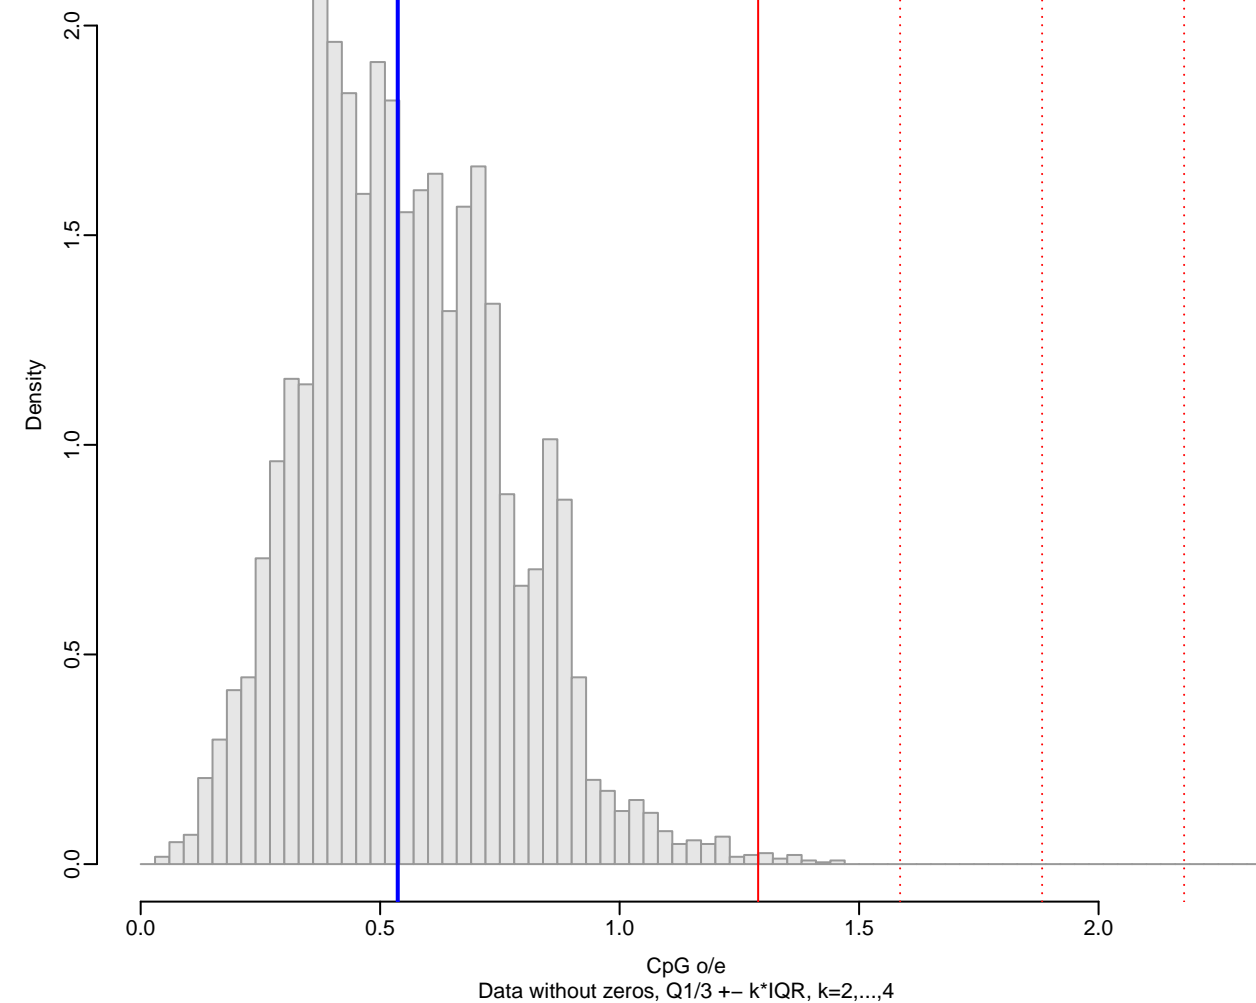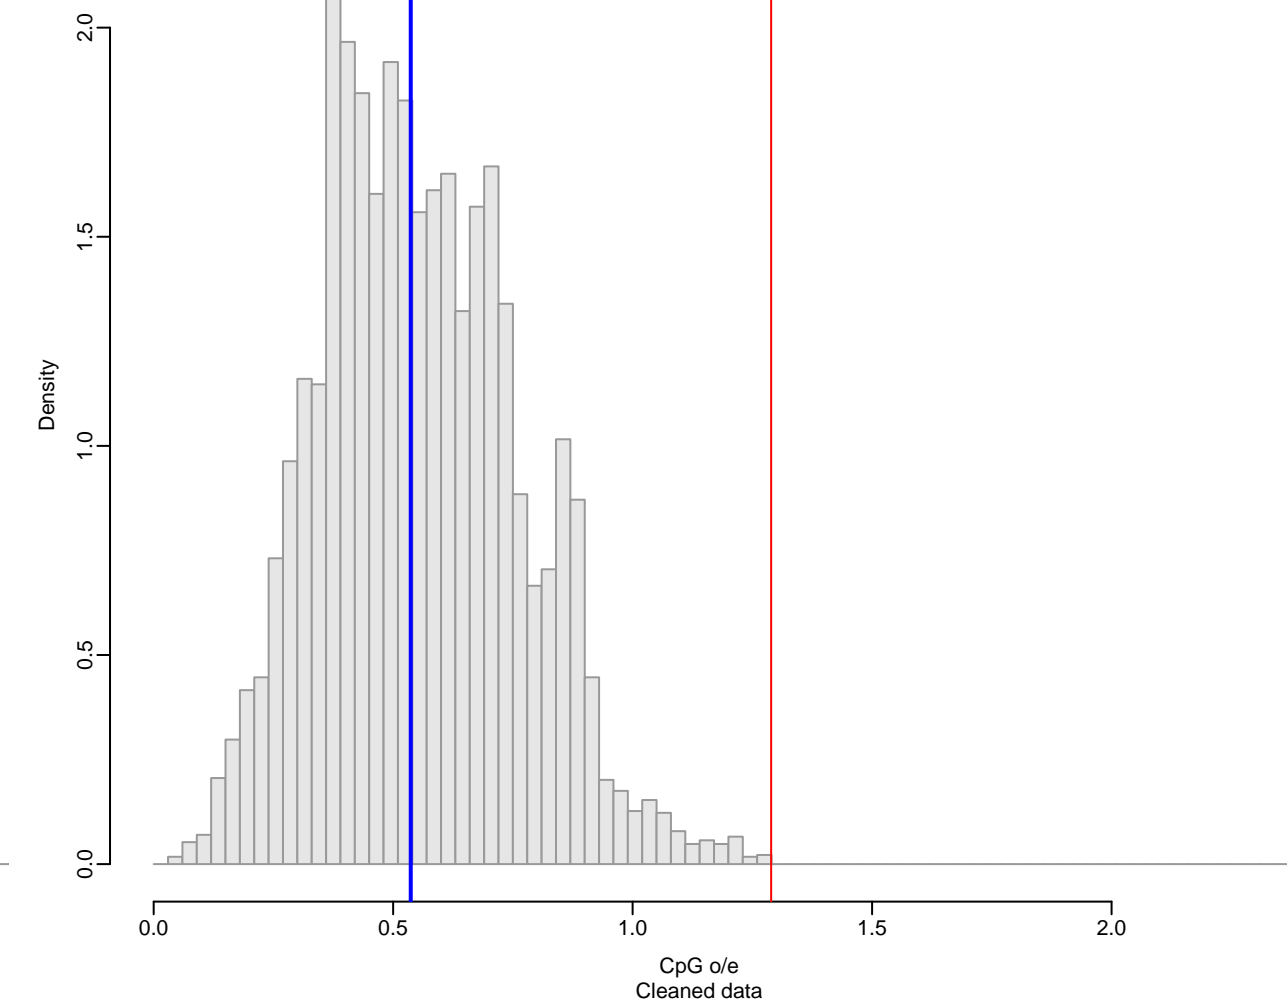

Litopenaeus\_vannamei

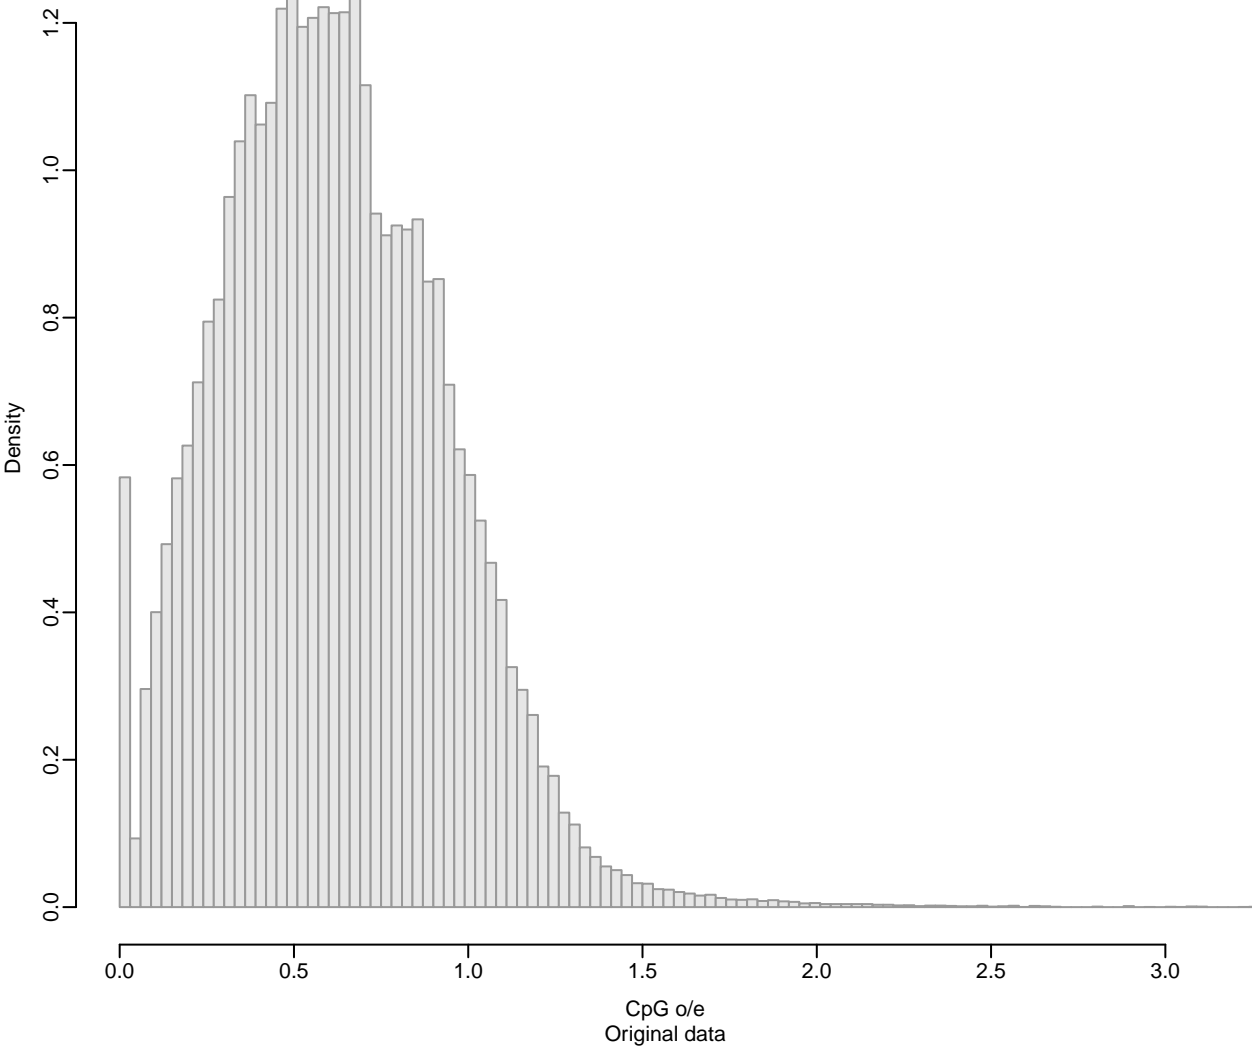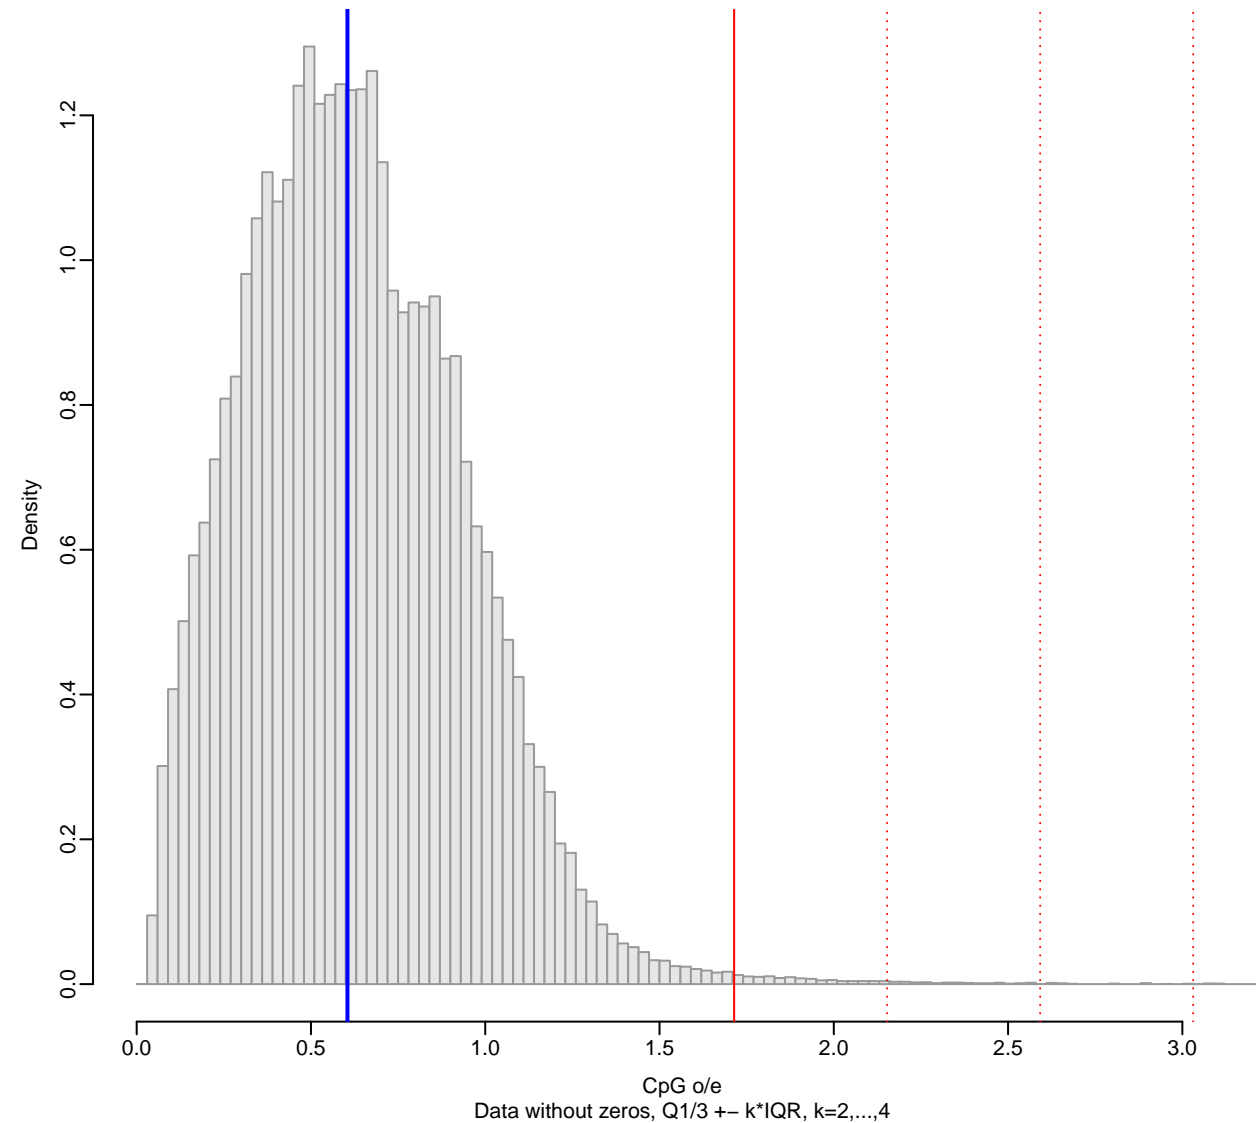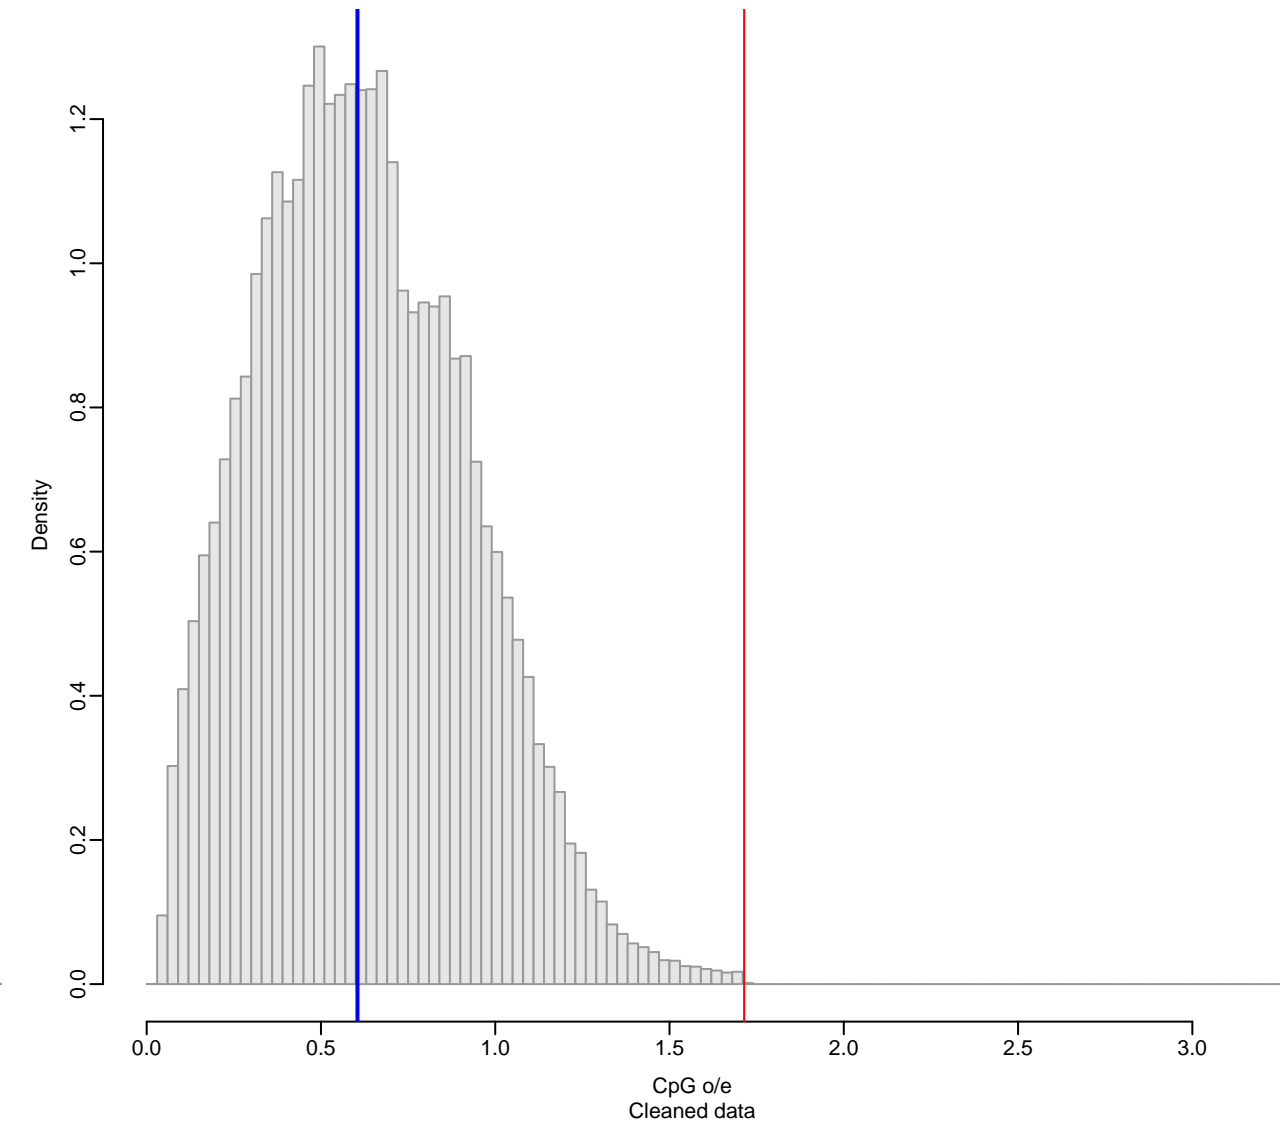

Littorina\_saxatilis

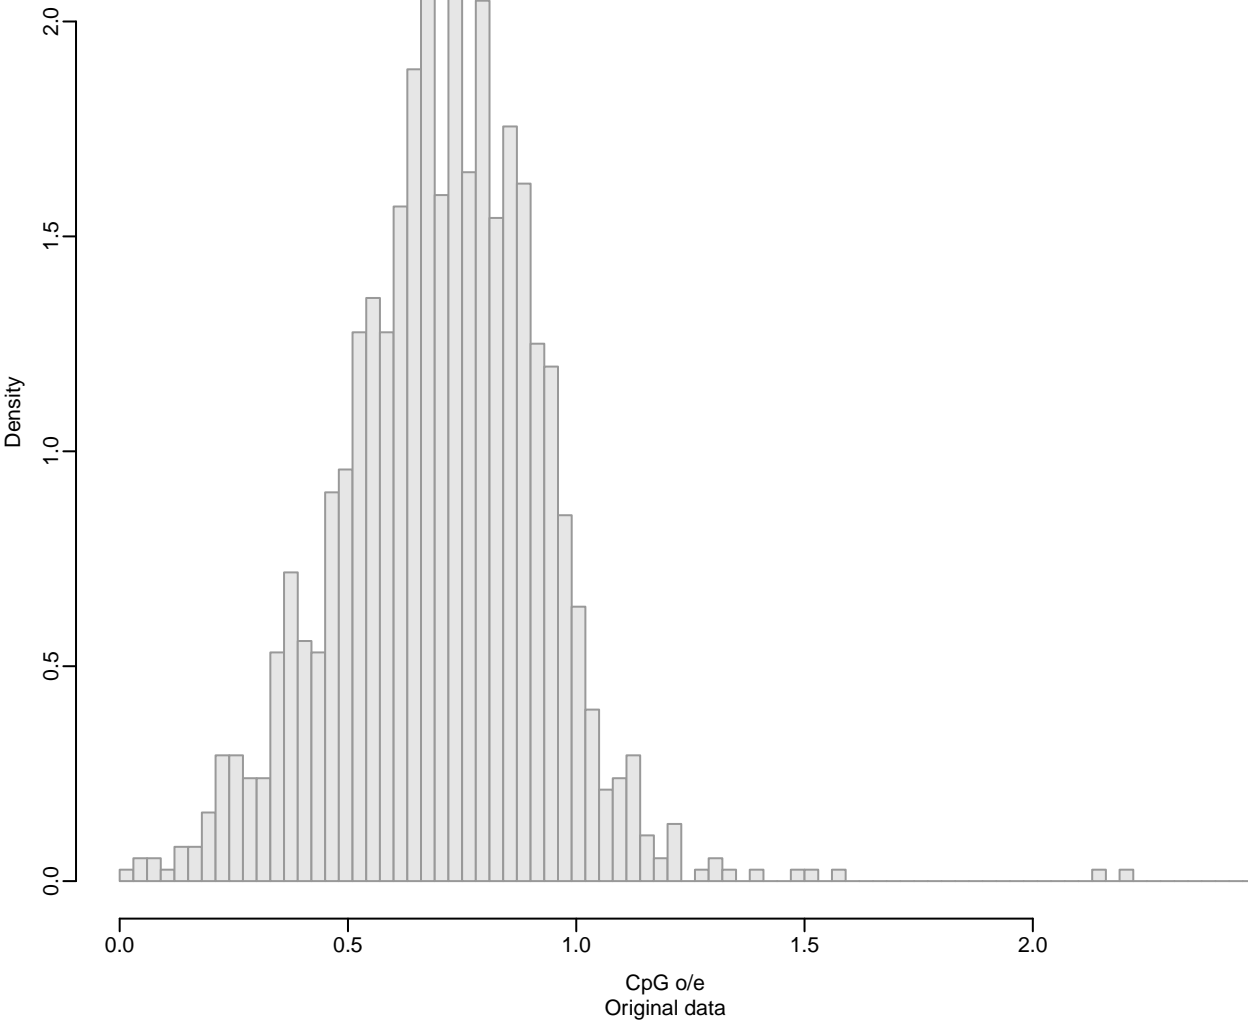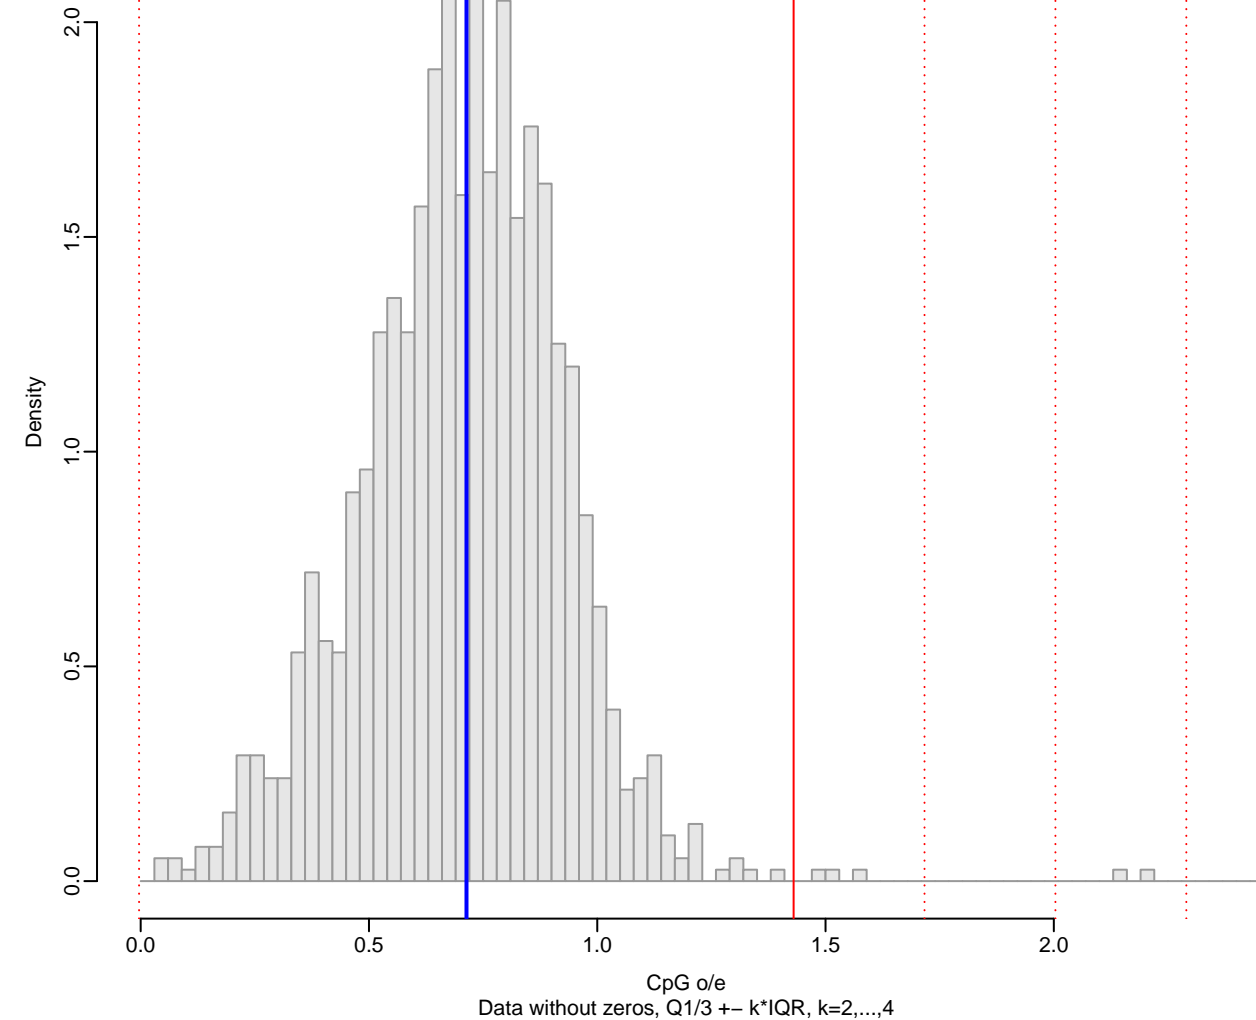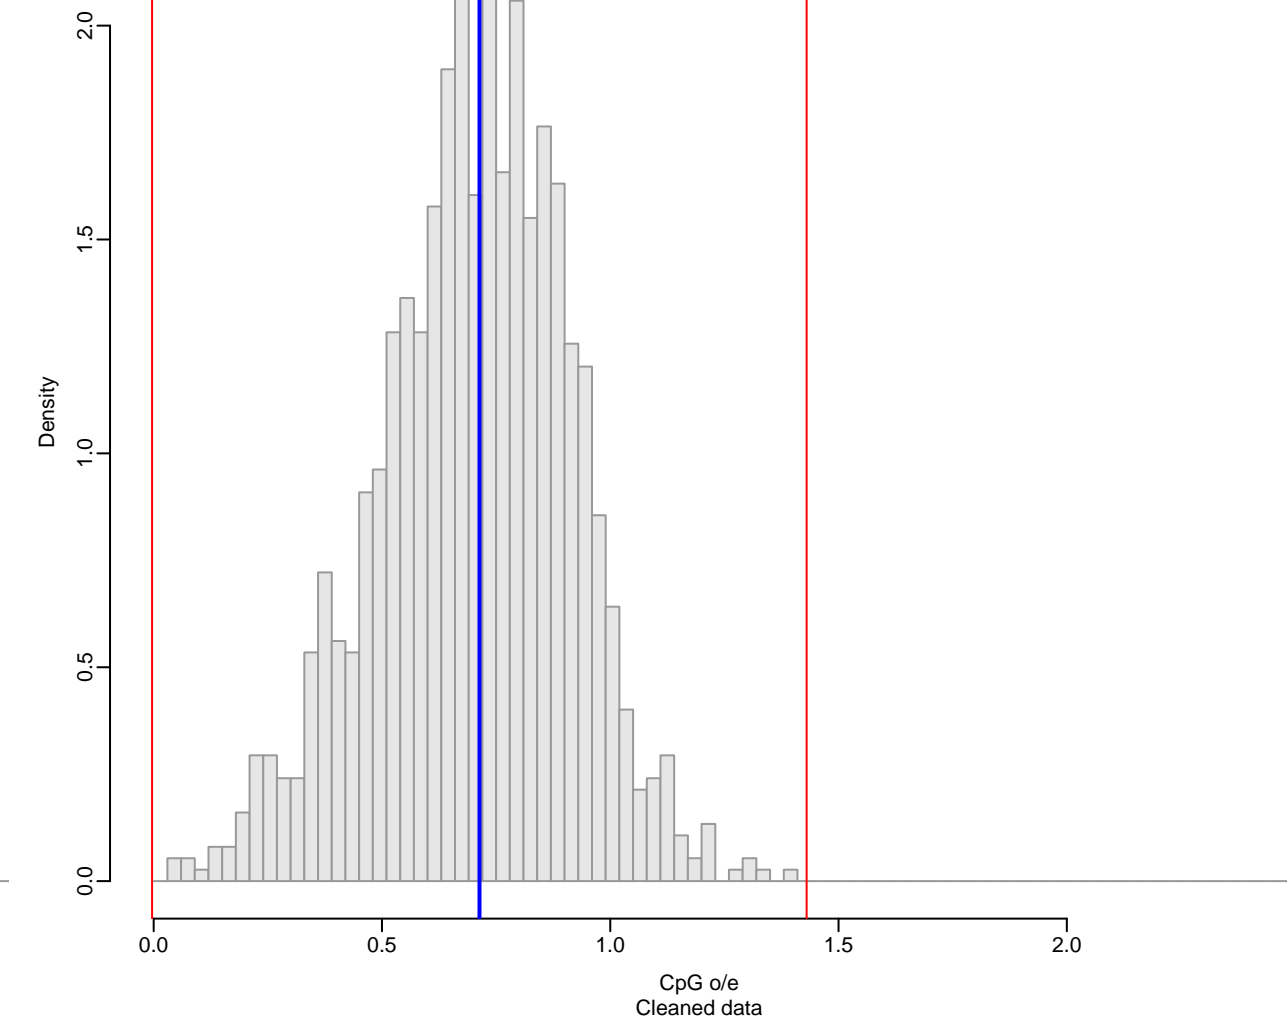

Loa\_loa

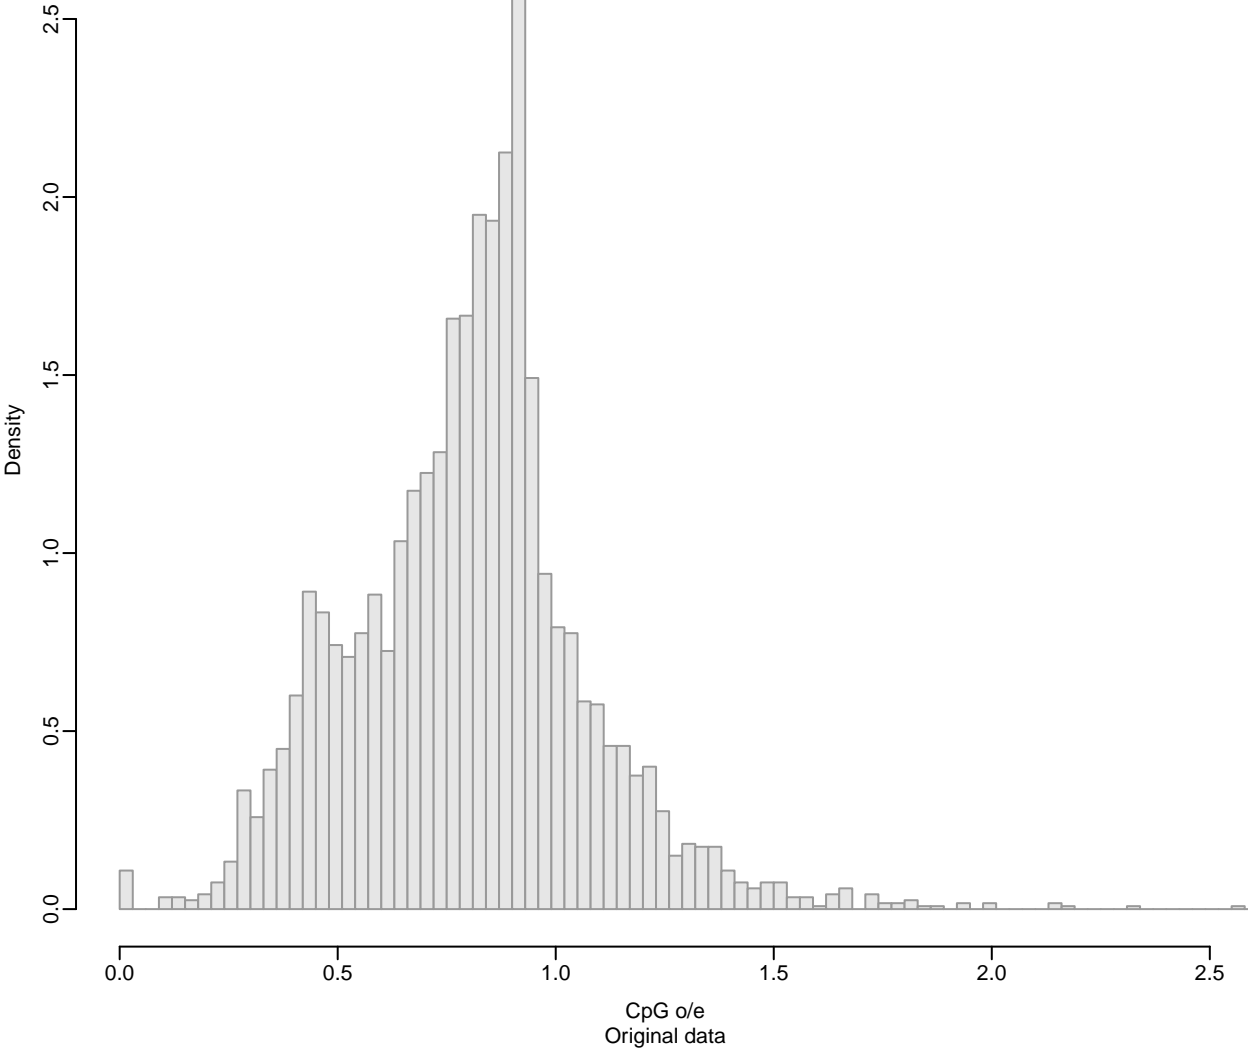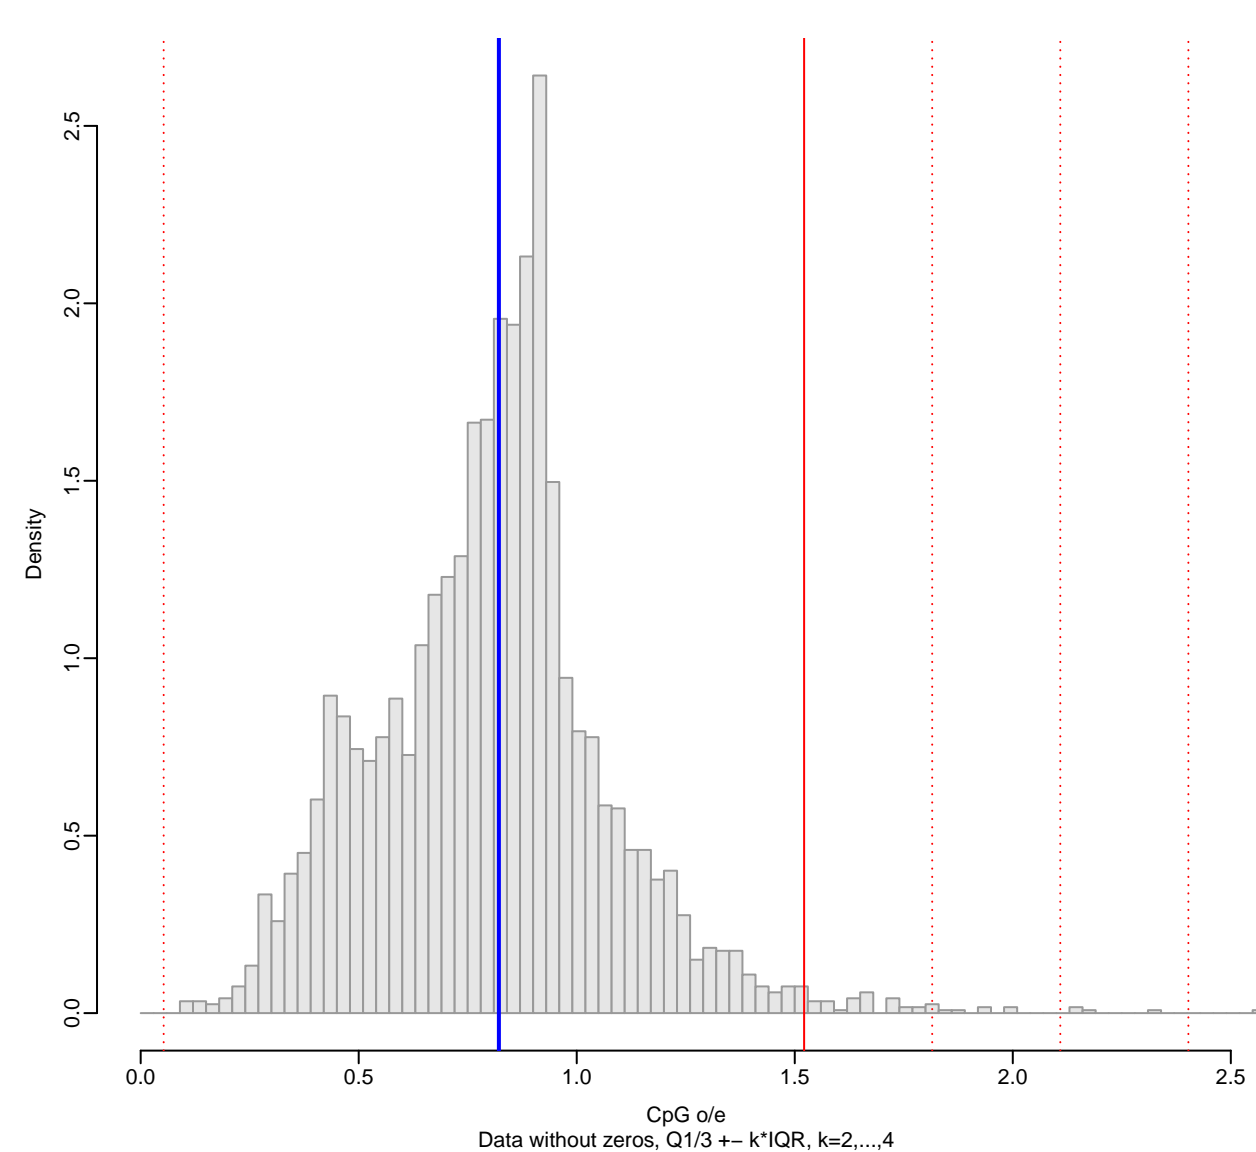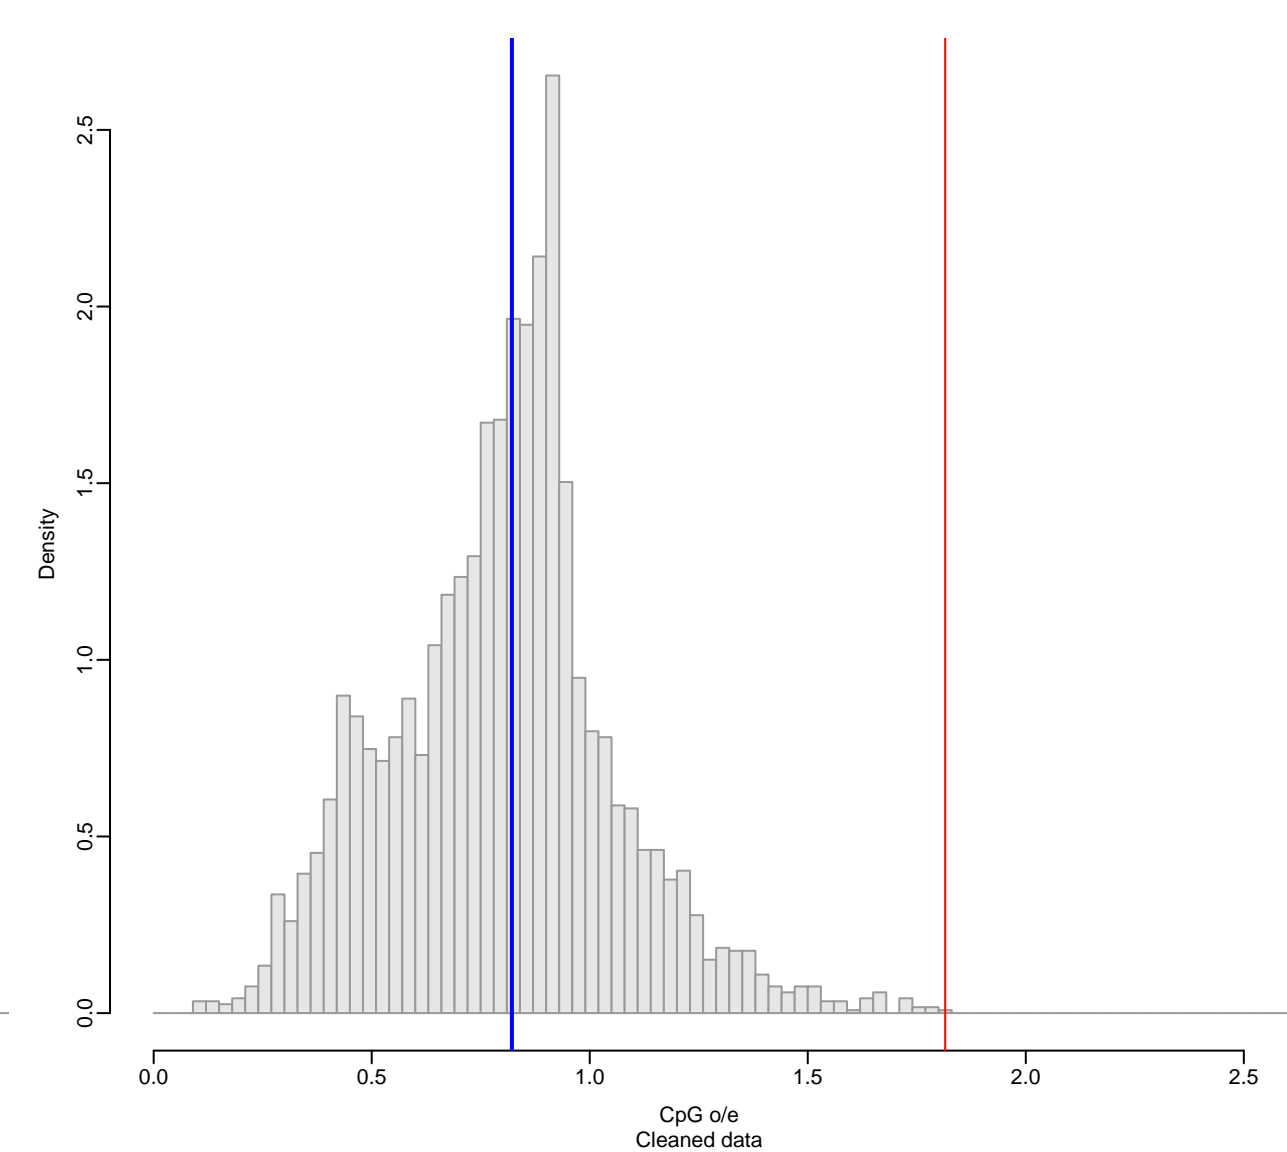

Locusta\_migratoria

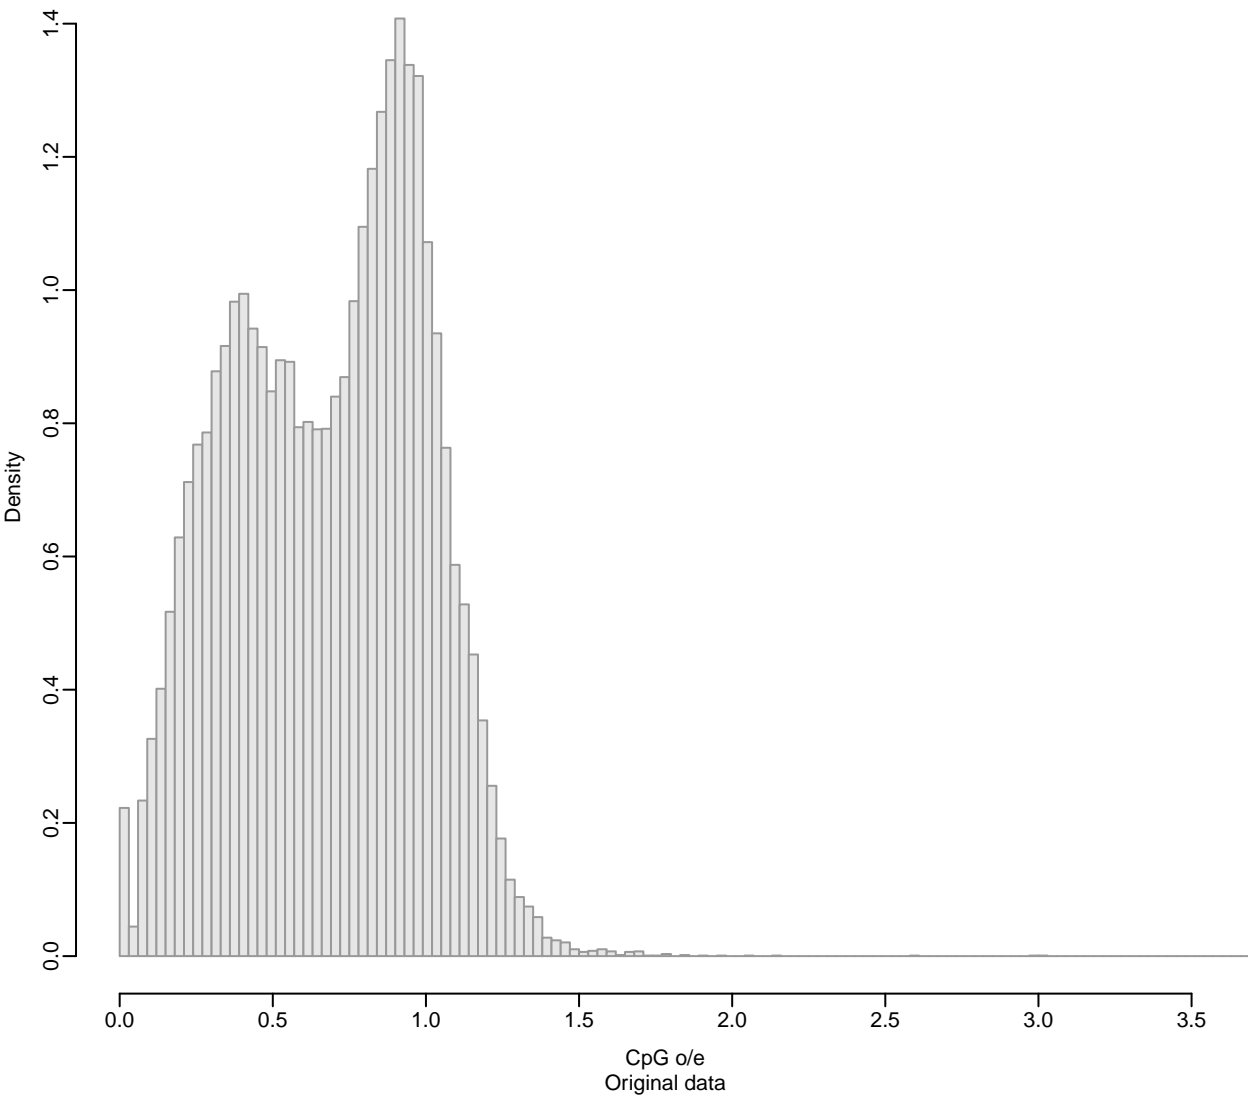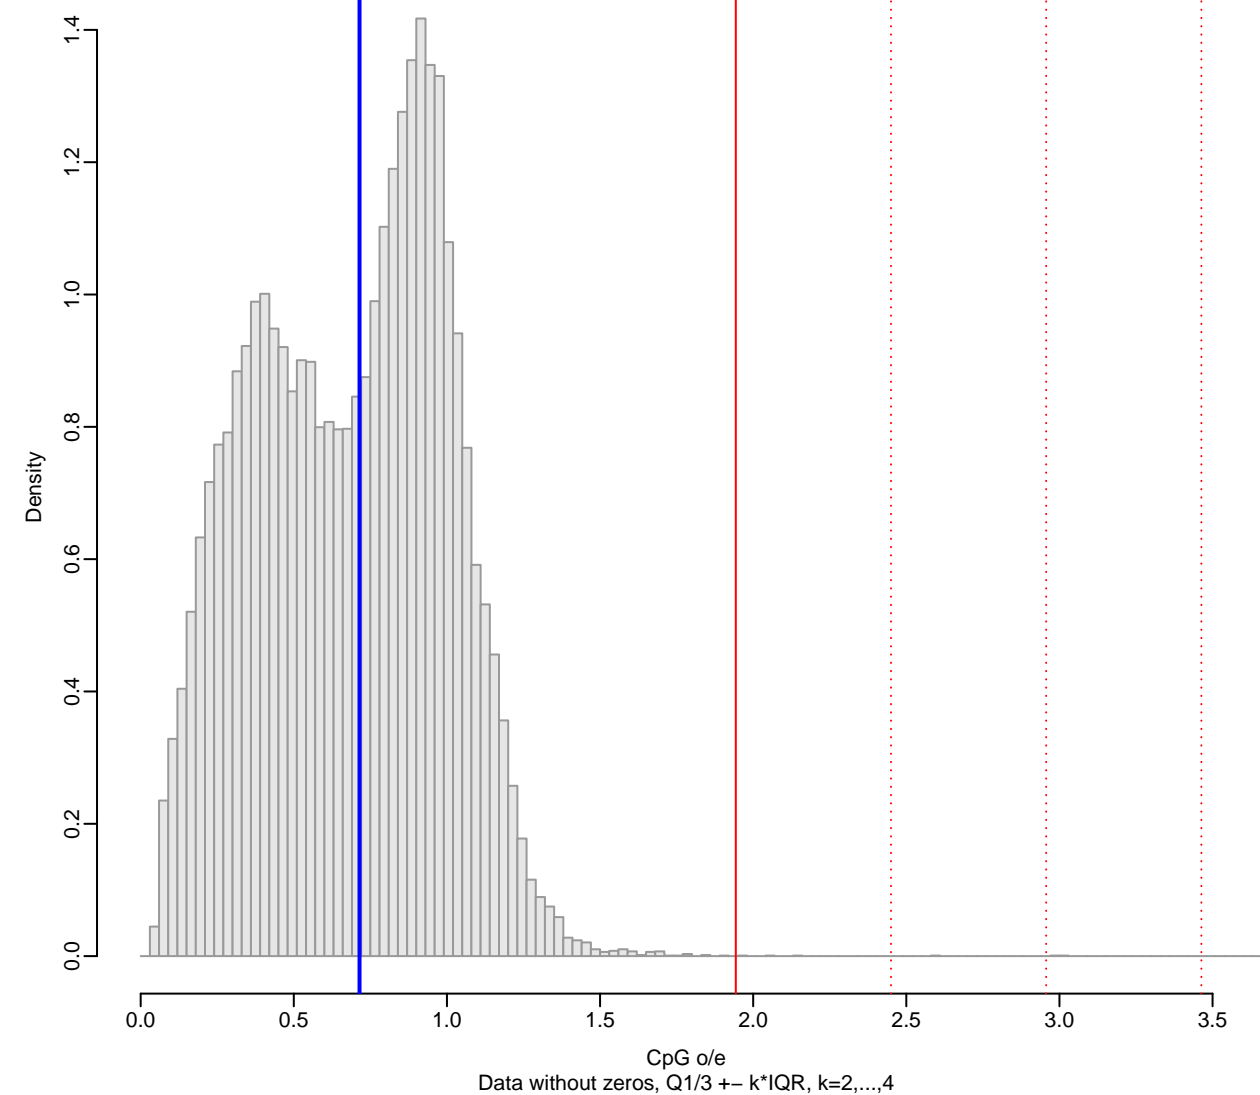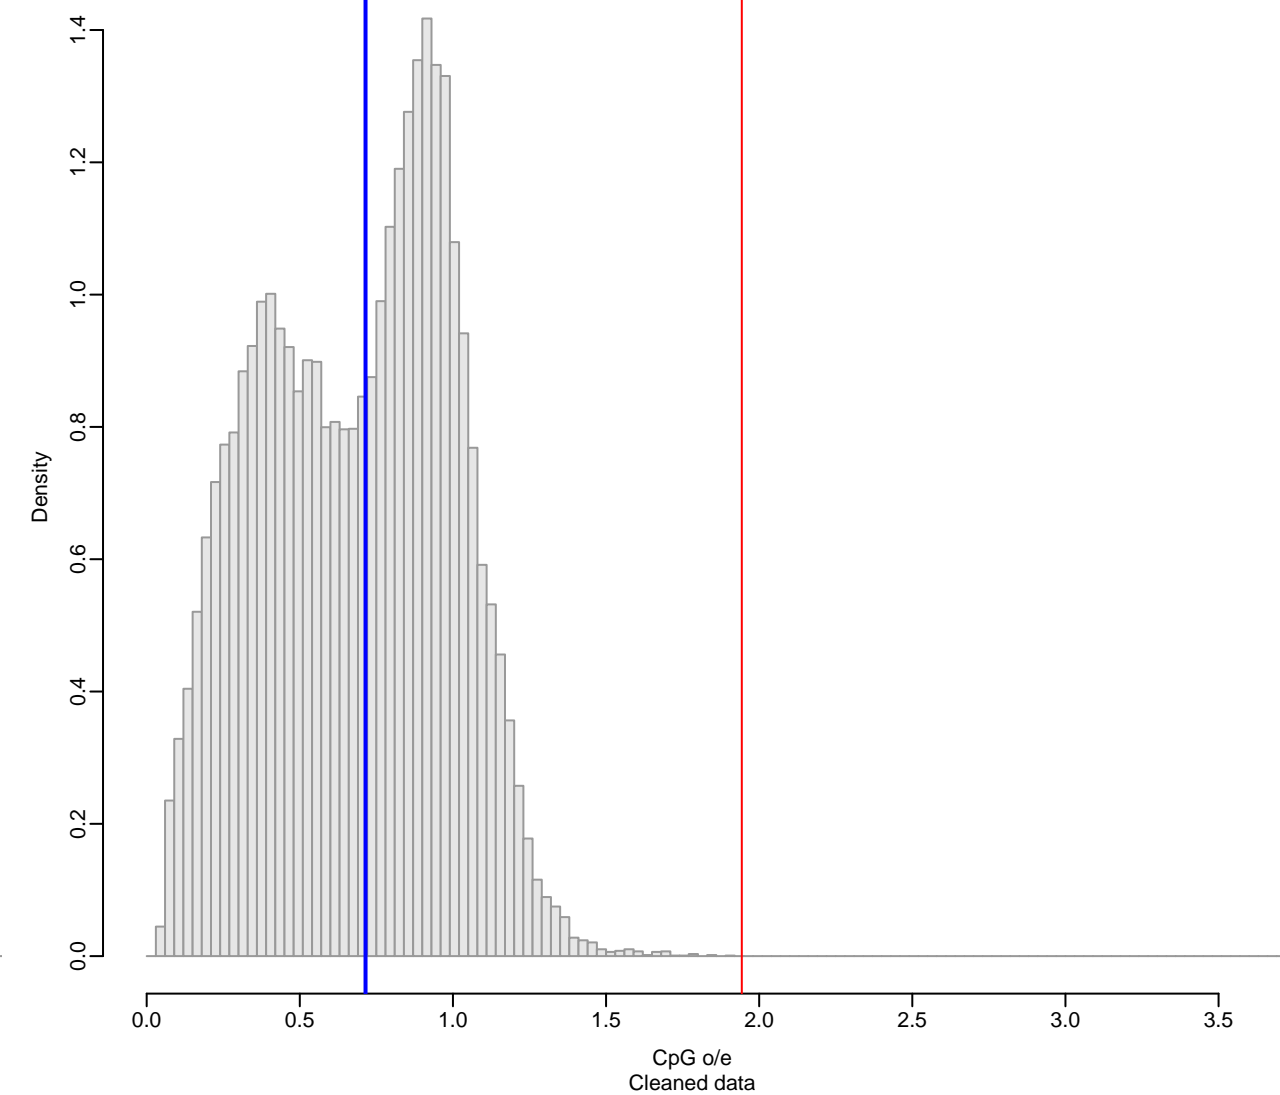

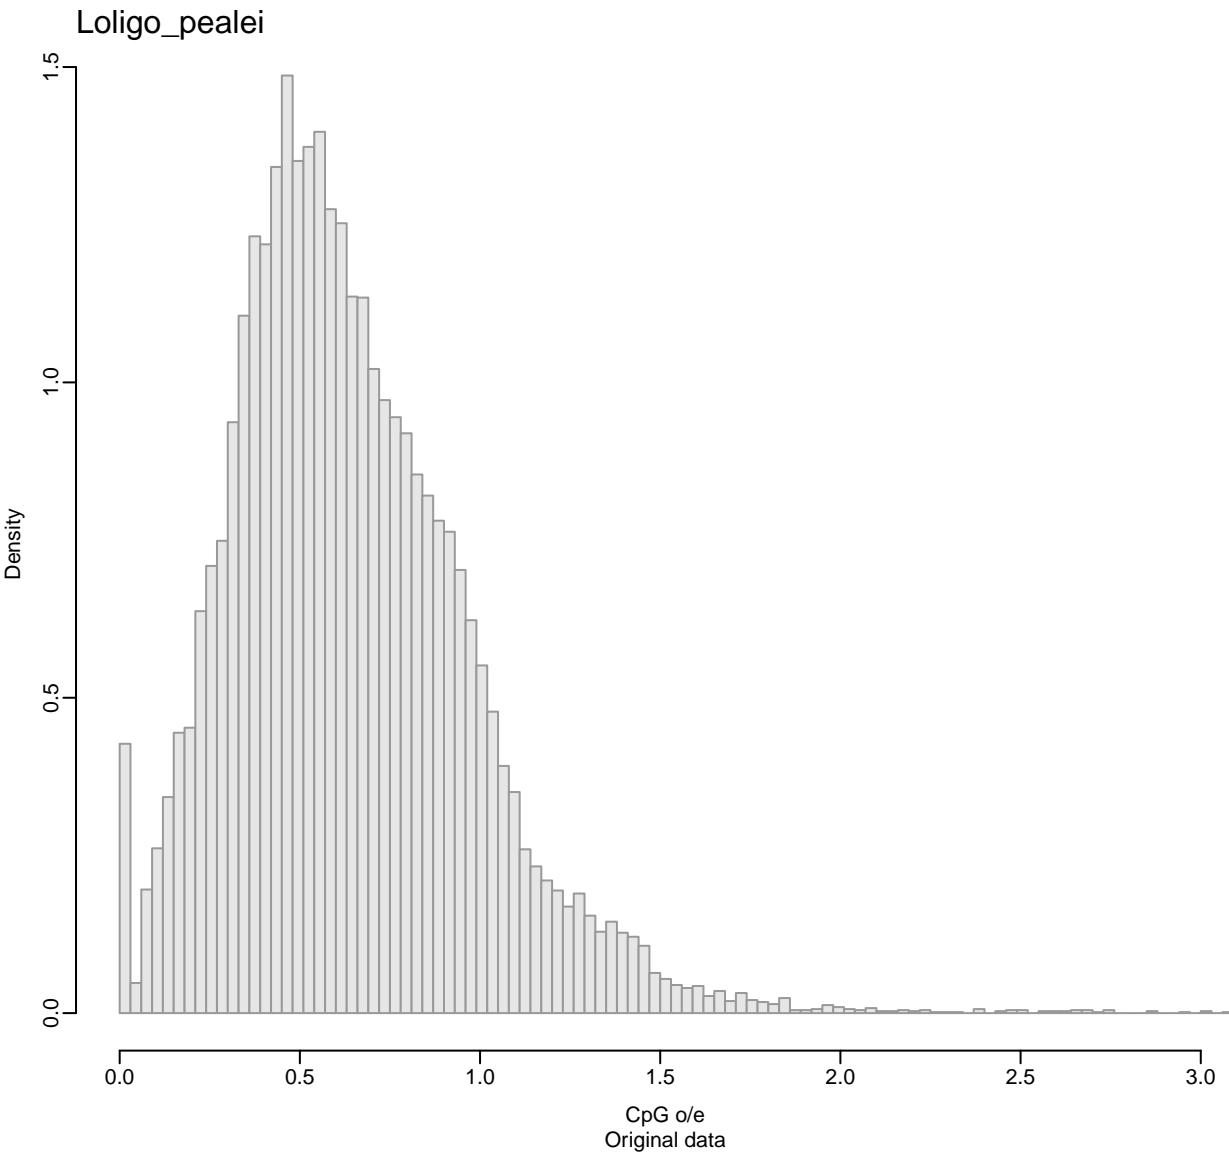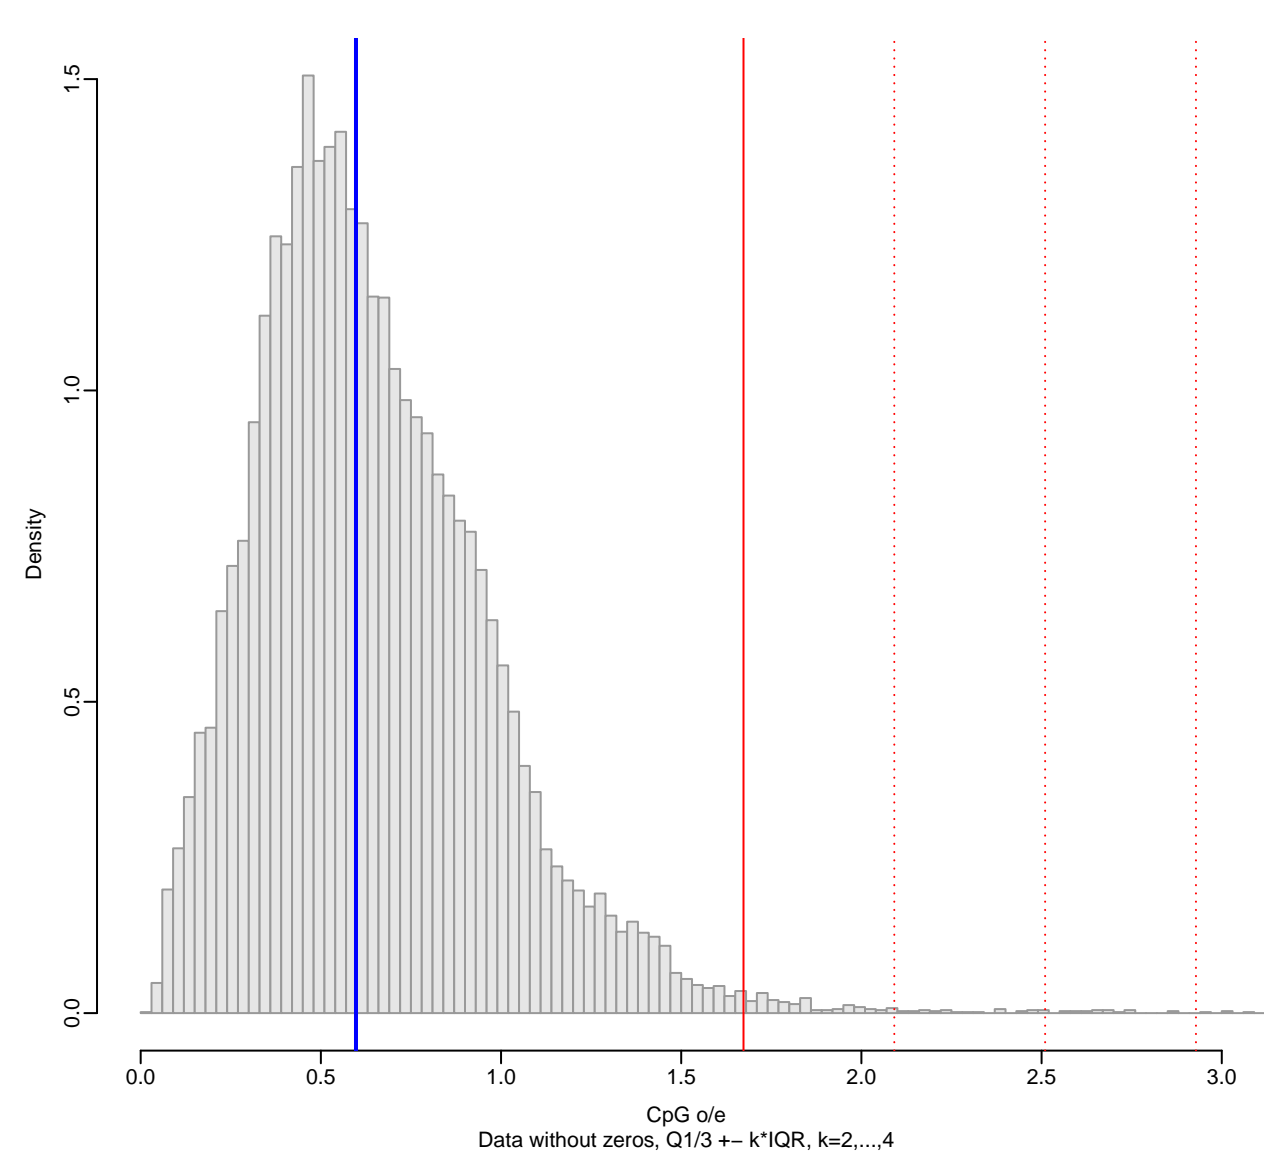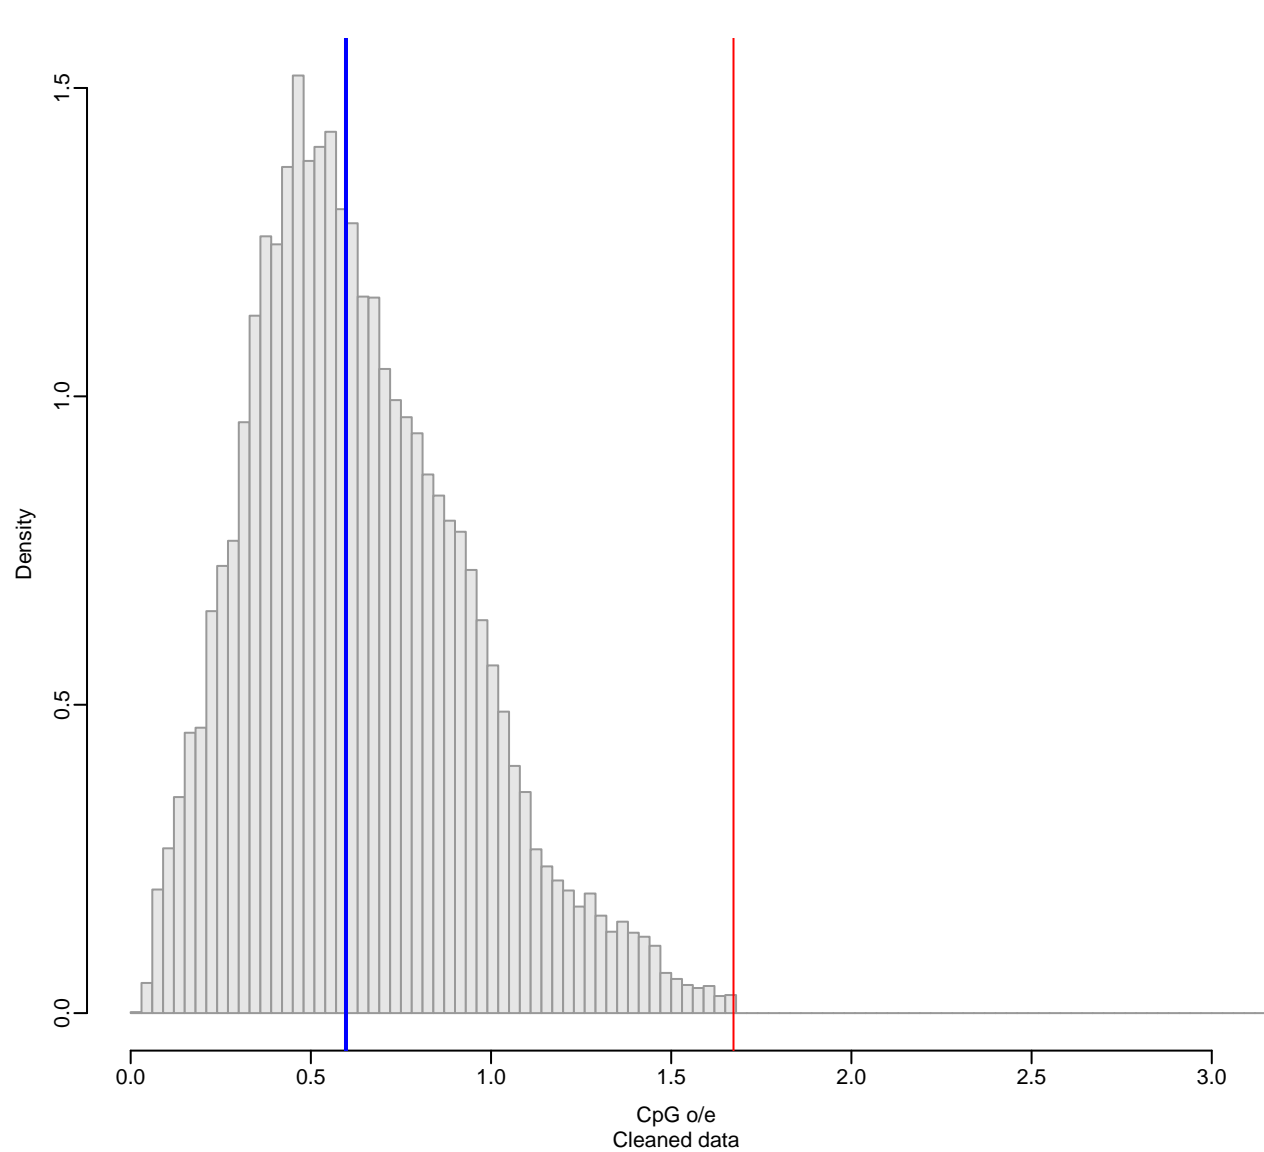



# Lolium\_perenne

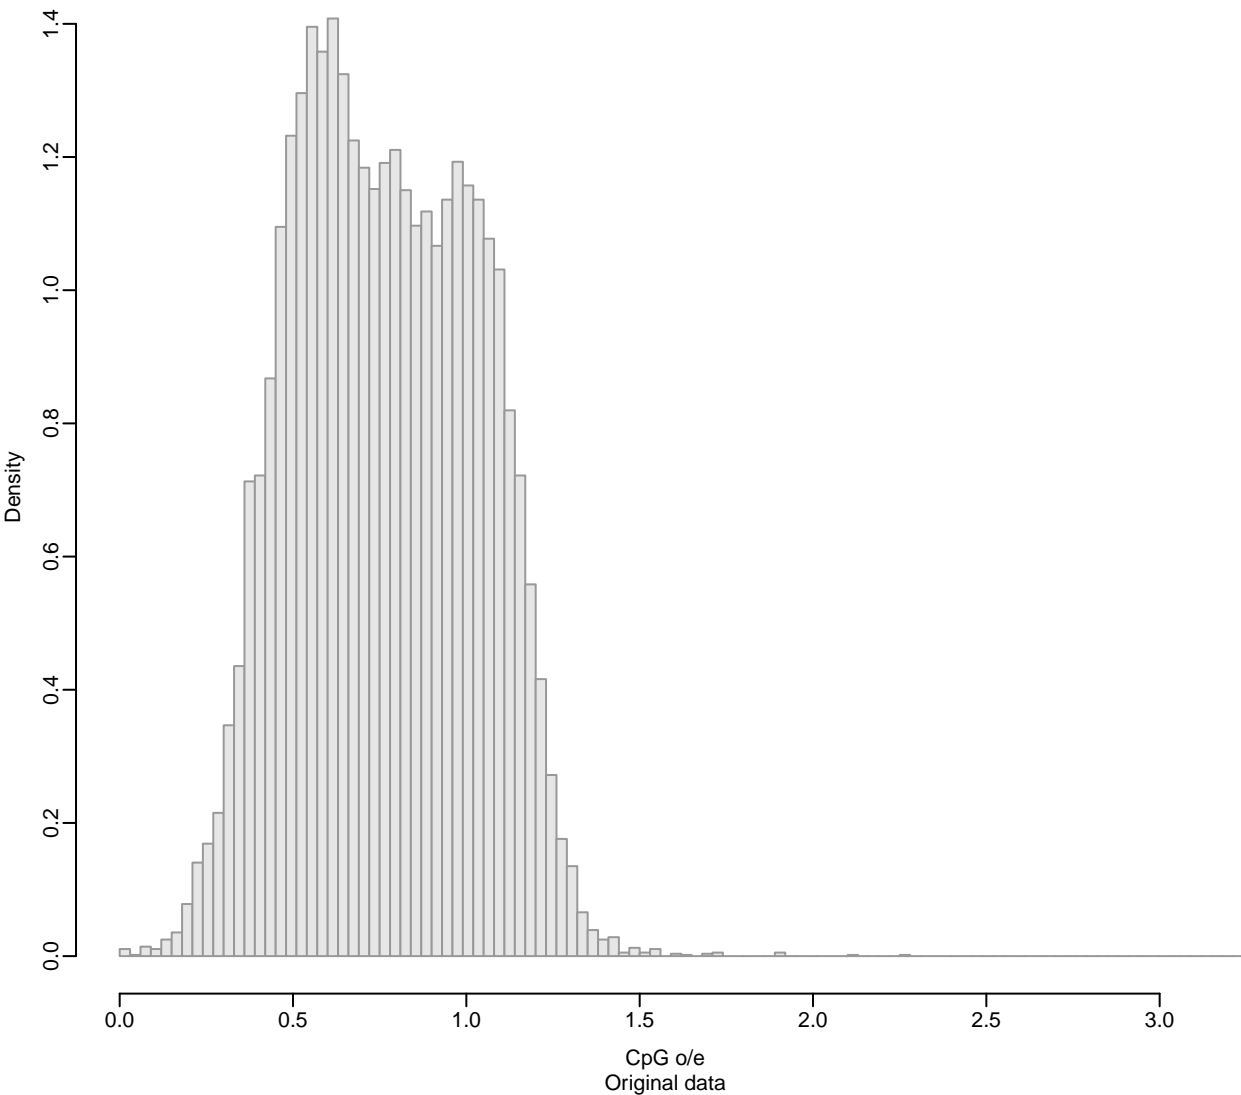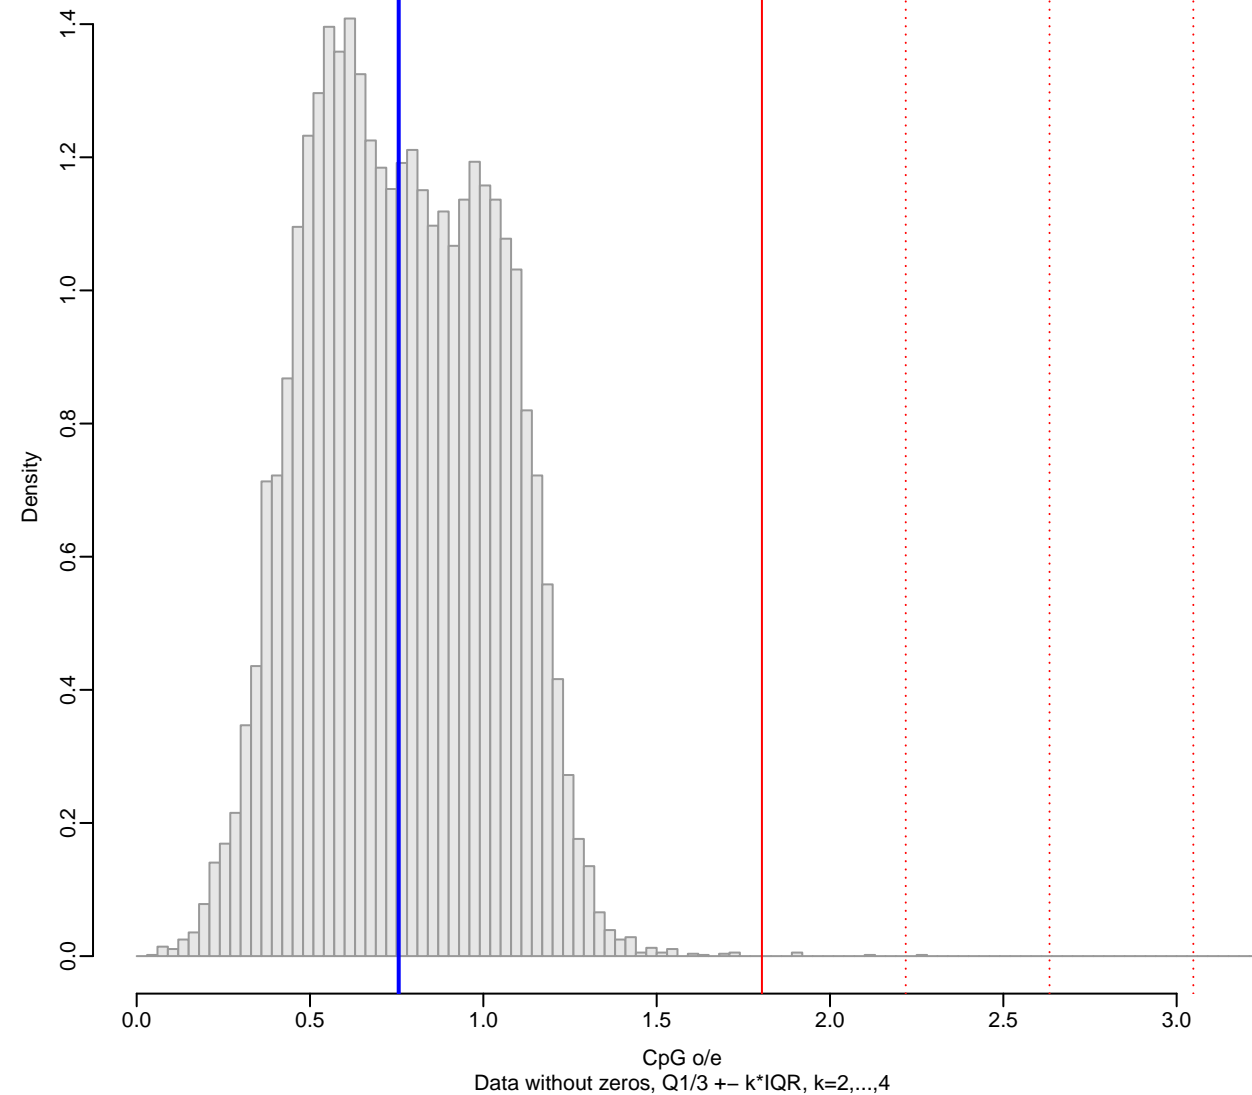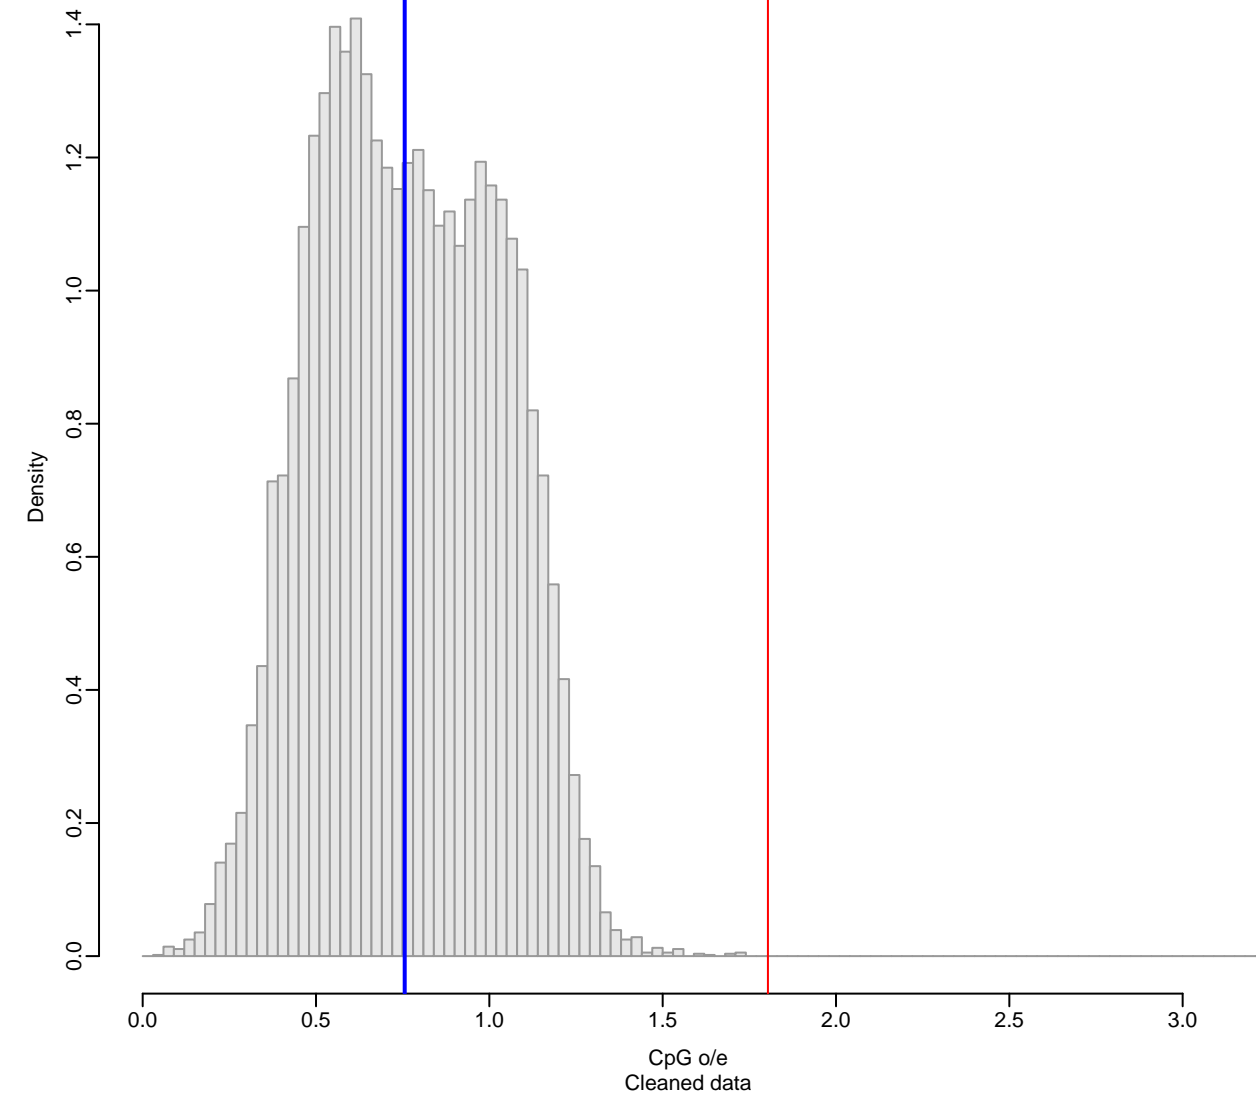

Lottia\_gigantea

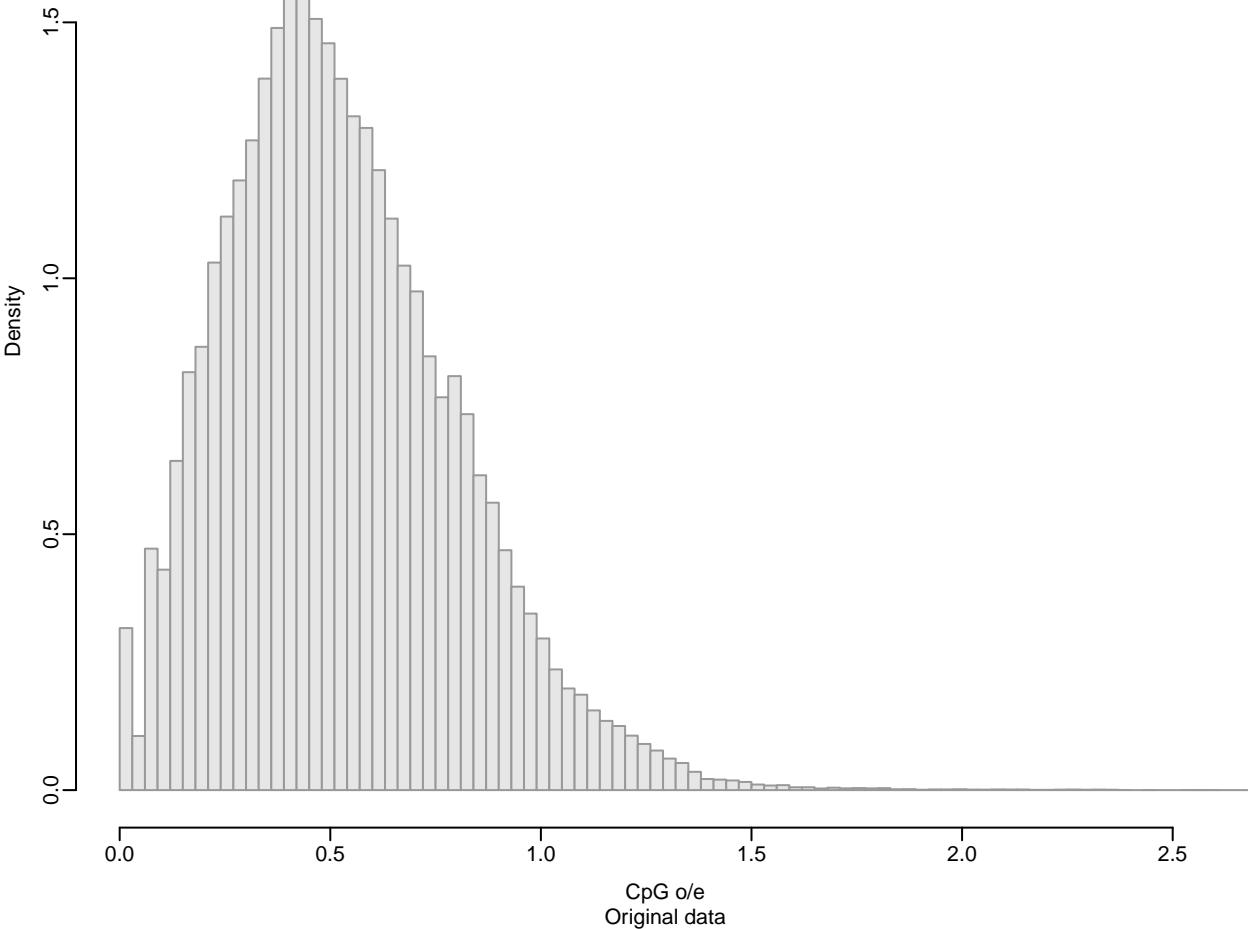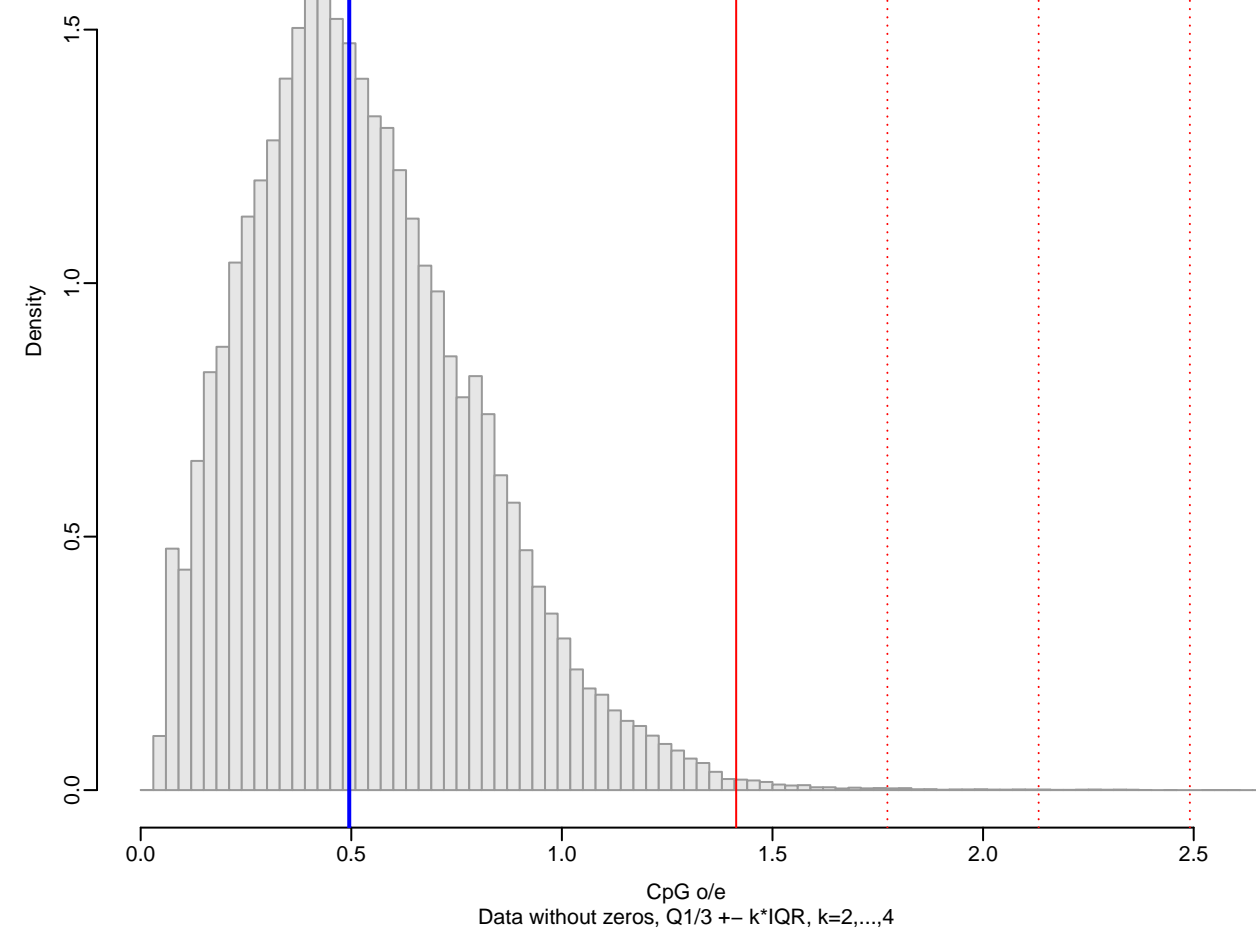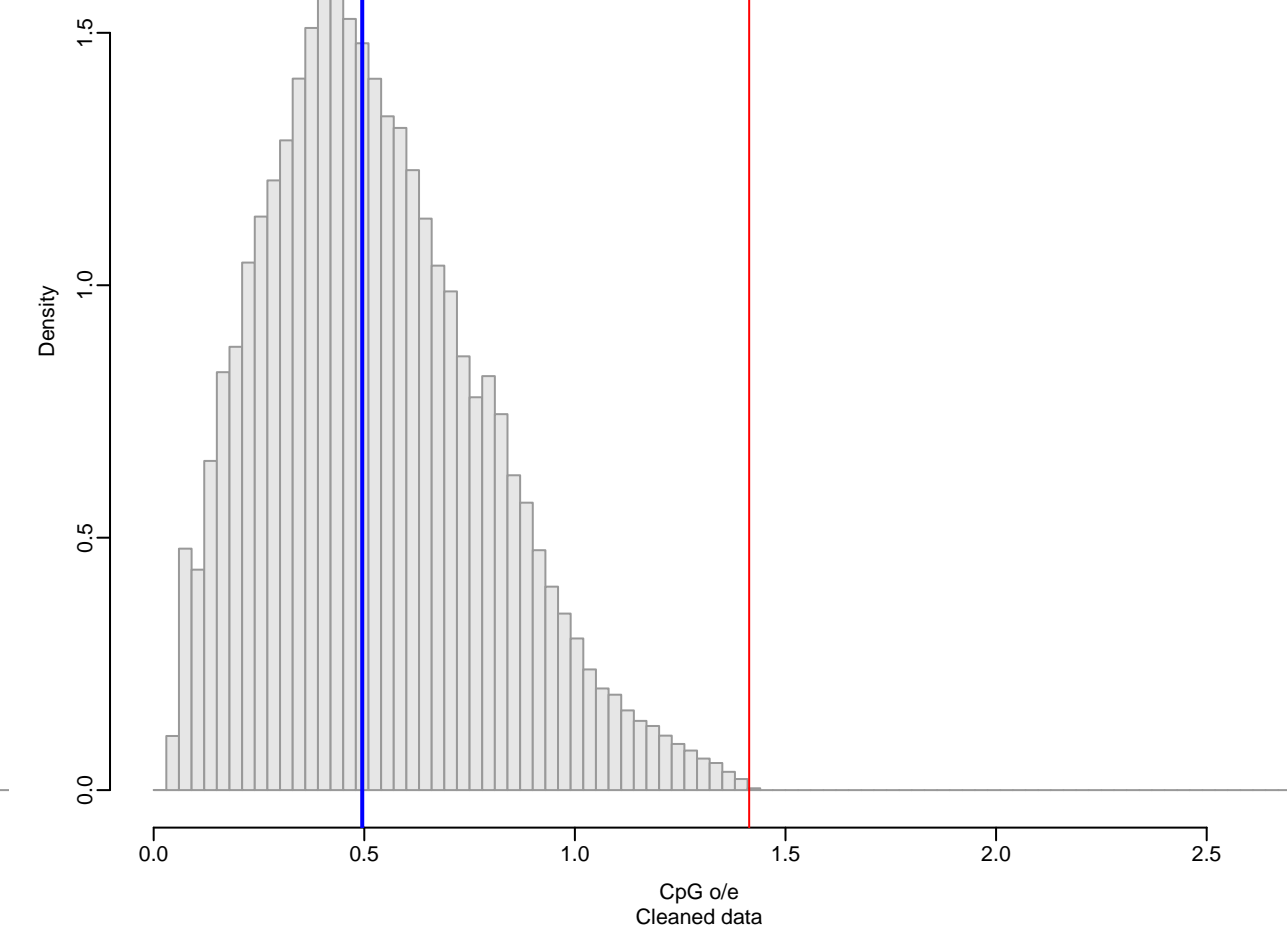

## Lotus\_japonicus

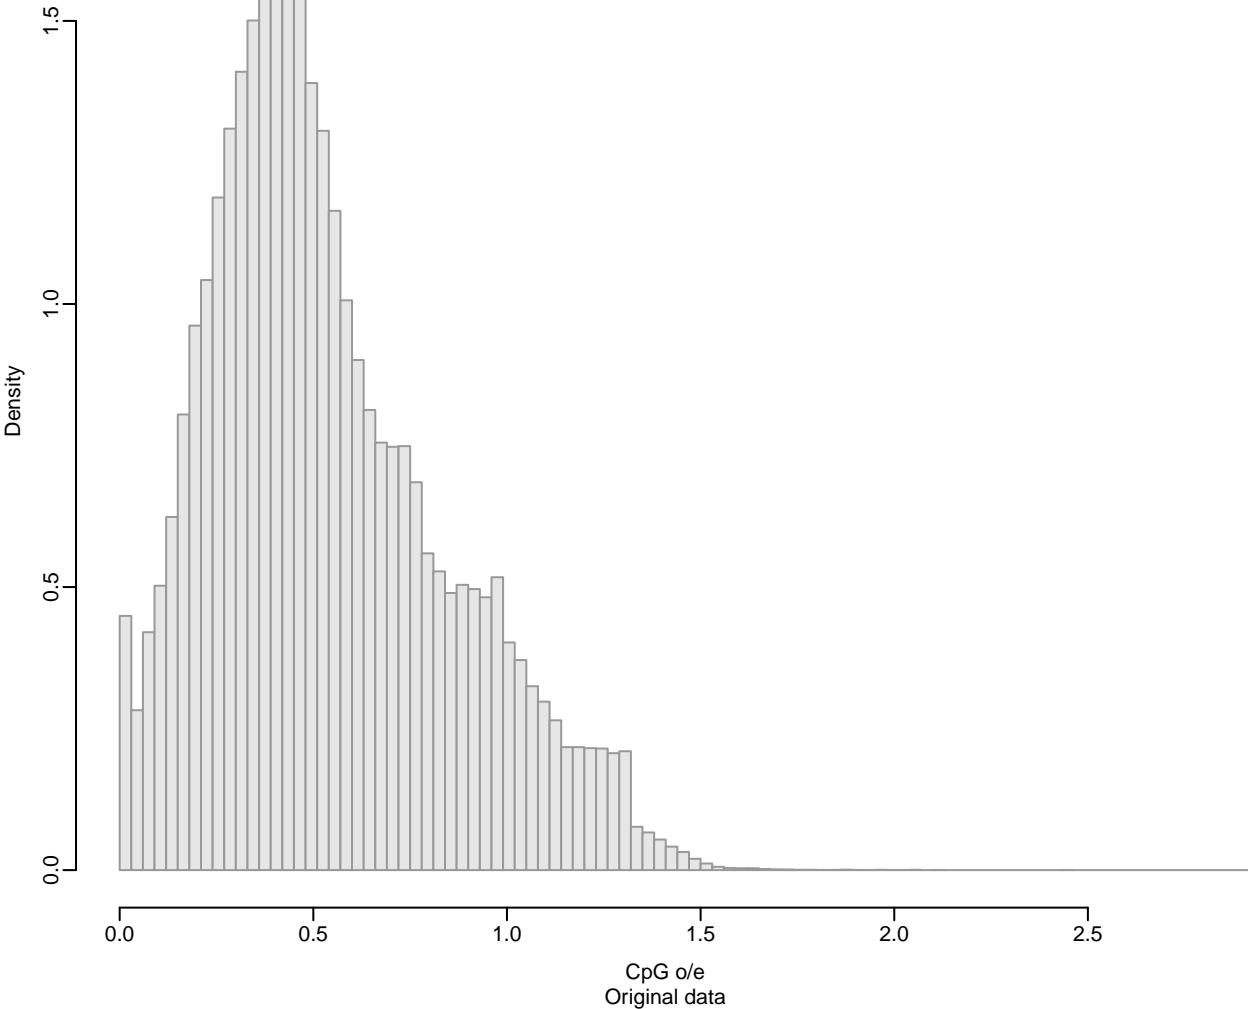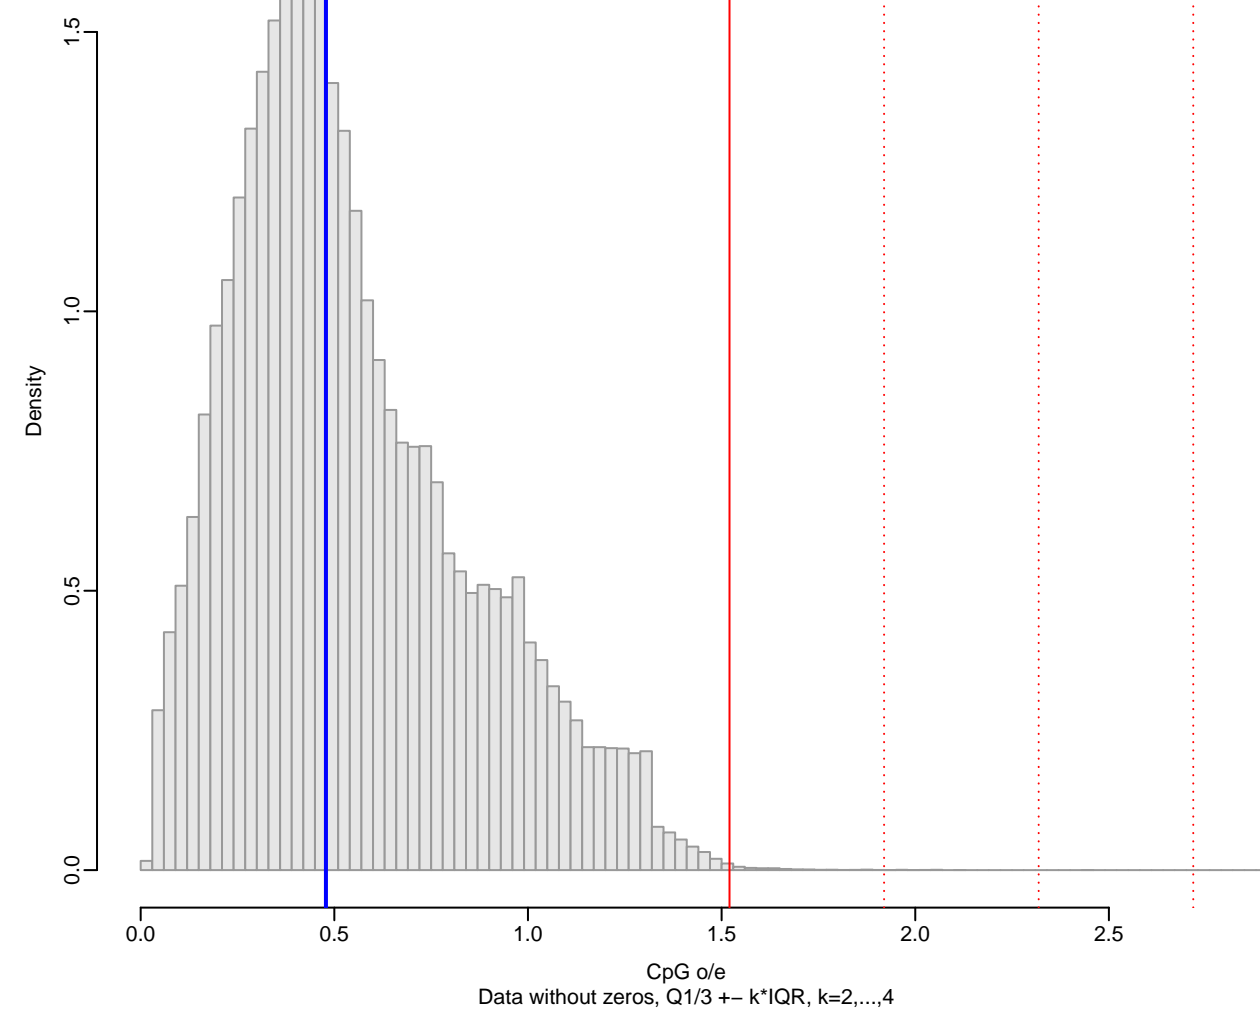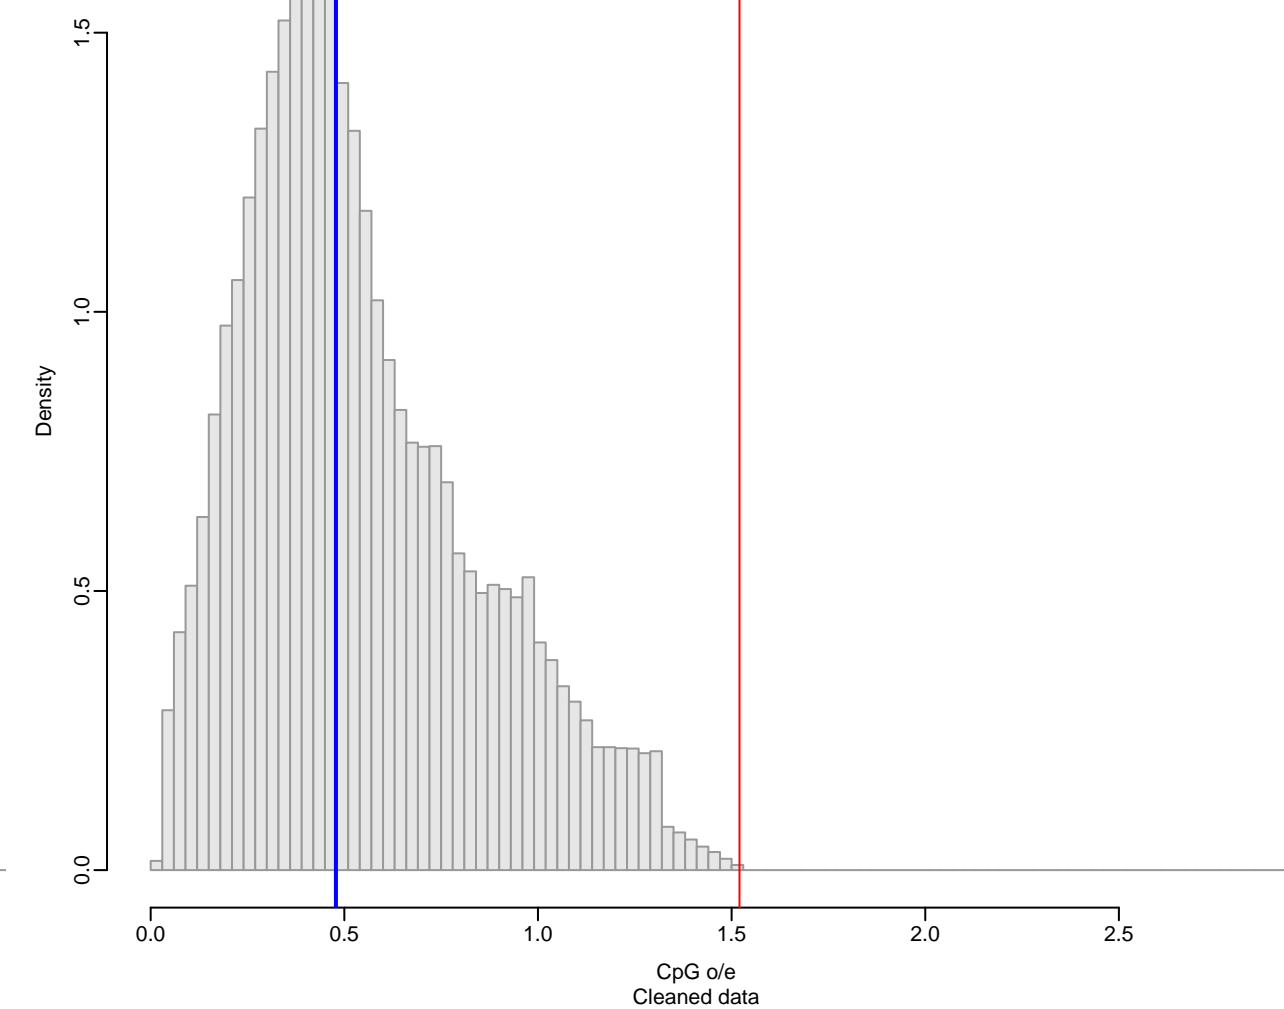

Lumbricus\_rubellus

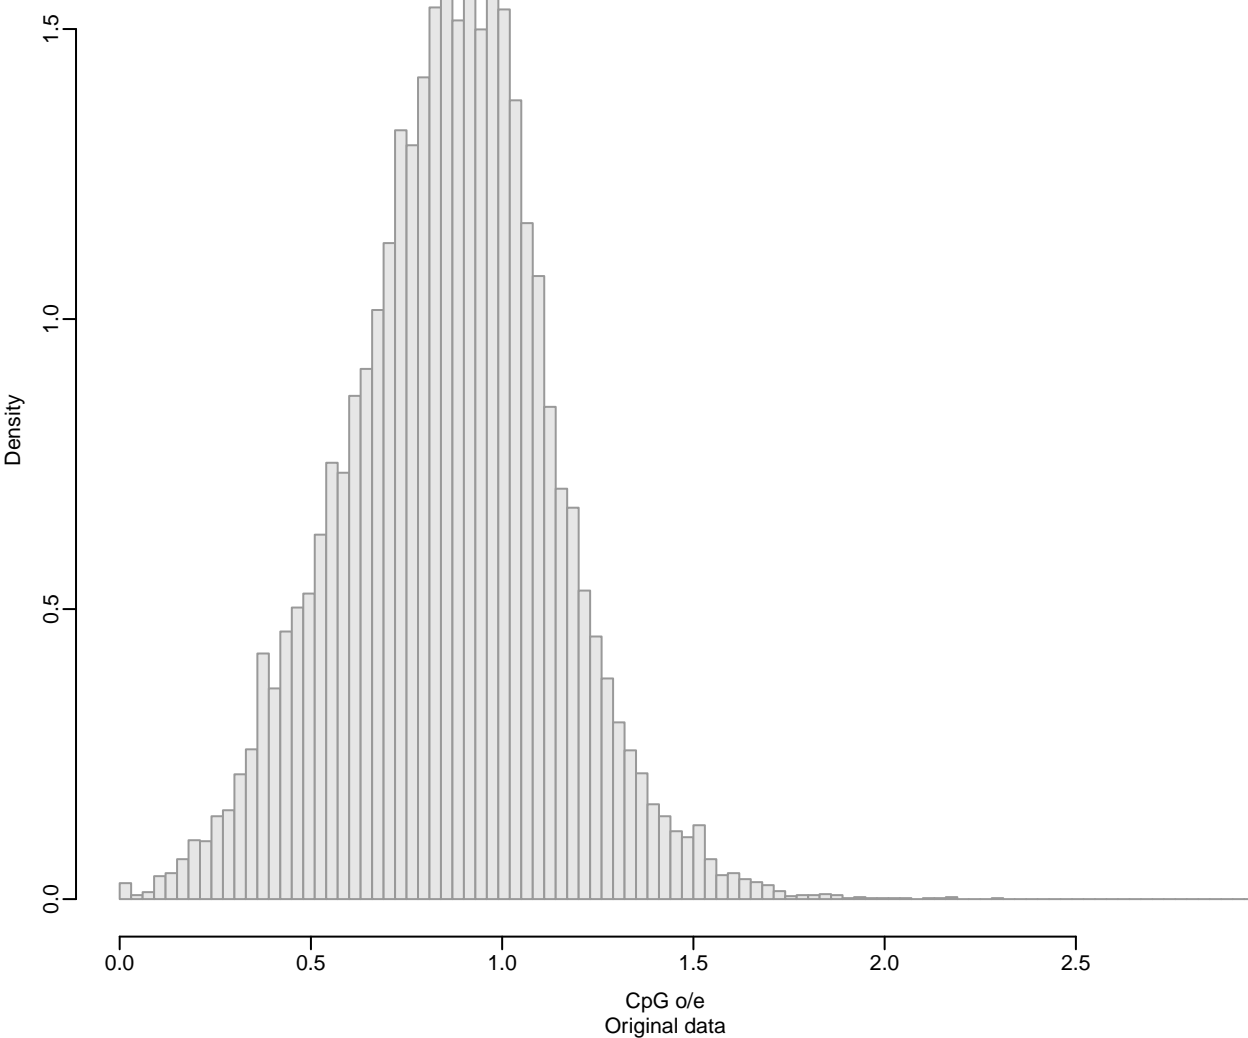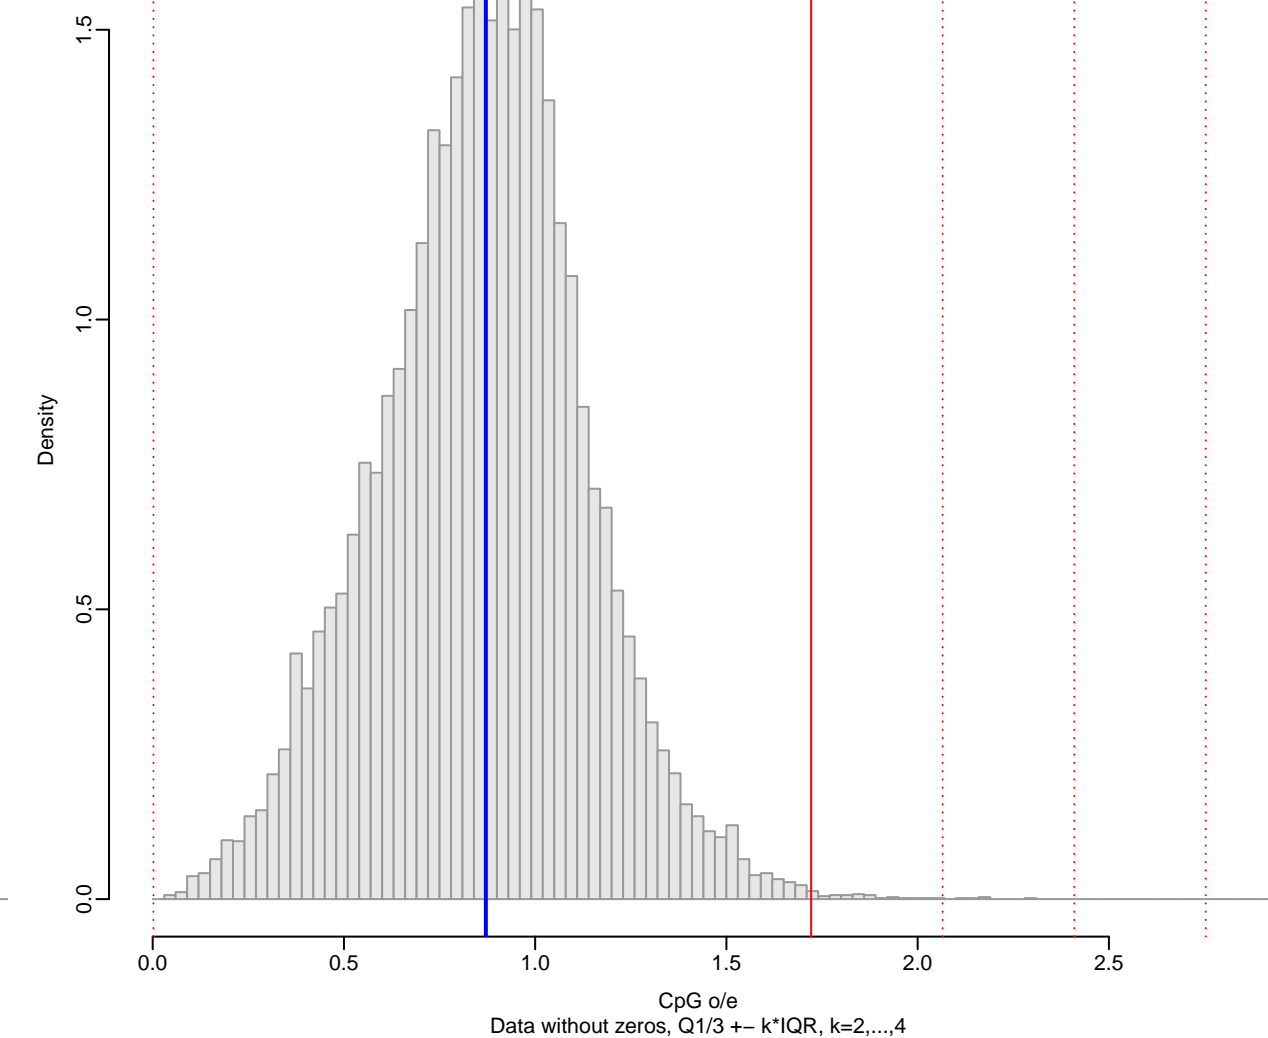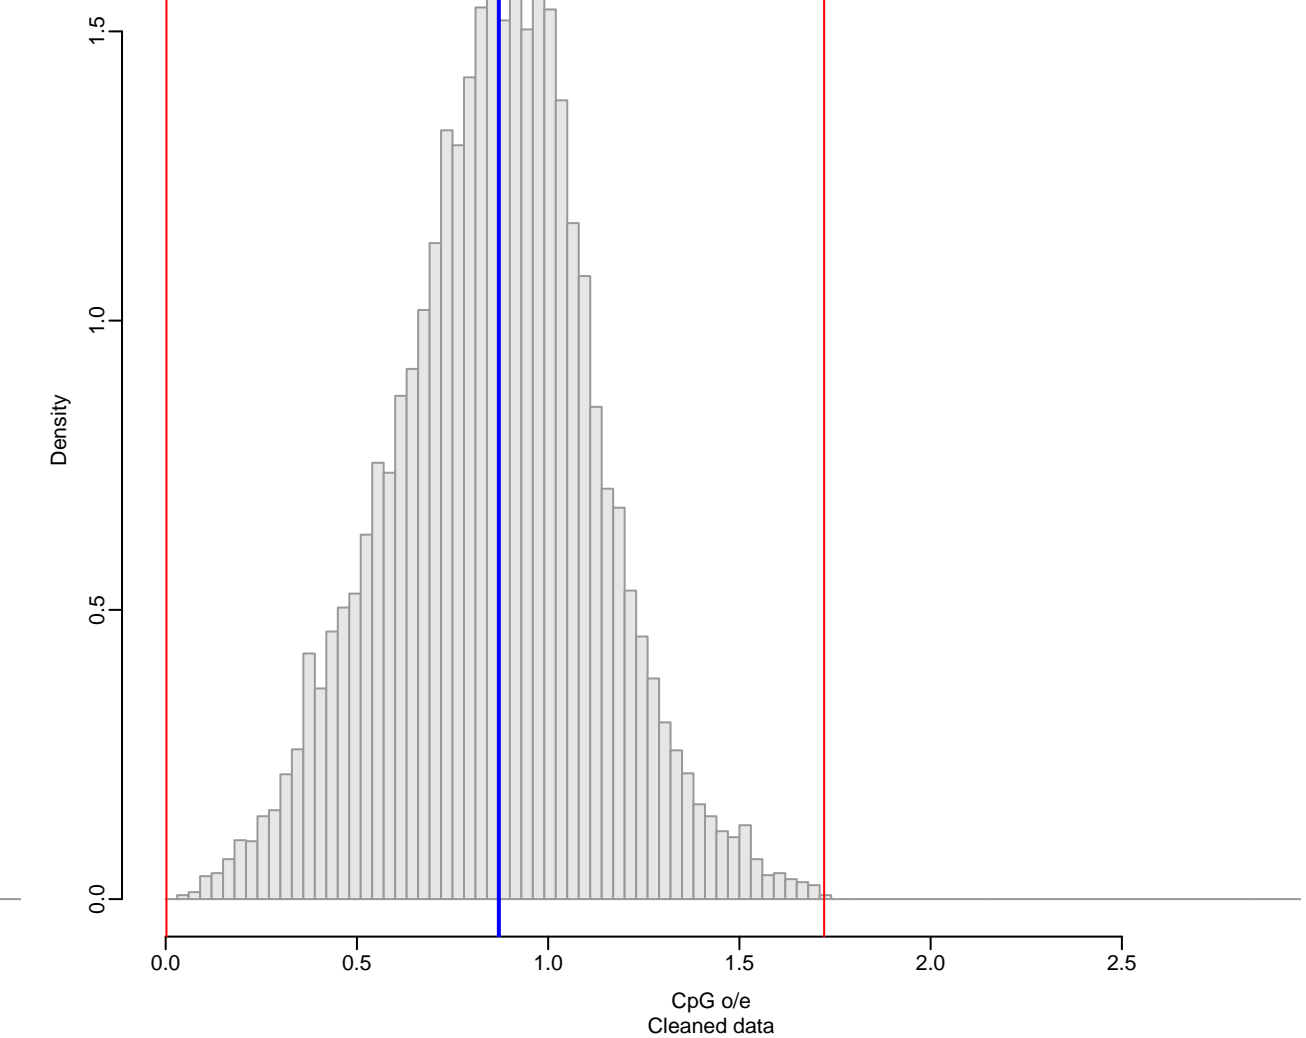

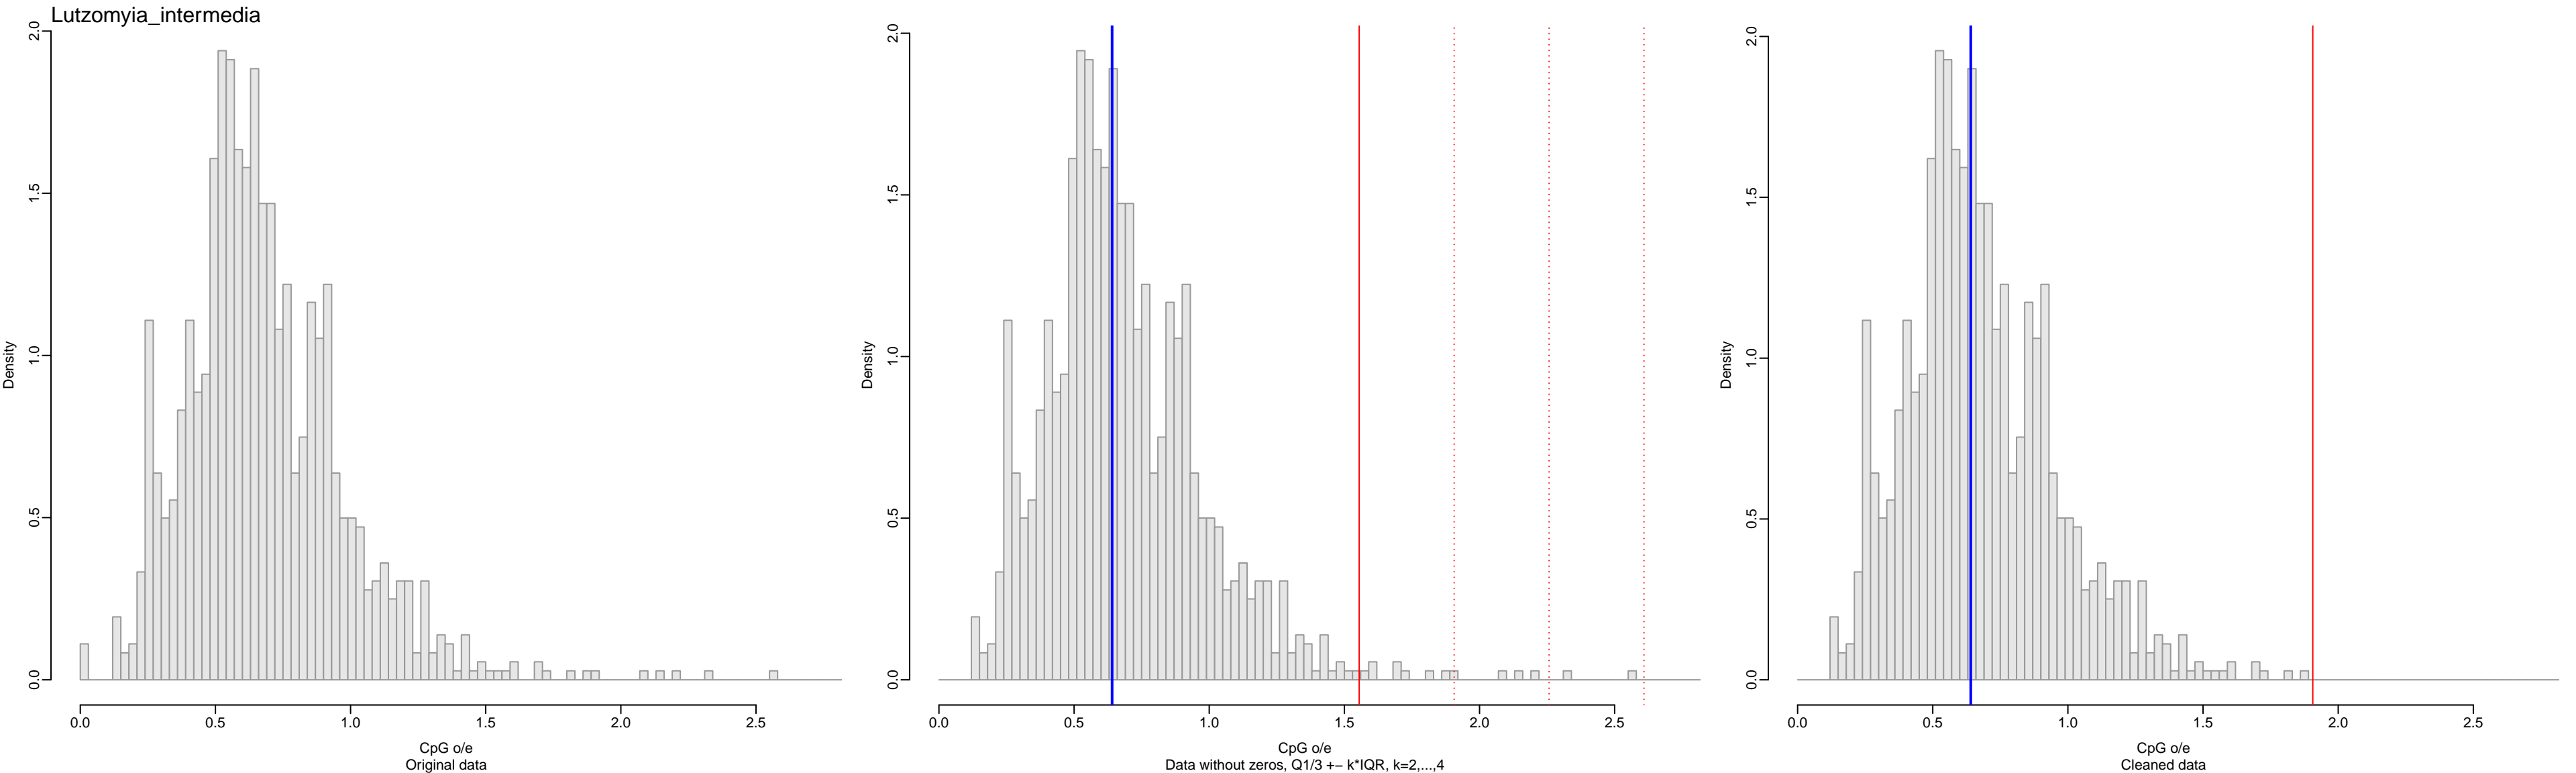

Lutzomyia\_longipalpis

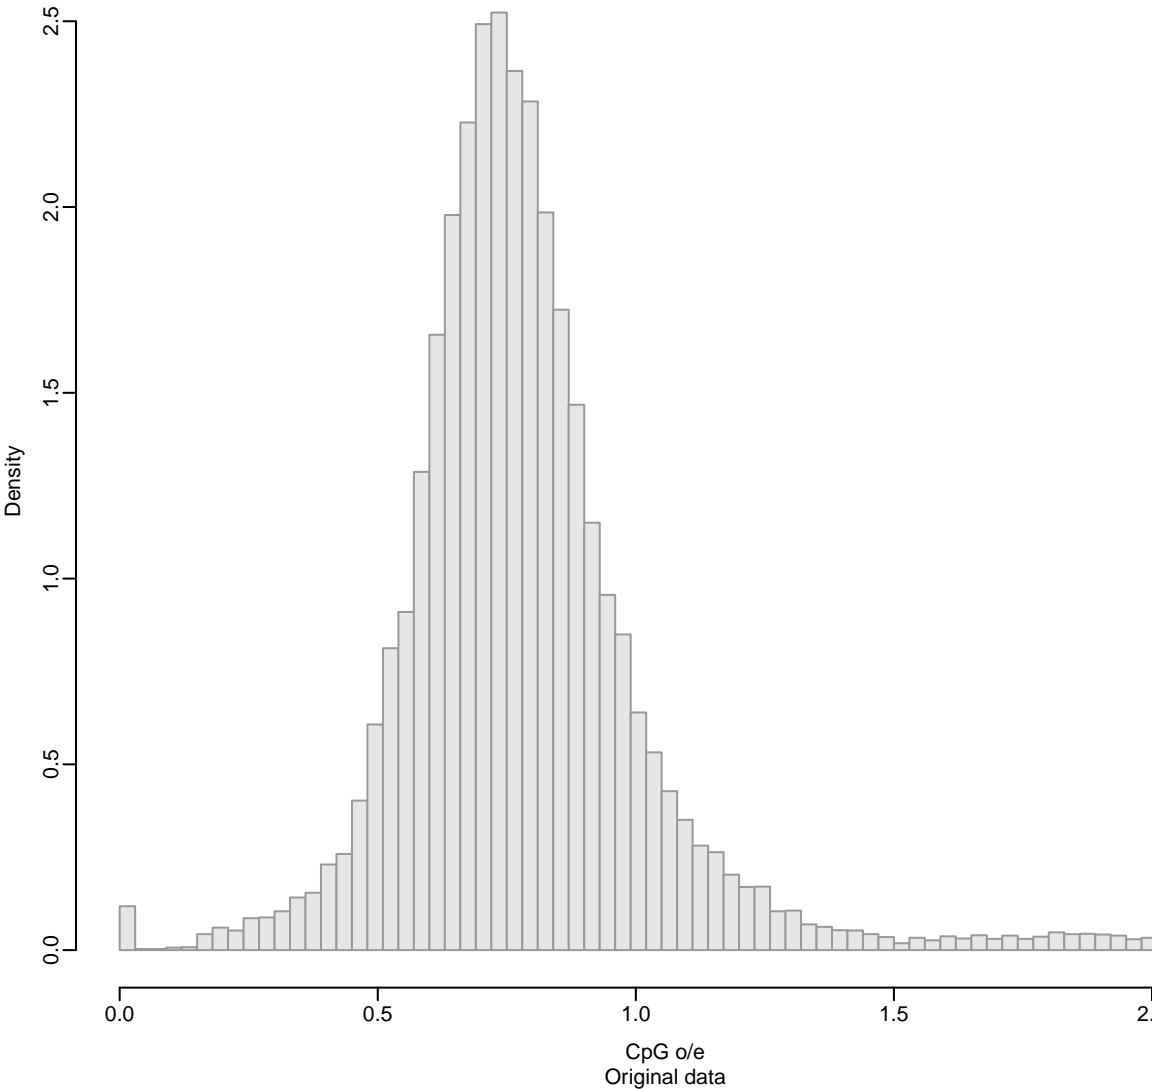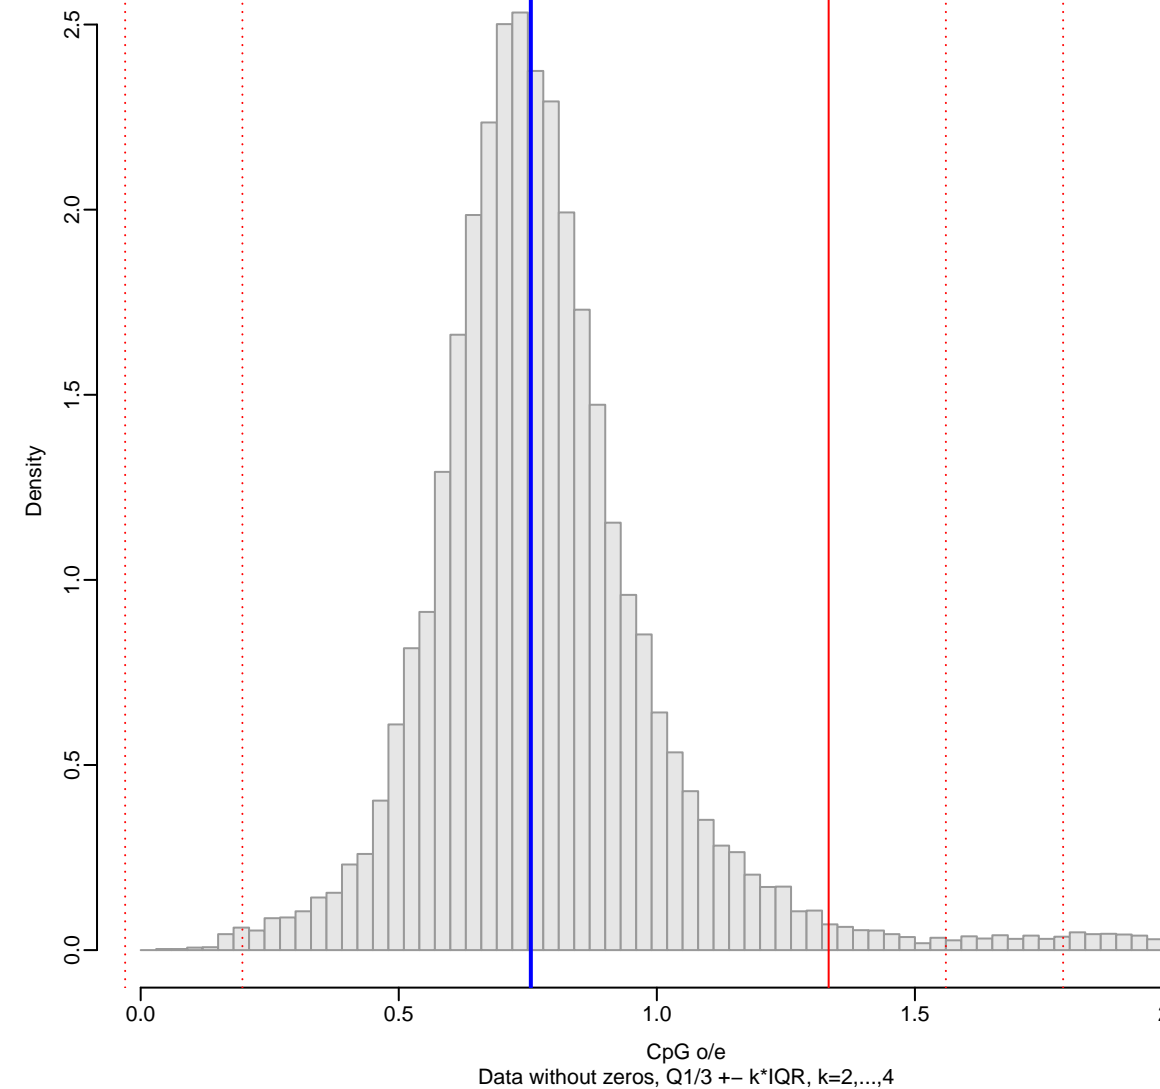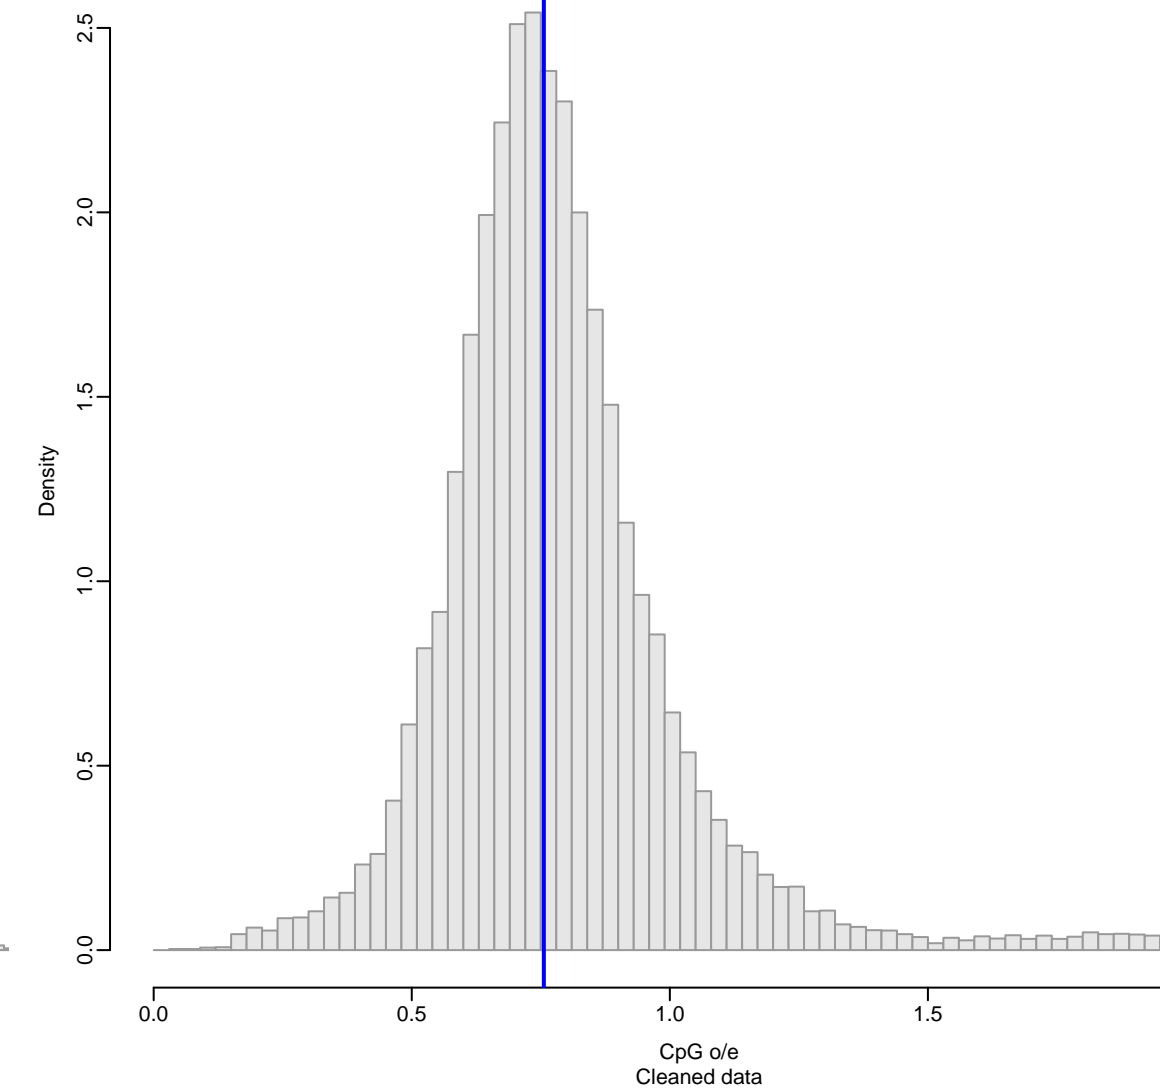

Lutzomyia\_umbratilis

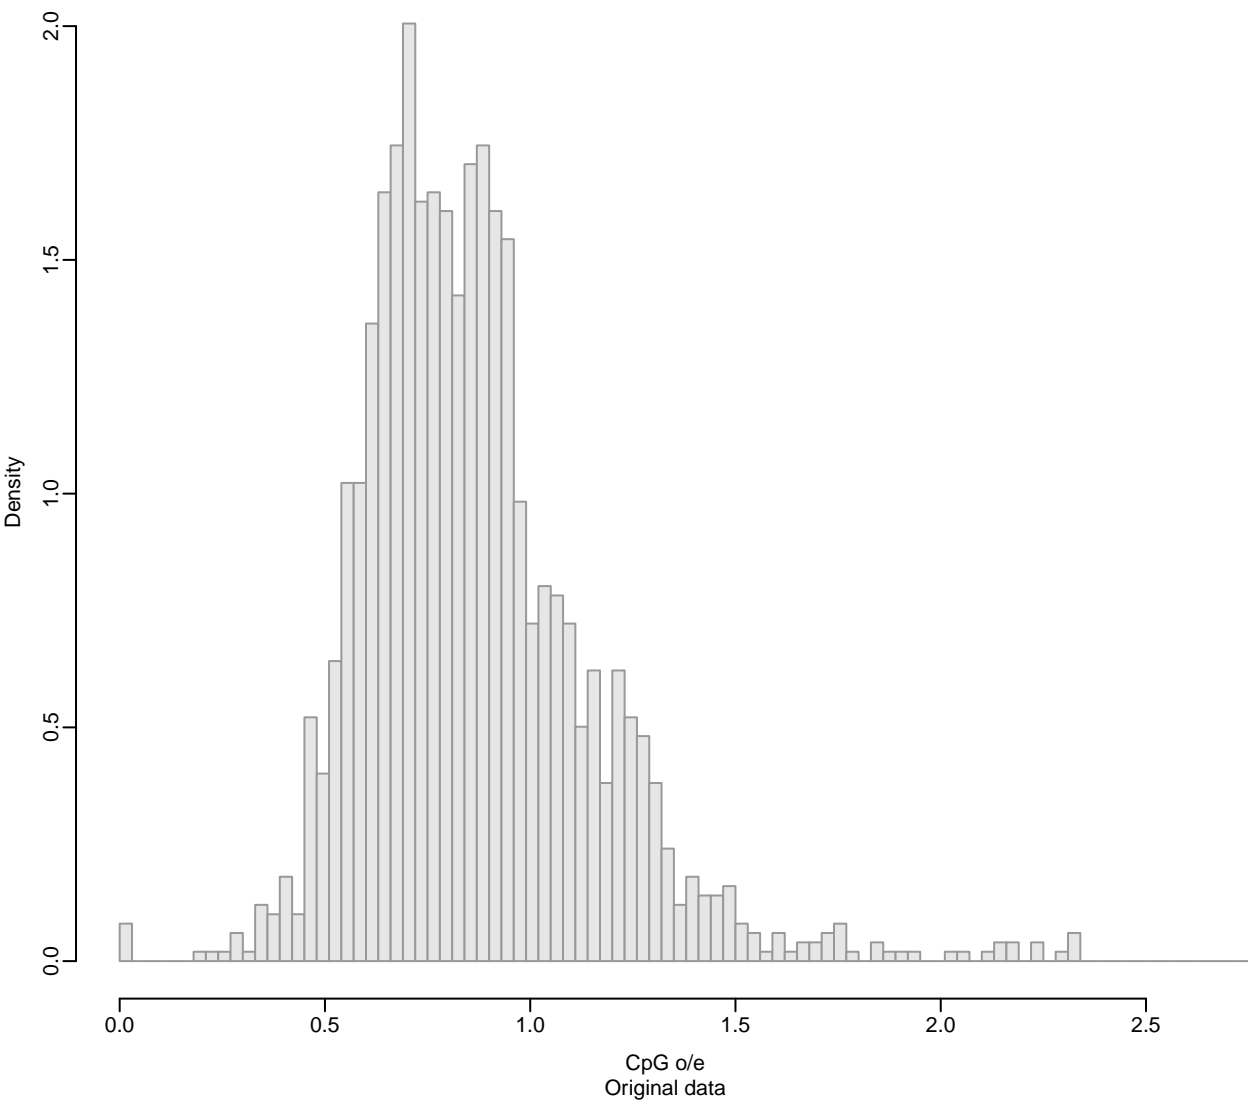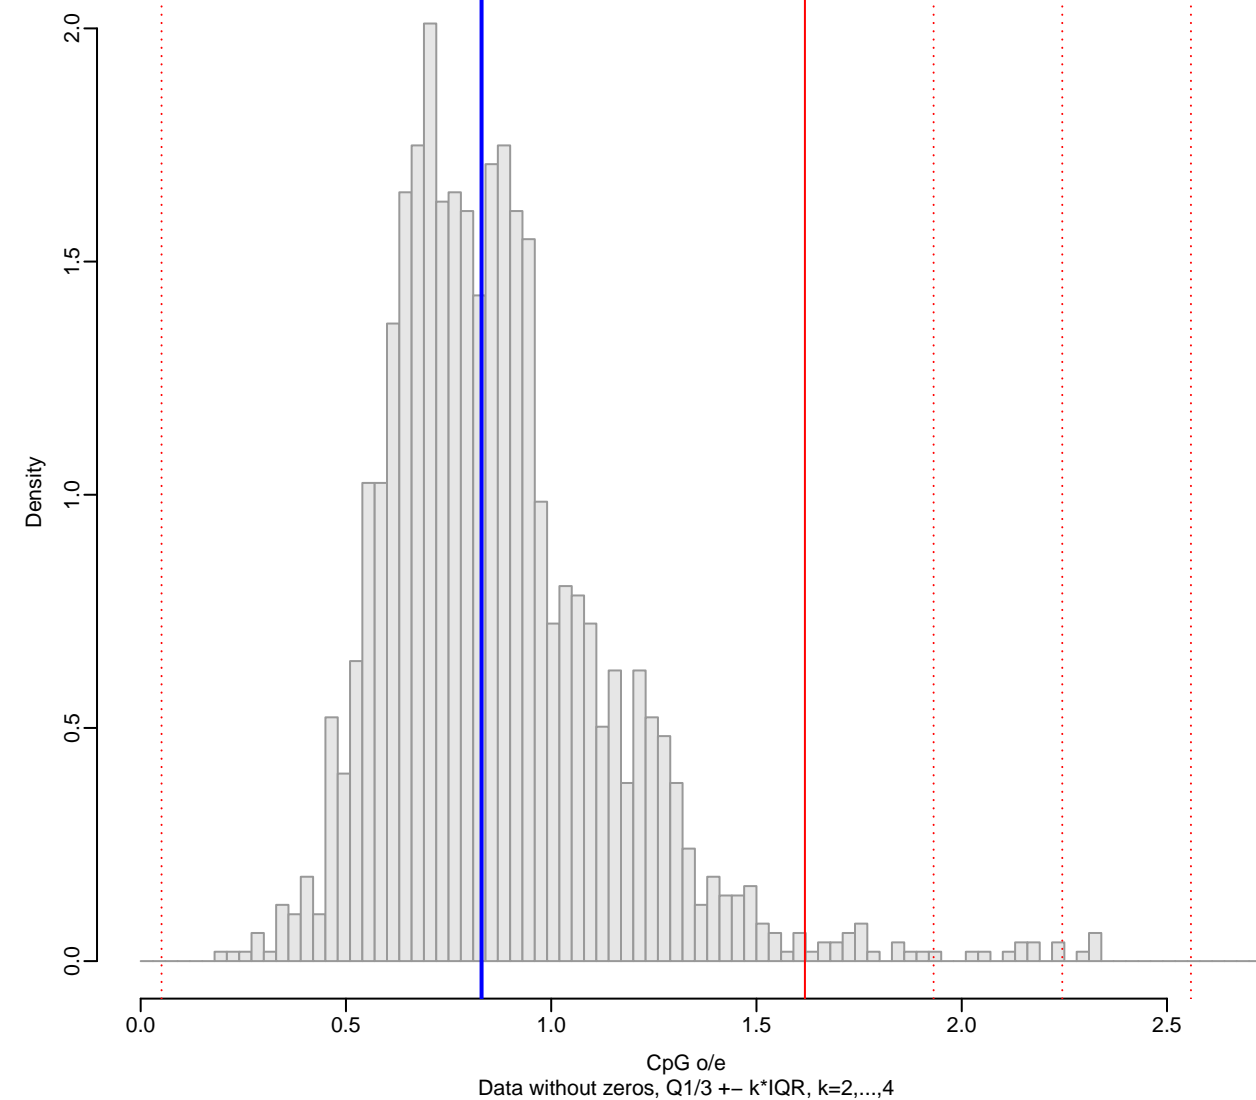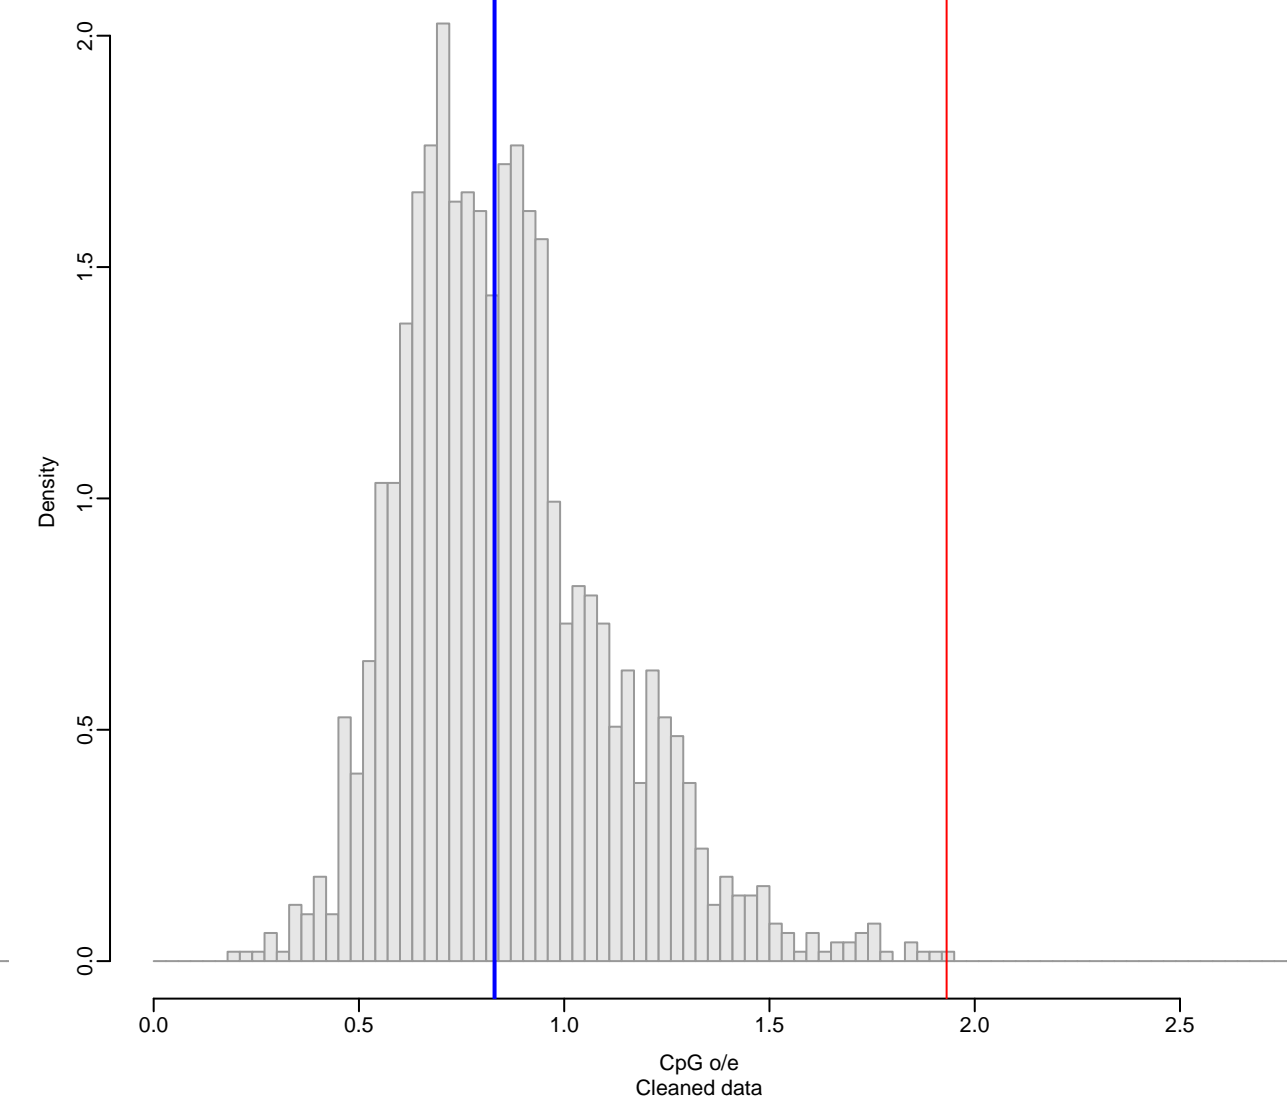

*Lymnaea stagnalis*

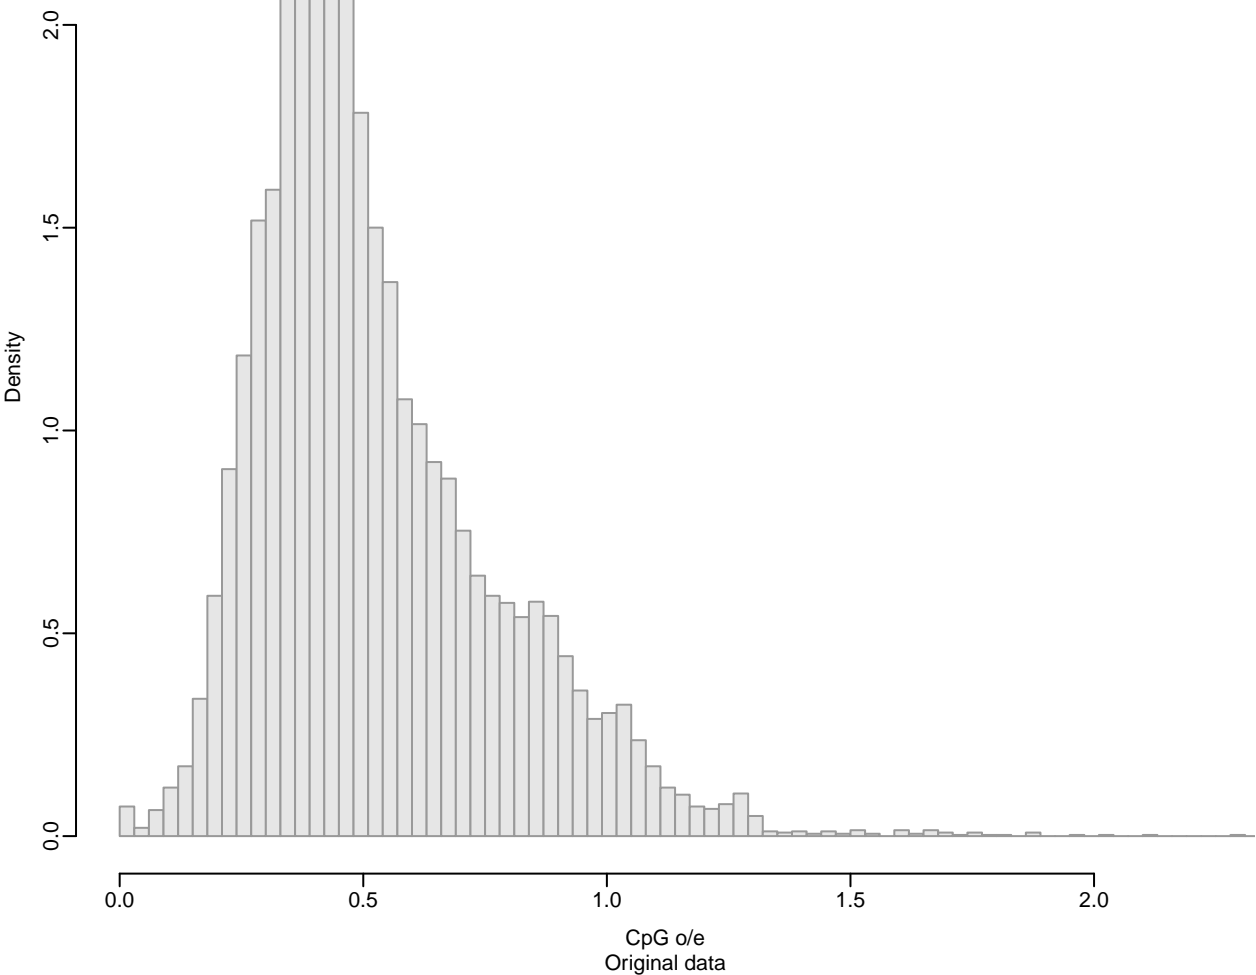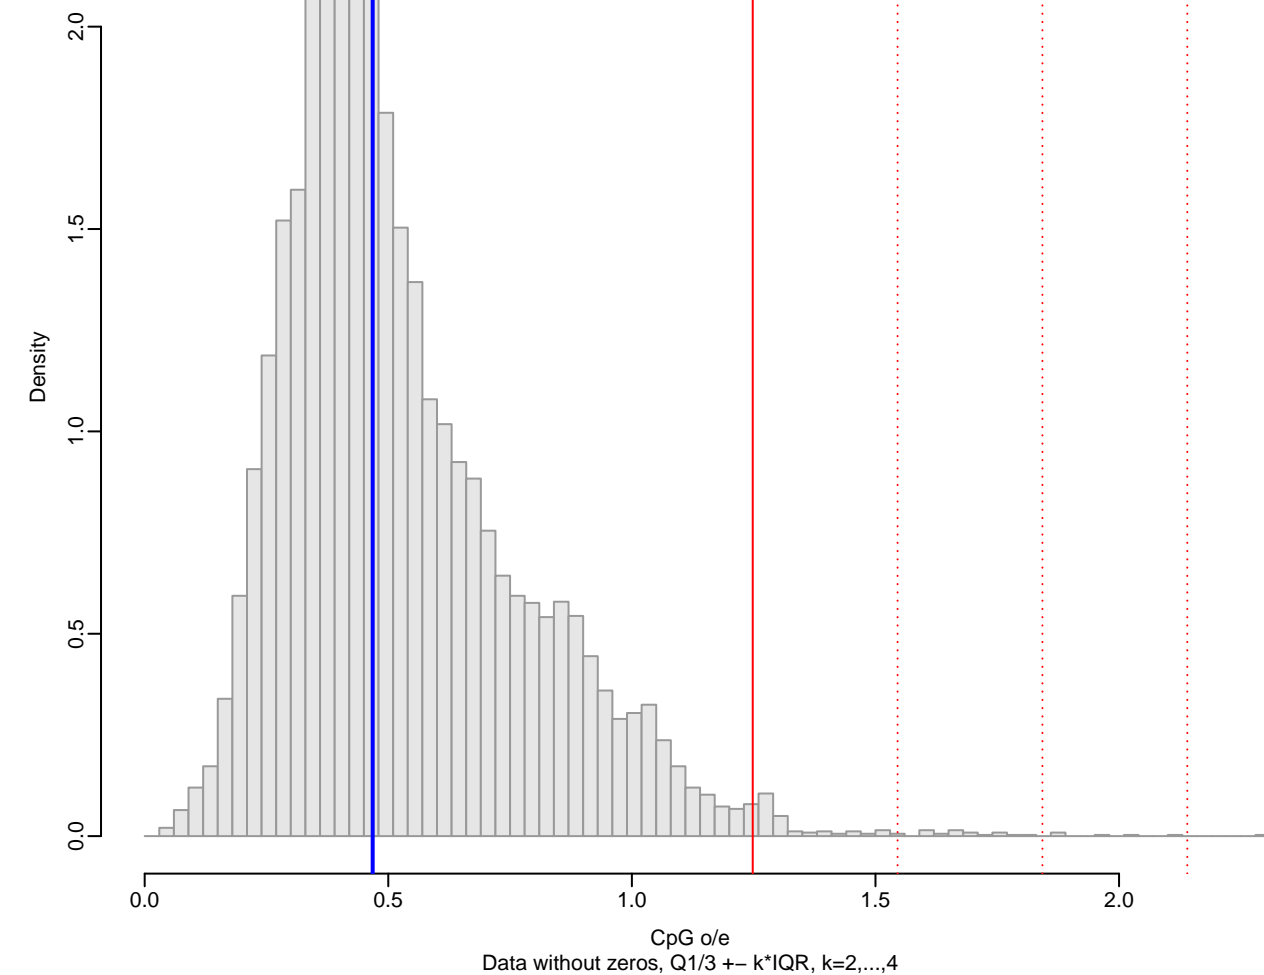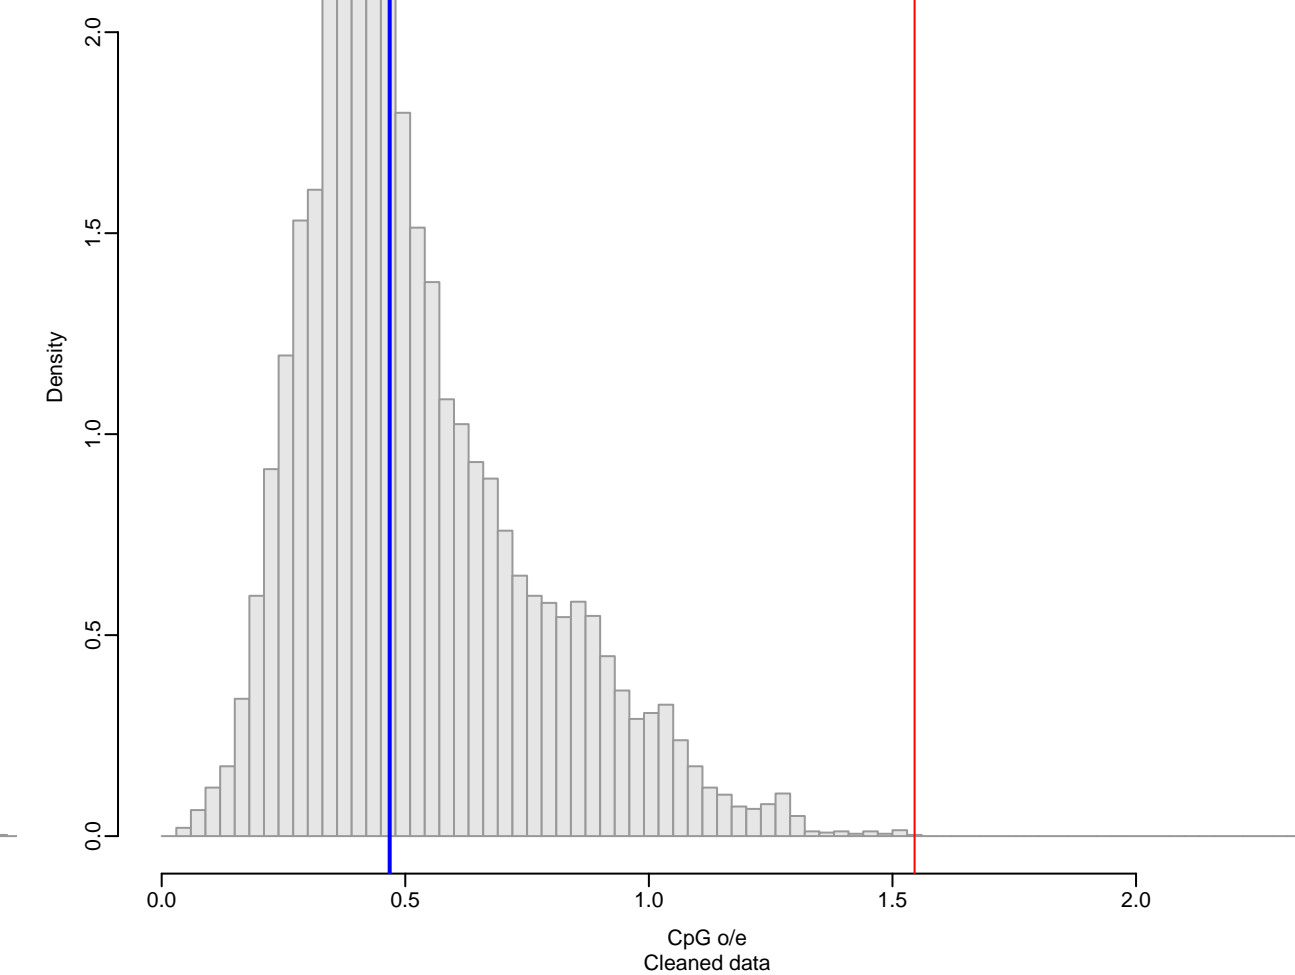



Lysiphlebus\_testaceipes

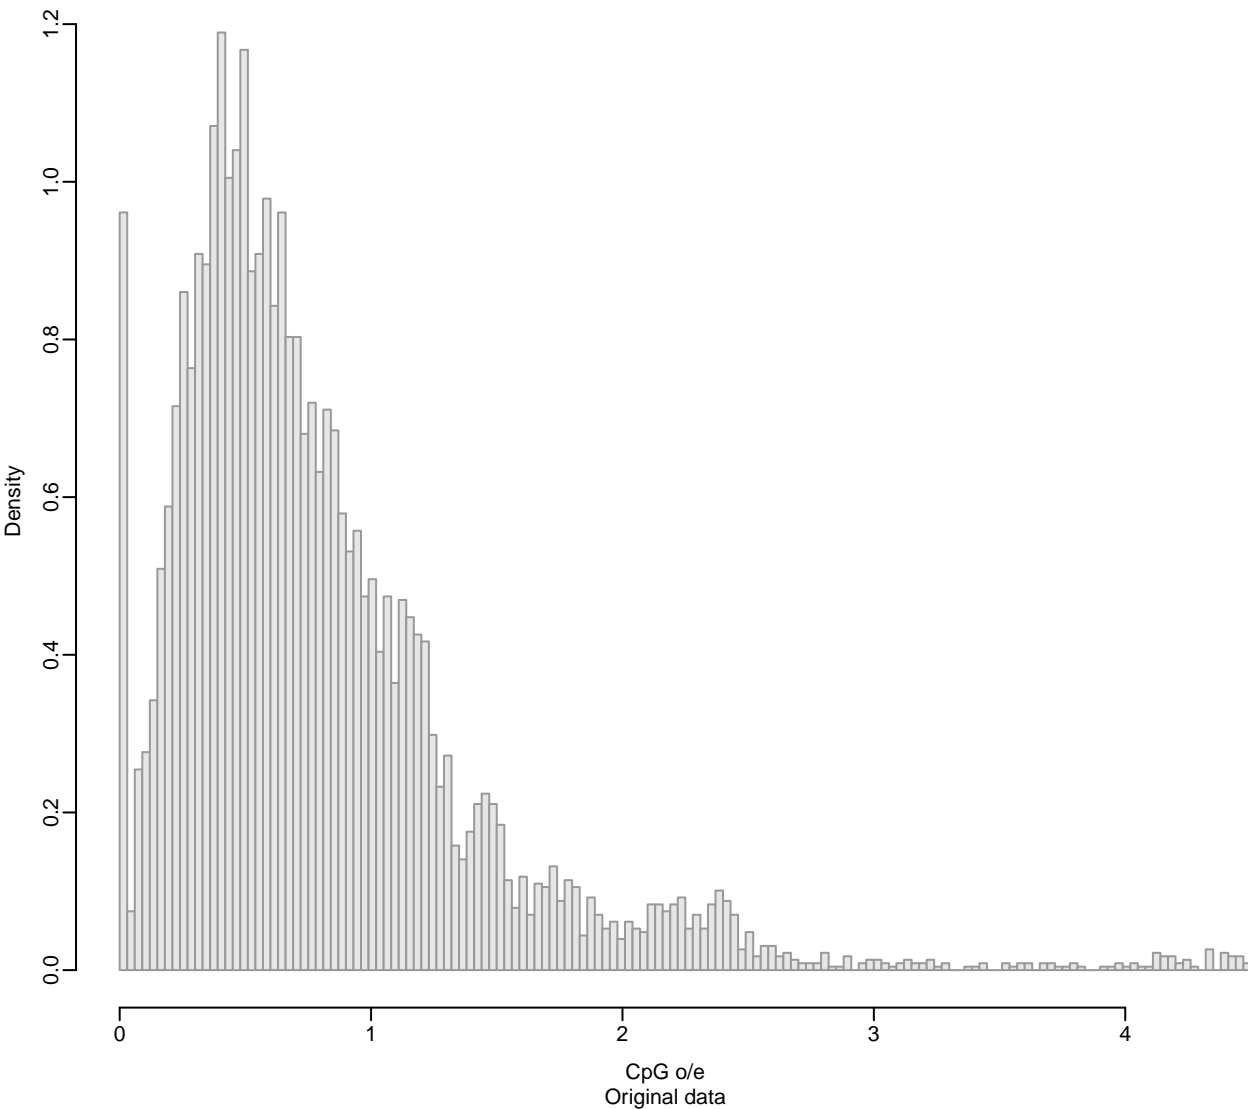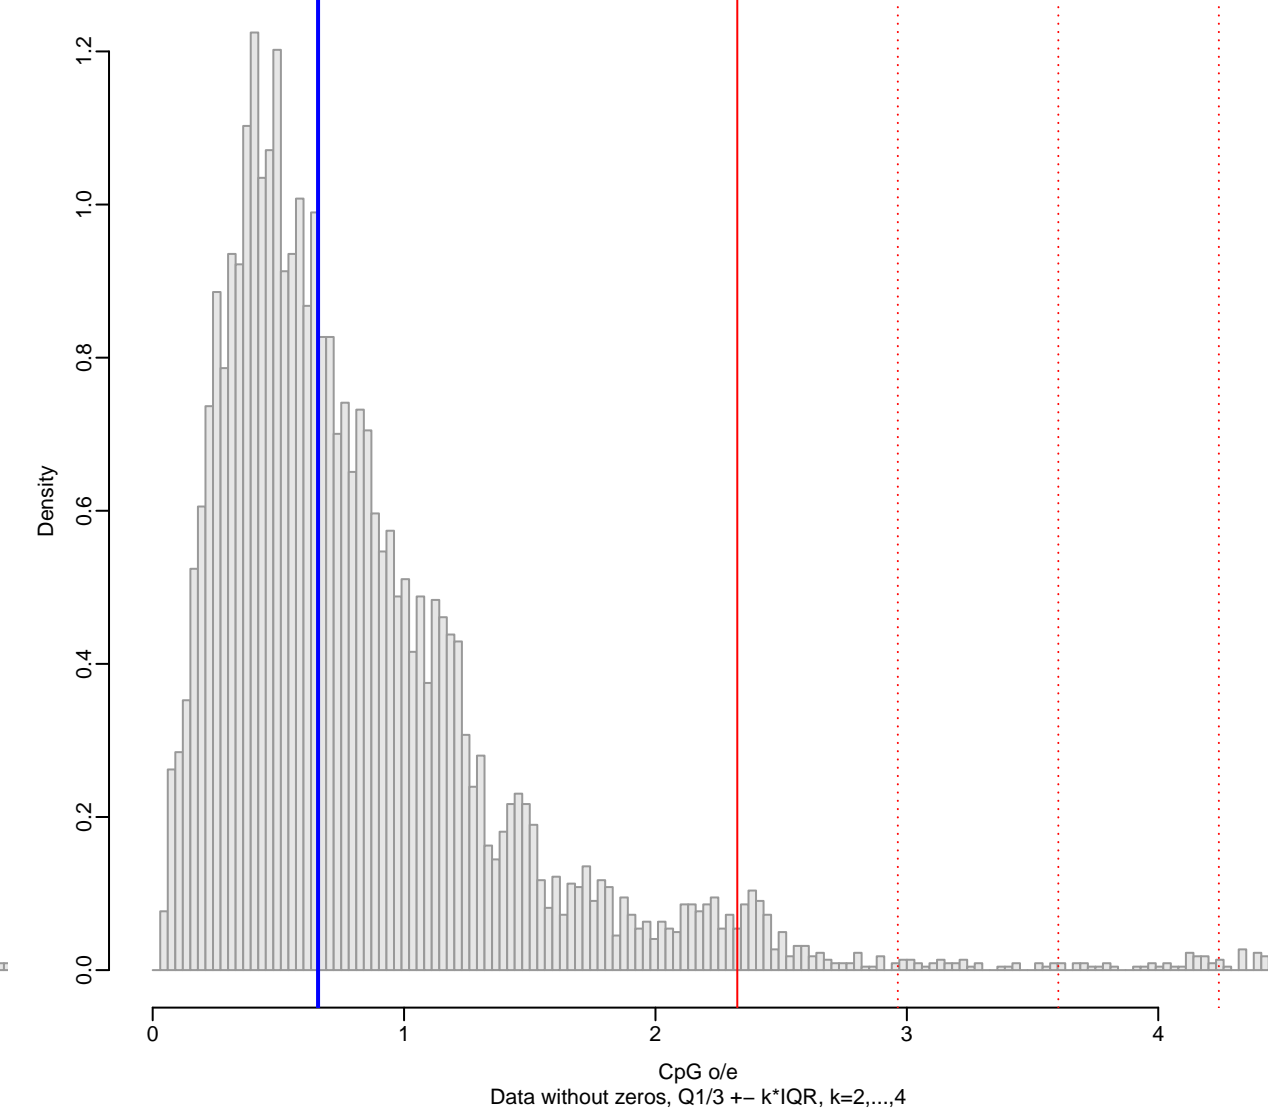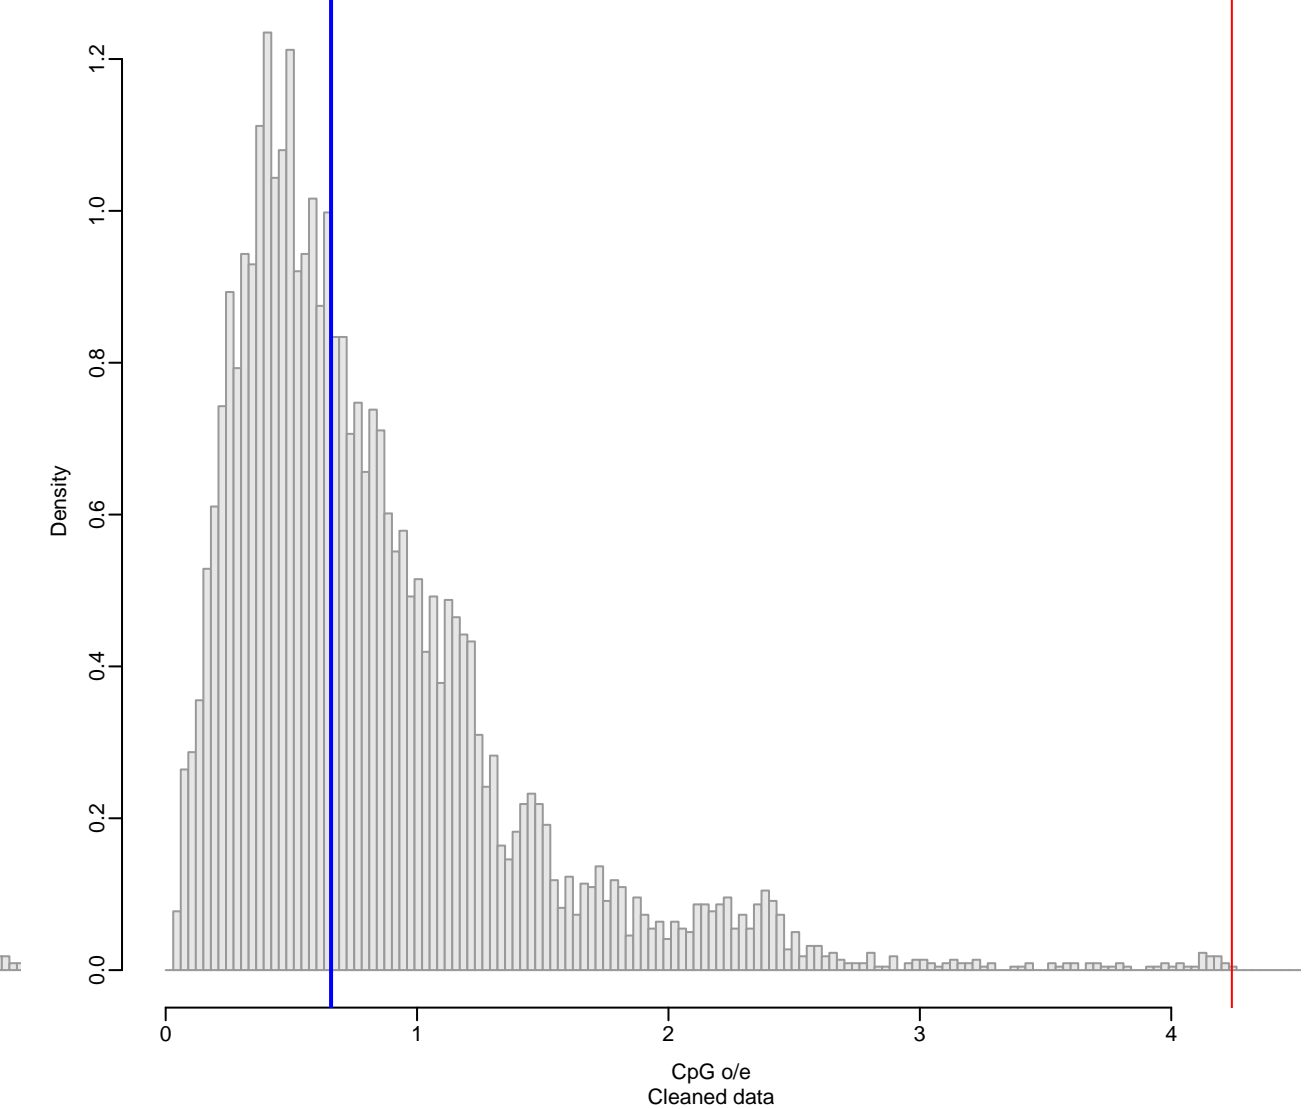

Macaca\_fascicularis

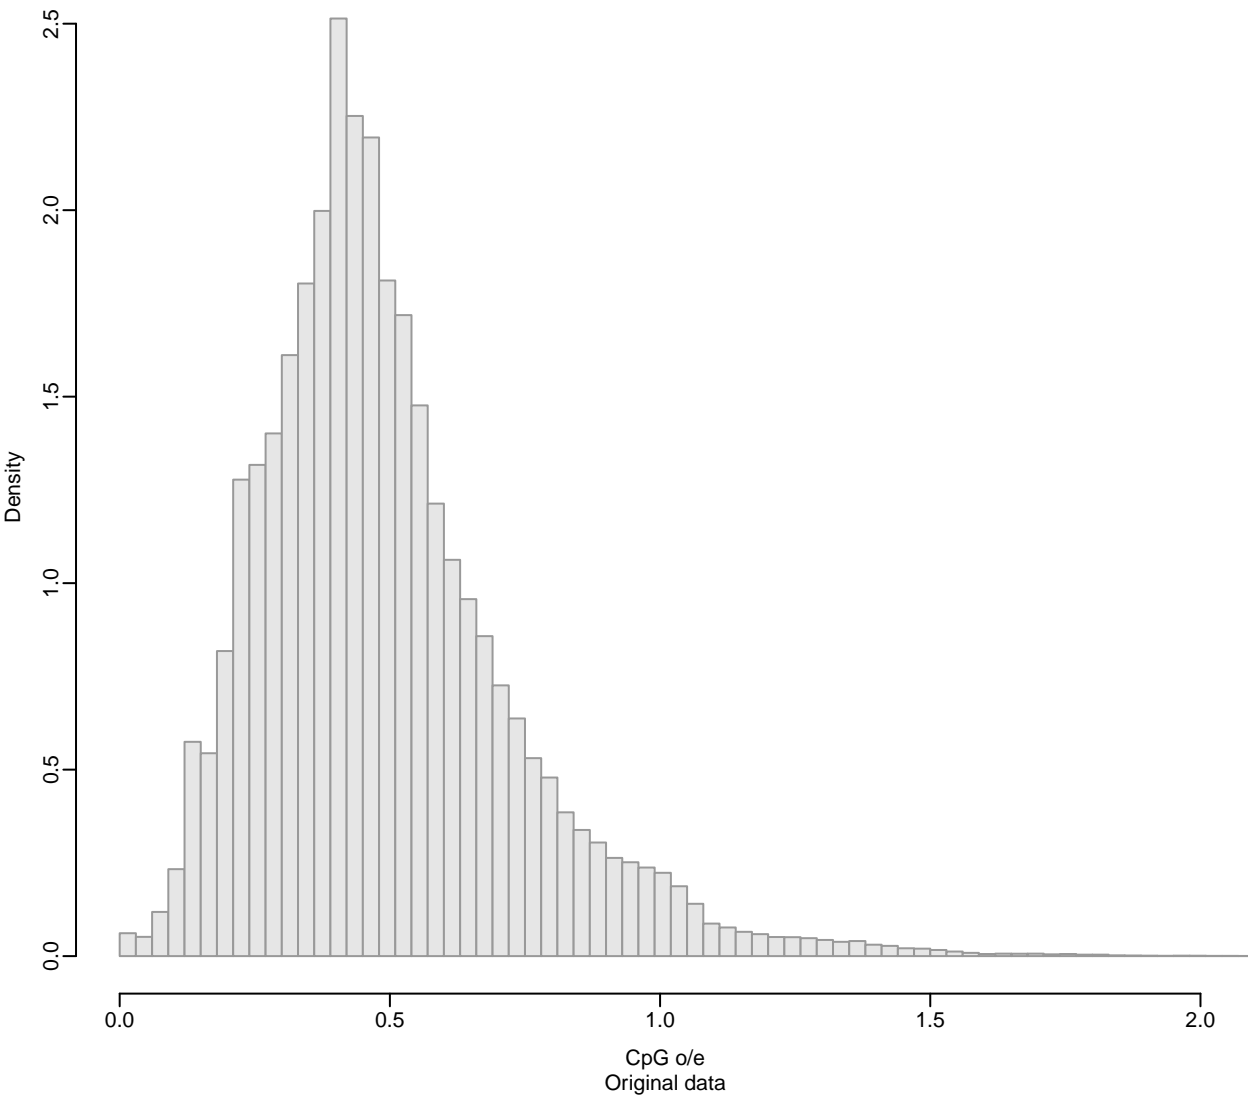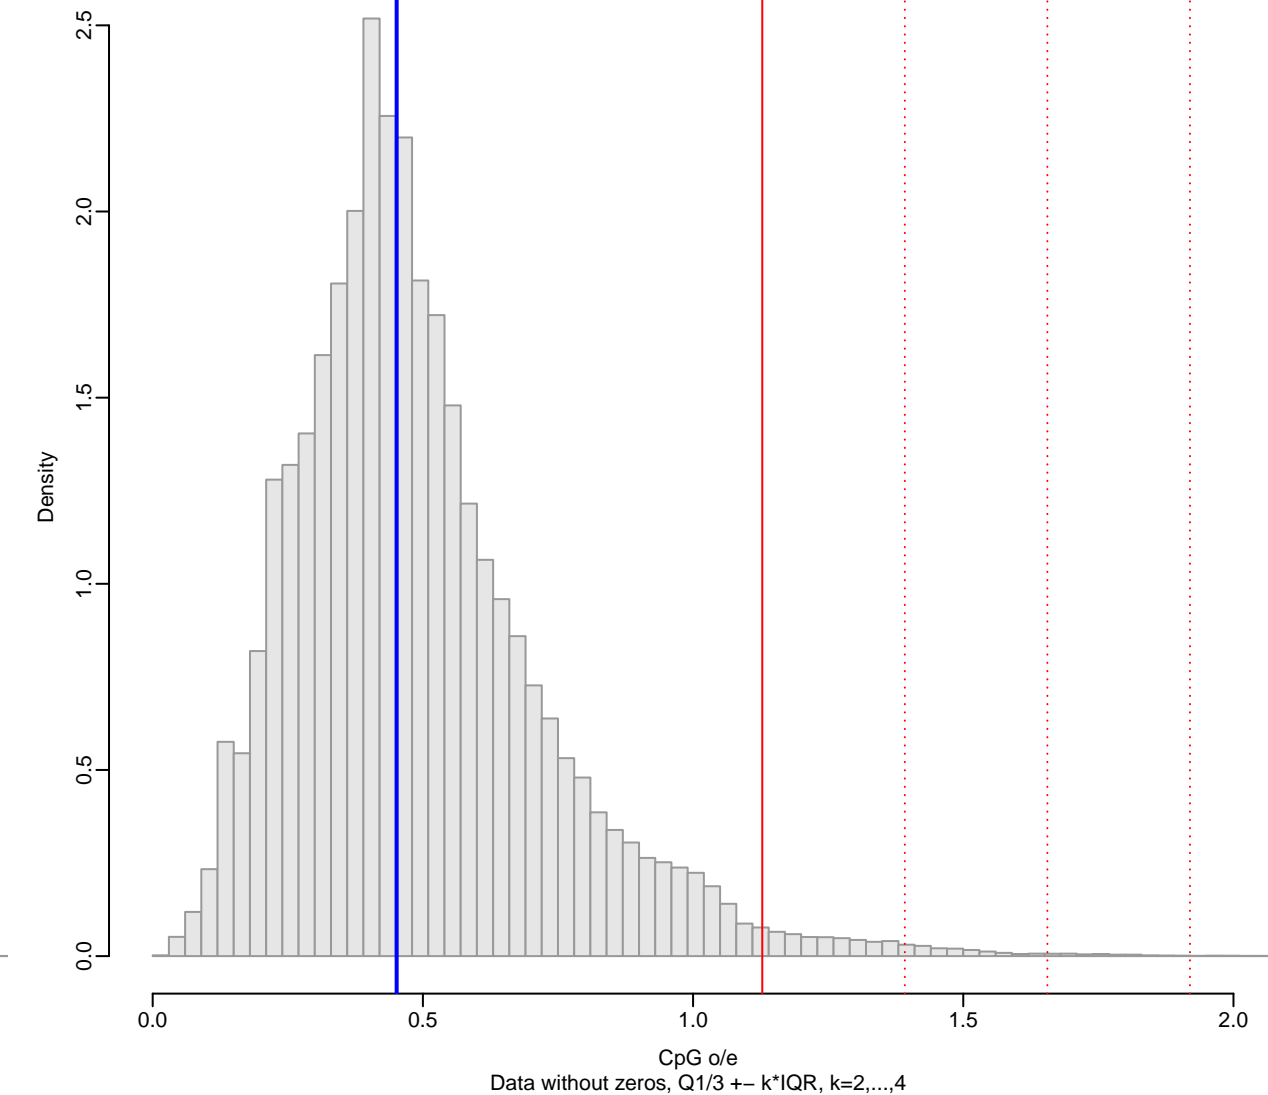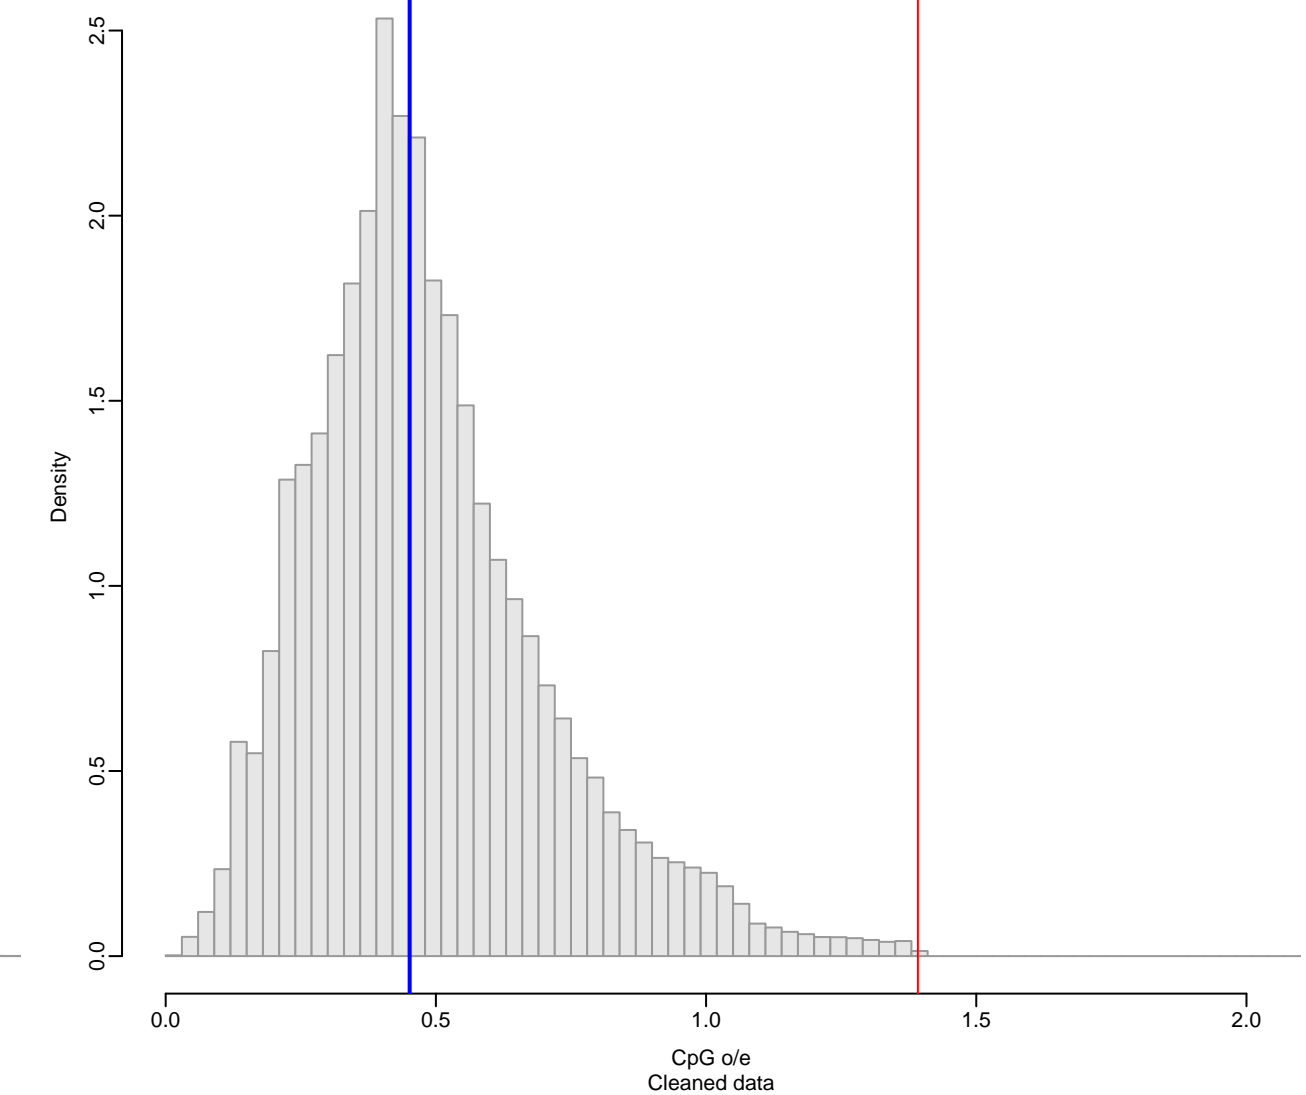

Macaca\_mulatta

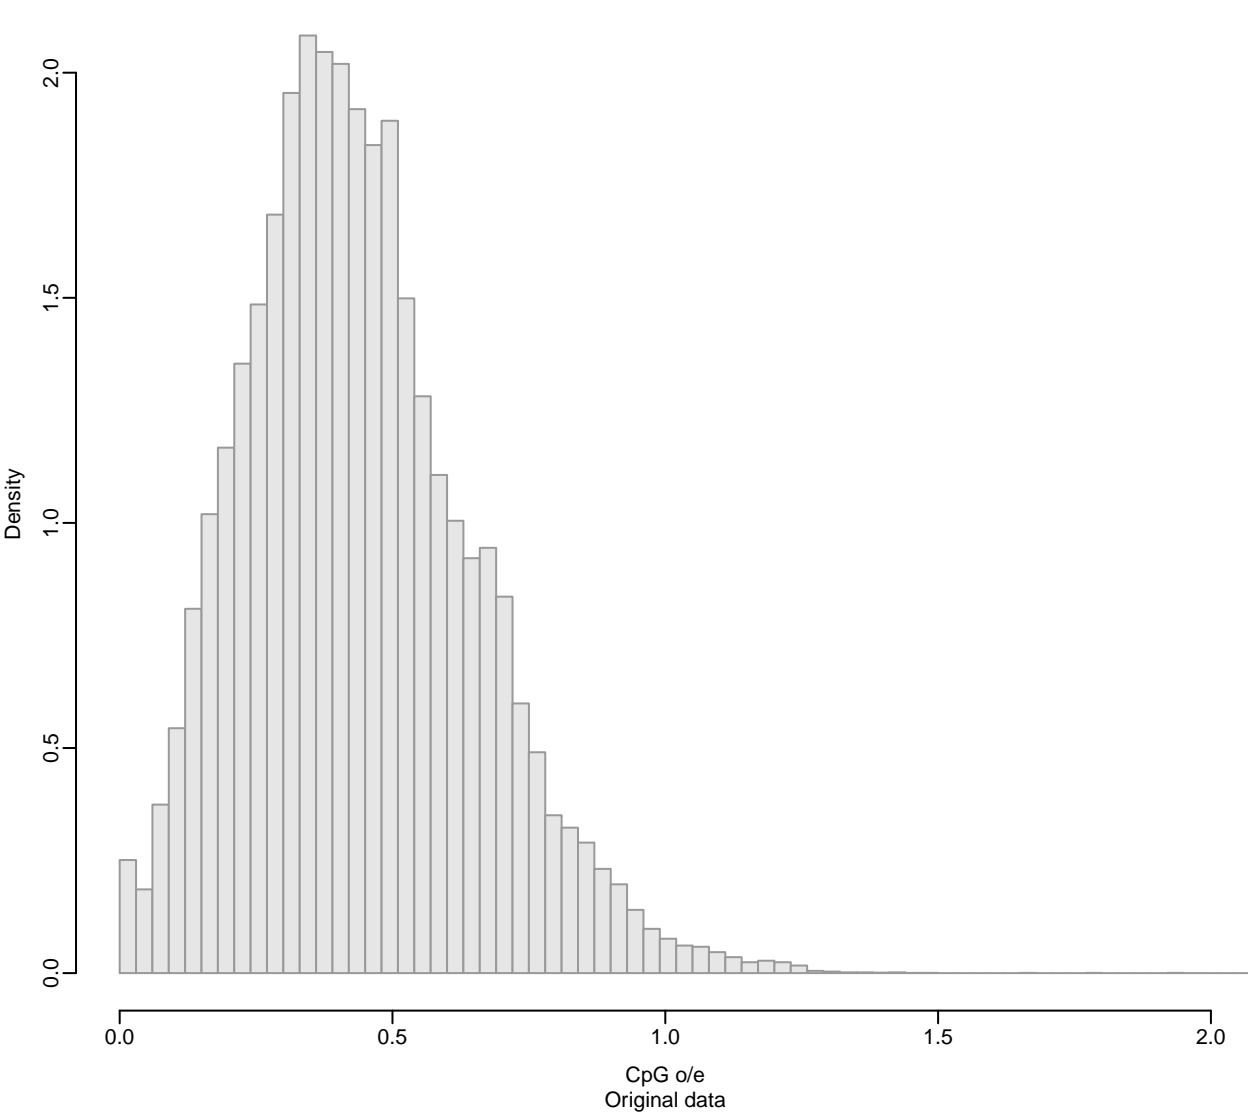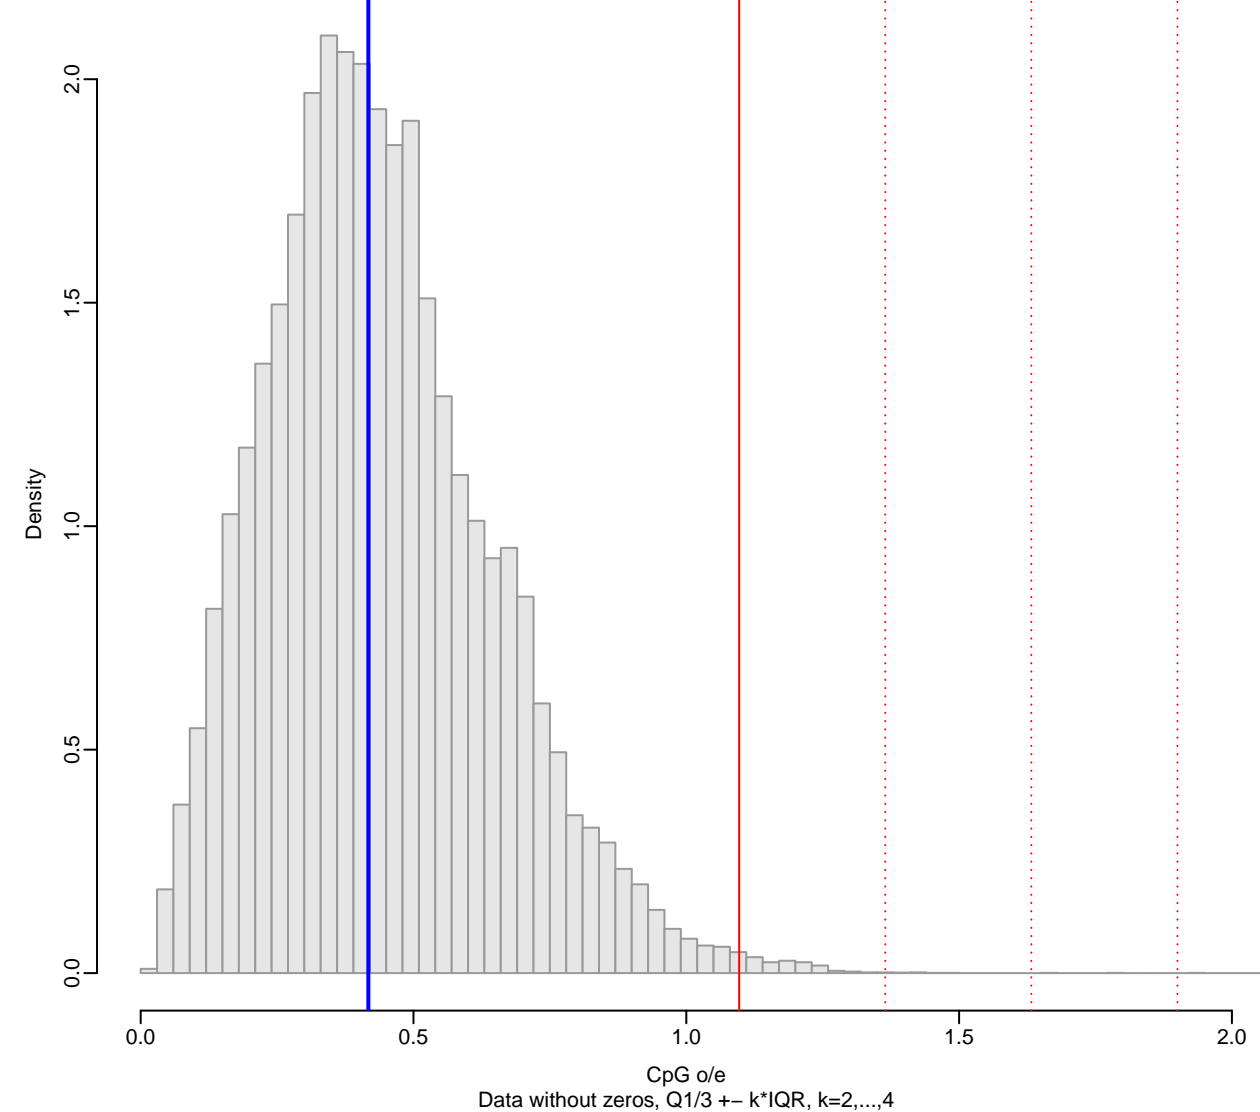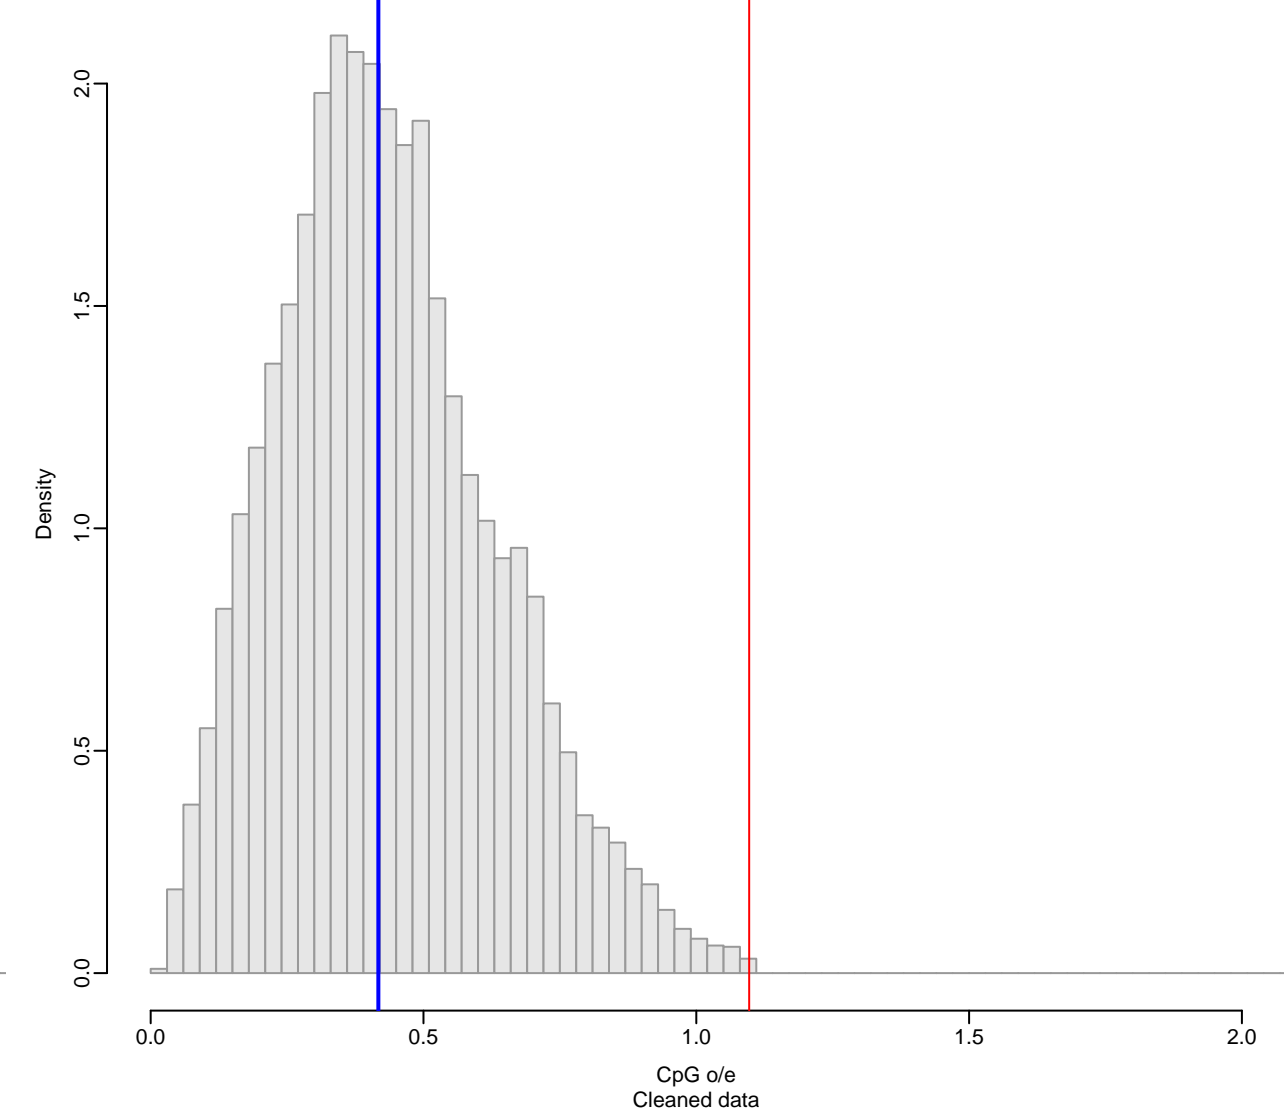

Macaca\_nemestrina

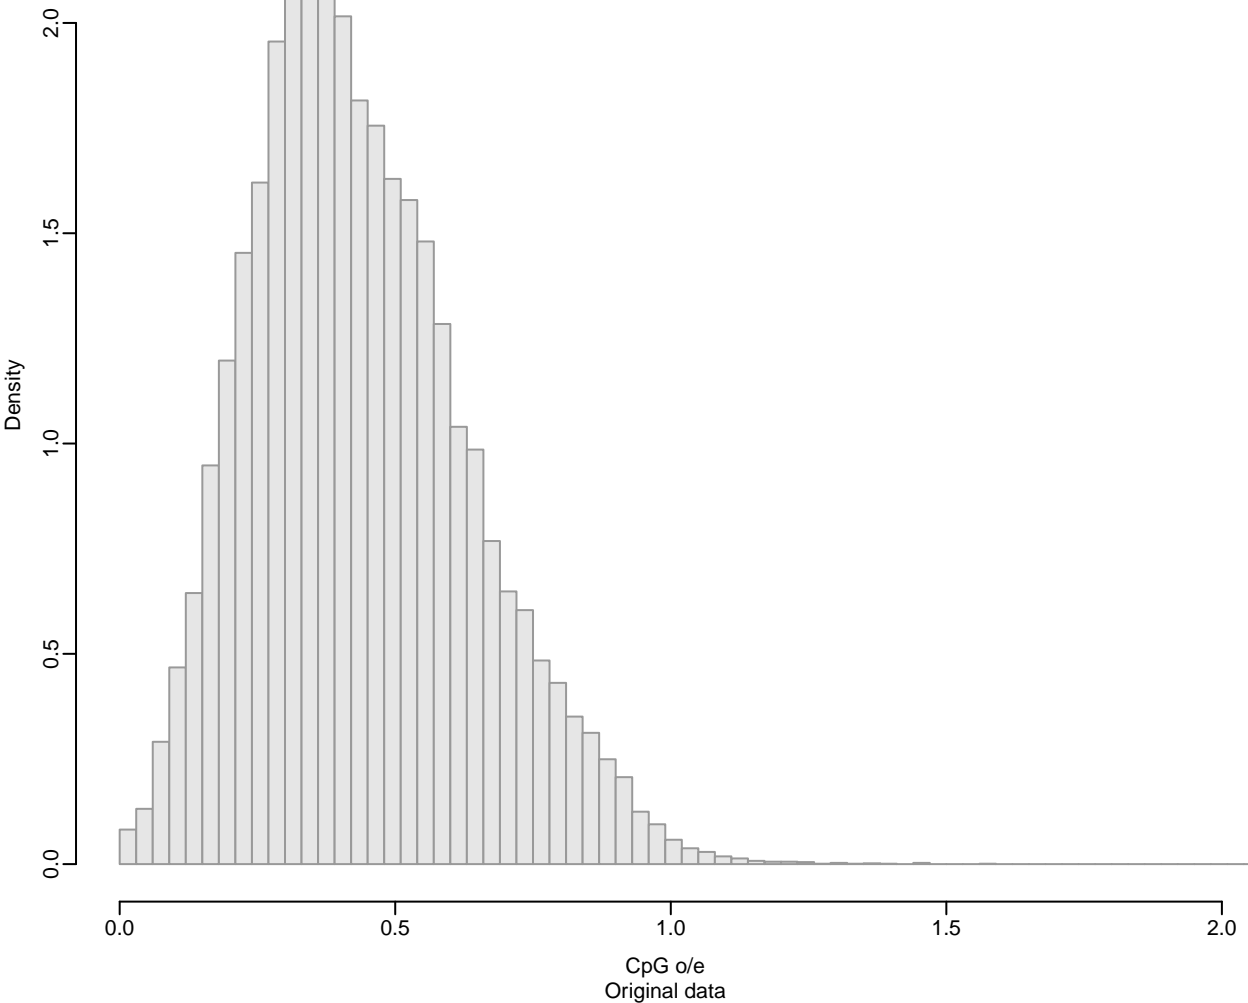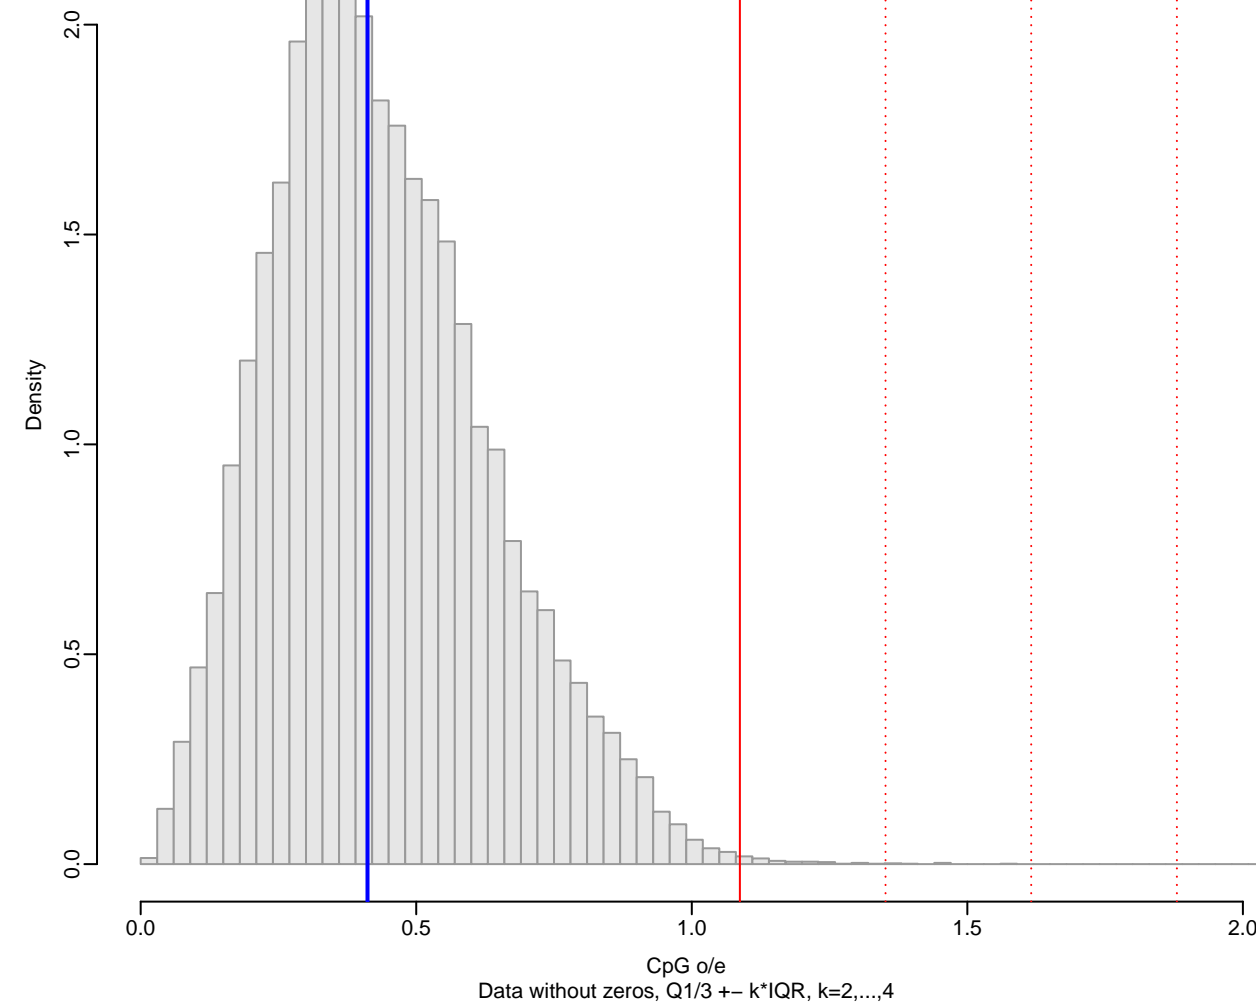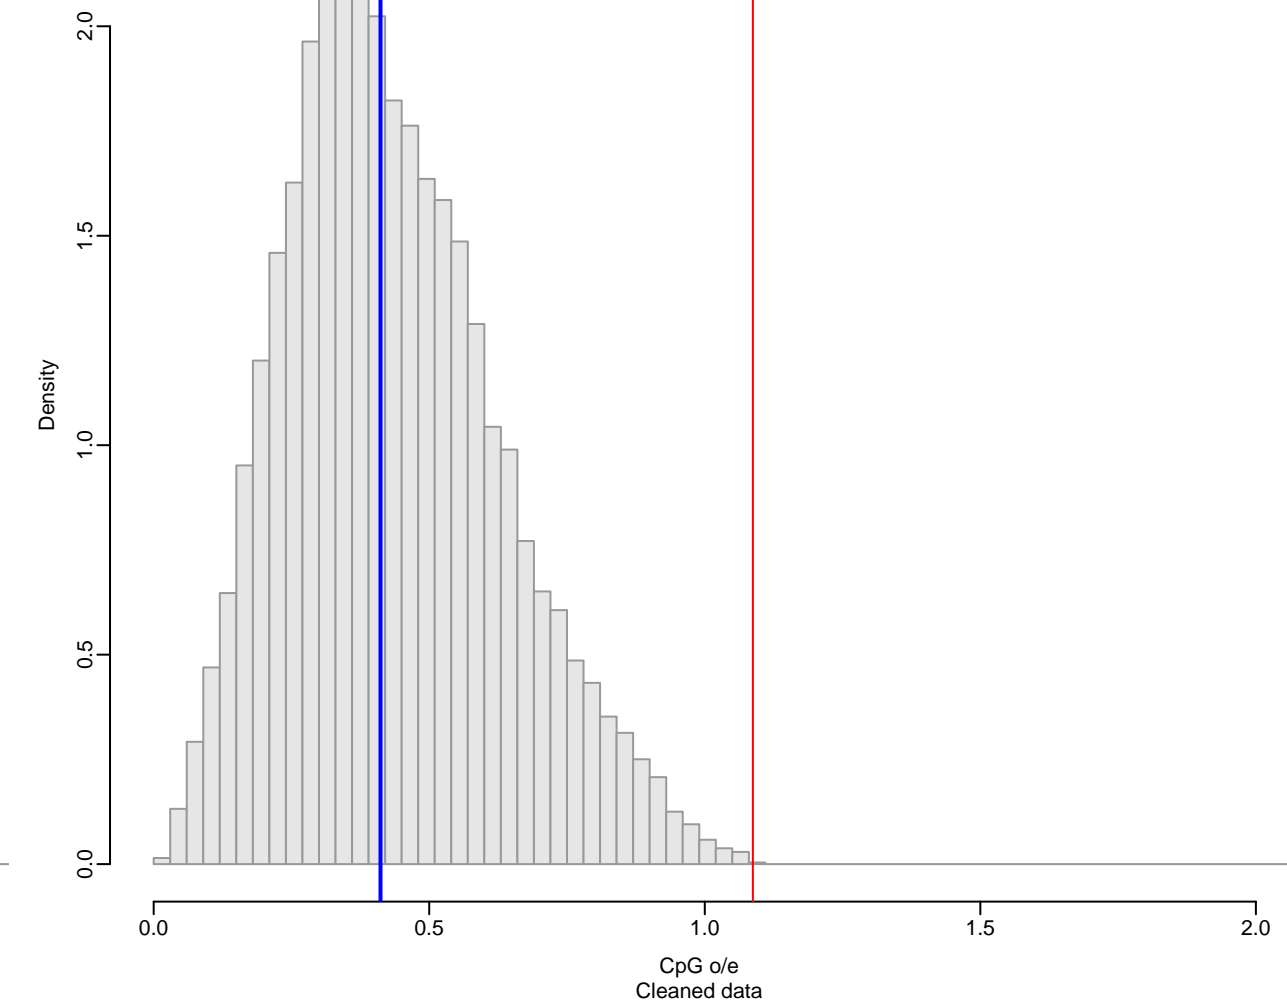

*Maconellicoccus\_hirsutus*

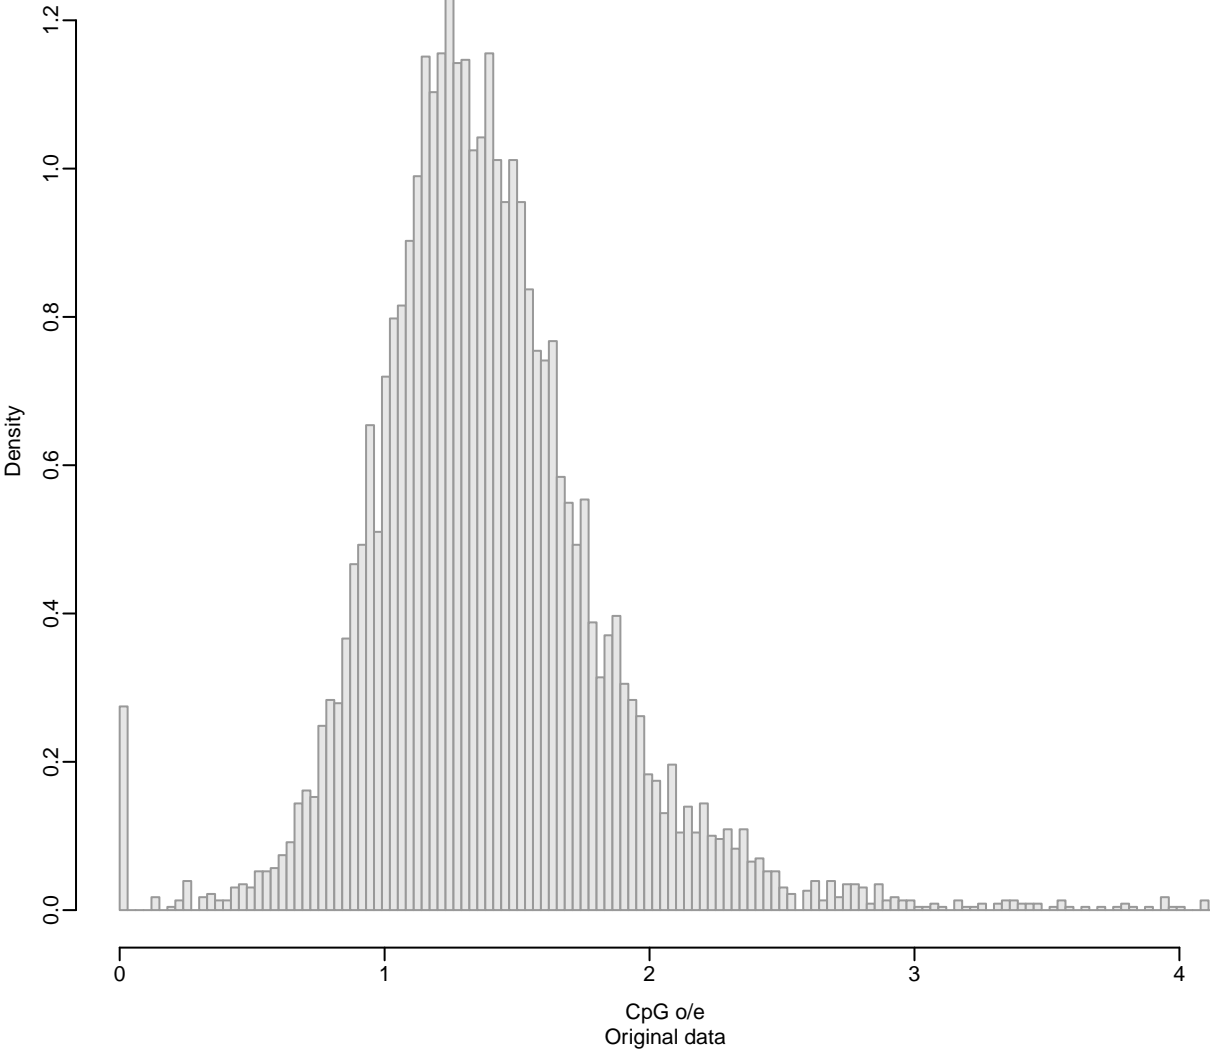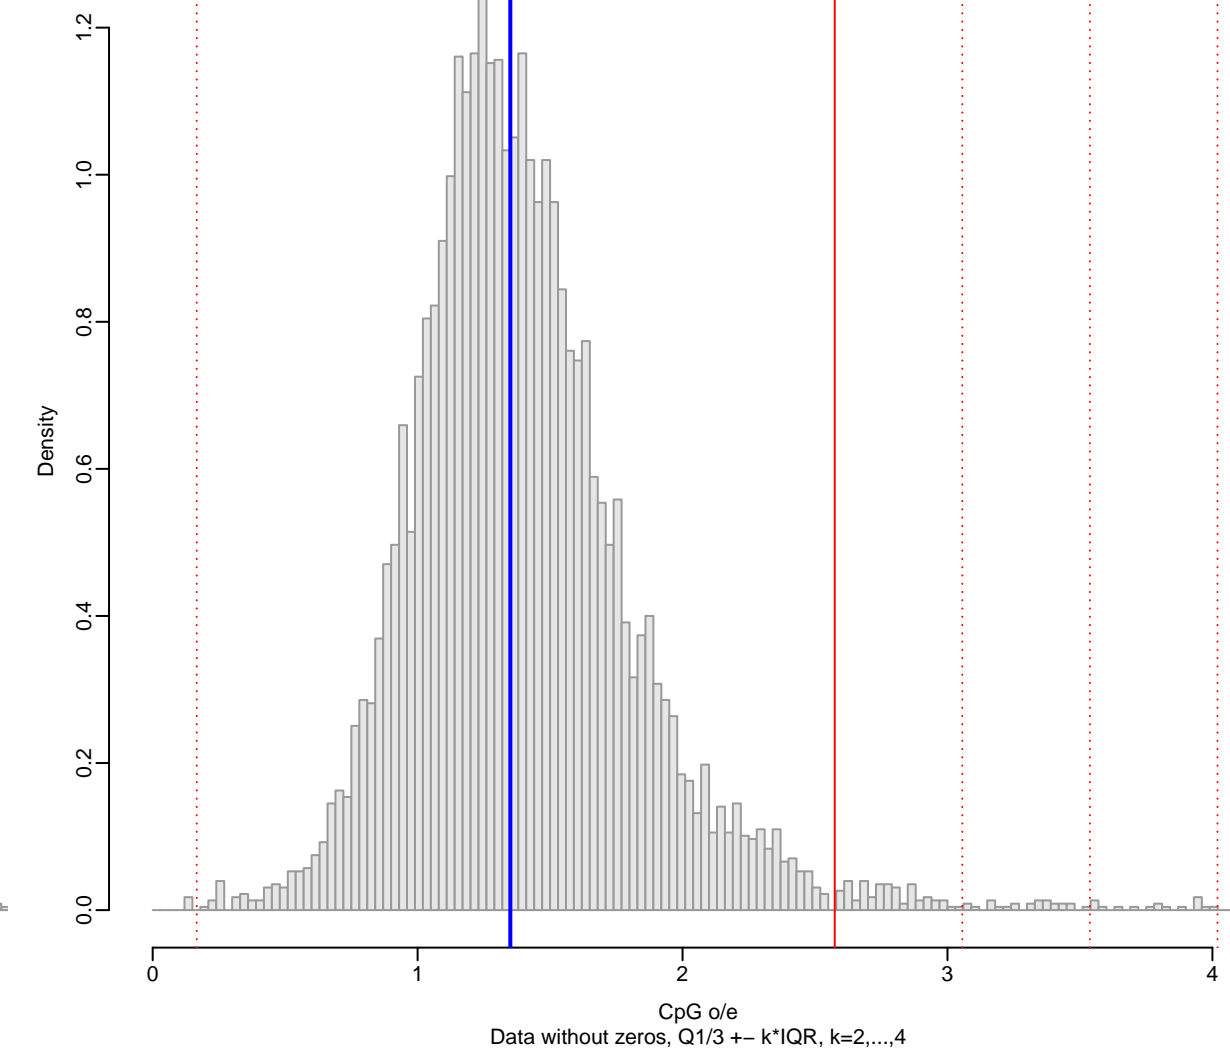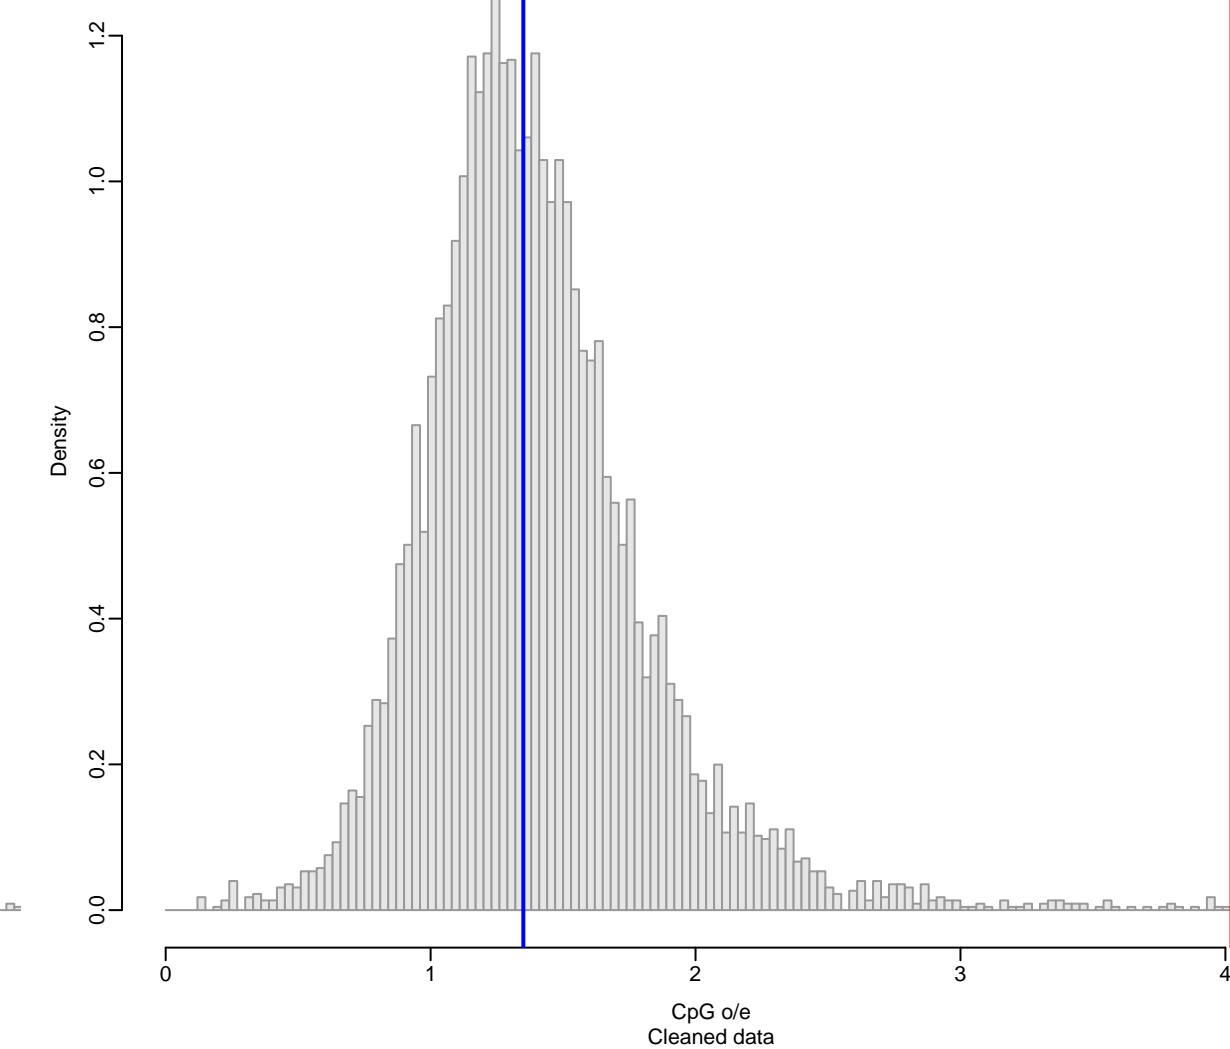

Macrobrachium\_nipponense

Density

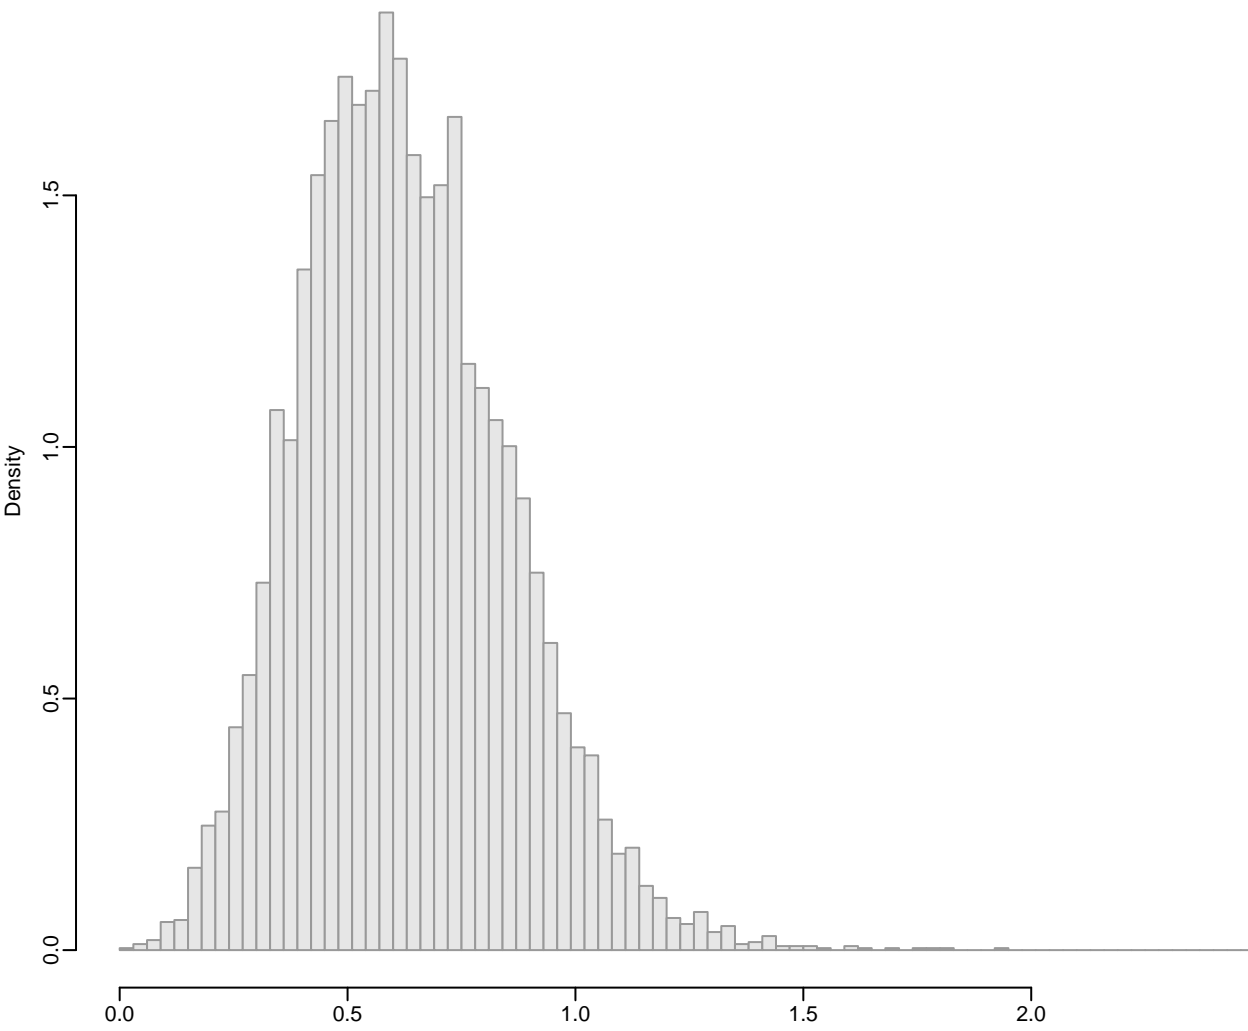

Density

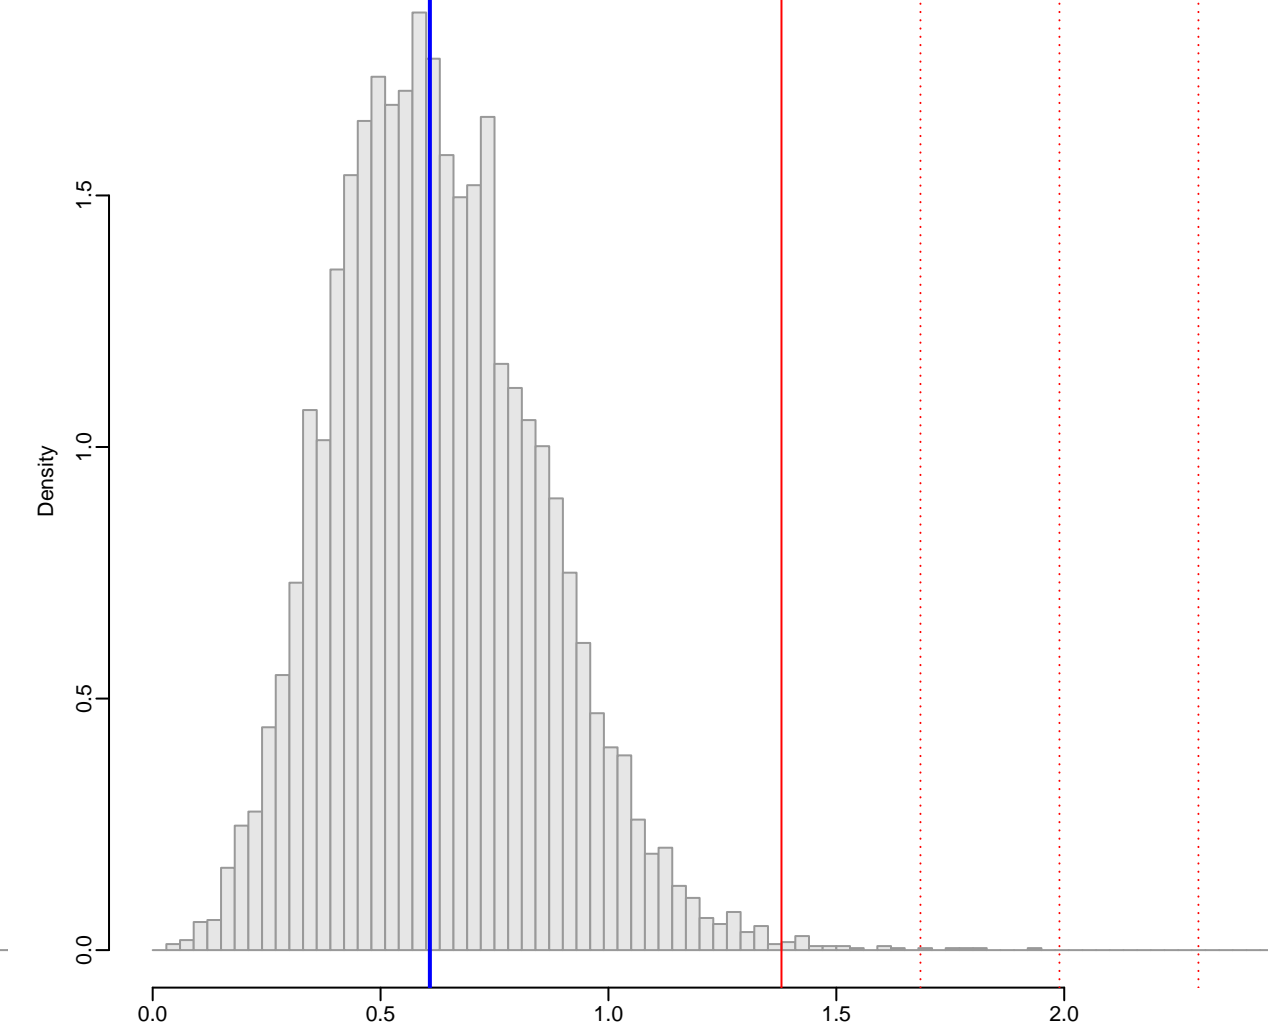

Density

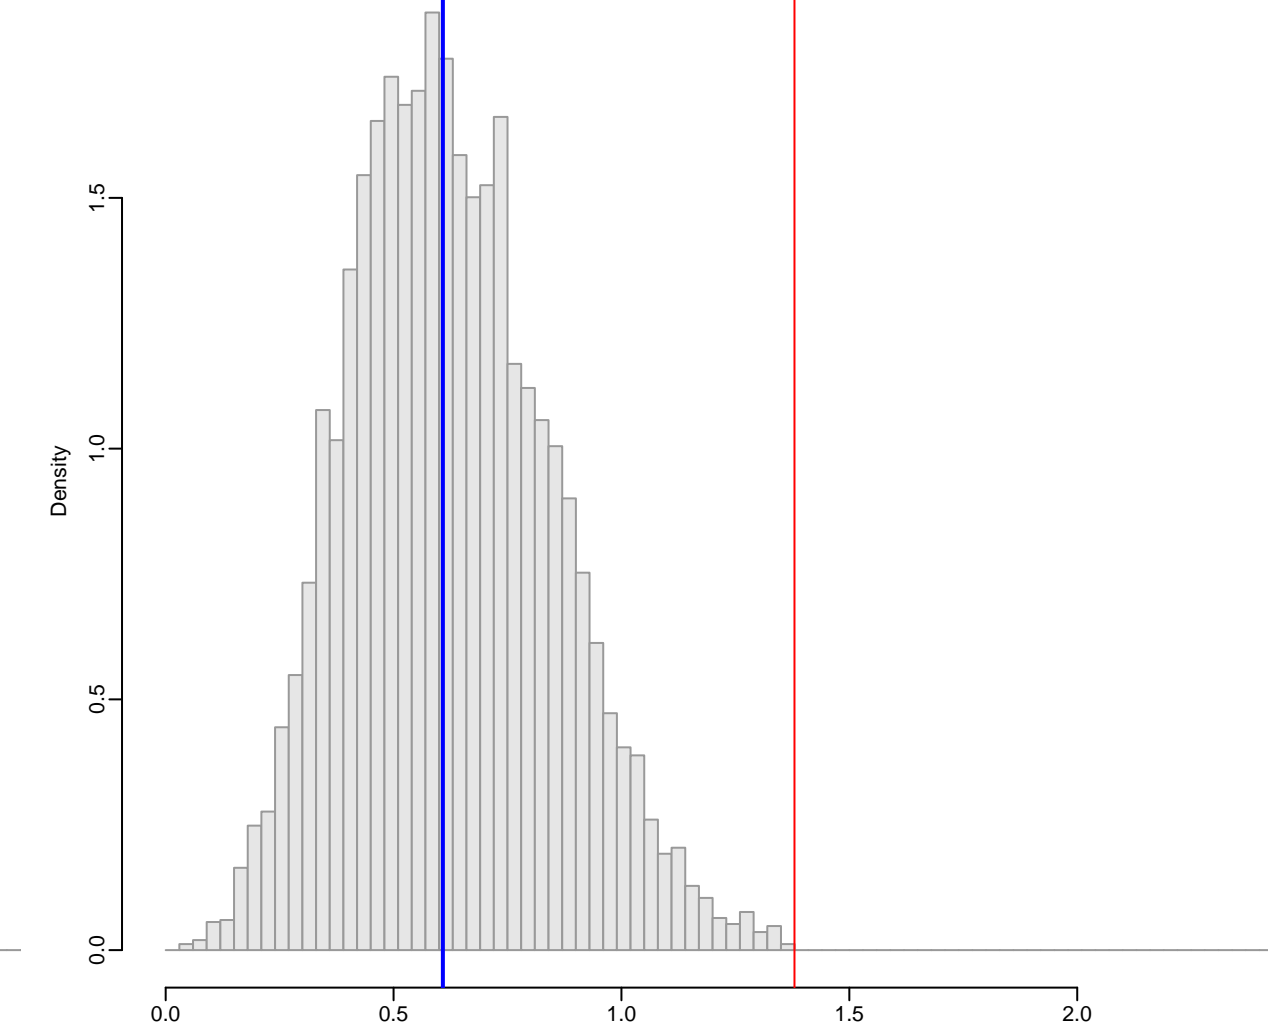

Macrobrachium\_rosenbergii

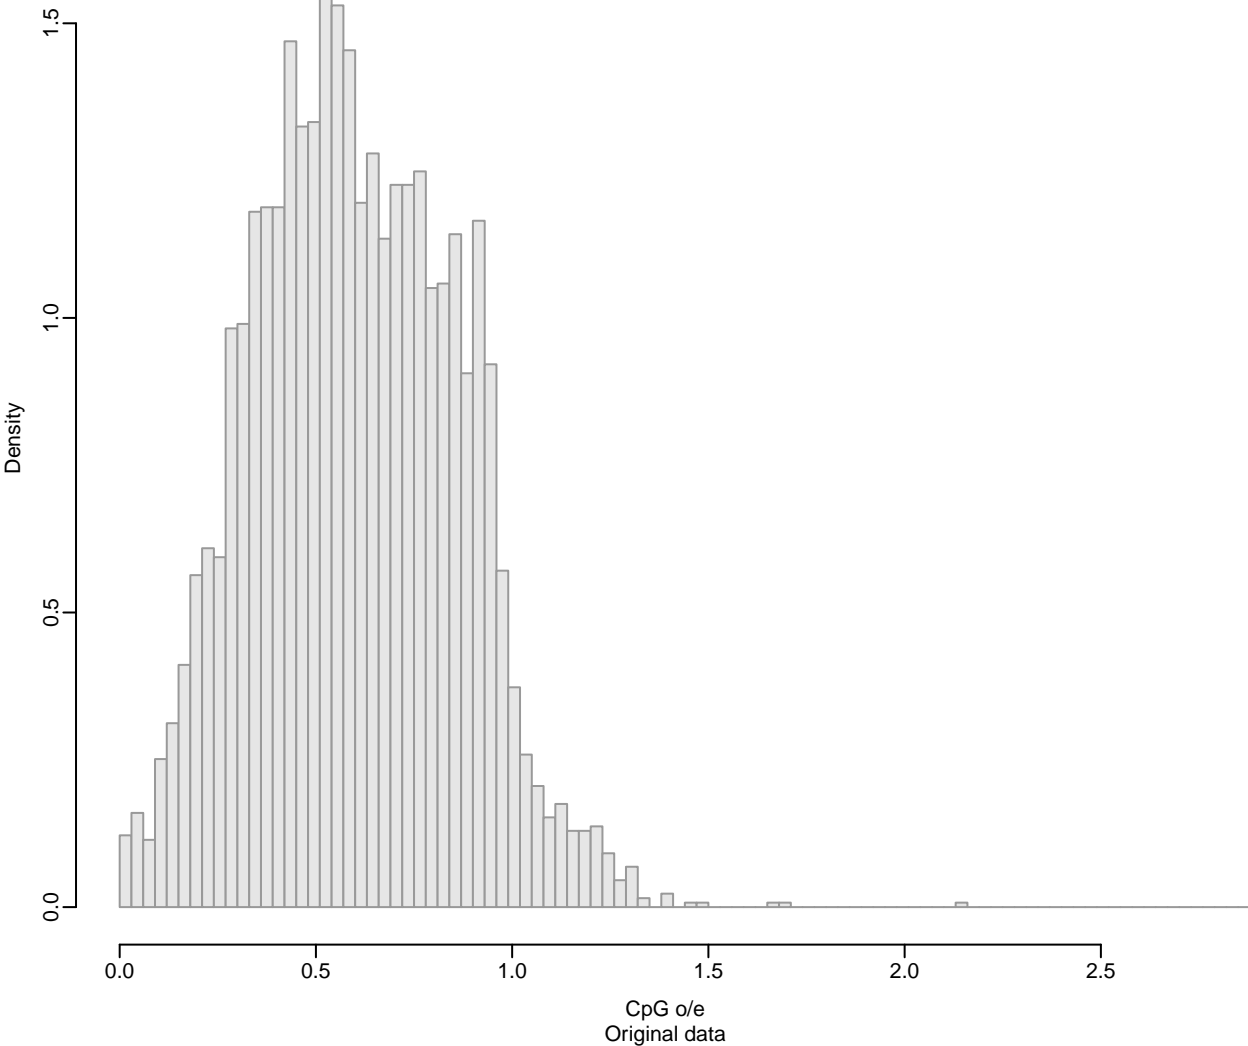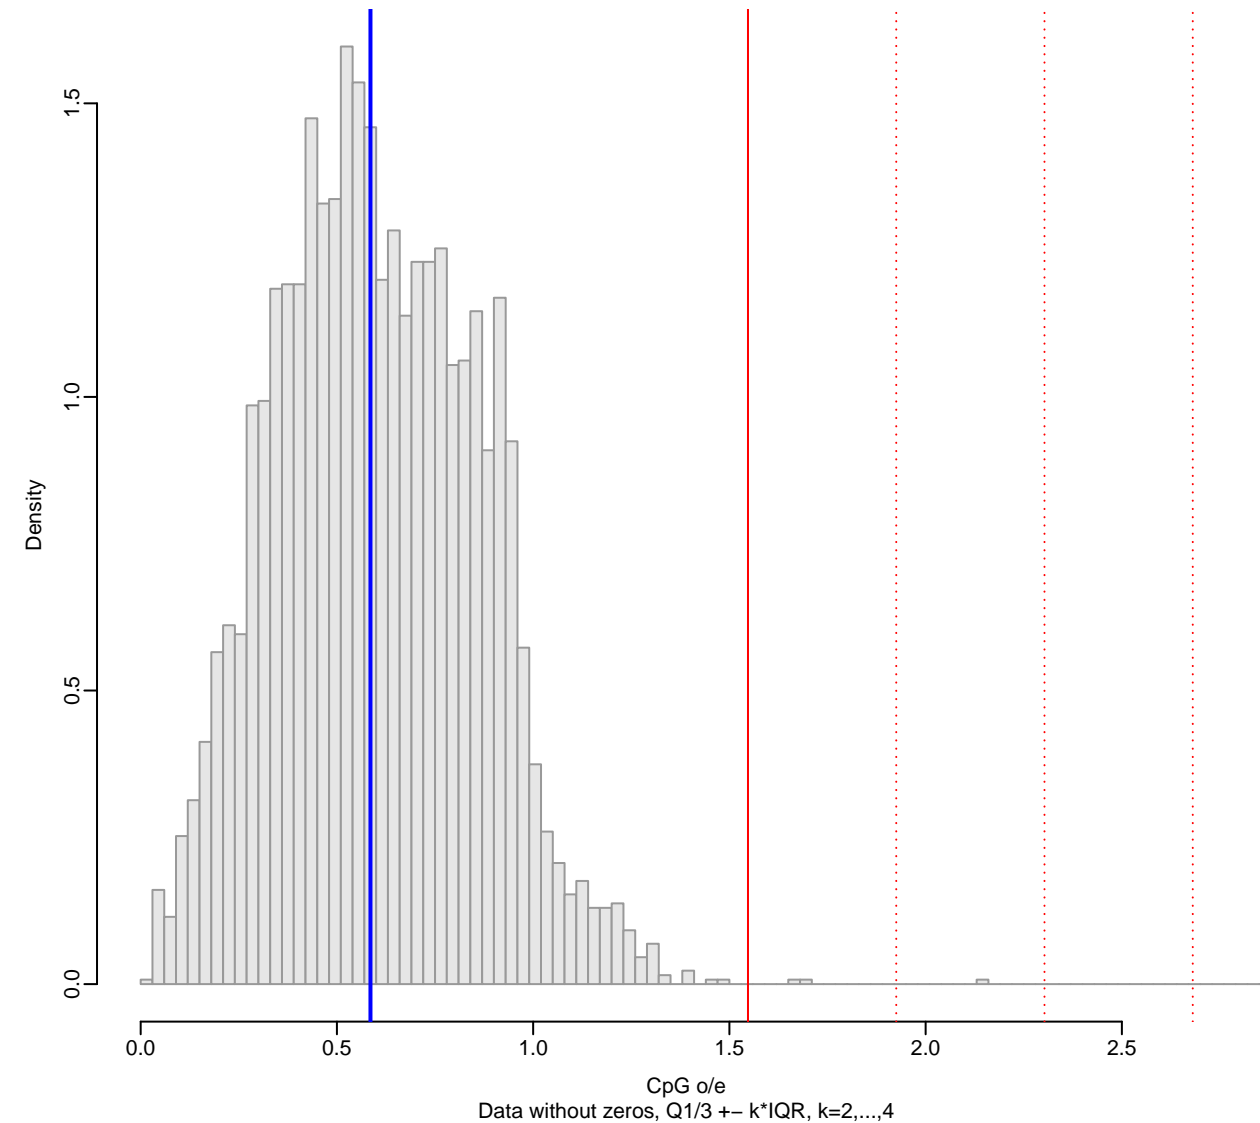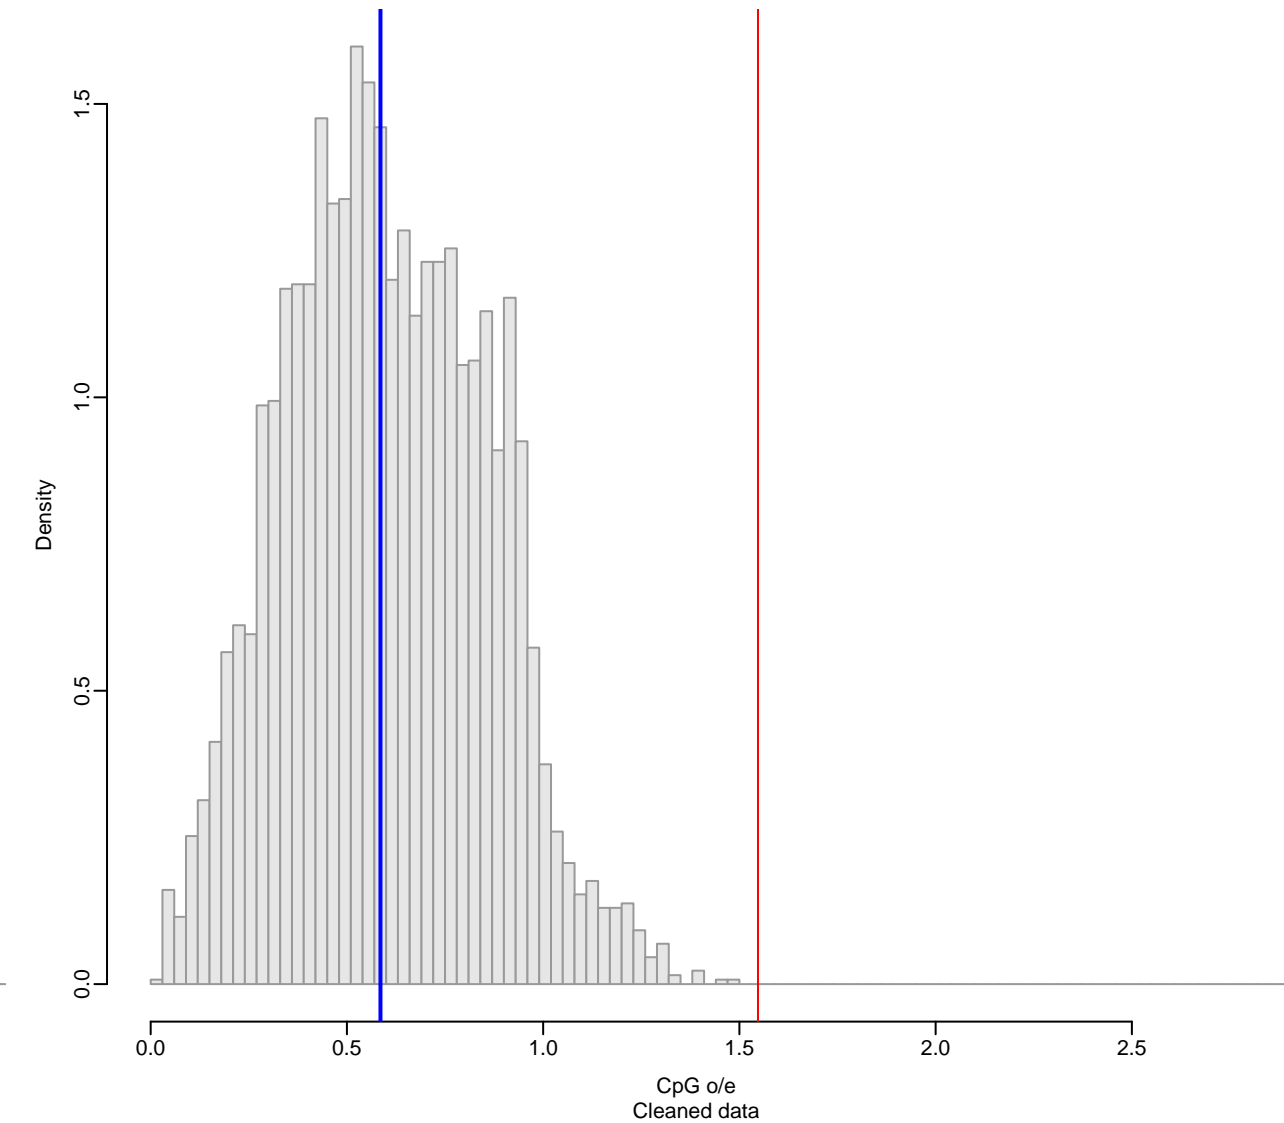

Macropus\_eugenii

Density

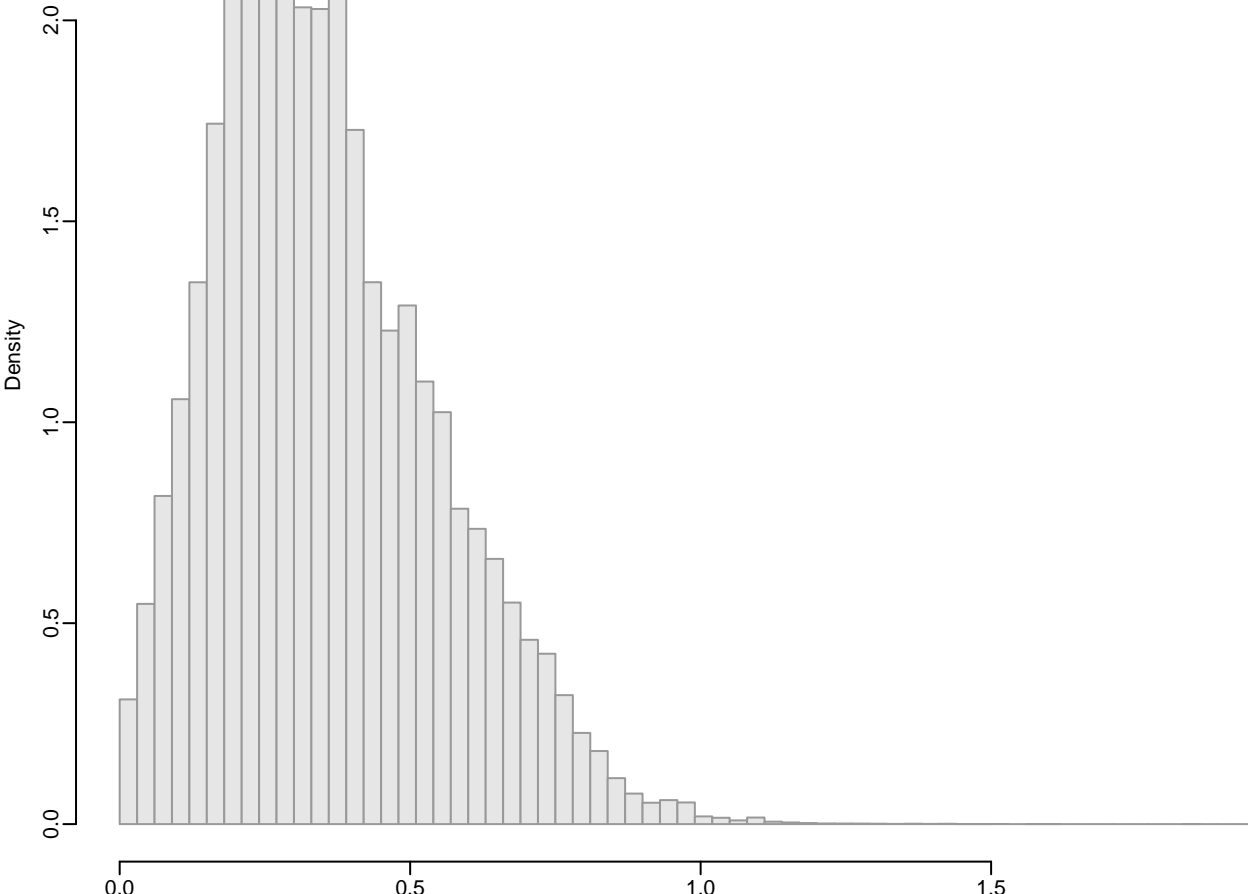

CpG o/e  
Original data

Density

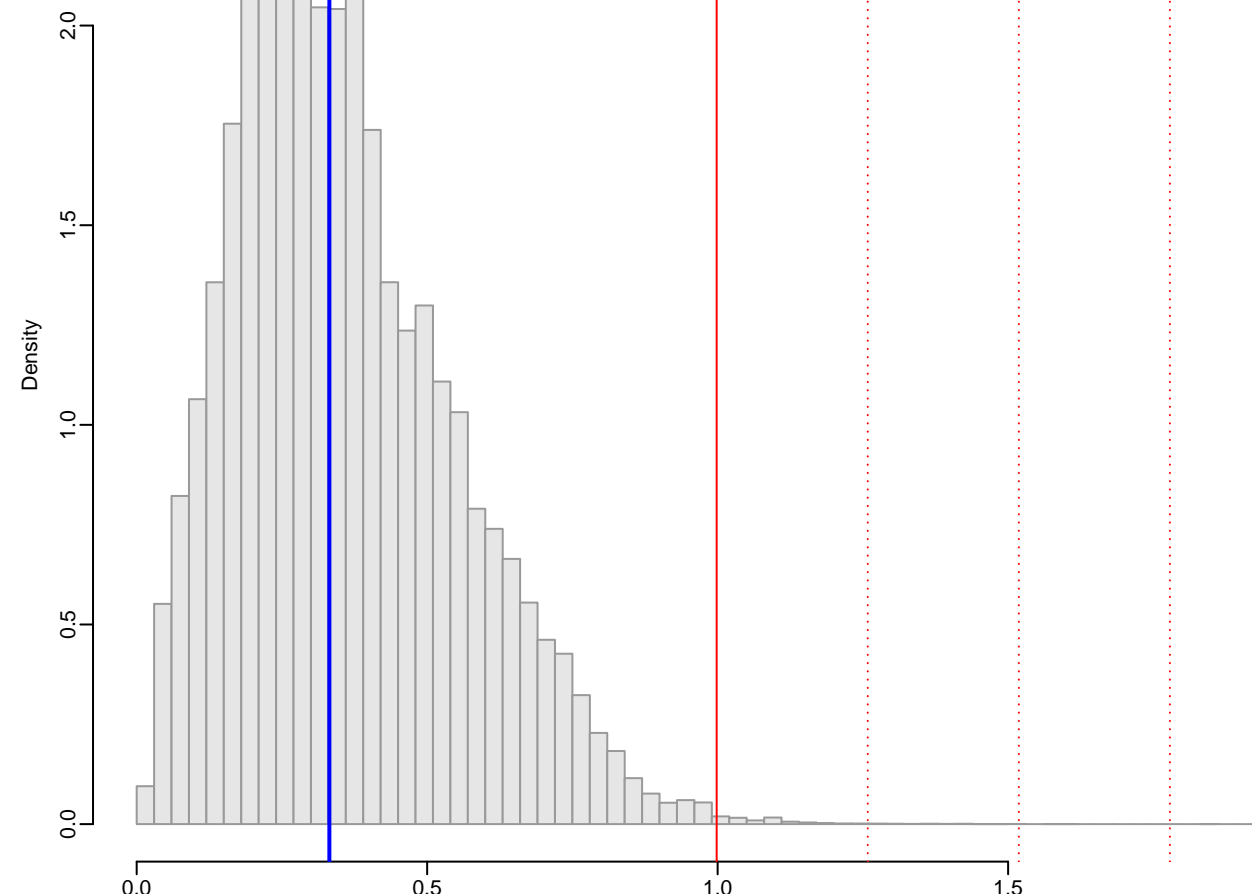

CpG o/e  
Data without zeros,  $Q1/3 \pm k \cdot IQR$ ,  $k=2, \dots, 4$

Density

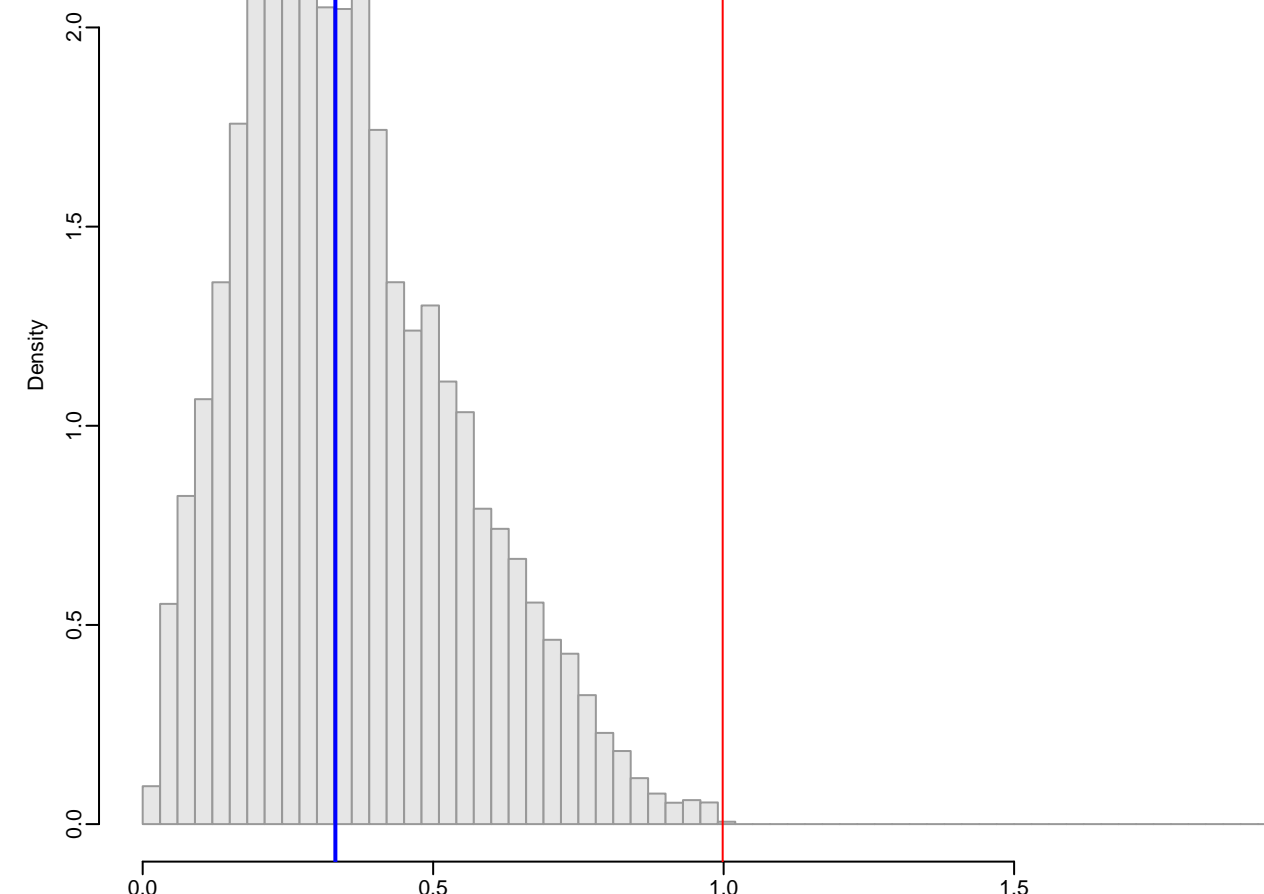

CpG o/e  
Cleaned data



Magnaporthe\_grisea

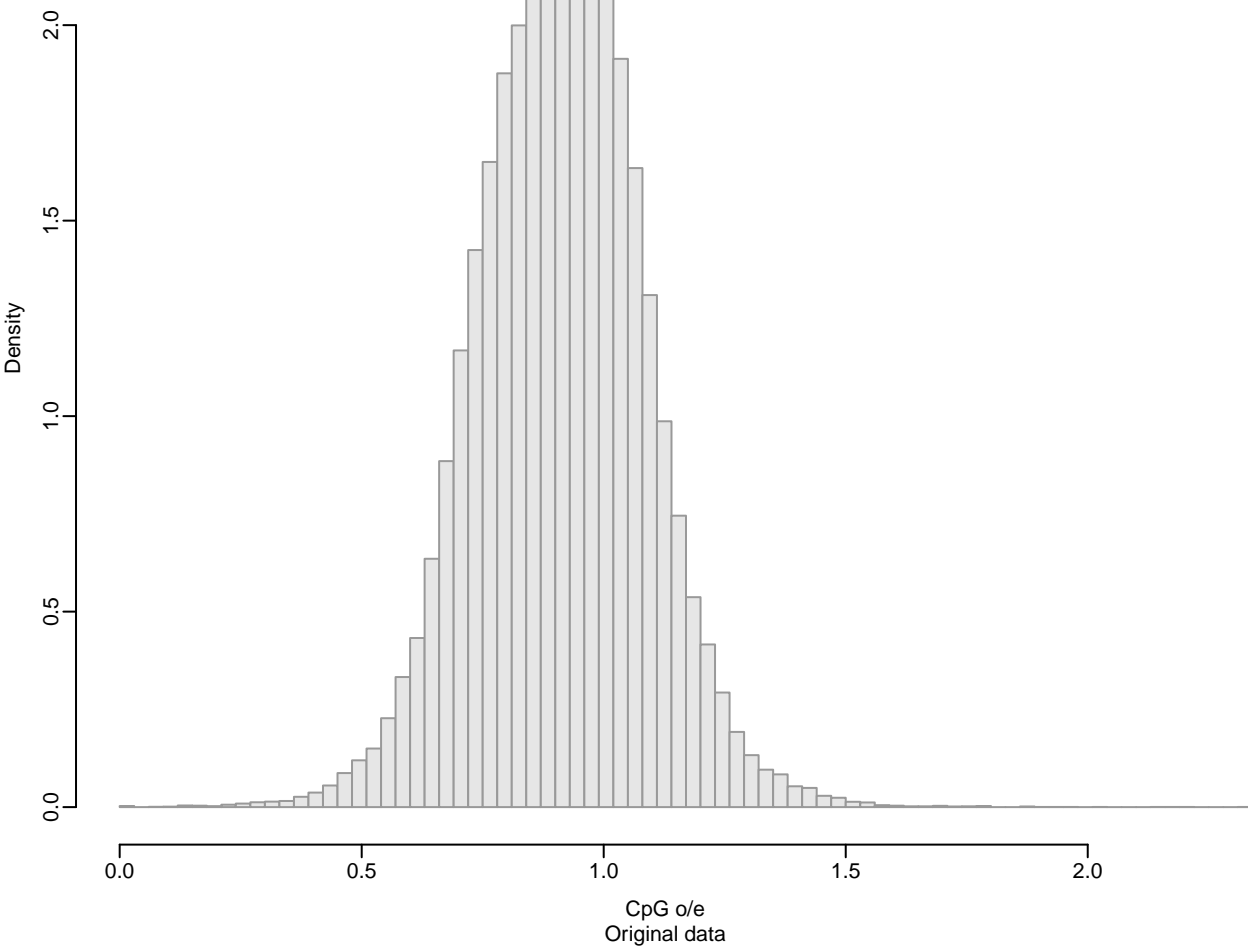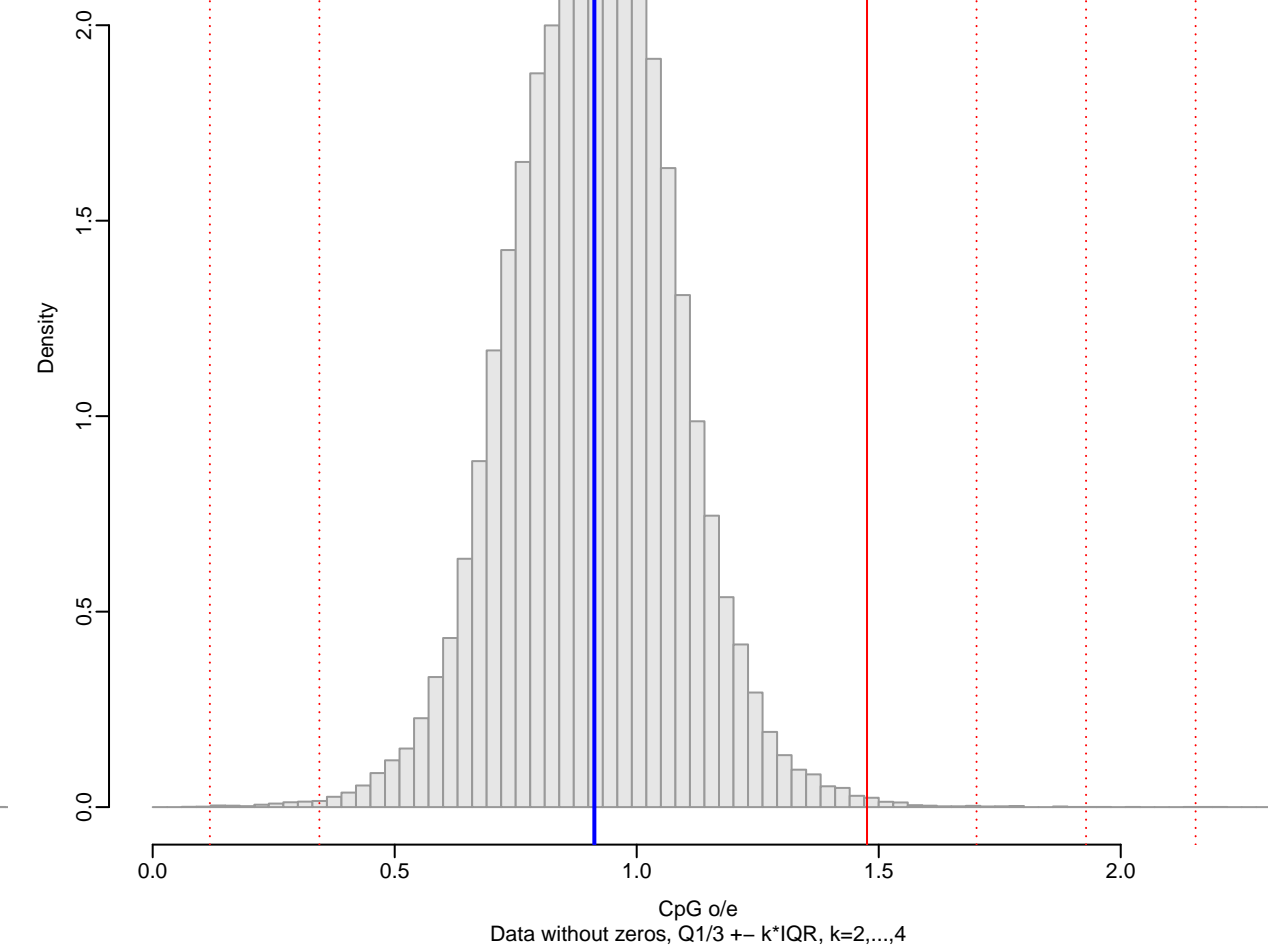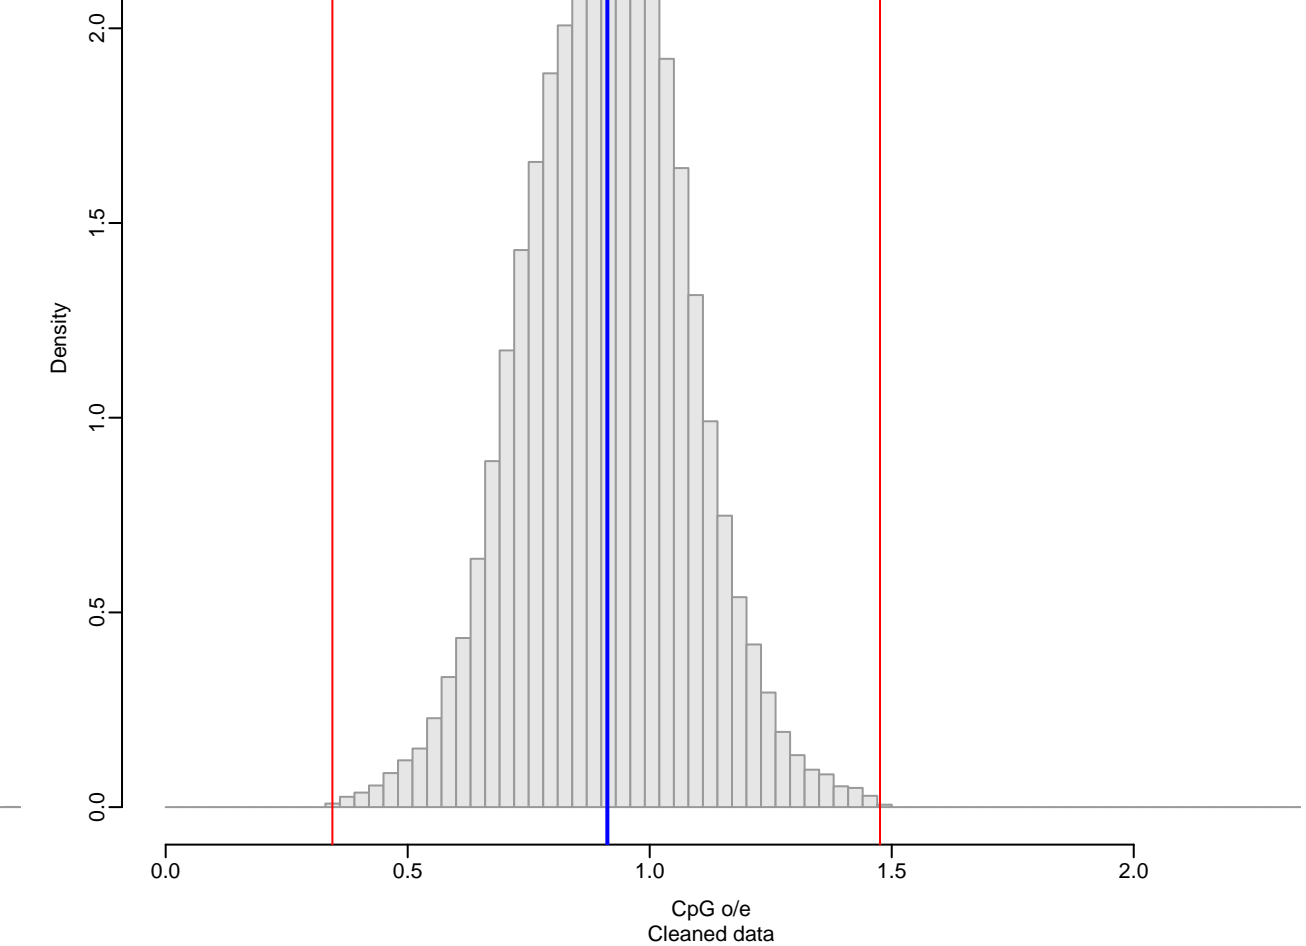

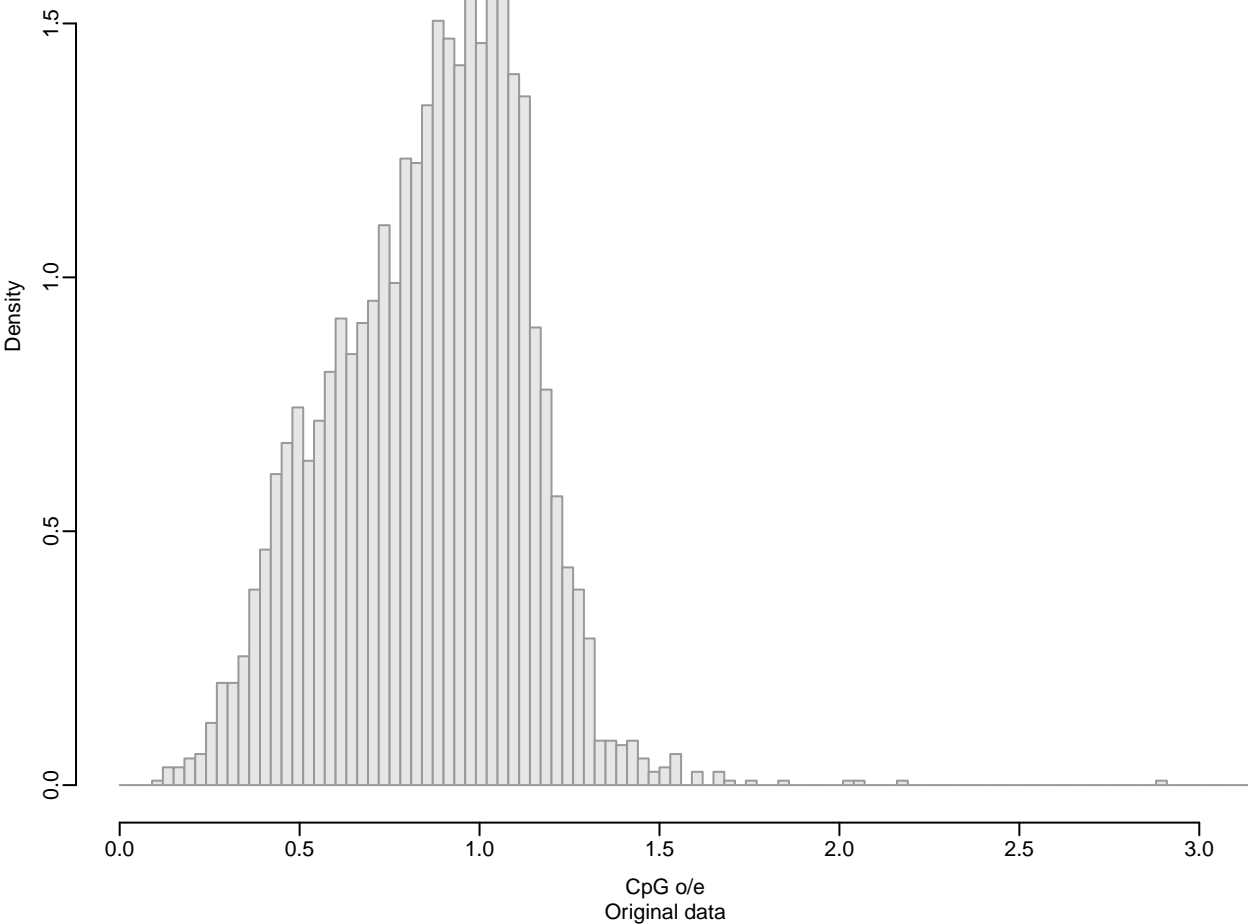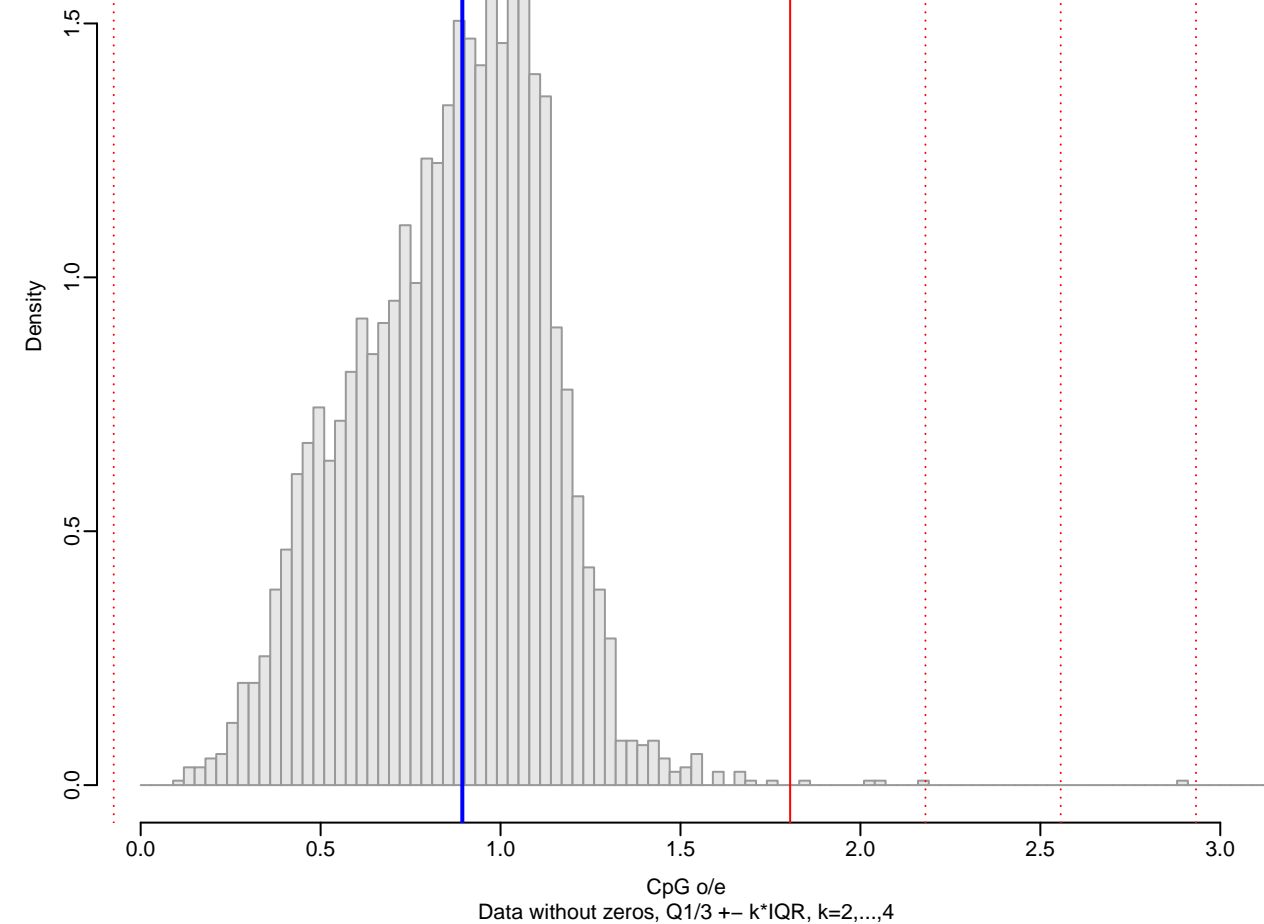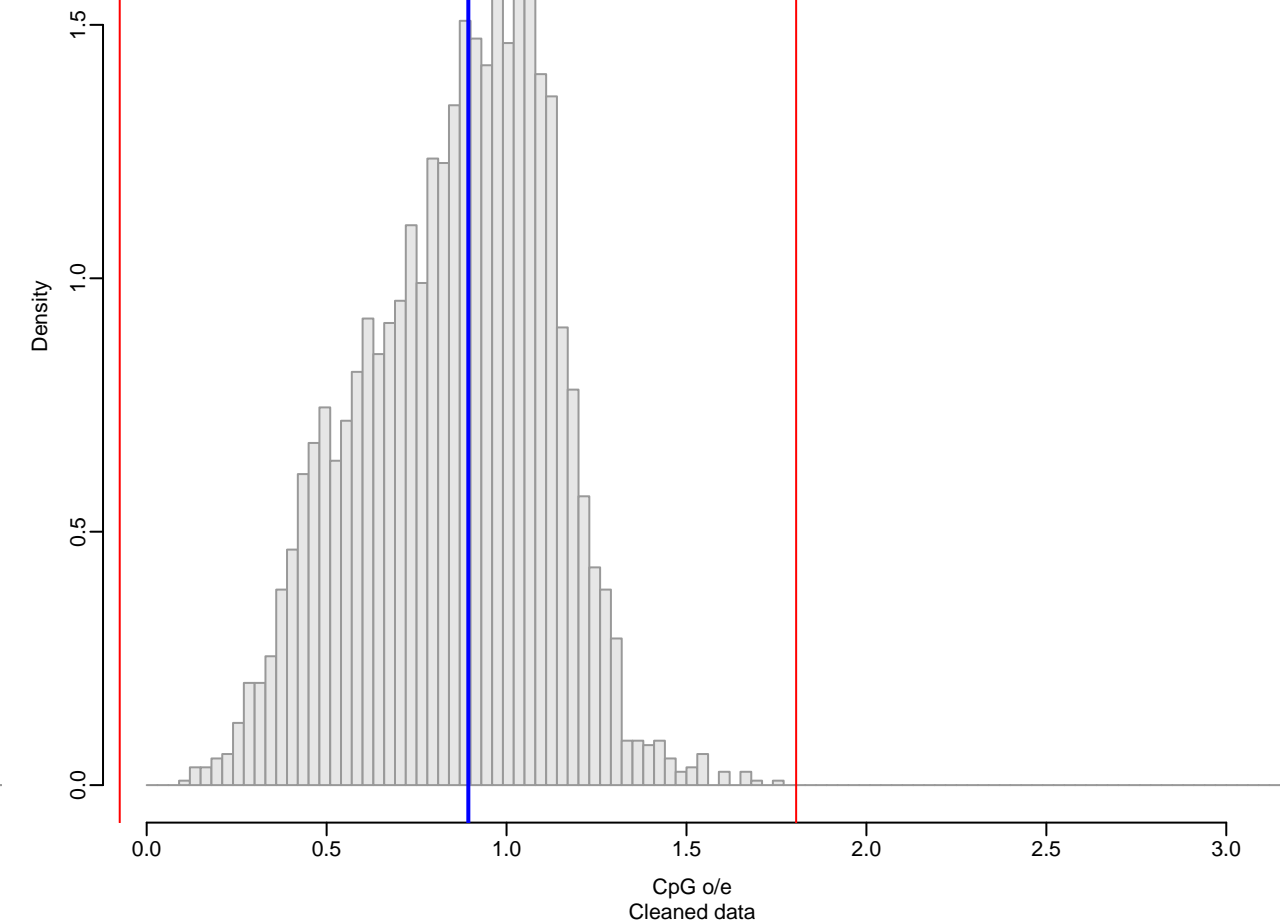

Mahonia\_nervosa

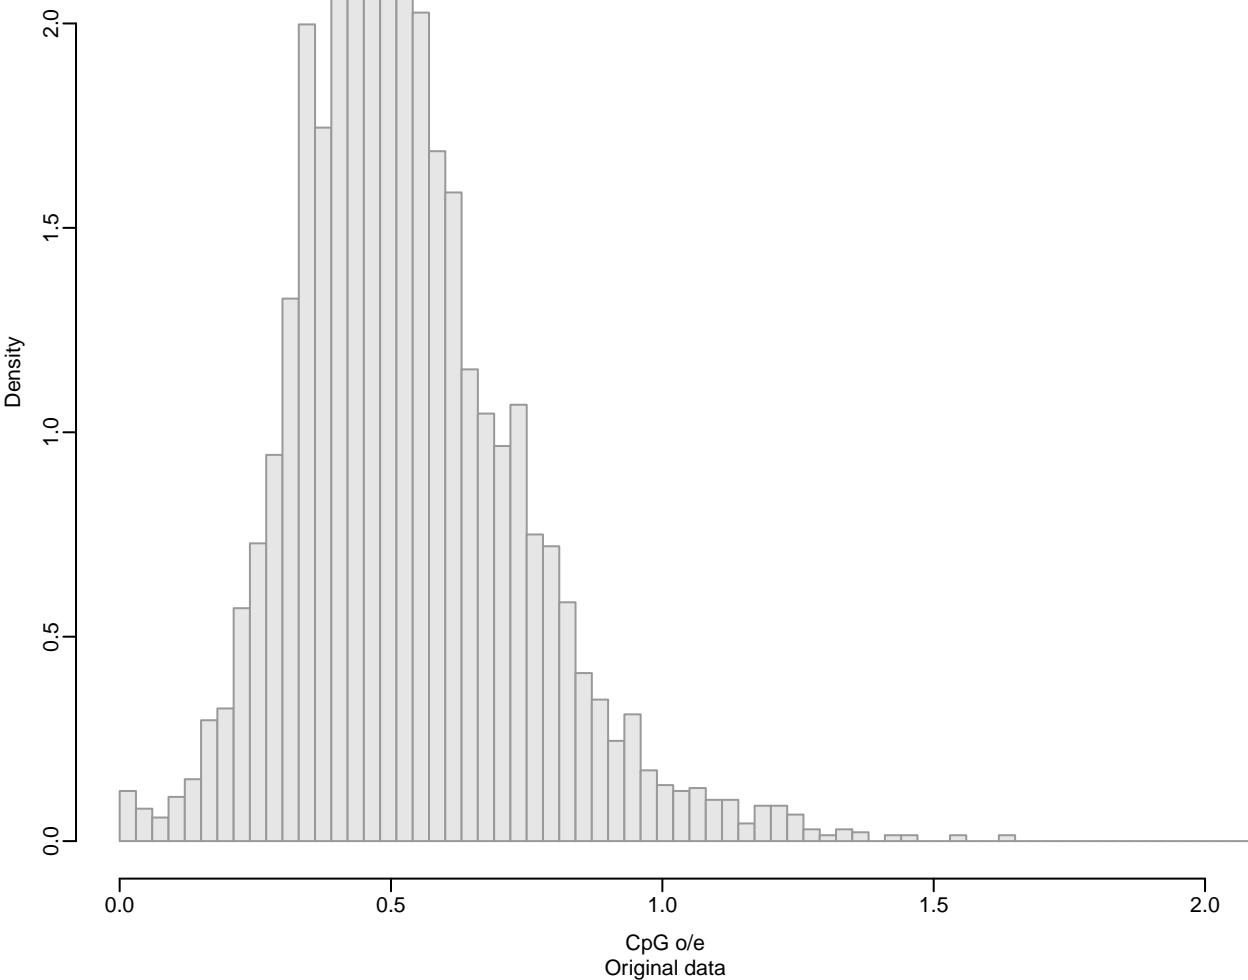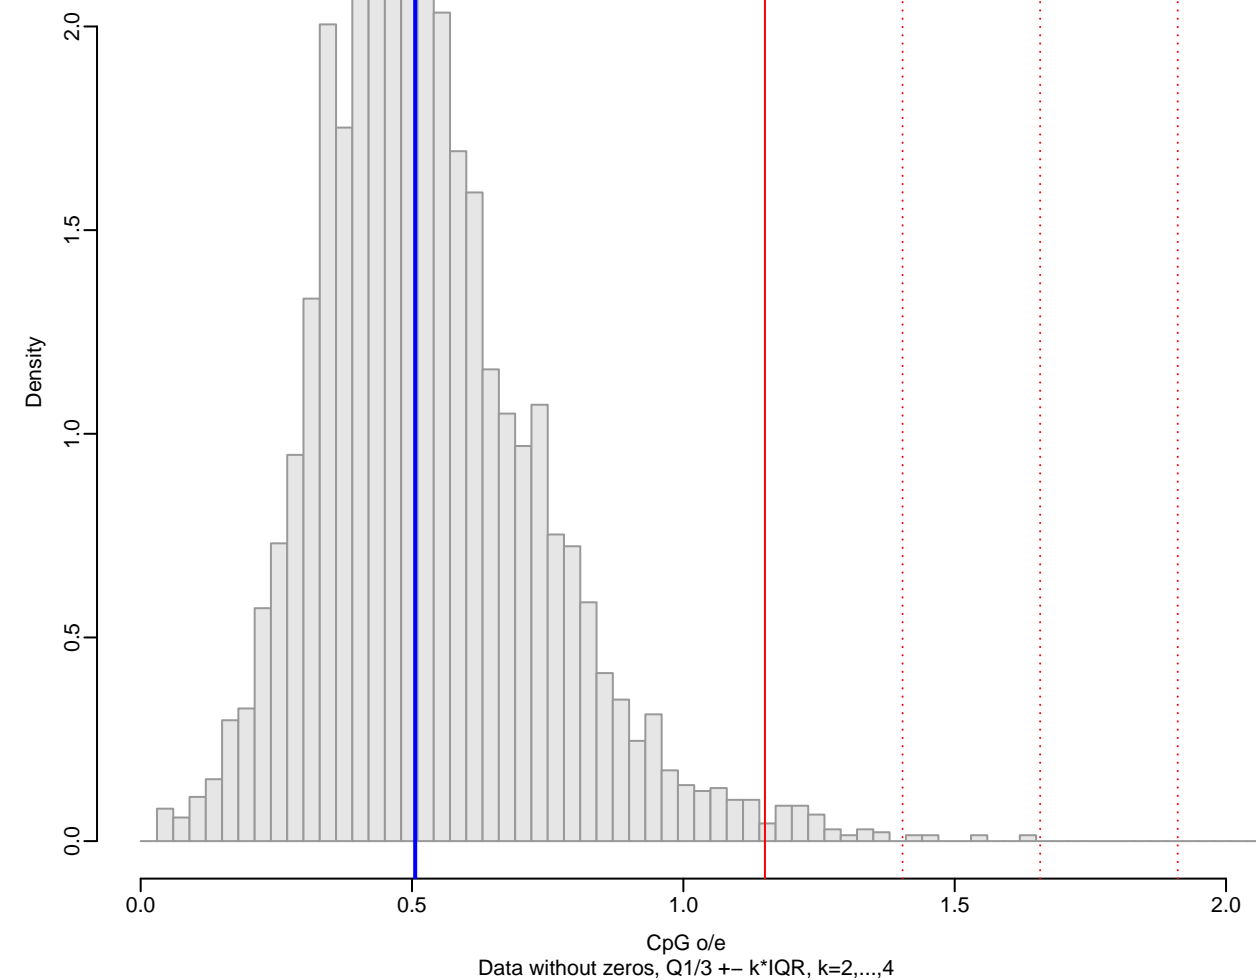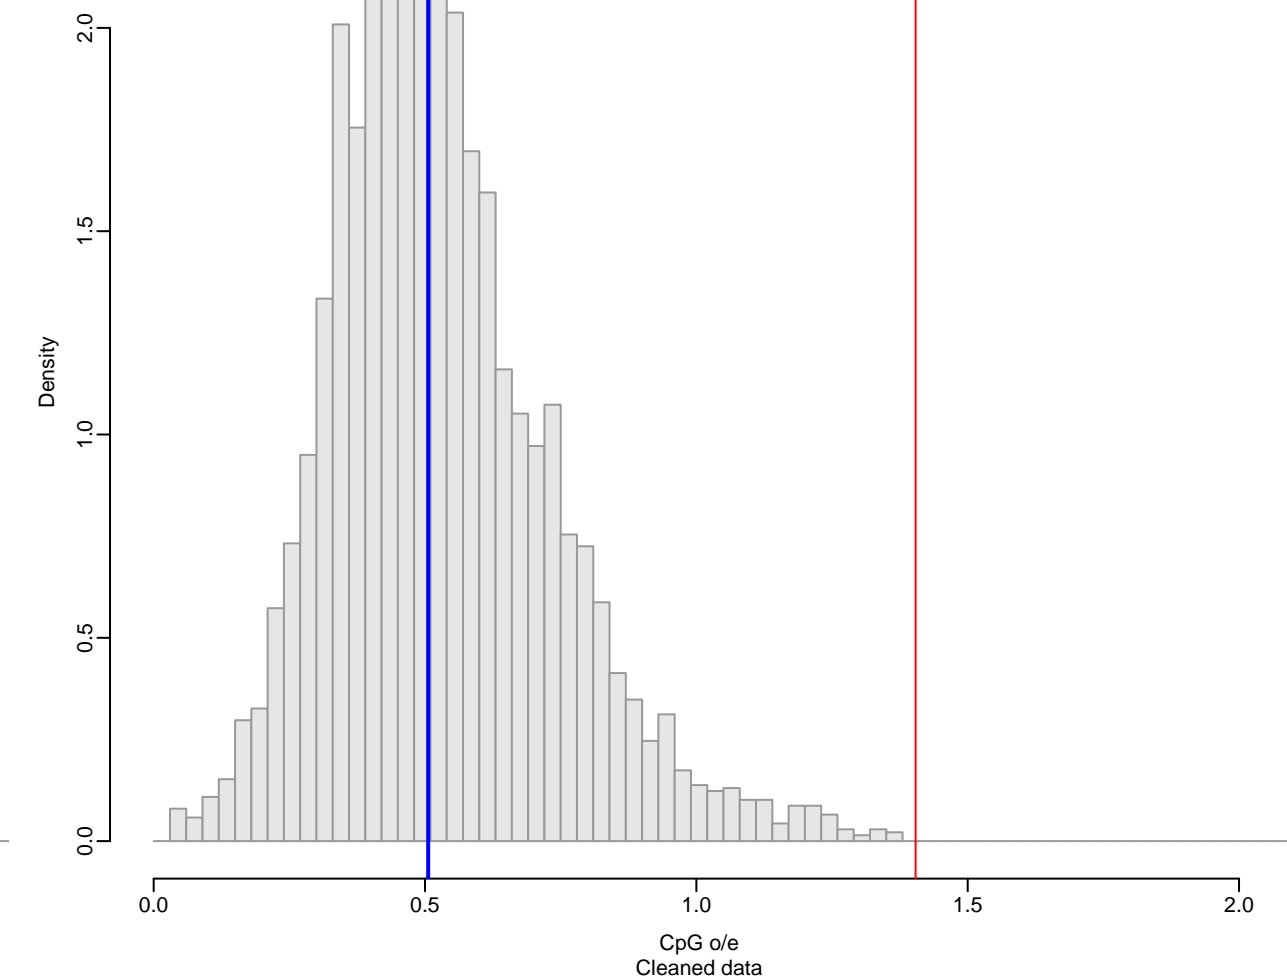

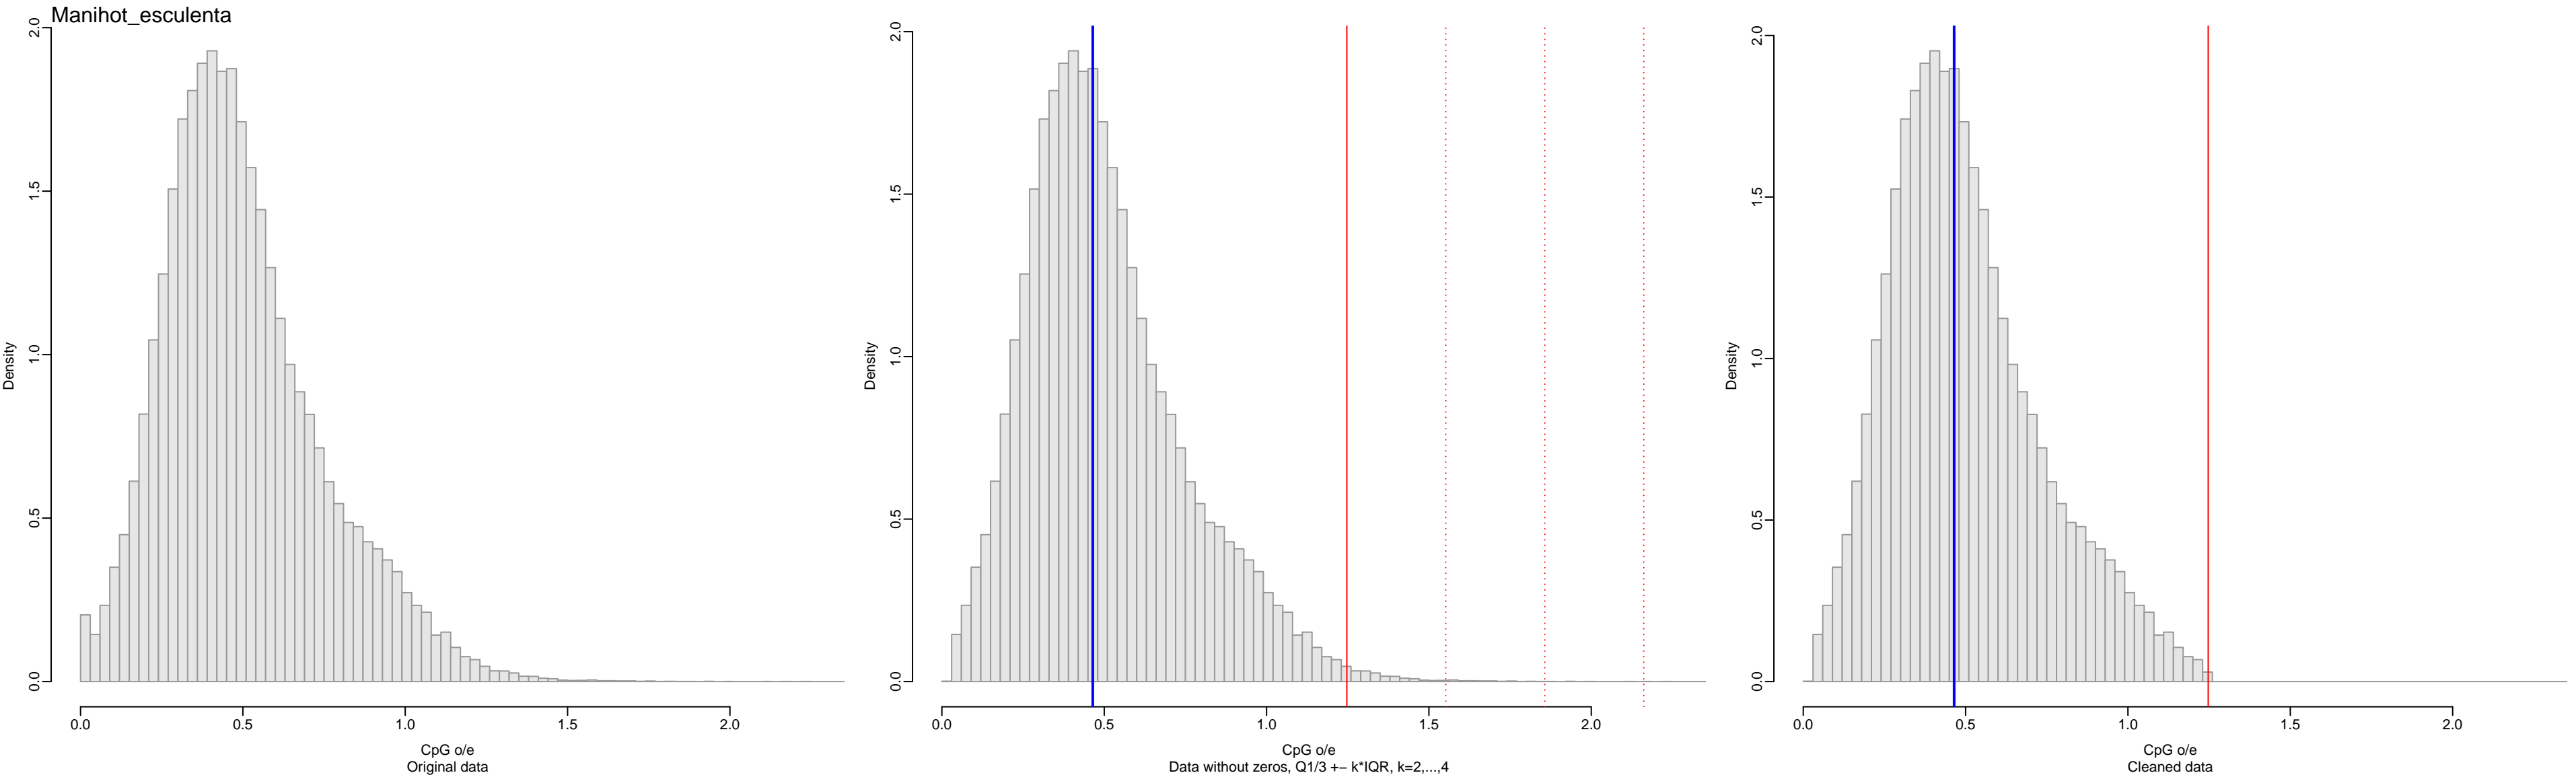

Marsupenaeus\_japonicus

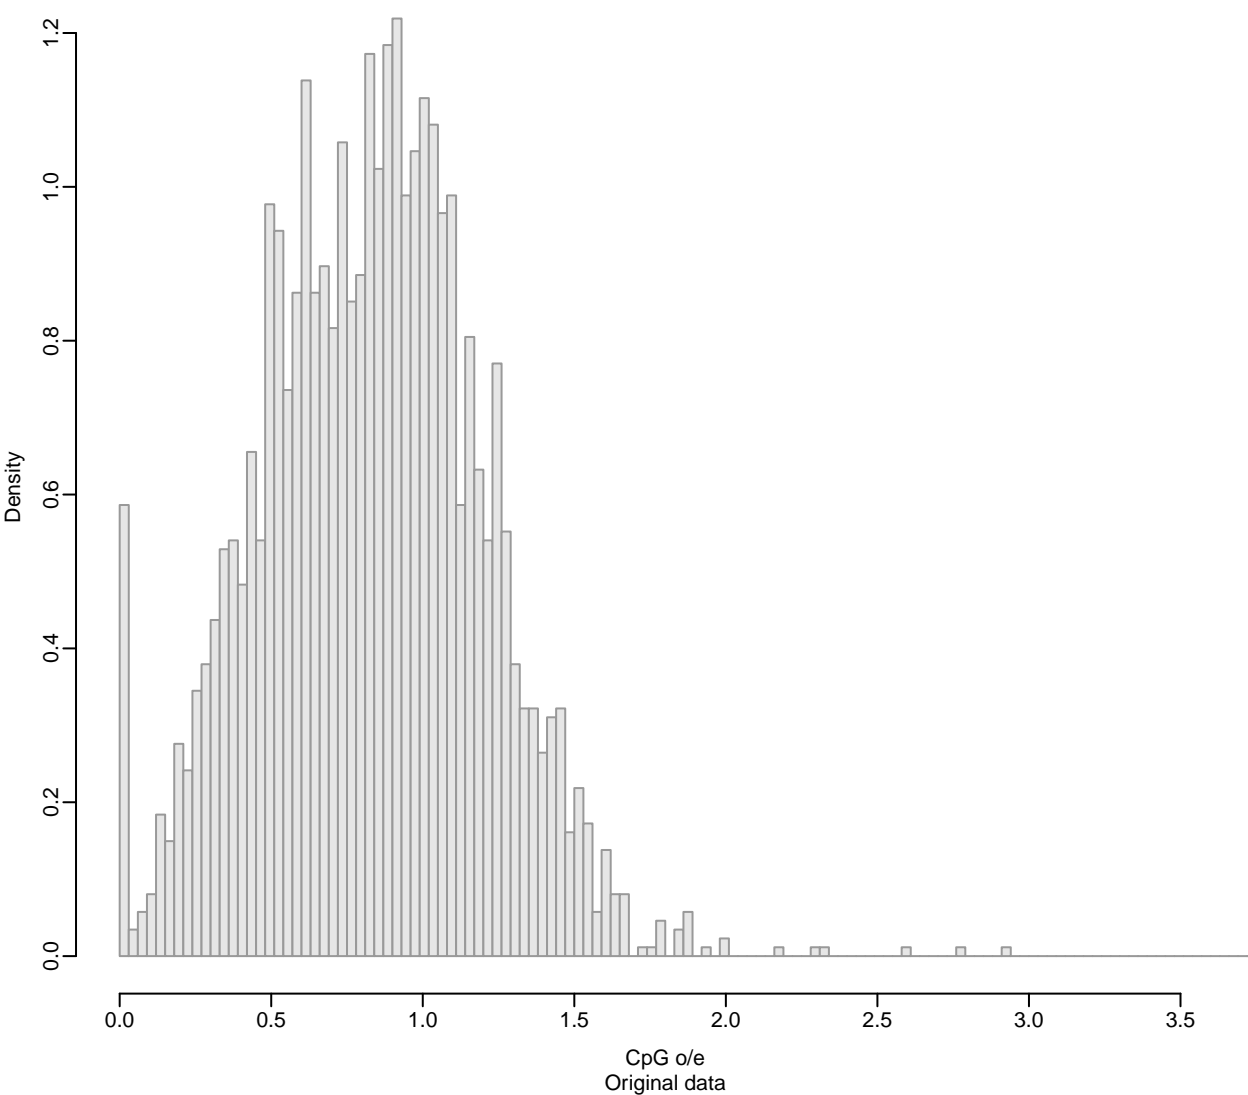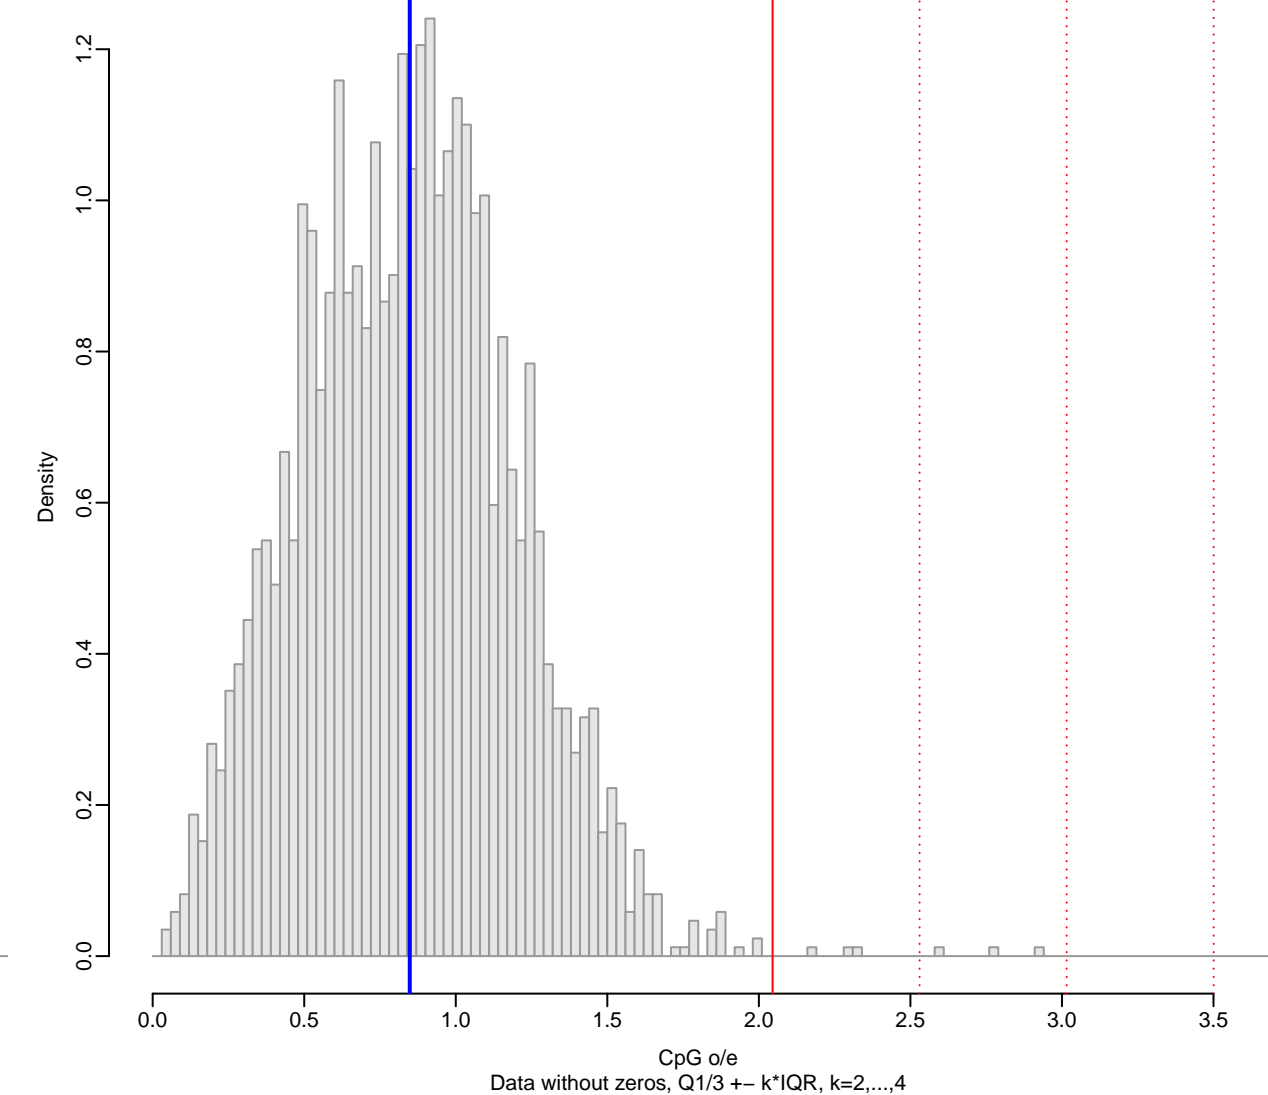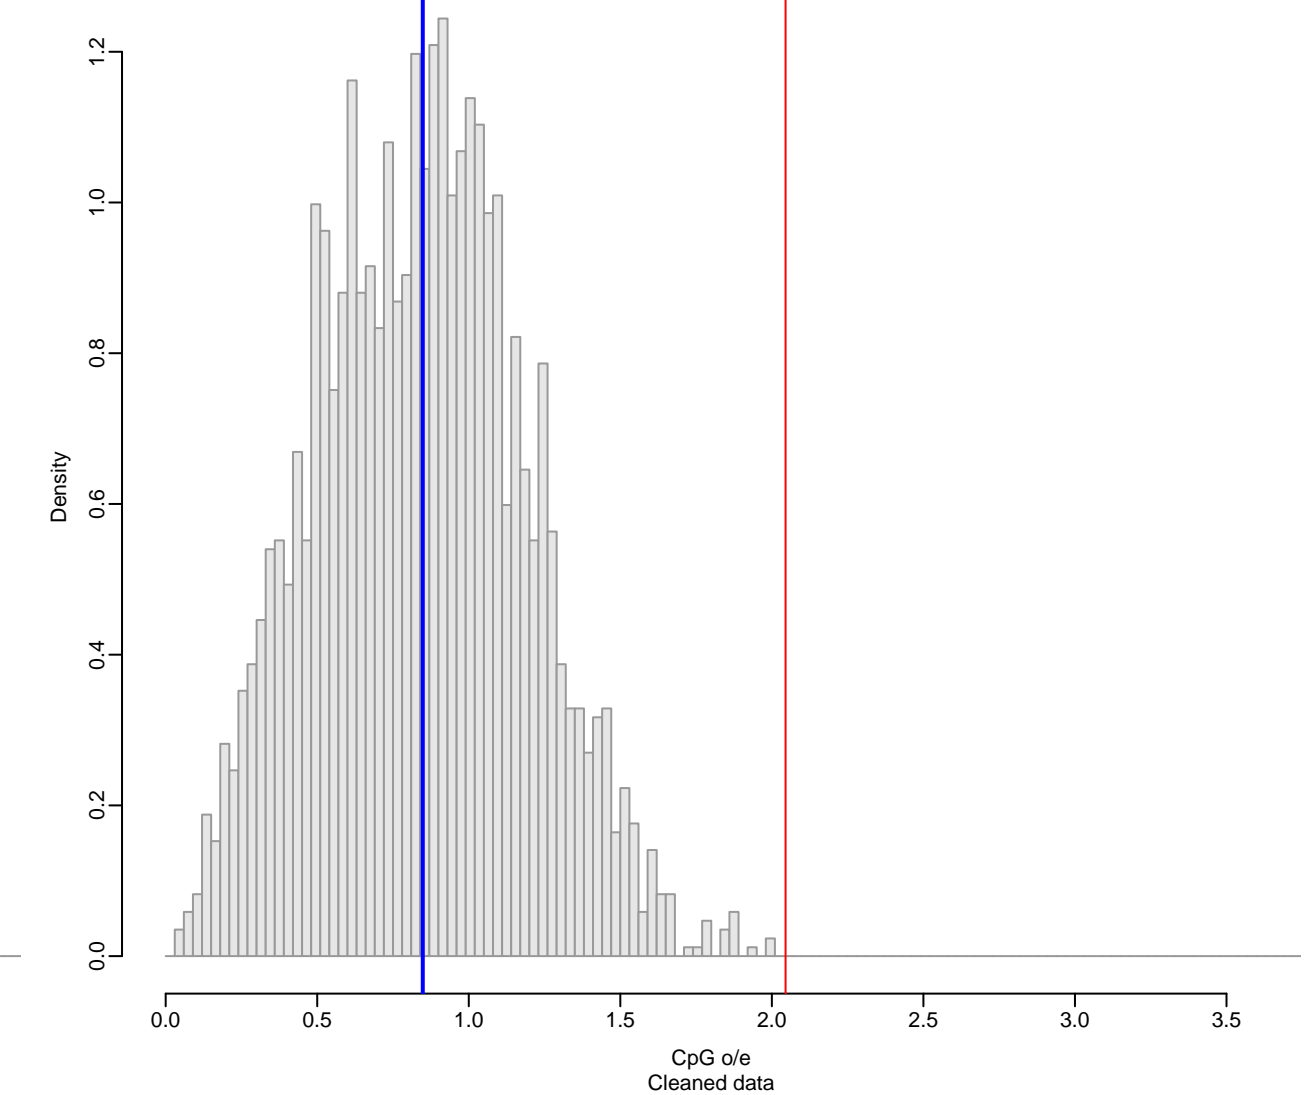

Mastigamoeba\_balamuthi

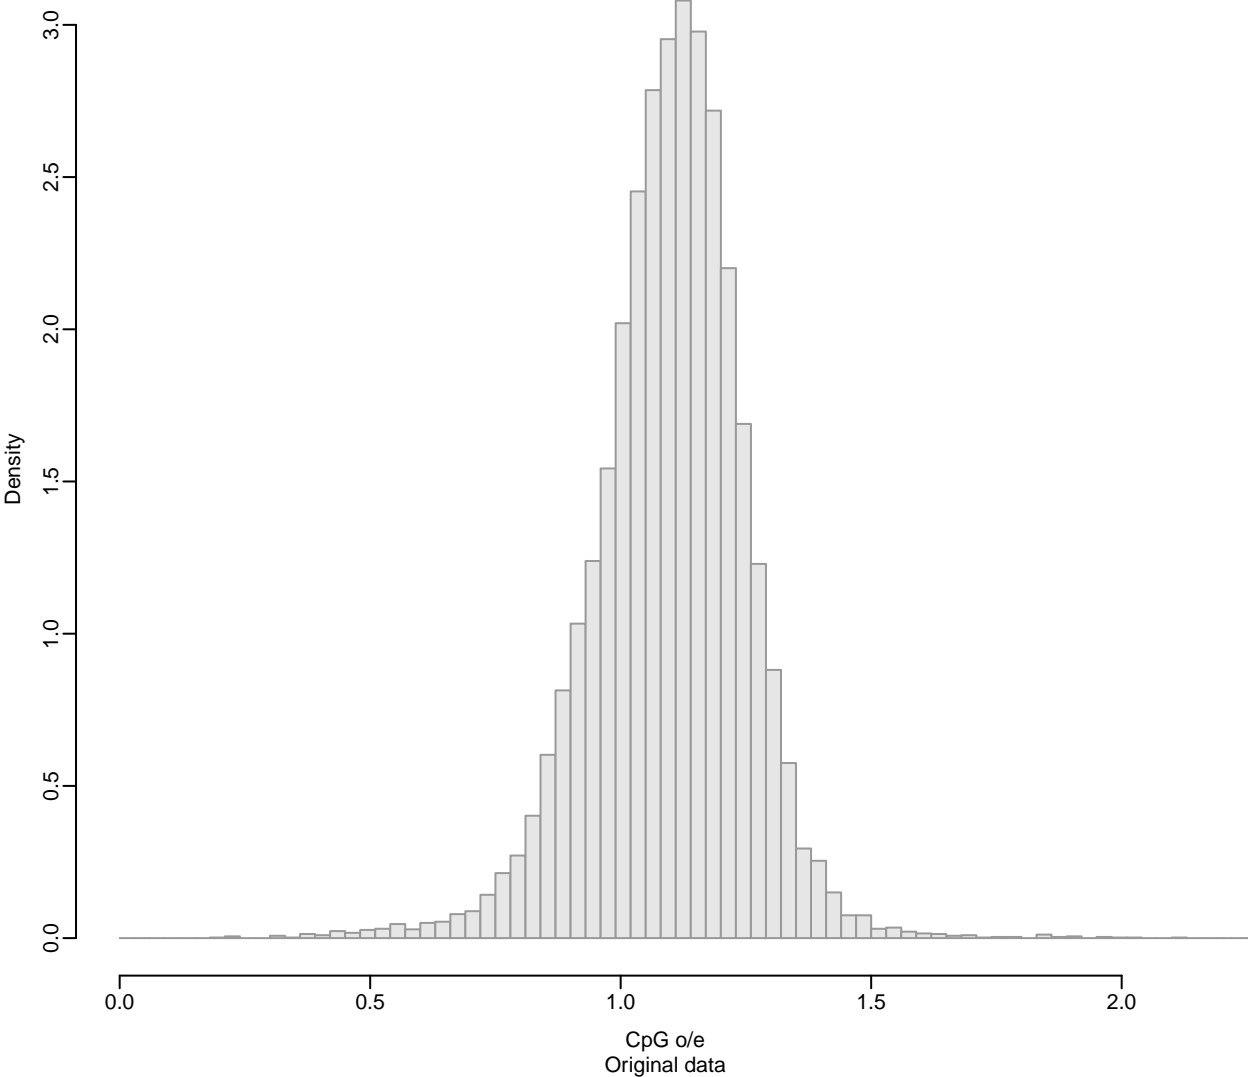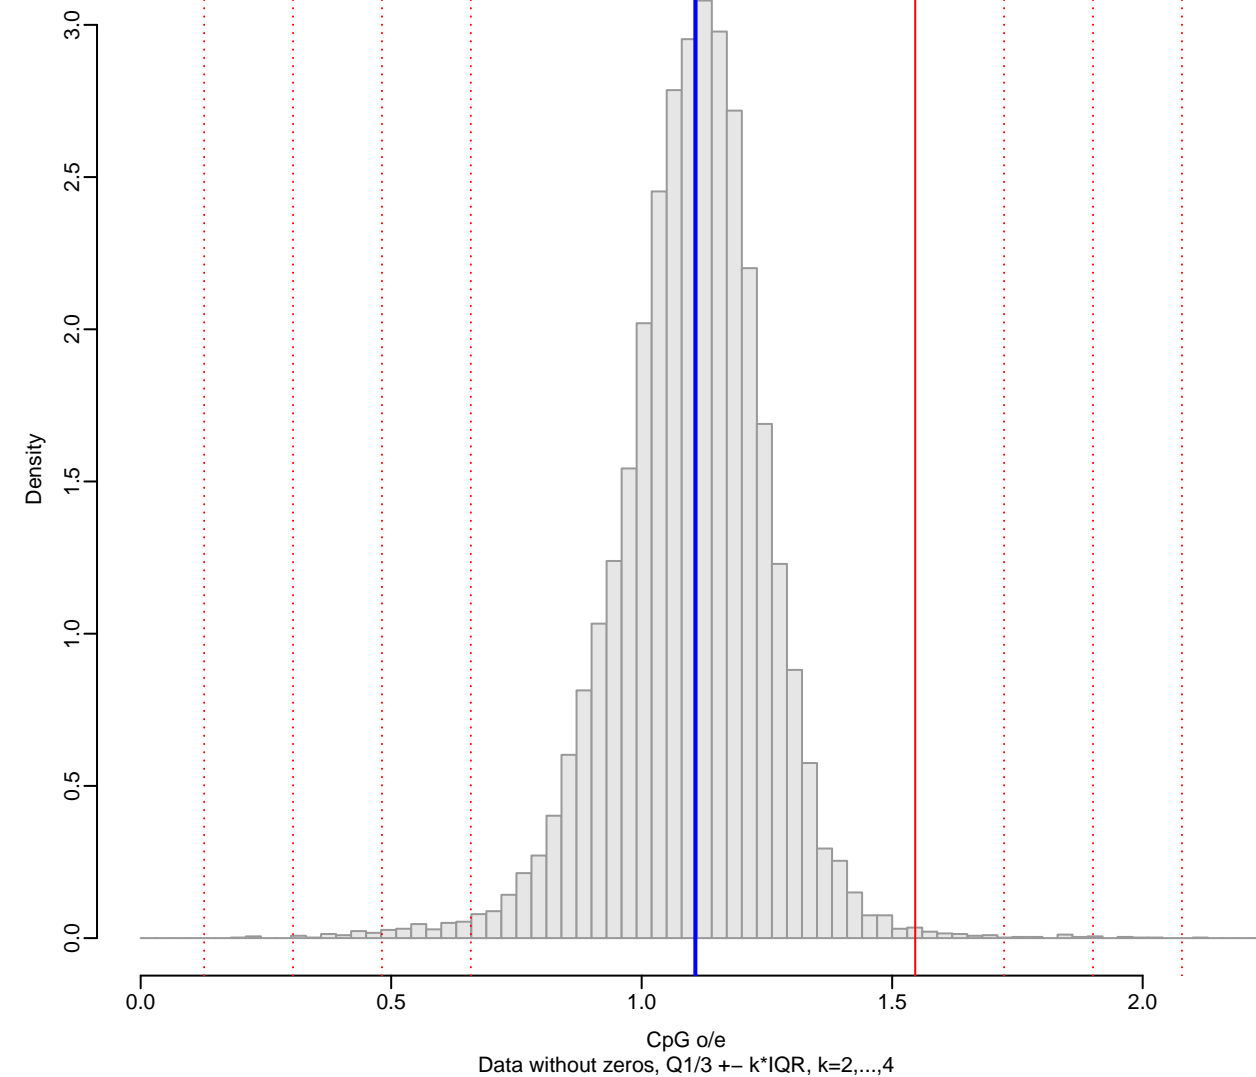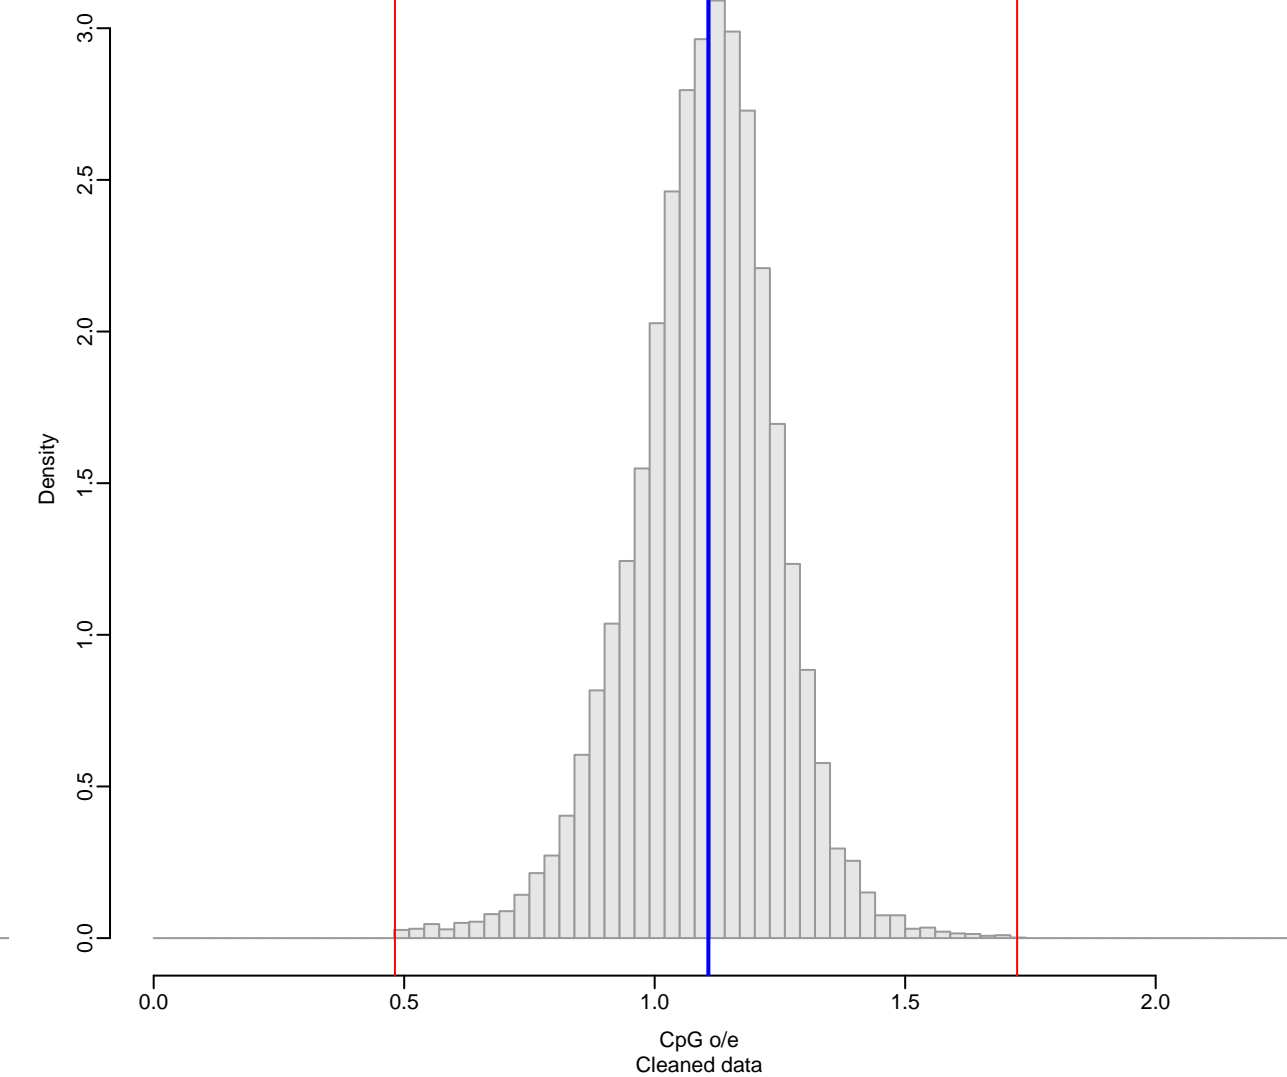

Meleagris\_gallopavo

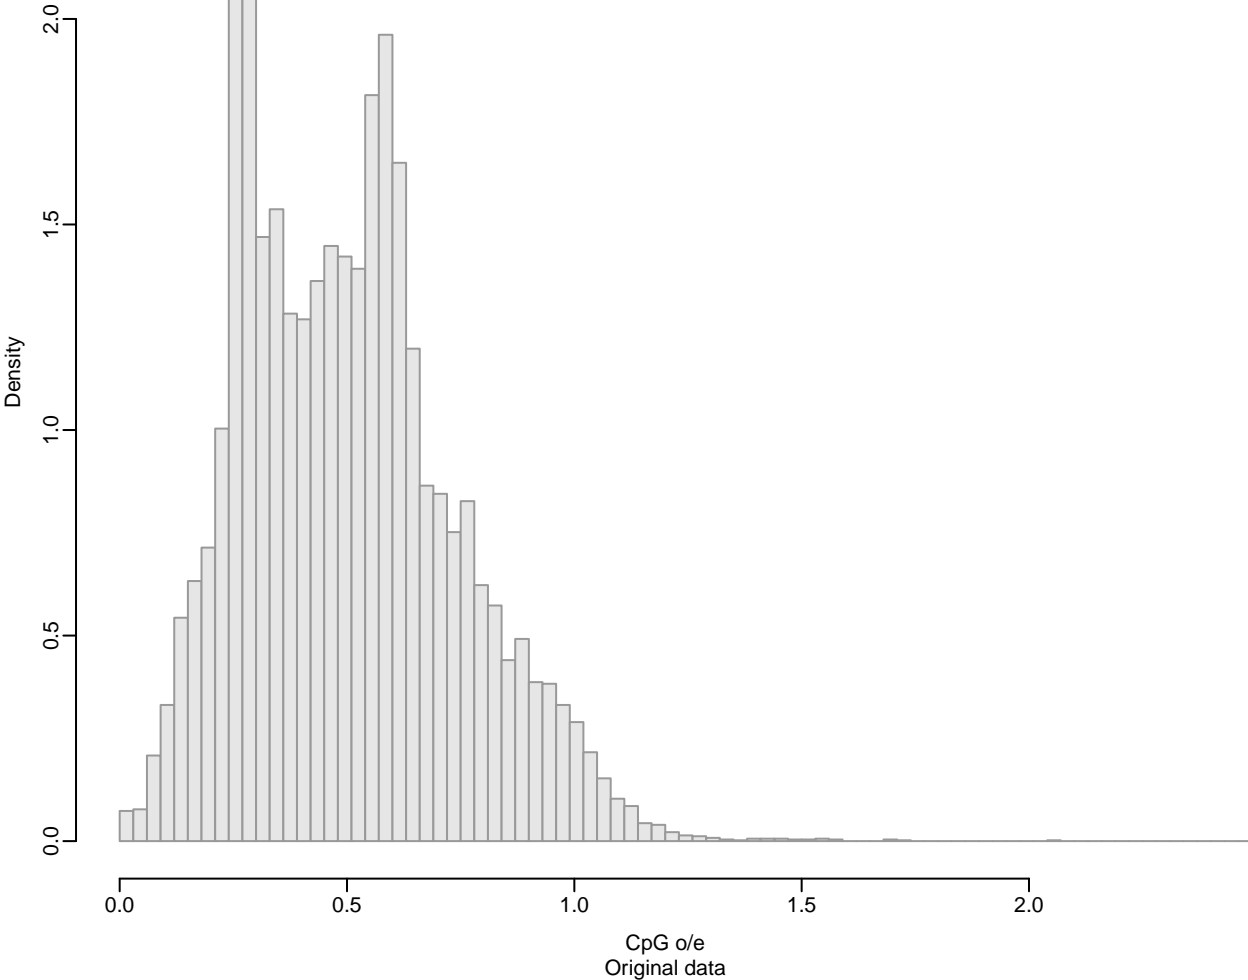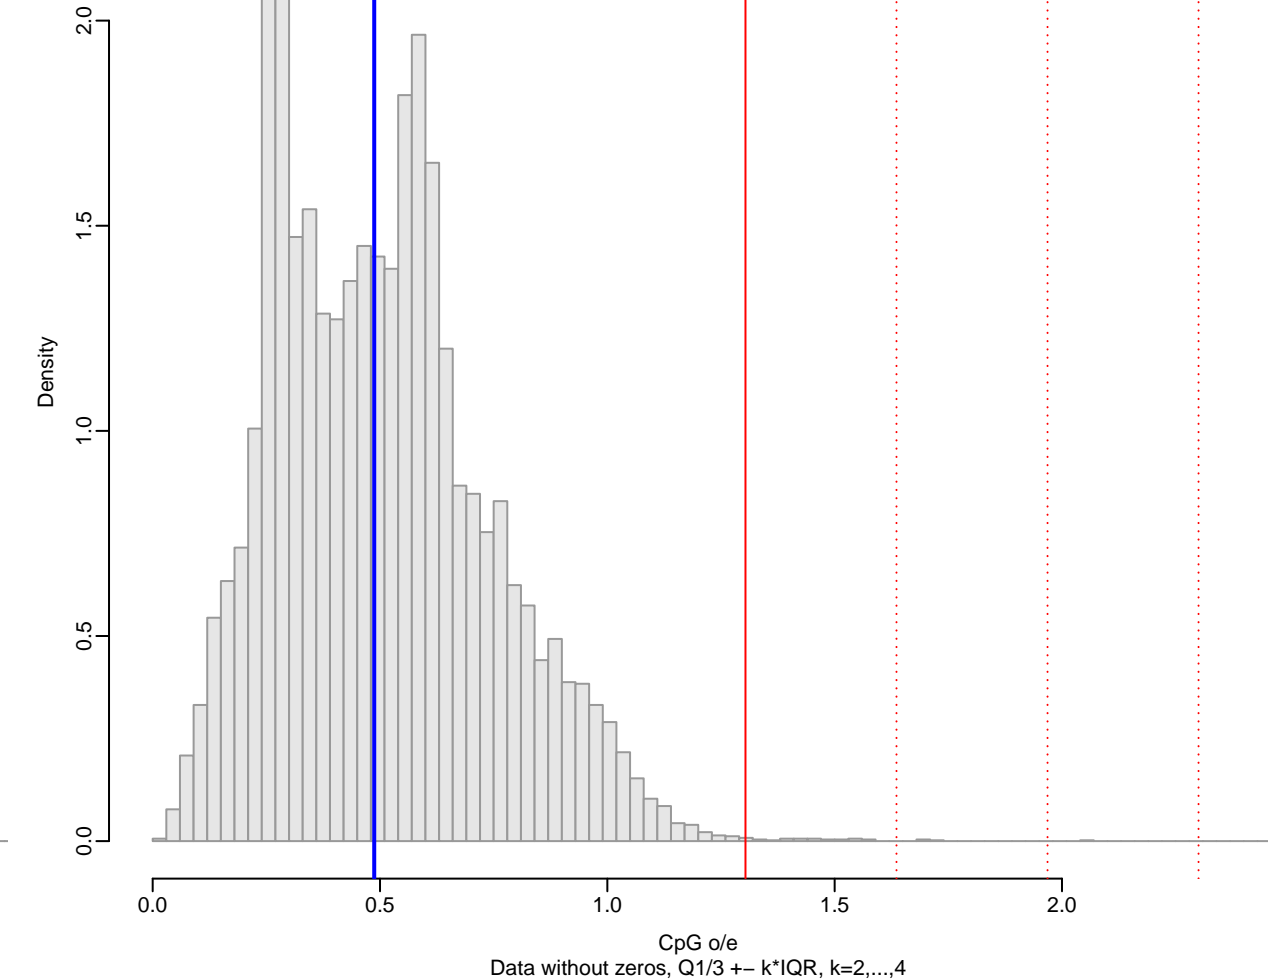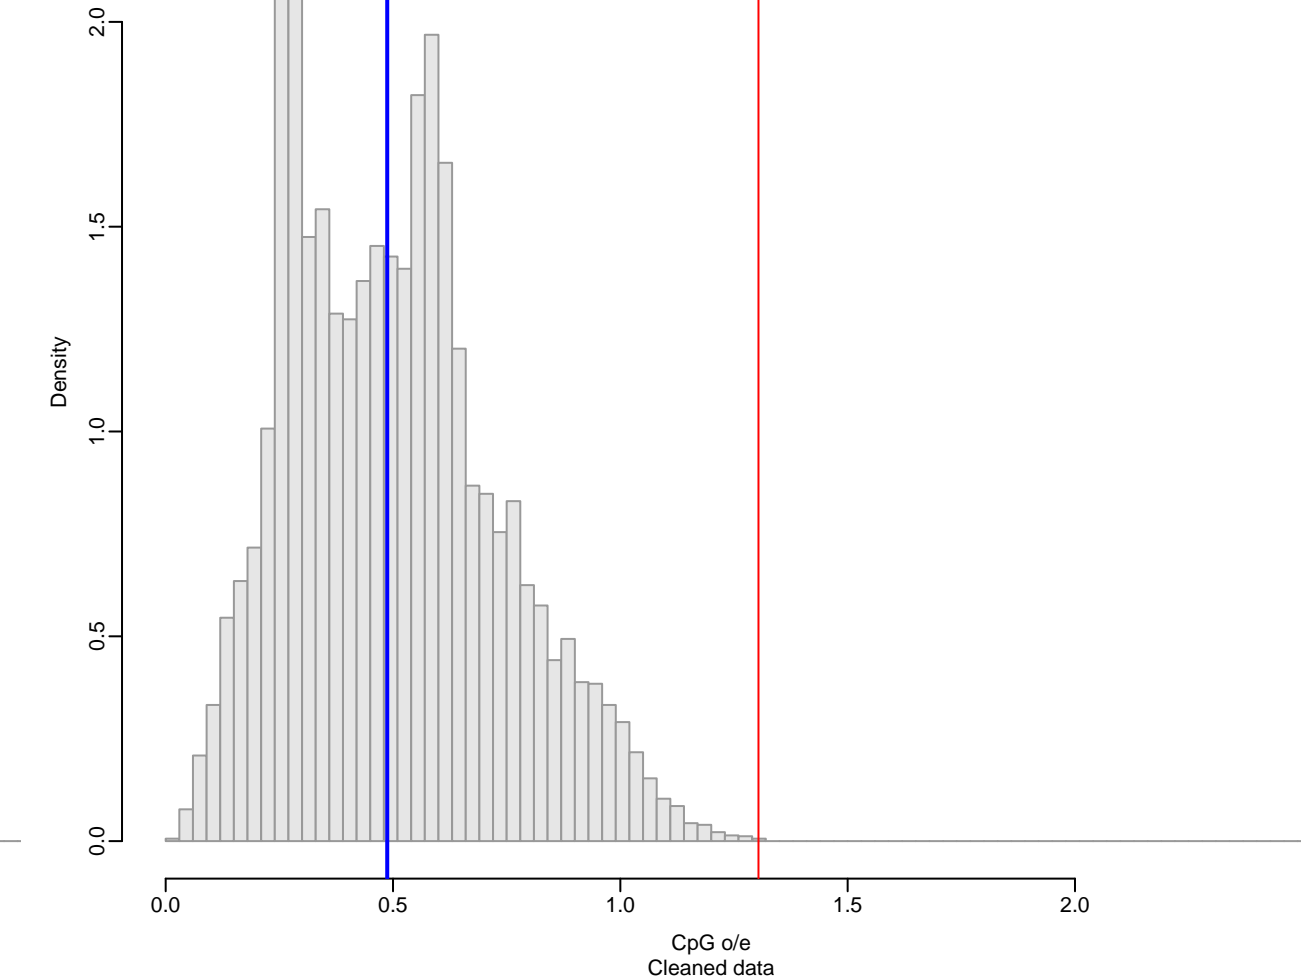

Meloidogyne\_arenaria

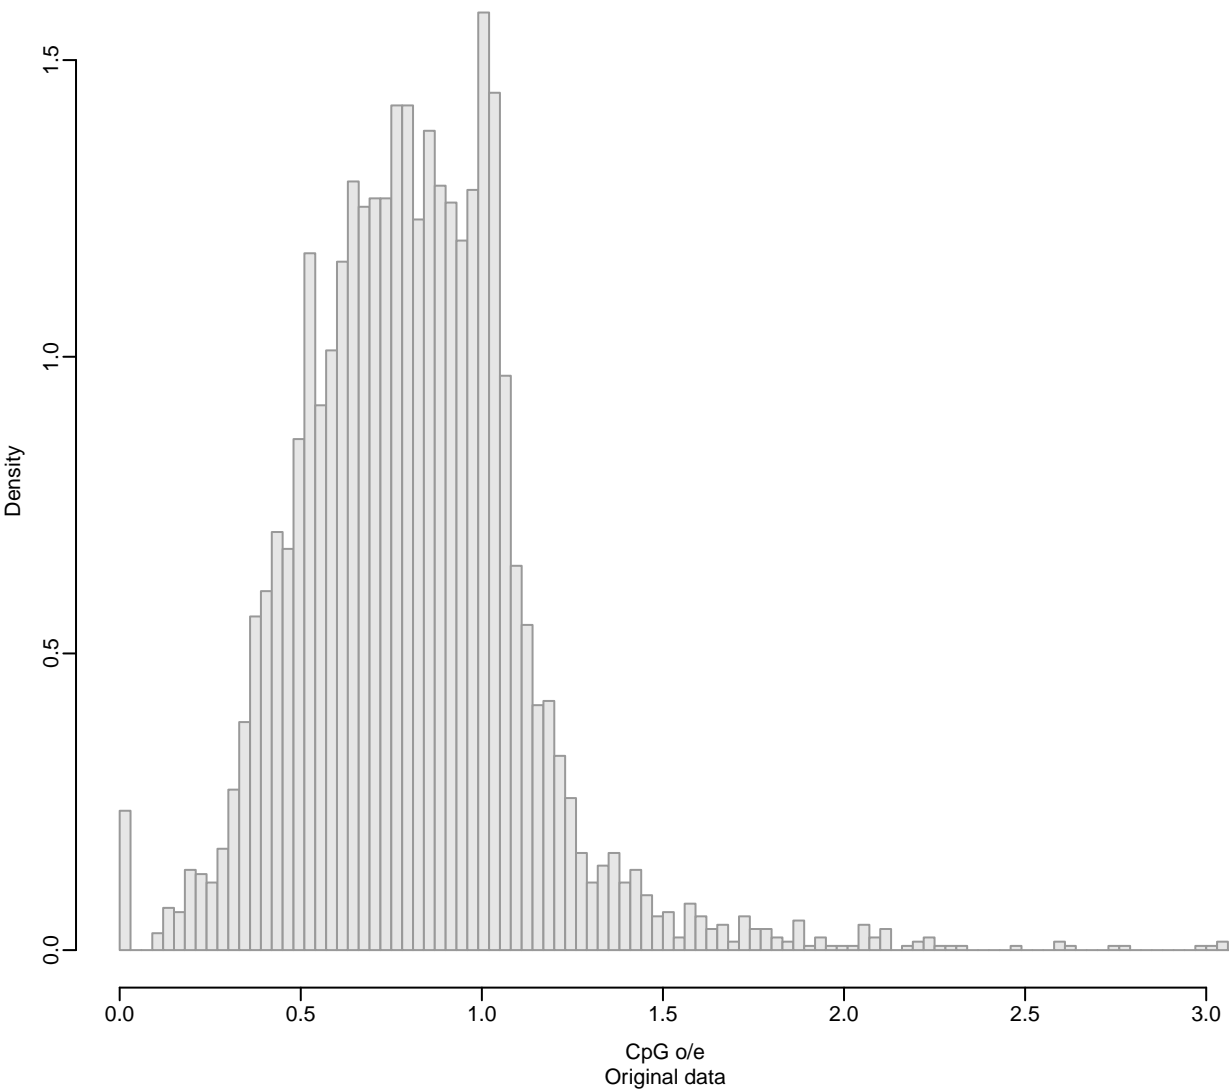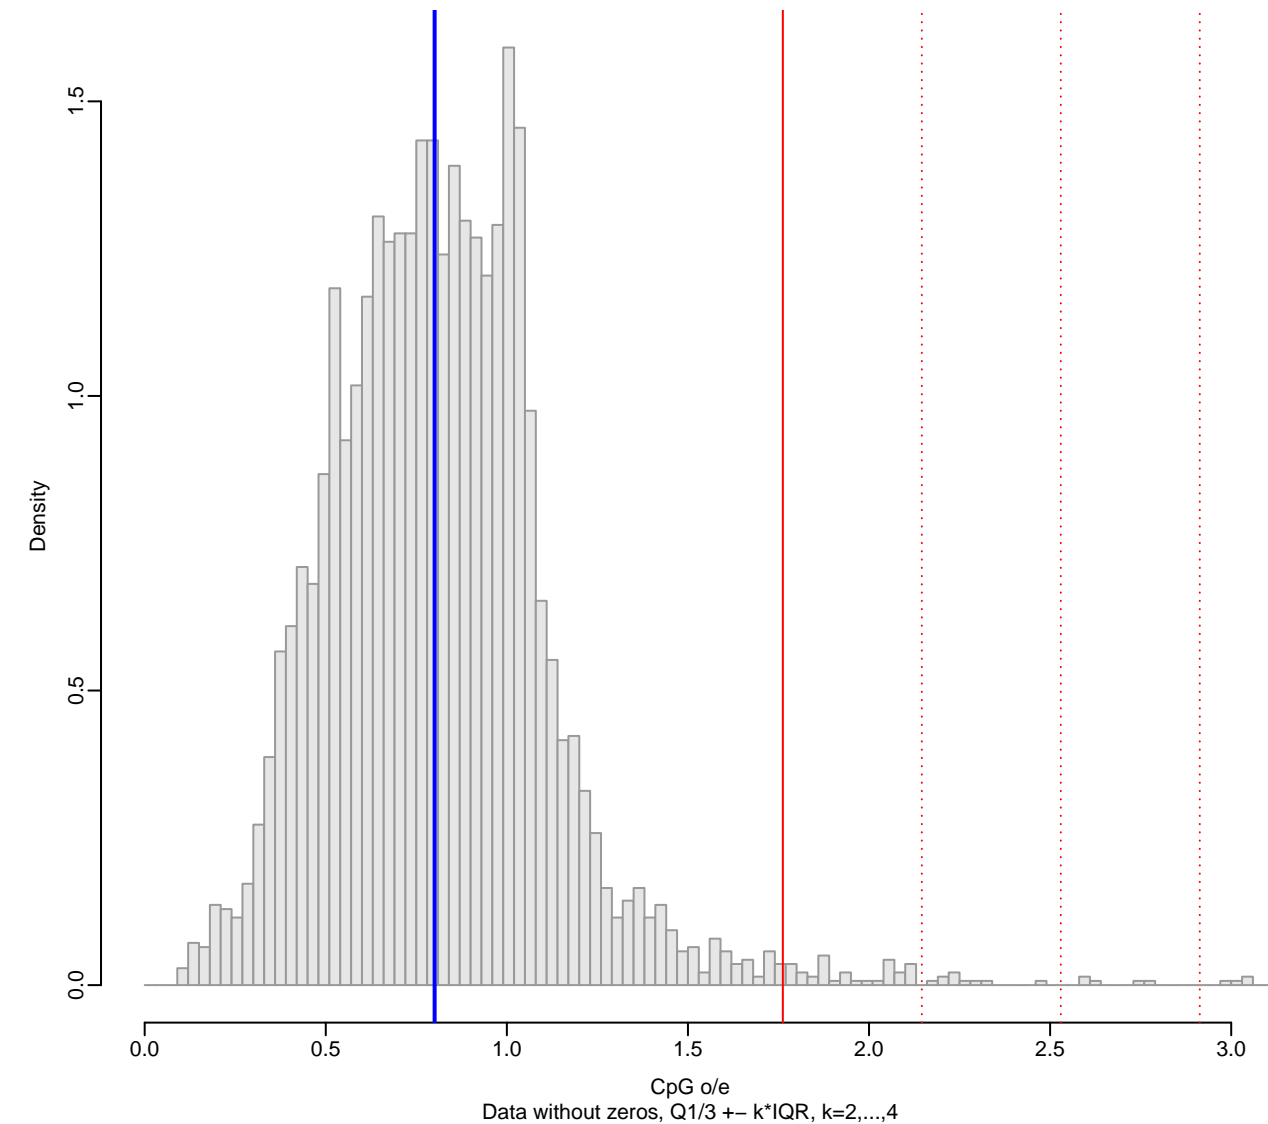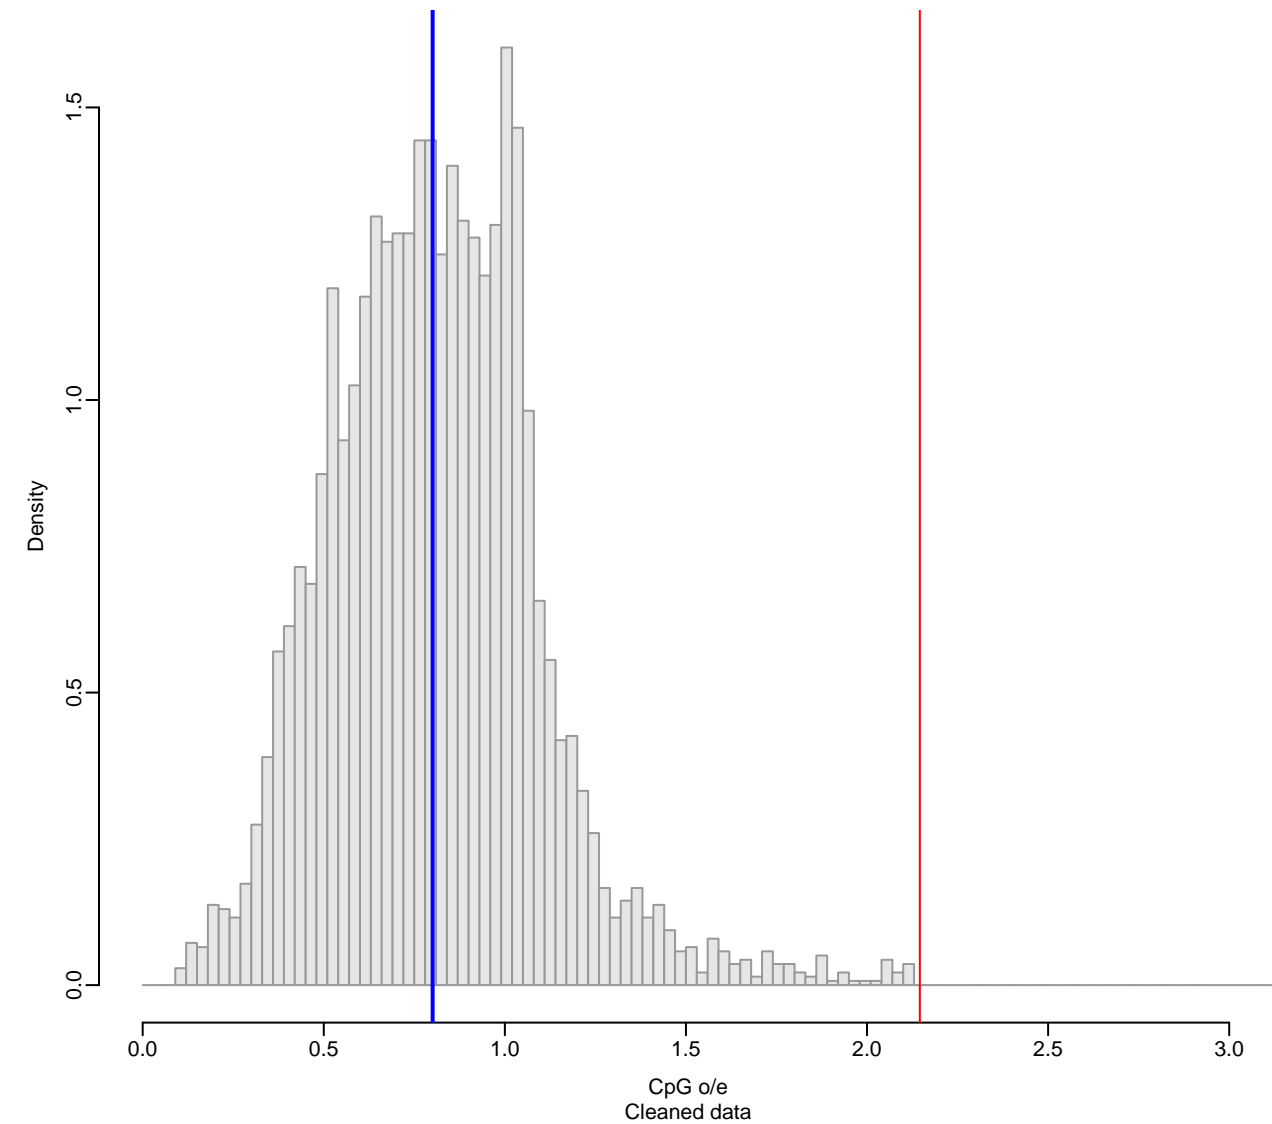



Meloidogyne\_chitwoodi

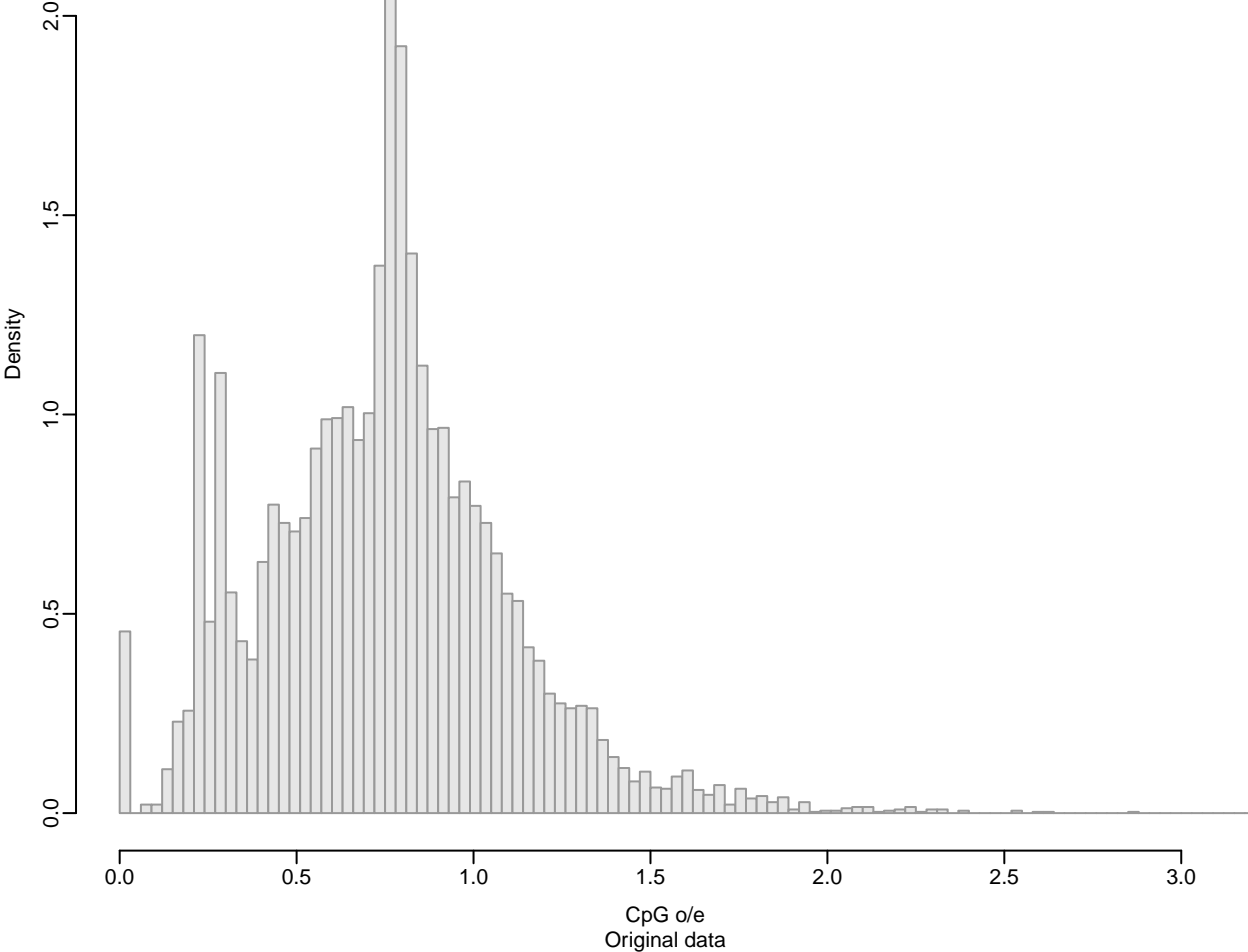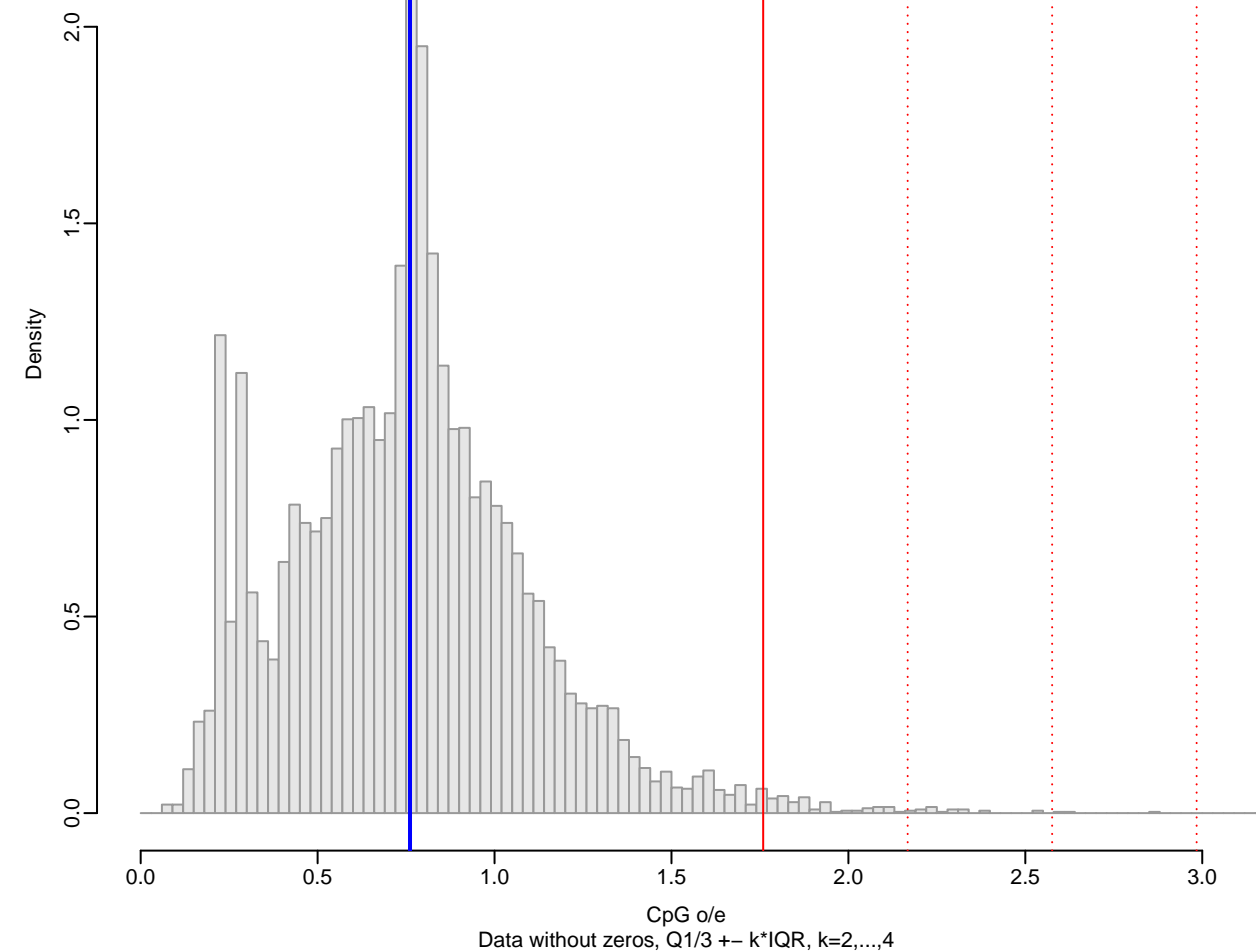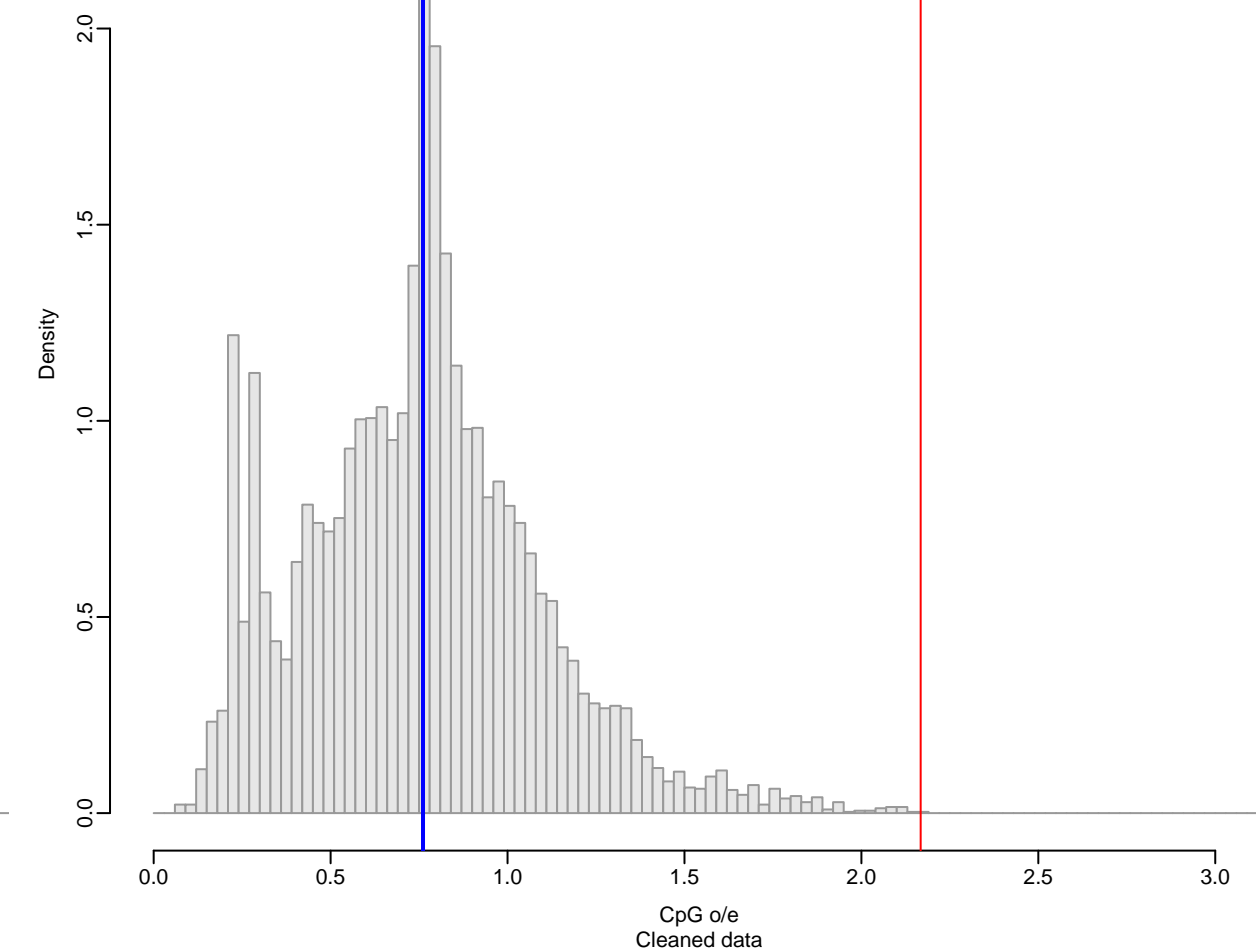

Meloidogyne\_hapla

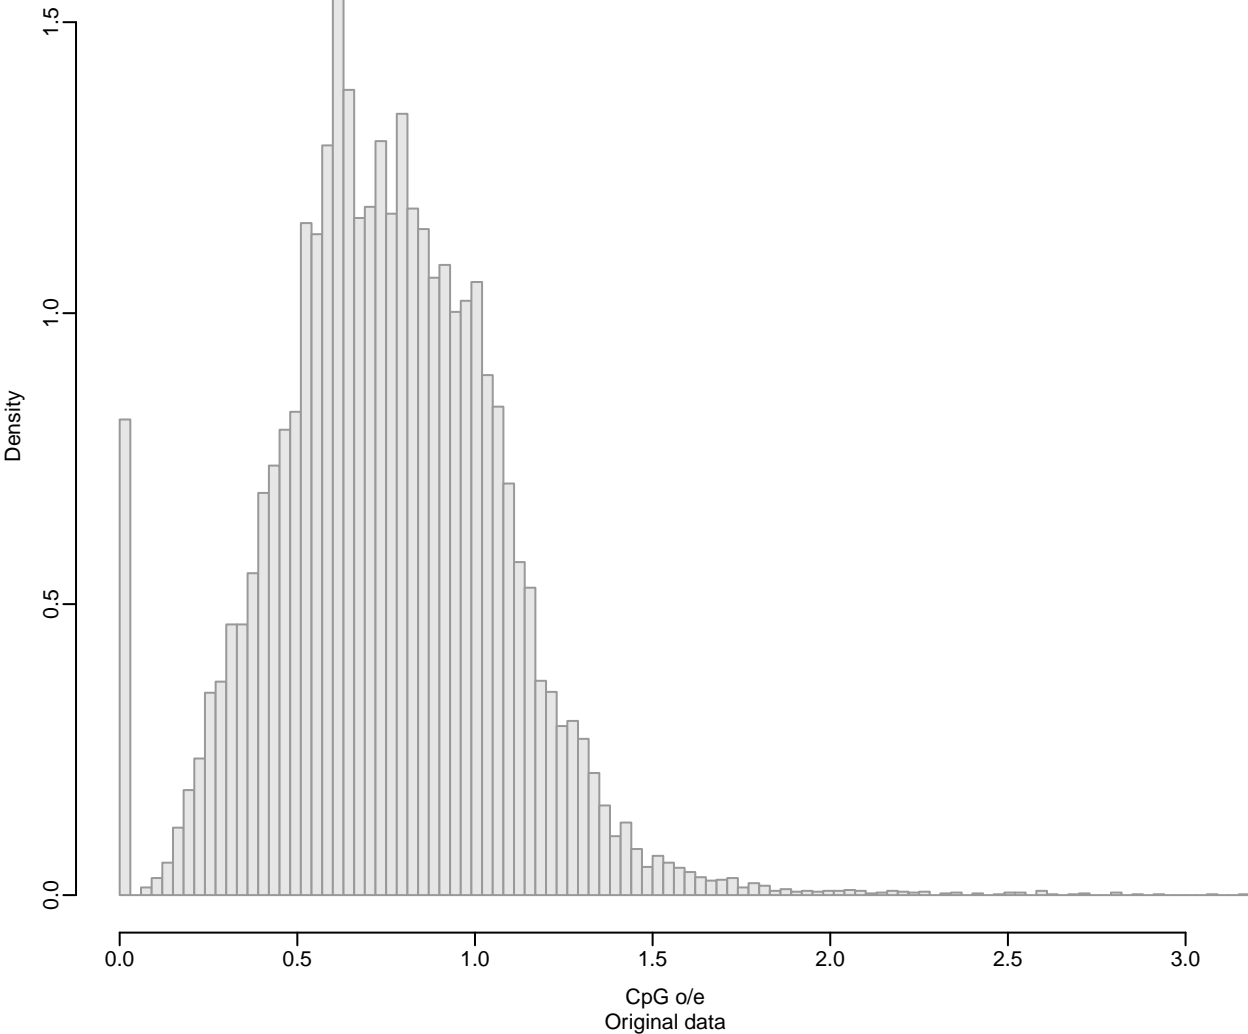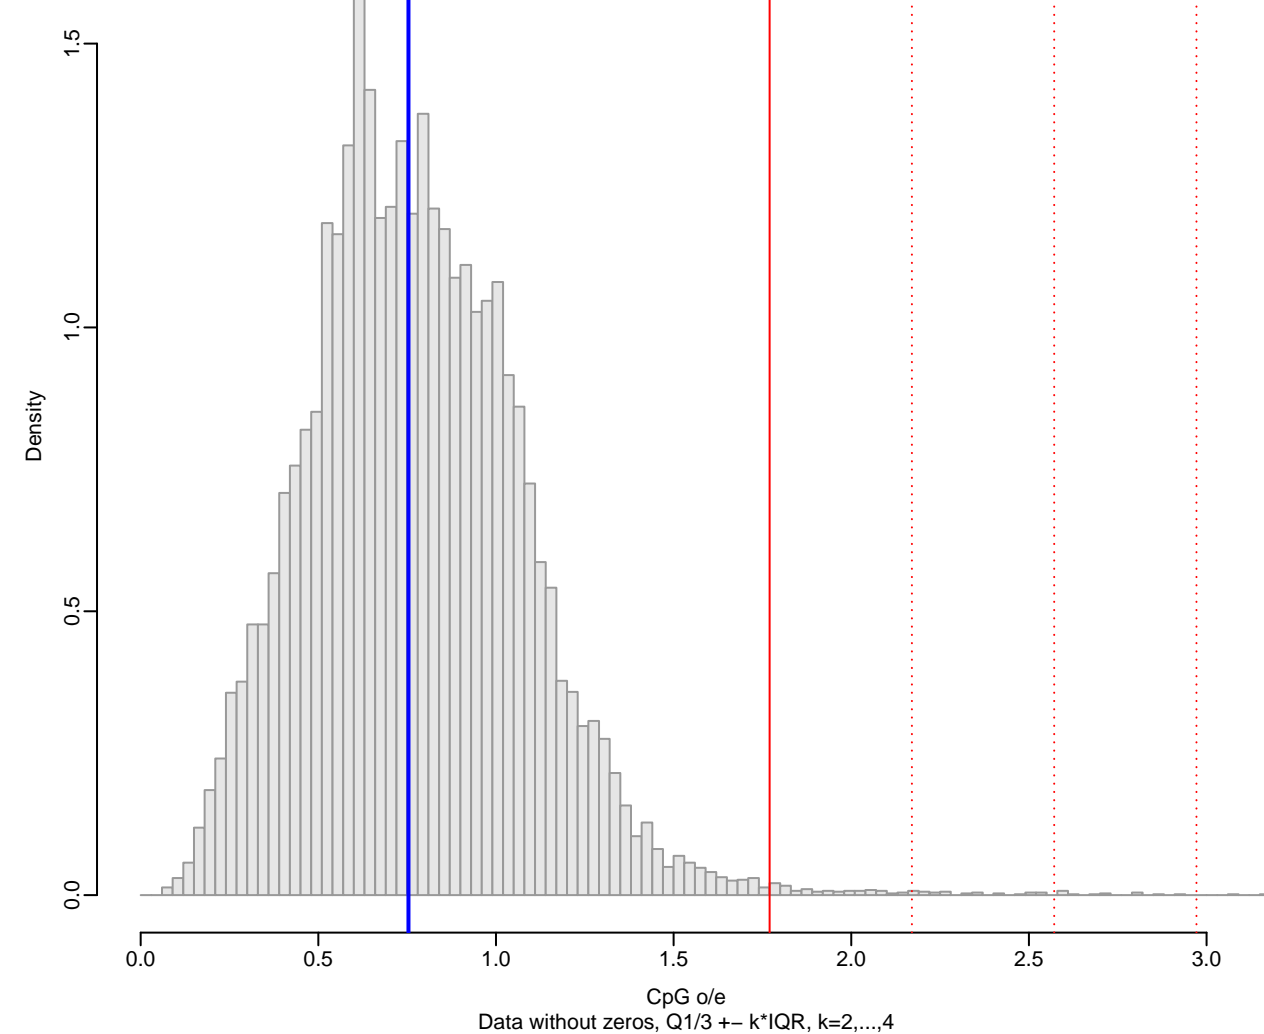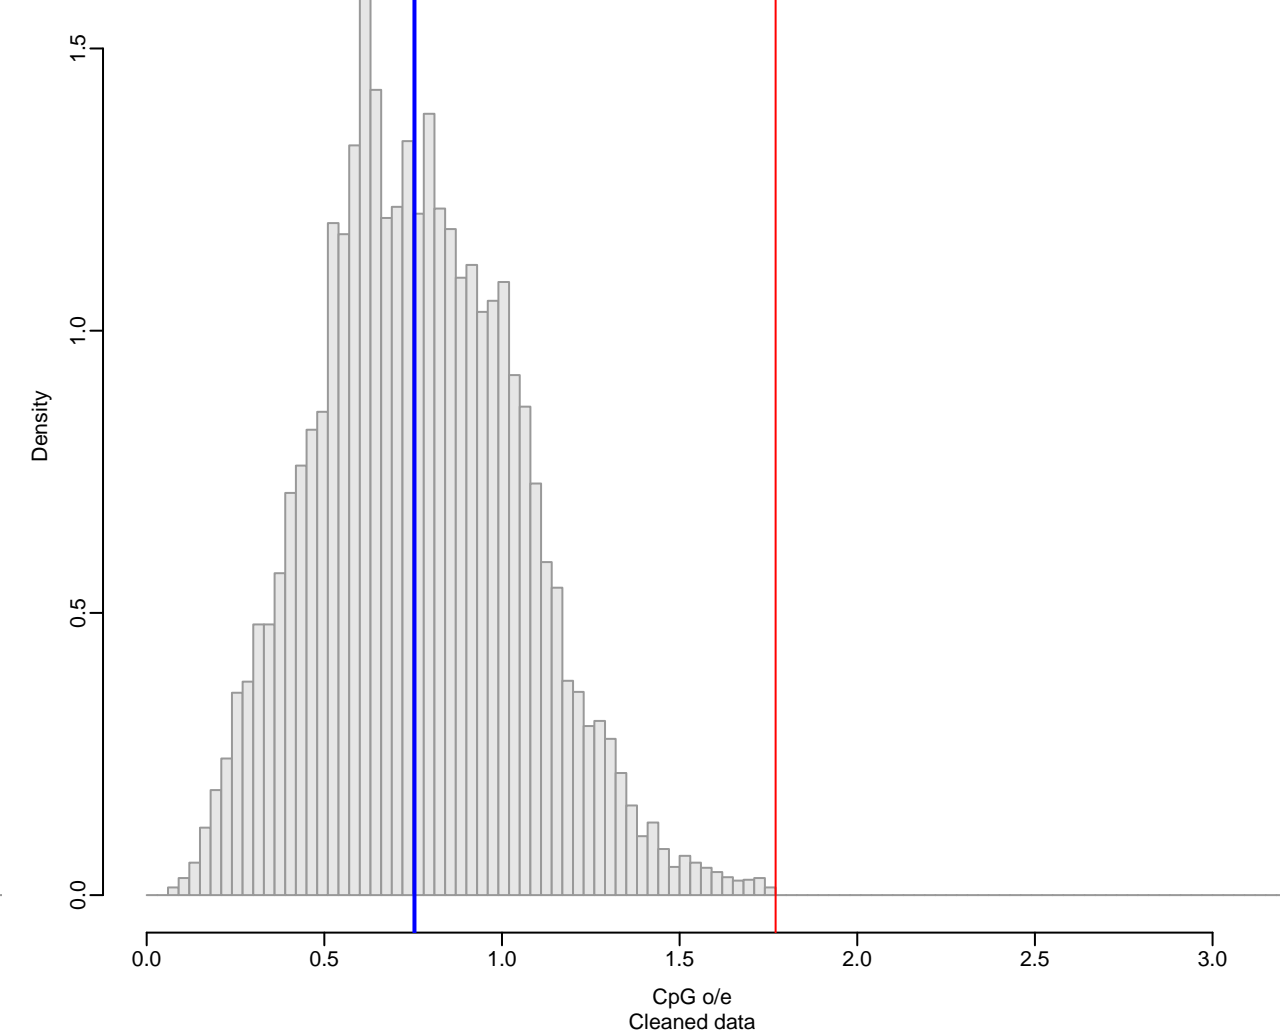

Meloidogyne\_incognita

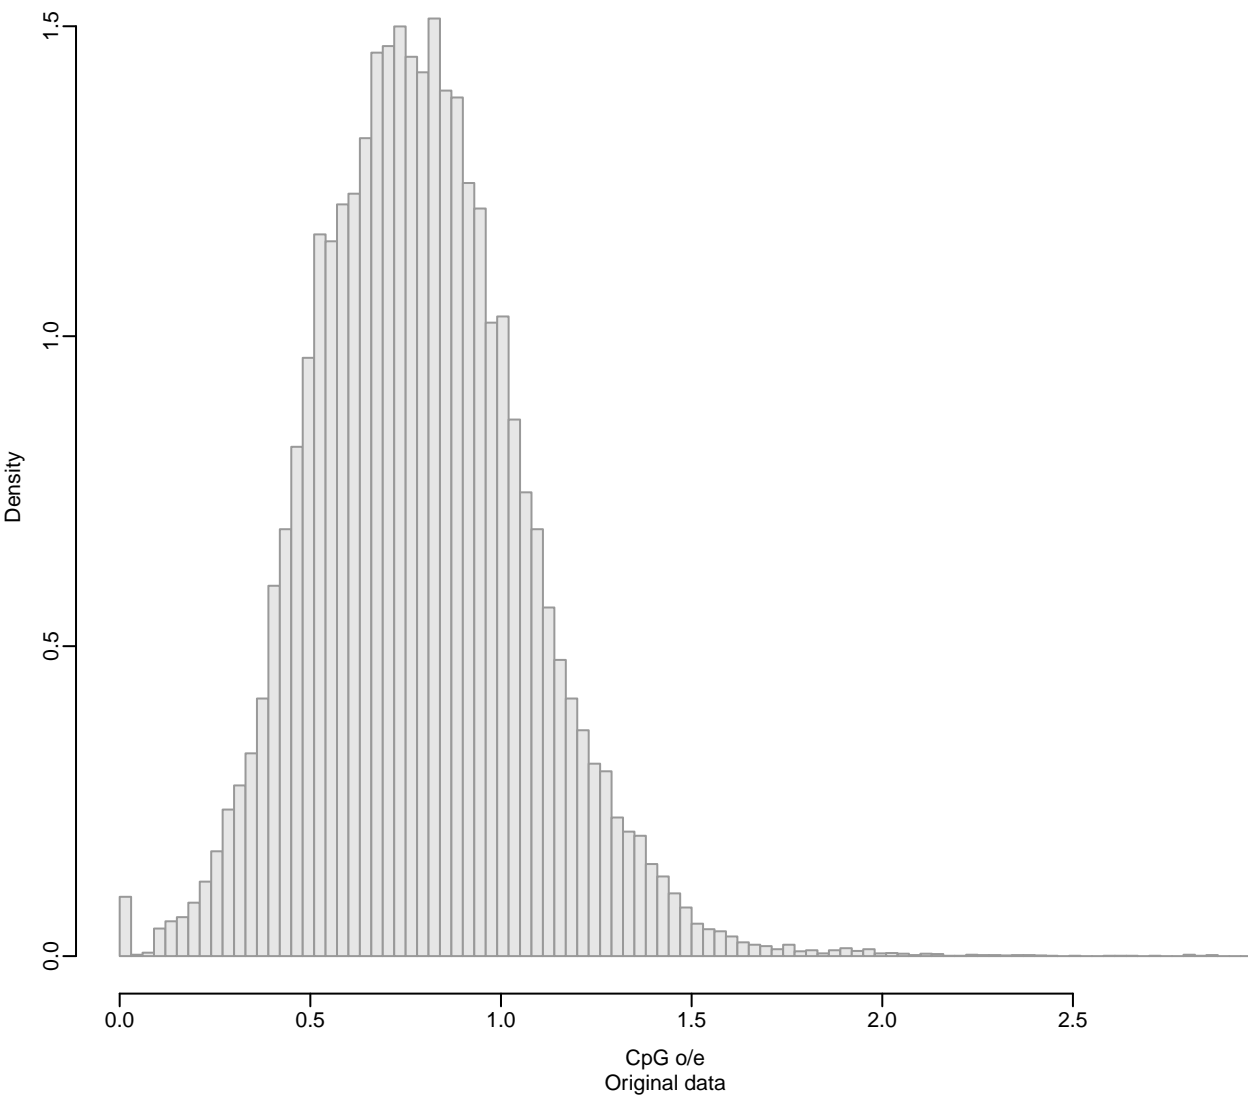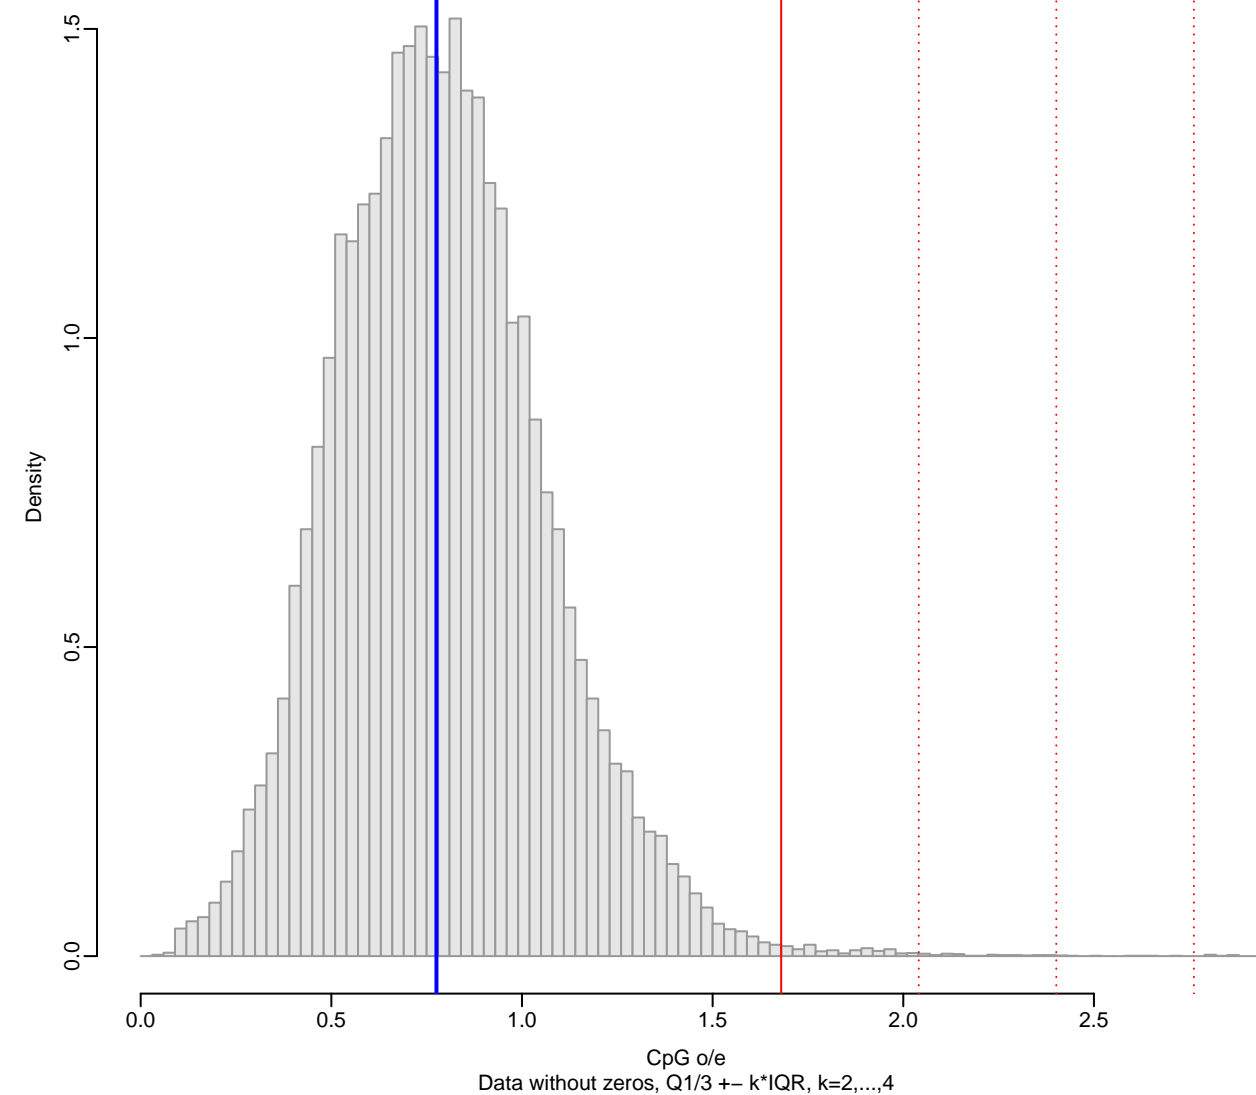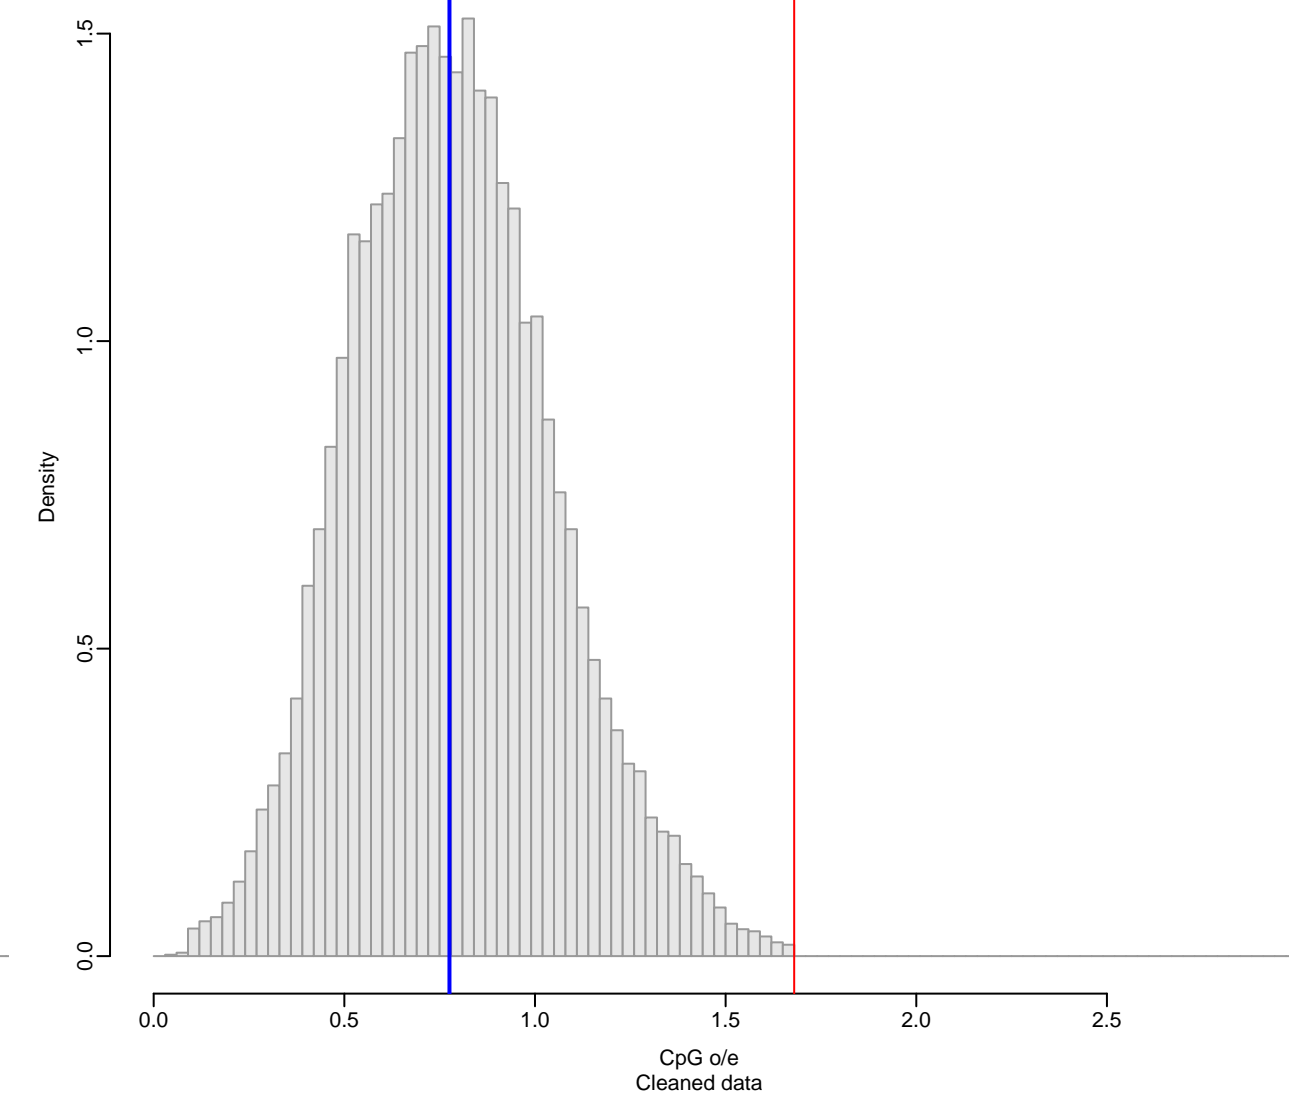

Meloidogyne\_javanica

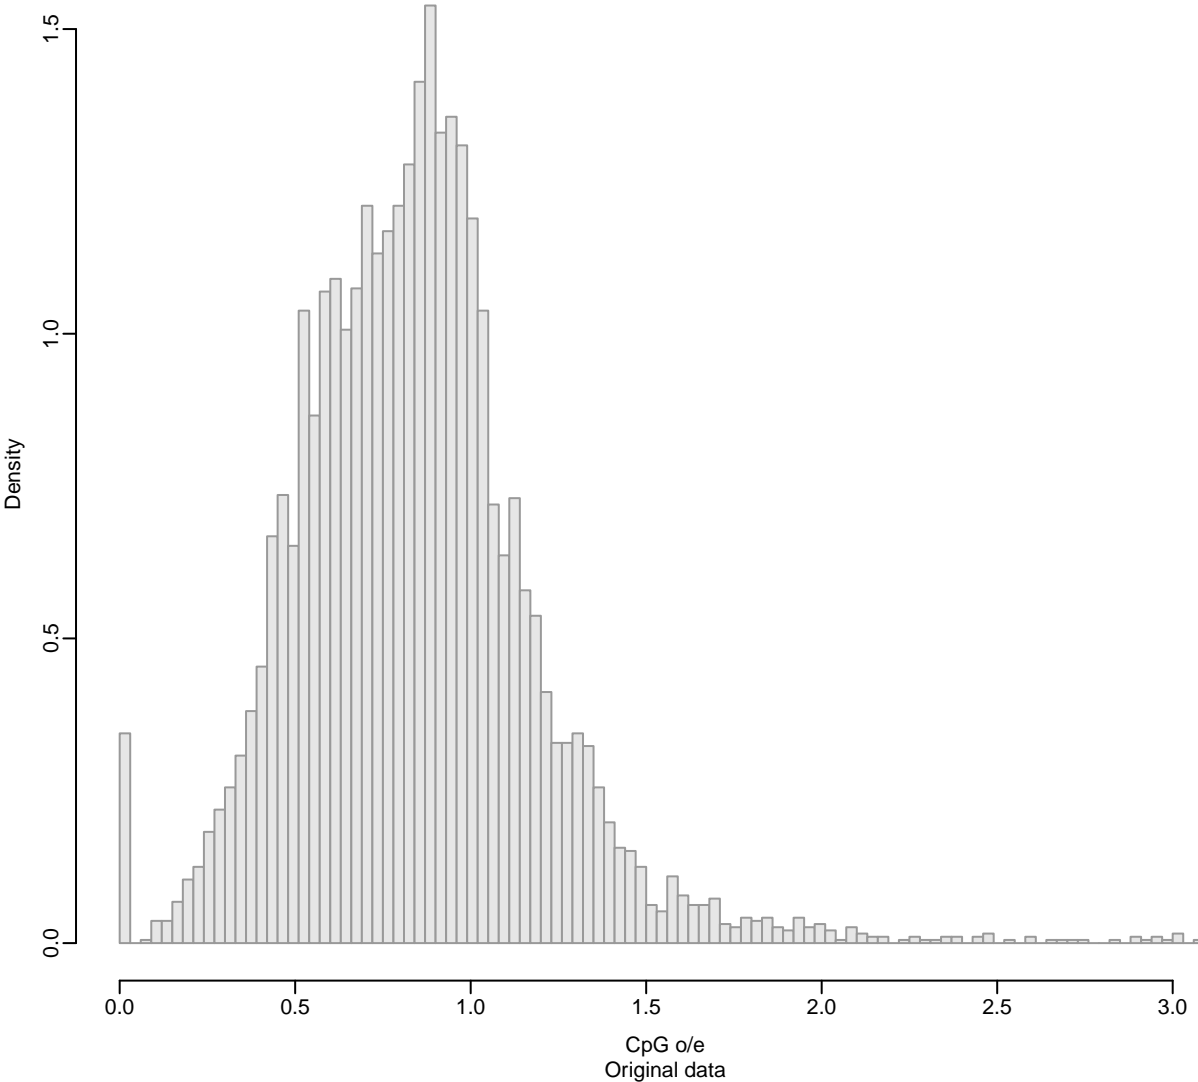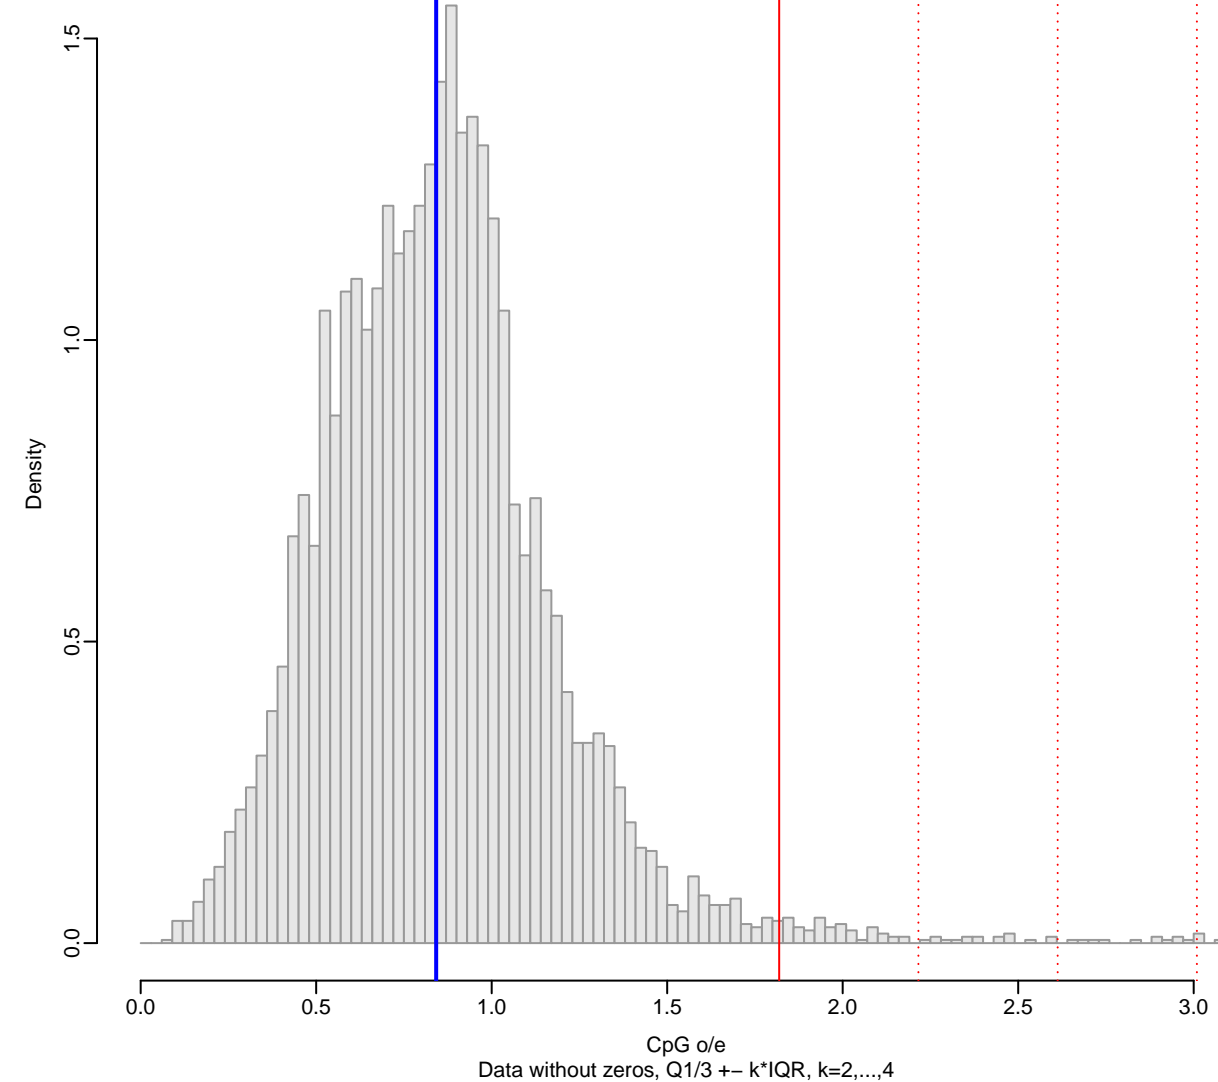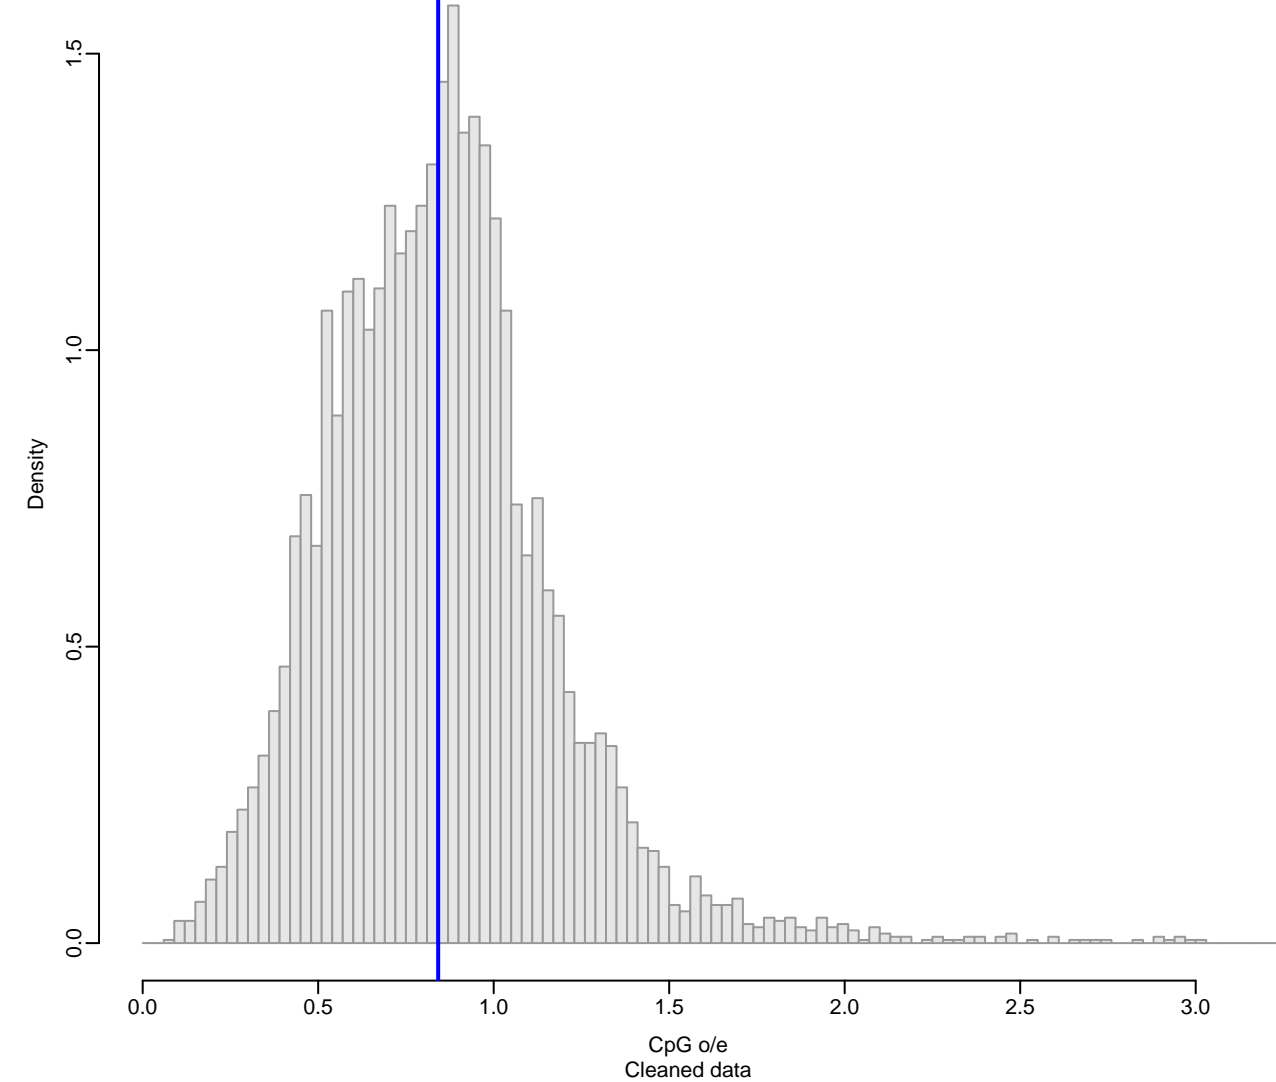

Meloidogyne\_paranaensis

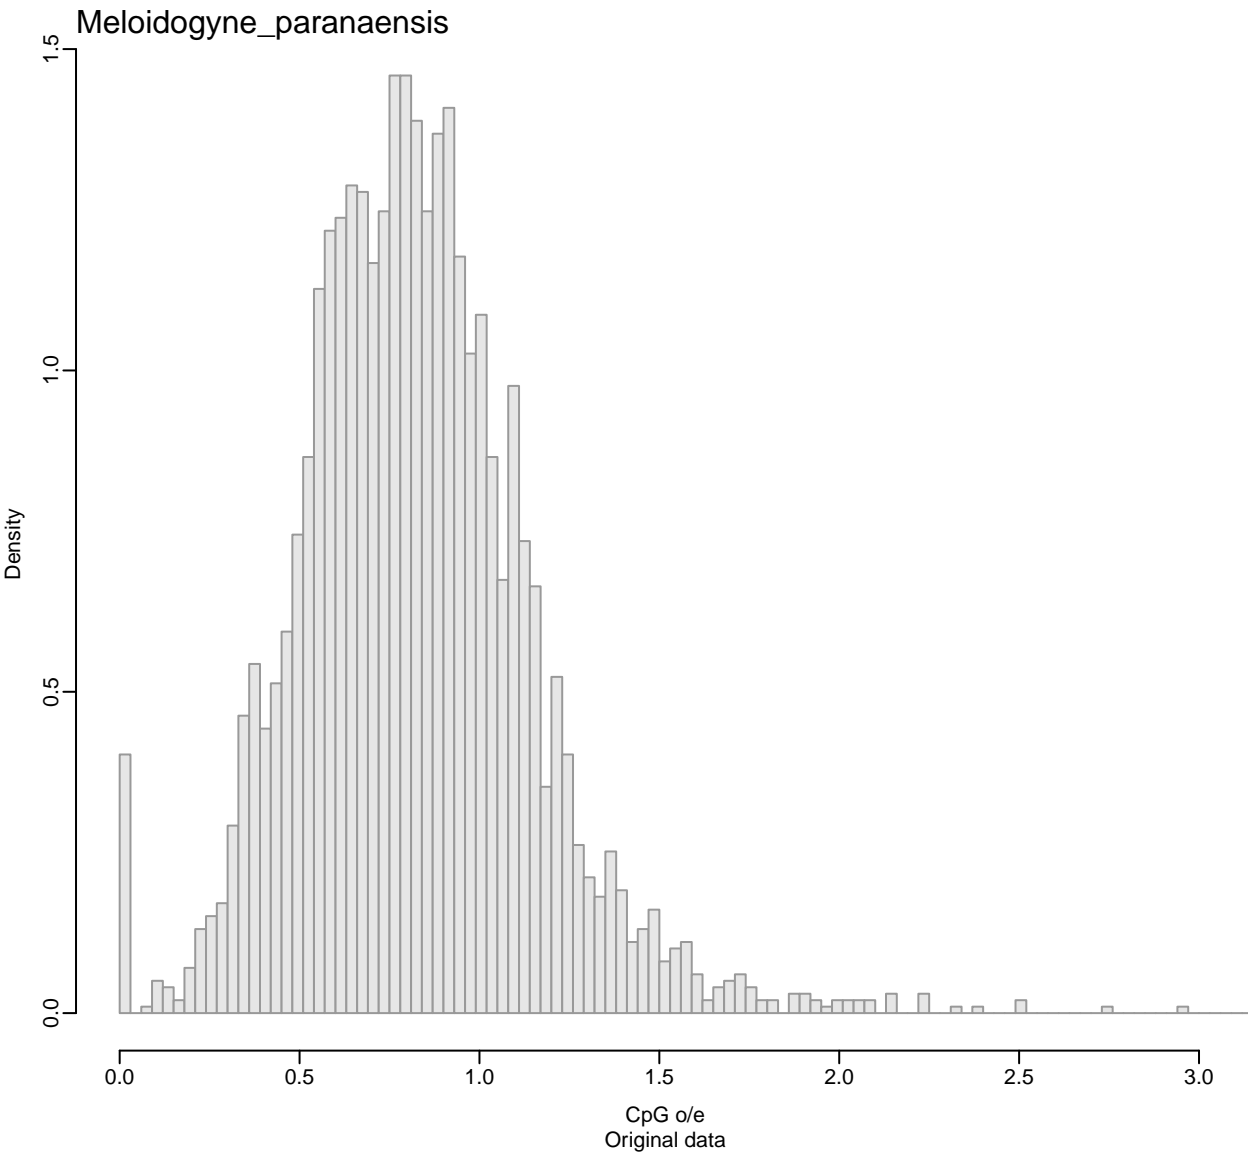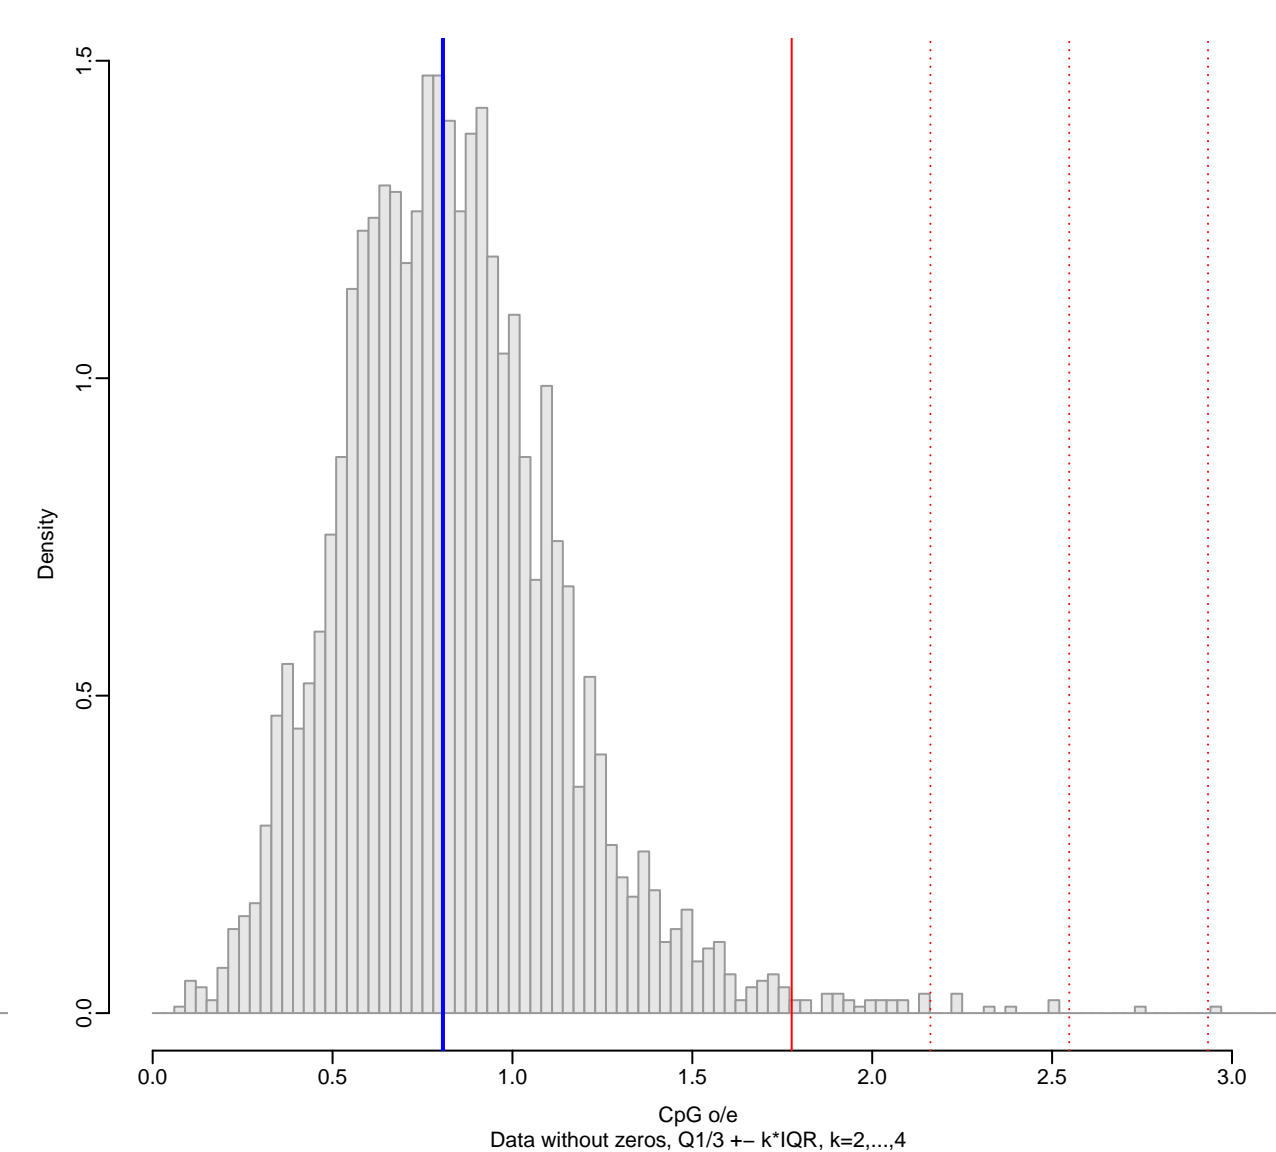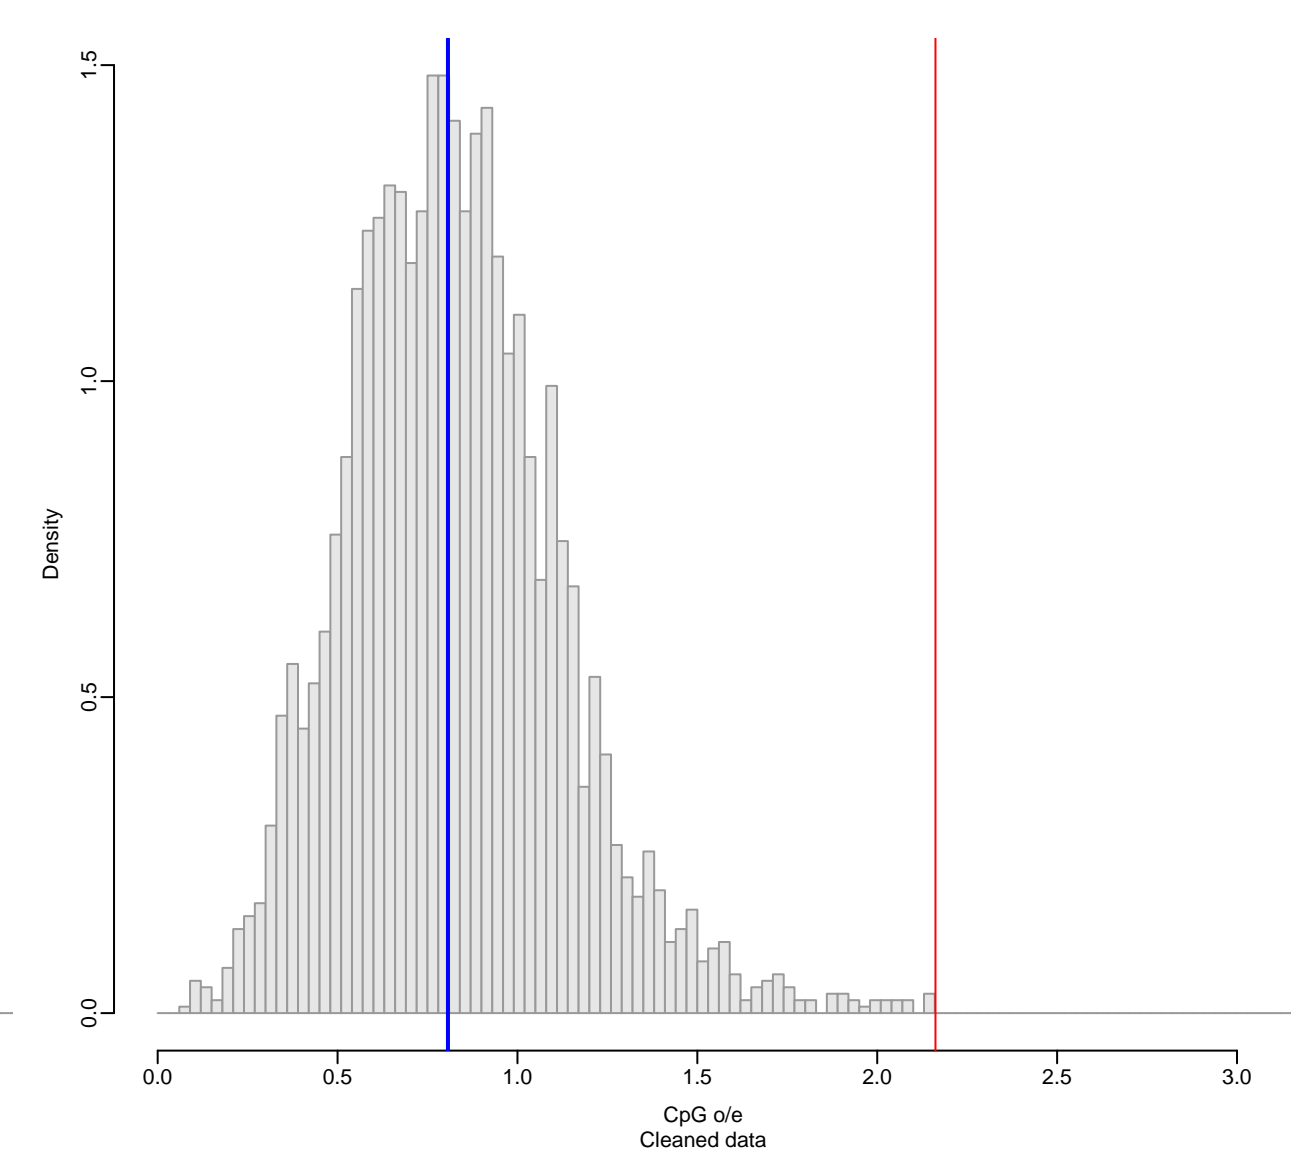

Metarhizium\_acridum

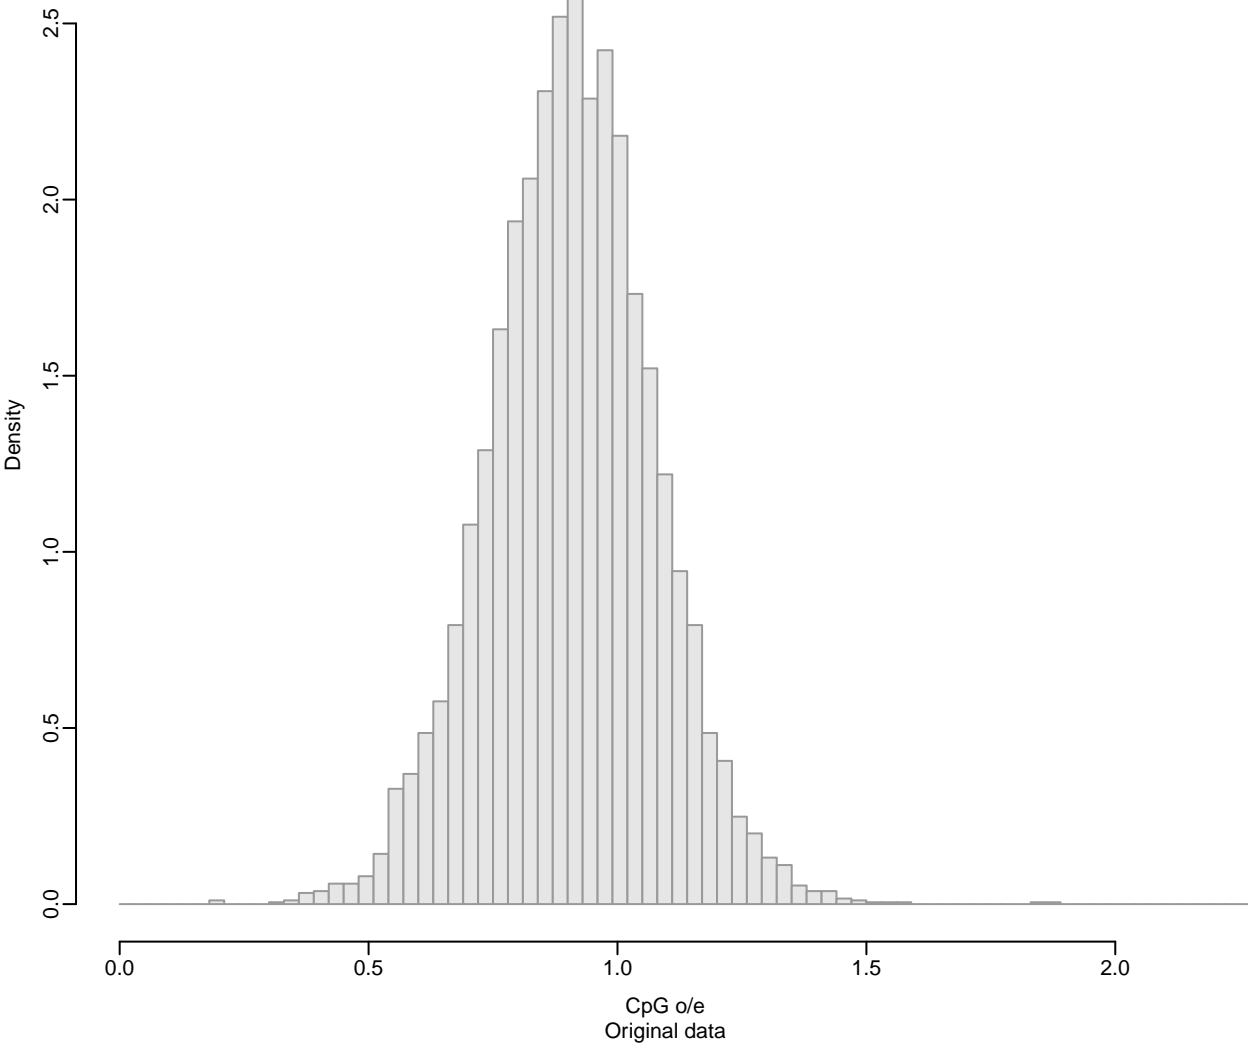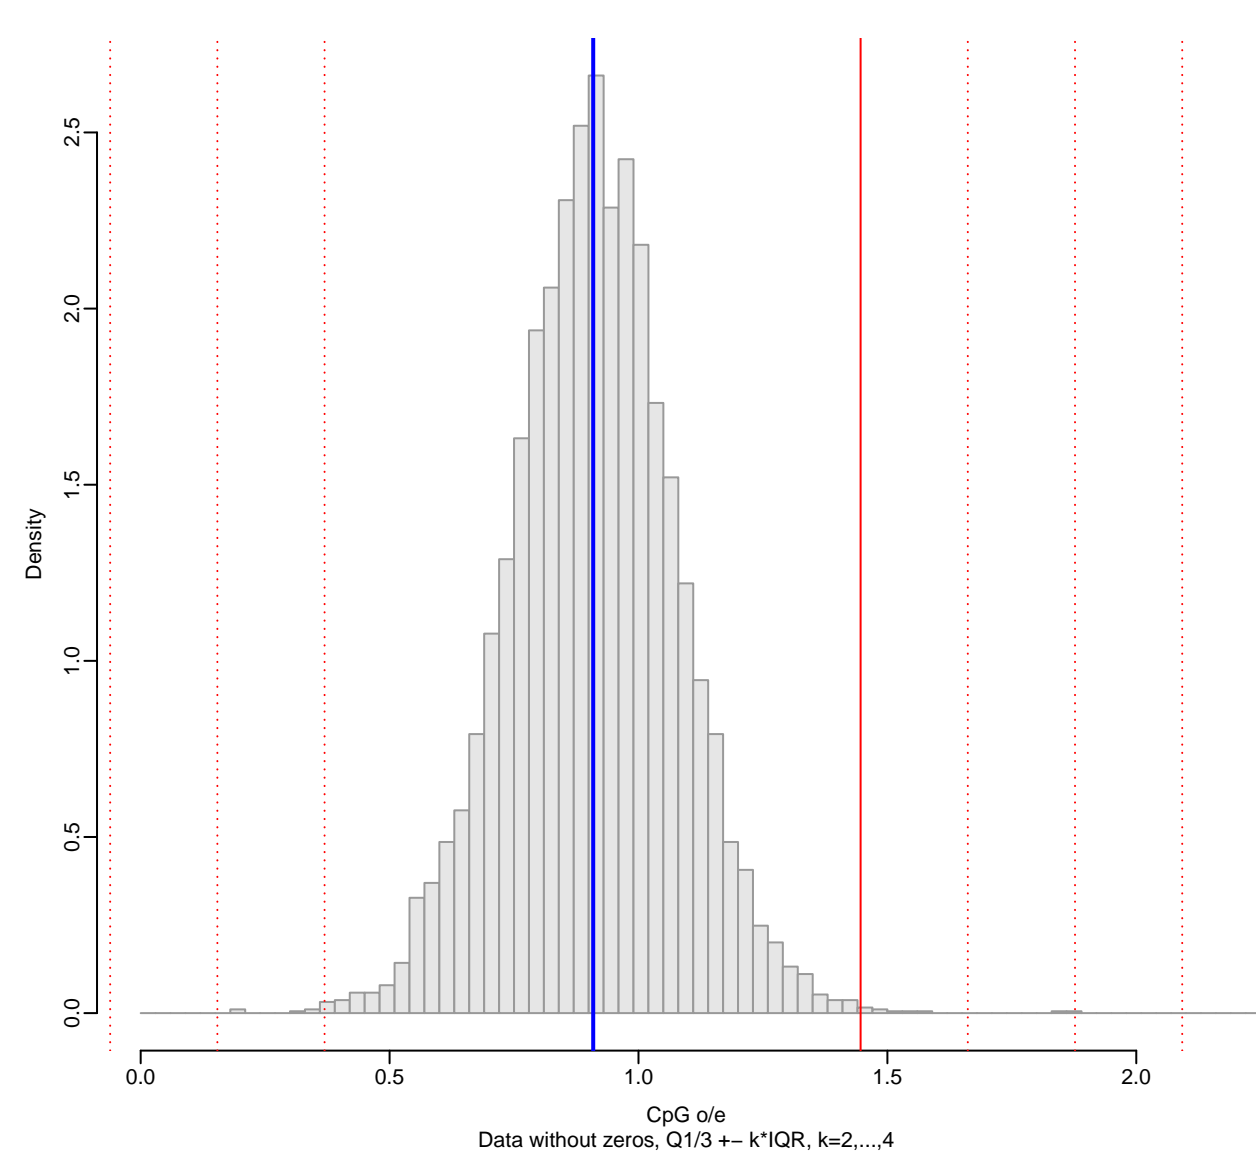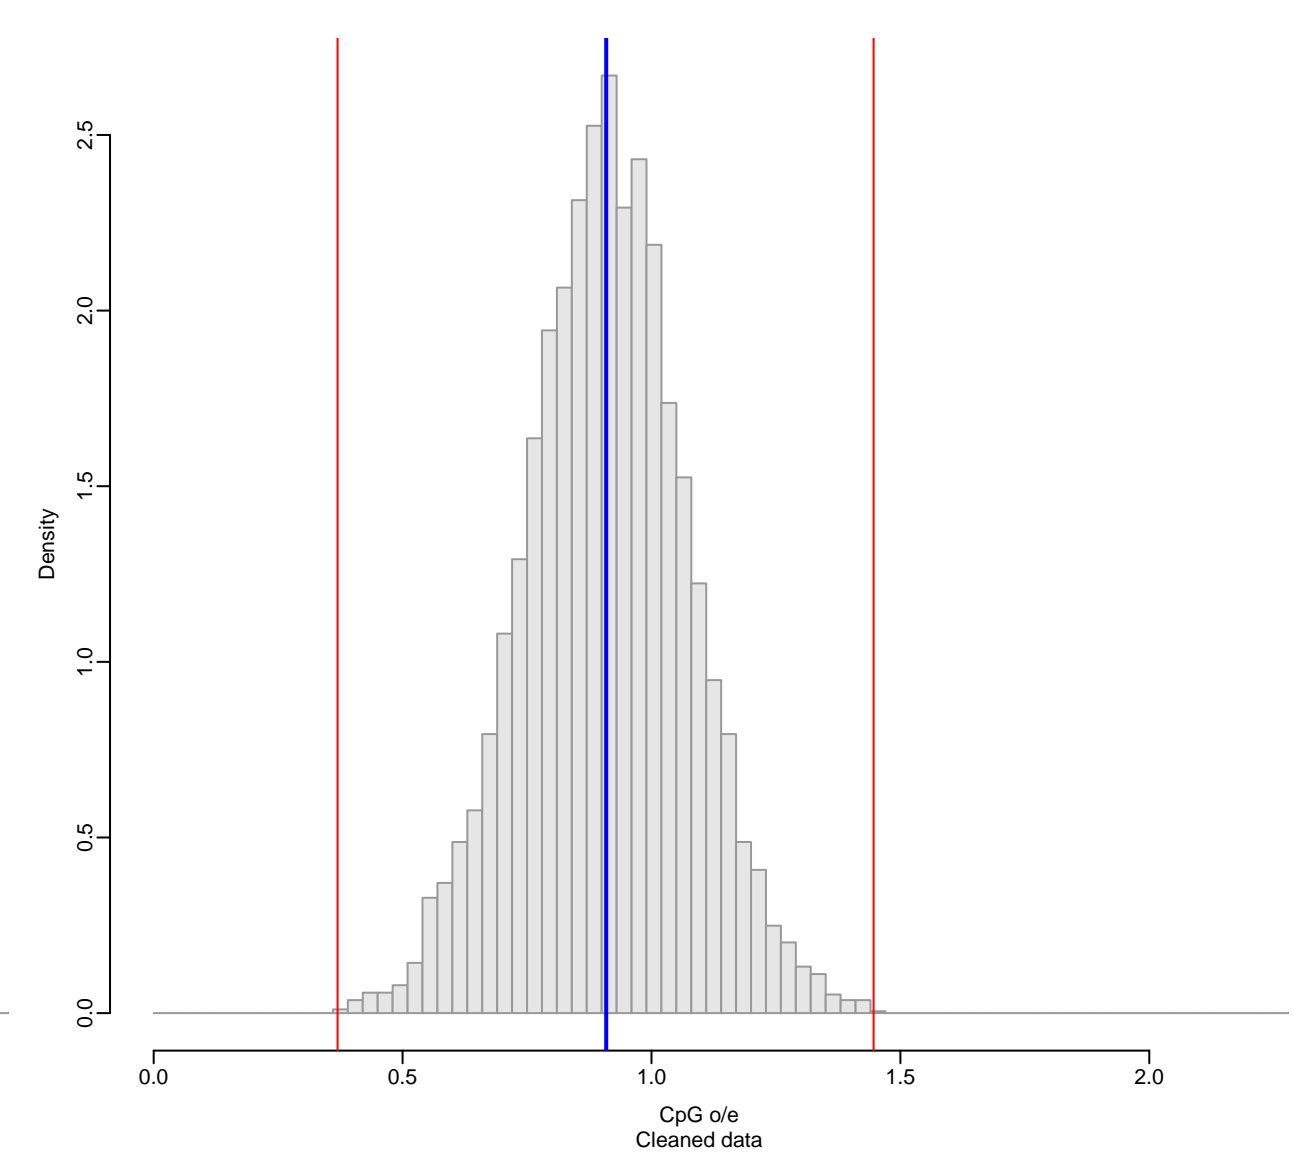

# Metridium\_senile

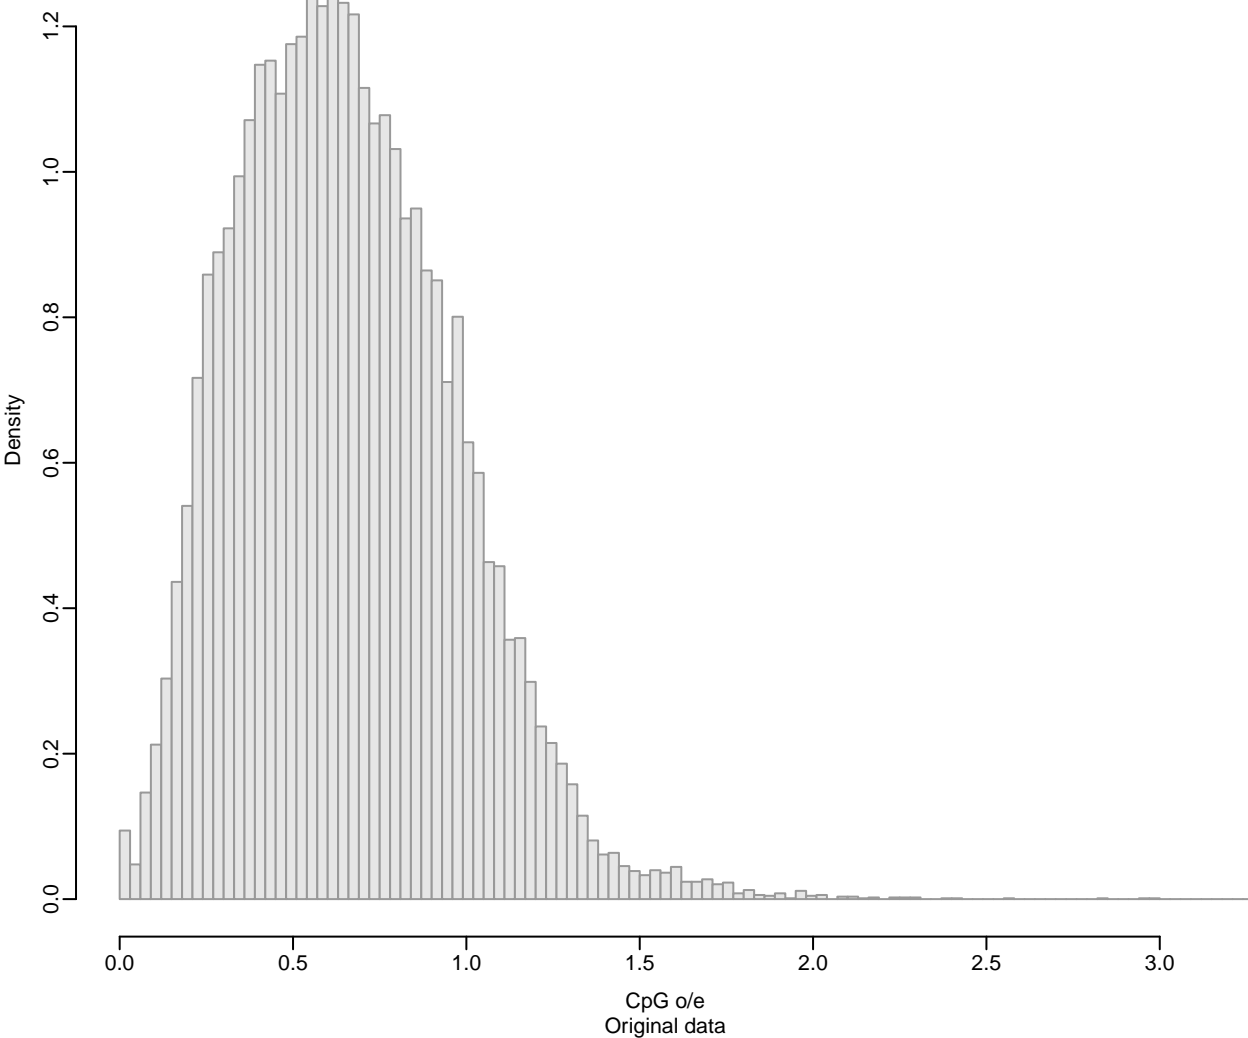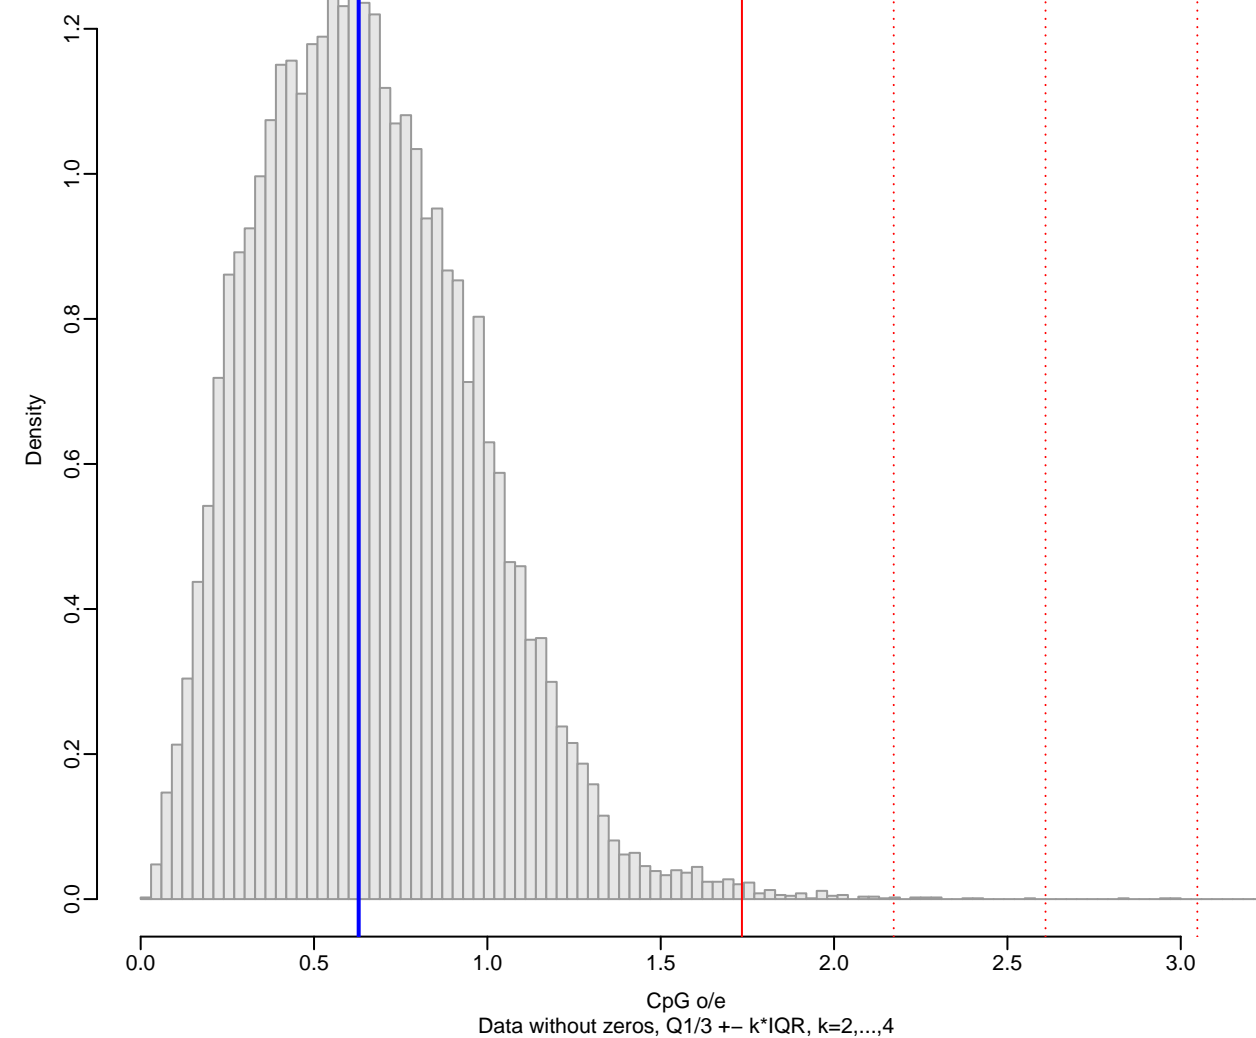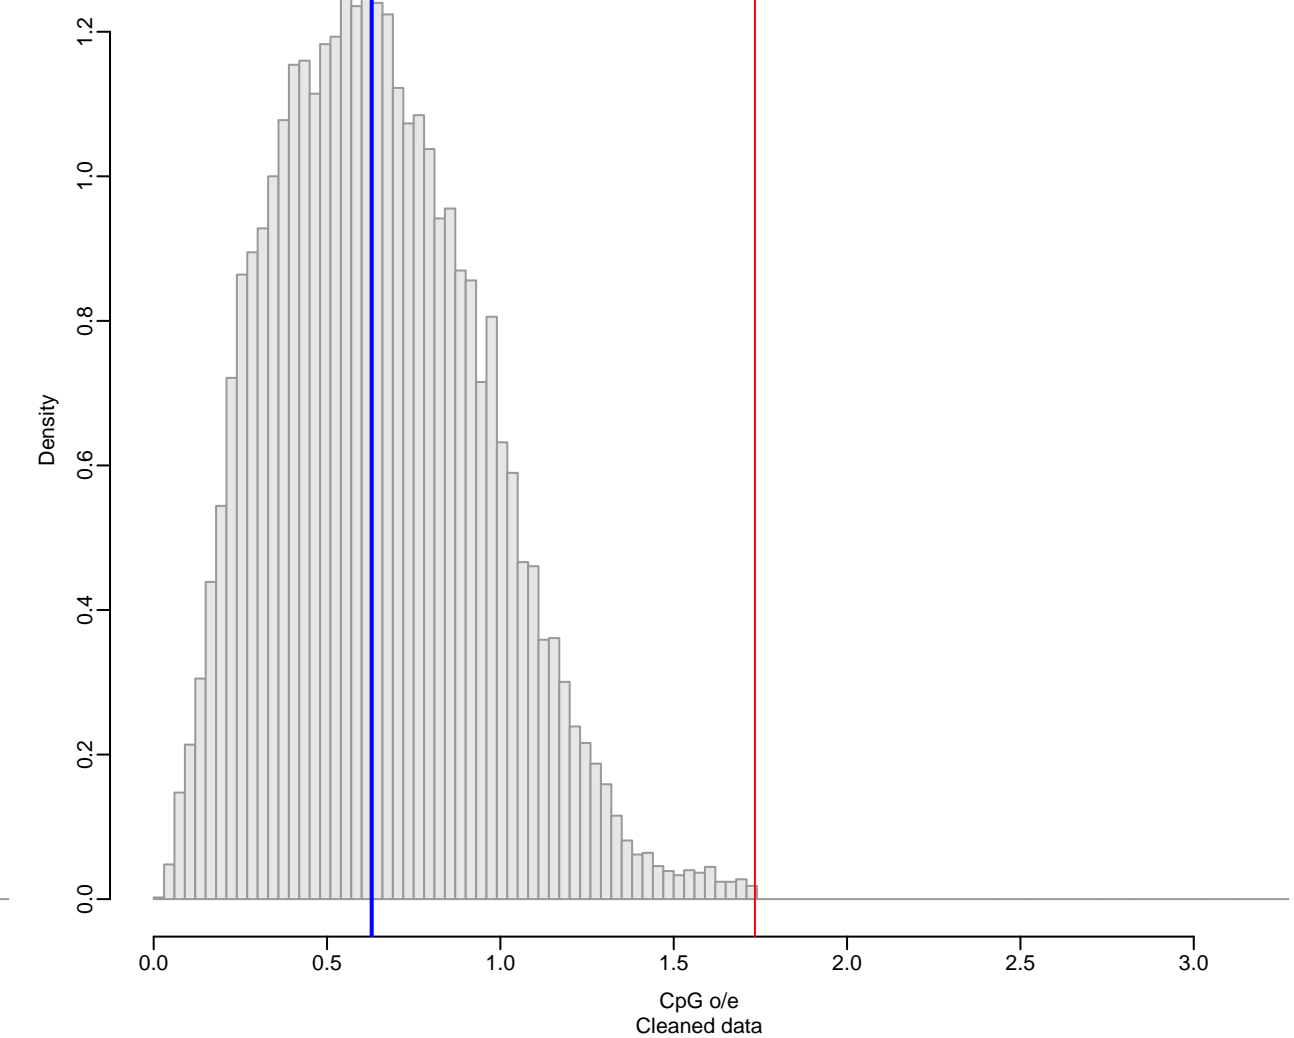

Microbotryum\_violaceum

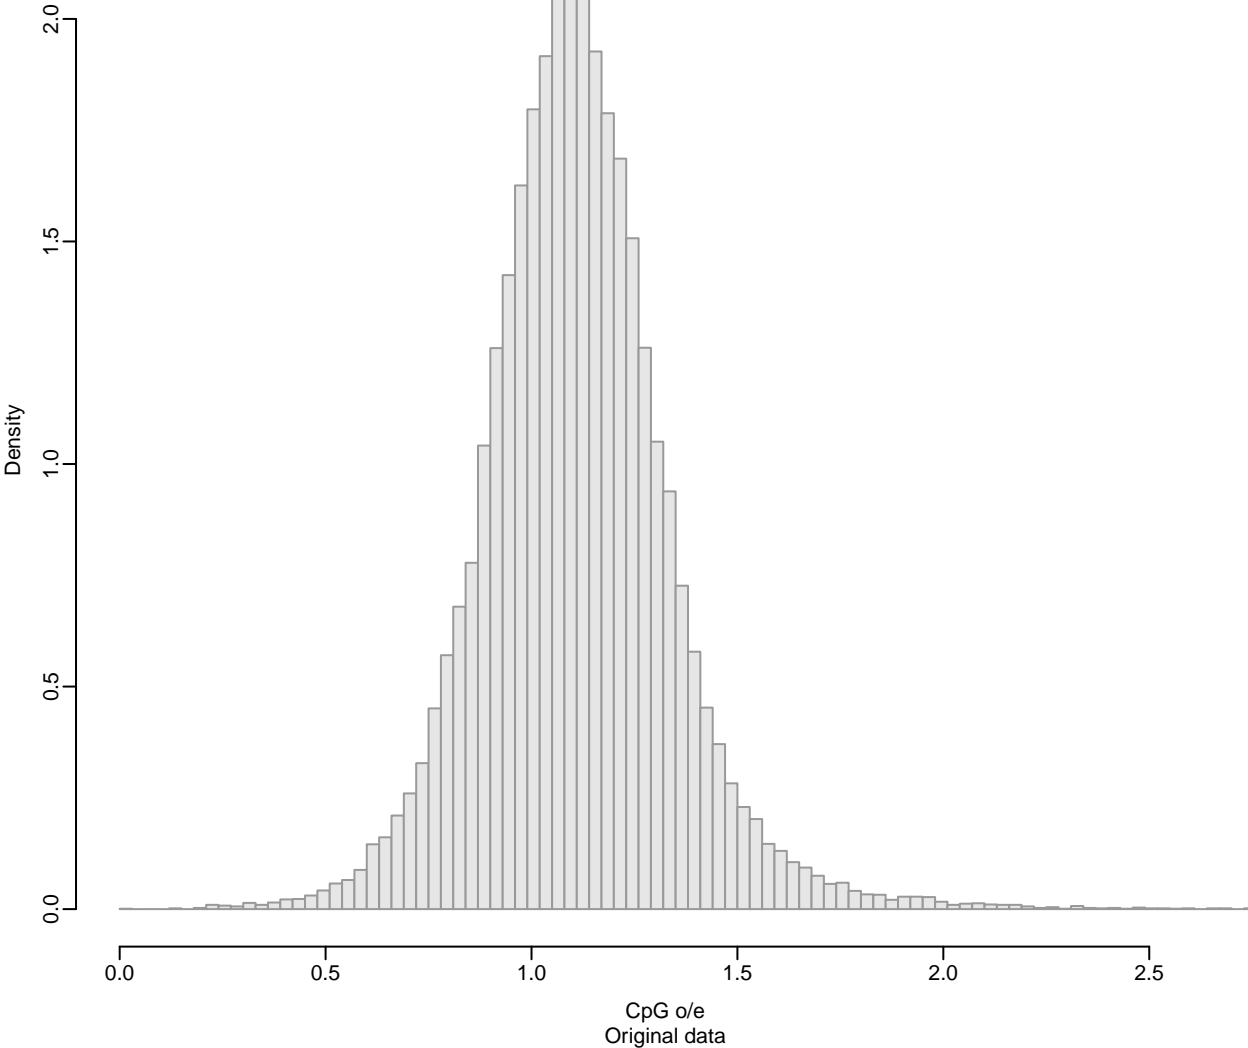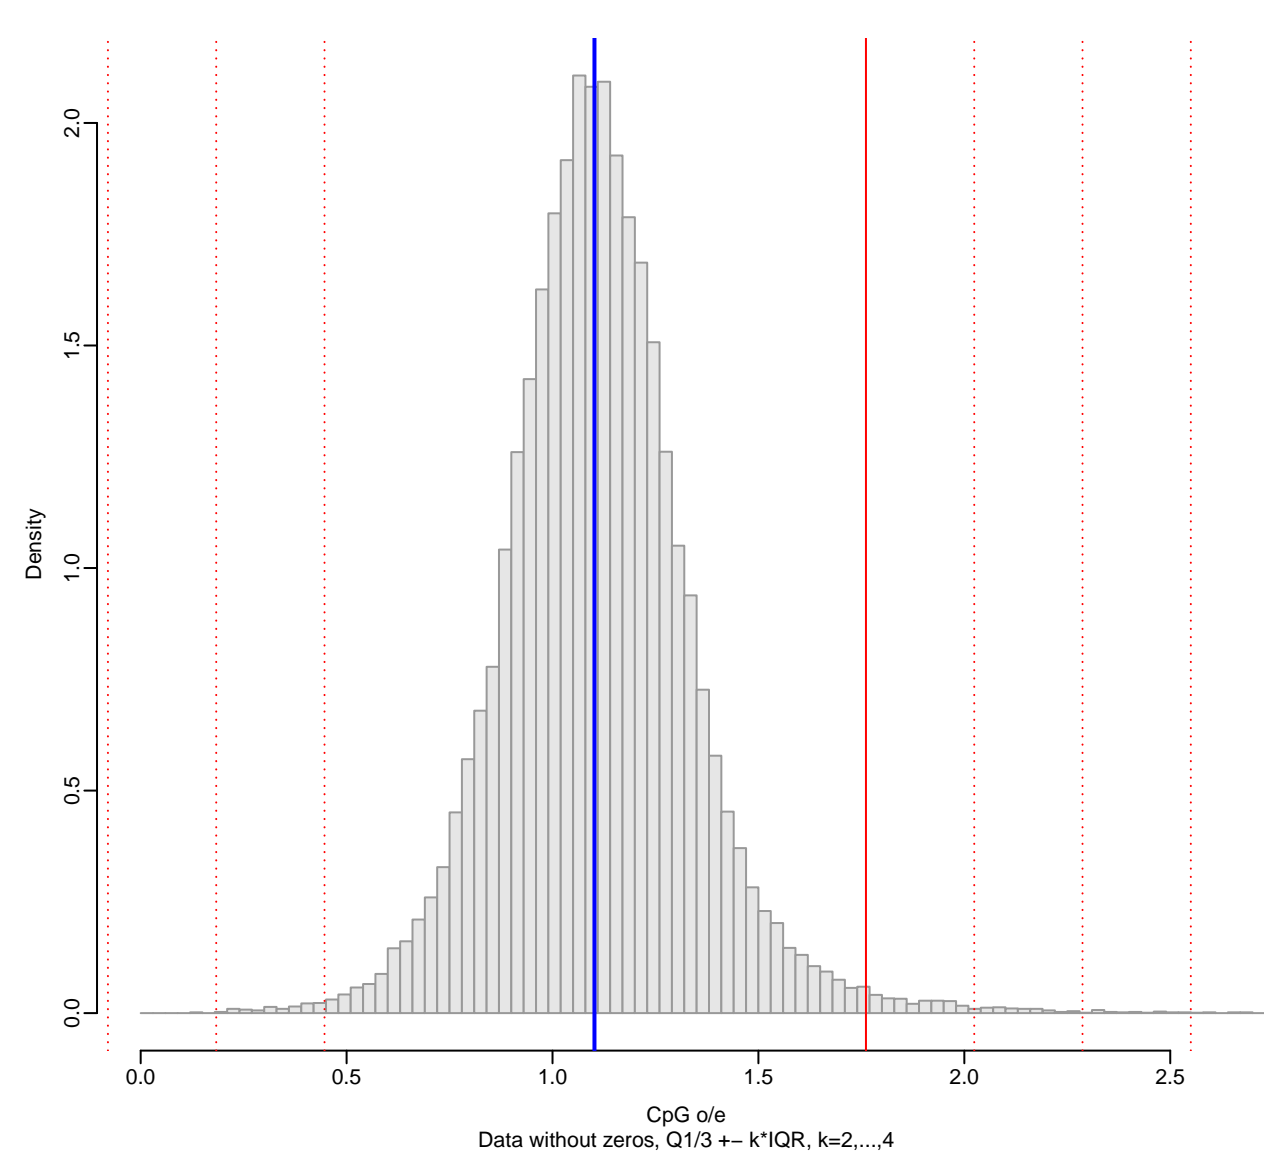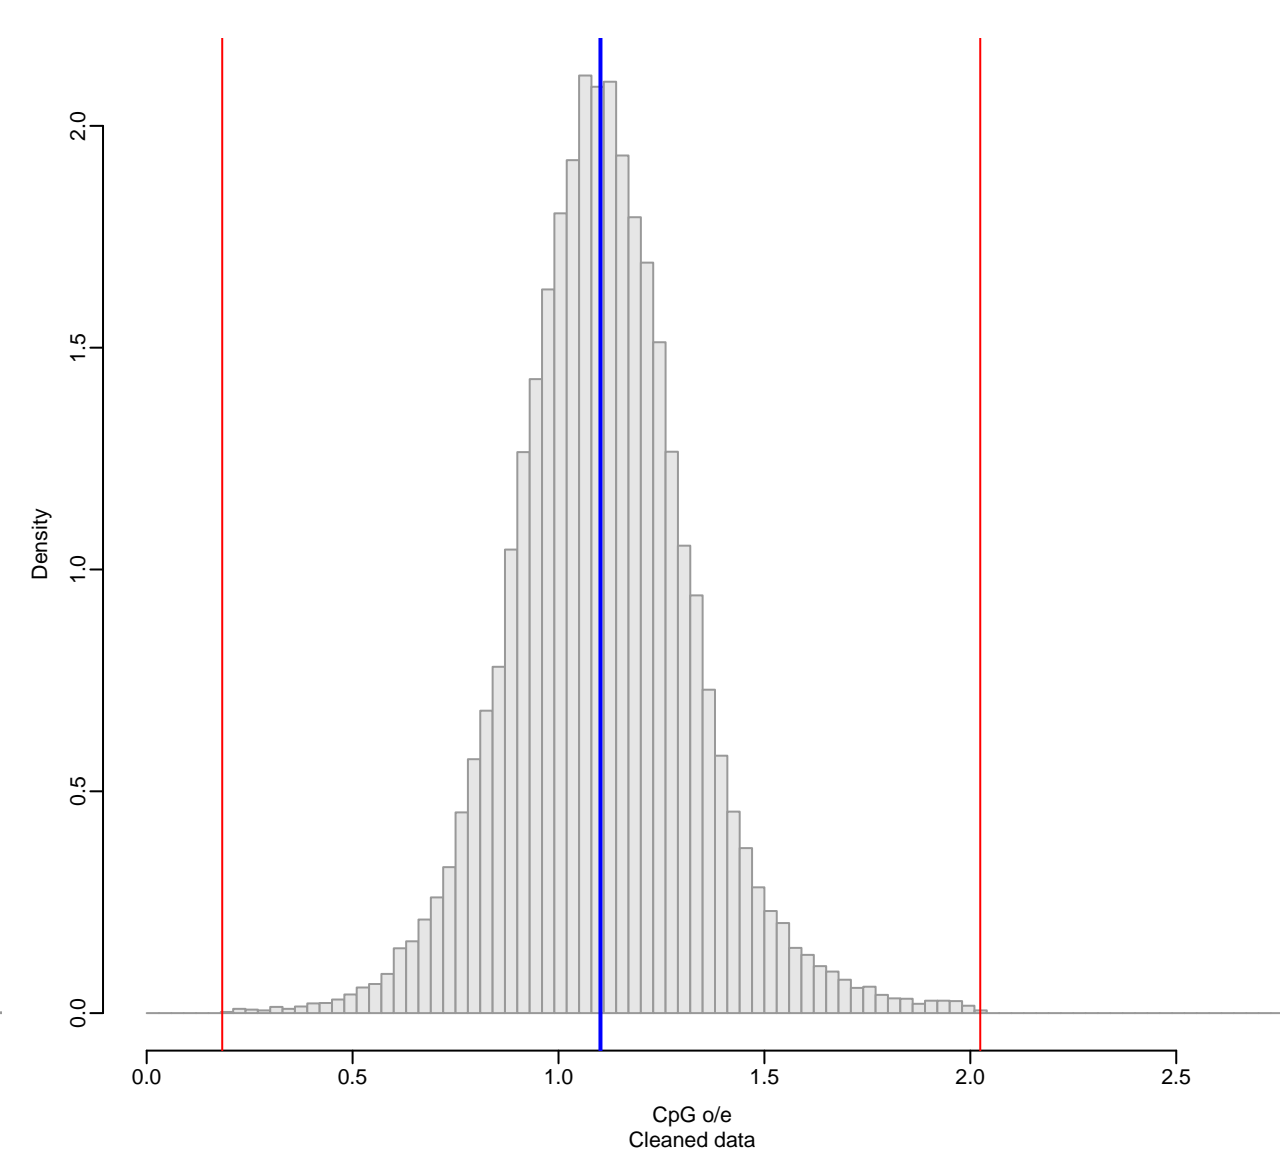



# Miinesium\_tardigradum

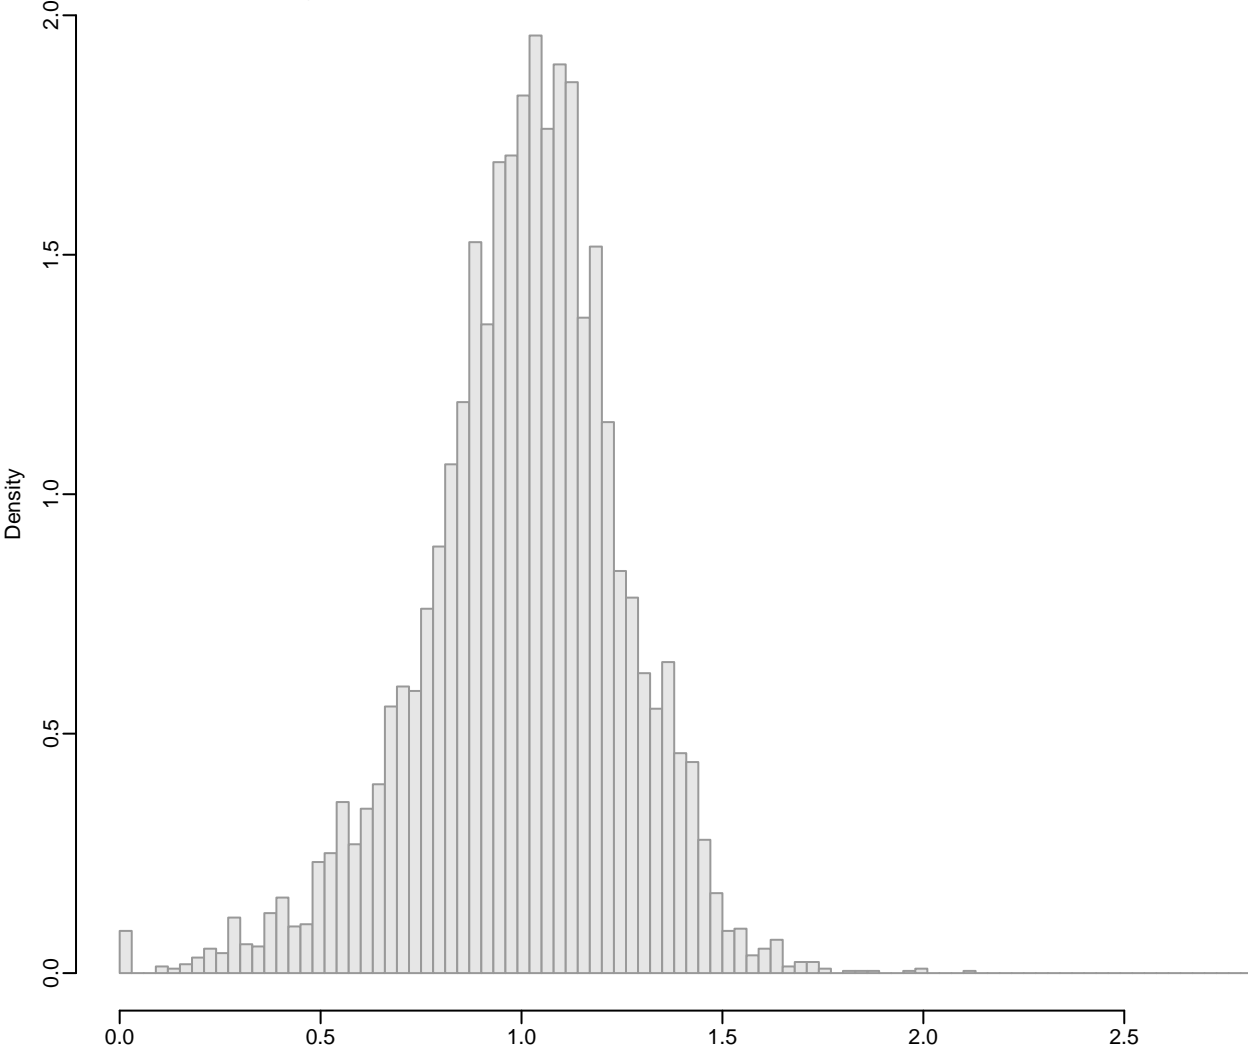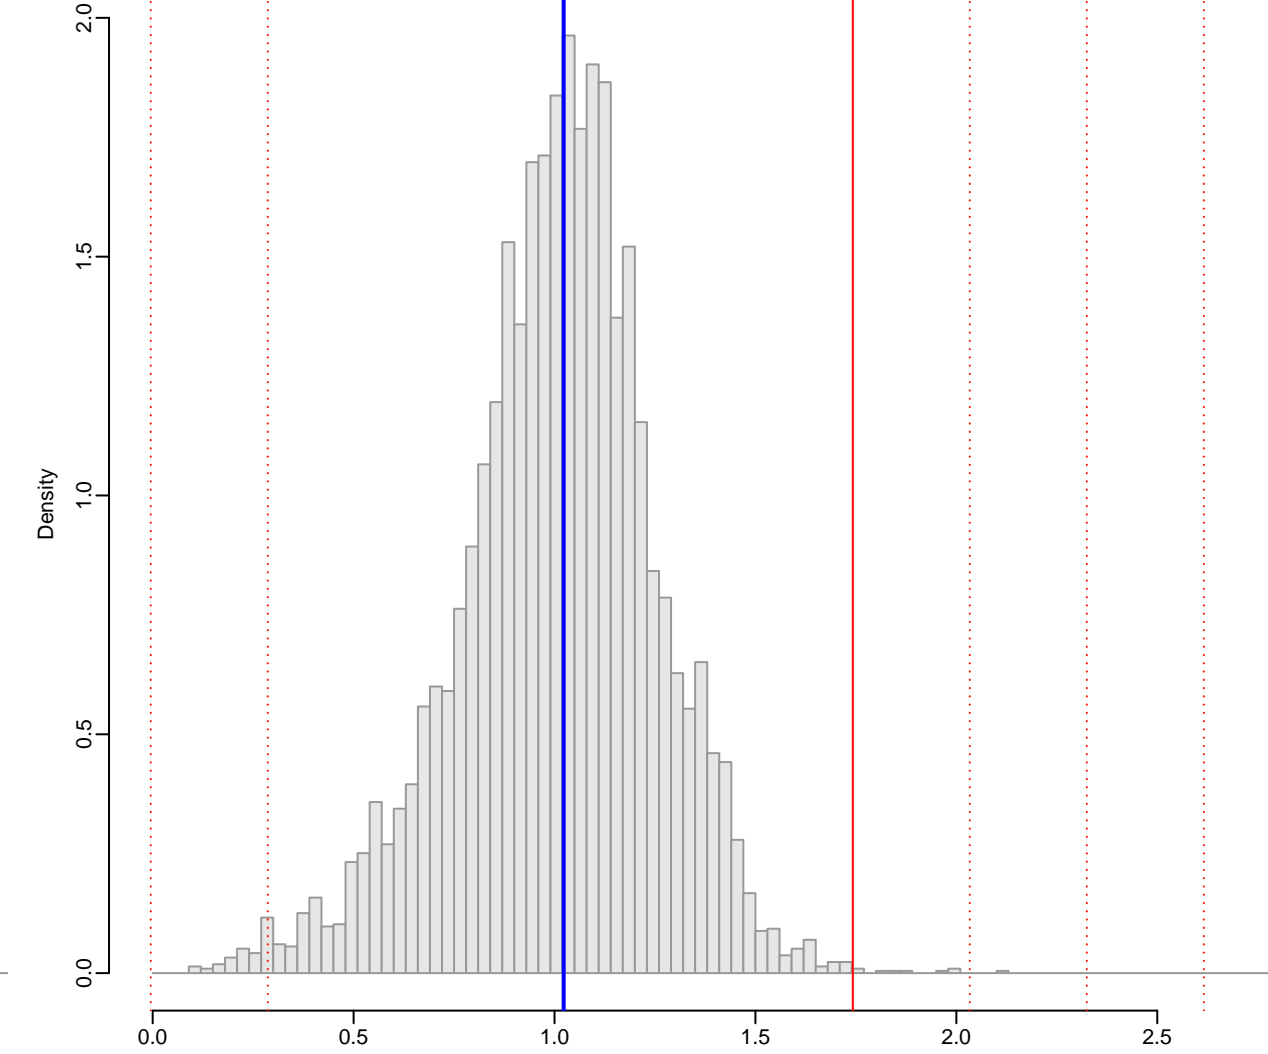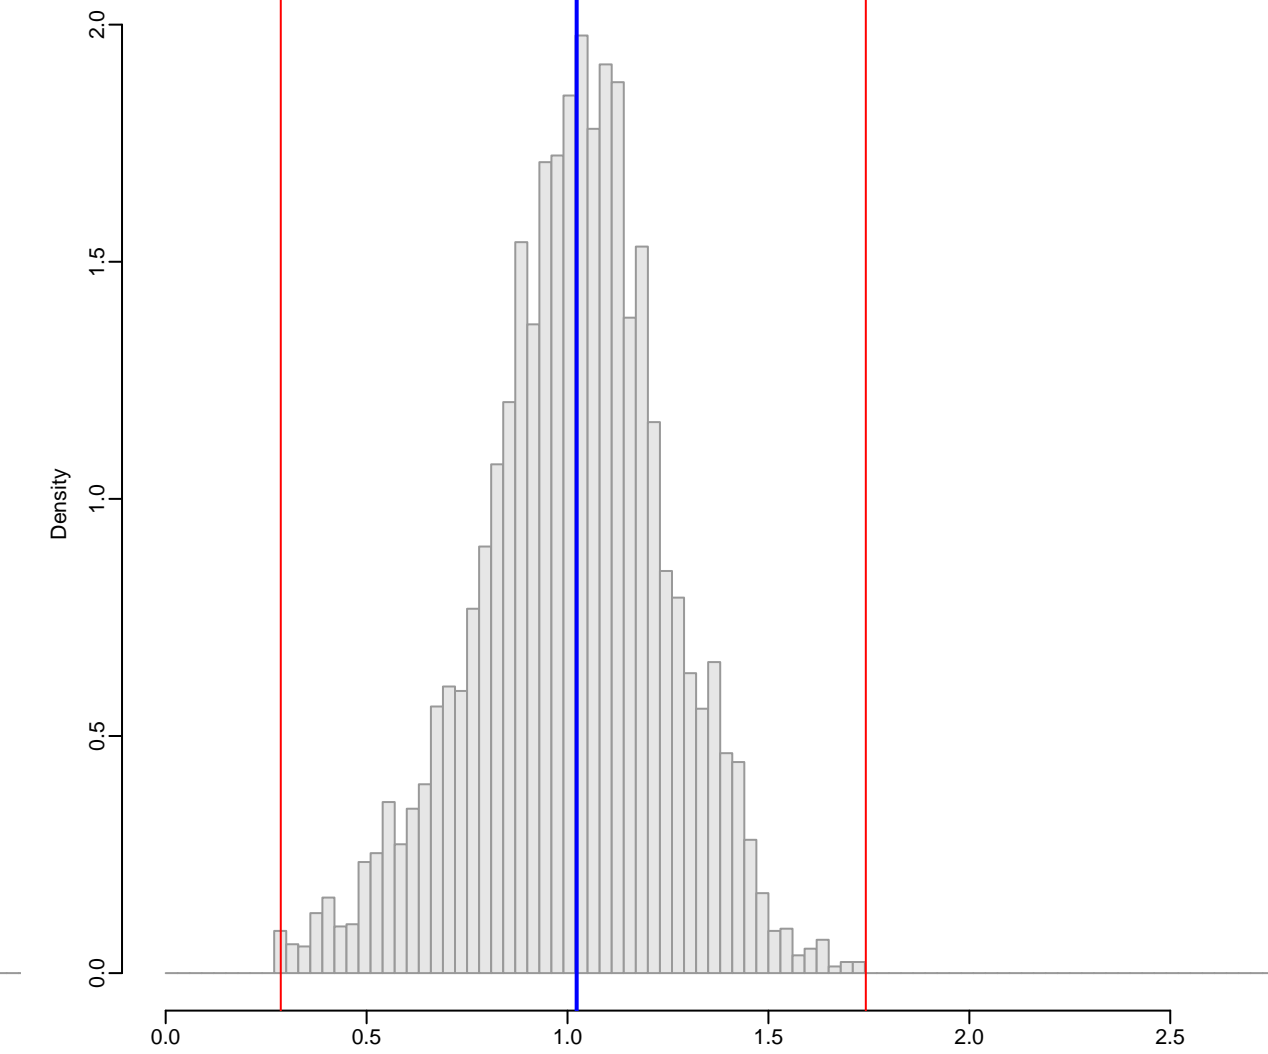

Mimulus\_lewisii

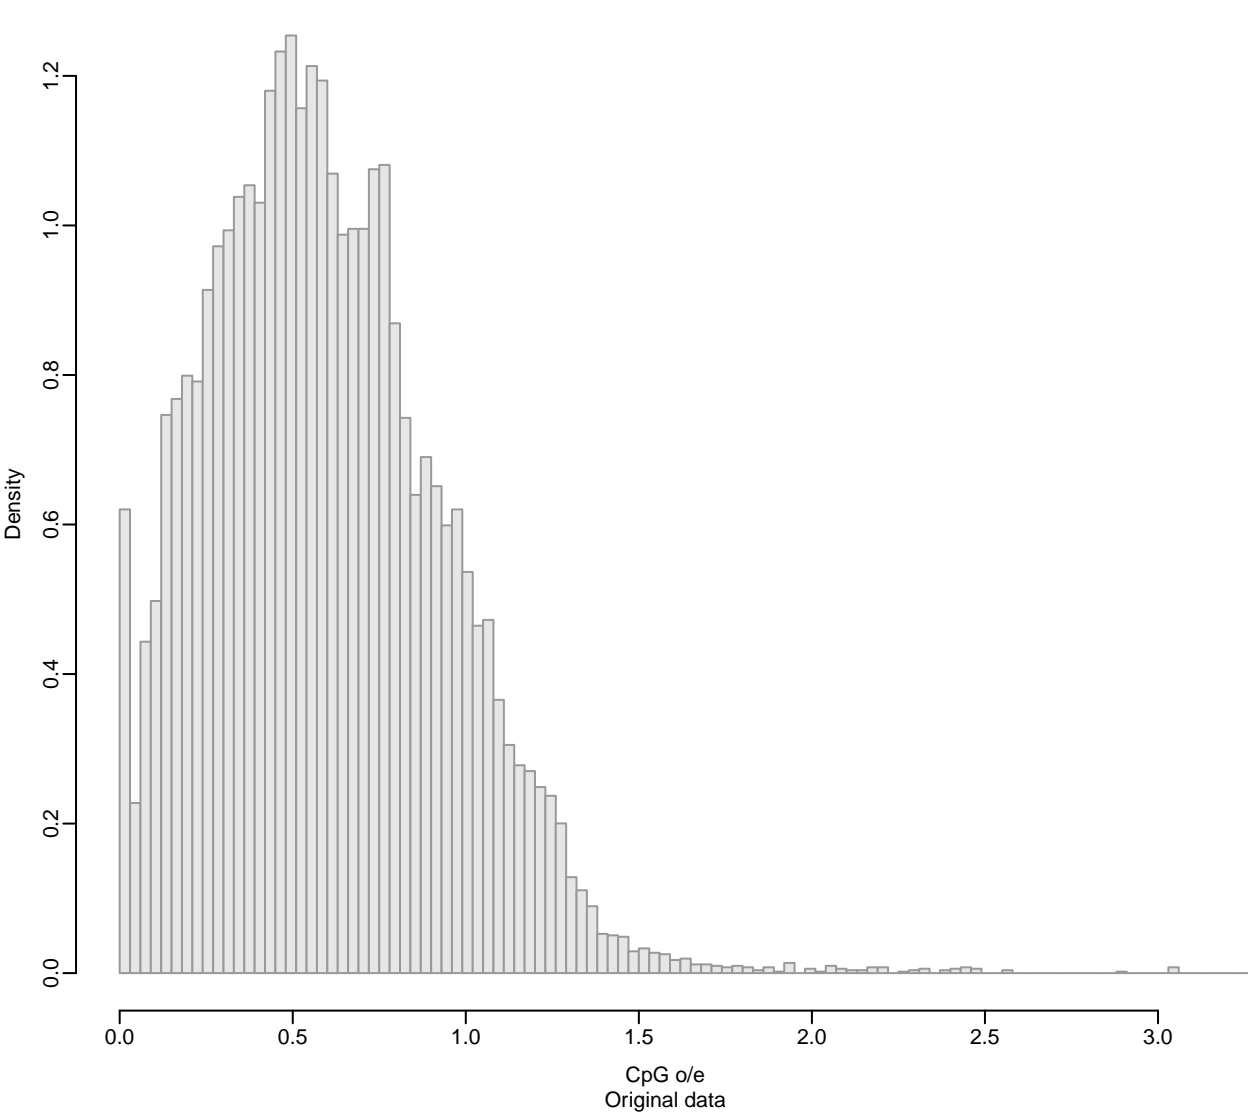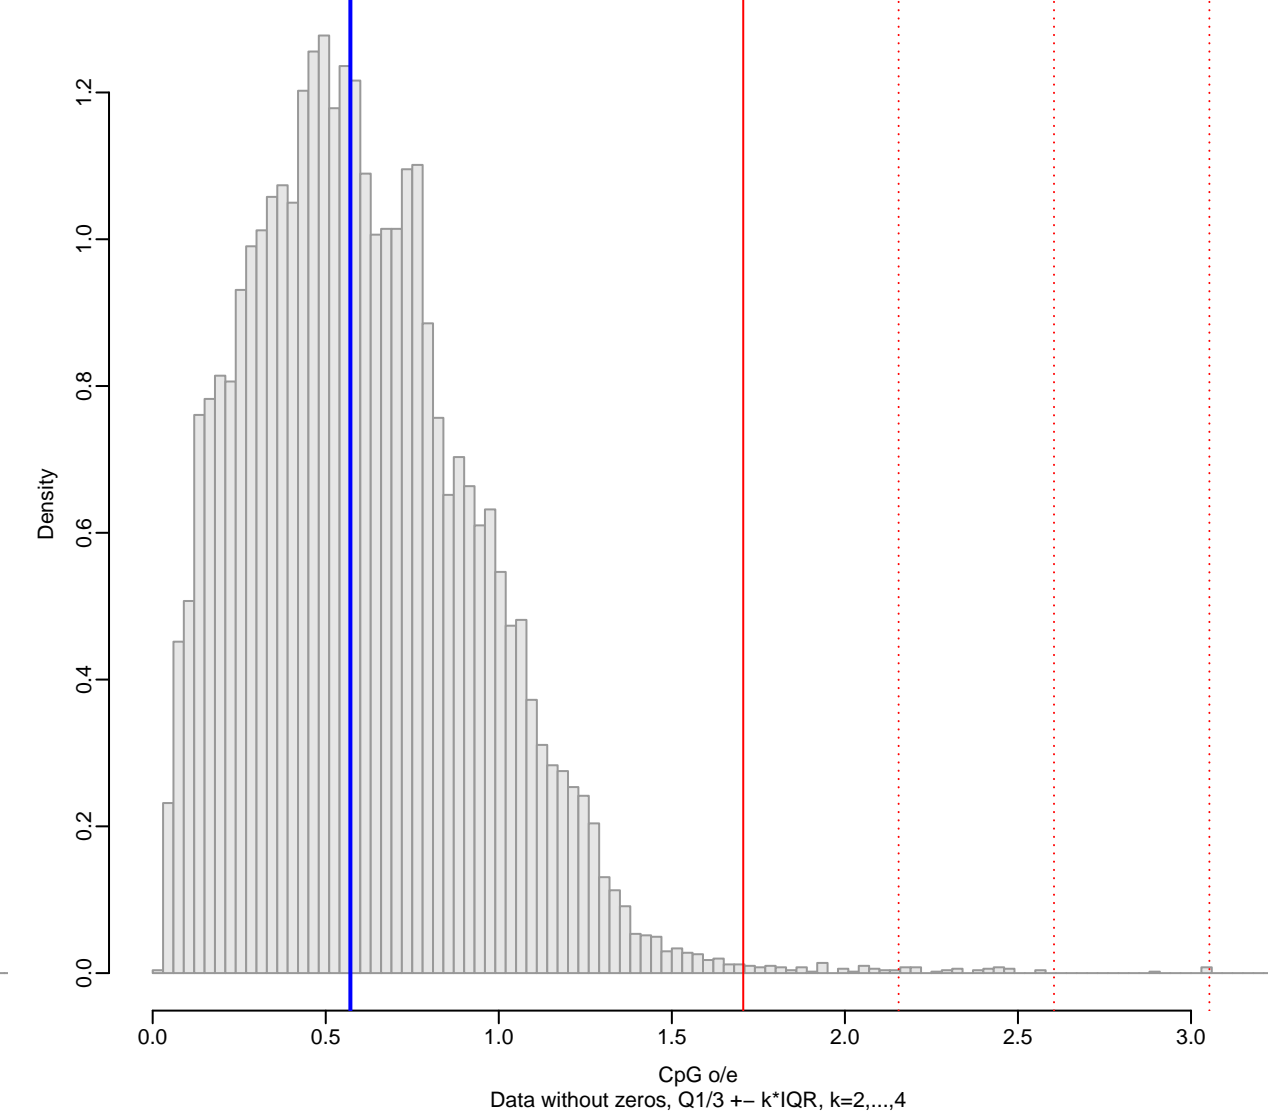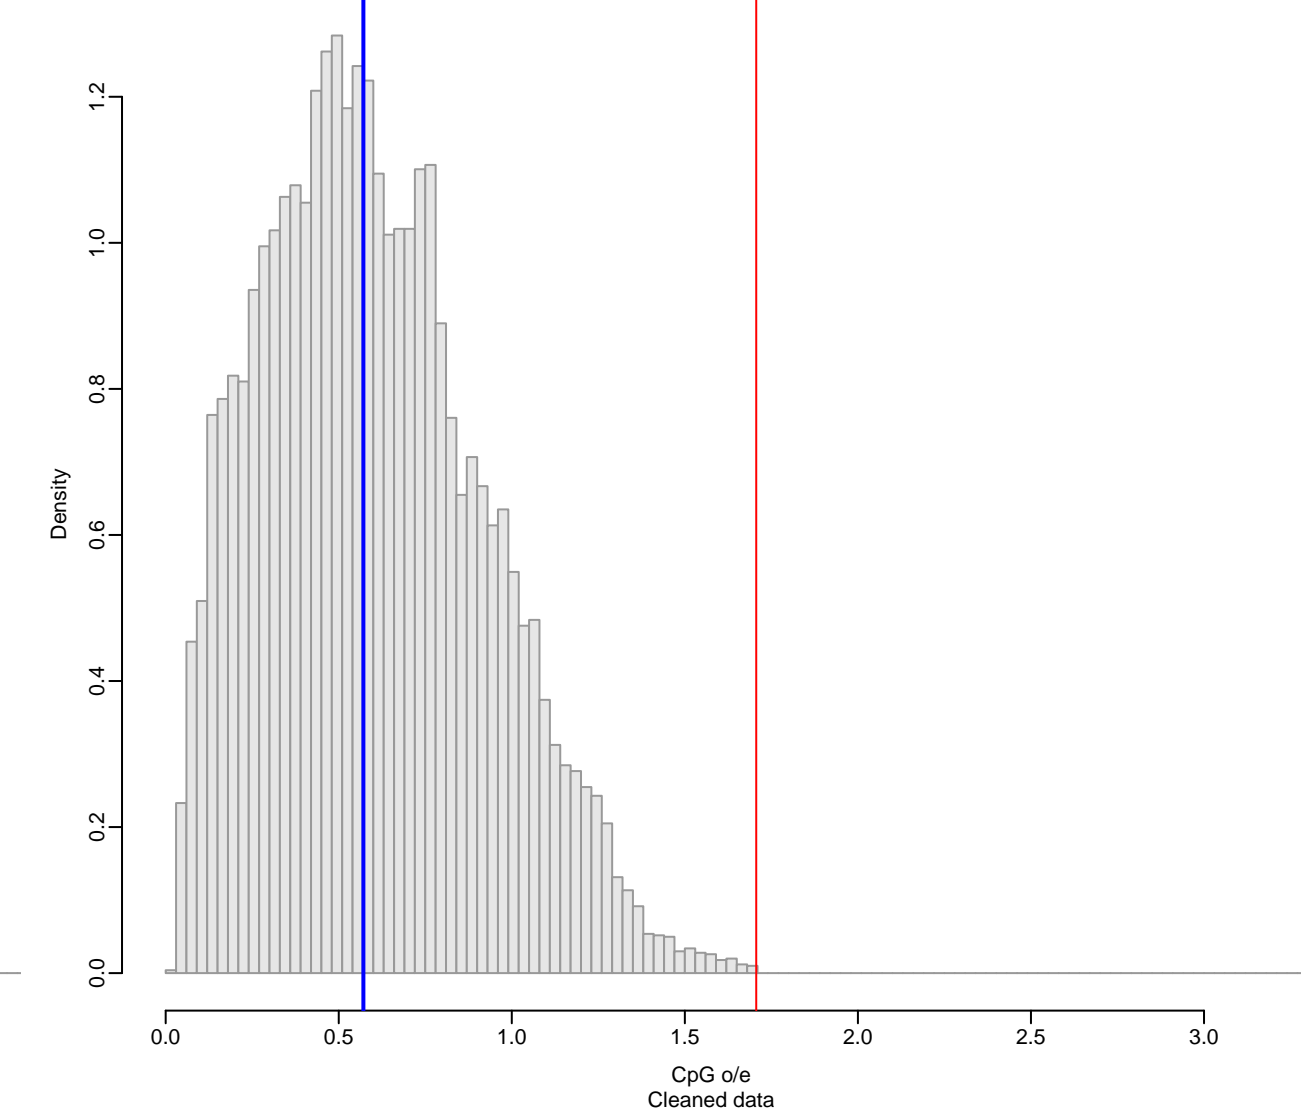

Misgurnus\_anguillicaudatus

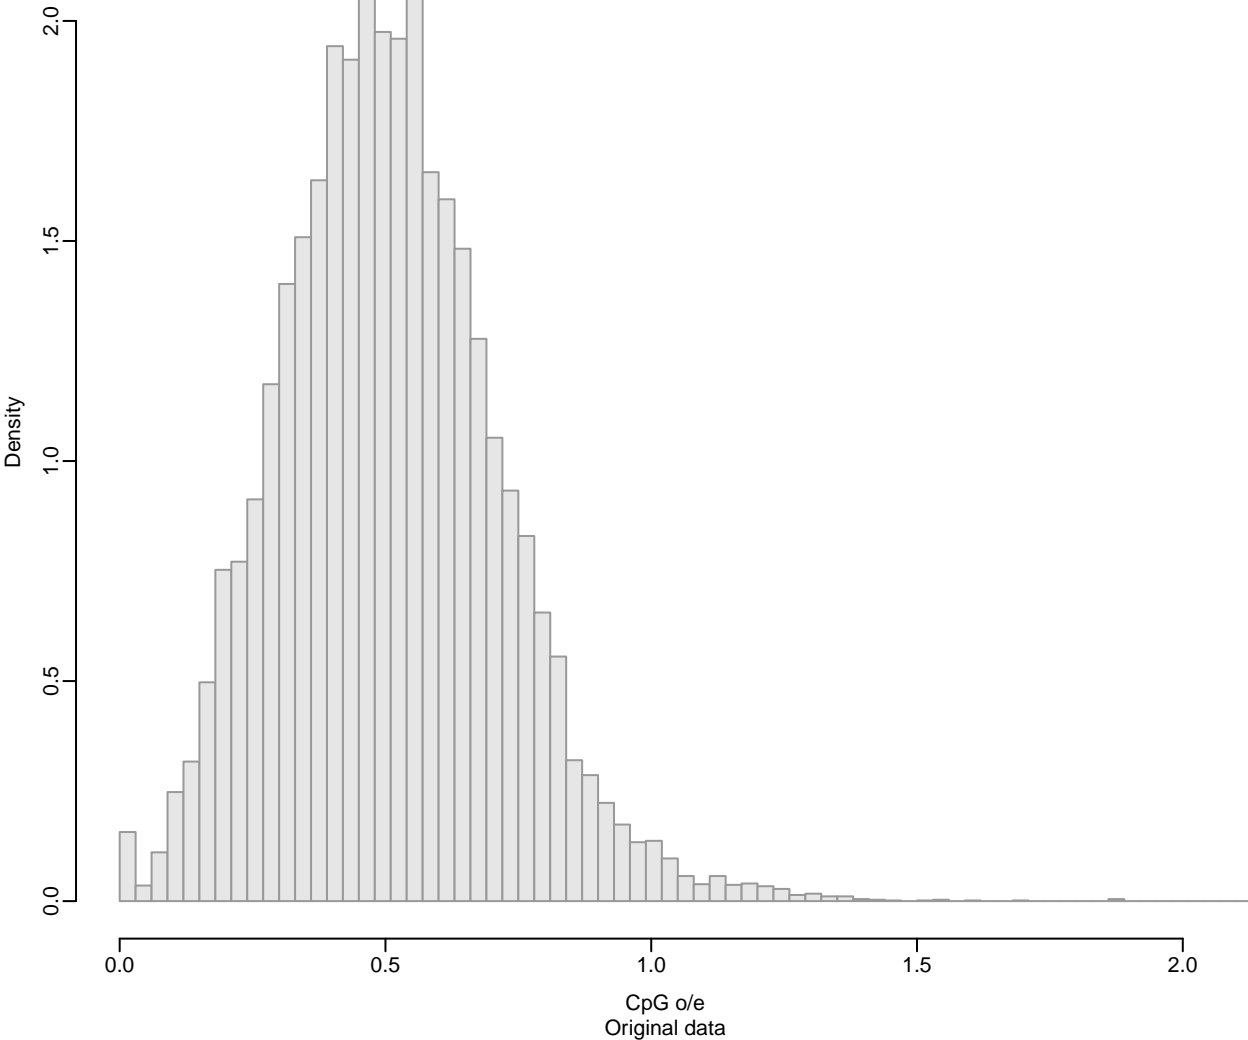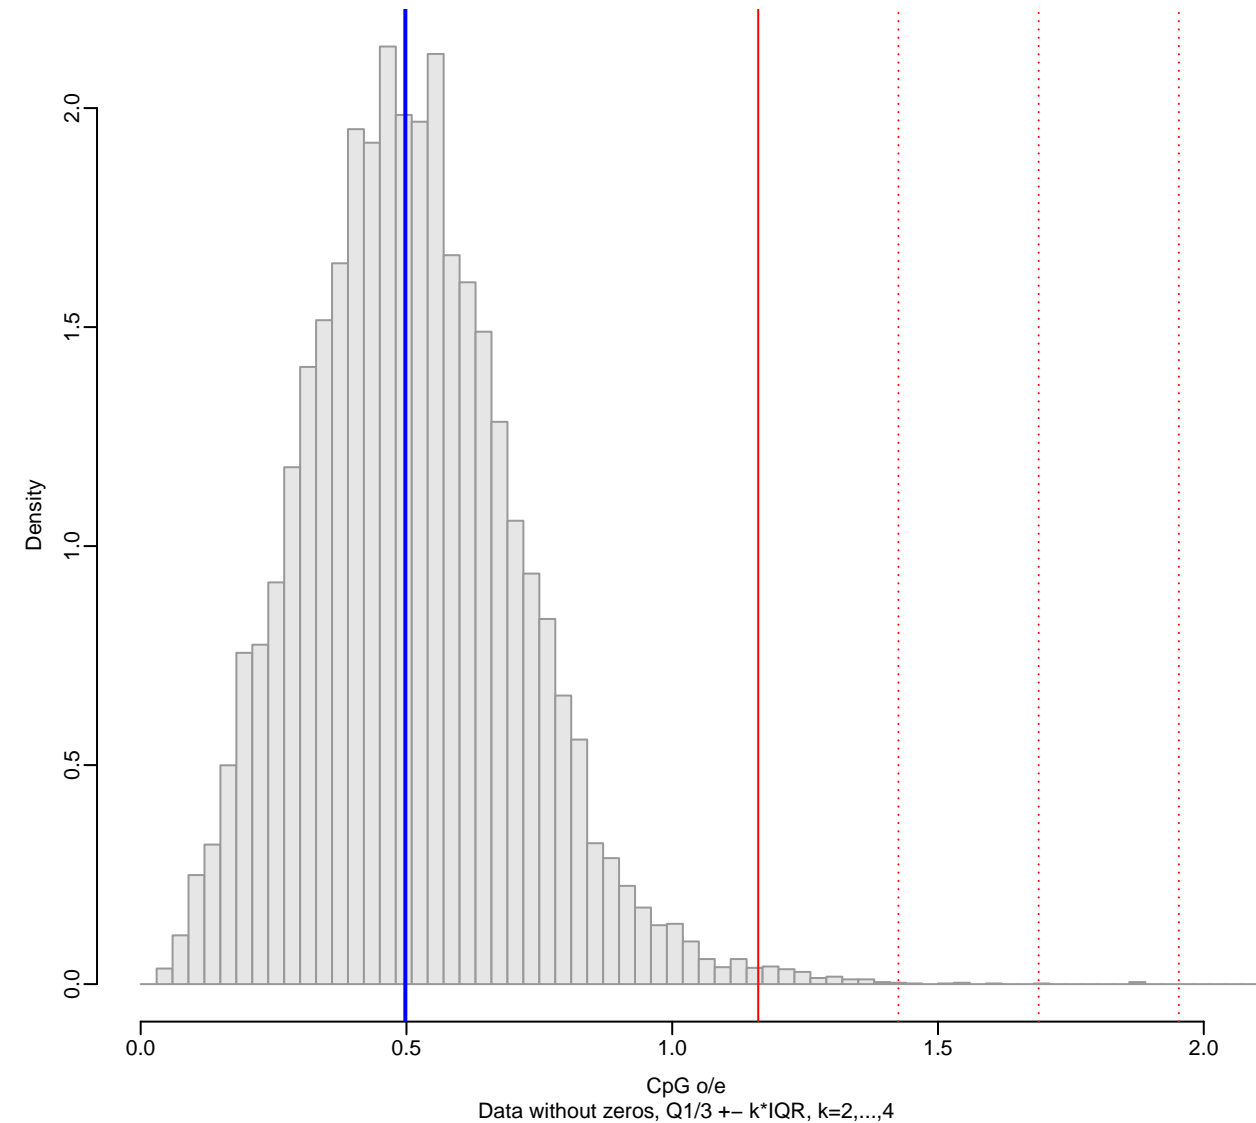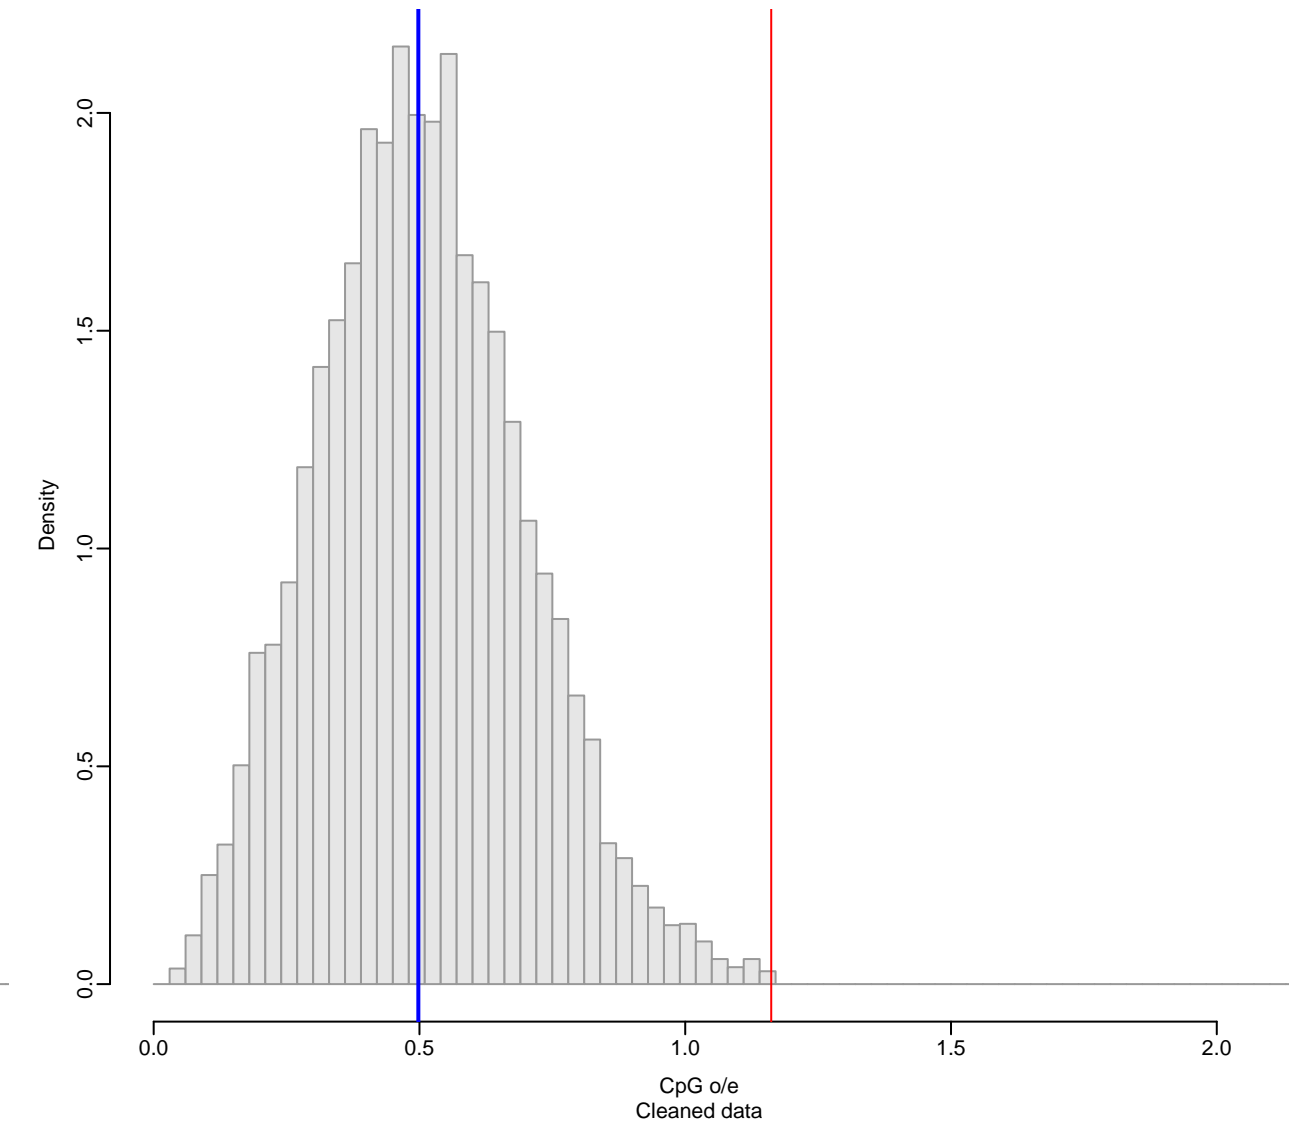

Mizuhopecten\_yessoensis

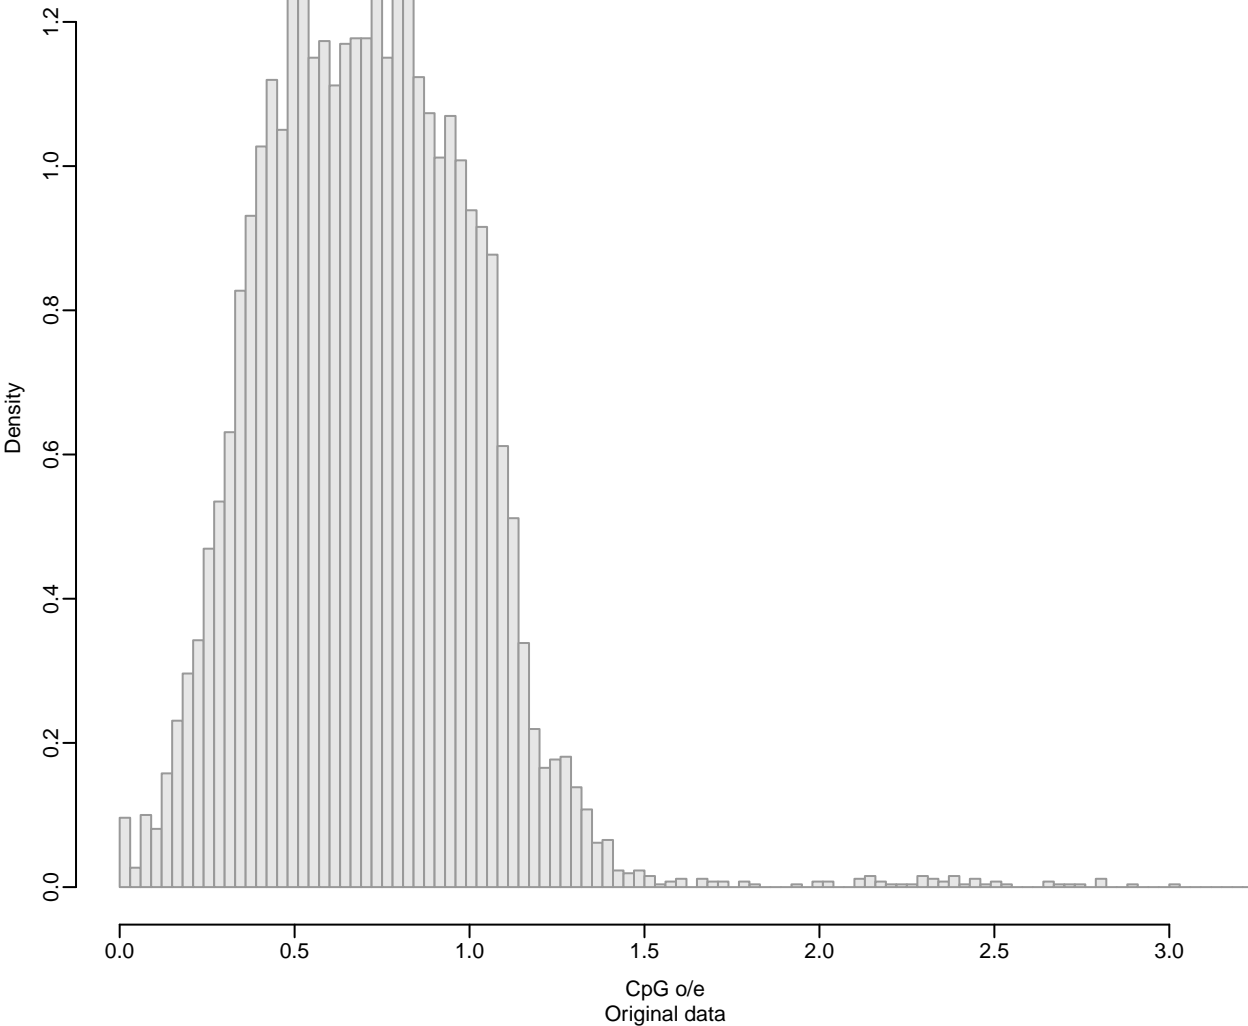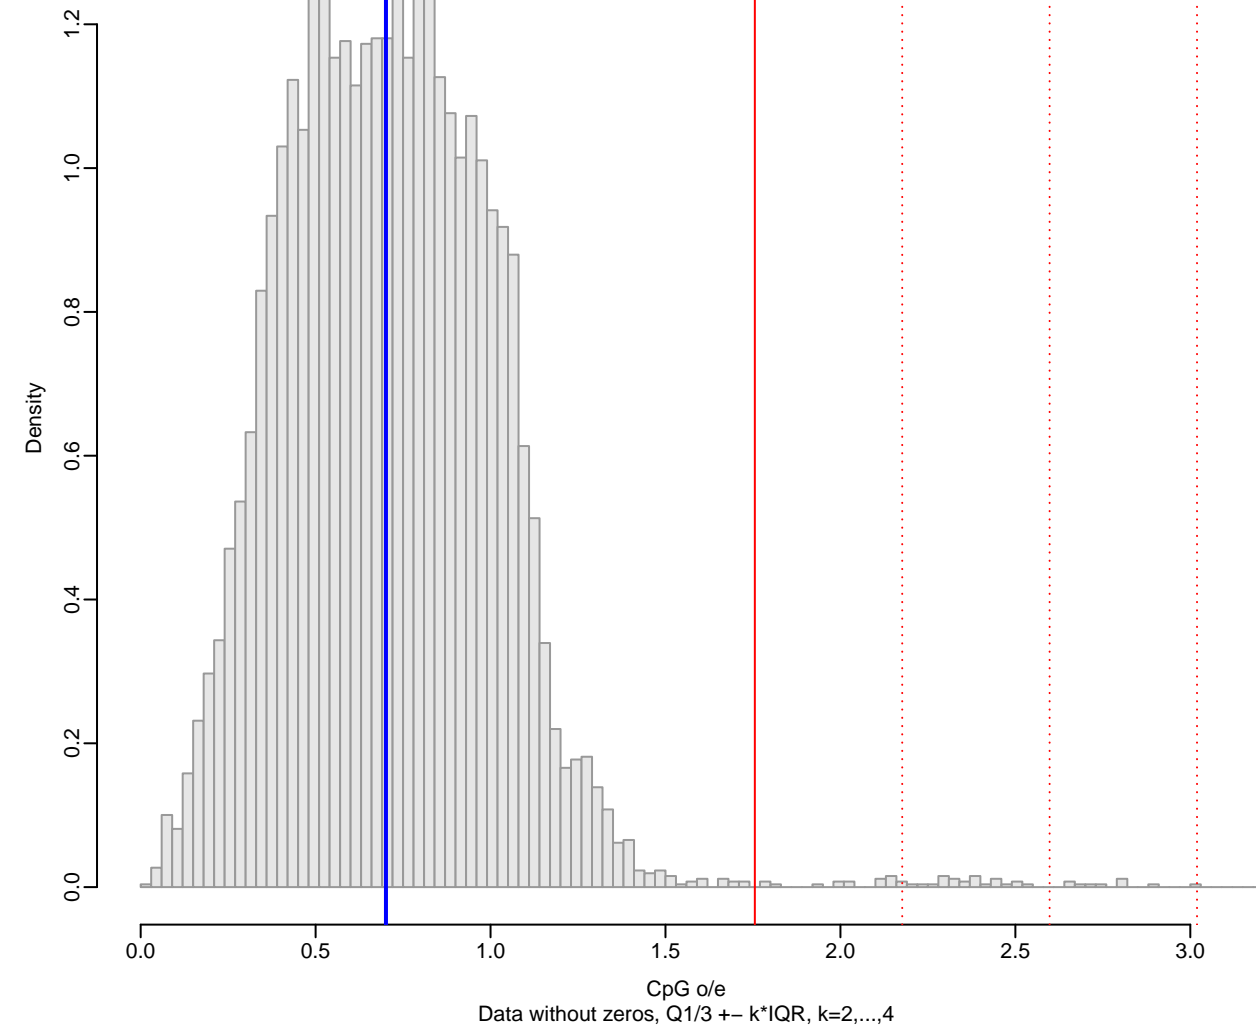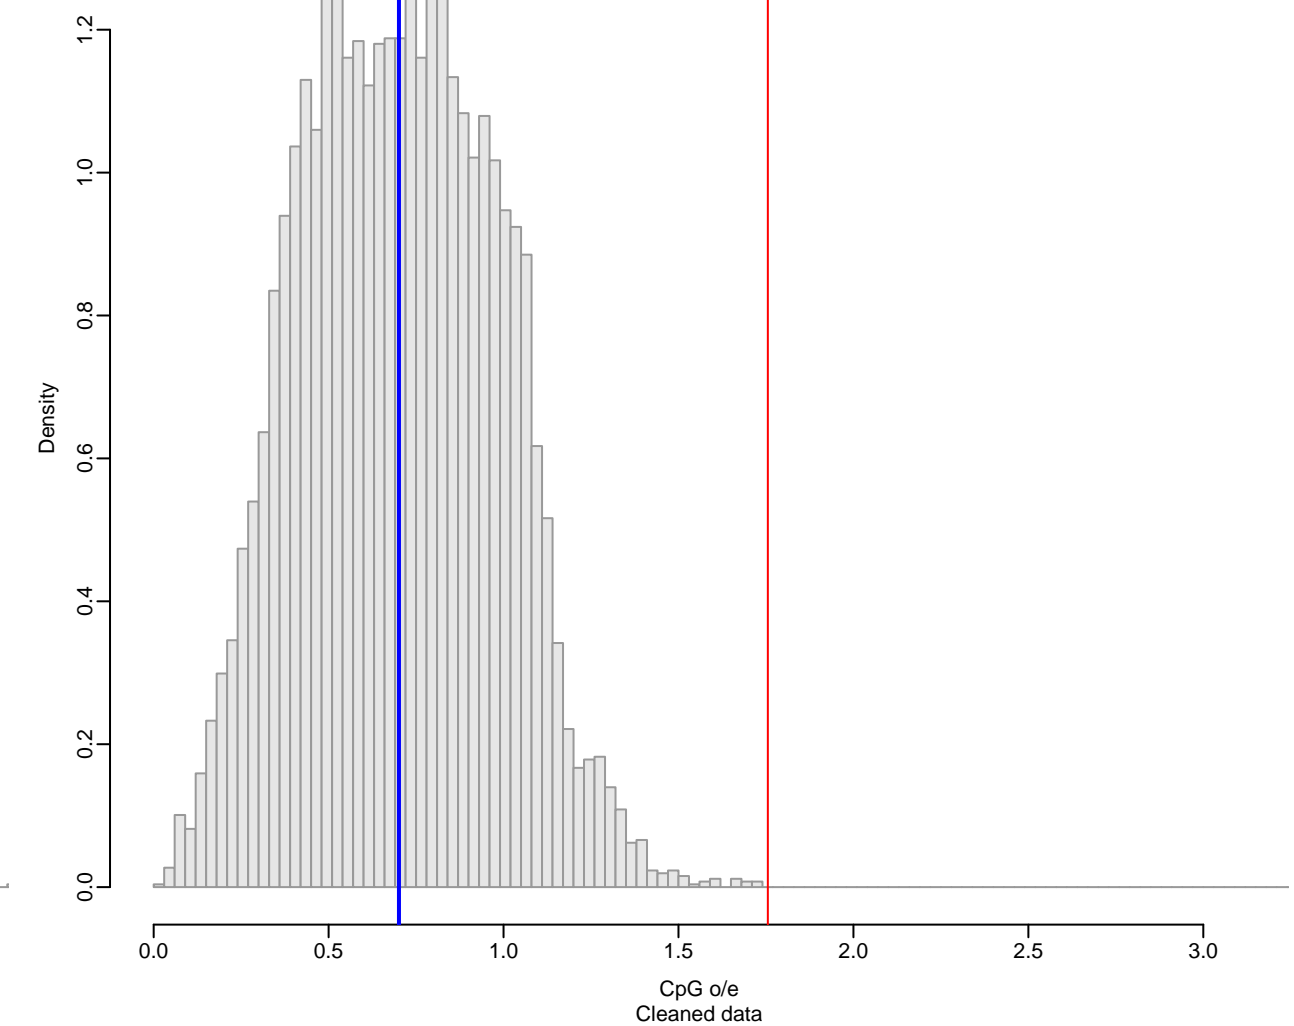

Mnemiopsis\_leidy

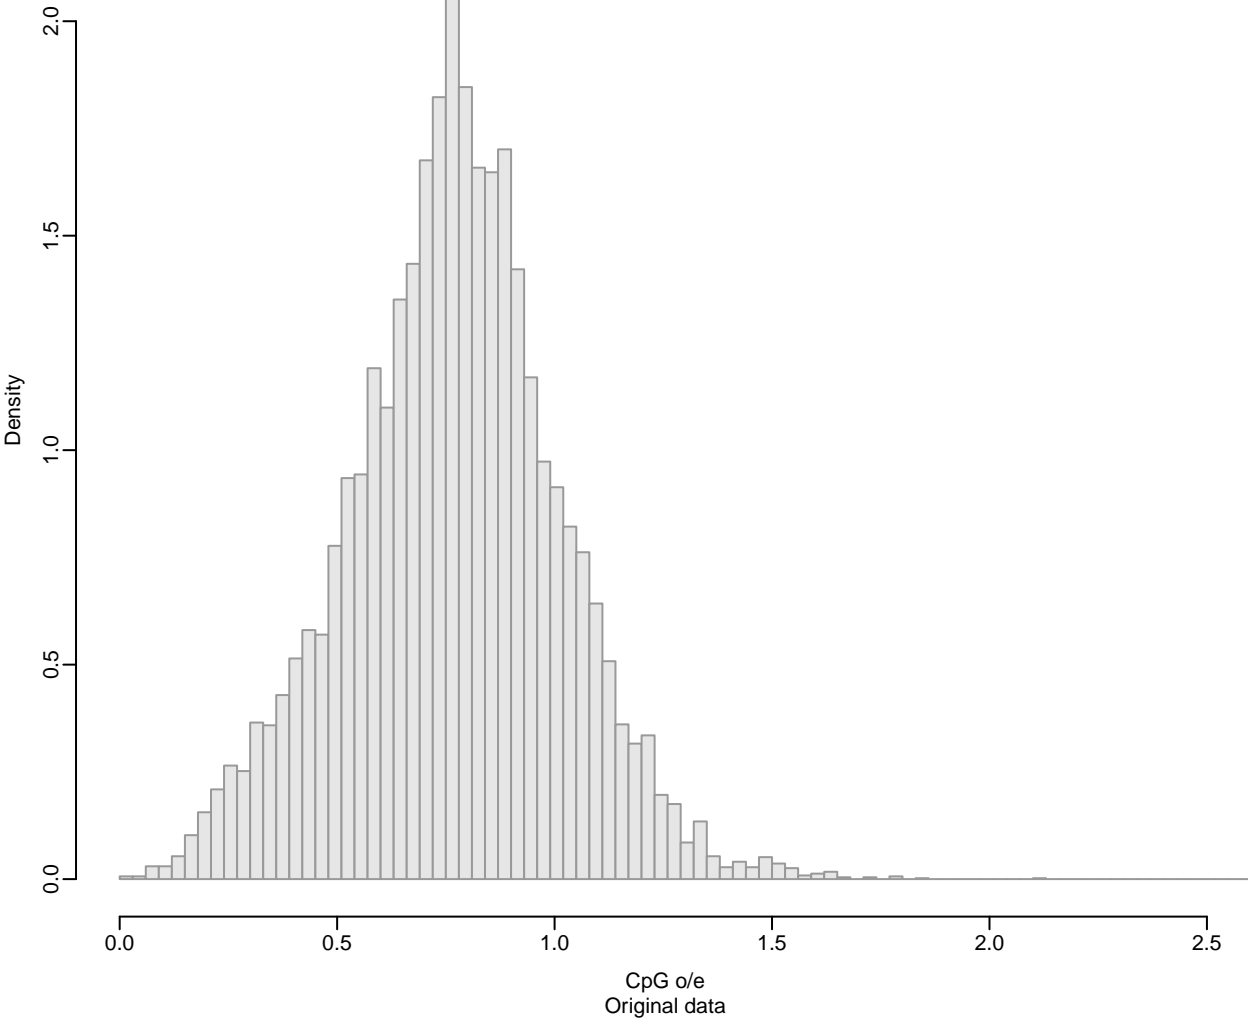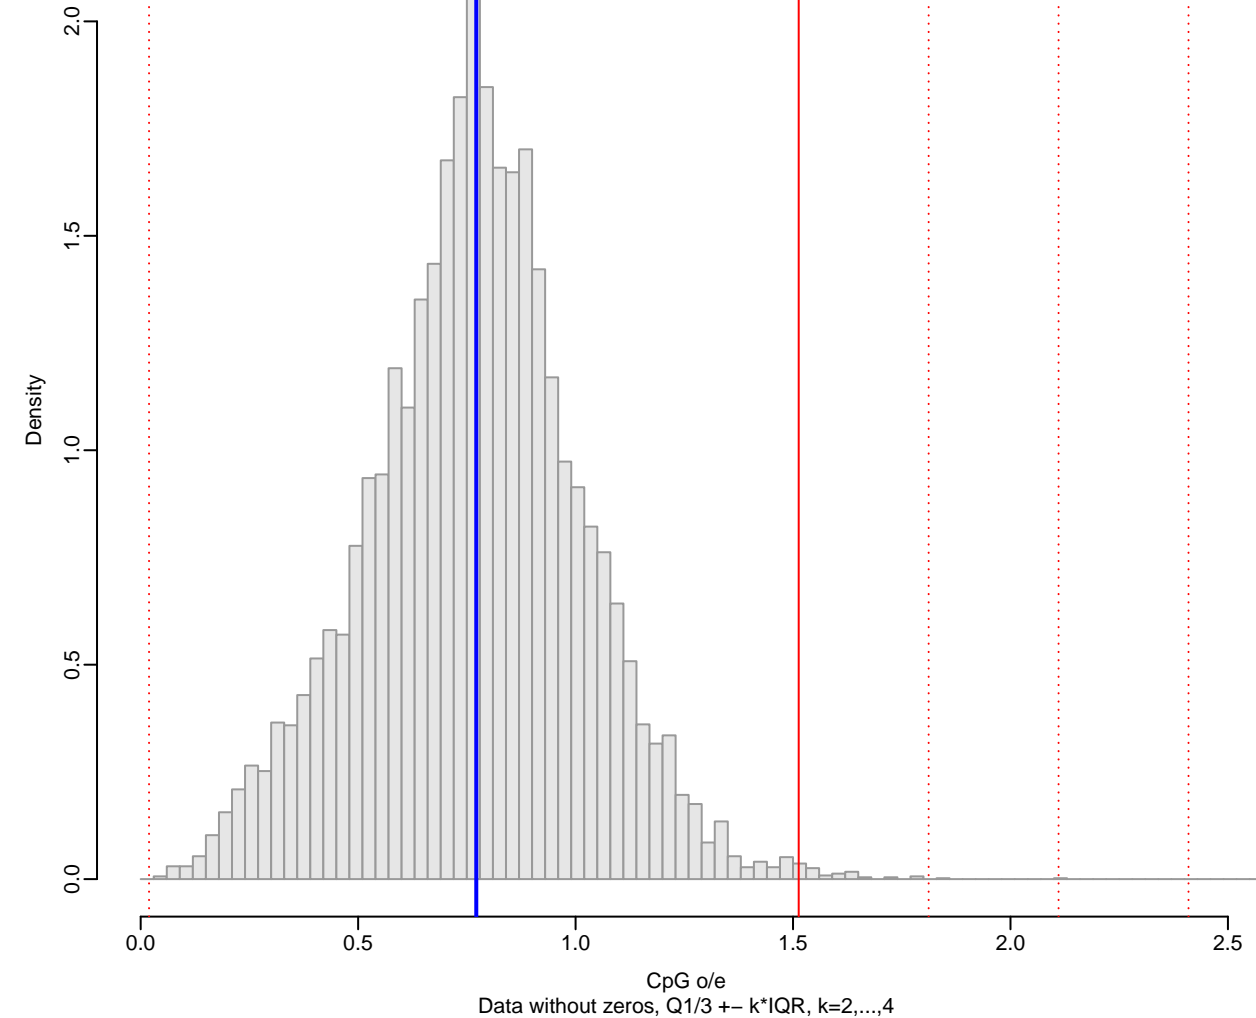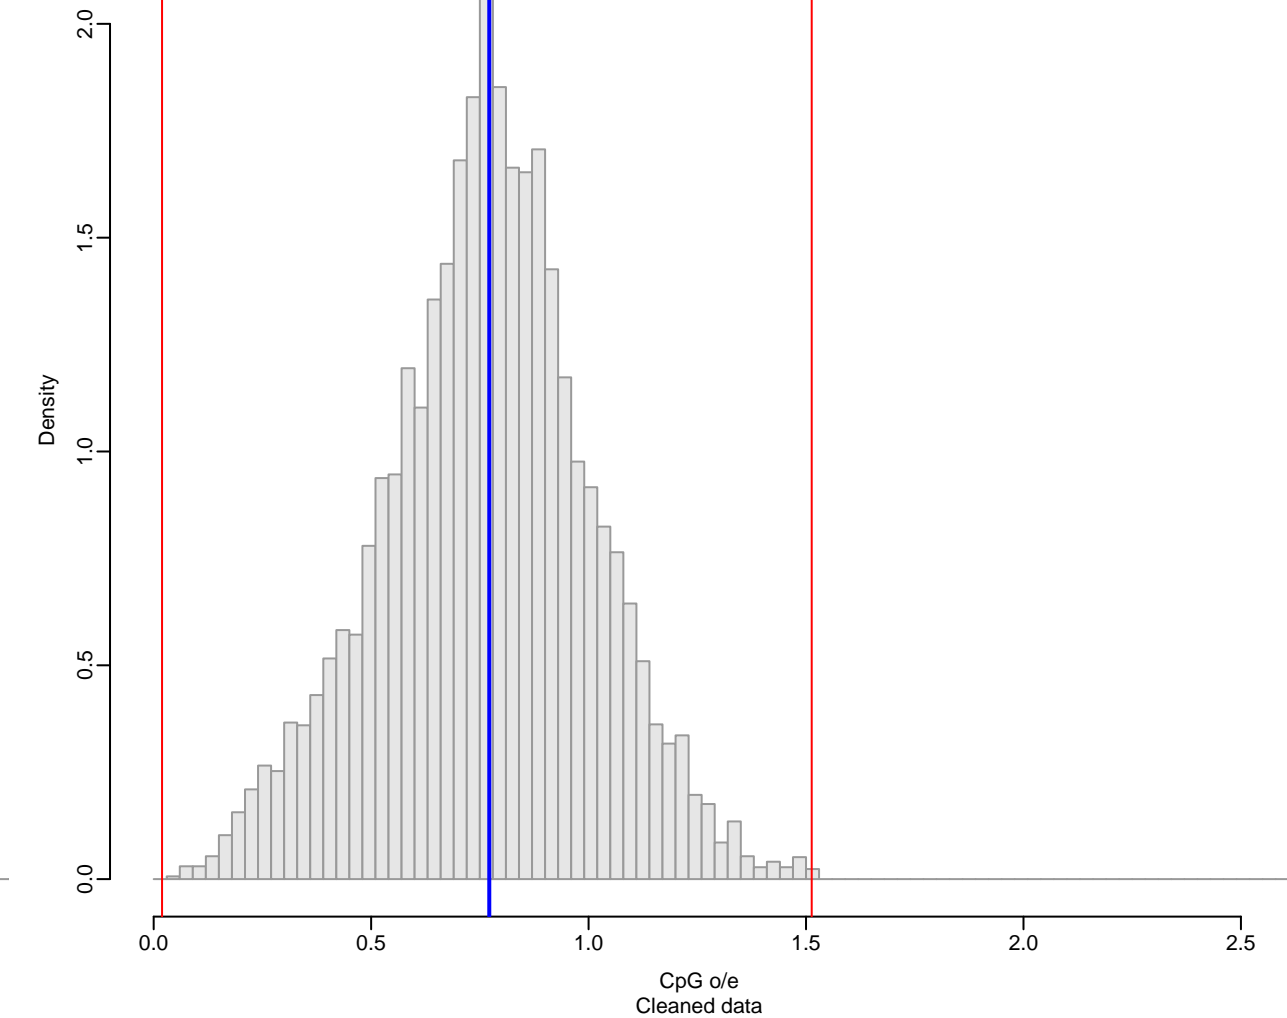

Molgula\_tectiformis

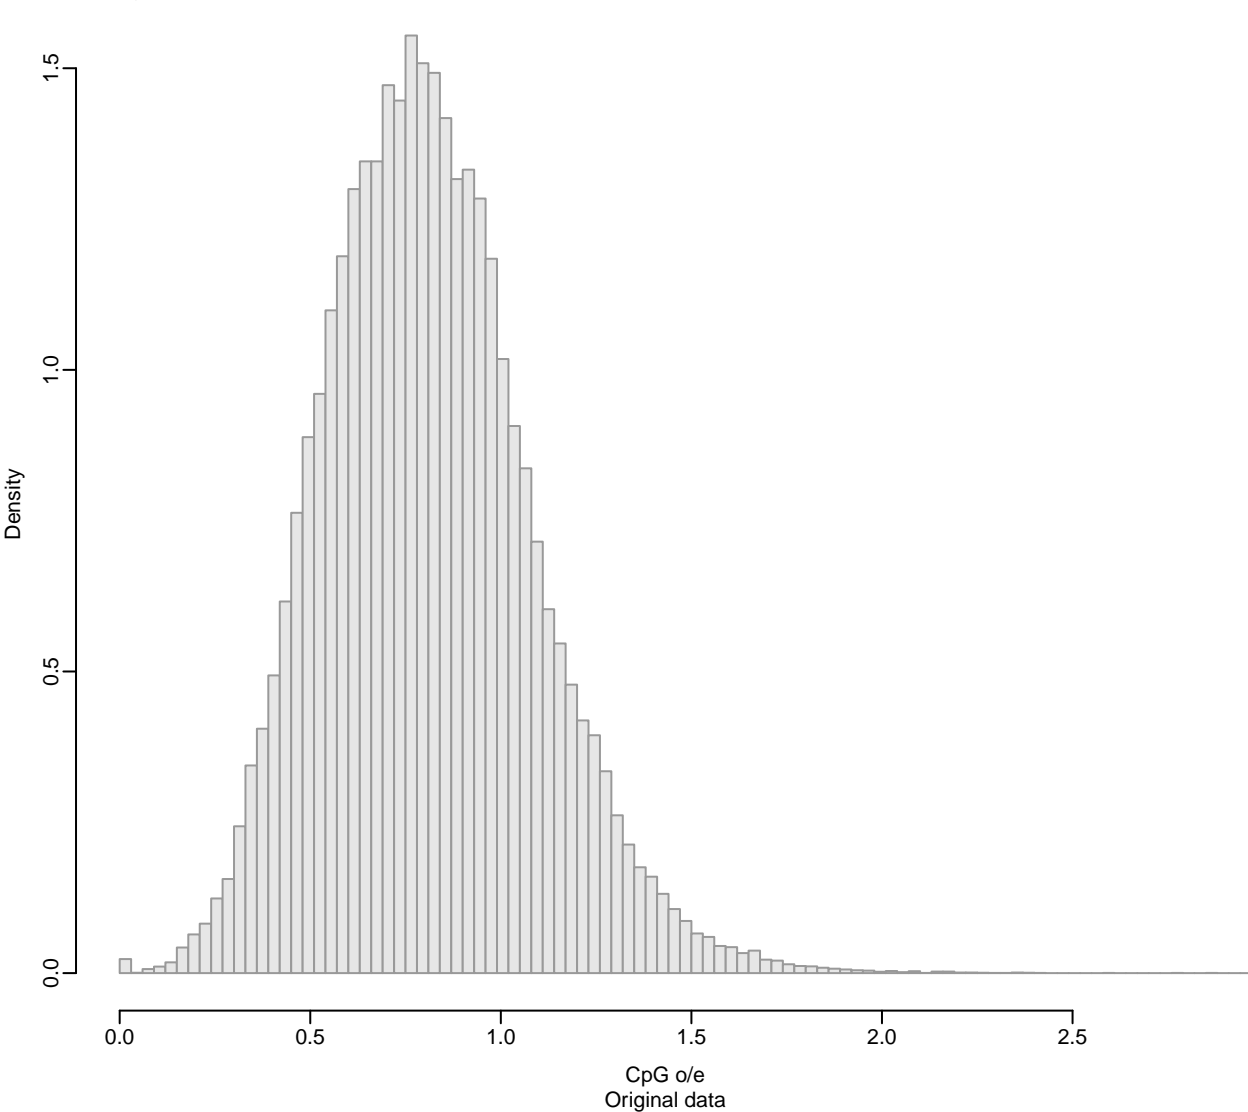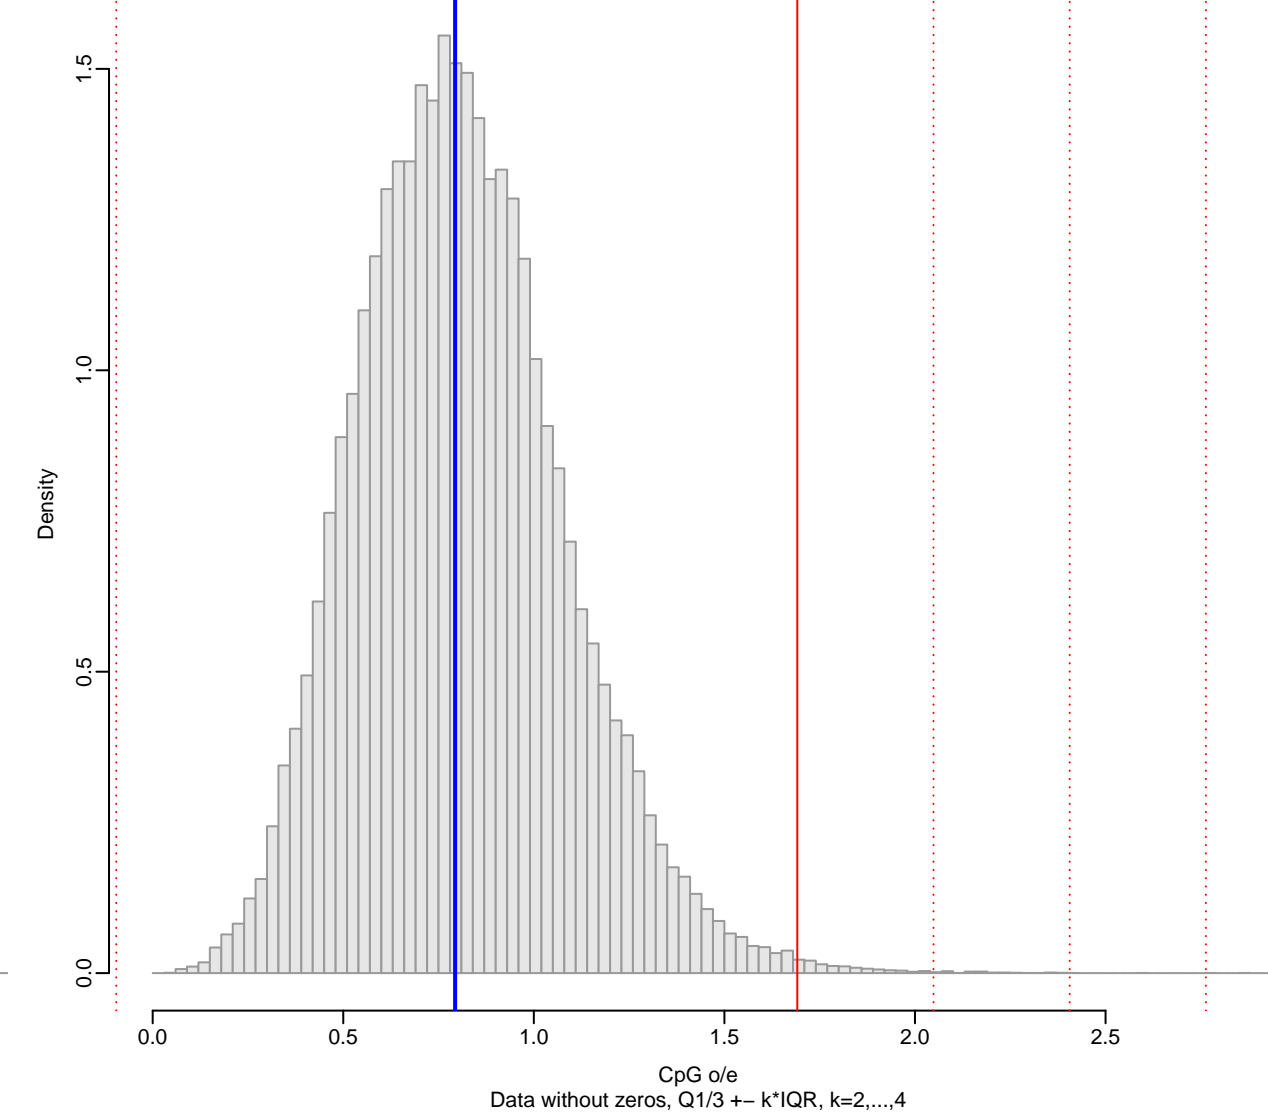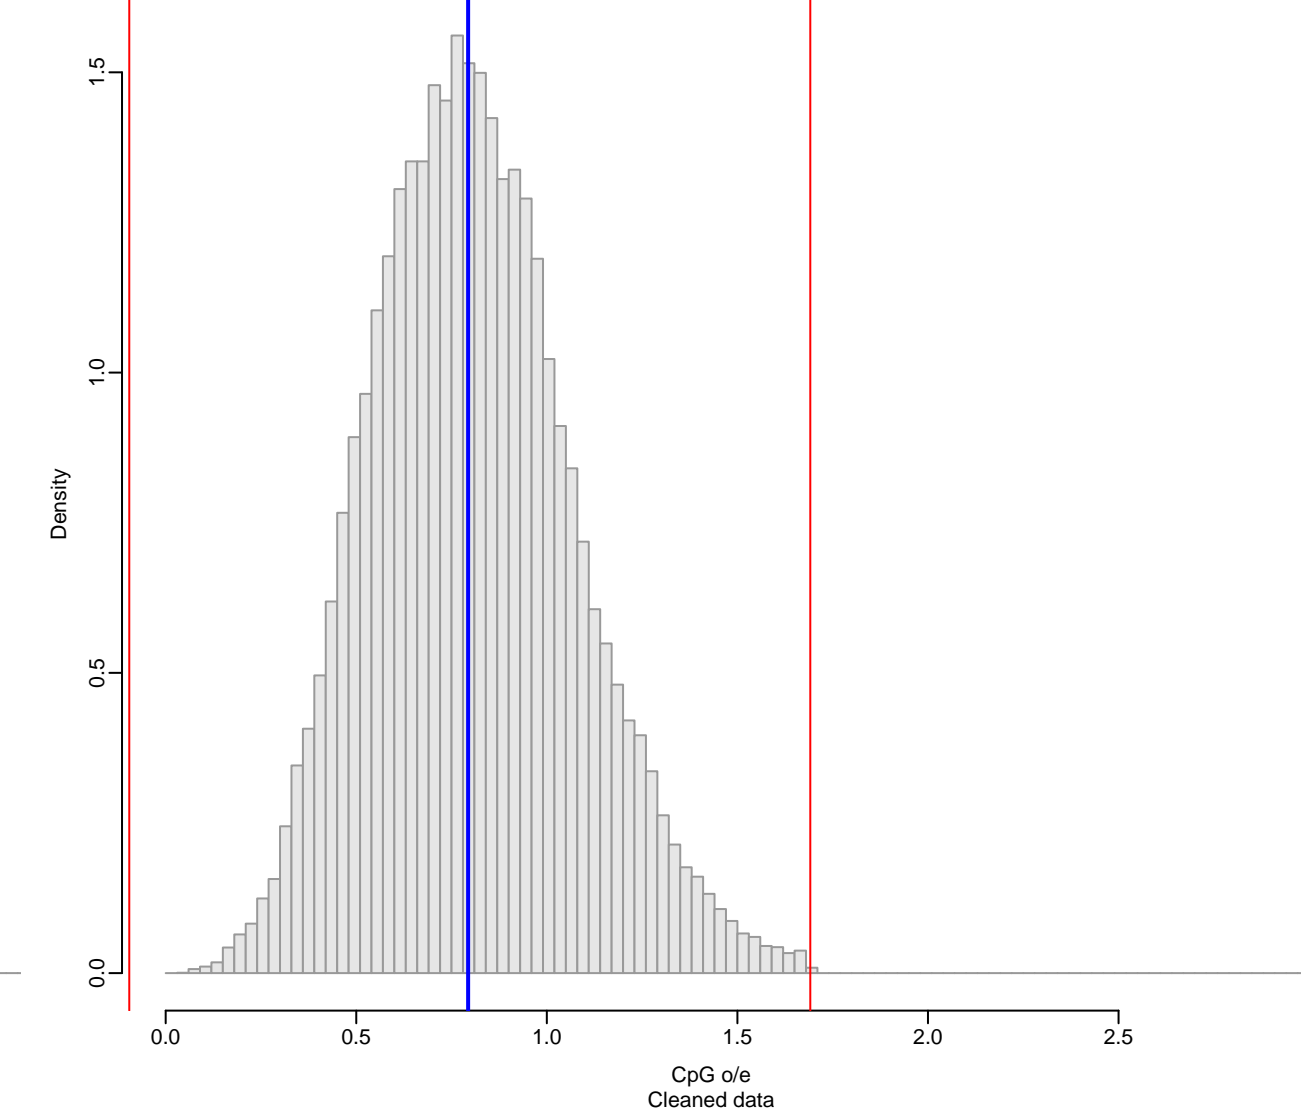

Moniliophthora\_ernica

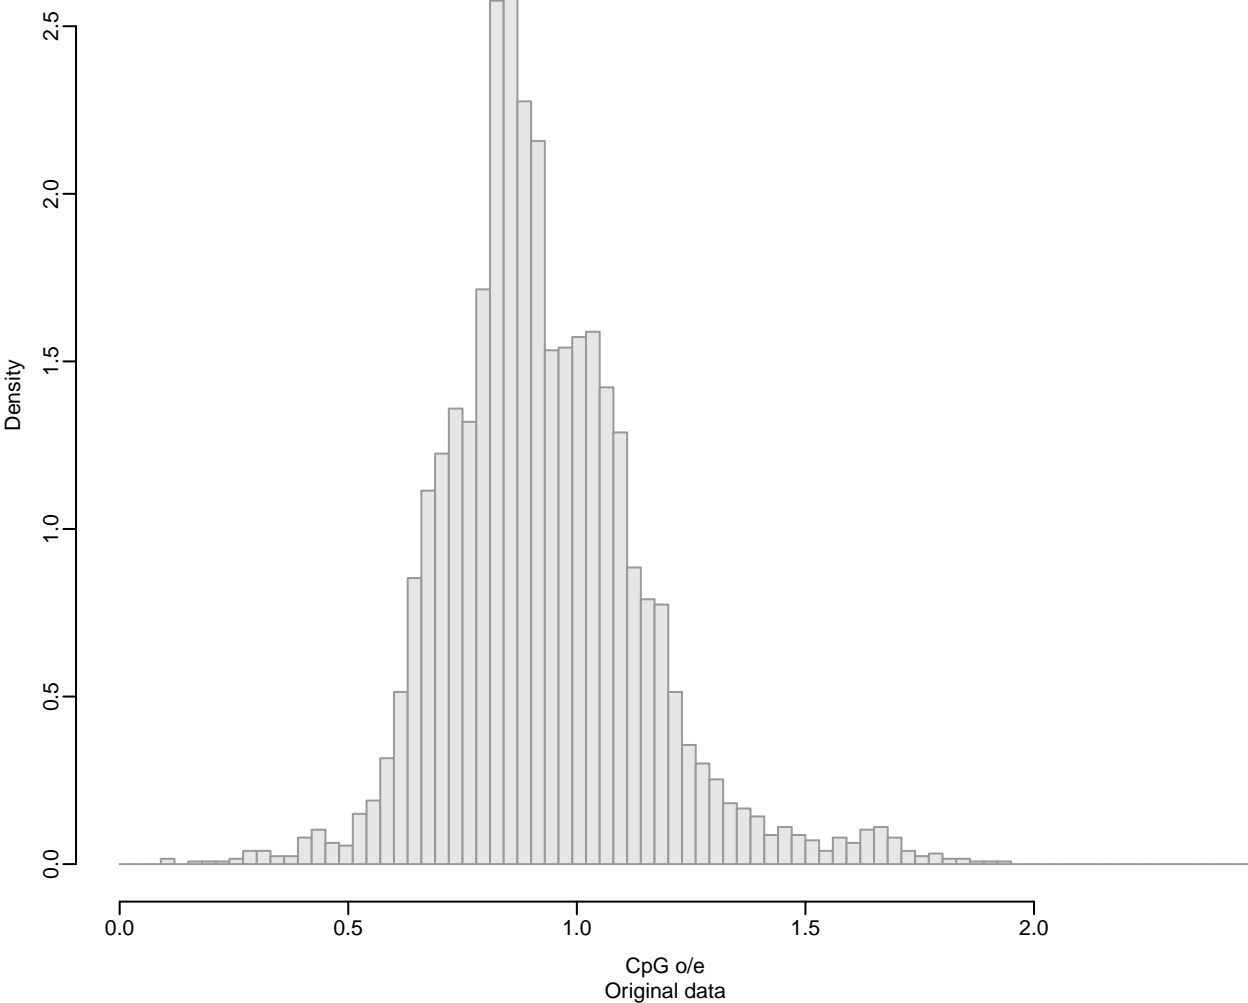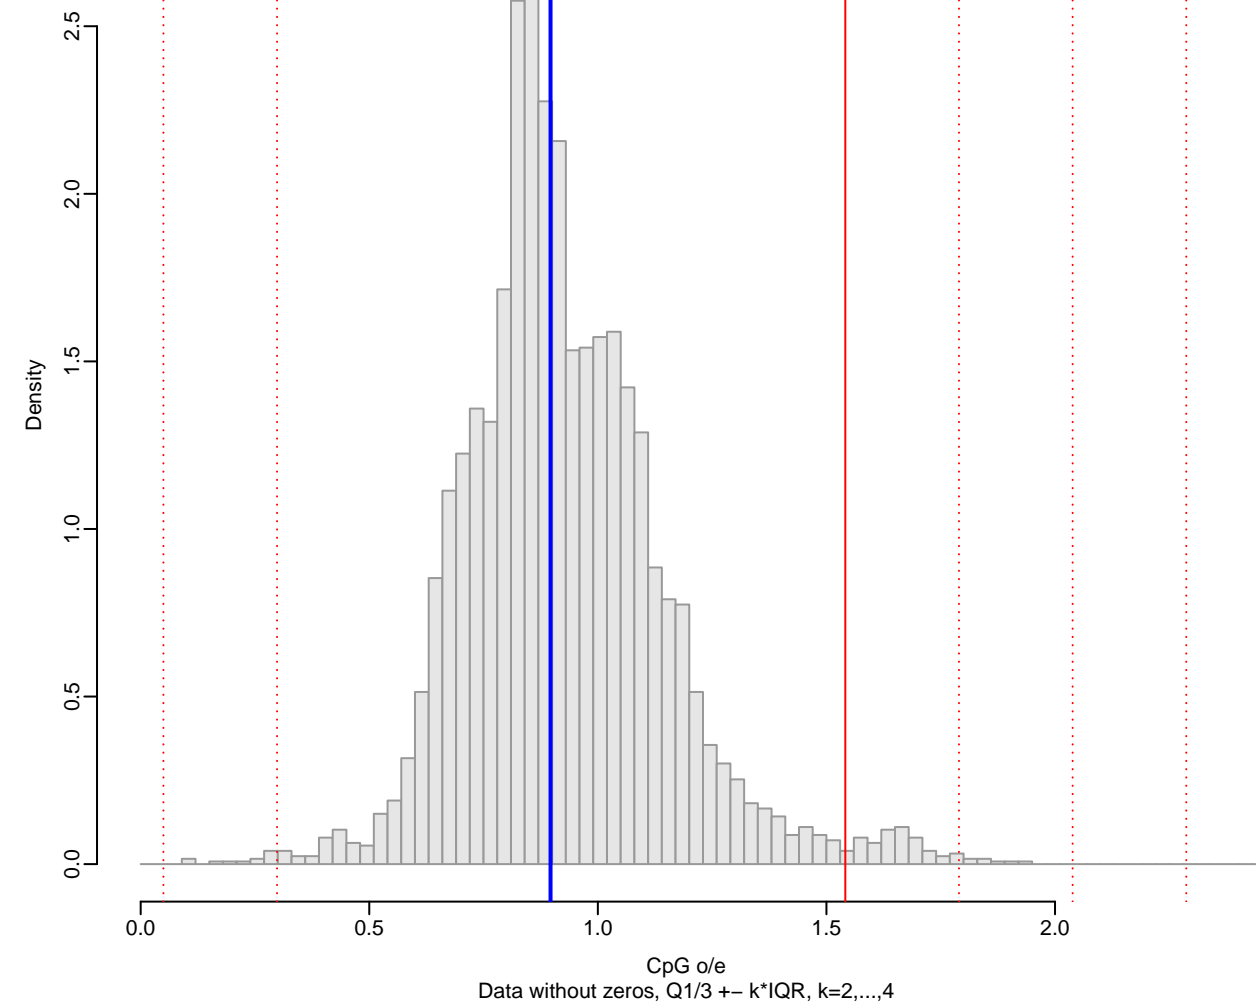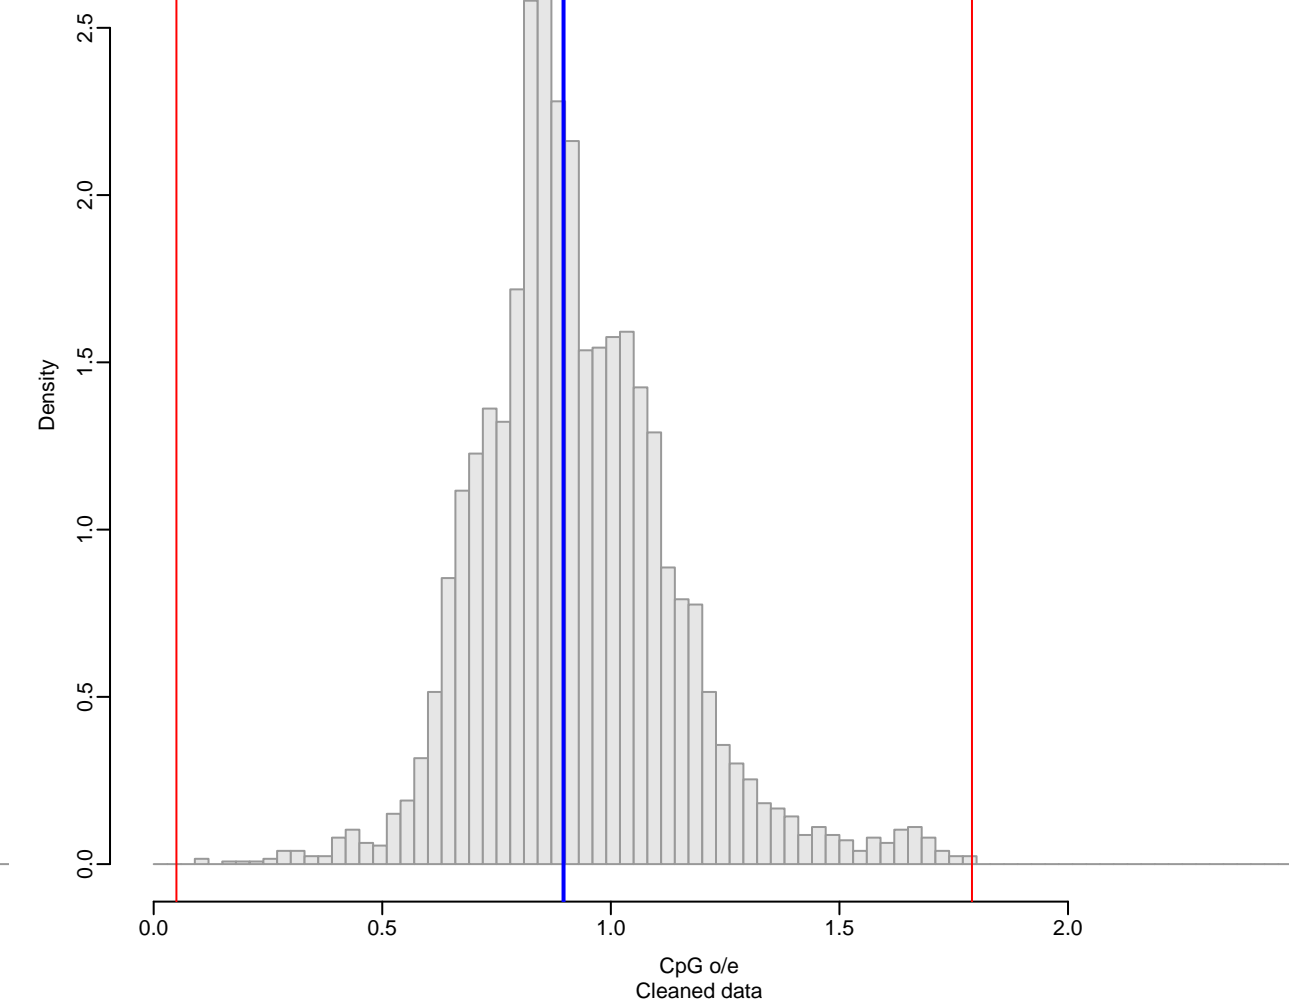

Monosiga\_ovata

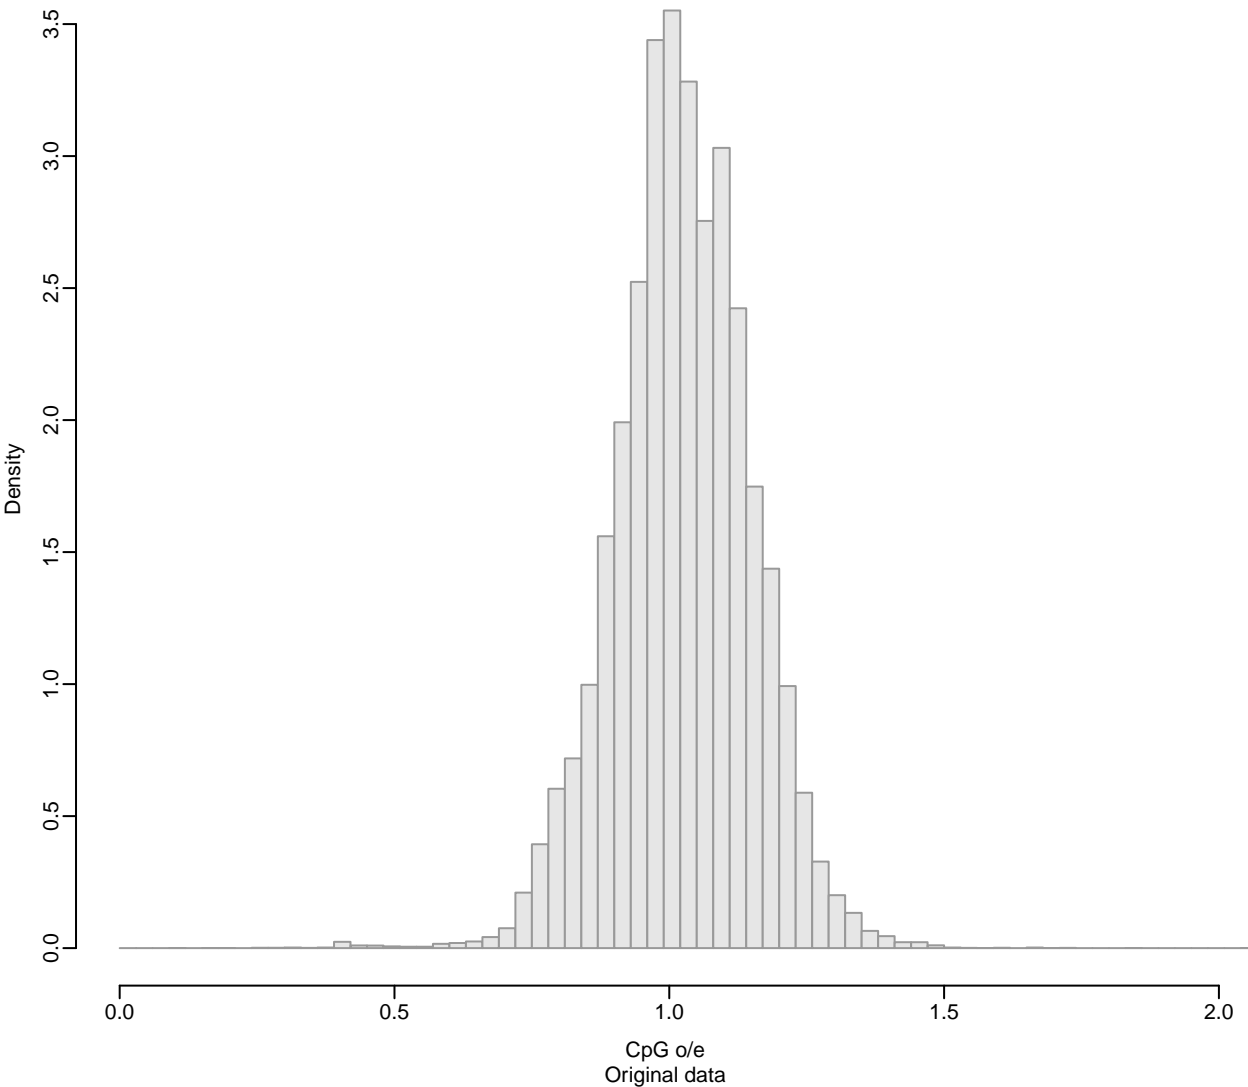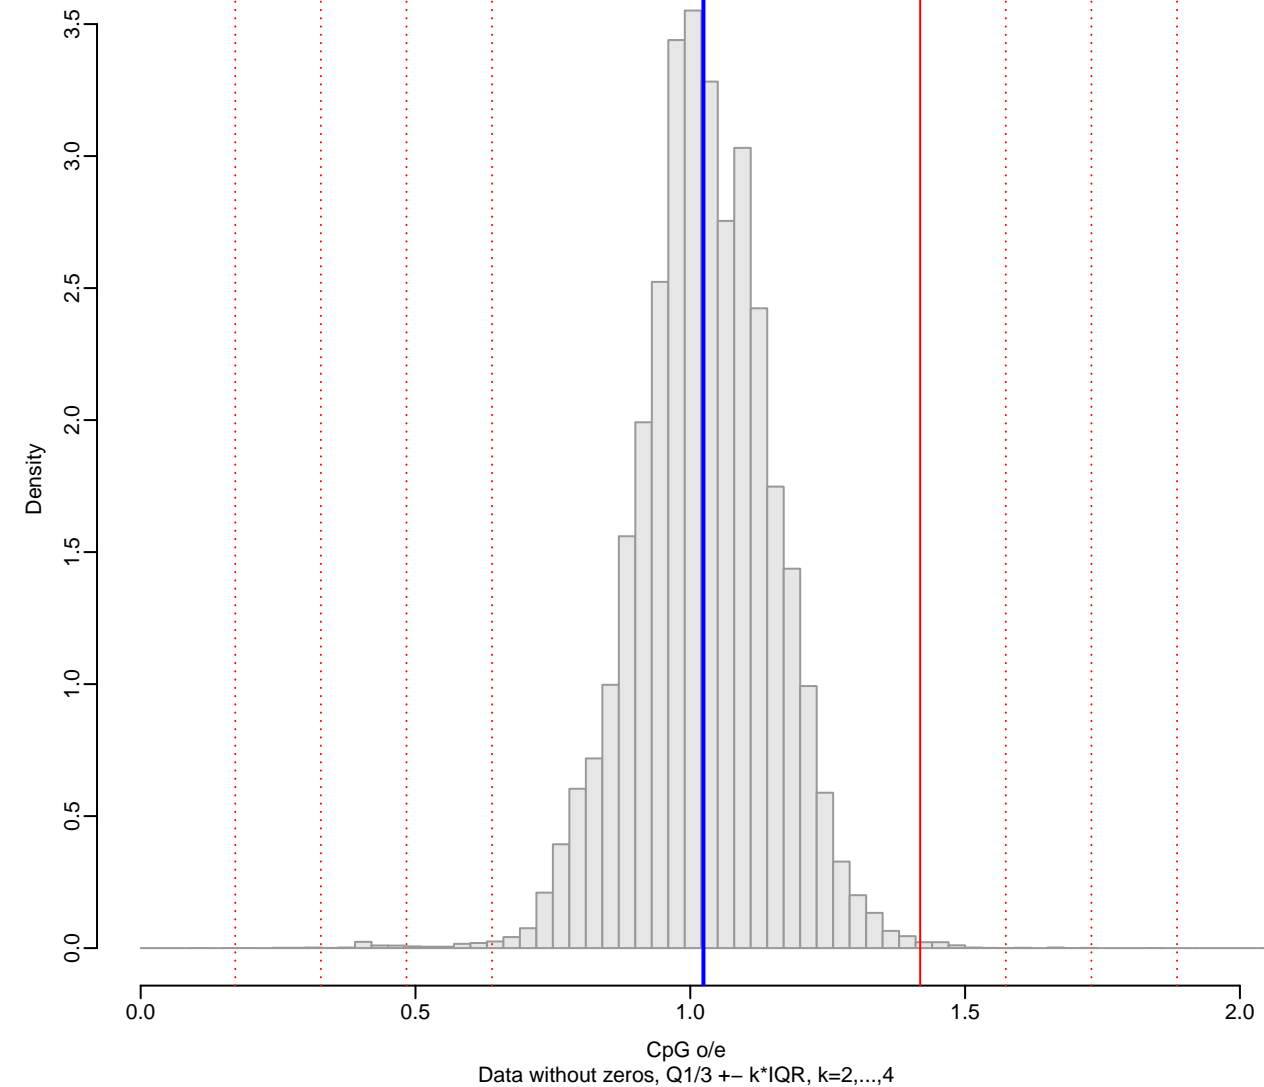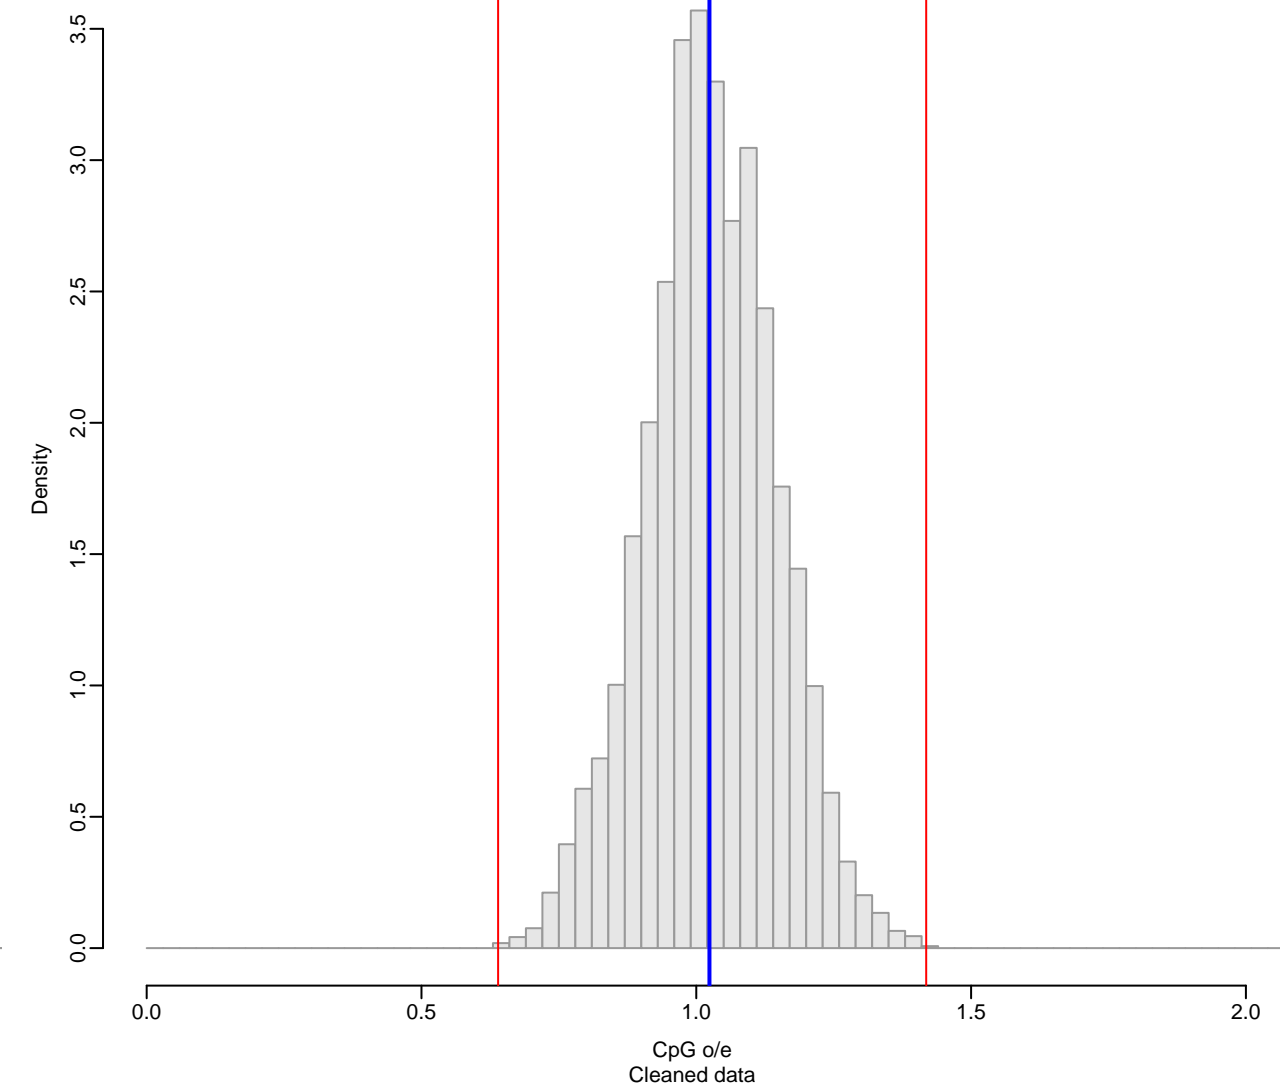



Morus\_indica

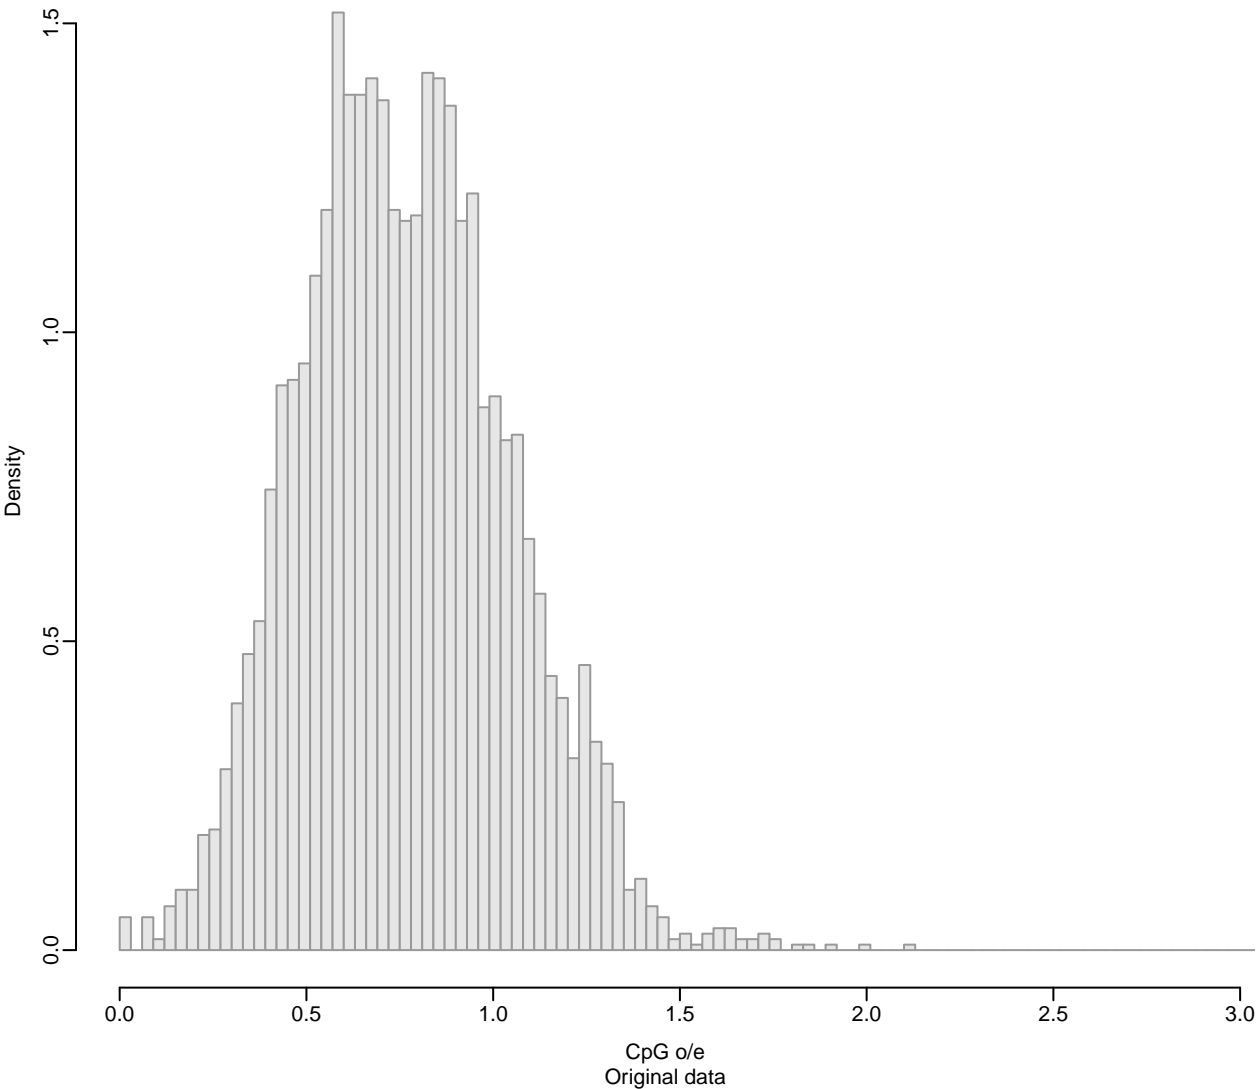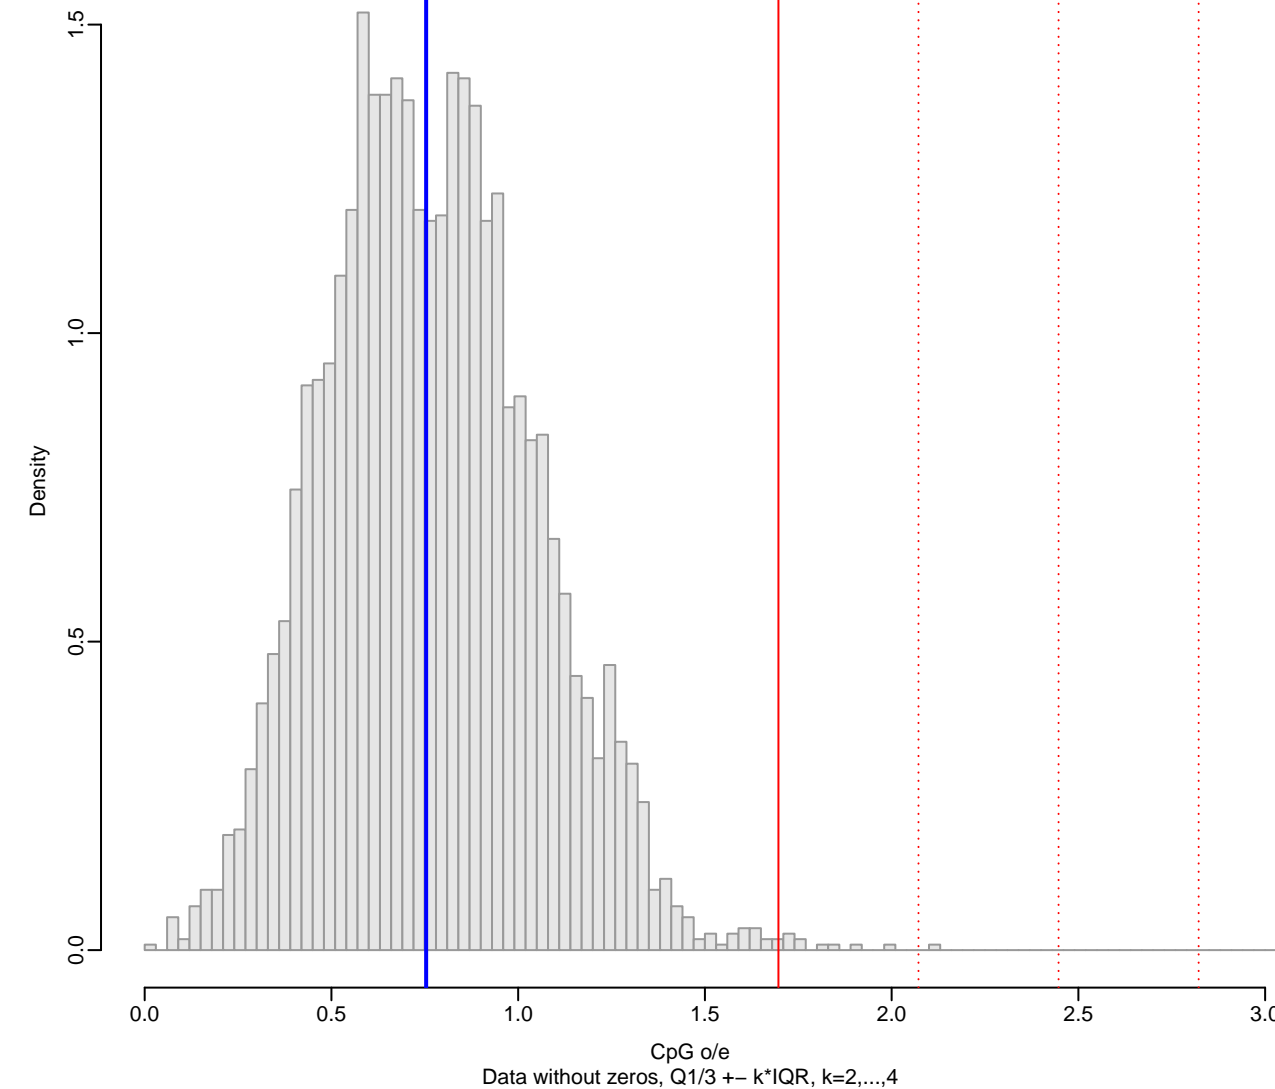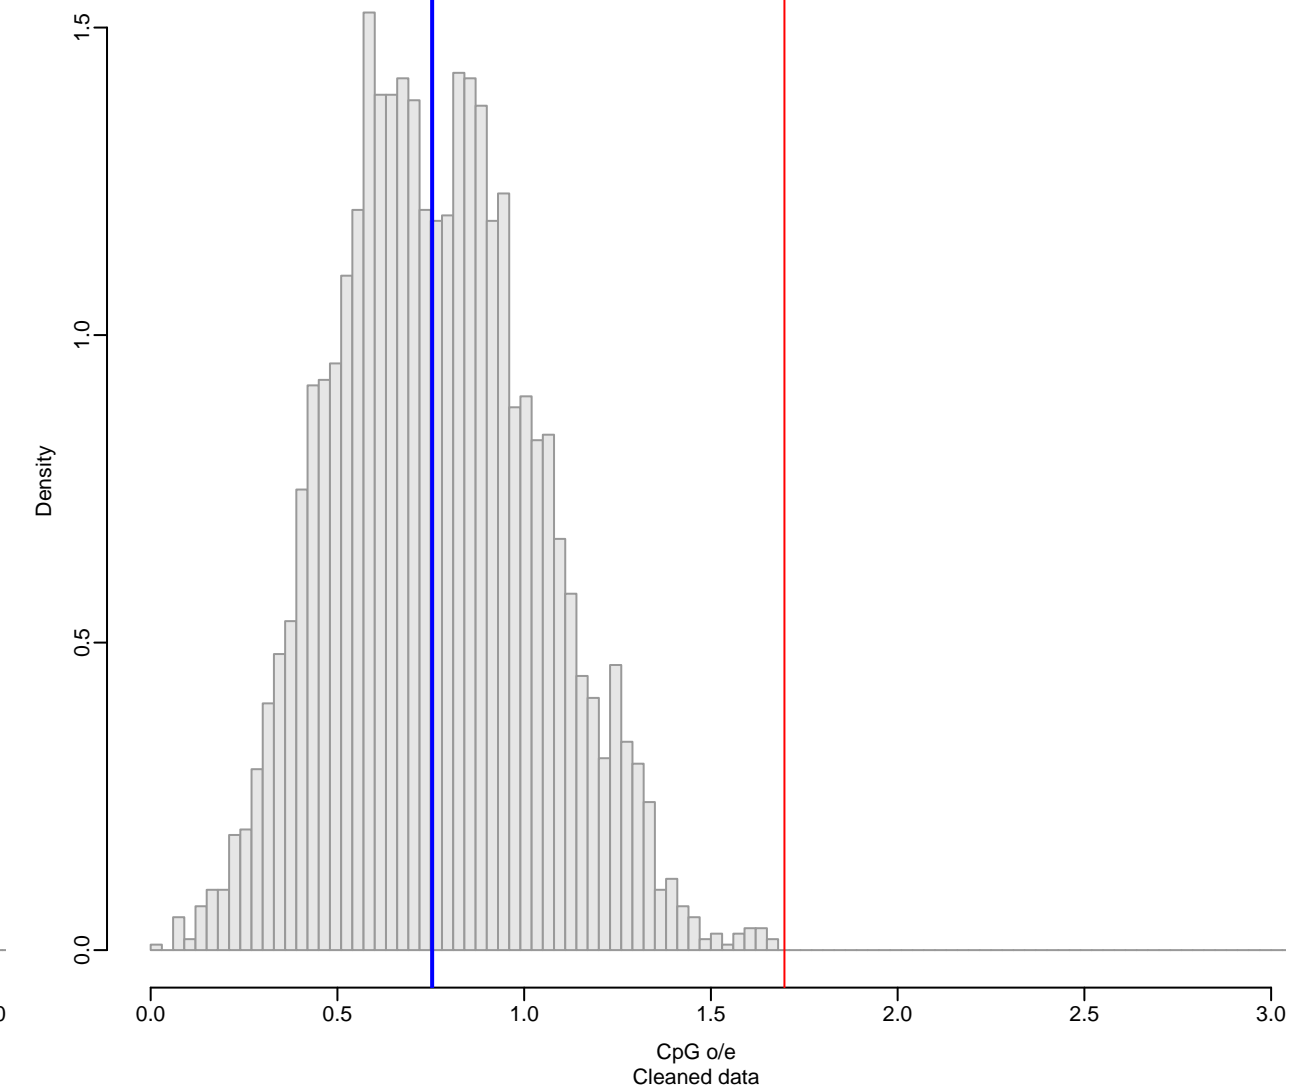

*Mycosphaerella\_fijiensis*

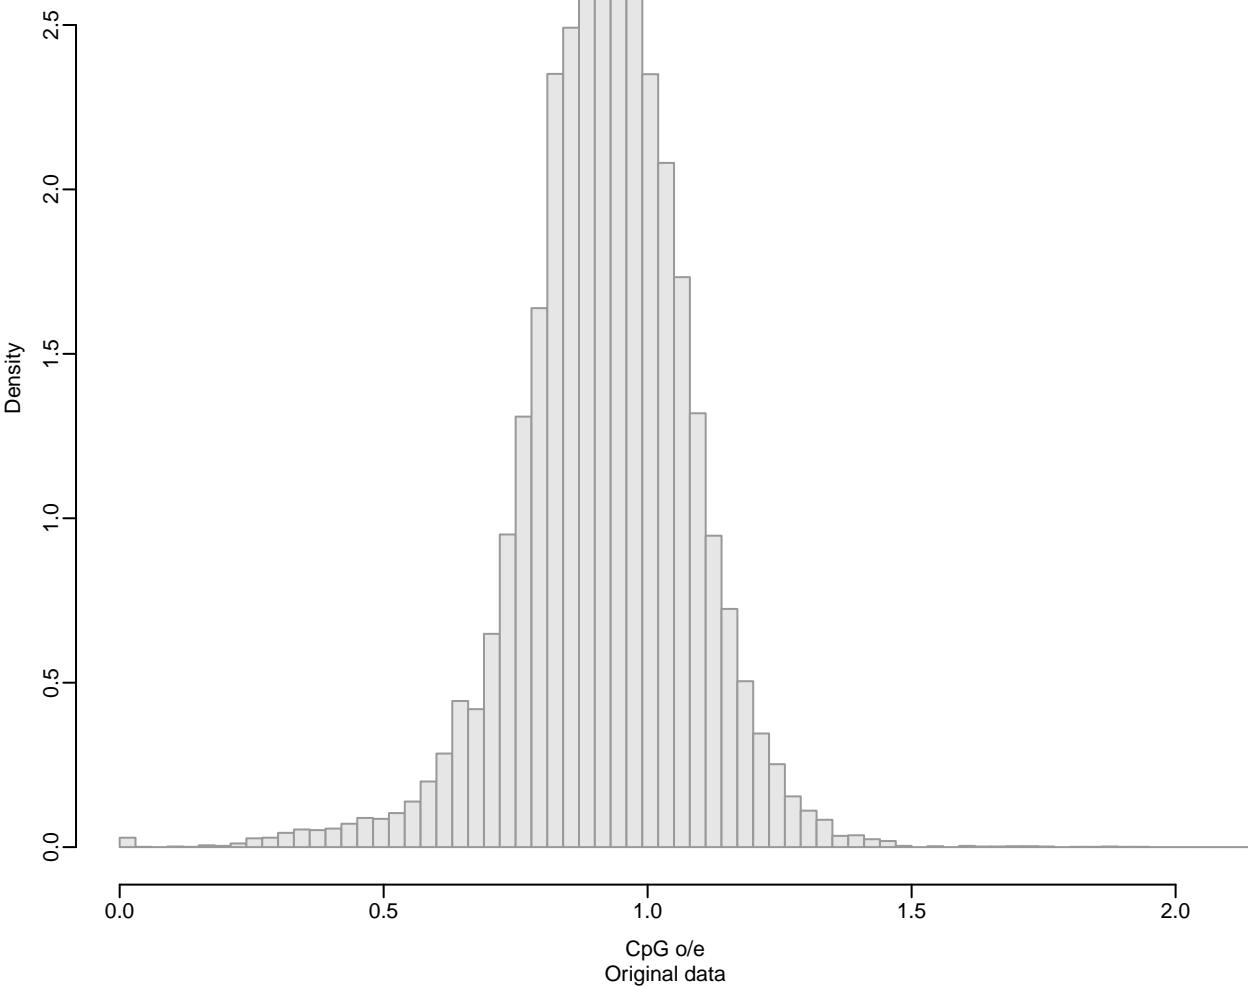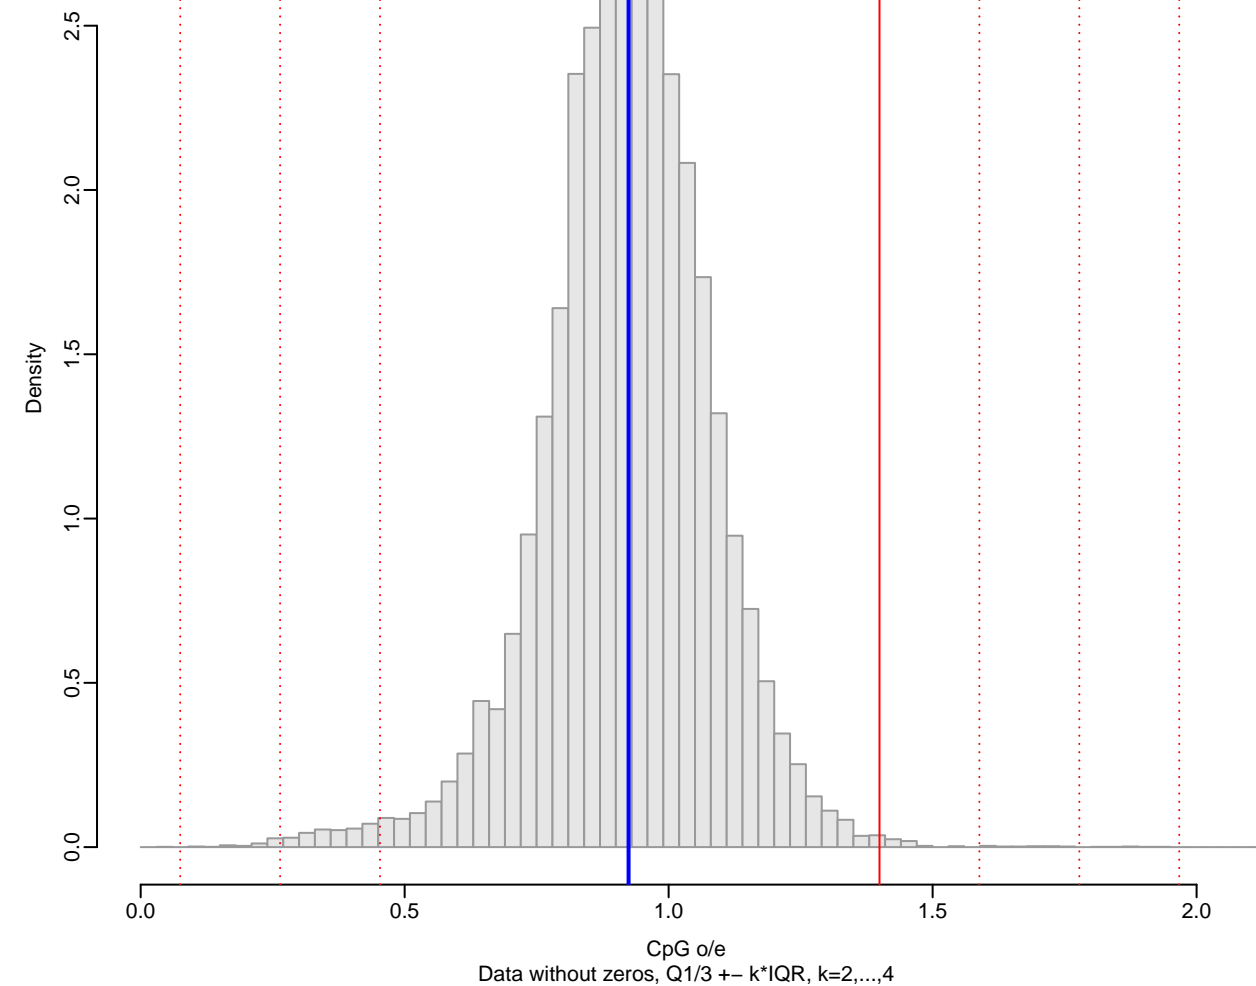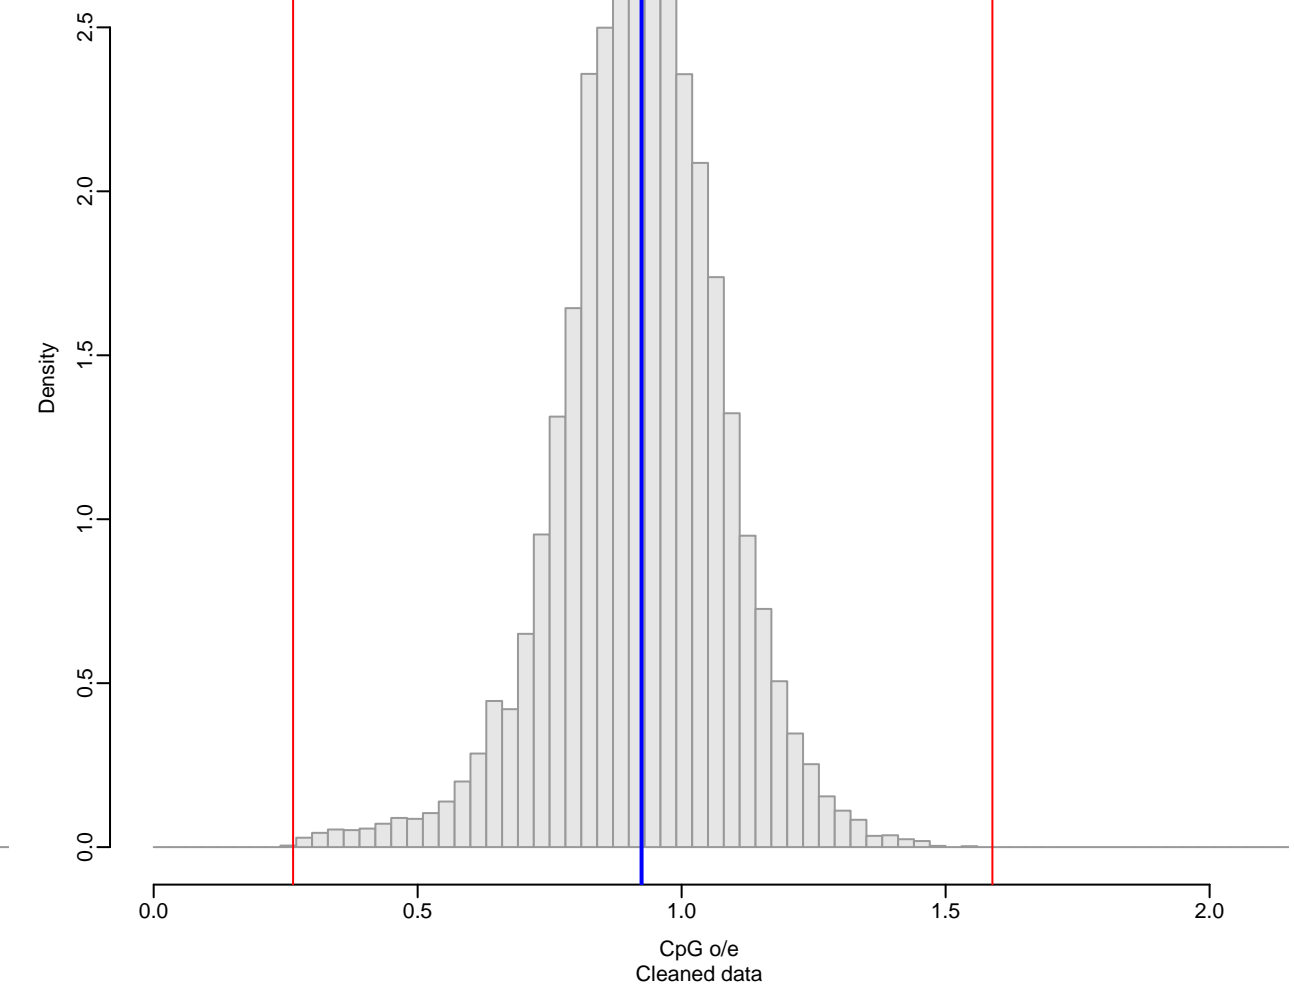

Mytilus\_californianus

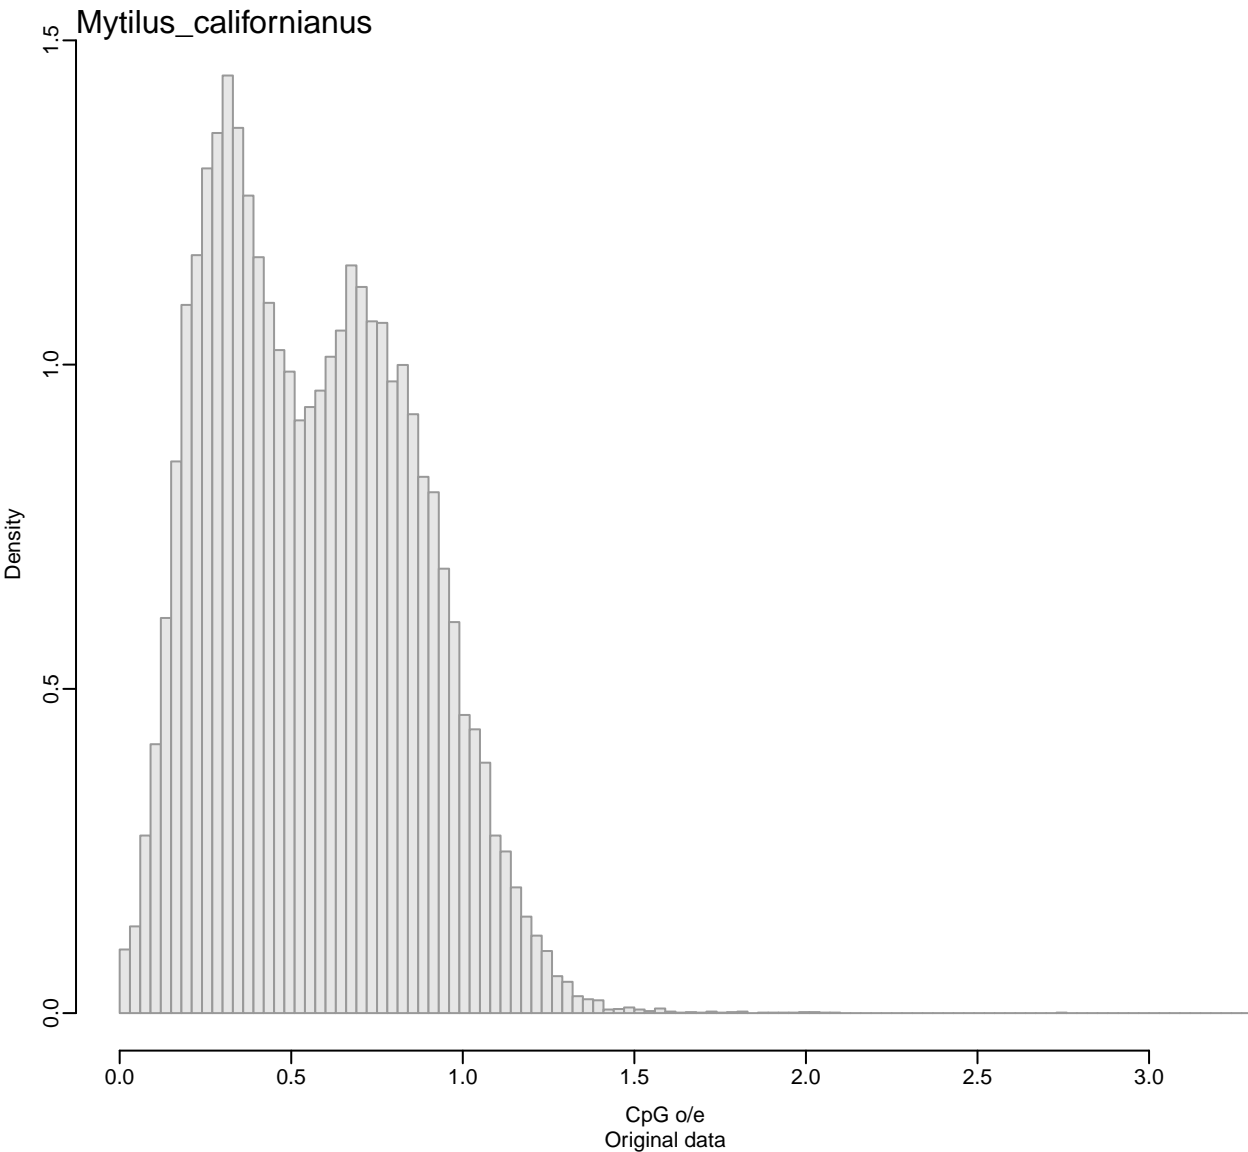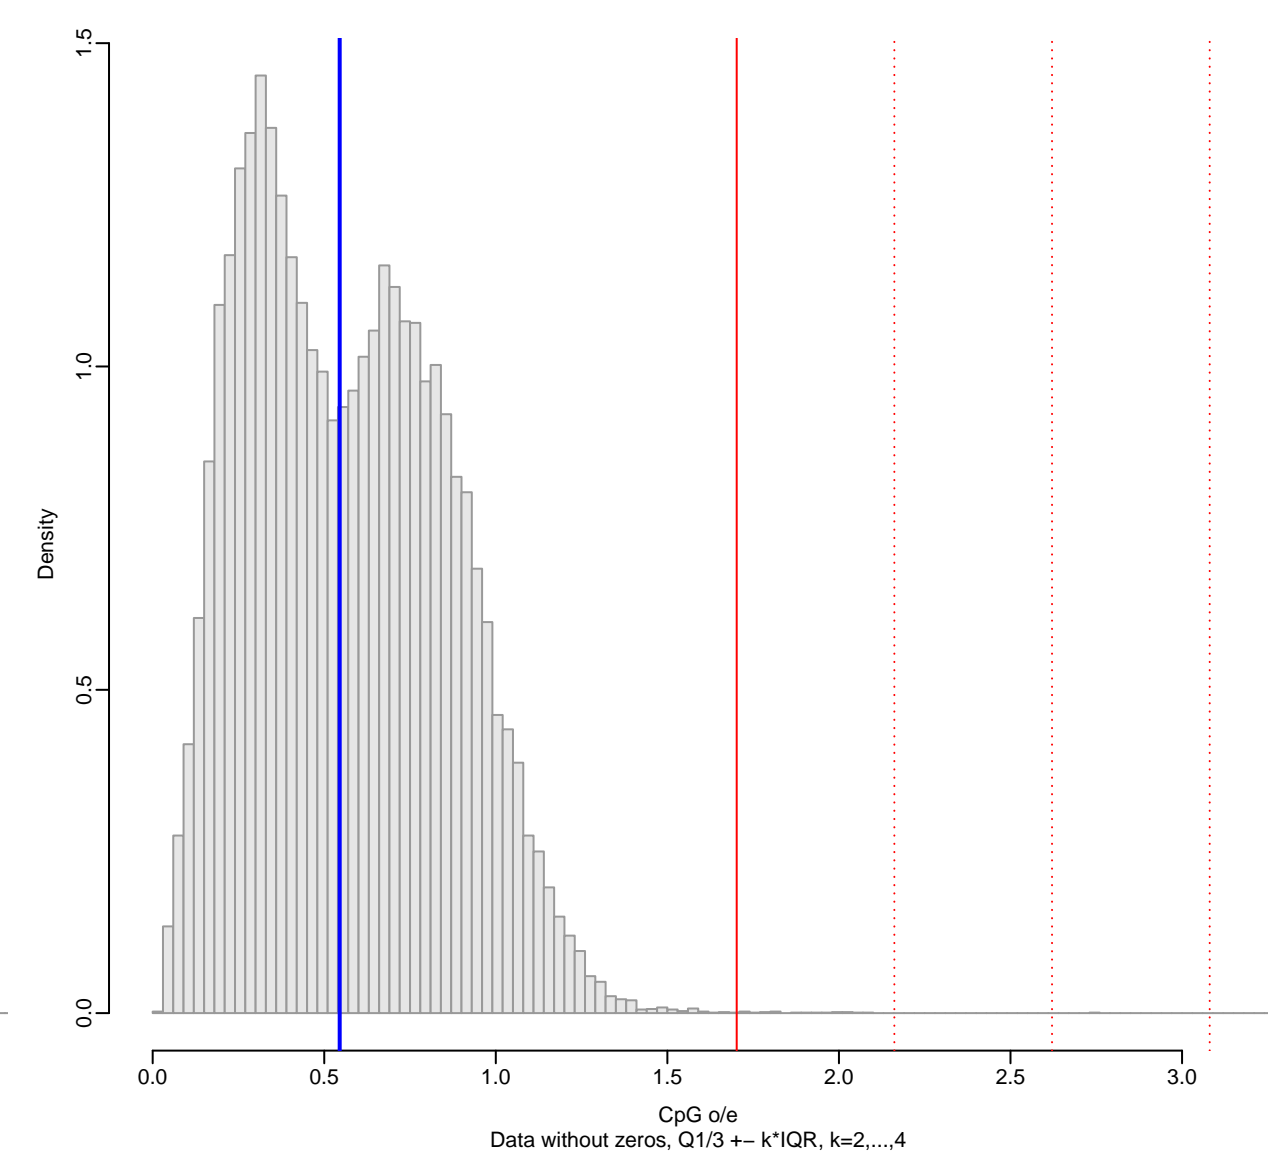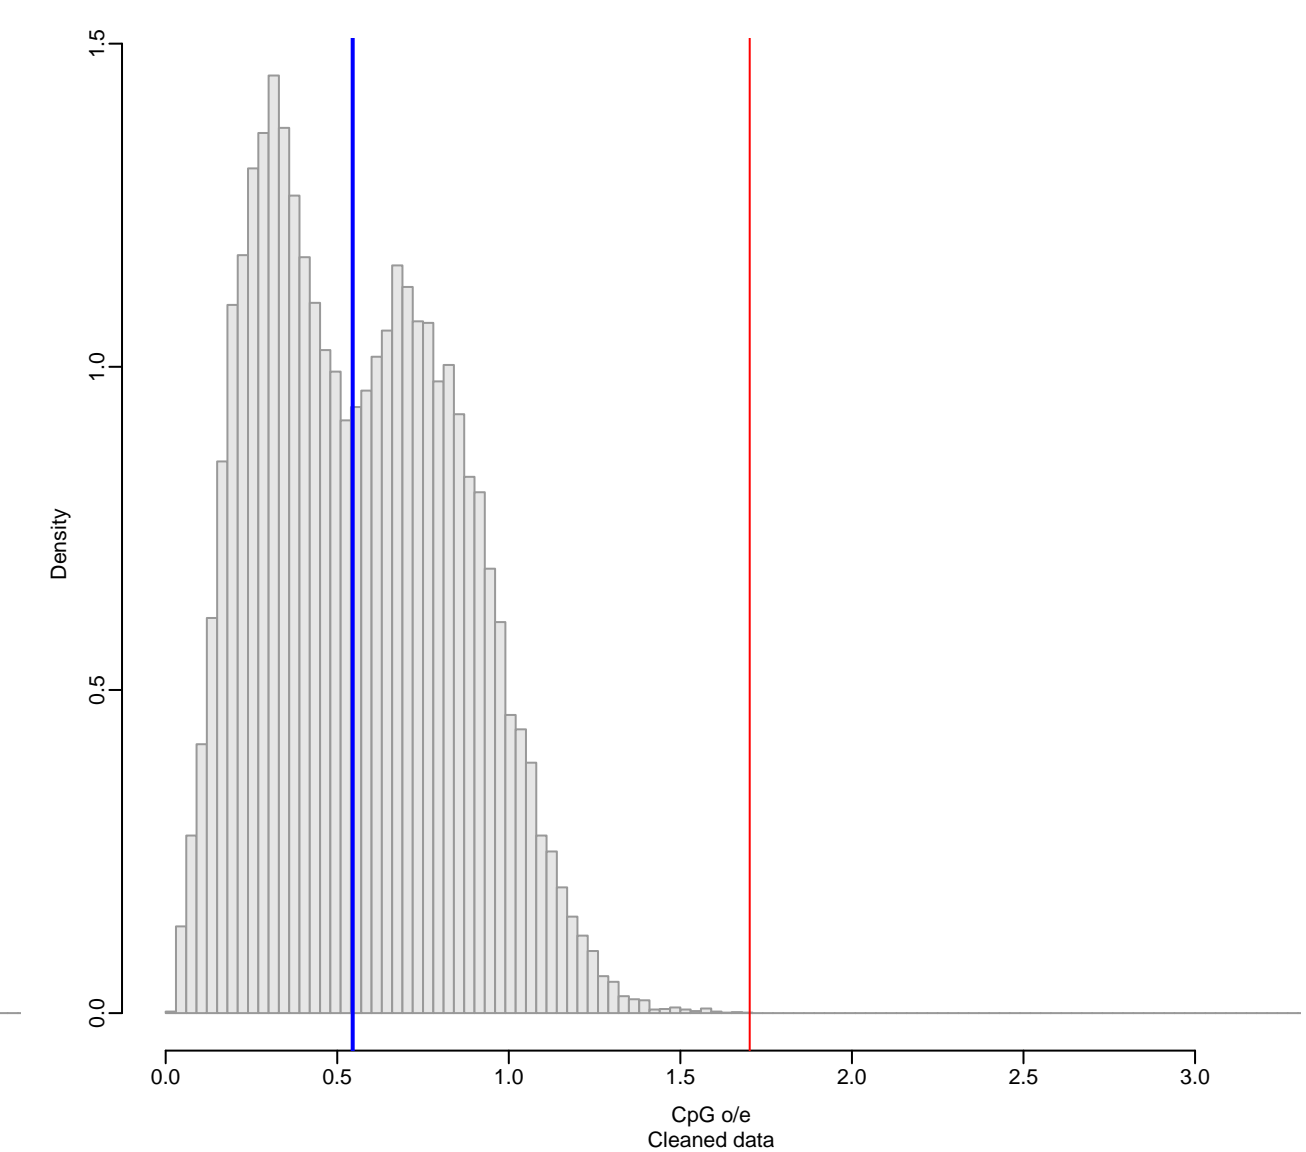

Mytilus\_edulis

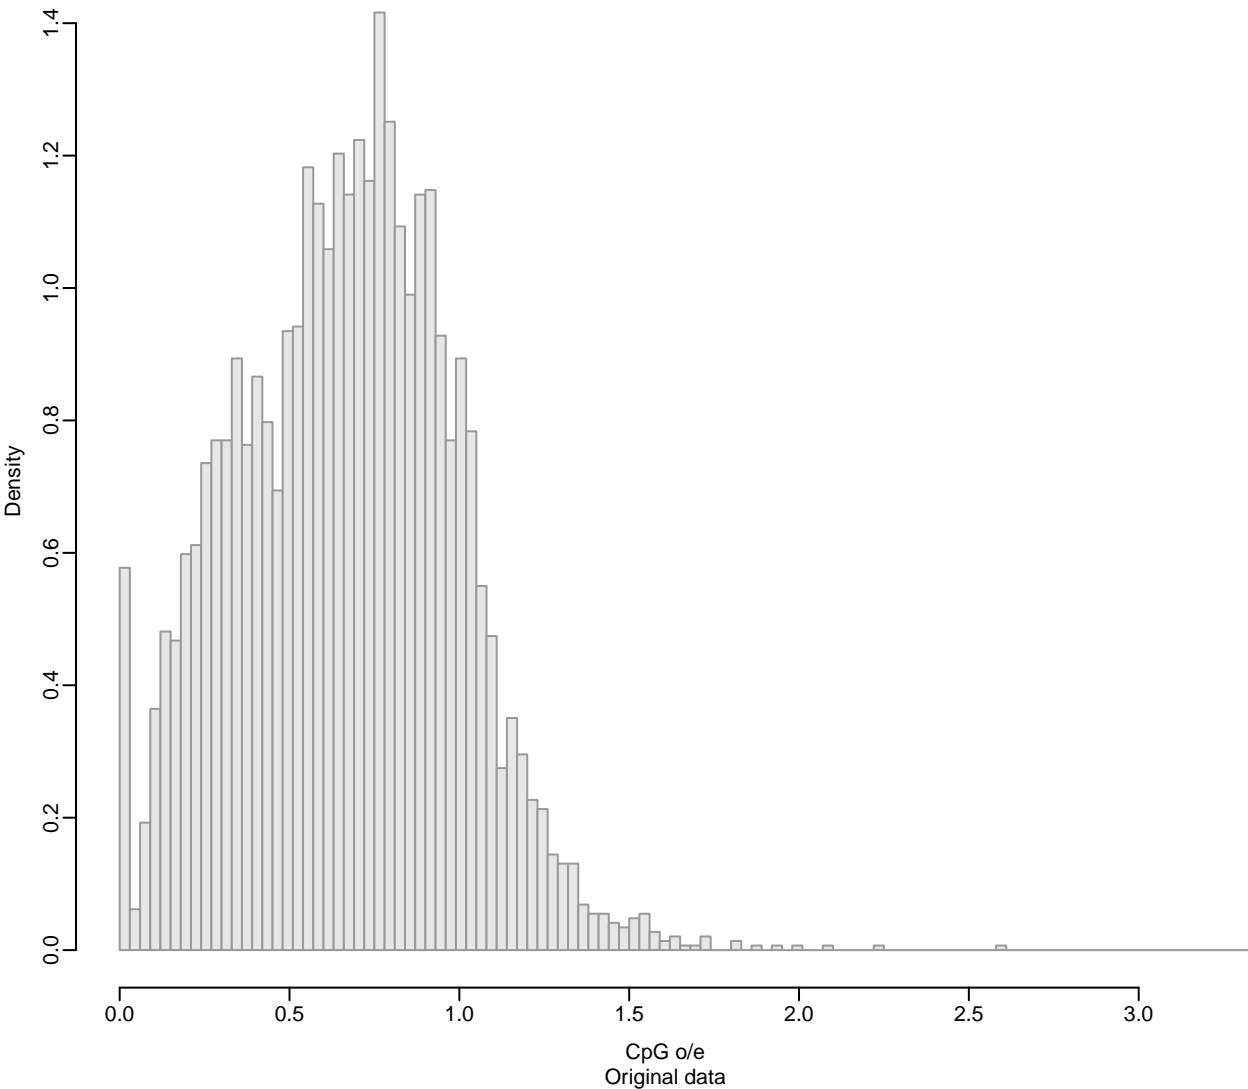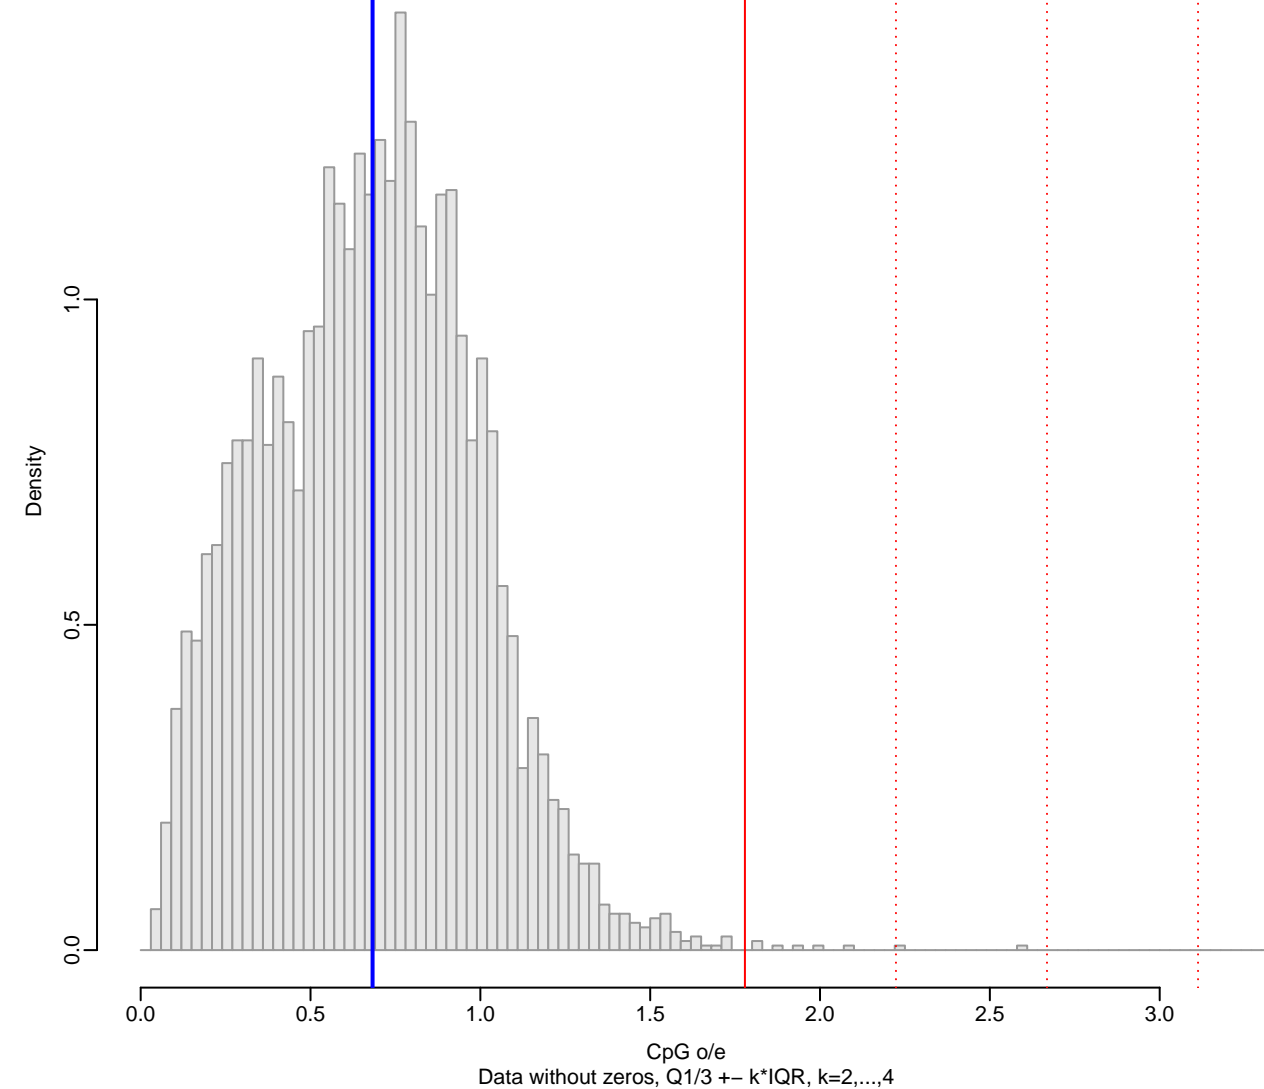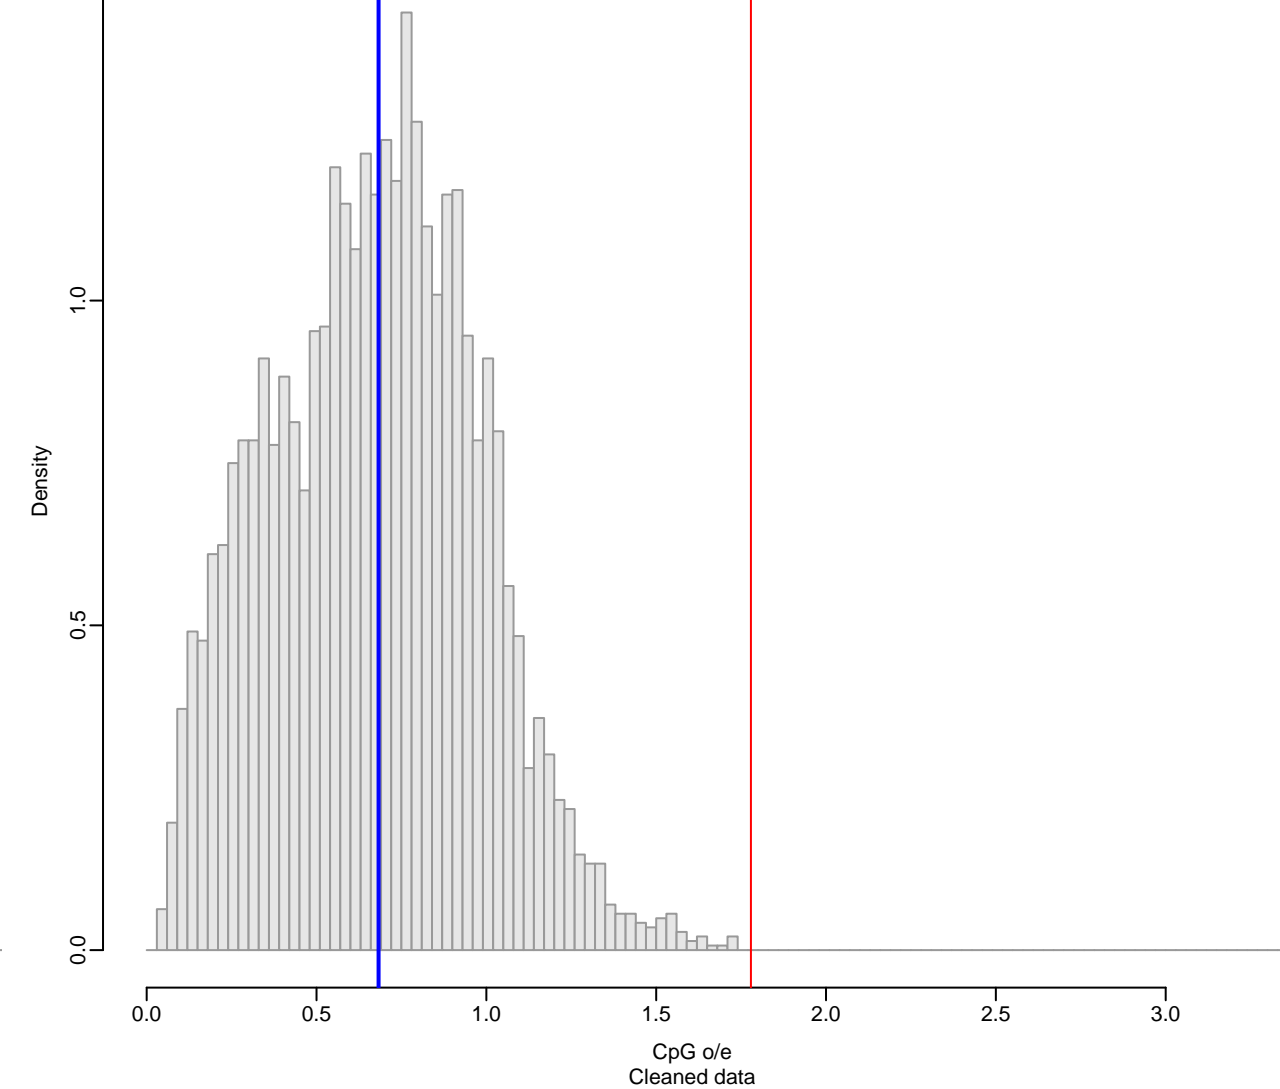

Mytilus\_galloprovincialis

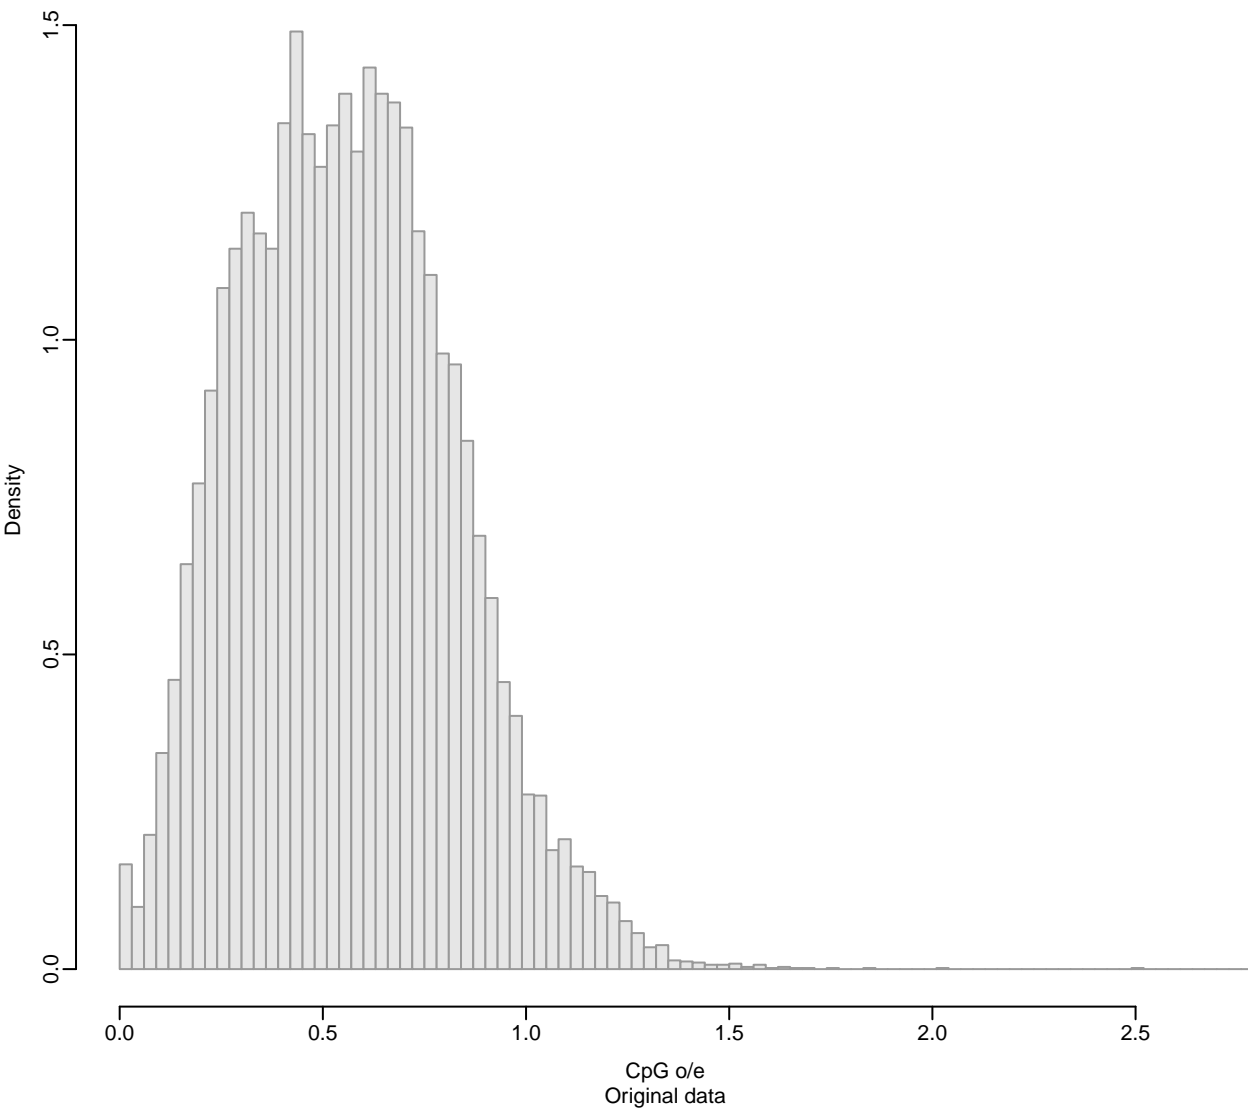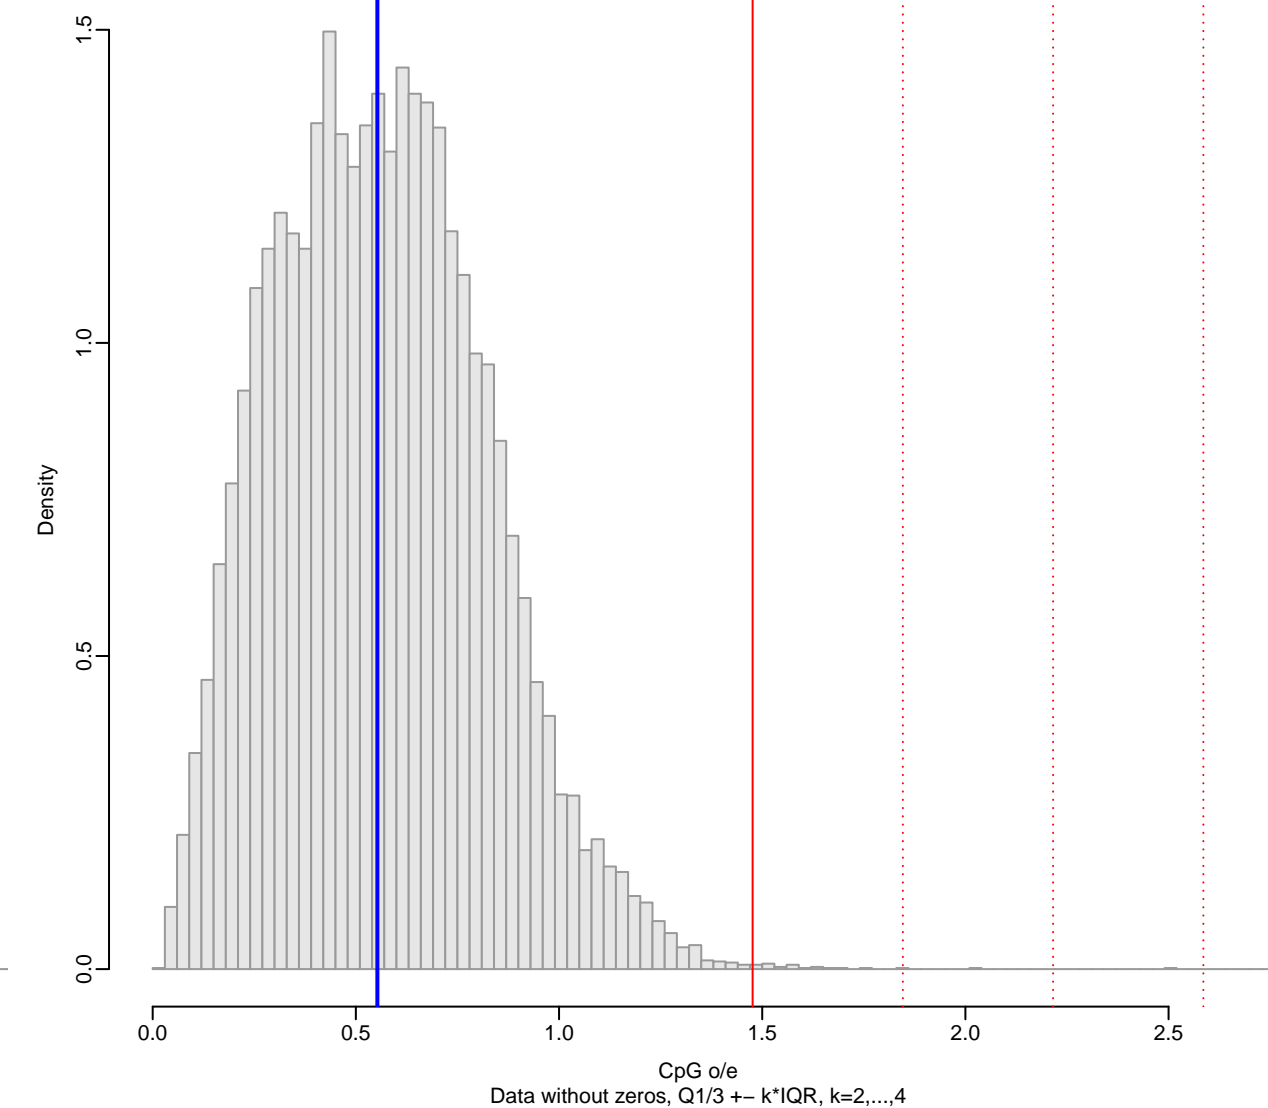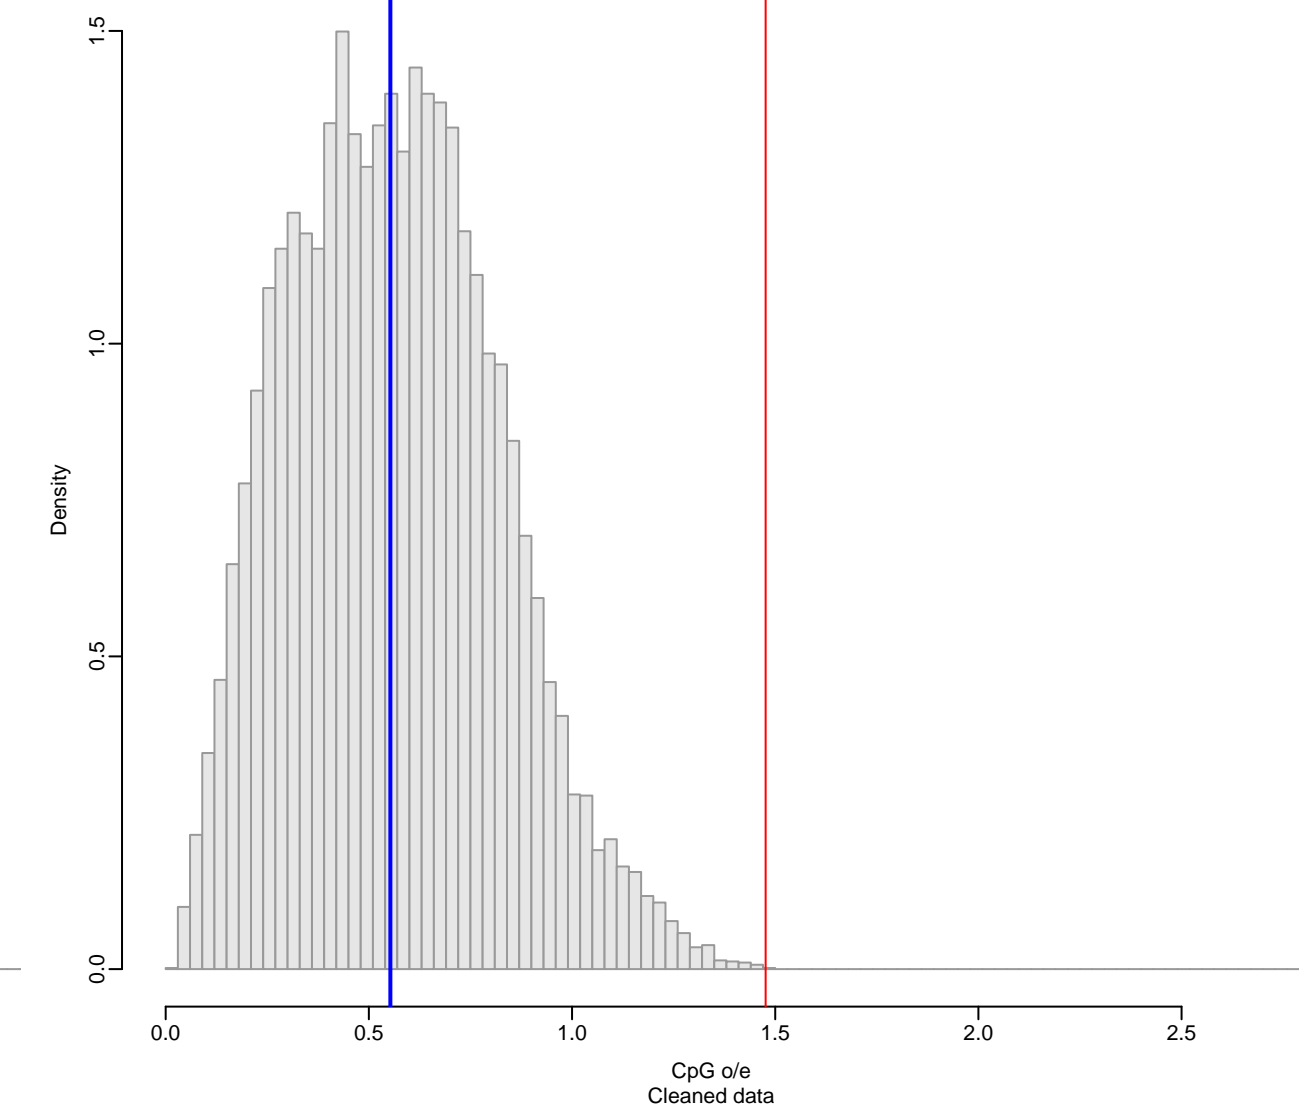

Myzostoma\_cirriferum

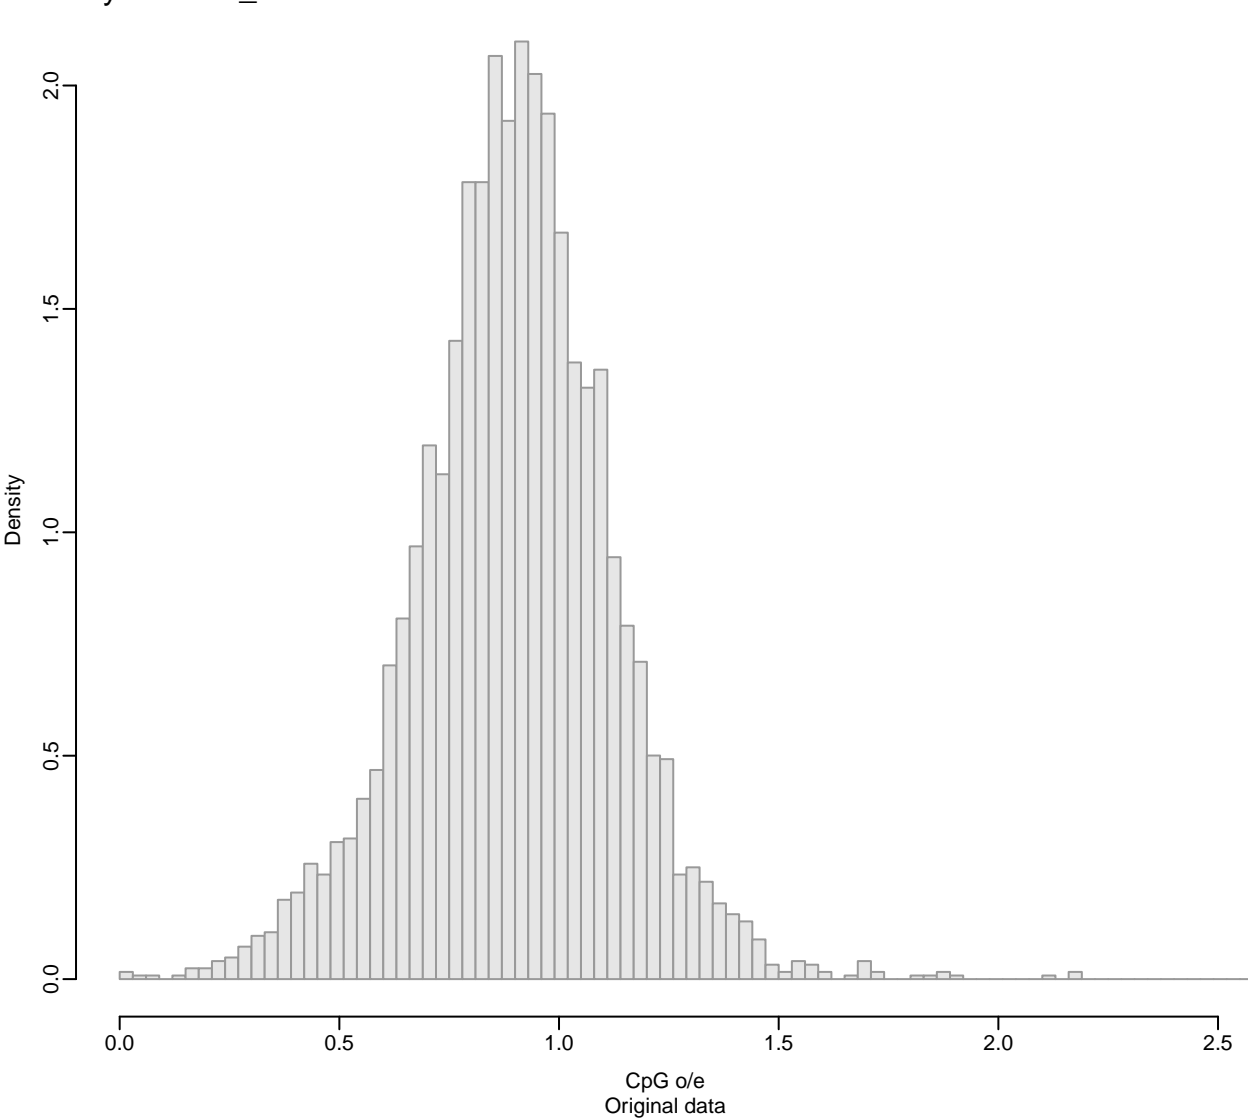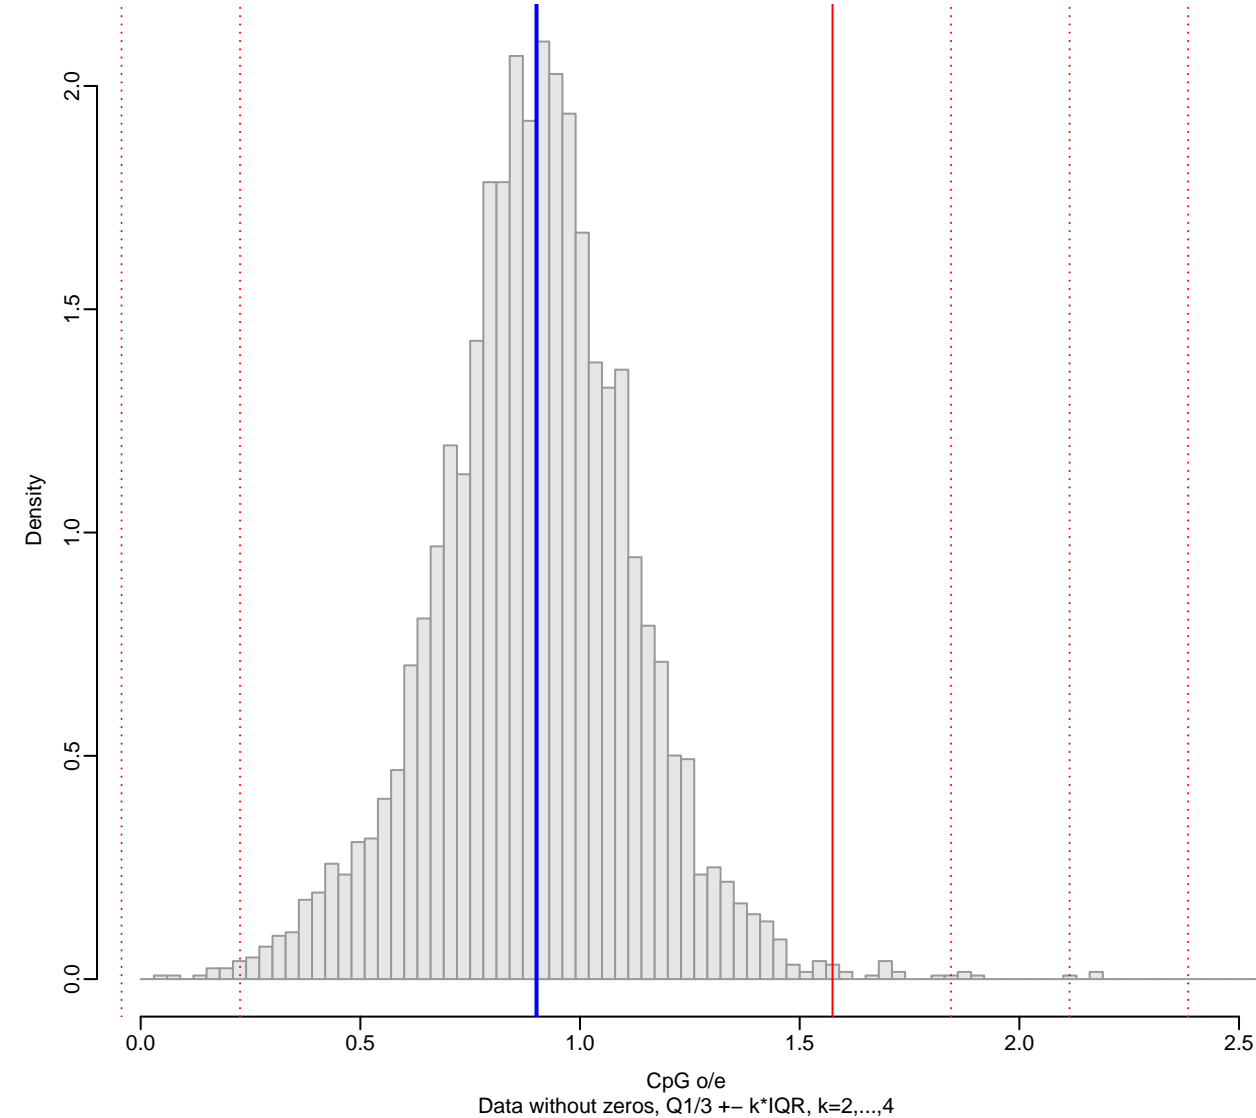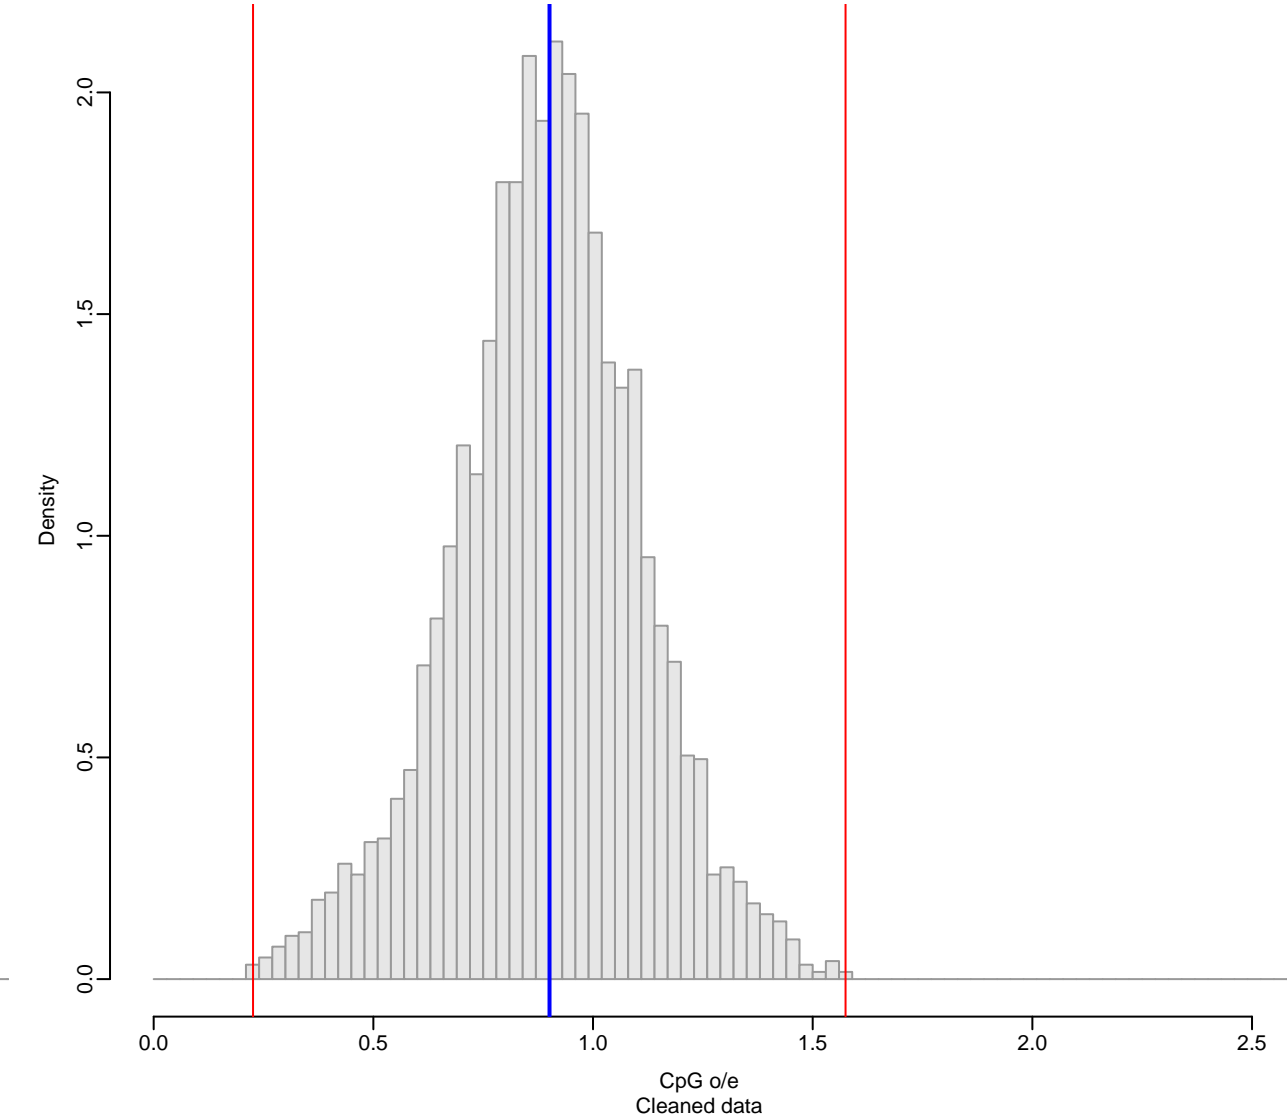

Myzus\_ascalonicus

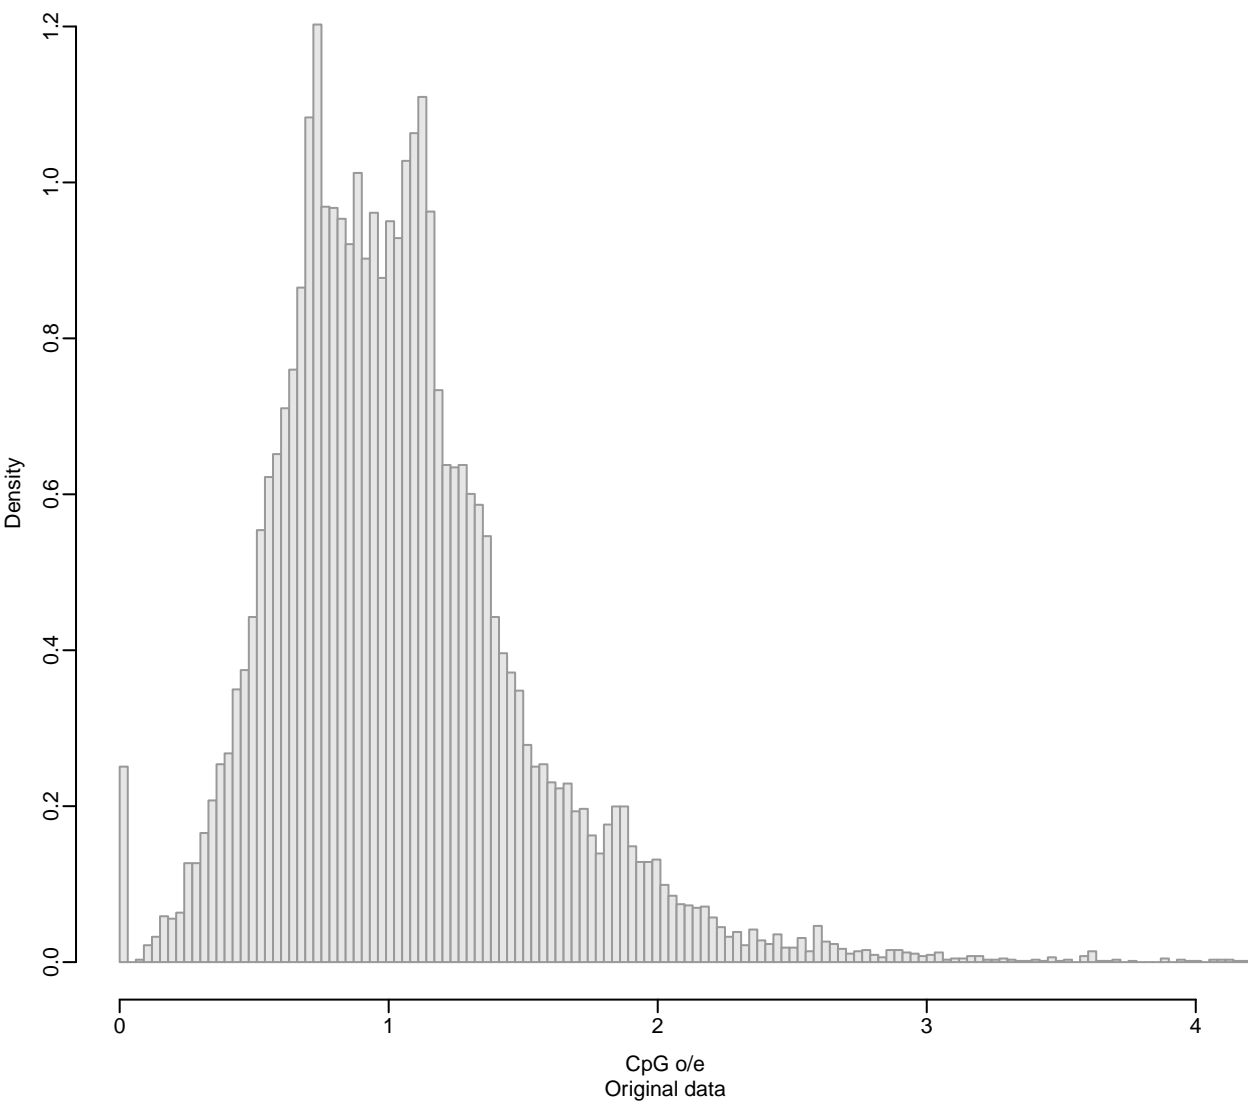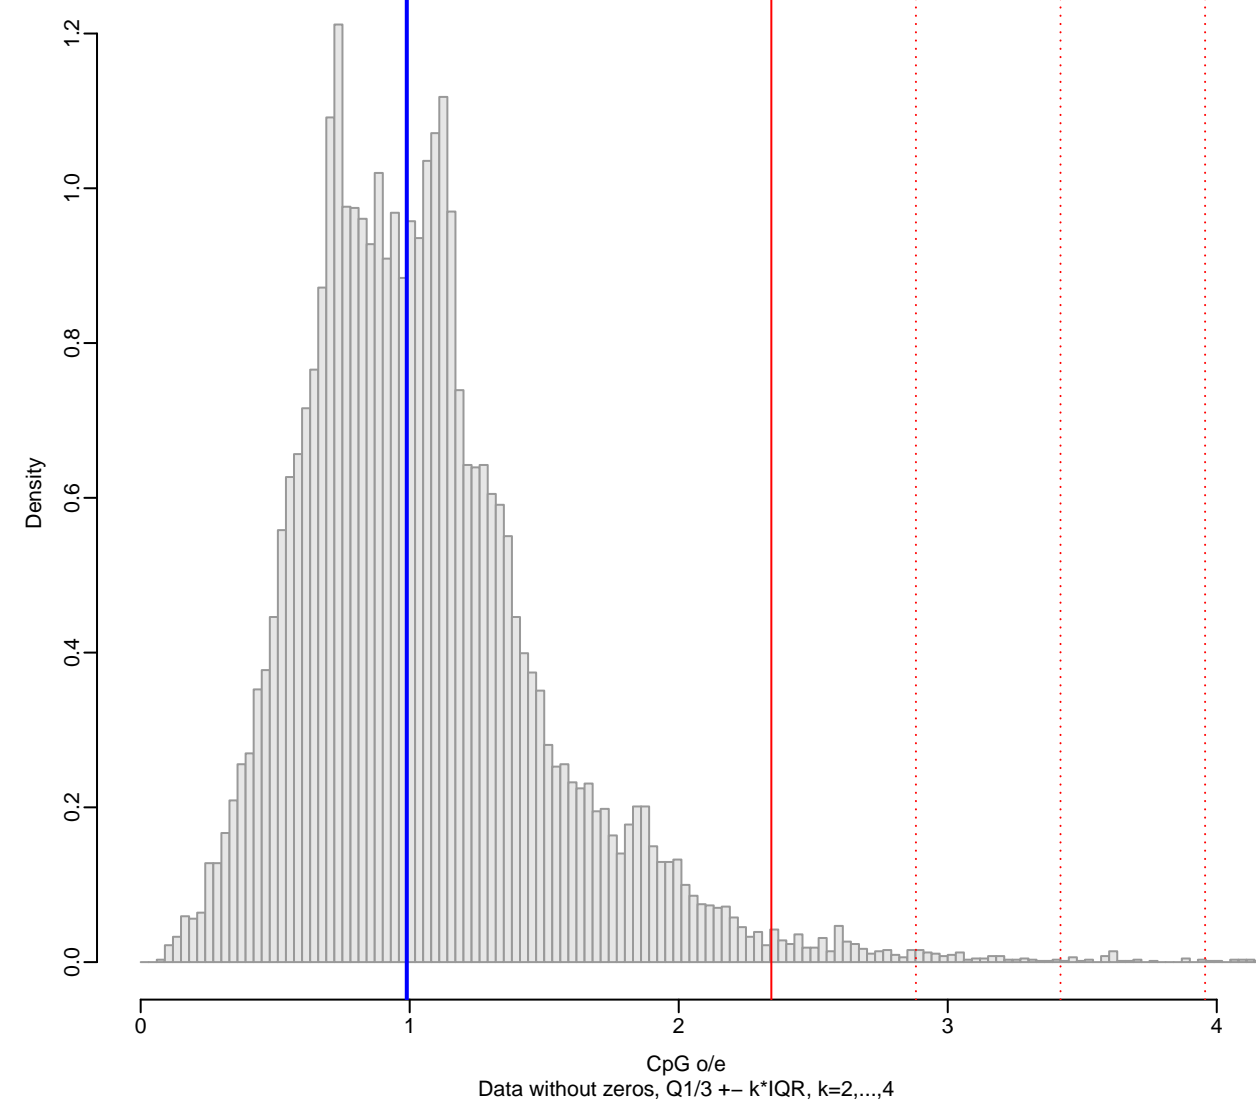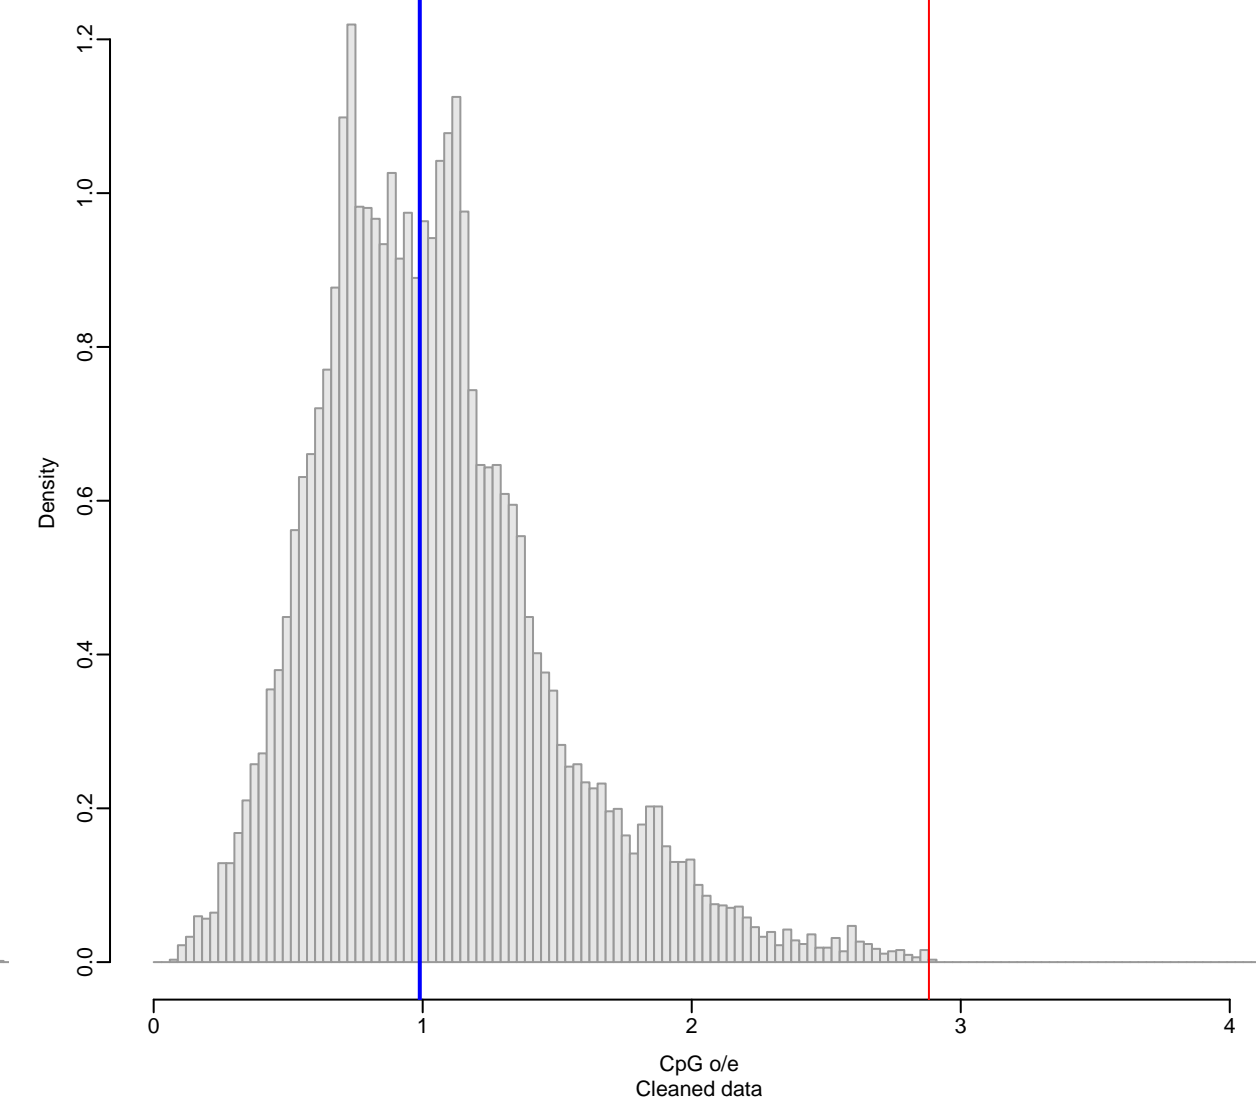

Myzus\_persicae

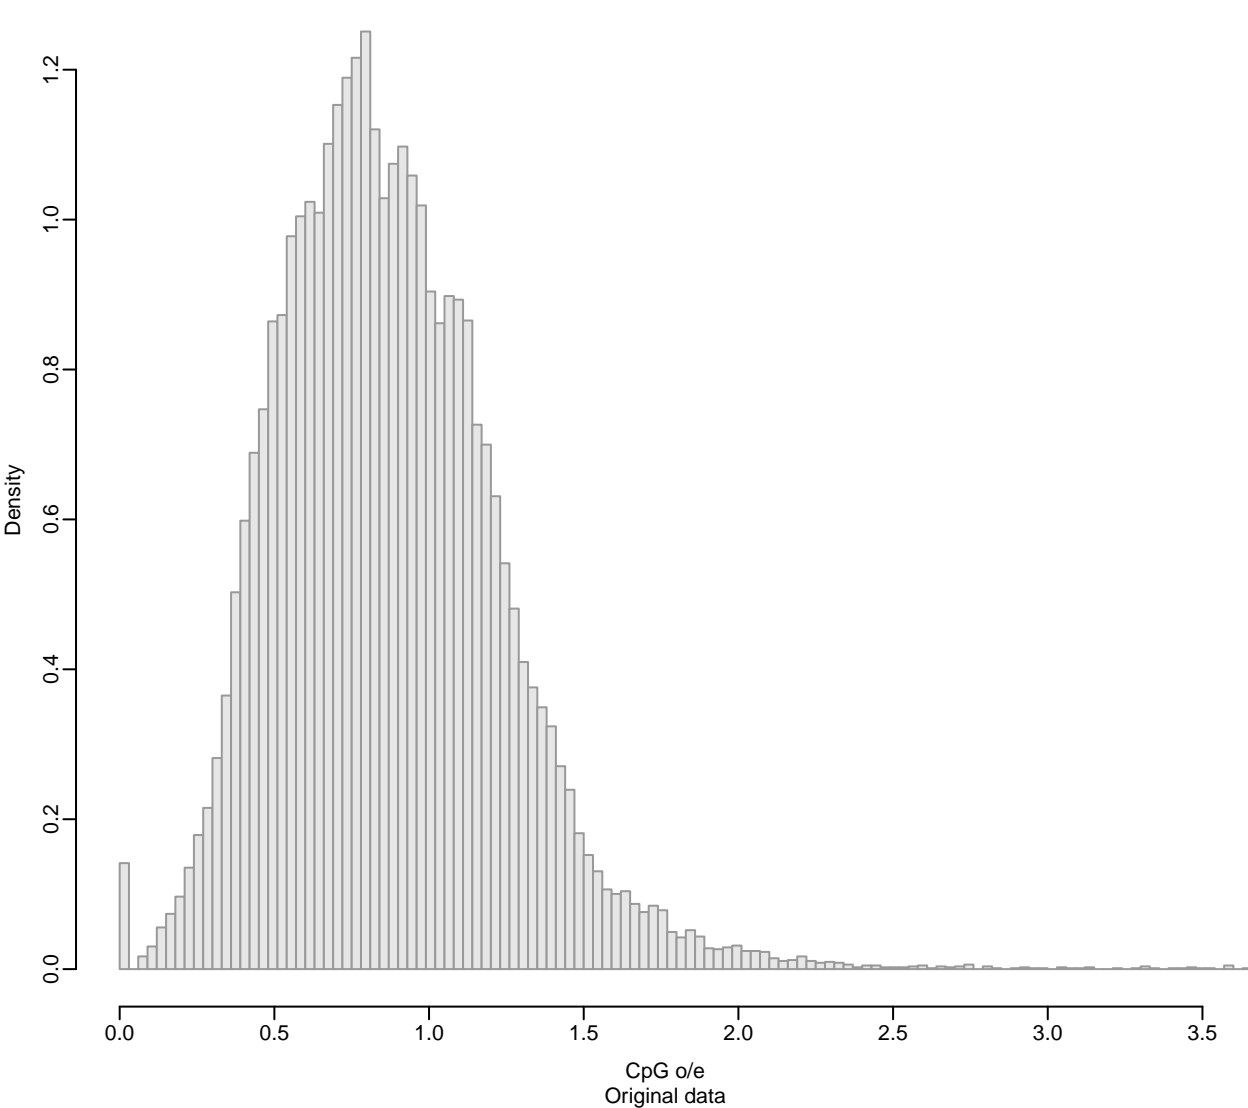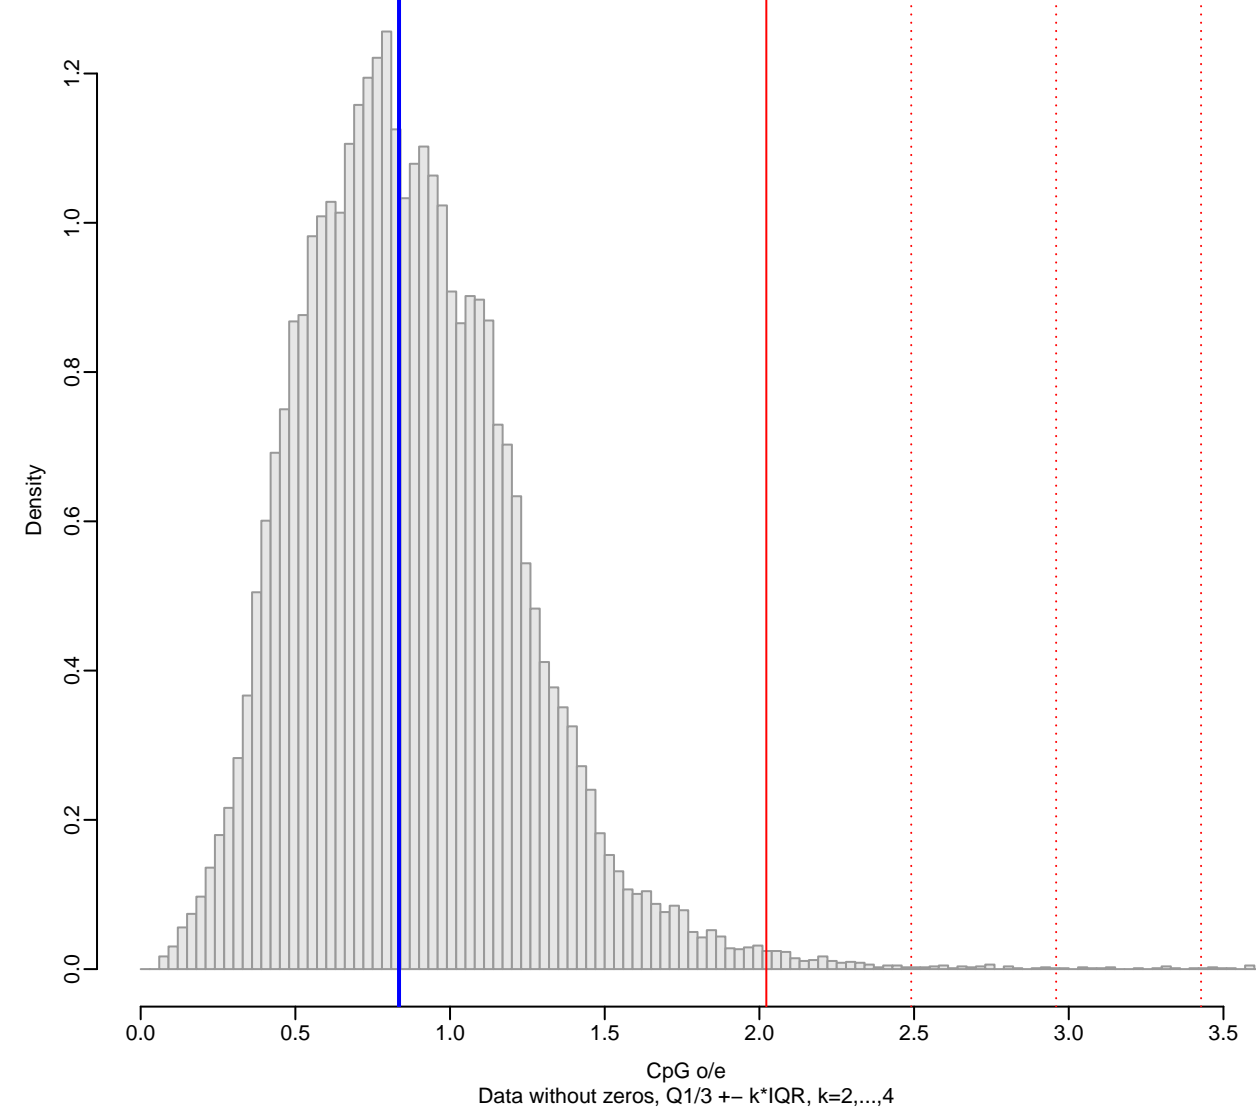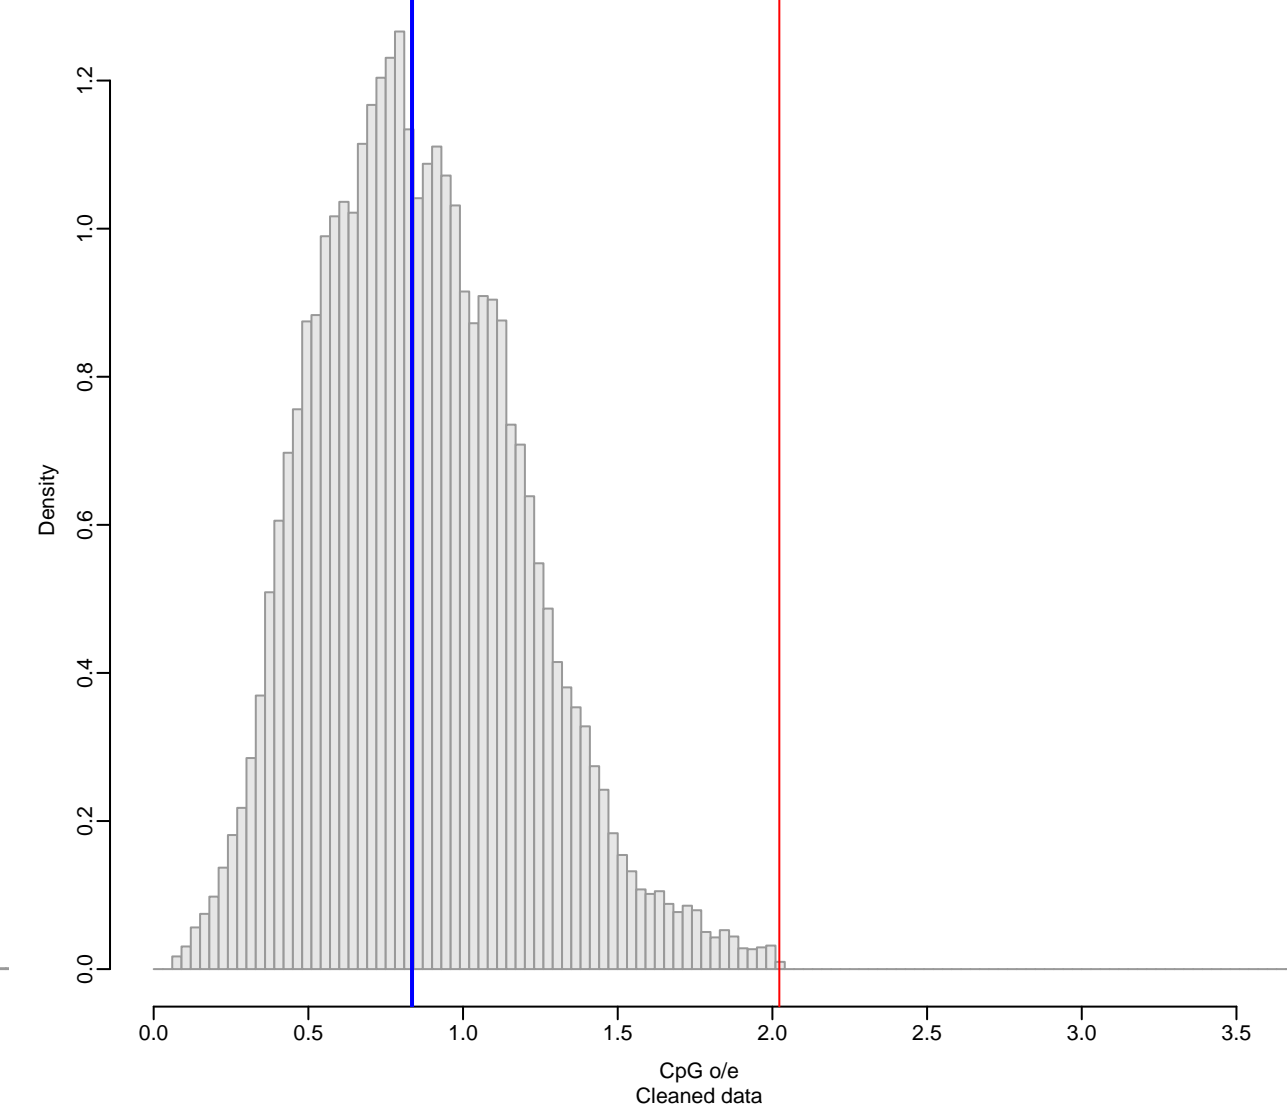



Naegleria\_gruberi

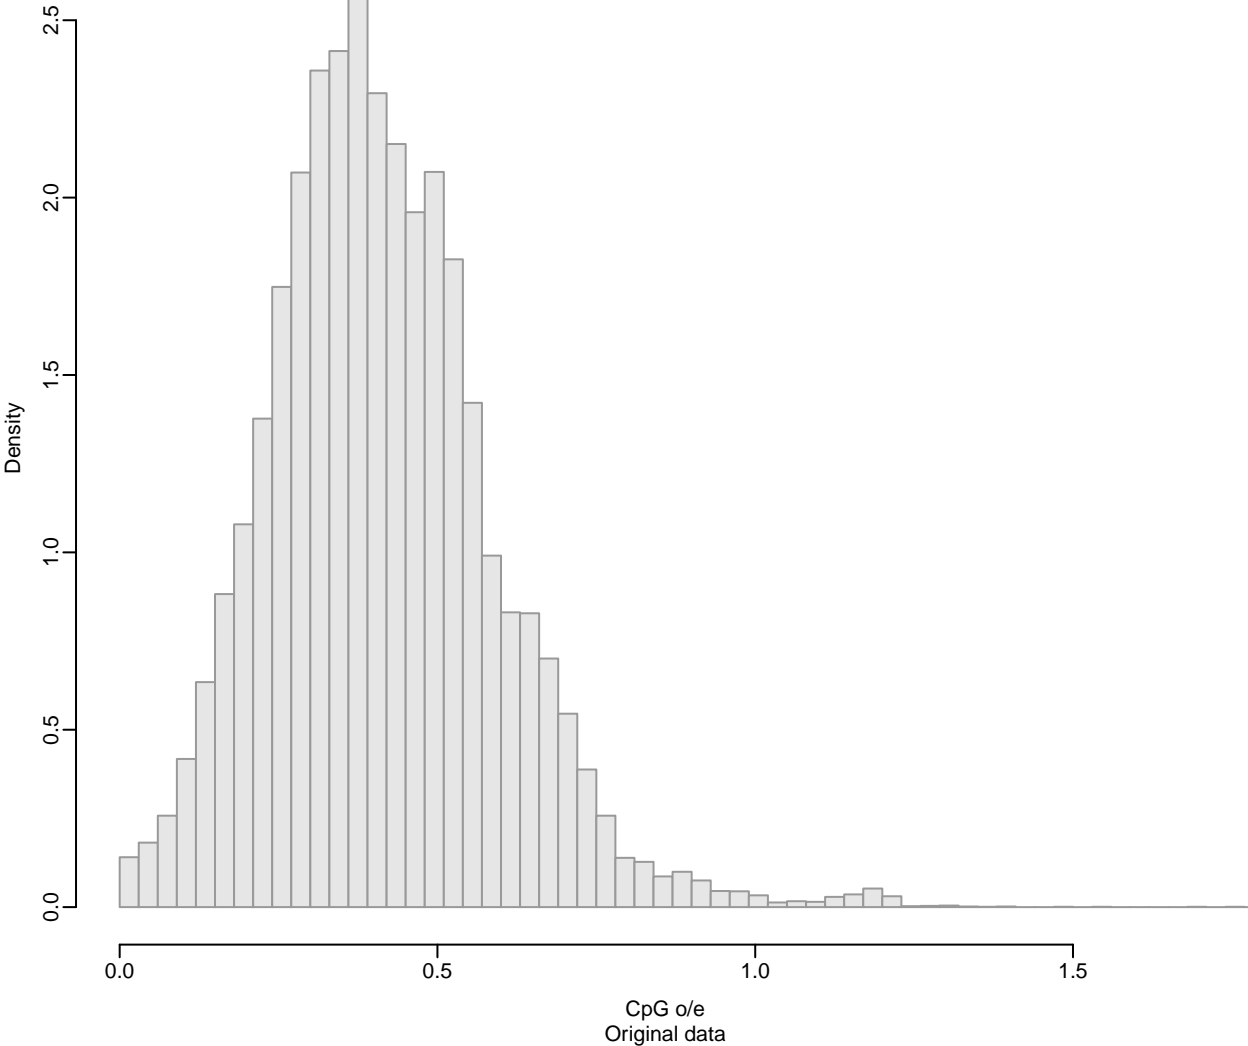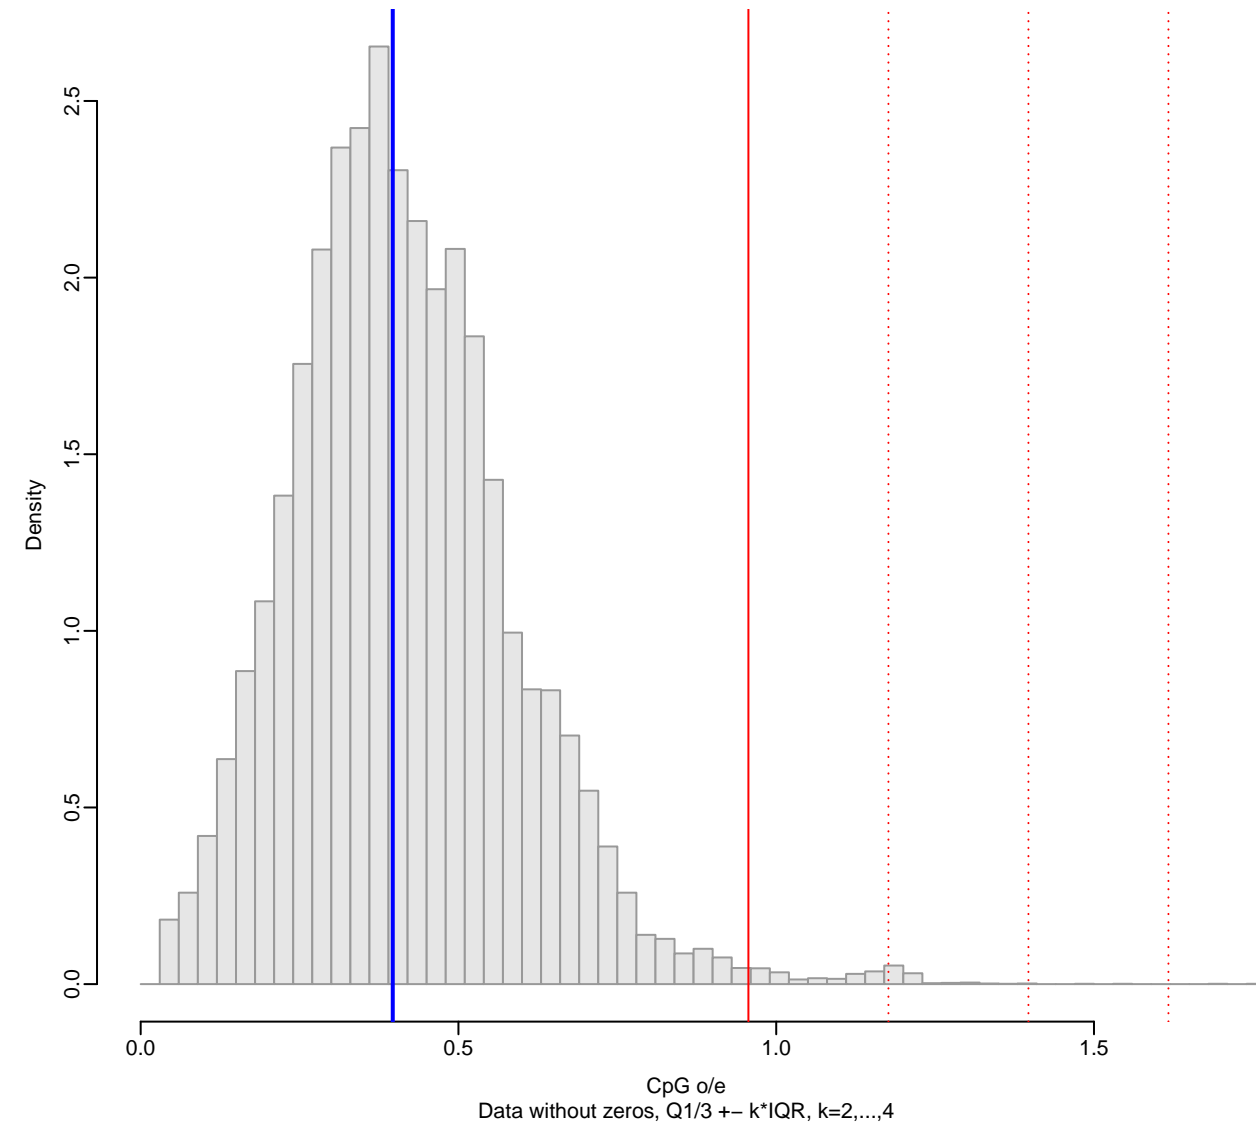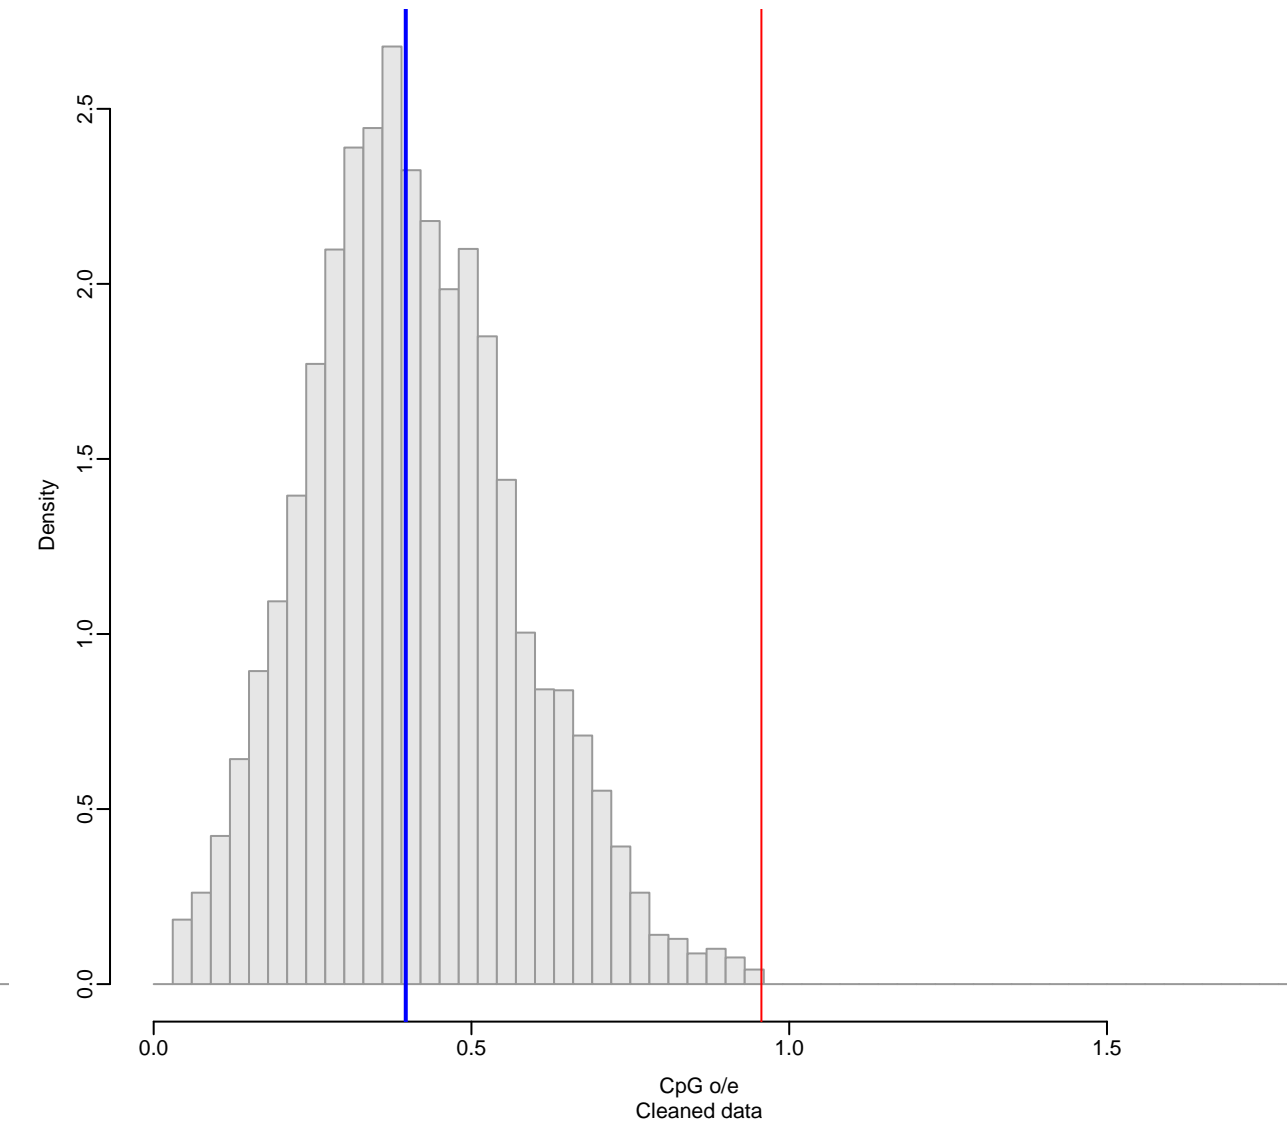

Naja\_atra

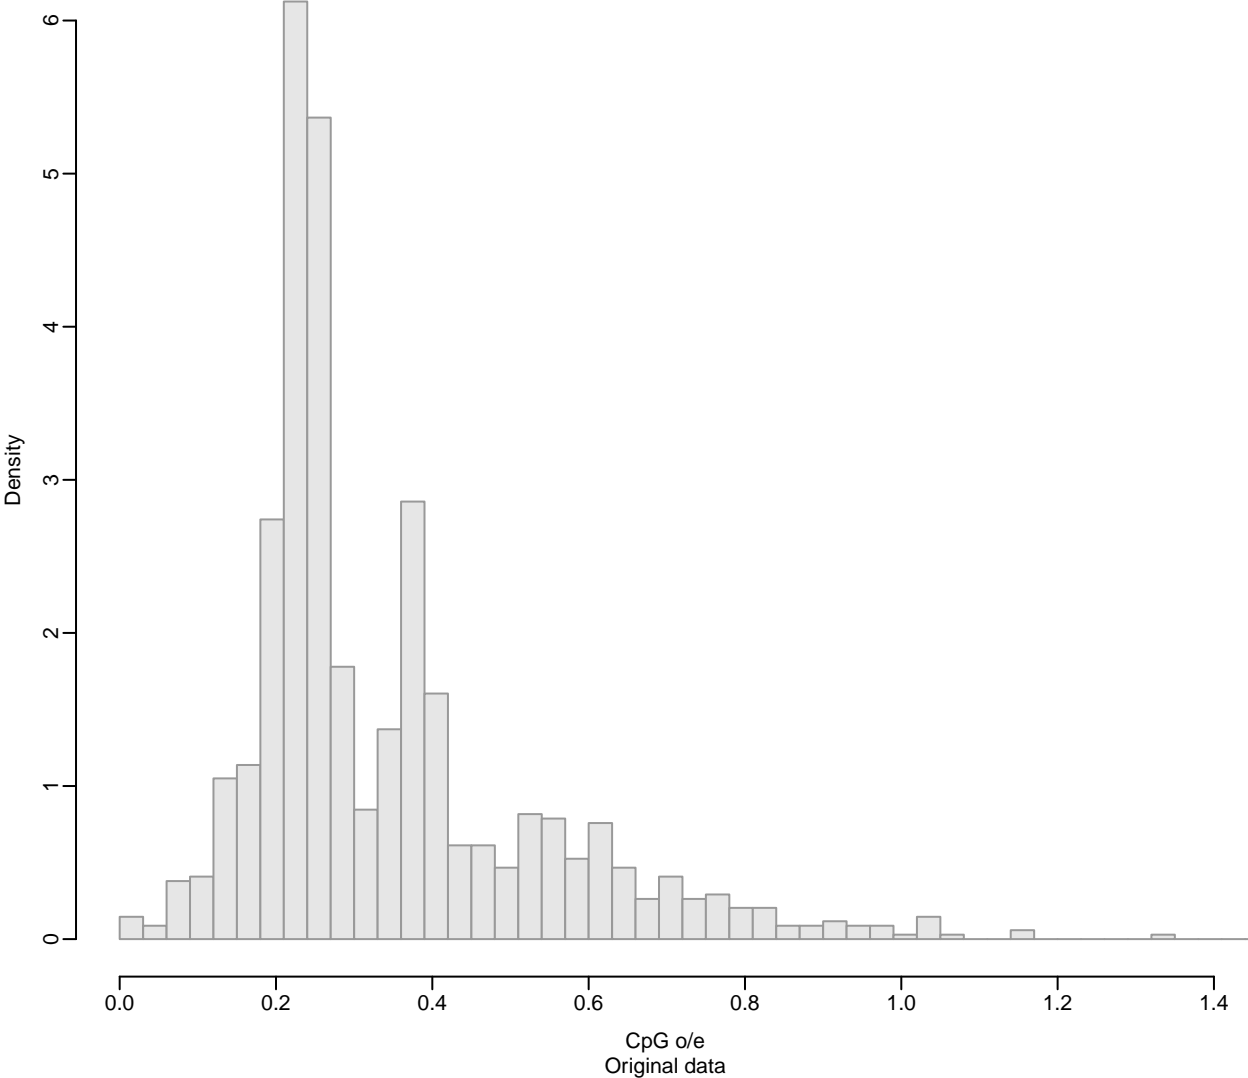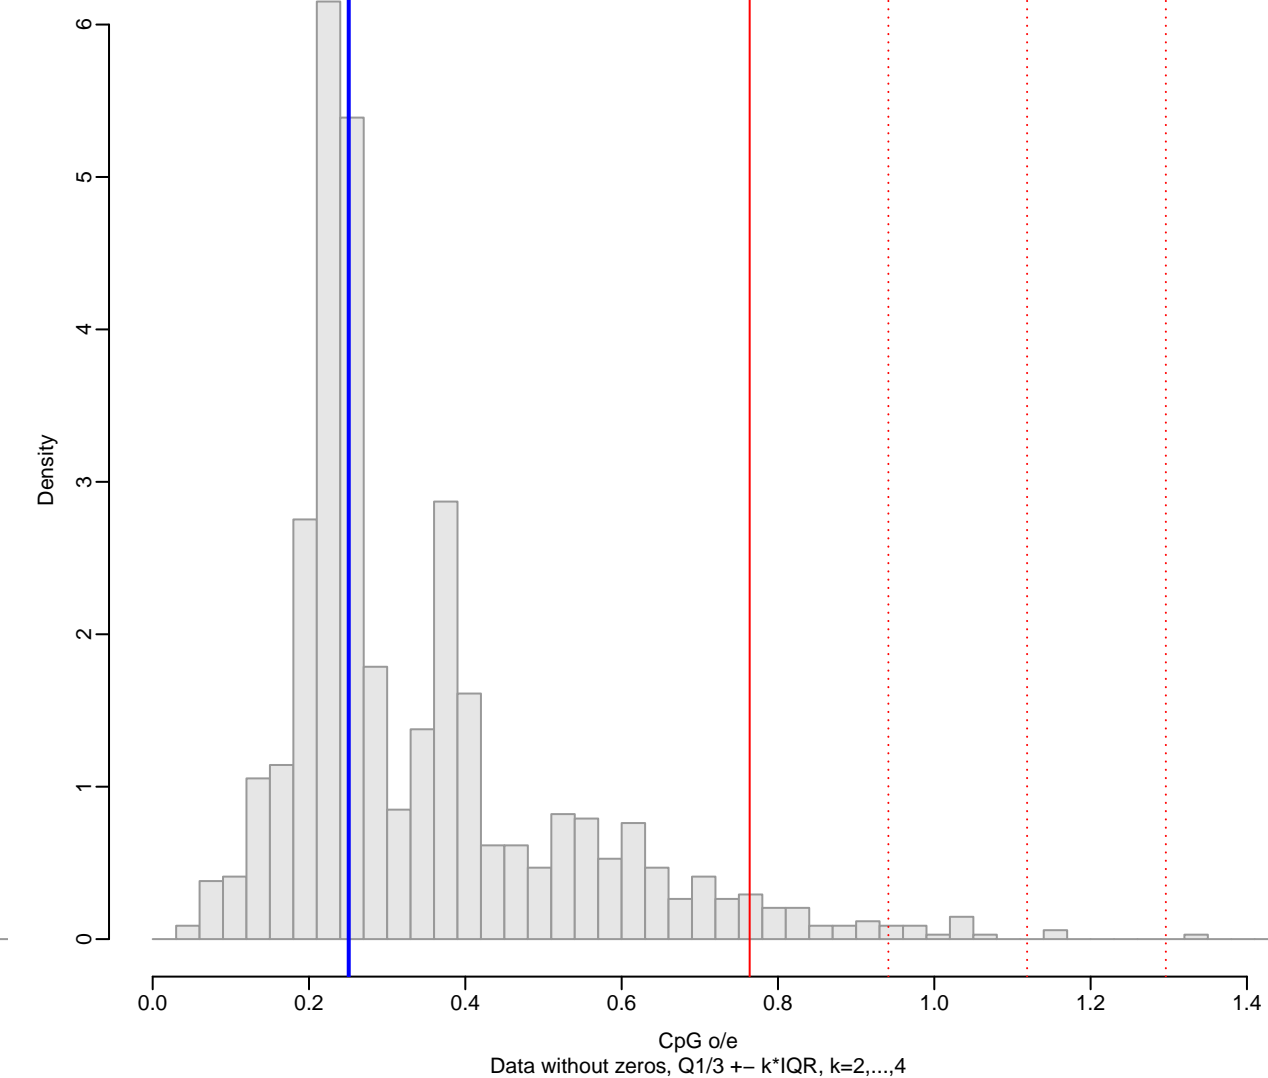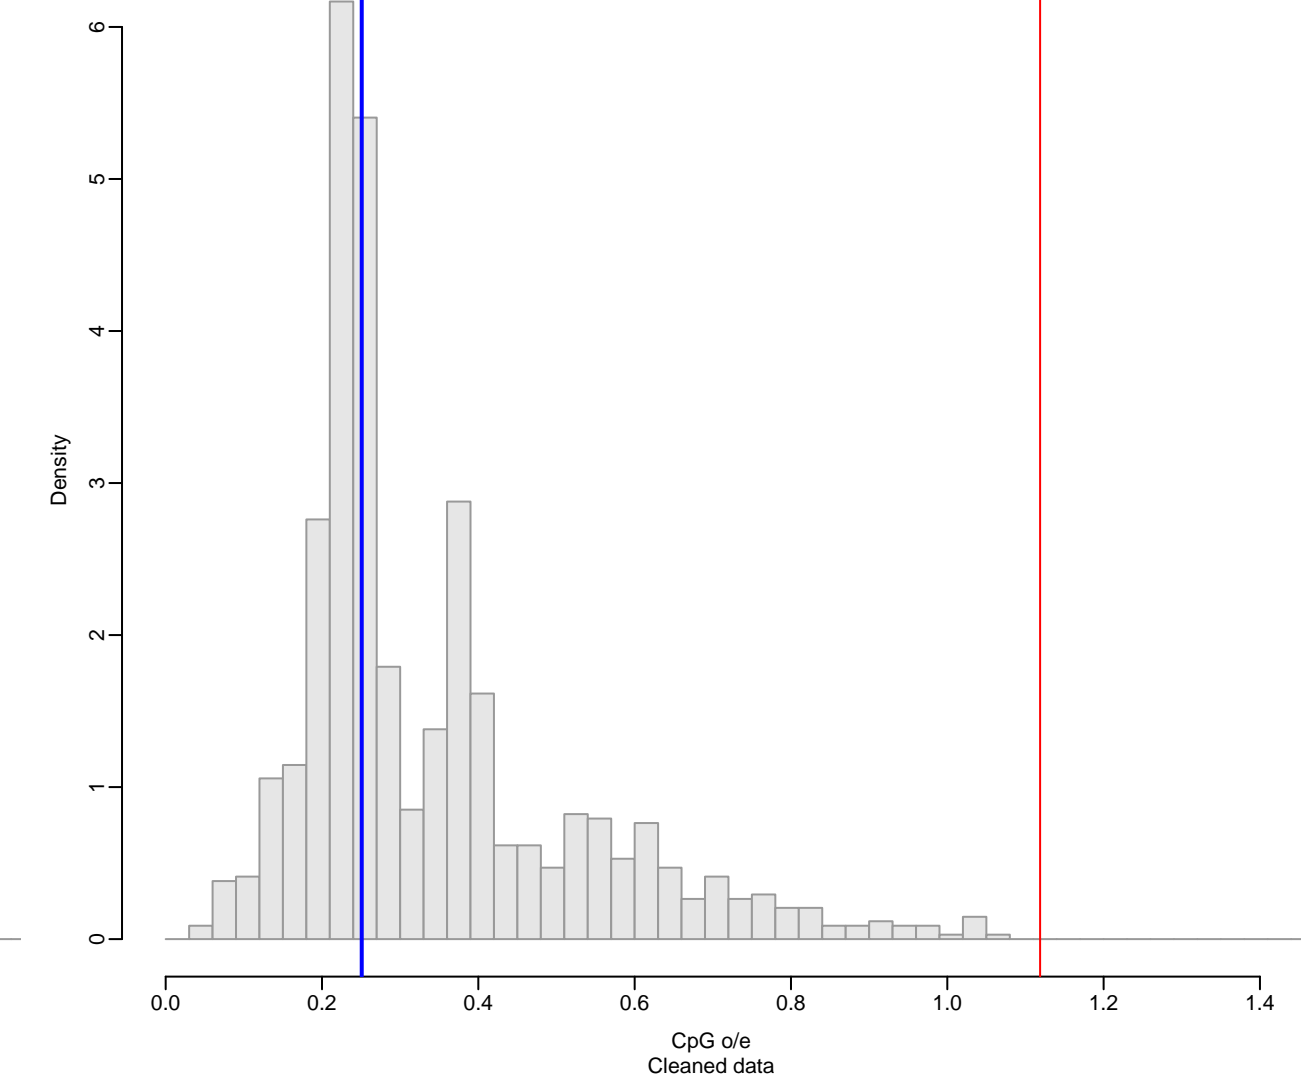

Nasonia\_vitripennis

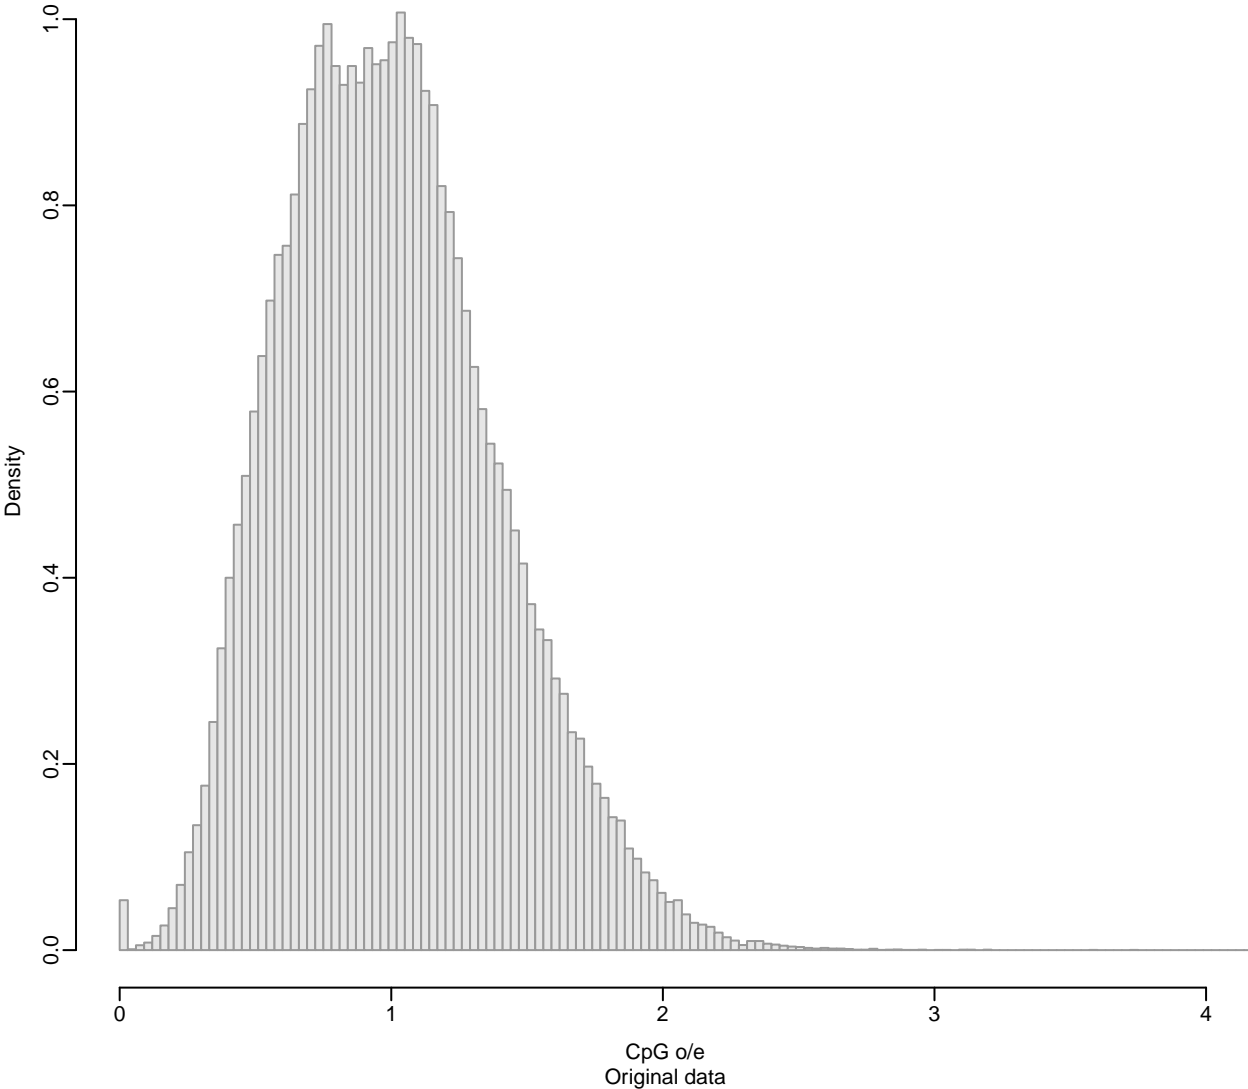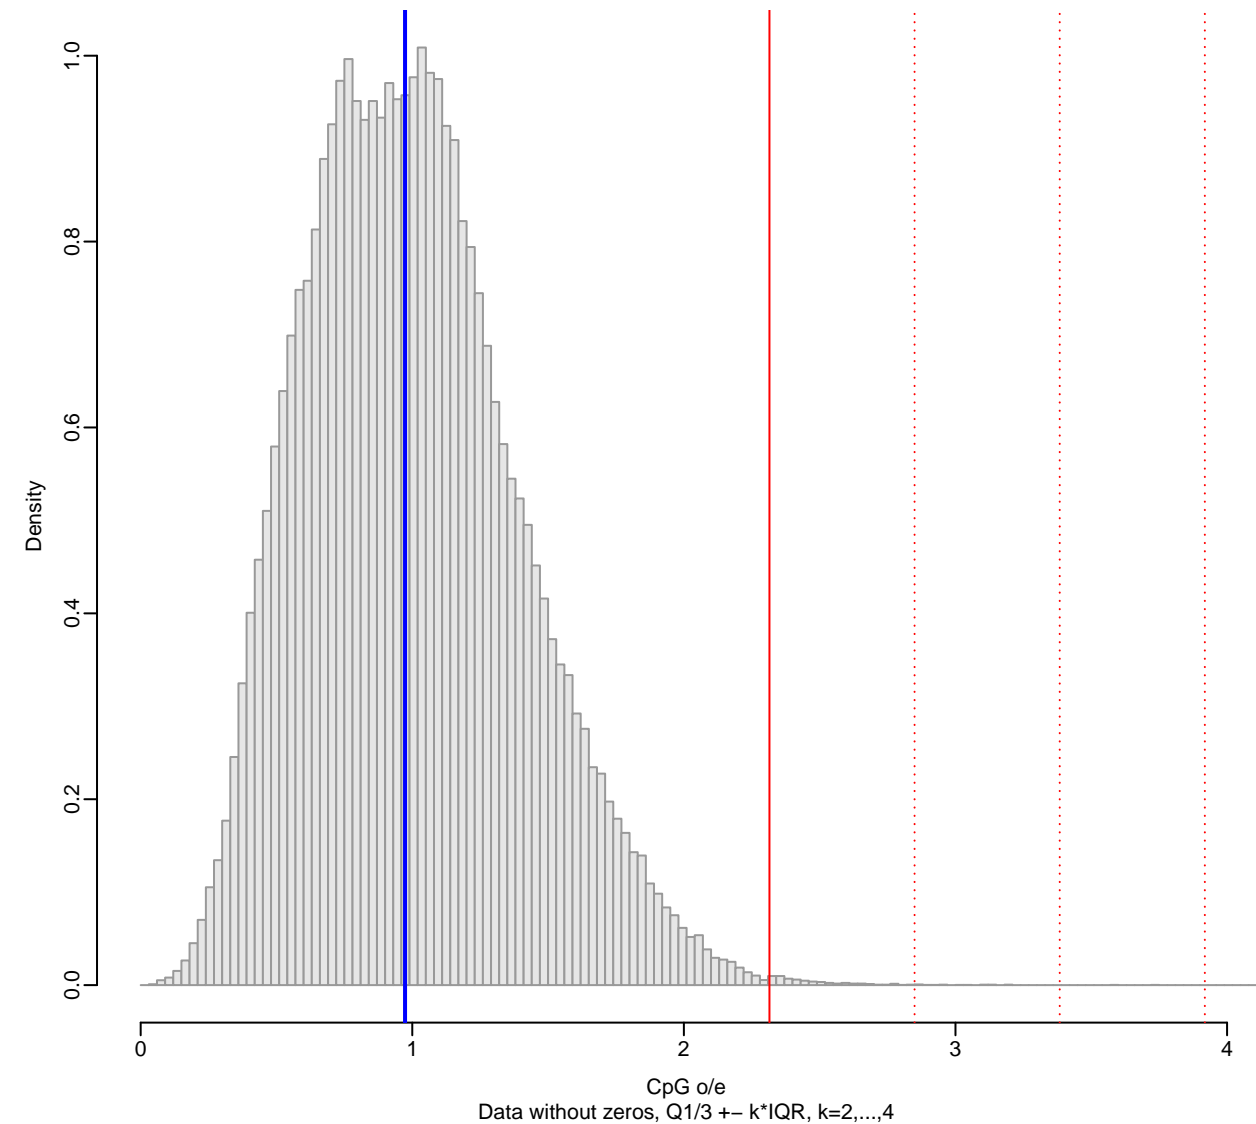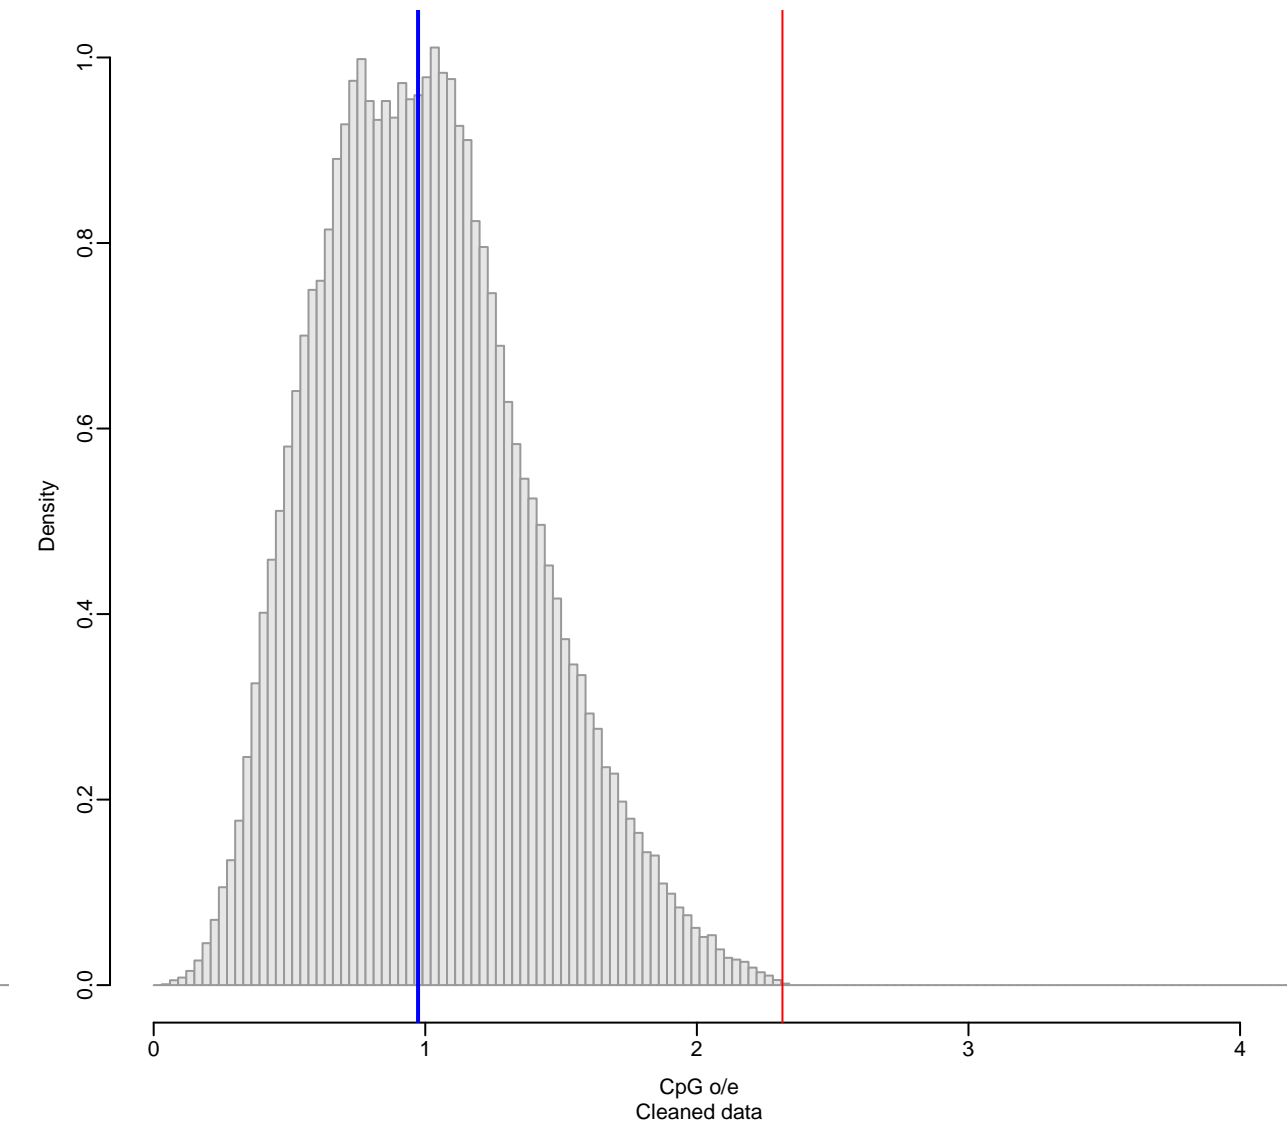

Necator\_americanus

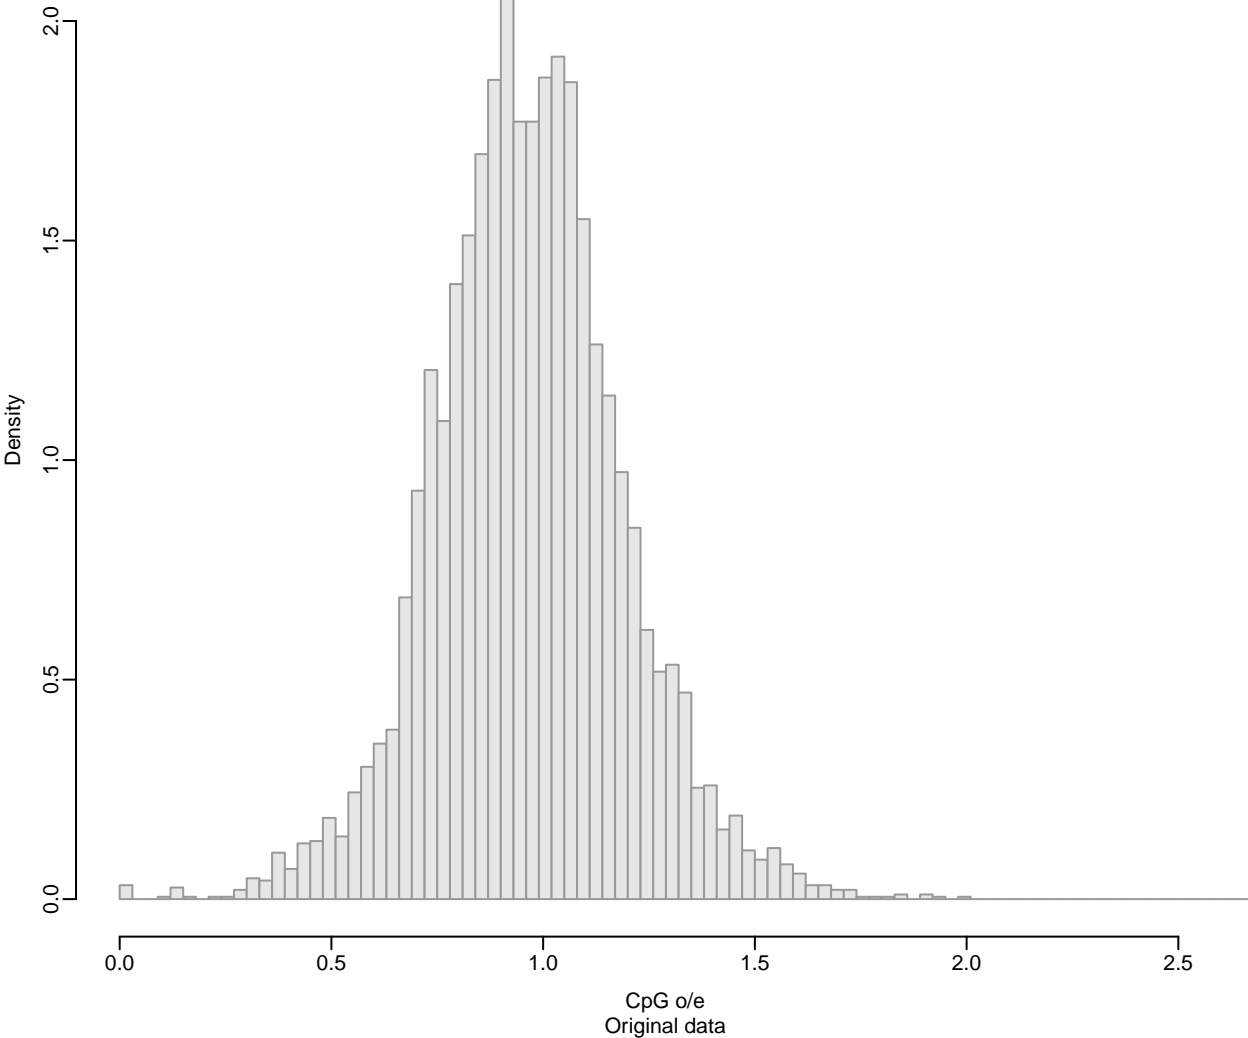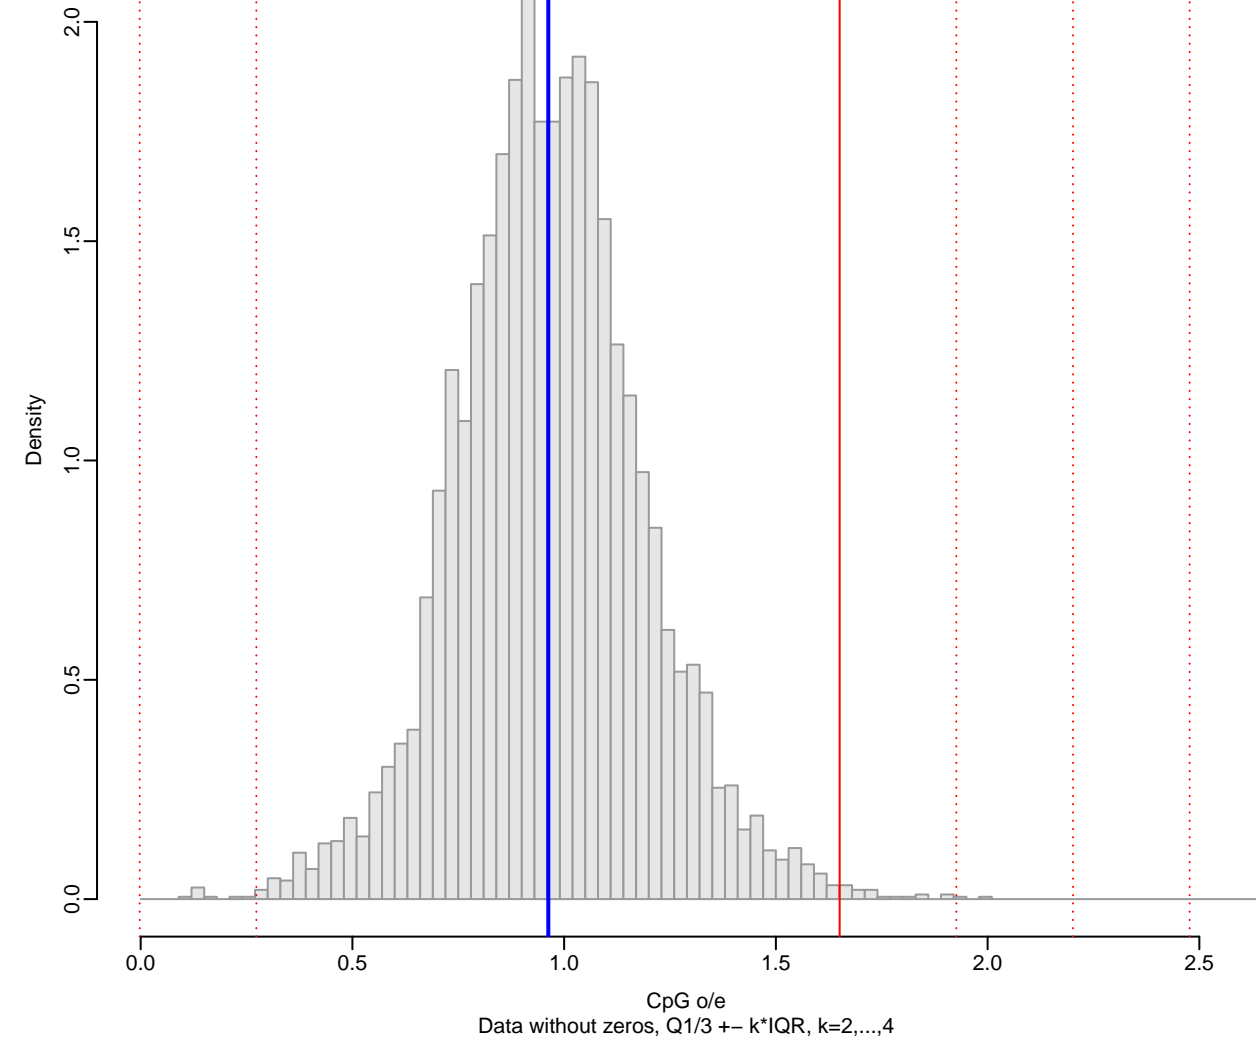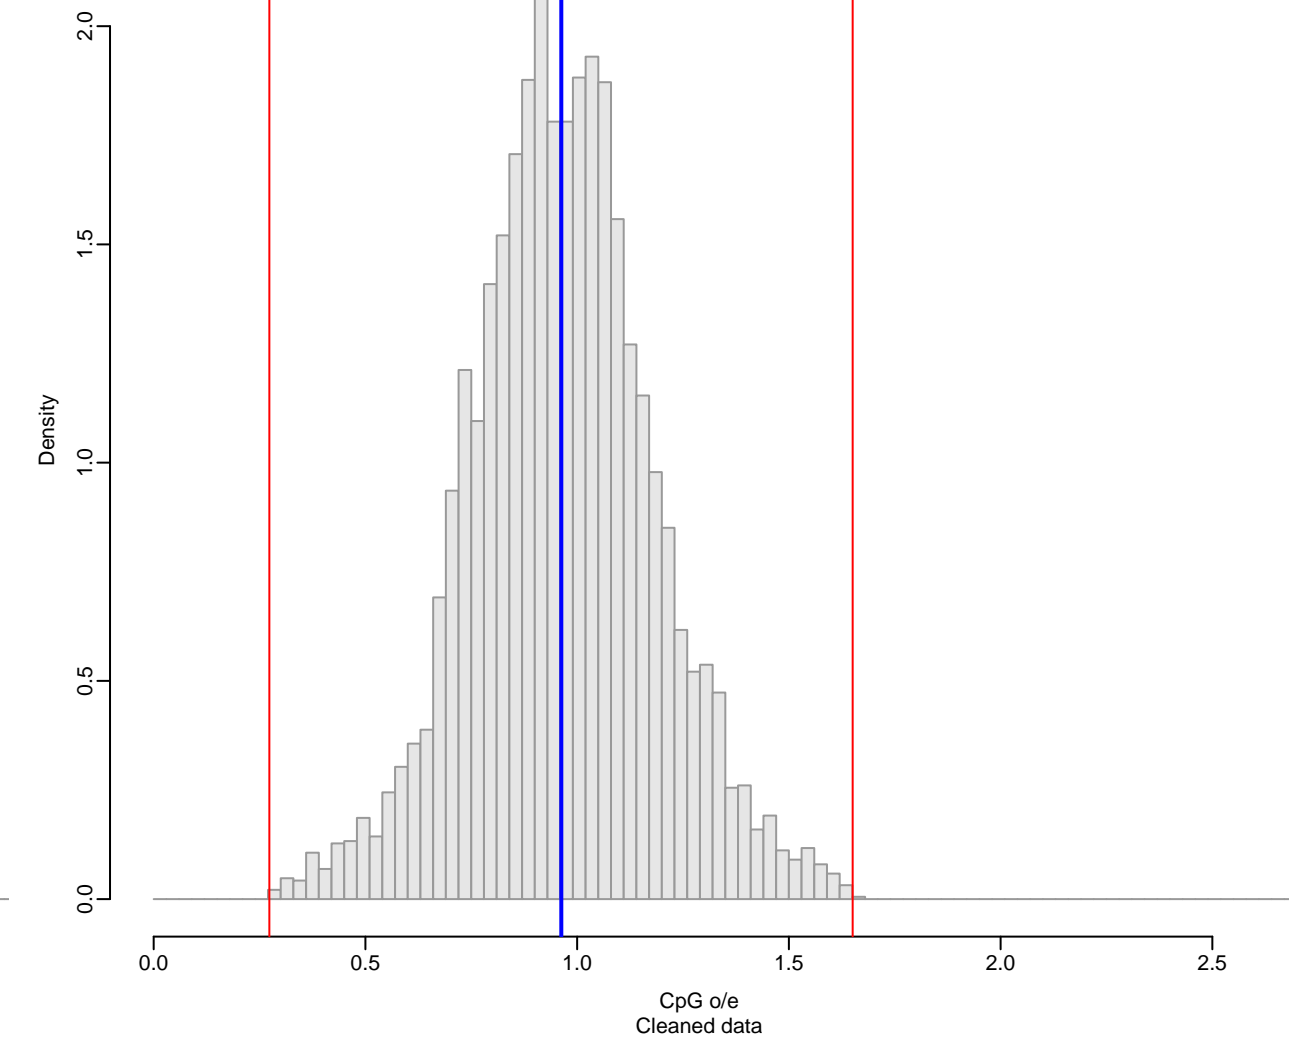

# Nematostella\_vectensis

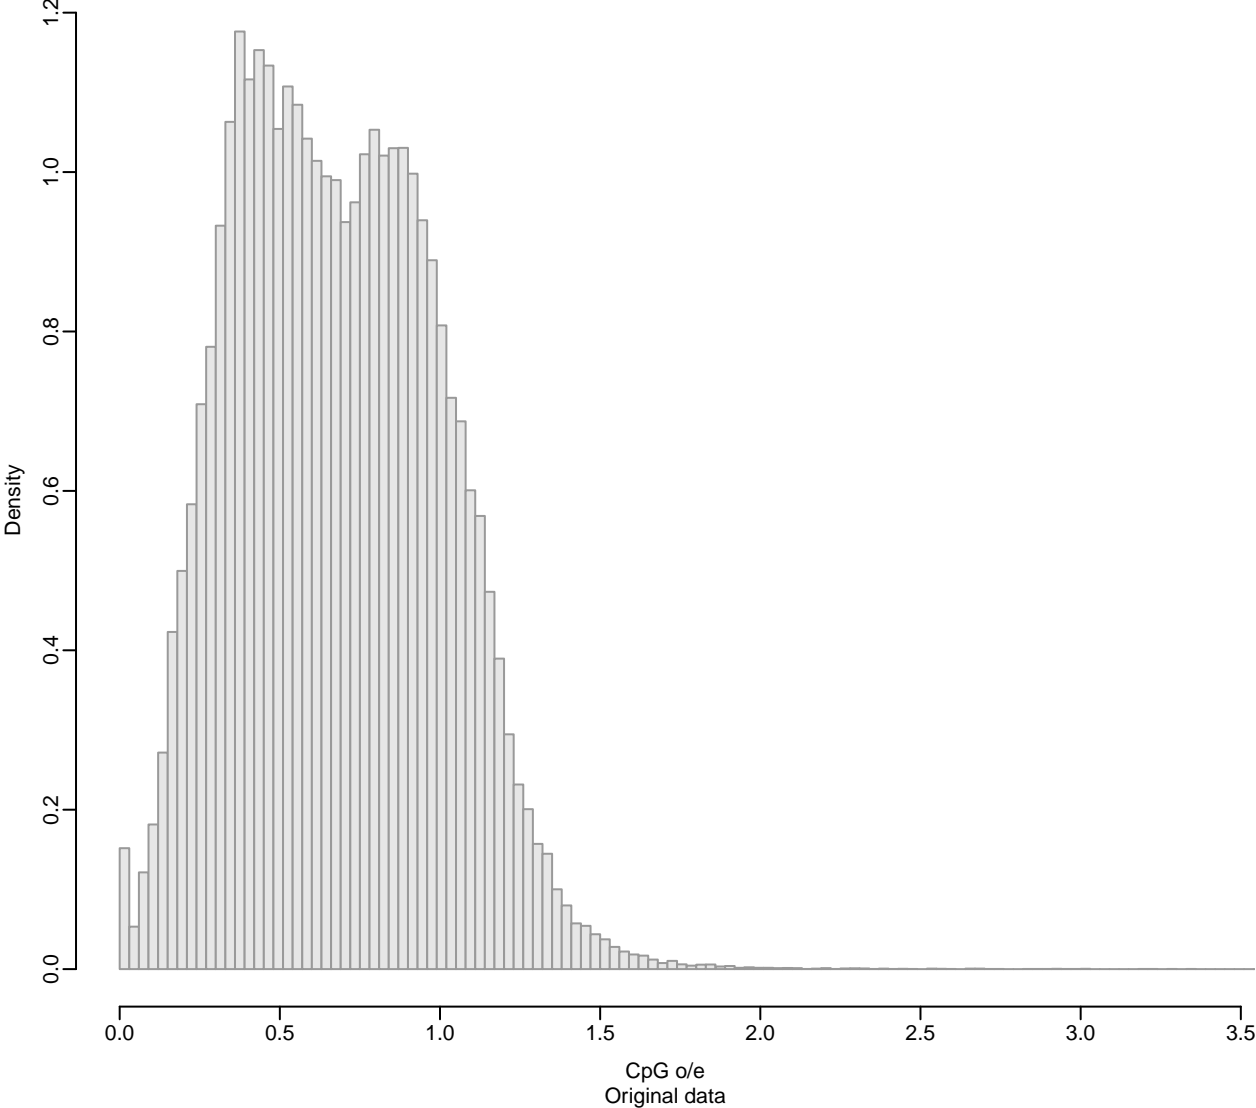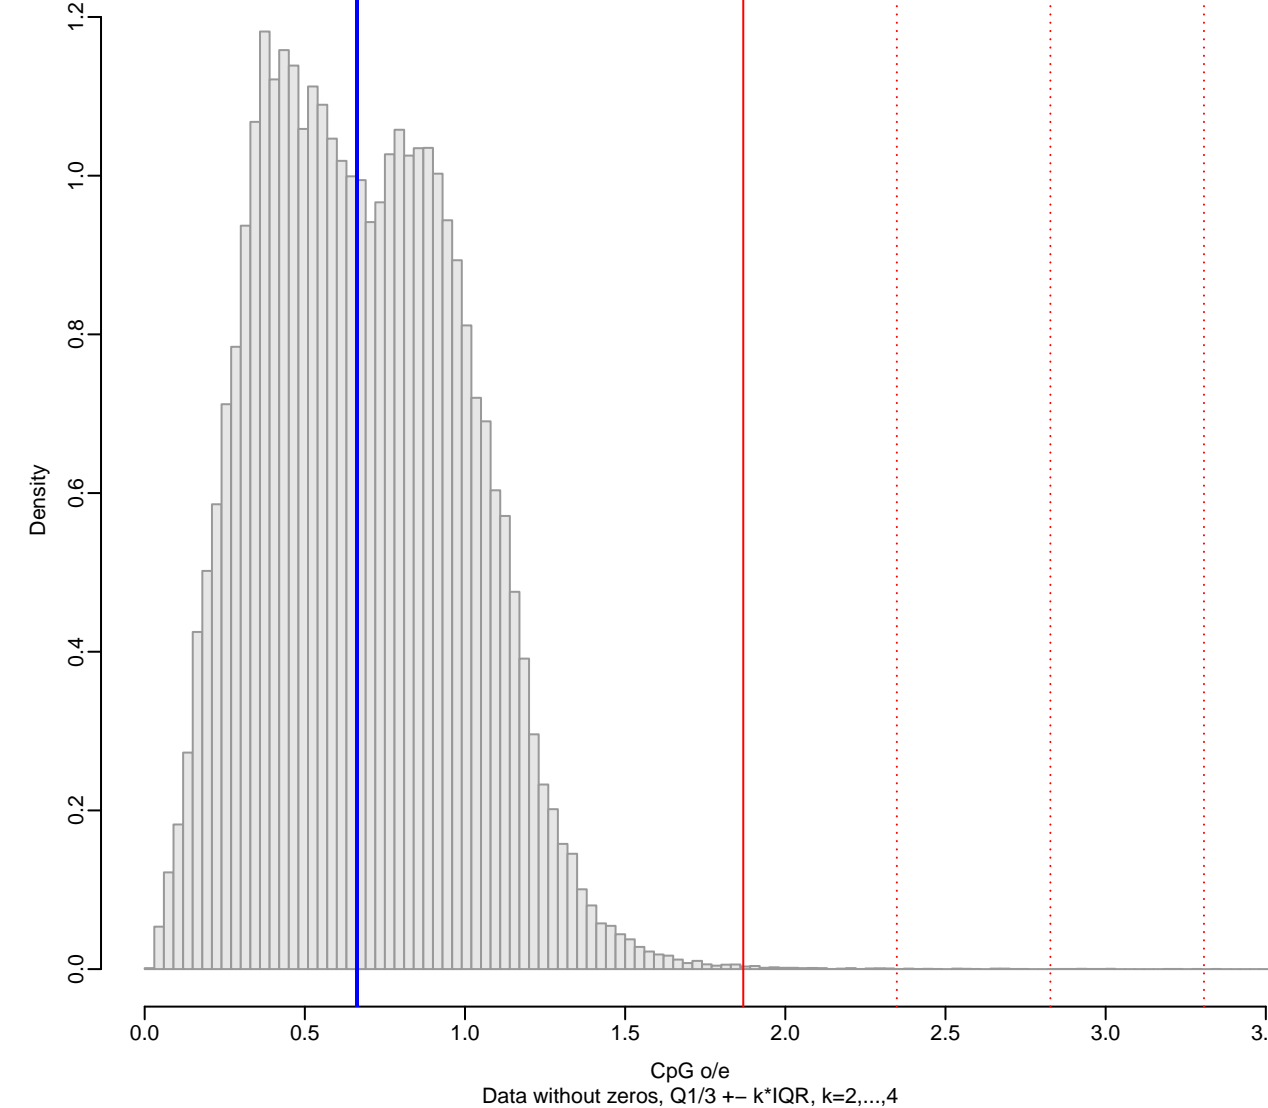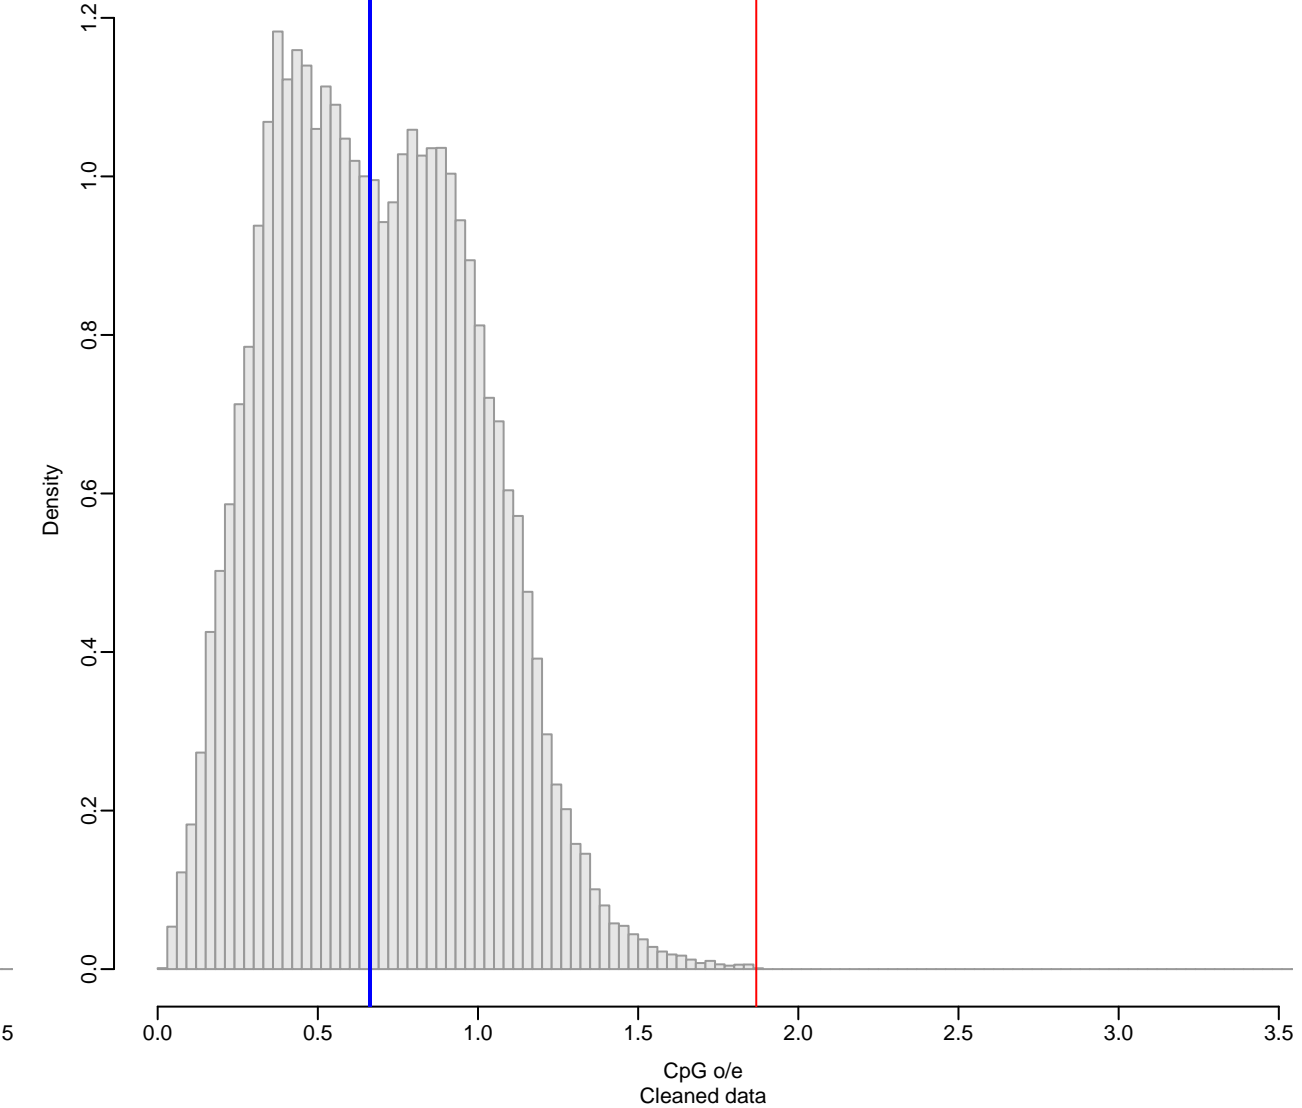

Neotyphodium\_lolii

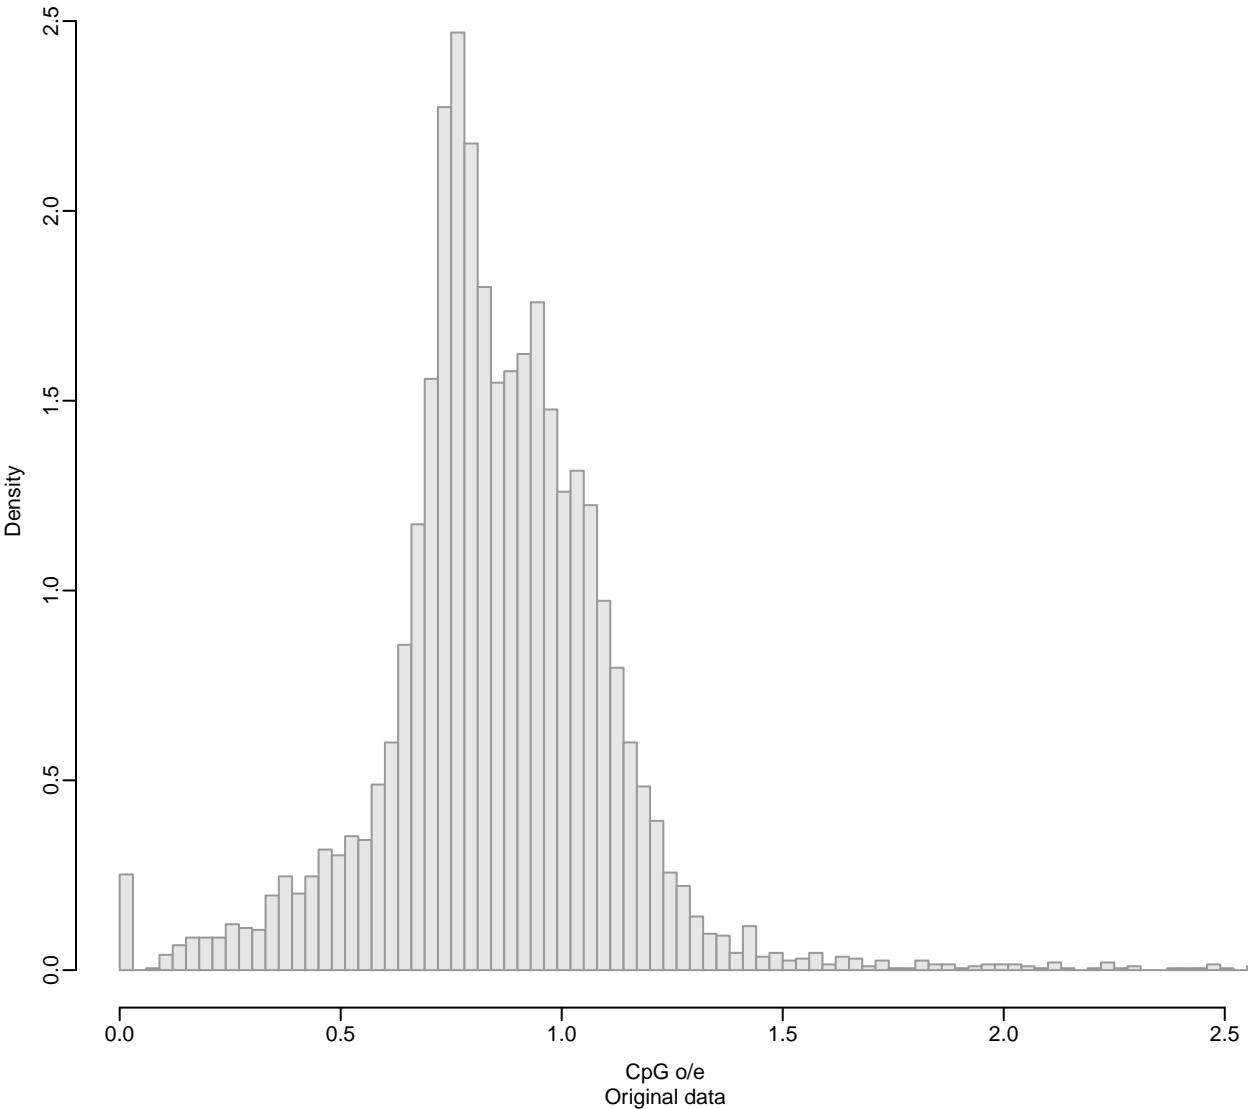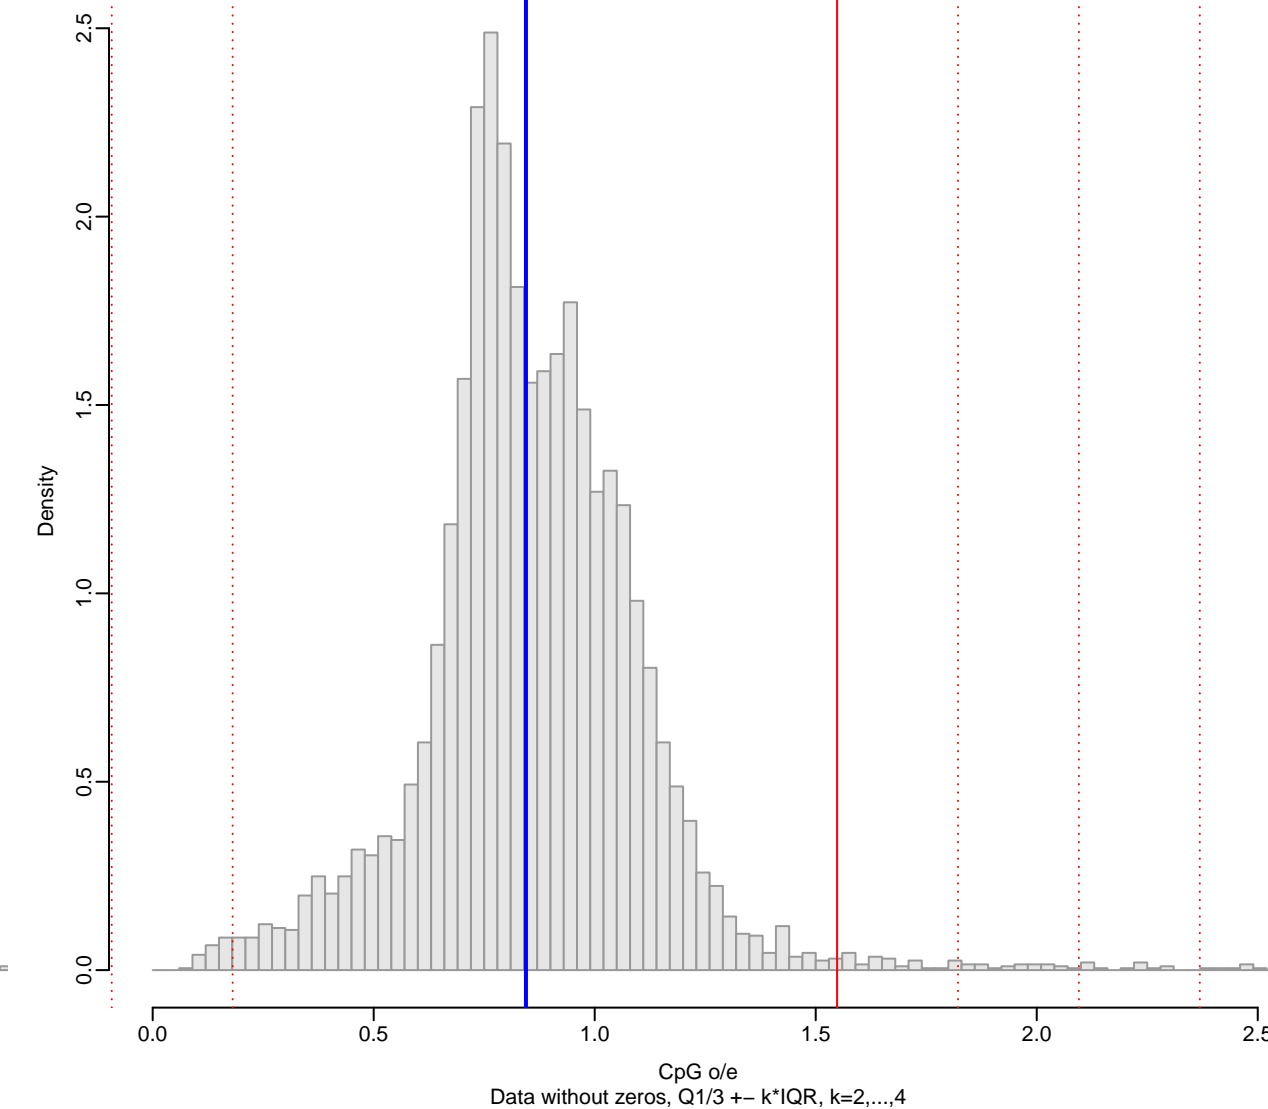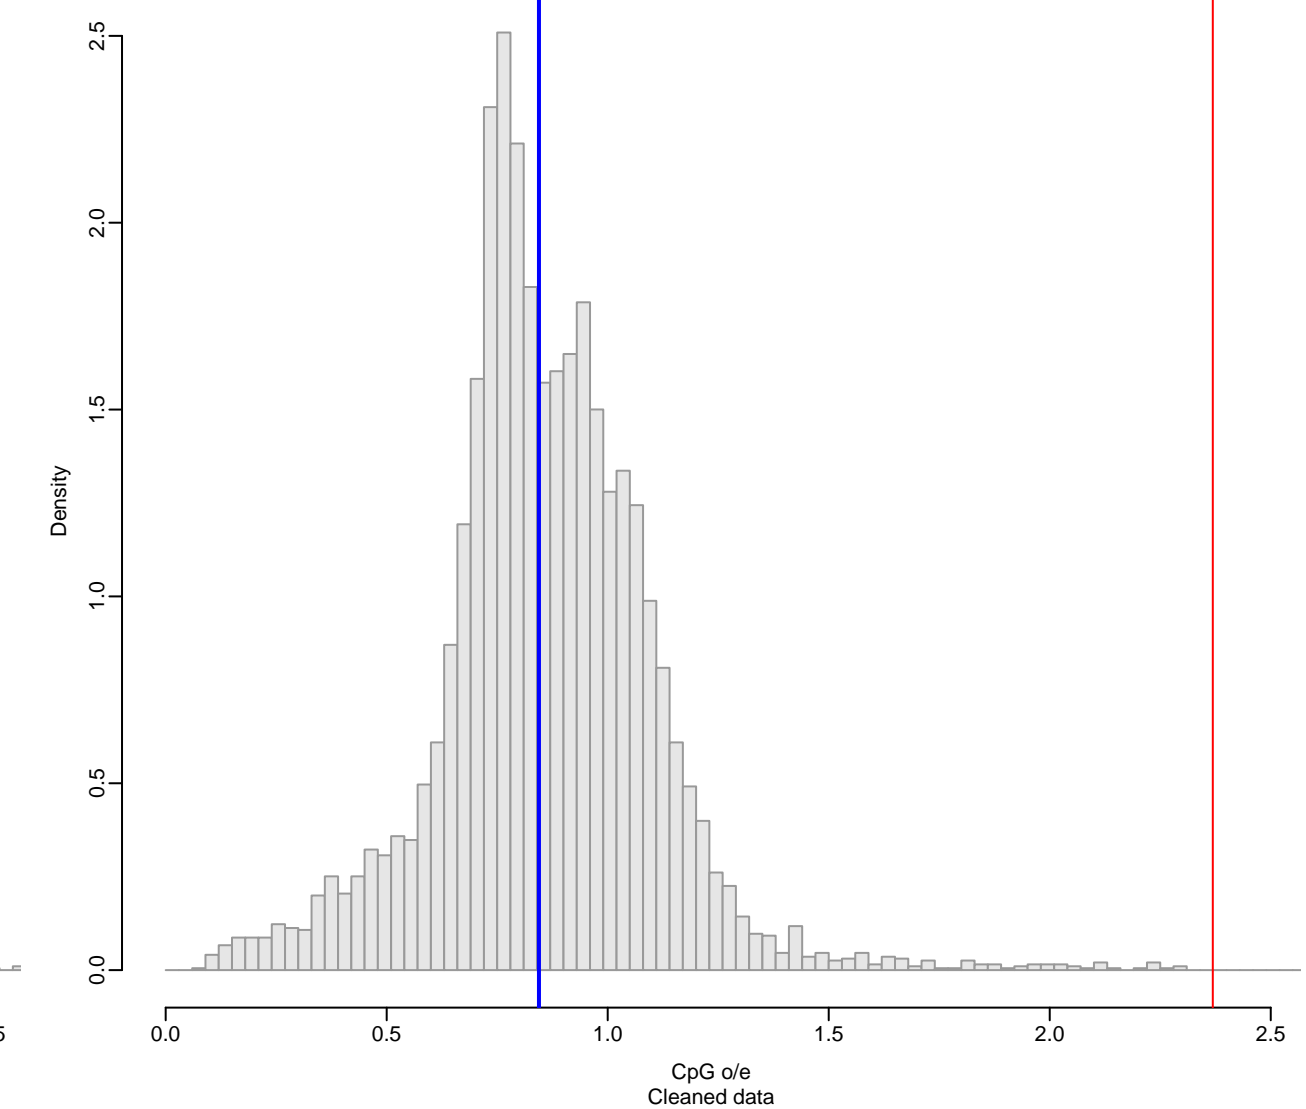

Neurospora\_crassa

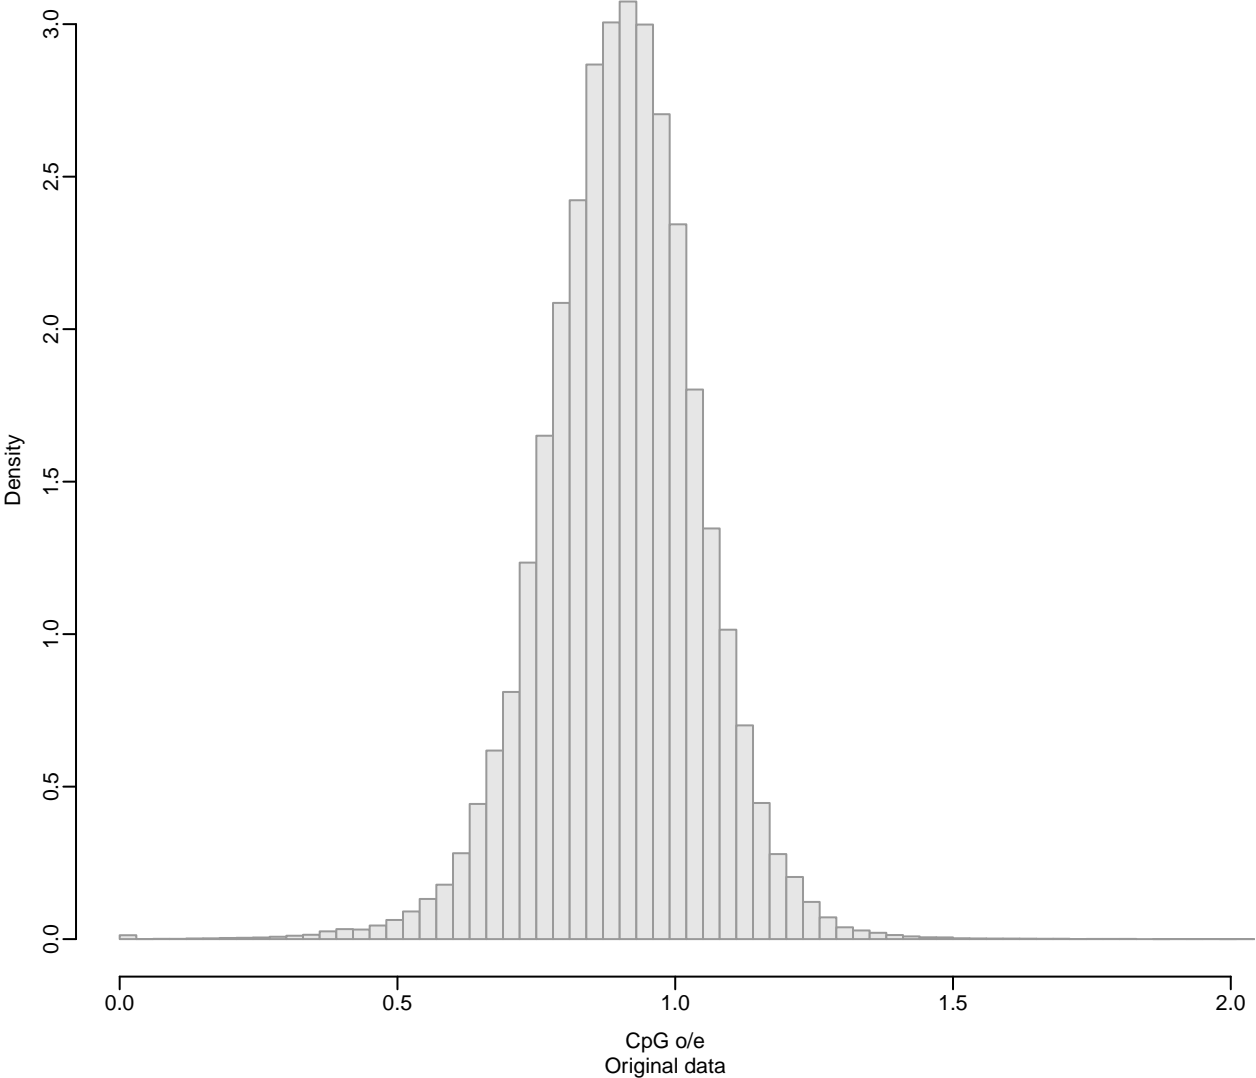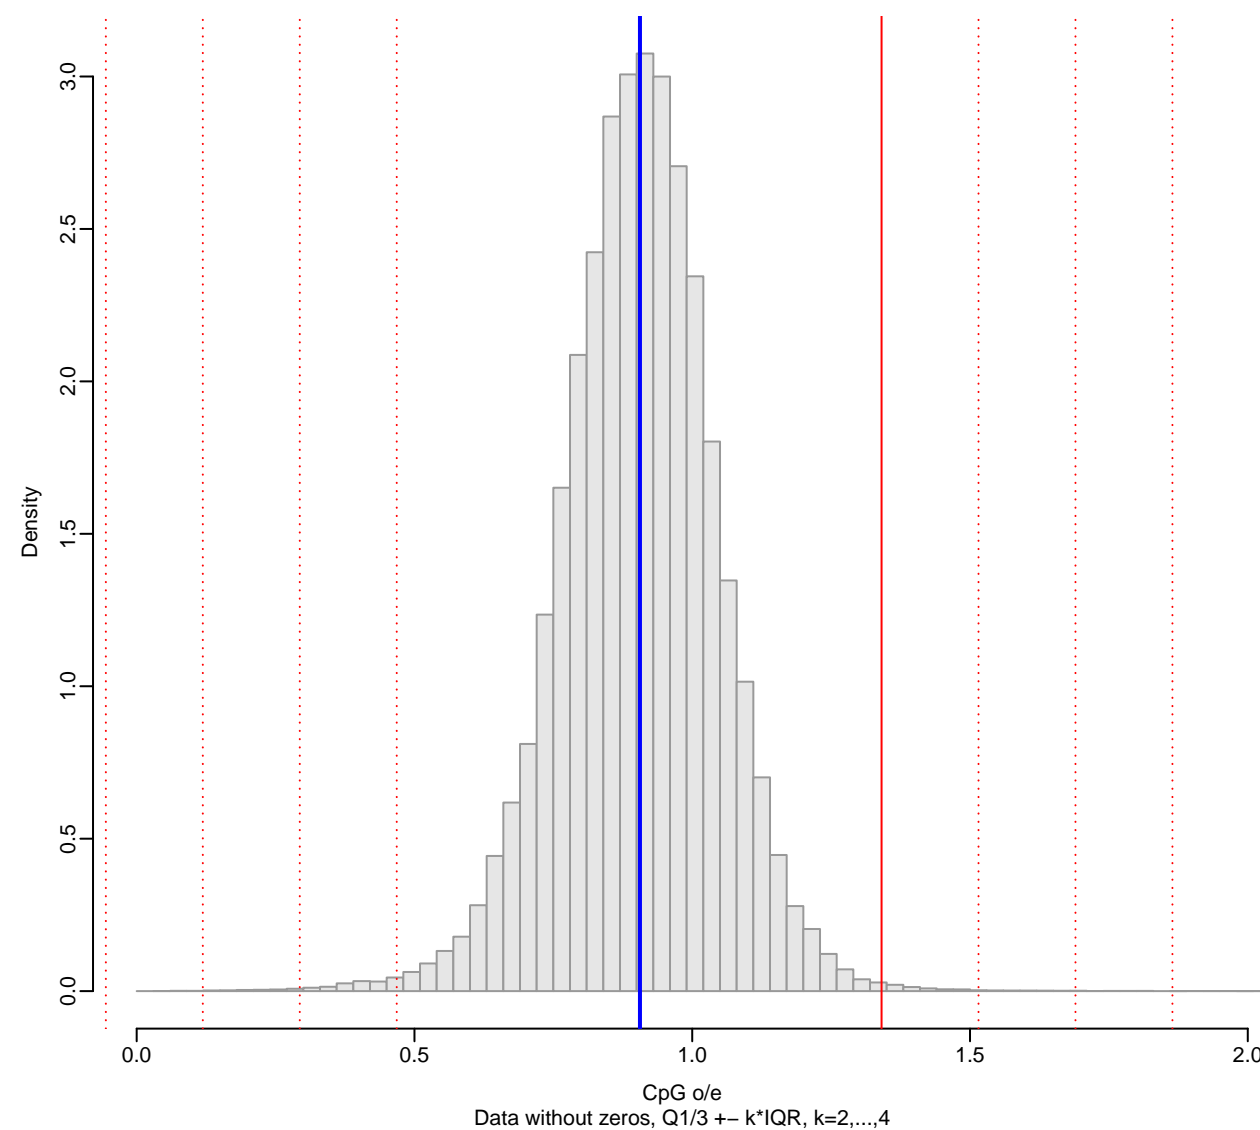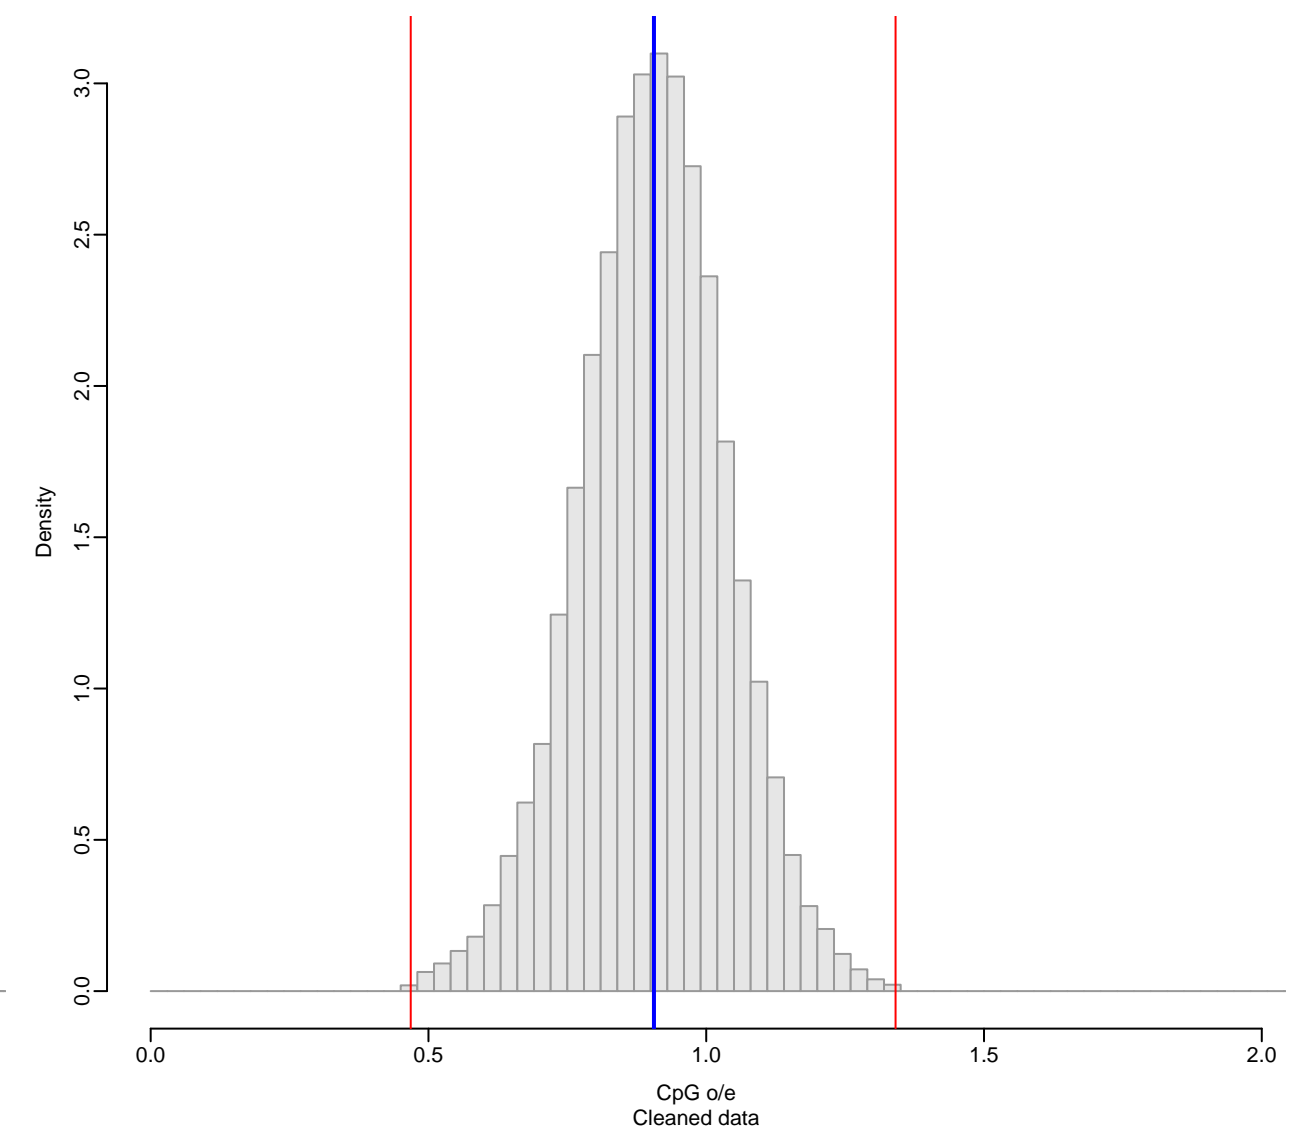

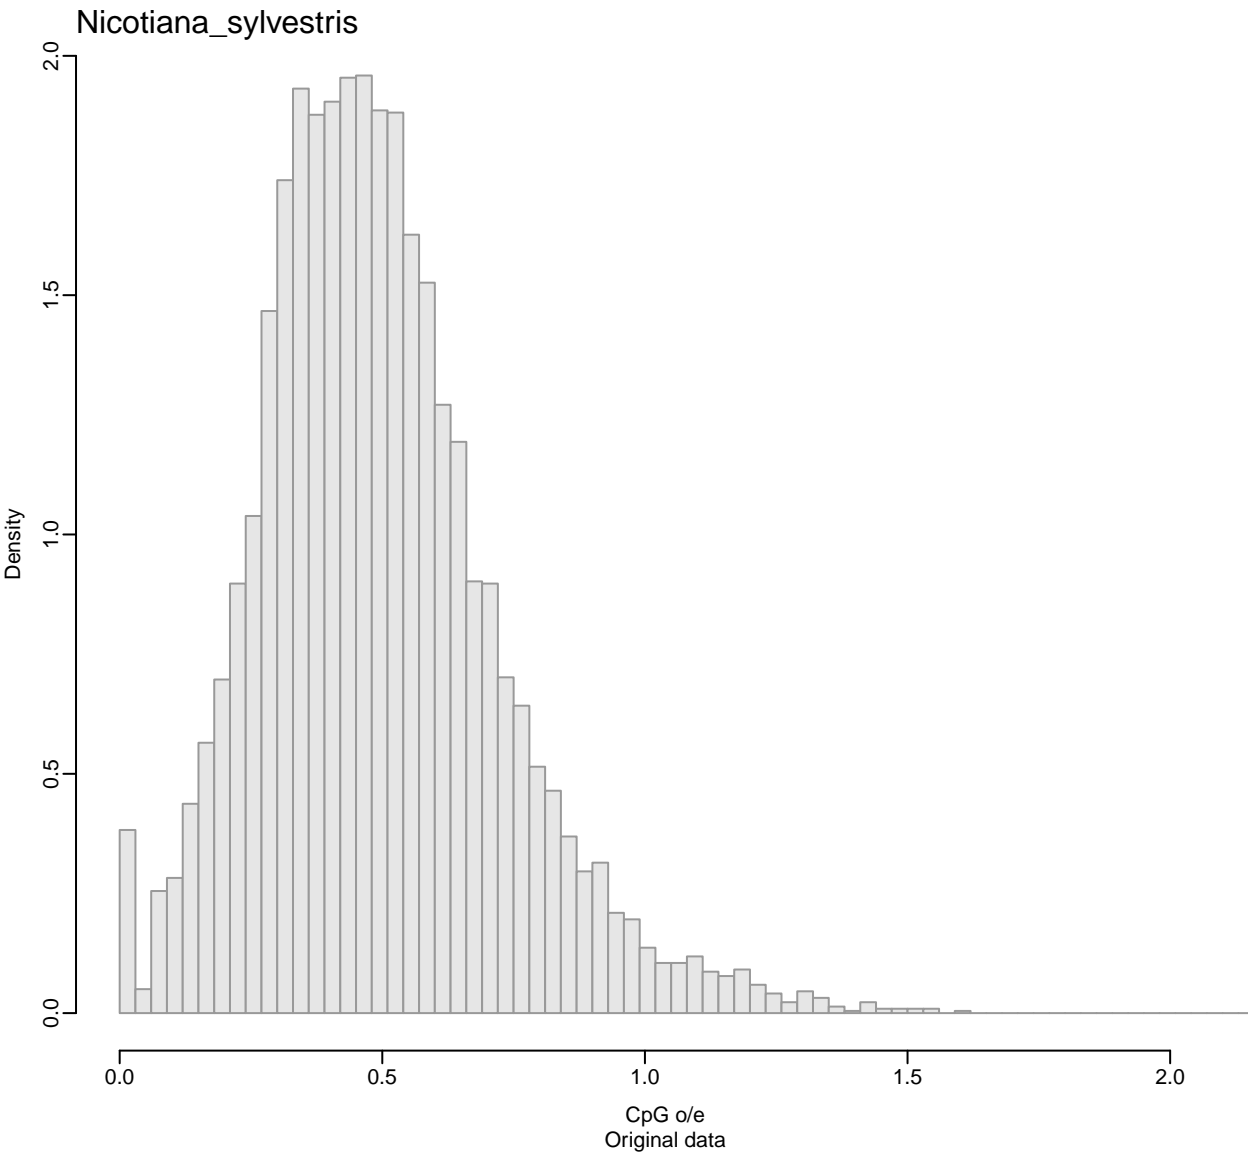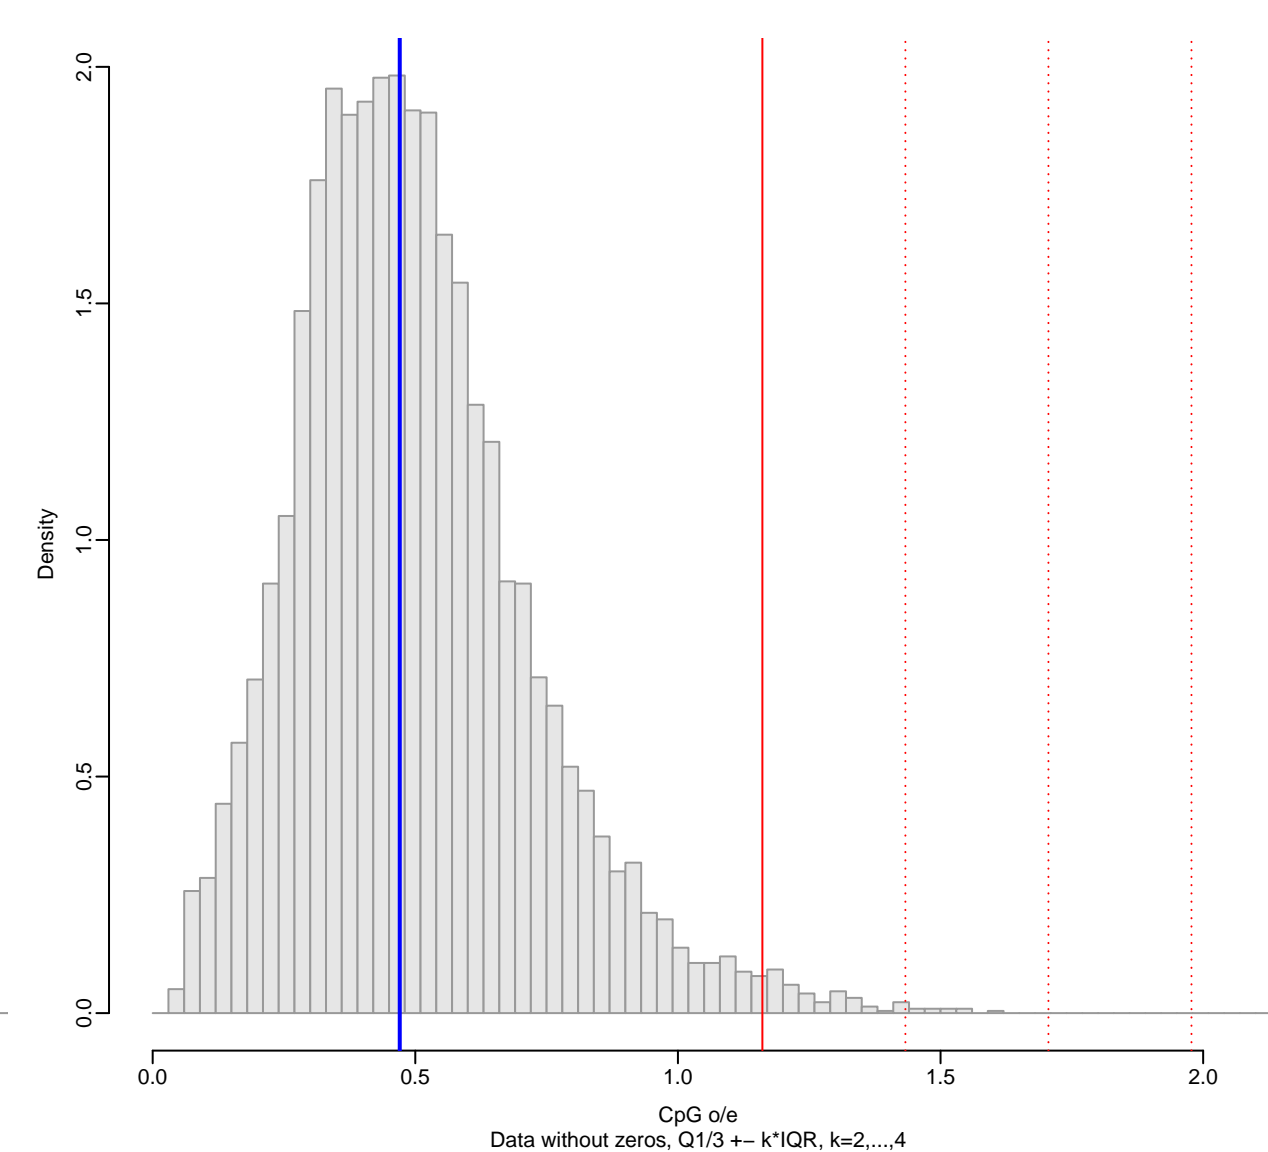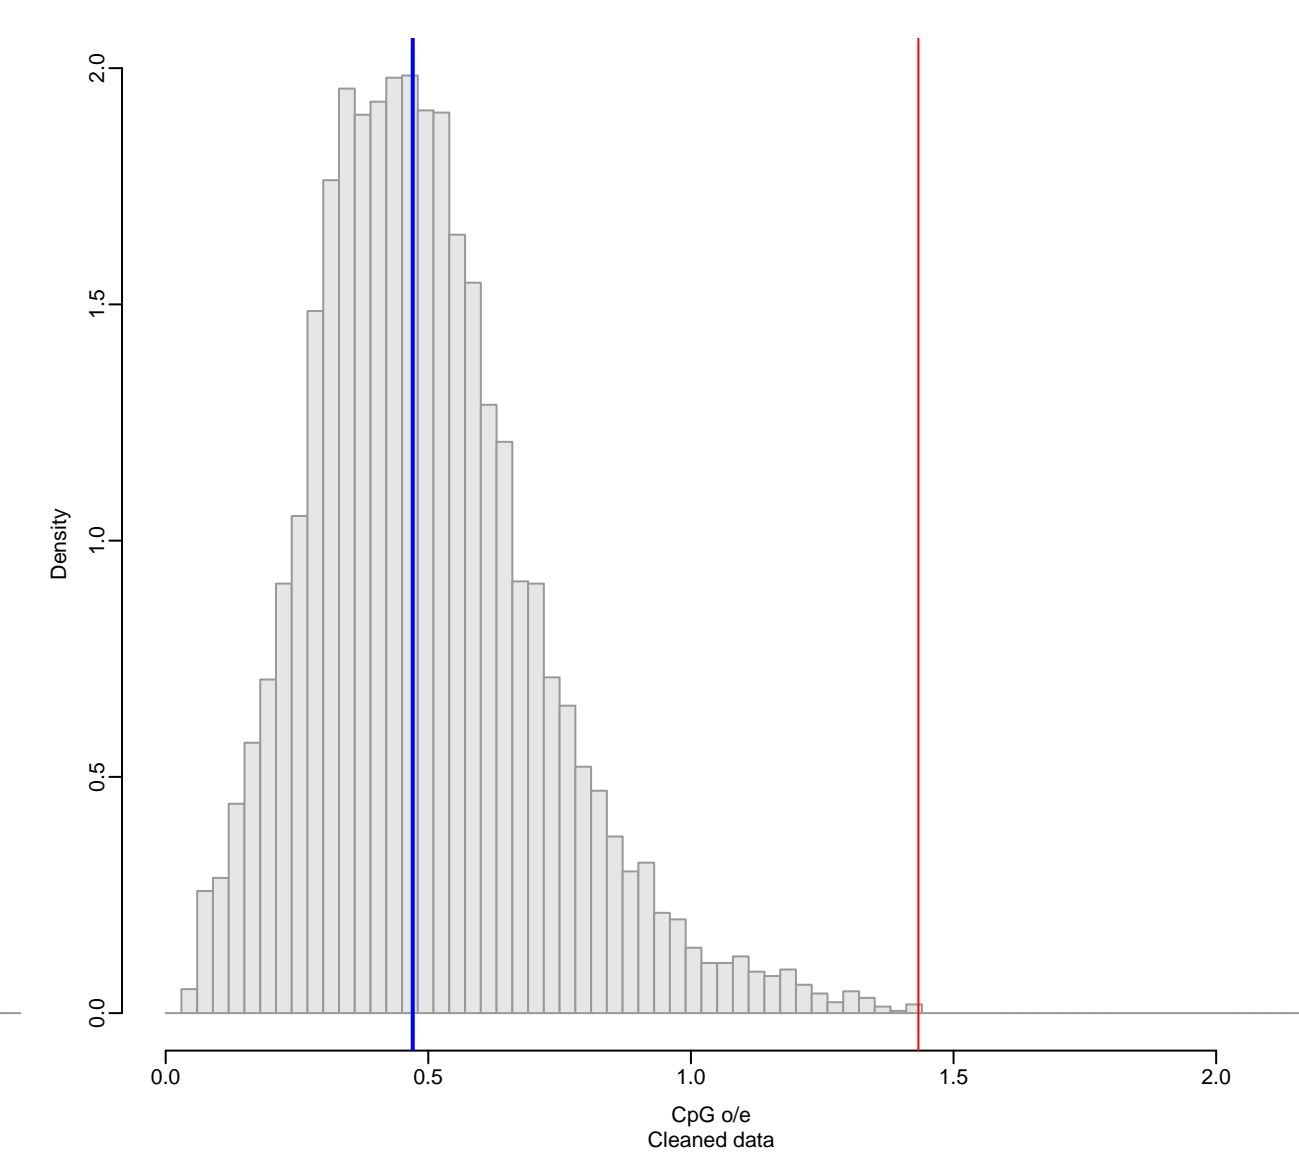



Nicotiana\_tabacum

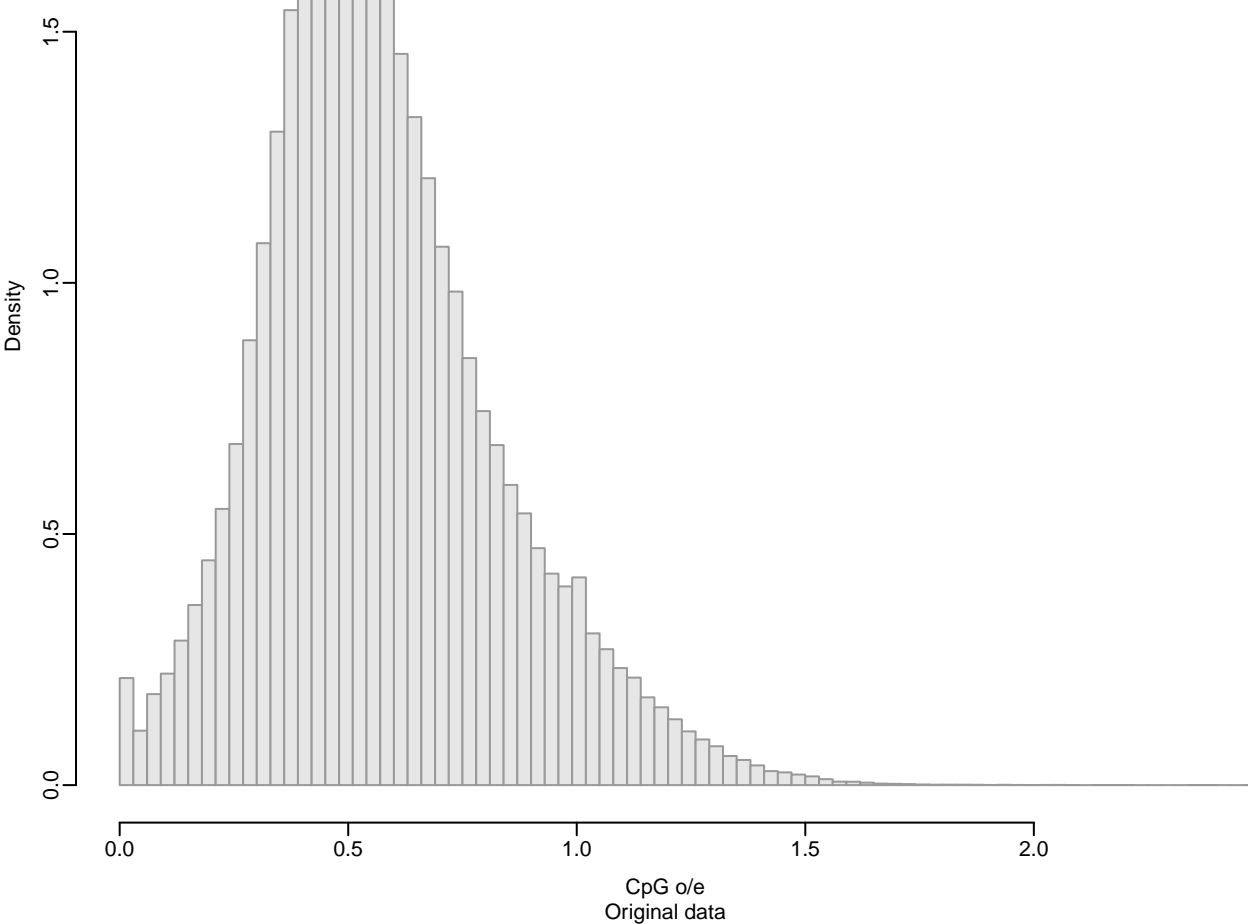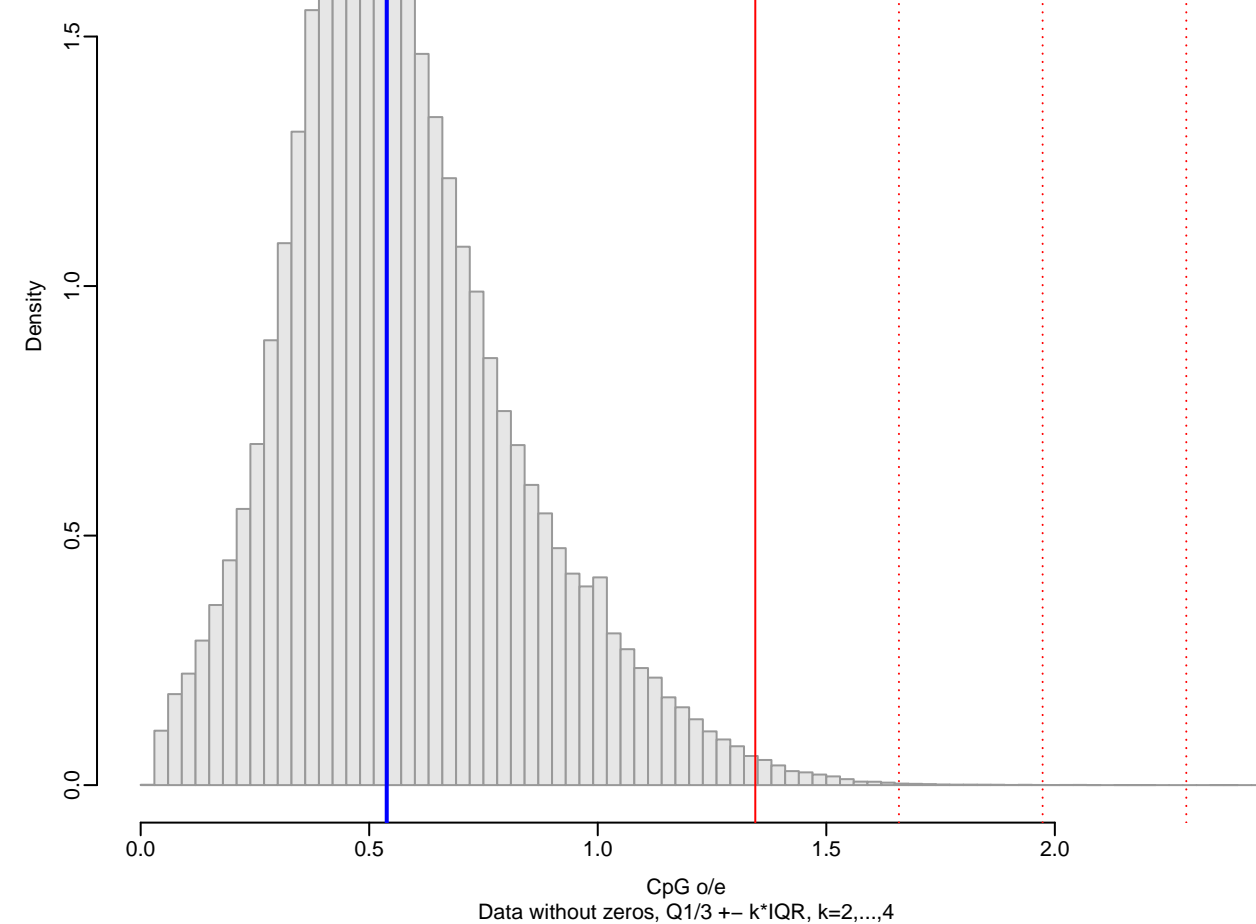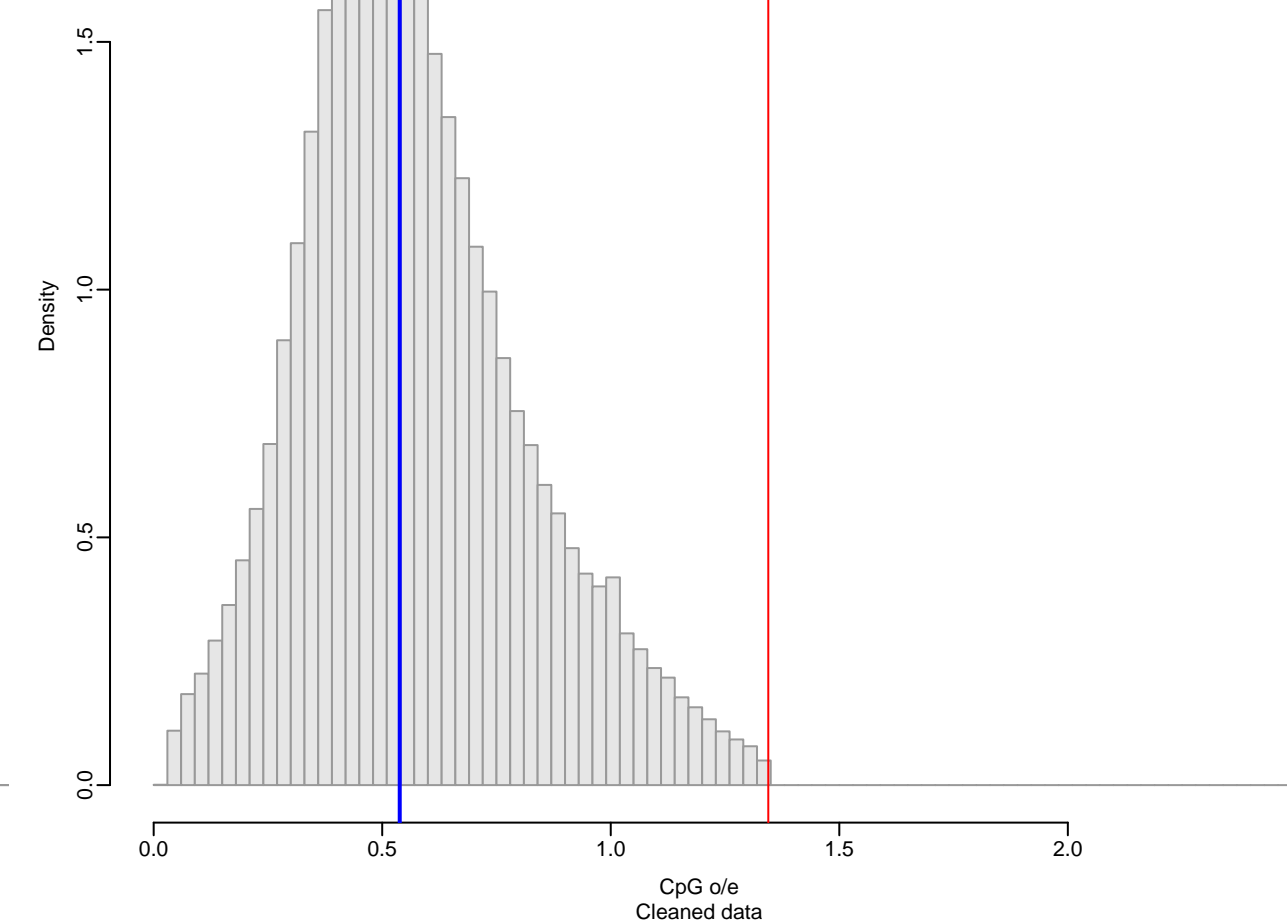

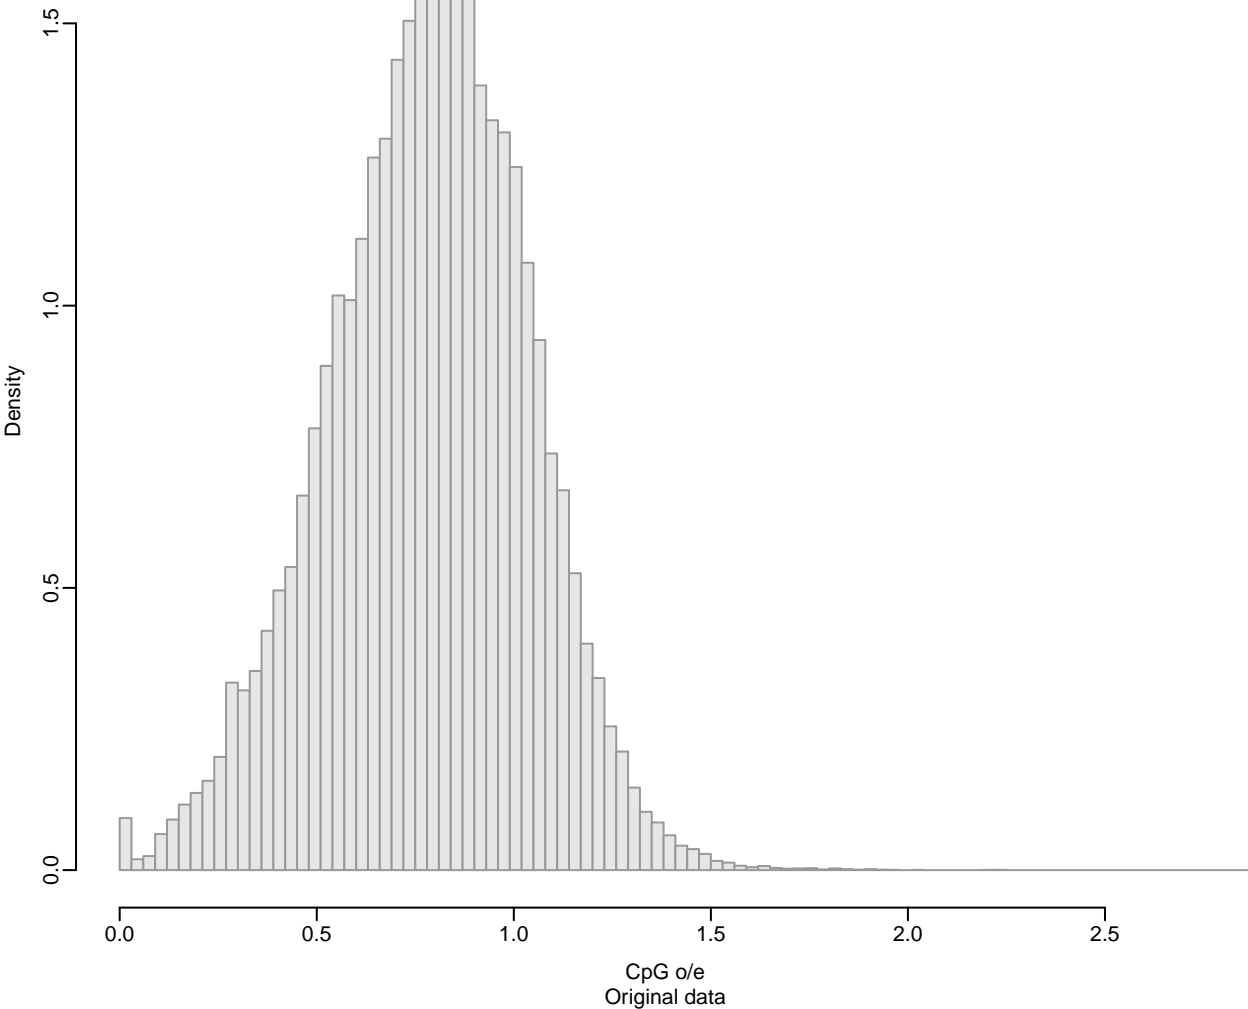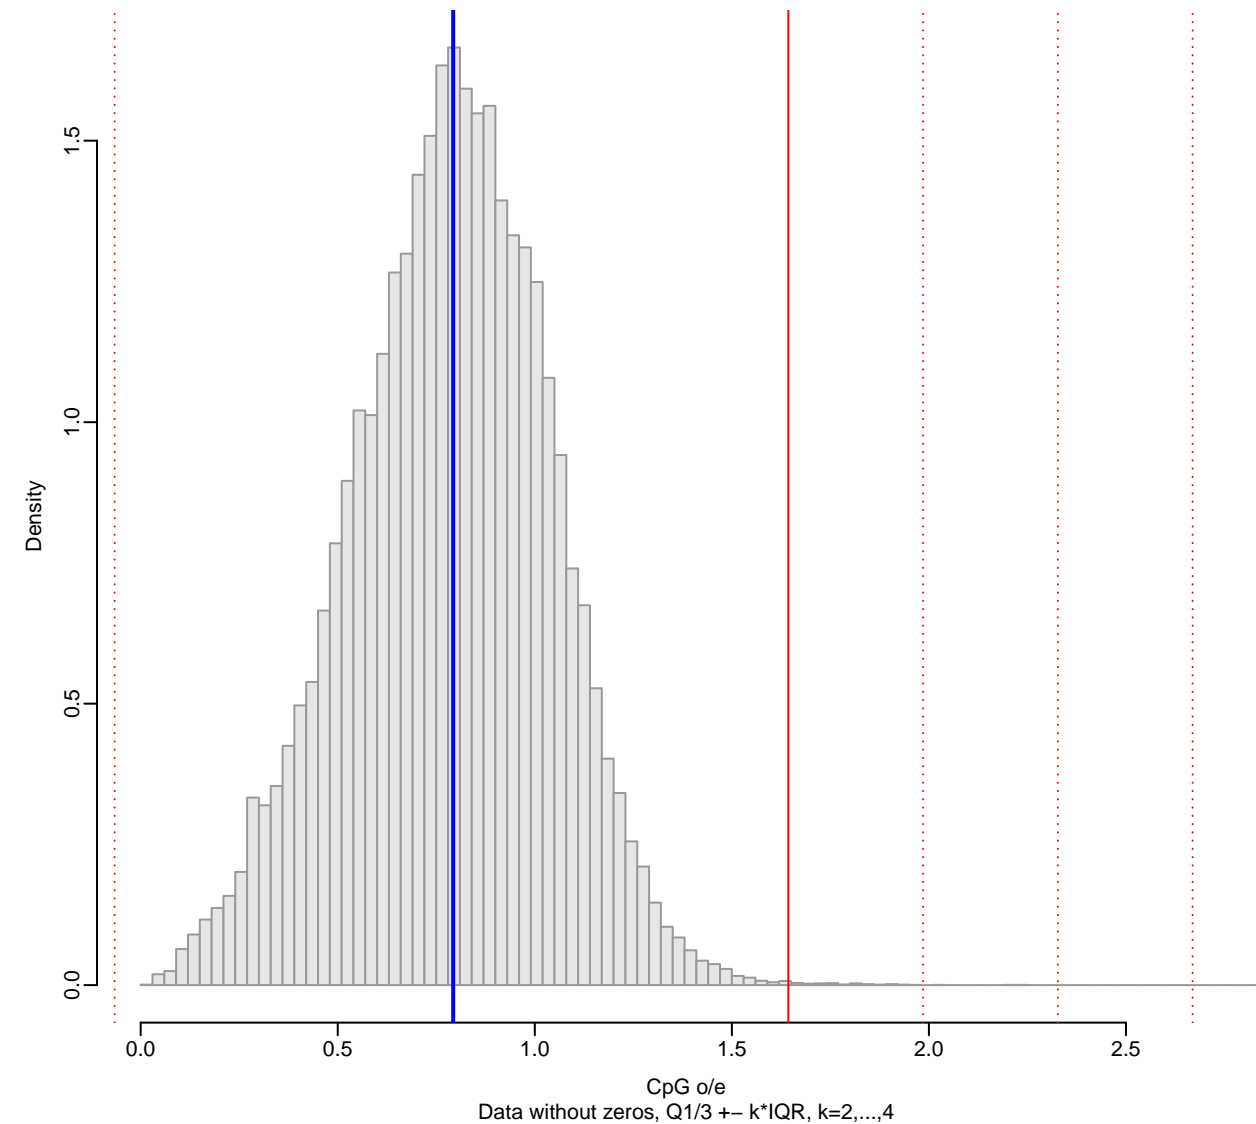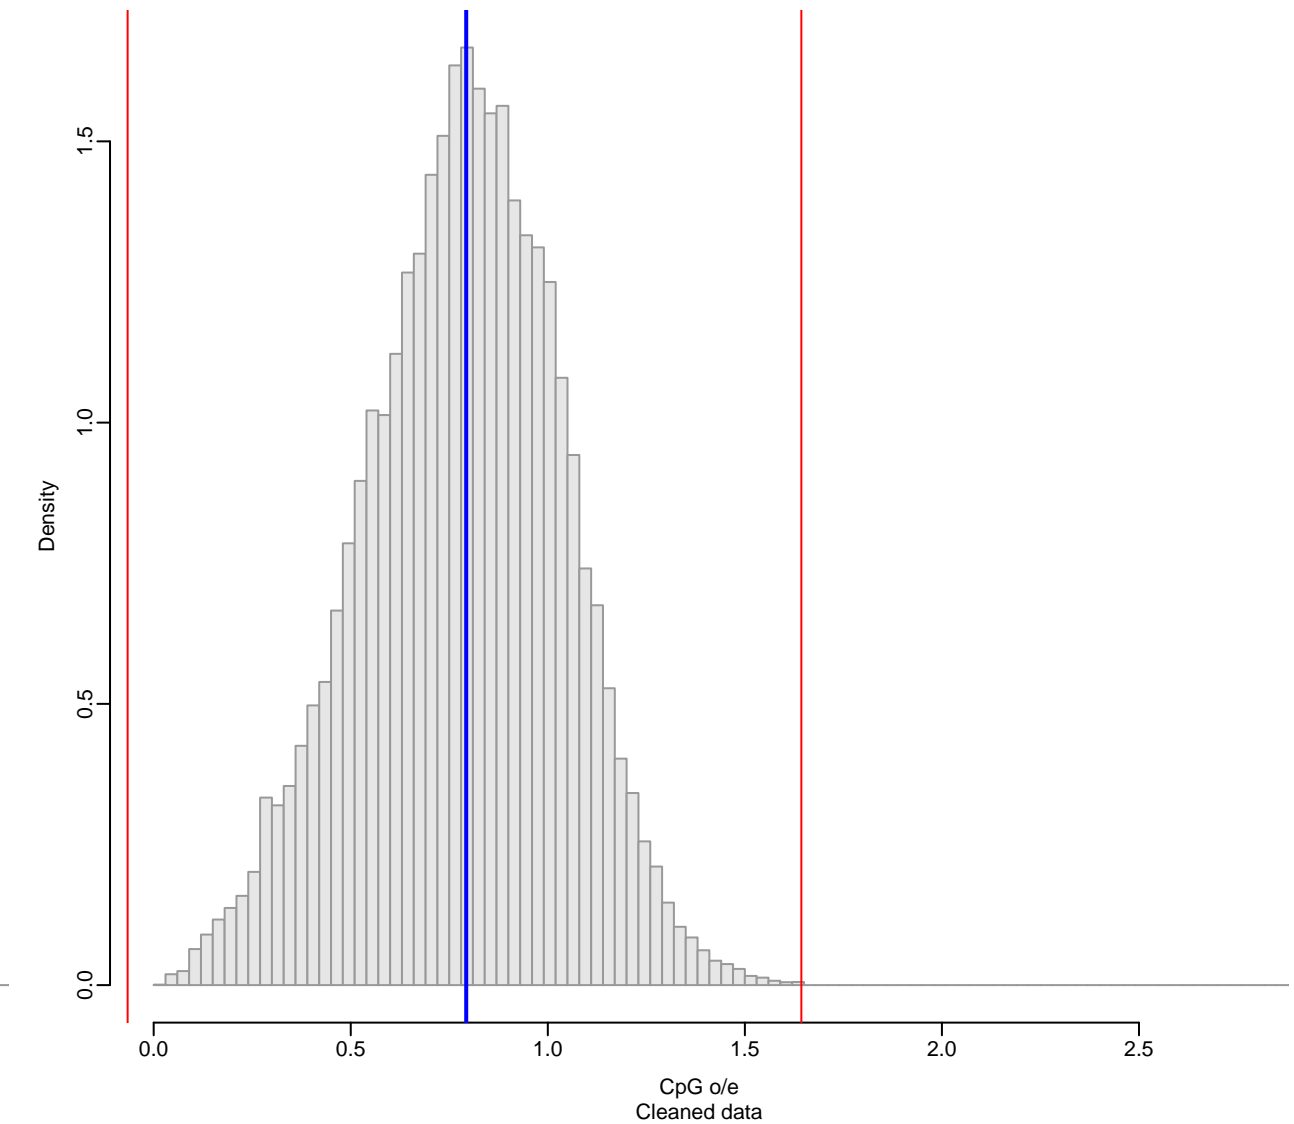

# Nippostrongylus\_brasiliensis

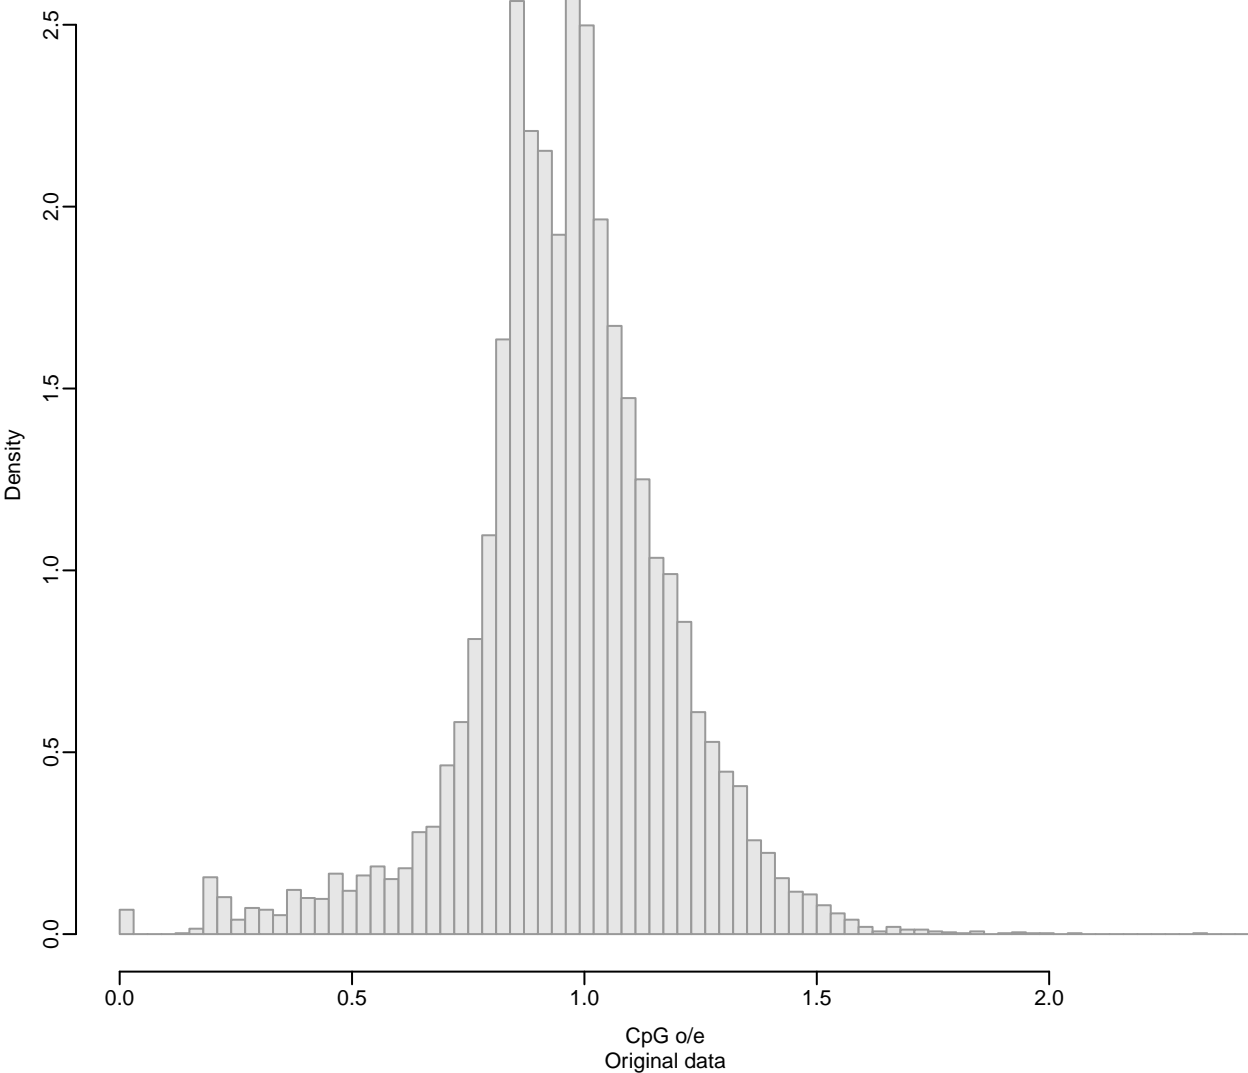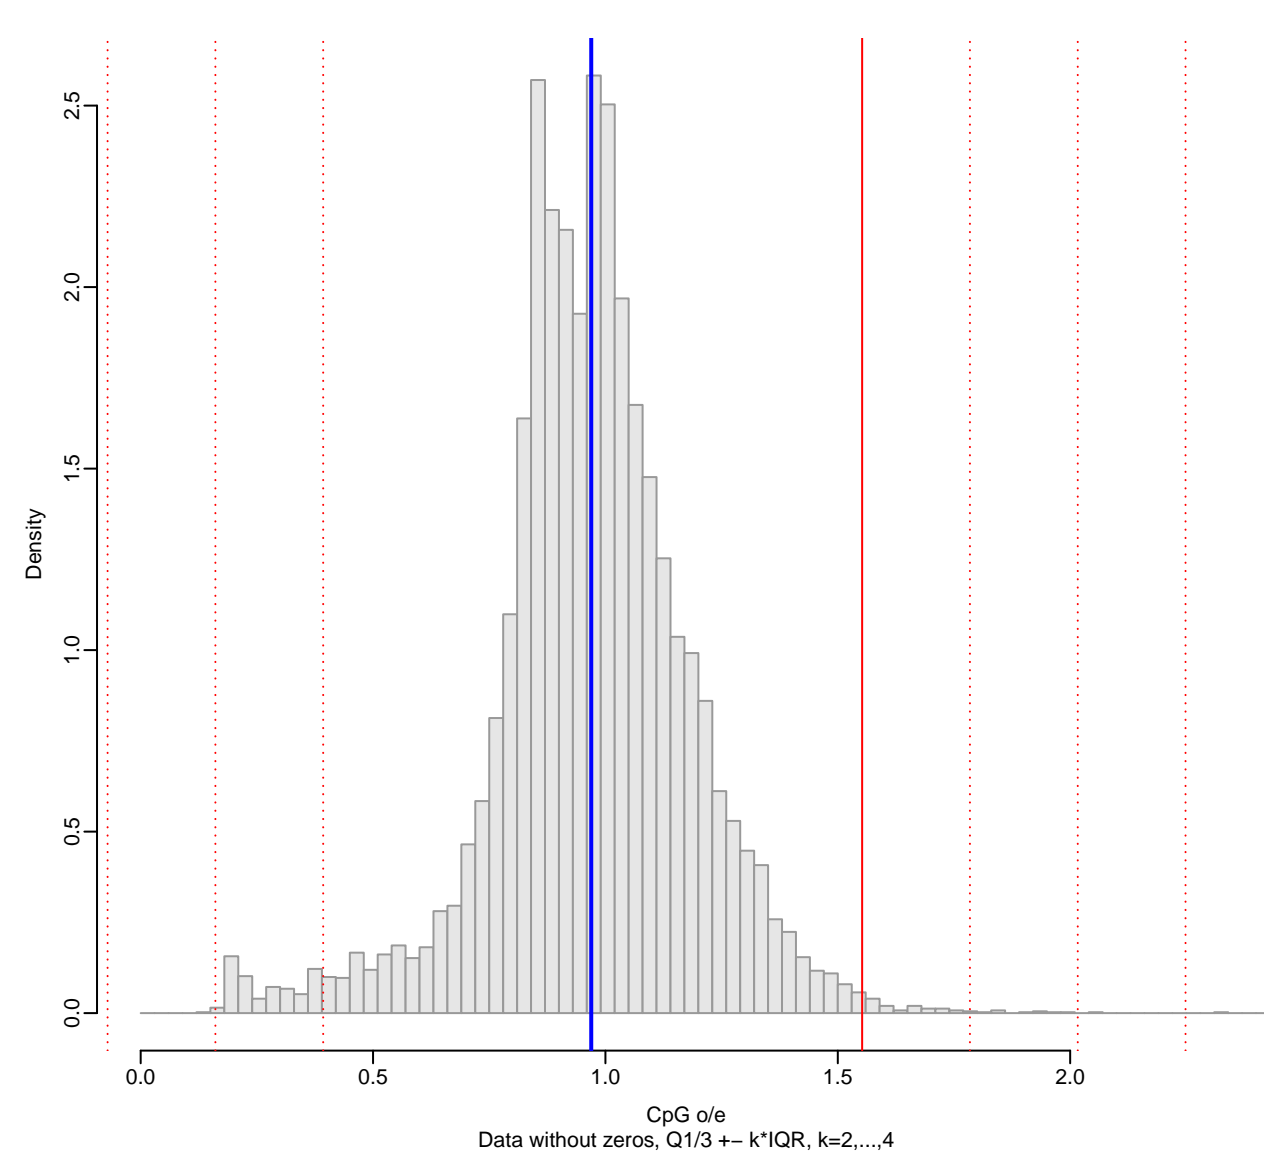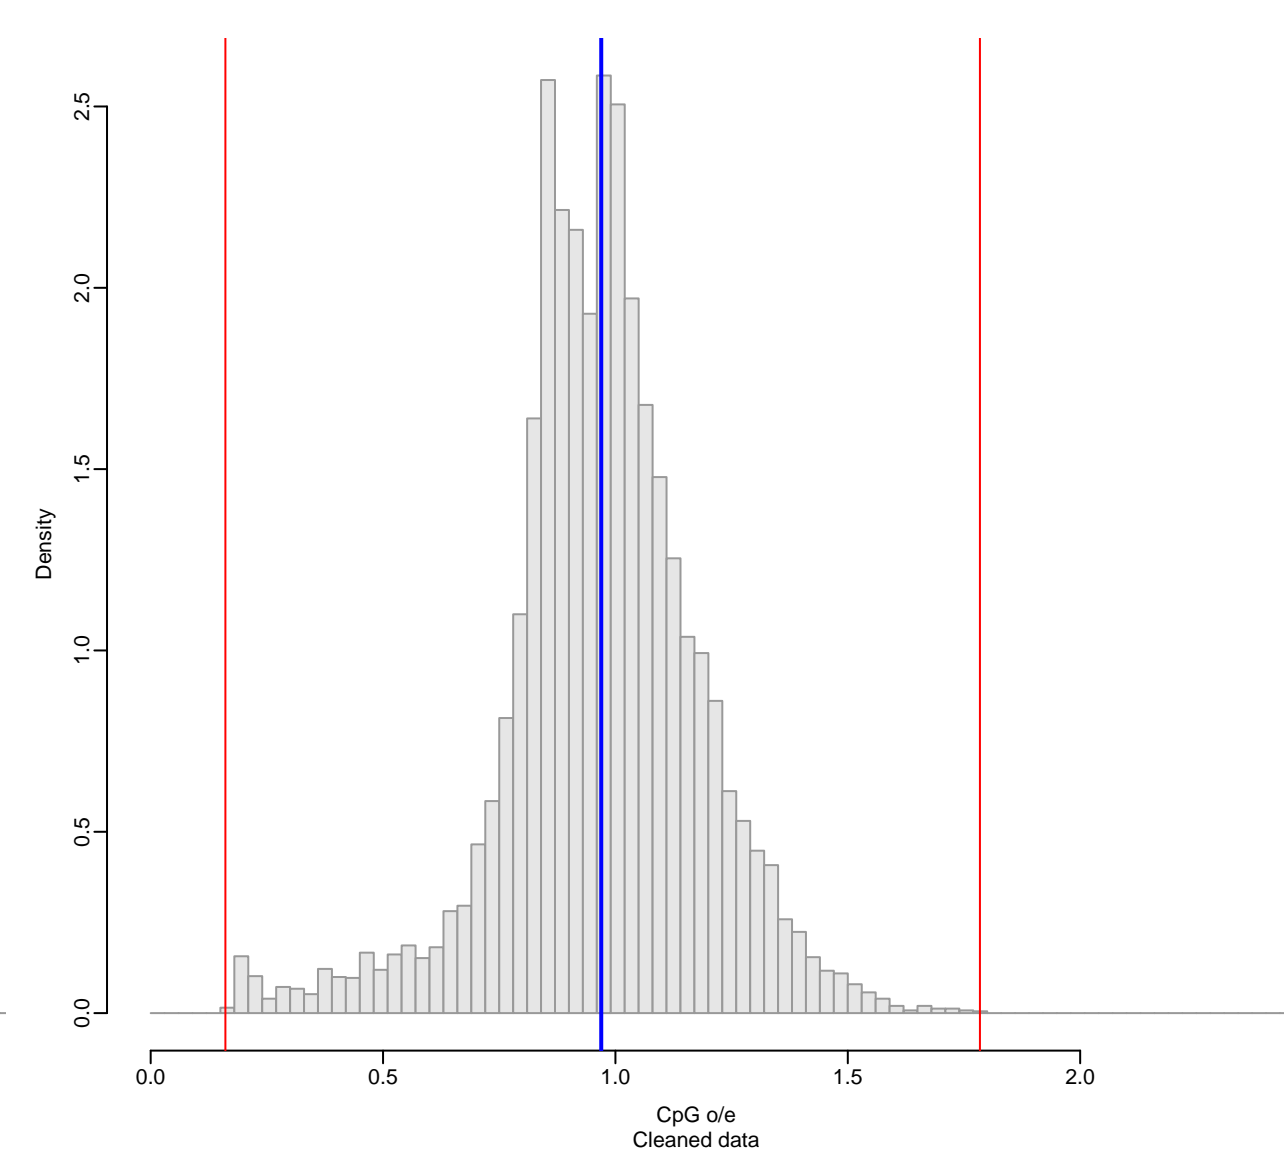

# Nitella\_hyalina

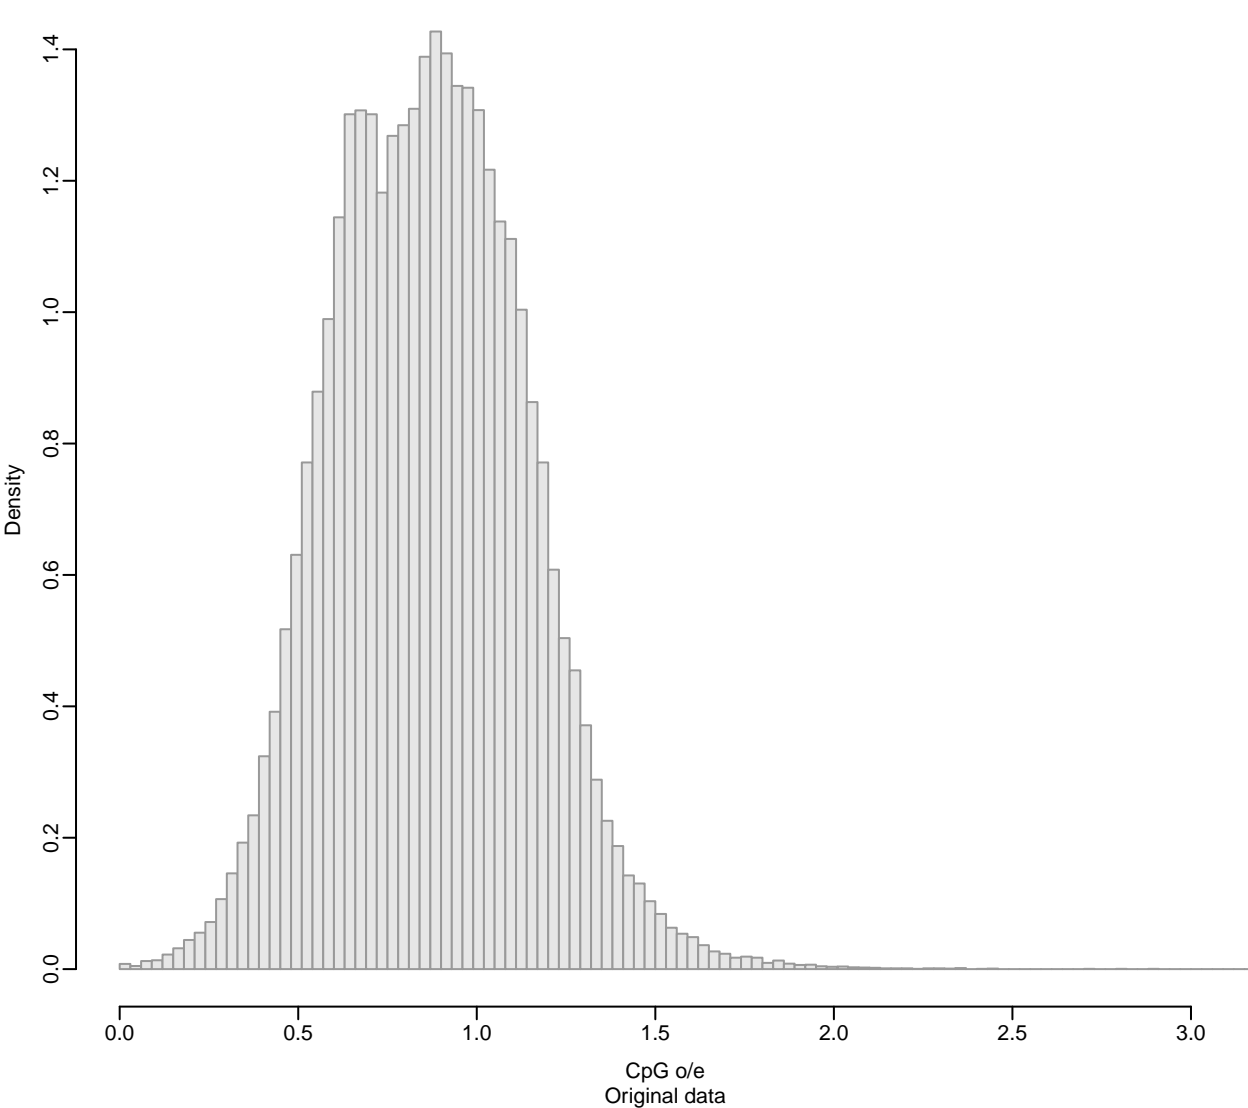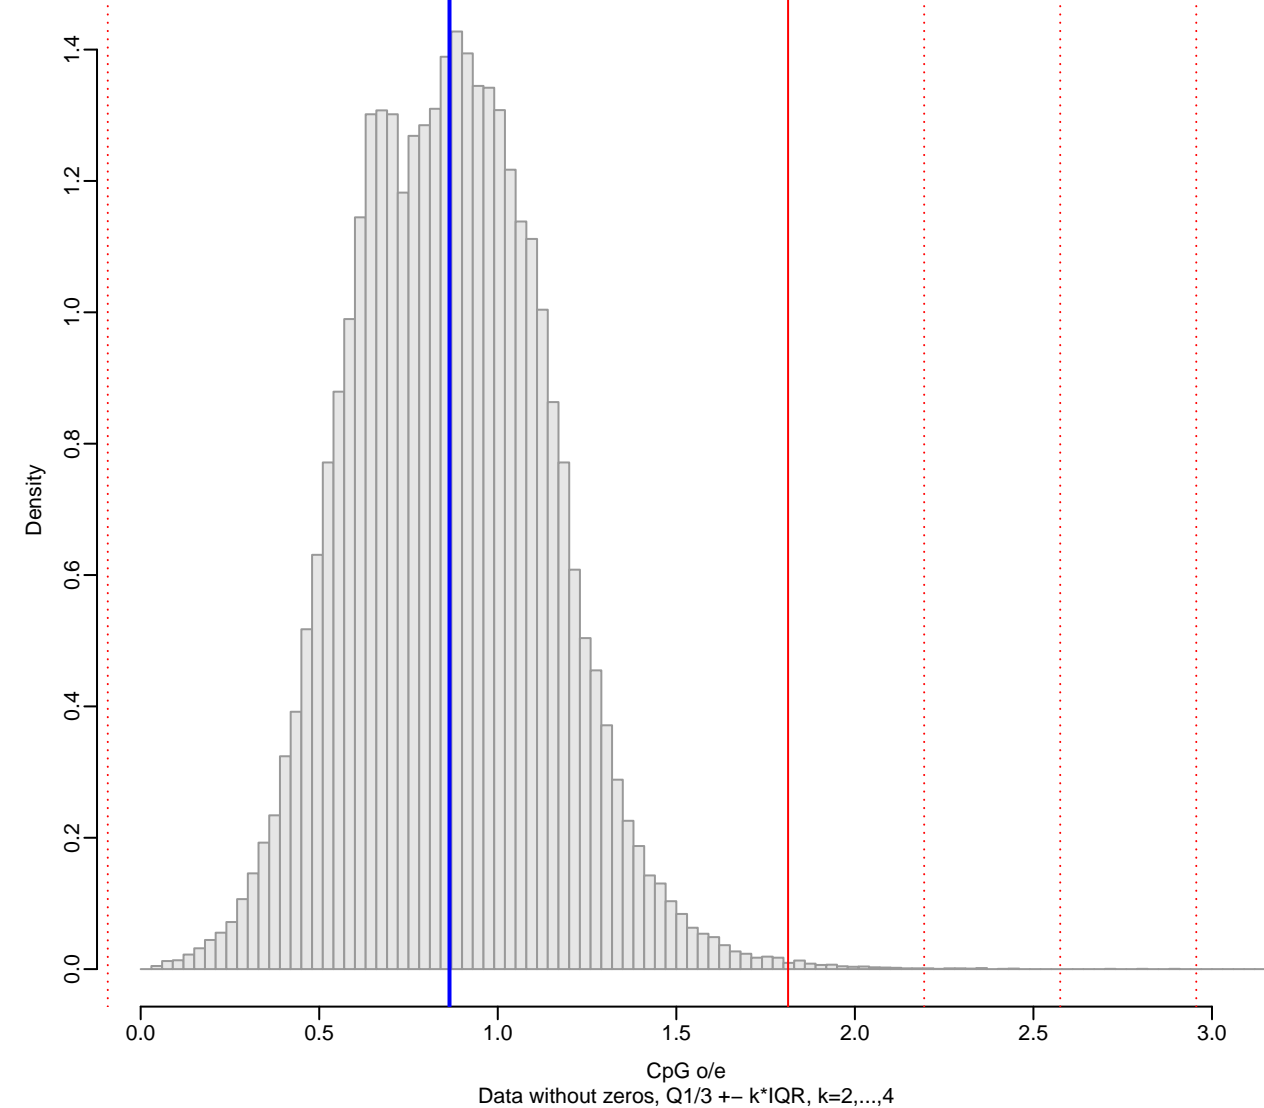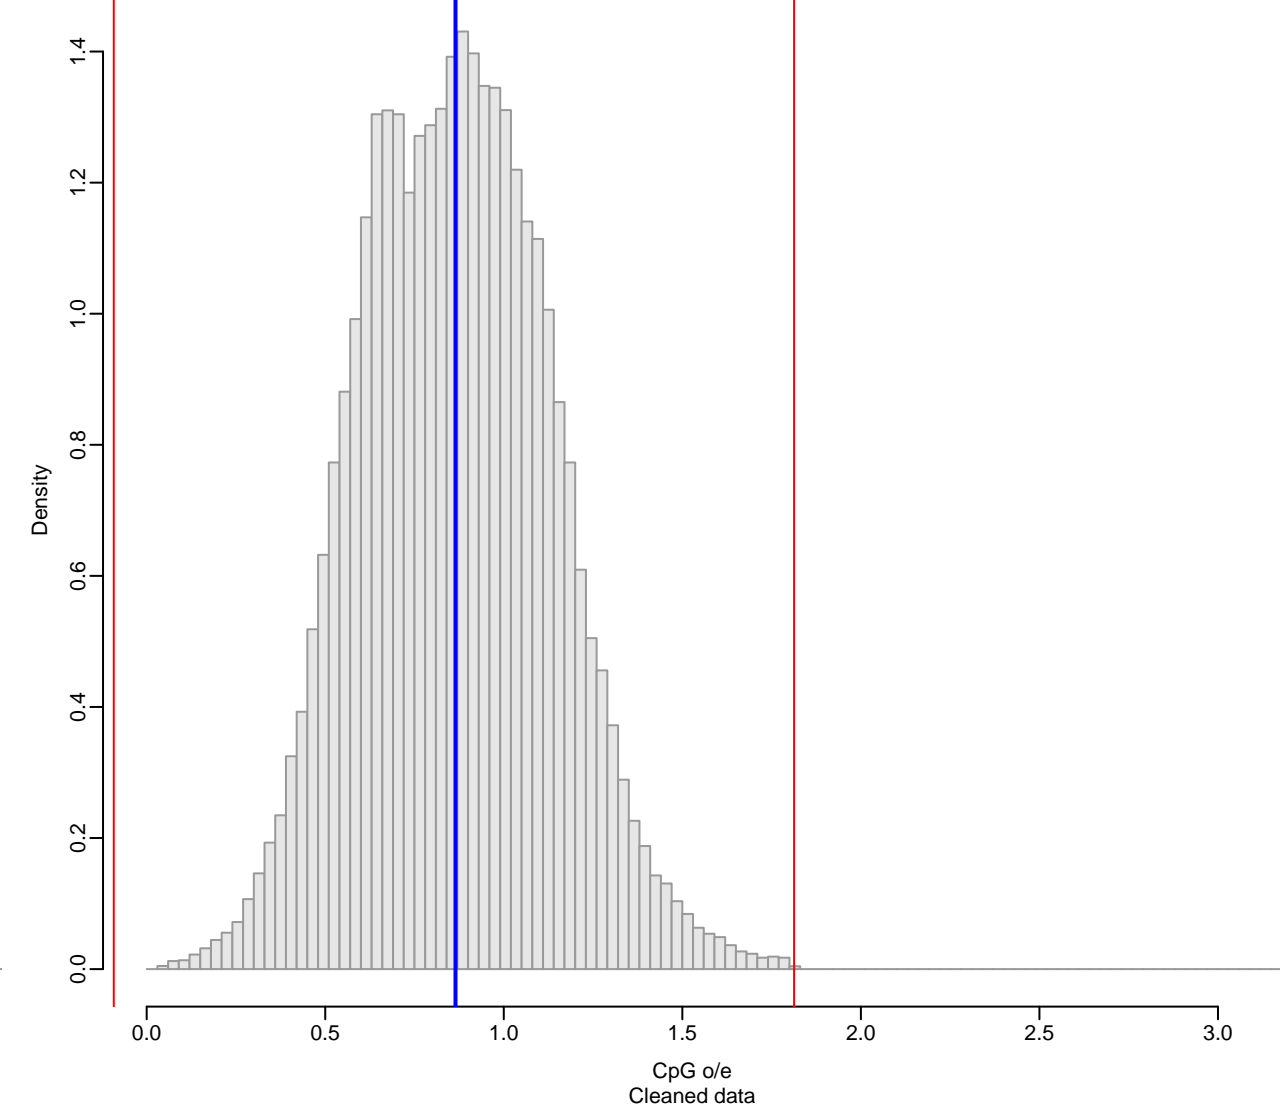

Onchocerca\_flexuosa

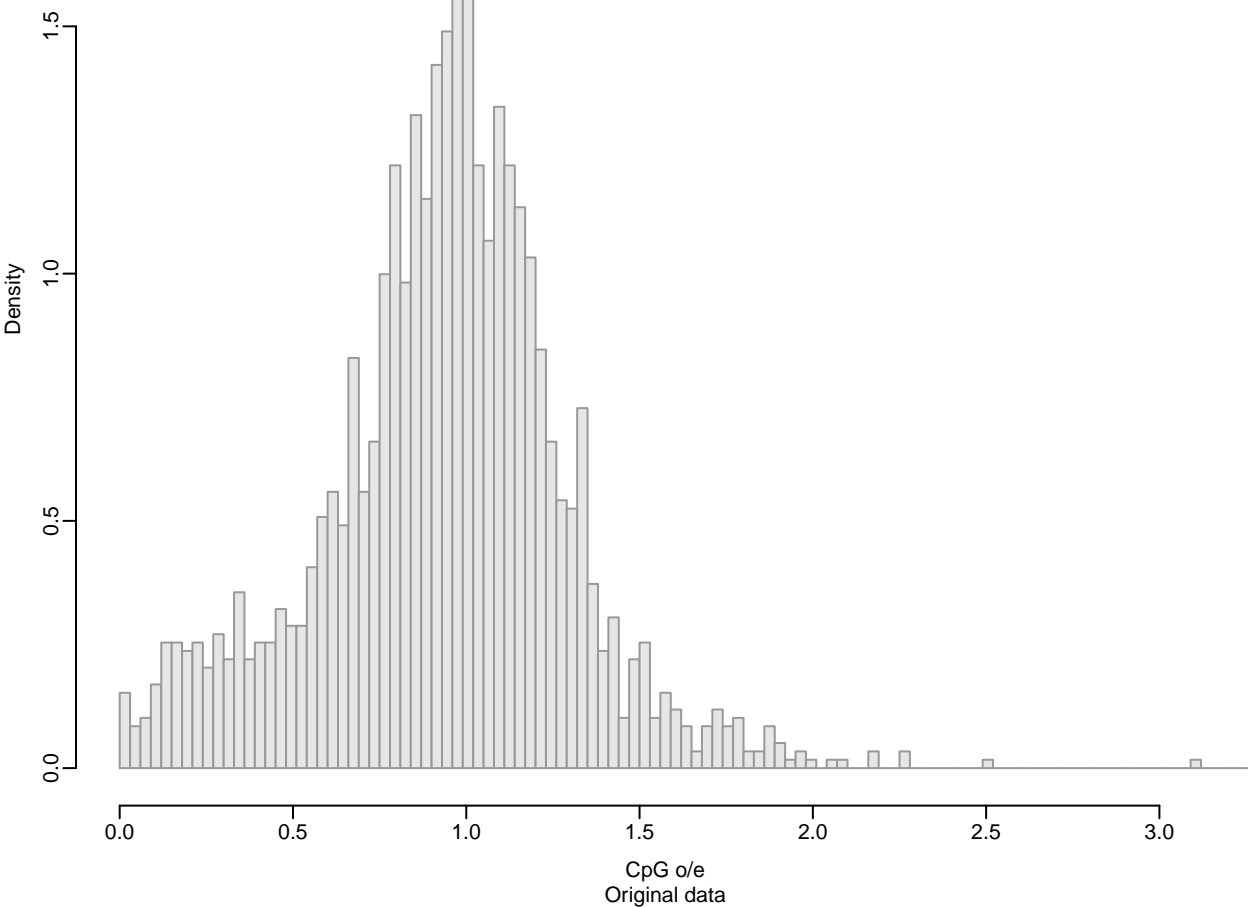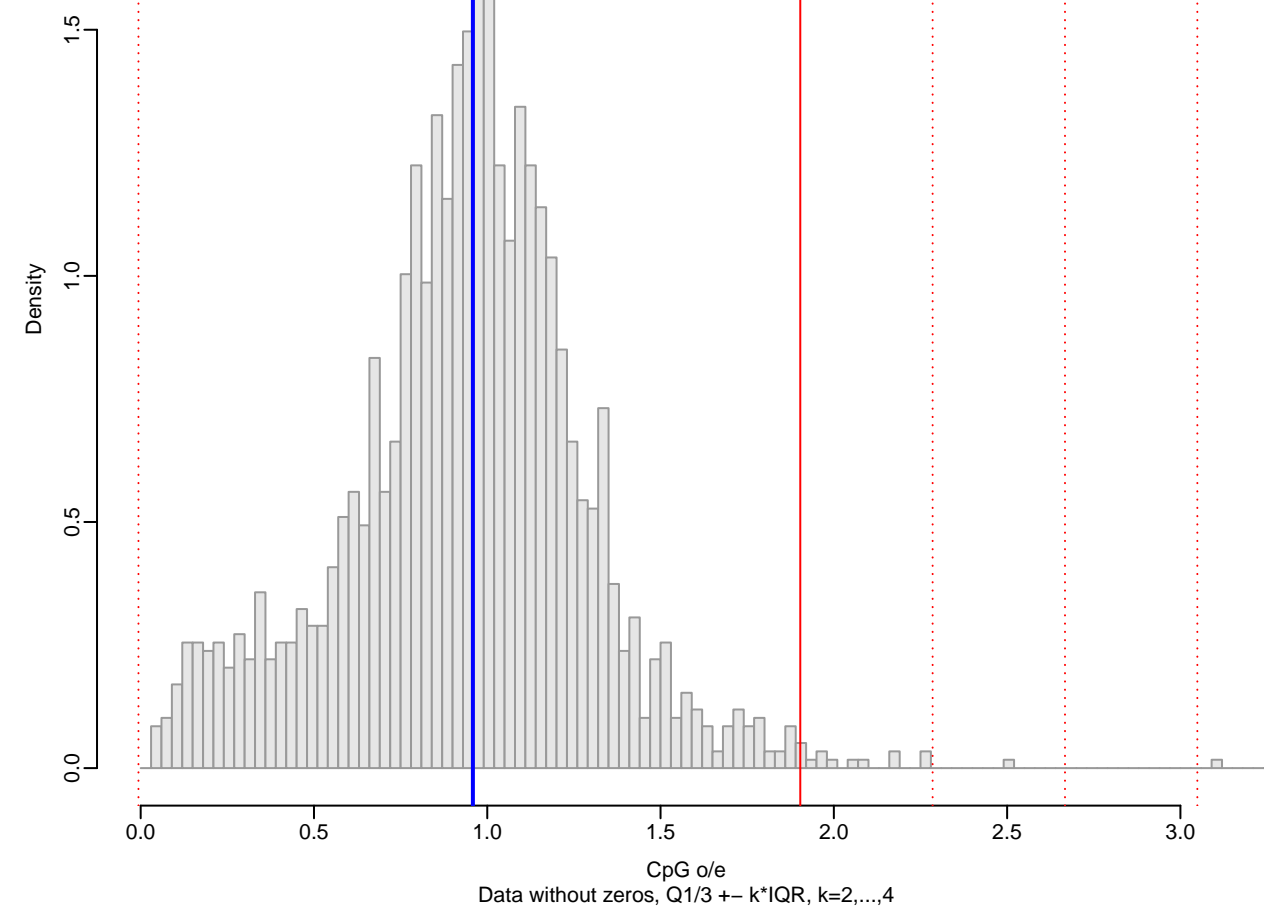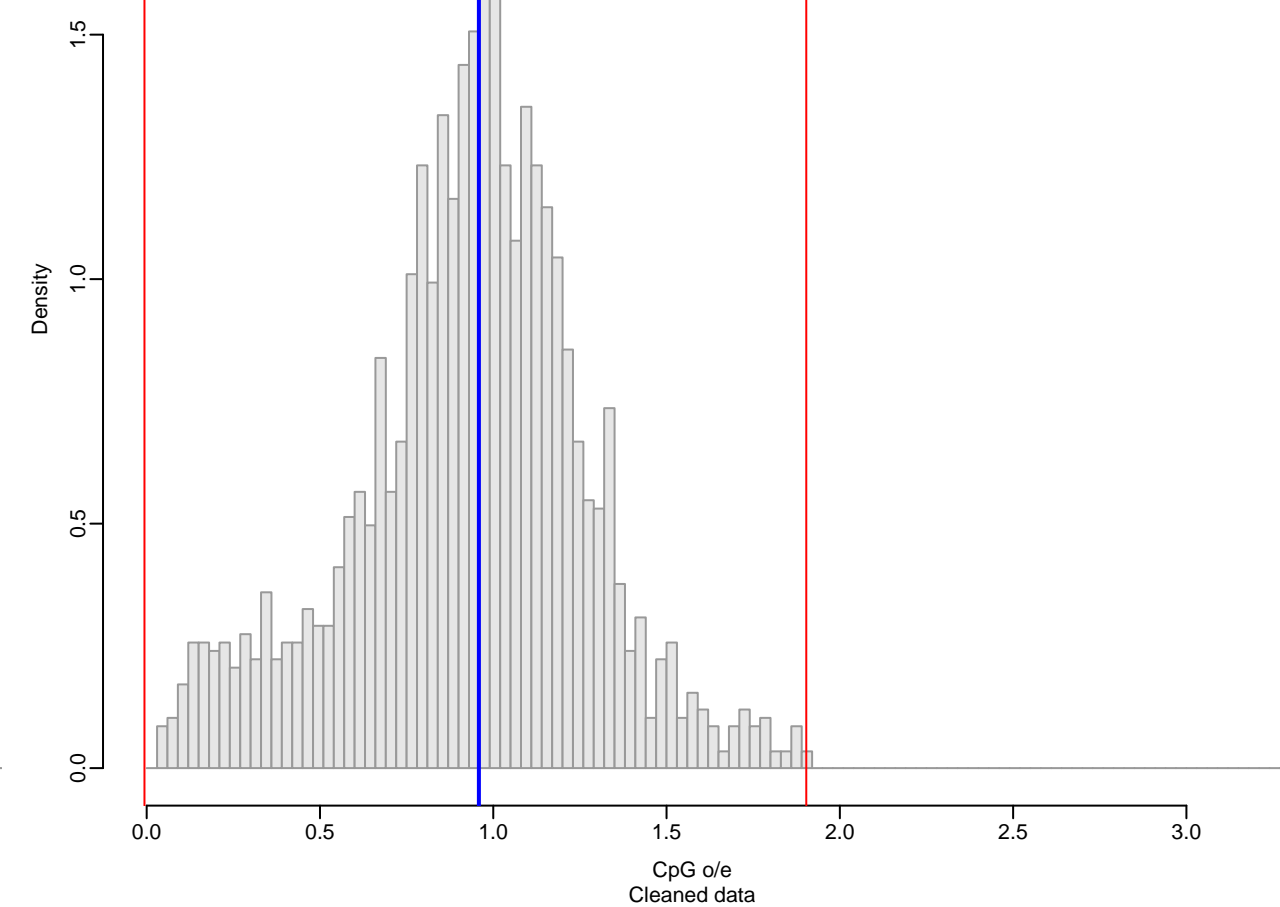

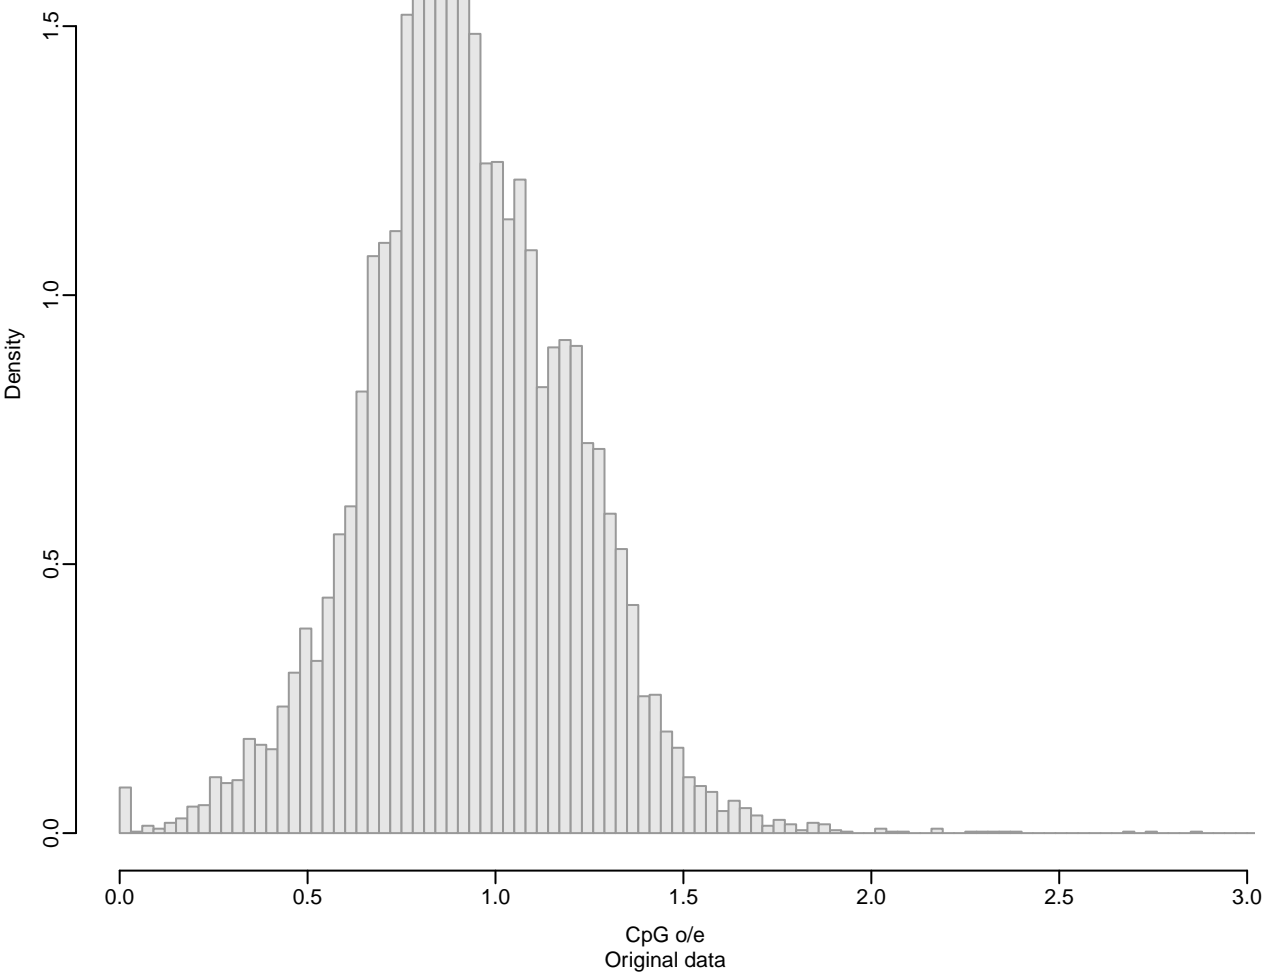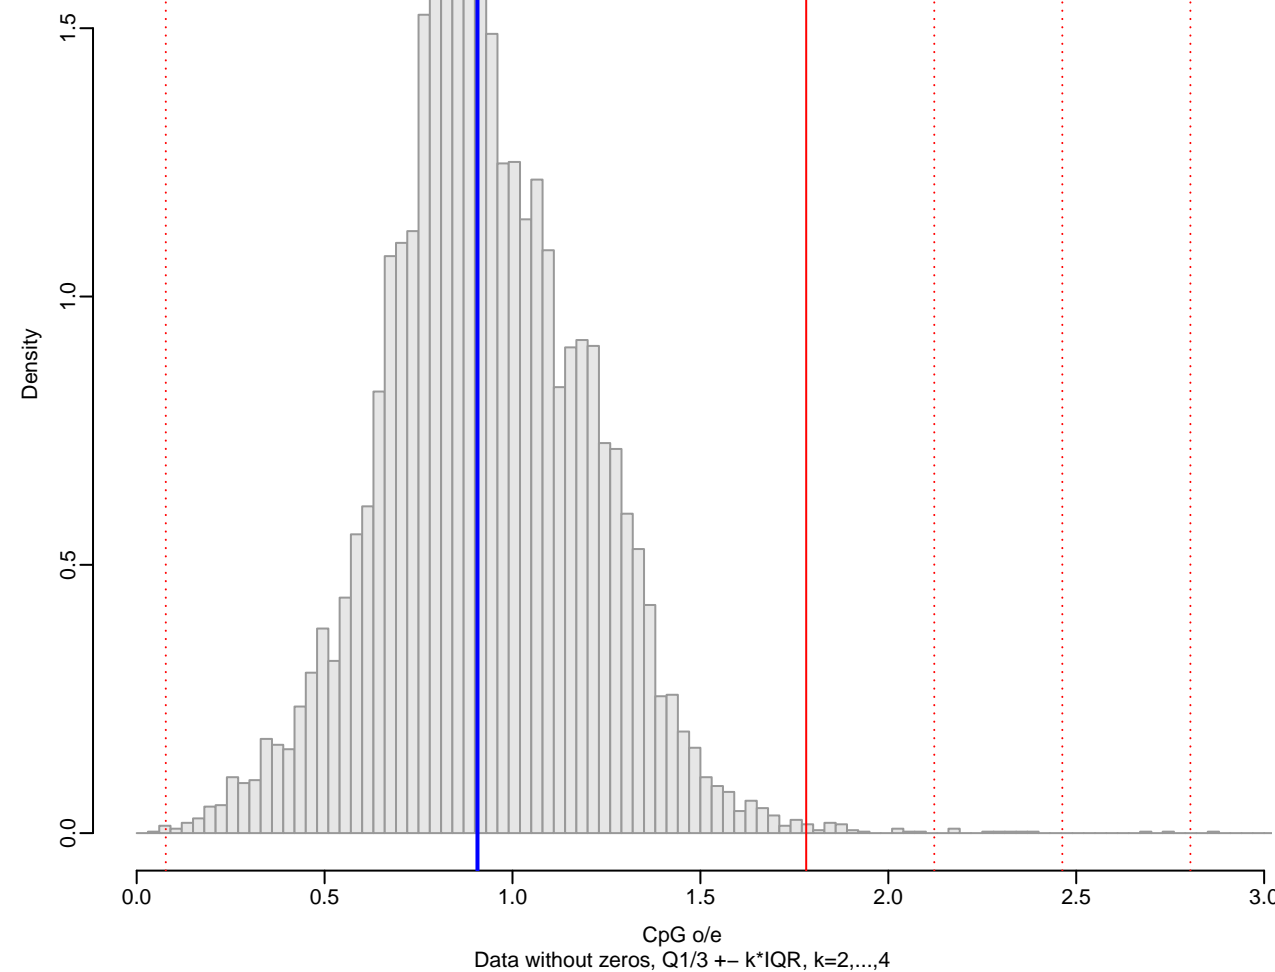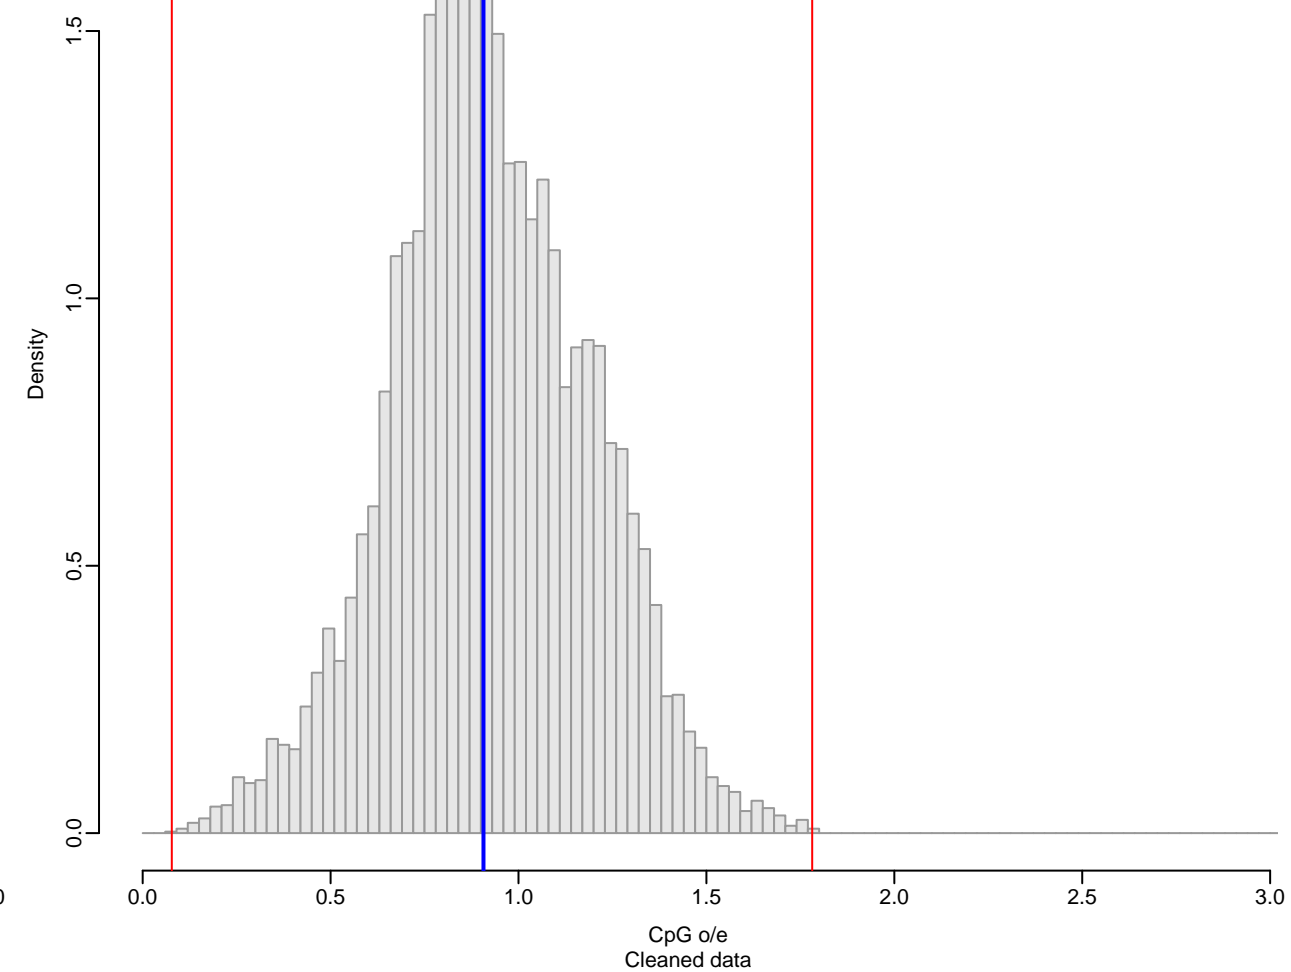

Oncomelania\_hupensis

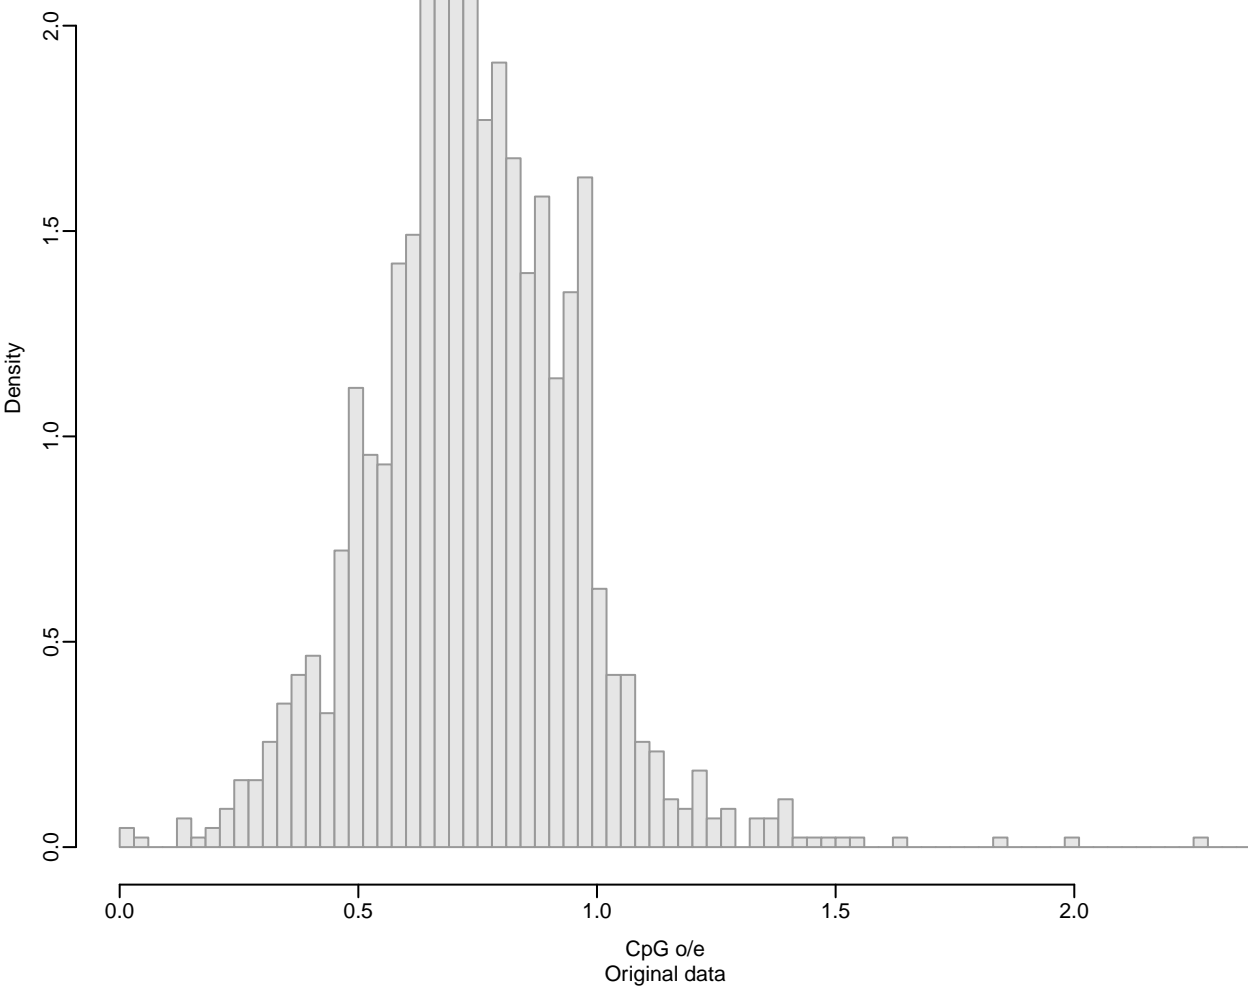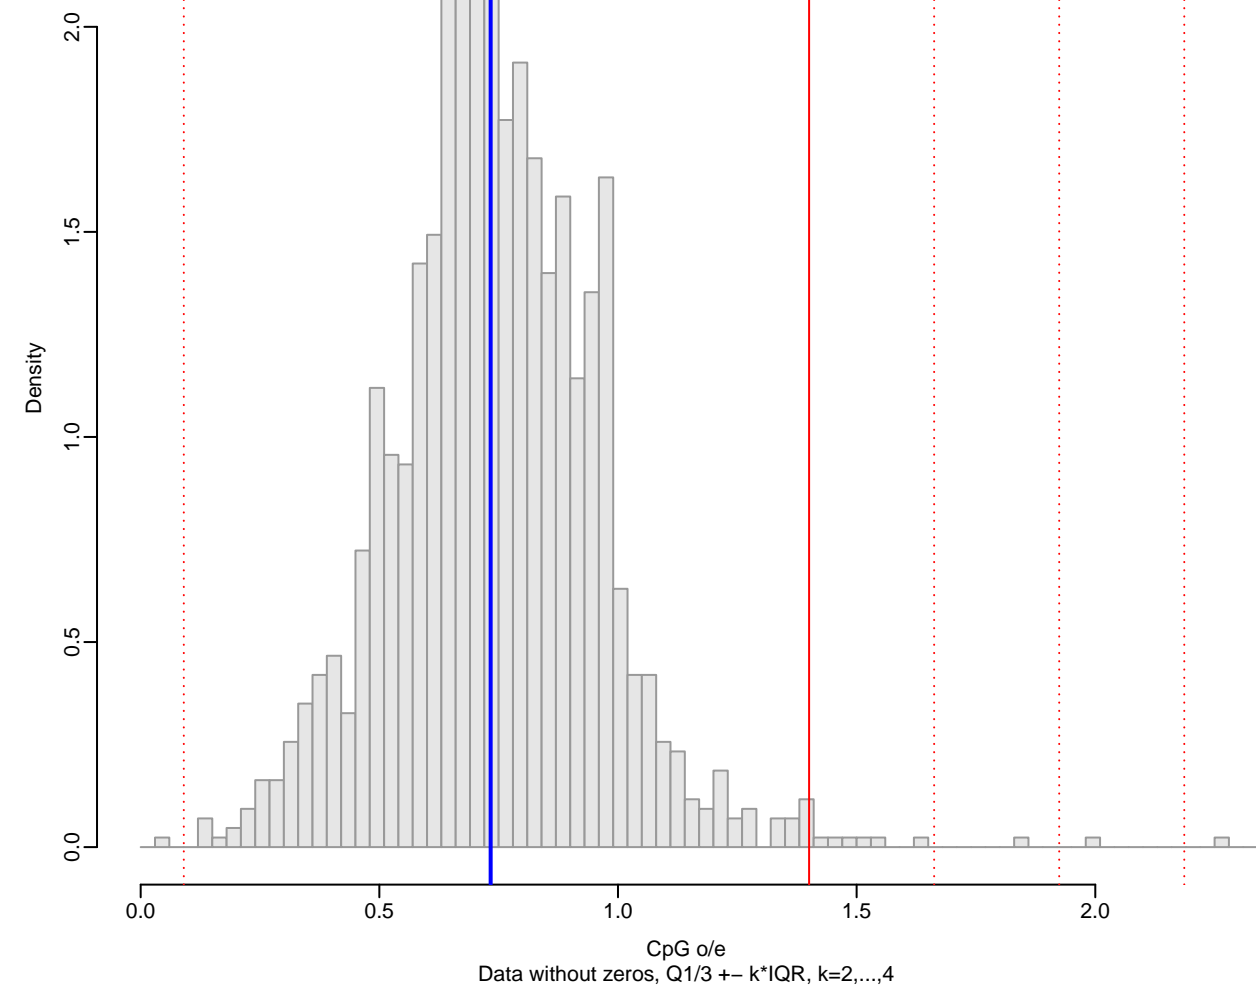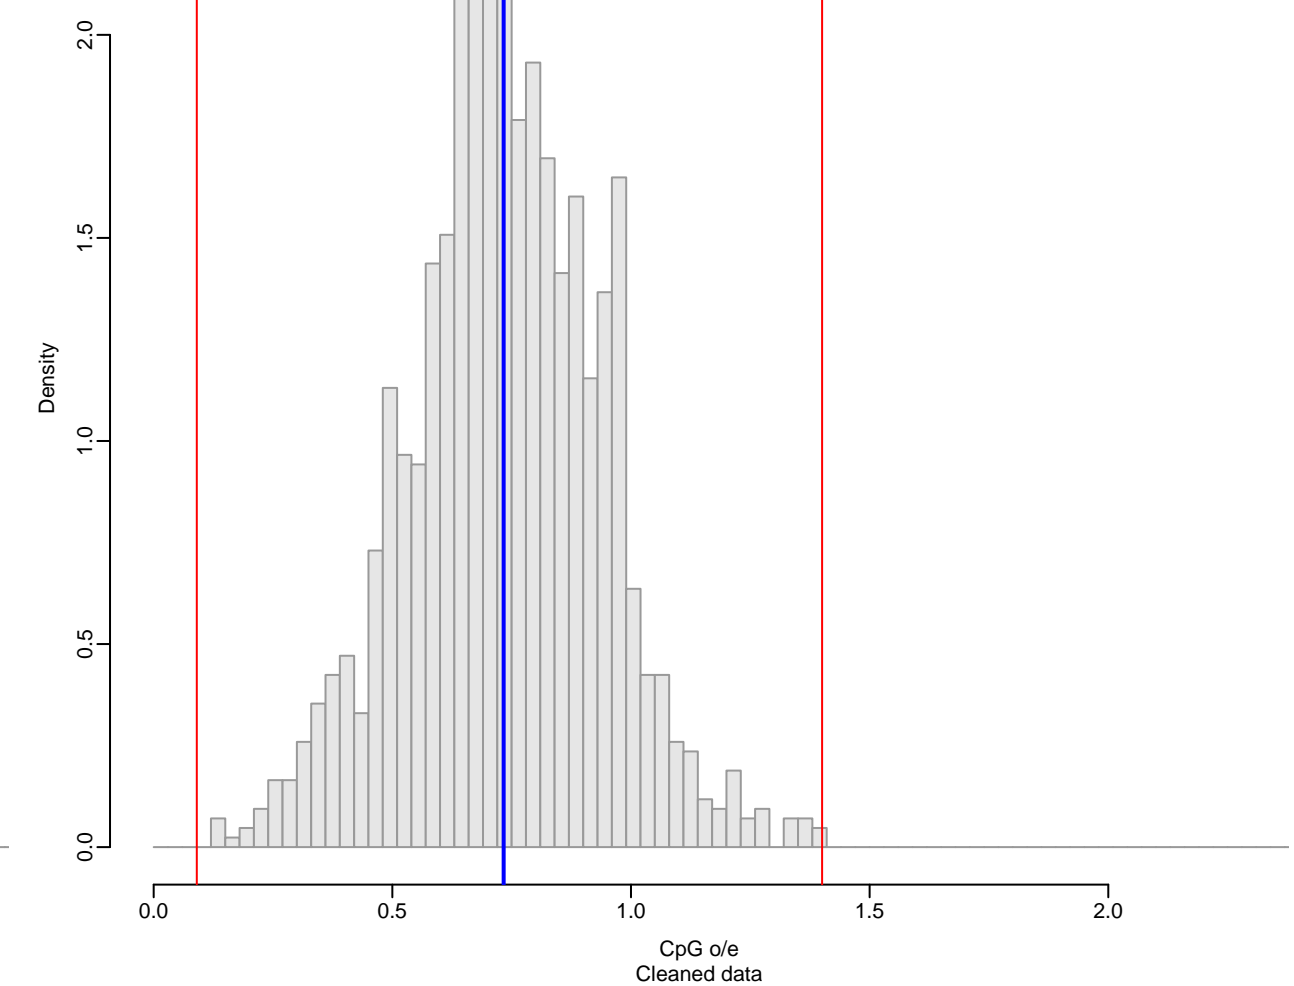

Oncorhynchus\_kisutch

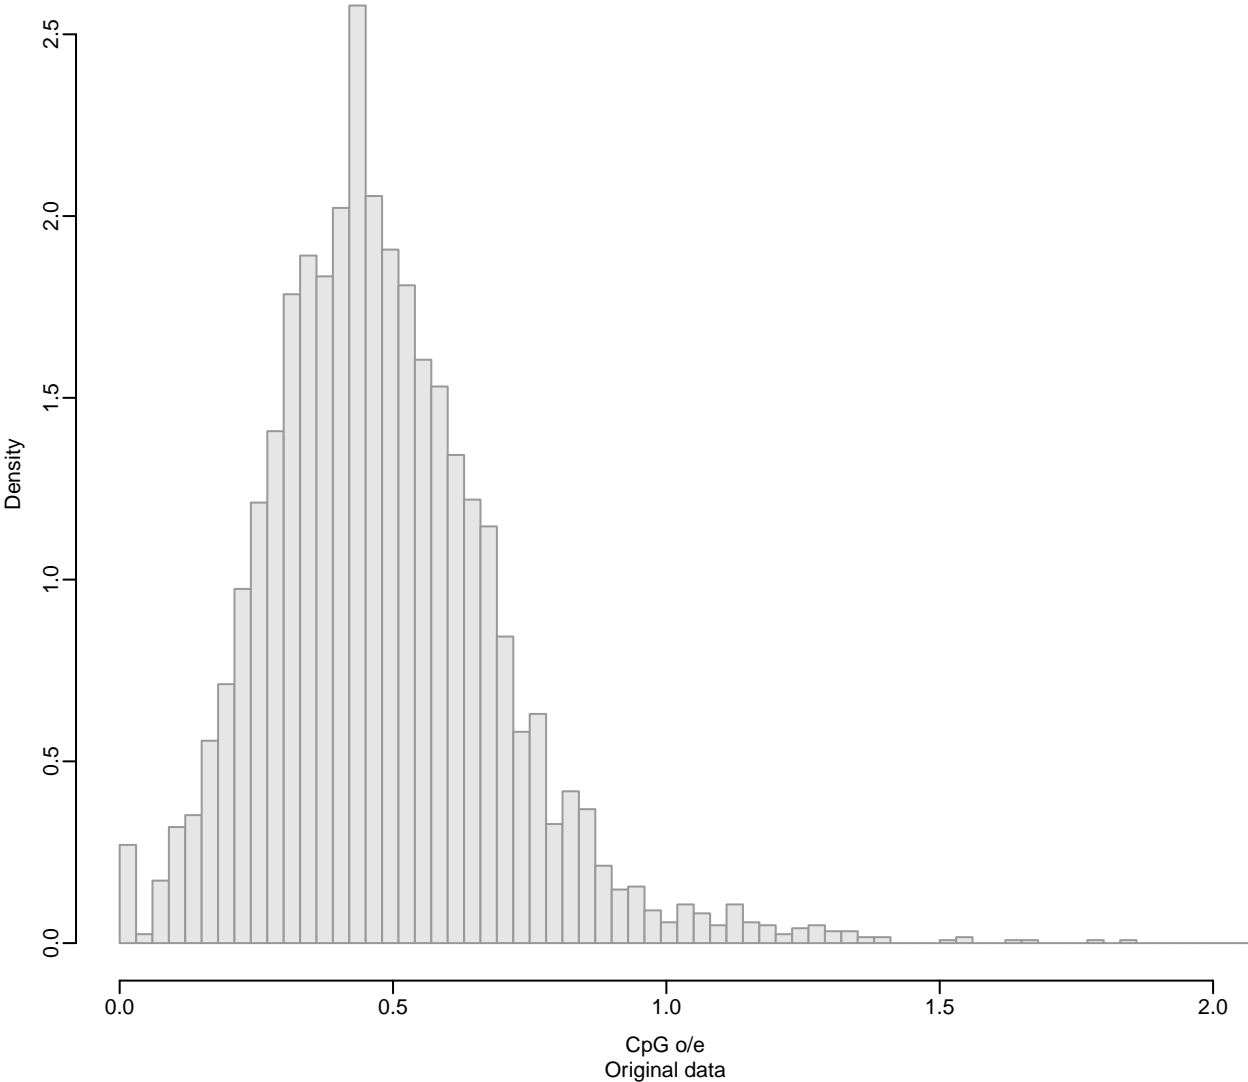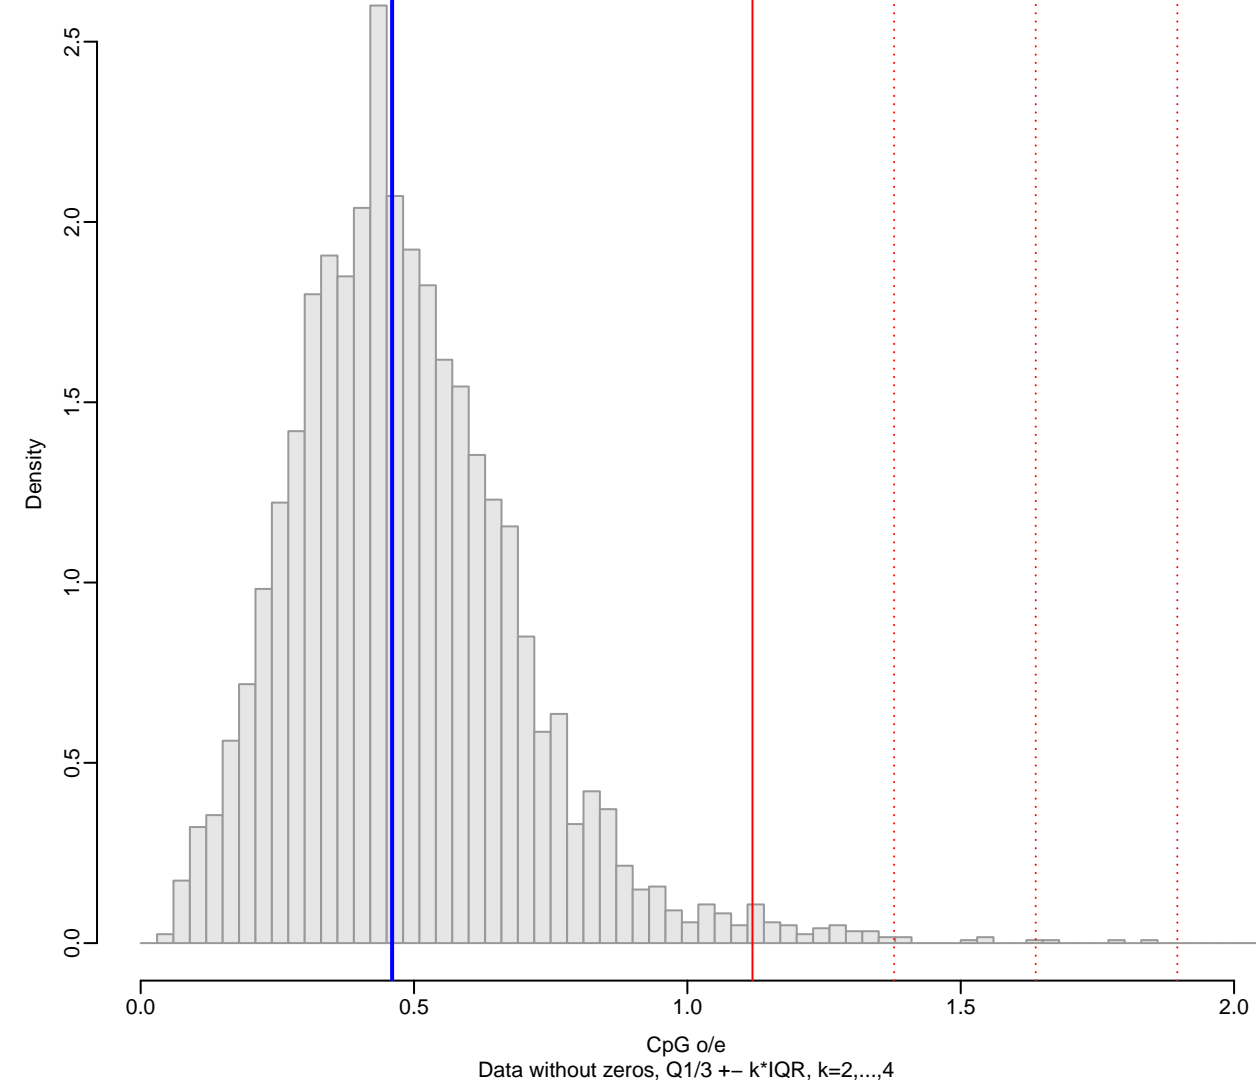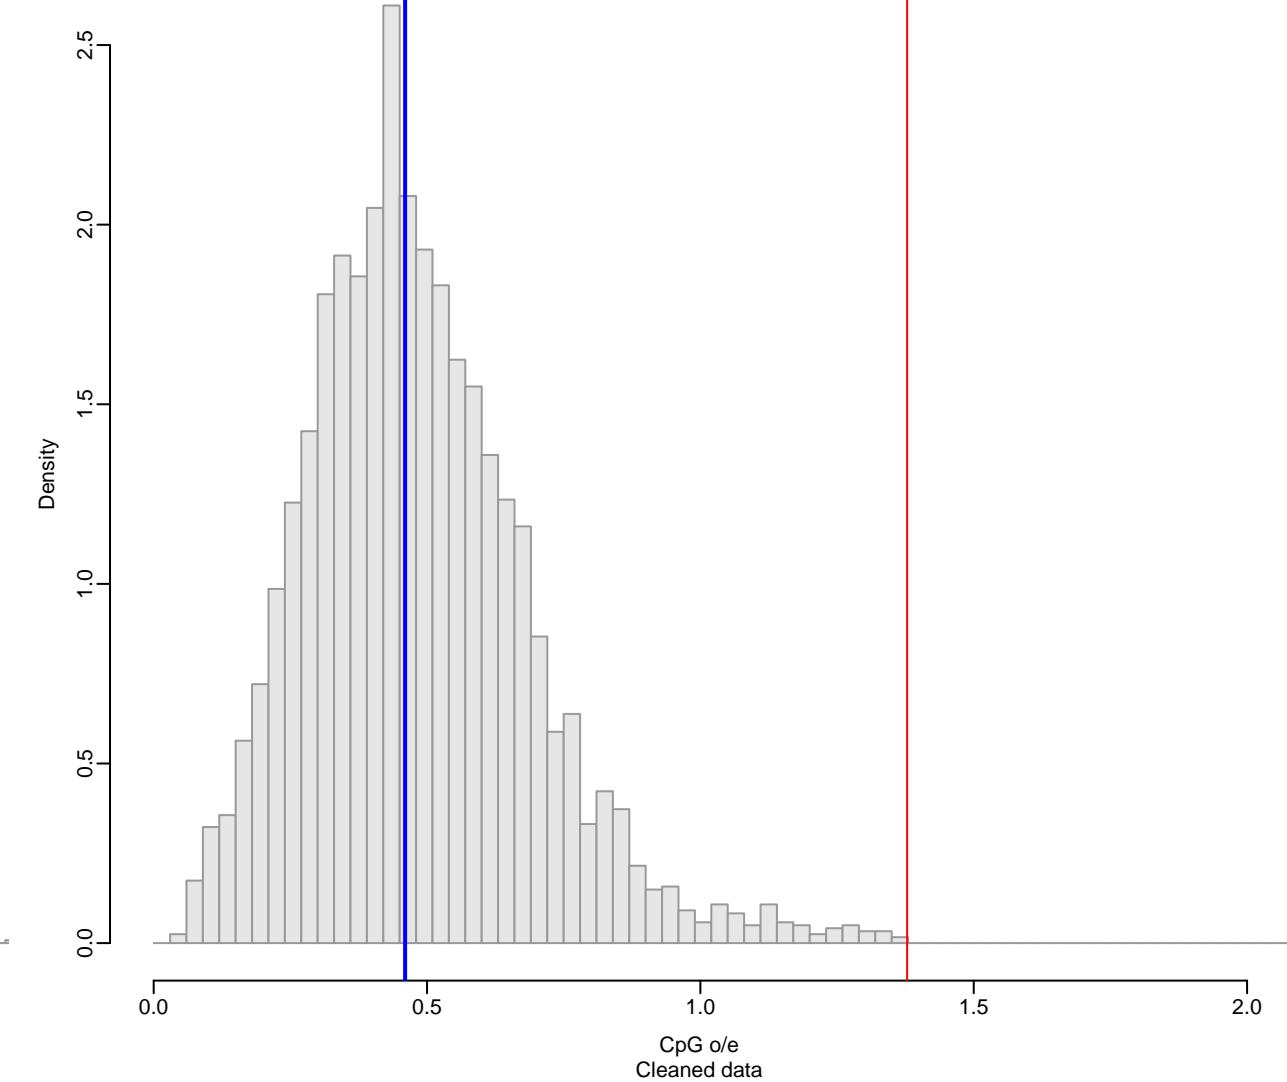



Oncorhynchus\_mykiss

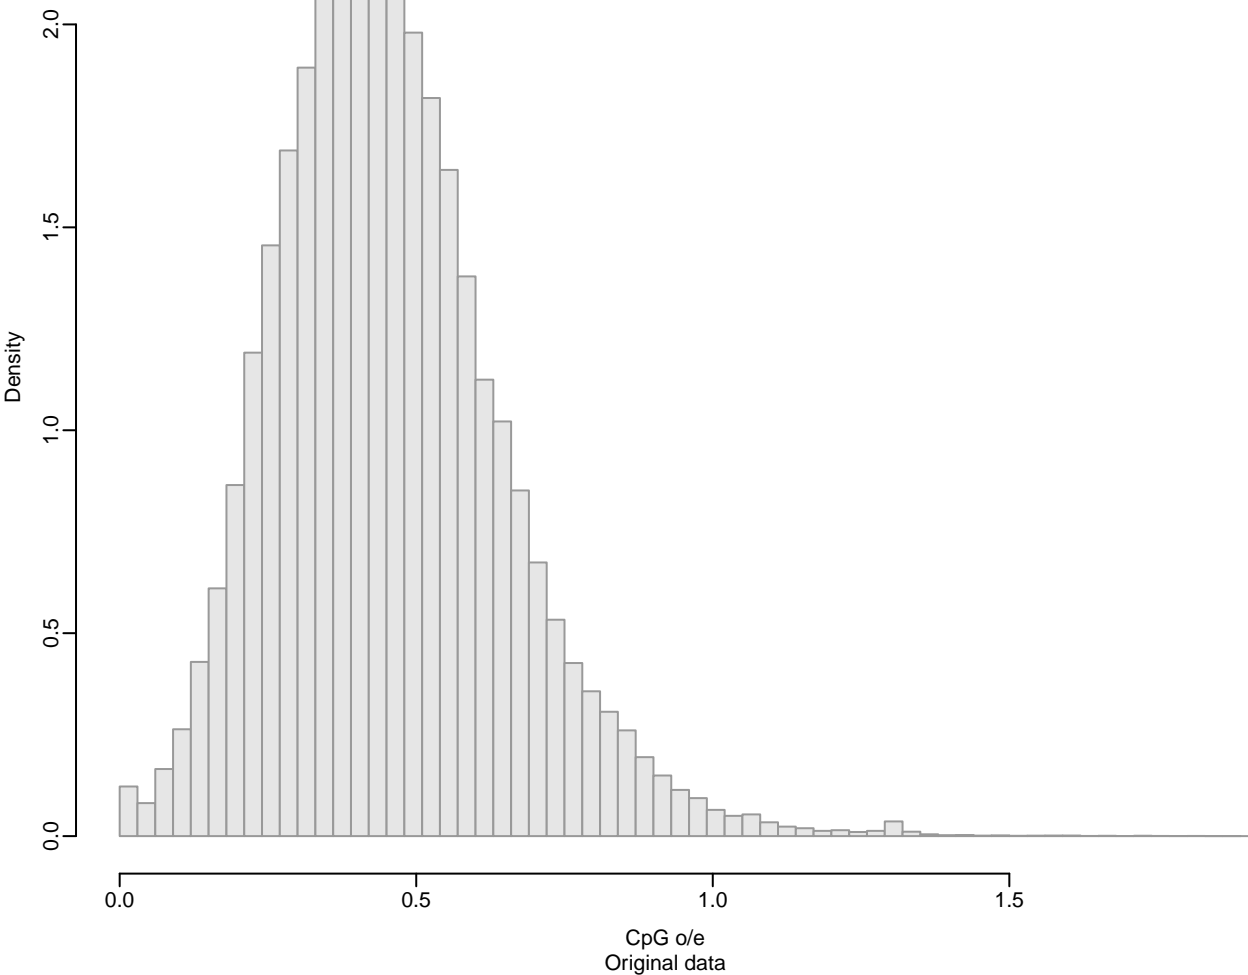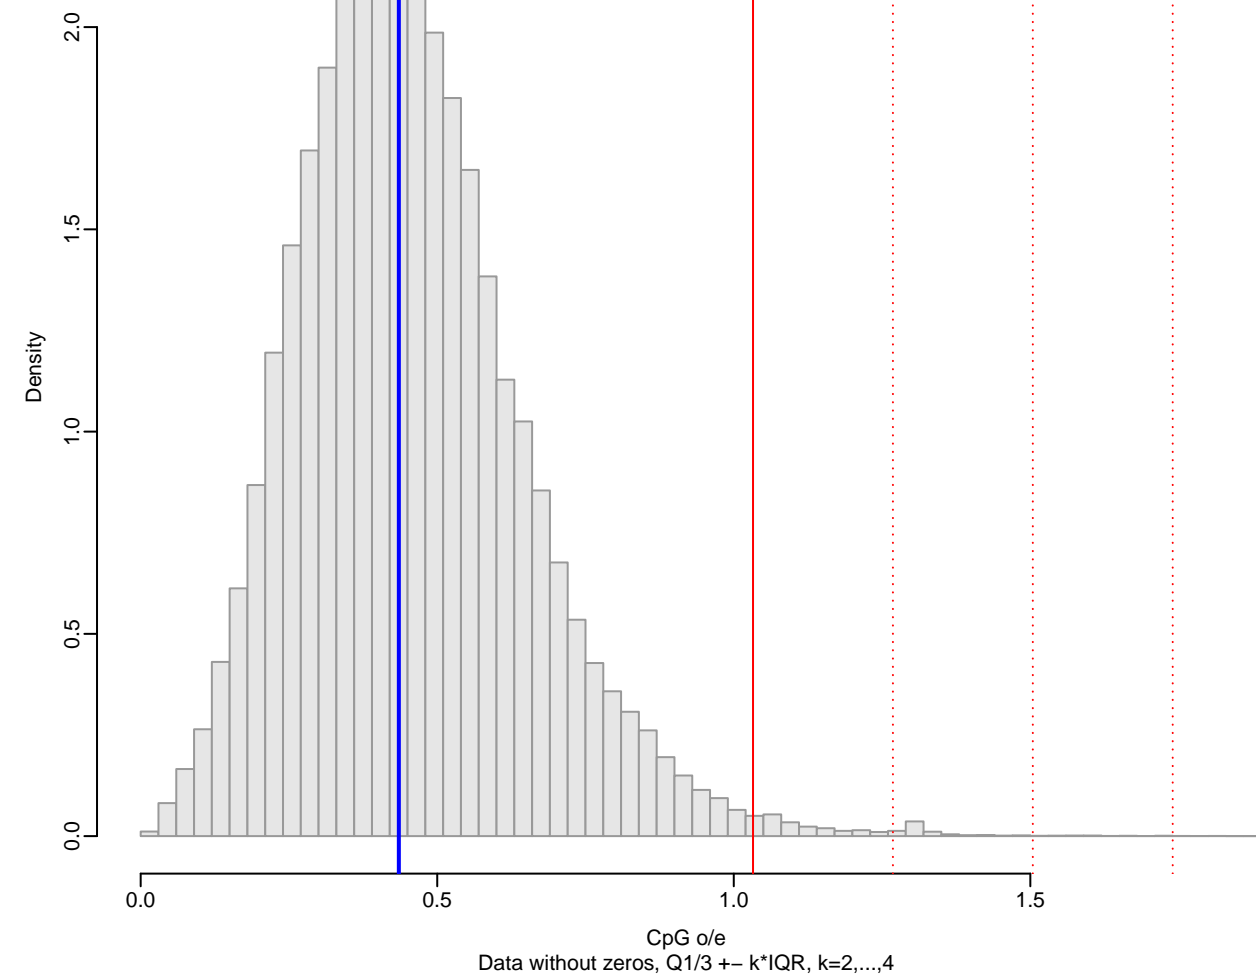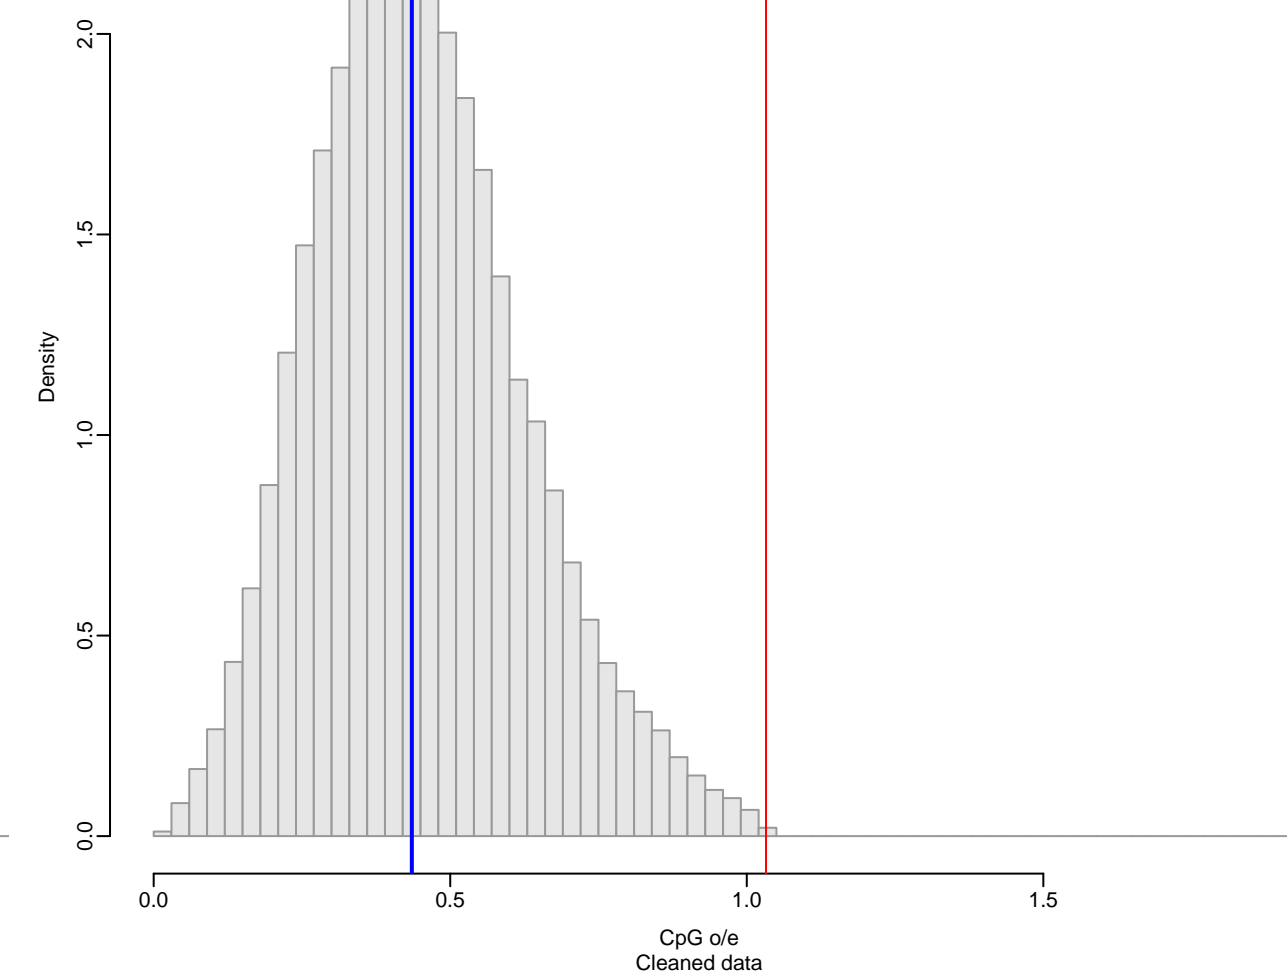

Oncorhynchus\_nerka

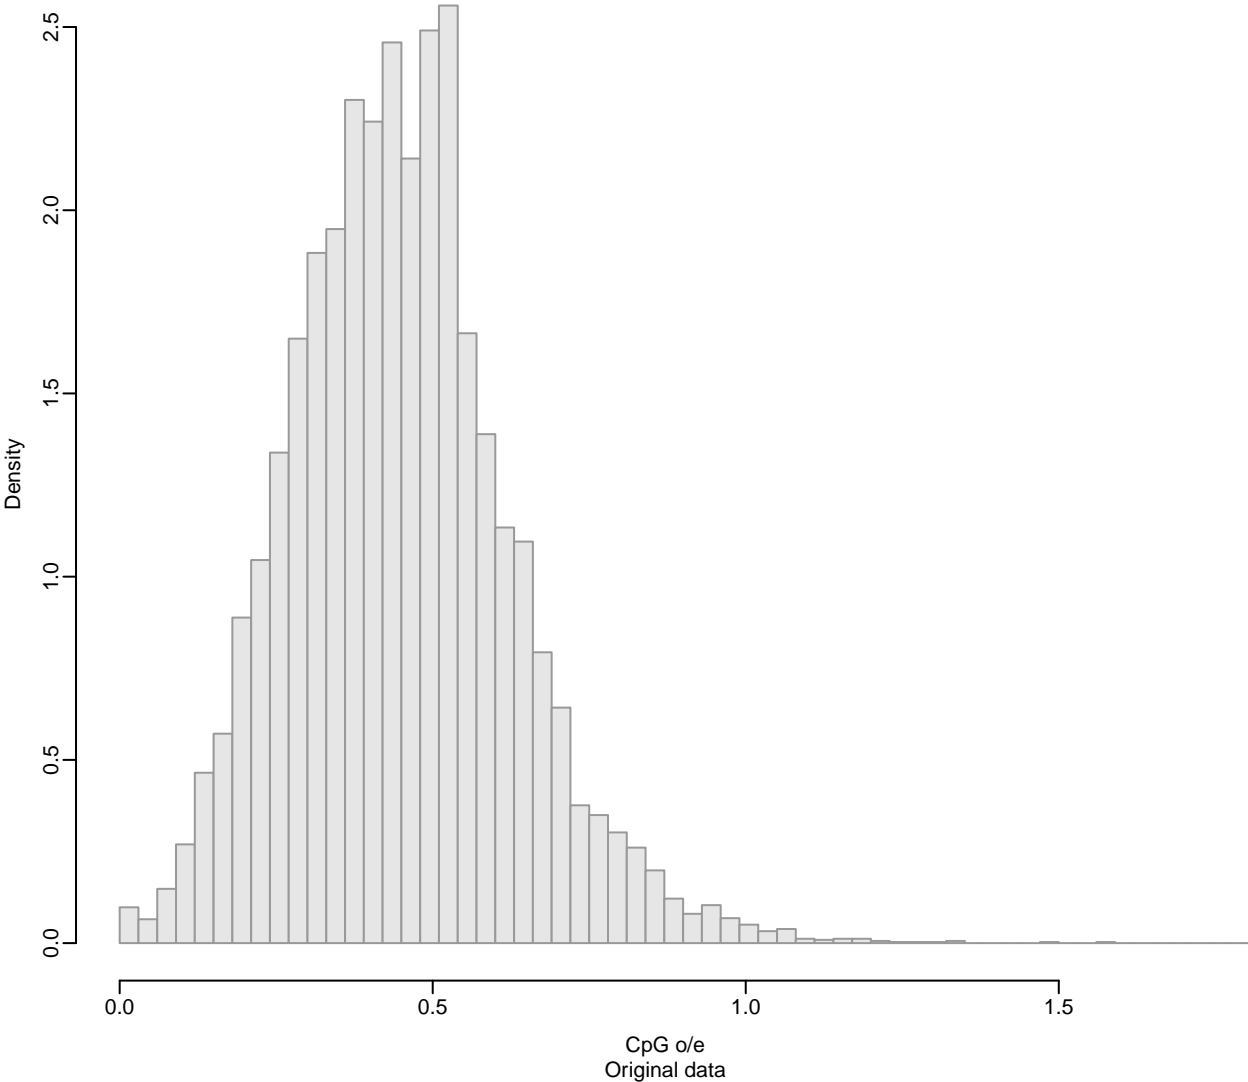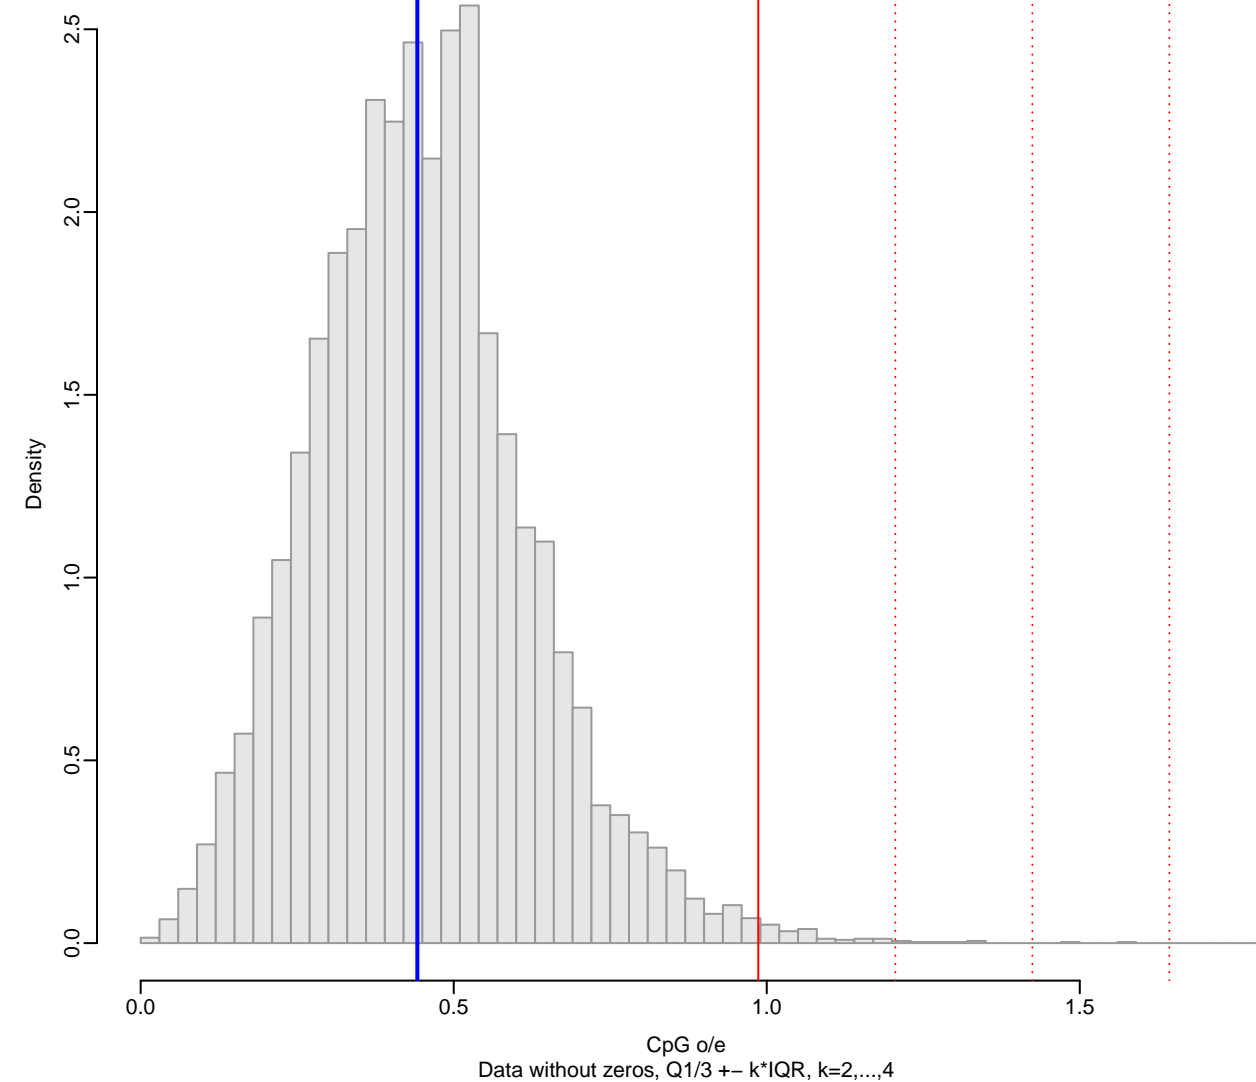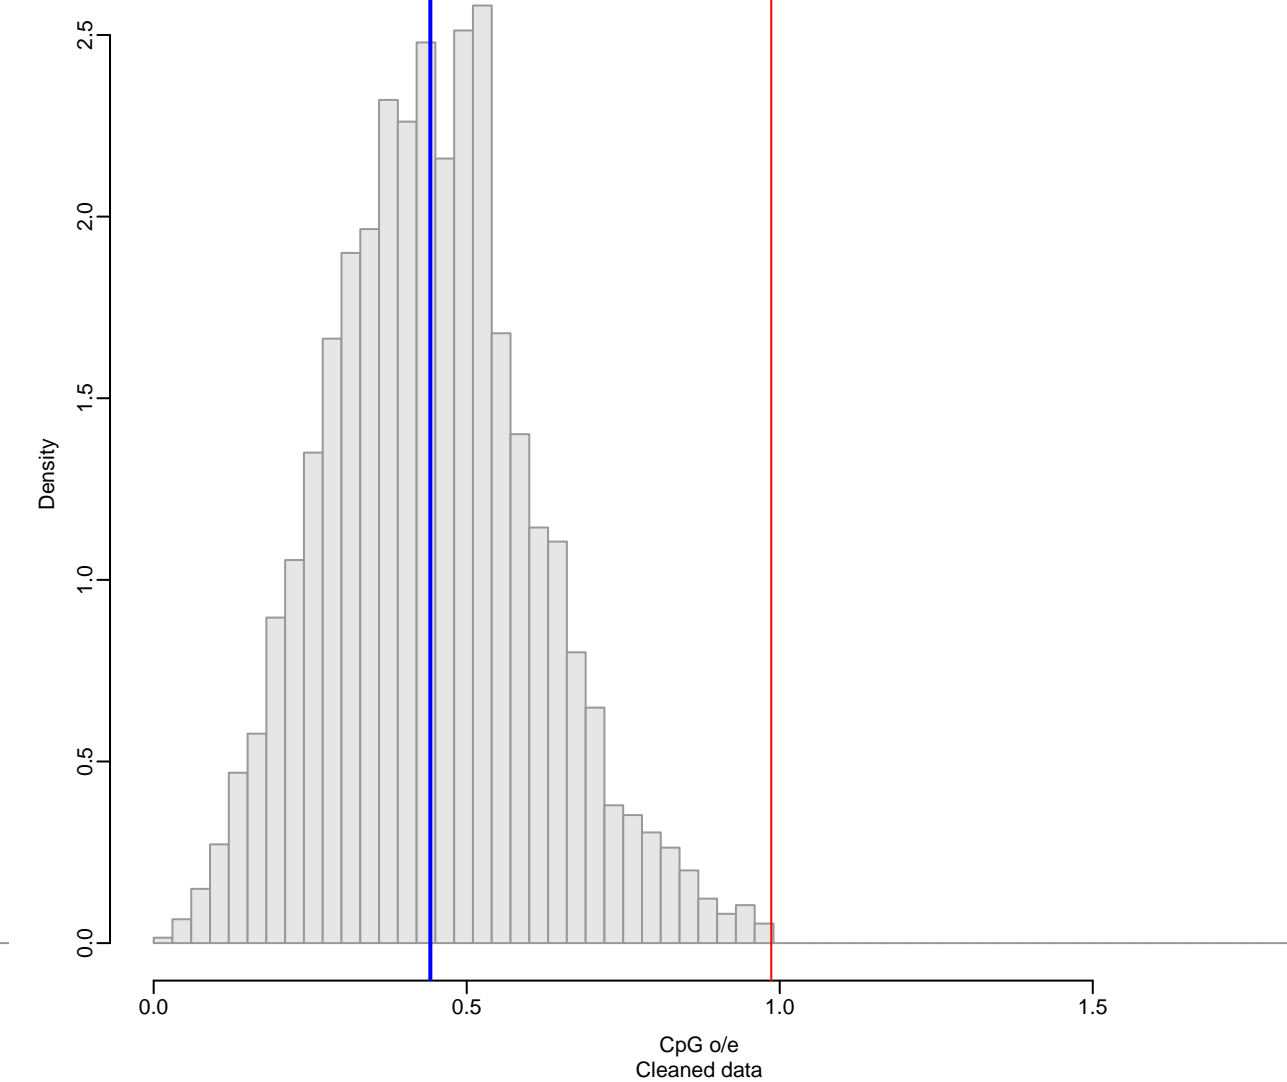

Oncorhynchus\_tshawytscha

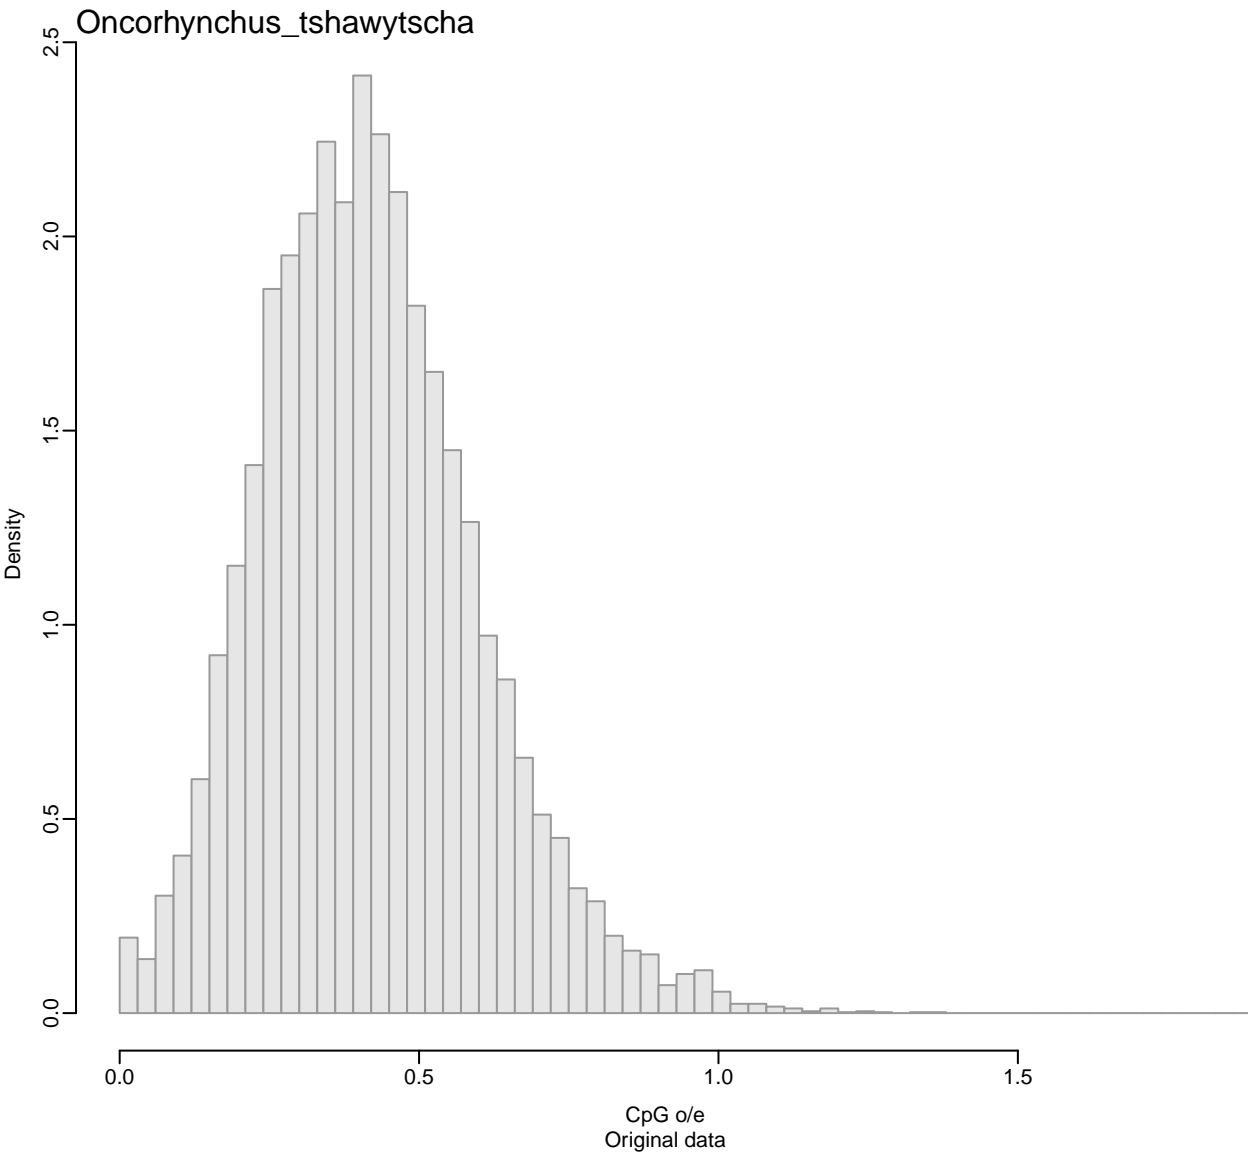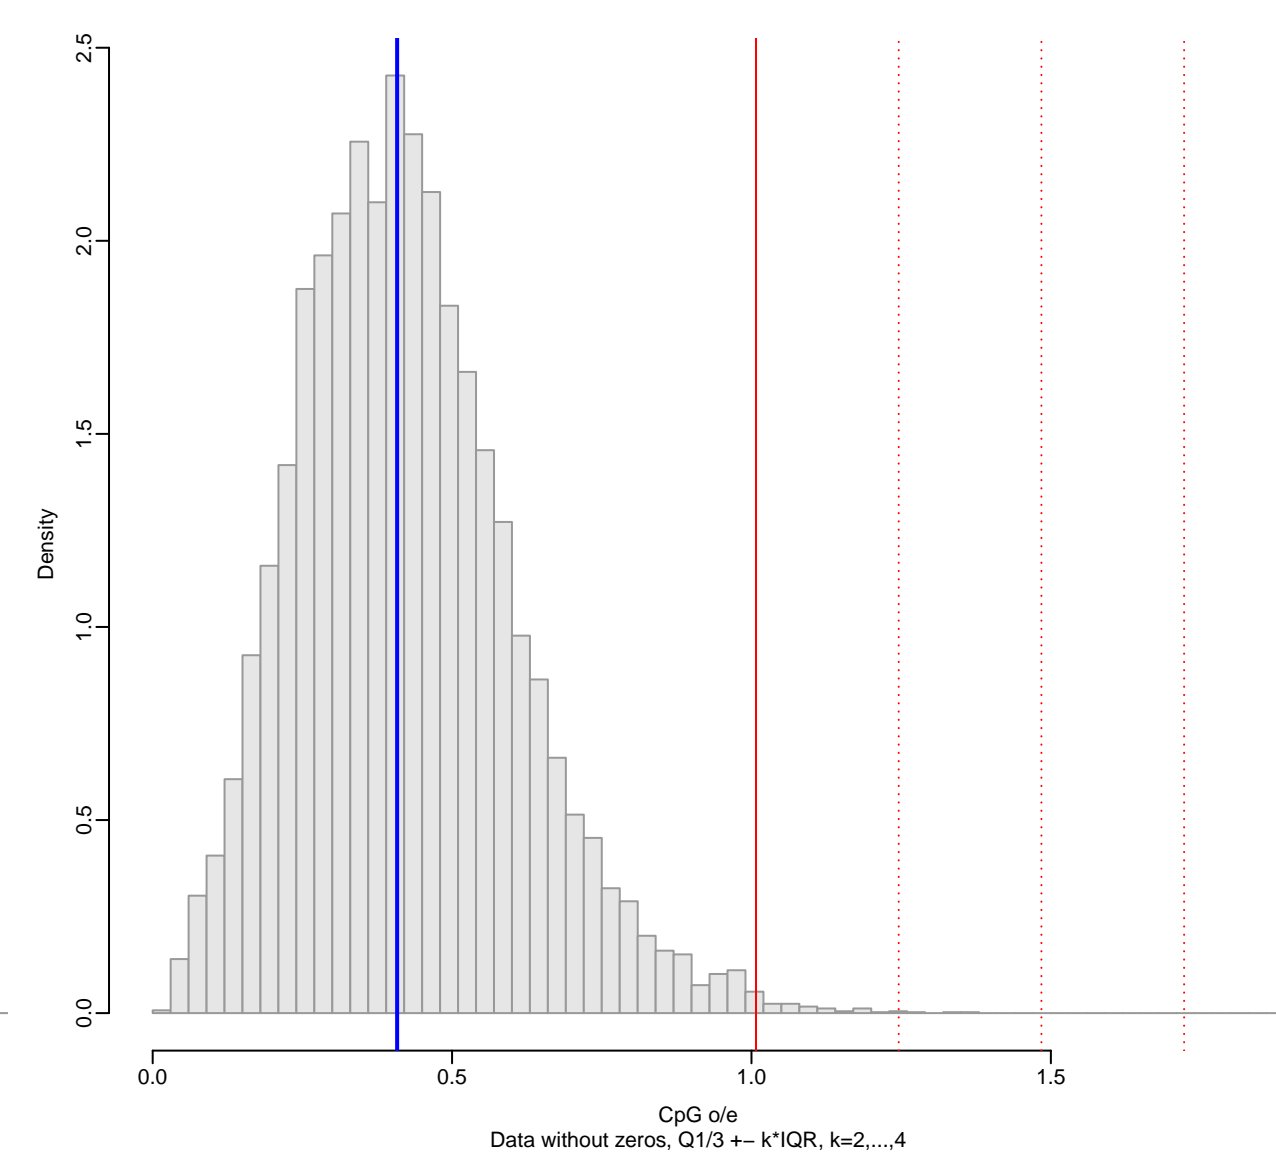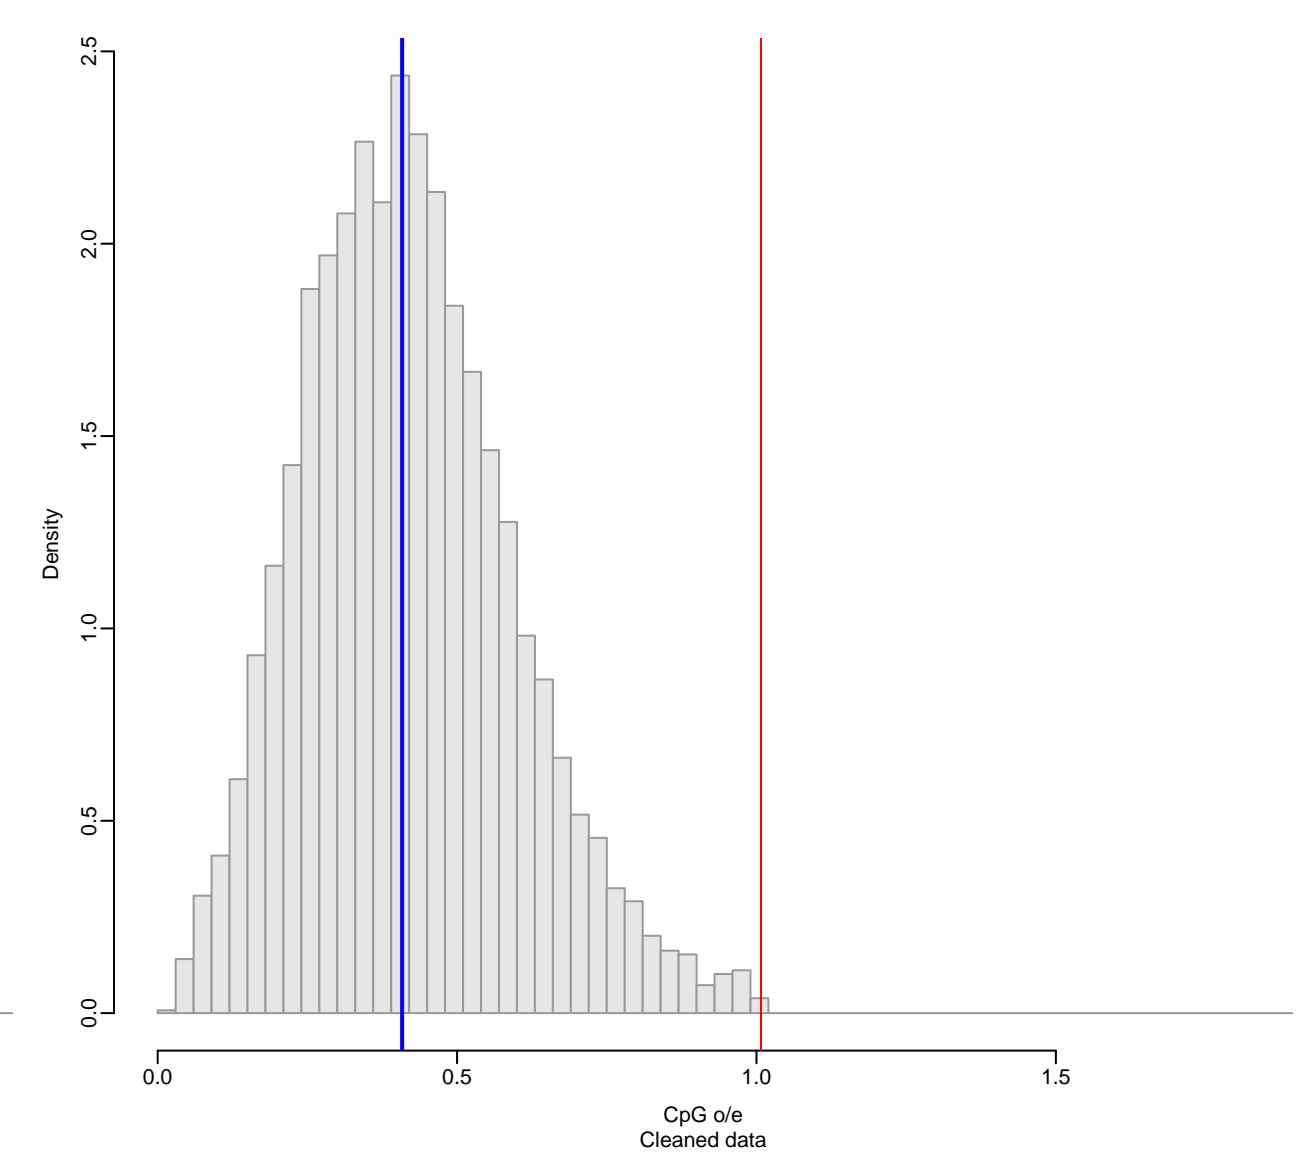

# Onthophagus\_taurus

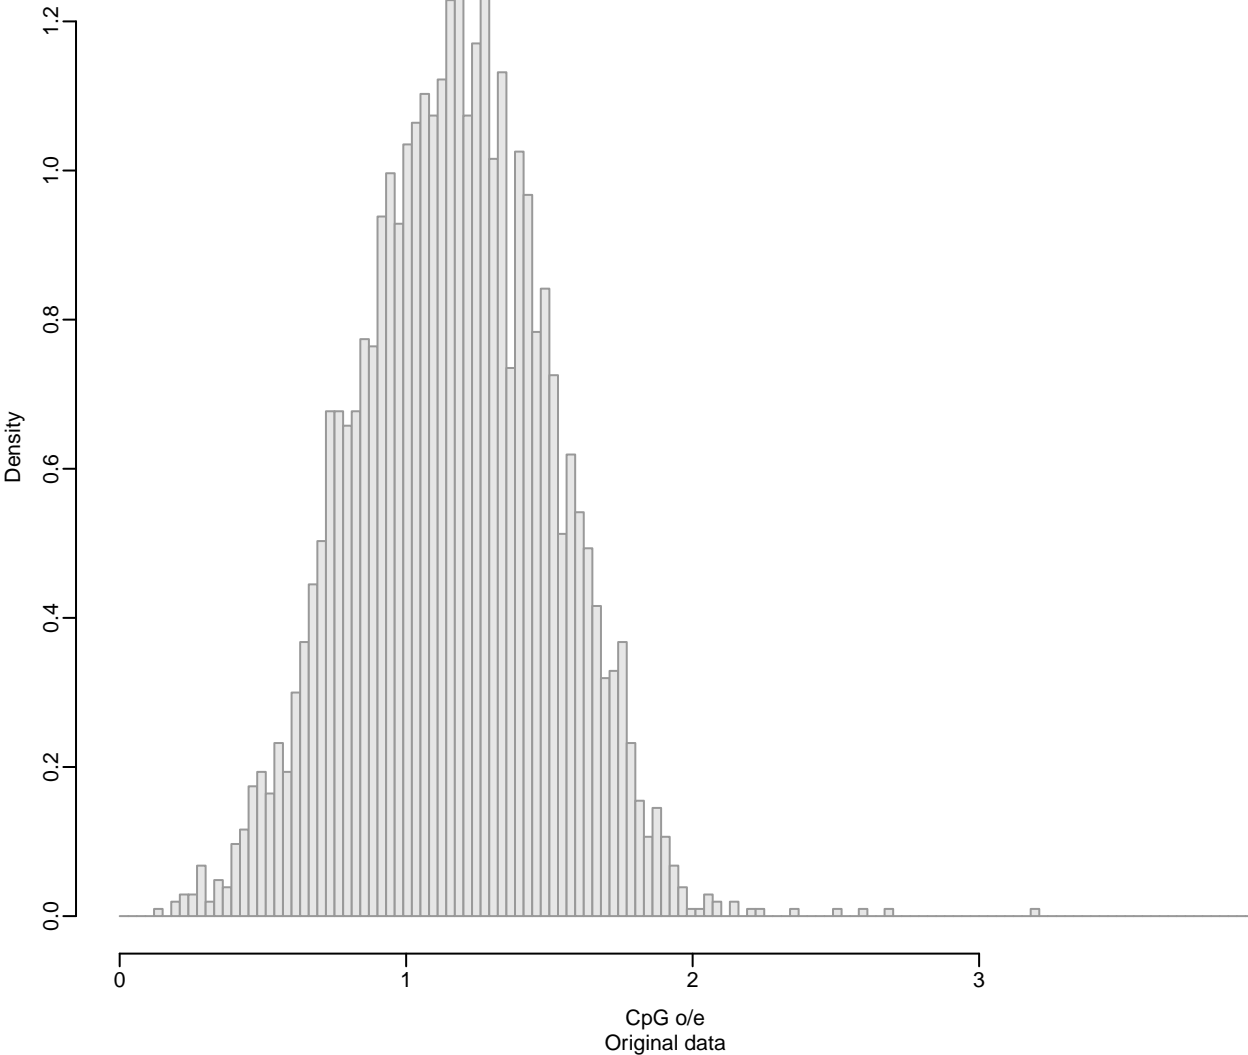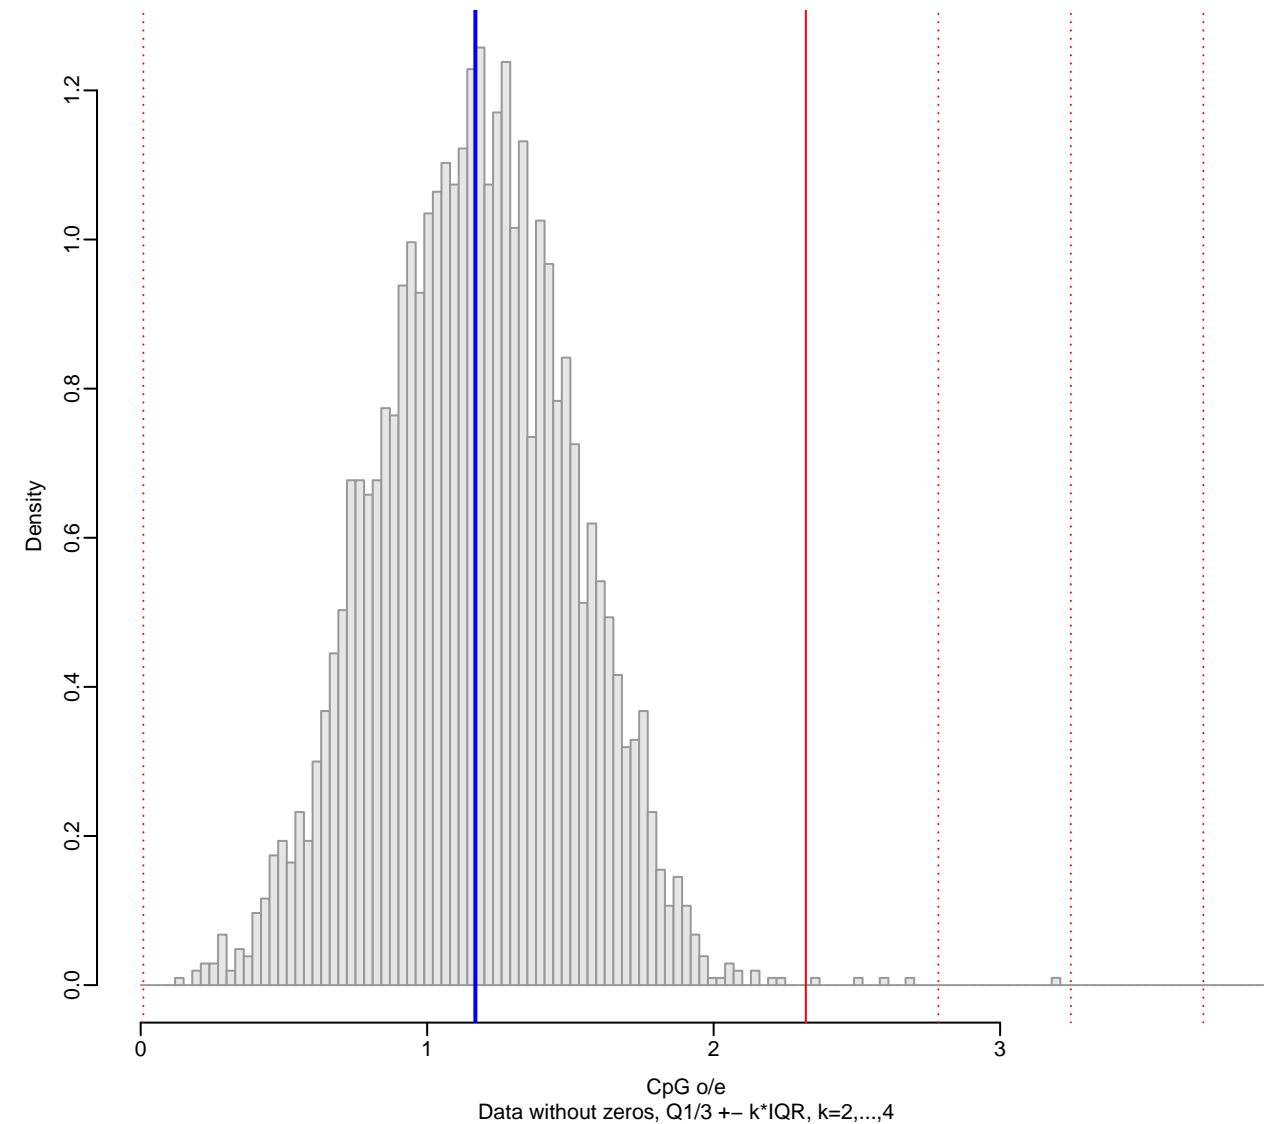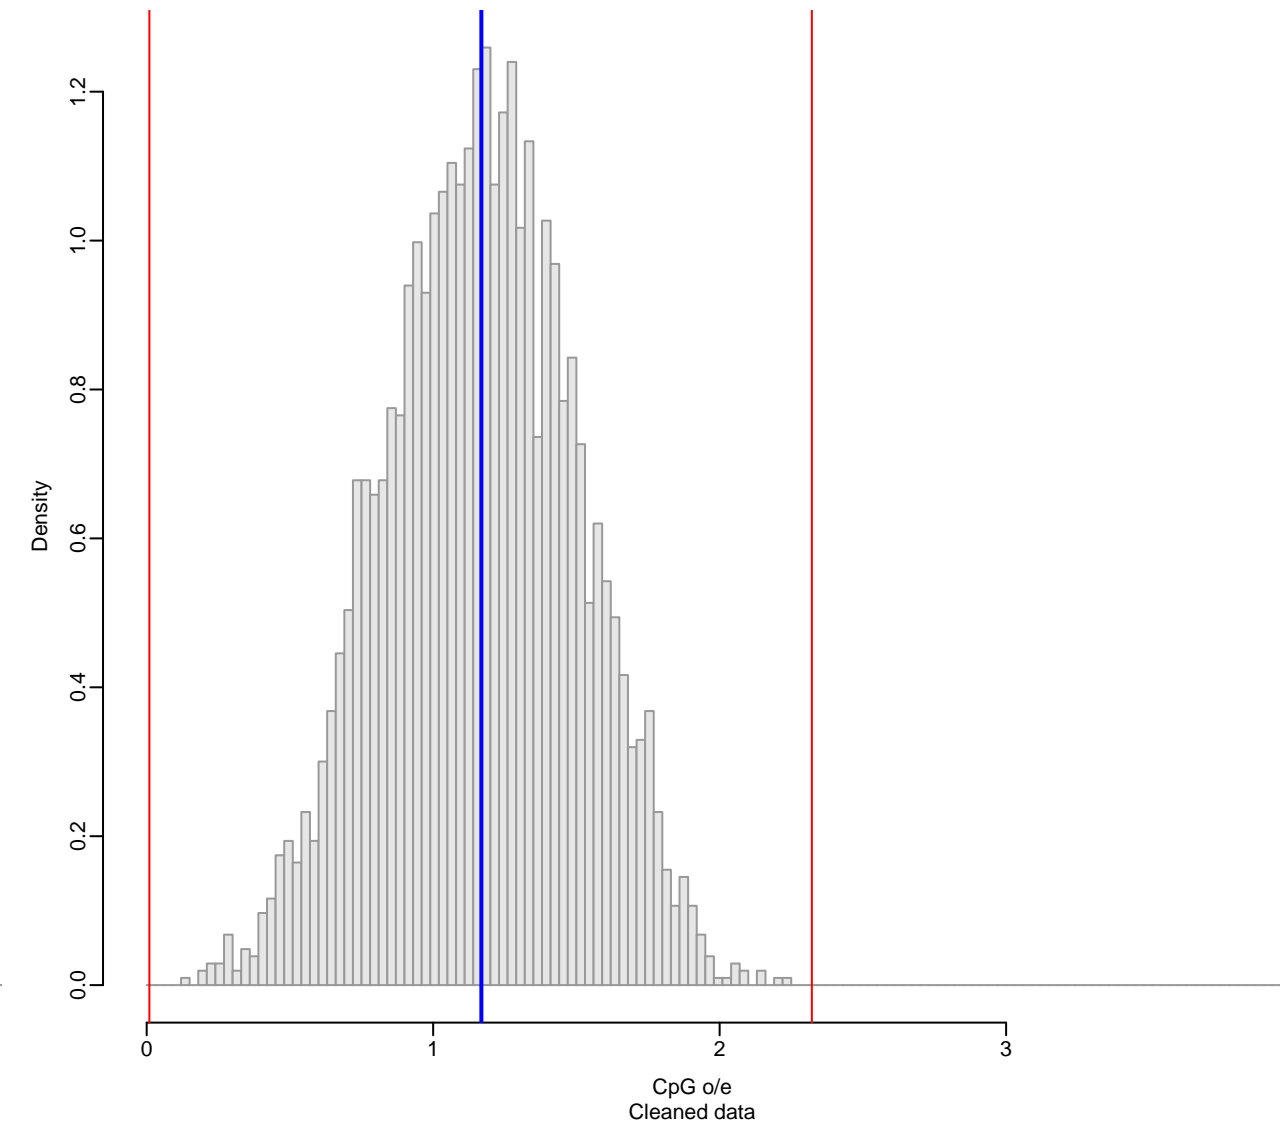

Onychiurus\_arcticus

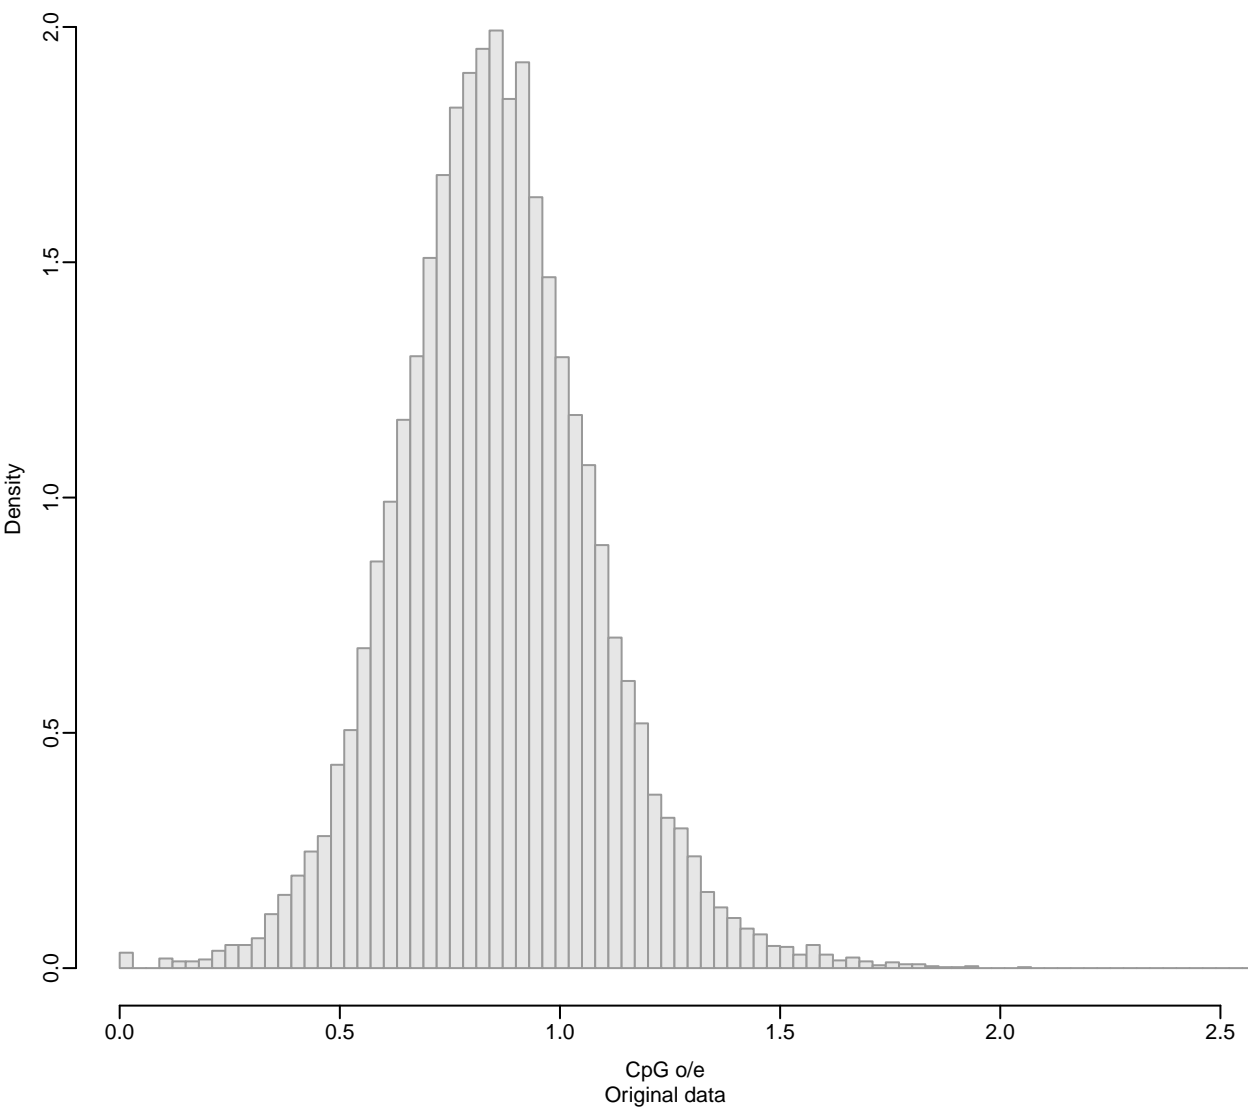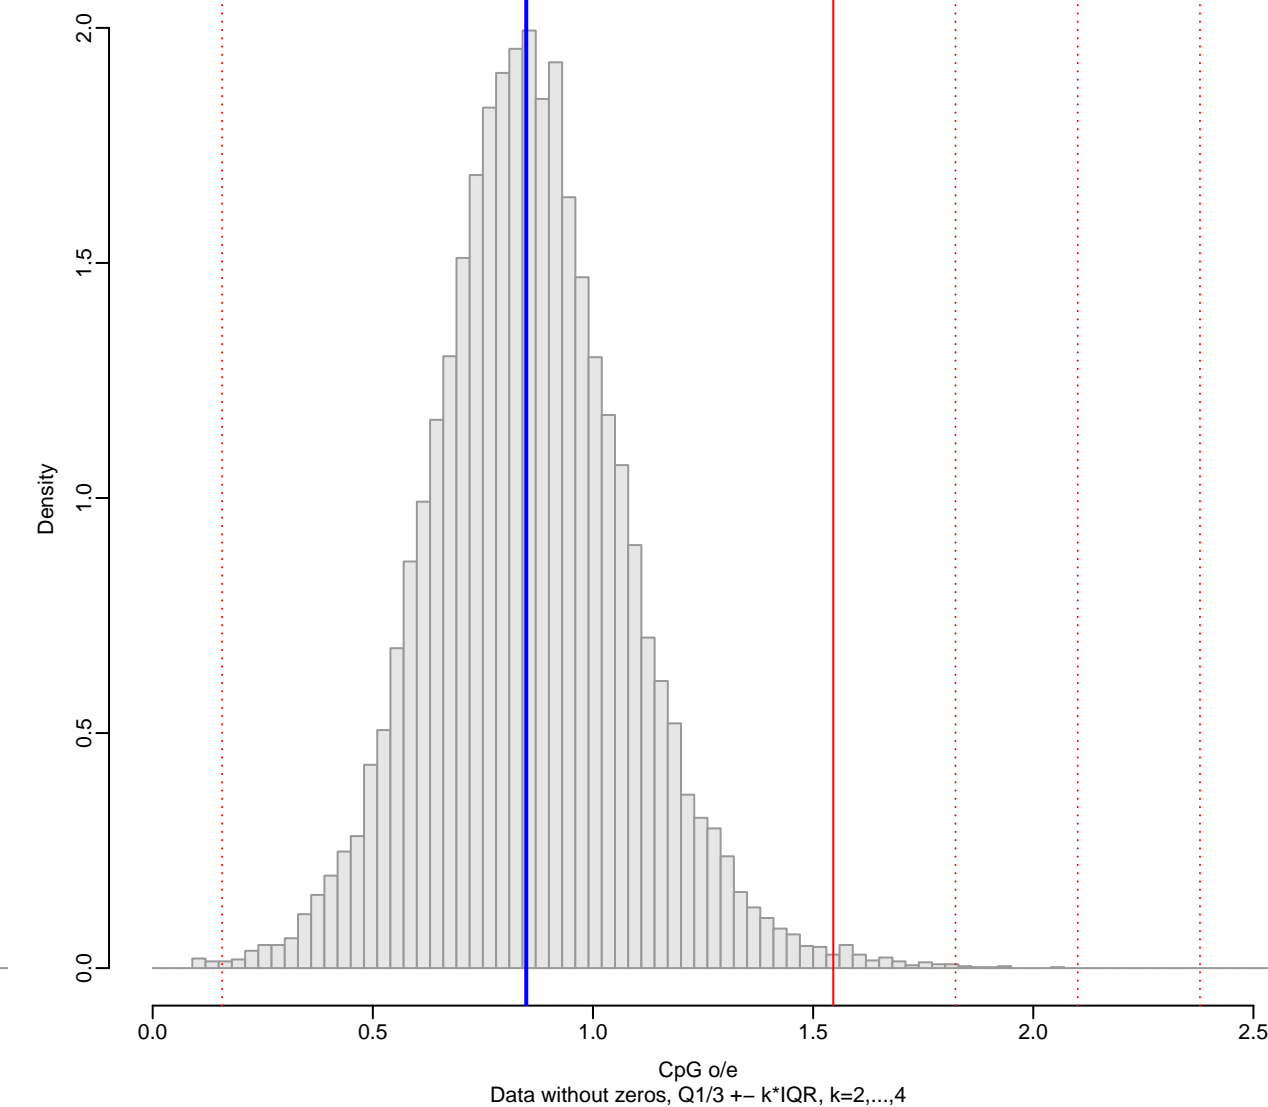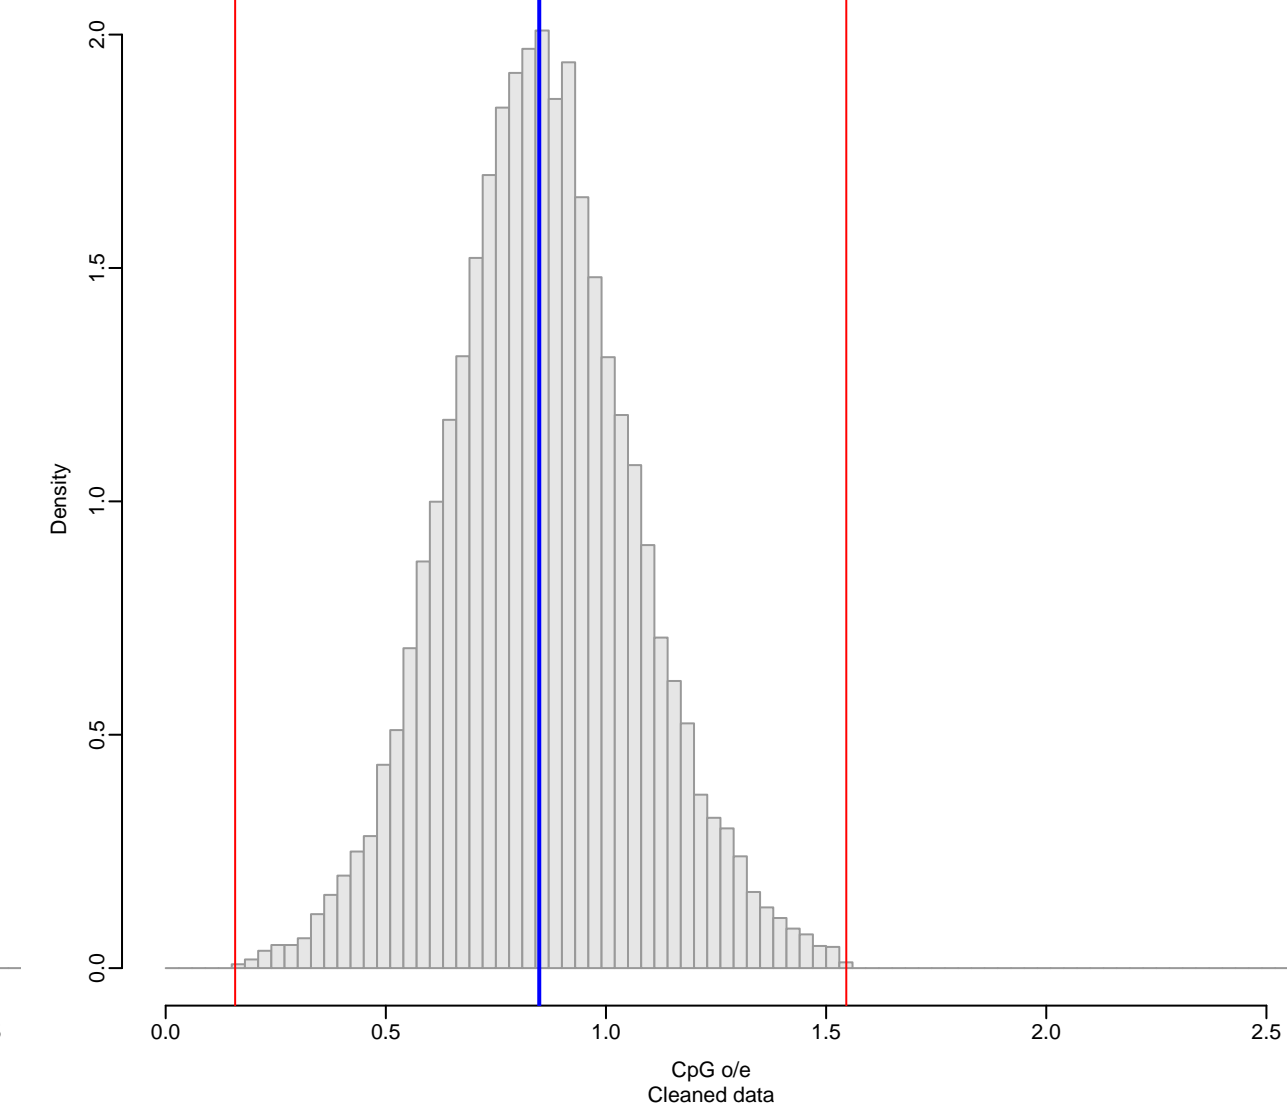

Ophiostoma\_novo-ulmi

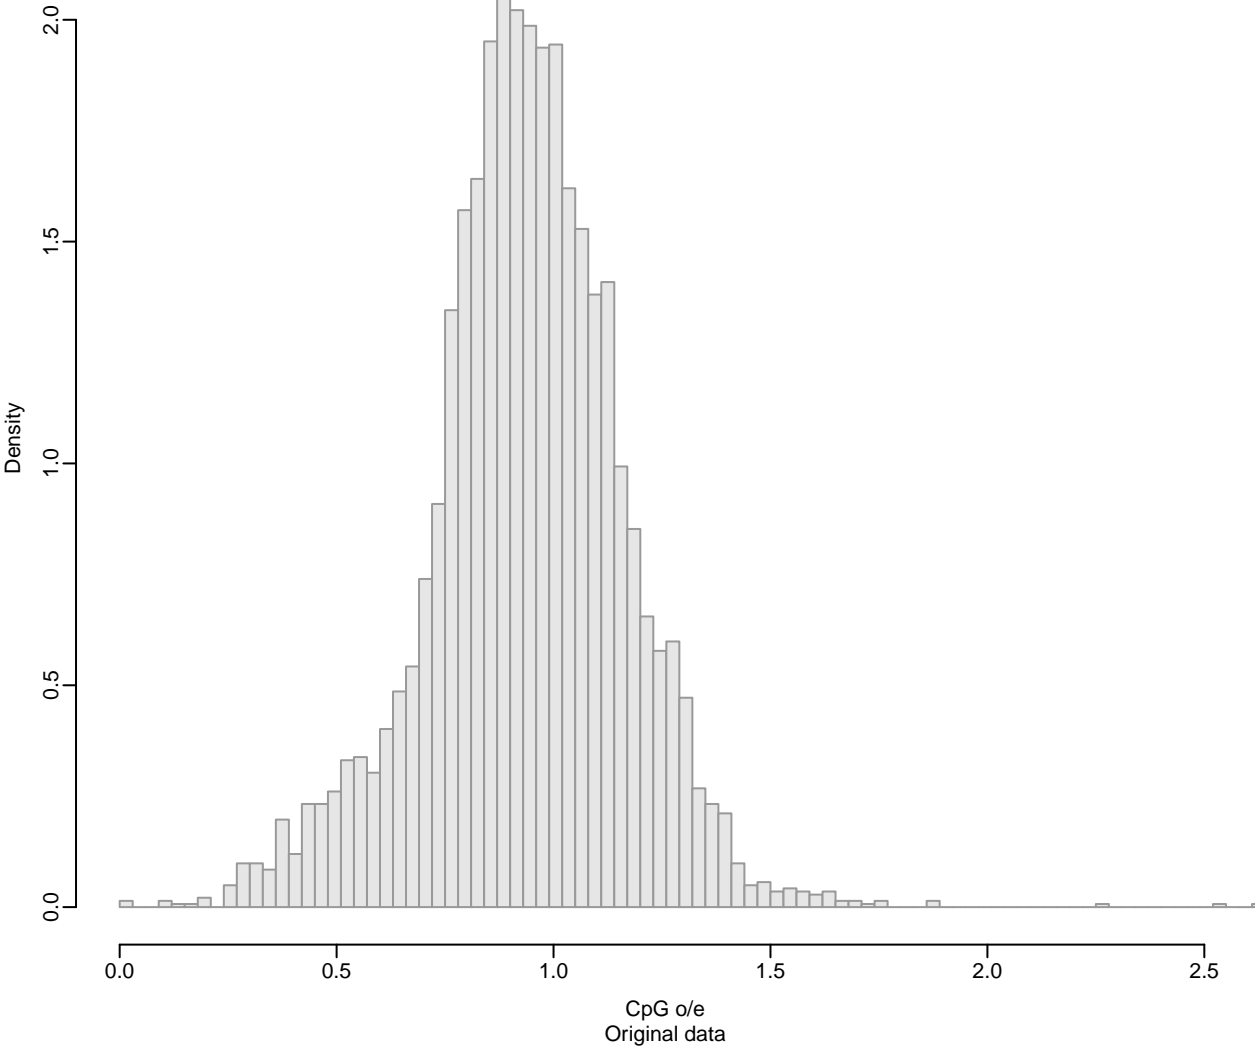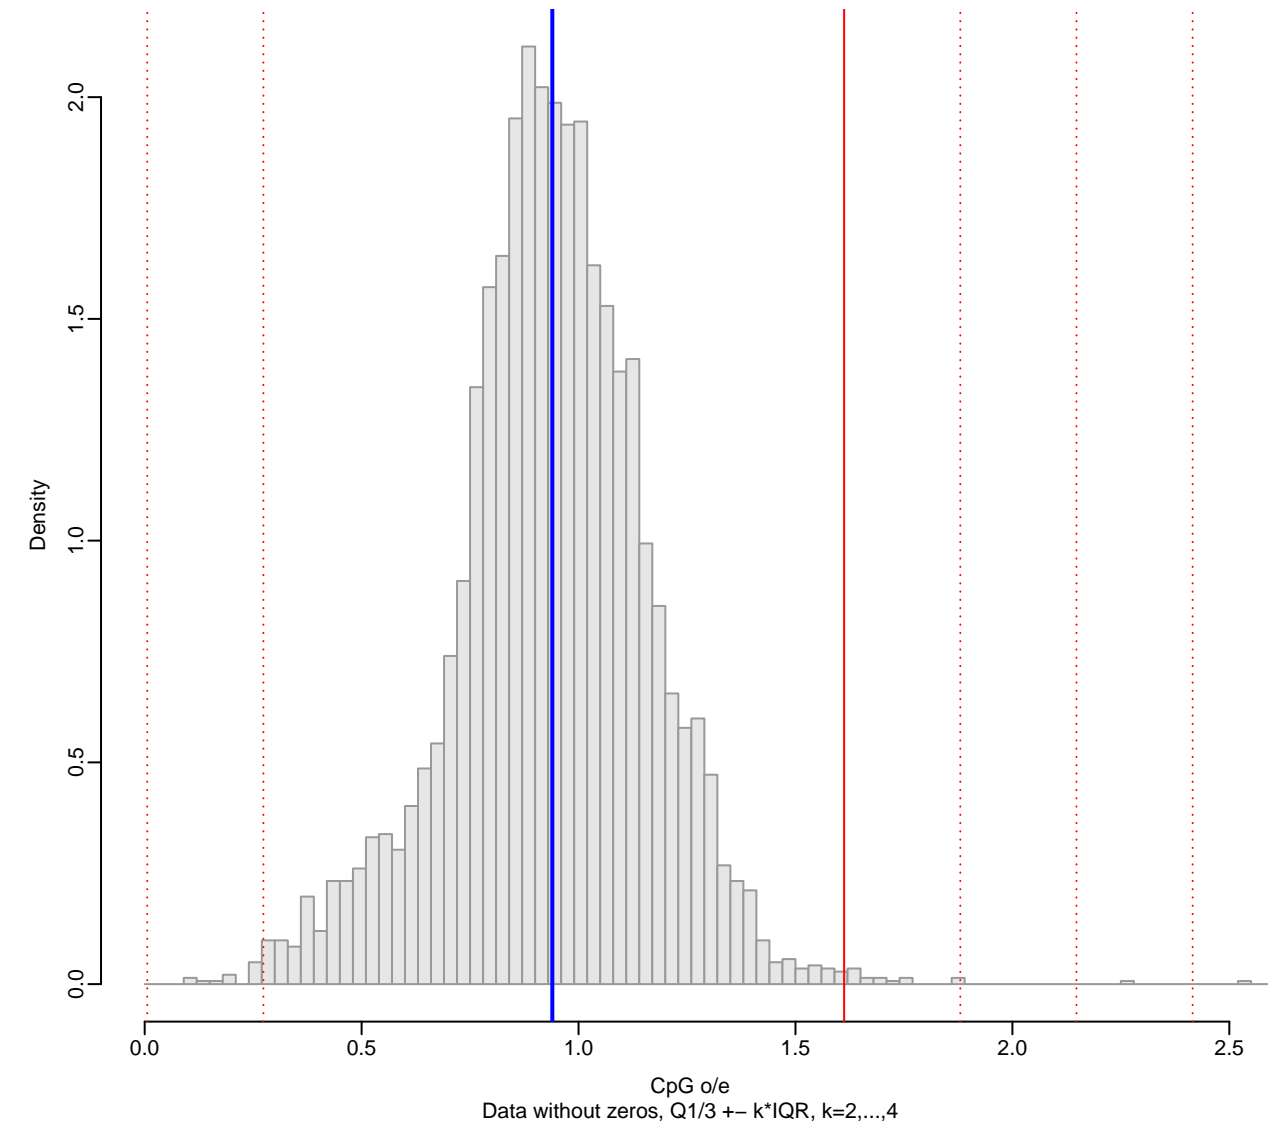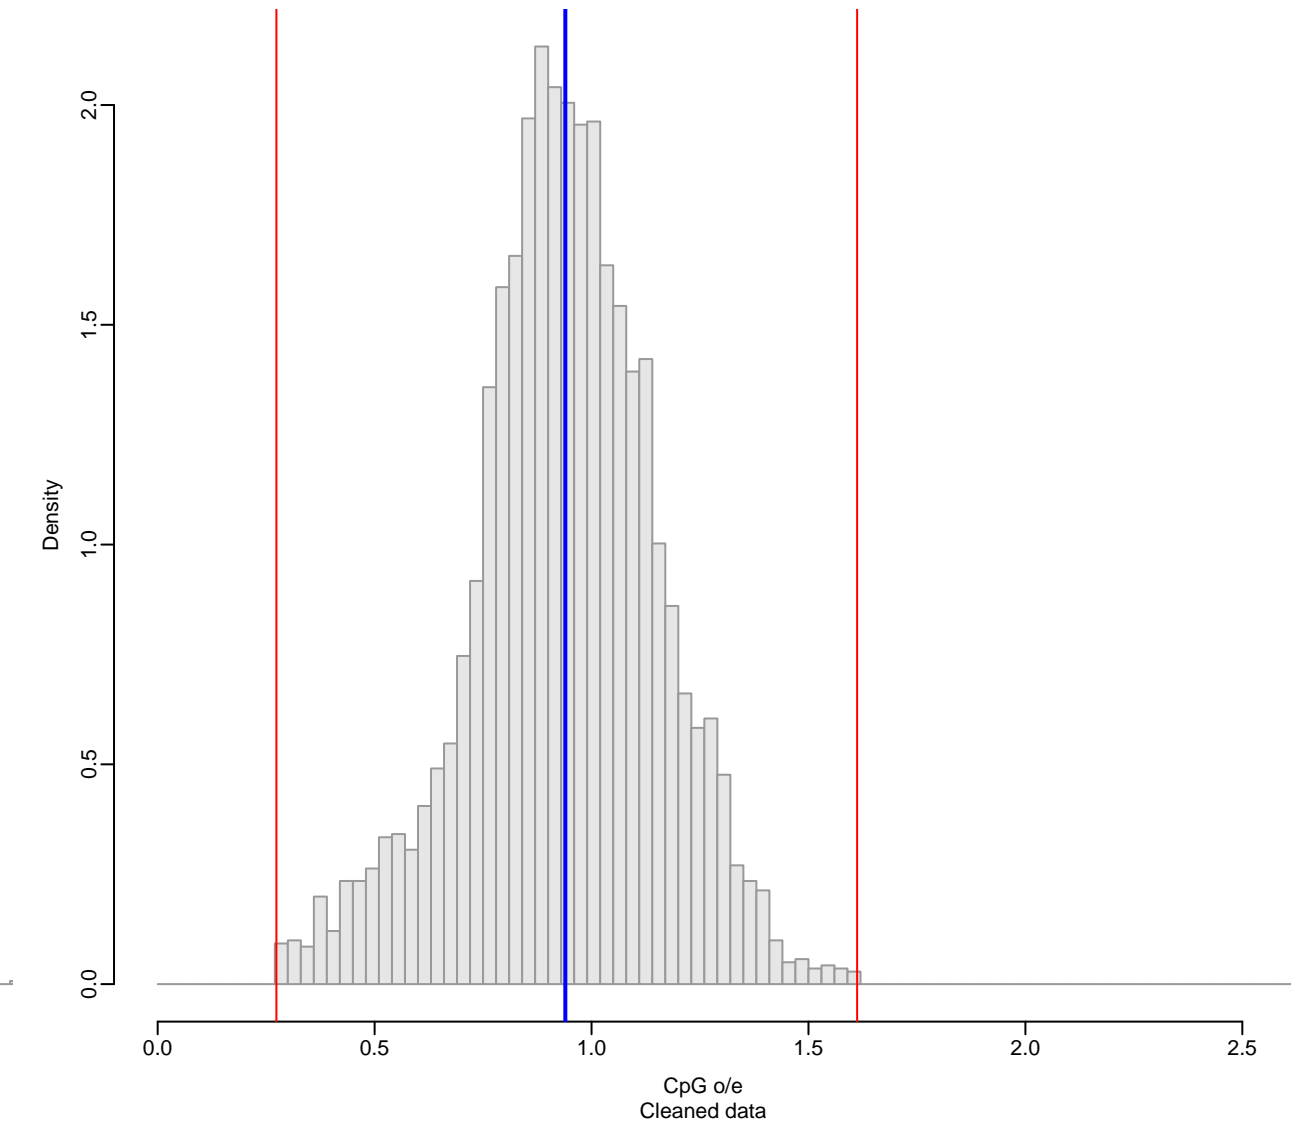

Ophryotrocha\_puerilis

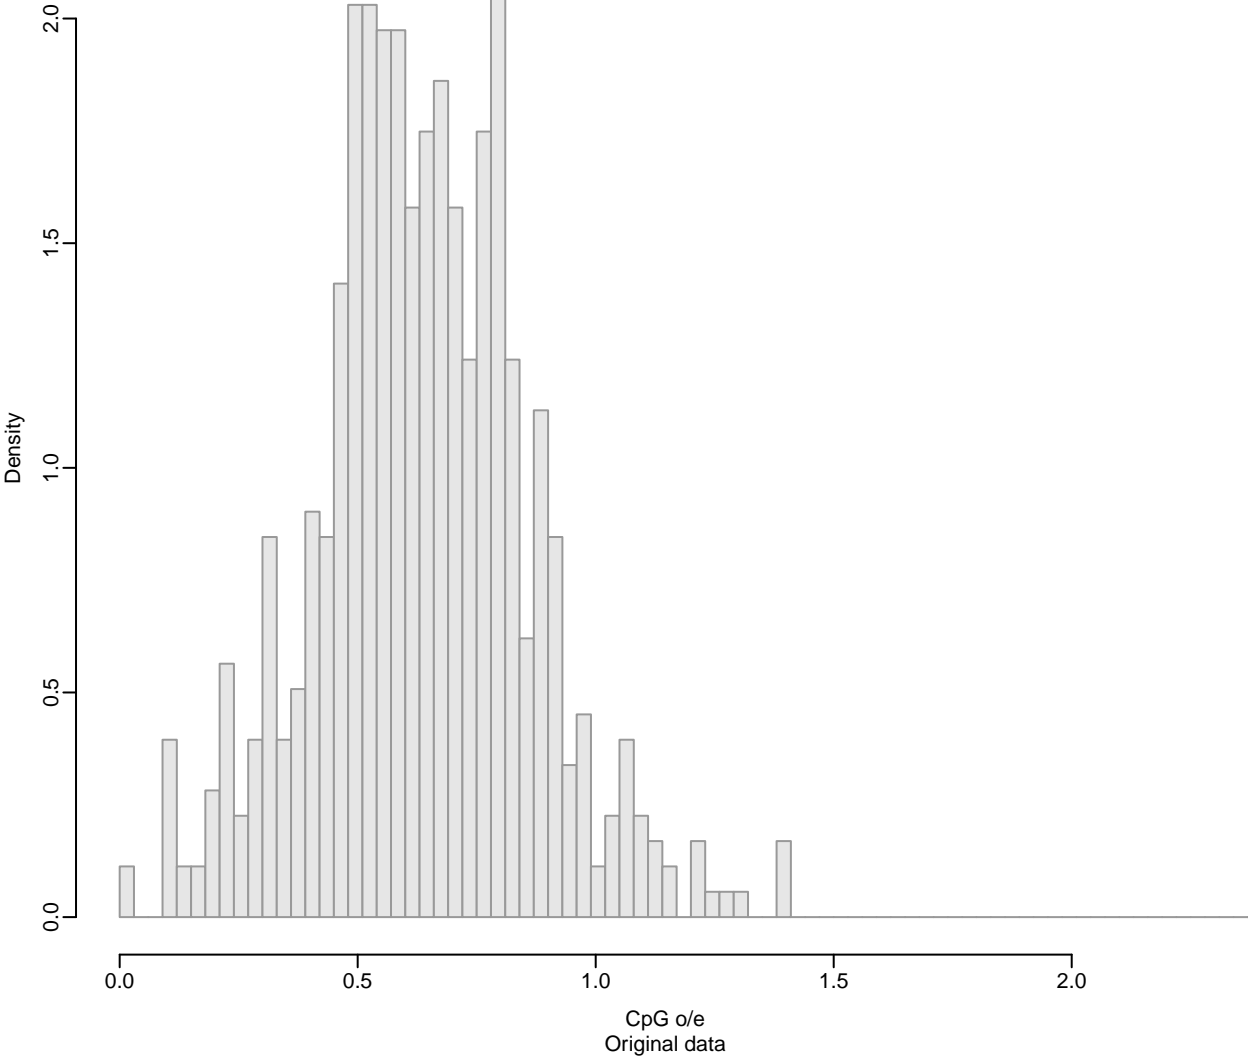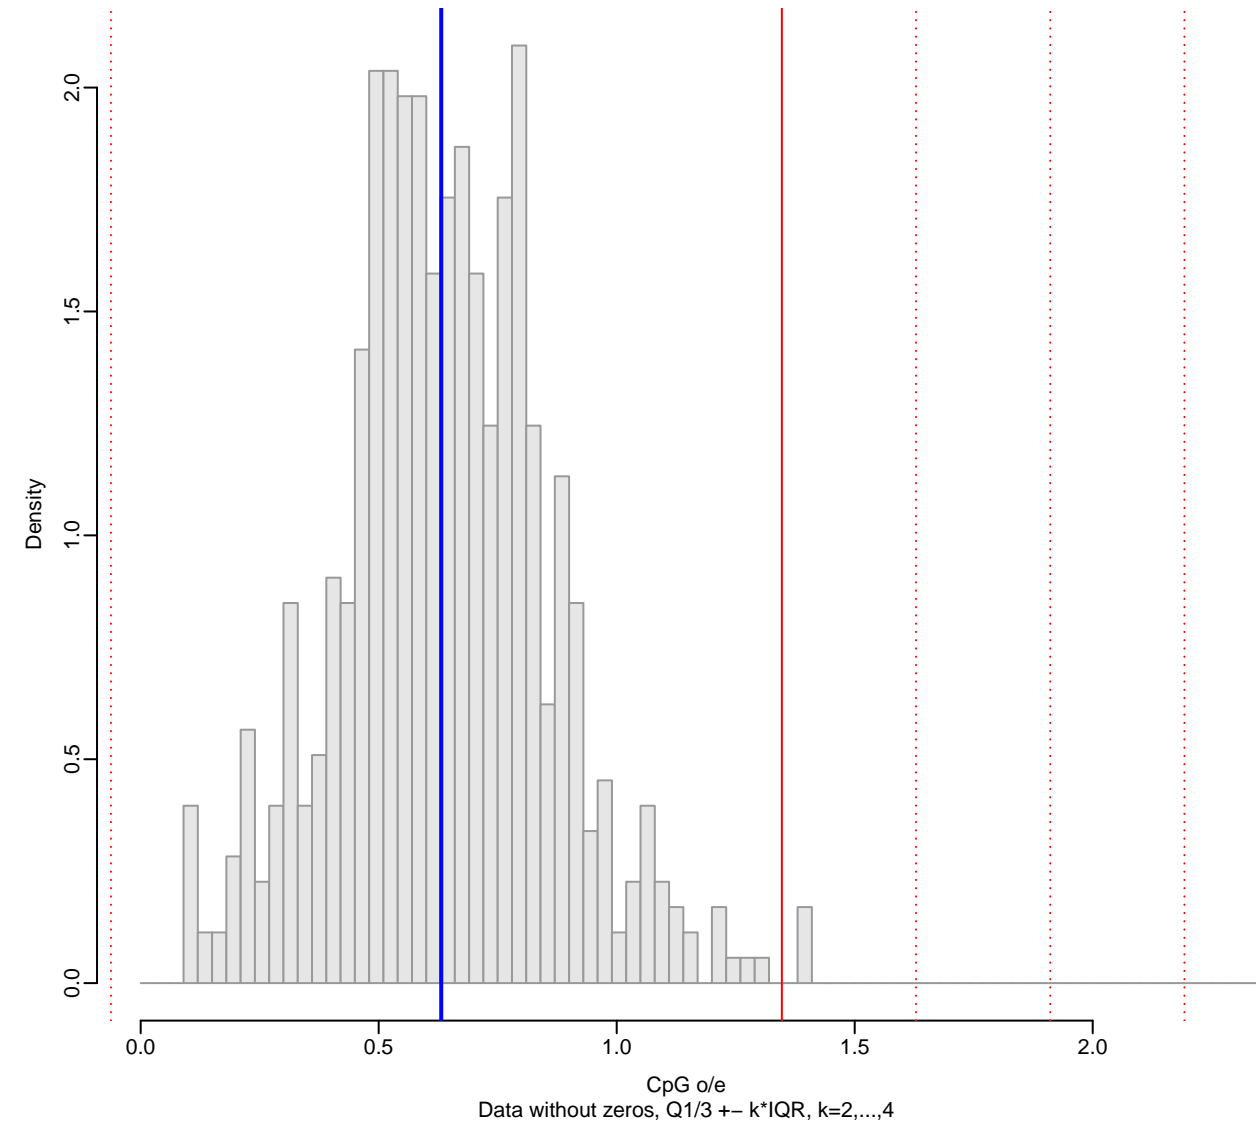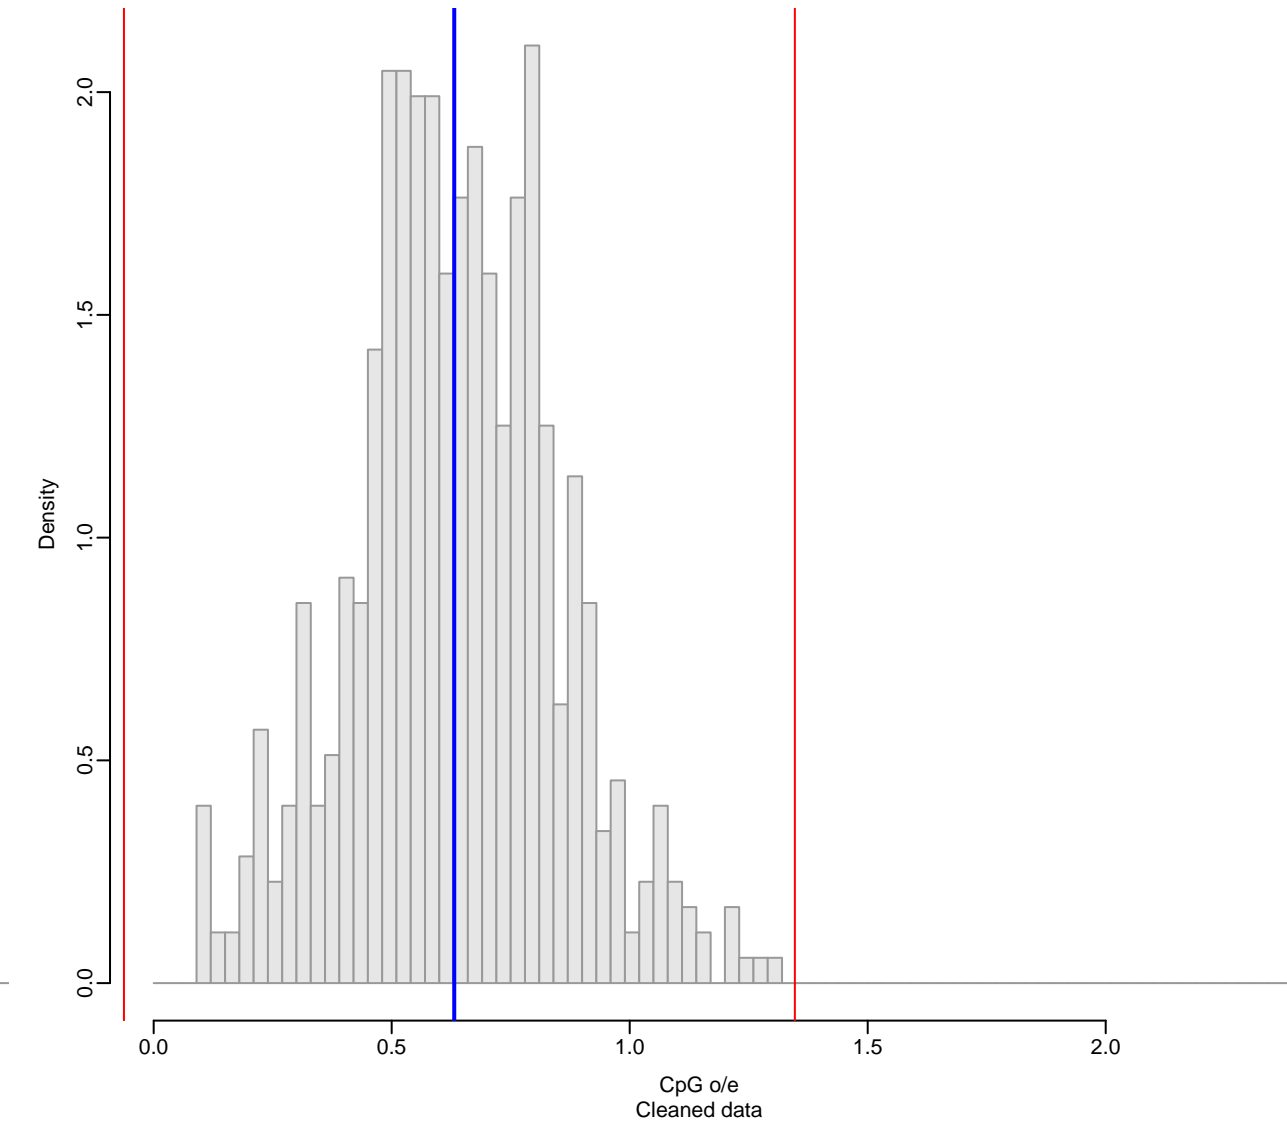

Oreochromis\_niloticus

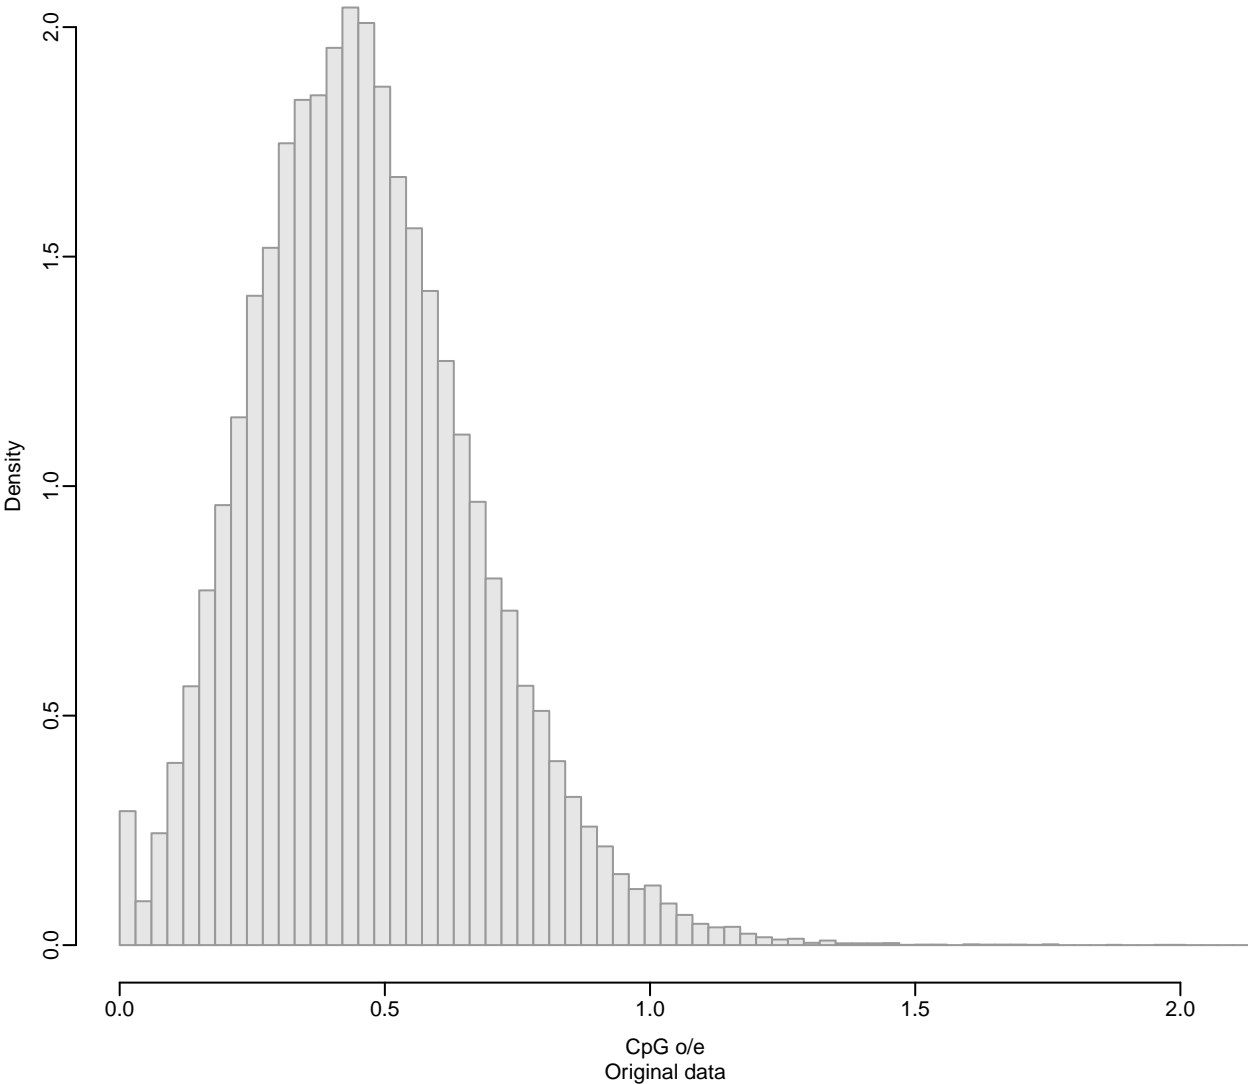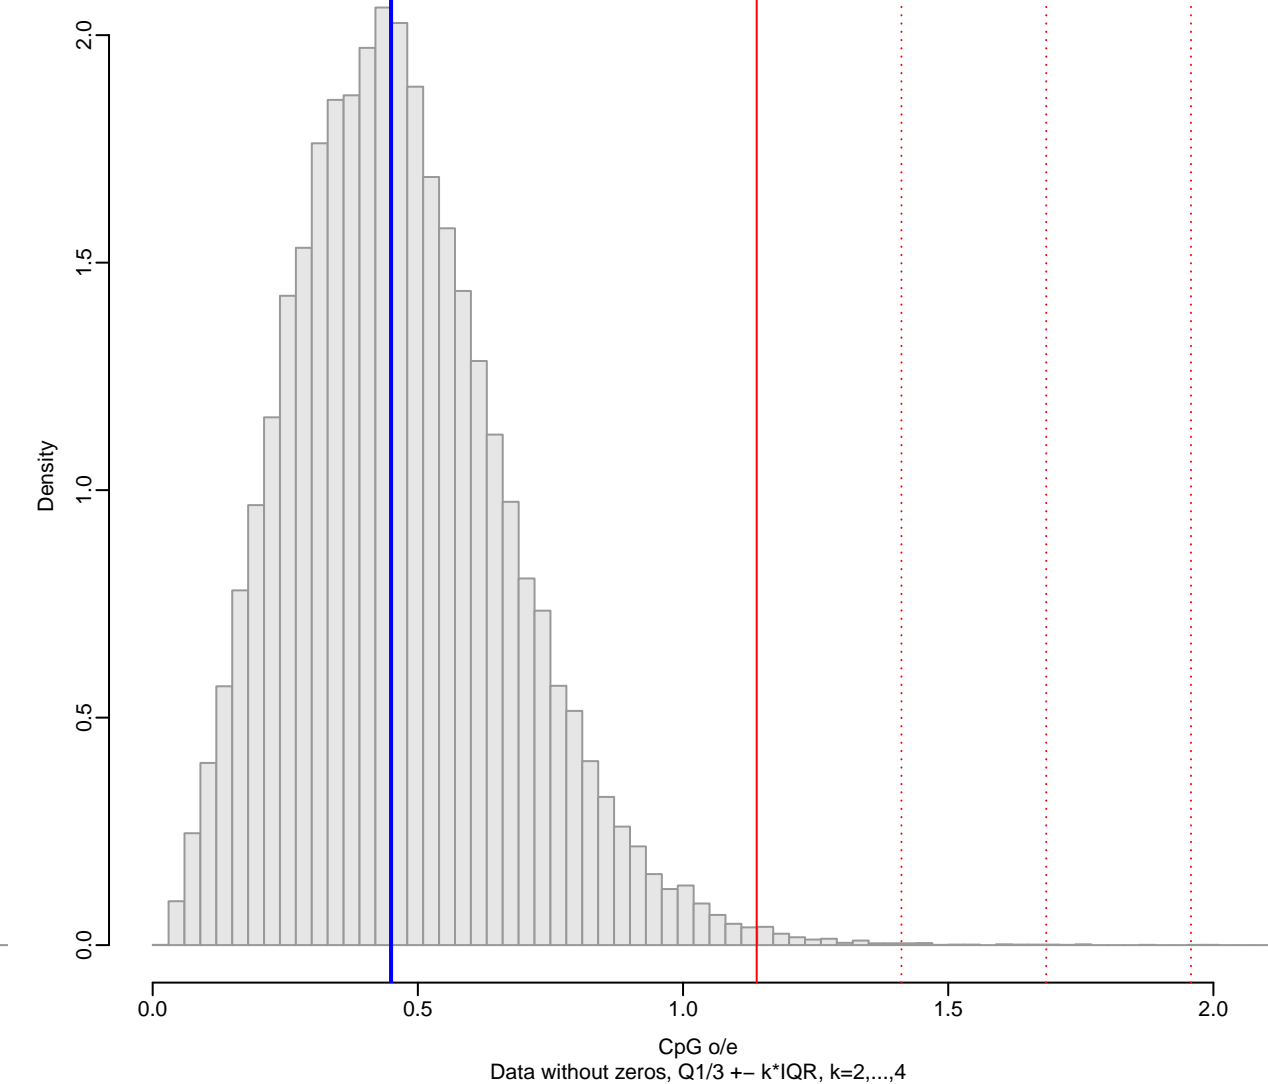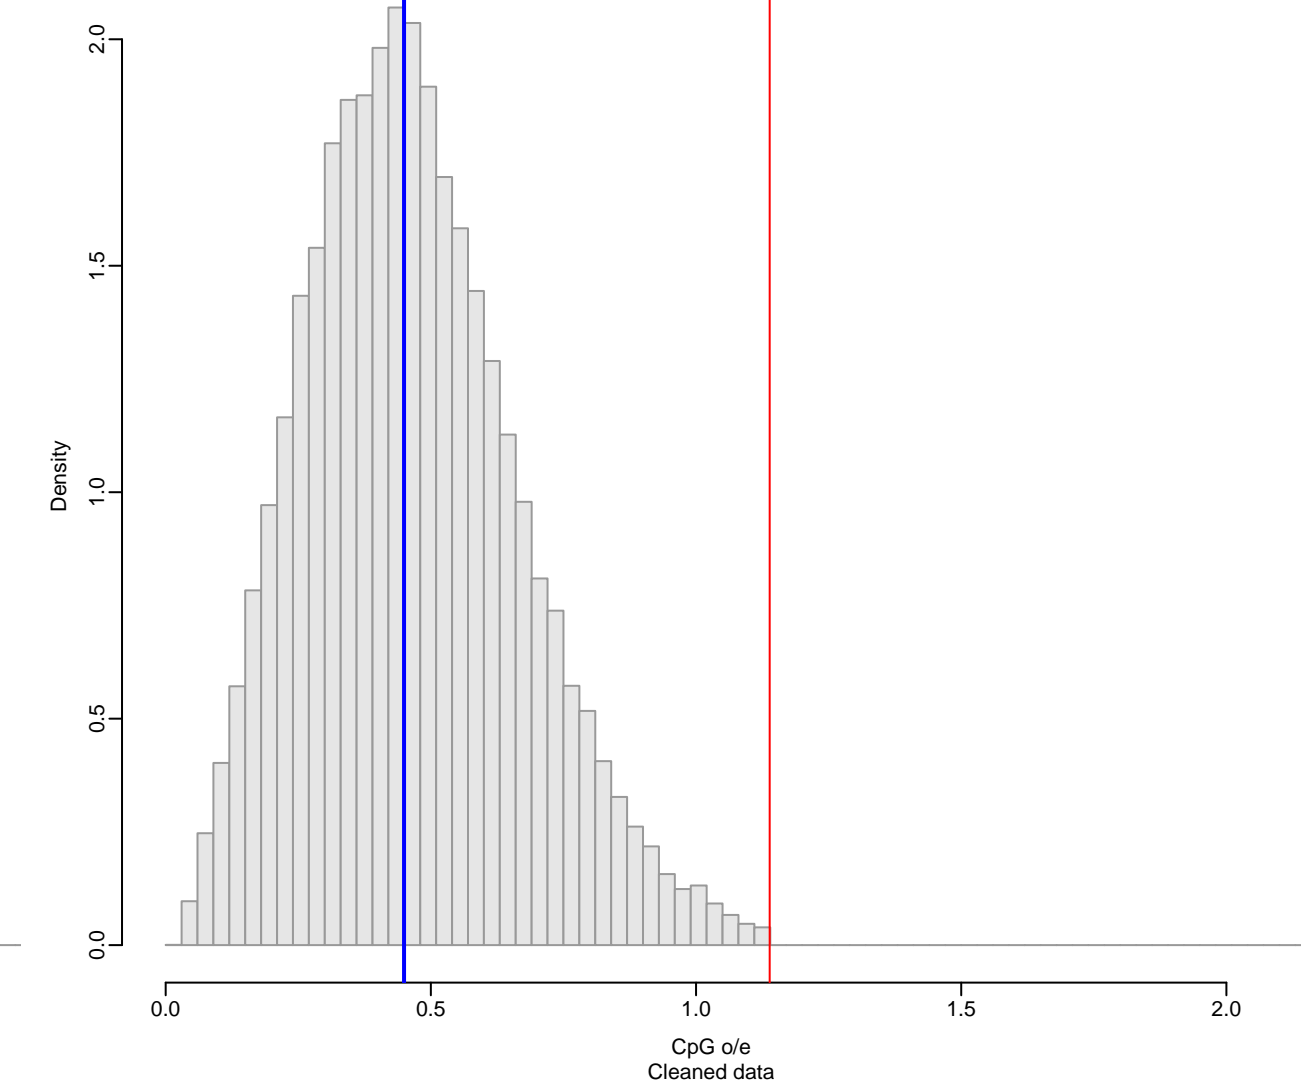



Ornithorhynchus\_anatinus

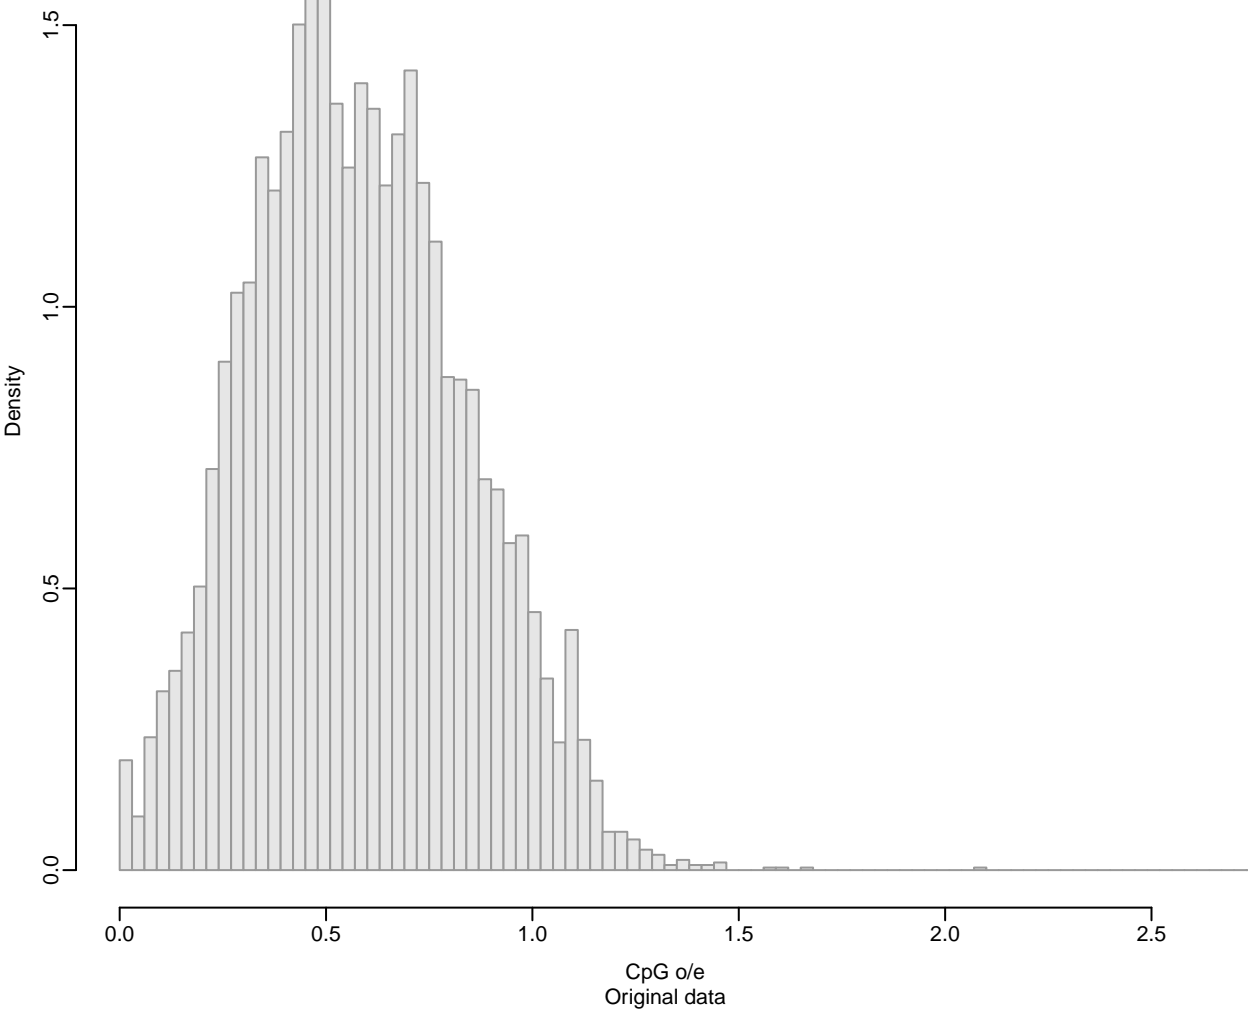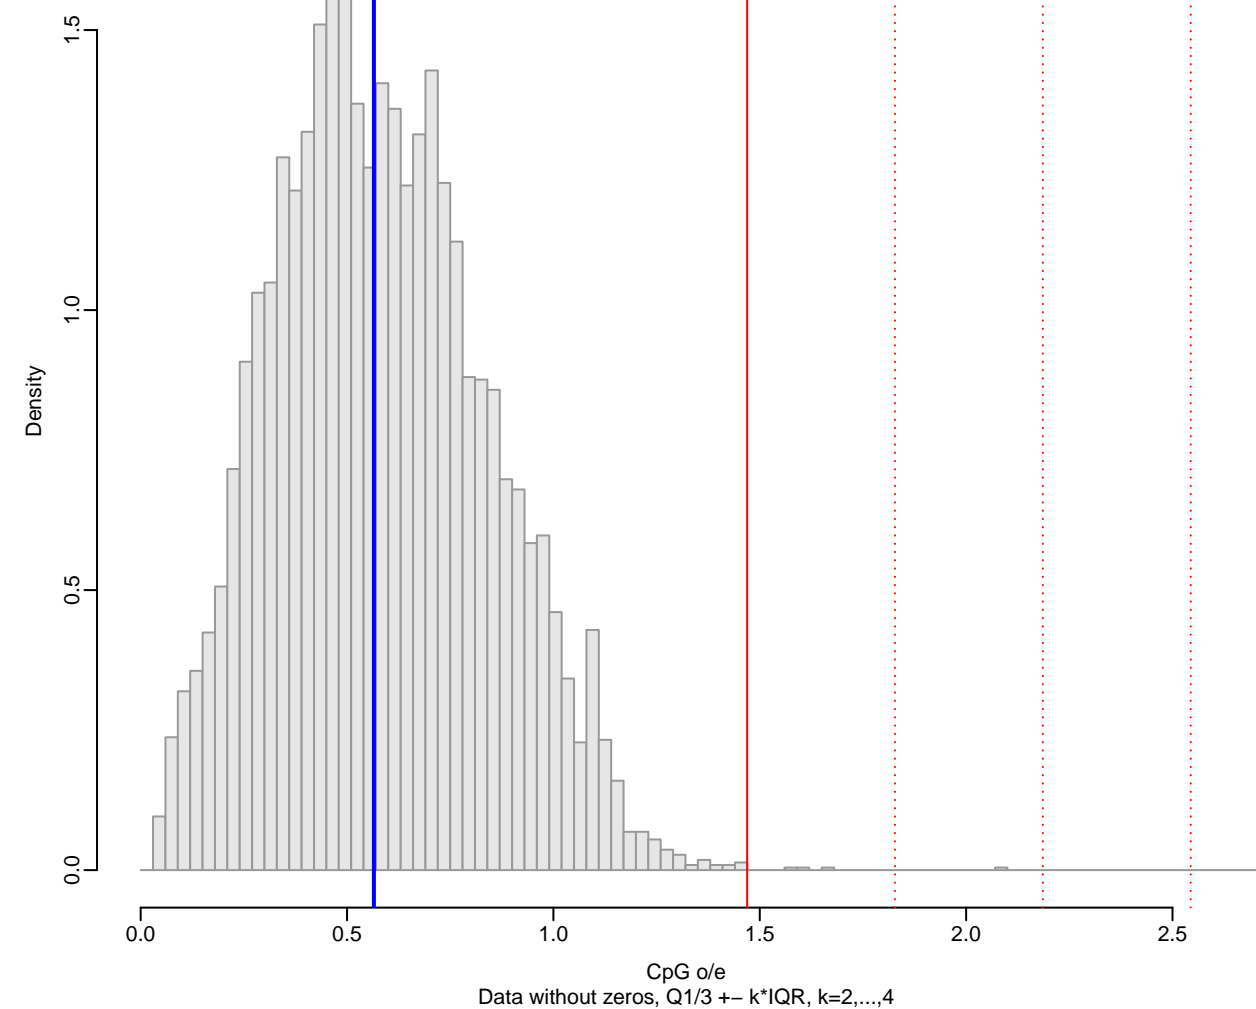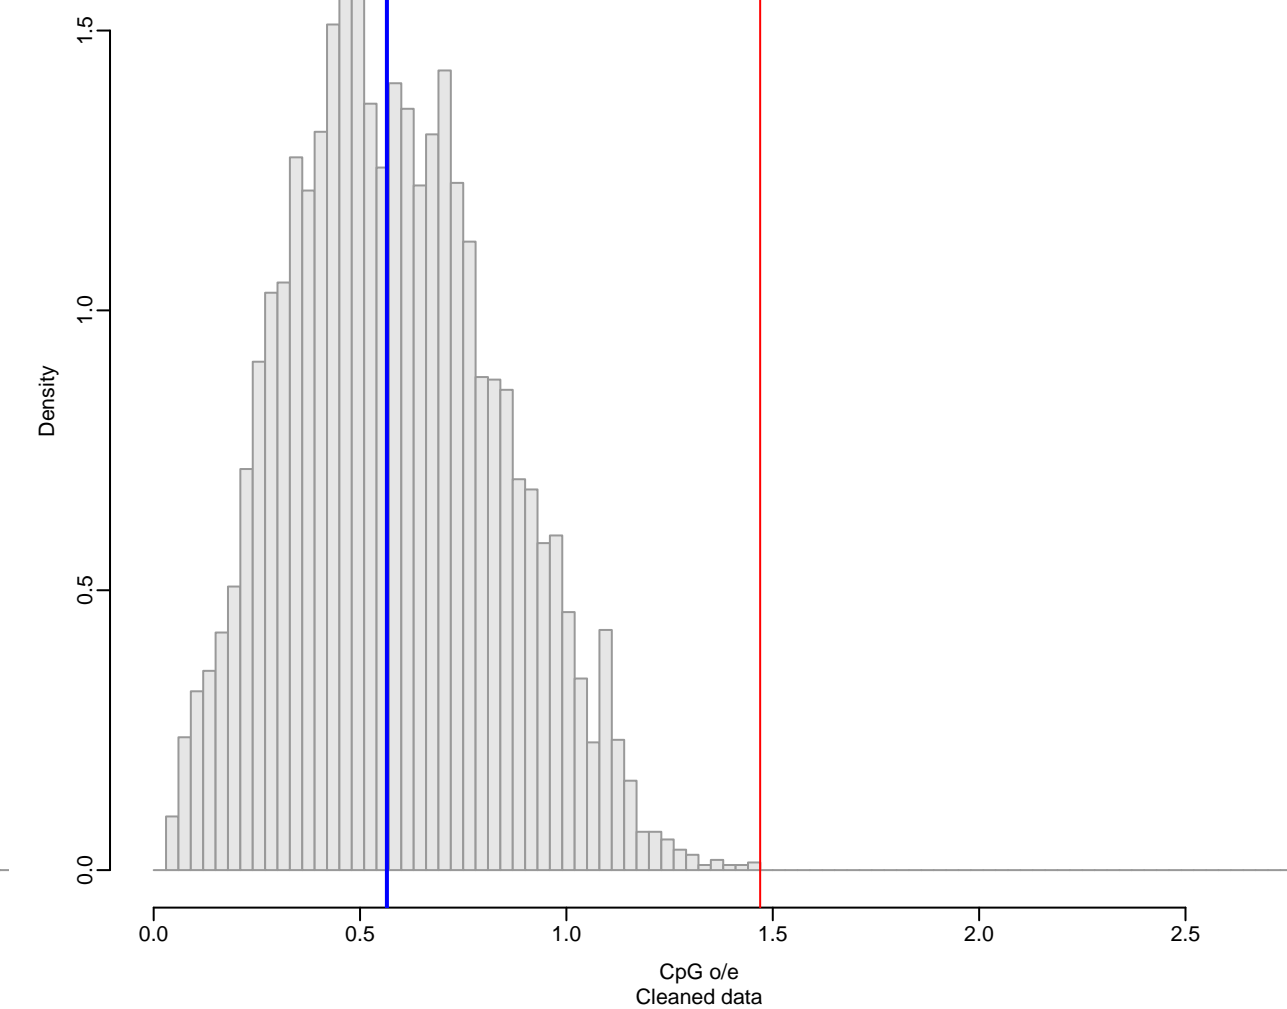

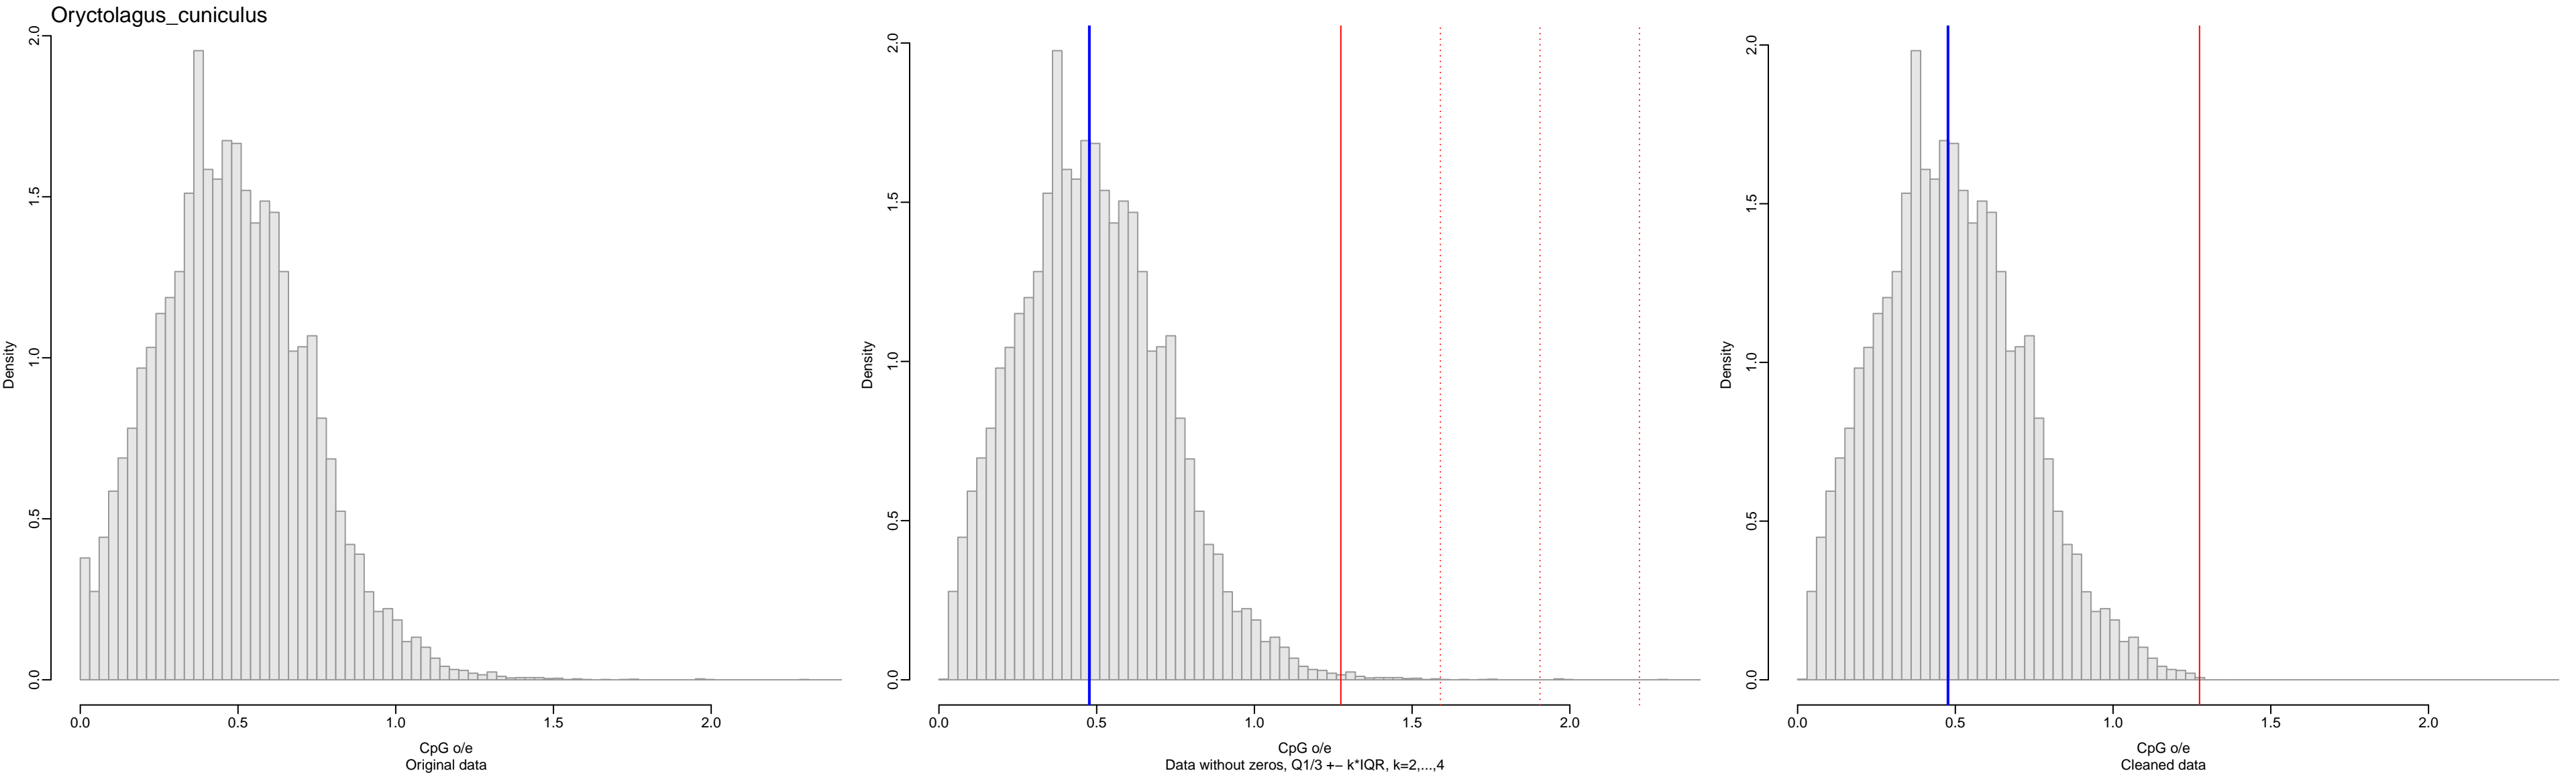

Oryza\_longistaminata

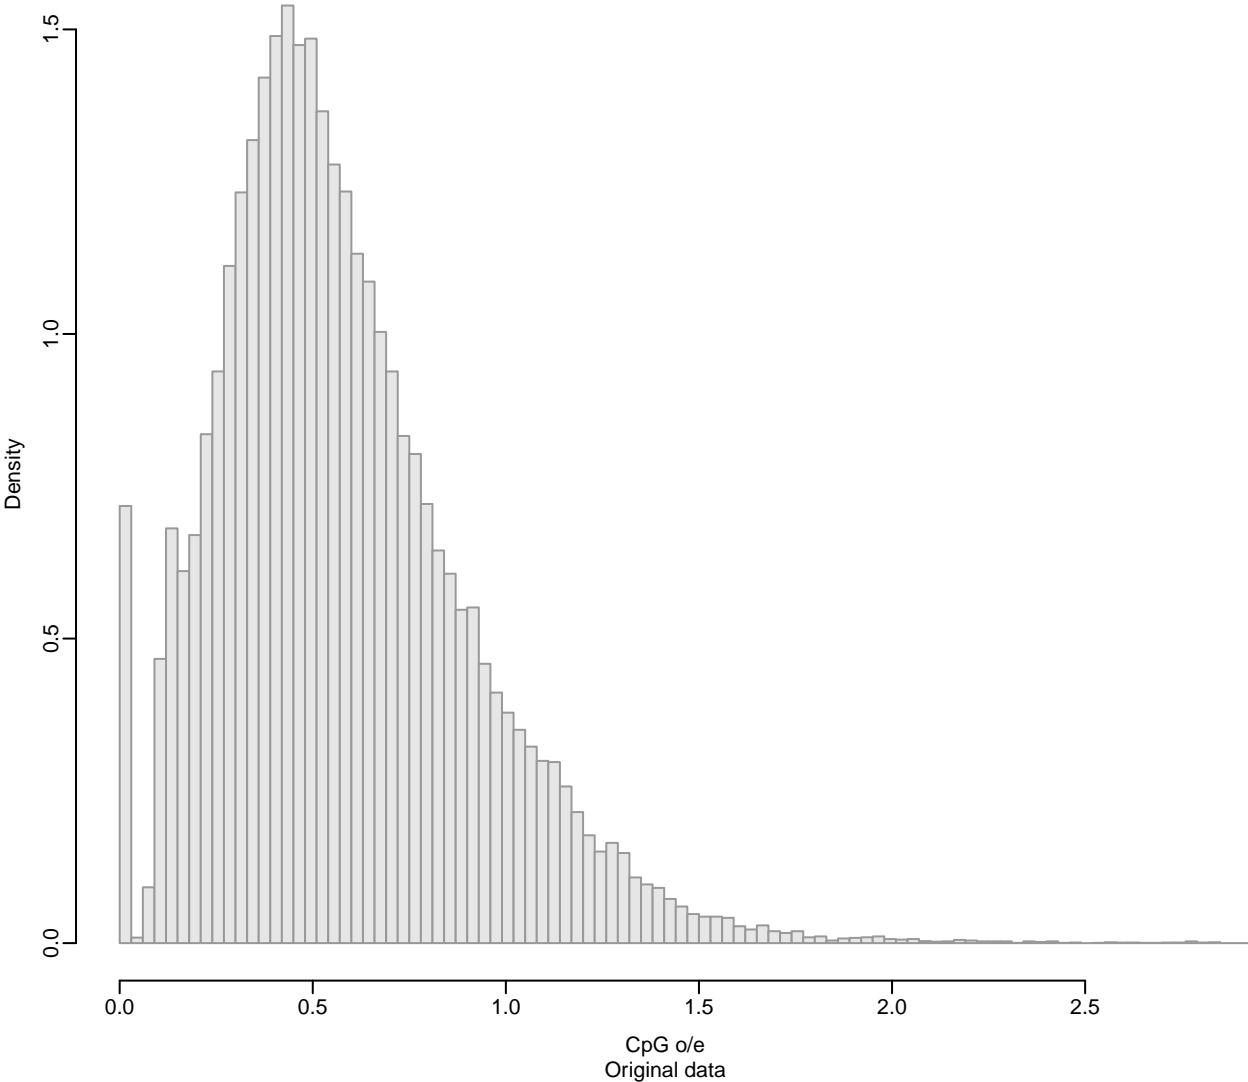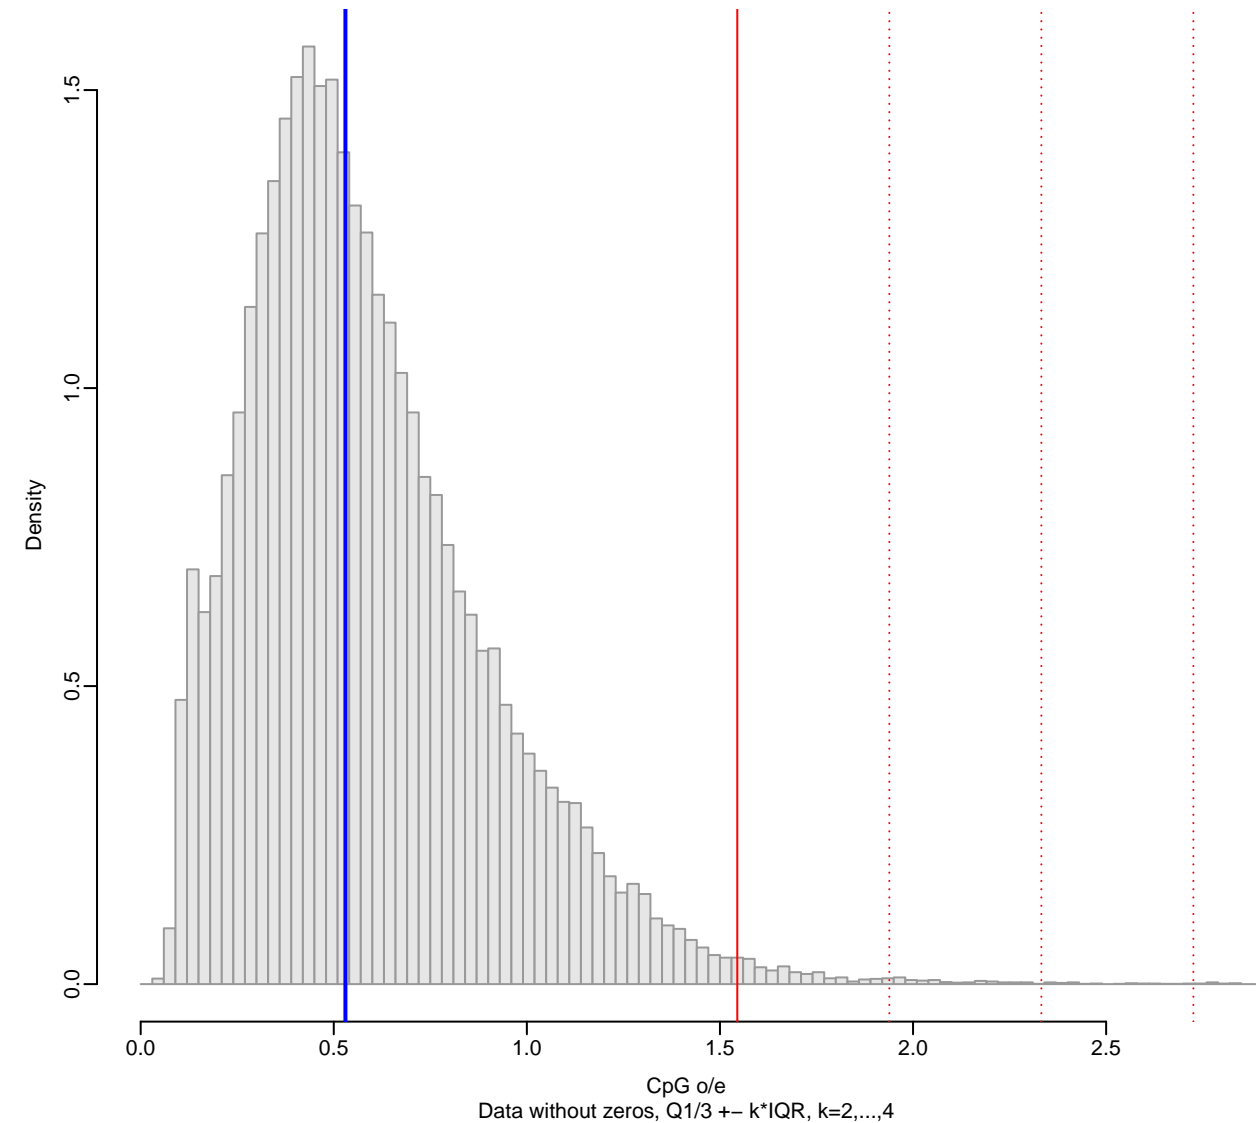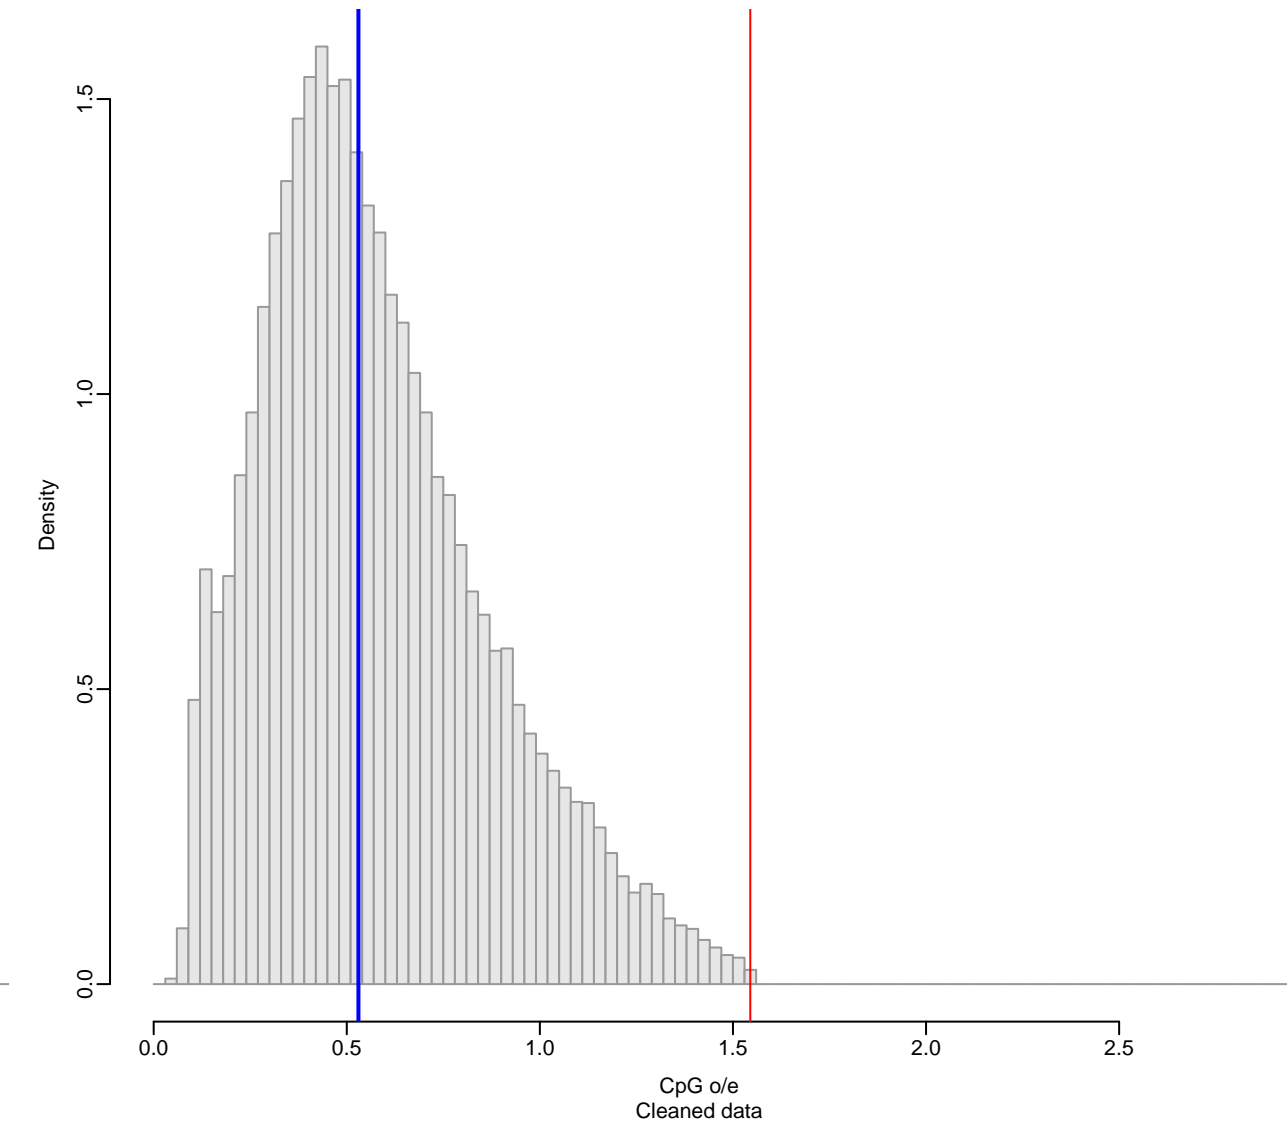

Oryza\_minuta

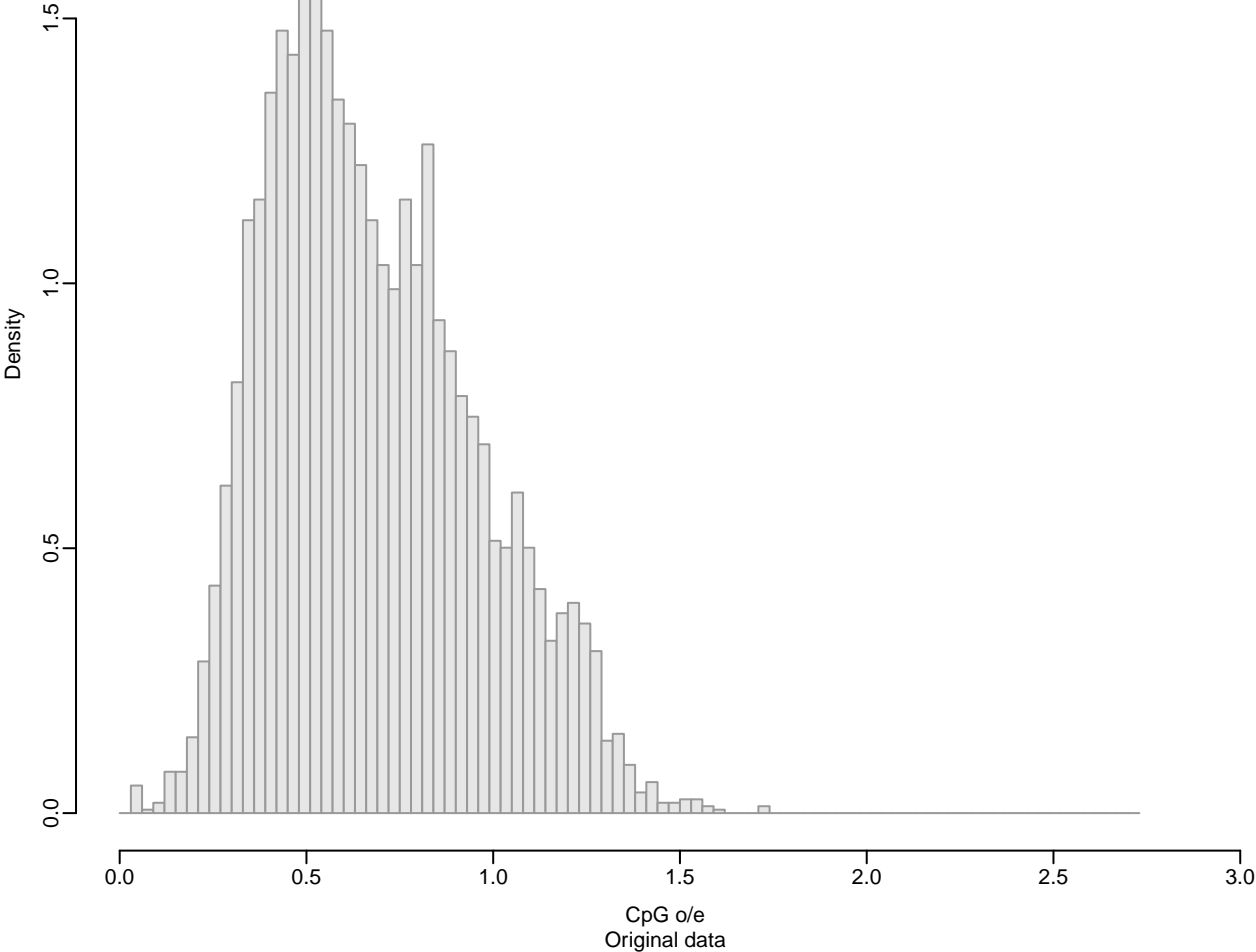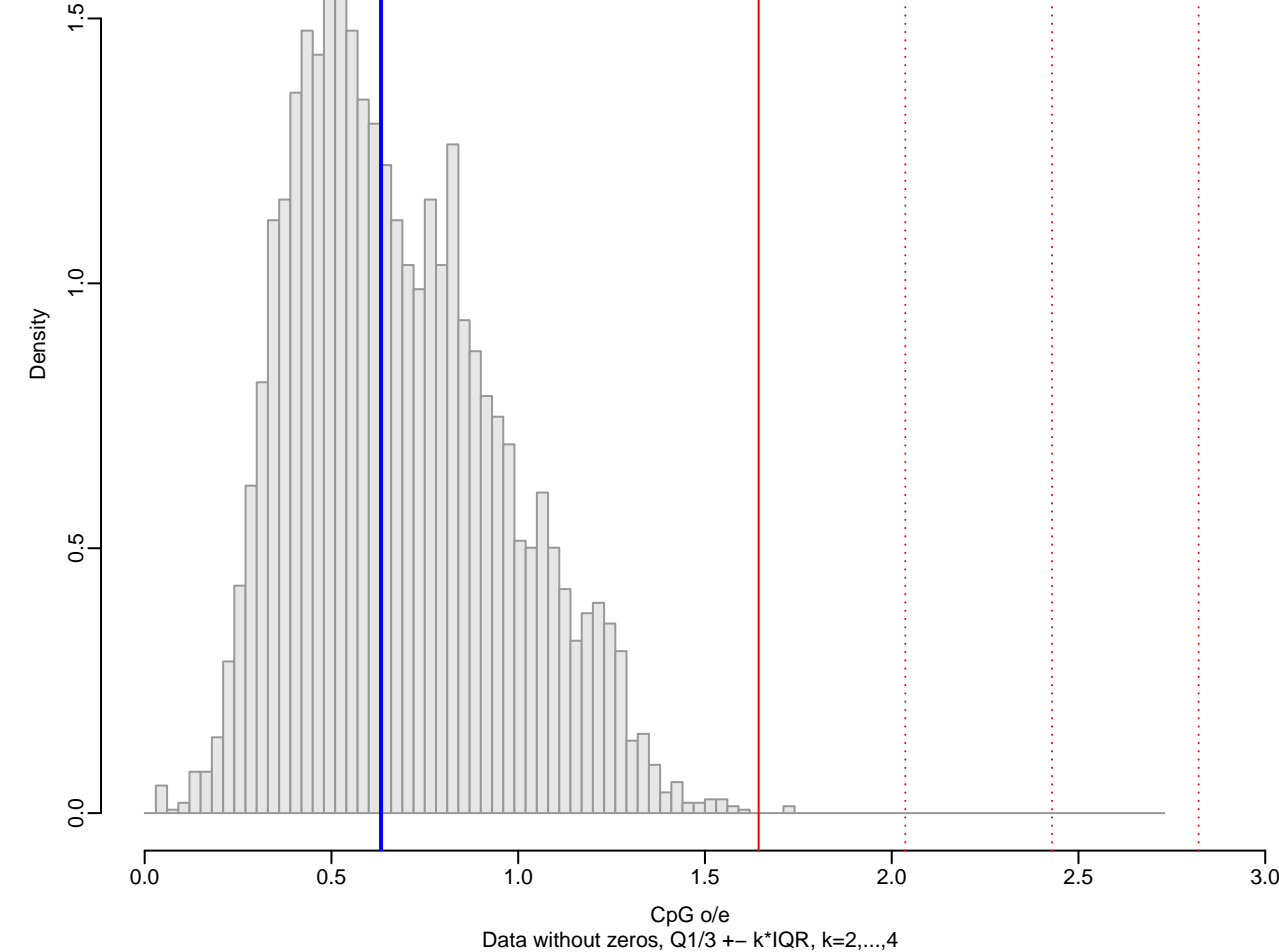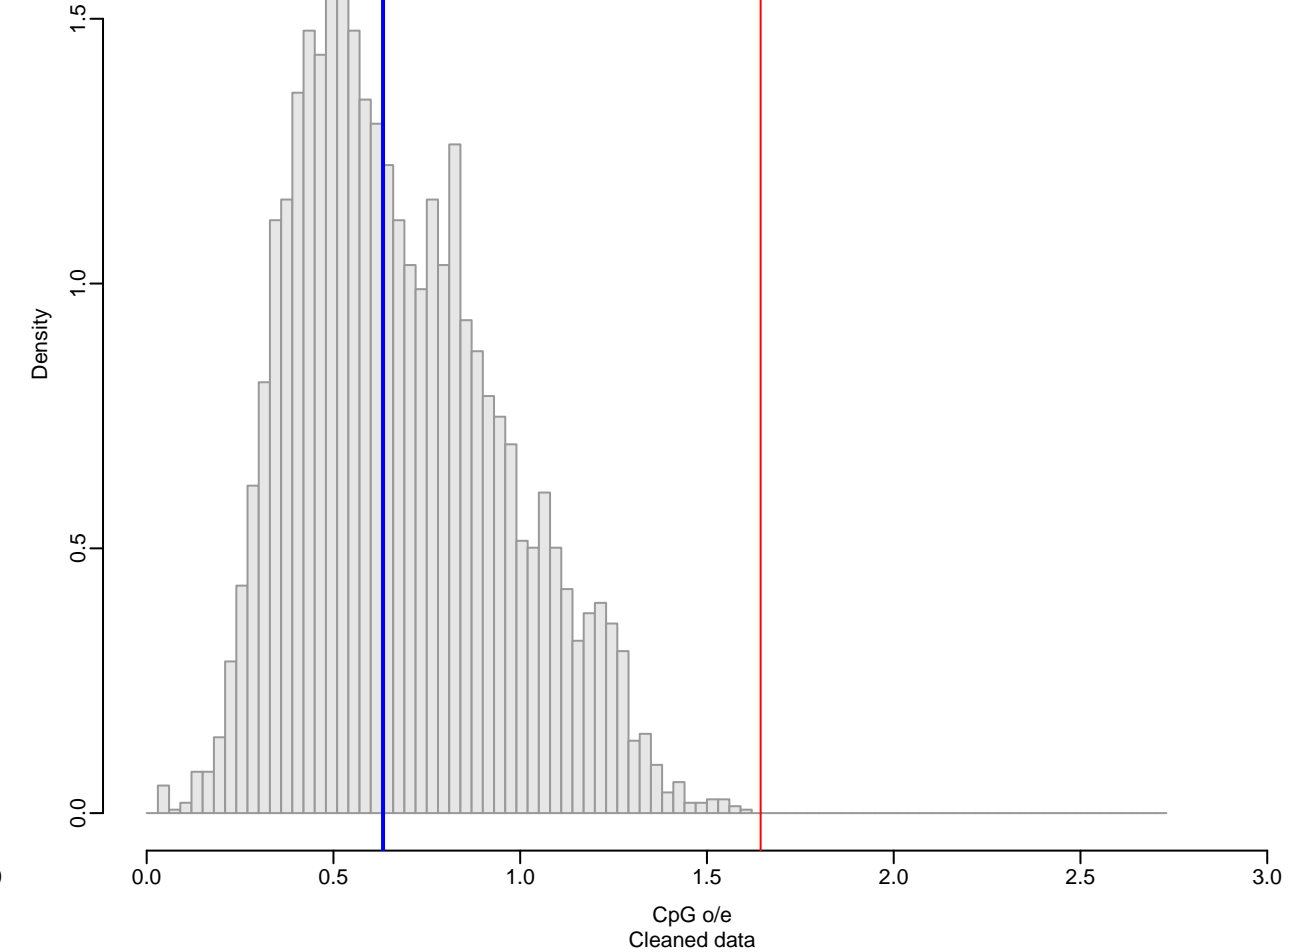

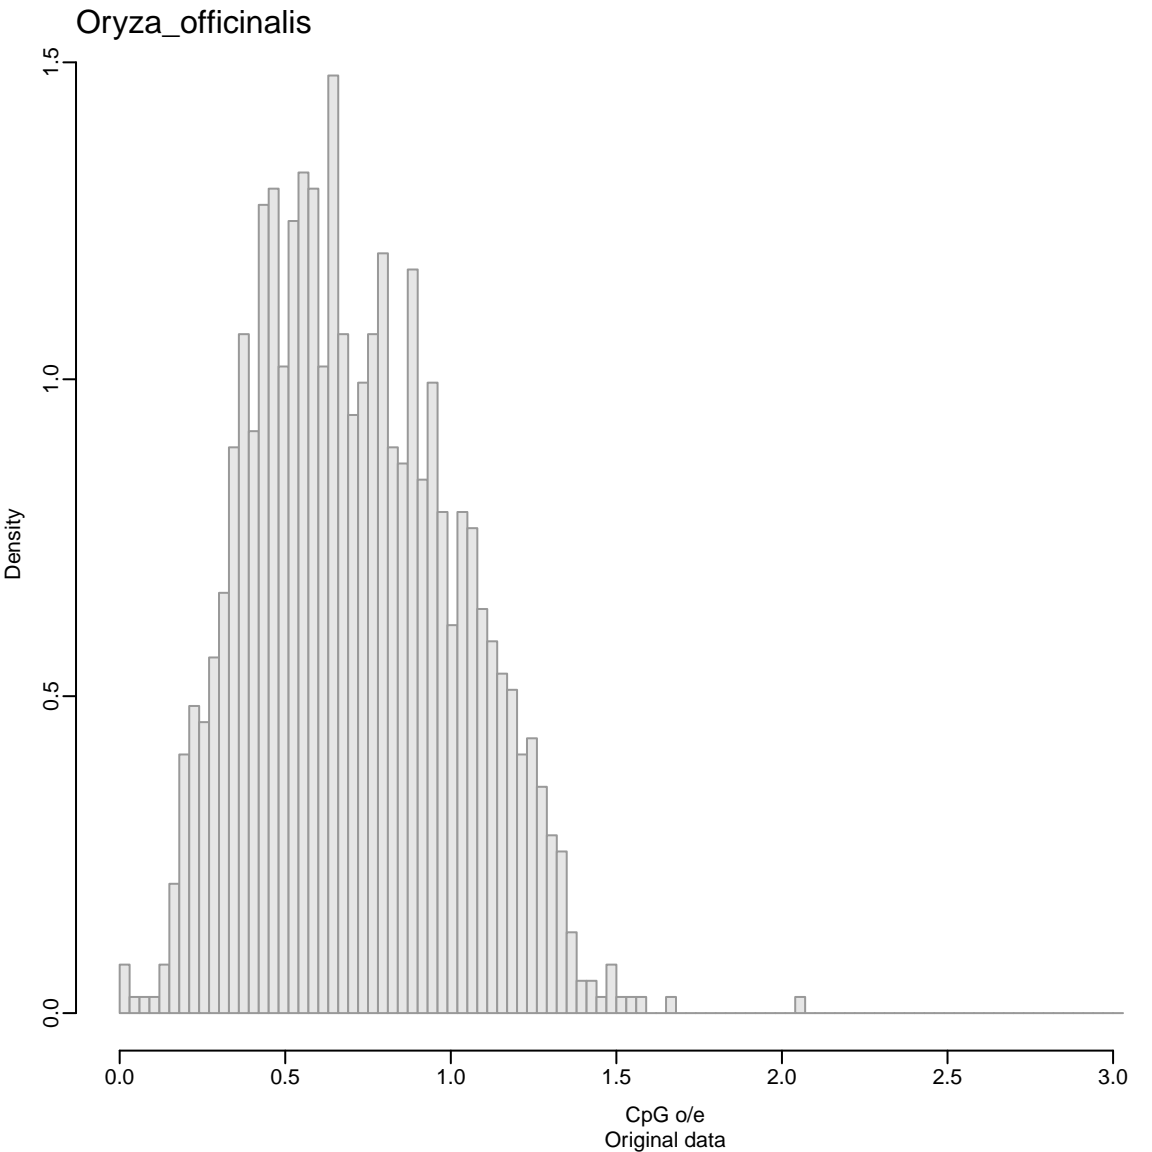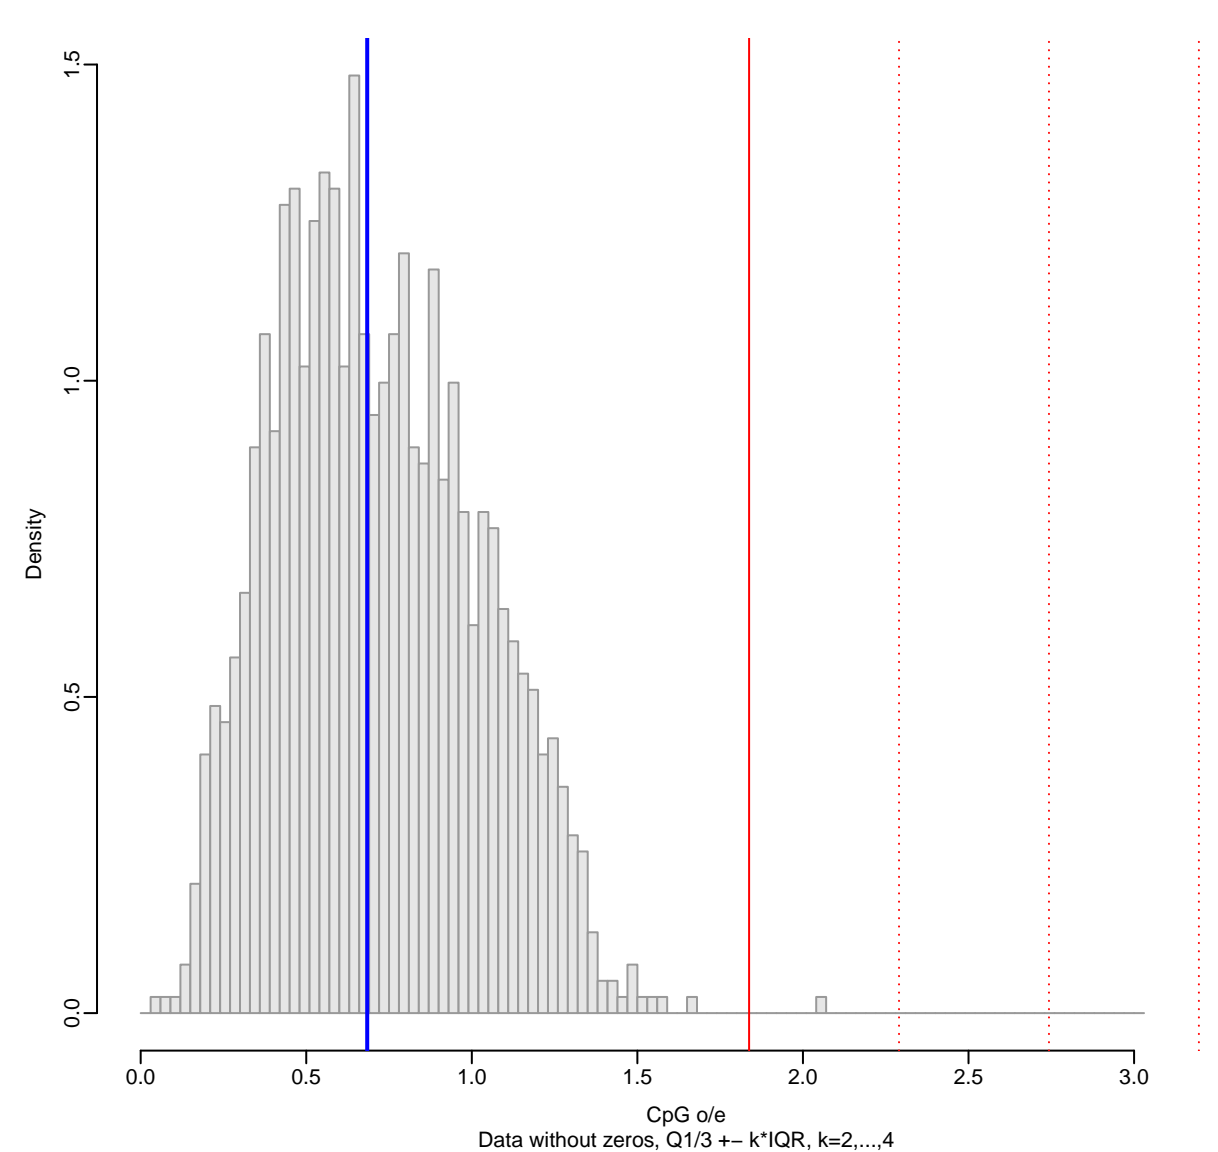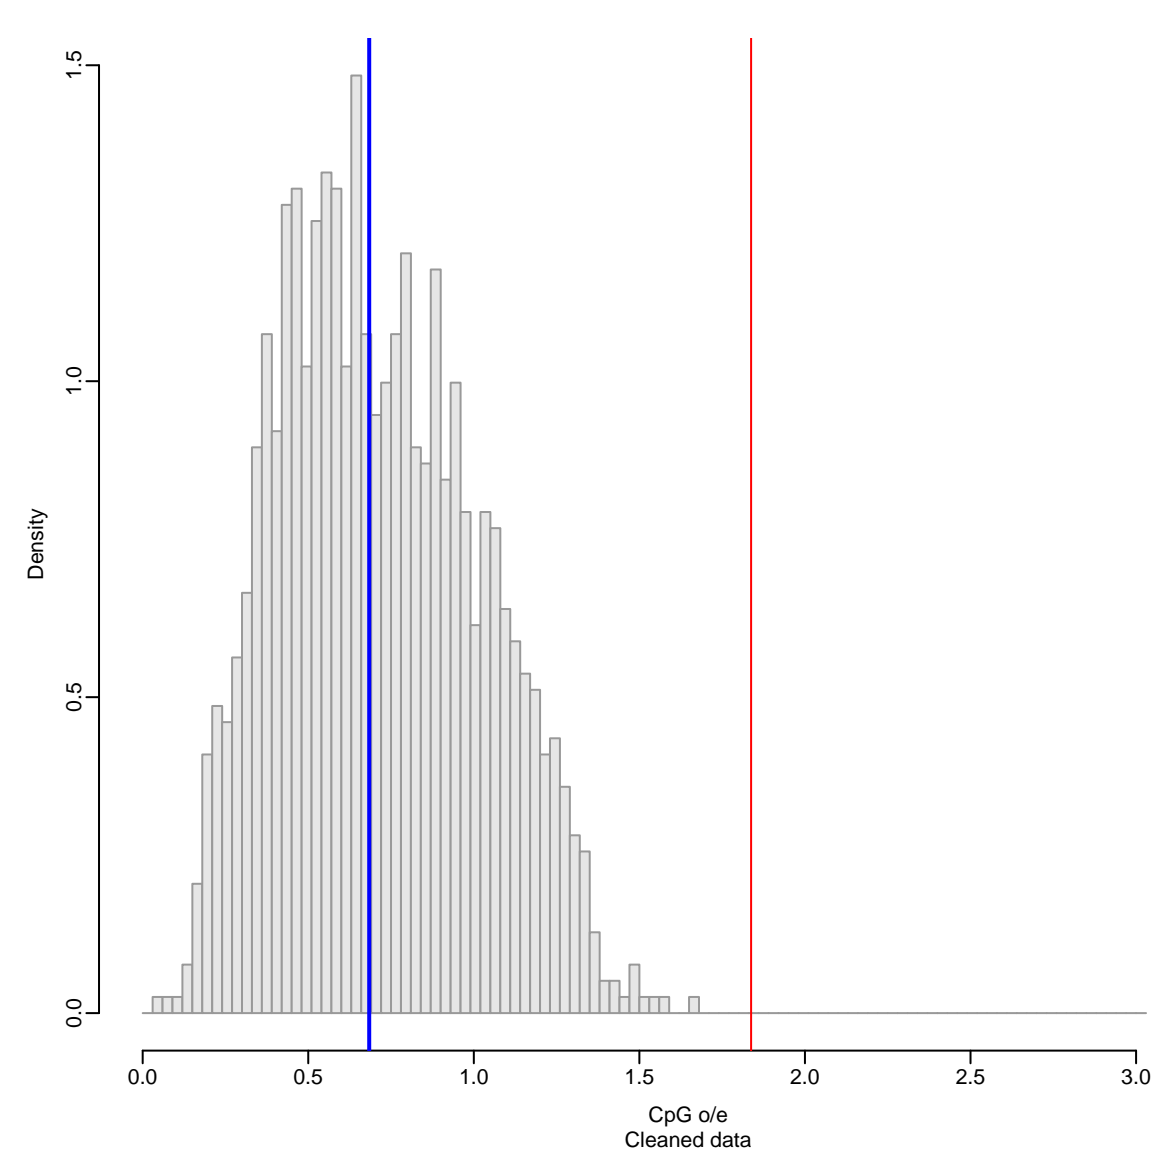

Oryza\_sativa

Density

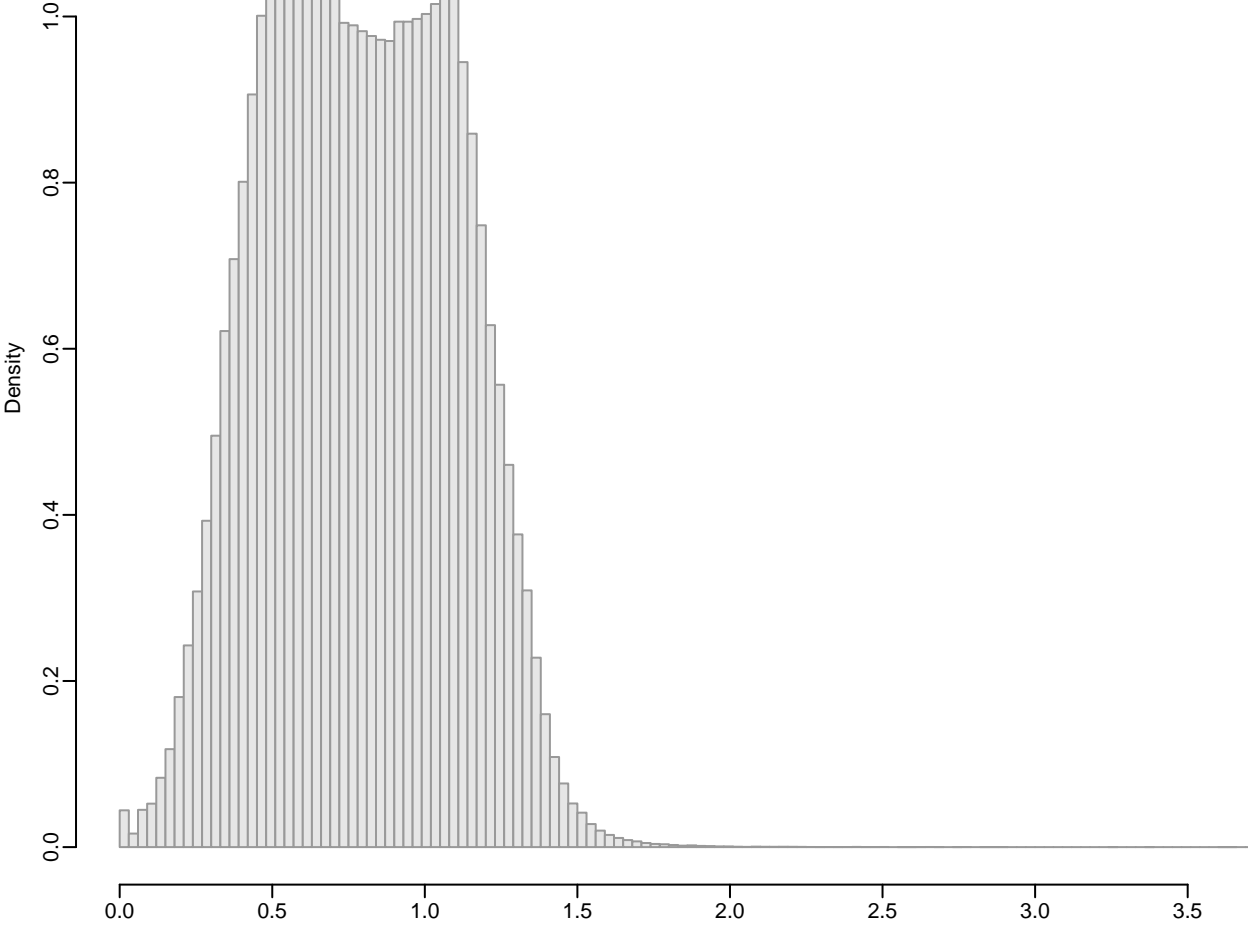

Density

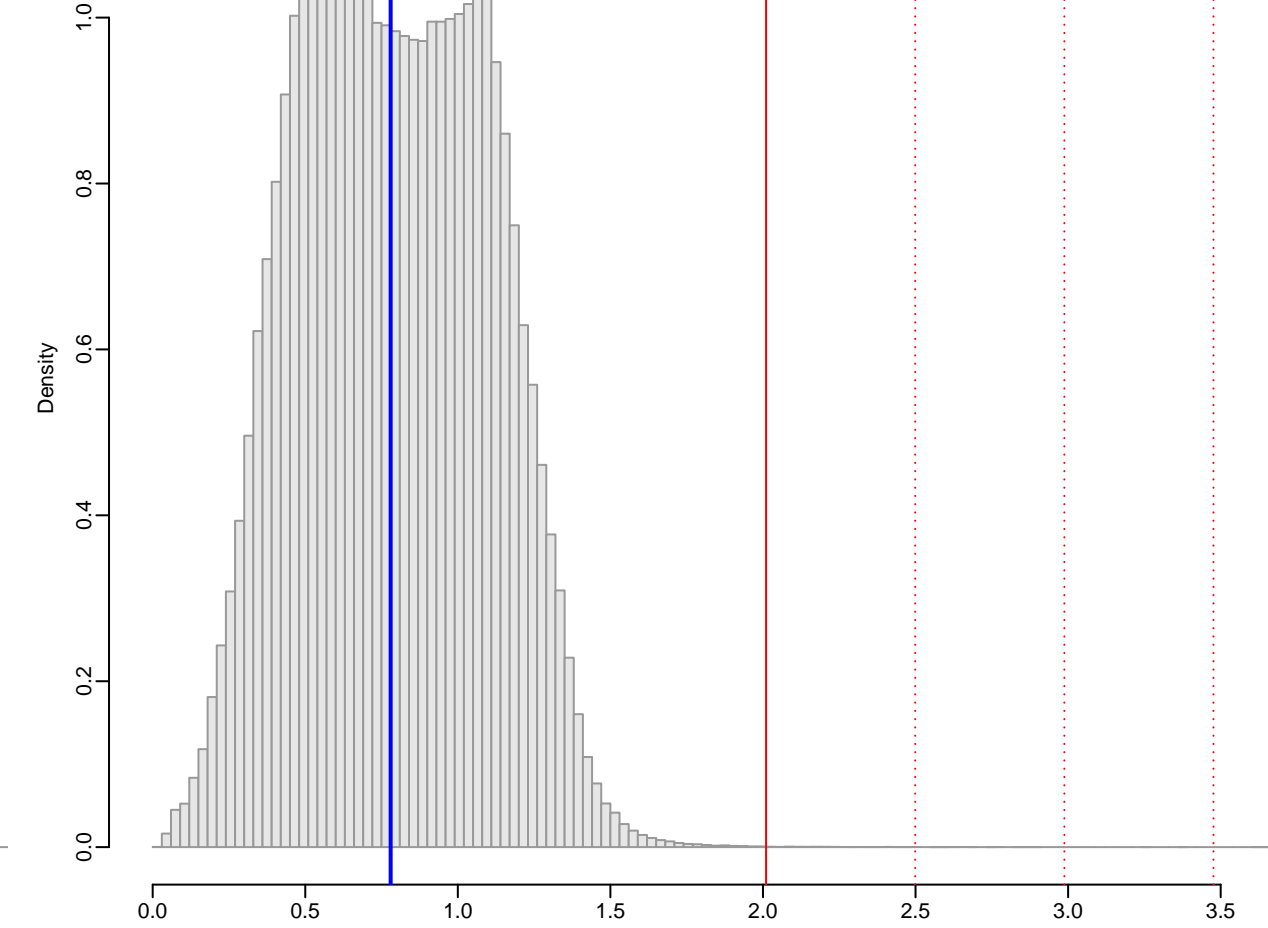

Density

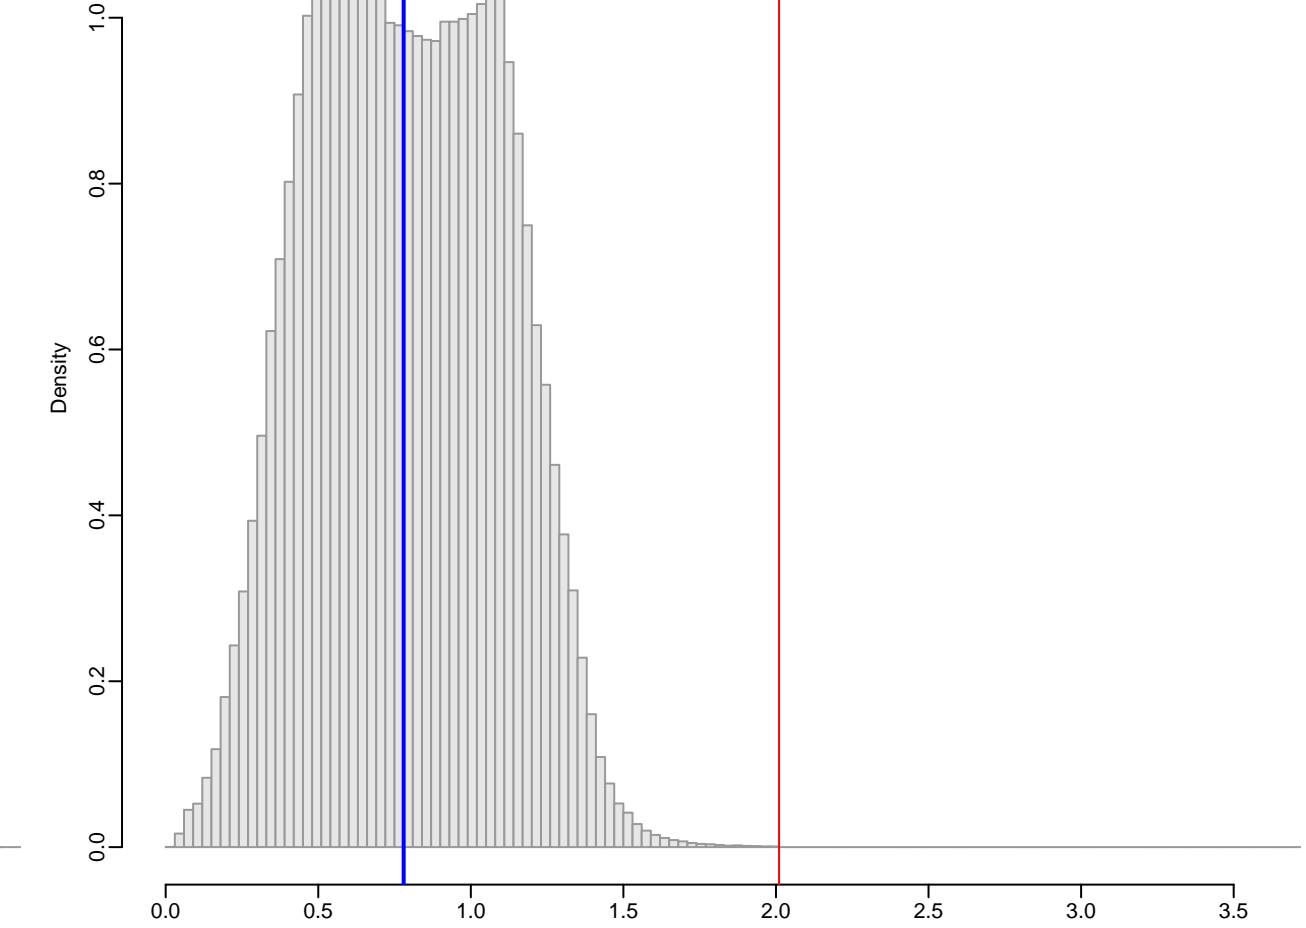

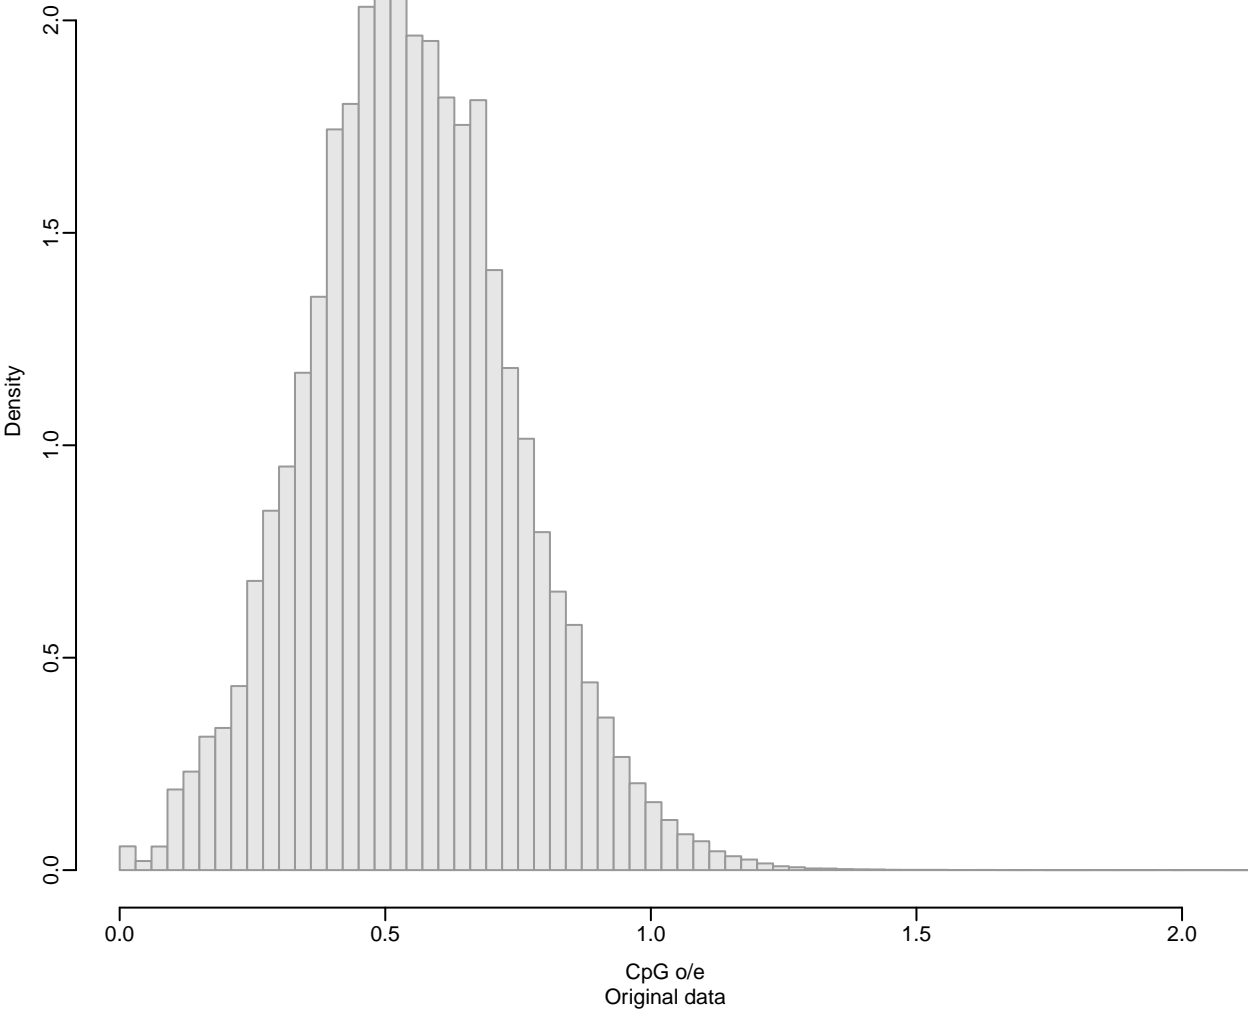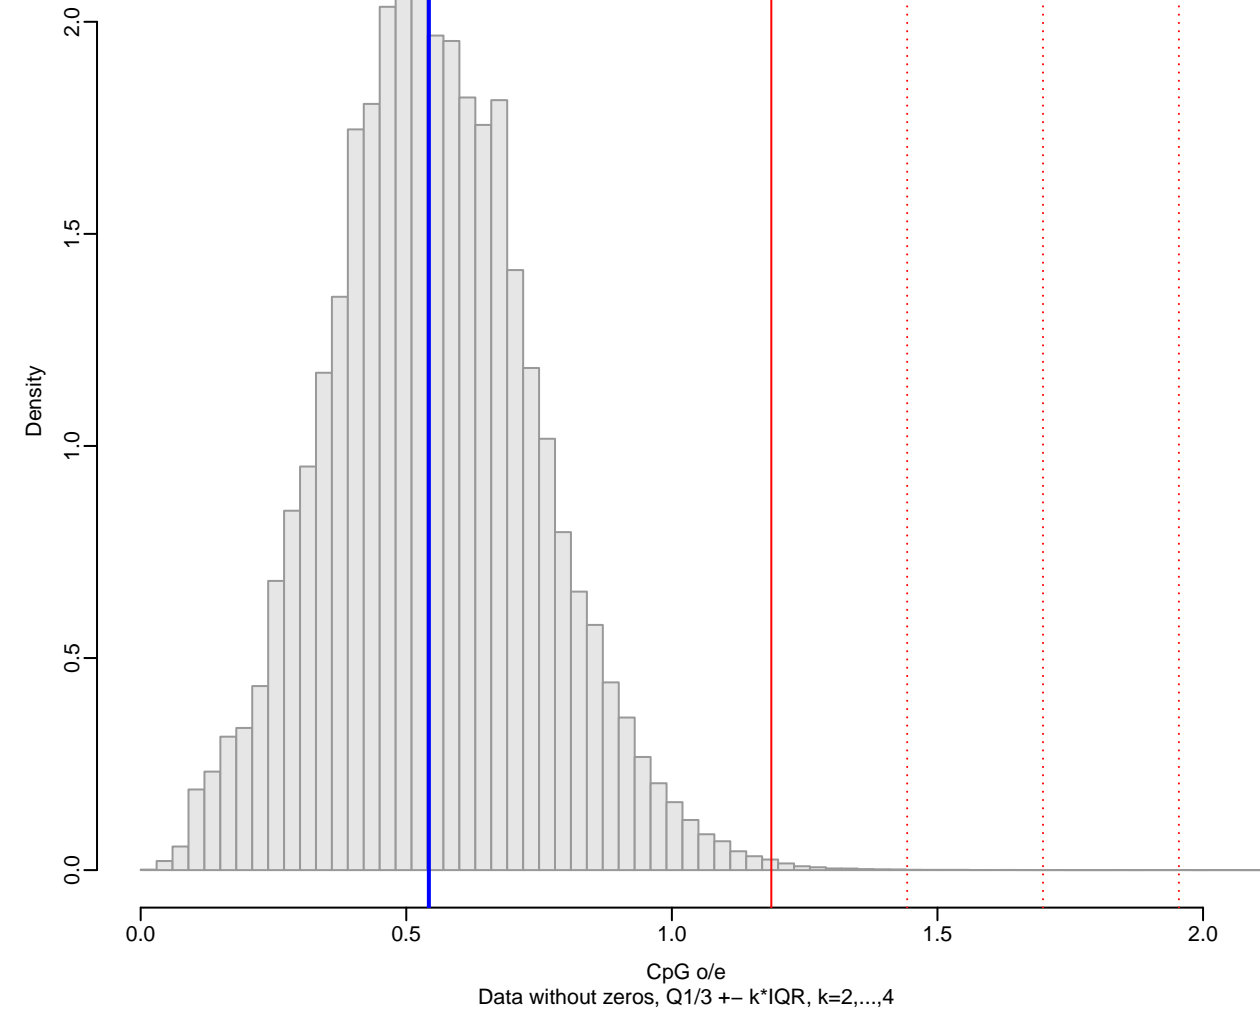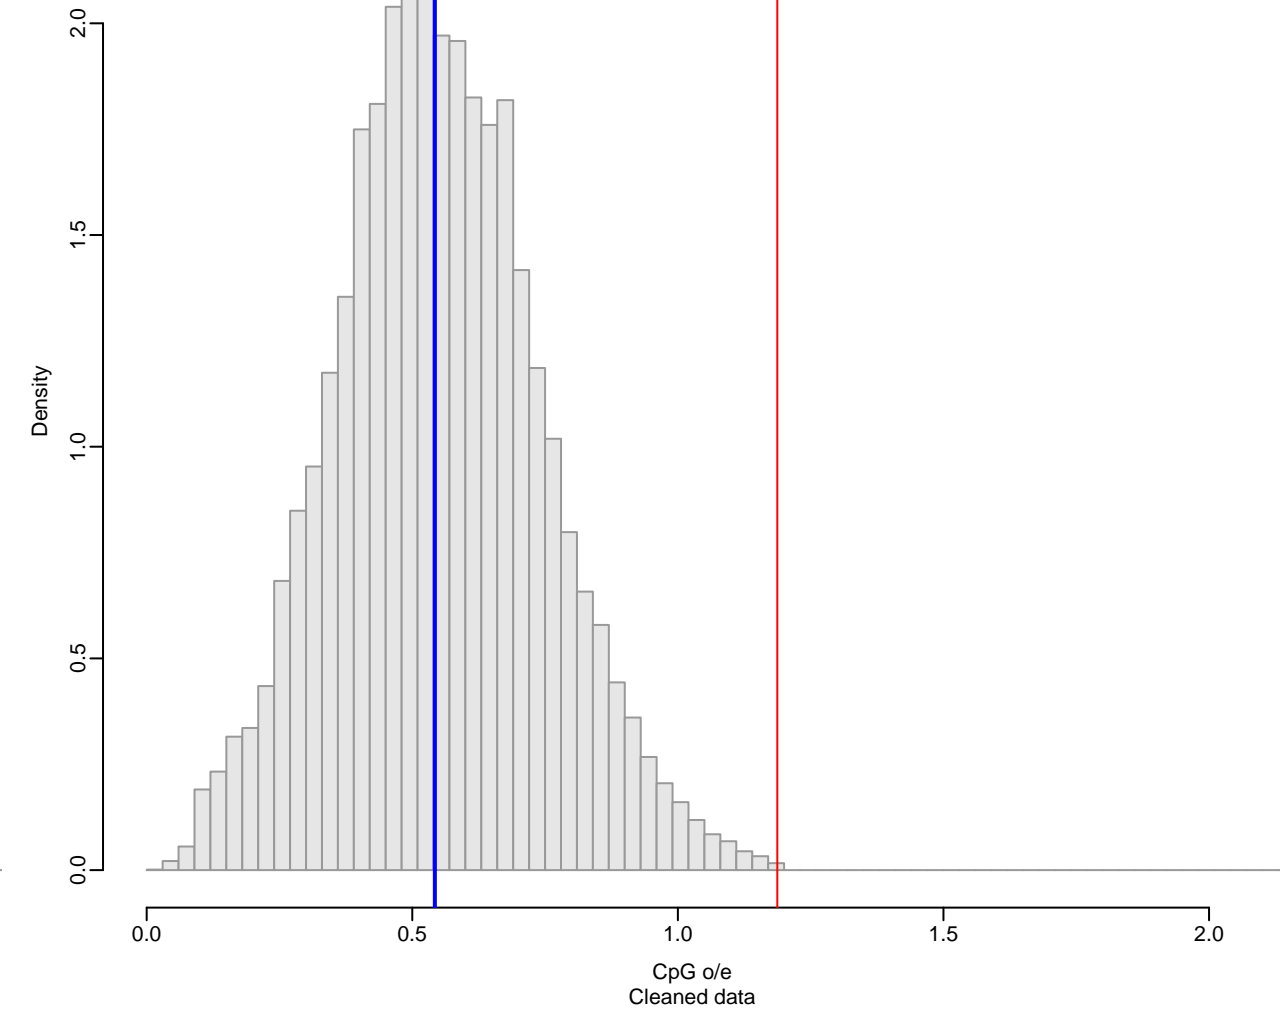

Osmerus\_mordax

Density

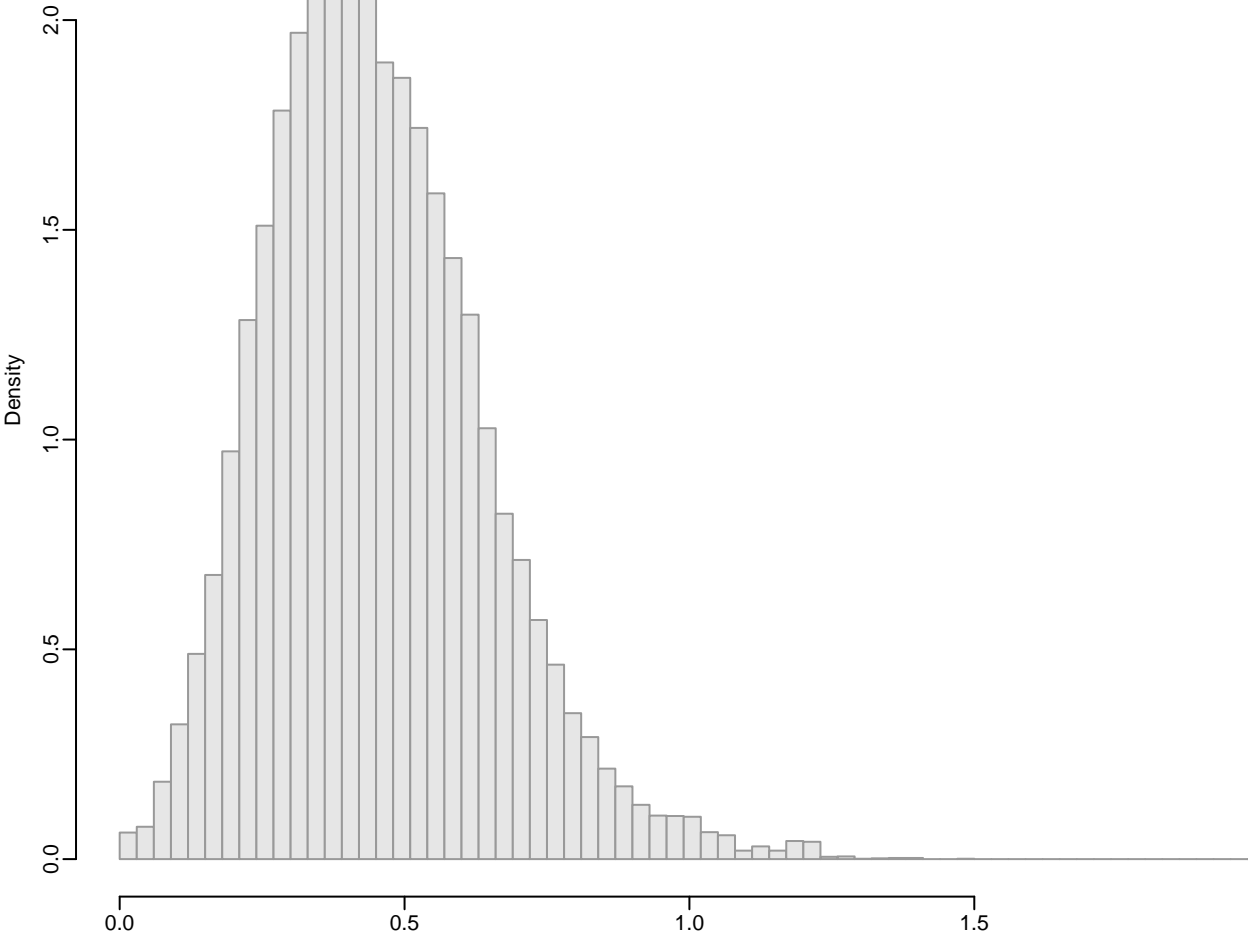

Density

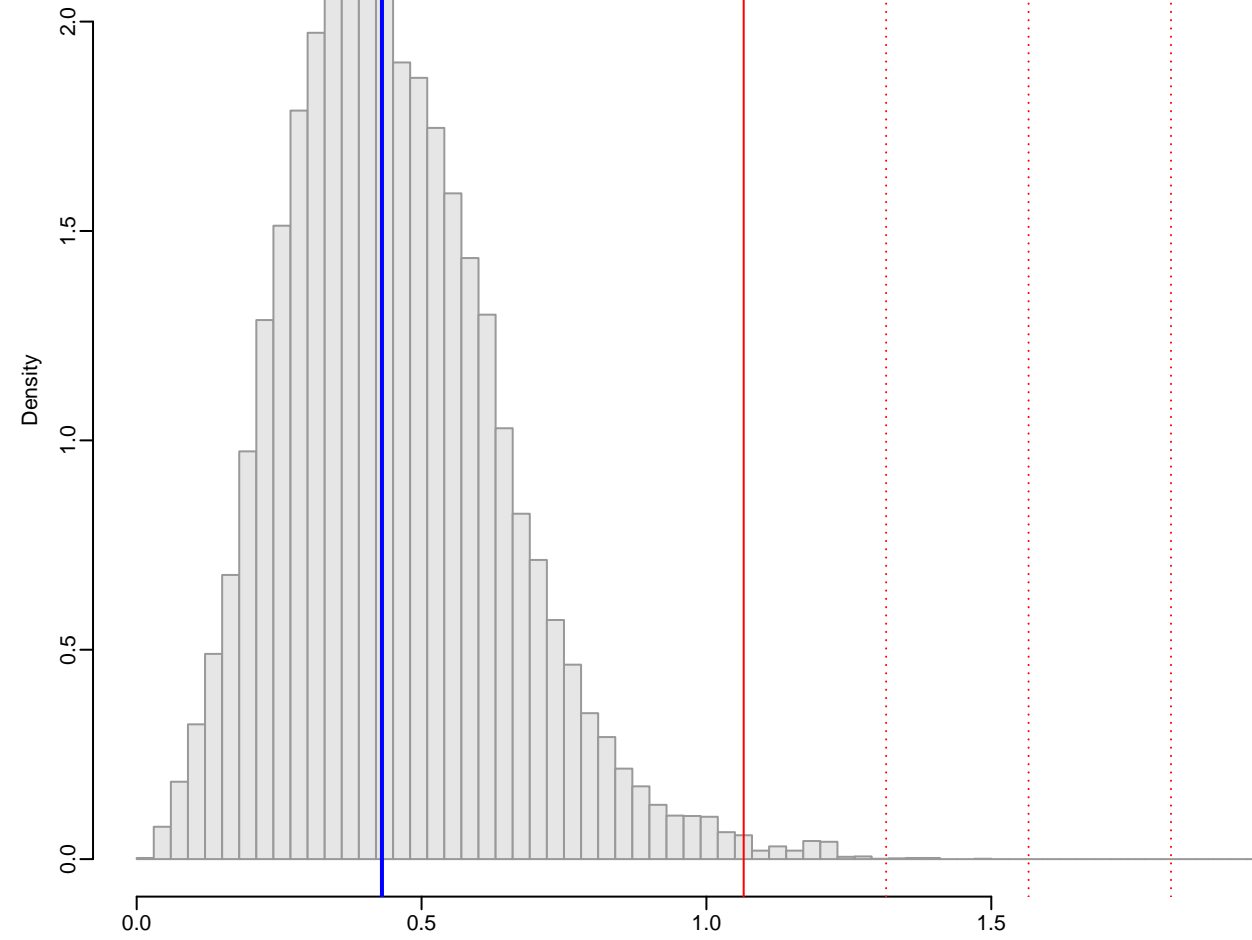

Density

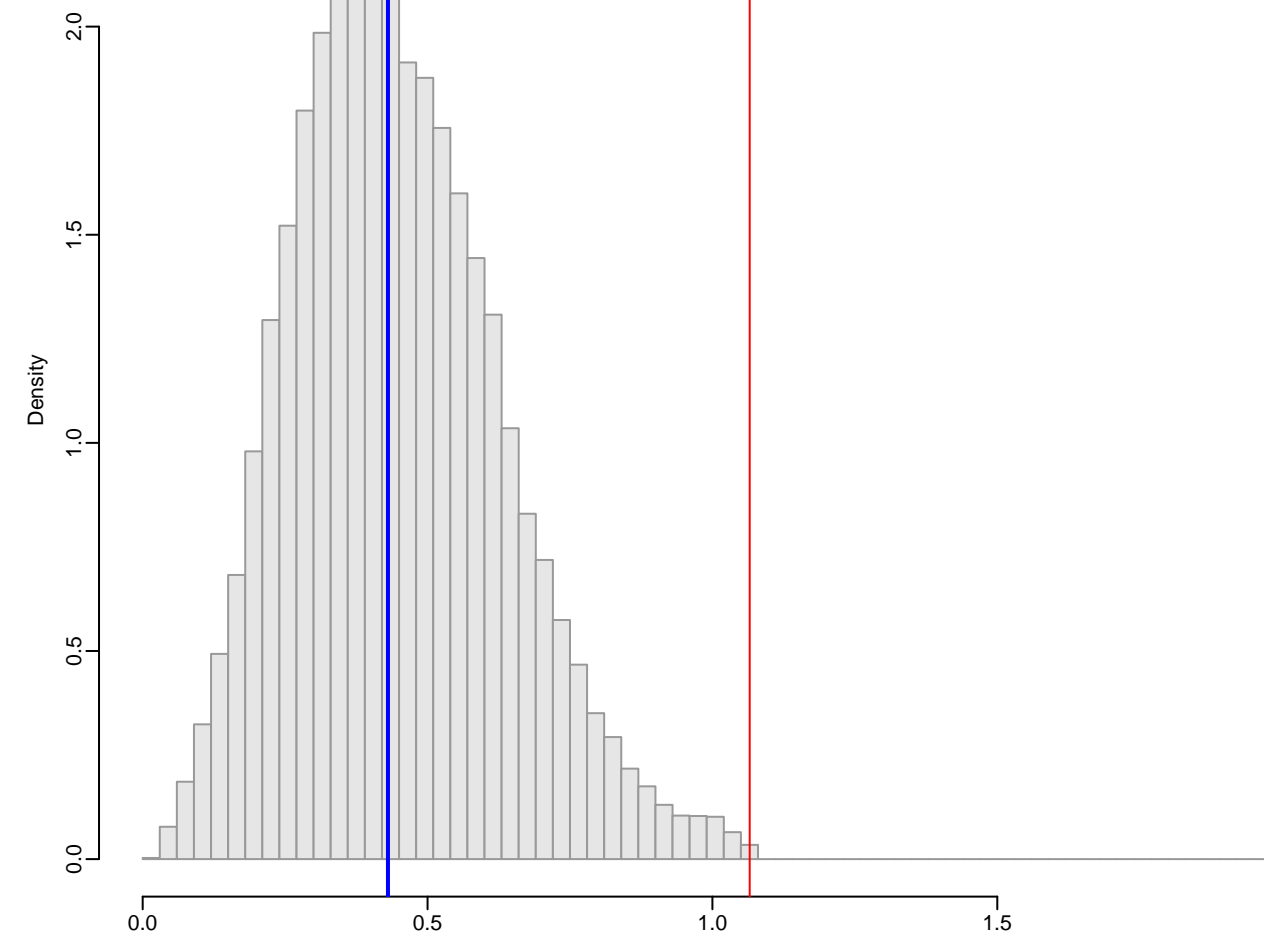



Osmunda\_lancea

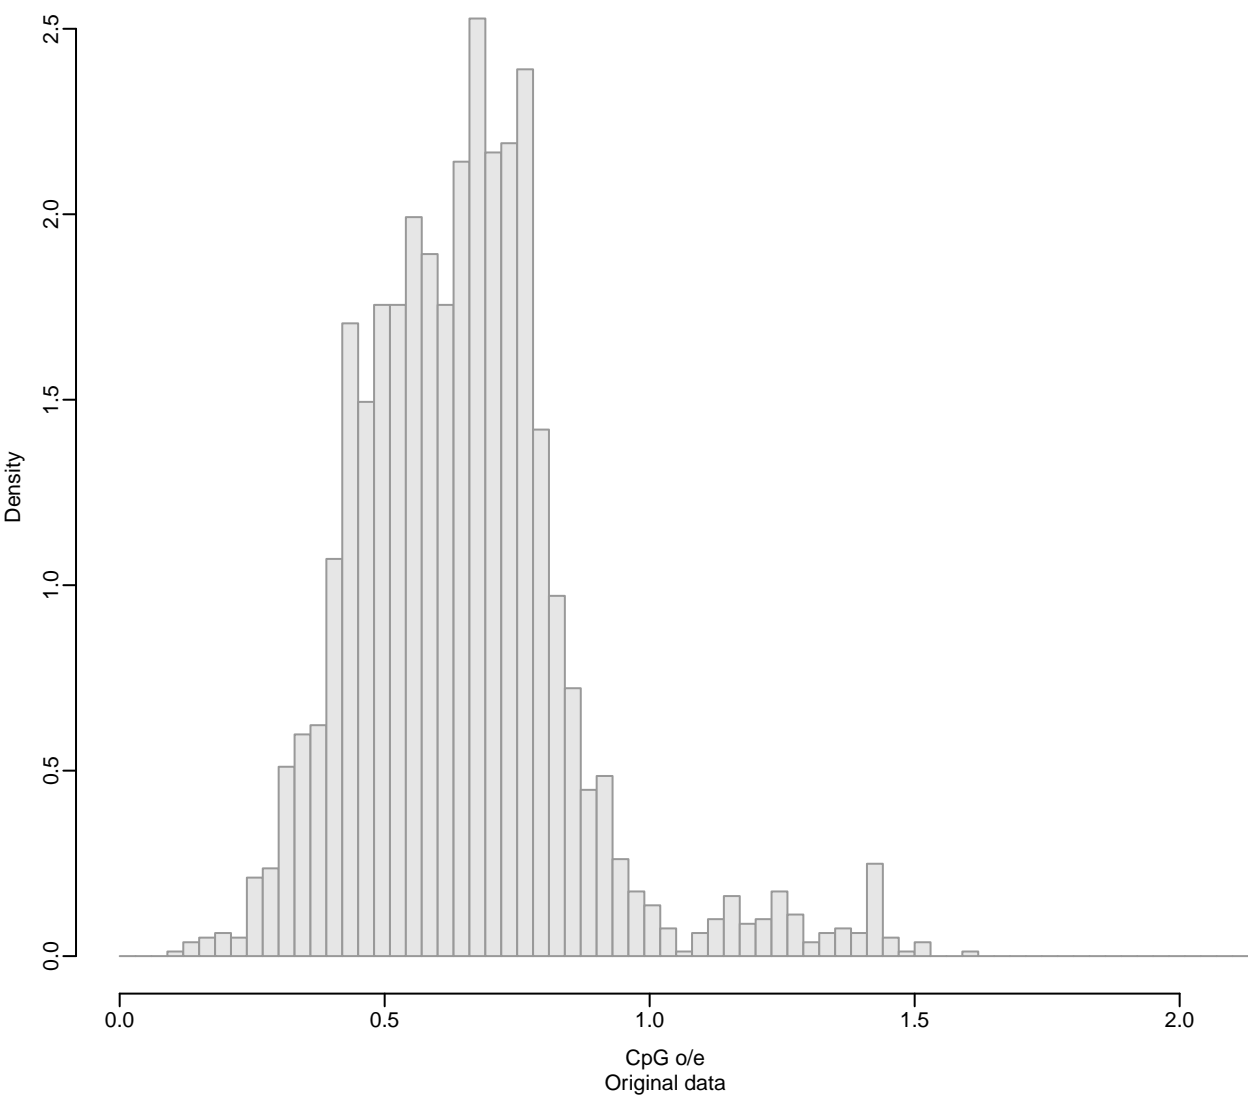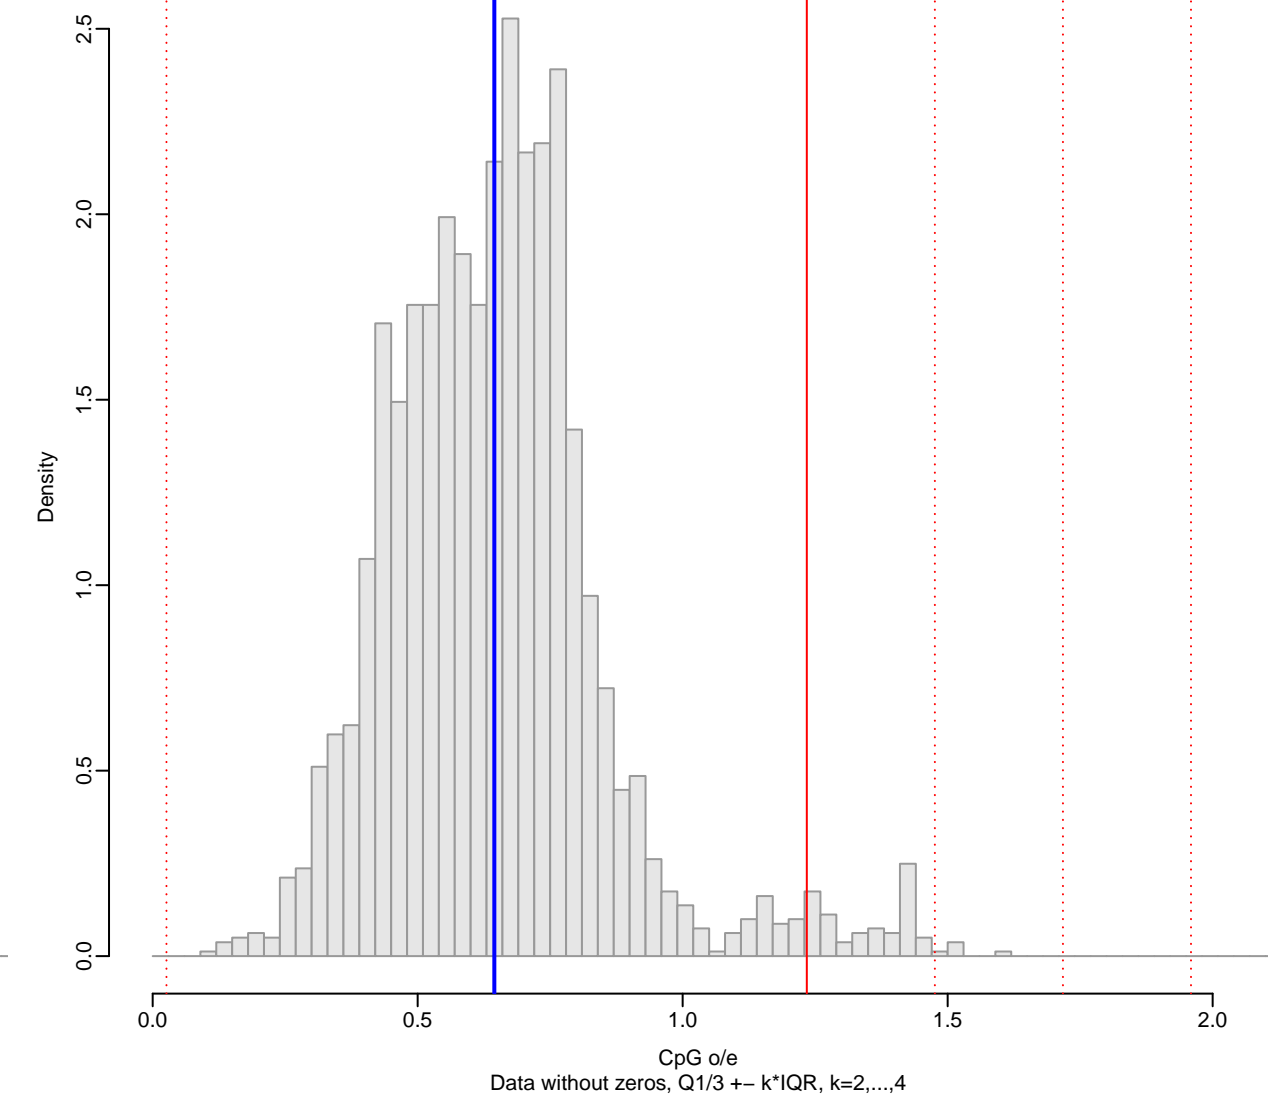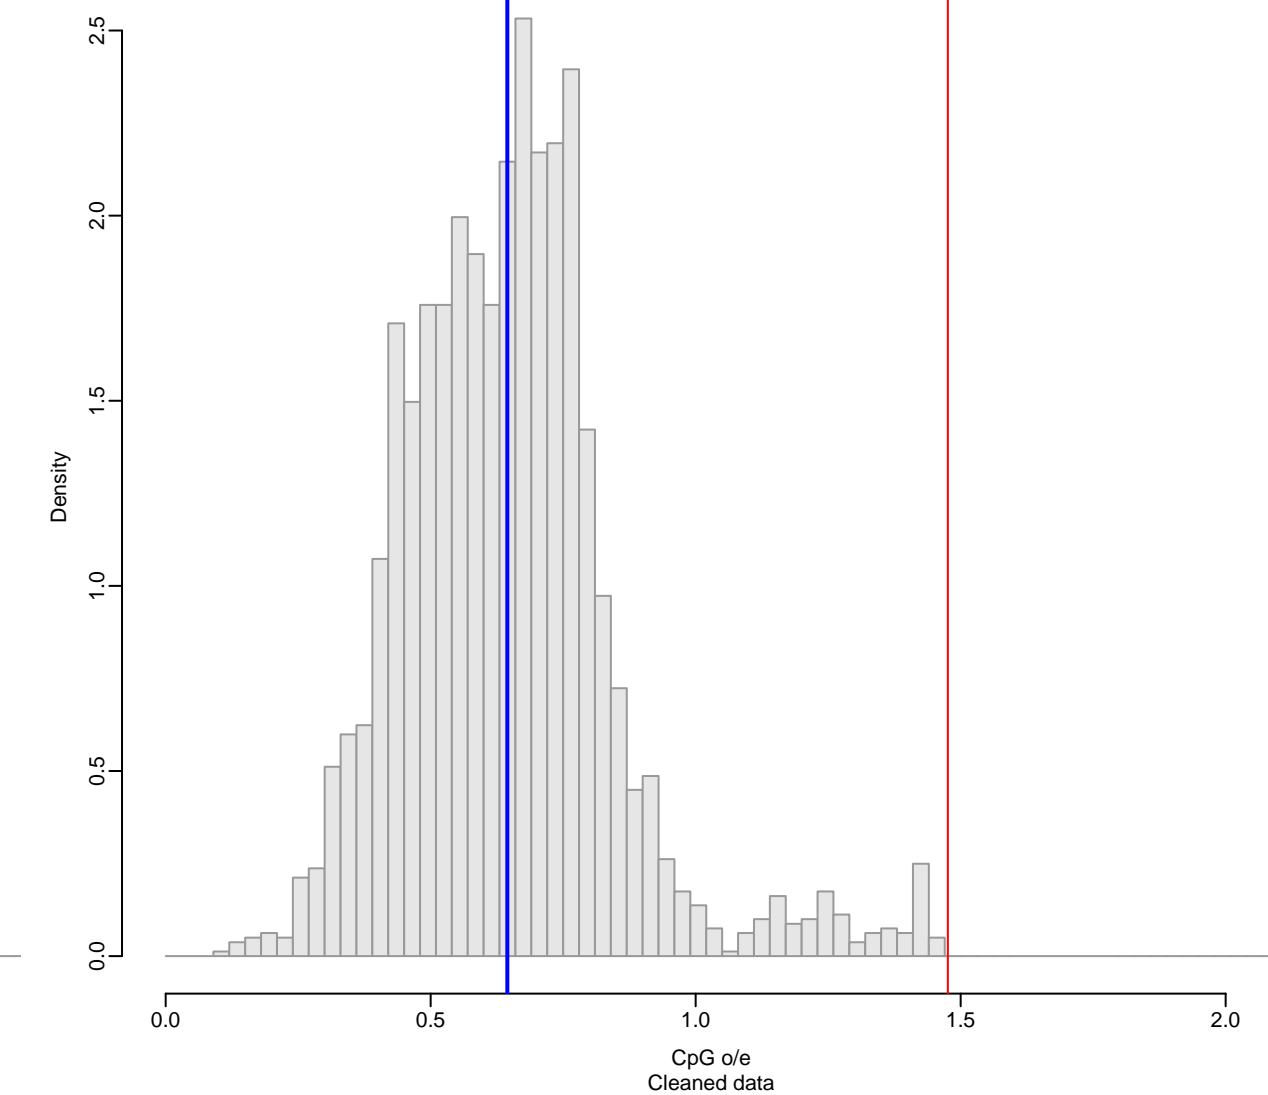

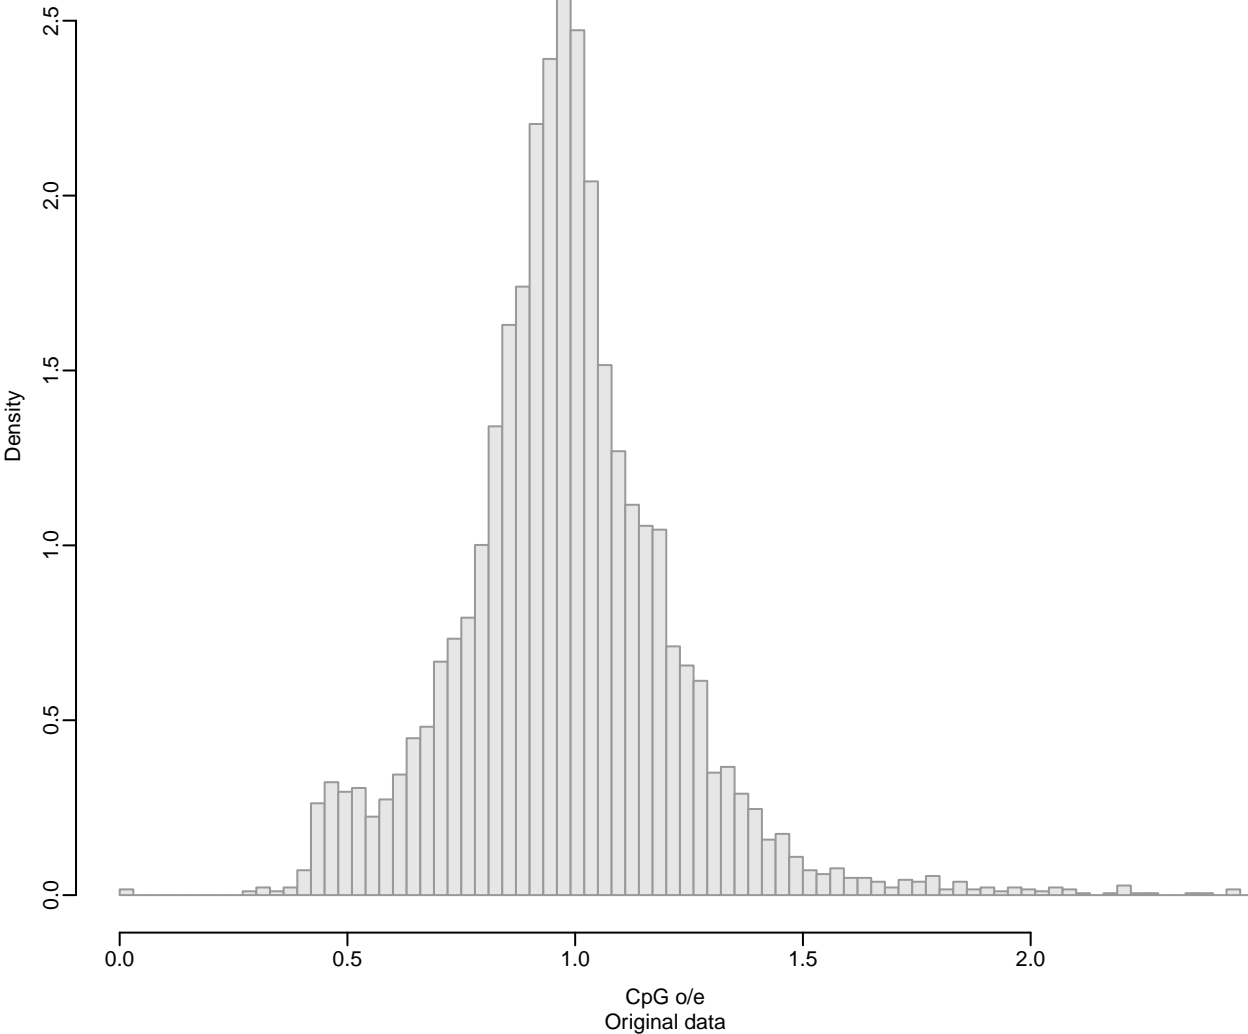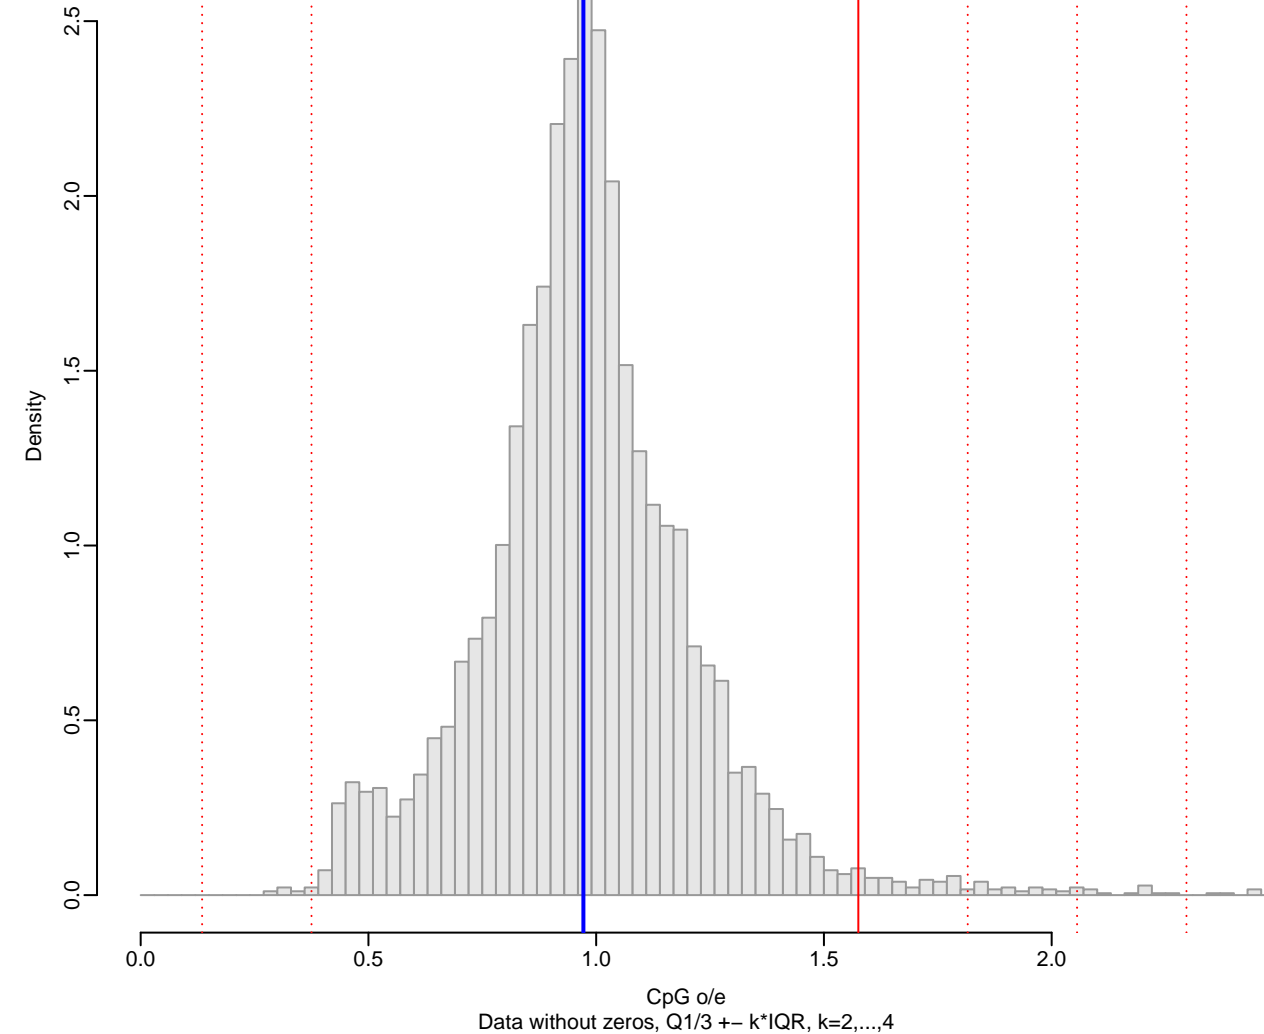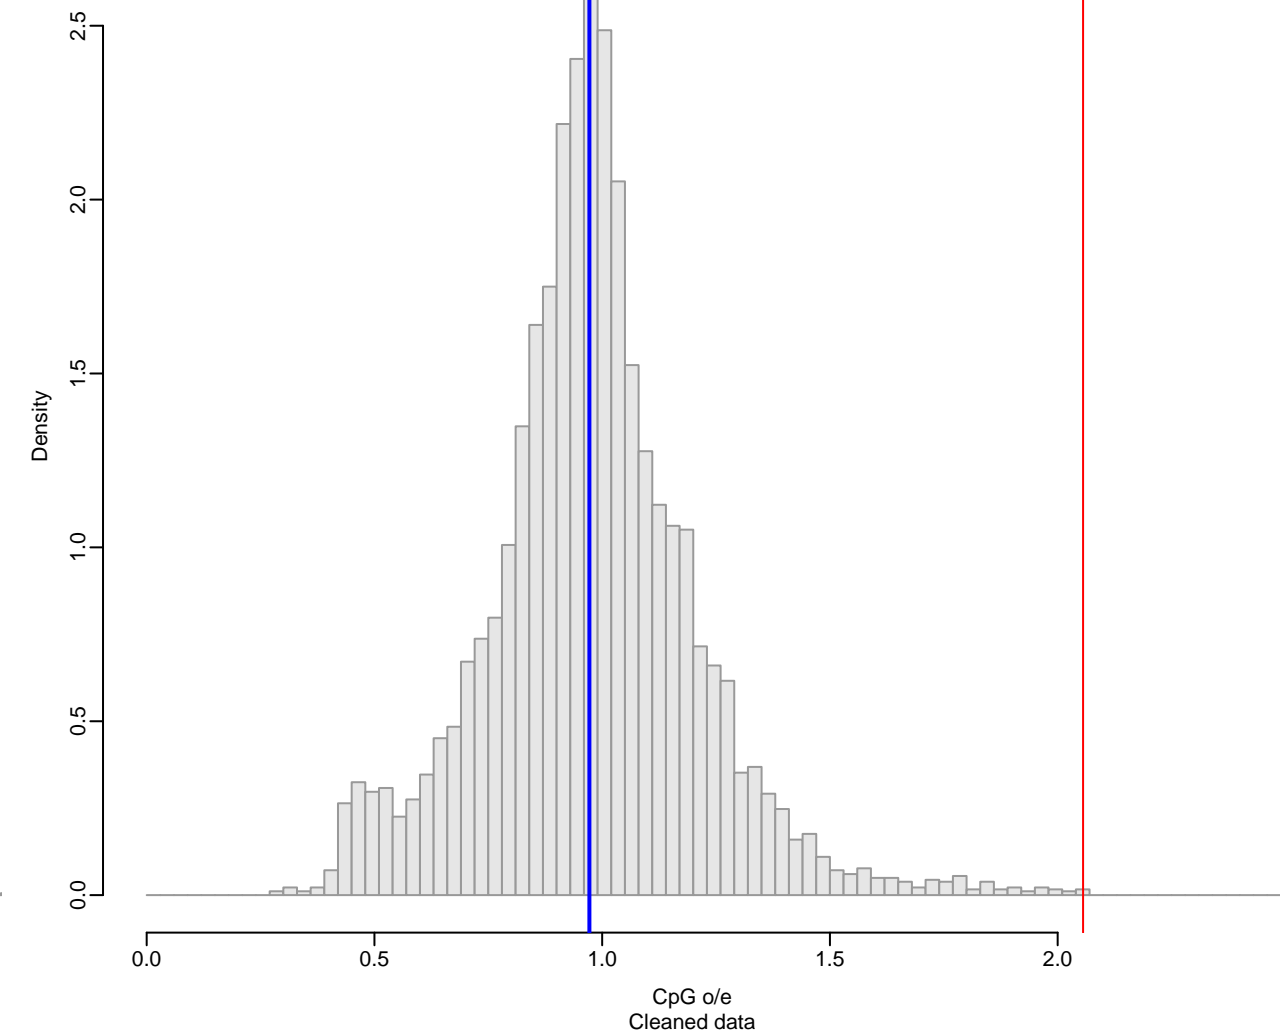

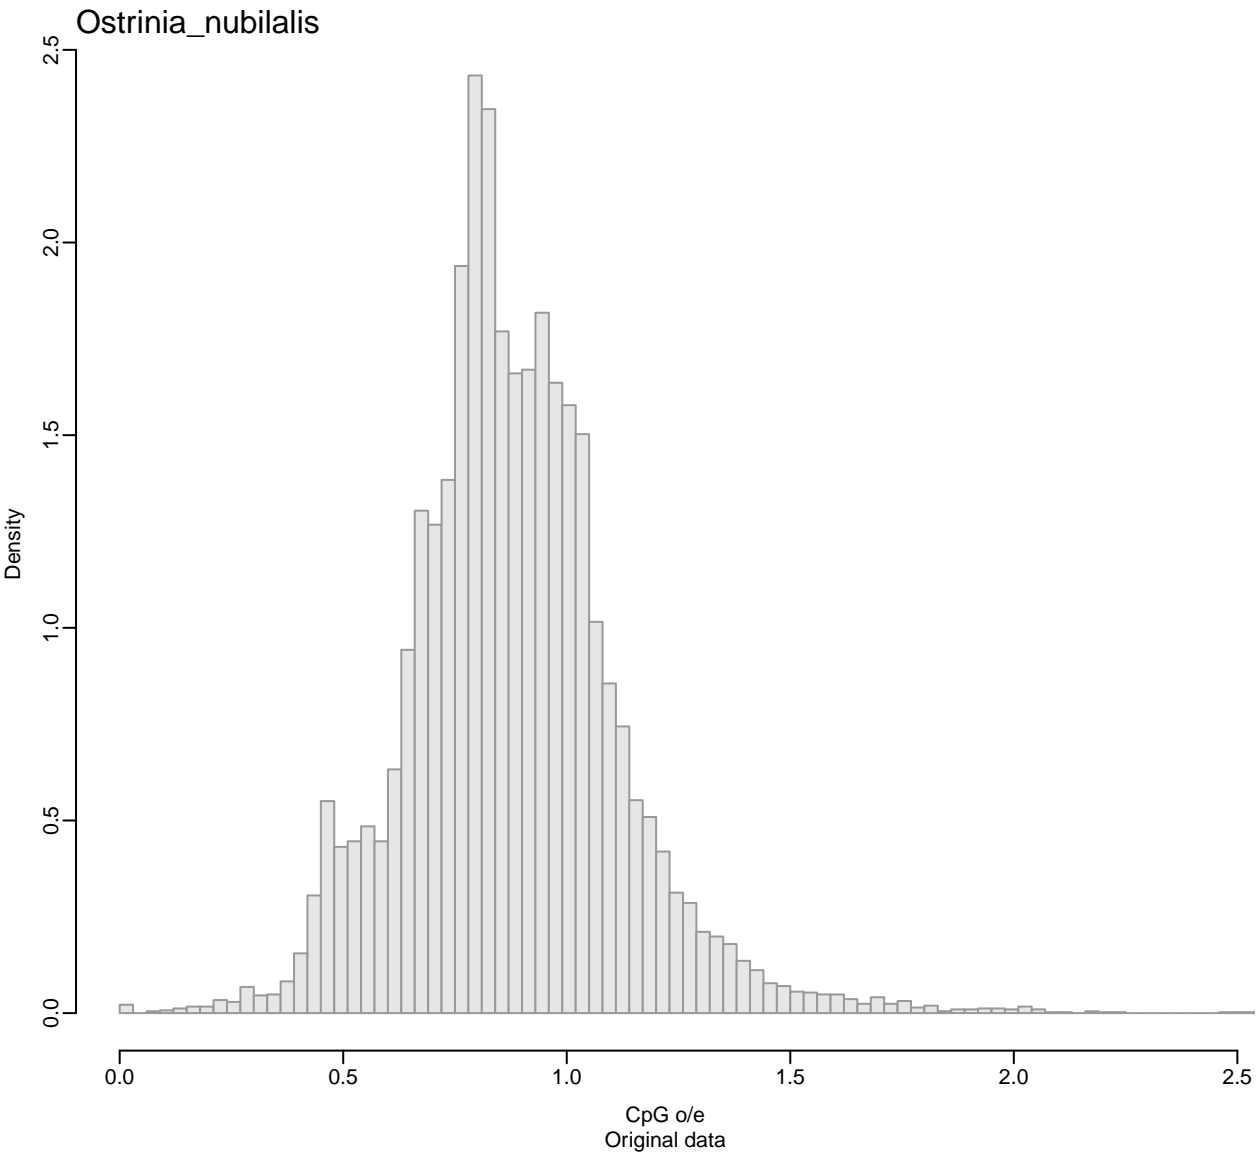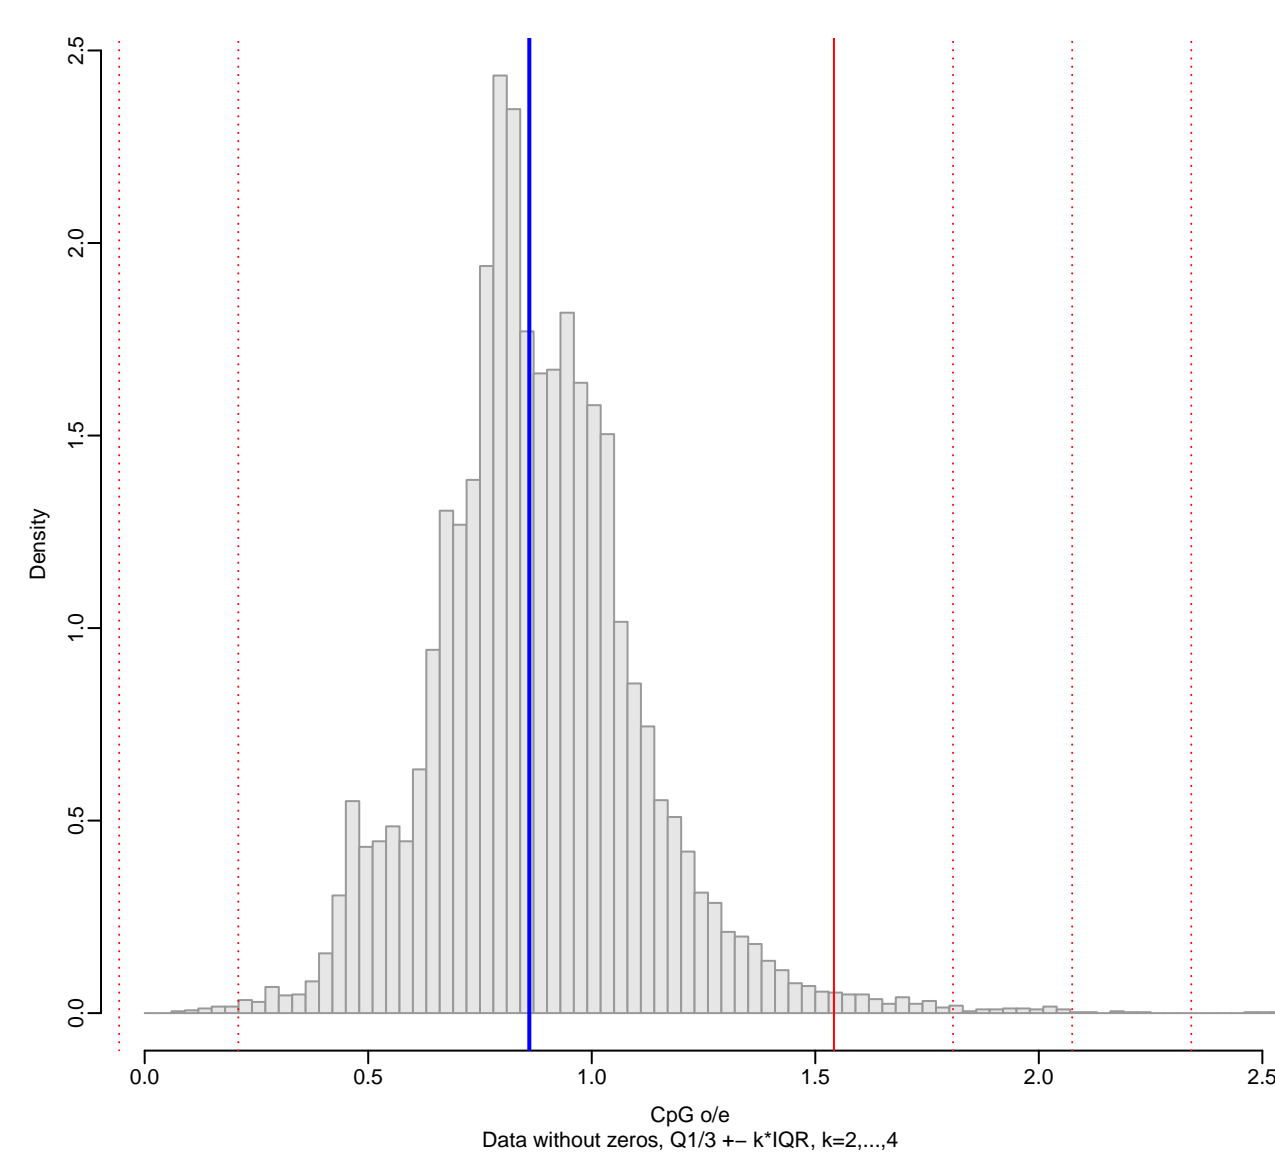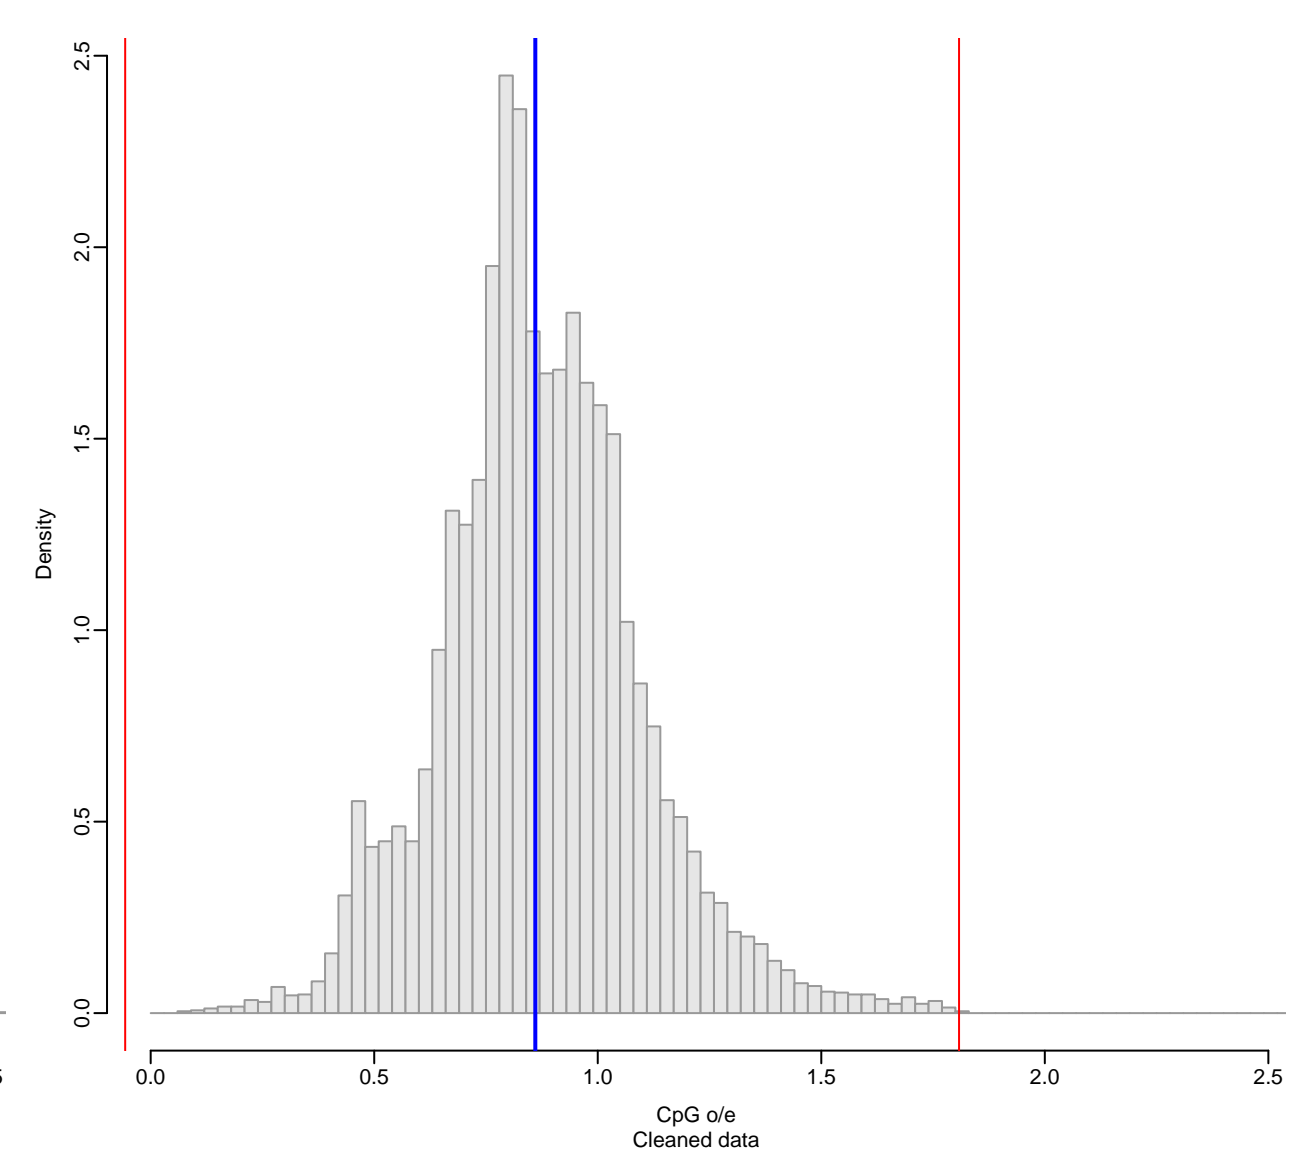

Ovis\_aries

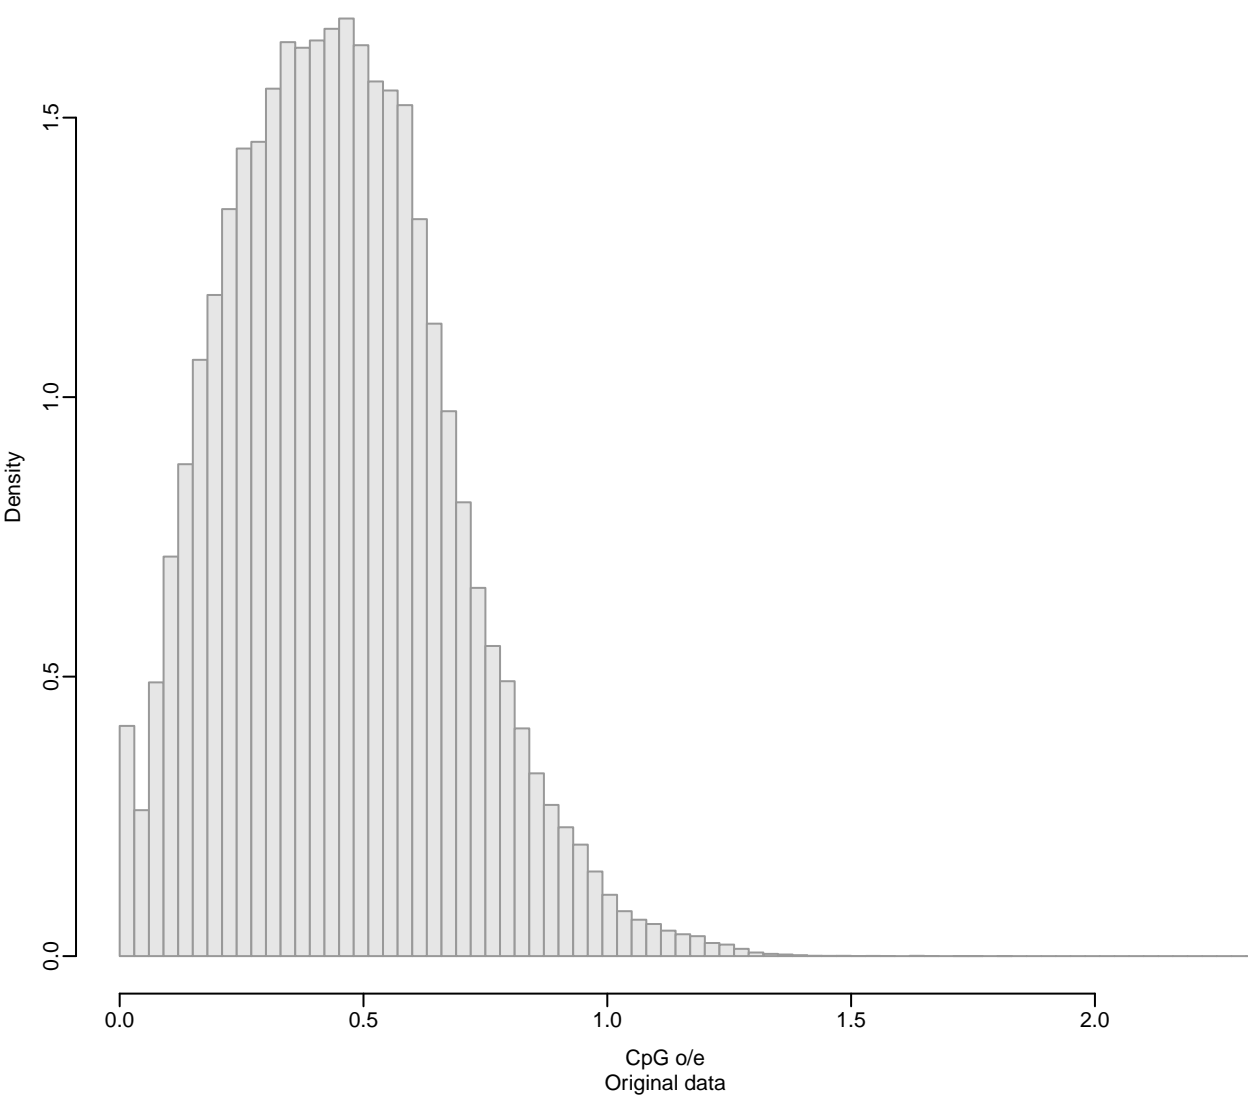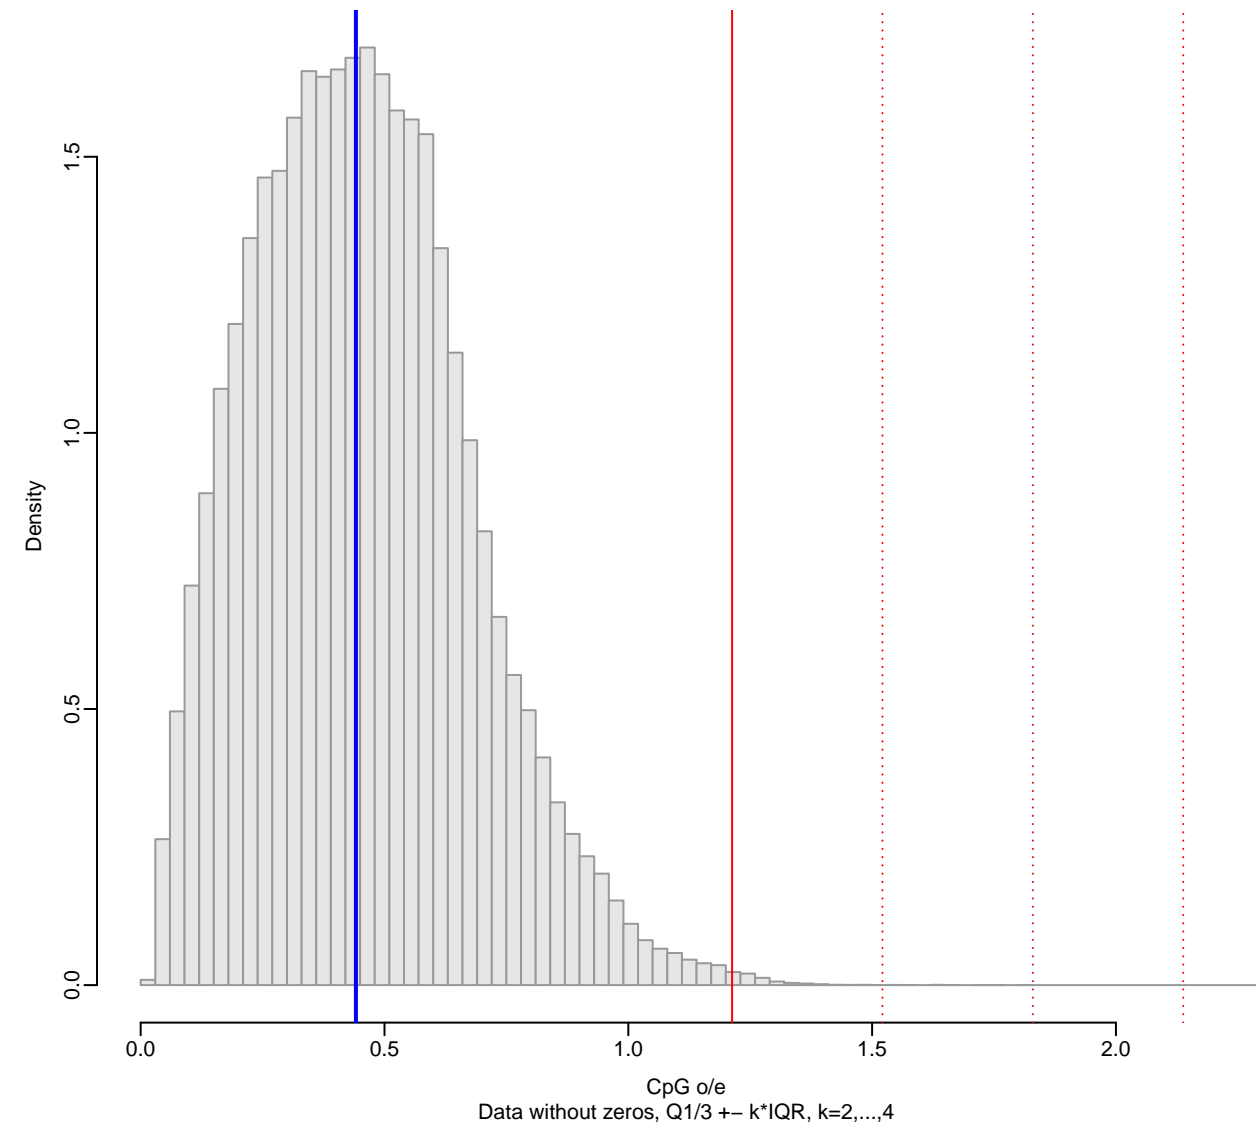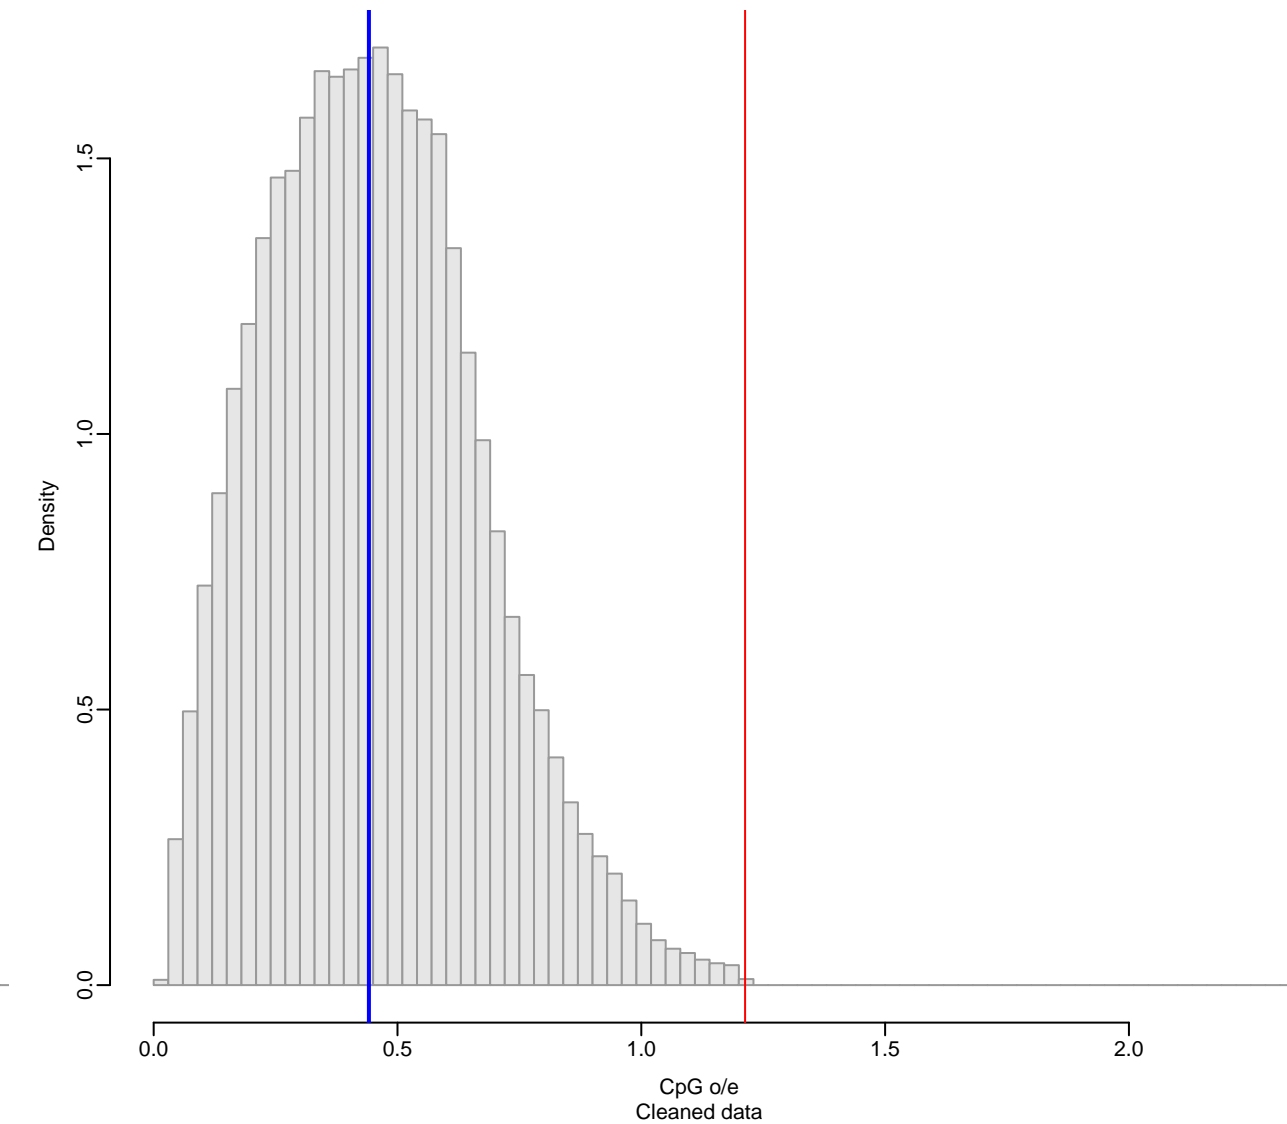

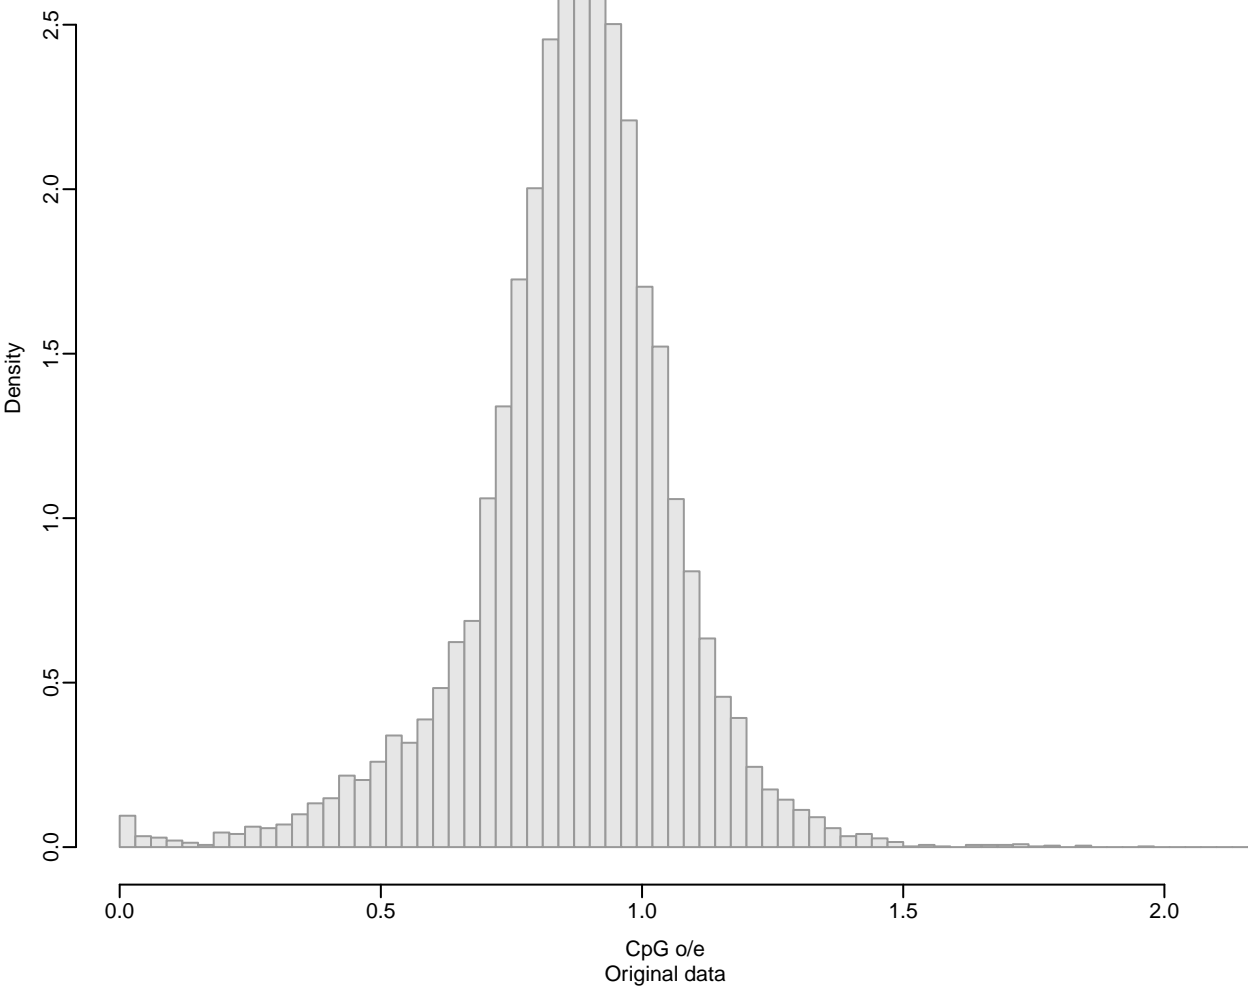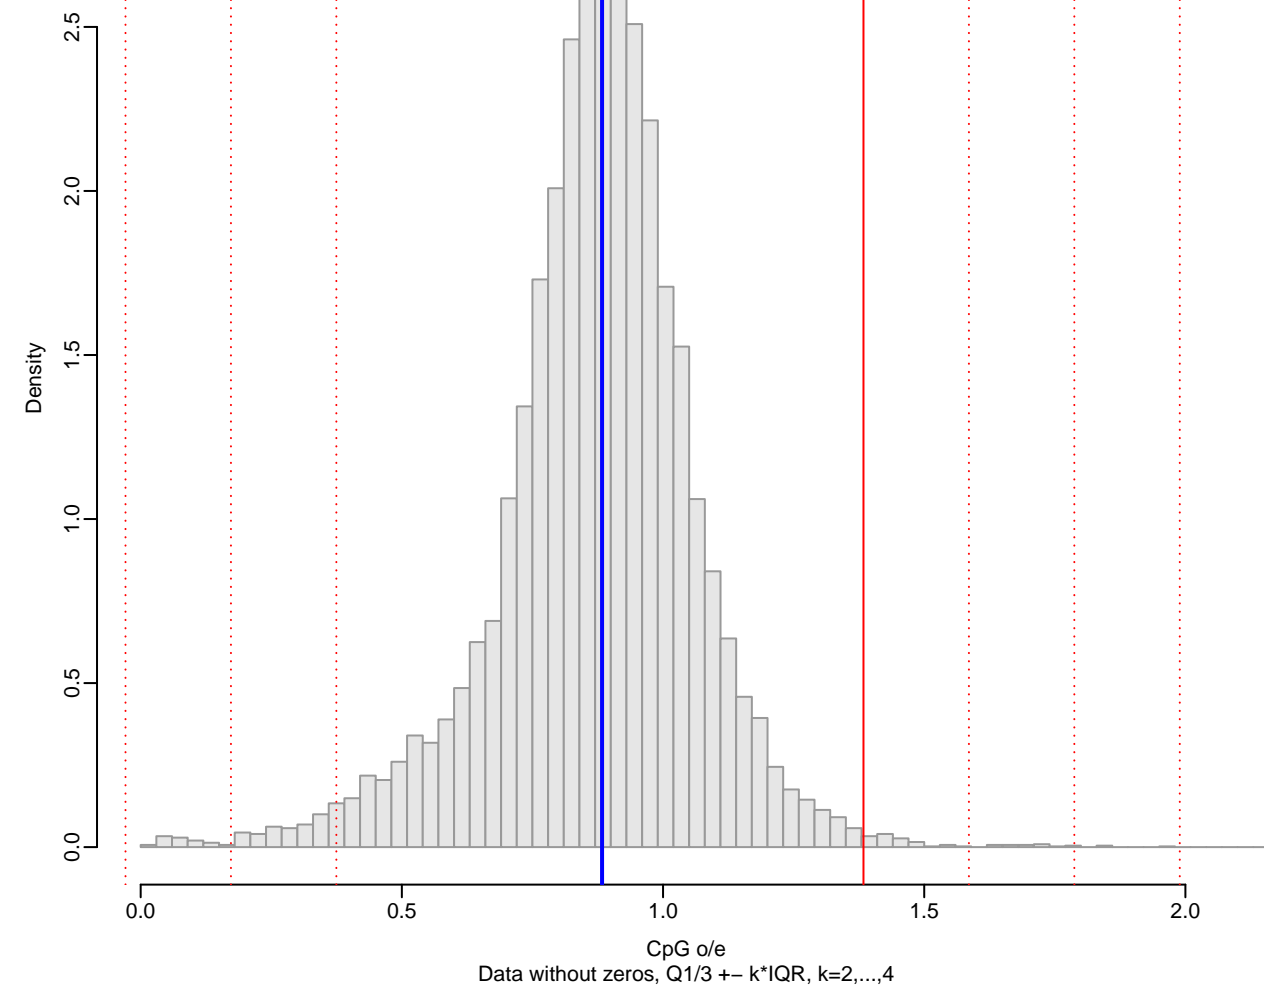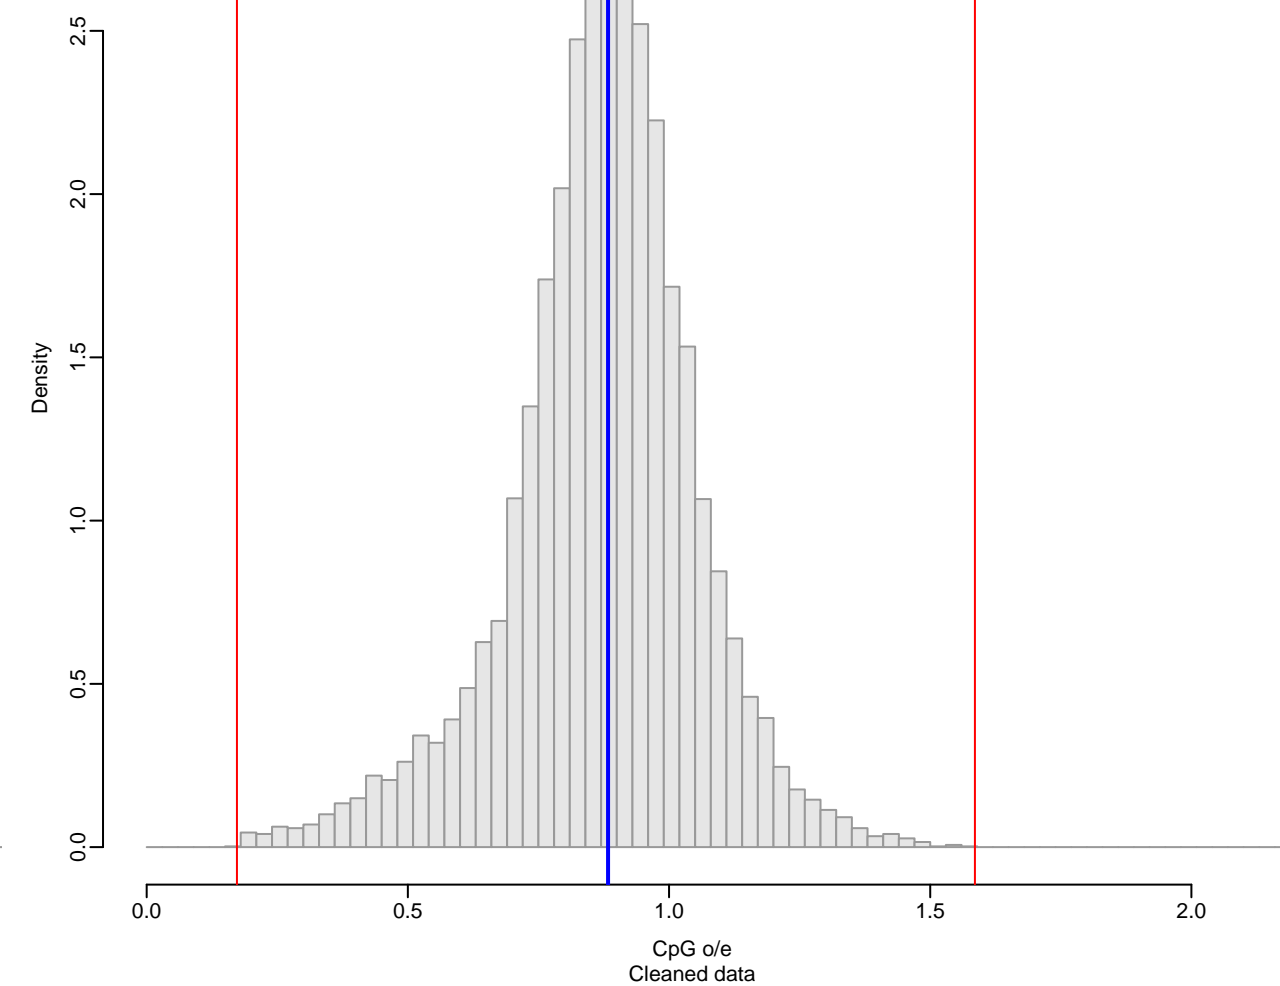

*Paeonia\_suffruticosa*

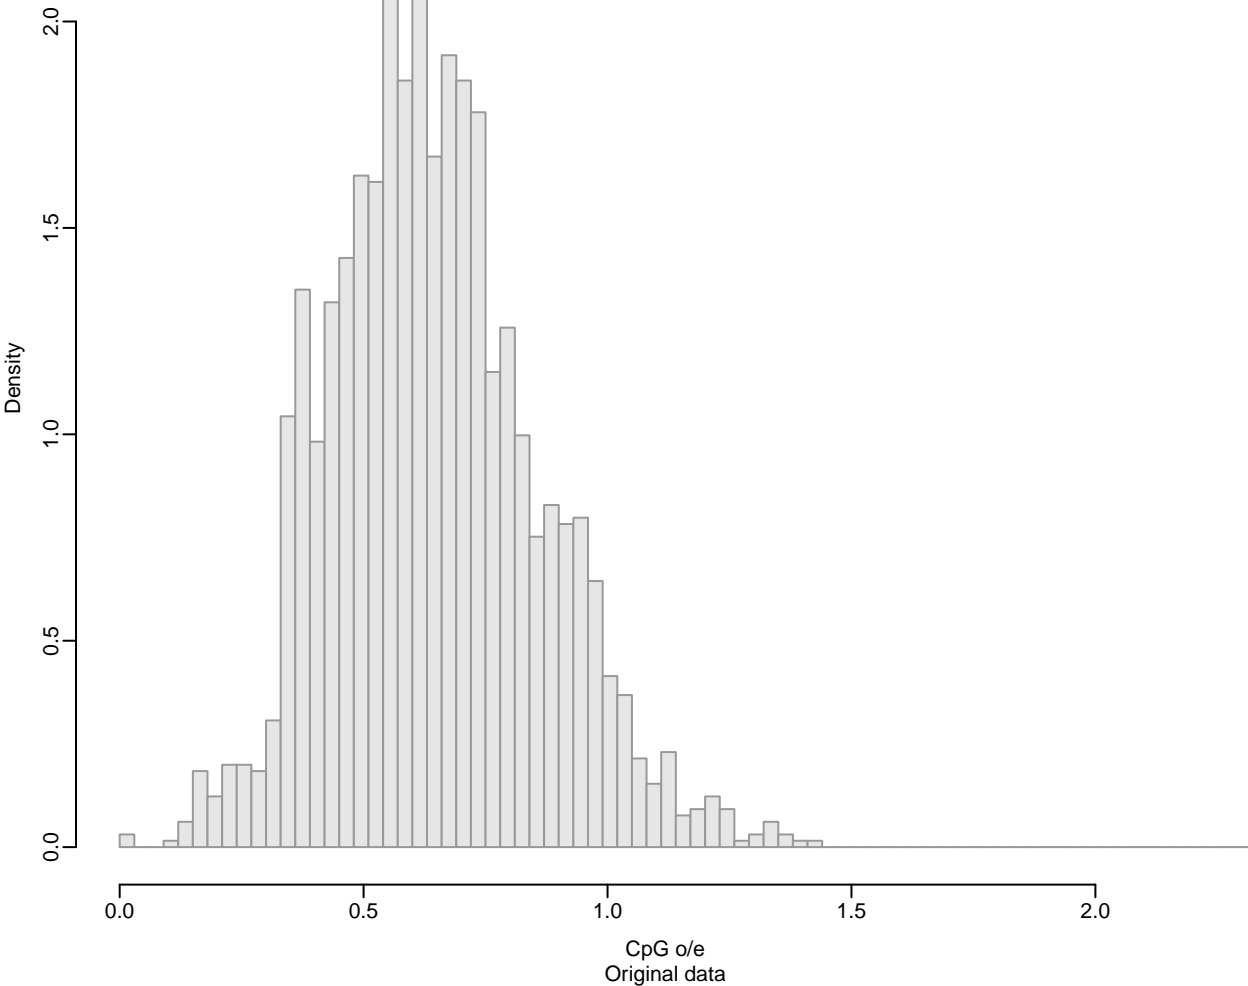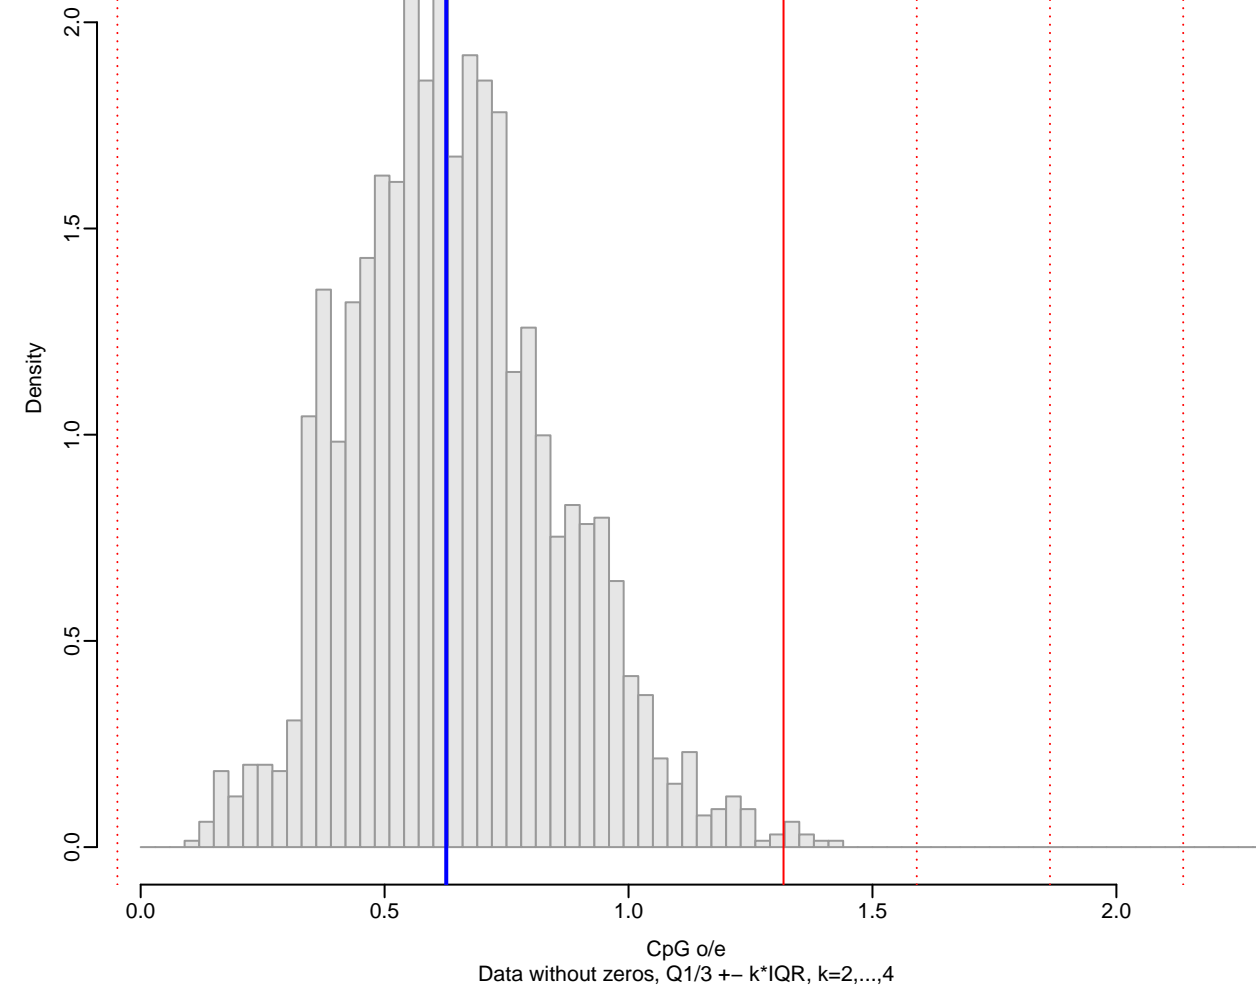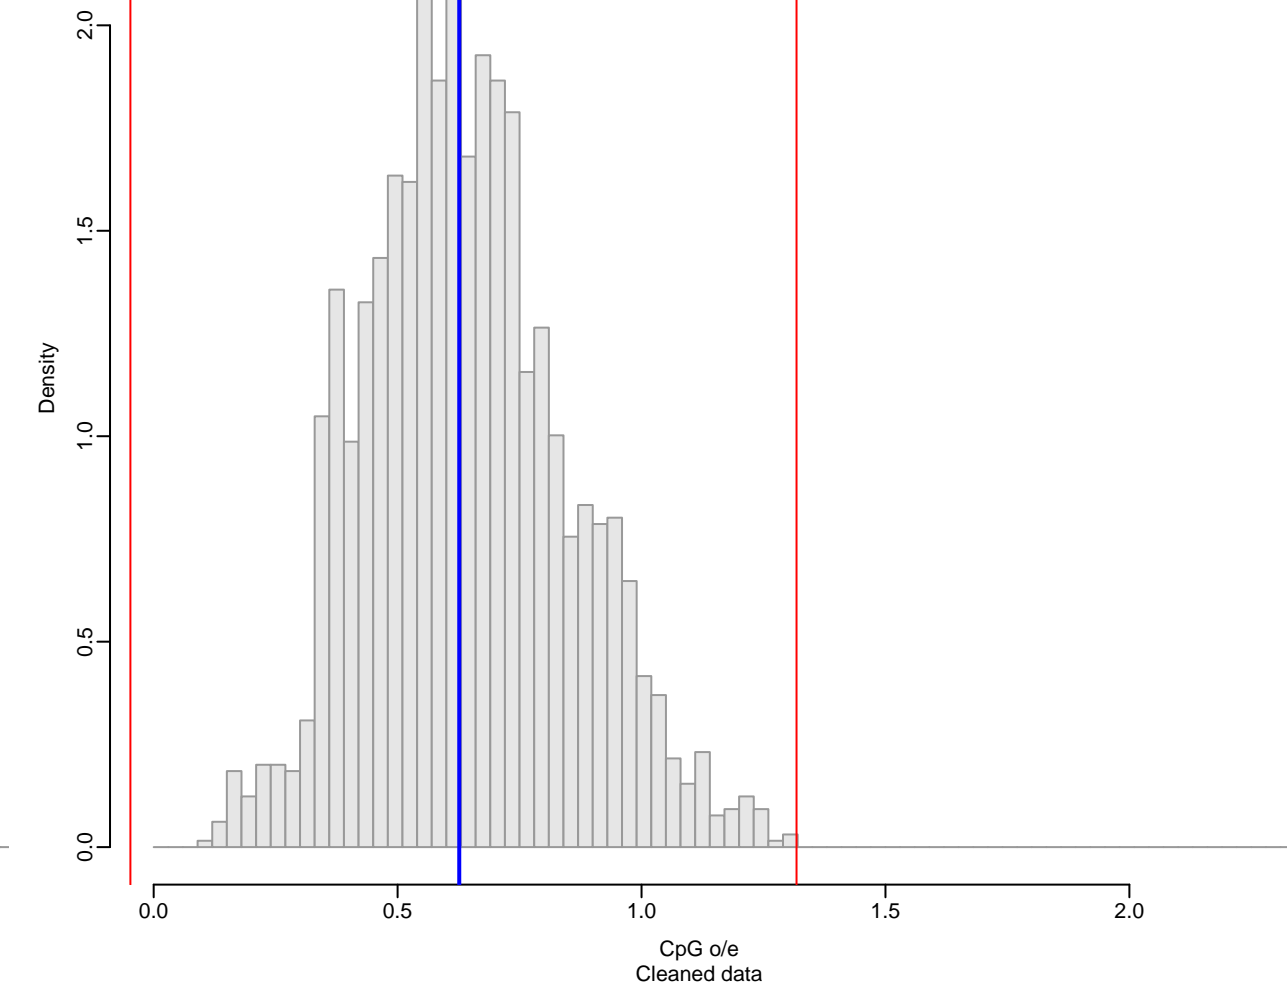

Pagrus\_major

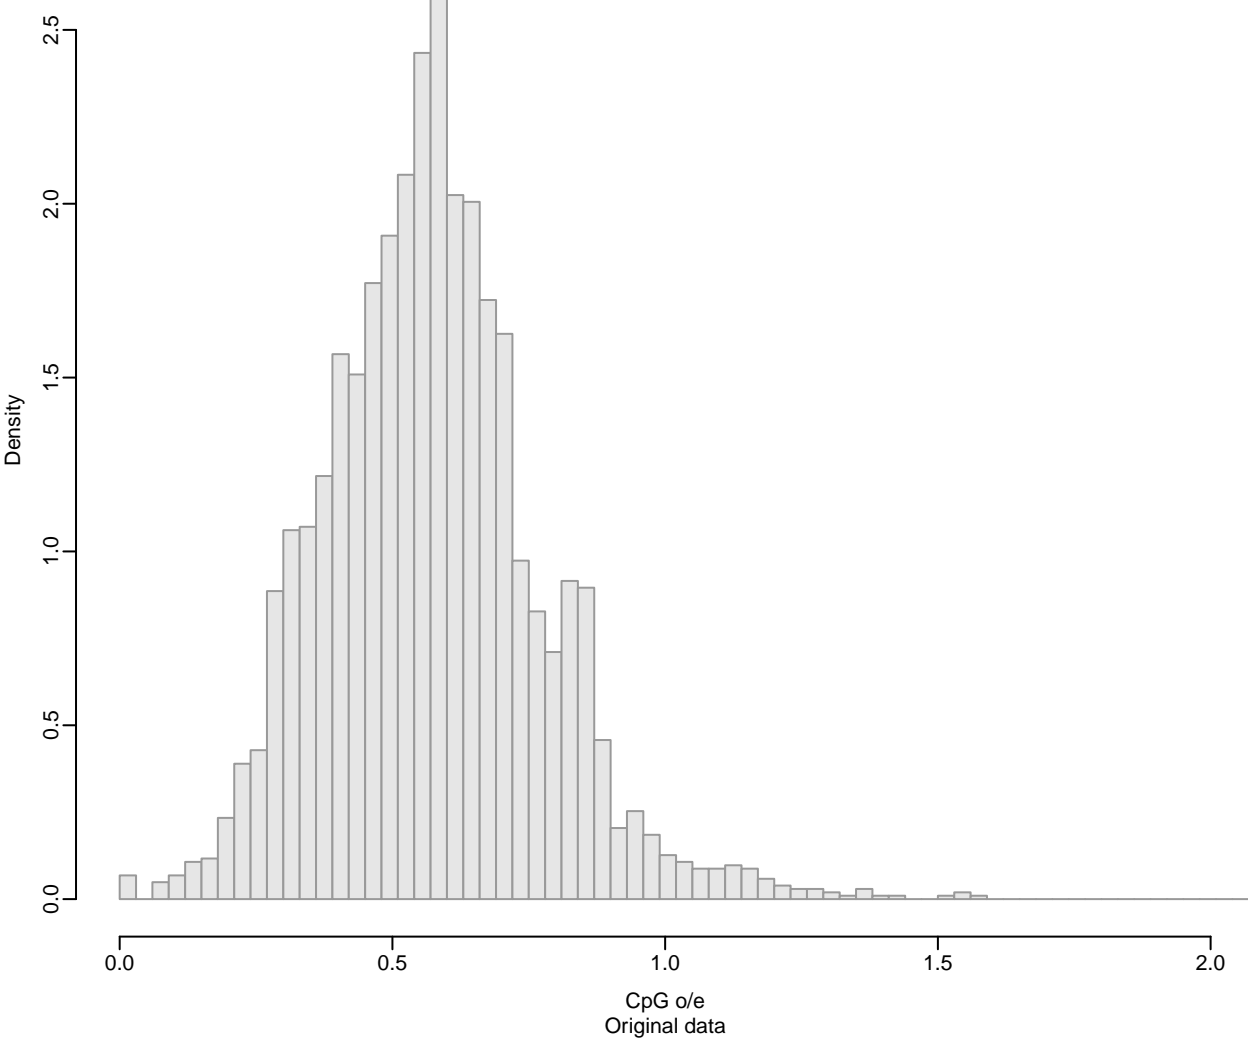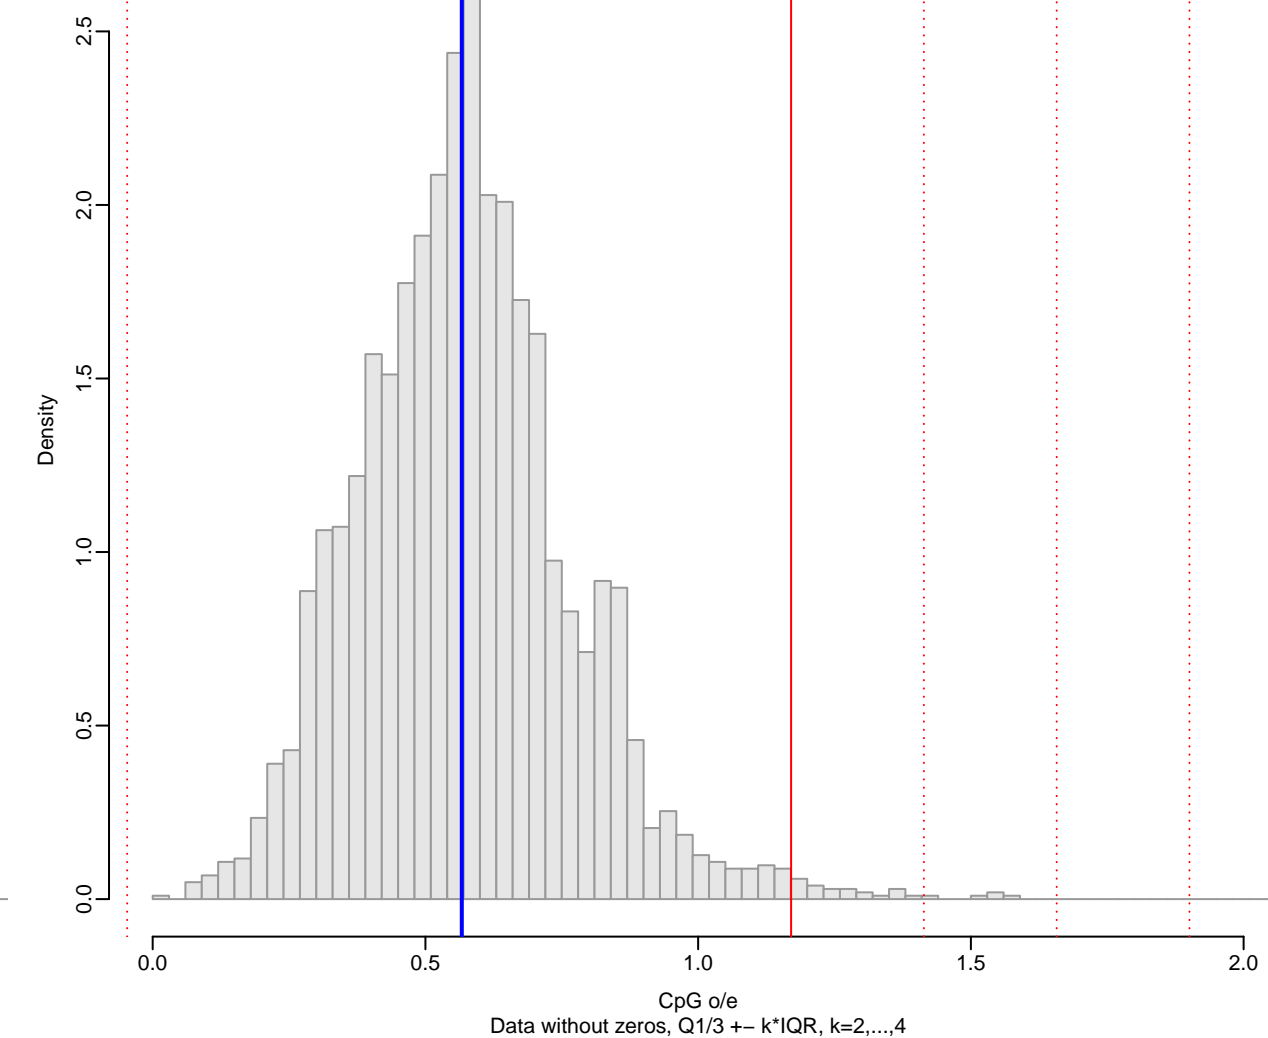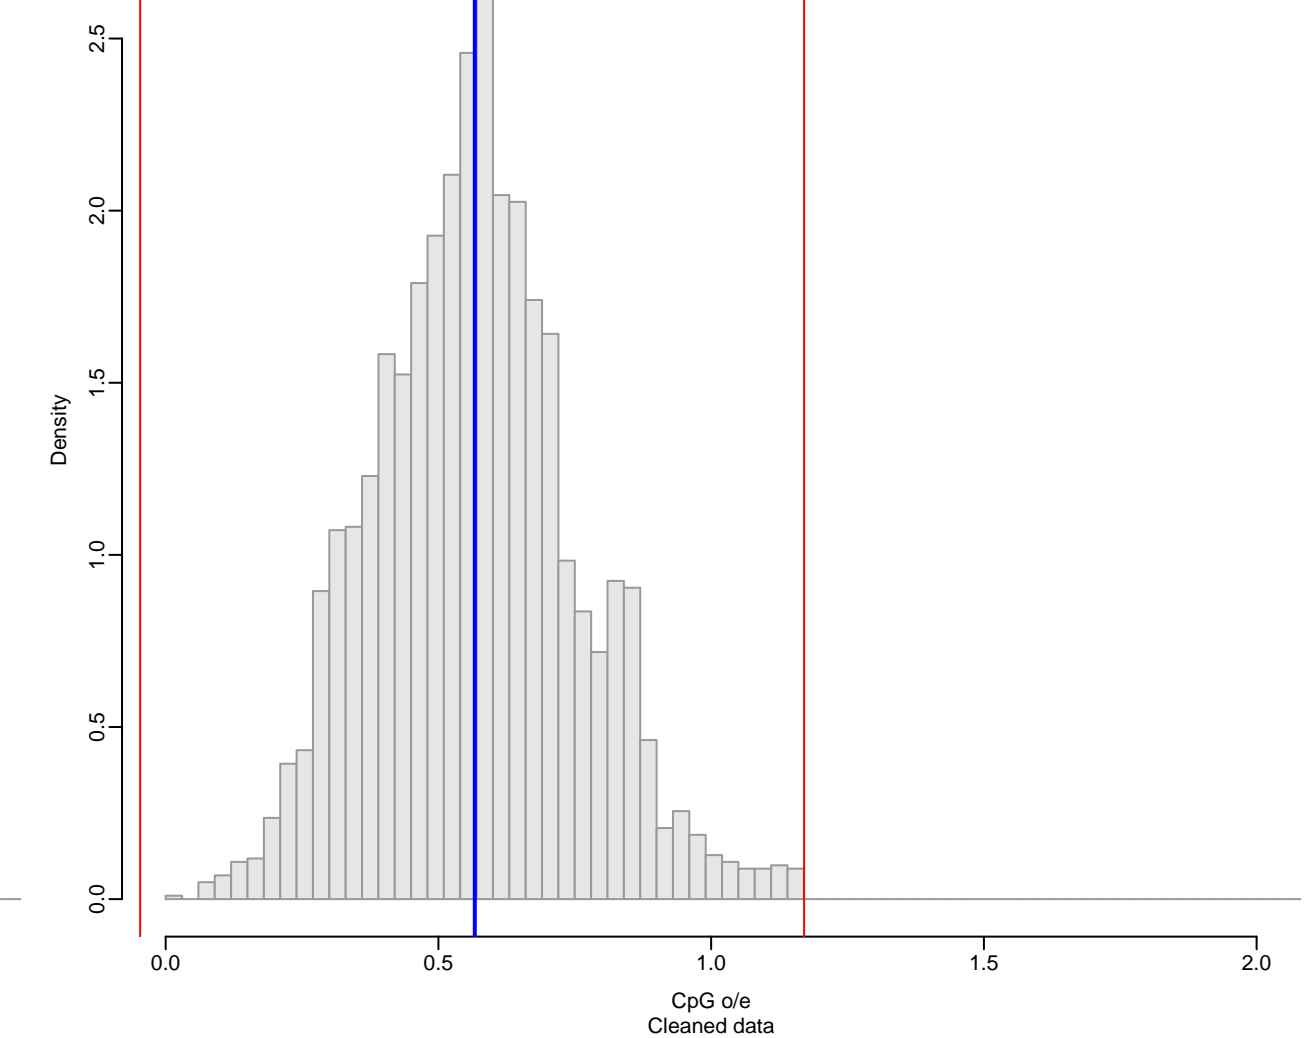

# Pan\_troglodytes

Density

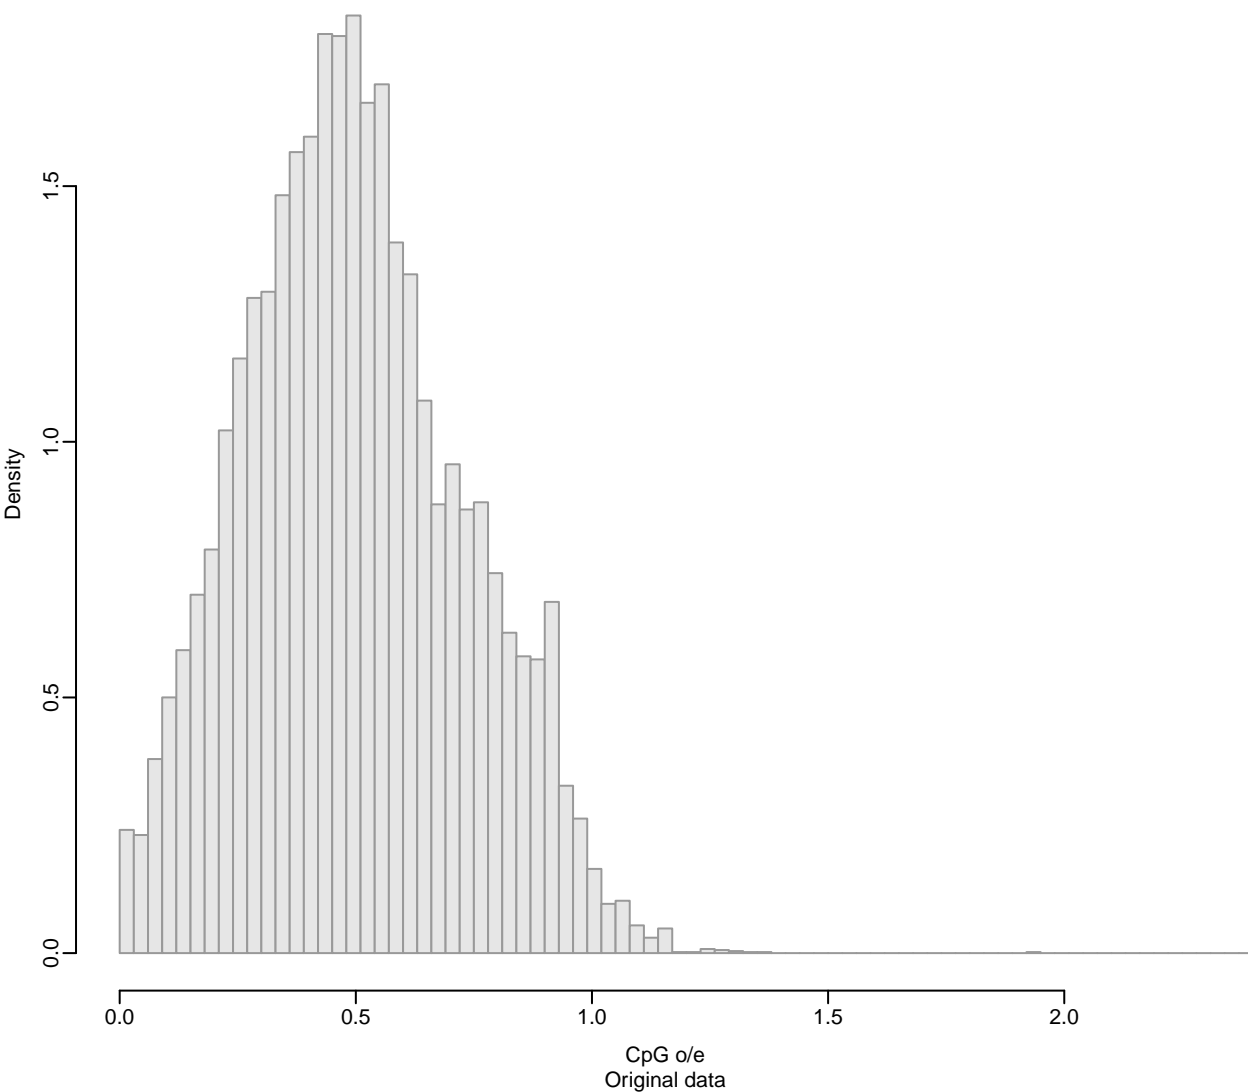

Density

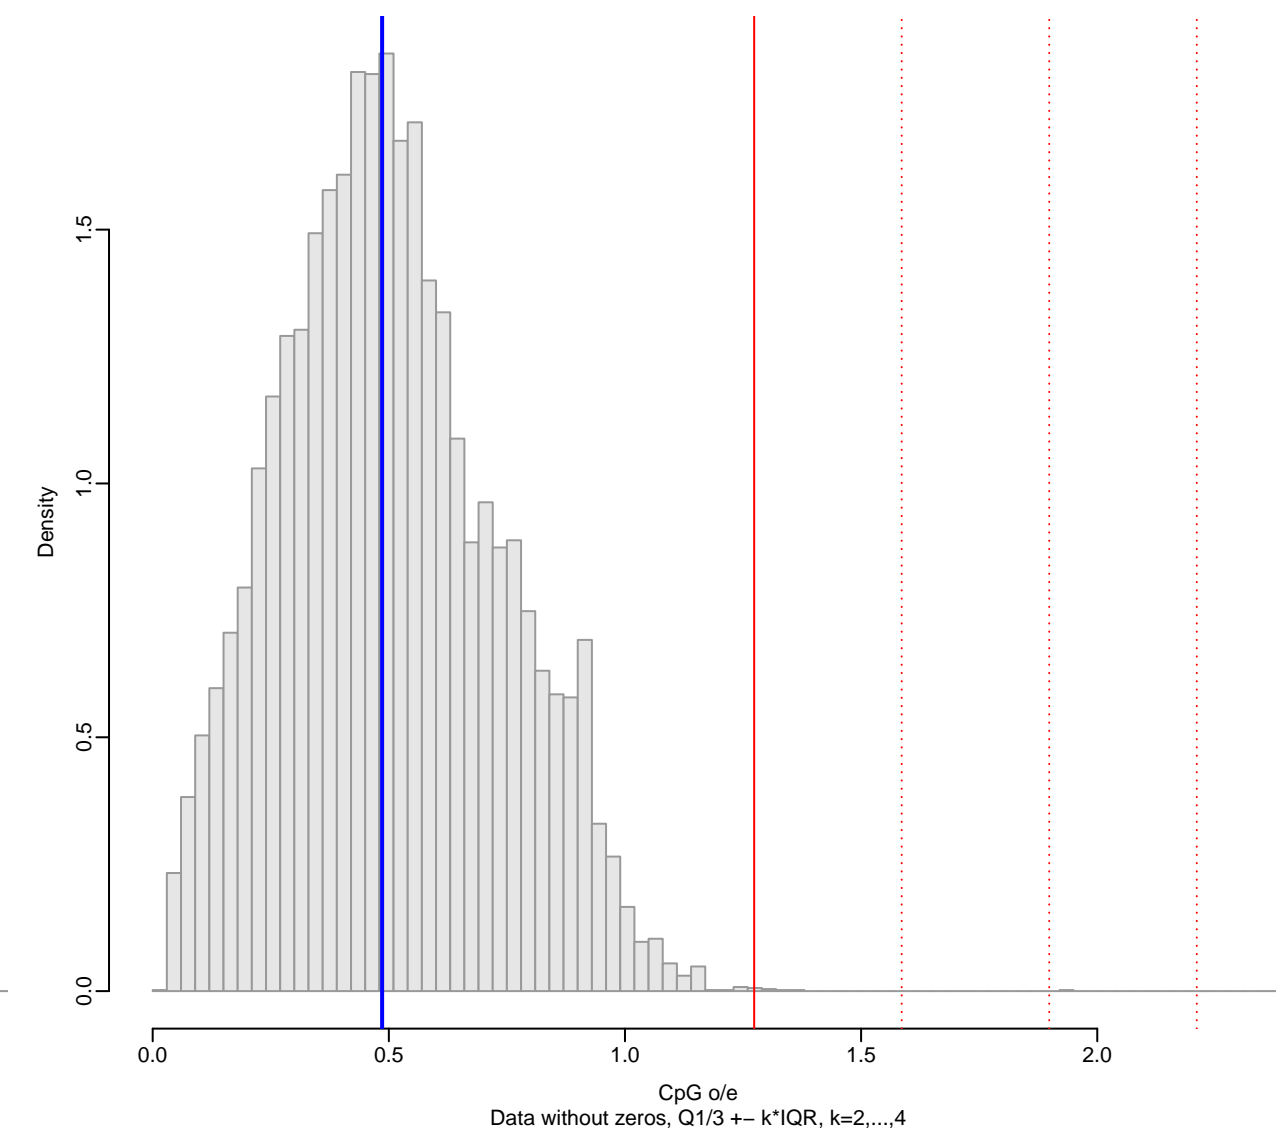

Density

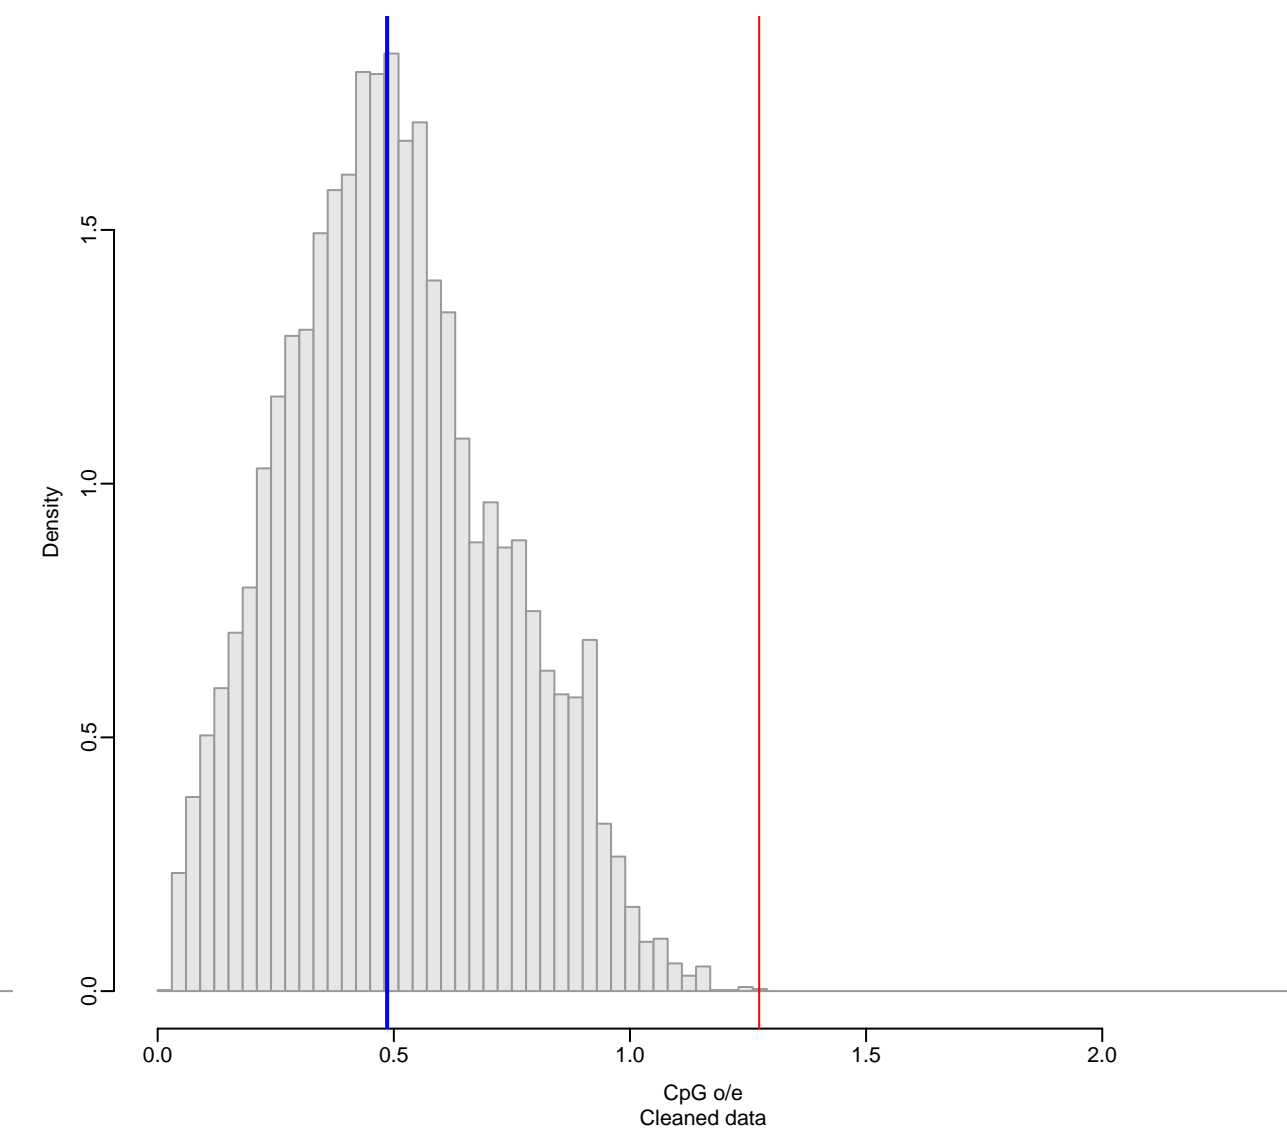



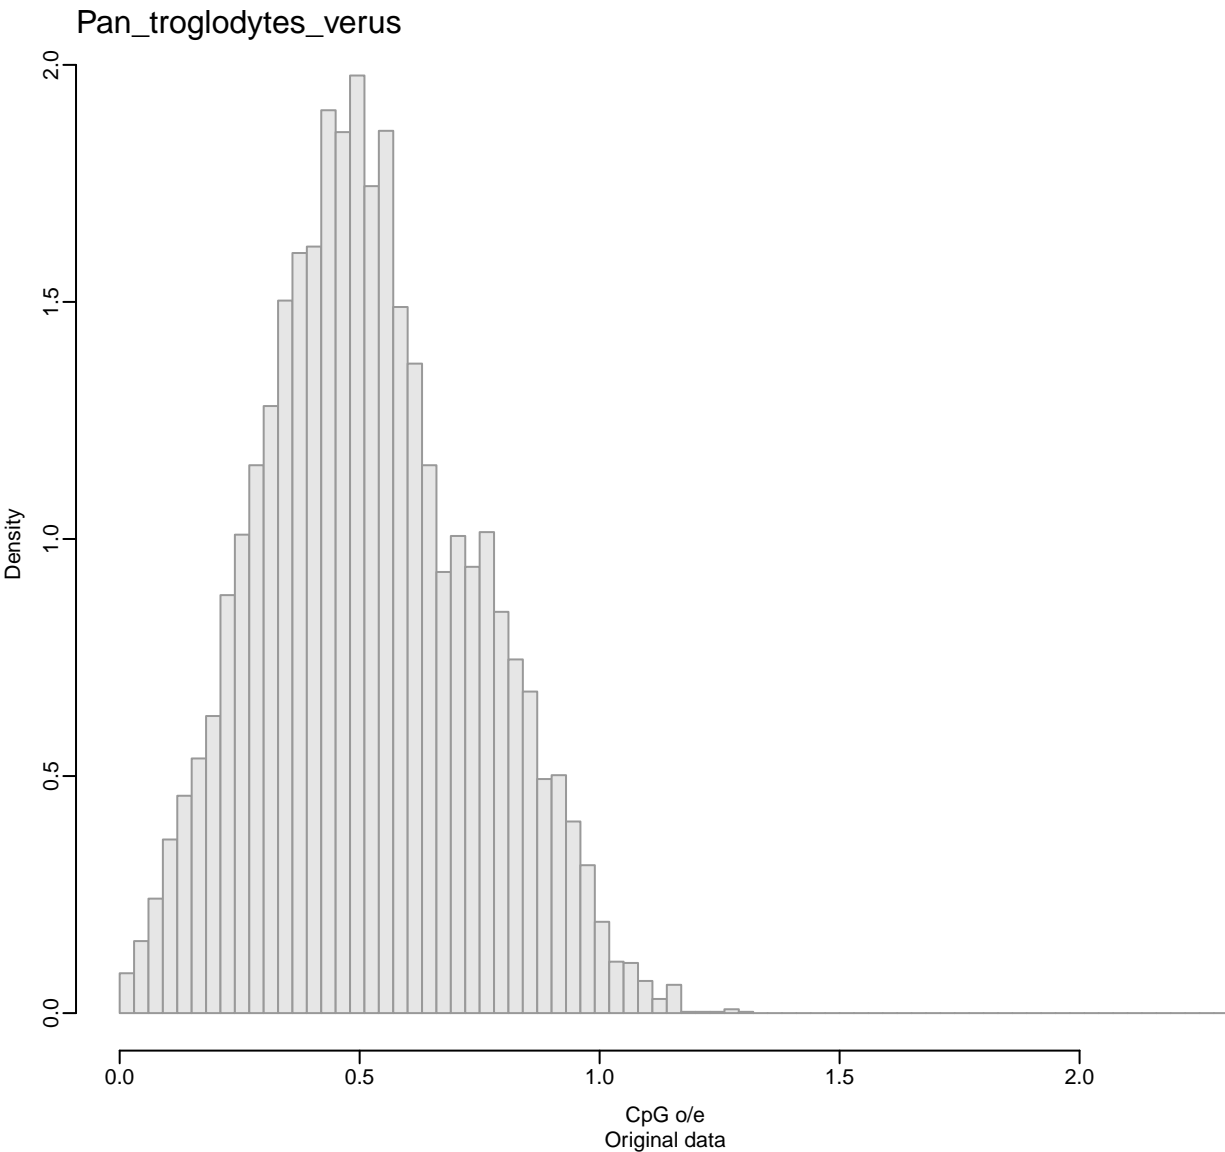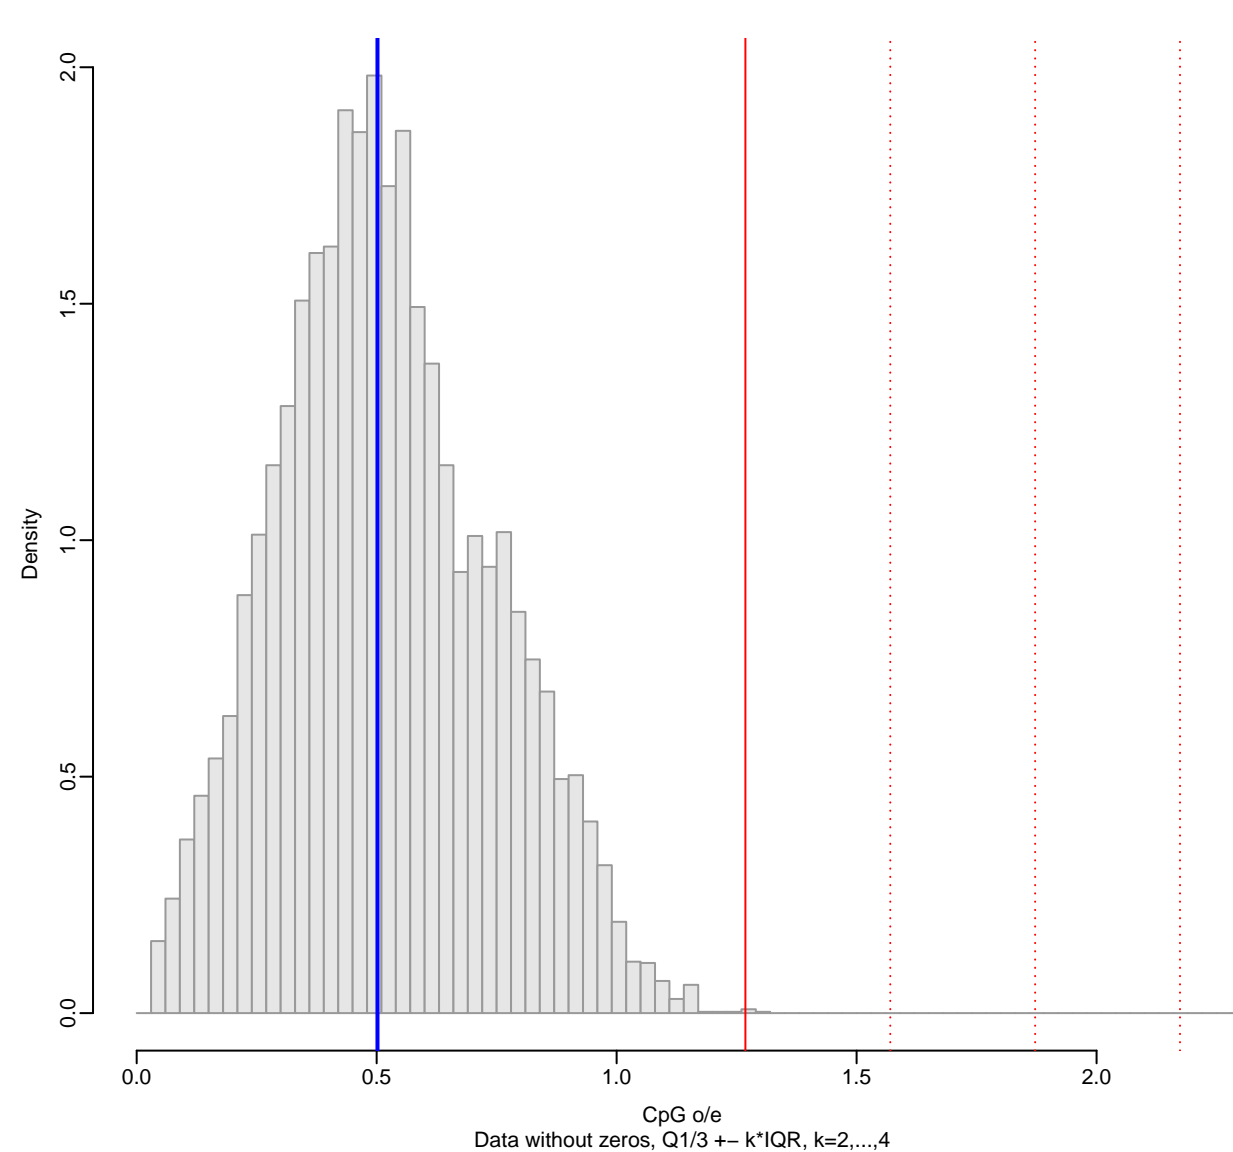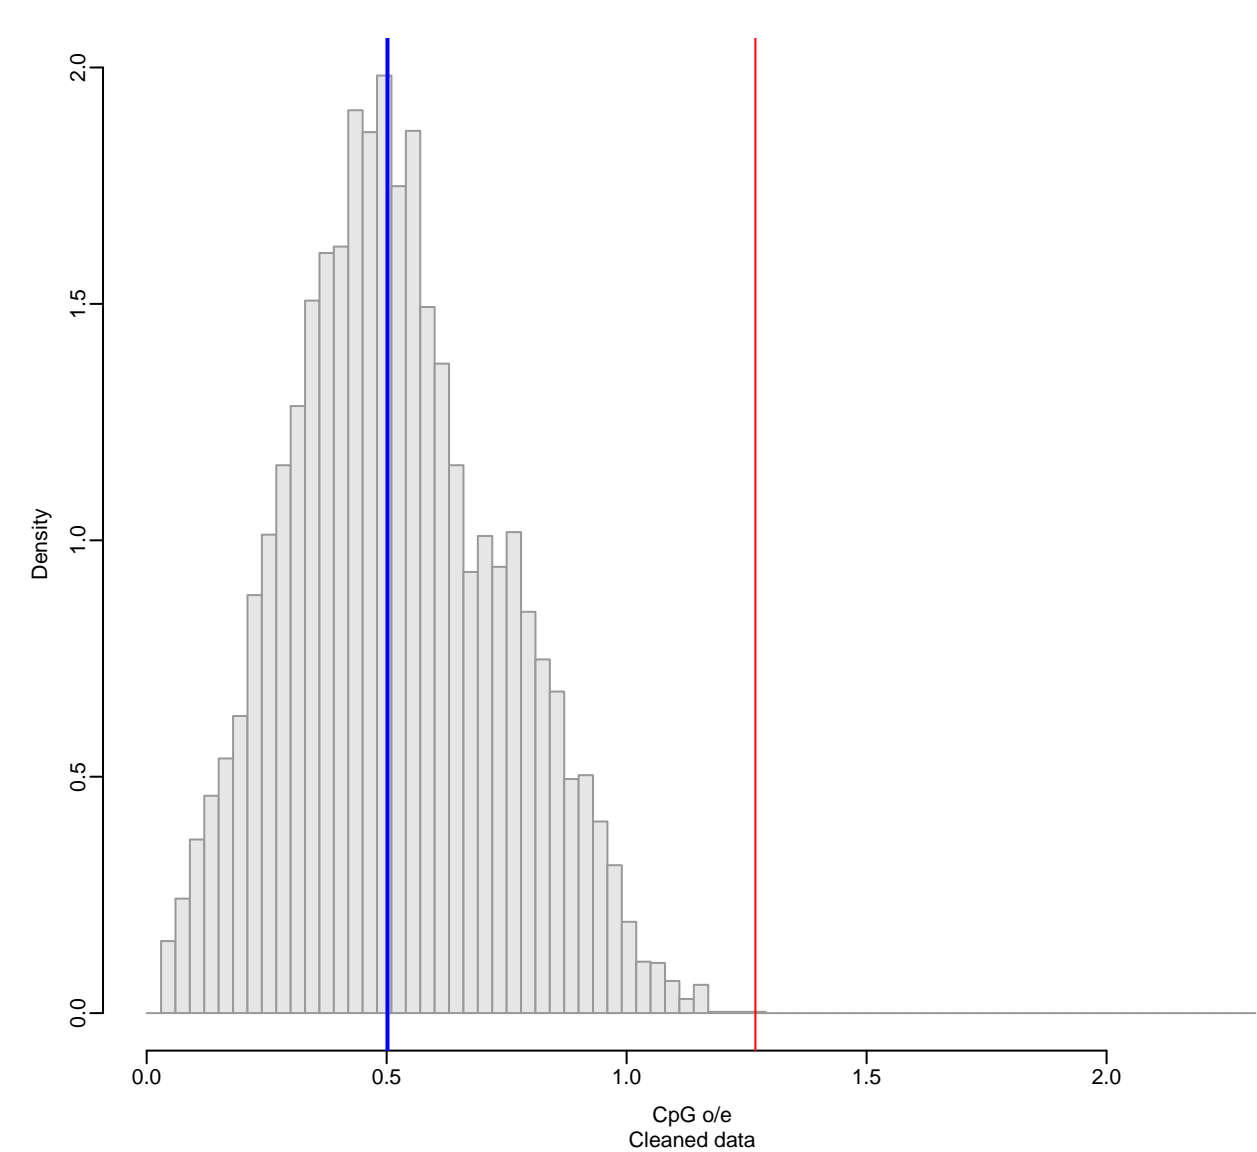

Panagrolaimus\_superbus

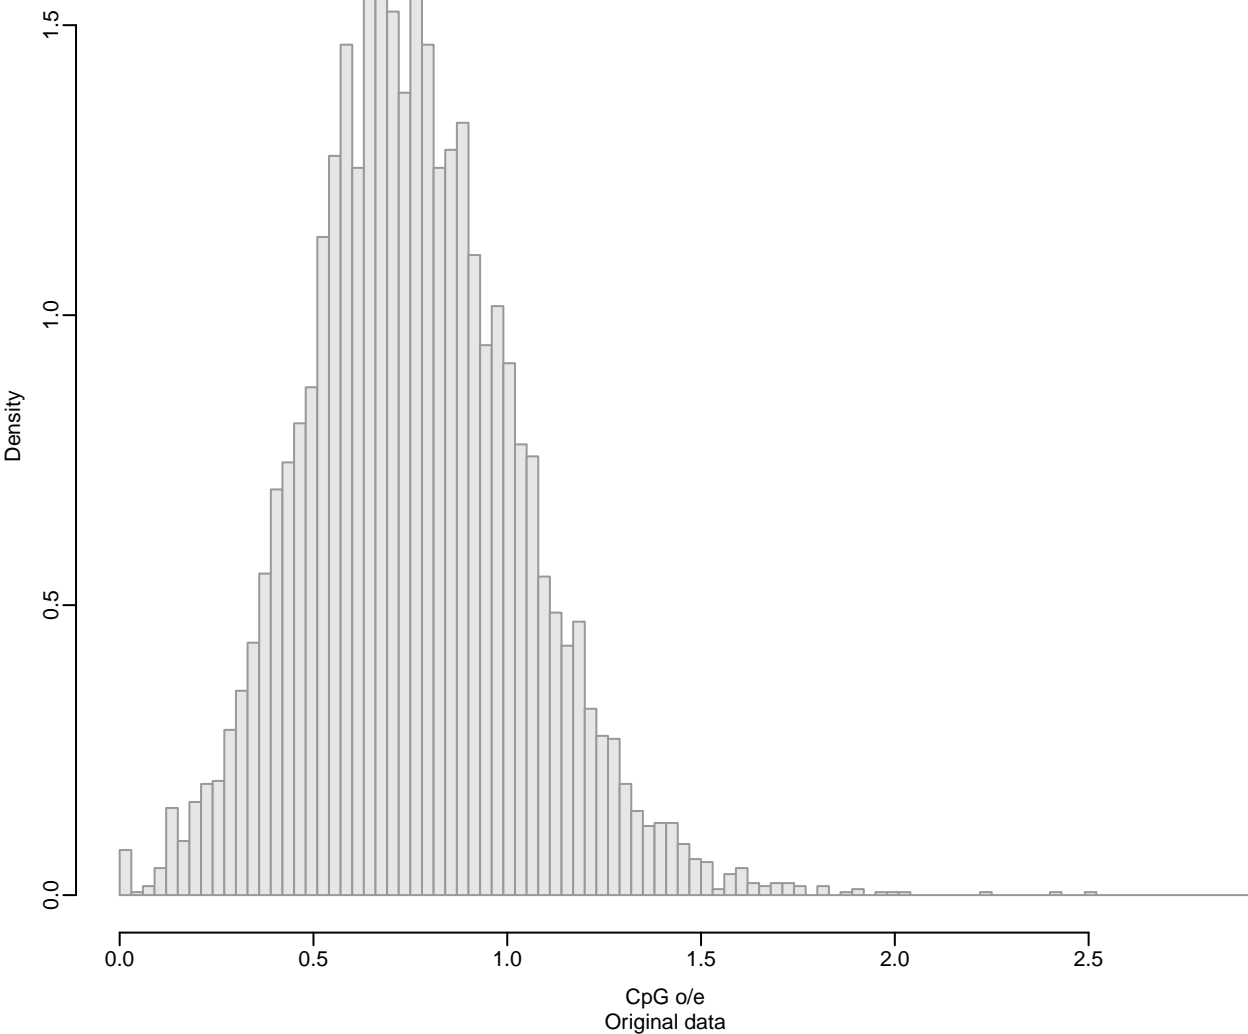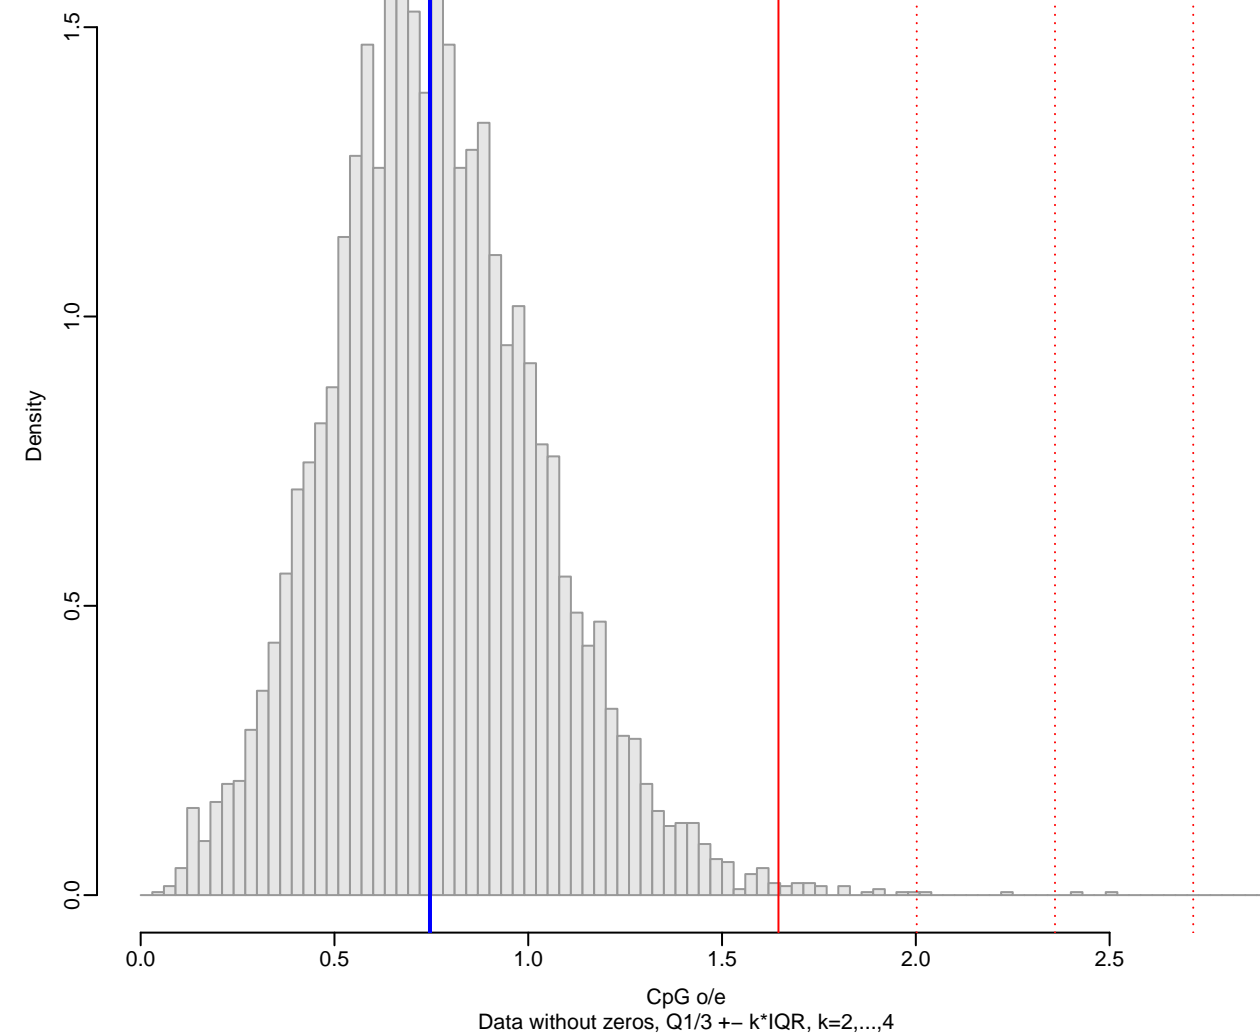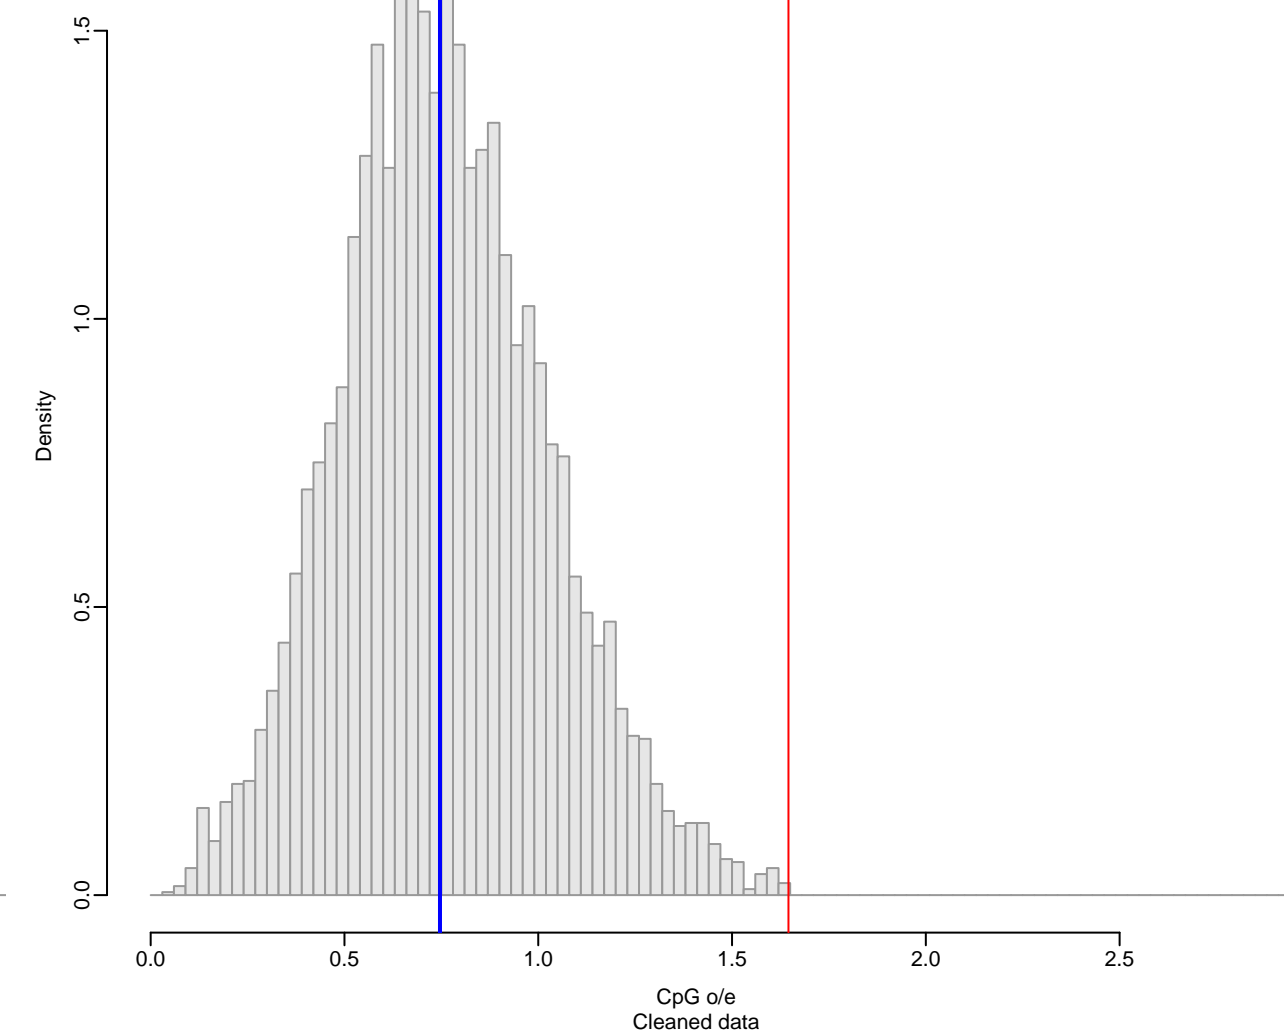

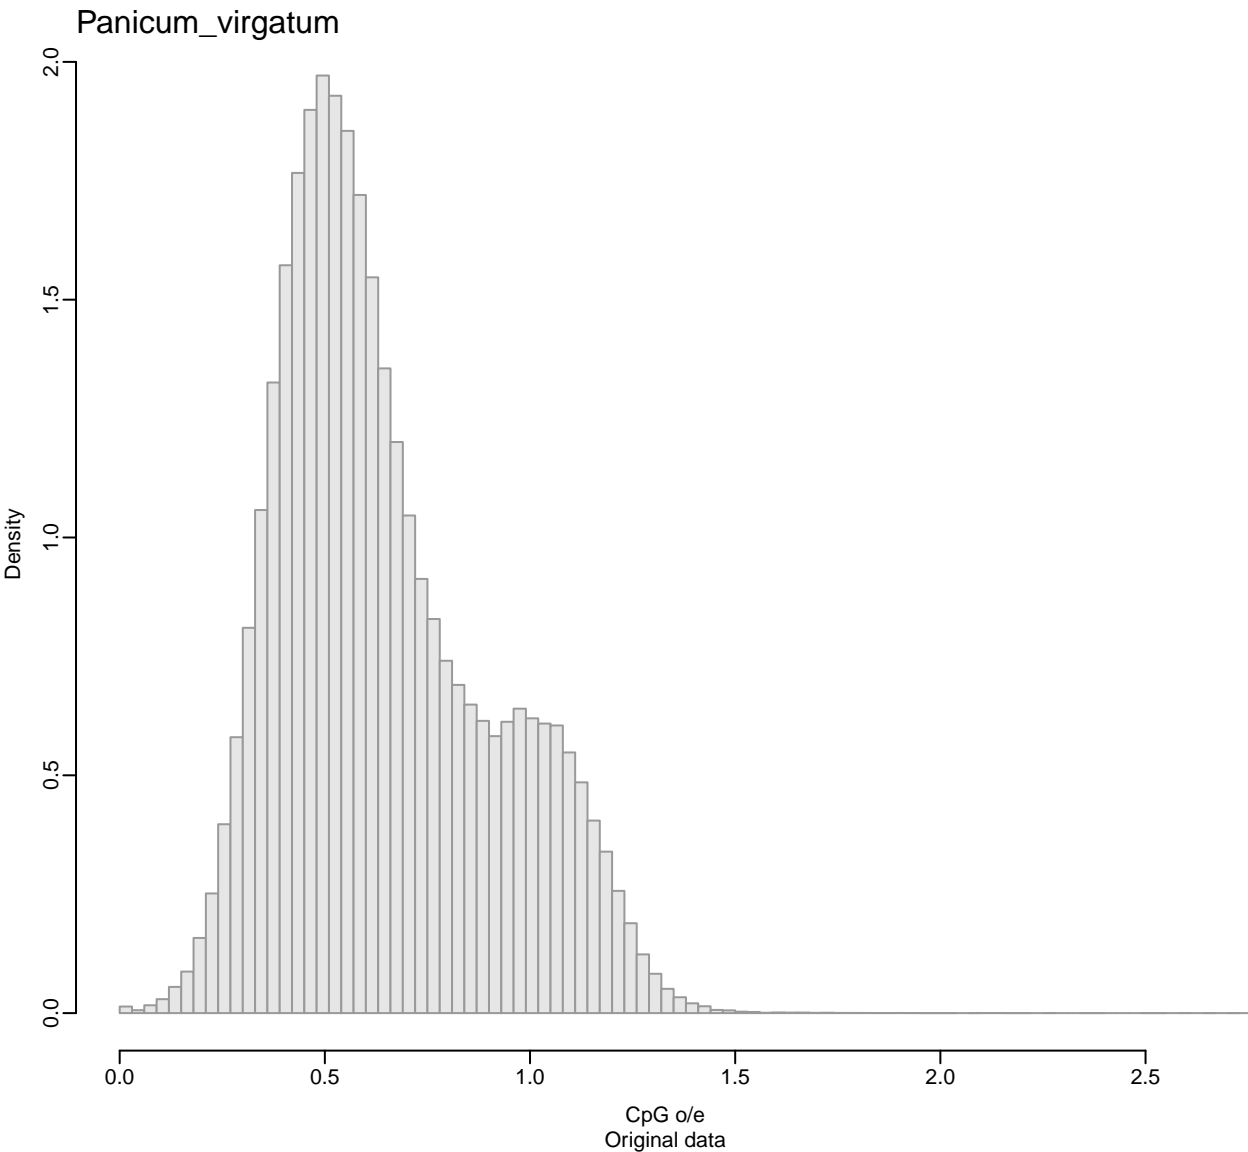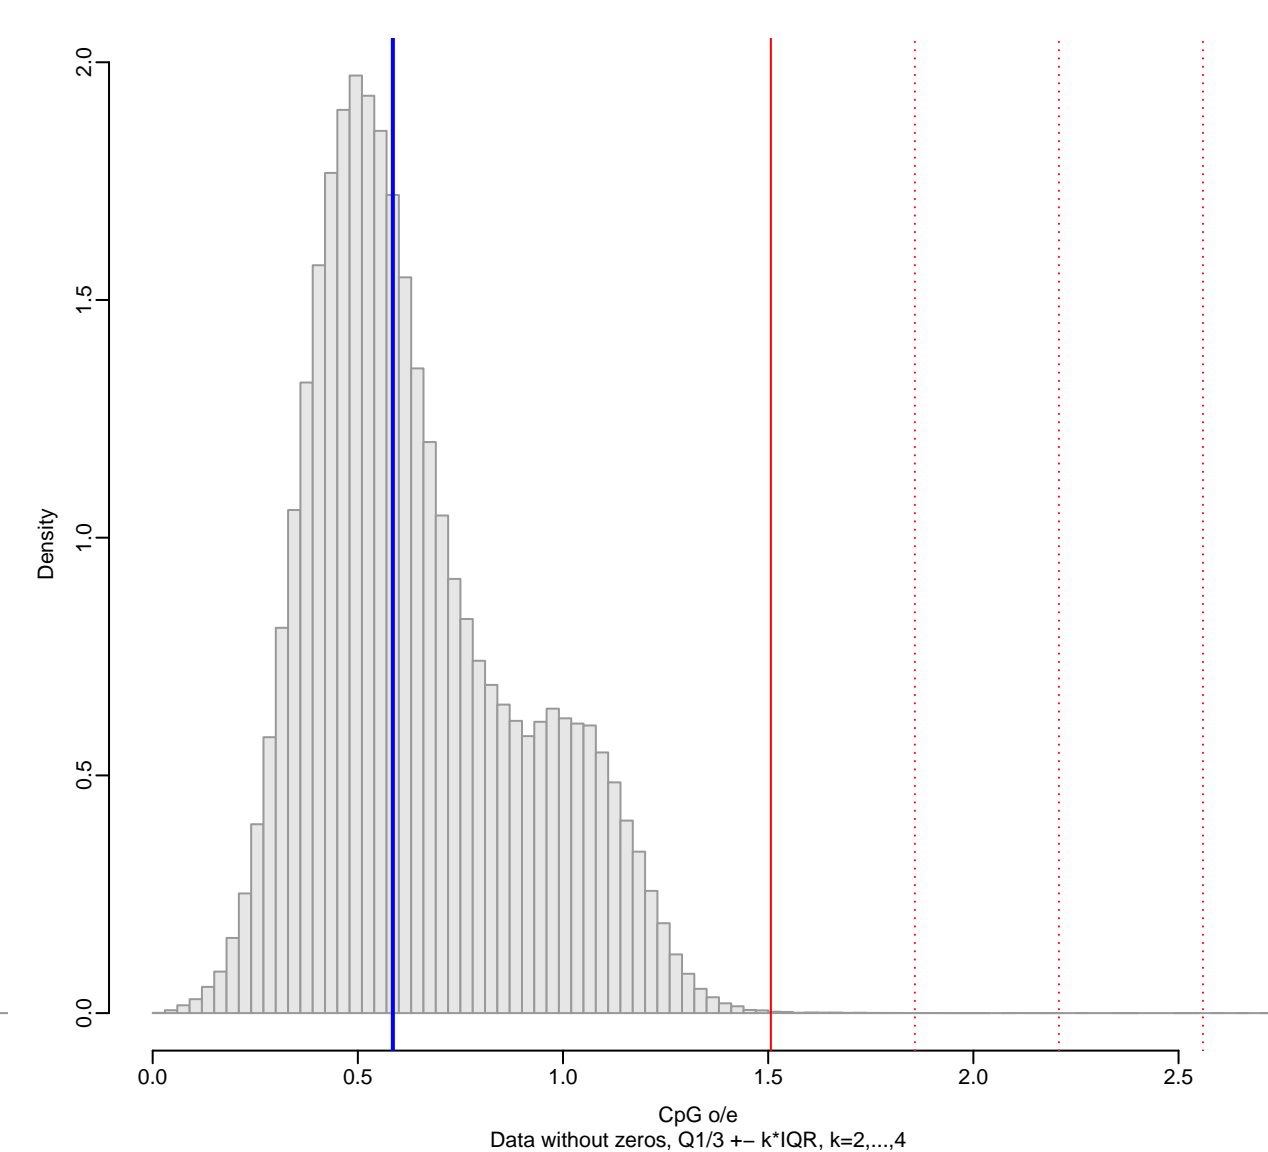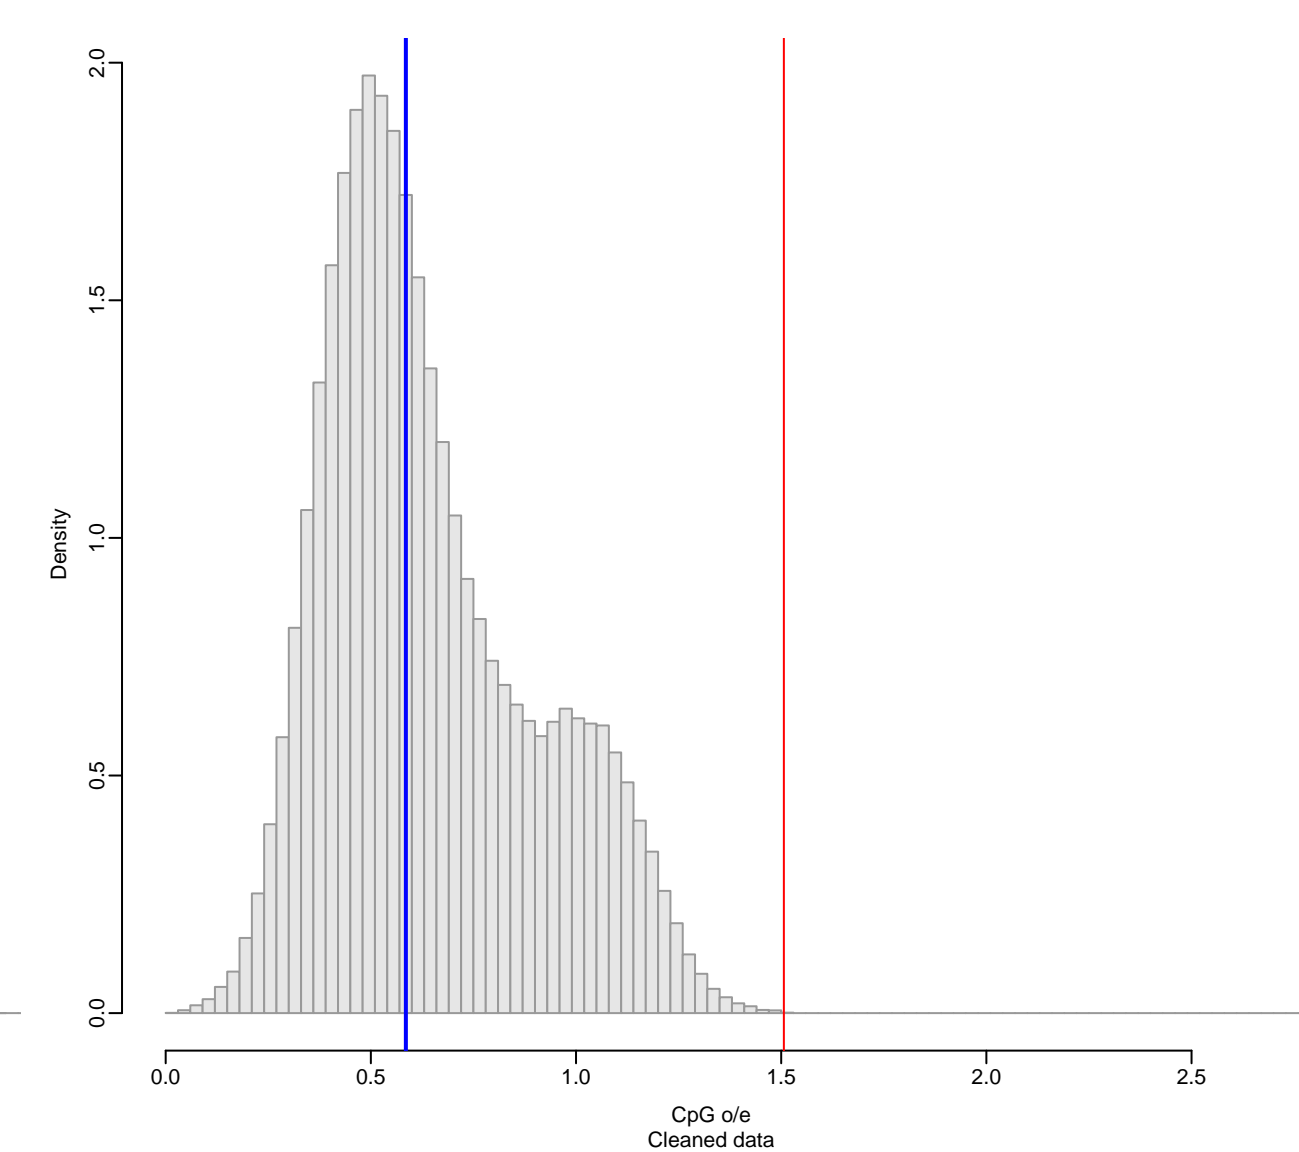

Papilio\_polytes

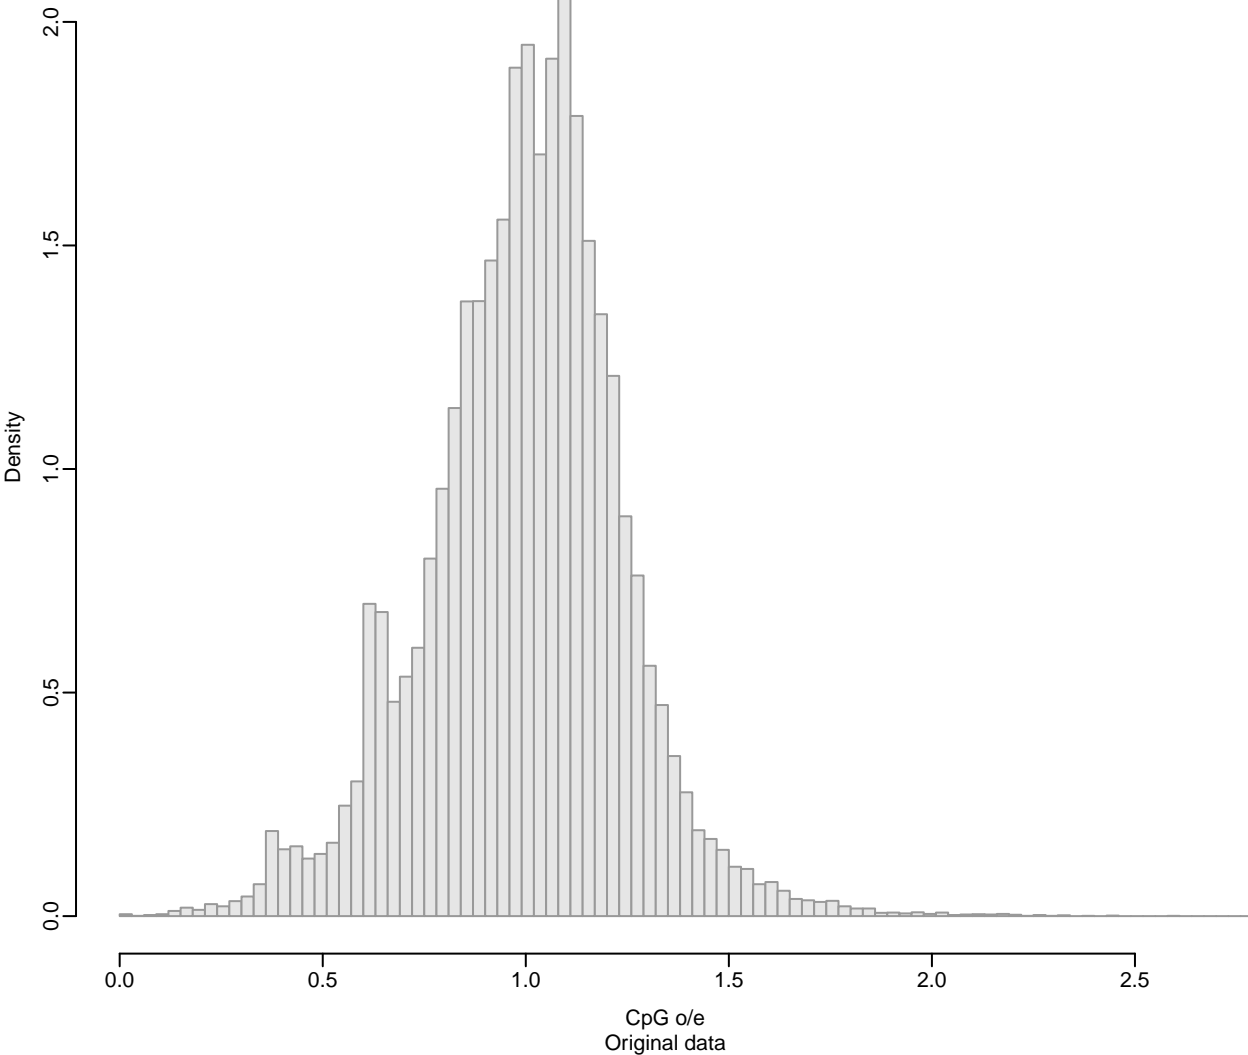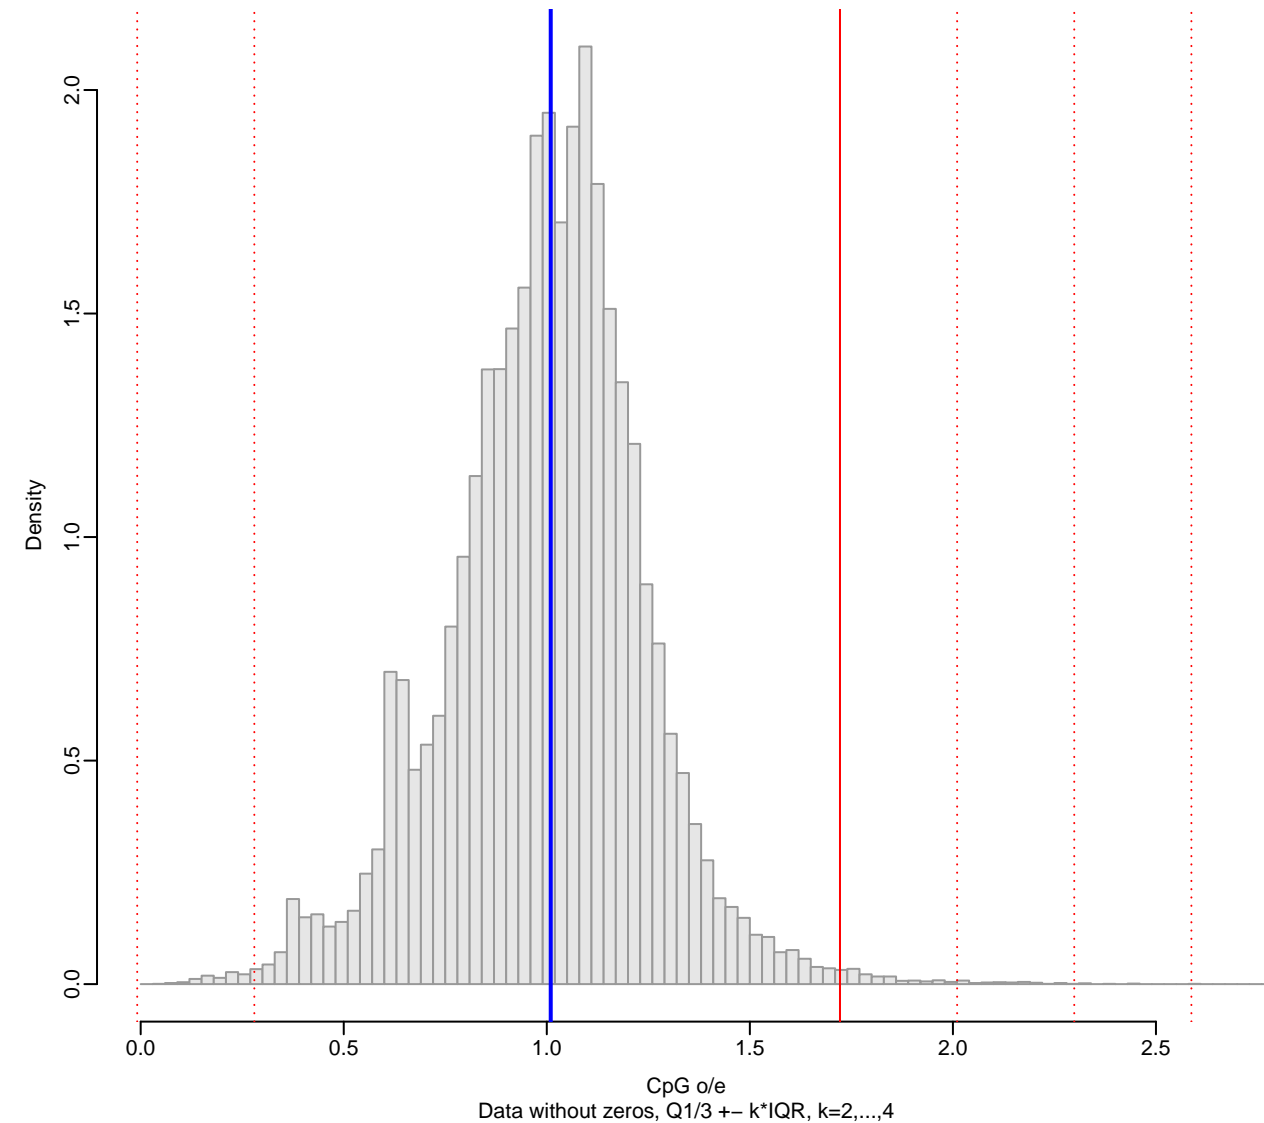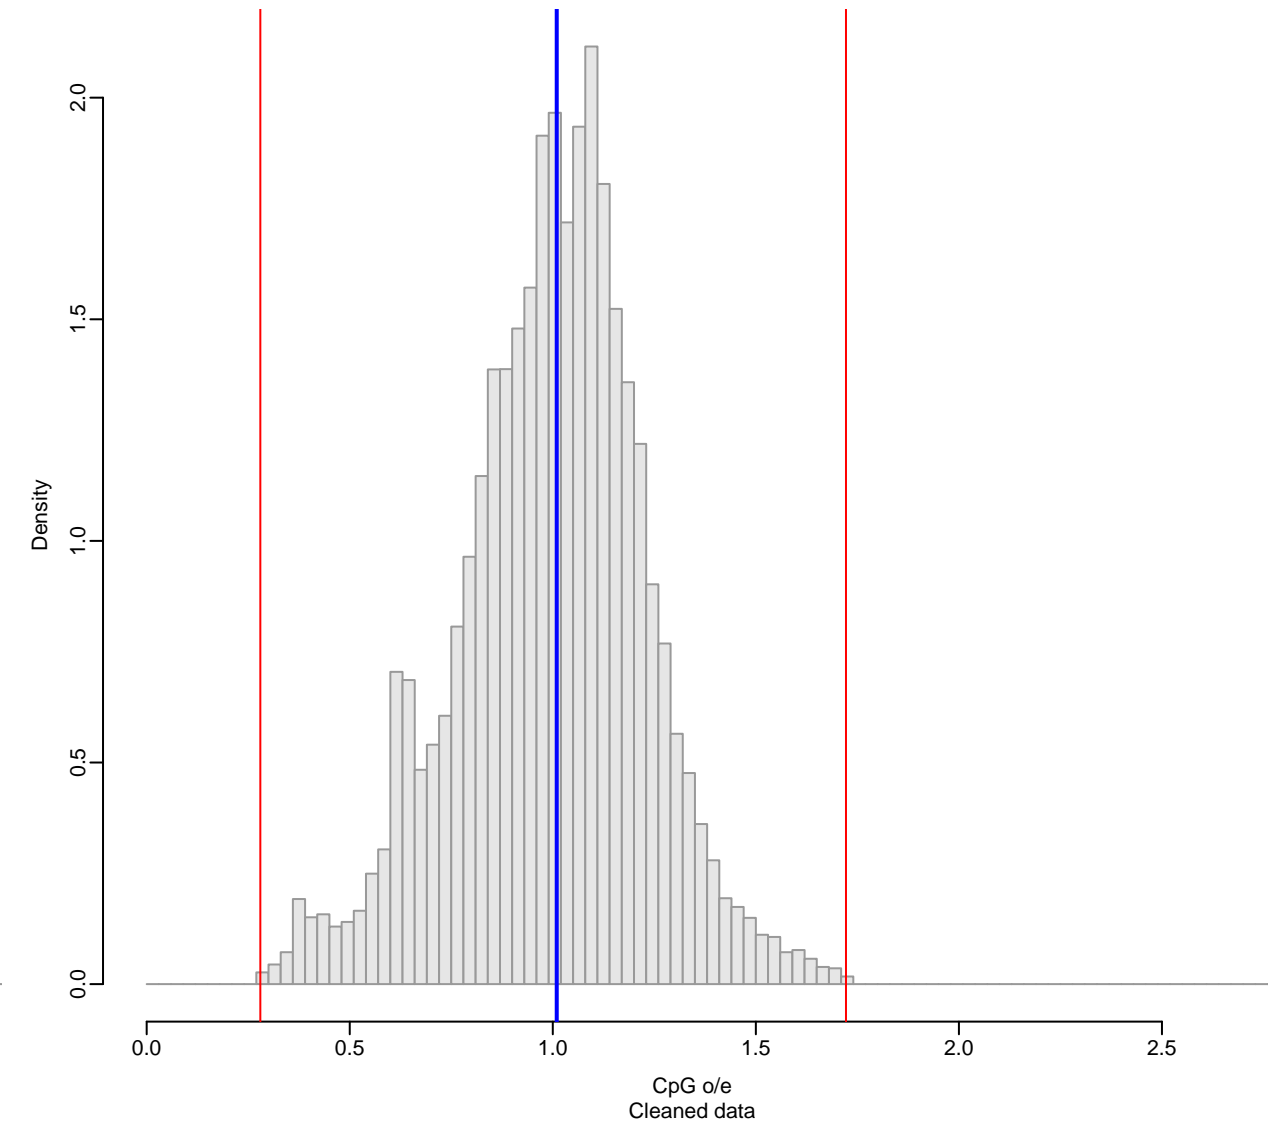

Papilio\_xuthus

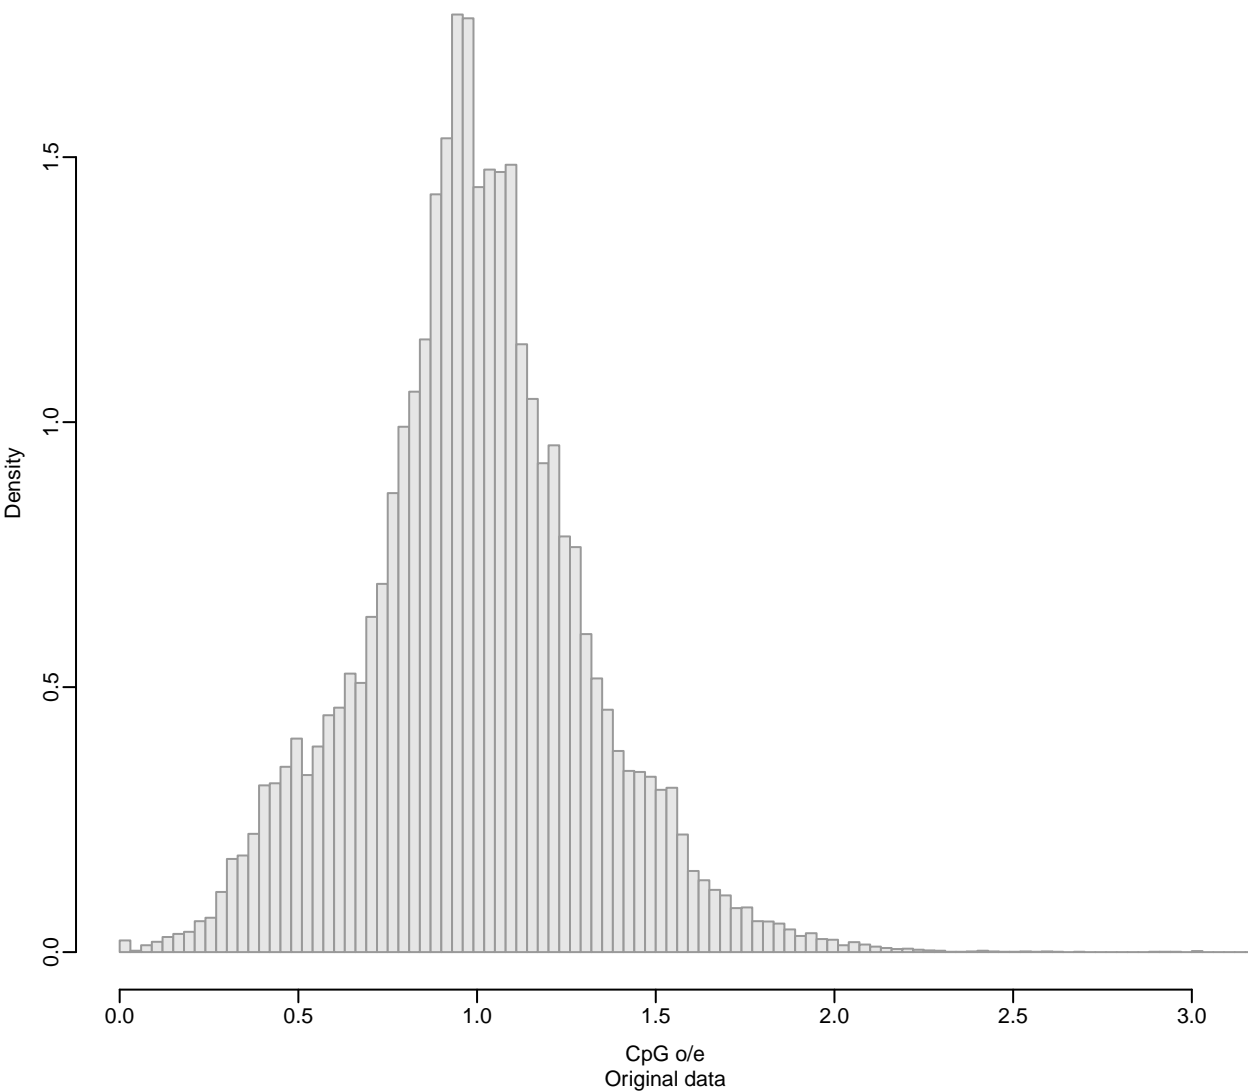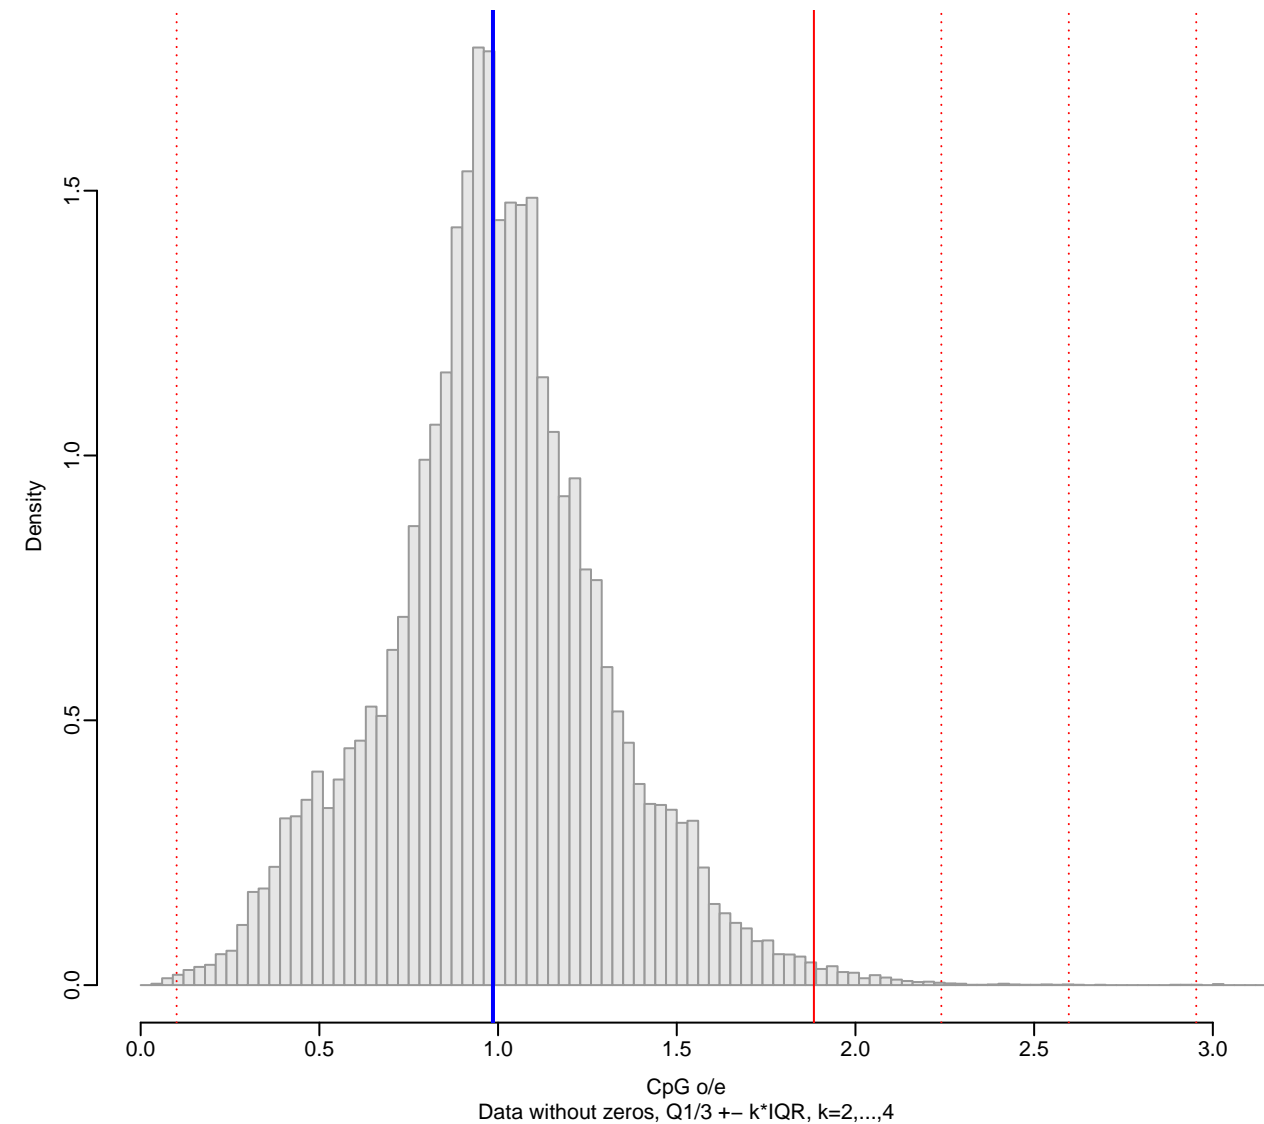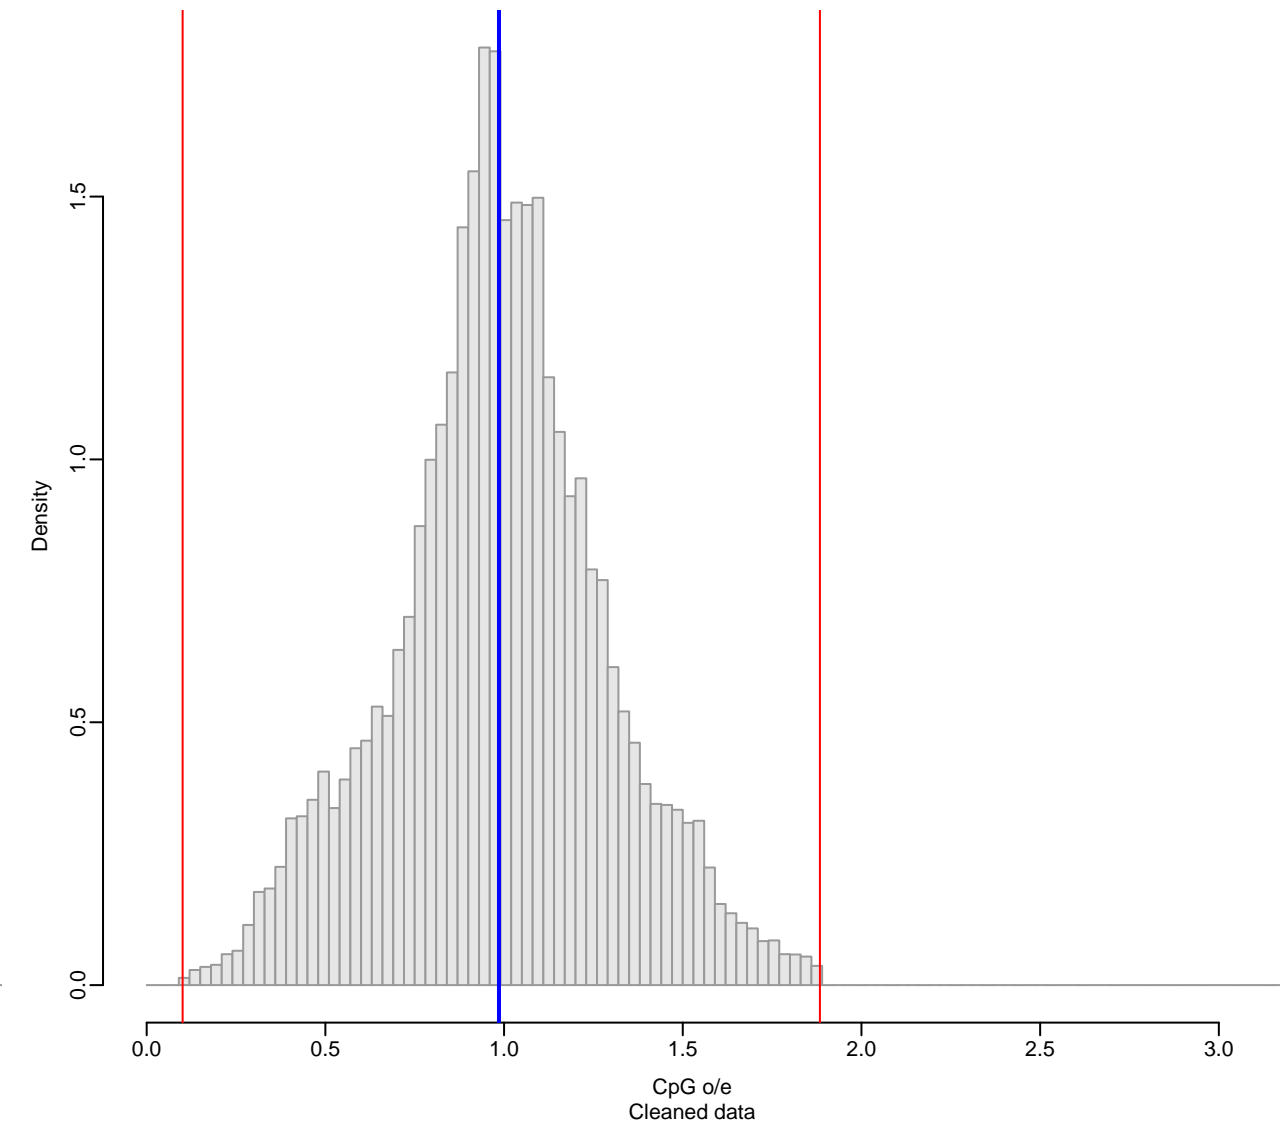

Papio\_anubis

Density

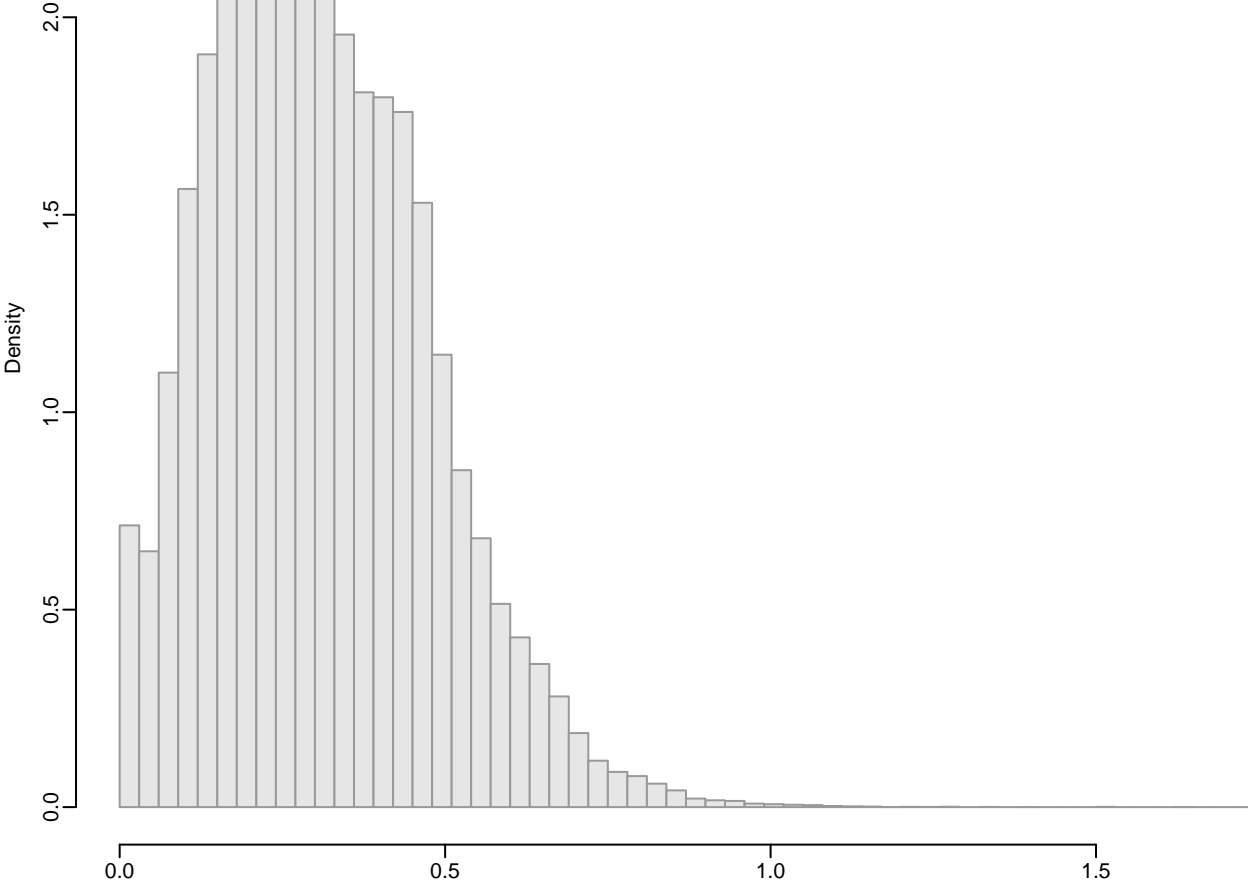

Density

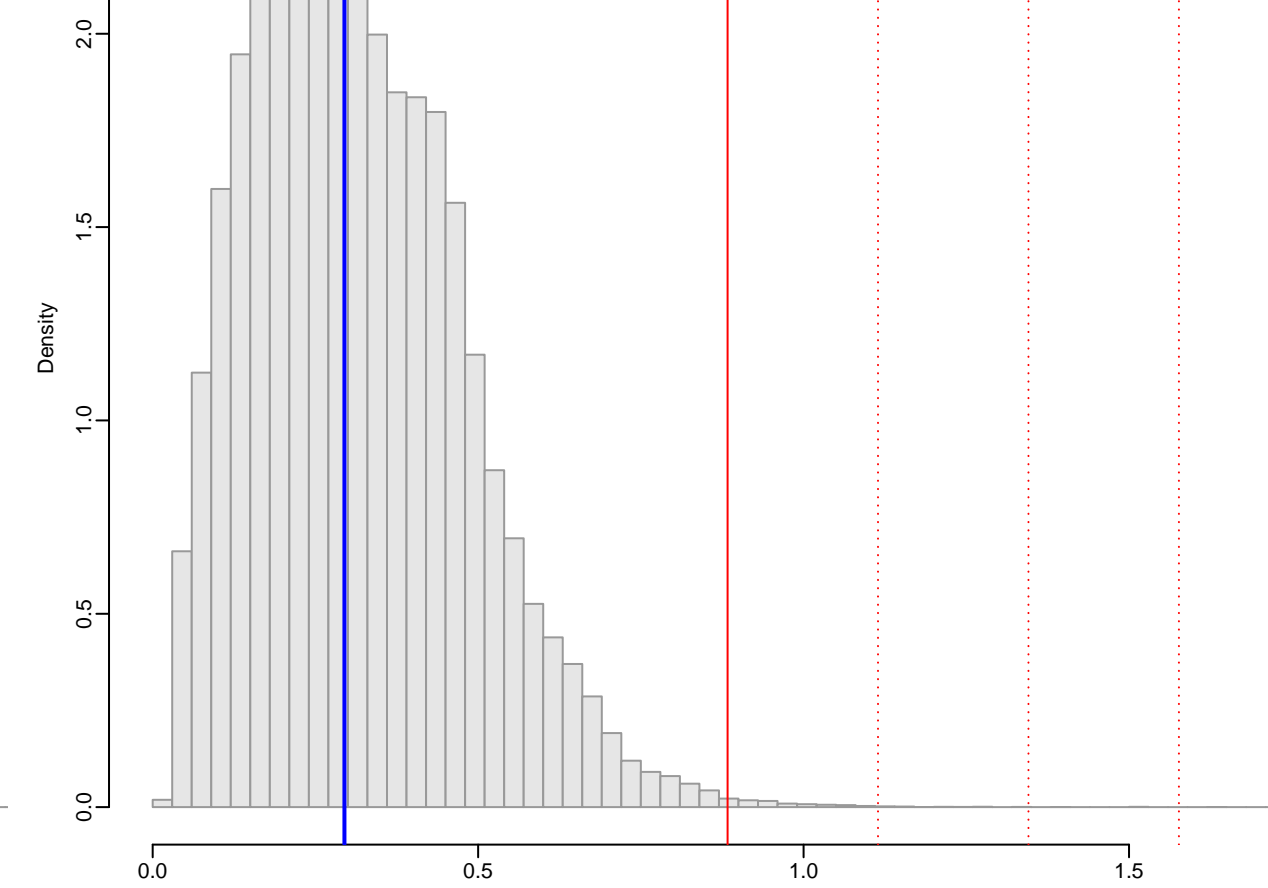

Density

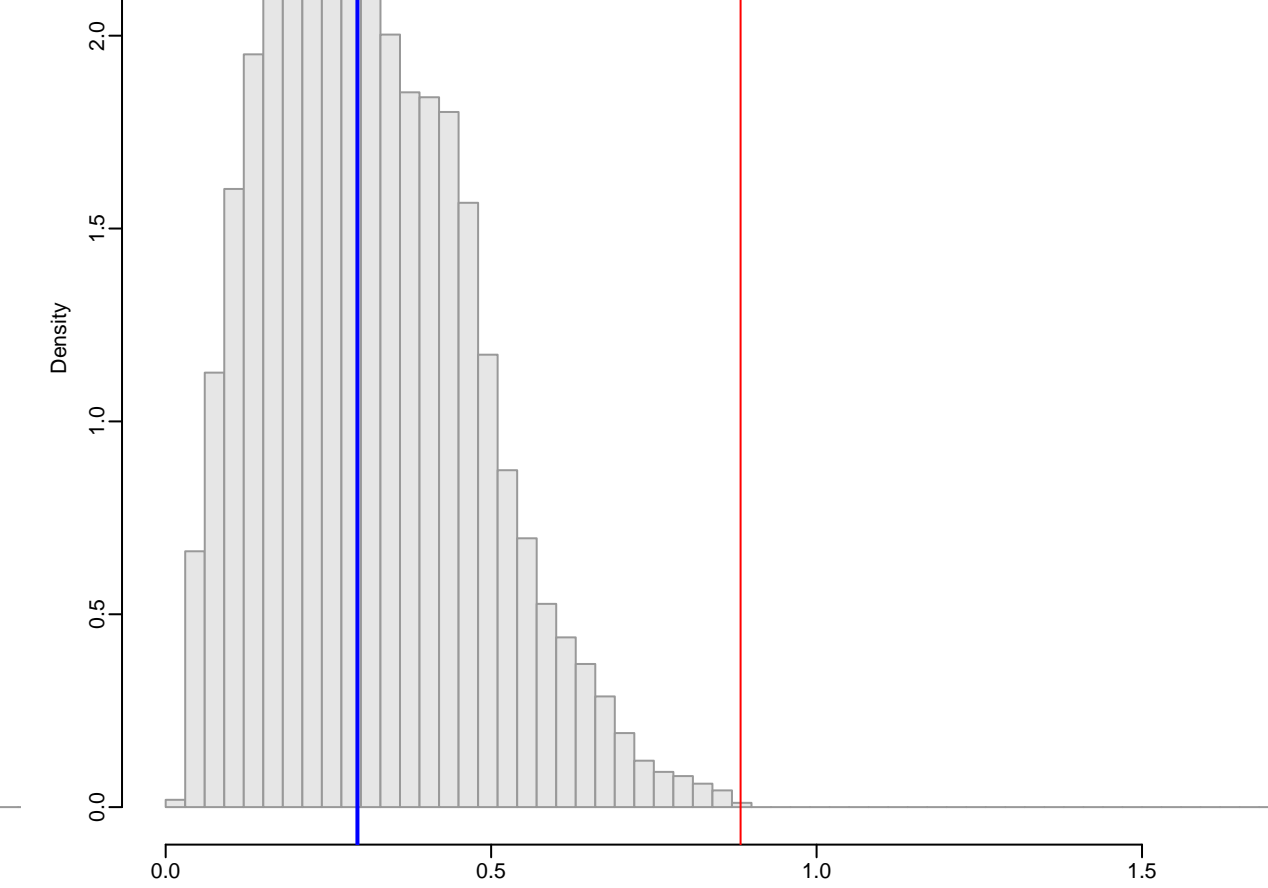

Paracentrotus\_lividus

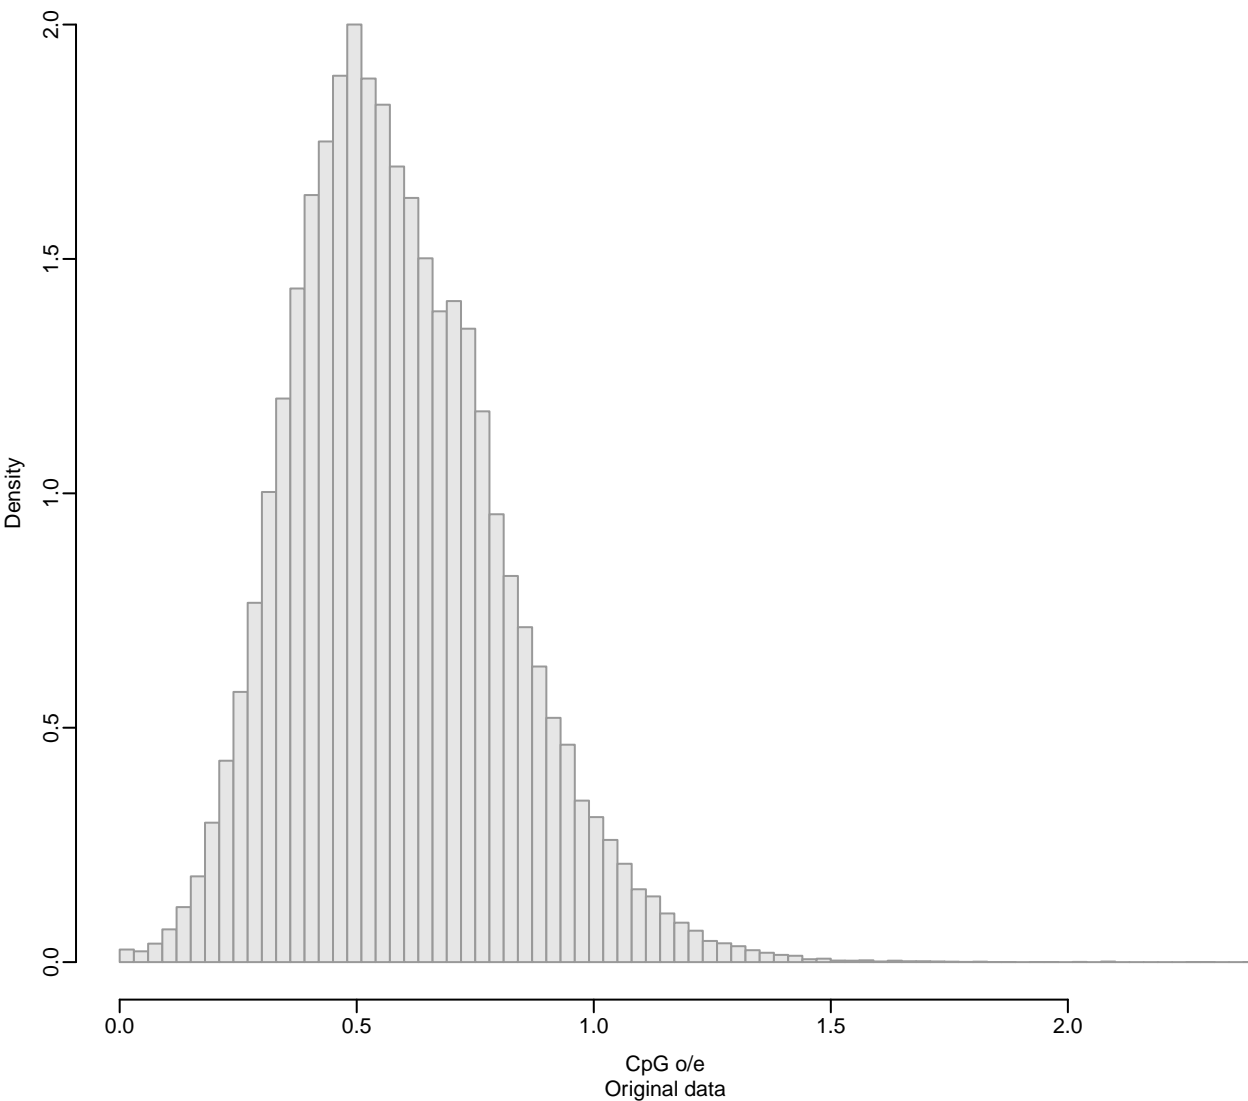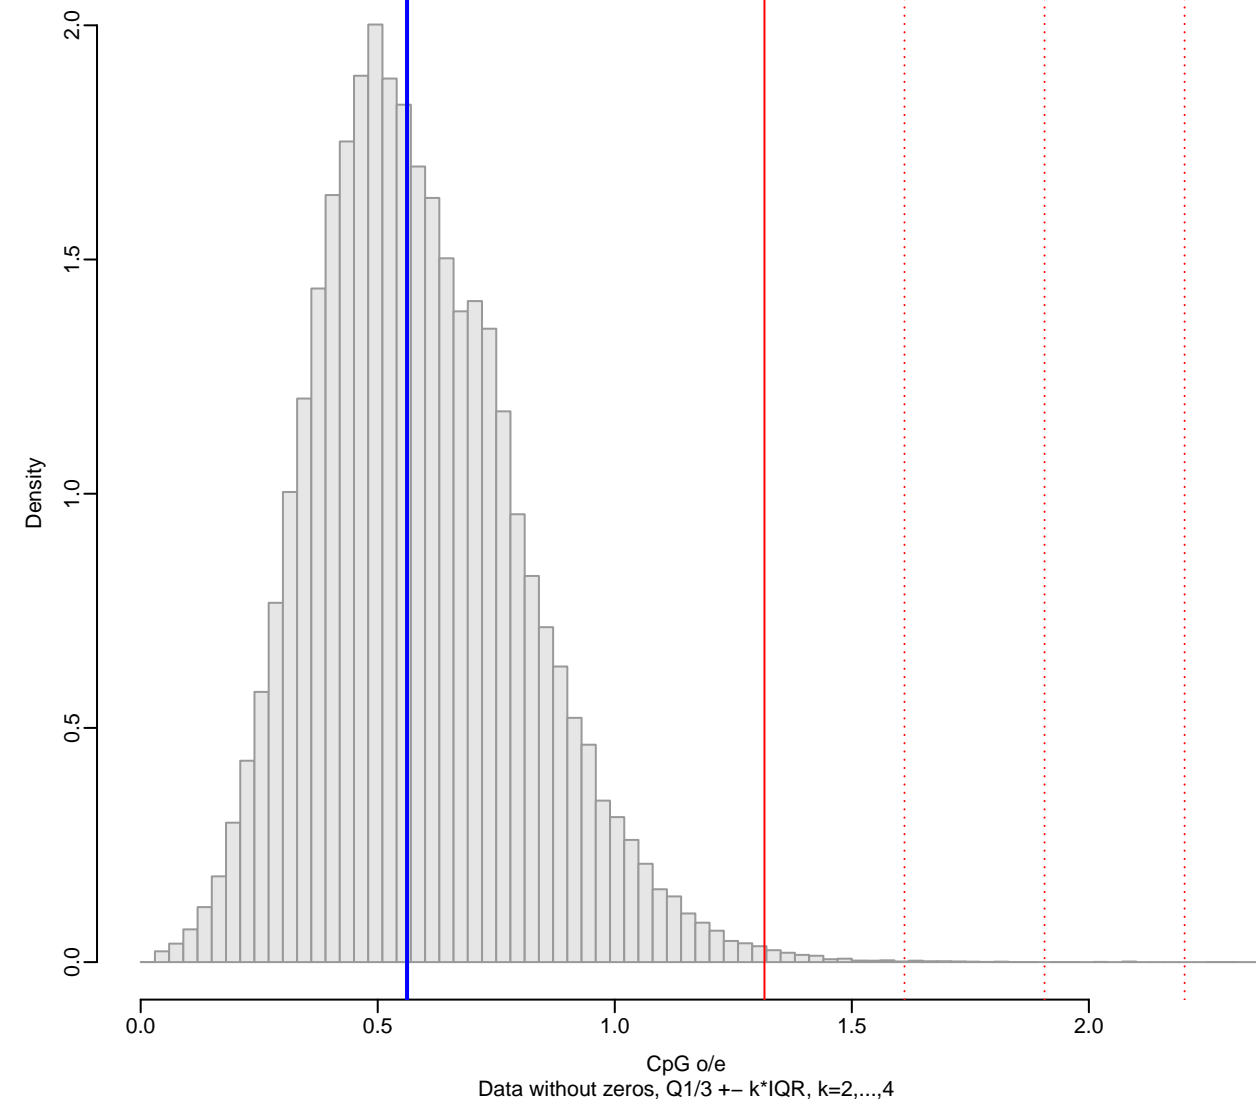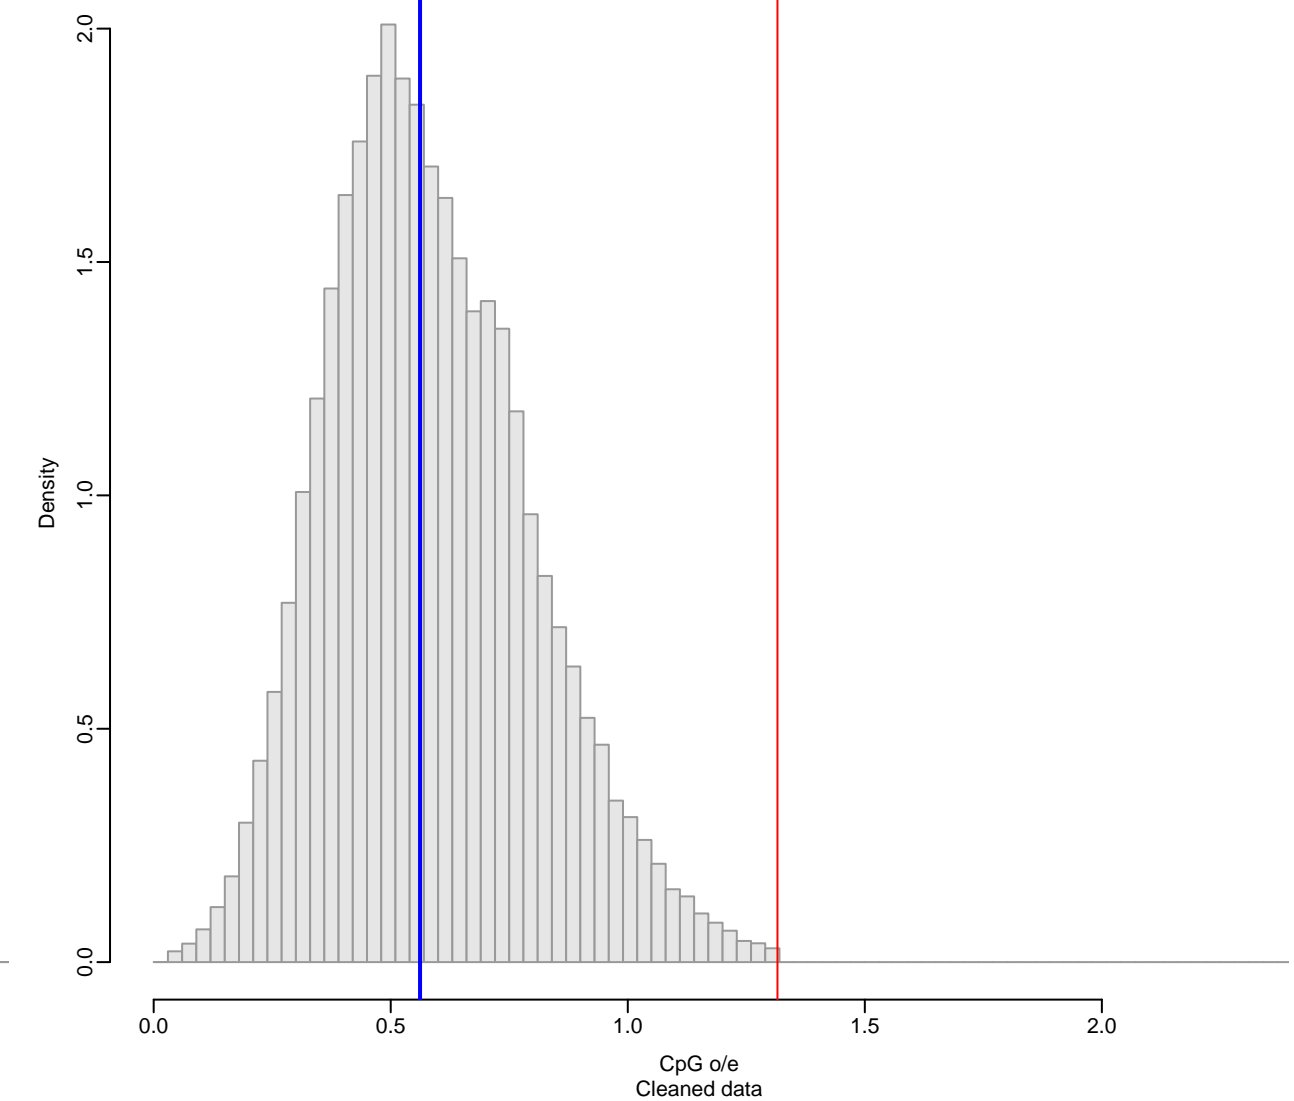

Paracercomonas\_marina

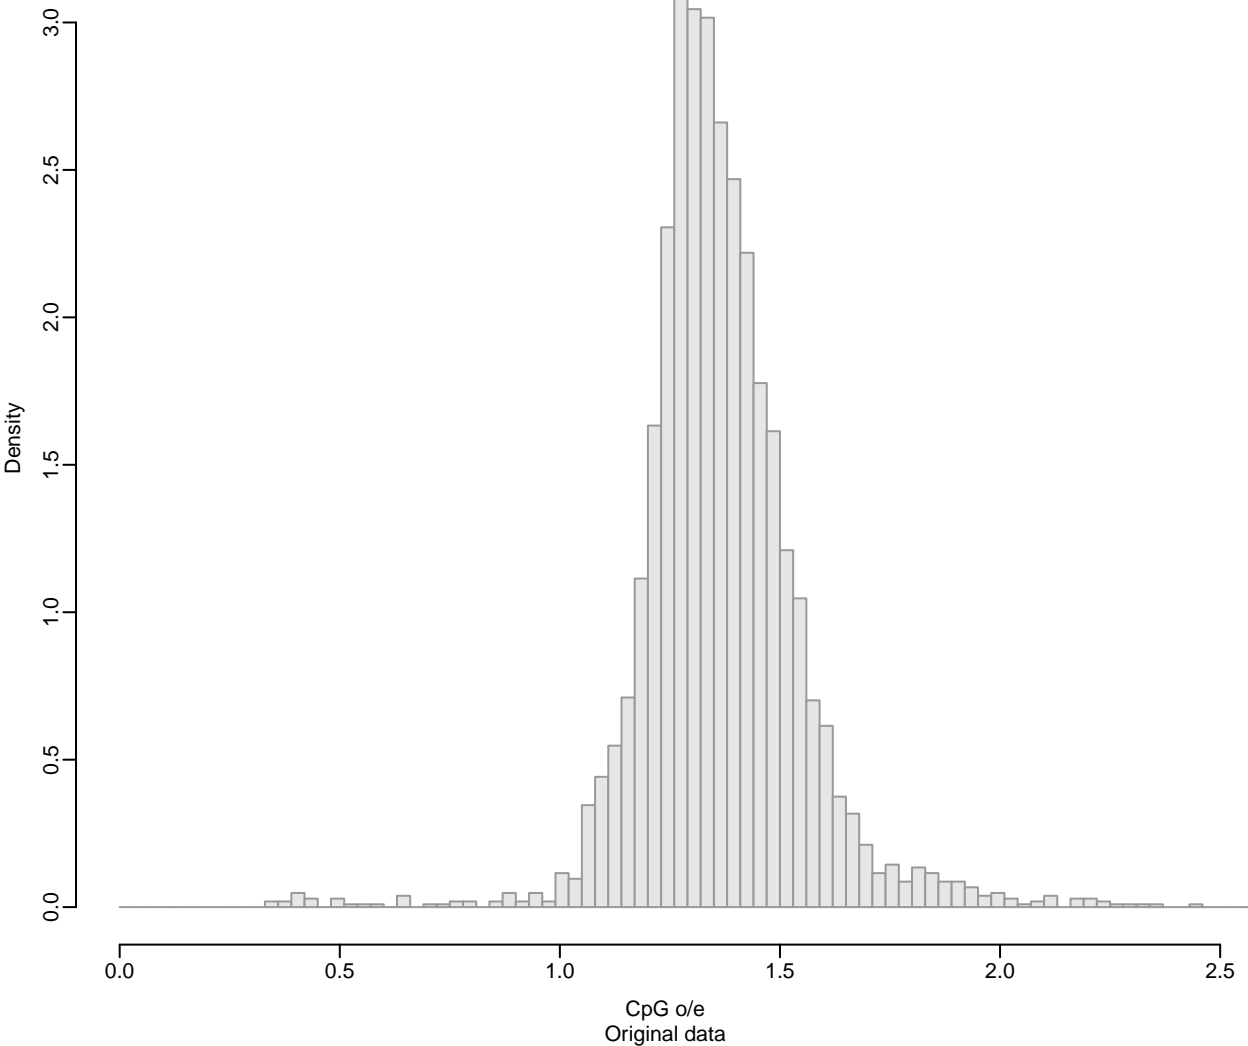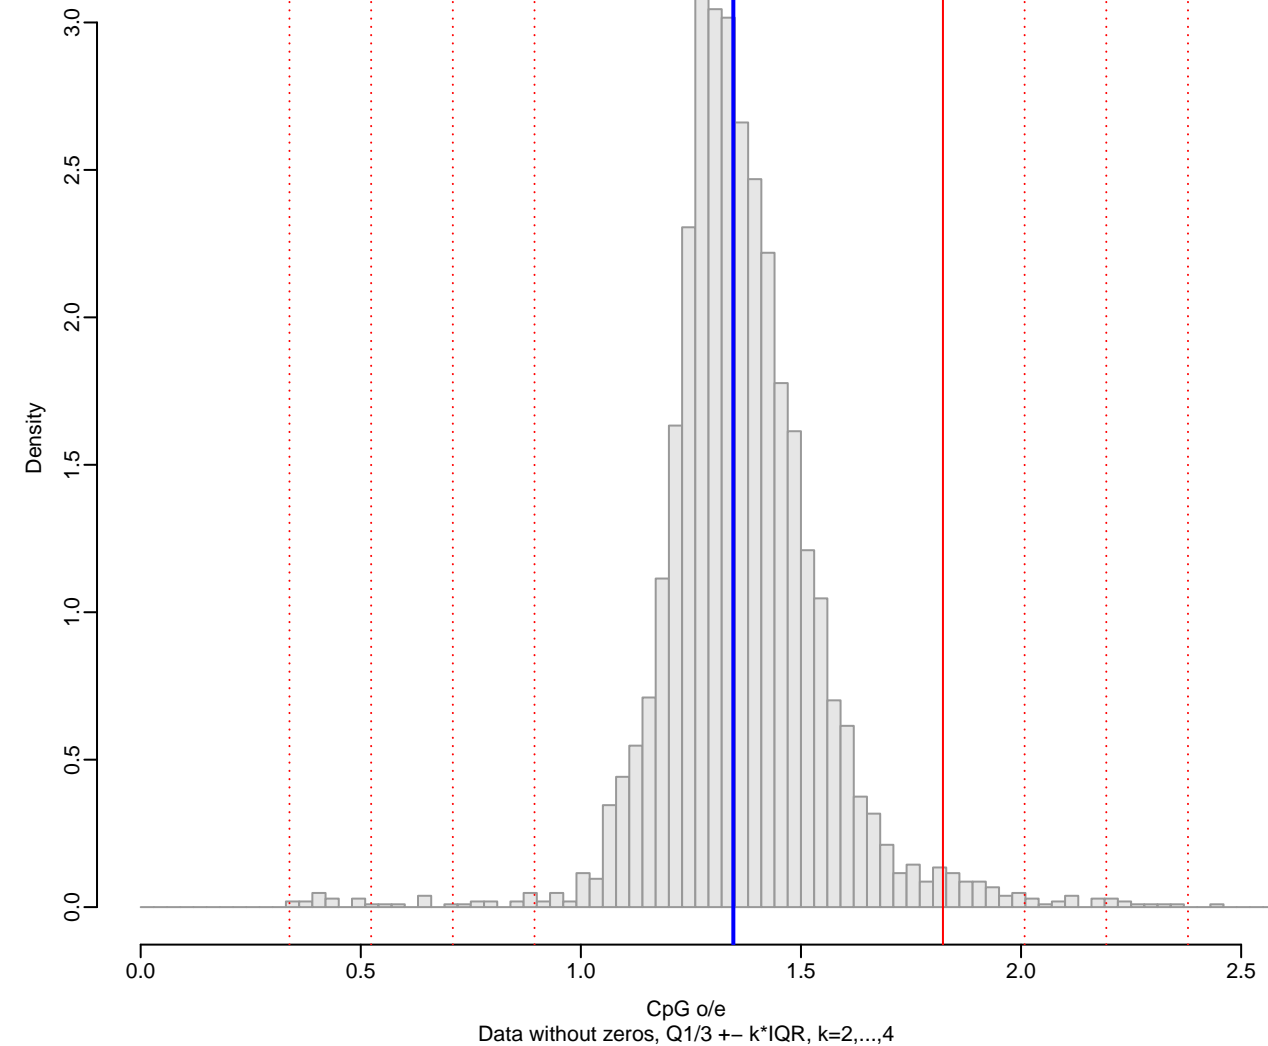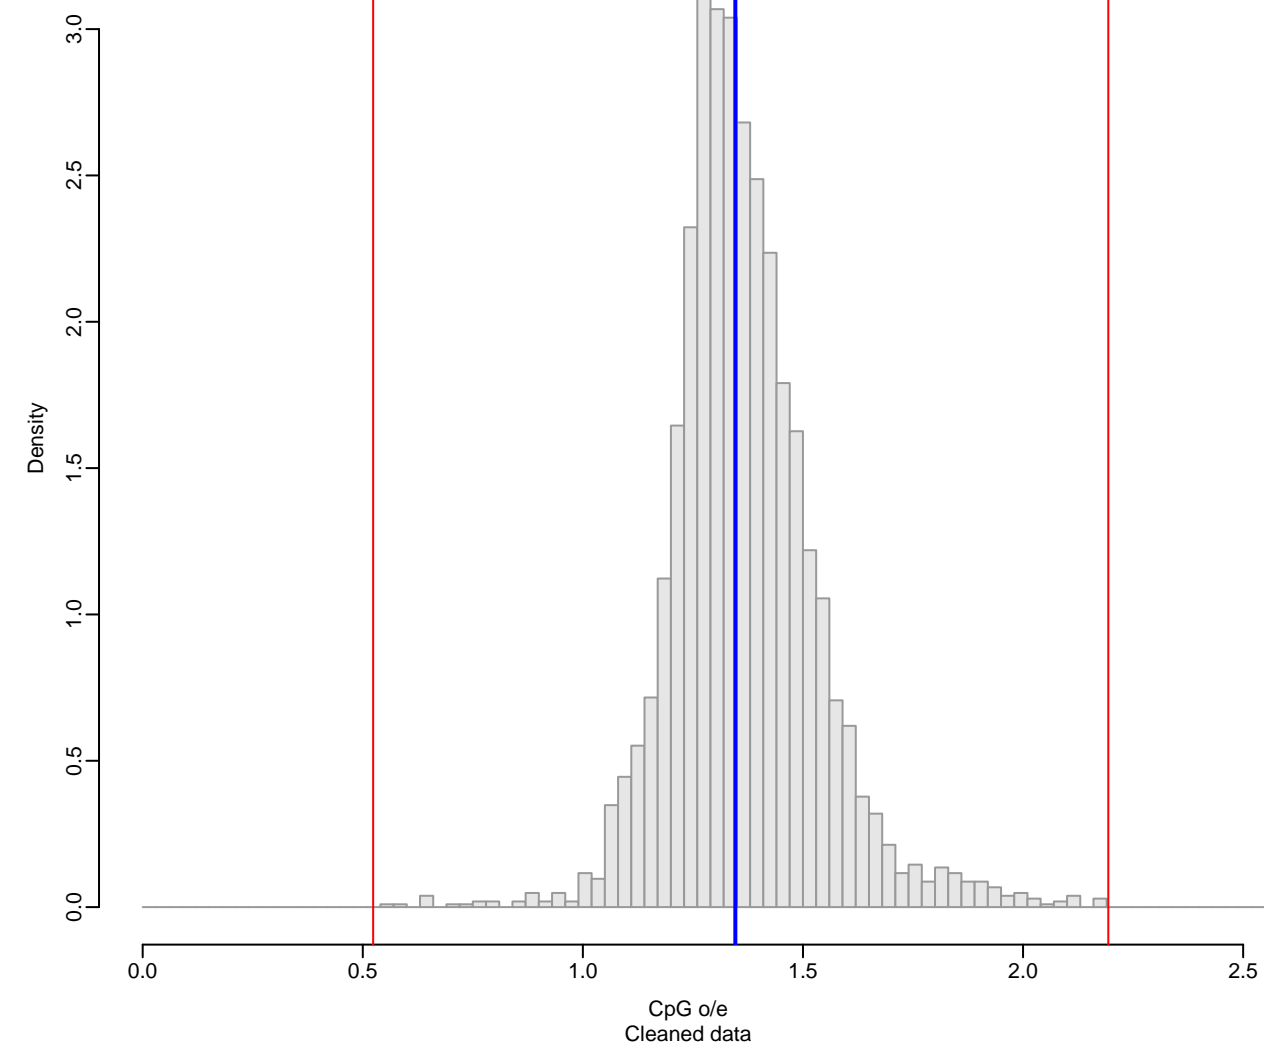



Paracoccidioides\_brasiliensis

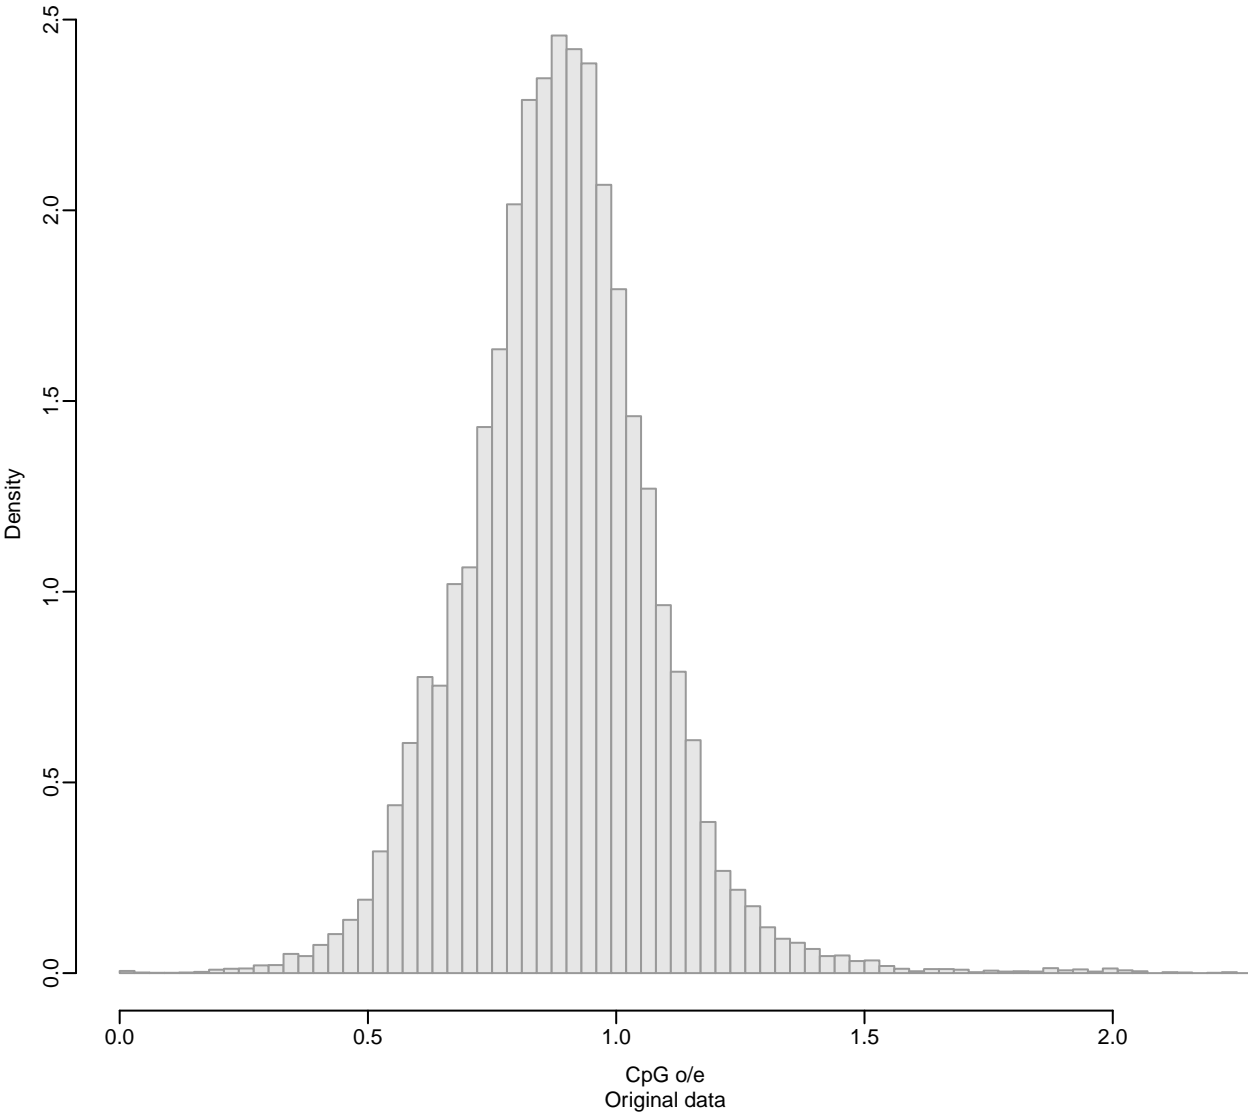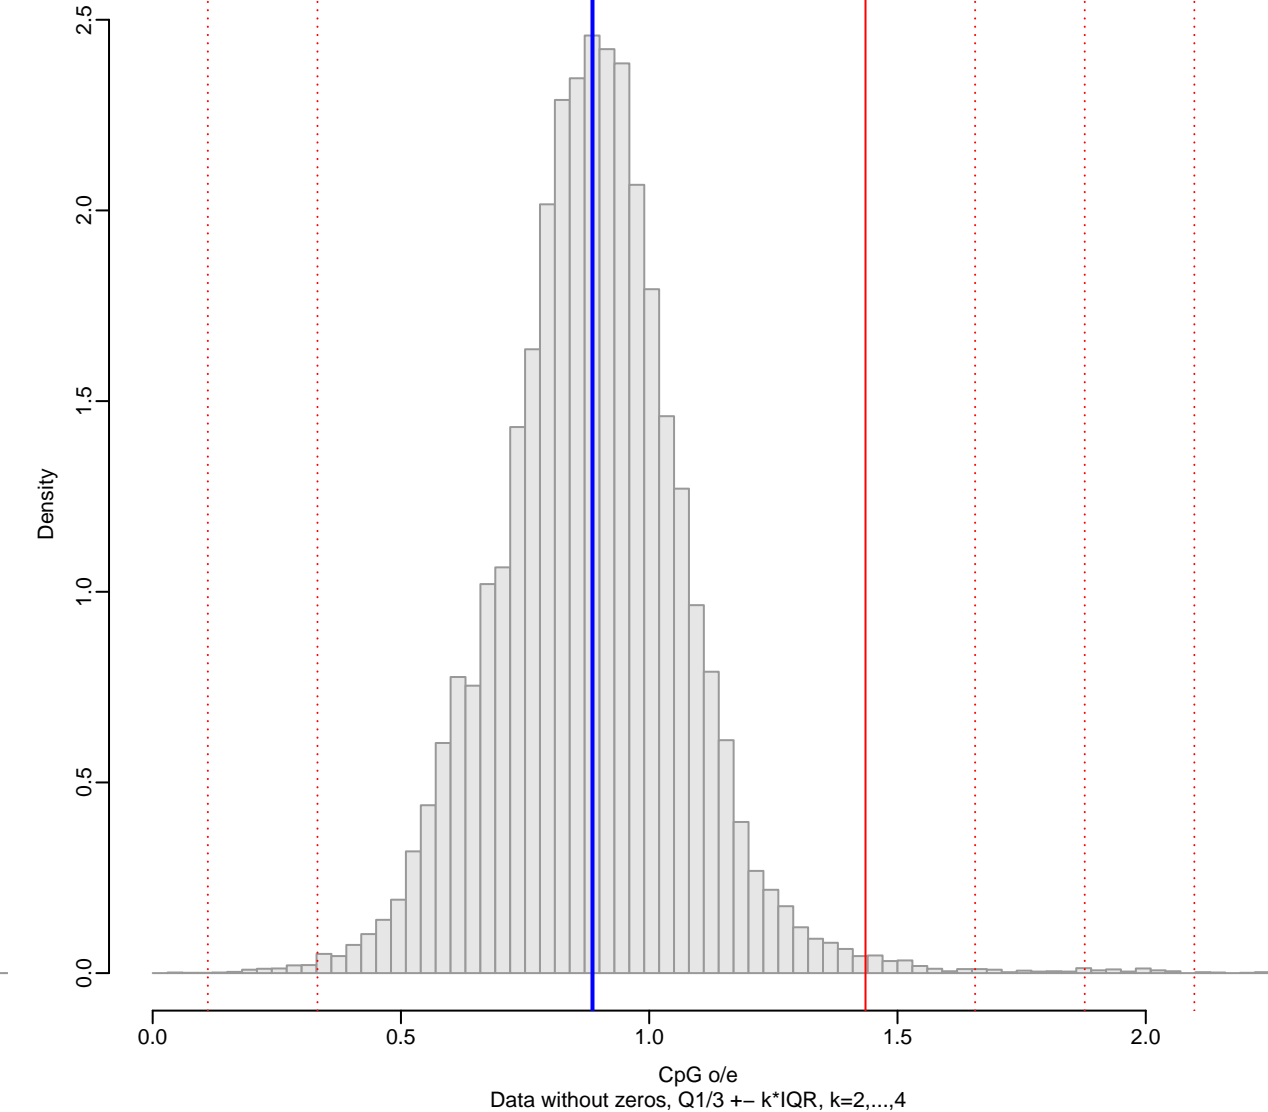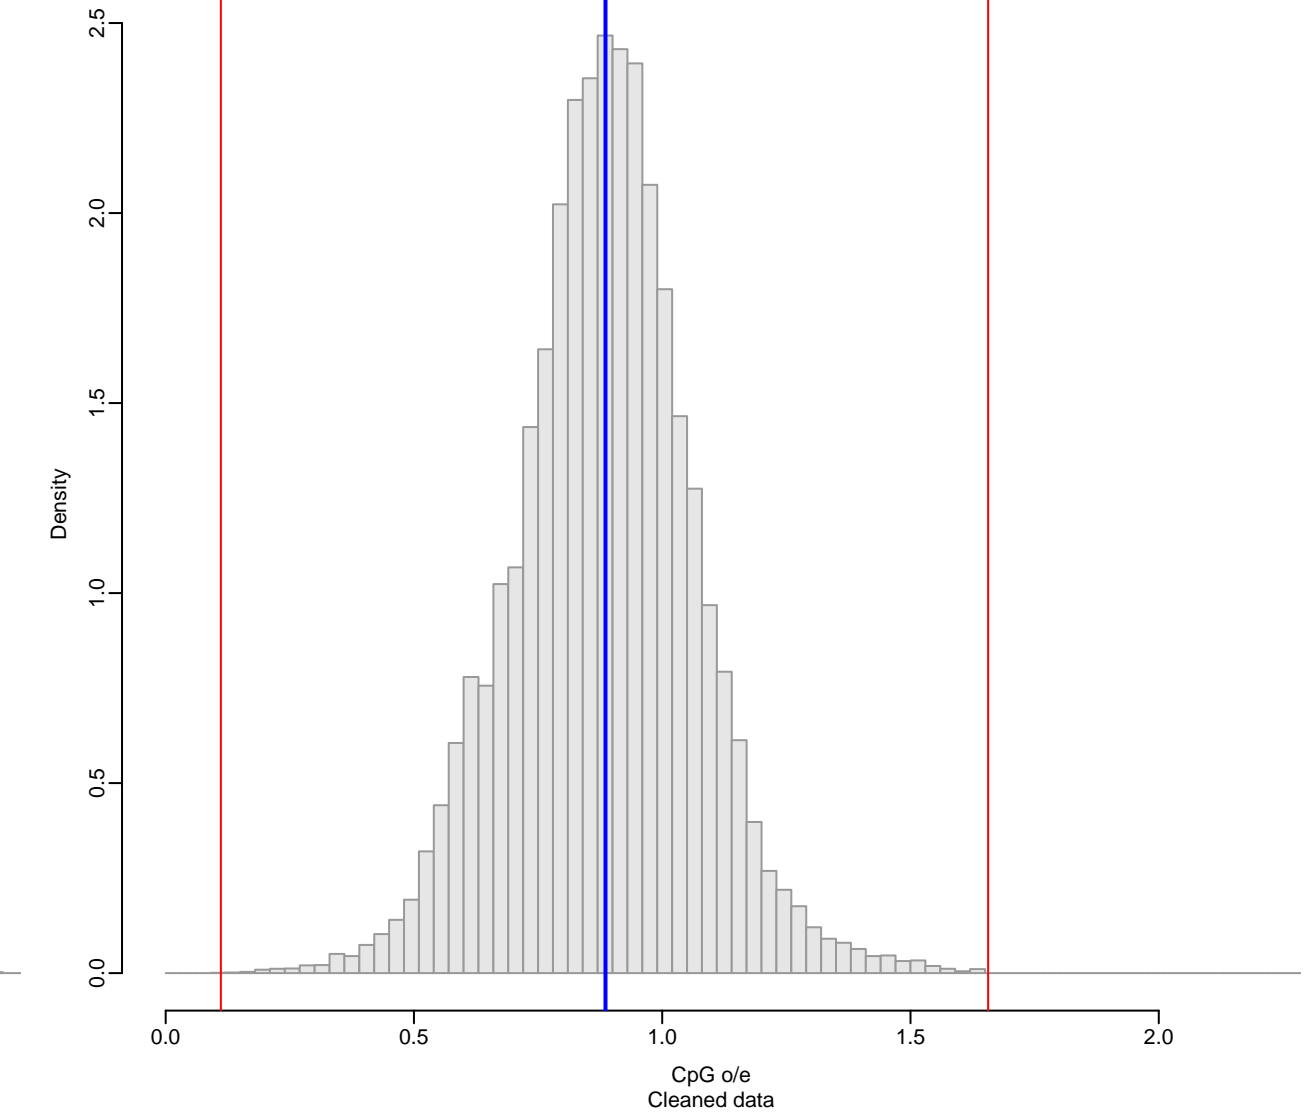

Paralichthys\_olivaceus

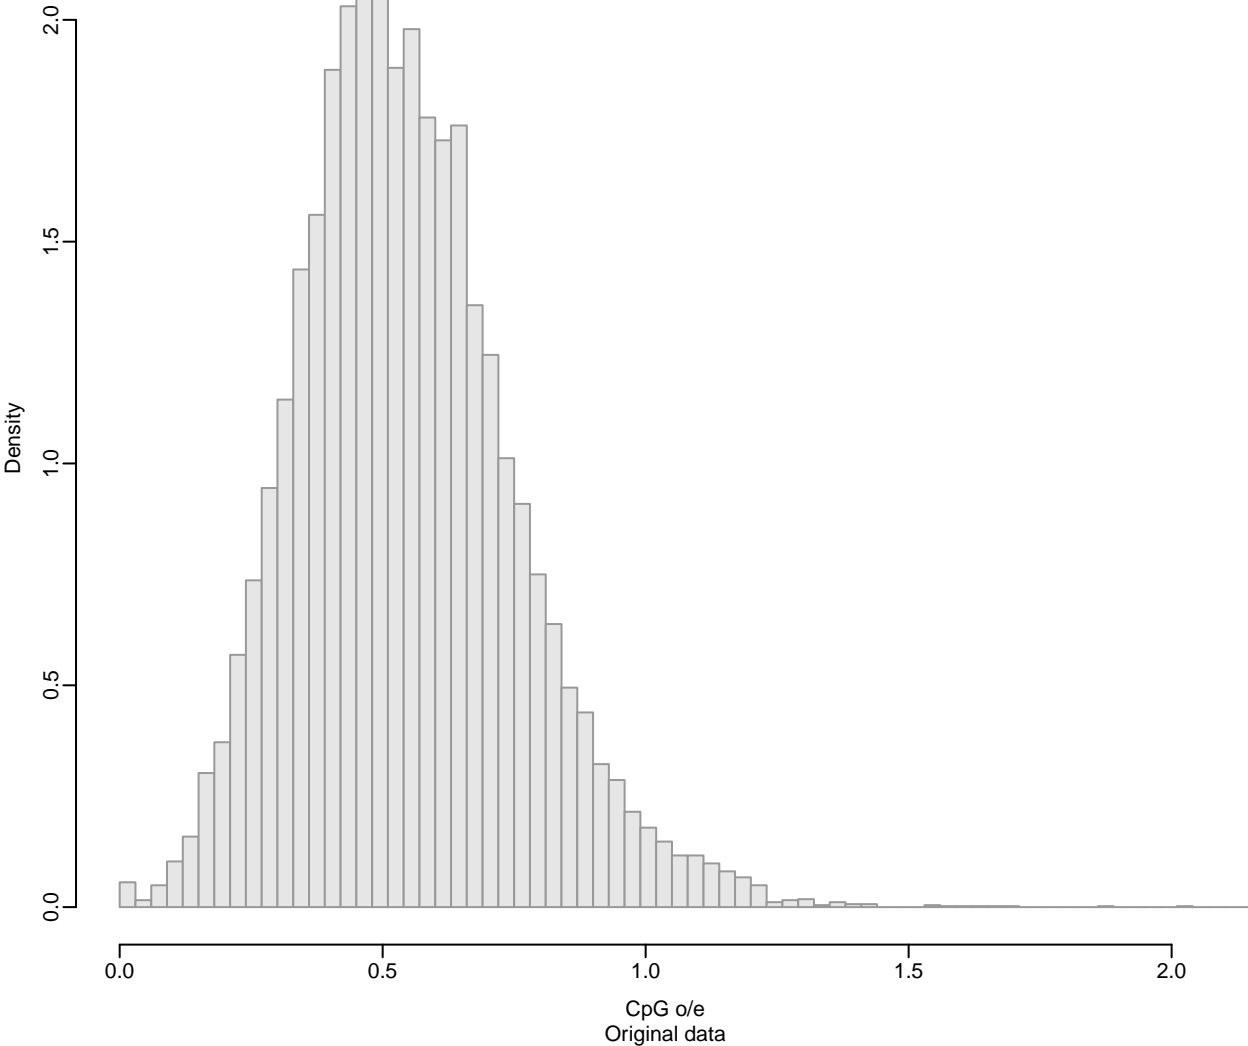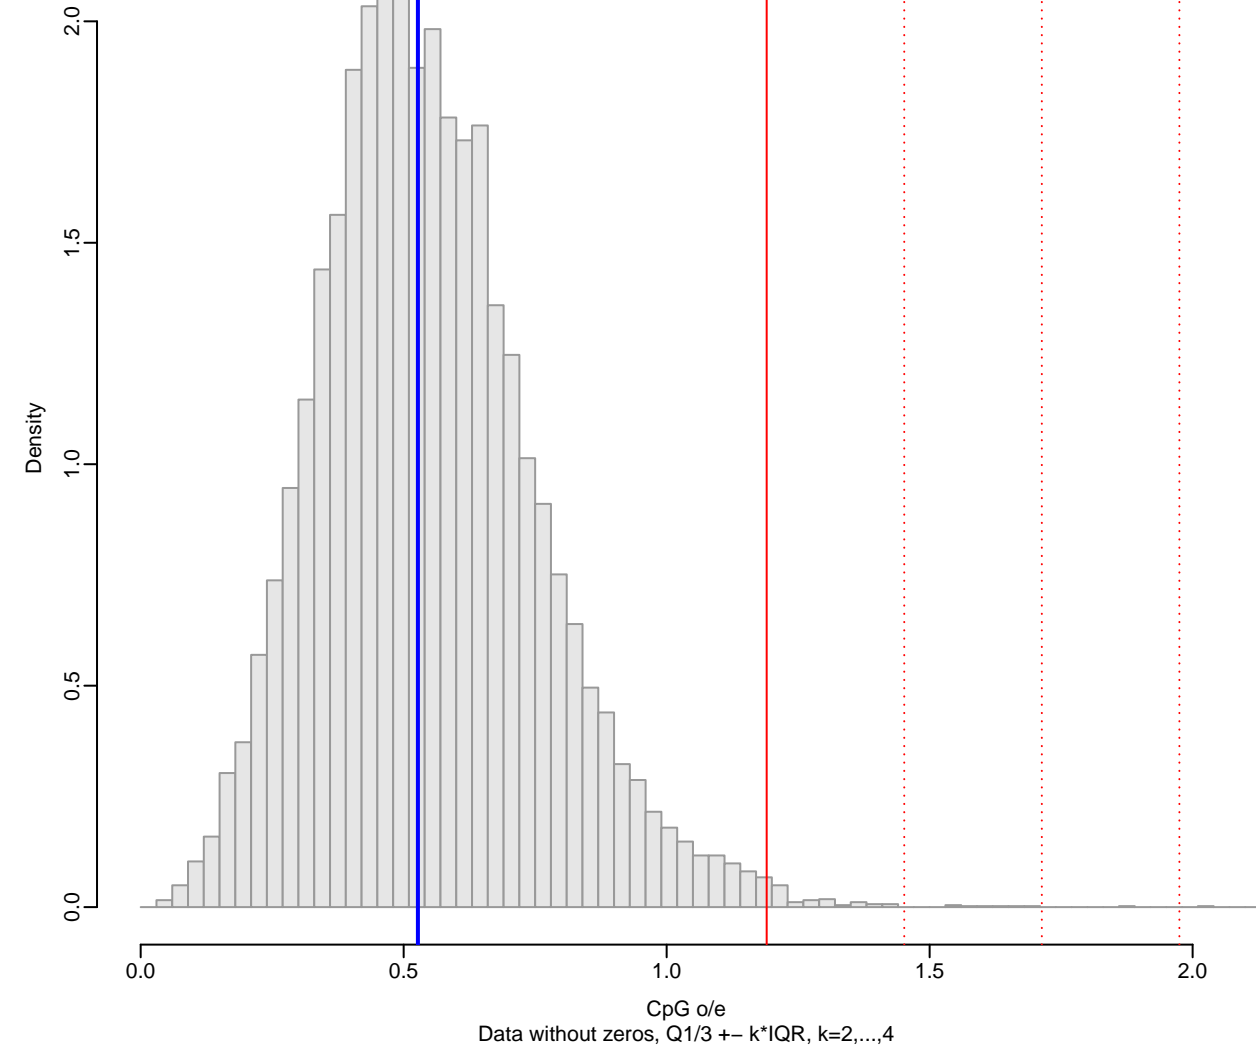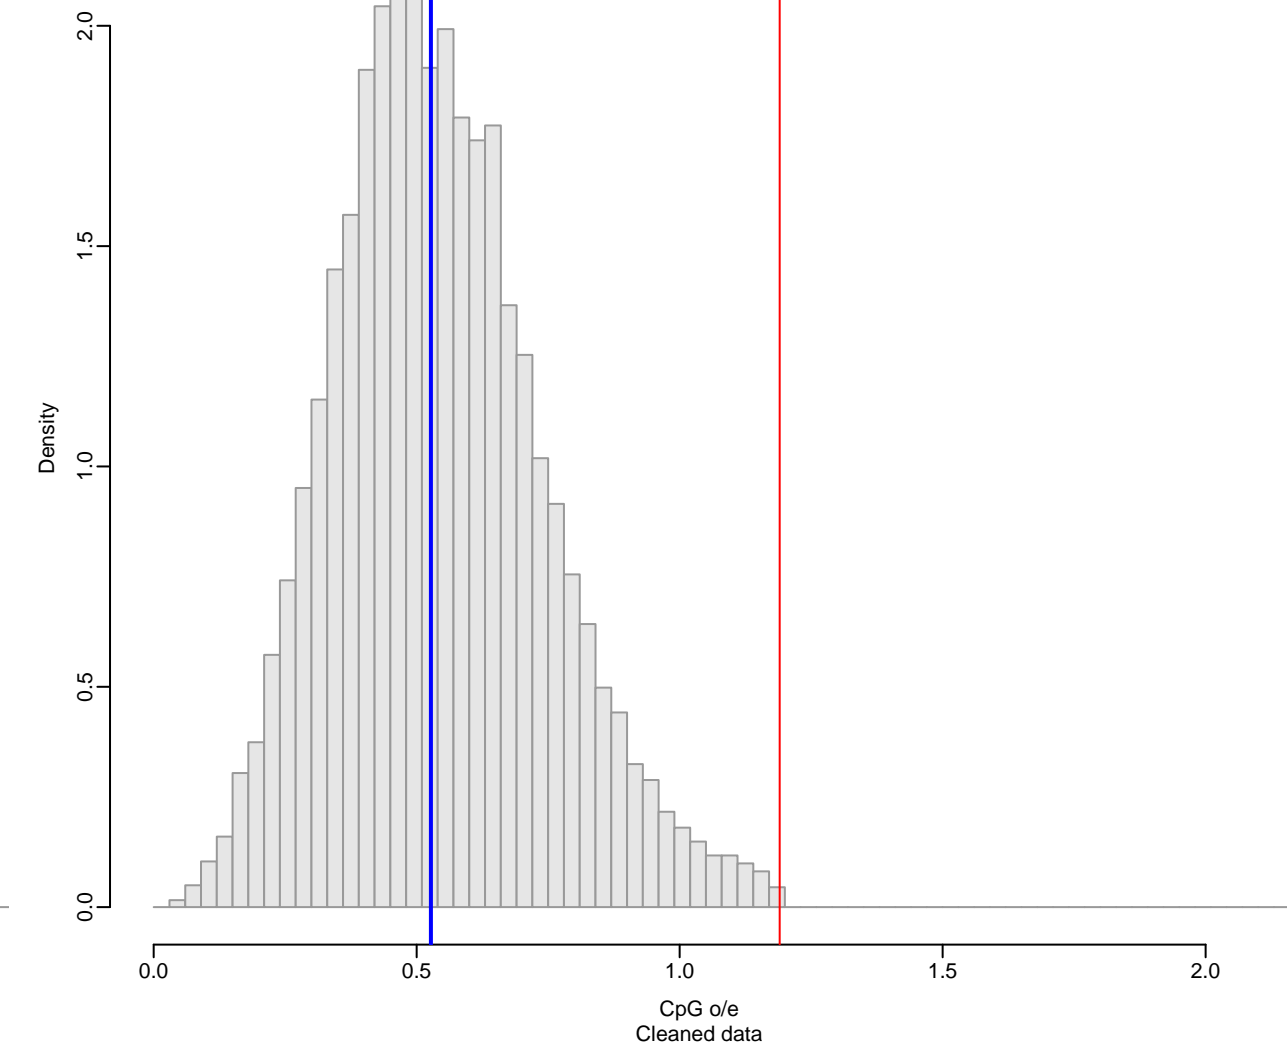

Paramecium\_tetraurelia

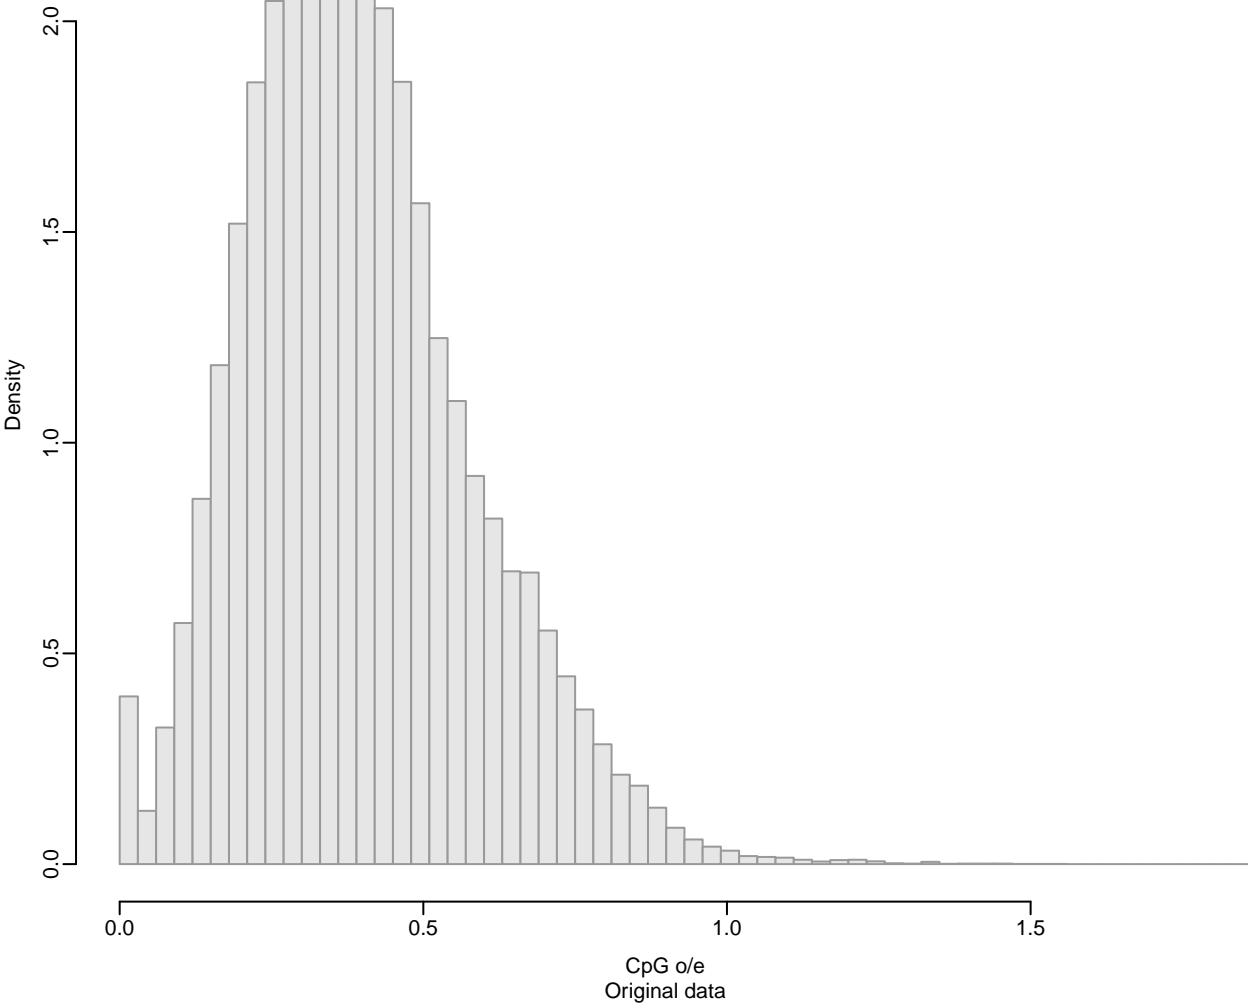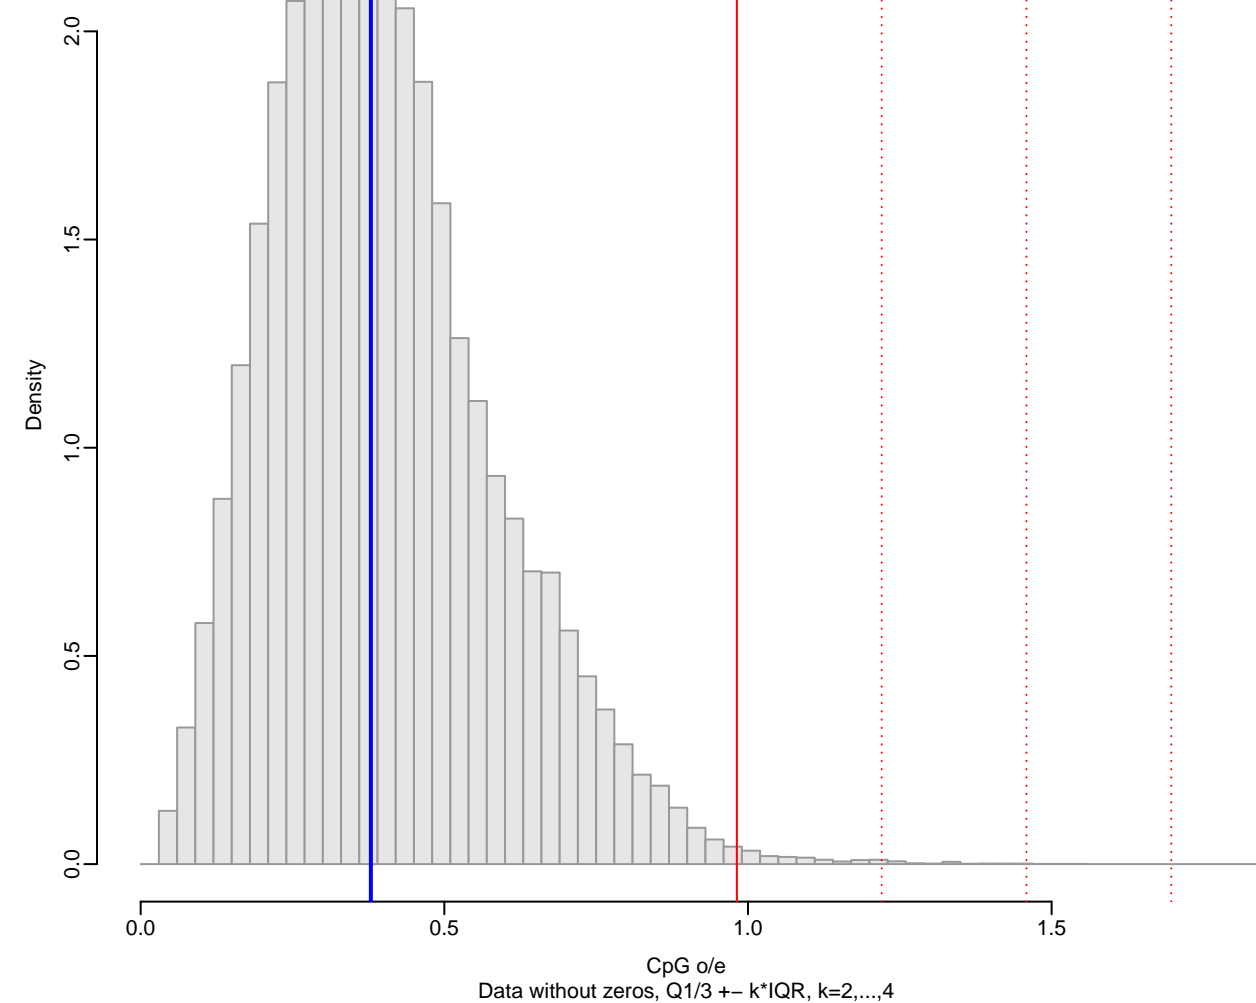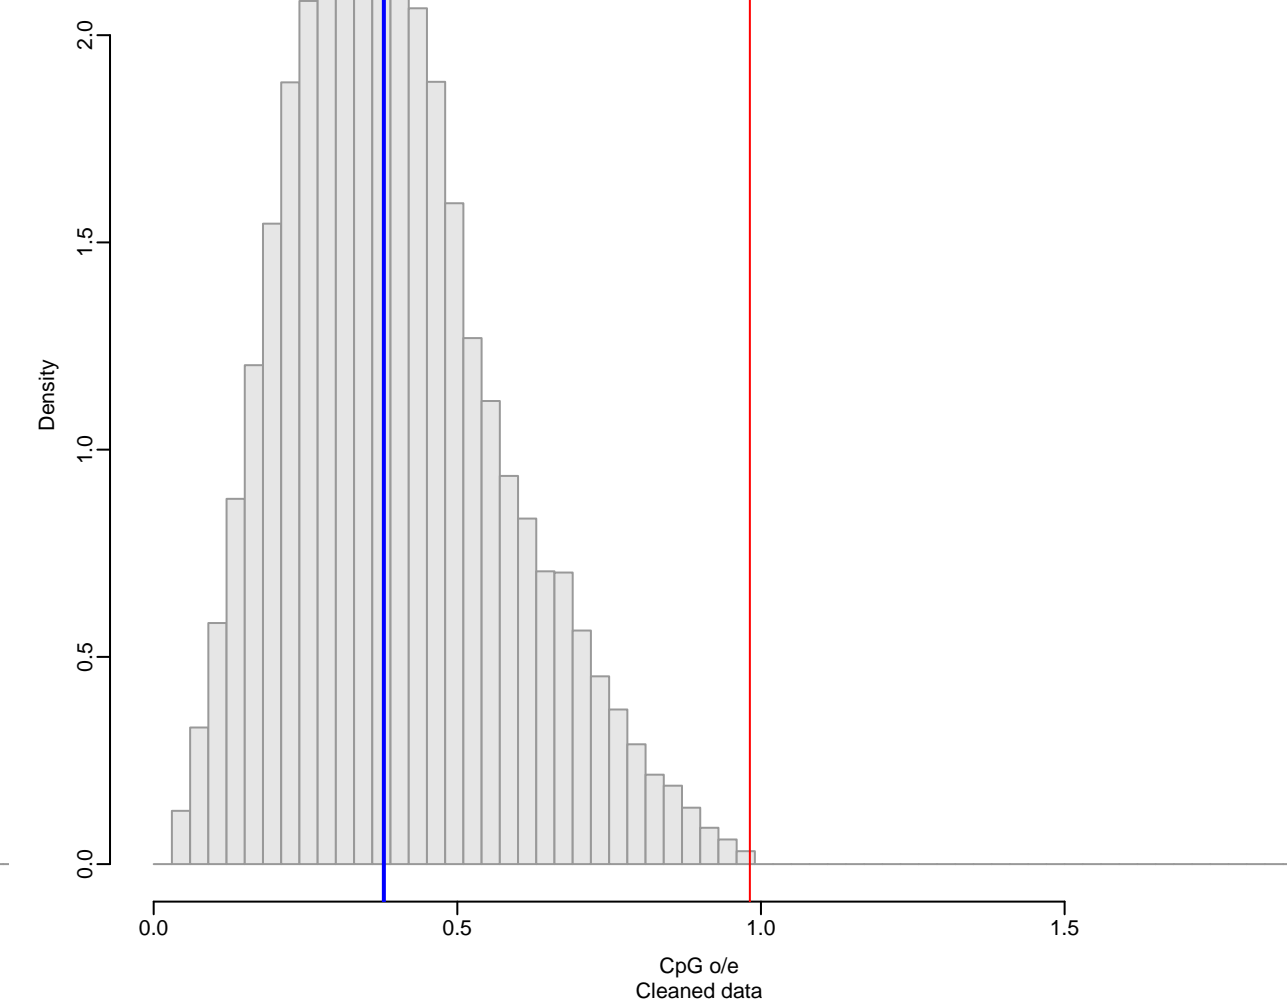

Parasteatoda\_tepidariorum

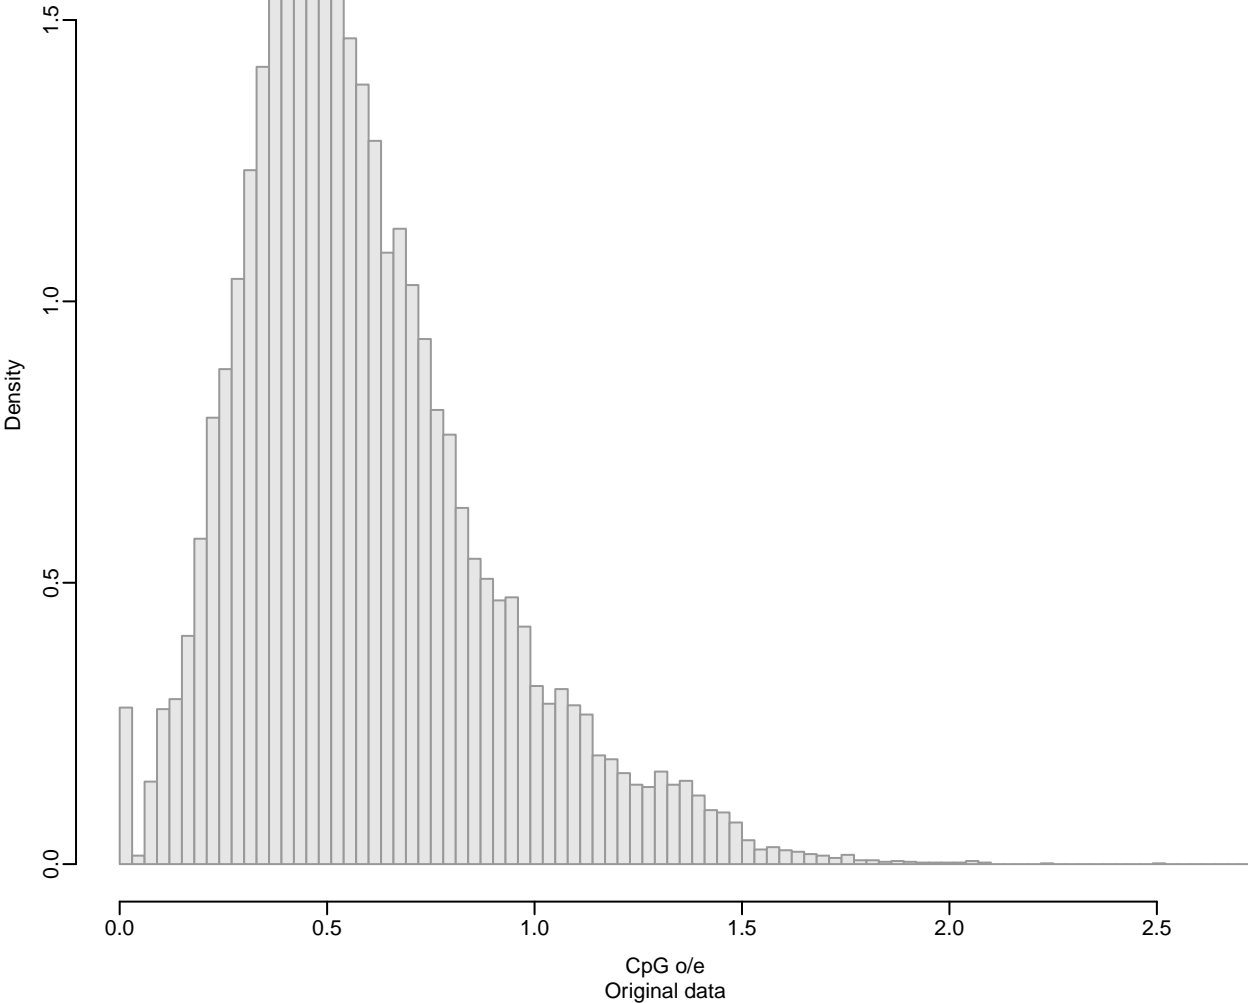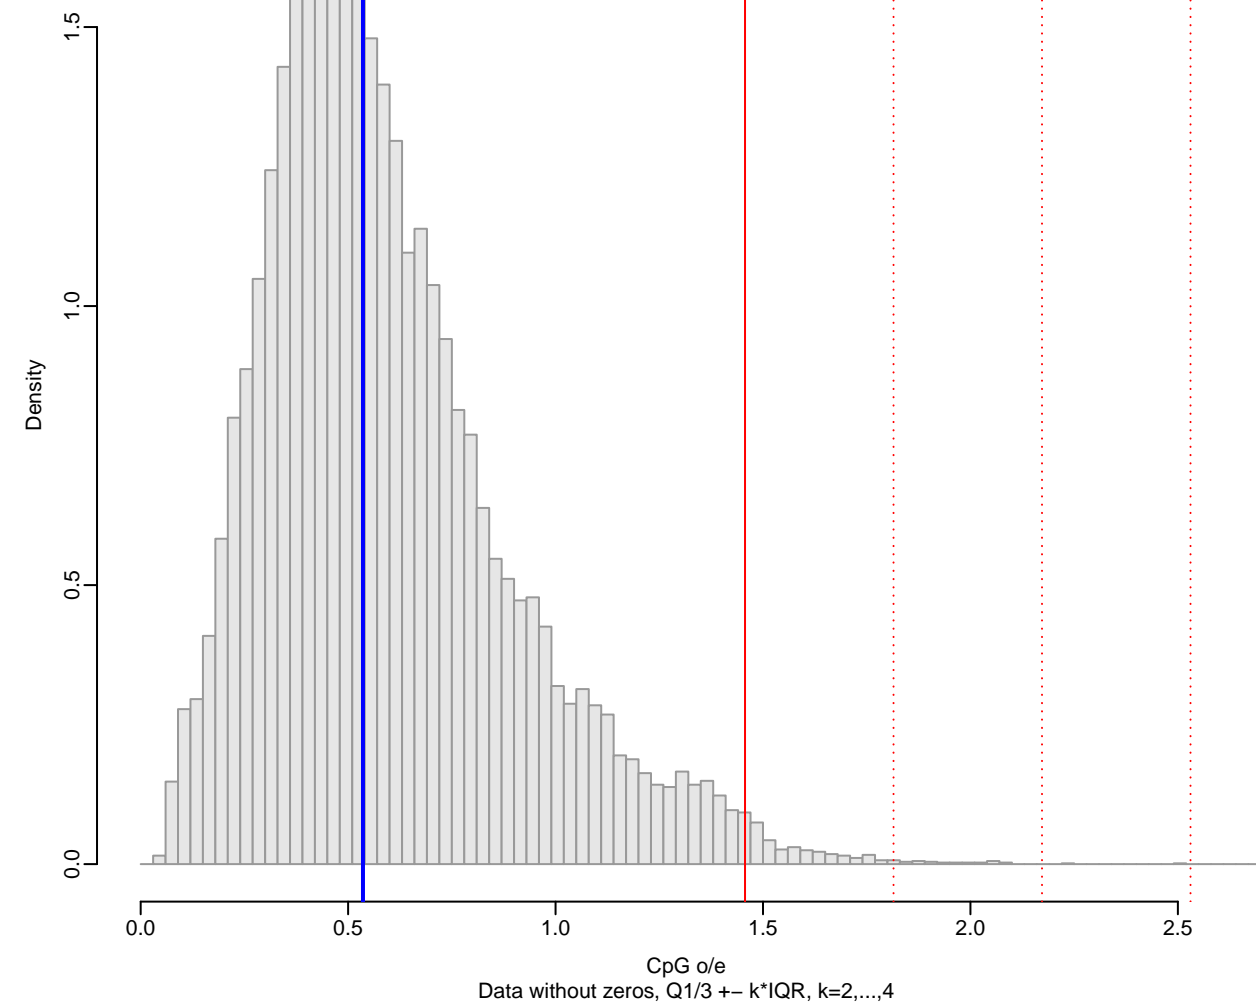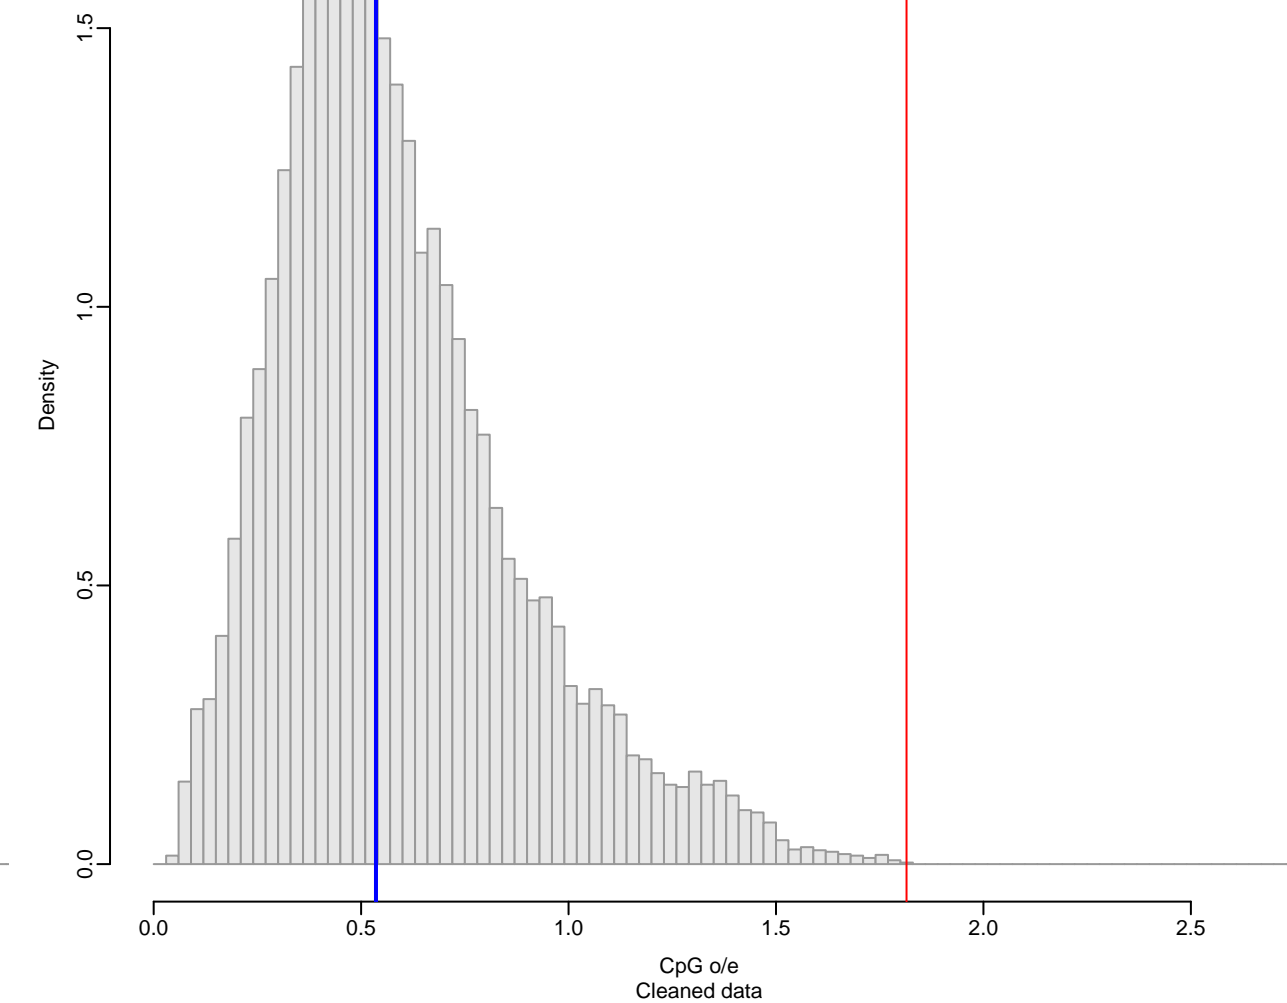

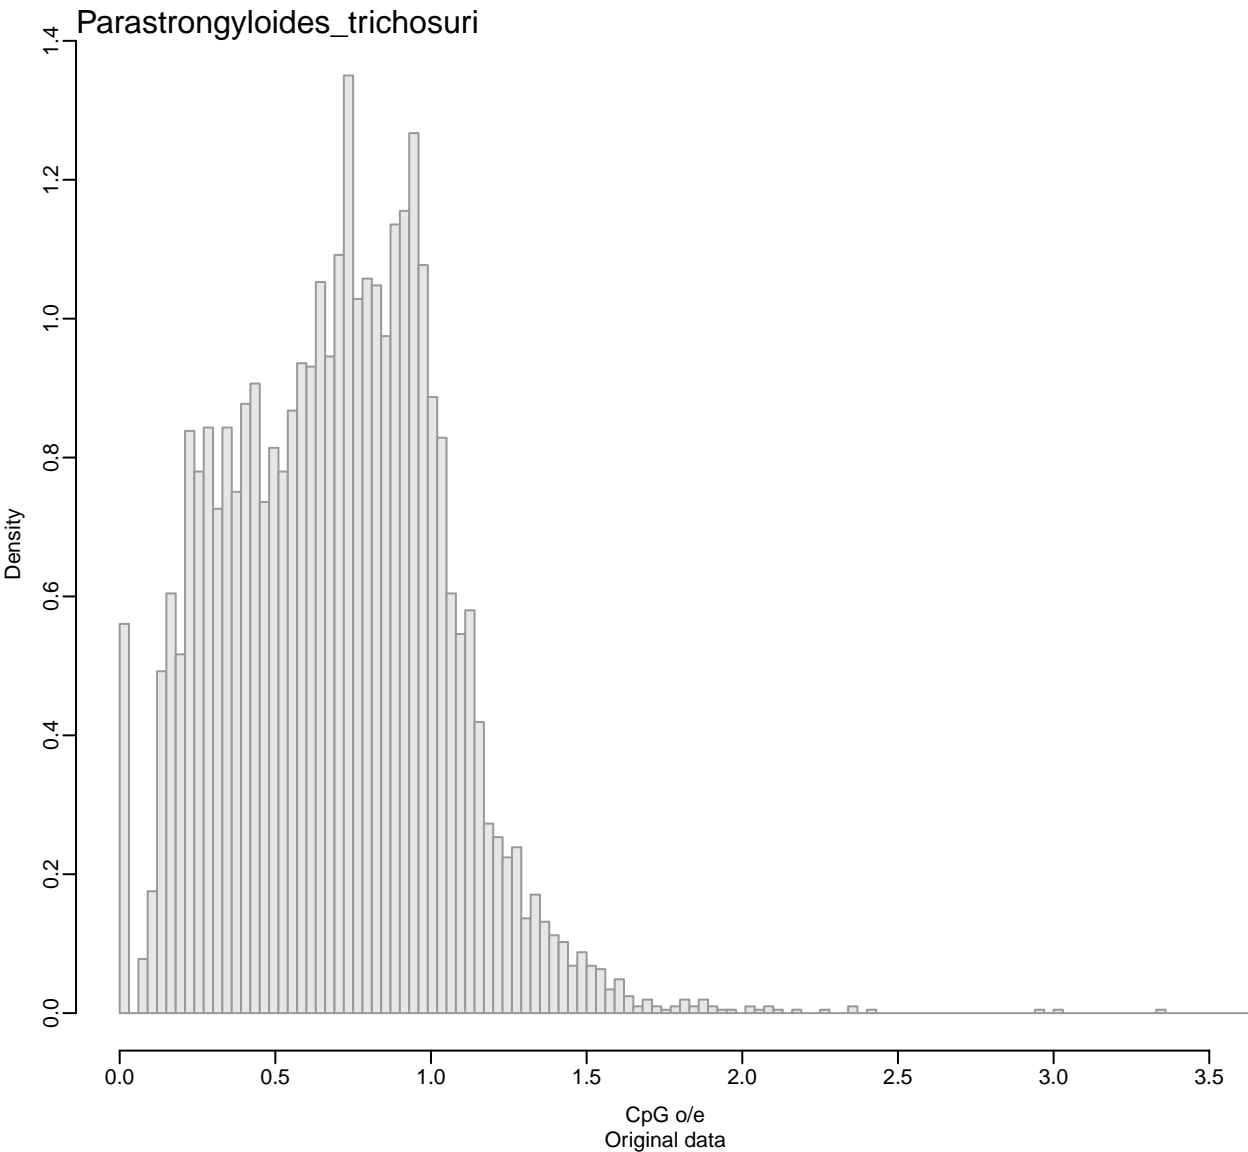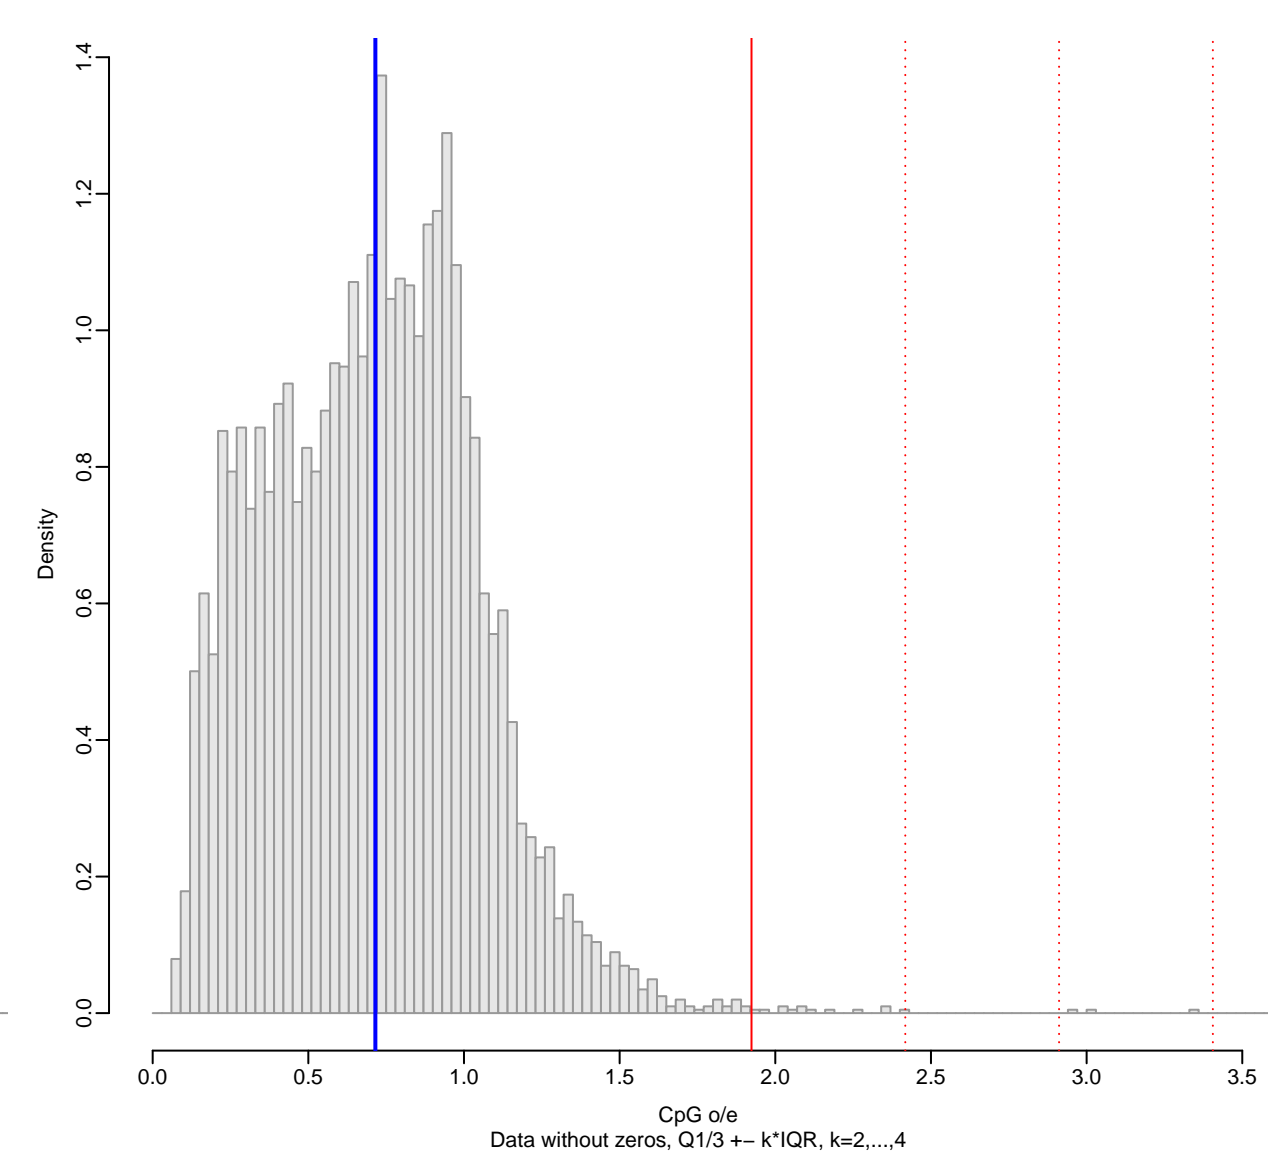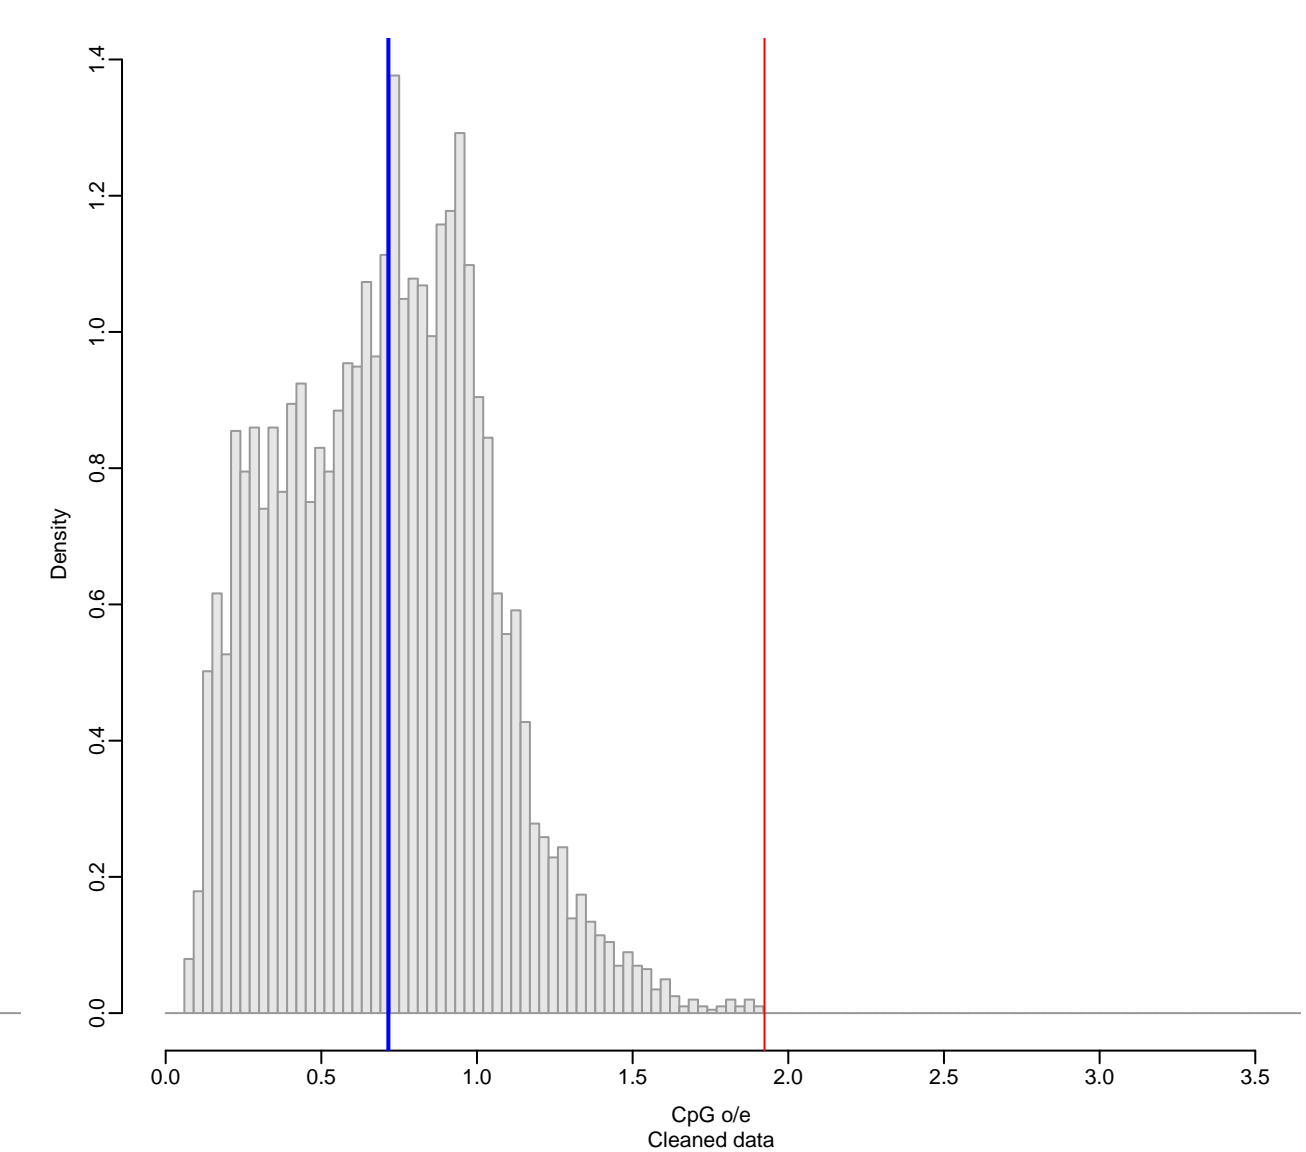

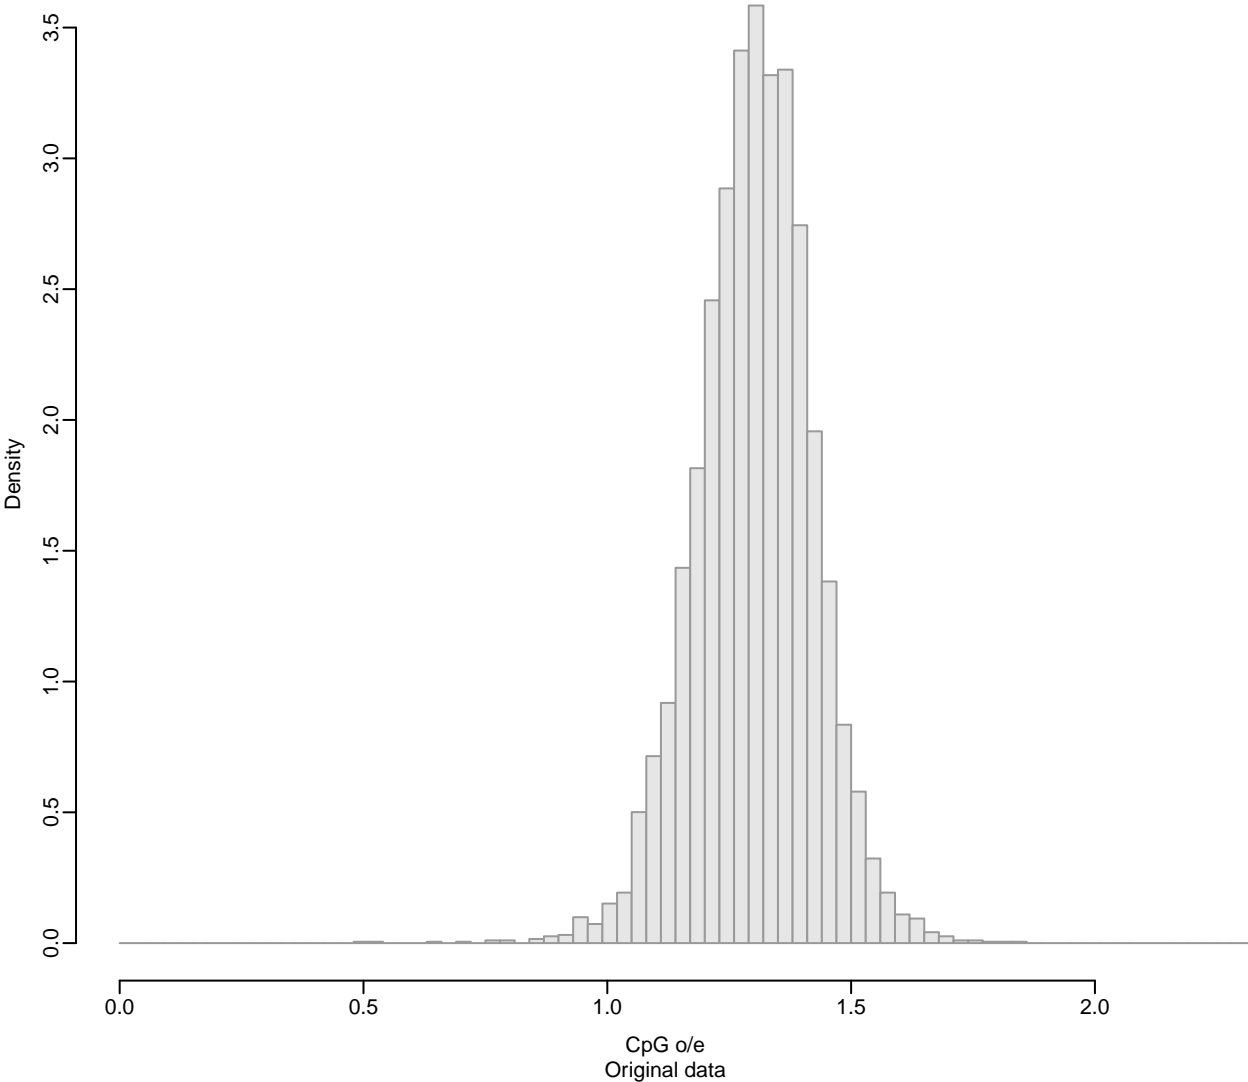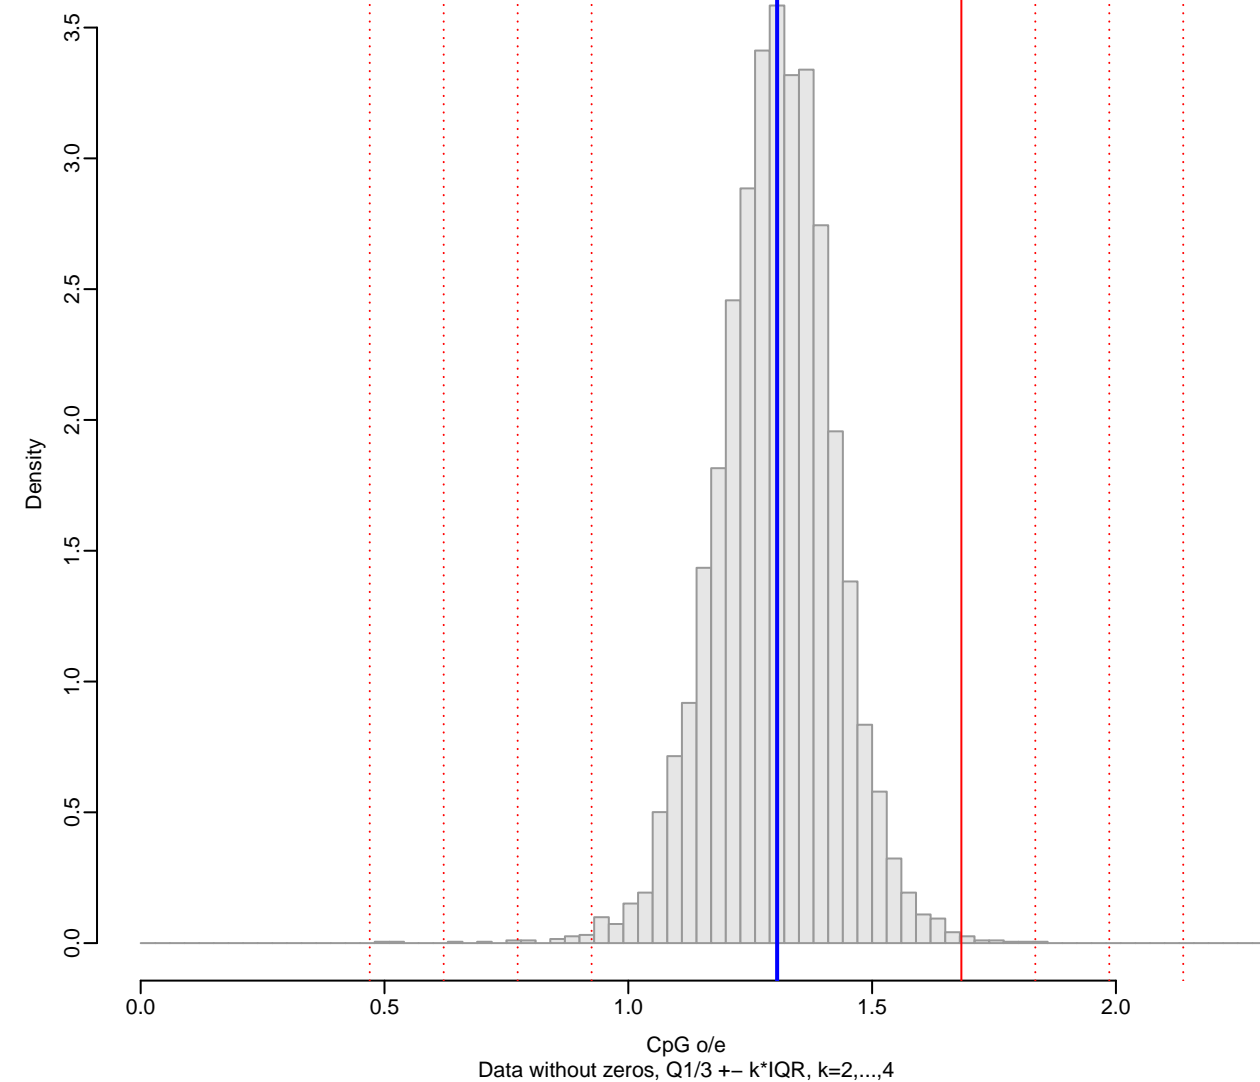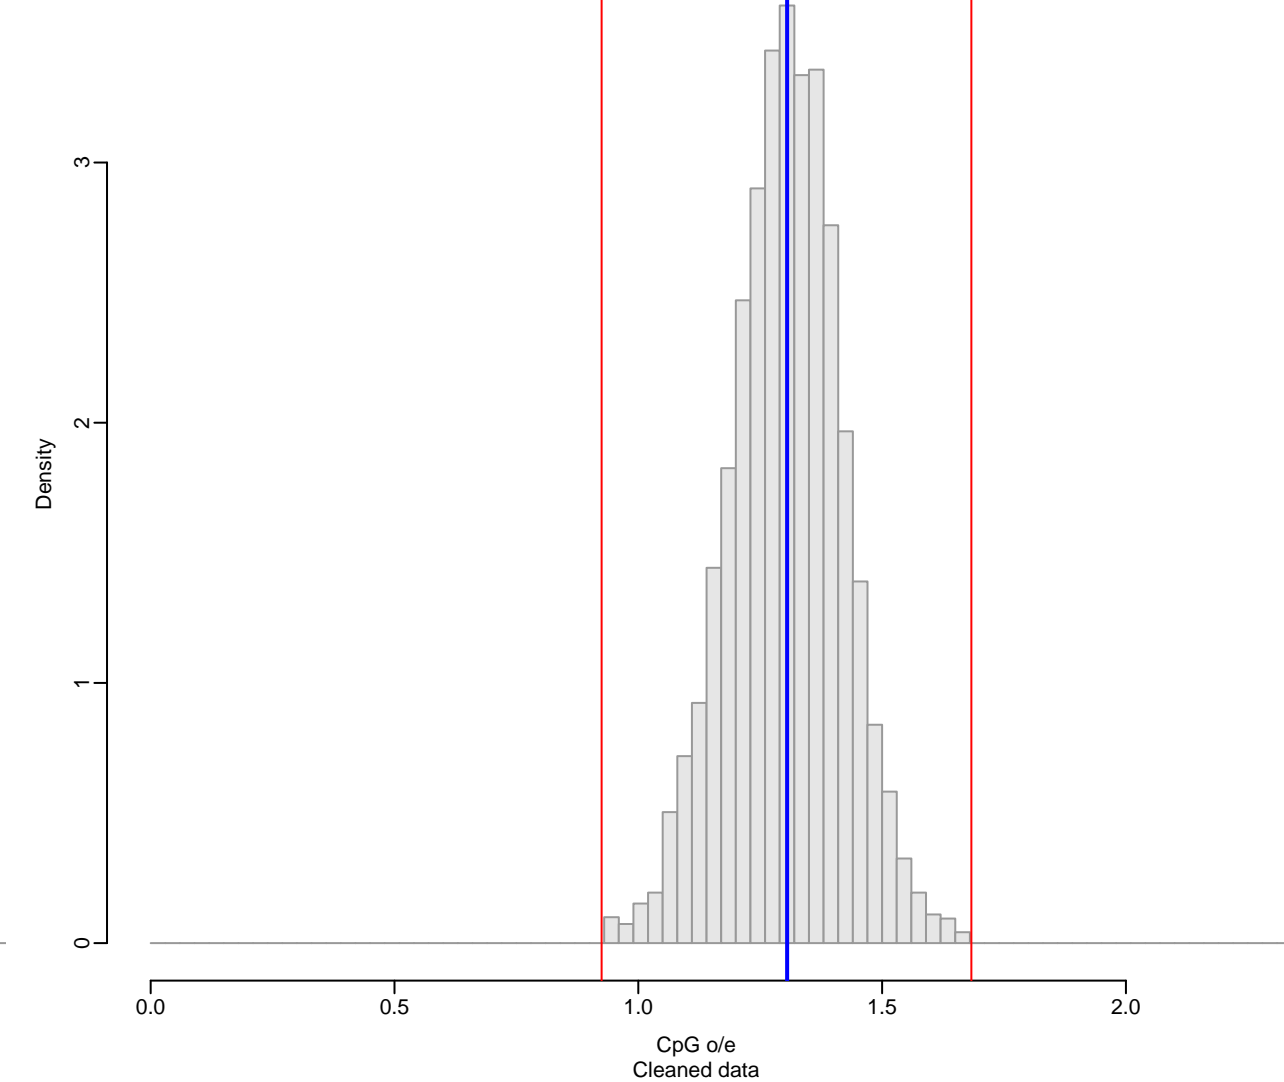

Pemphigus\_spyrothecae

Density

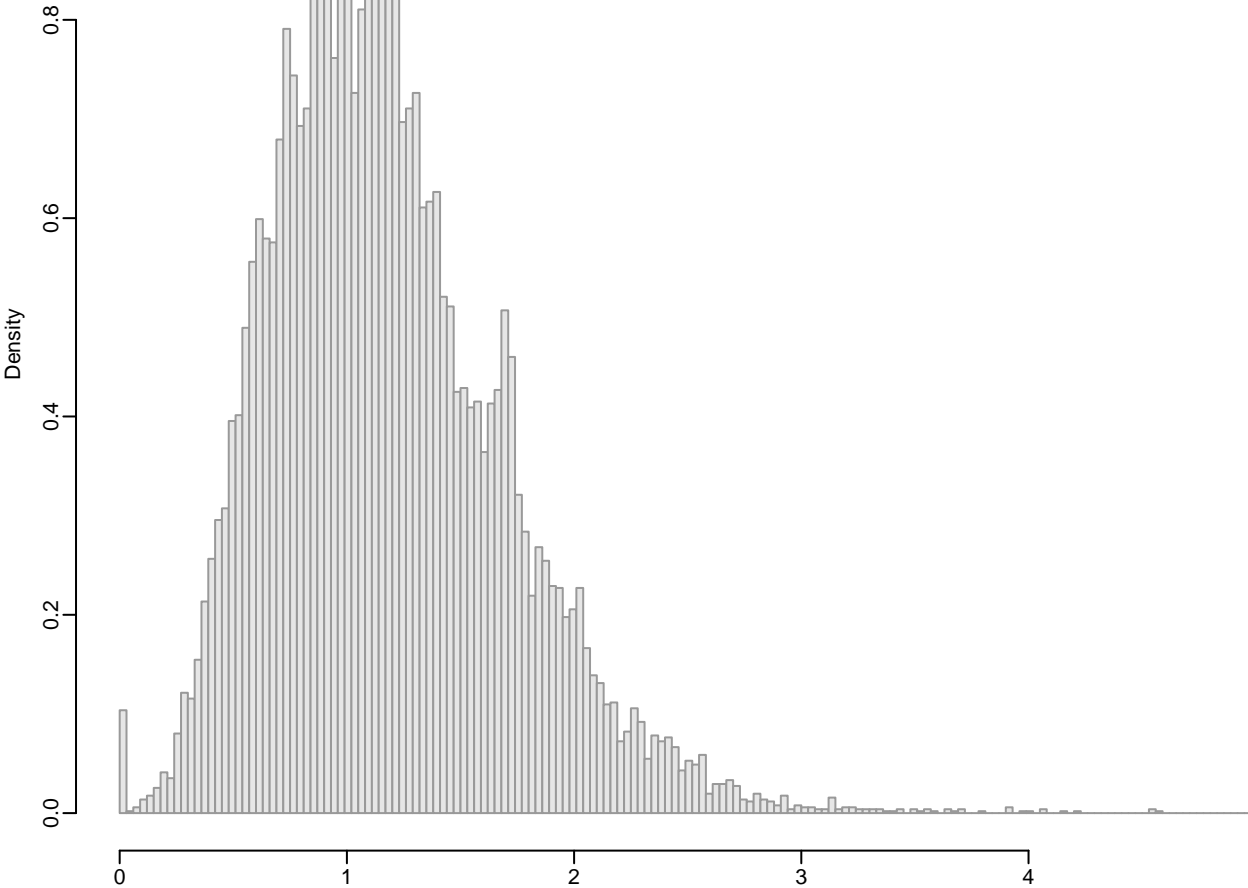

Density

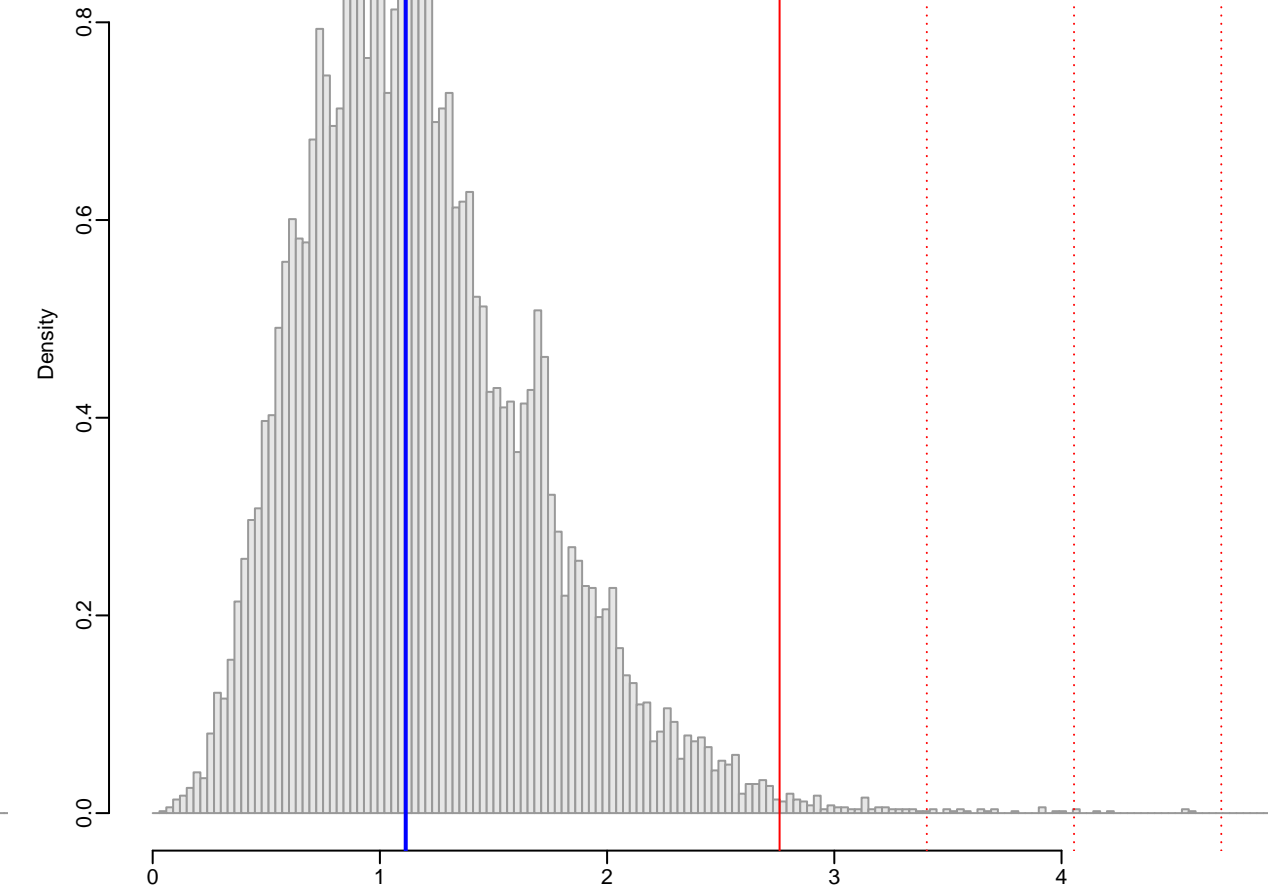

Density

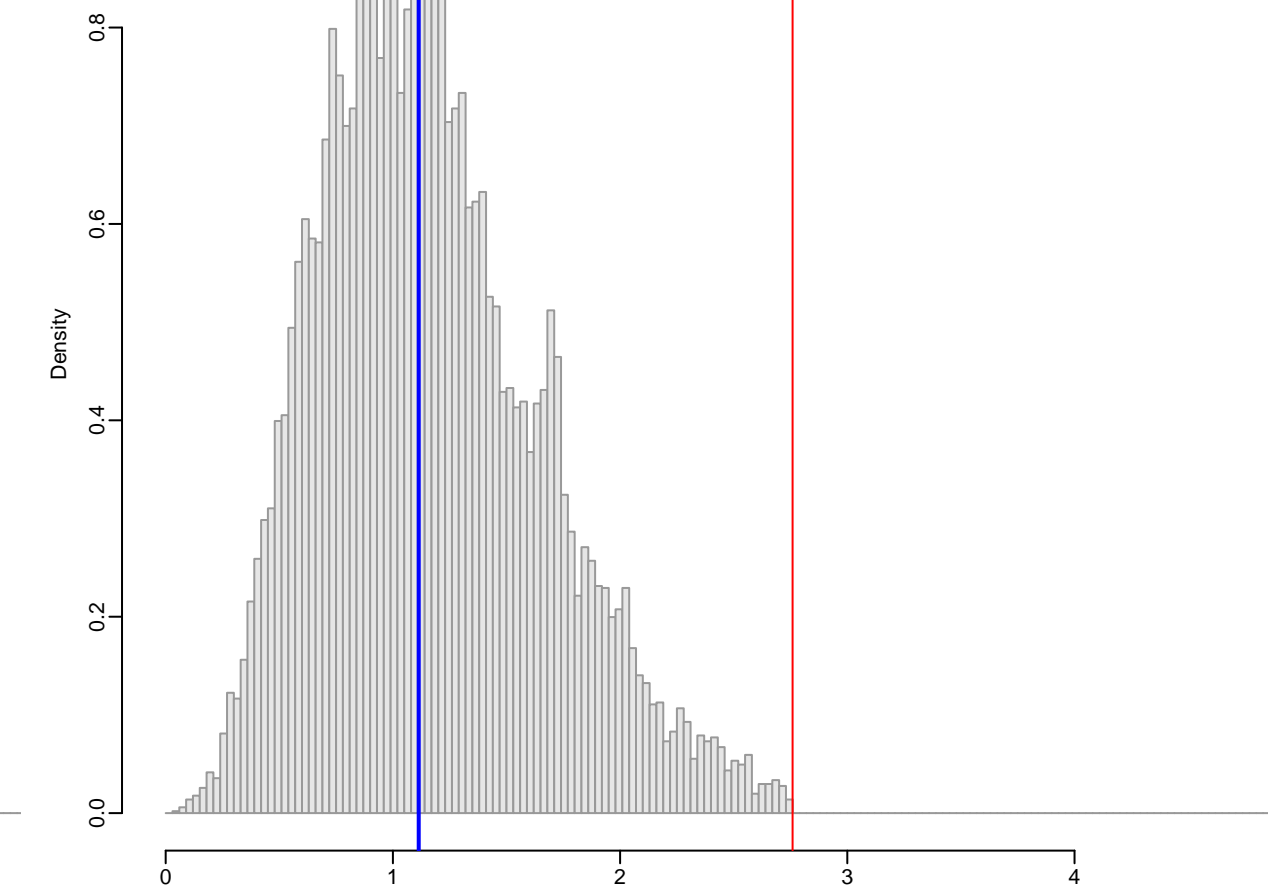

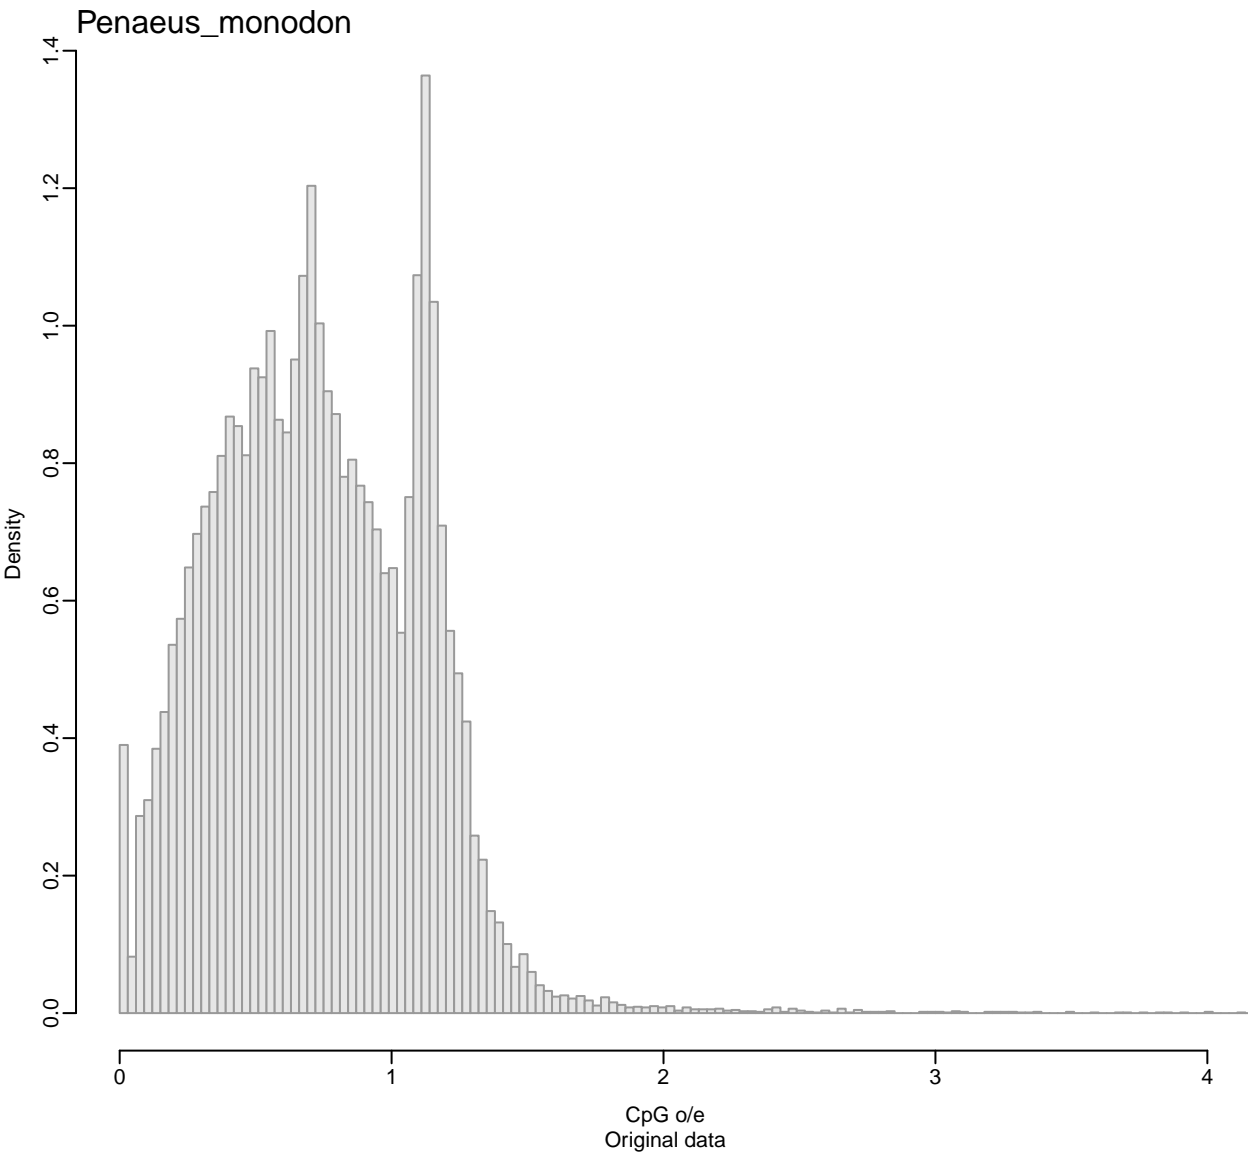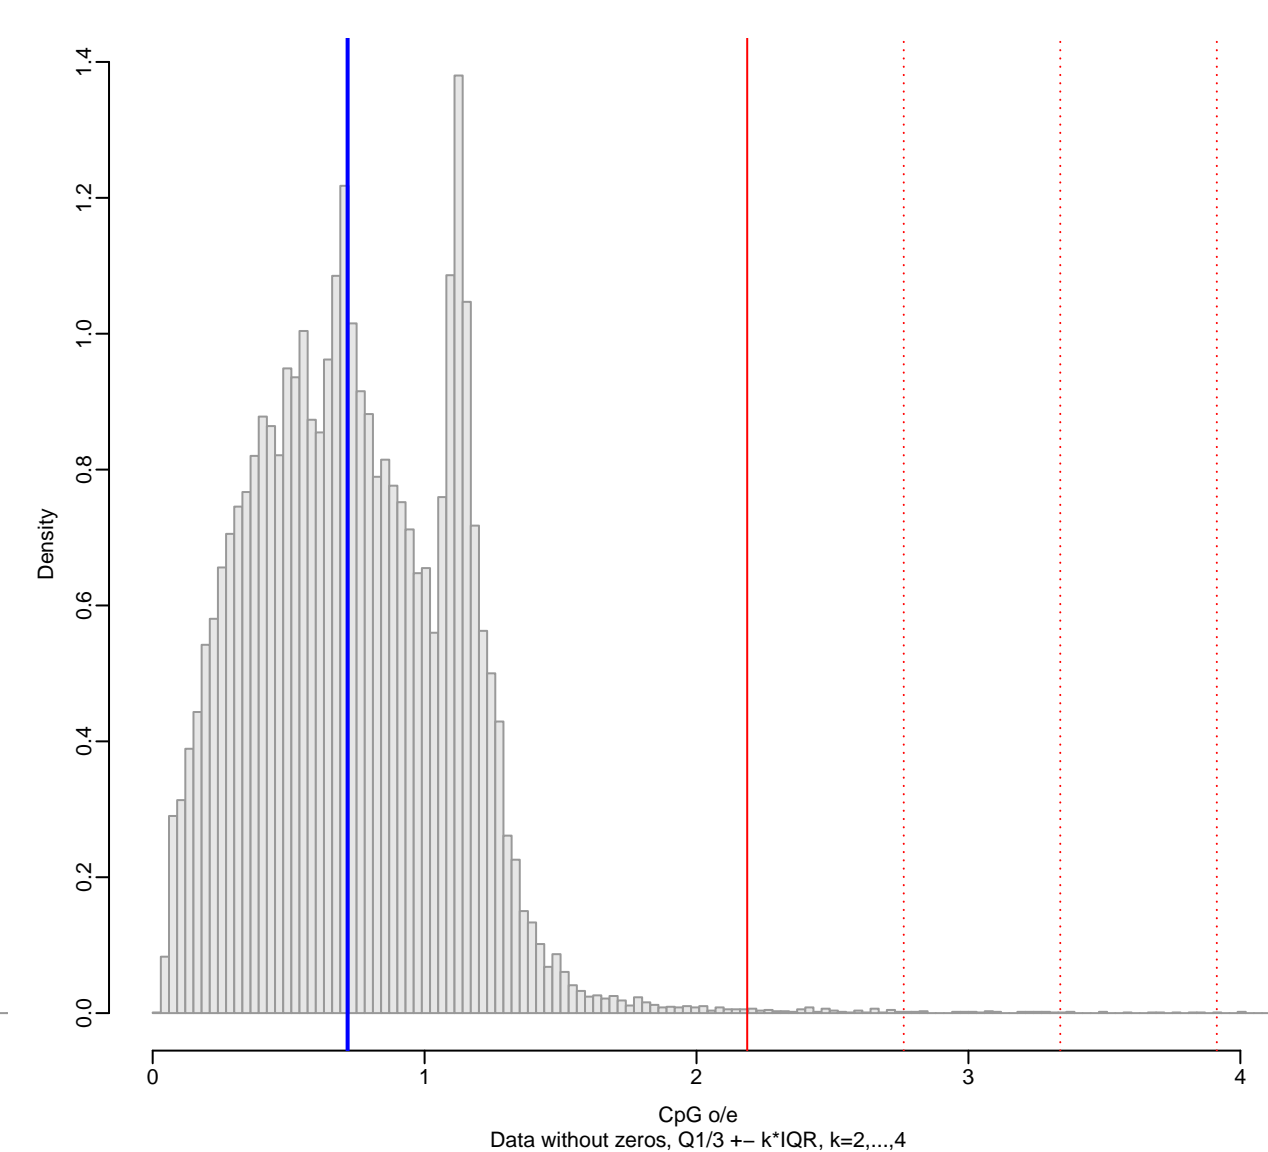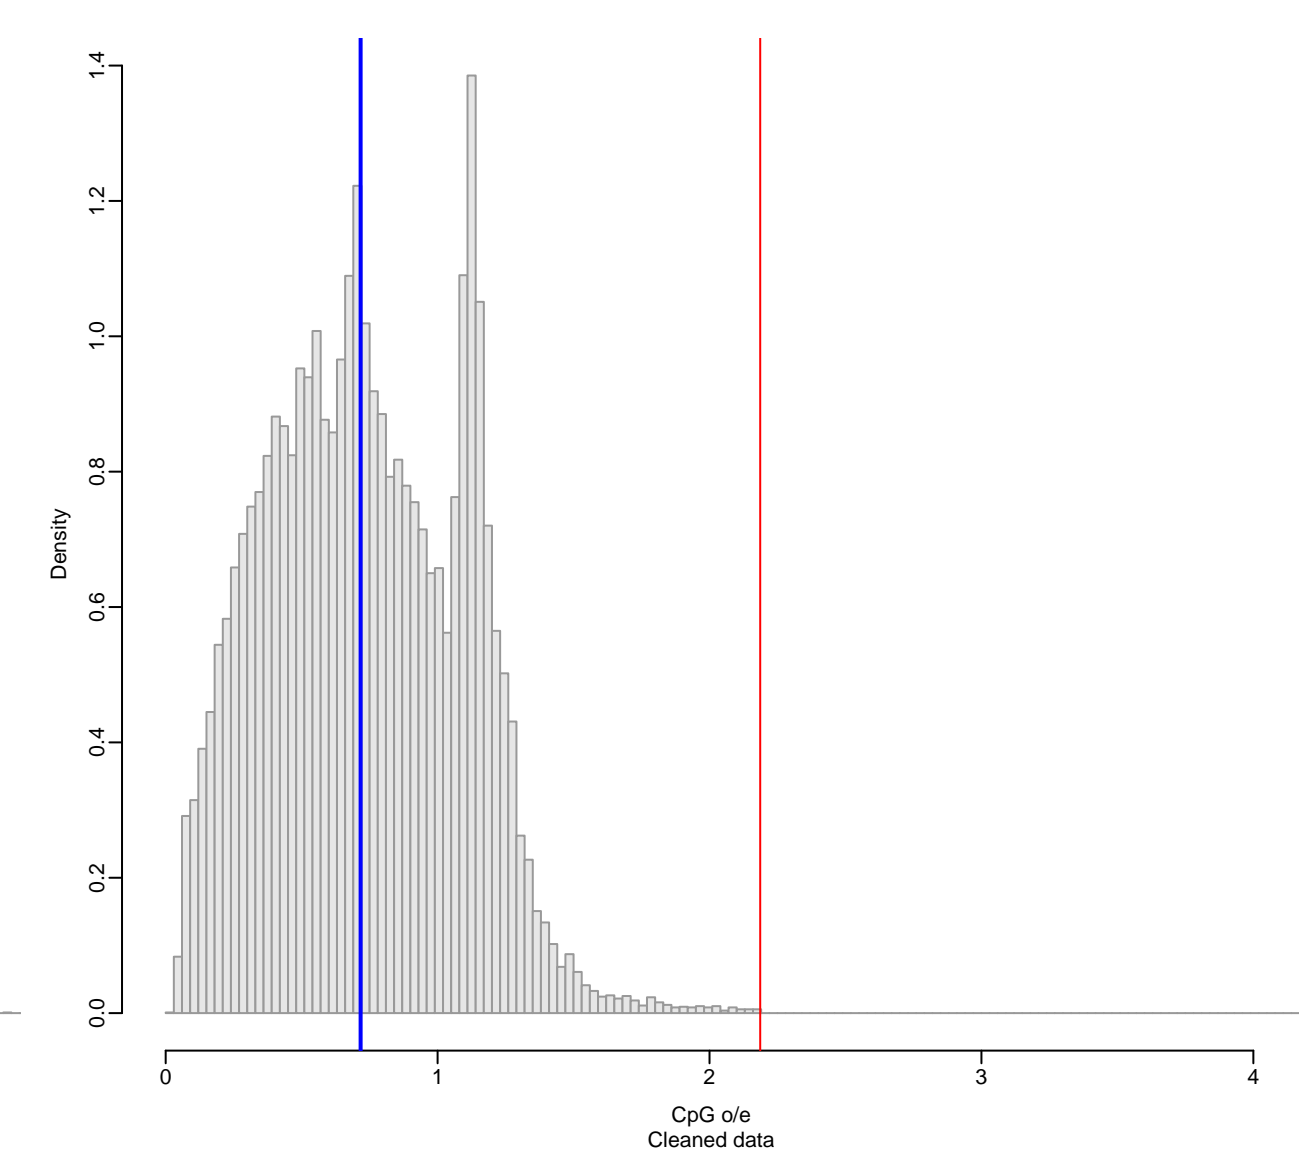



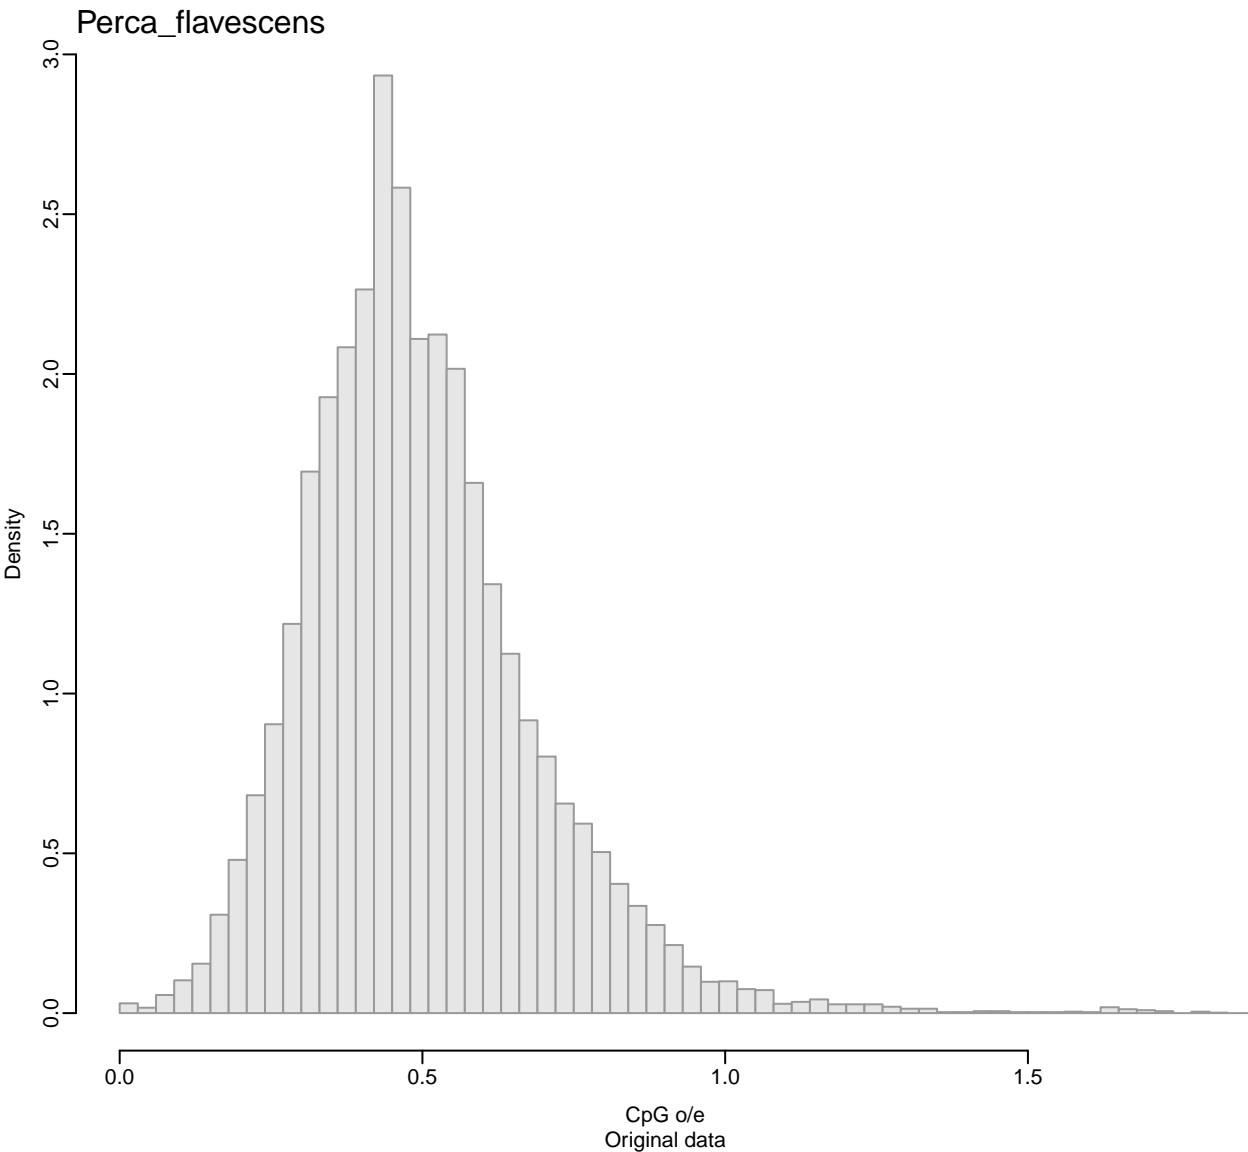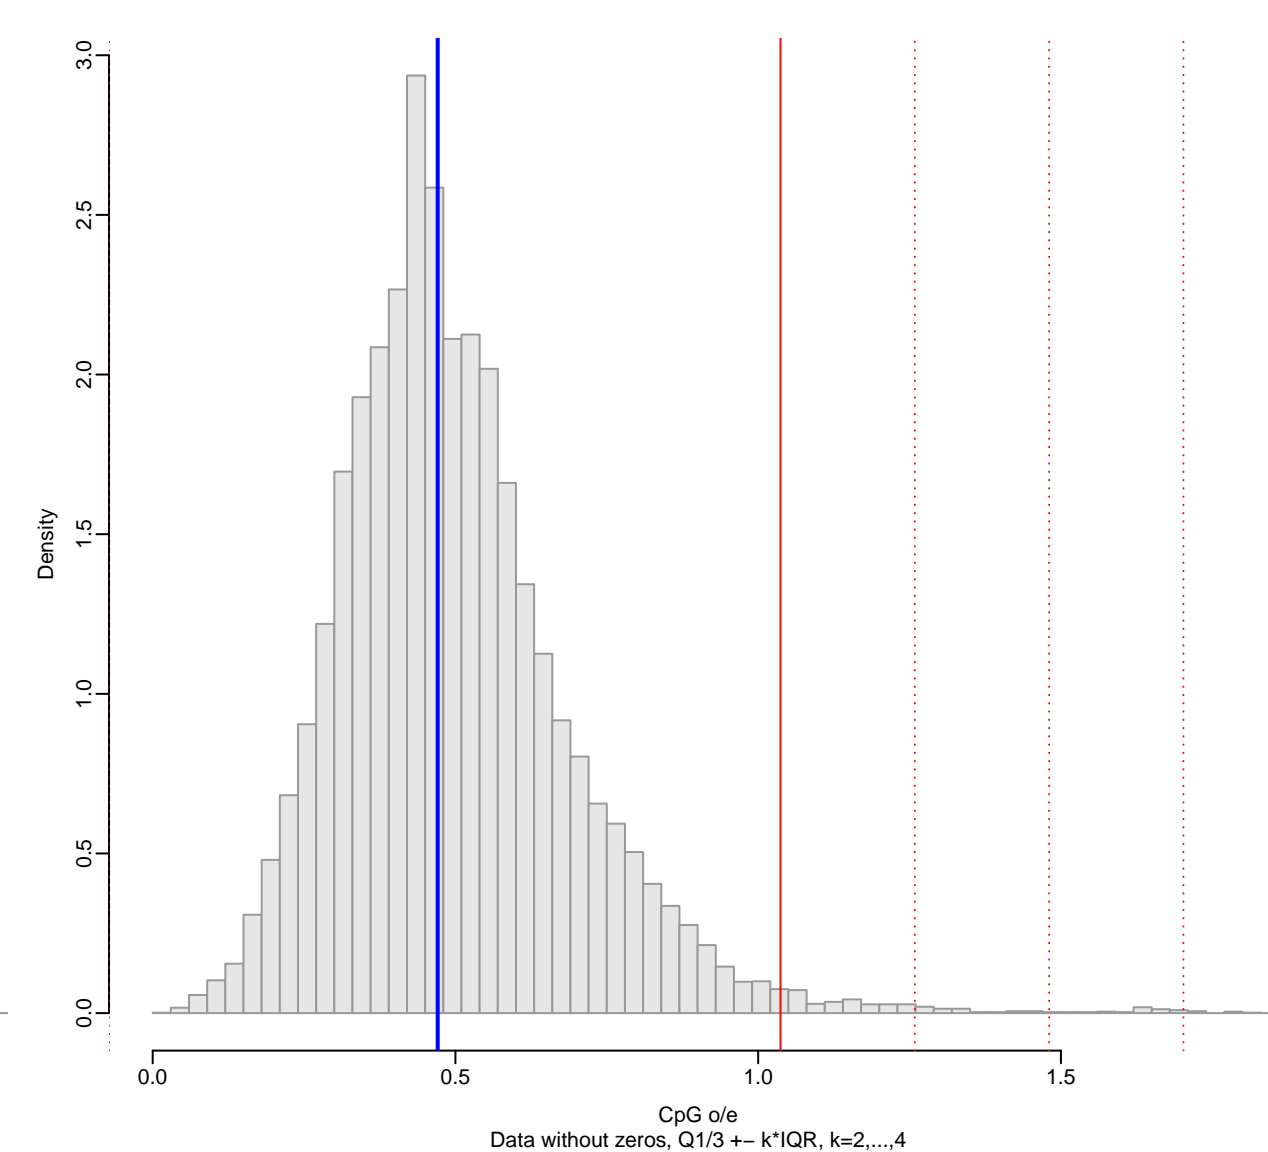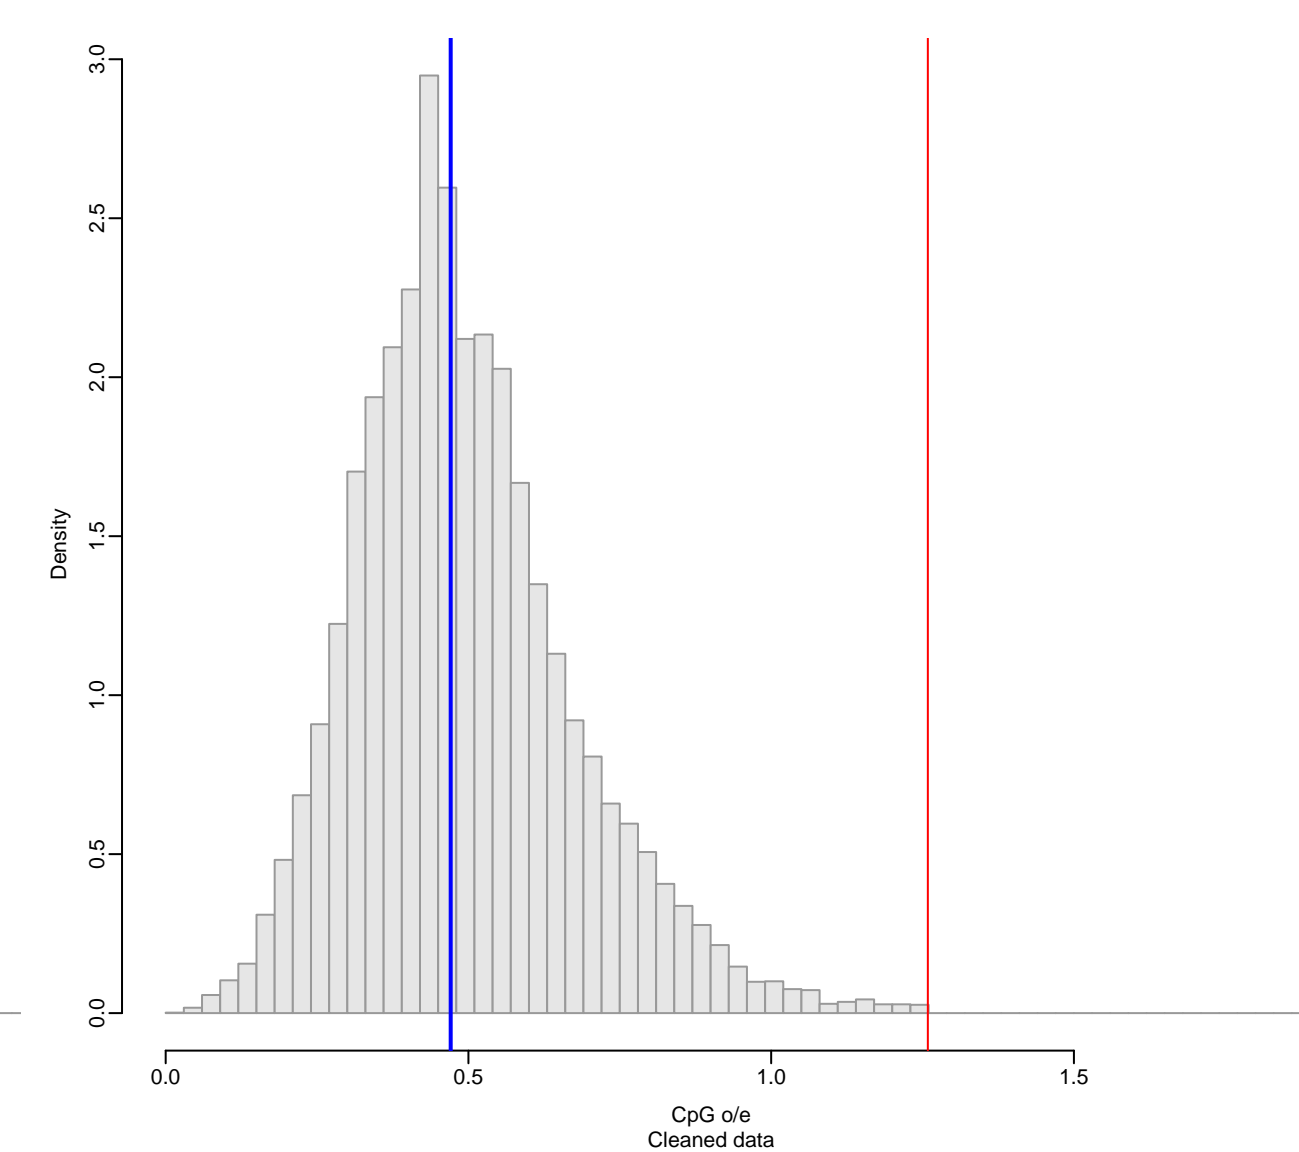

Peregrinus\_maidis

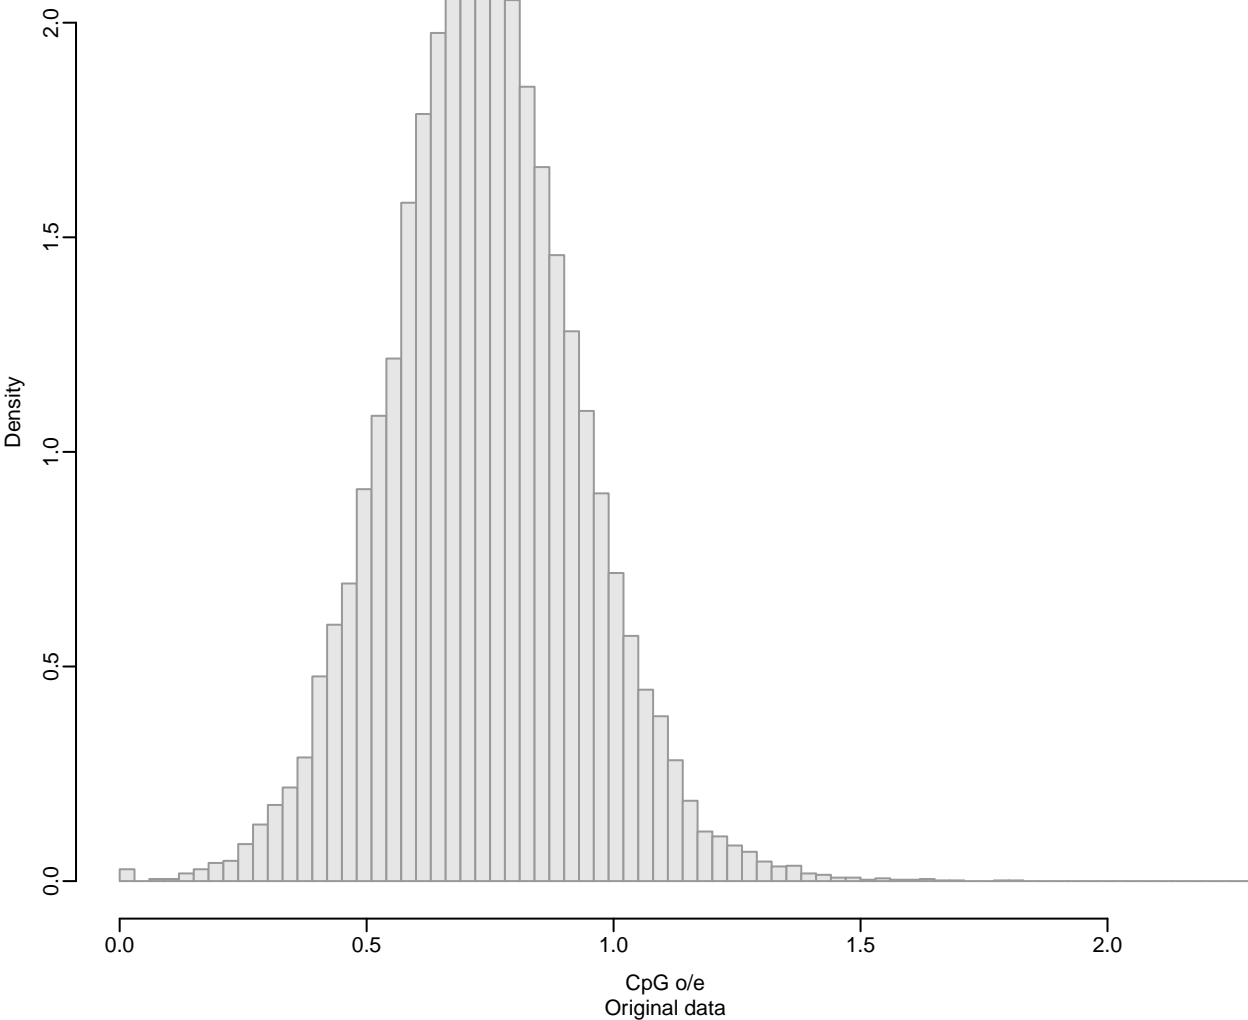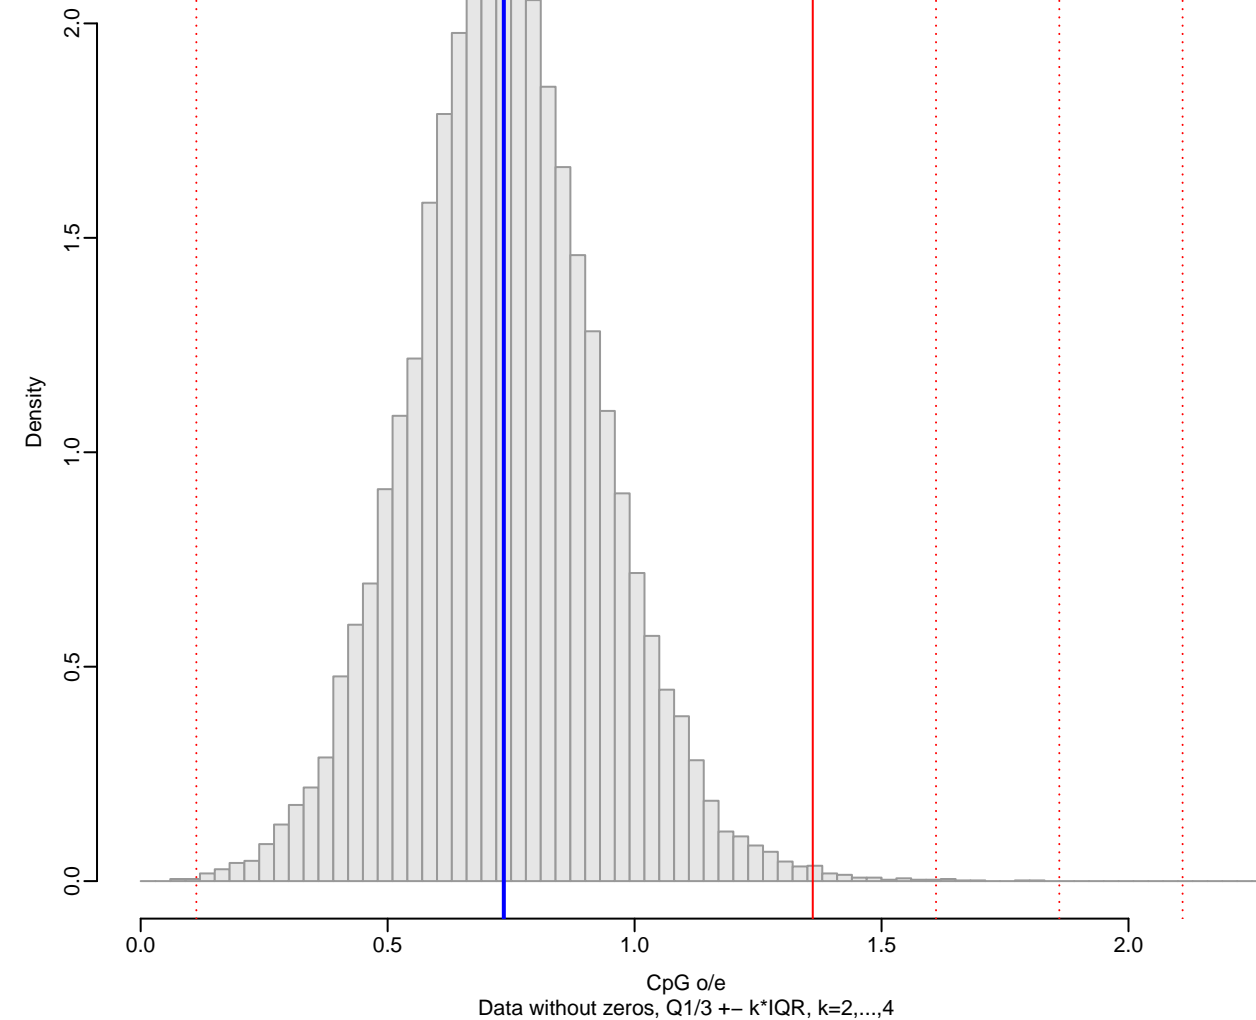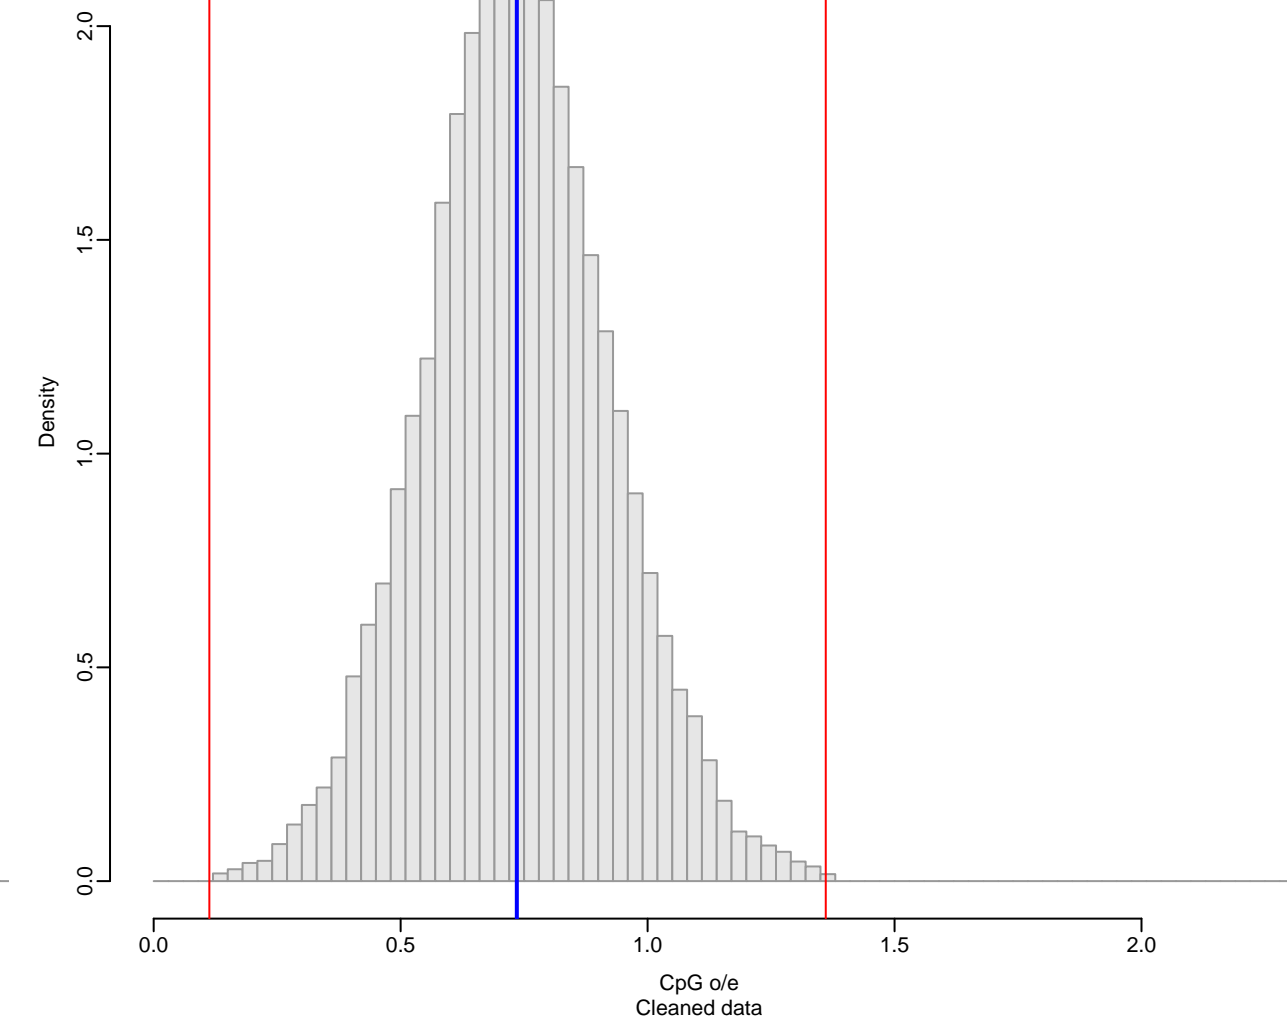

Peromyscus\_maniculatus\_bairdii

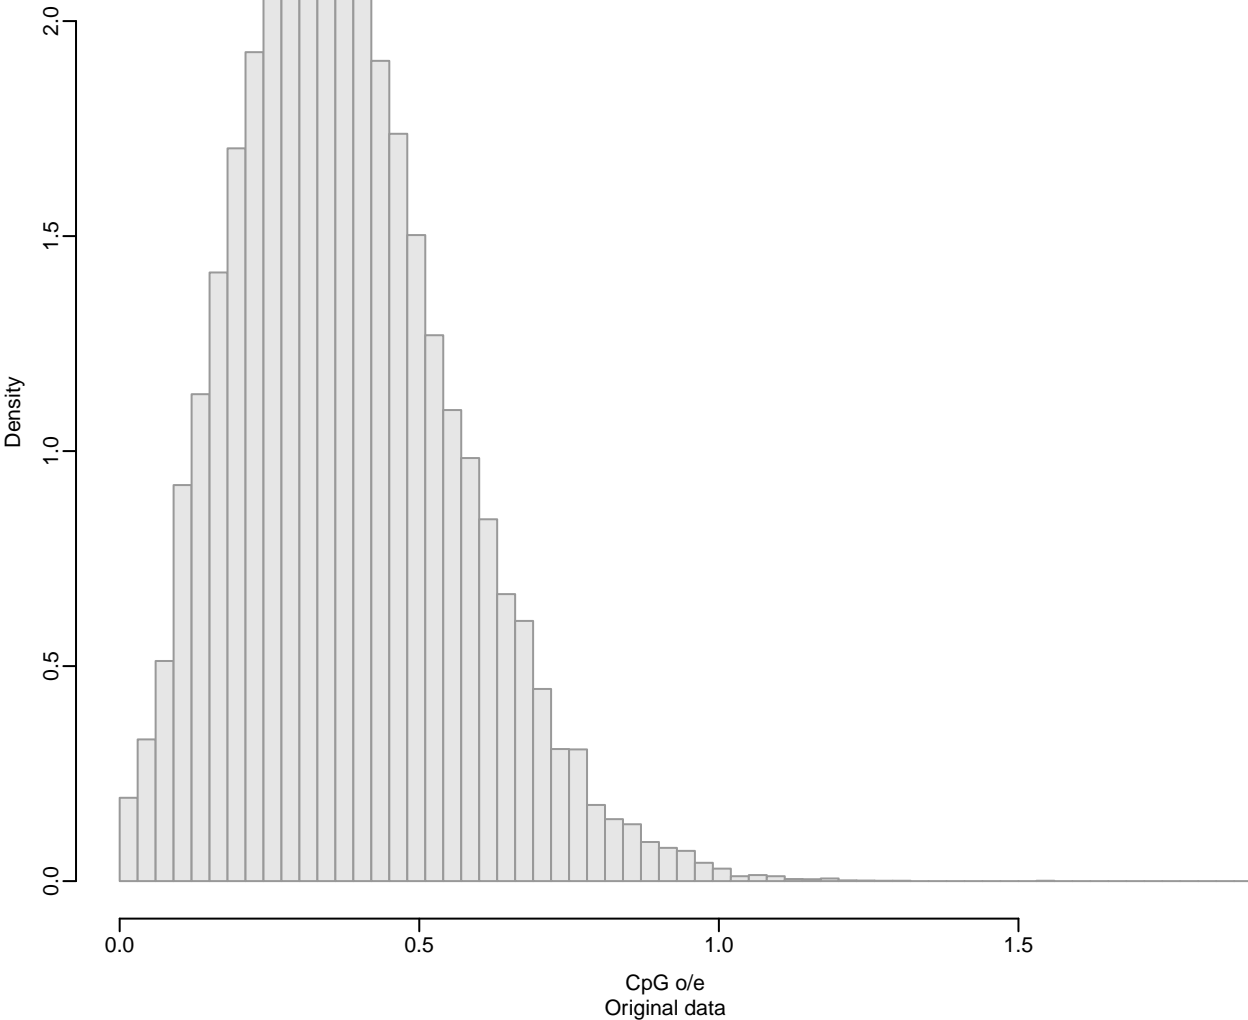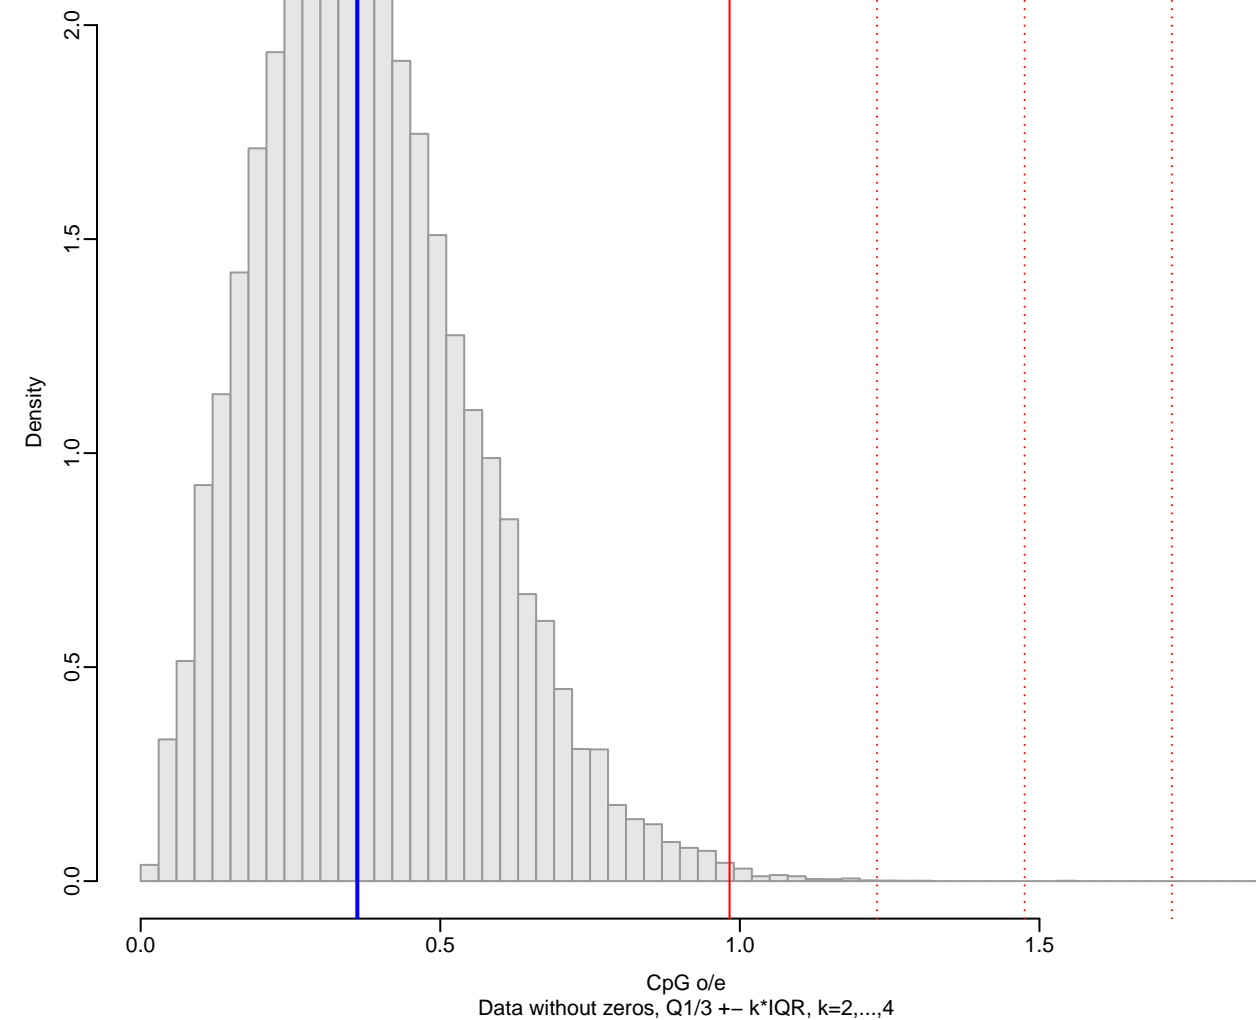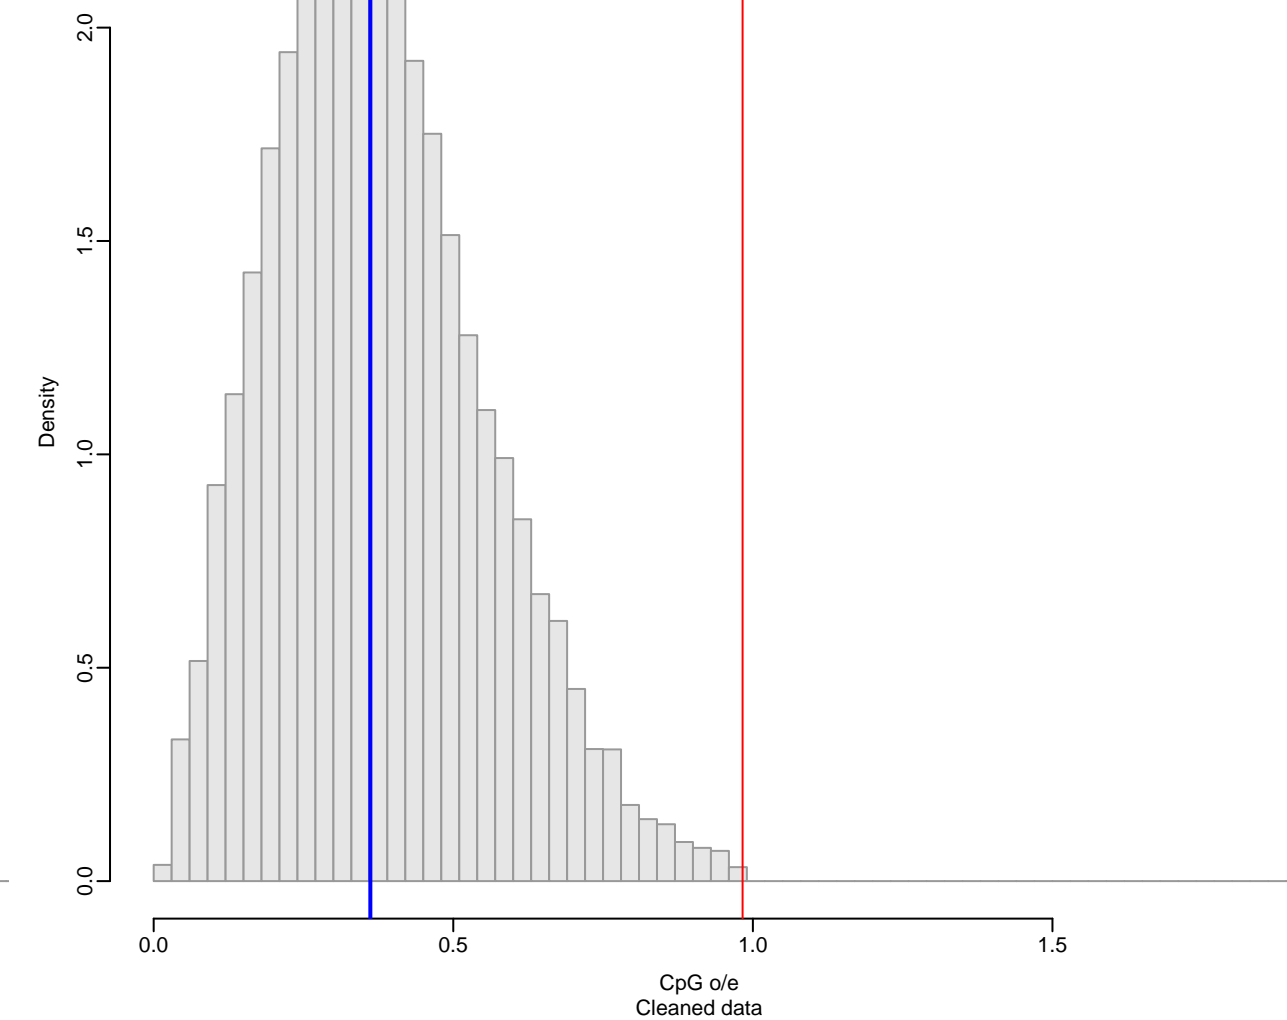

Peromyscus\_polionotus\_subgriseus

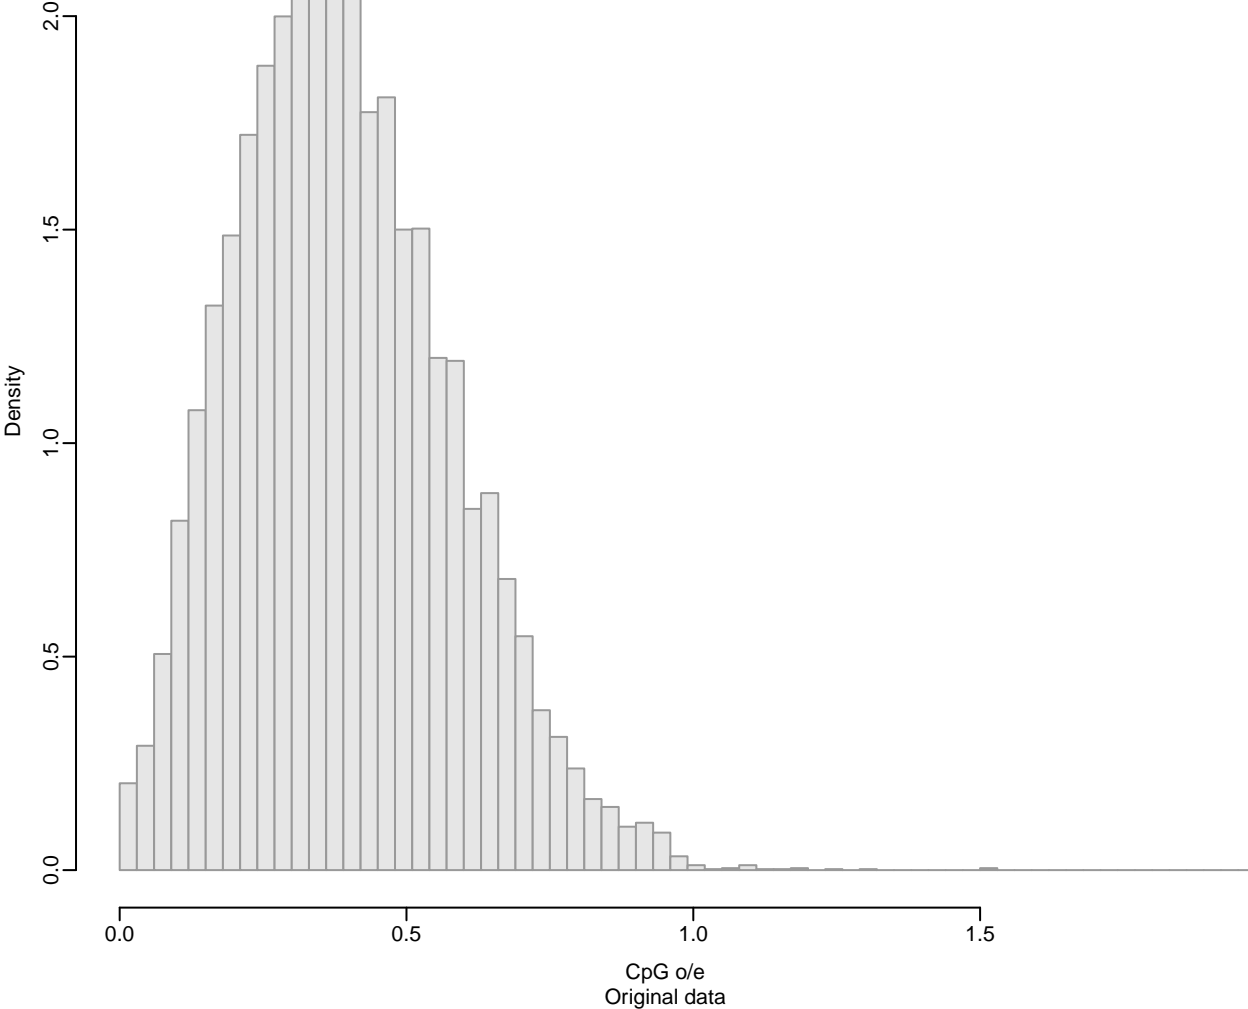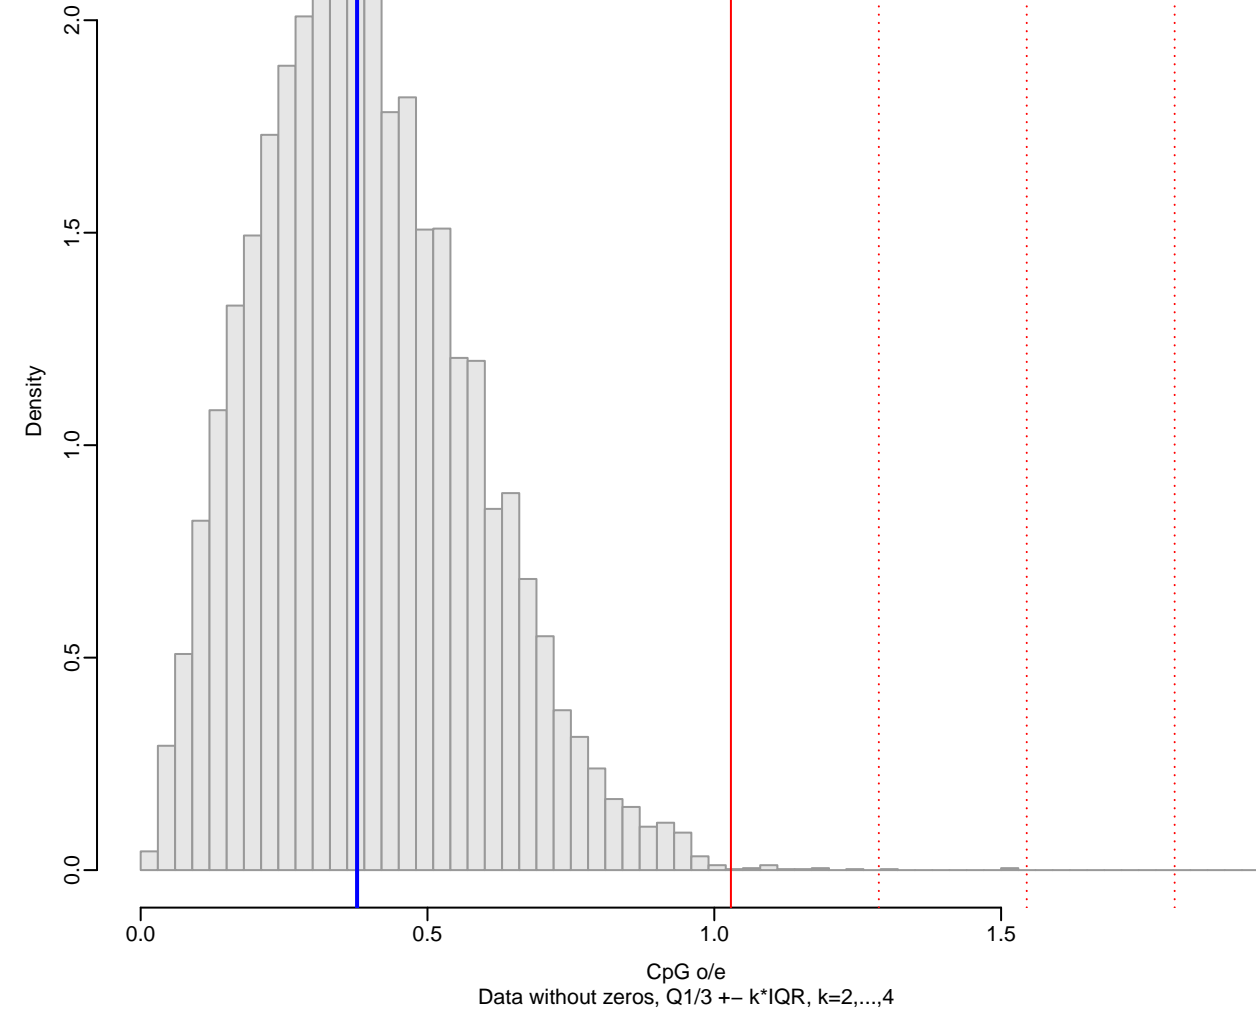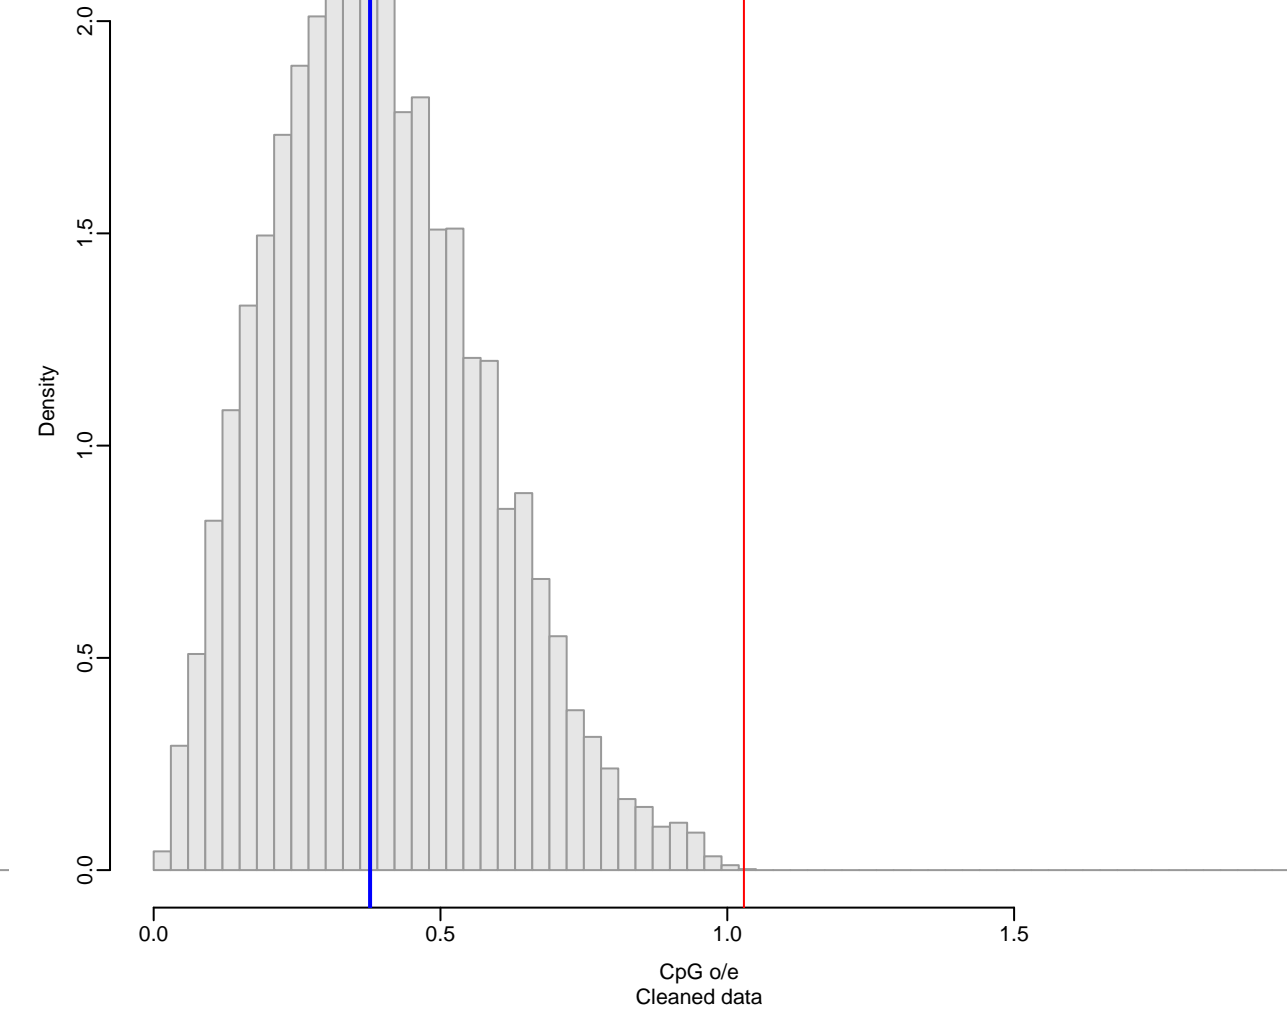

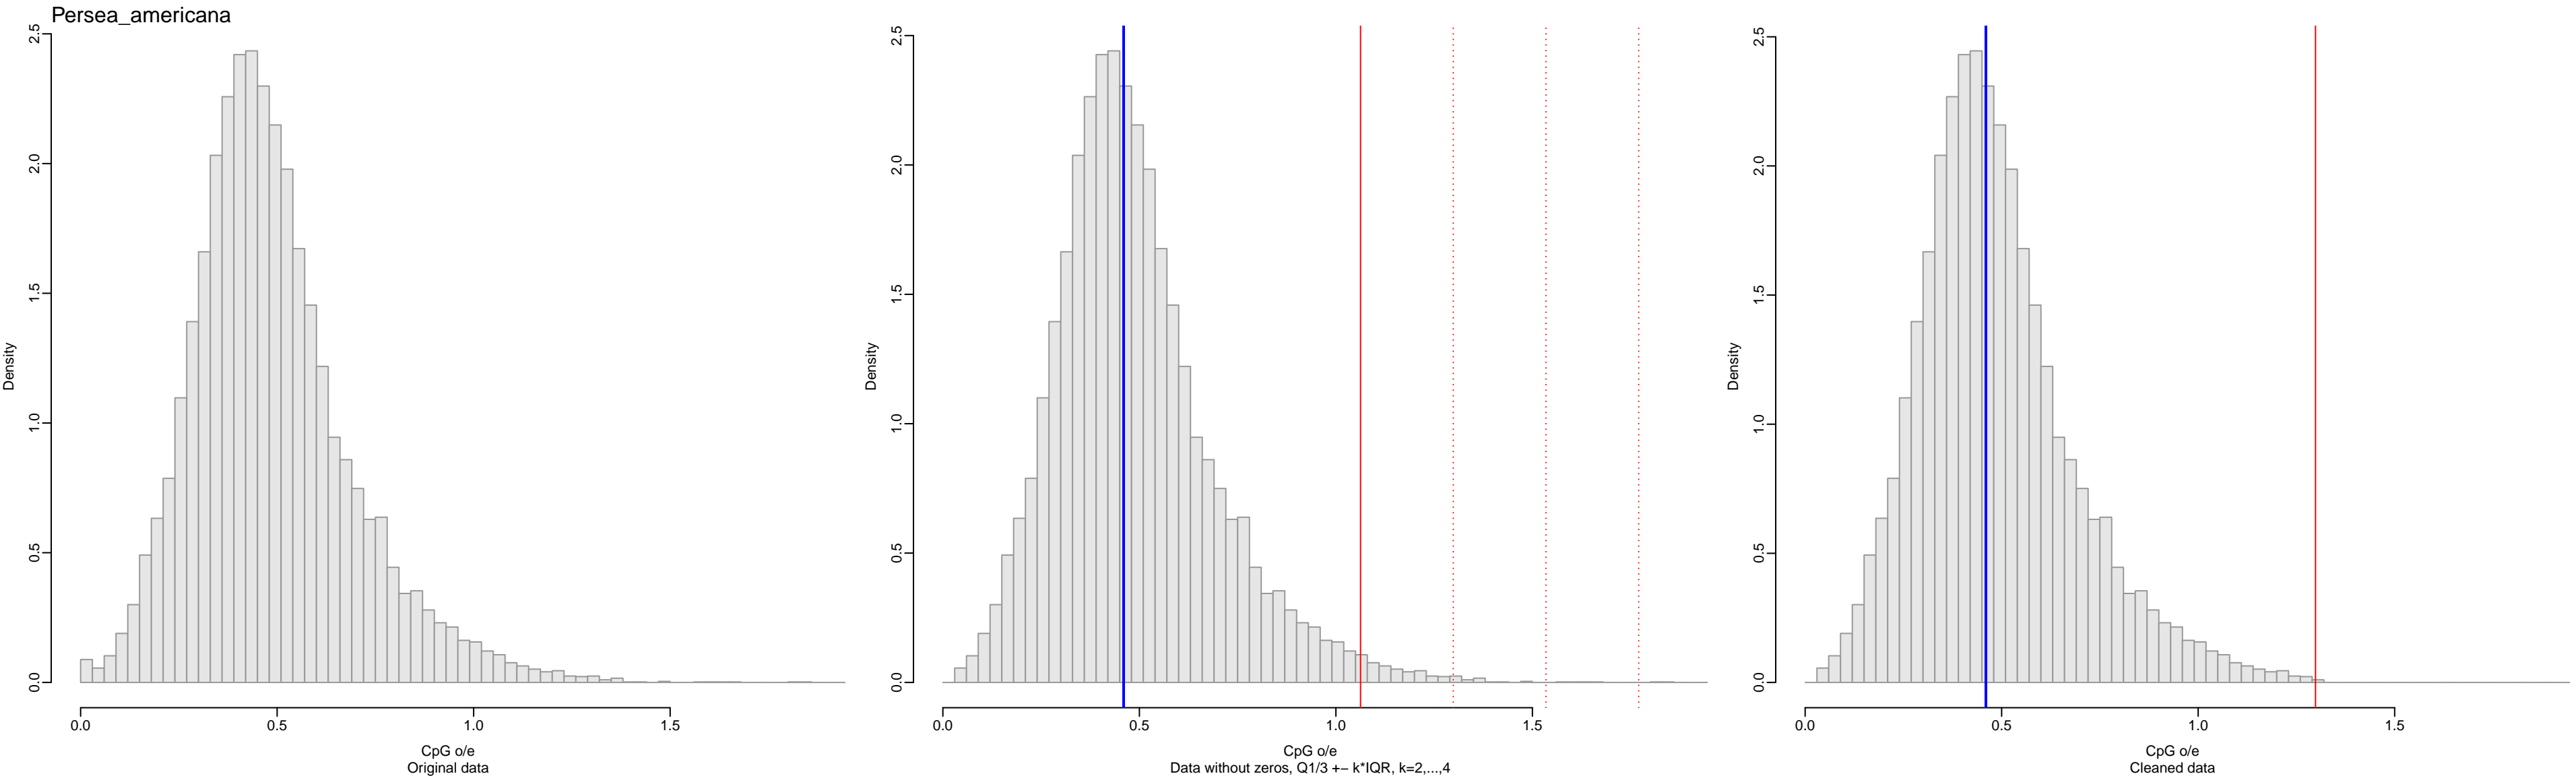

Petrolisthes\_cinctipes

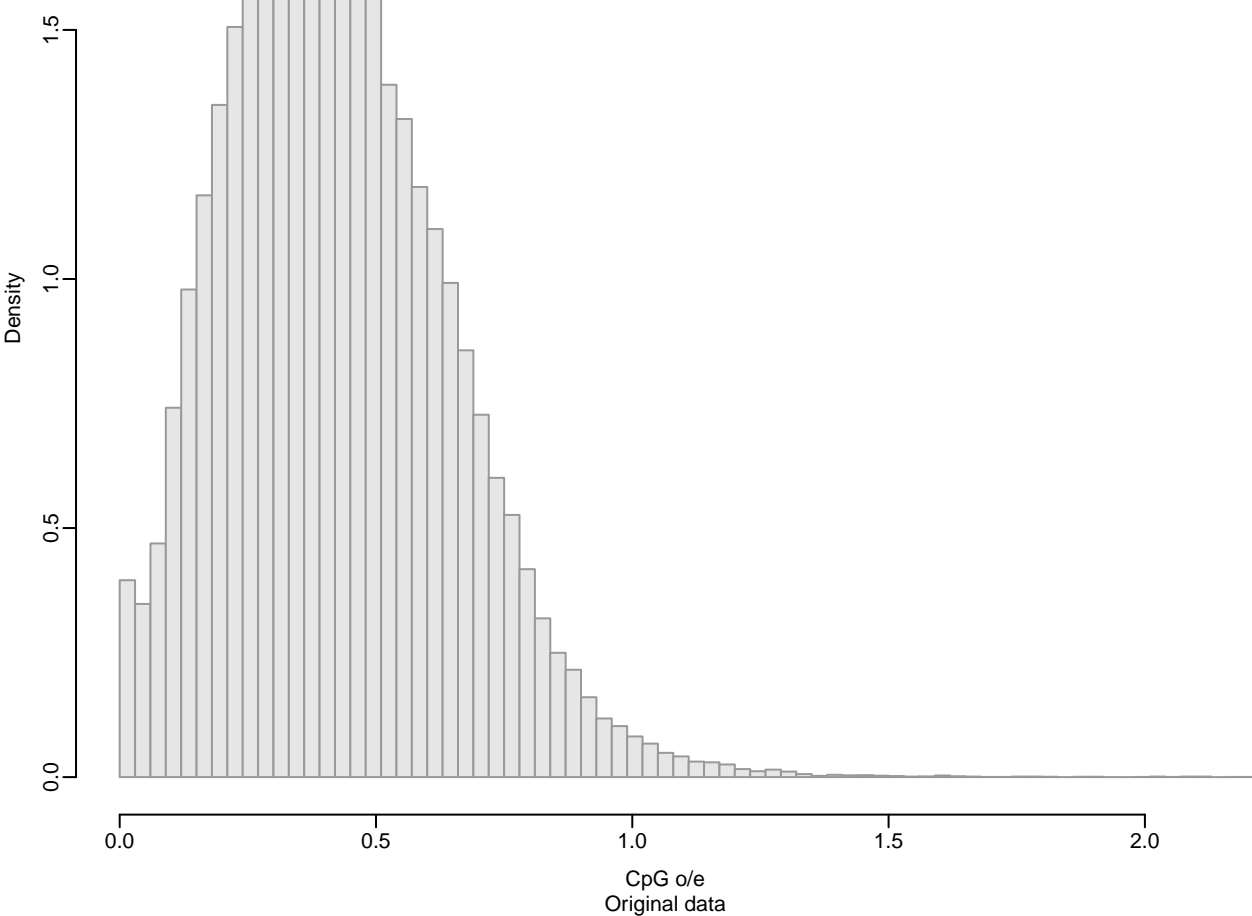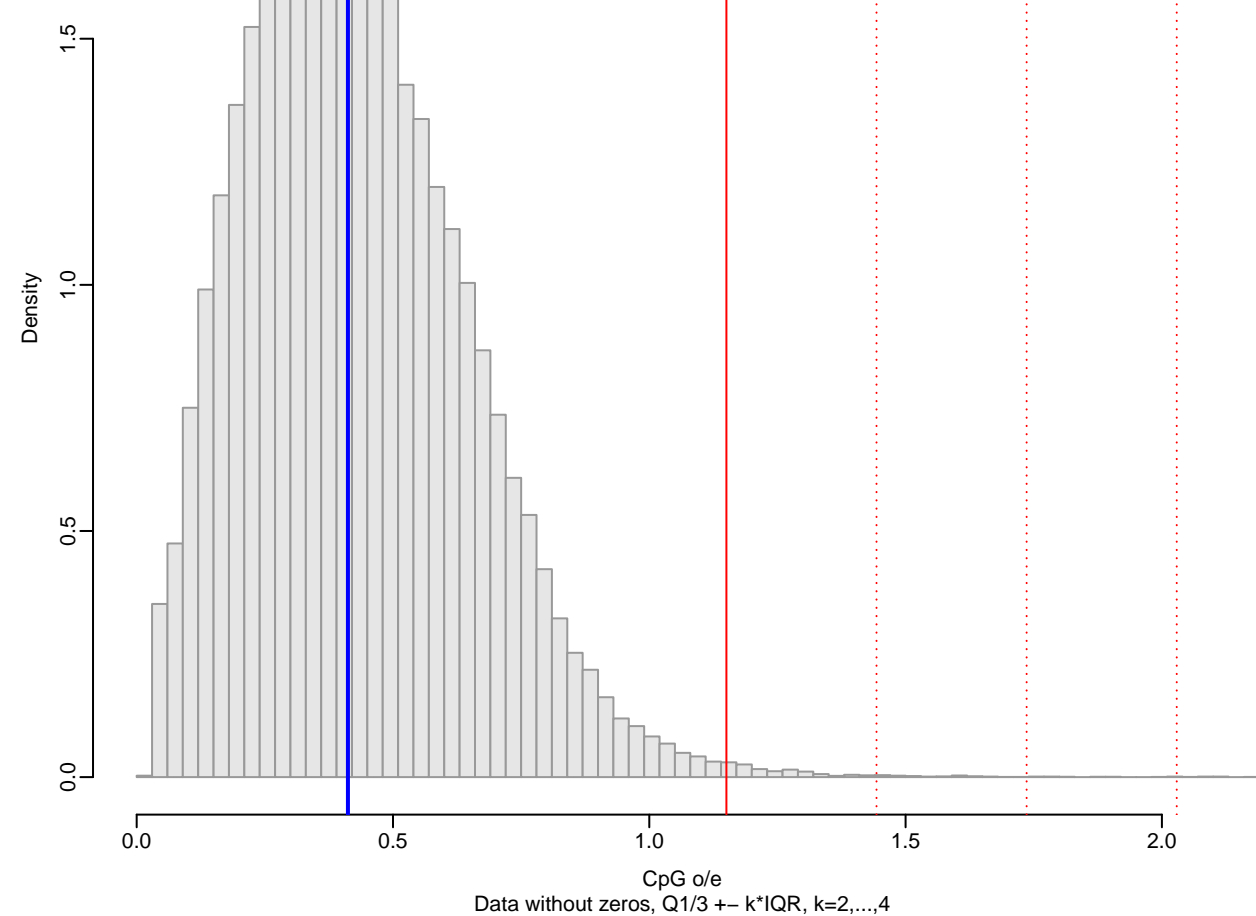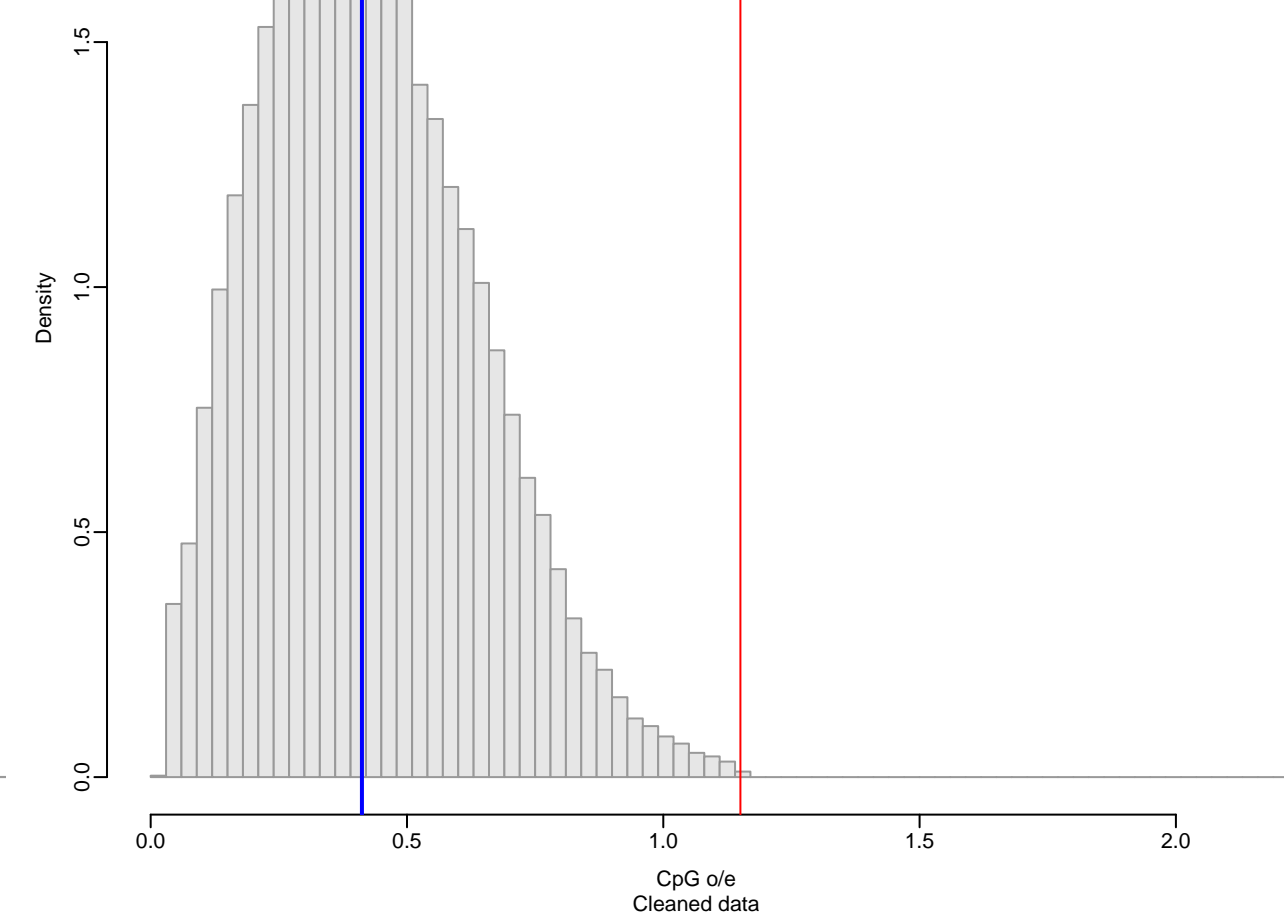

Petromyzon\_marinus

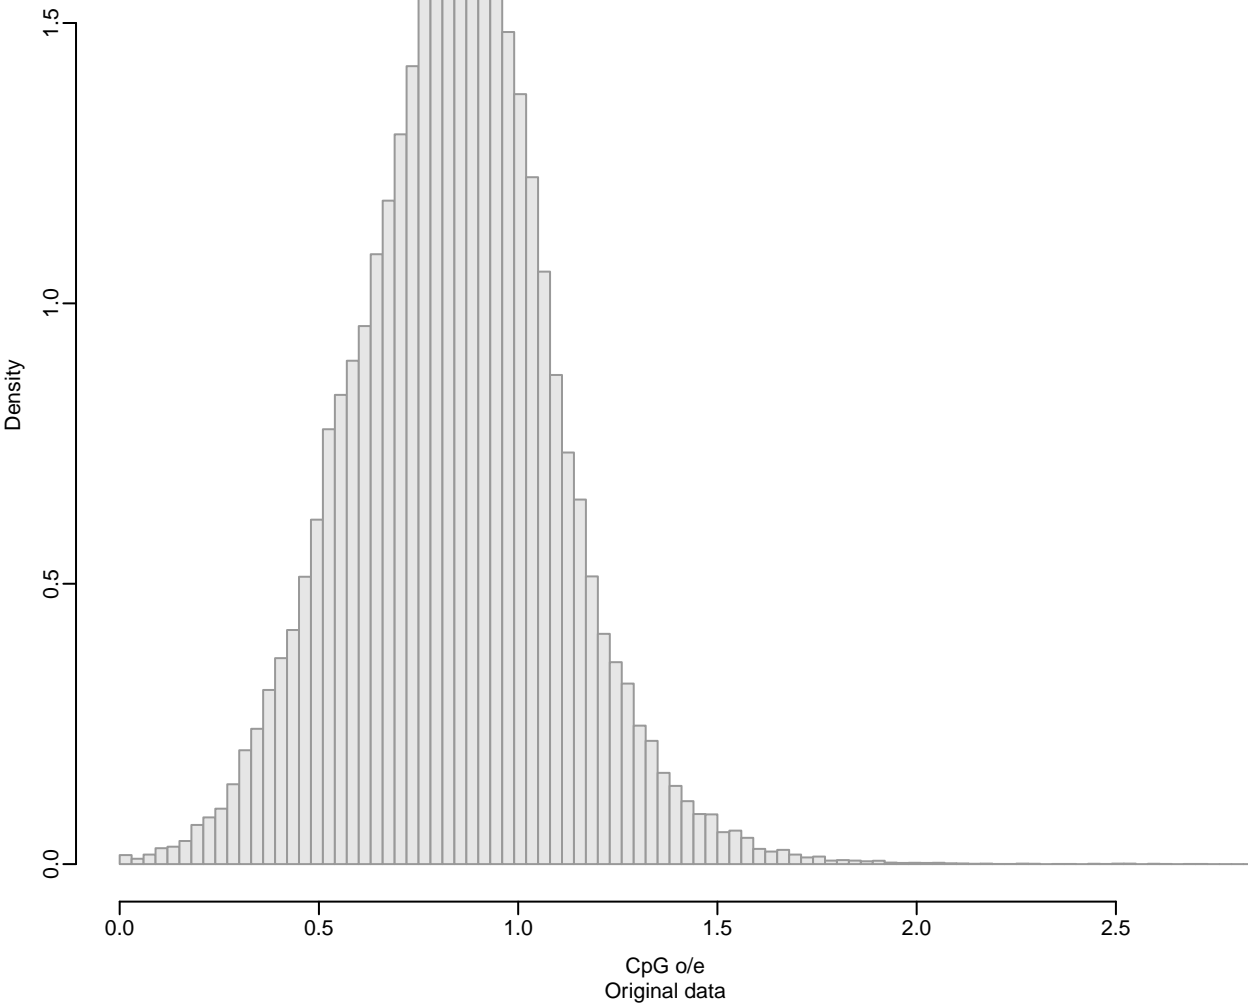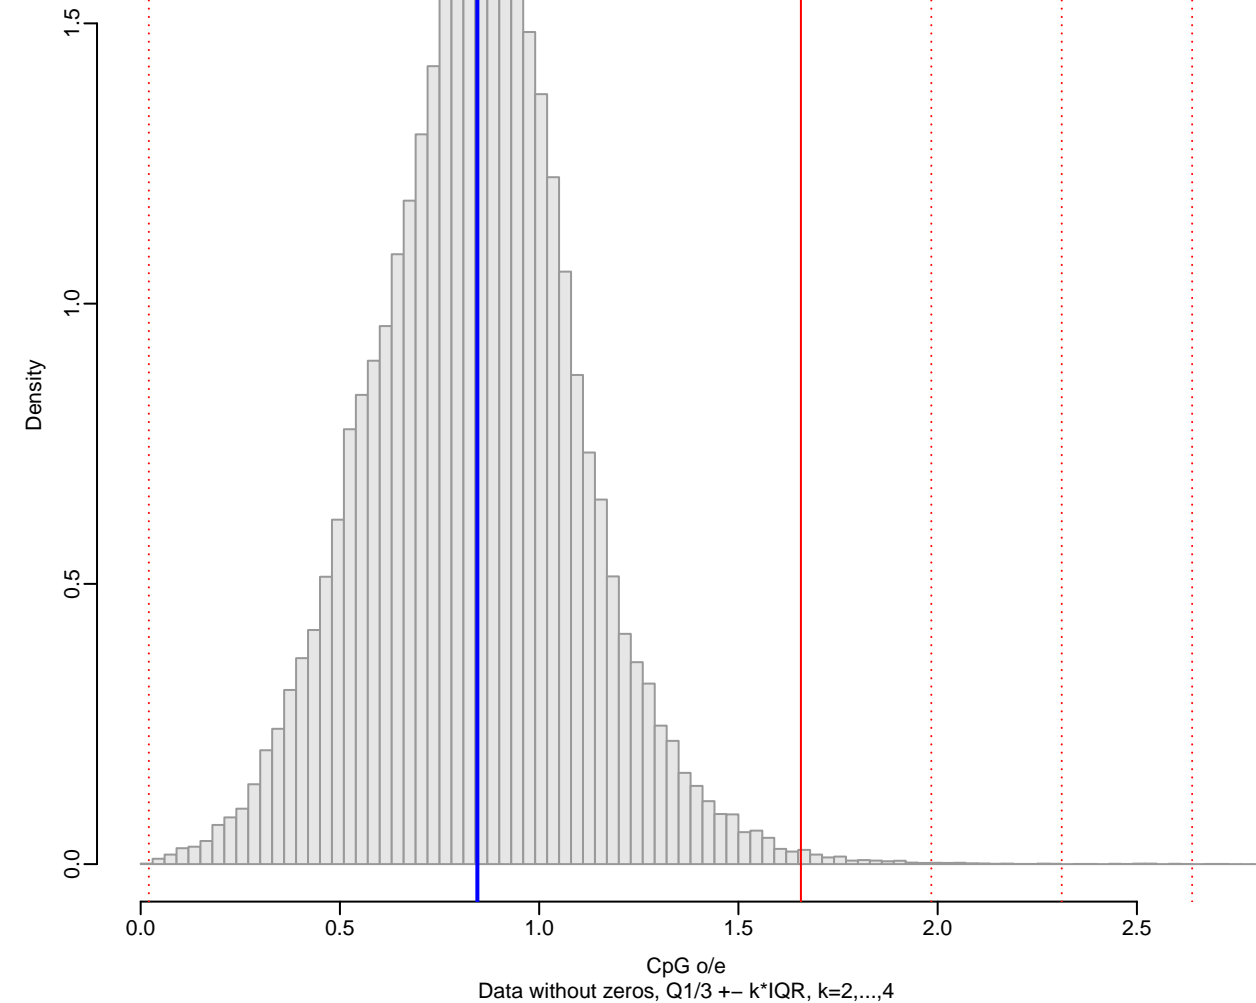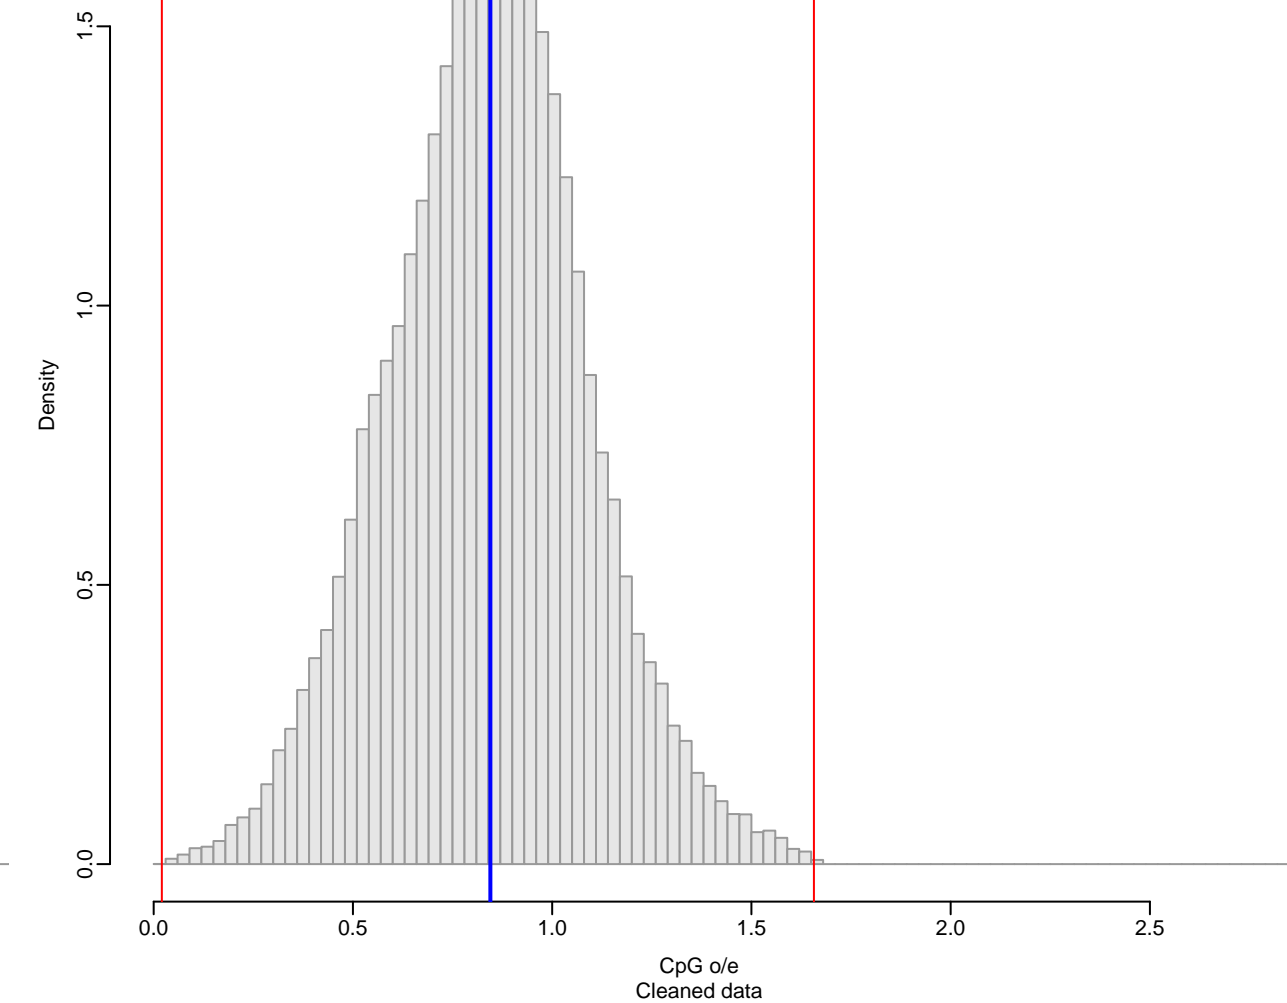

Phakopsora\_pachyrhizi

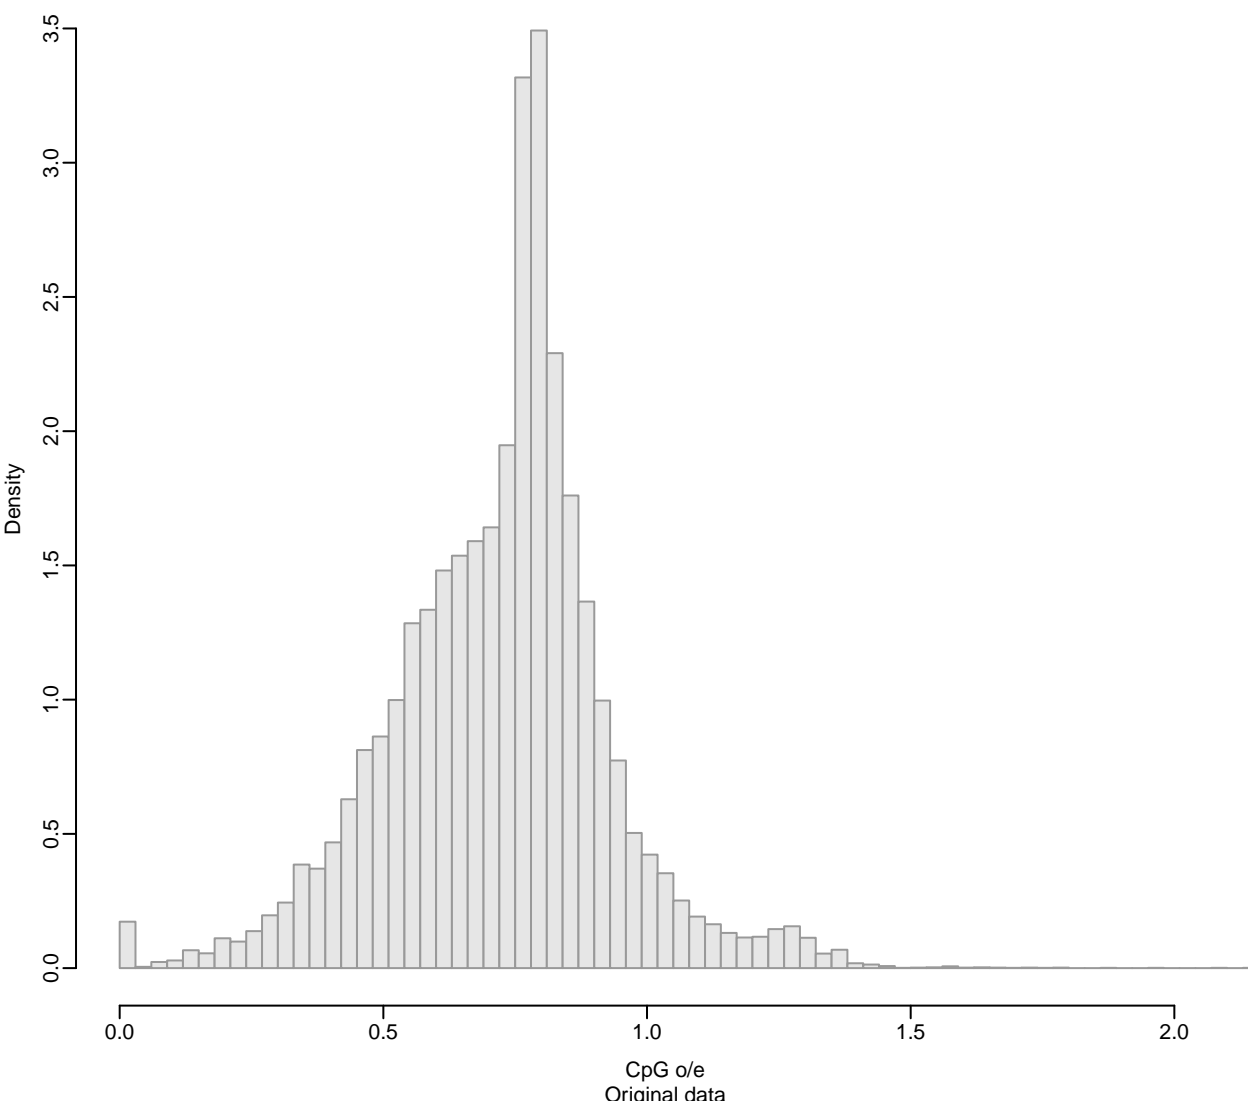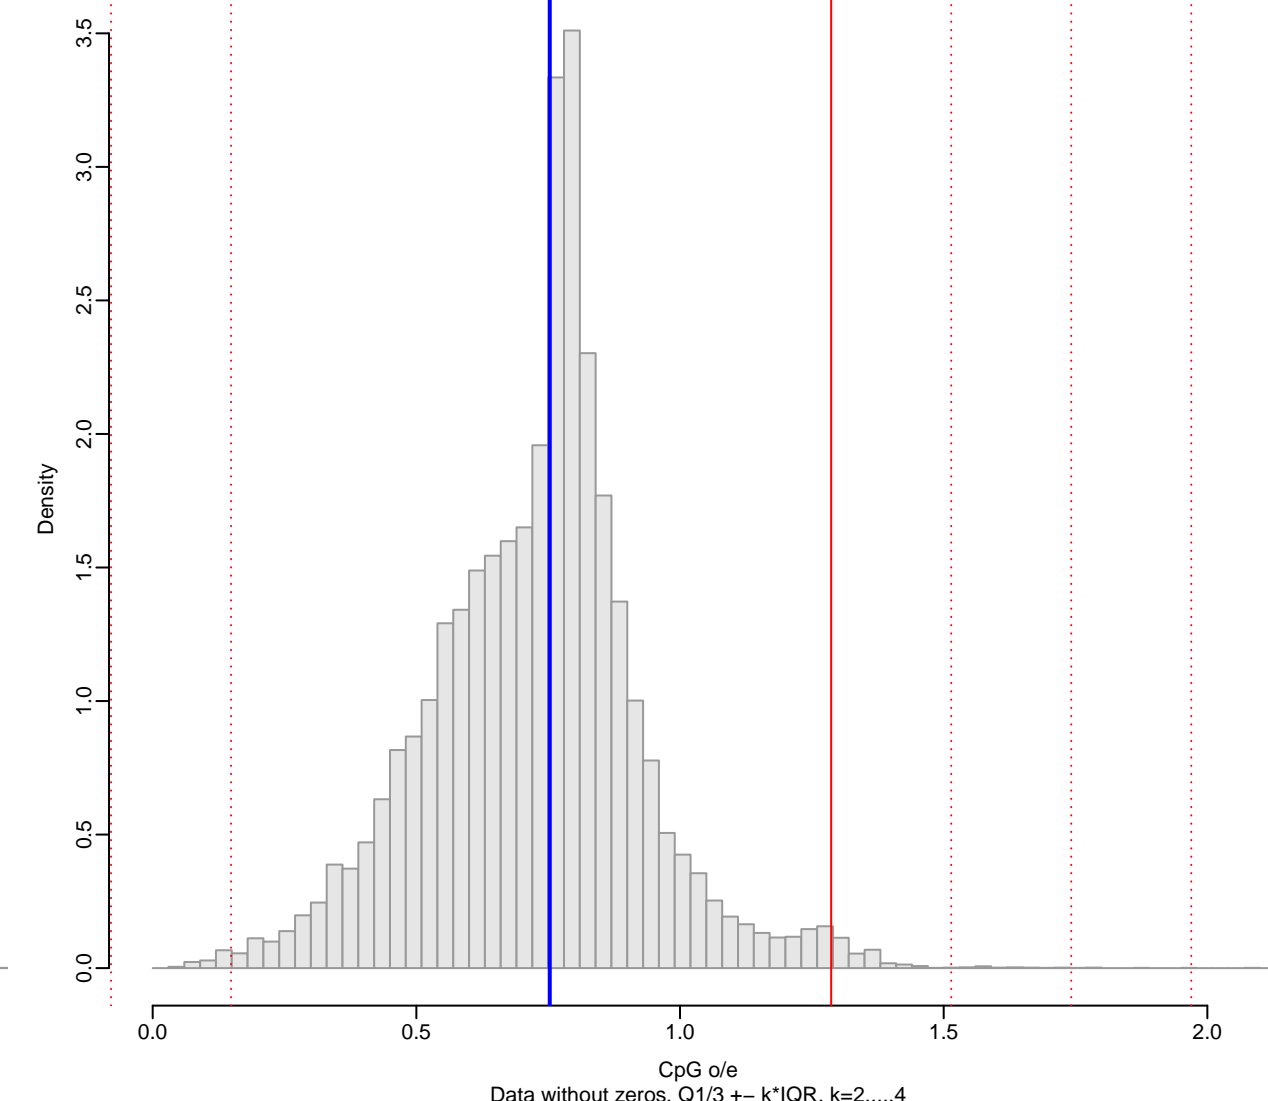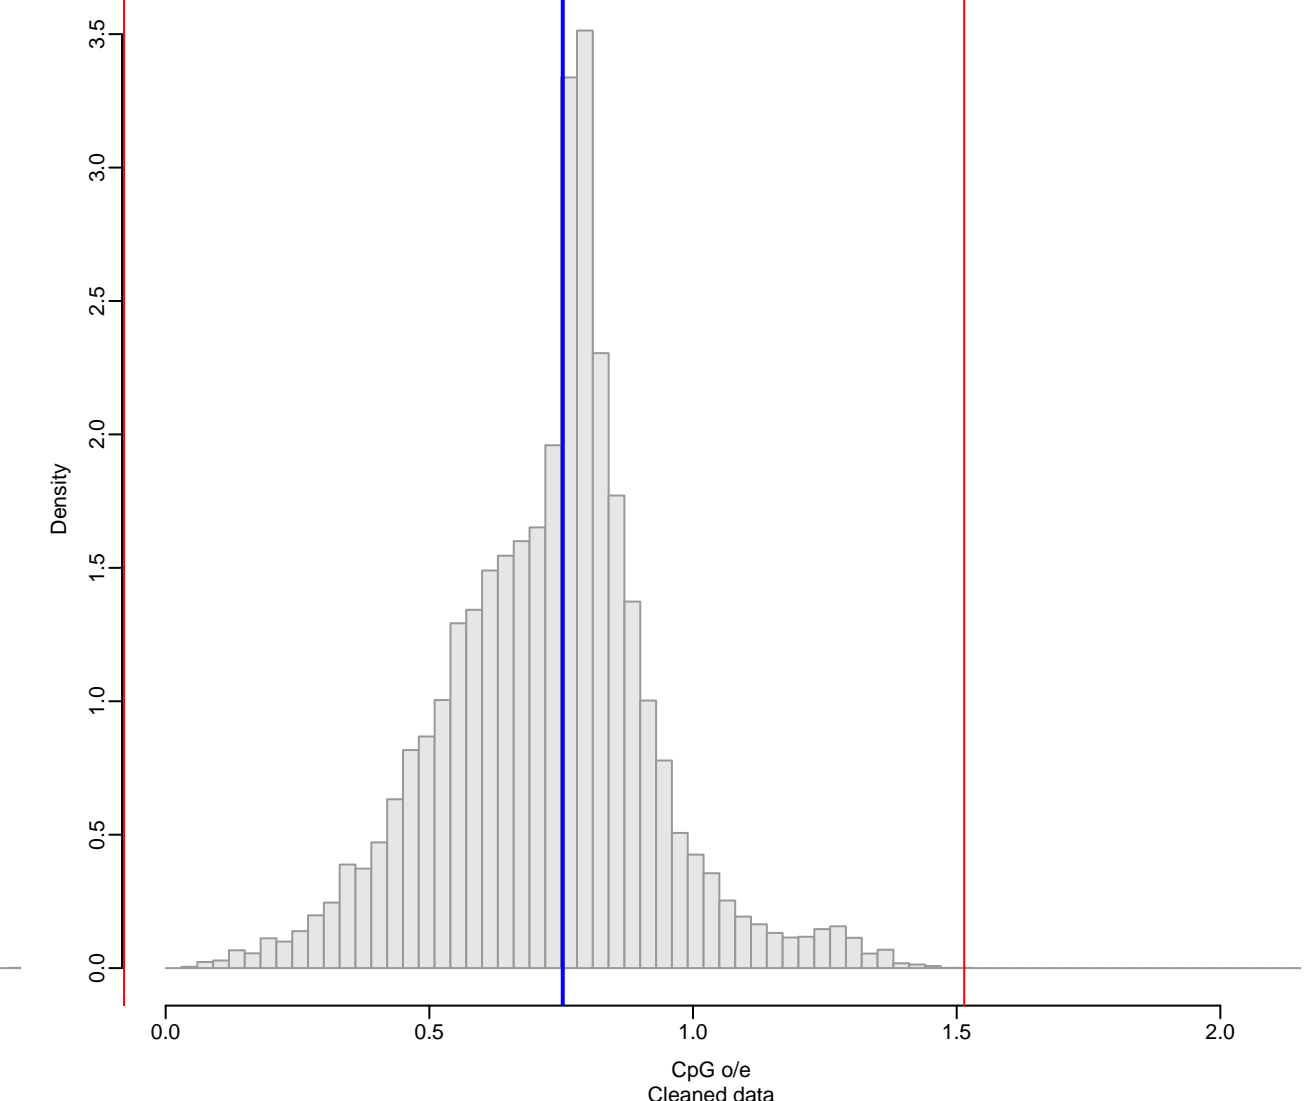



Phanerochaete\_carnosa

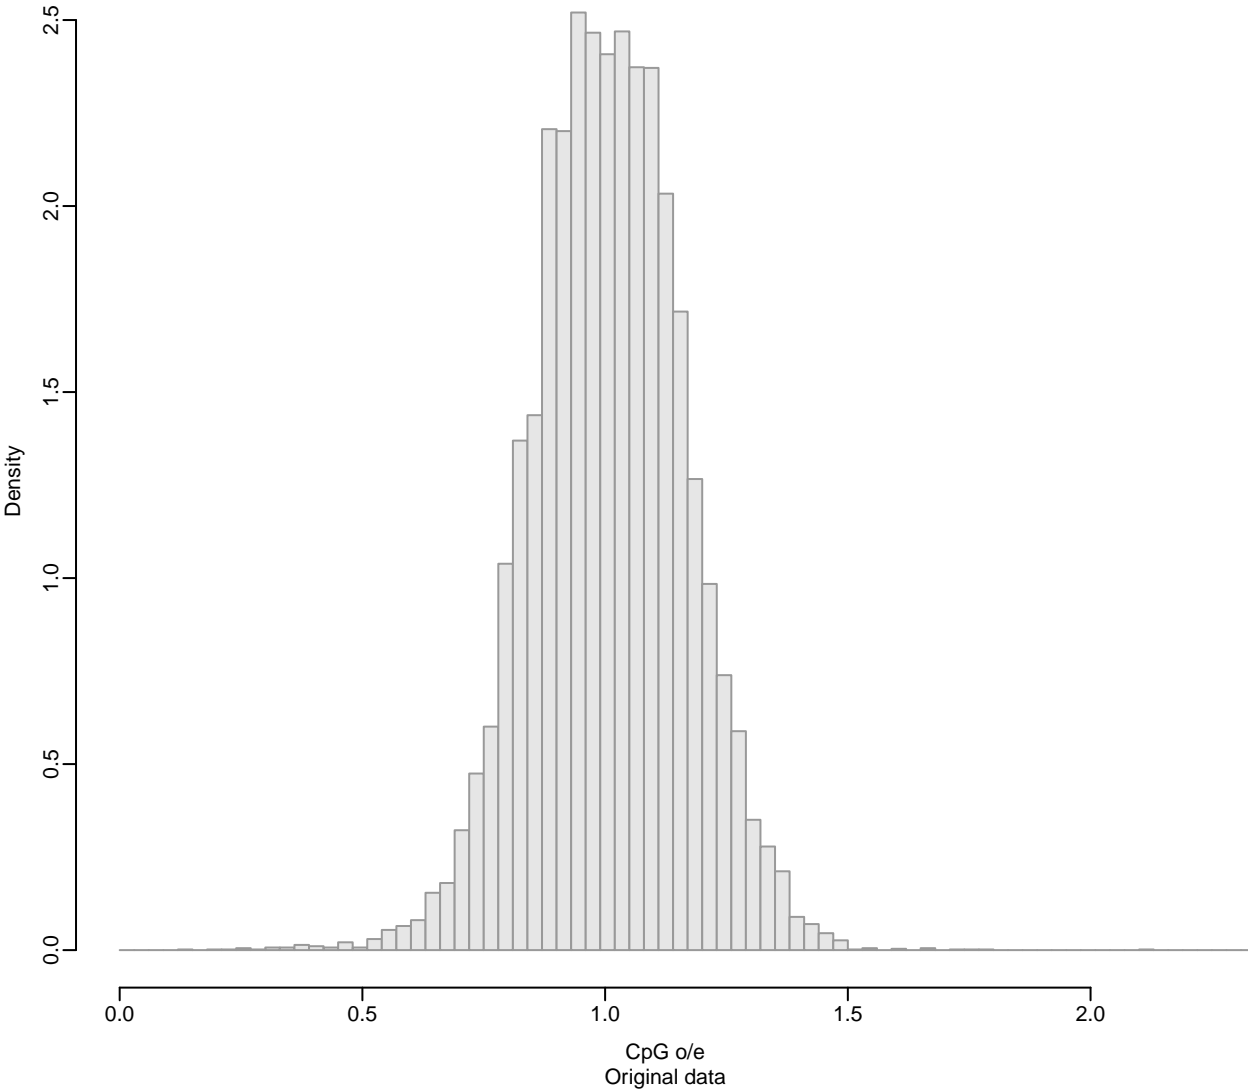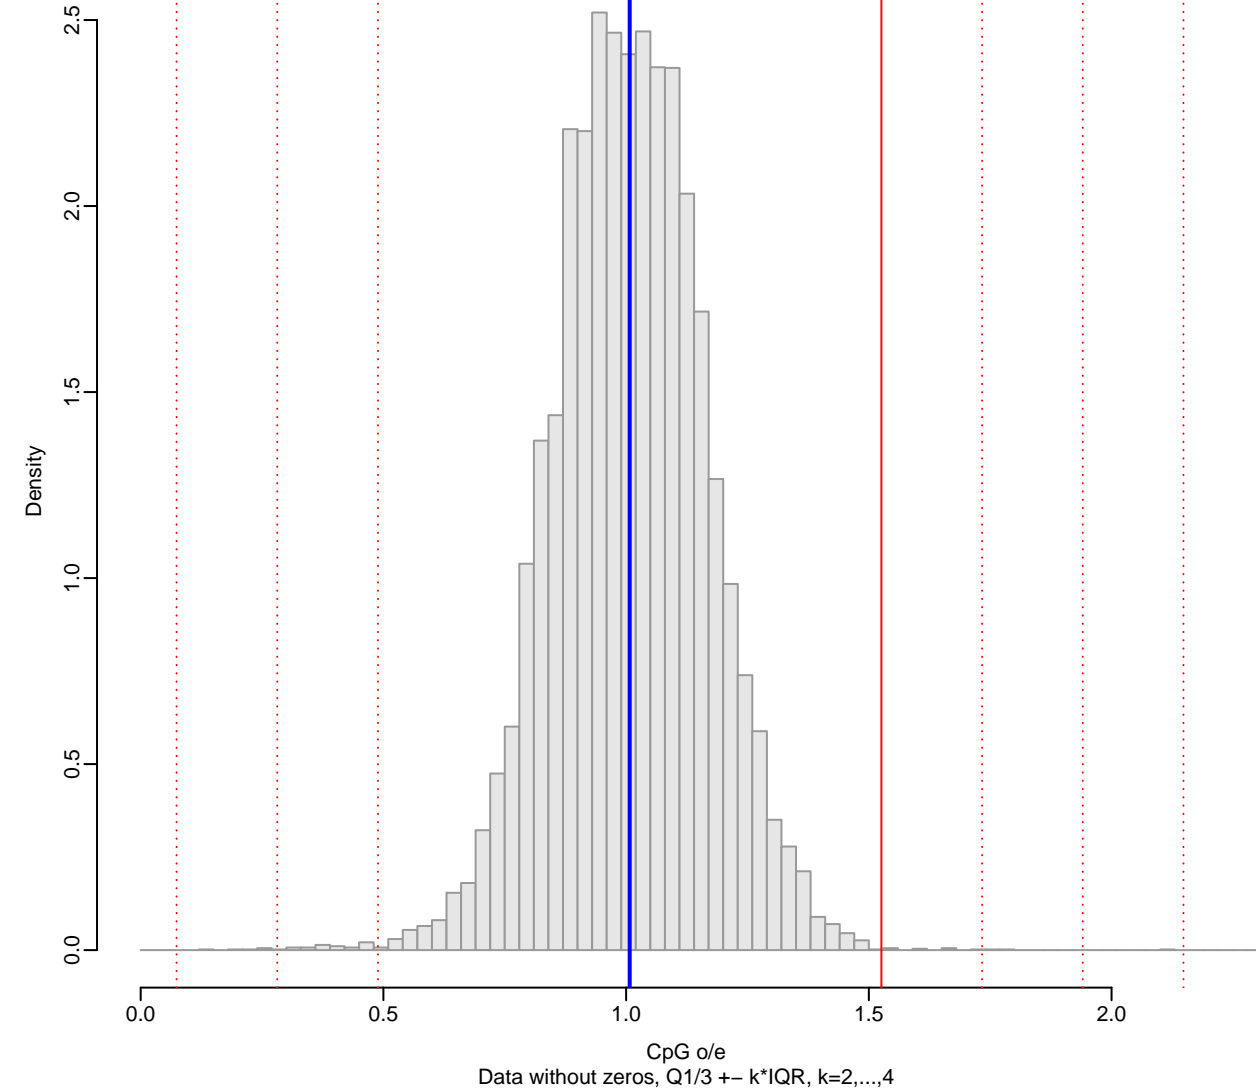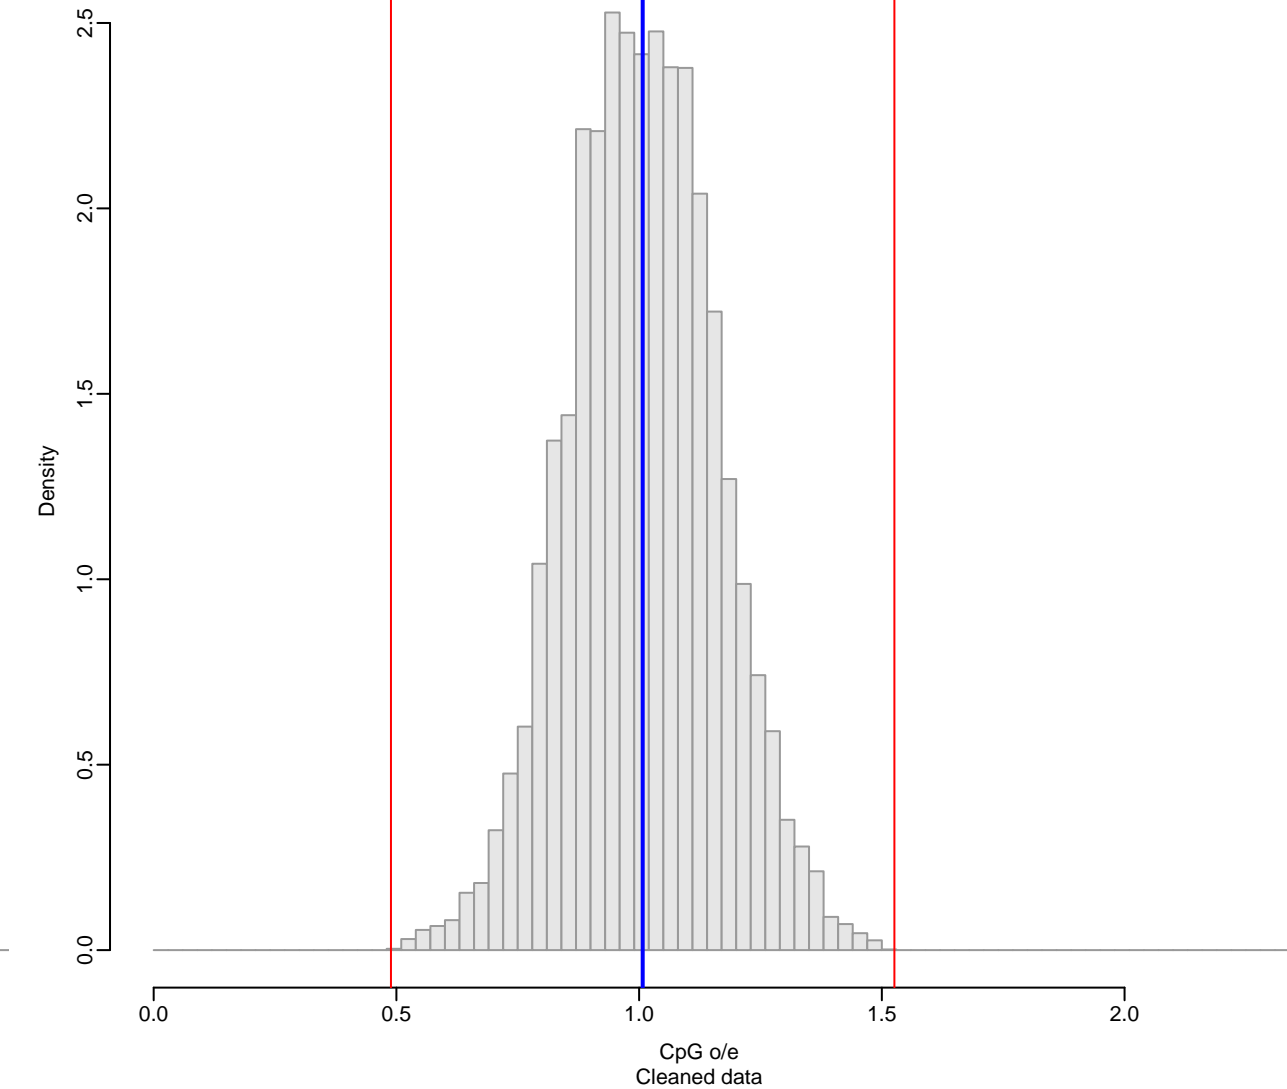

Phanerochaete\_chrysosporium

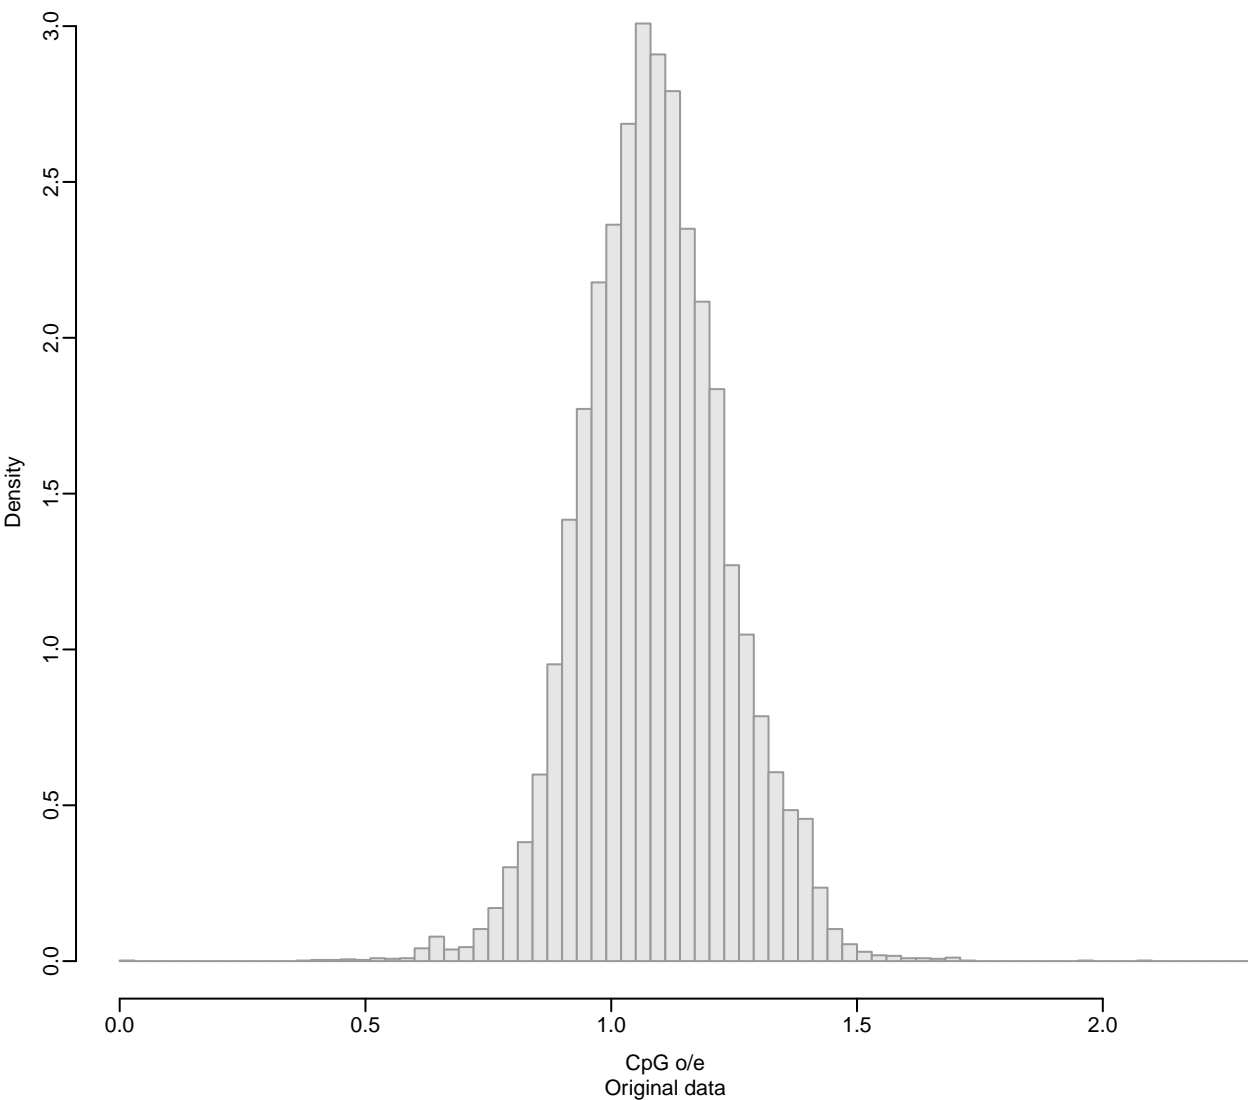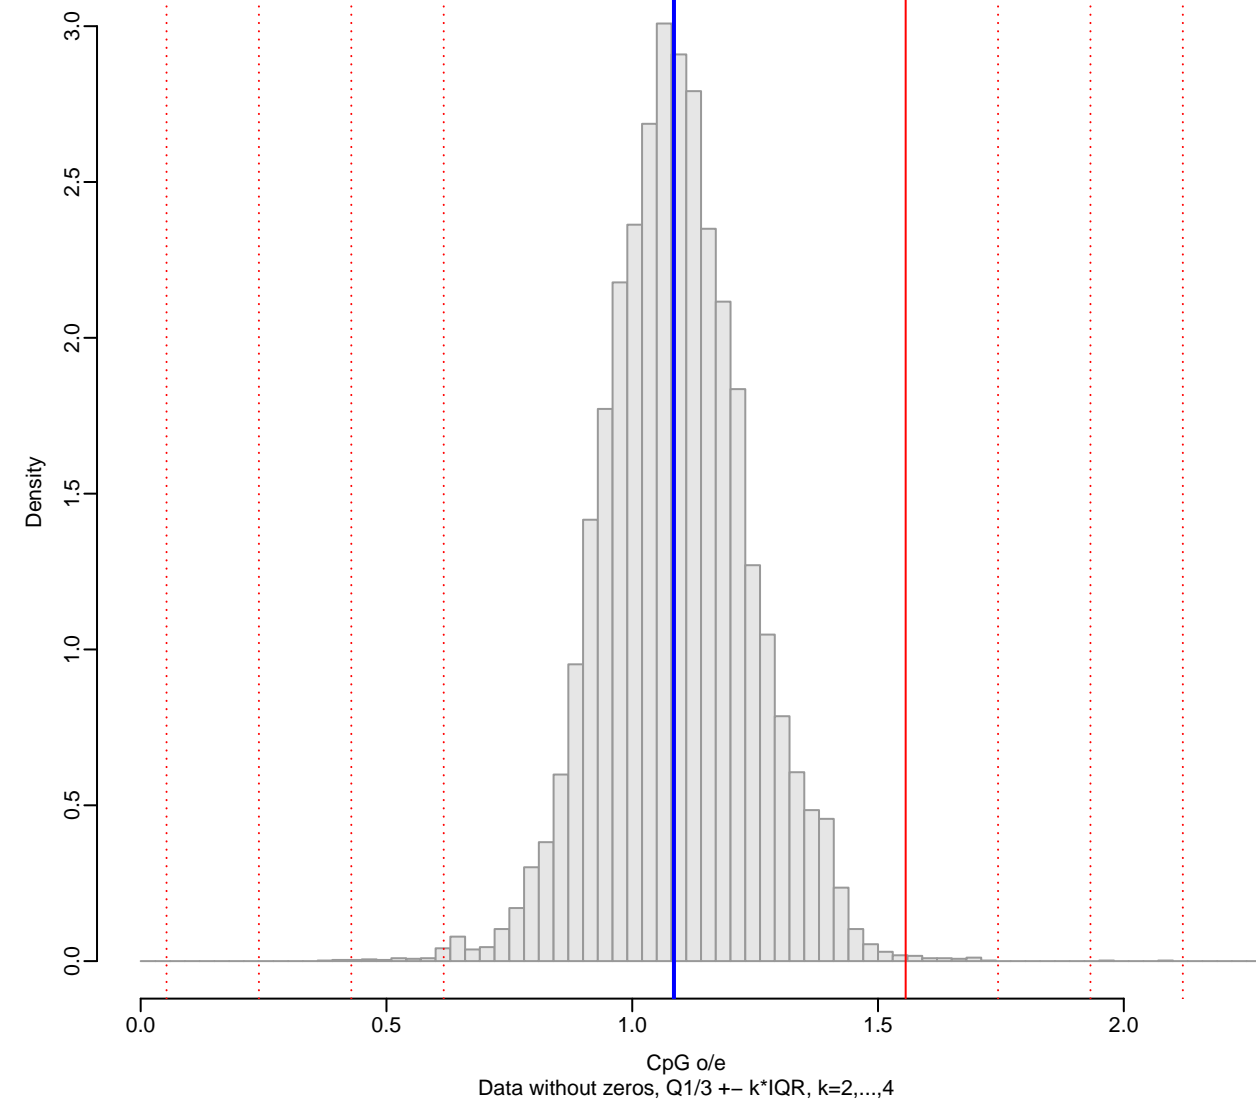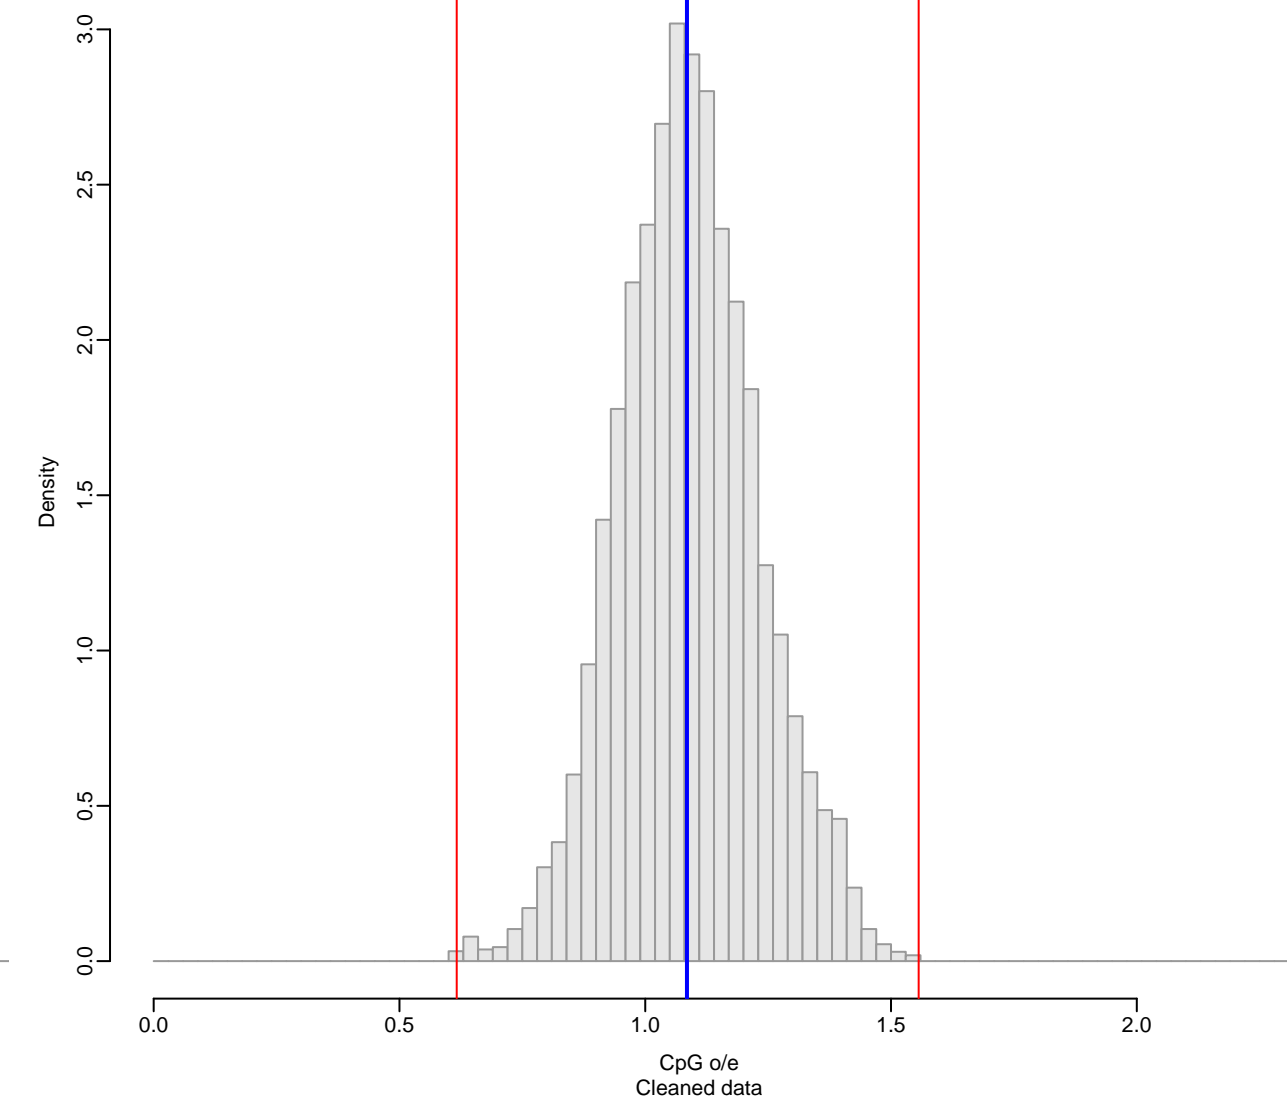

Phaseolus\_coccineus

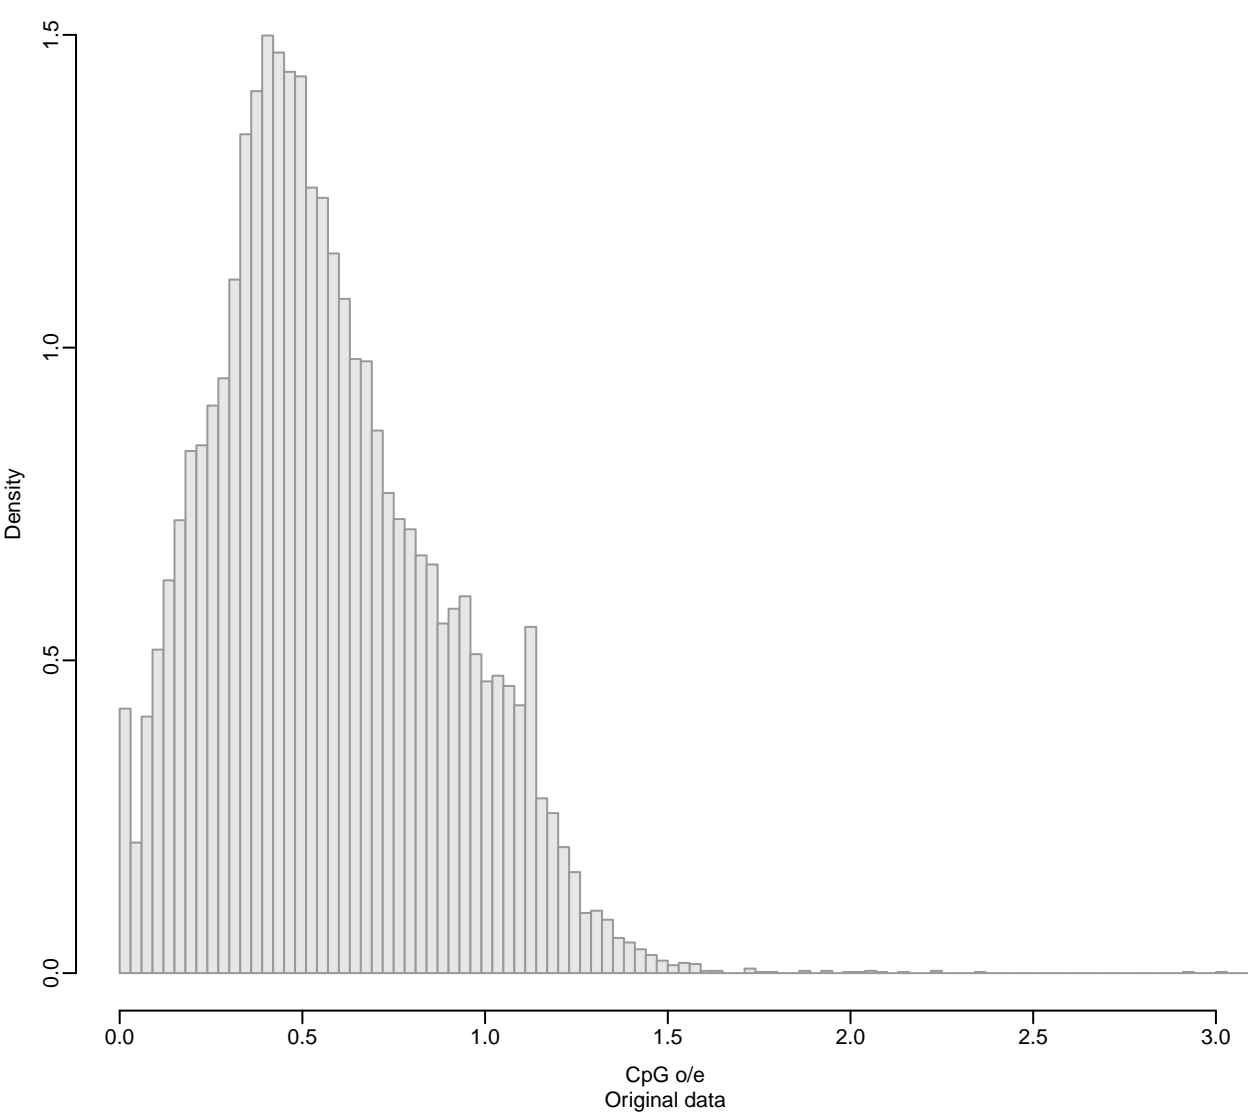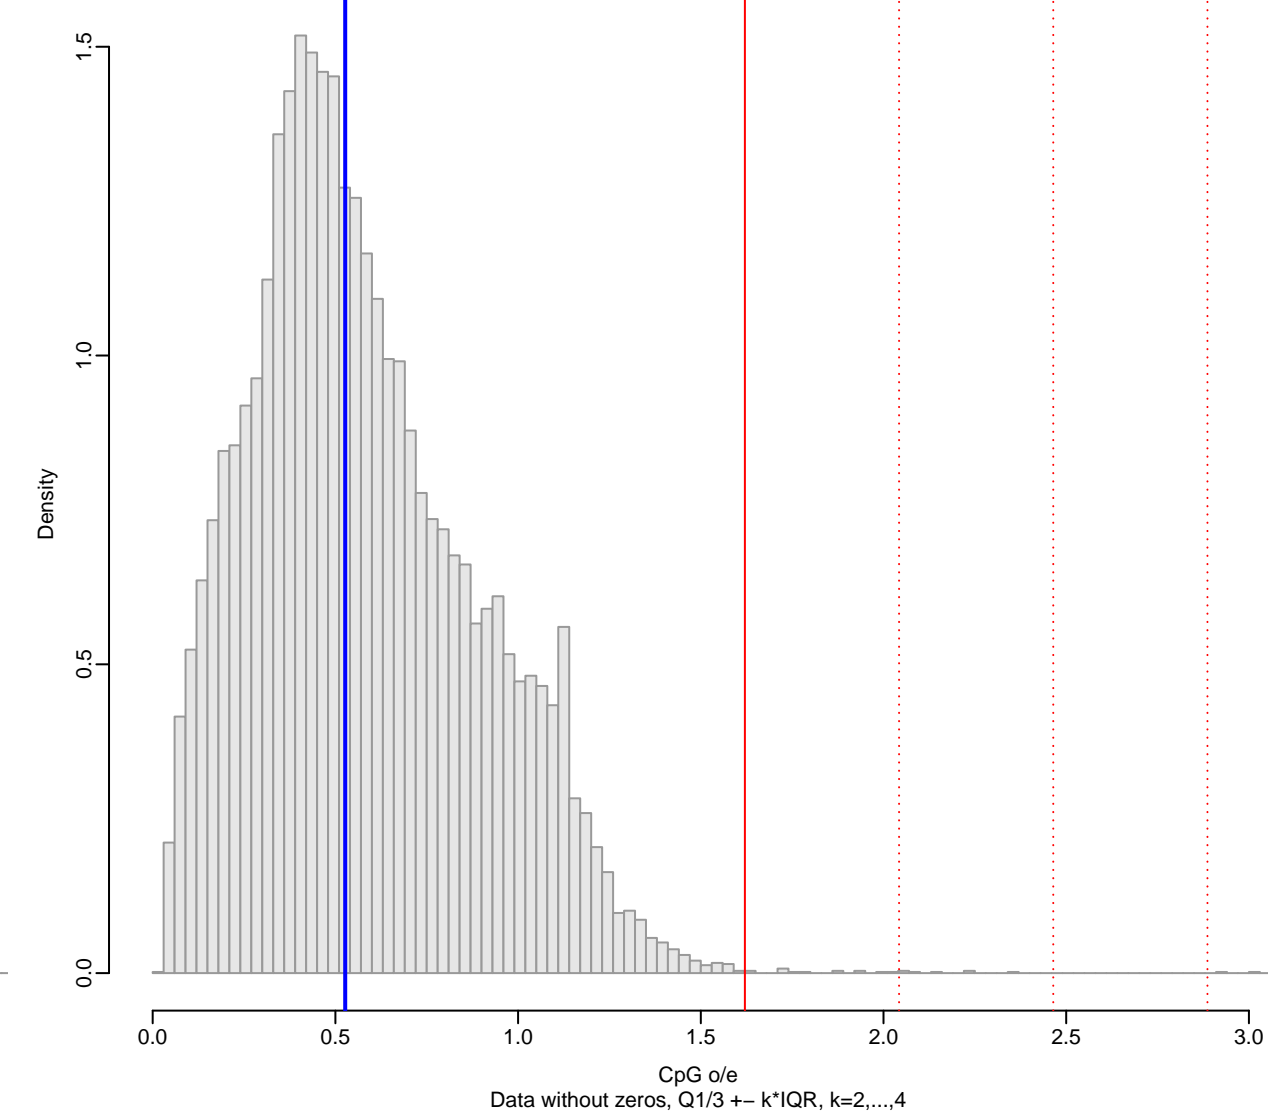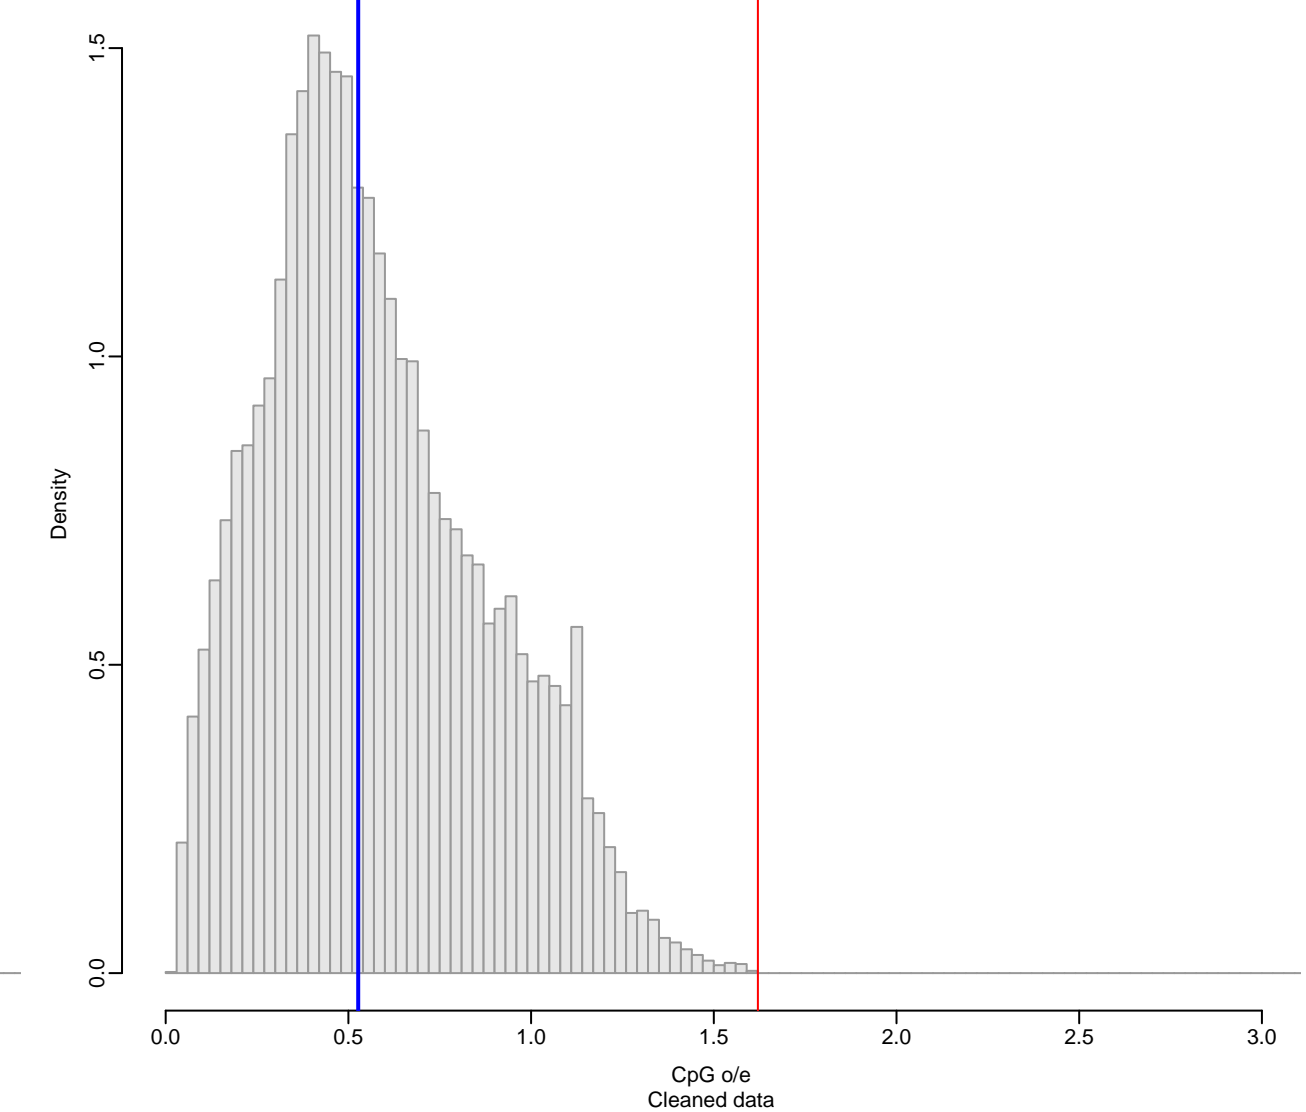

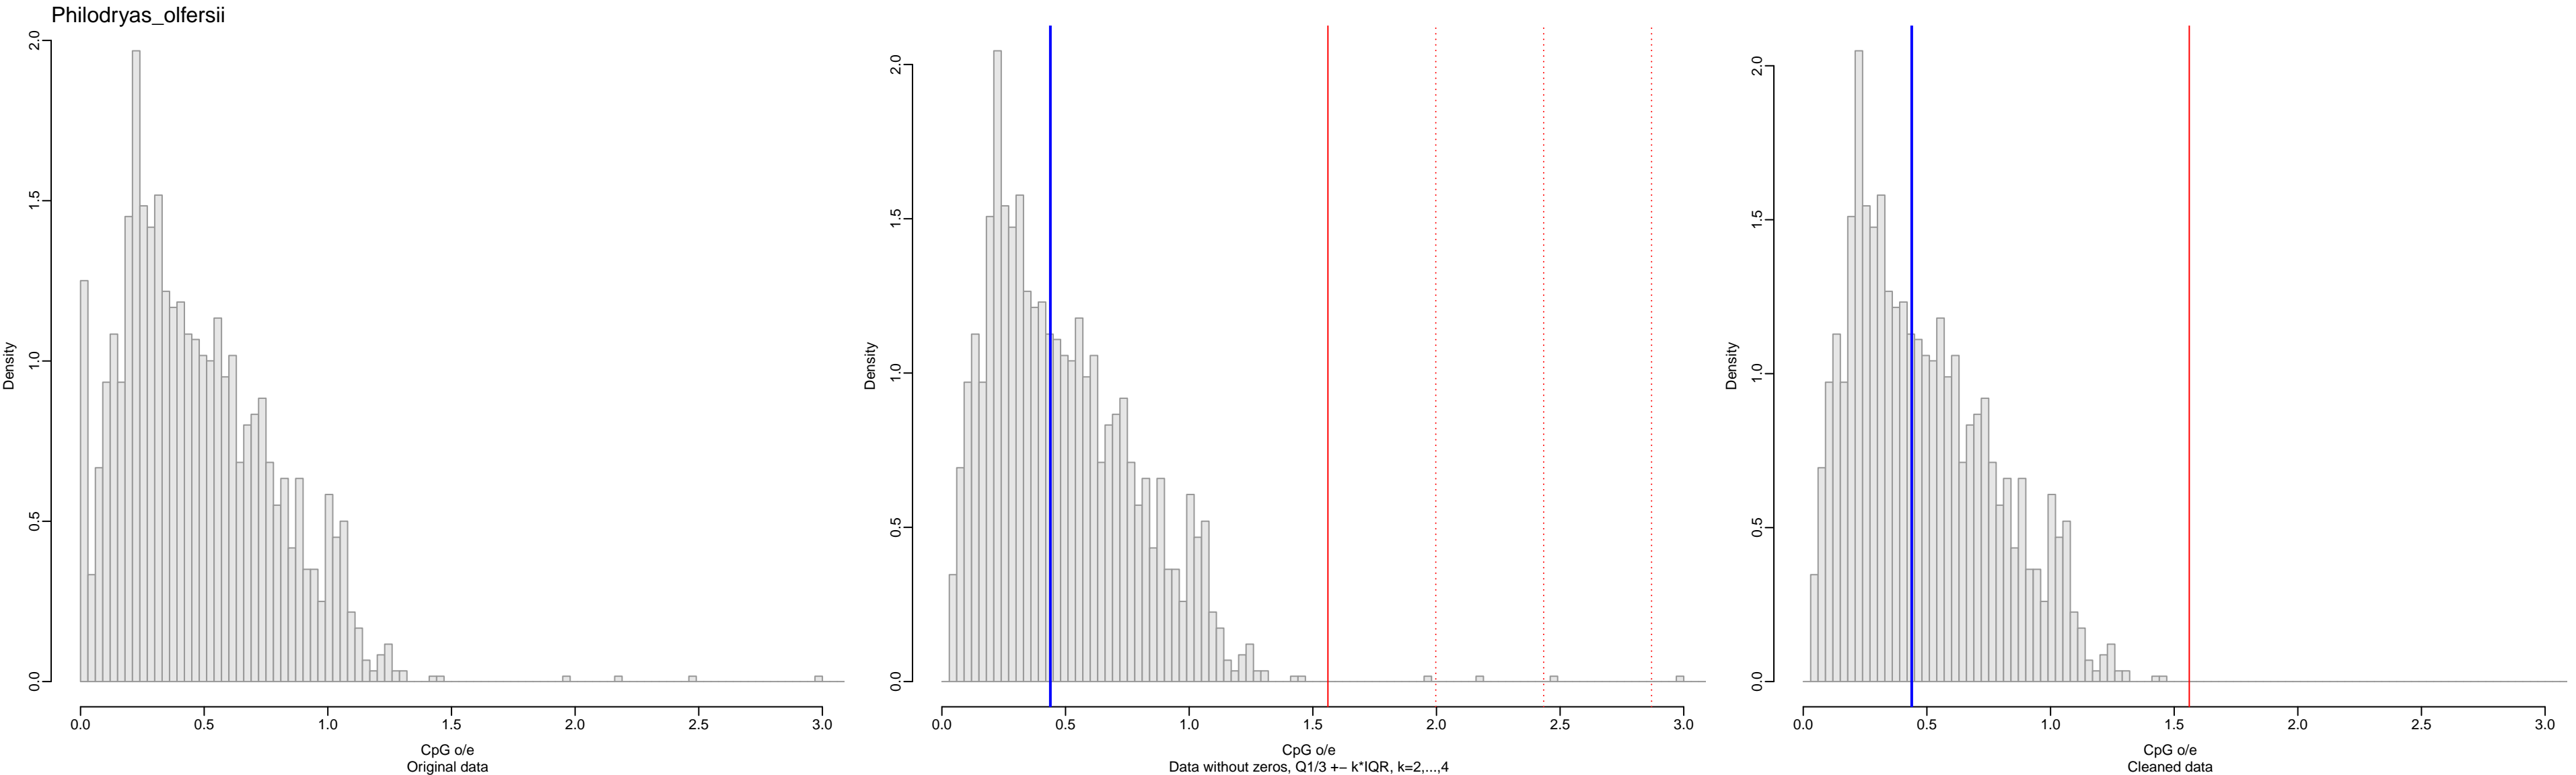

Phlebotomus\_ernicius

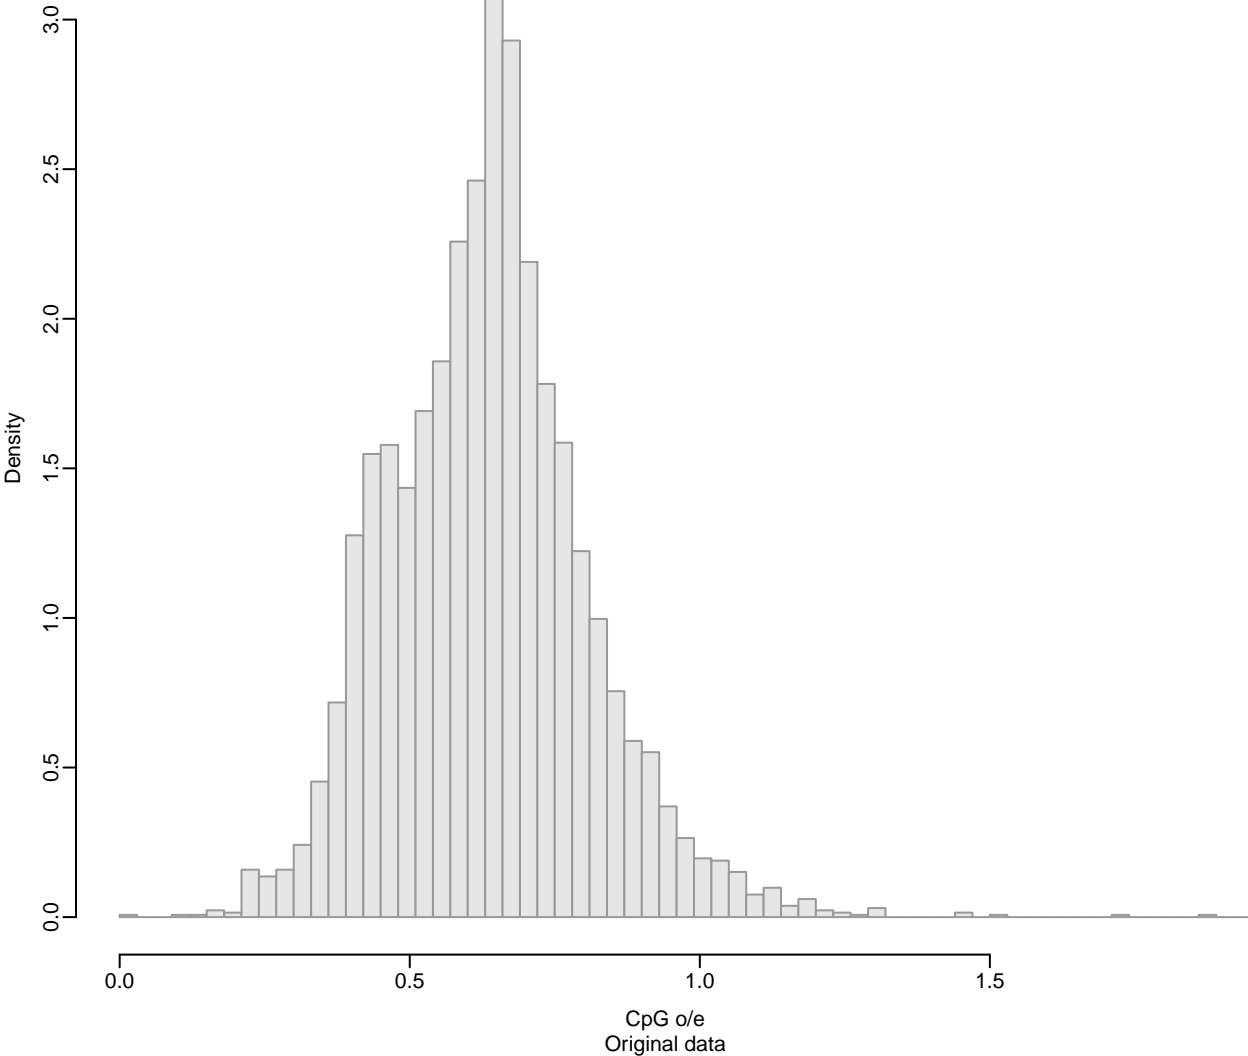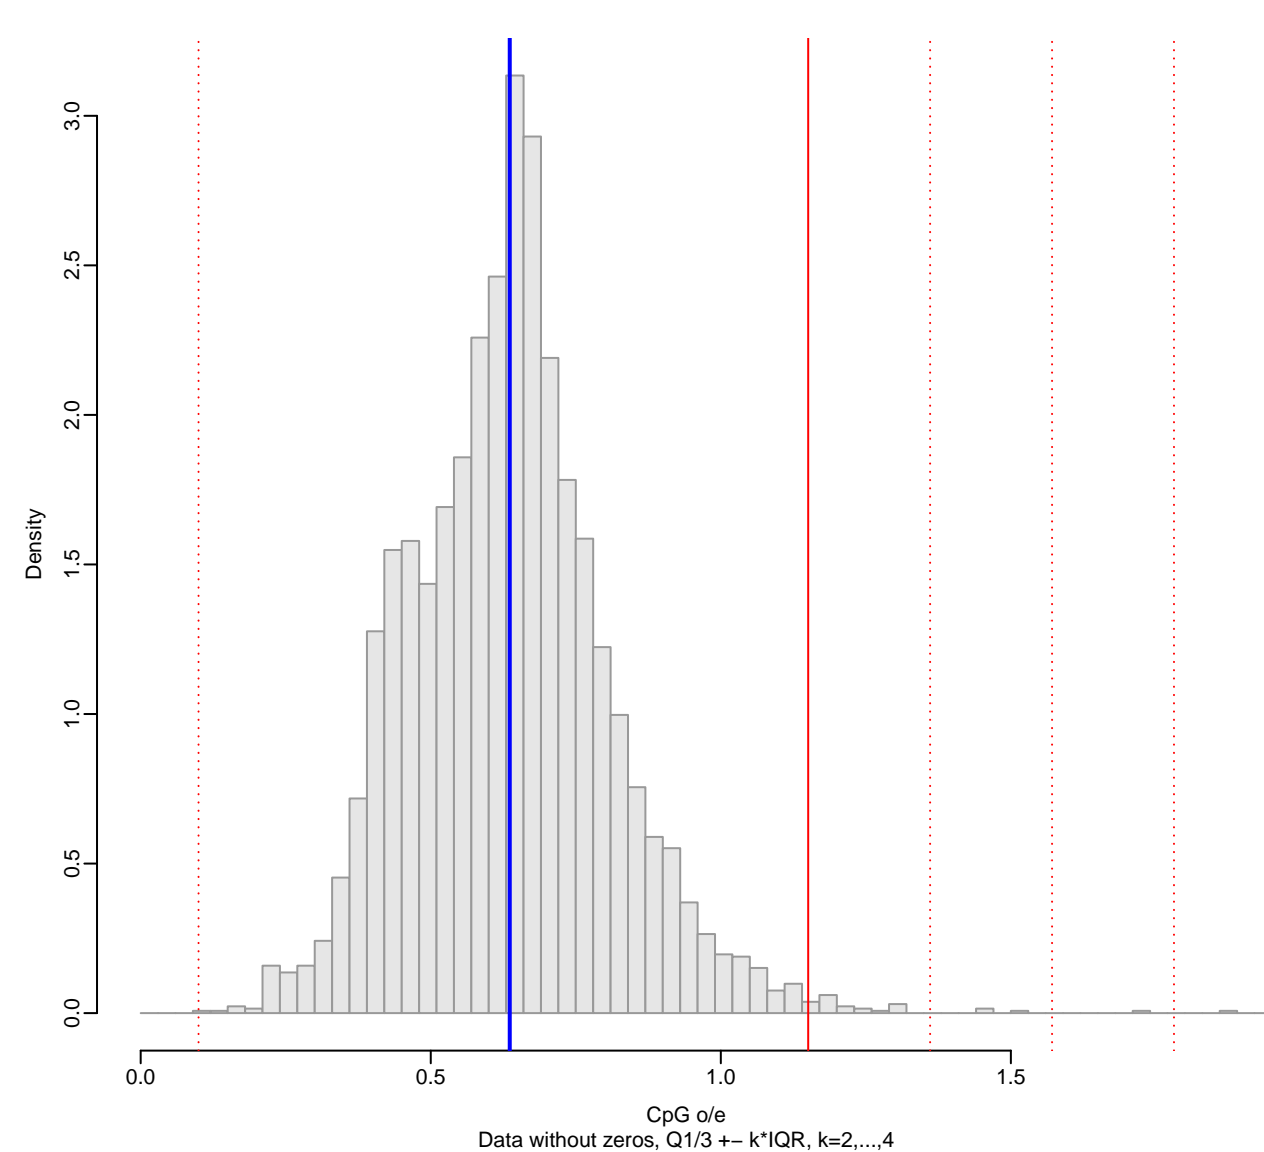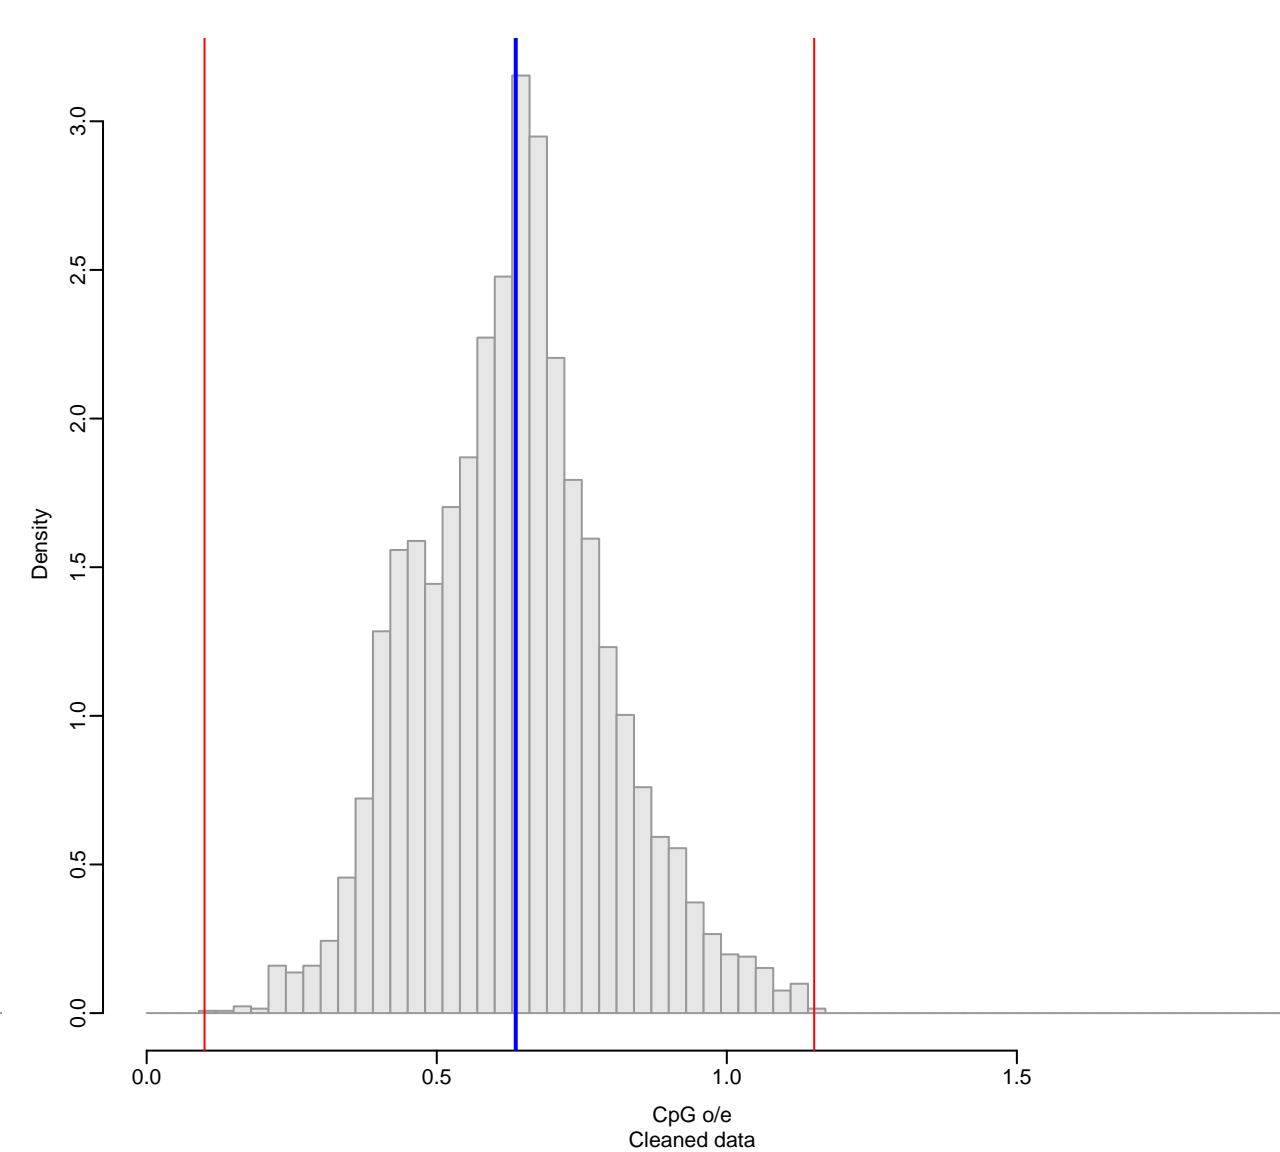

Phycomyces\_blakesleanus

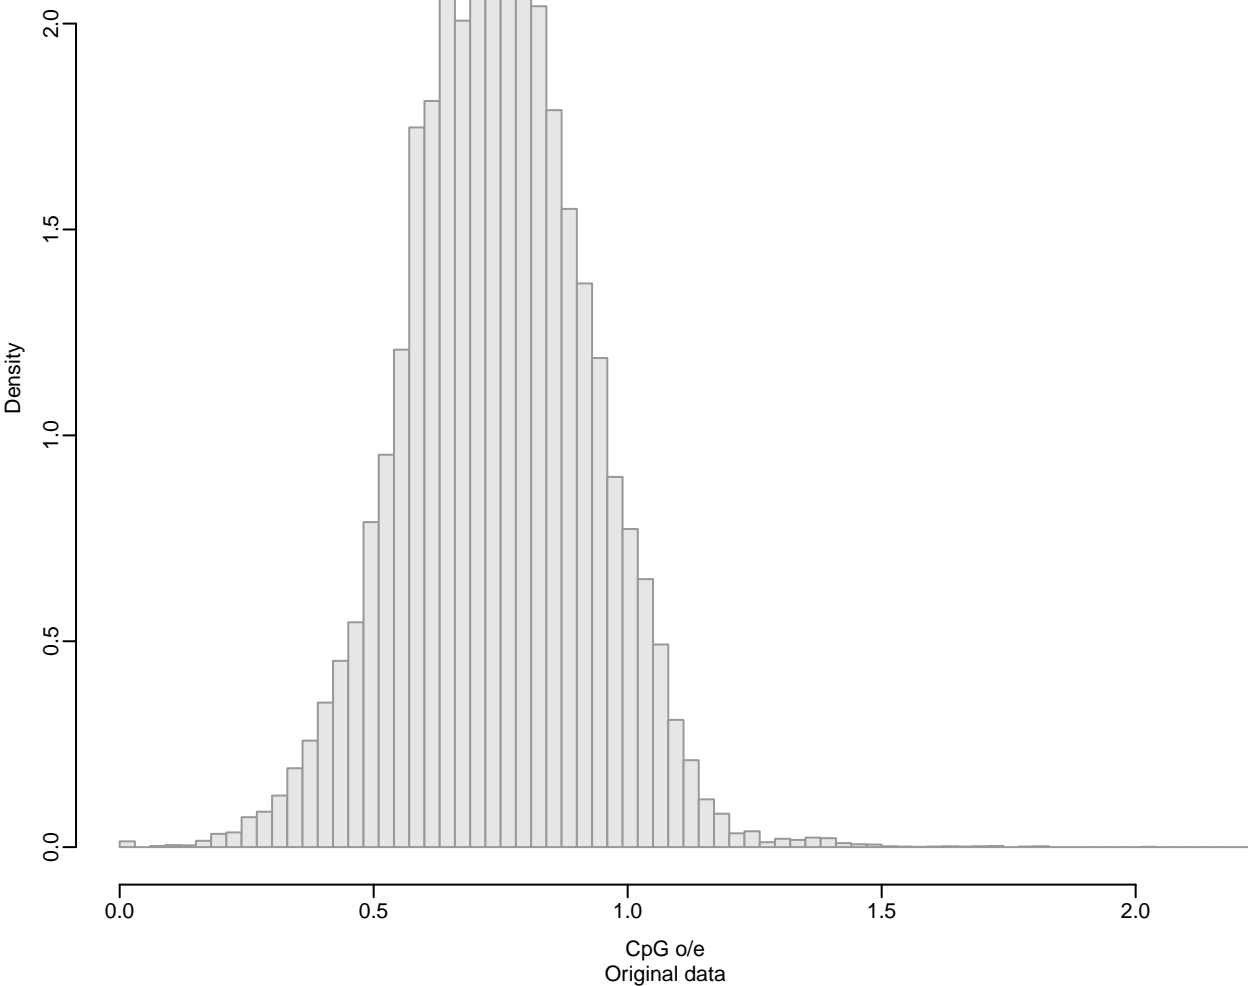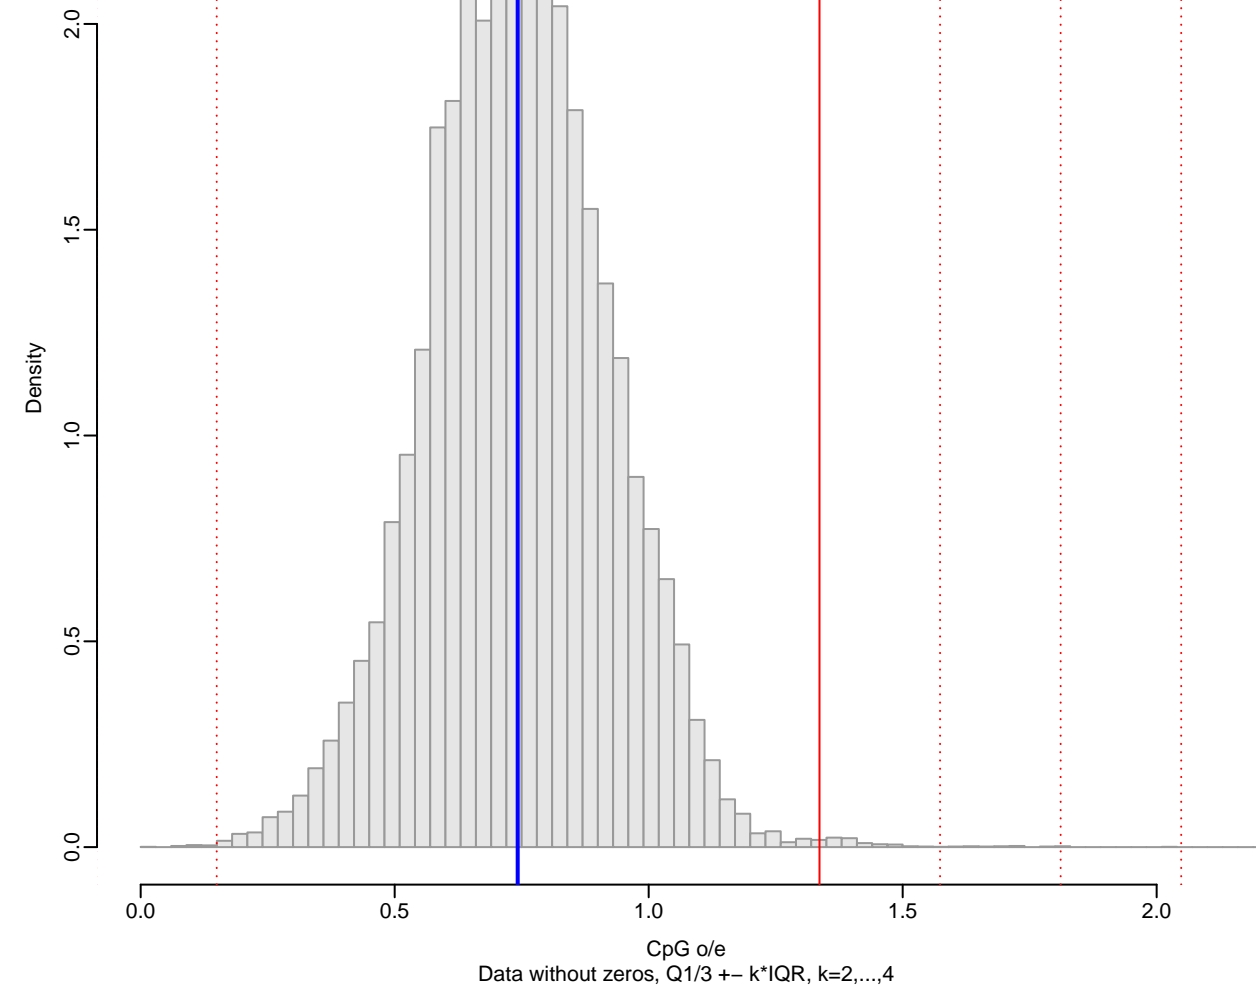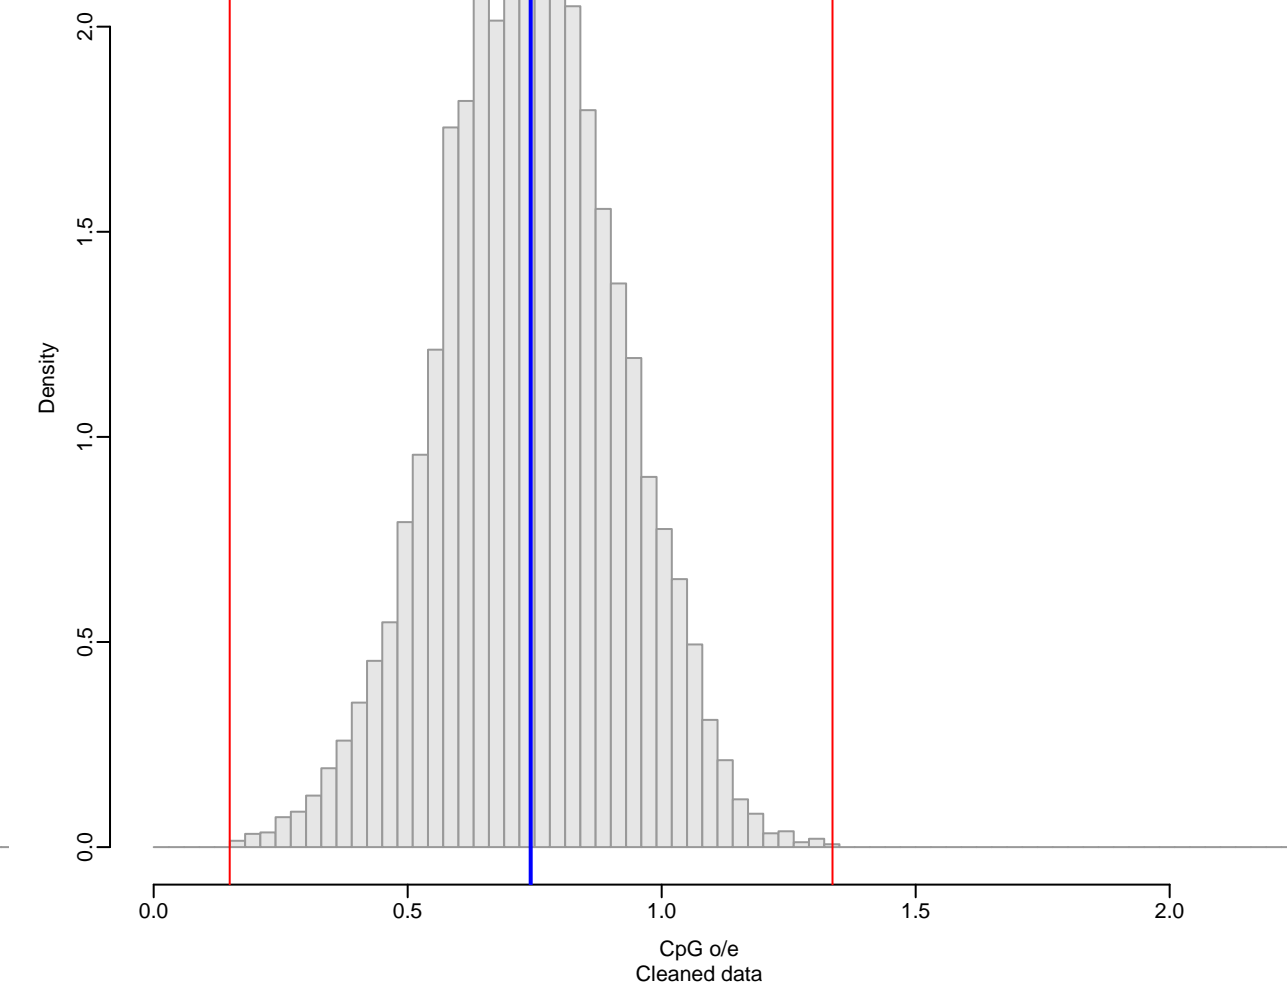

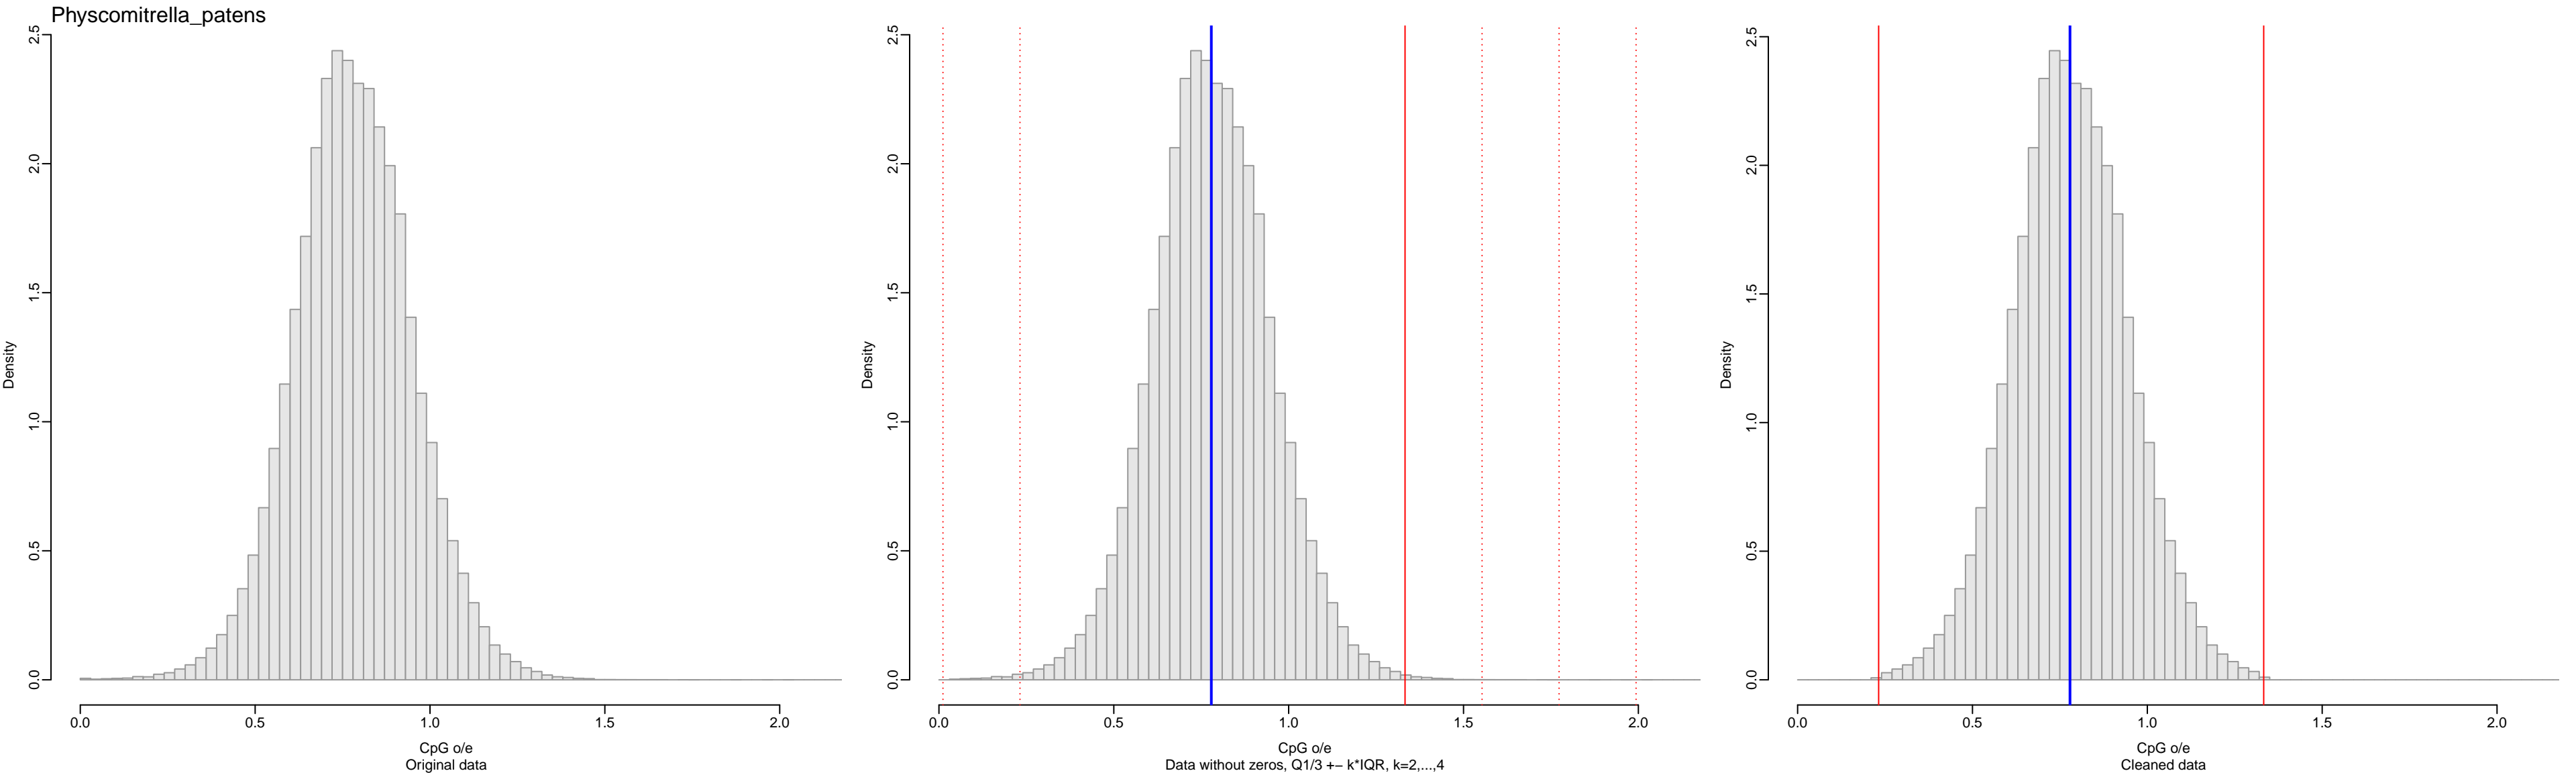

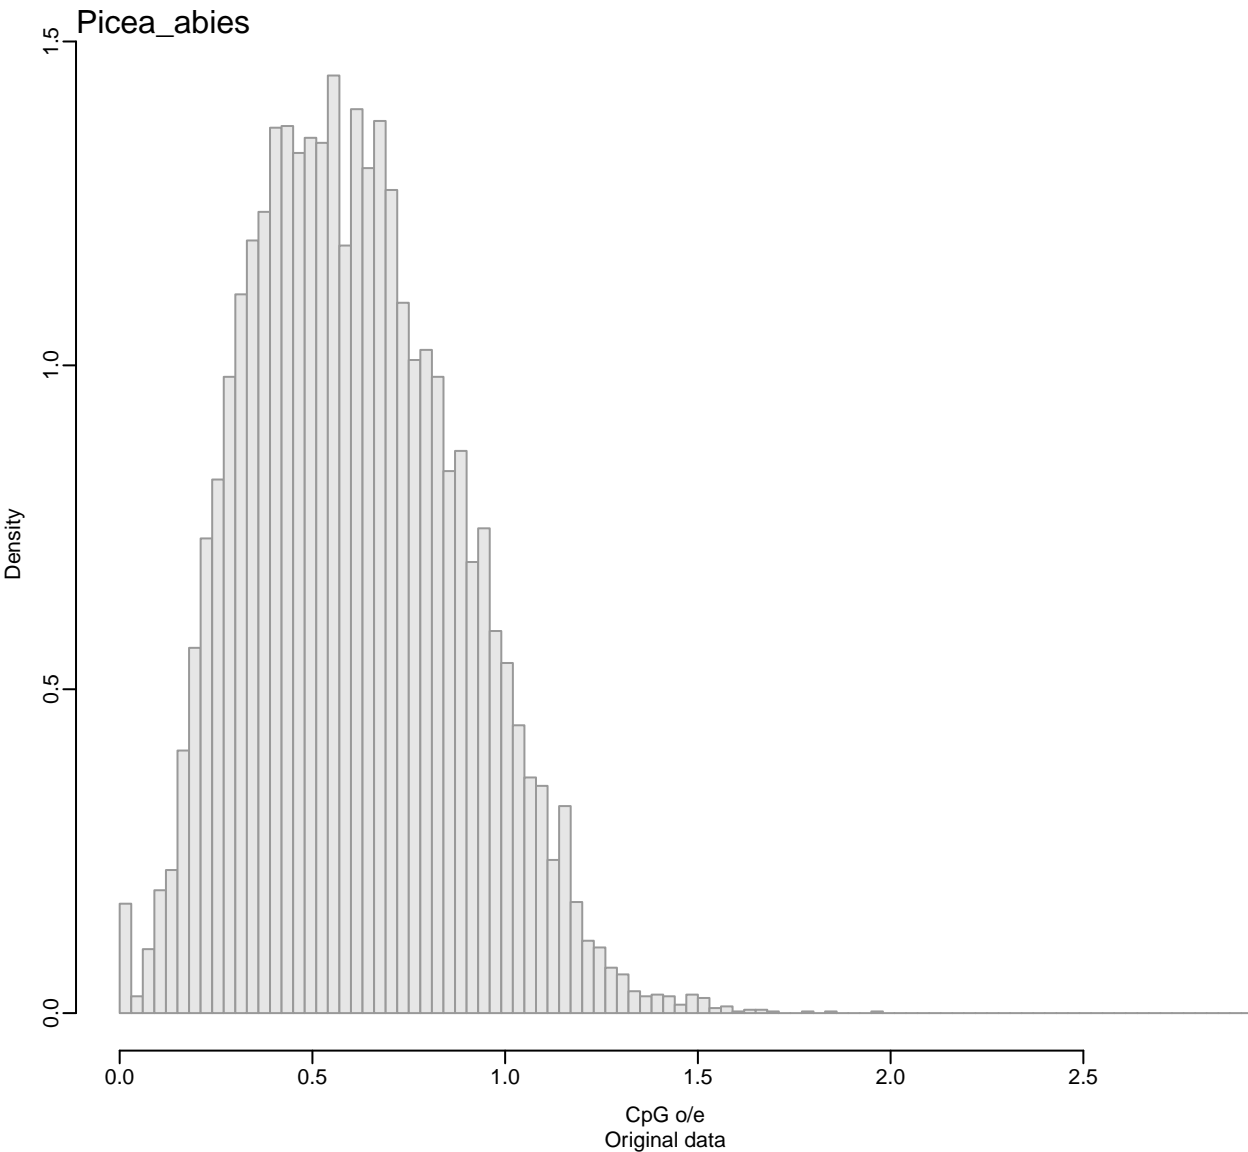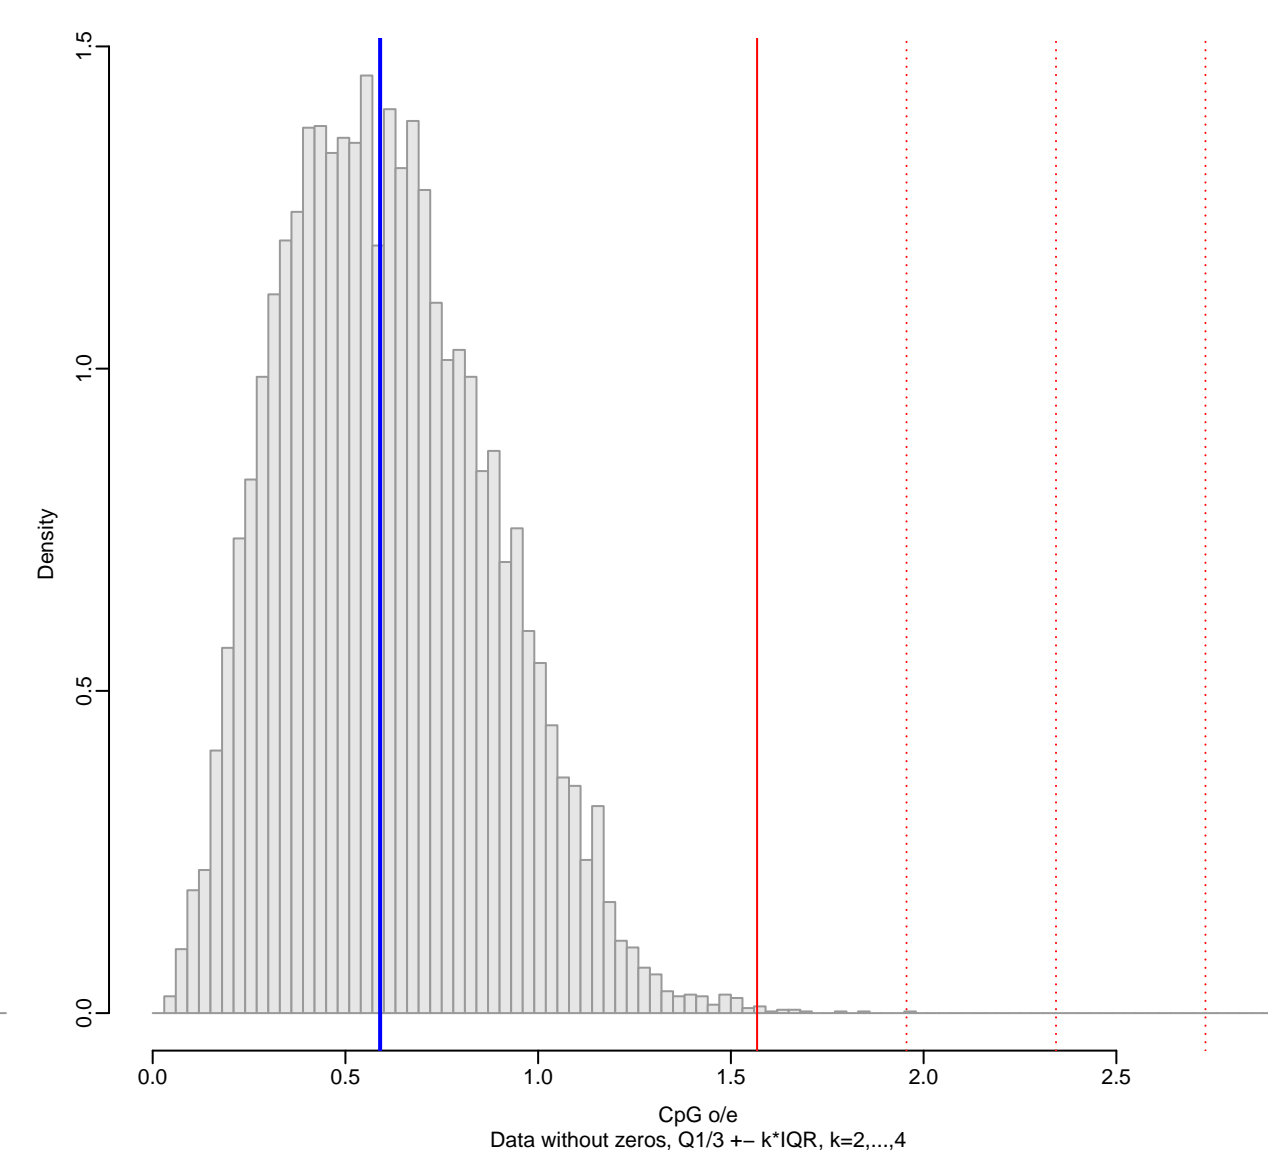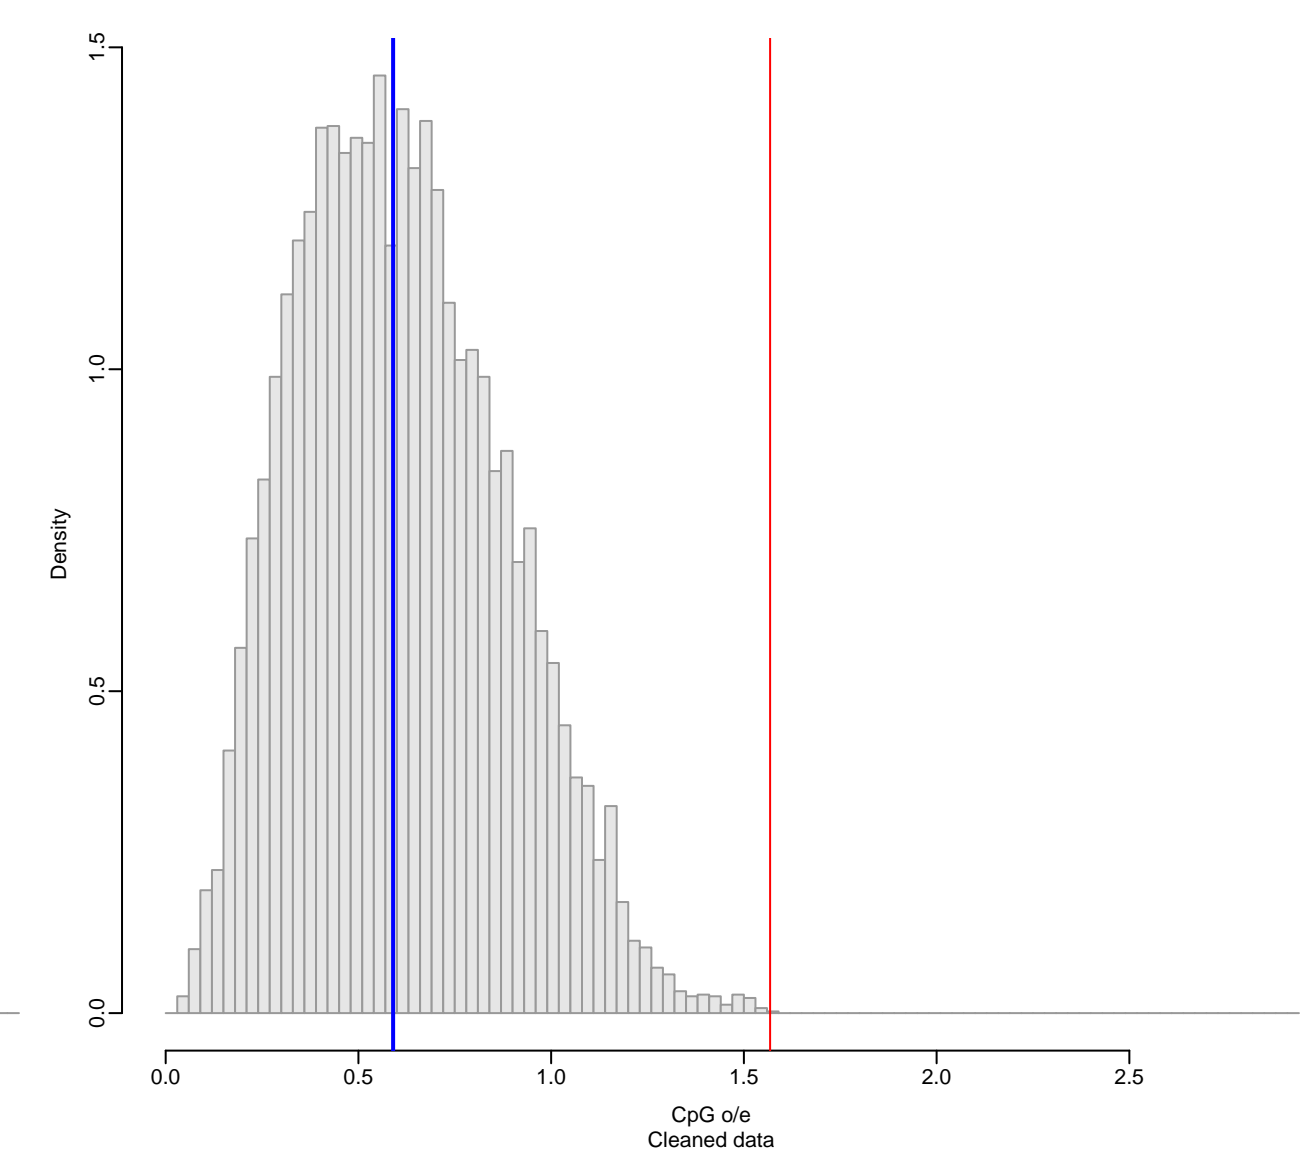



Picea\_glauca

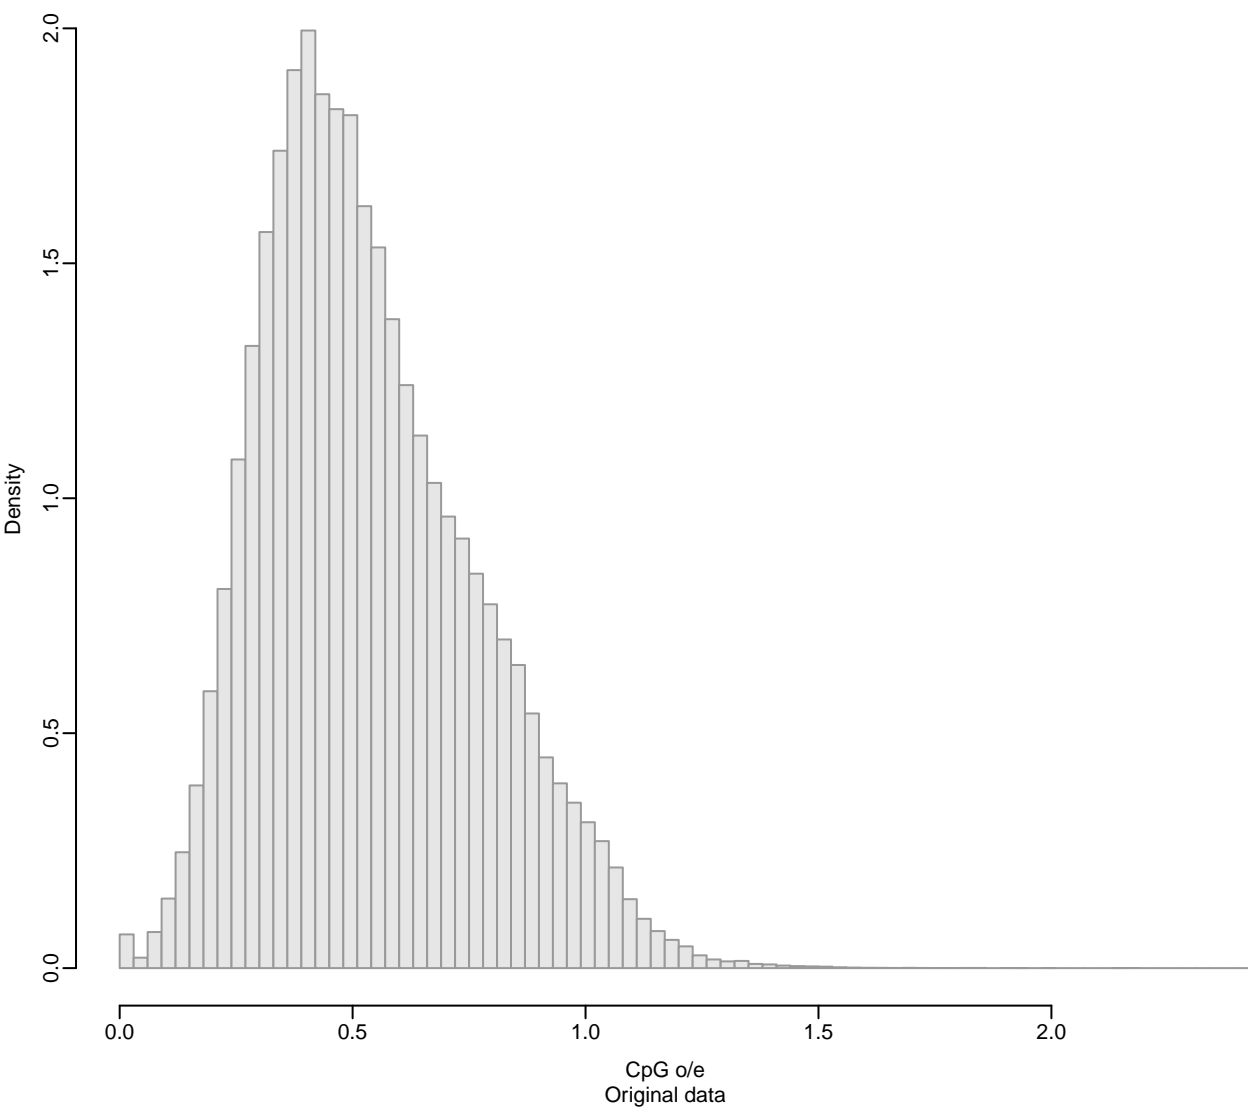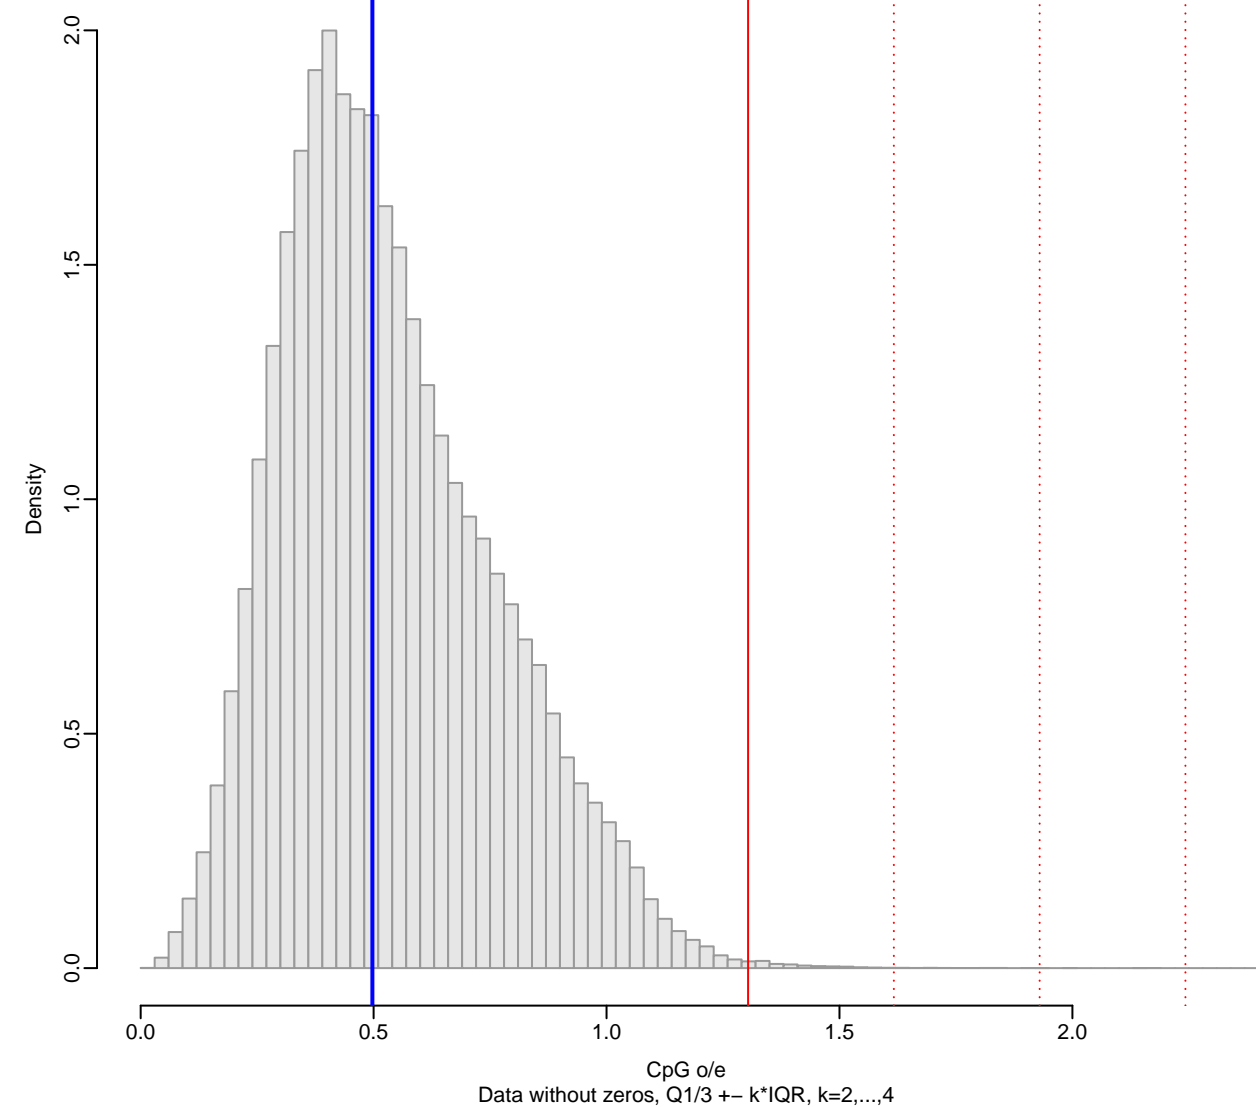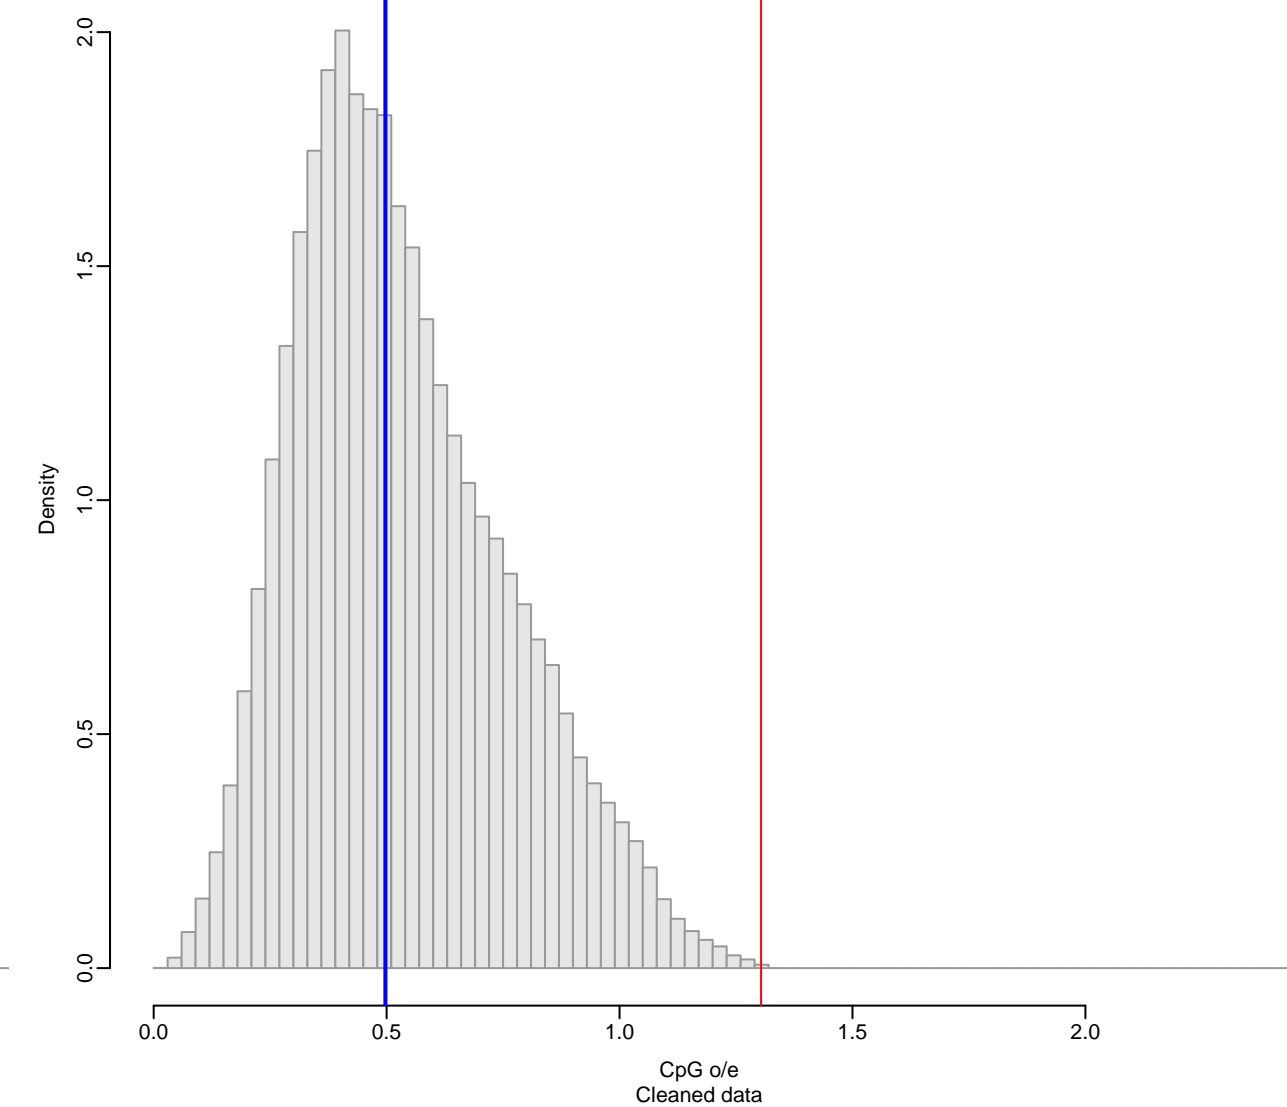

Picea\_mariana

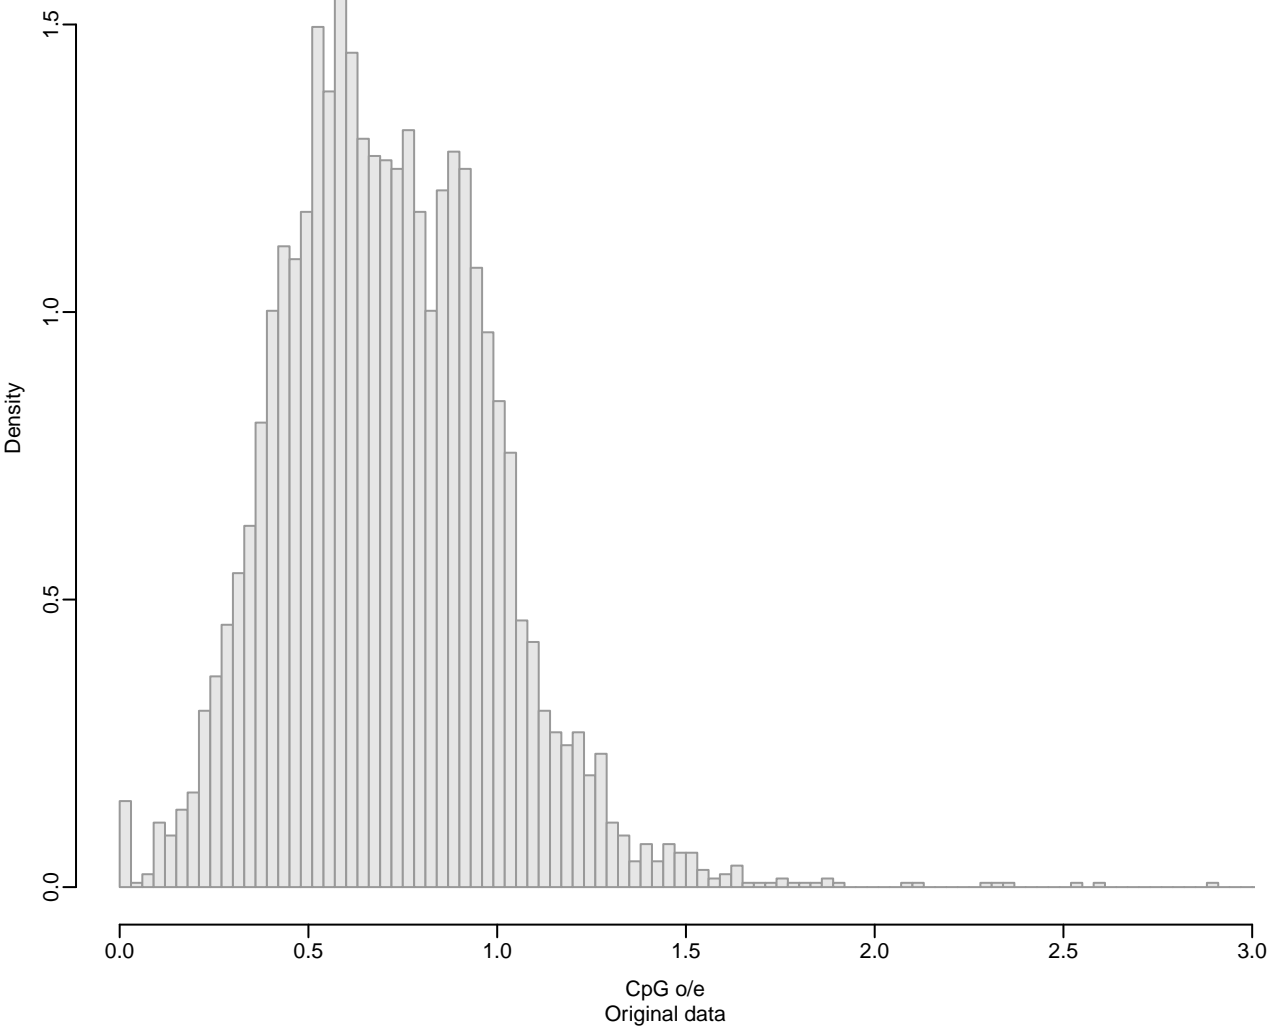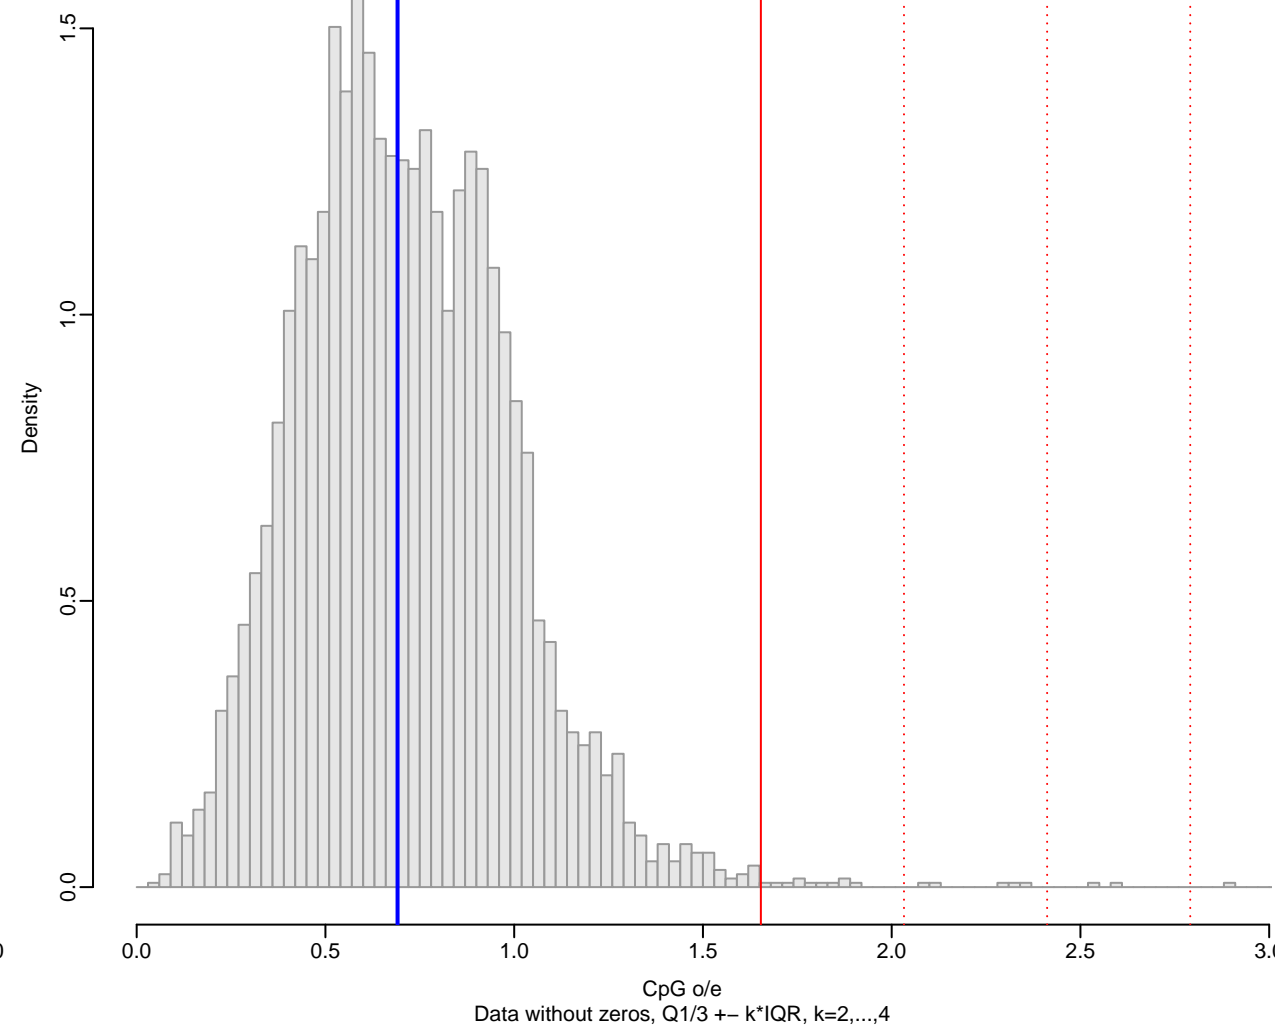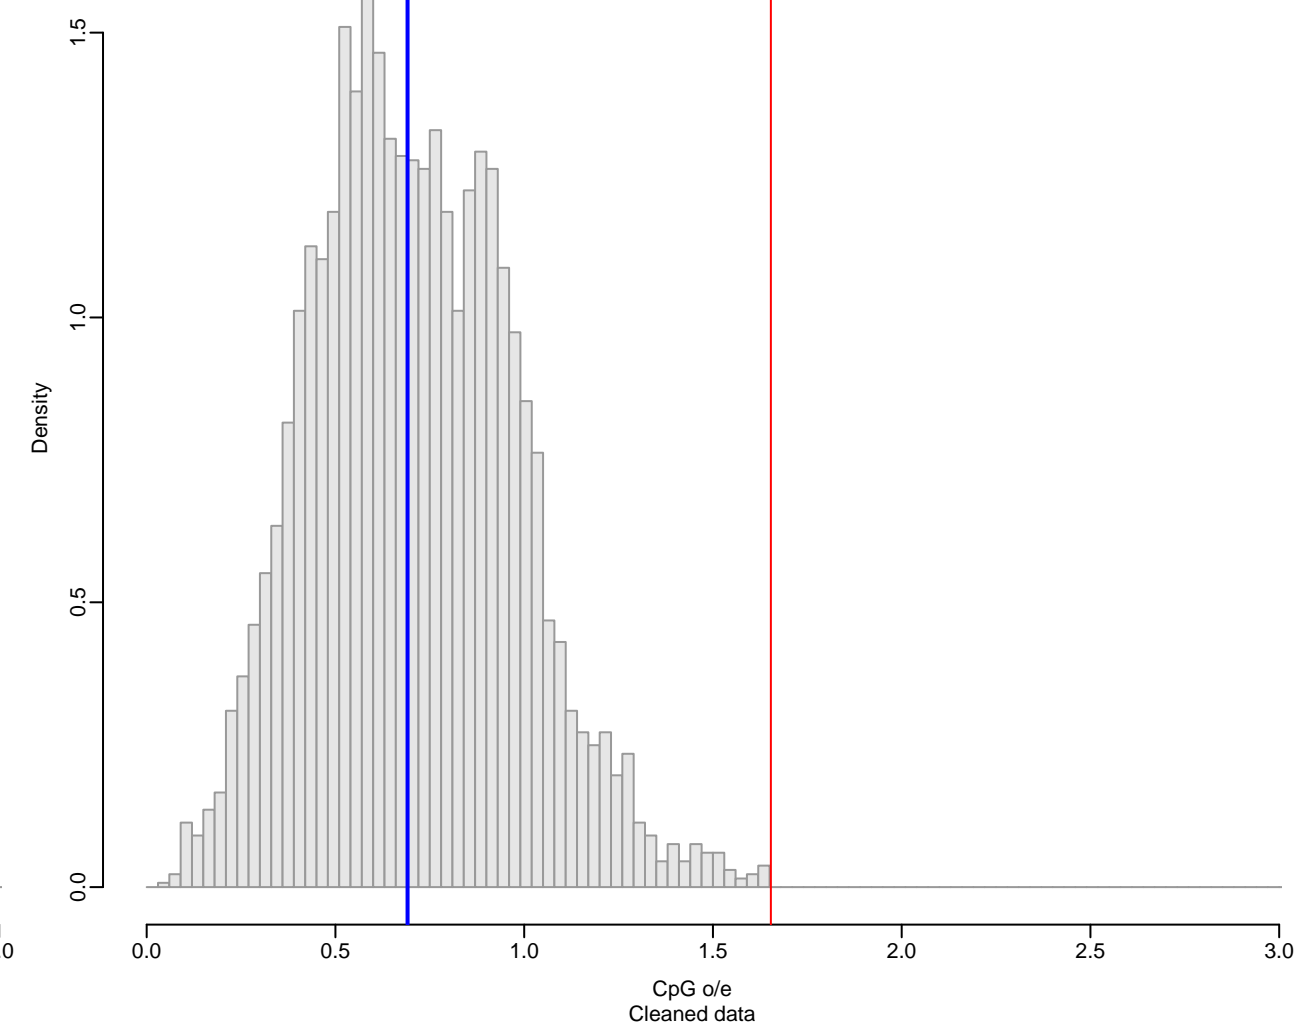

*Picea\_sitchensis*

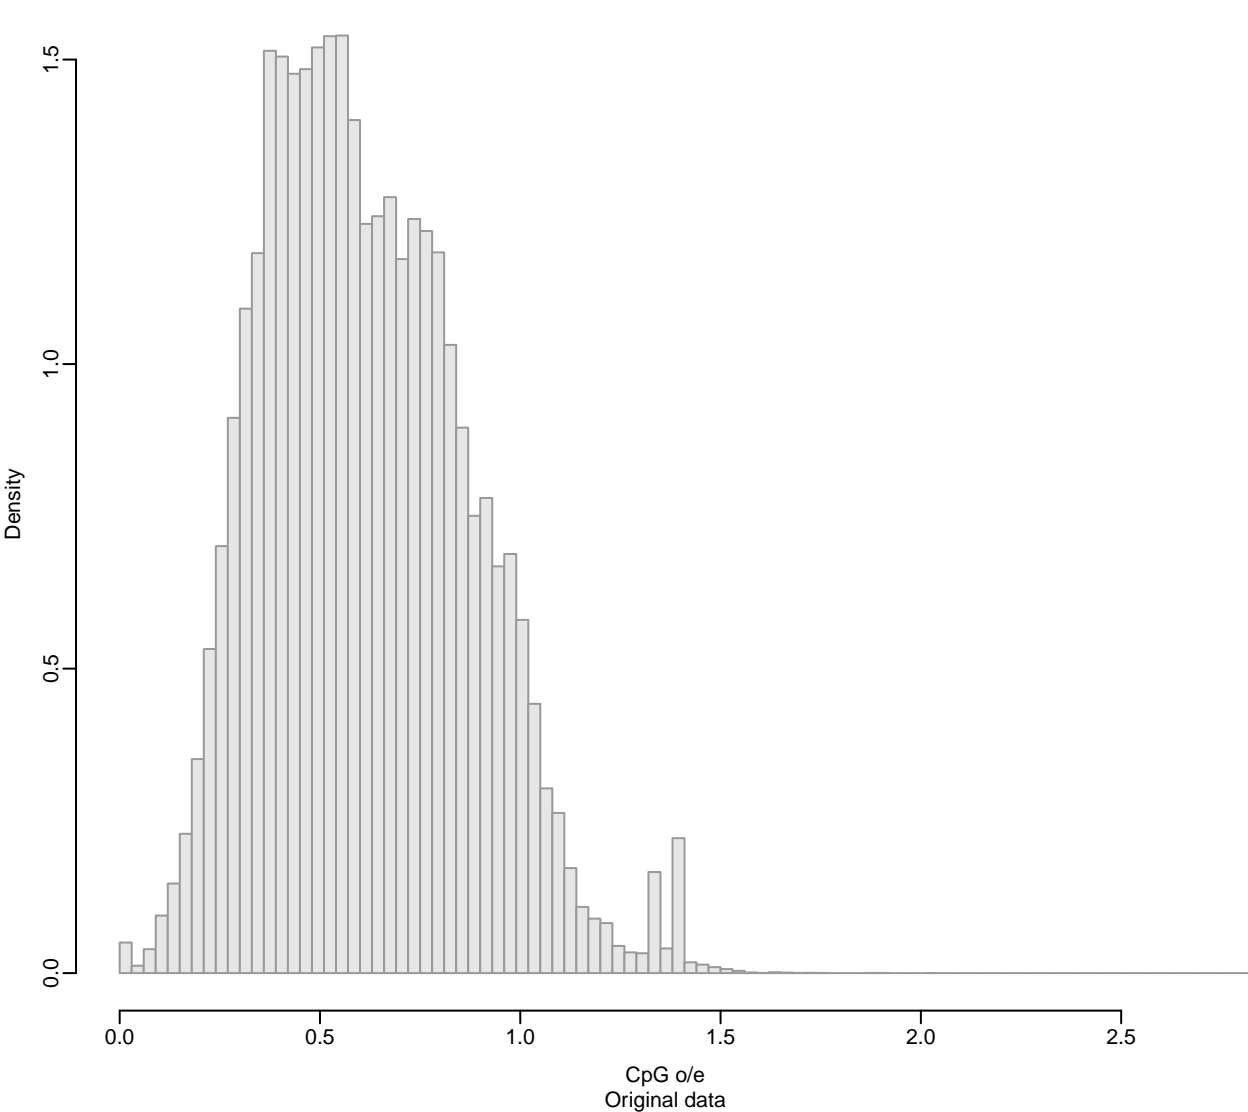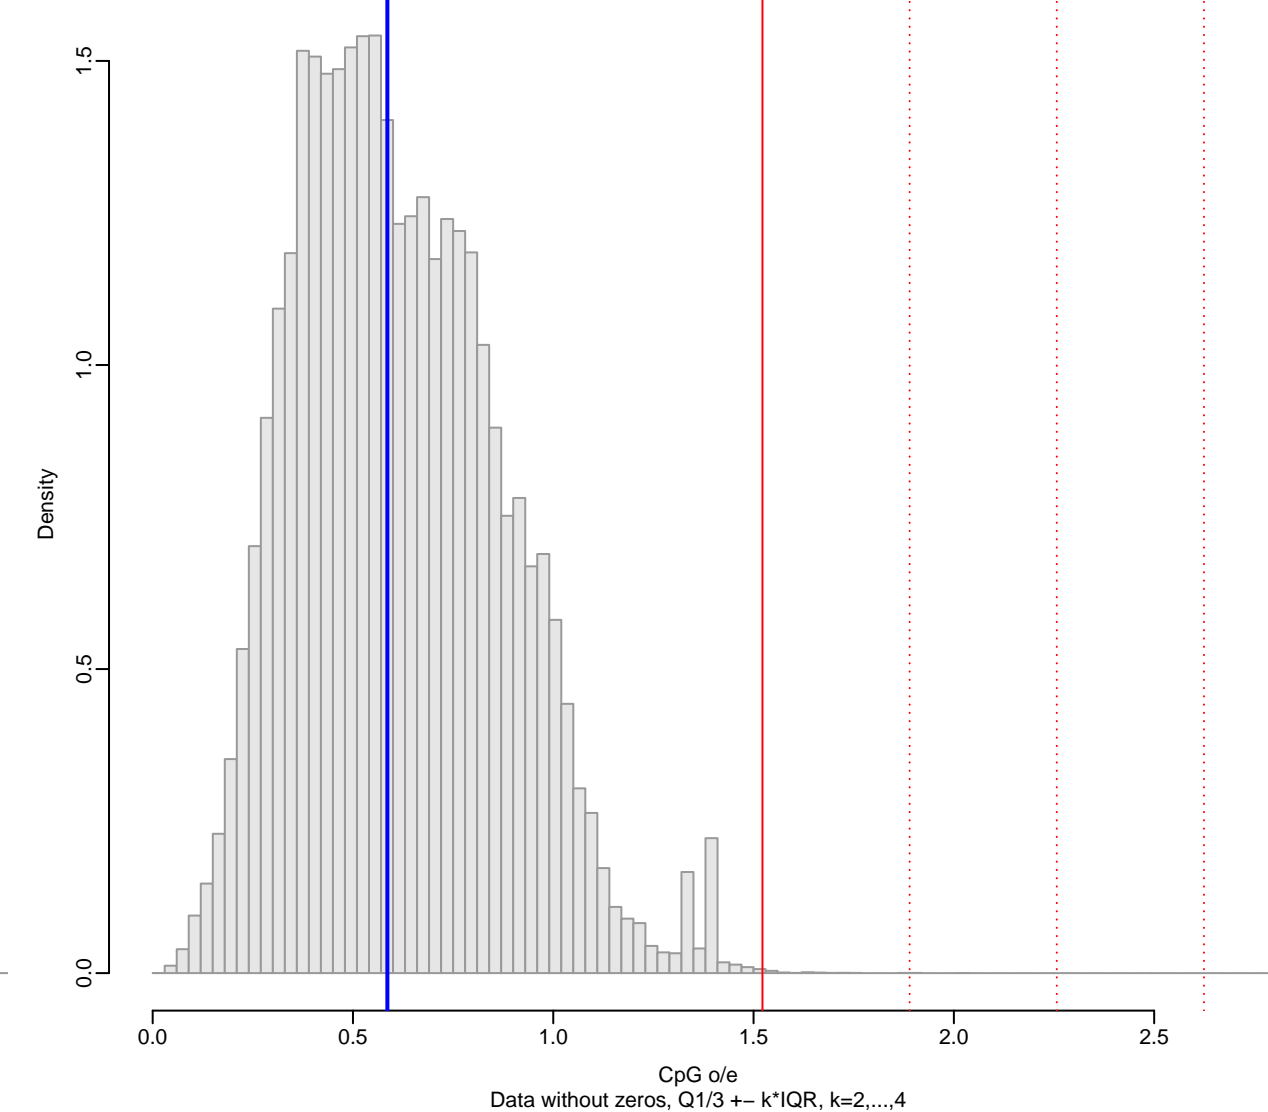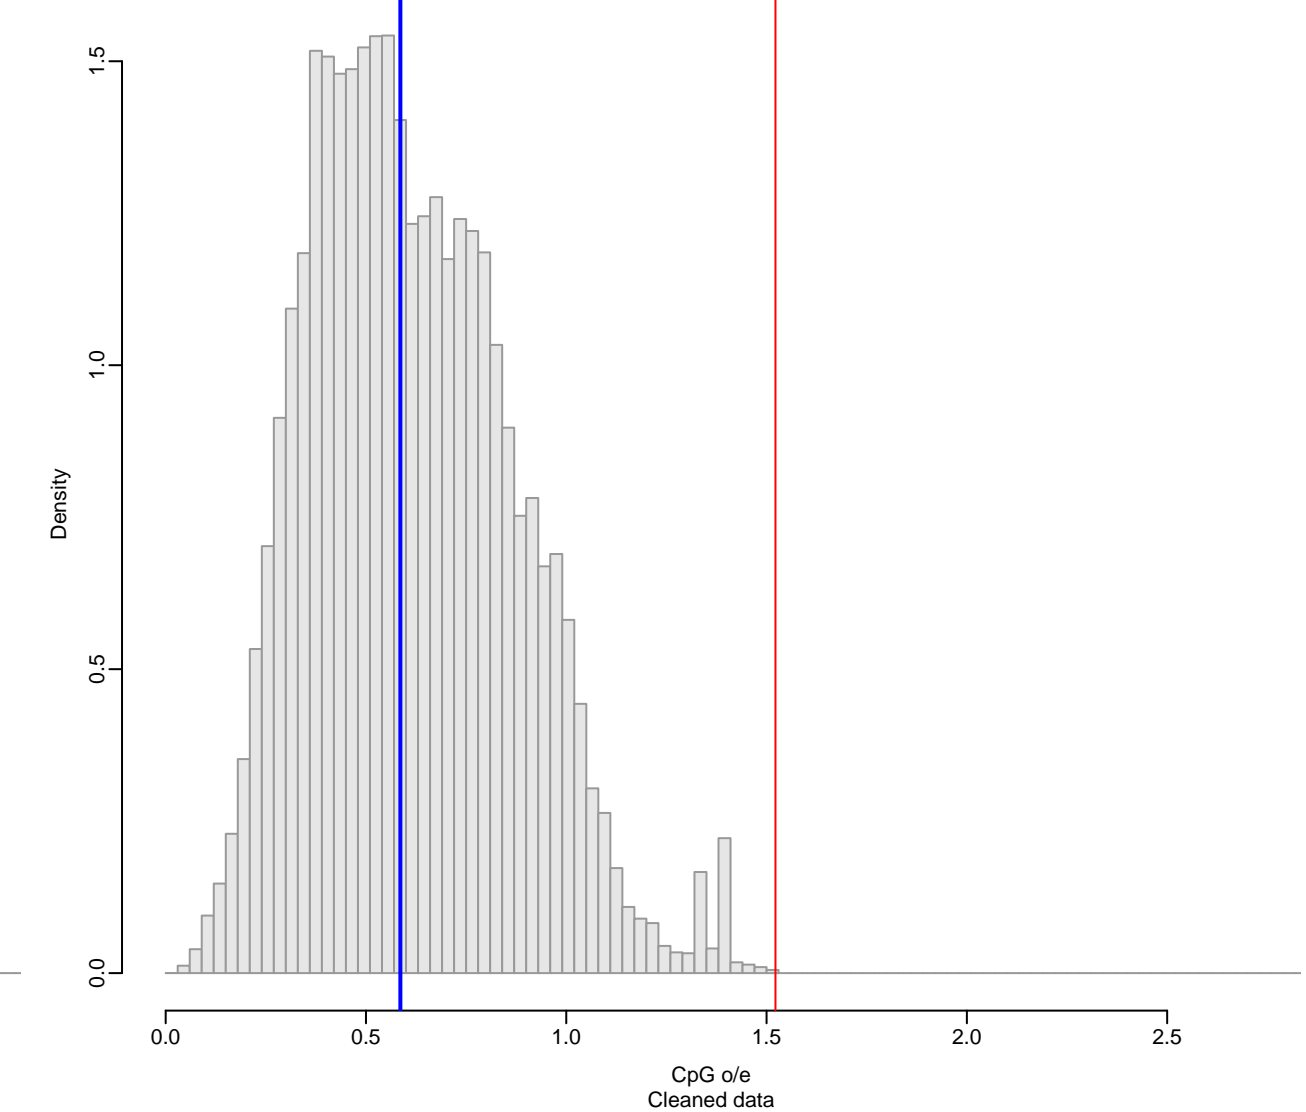

Pichia\_stipitis

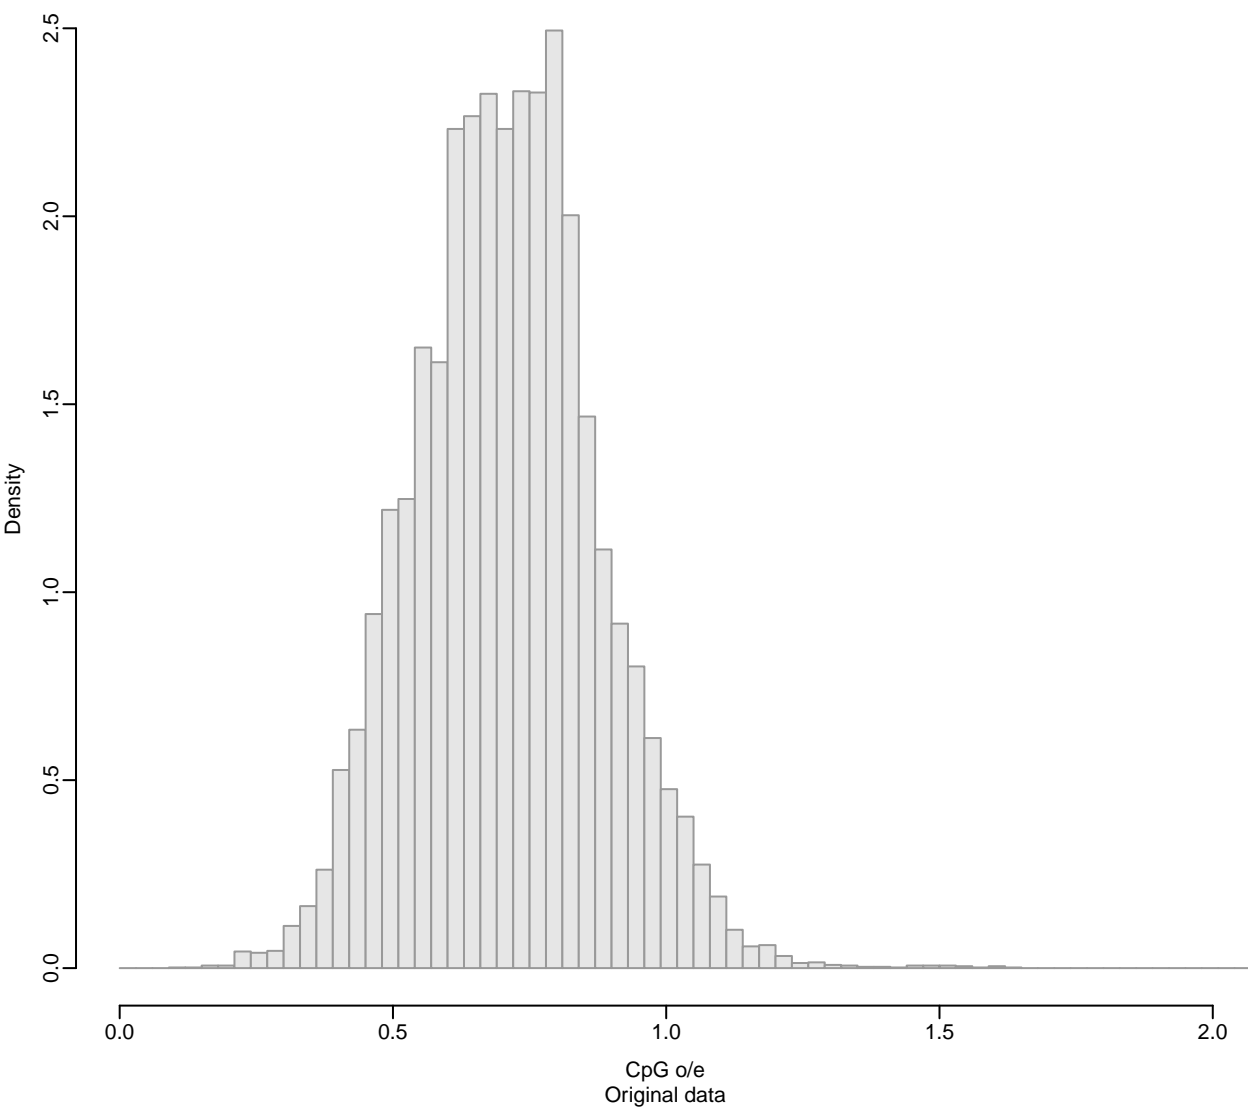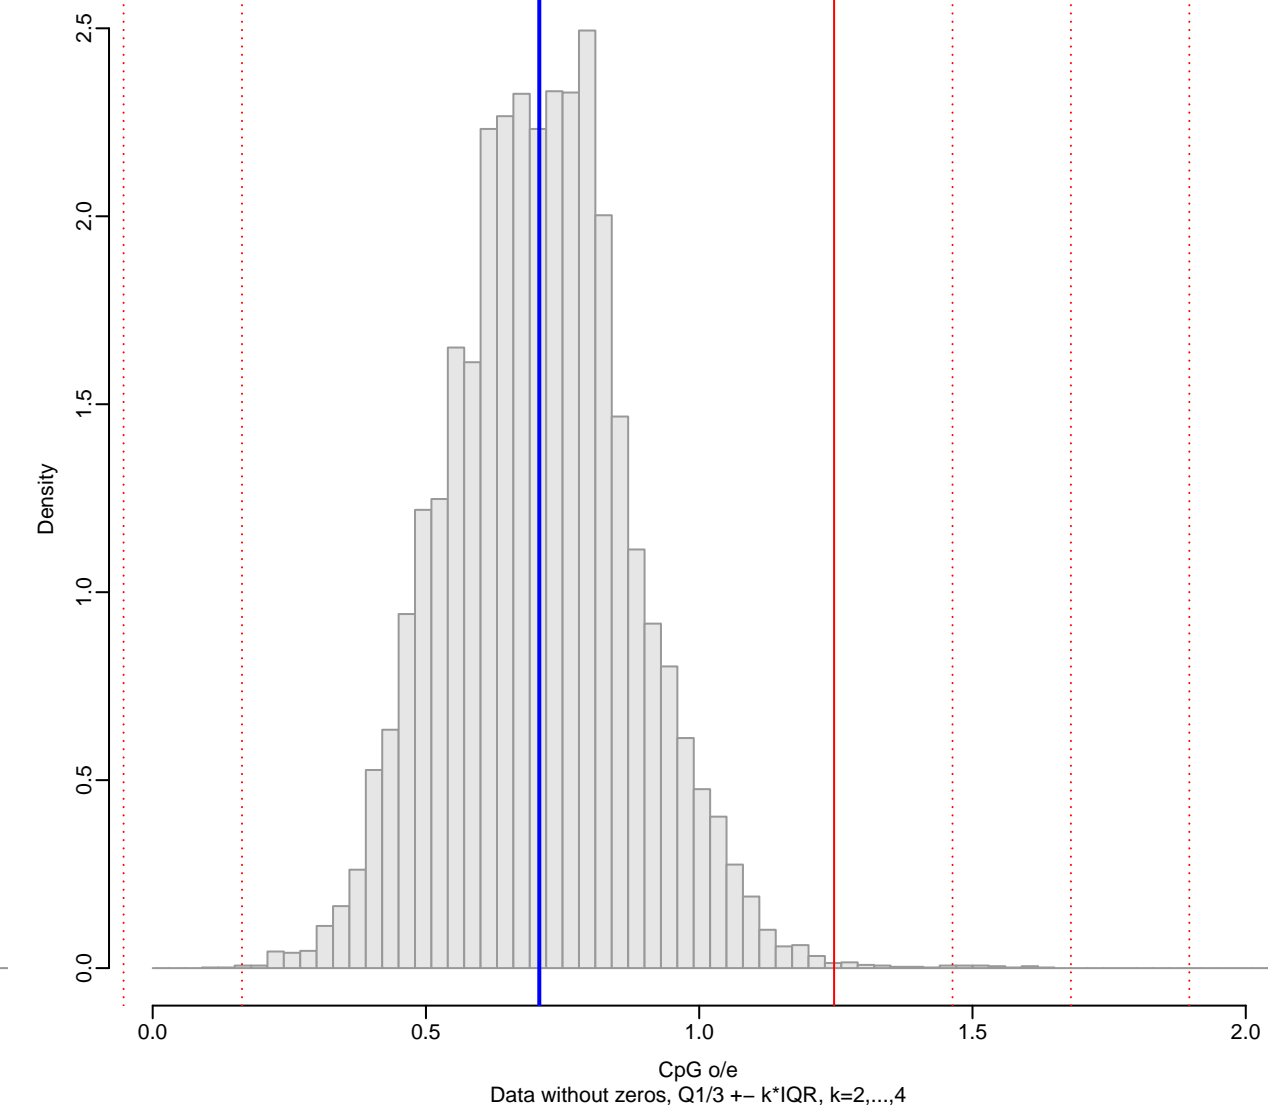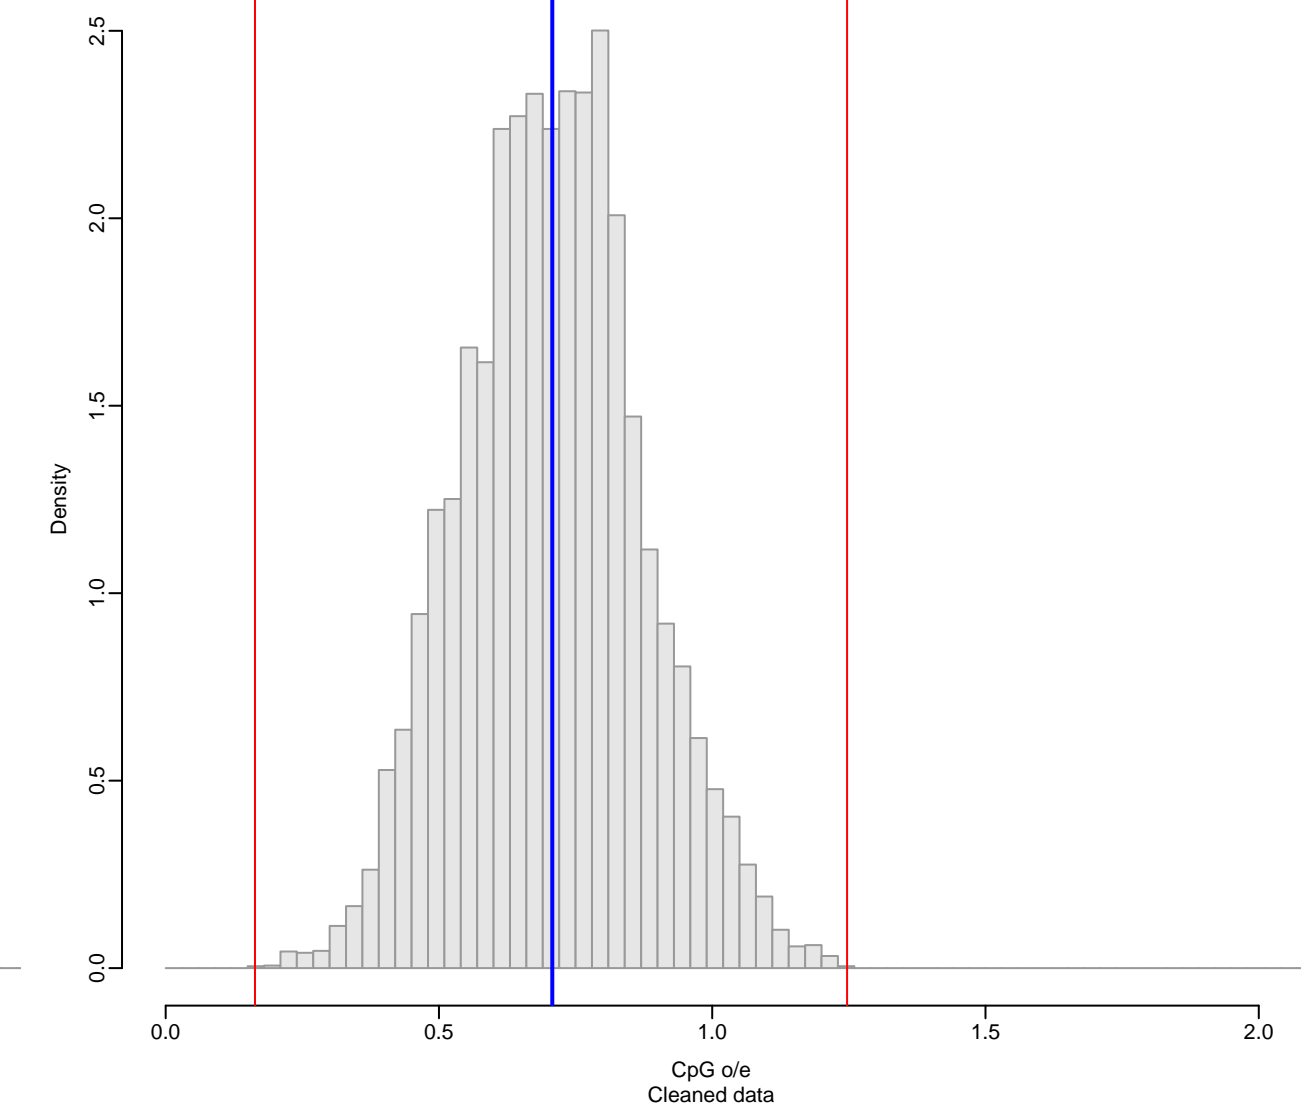

Pimephales\_promelas

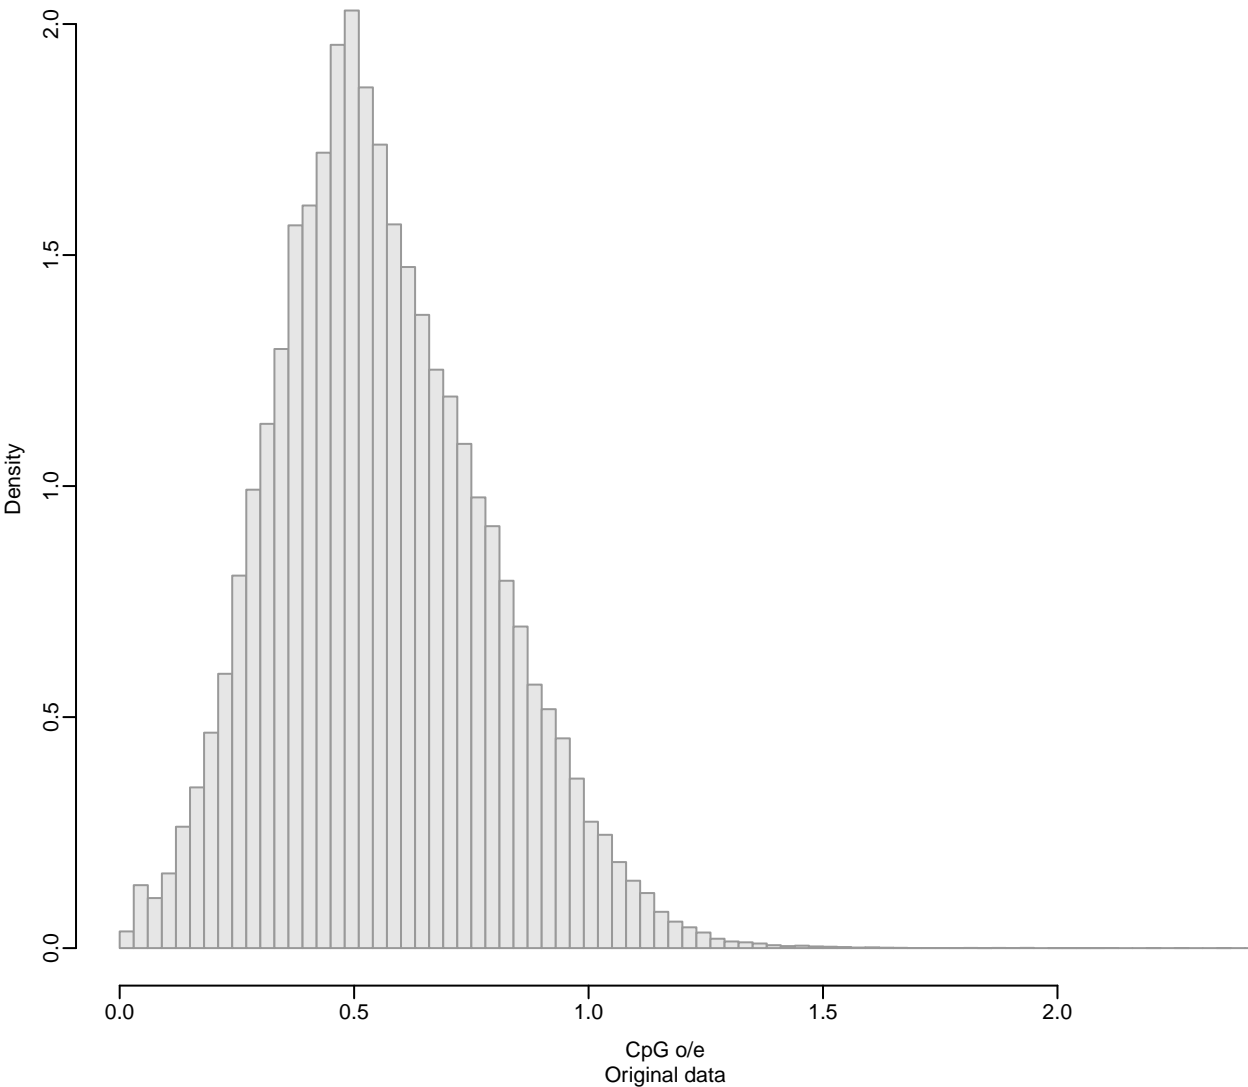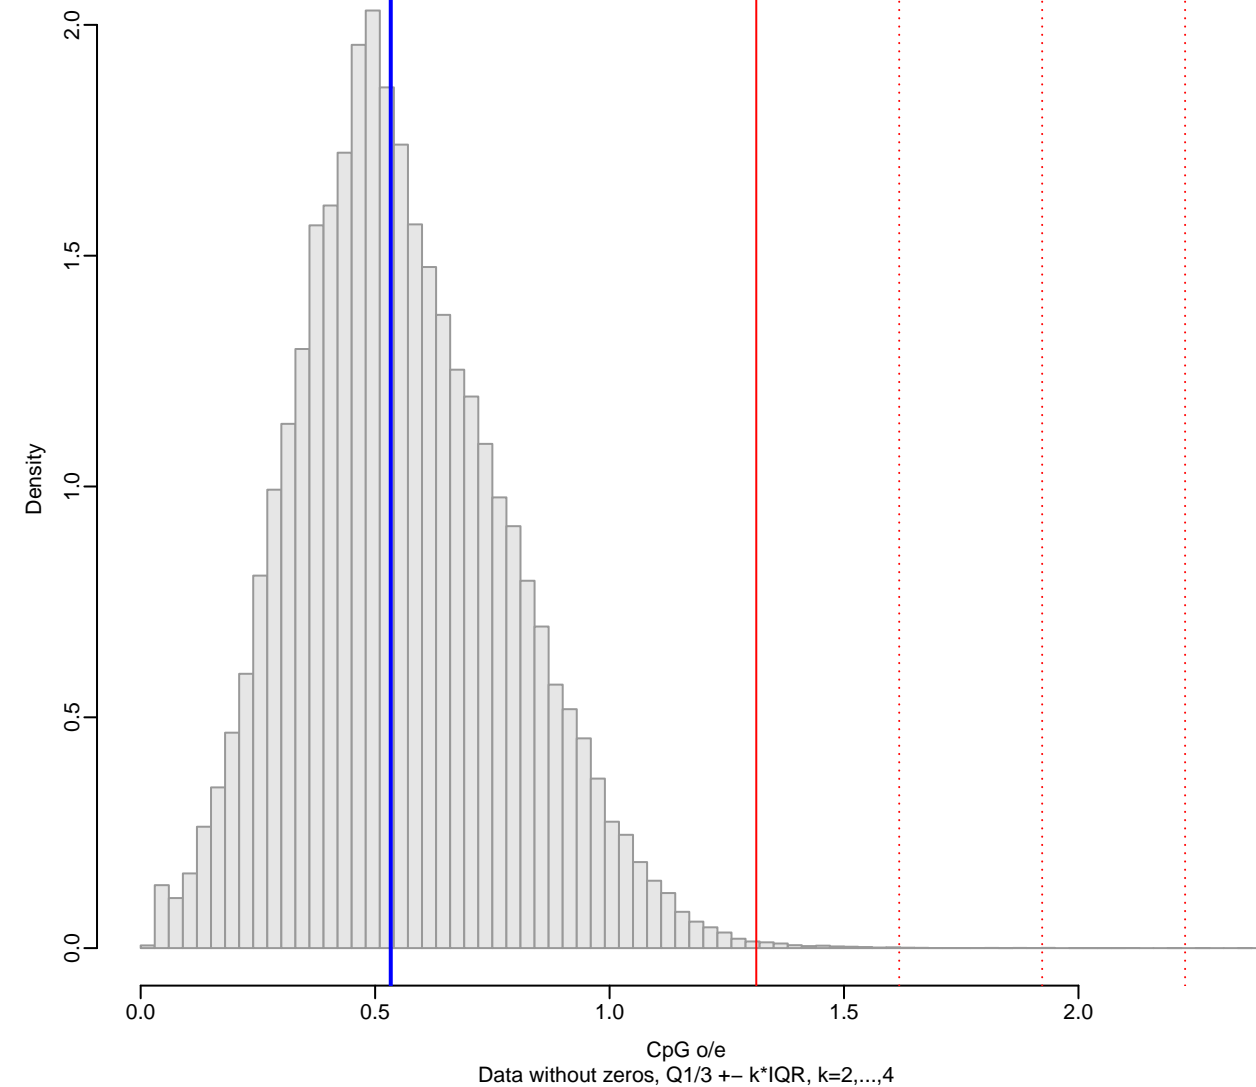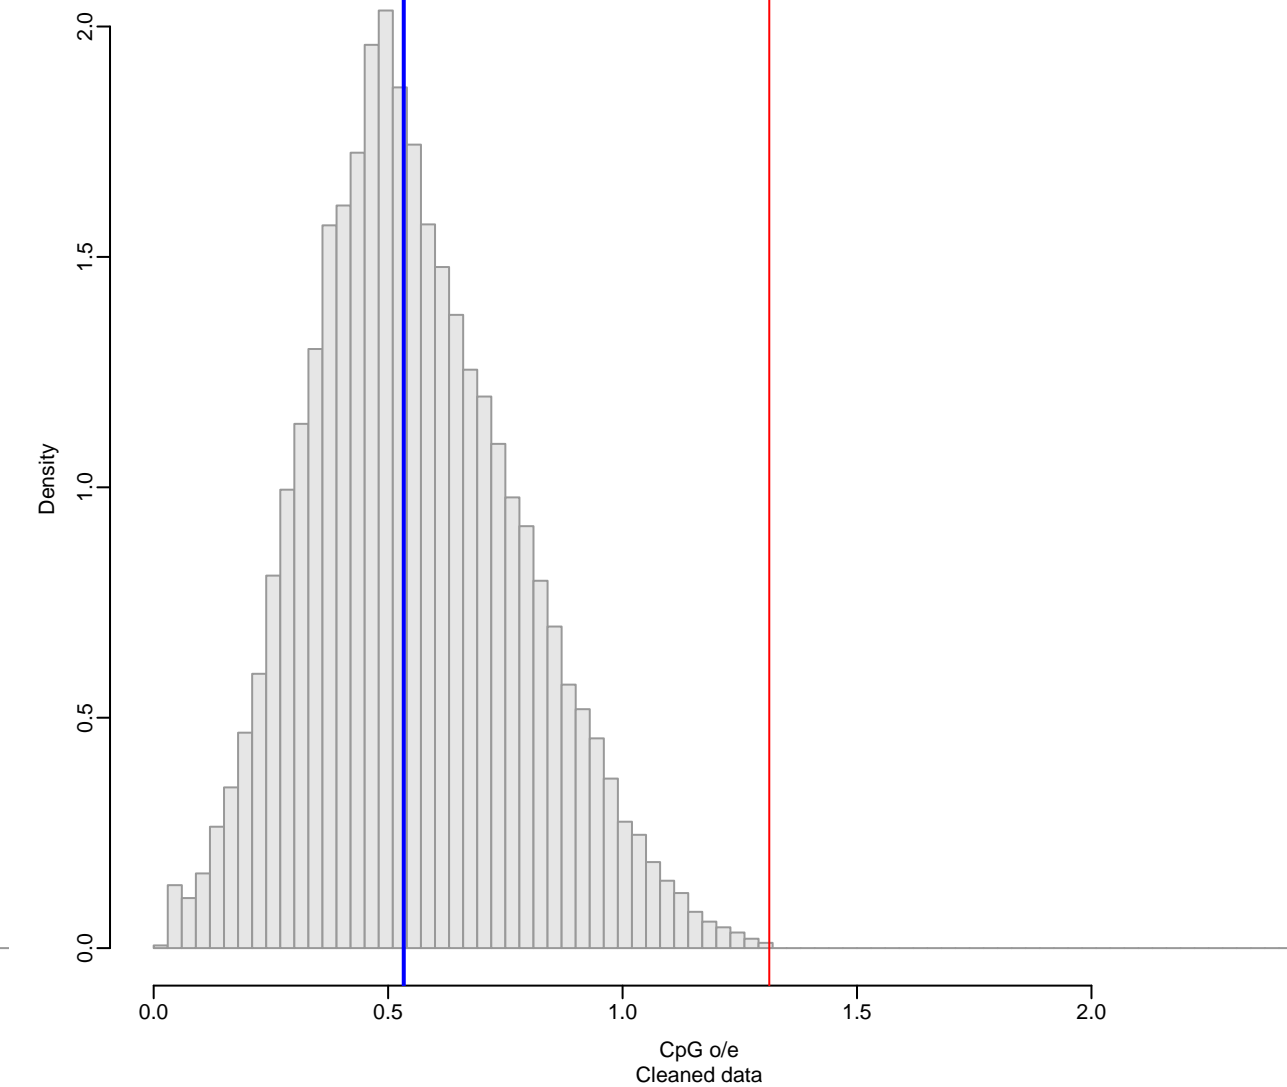

Pinctada\_fucata

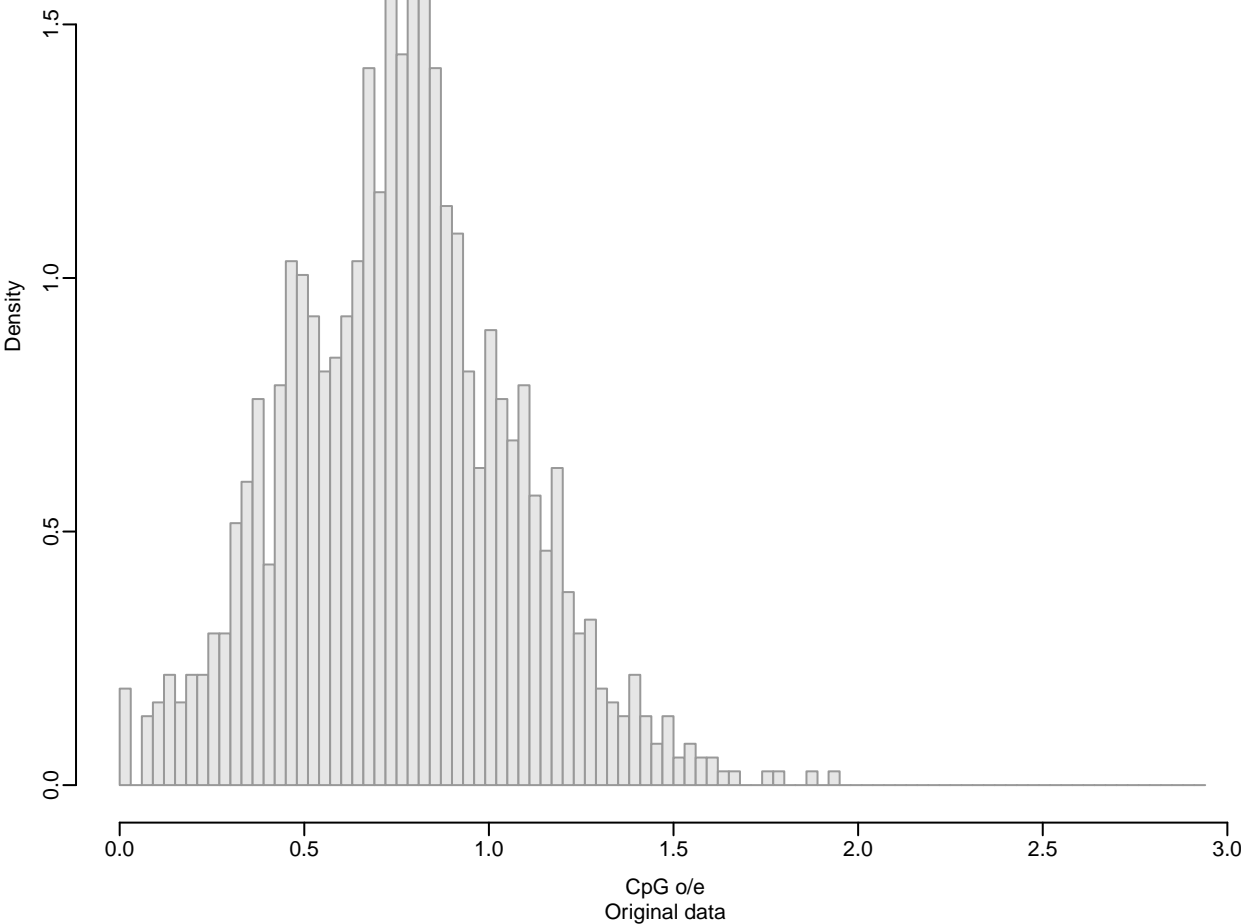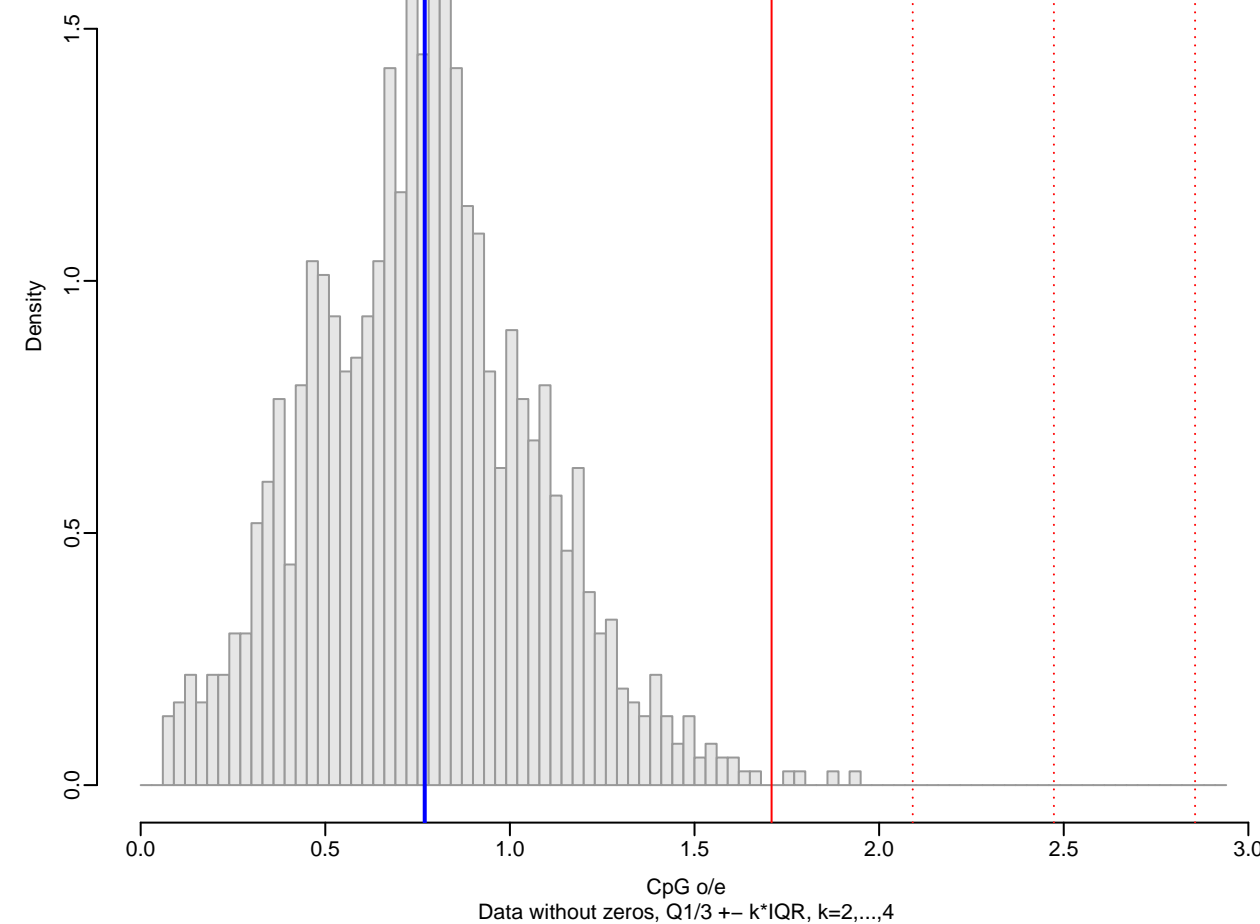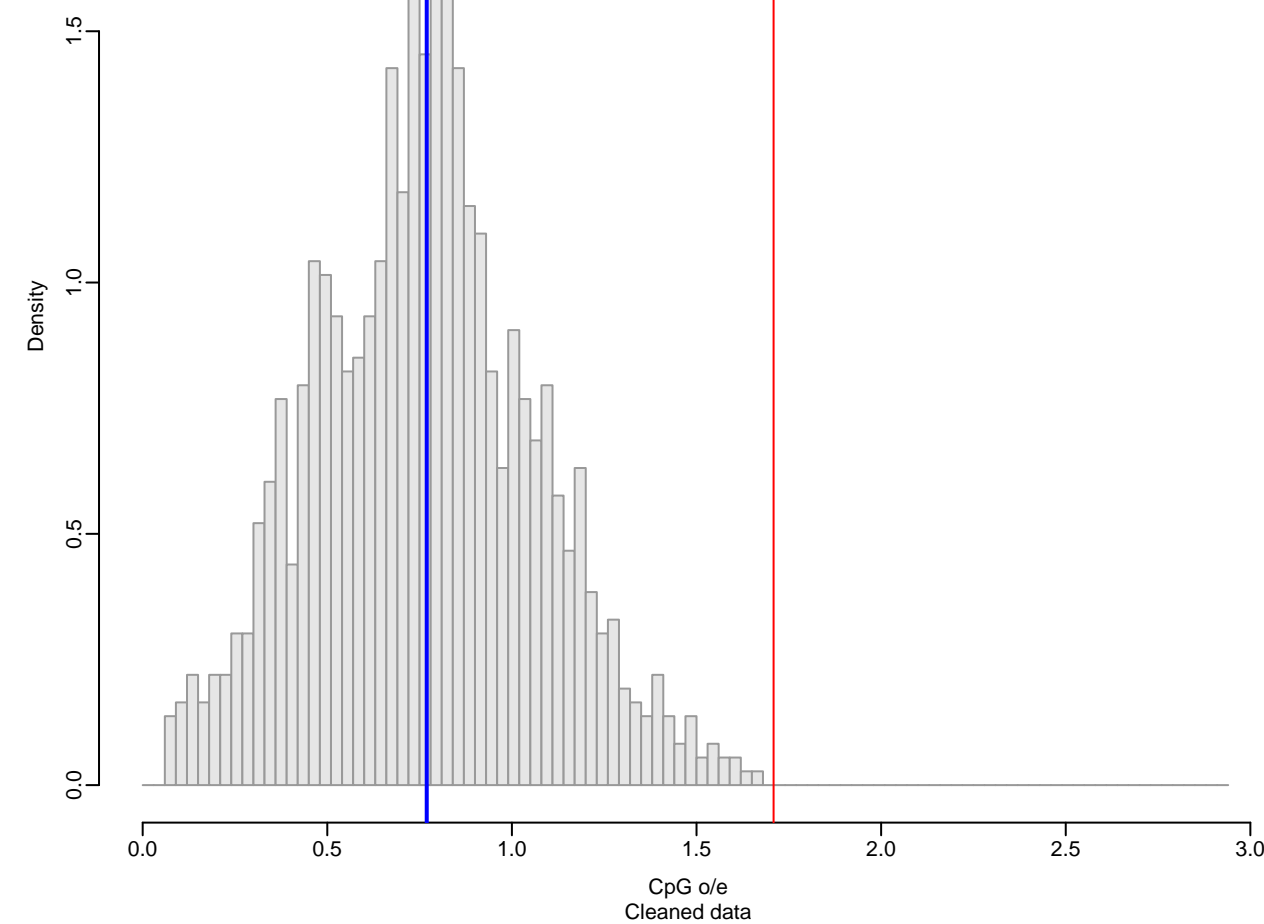

Pinctada\_martensi

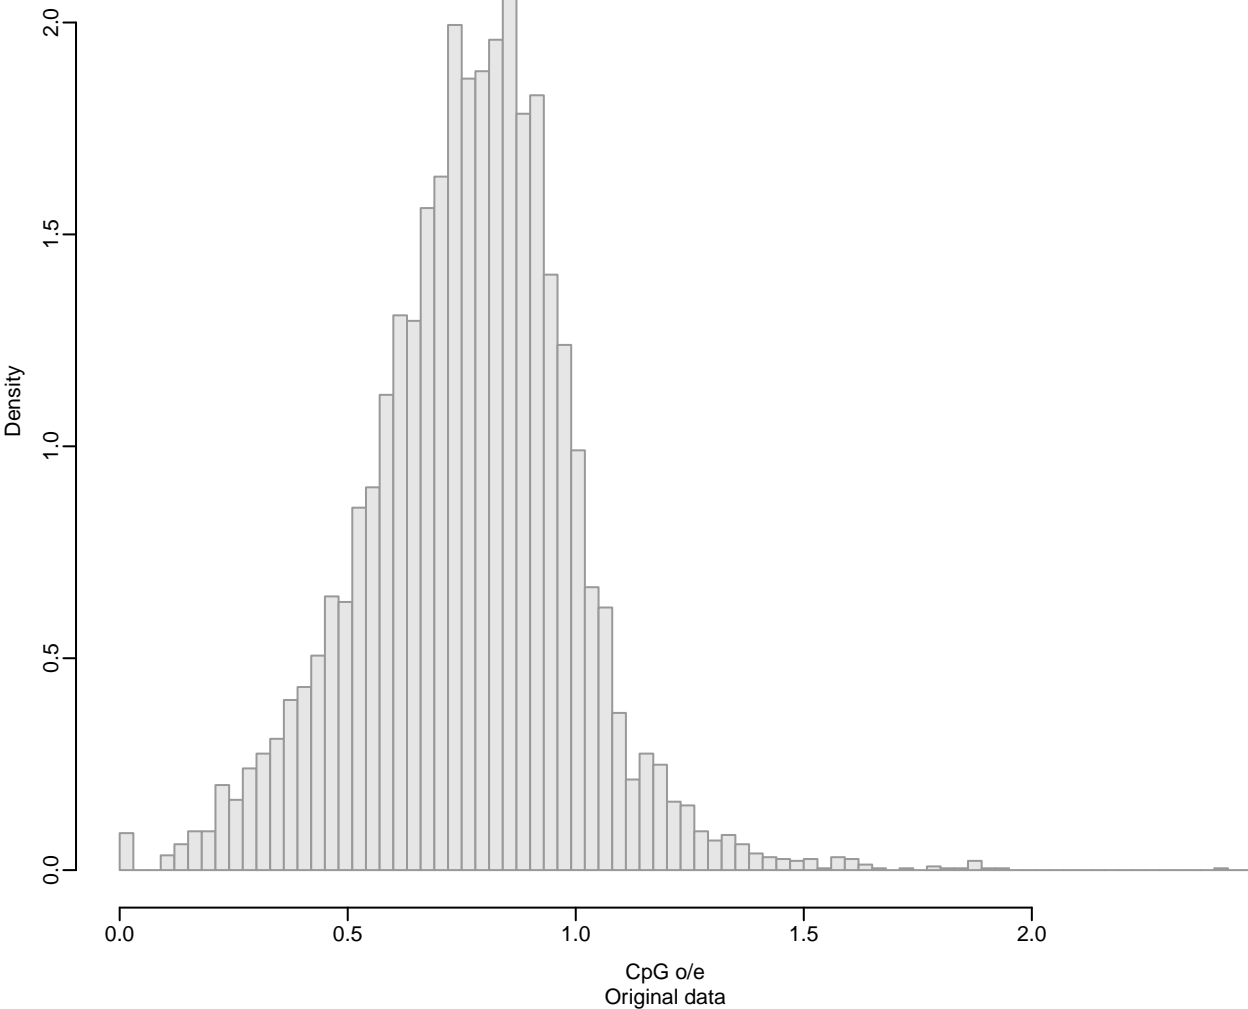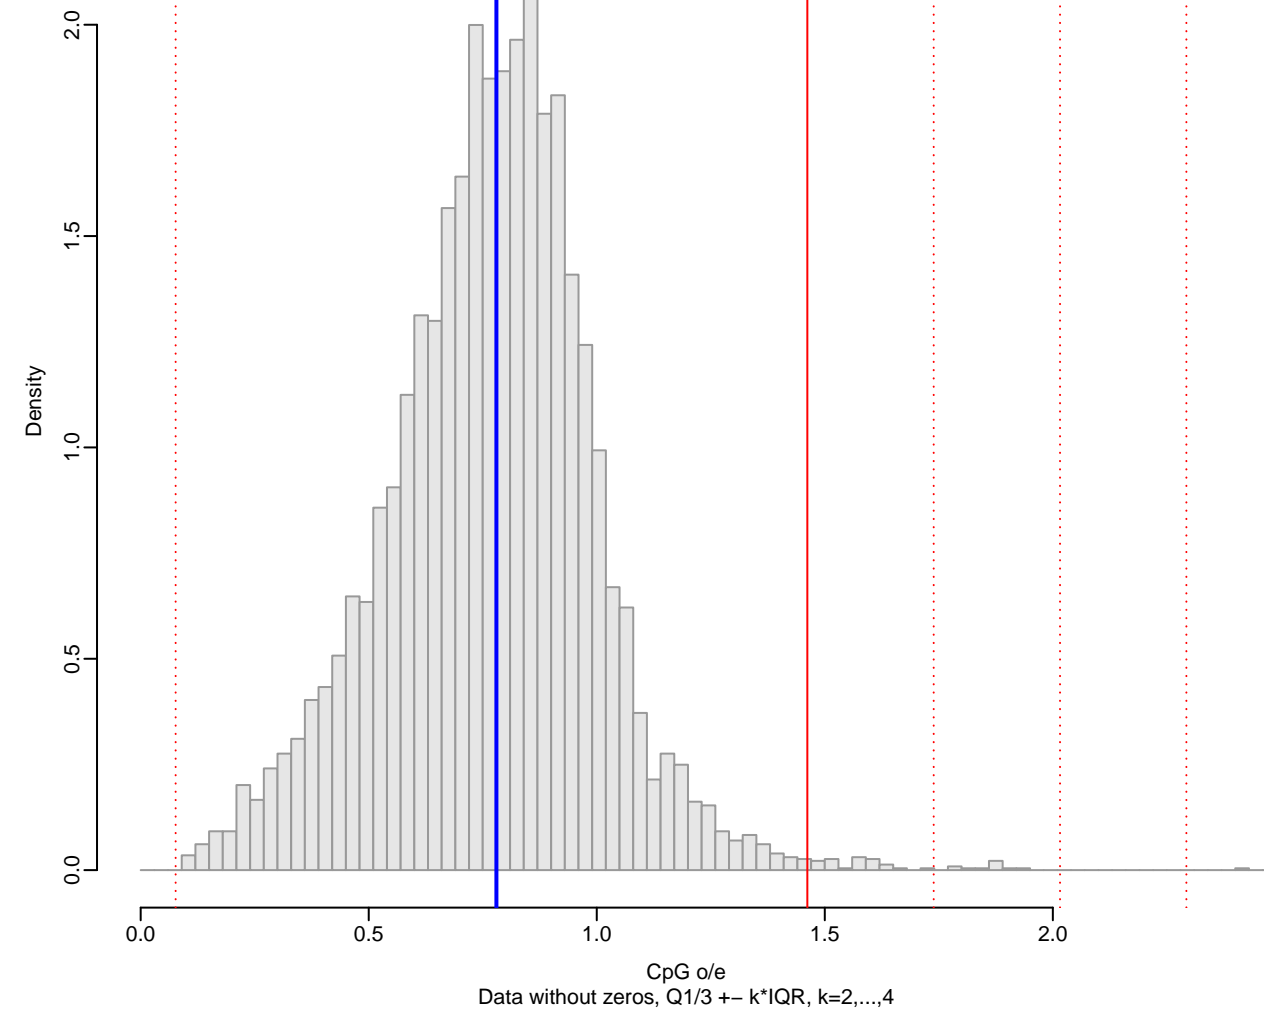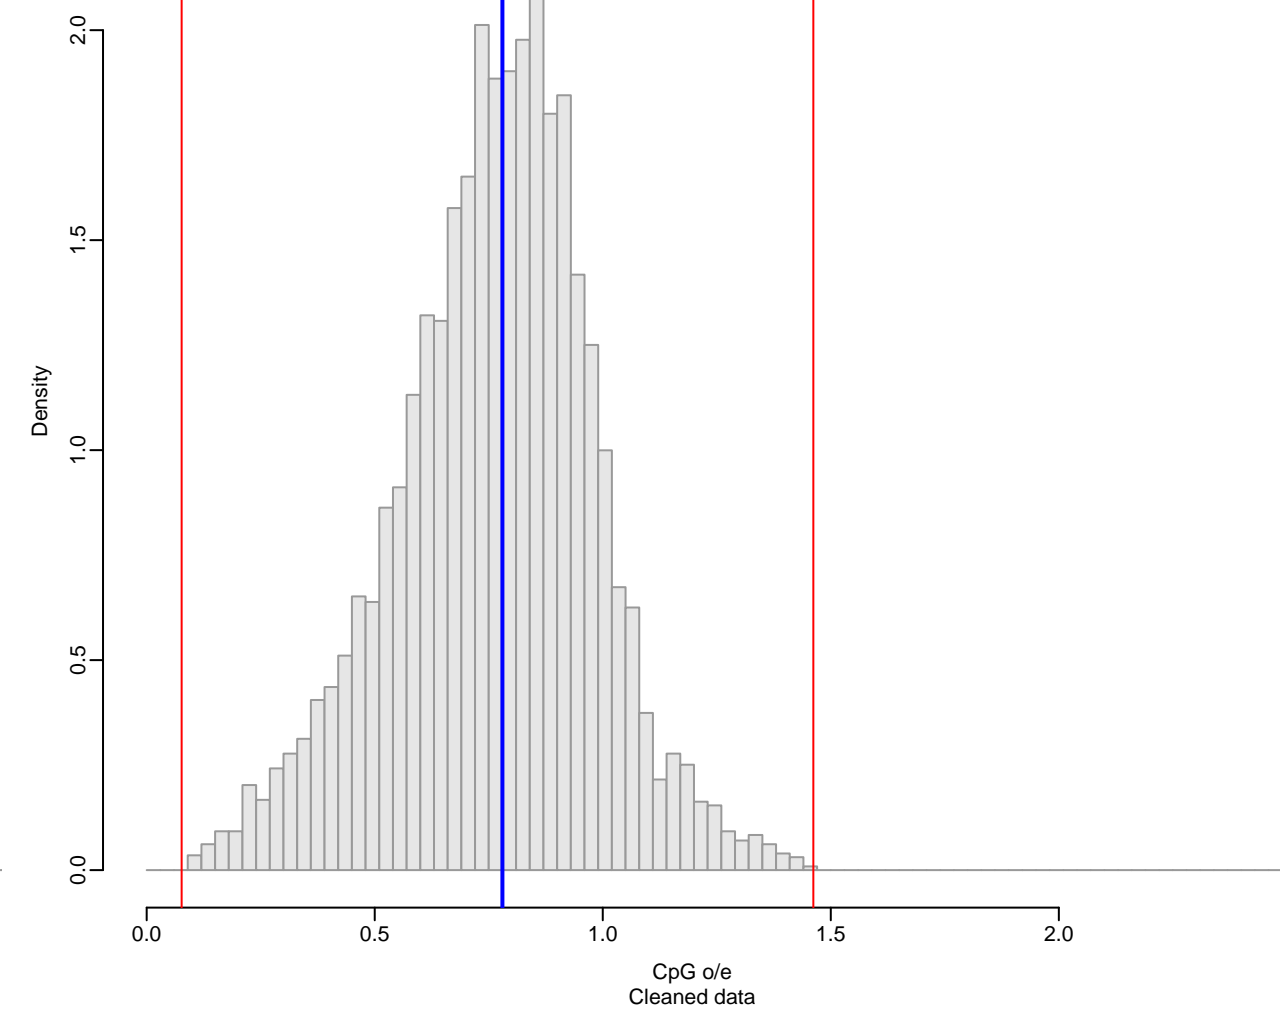

Pinctada\_maxima

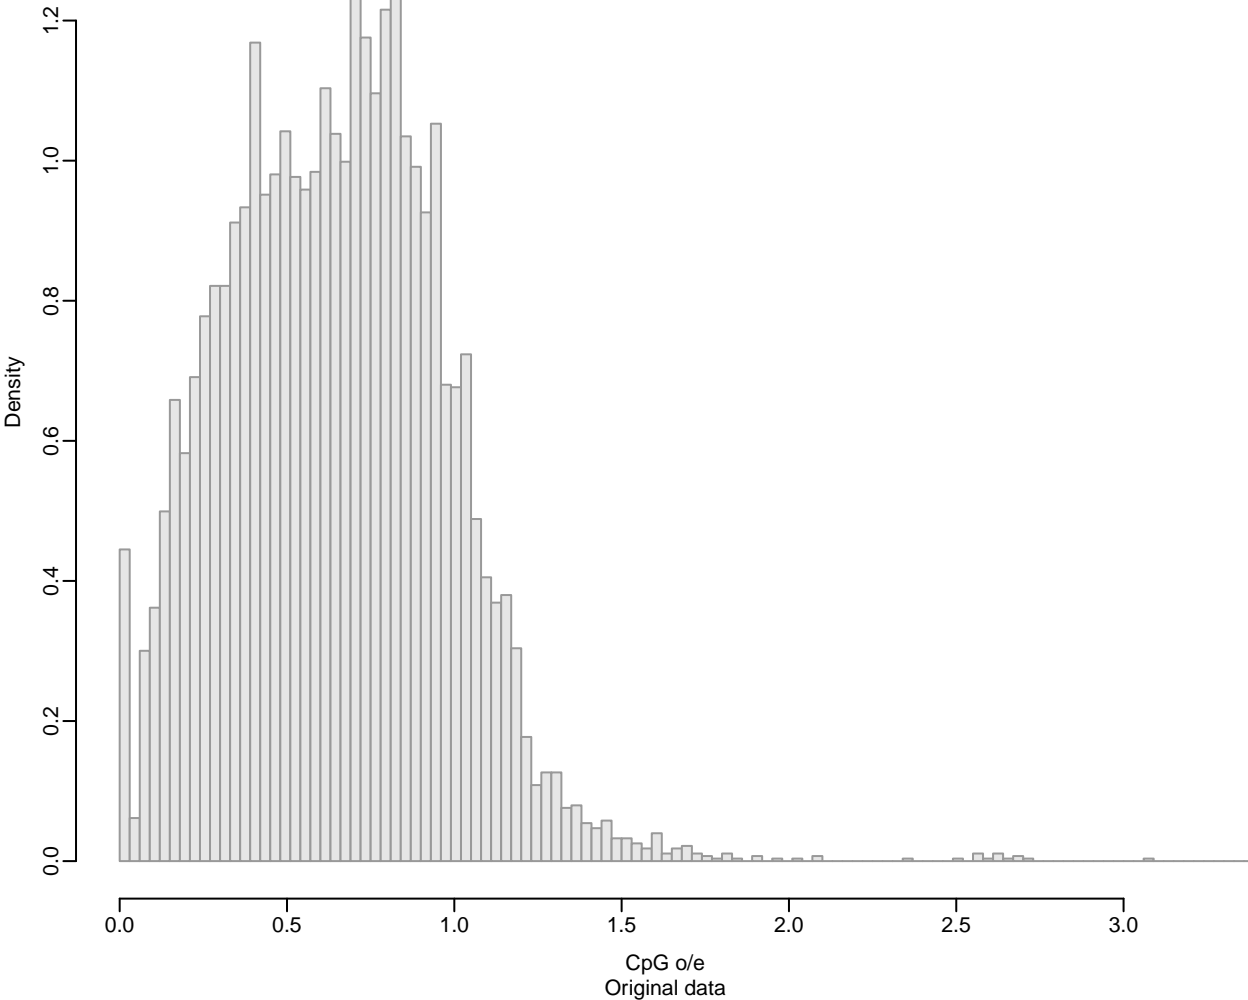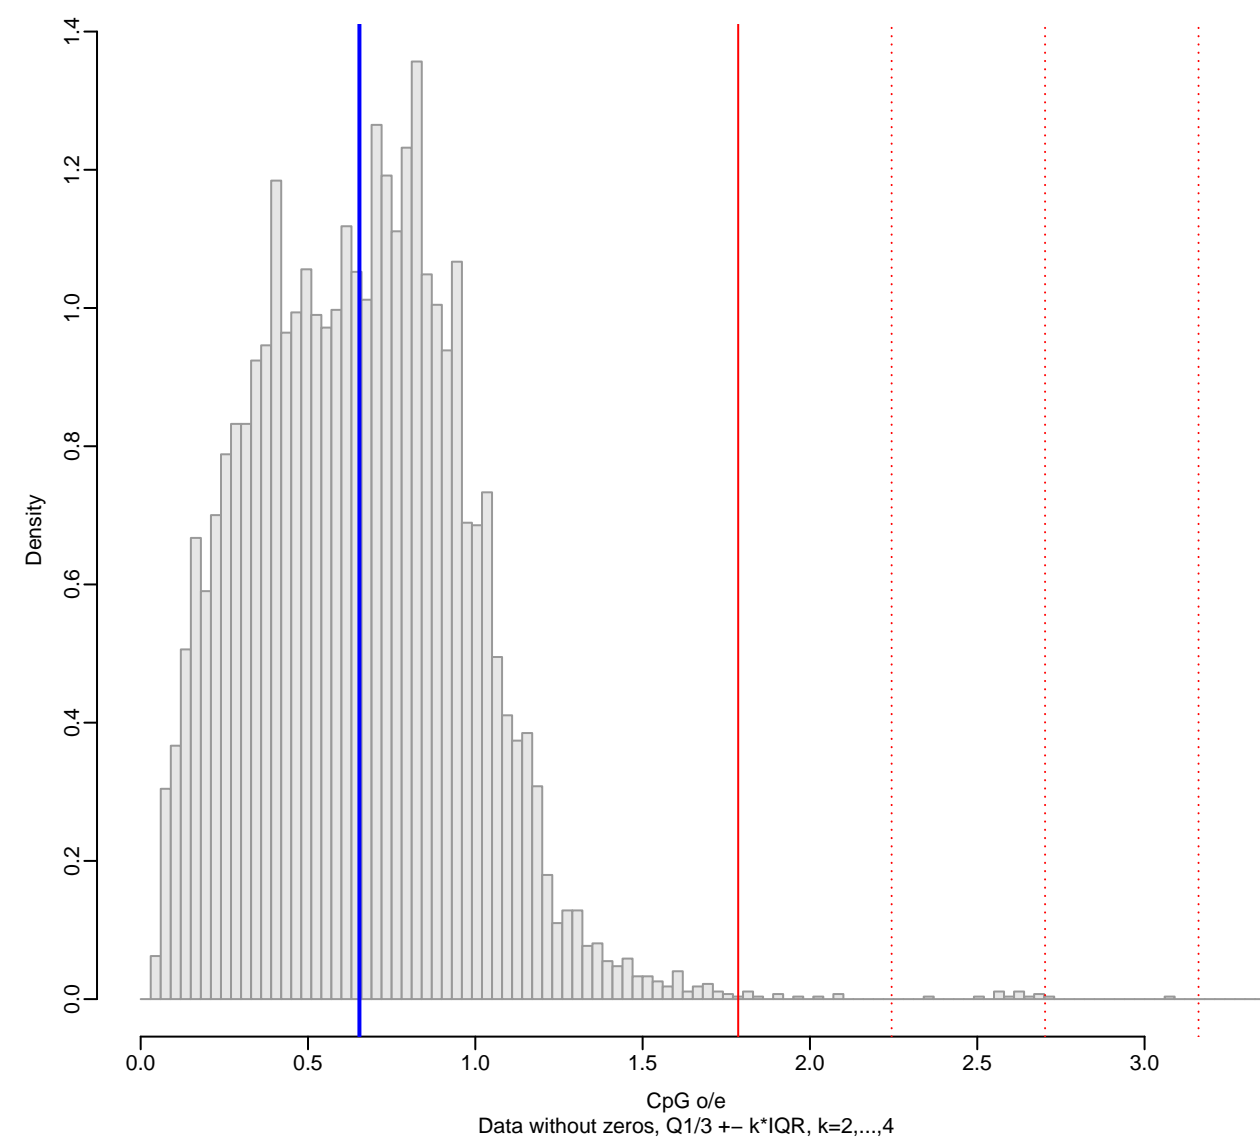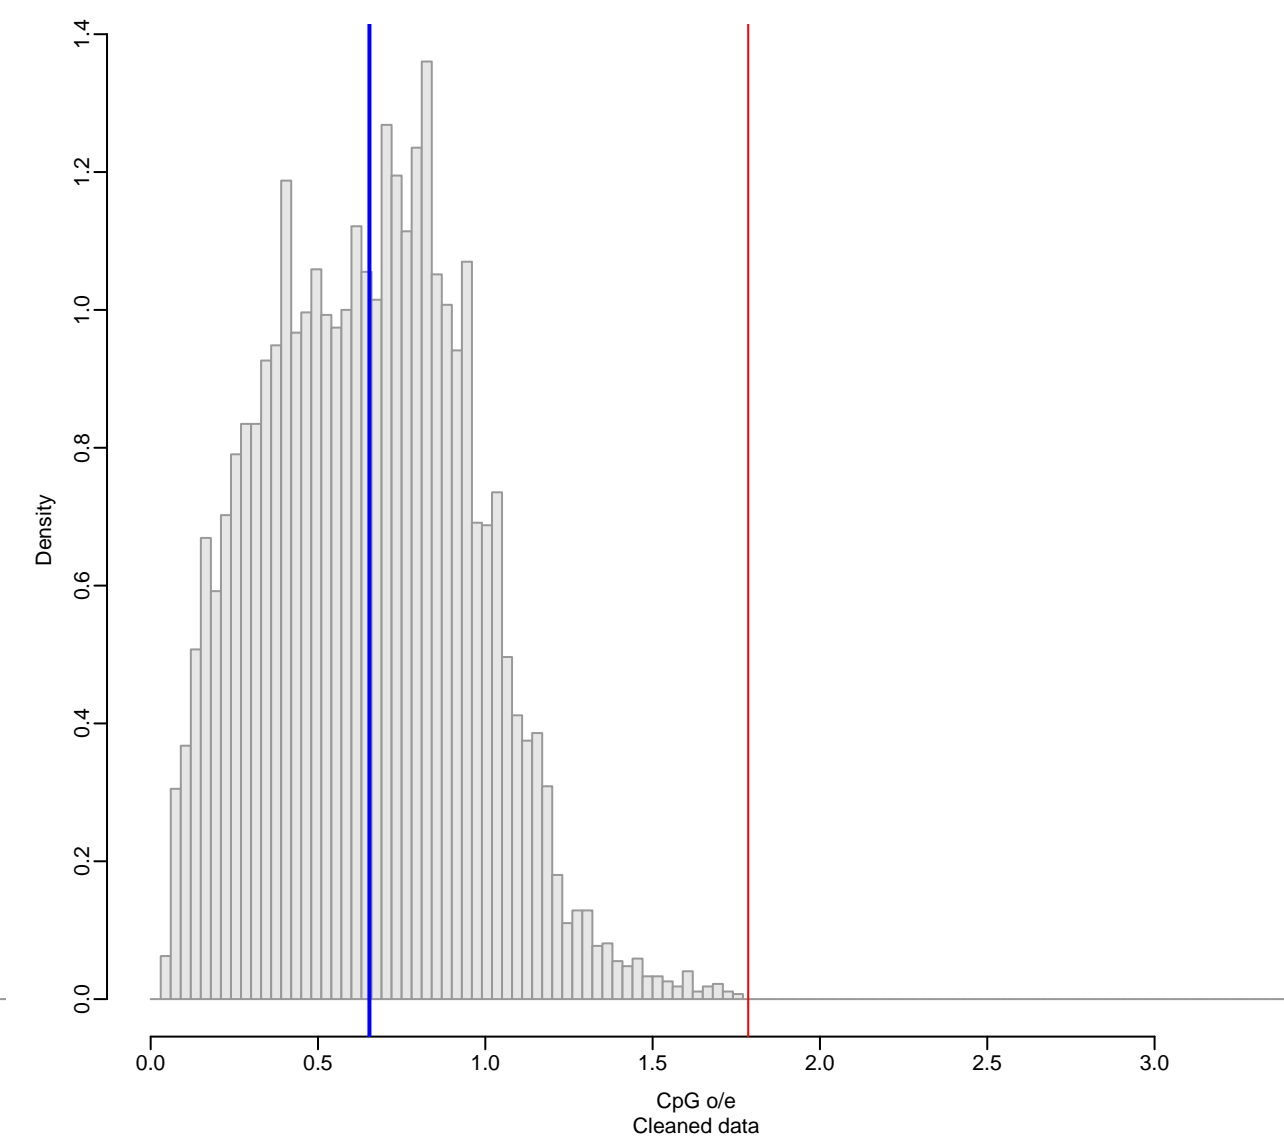



Pinus\_banksiana

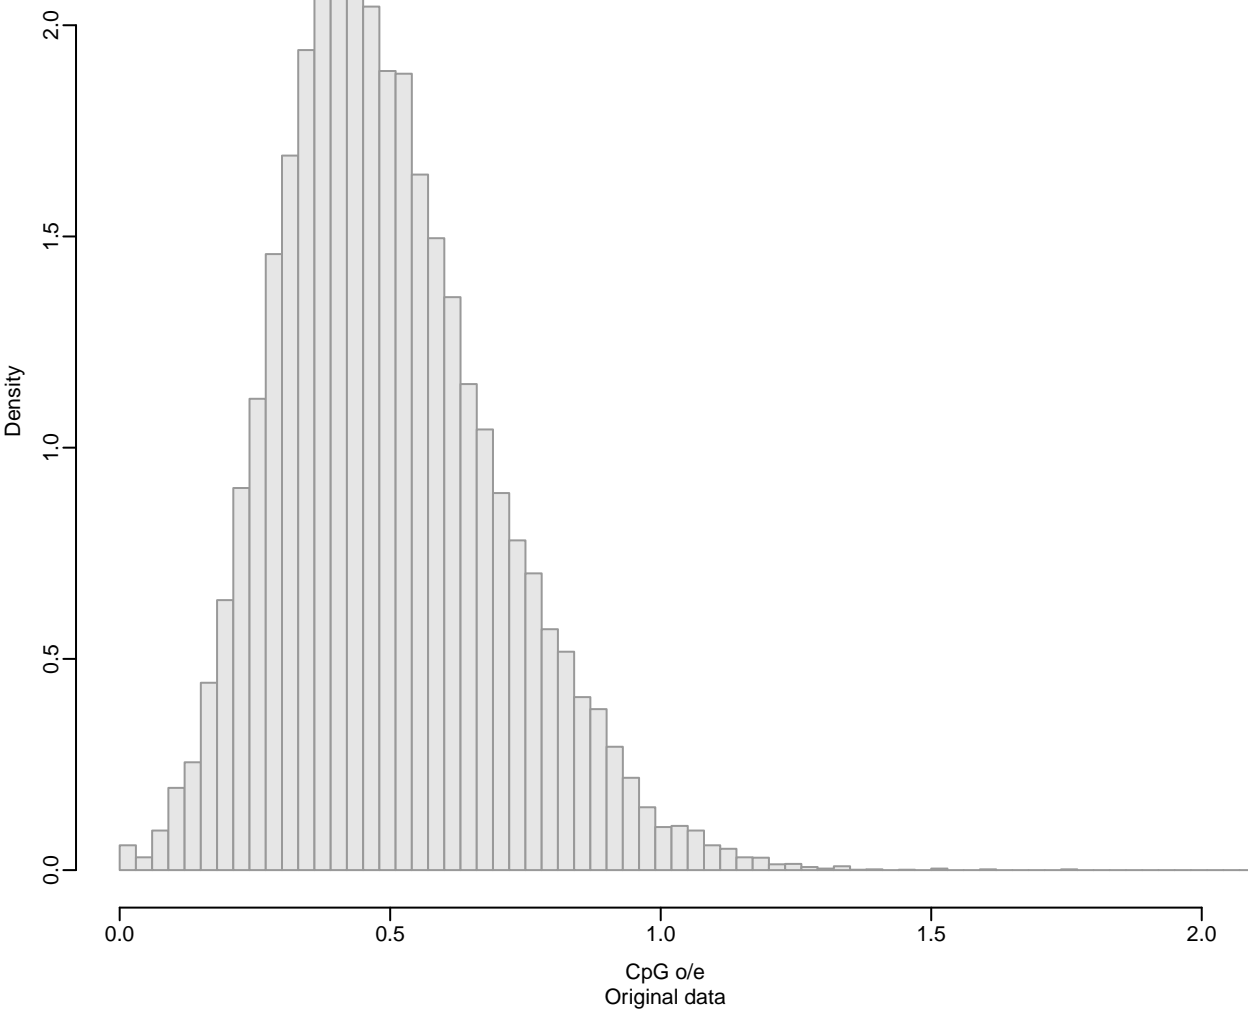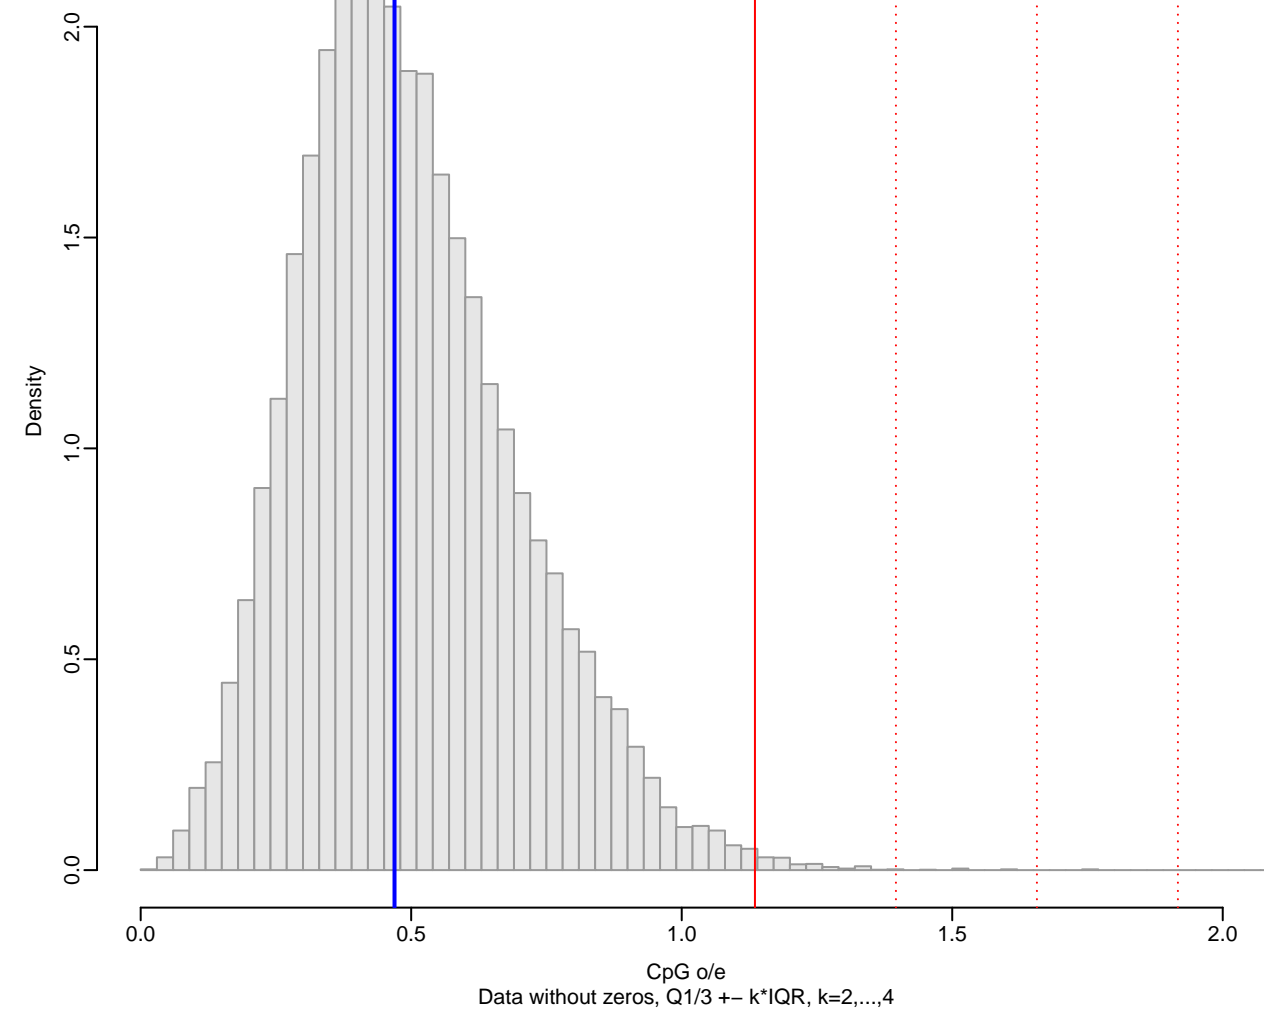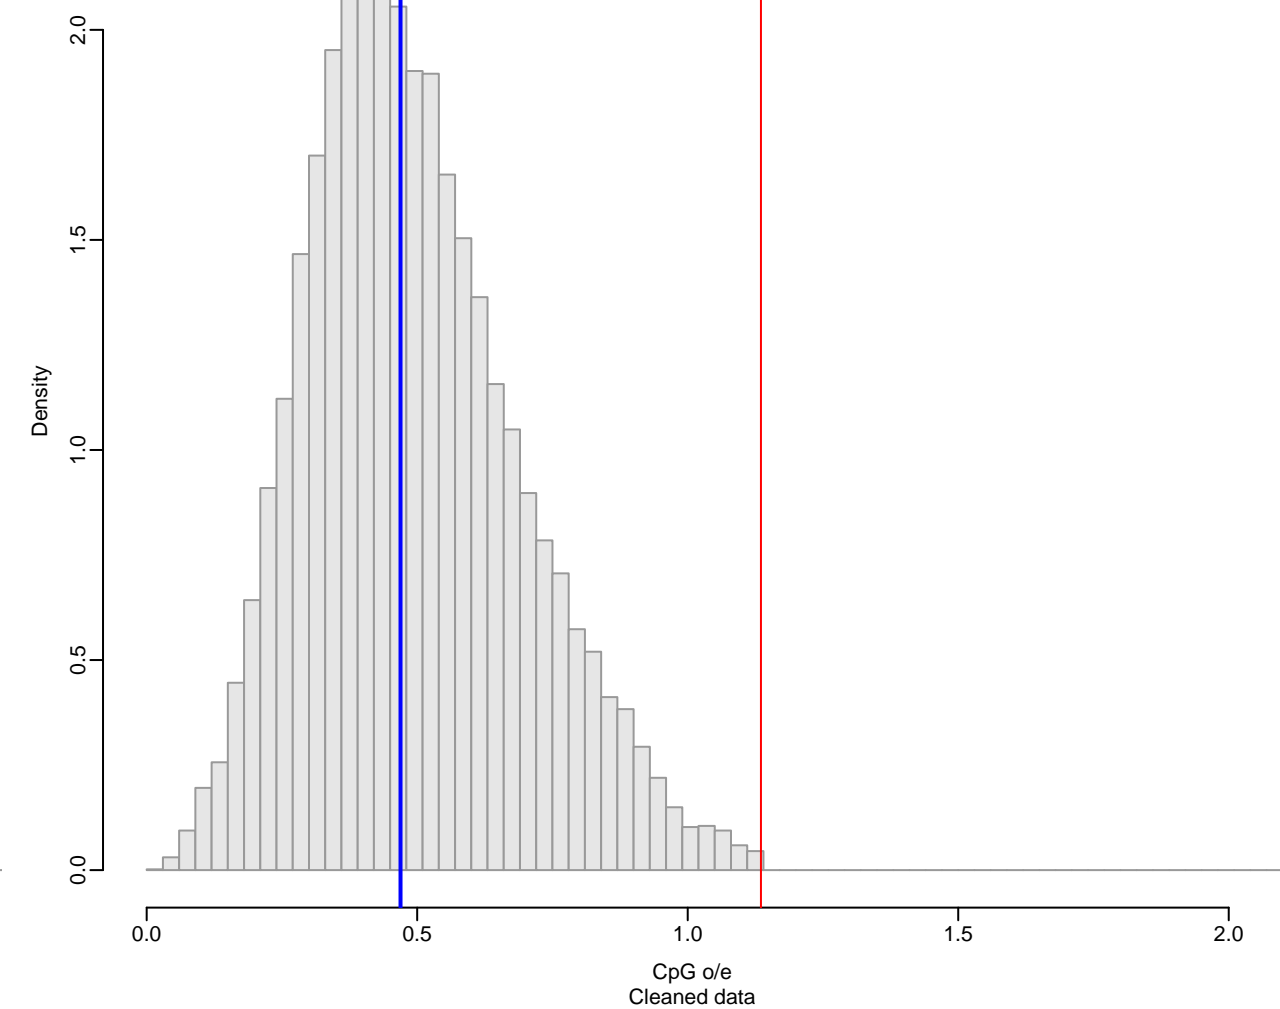

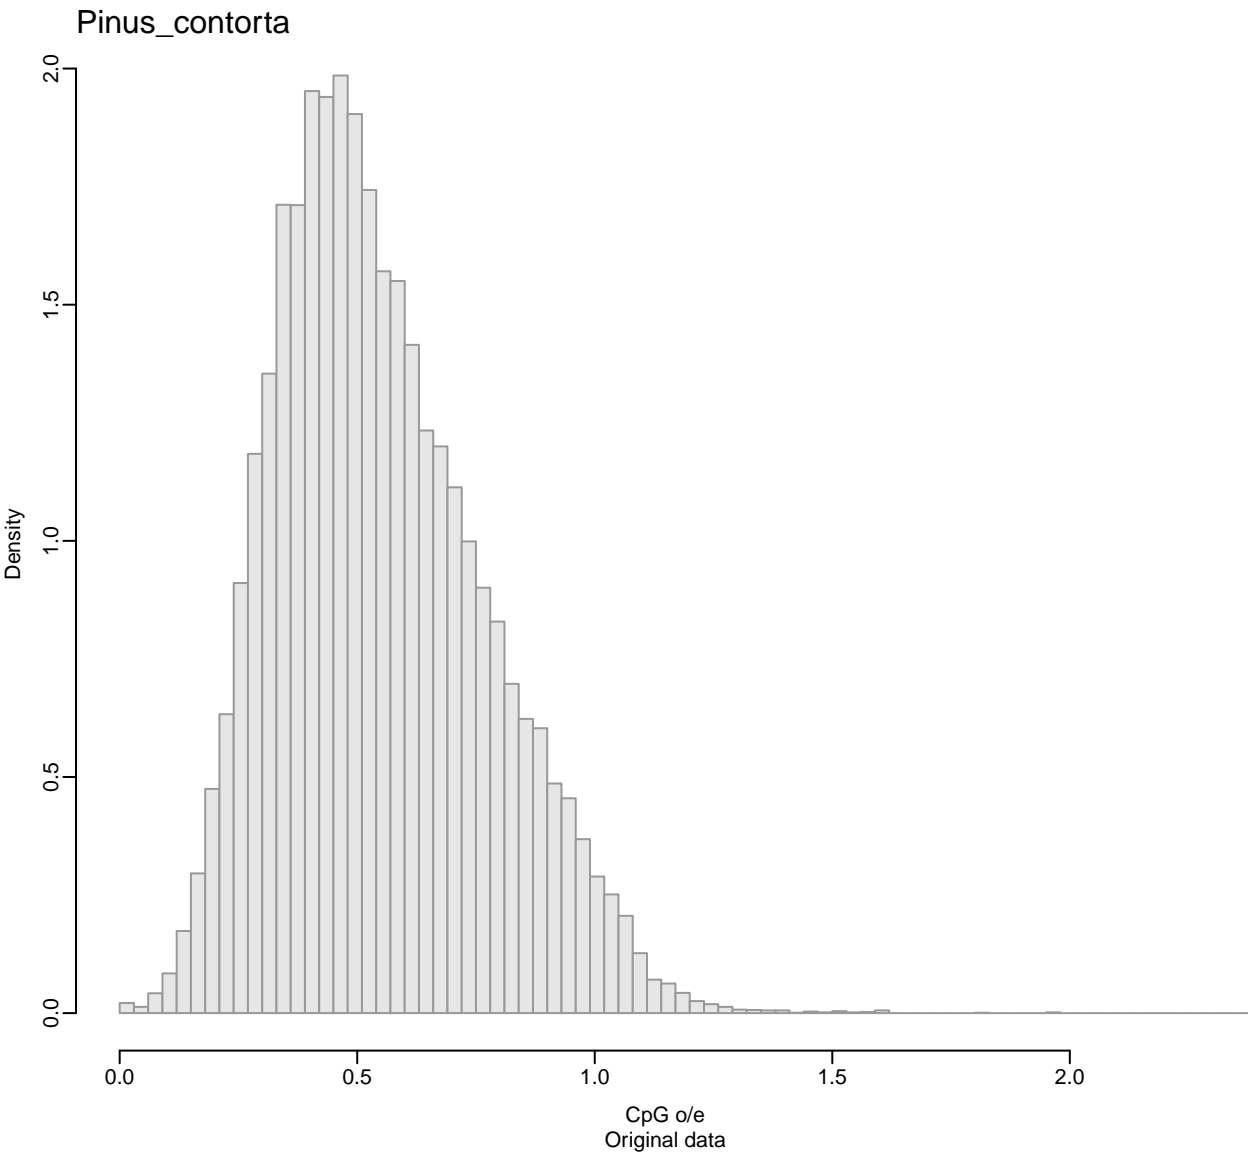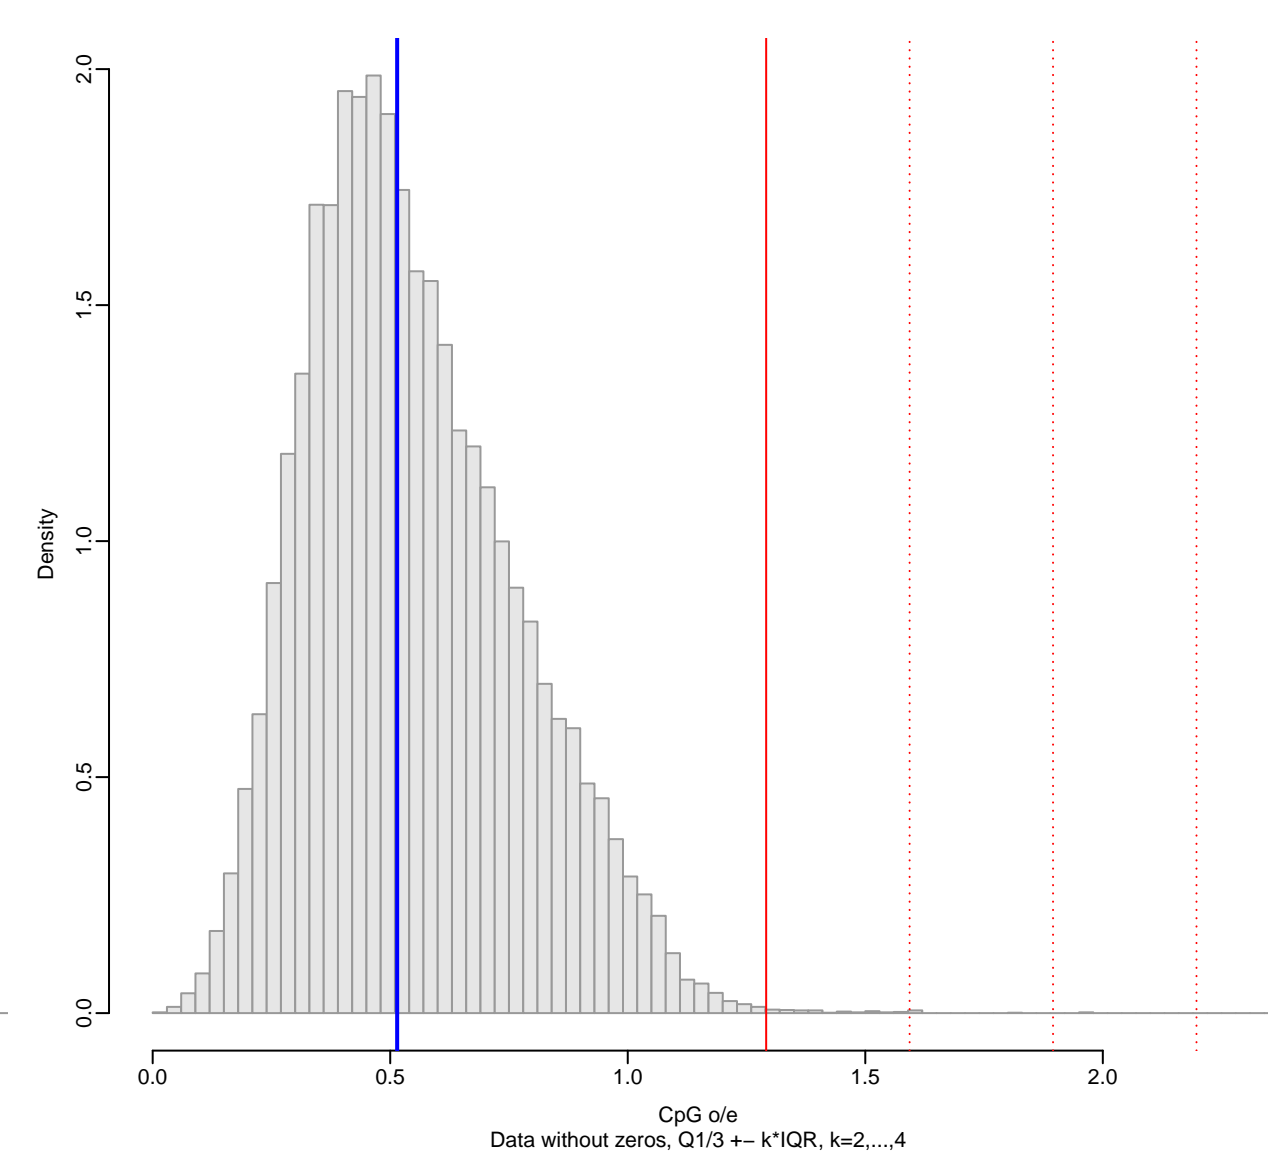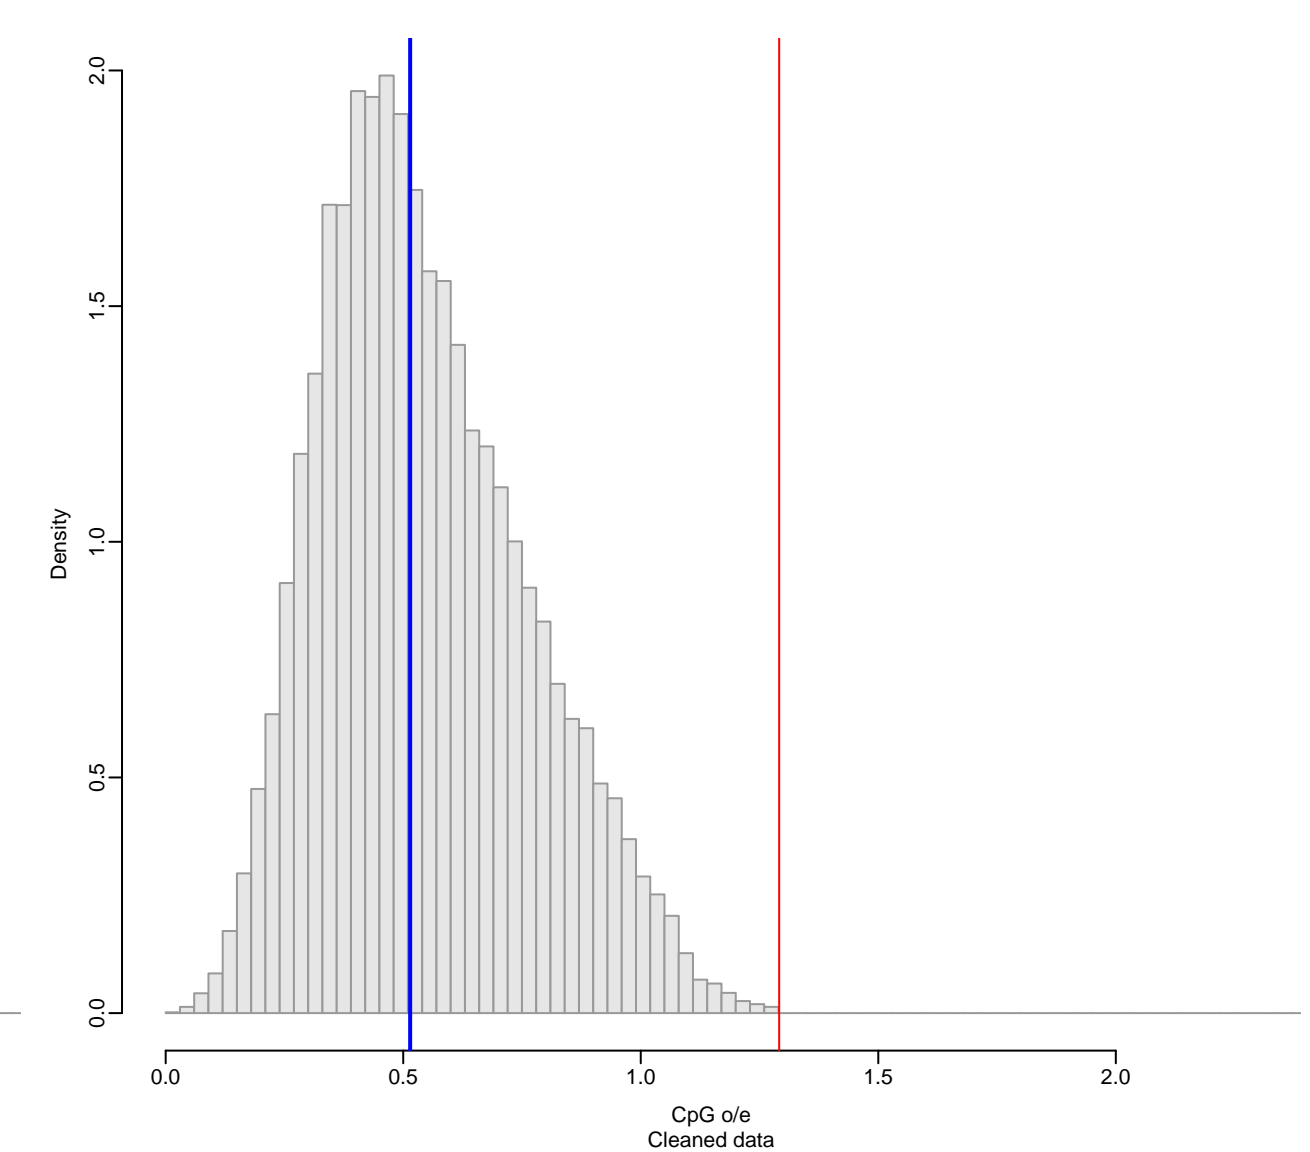

Pinus\_densiflora

Density

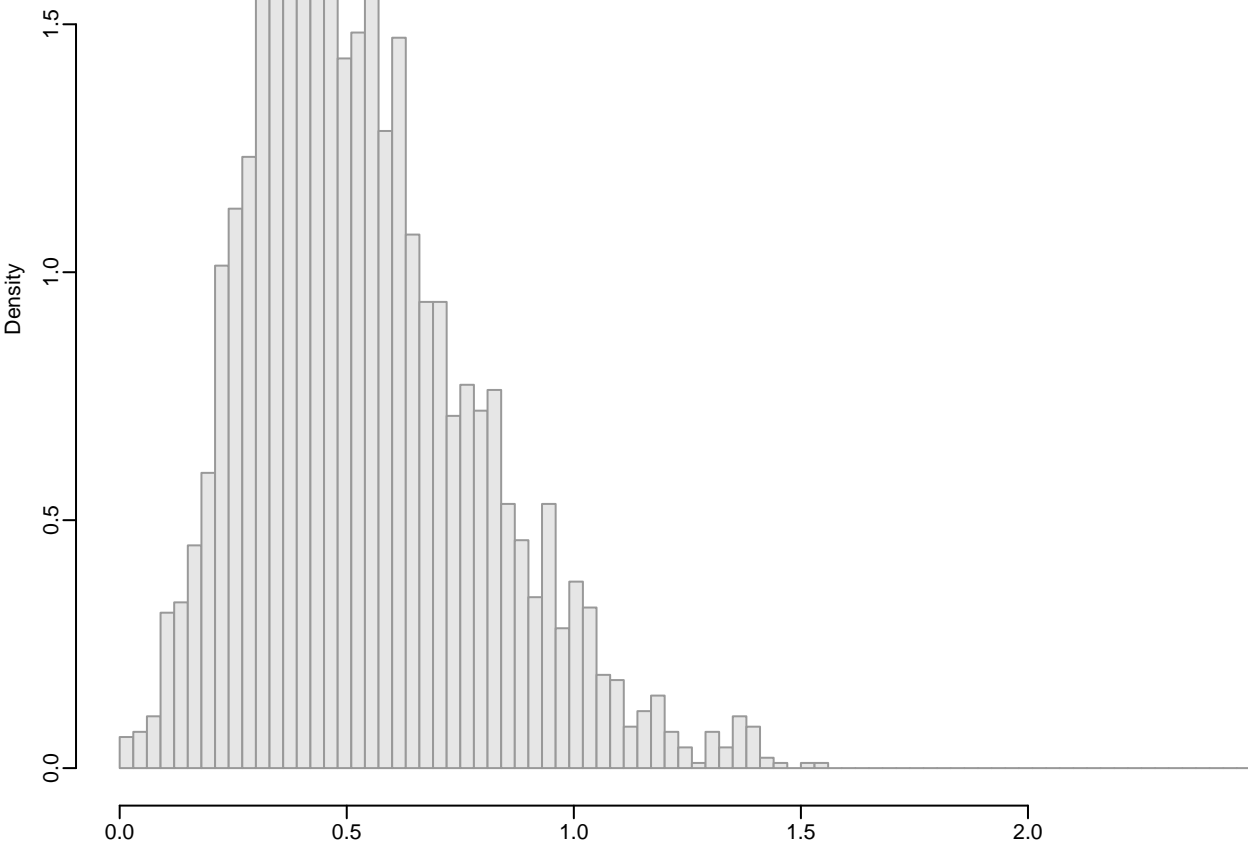

Density

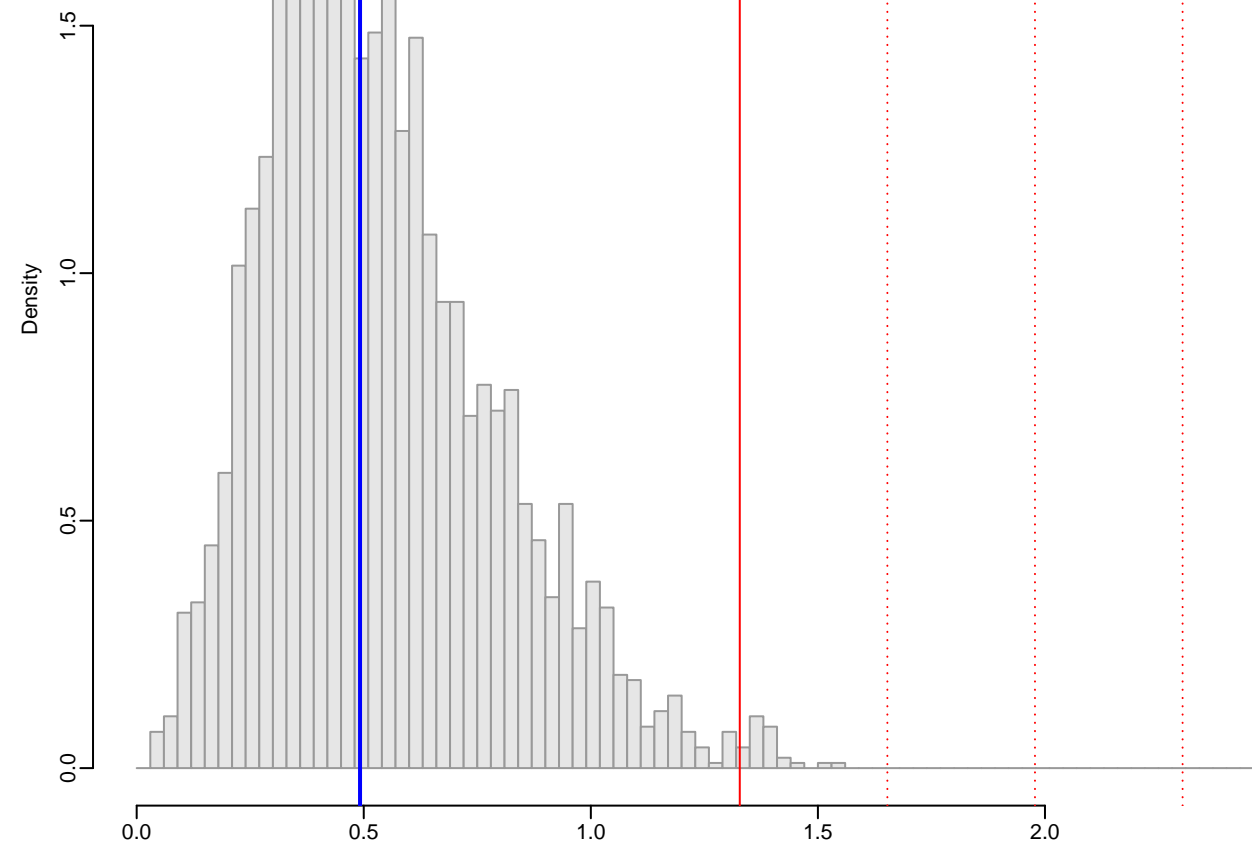

Density

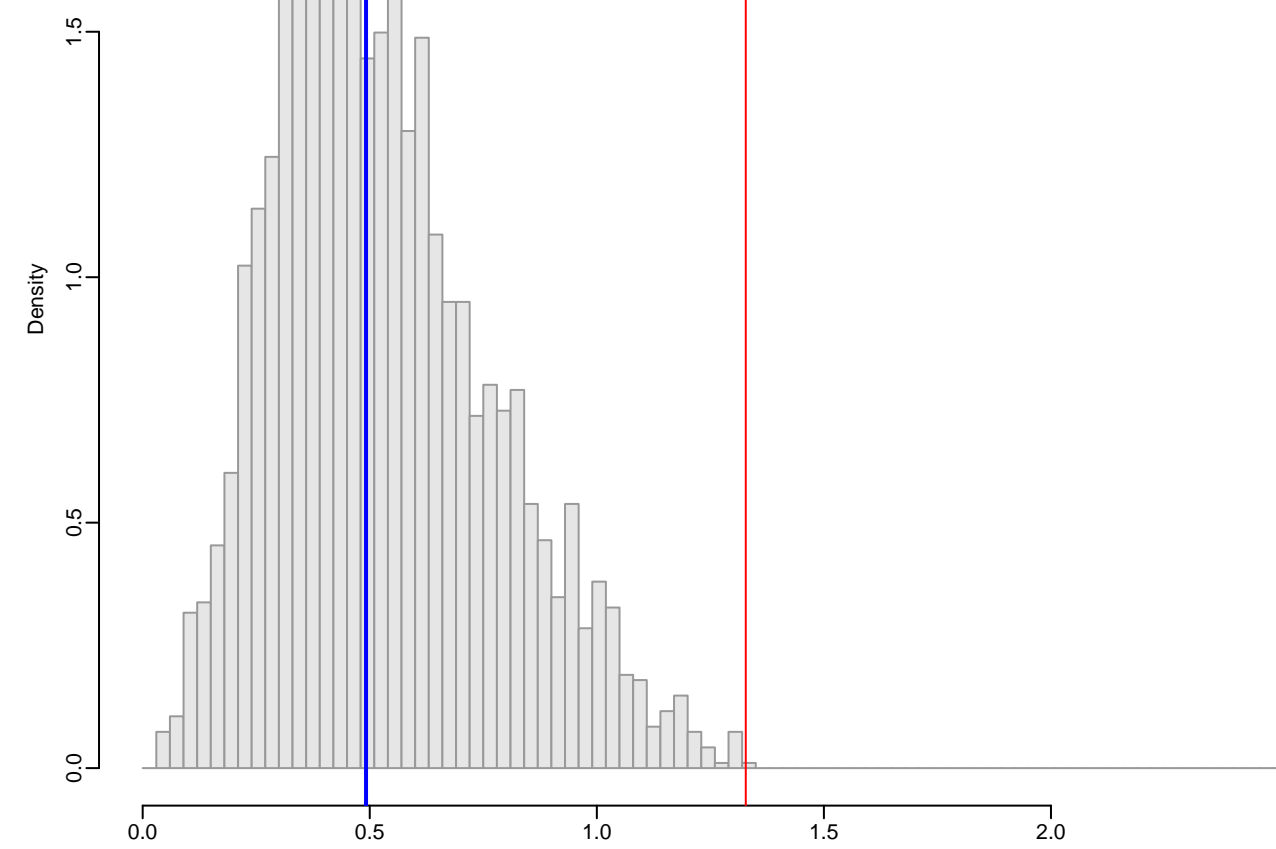

Pinus\_pinaster

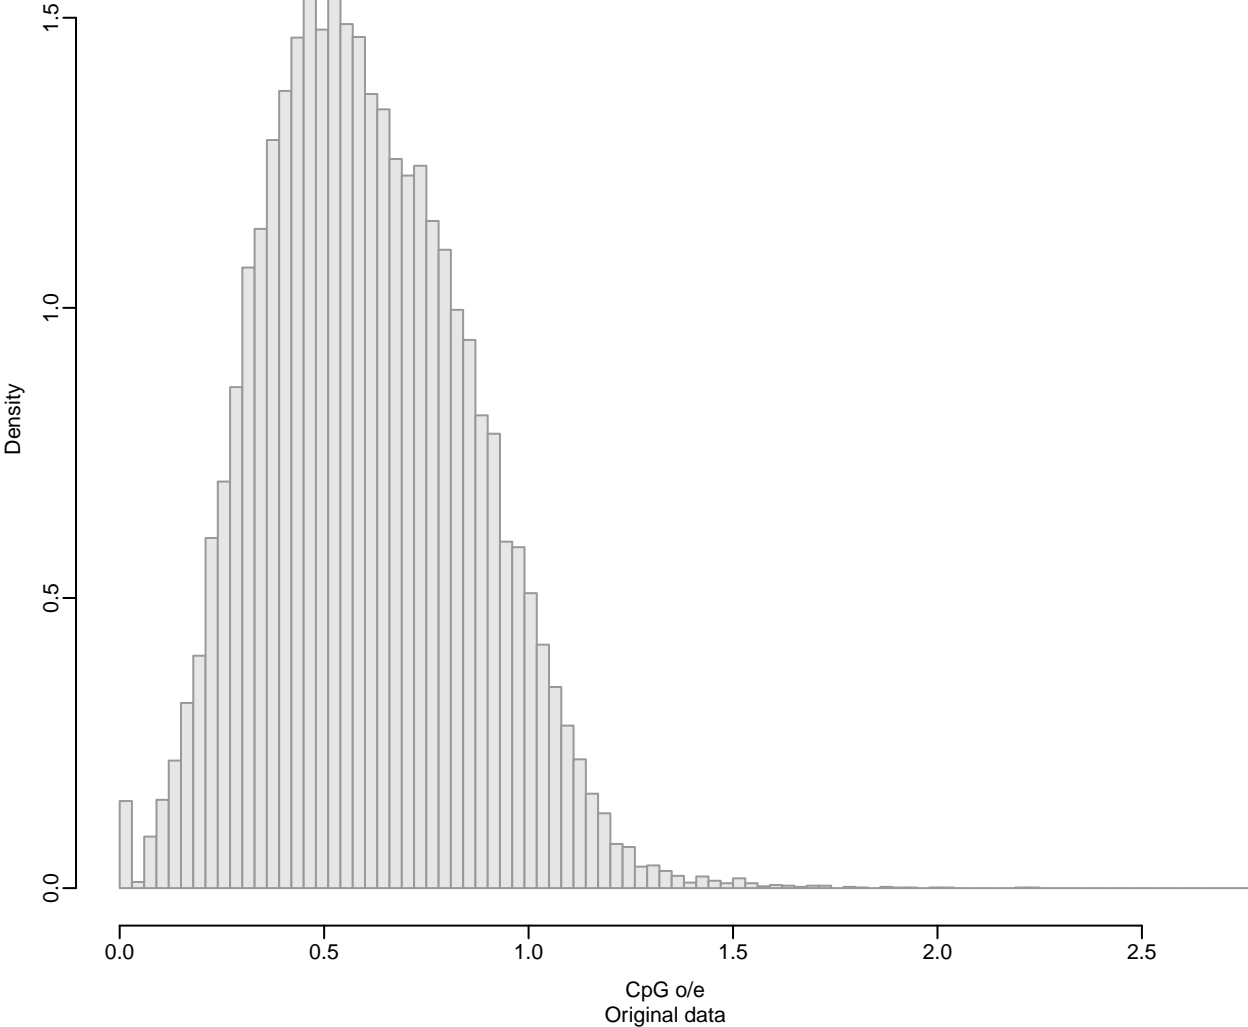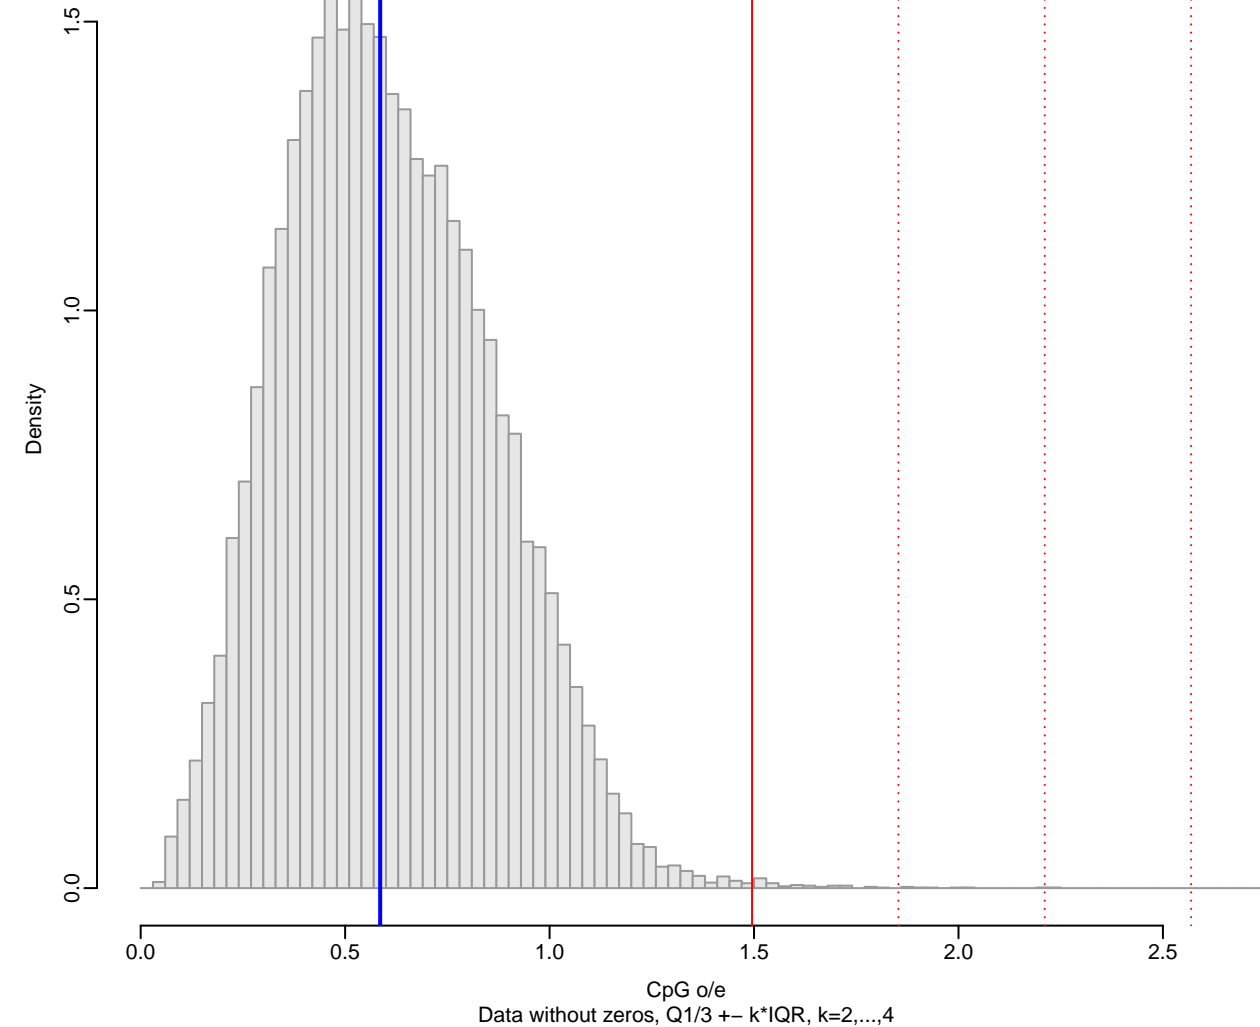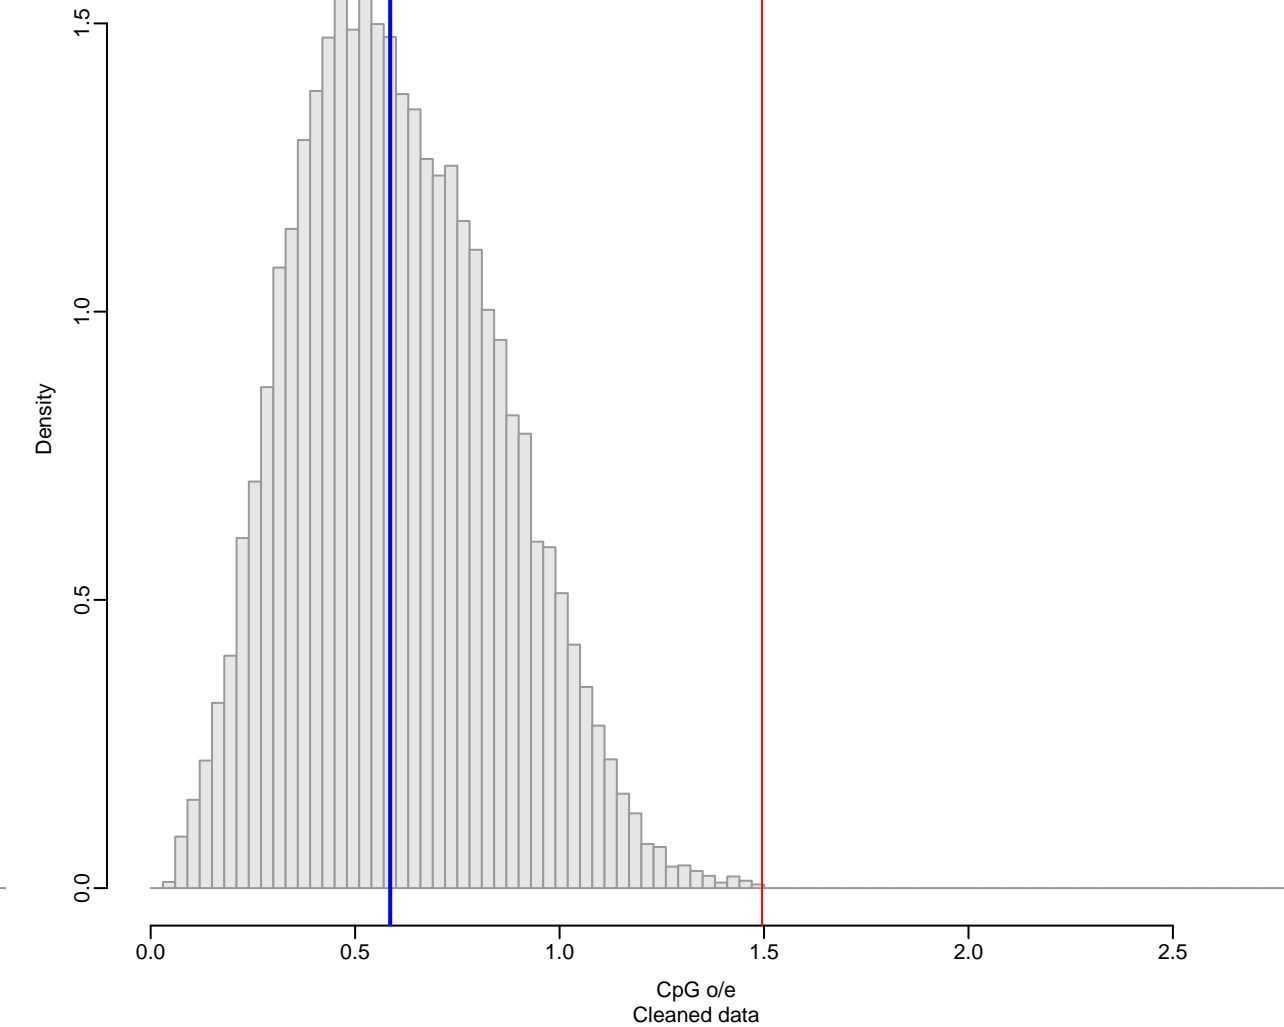

Pinus\_radiata

Density

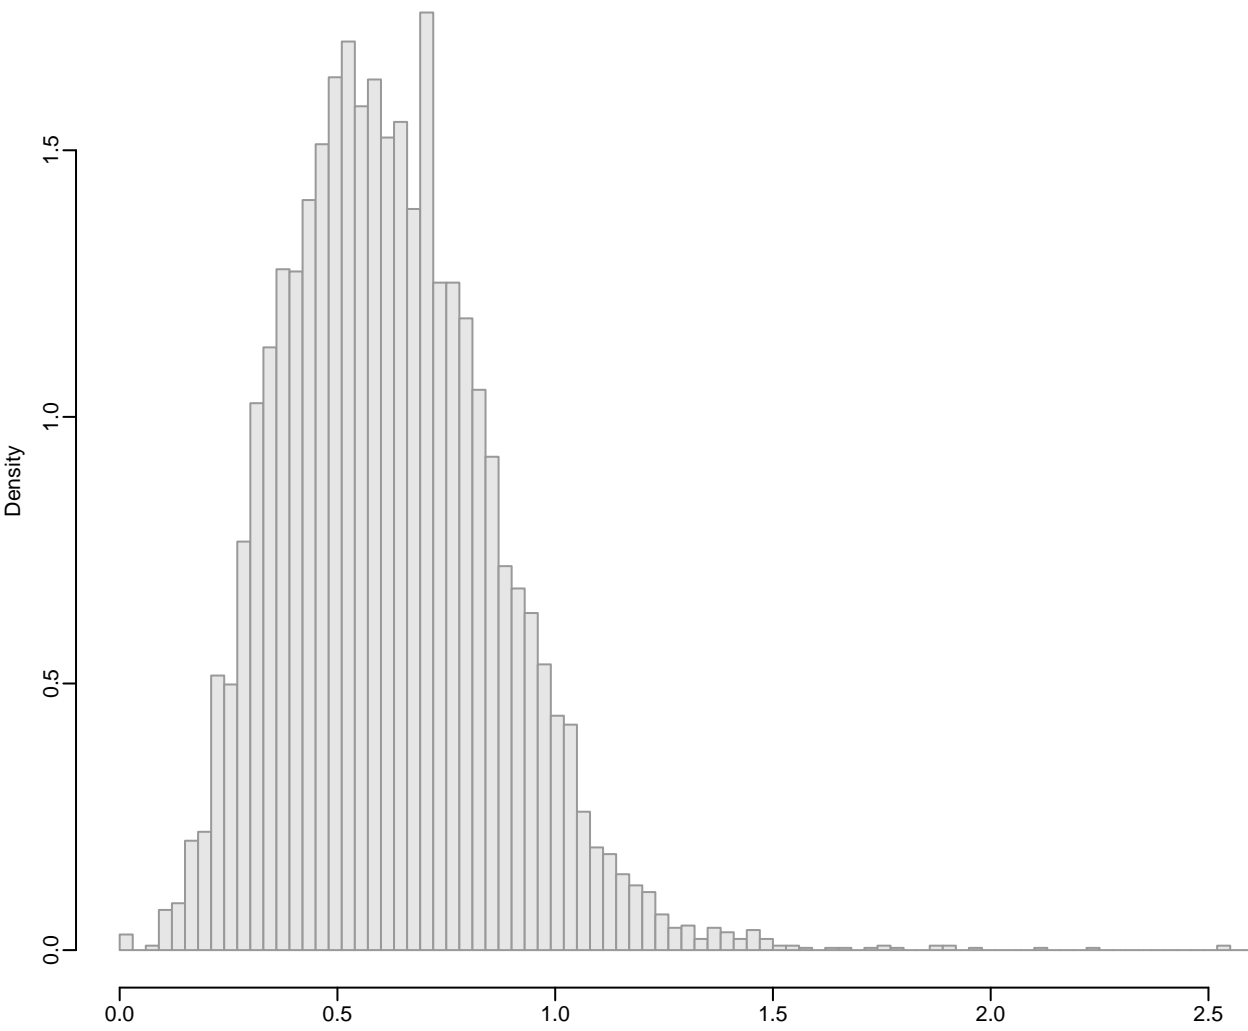

Density

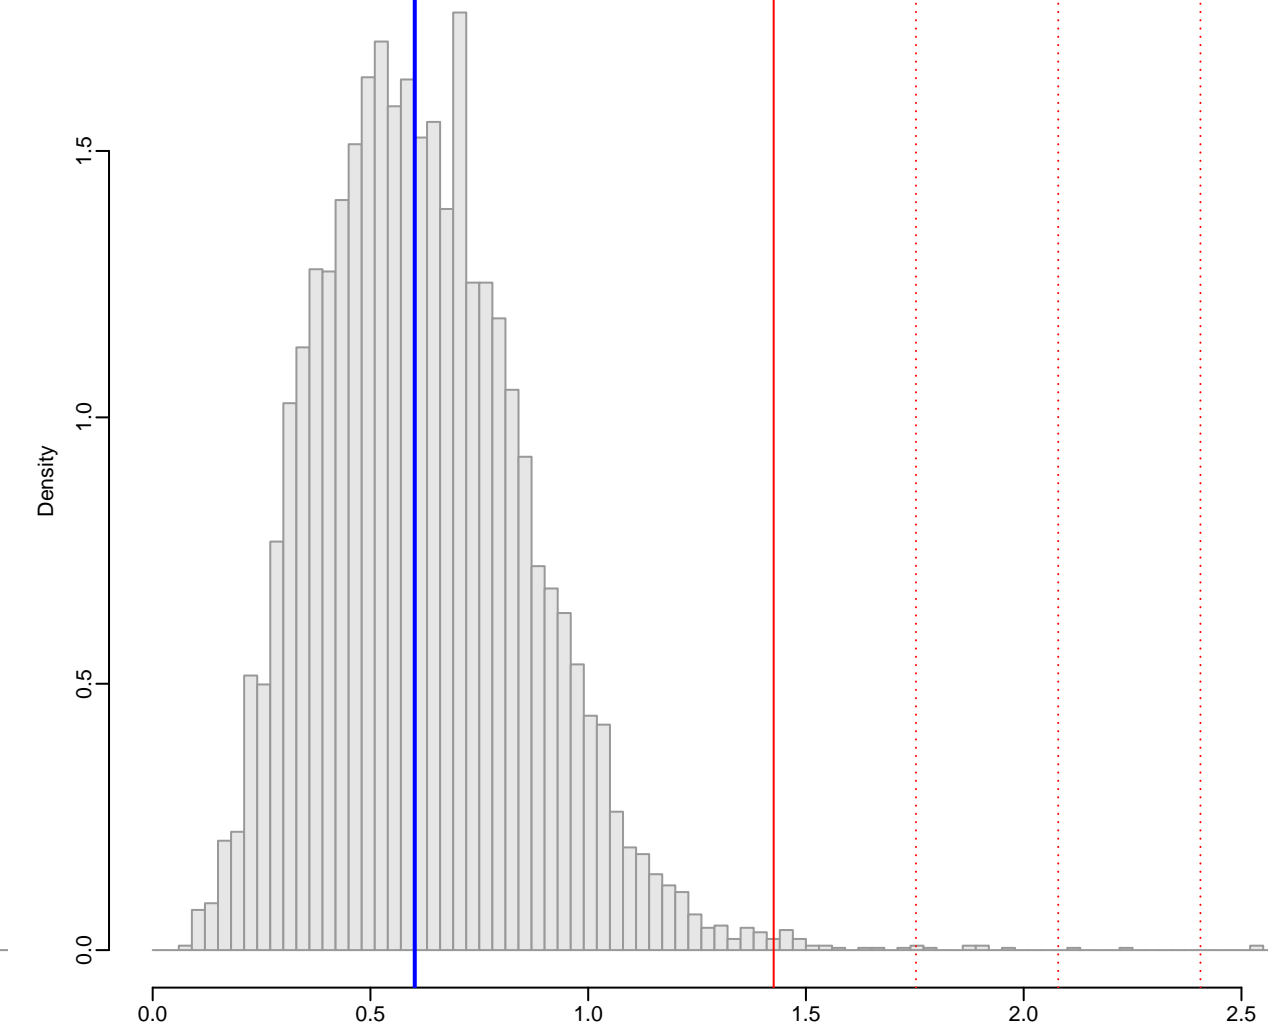

Density

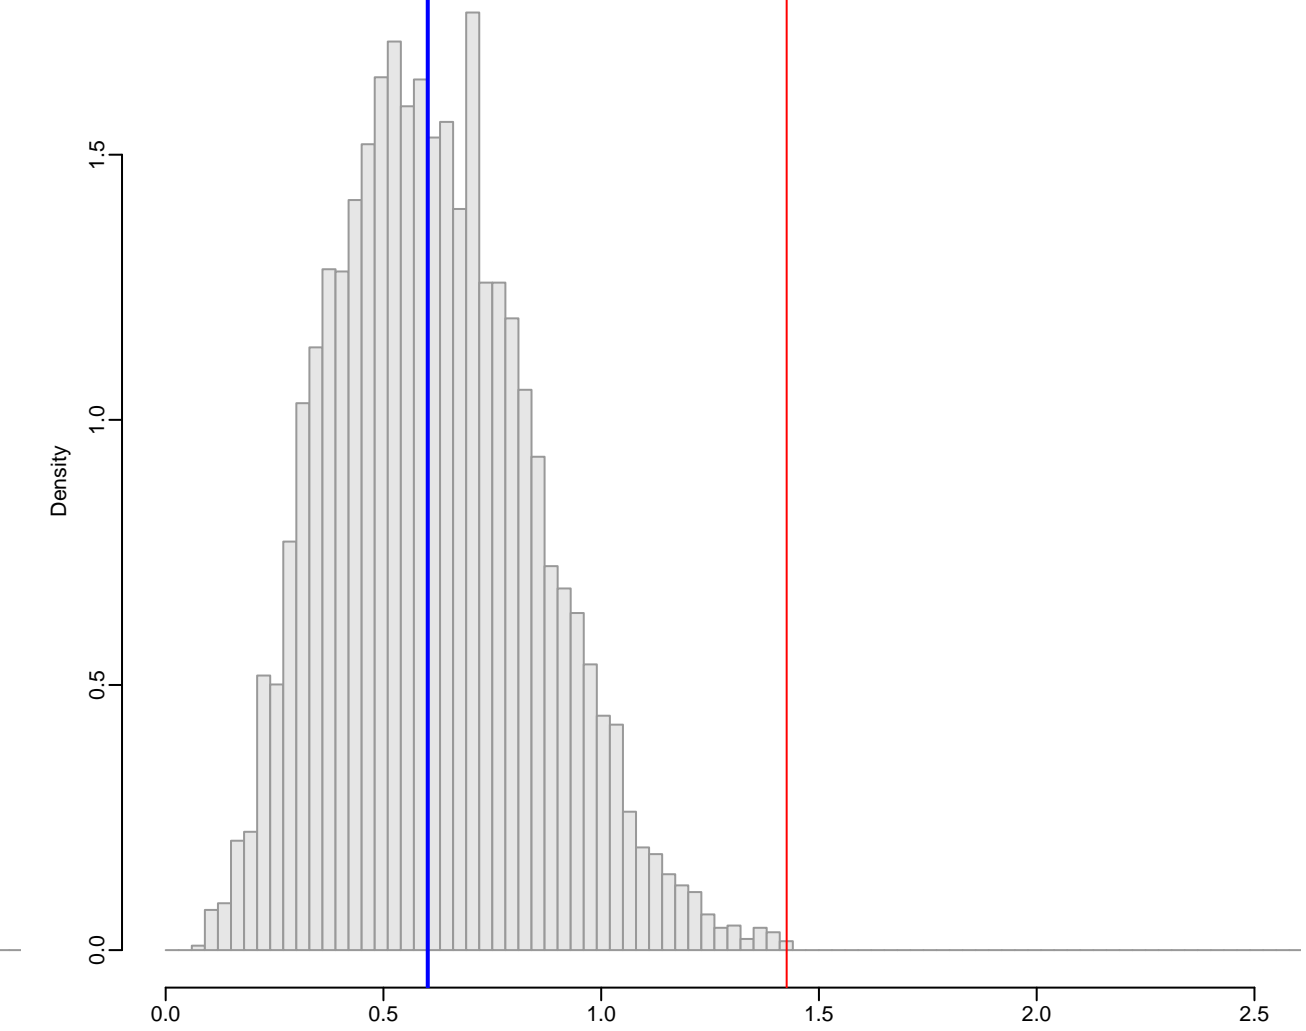

Pinus\_sylvestris

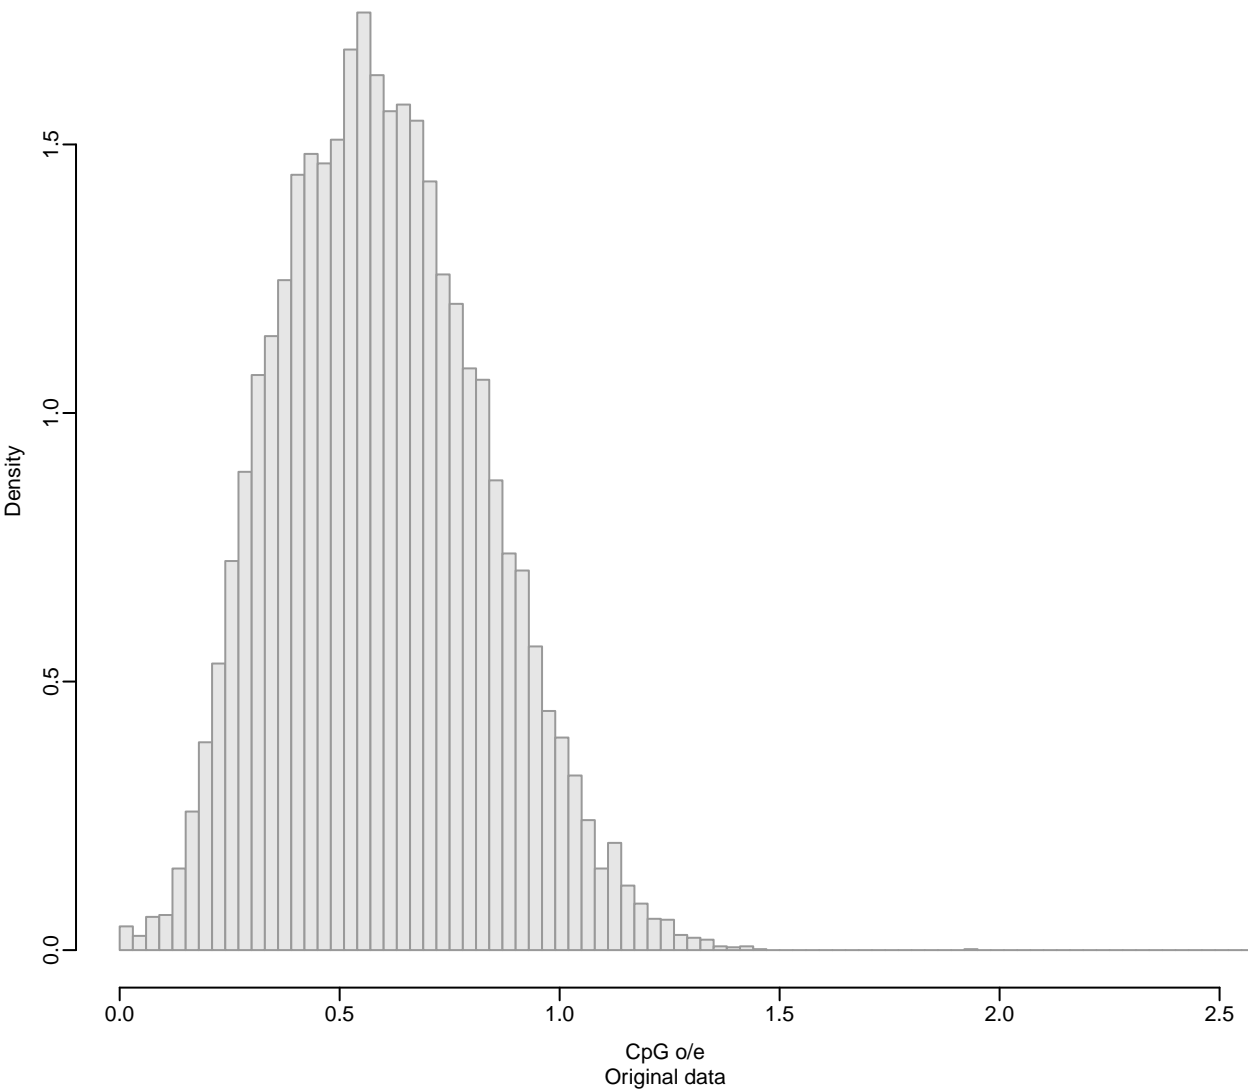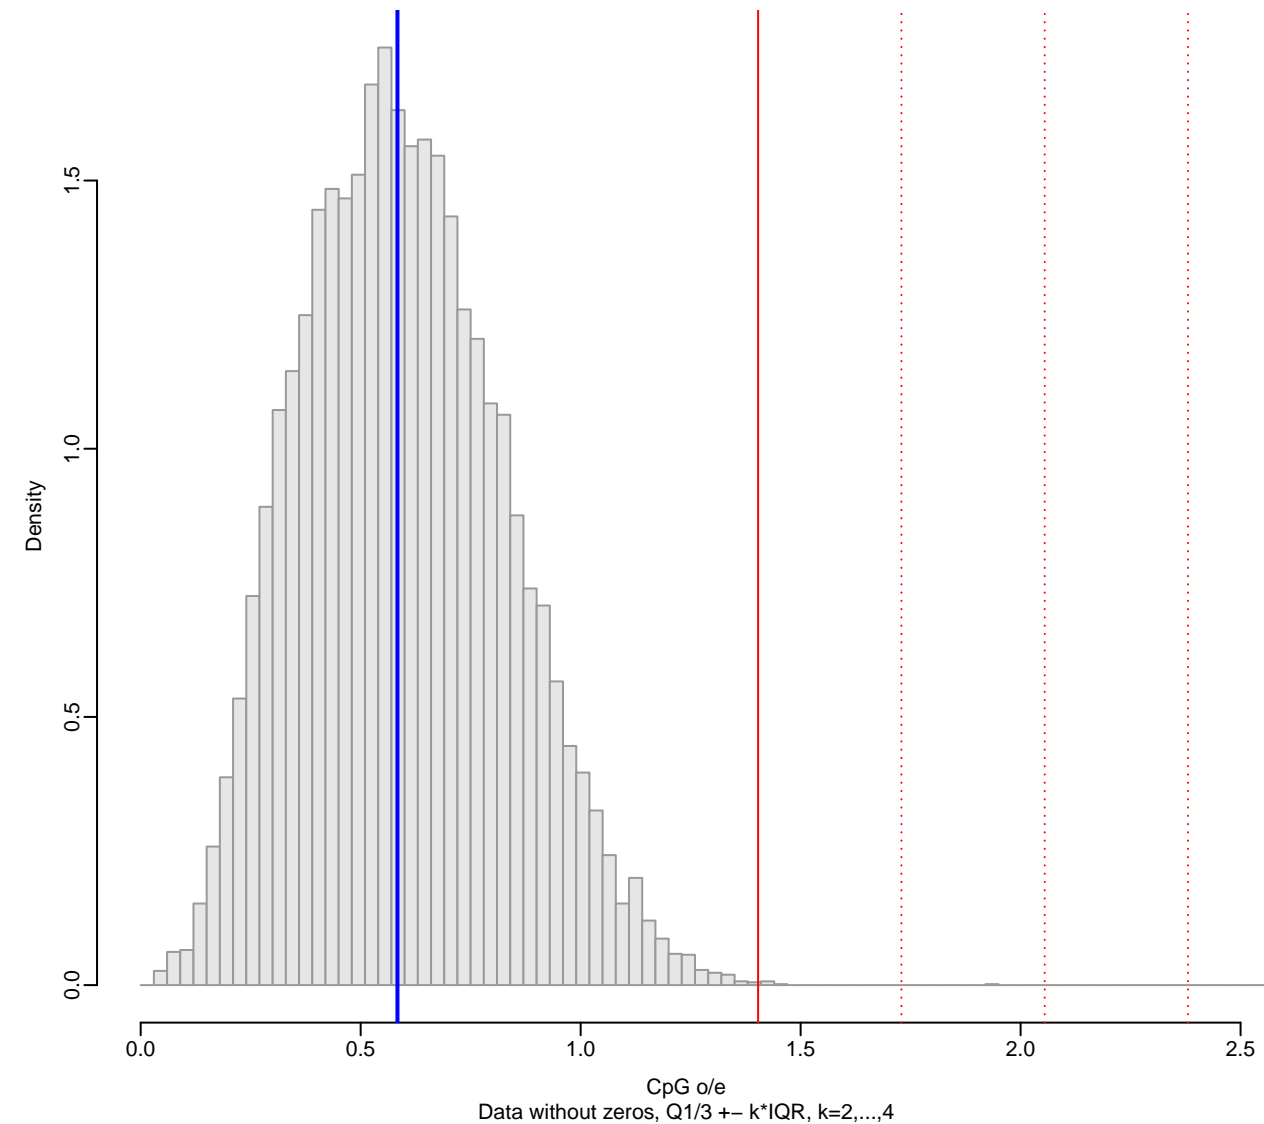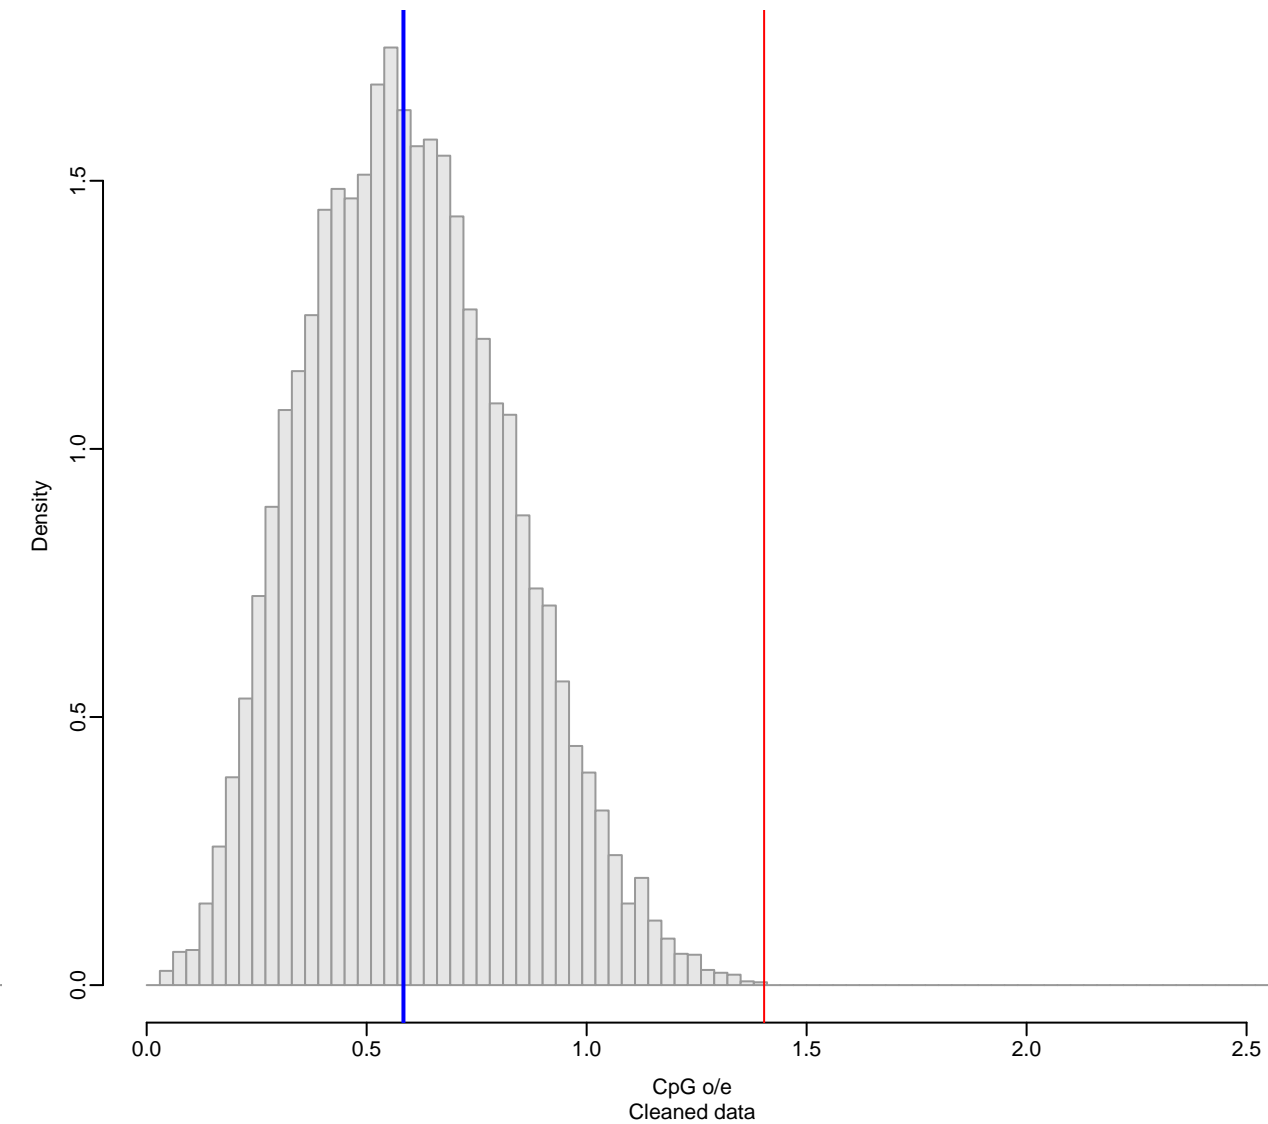

Pinus\_taeda

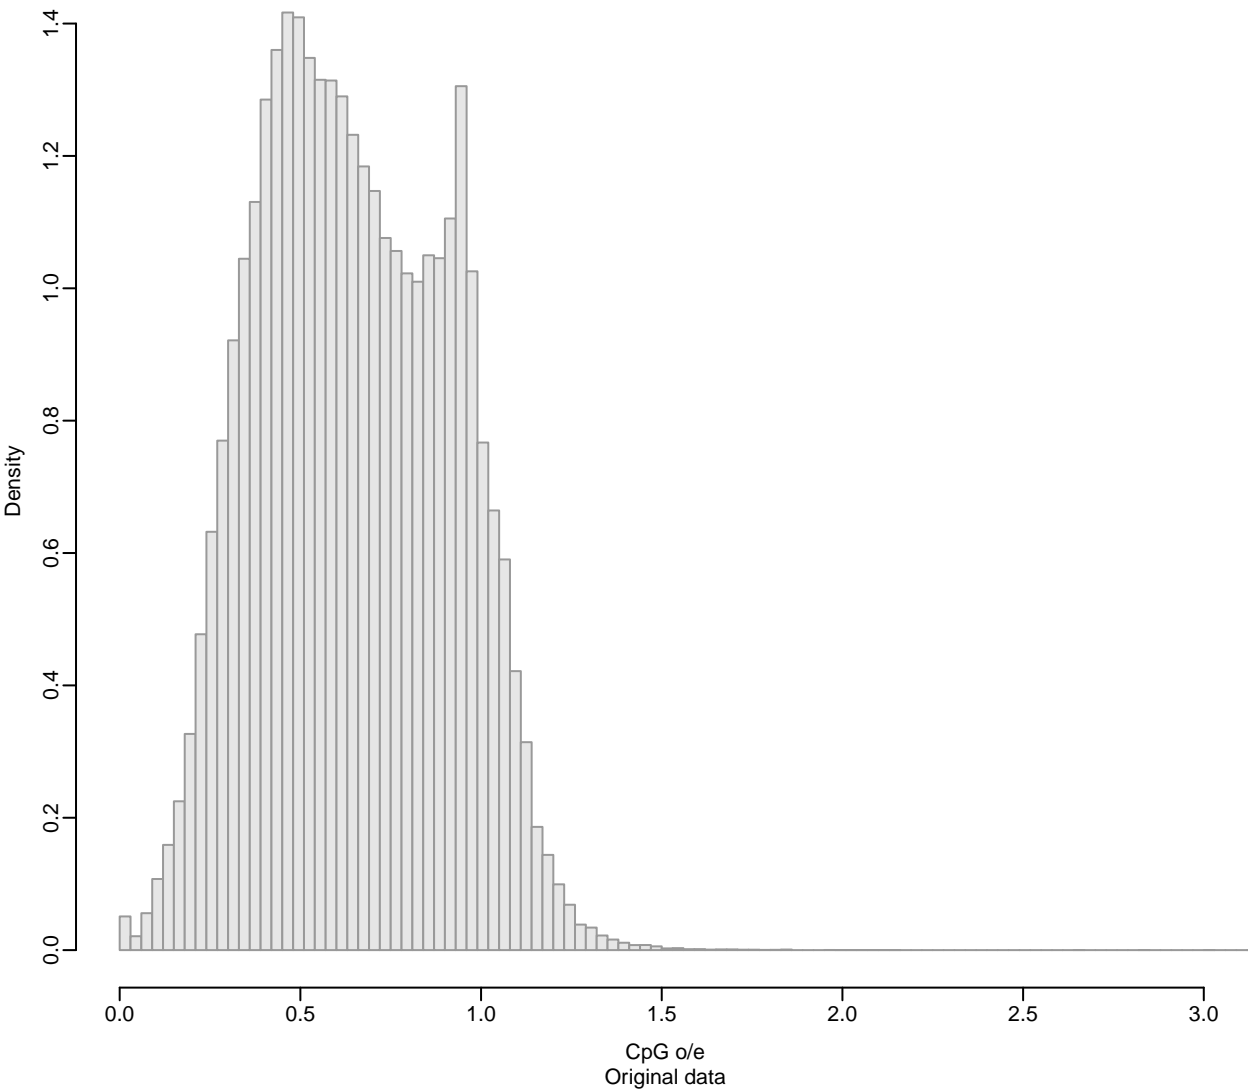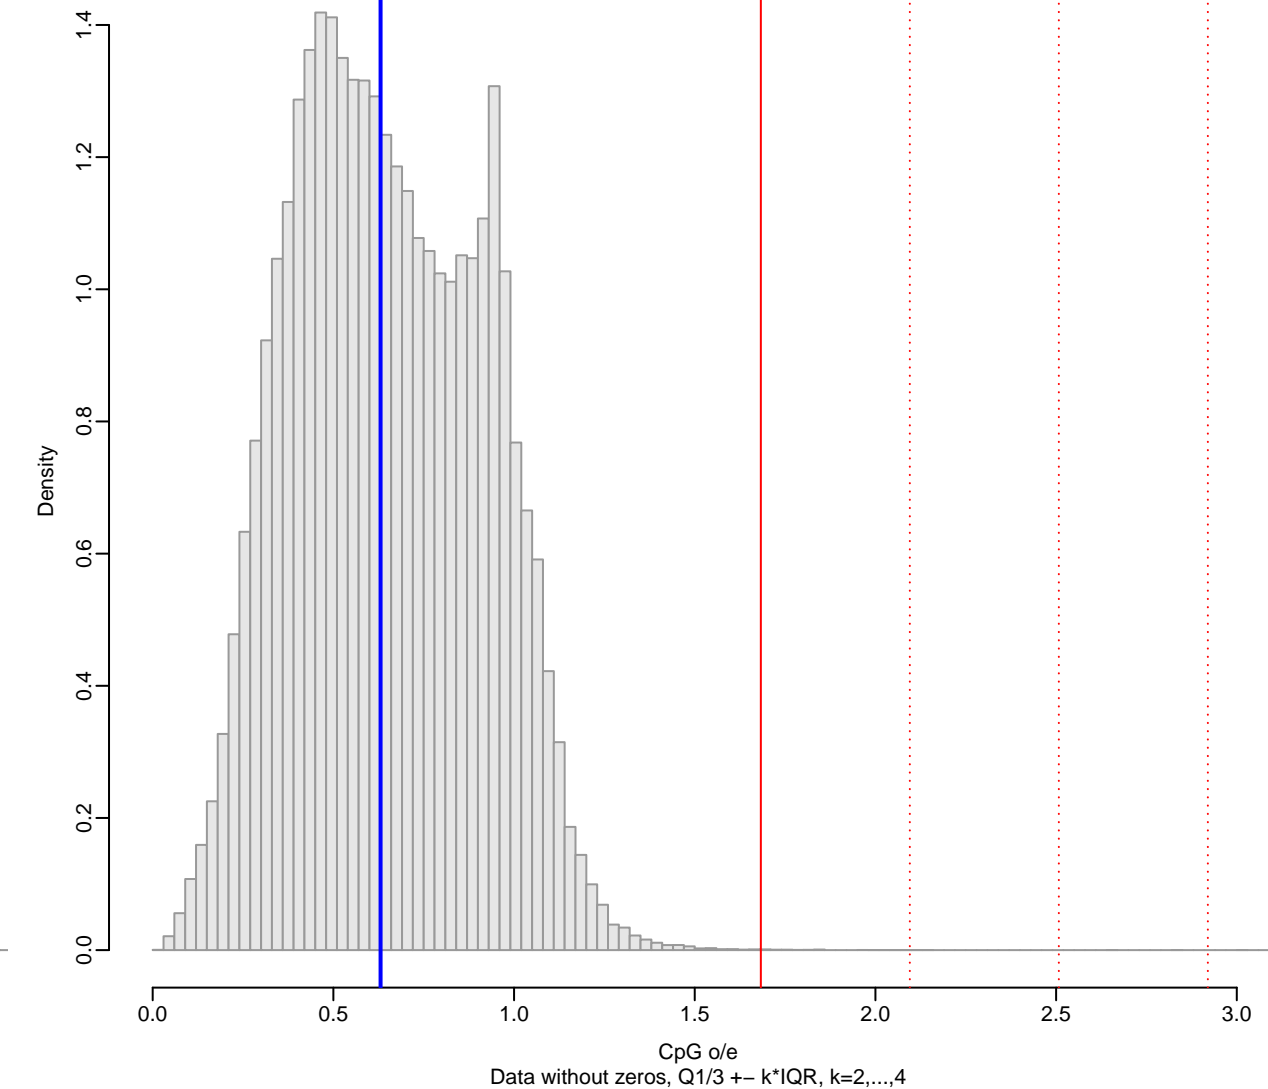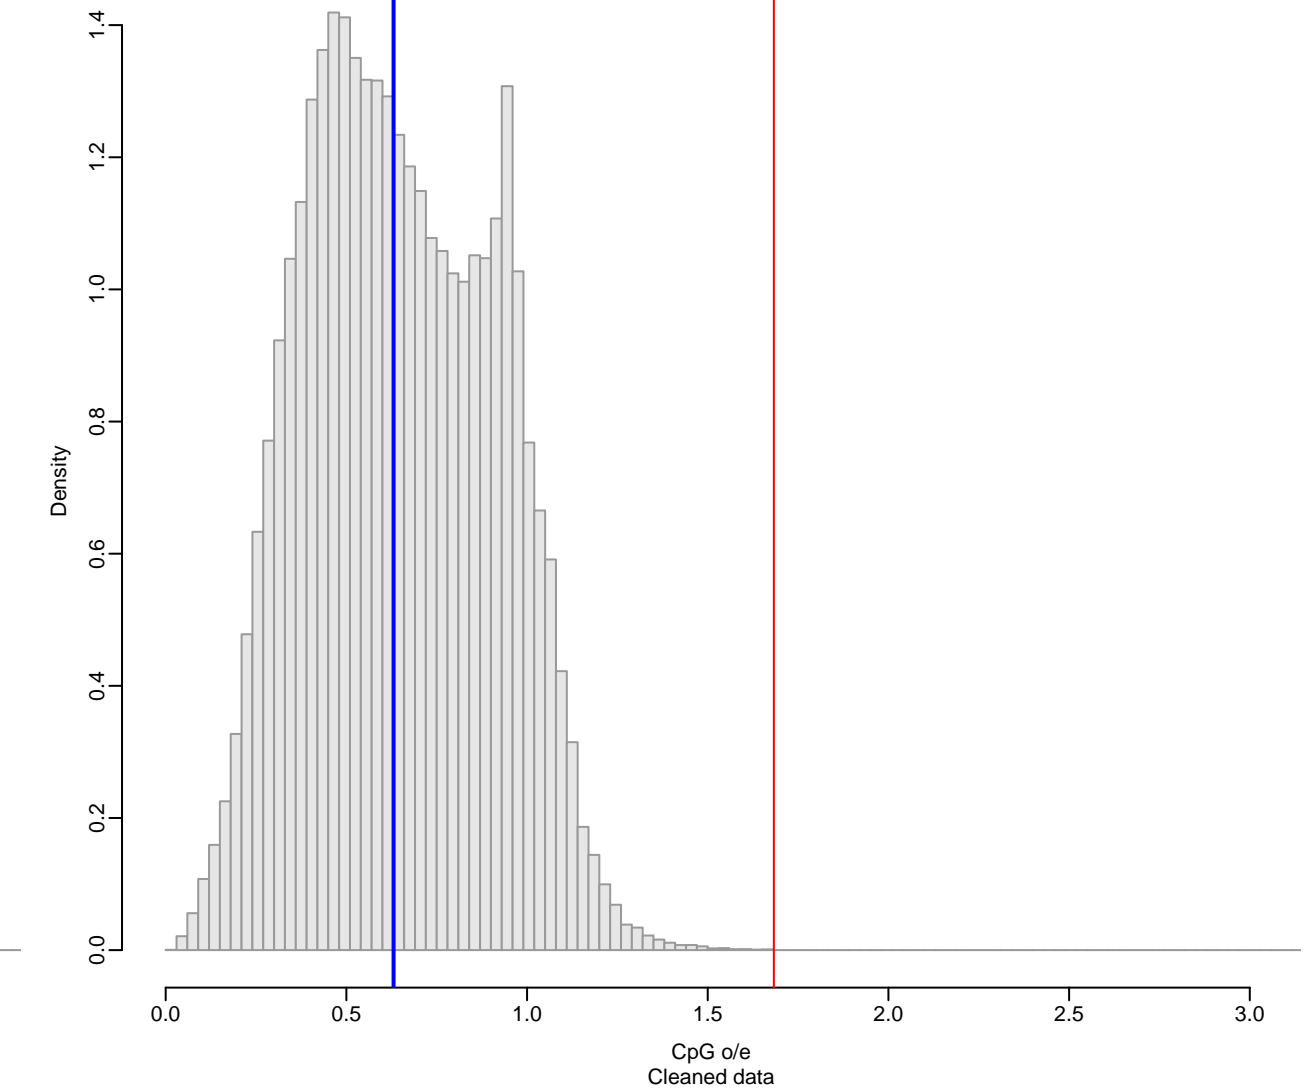

Pinus\_thunbergii

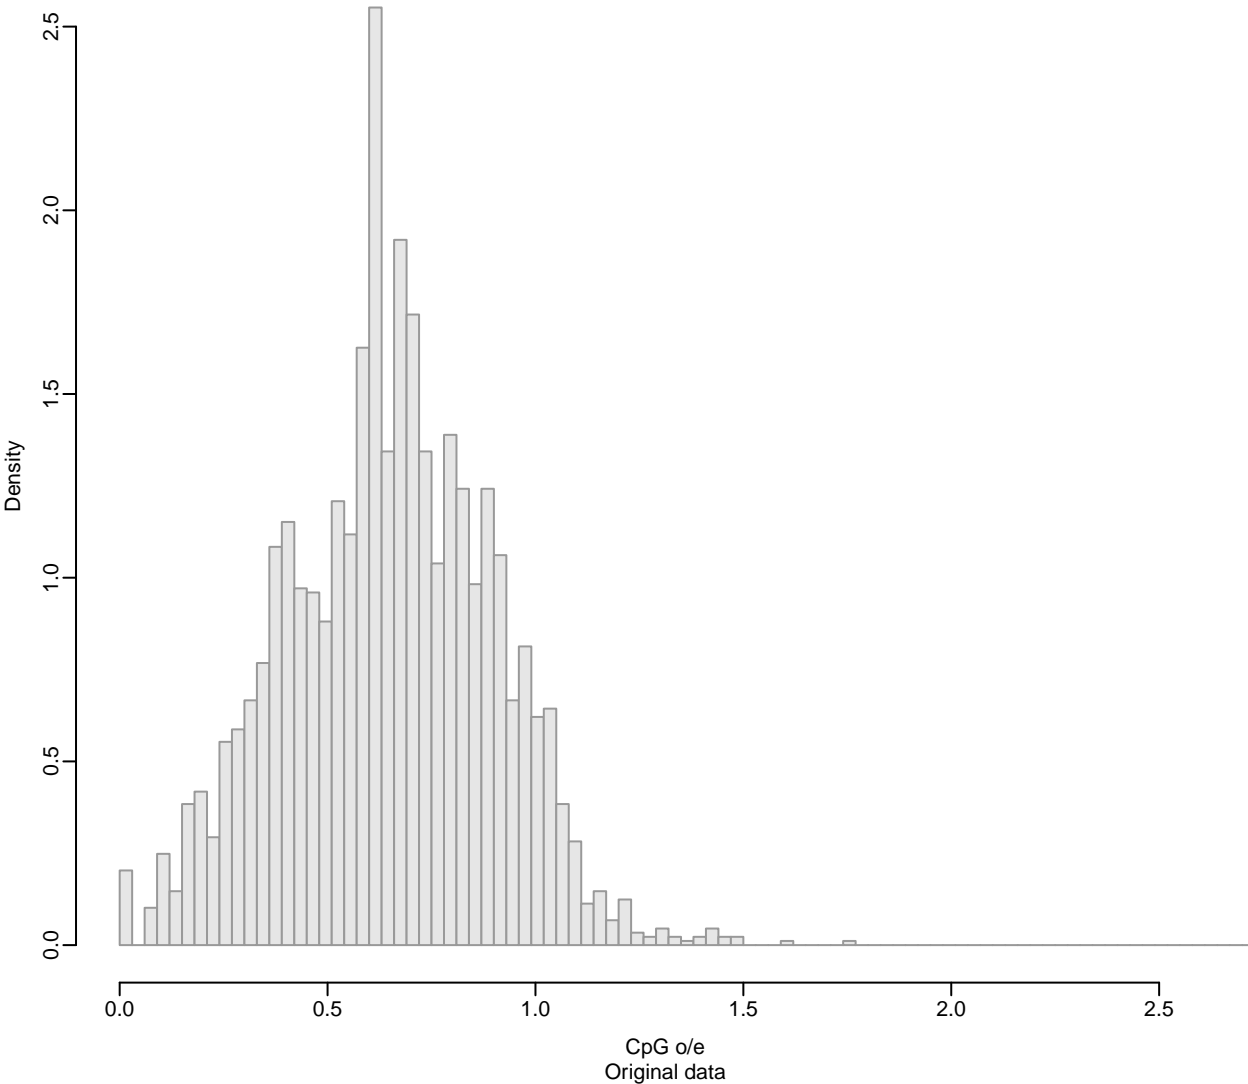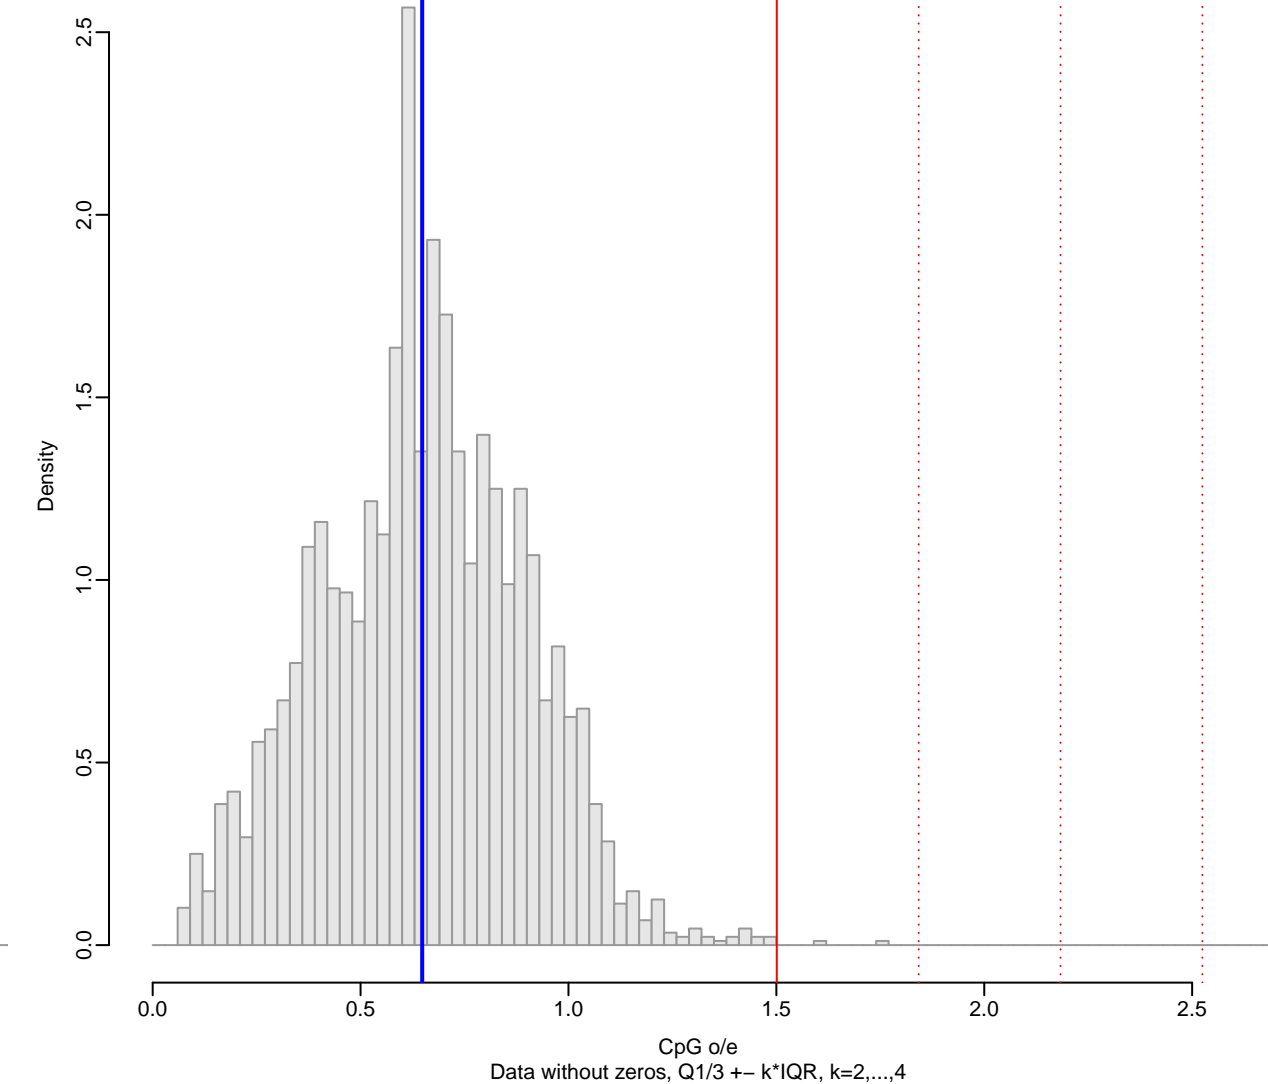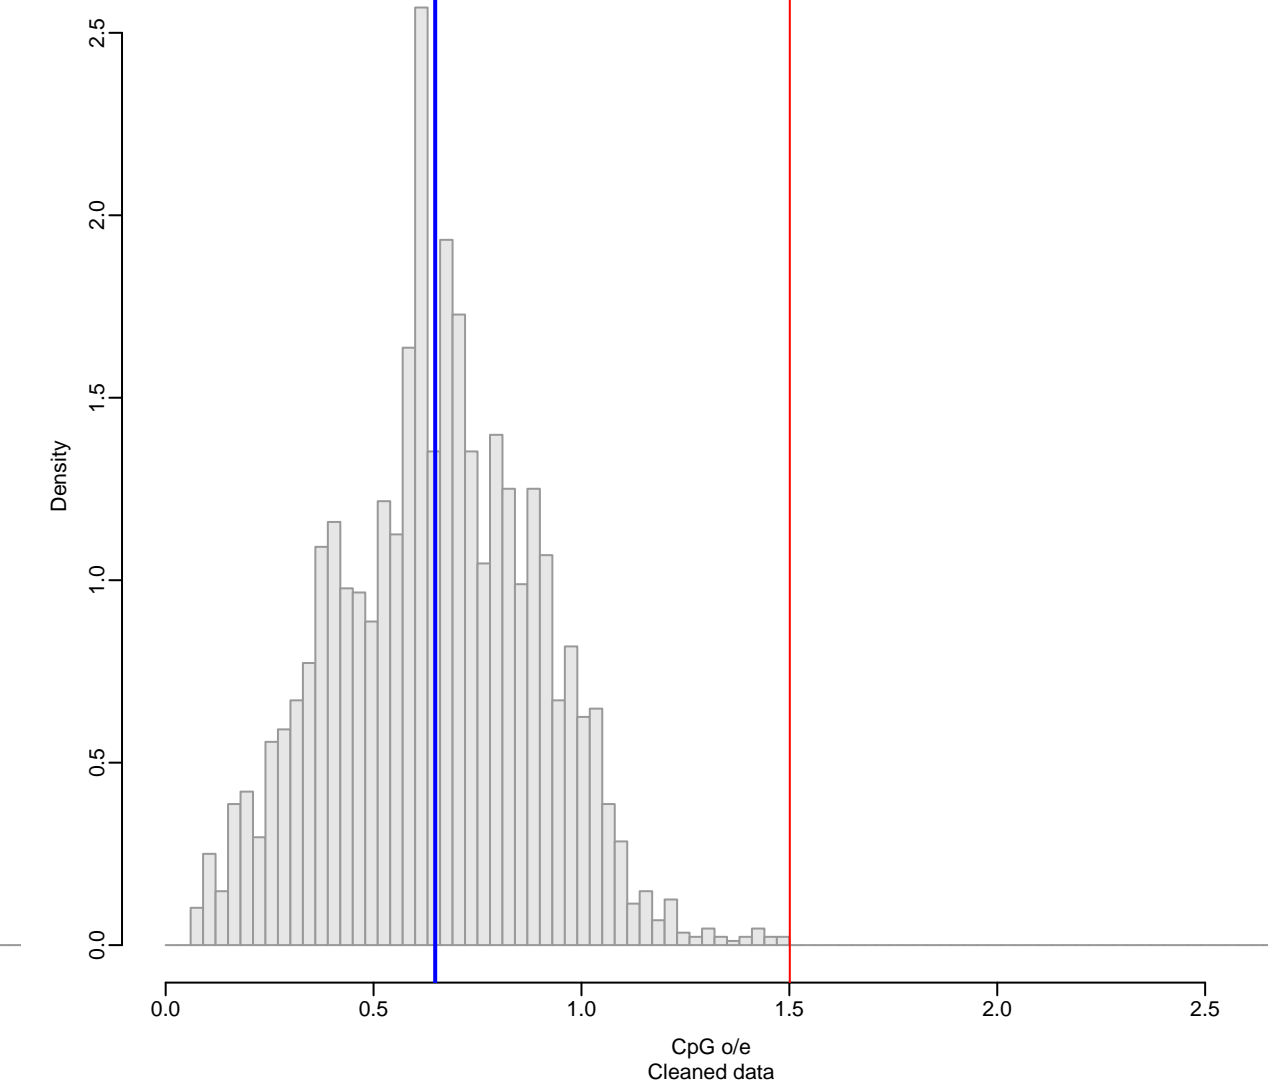



Pissodes\_strobi

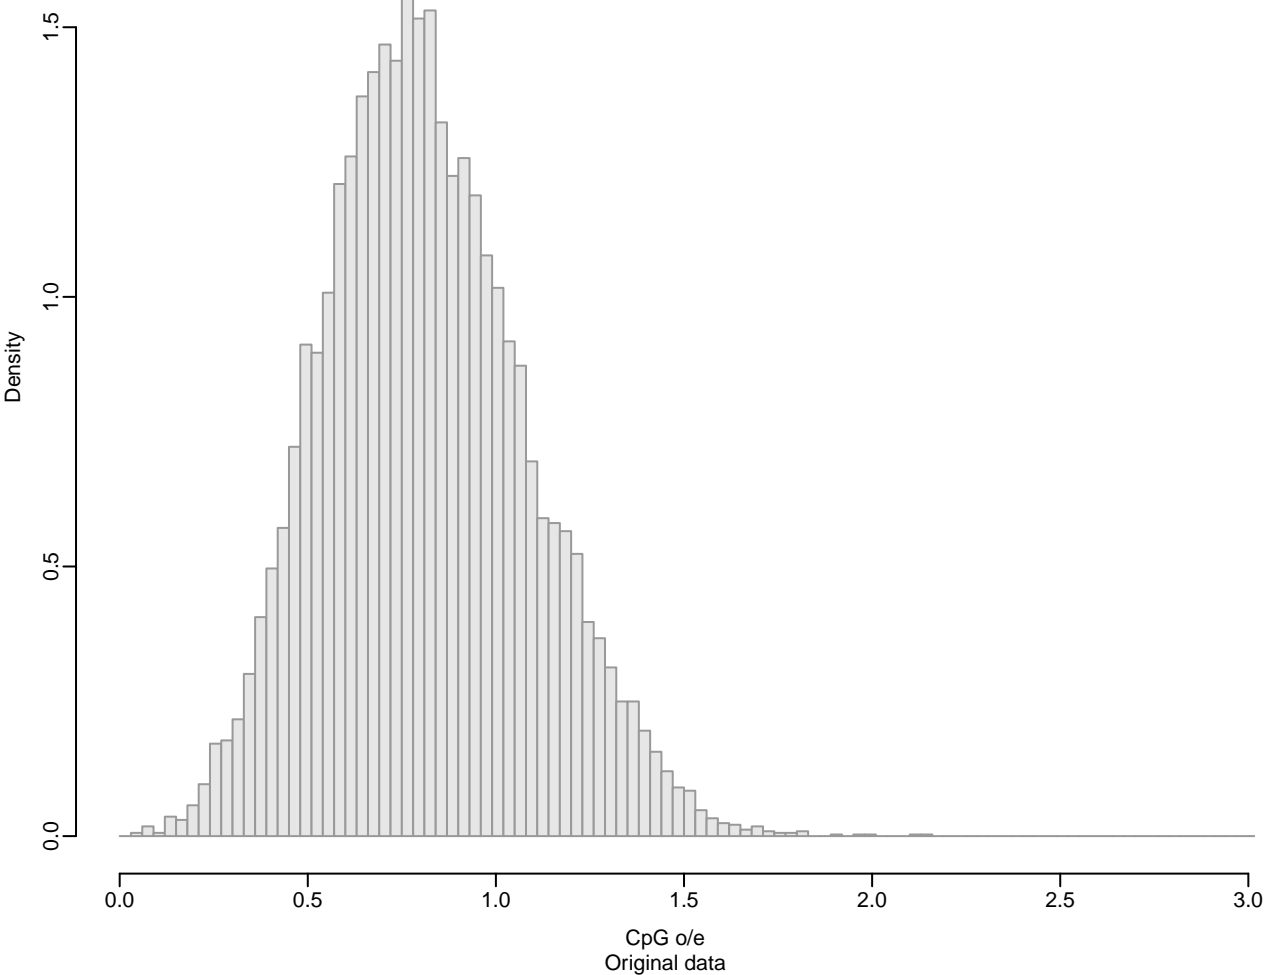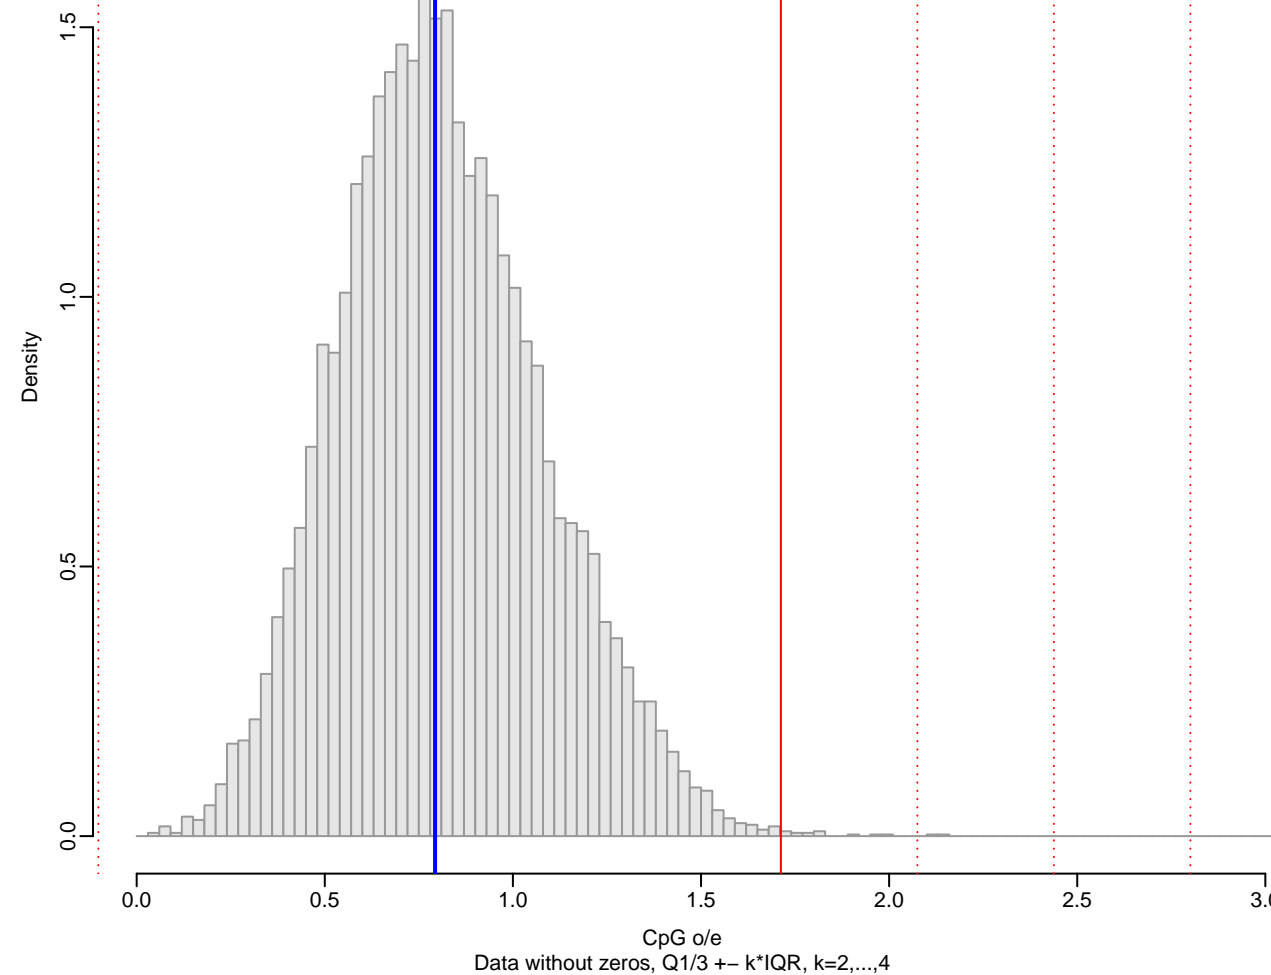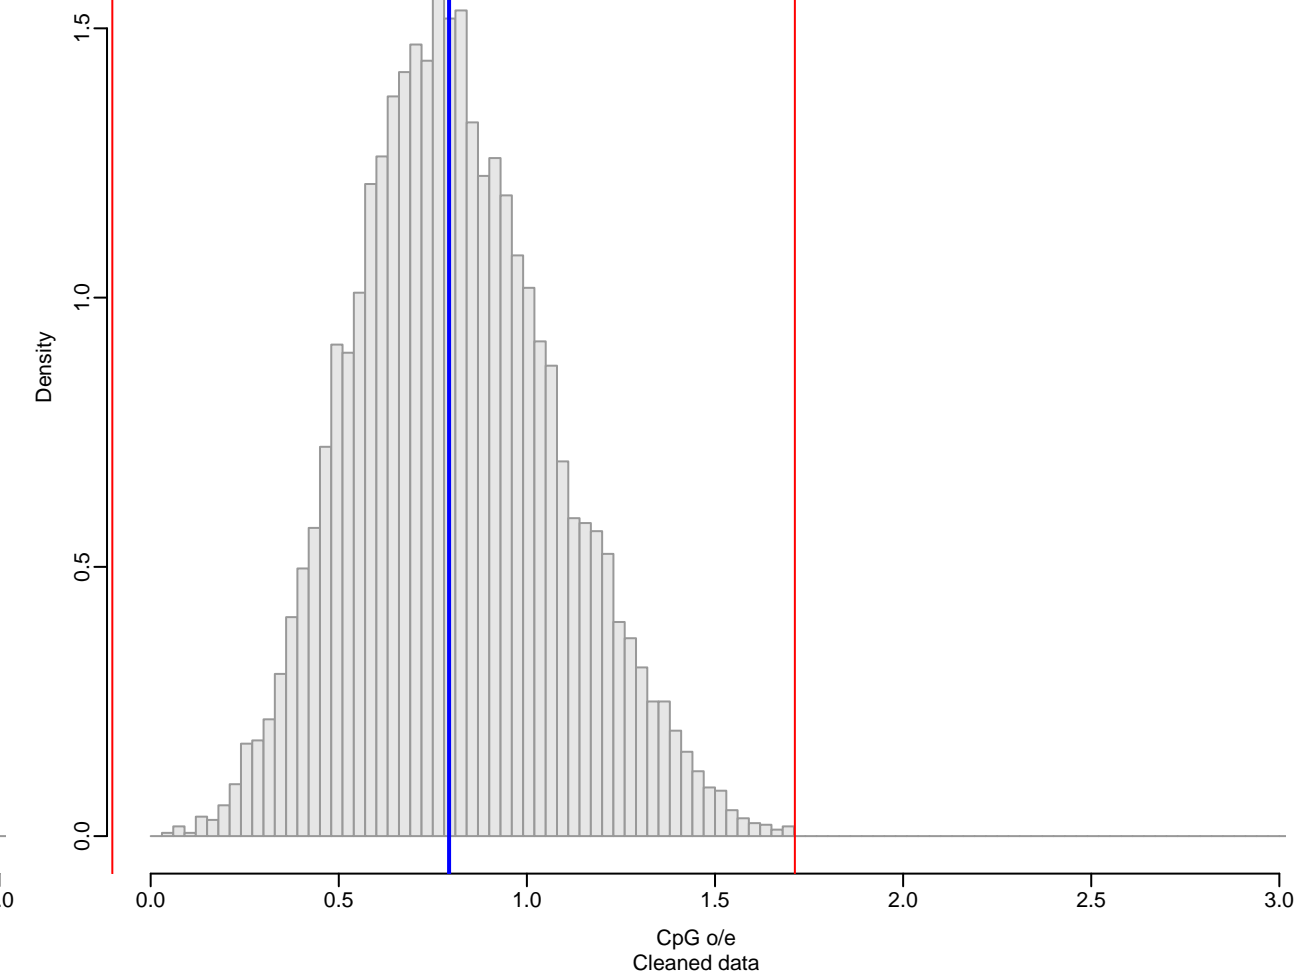

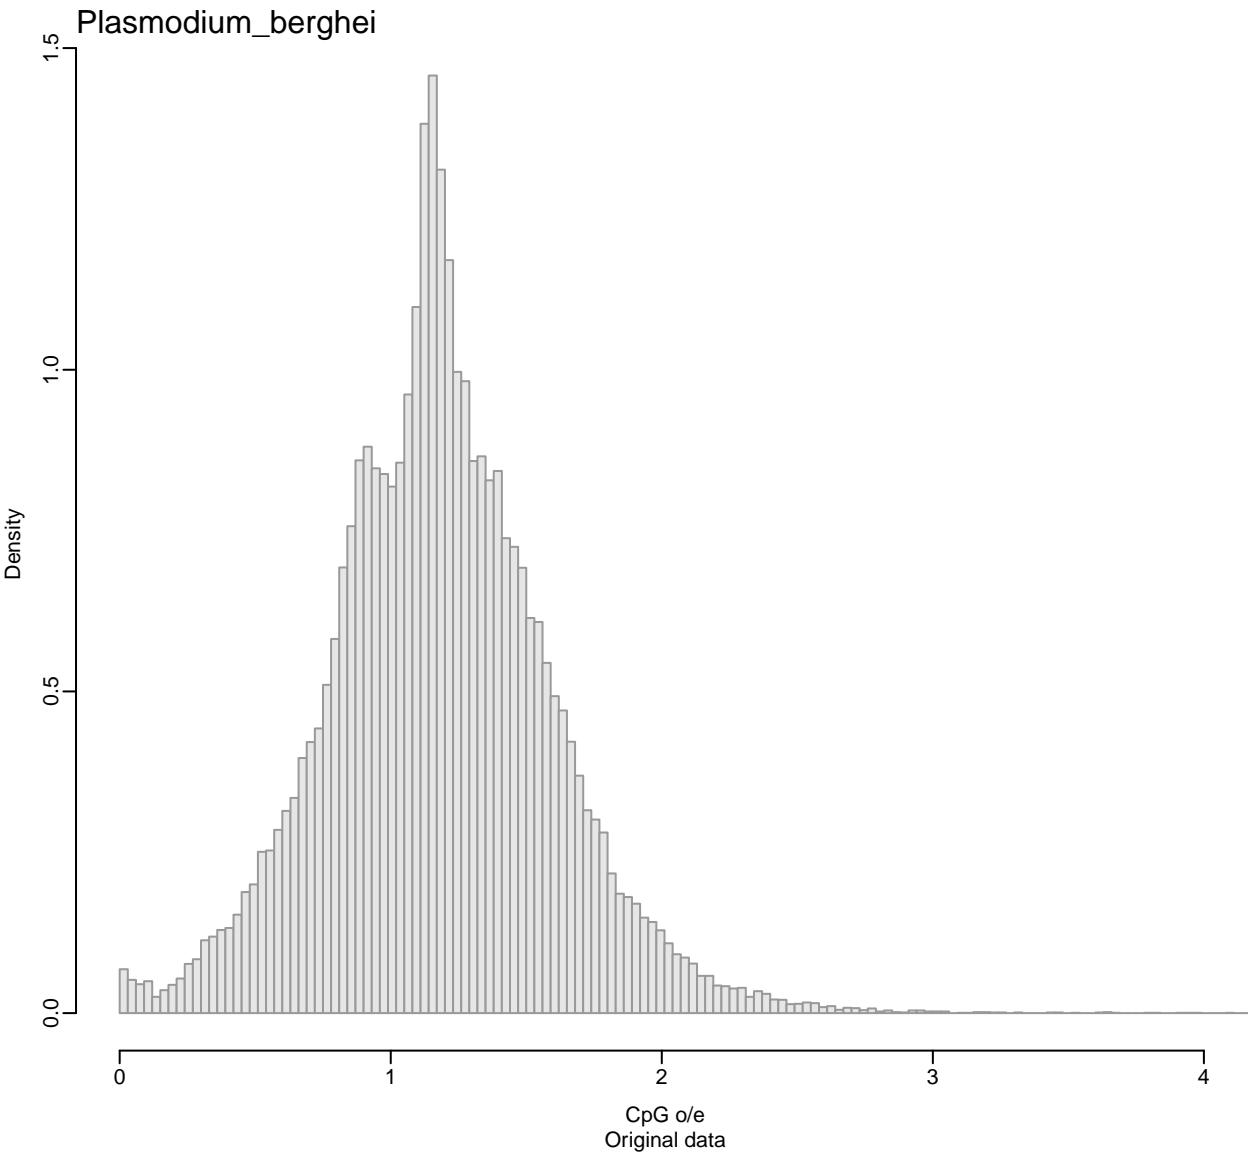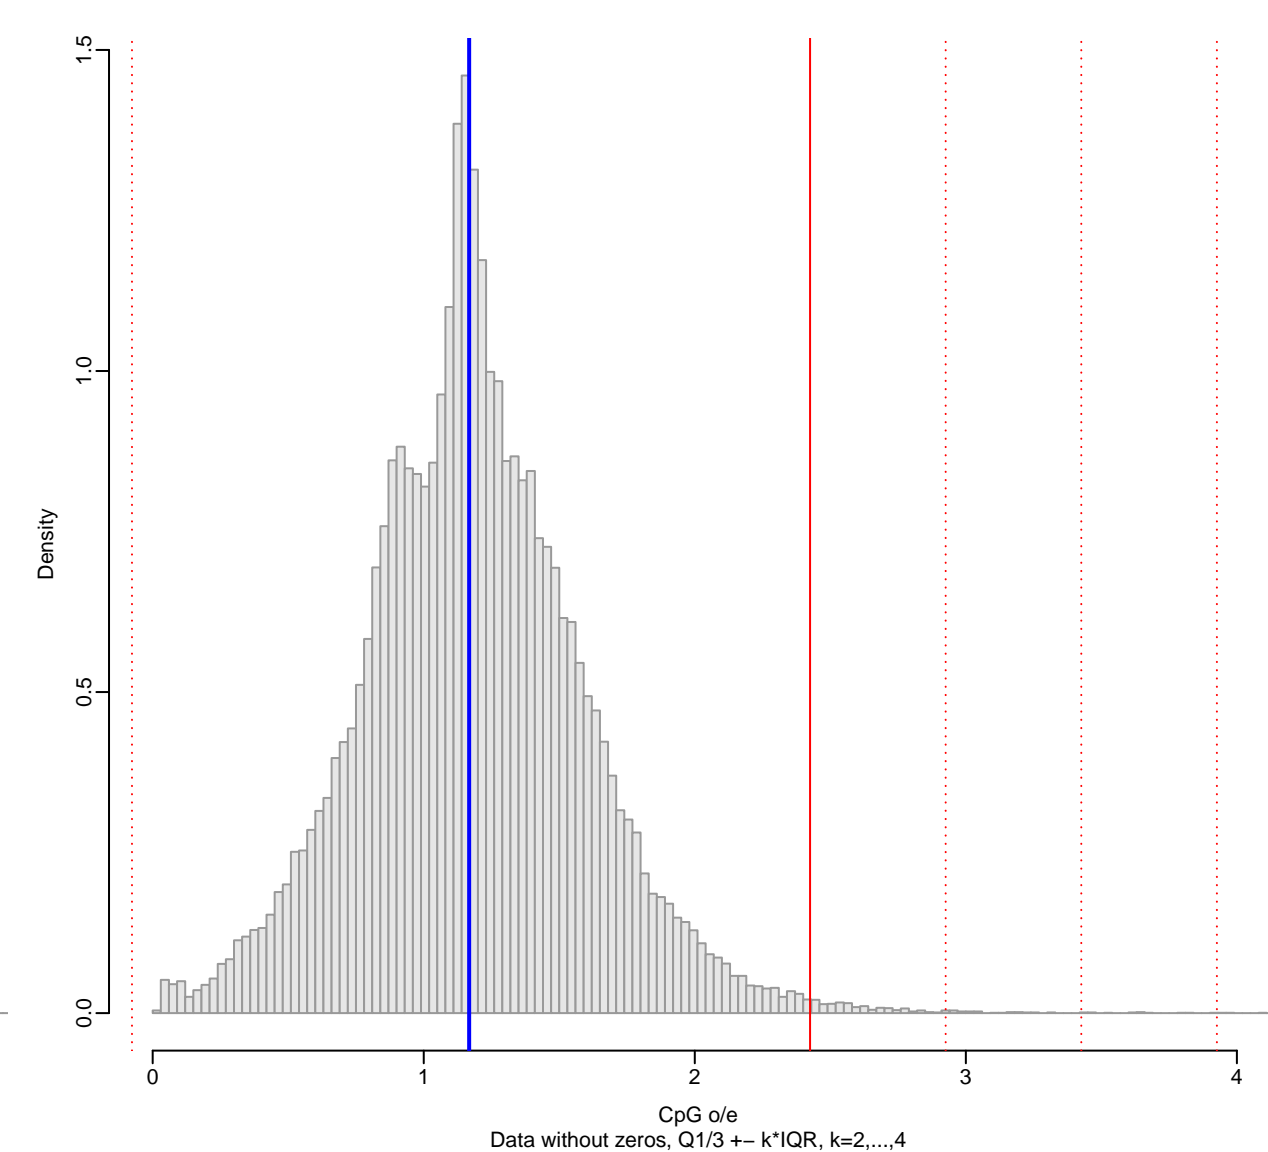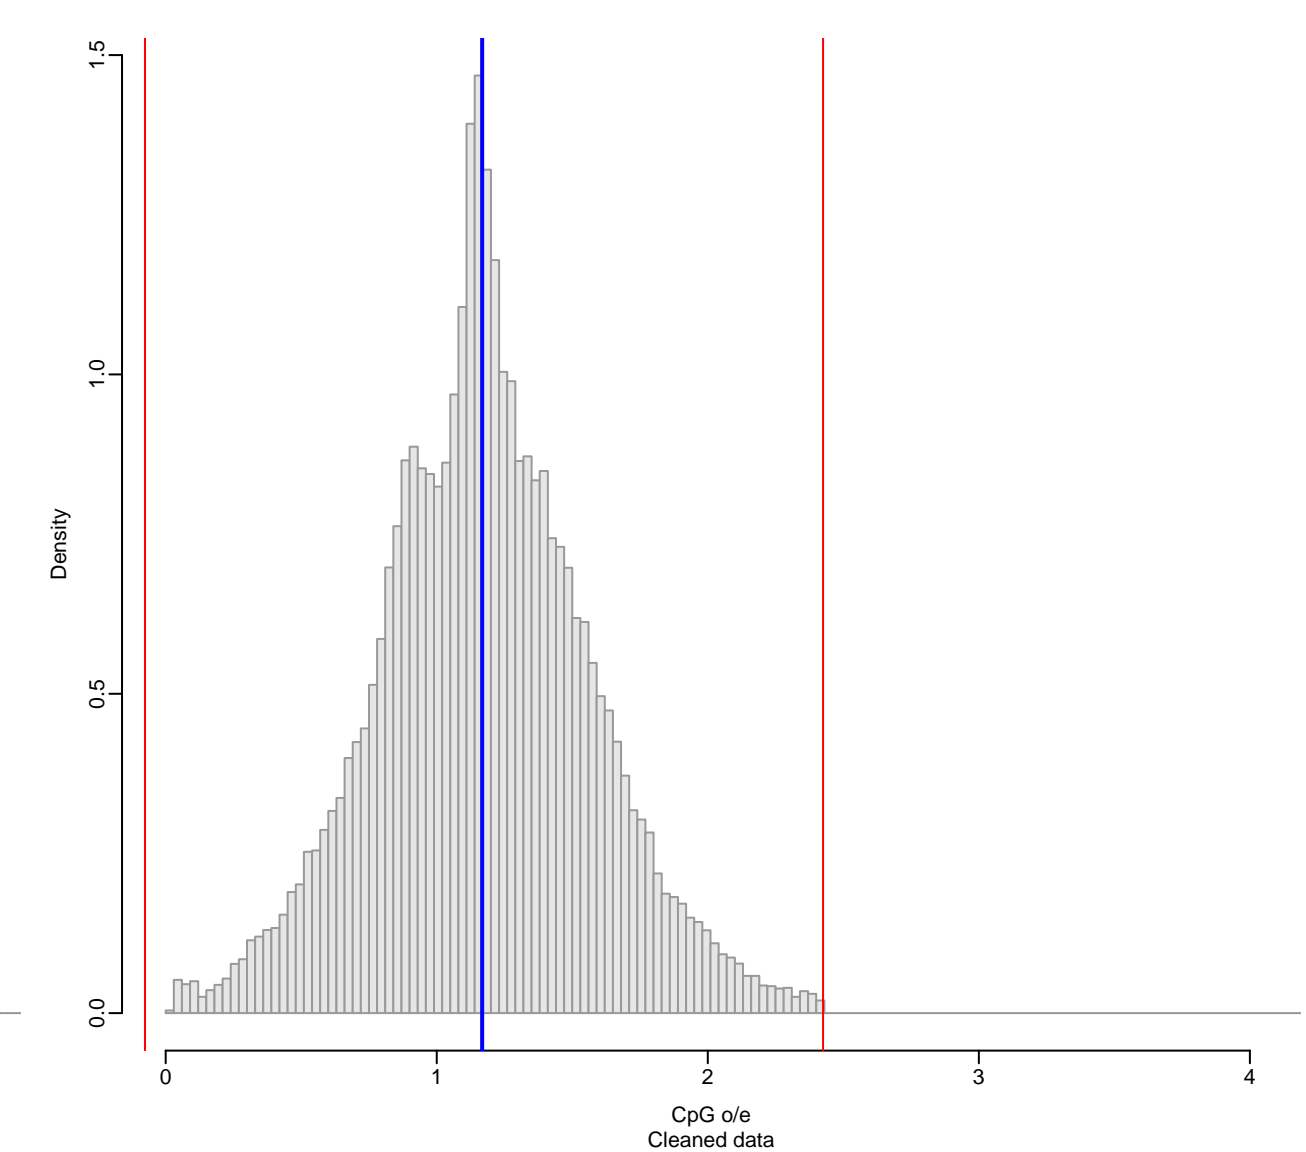

Plasmodium\_falciparum 3D7

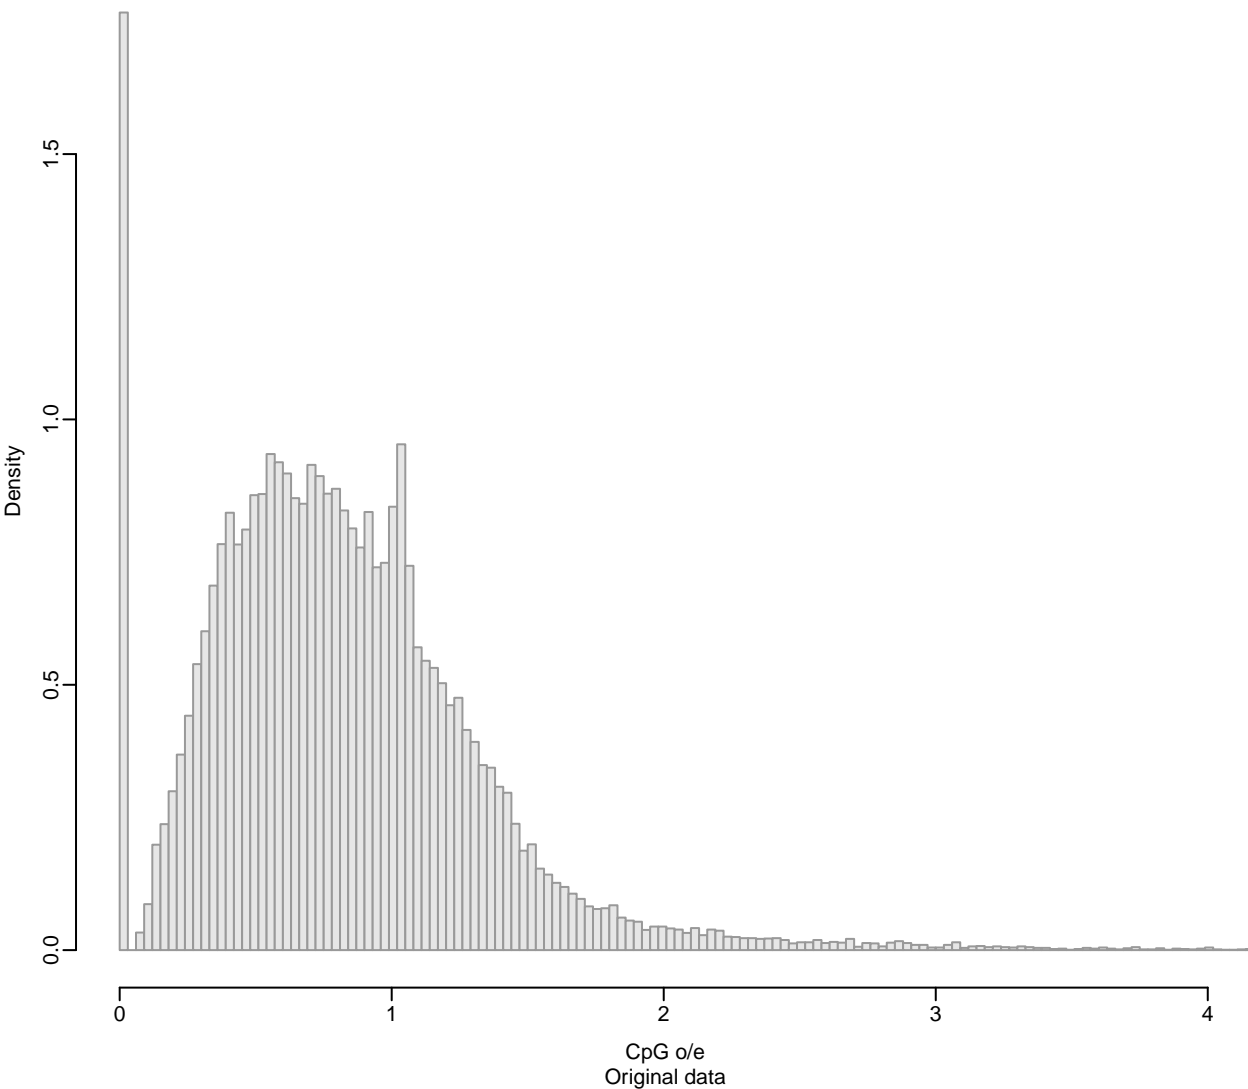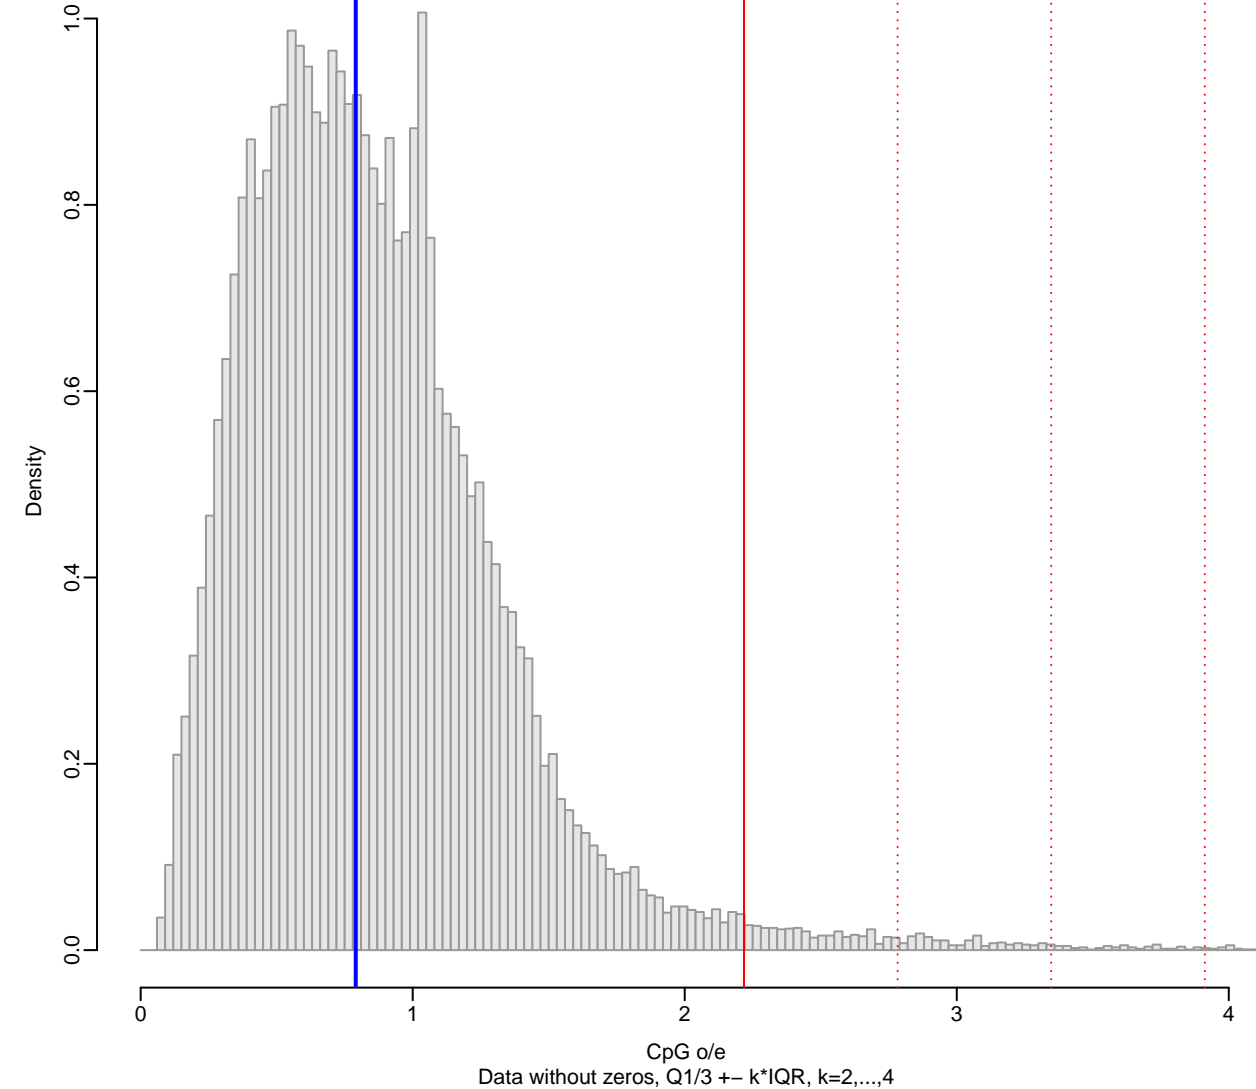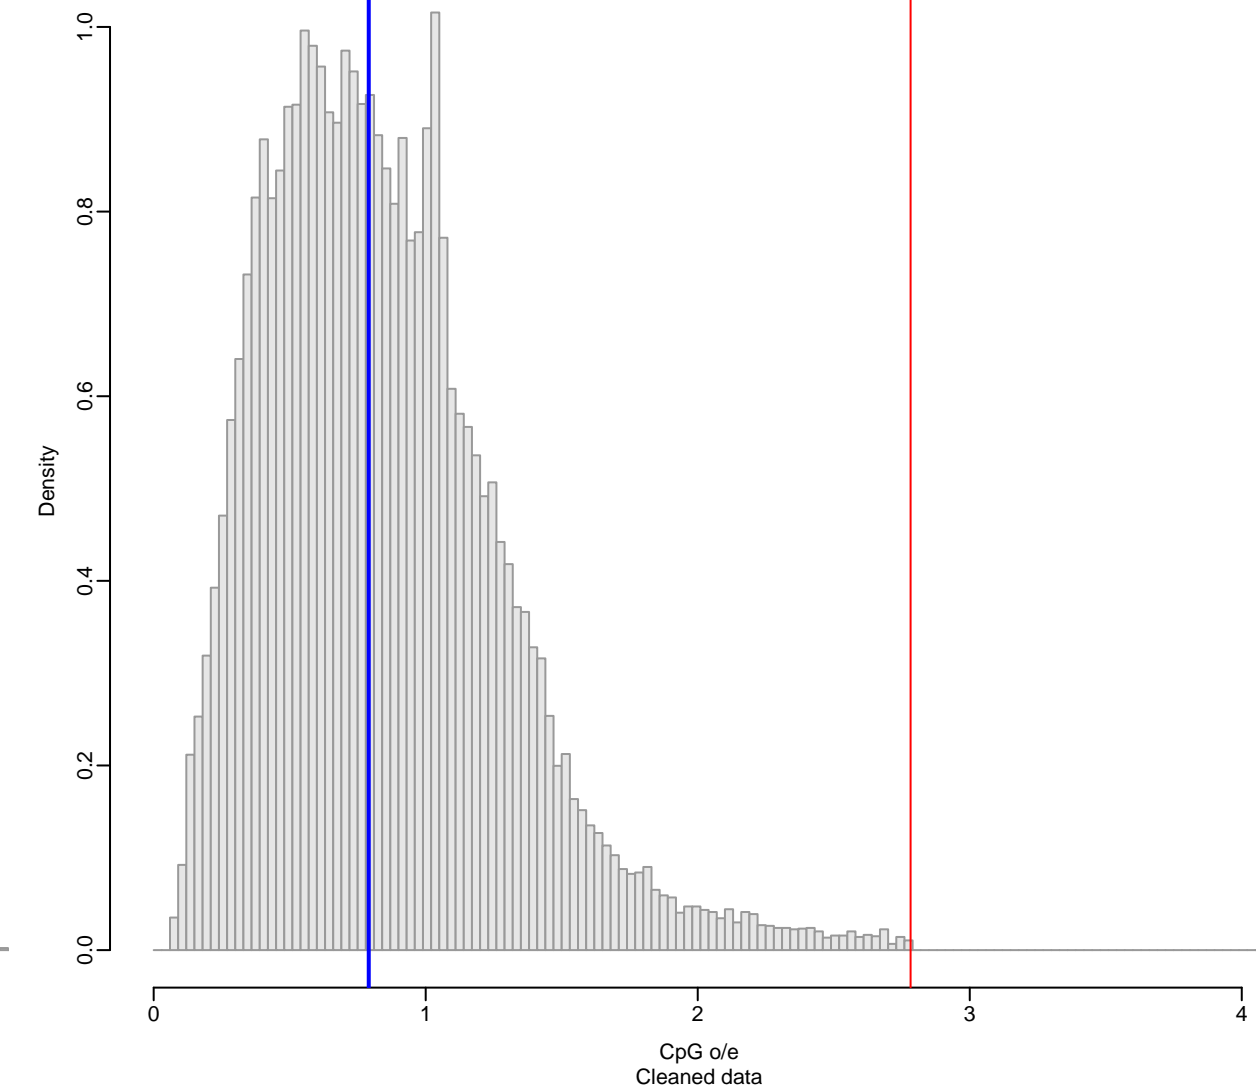

# Plasmodium\_falciparum

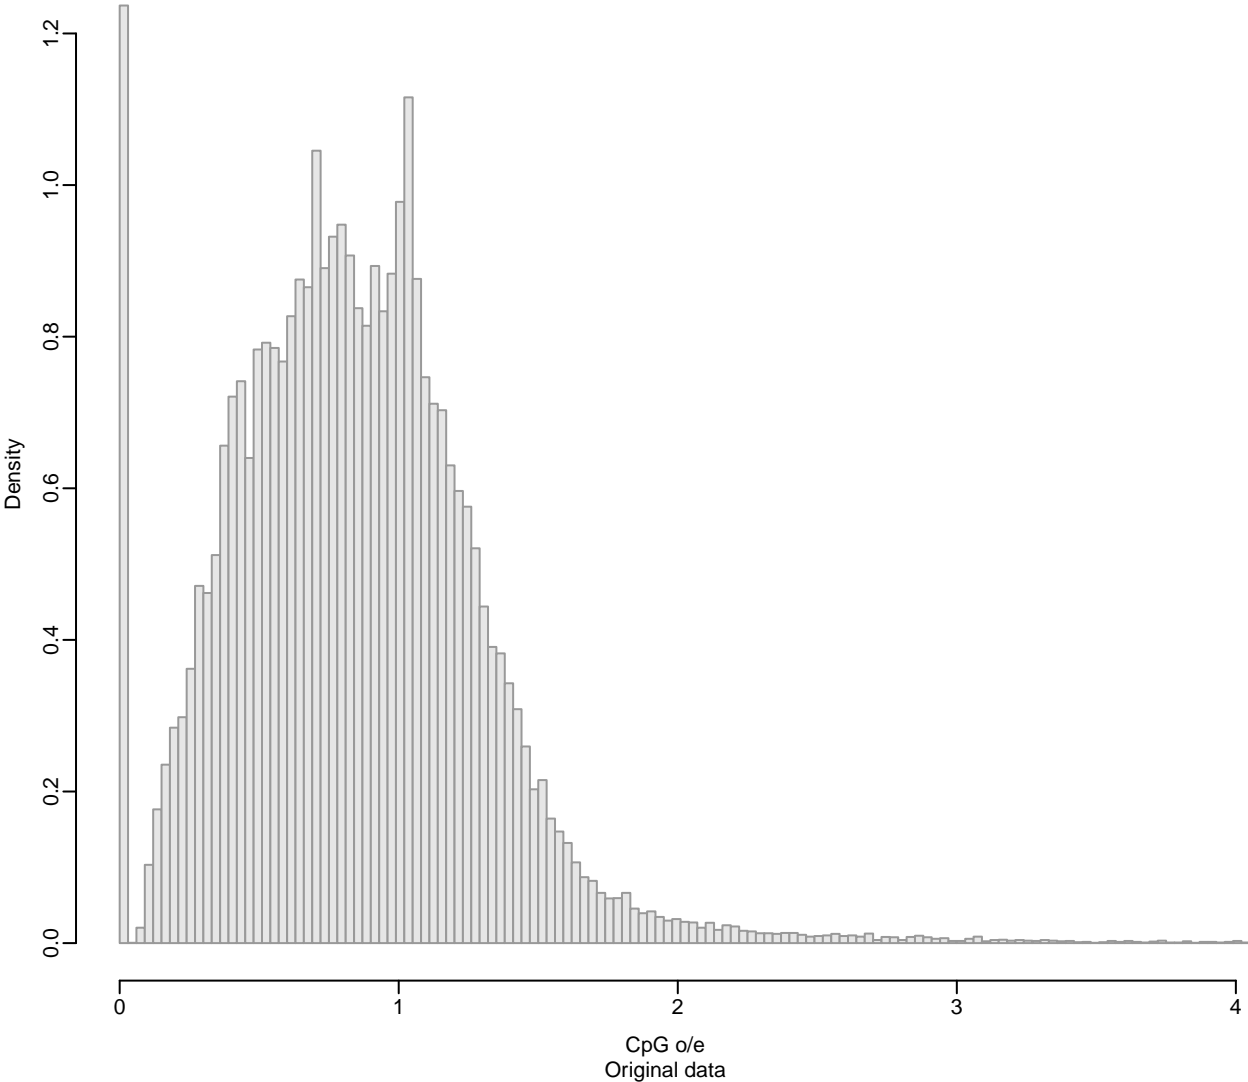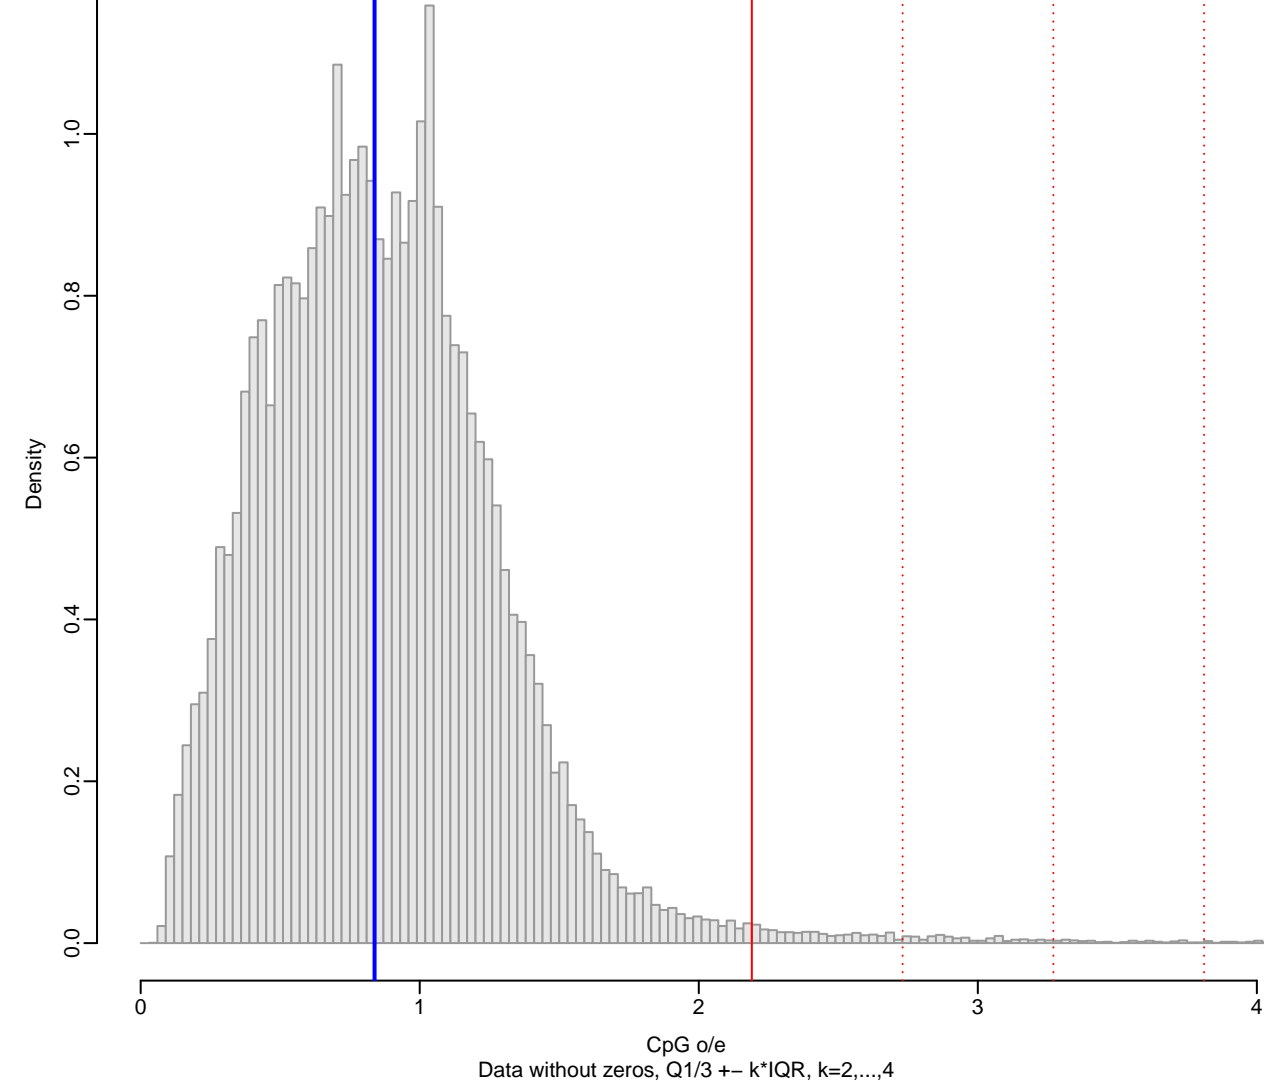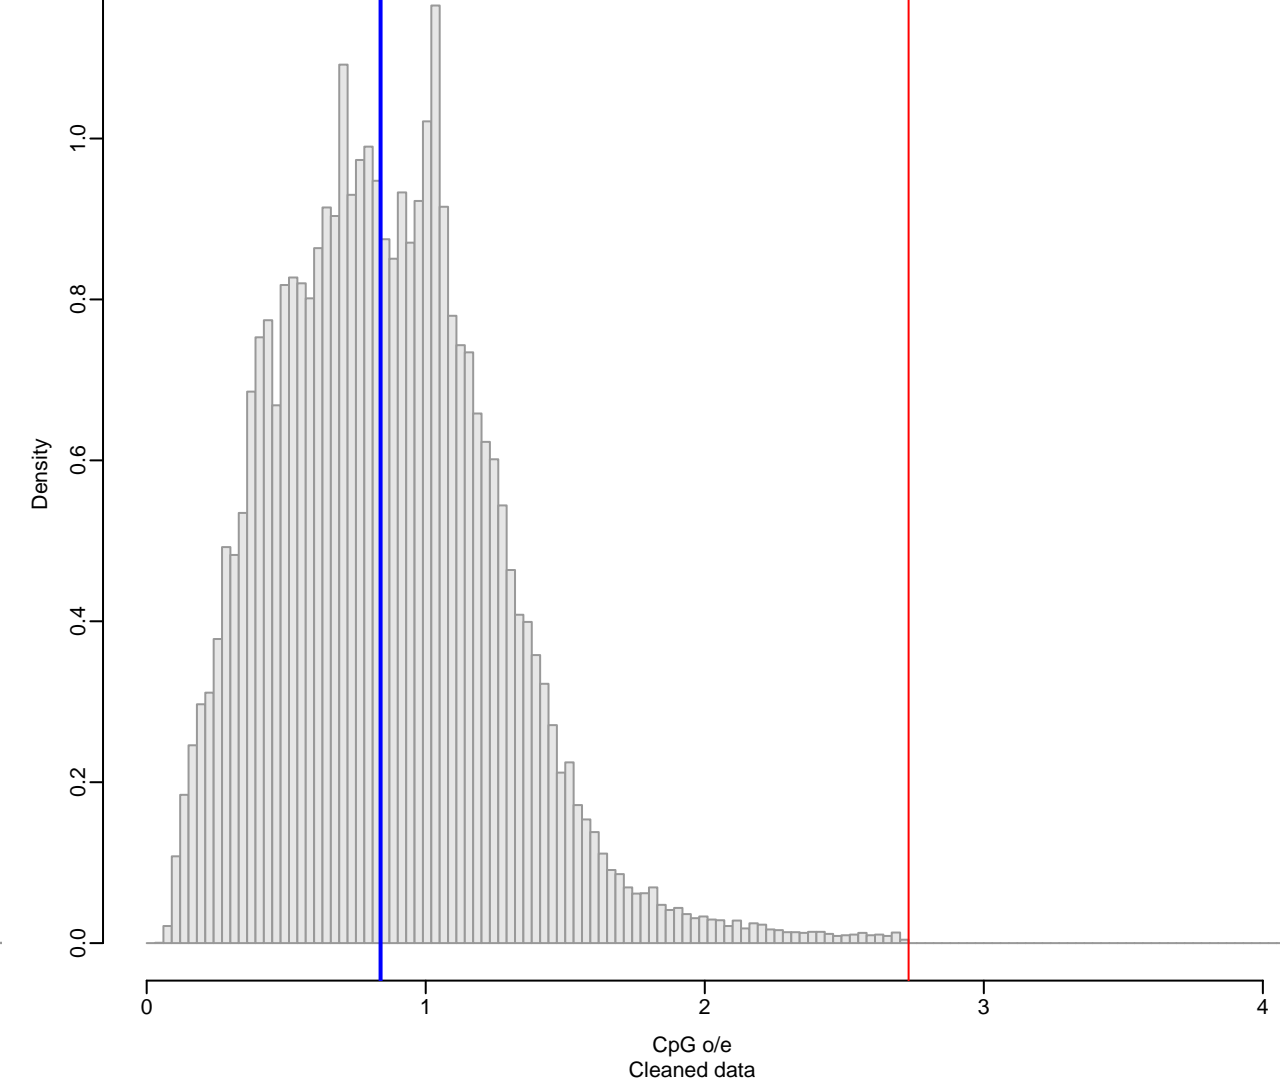

# Plasmodium\_vivax

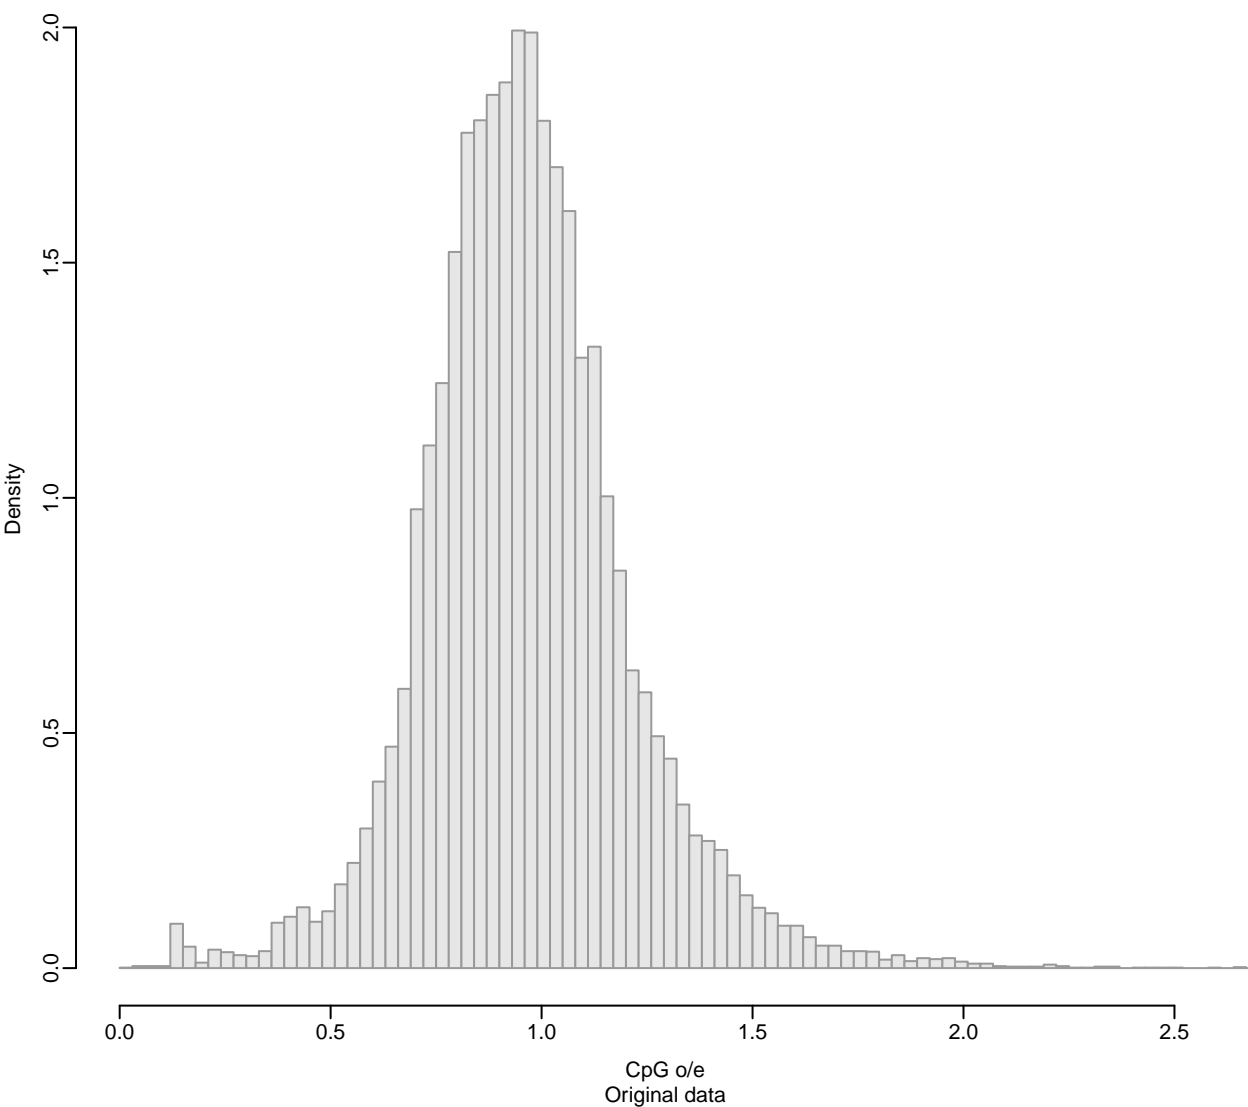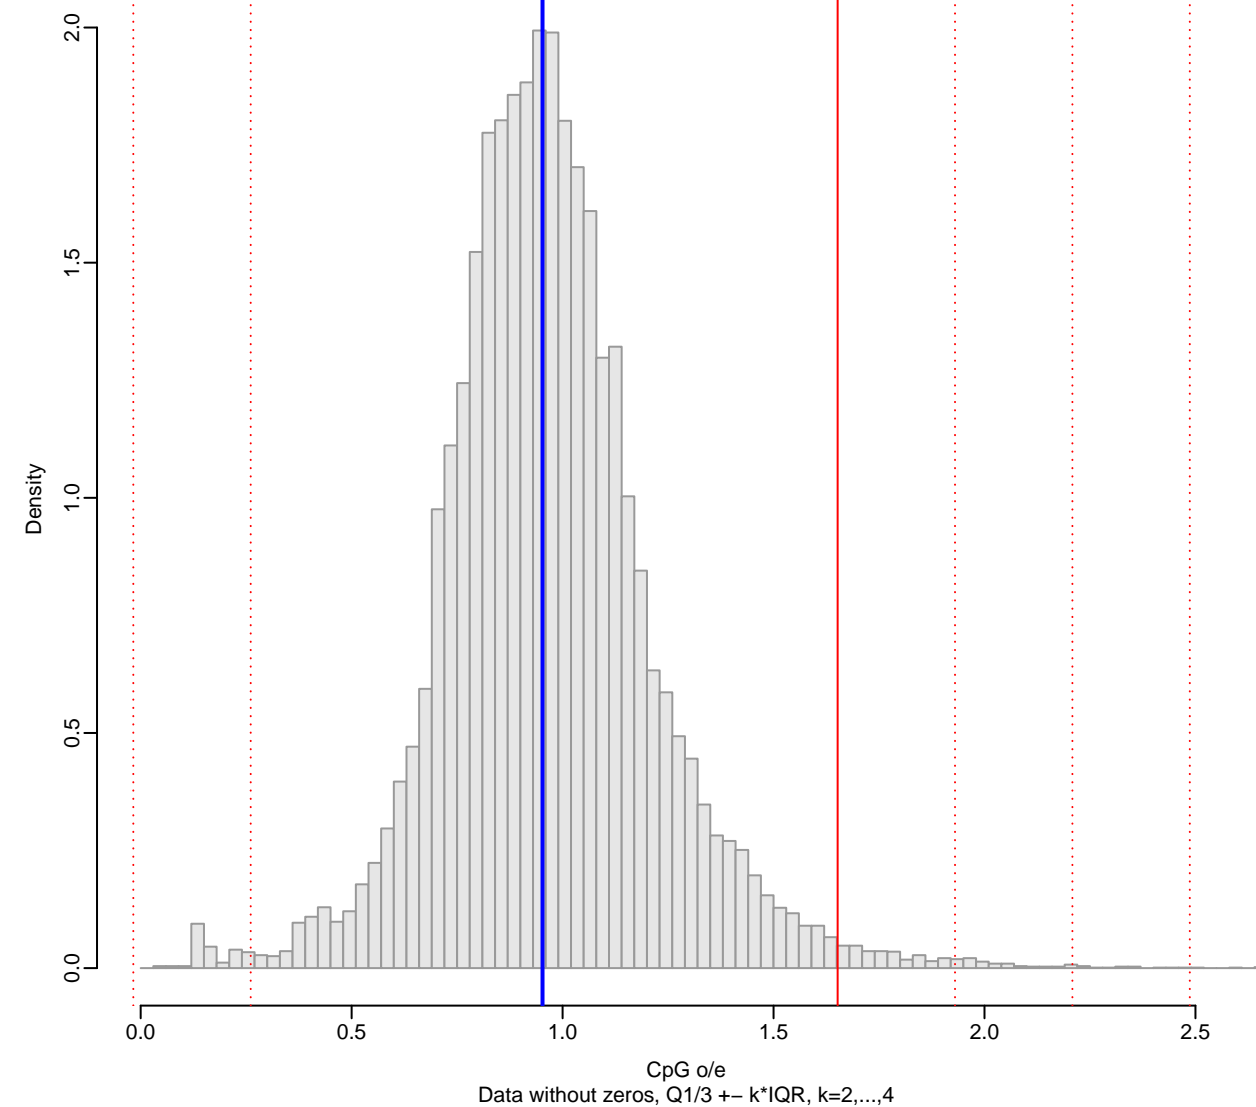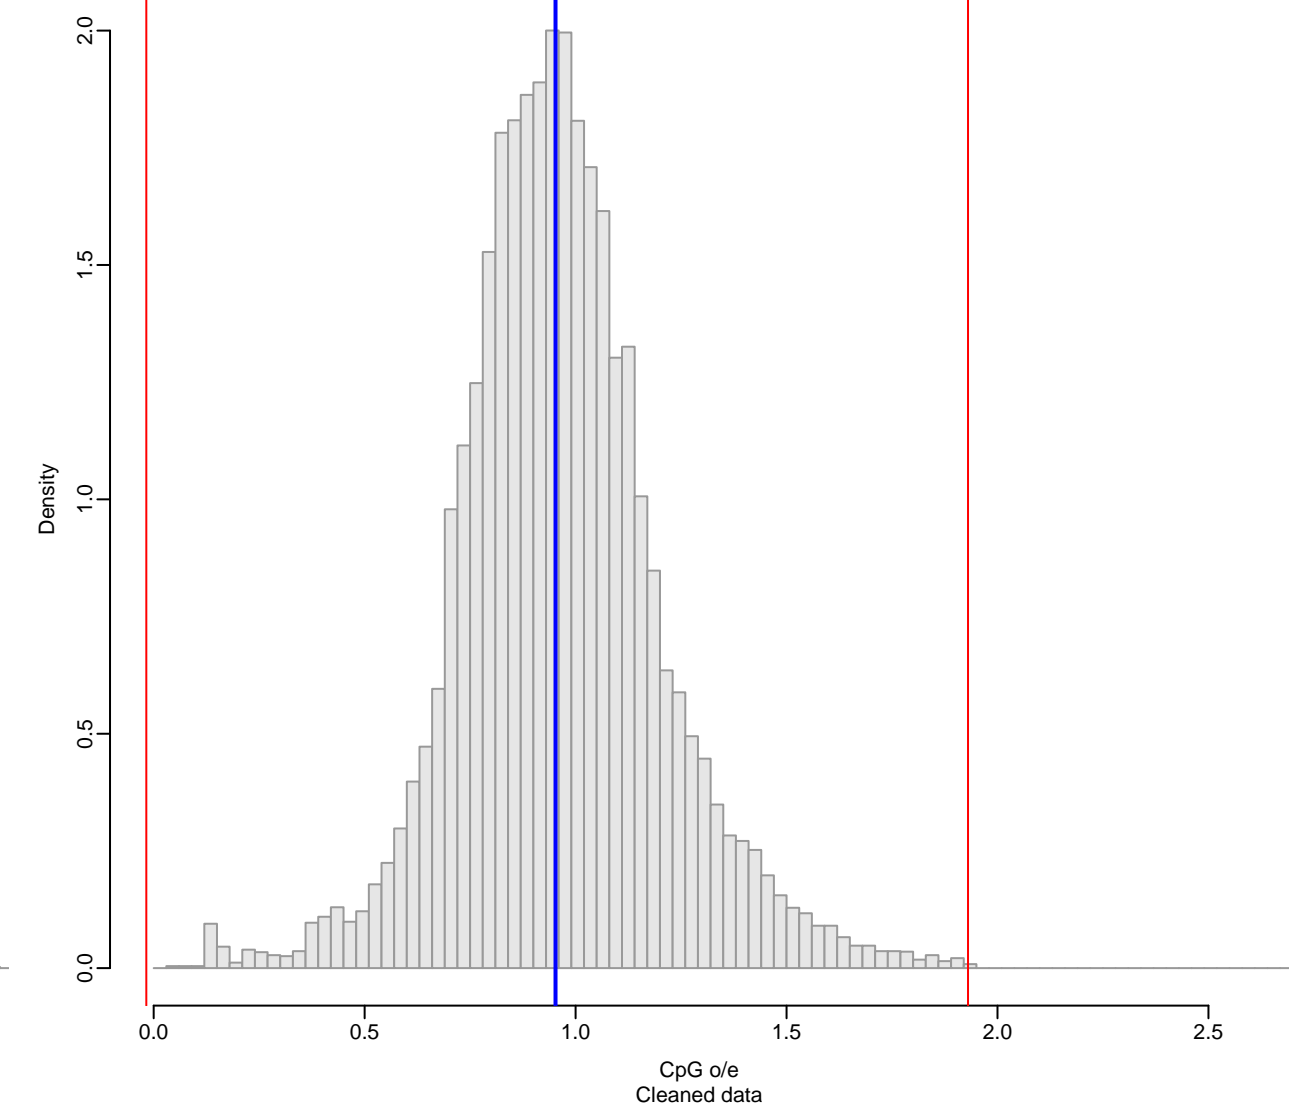

Plasmodium\_yoelii

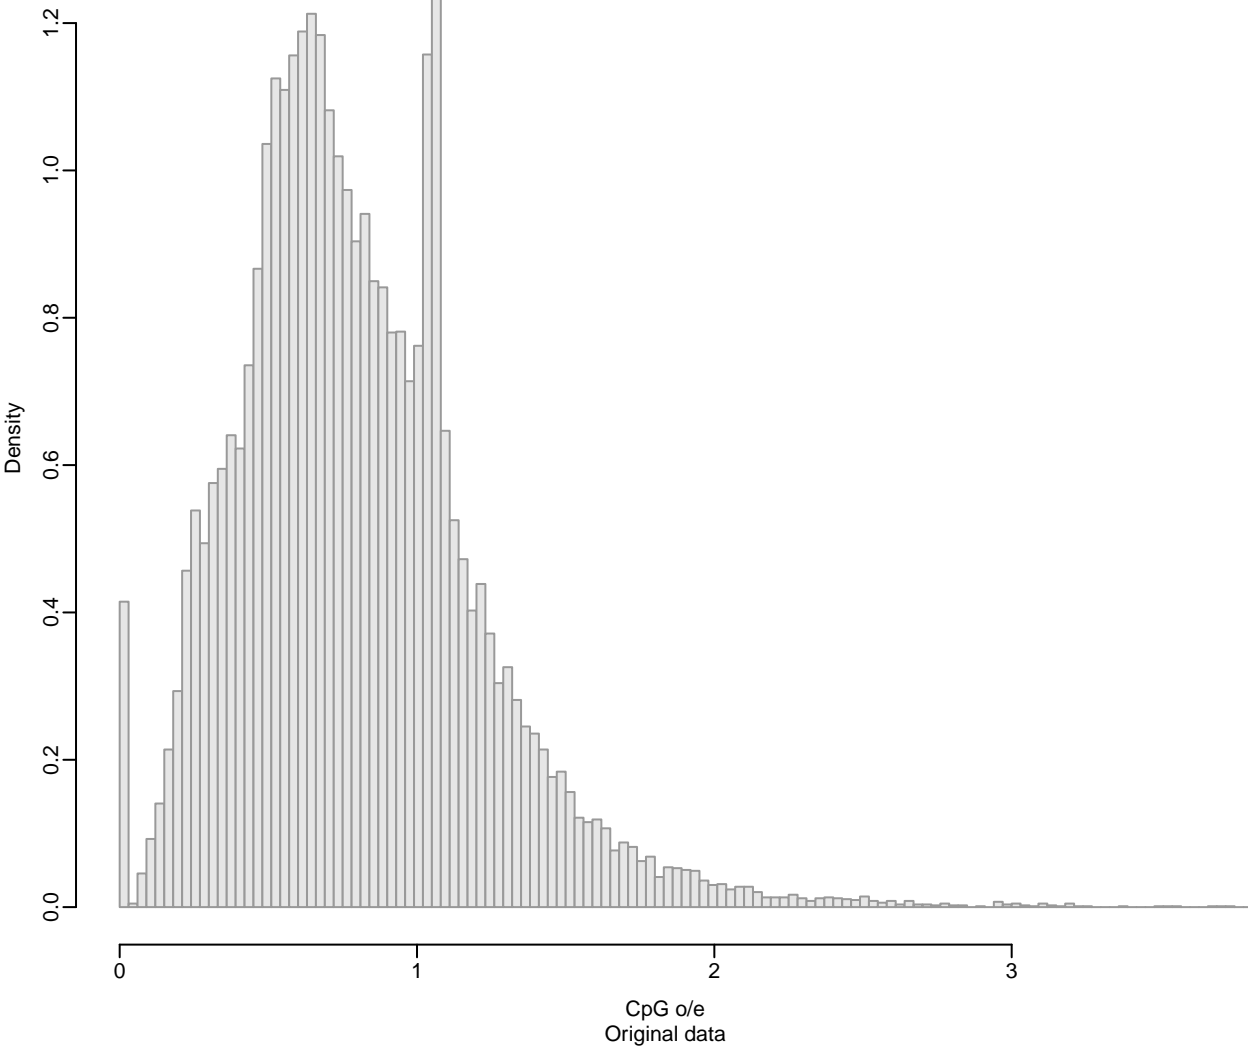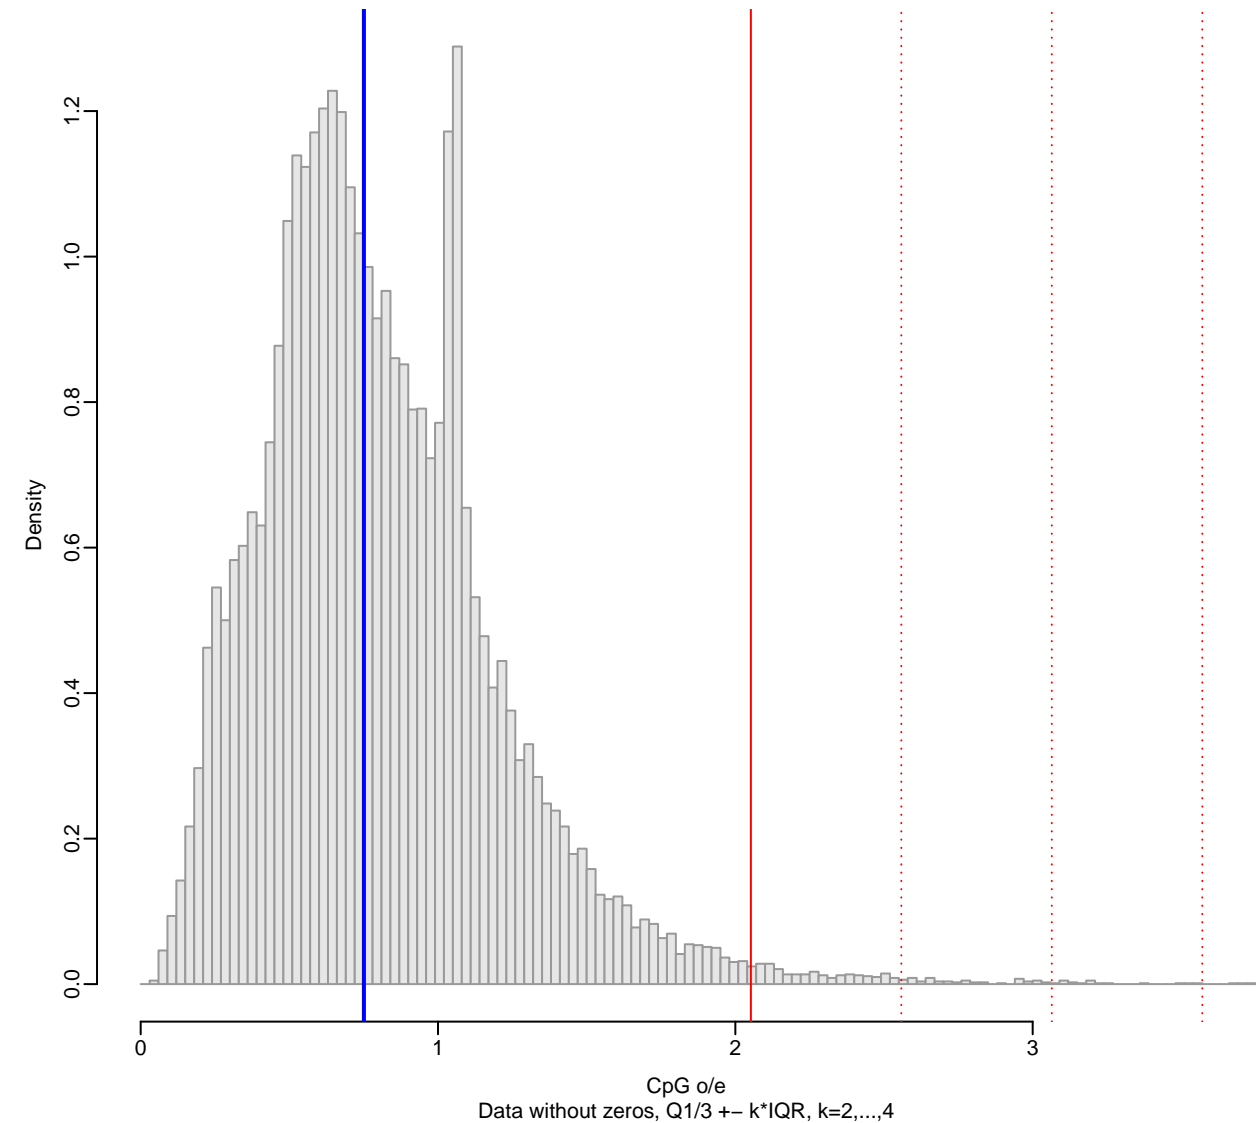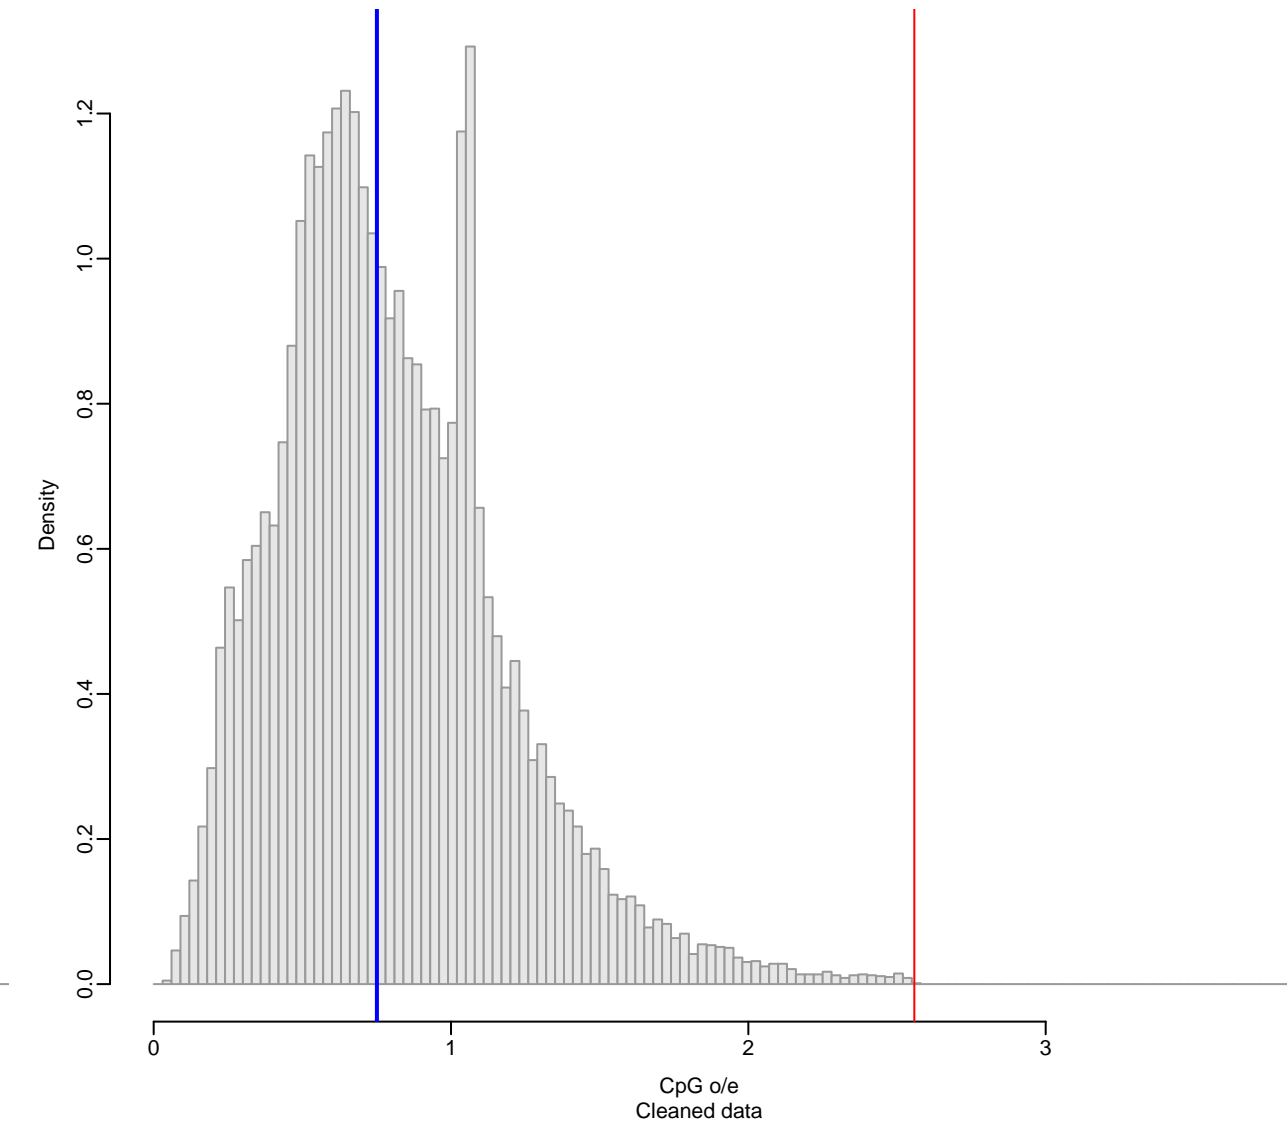

Platichthys\_flesus

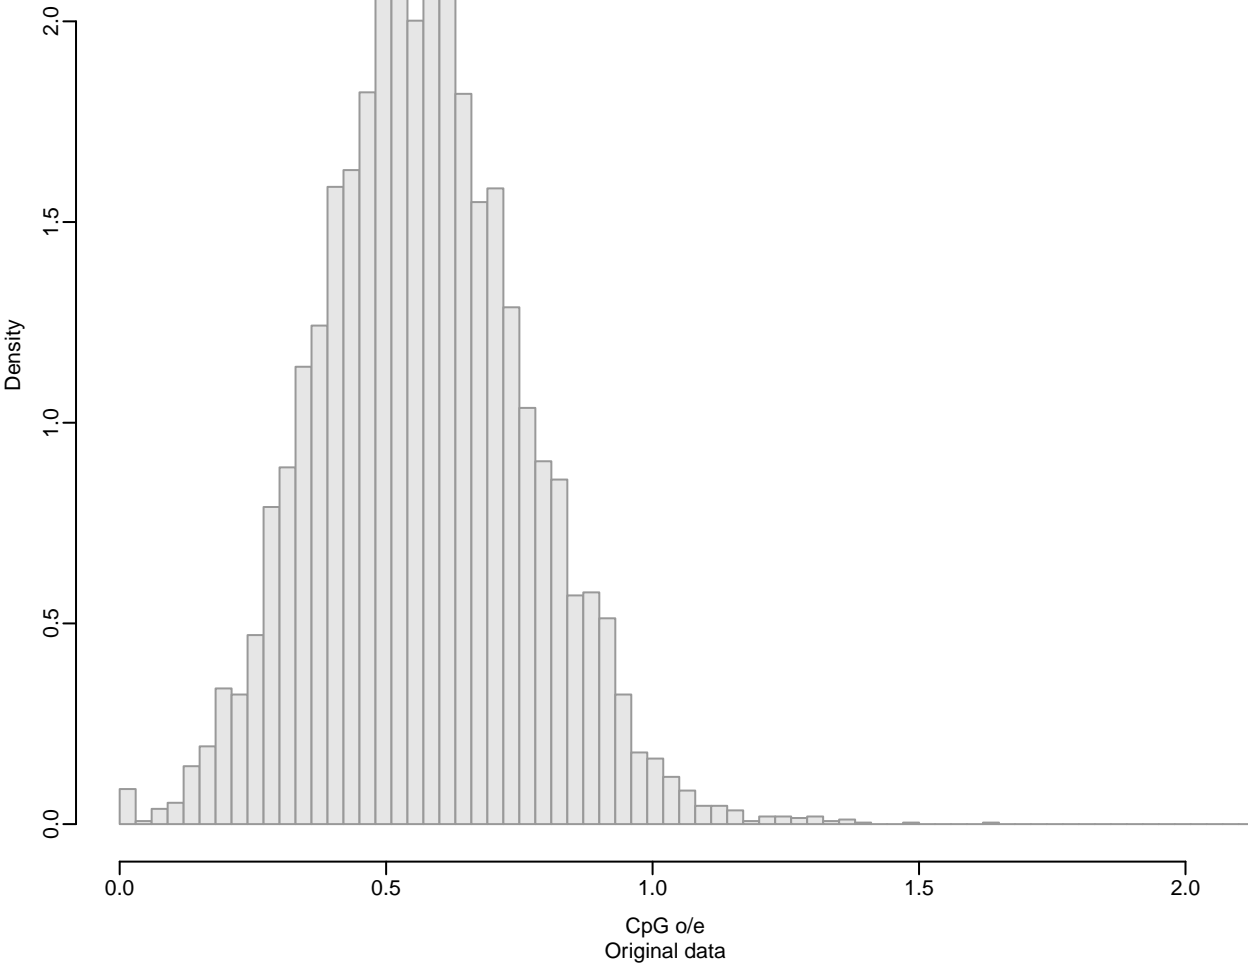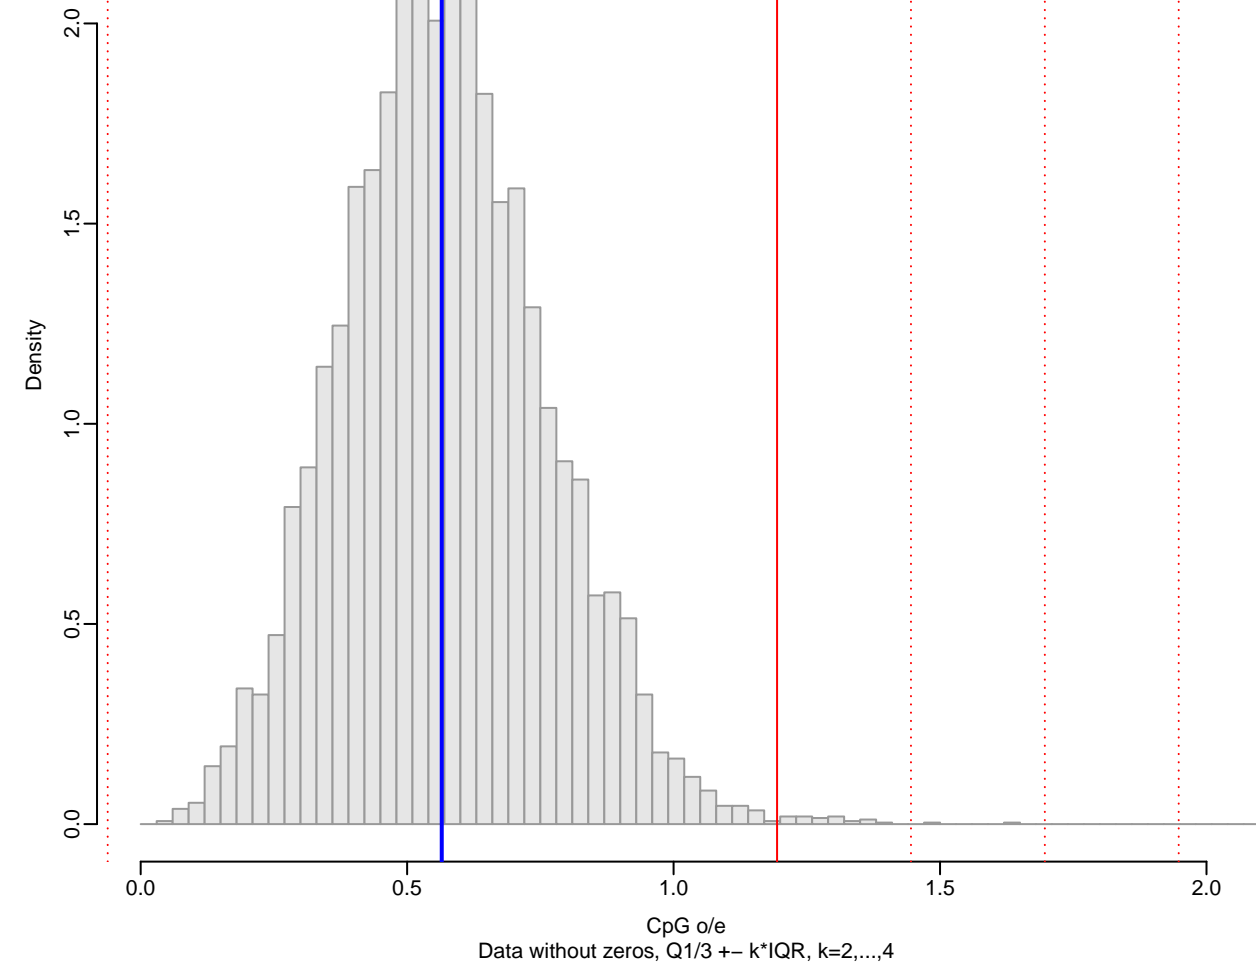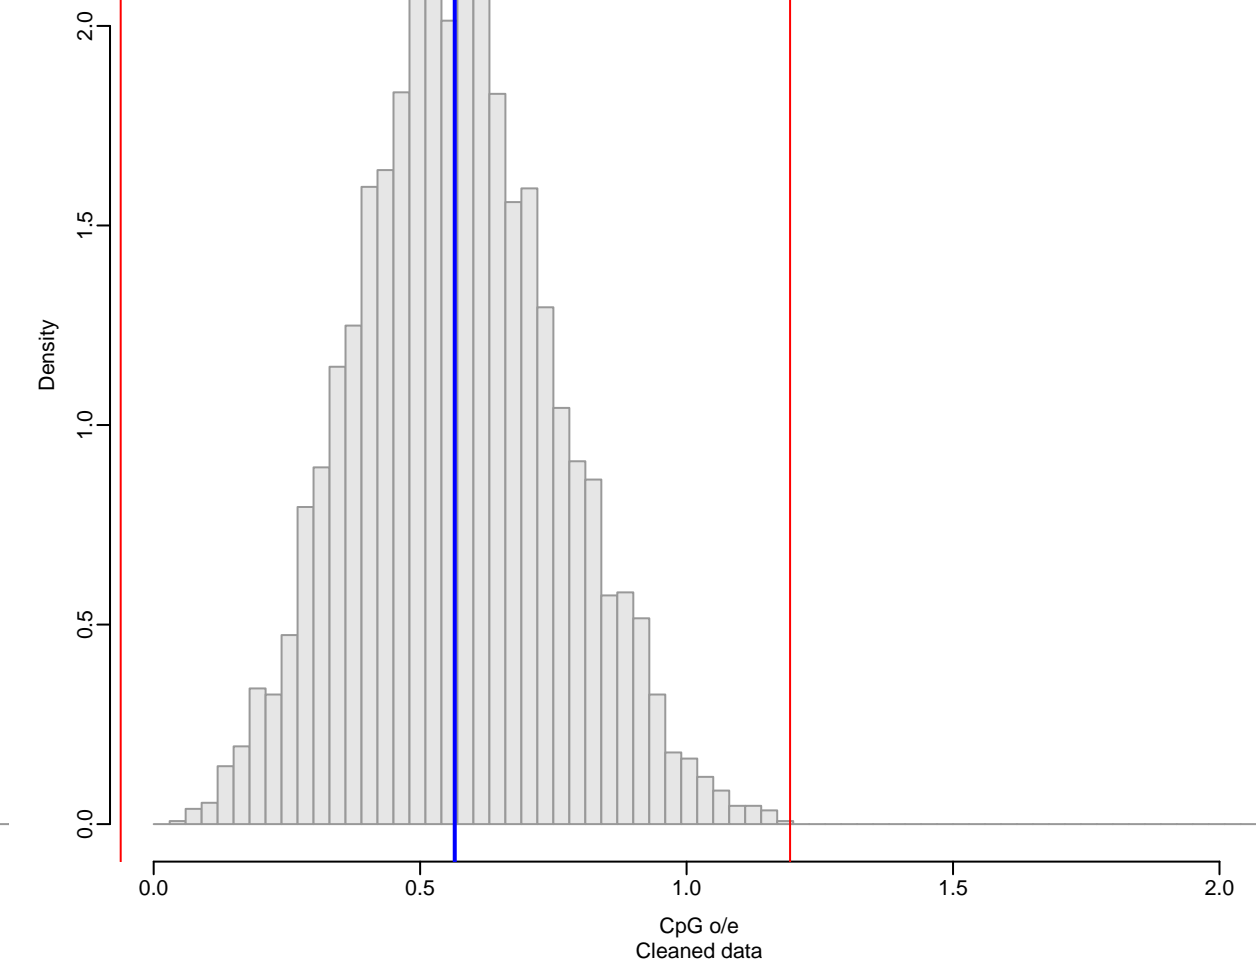

Pleurobrachia\_pileus

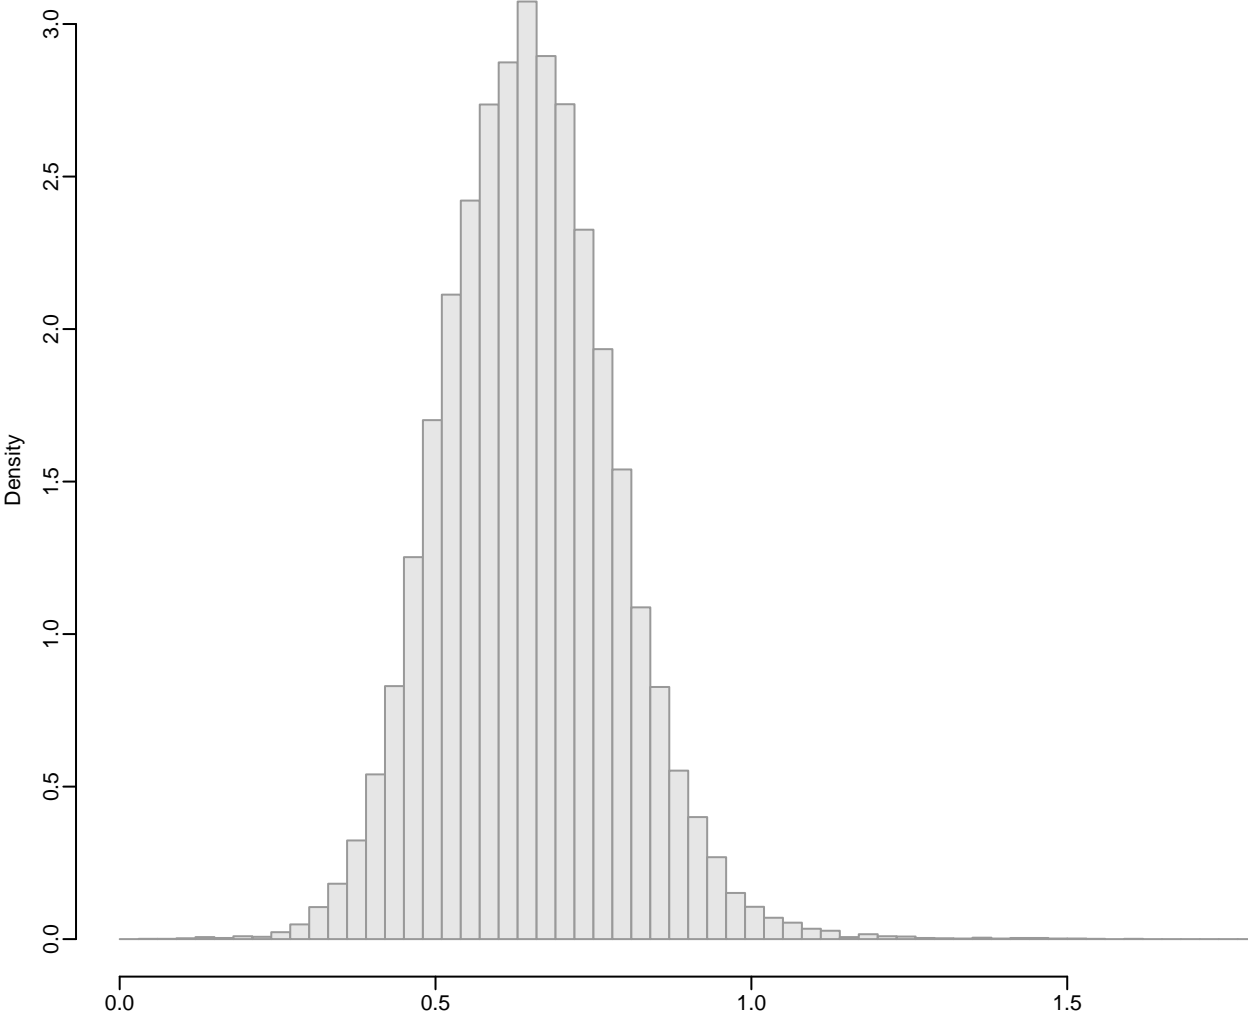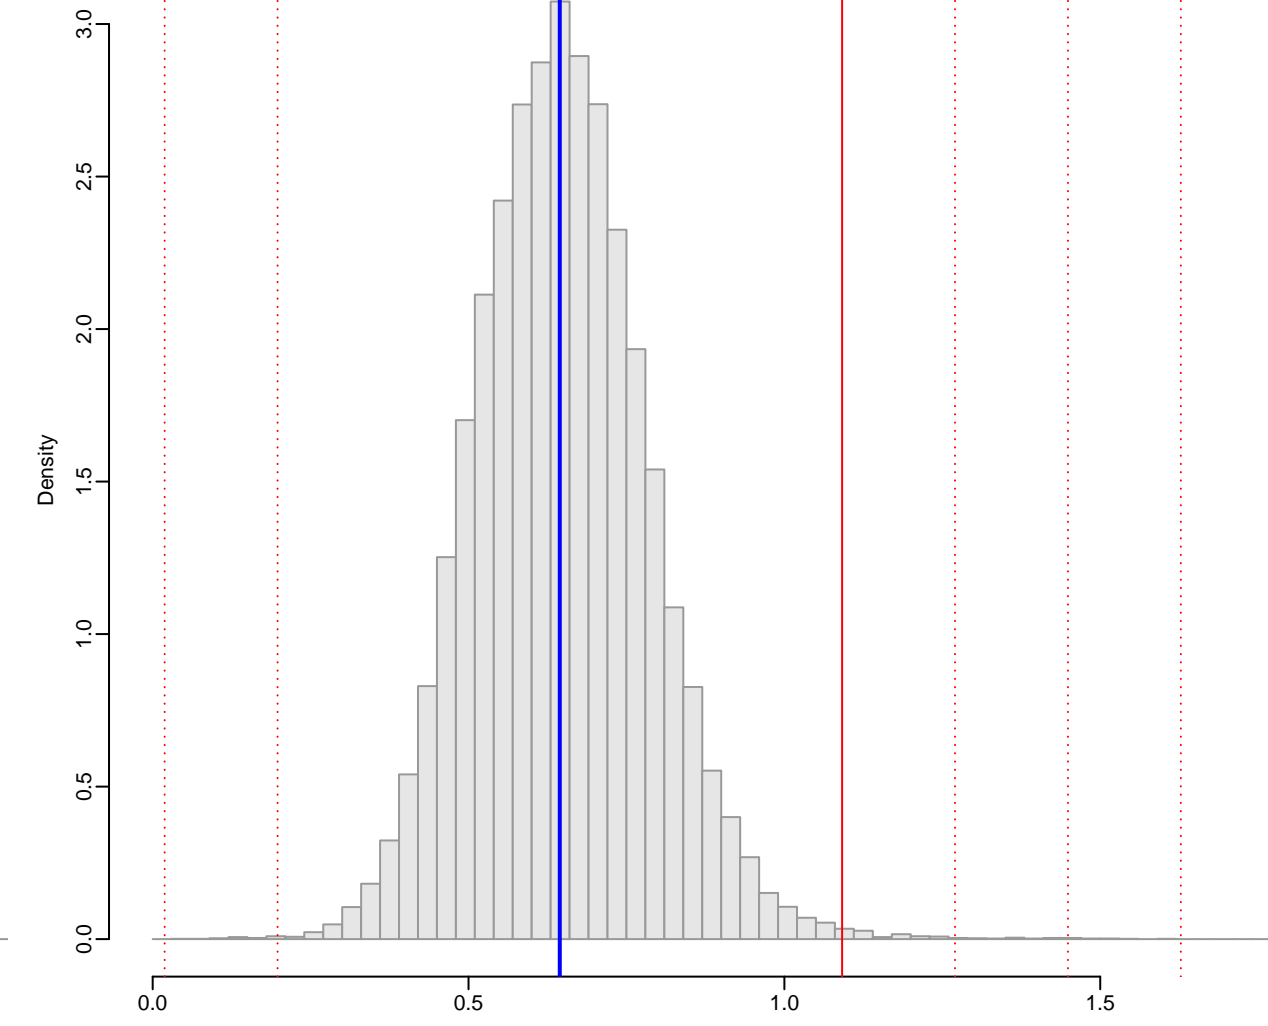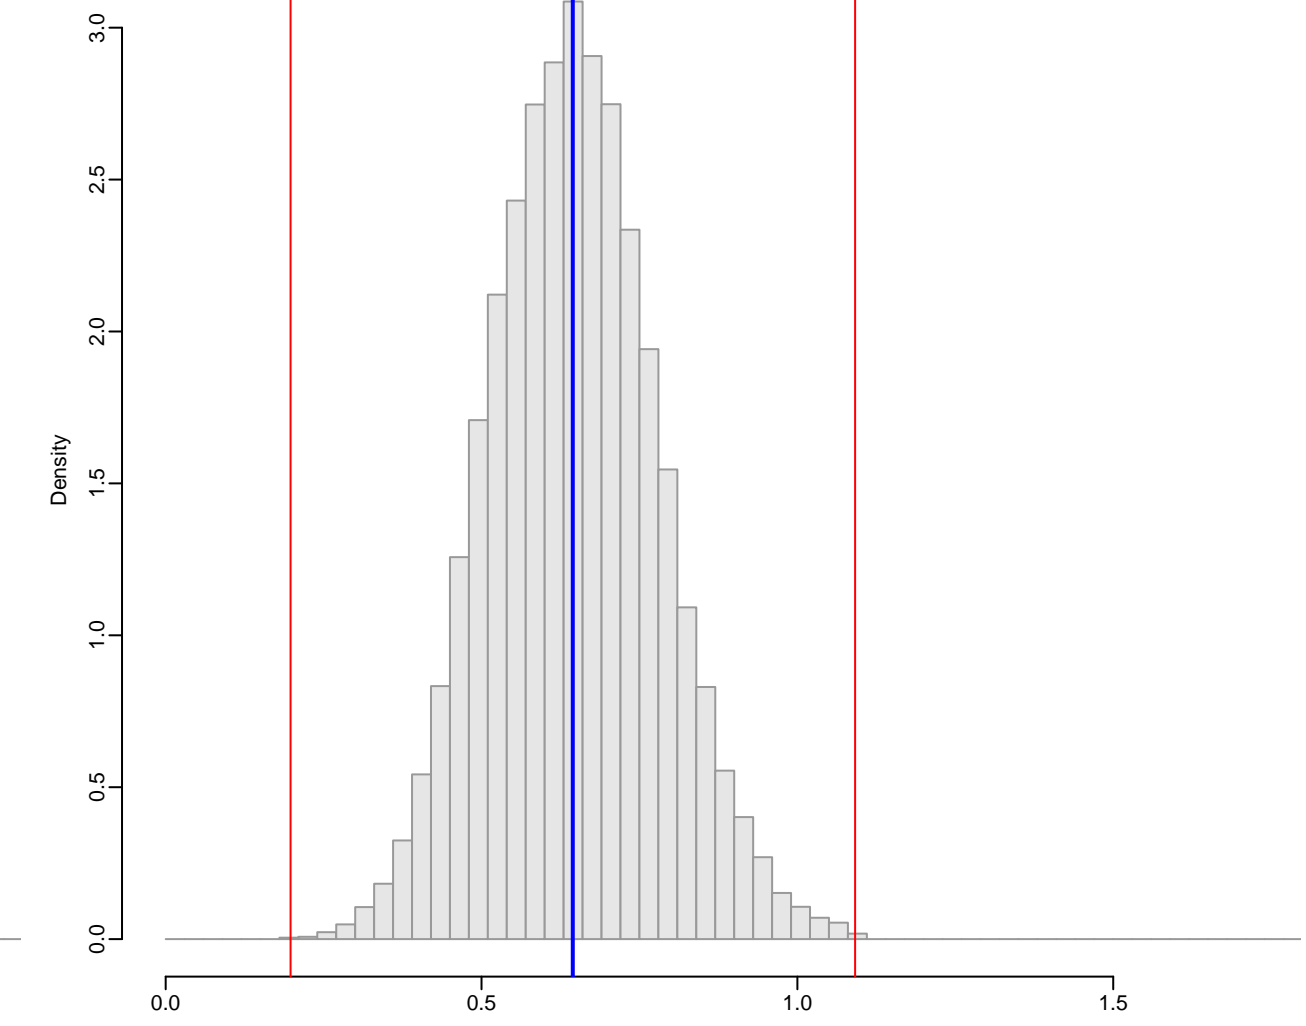



Plurionectes\_platessa

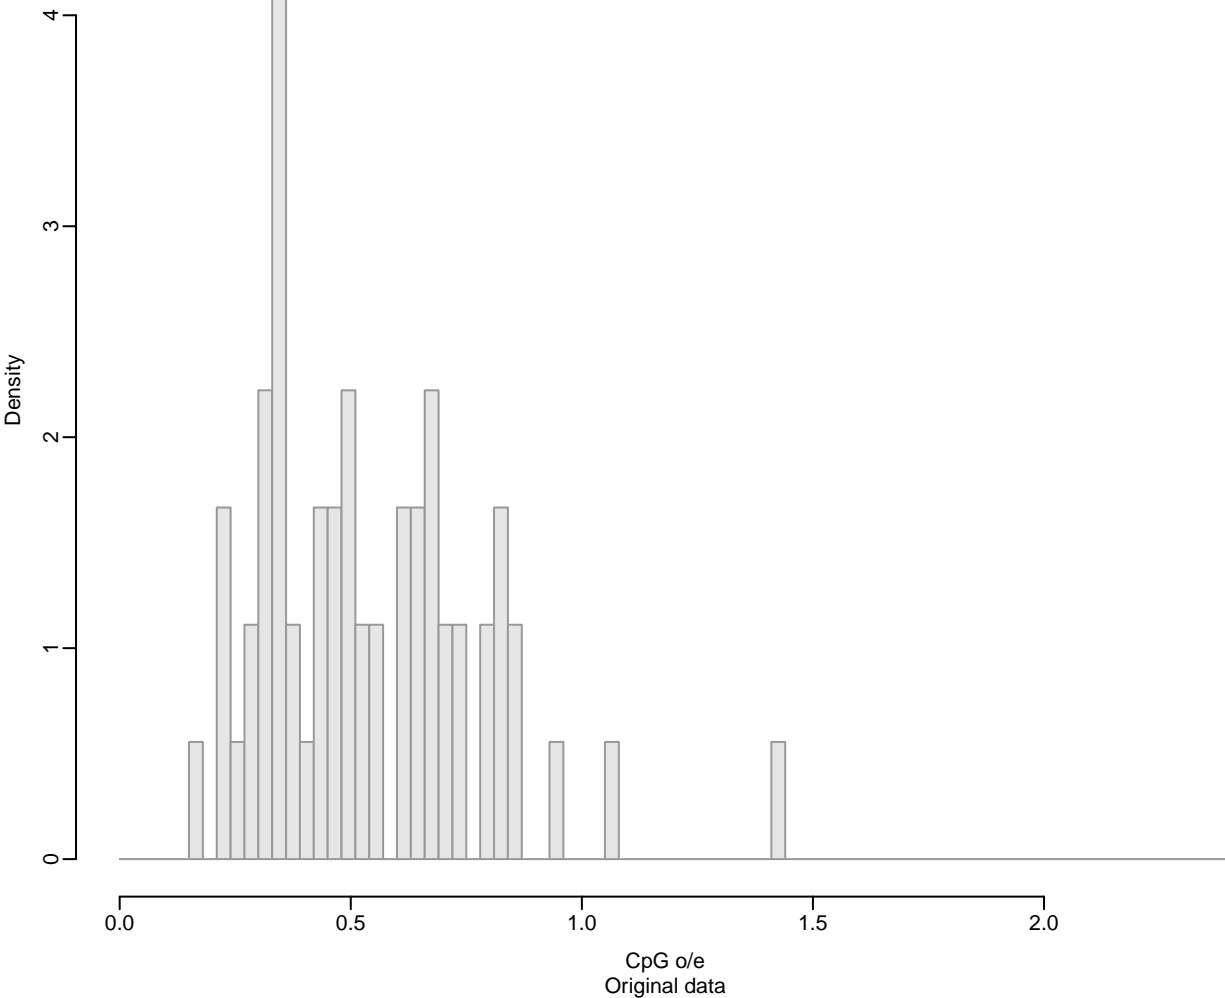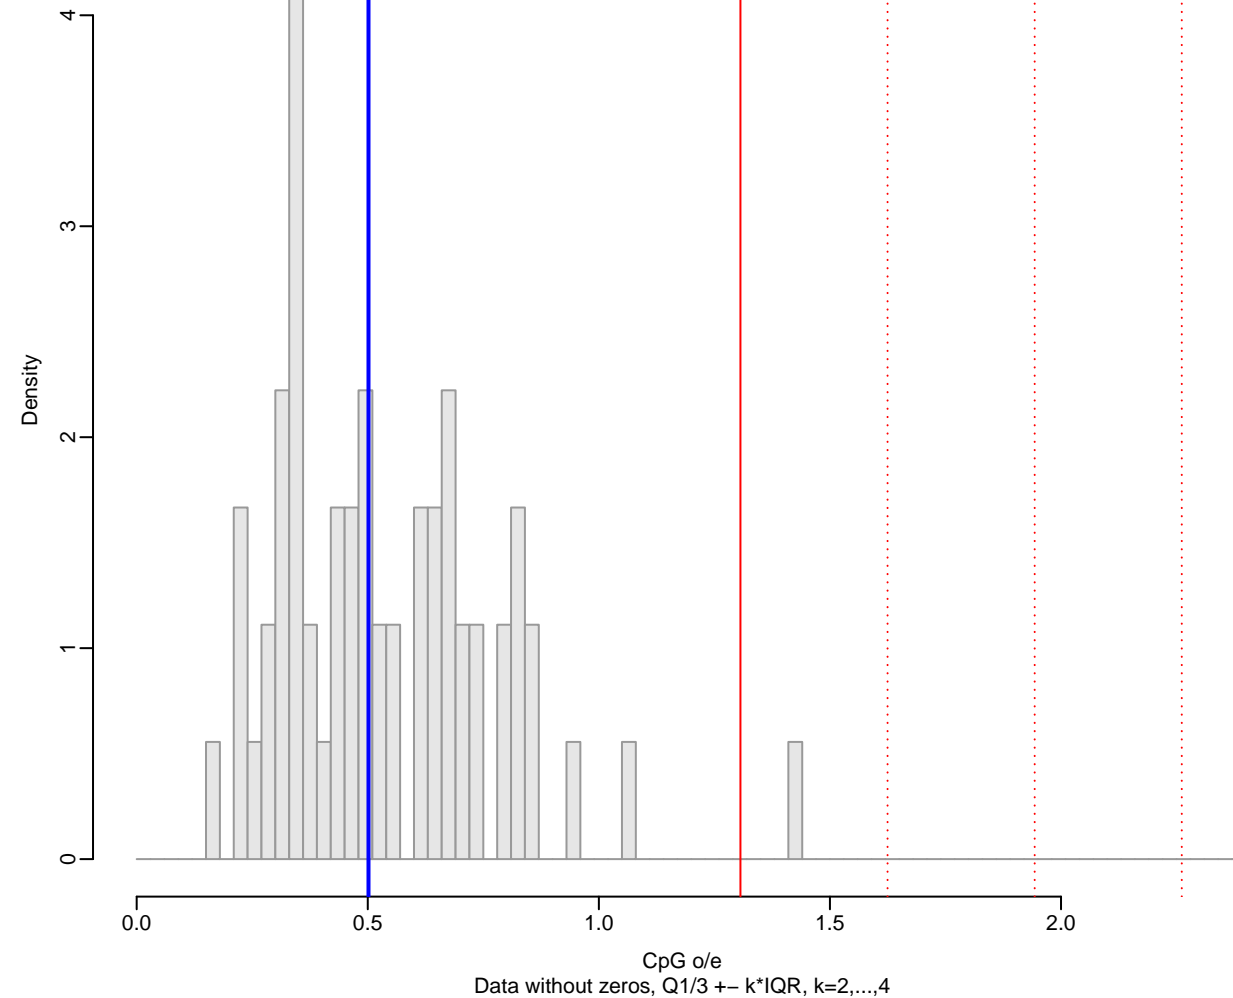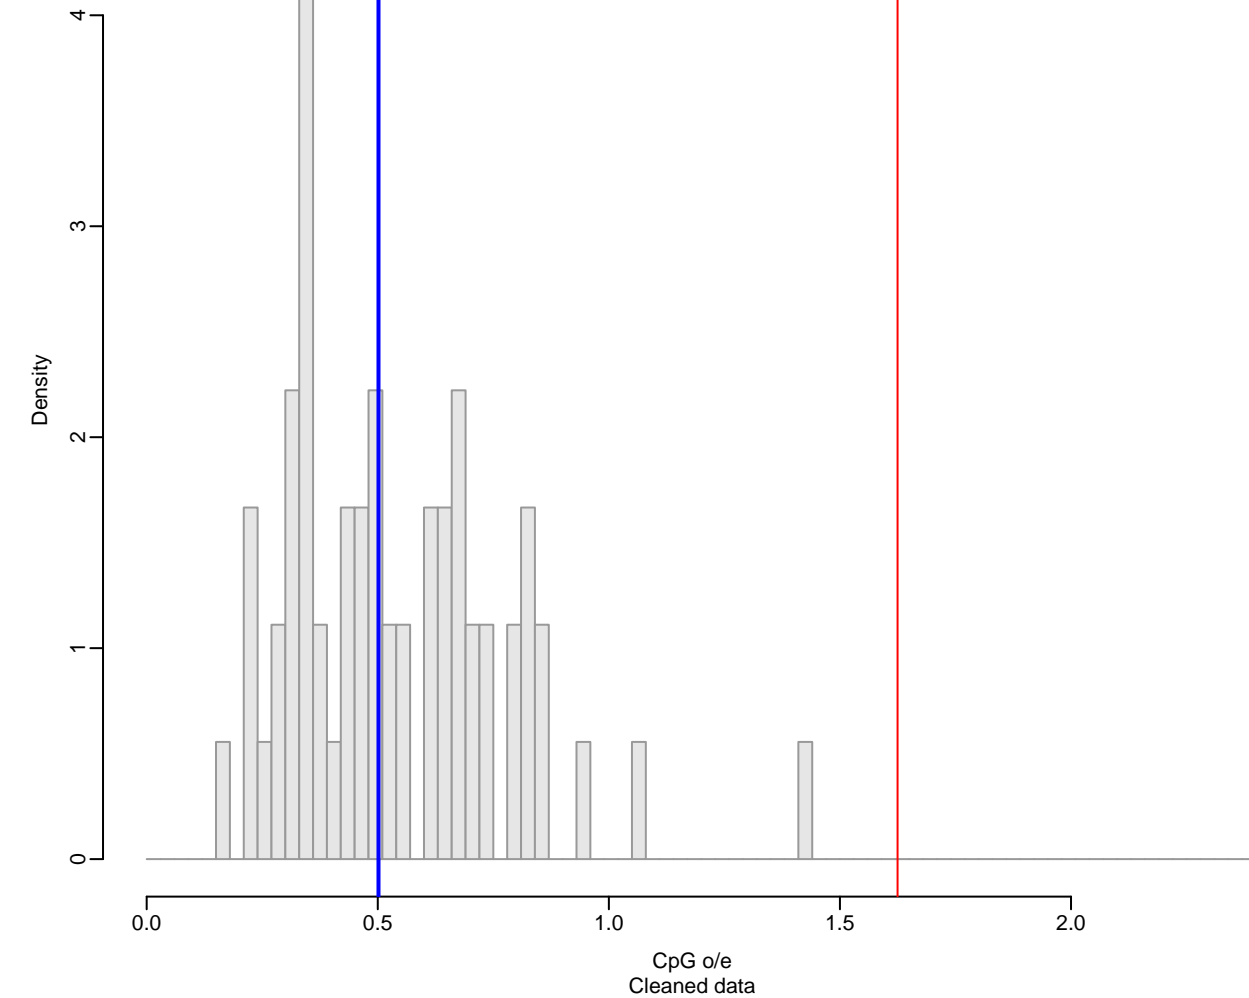

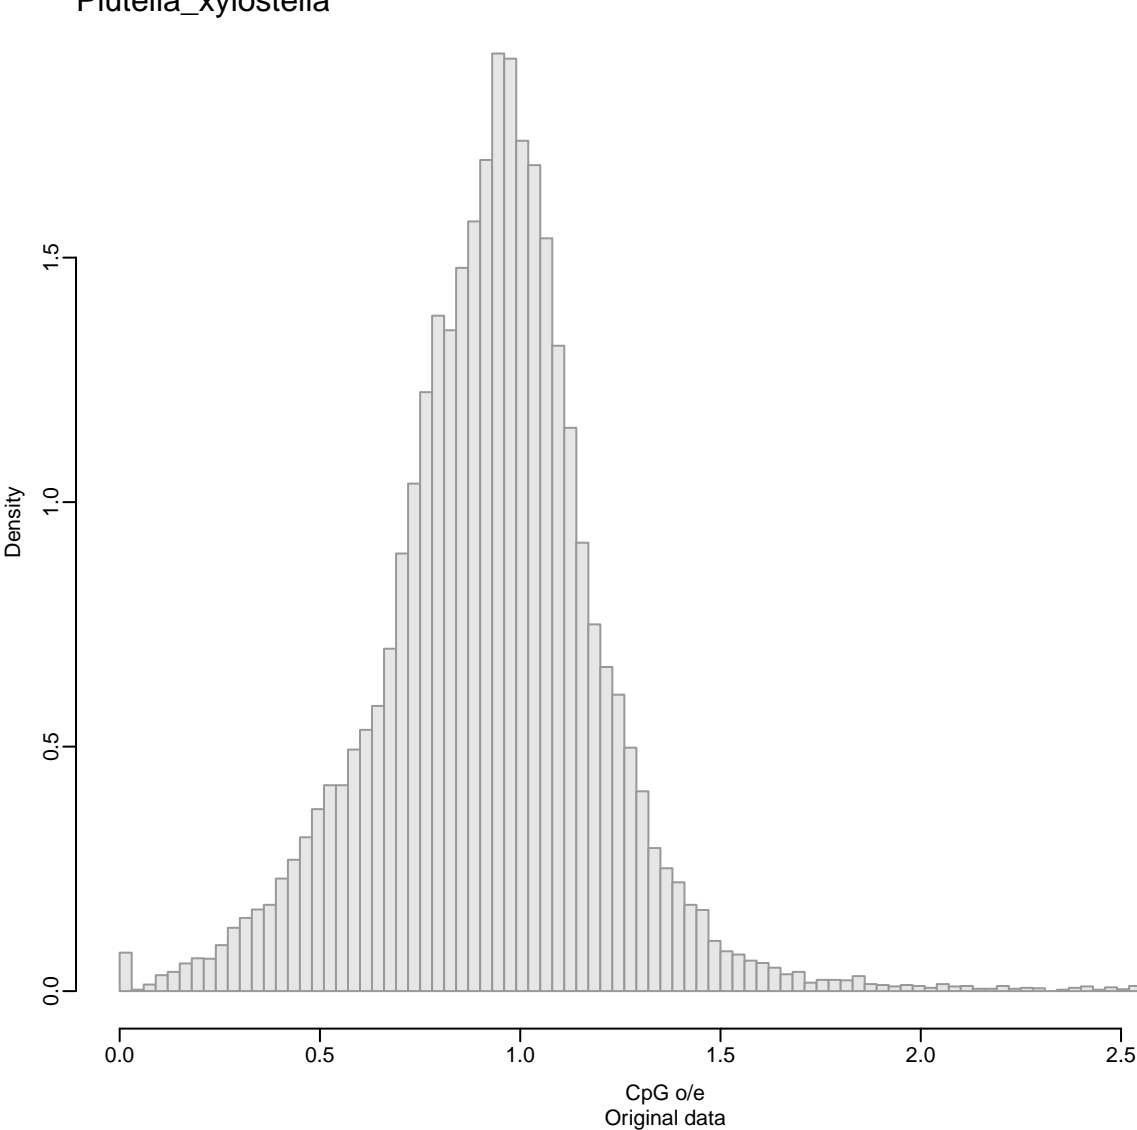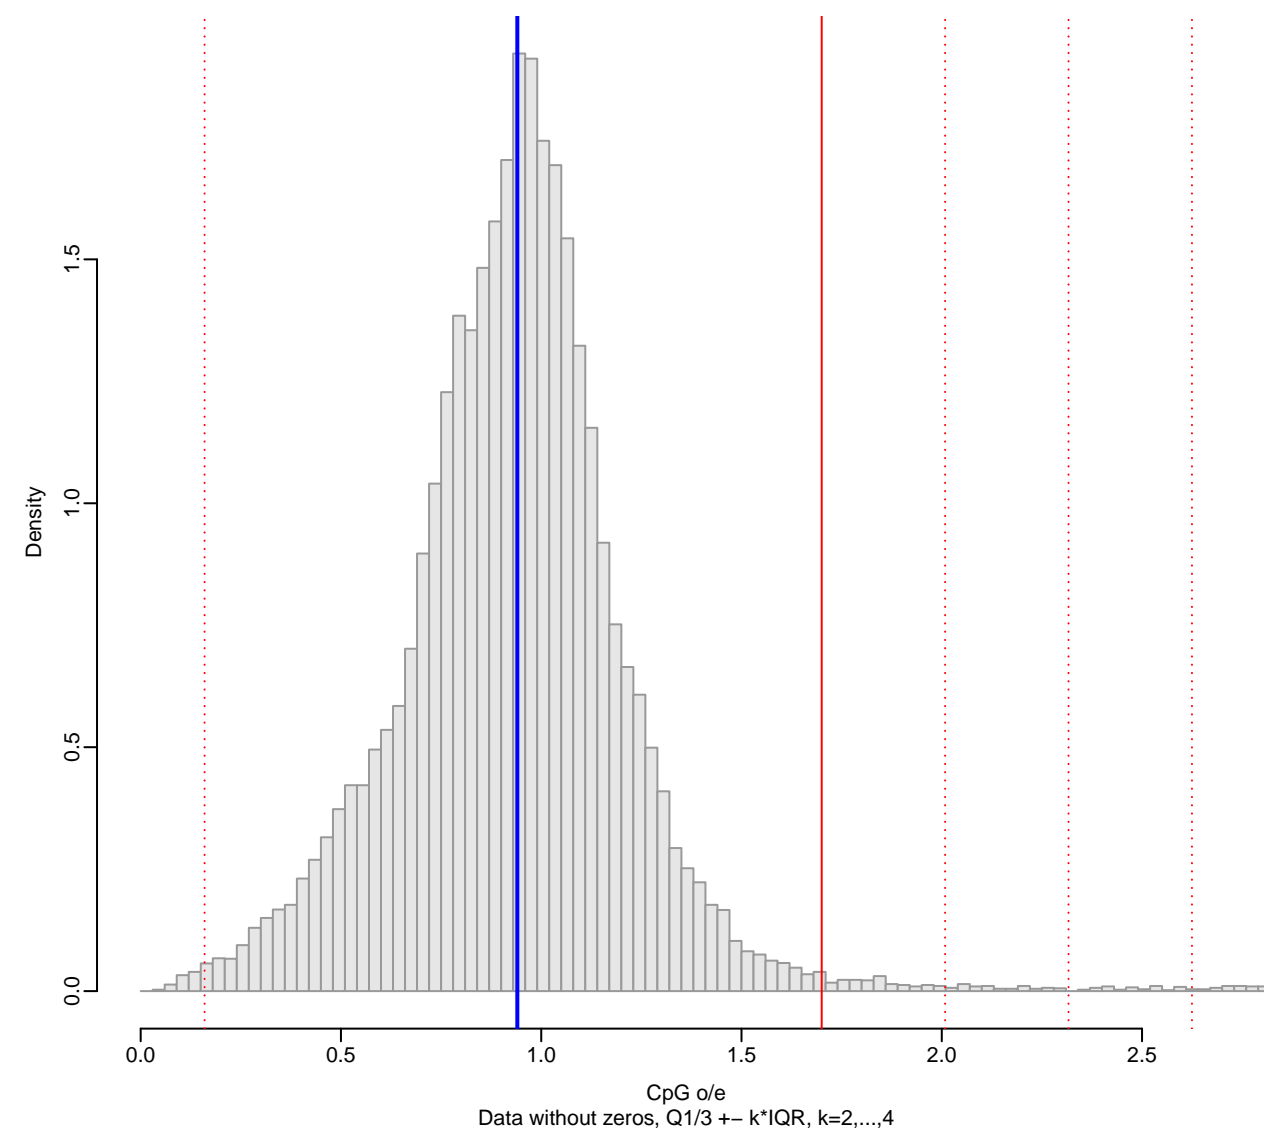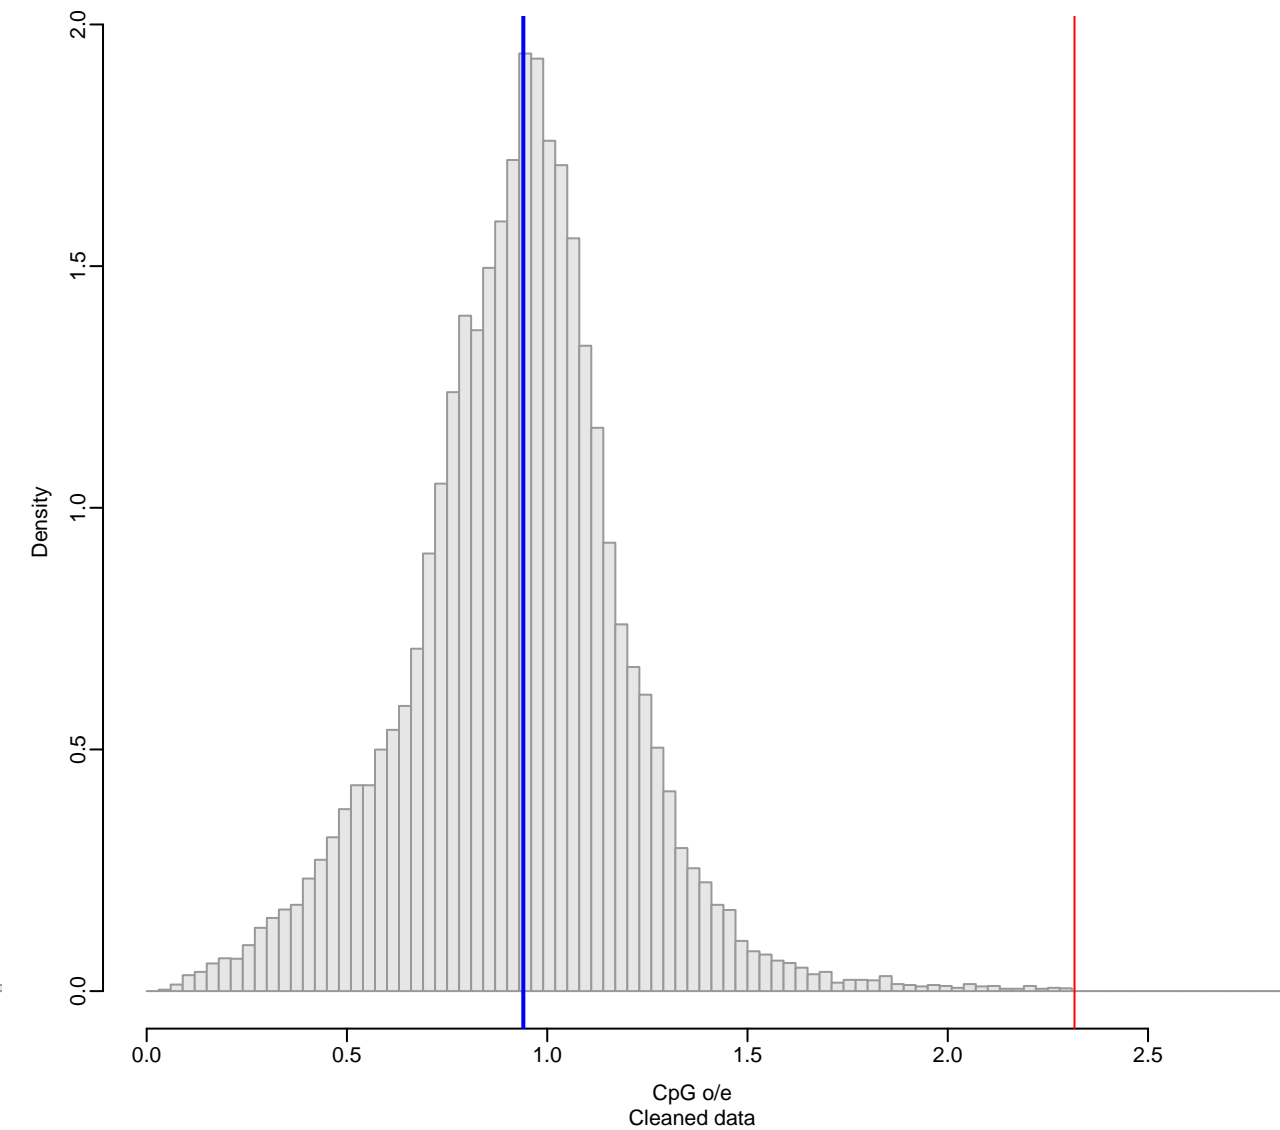

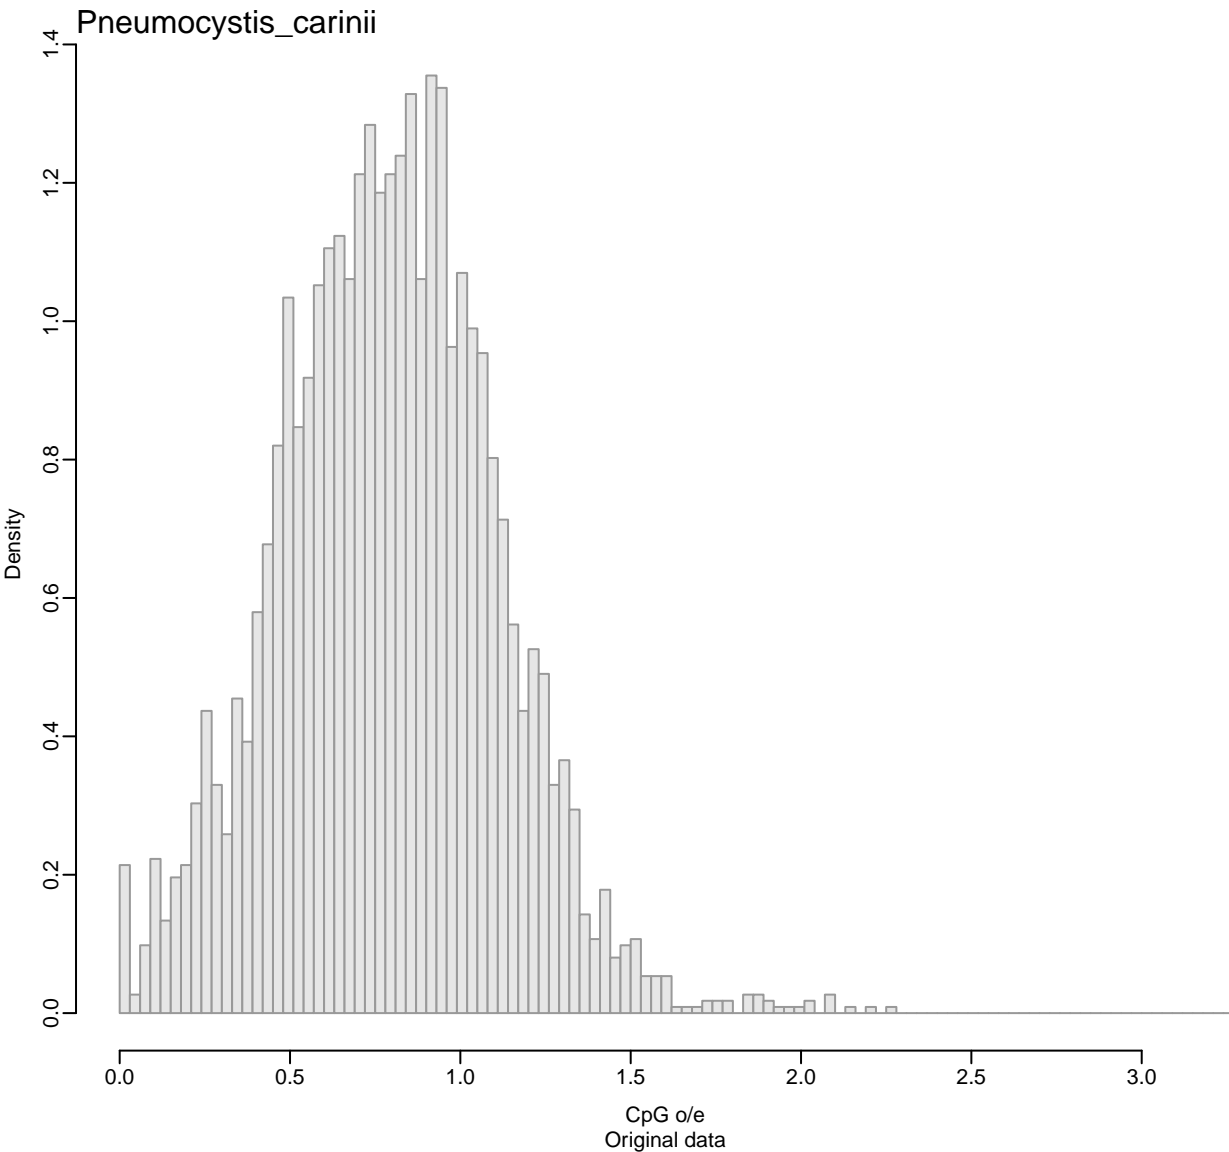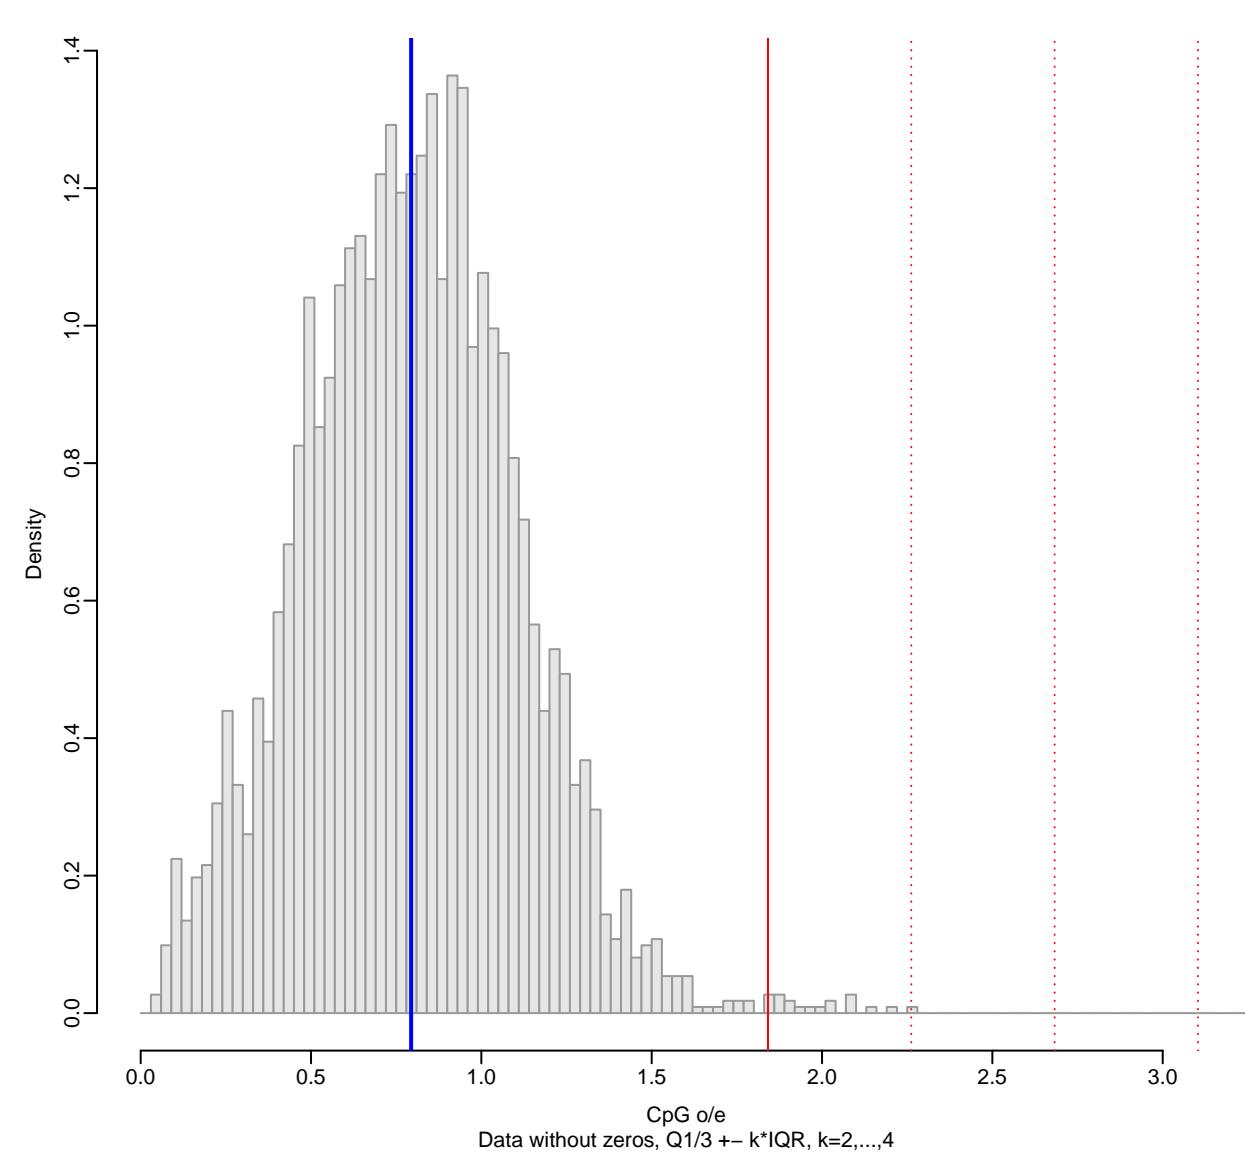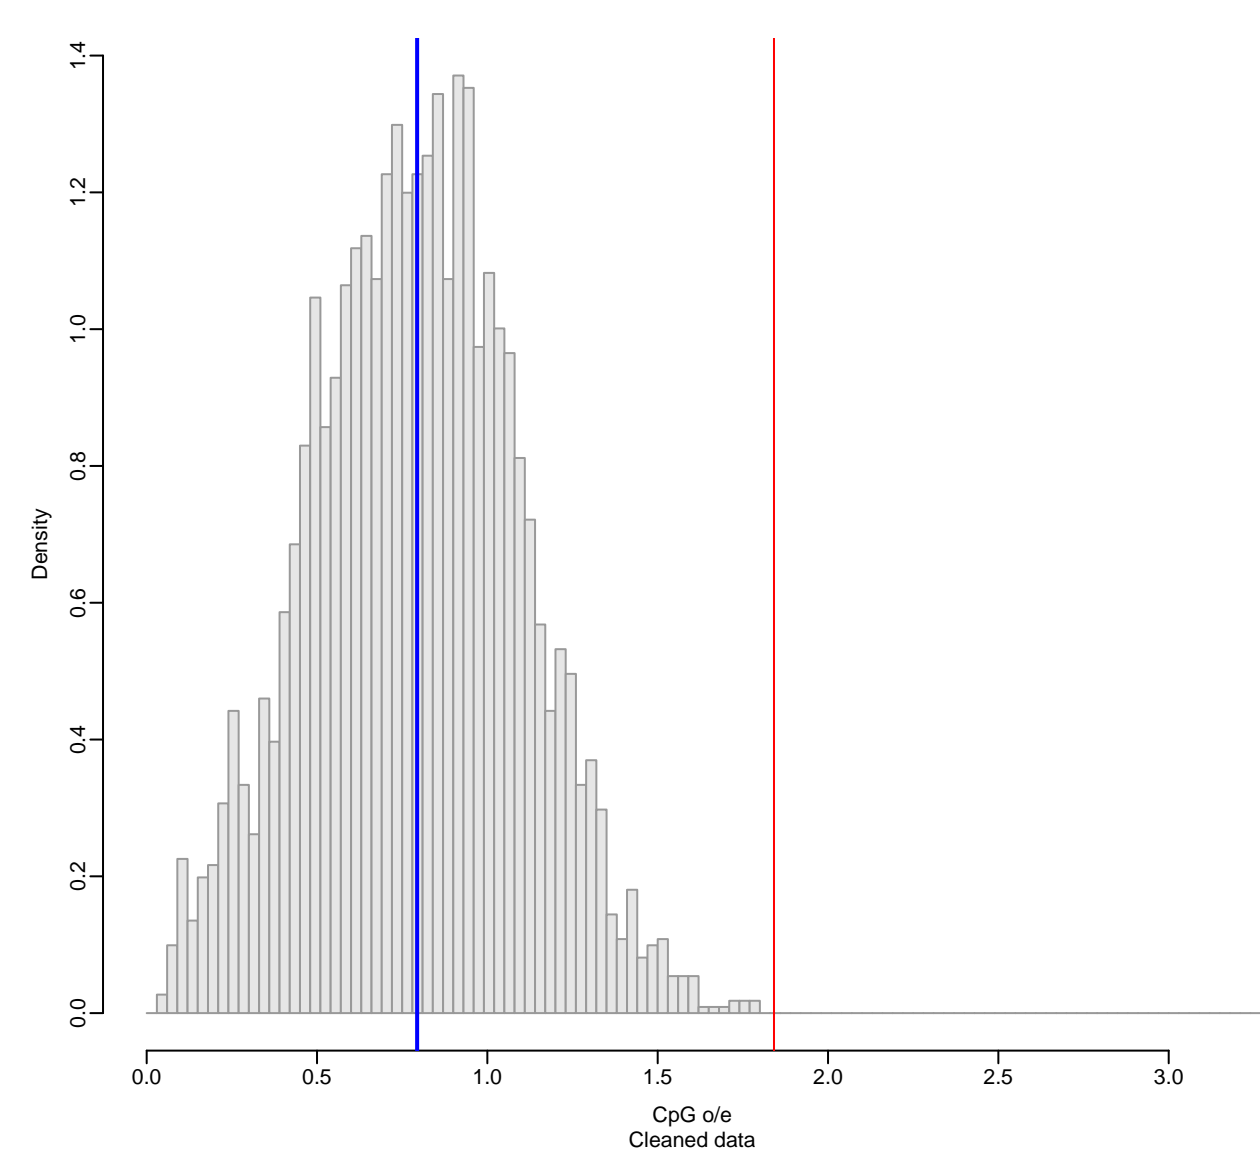

Podocoryne\_carnea

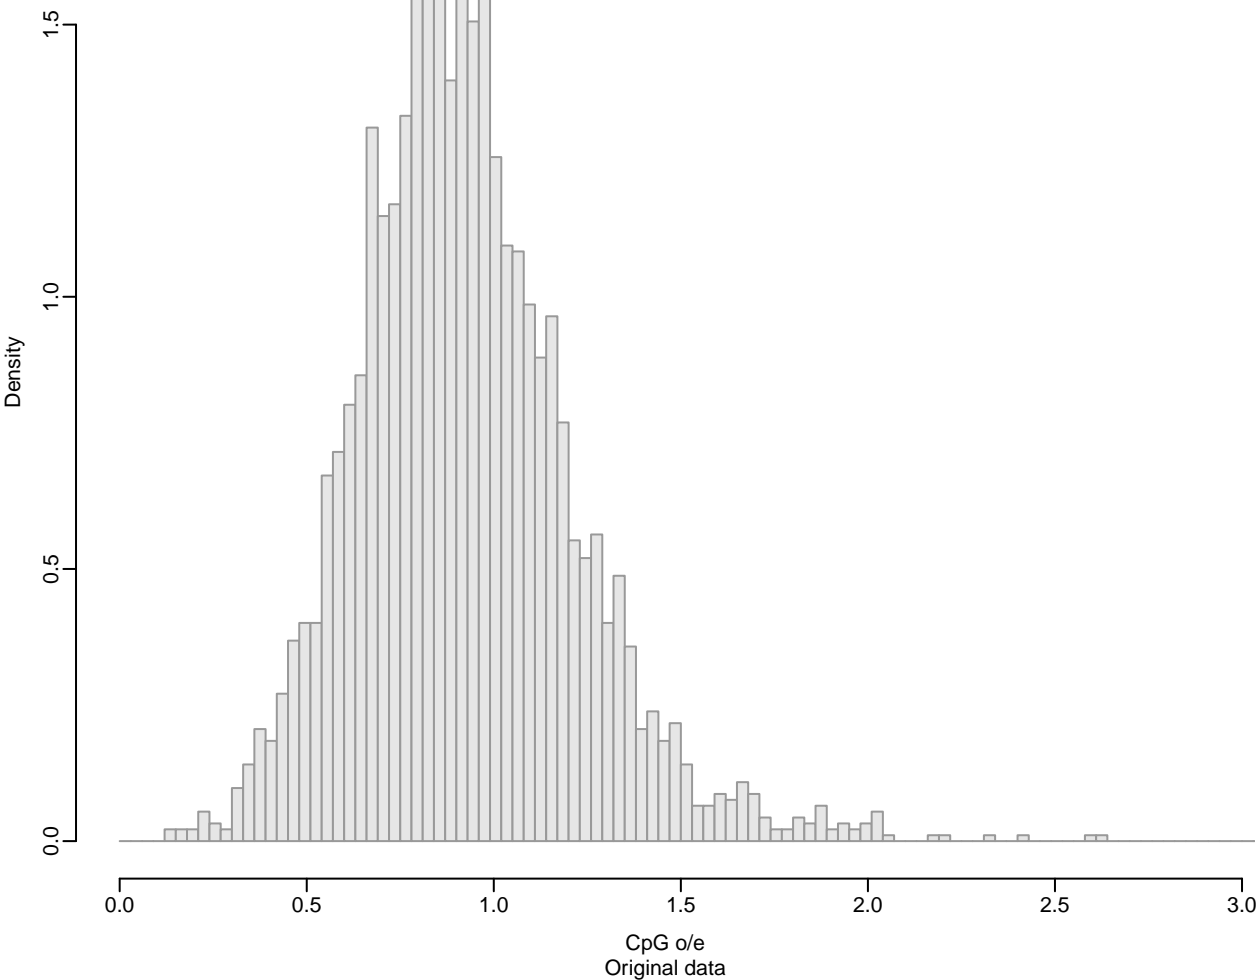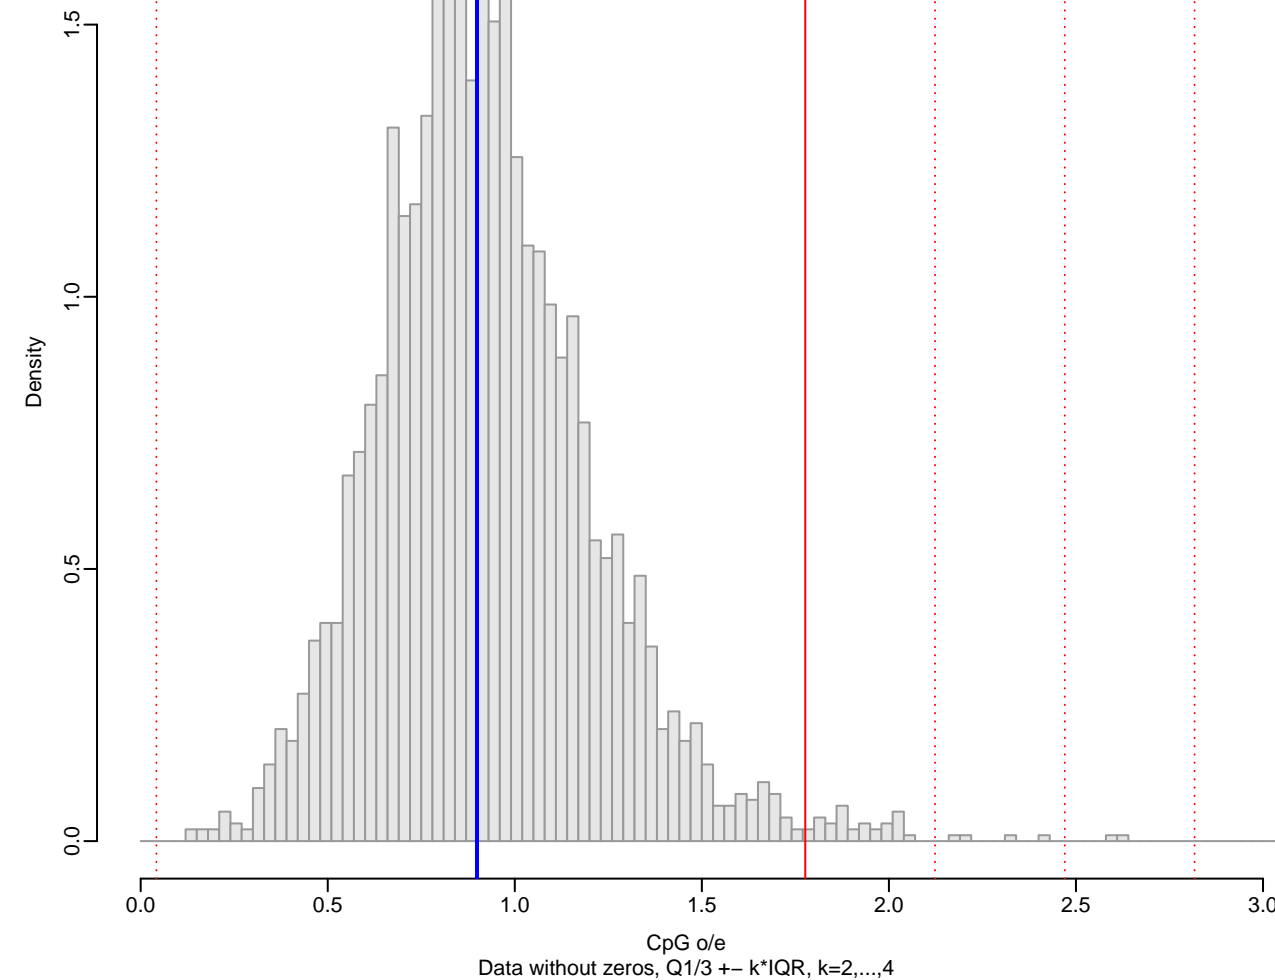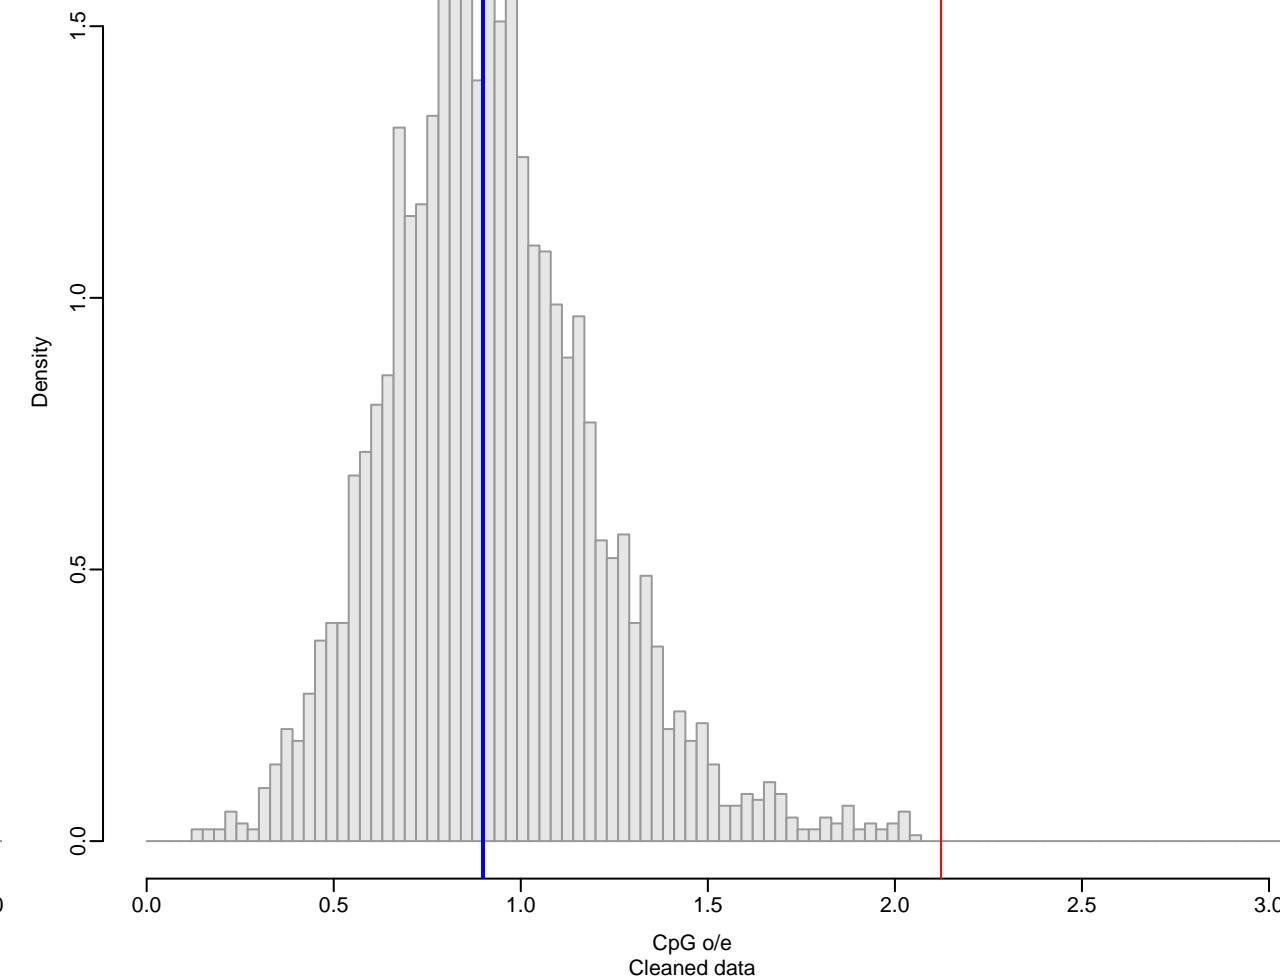

Podospora\_anserina

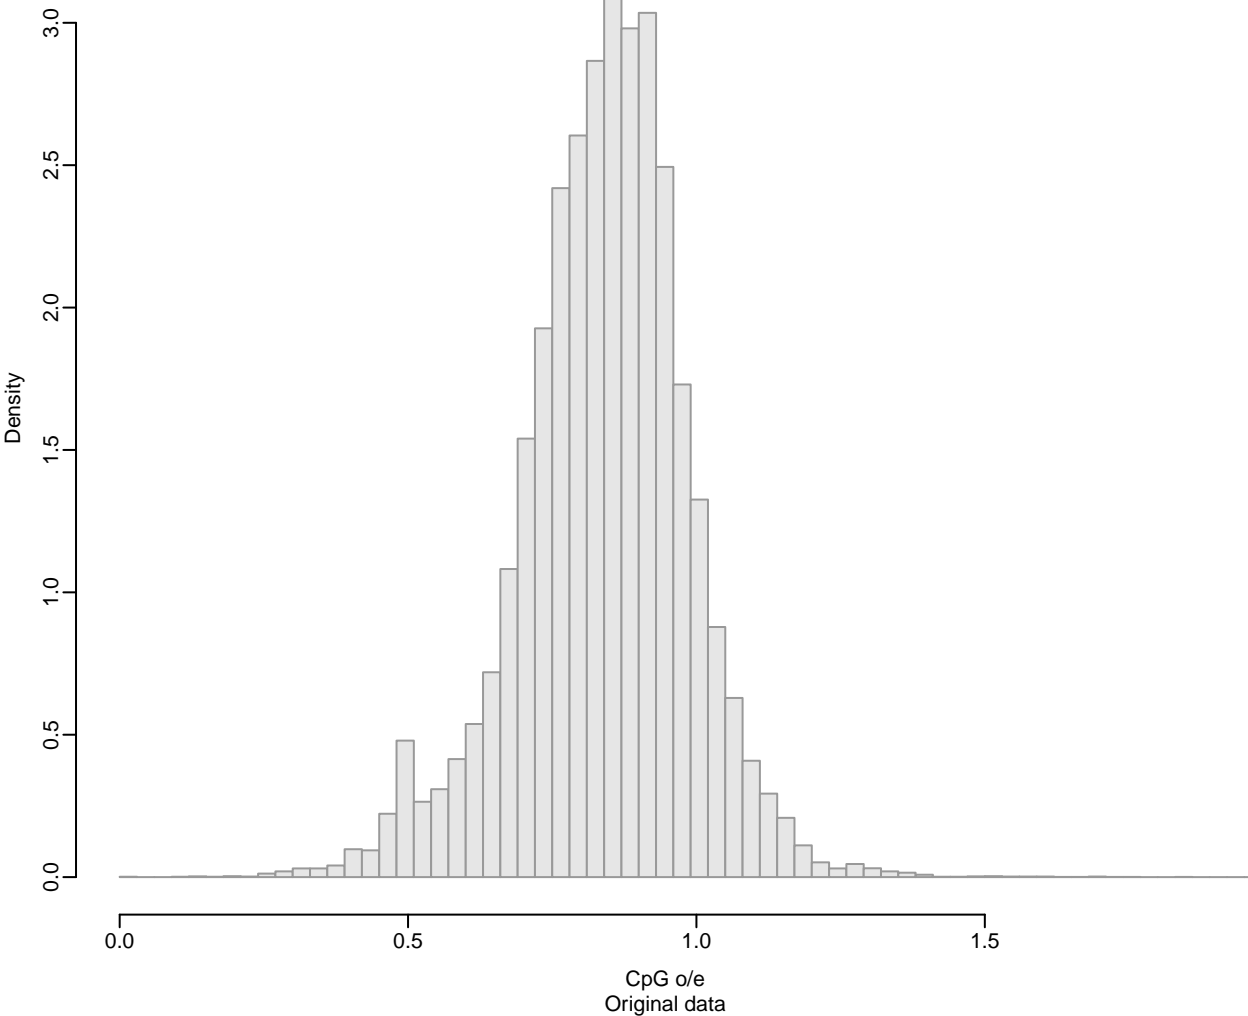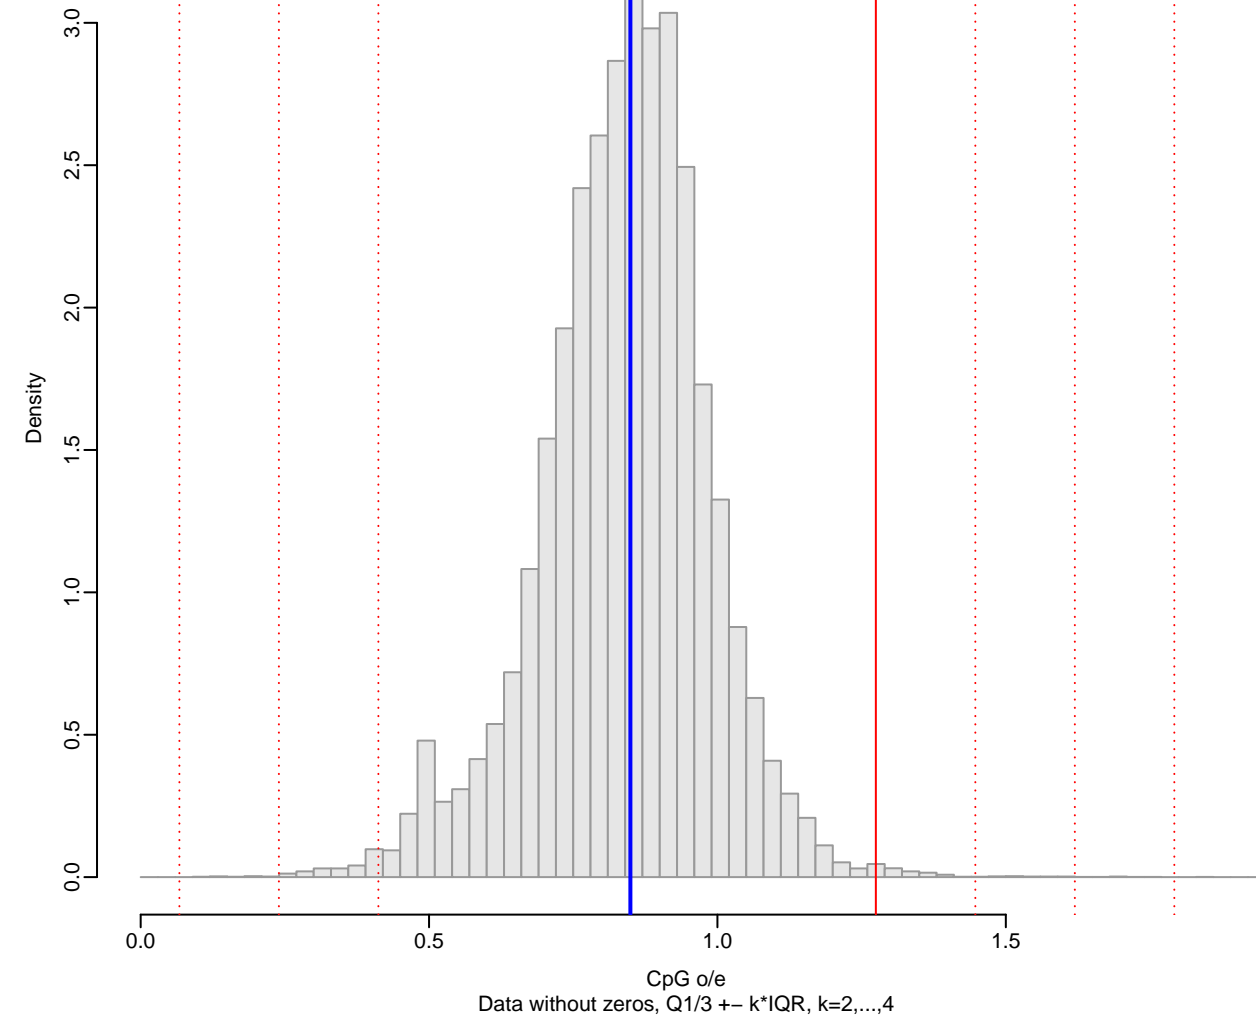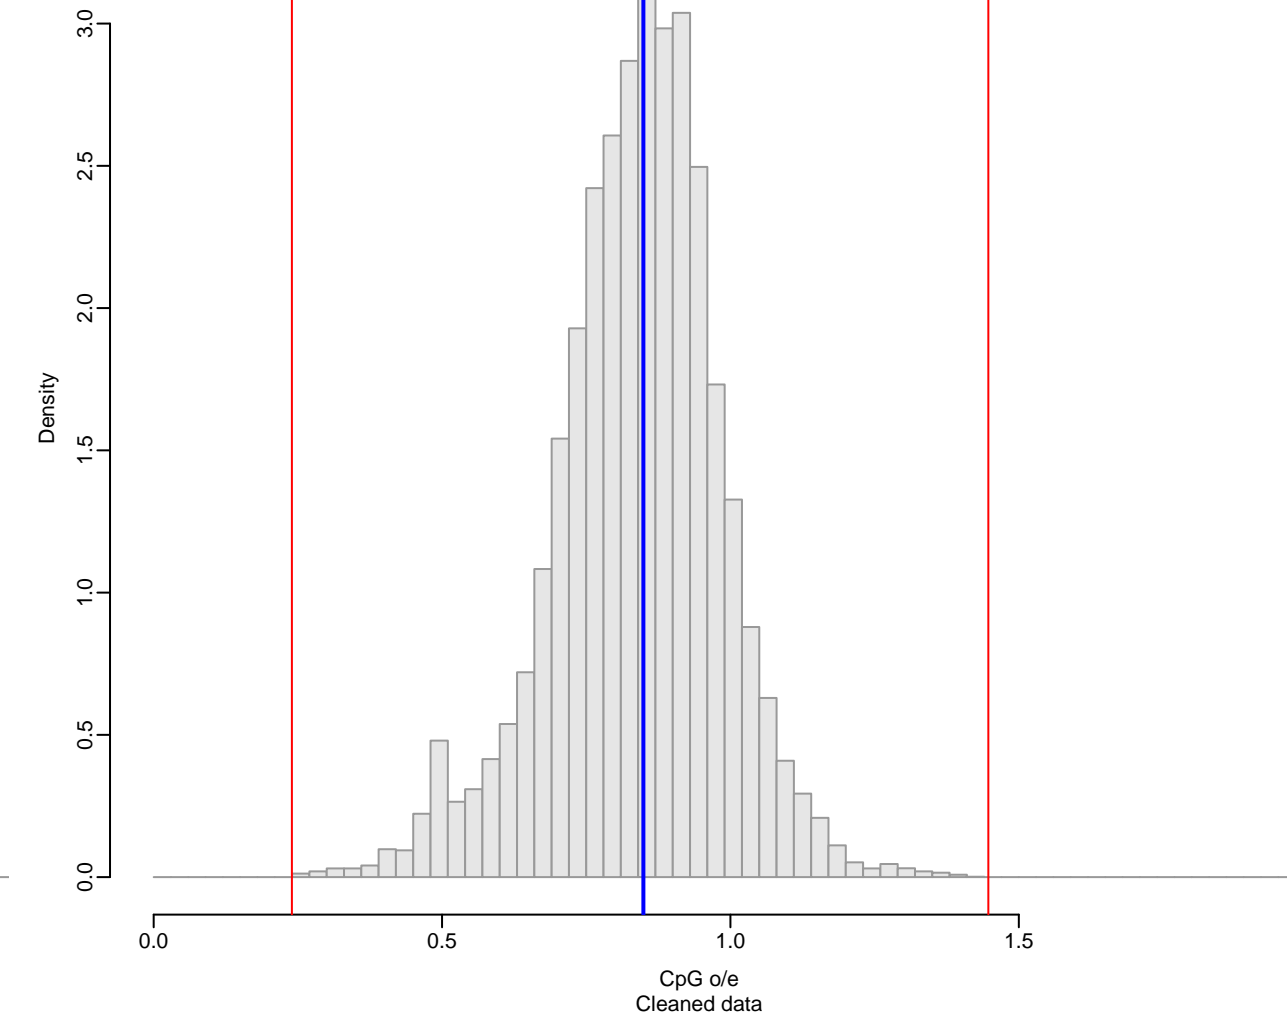

Poecilia\_reticulata

Density

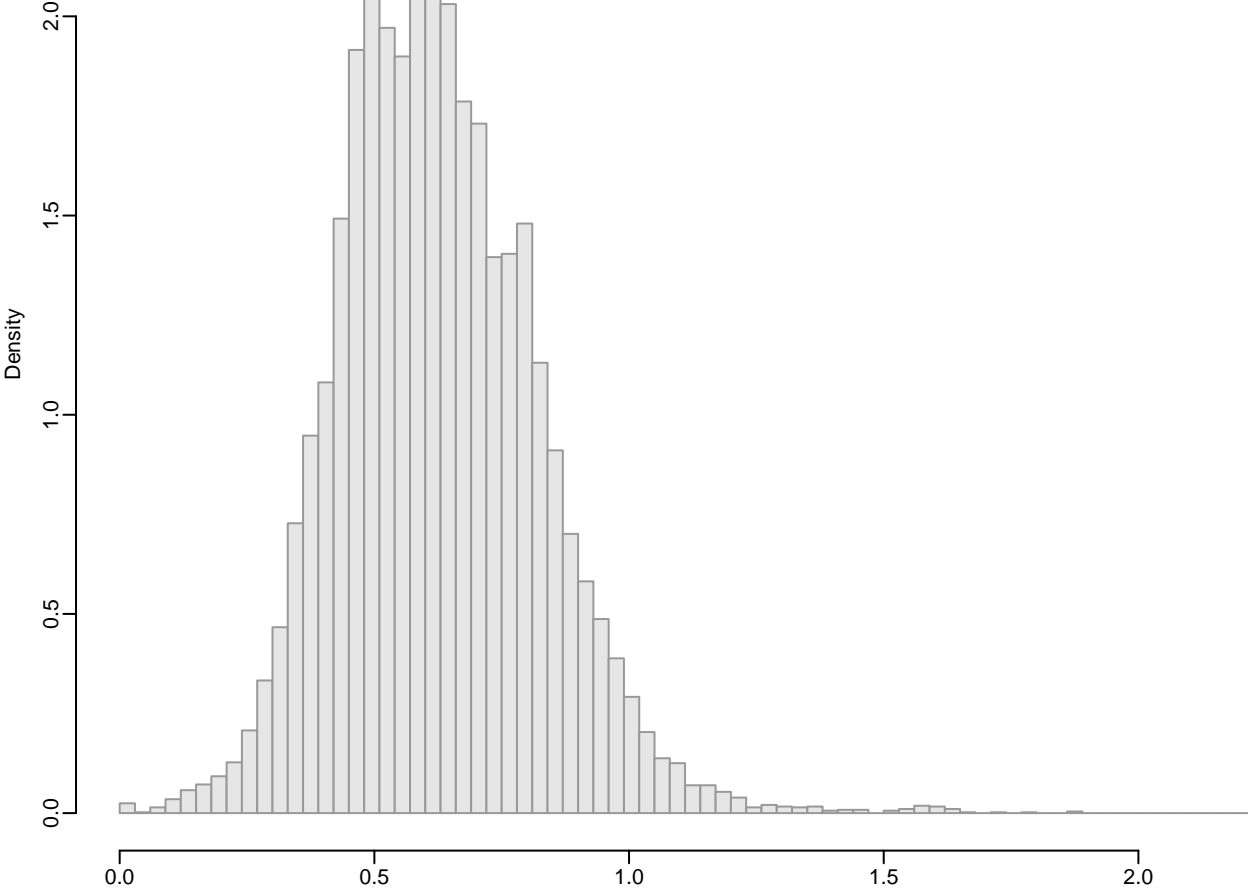

Density

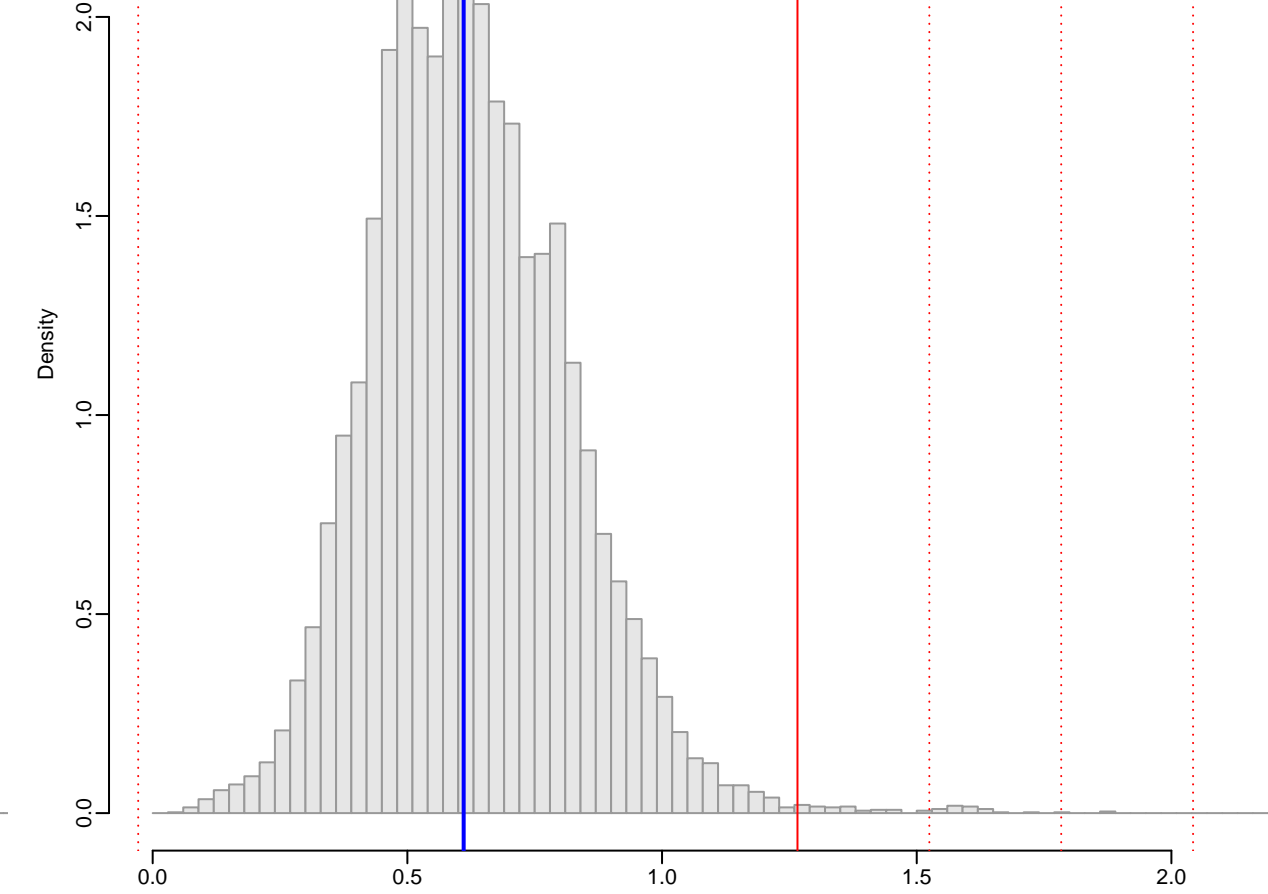

Density

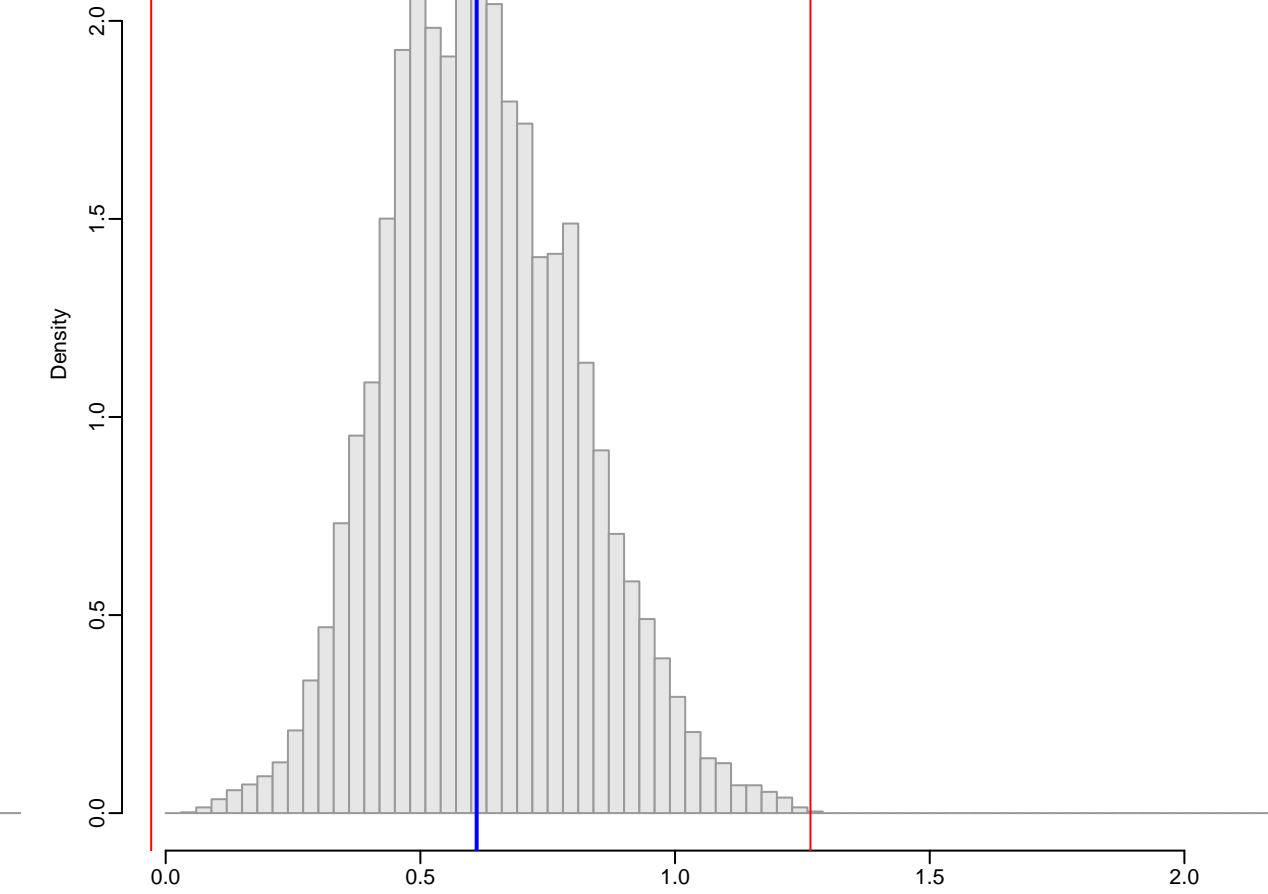

Pollicipes\_pollicipes

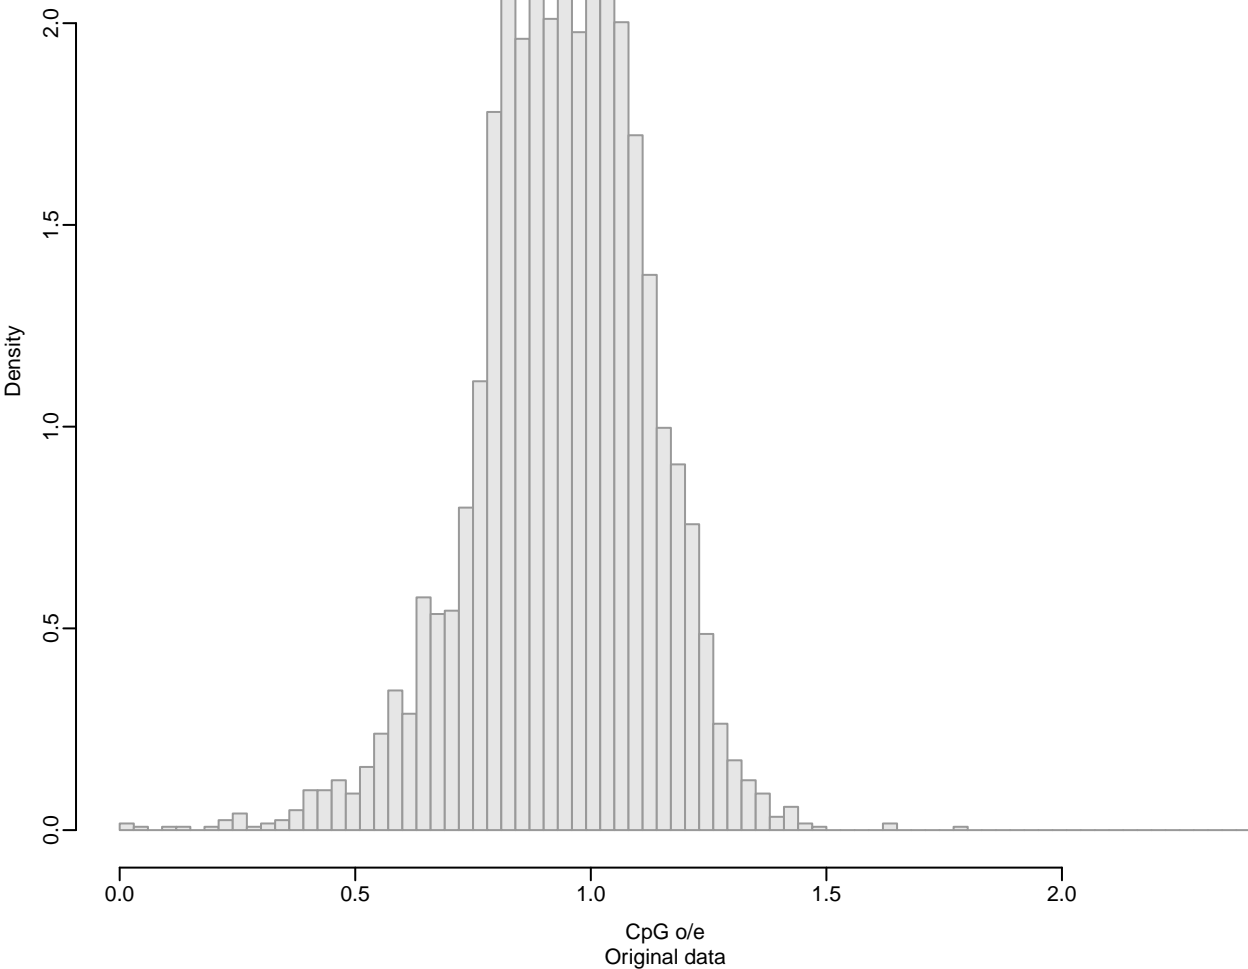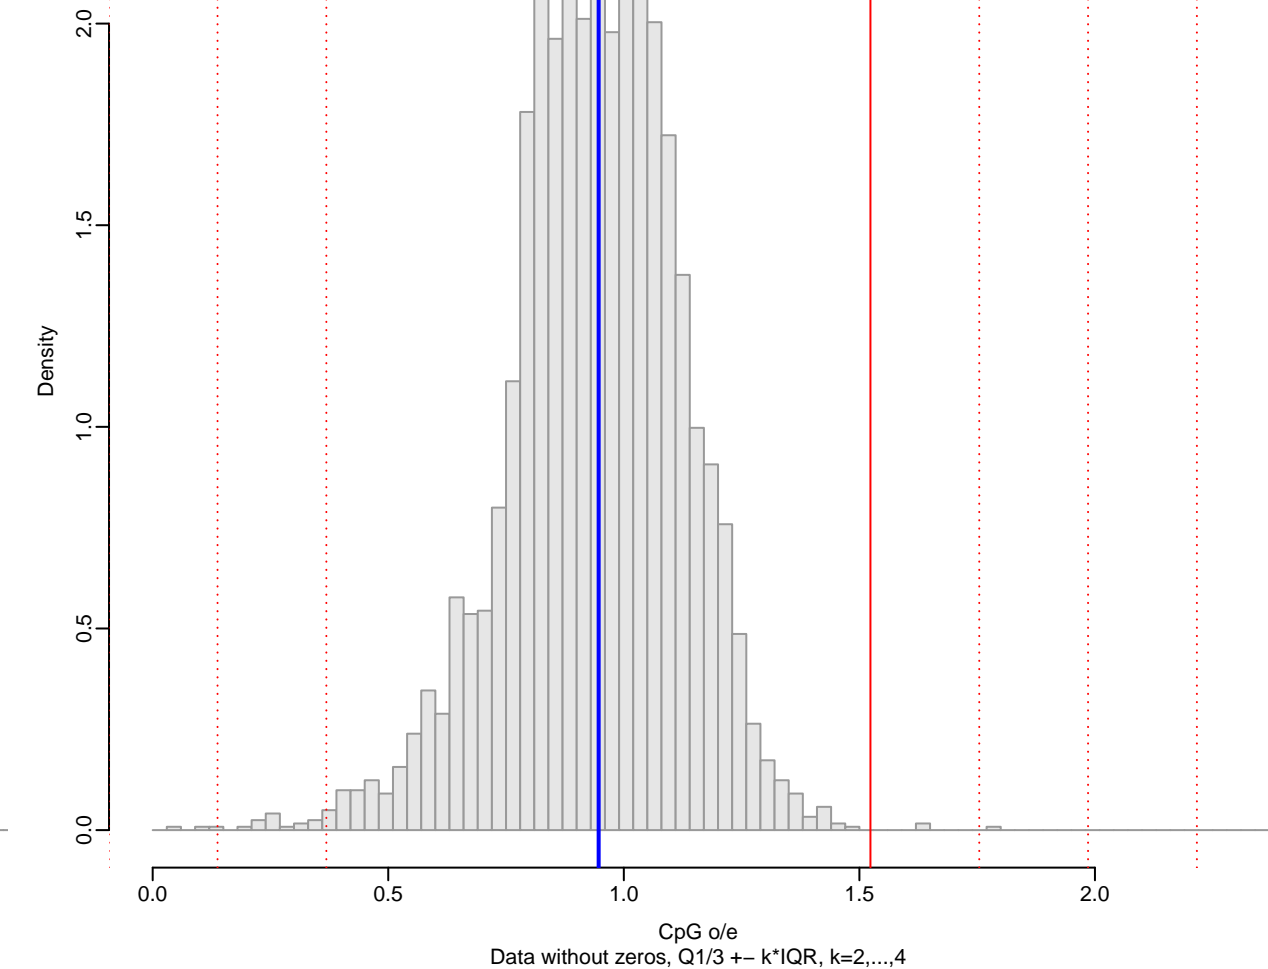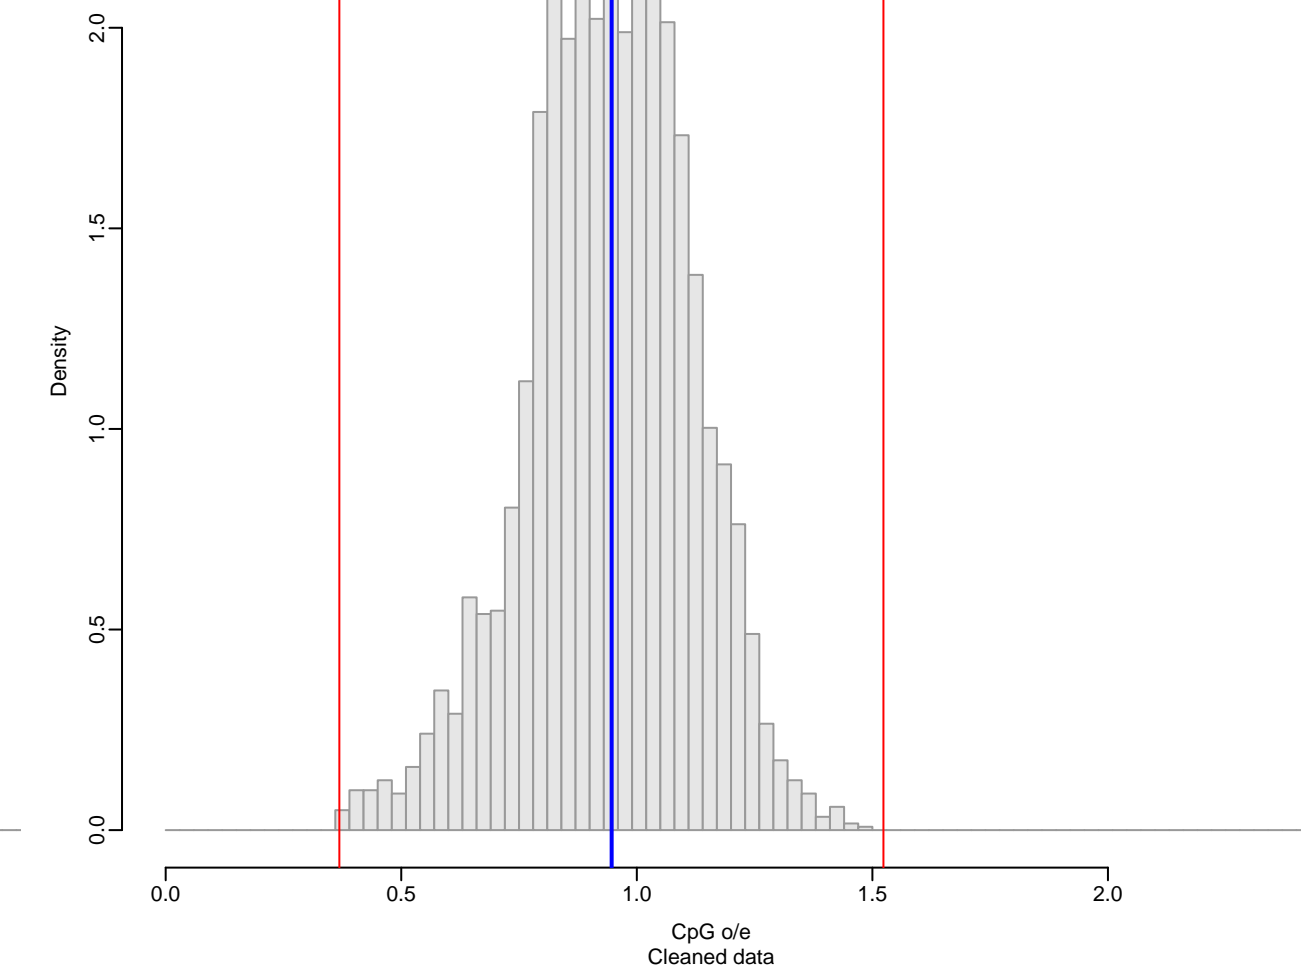

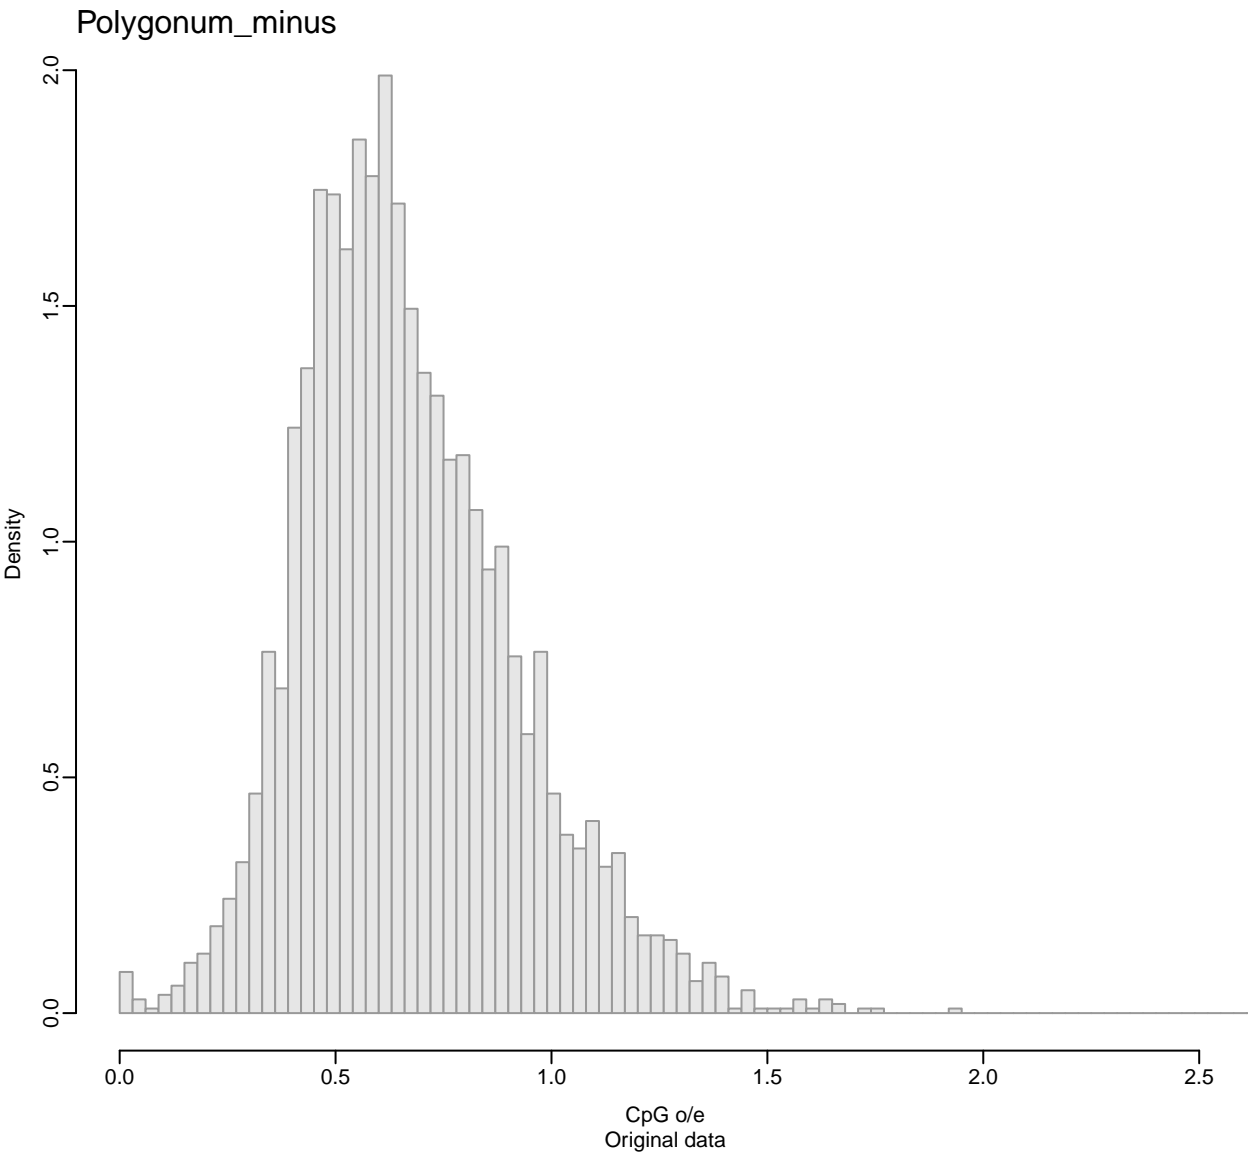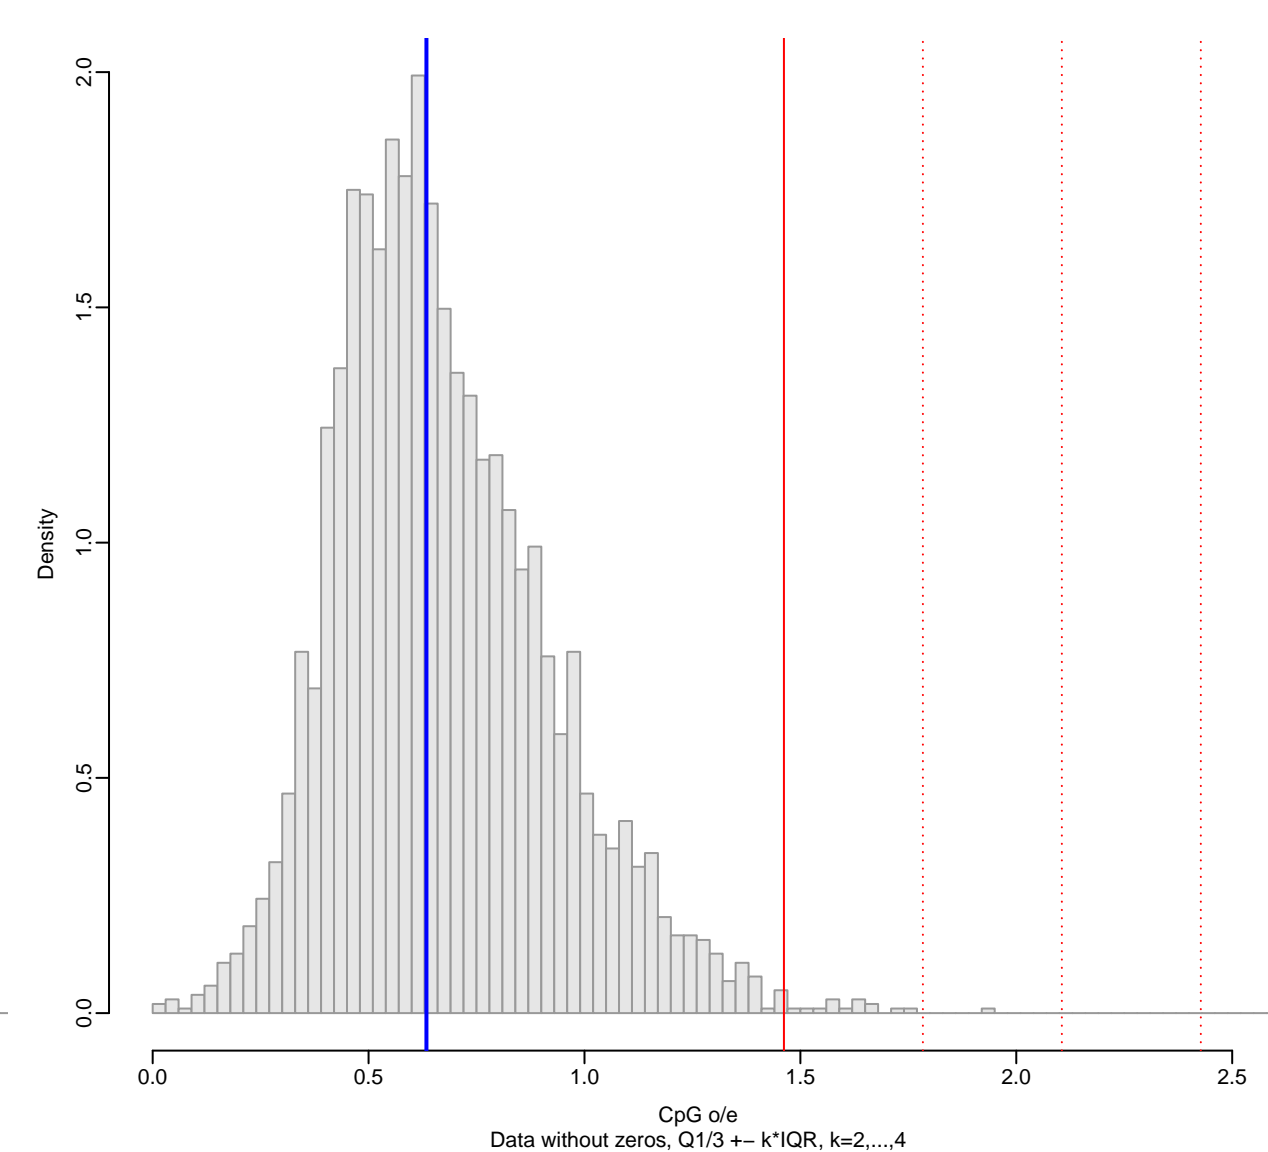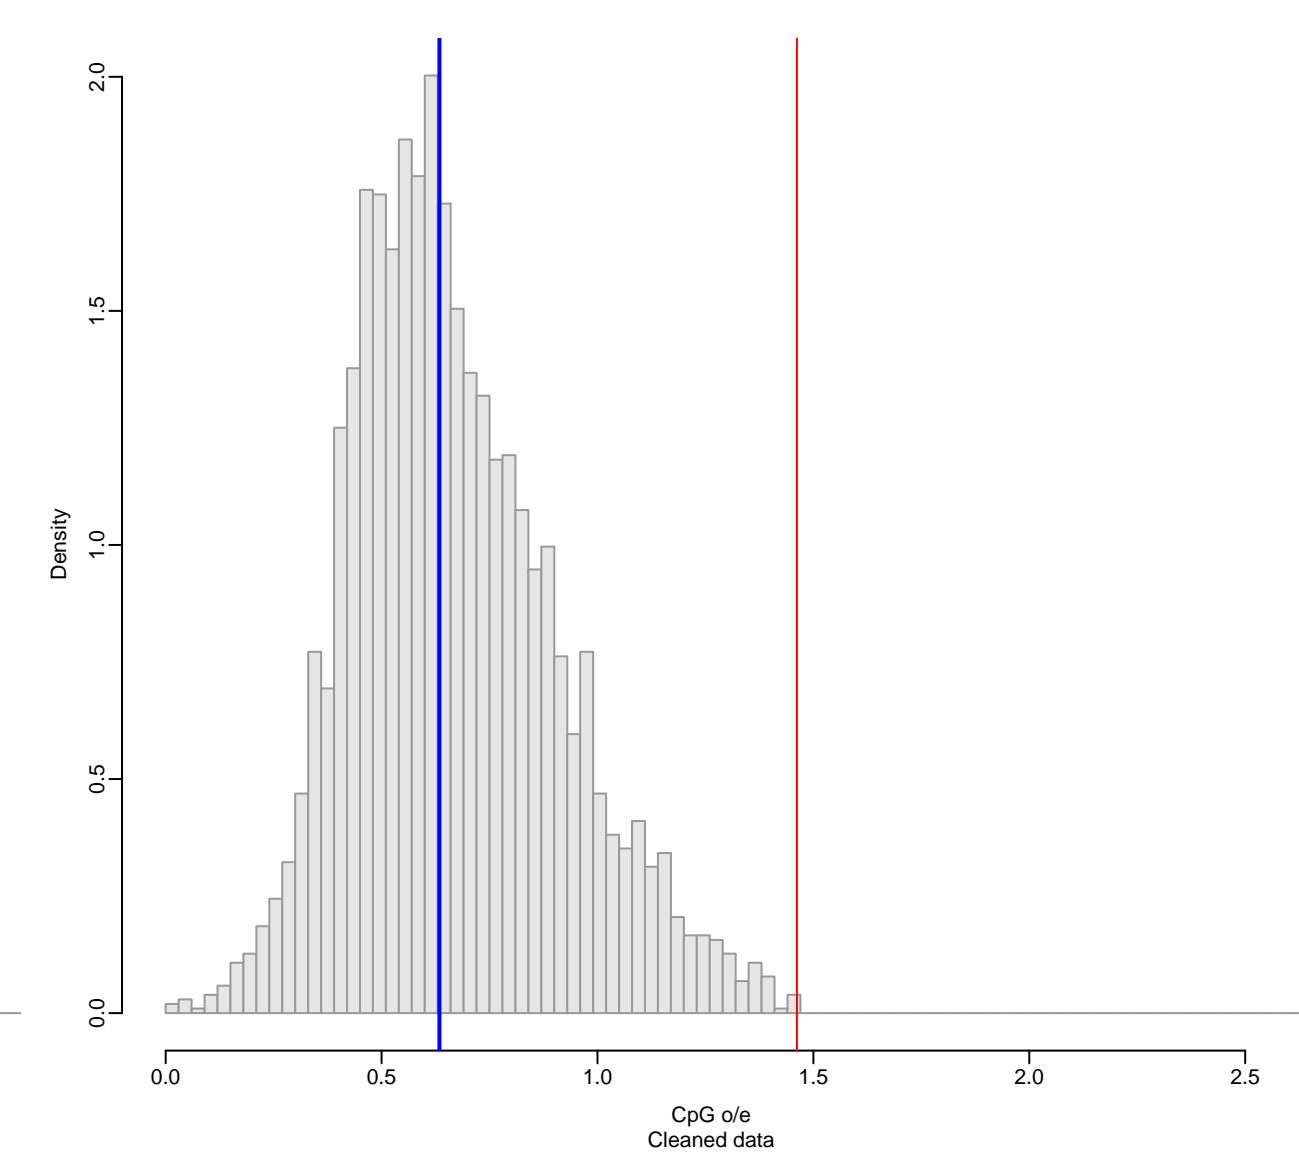



# Polypedilum\_vanderplanki

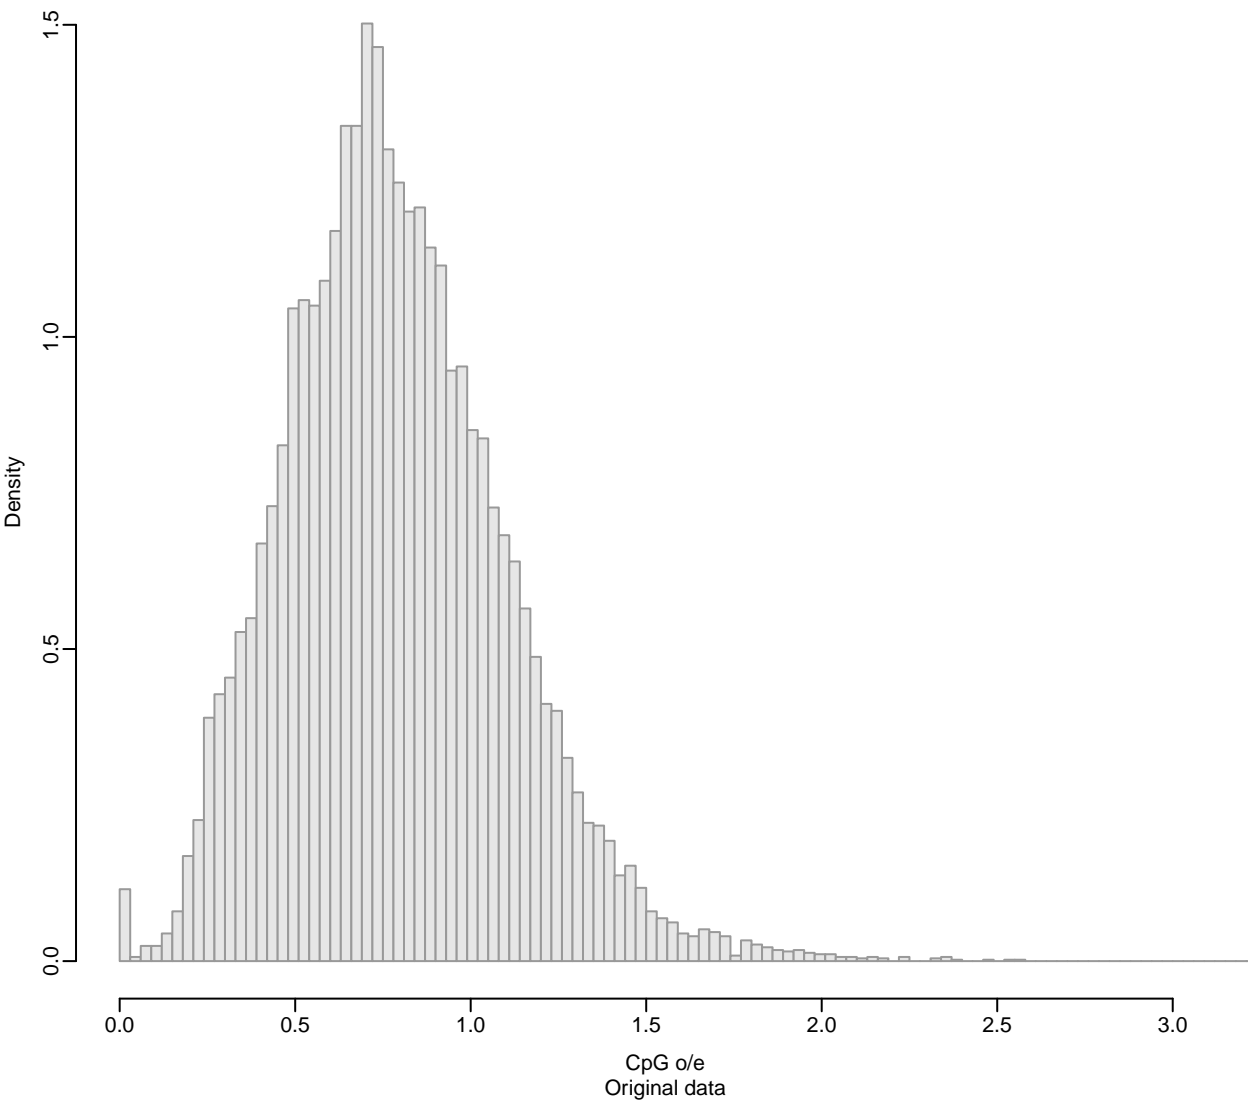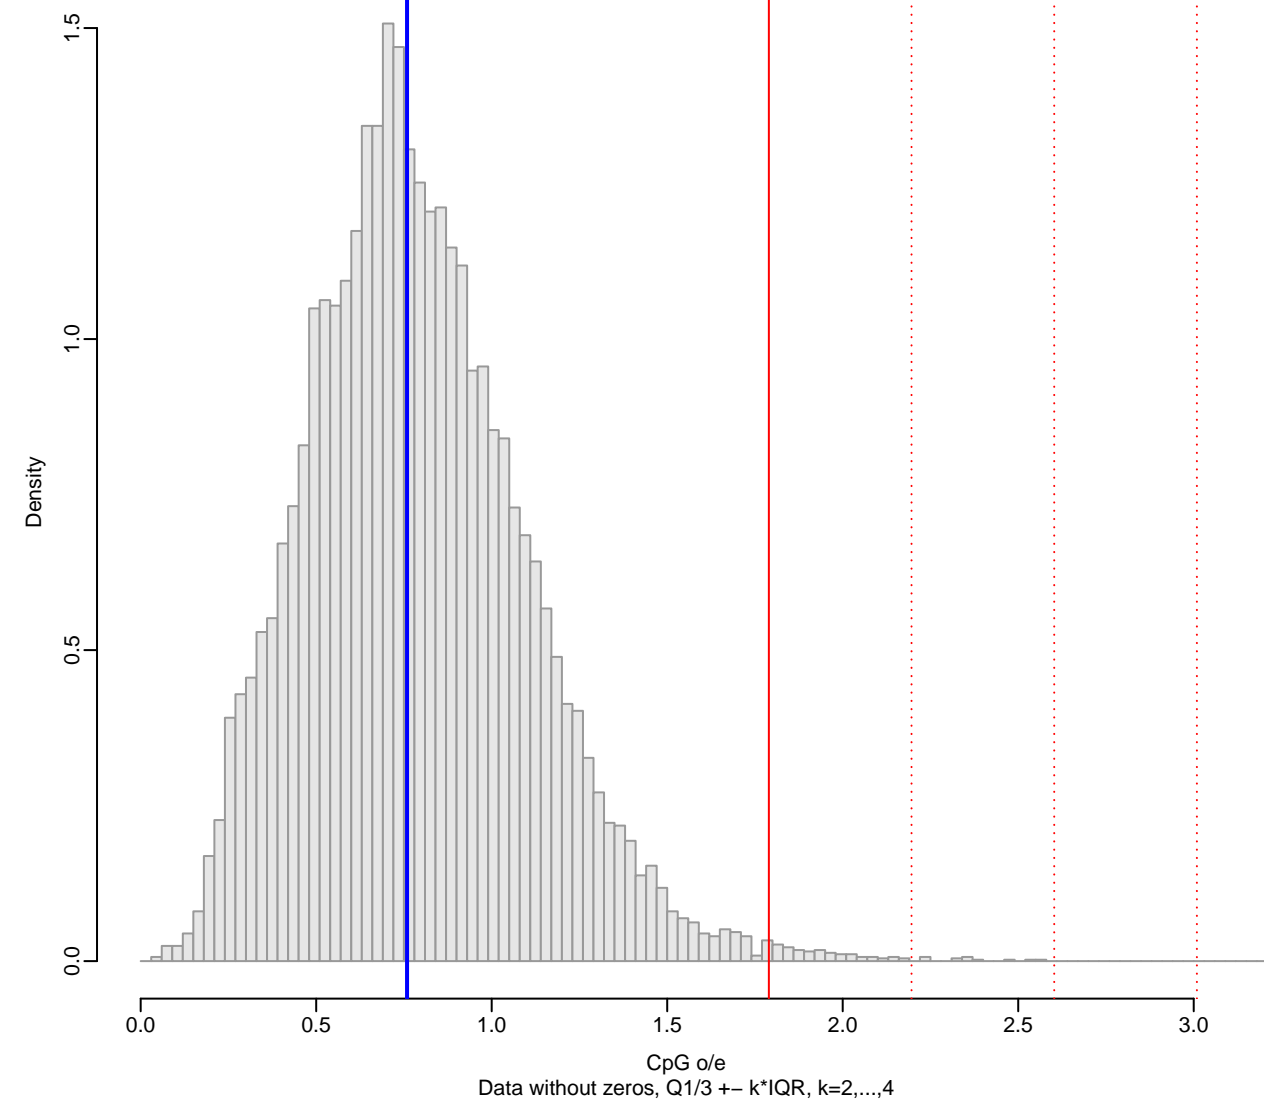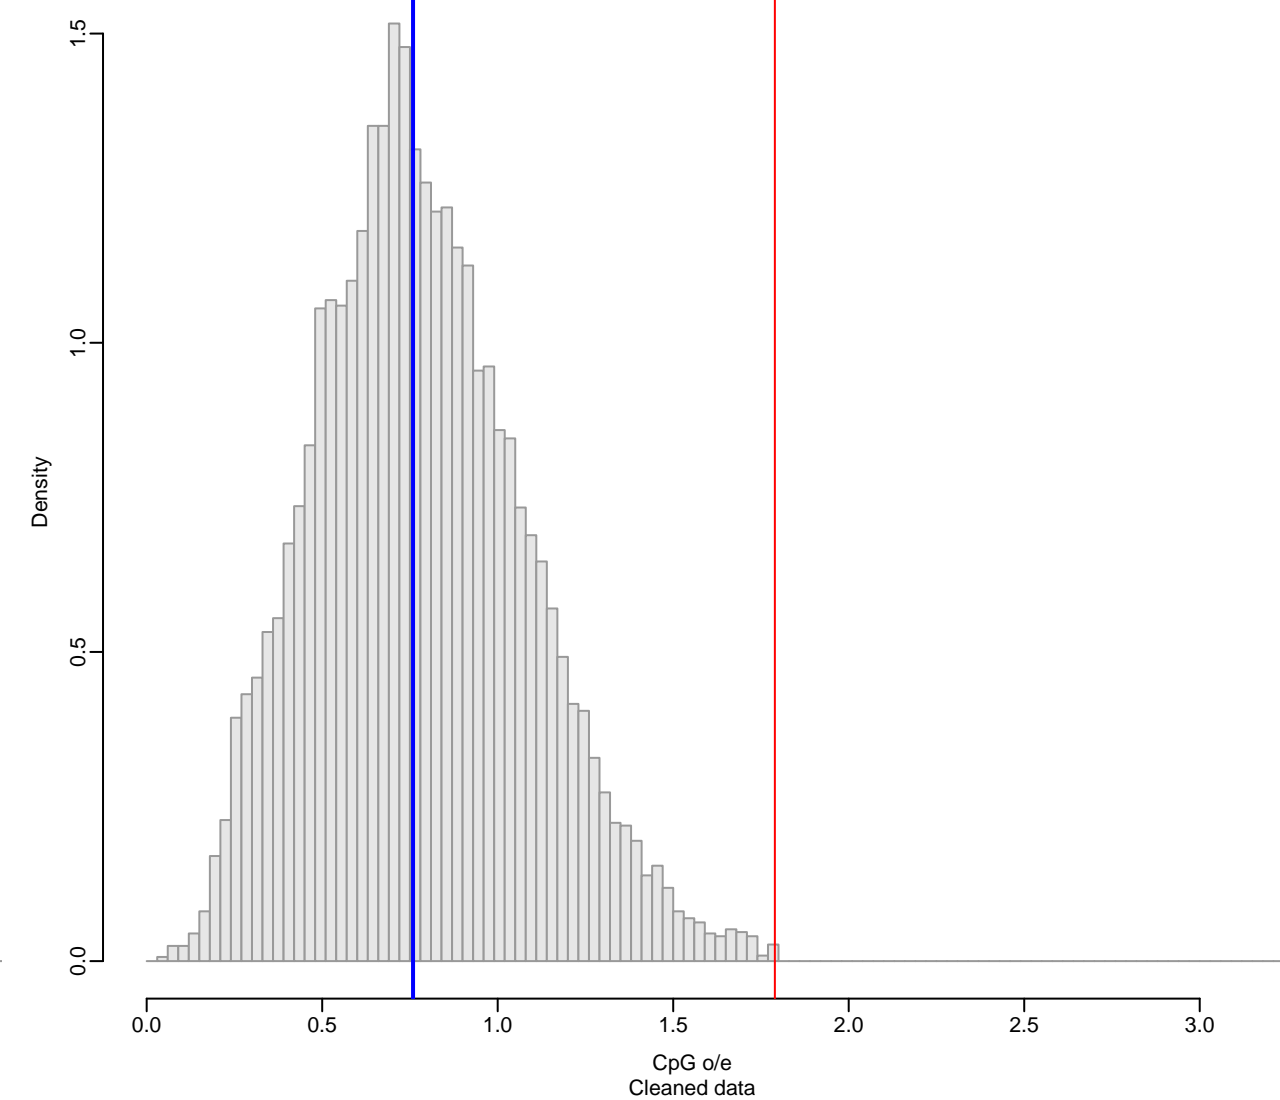

Pongo\_abelii

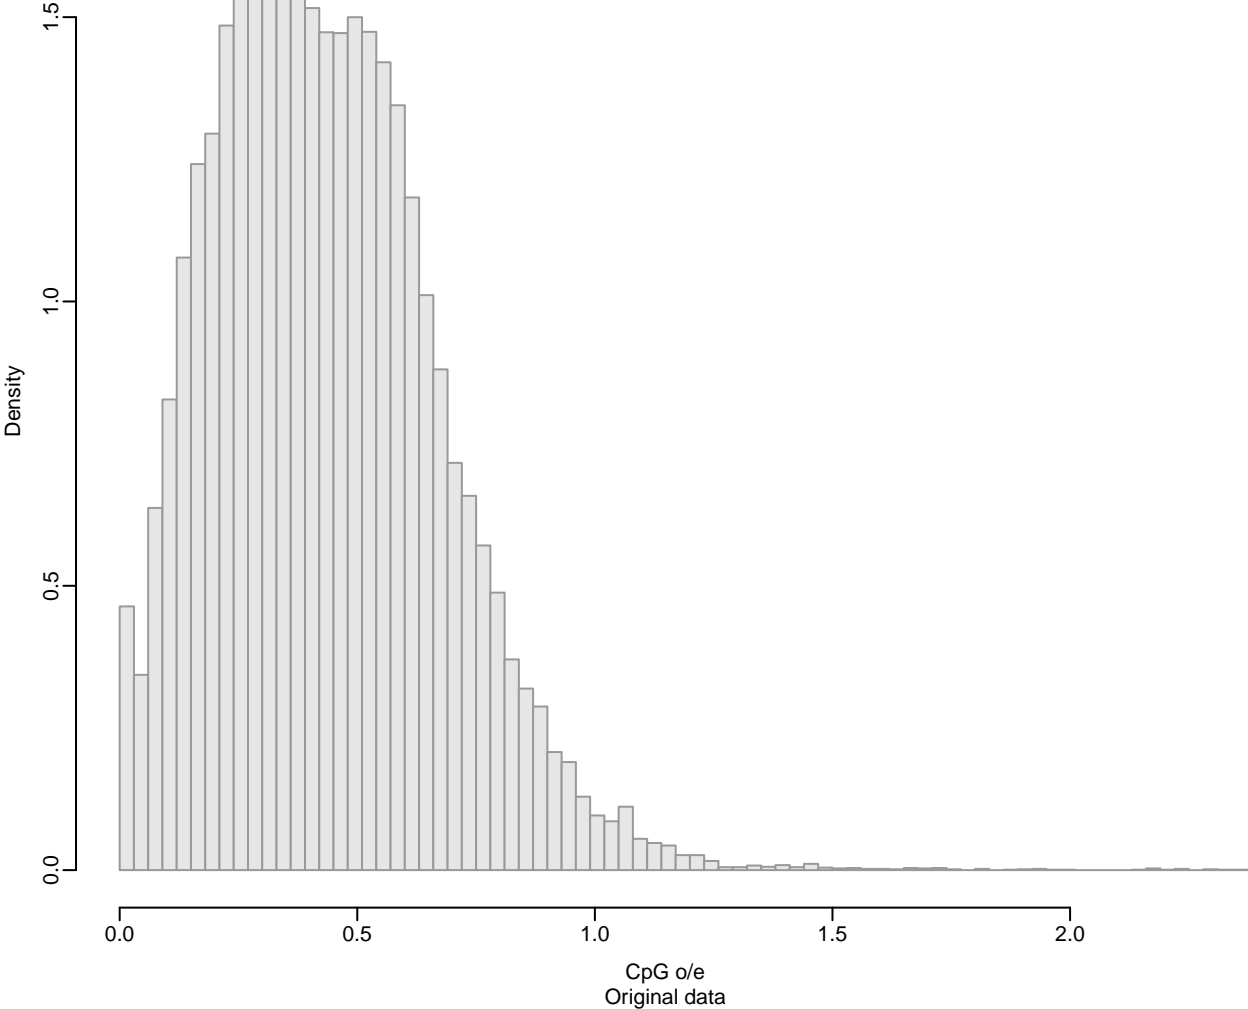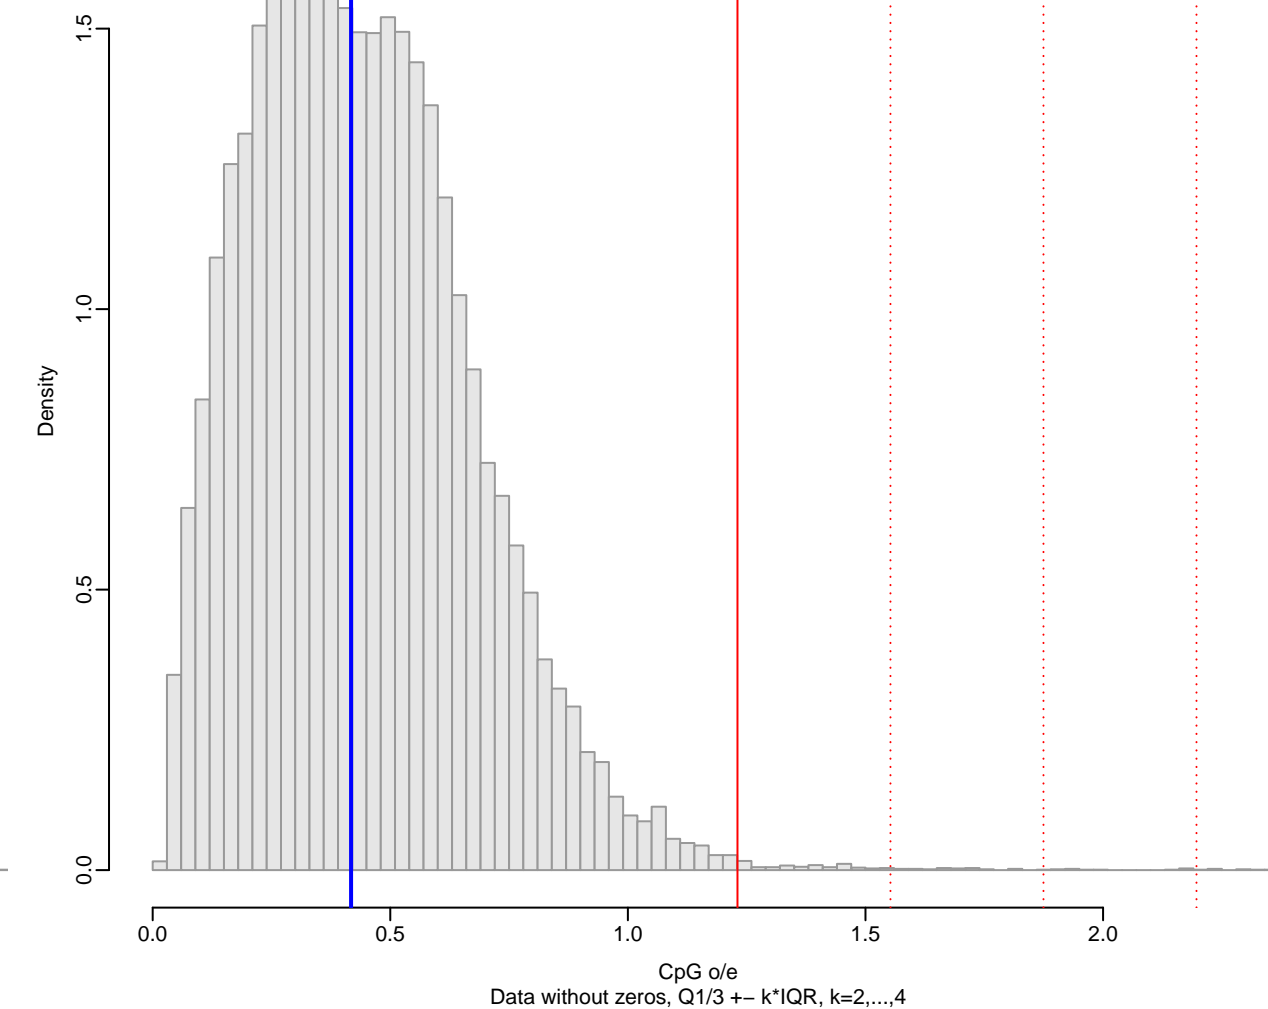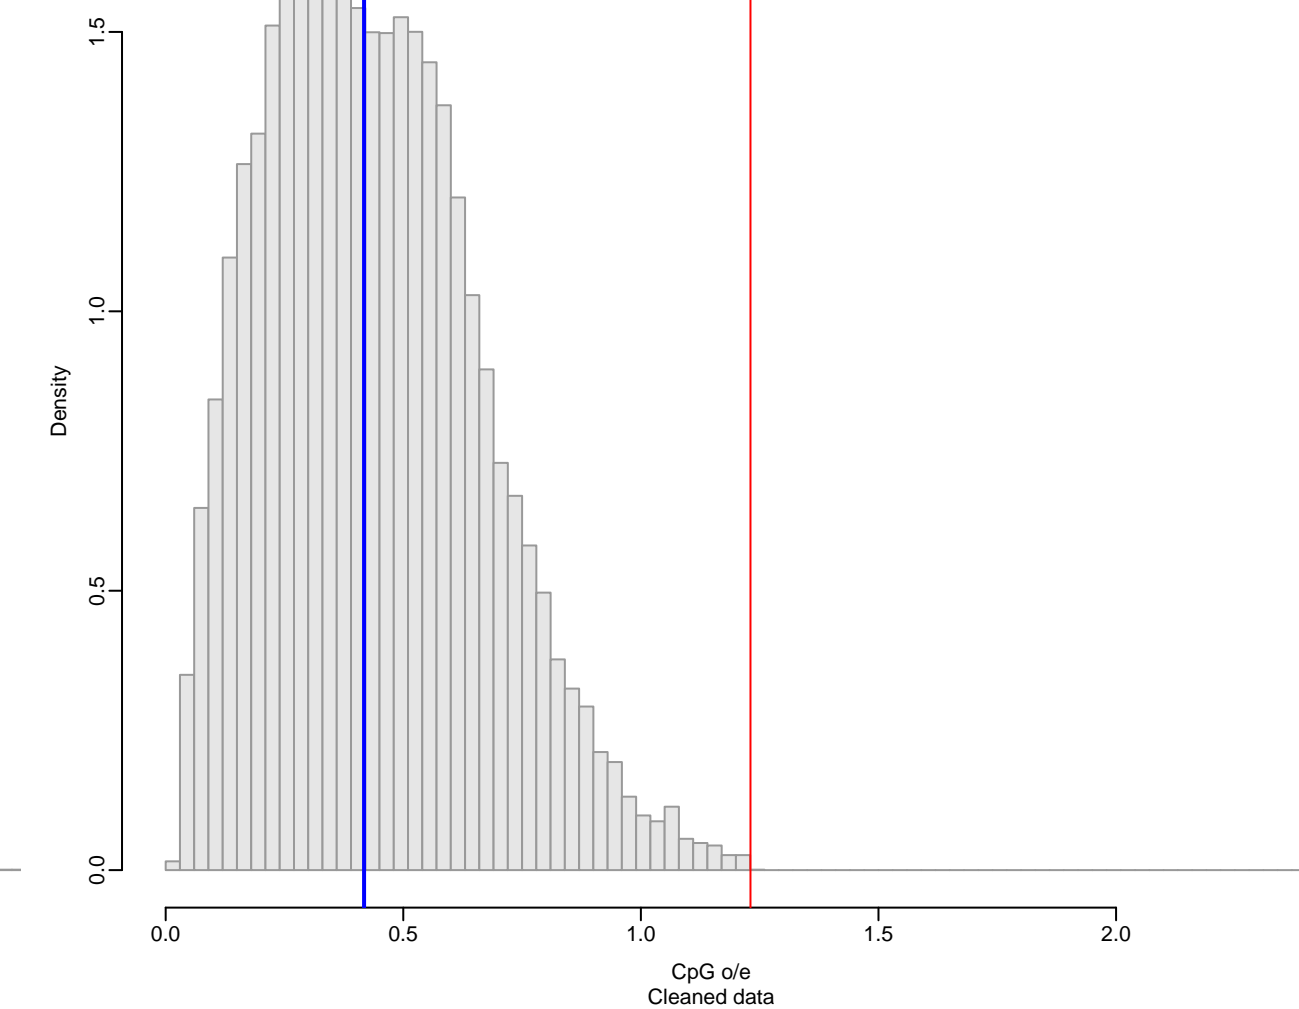

Populus\_deltoides

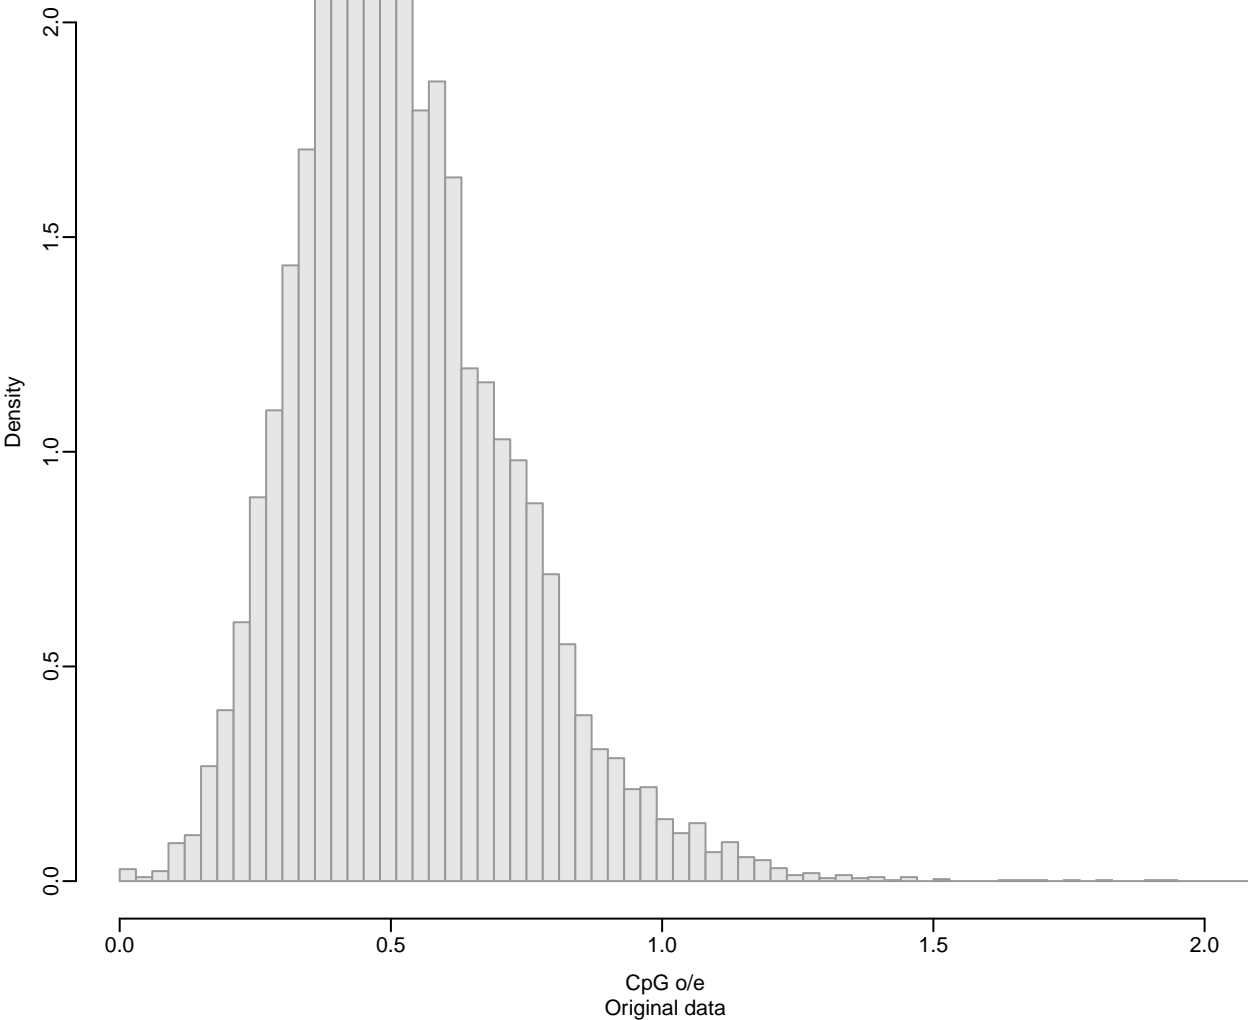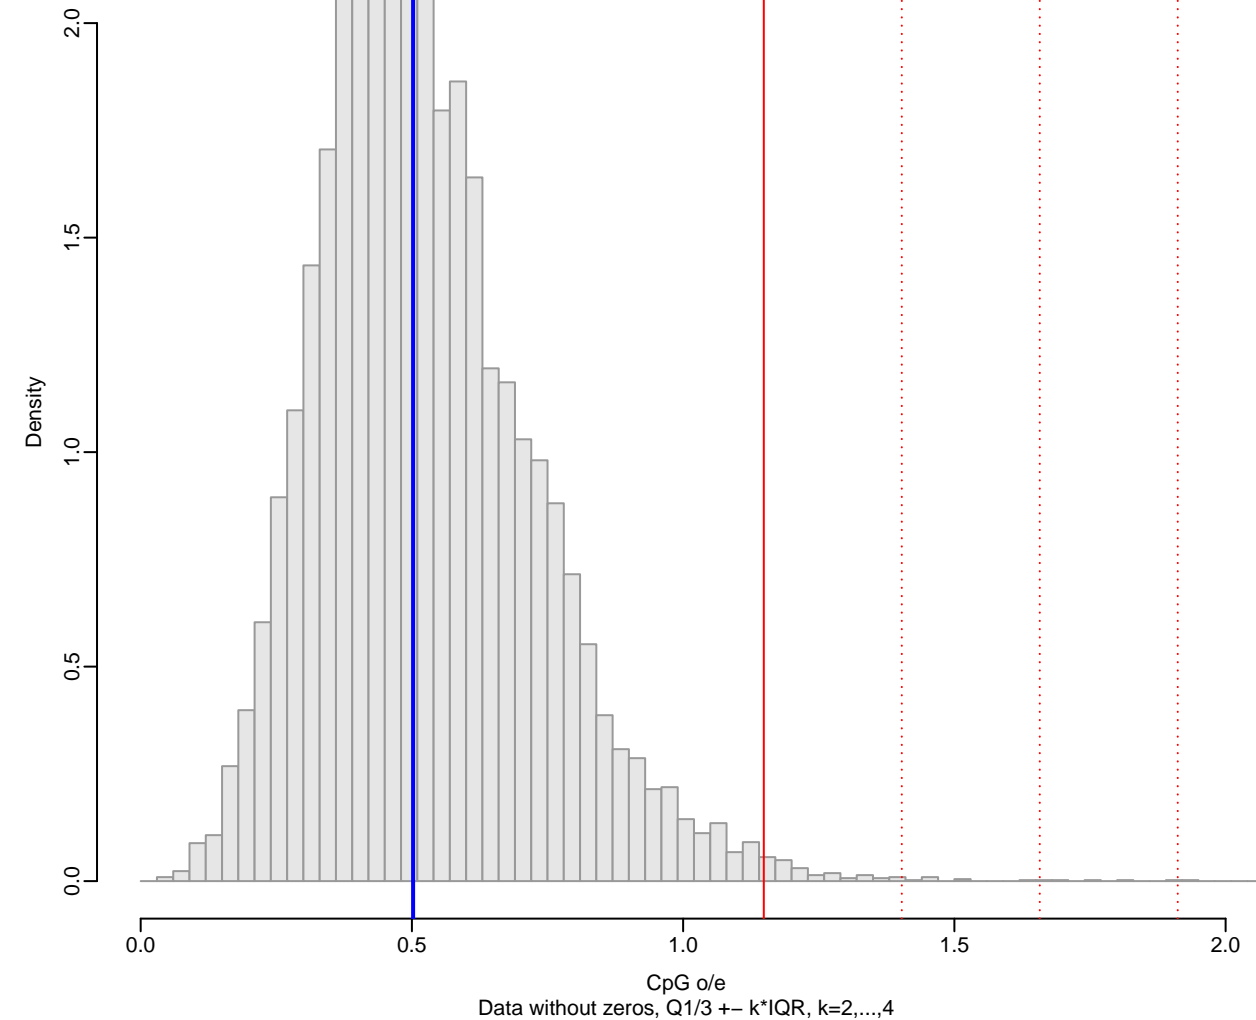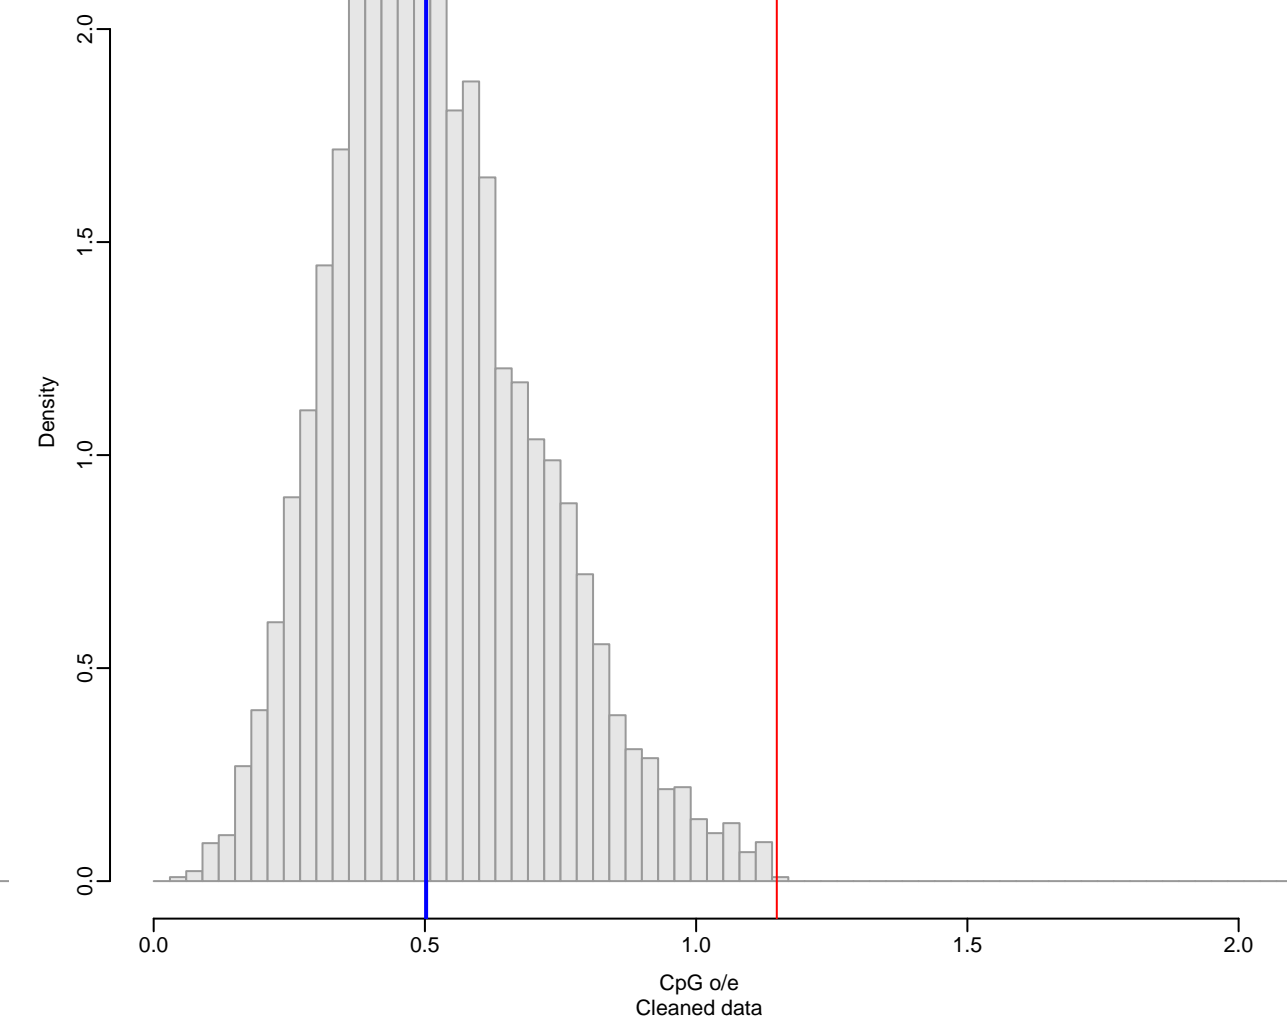

Populus\_euphratica

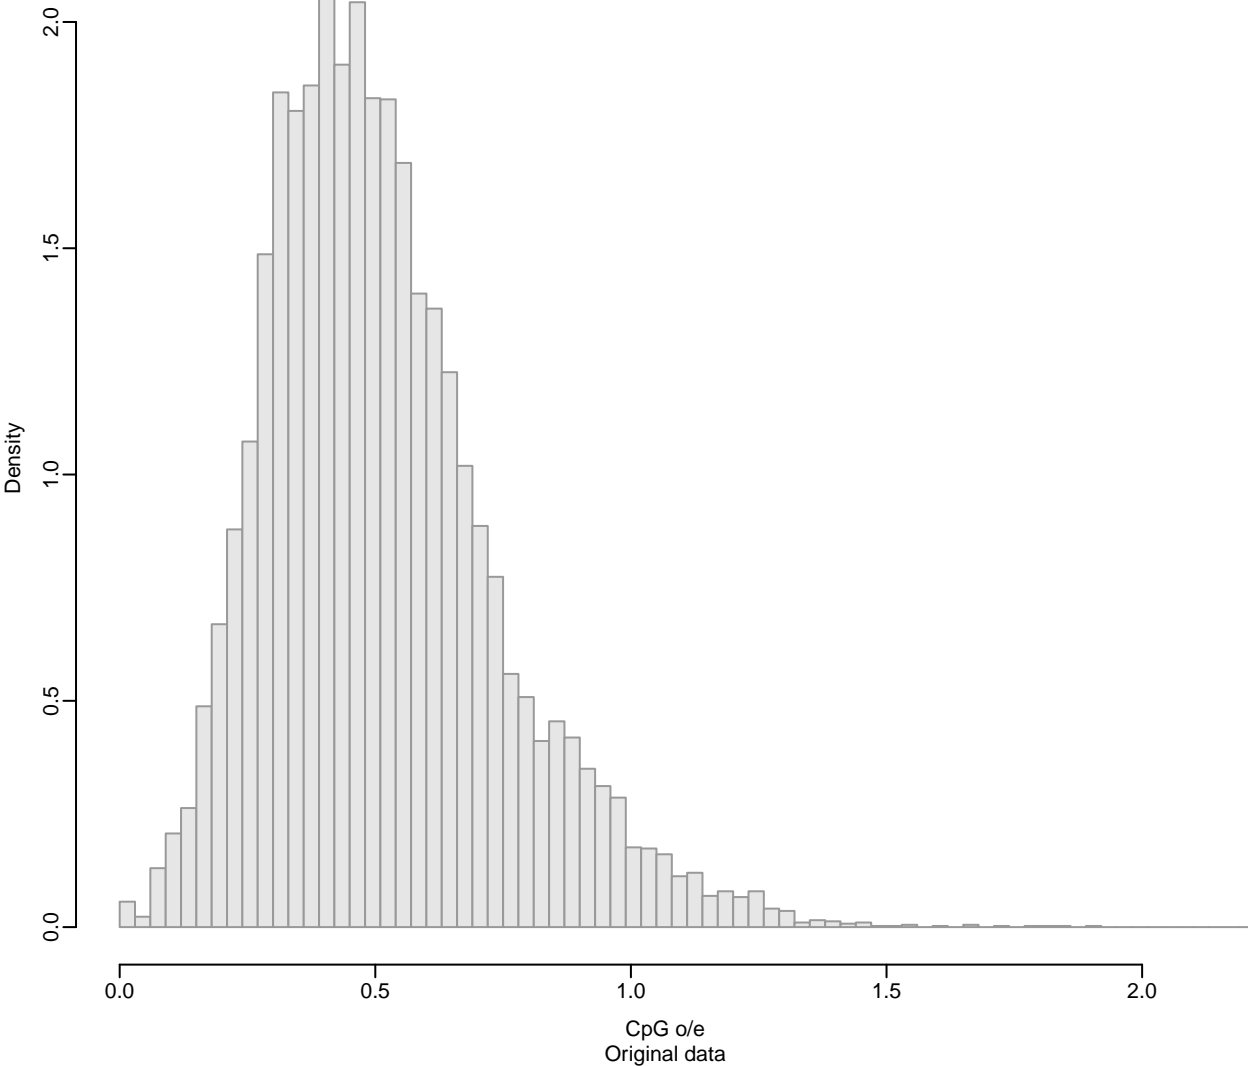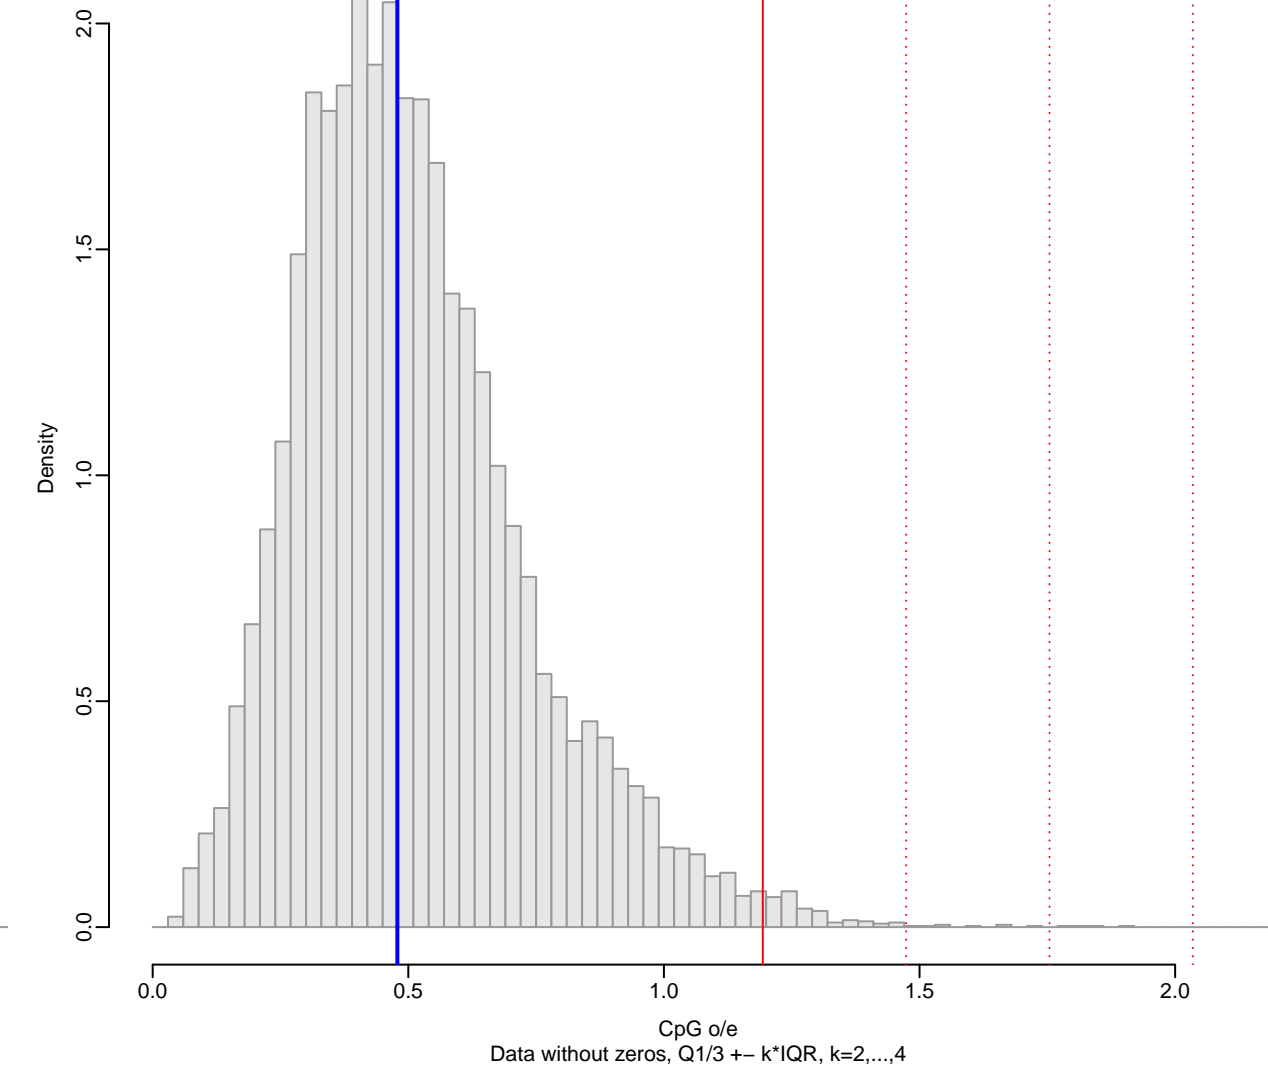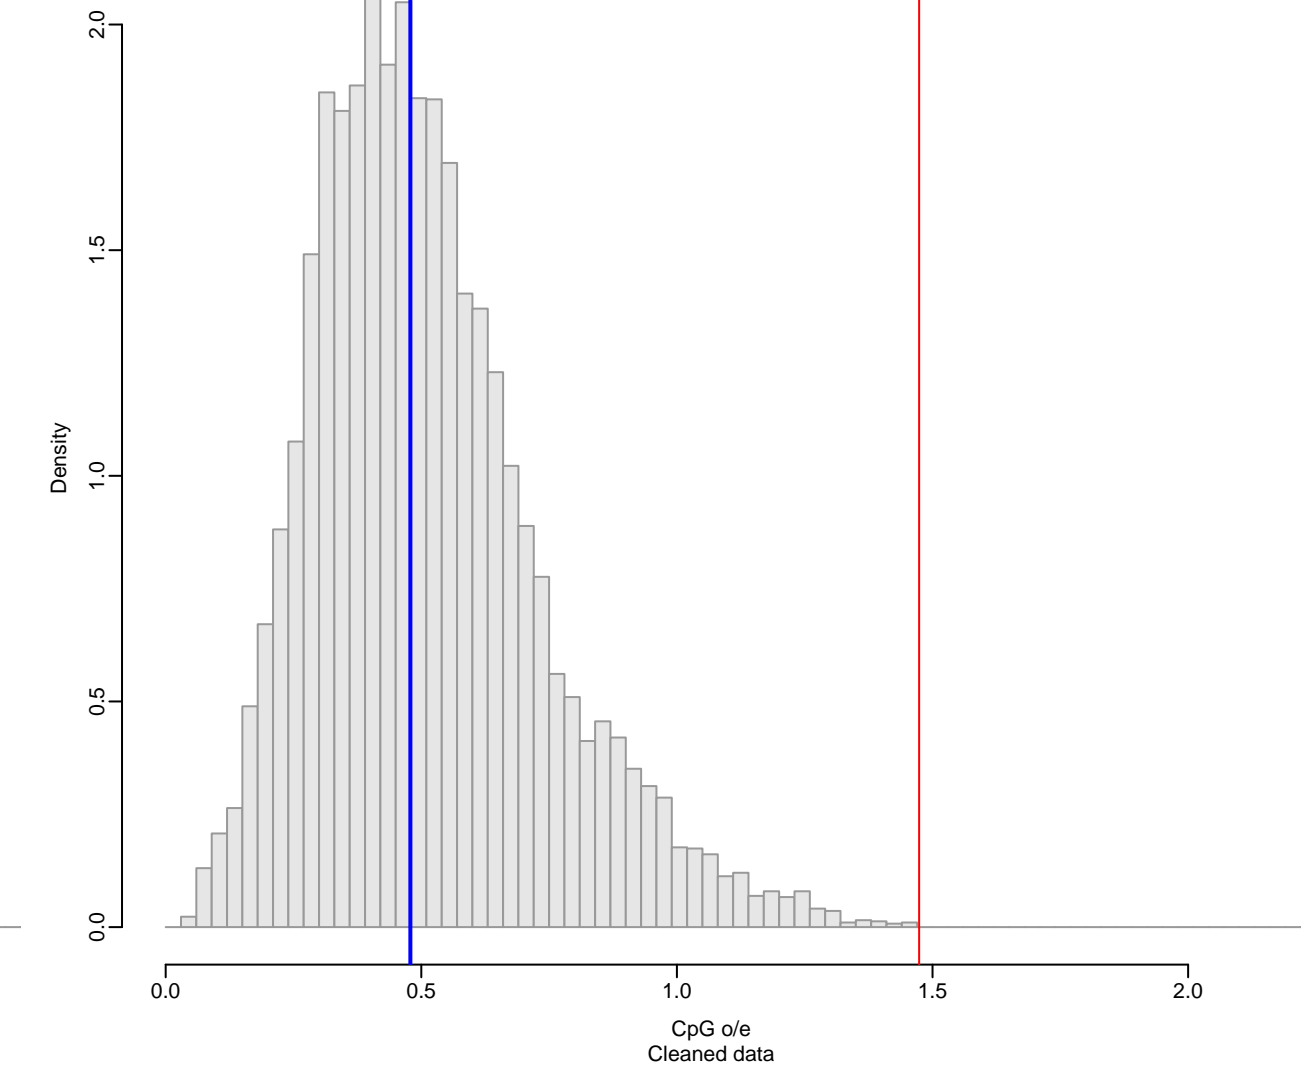

Populus\_tremula

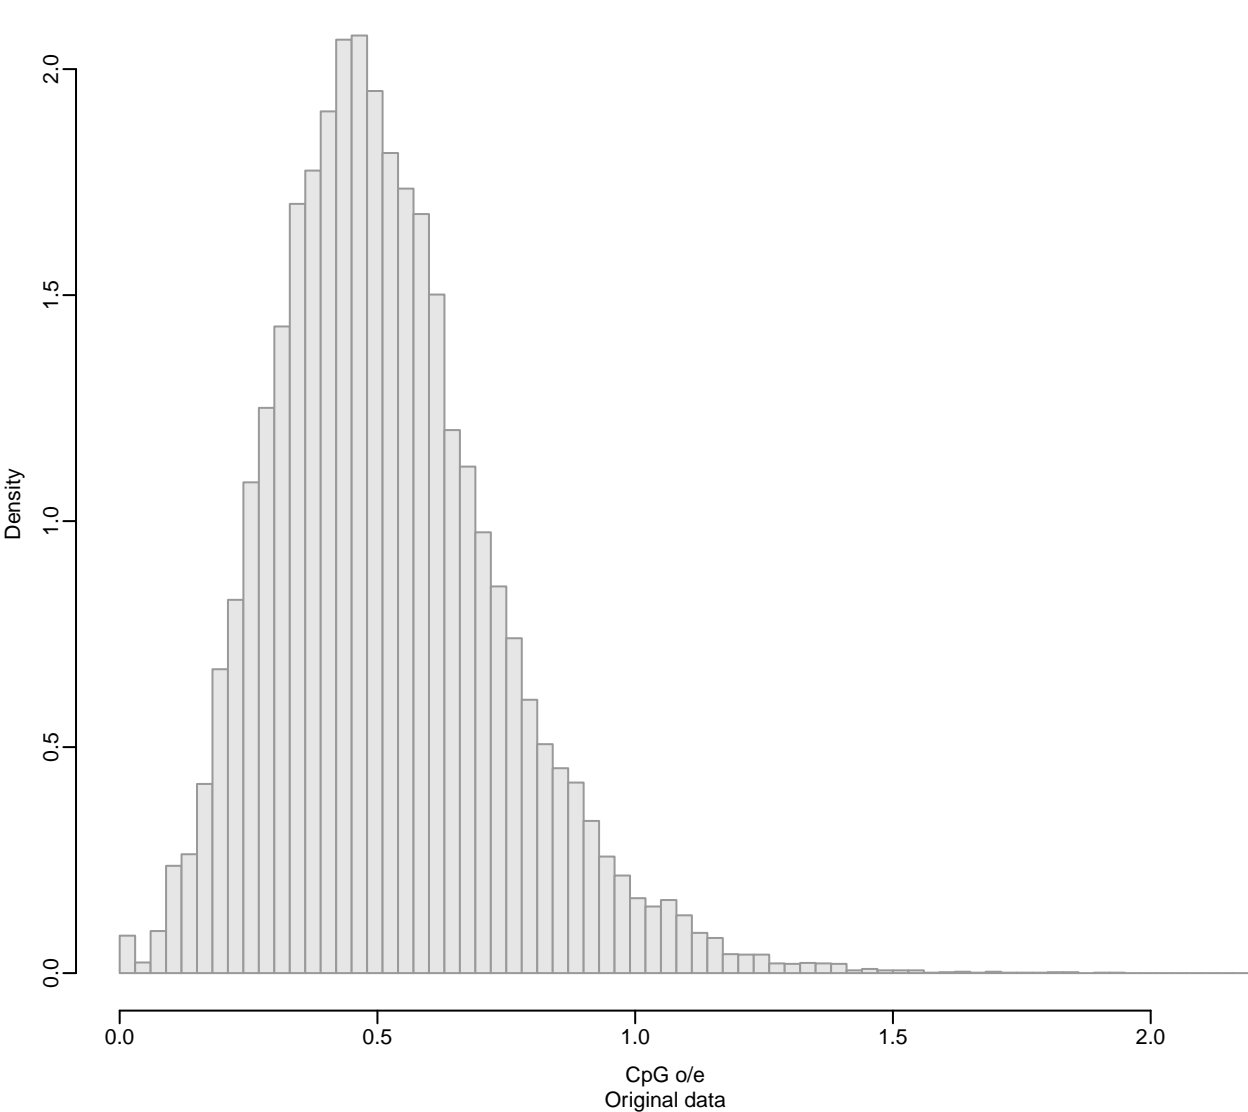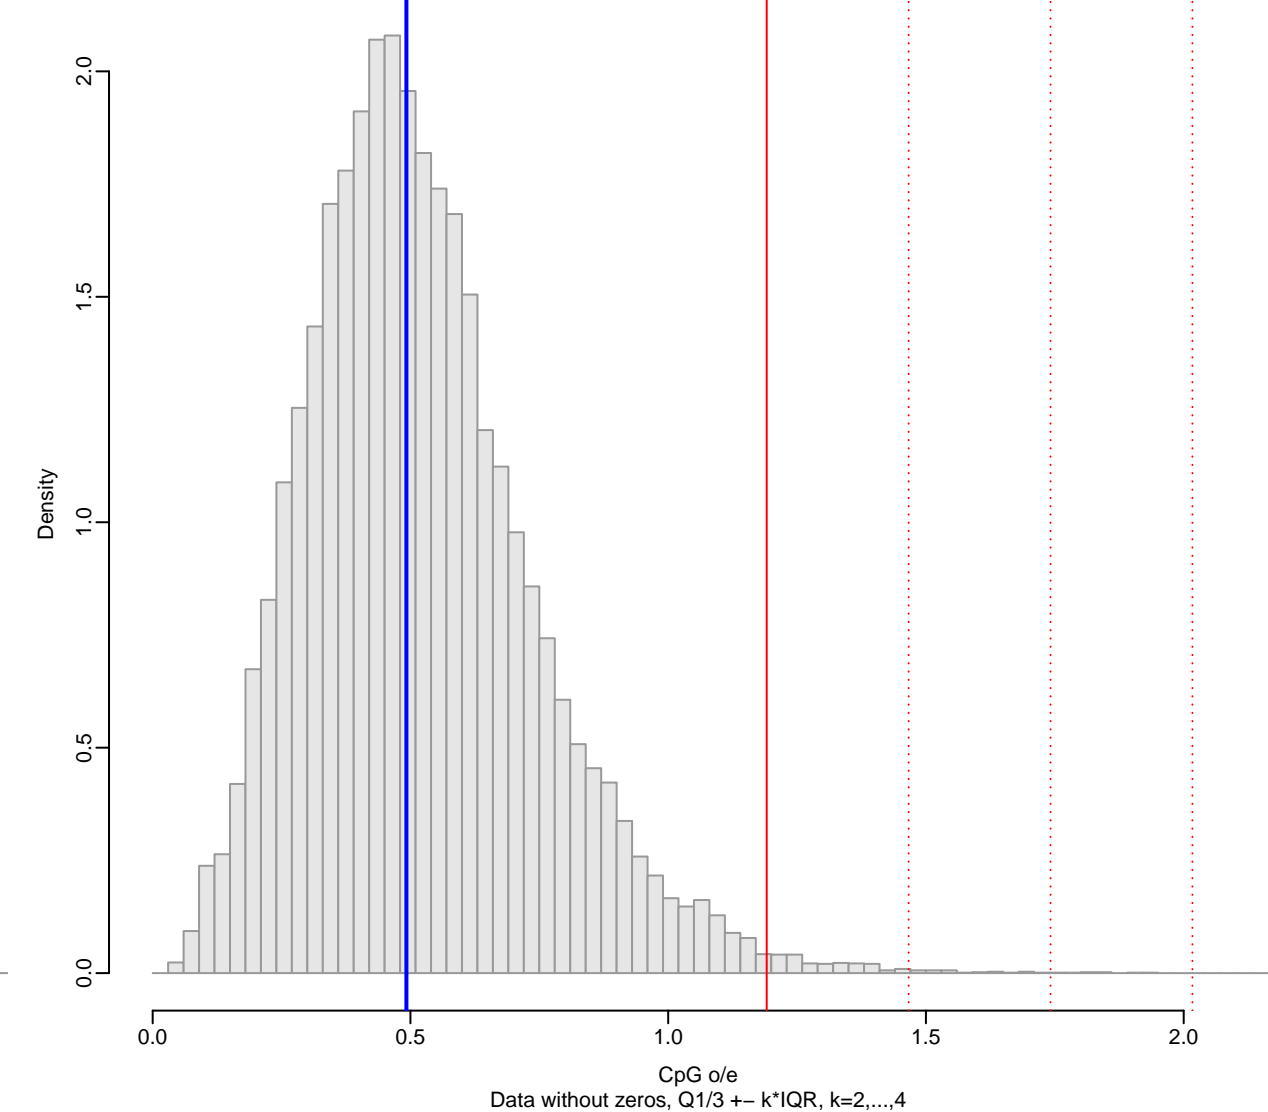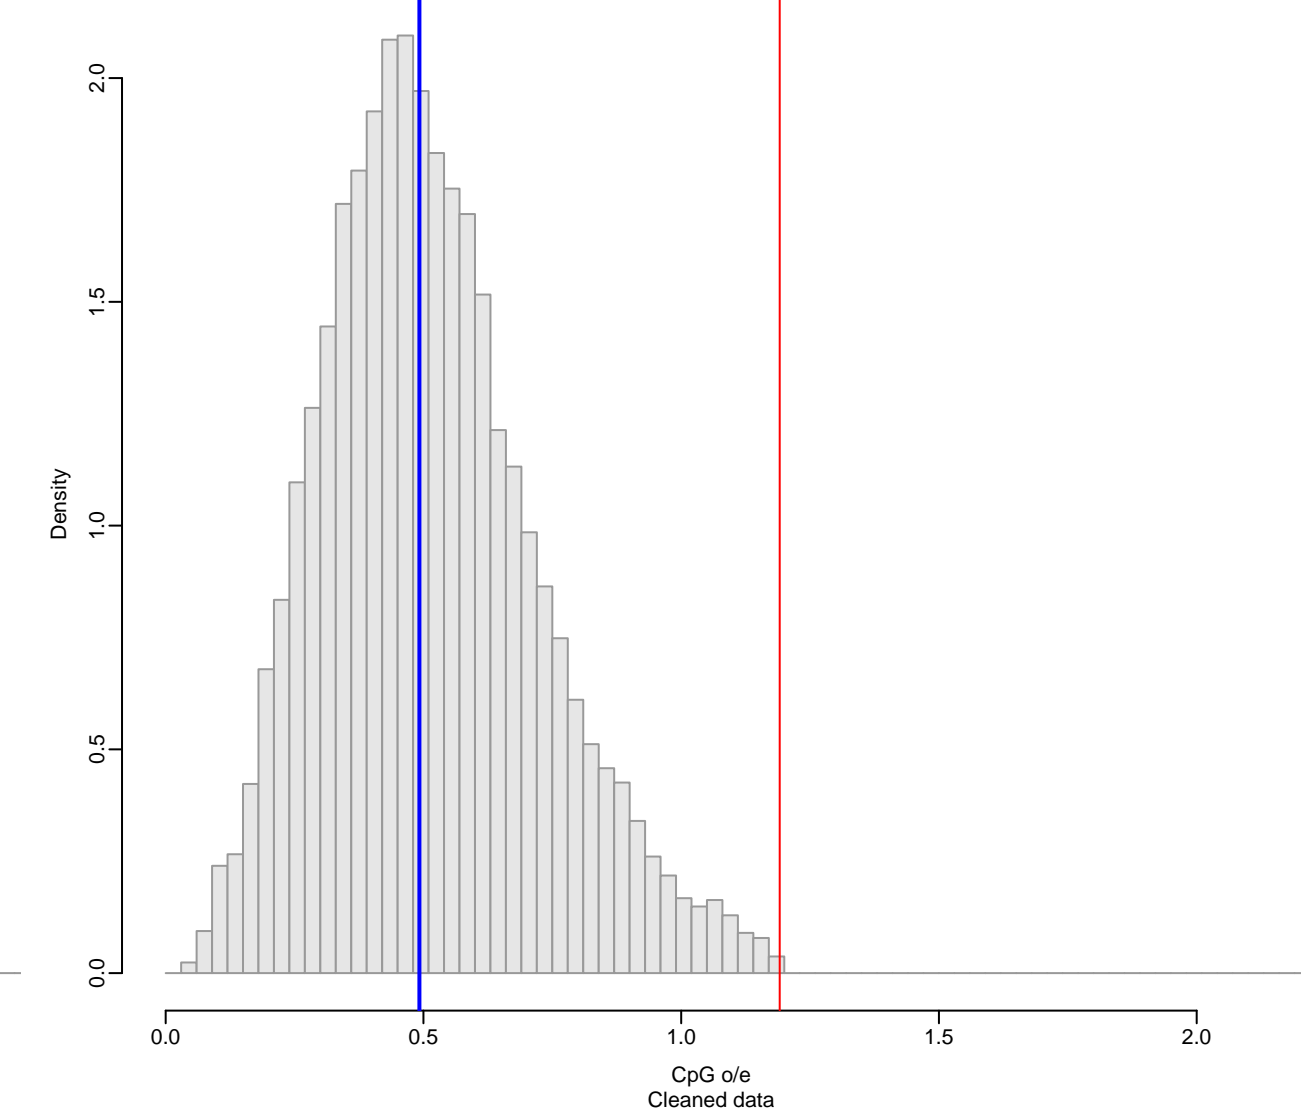

Populus\_tremuloides

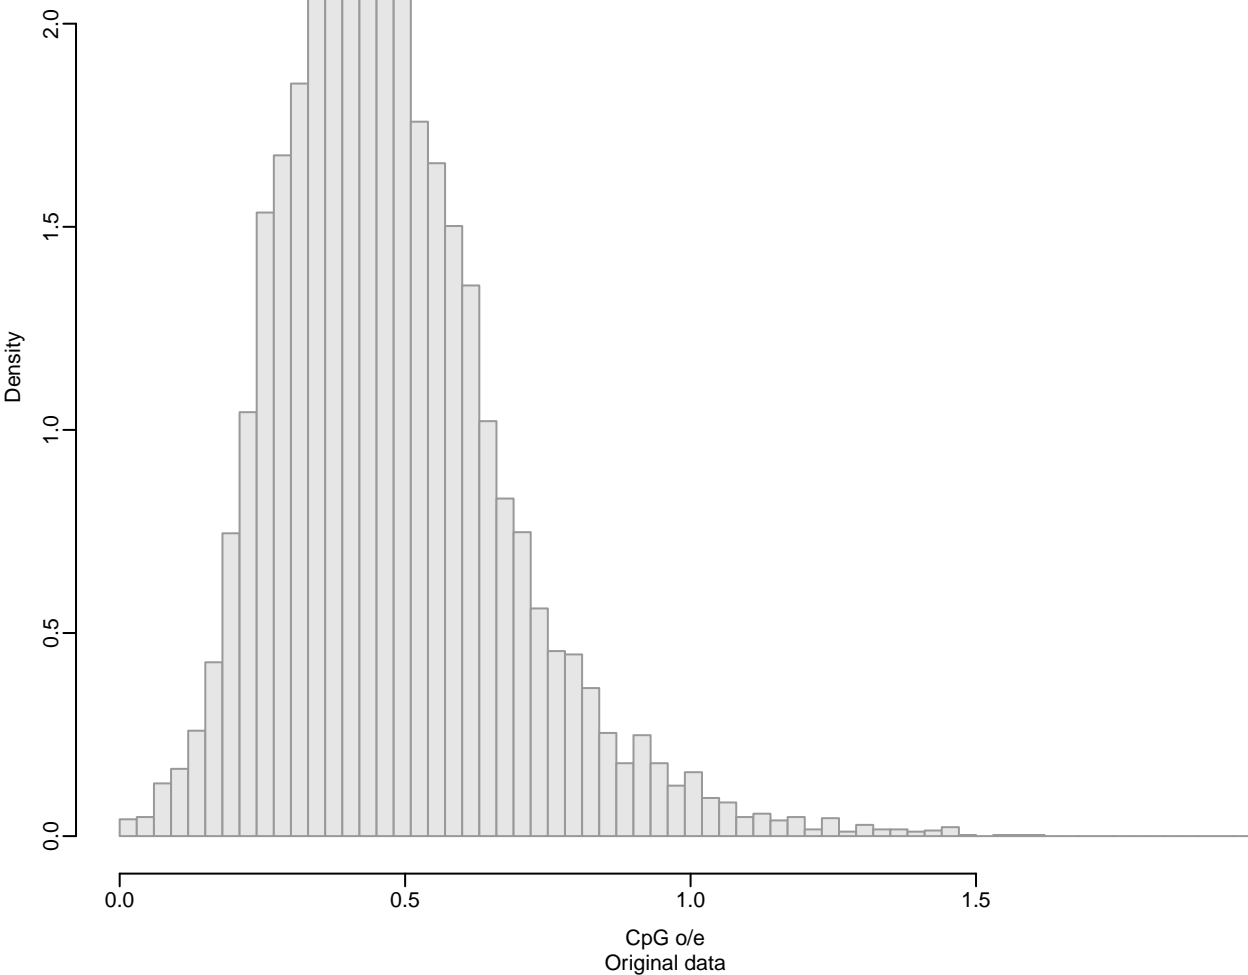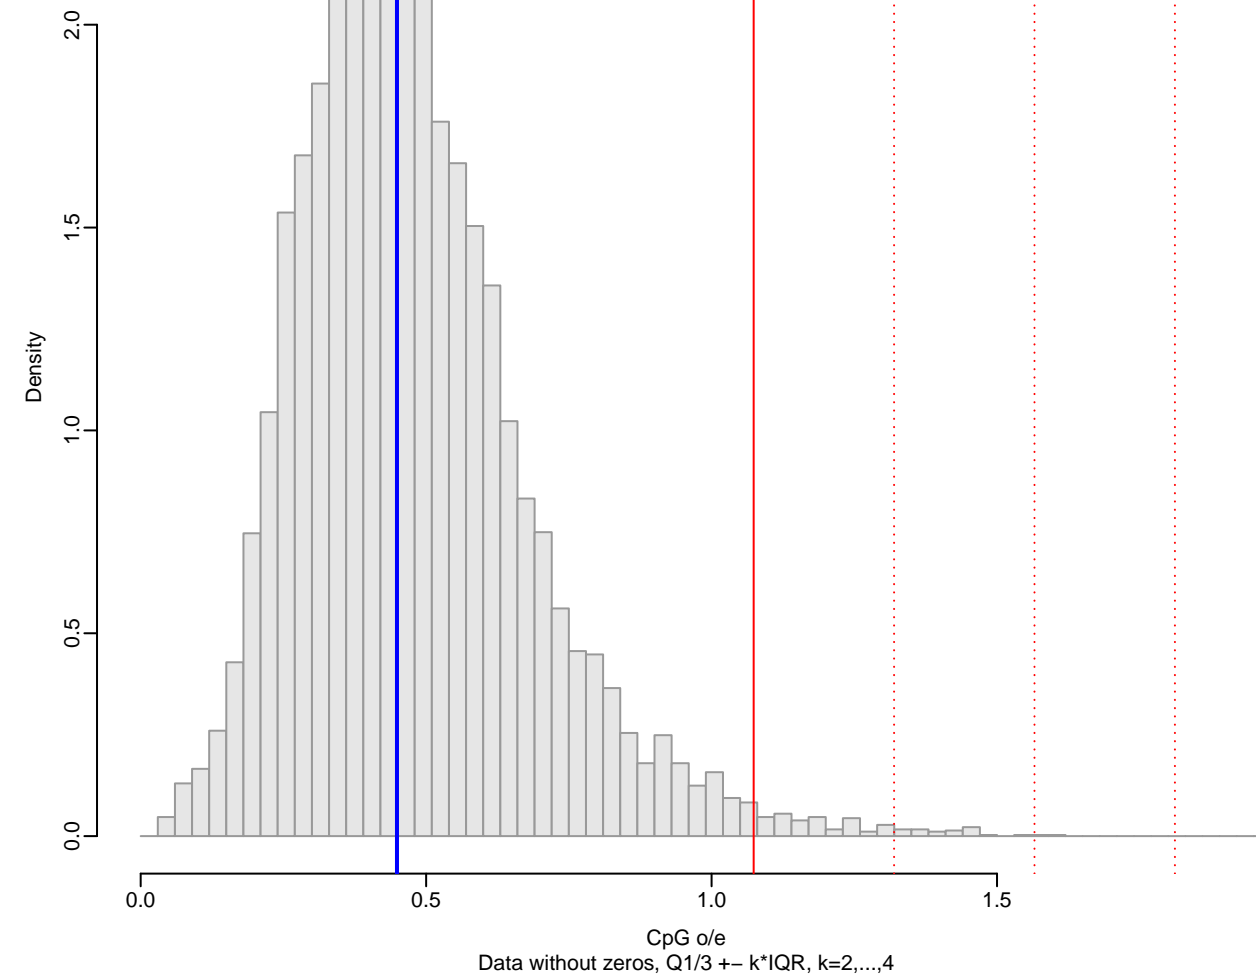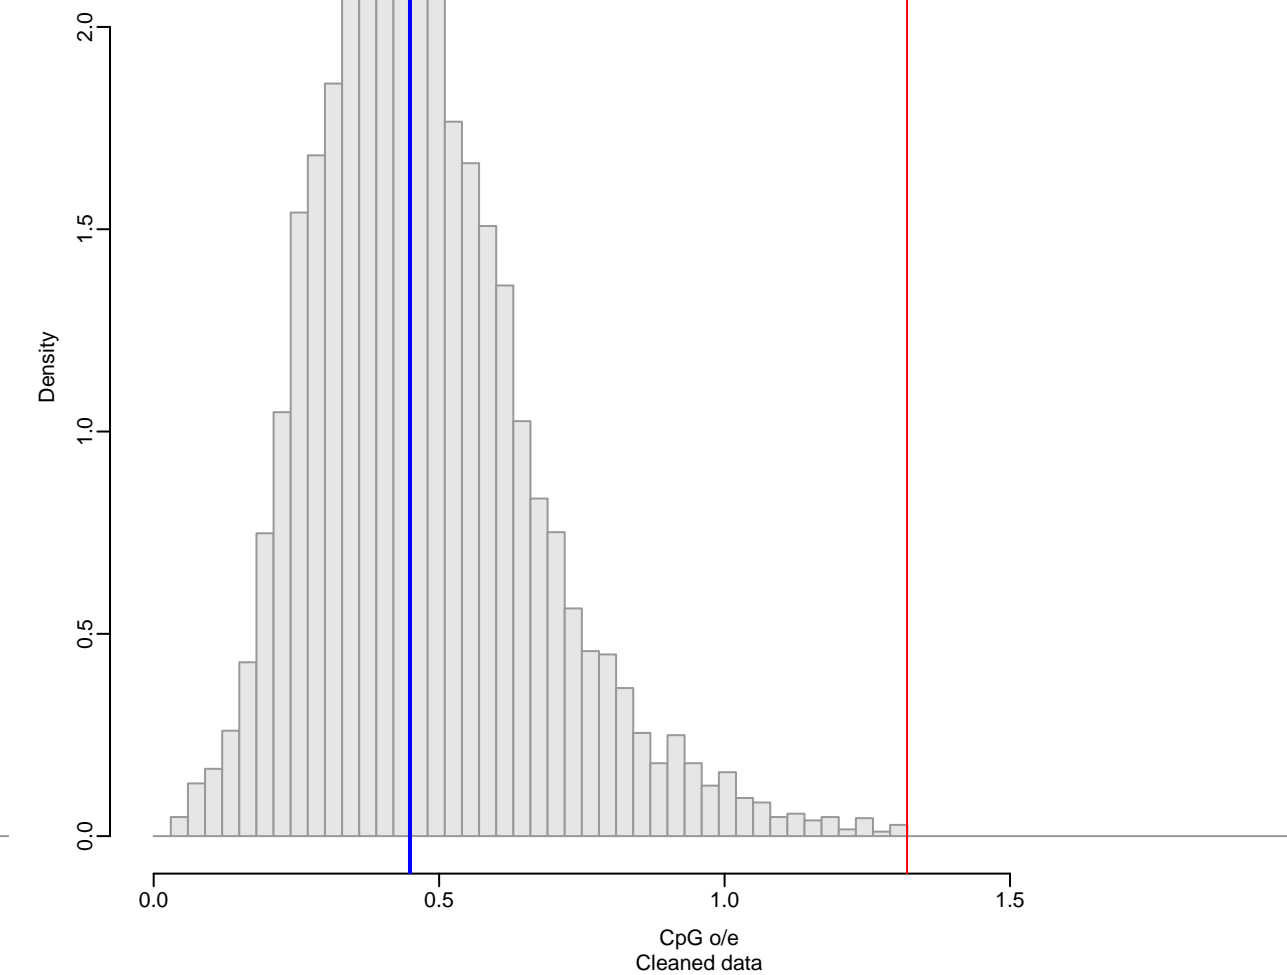

Porphyra\_yezoensis

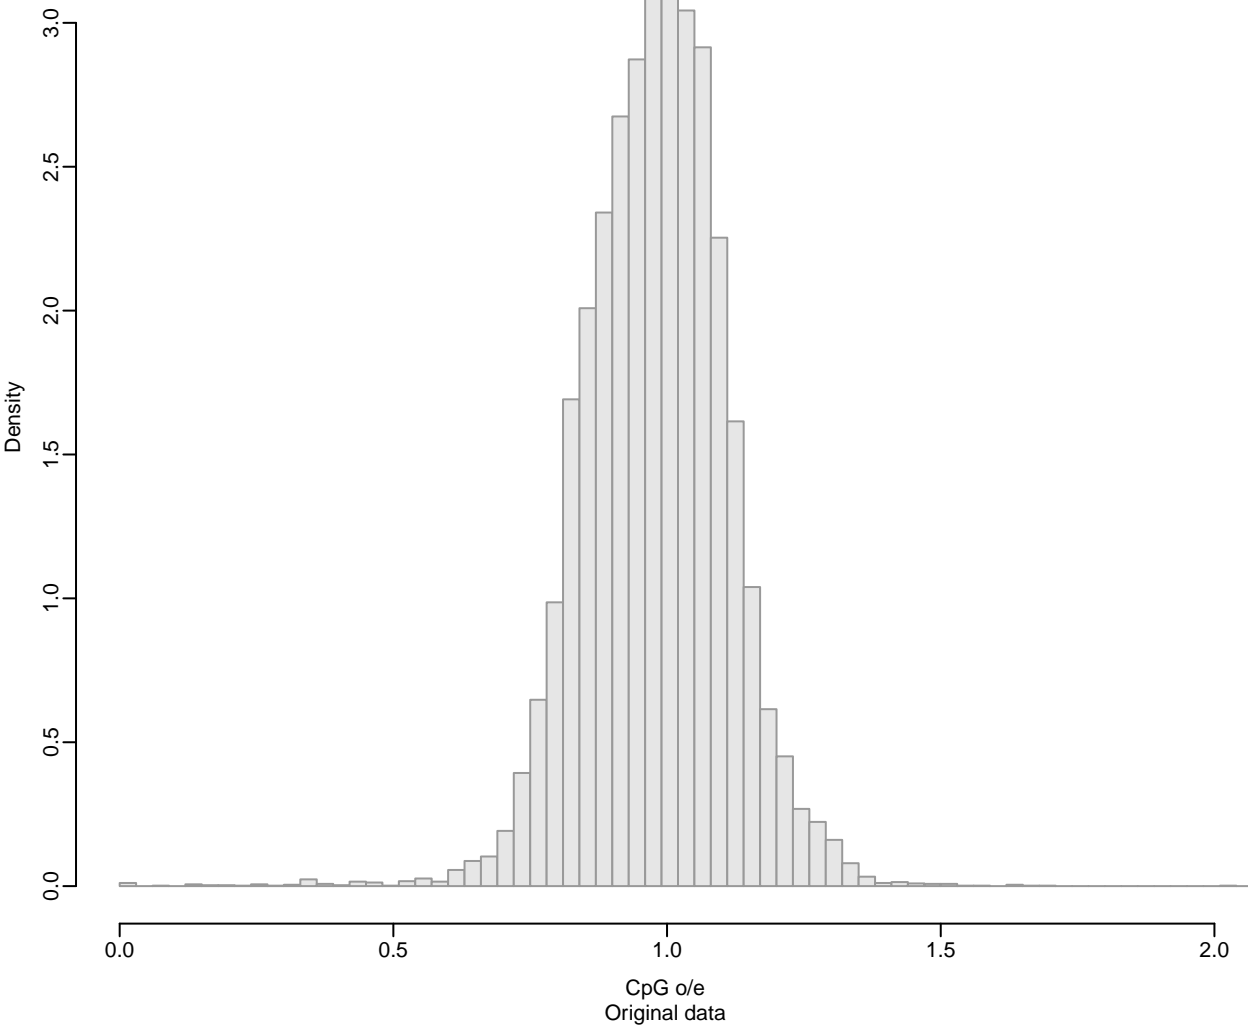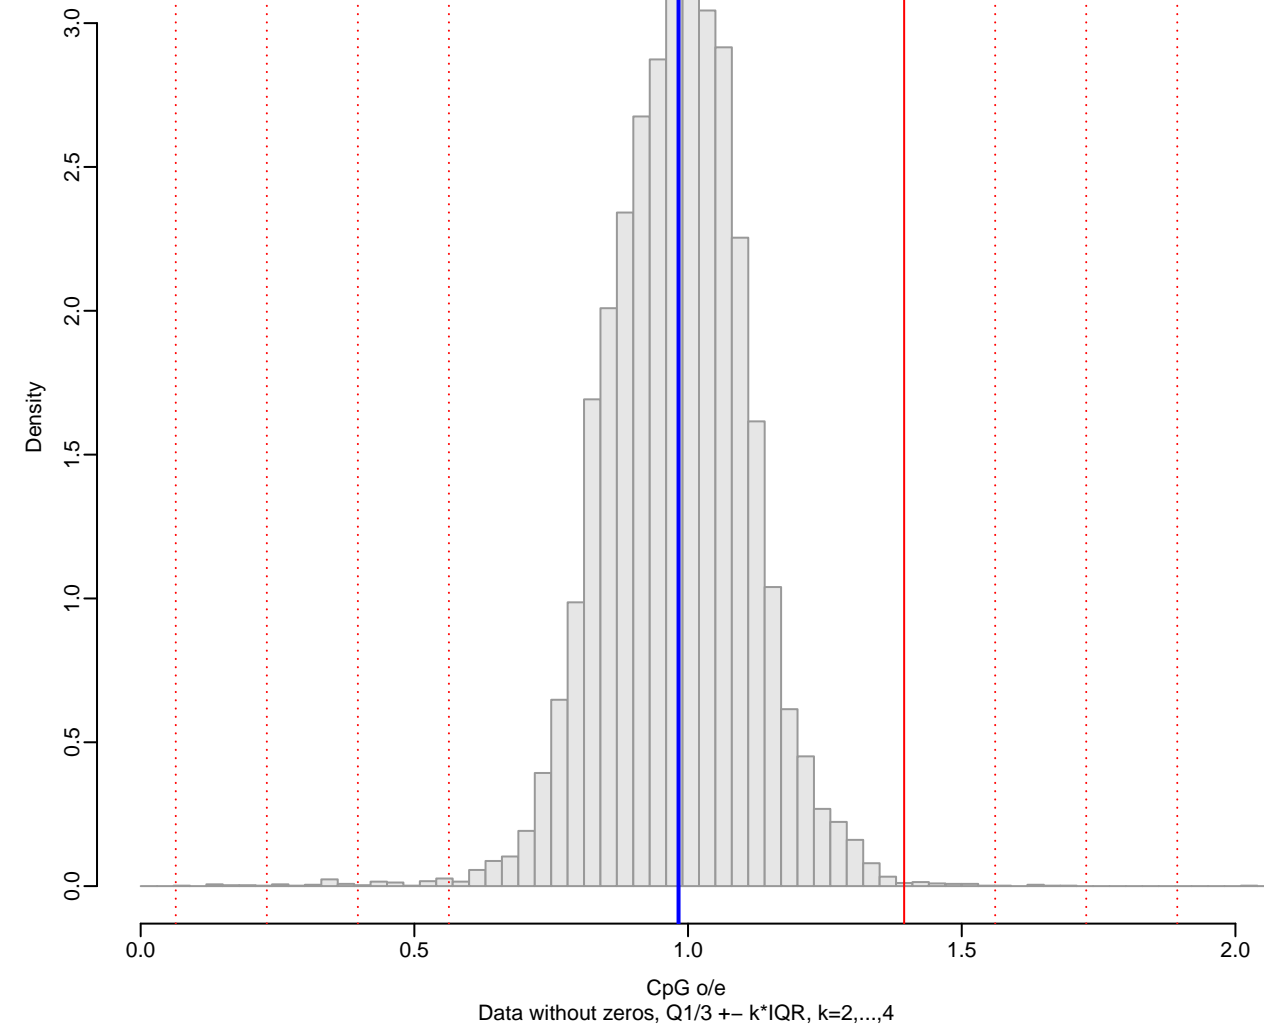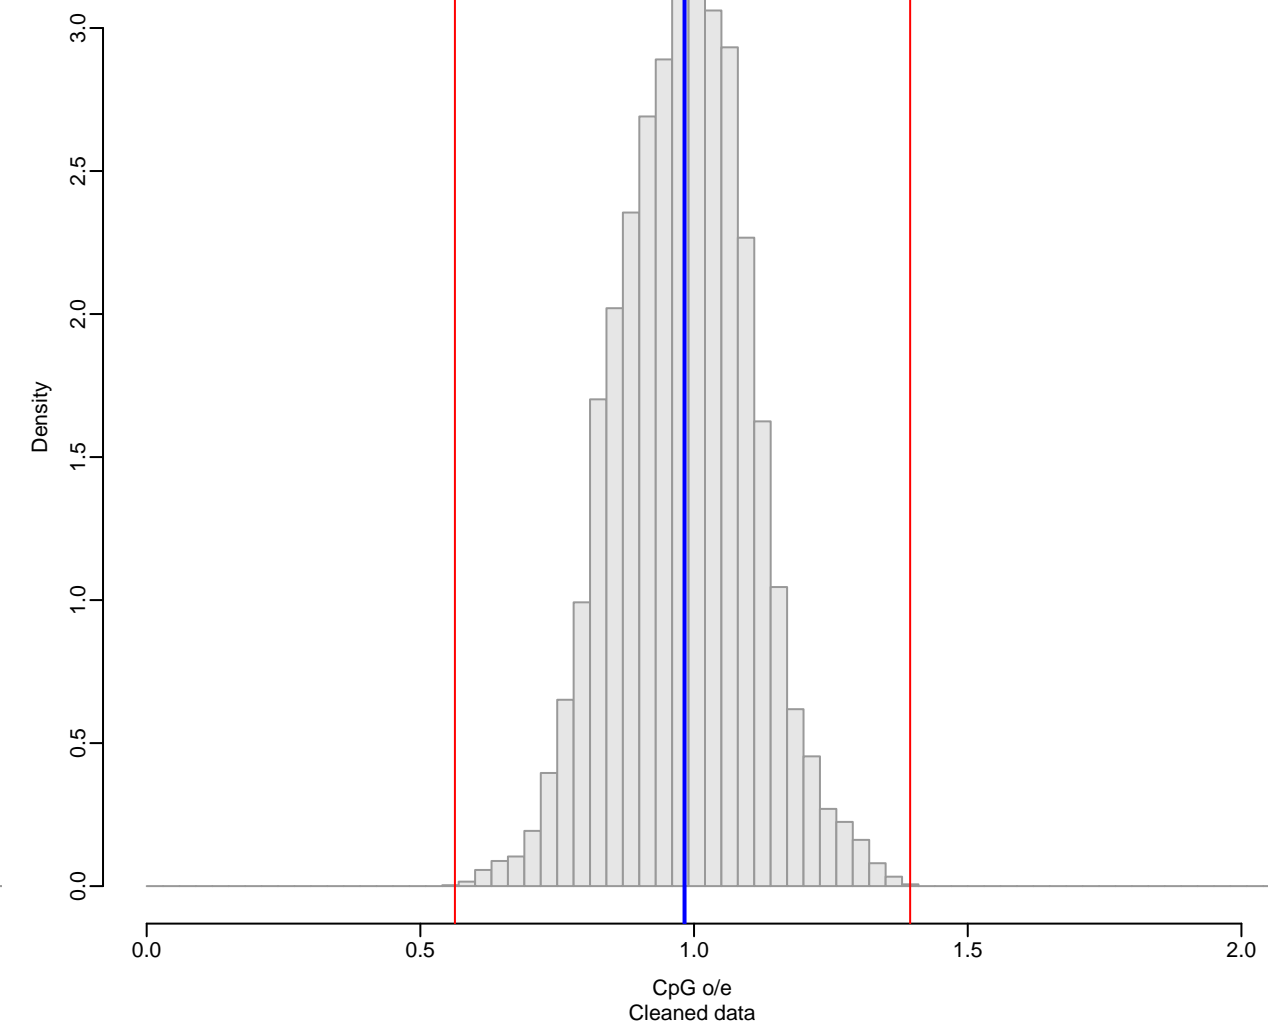

Postia\_placenta

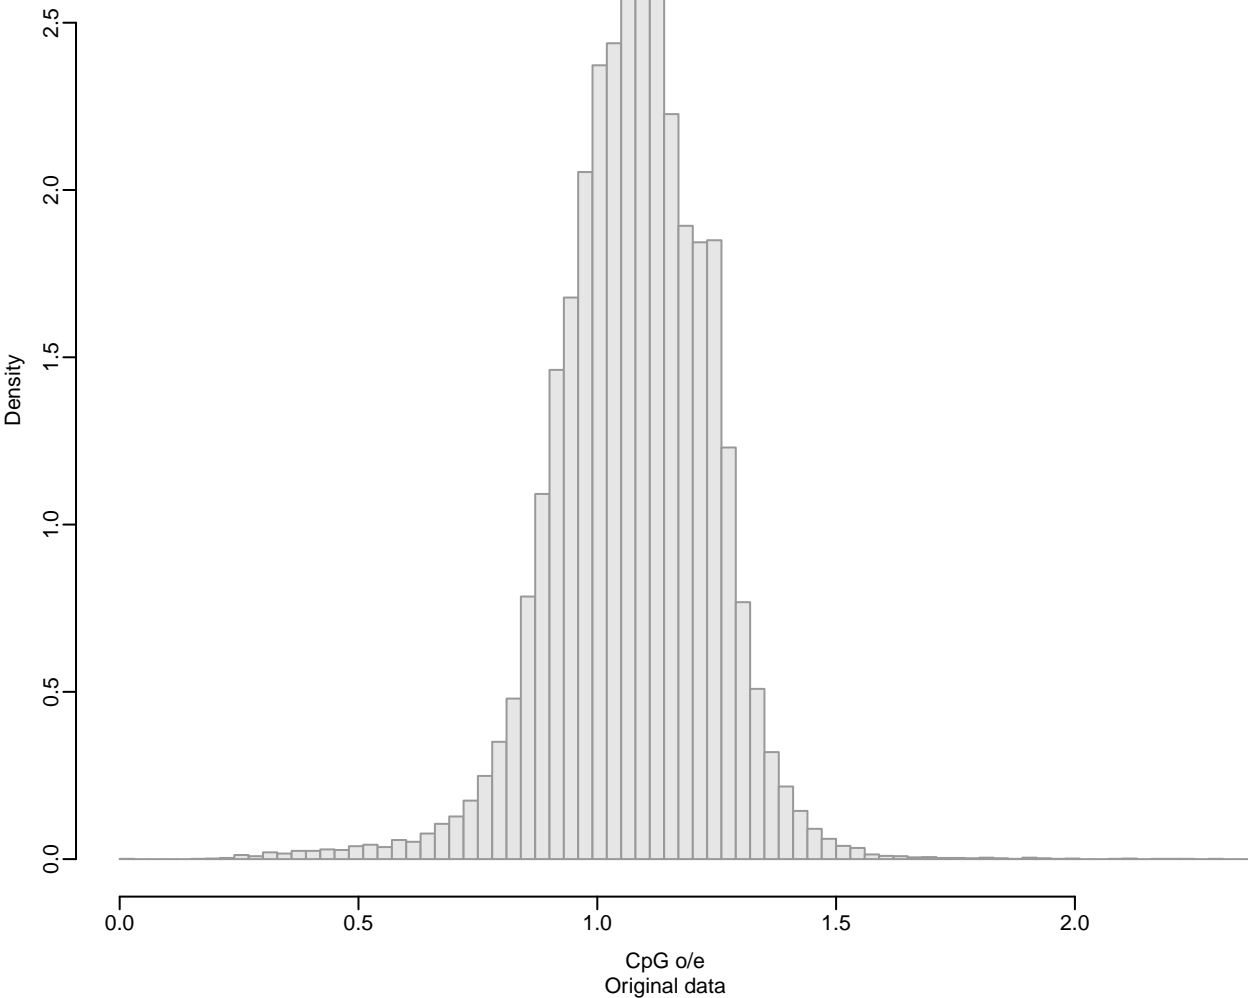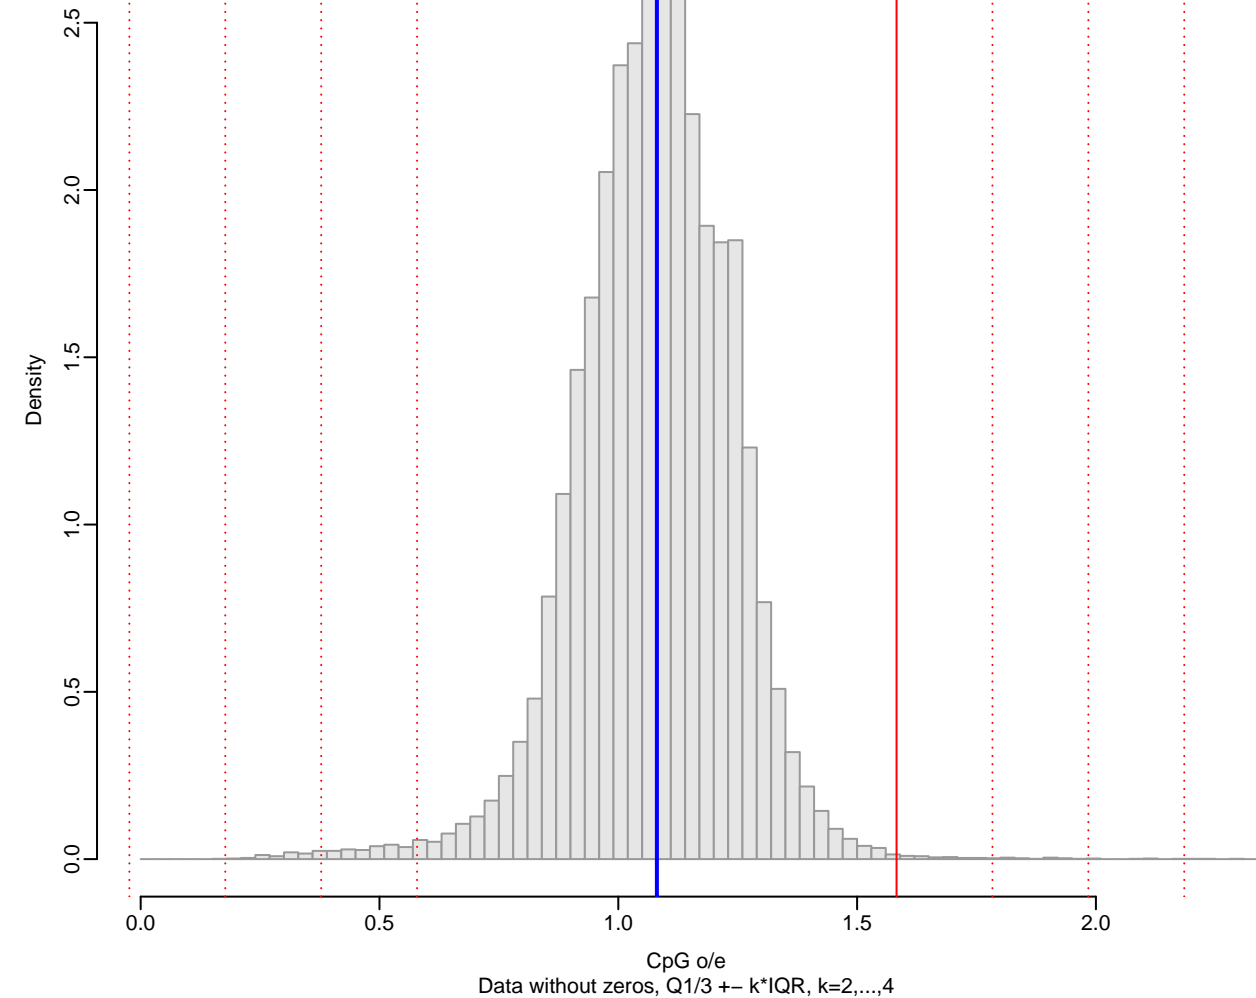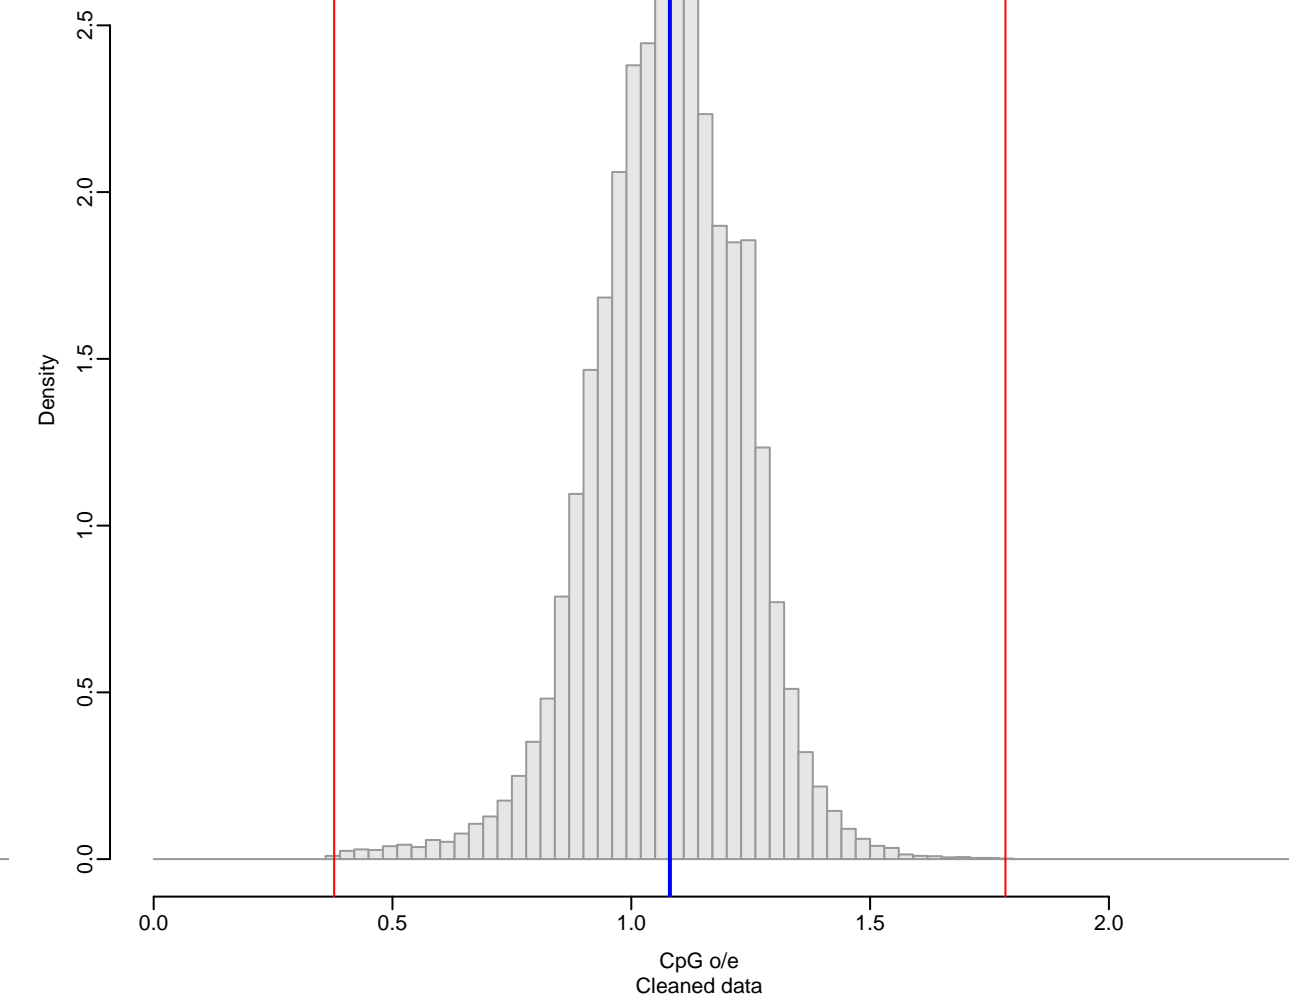



Pristionchus\_pacificus

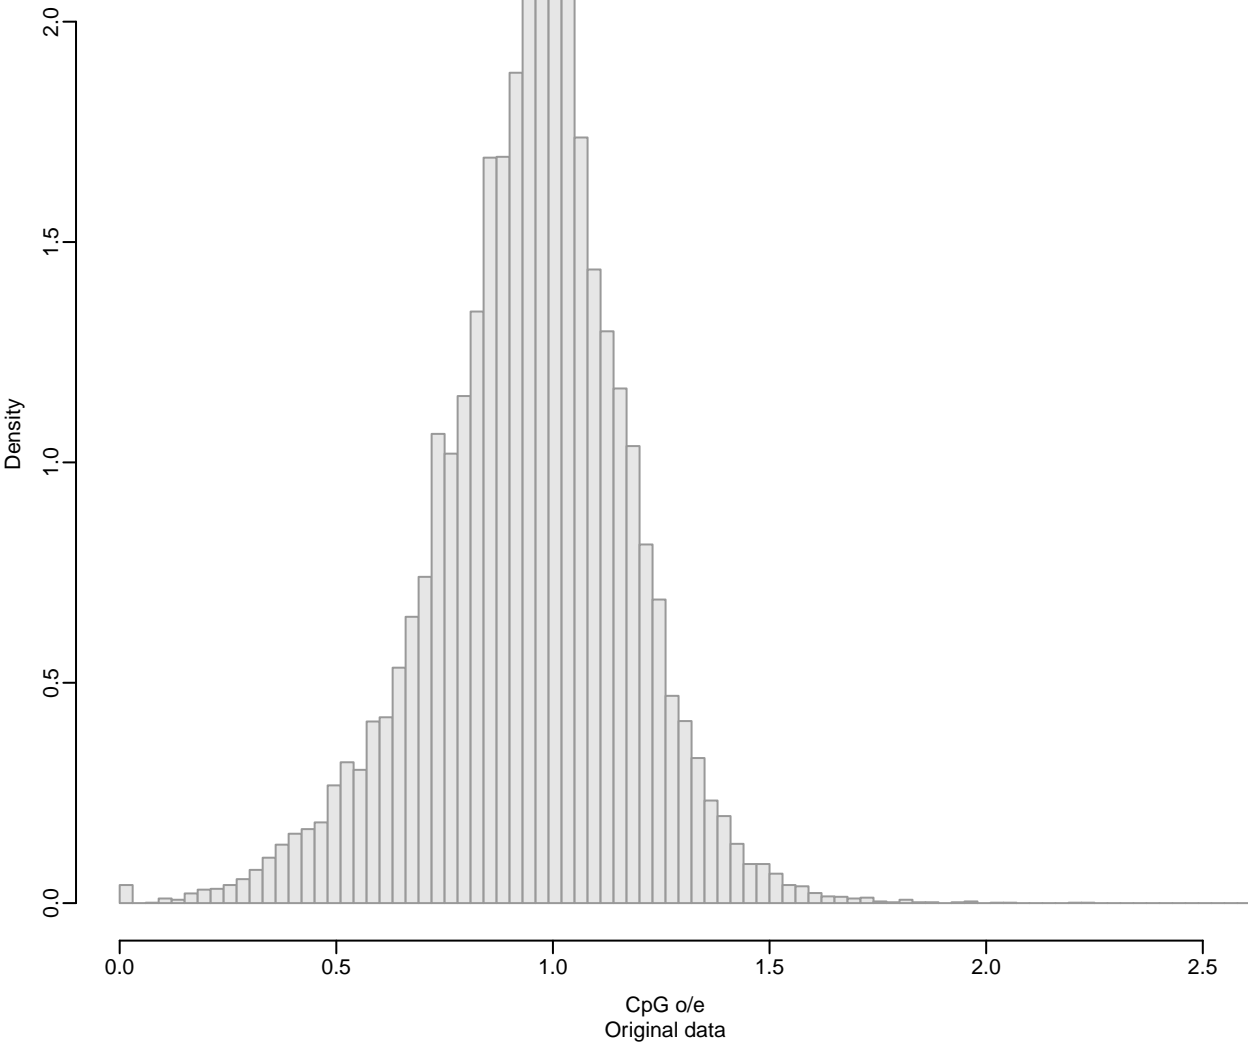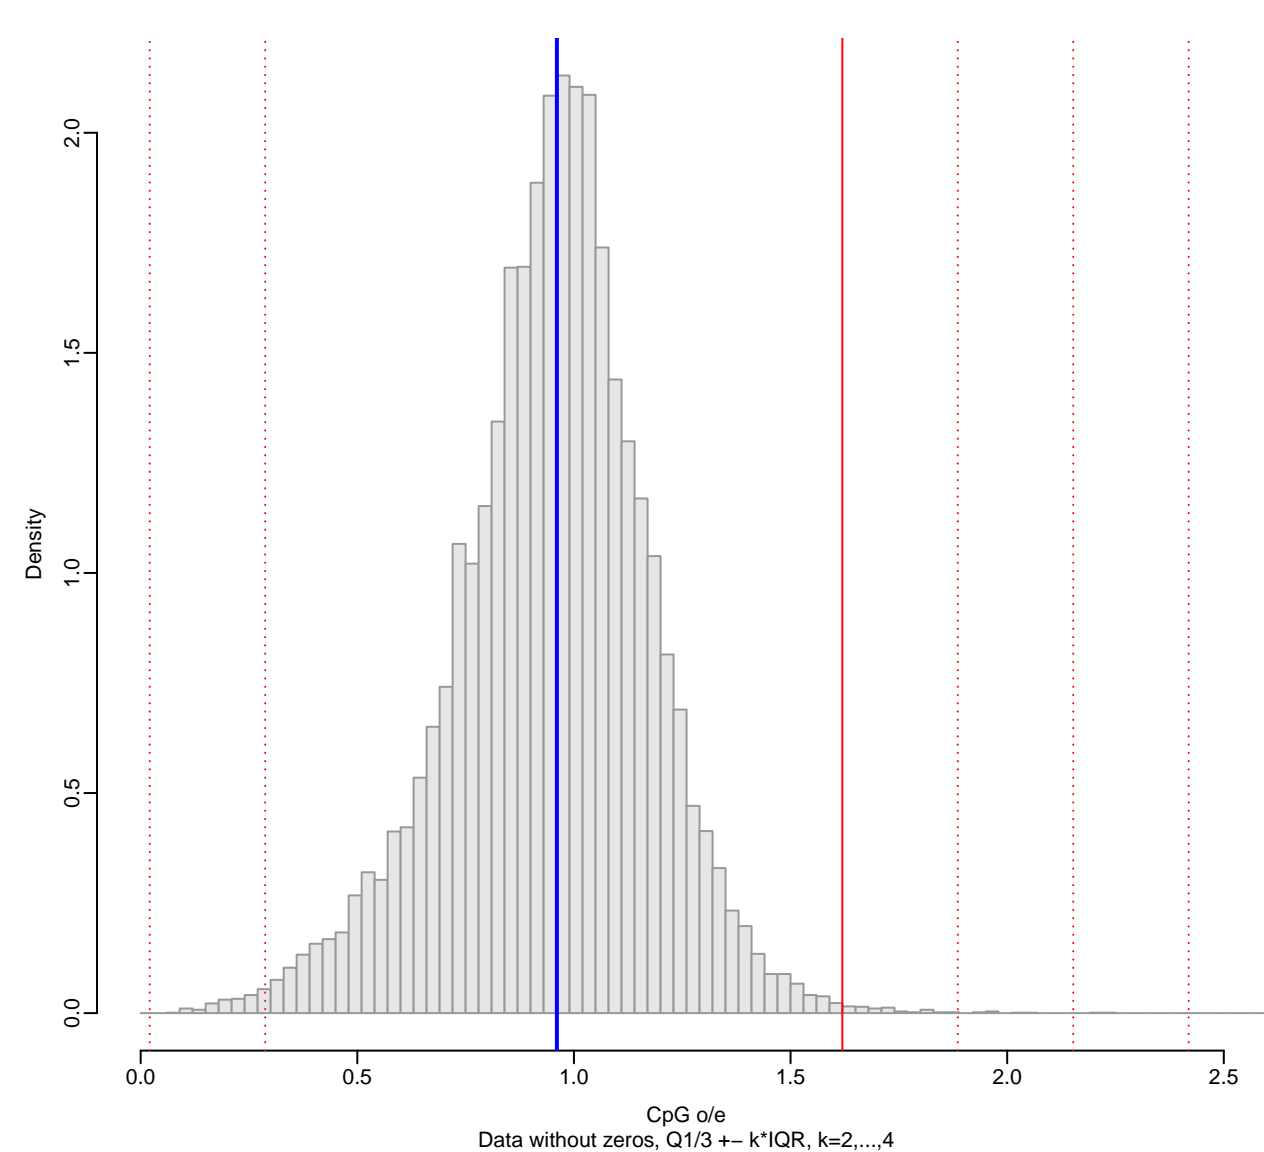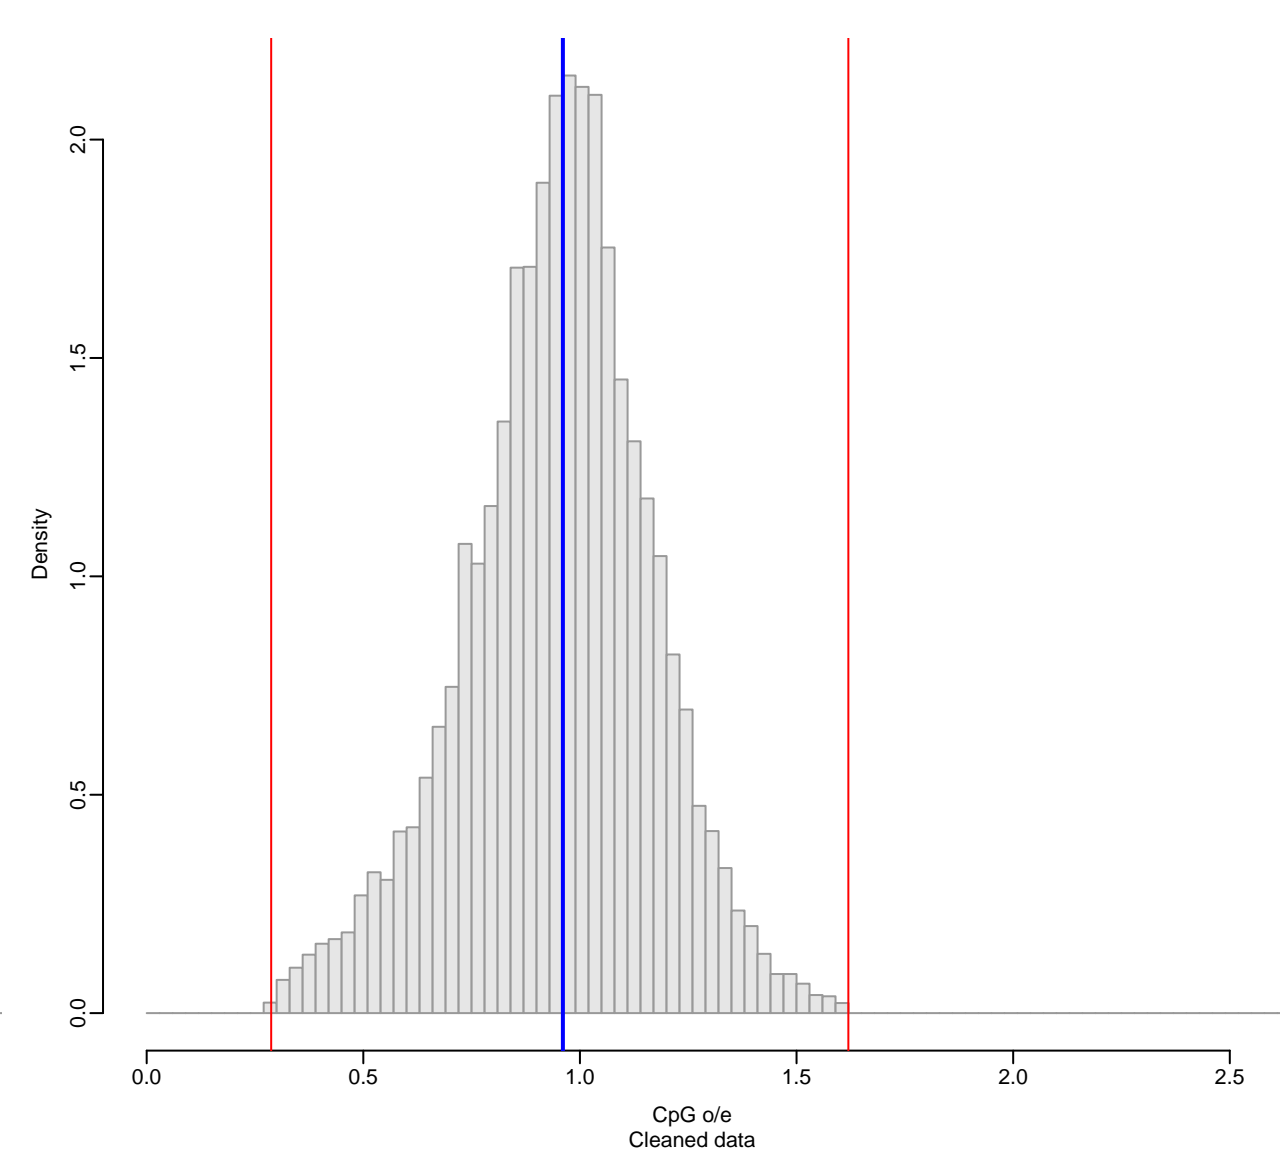

Prunus\_armeniaca

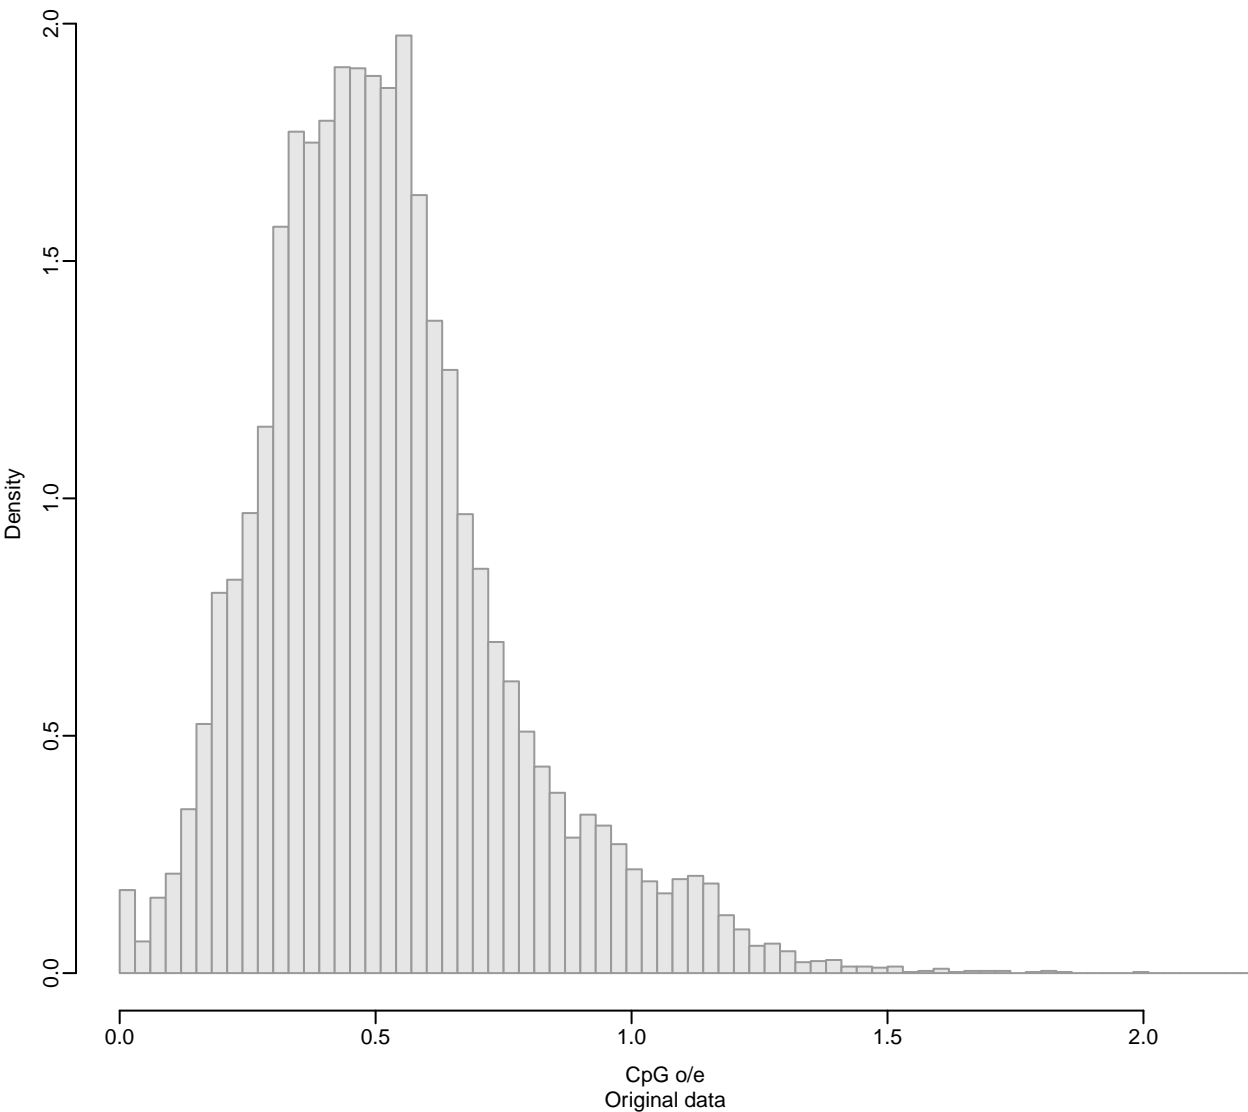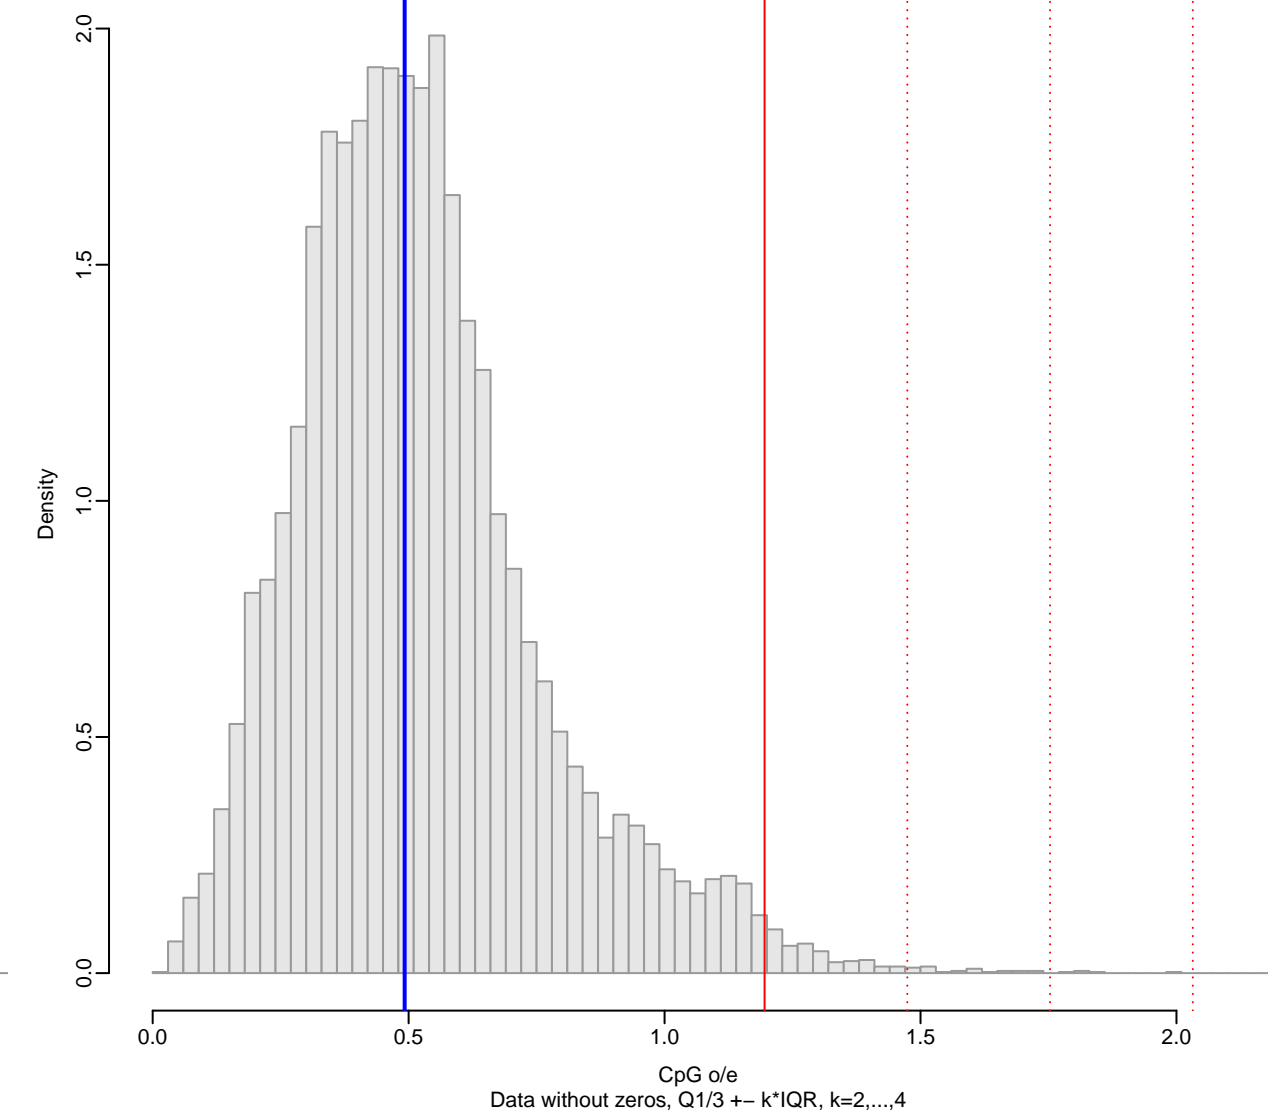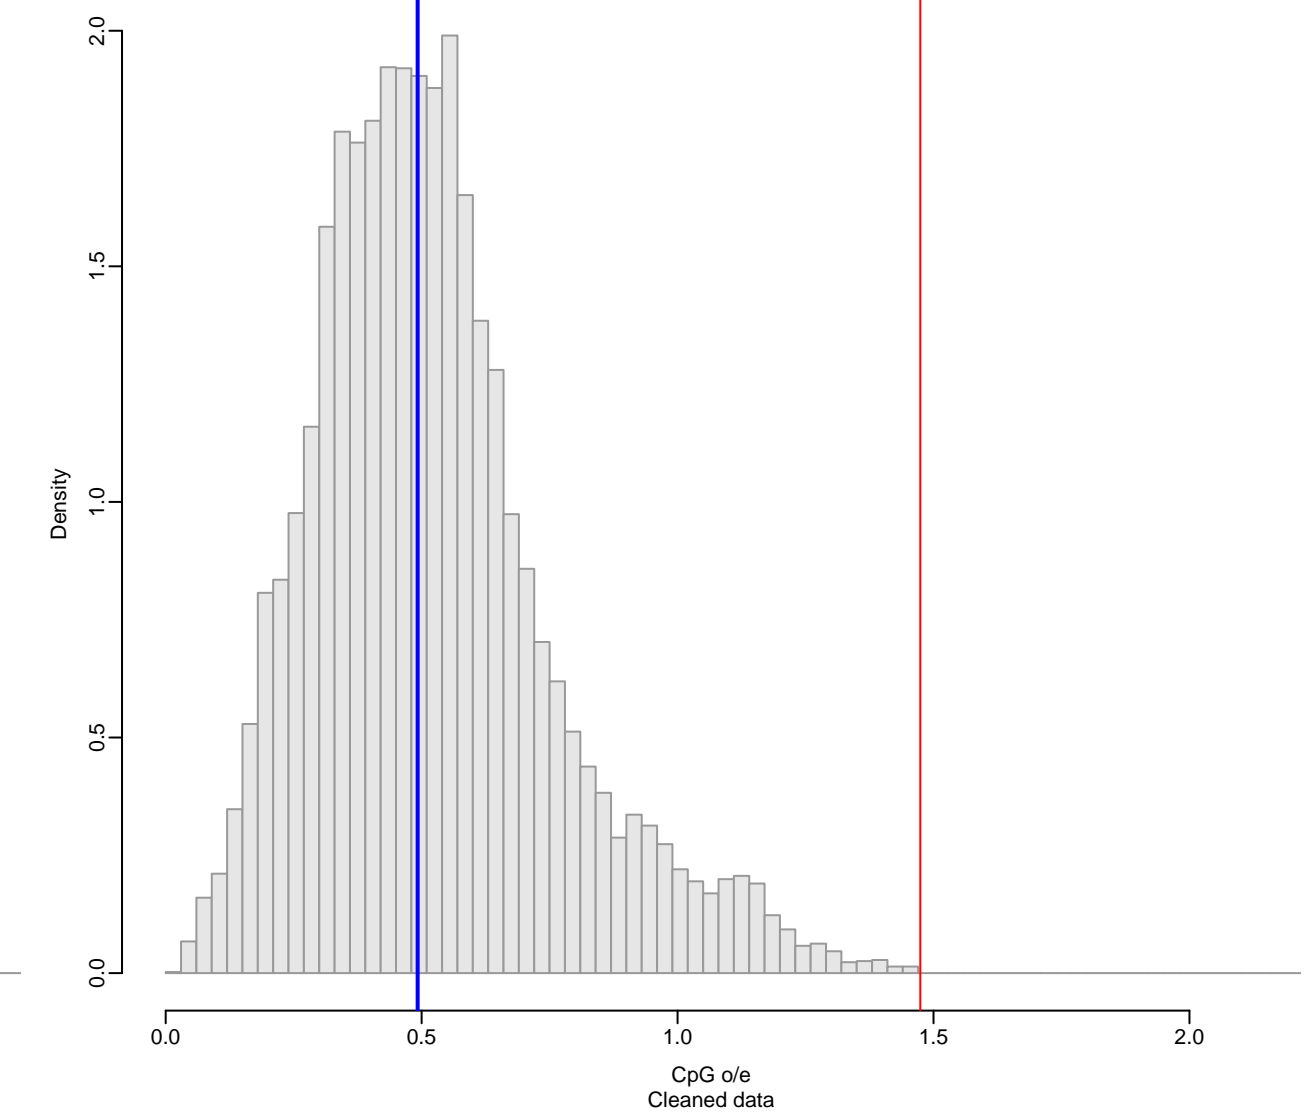

Prunus\_persica

Density

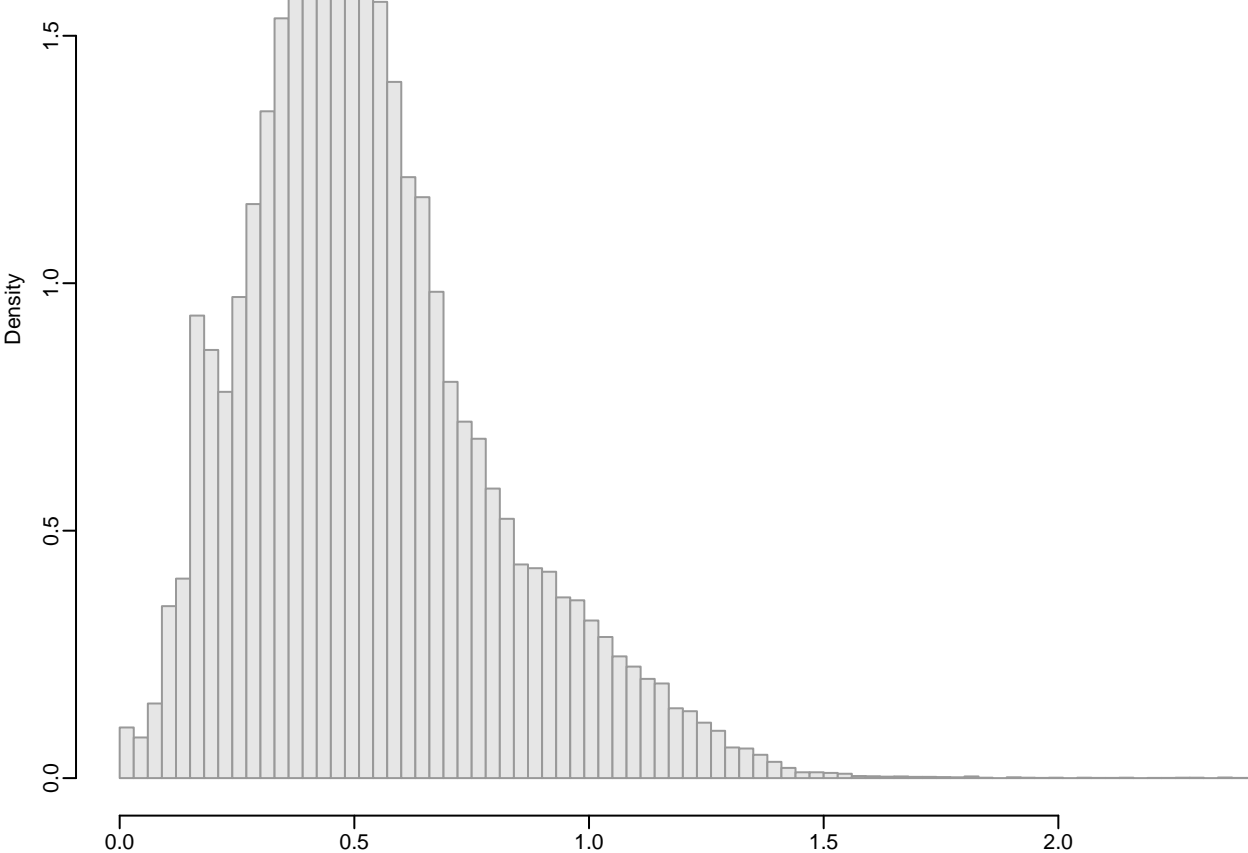

Density

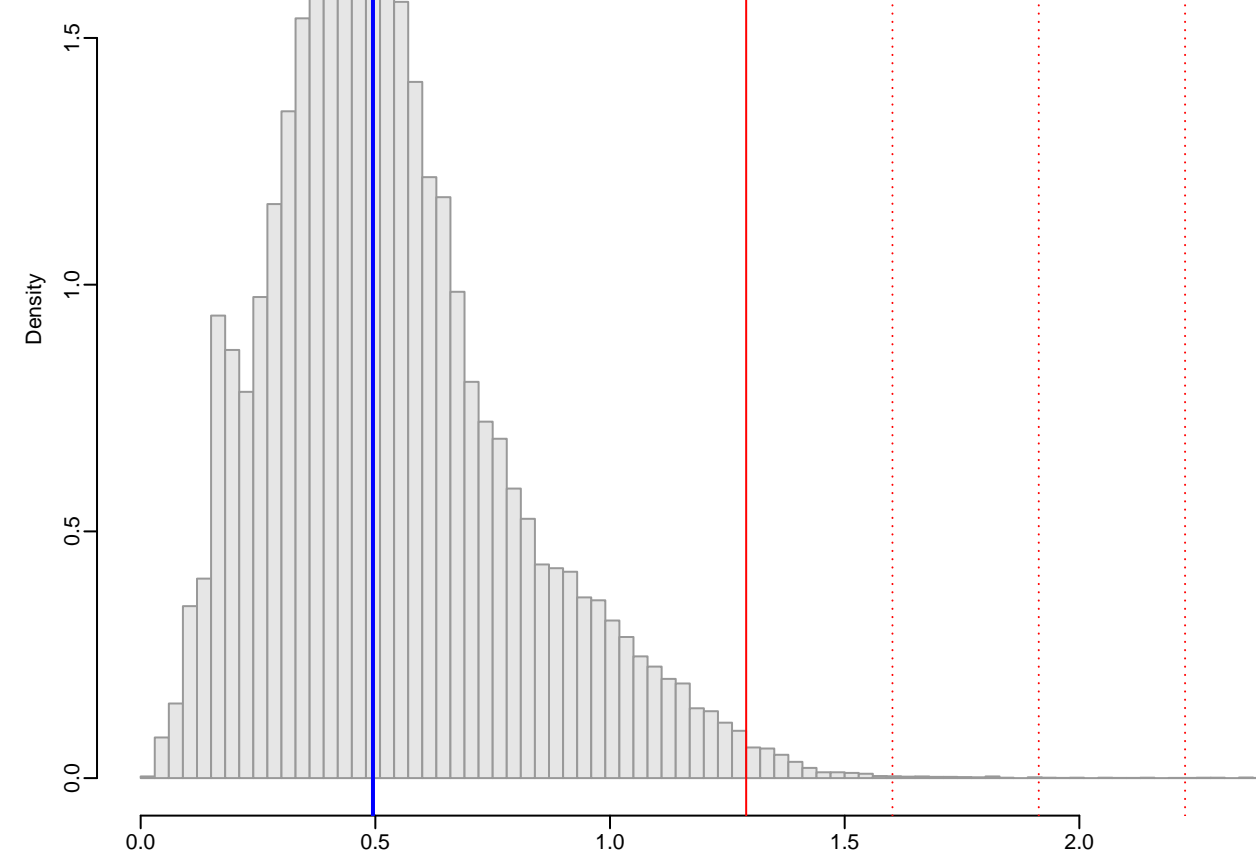

Density

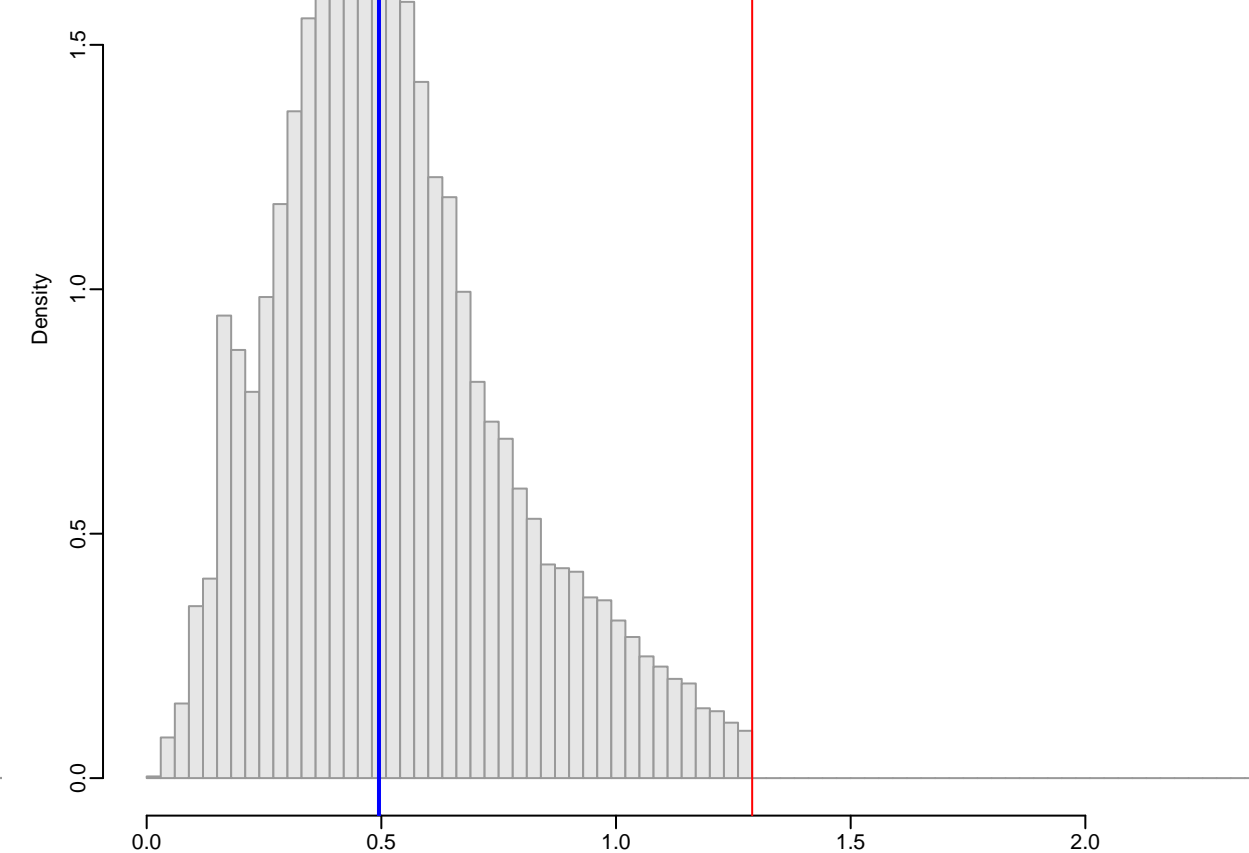

Prymnesium\_parvum

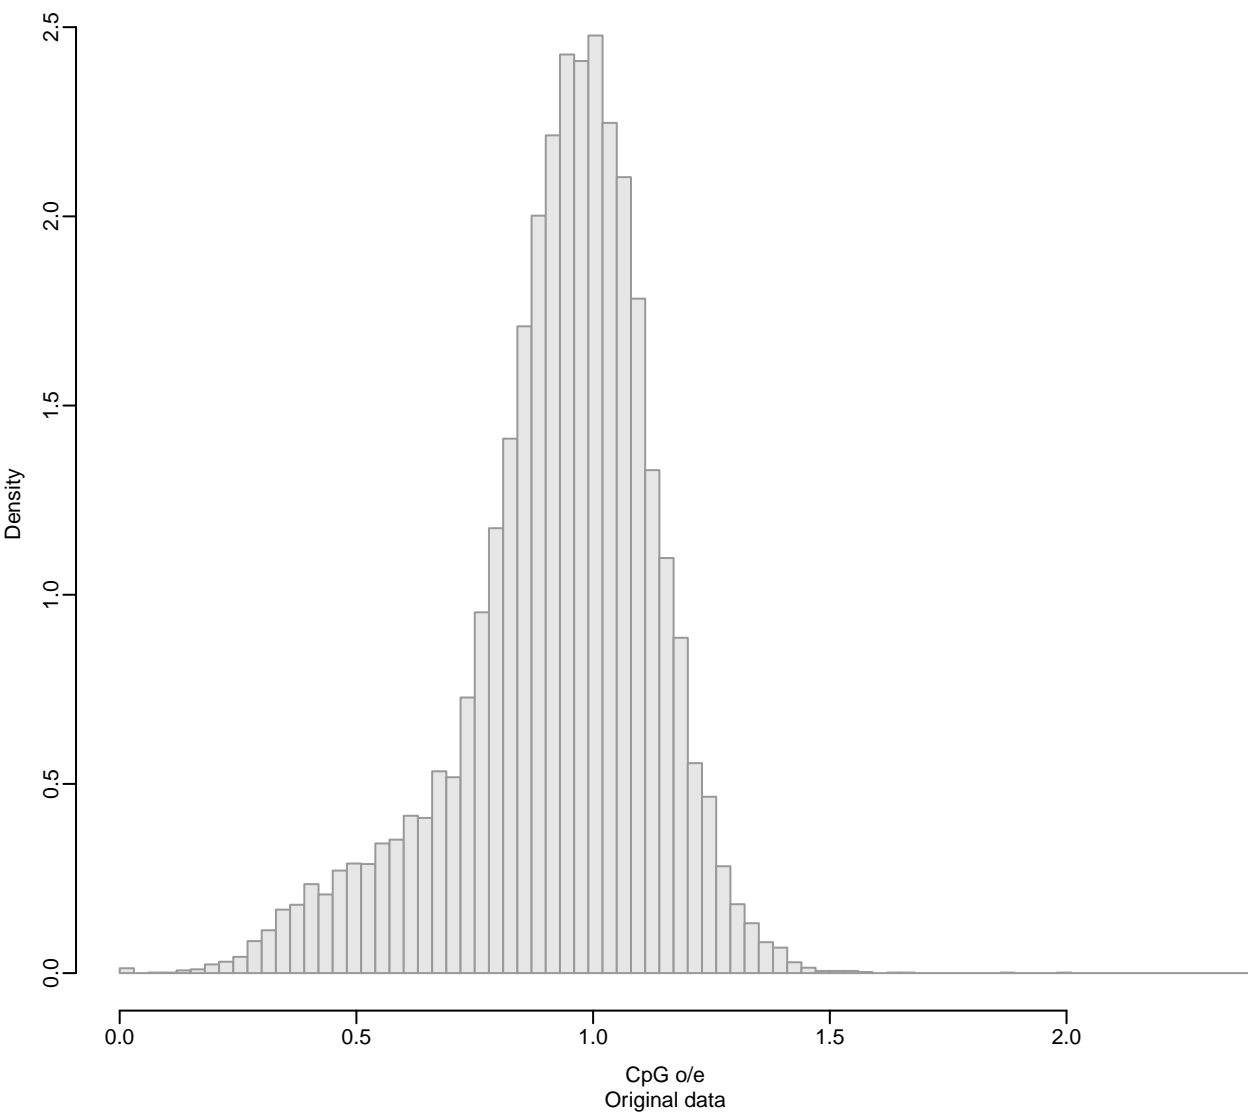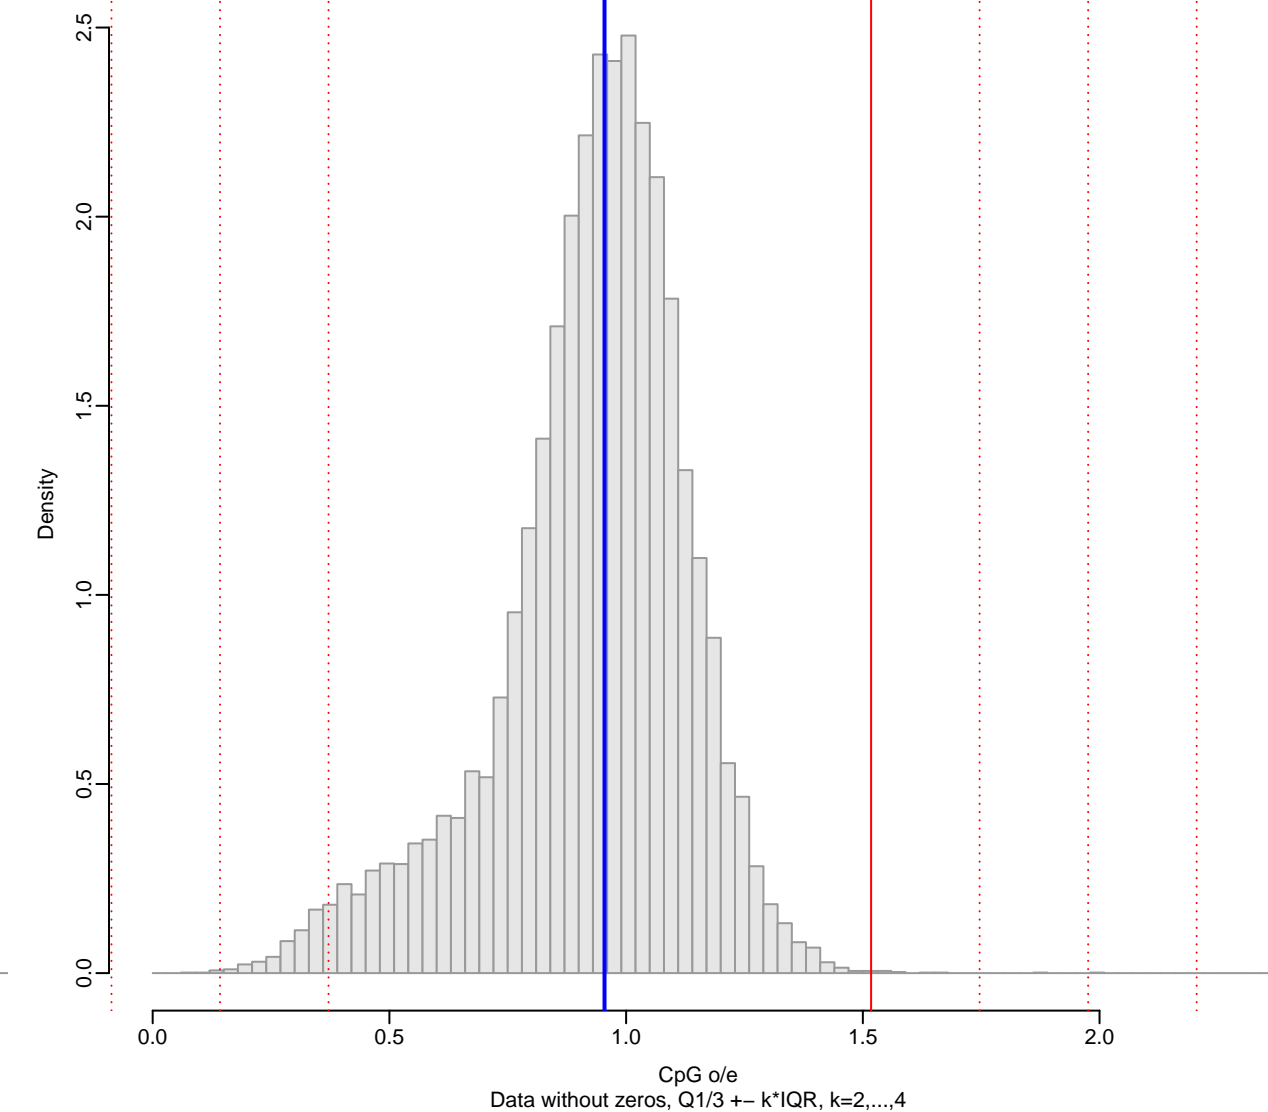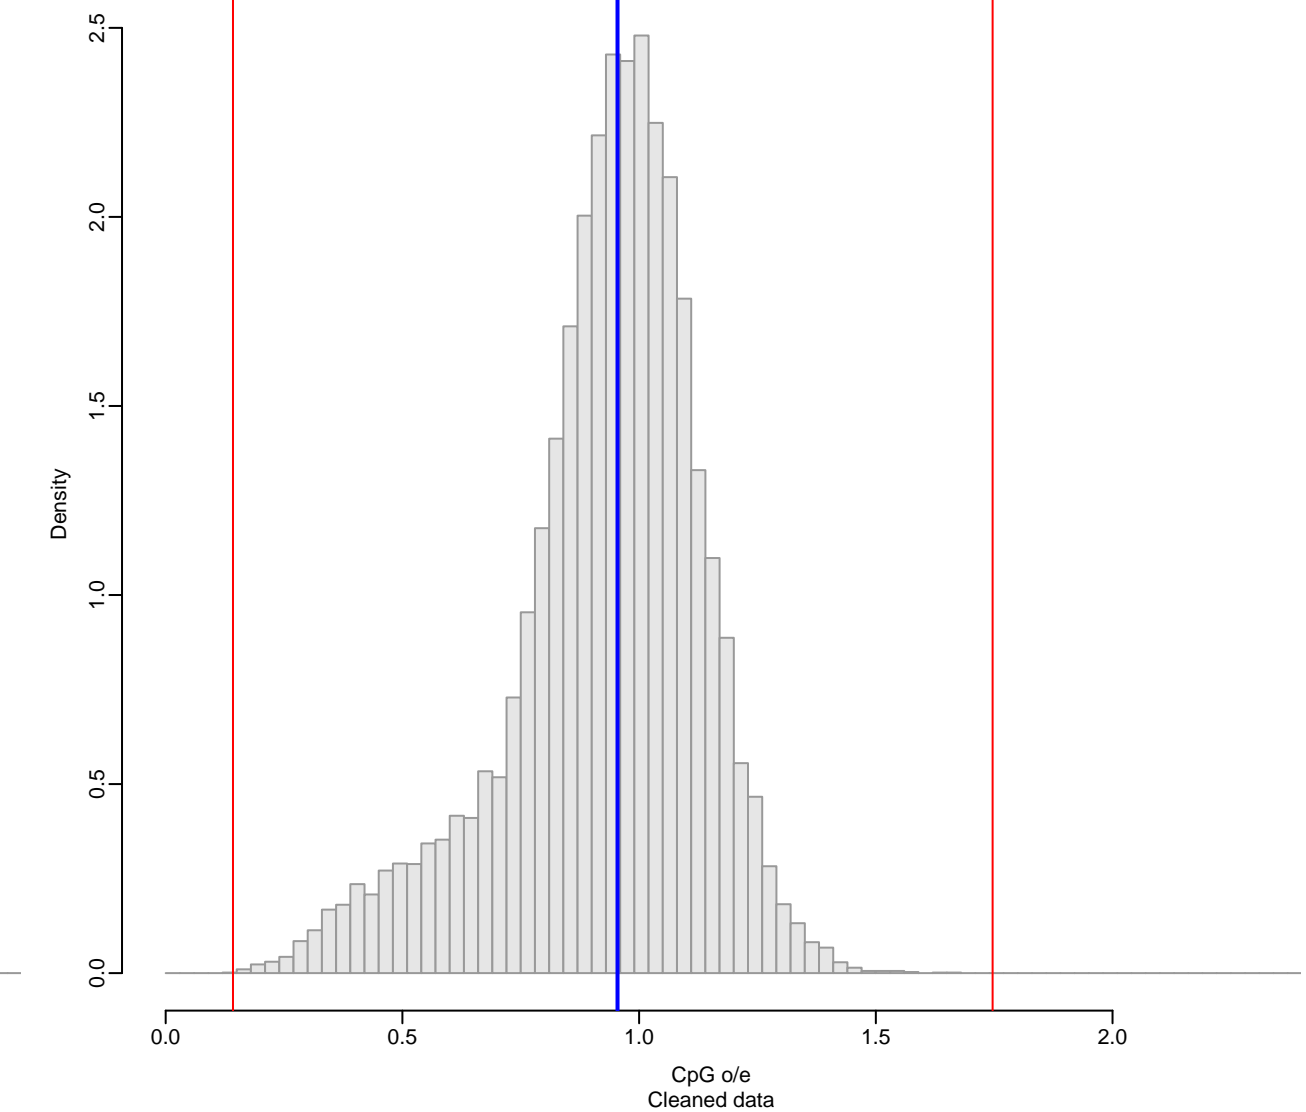

Psetta\_maxima

Density

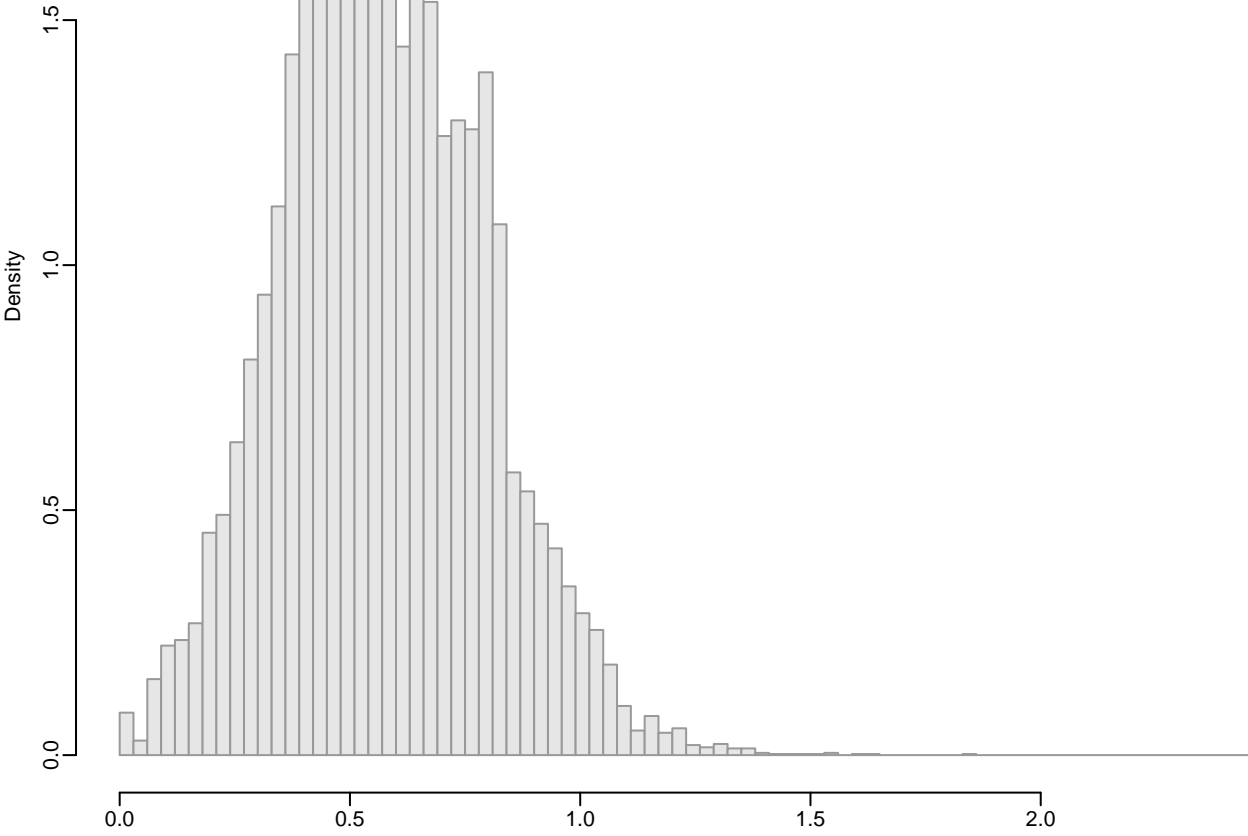

CpG o/e  
Original data

Density

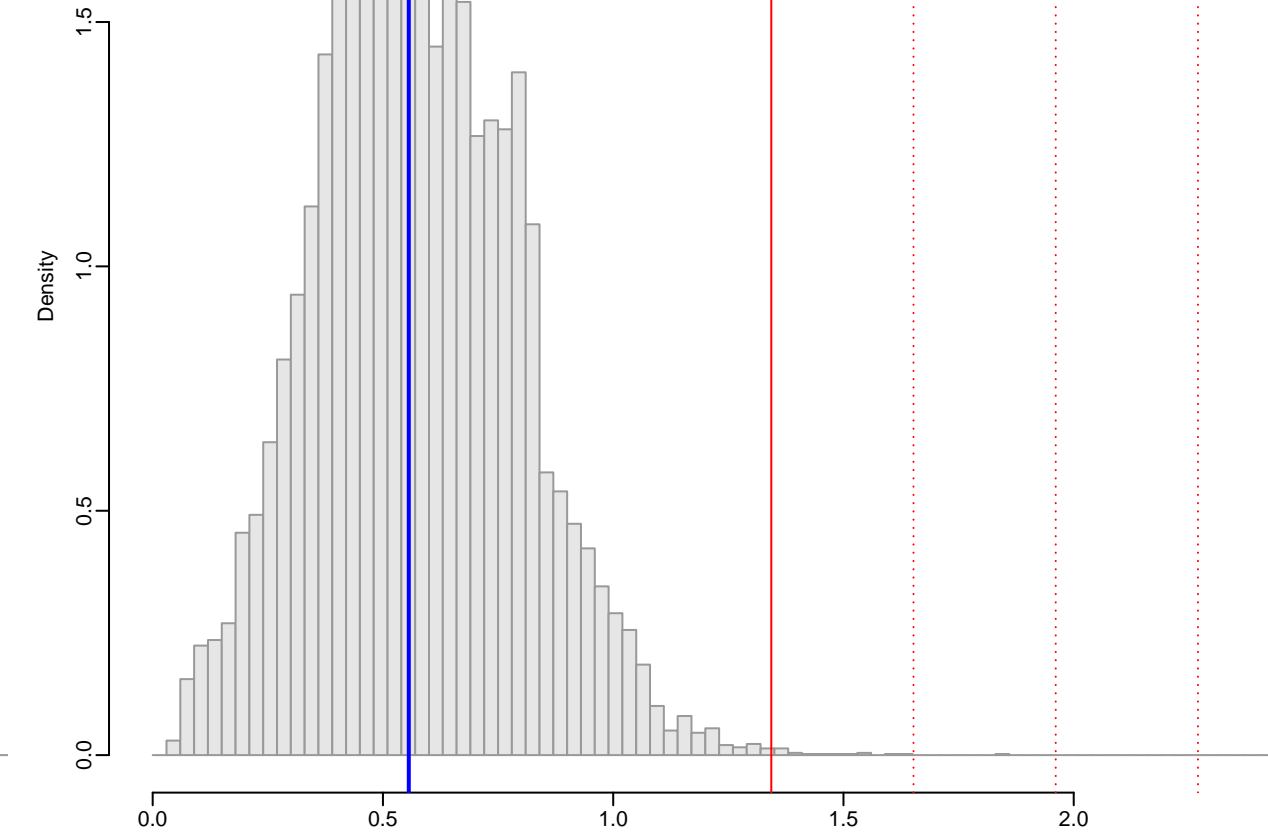

CpG o/e  
Data without zeros,  $Q1/3 \pm k \cdot IQR$ ,  $k=2, \dots, 4$

Density

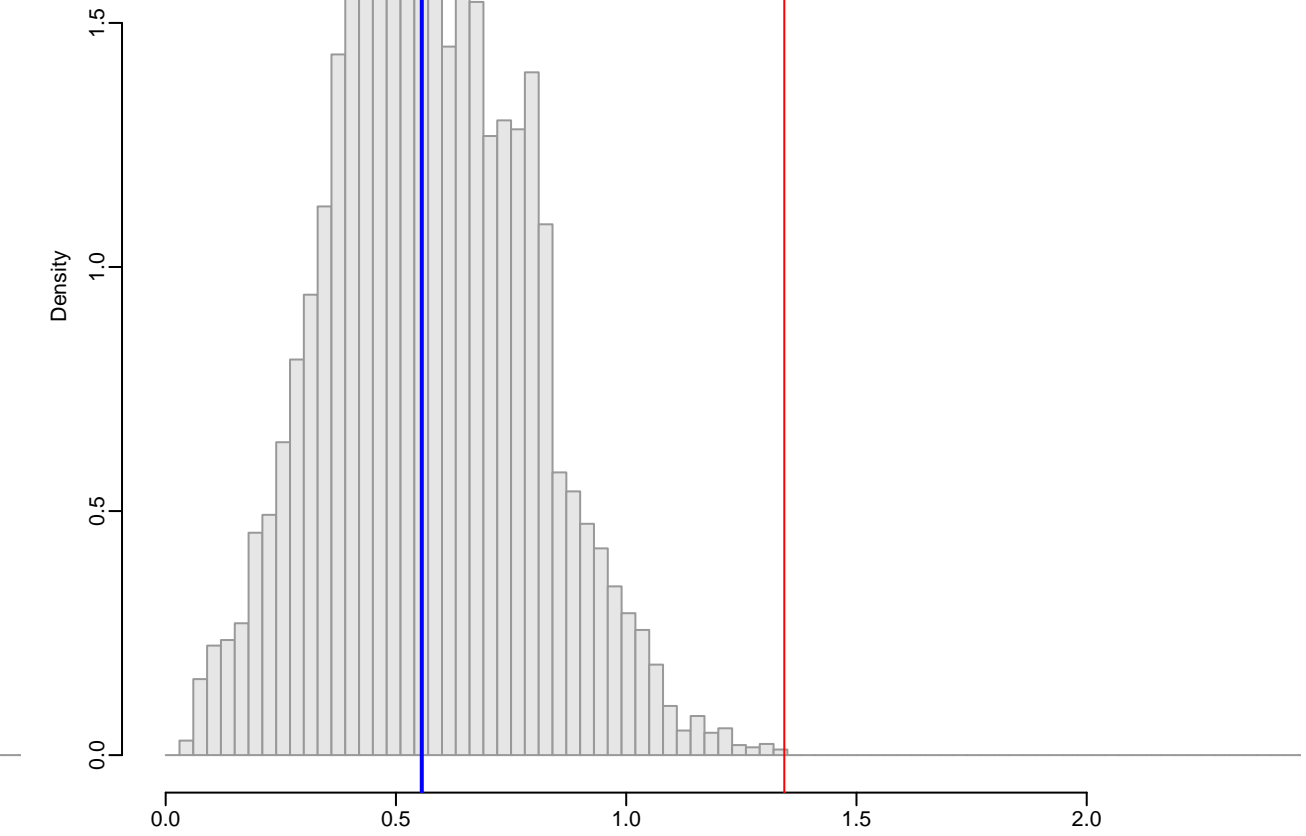

CpG o/e  
Cleaned data

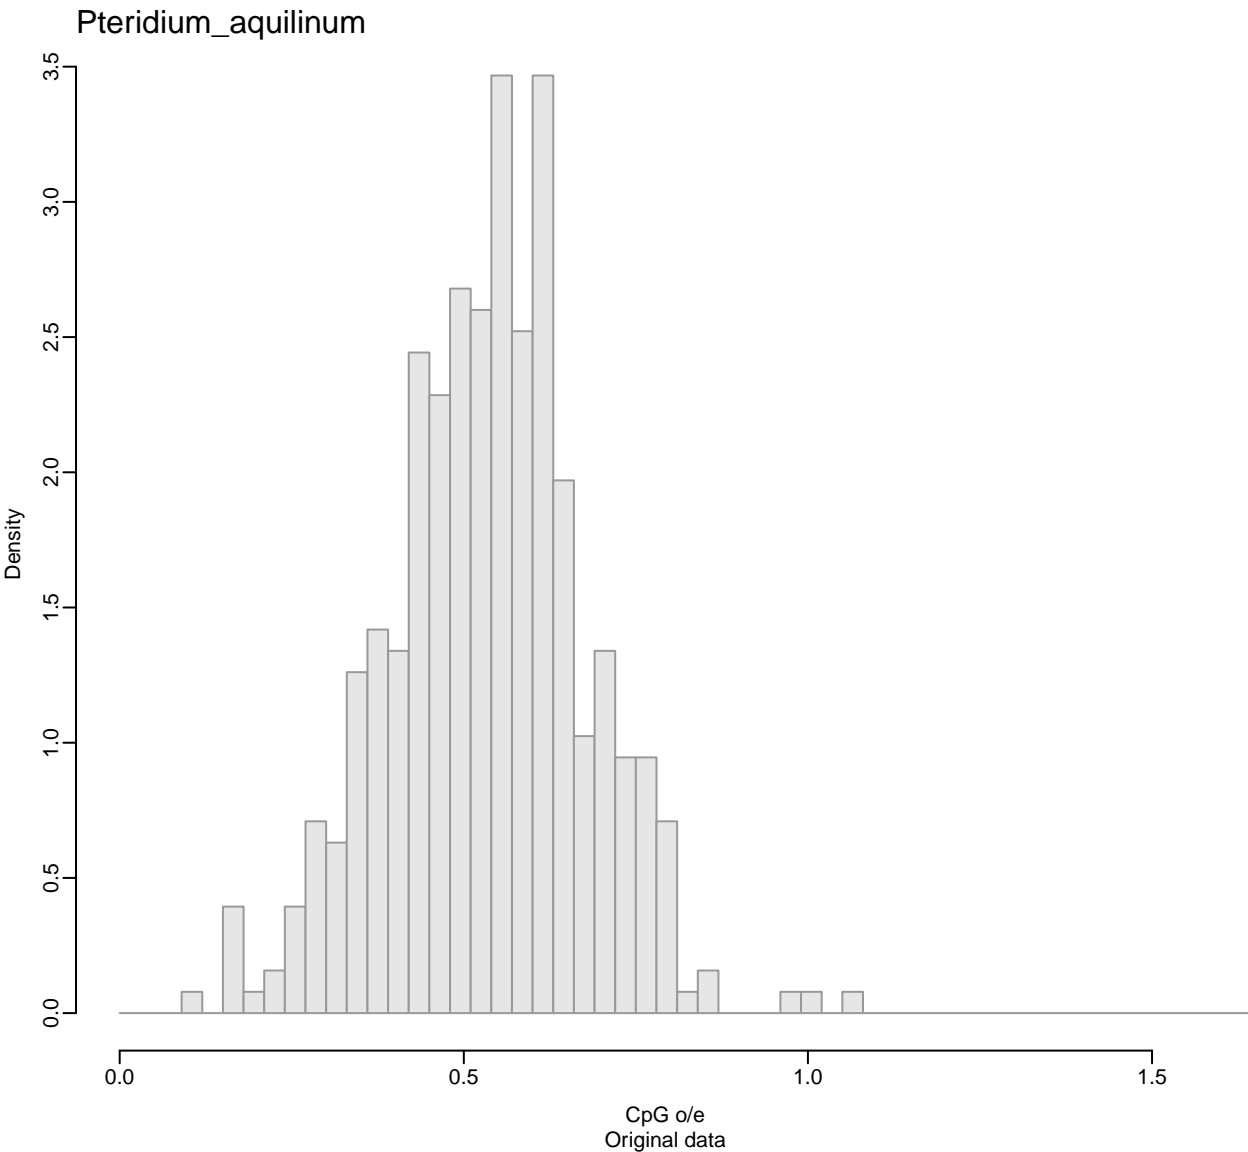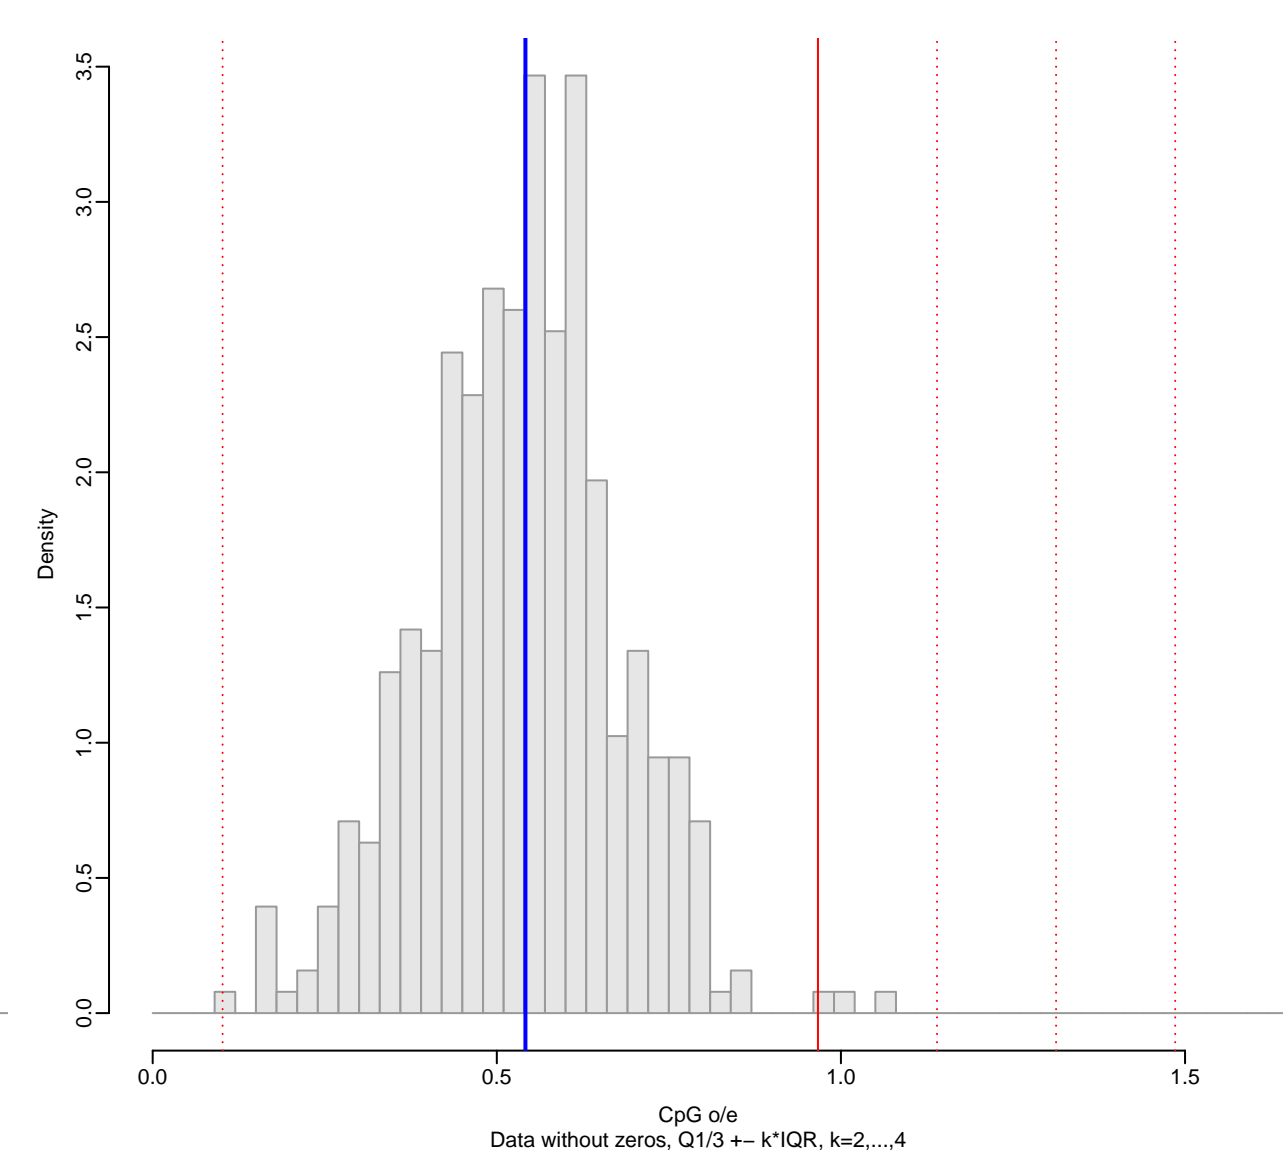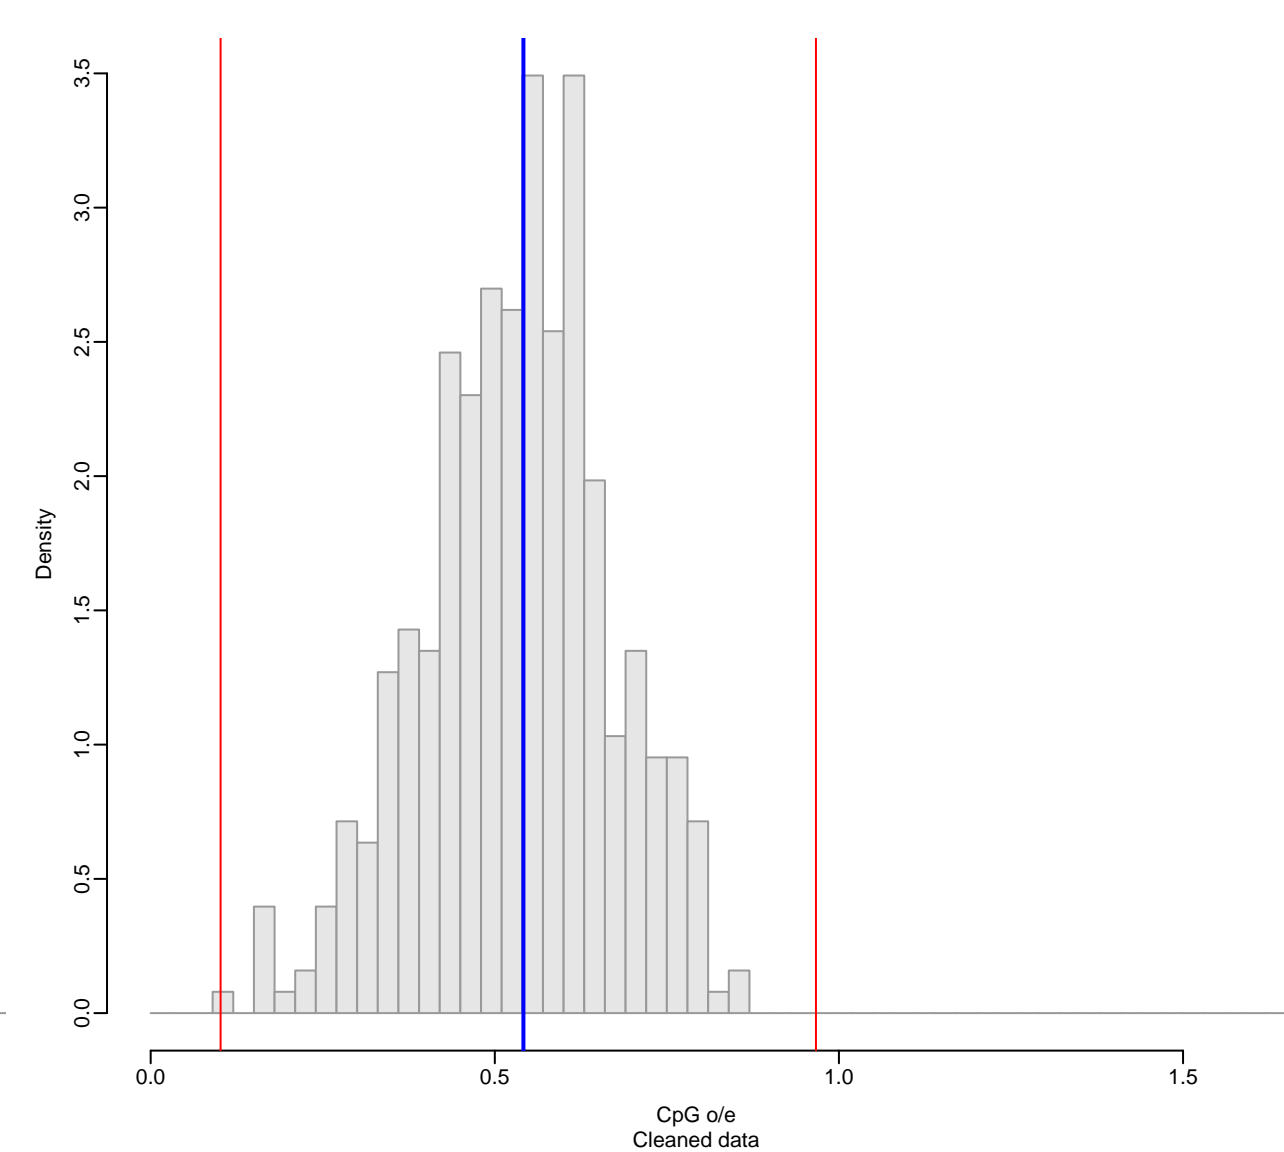

Quercus\_petraea

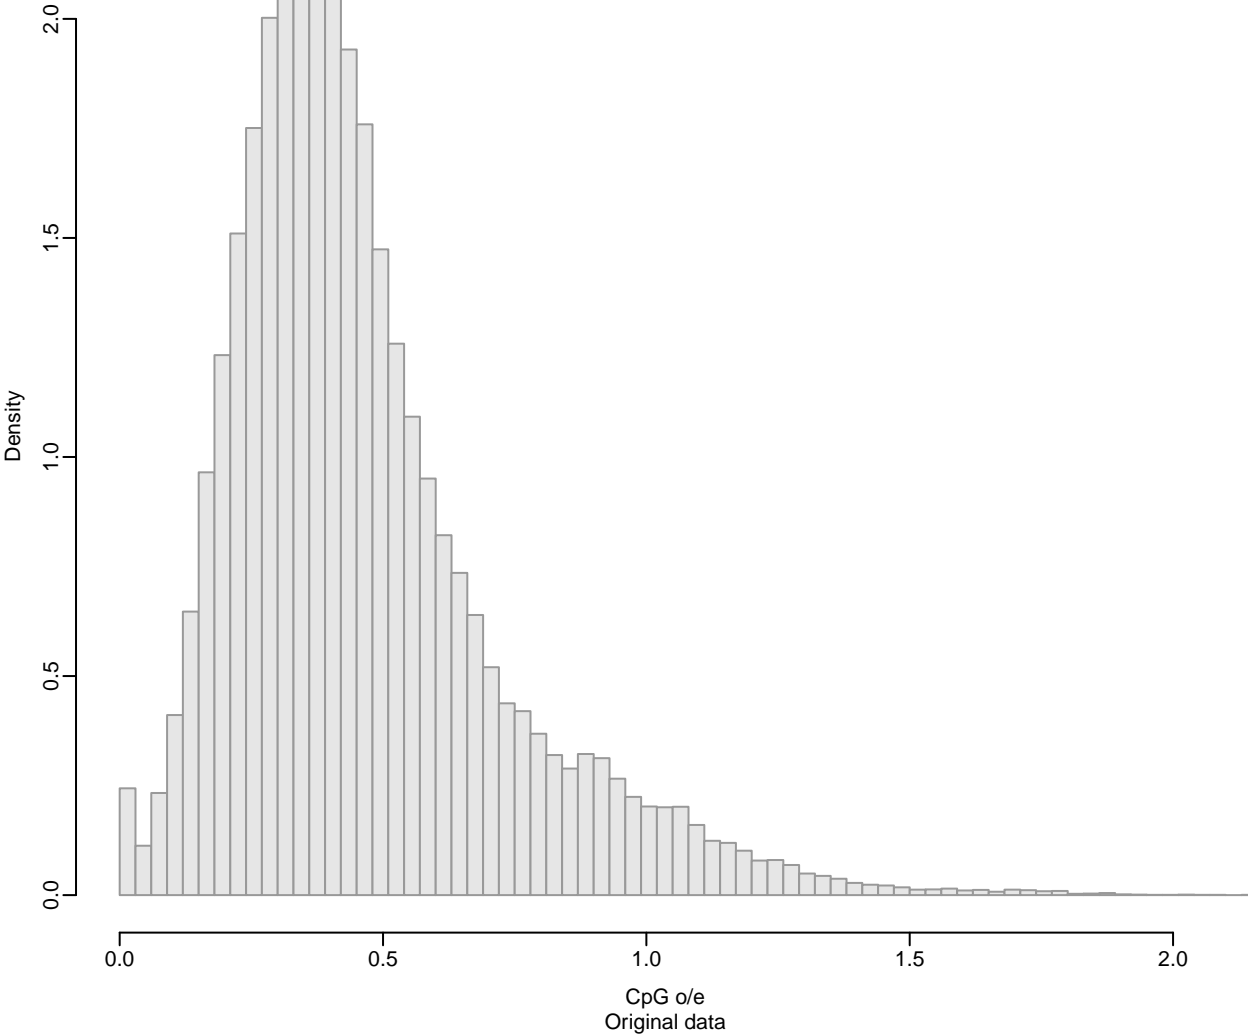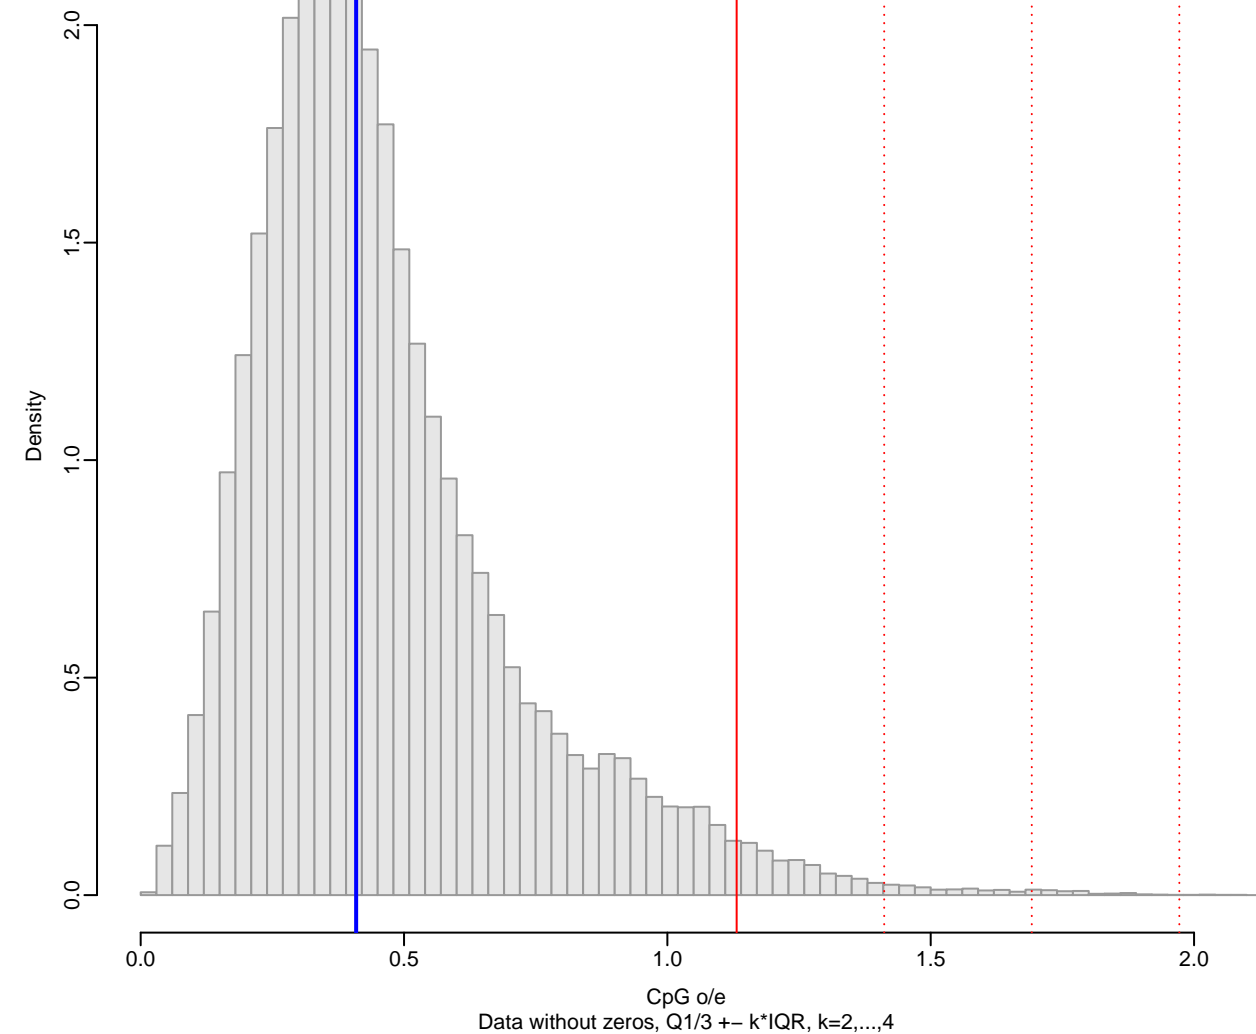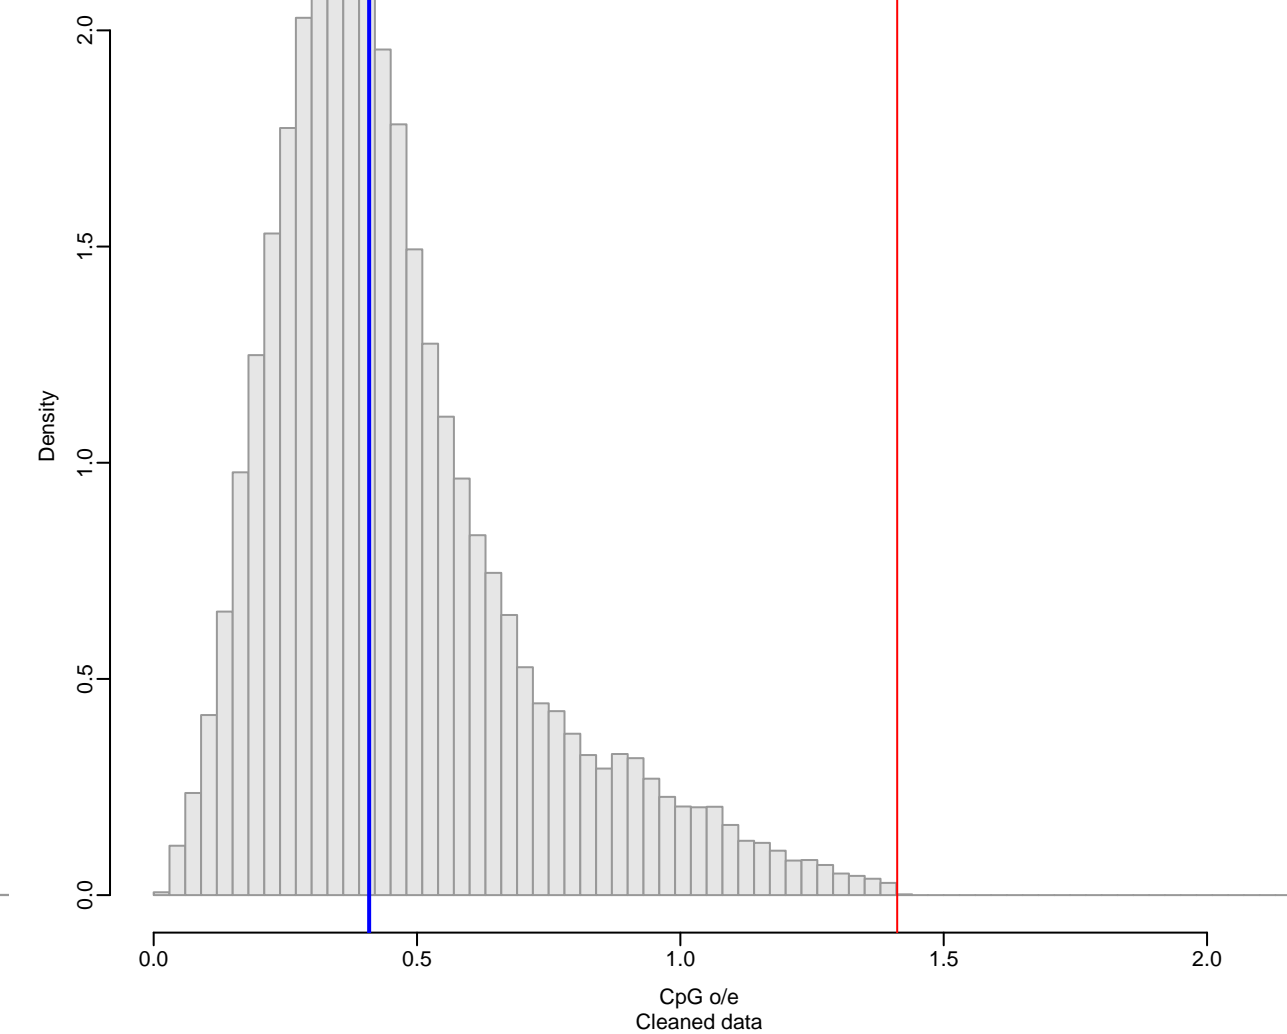

Quercus\_robur

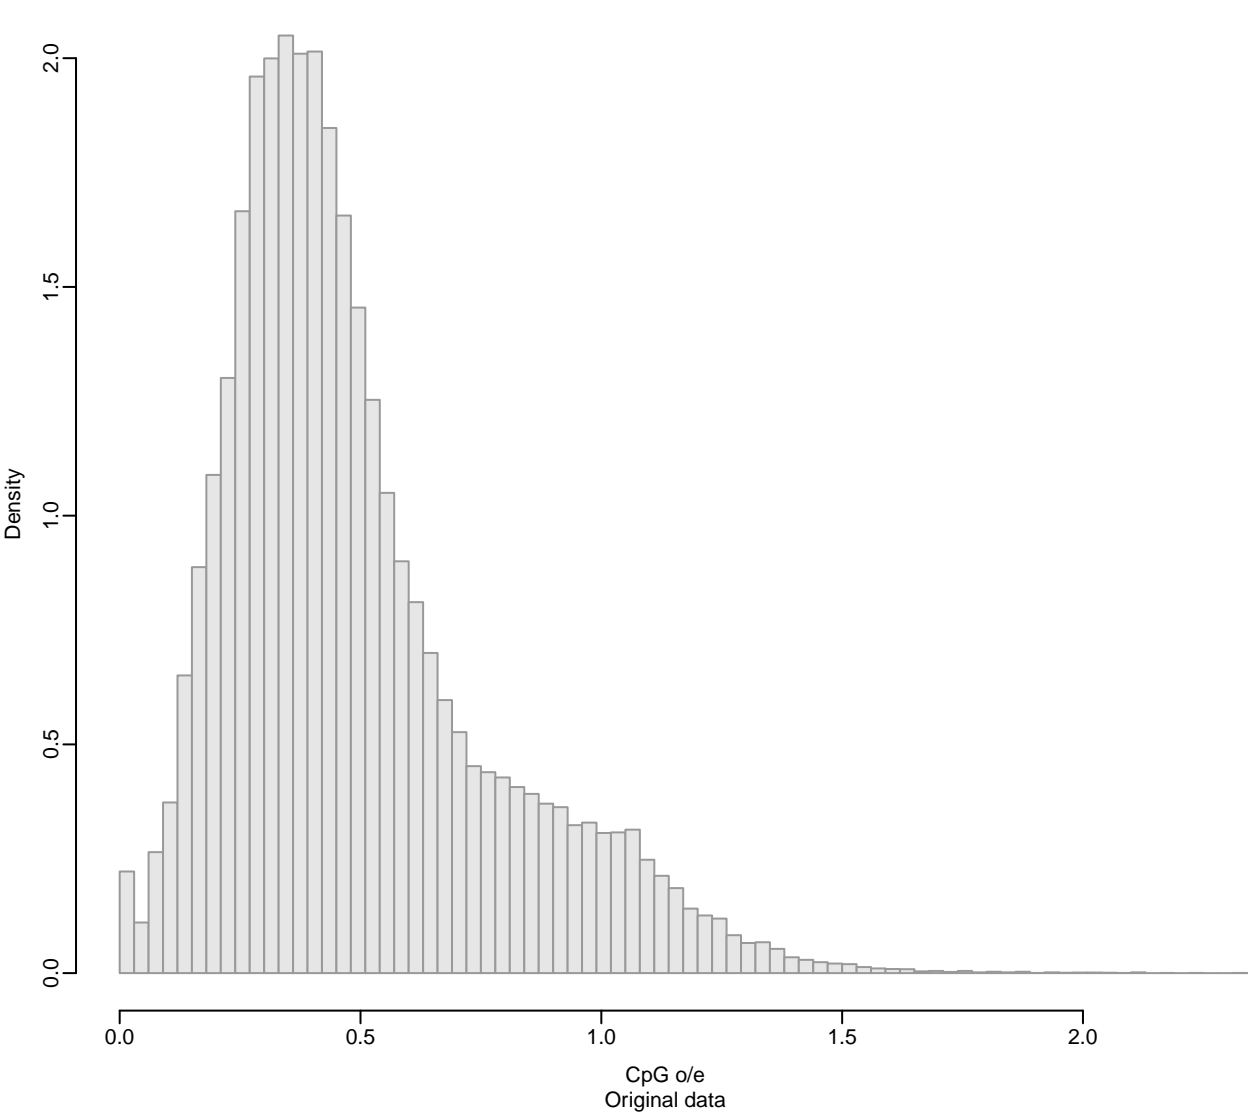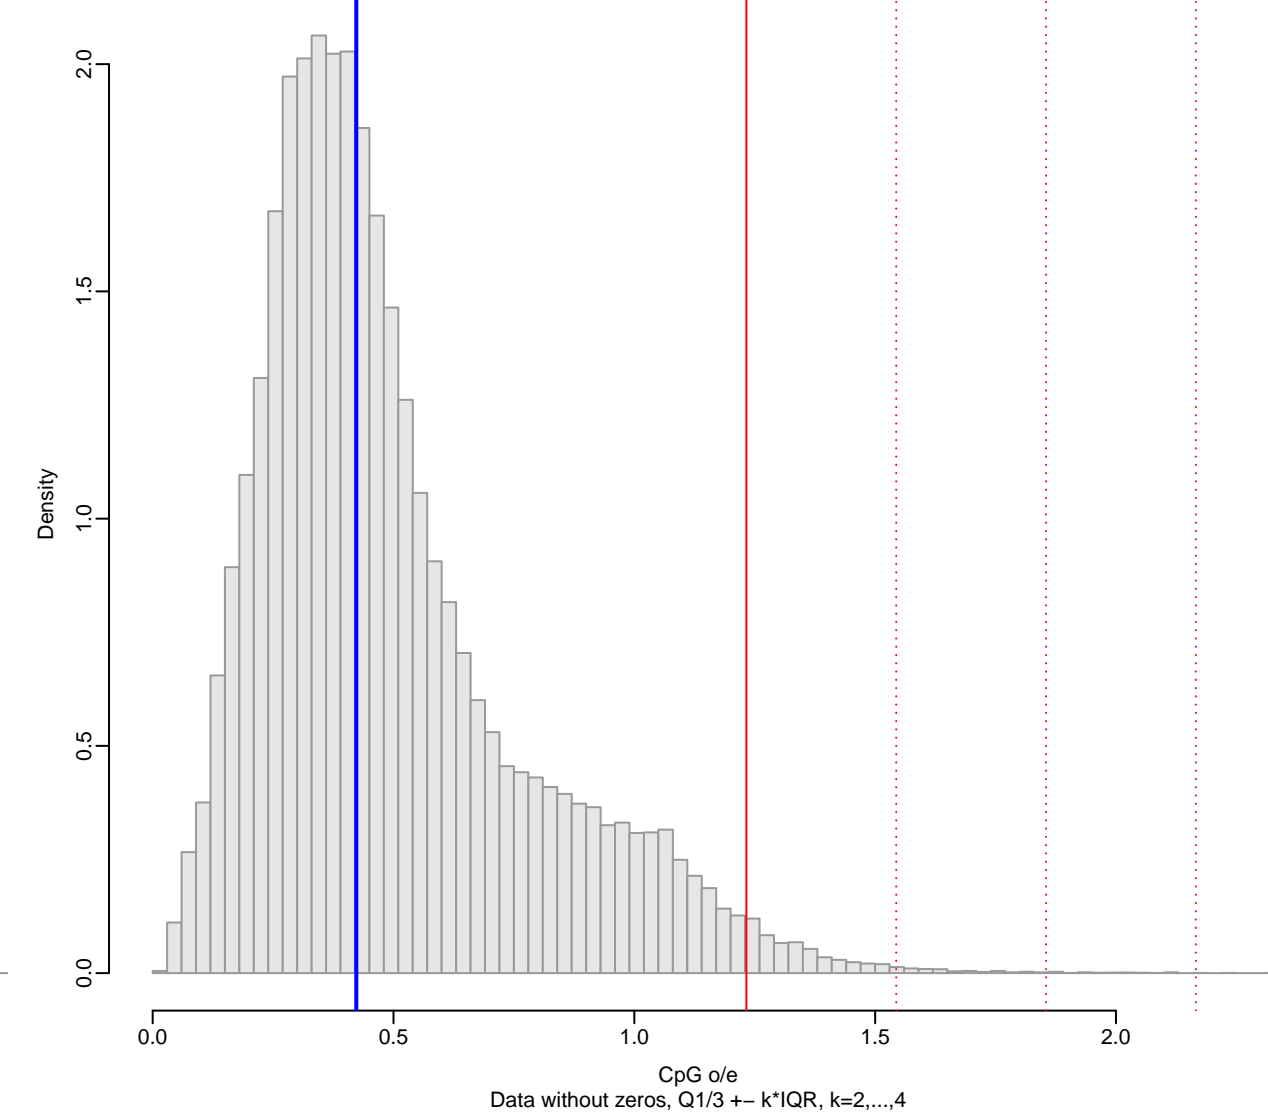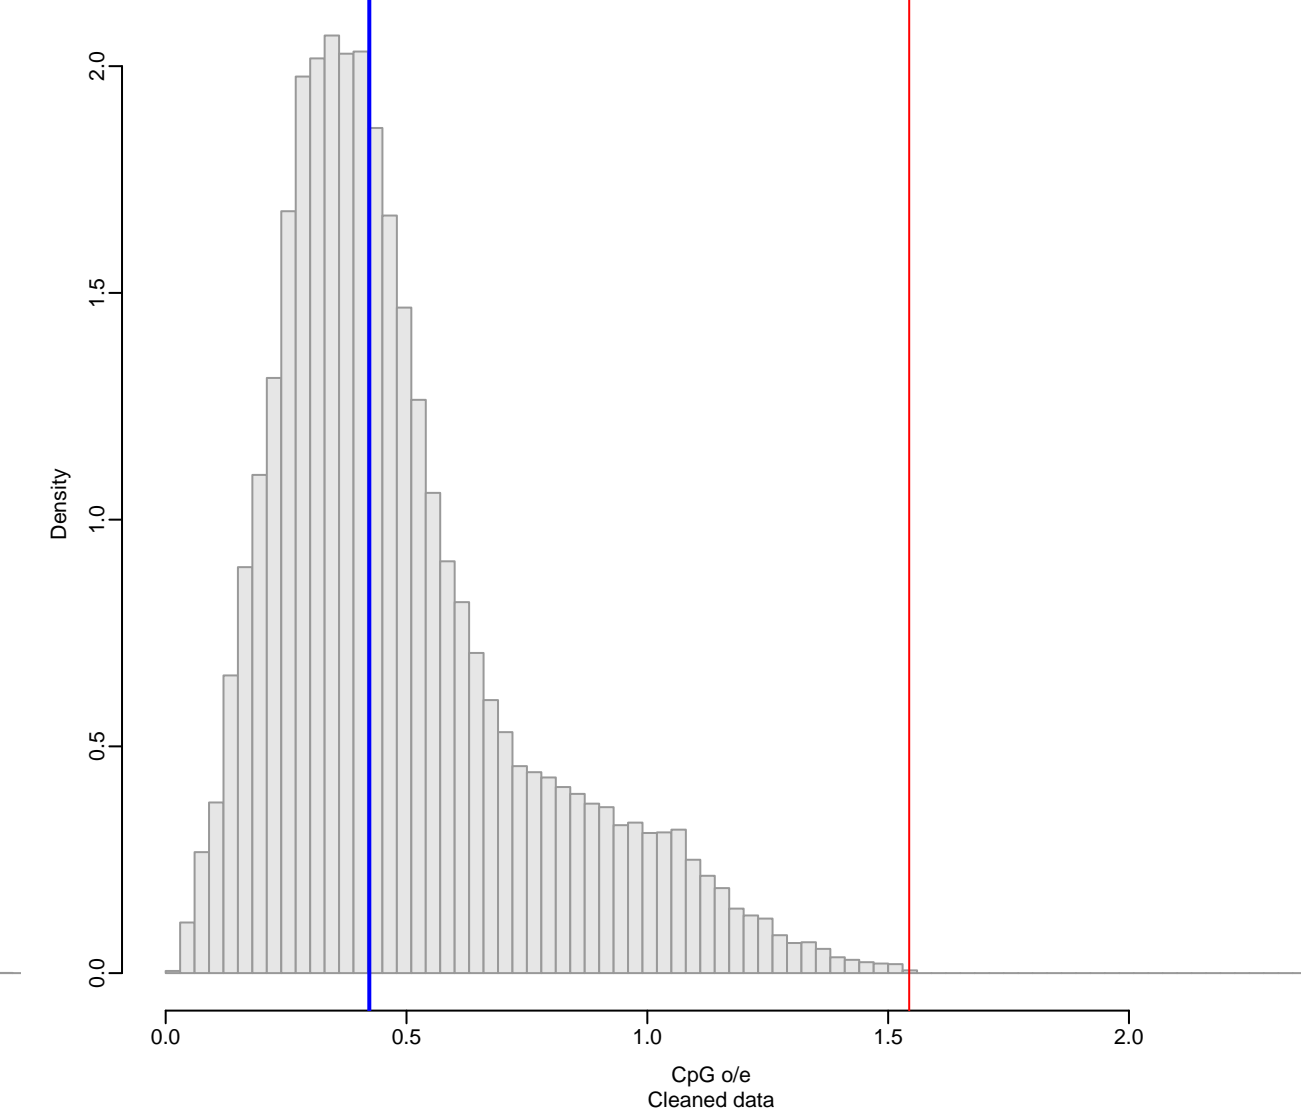



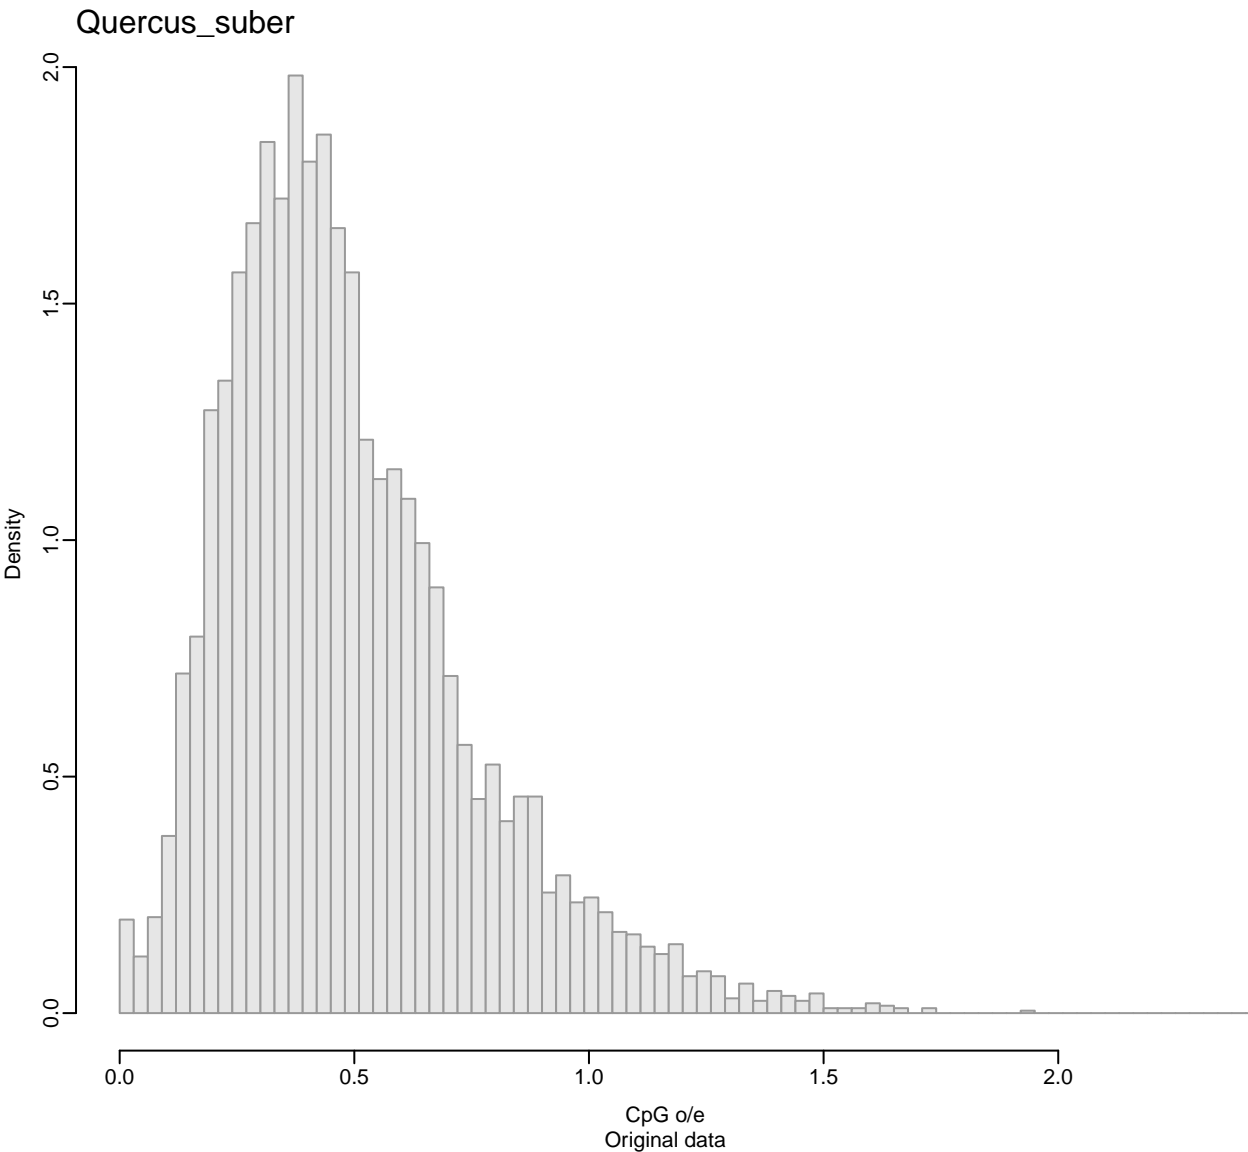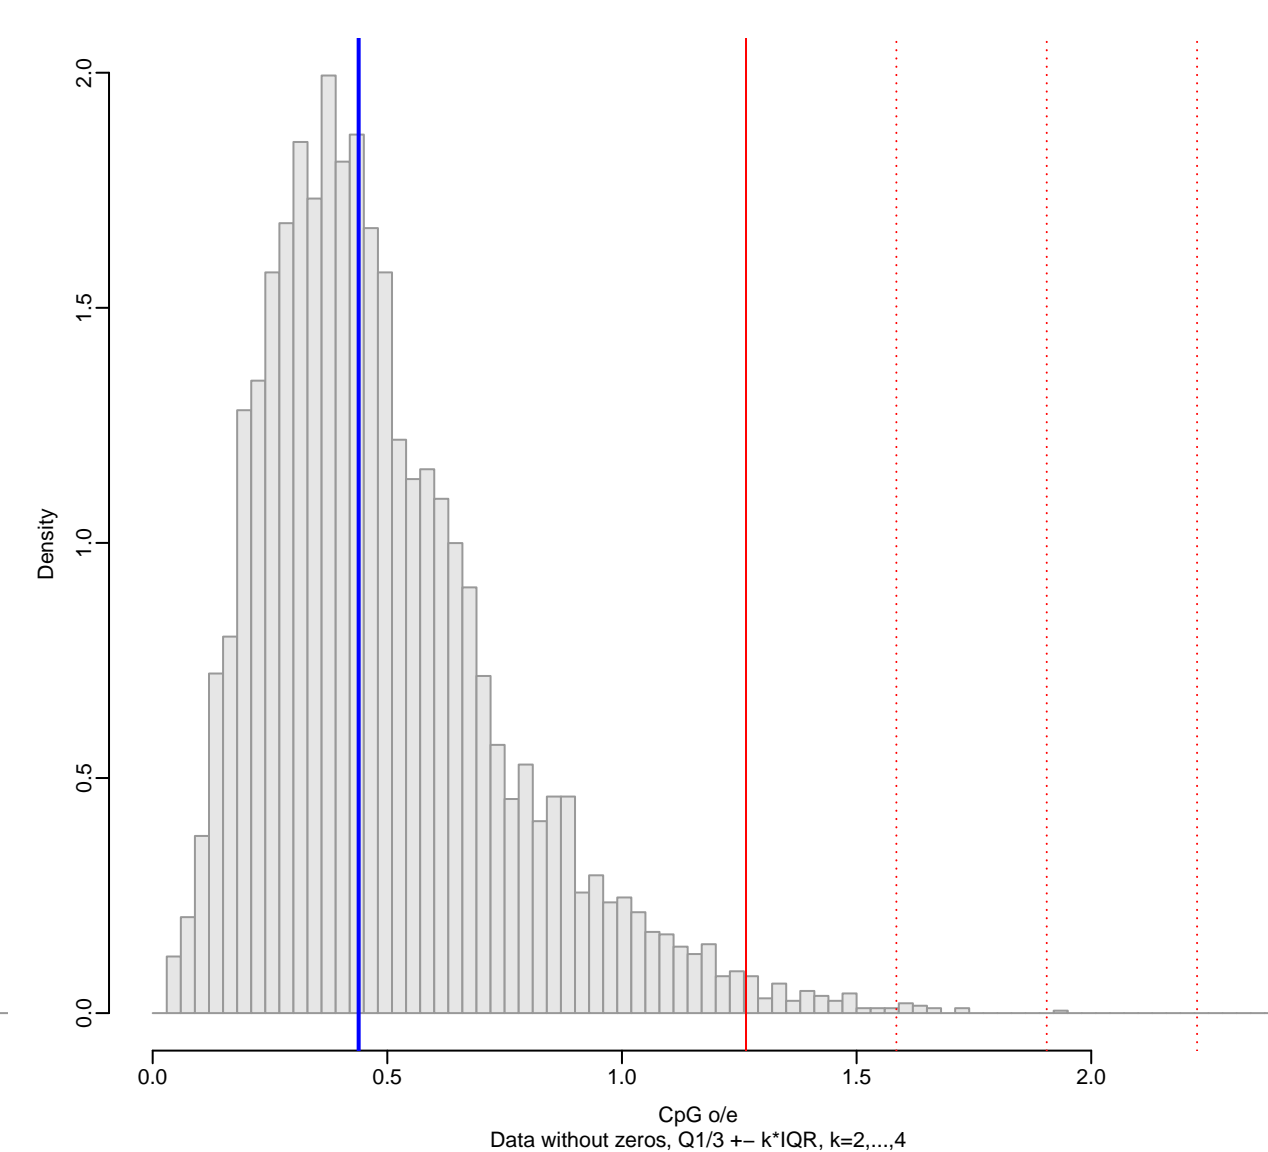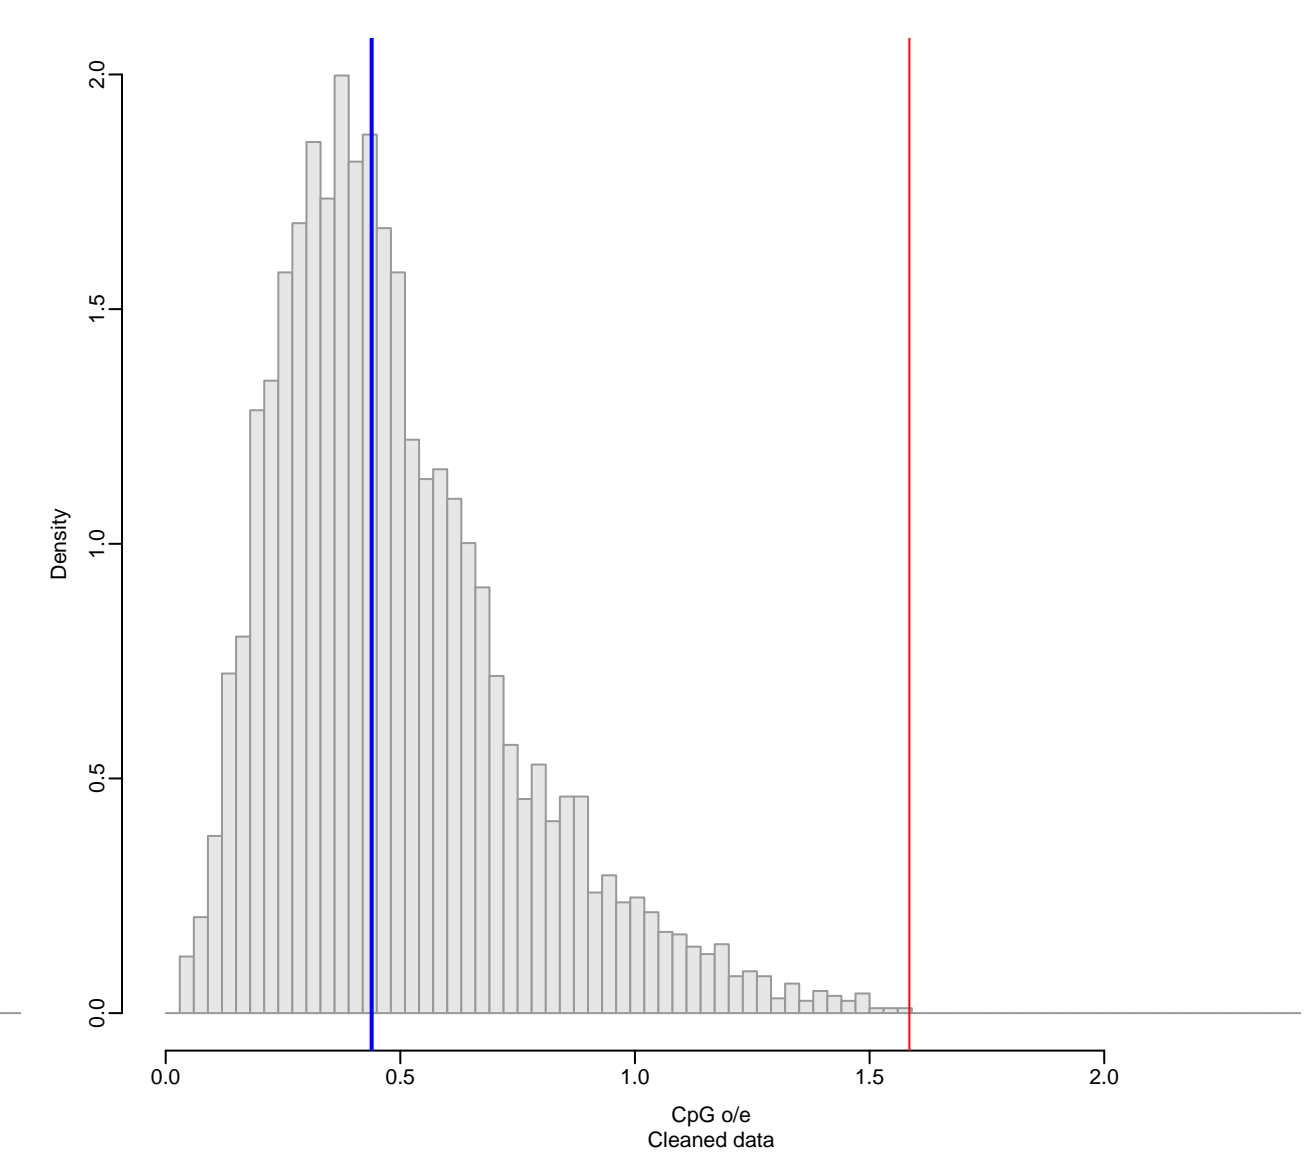

Radopholus\_similis

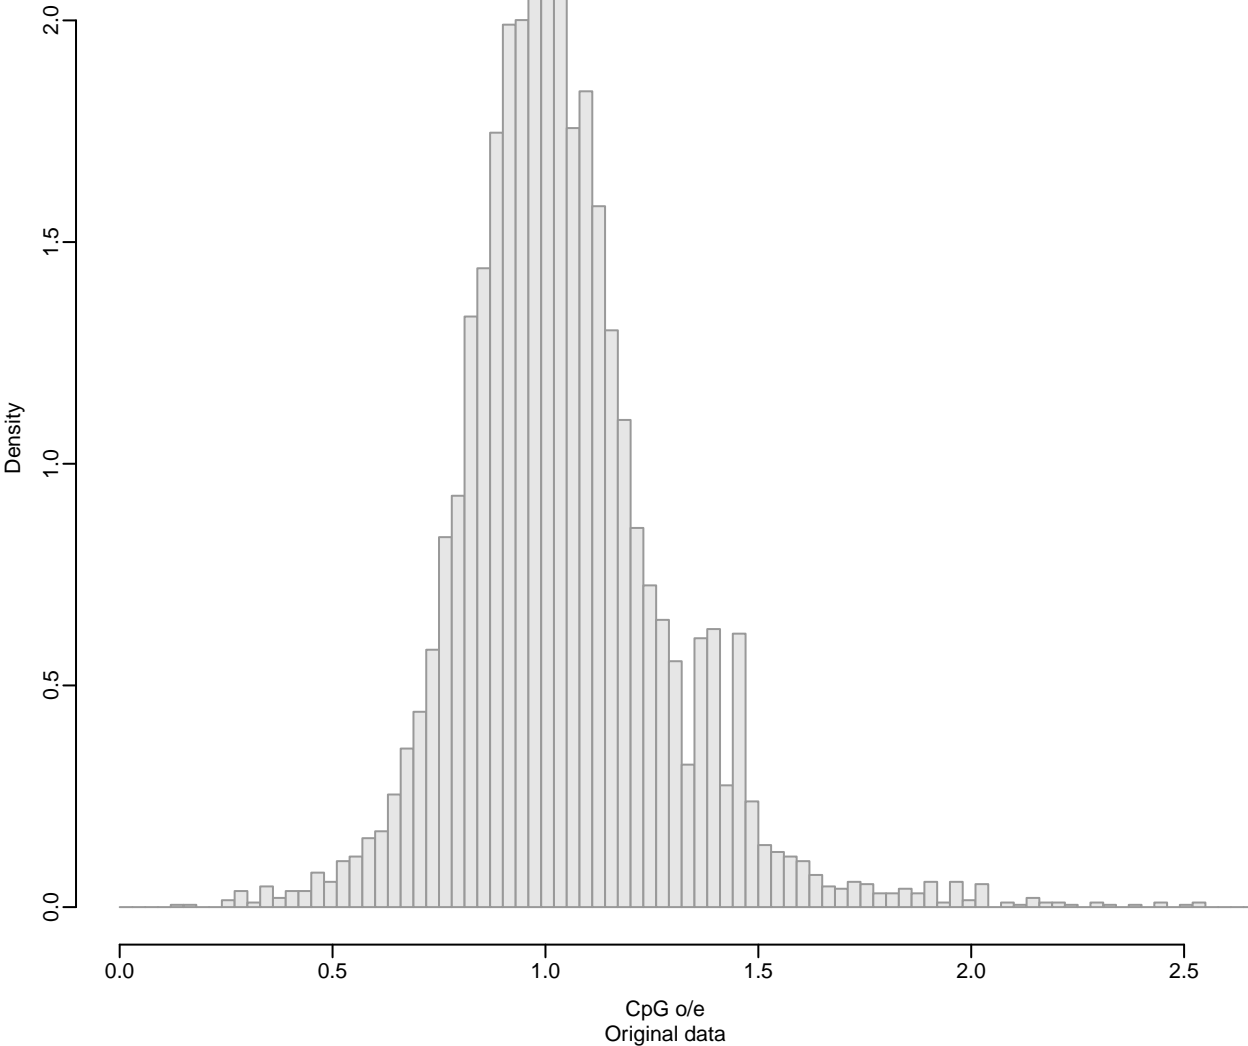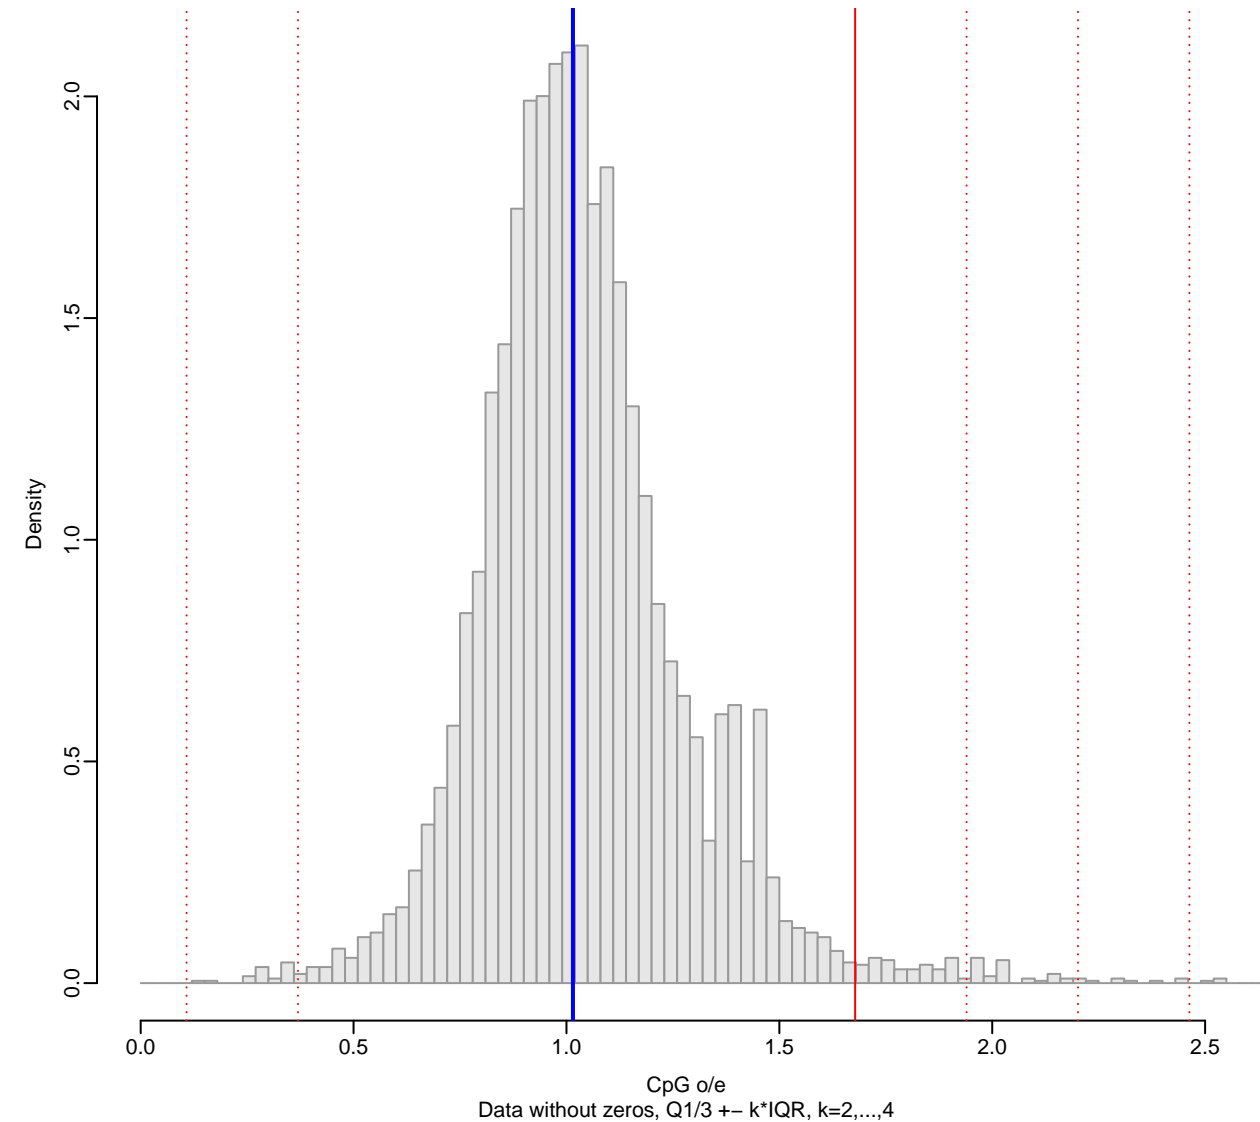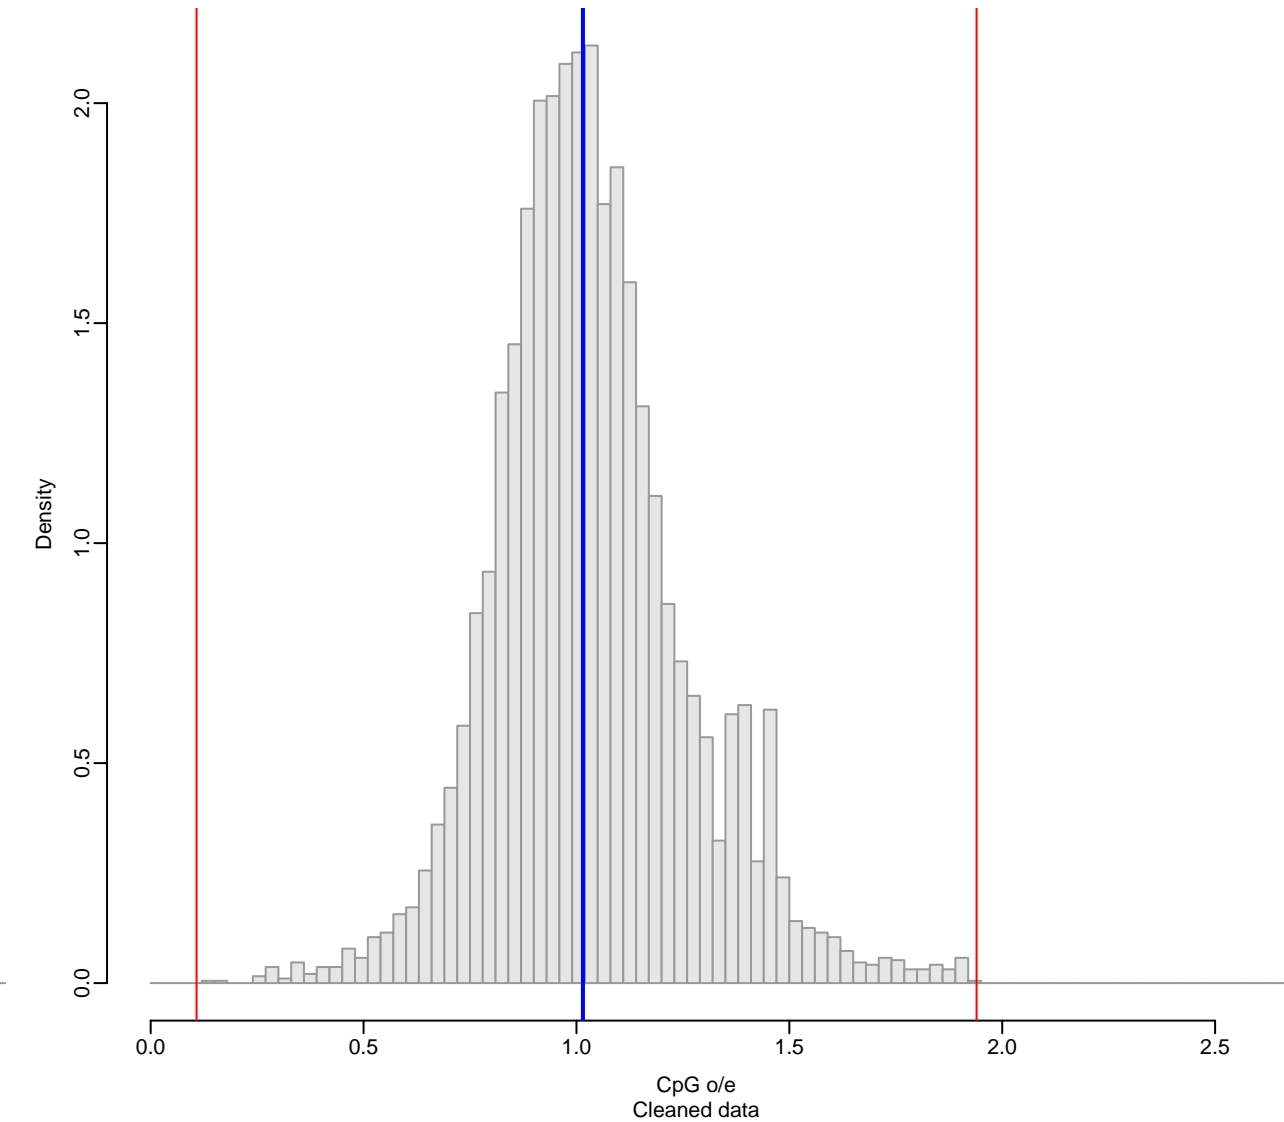

Raphanus\_sativus

Density

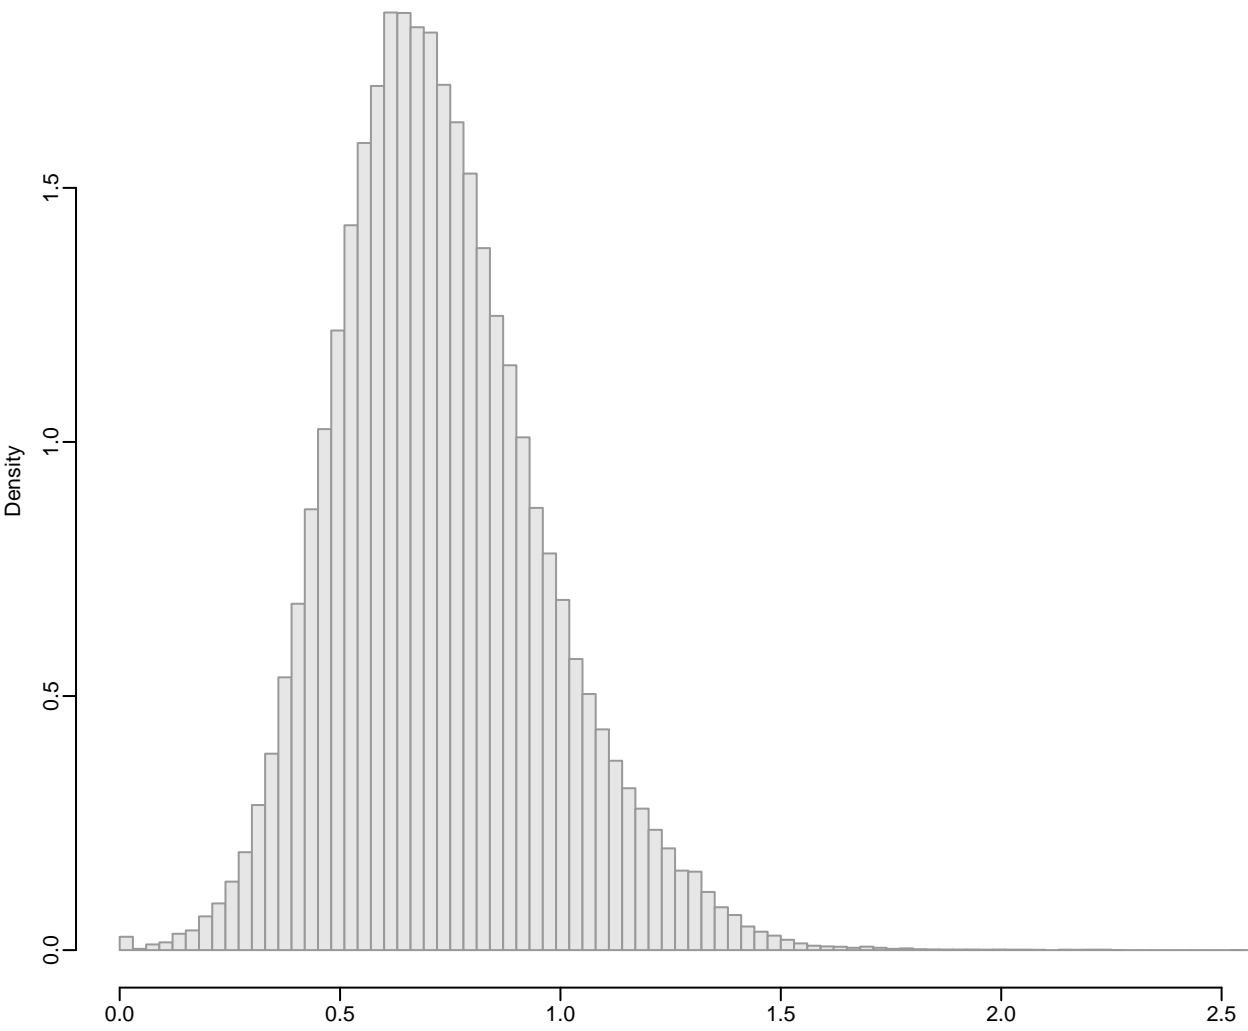

Density

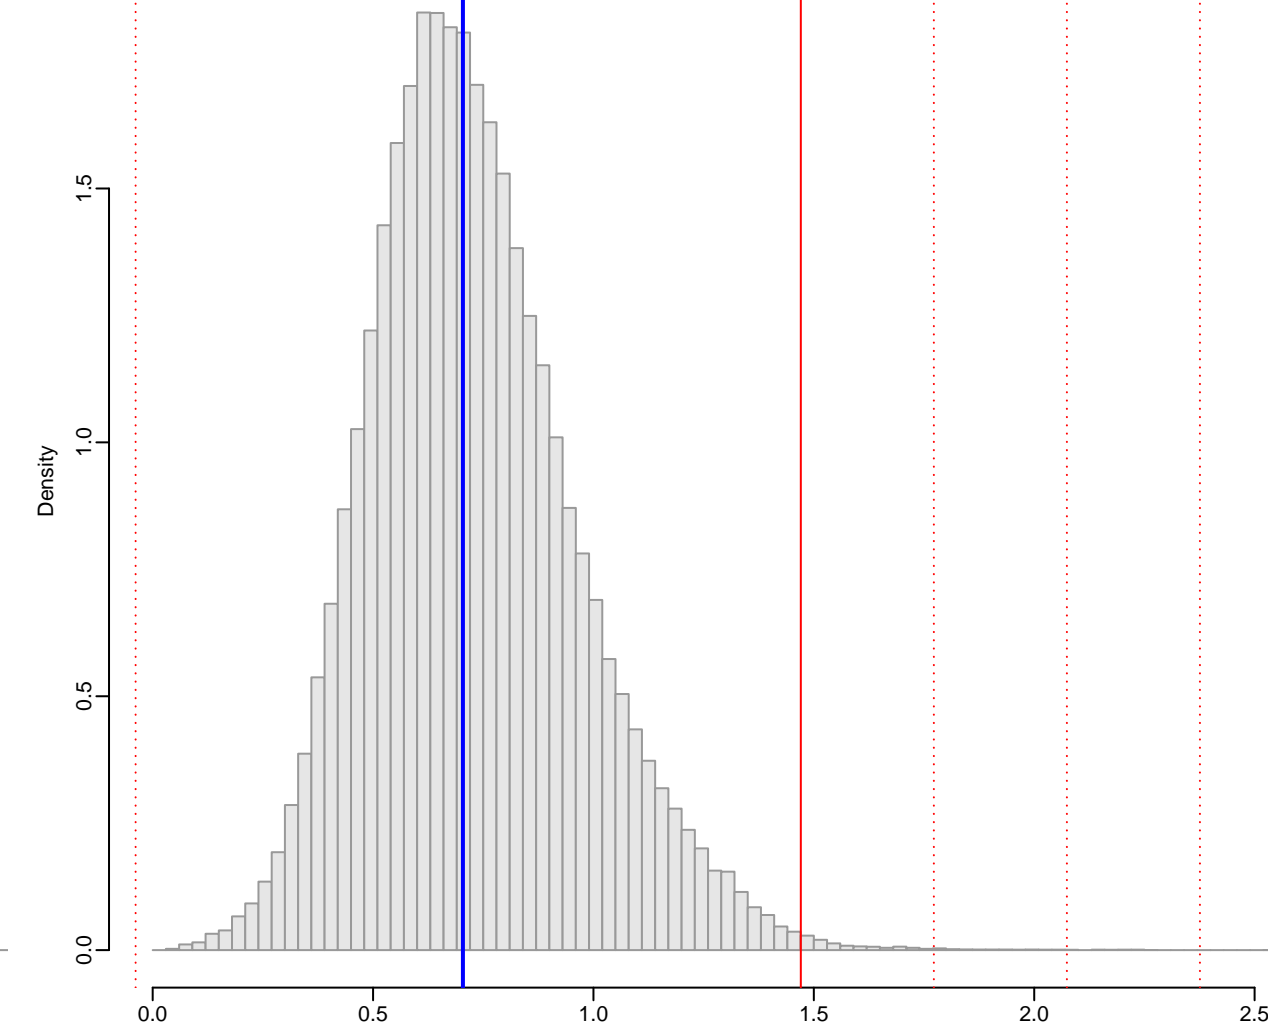

Density

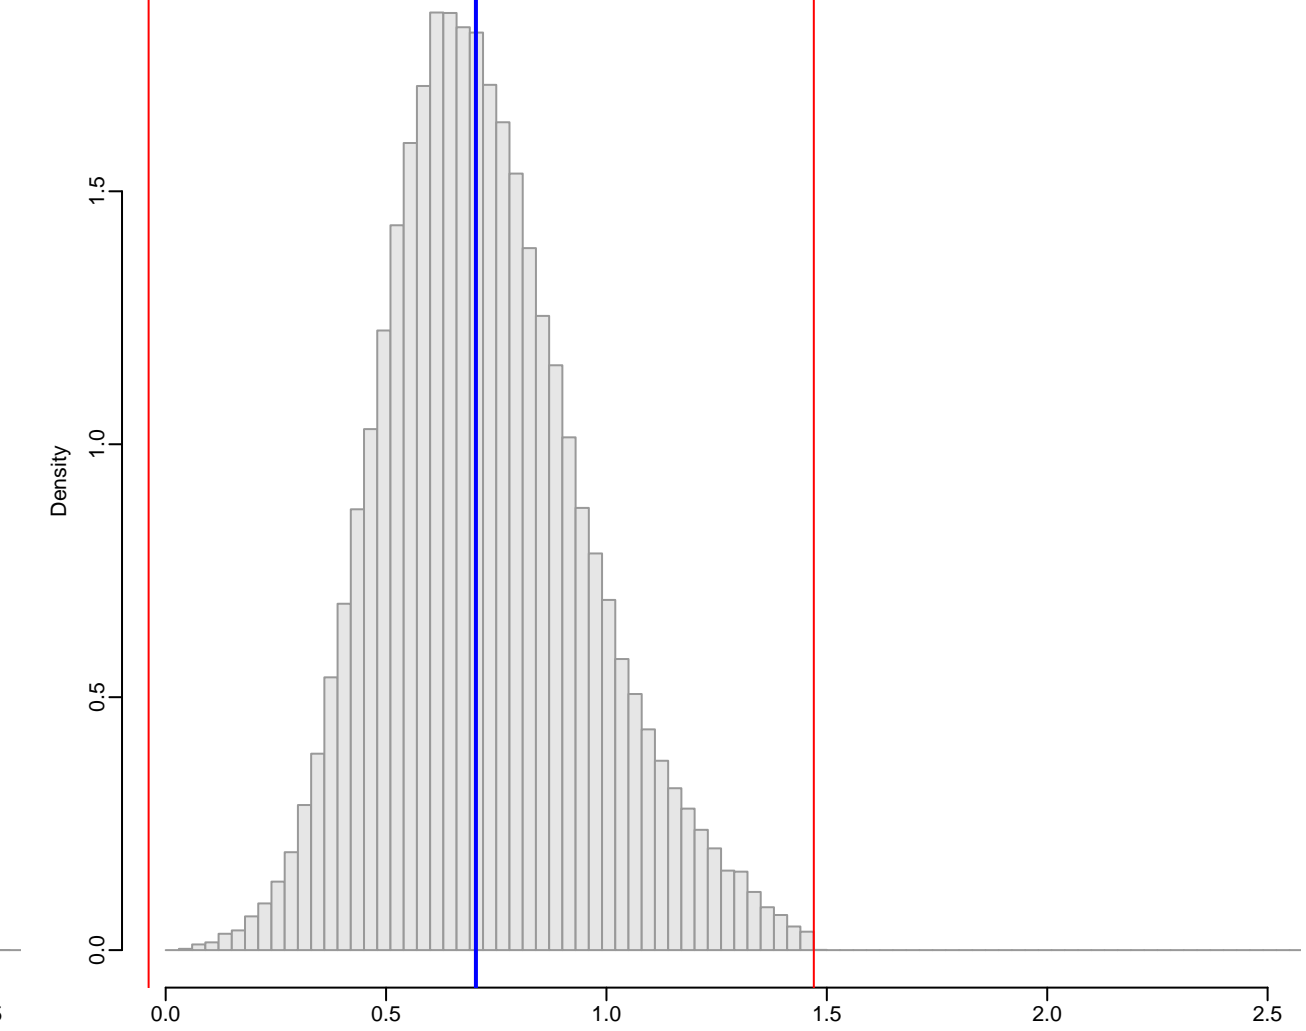

Rattus\_norvegicus

Density

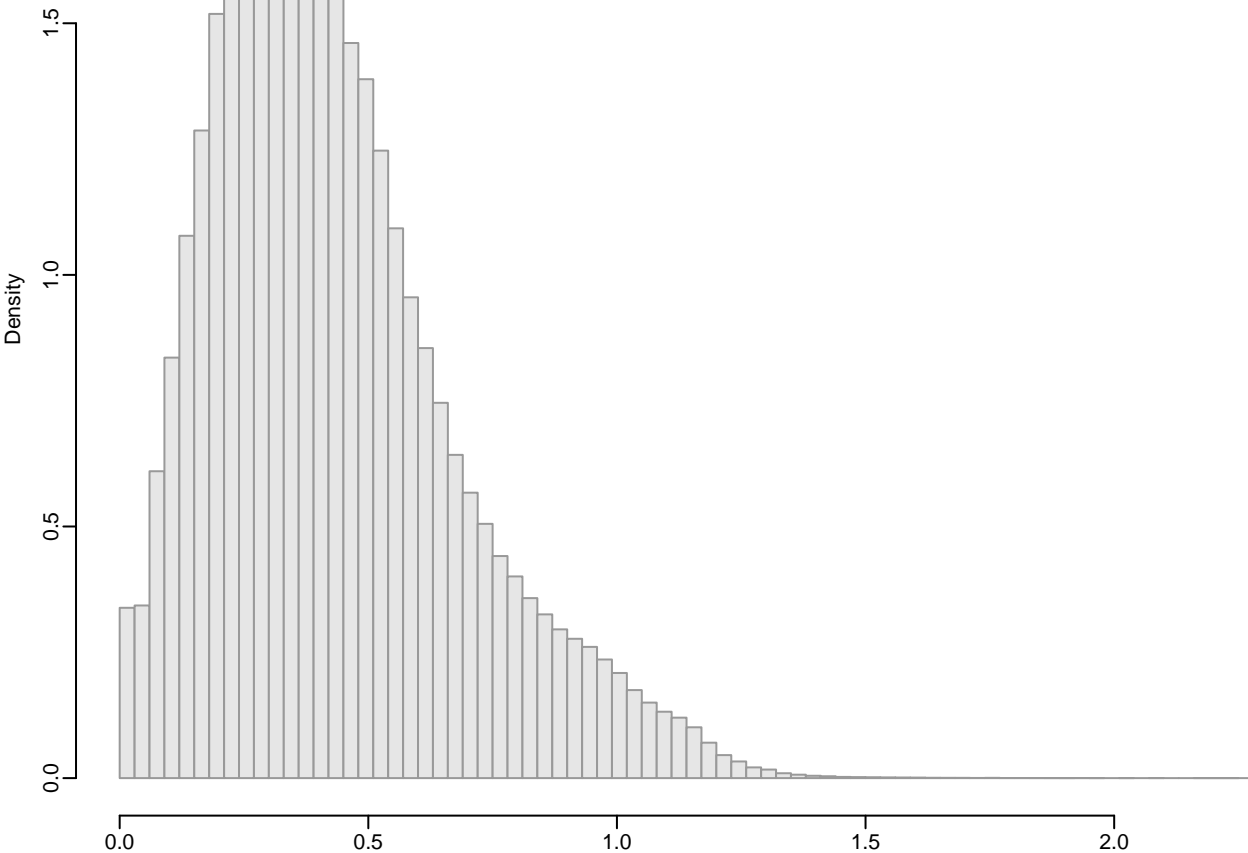

Density

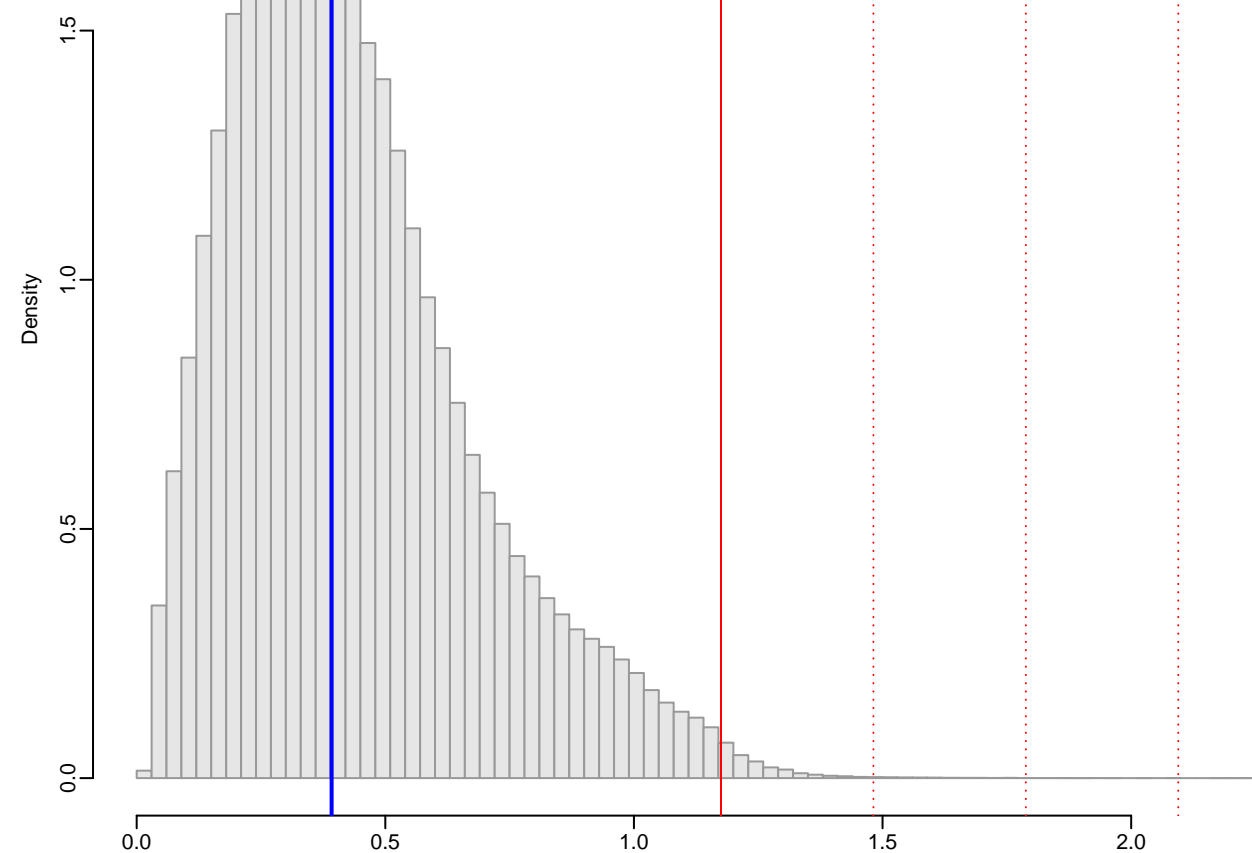

Density

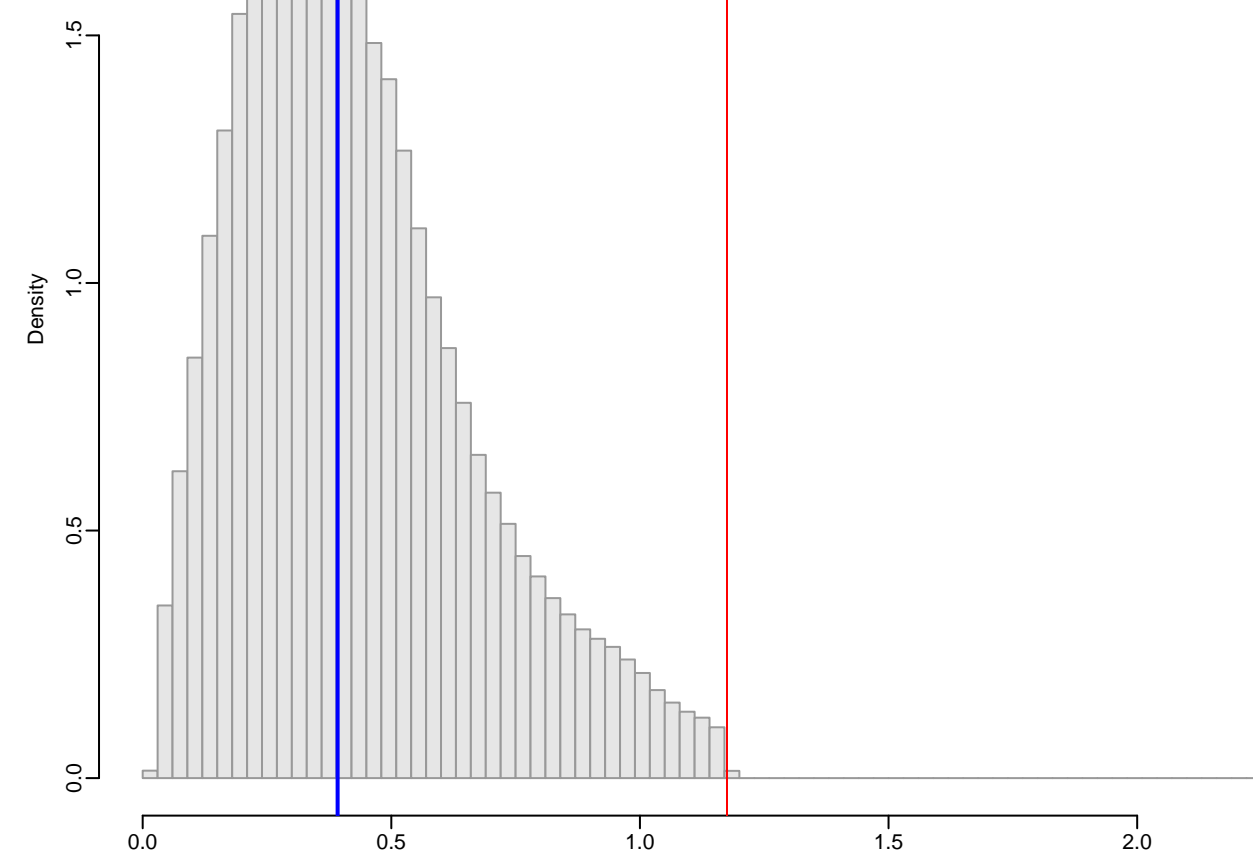

Reclinomonas\_americana

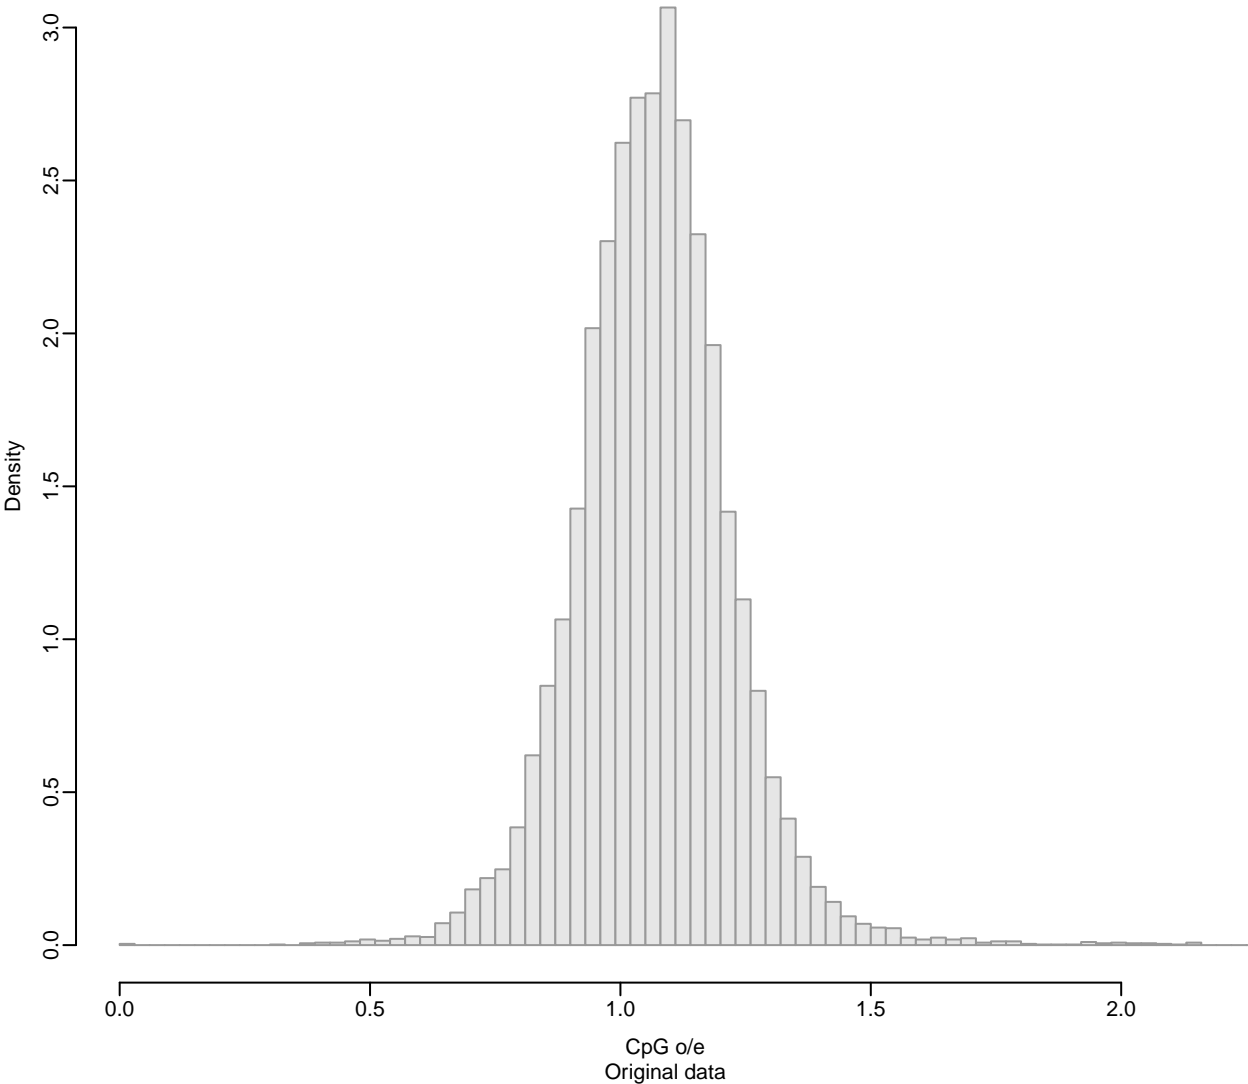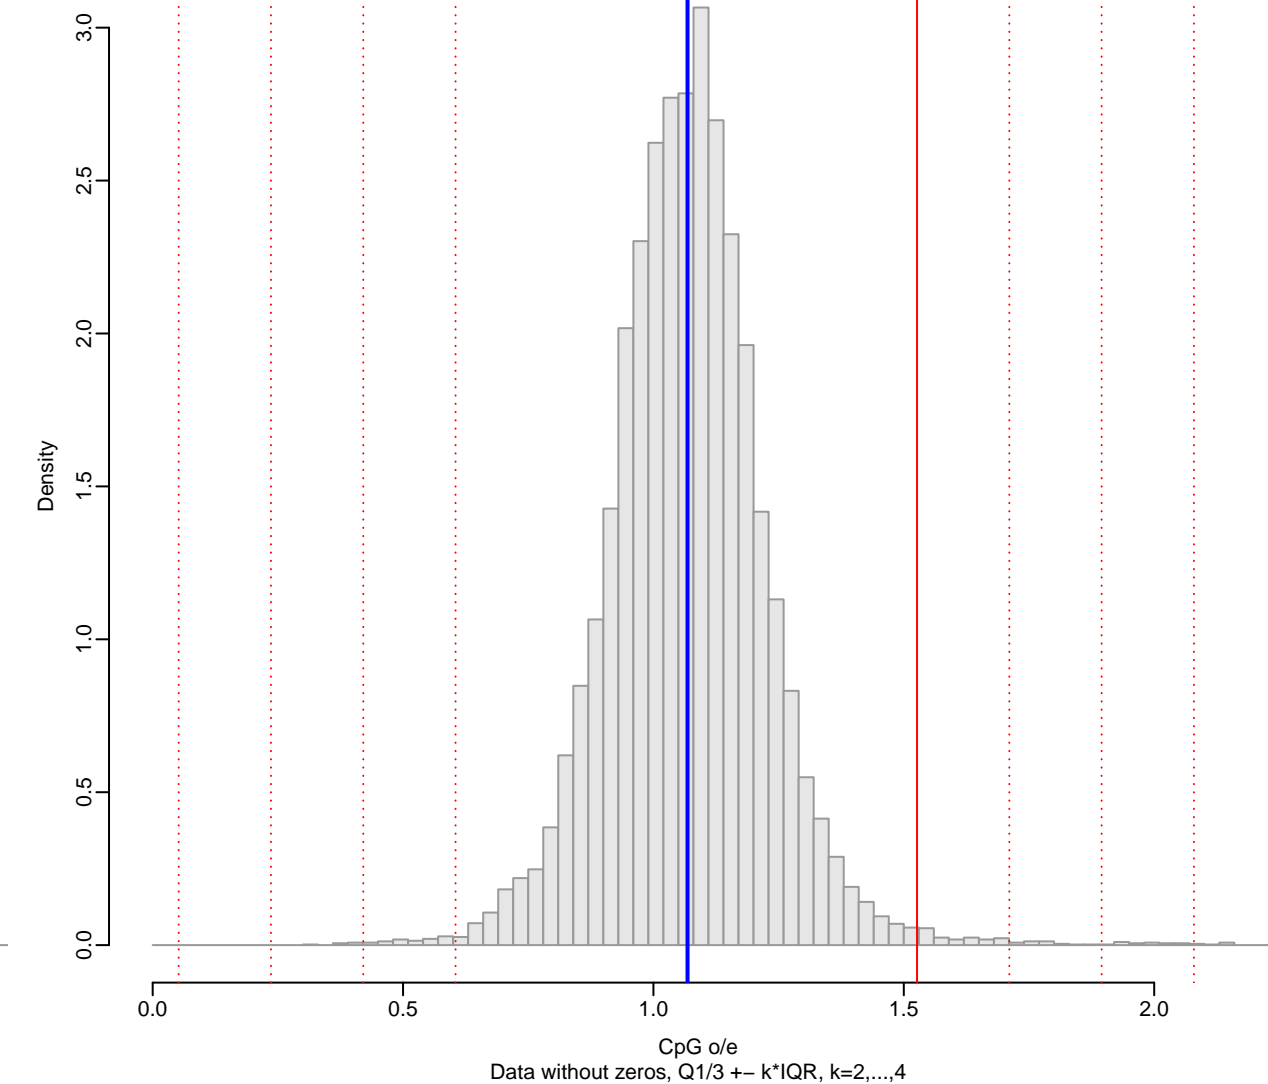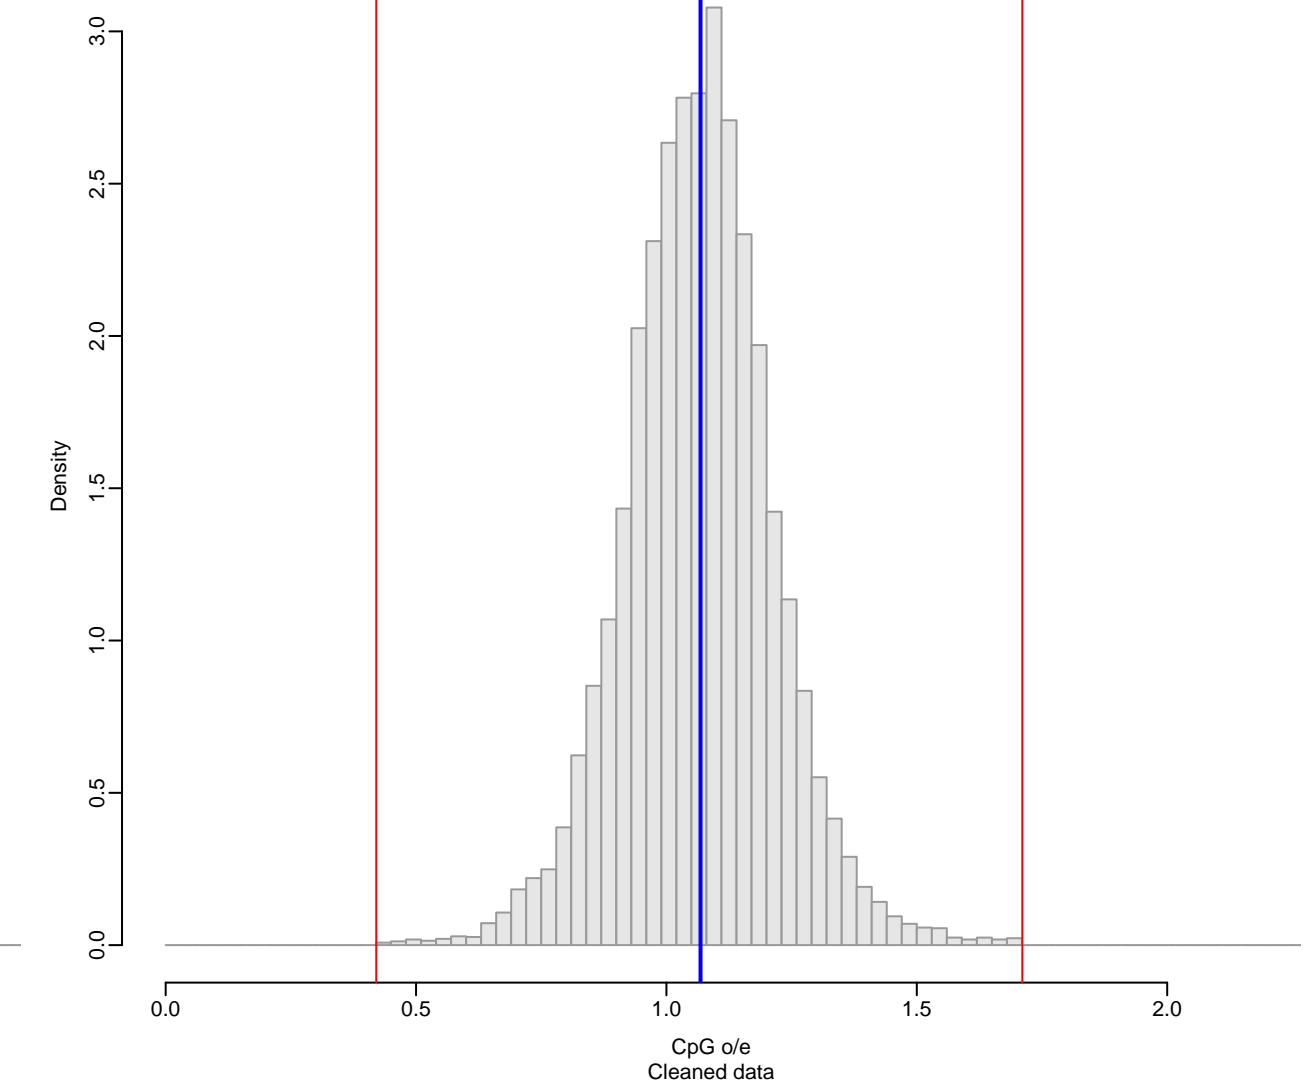

# Reticulitermes\_flavipes

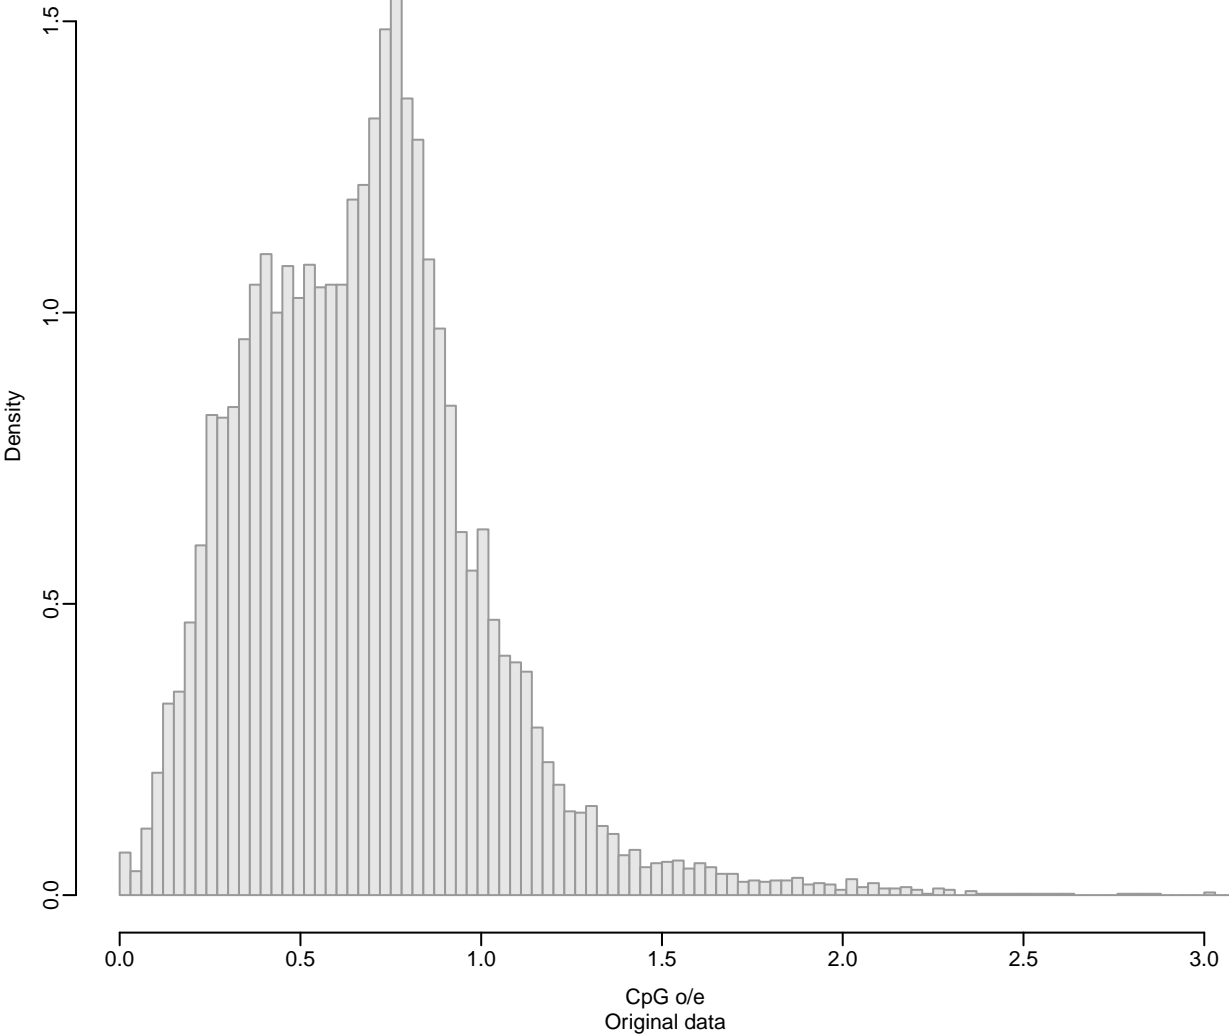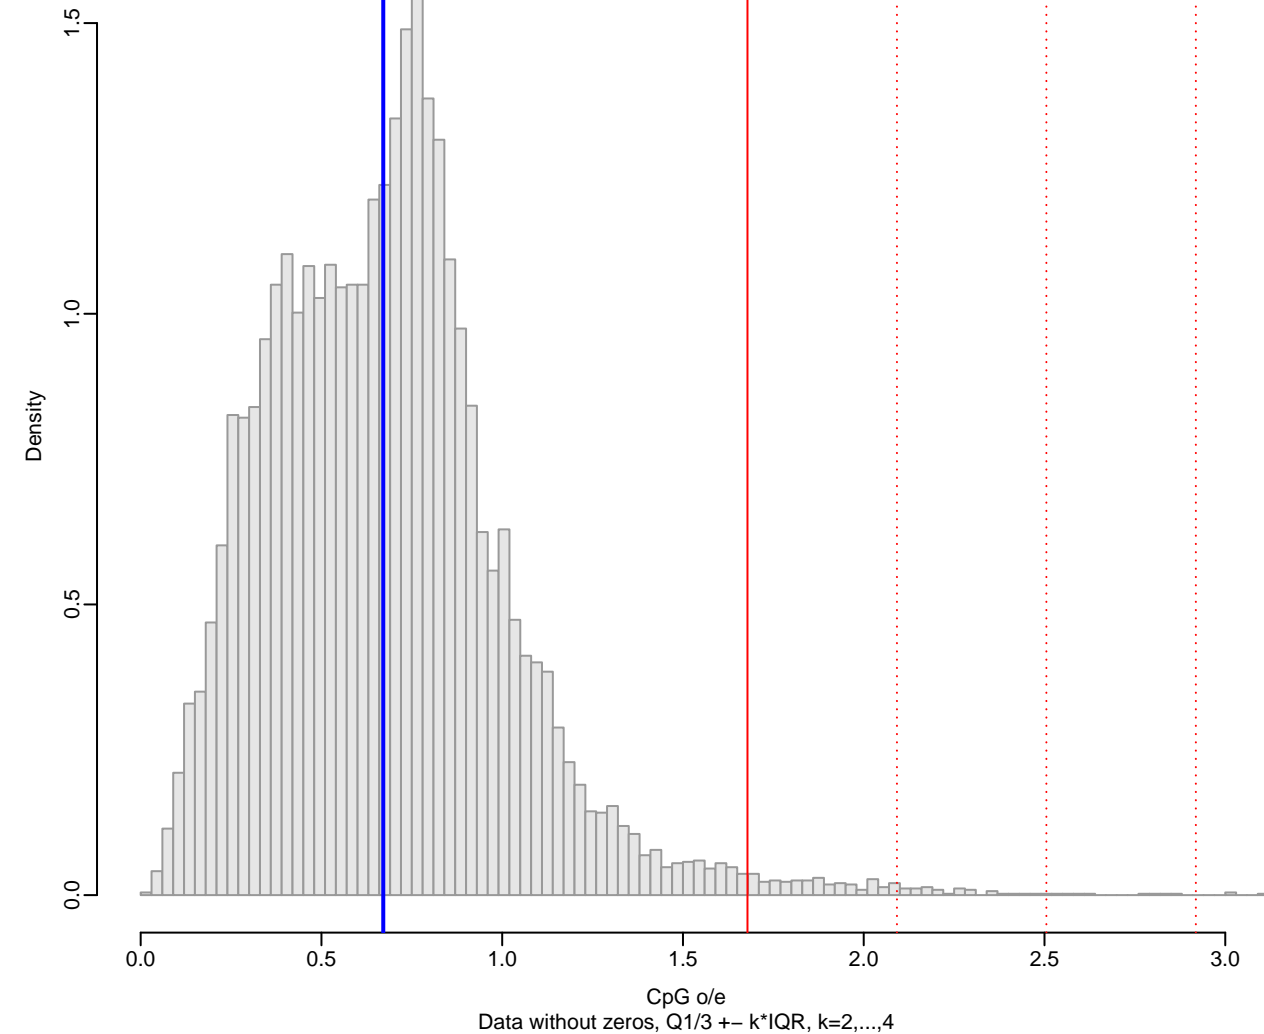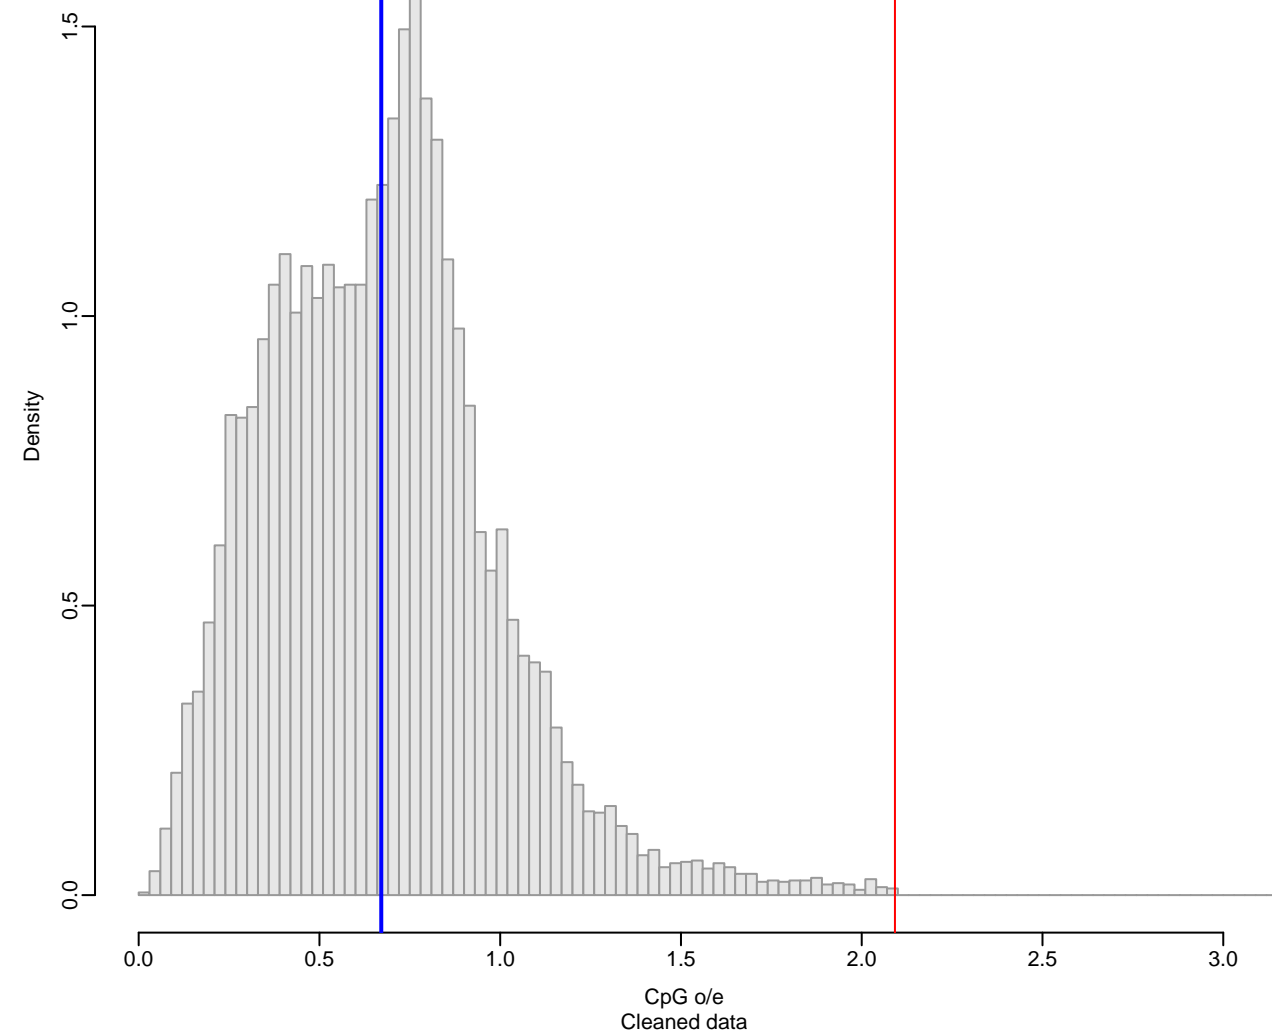

Rhipicephalus\_appendiculatus

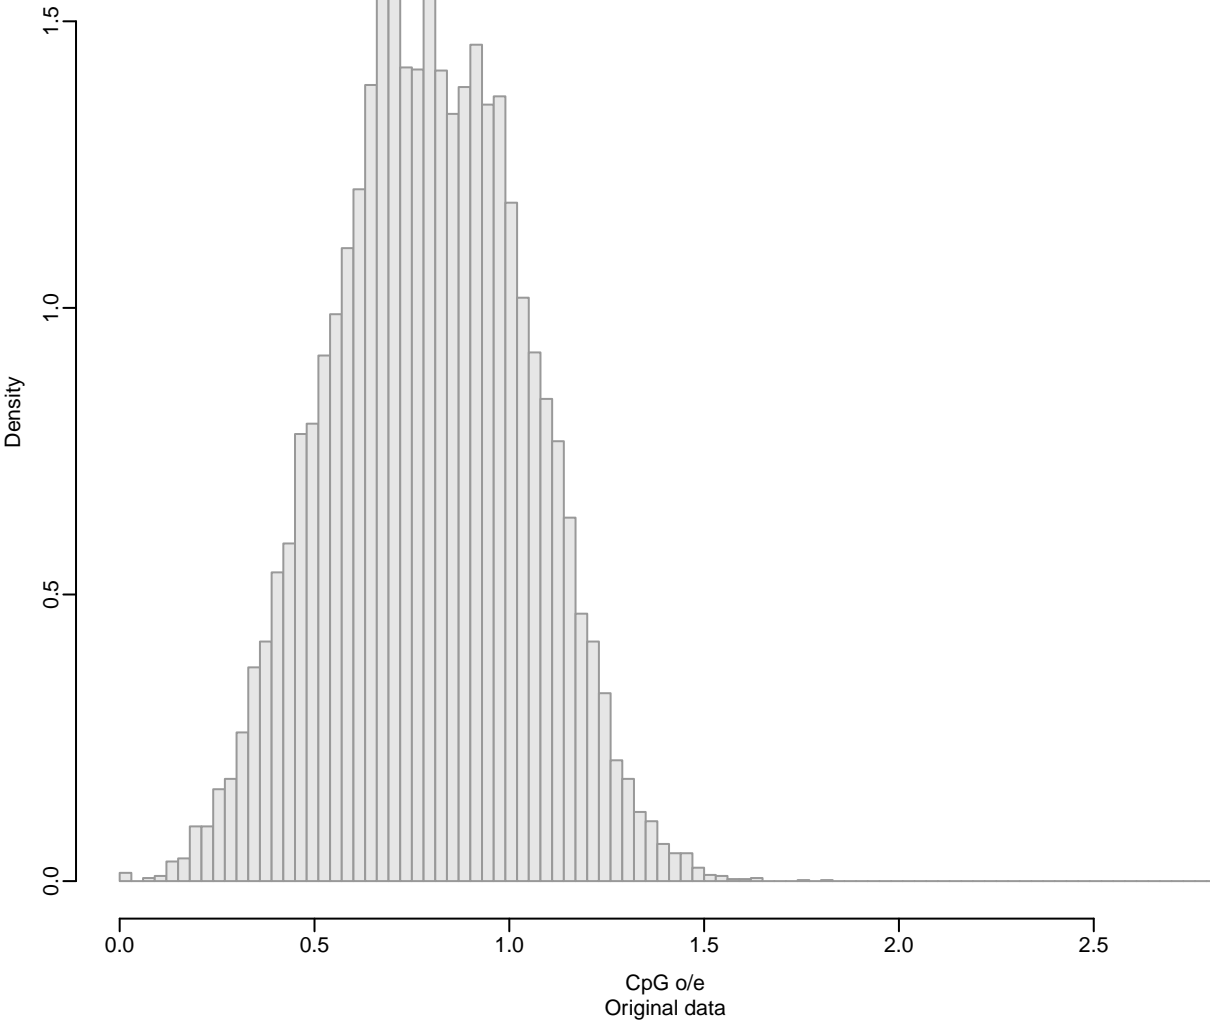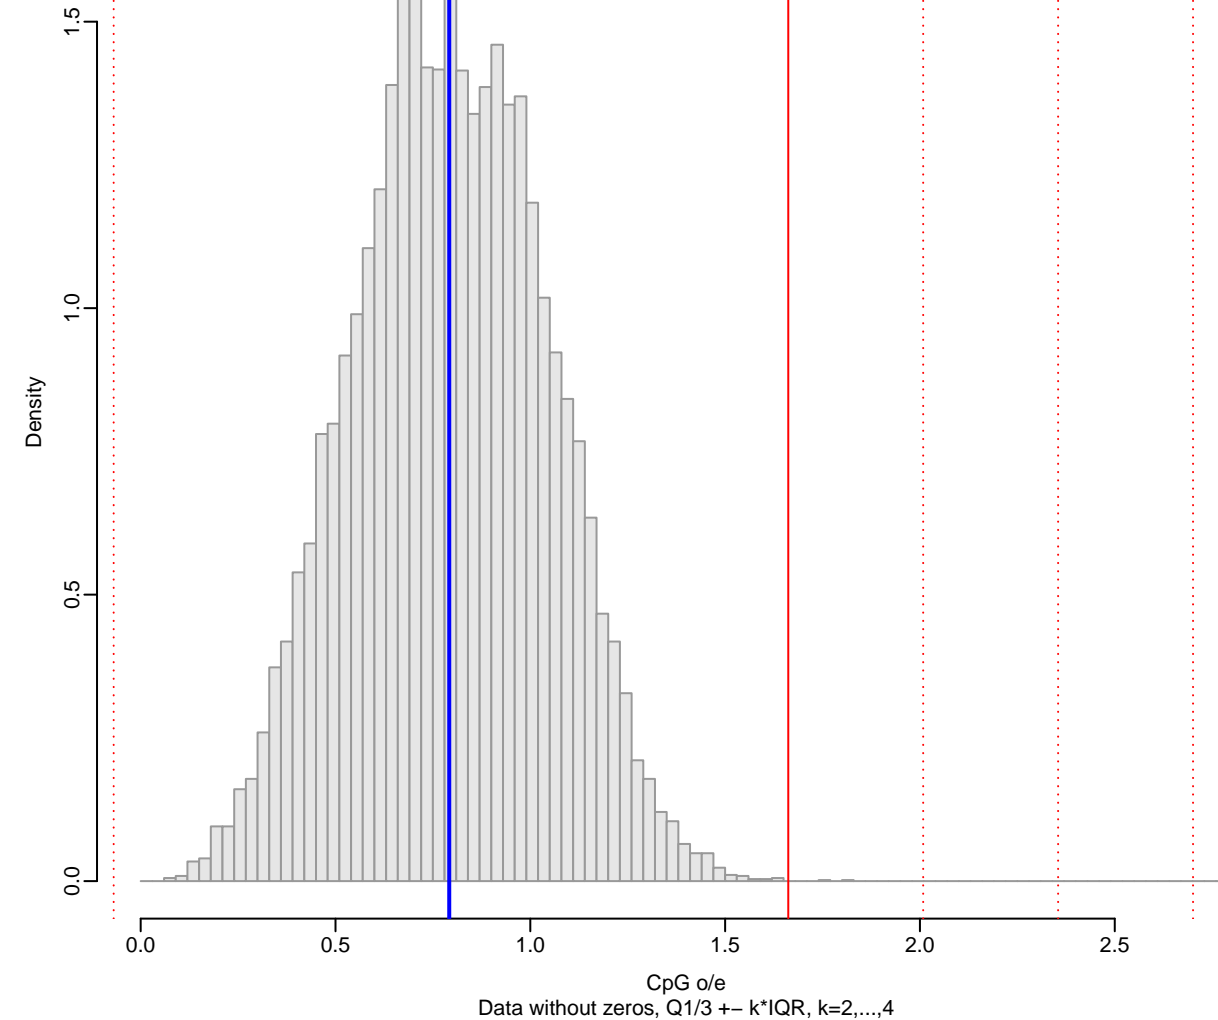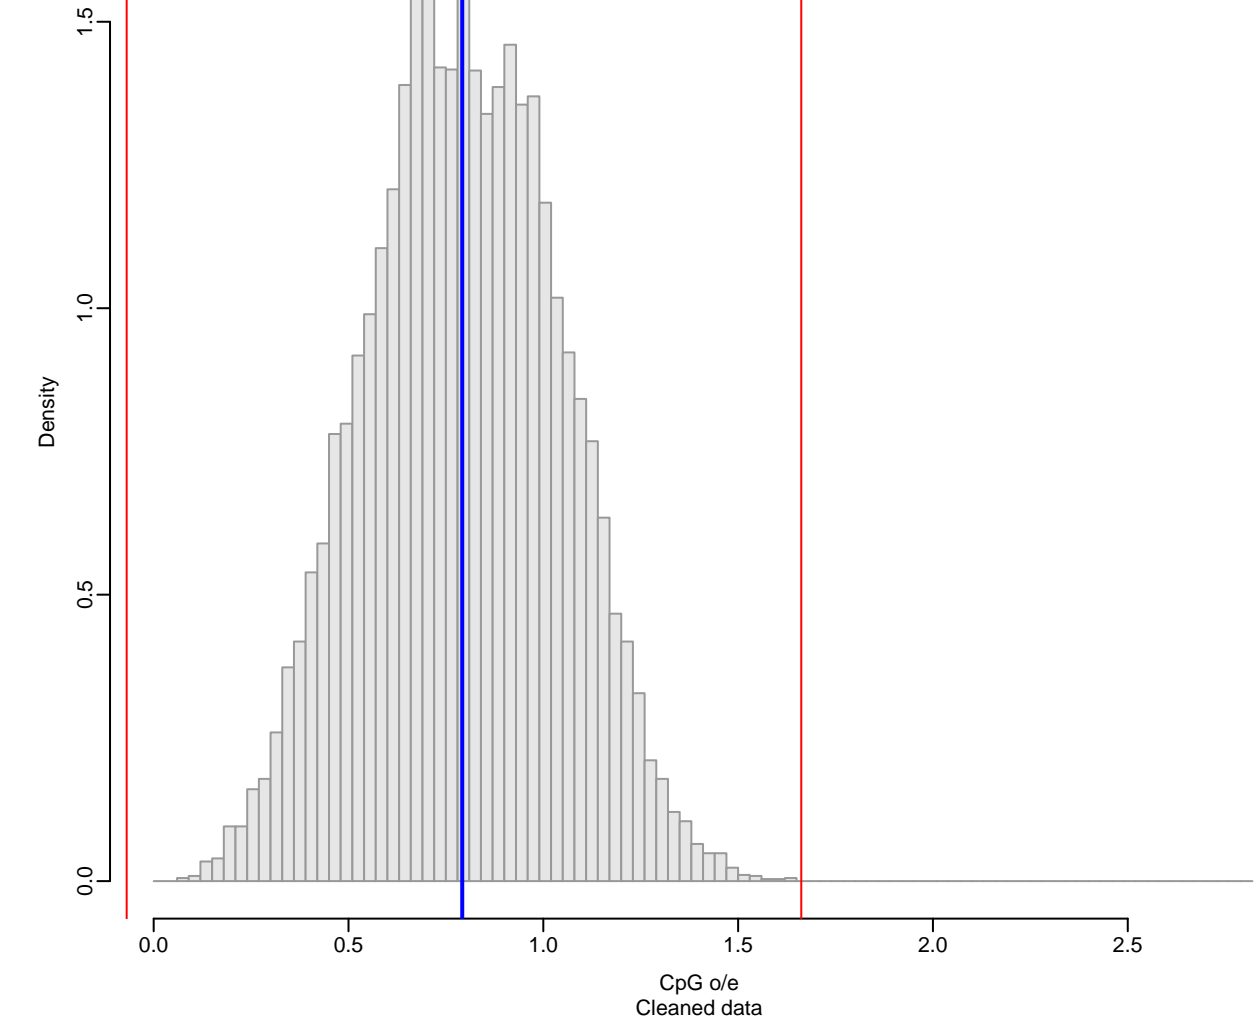

# Rhipicephalus\_microplus

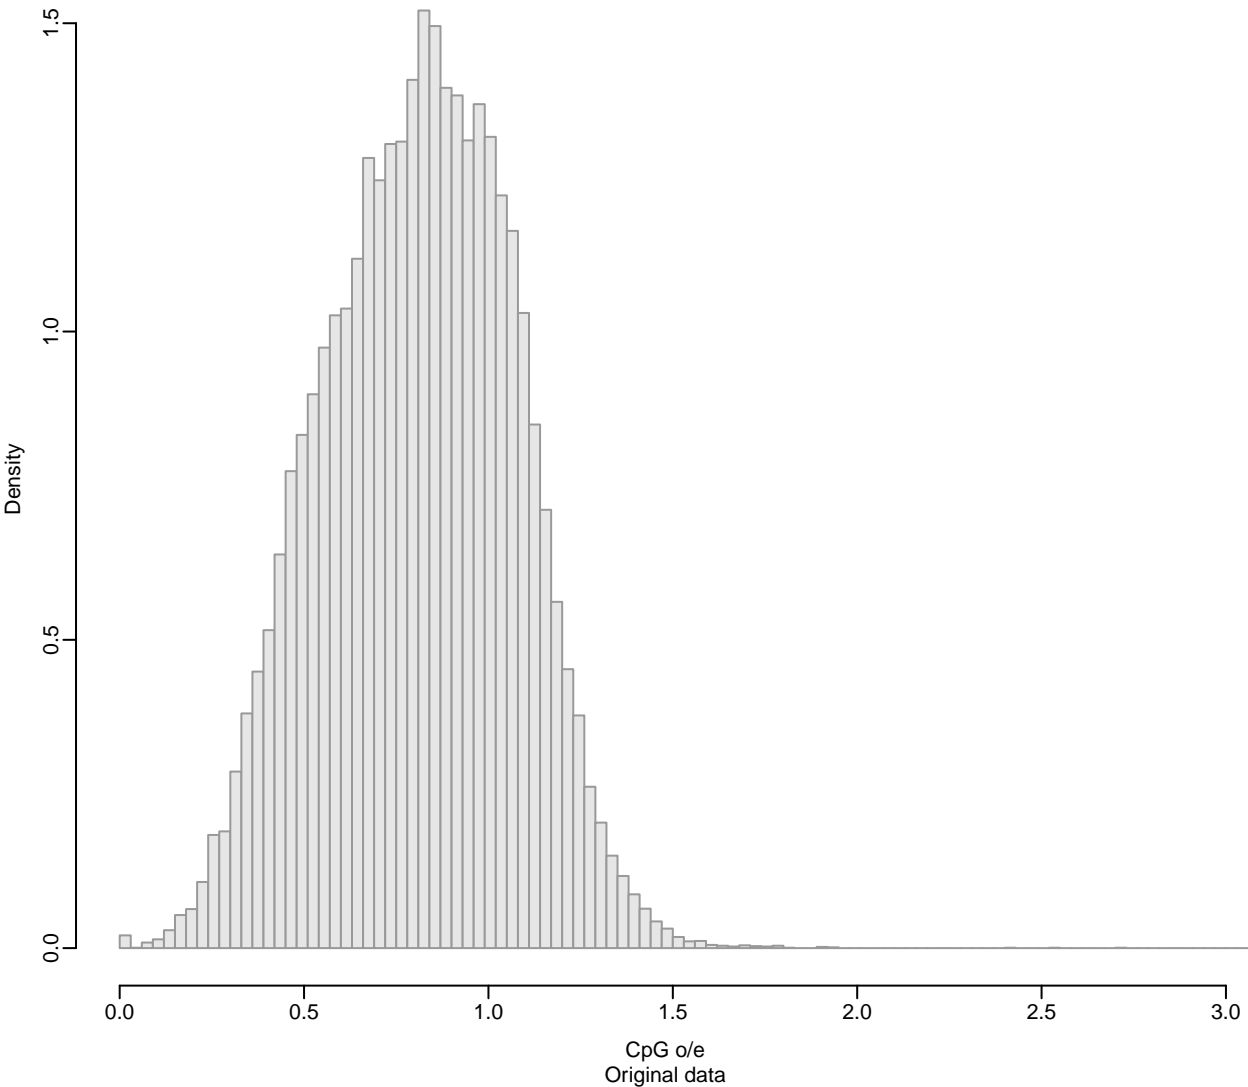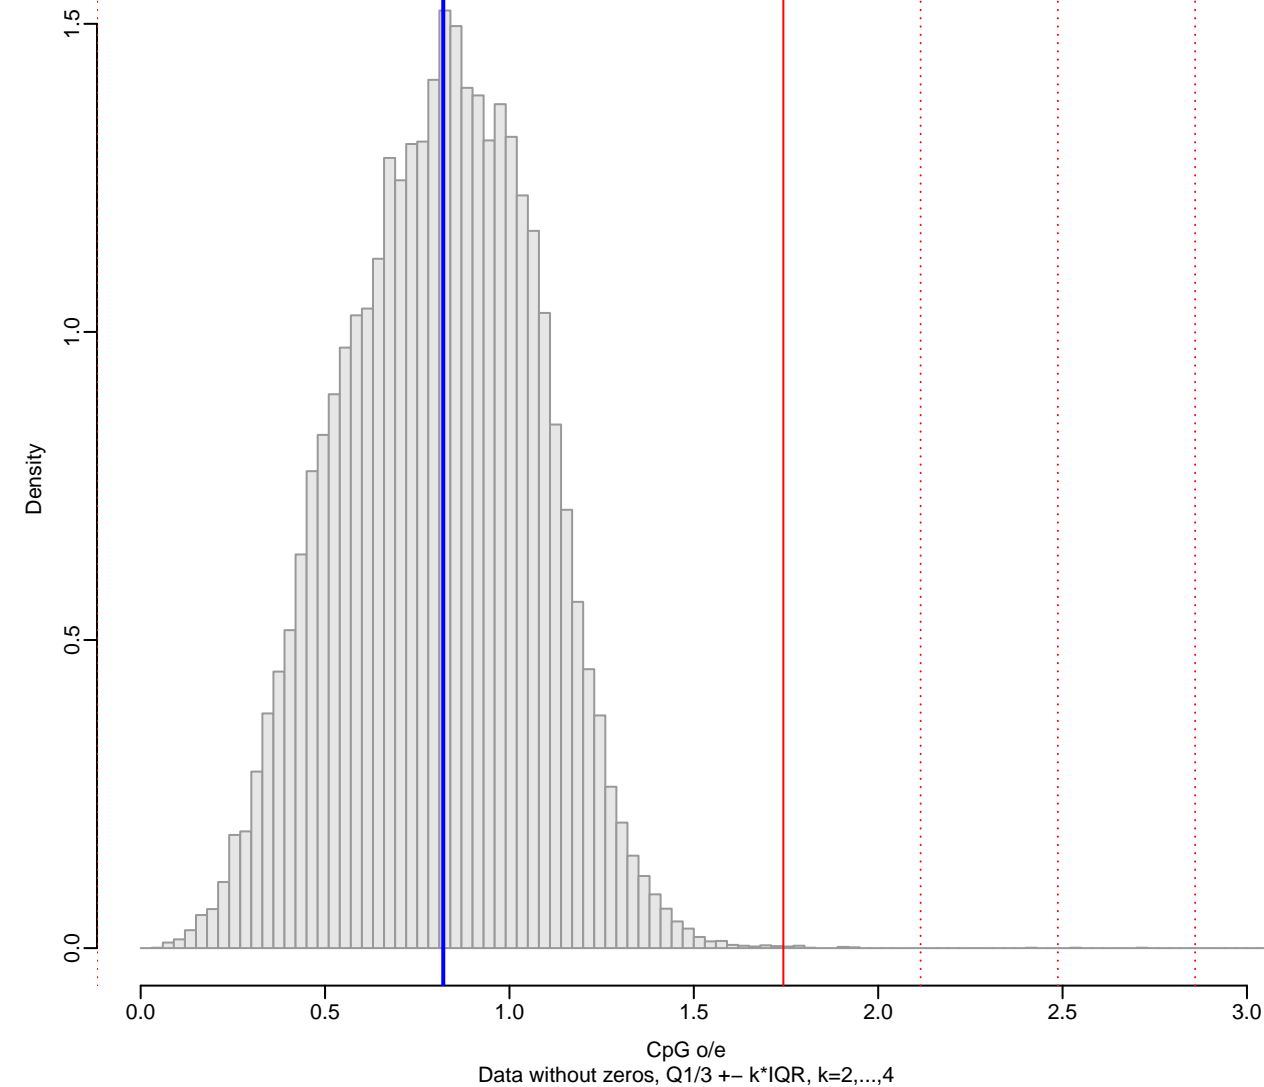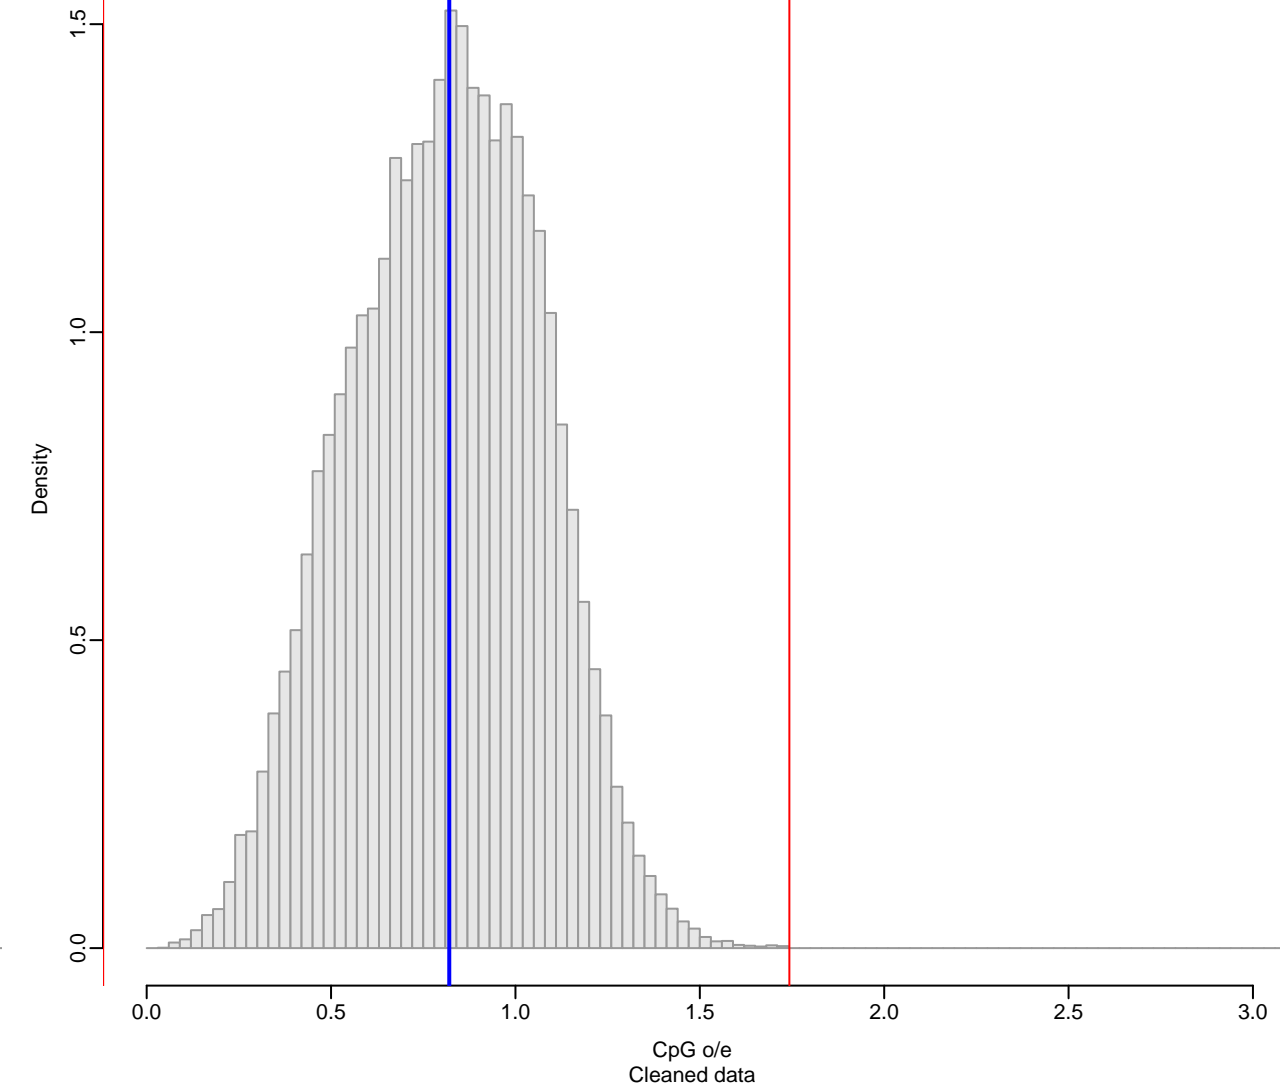



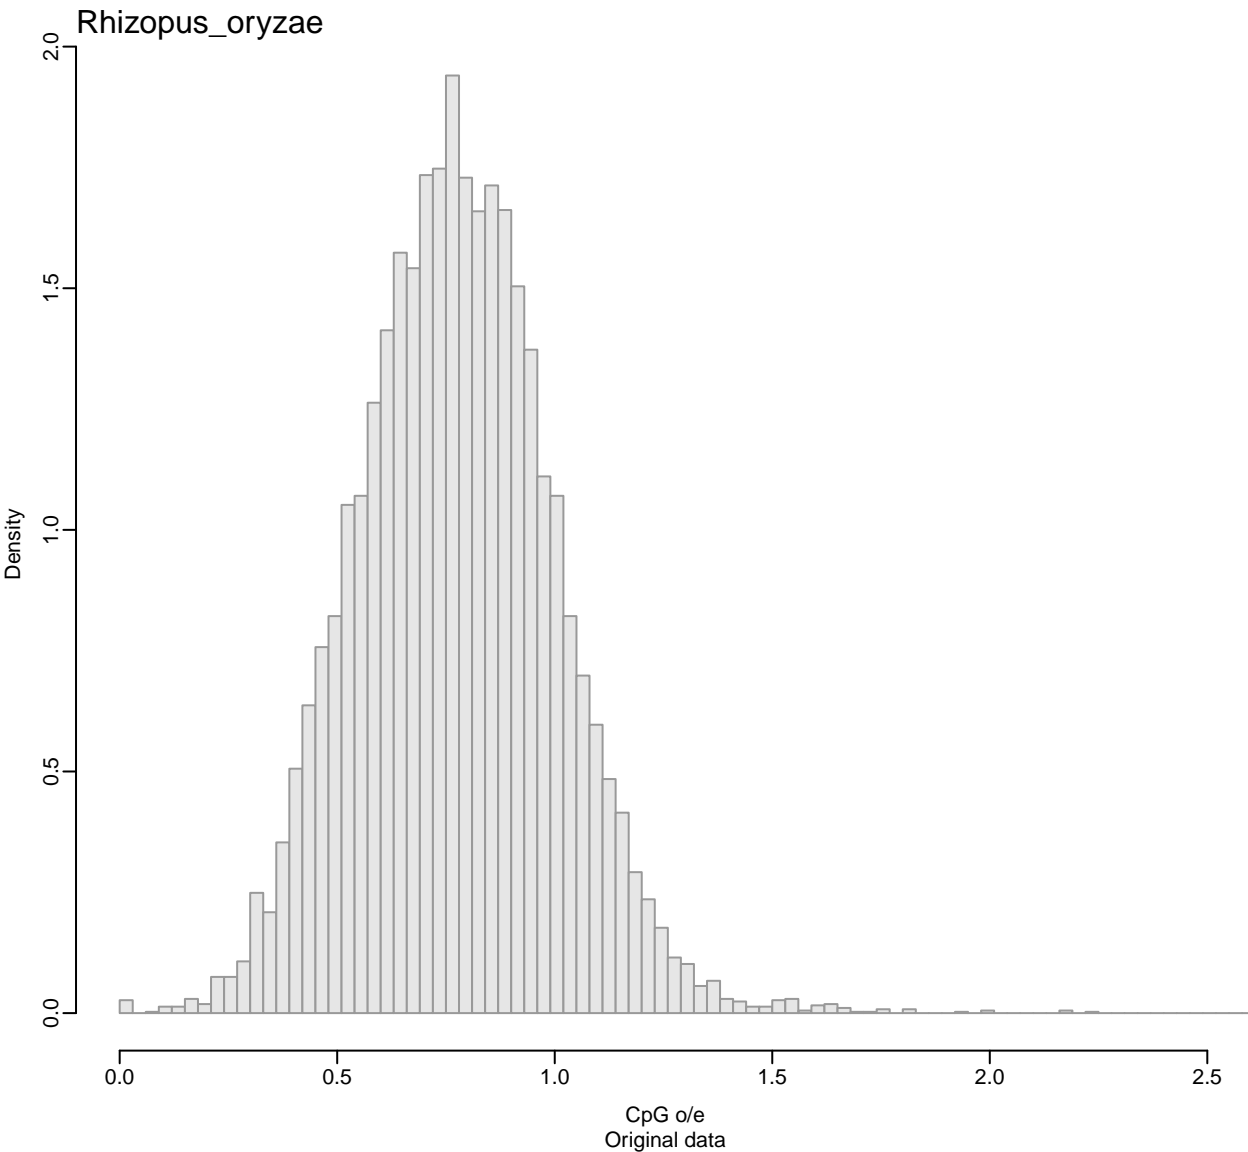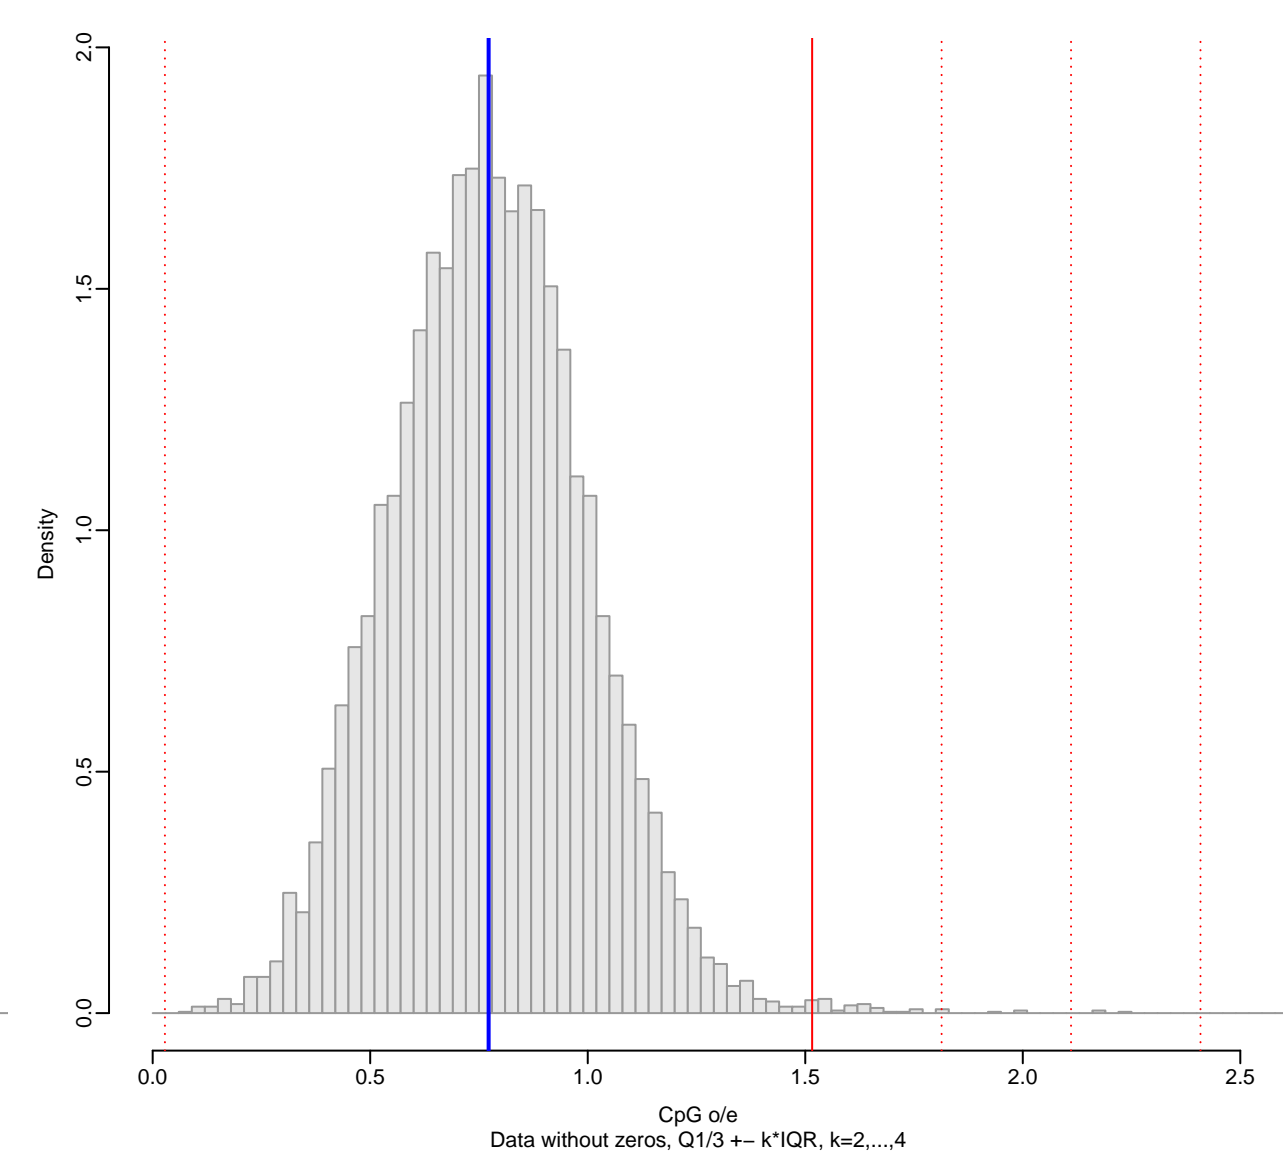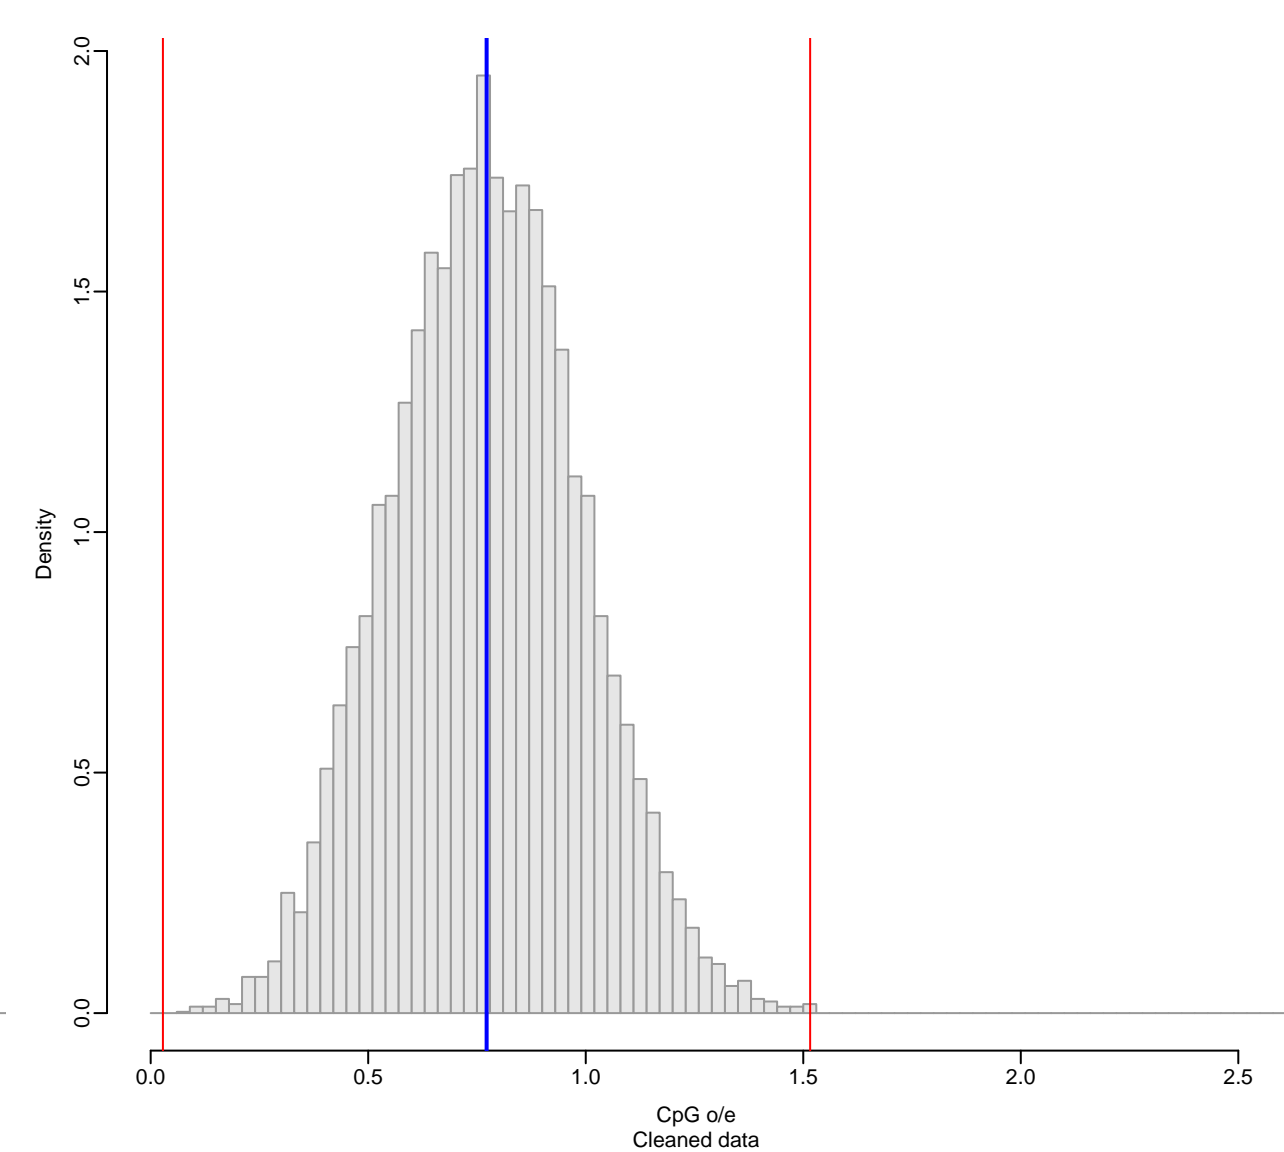

Rhodnius\_prolixus

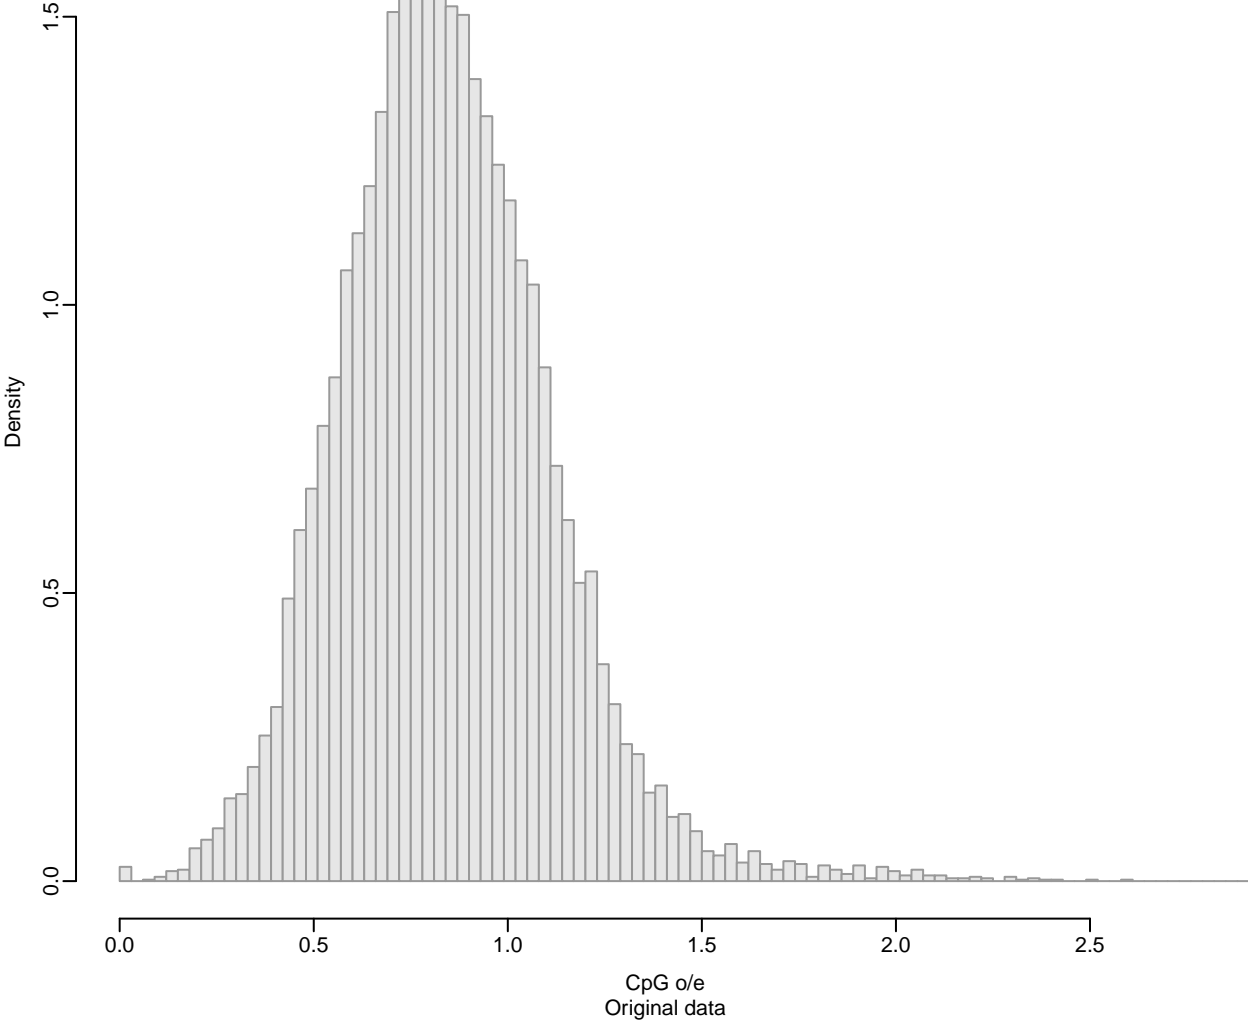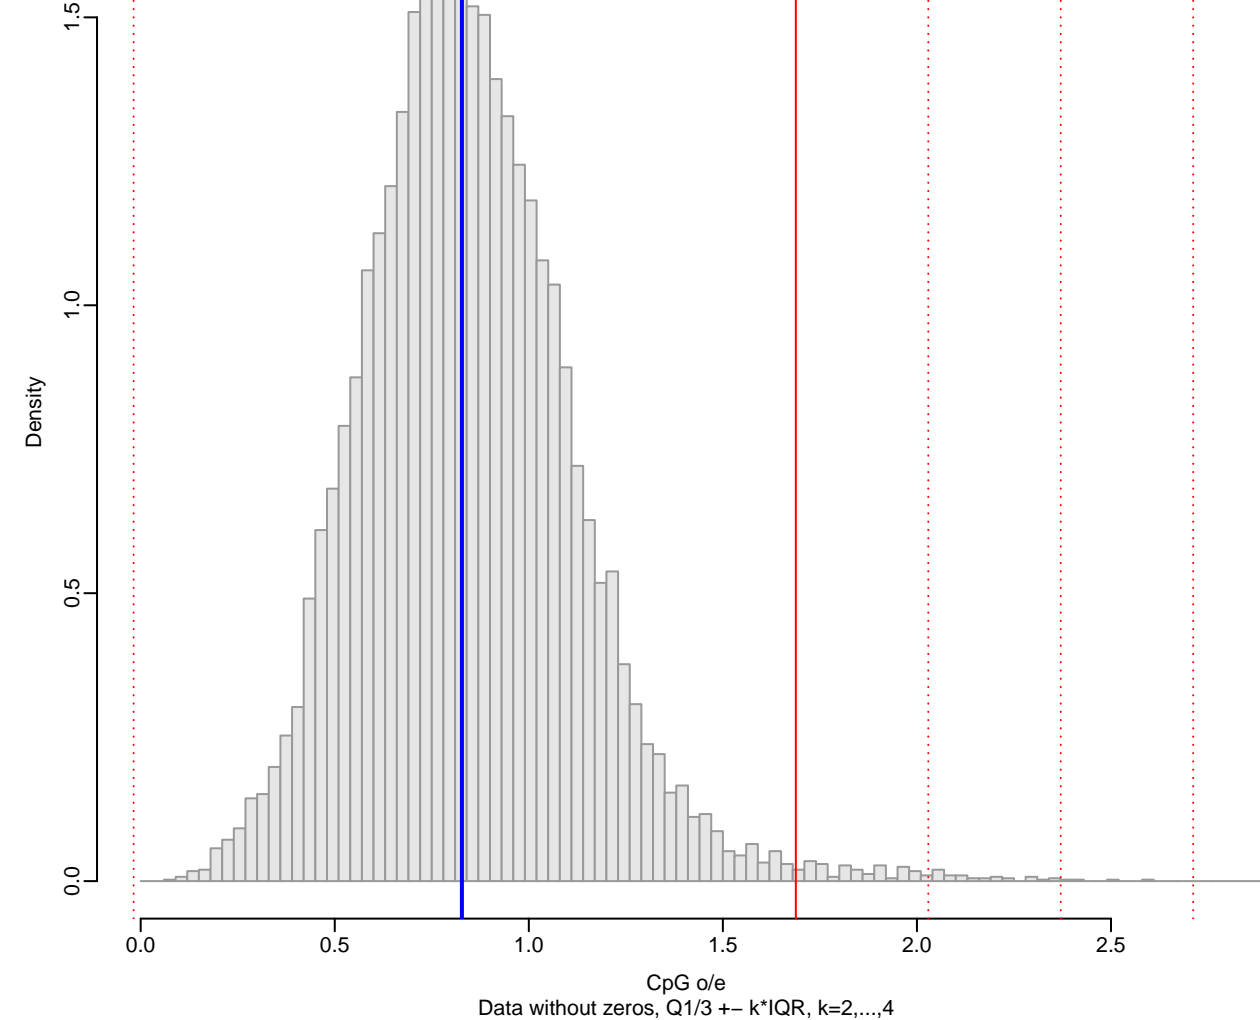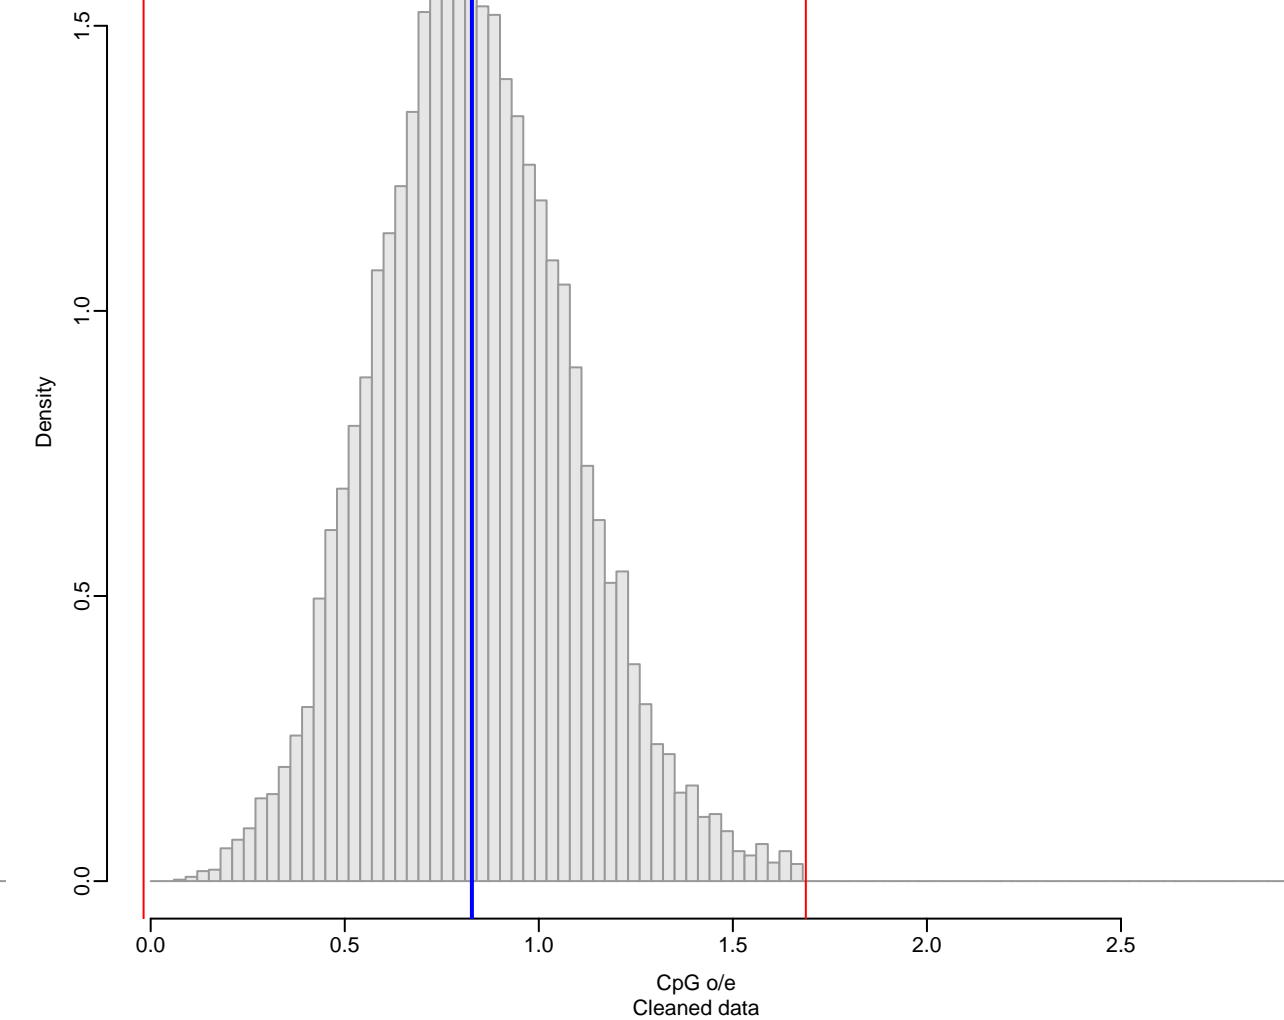

# Rhopalosiphum\_maidis

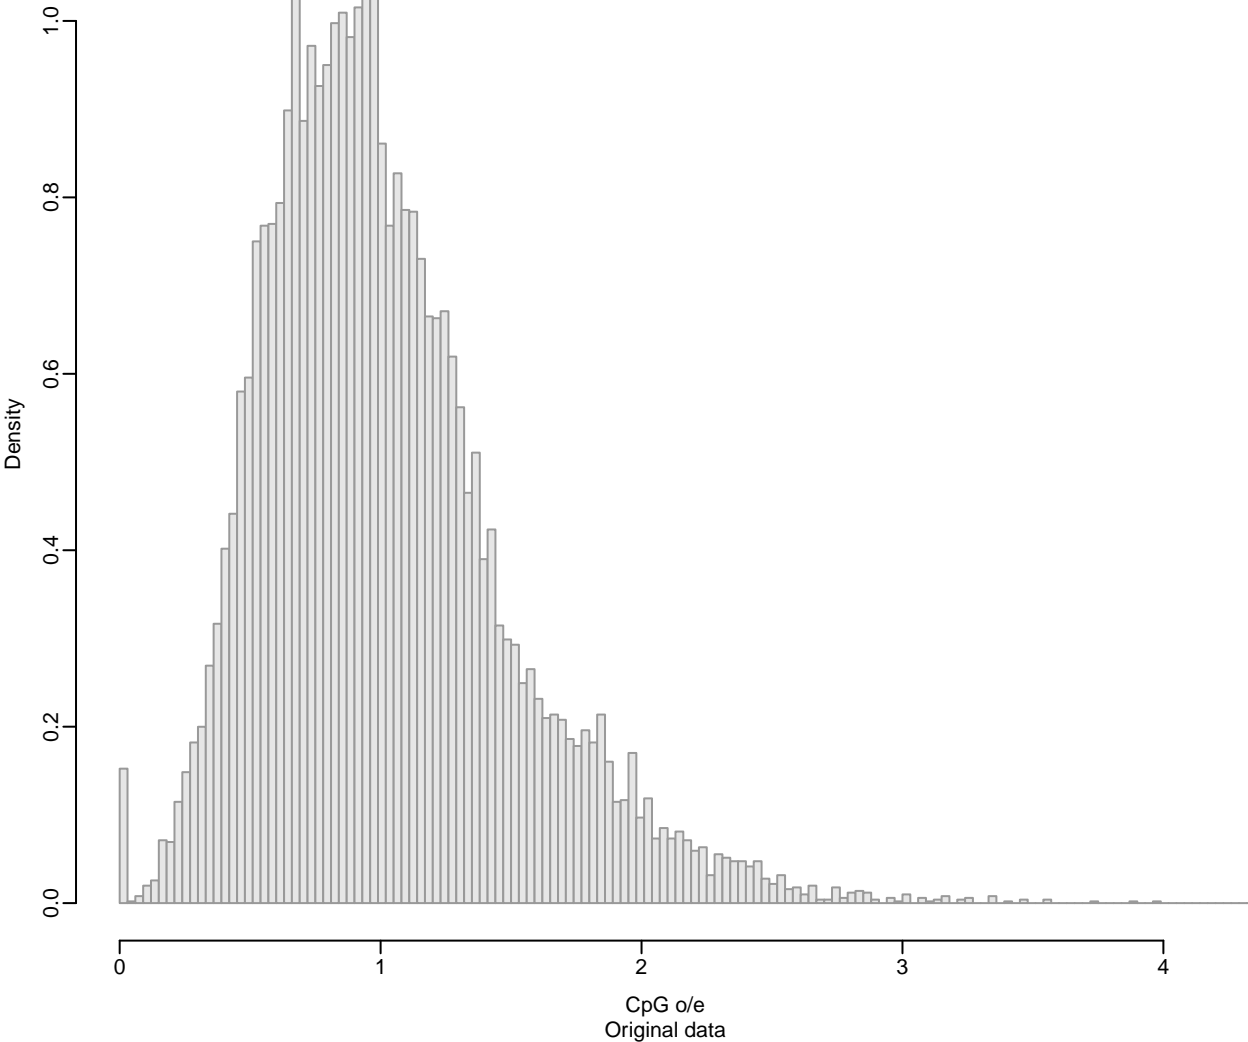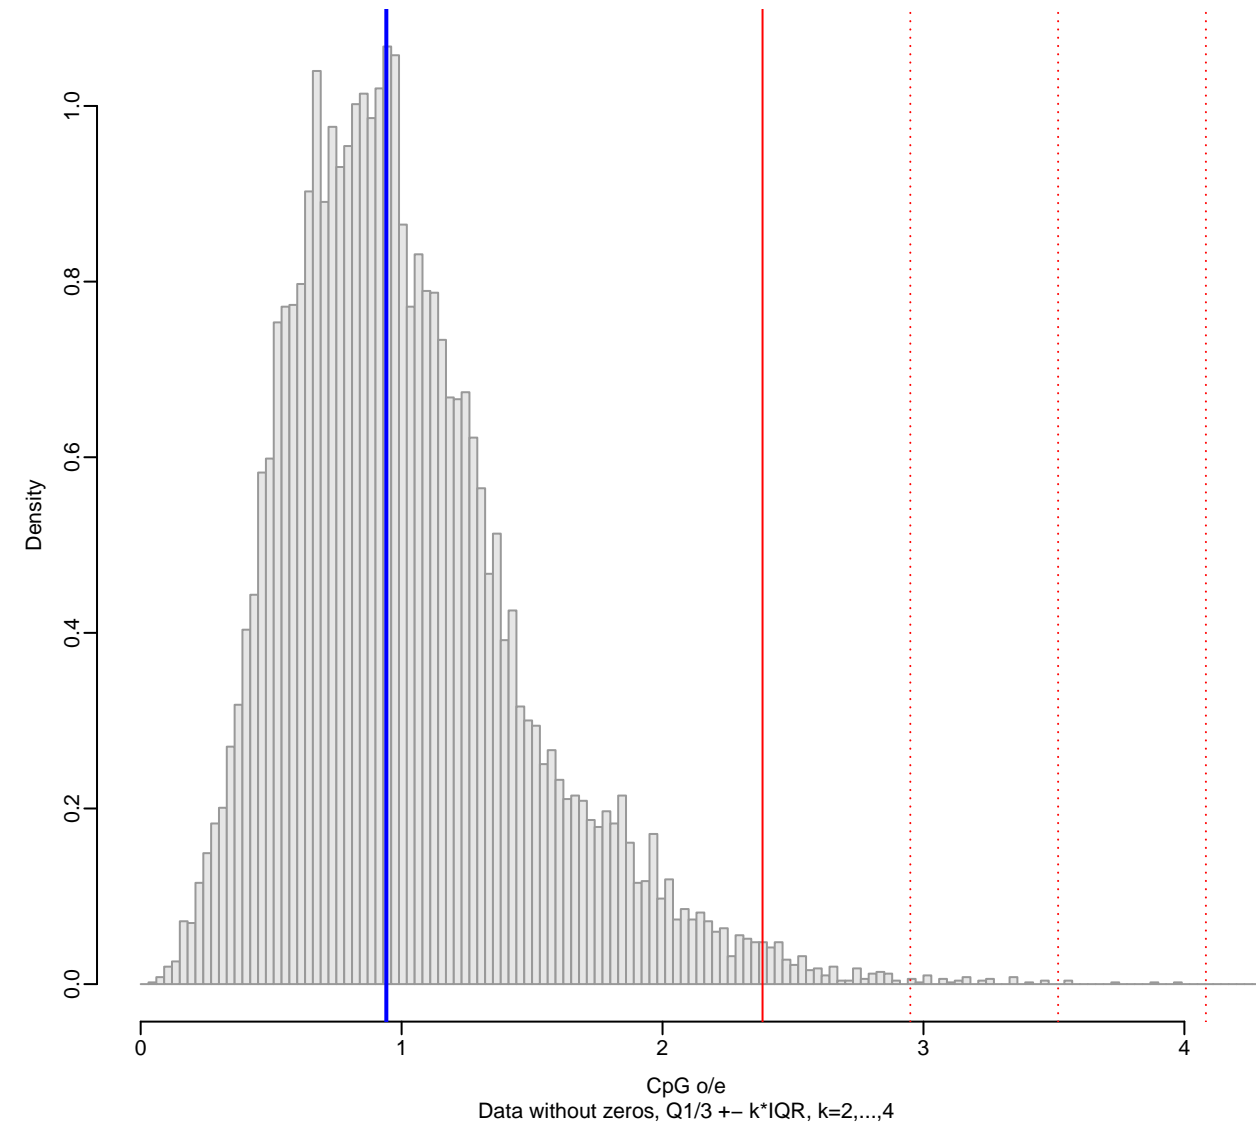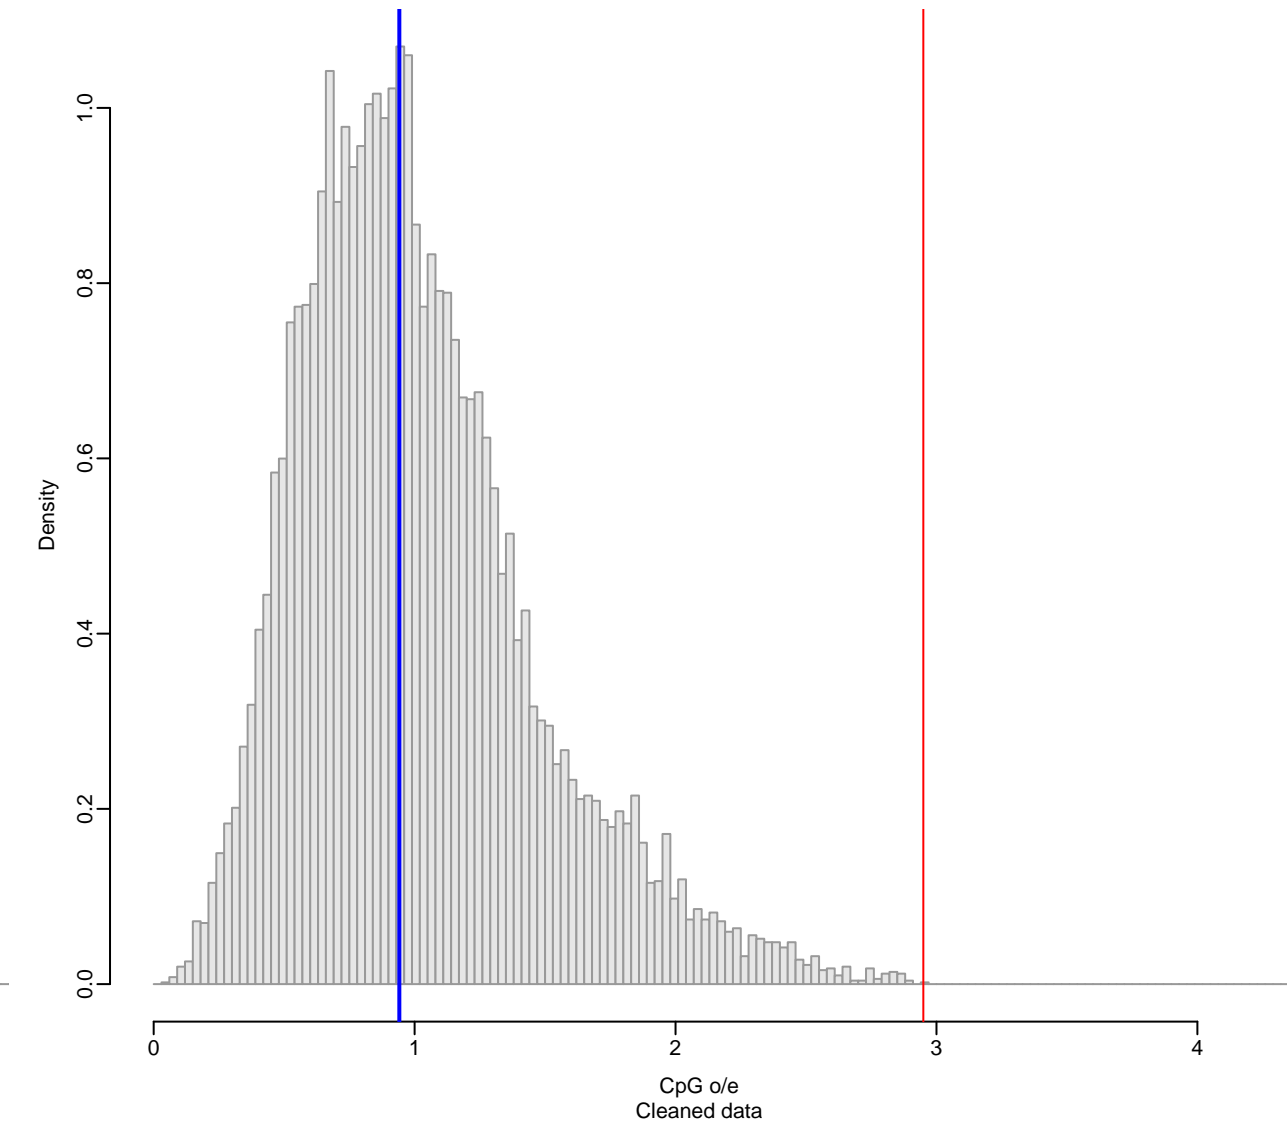

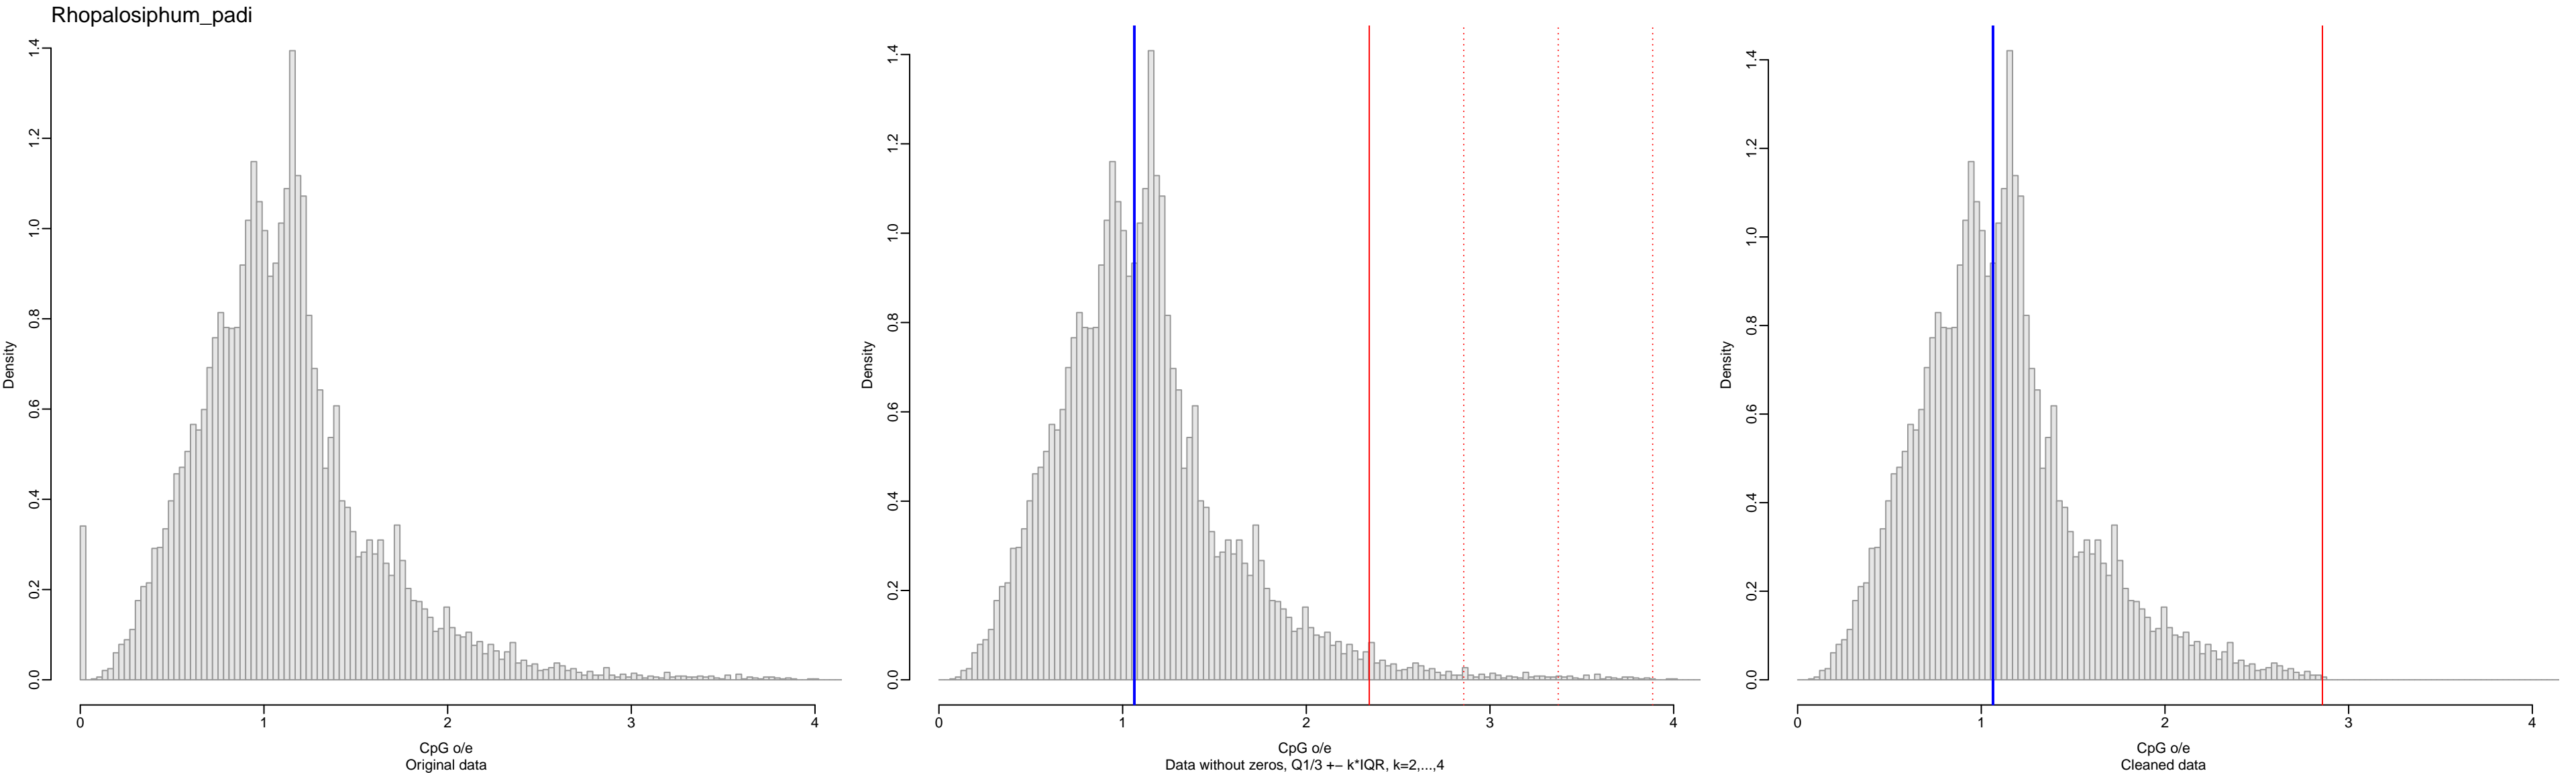

Rhynchosciara\_americana

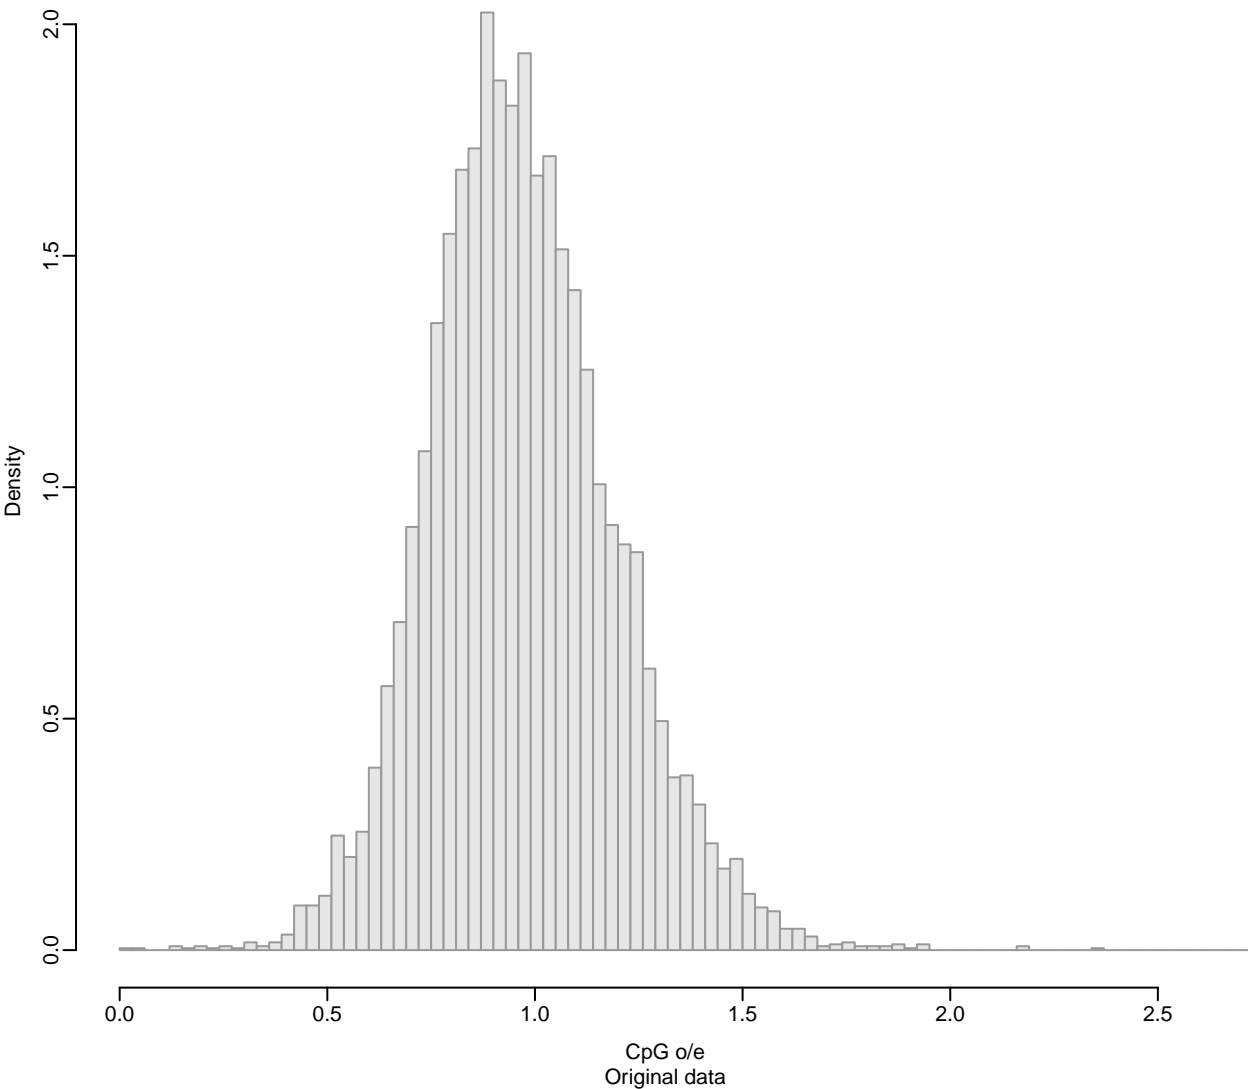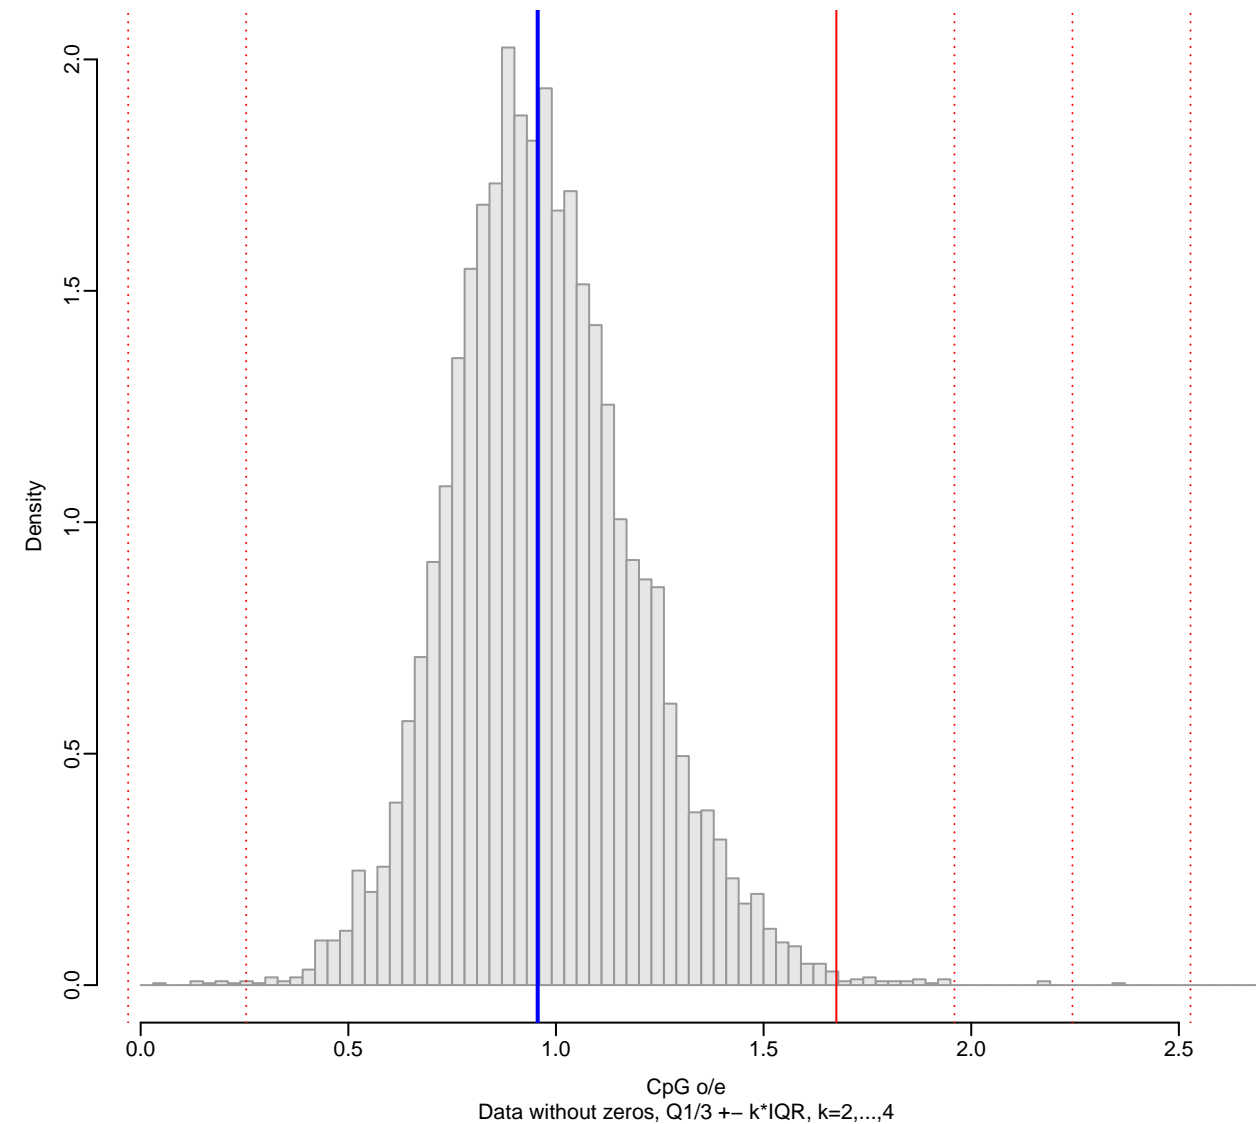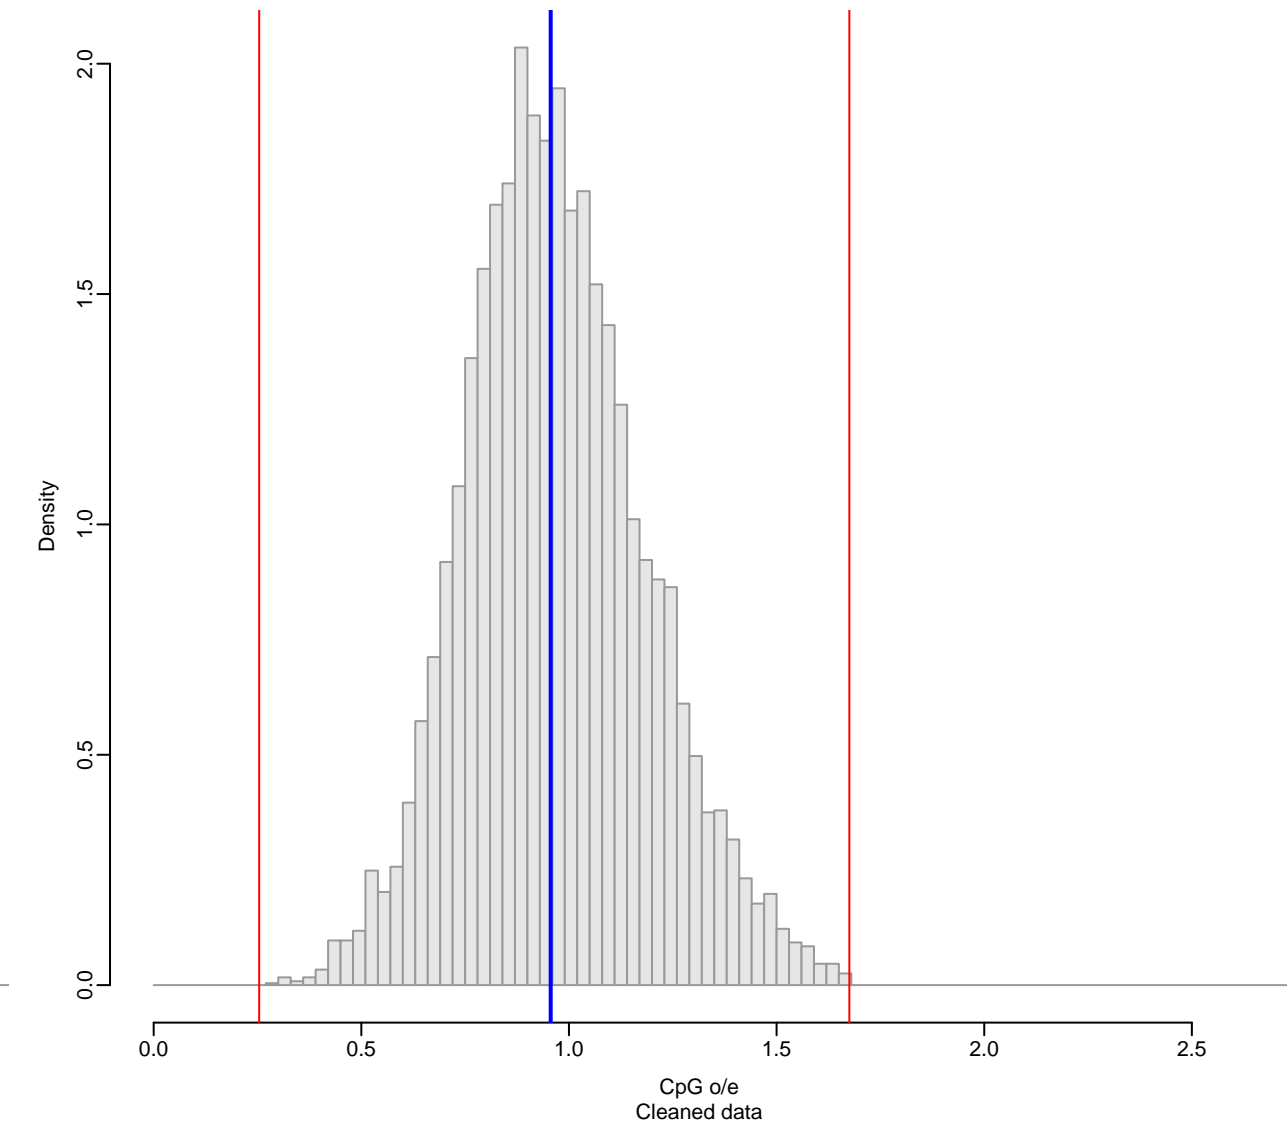

Rutilus\_rutilus

Density

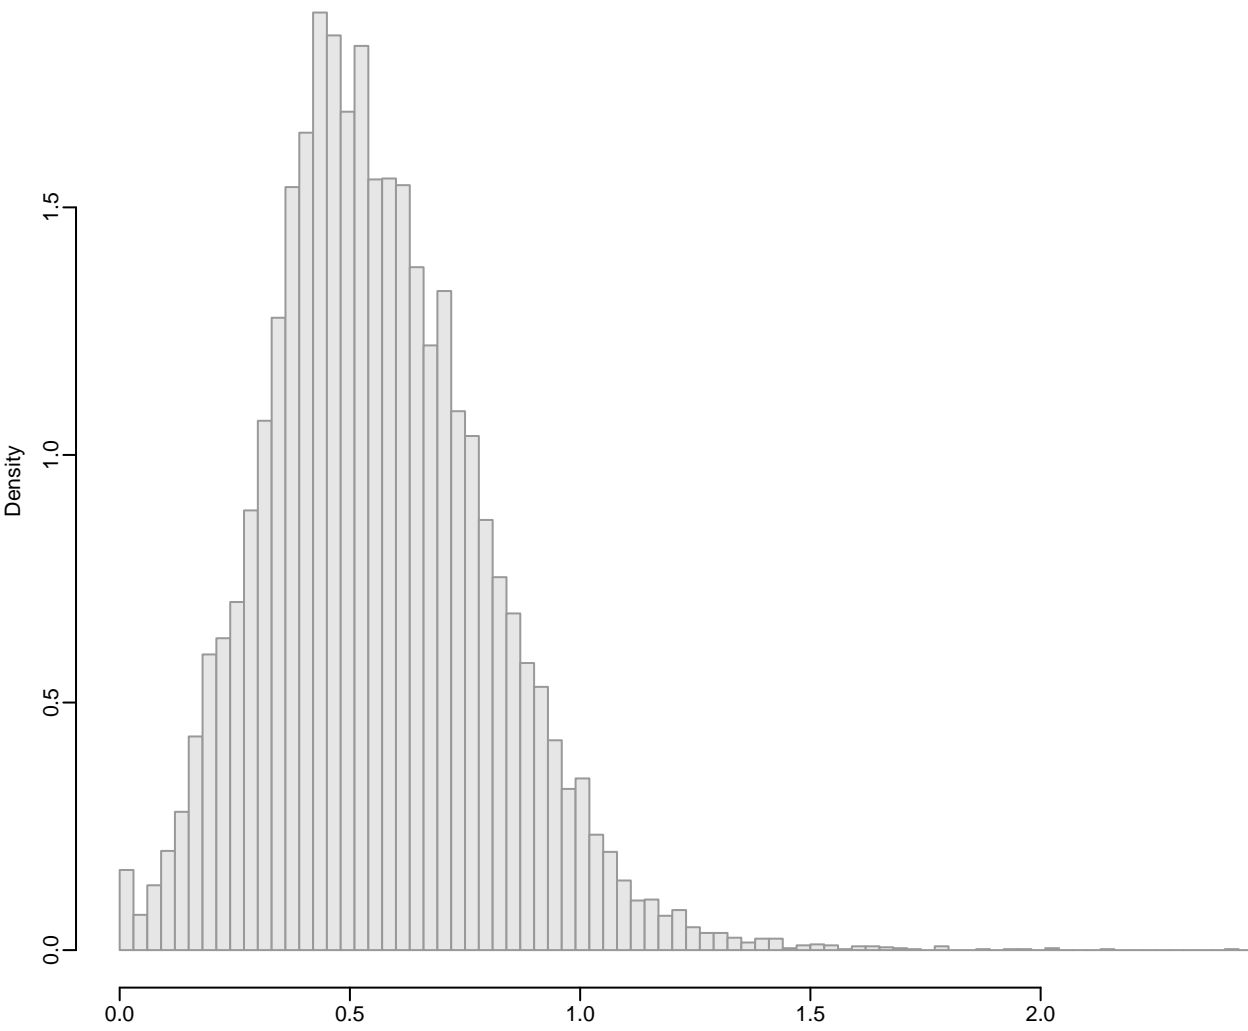

Density

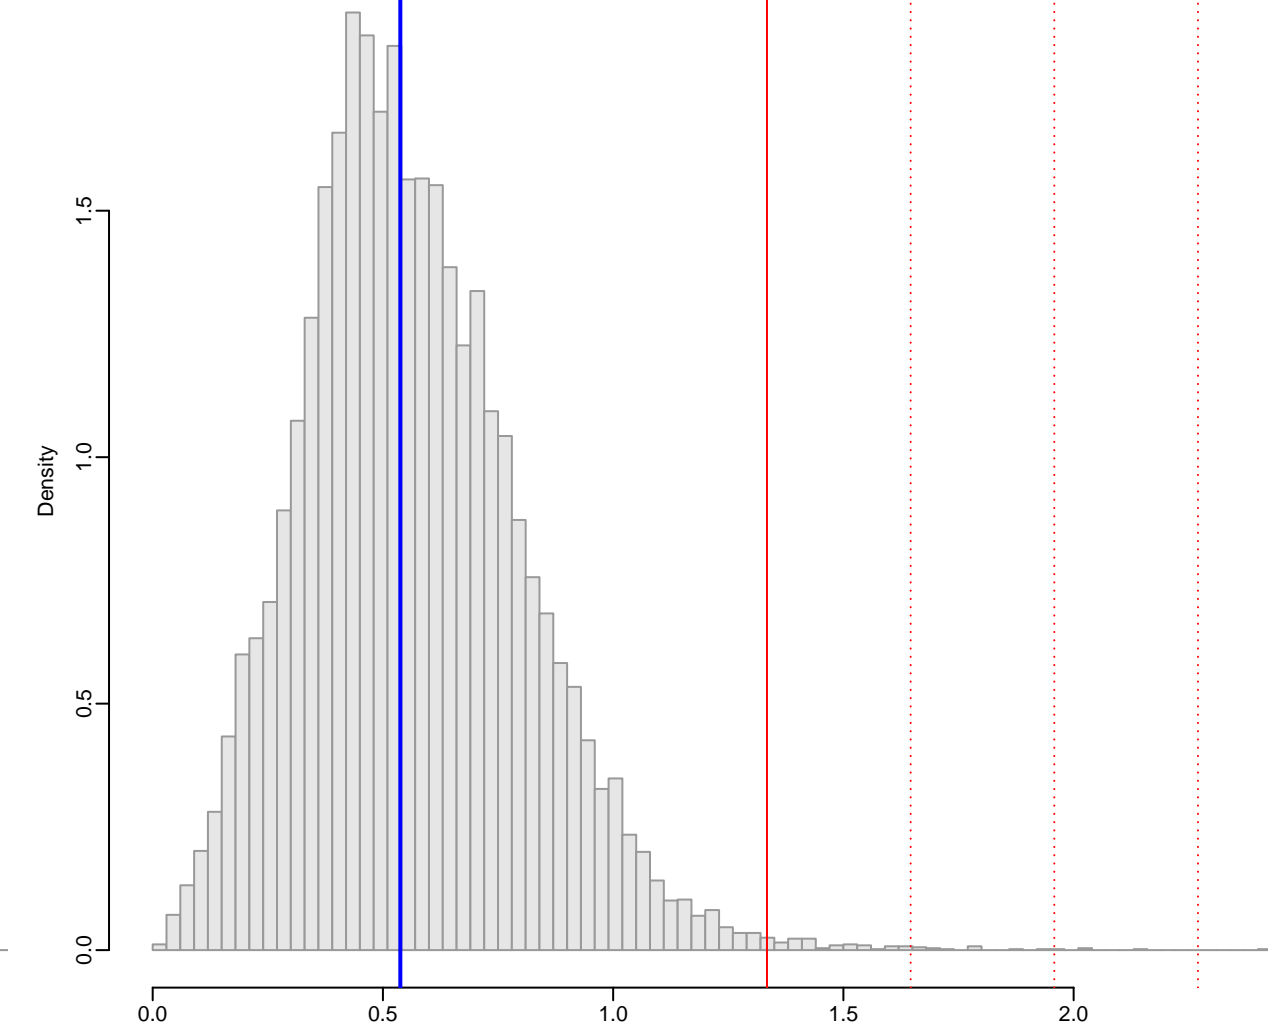

Density

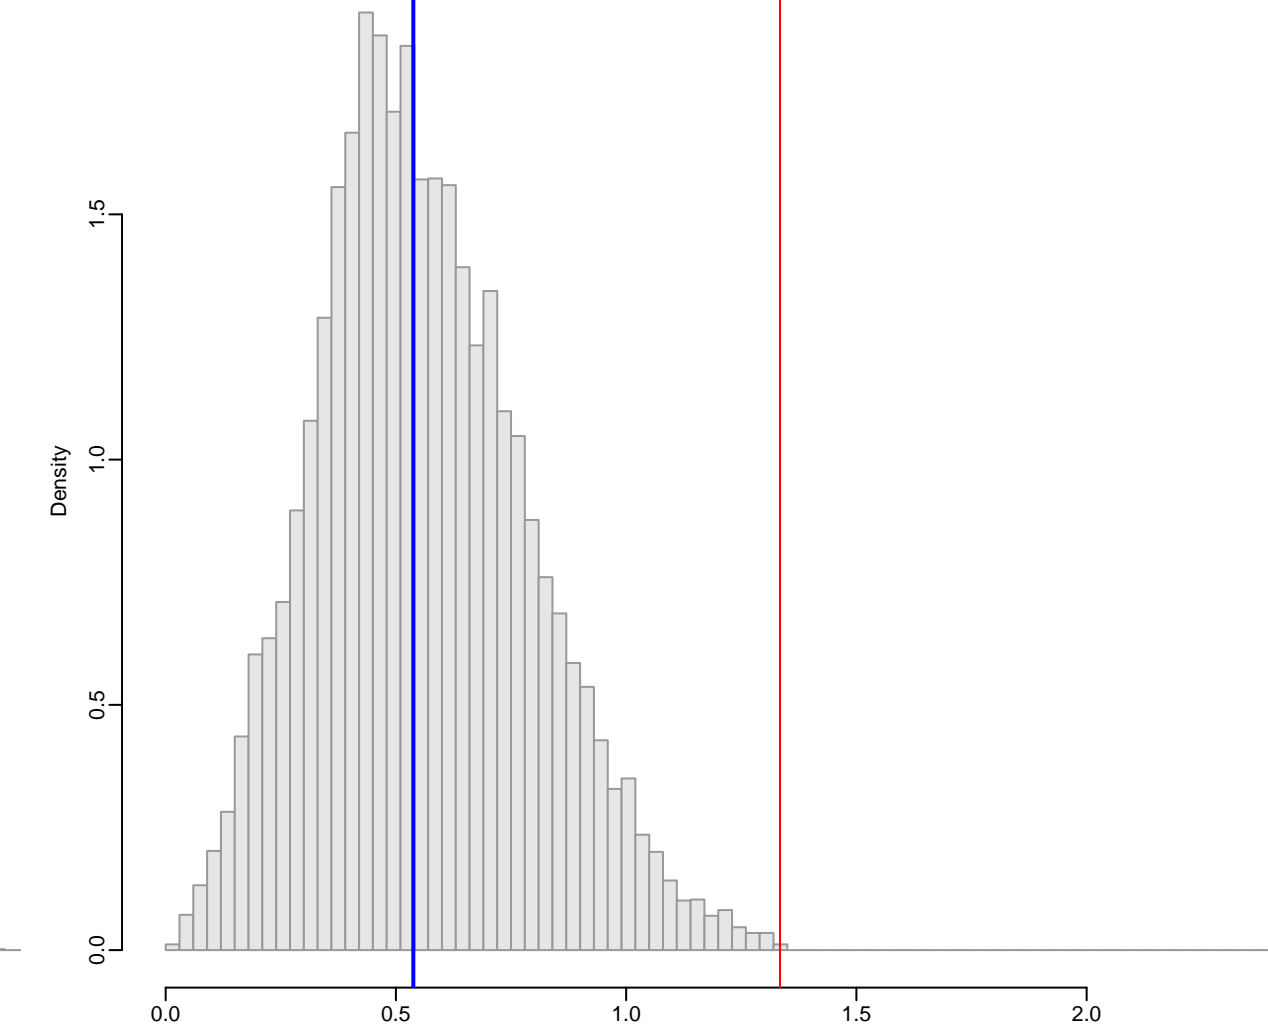

Saccharomyces\_cerevisiae

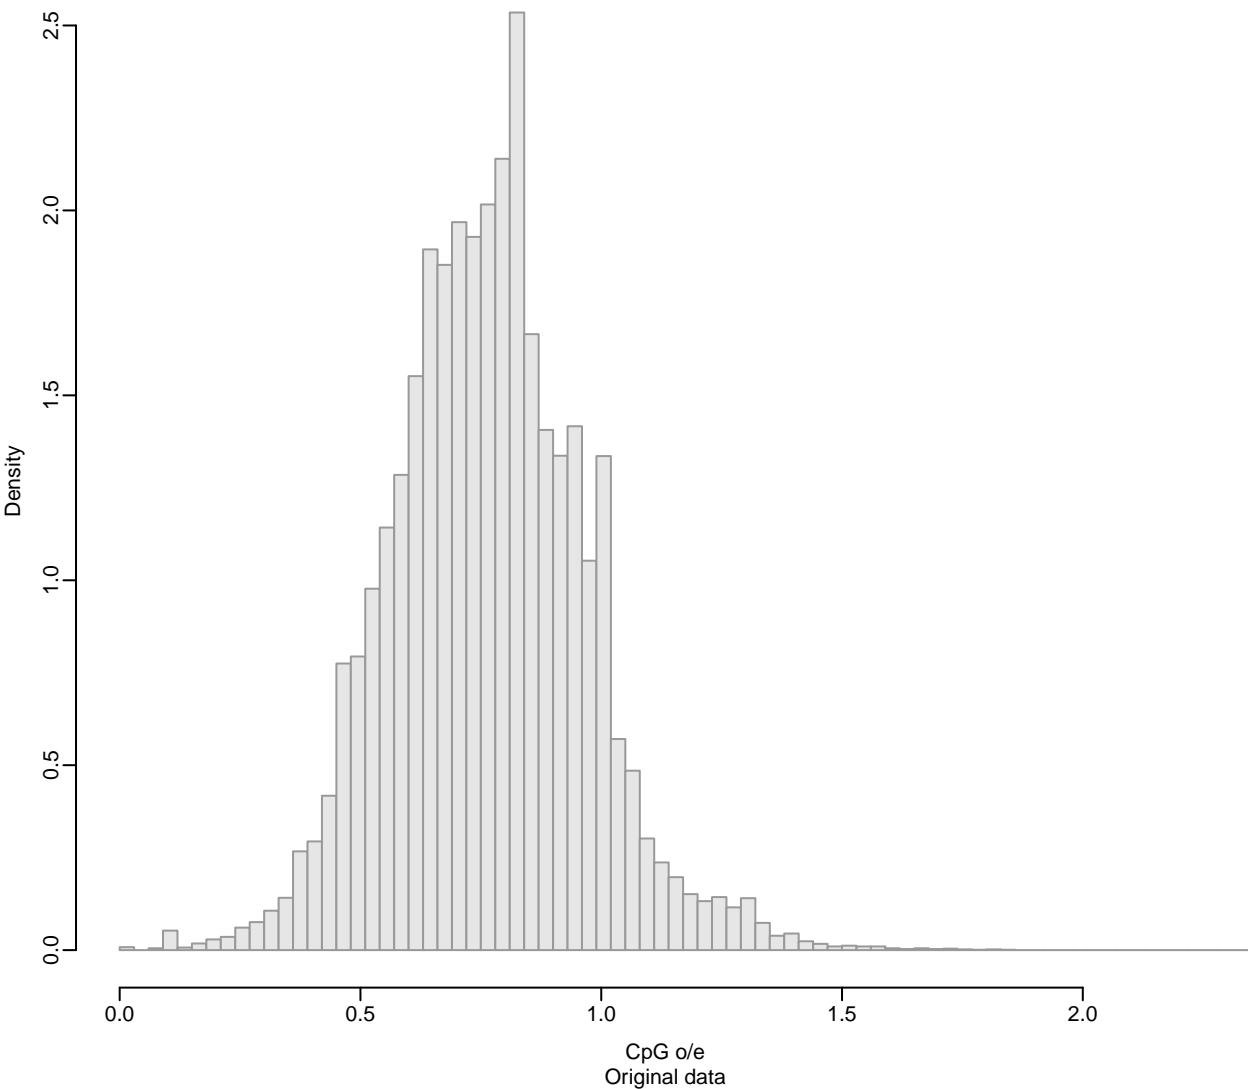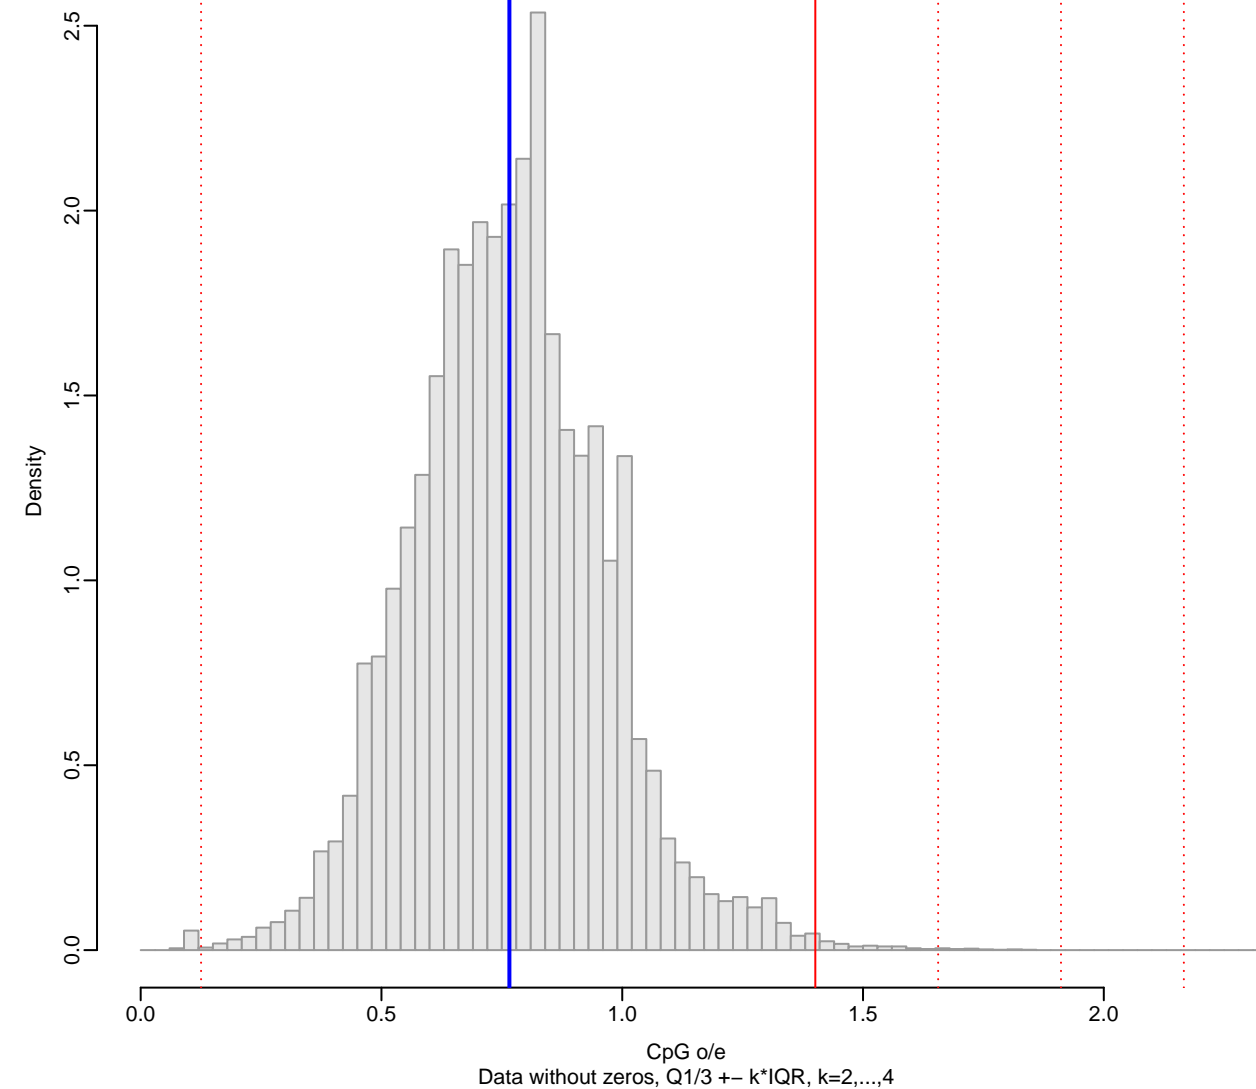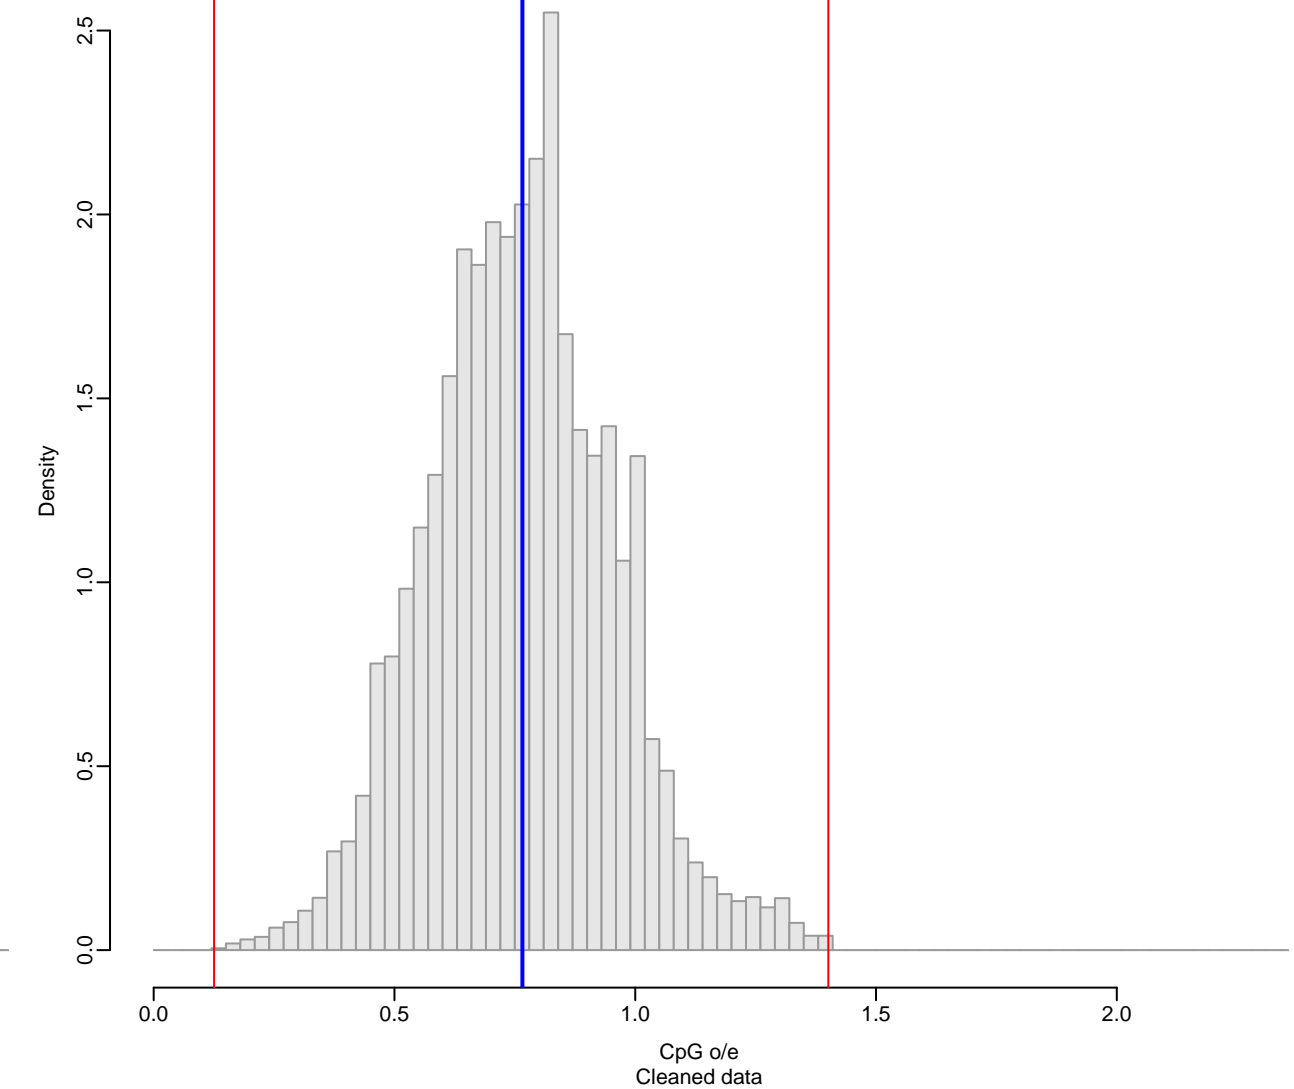

Saccharomyces\_pastorianus

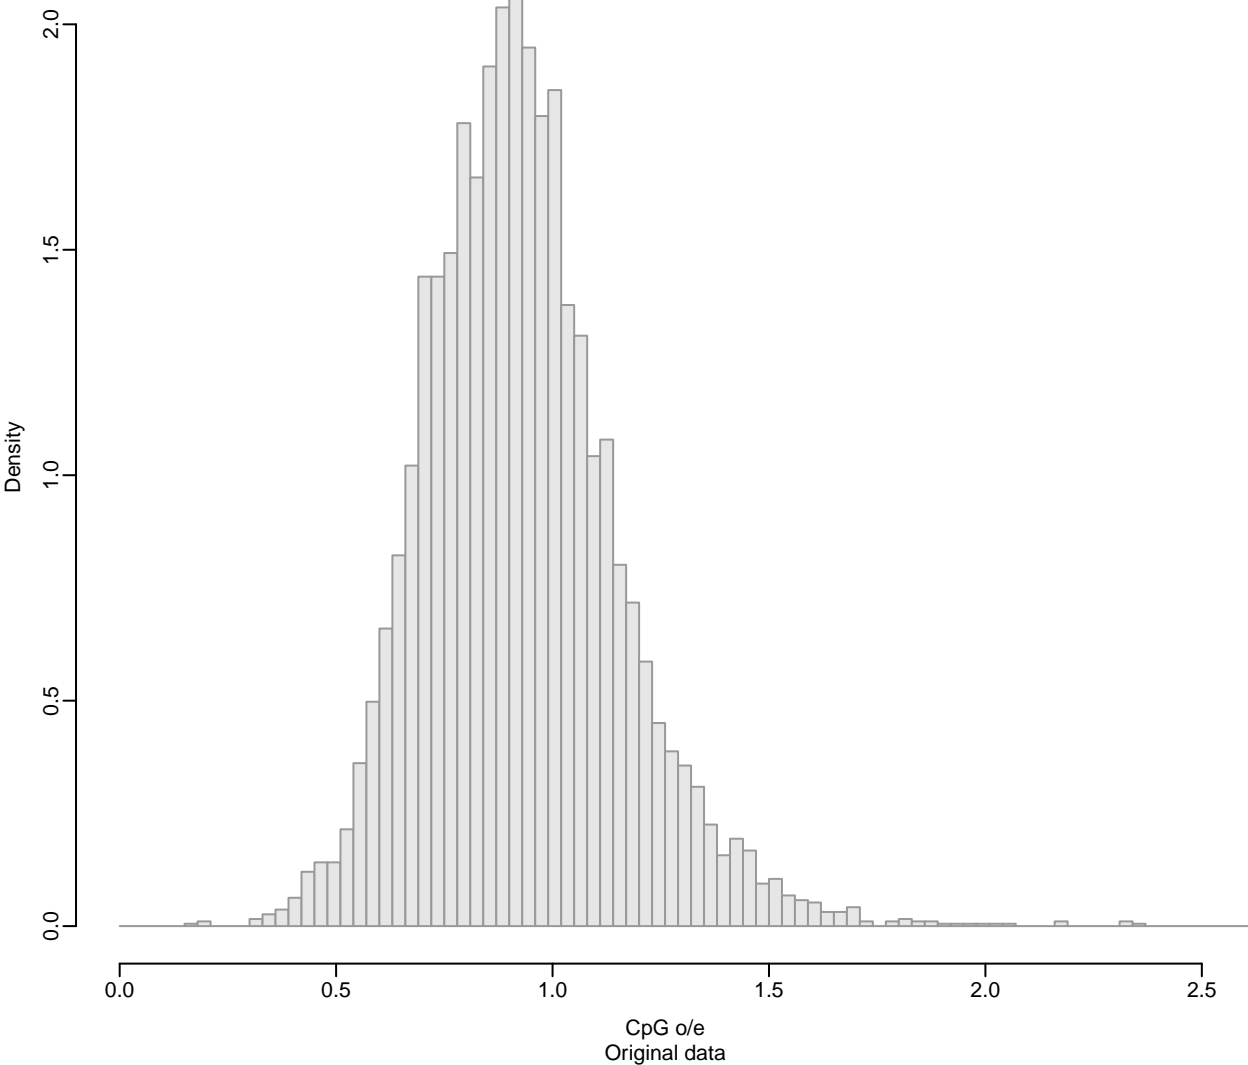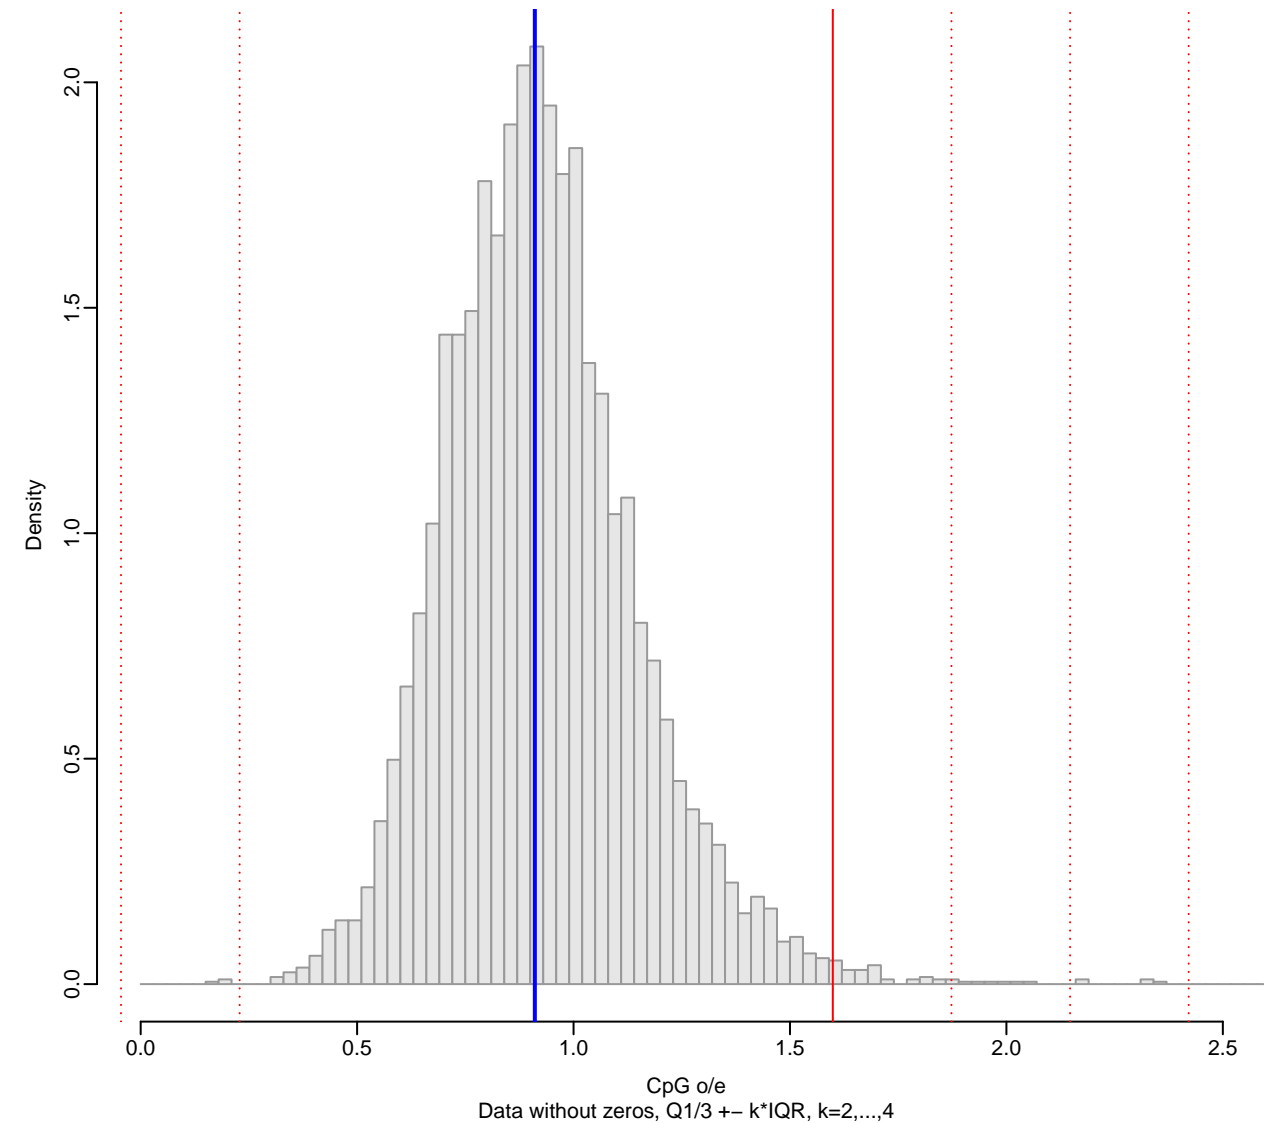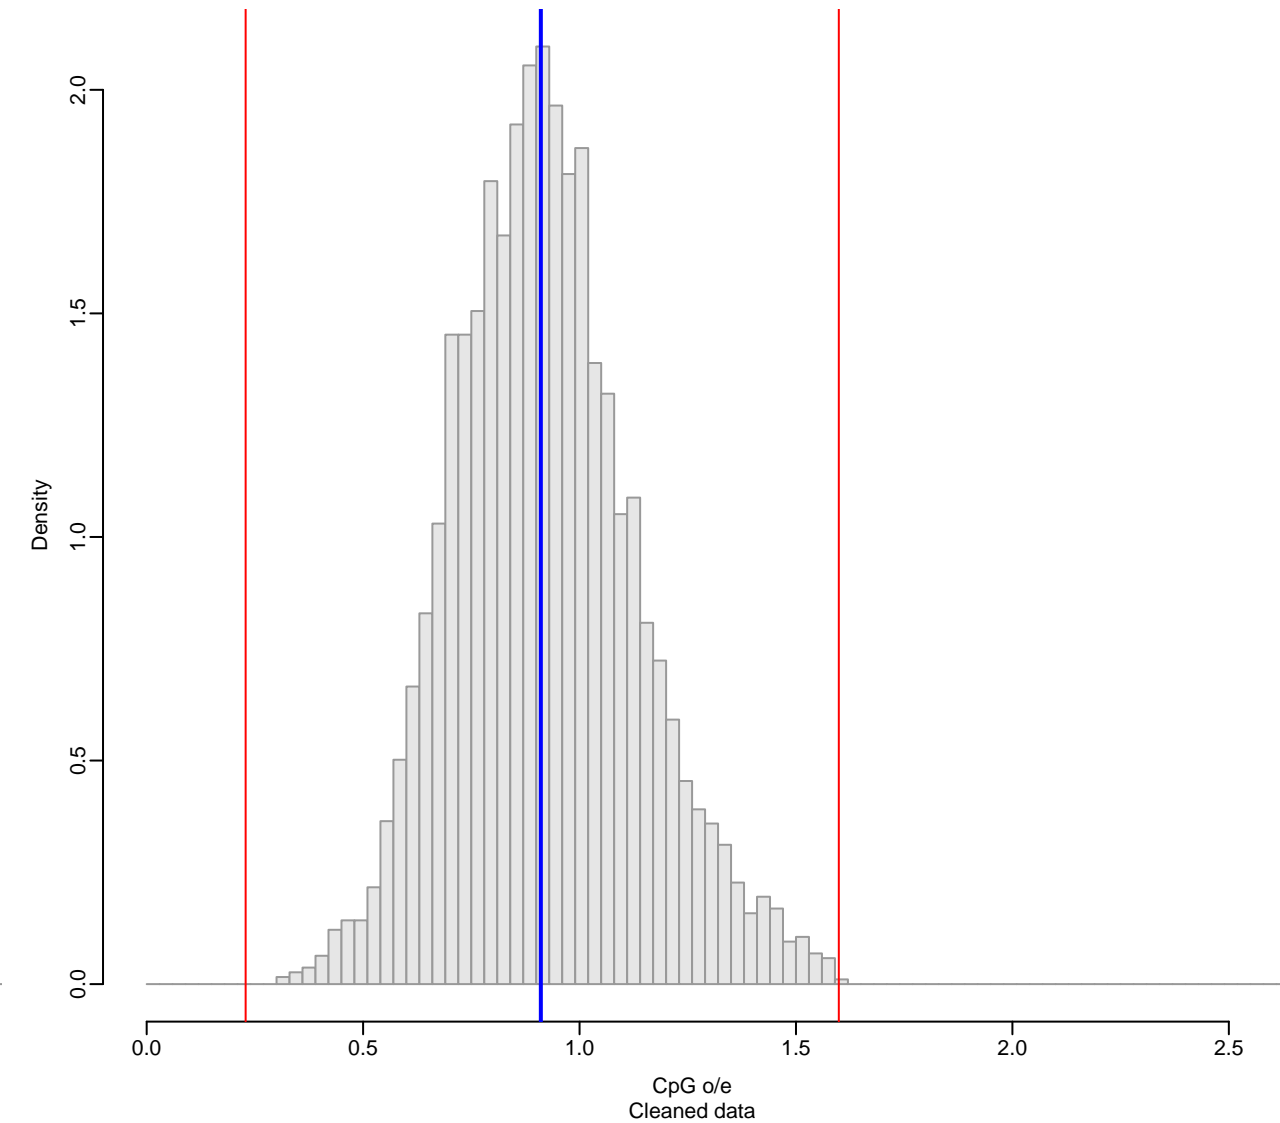



Saccoglossus\_kowalevskii

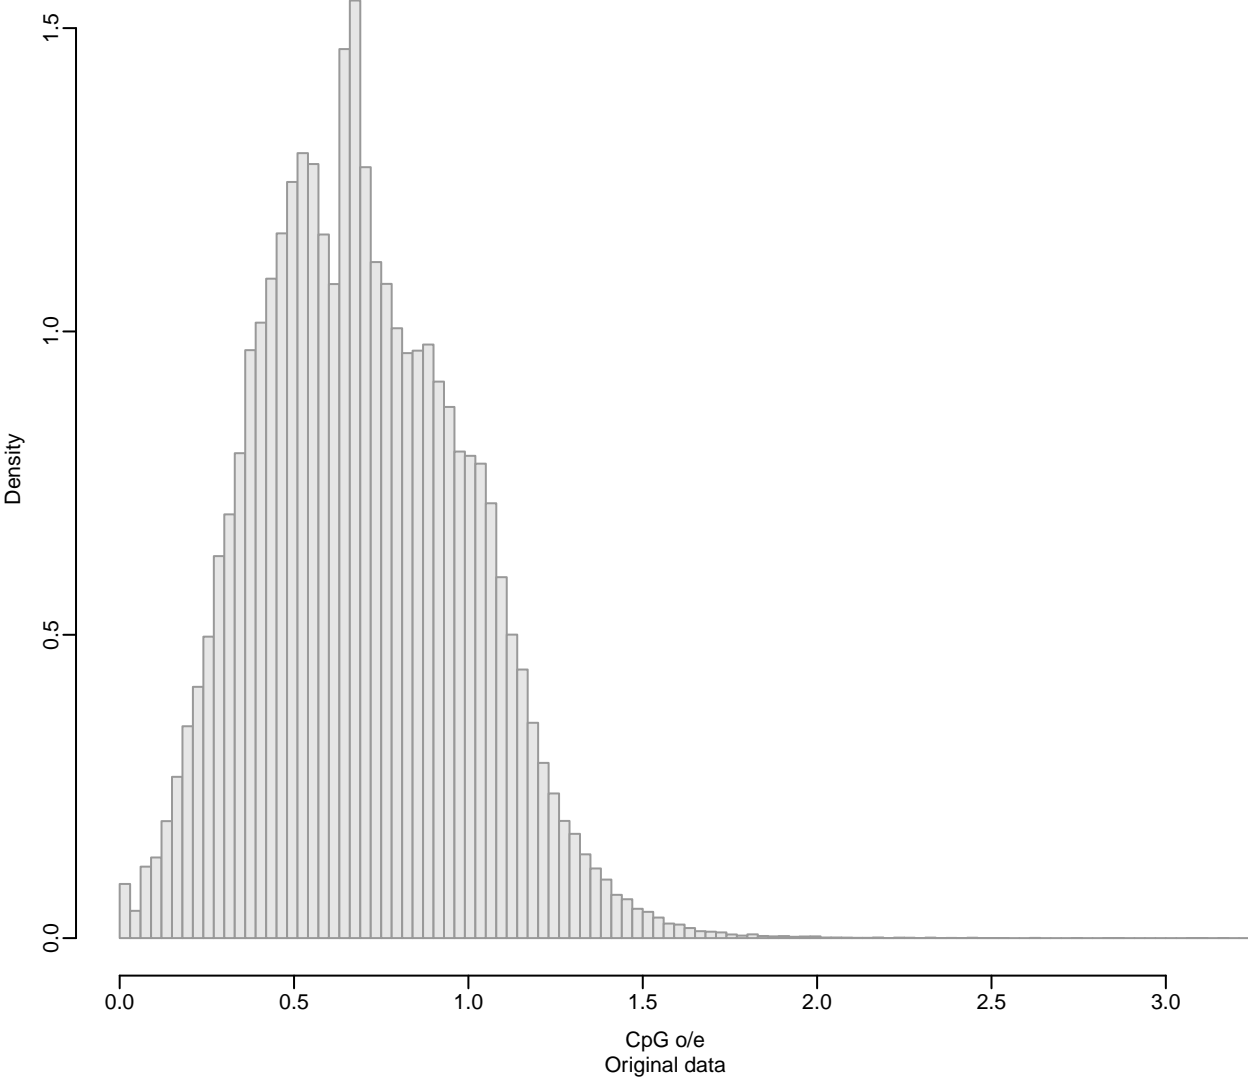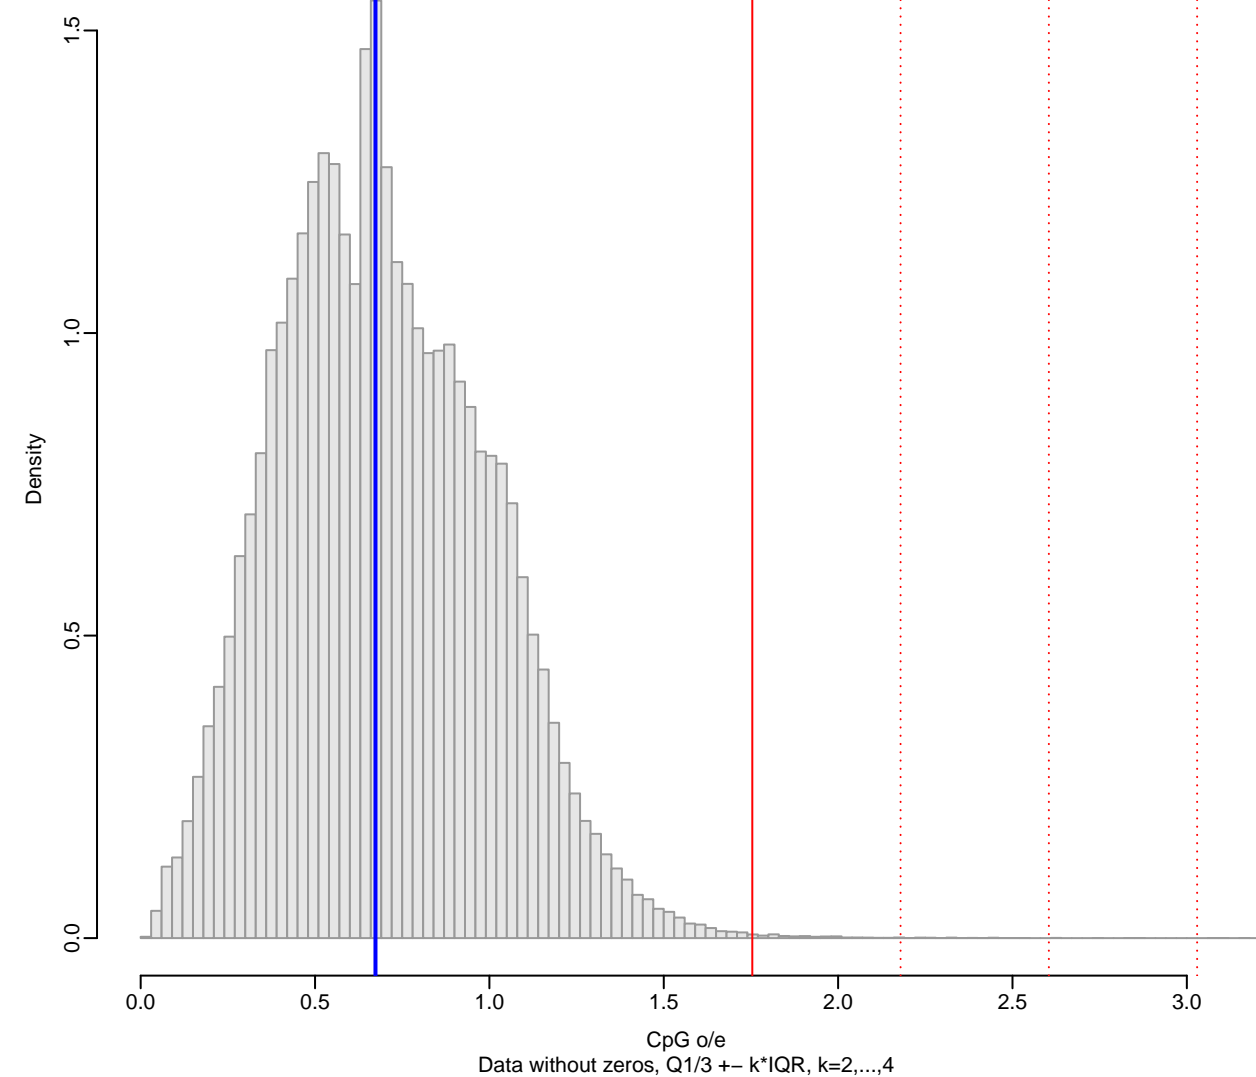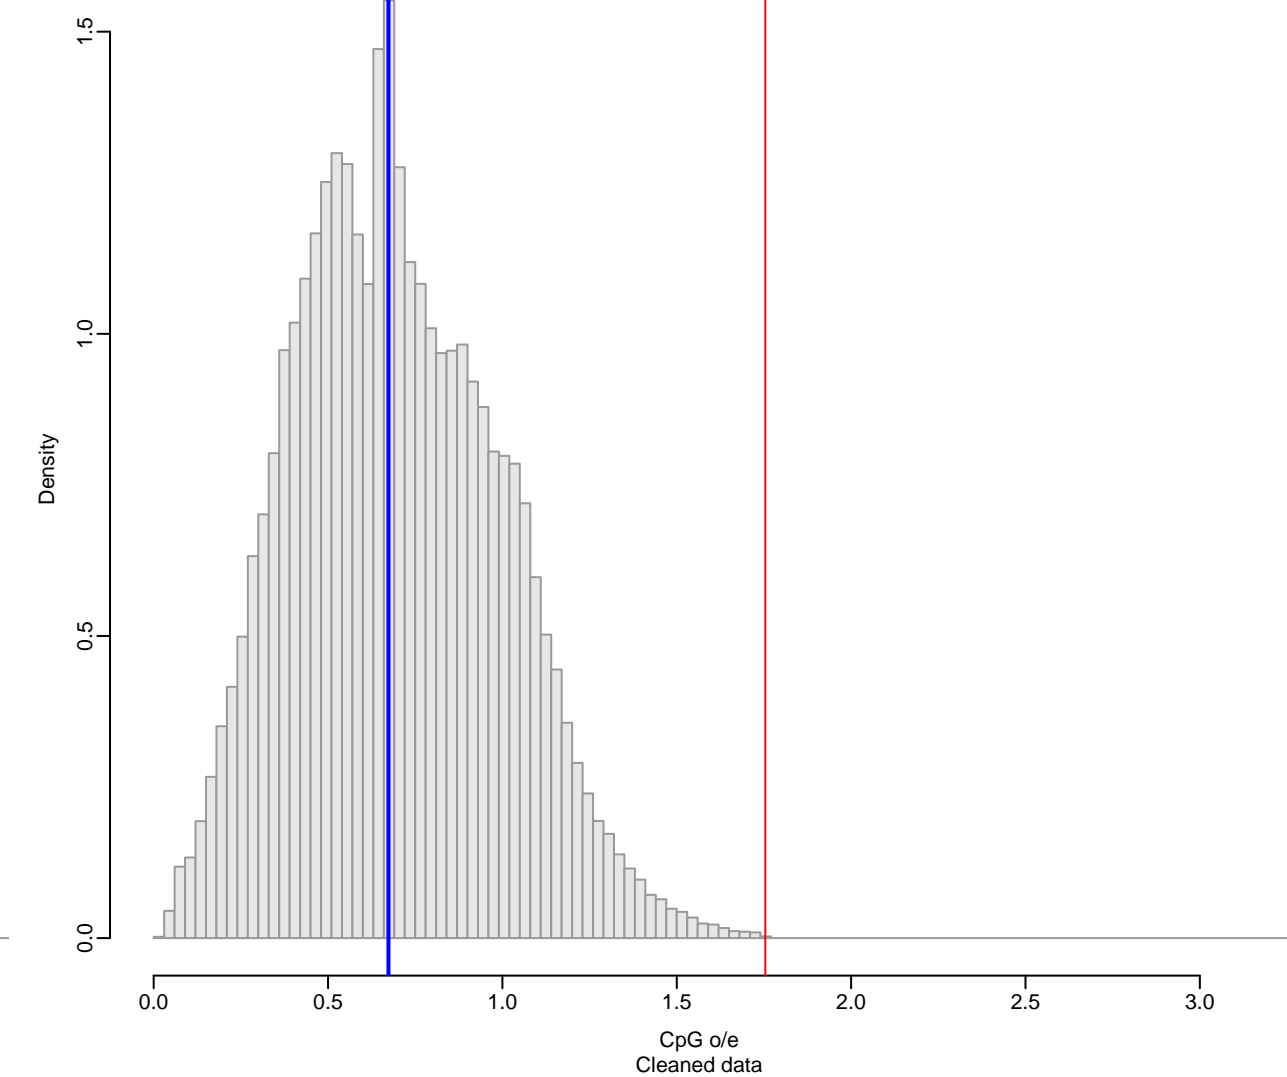

Salmo\_salar

Density

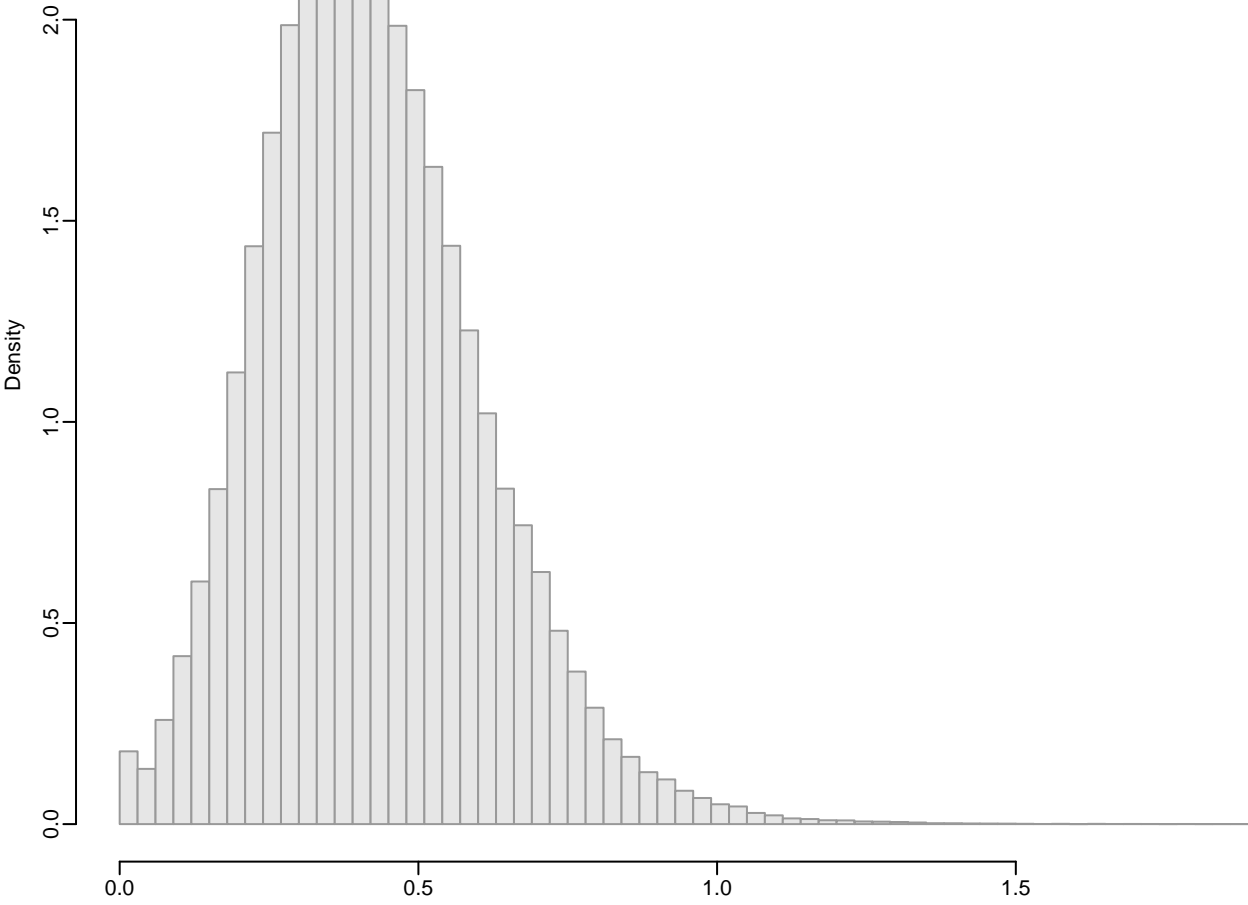

Density

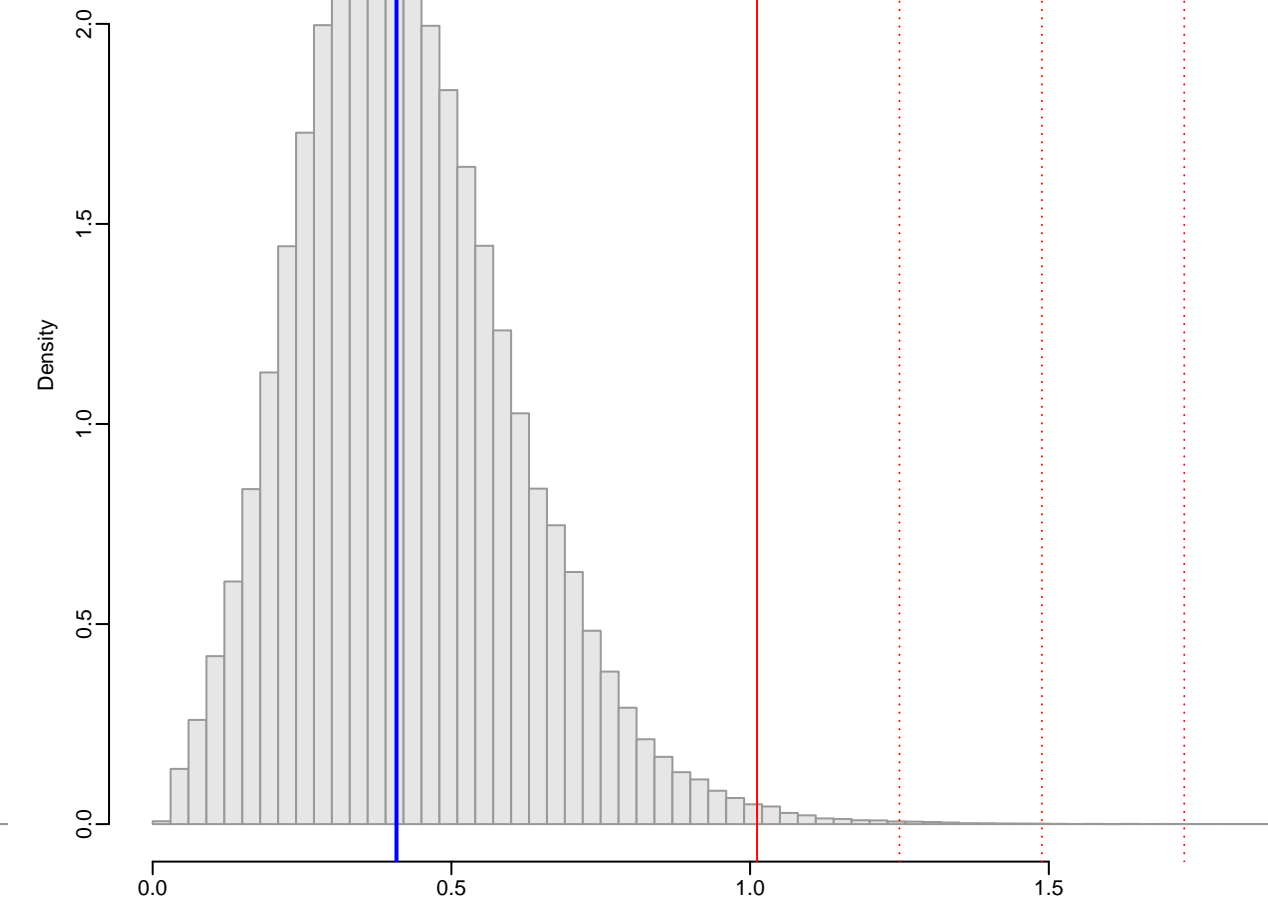

Density

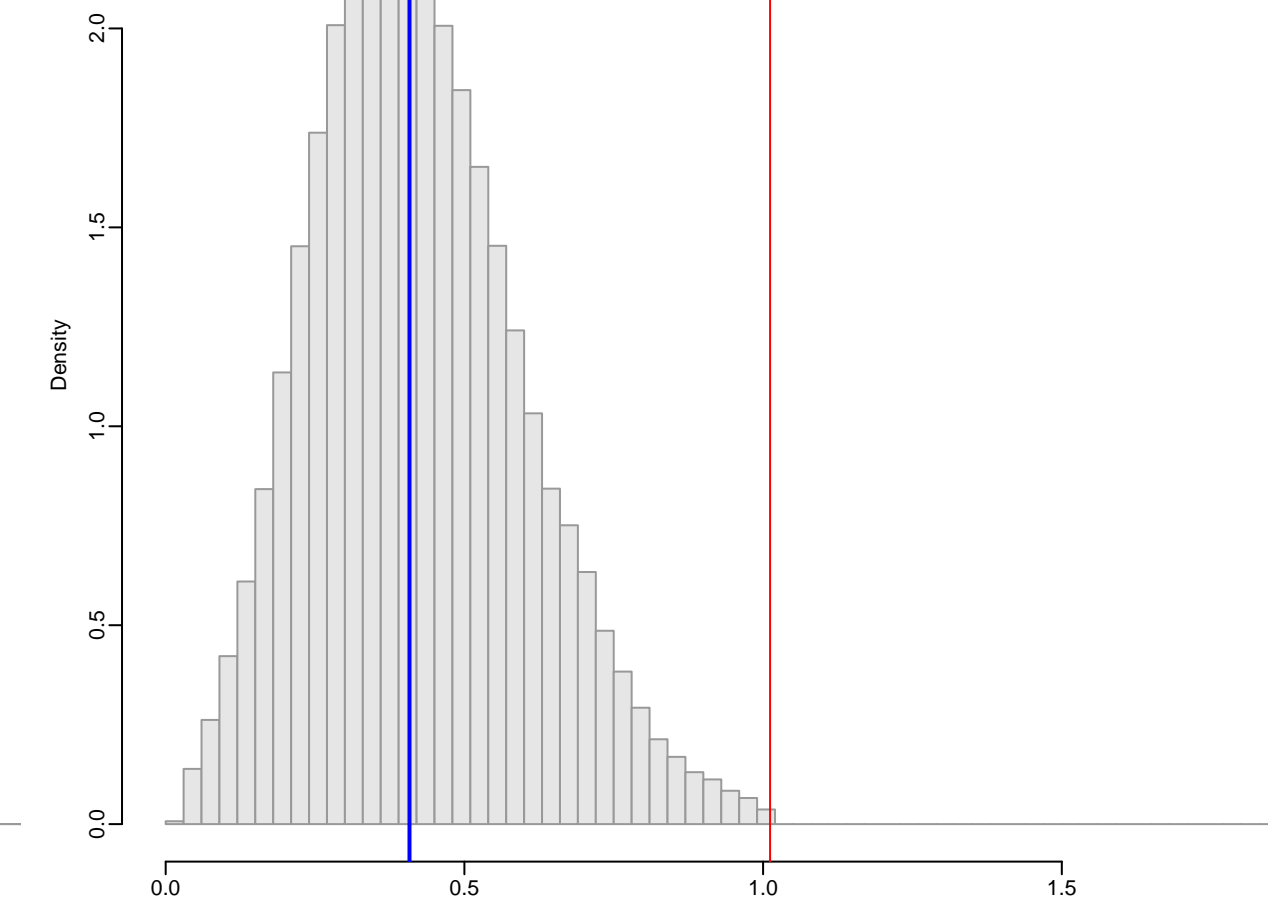

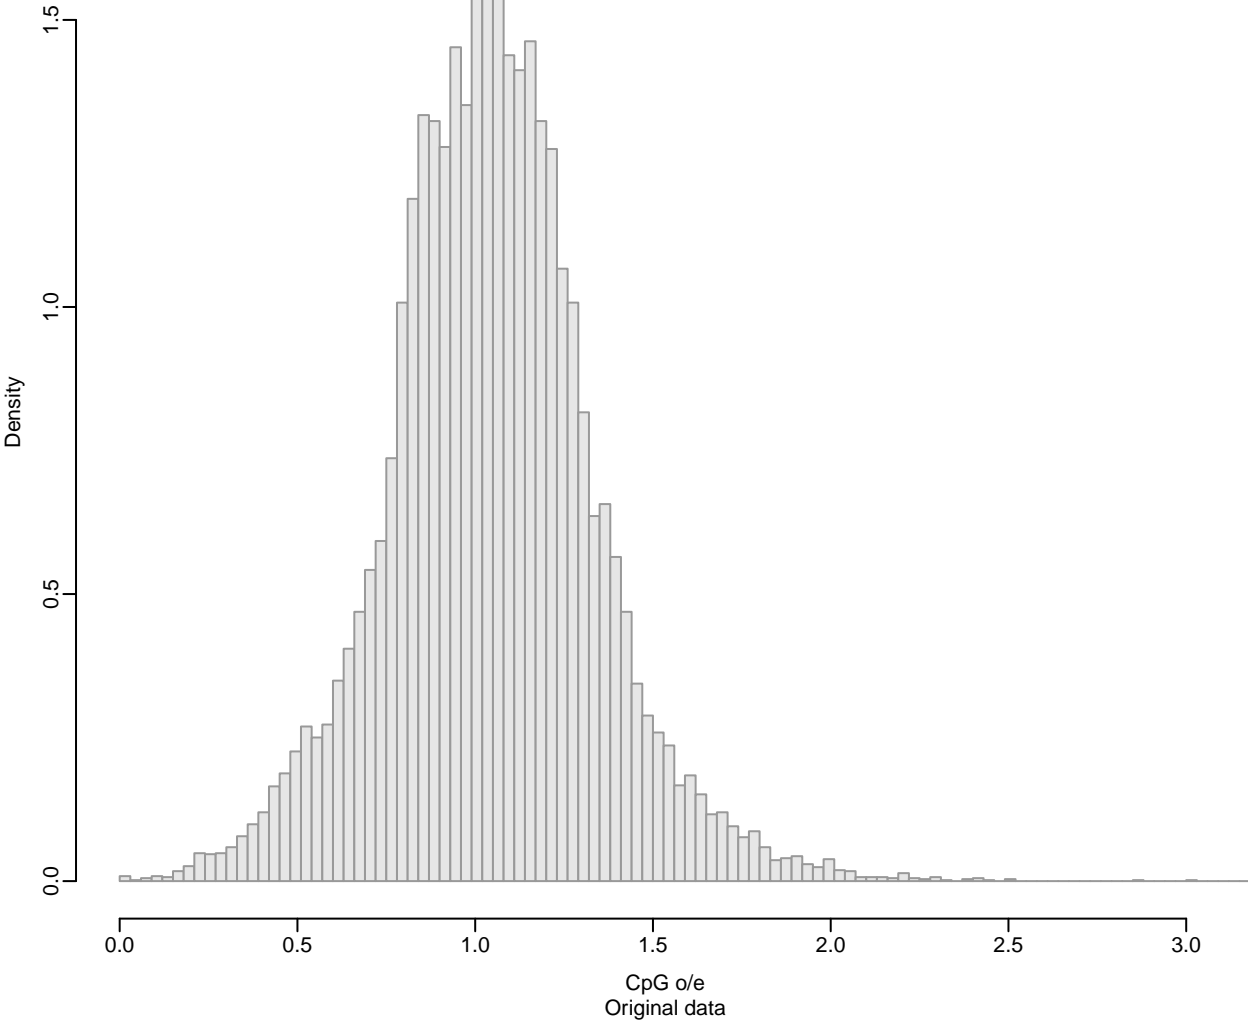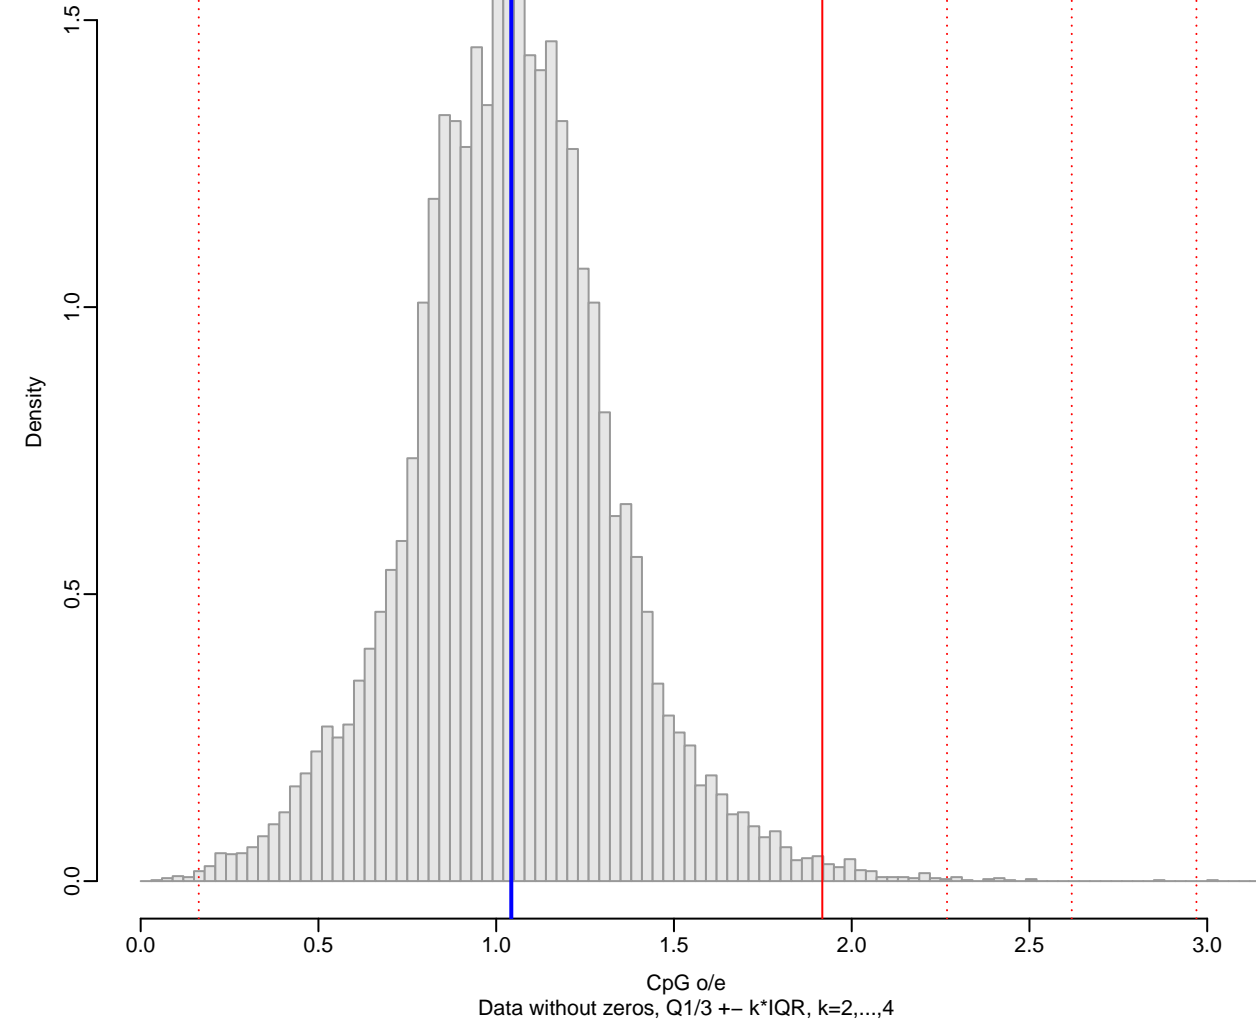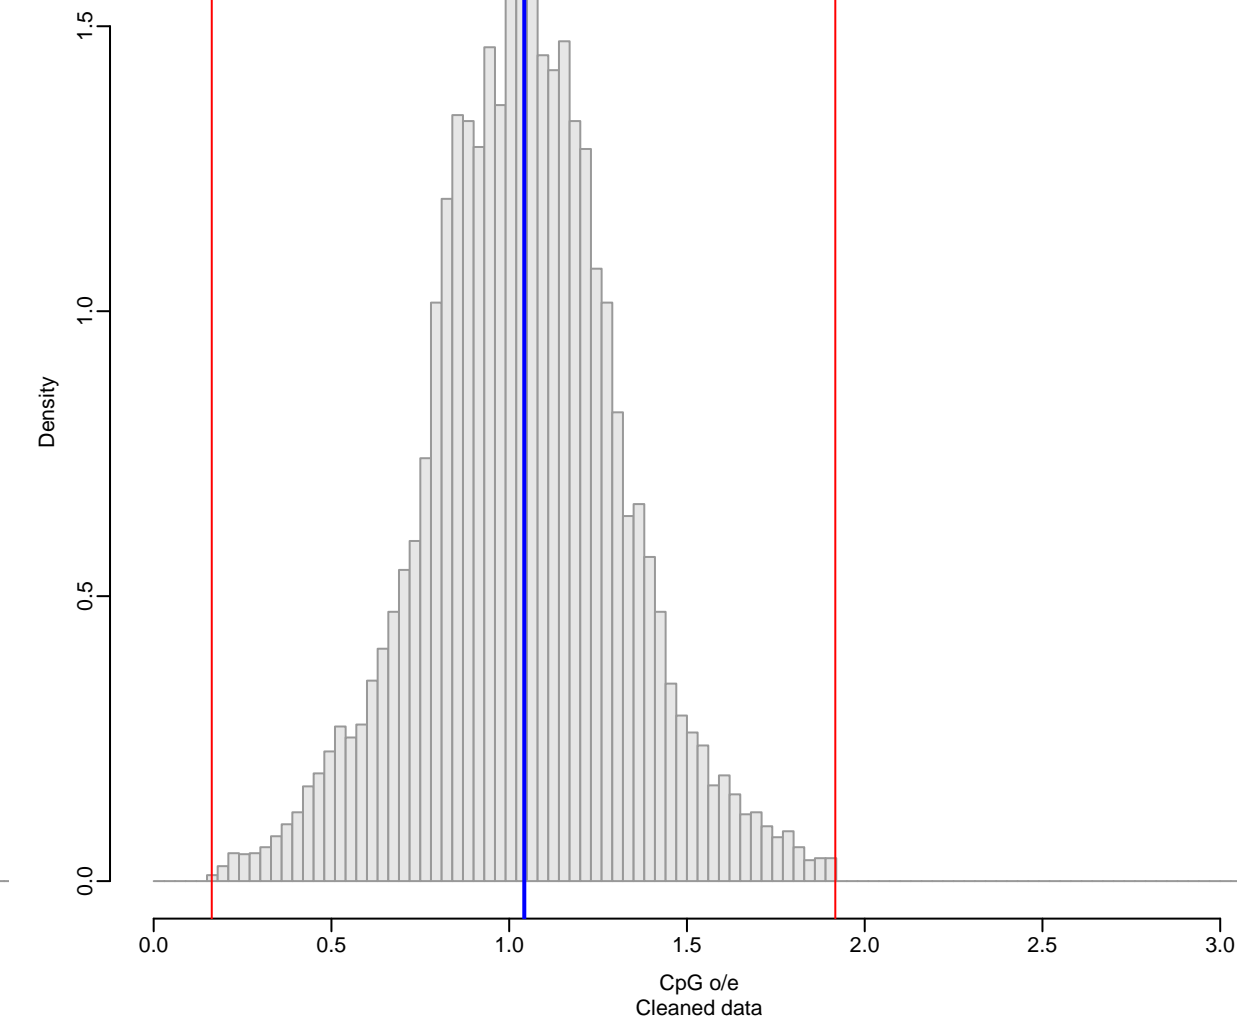

Sanguinaria\_canadensis

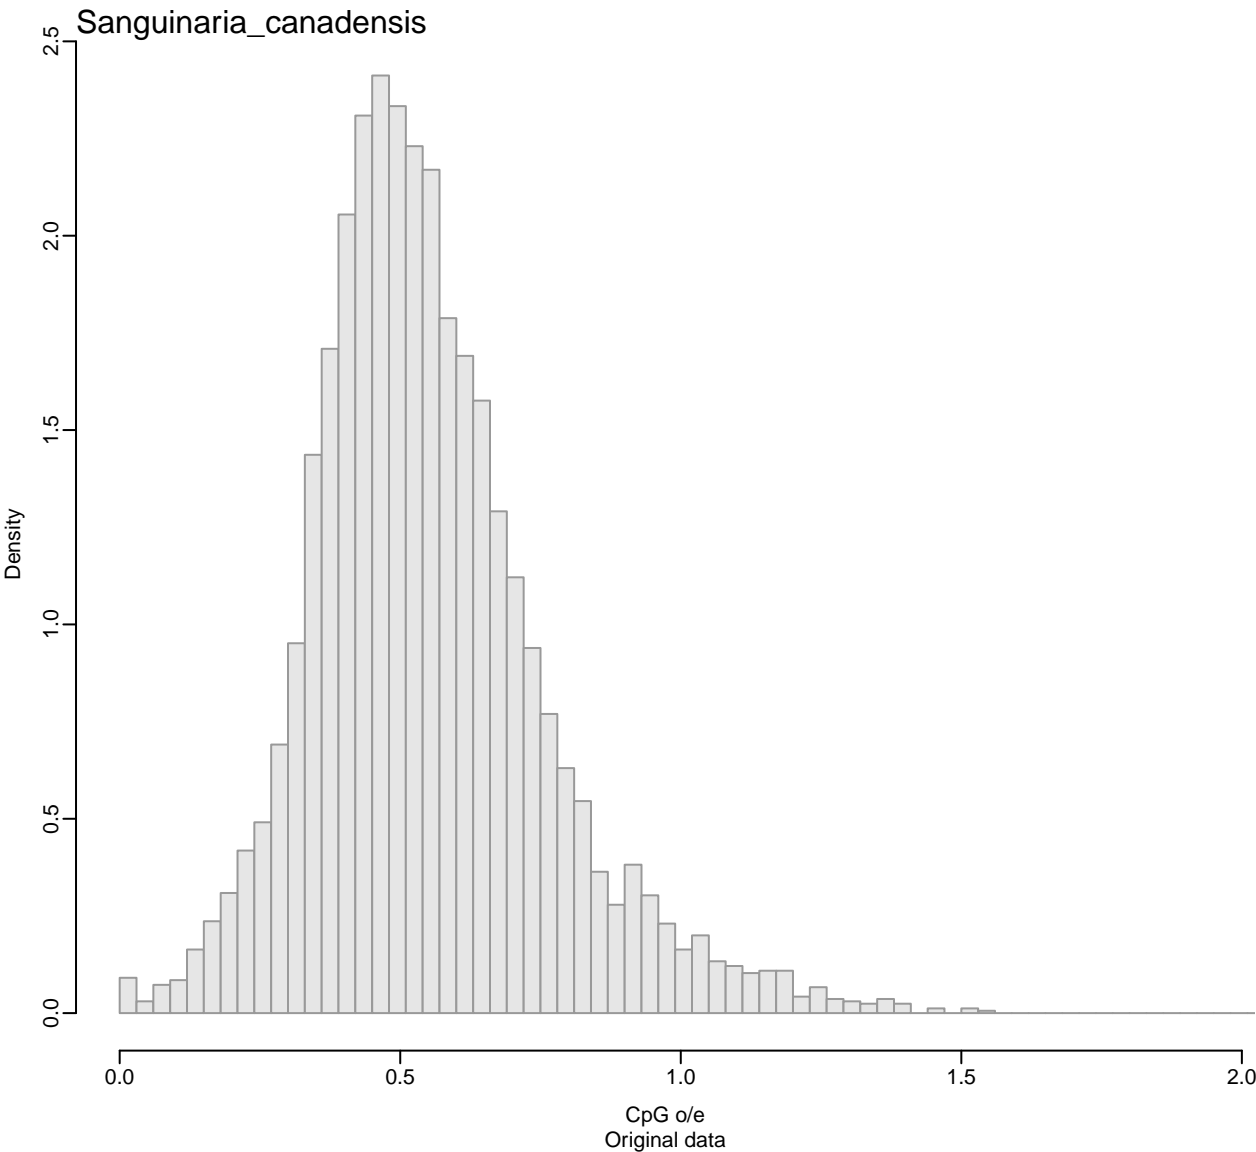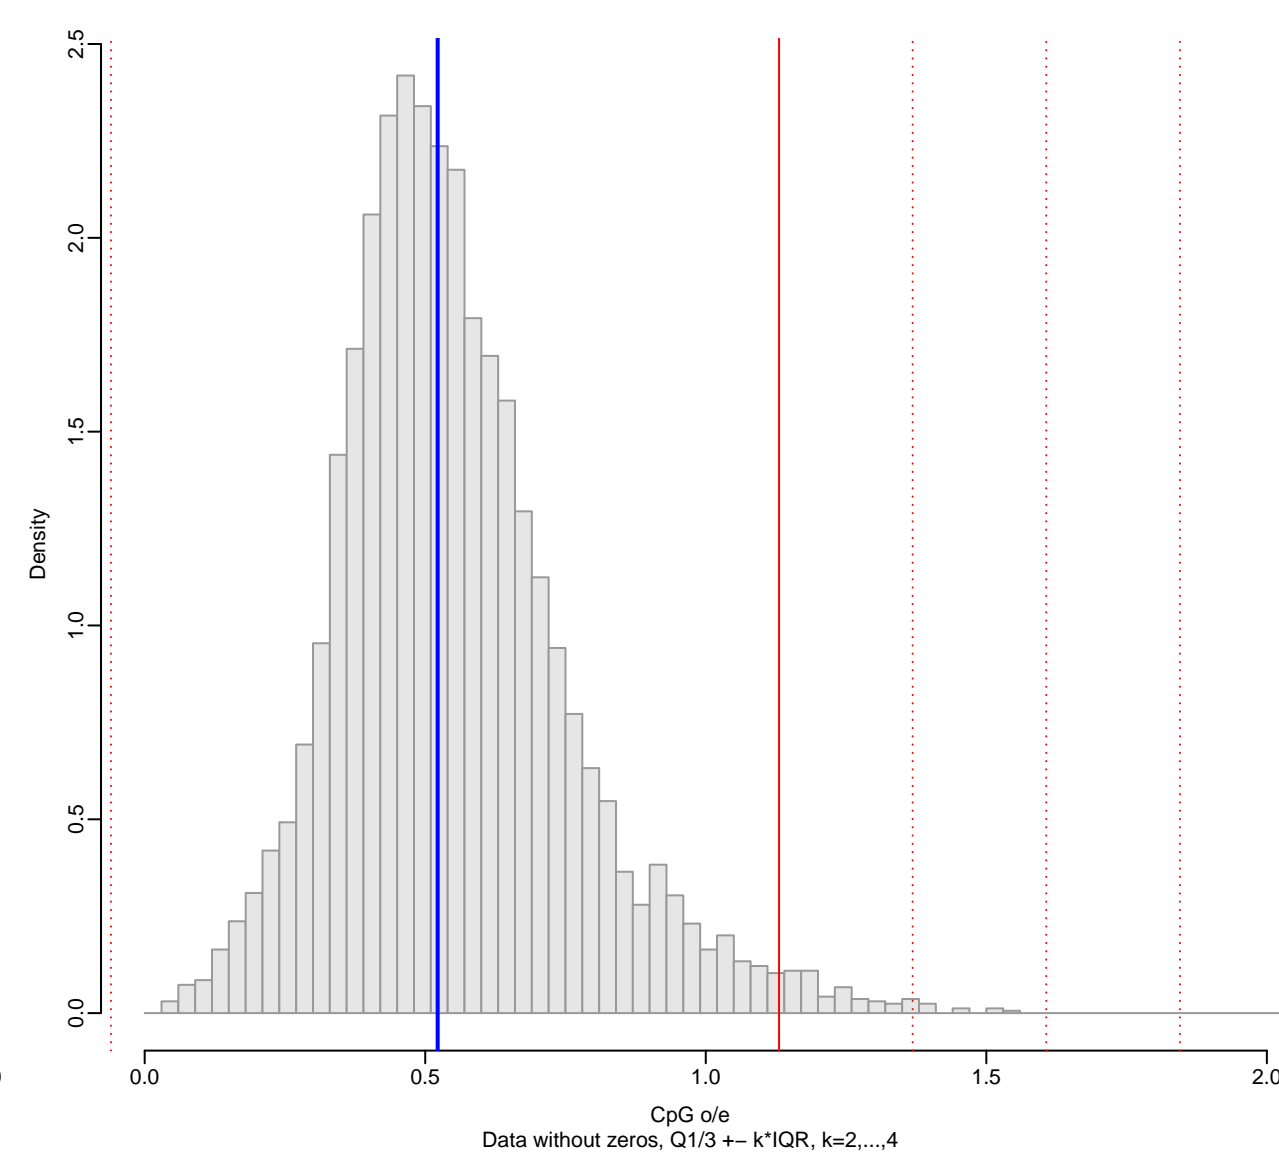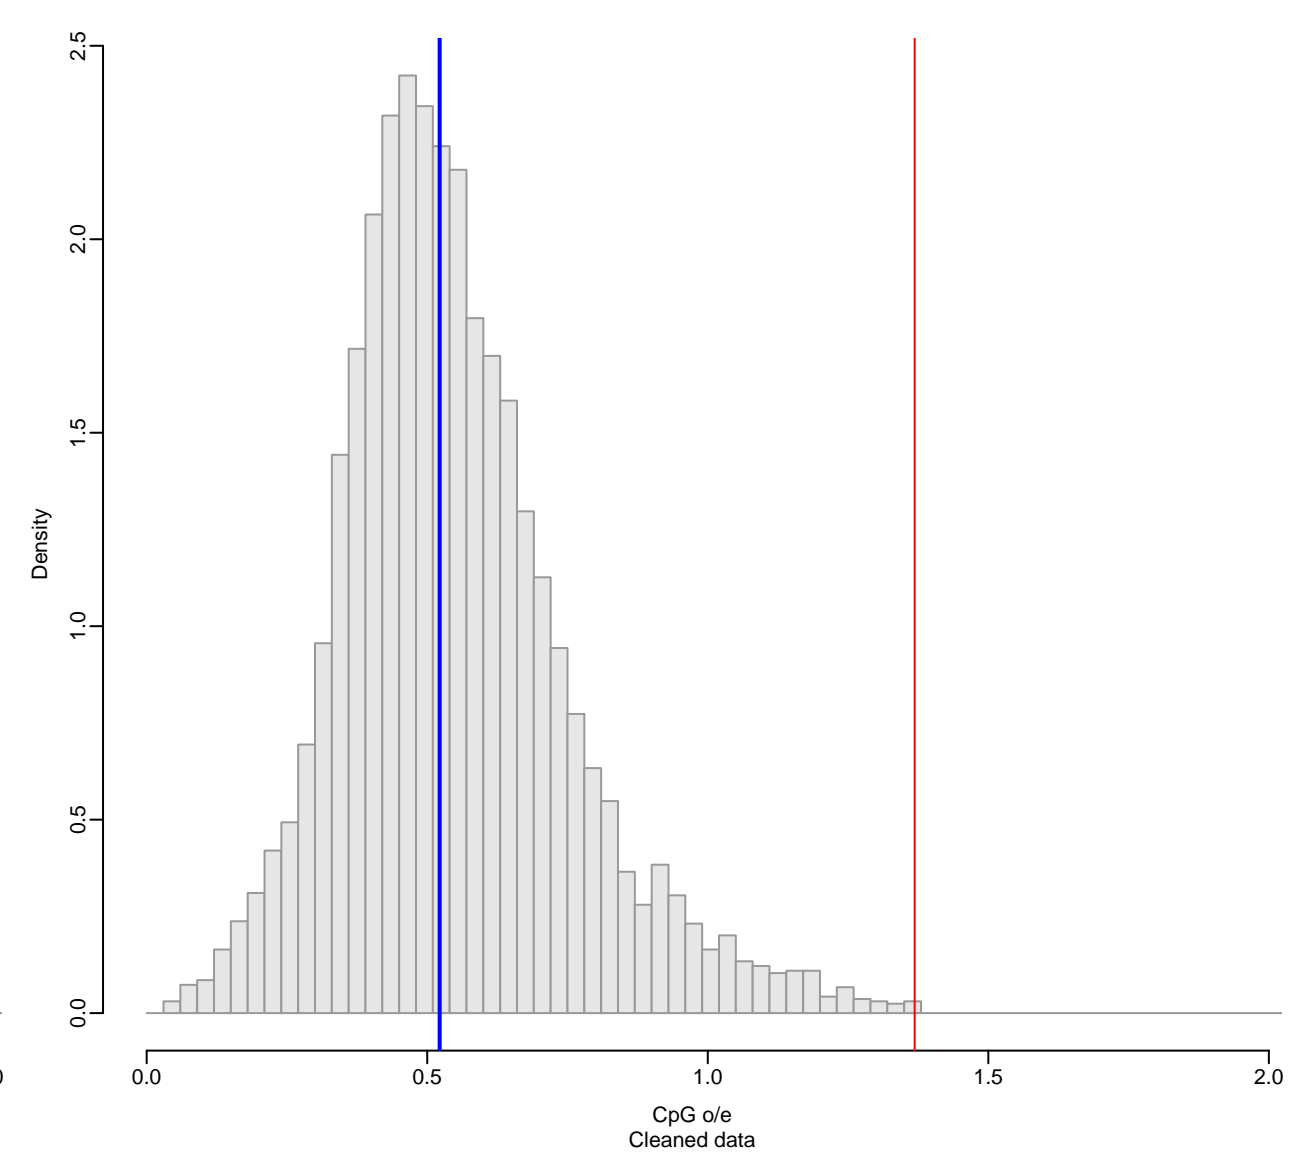

Sarcocapnos\_crassifolia

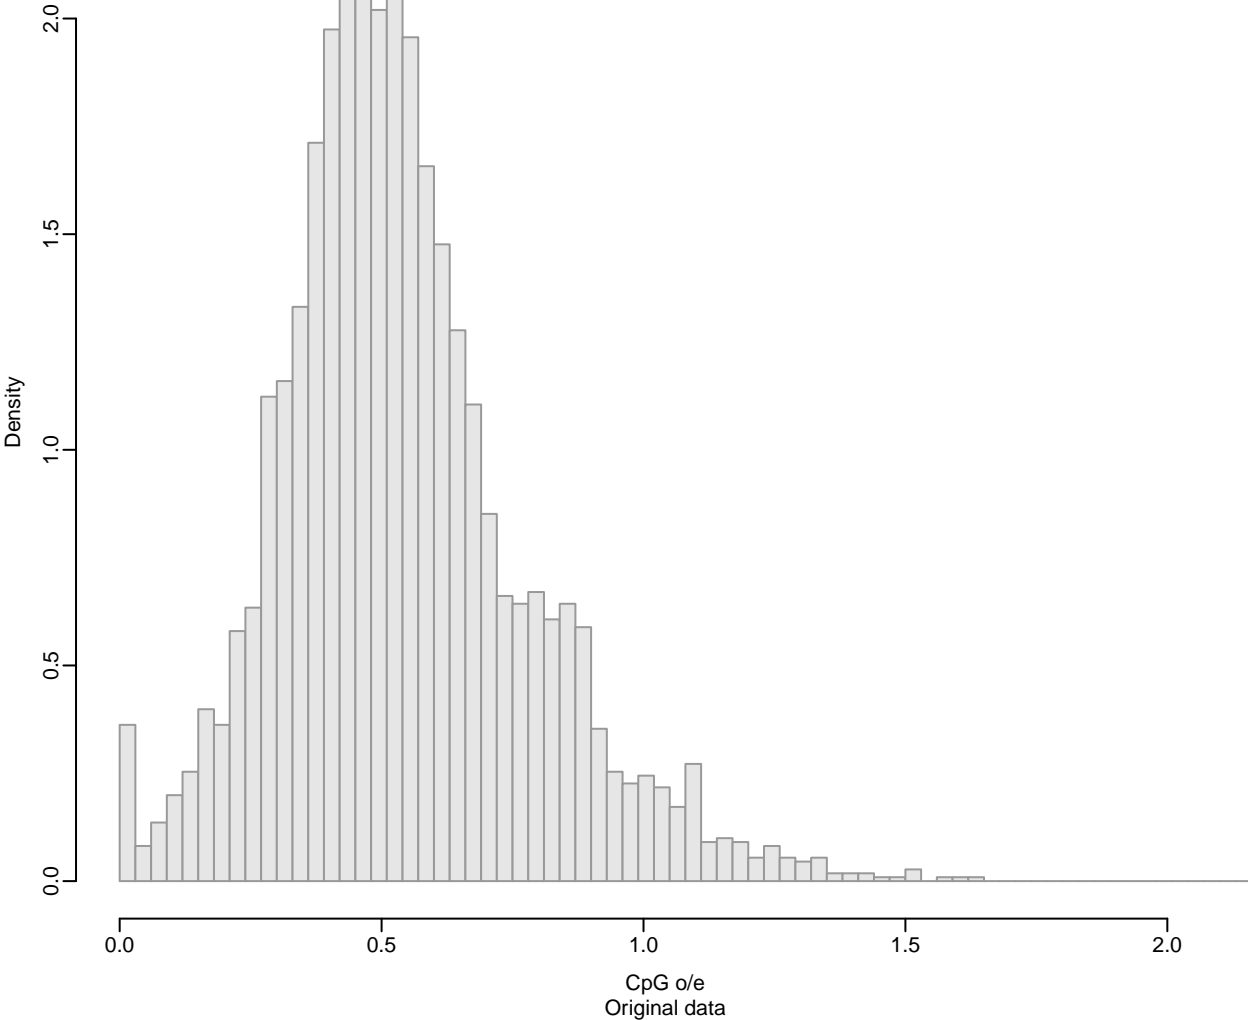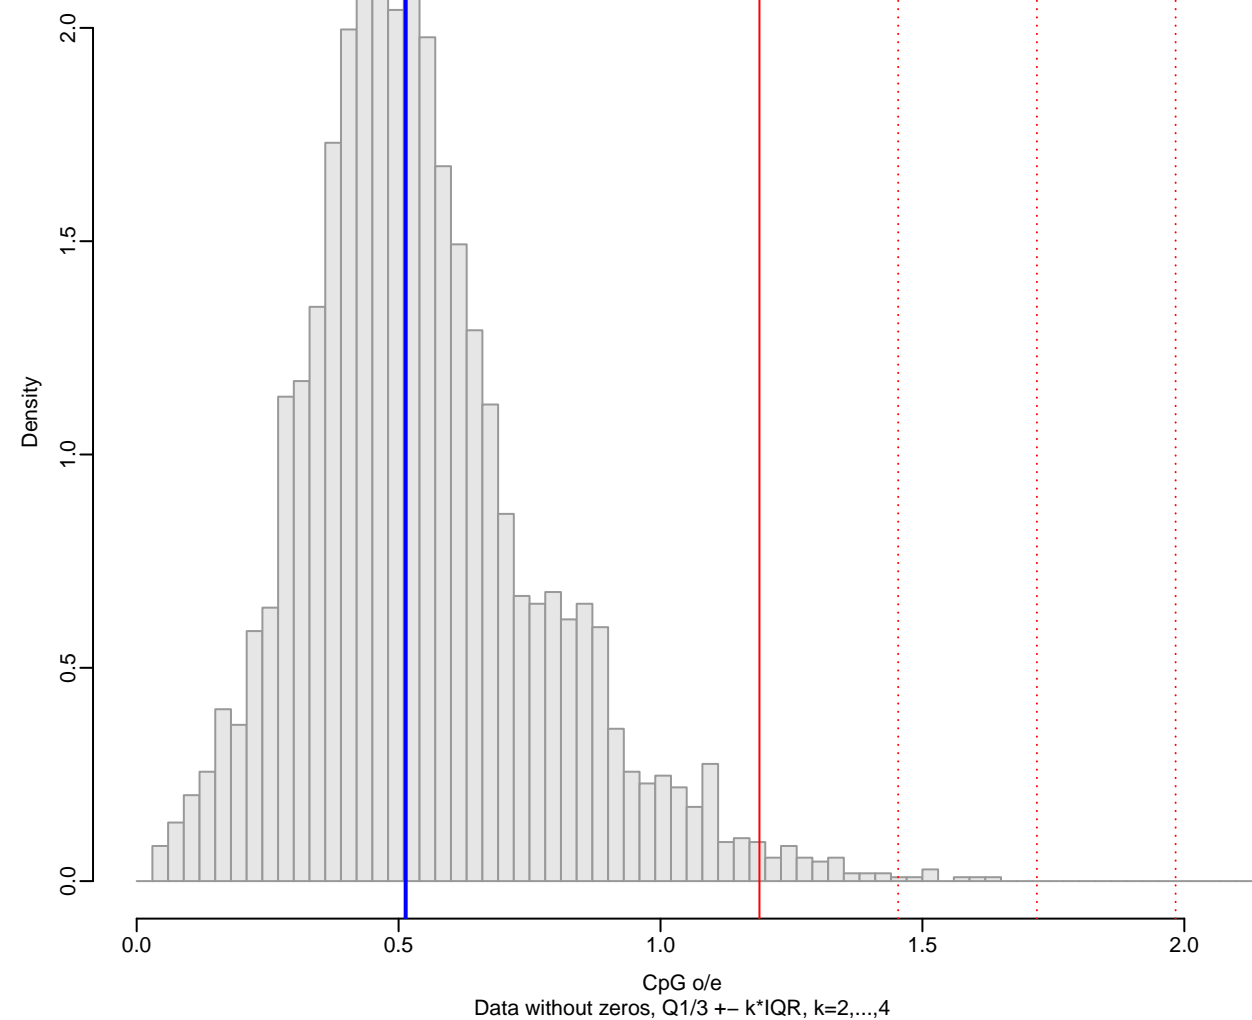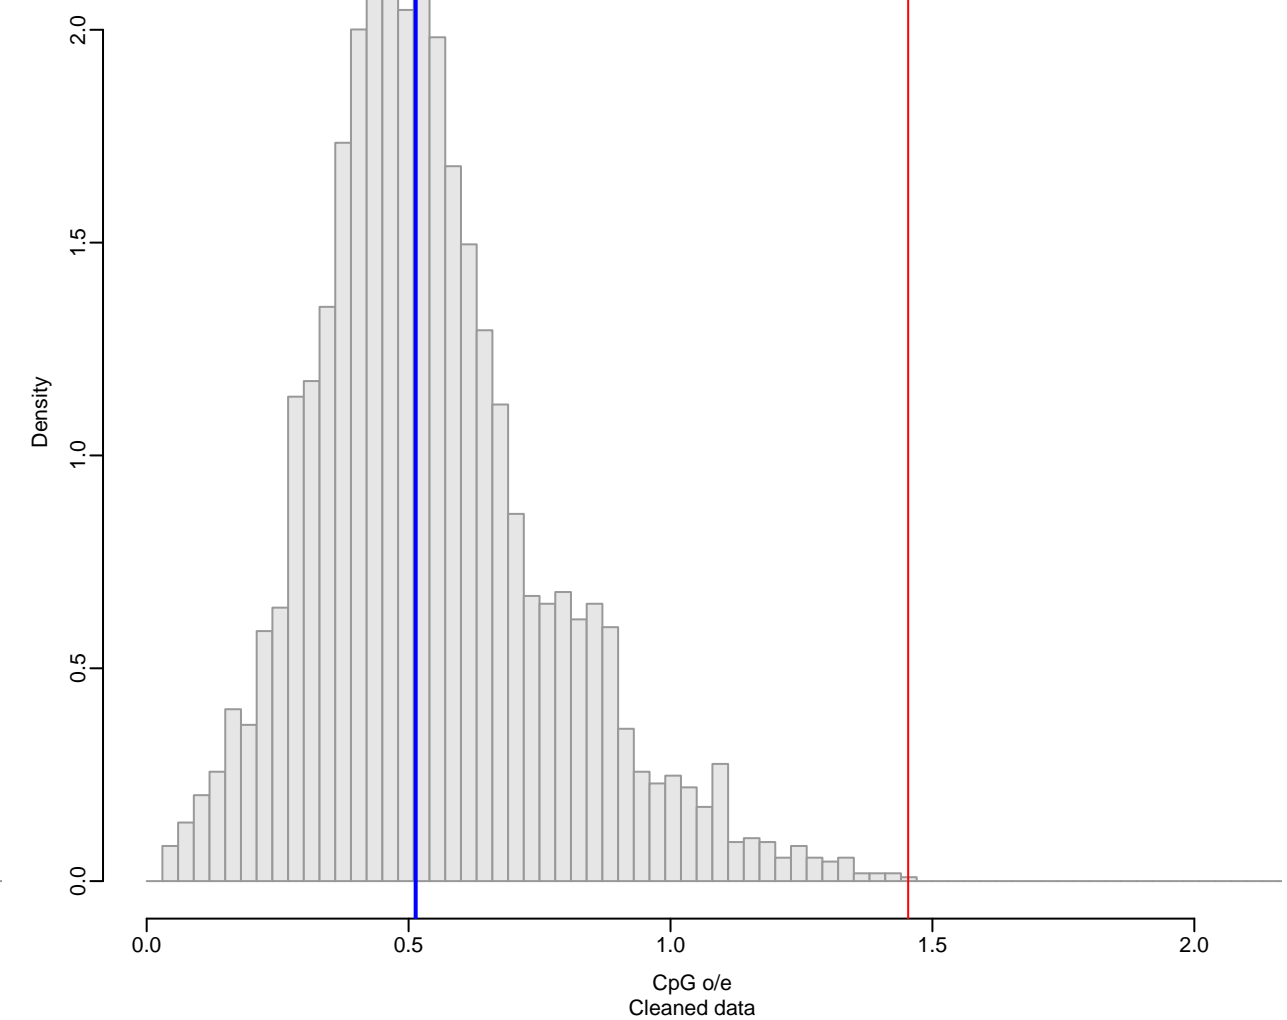

# Sarcocystis\_neurona

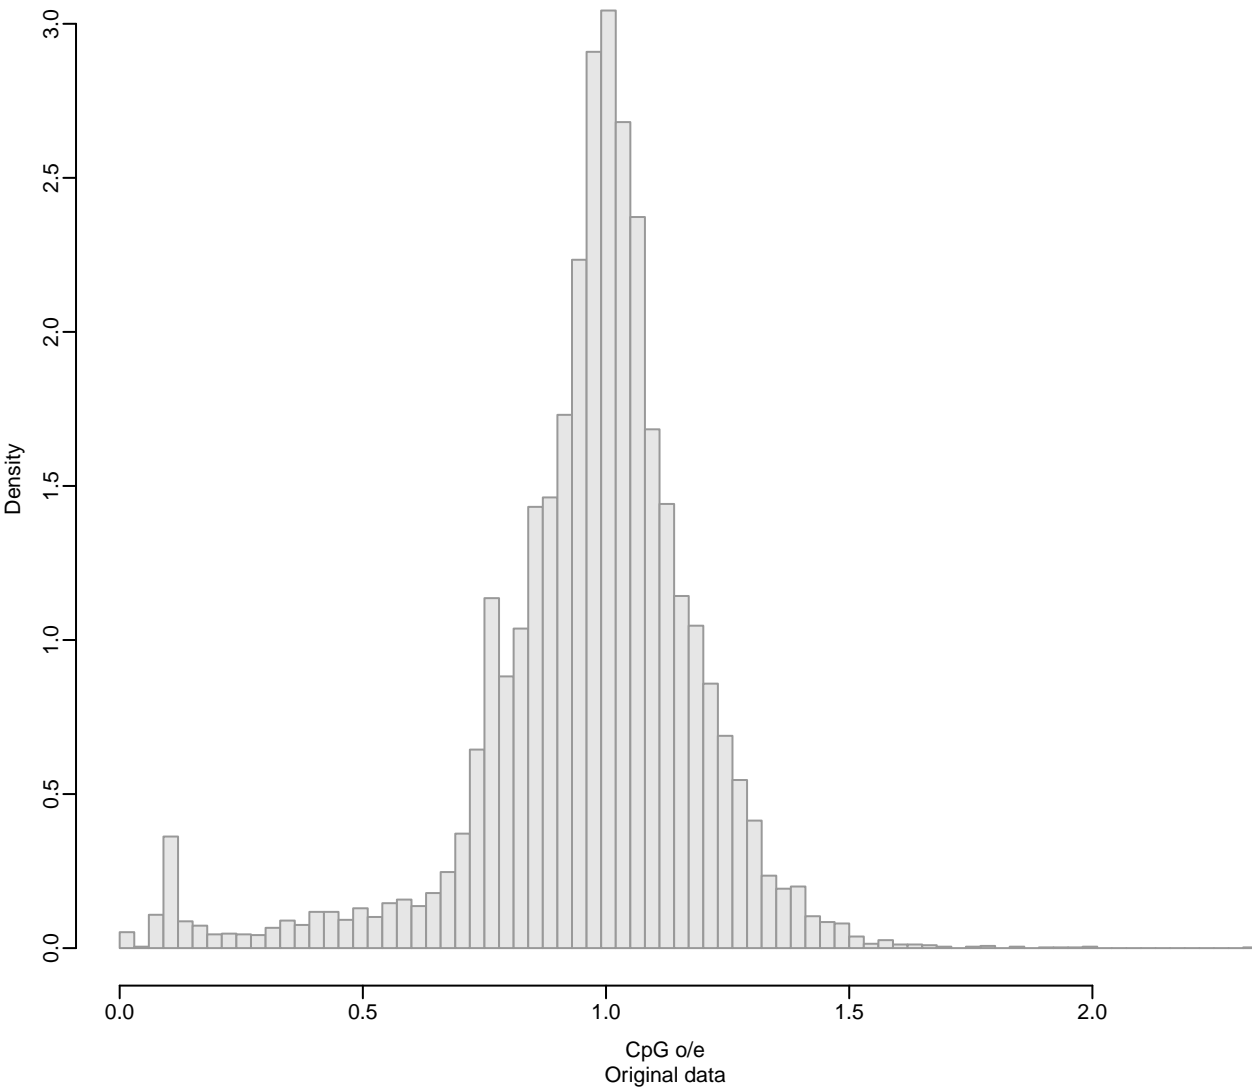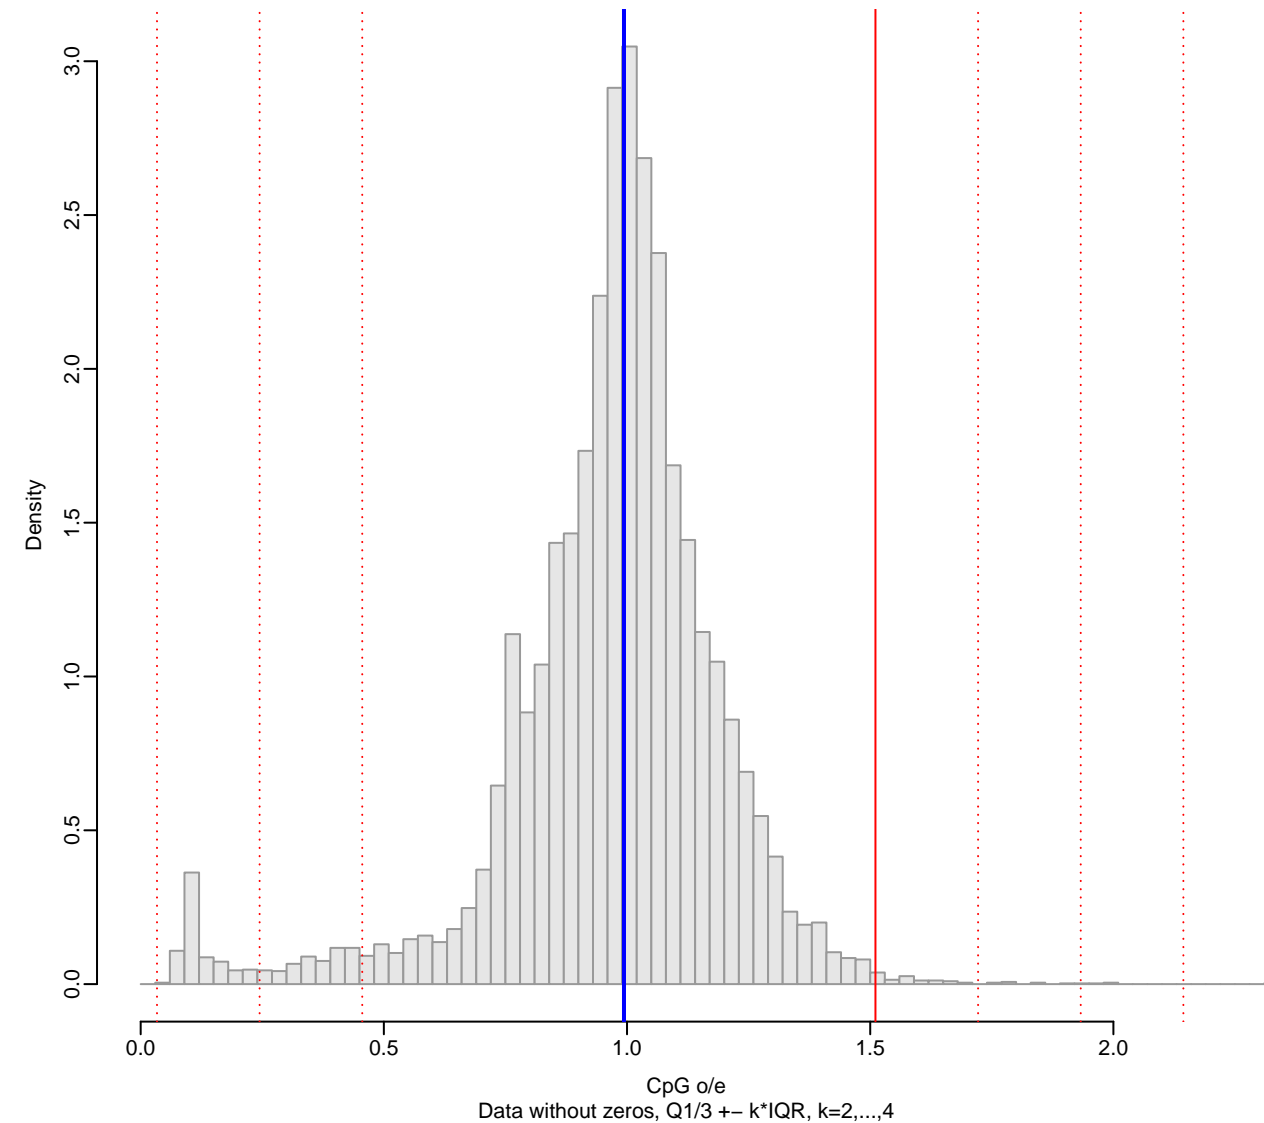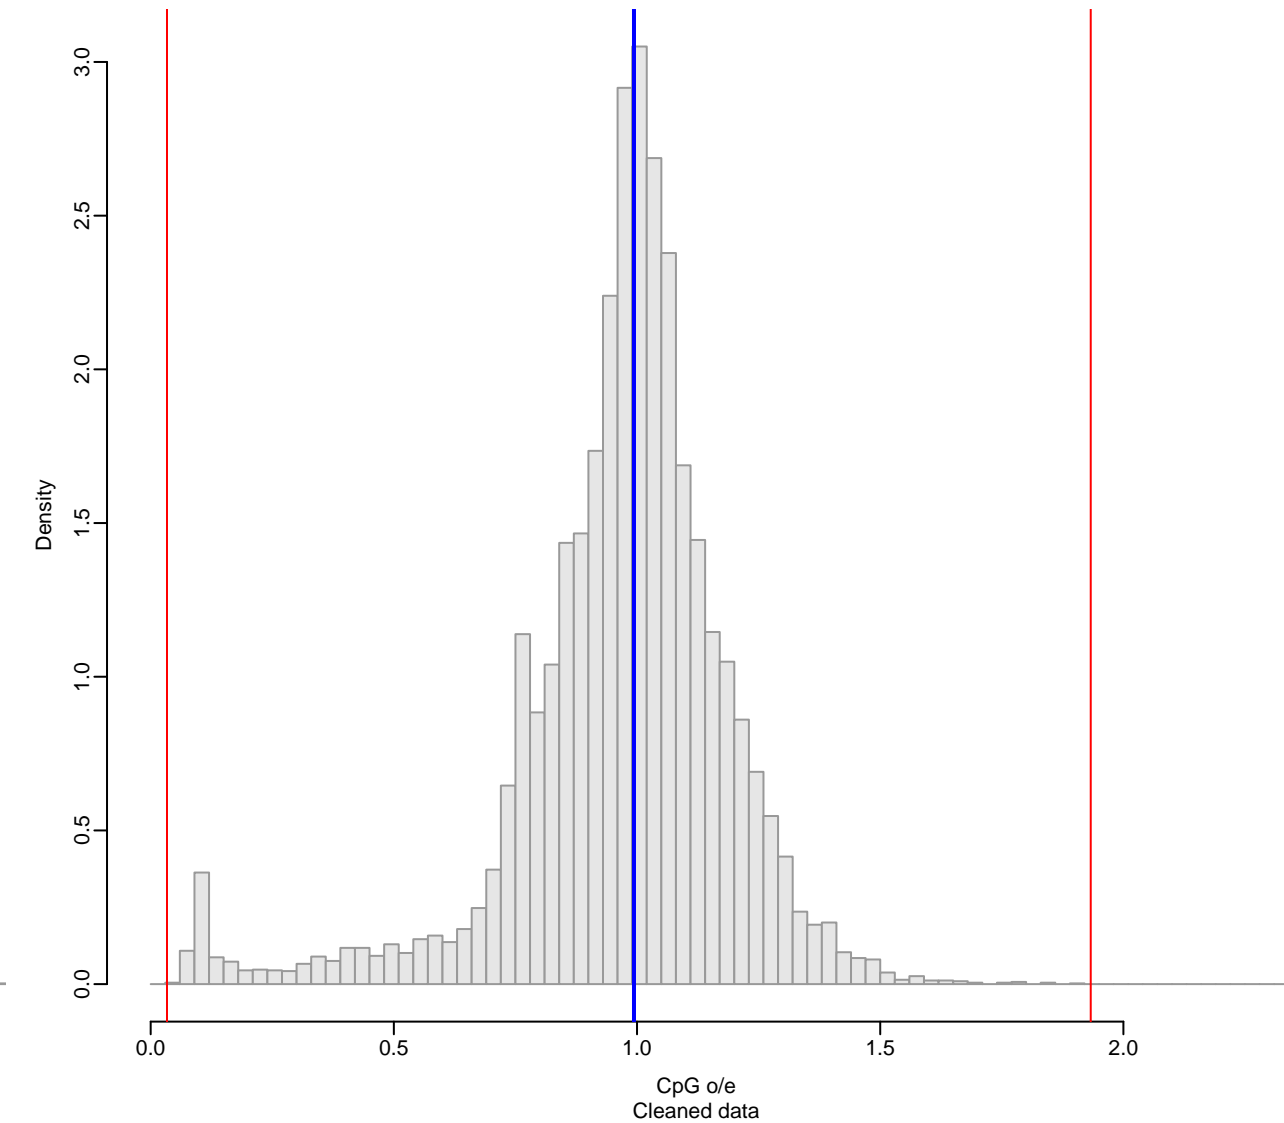

# Schistocerca\_gregaria

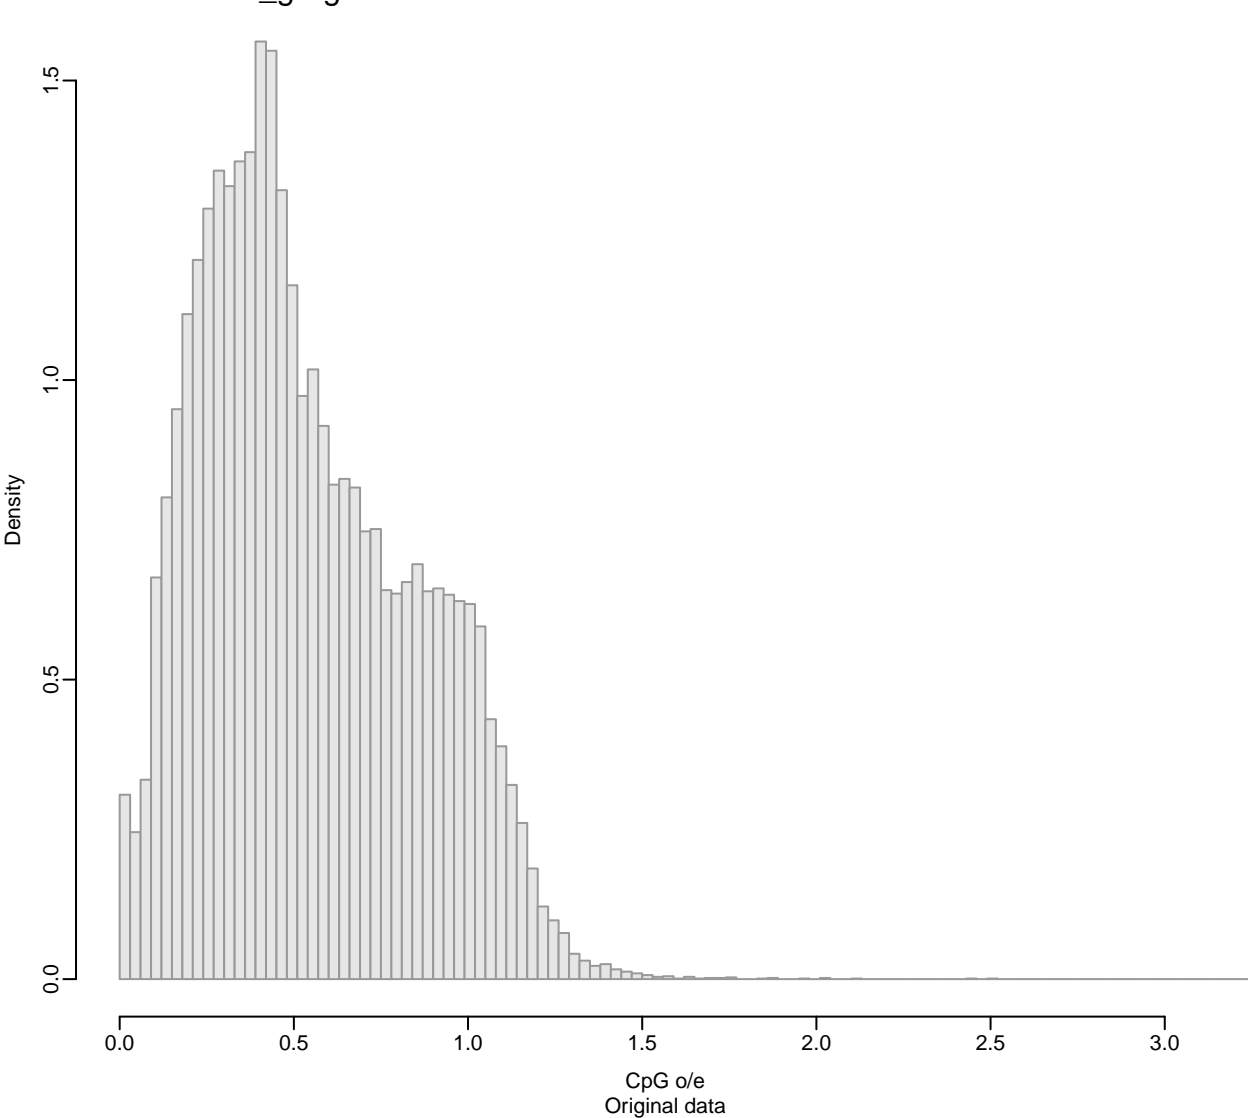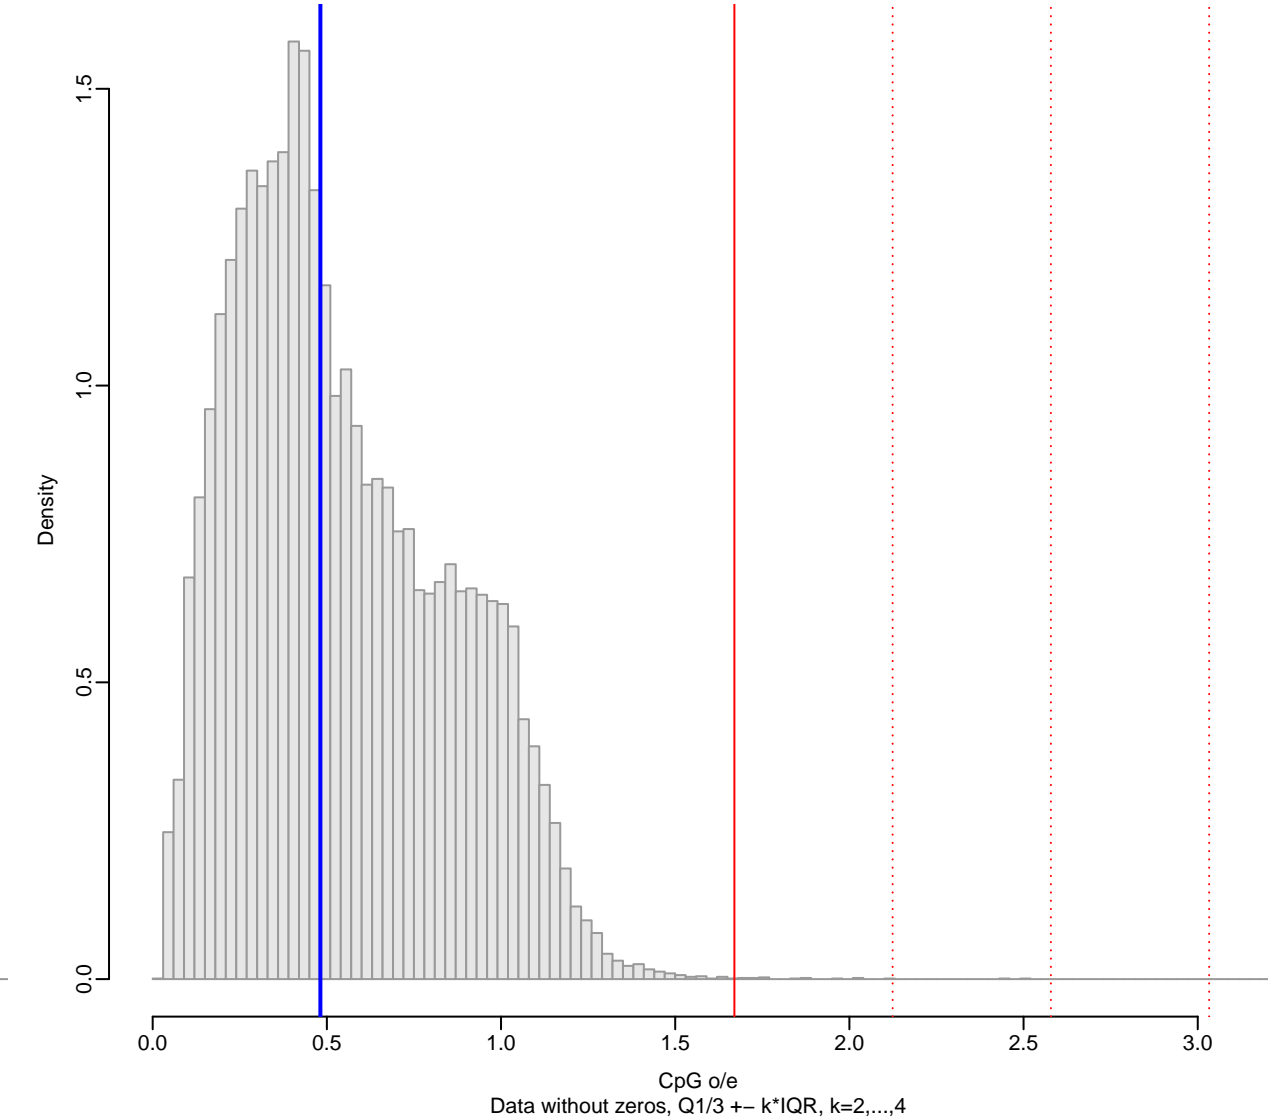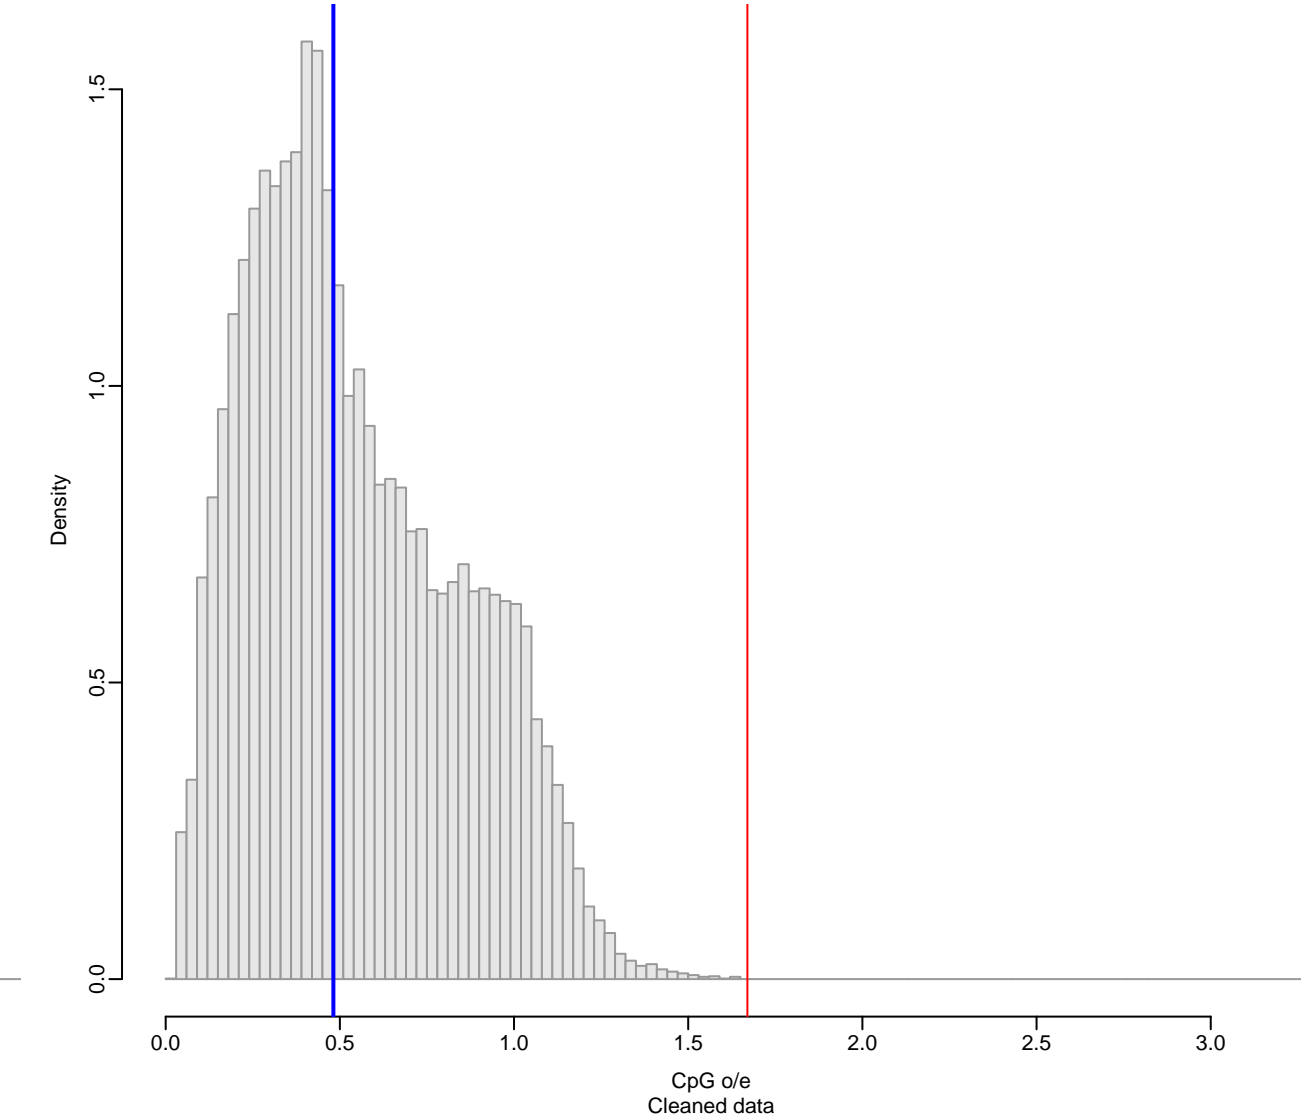

Schistosoma\_japonicum

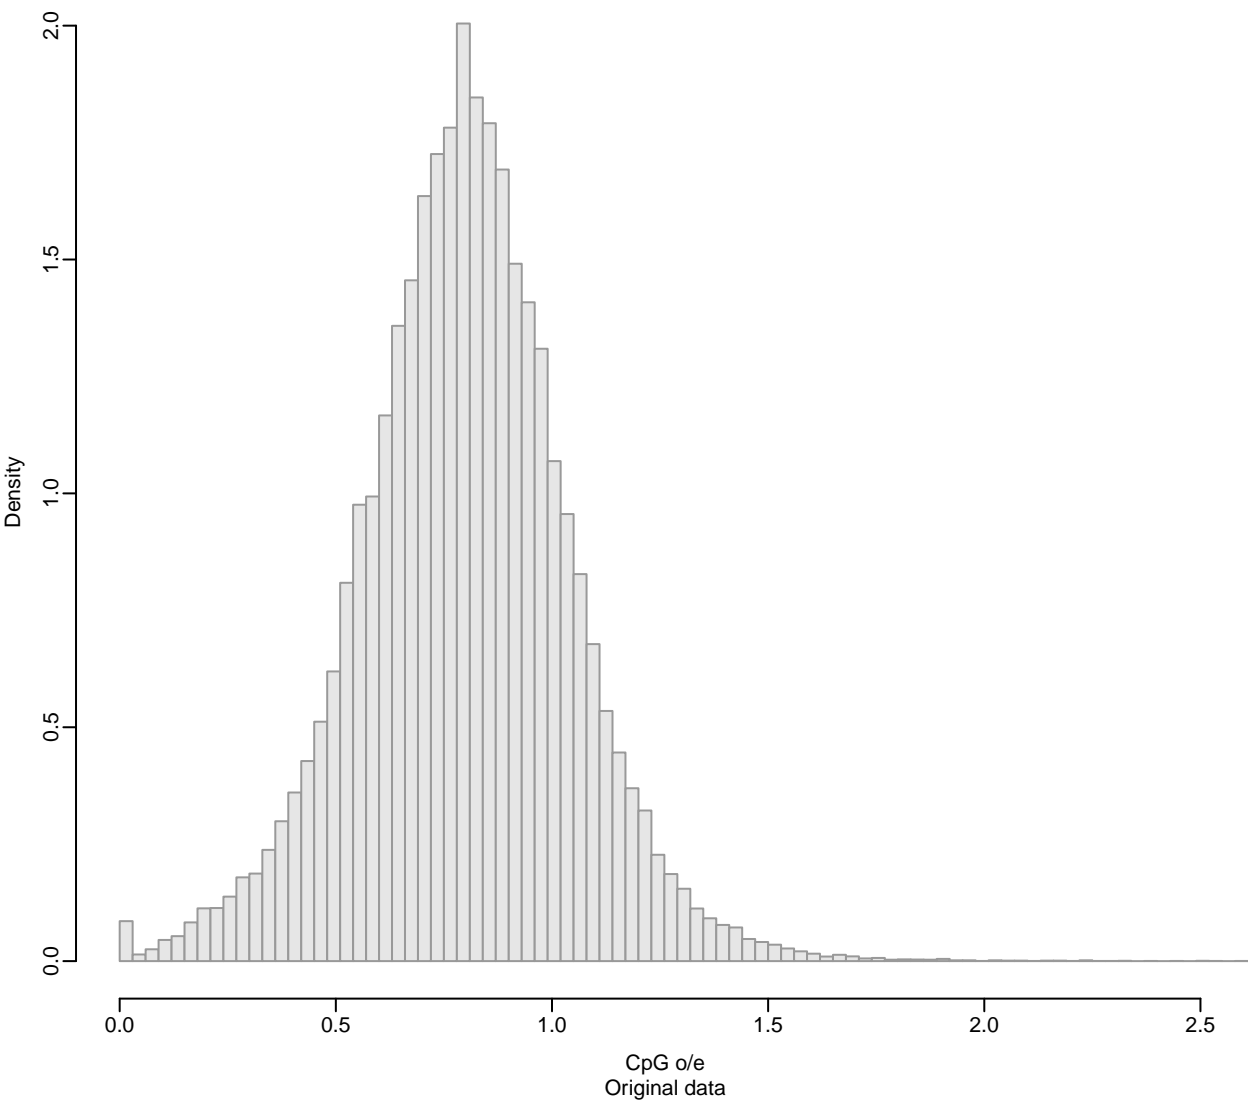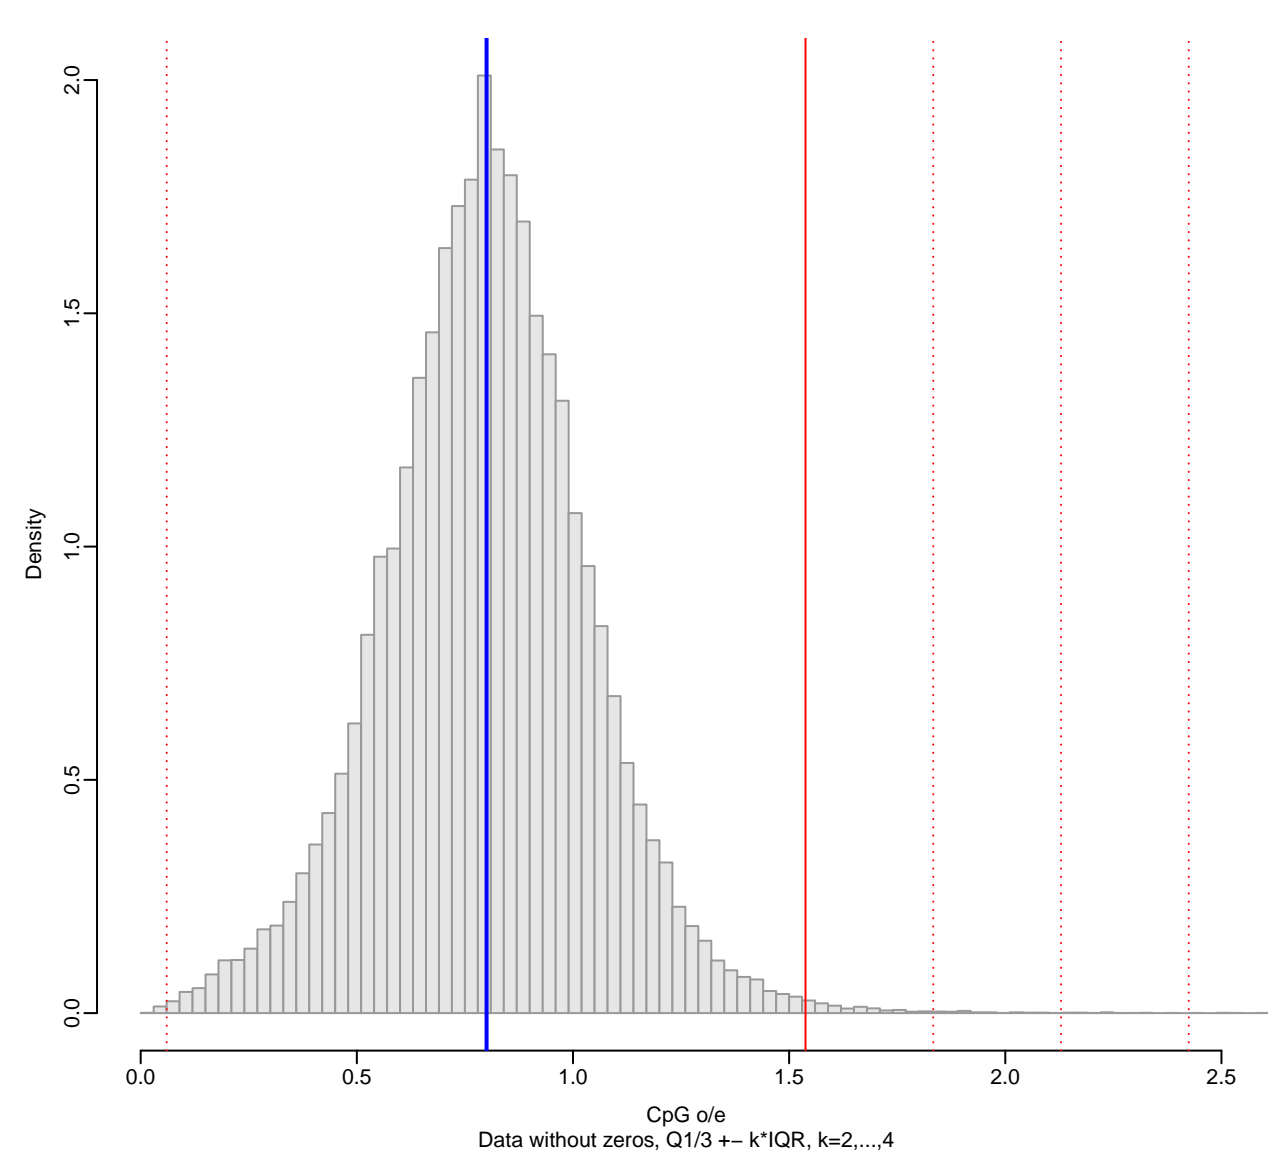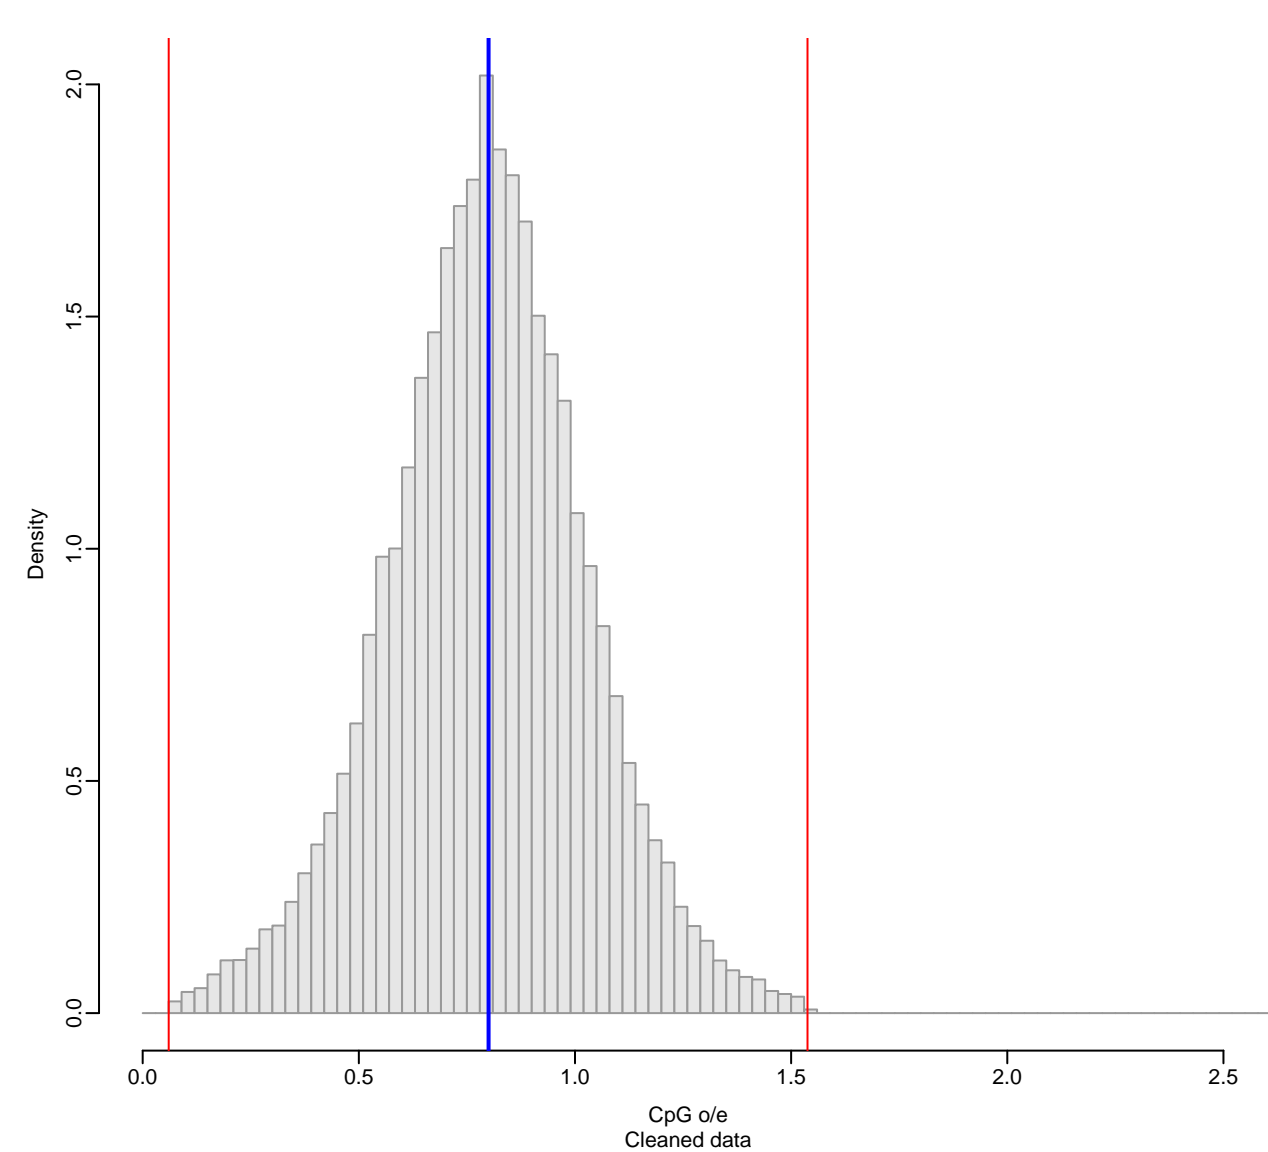



Schistosoma\_mansoni

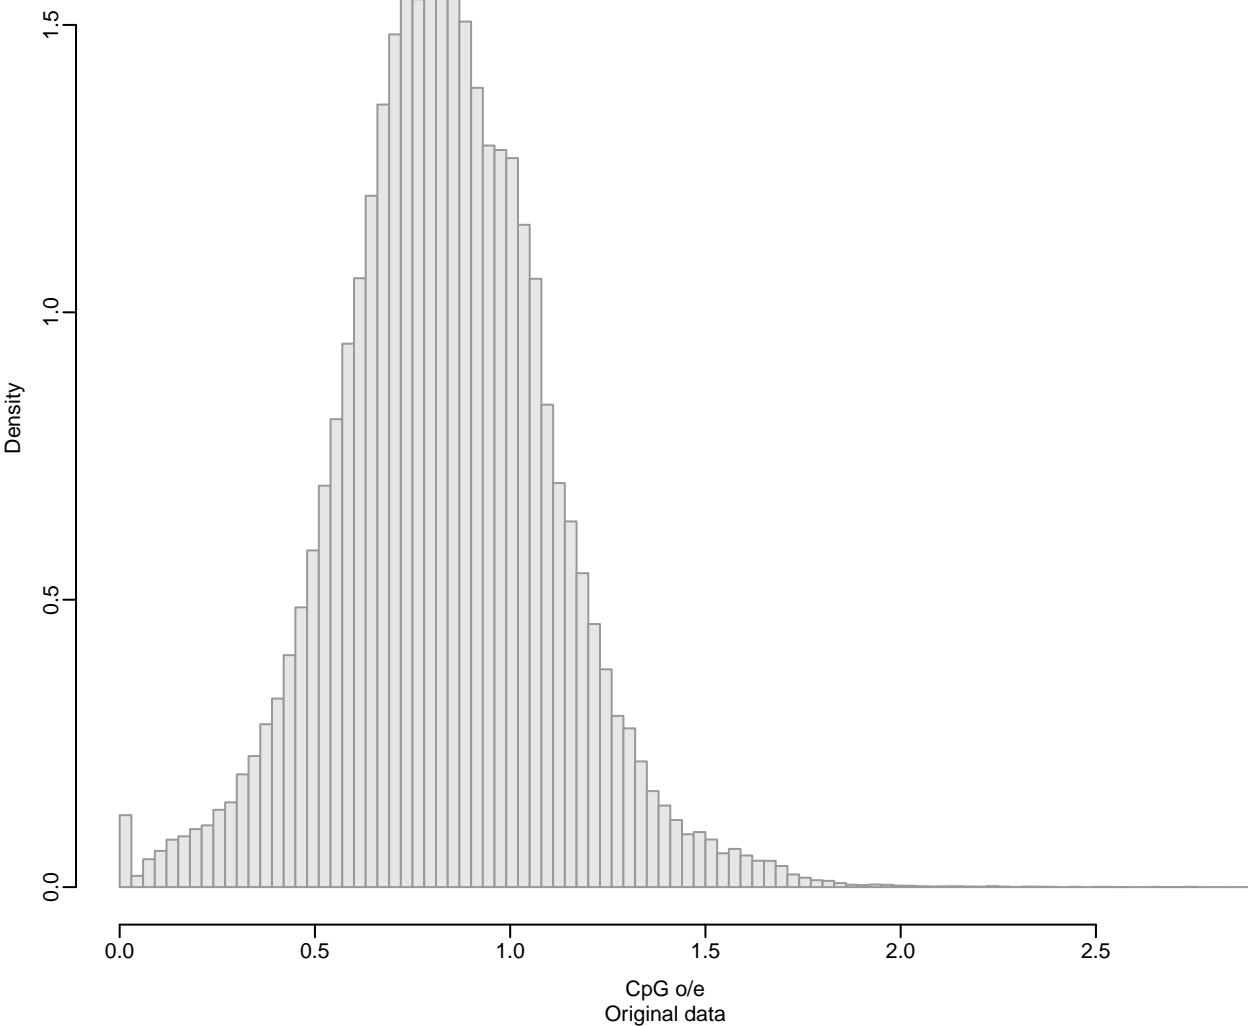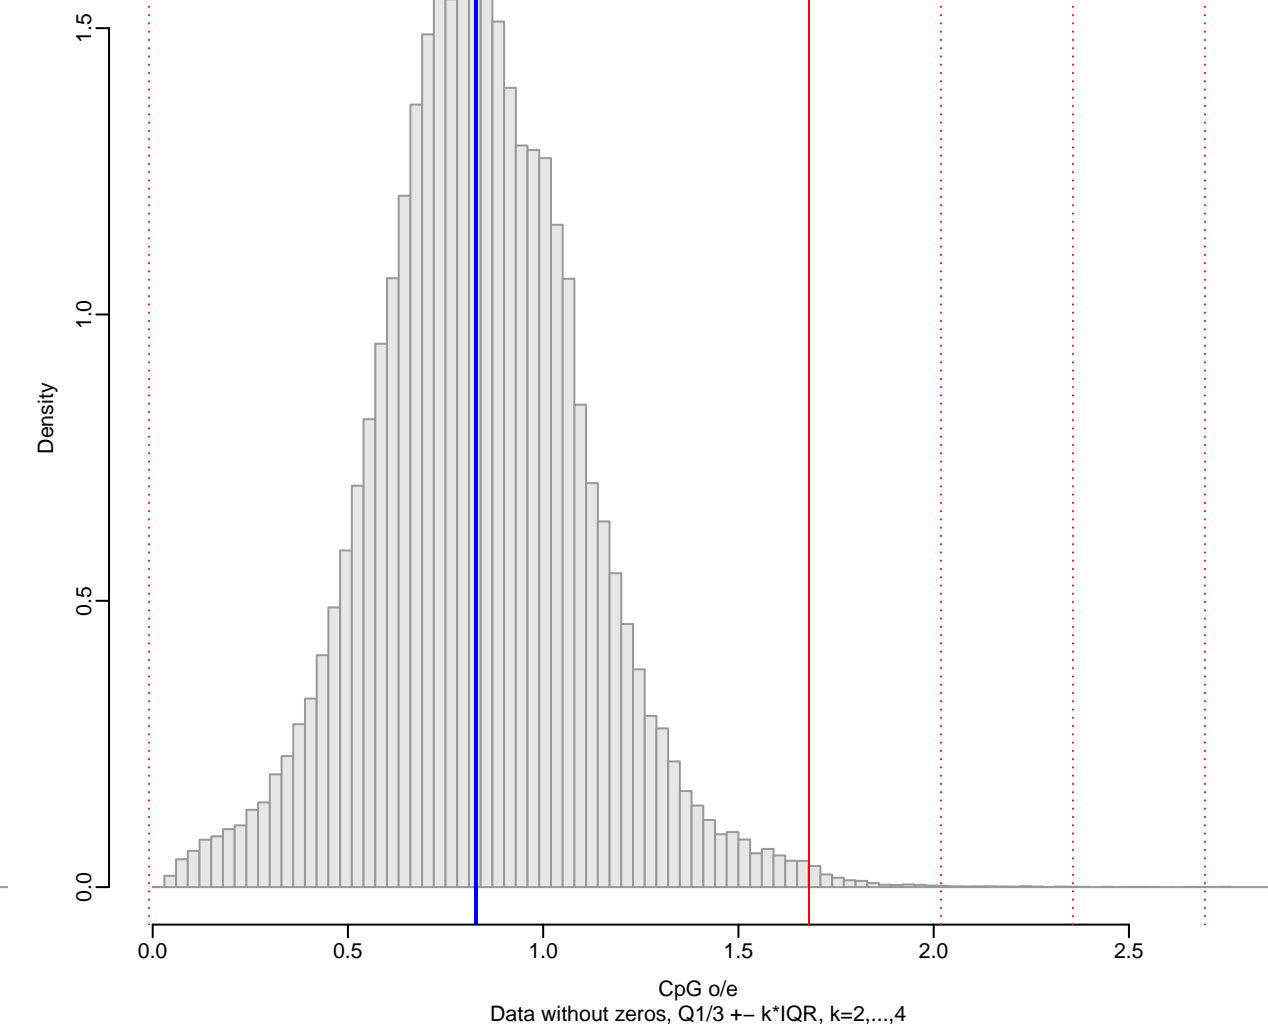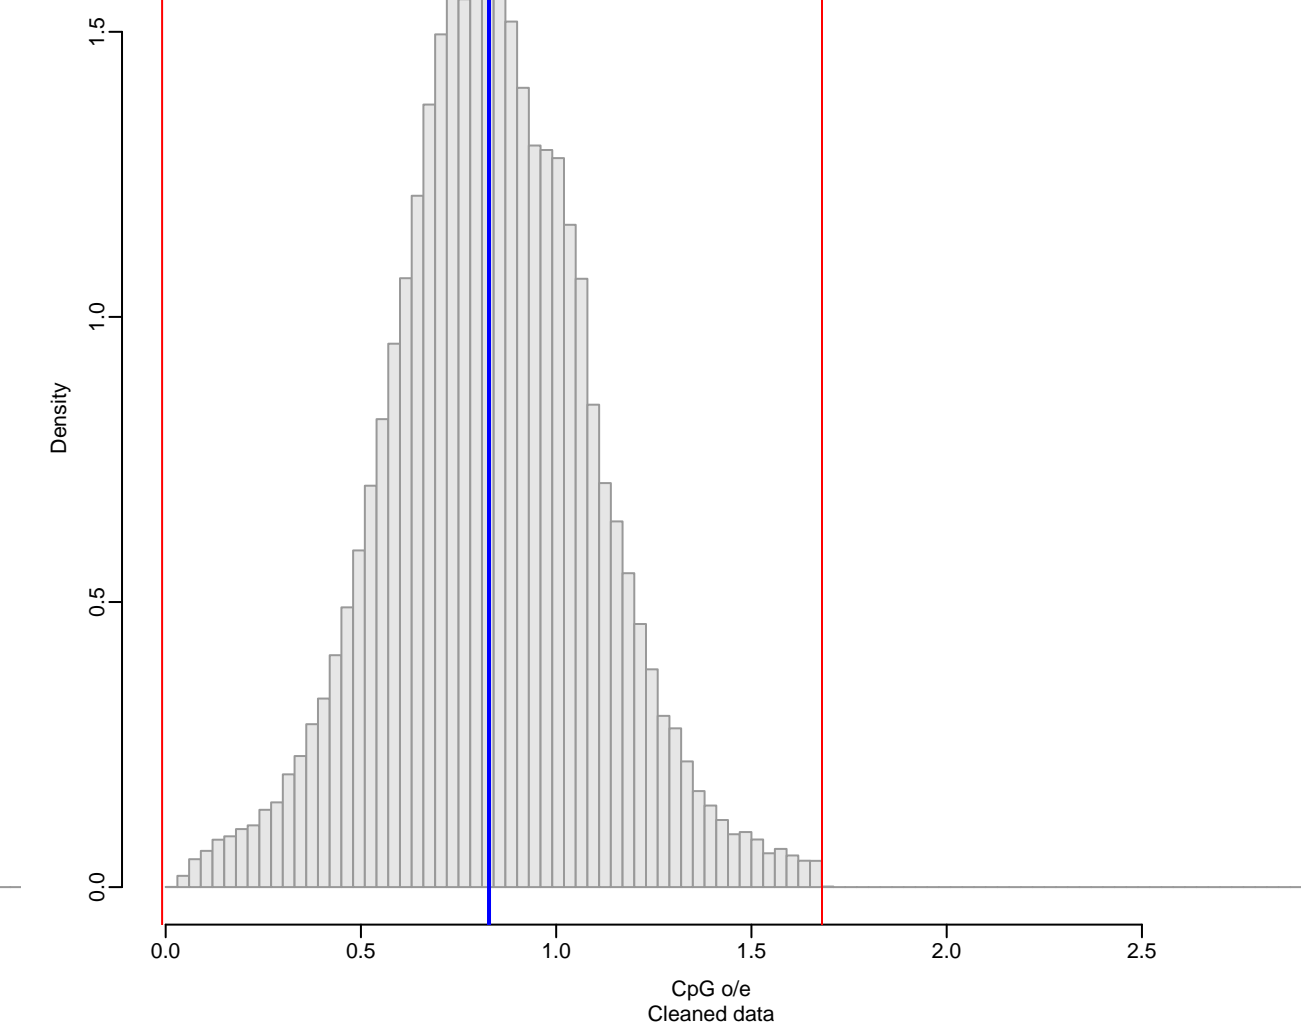

Schizosaccharomyces\_pombe

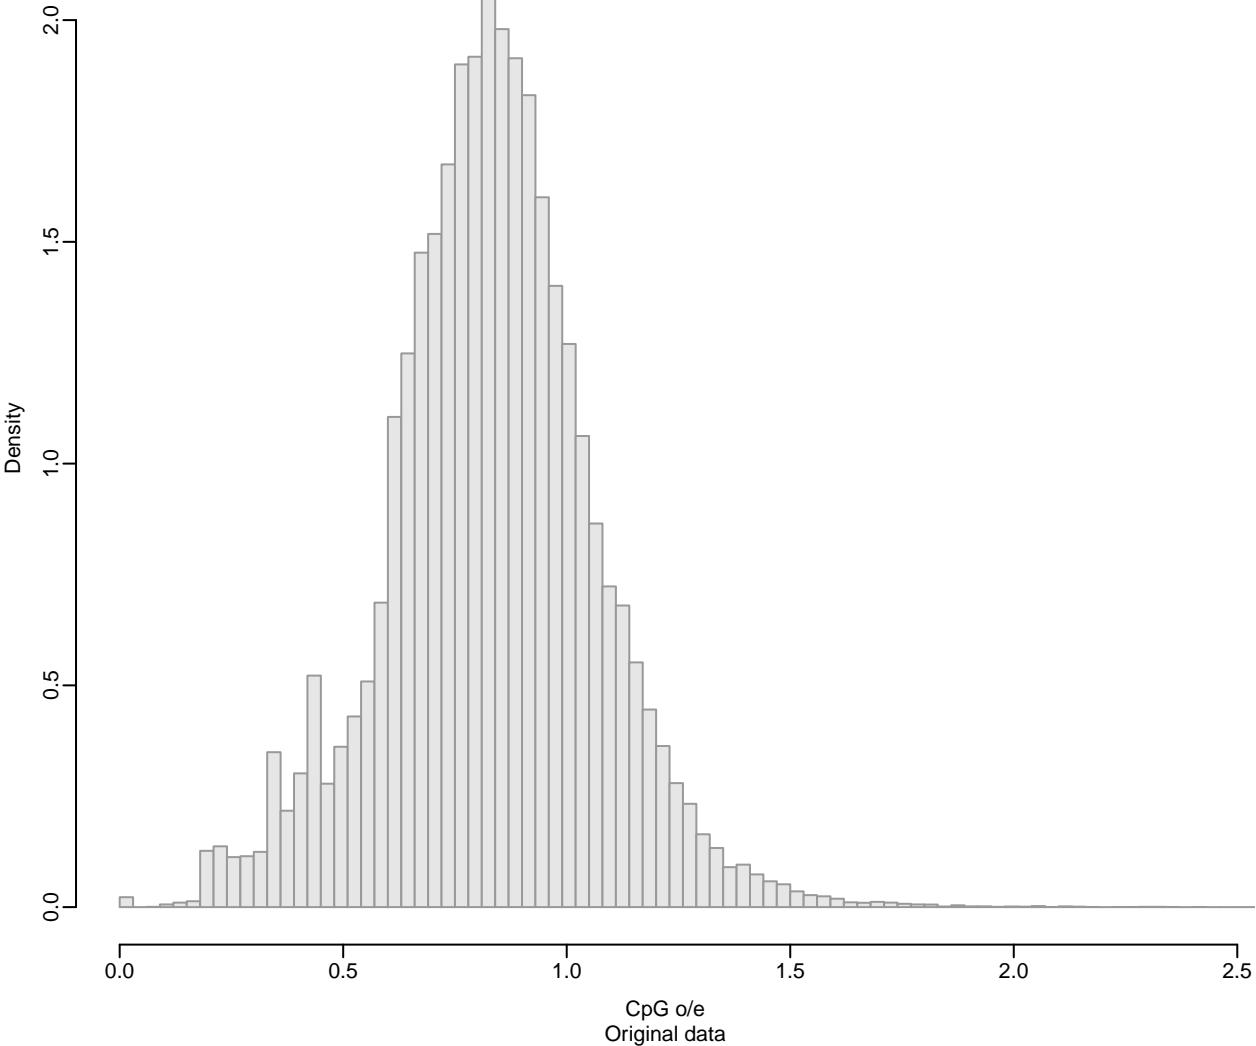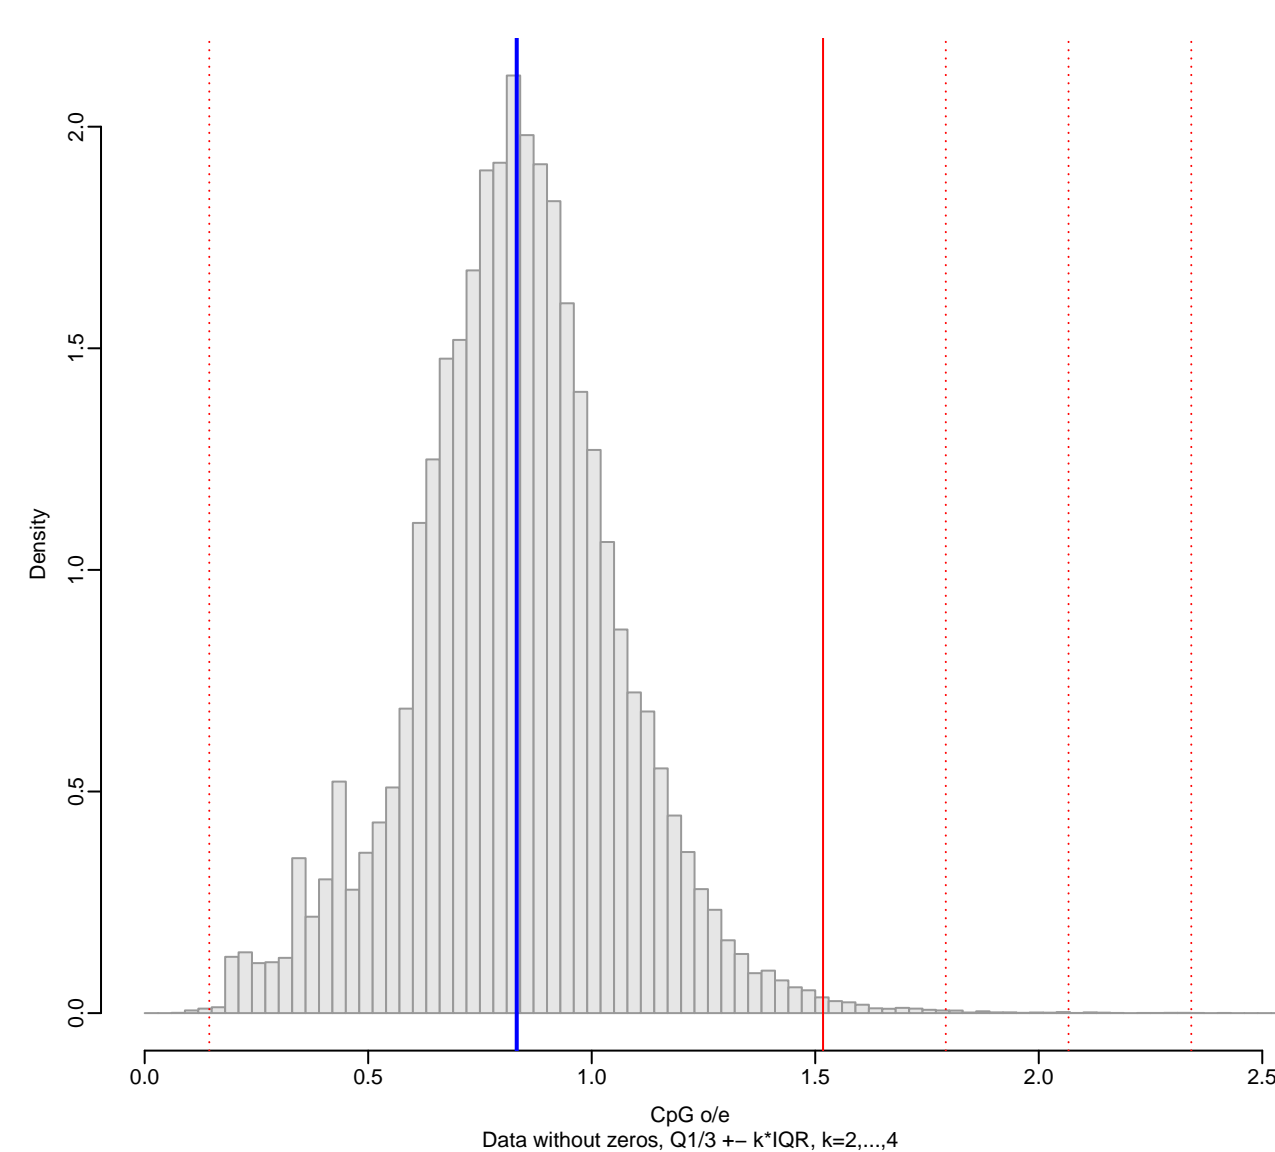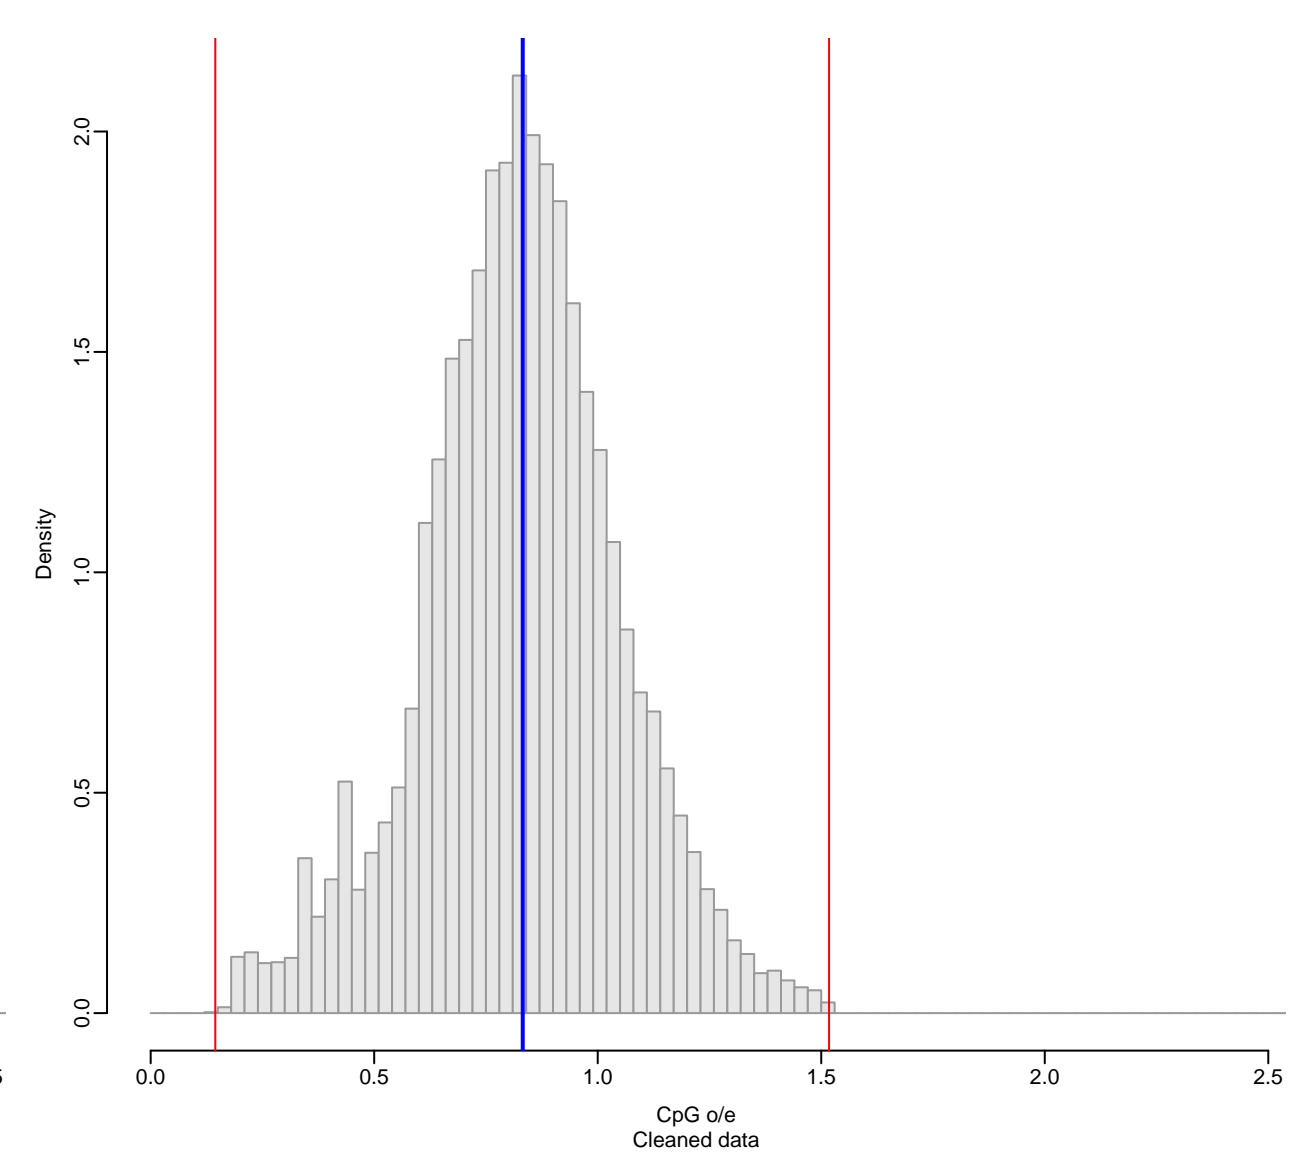

# Schmidtea\_mediterranea

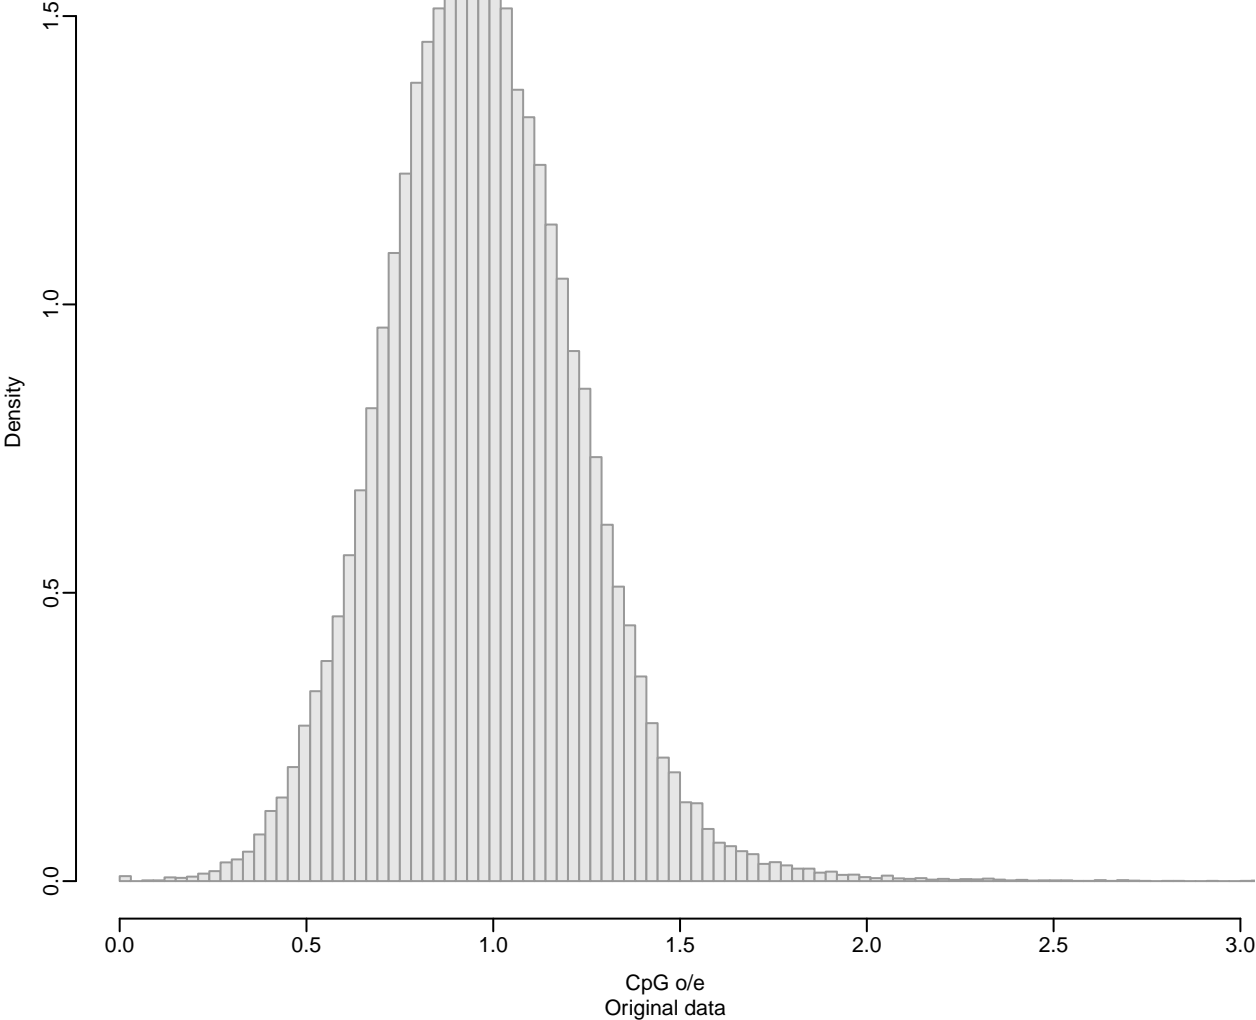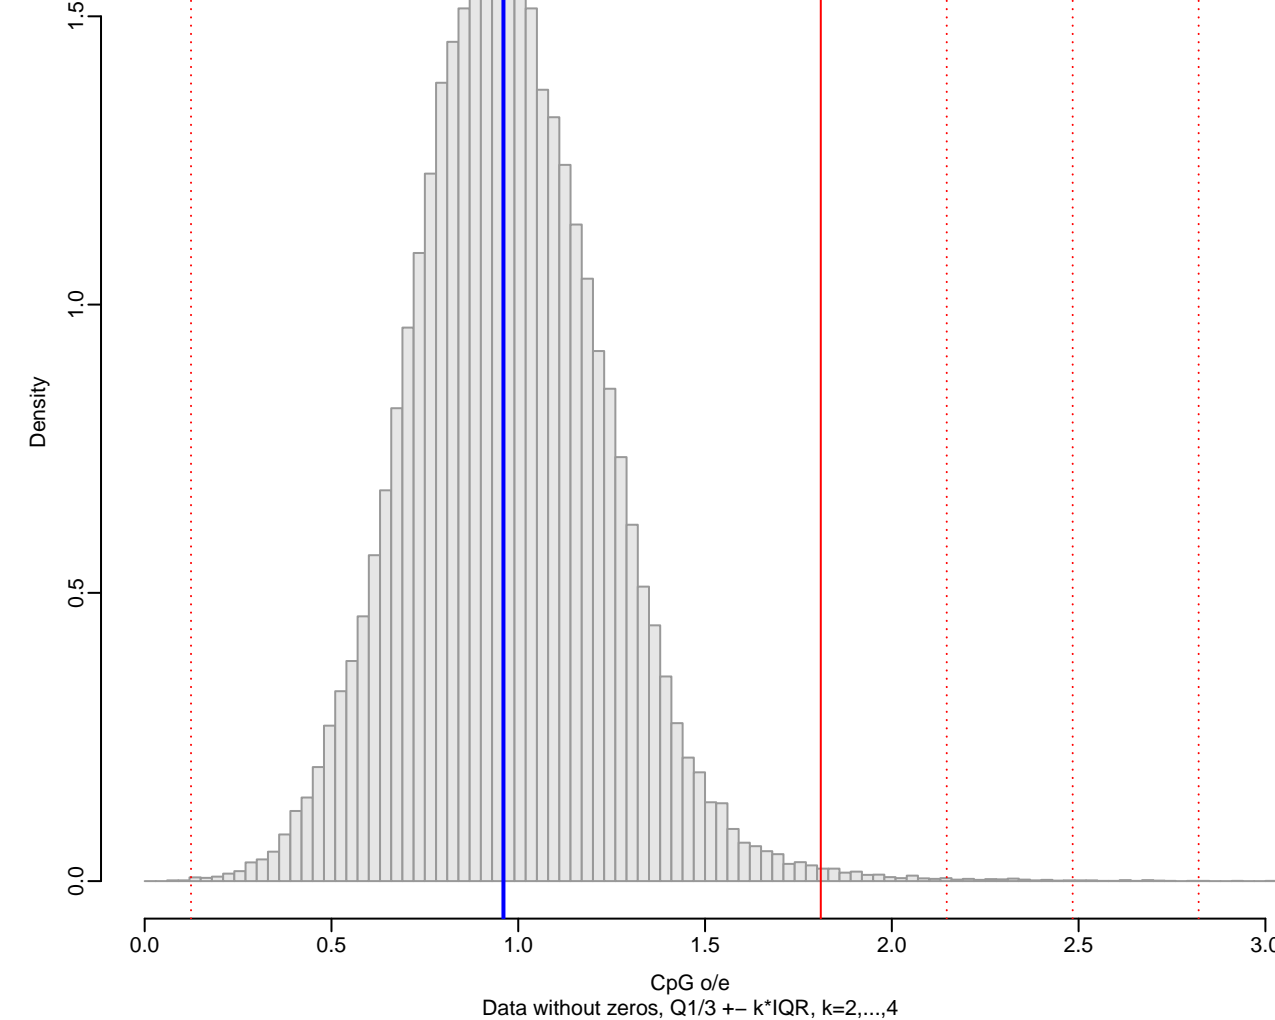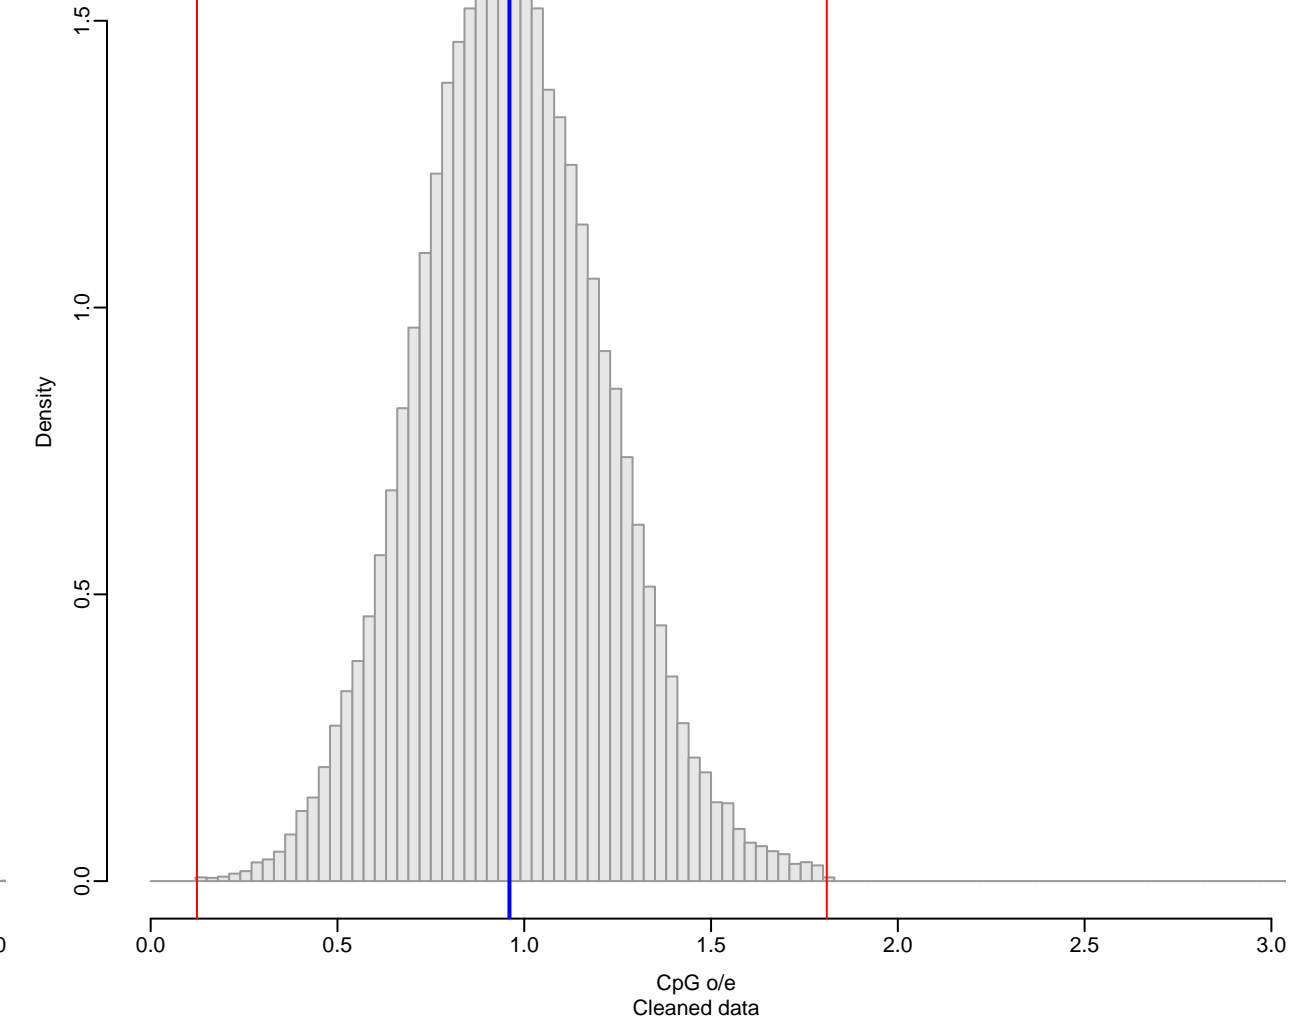

# Scophthalmus\_maximus

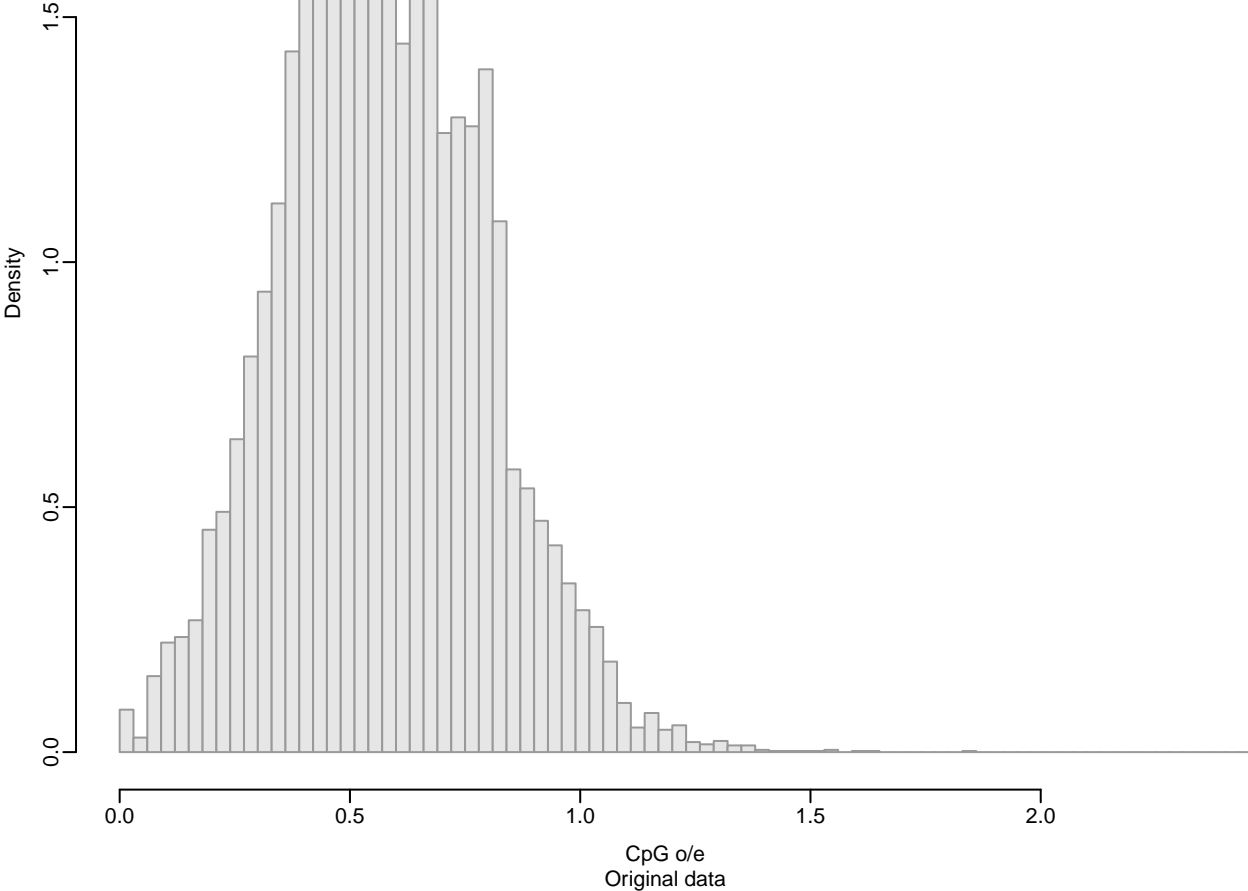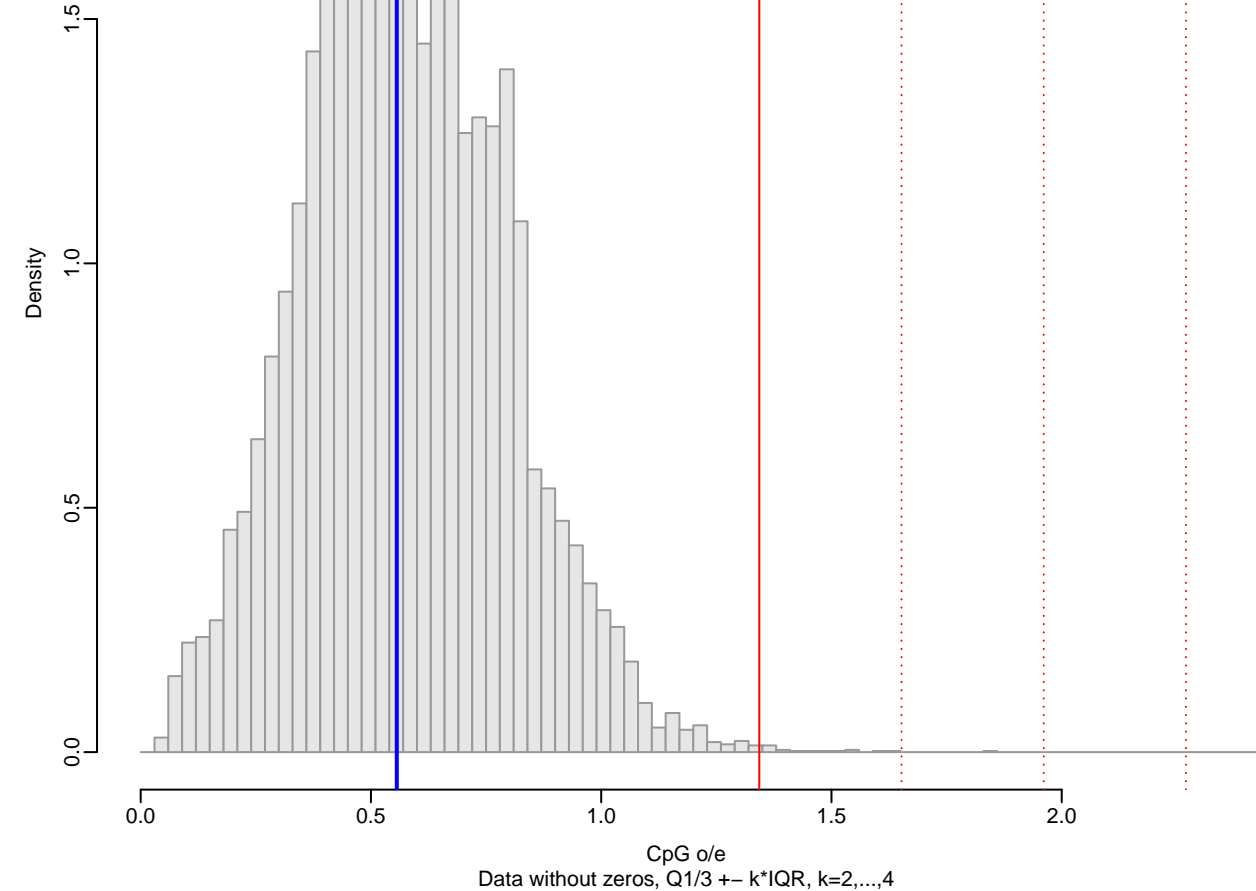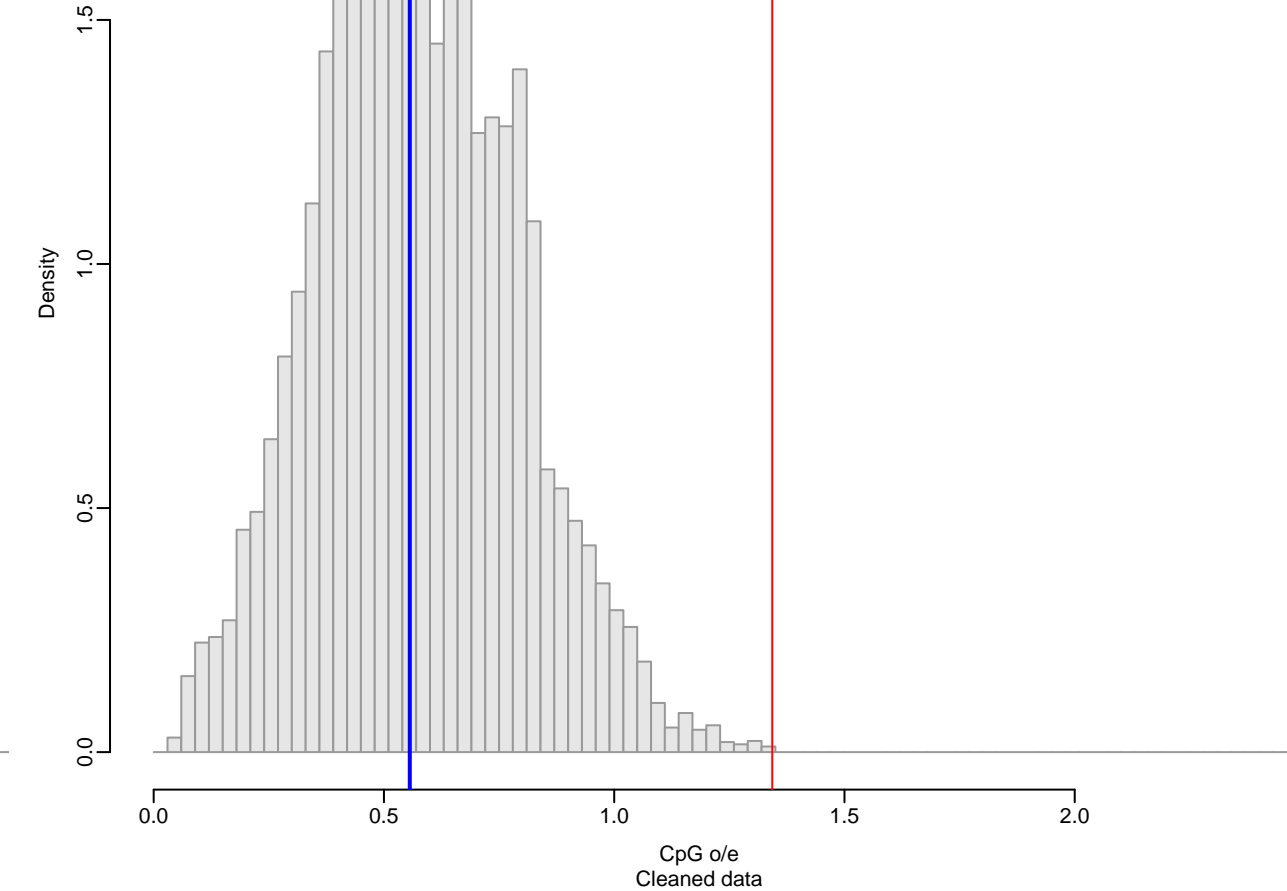

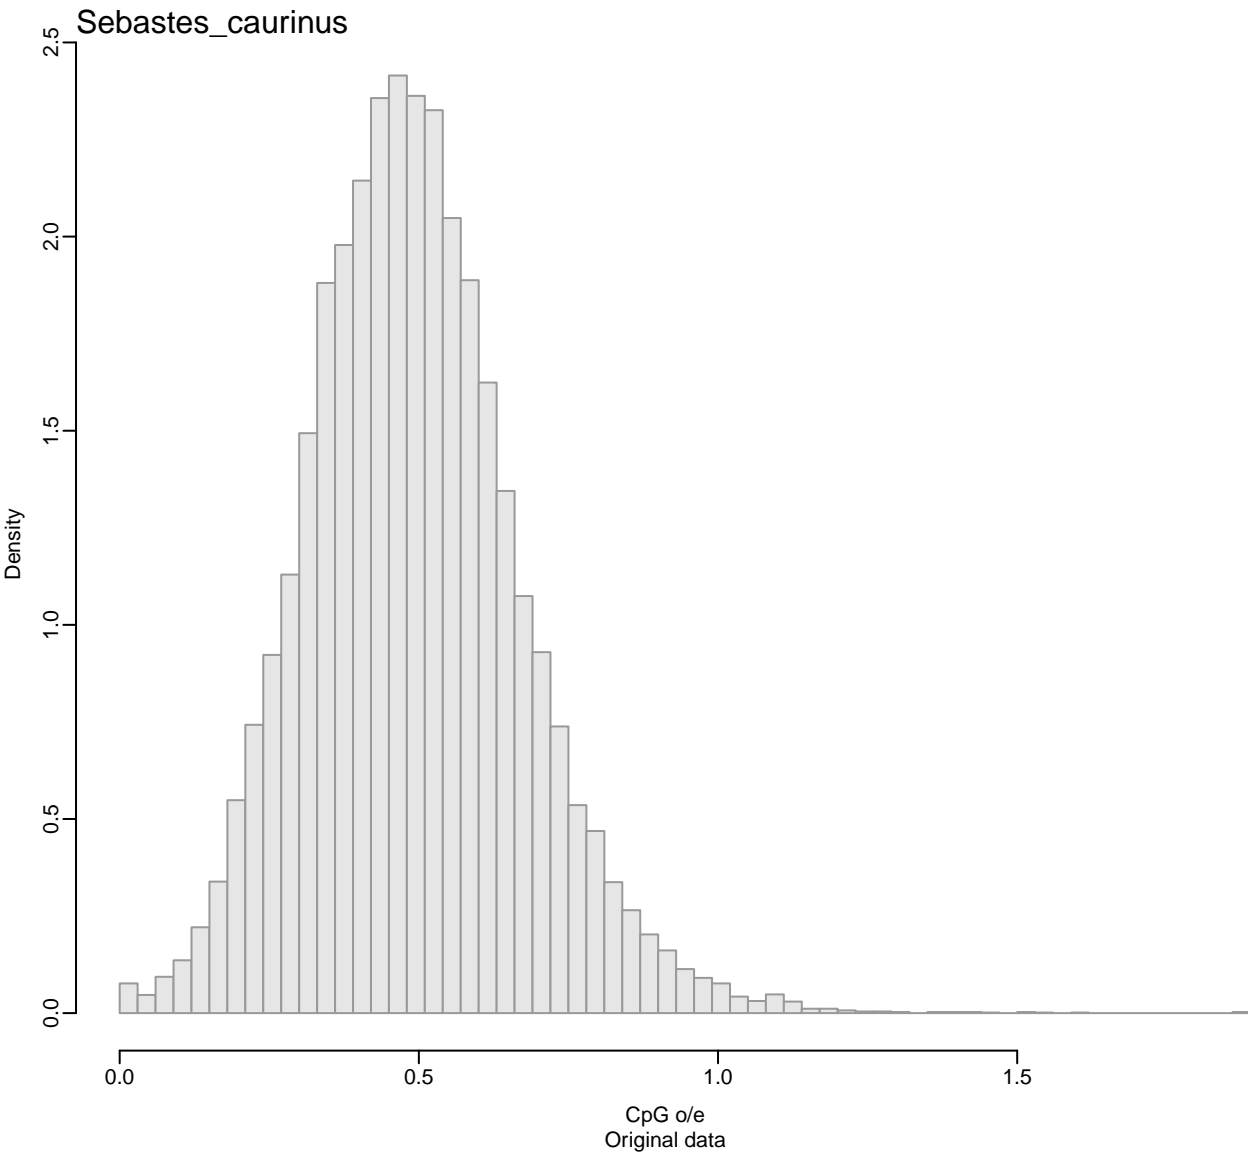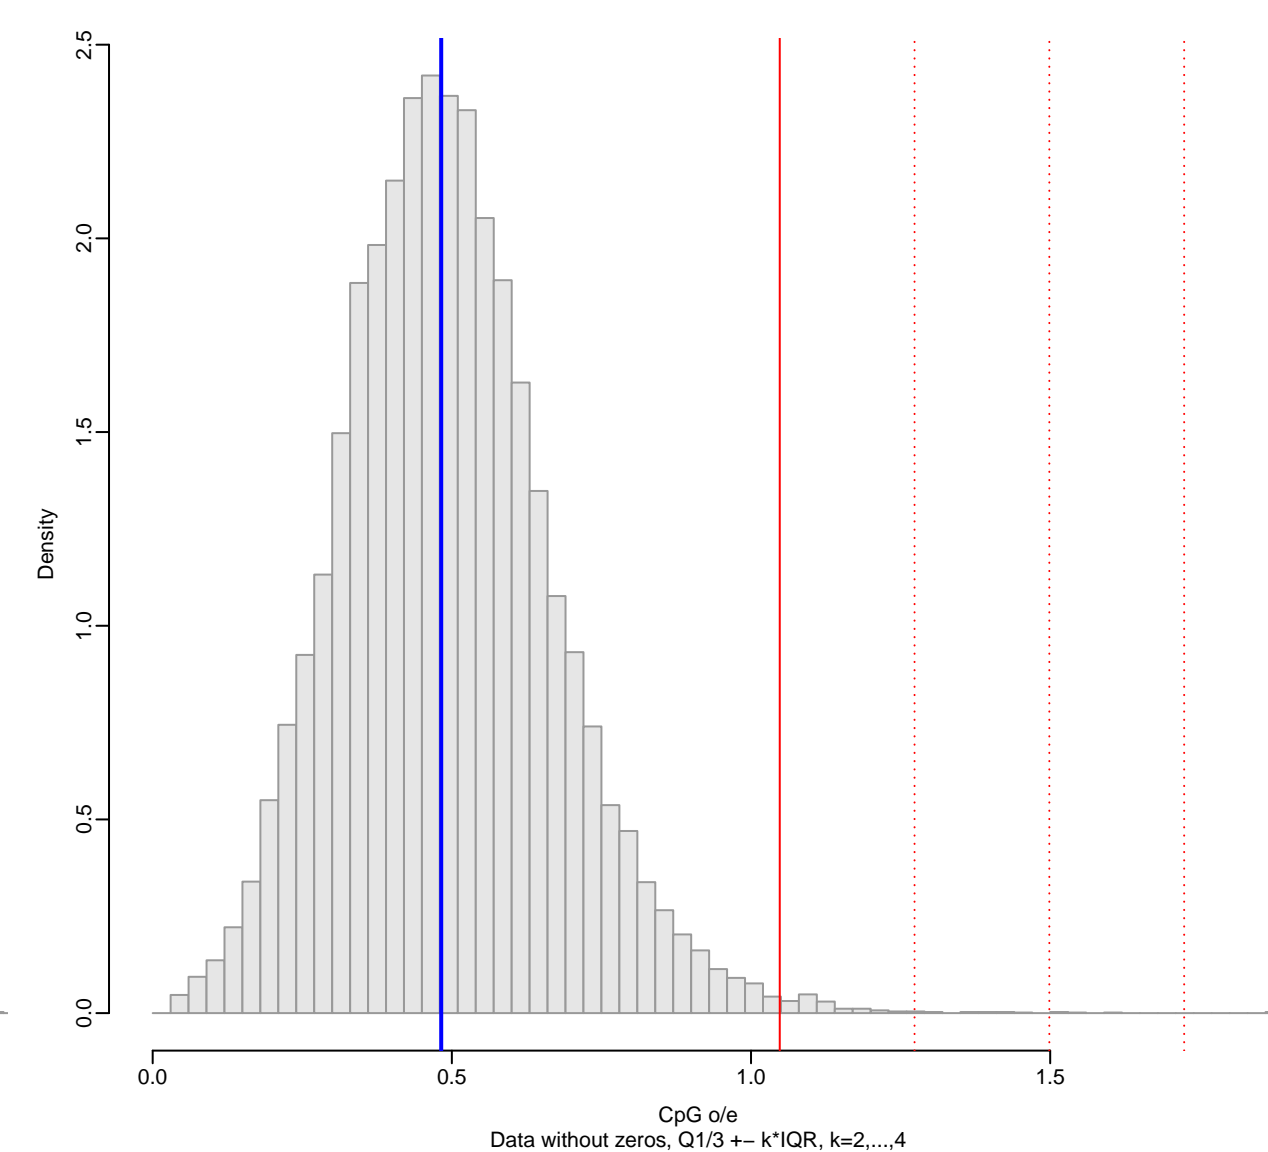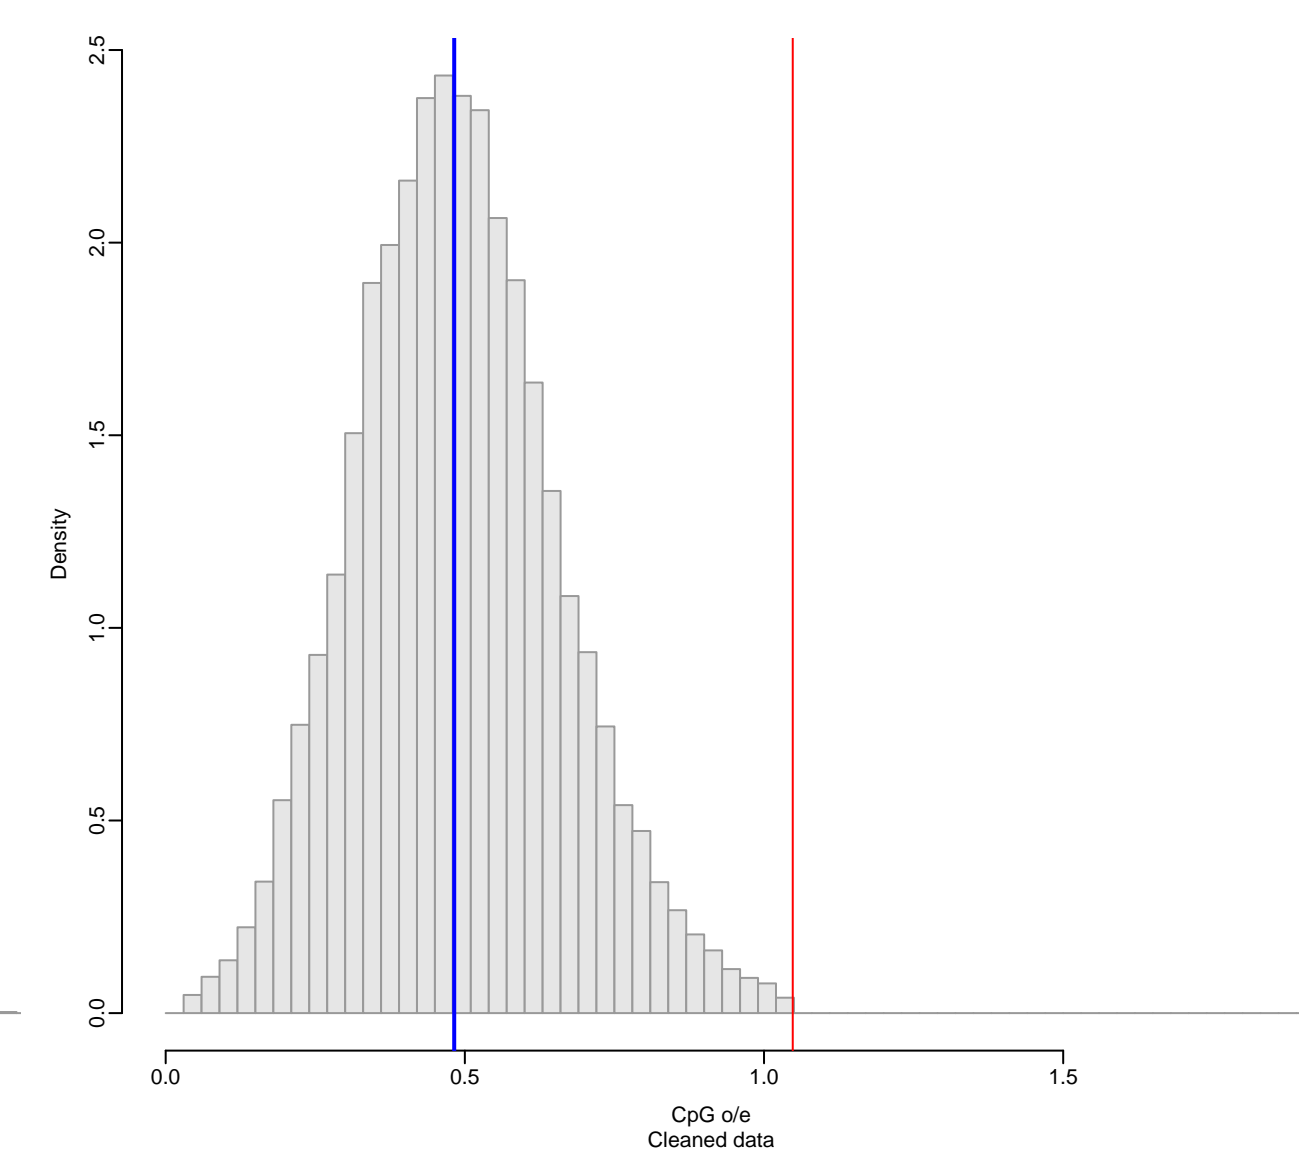

Selaginella\_lepidophylla

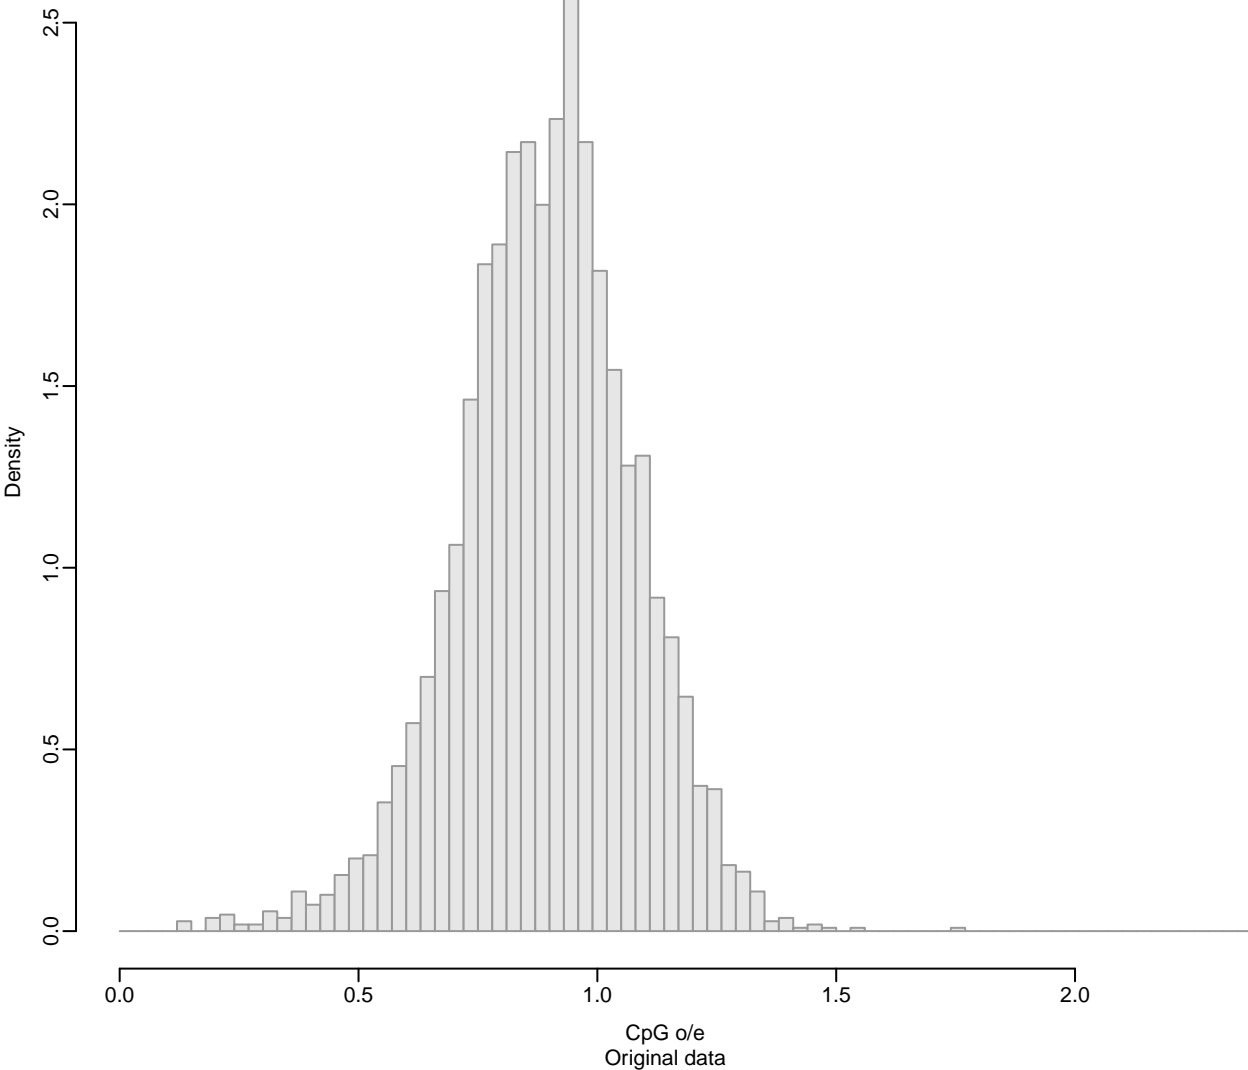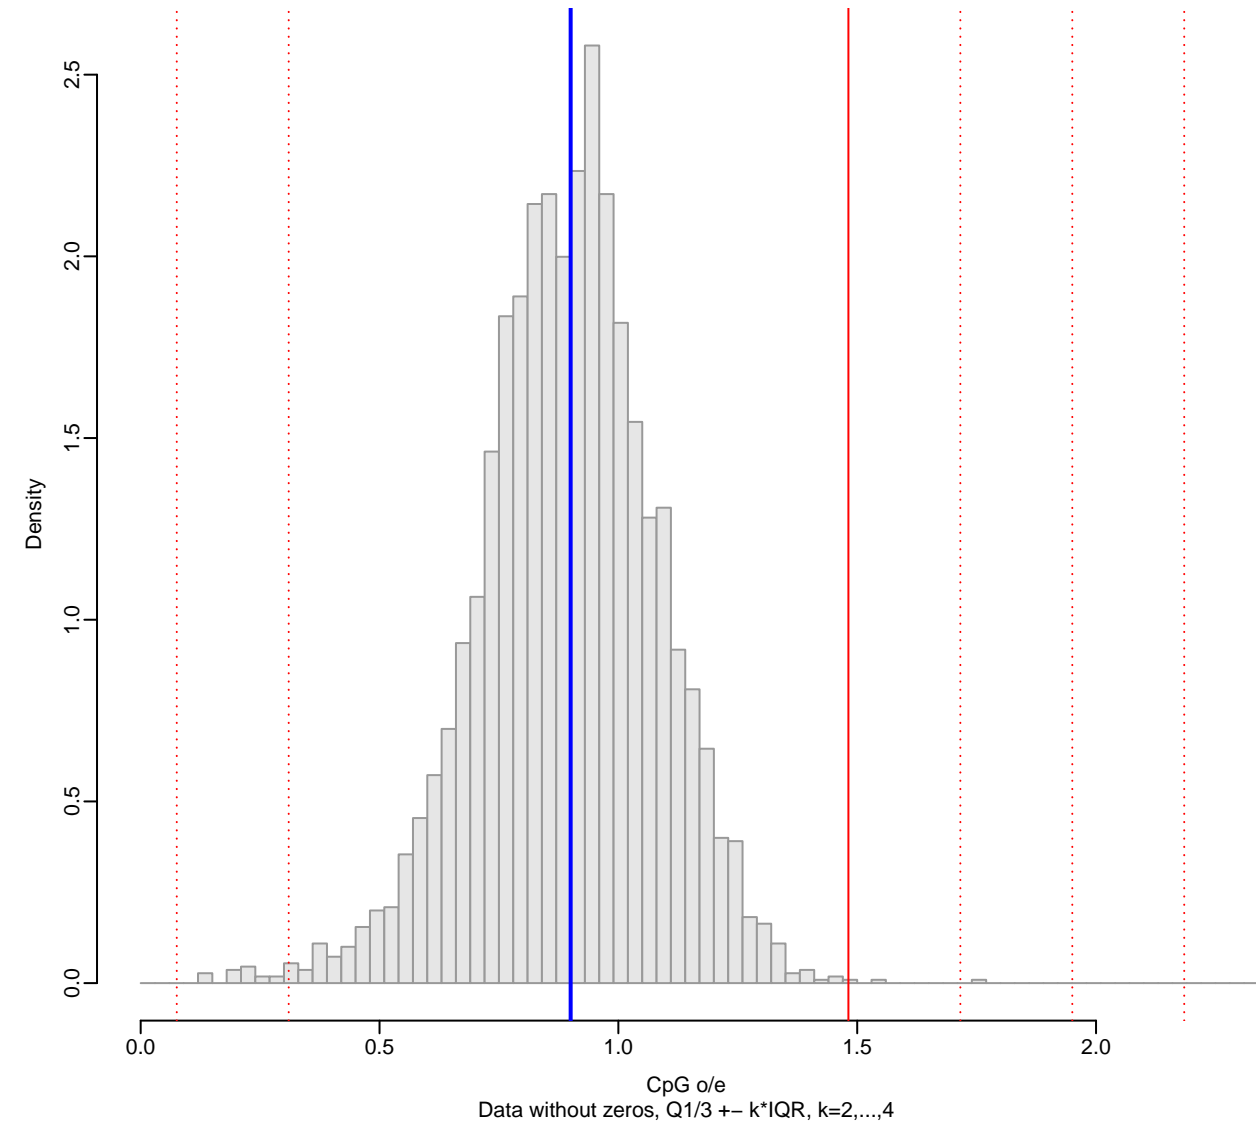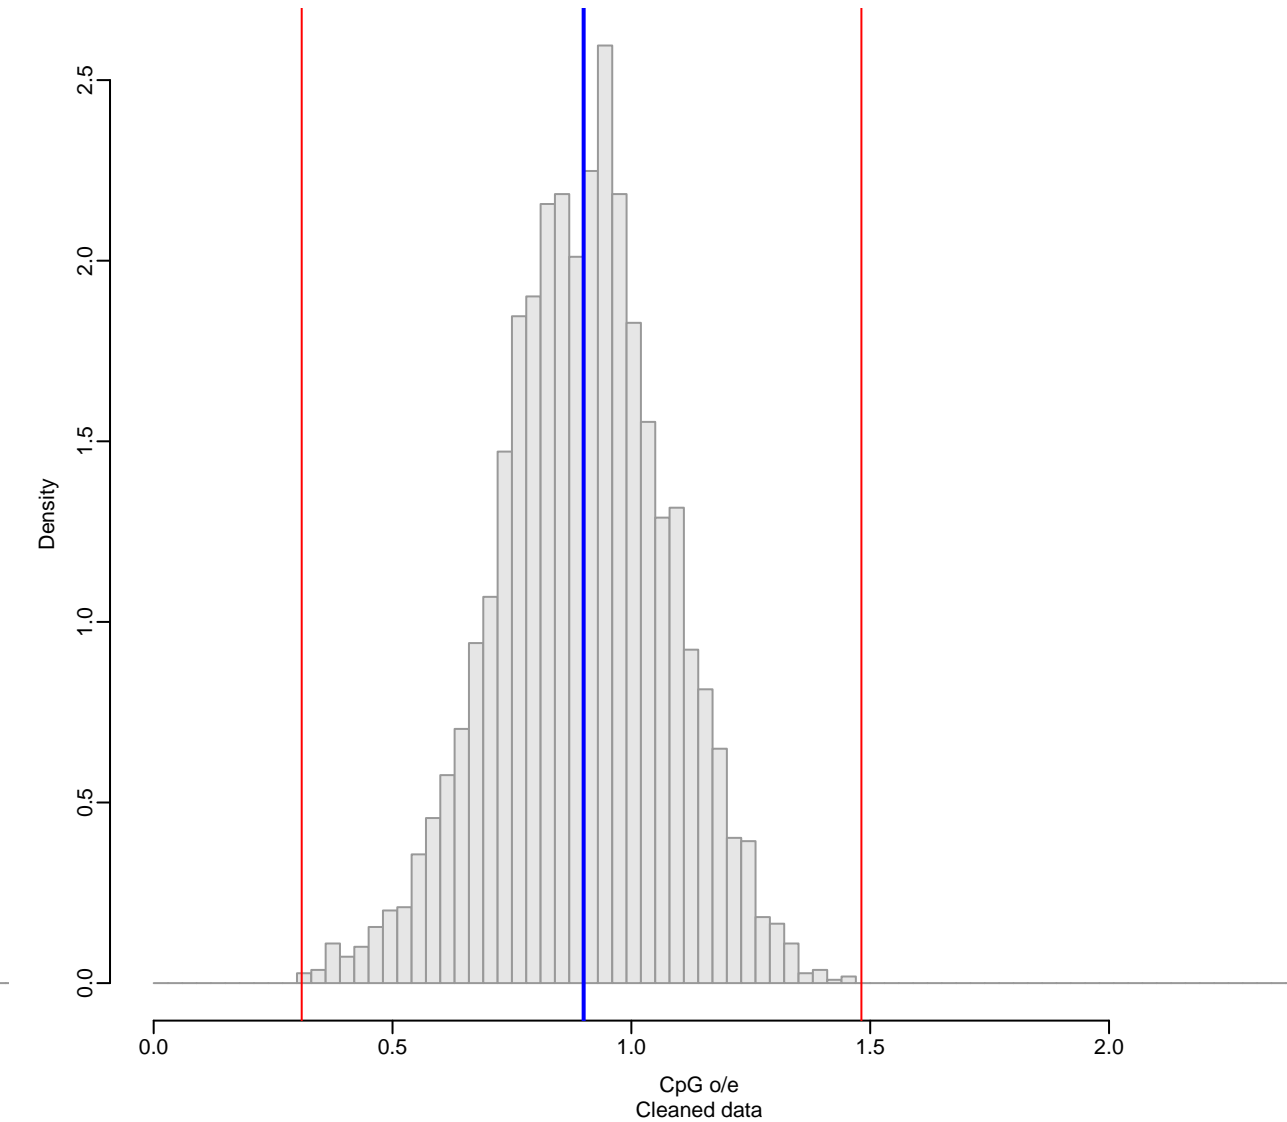

Selaginella\_moellendorffii

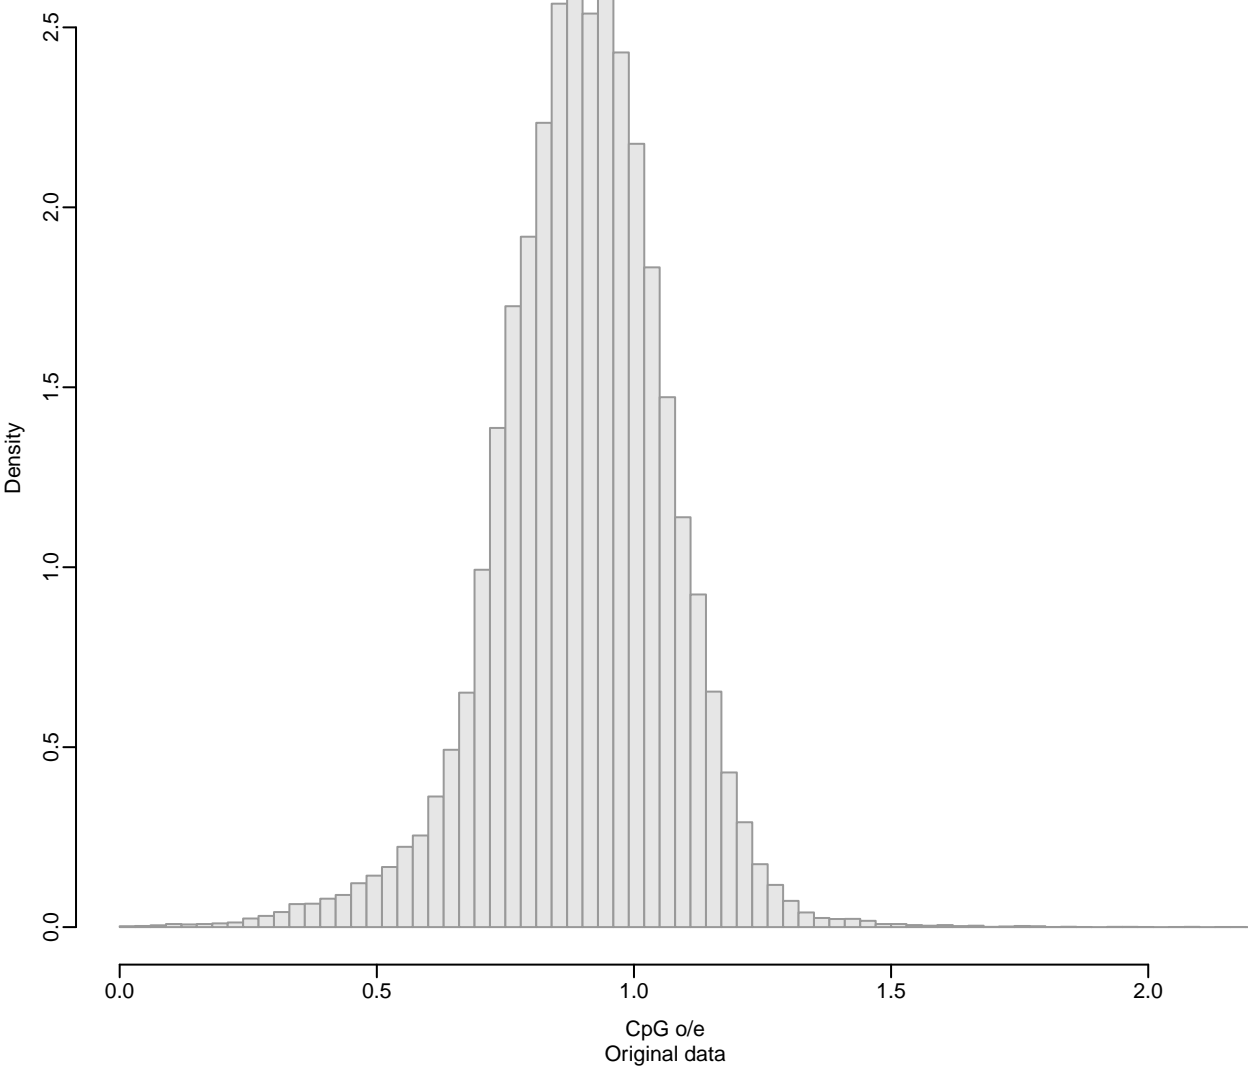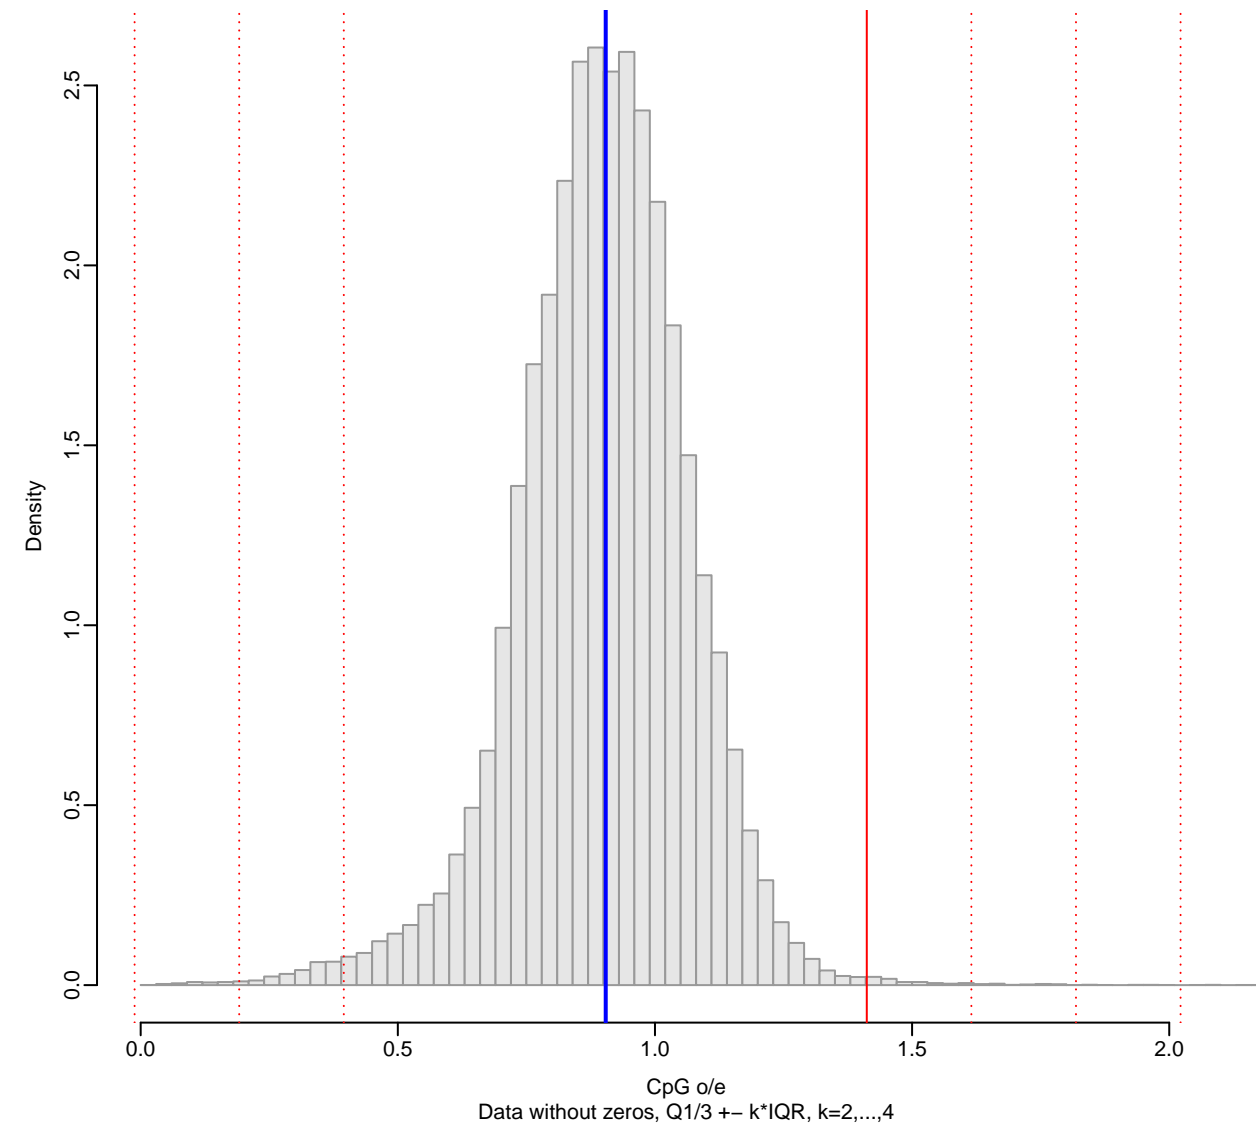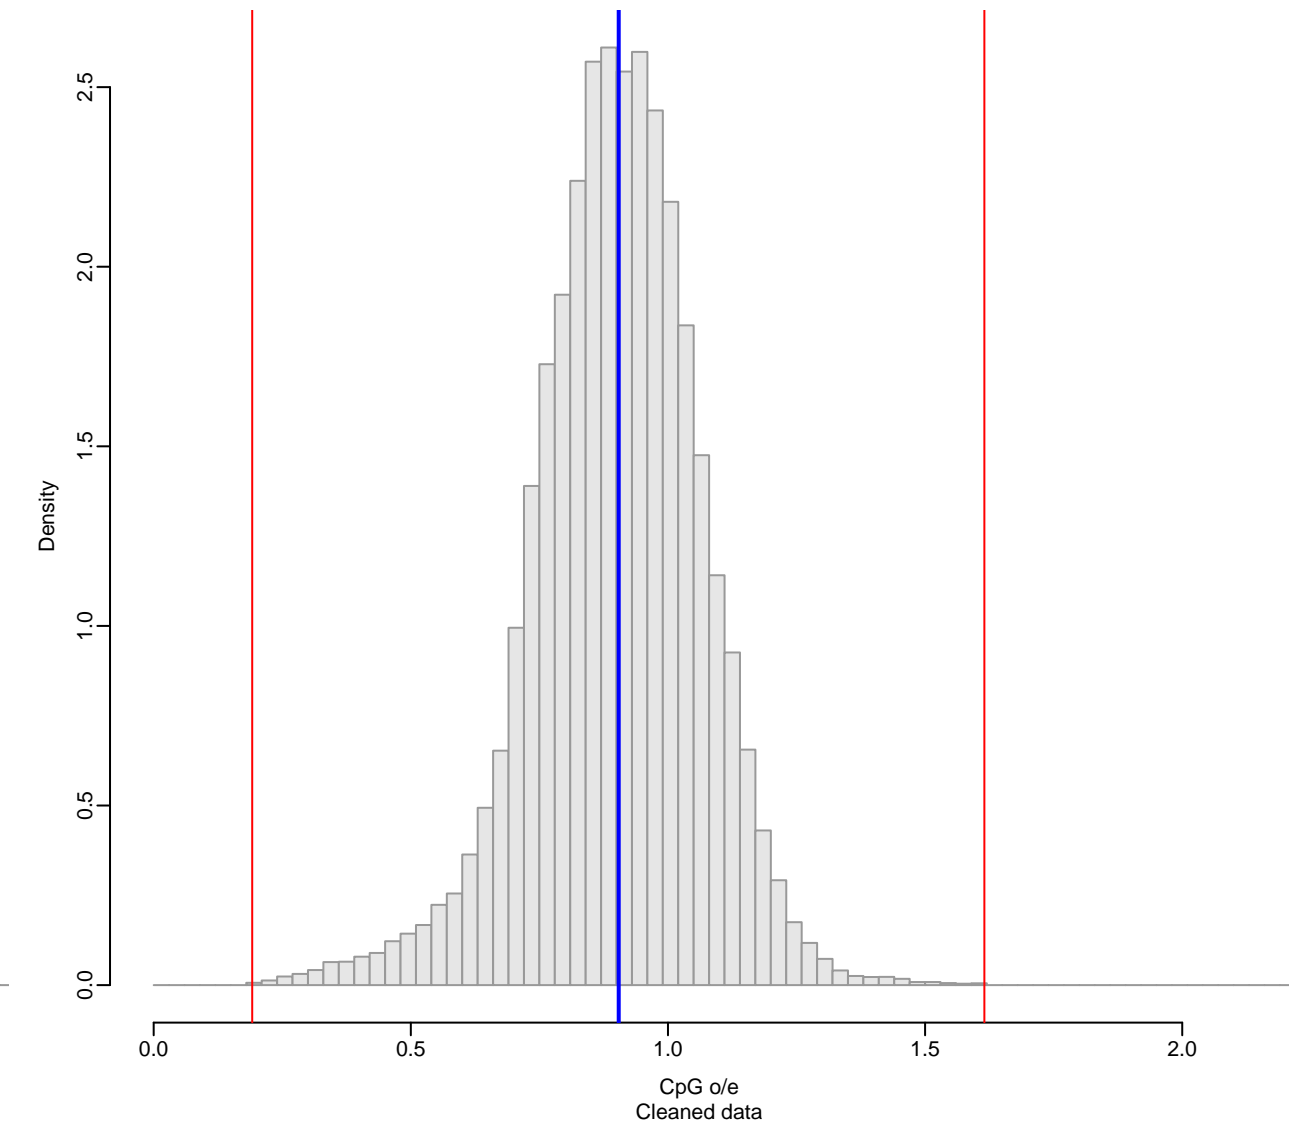

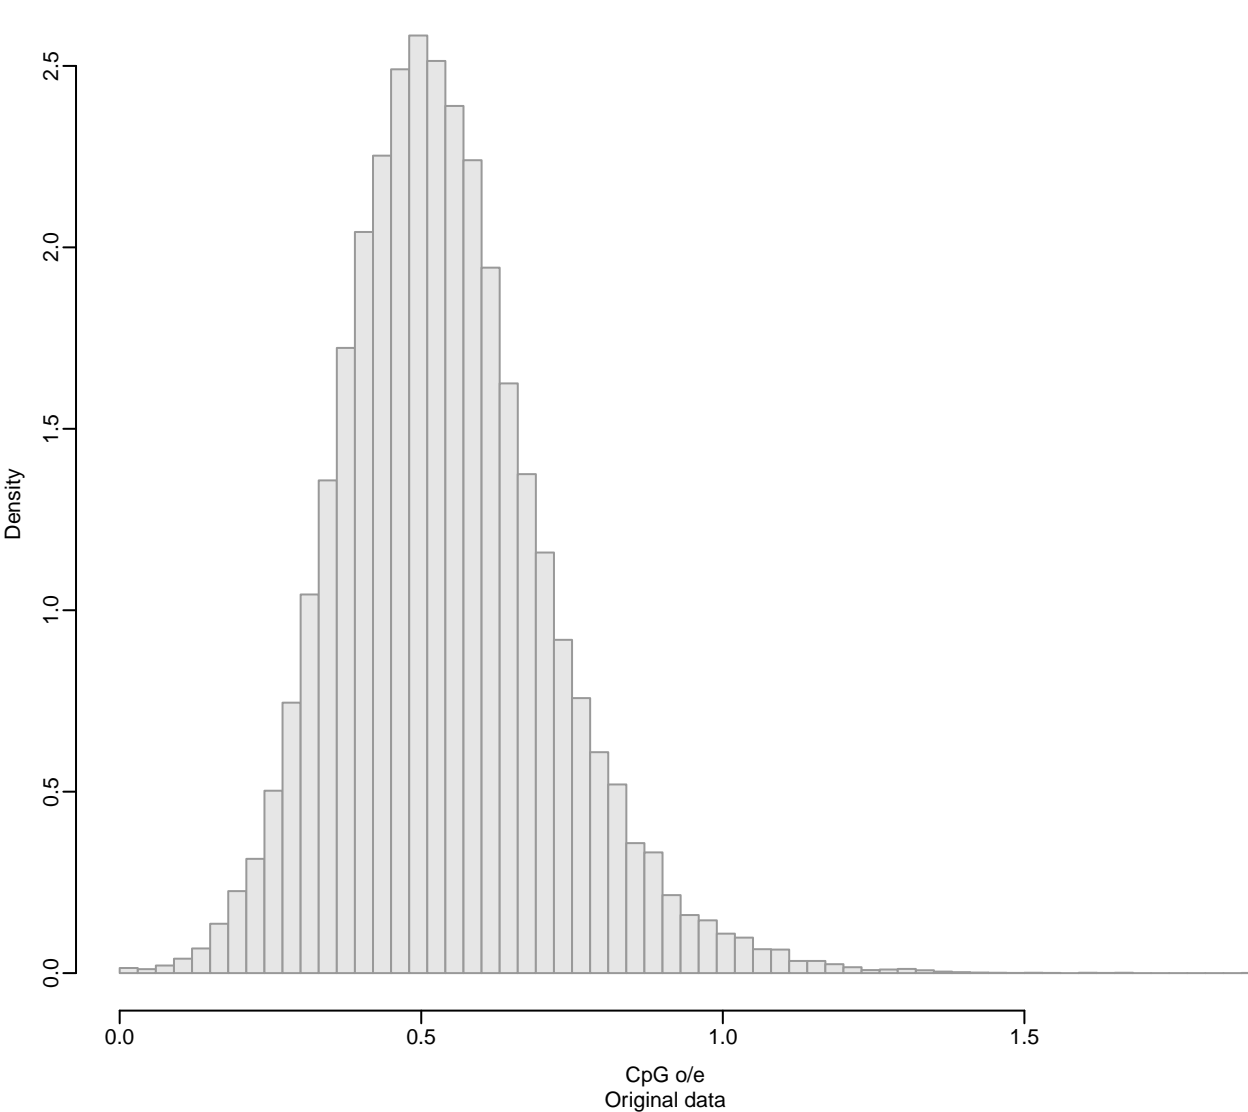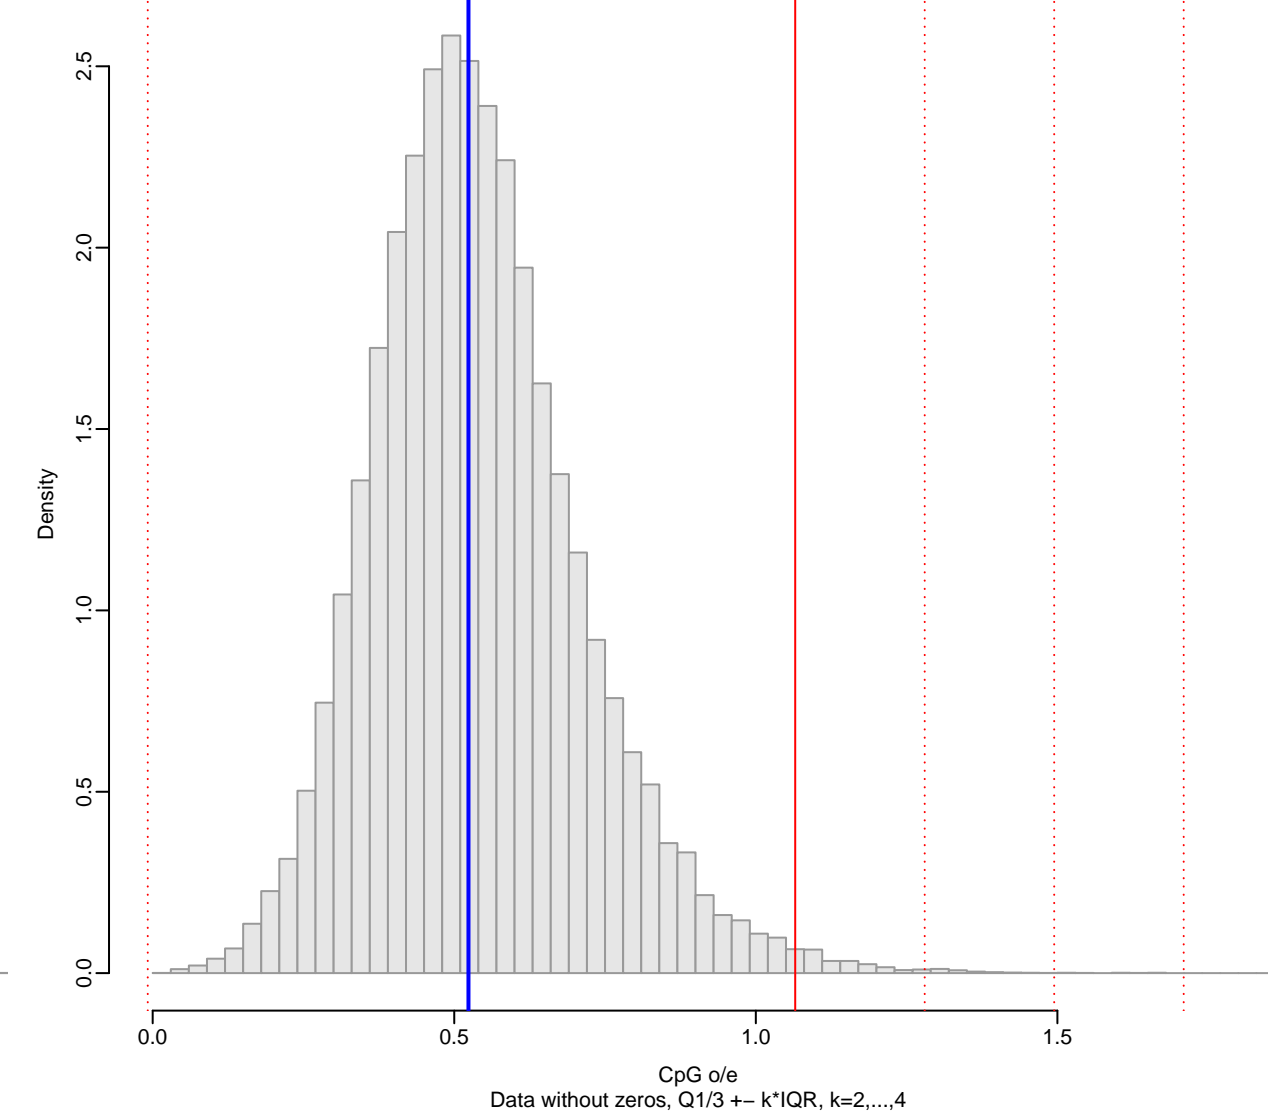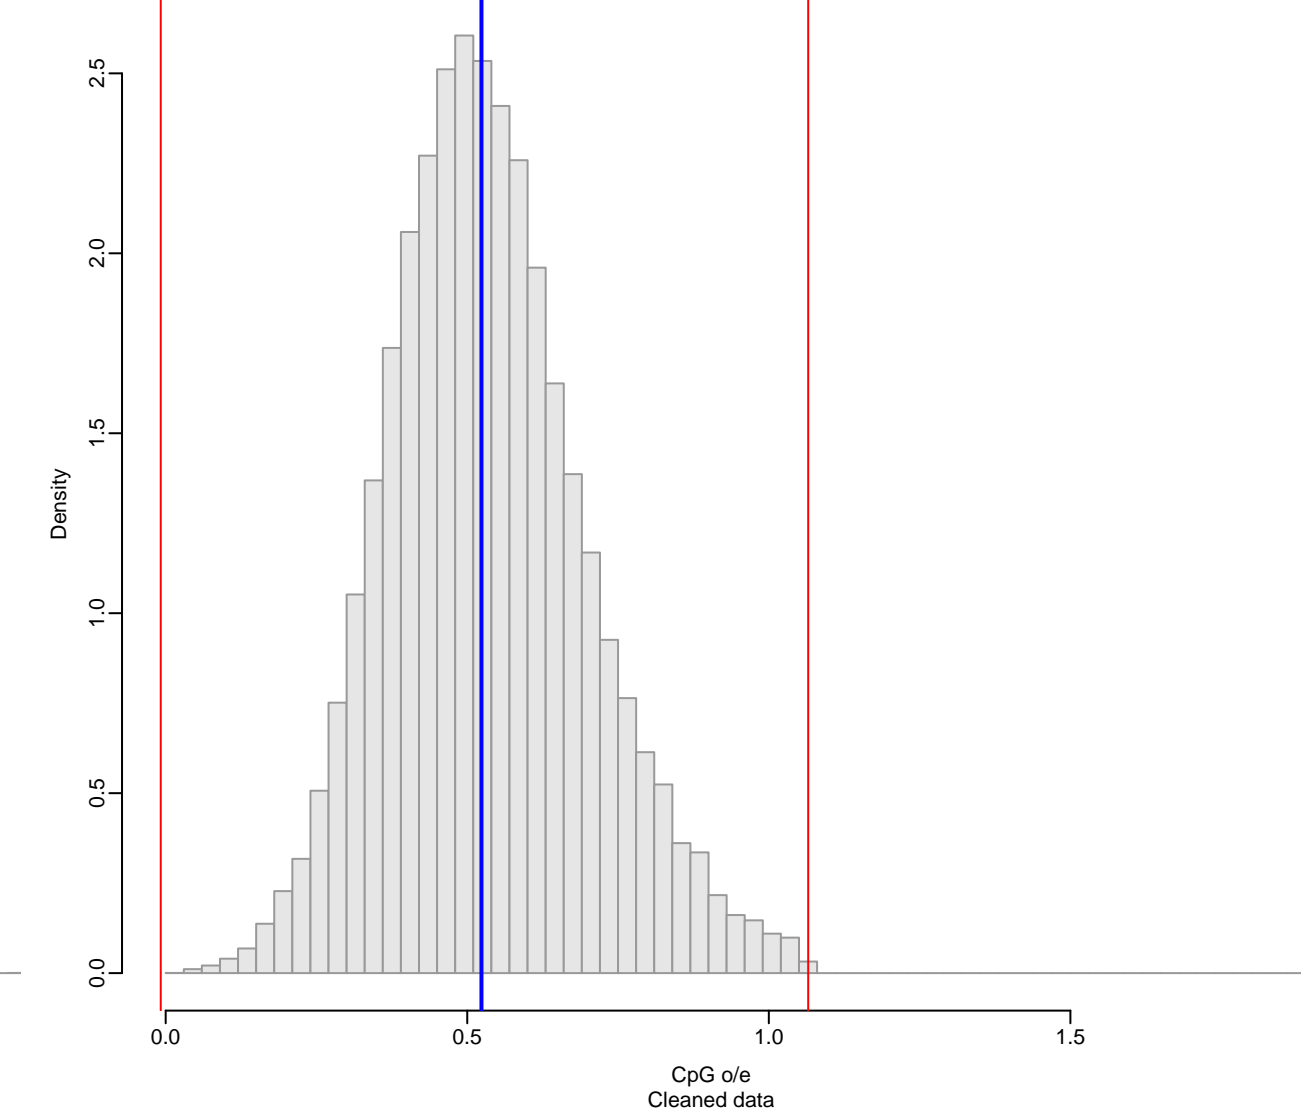



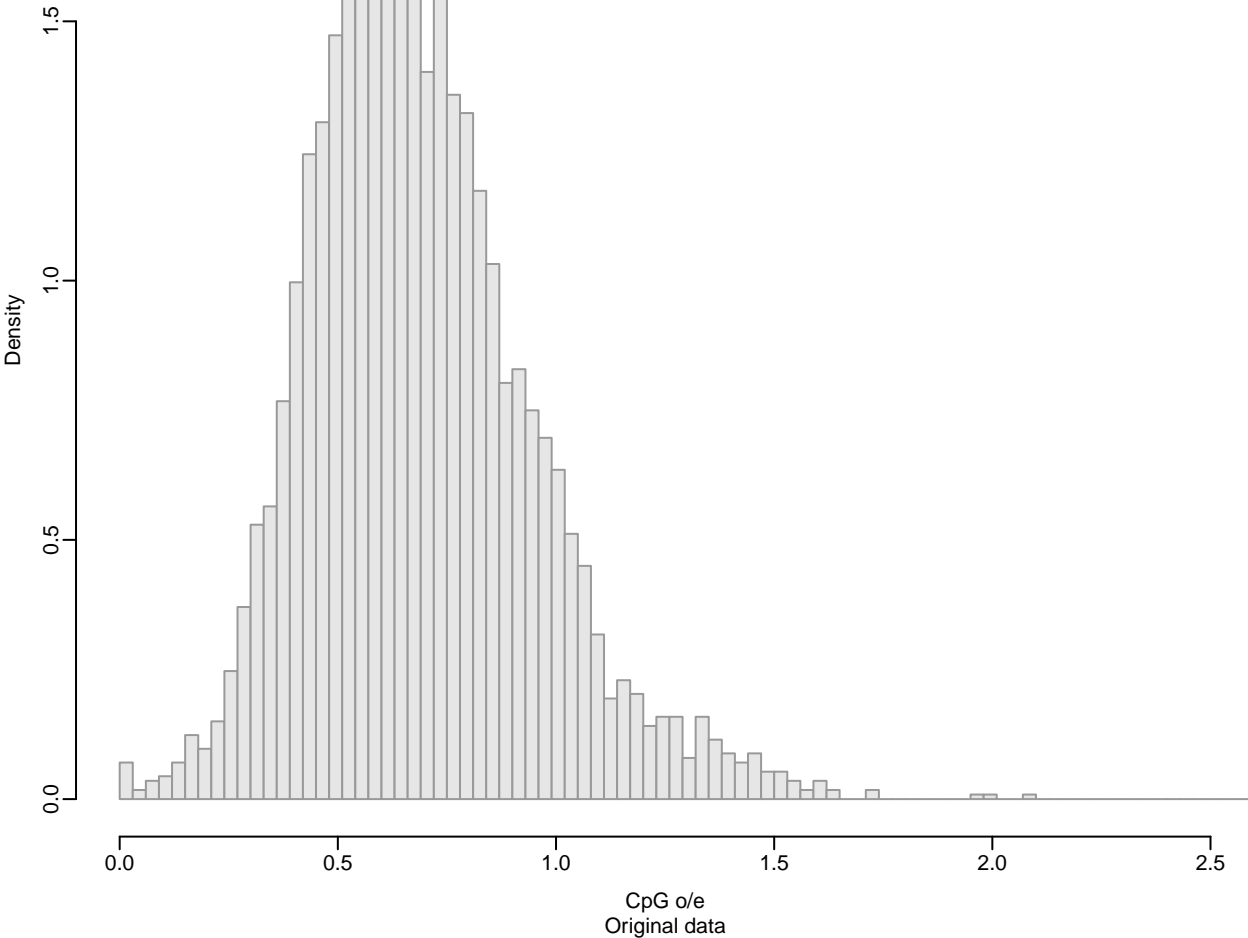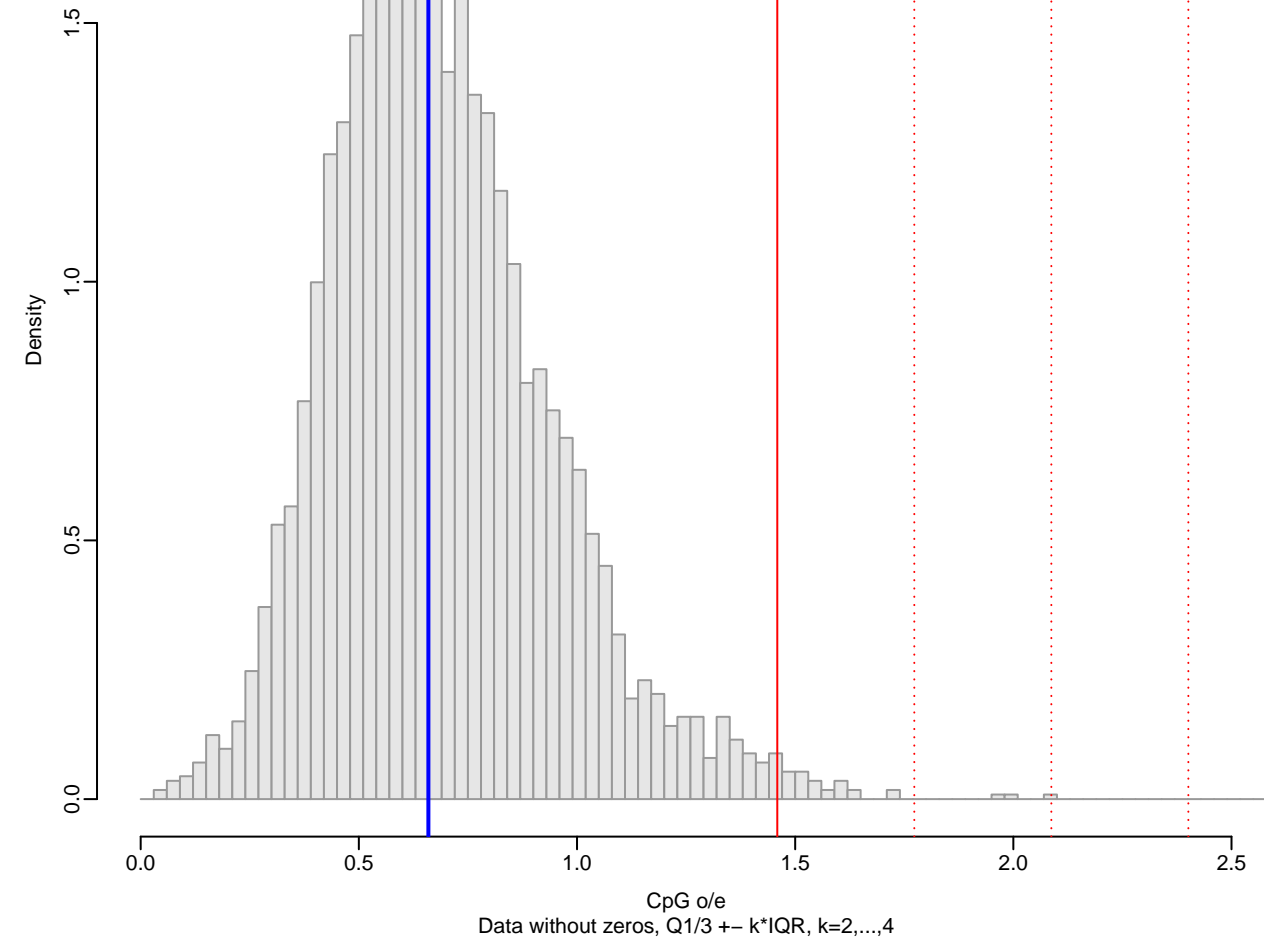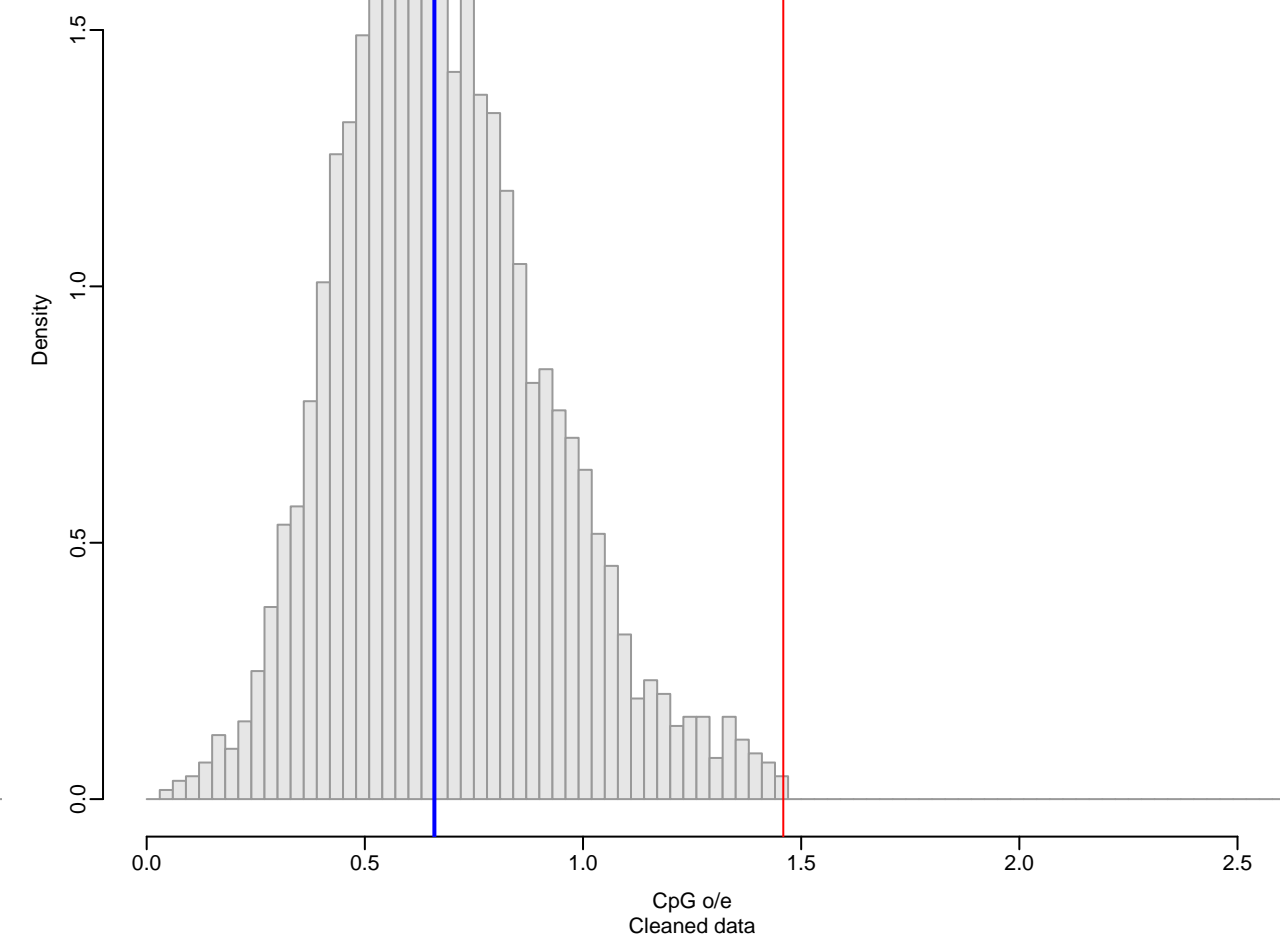

Solanum\_chacoense

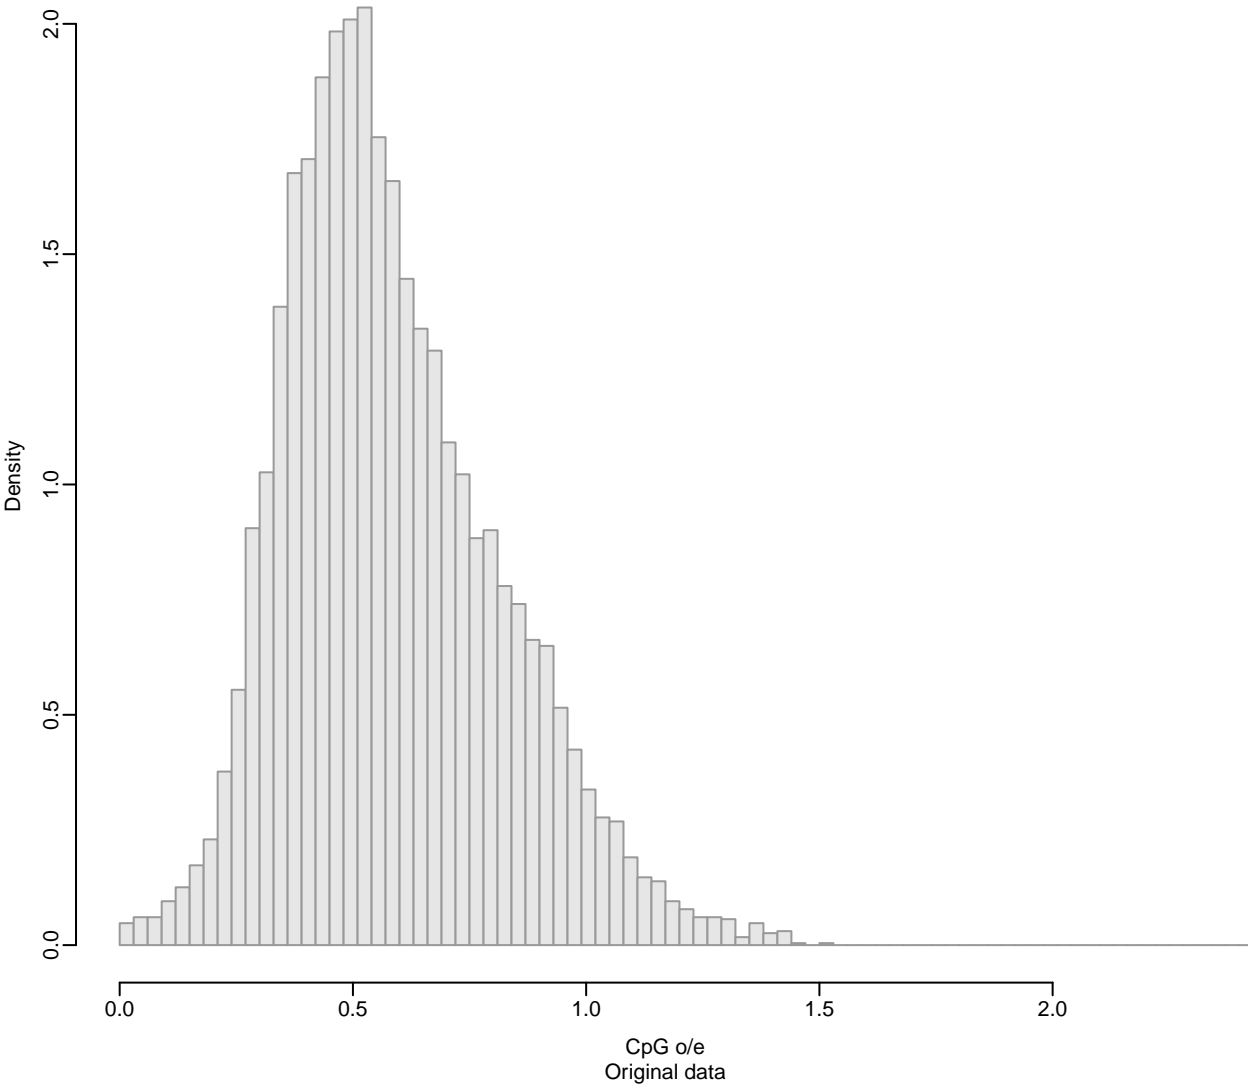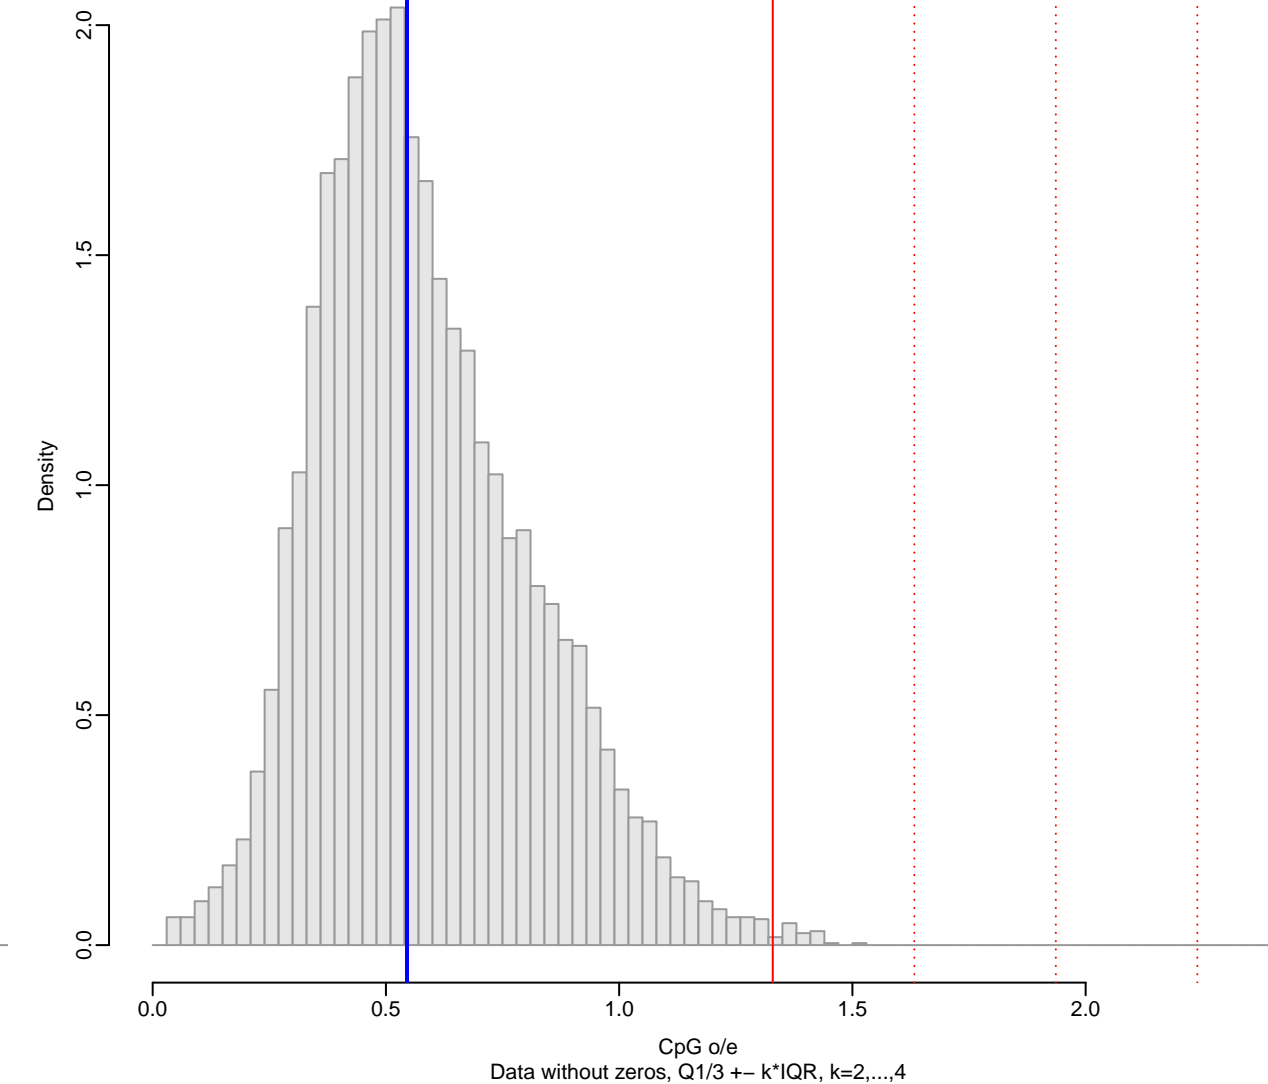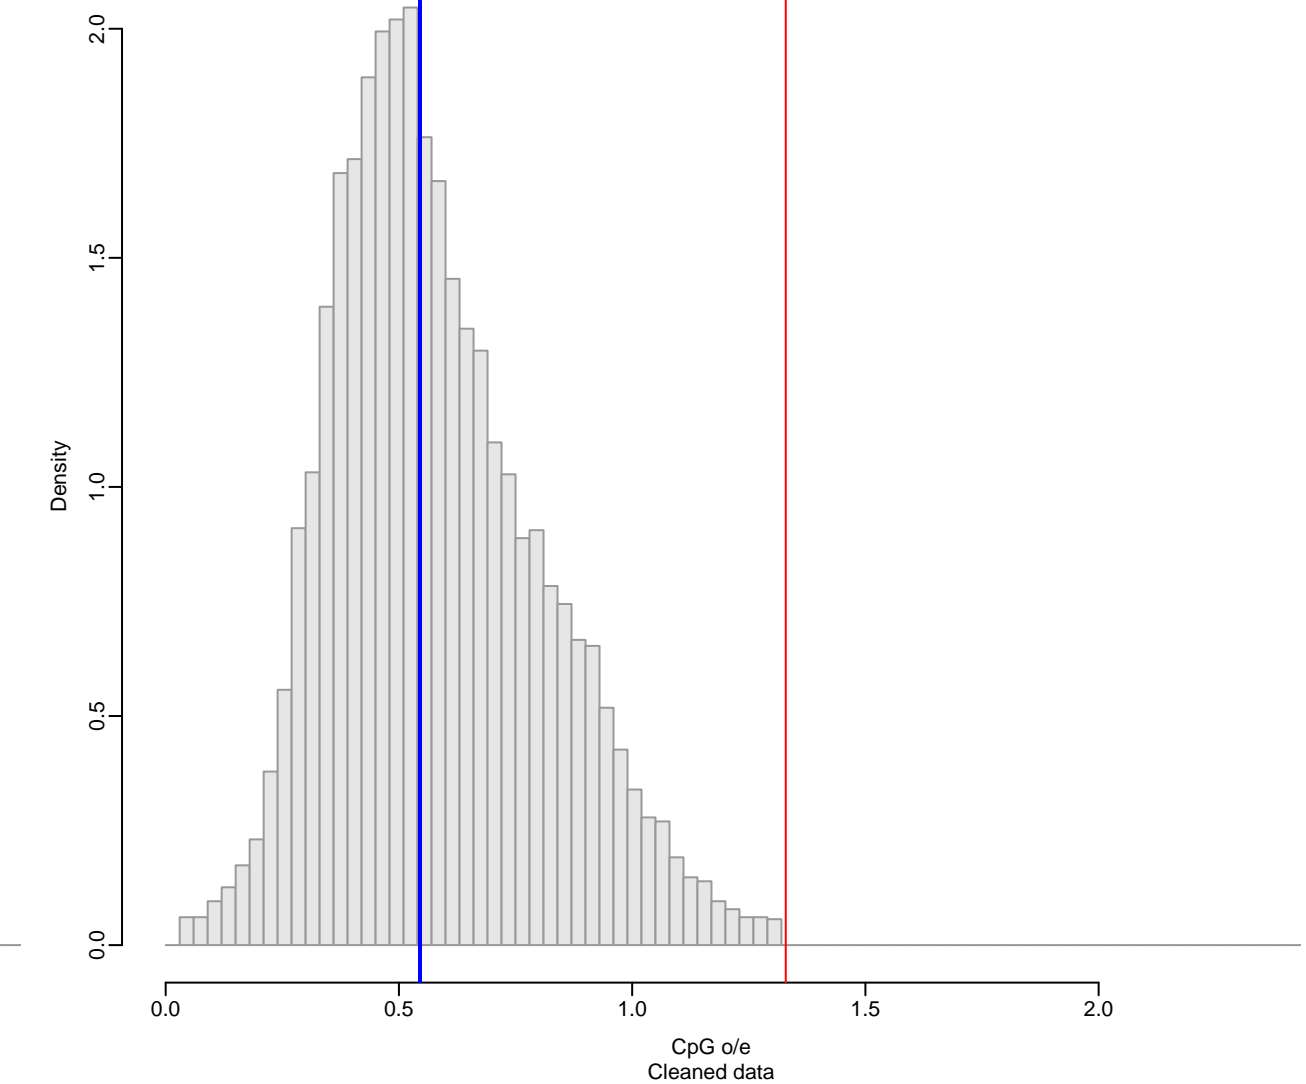

Solanum\_lycopersicum

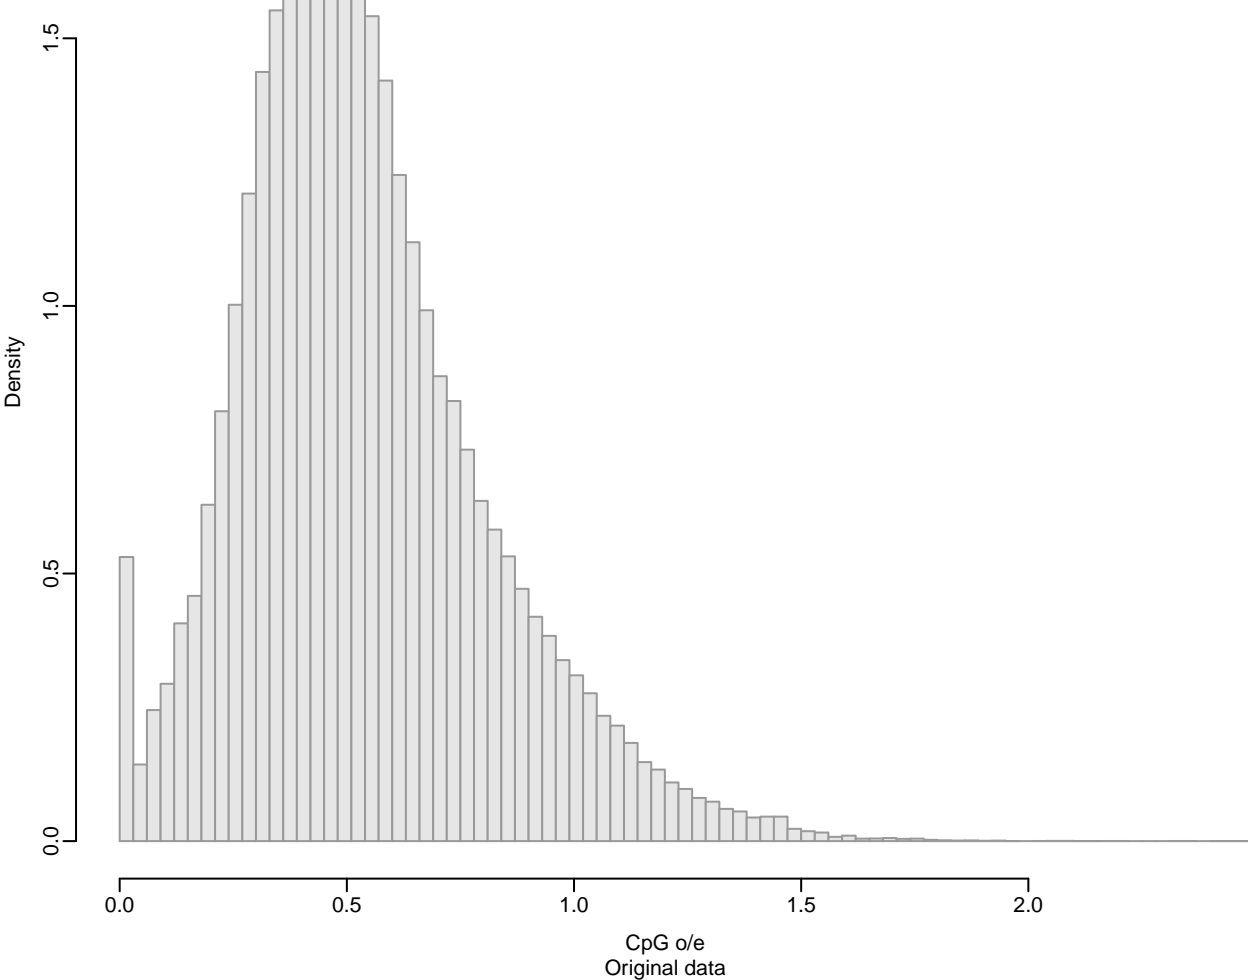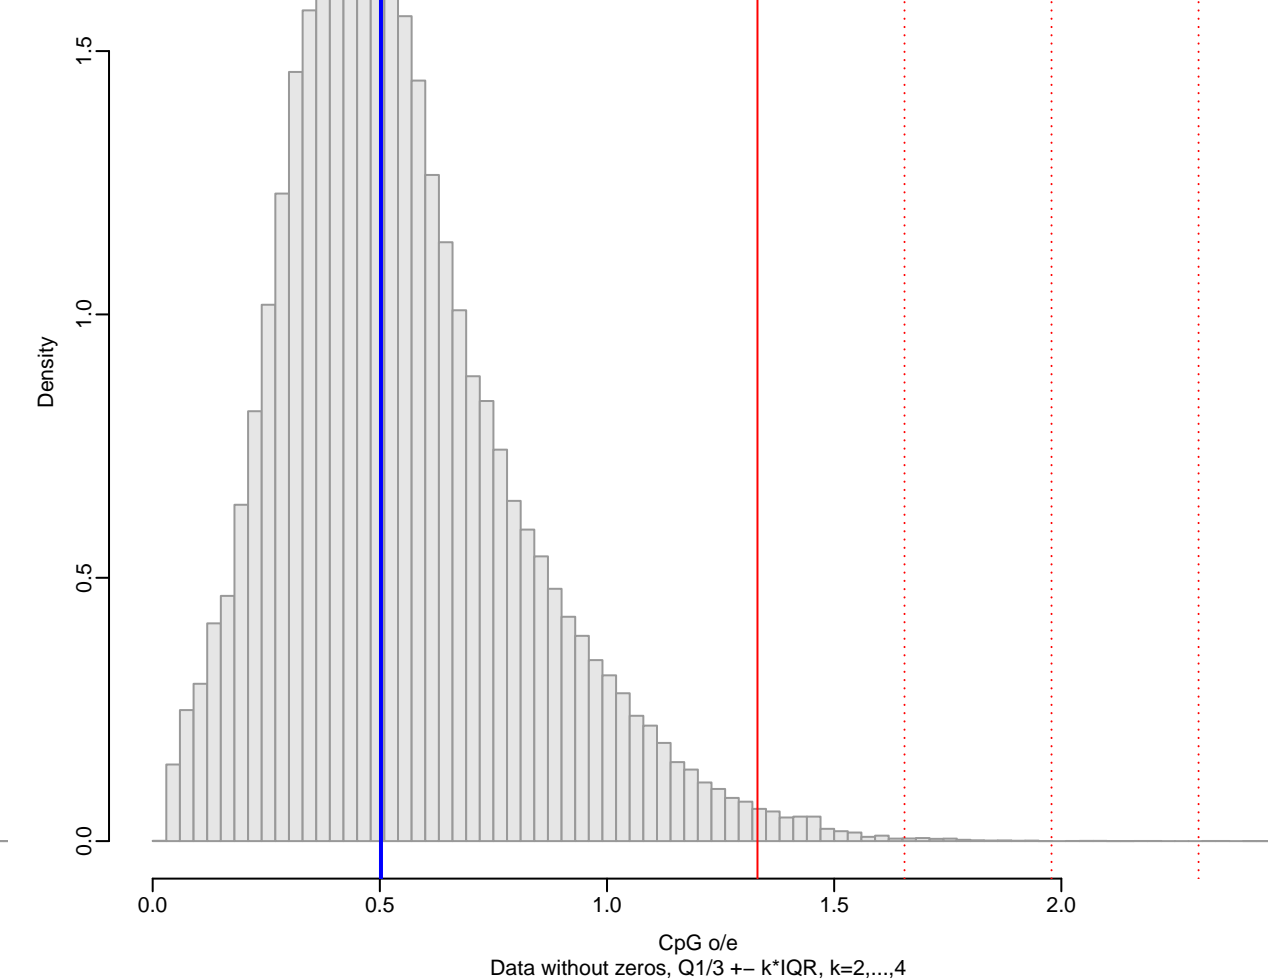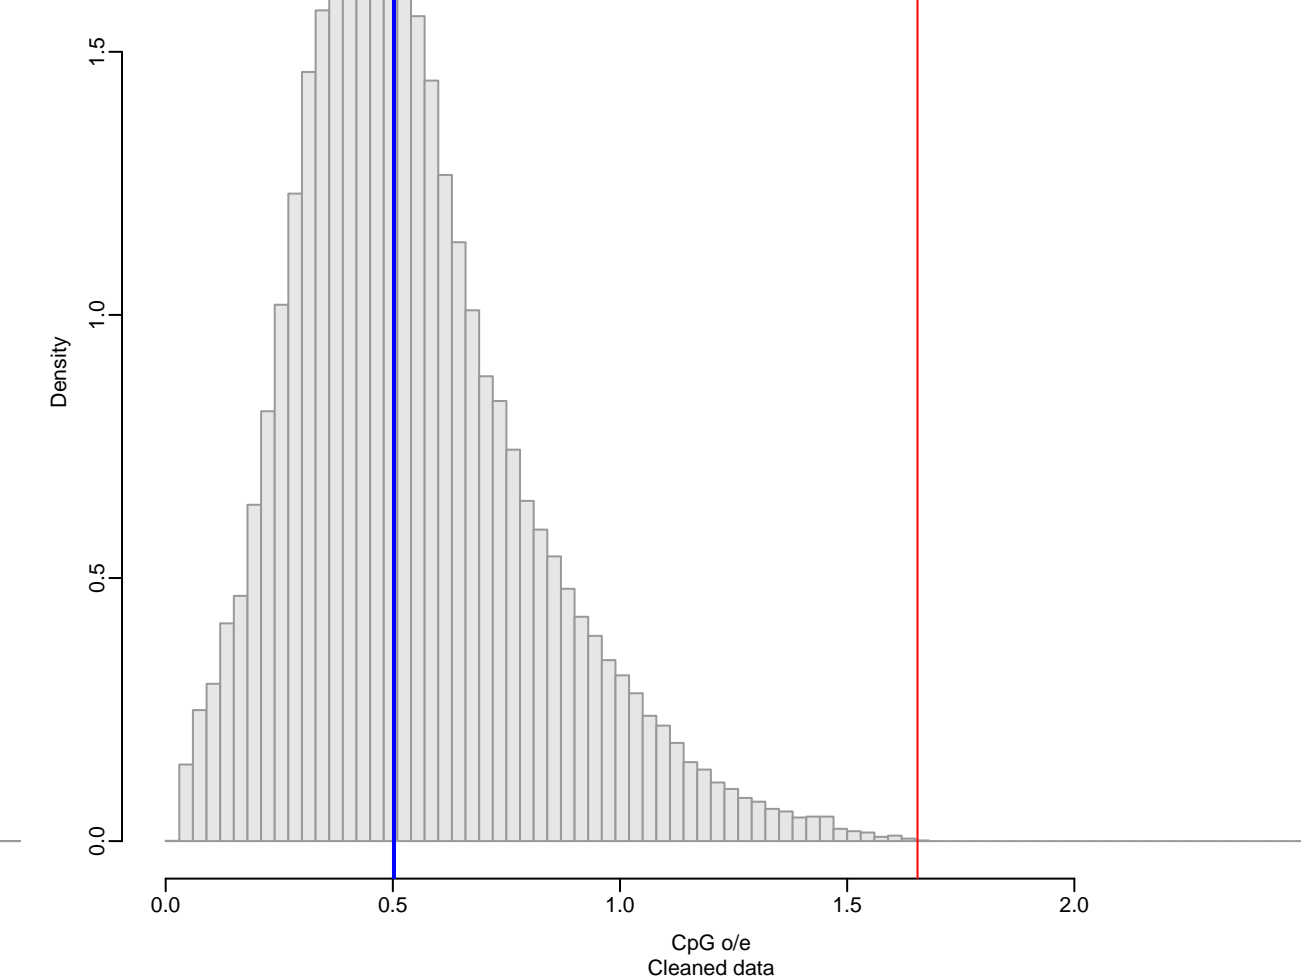

Solanum\_melongena

Density

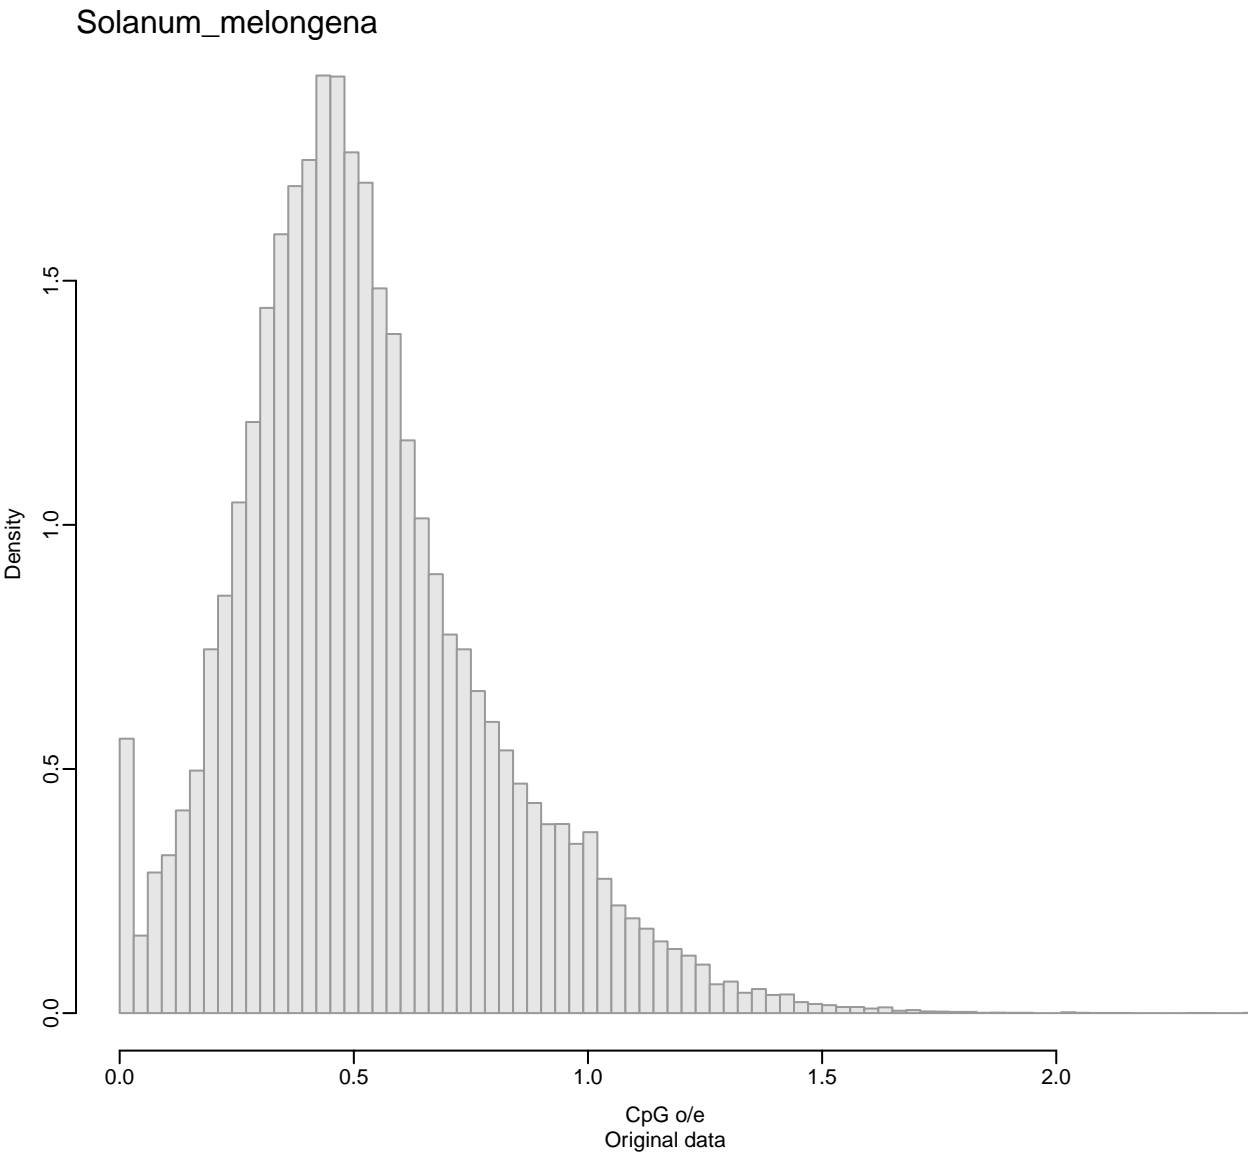

Density

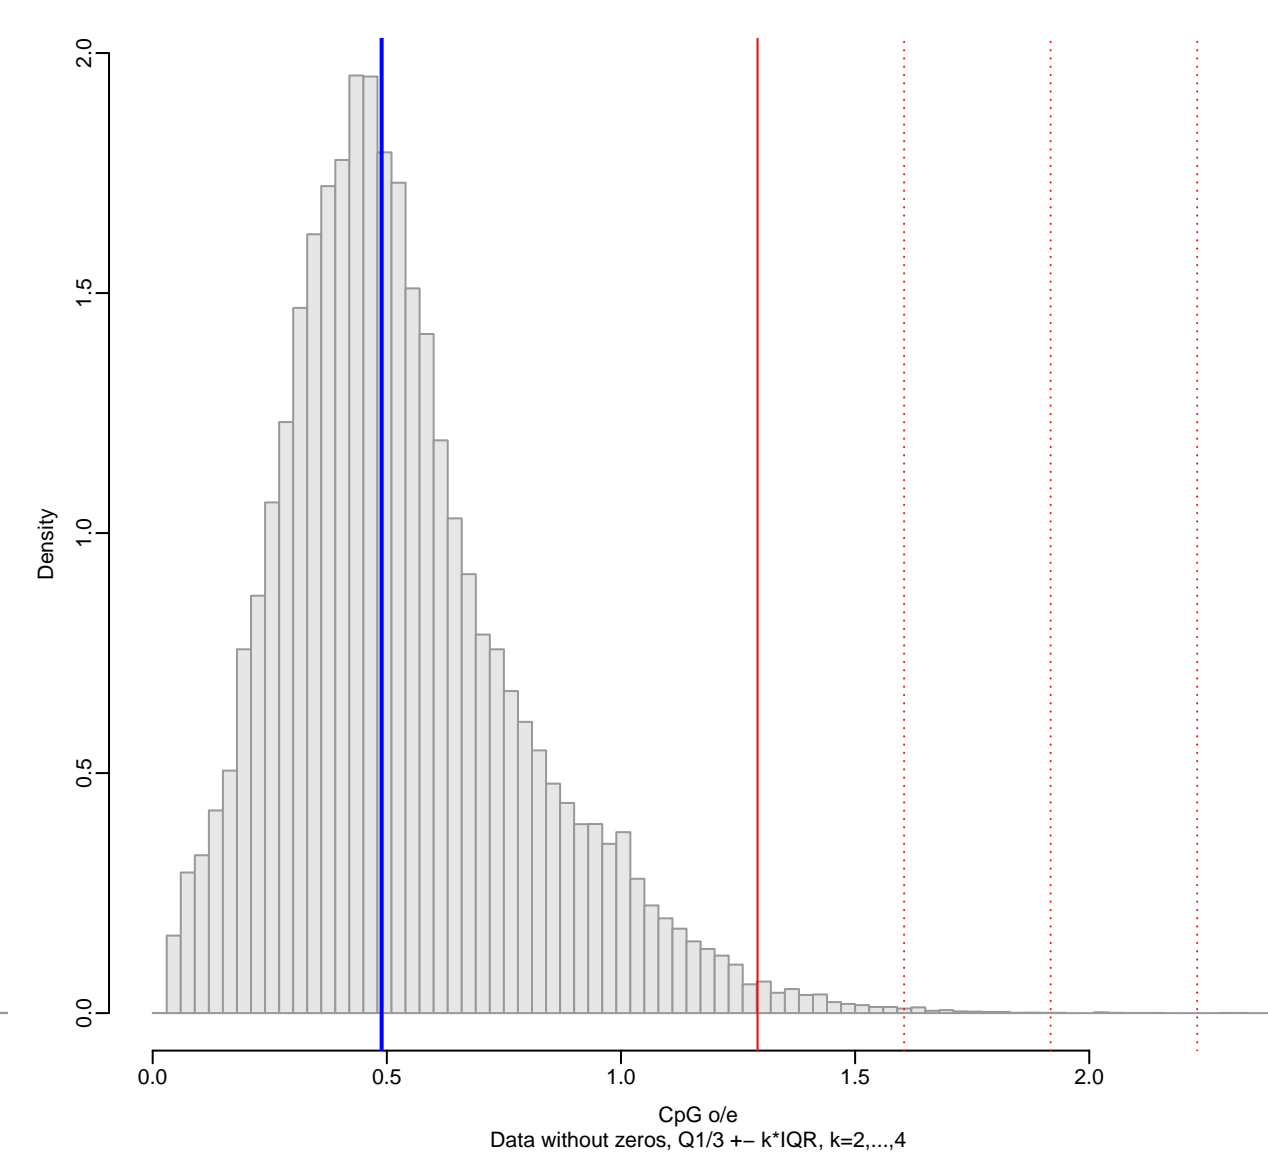

Density

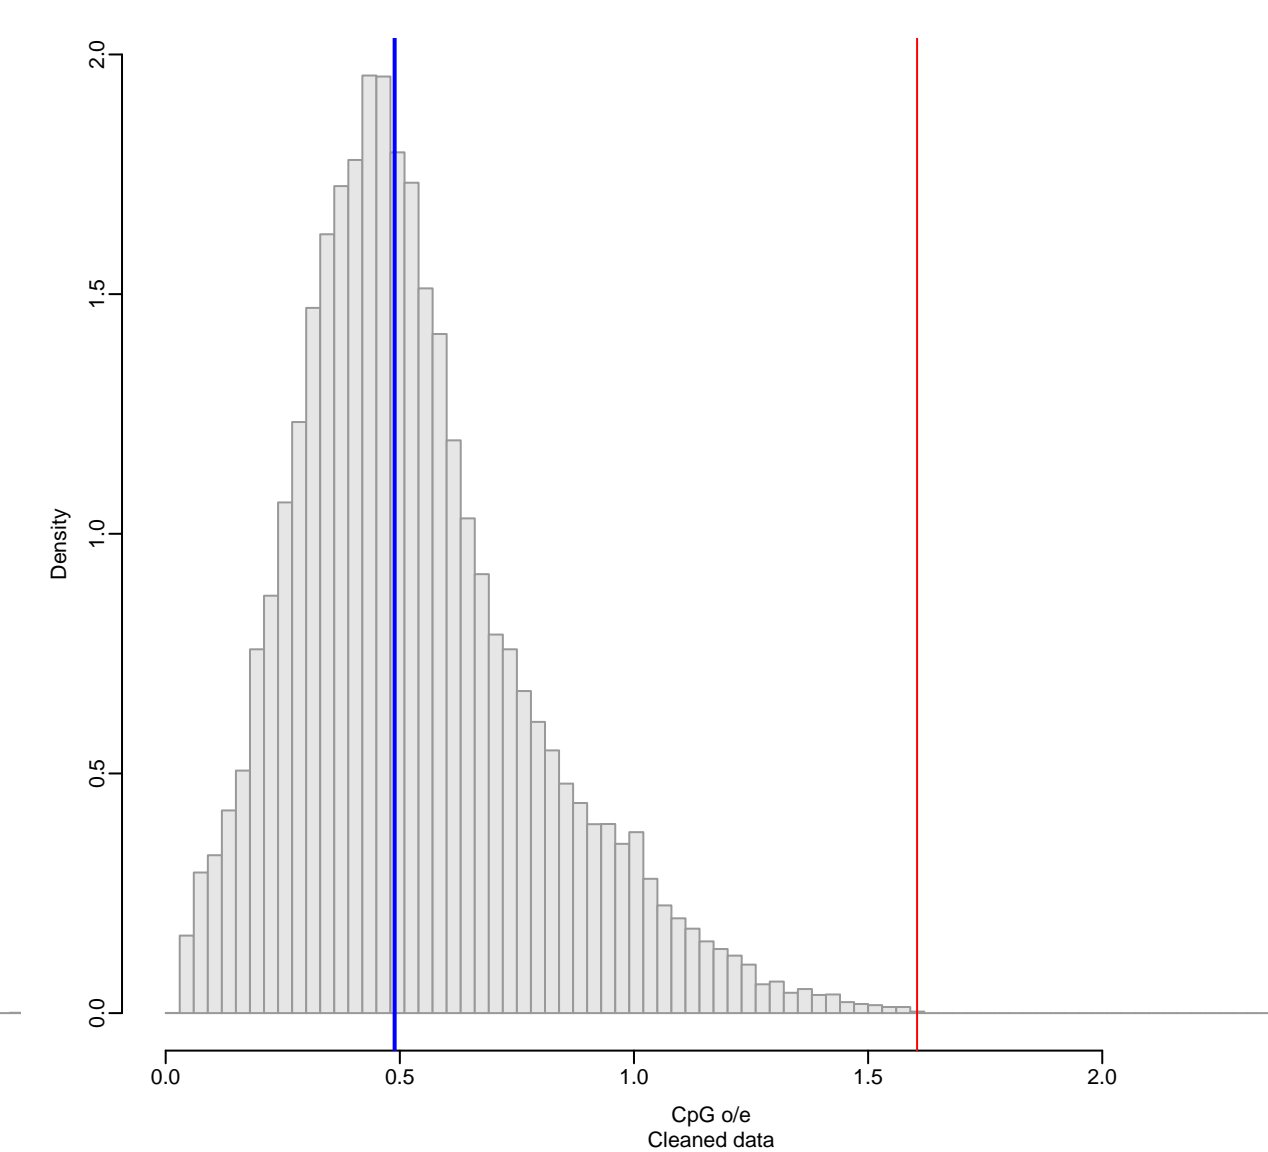

Solanum\_pennellii

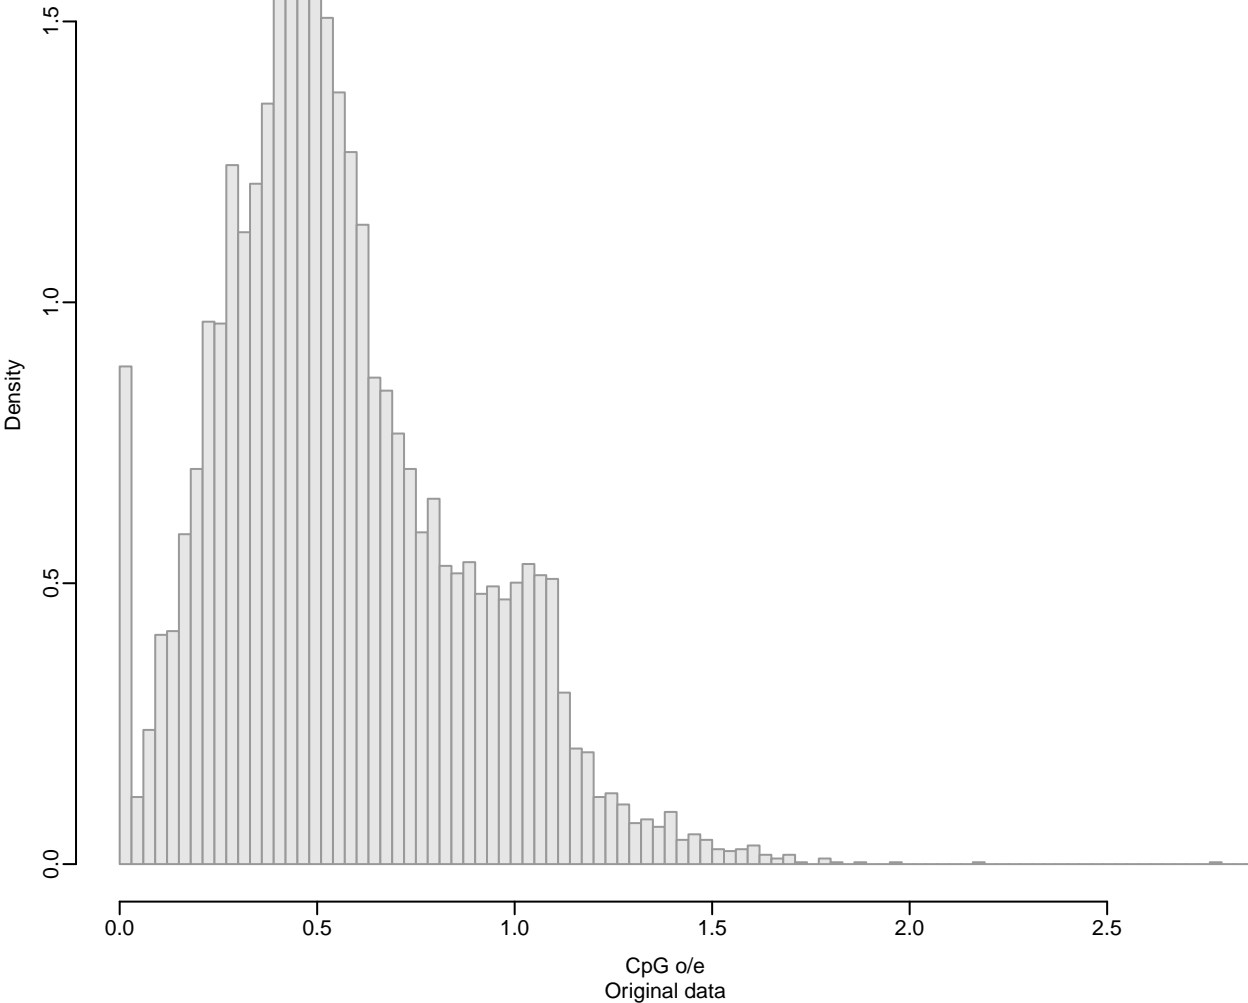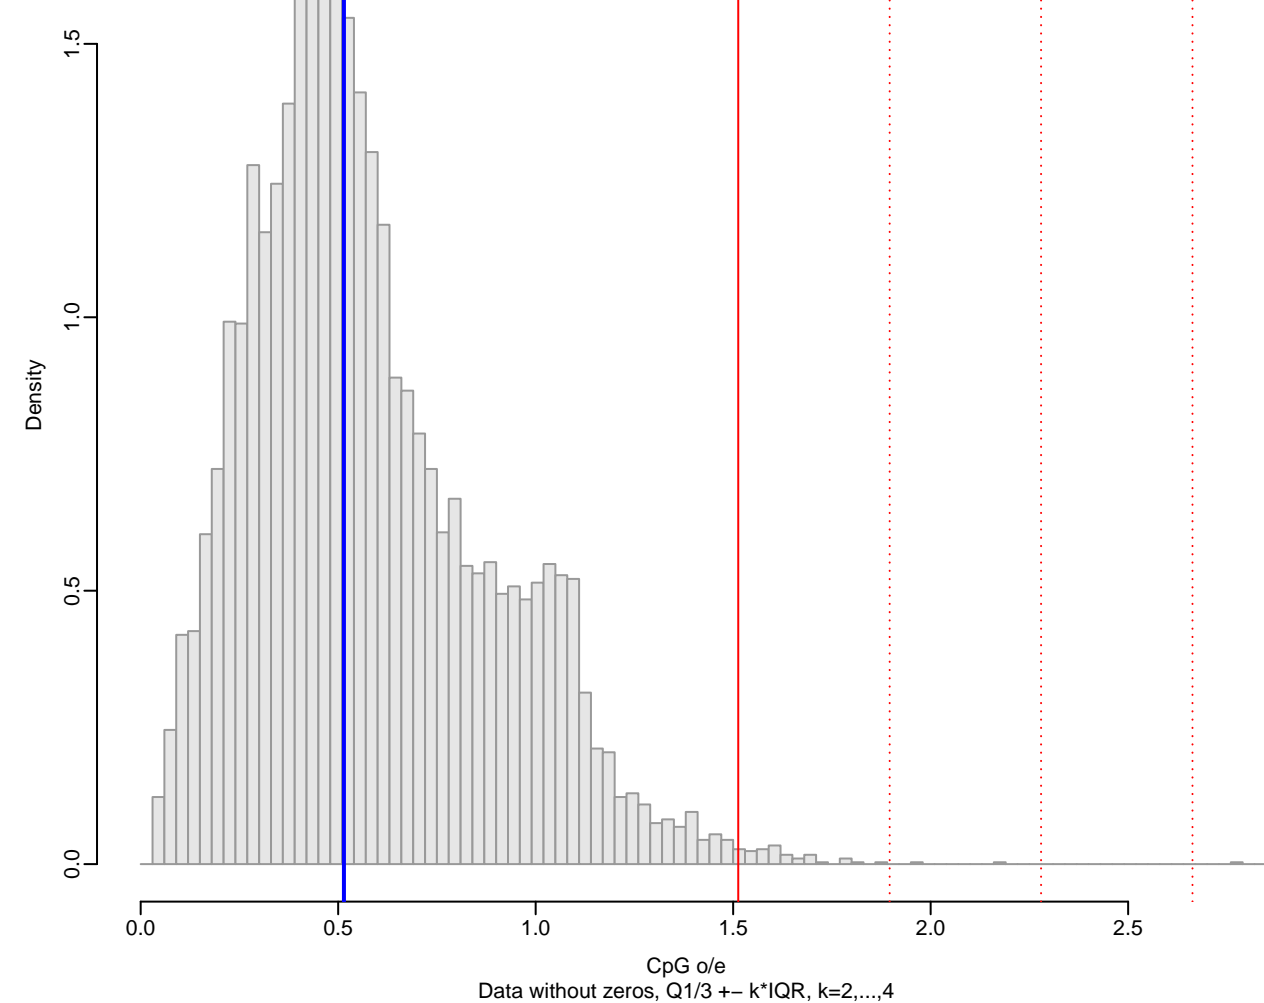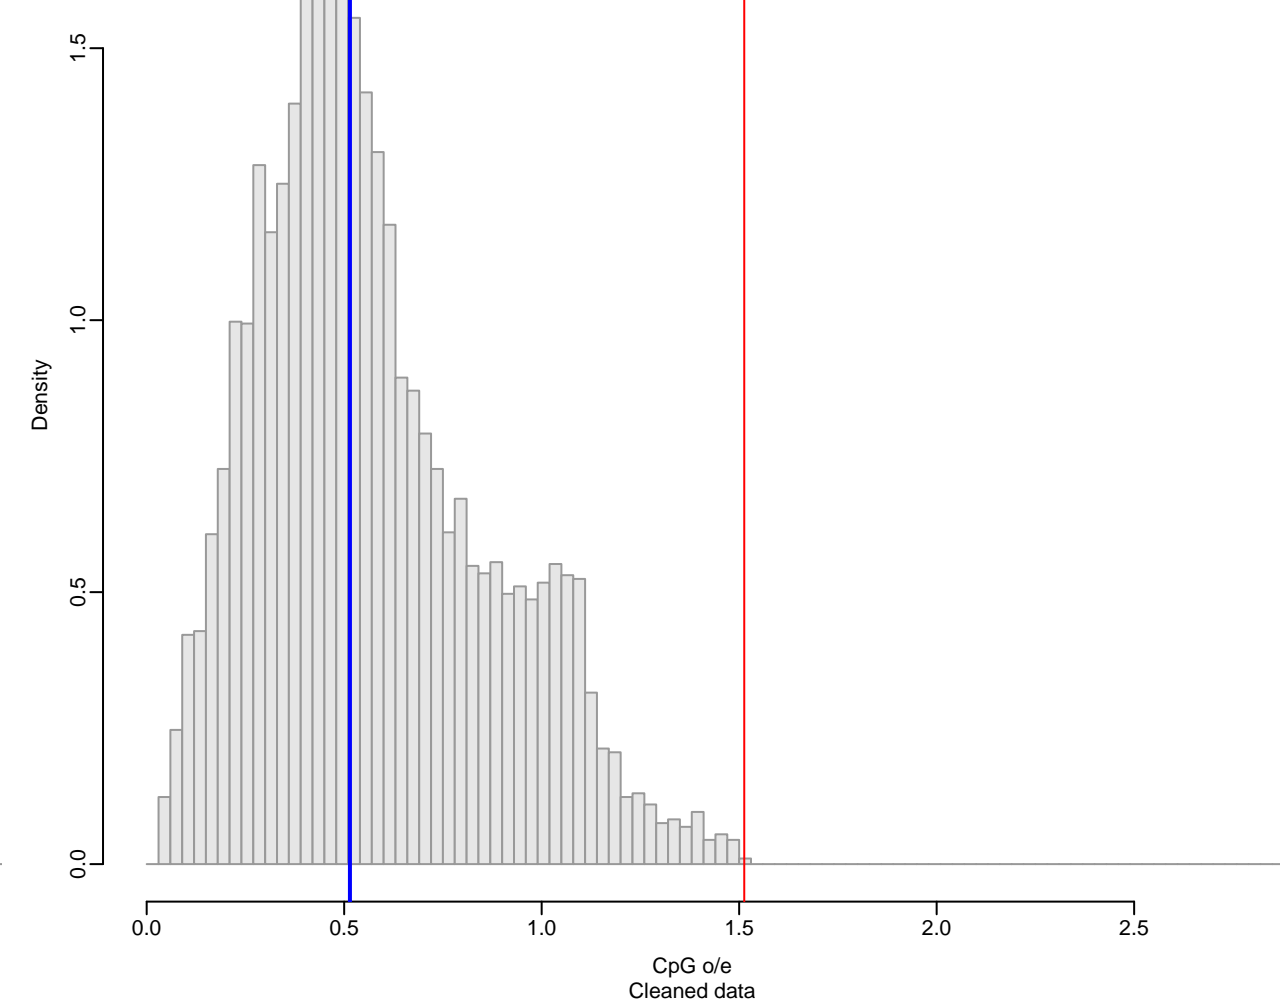

Solanum\_tuberosum

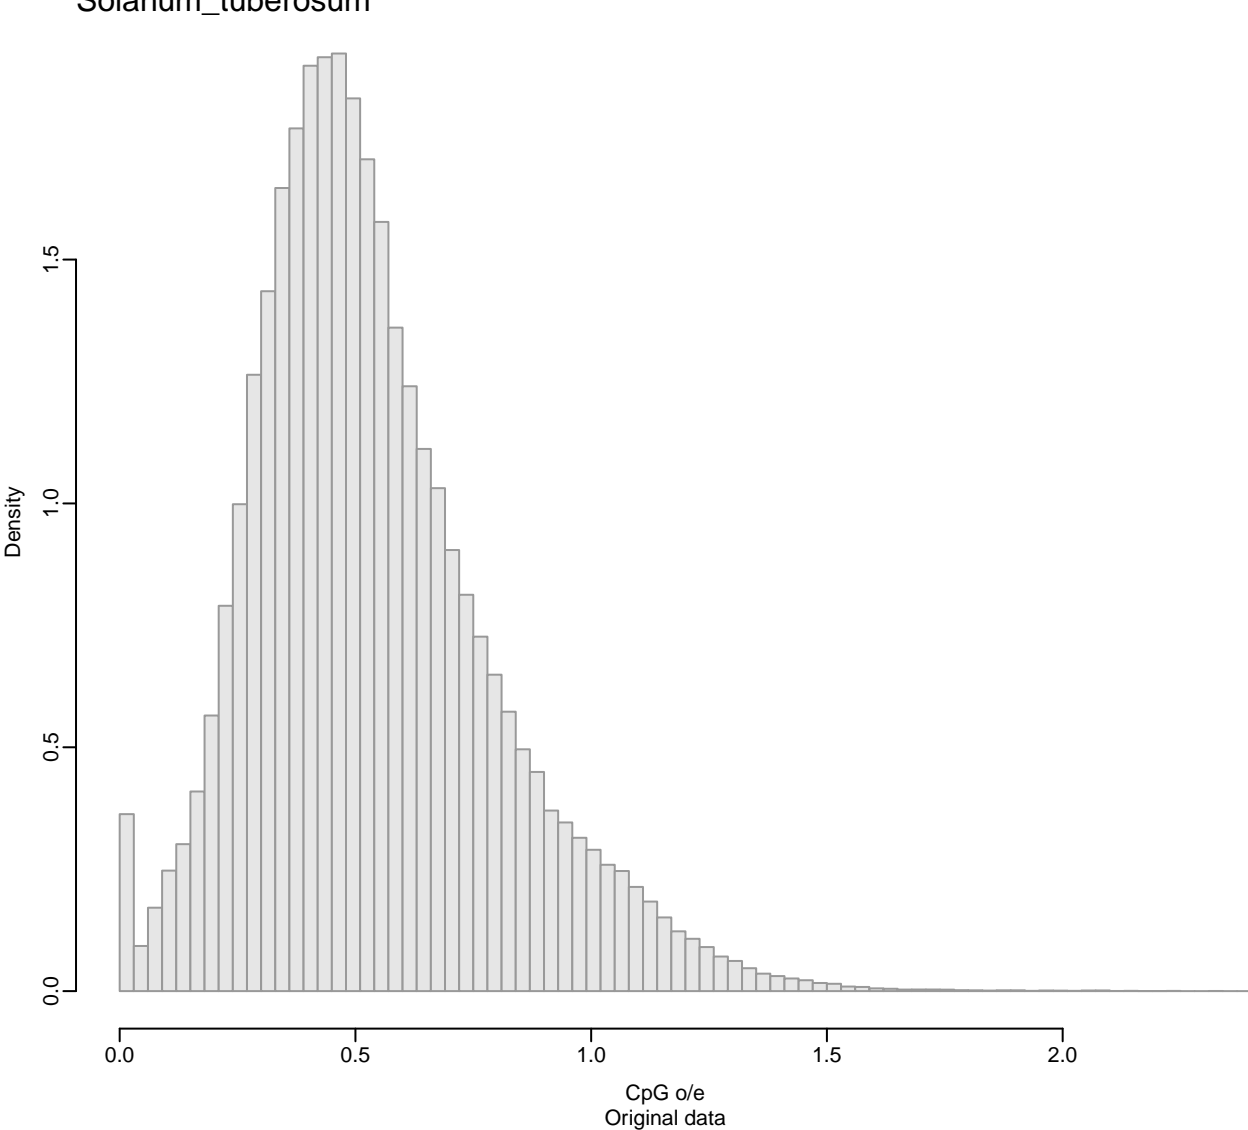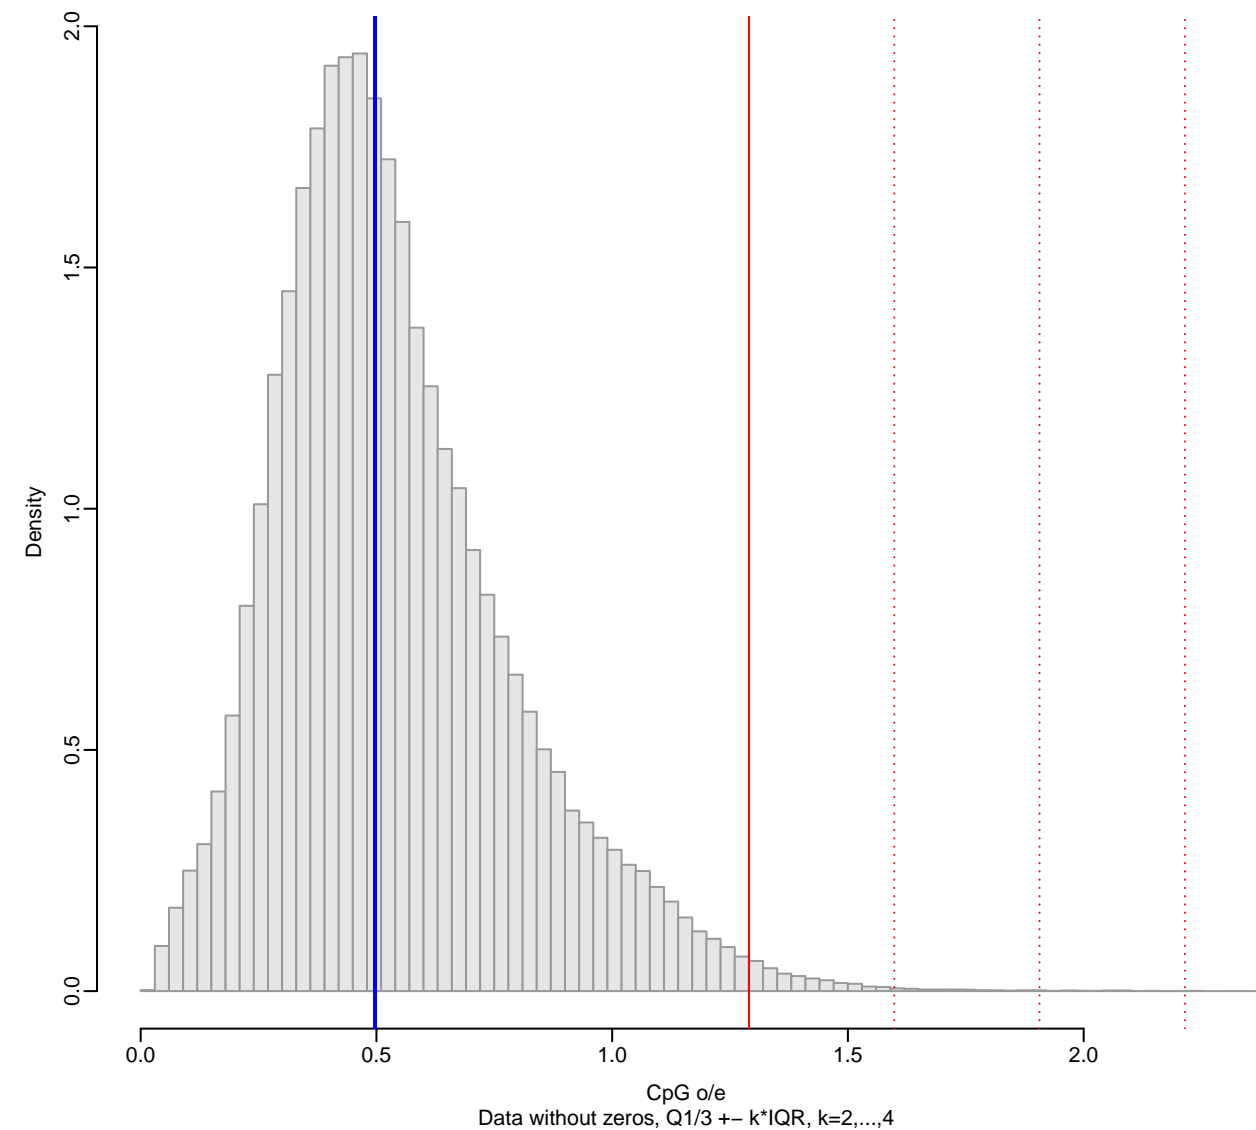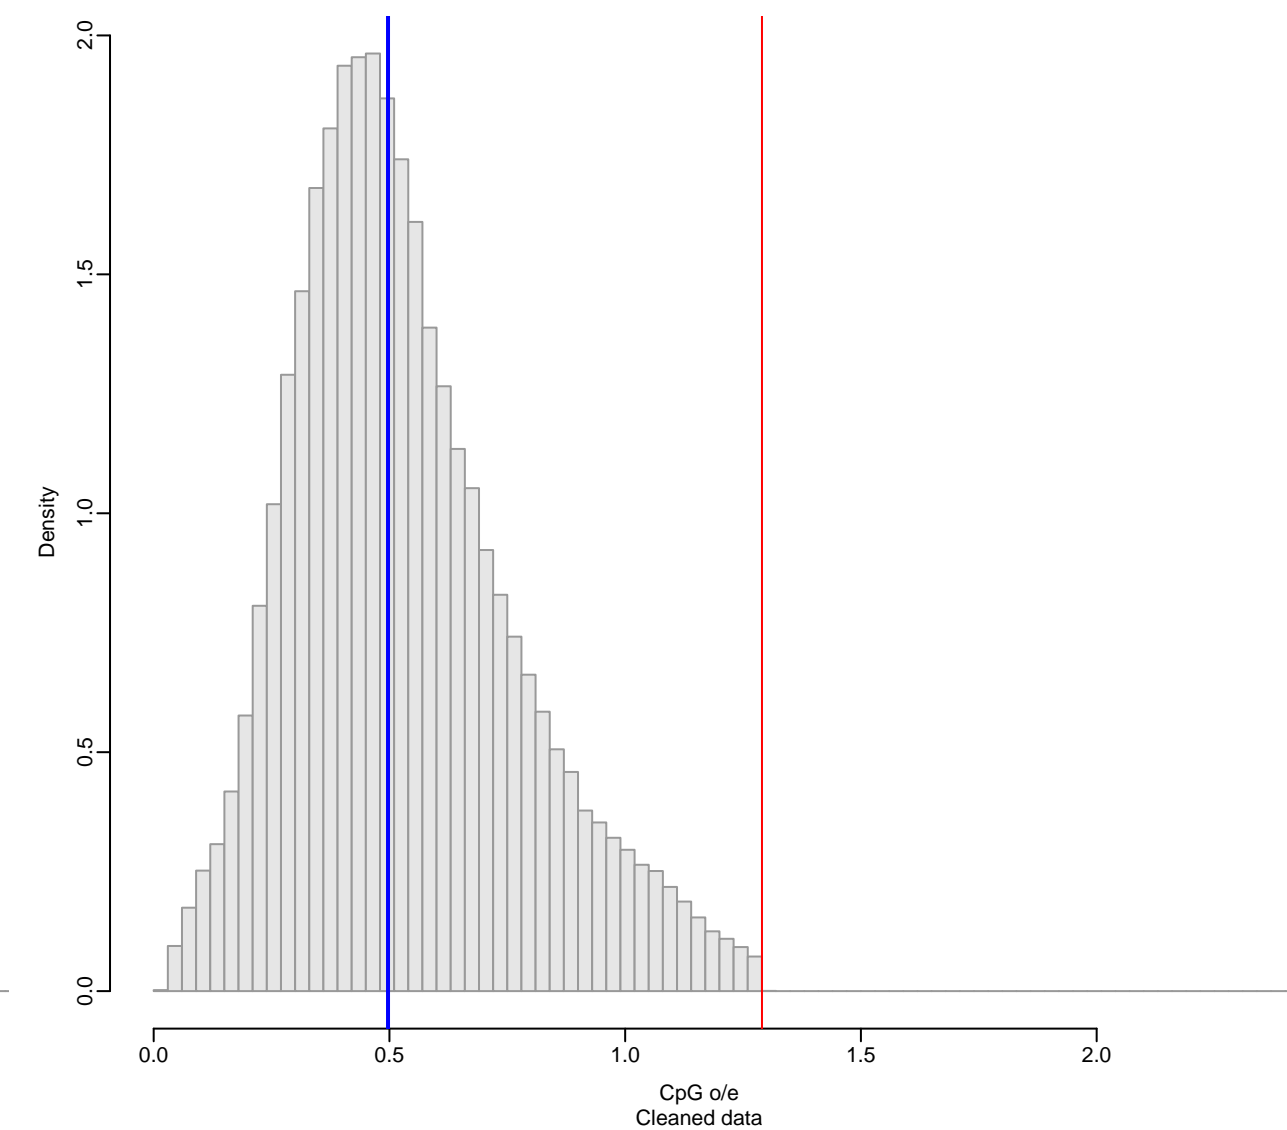

*Solea\_senegalensis*

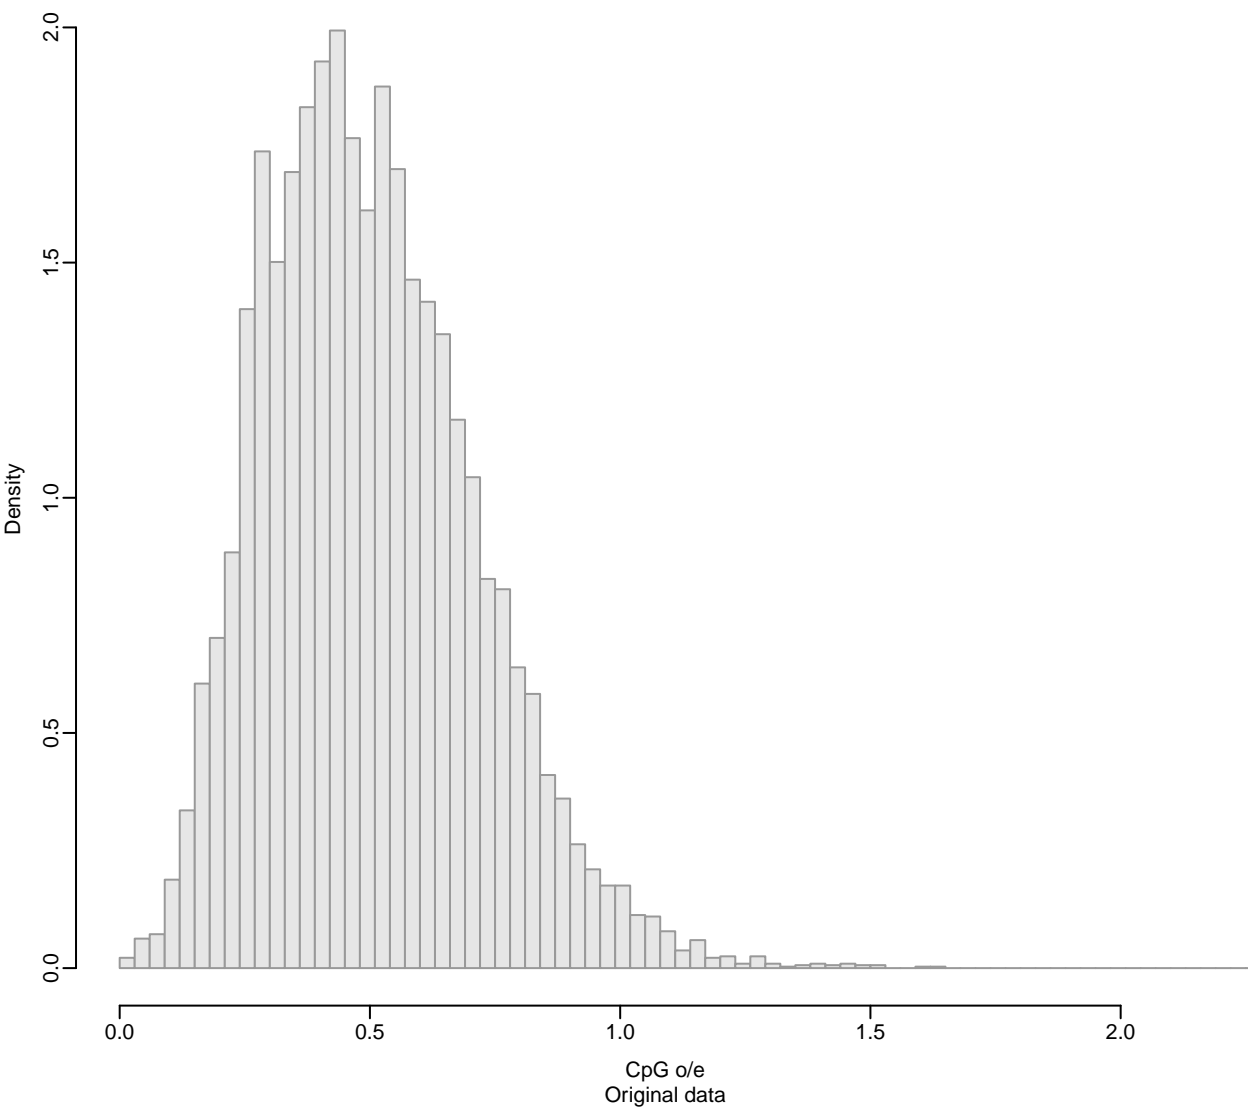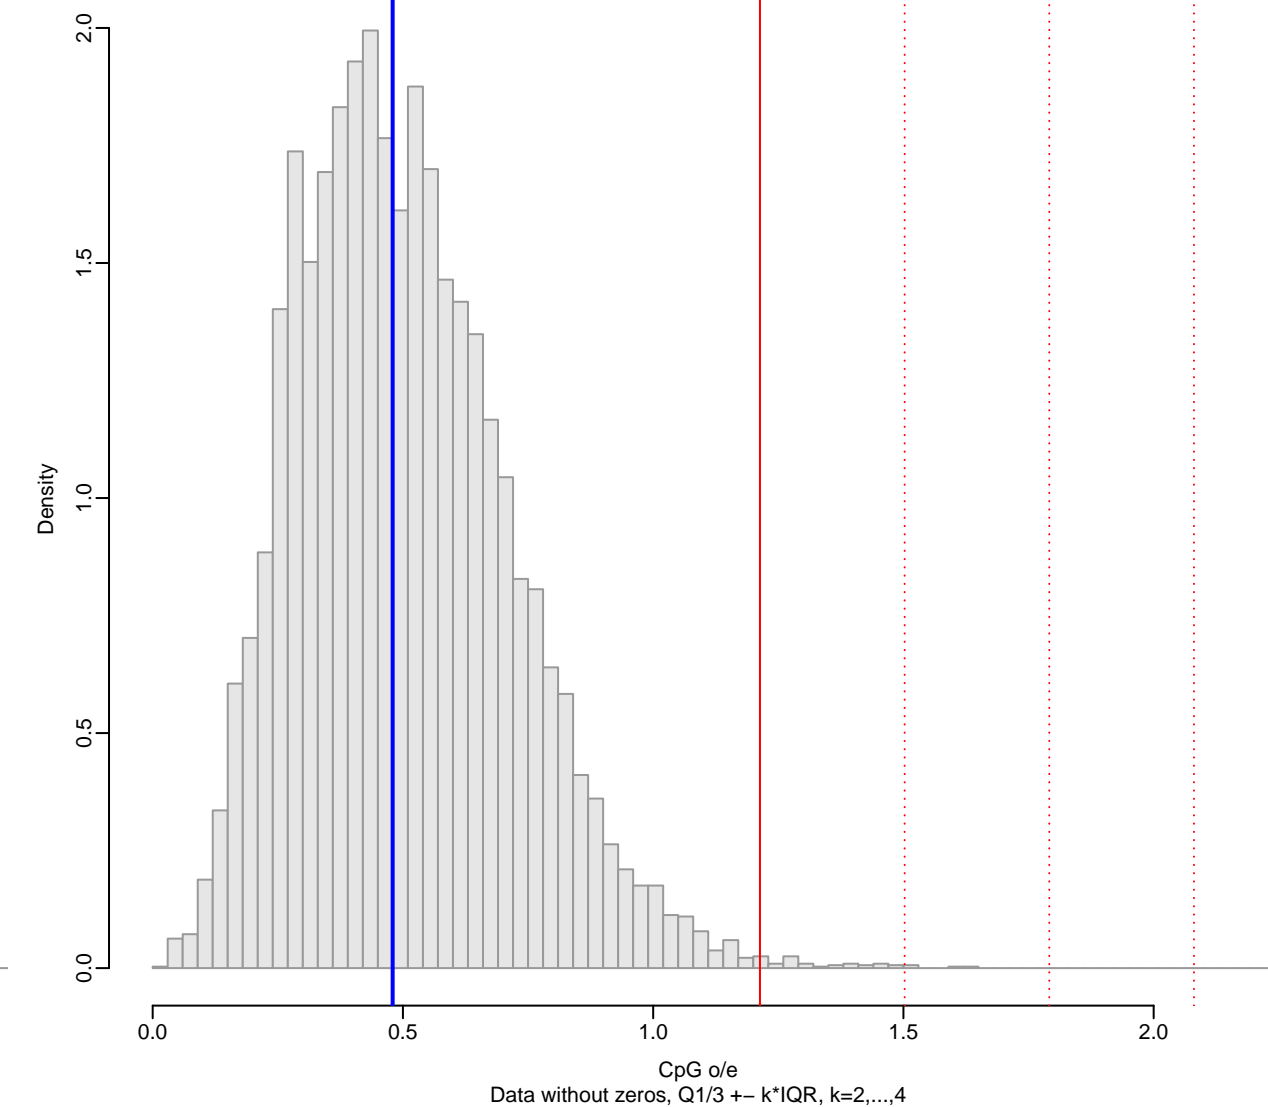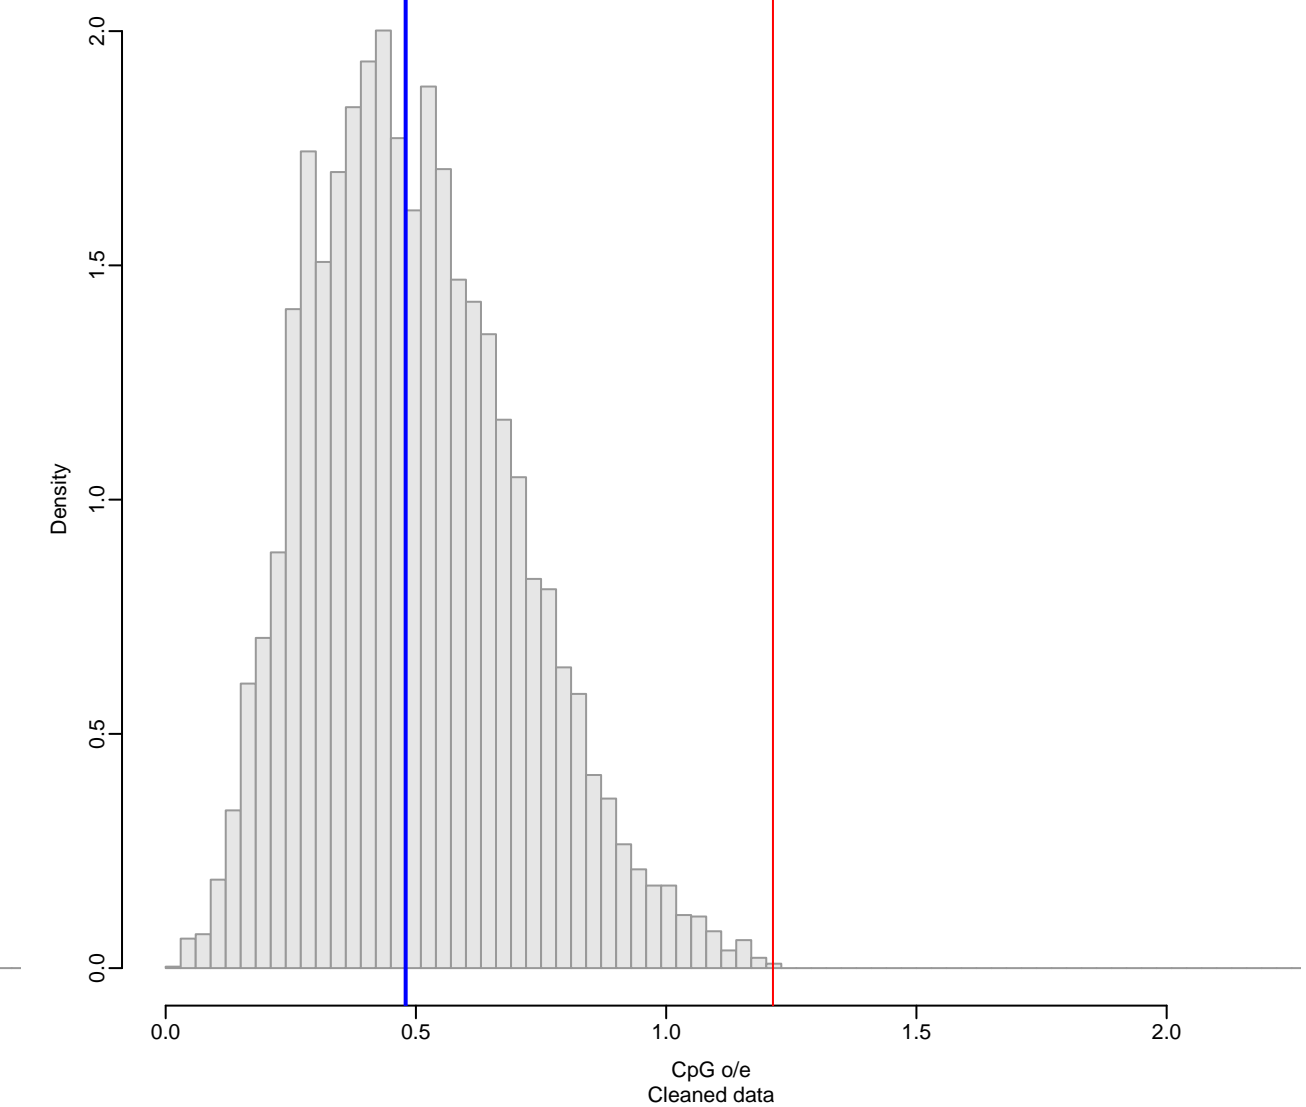

# Solenopsis\_invicta

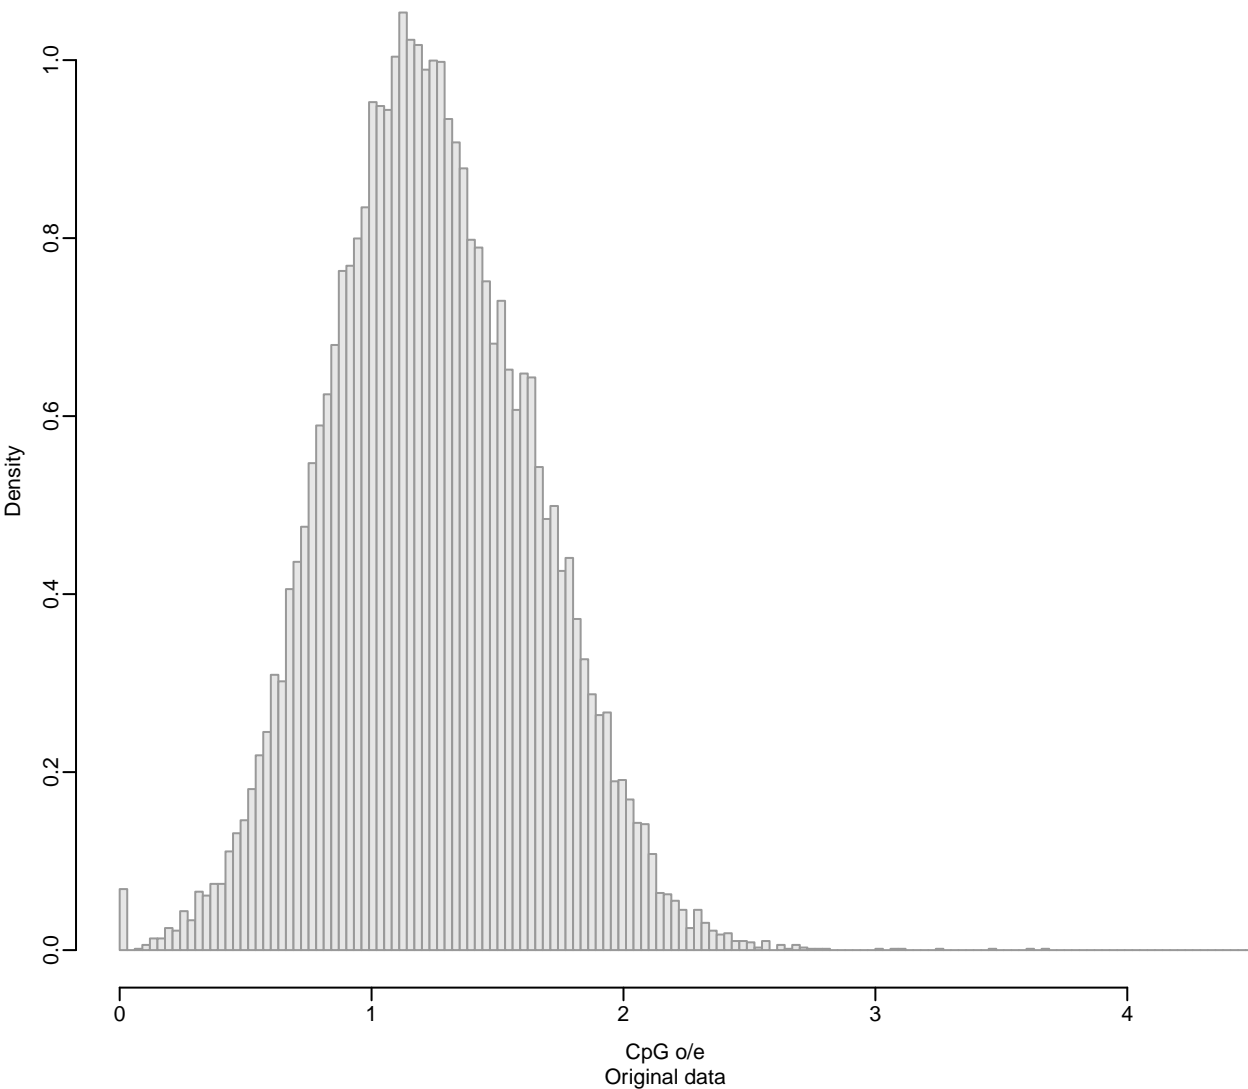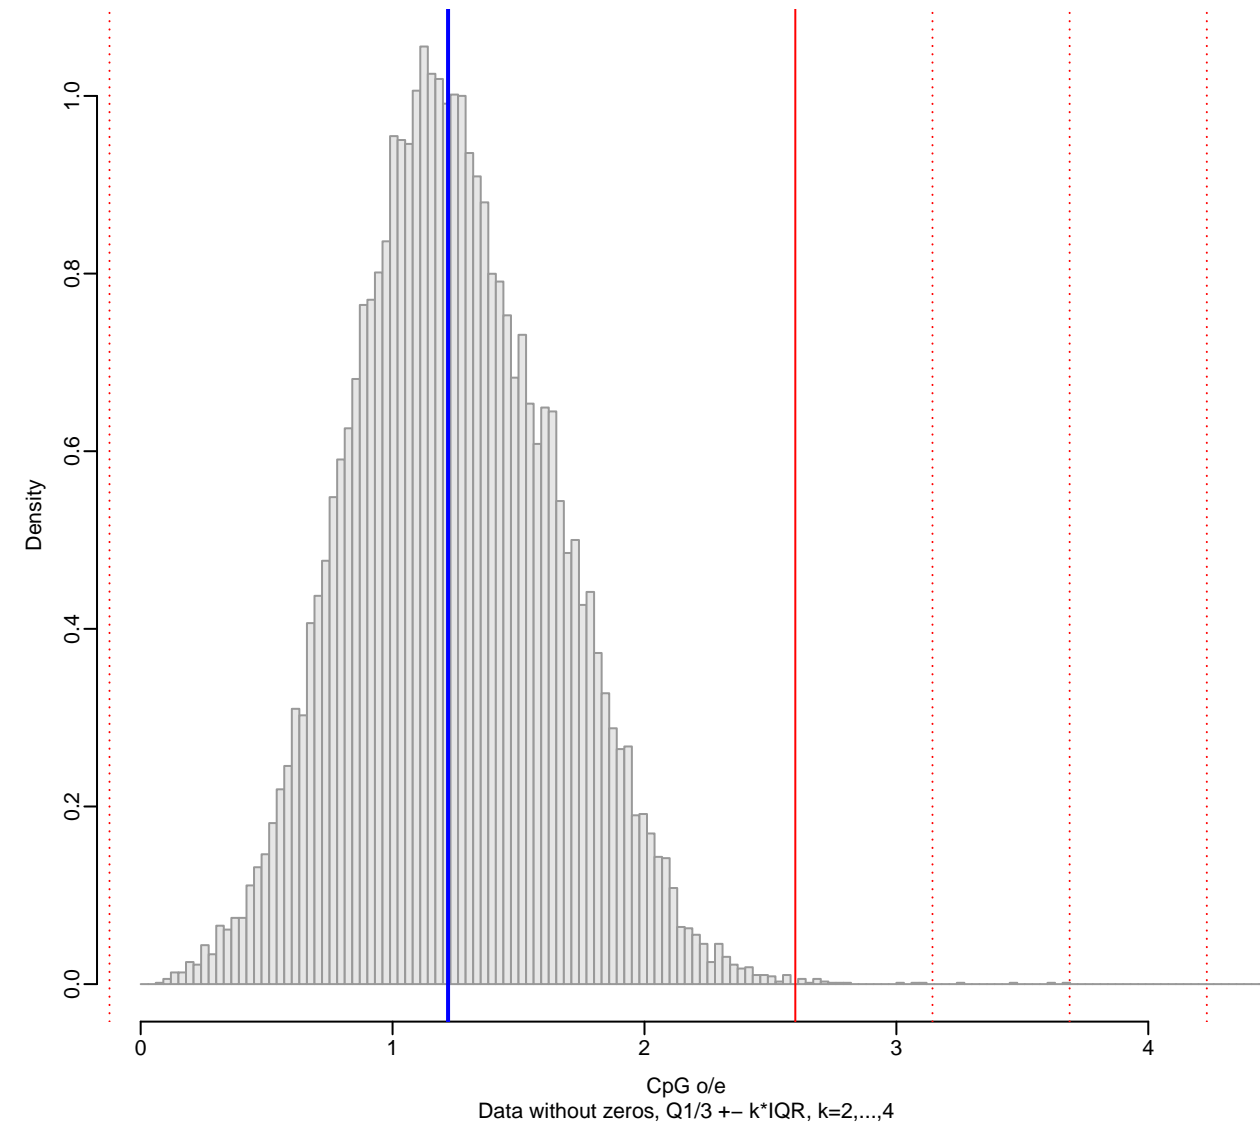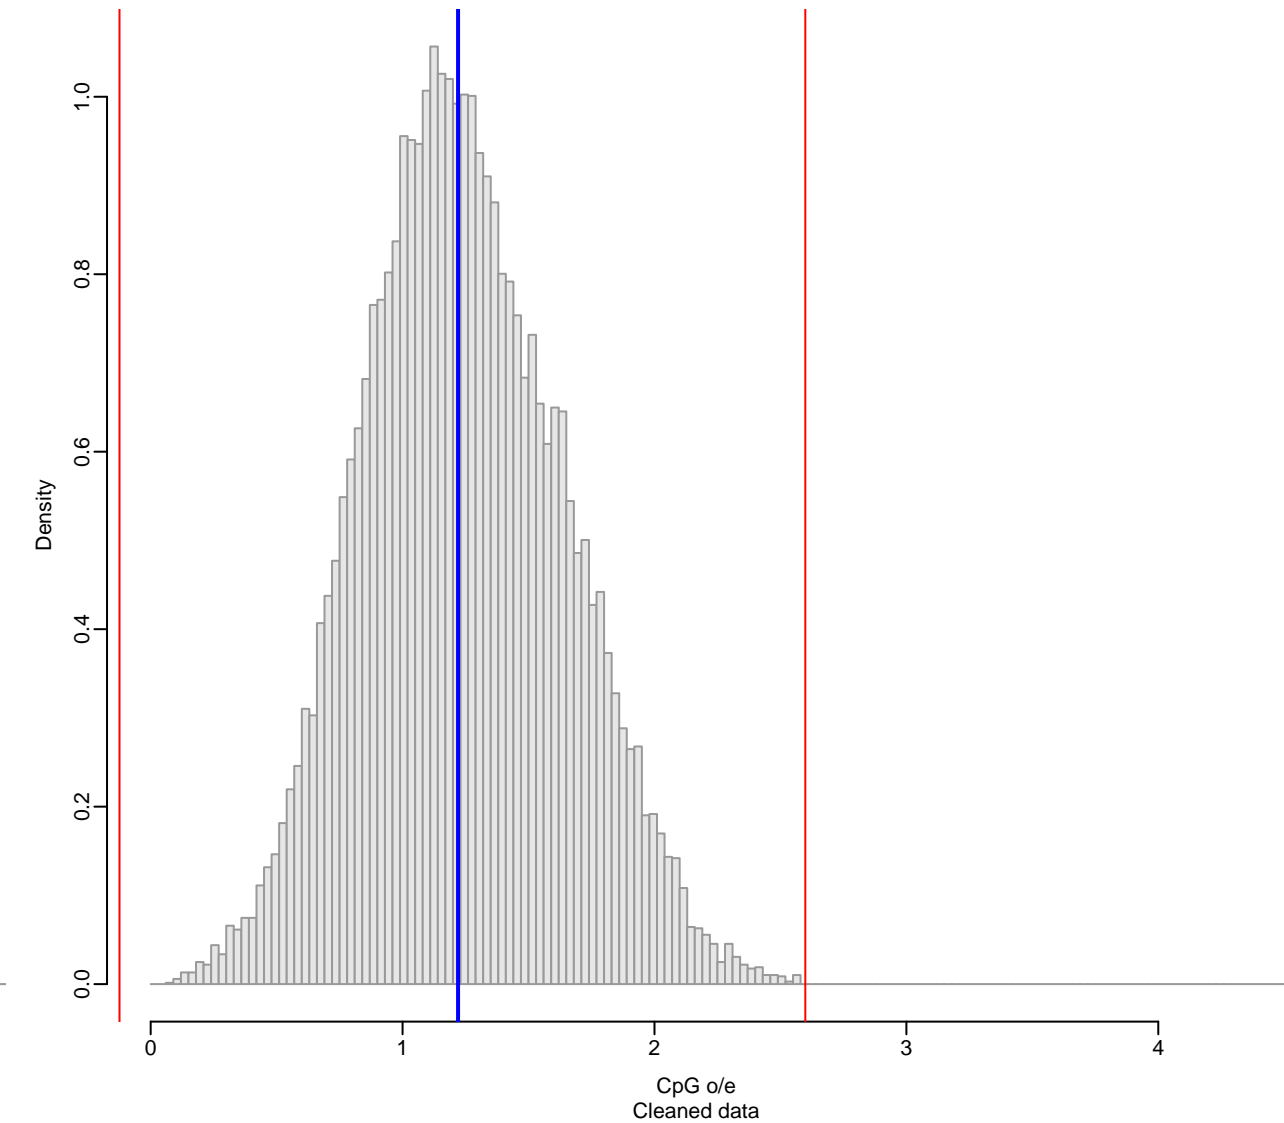



Spalax\_galili

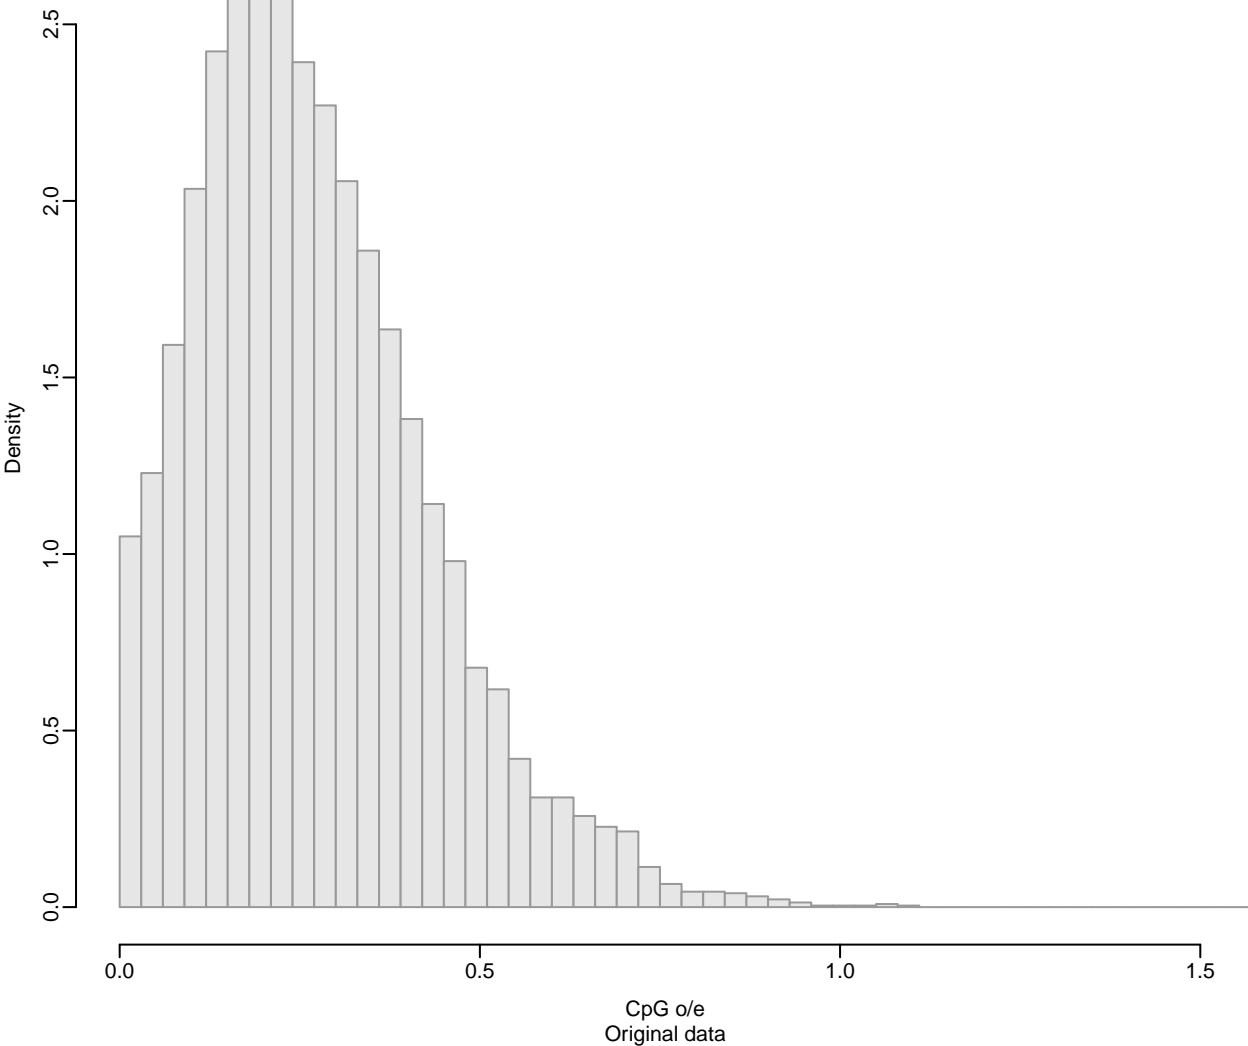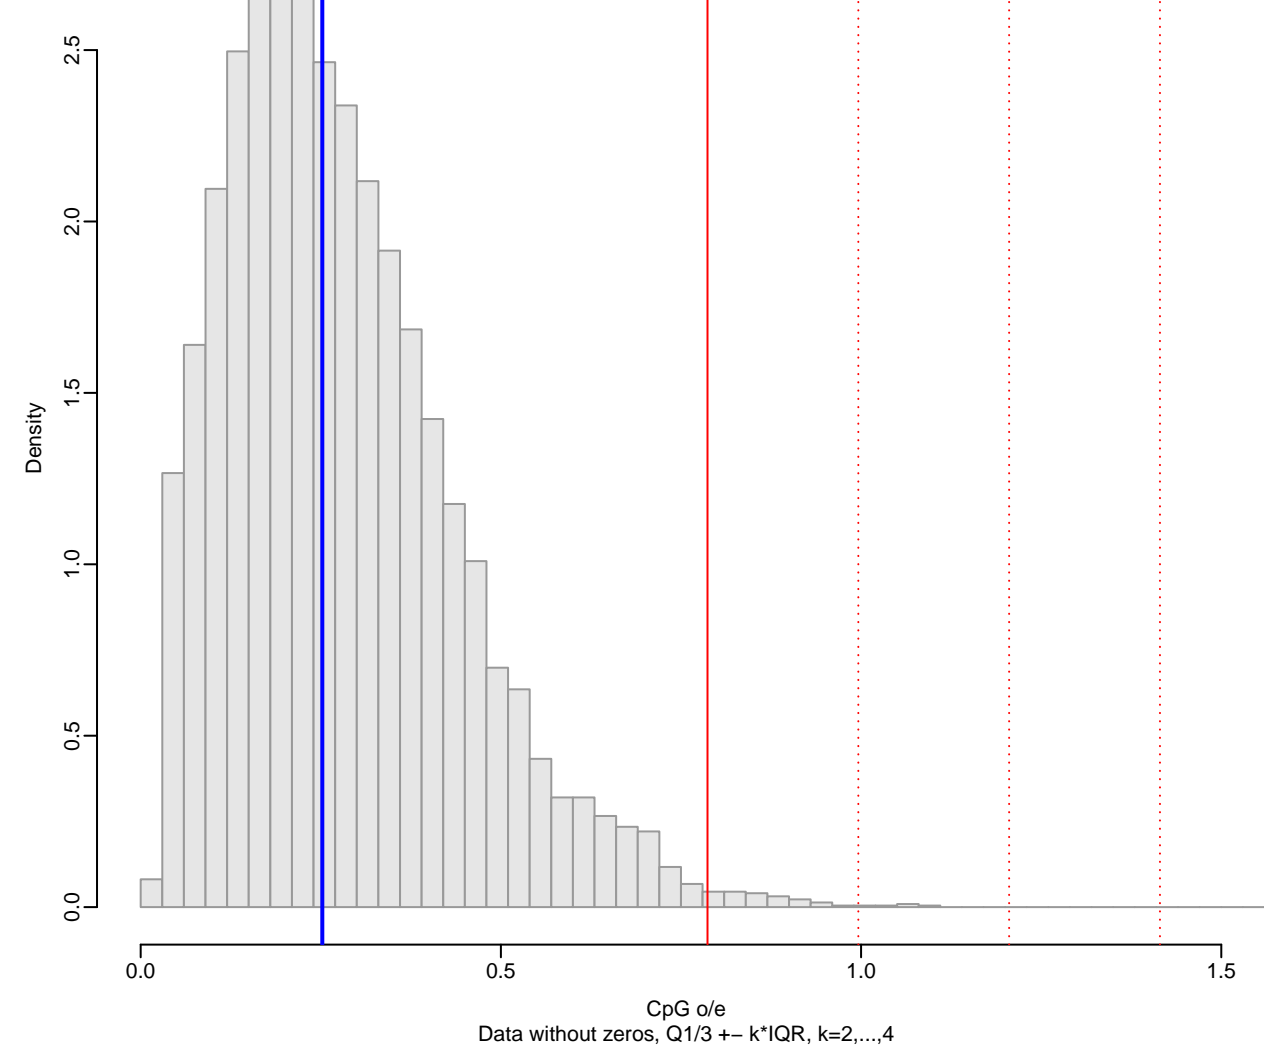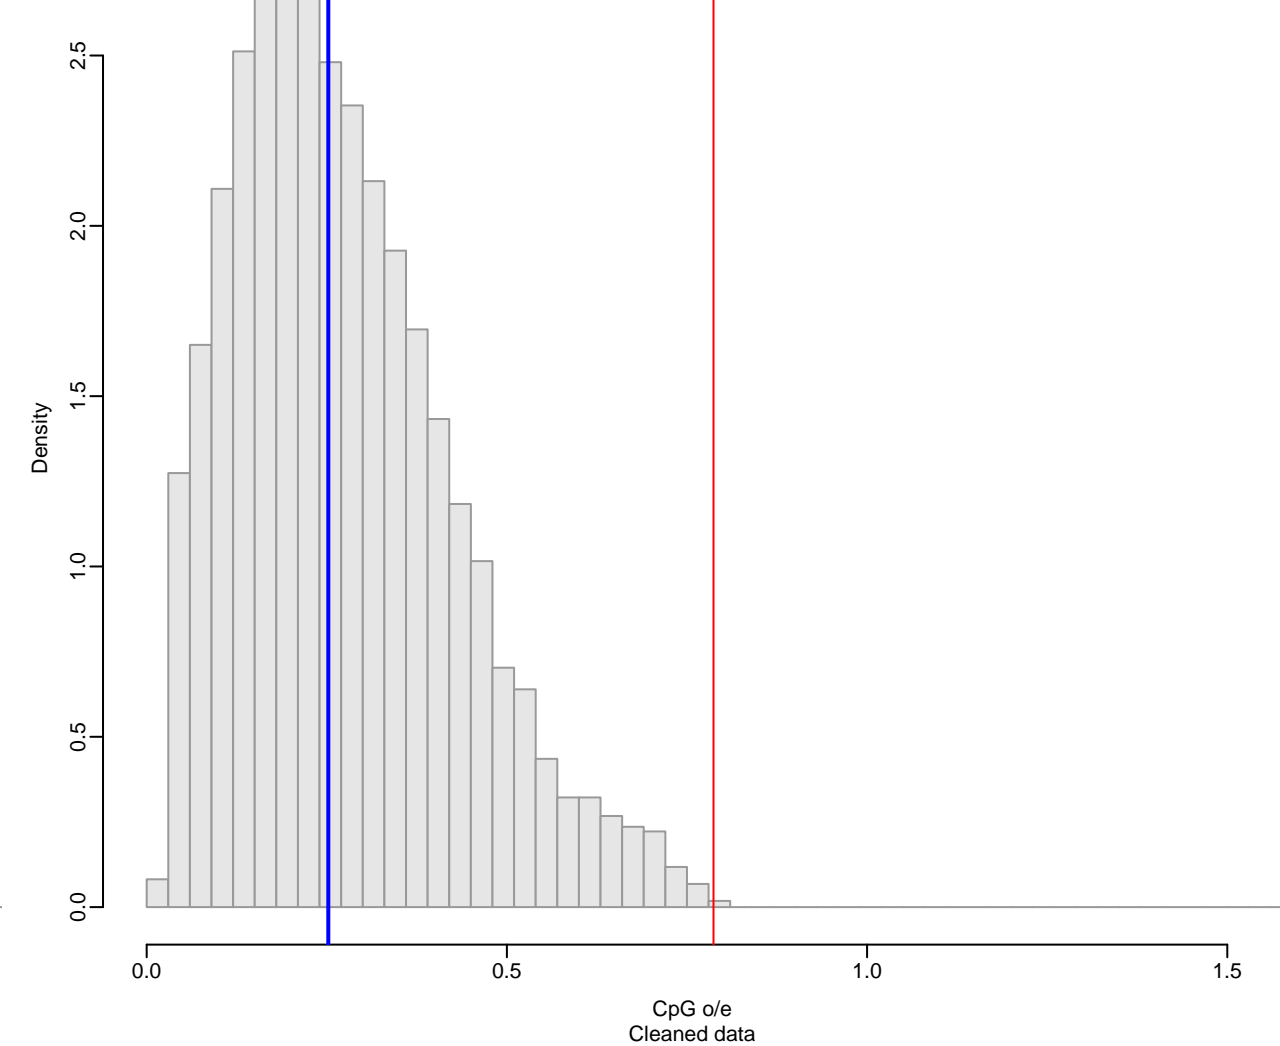

Sparus\_aurata

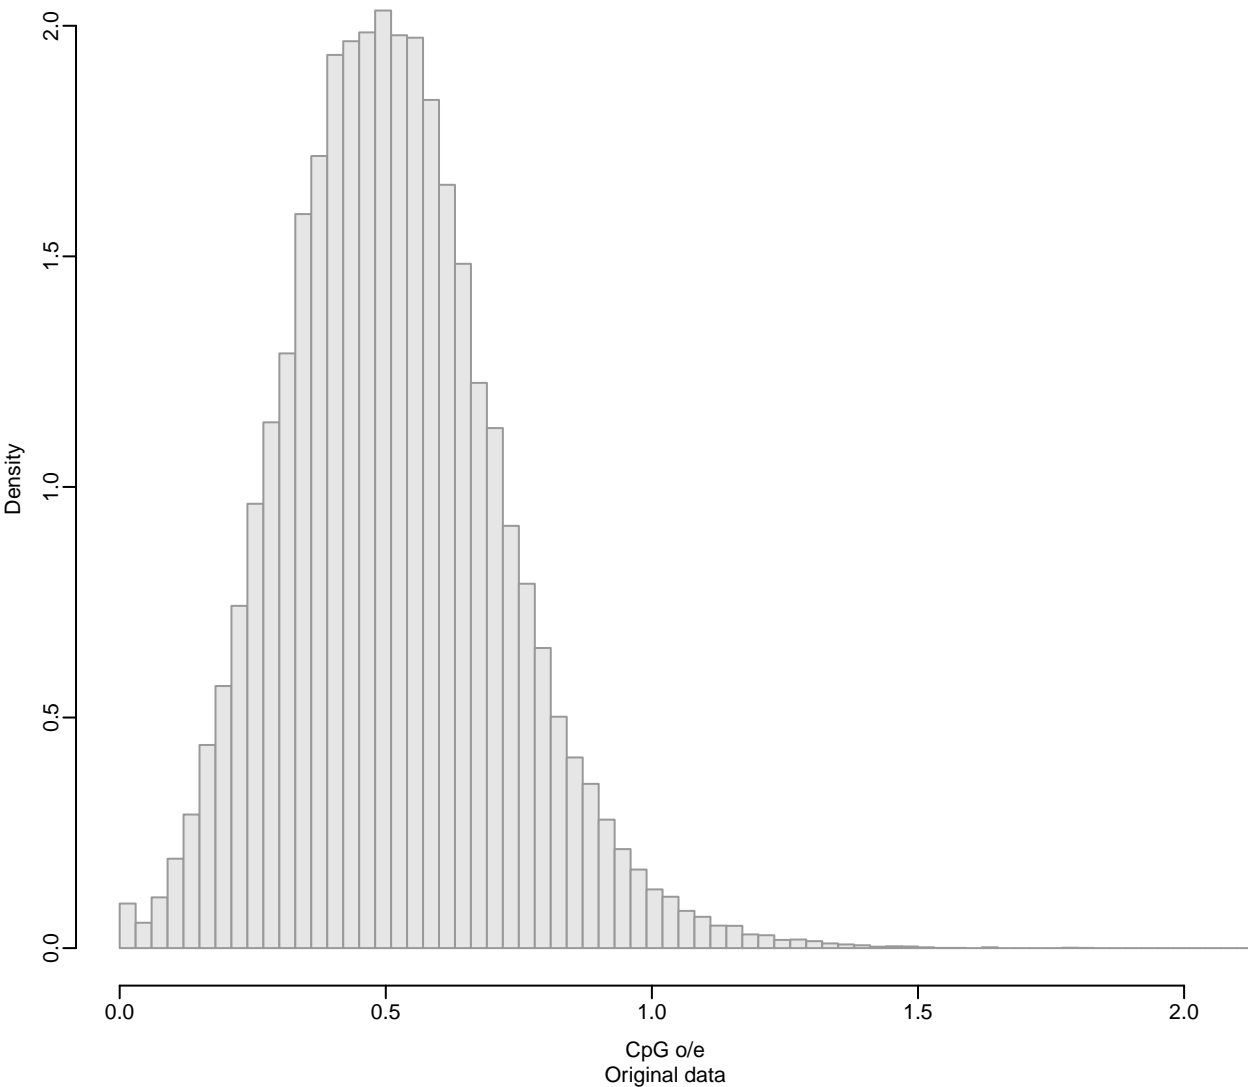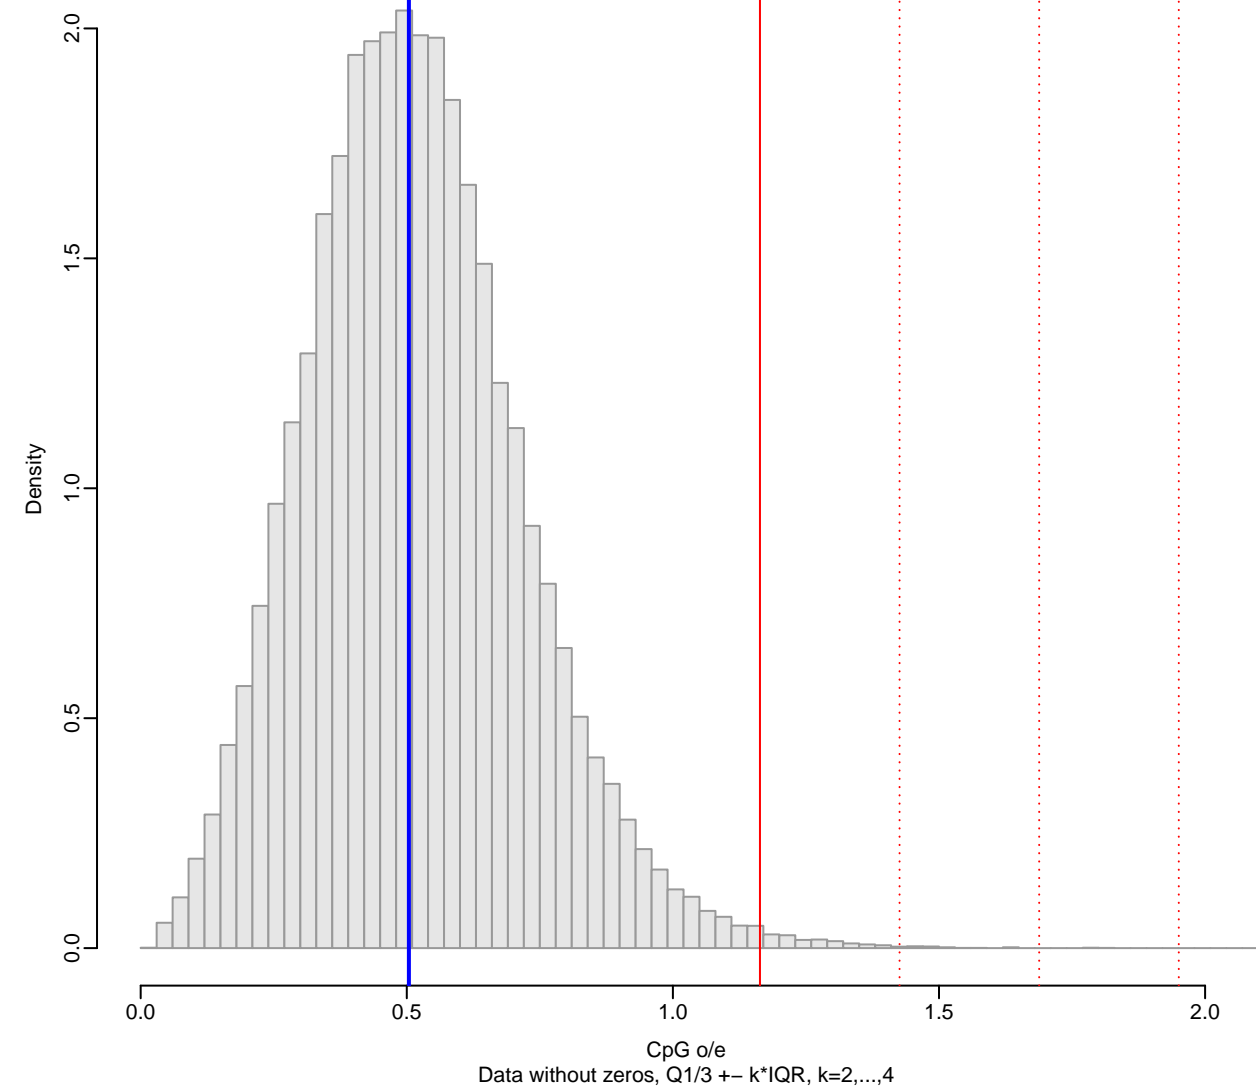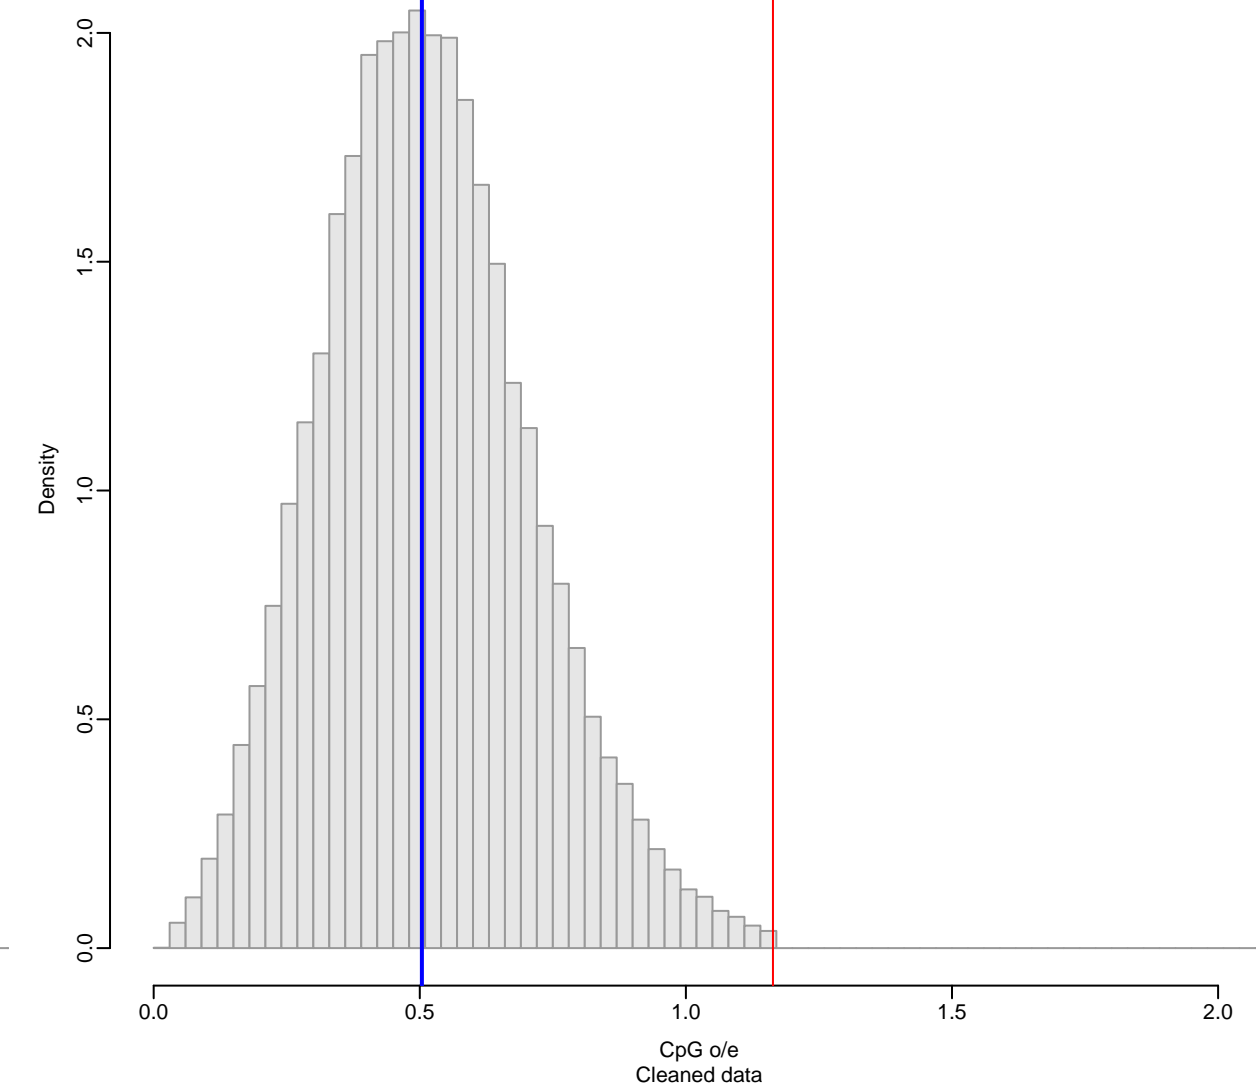

# Spermophilus\_lateralis

Density

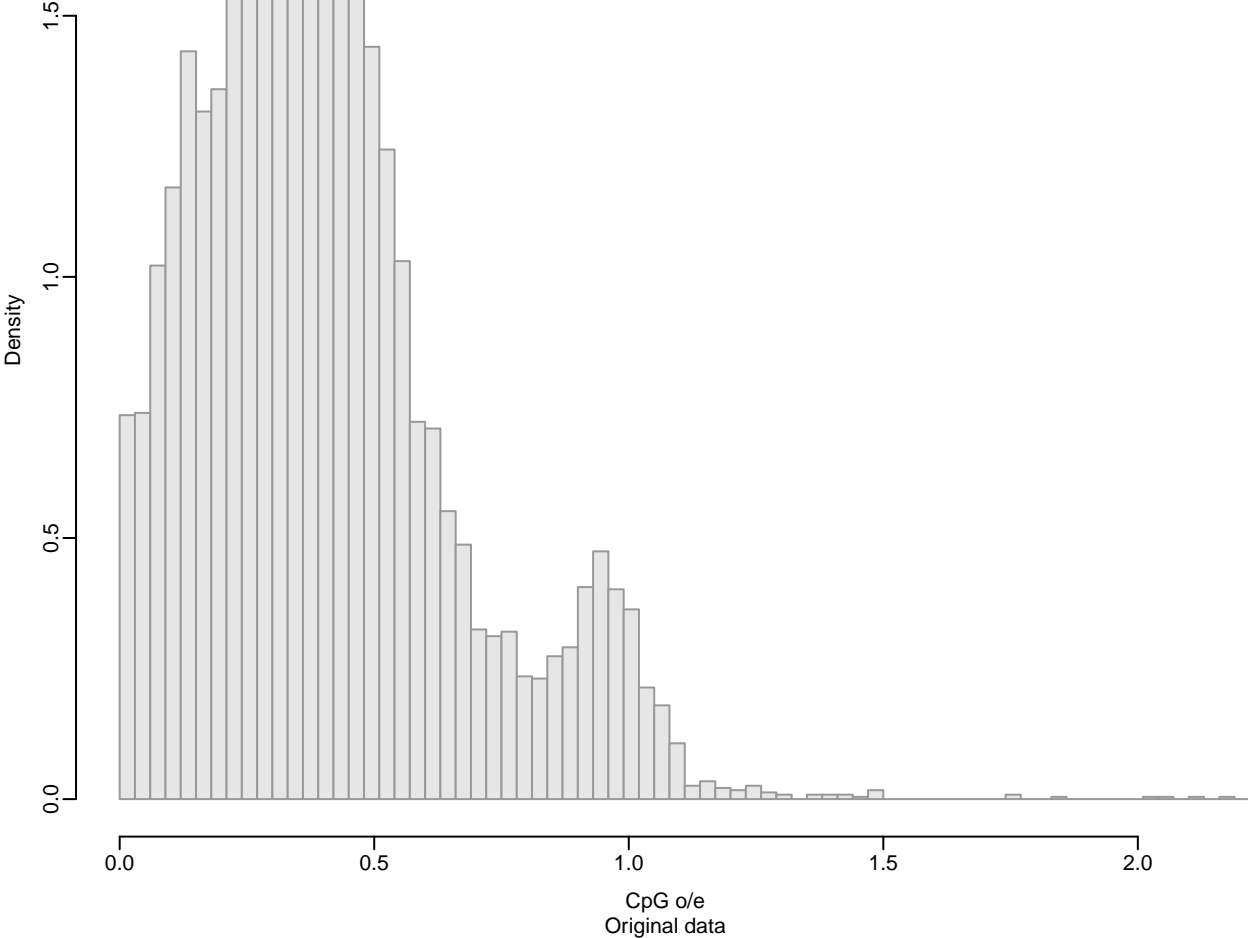

Density

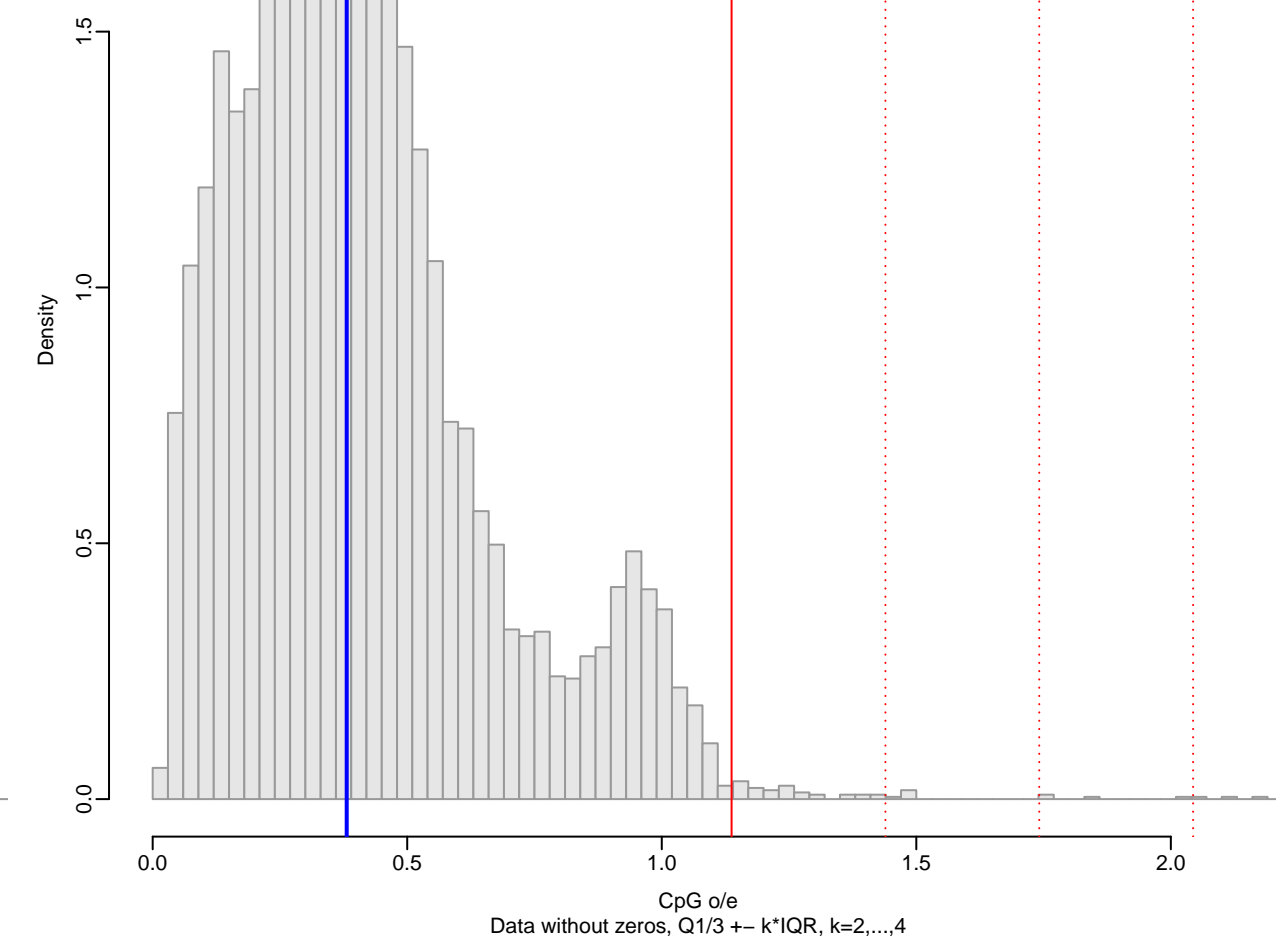

Density

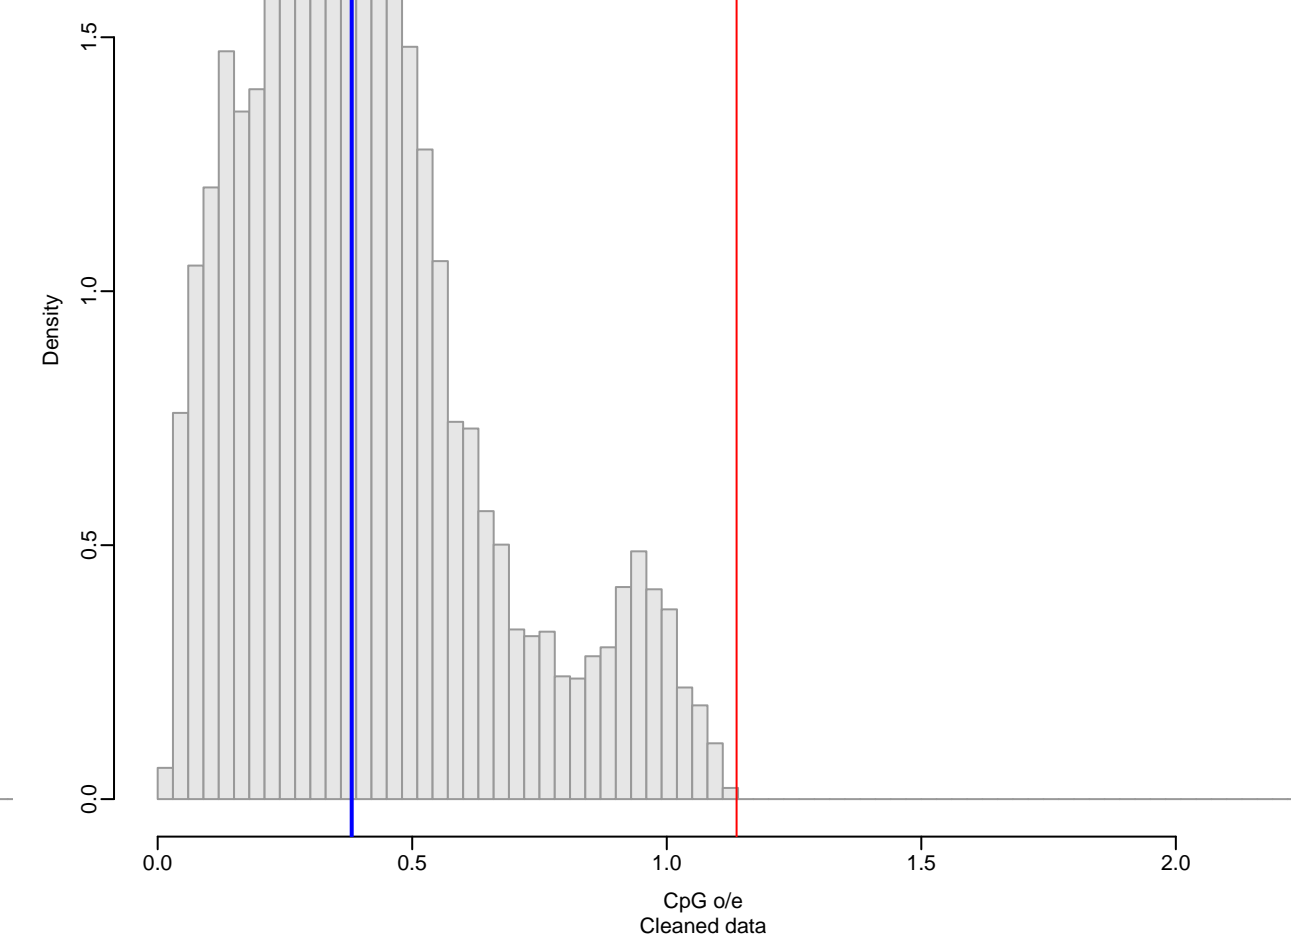

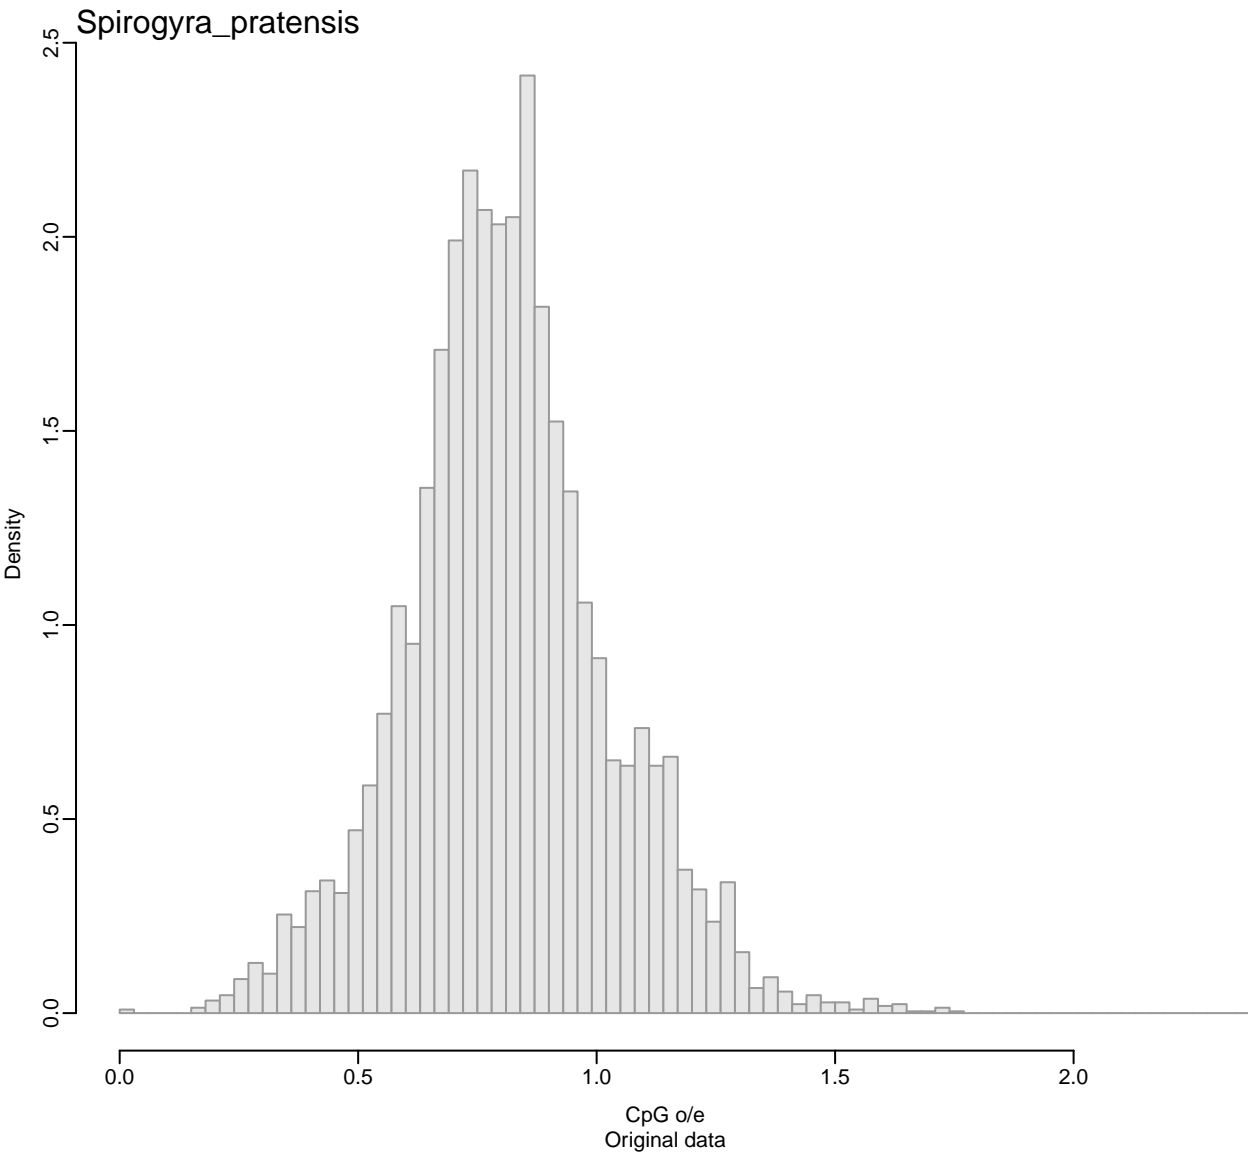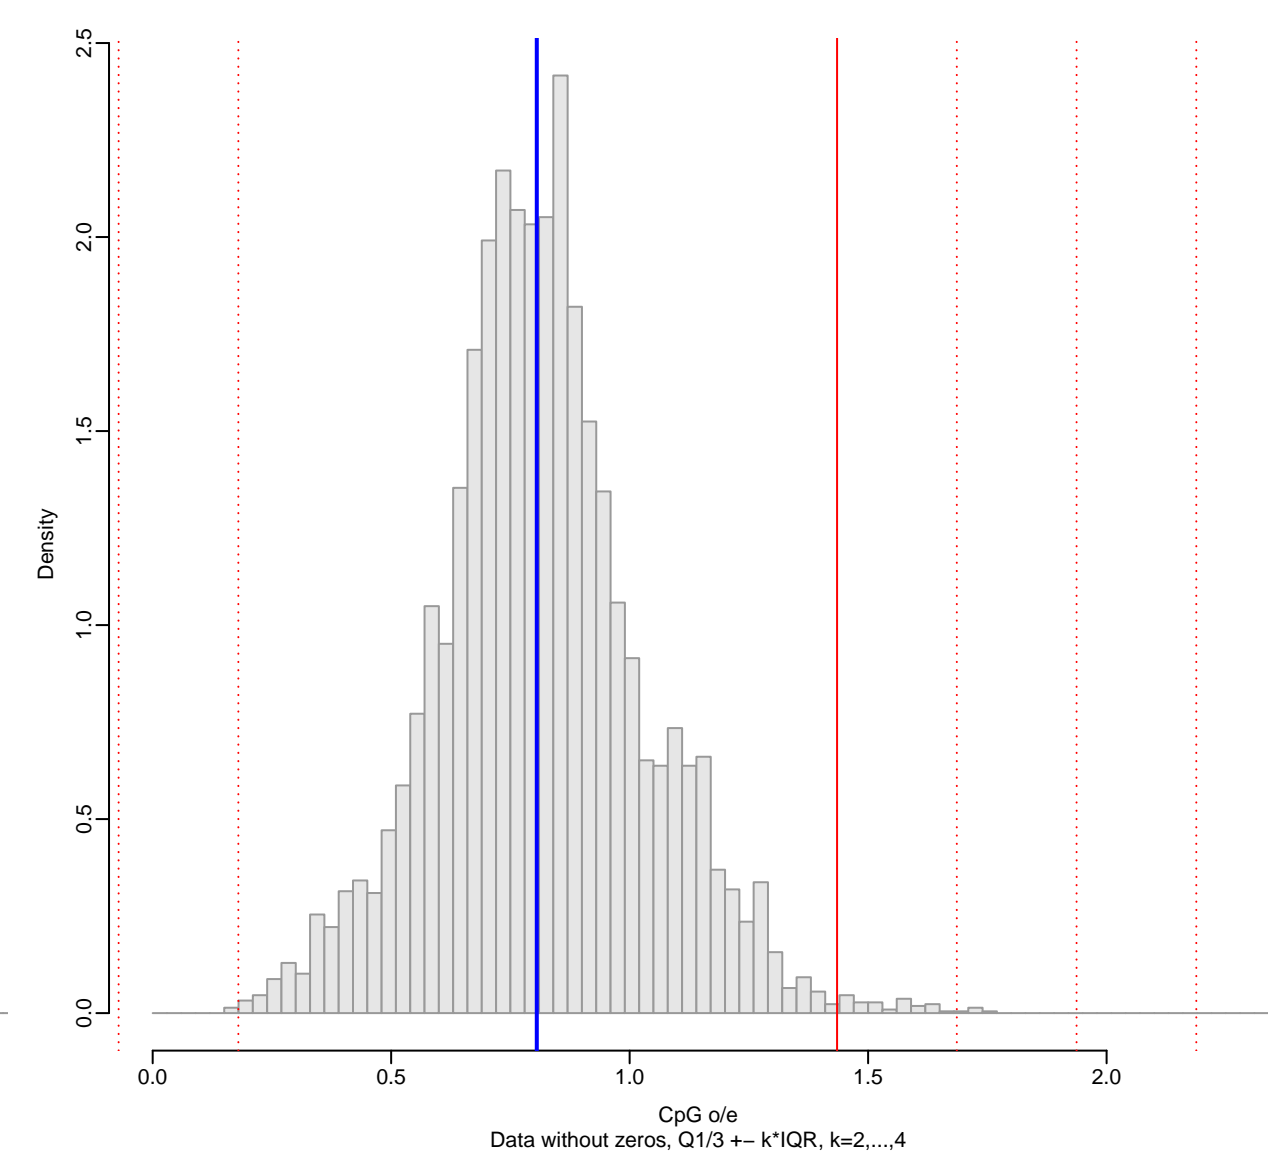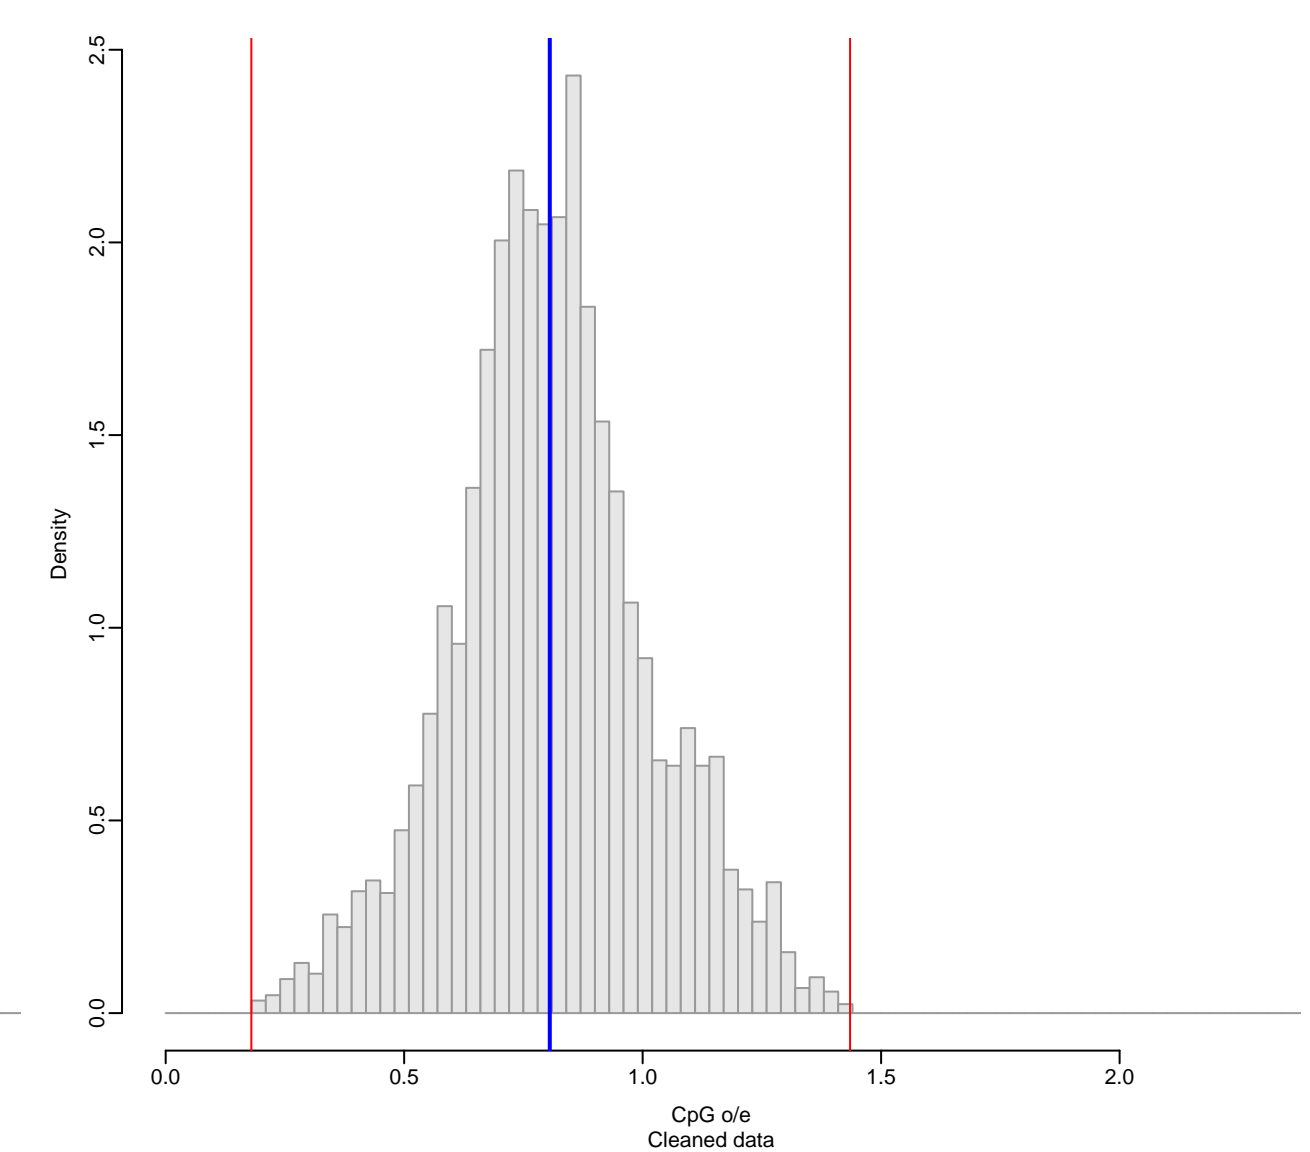

Spodoptera\_littoralis

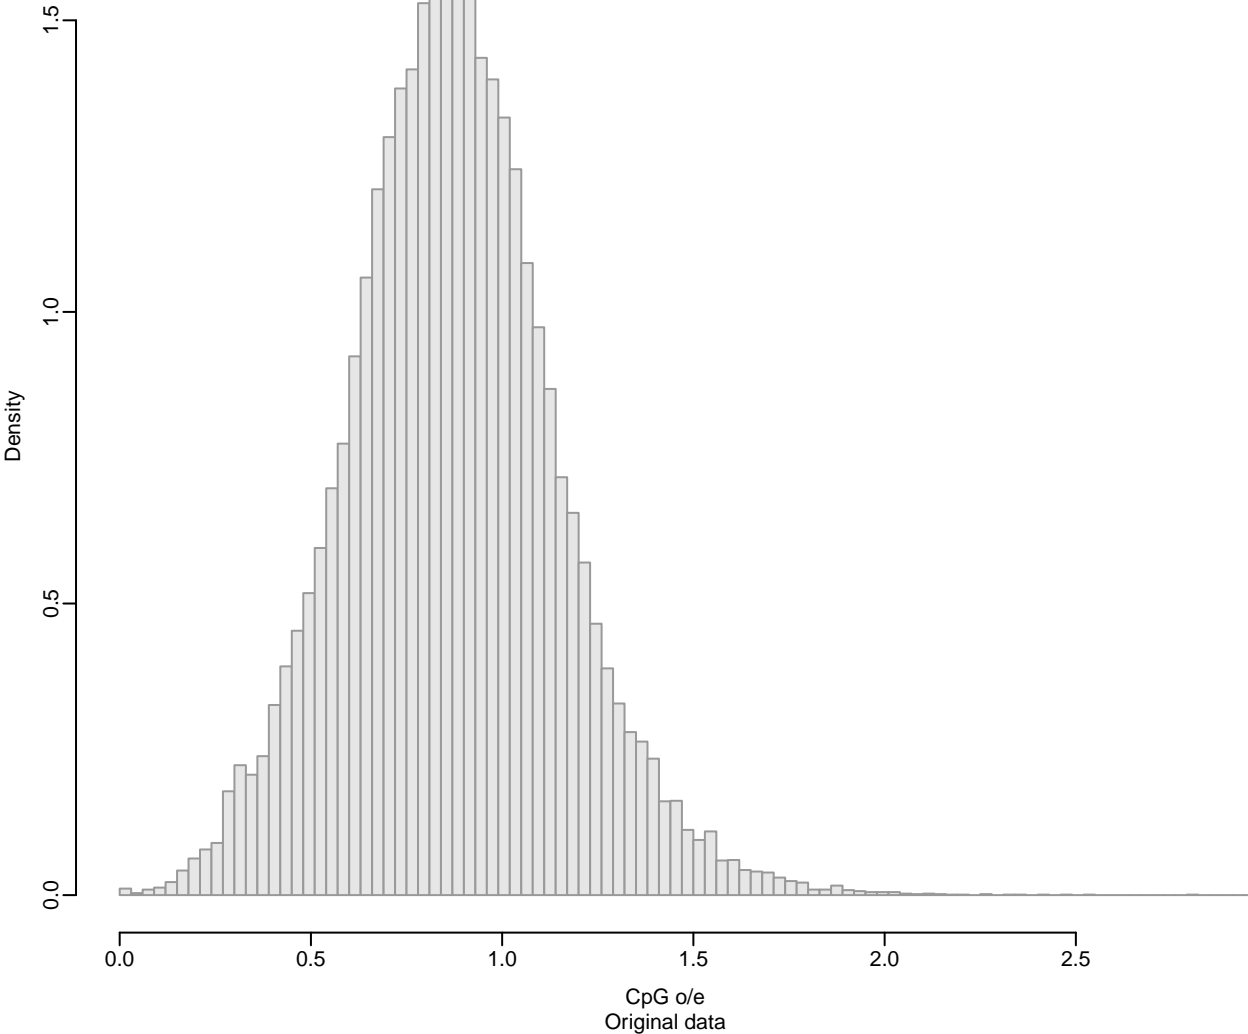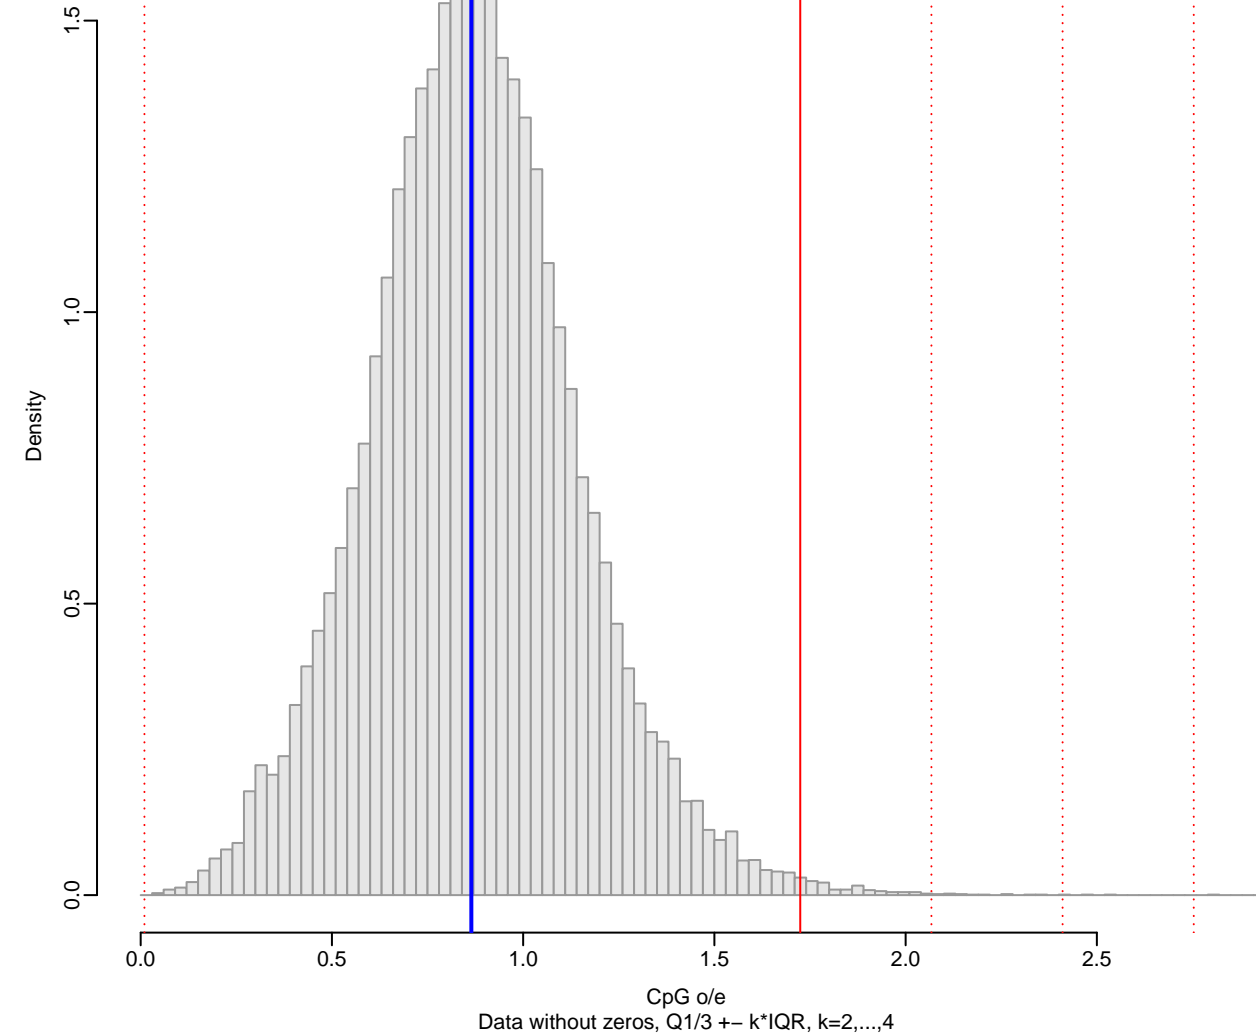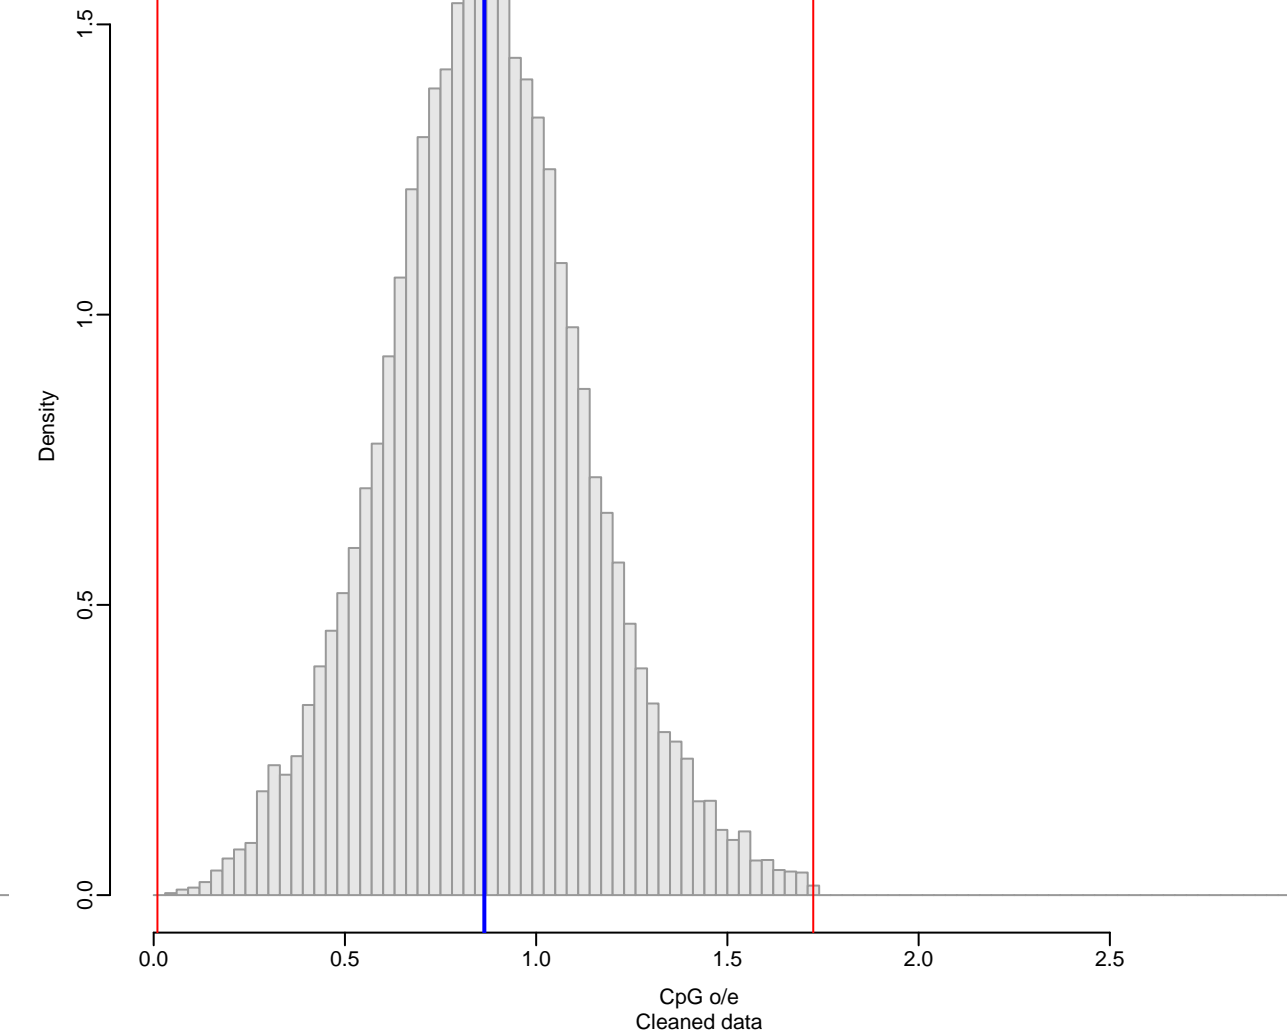

Spodoptera\_litura

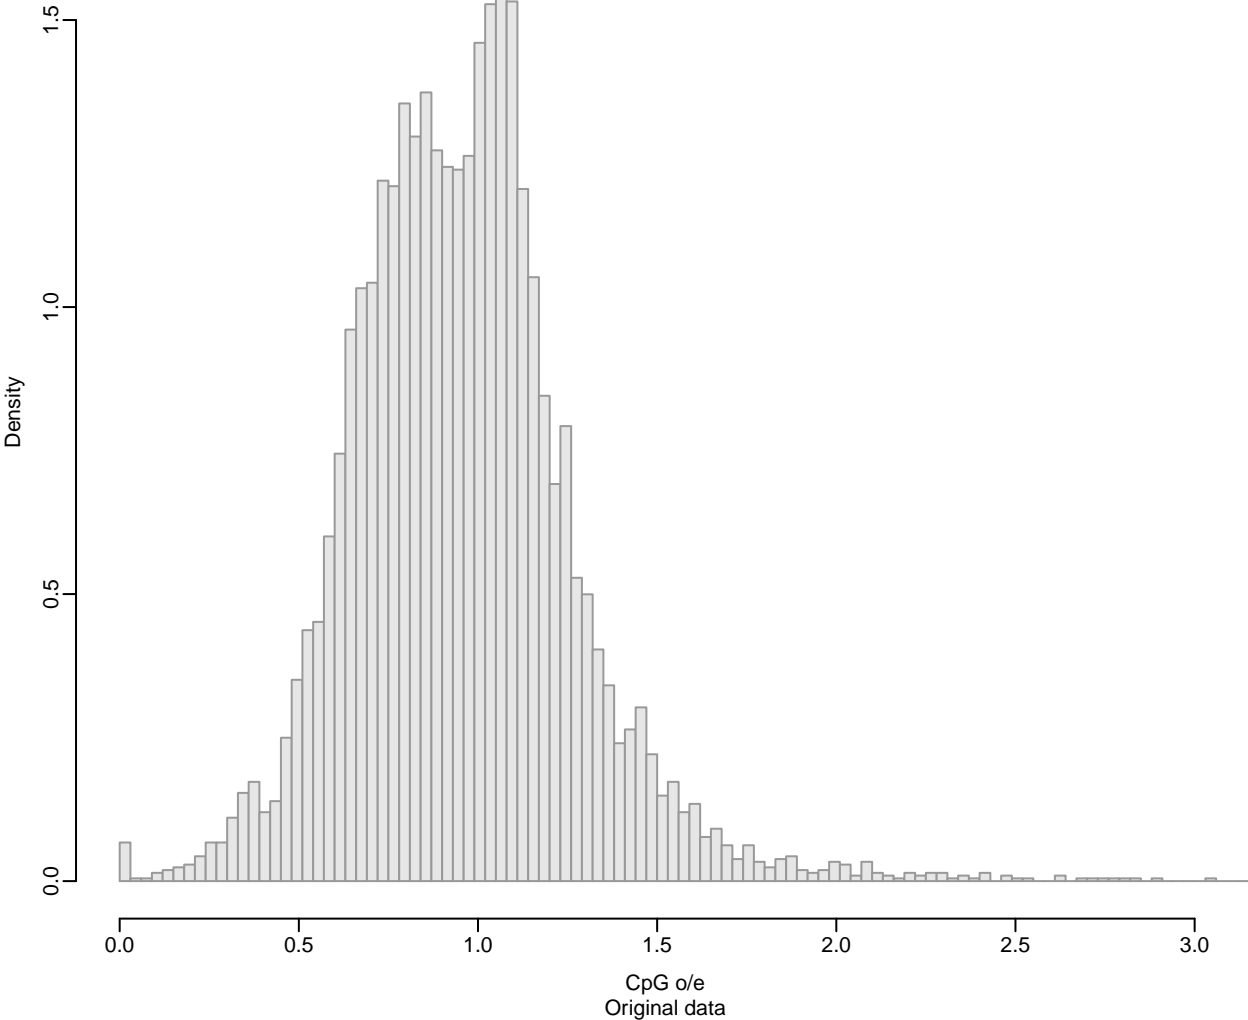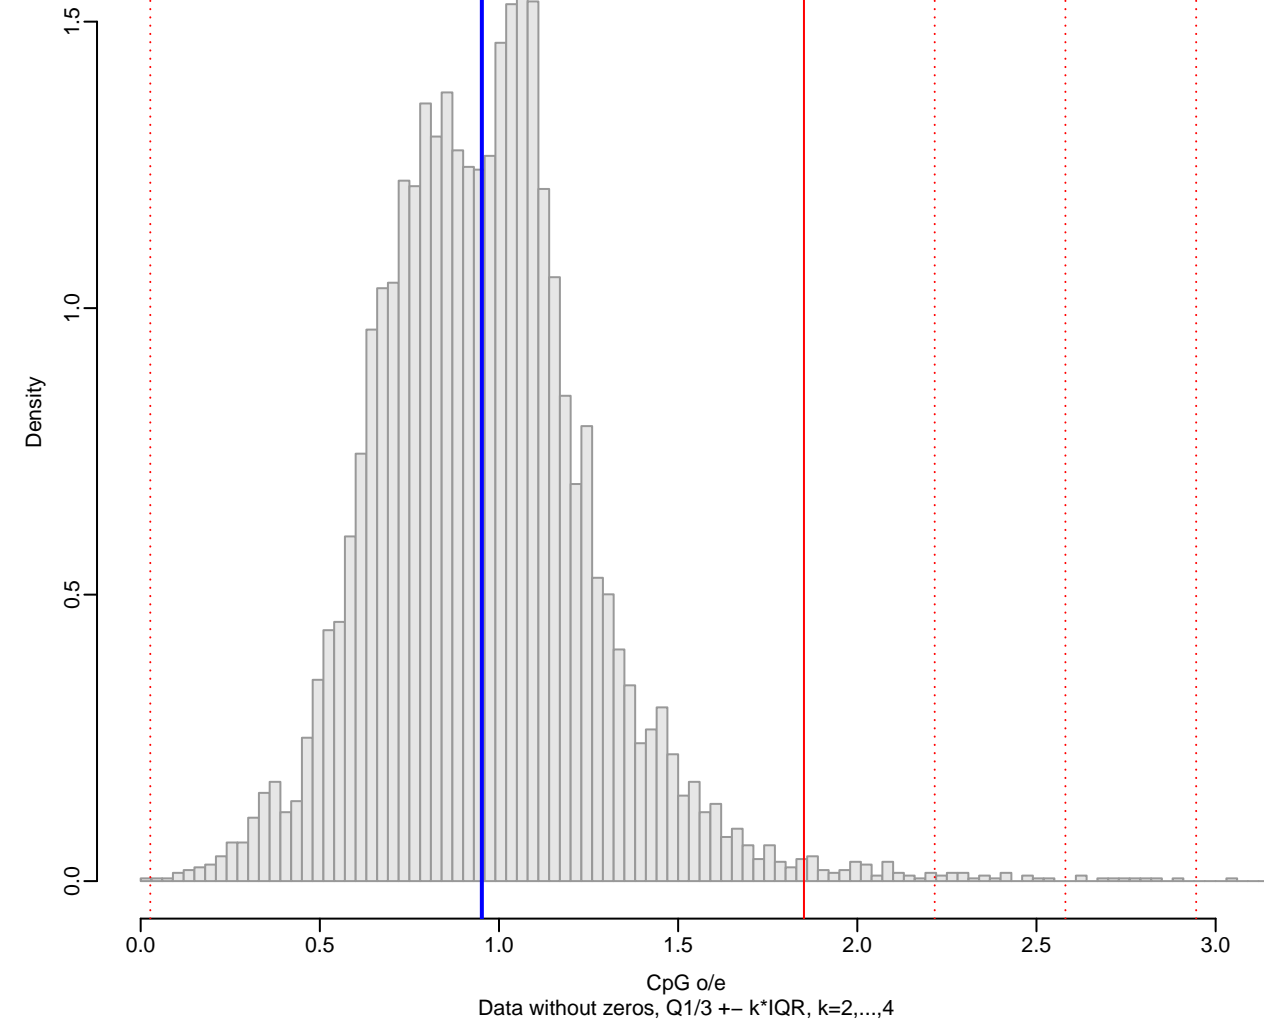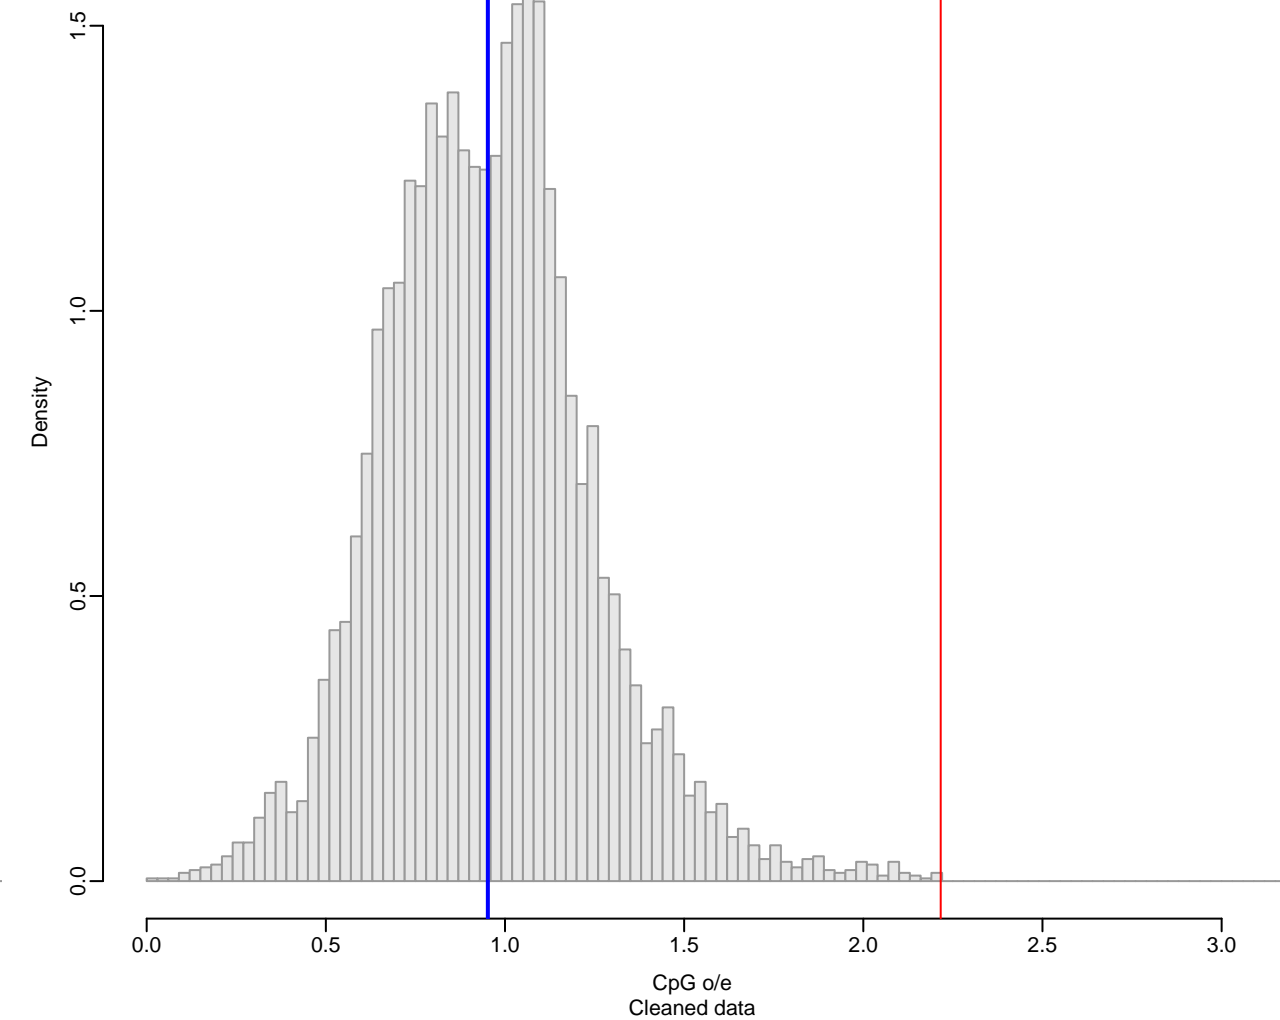

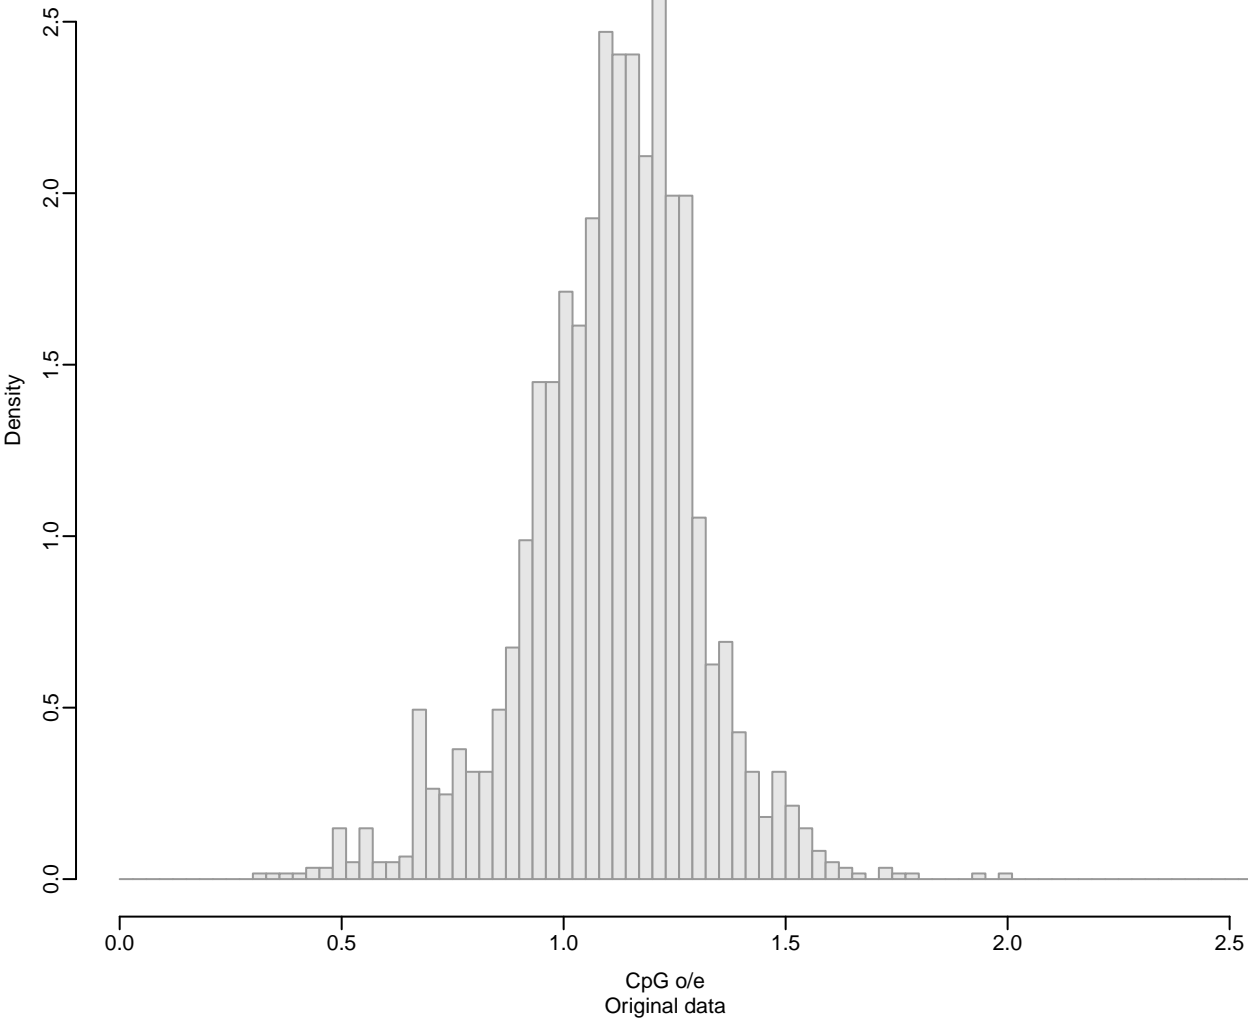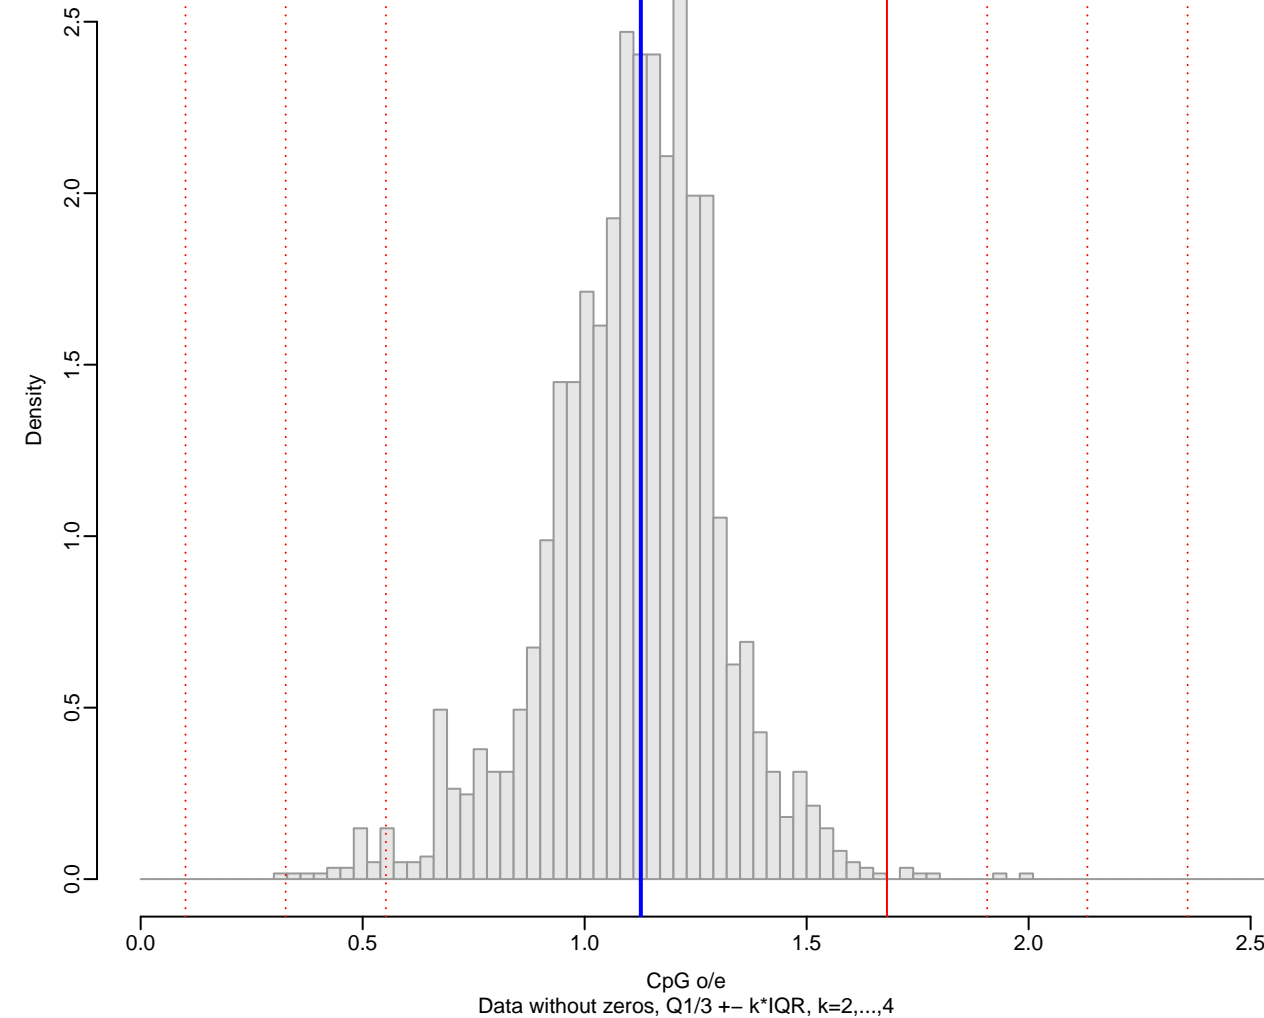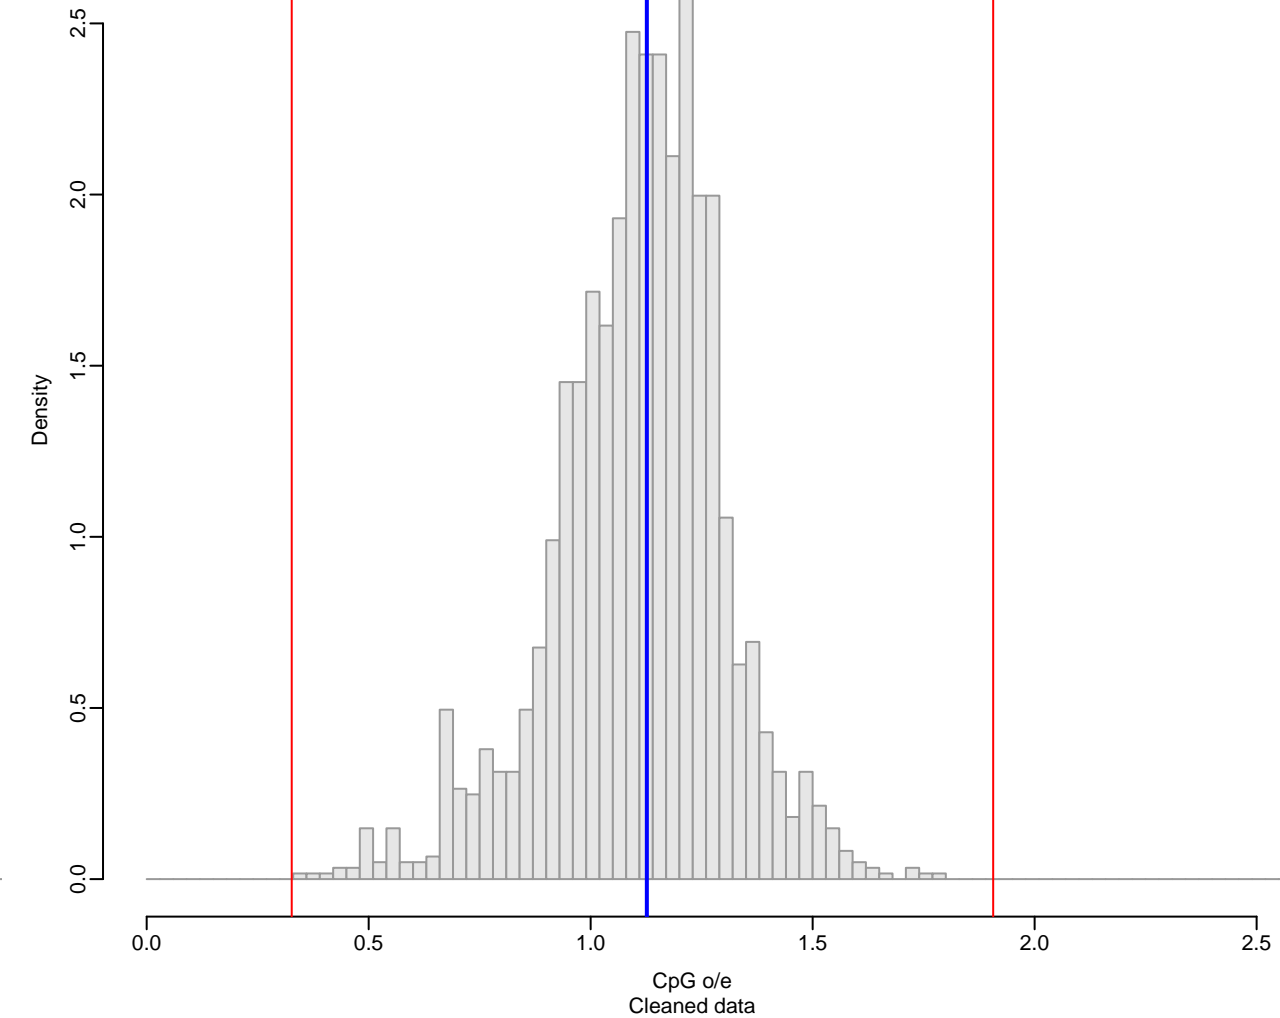

Sterkiella\_histriomuscorum

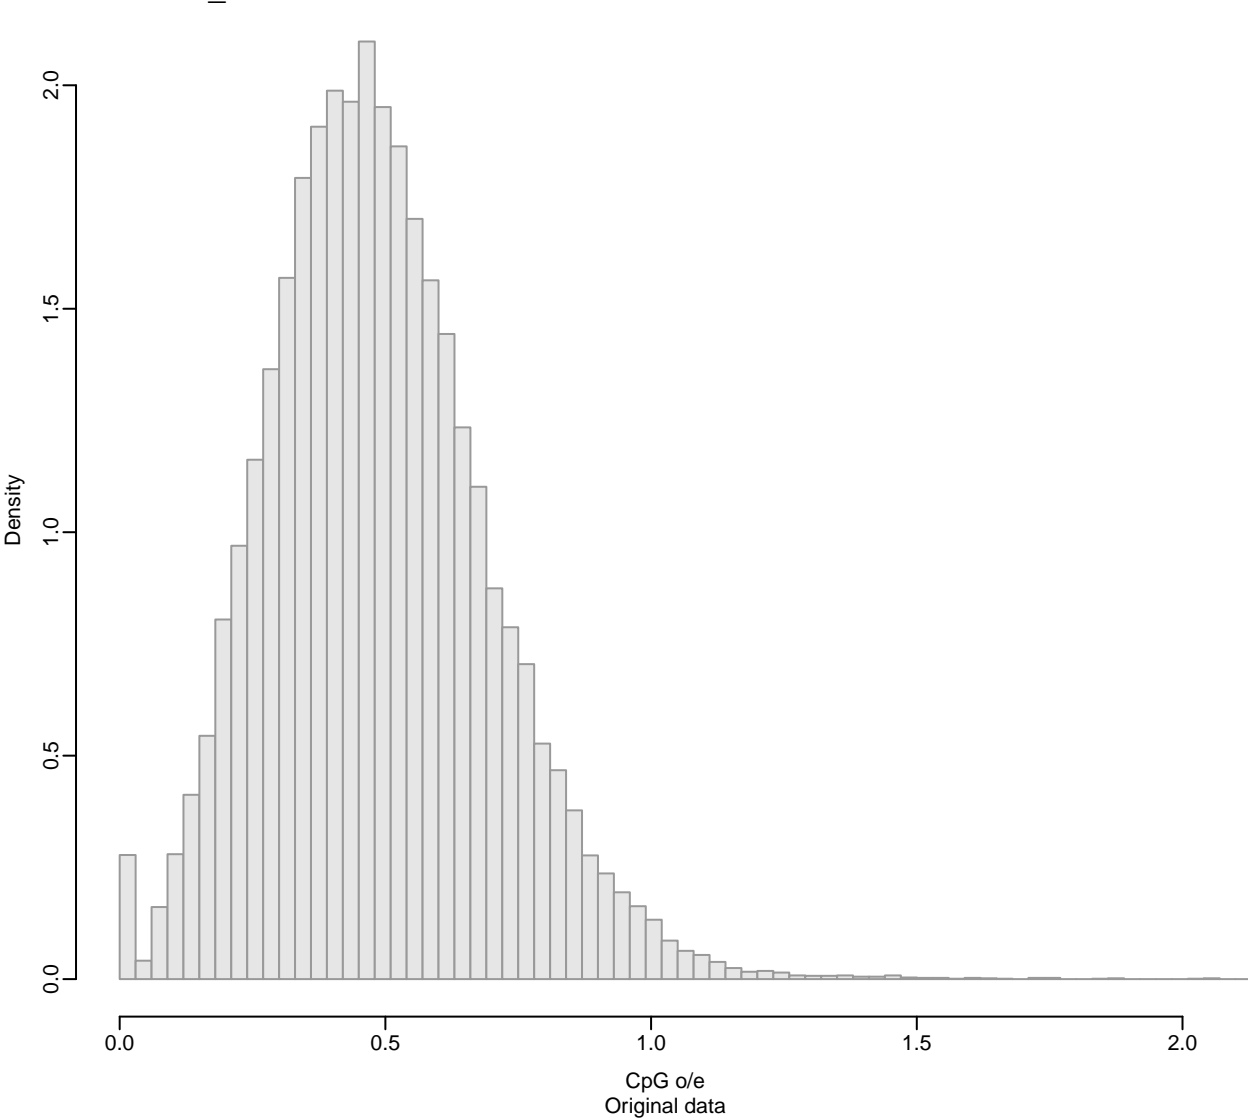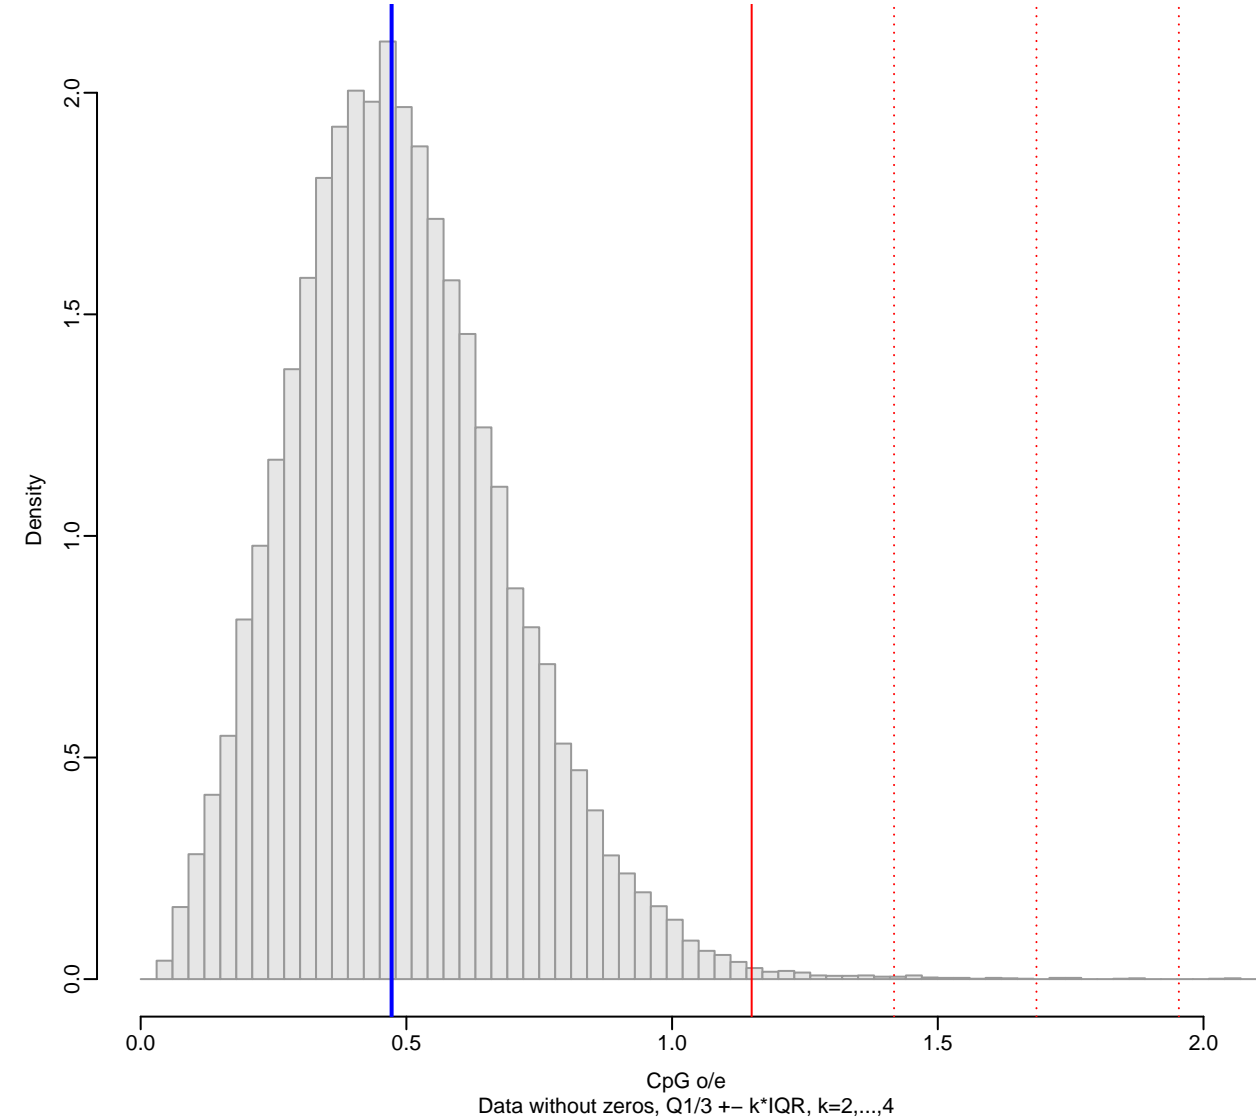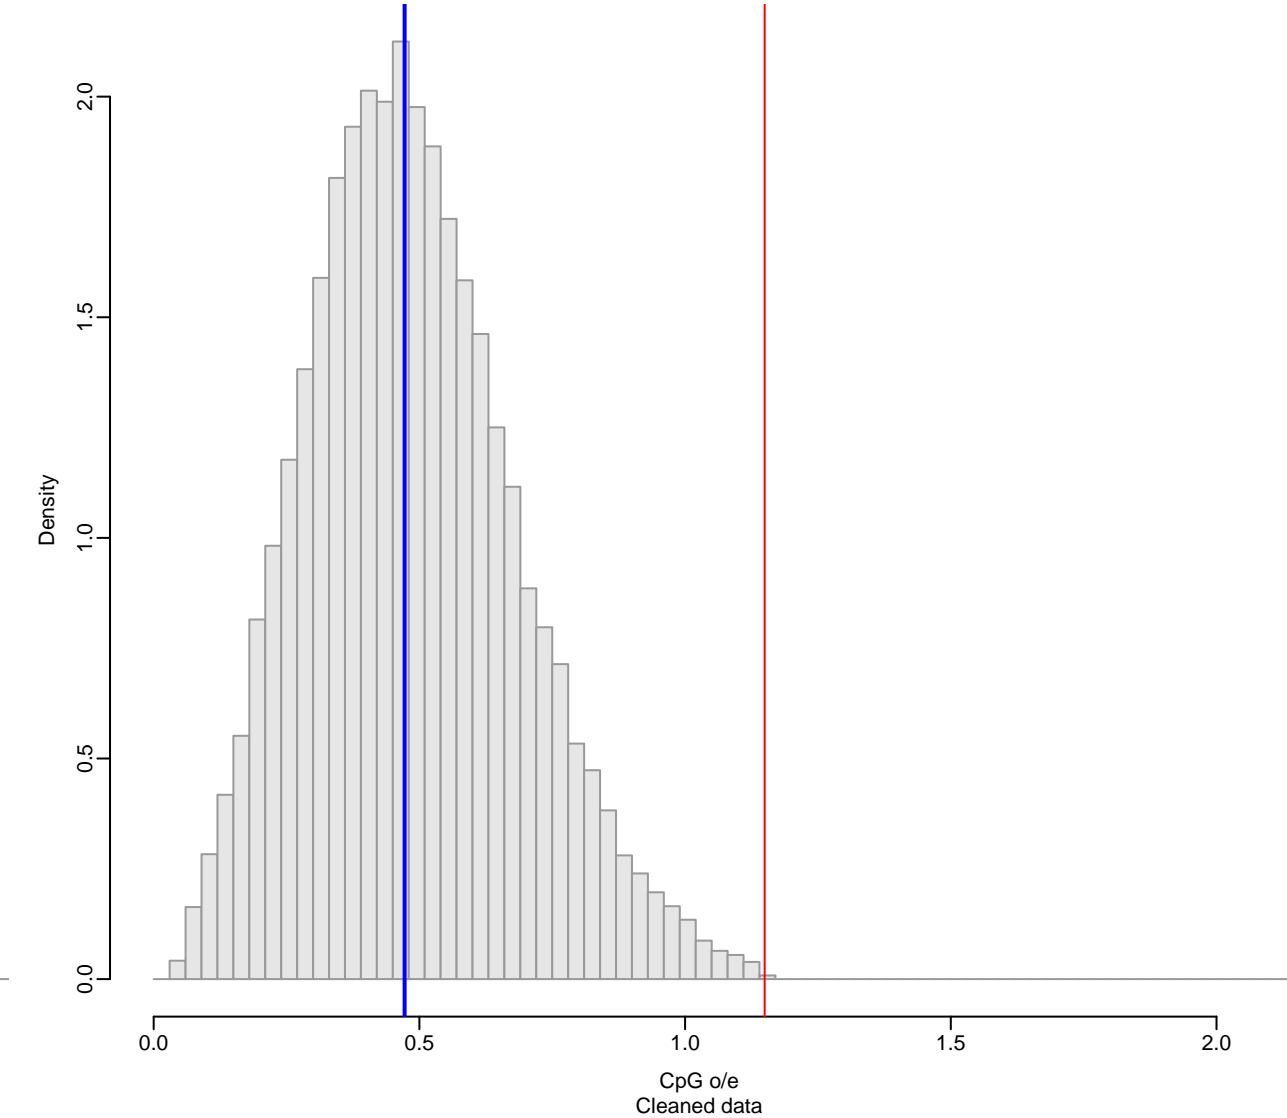



Density

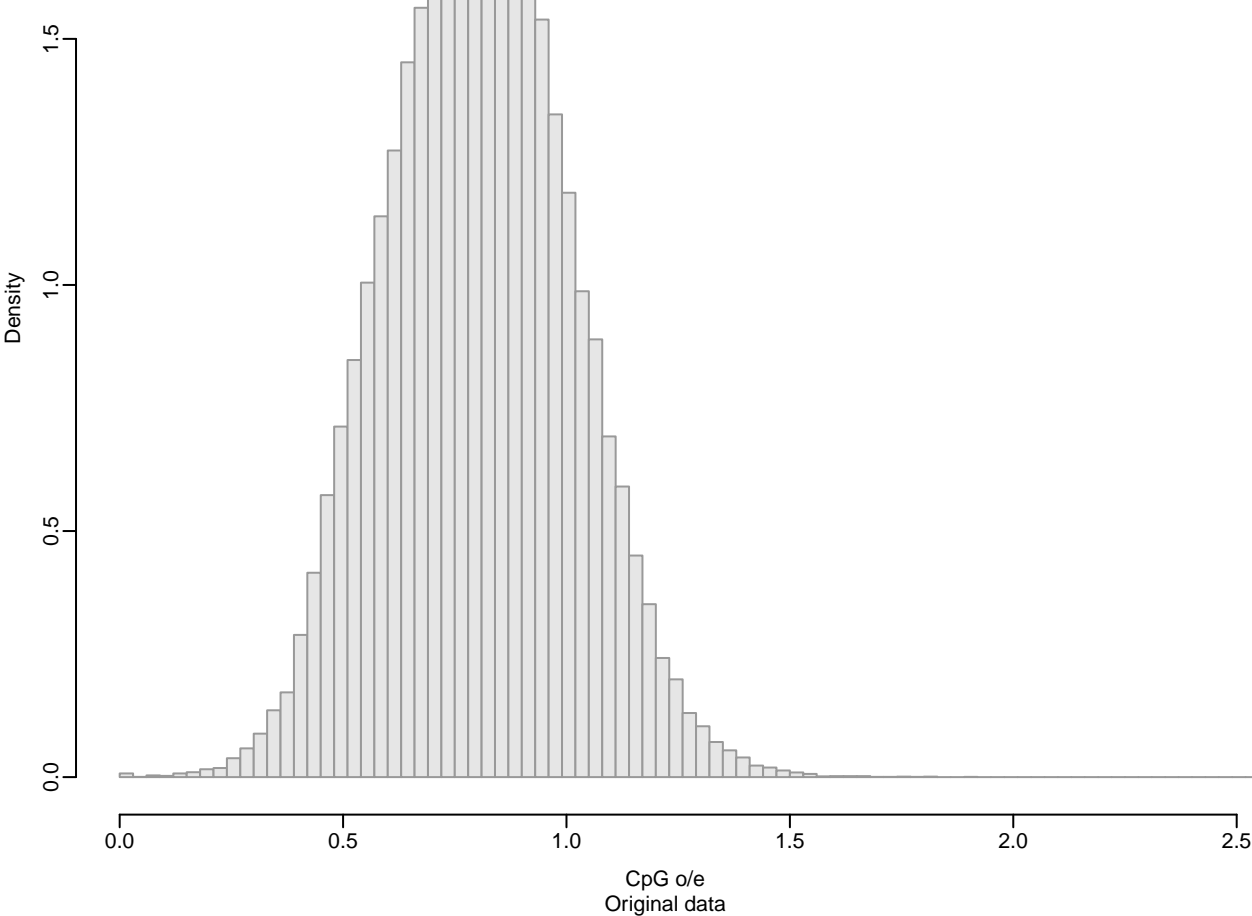

Density

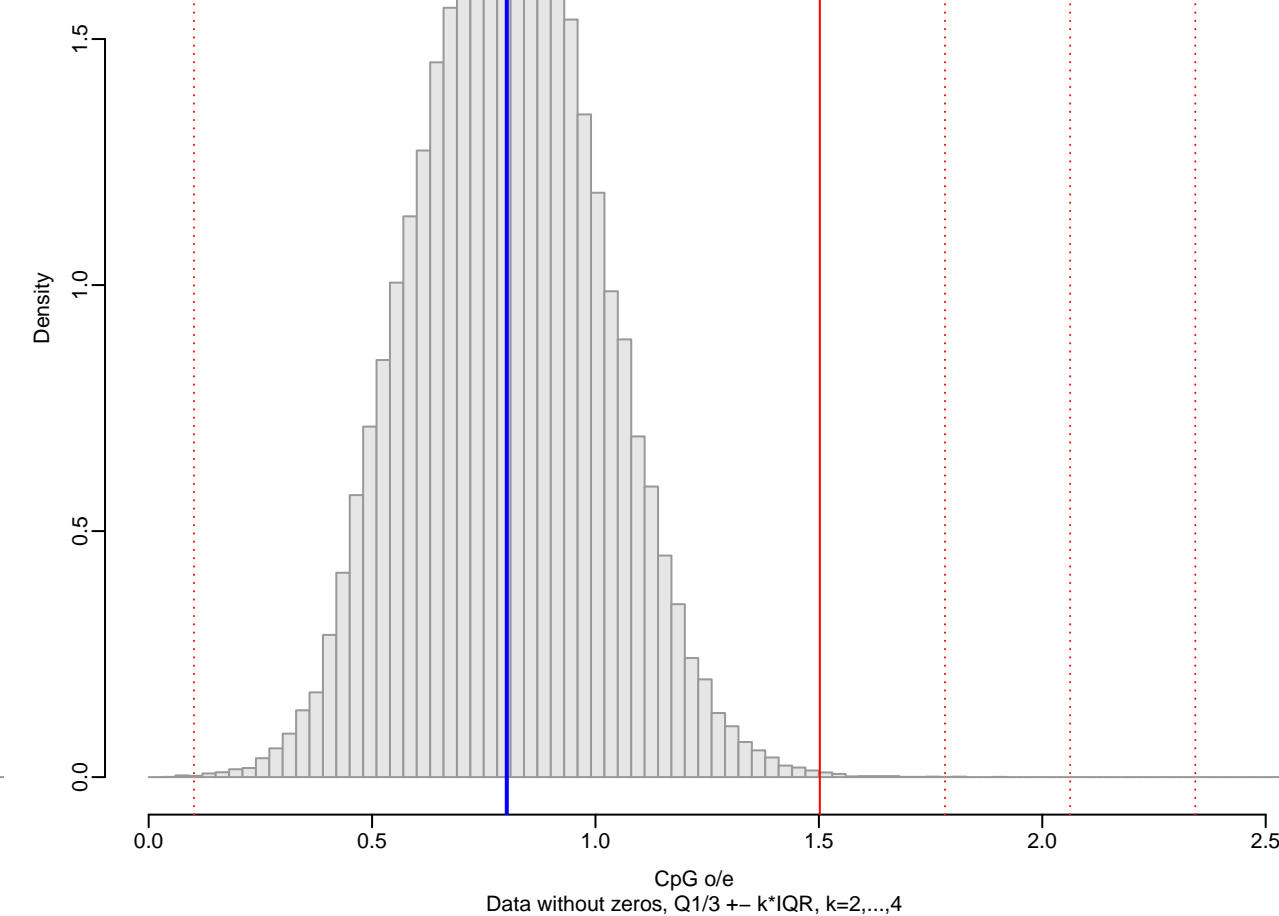

Density

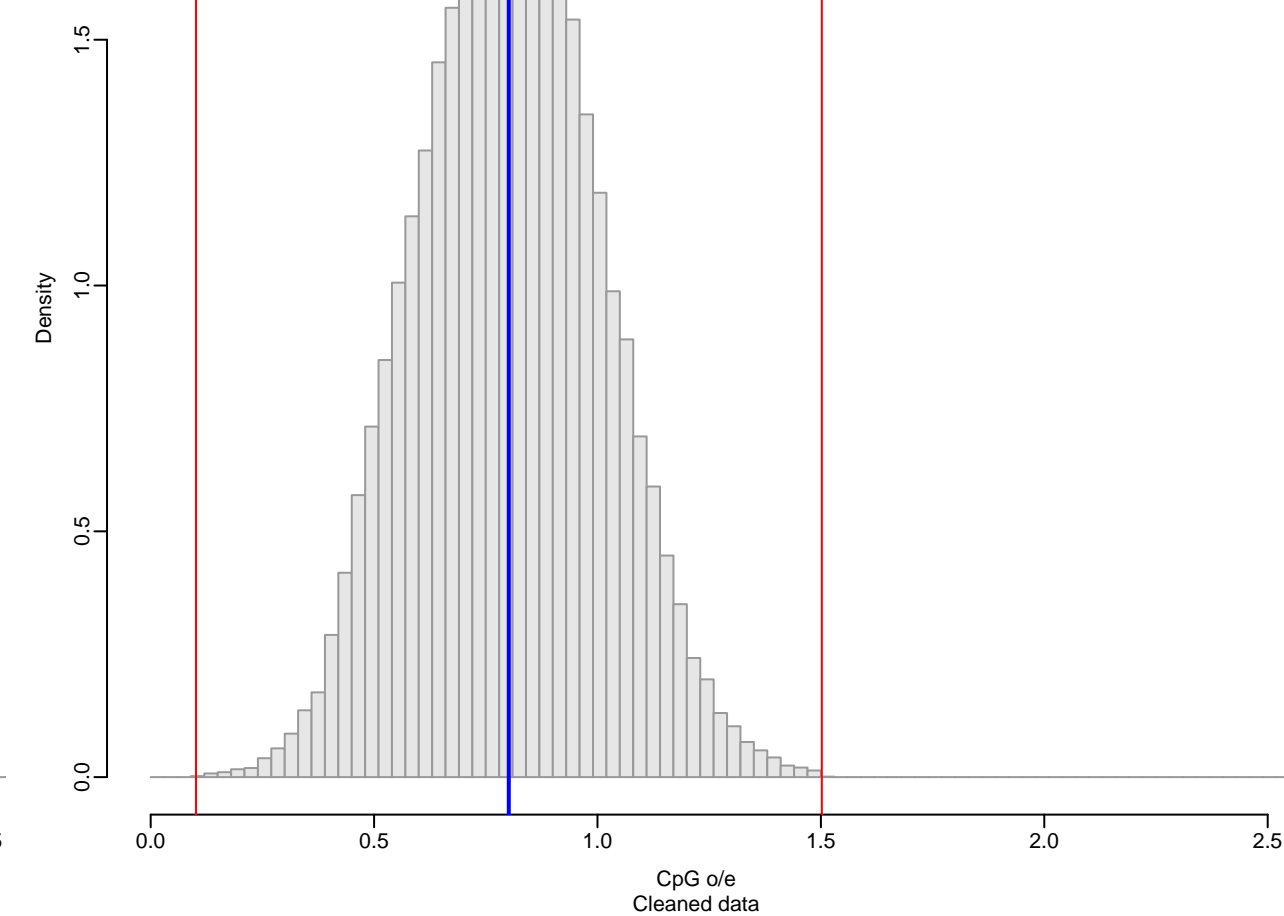

Strongylocentrotus\_purpuratus

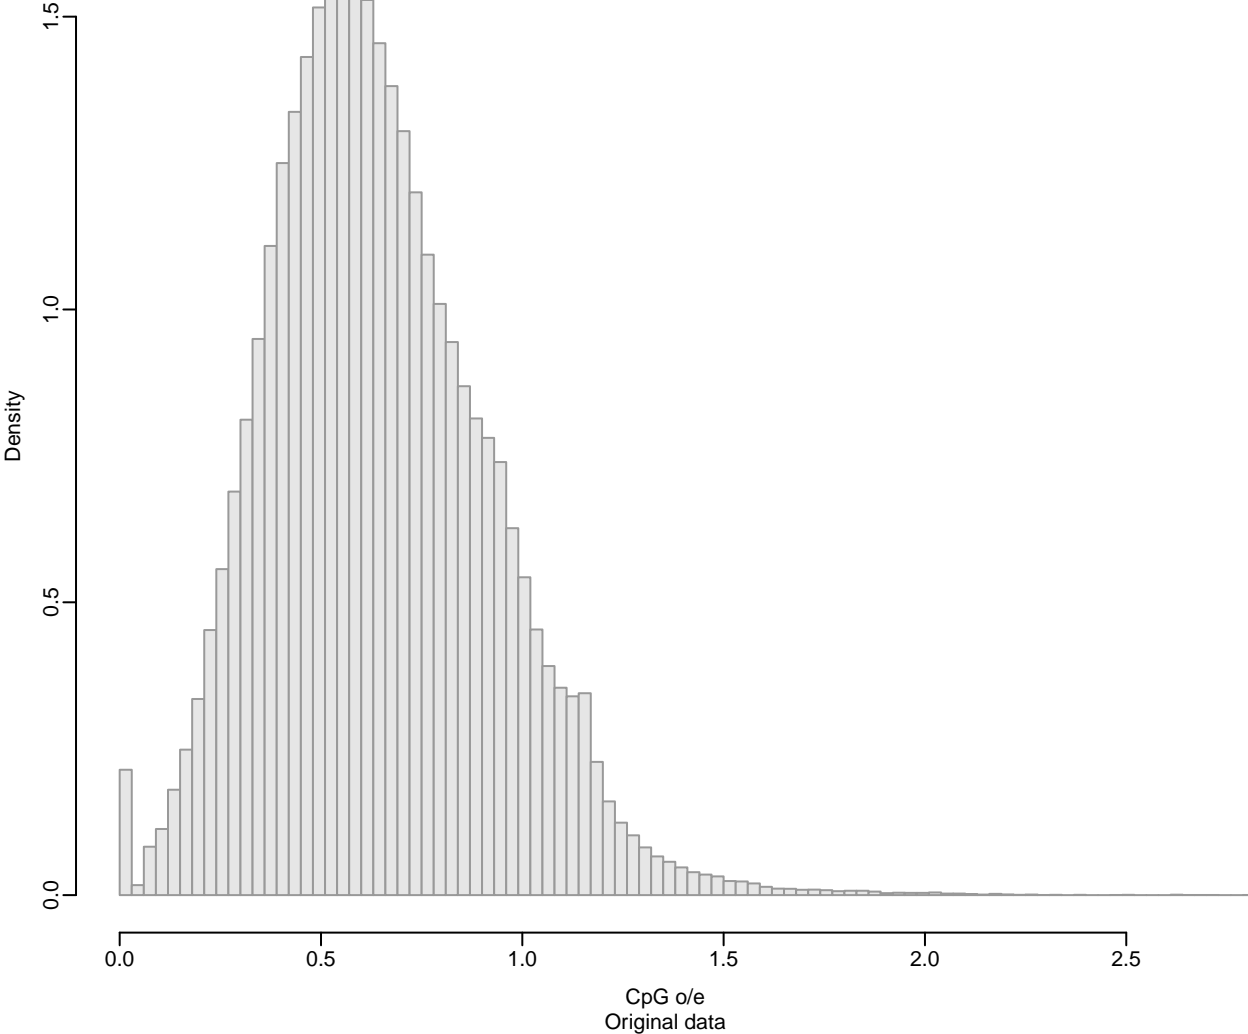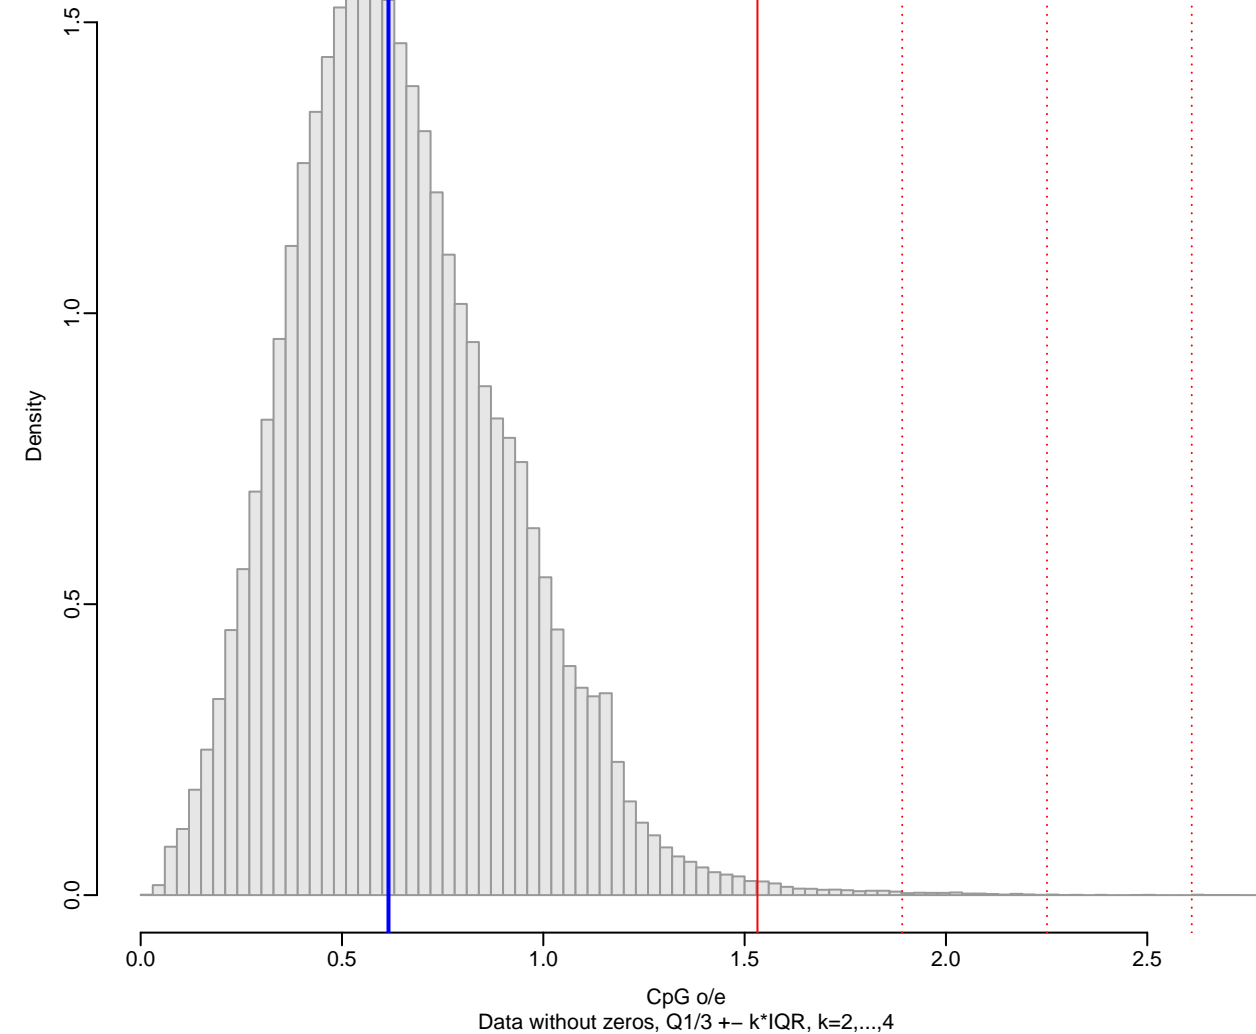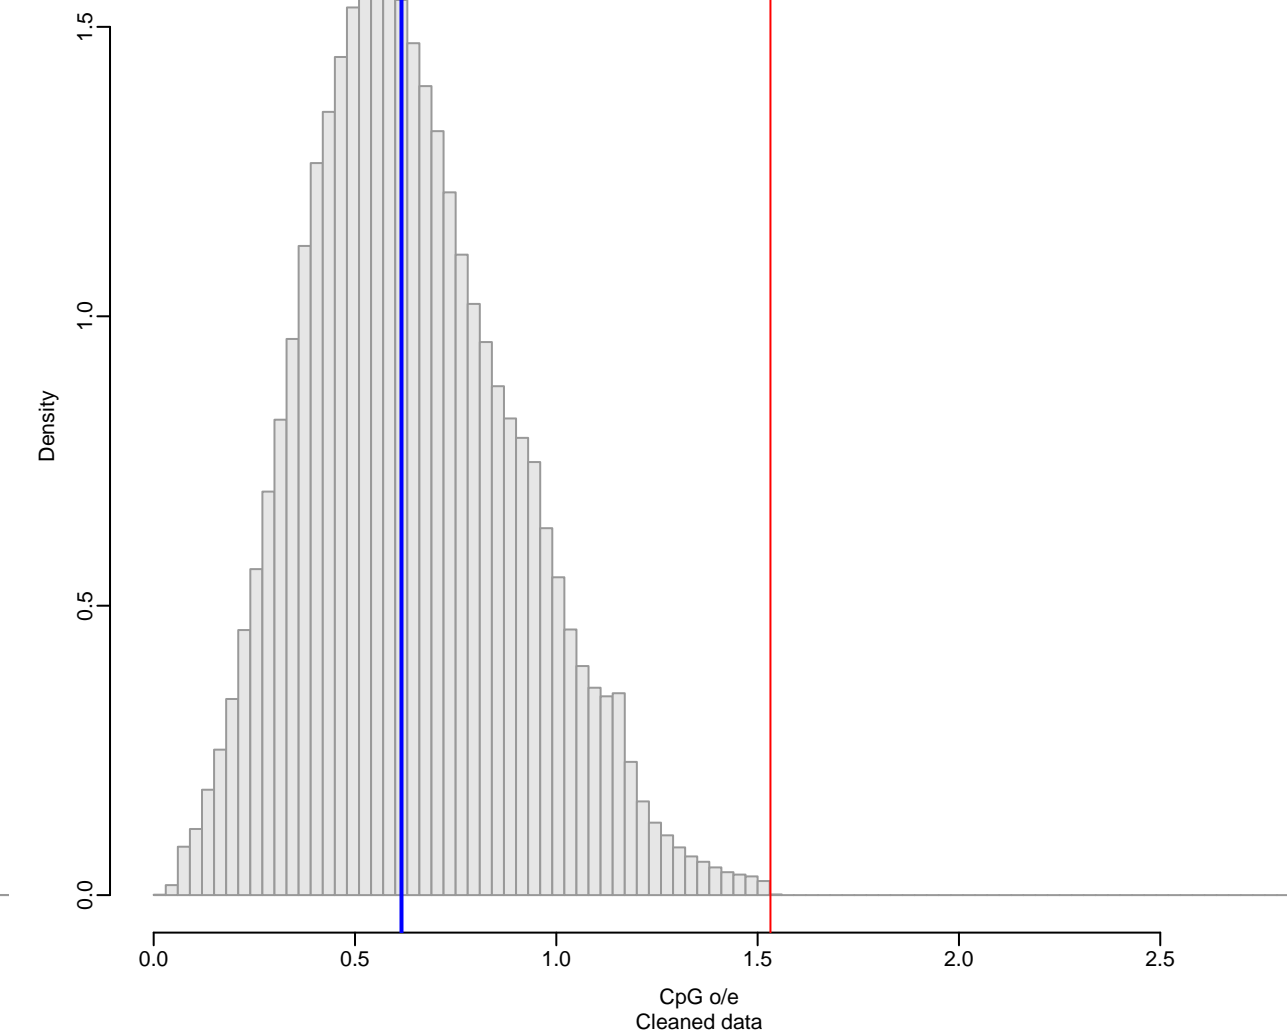

Suberites\_domuncula

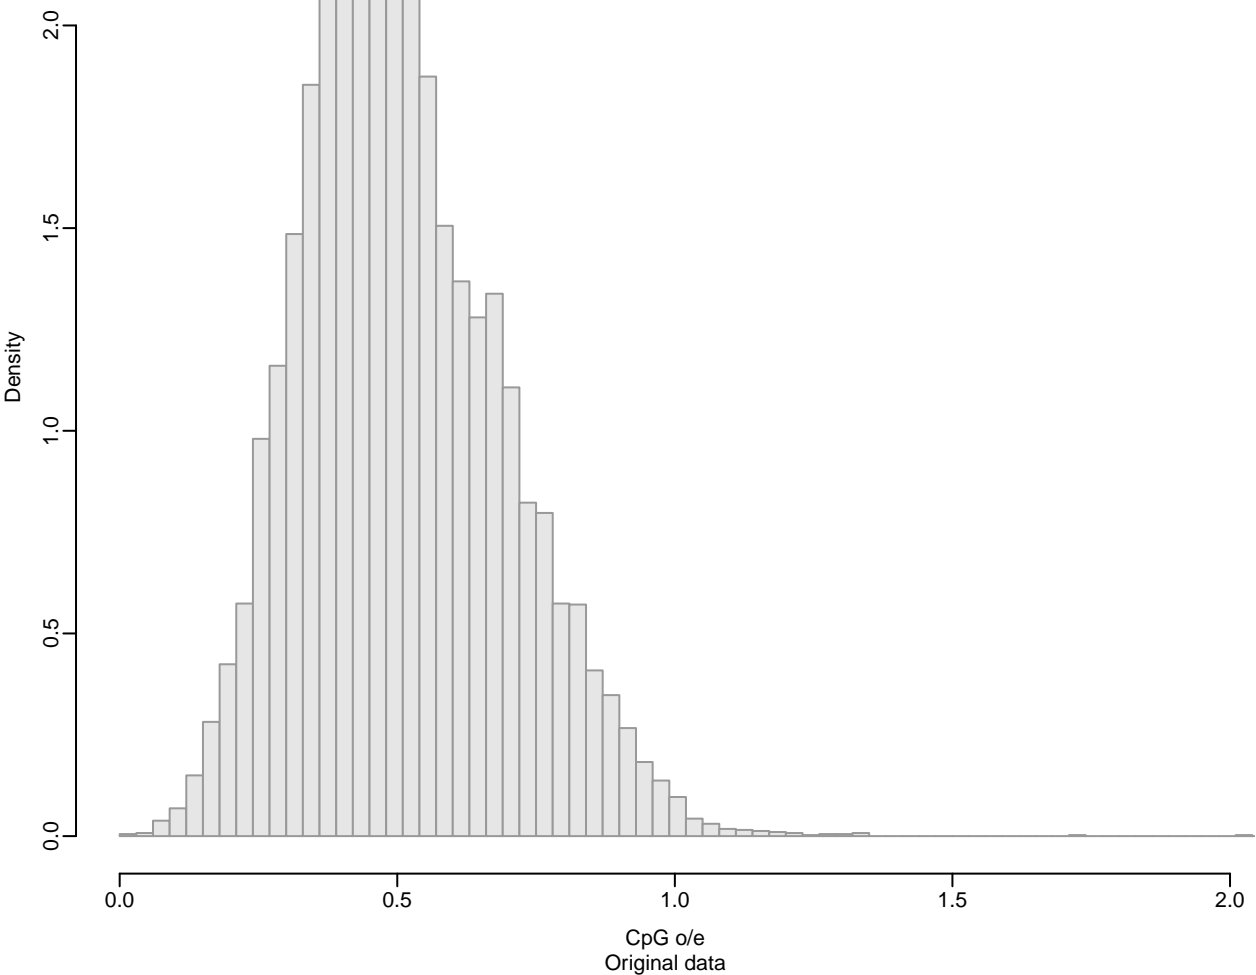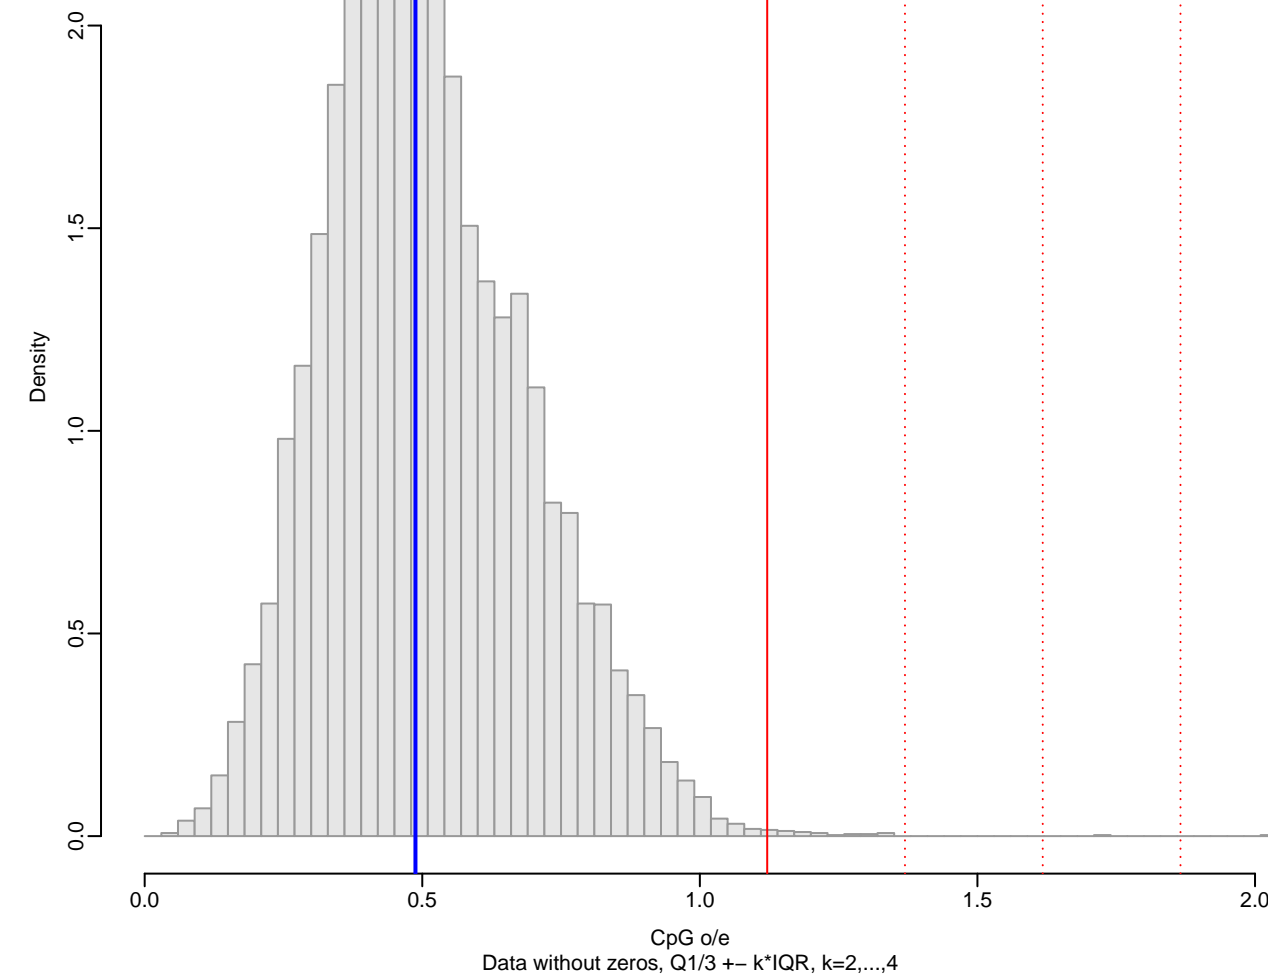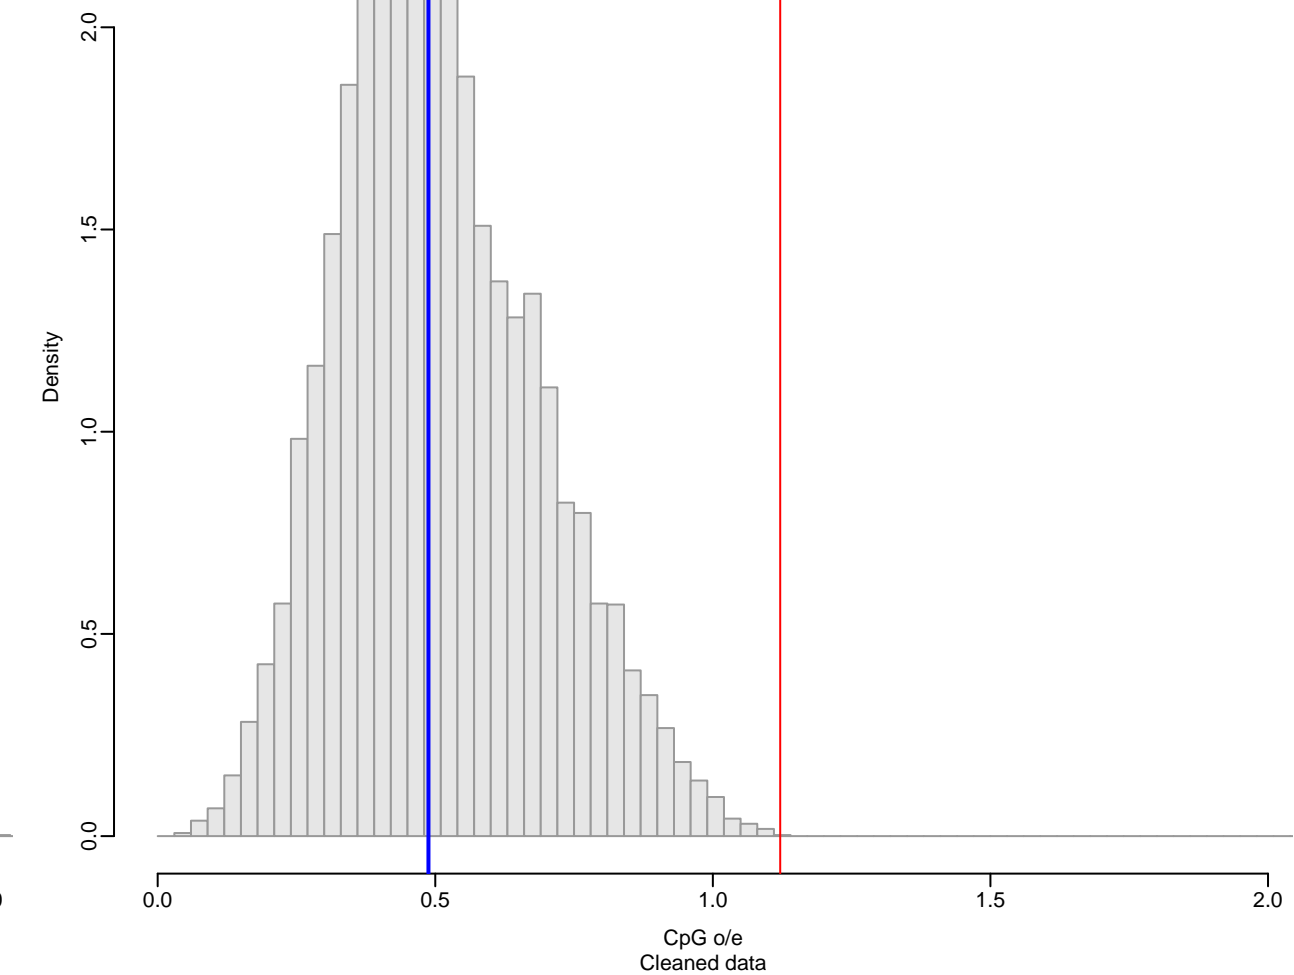

Suidasia\_medanensis

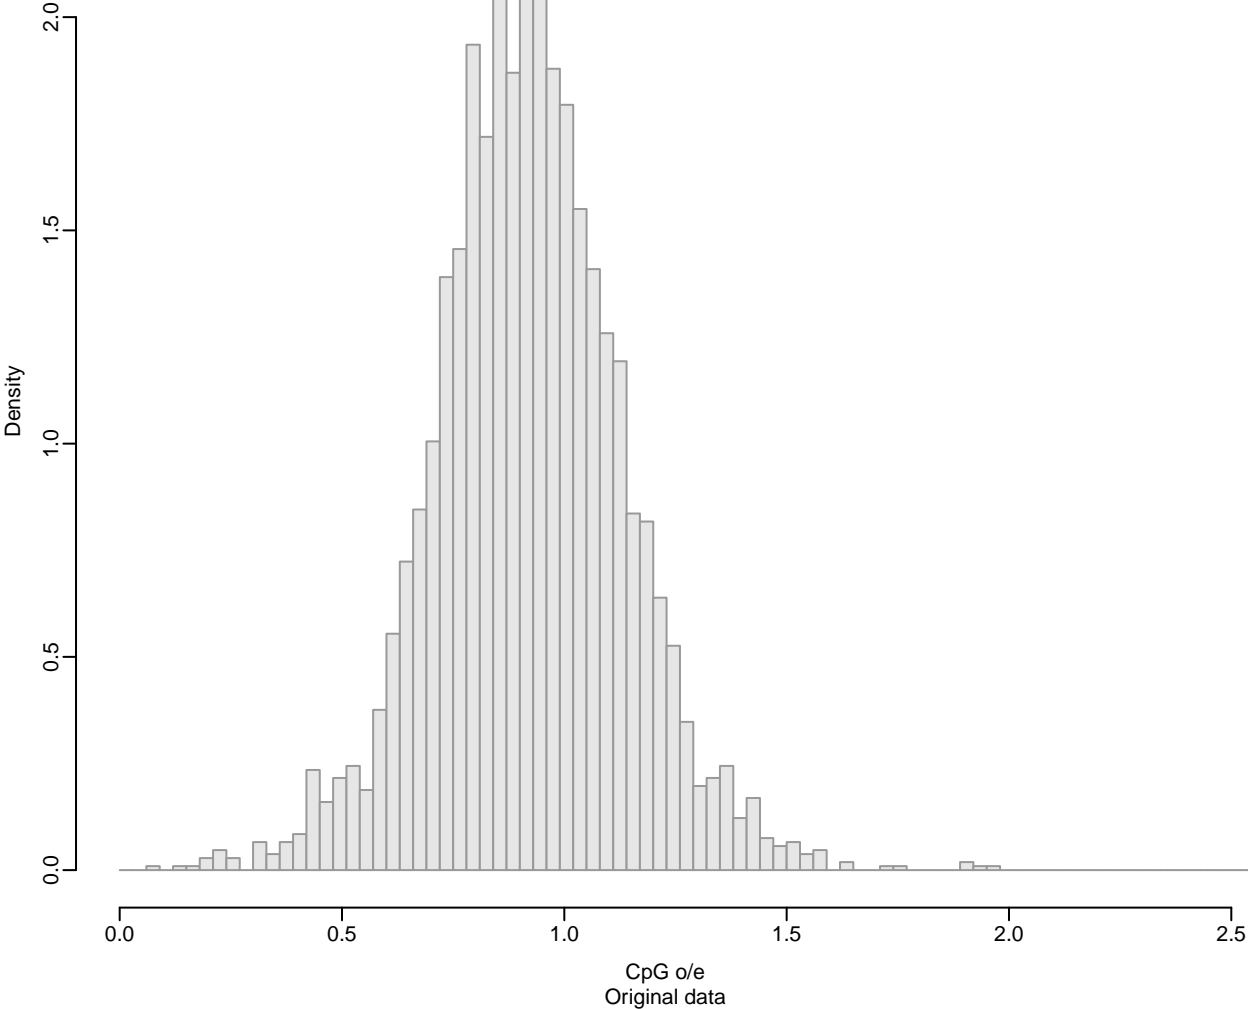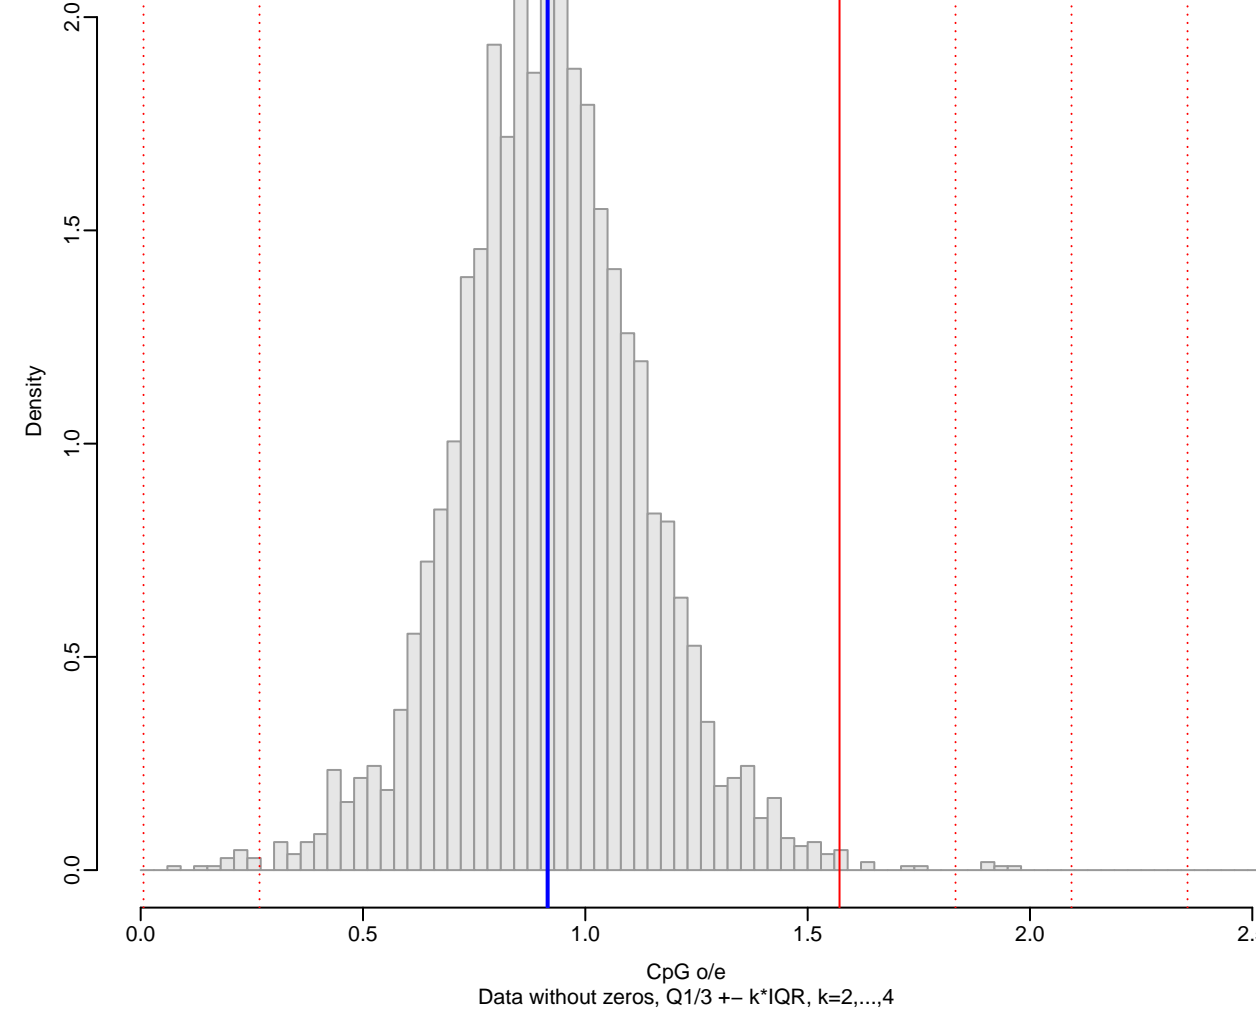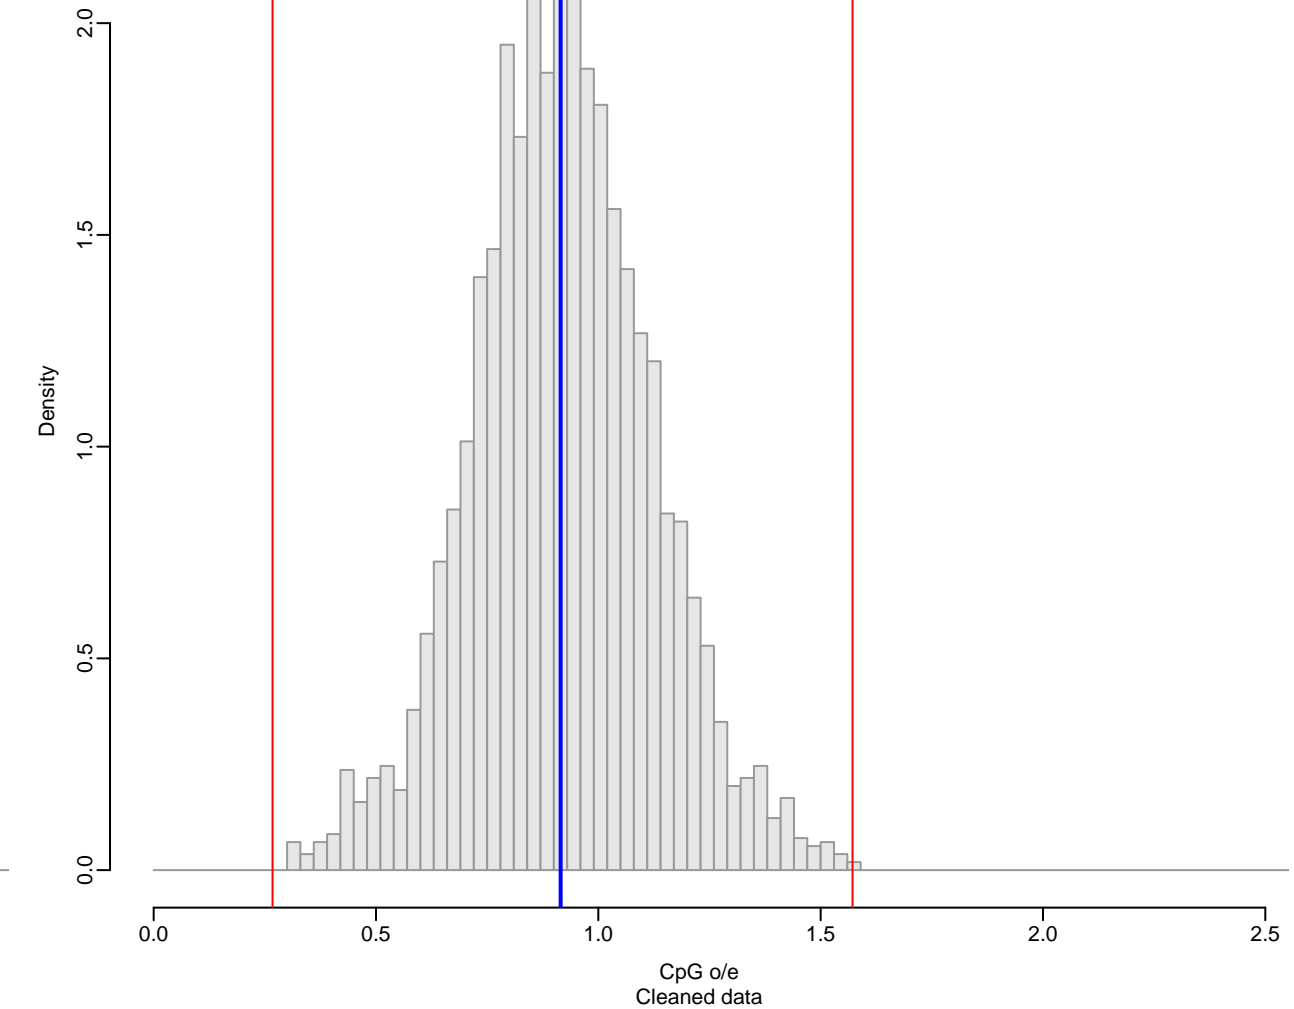

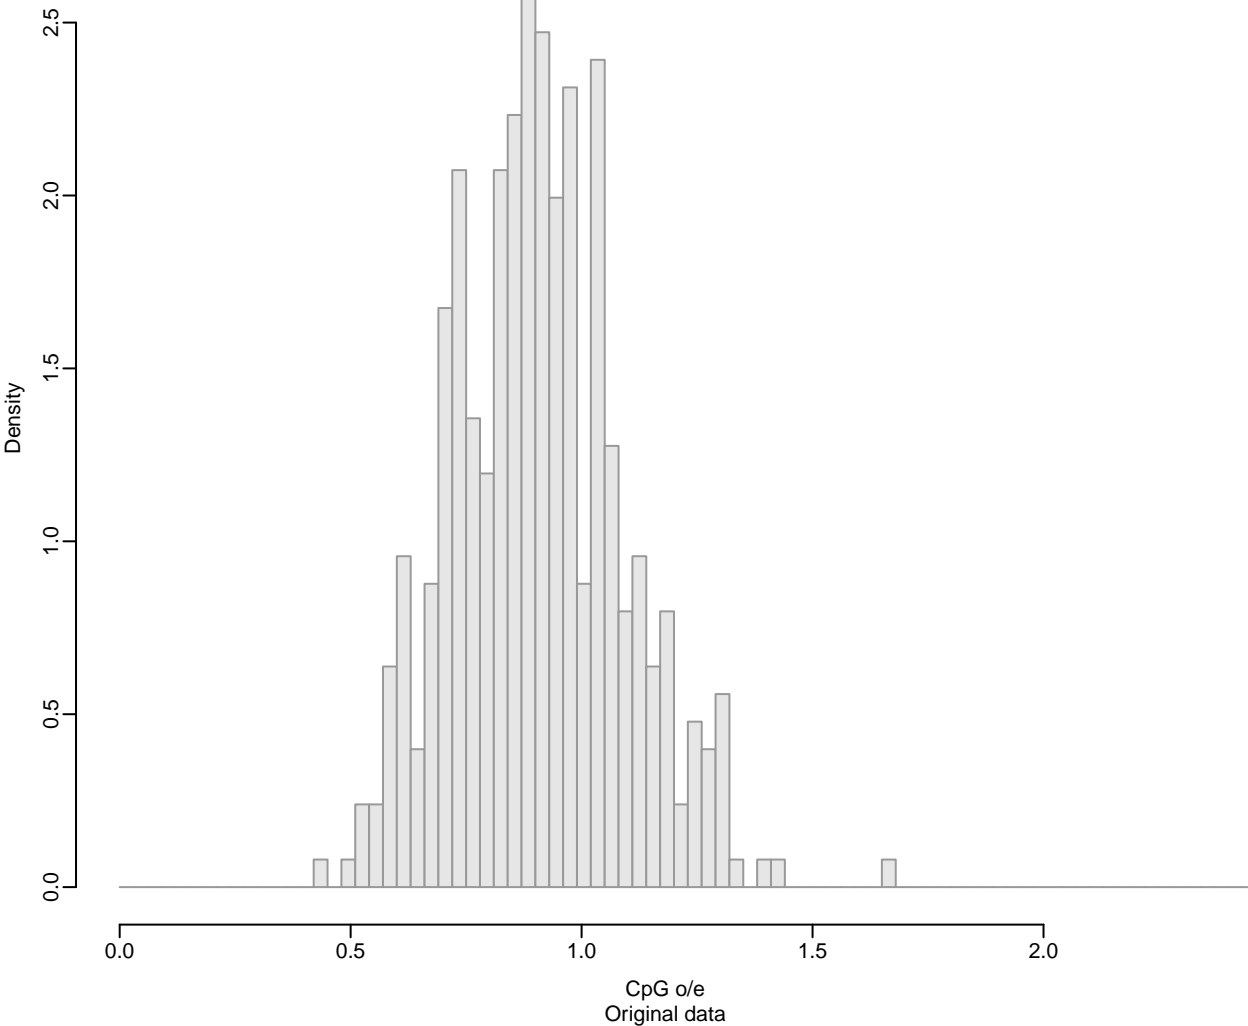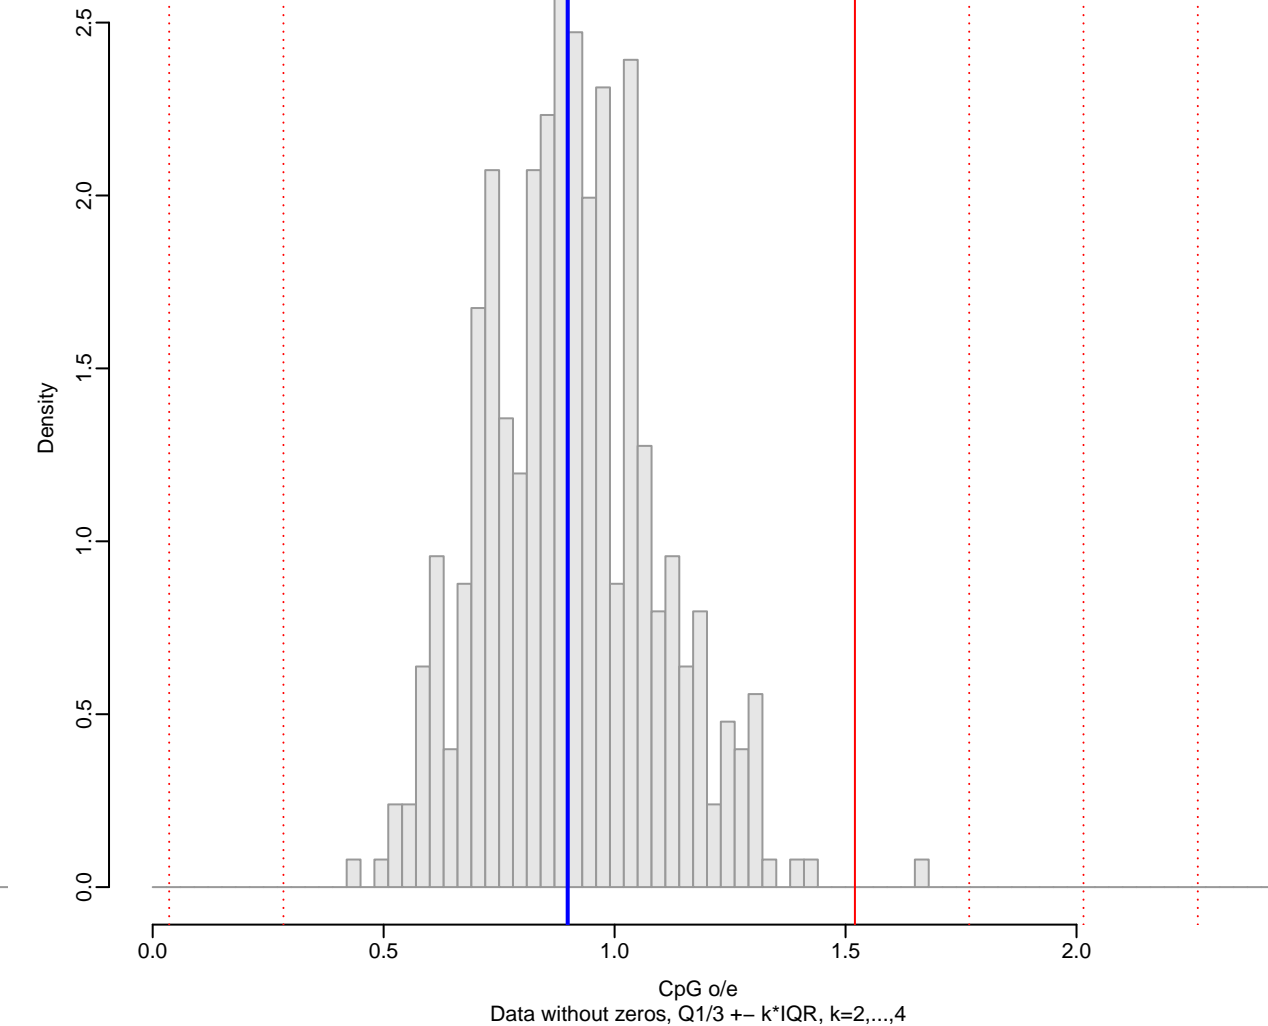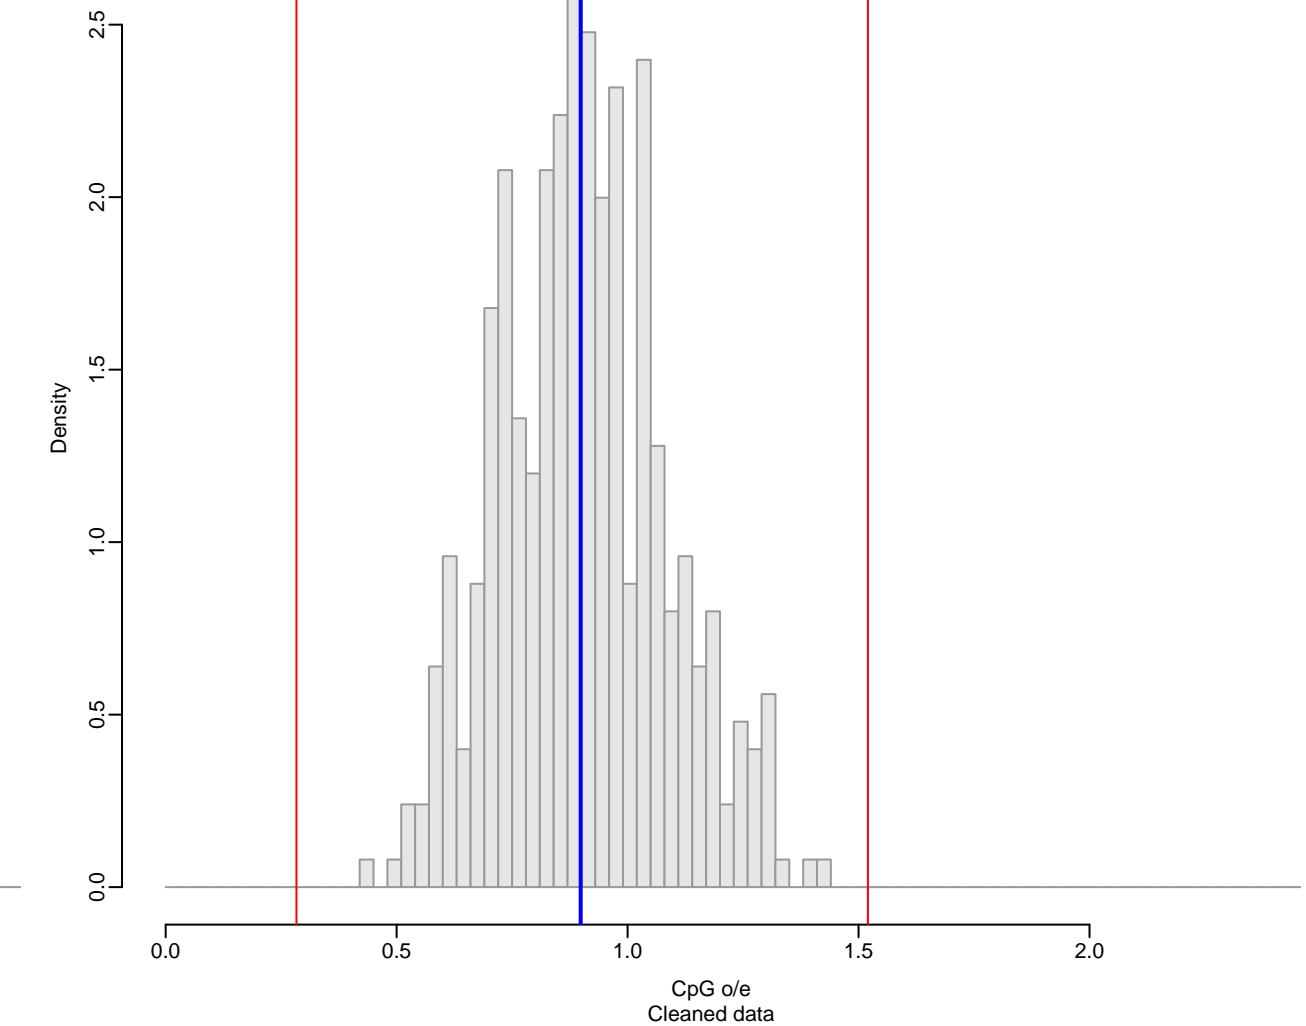

Sus\_scrofa

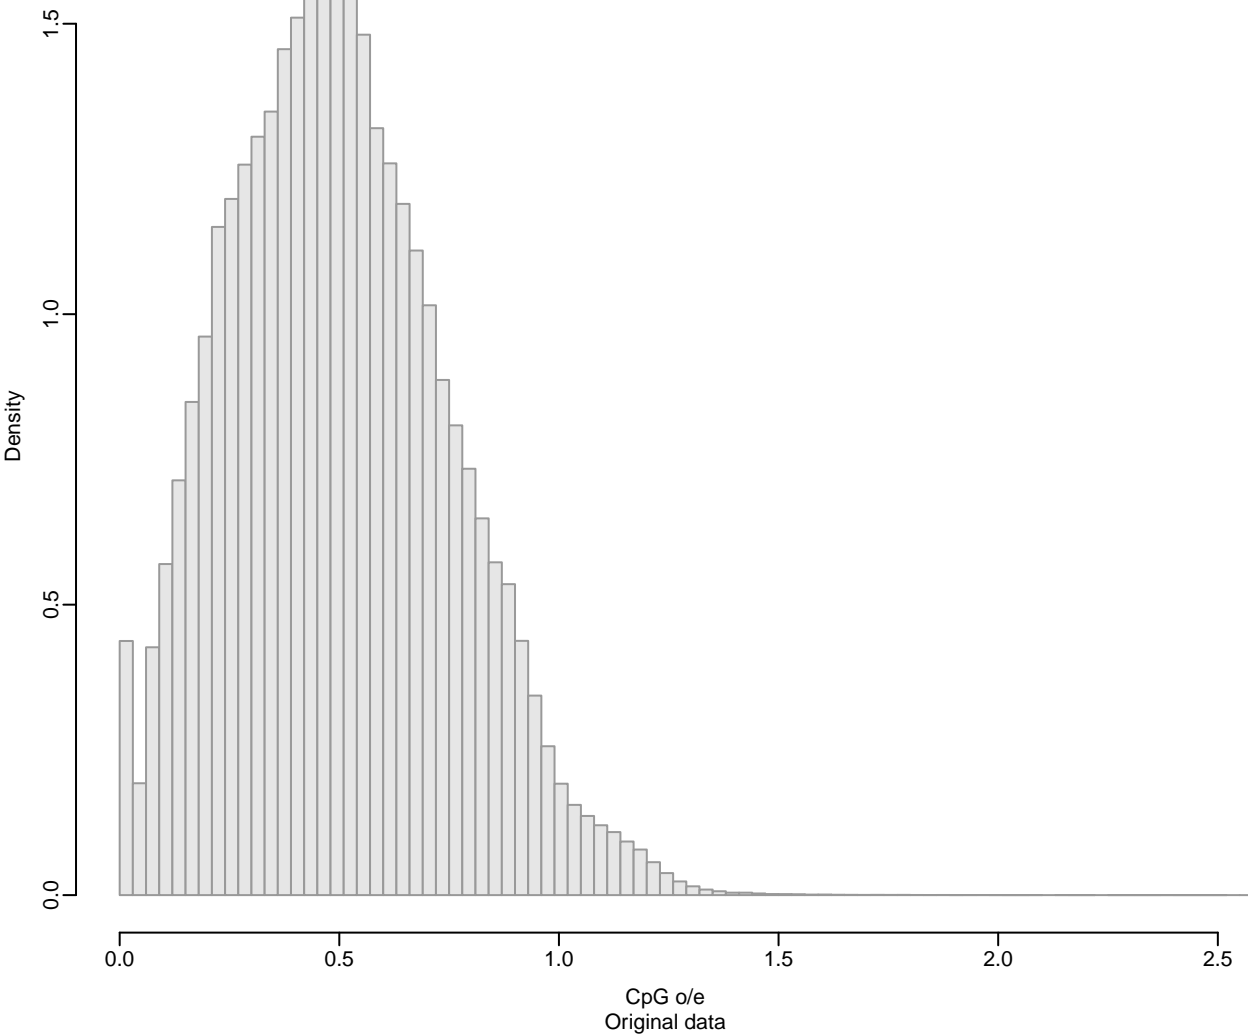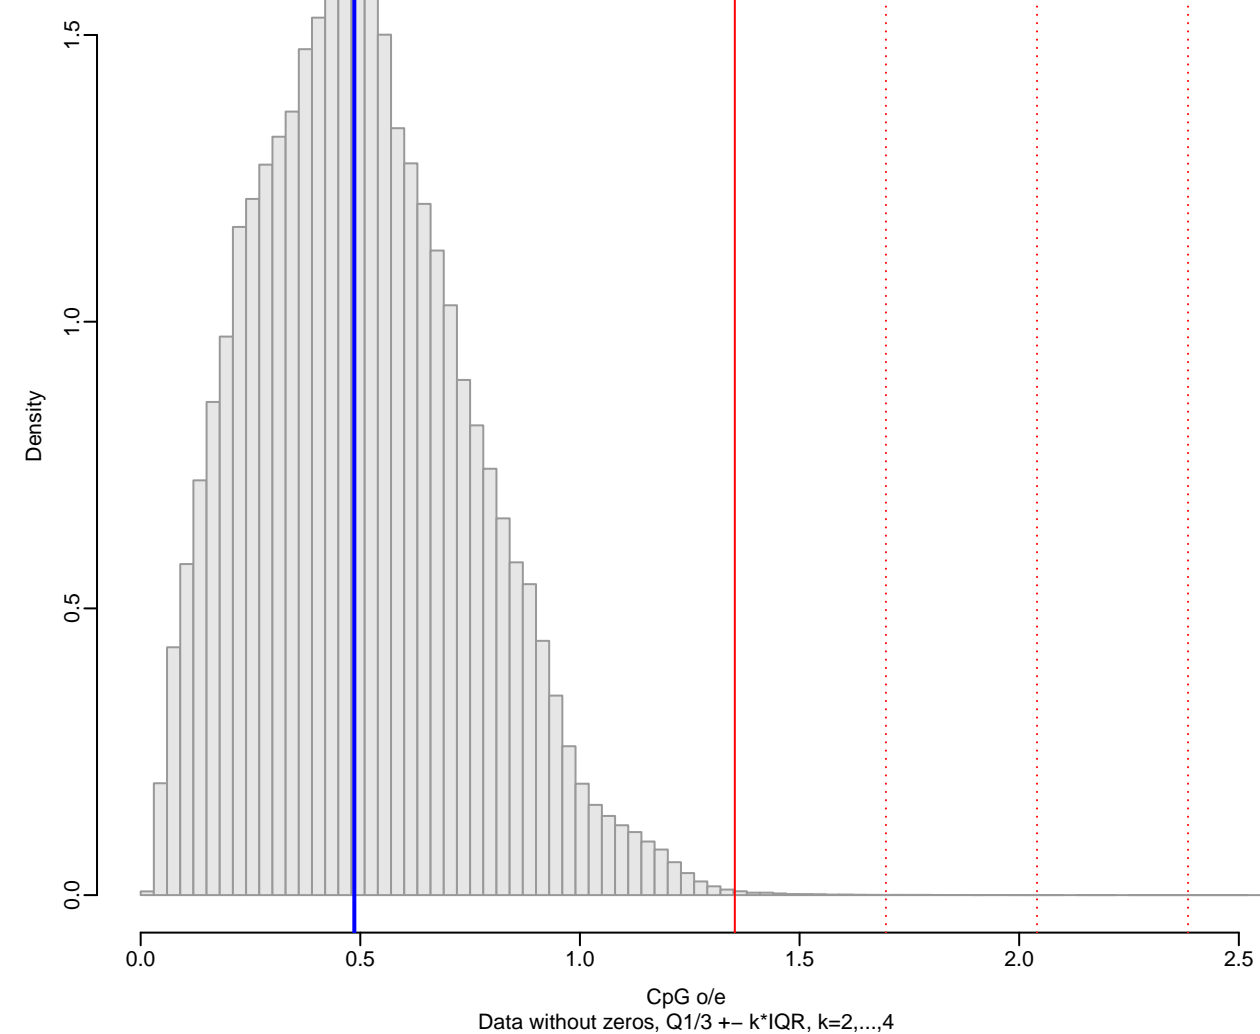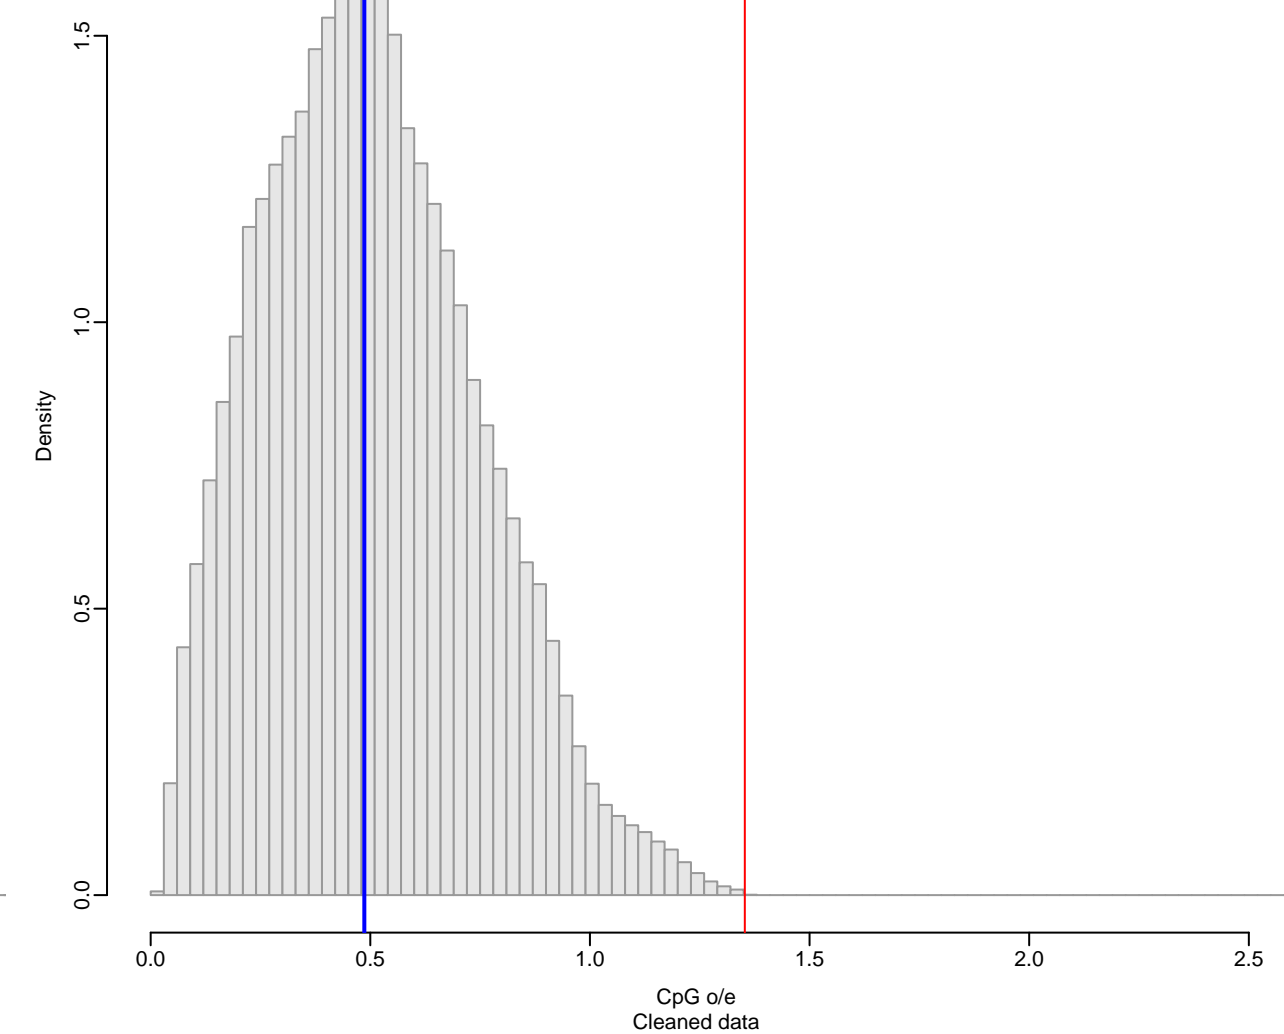

Taenia\_solium

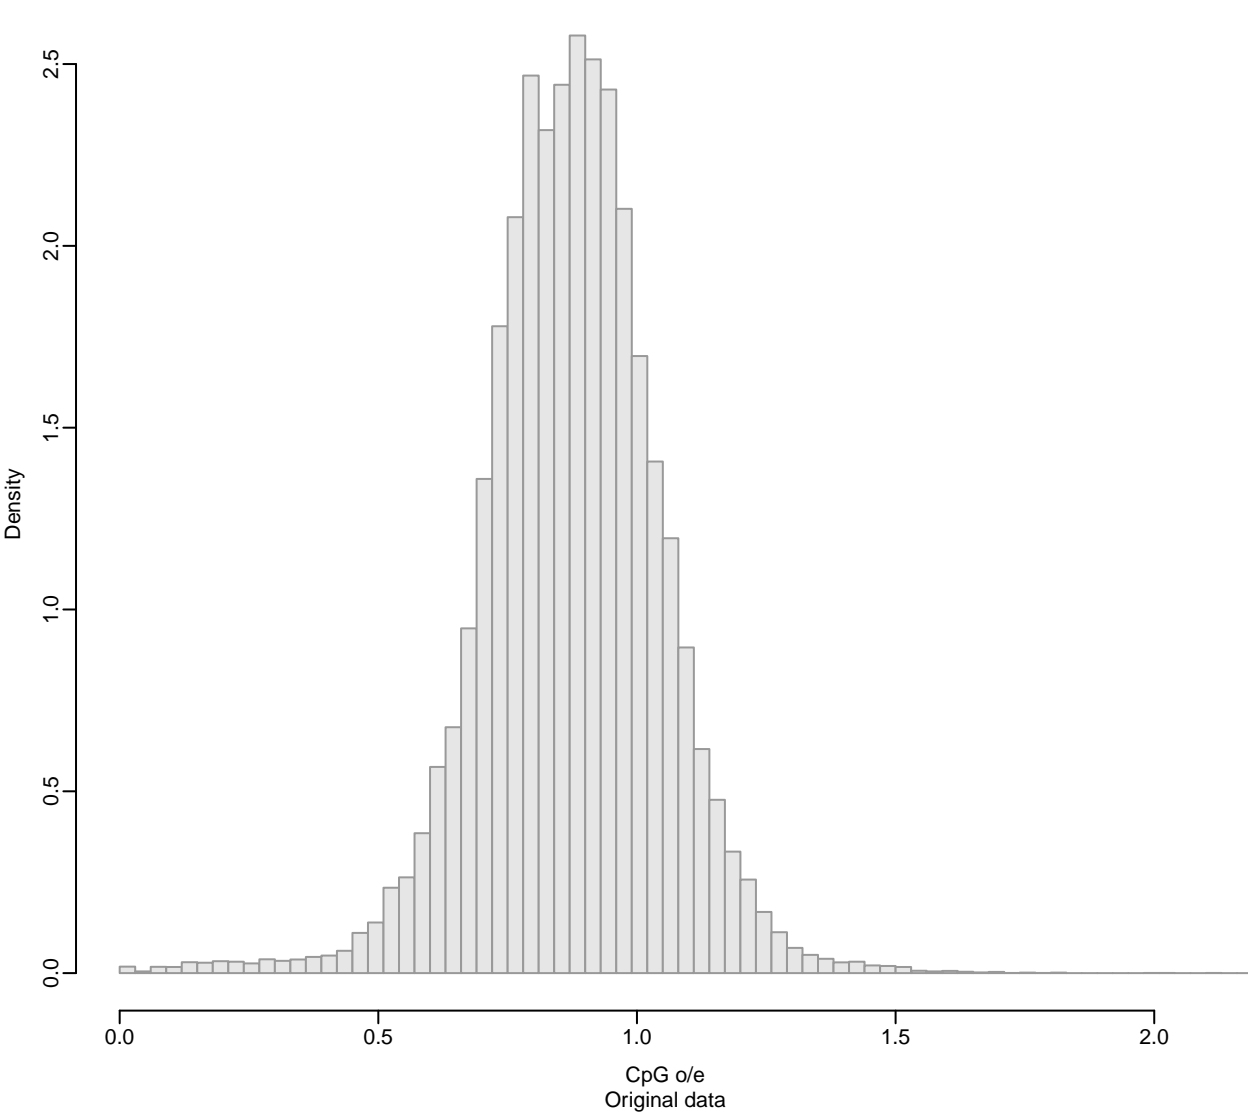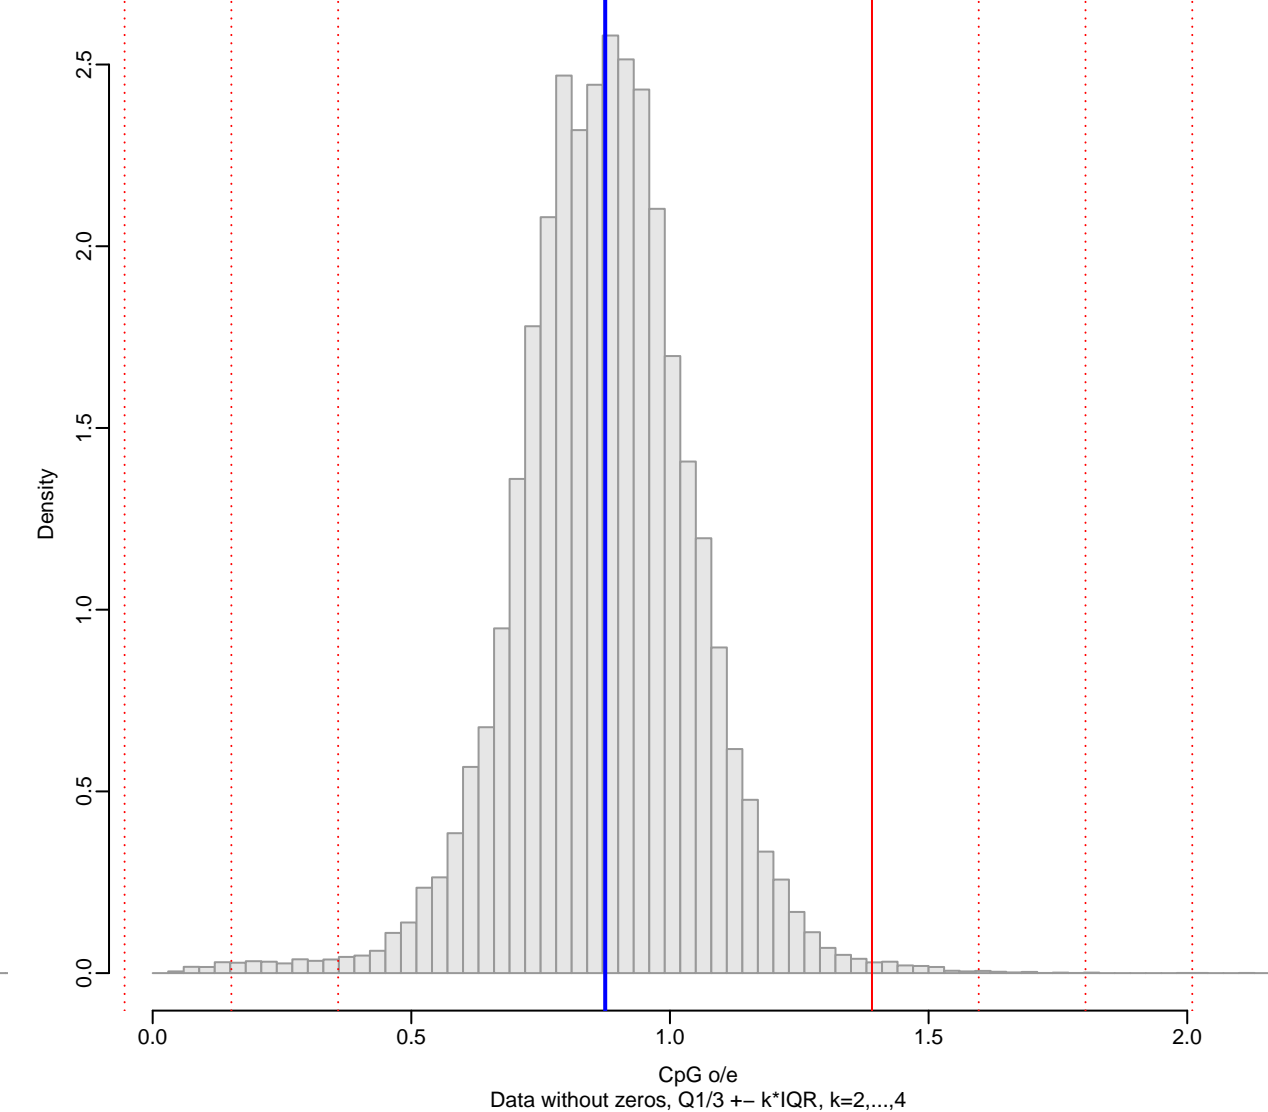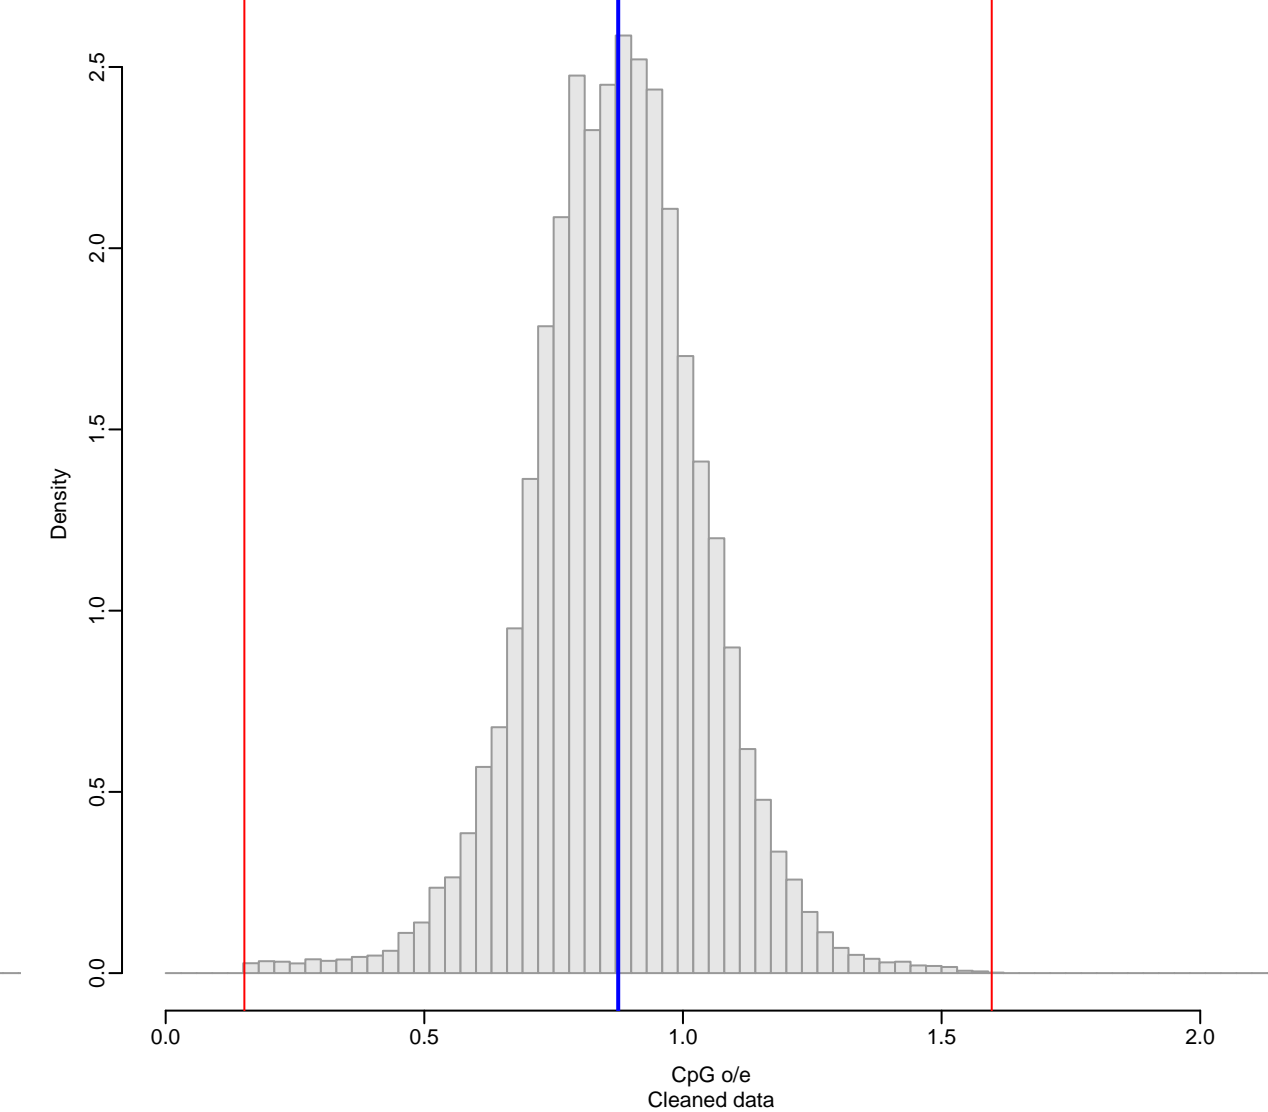

Taeniopygia\_guttata

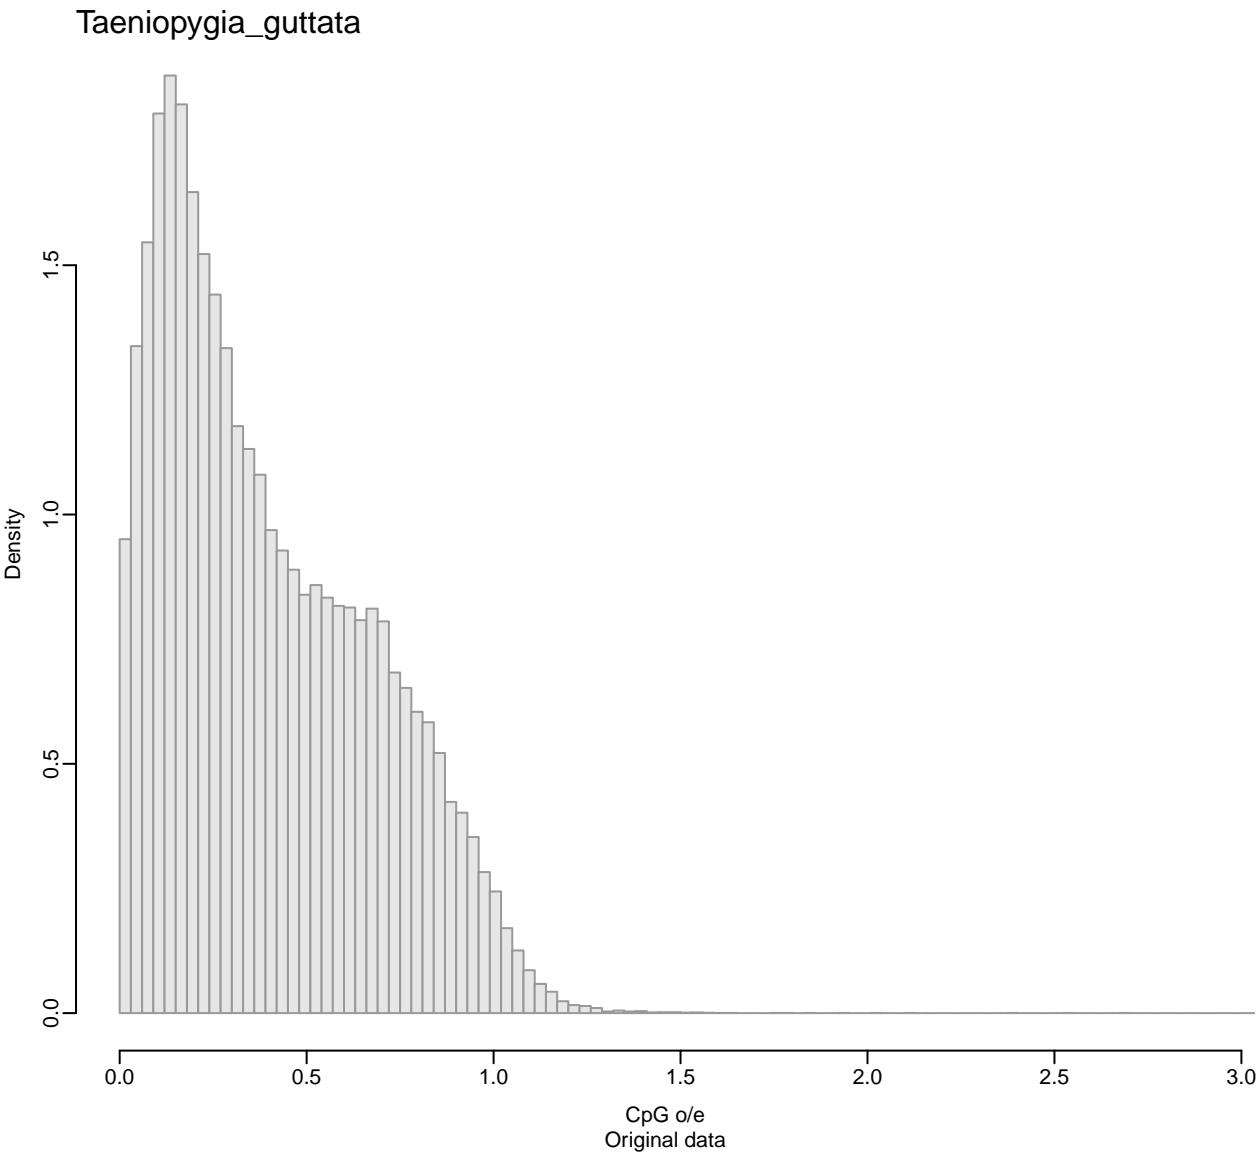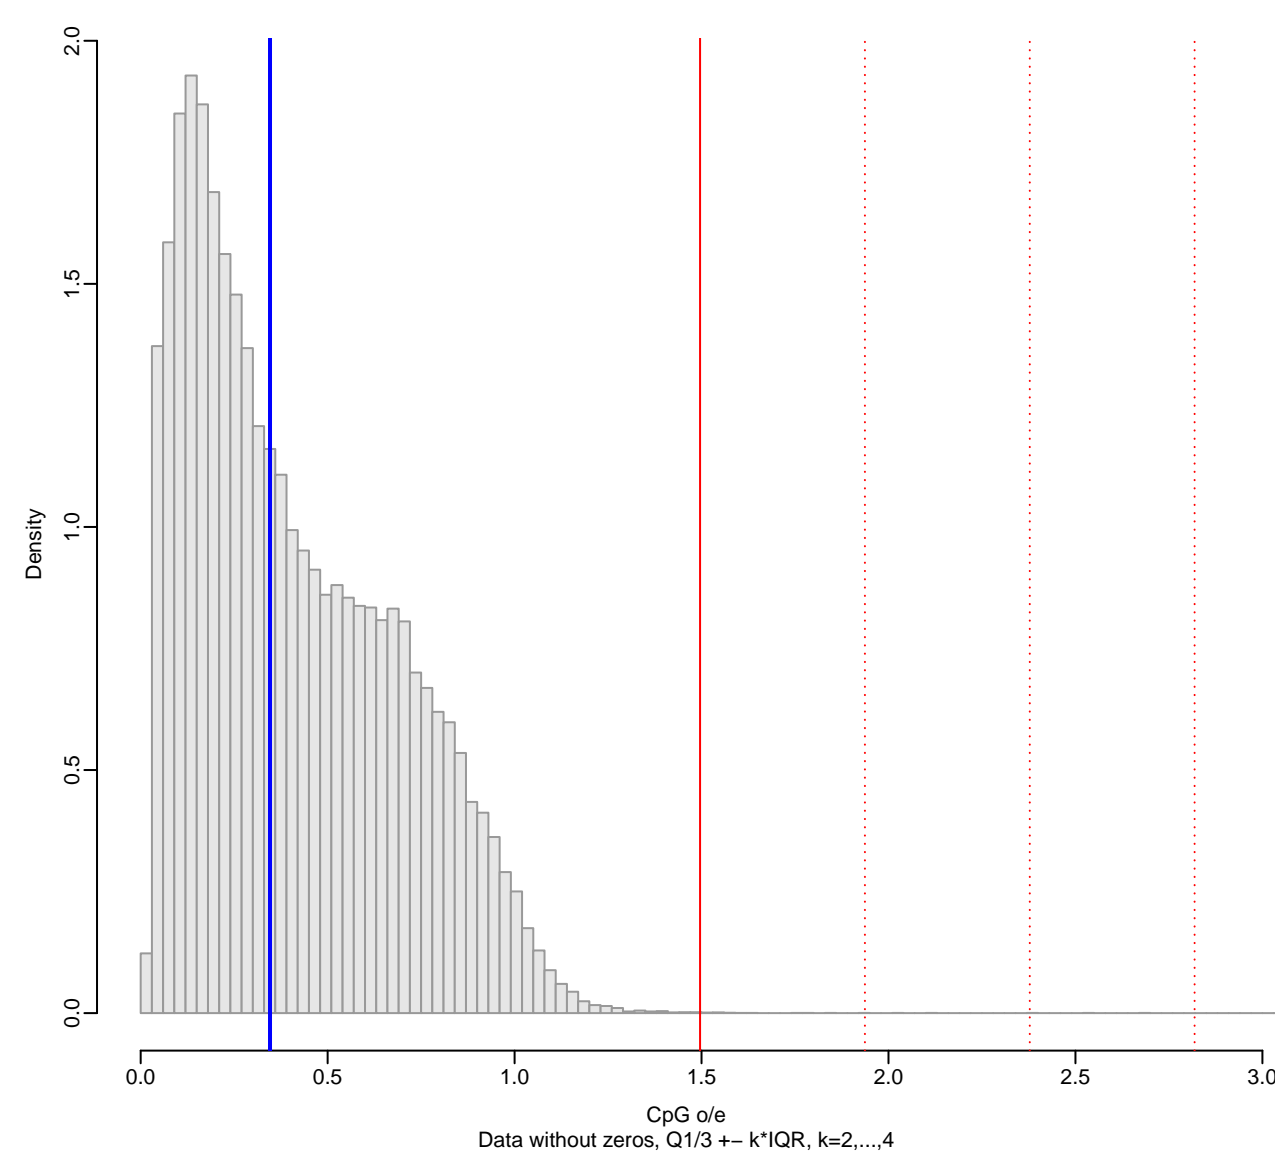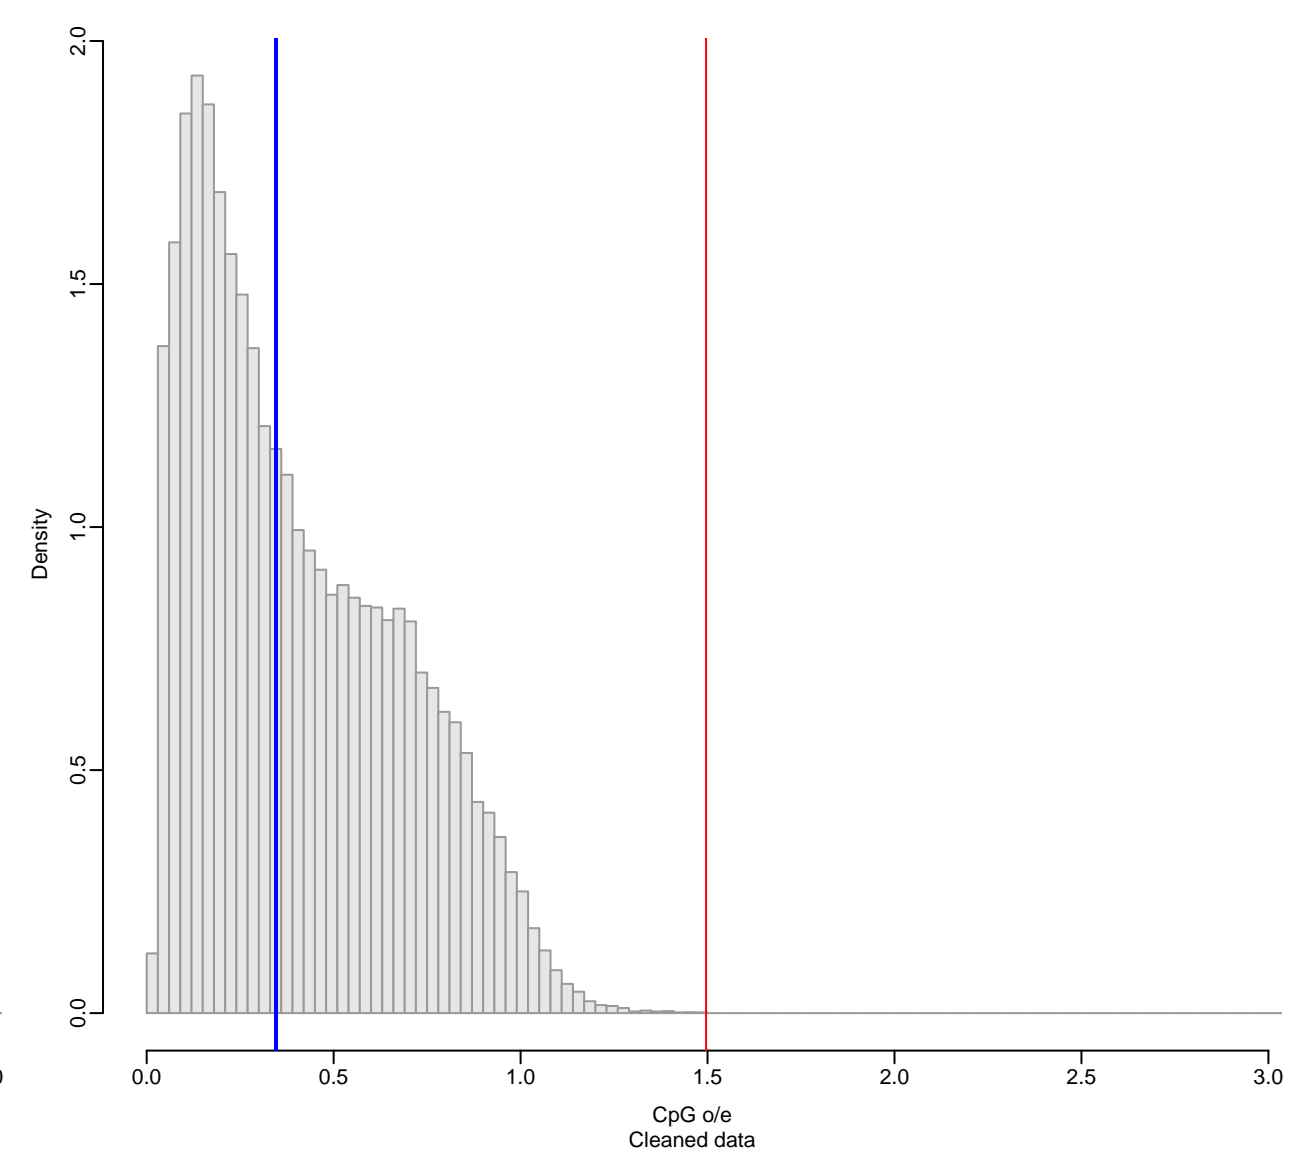



Tamarix\_androssowii

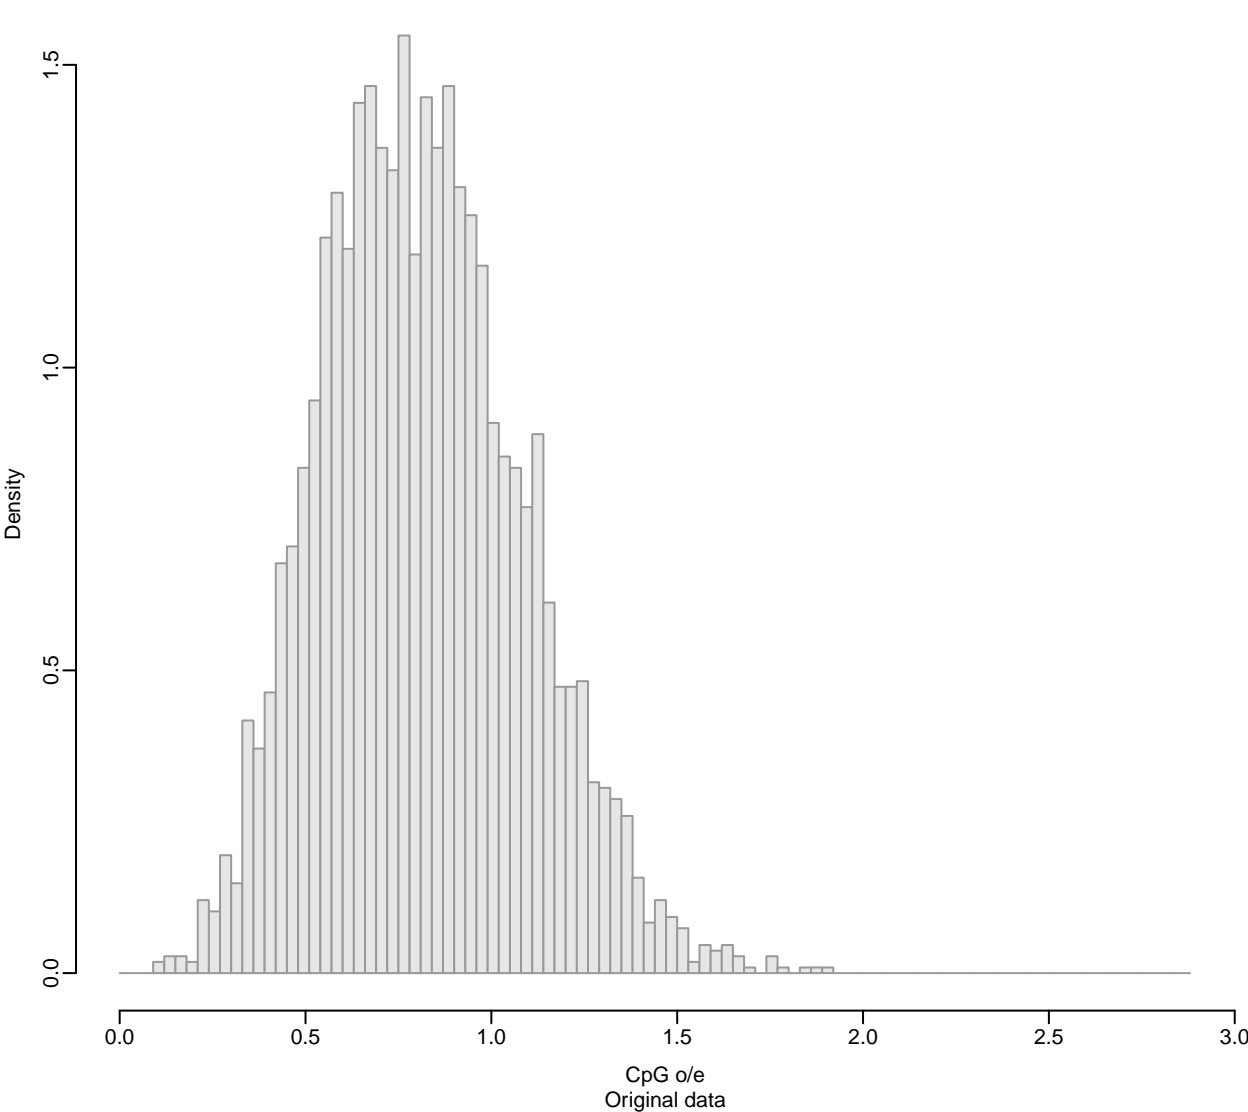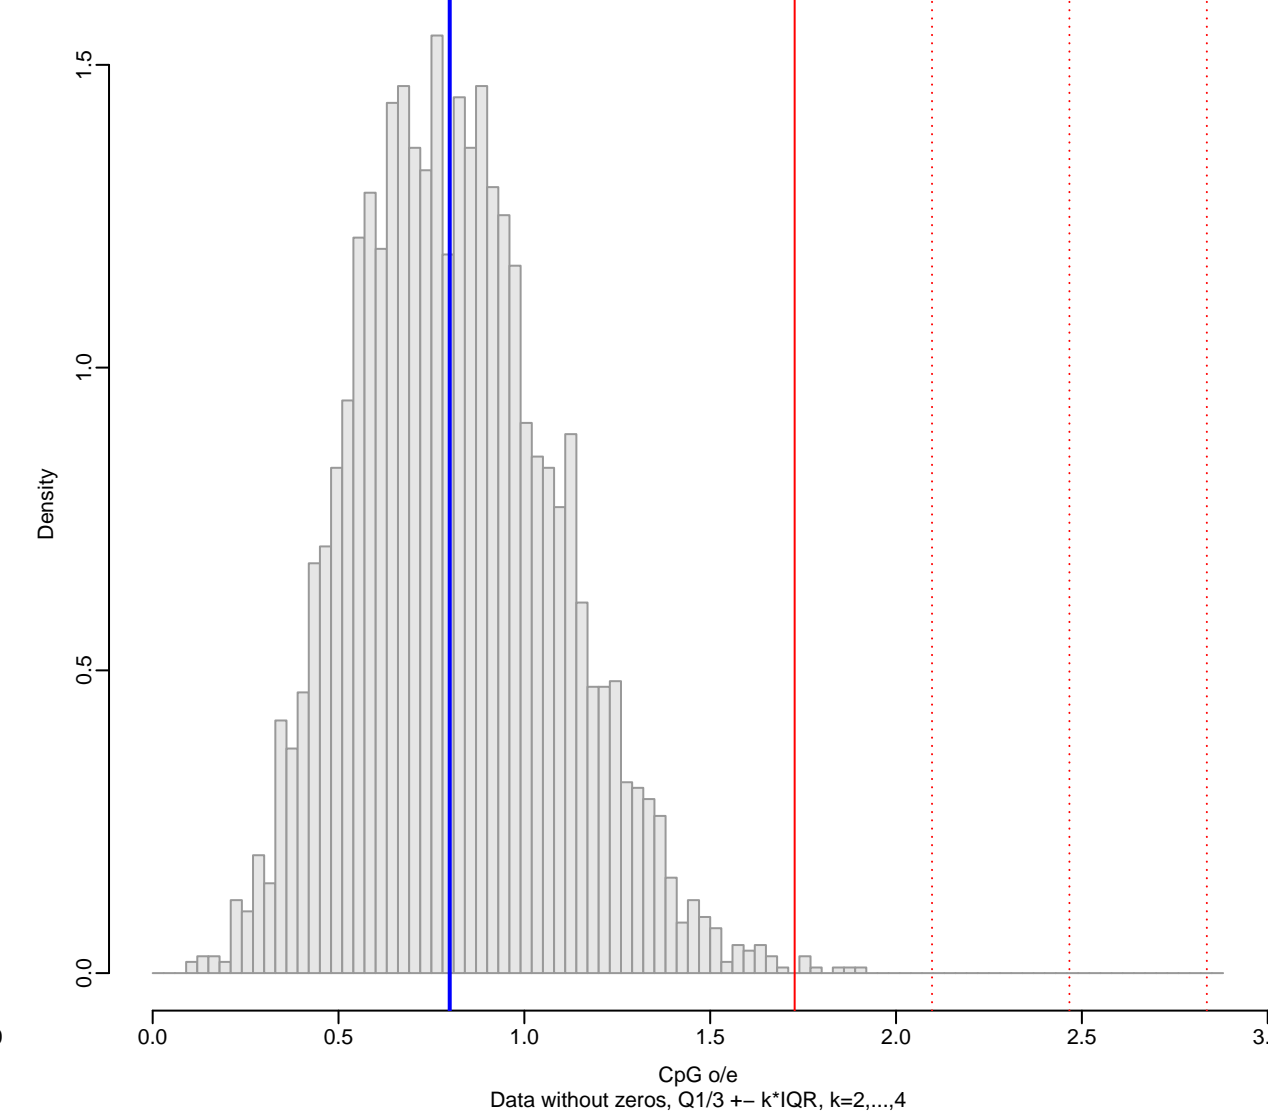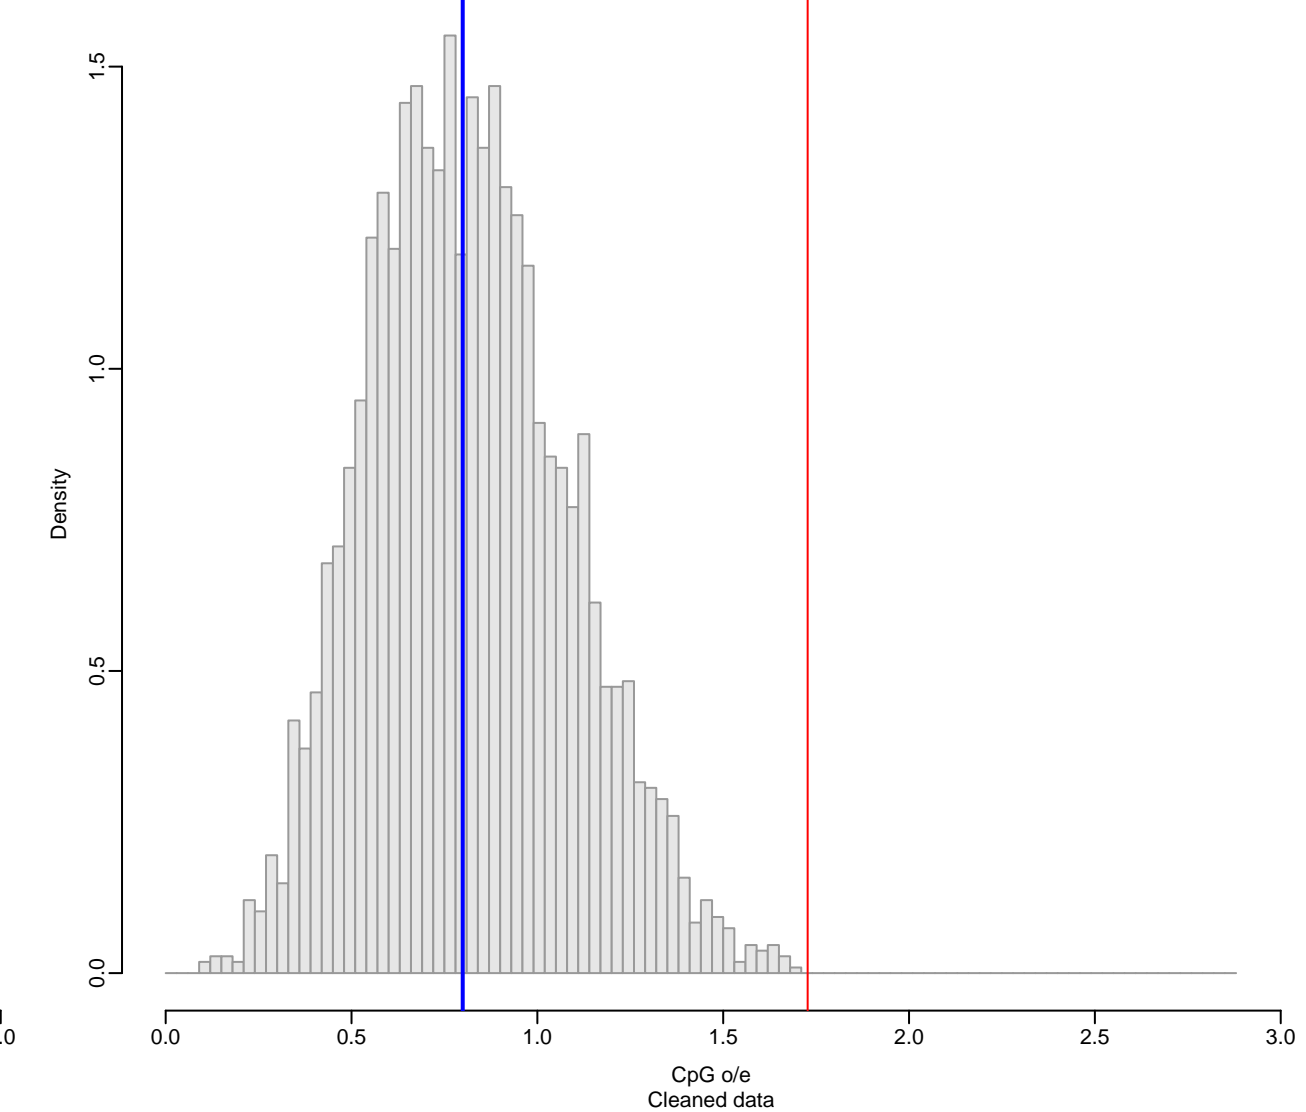

Taphrina\_deformans

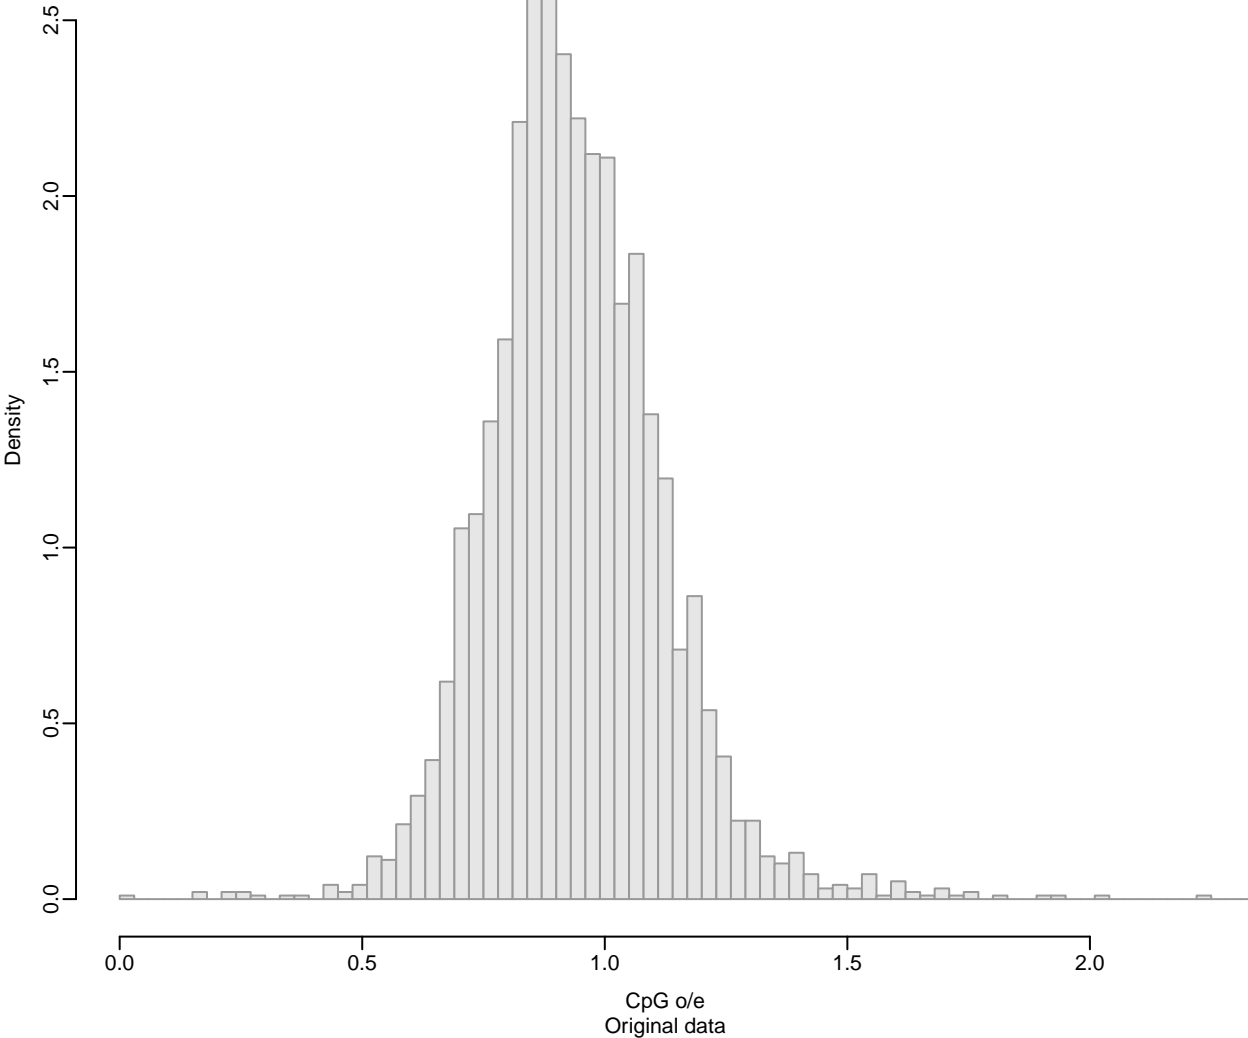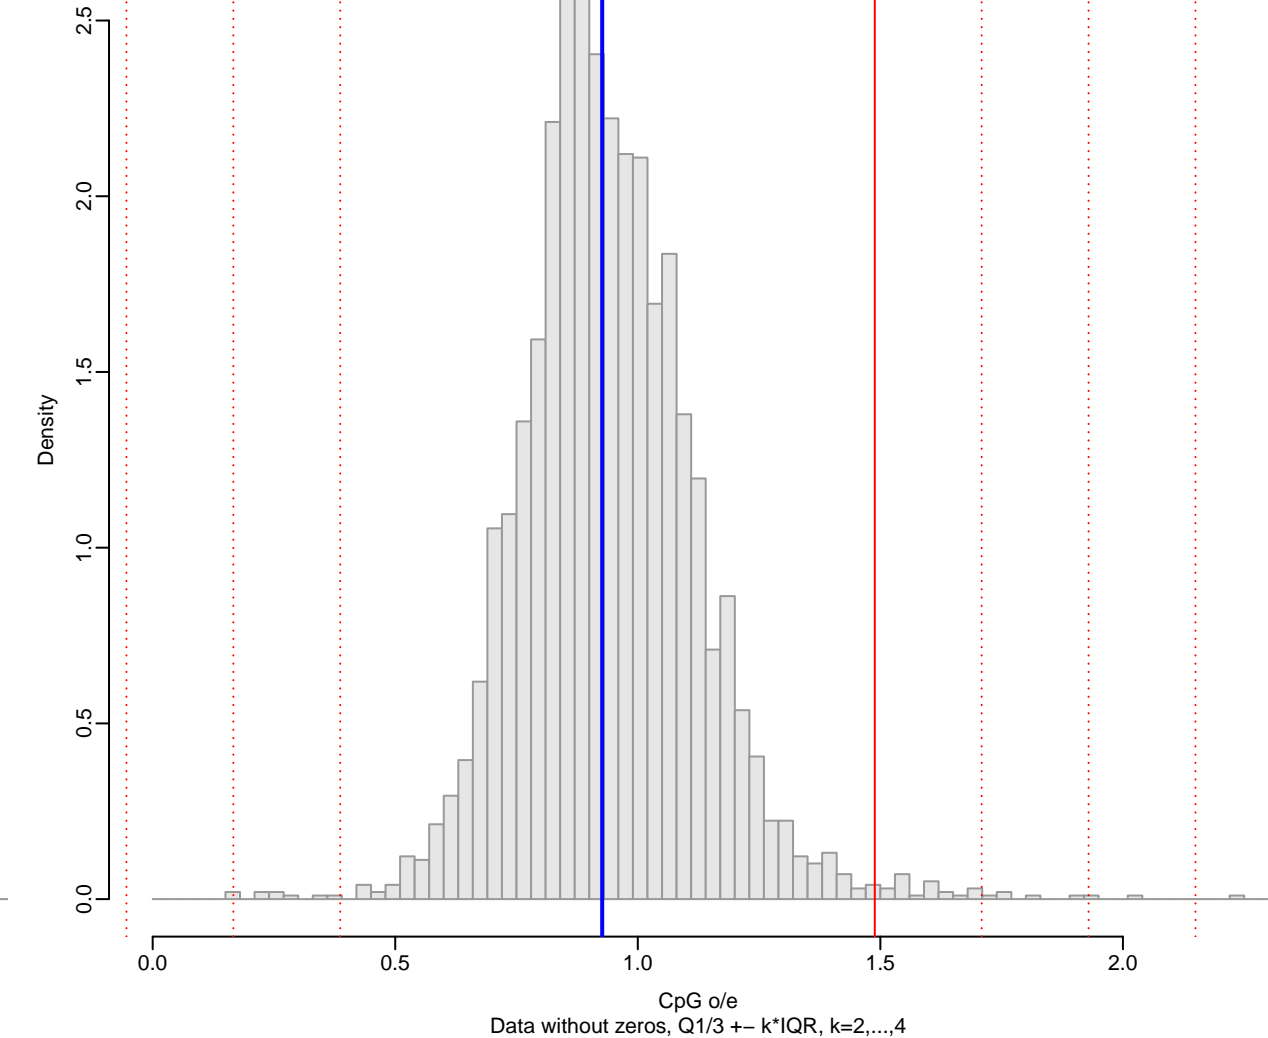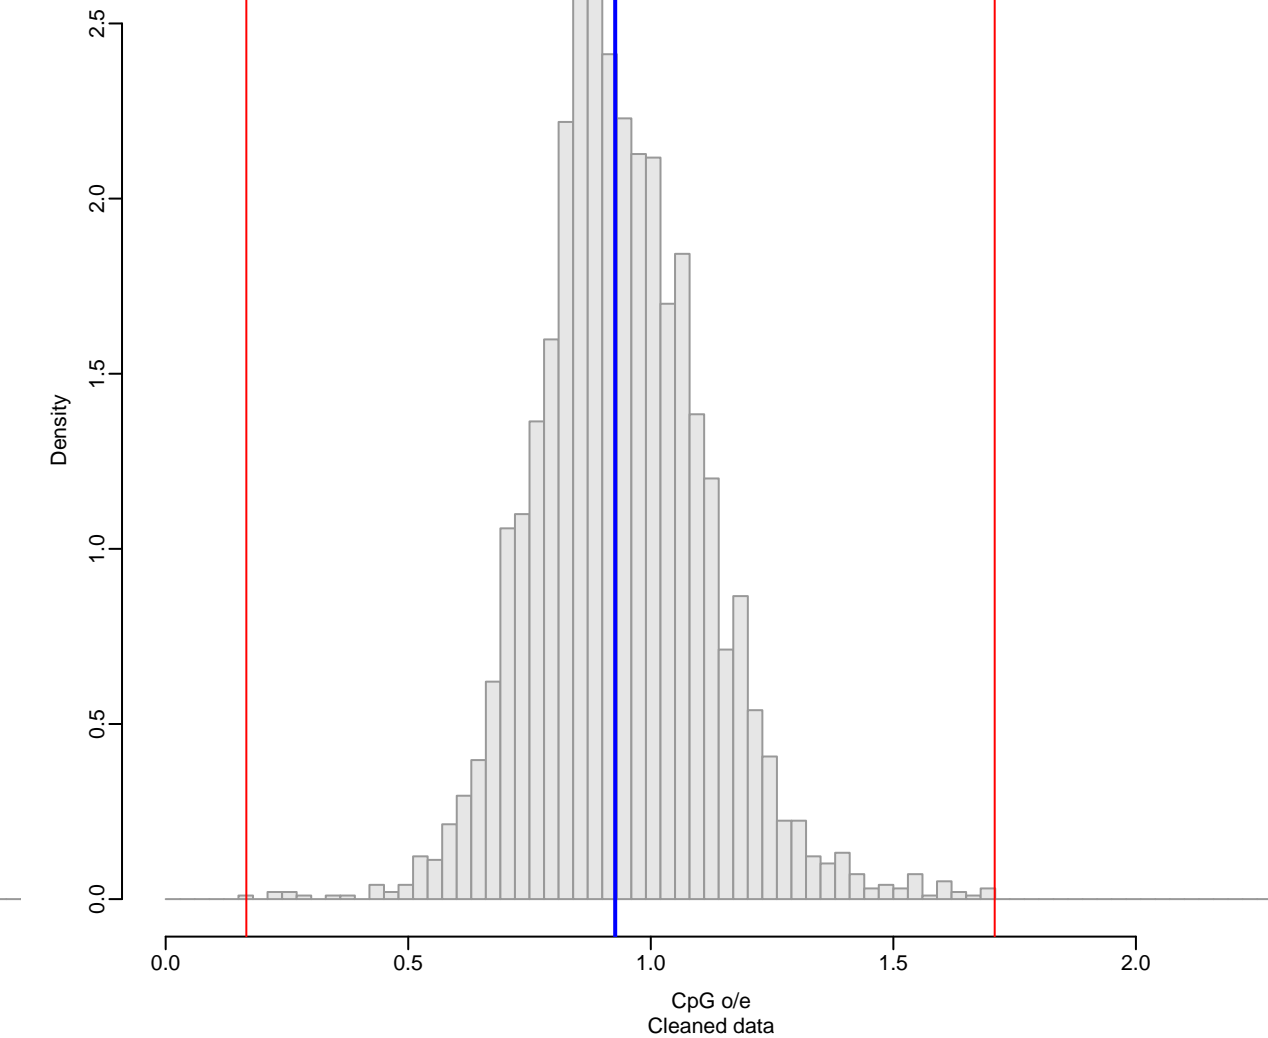

# Taraxacum\_kok-saghyz

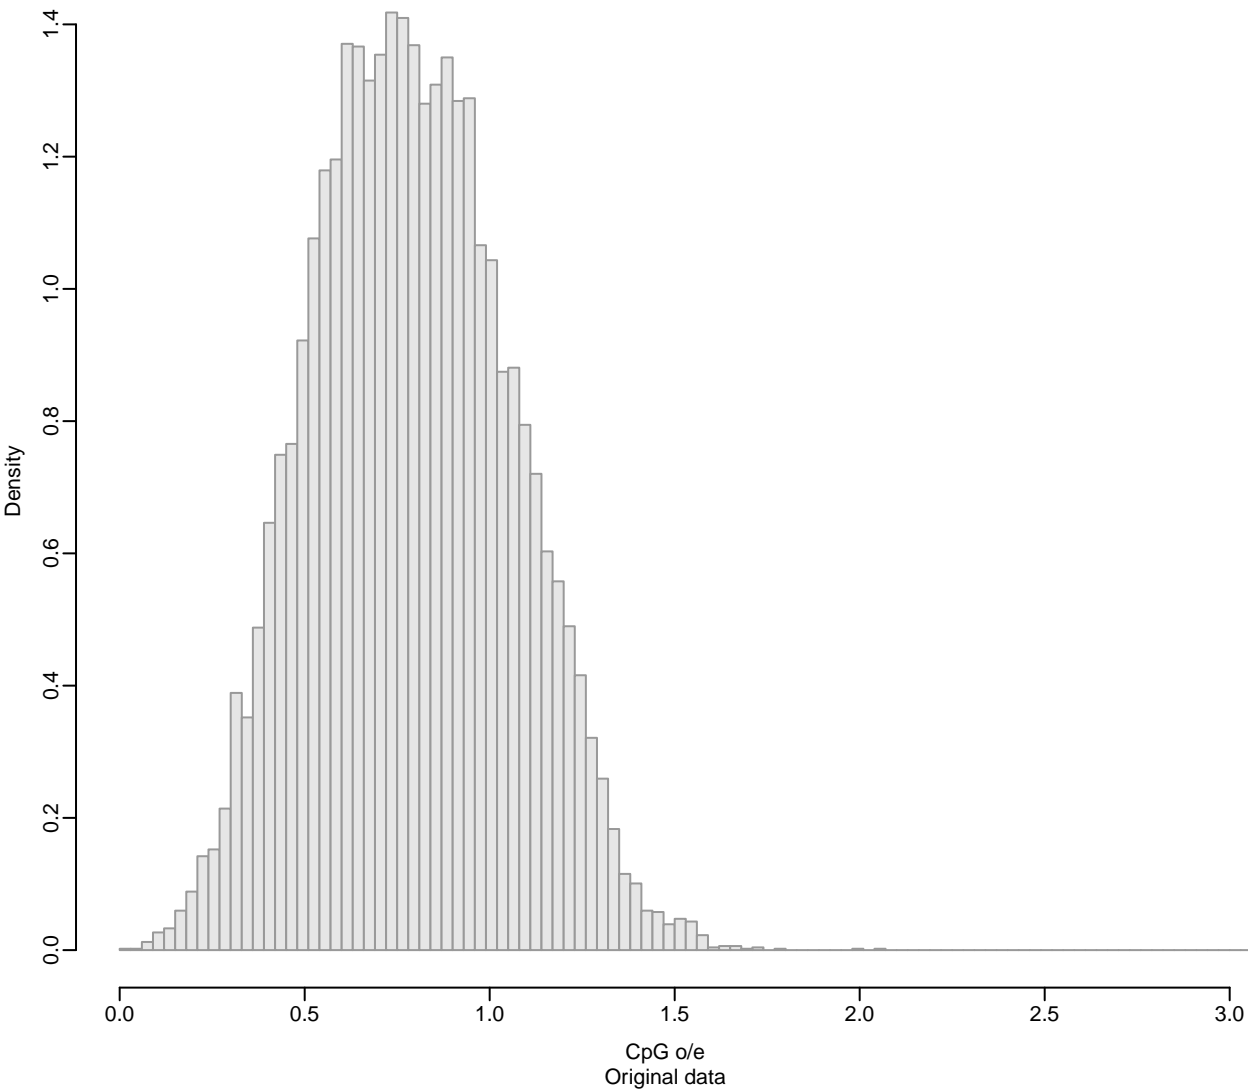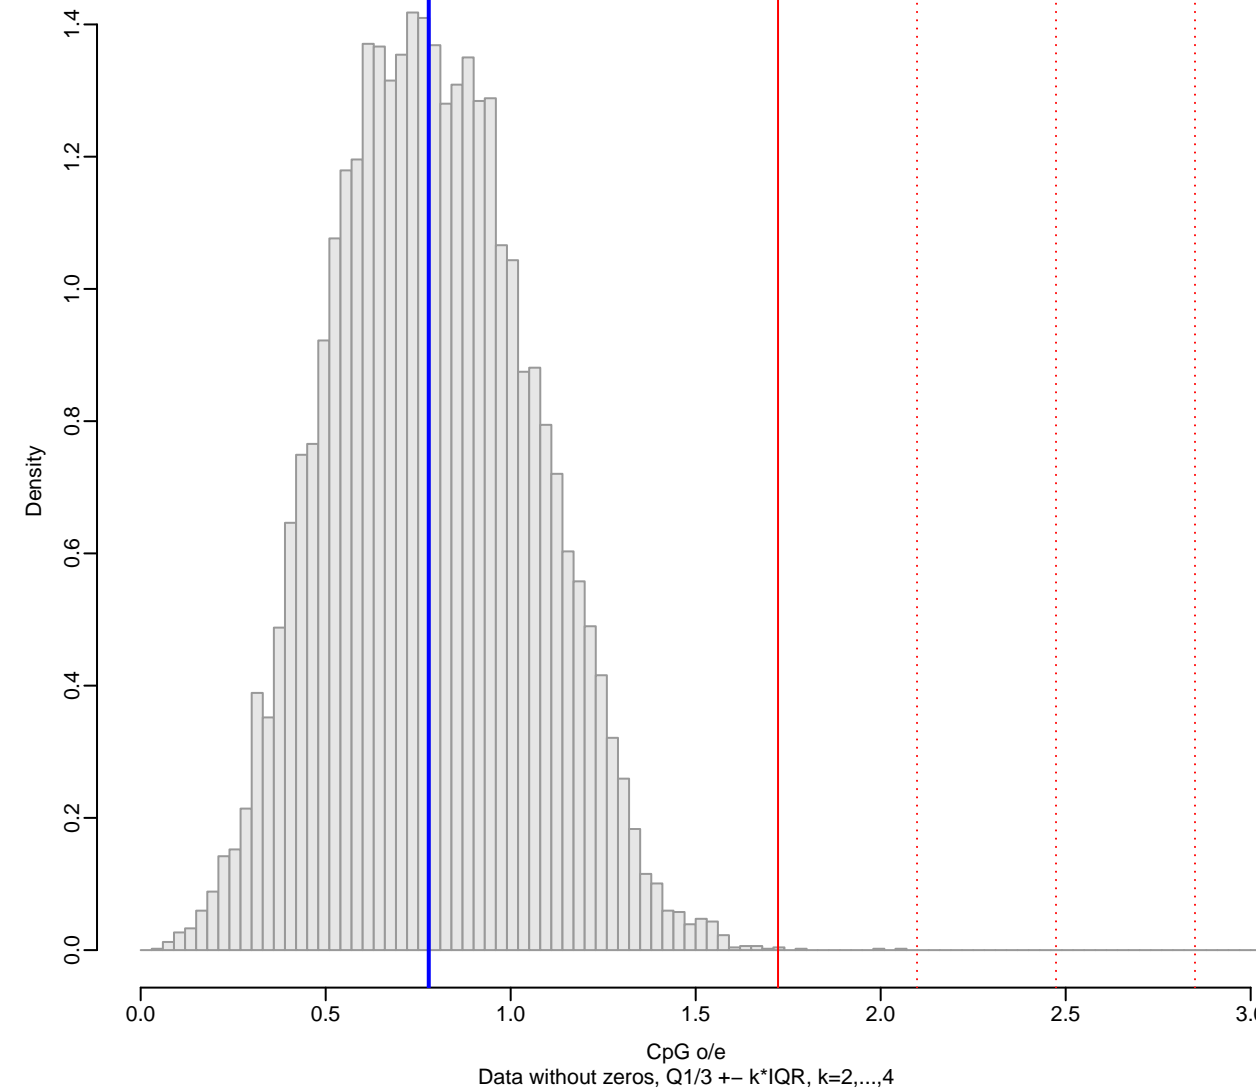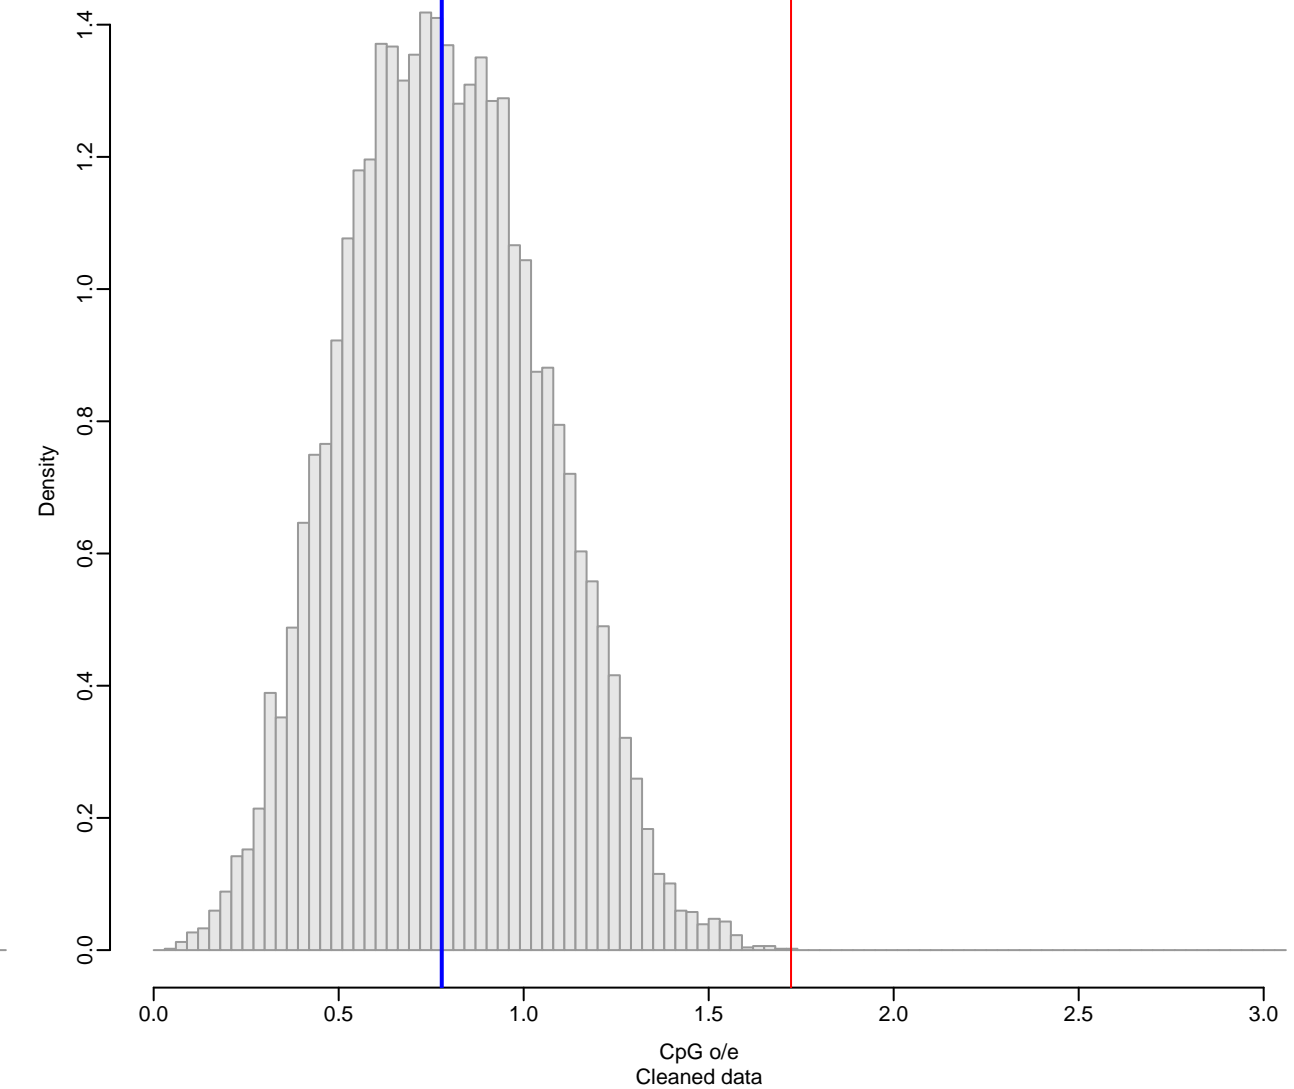

Taraxacum\_officinale

Density

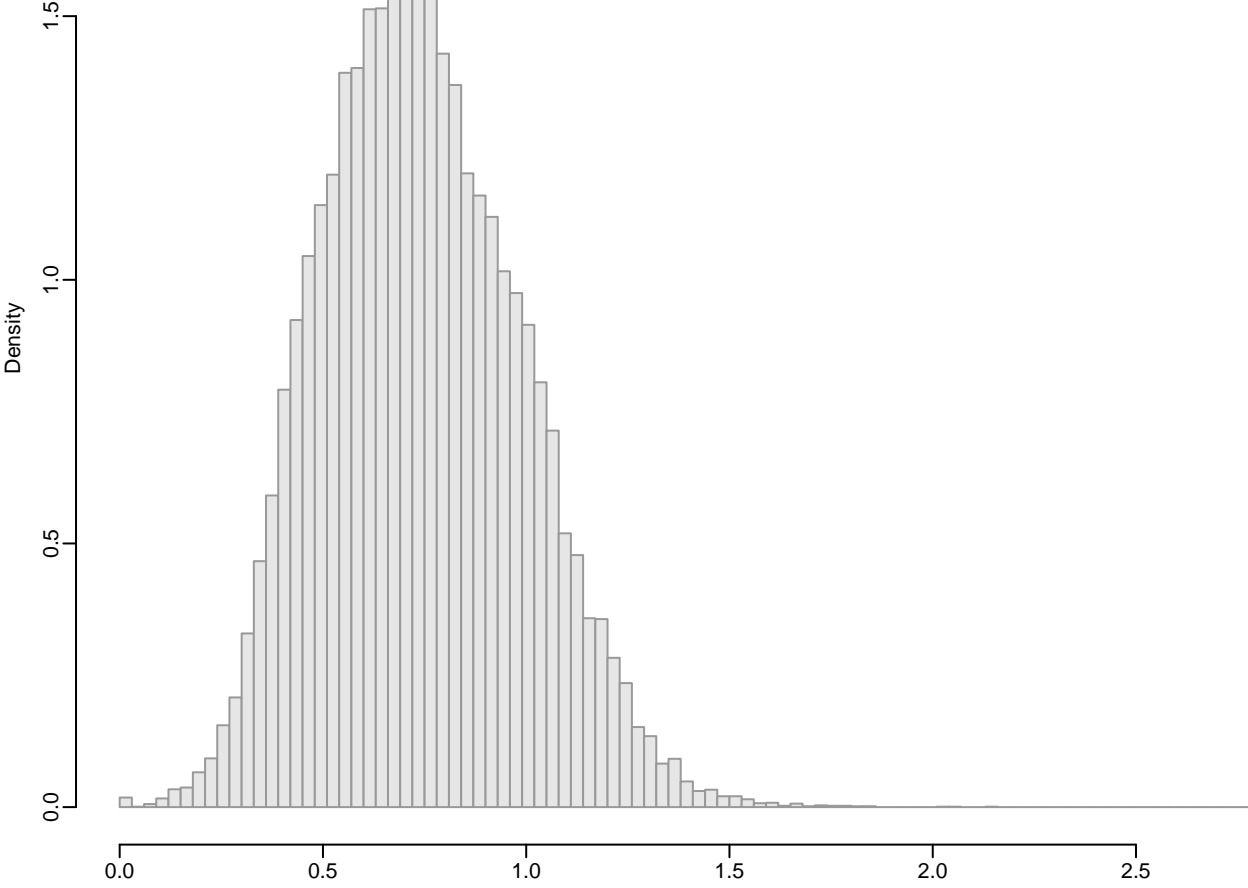

Density

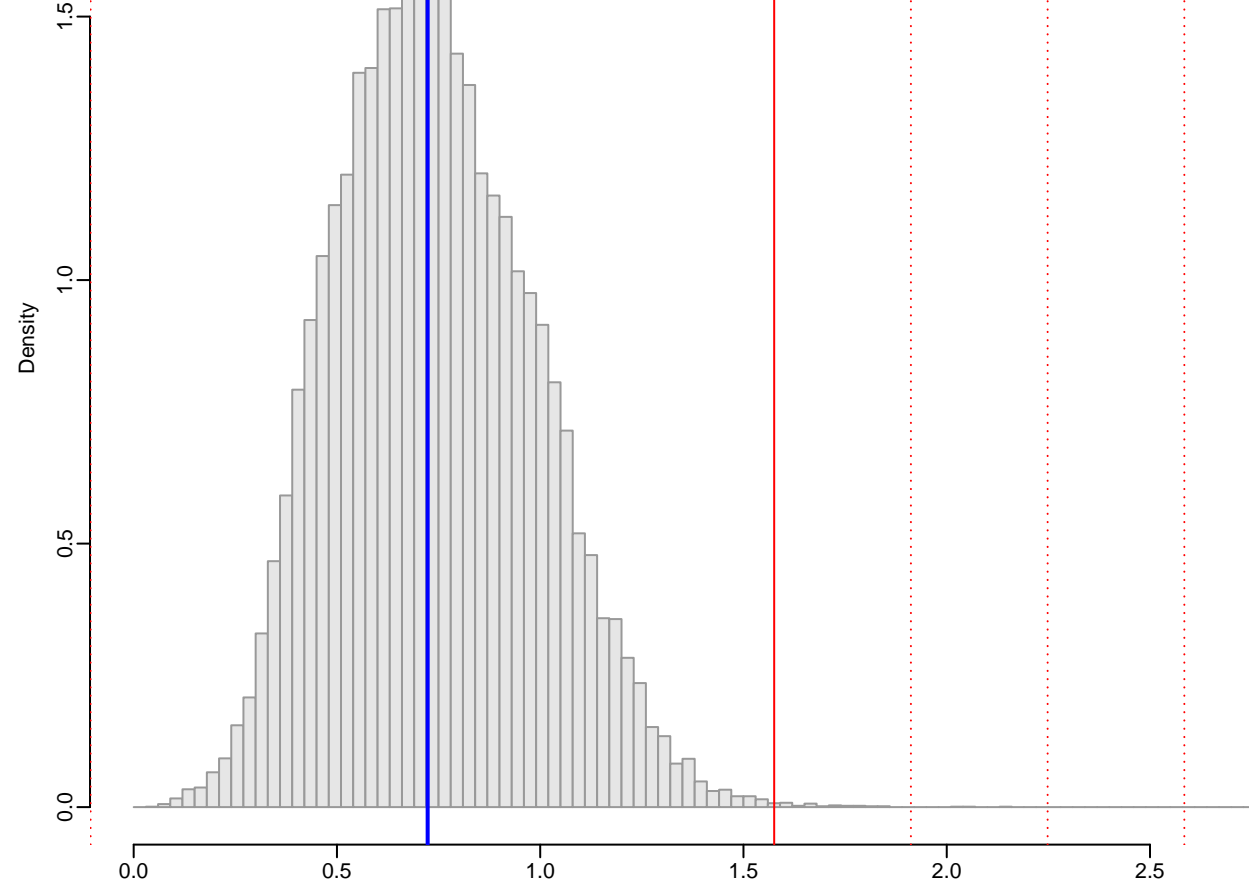

Density

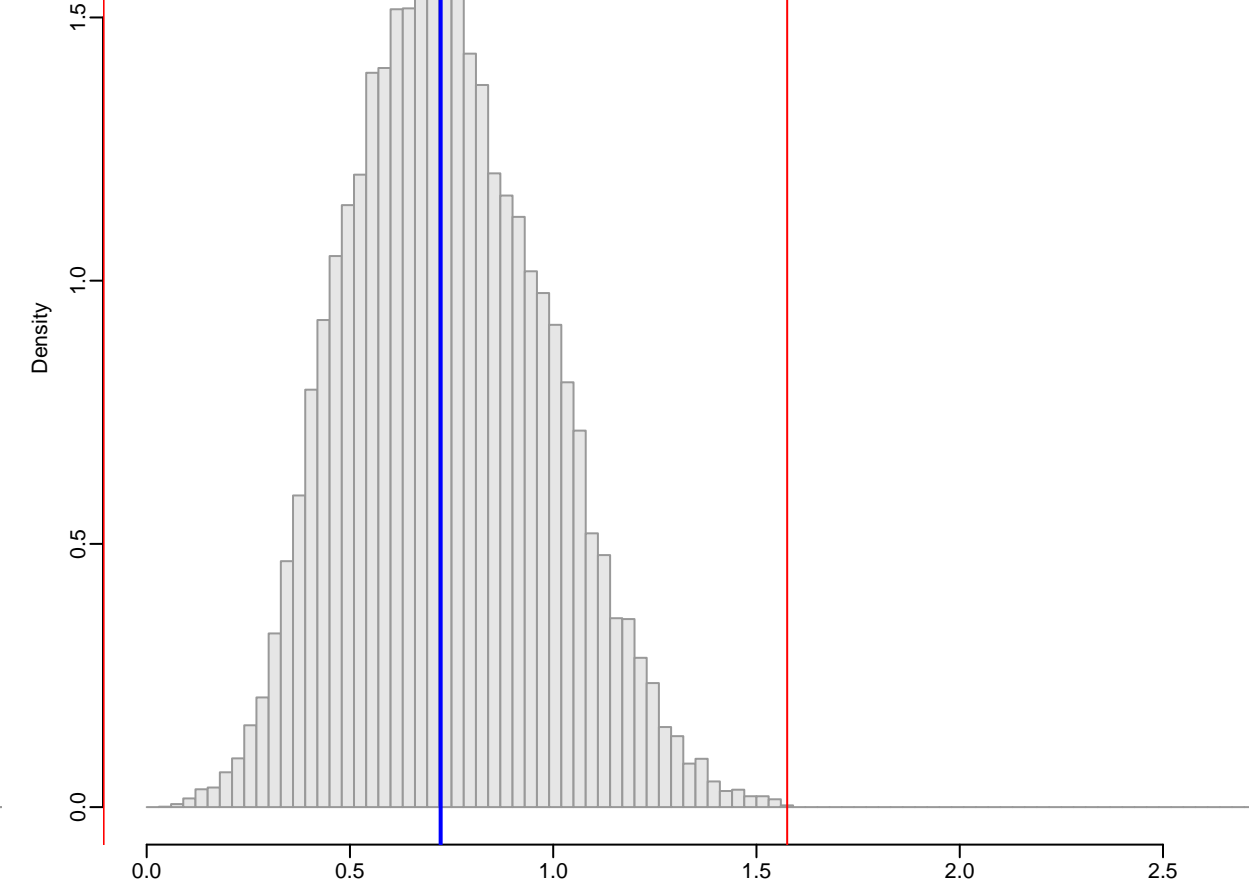

Tegillarca\_granosa

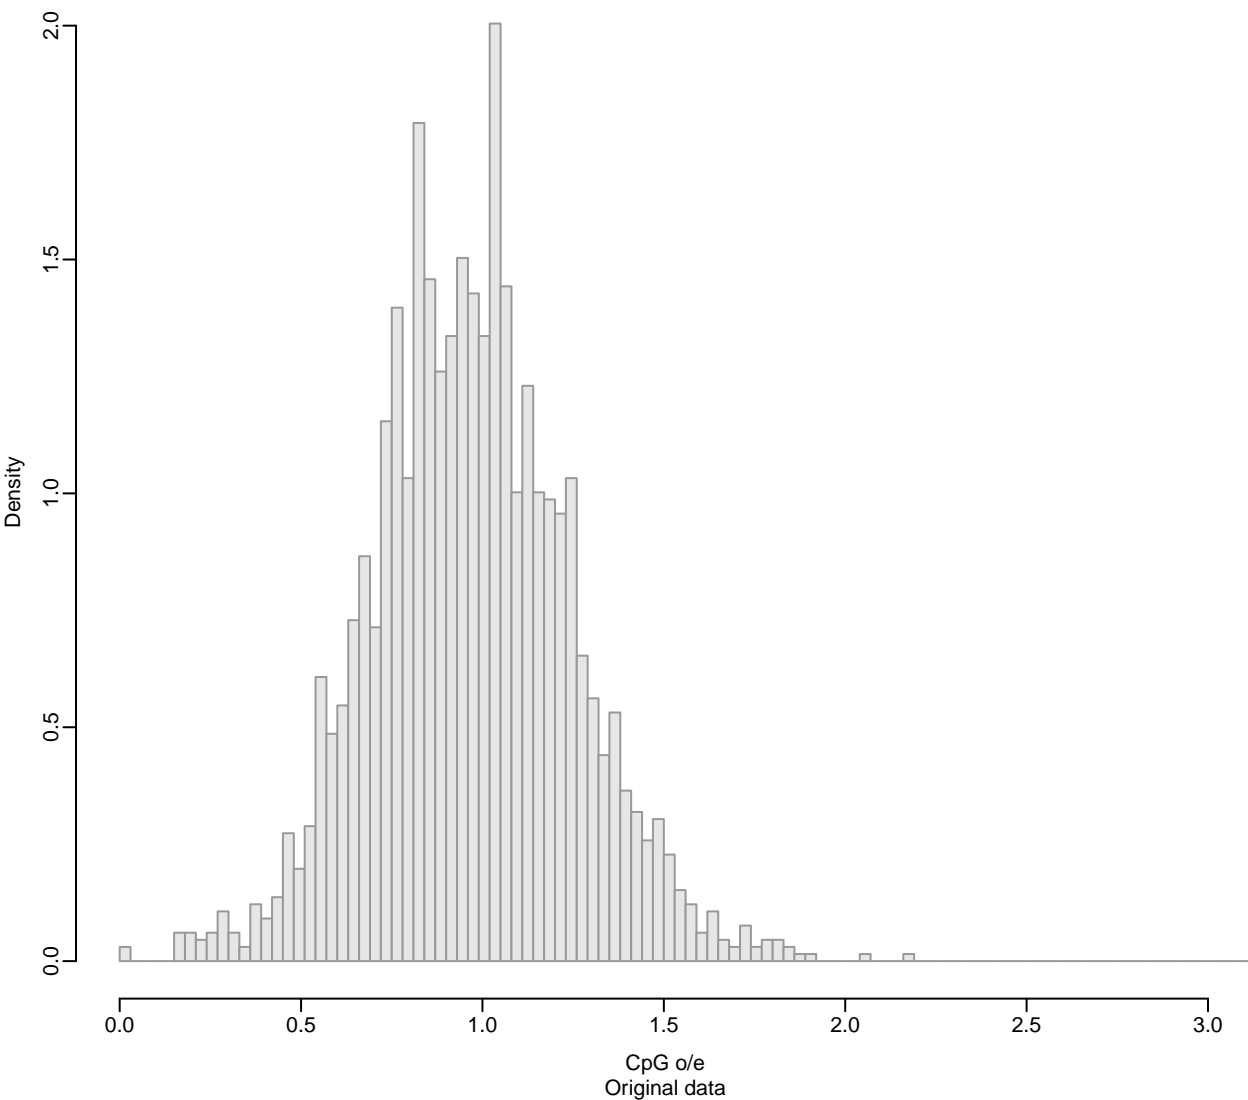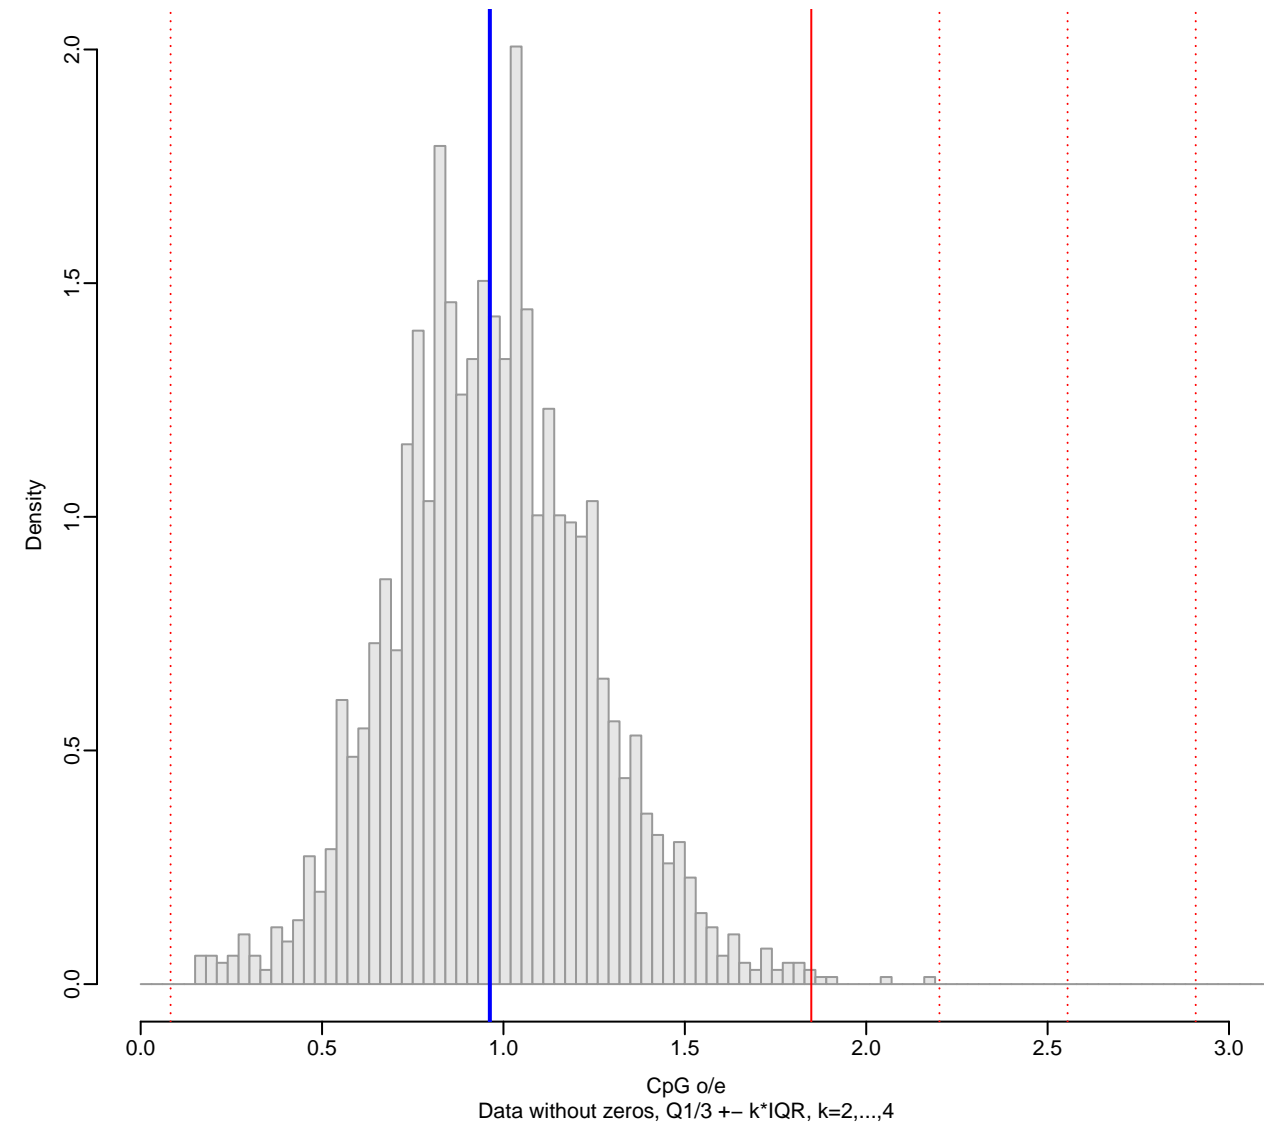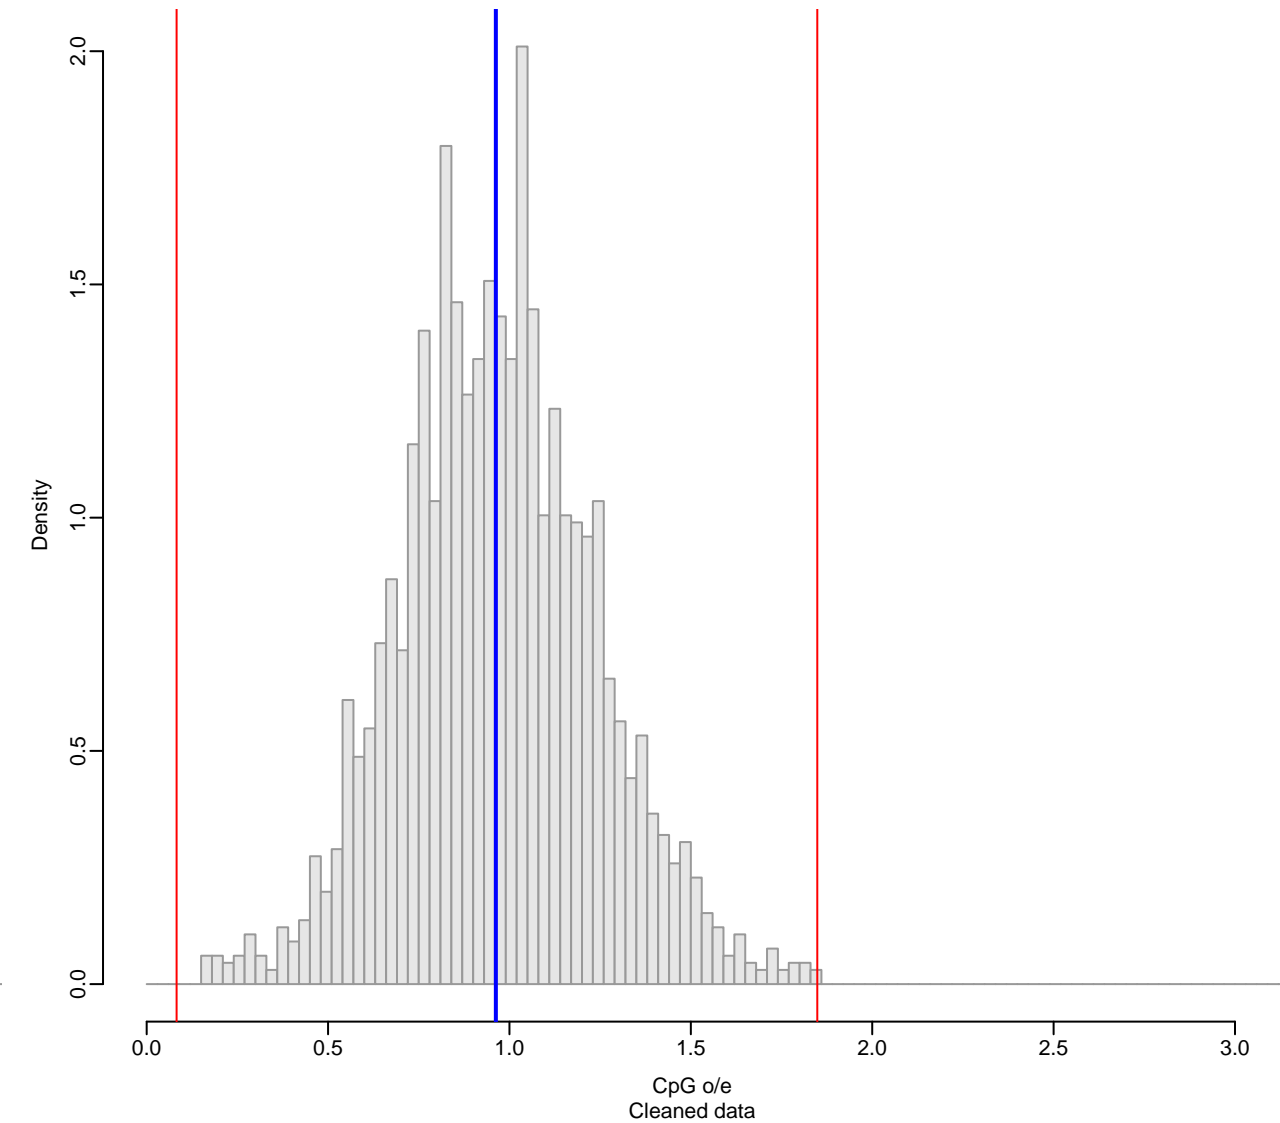

Tetrahymena\_thermophila

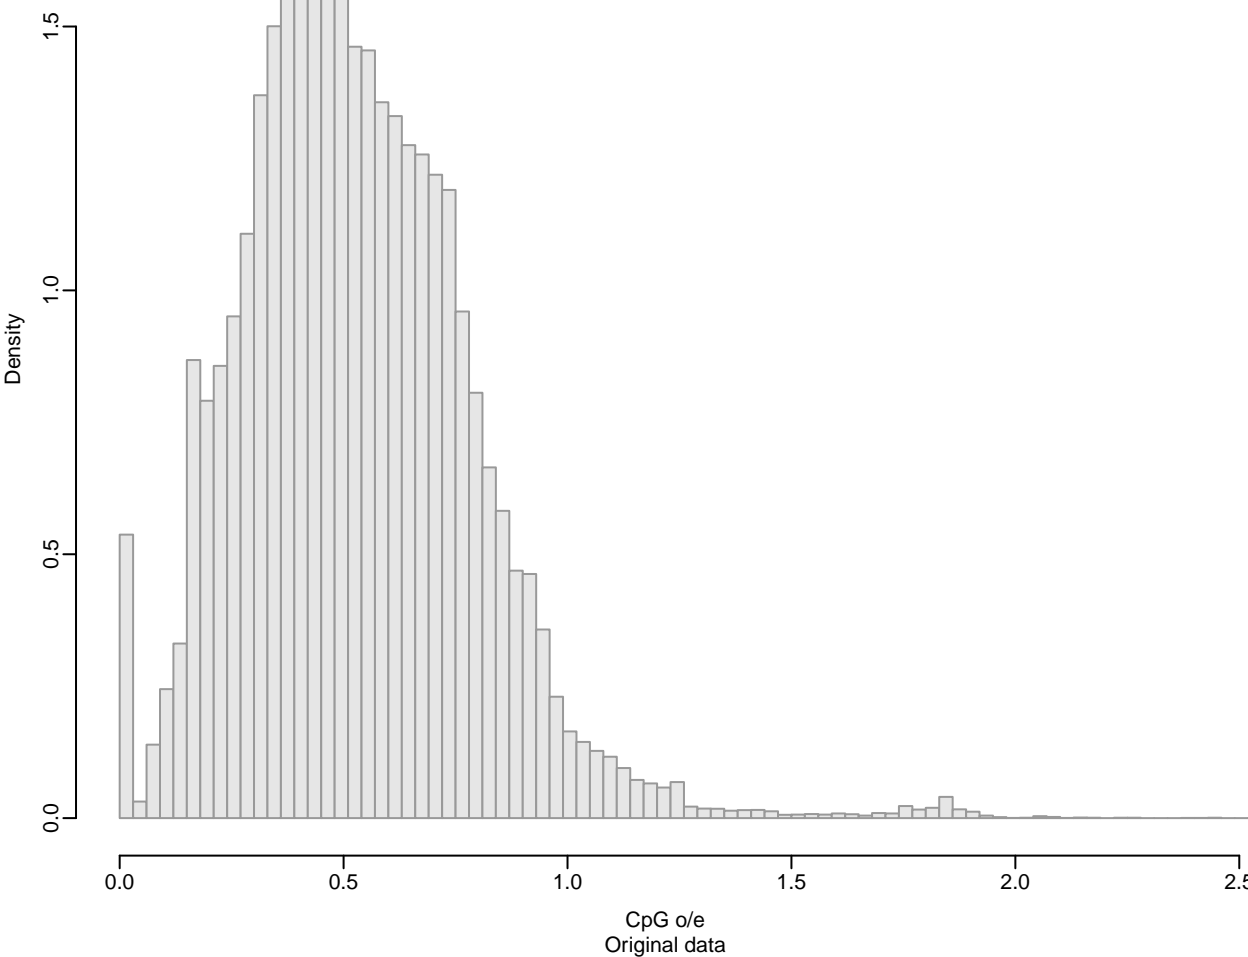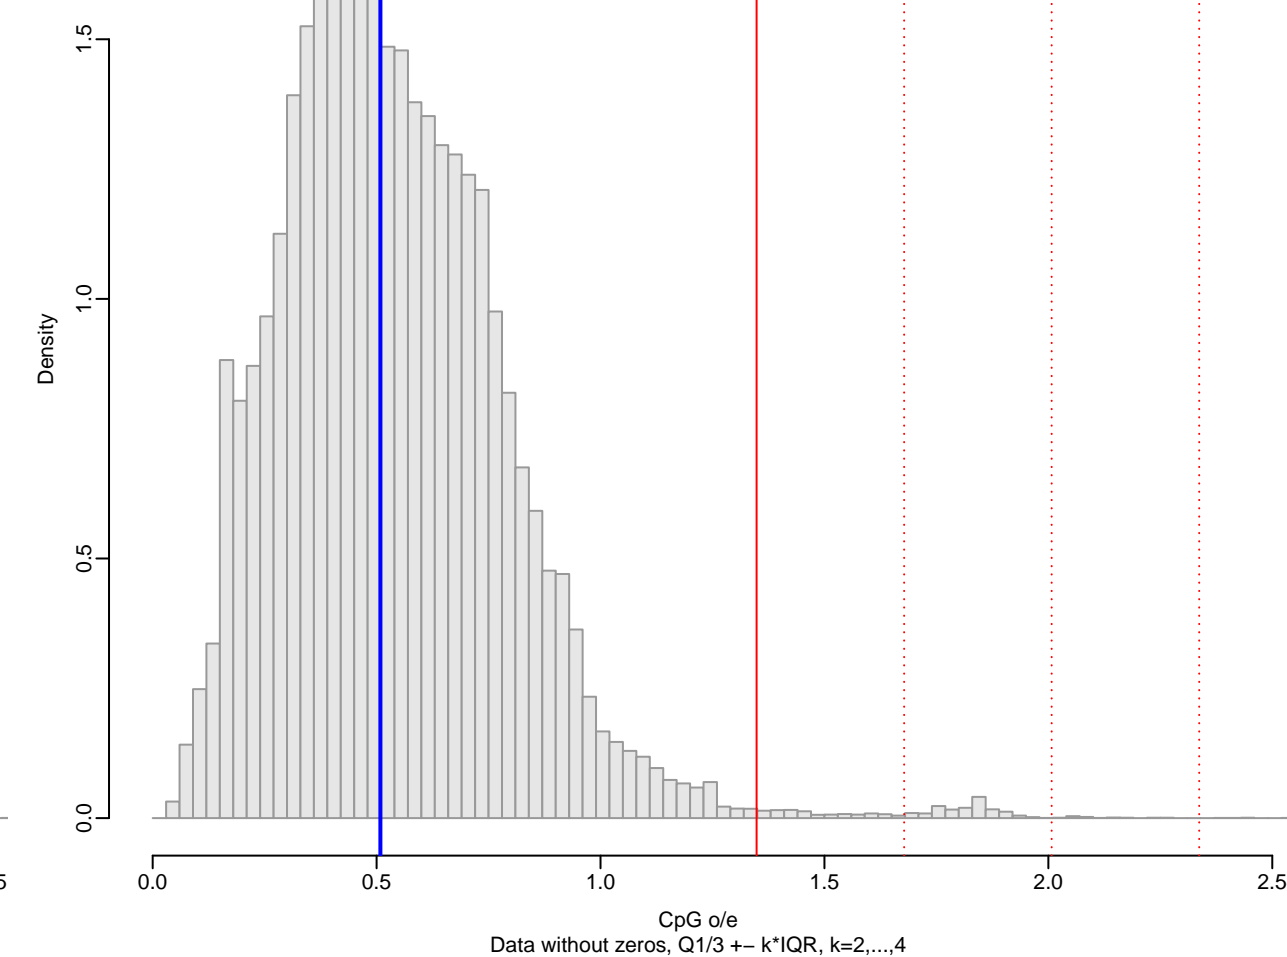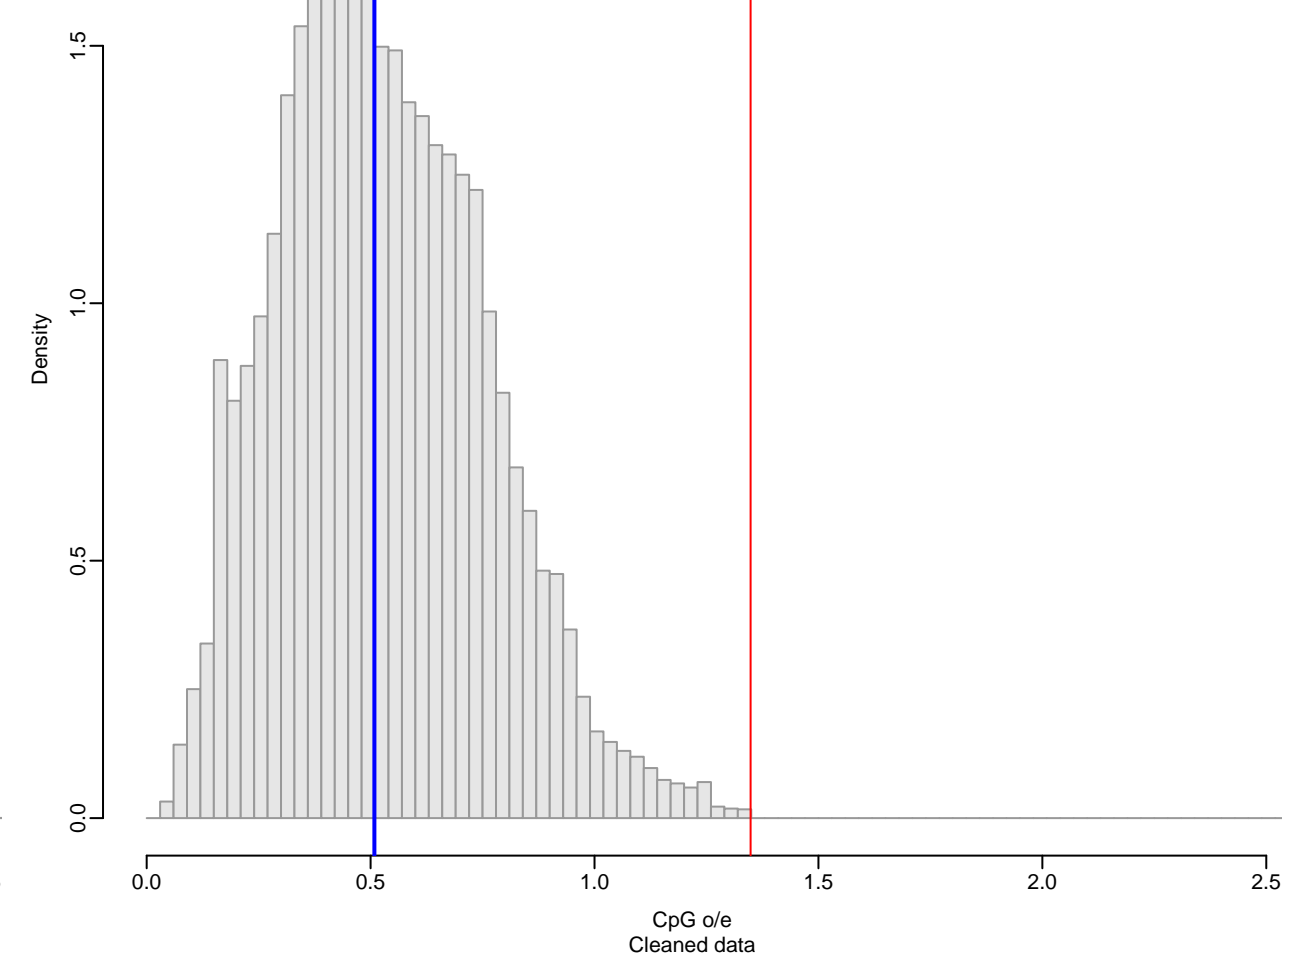

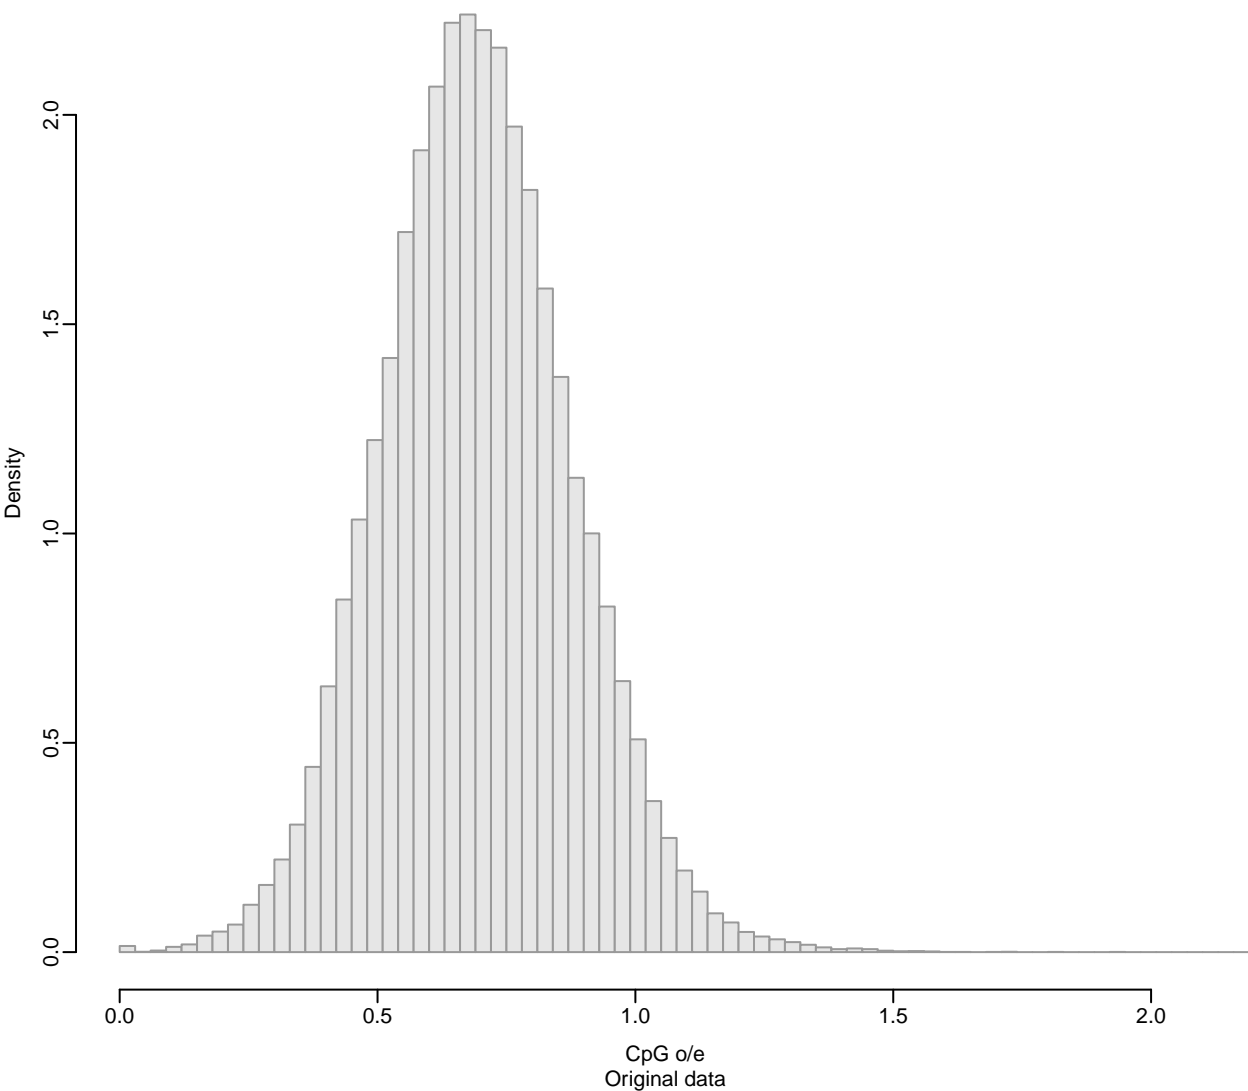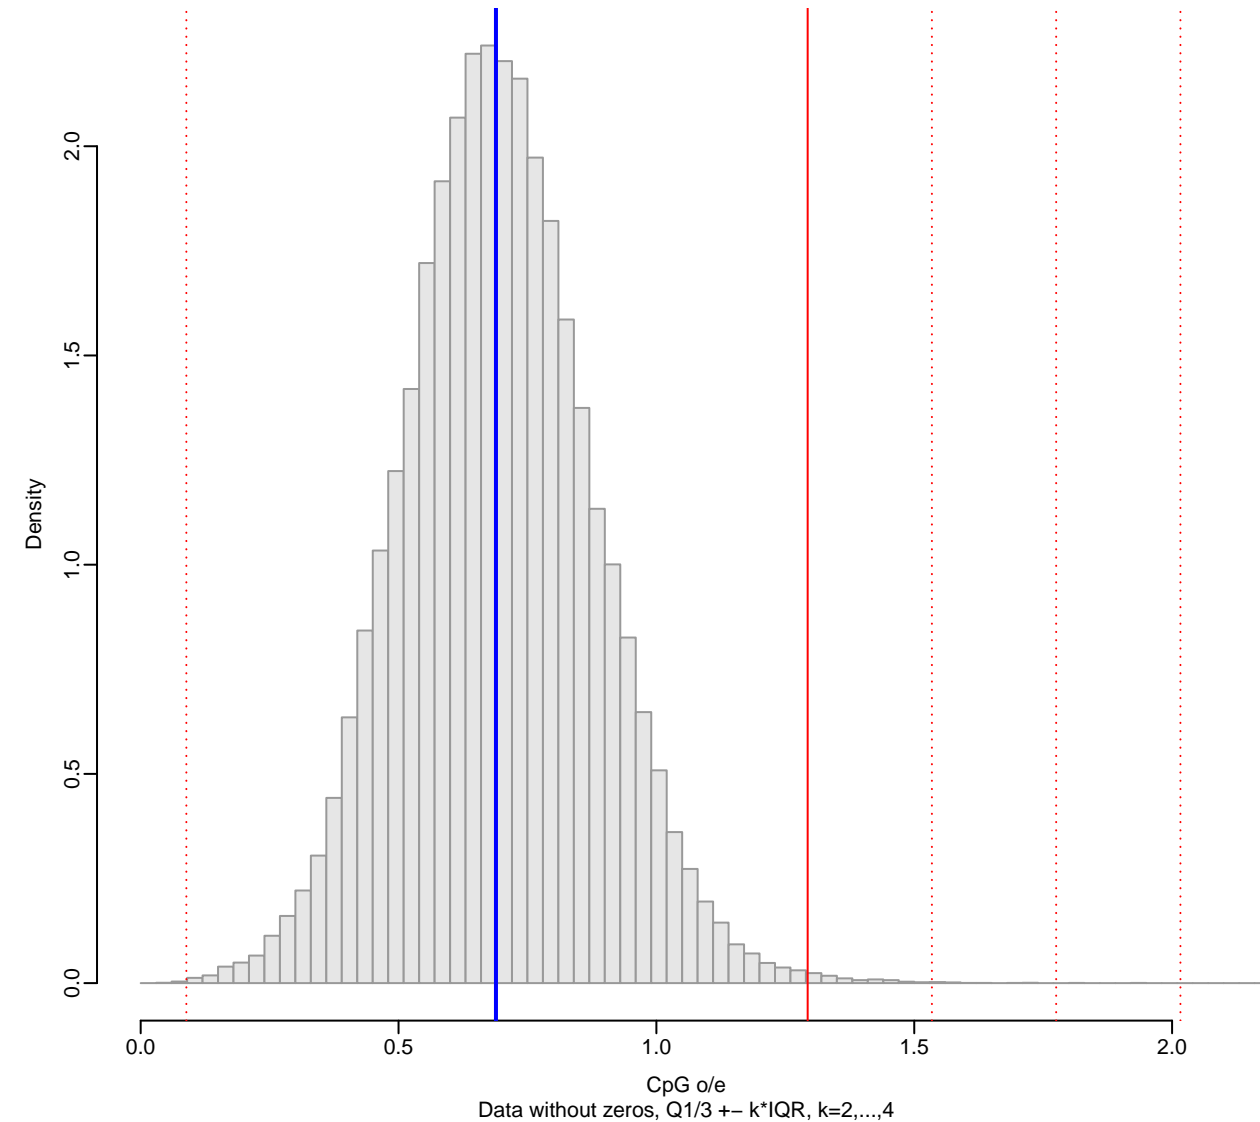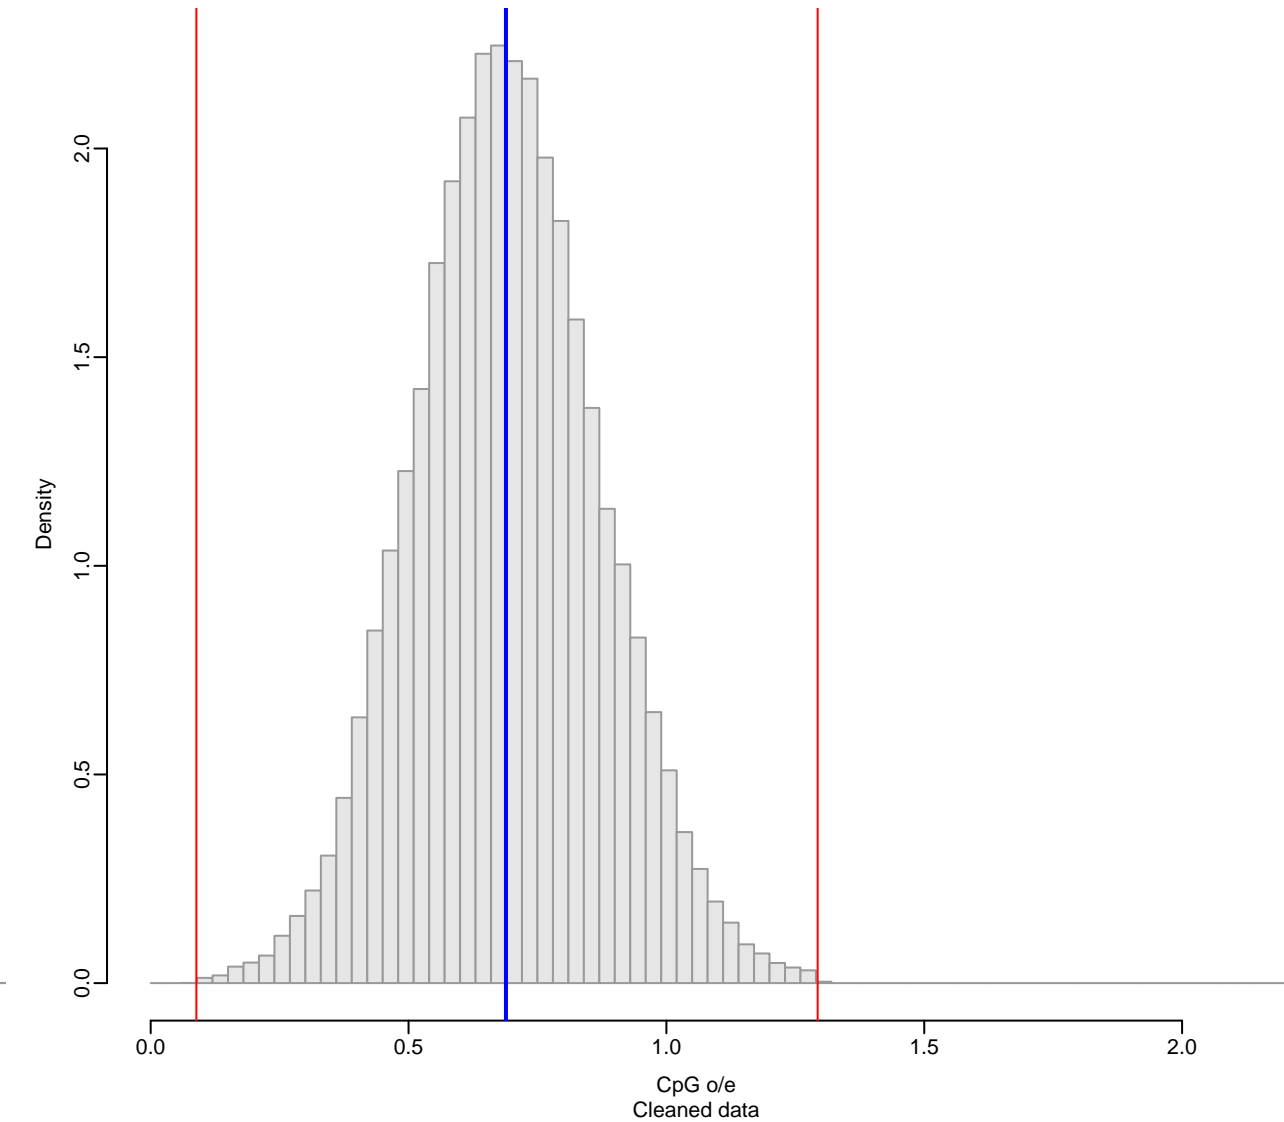

Theileria\_annulata

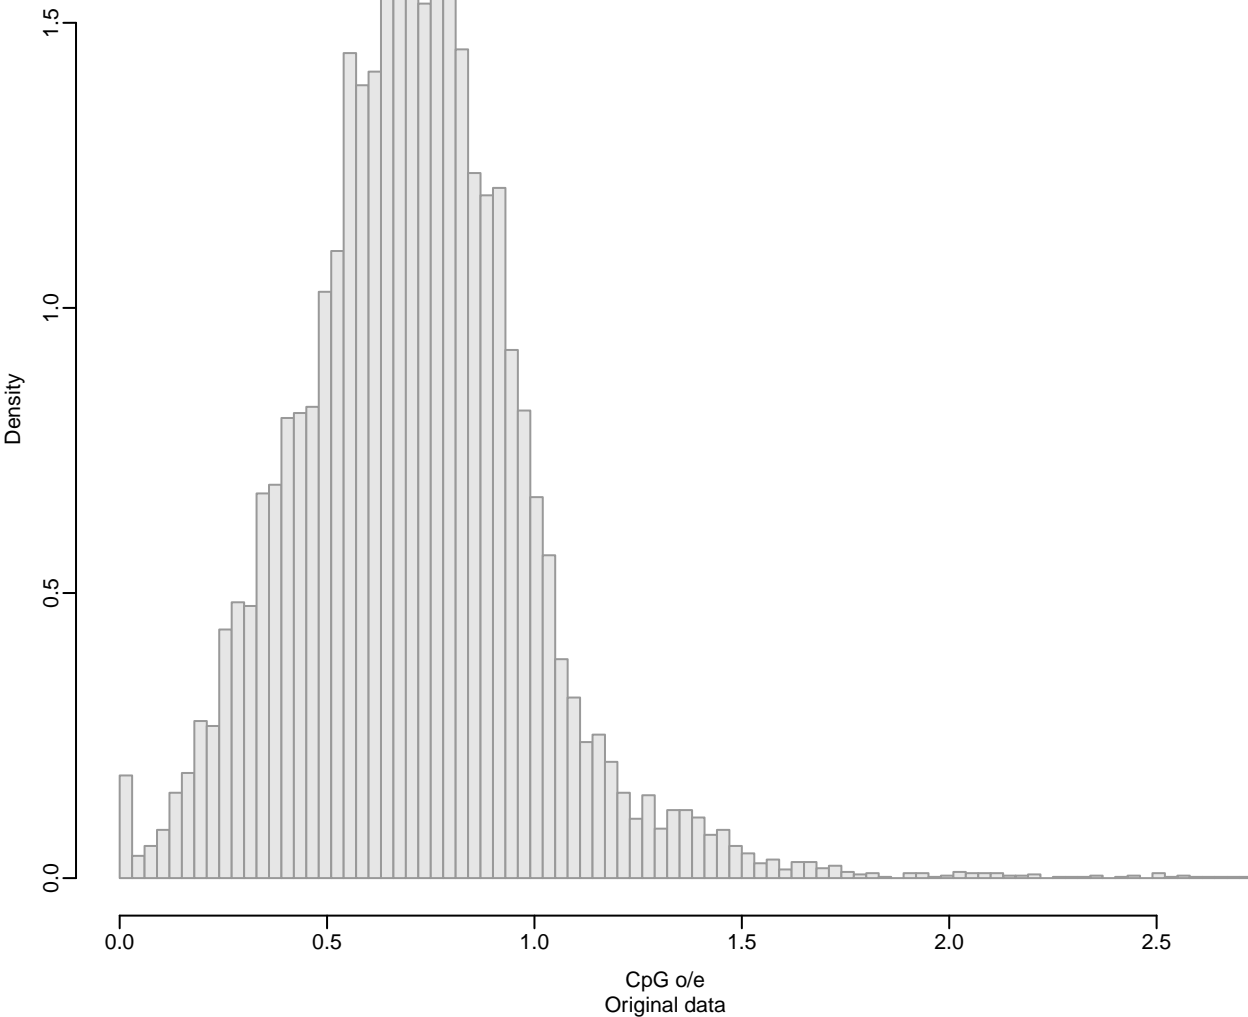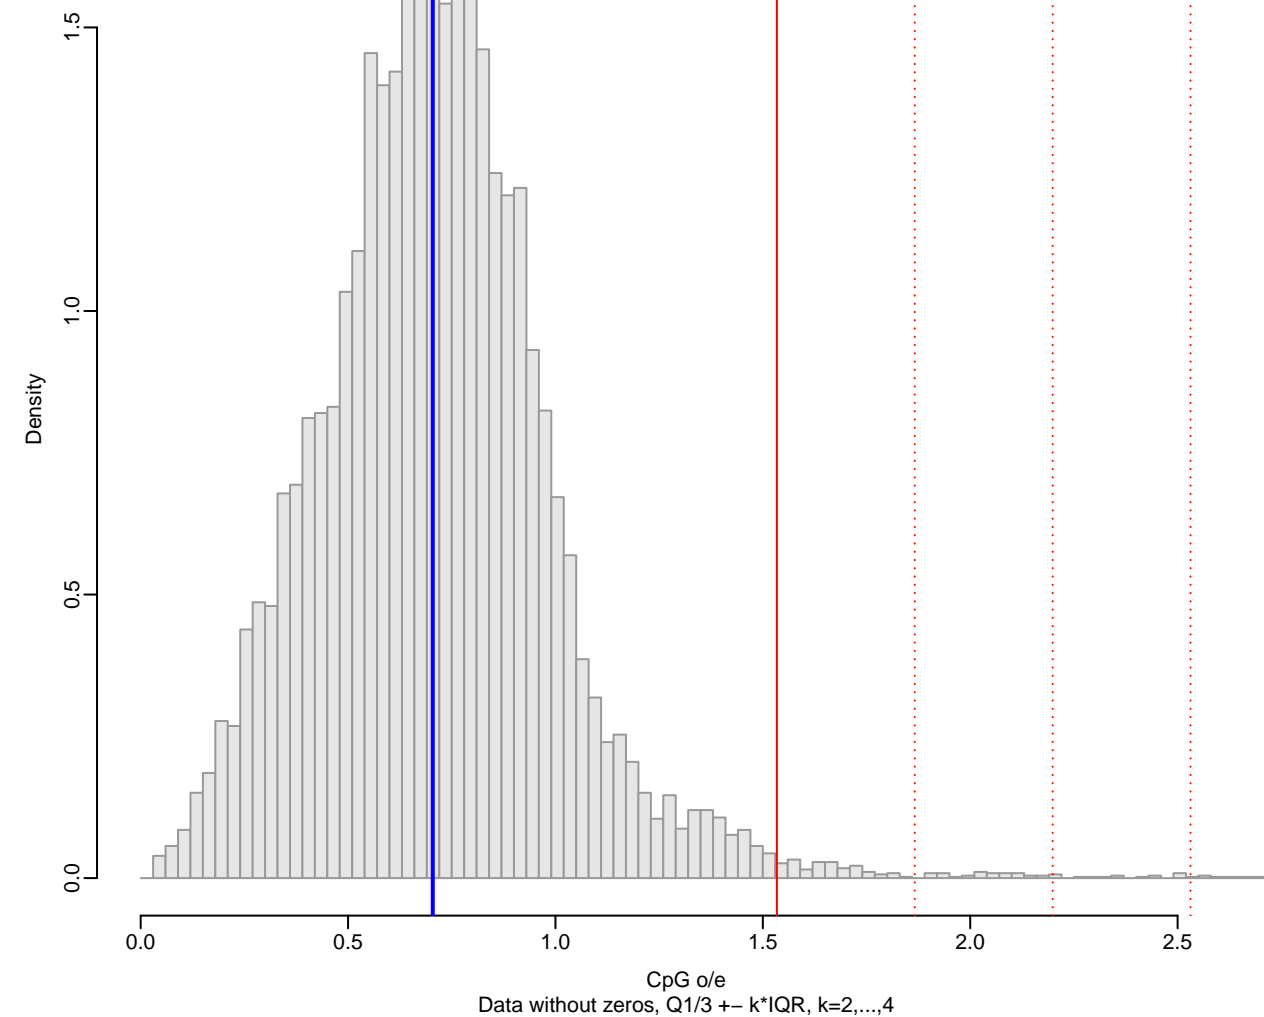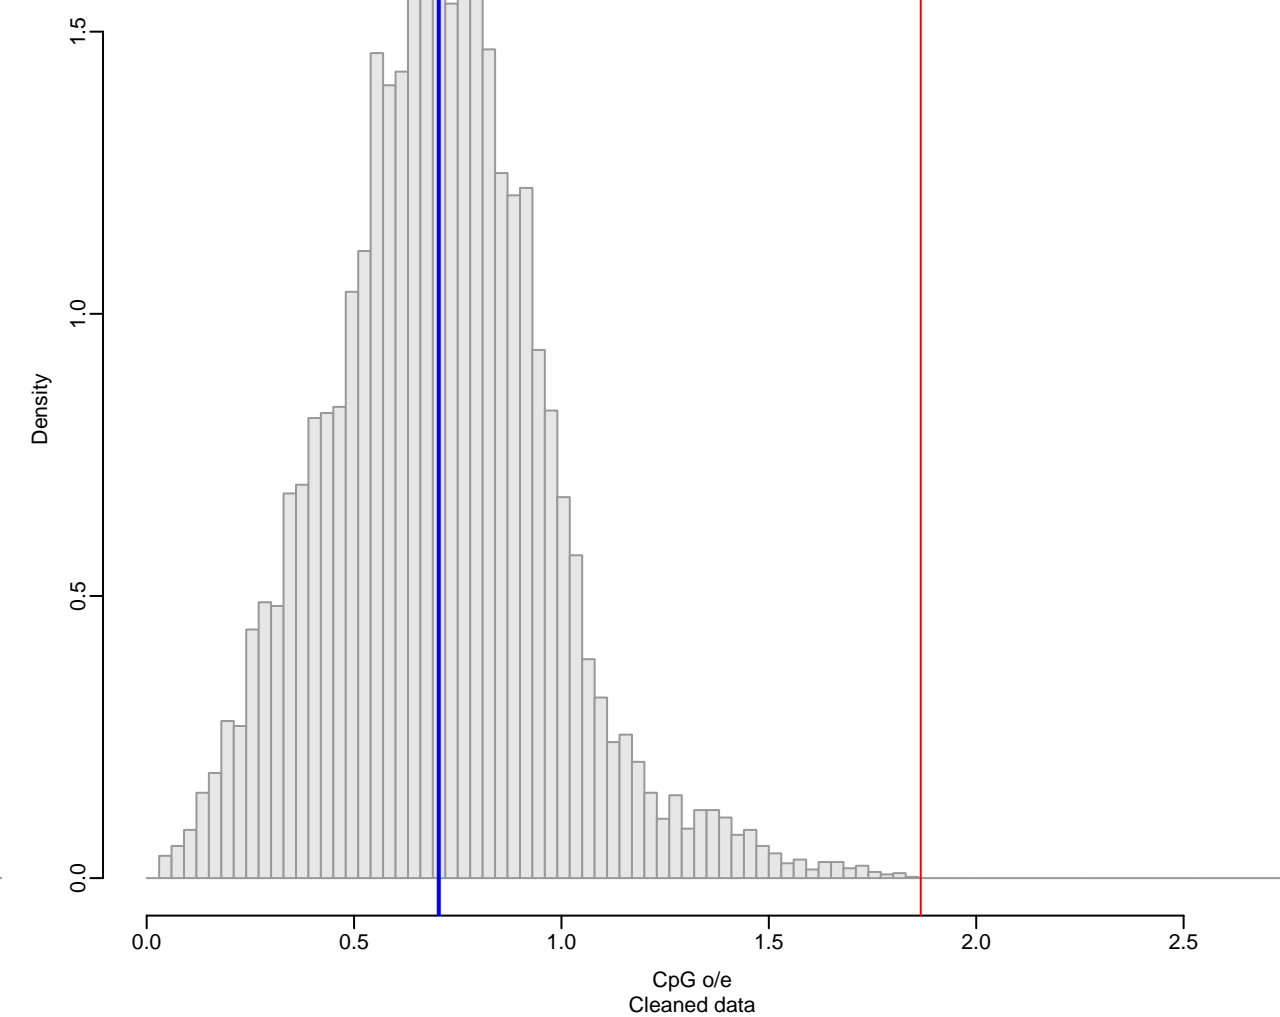



Theileria\_orientalis

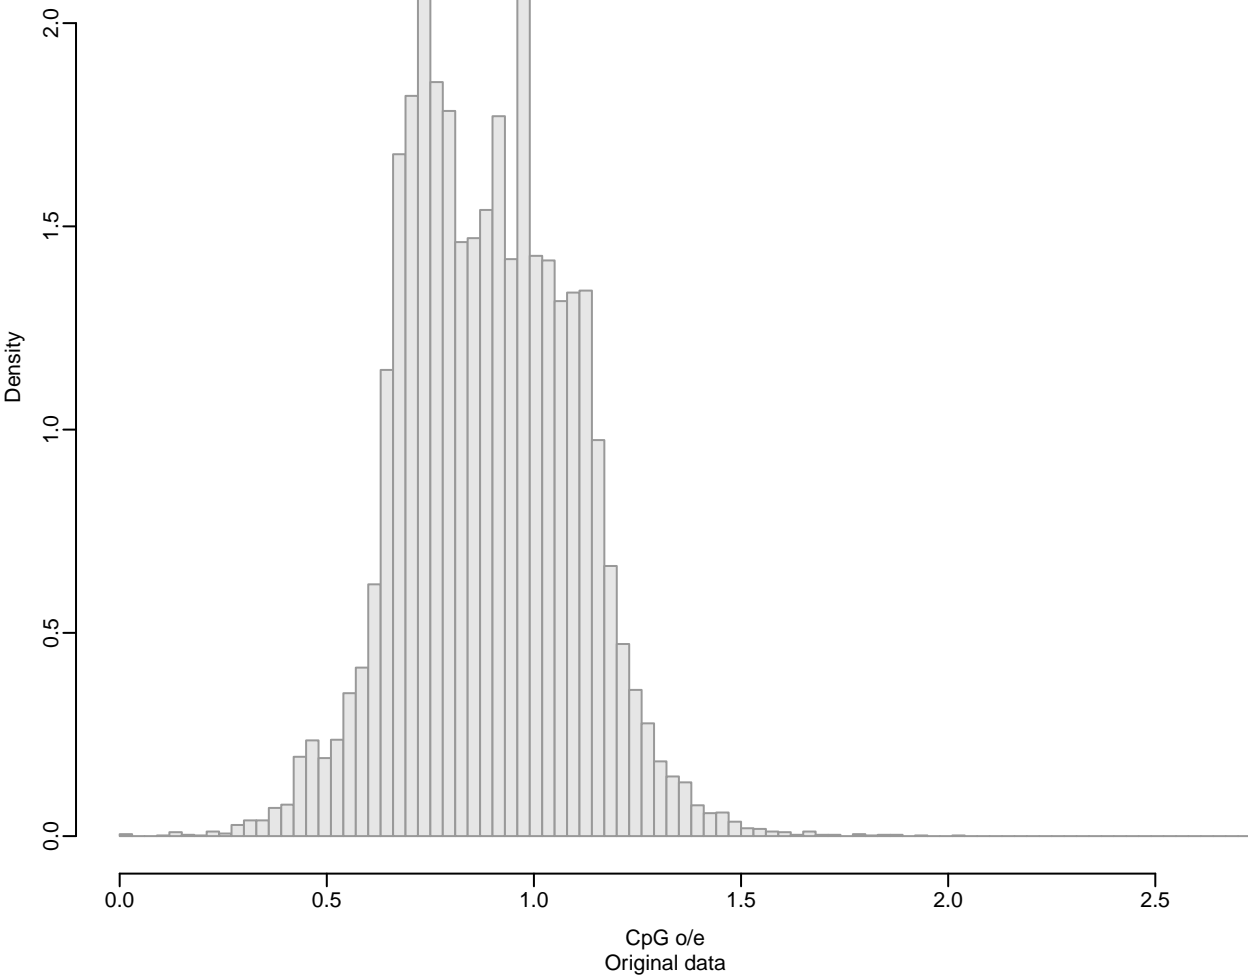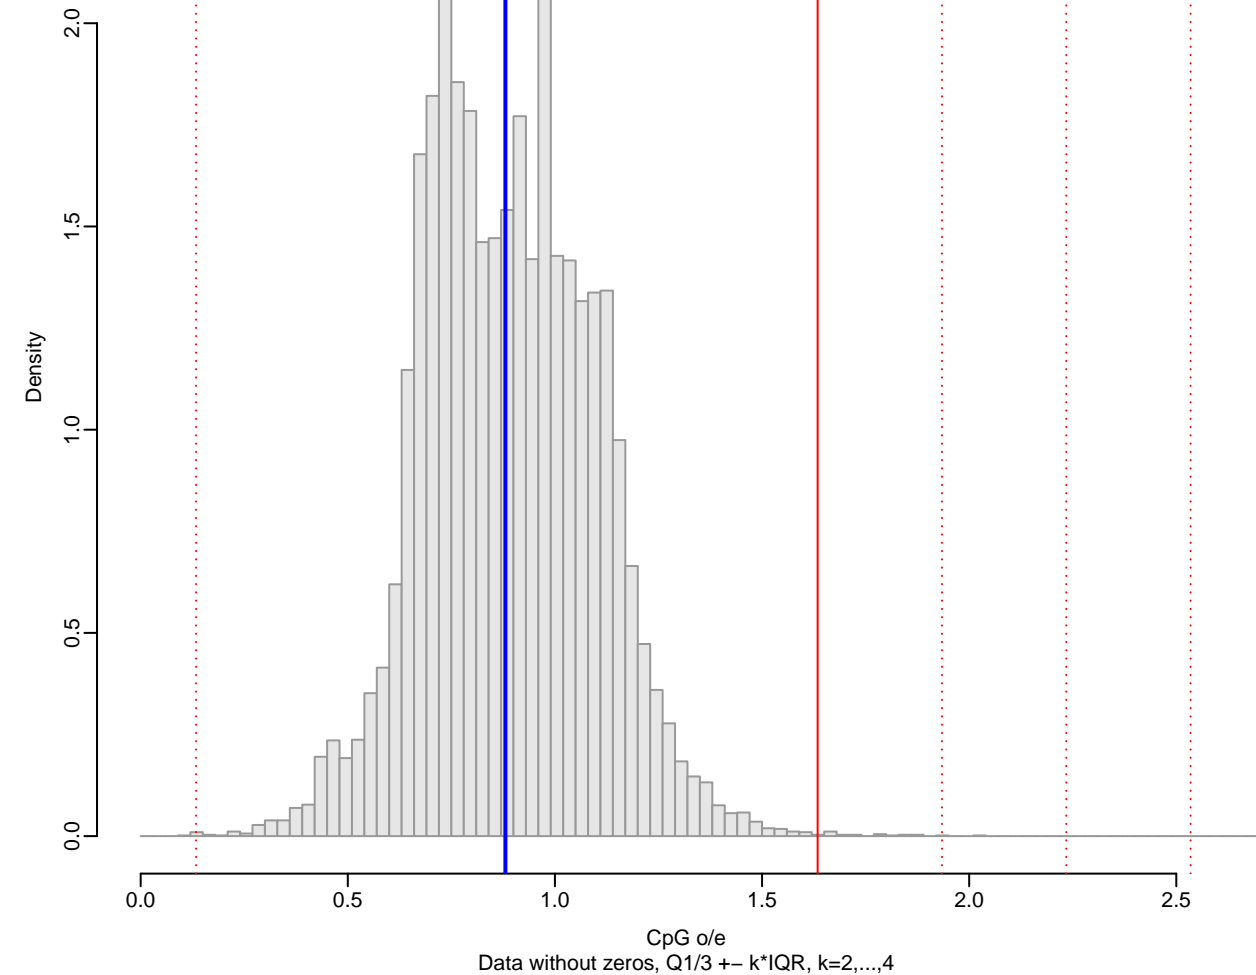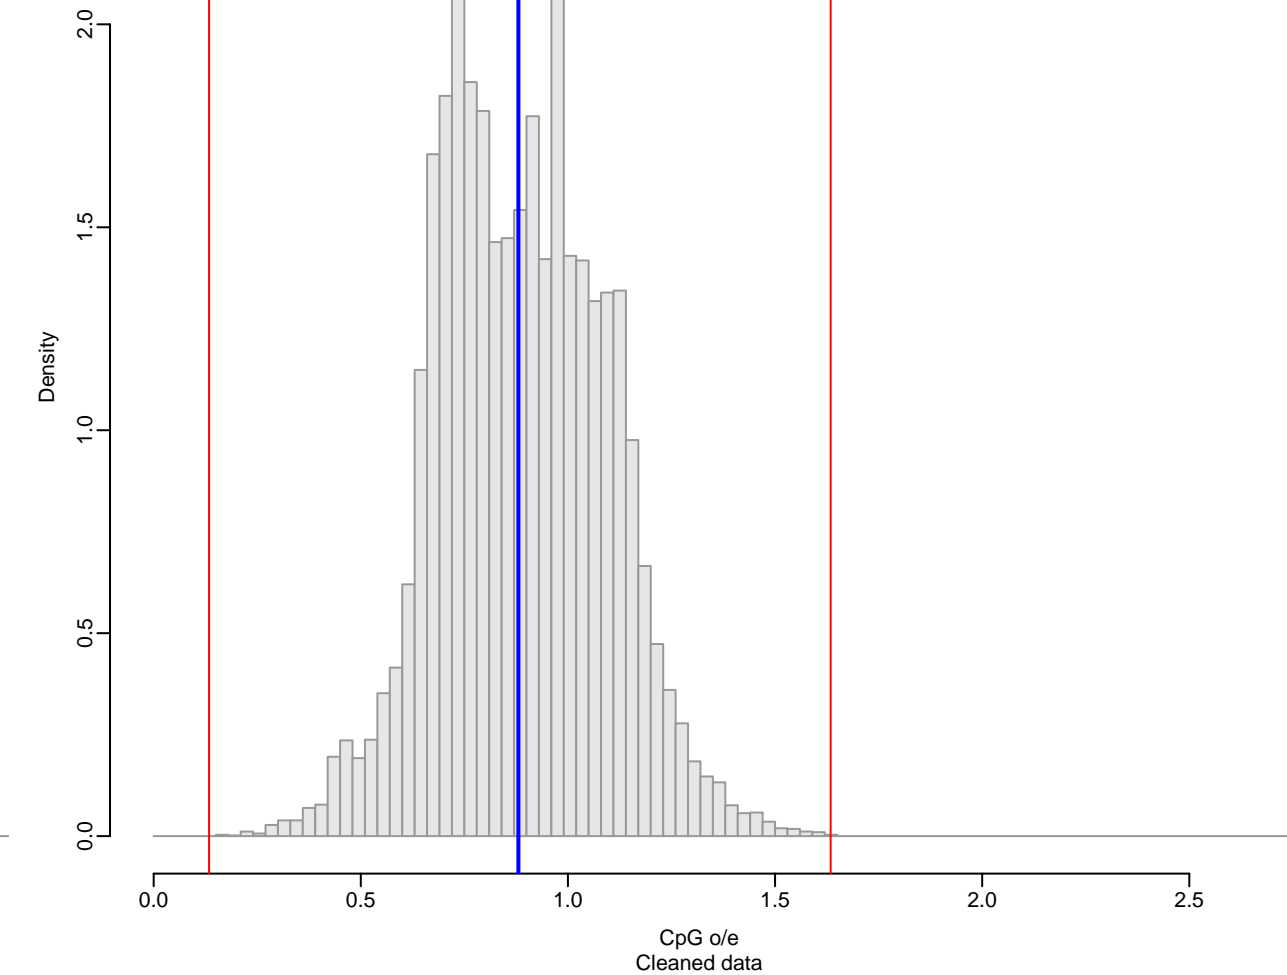

Theileria\_parva

Density

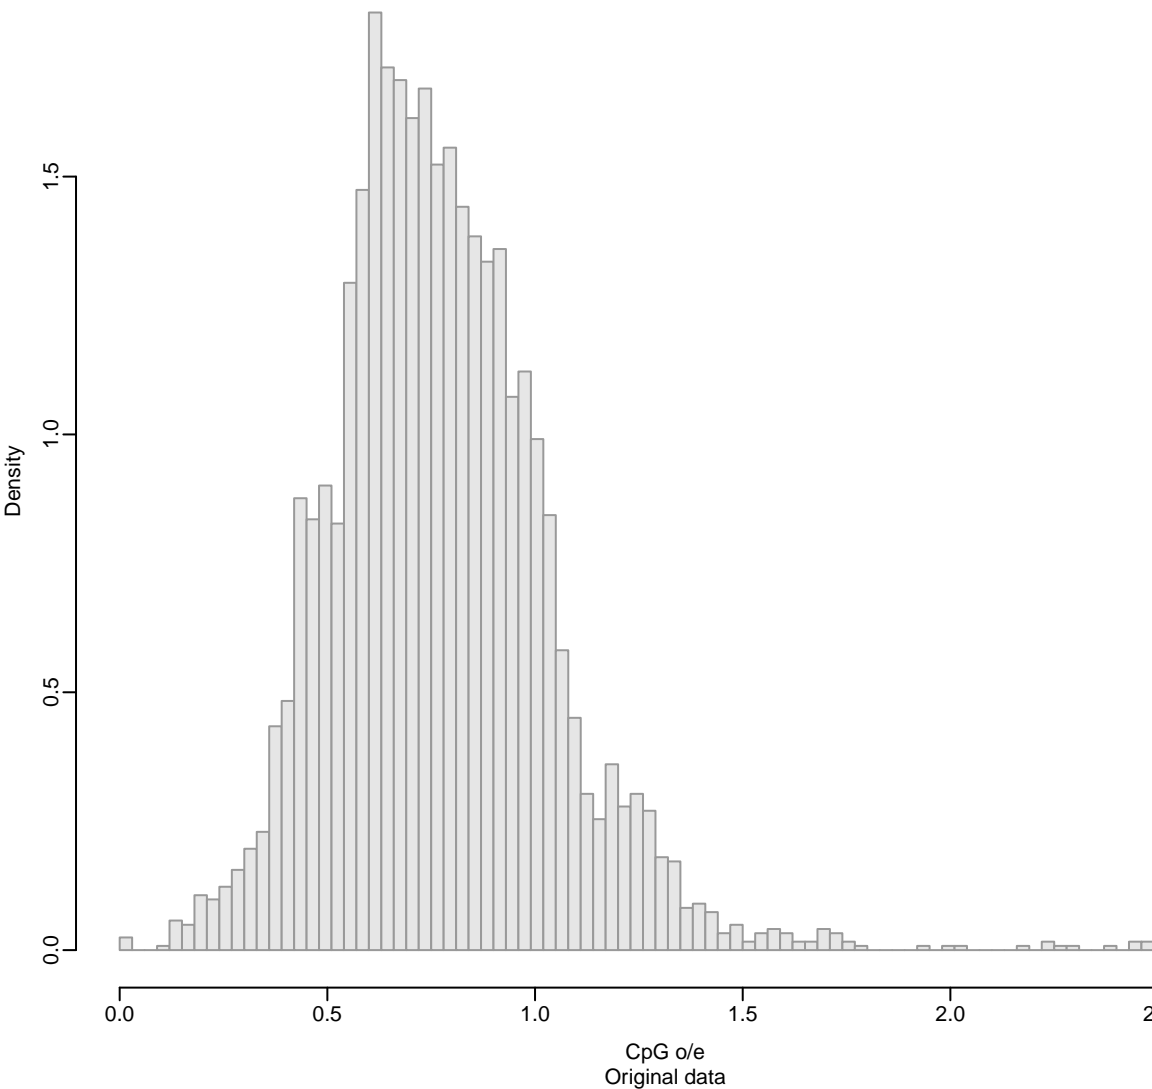

Density

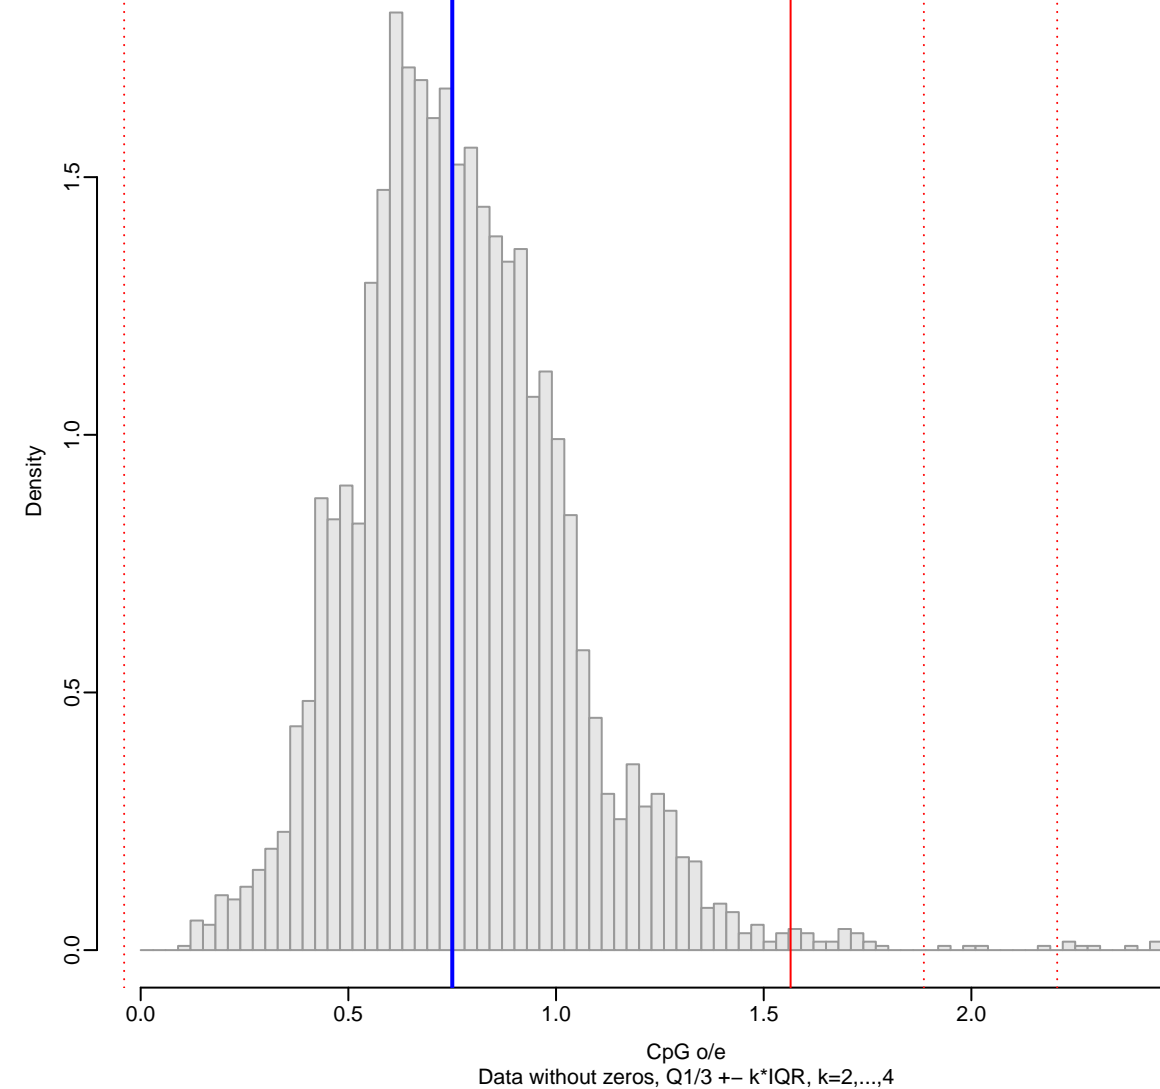

Density

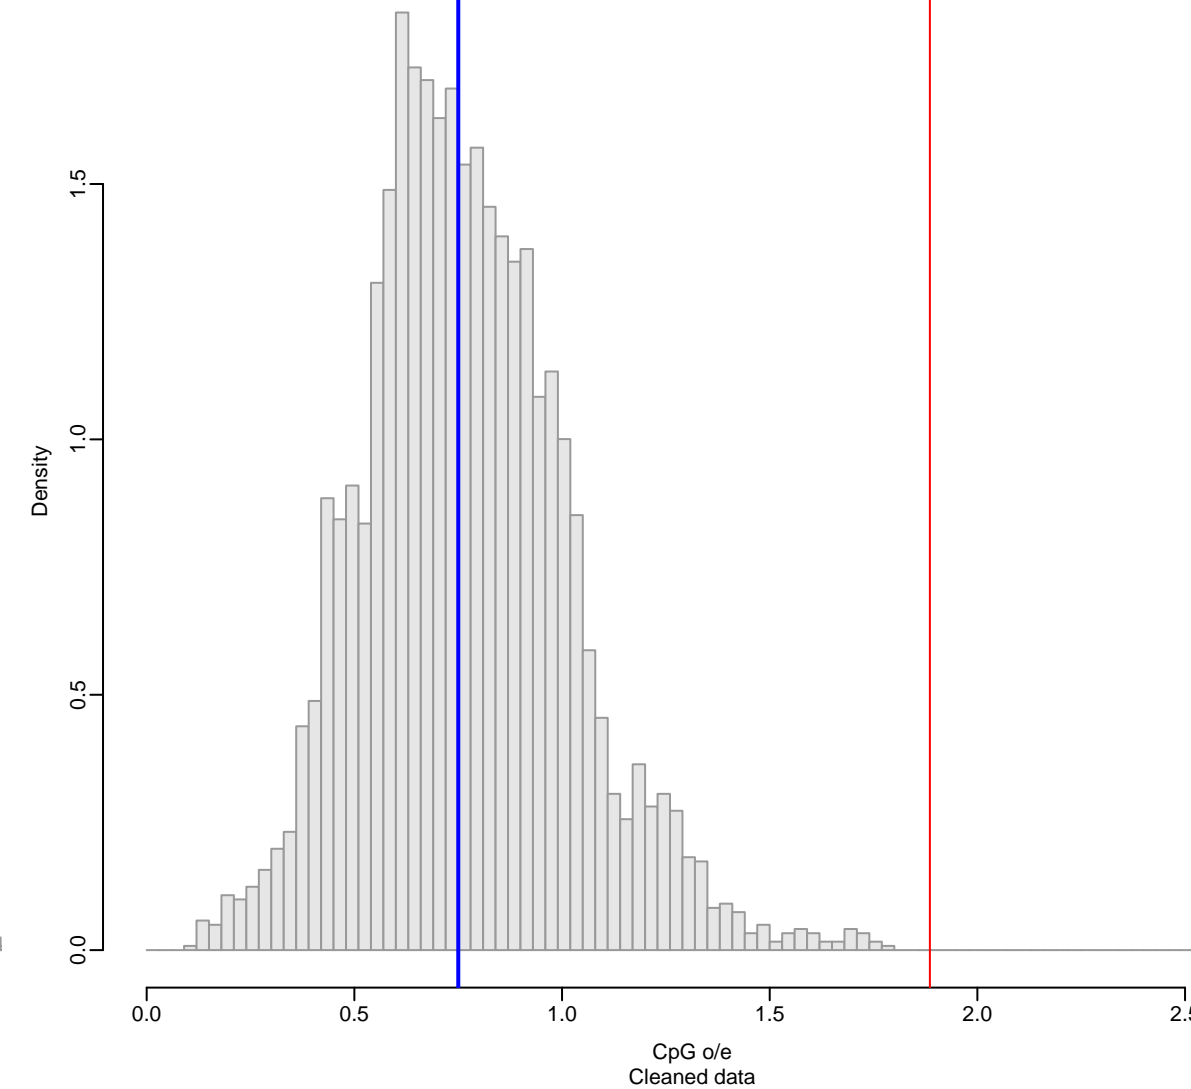

*Thellungiella\_halophila*

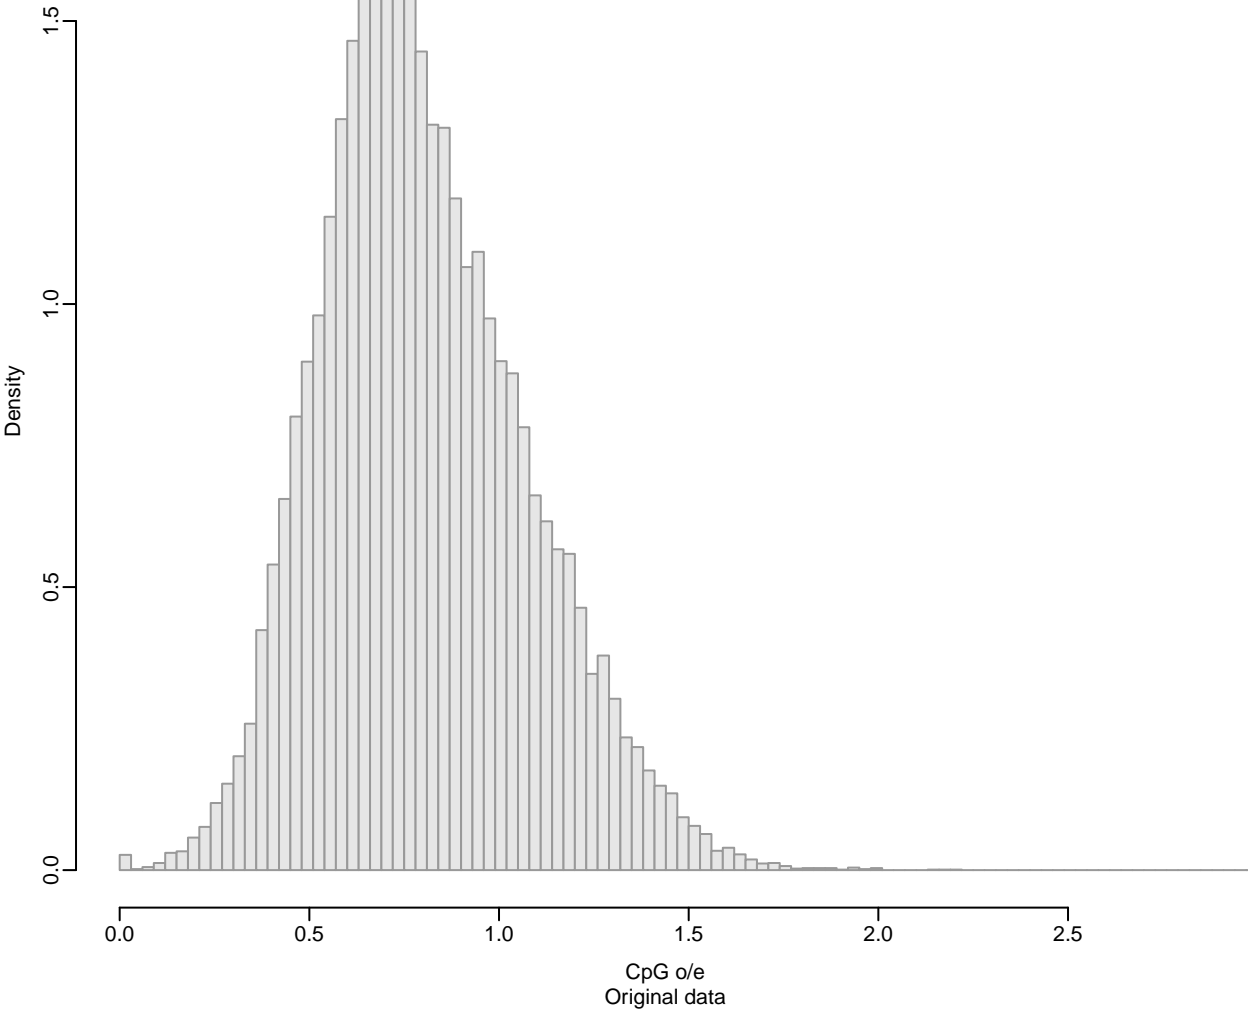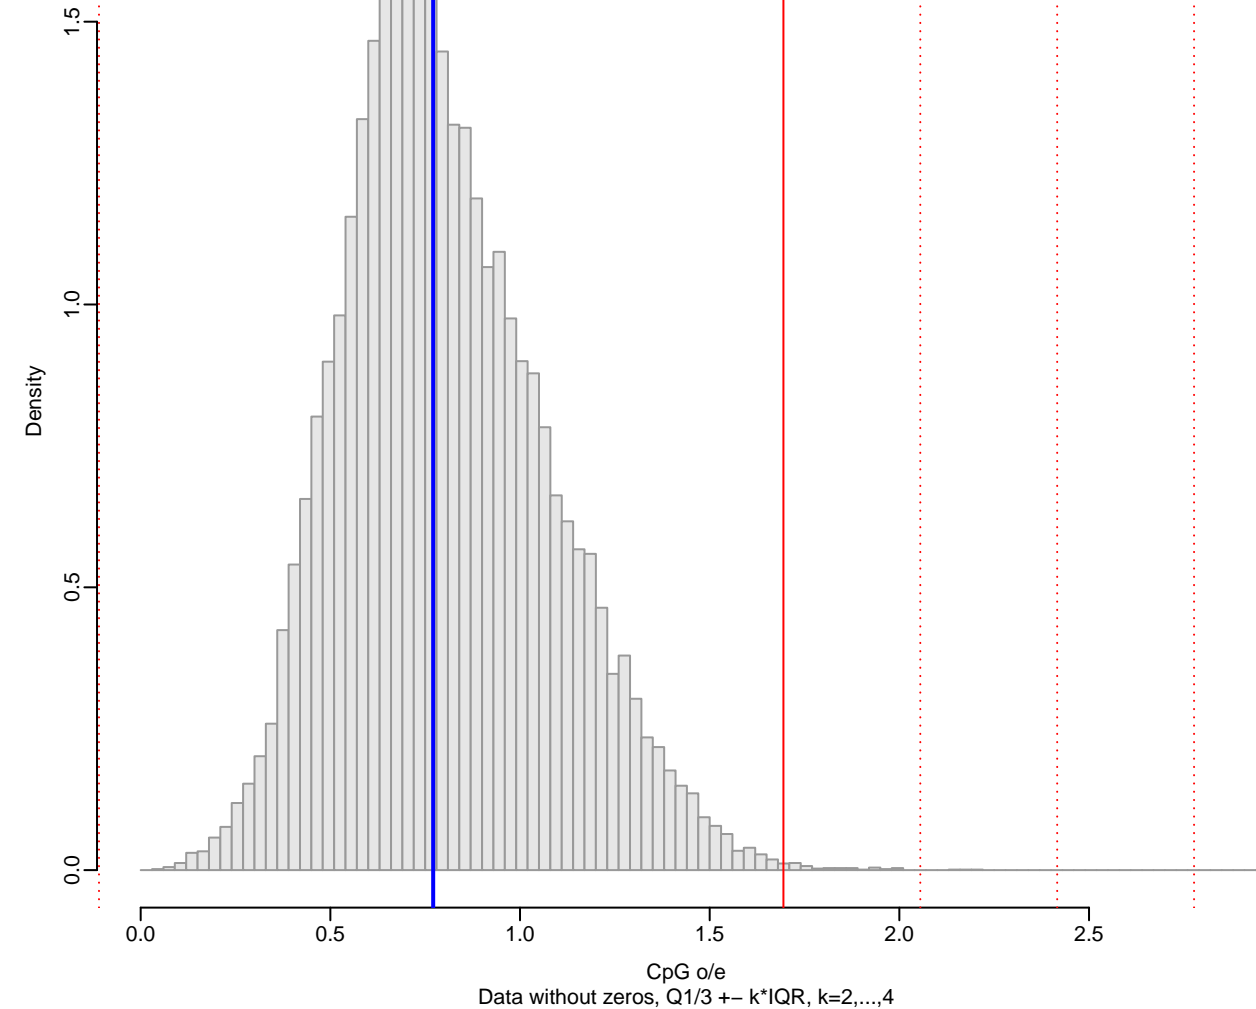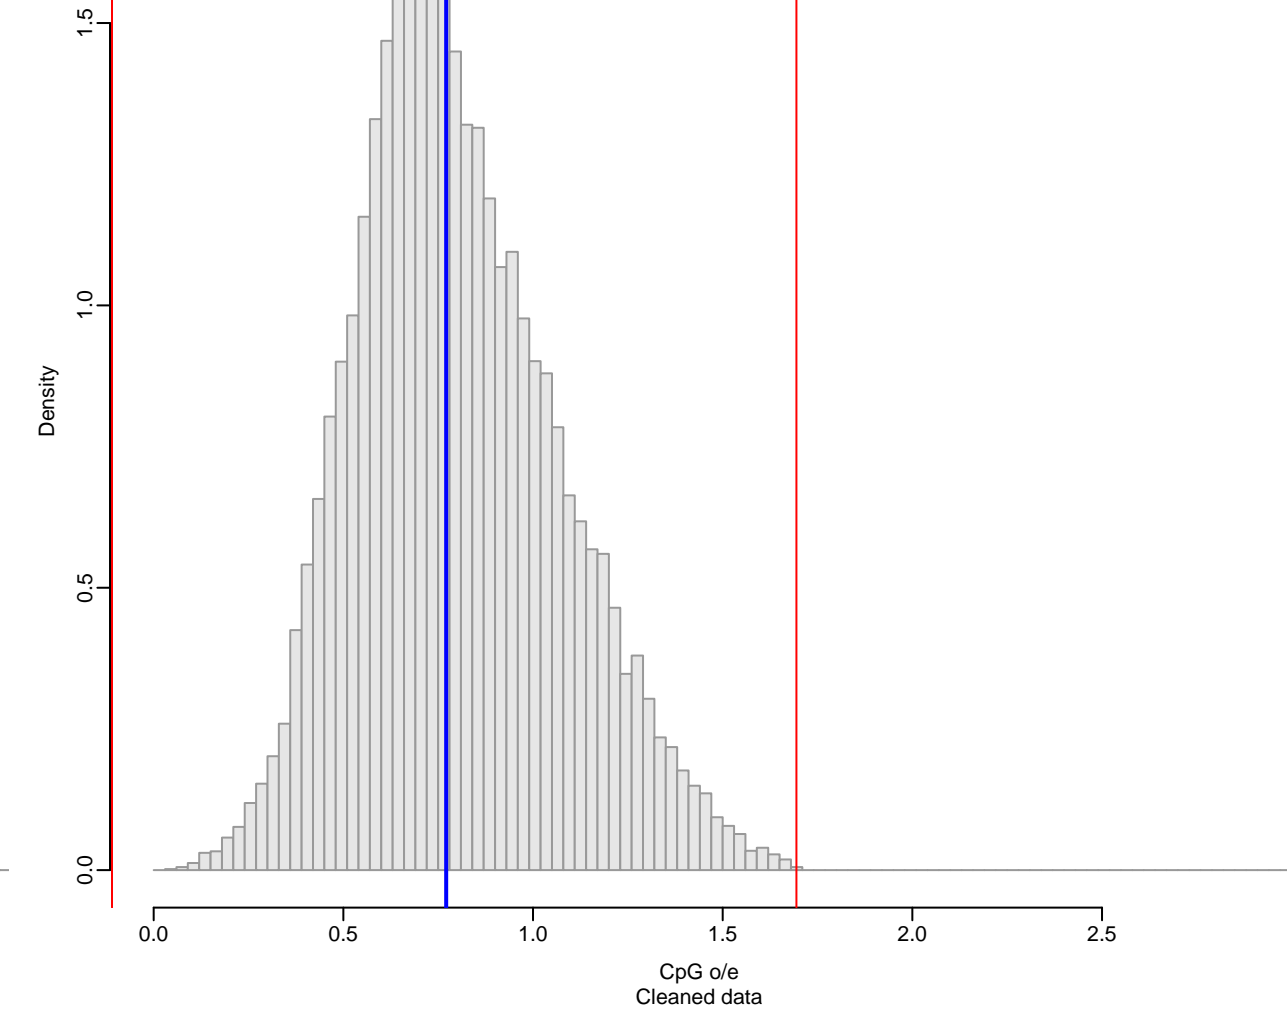

*Thlaspi\_caerulescens*

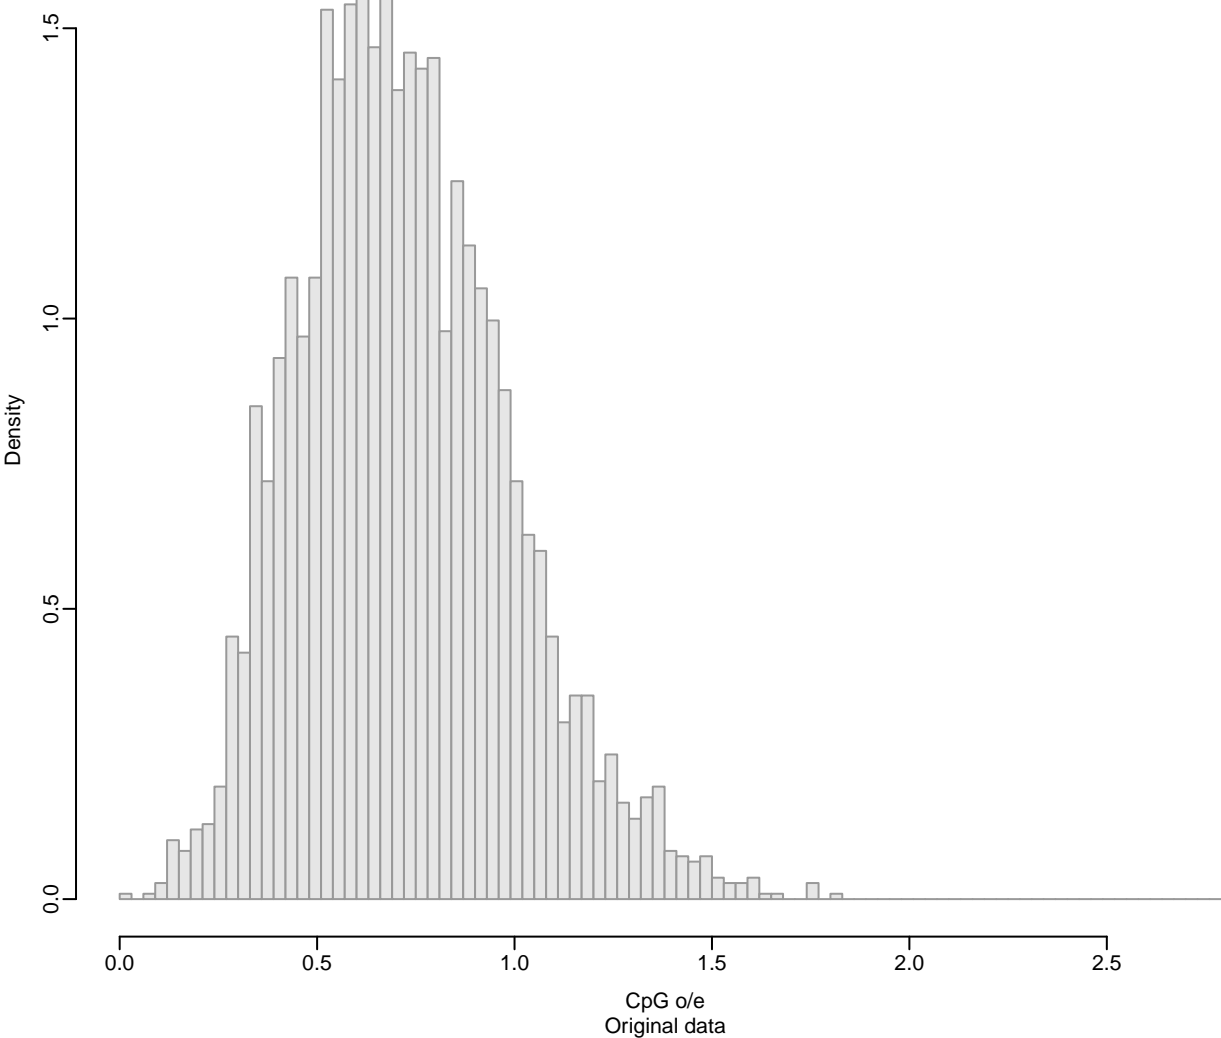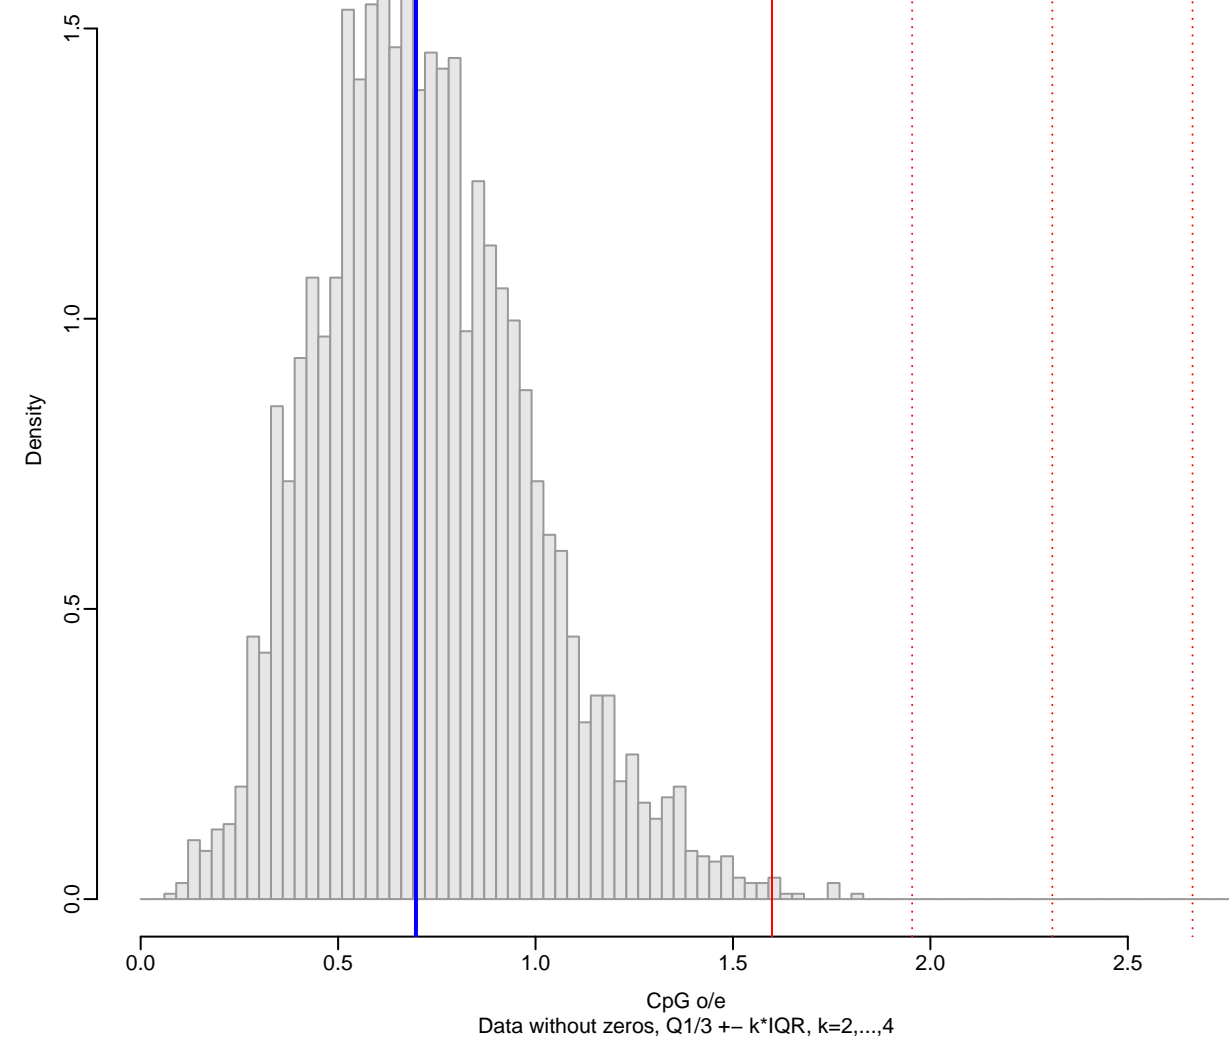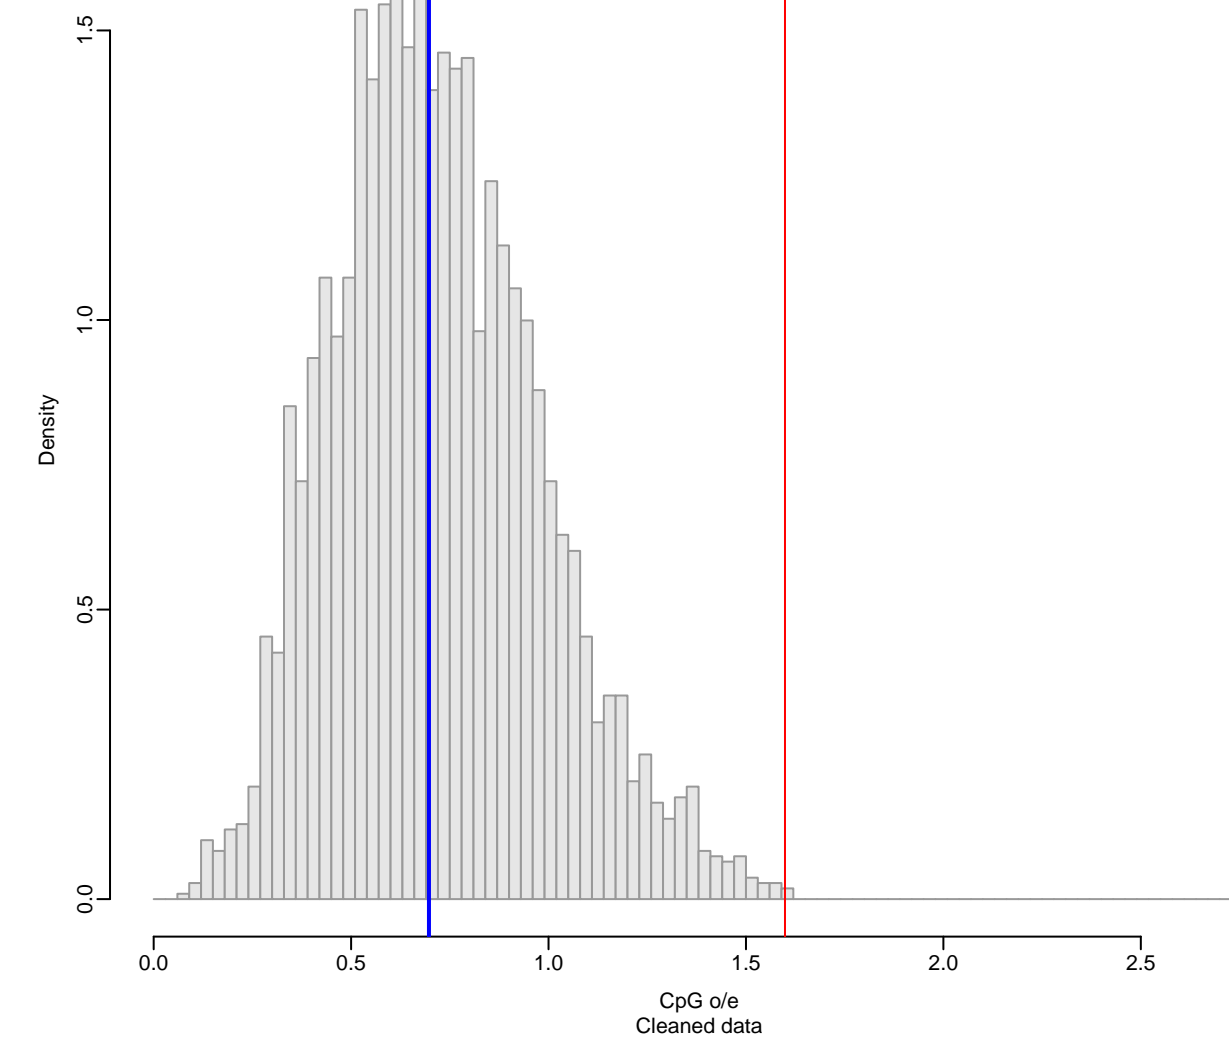

Thunnus\_thynnus

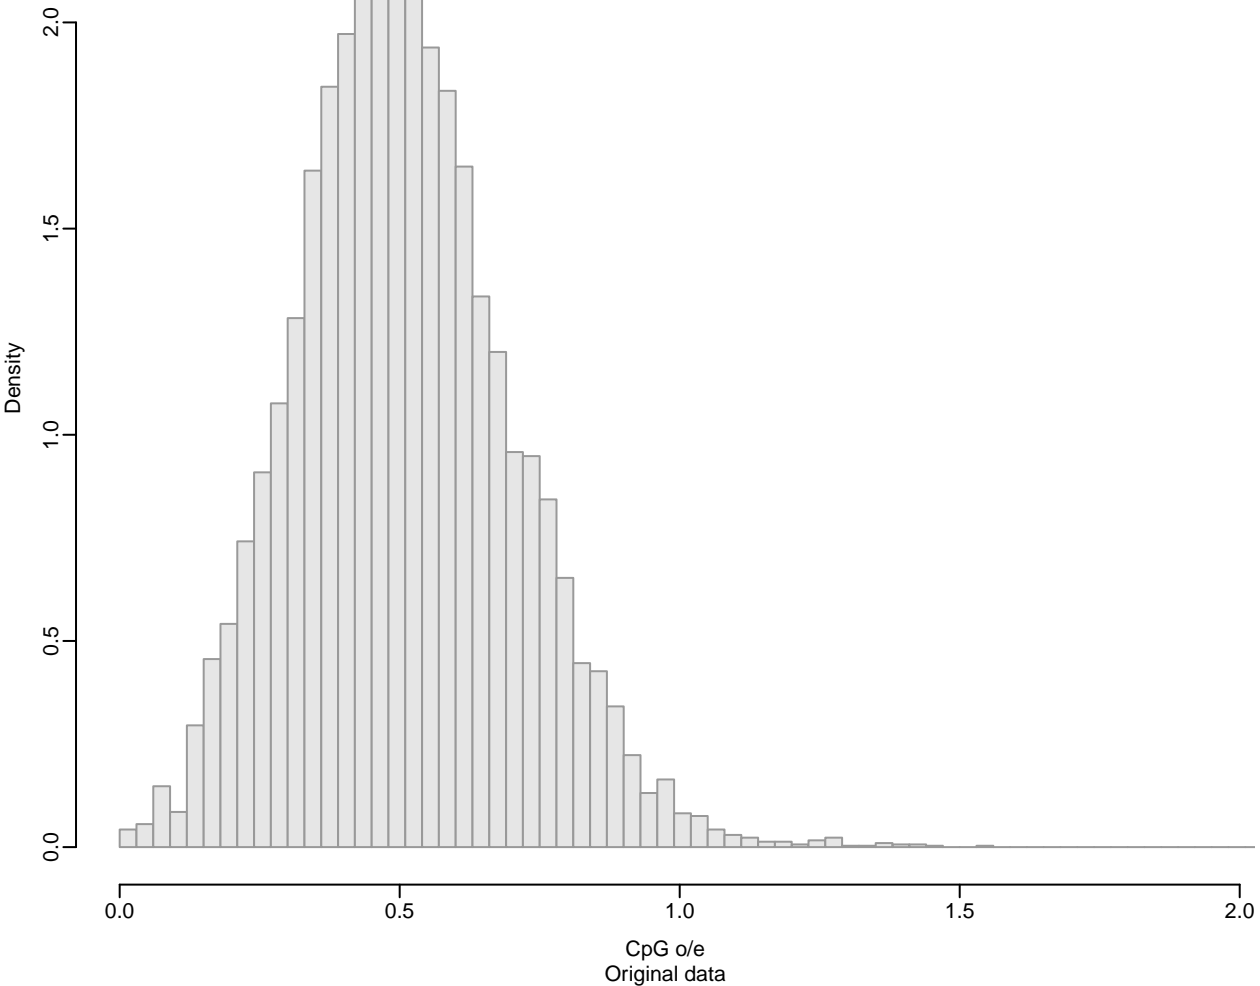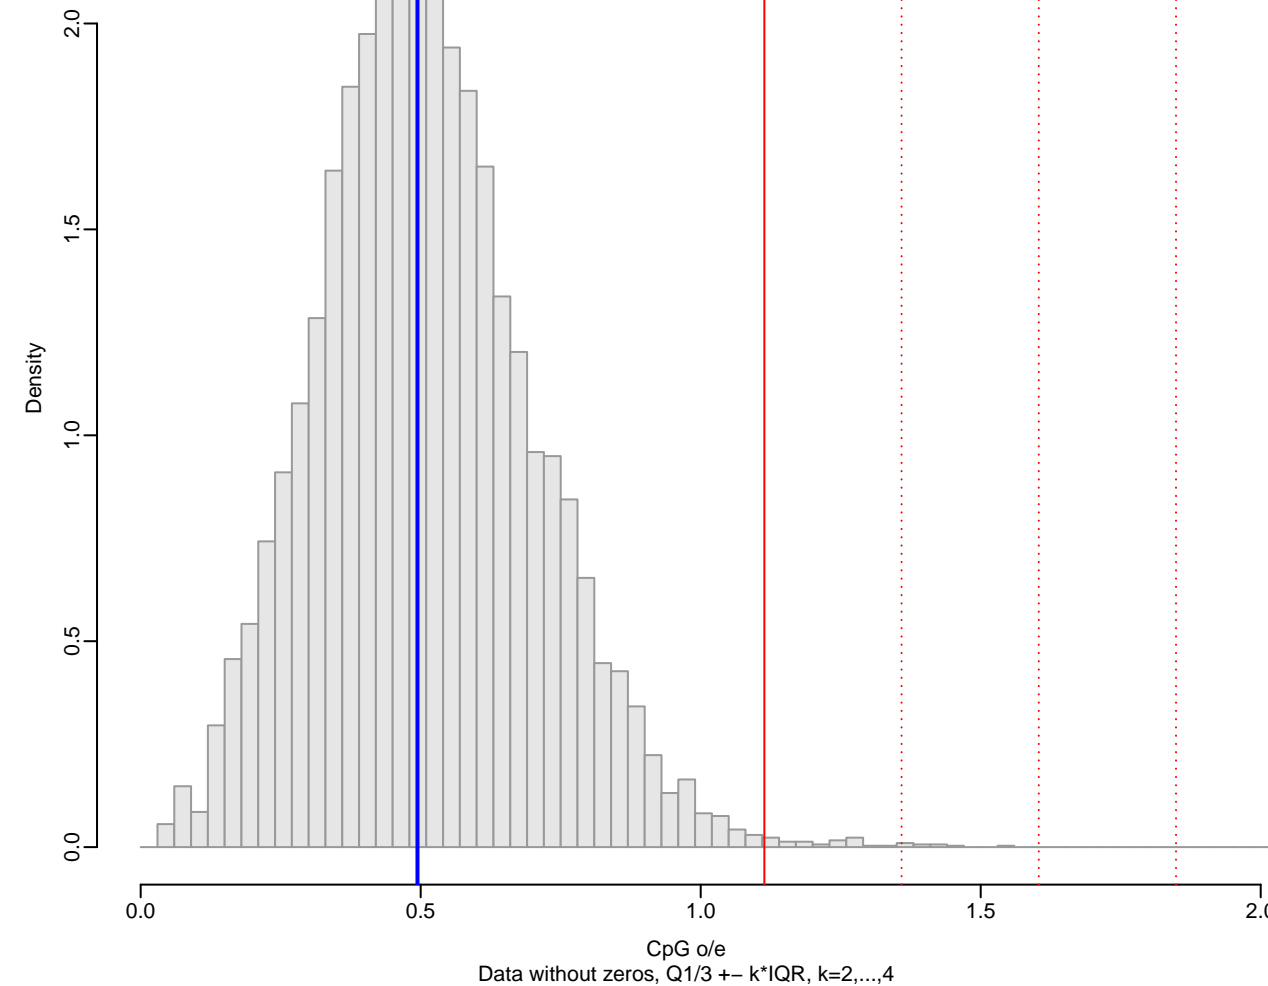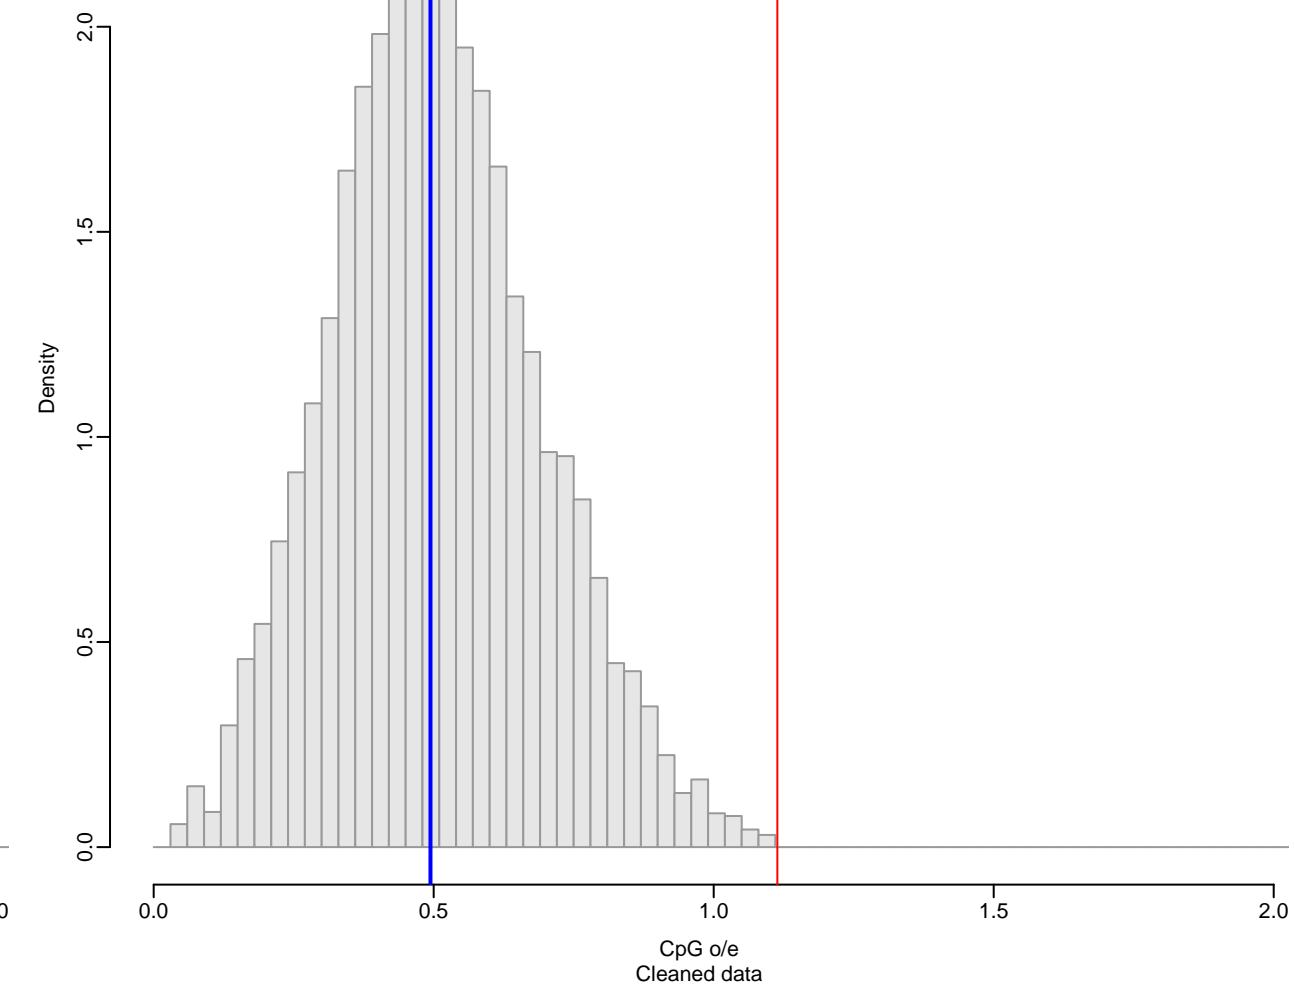

Thymallus\_thymallus

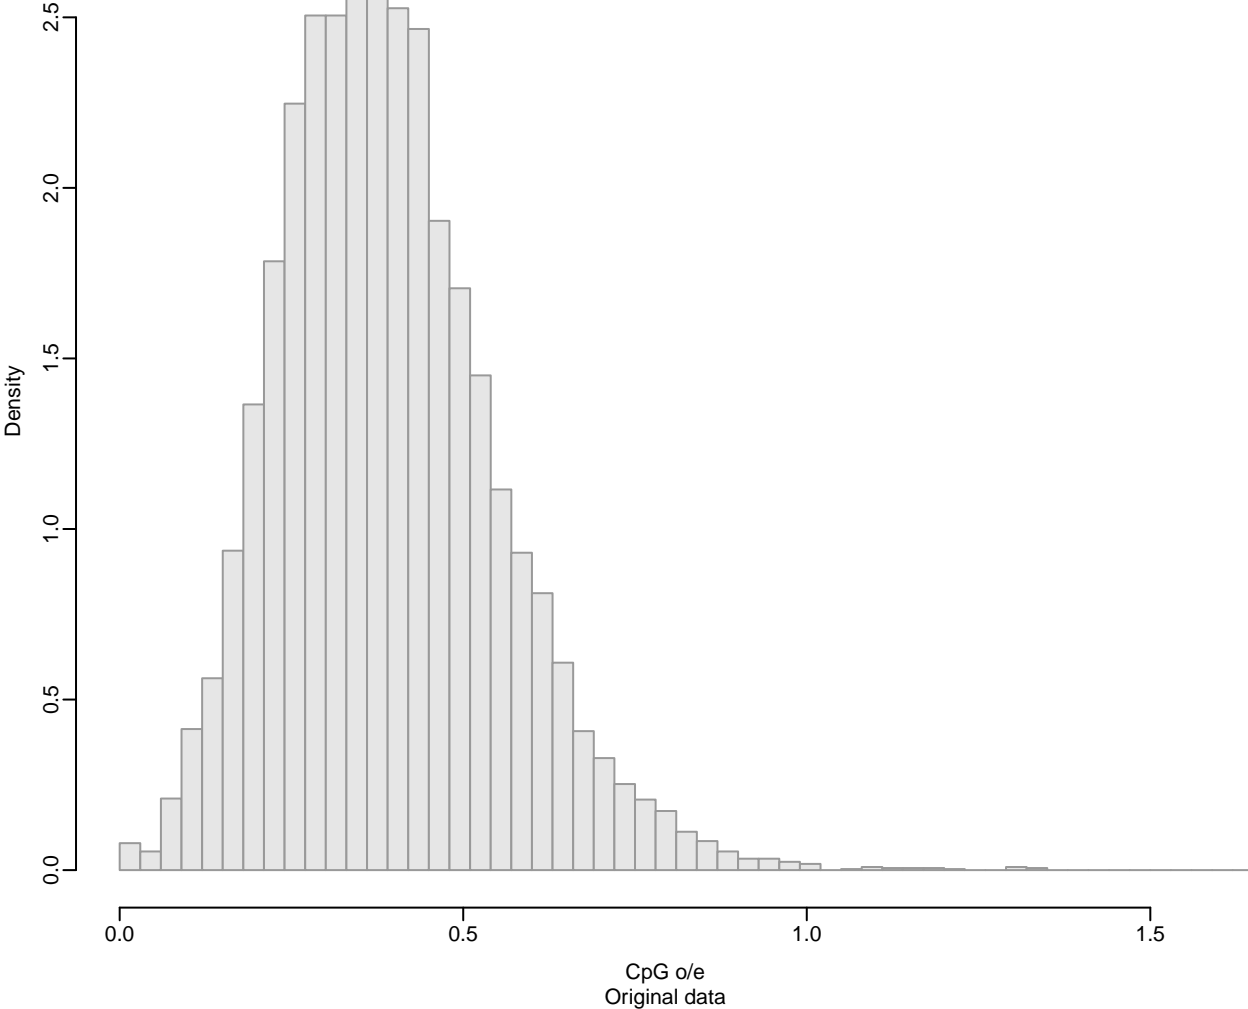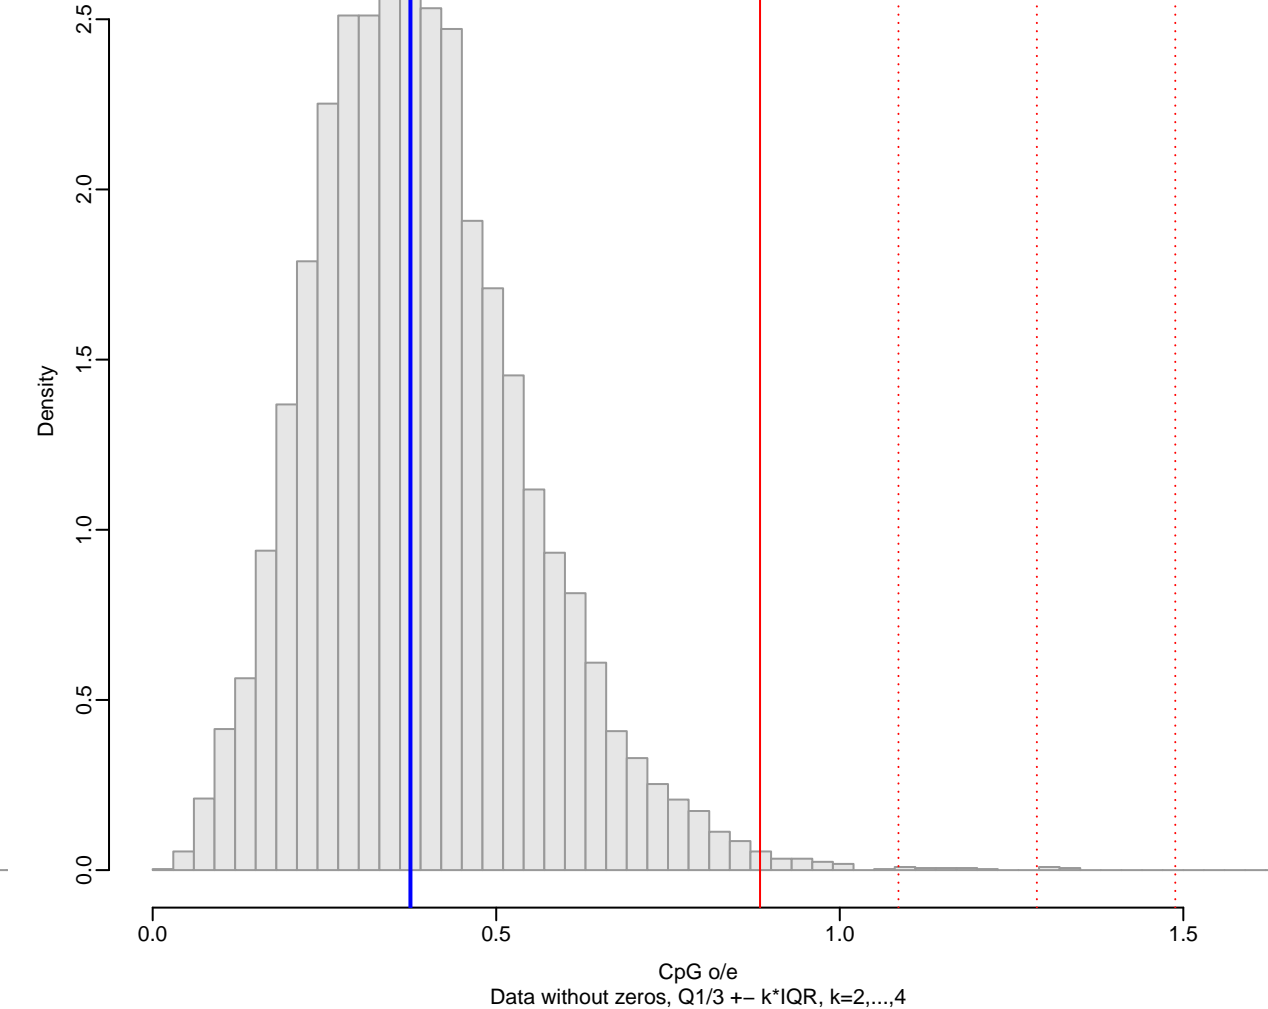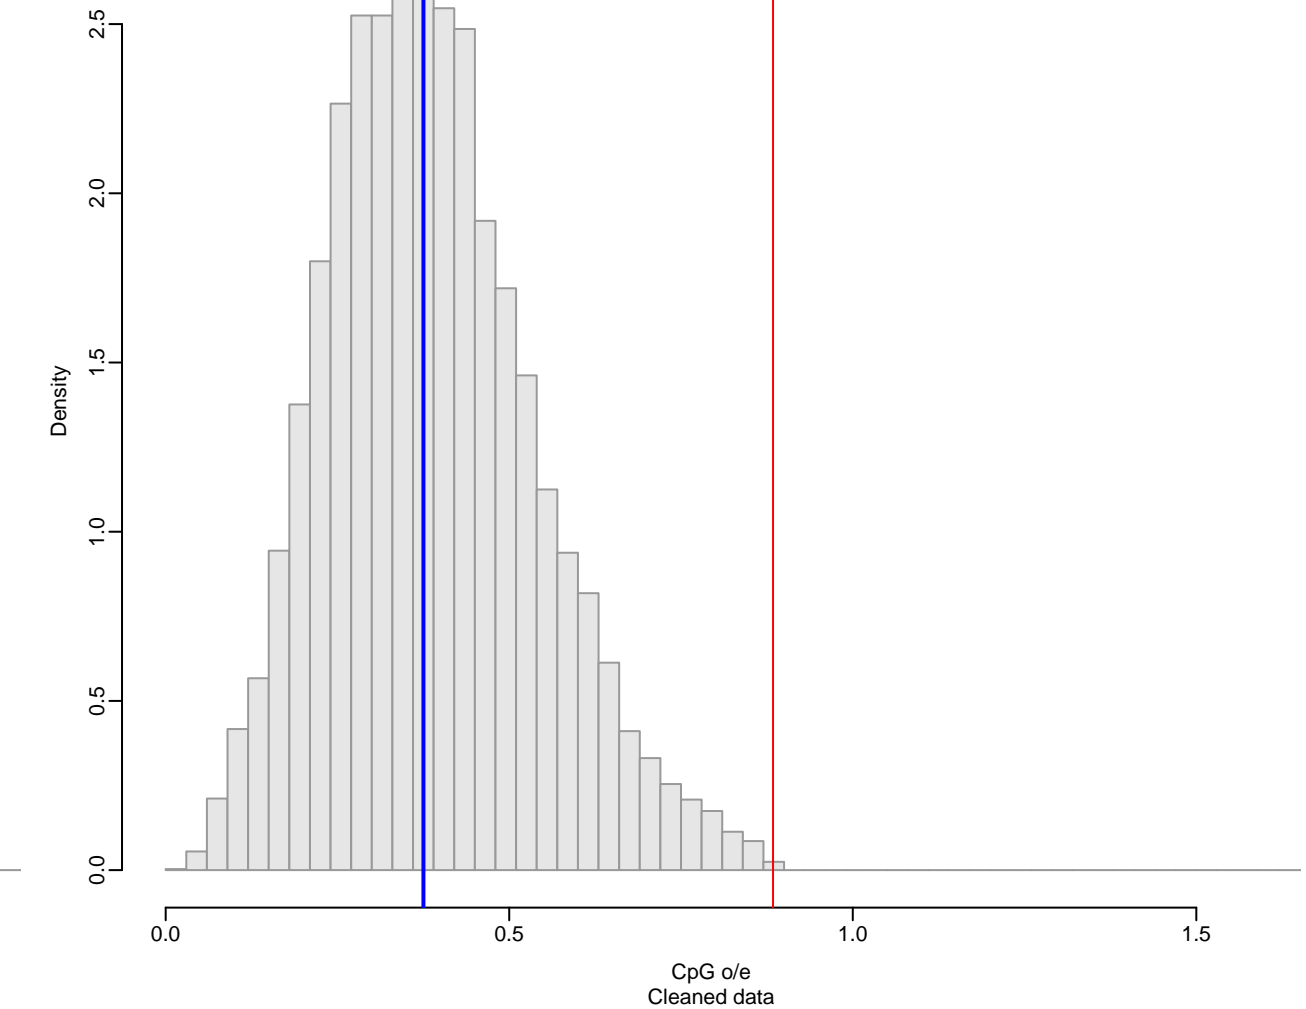

Tigriopus\_californicus

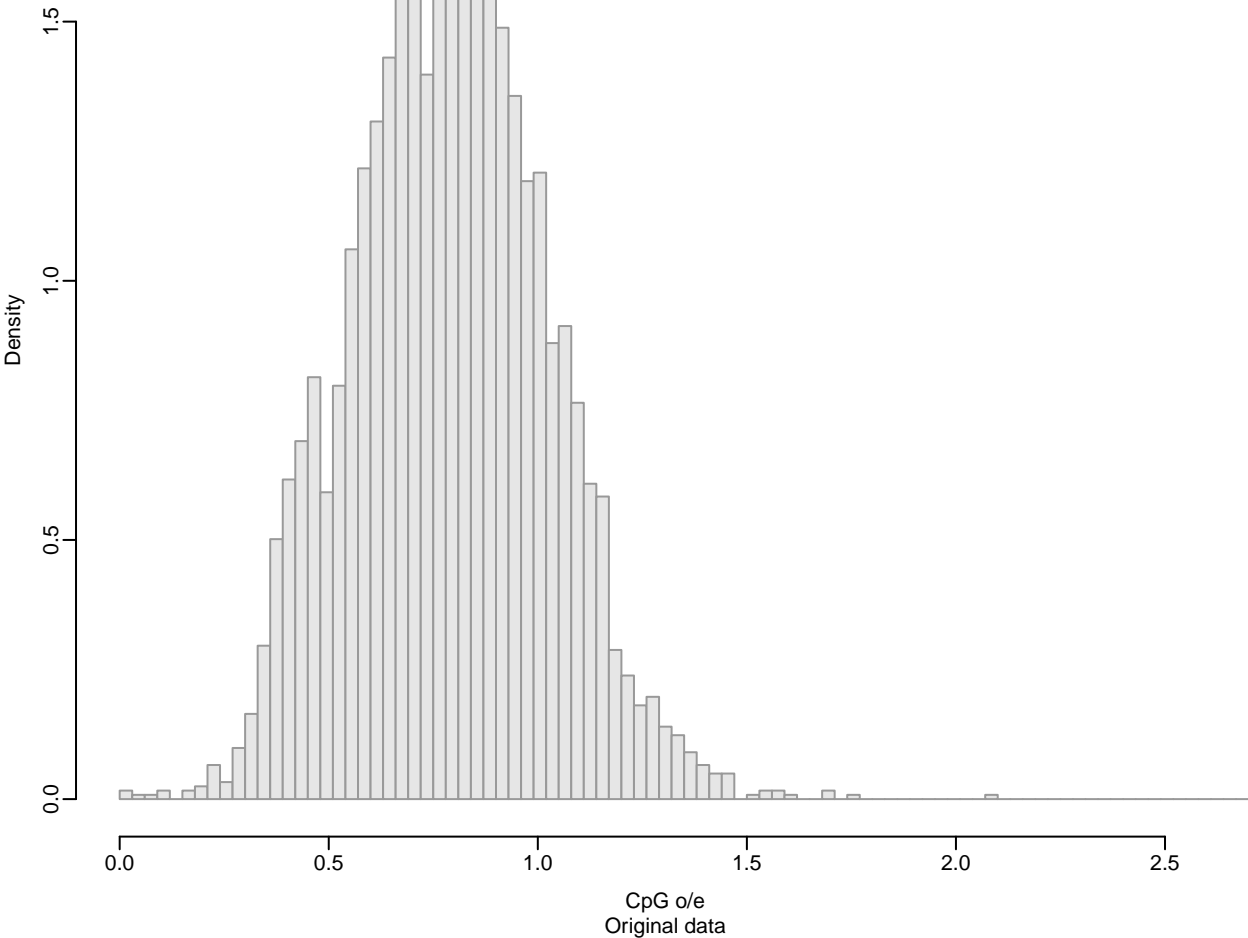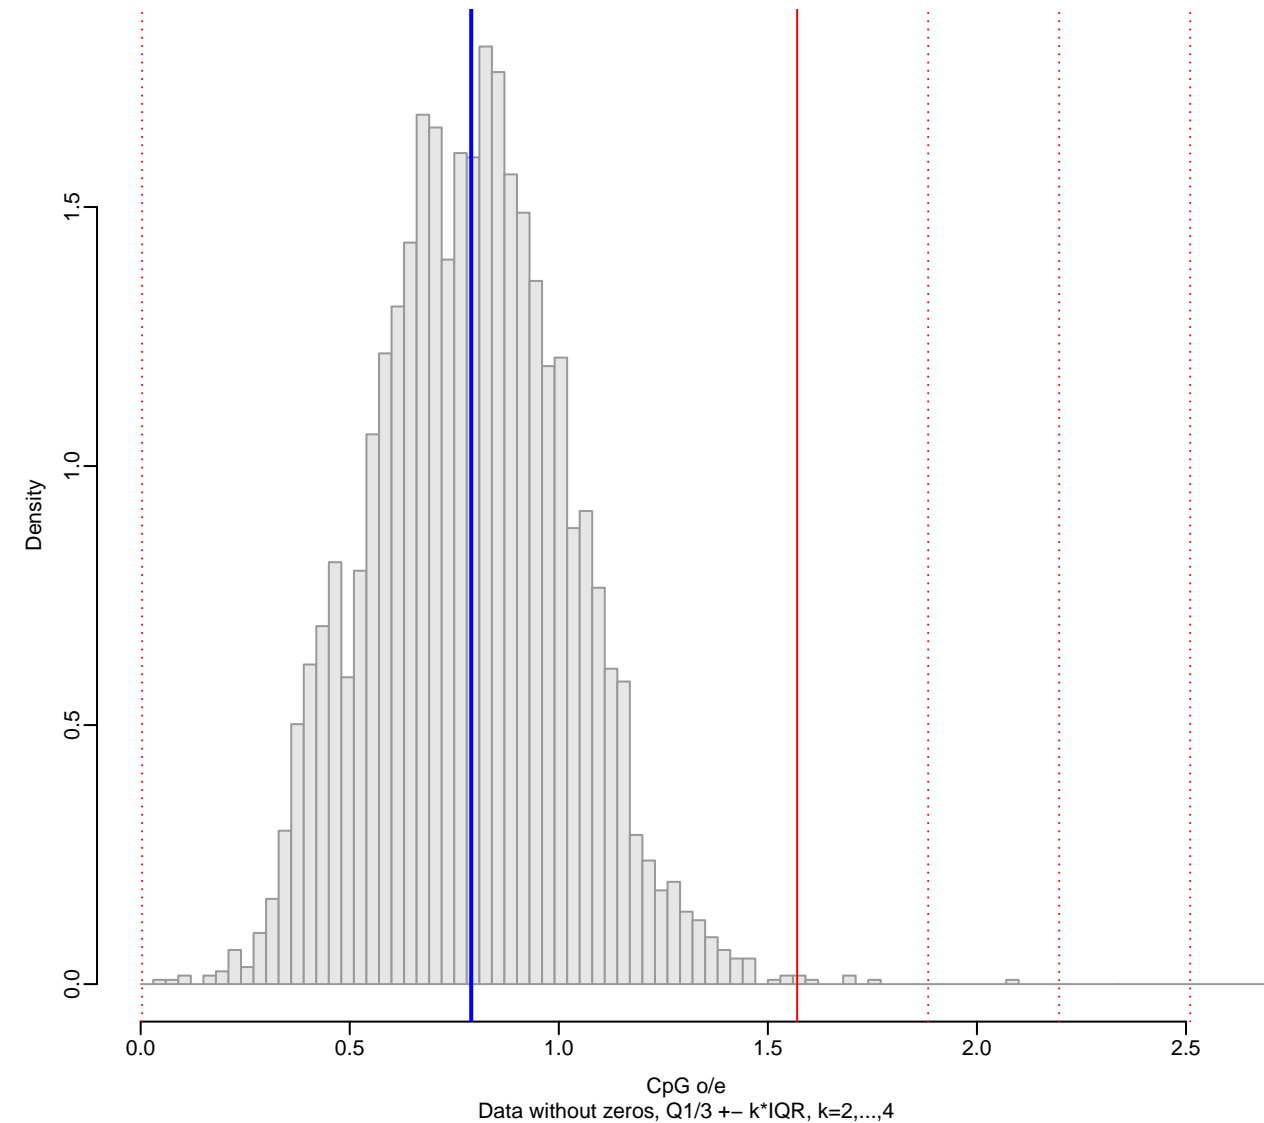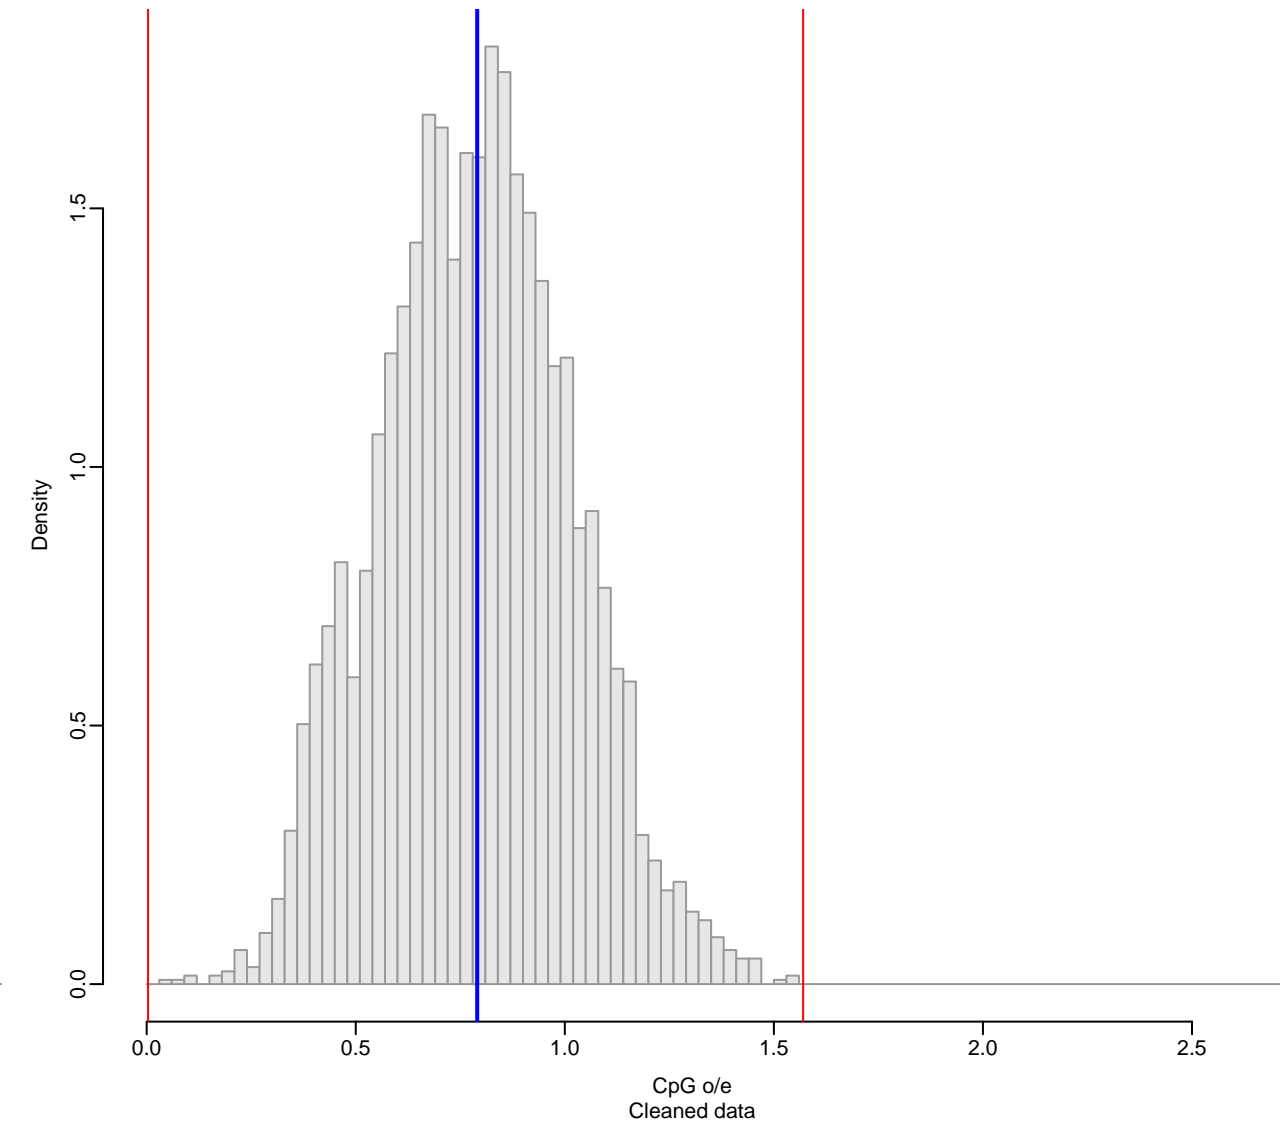

Torpedo\_californica

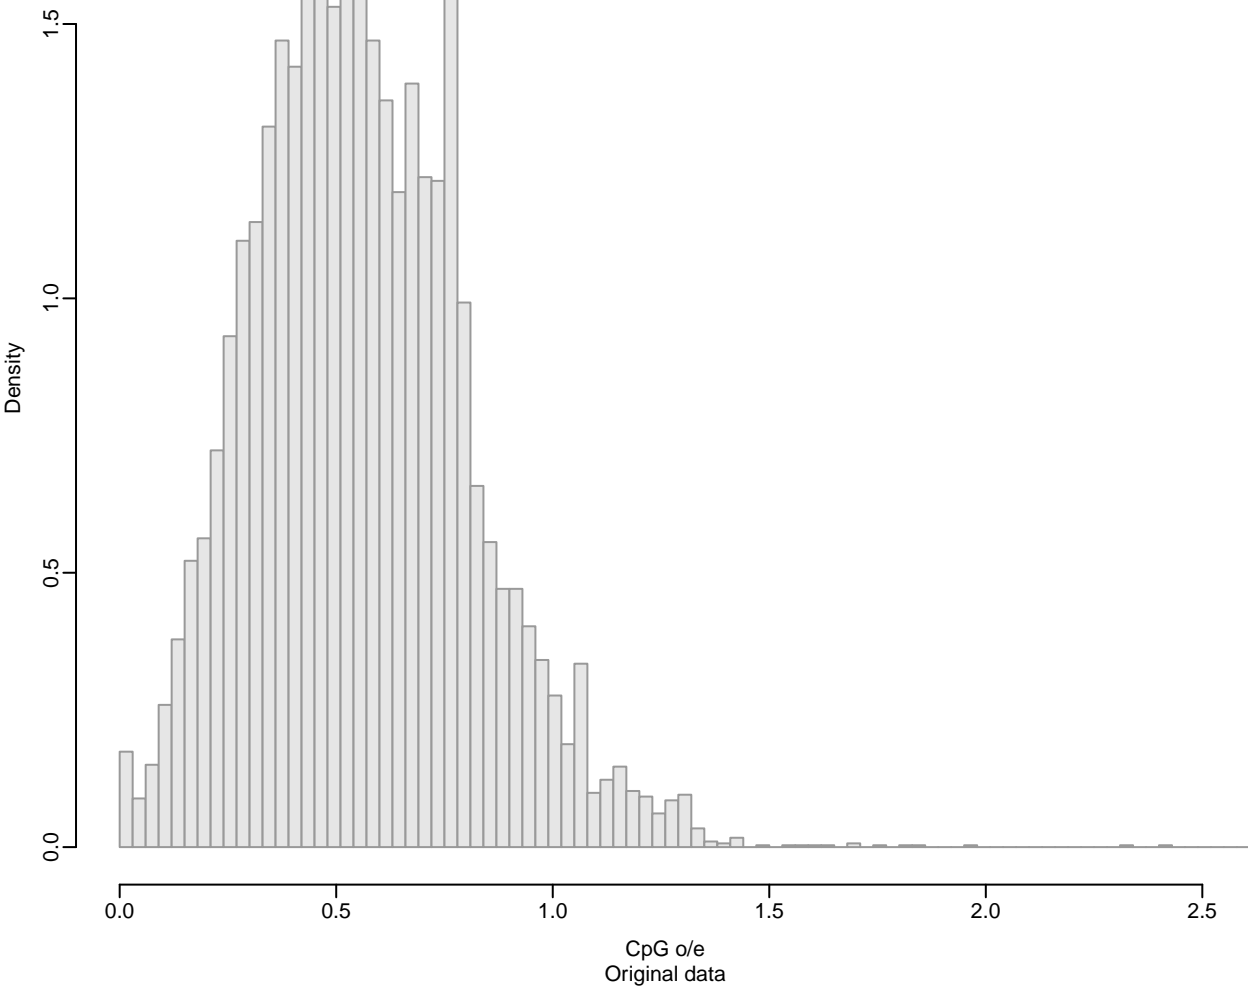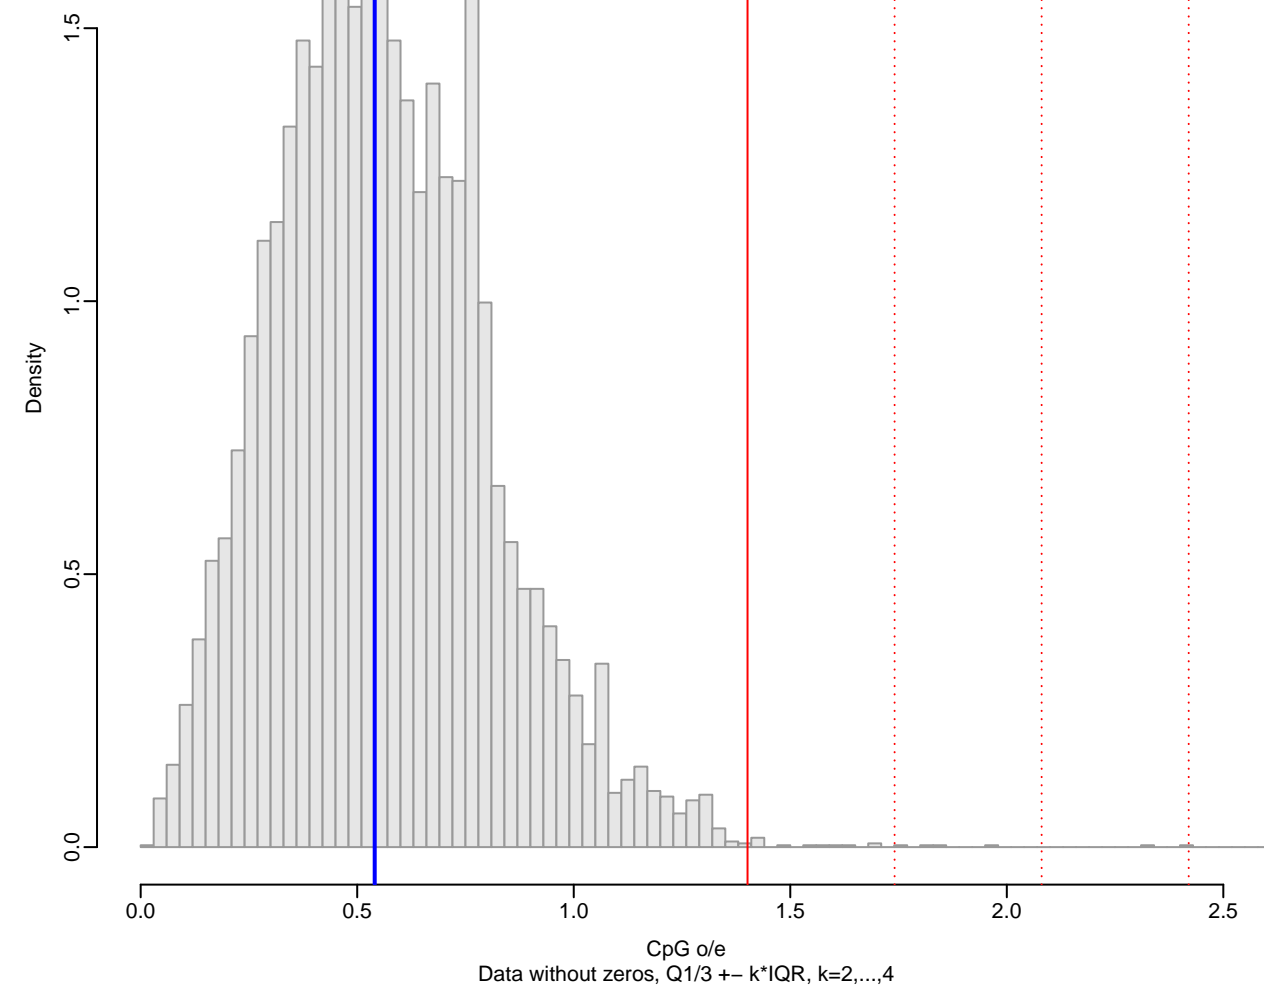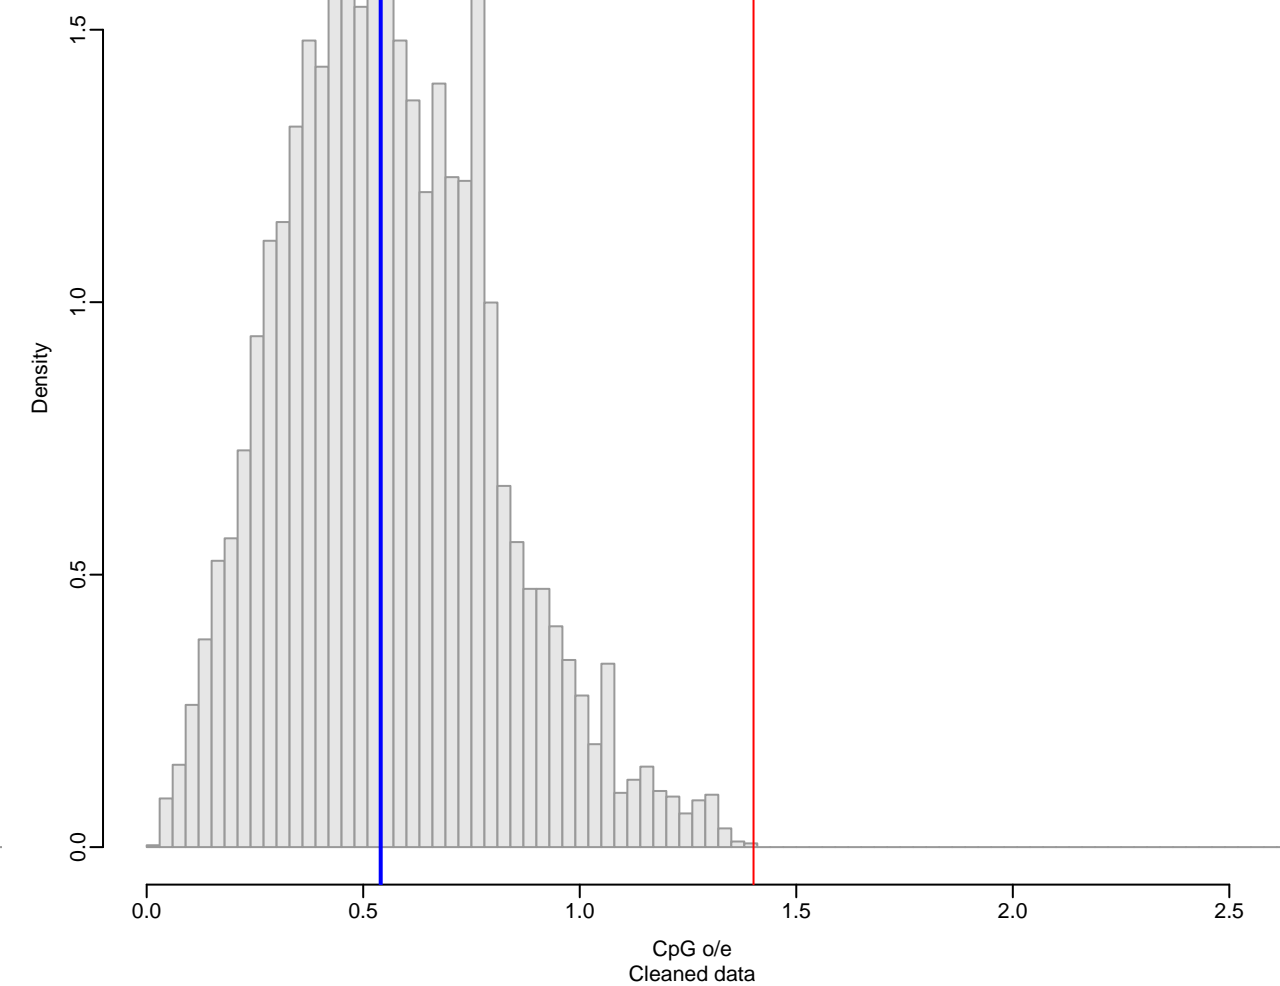



Toxoplasma\_gondii

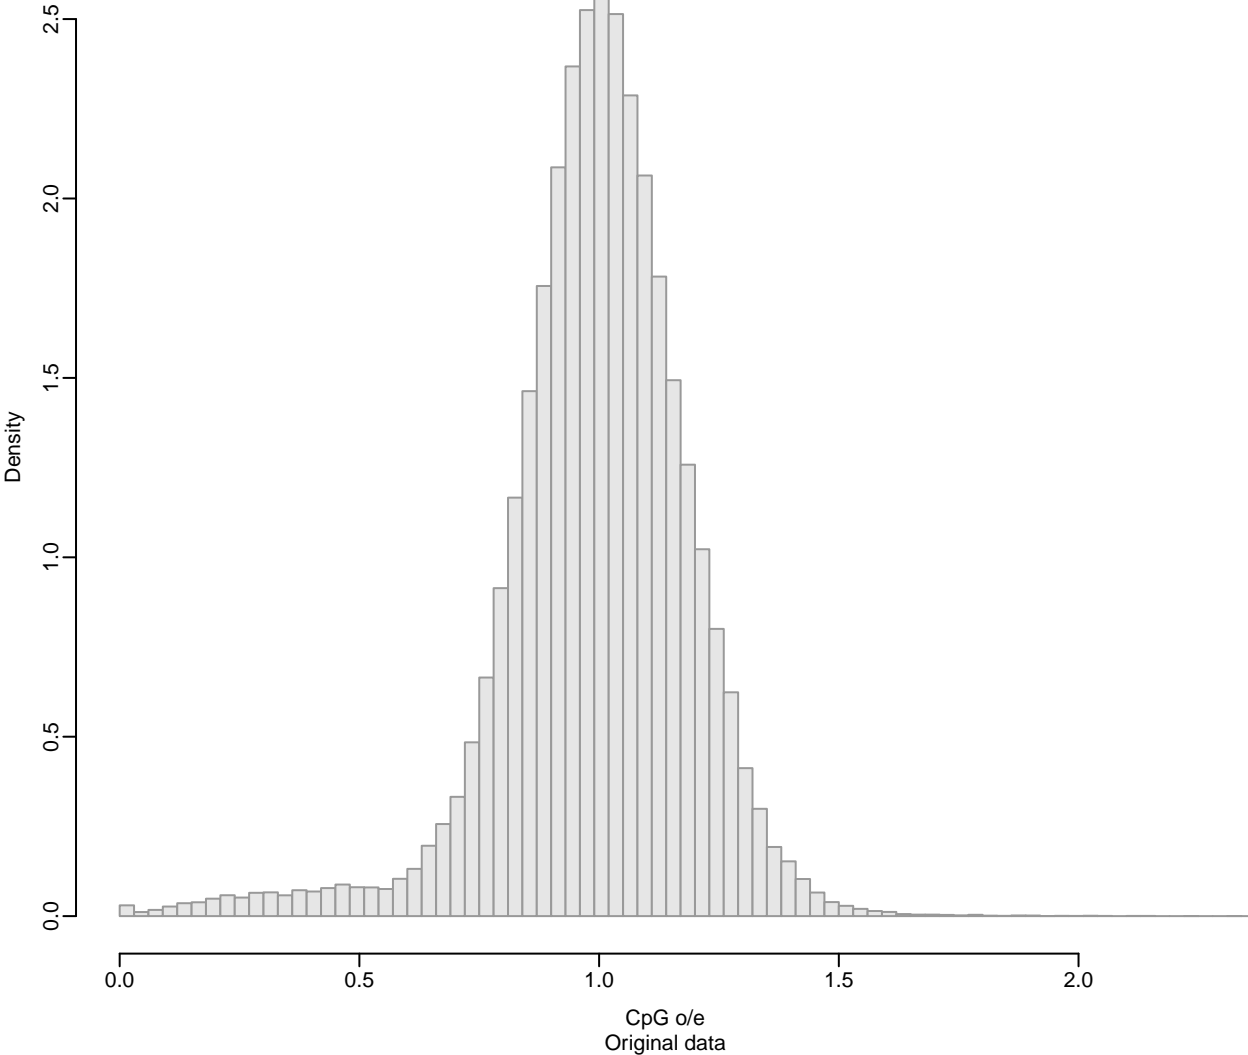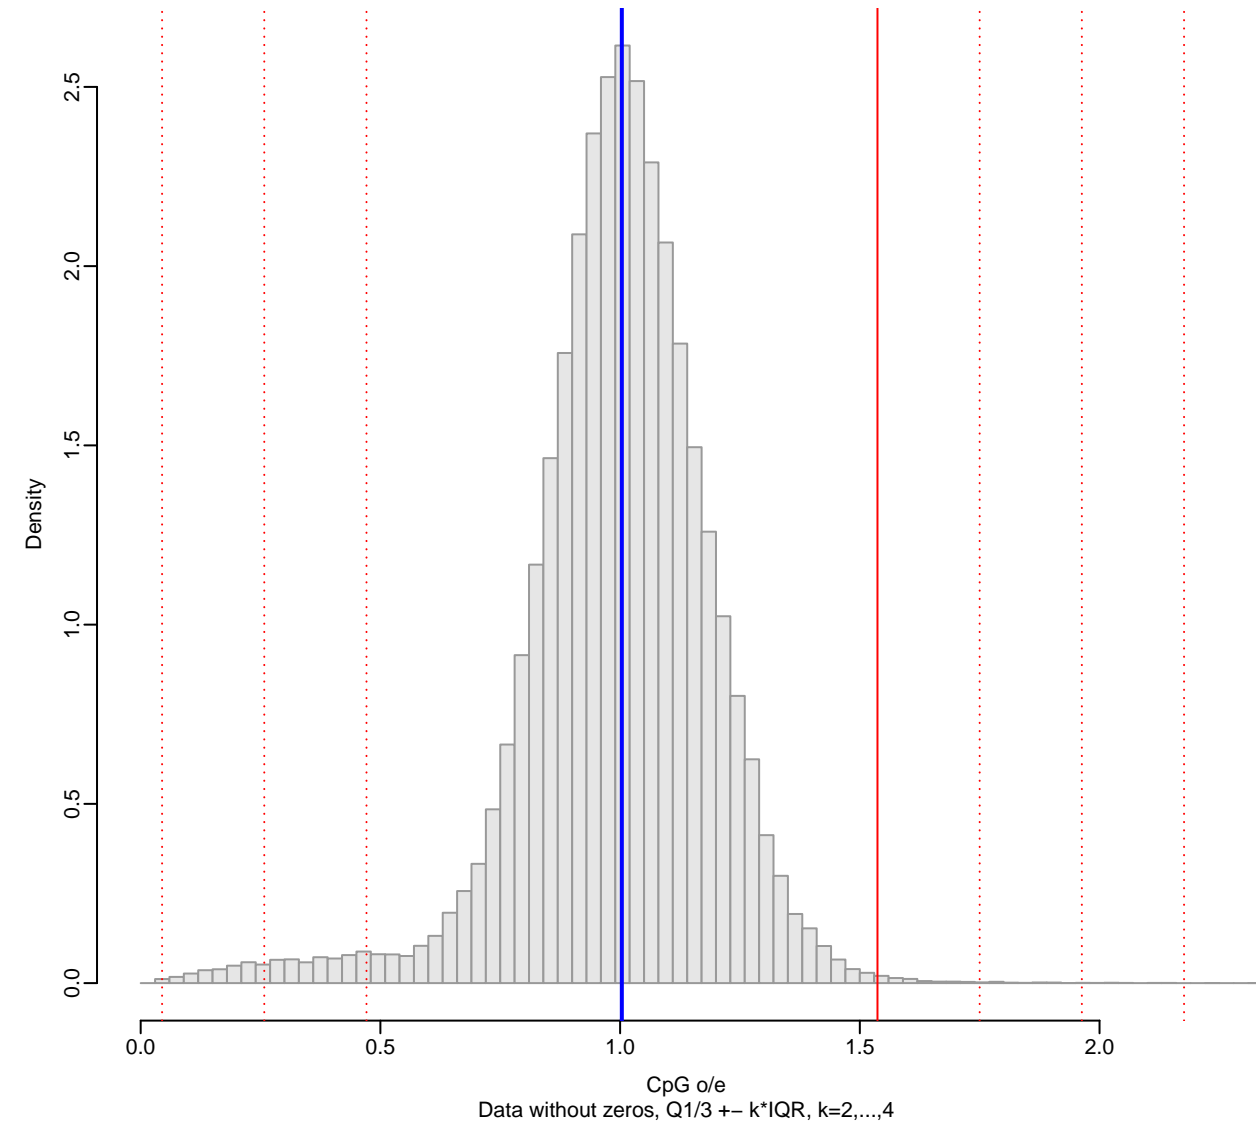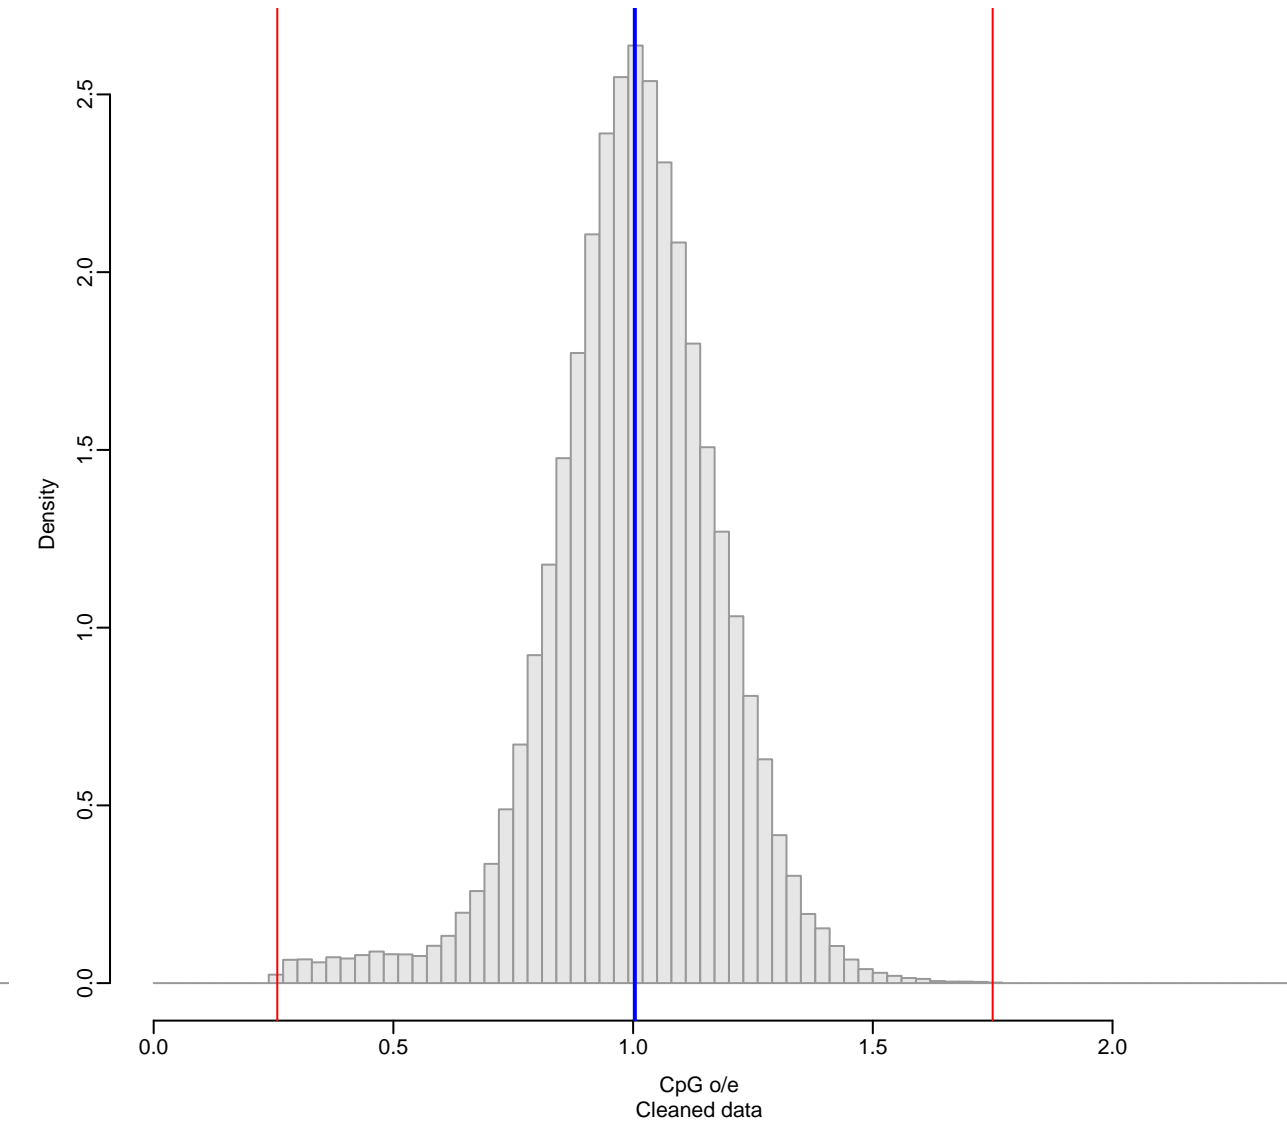

Toxoptera\_citricida

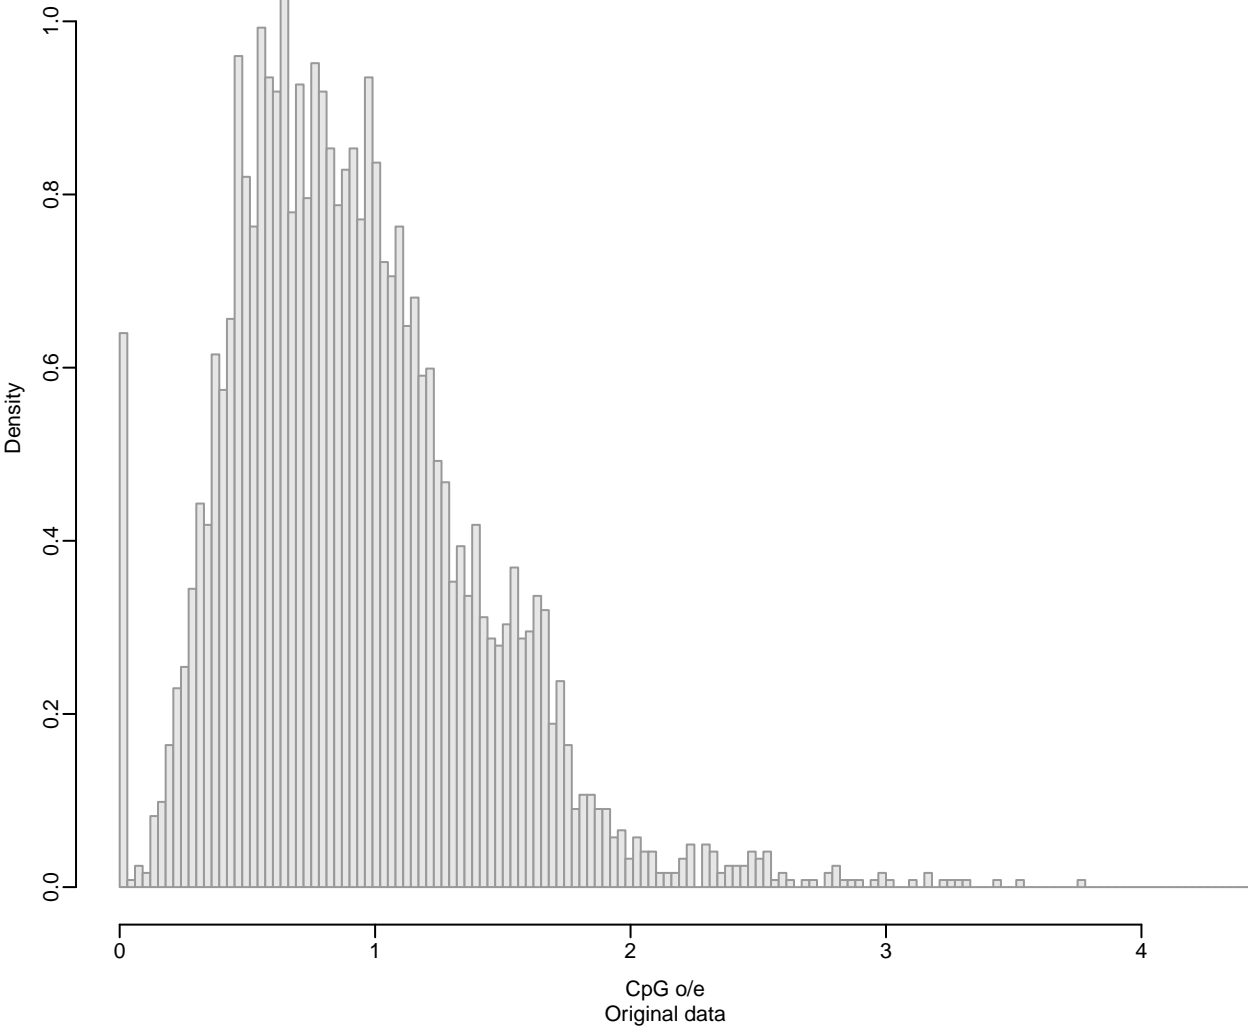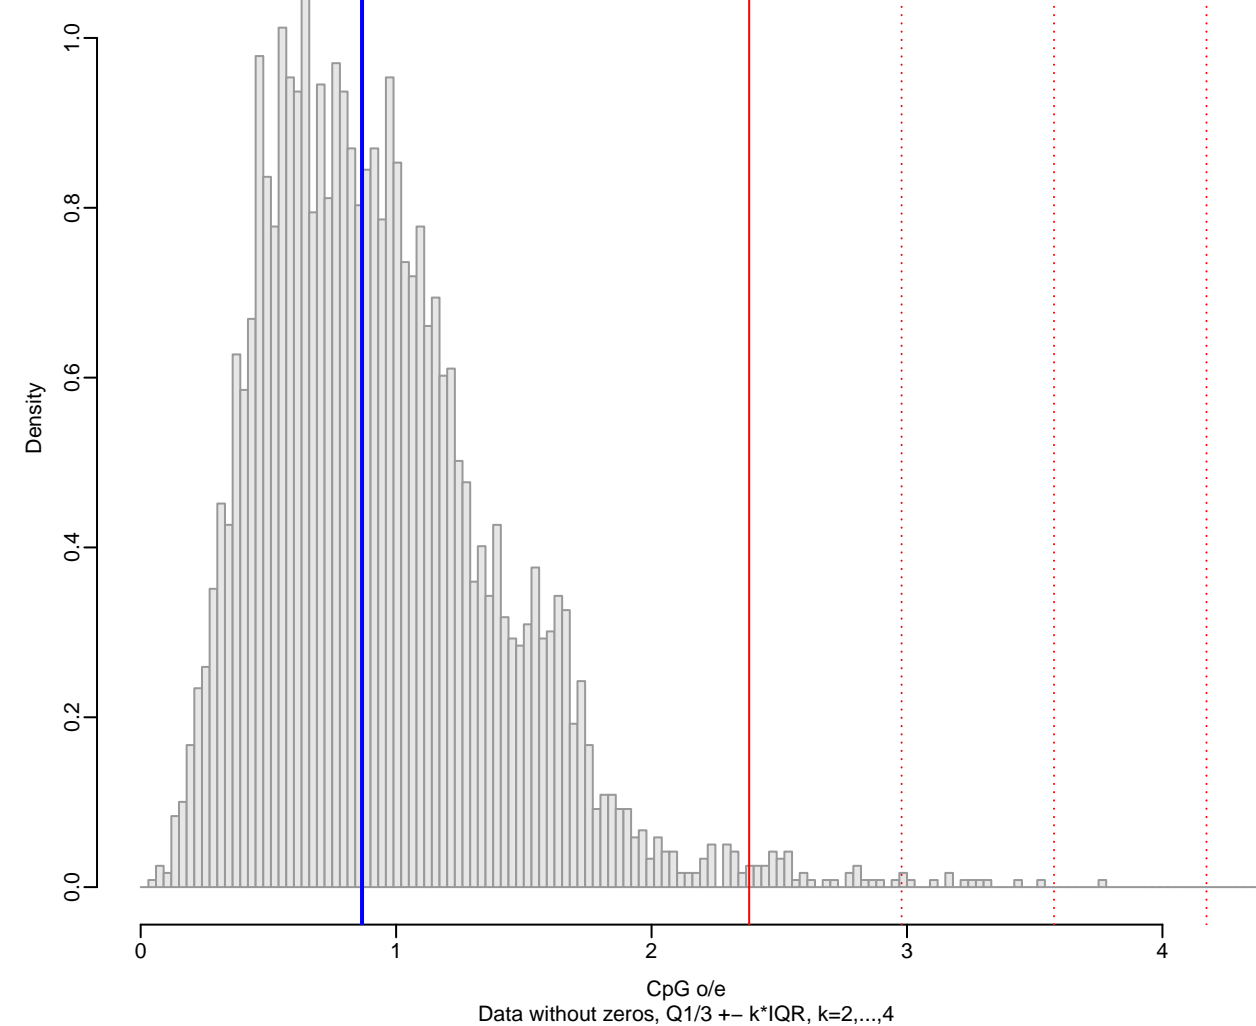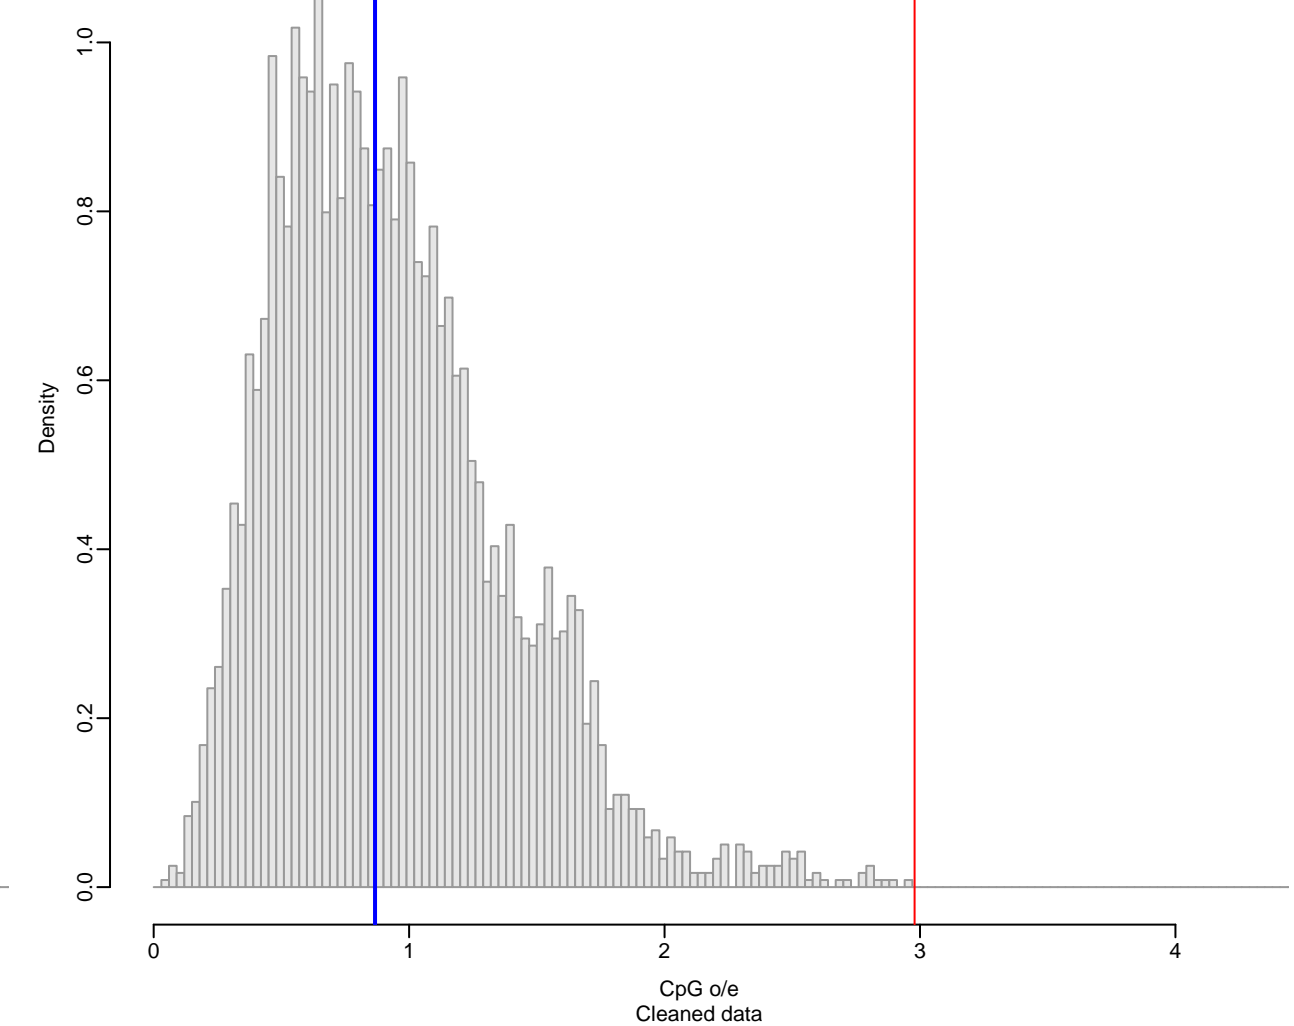

Trachemys\_scripta

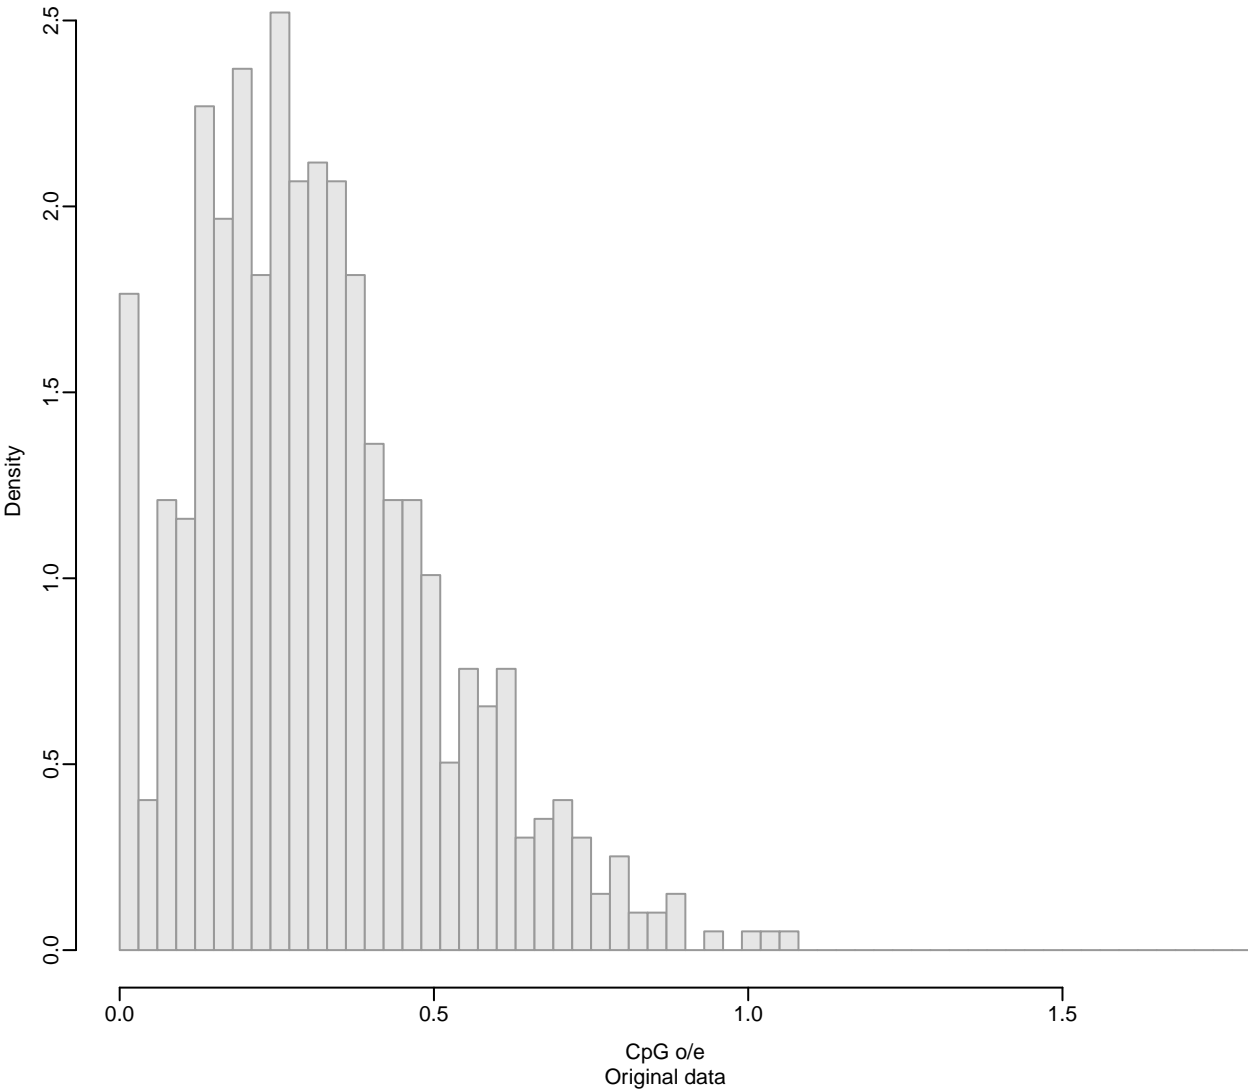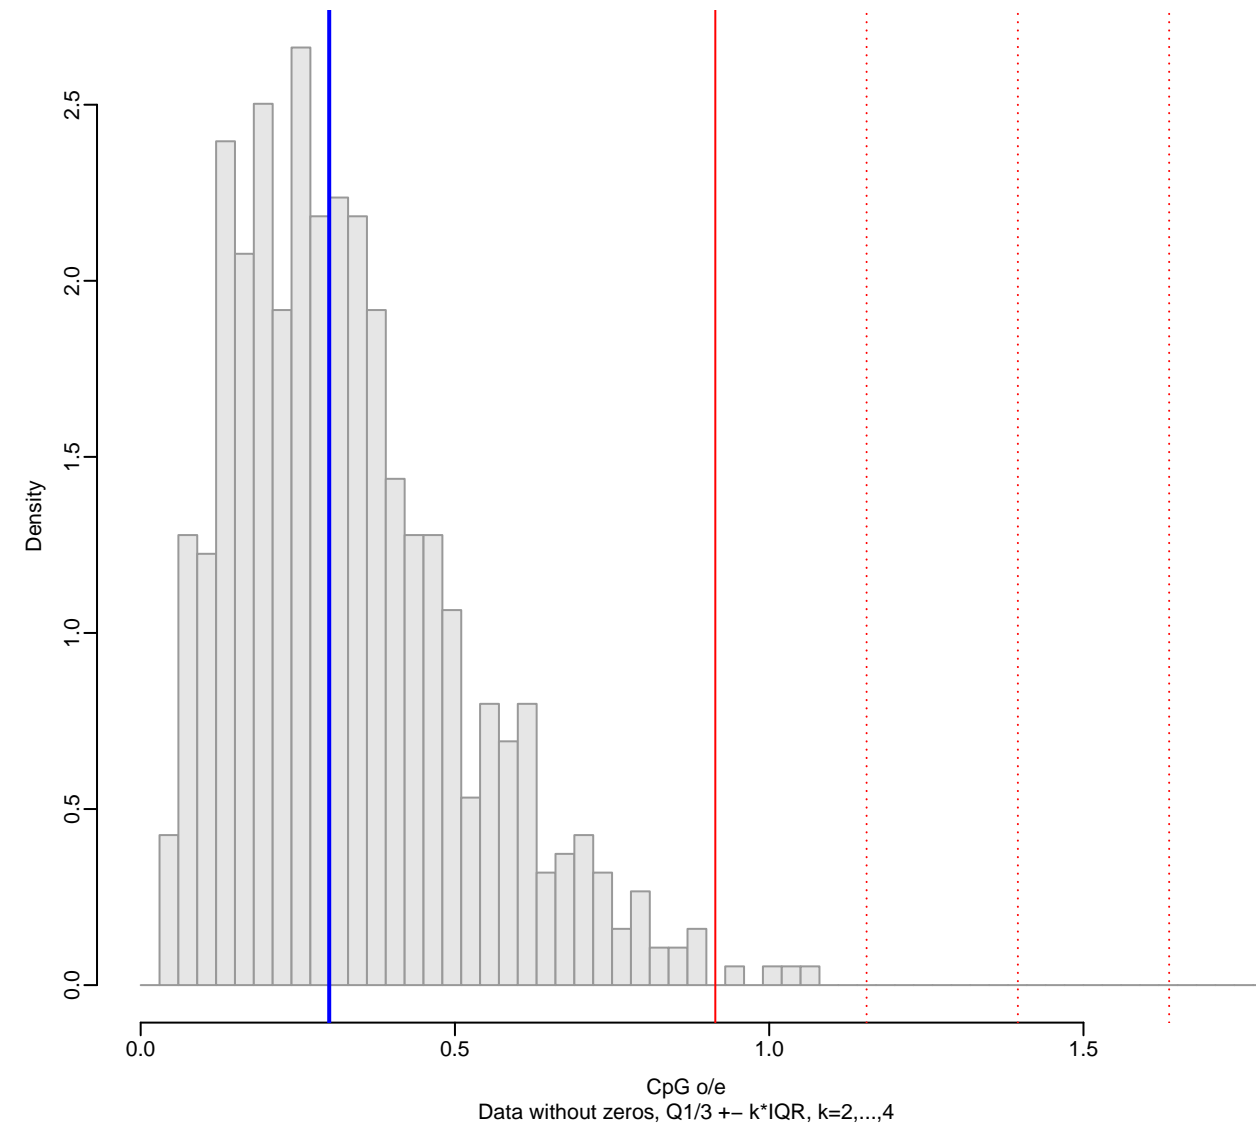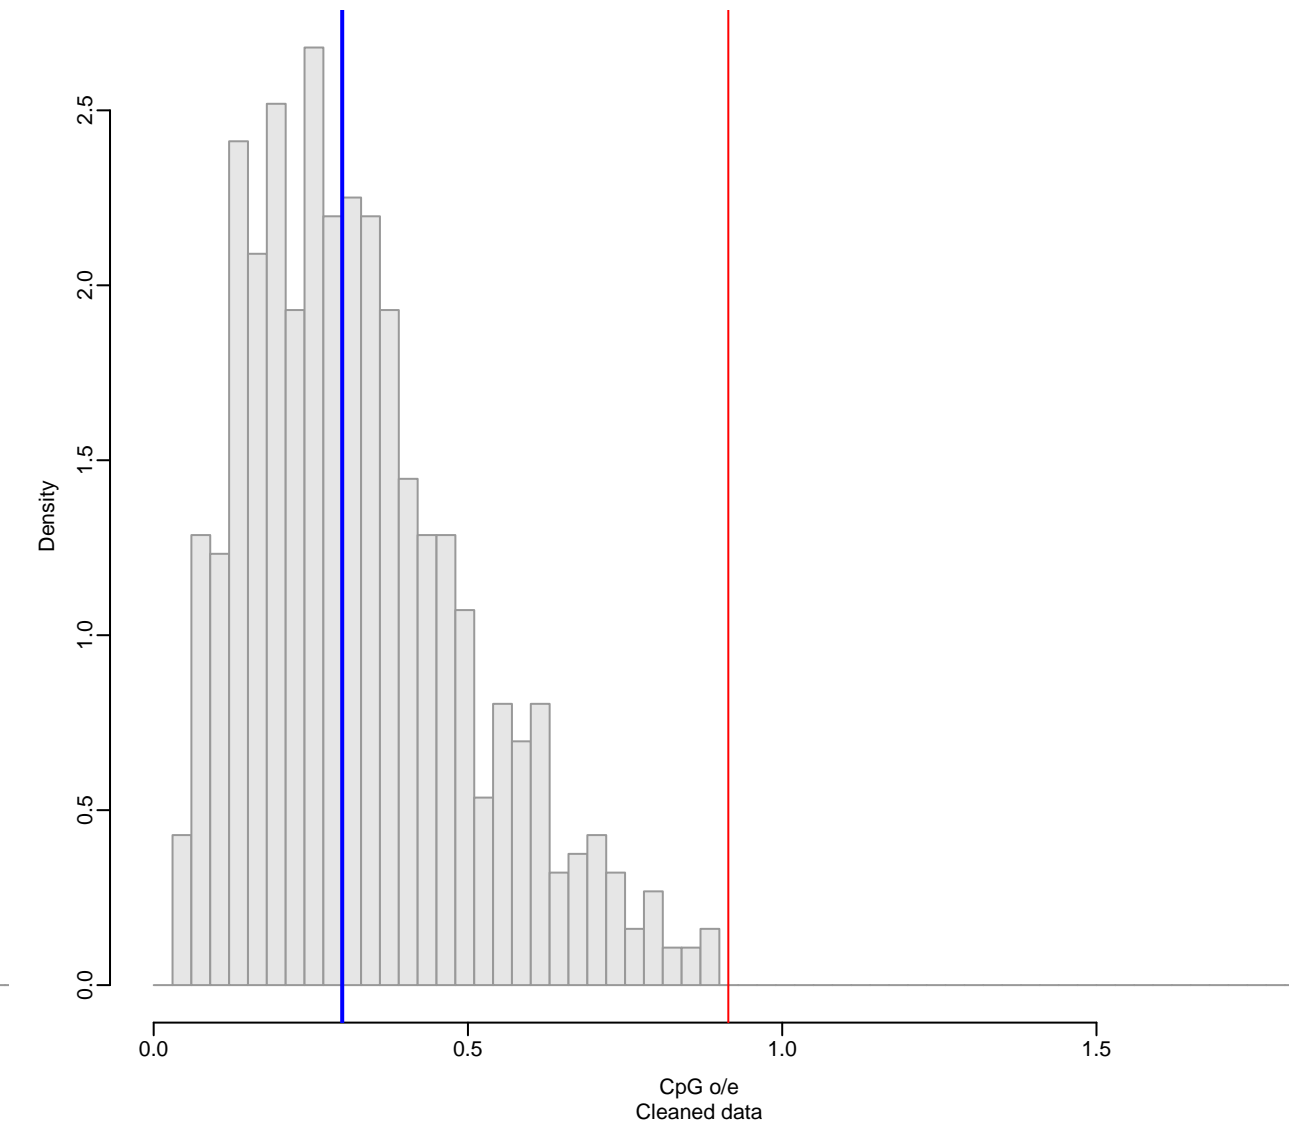

Tremella\_mesenterica

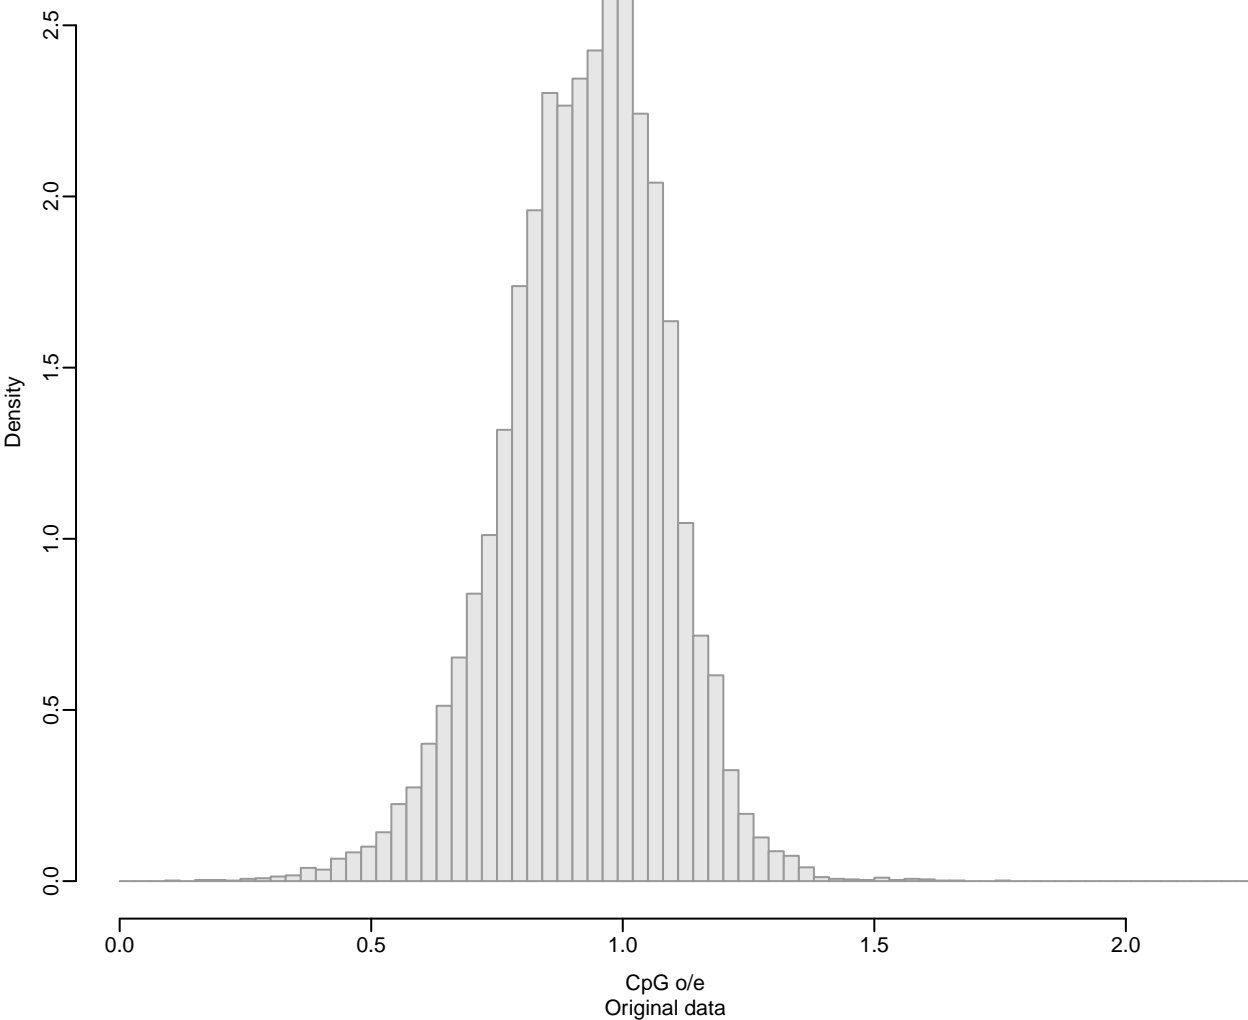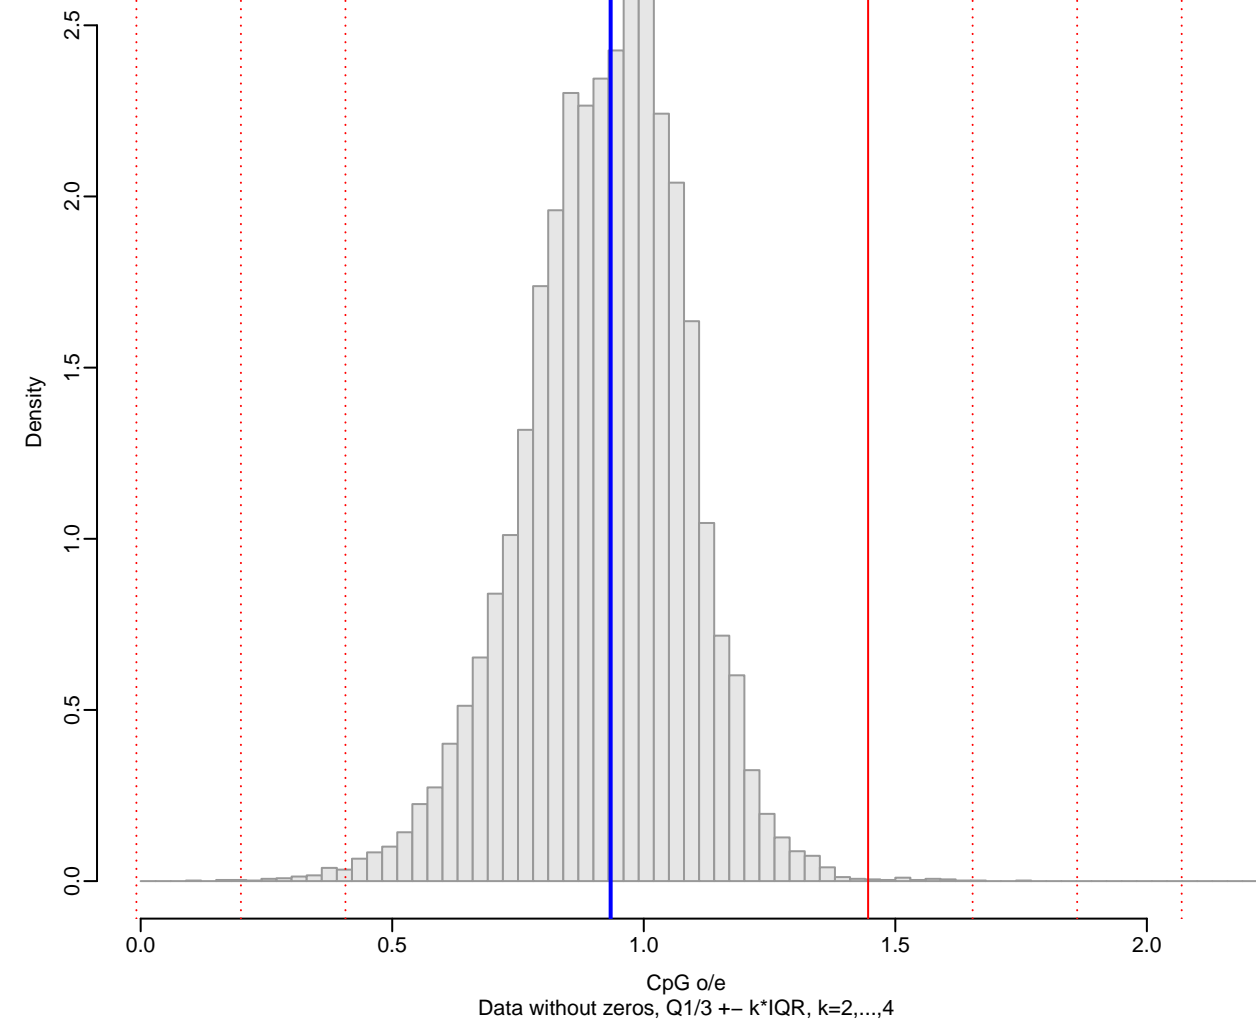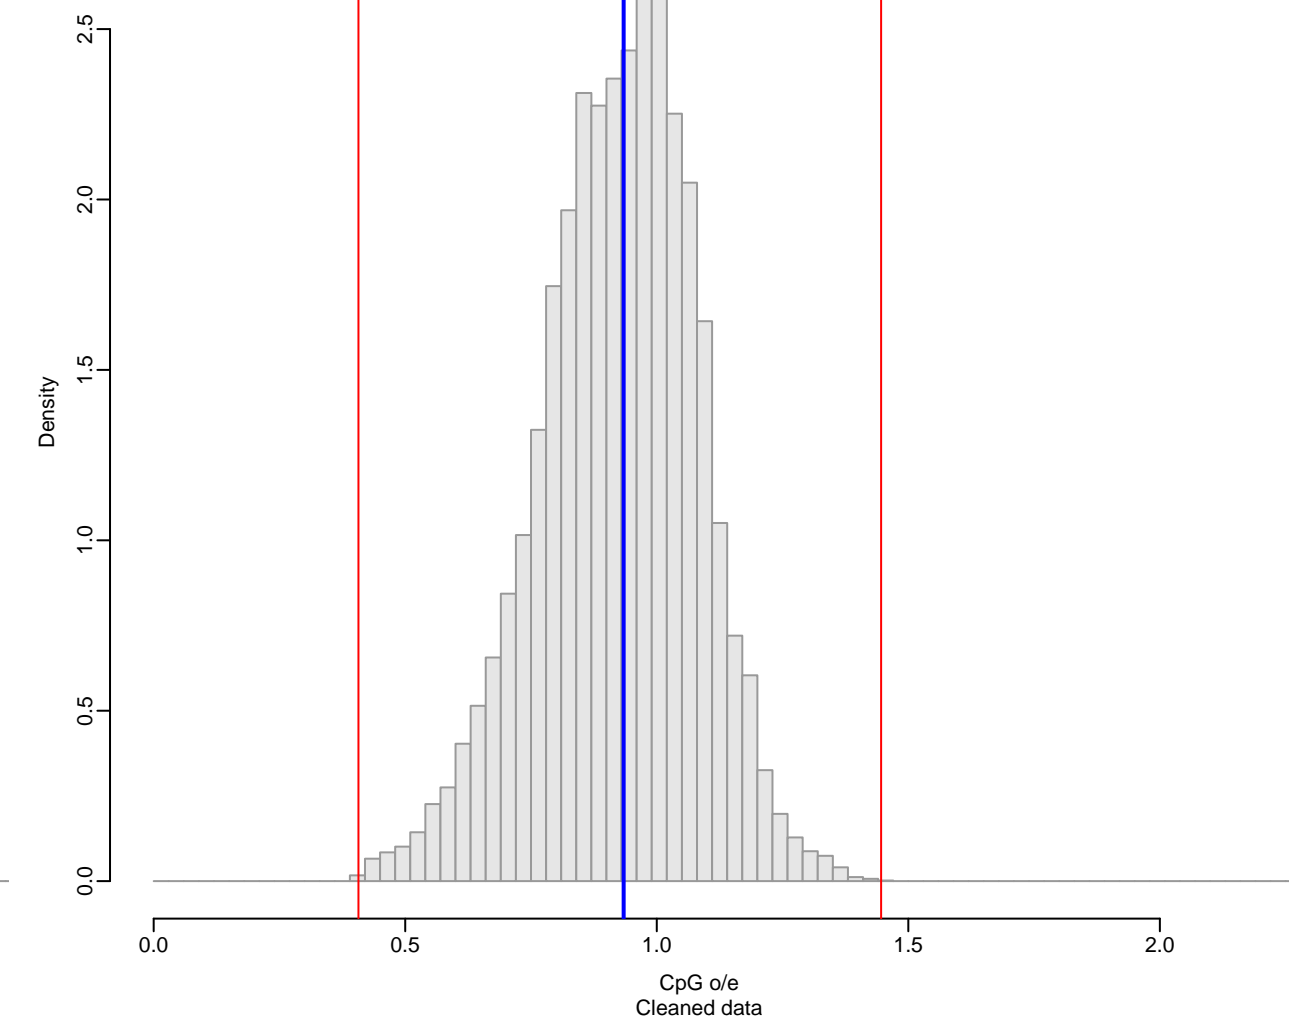

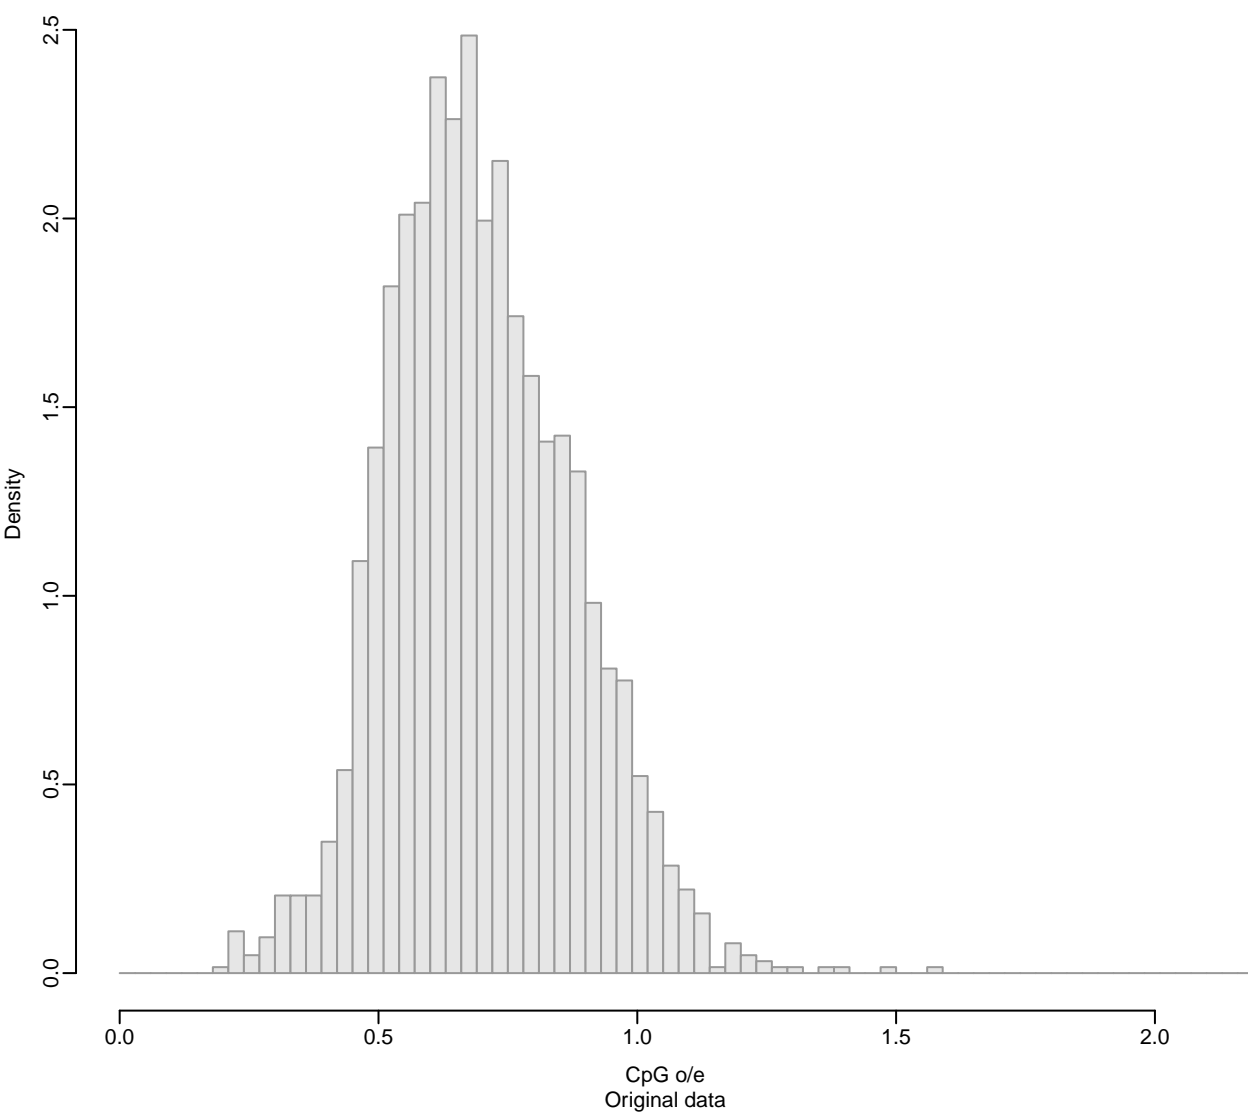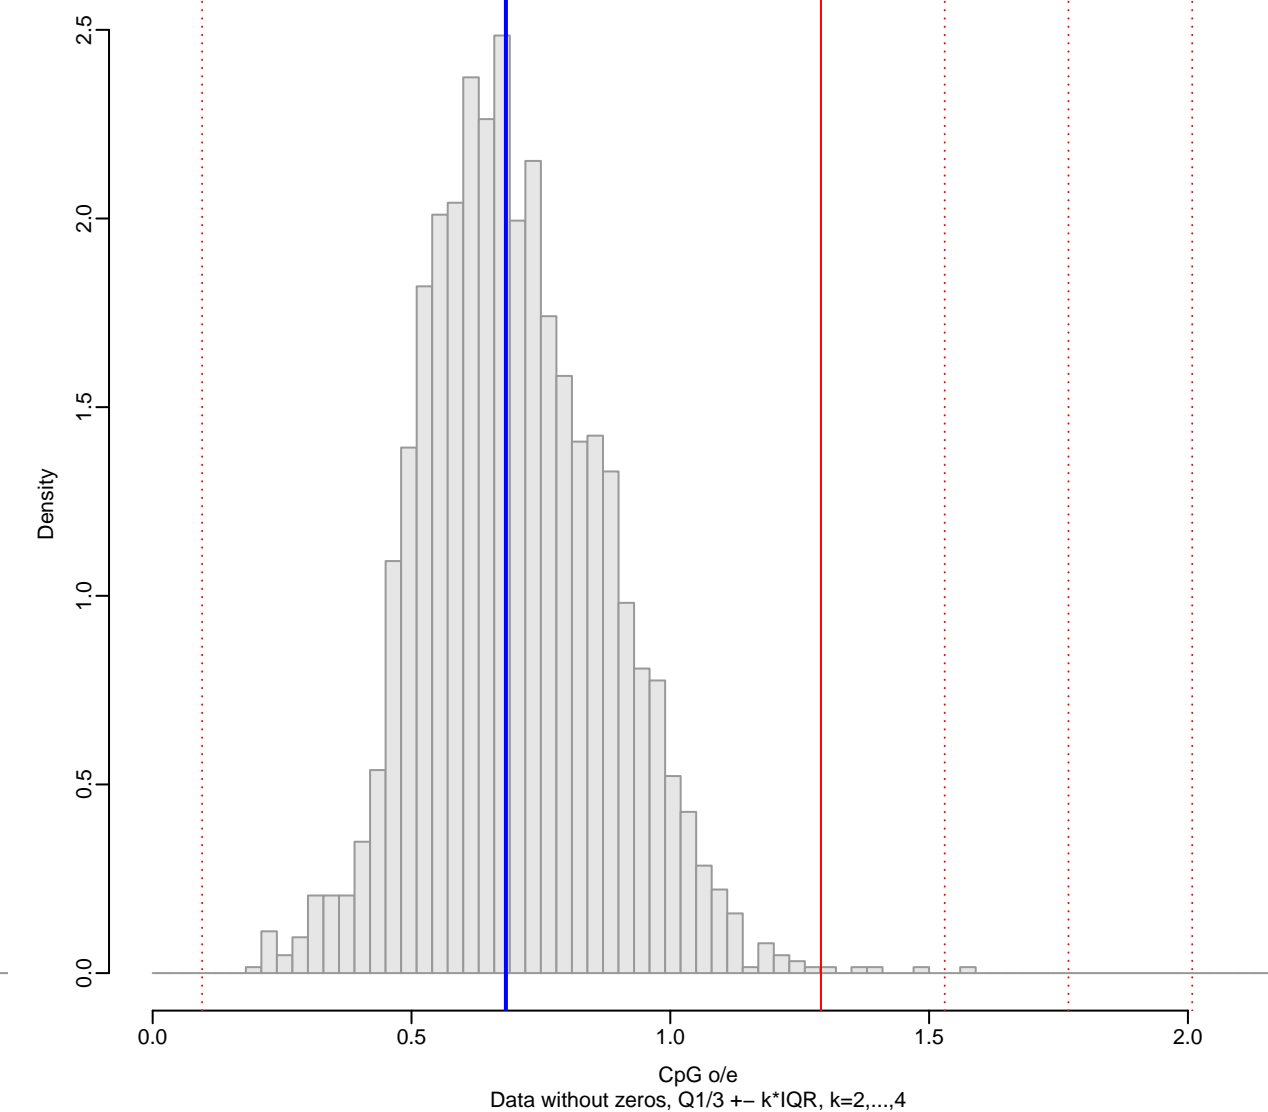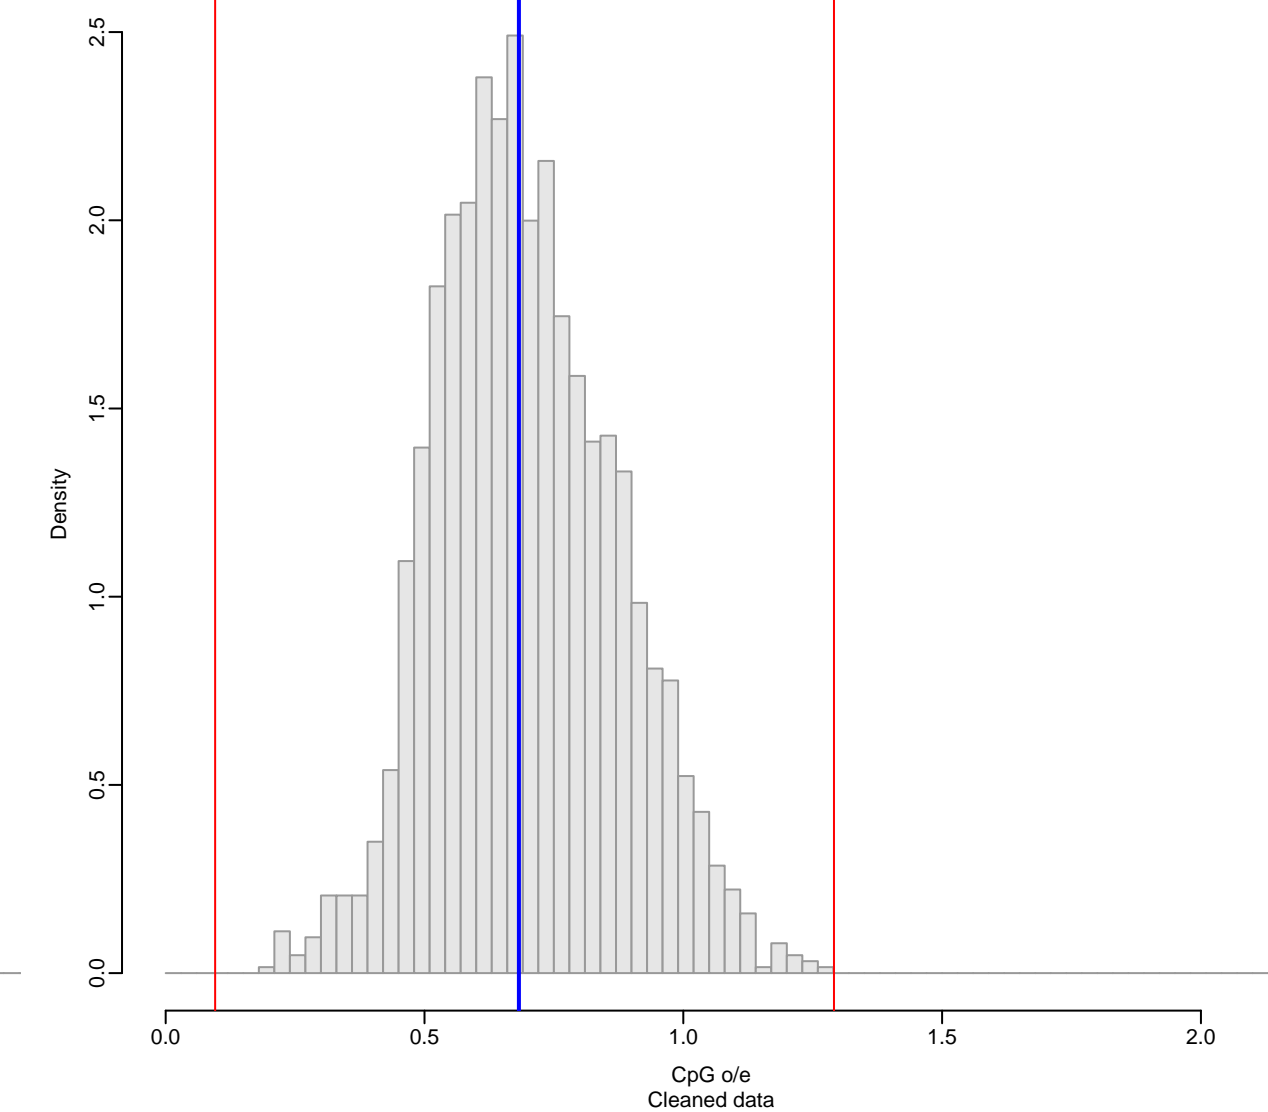

Triatoma\_matogrossensis

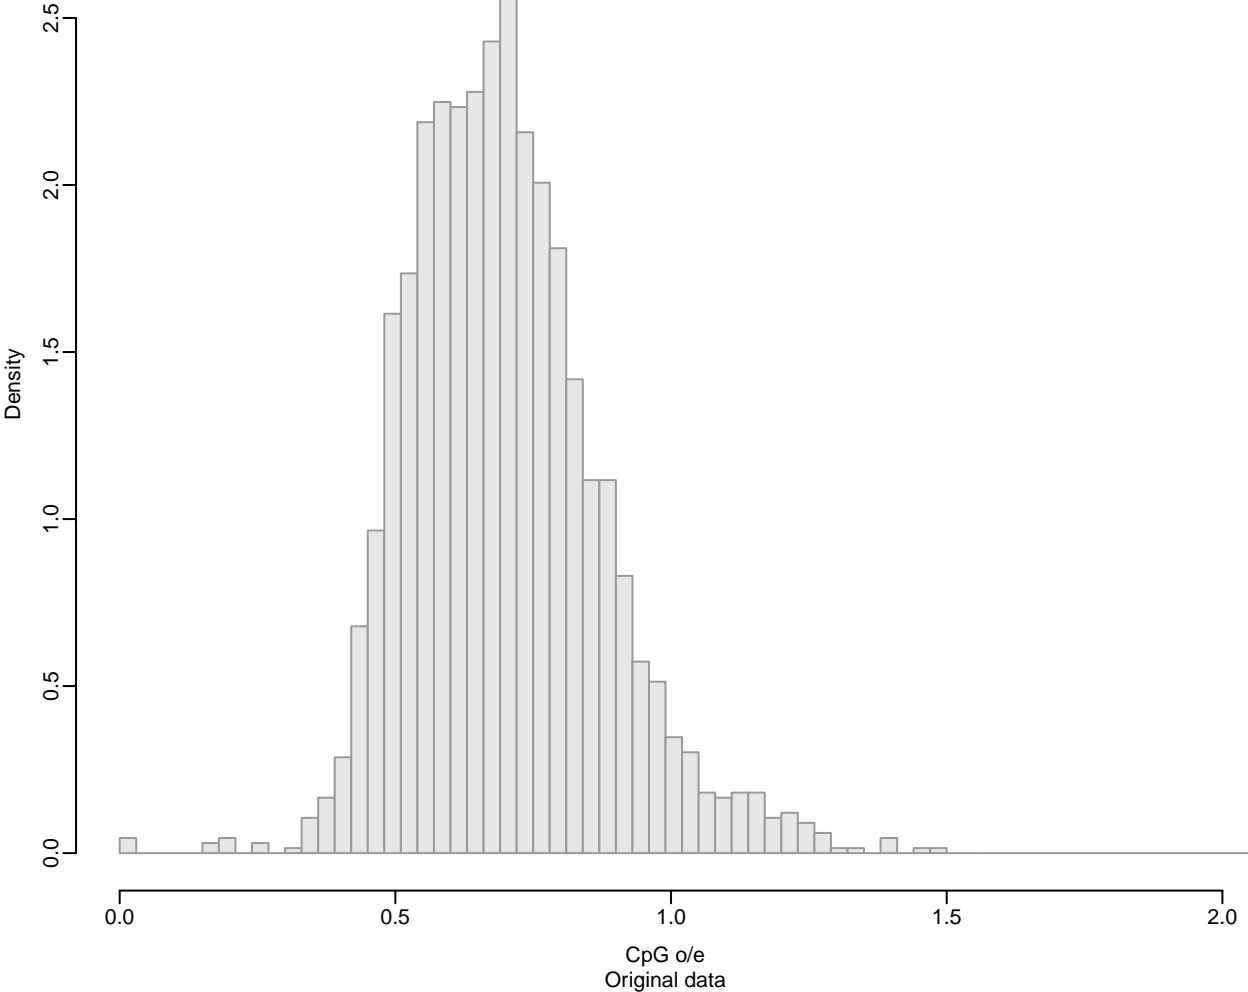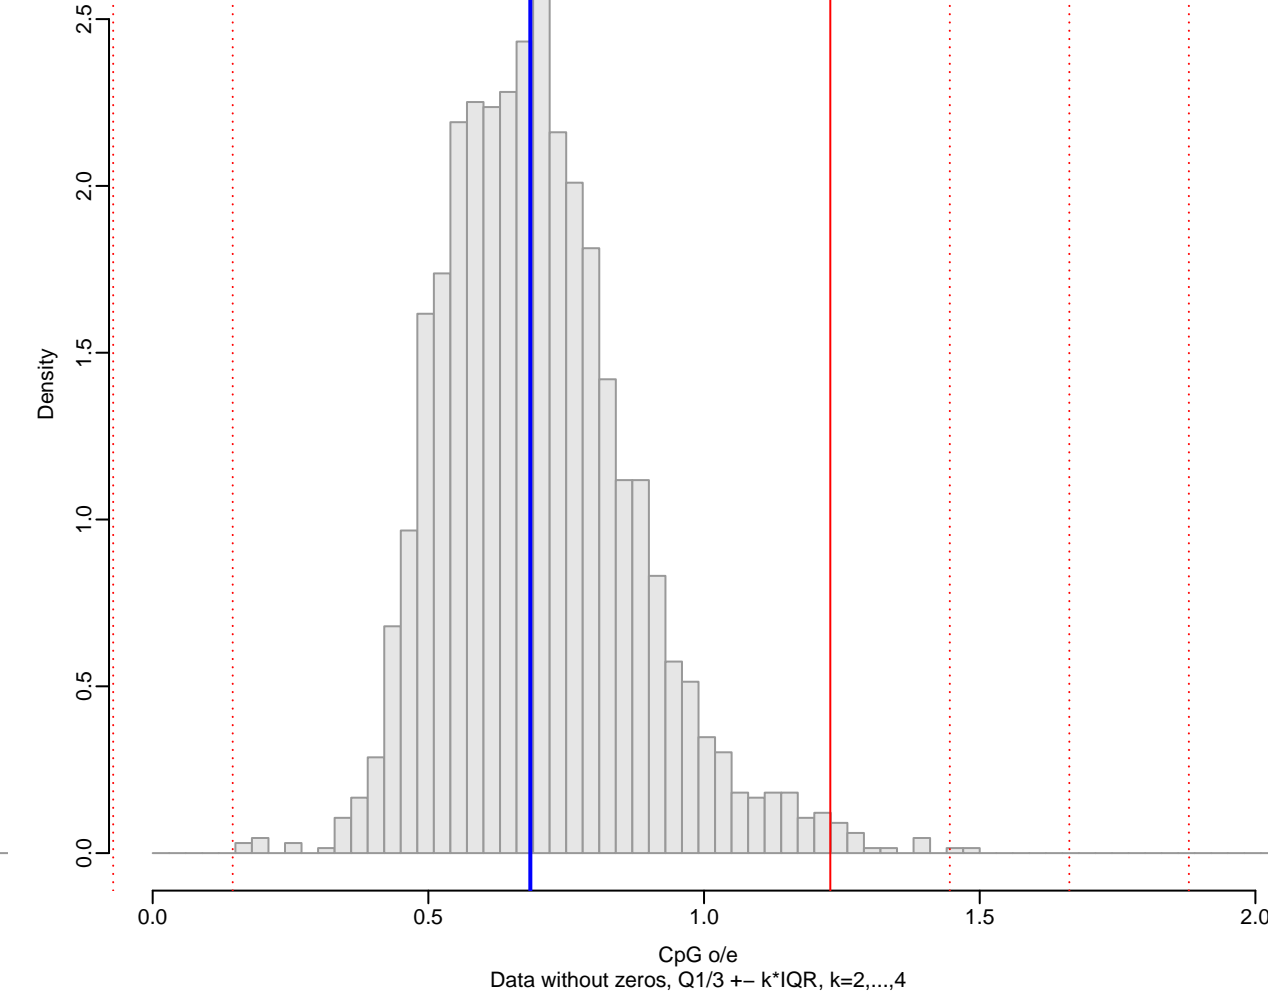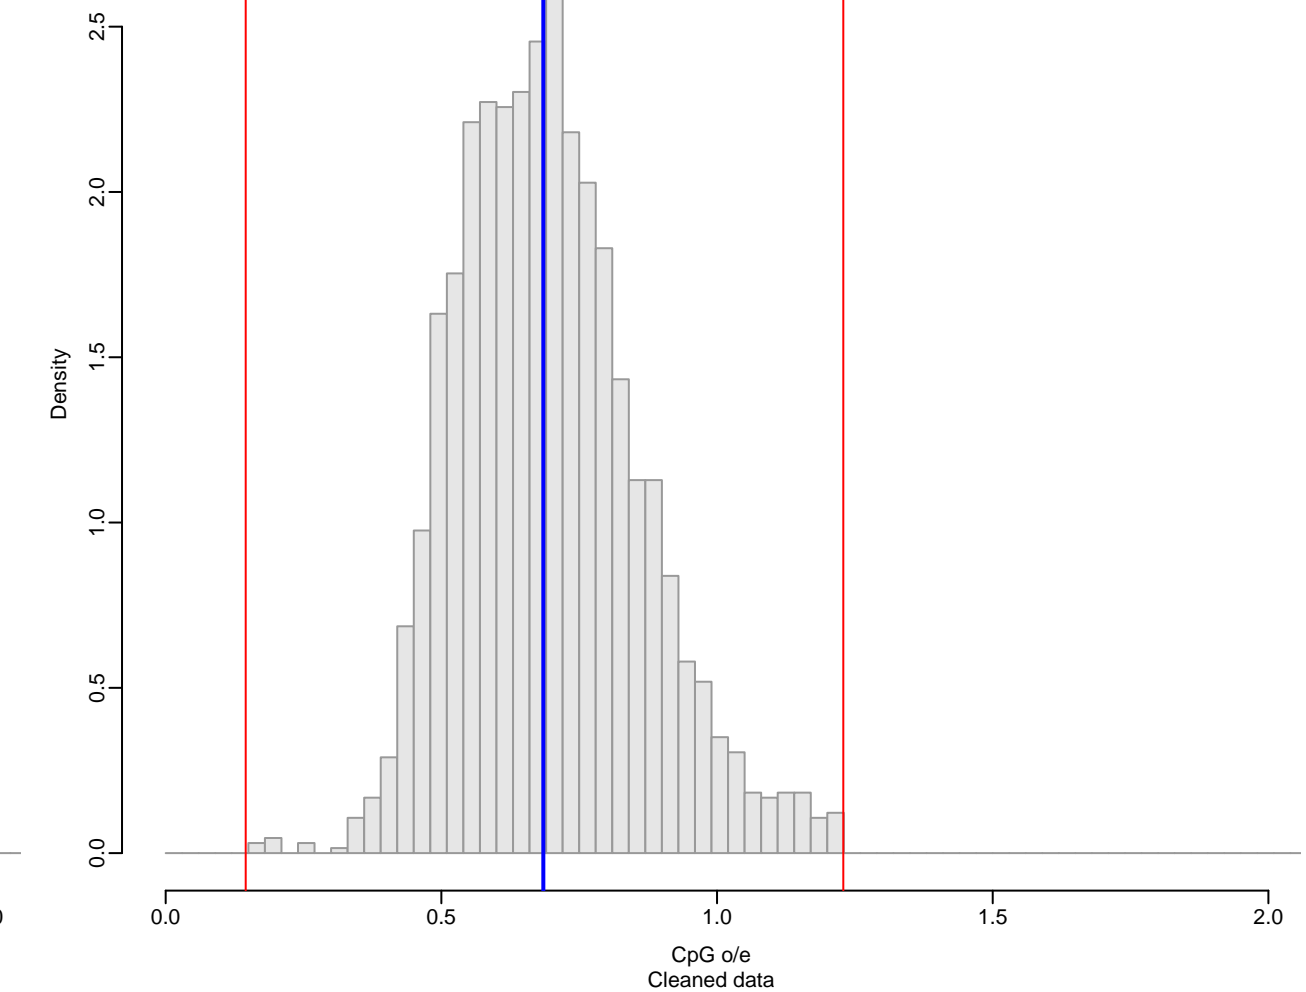

Tribolium\_castaneum

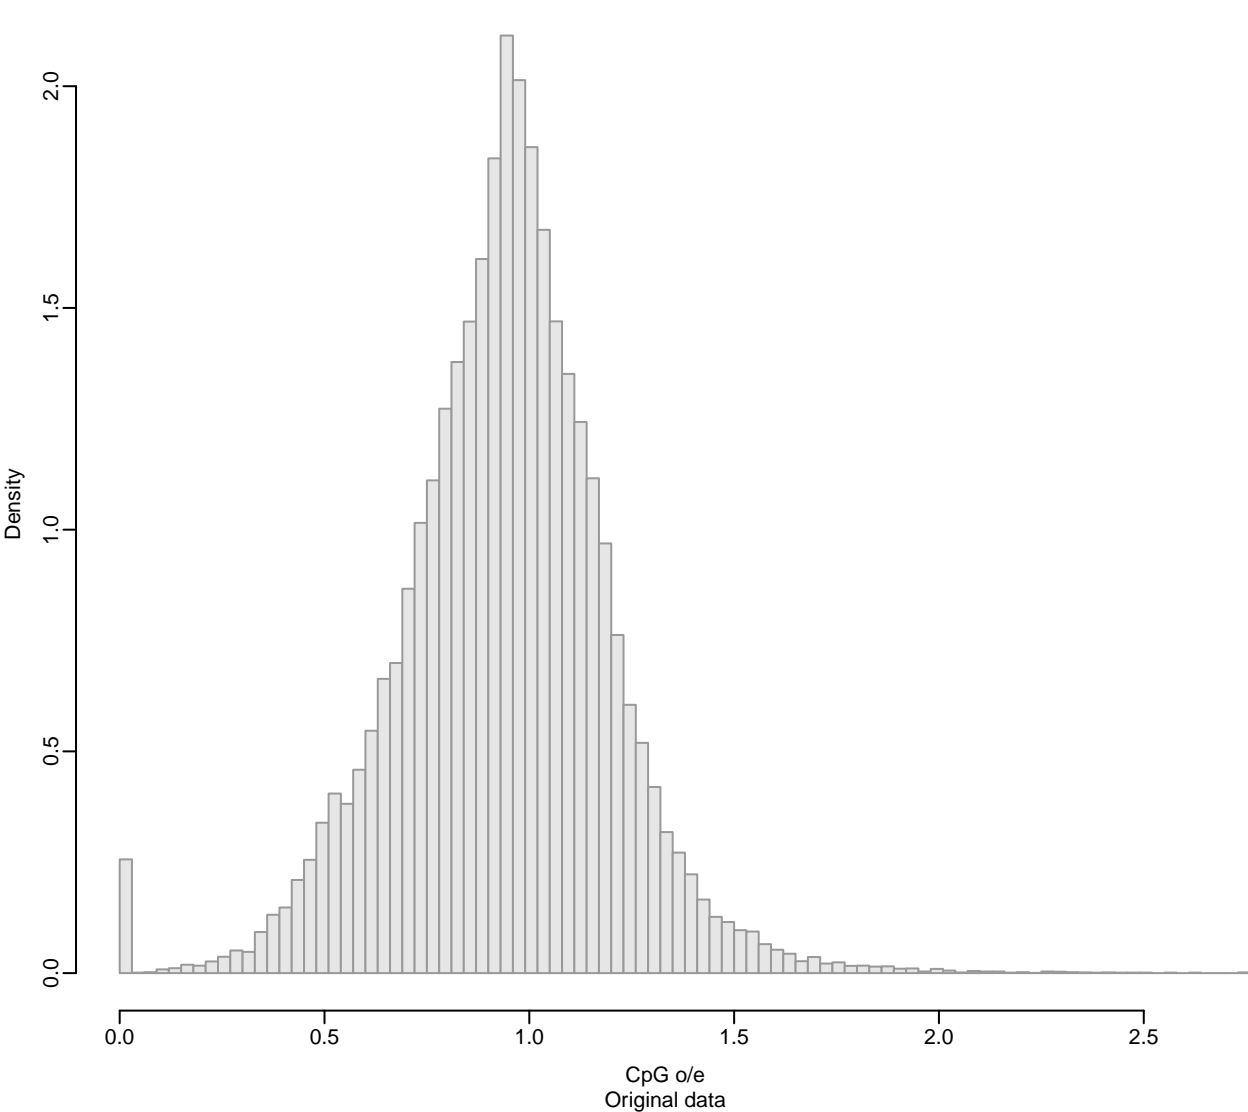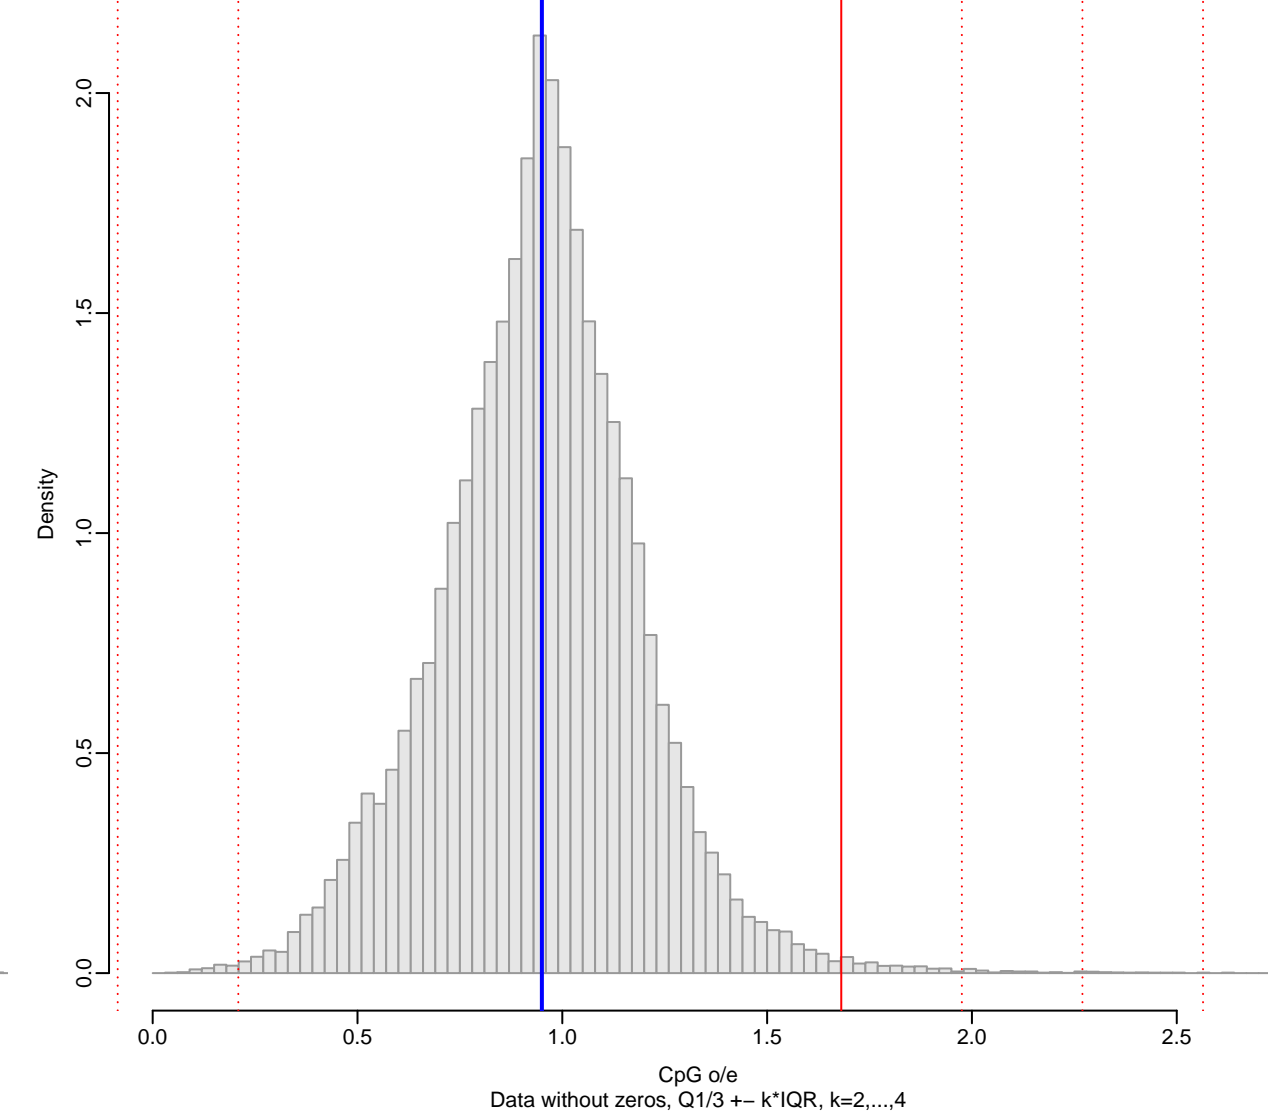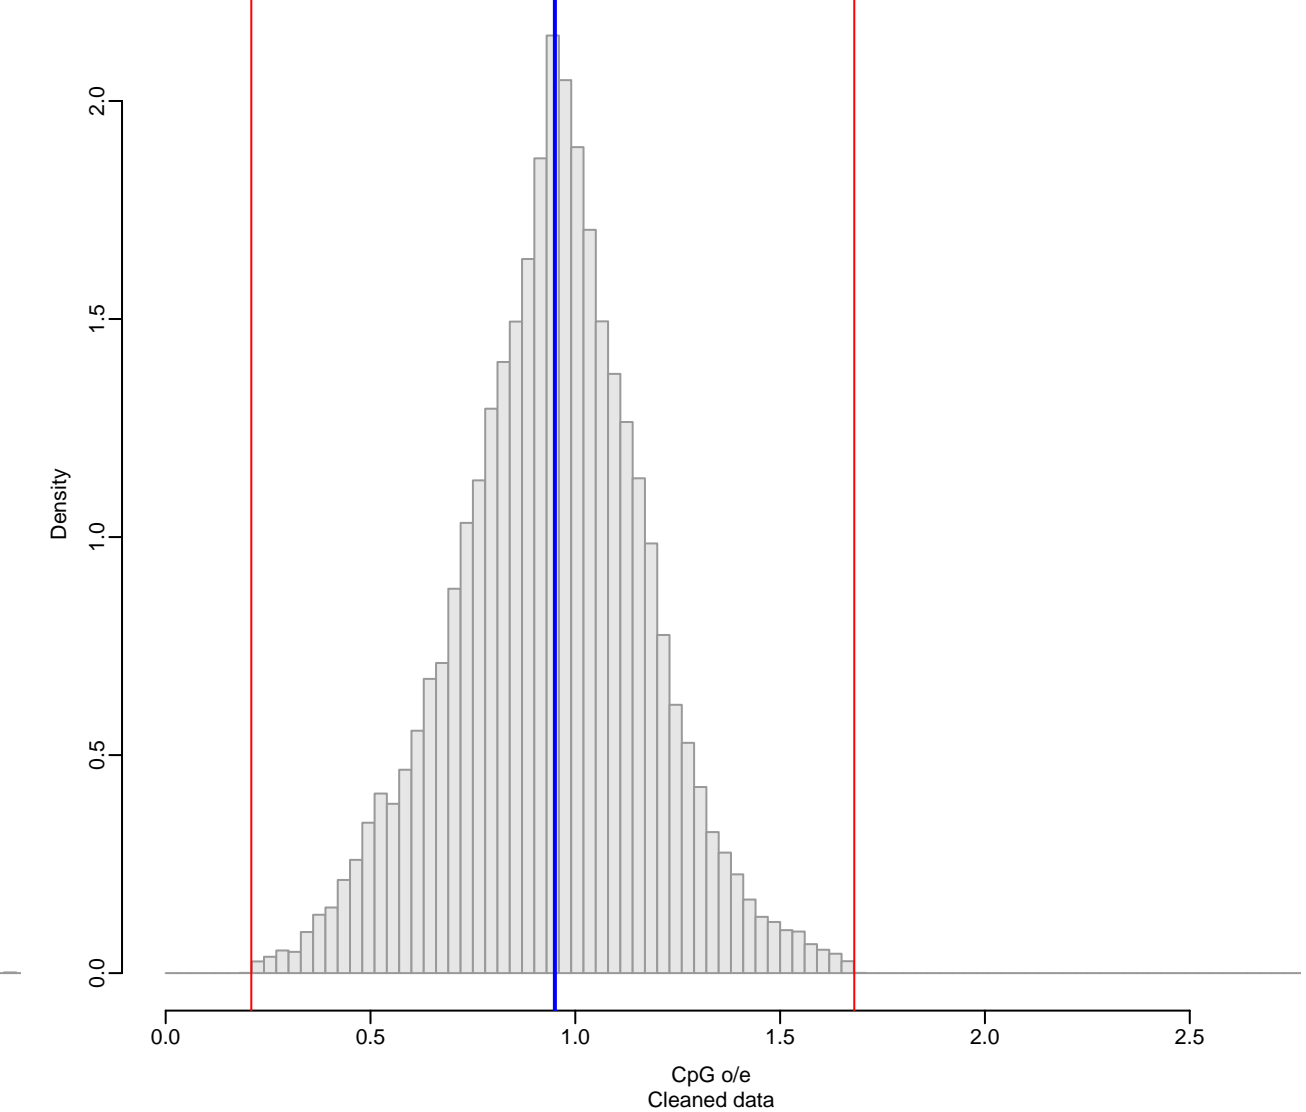

# Trichinella\_pseudospiralis

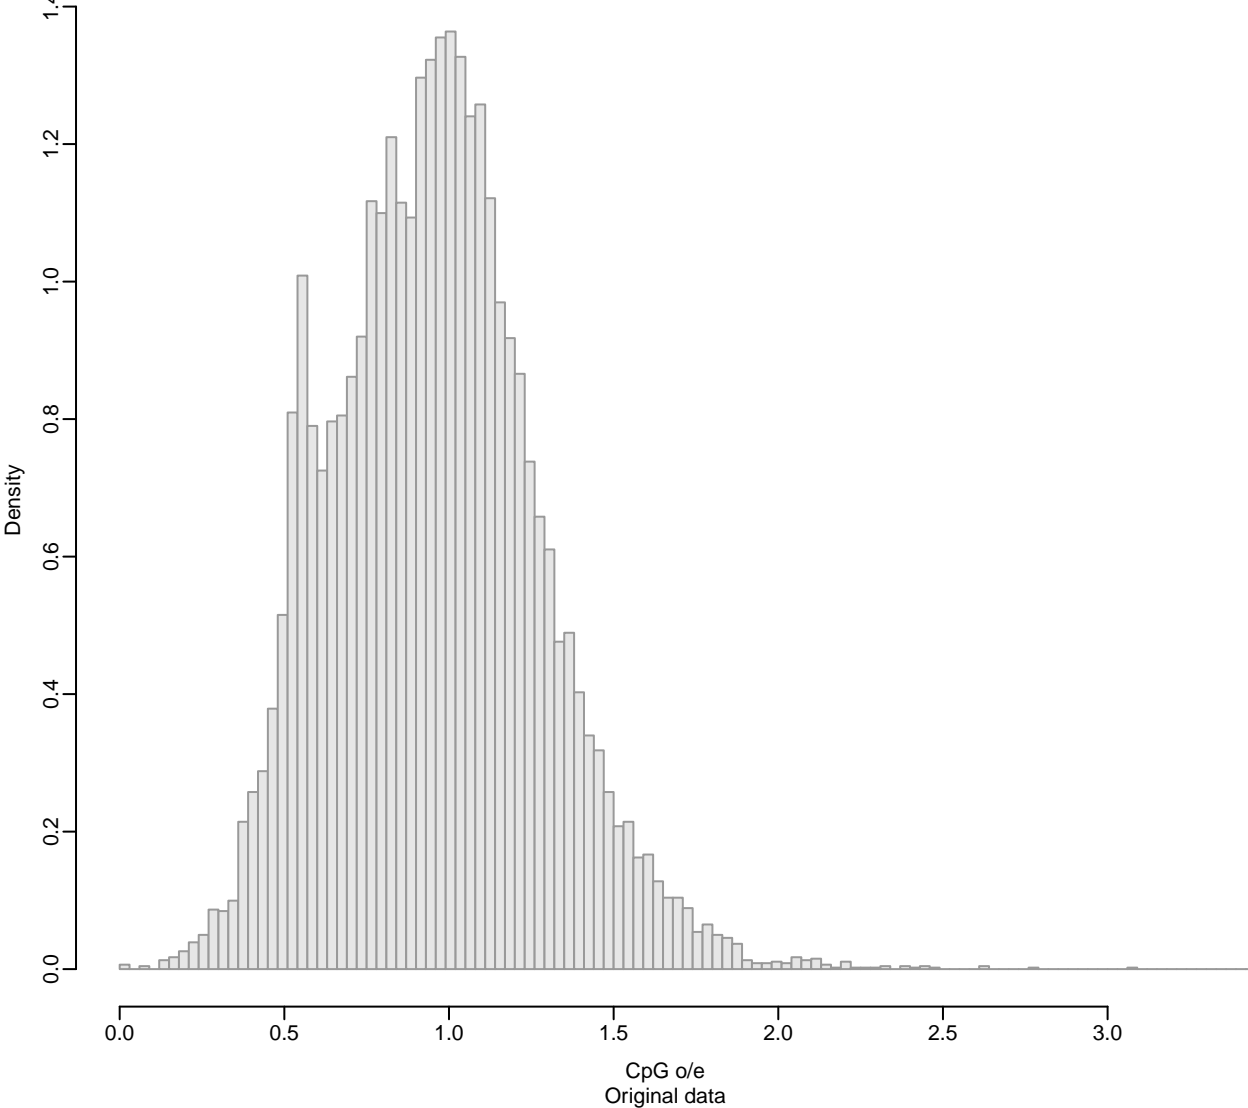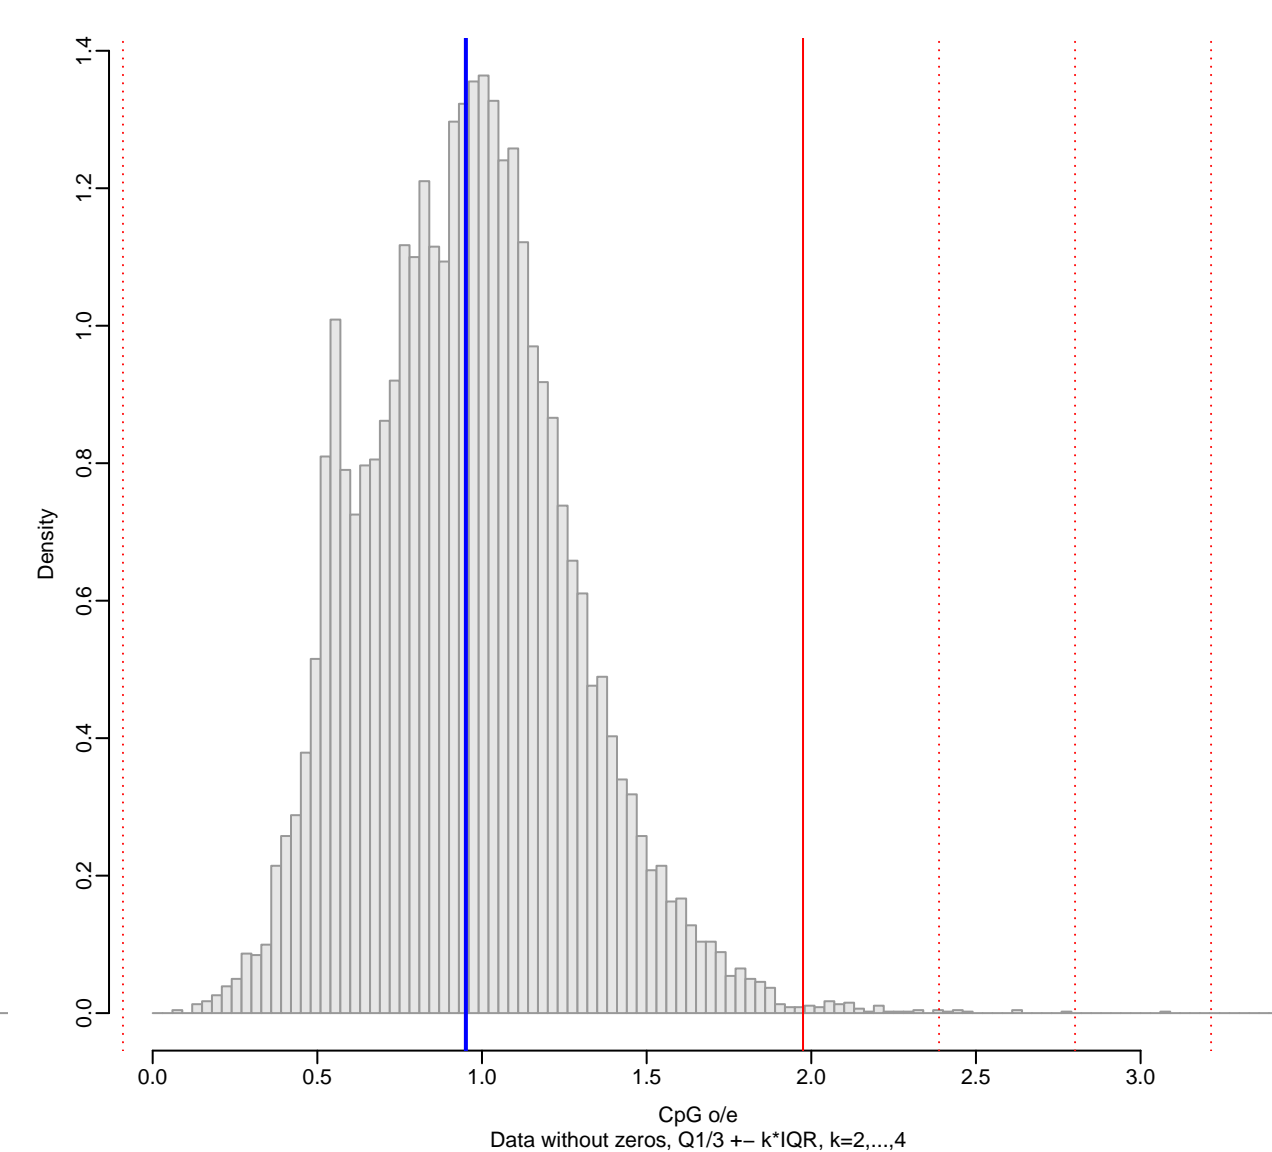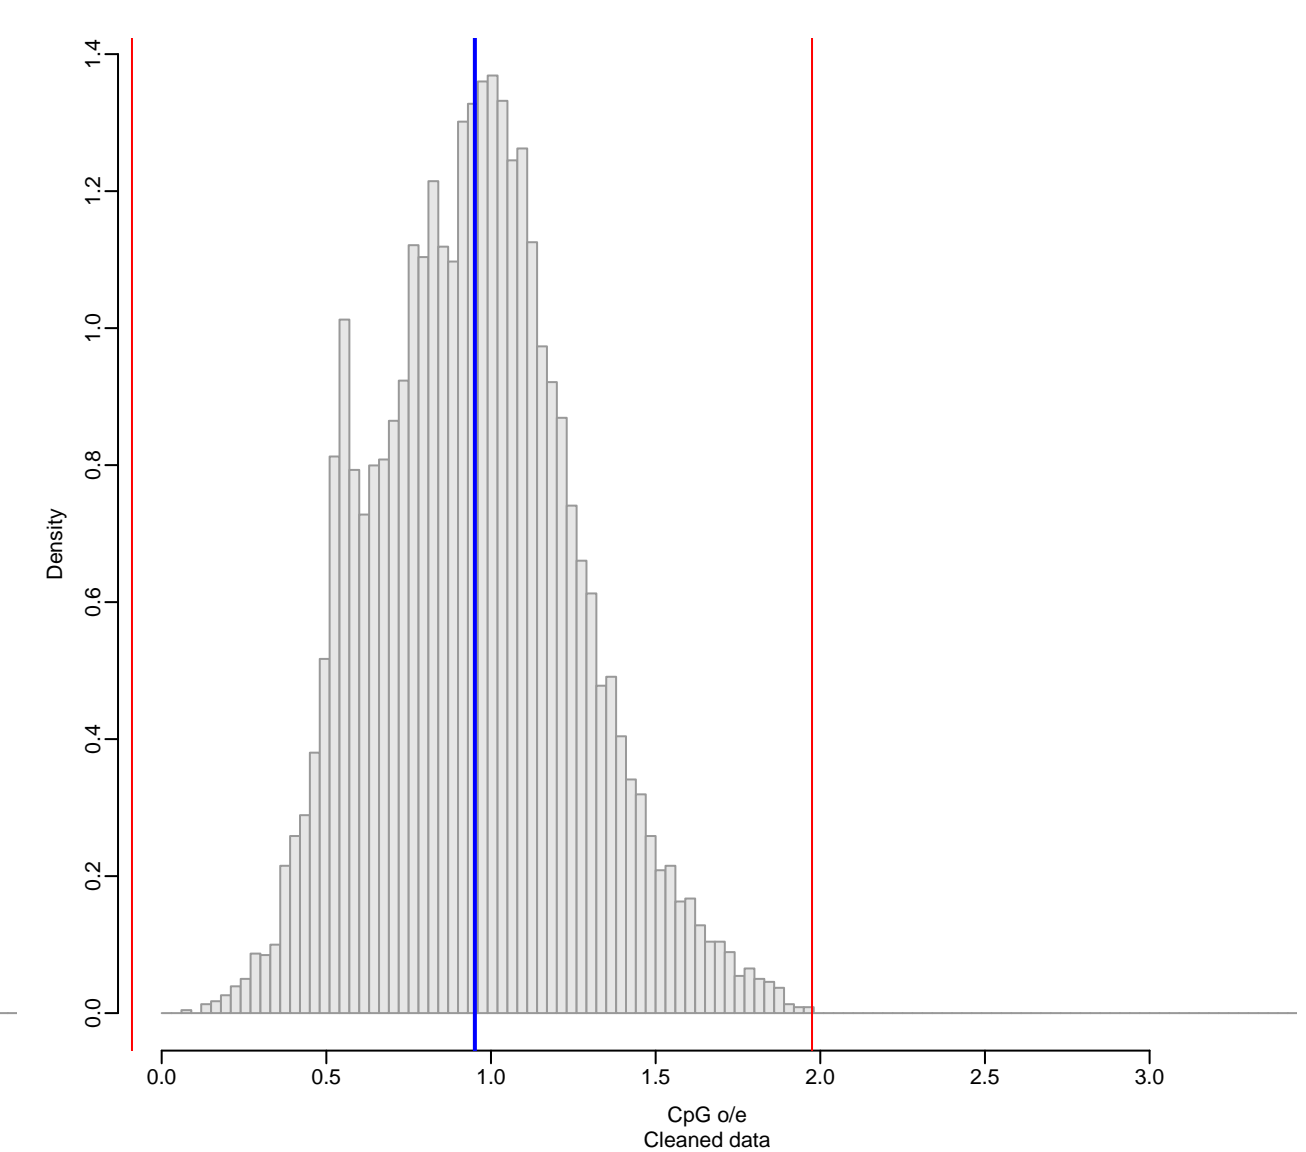



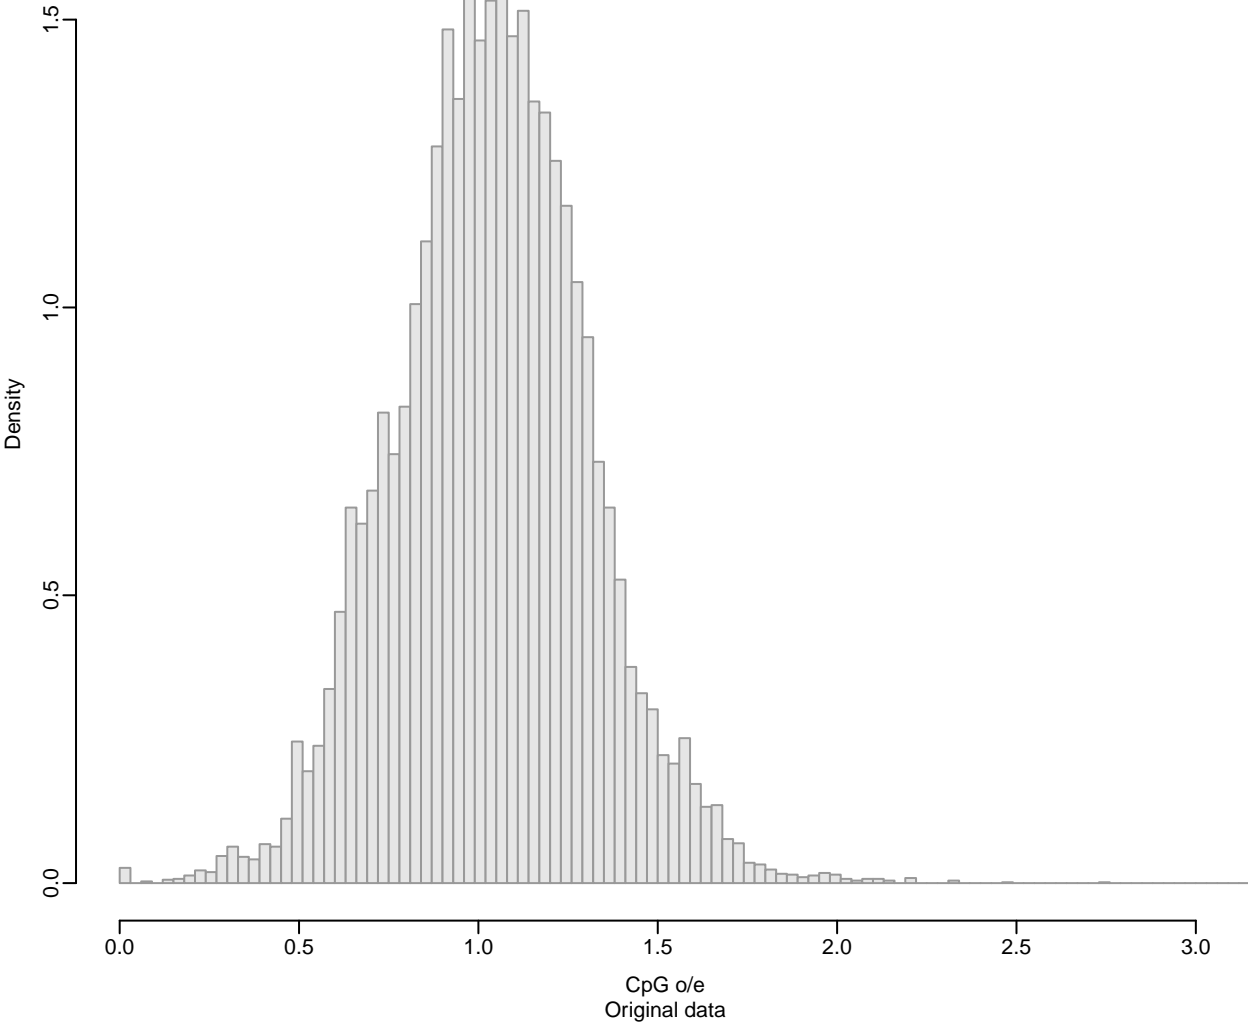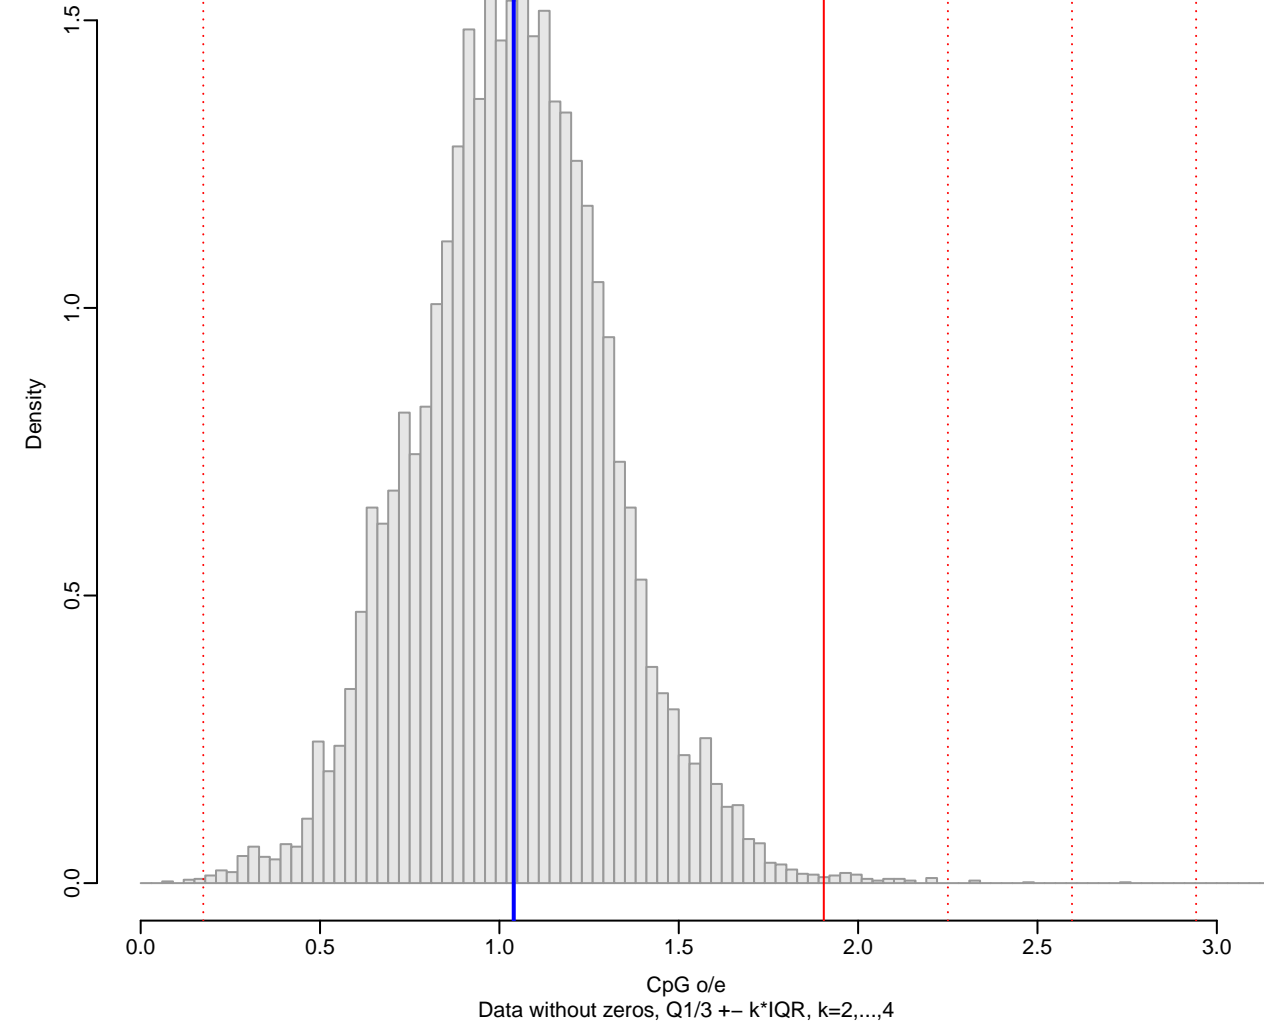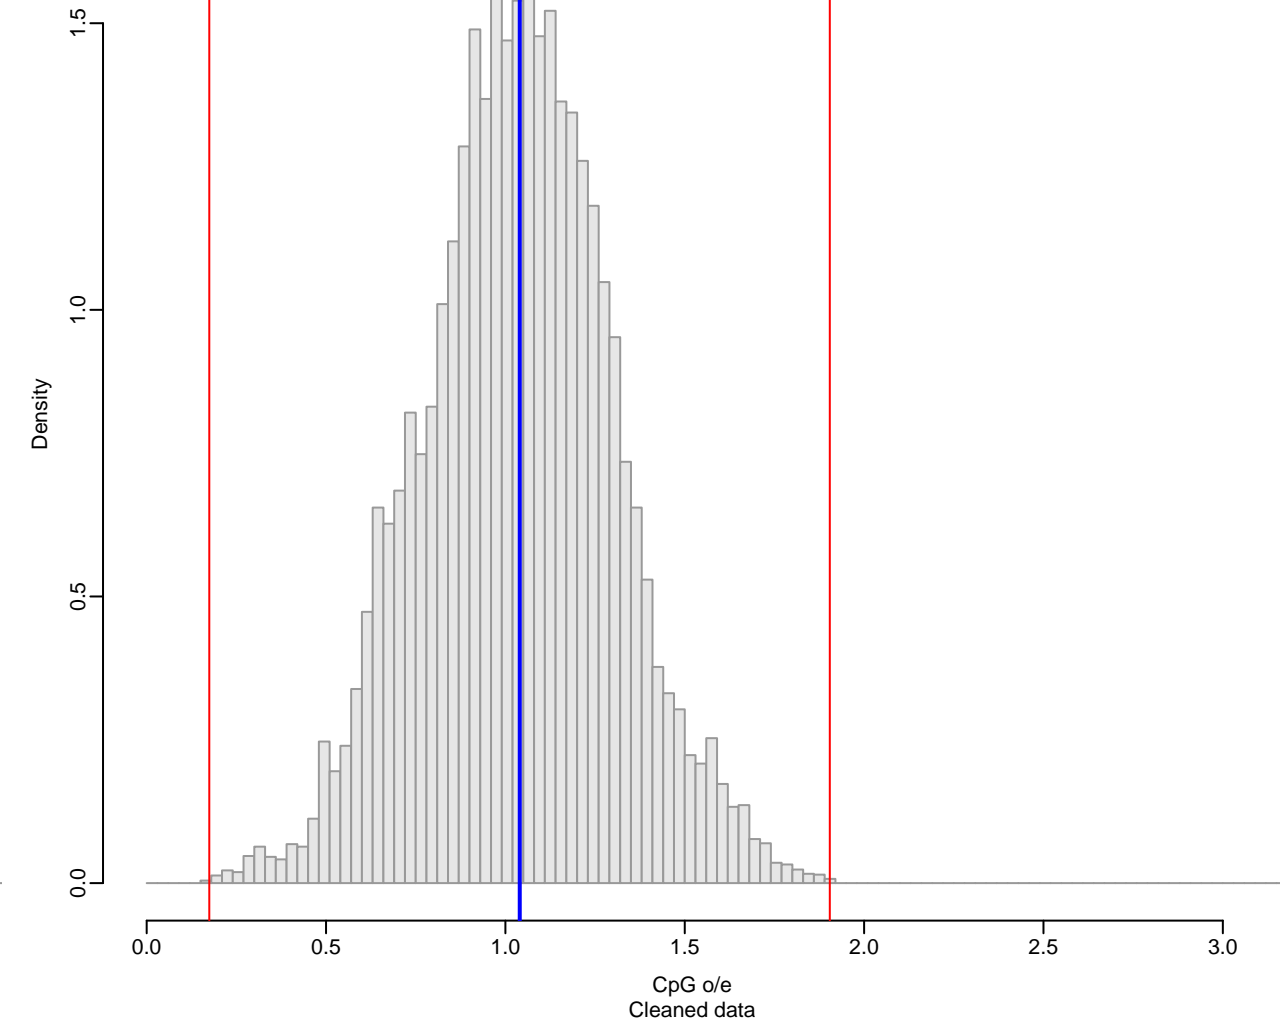

Trichoderma\_atroviride

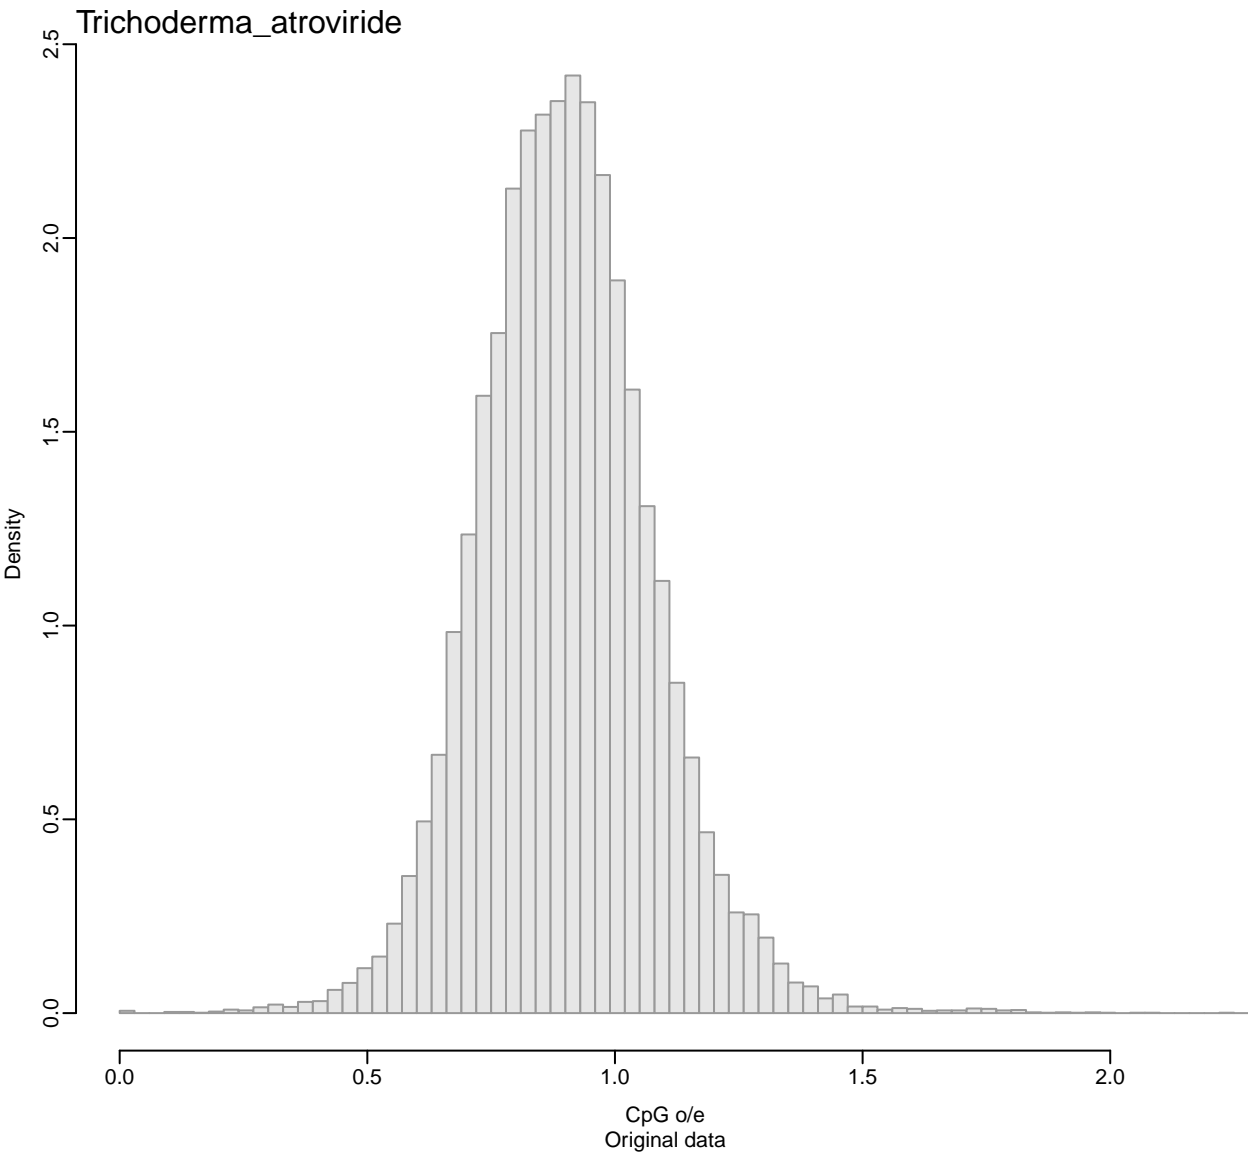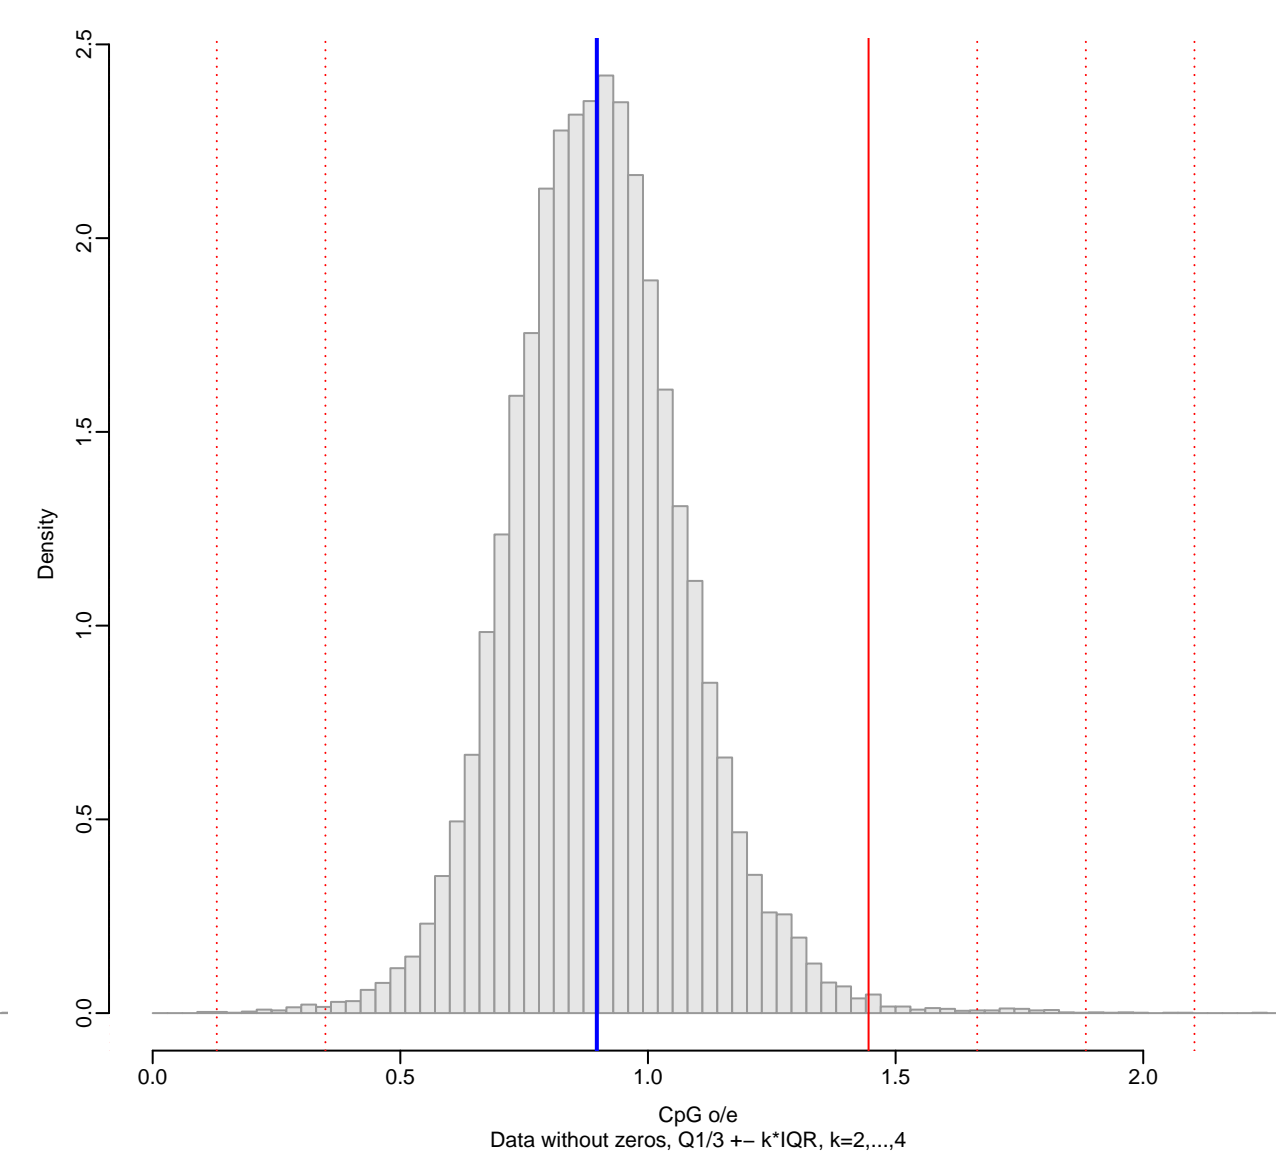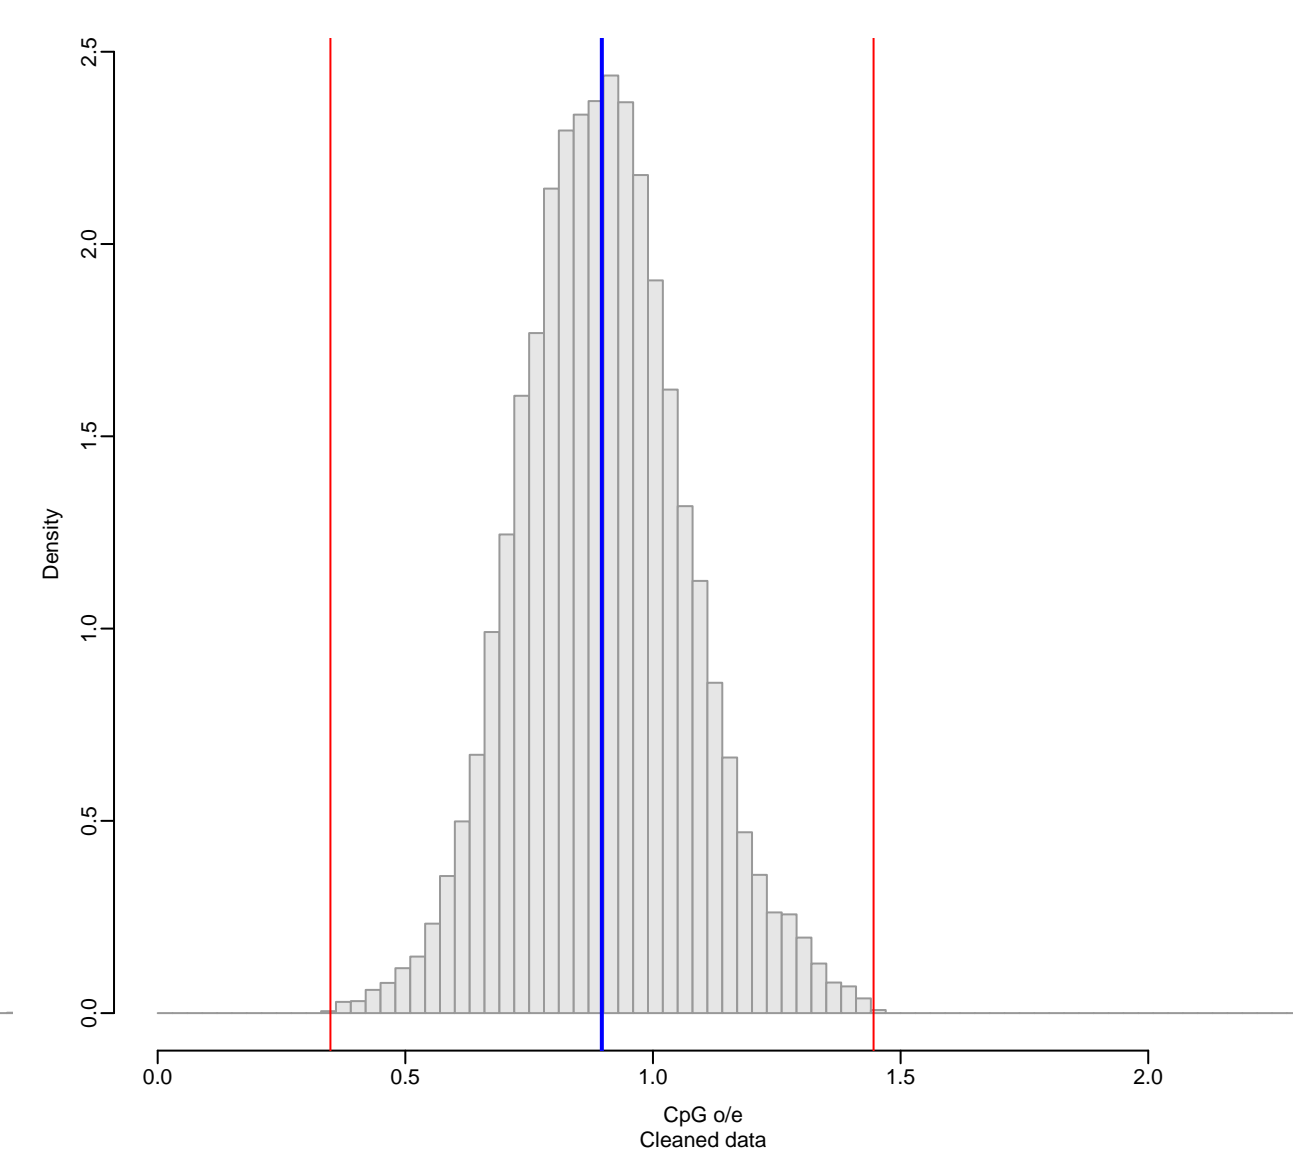

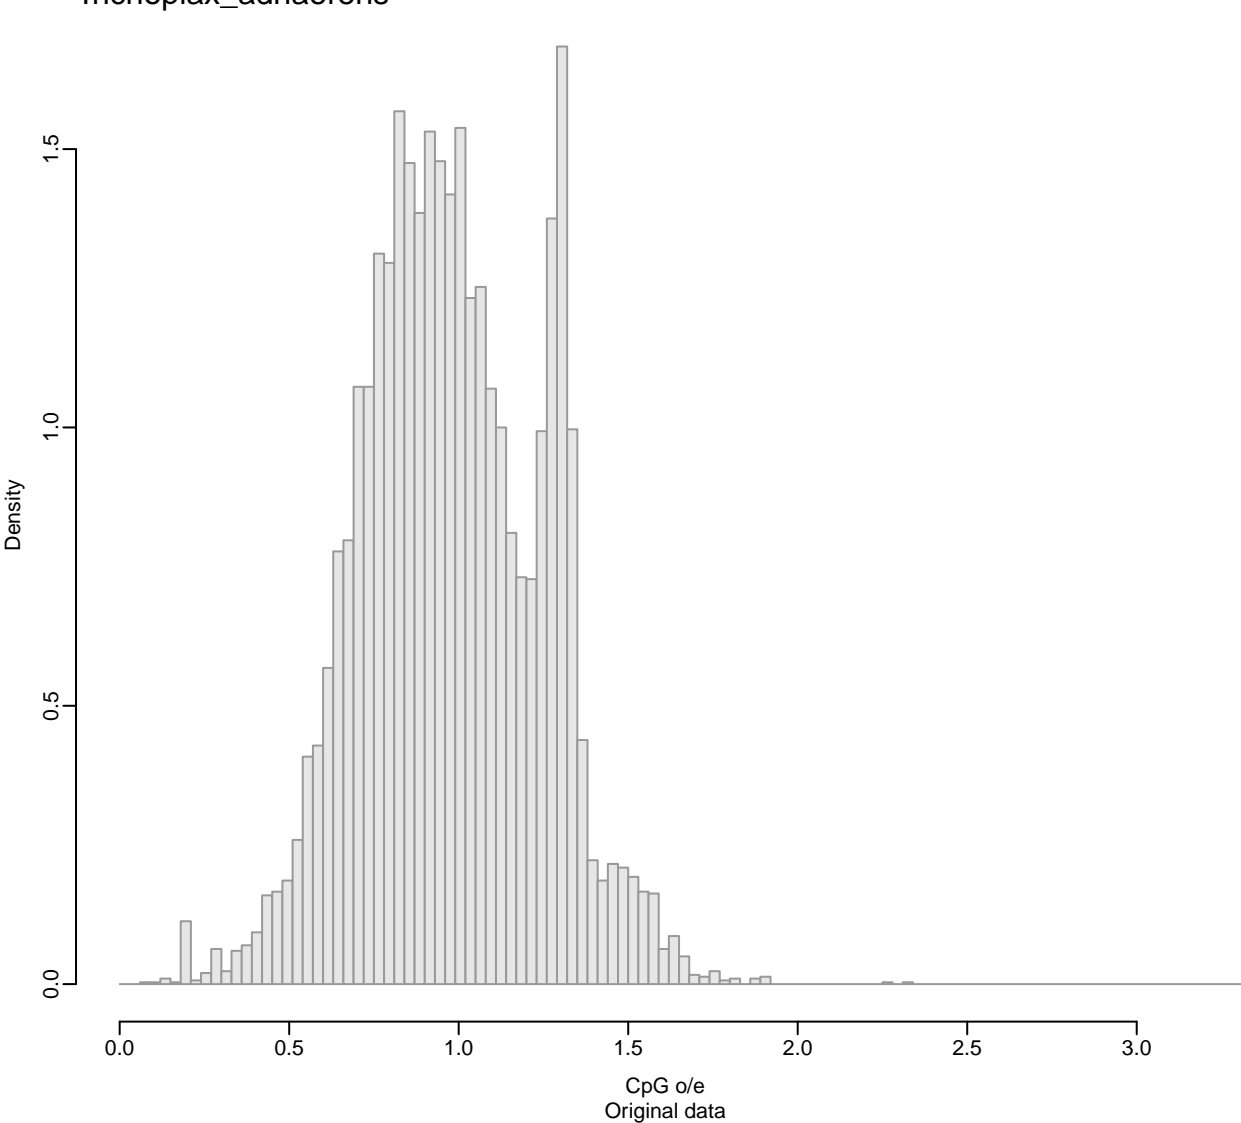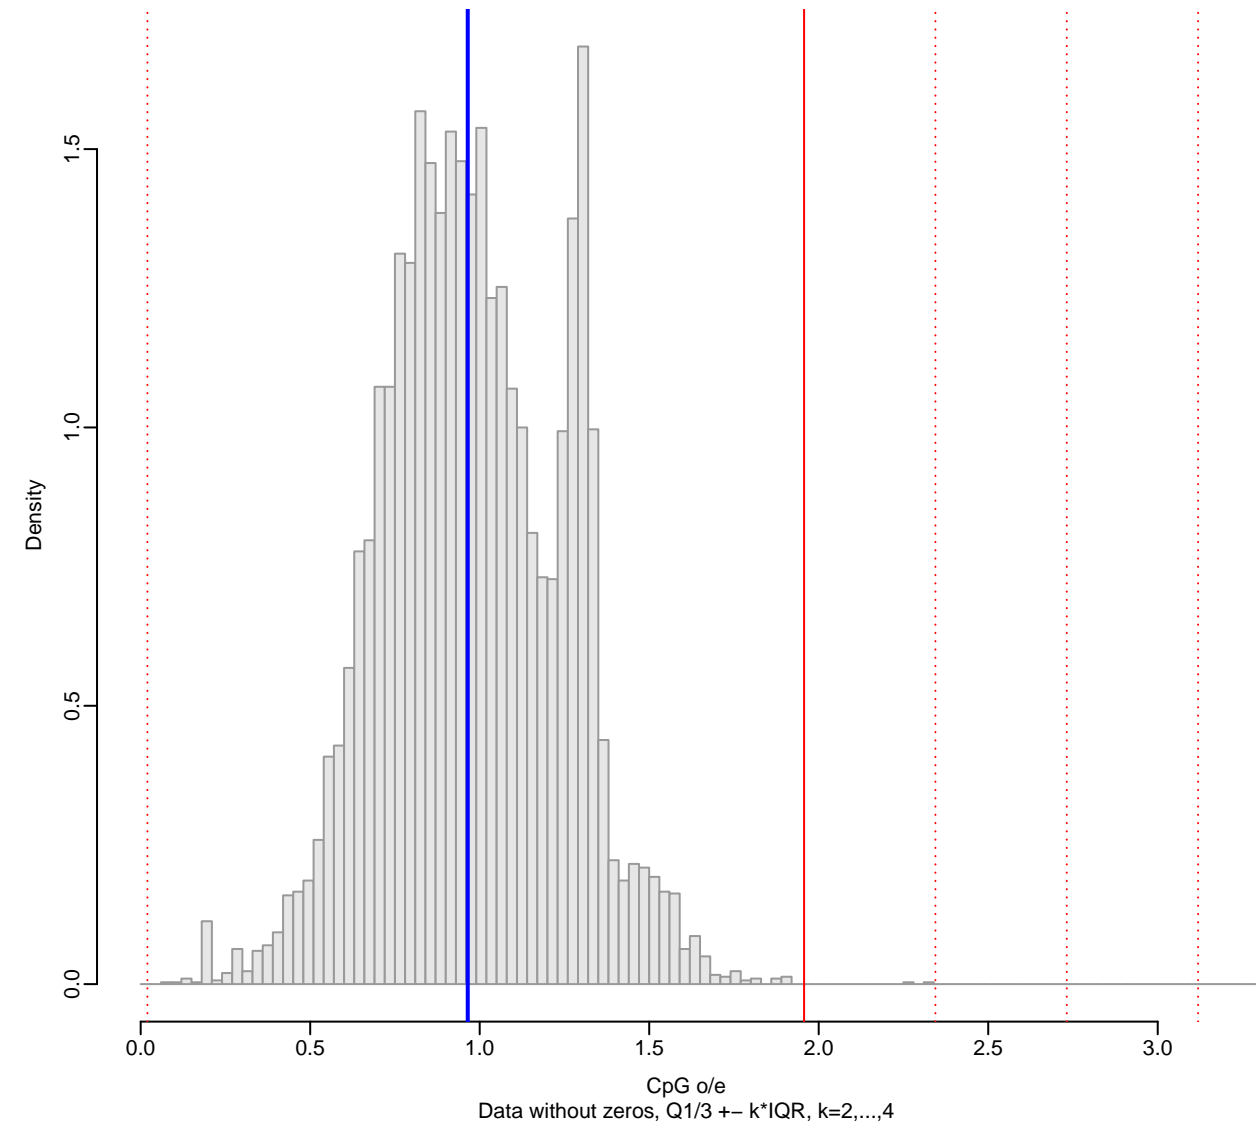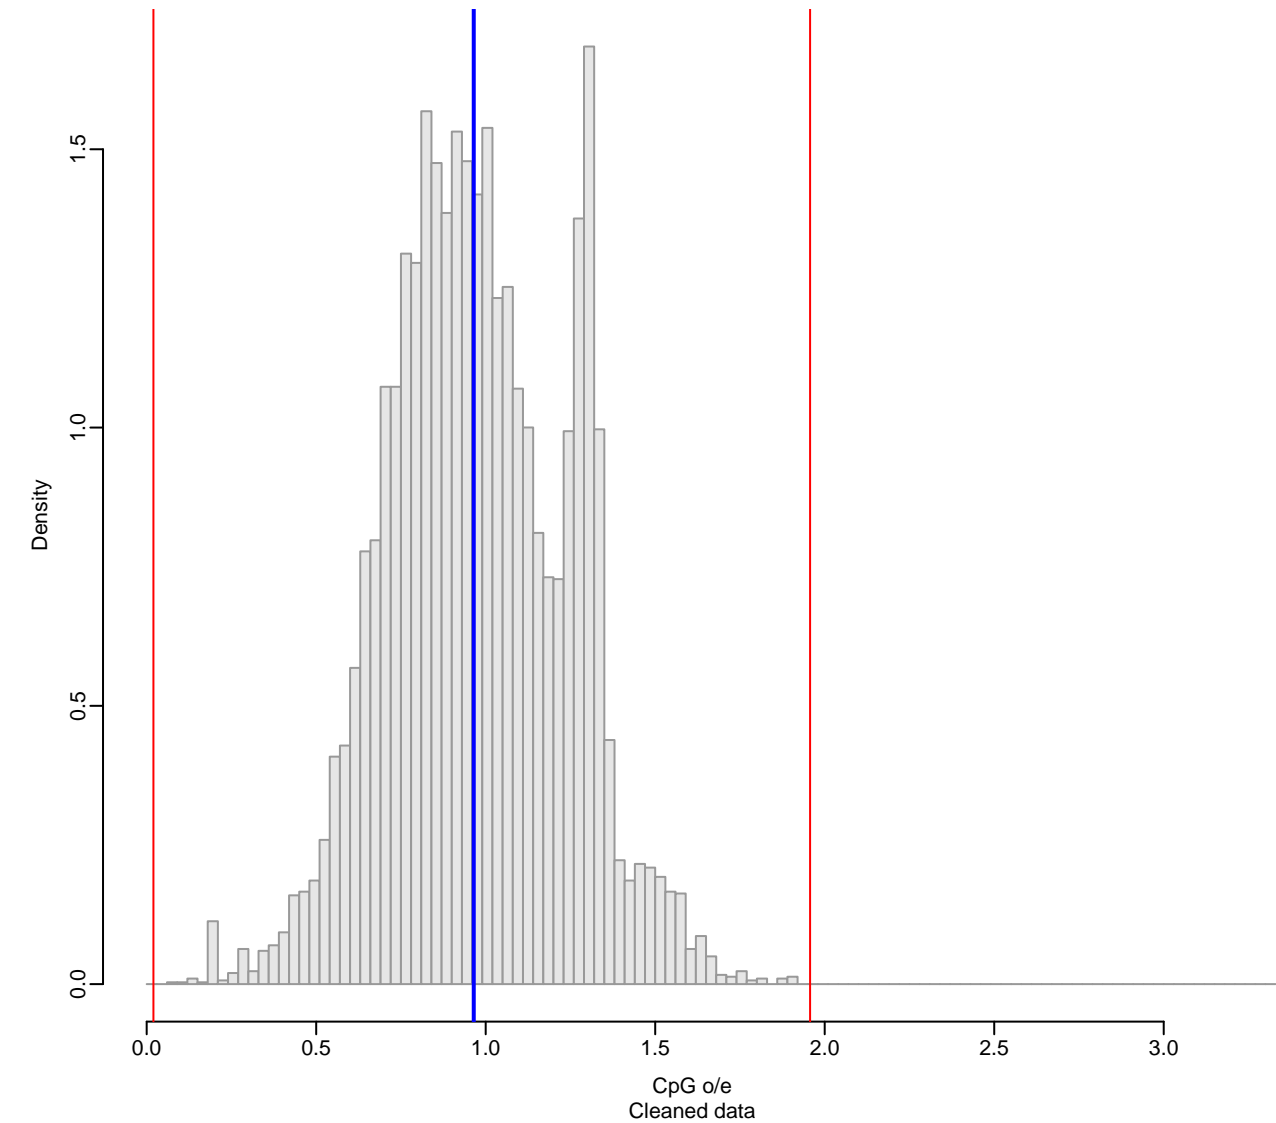

Trichosurus\_vulpecula

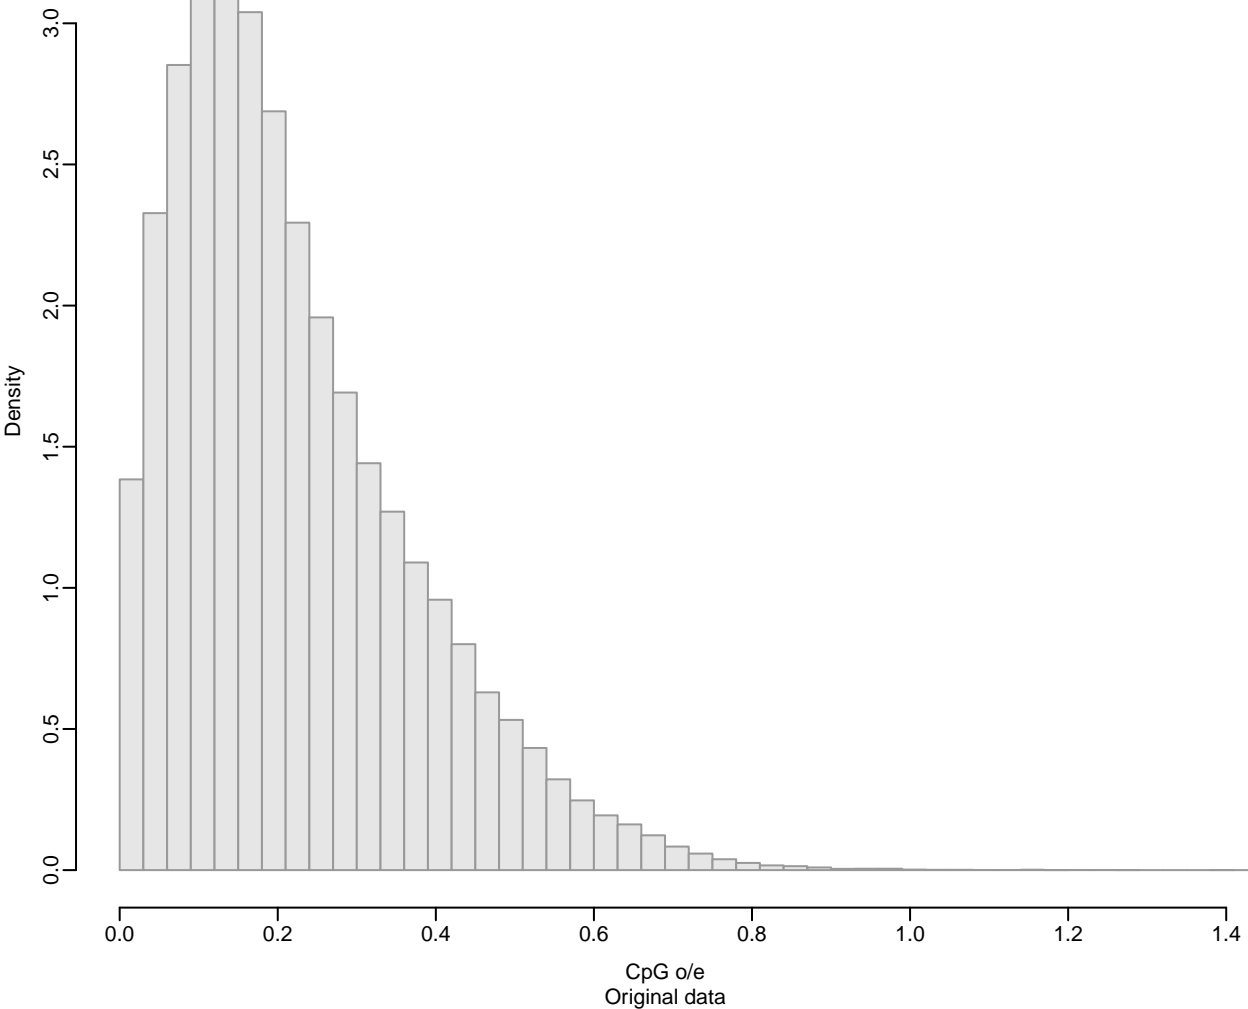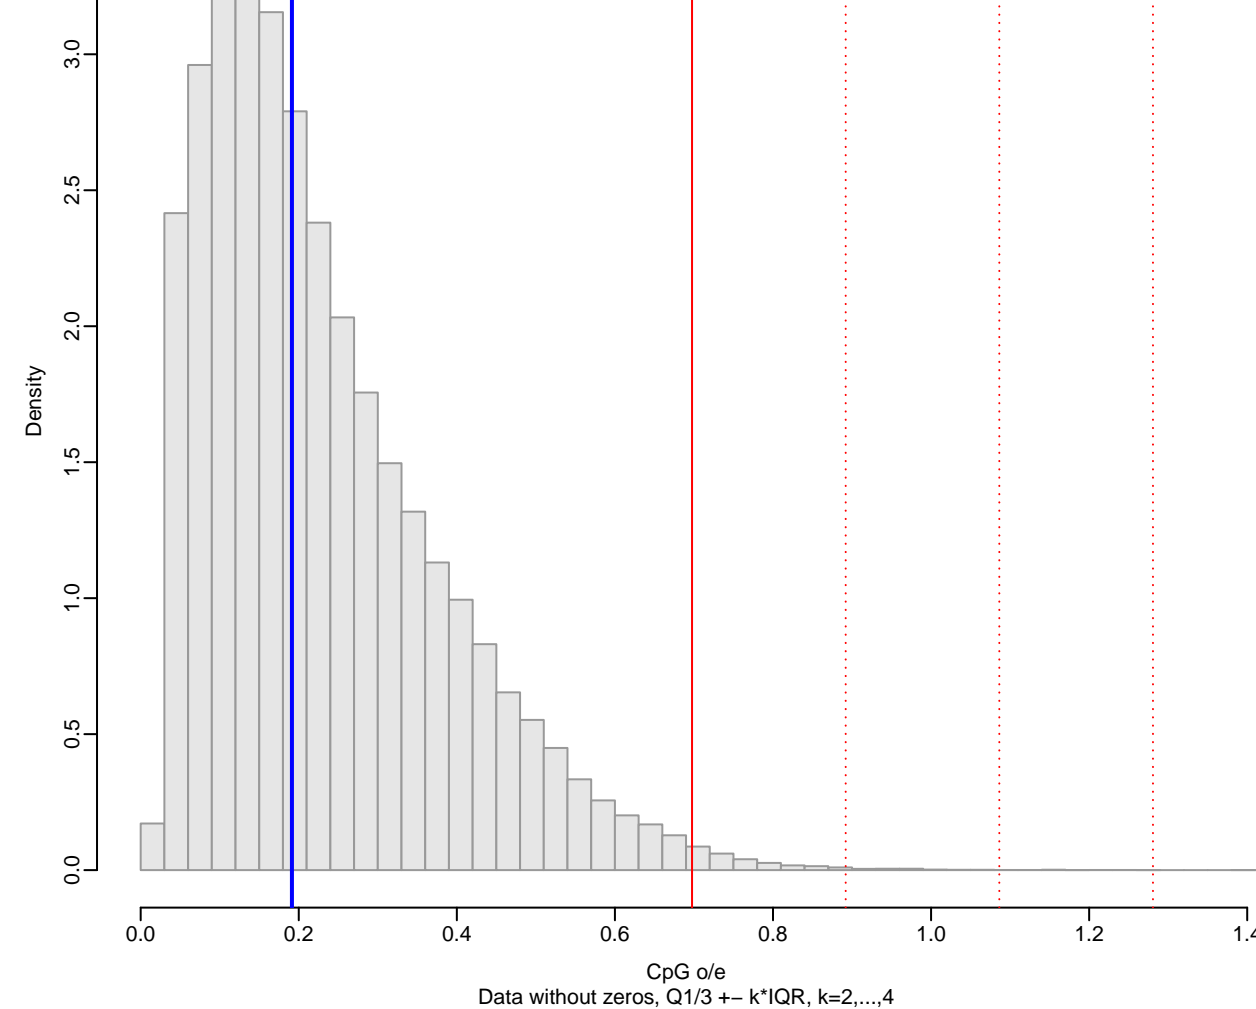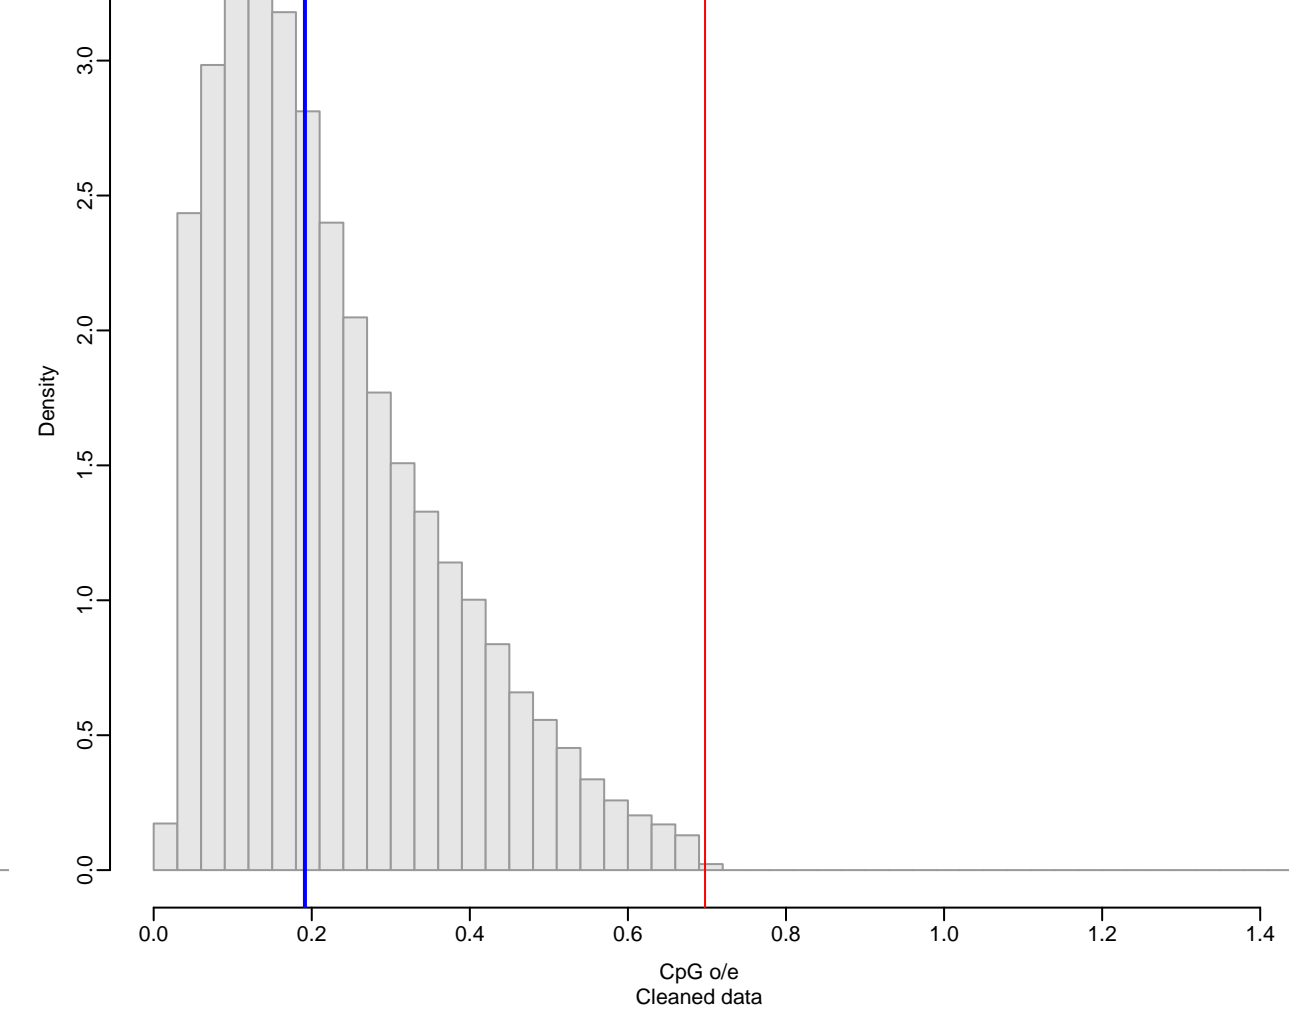

Trichuris\_muris

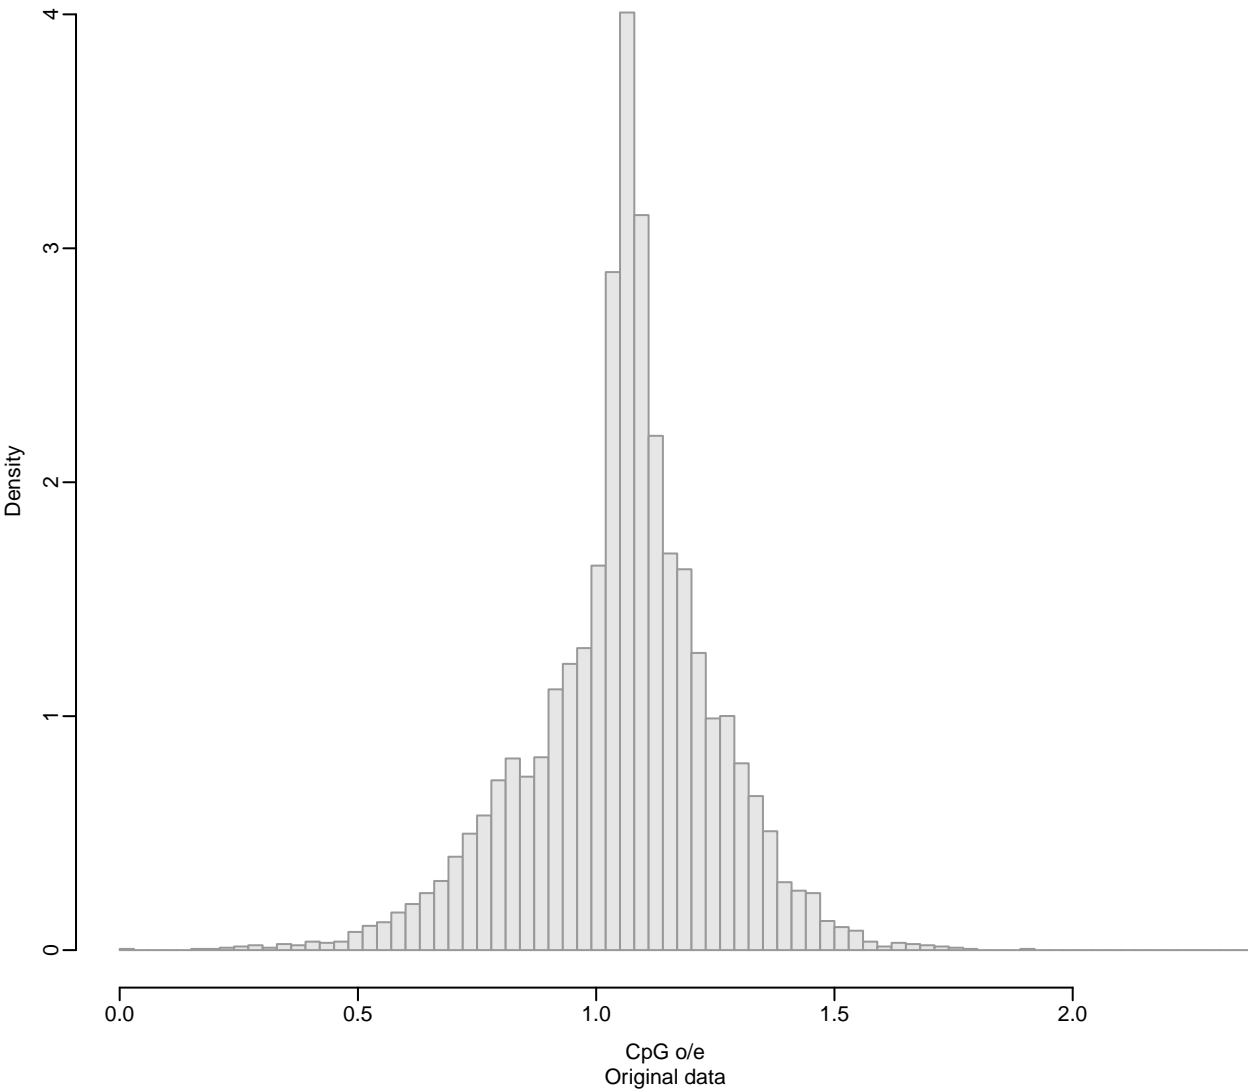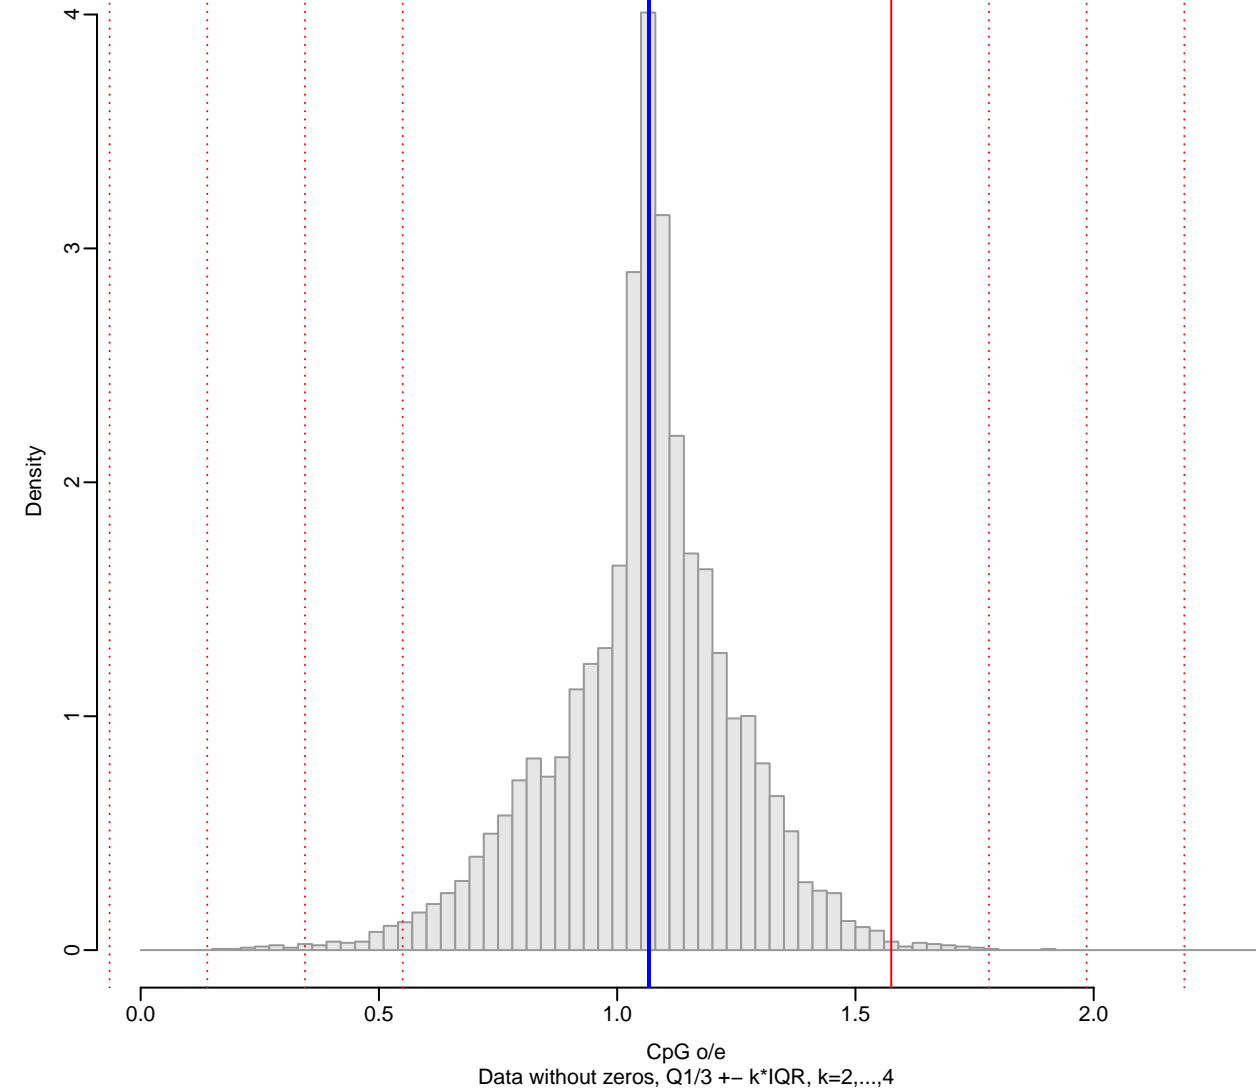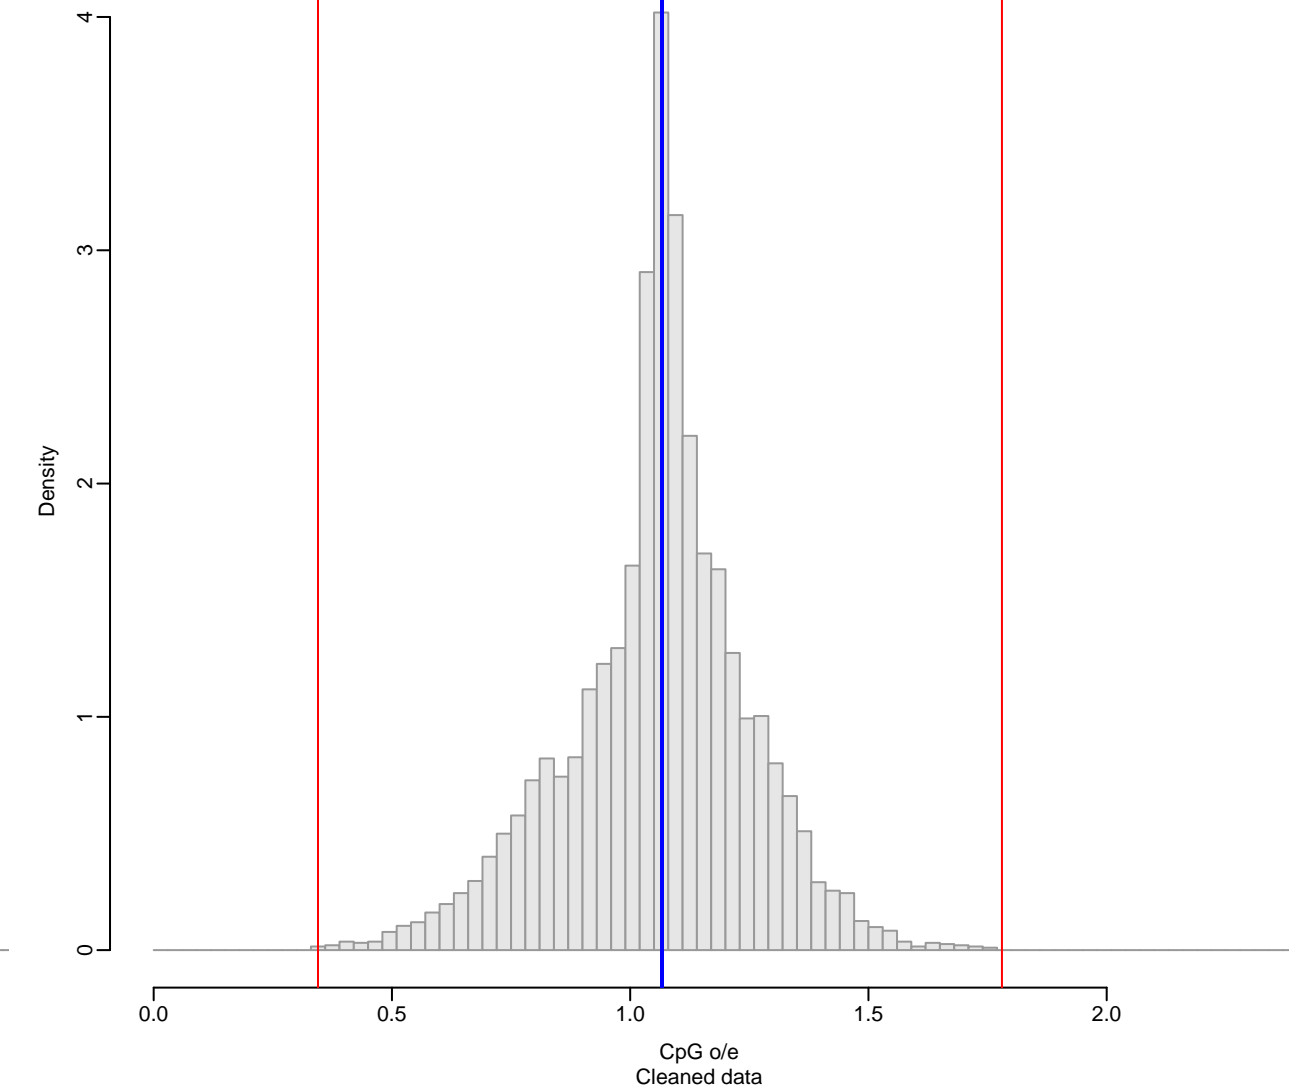

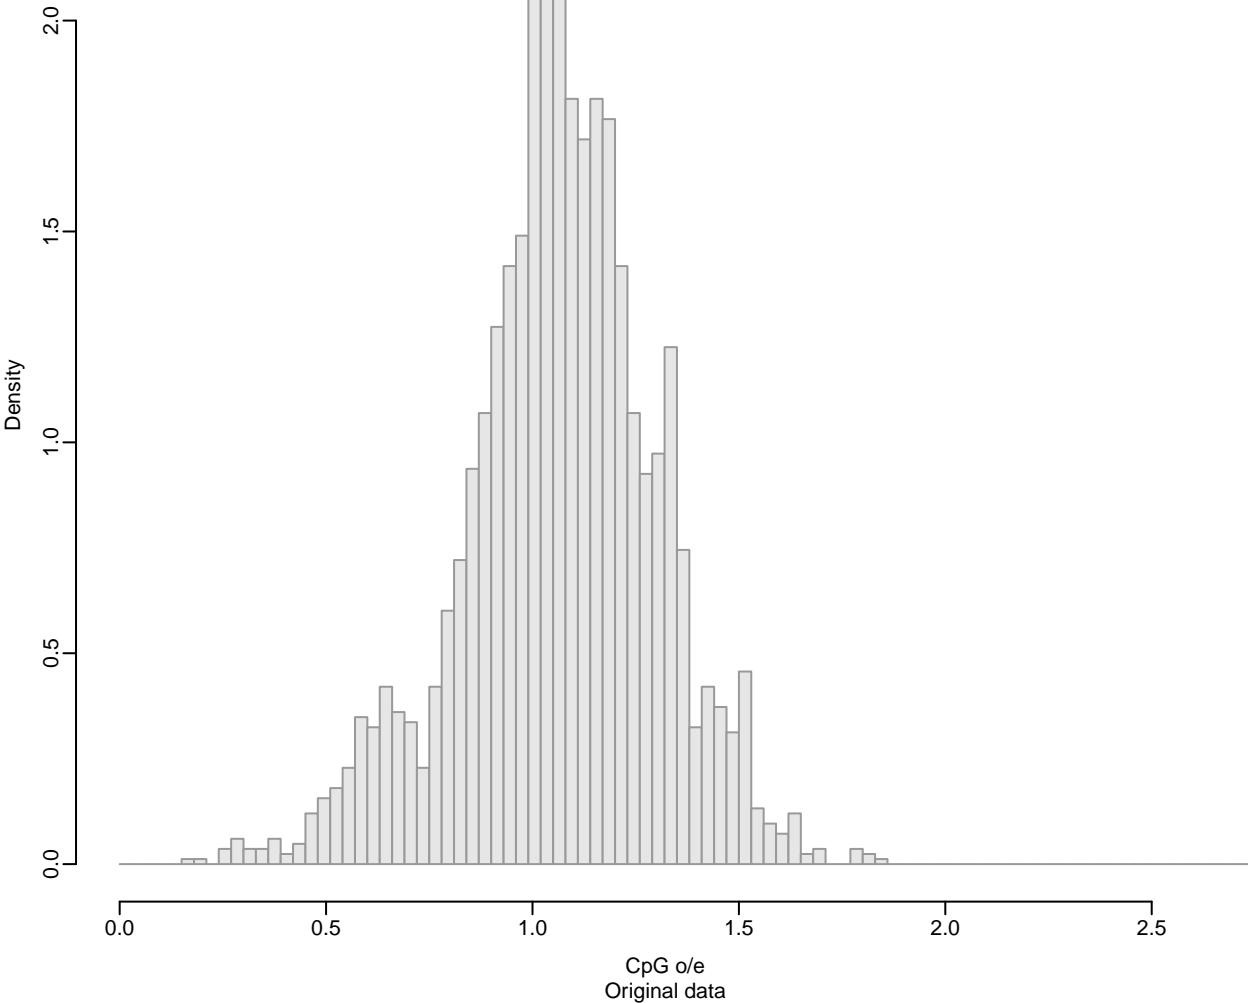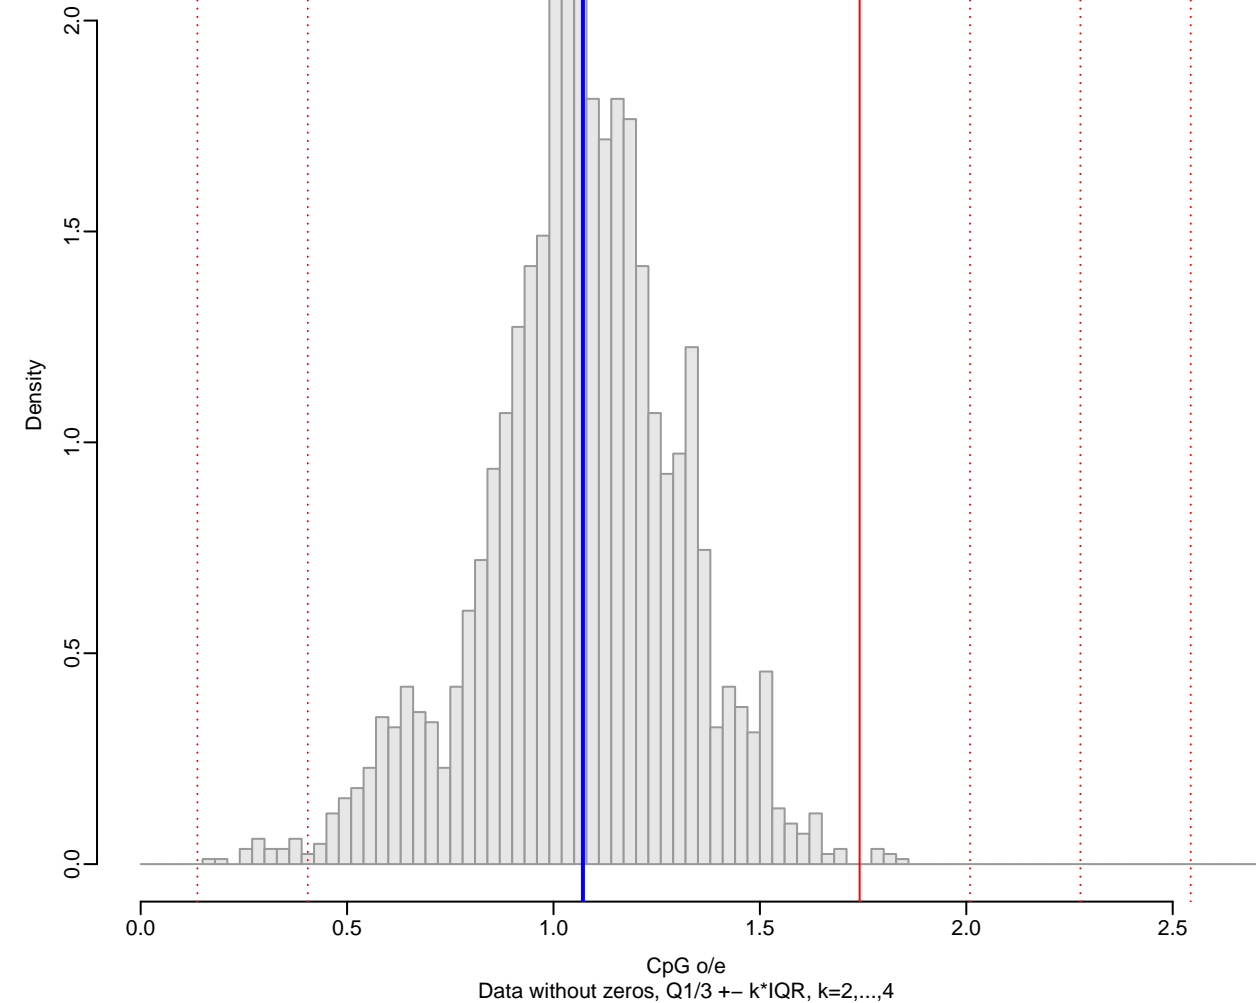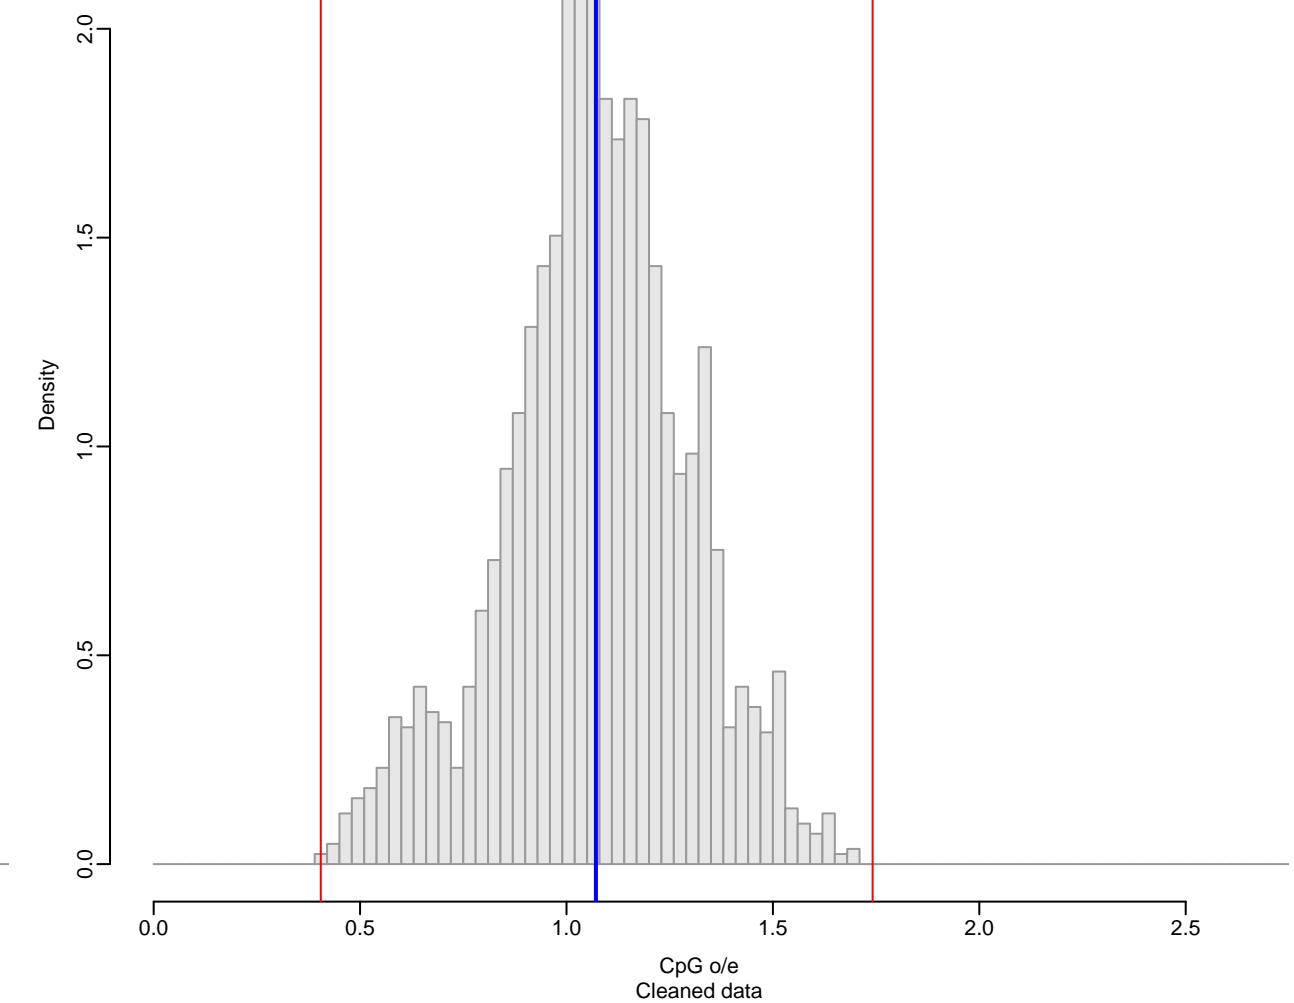

Trifolium\_repens

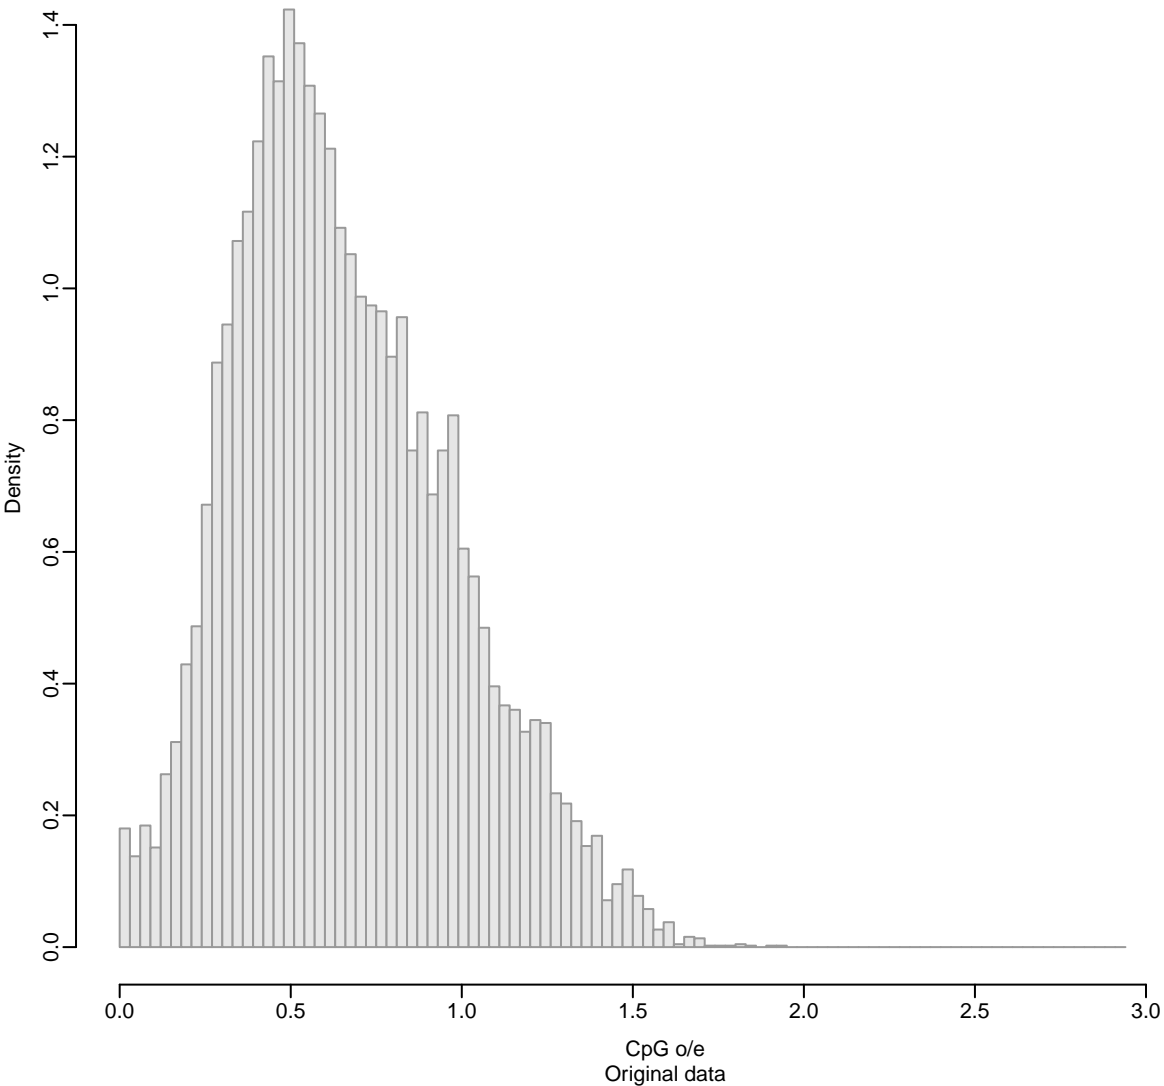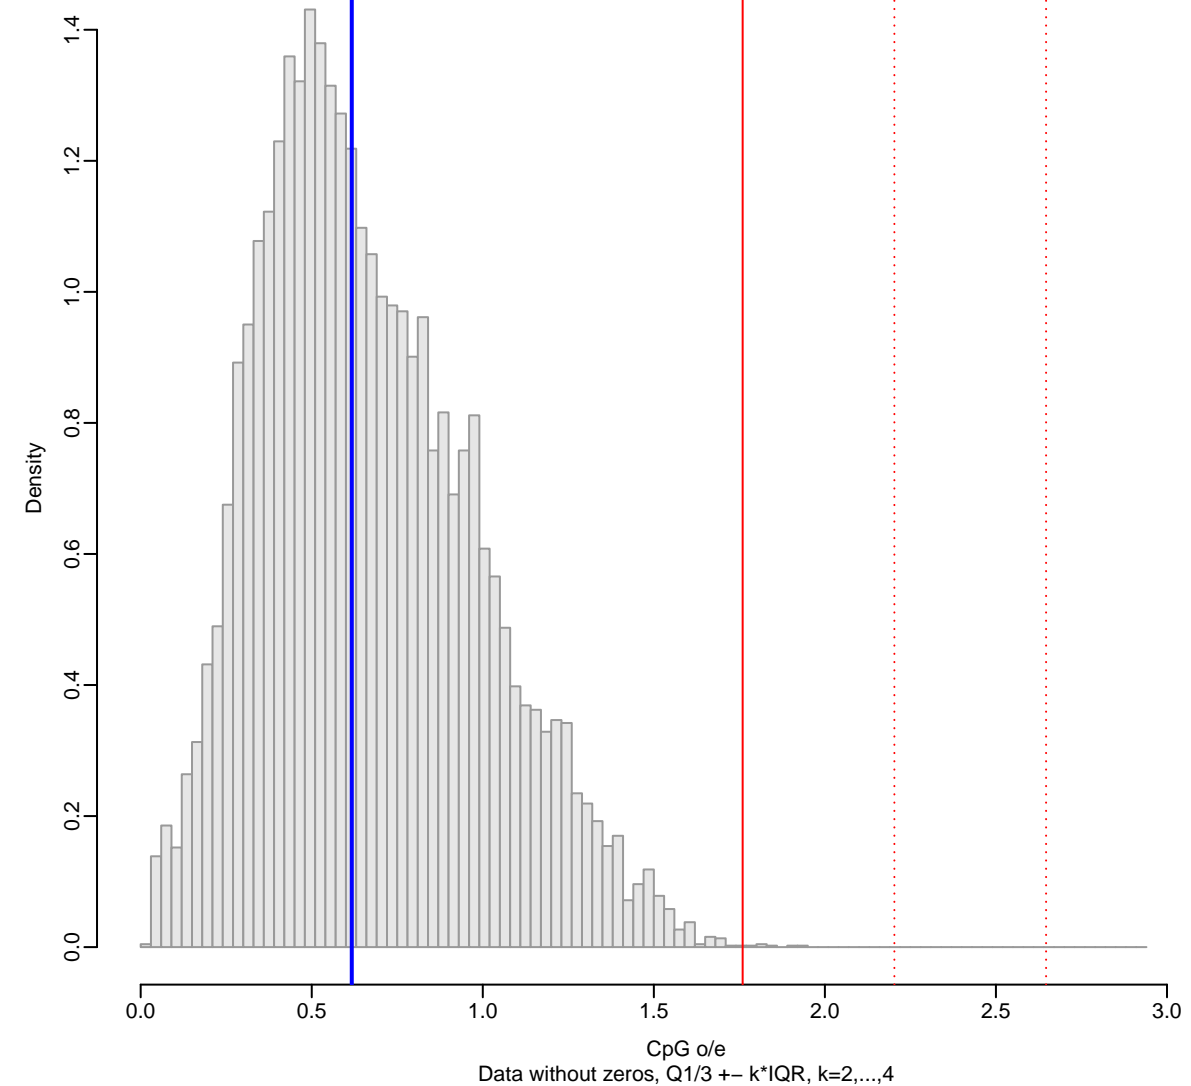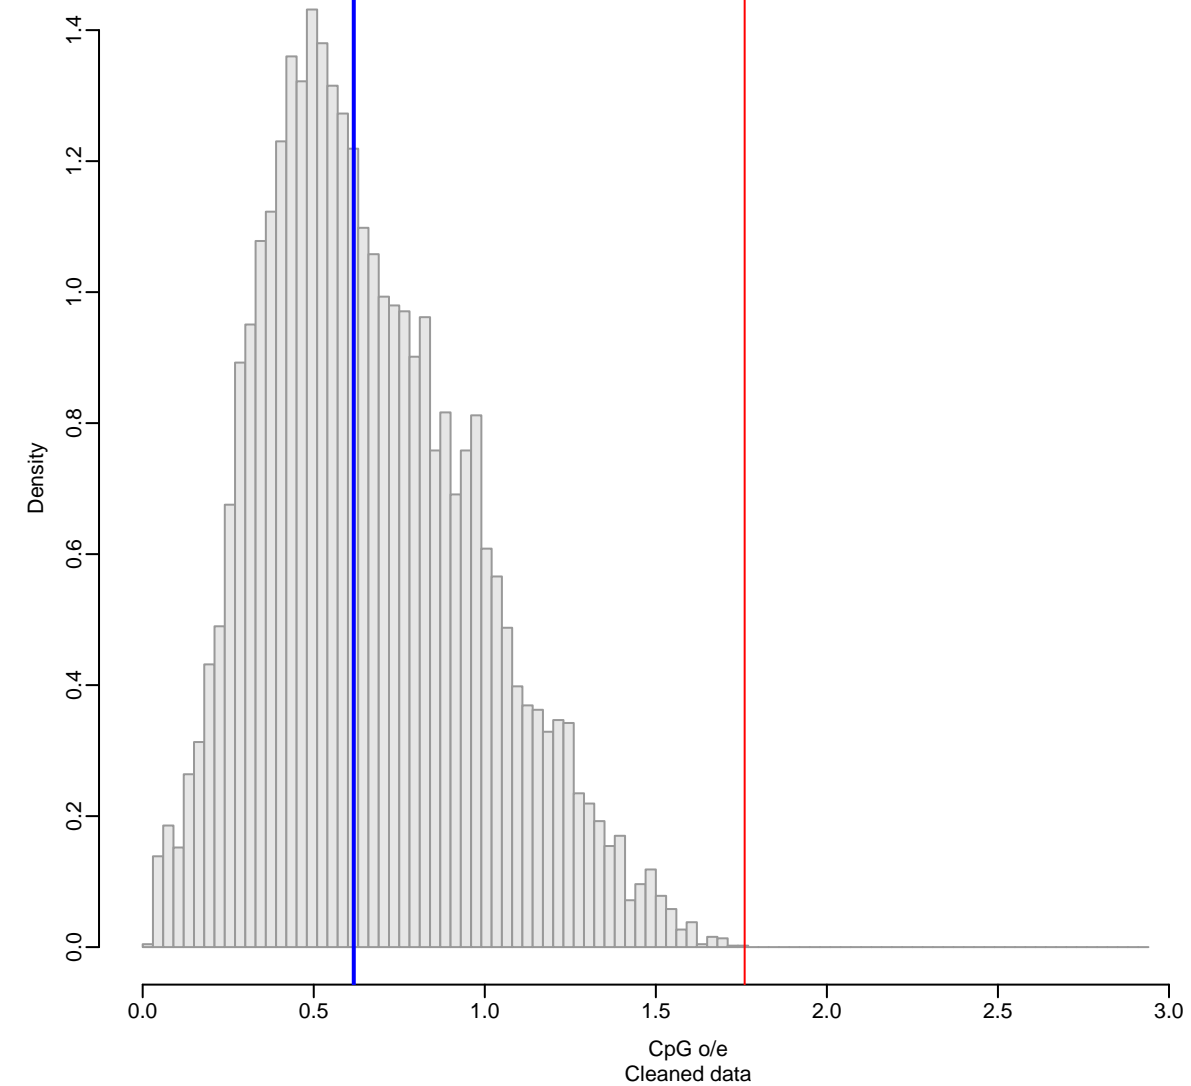

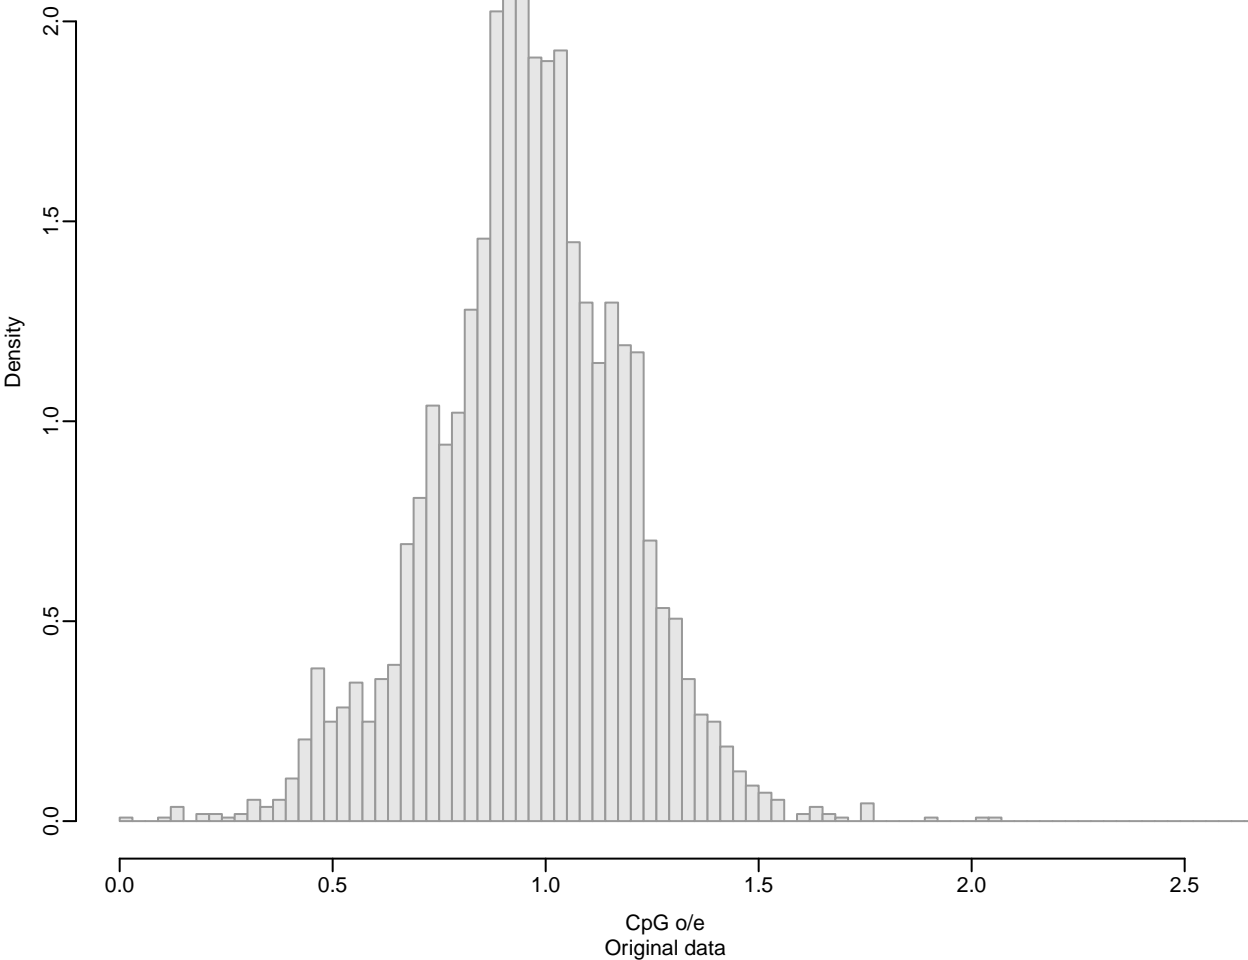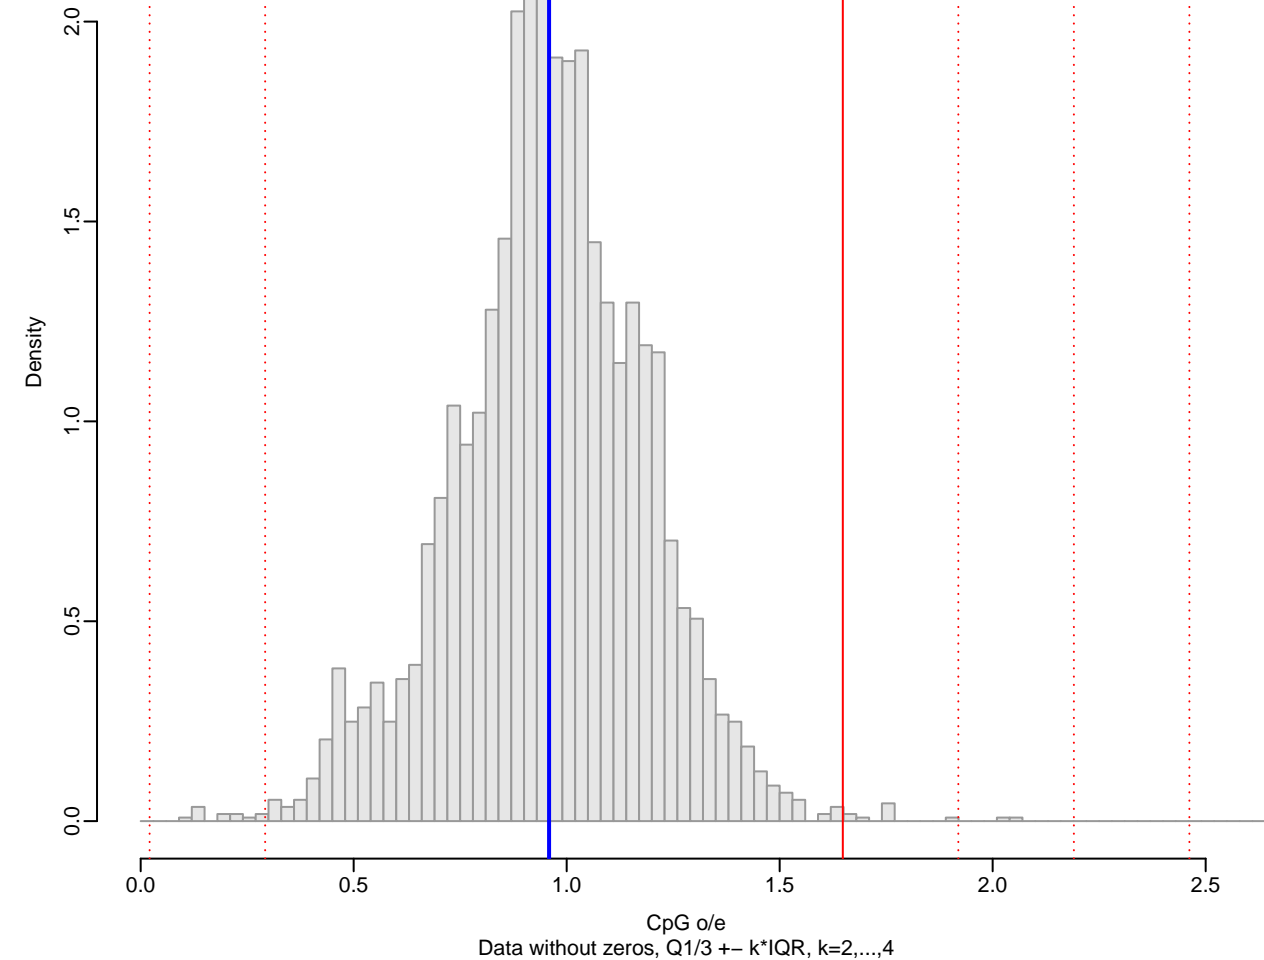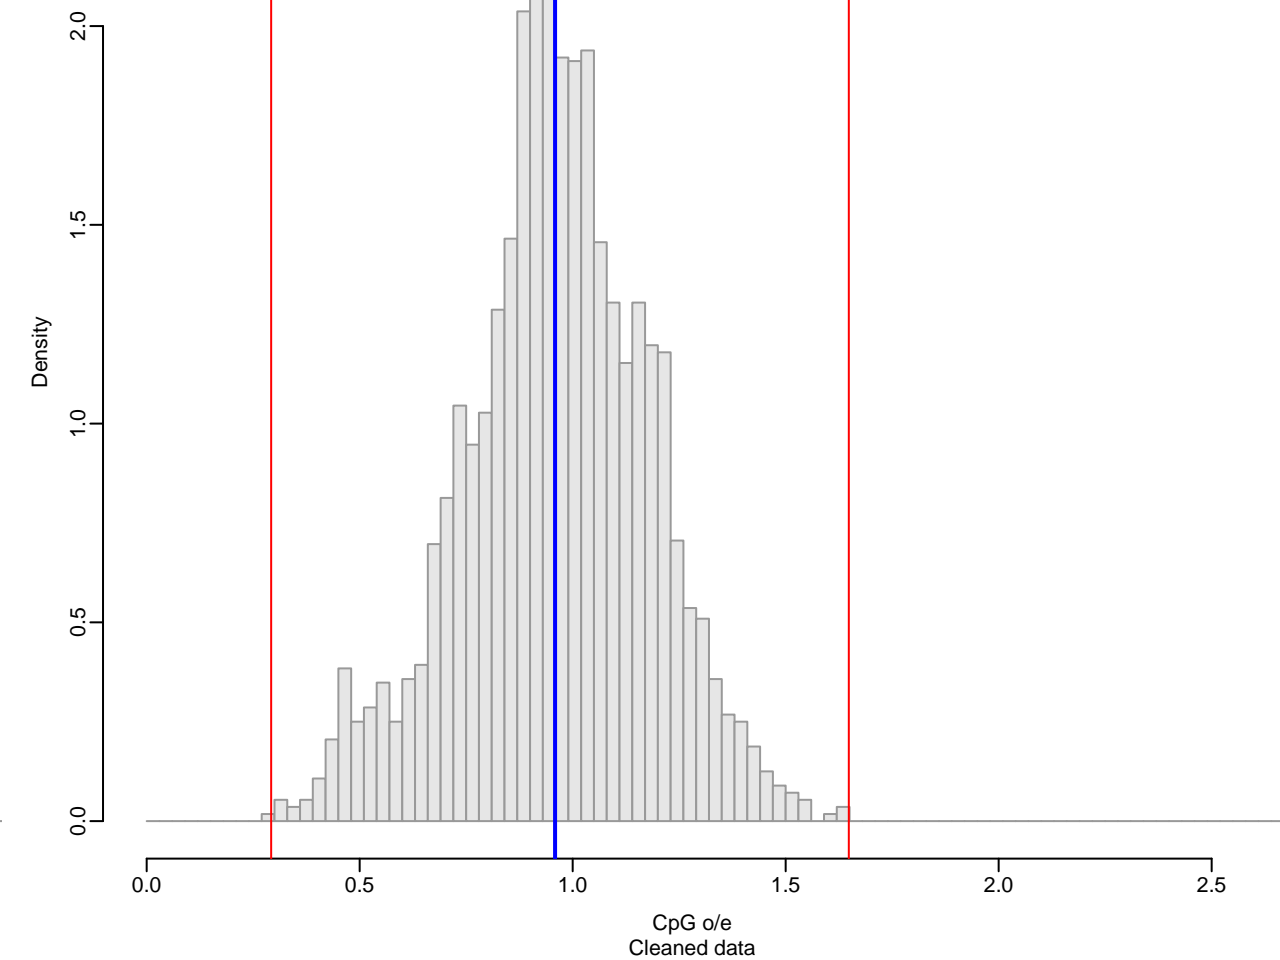



Triticum\_aestivum

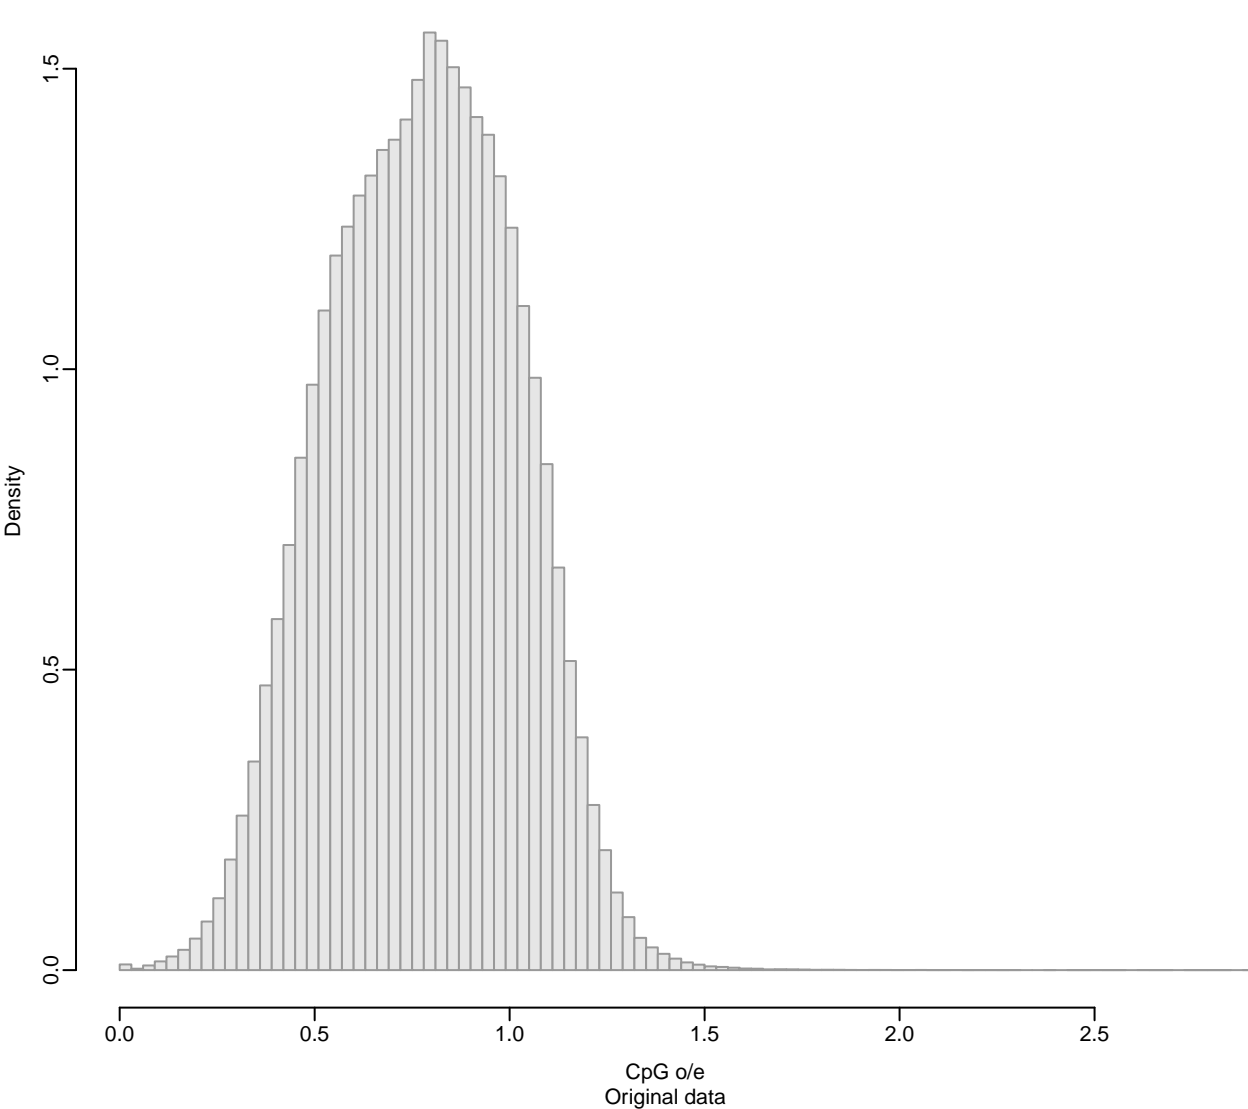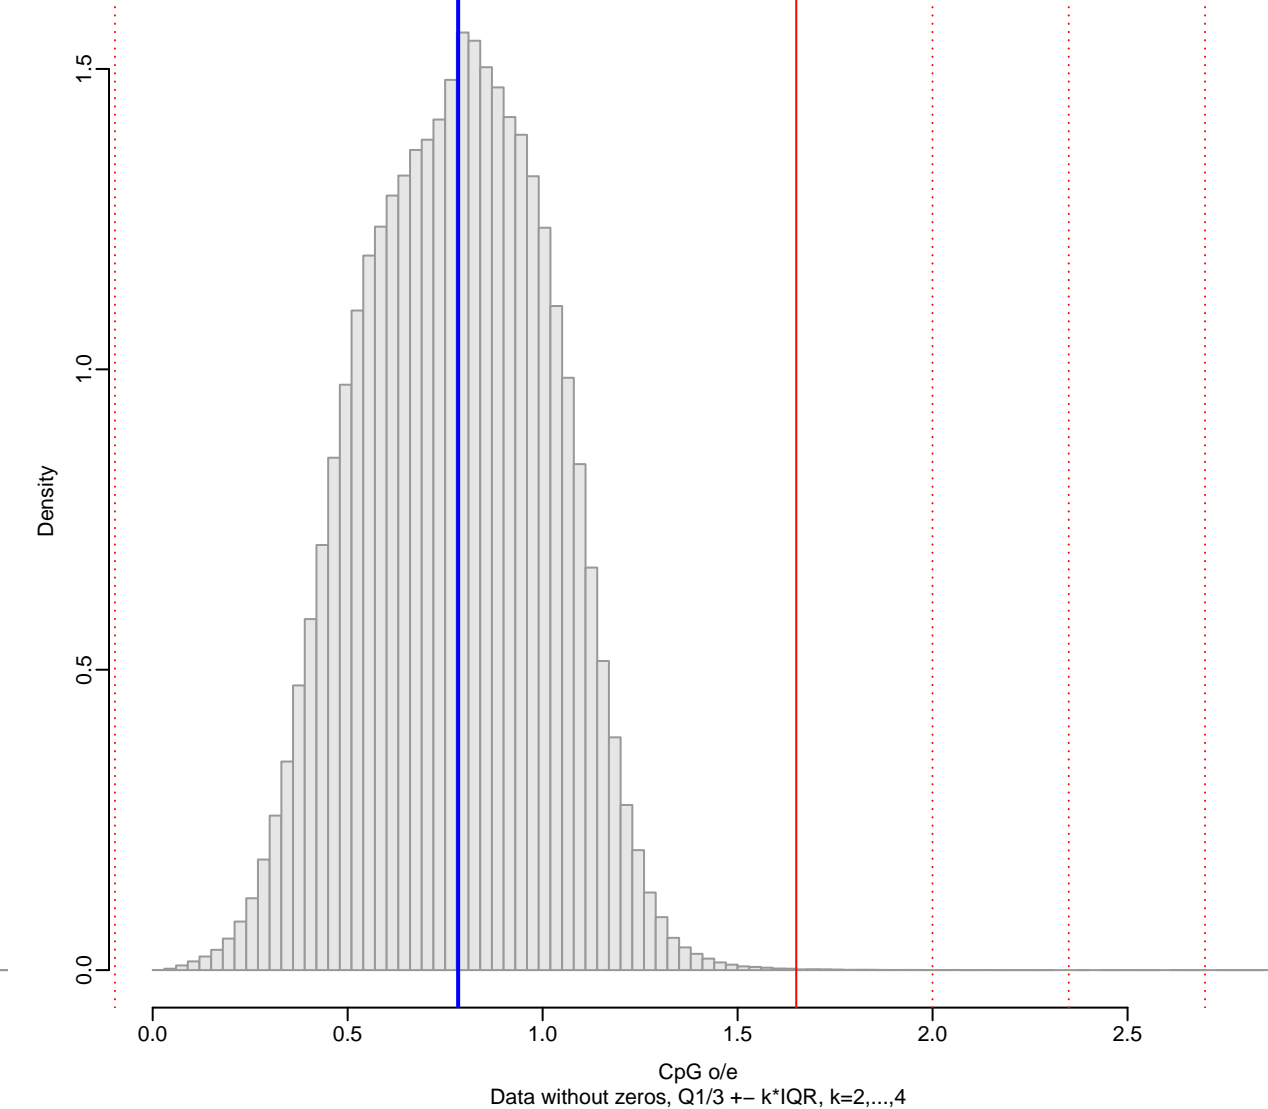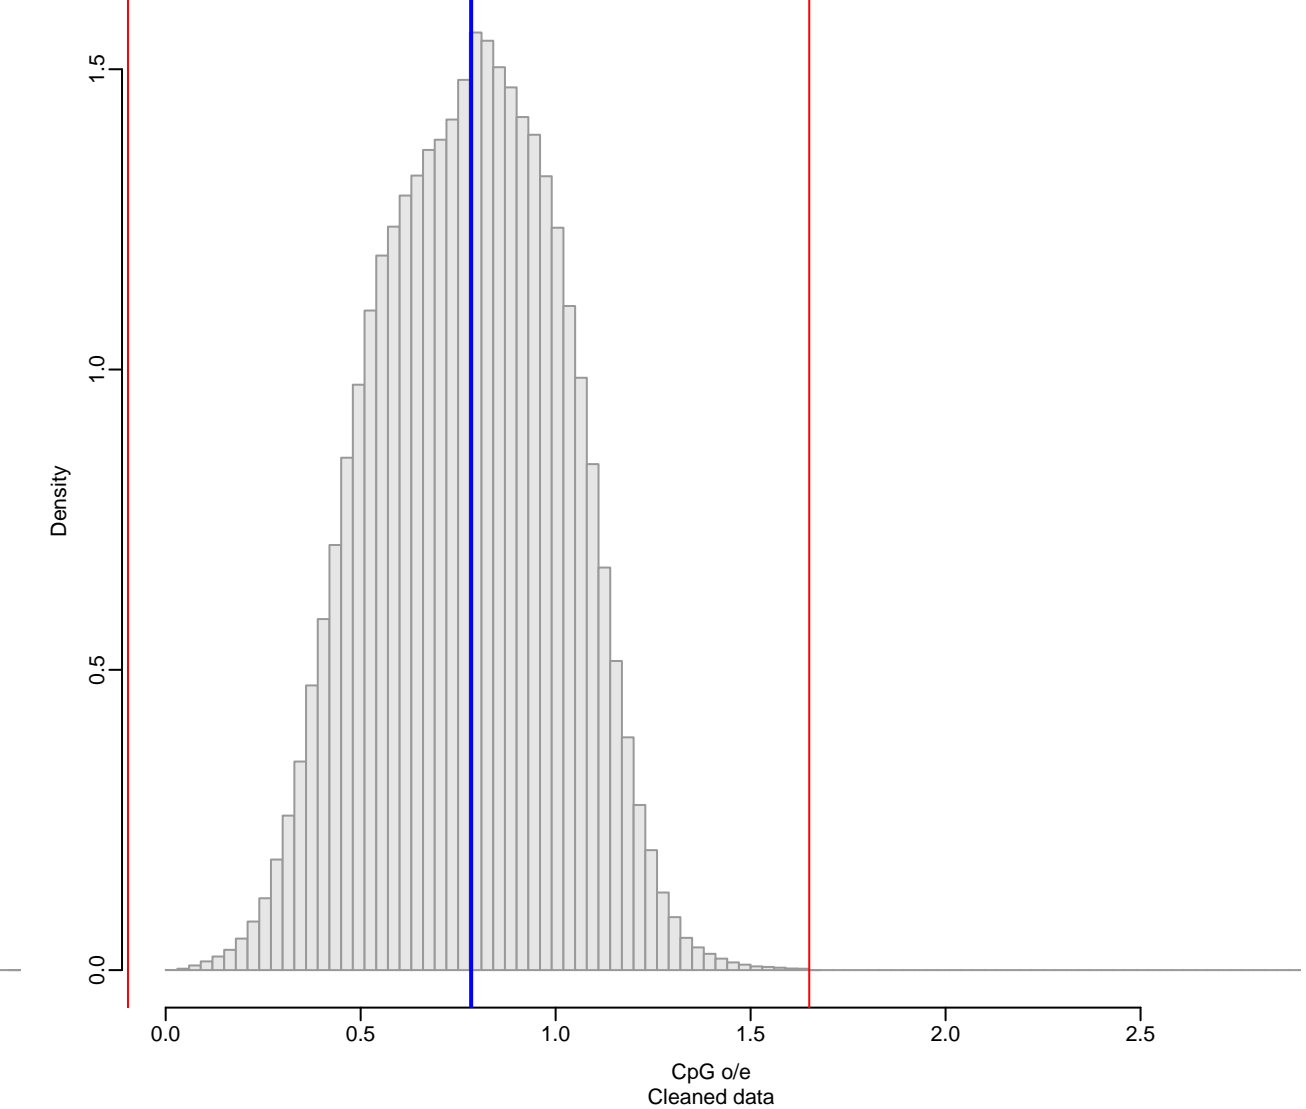

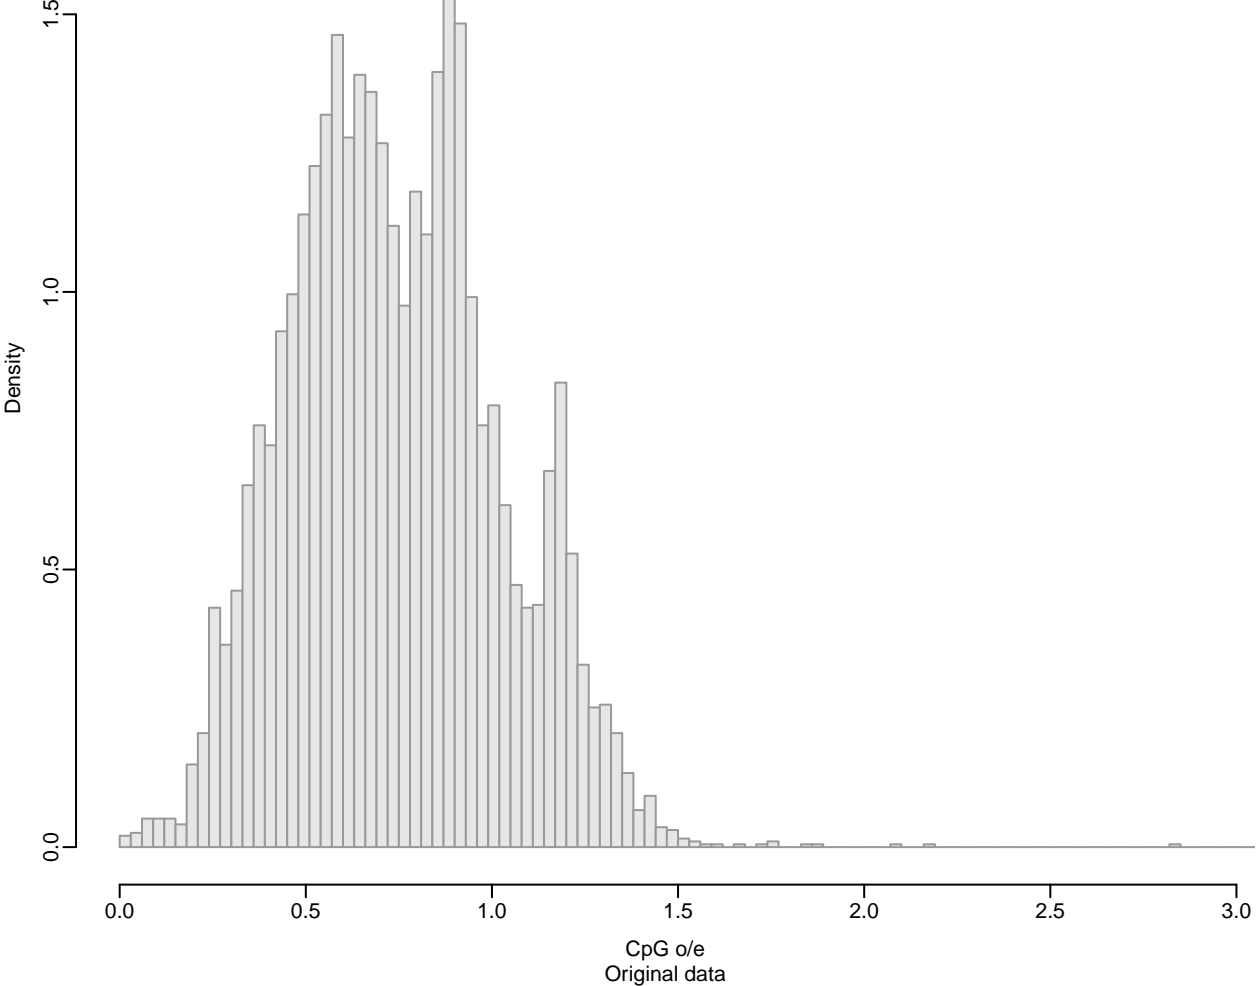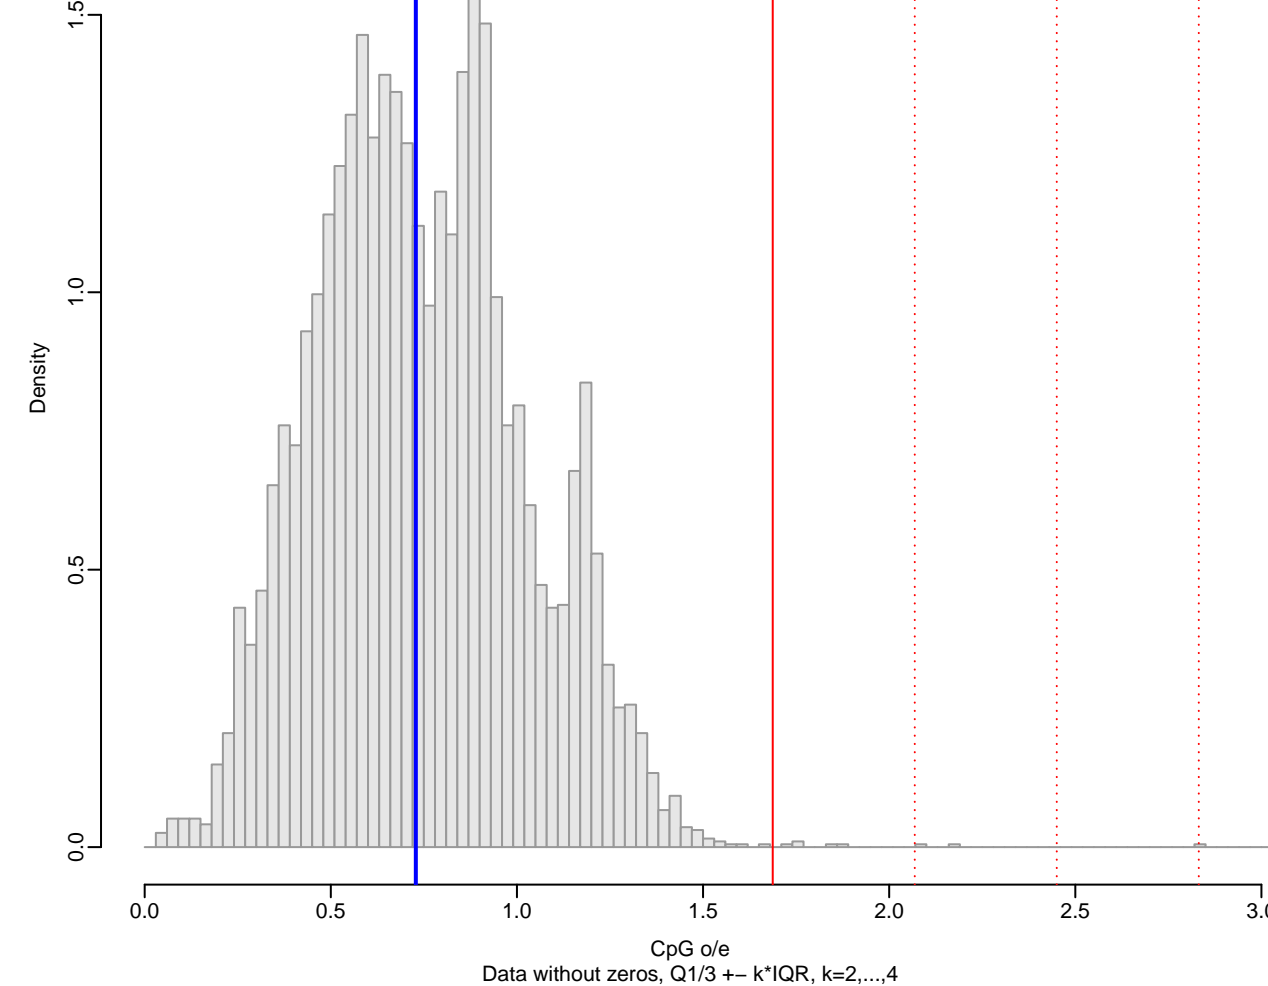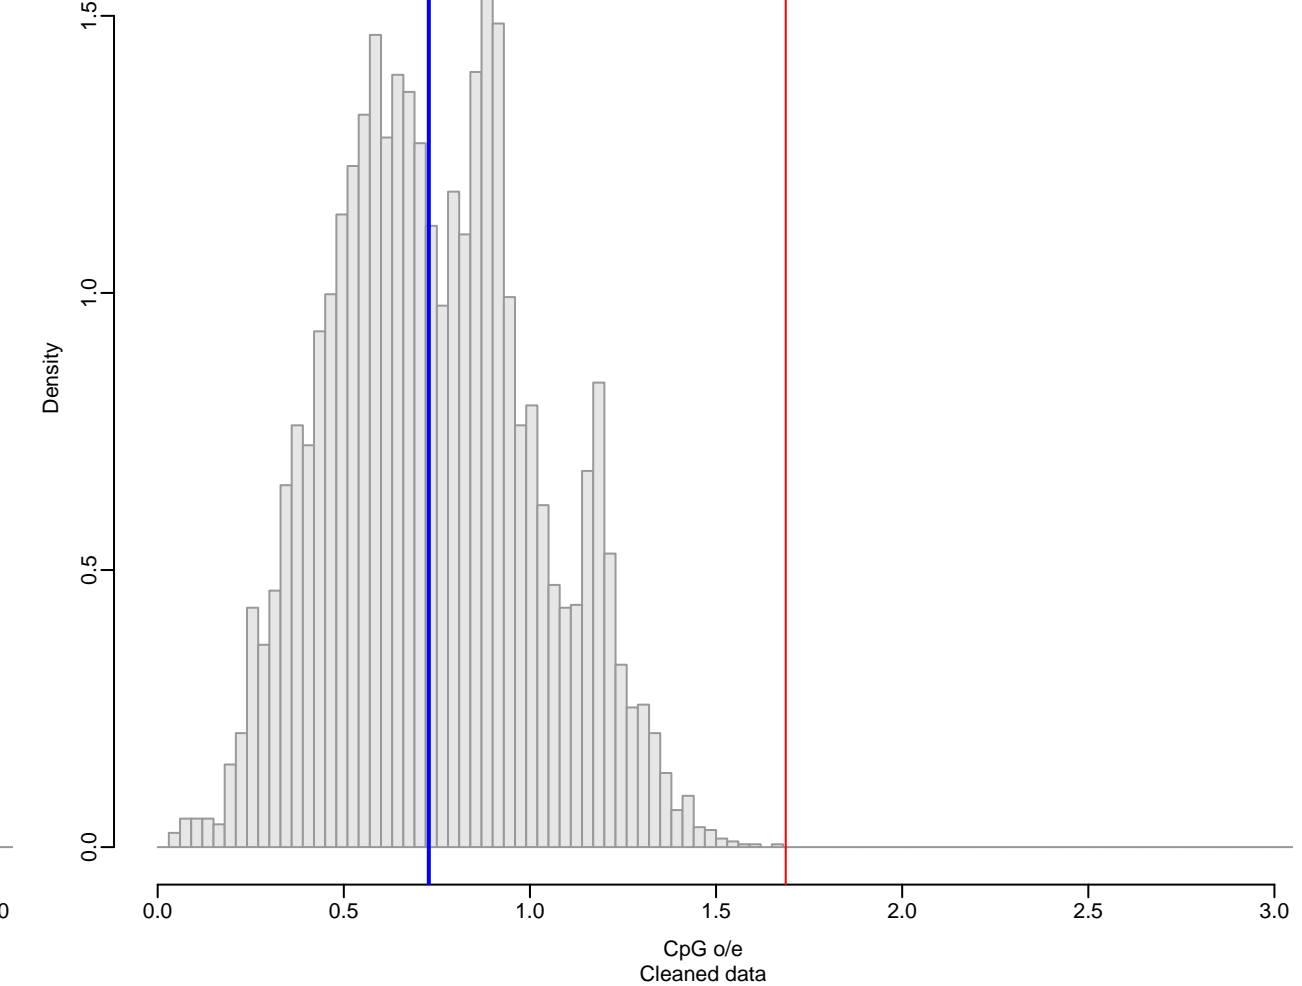

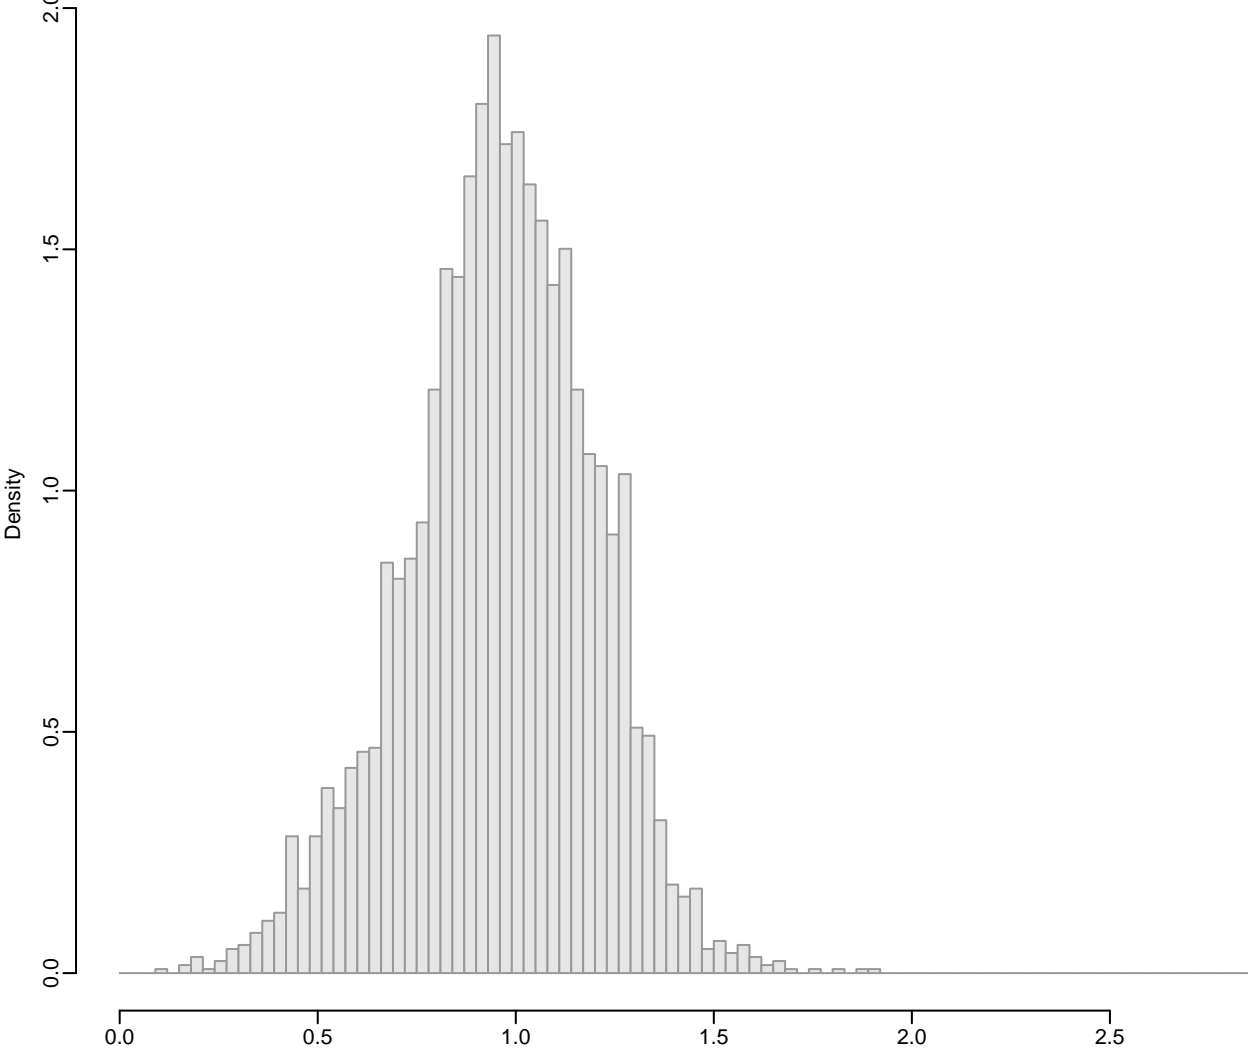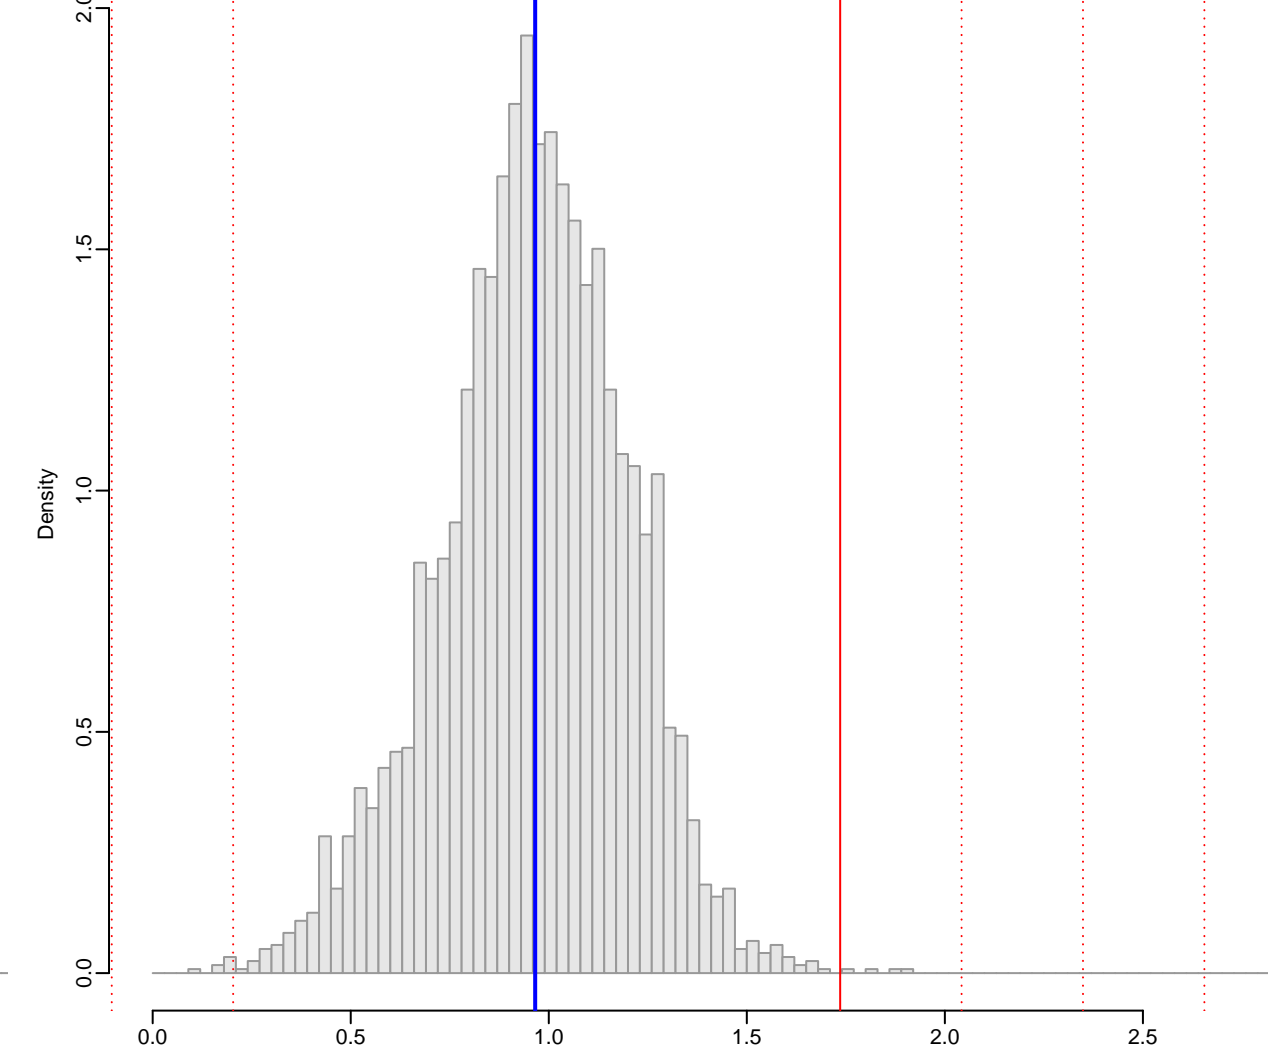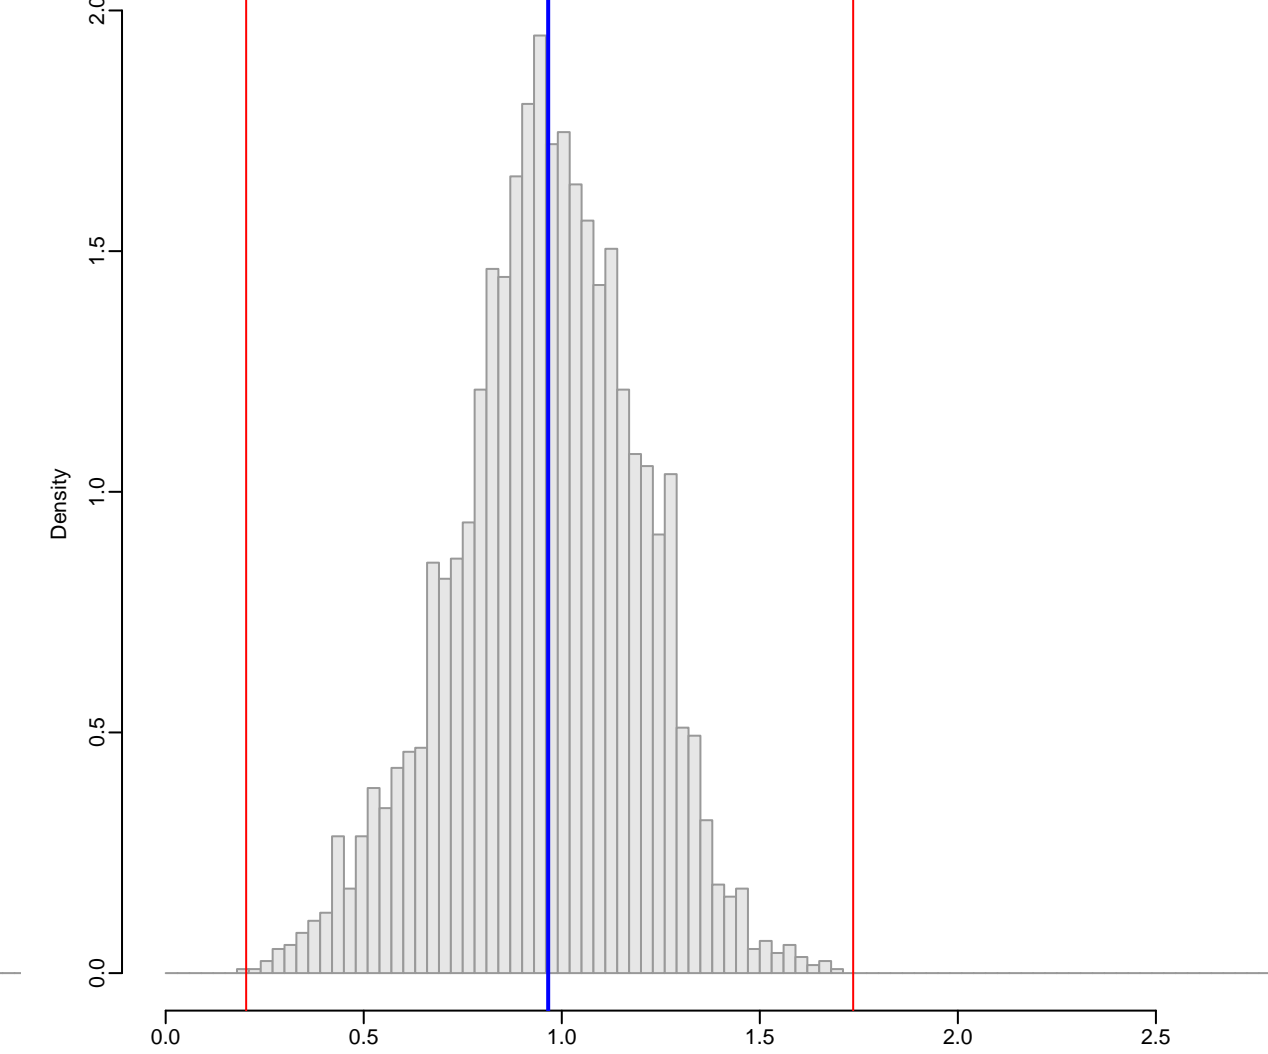

Trypanosoma\_brucei

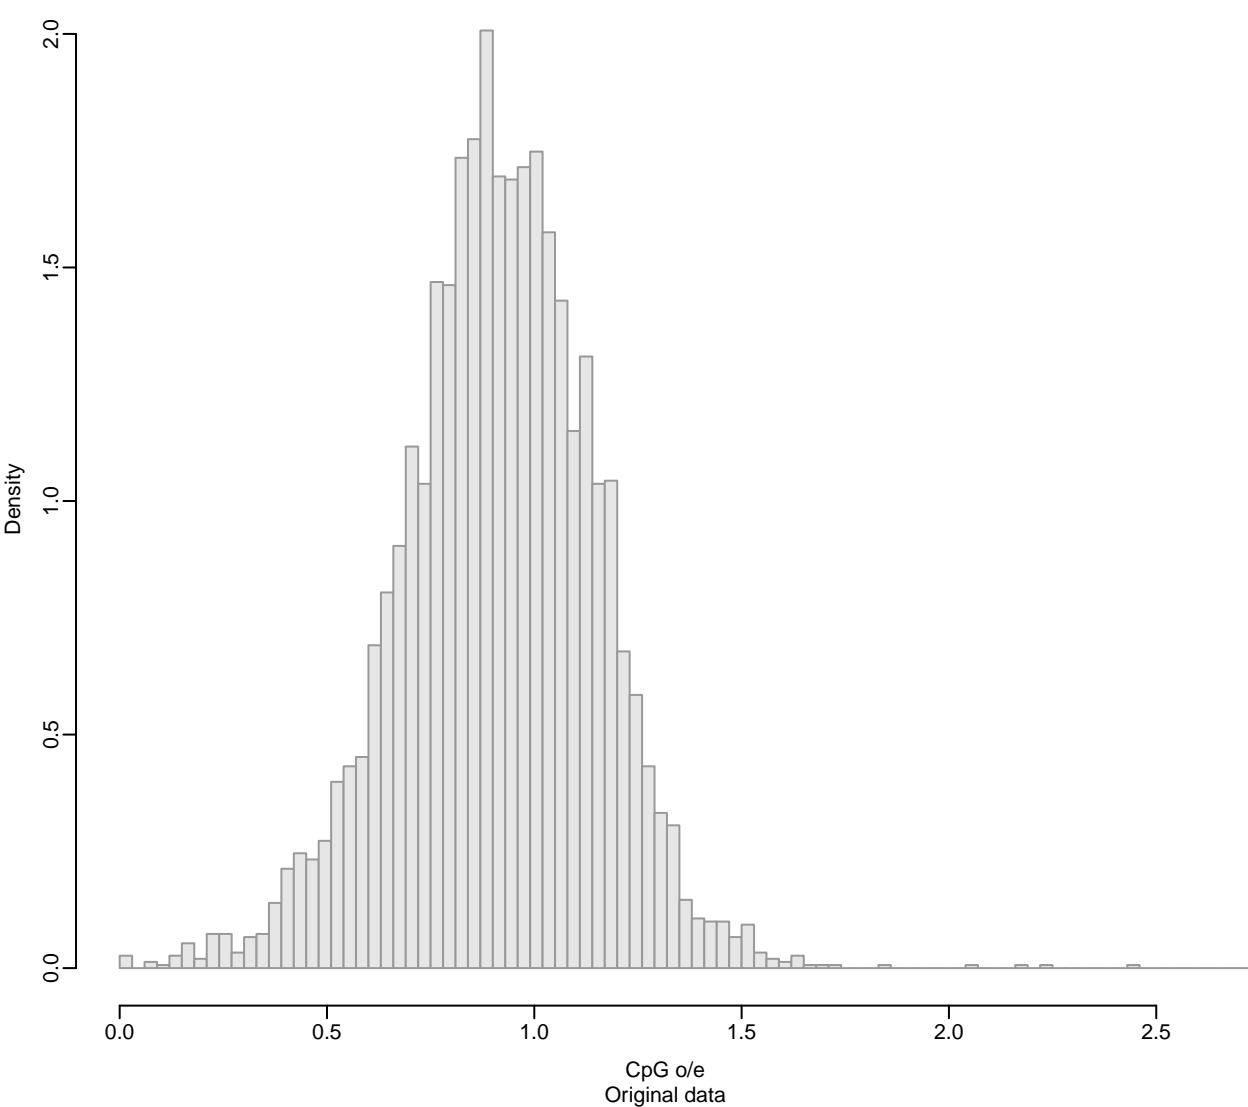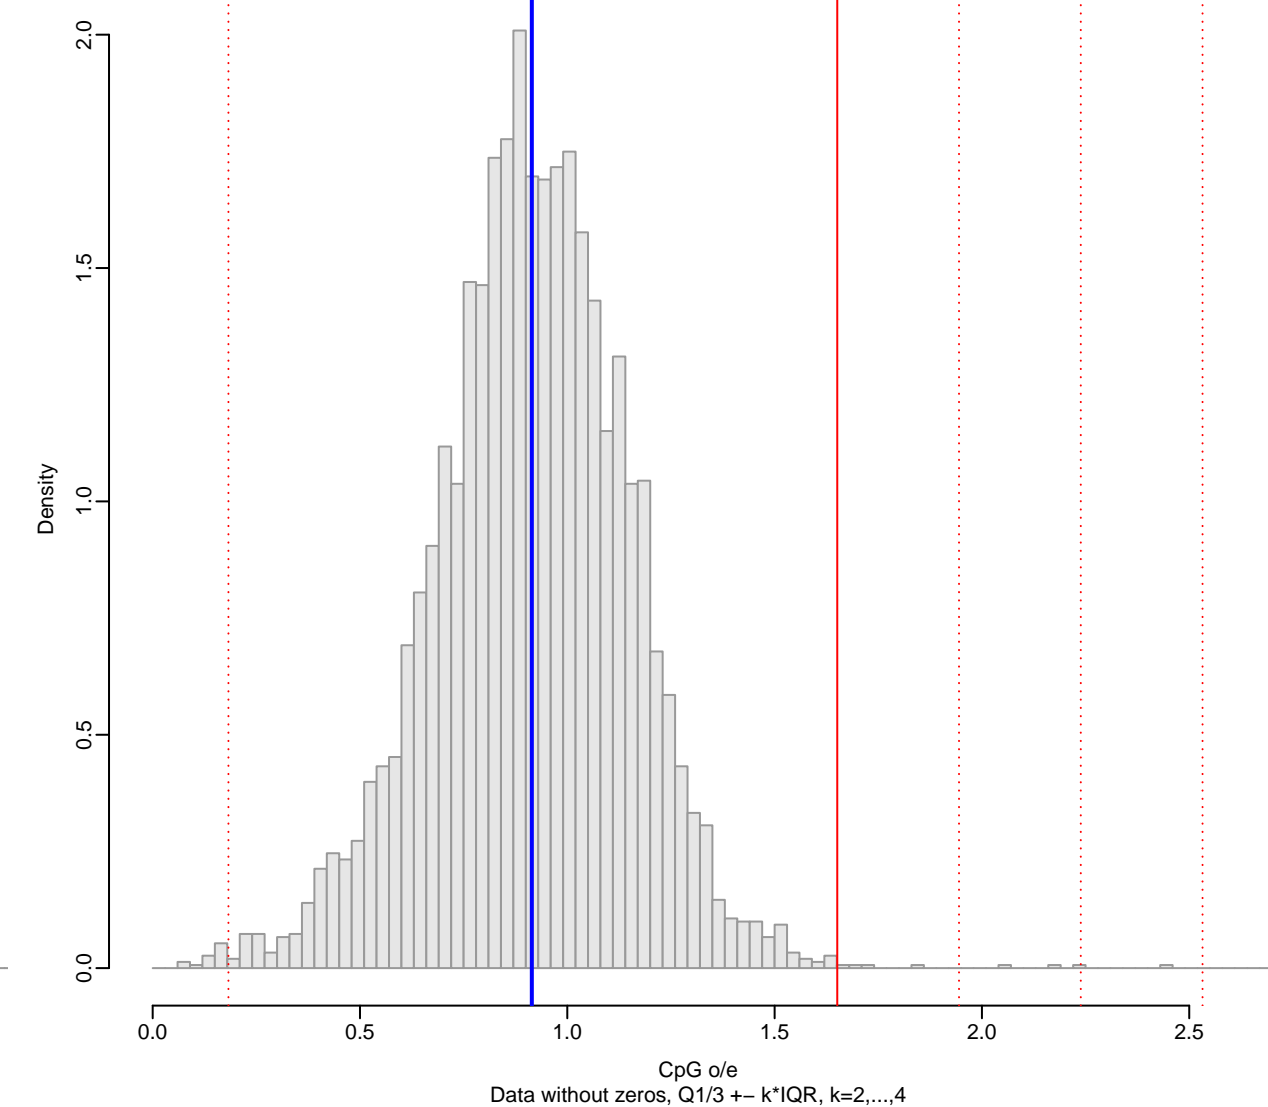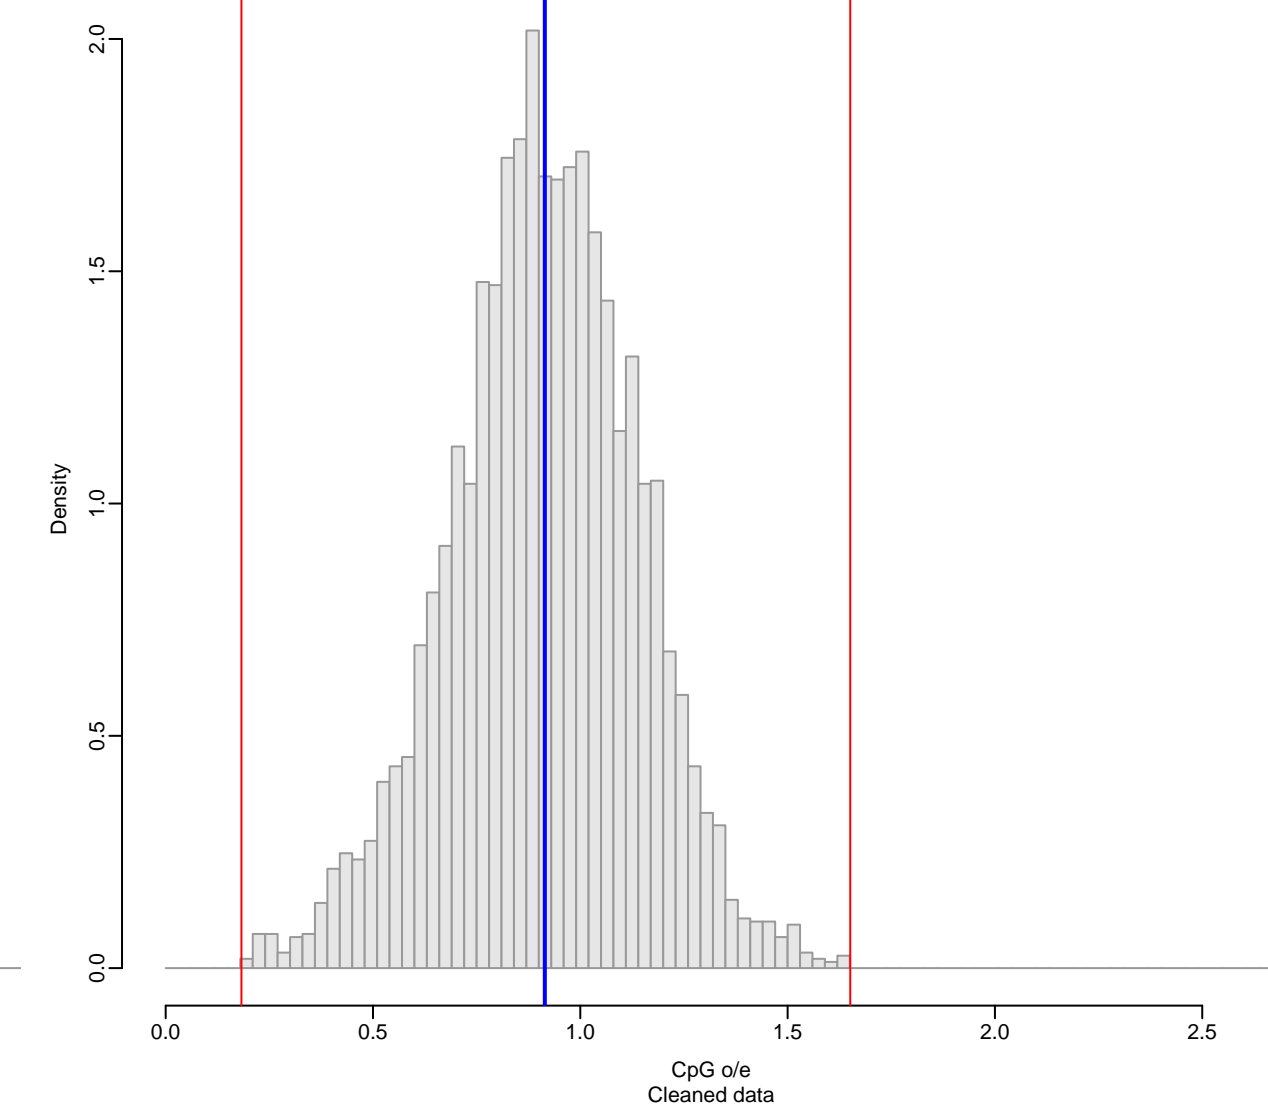

Trypanosoma\_cruzi

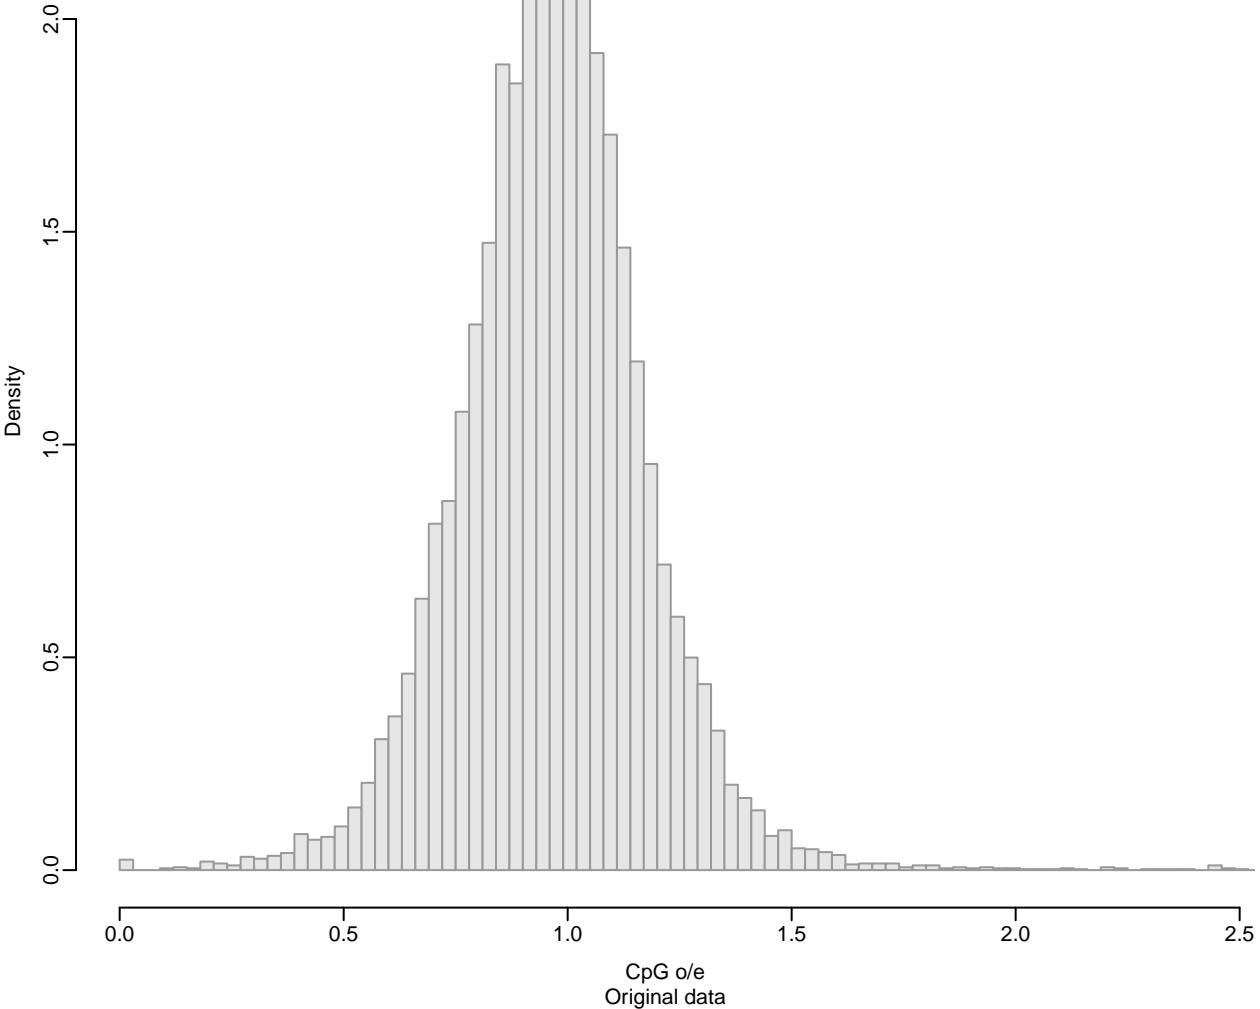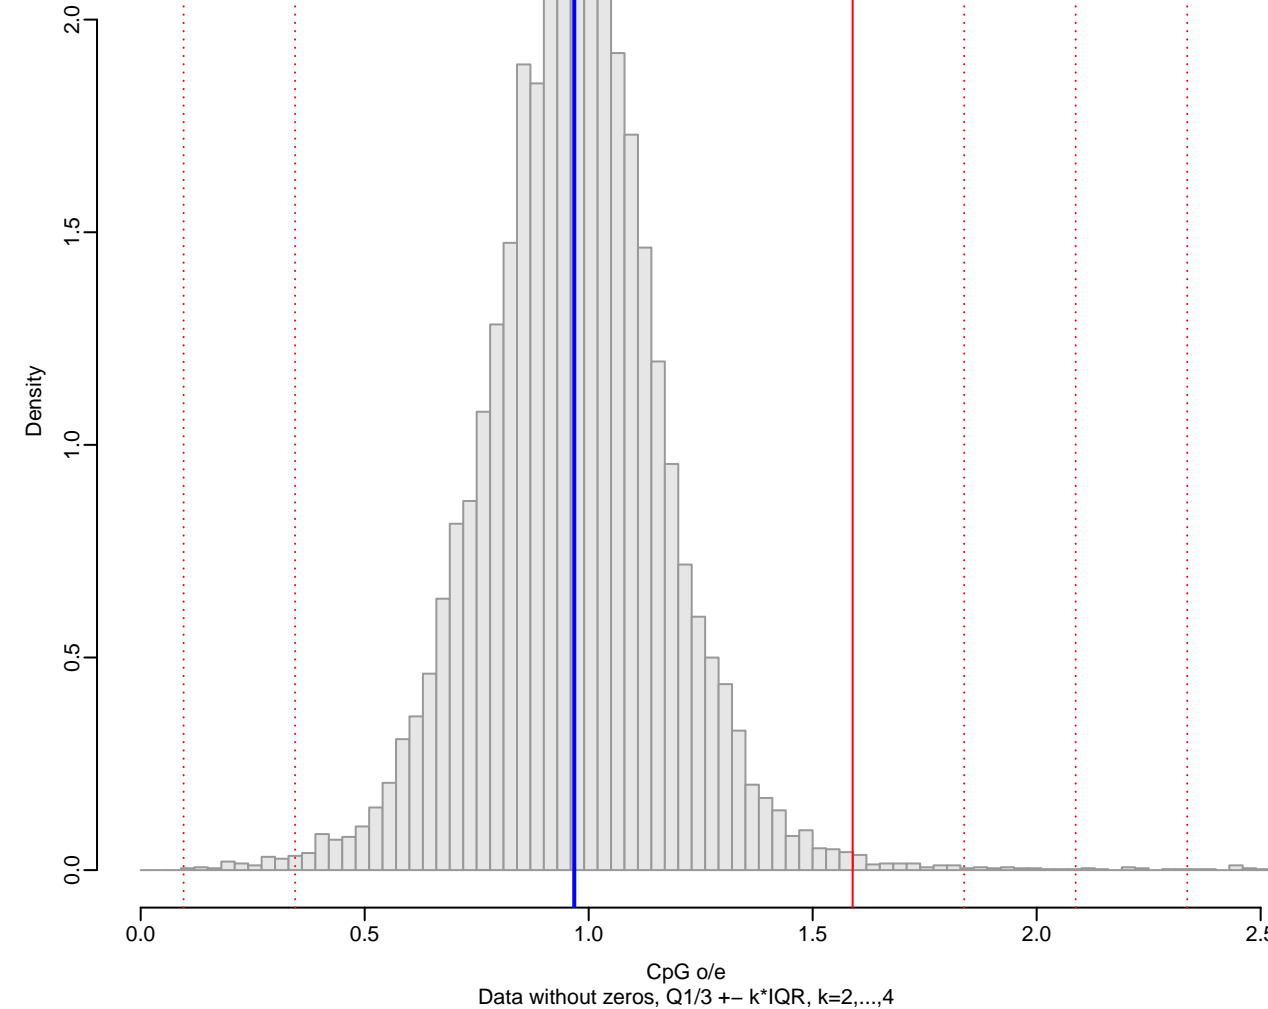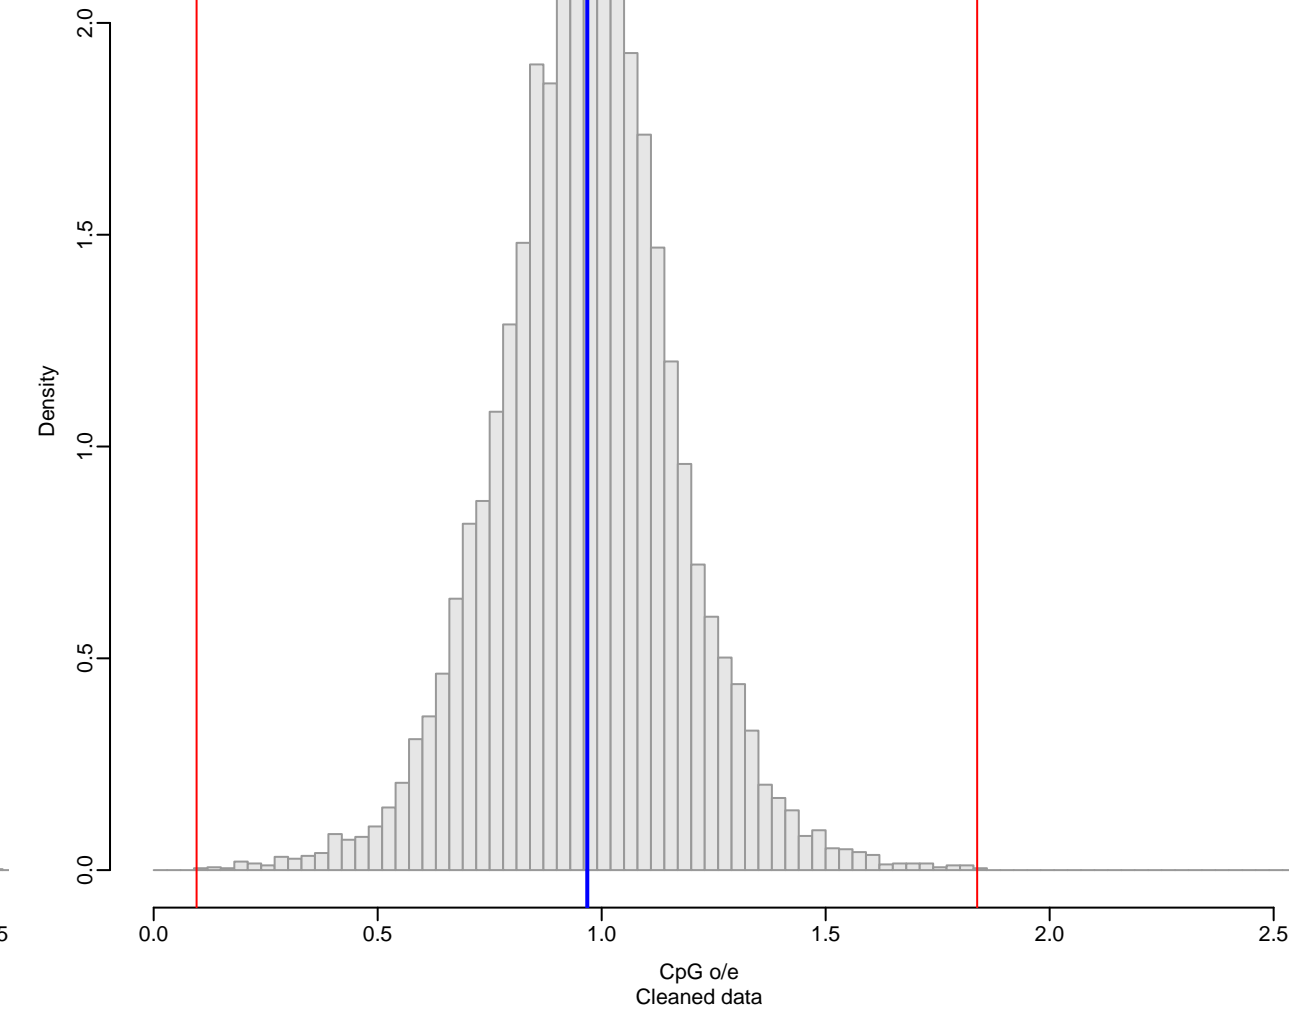

Trypanosoma\_rangeli

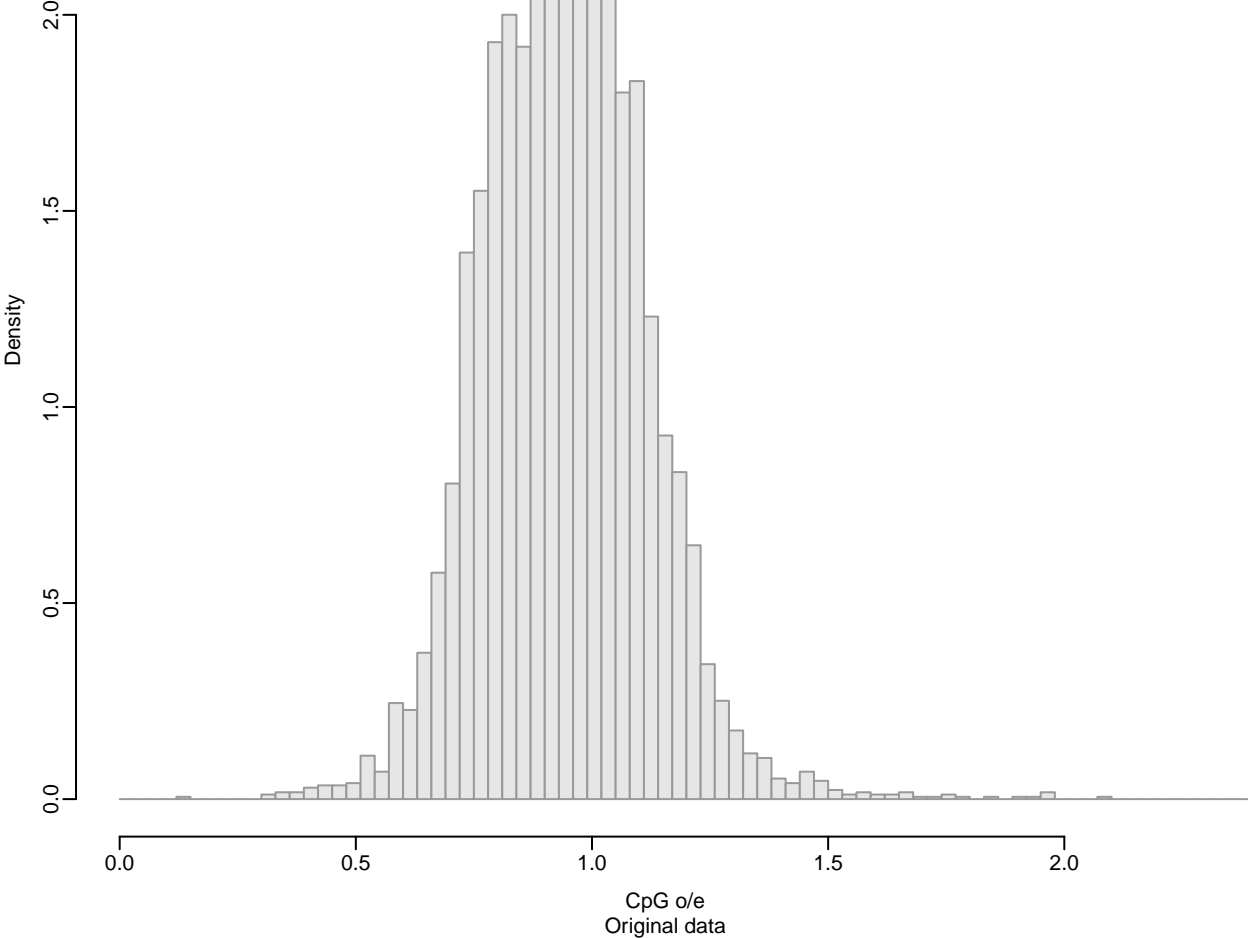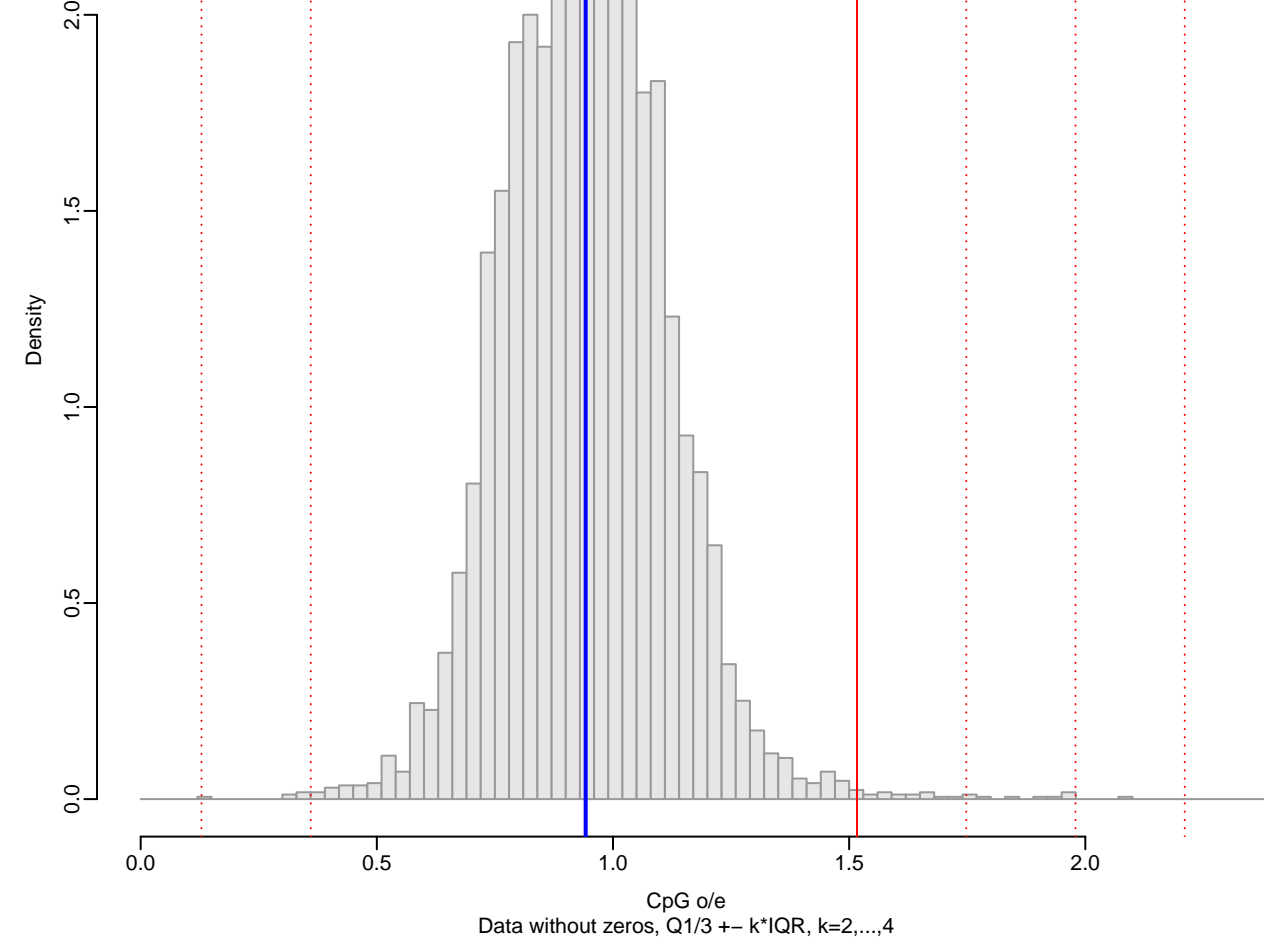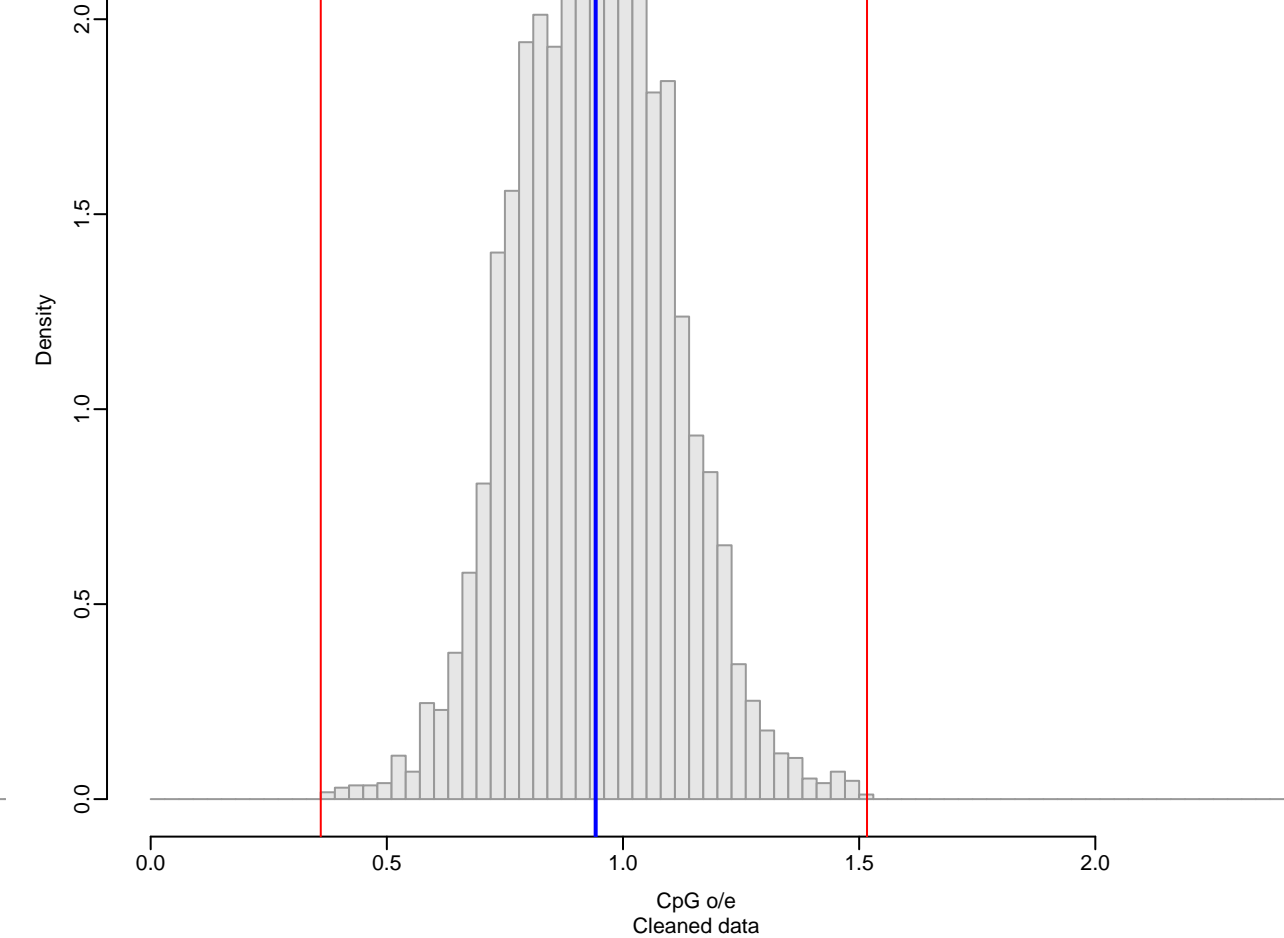

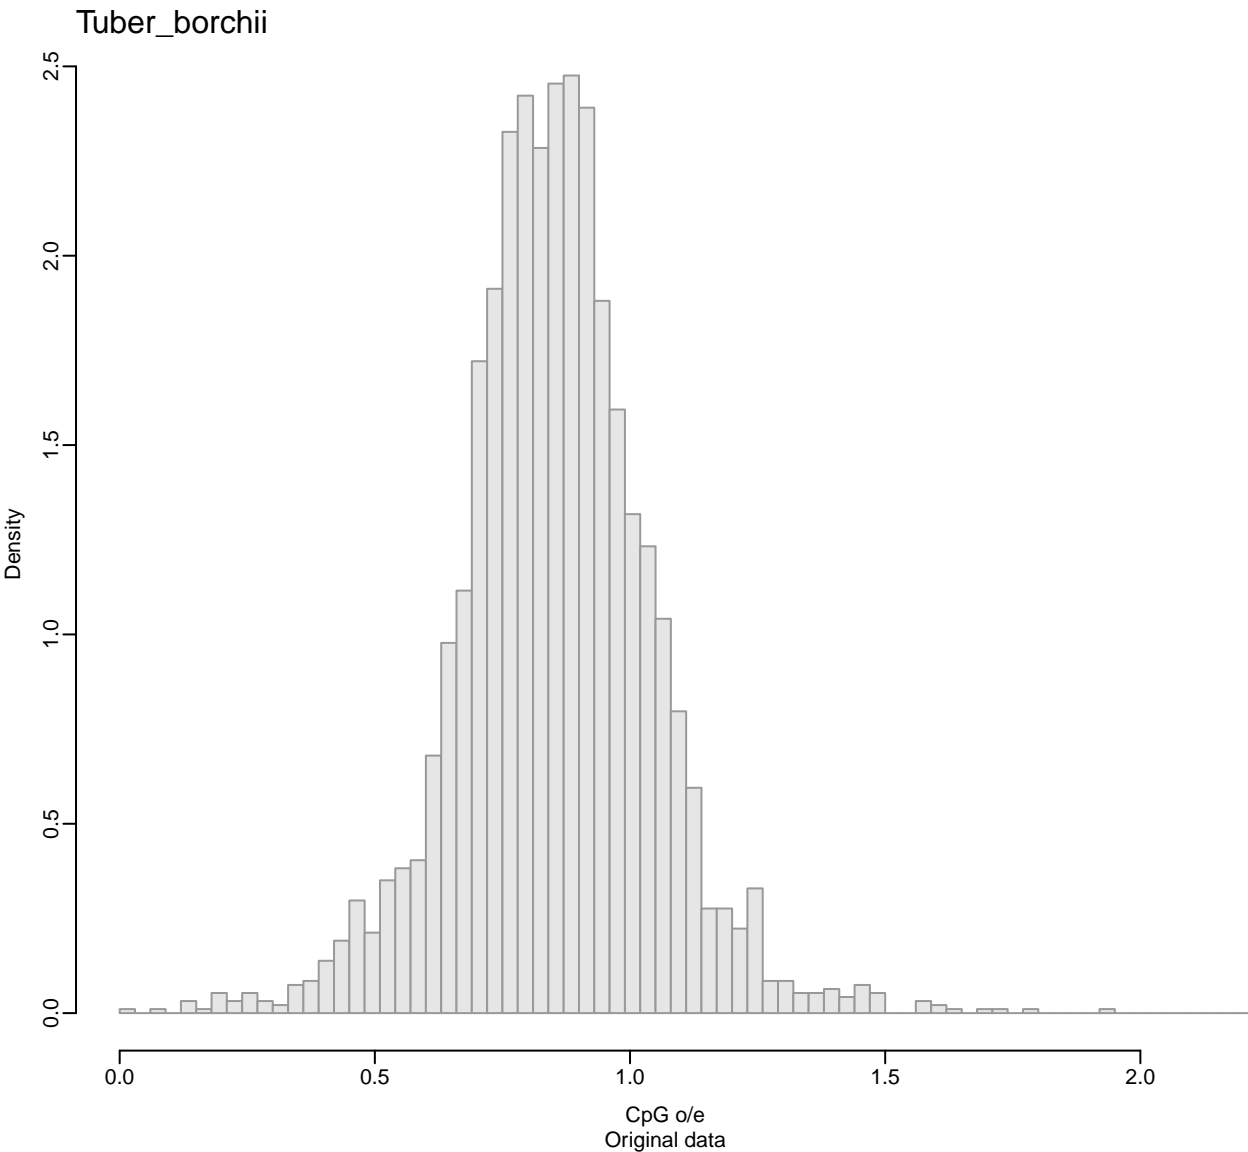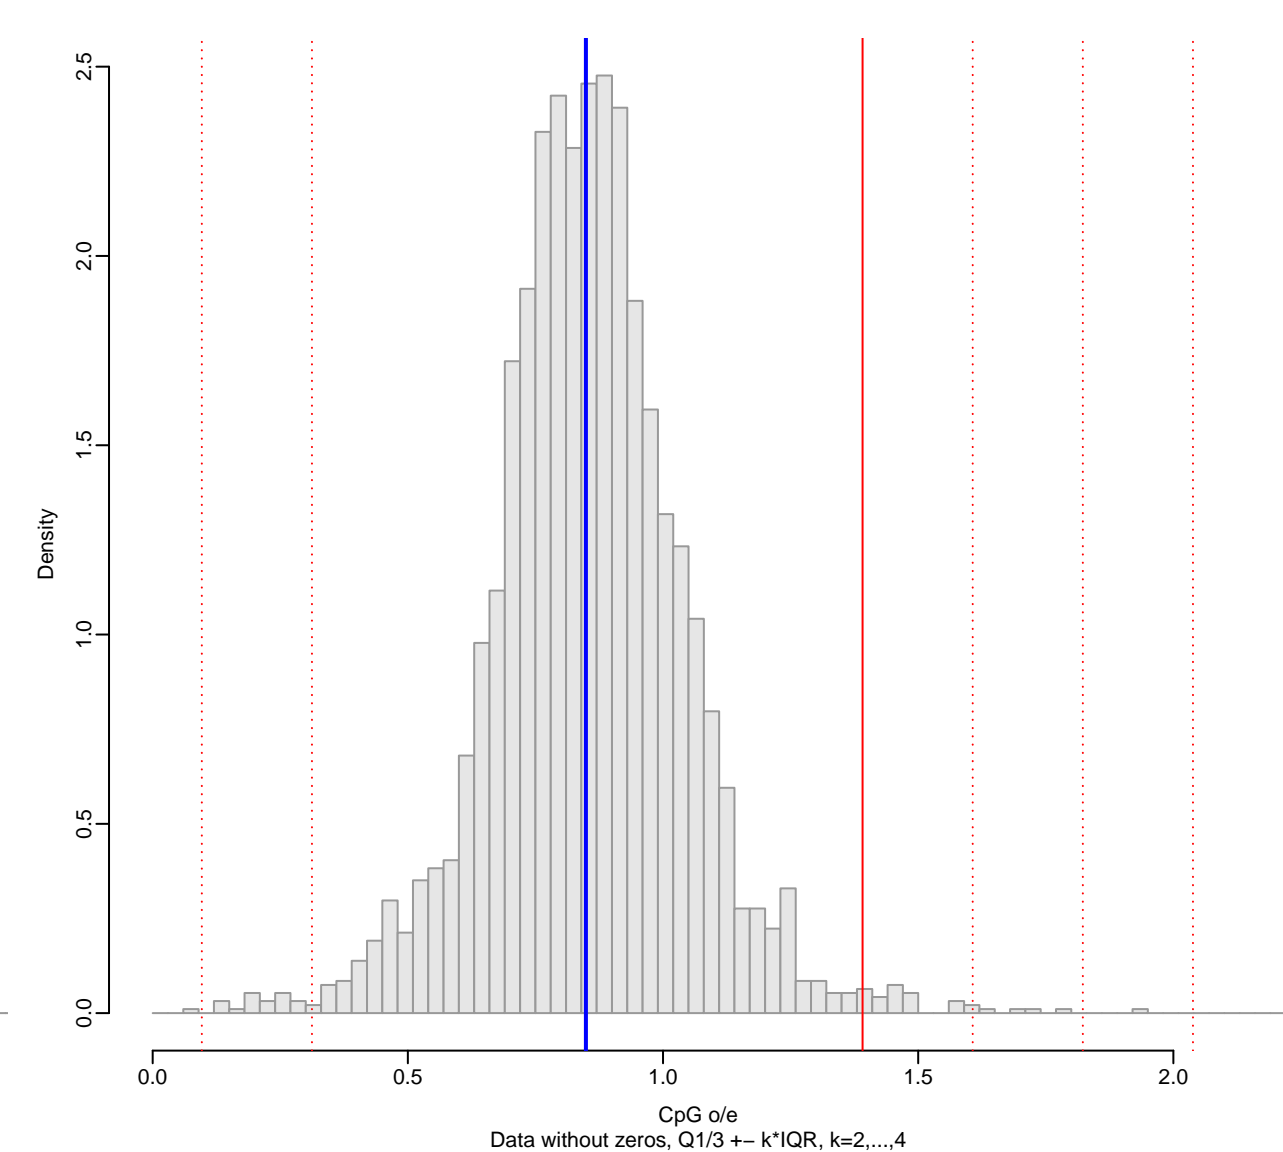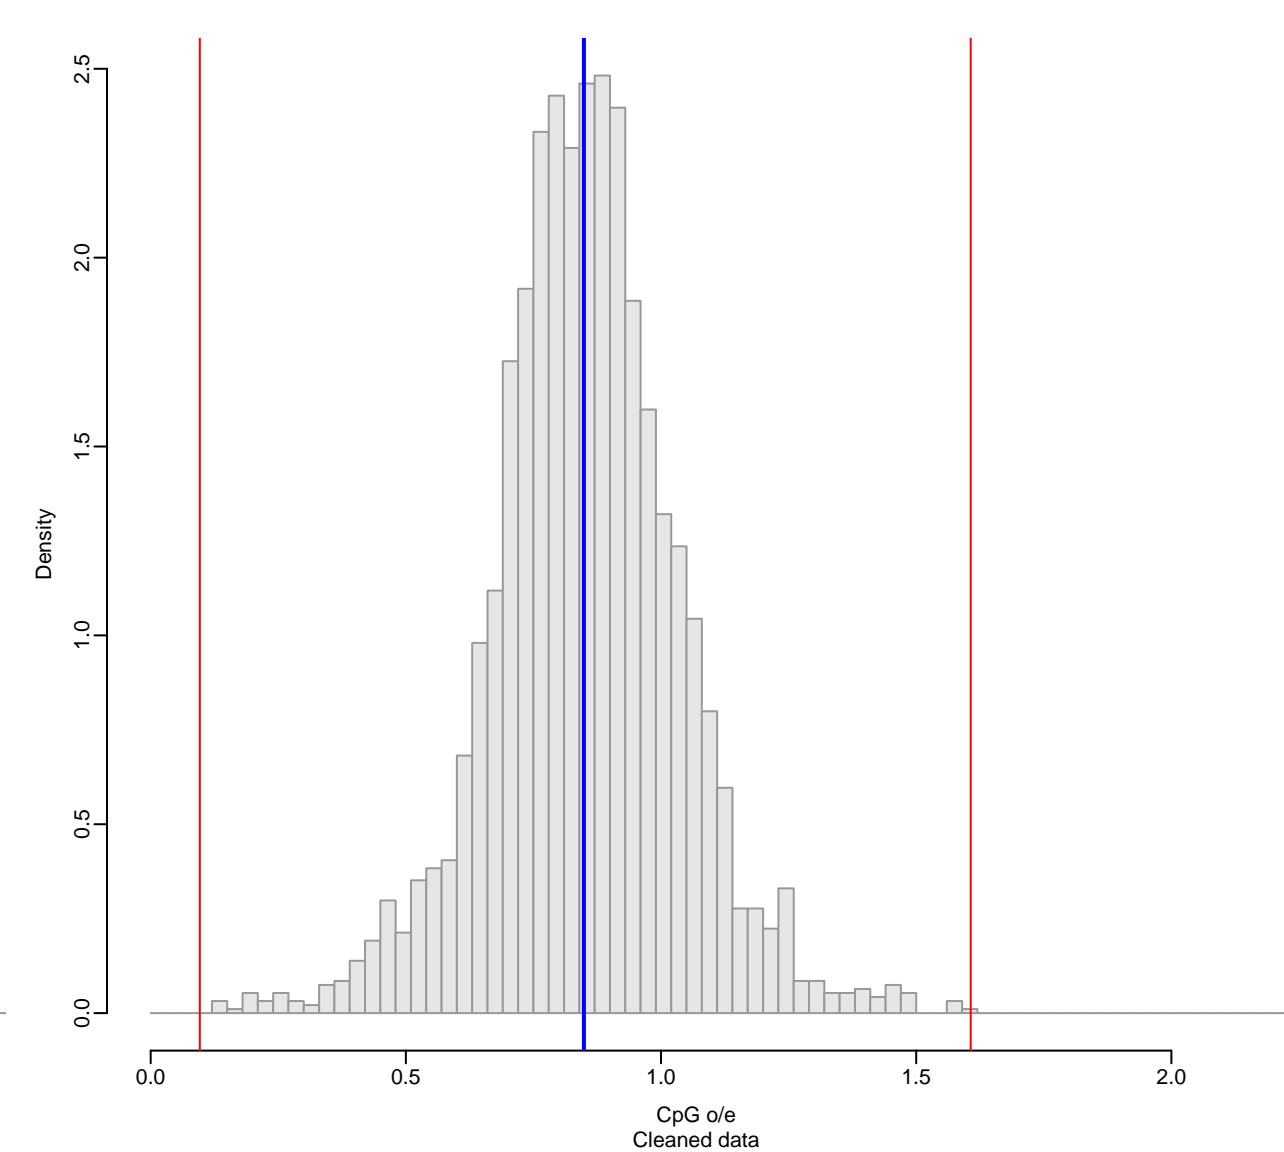

Tuber\_melanosporum

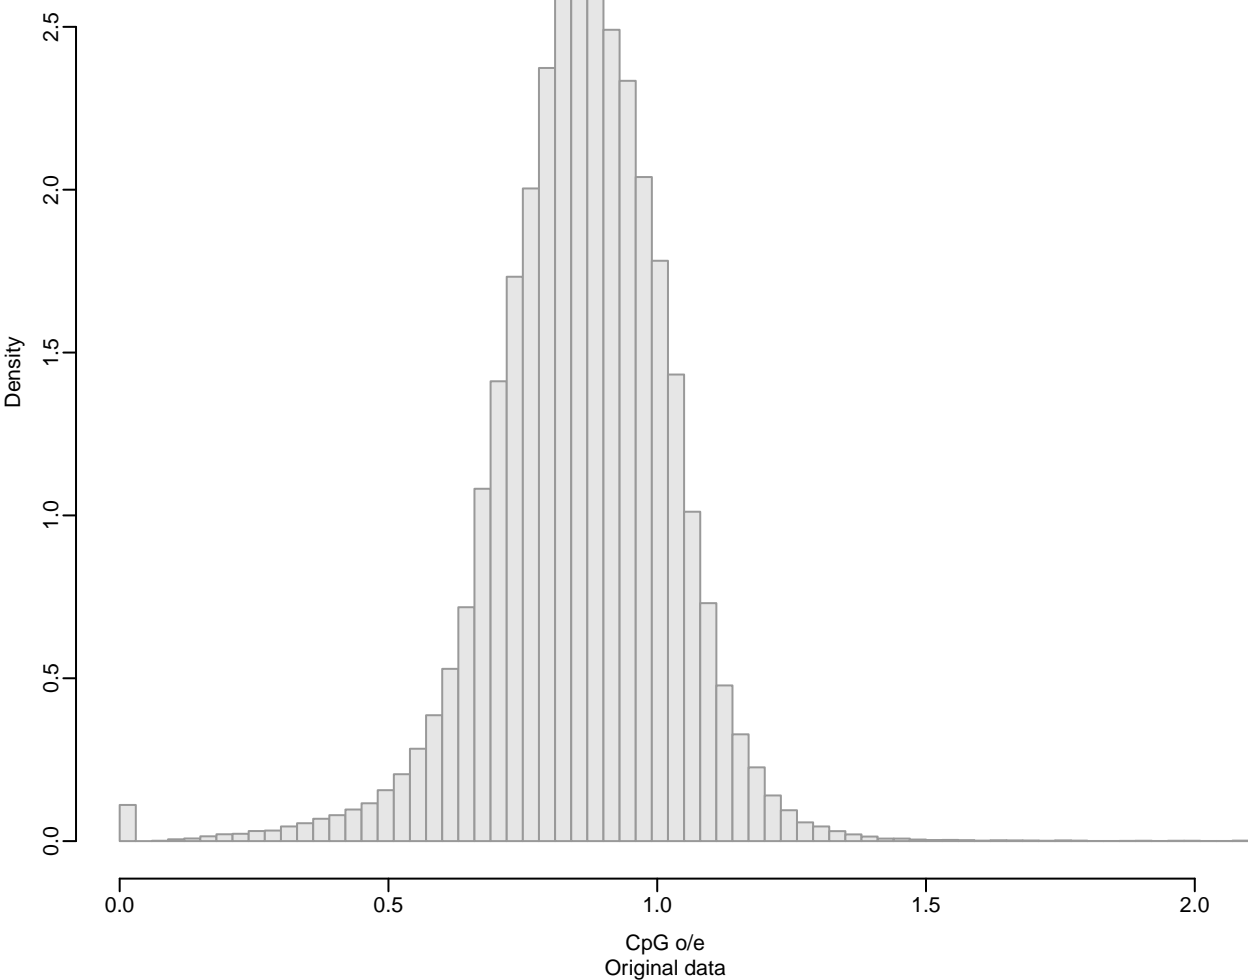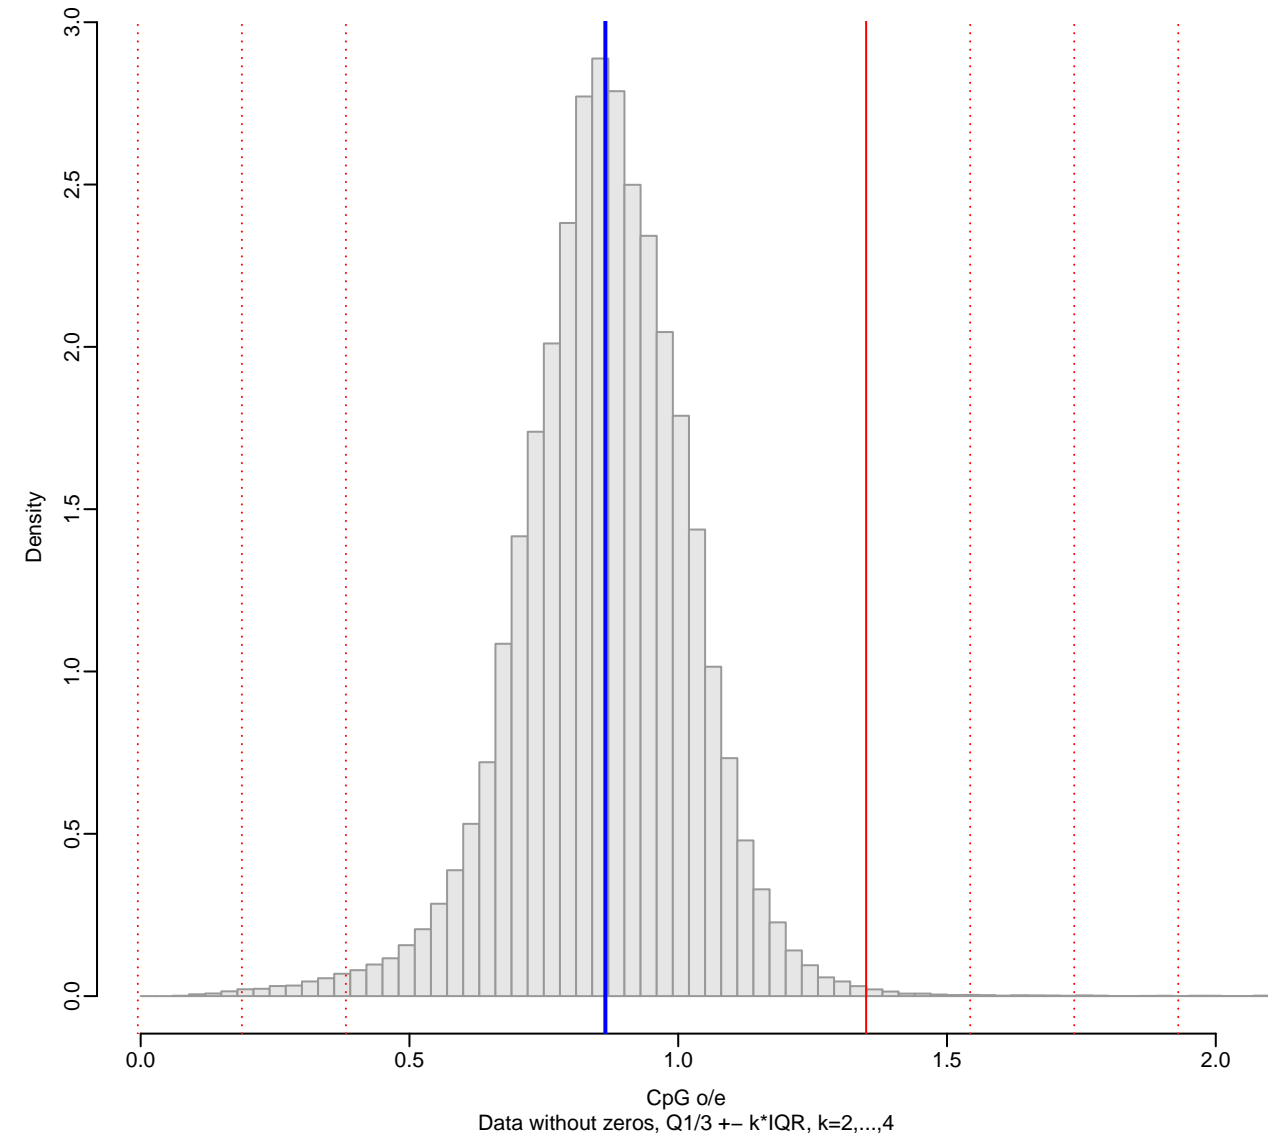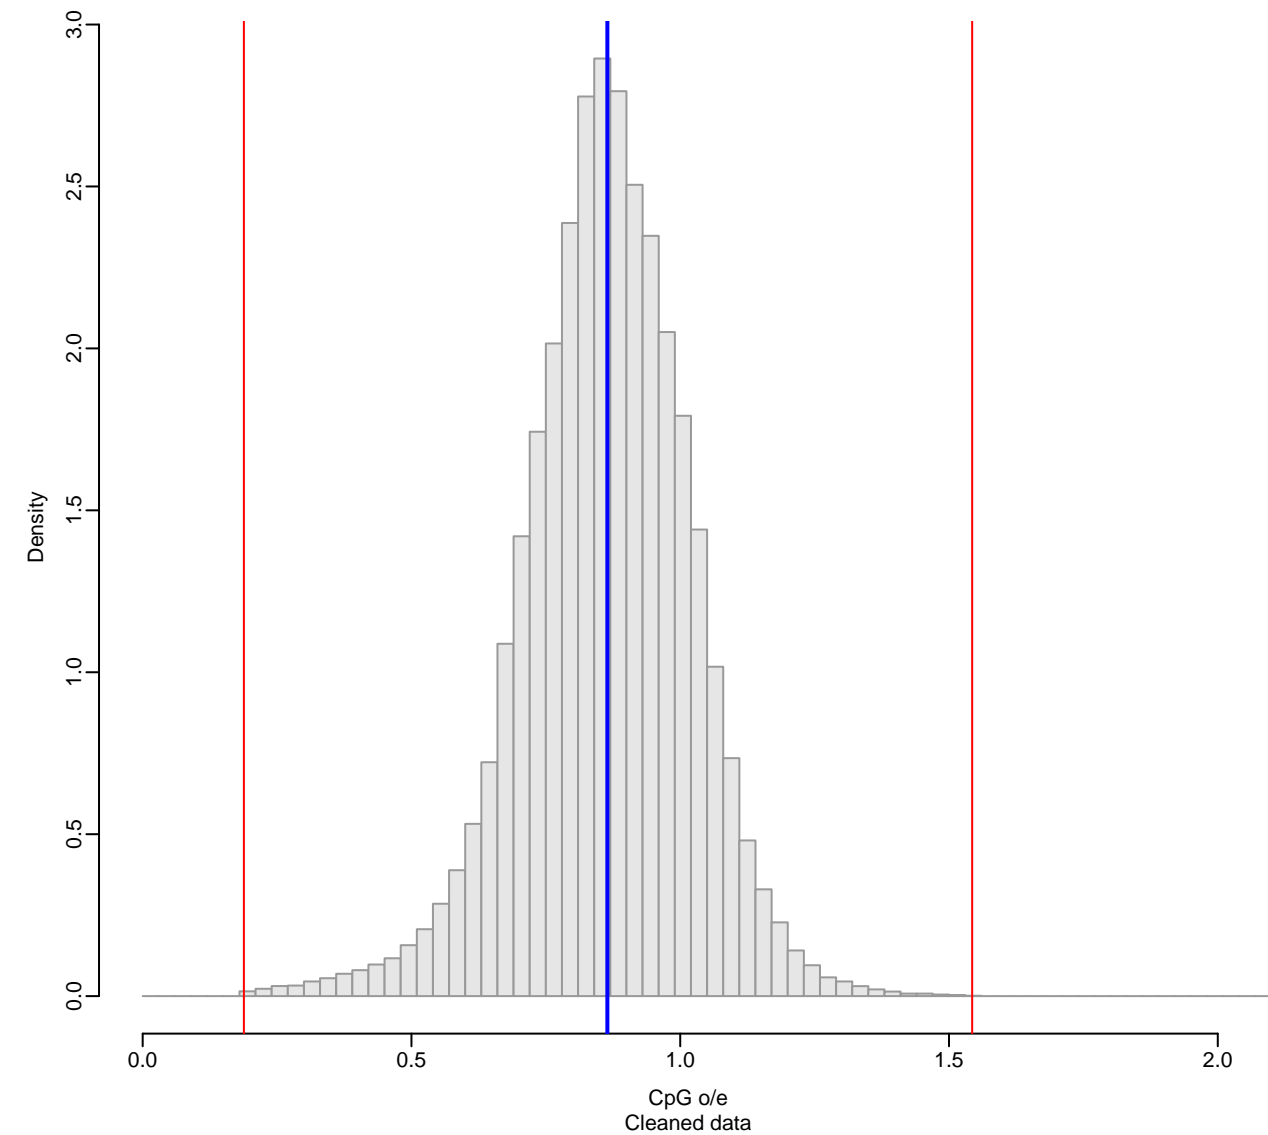



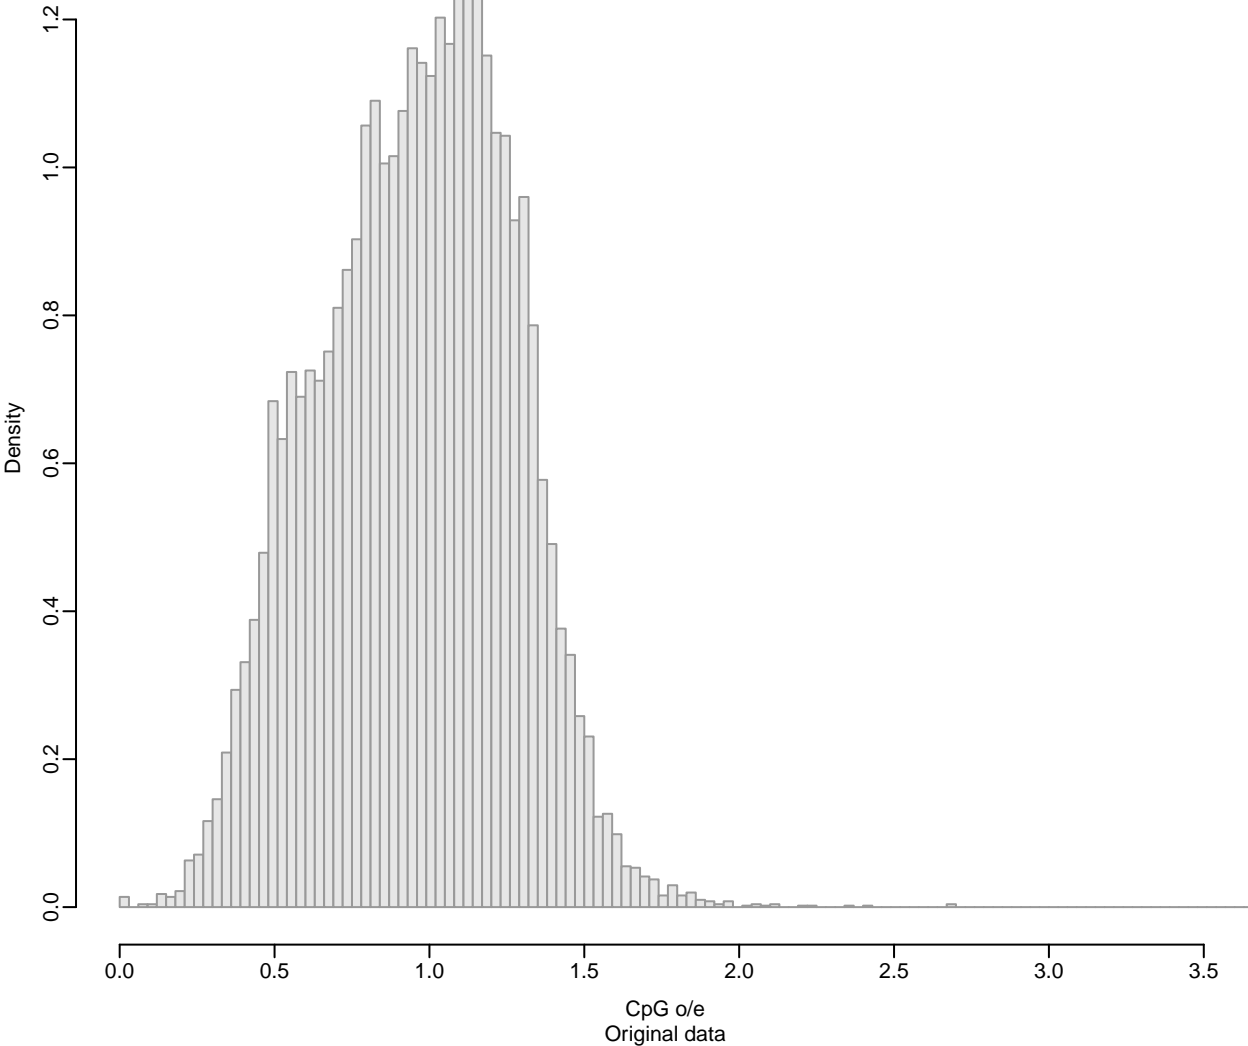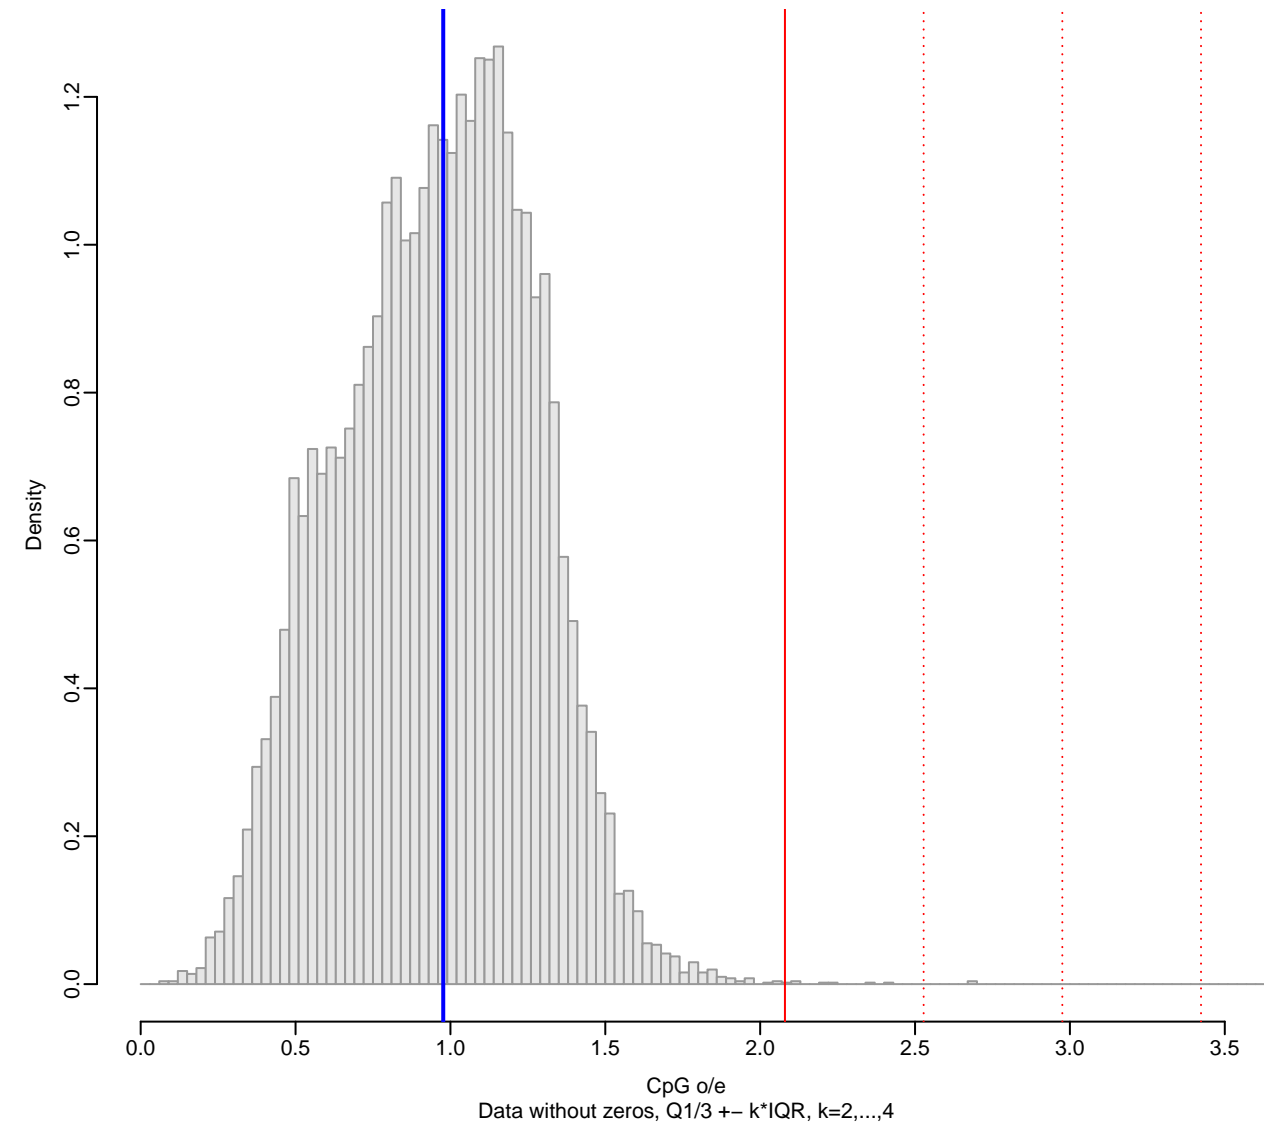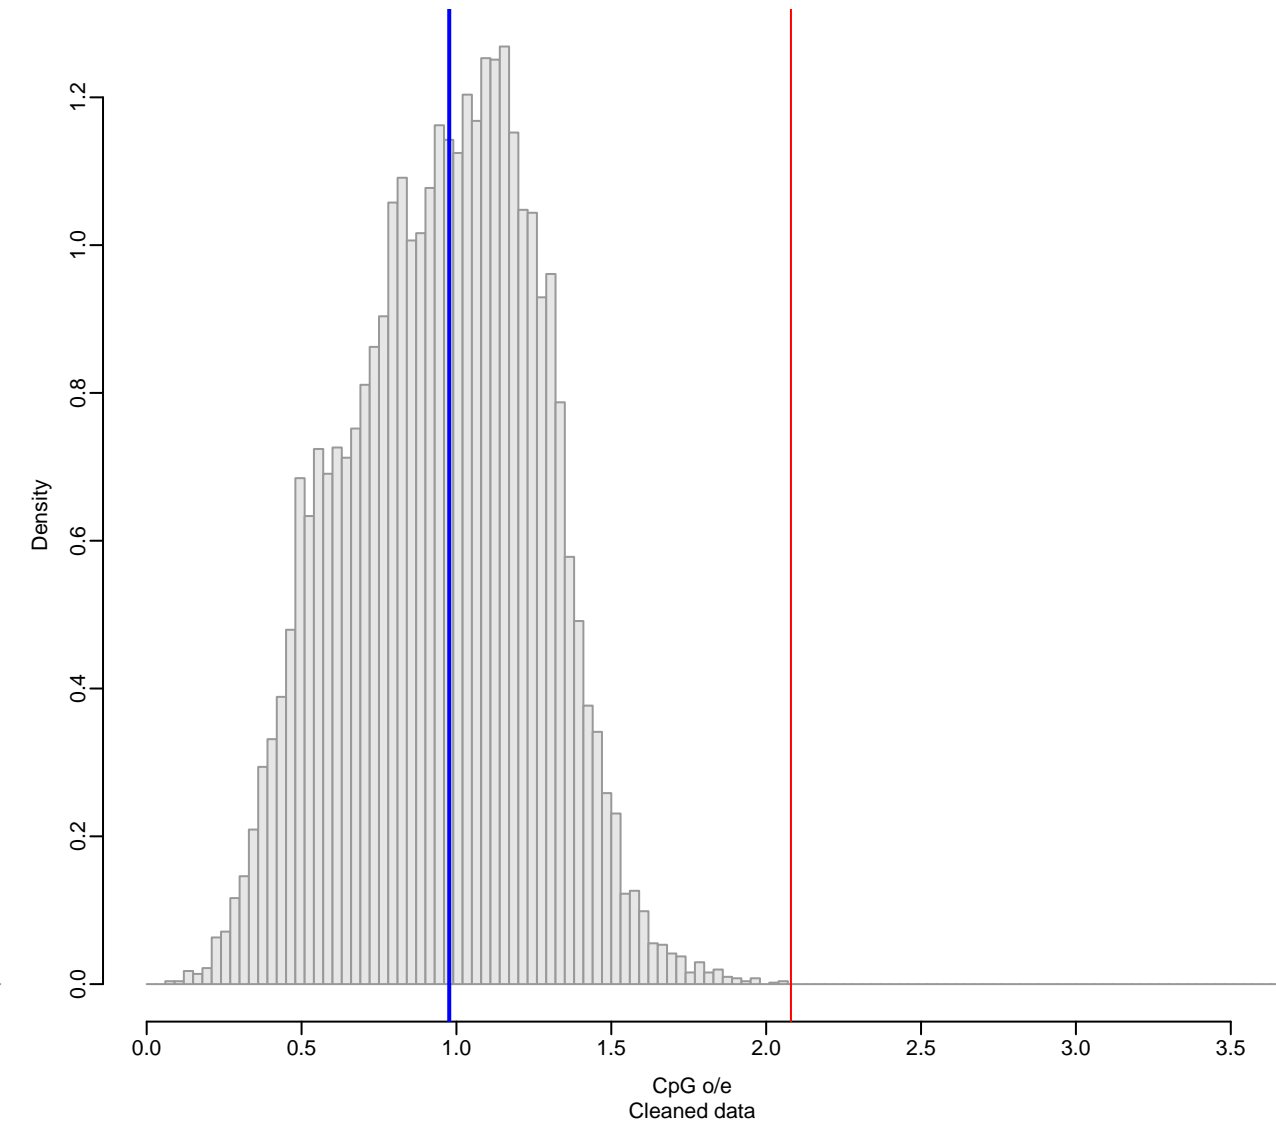

# Tursiops\_truncatus

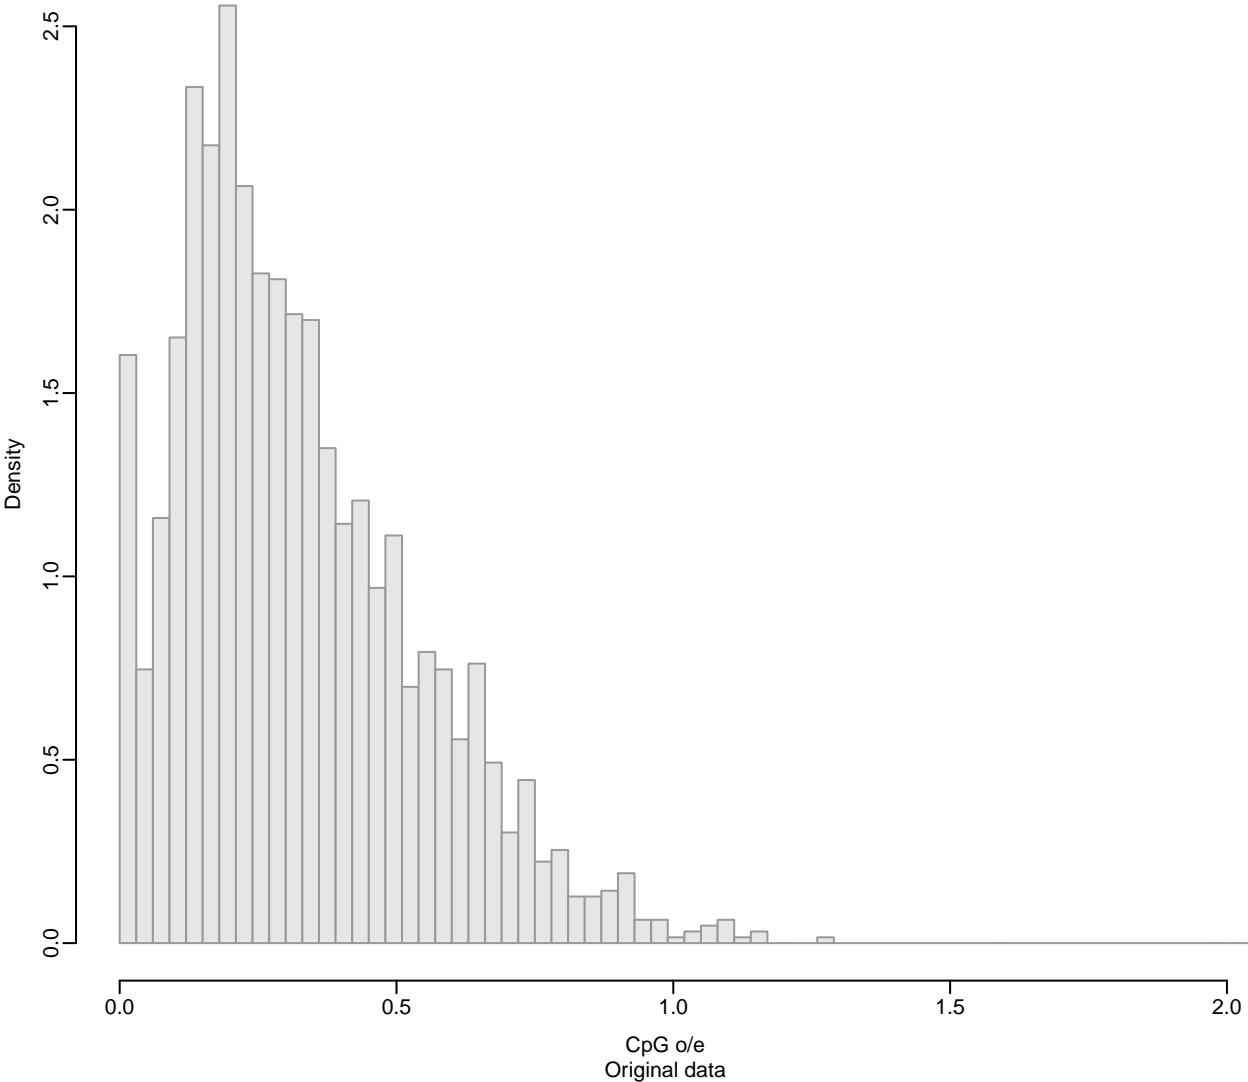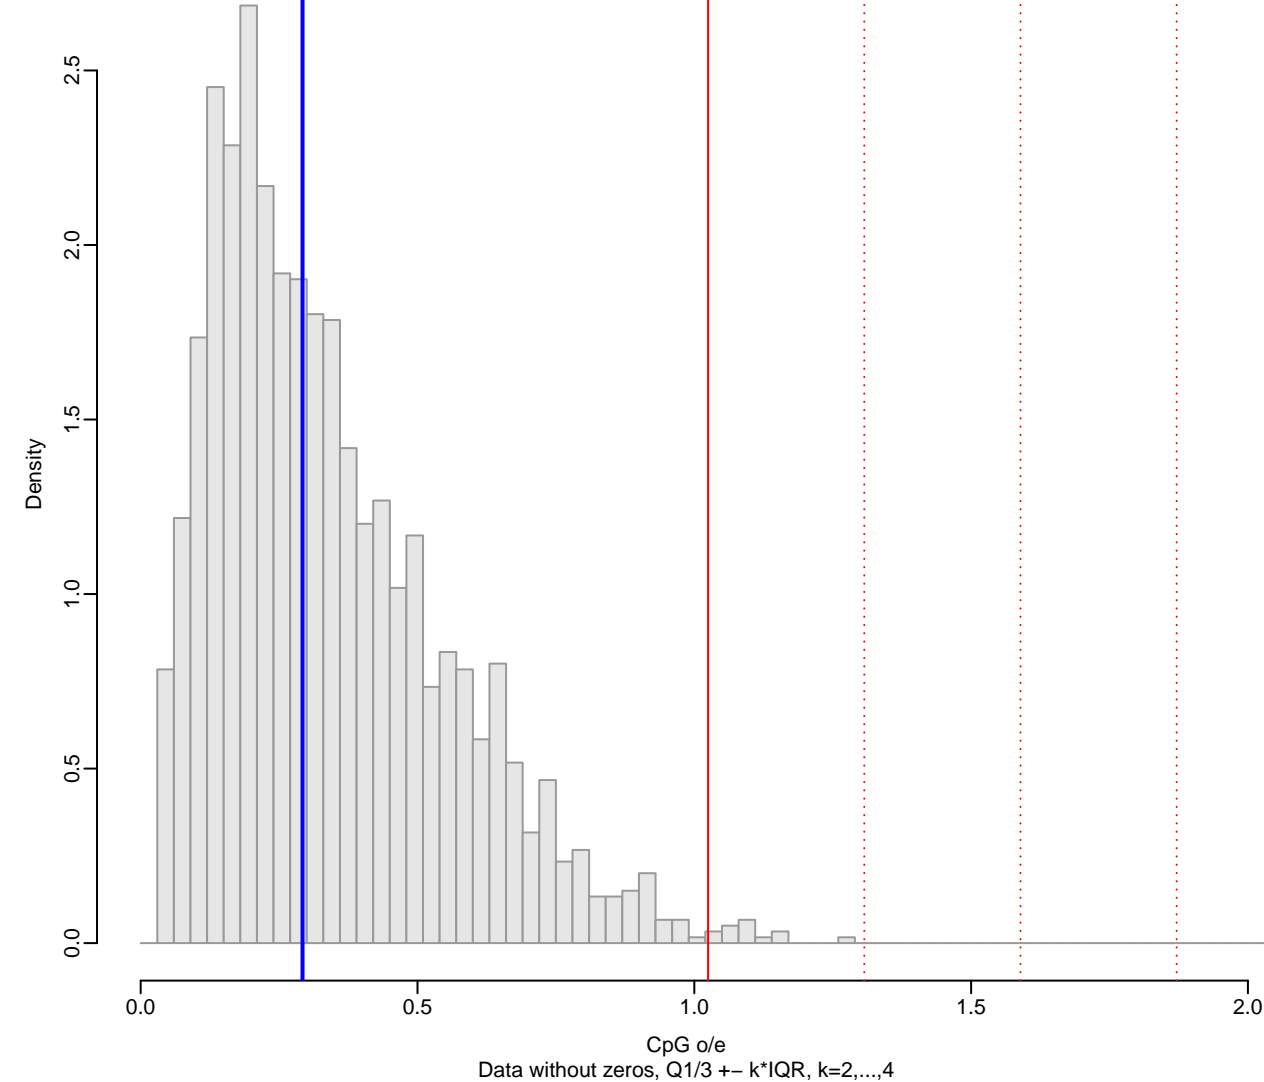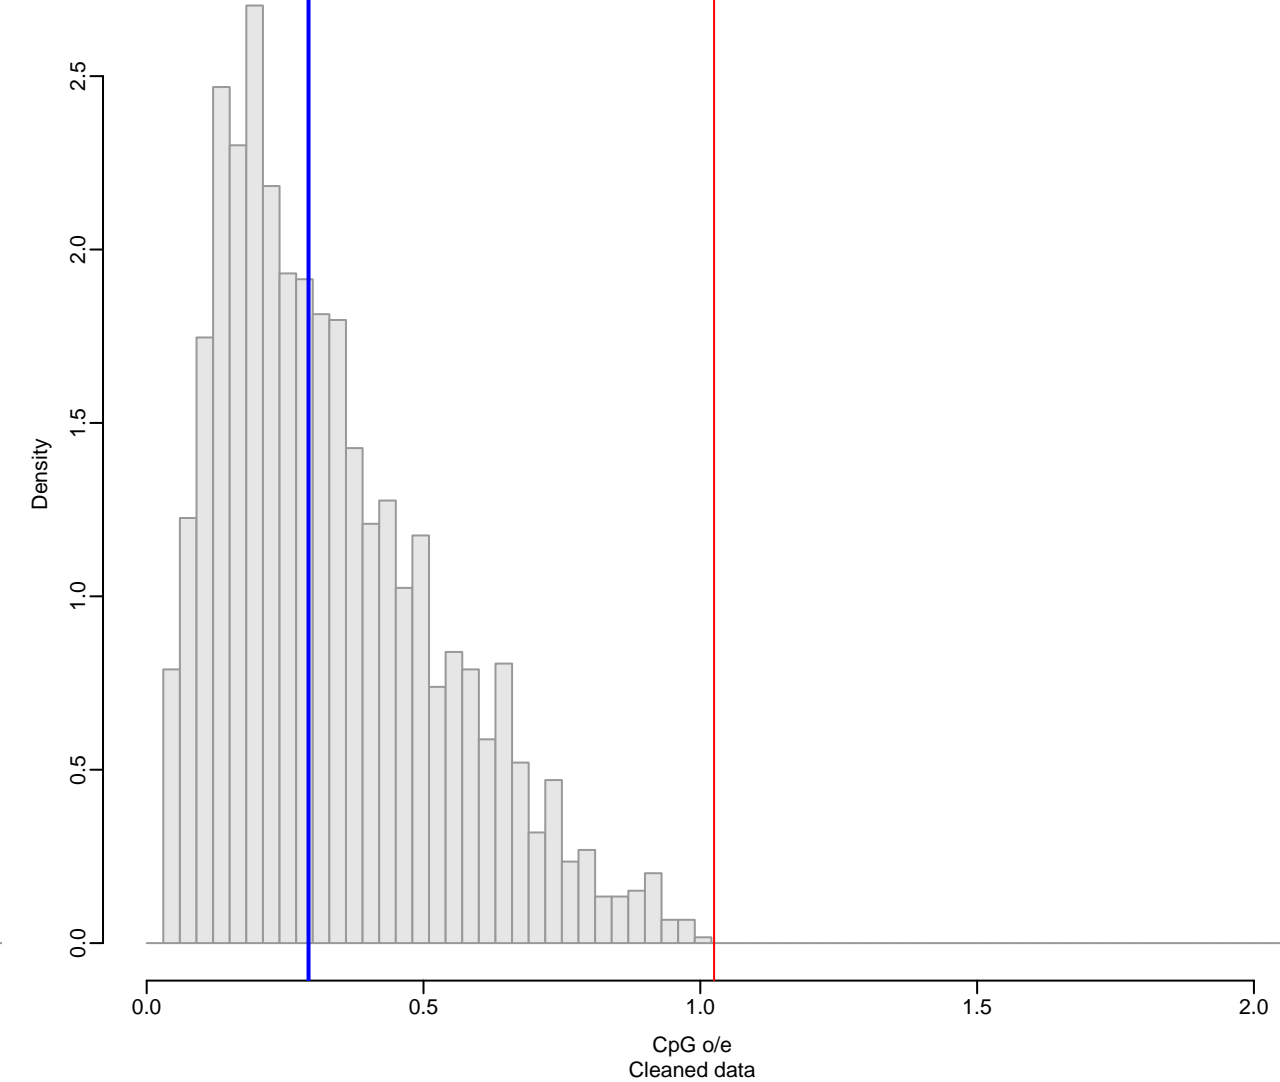

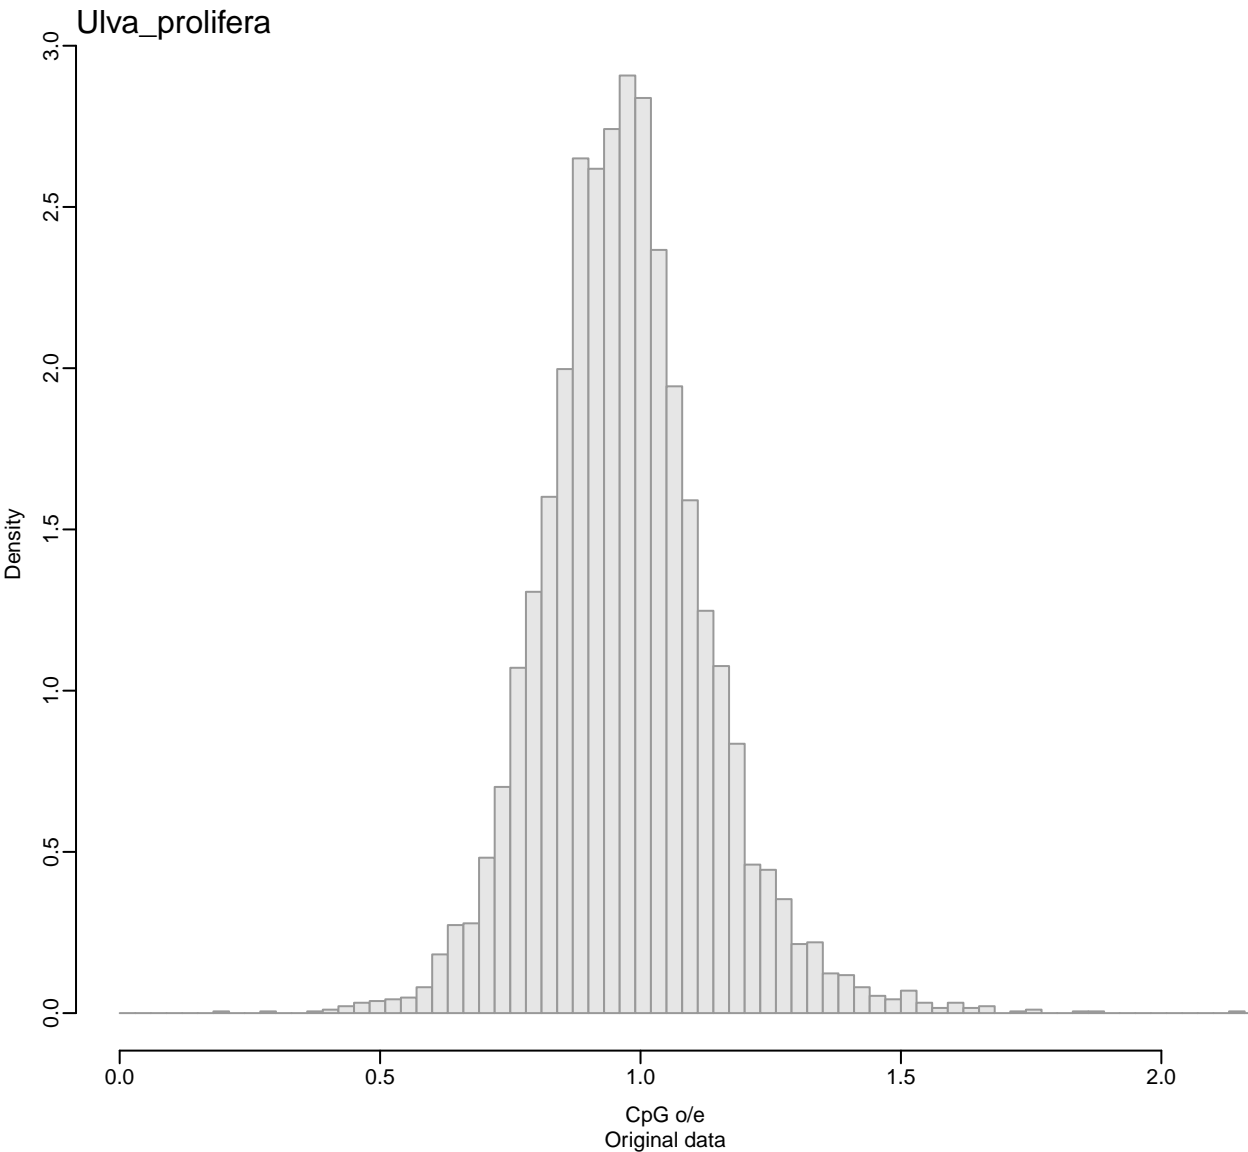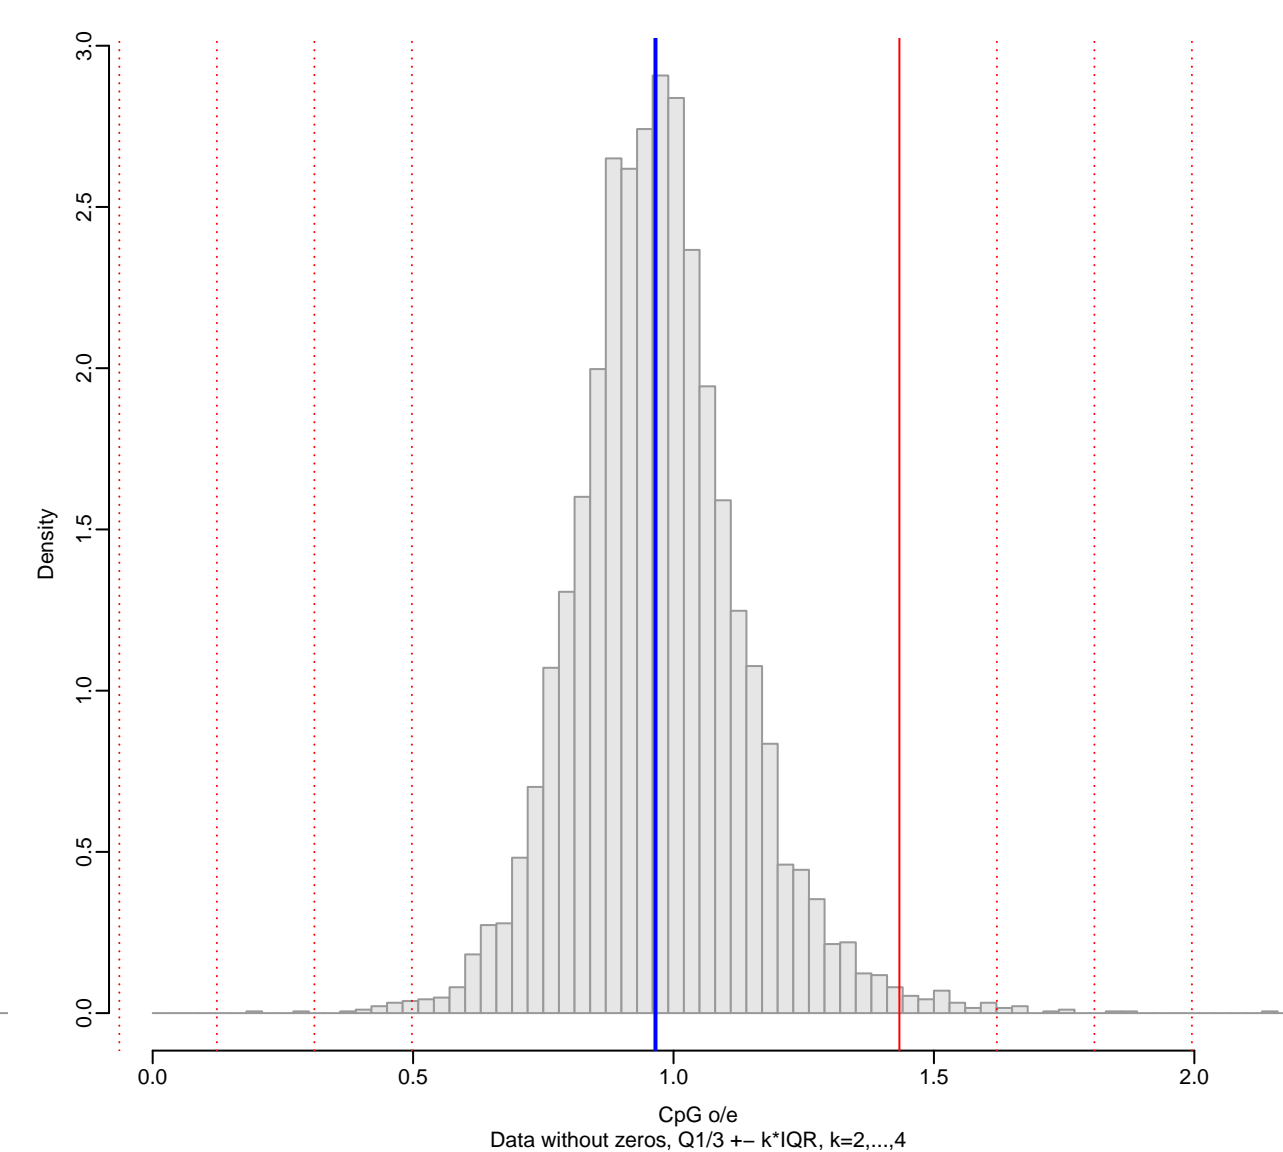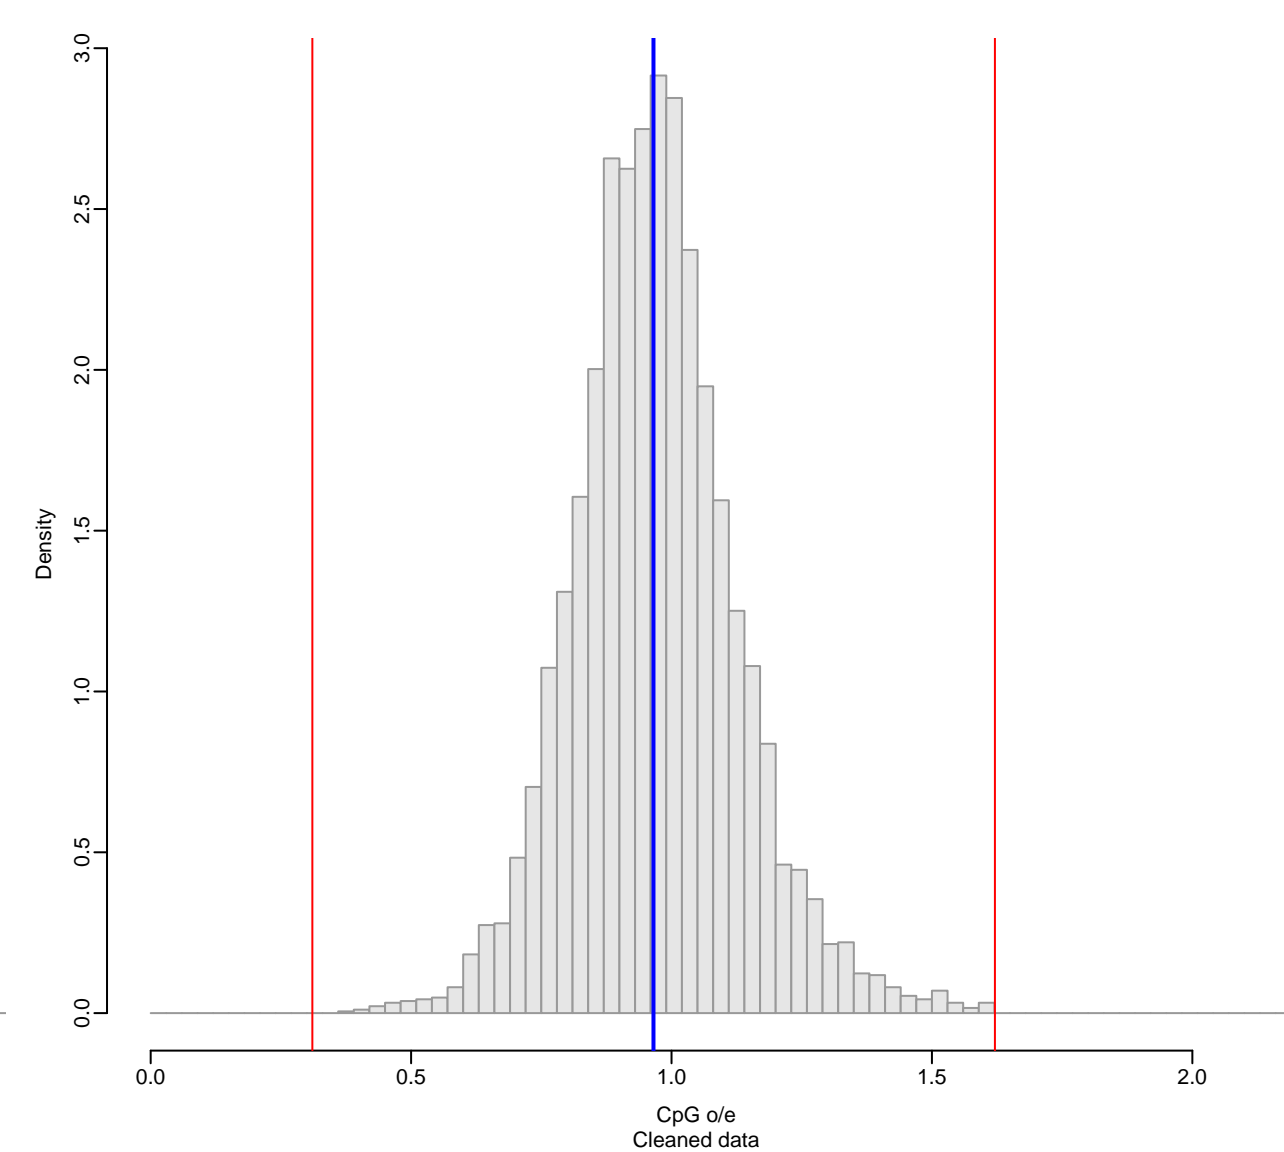

Urochloa\_brizantha

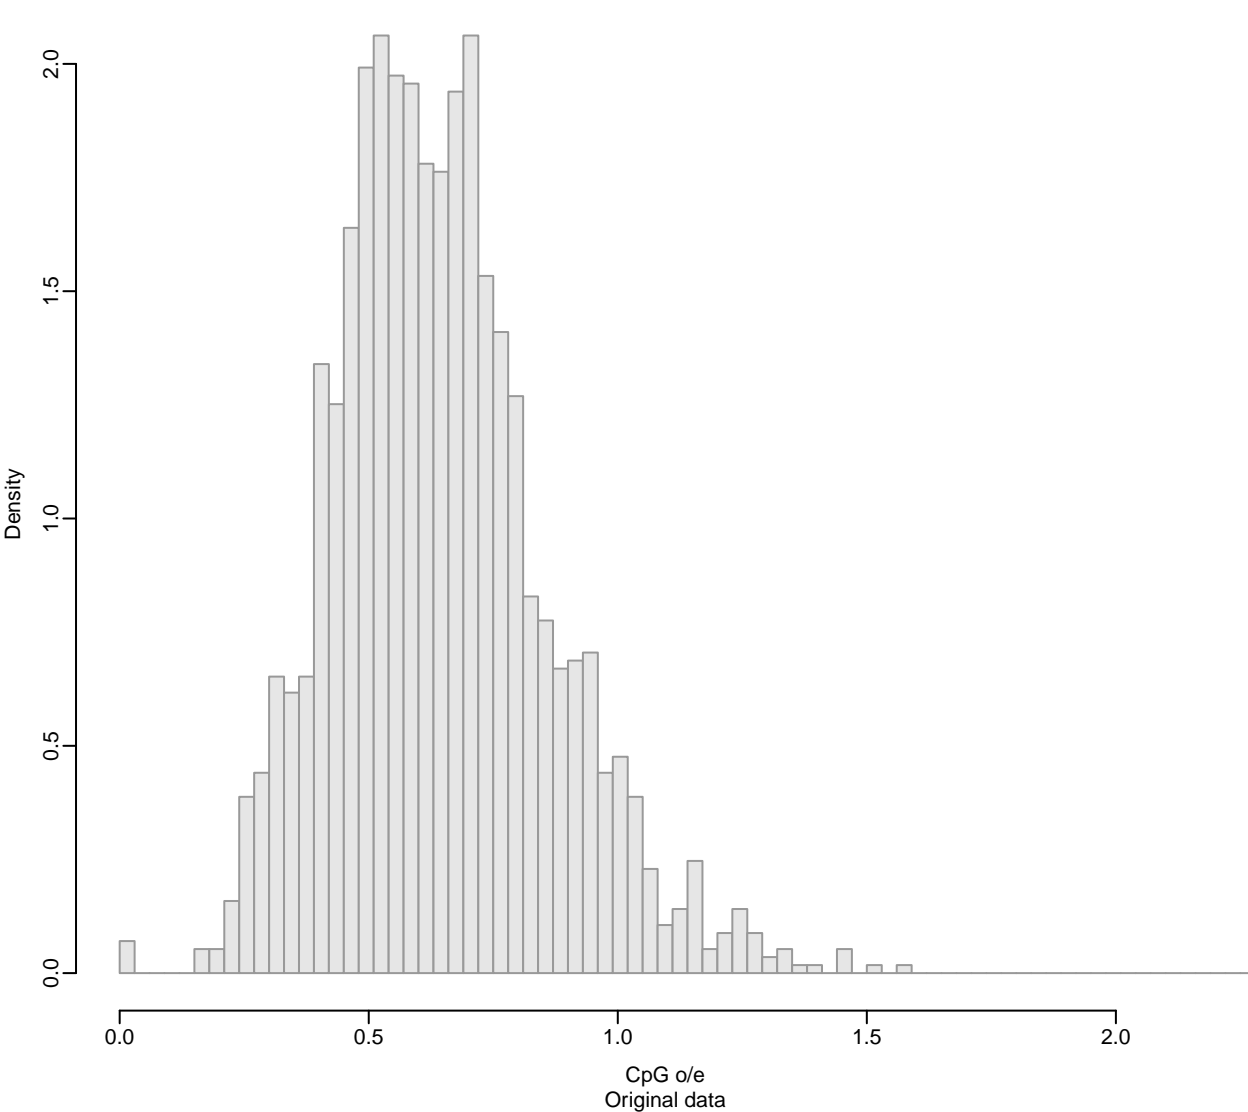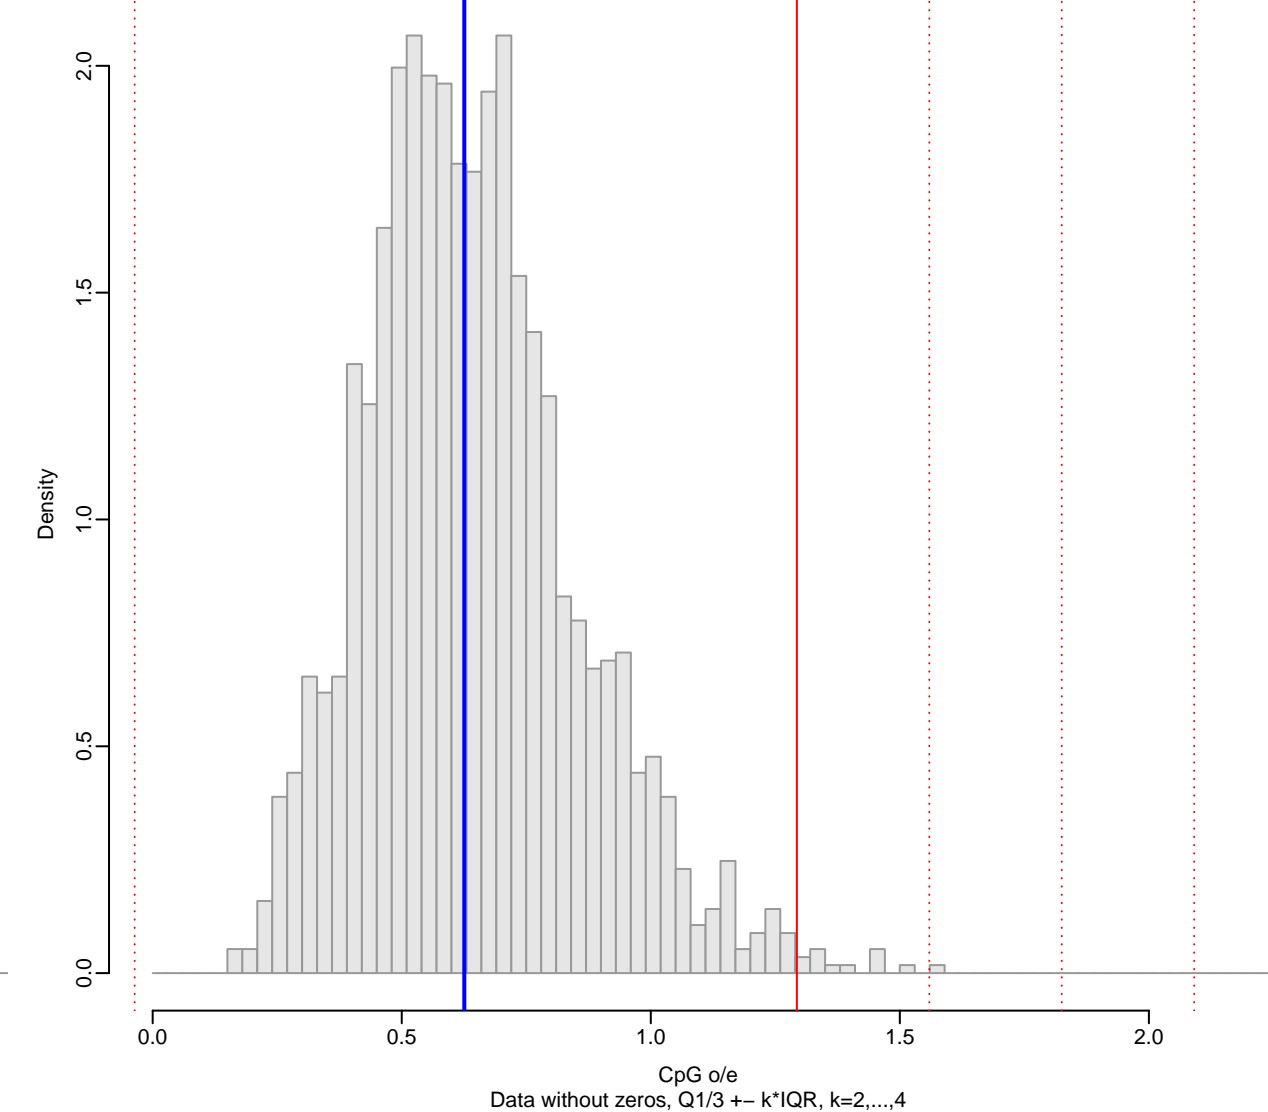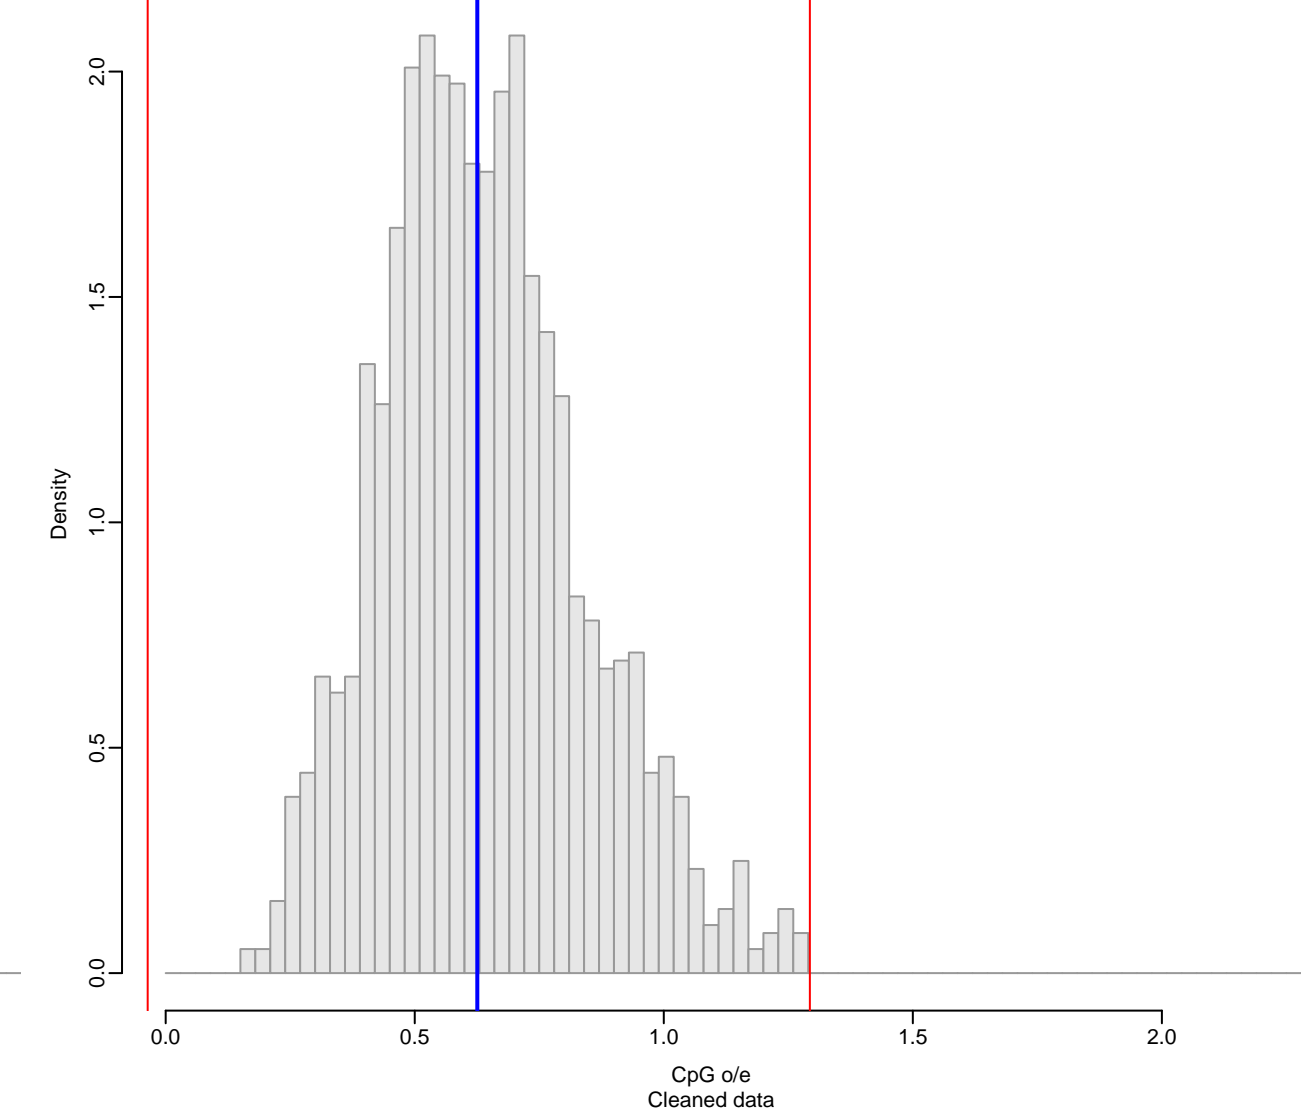

# Uromyces\_appendiculatus

Density

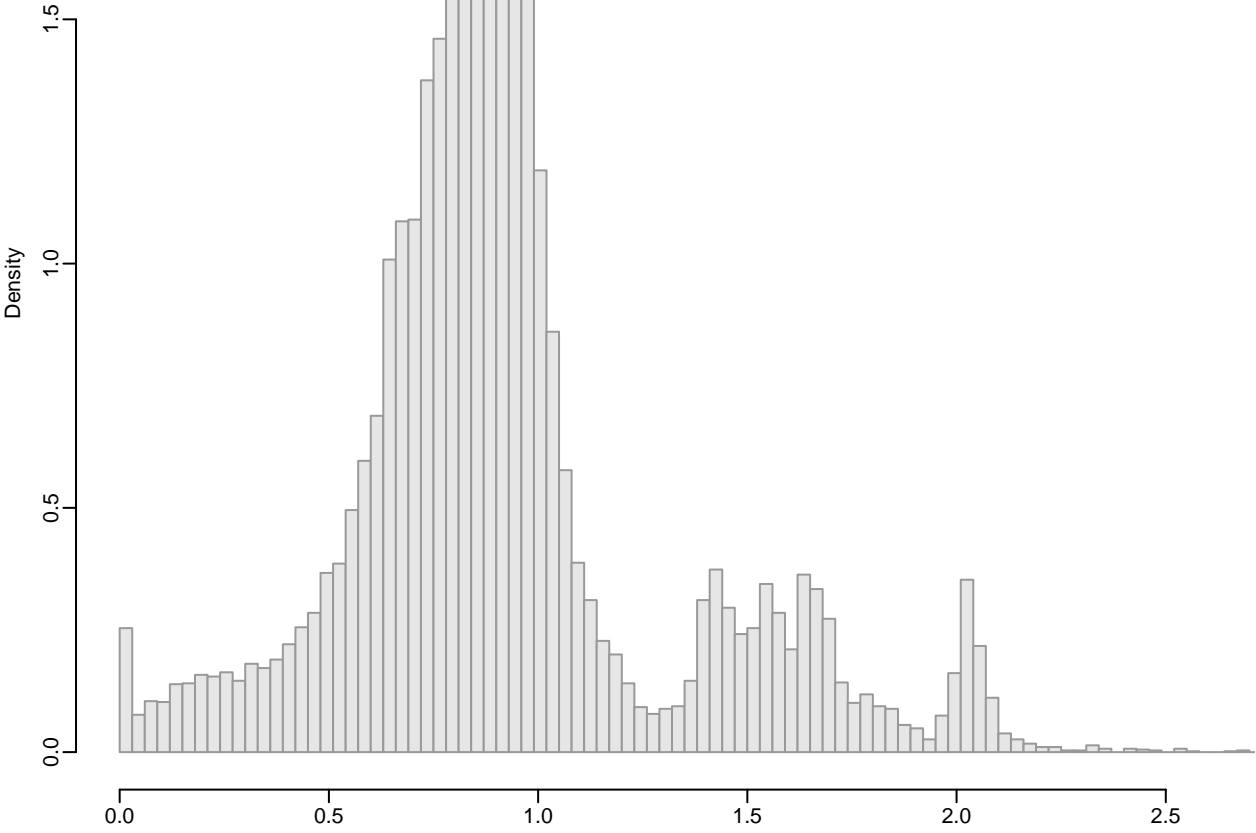

CpG o/e  
Original data

Density

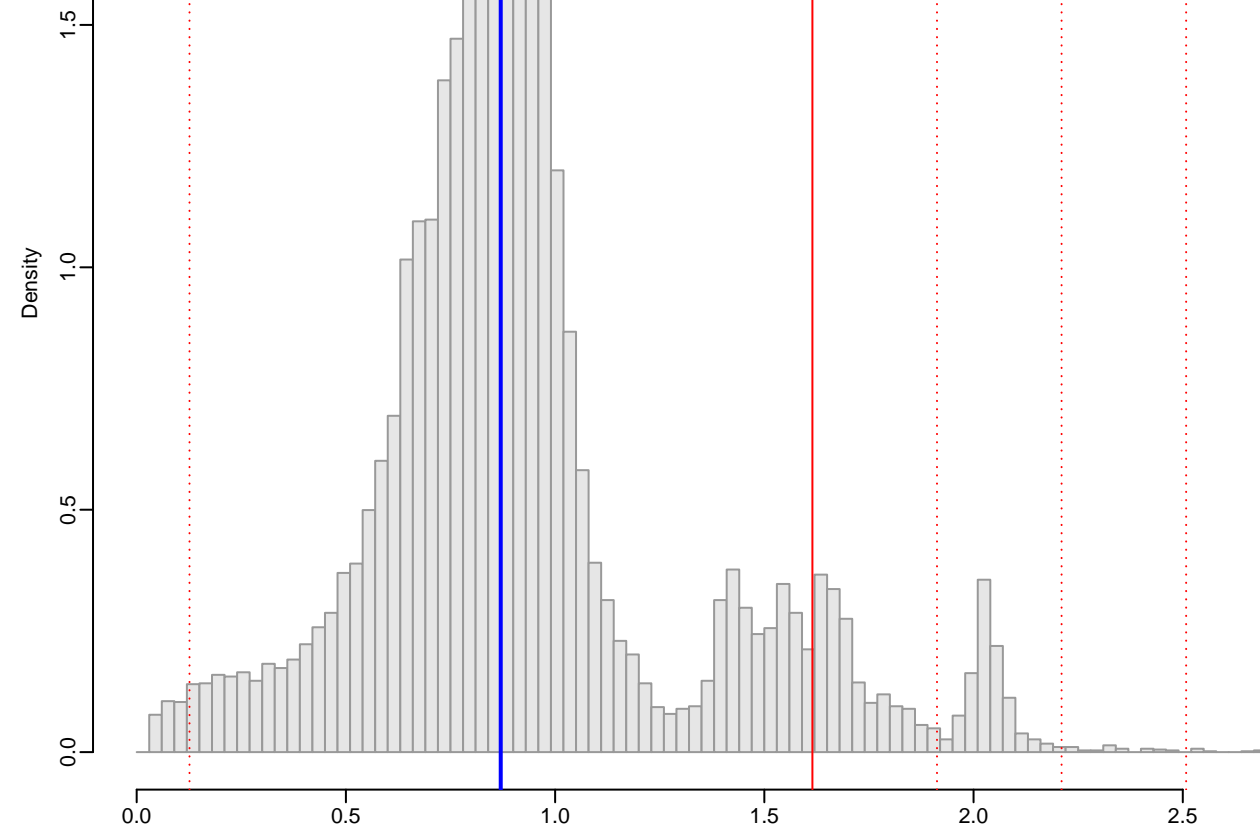

CpG o/e  
Data without zeros,  $Q1/3 \pm k \cdot IQR$ ,  $k=2, \dots, 4$

Density

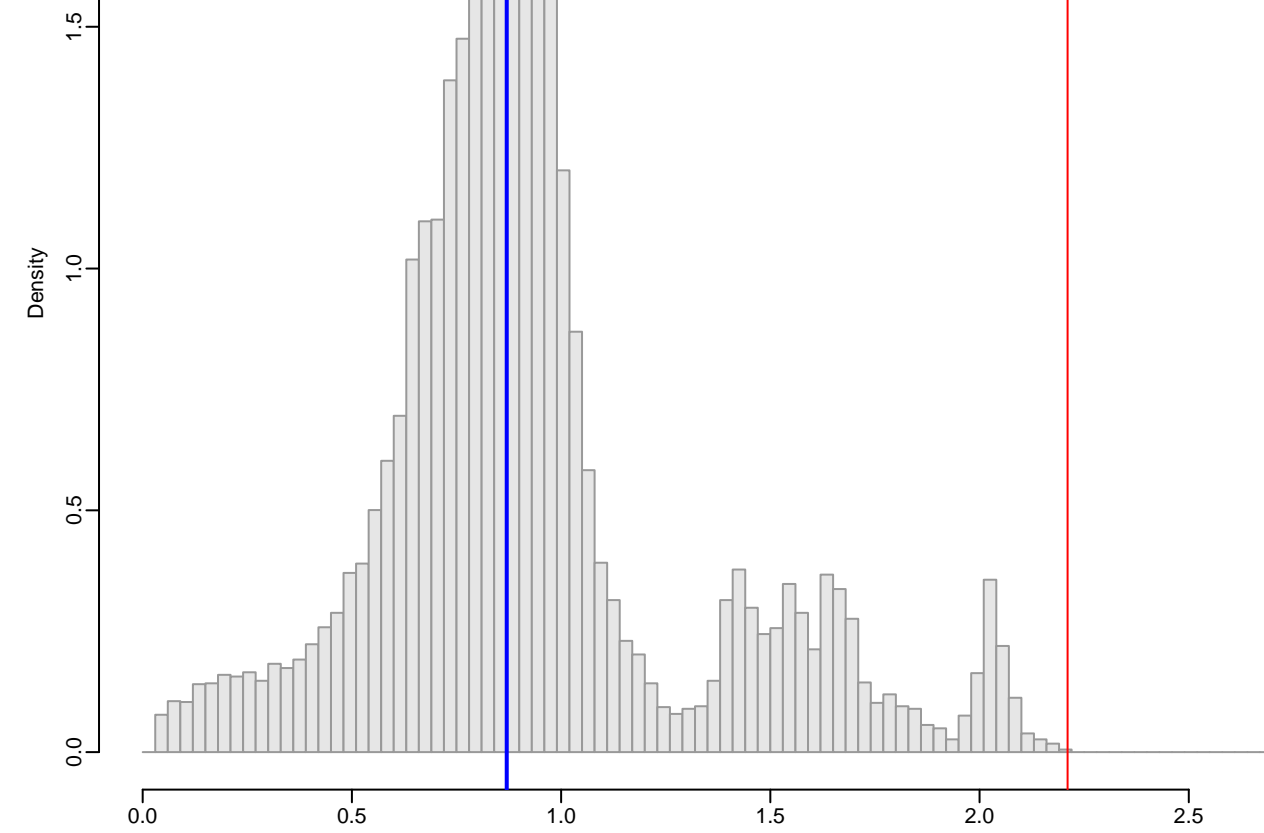

CpG o/e  
Cleaned data

# Ursus\_americanus

Density

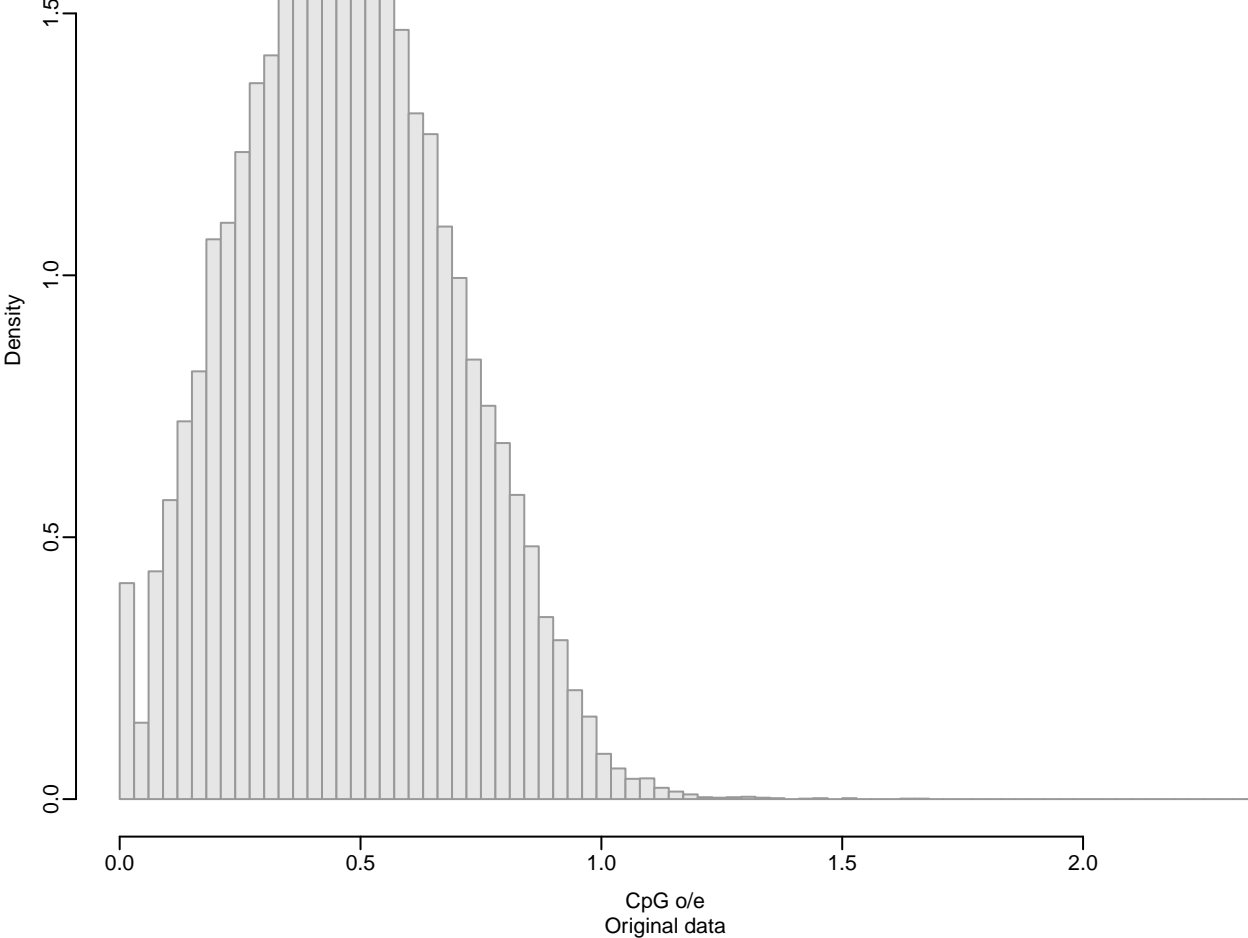

Density

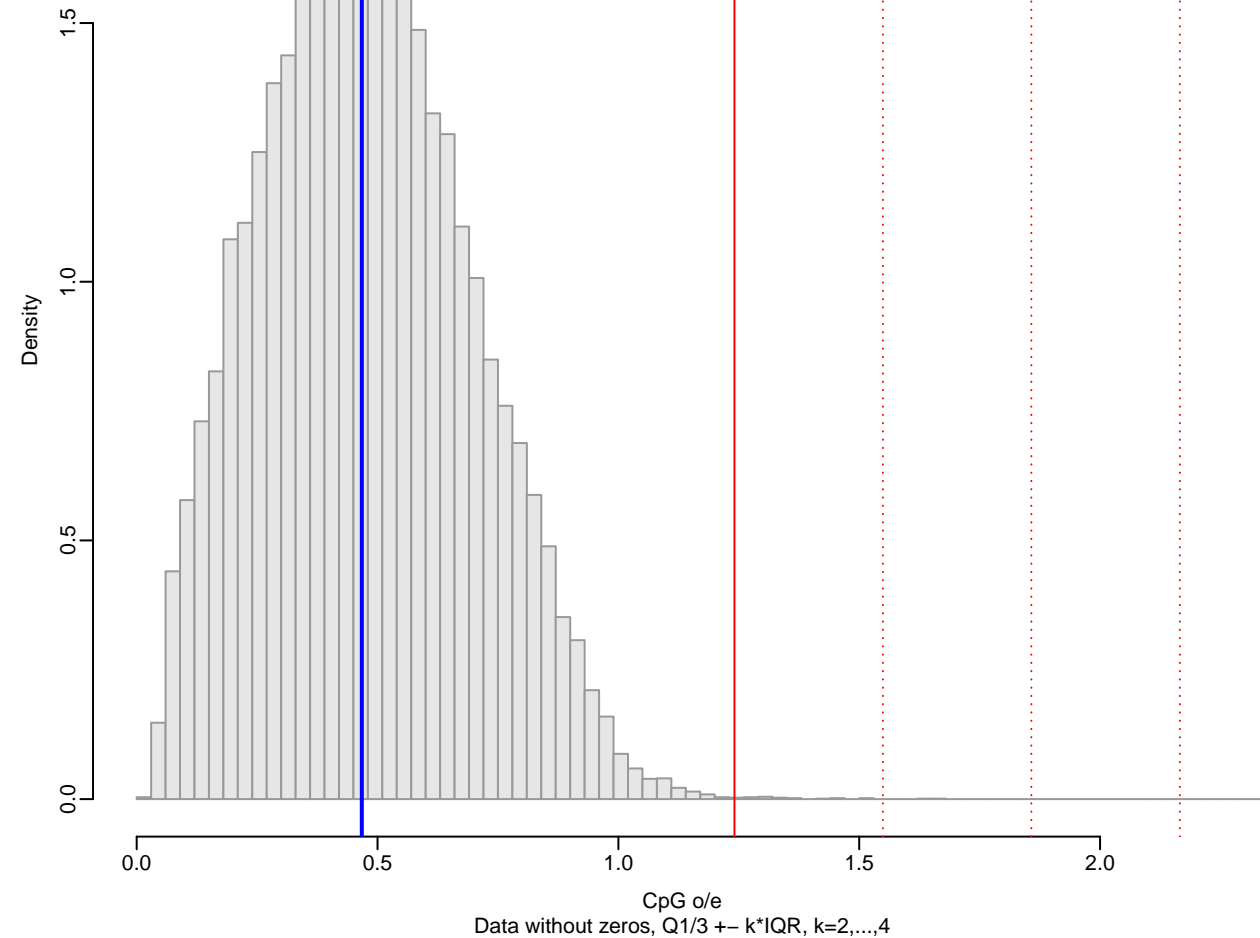

Density

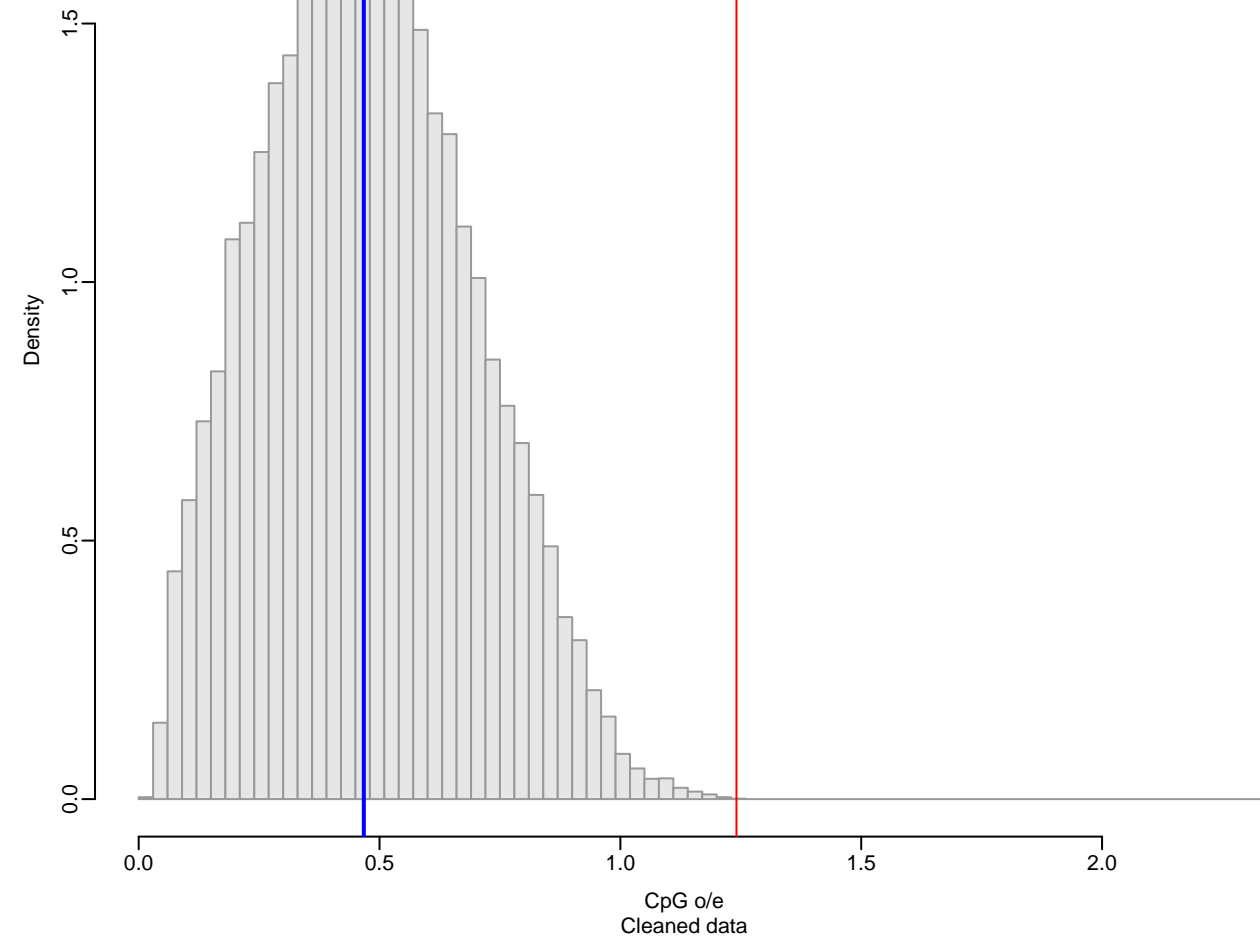

Vespula\_squamosa

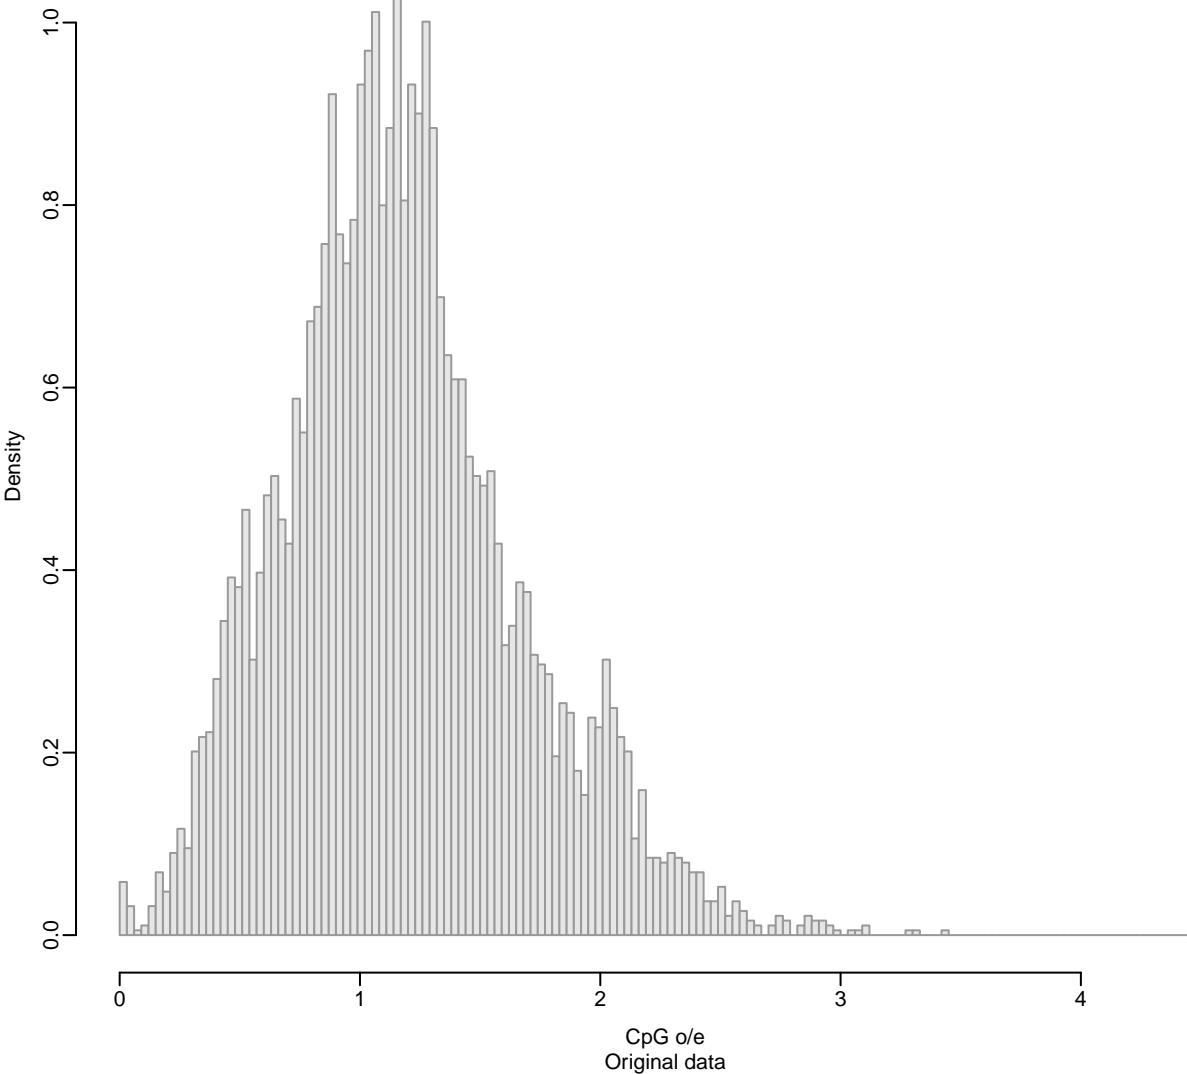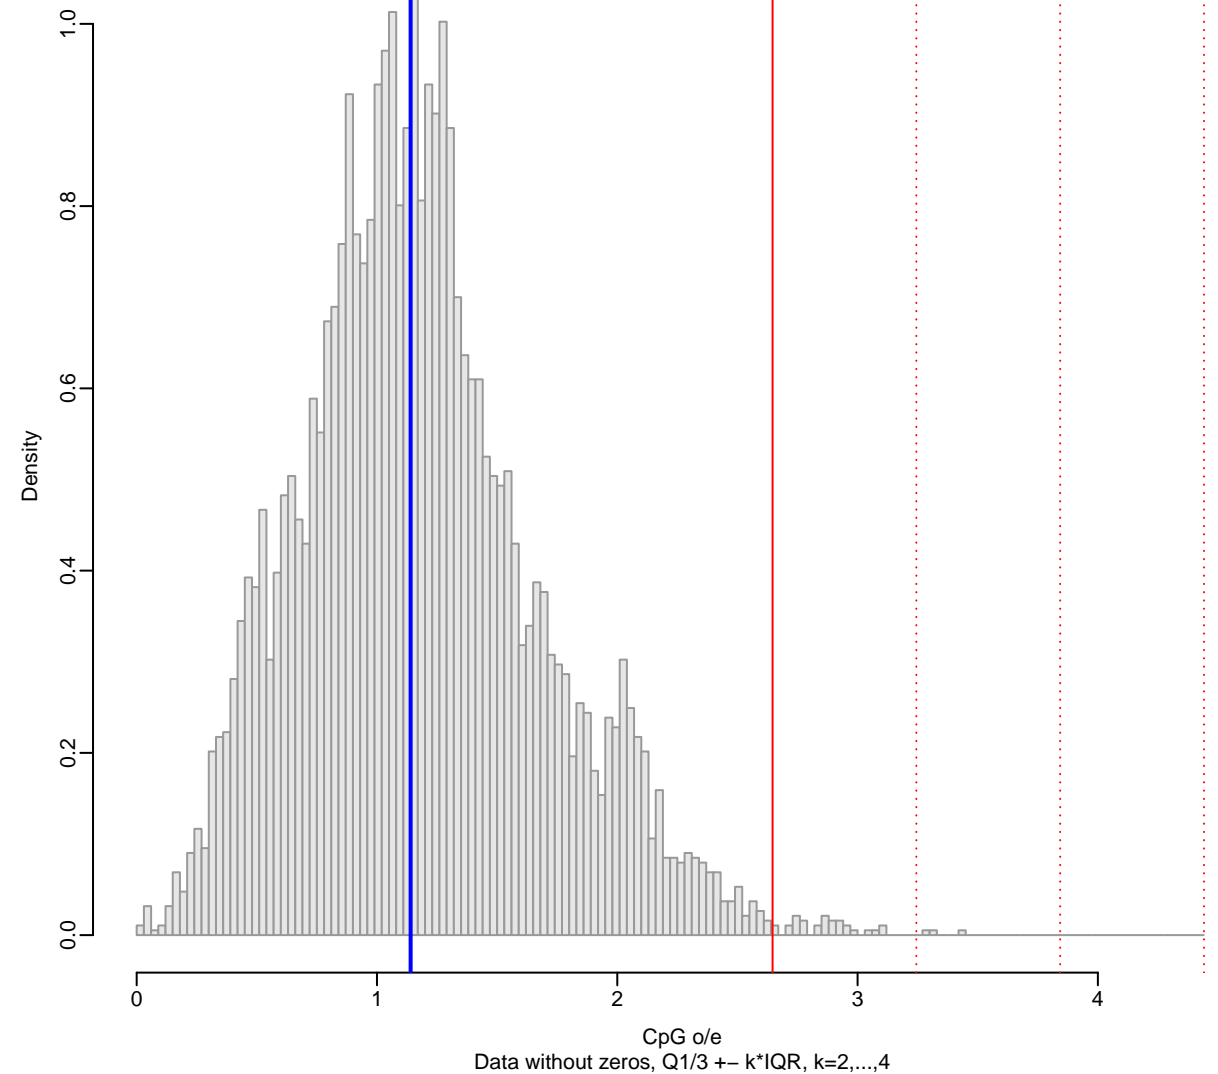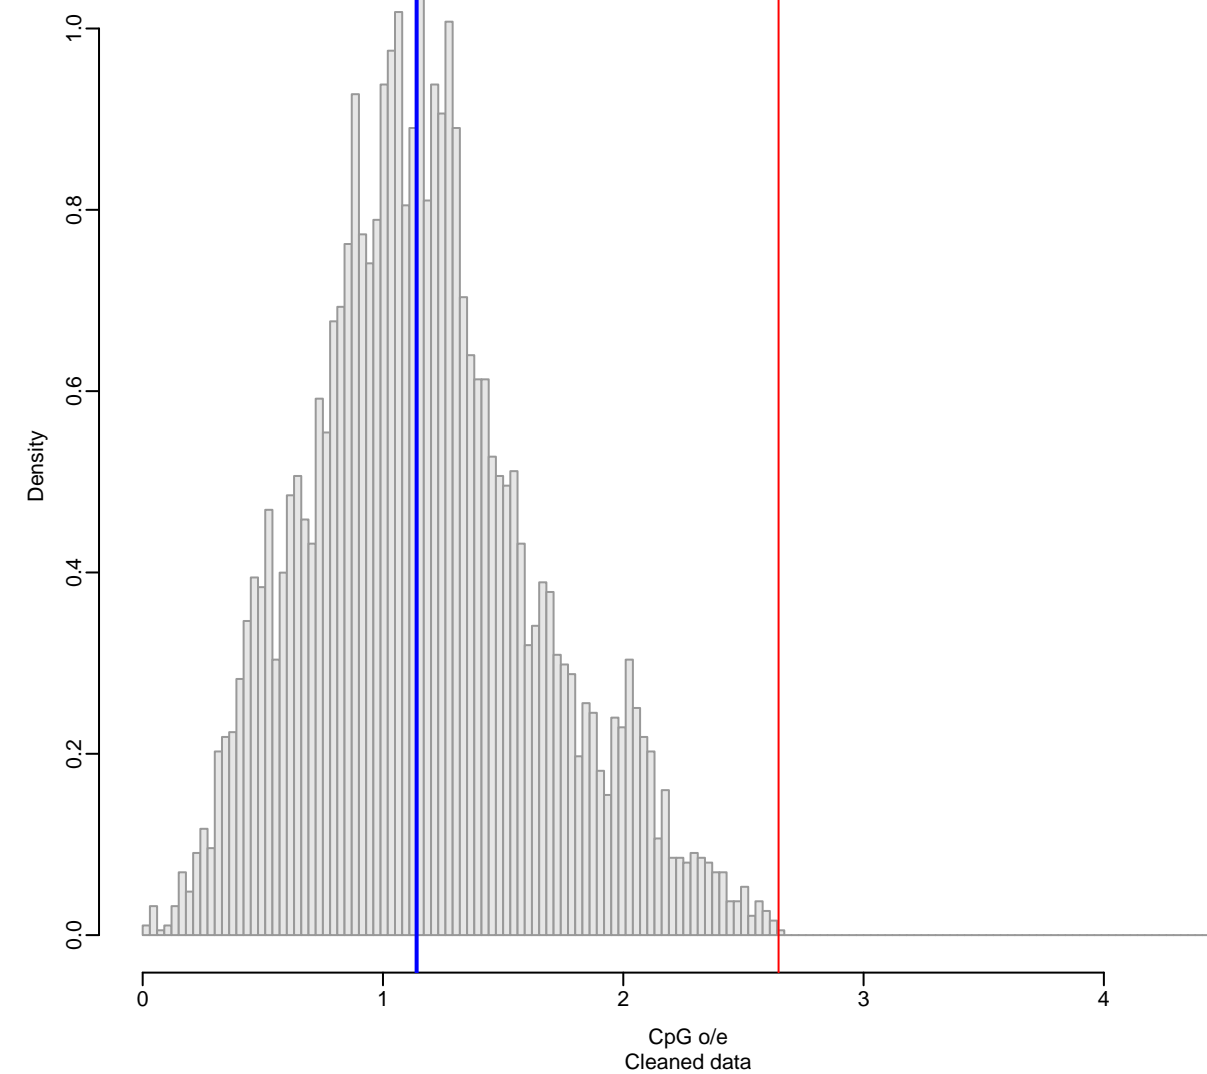

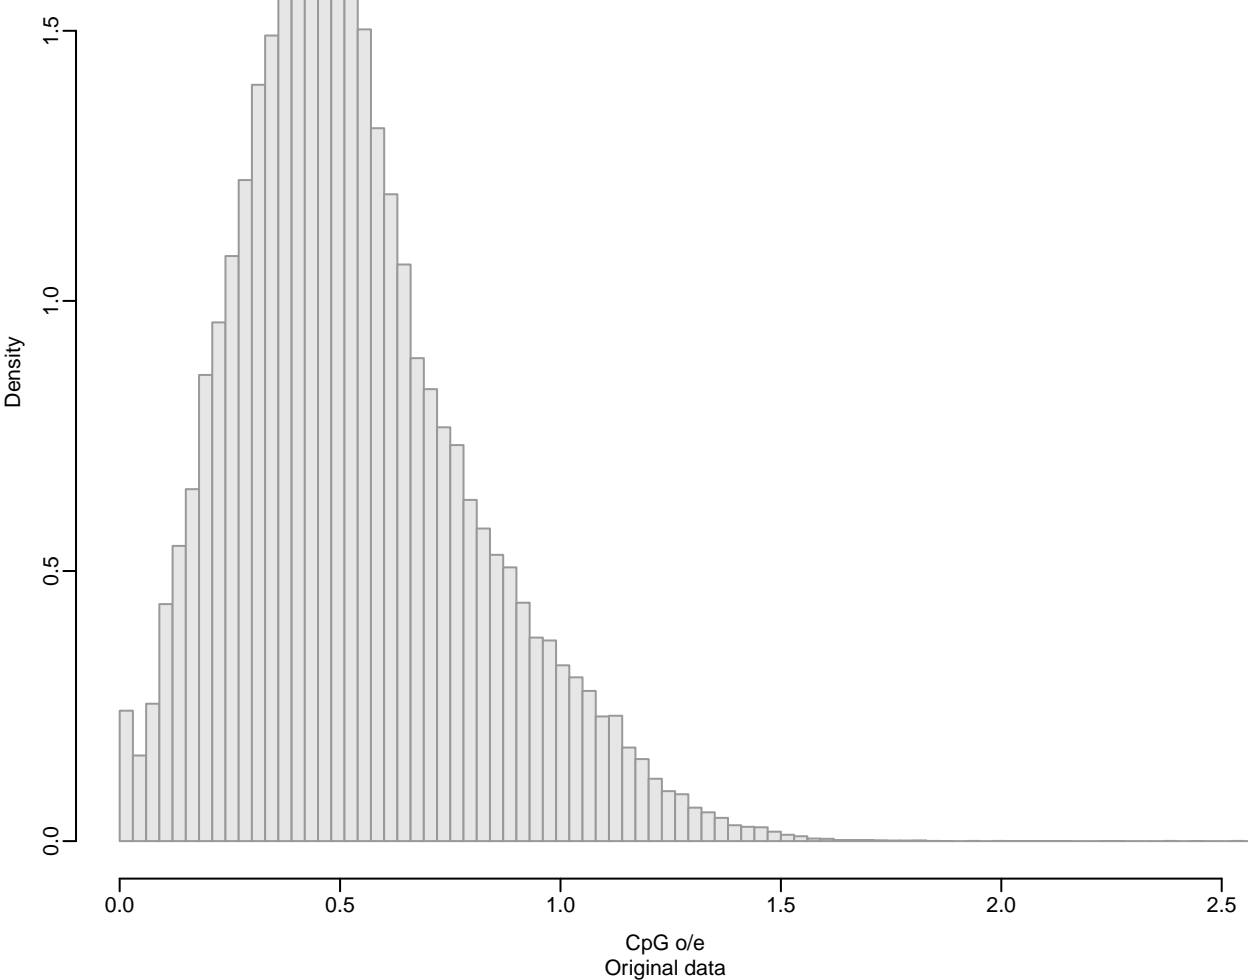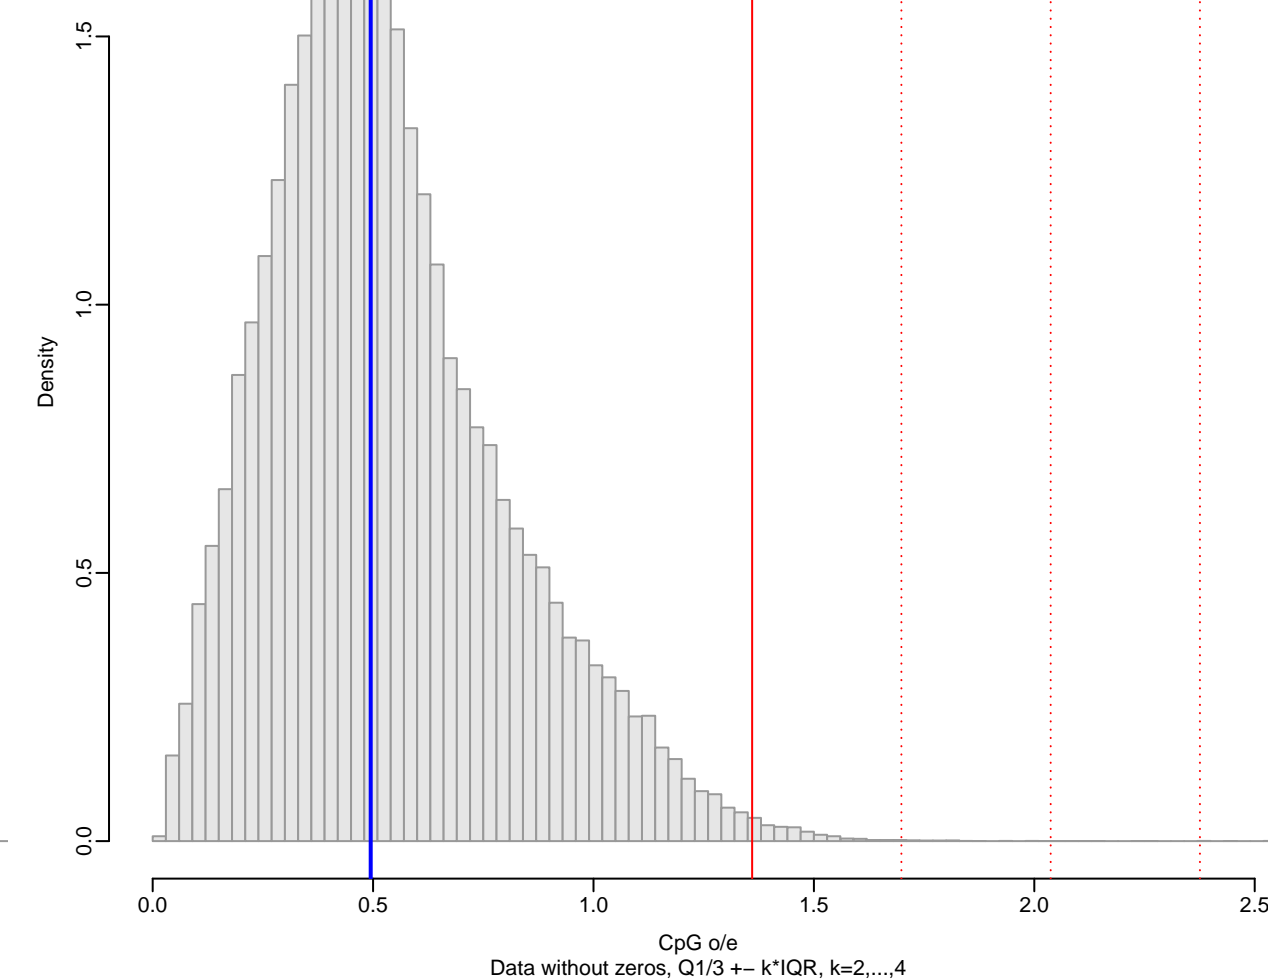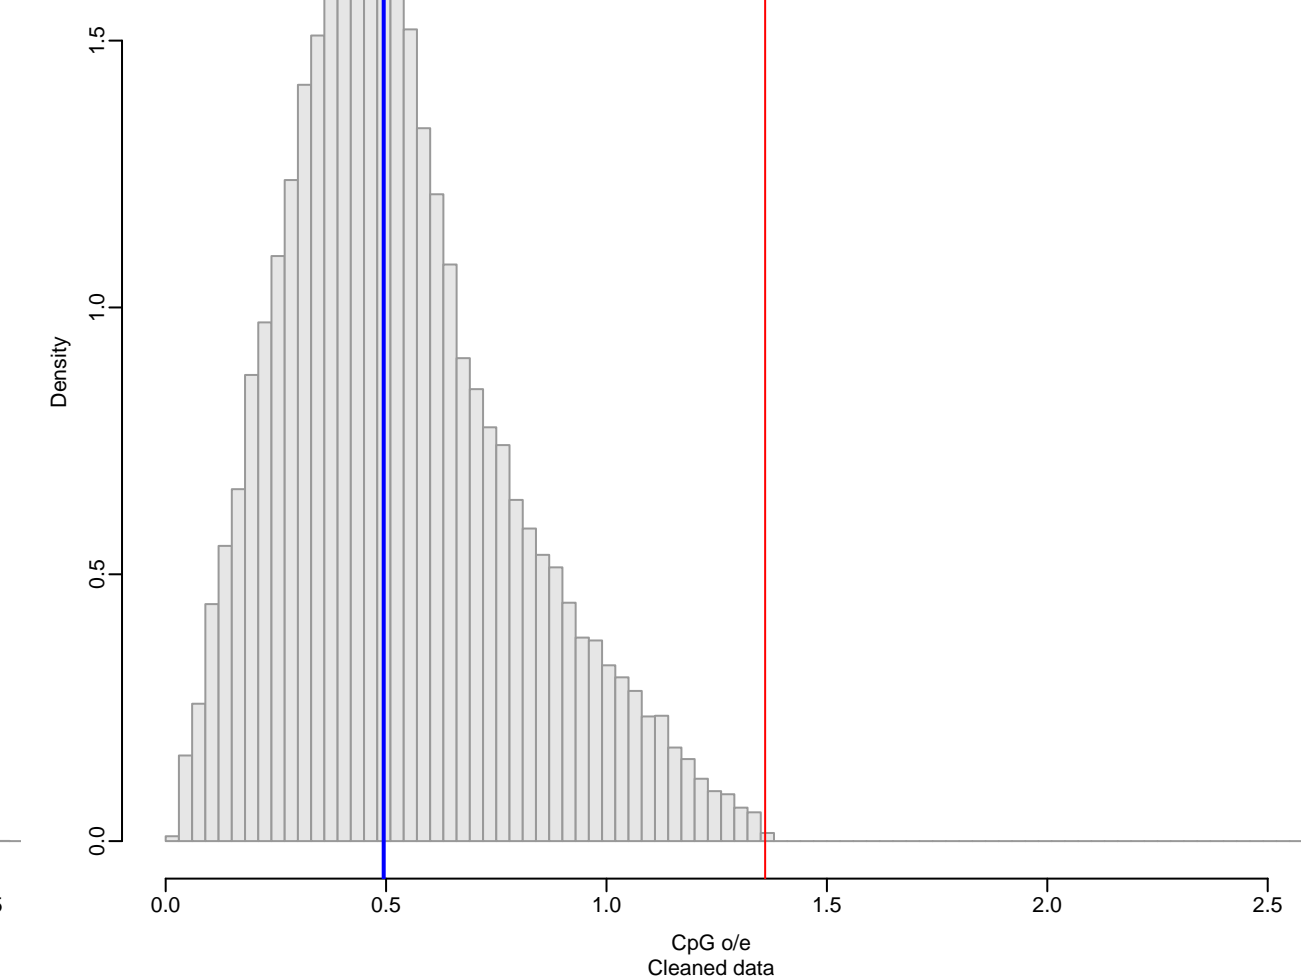



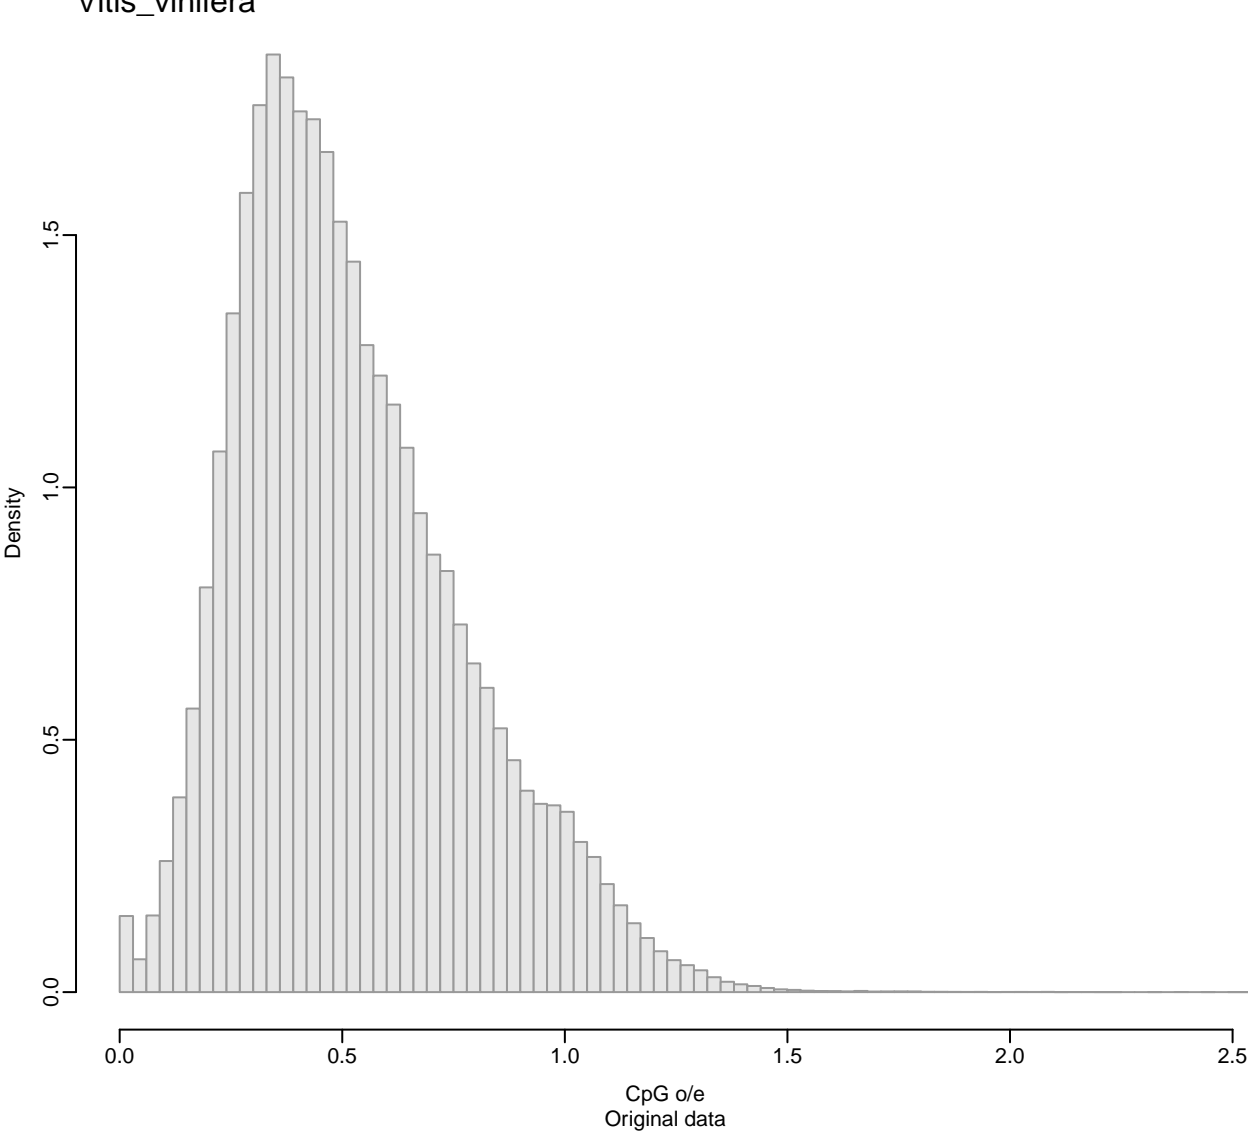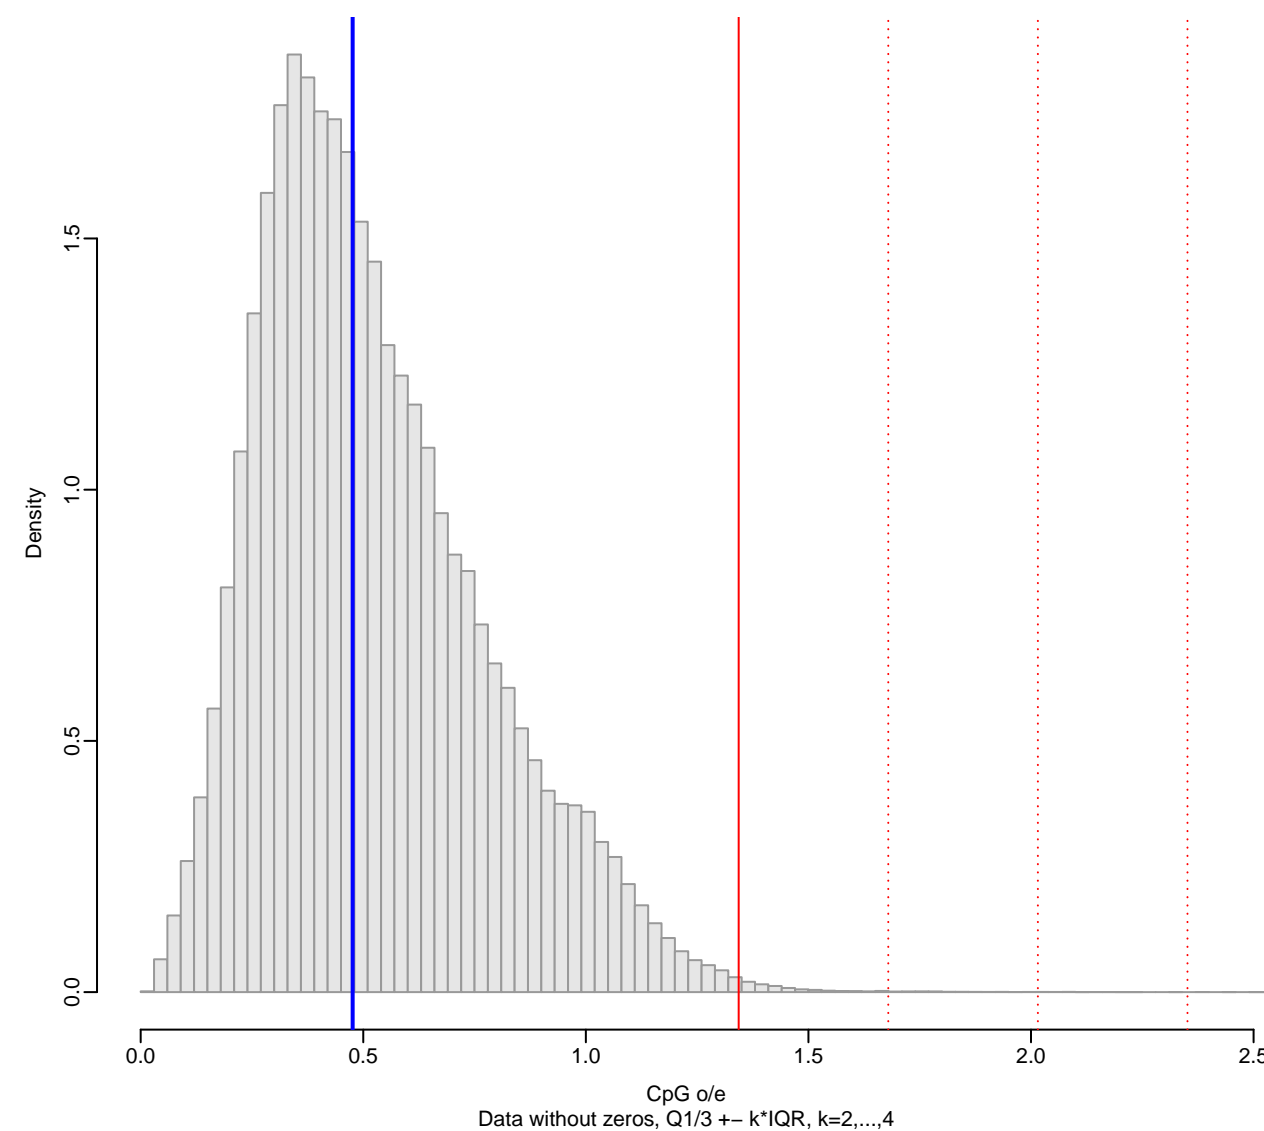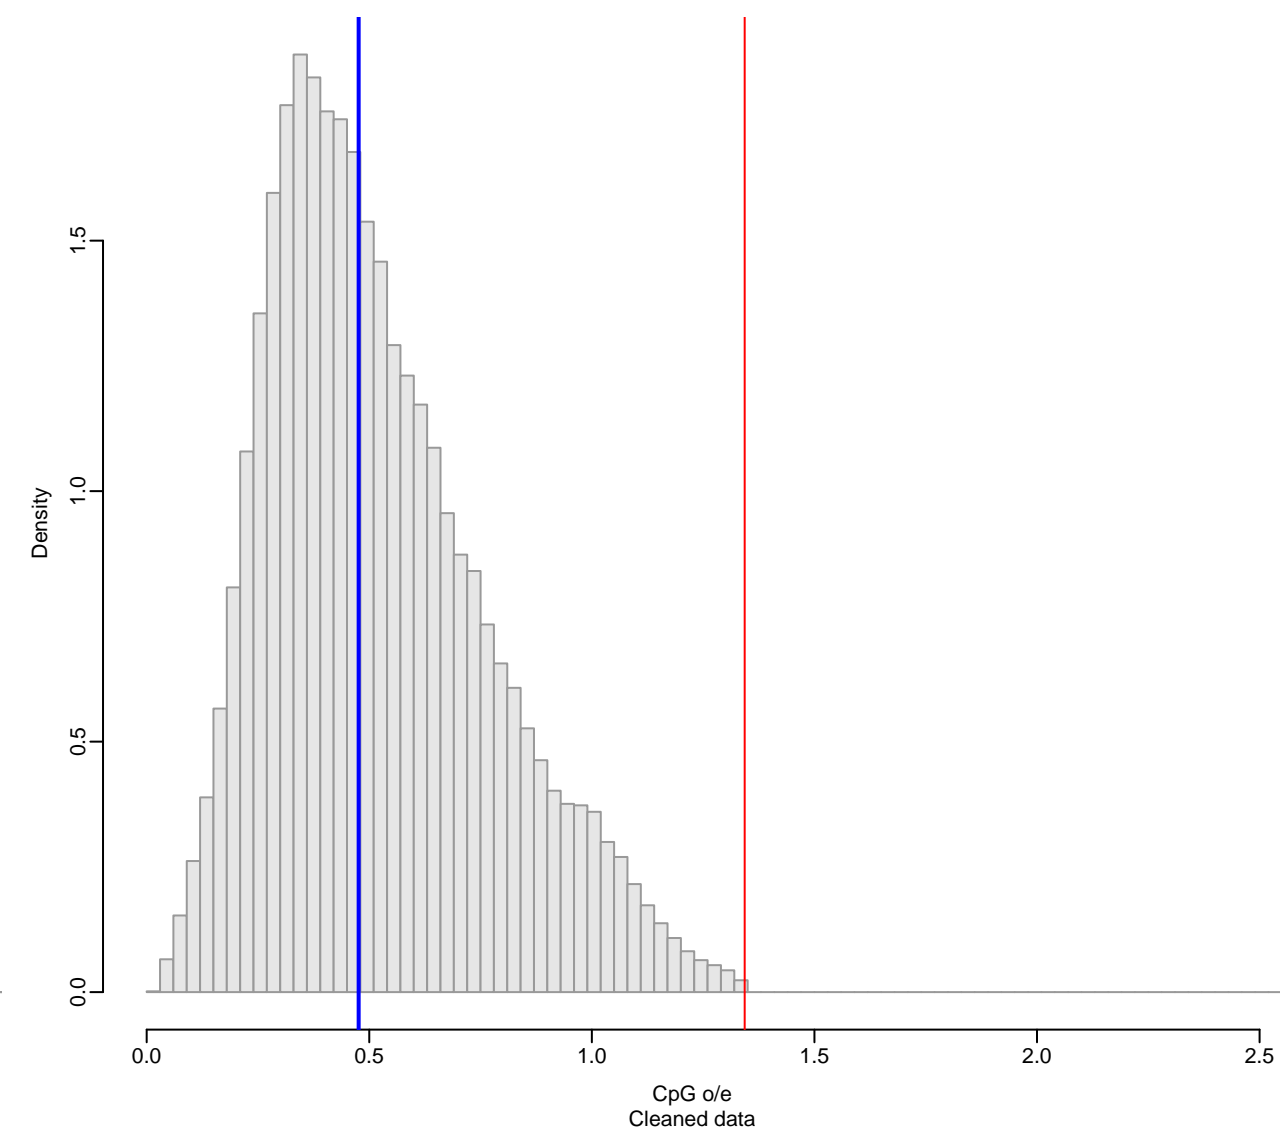

Wrightia\_tinctoria

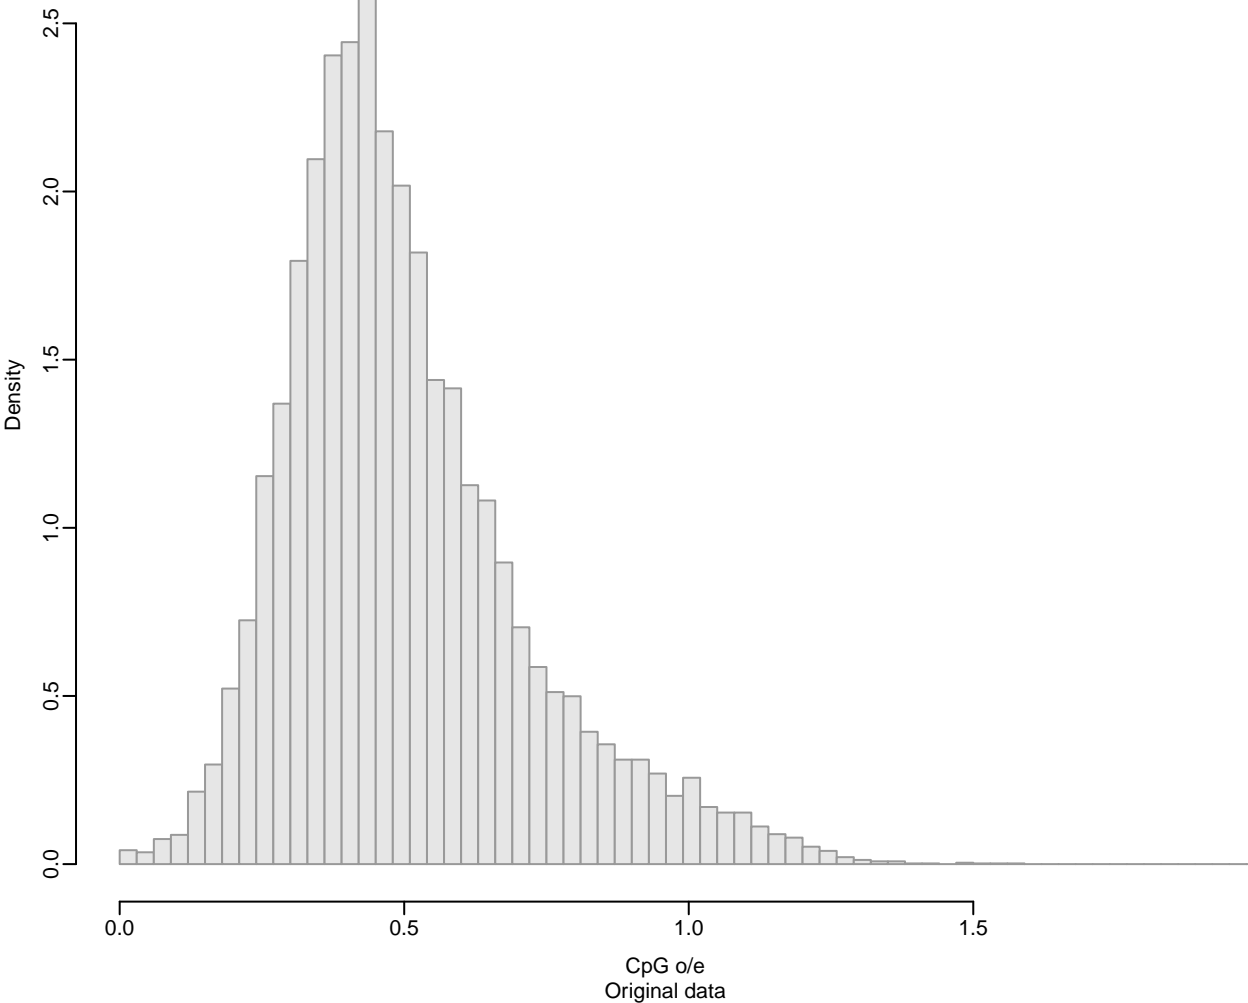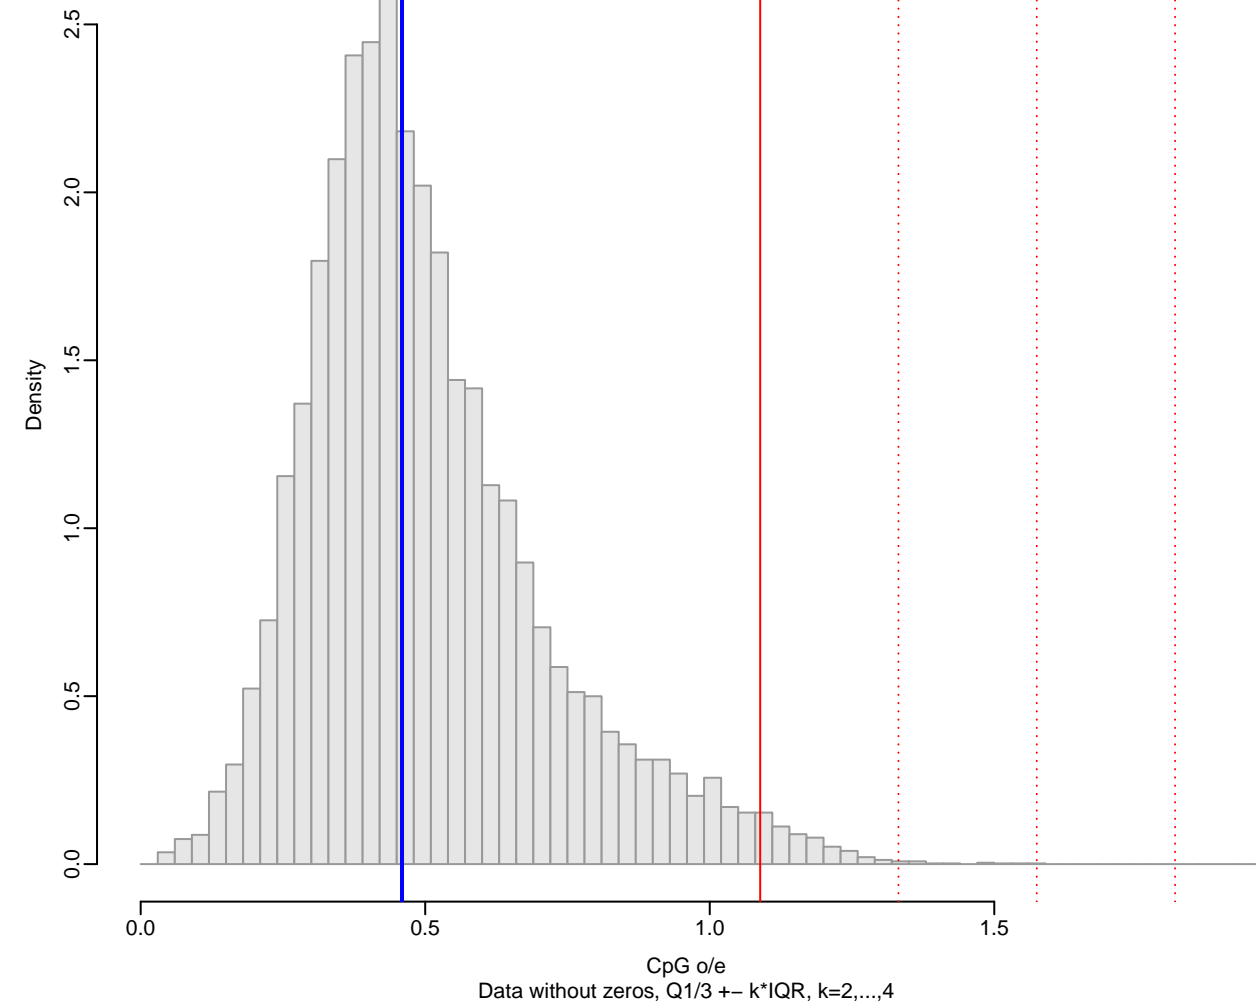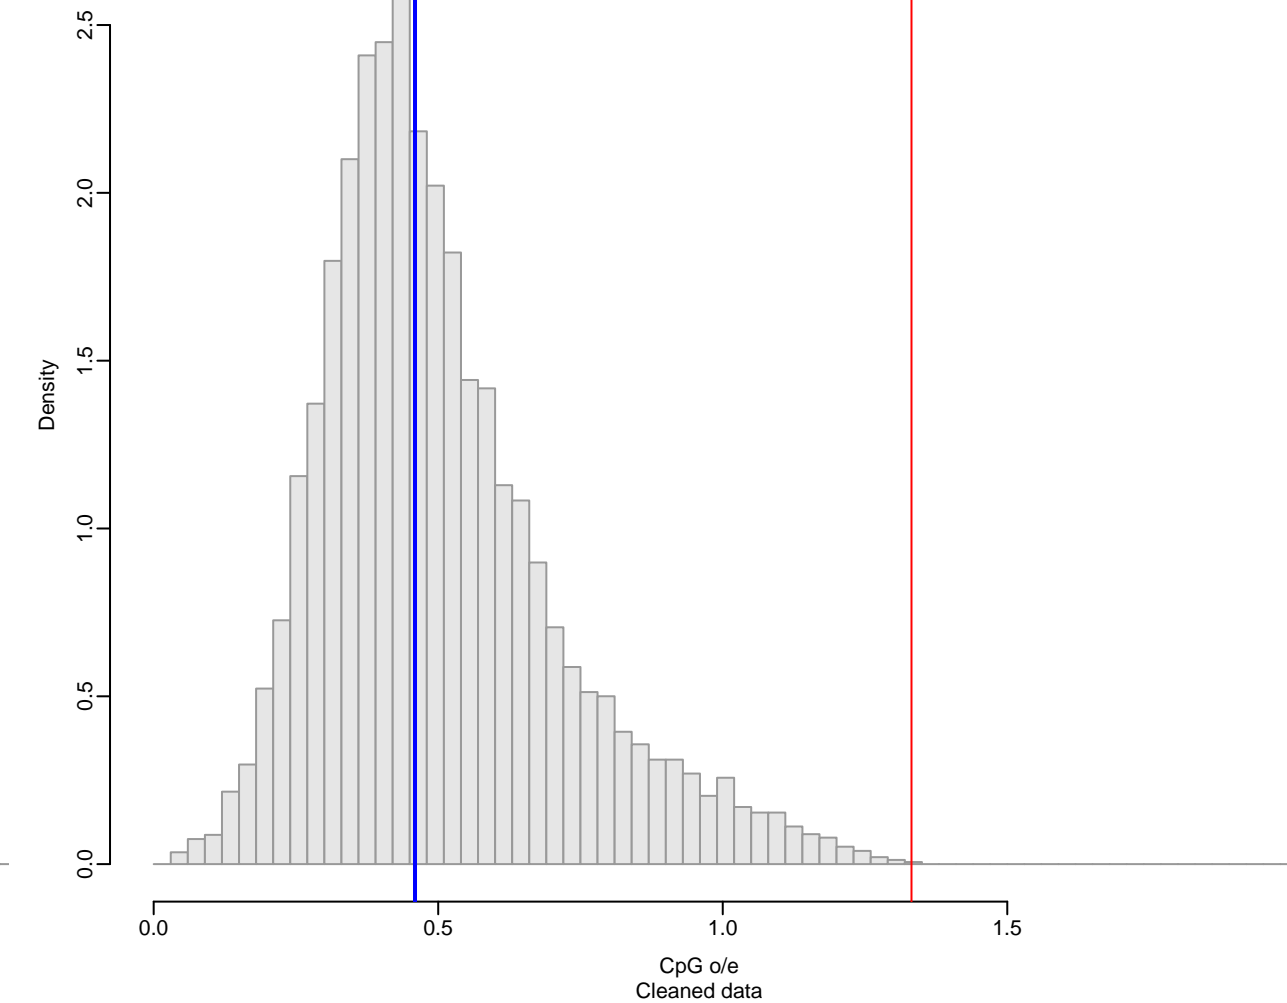

Wuchereria\_bancrofti

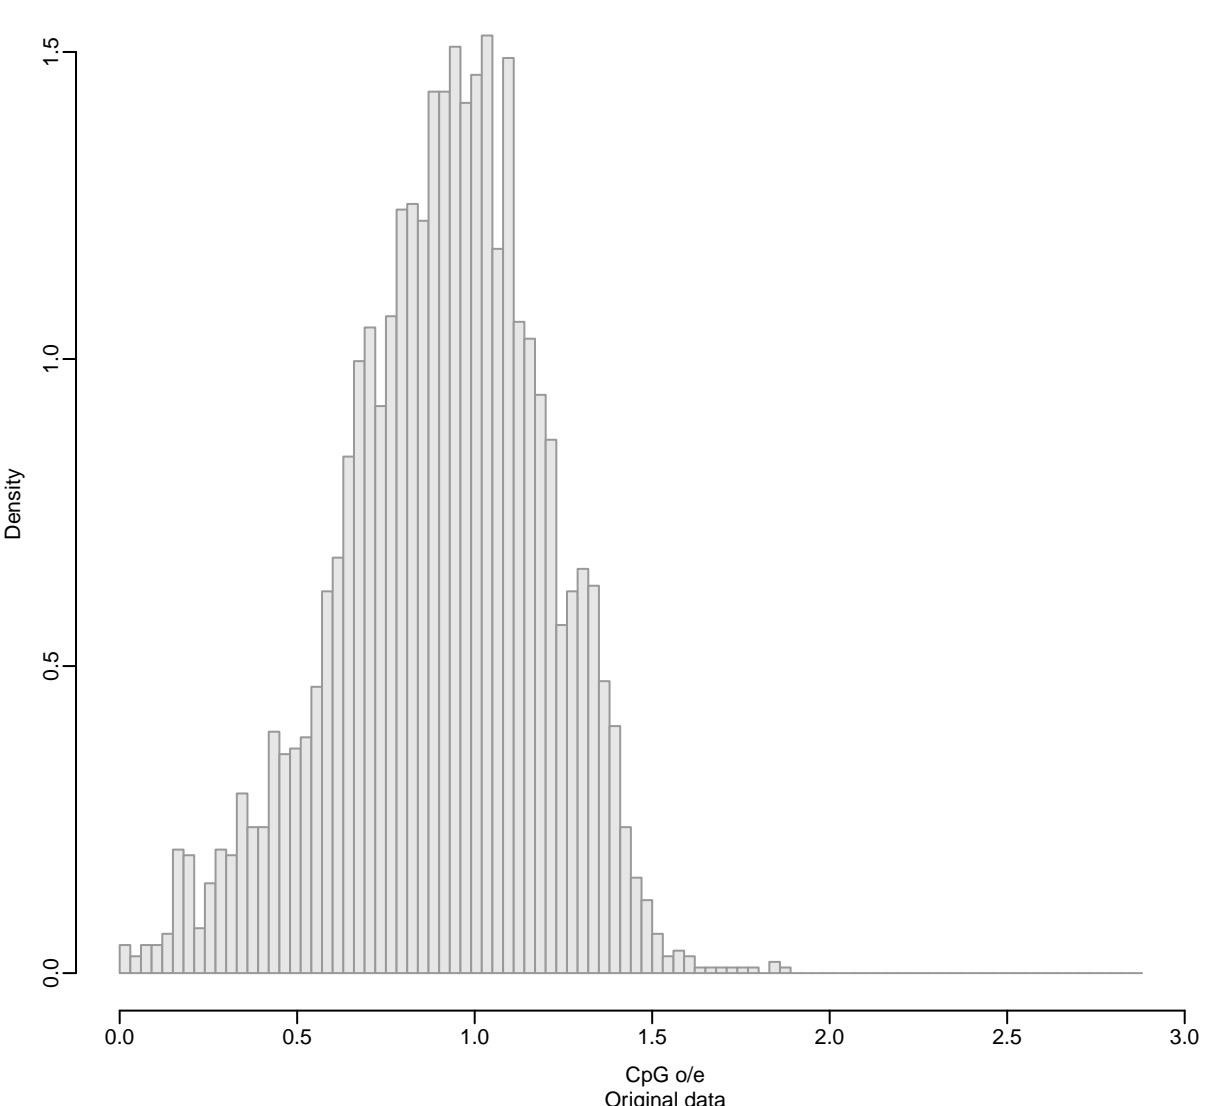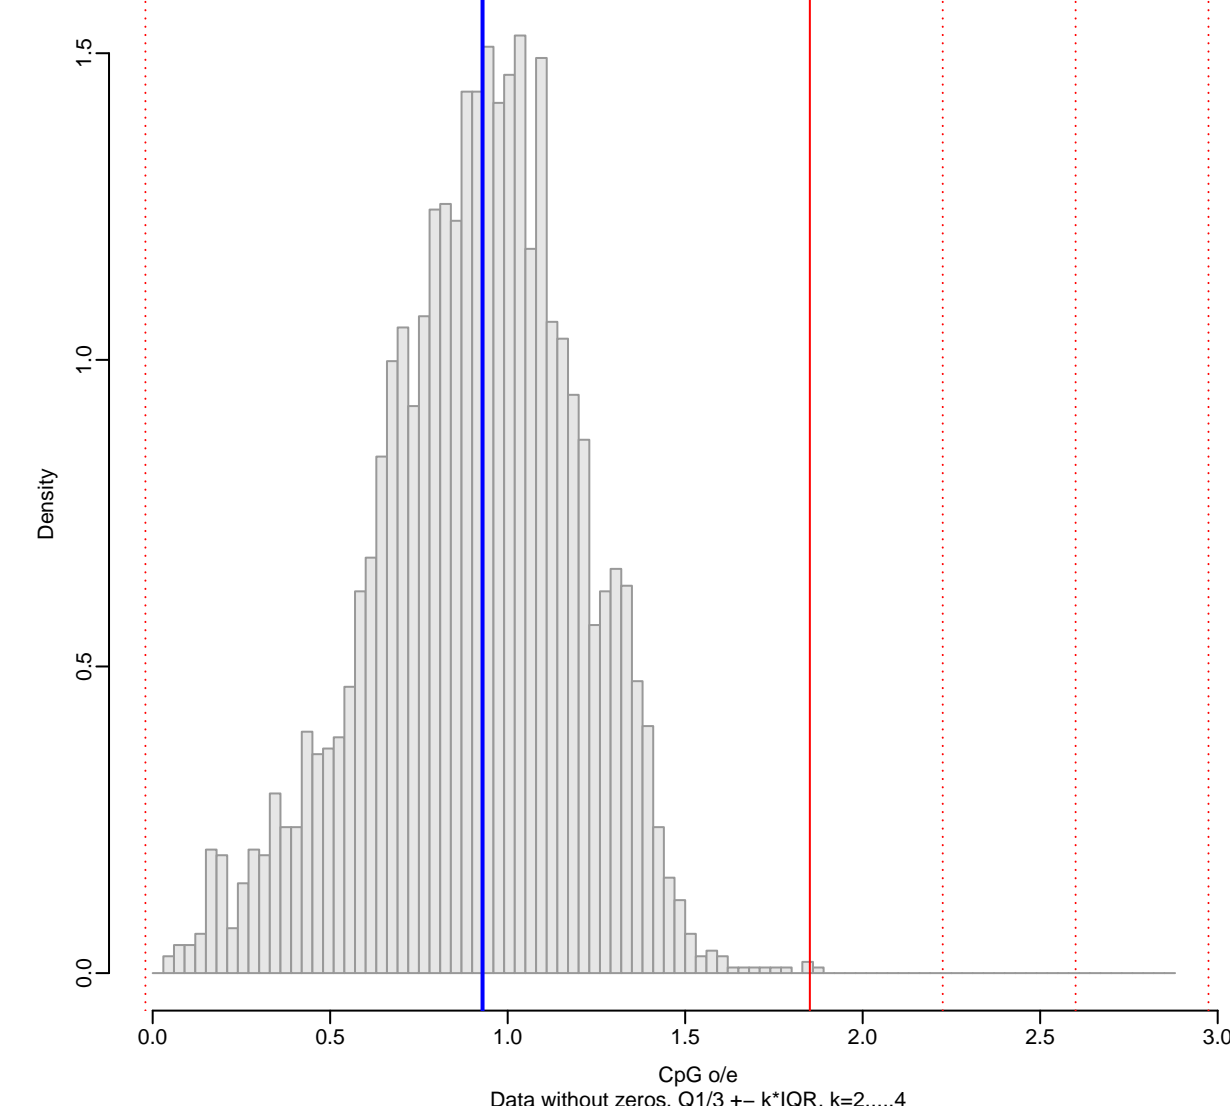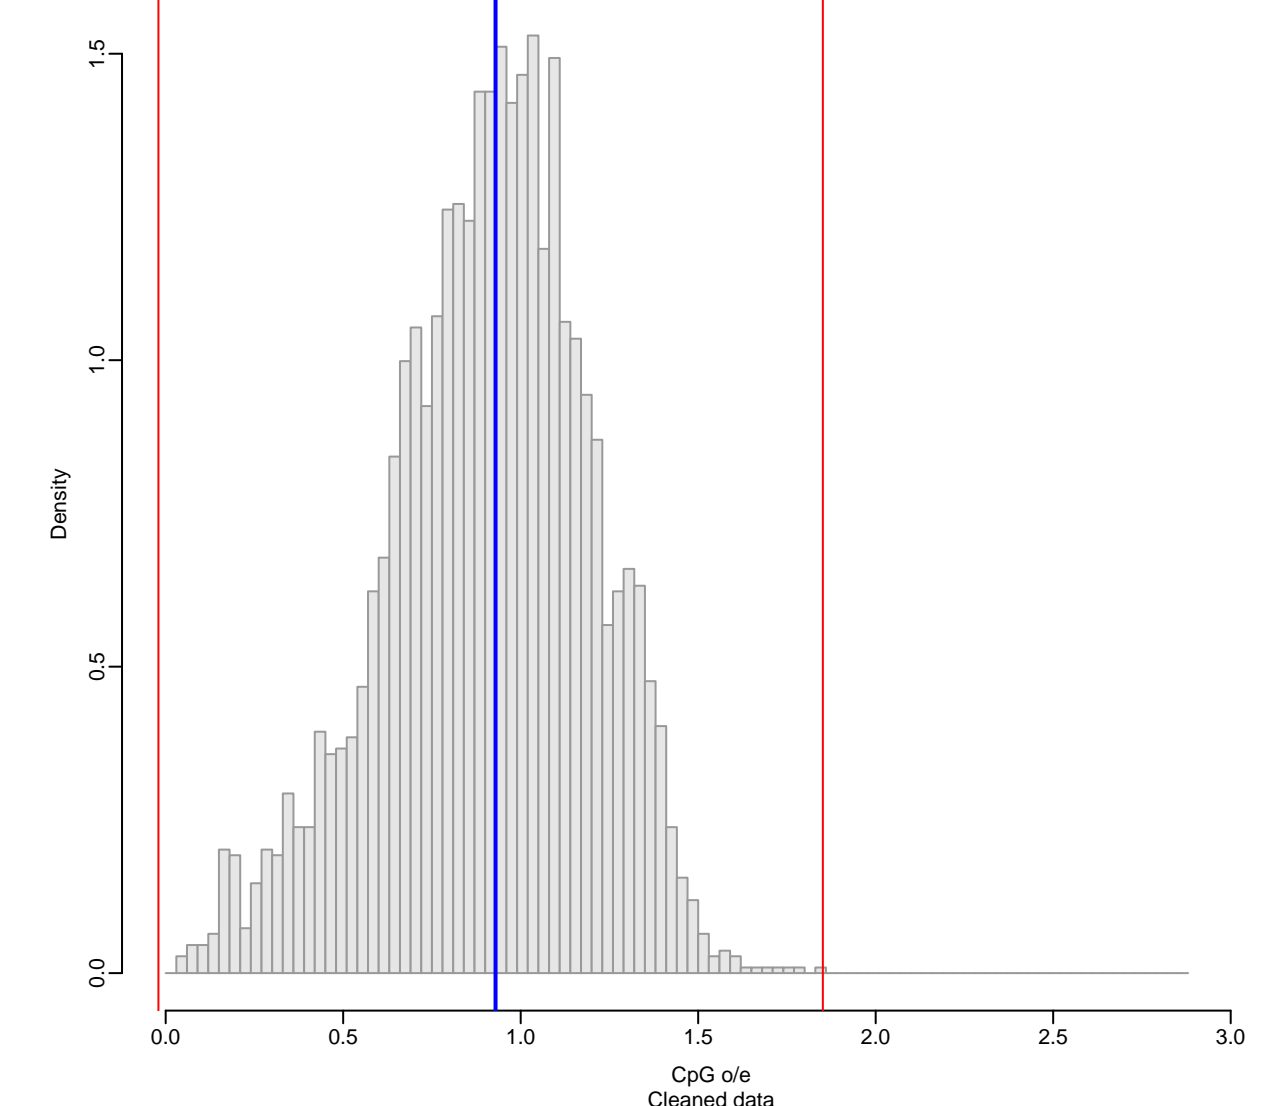

# Xenopus\_laevis

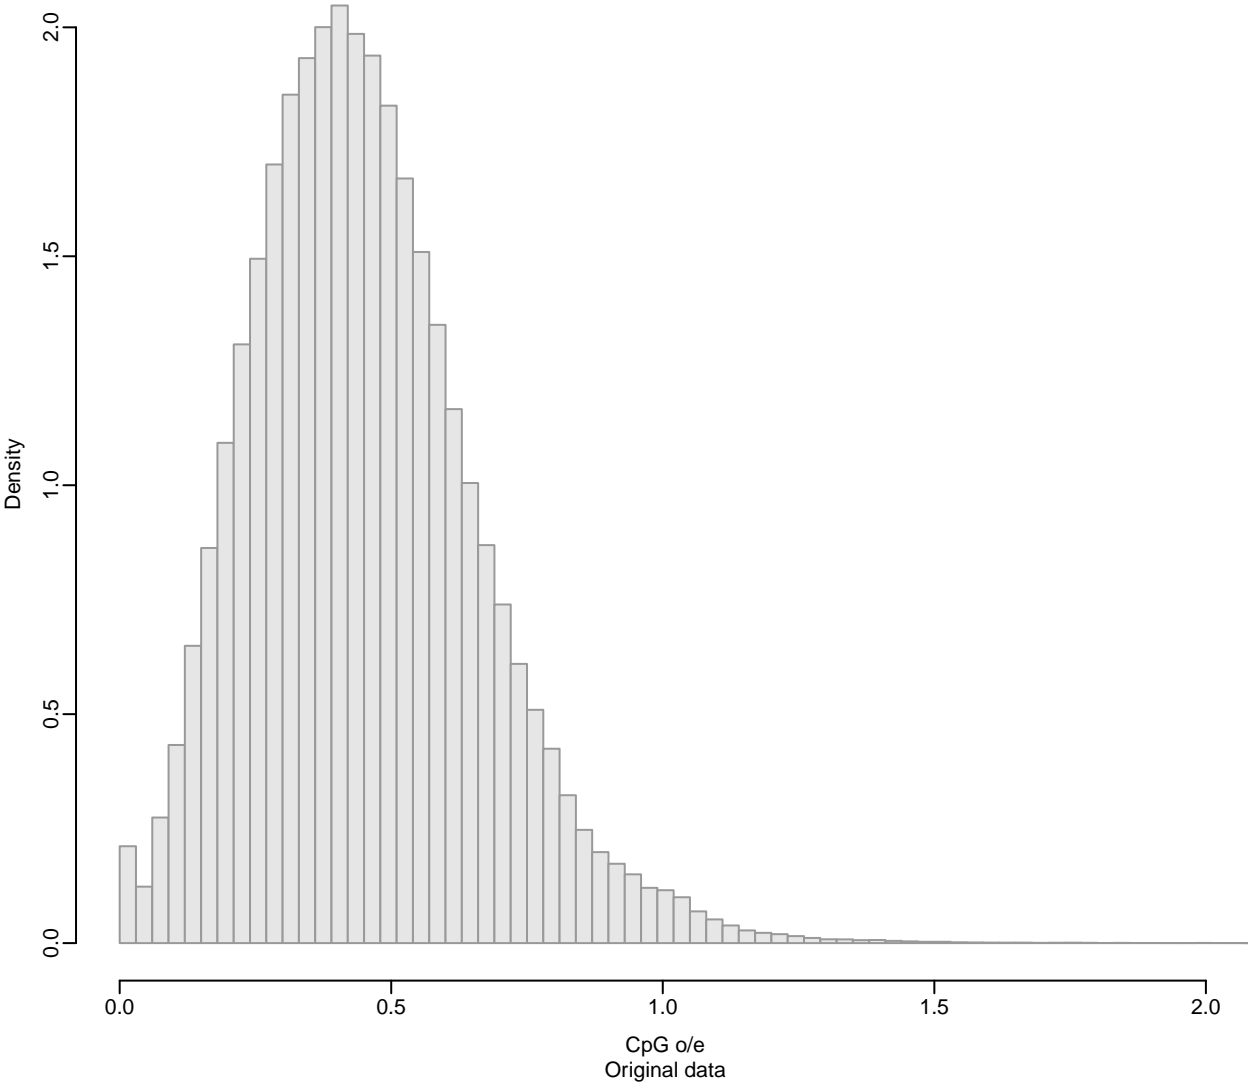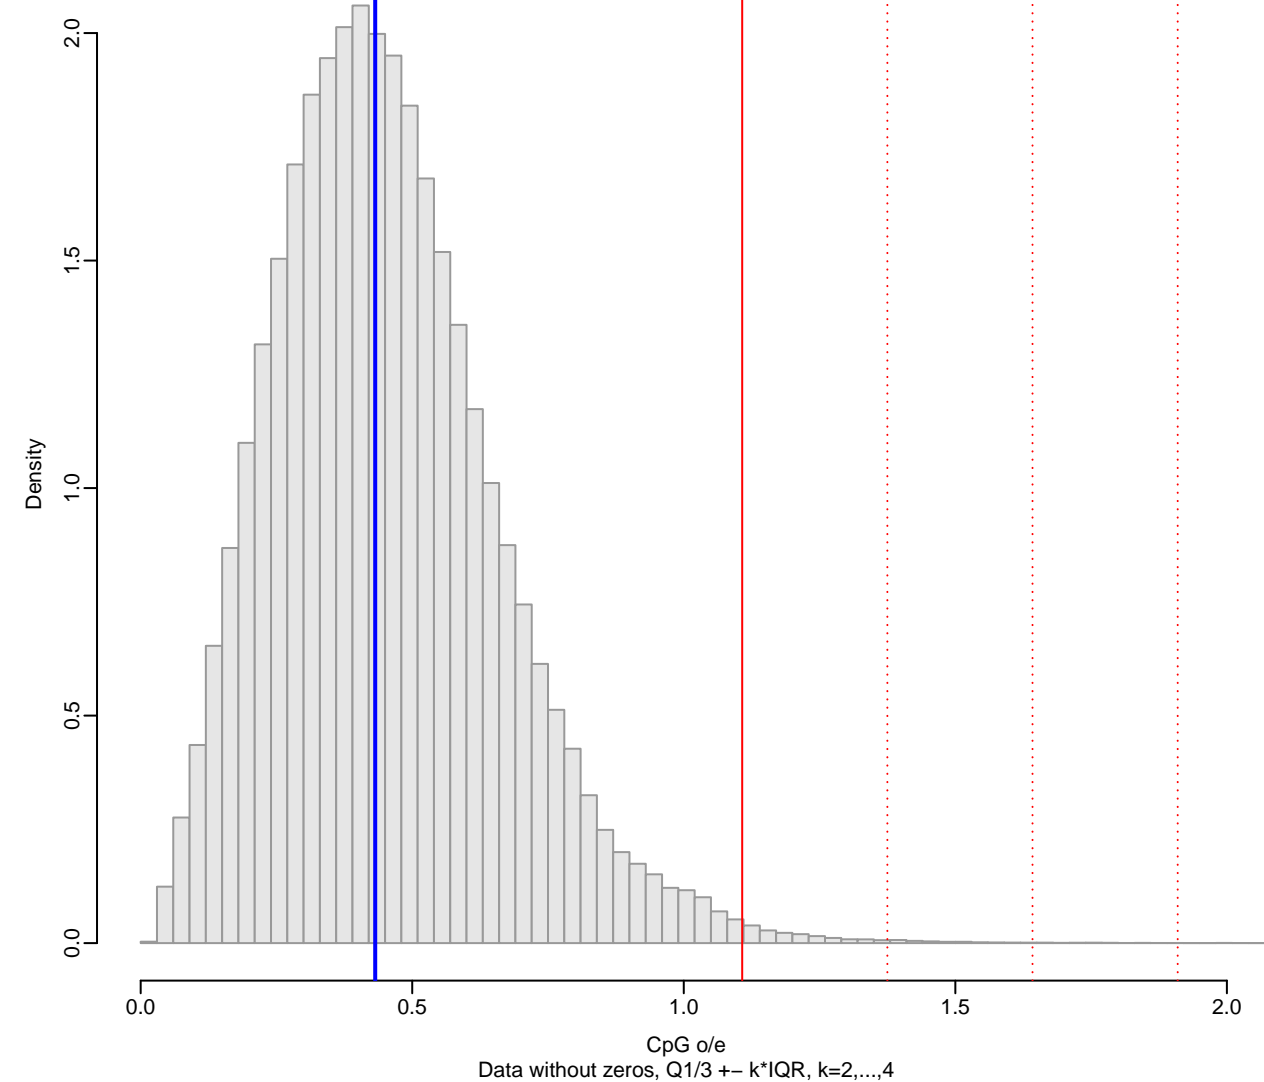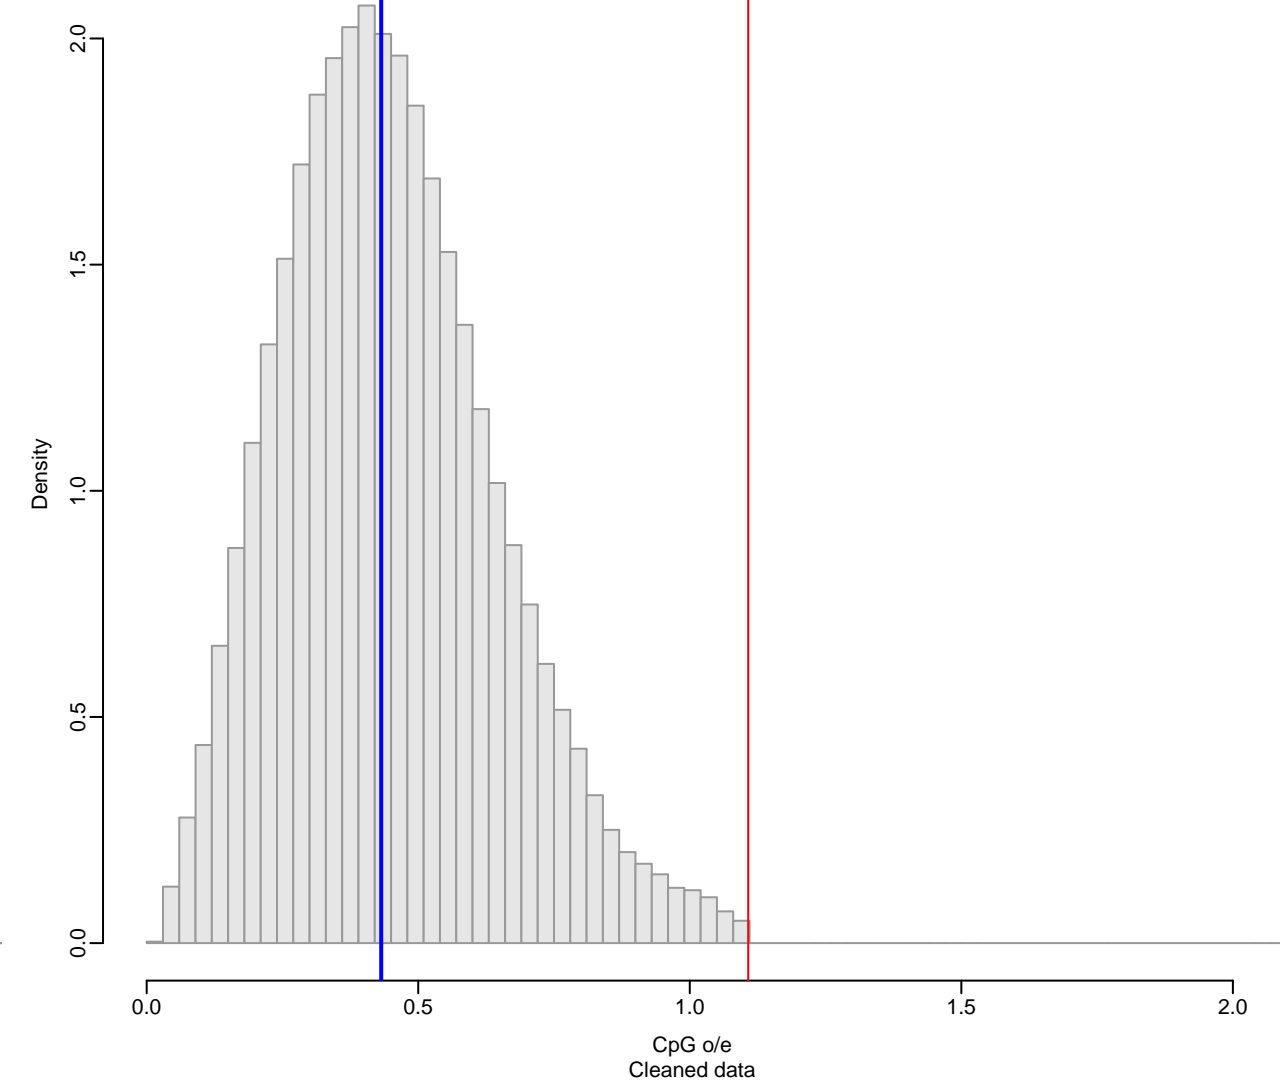

Xenopus\_tropicalis

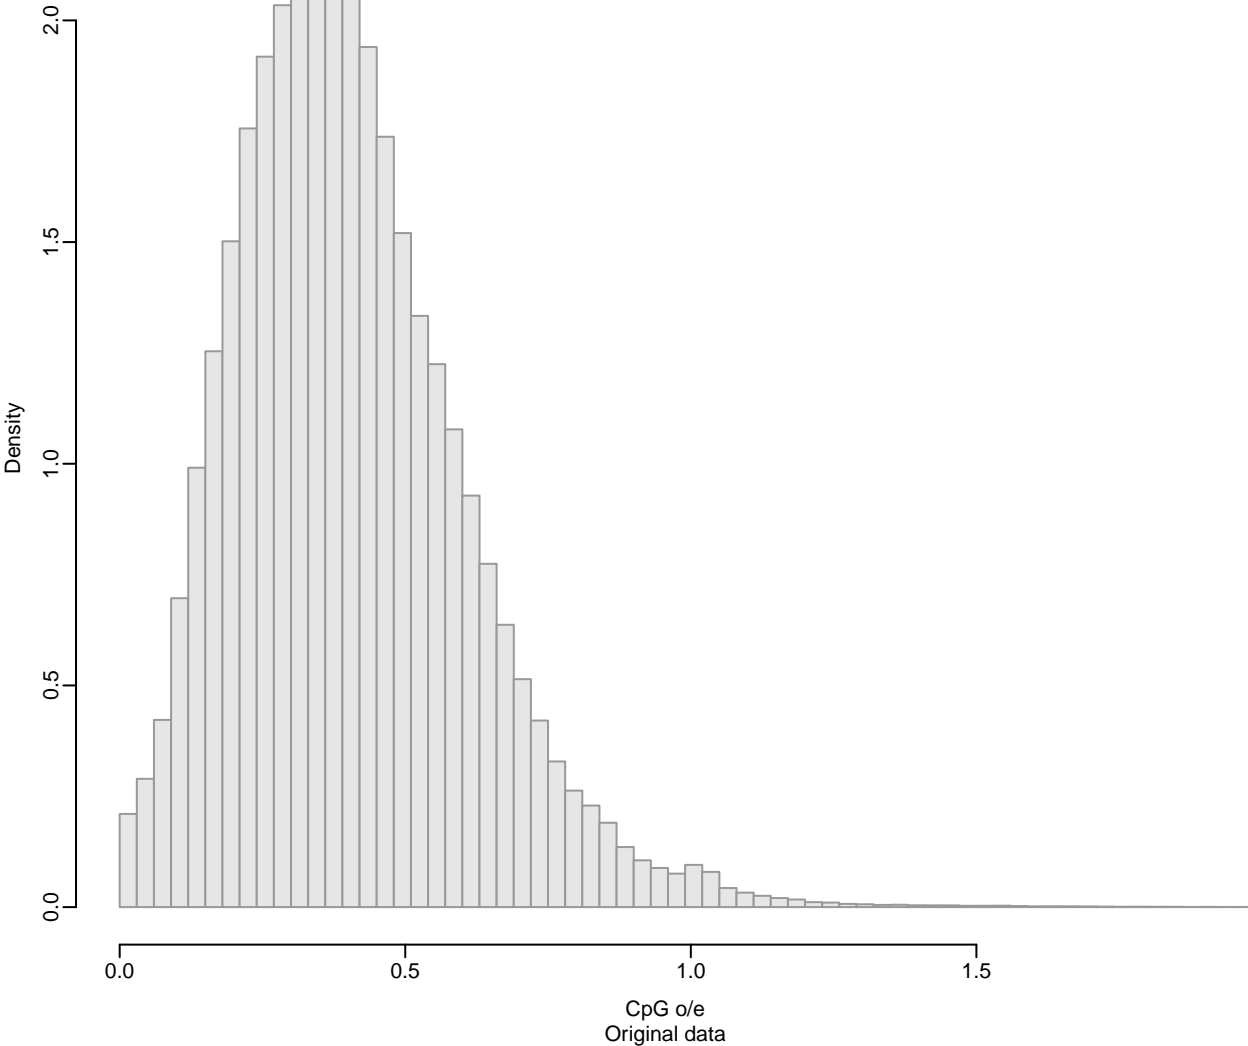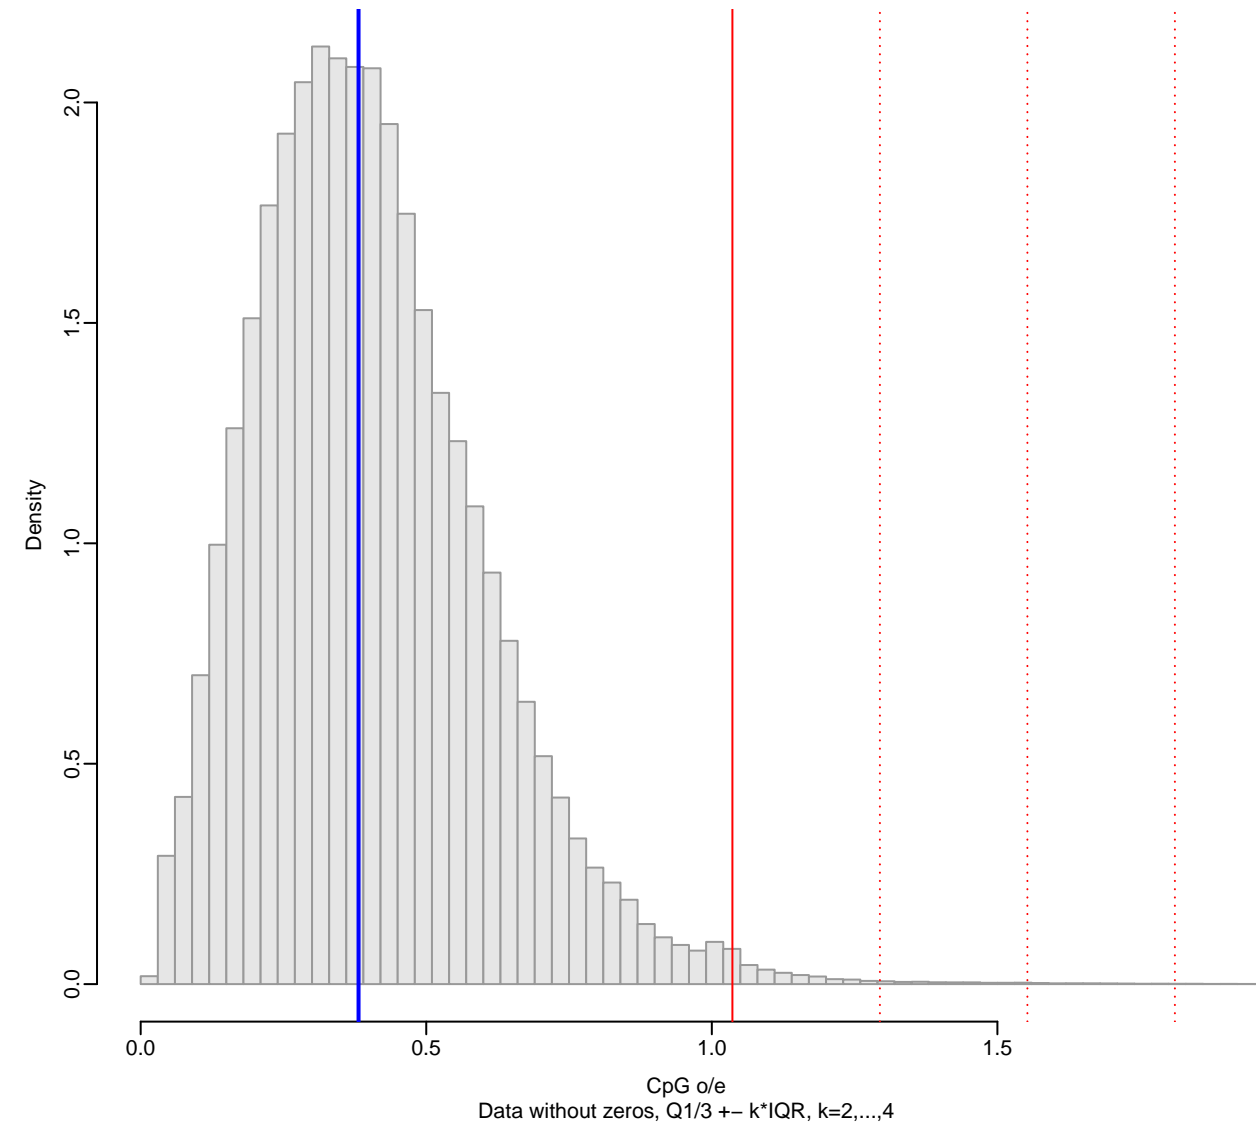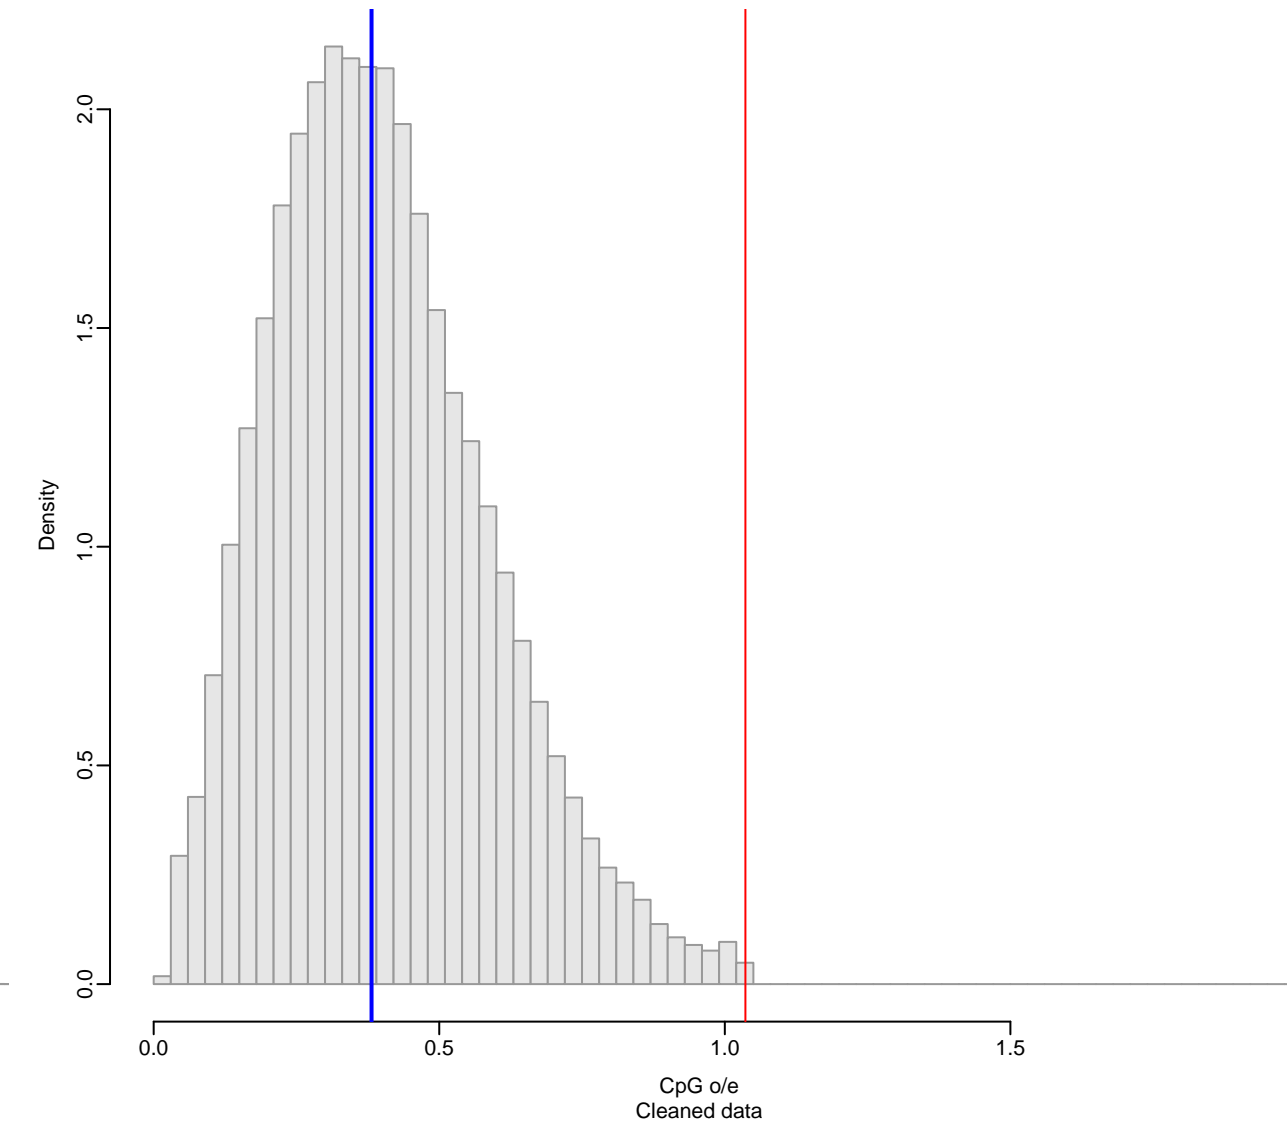

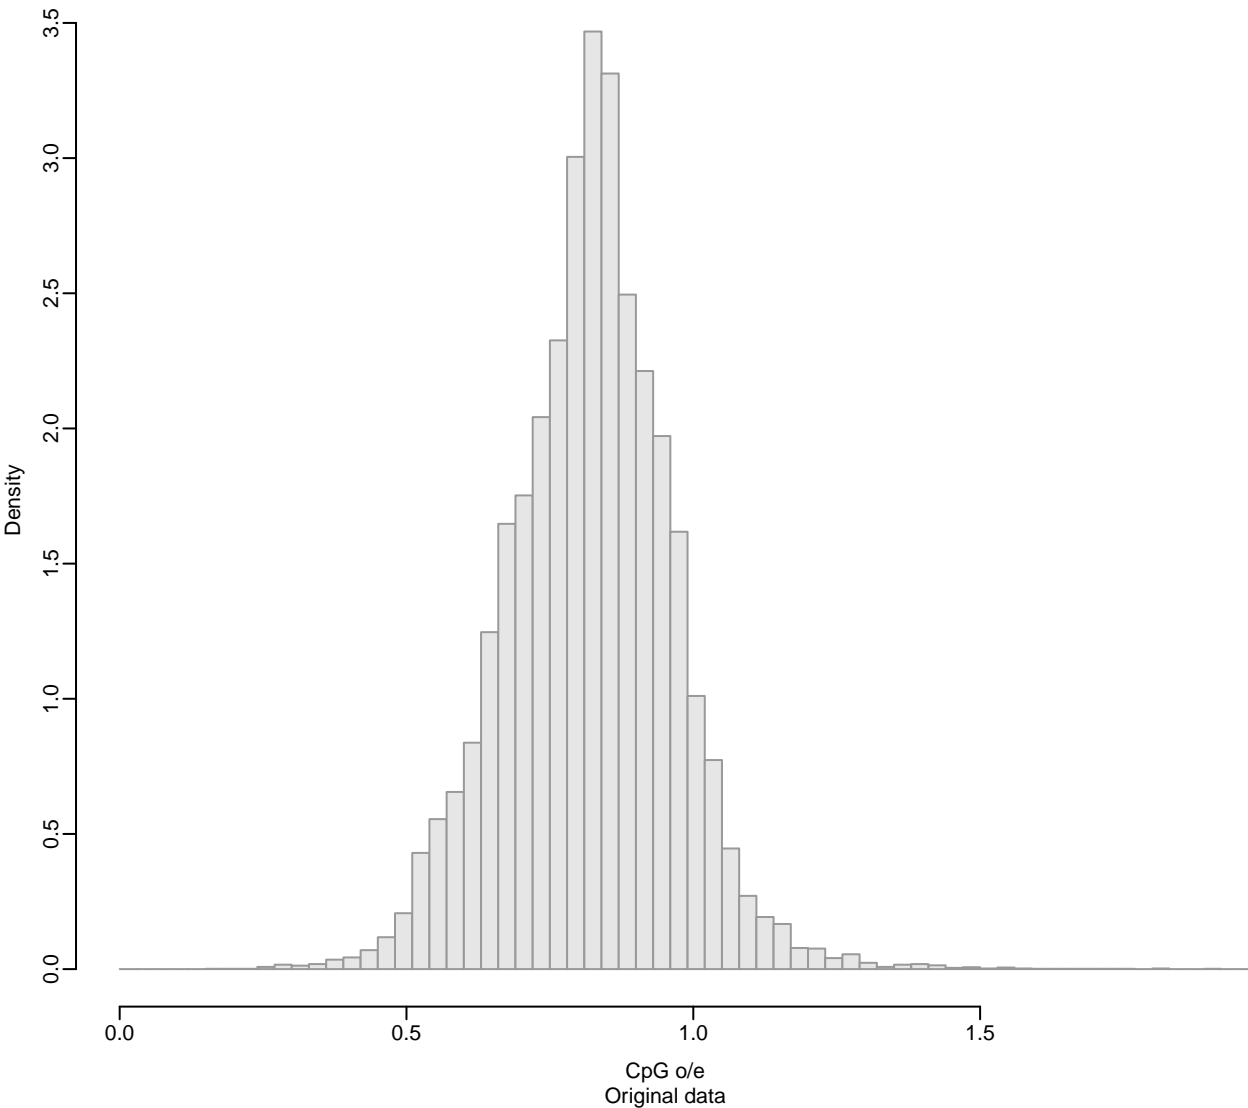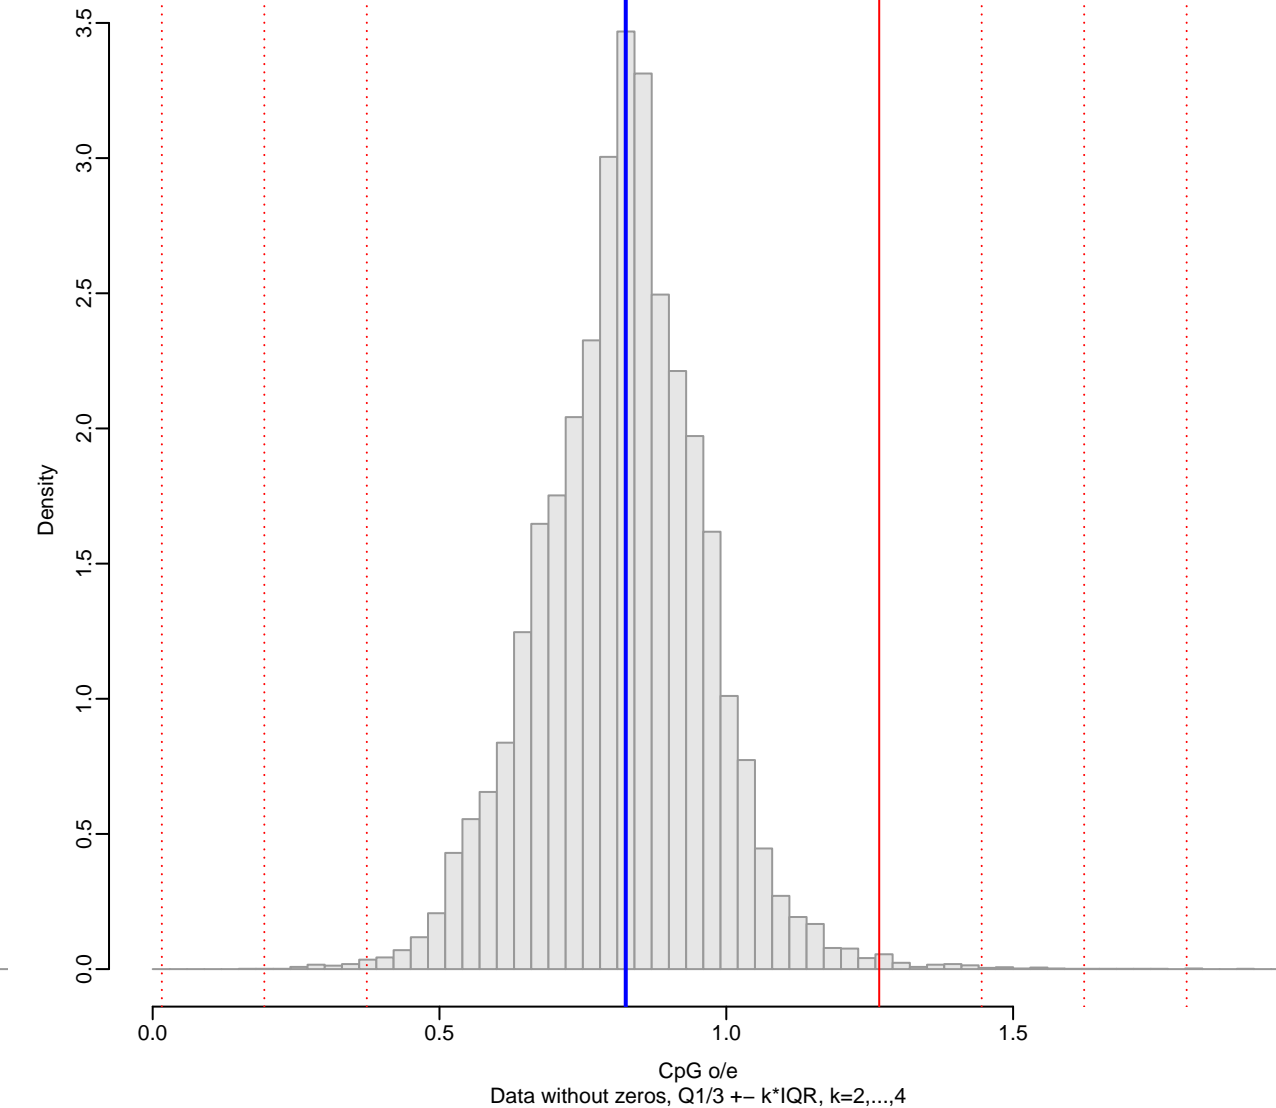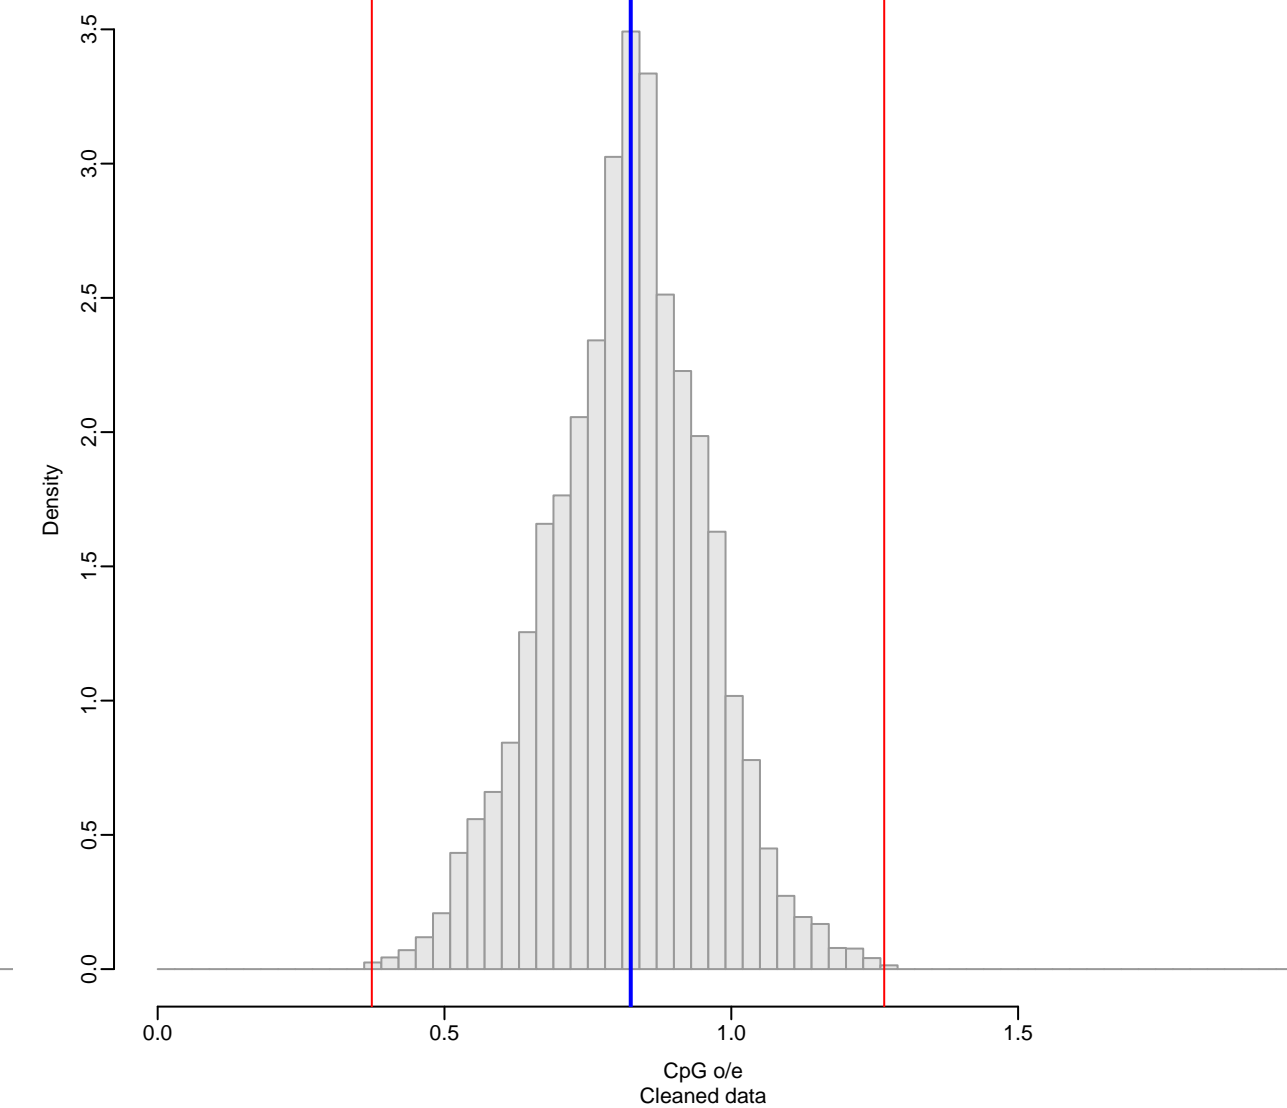

Zamia\_fischeri

Density

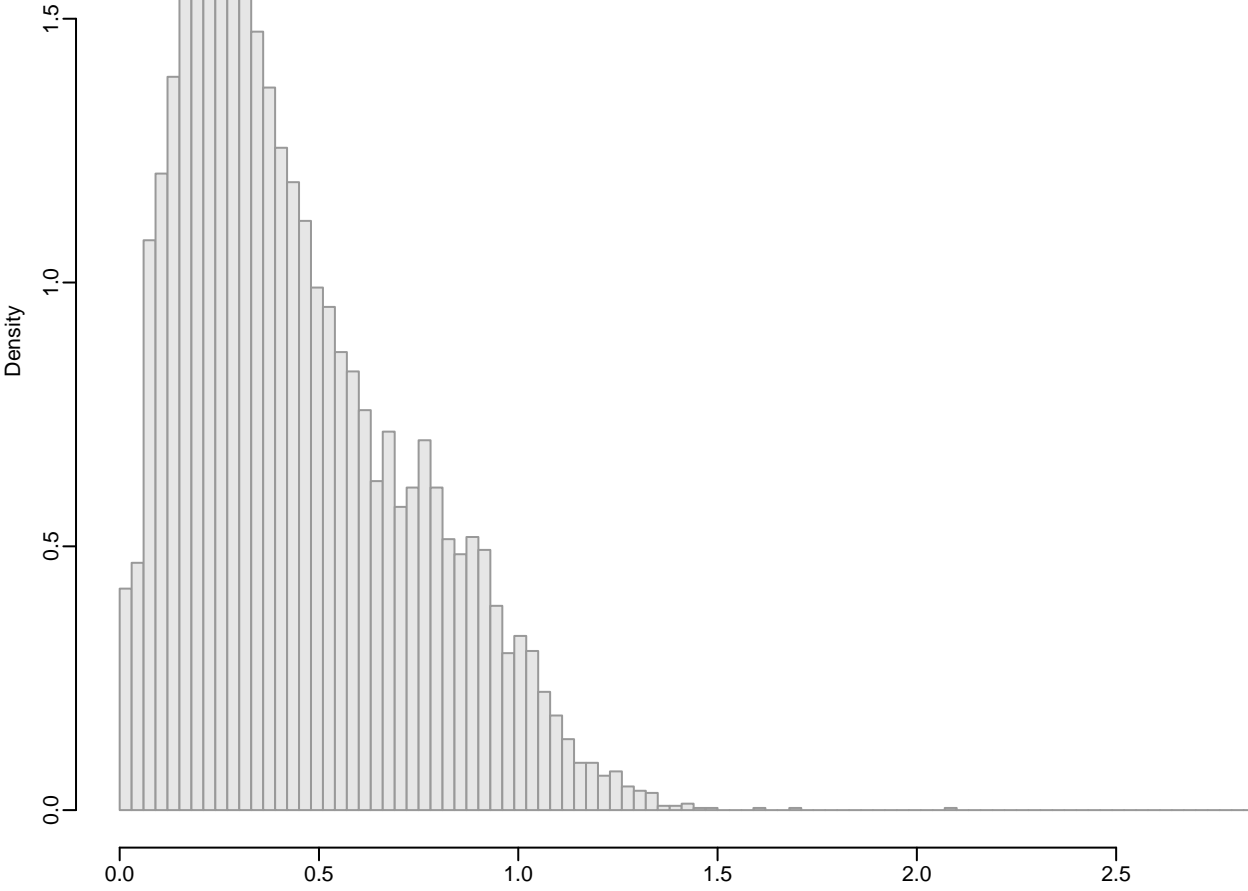

Density

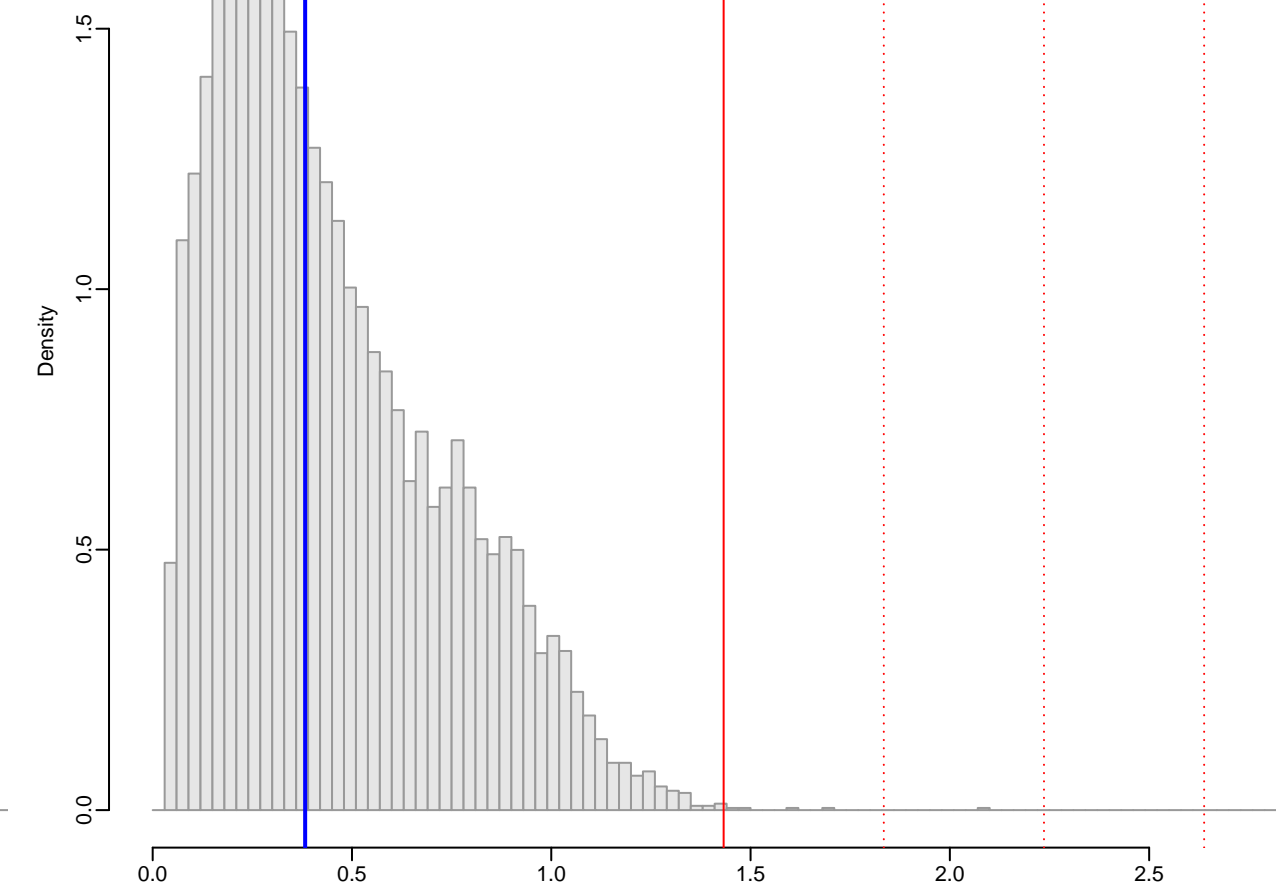

Density

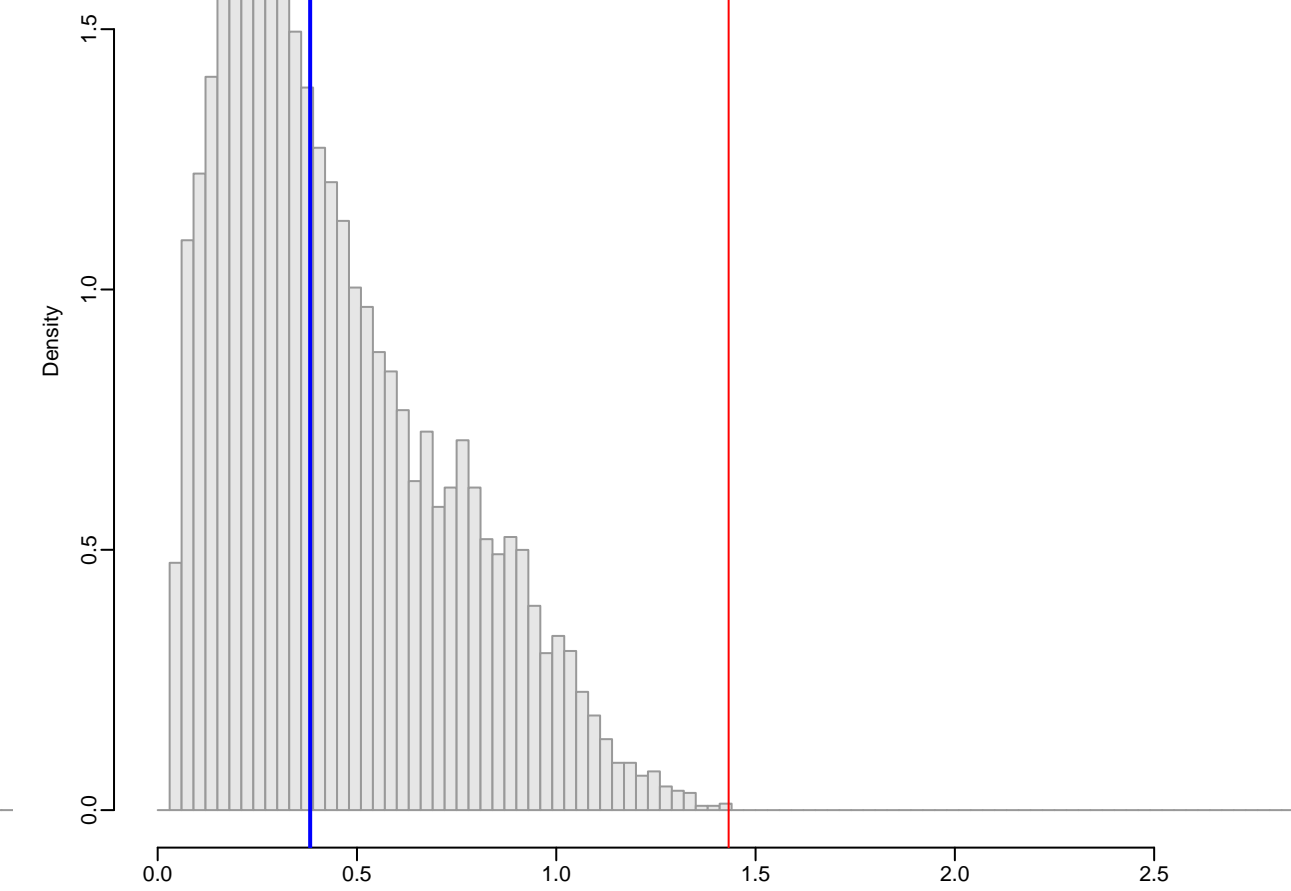

Zantedeschia\_aethiopica

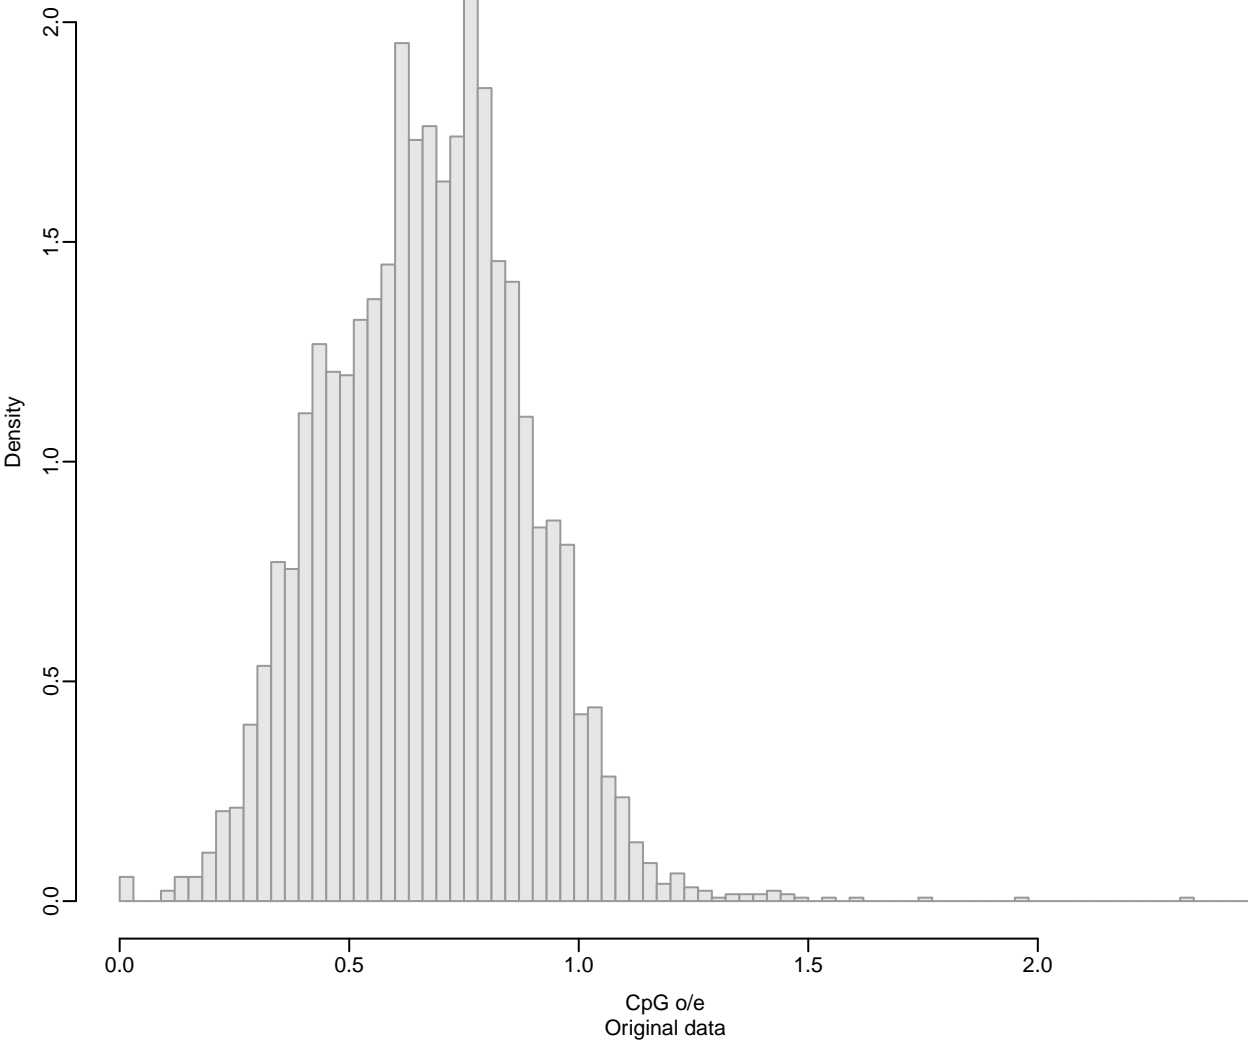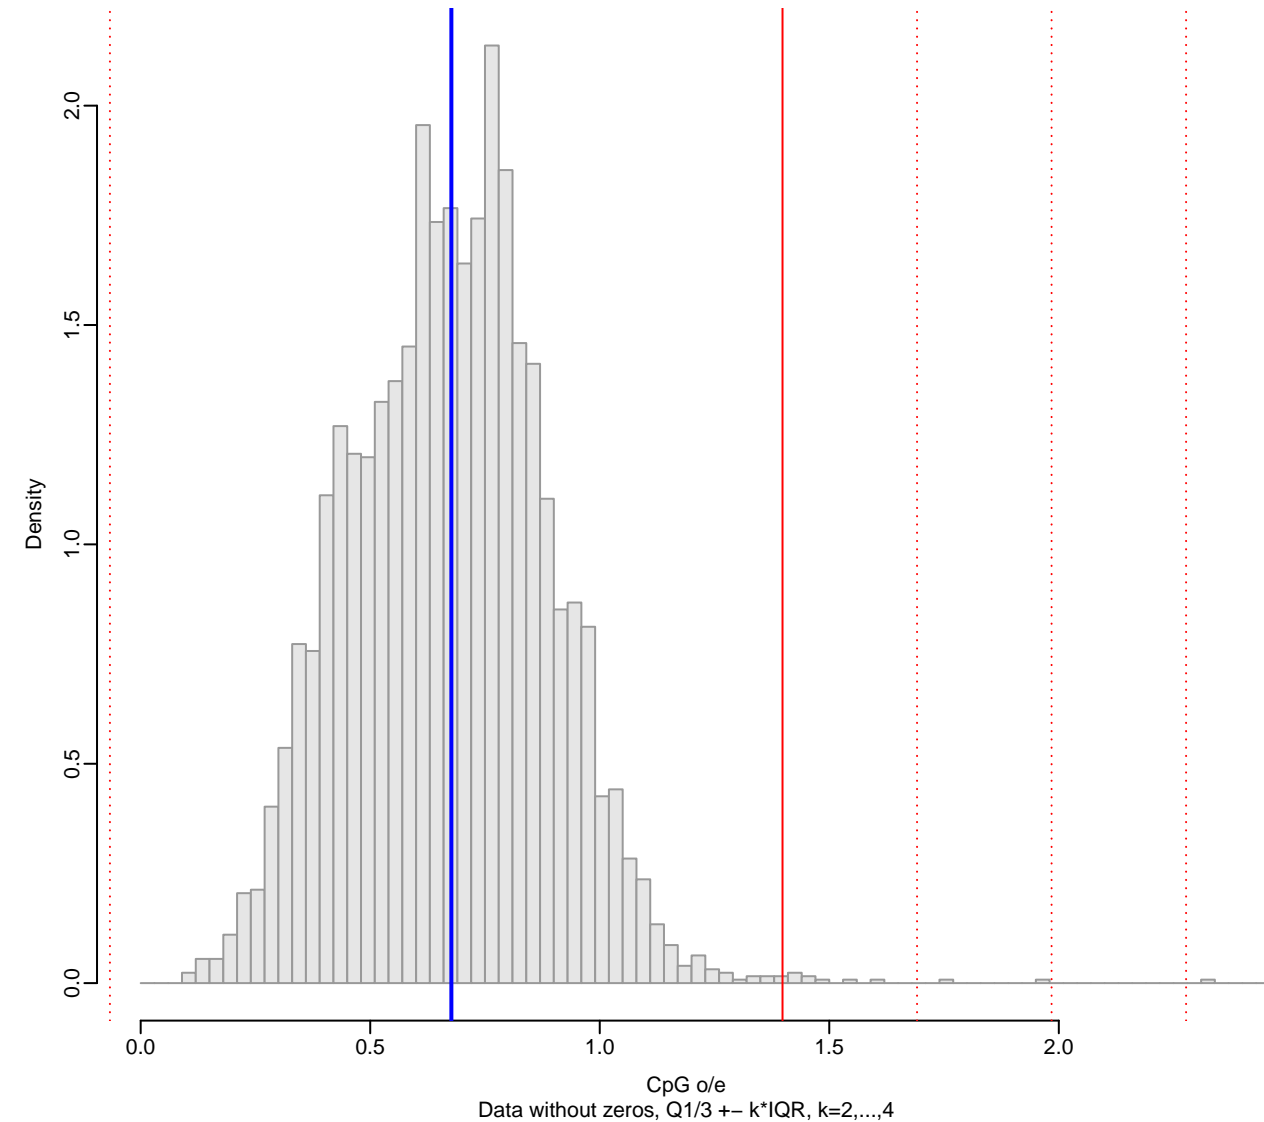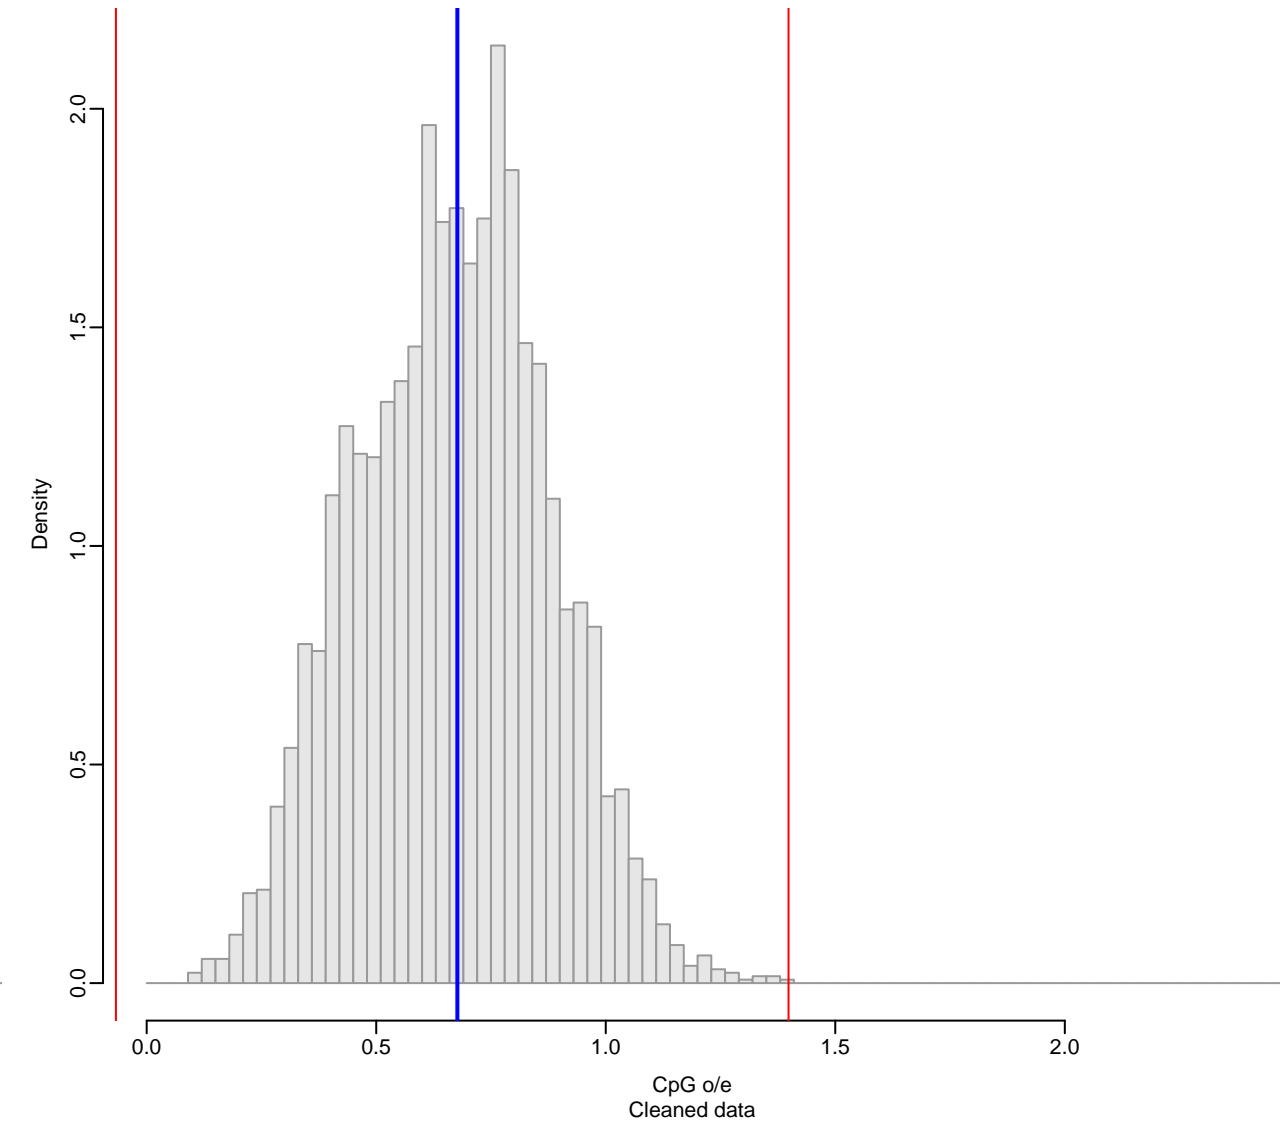



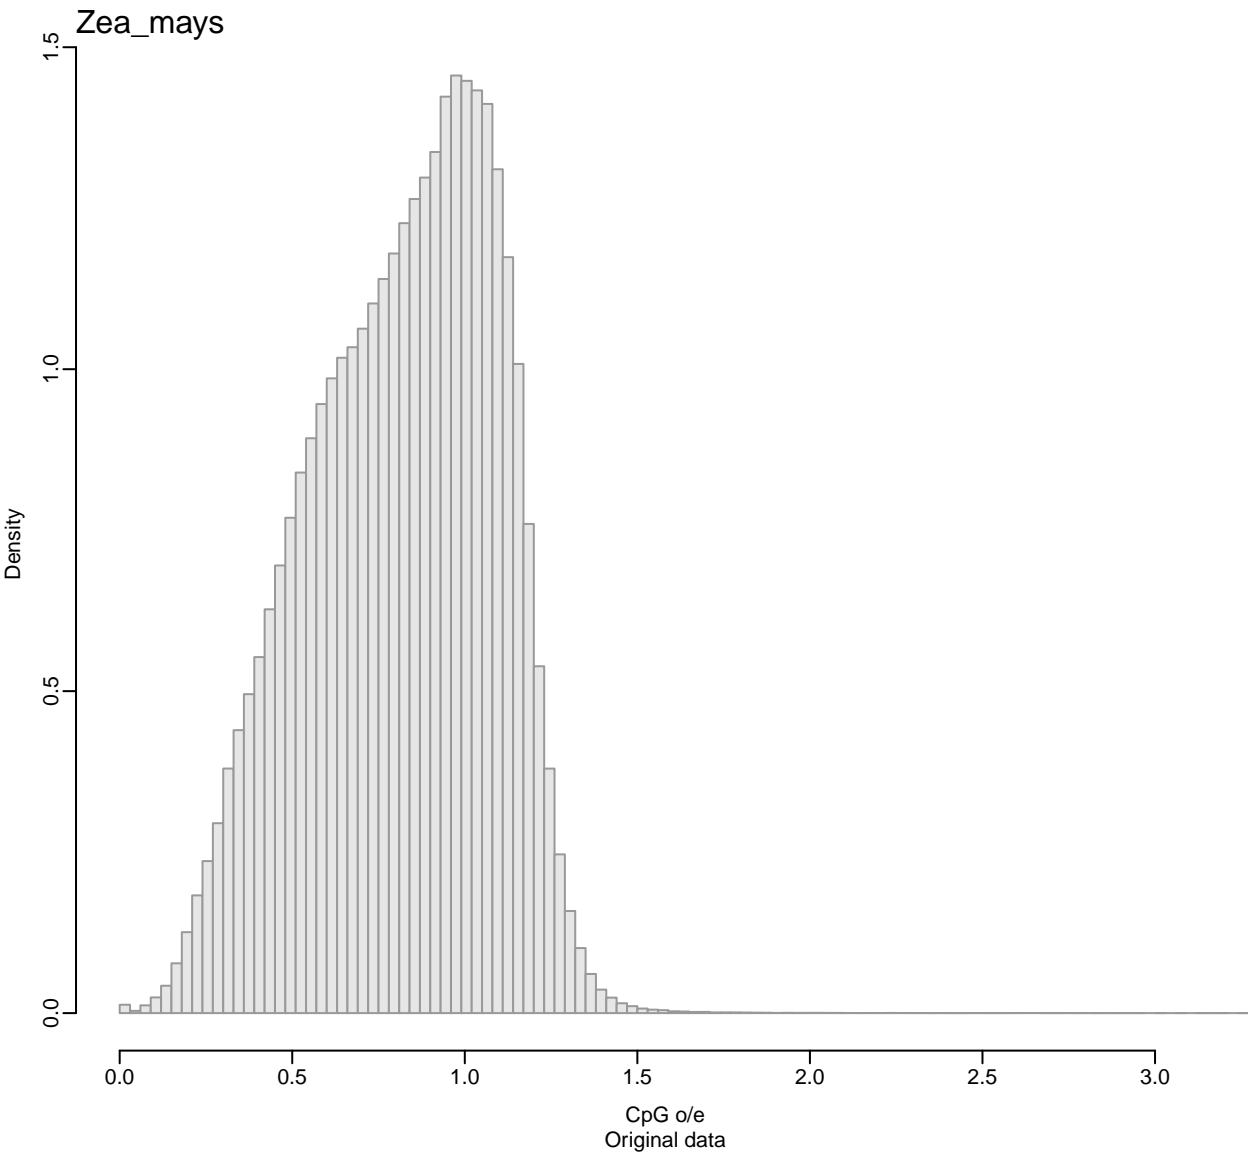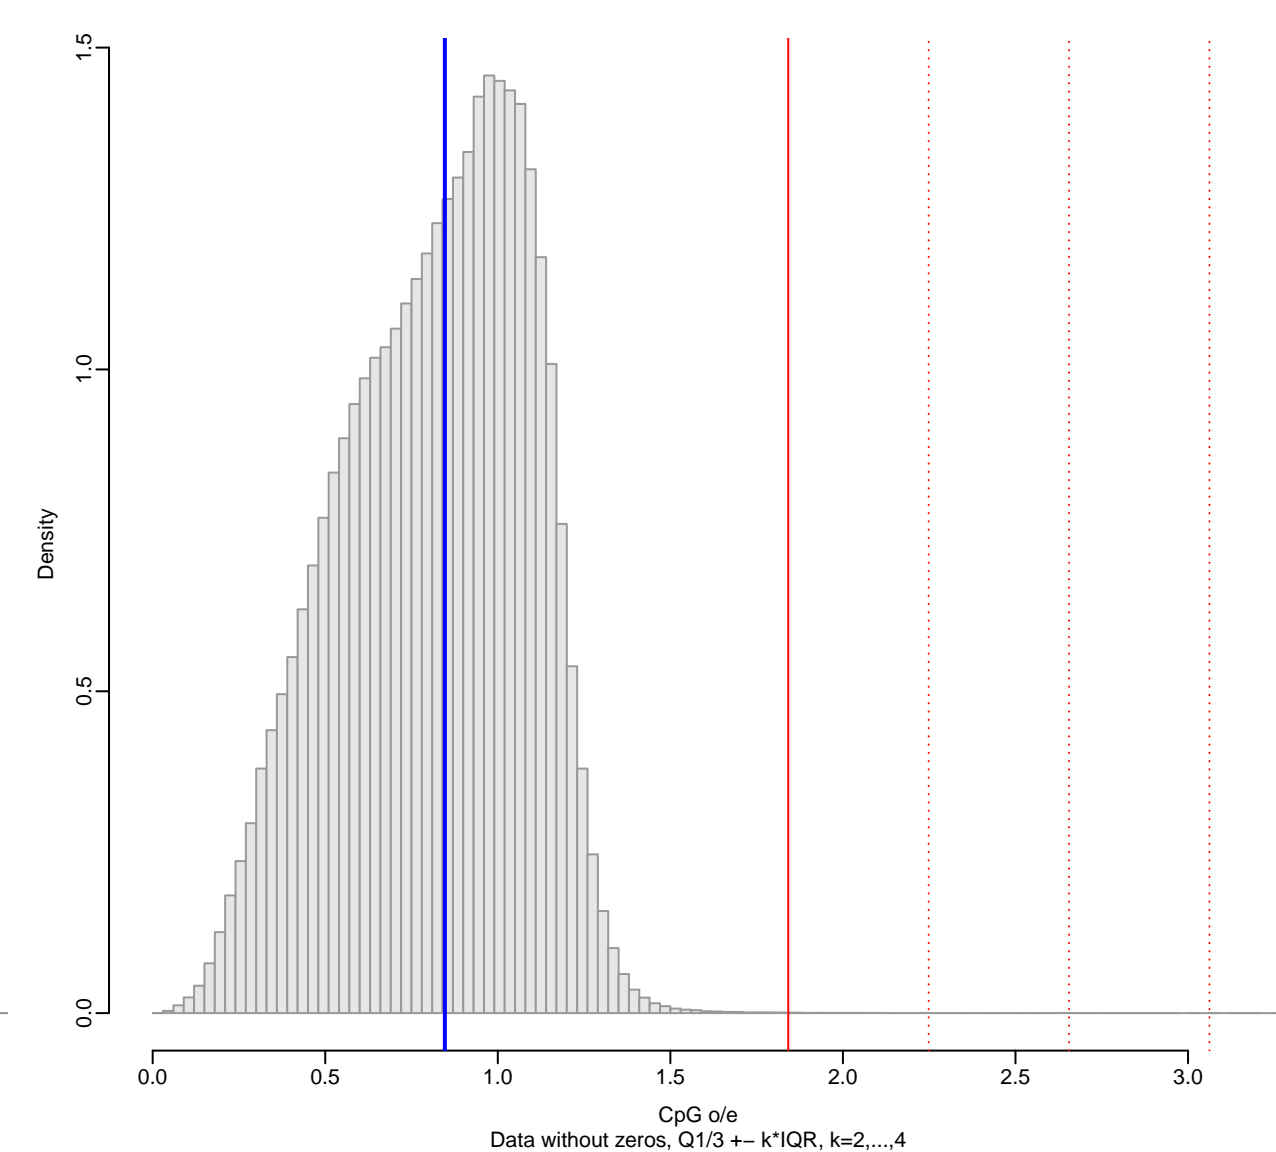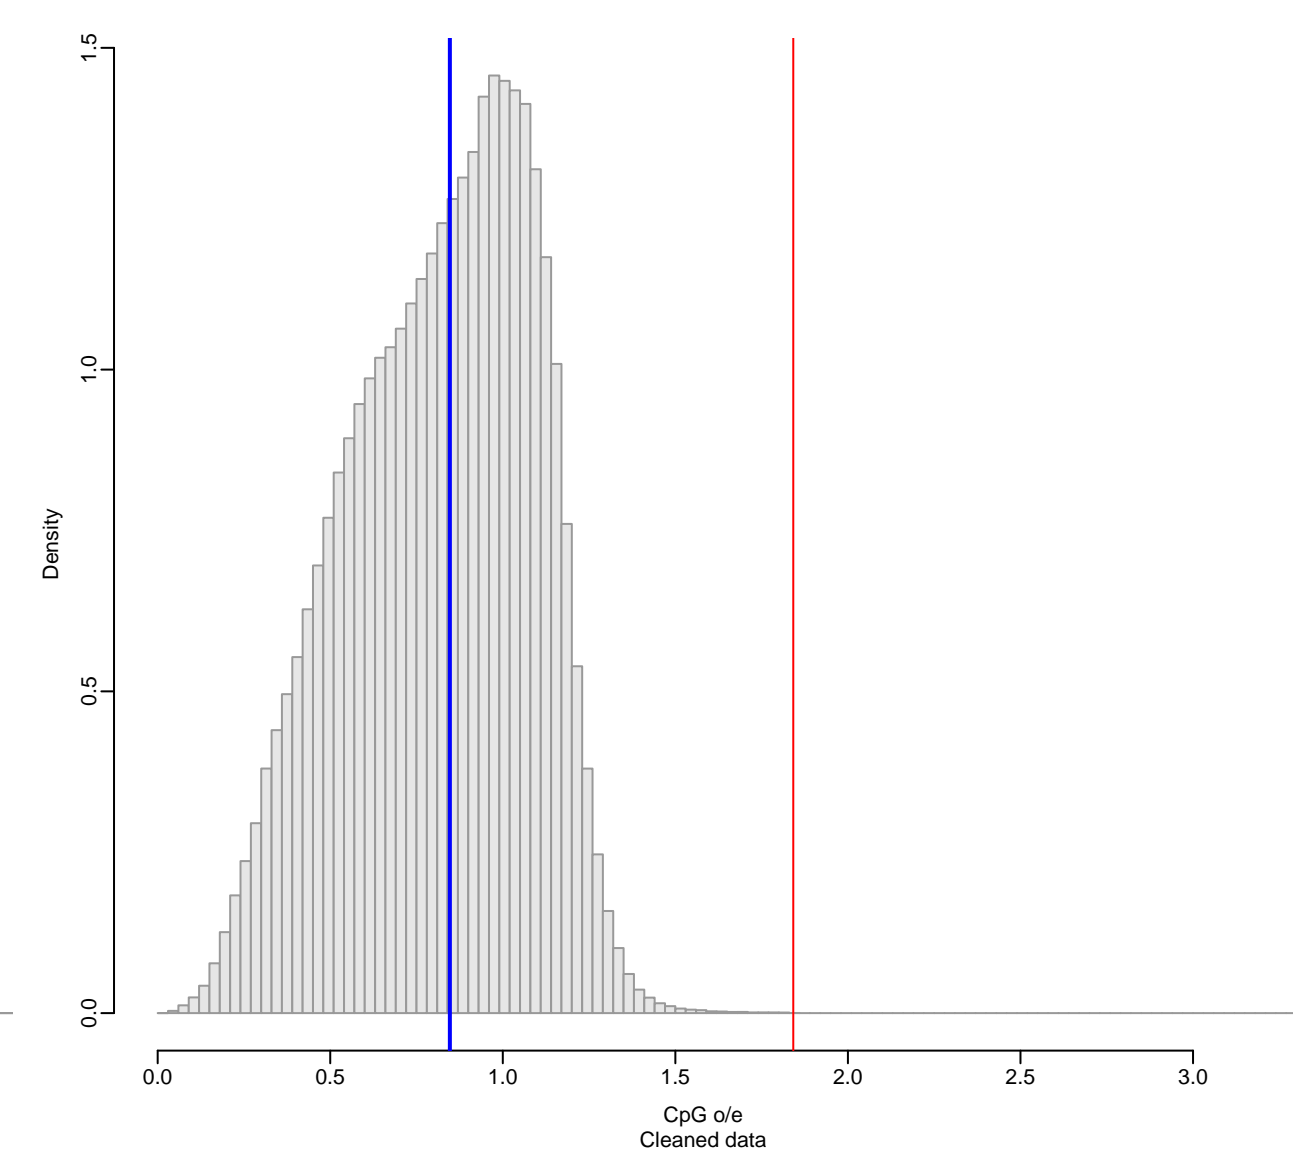

Zostera\_marina

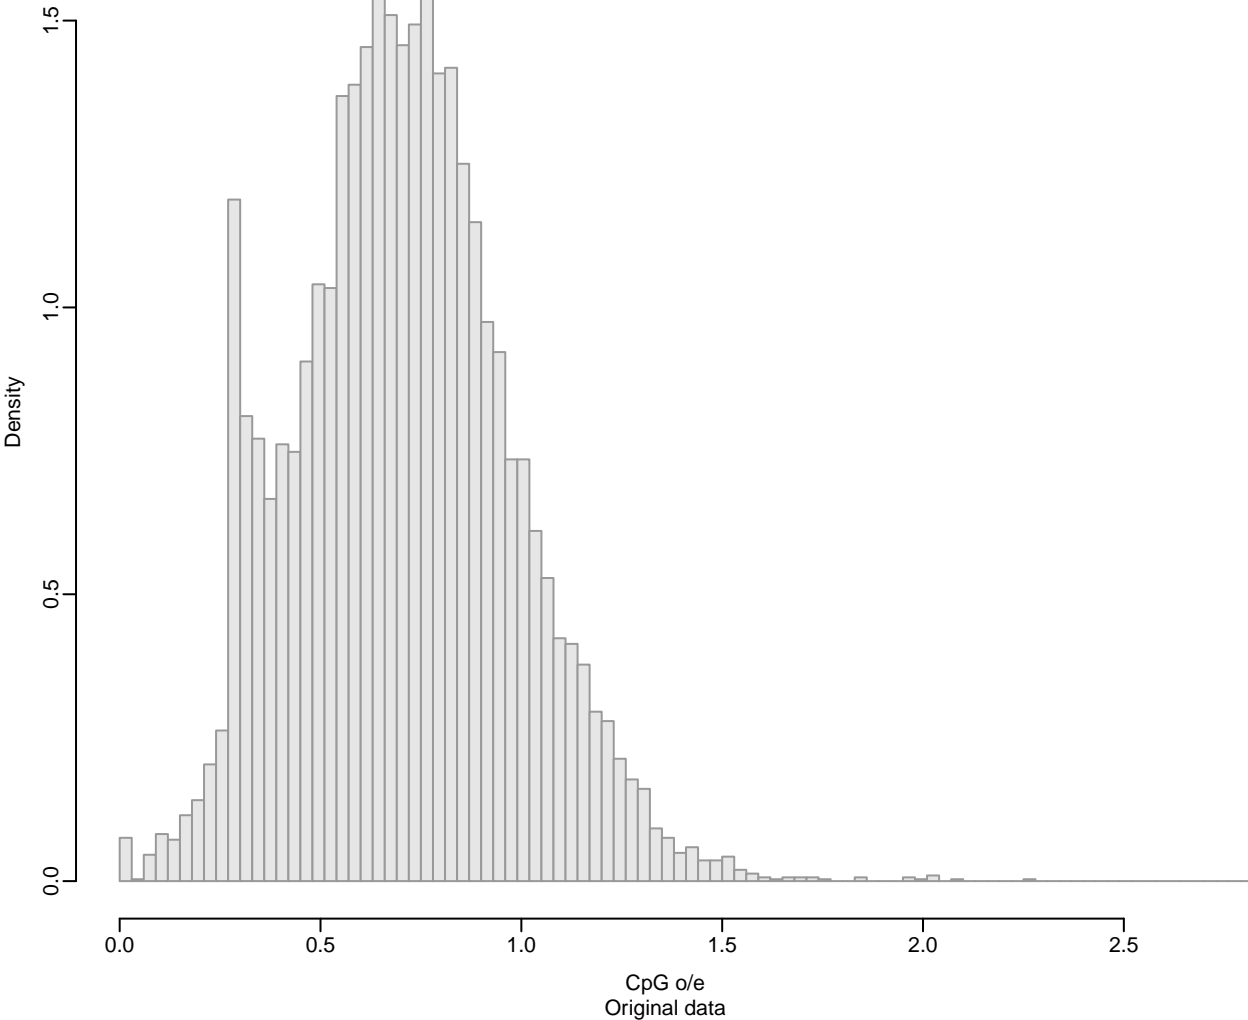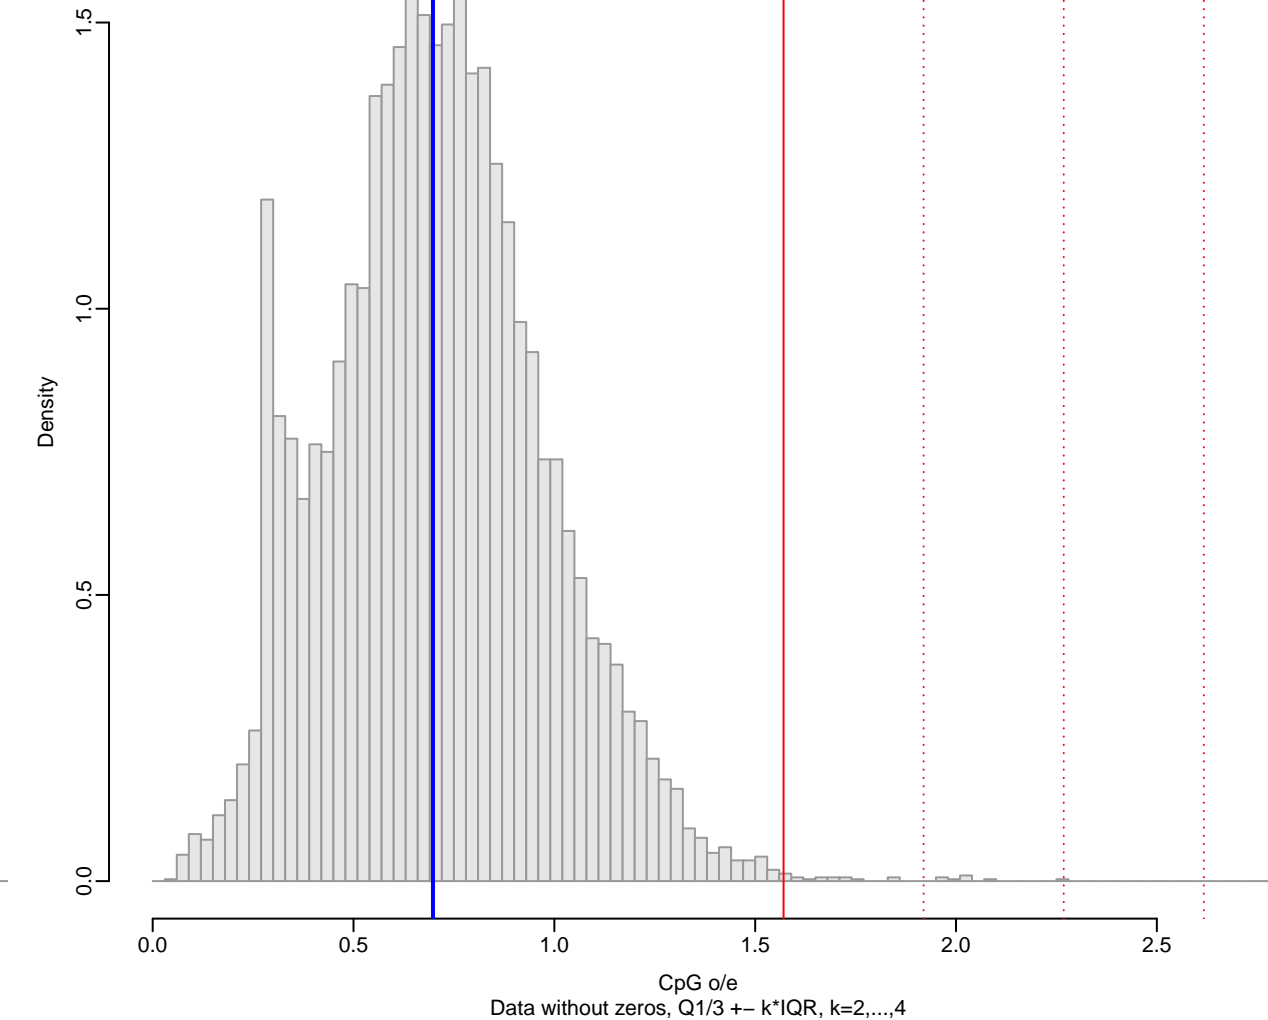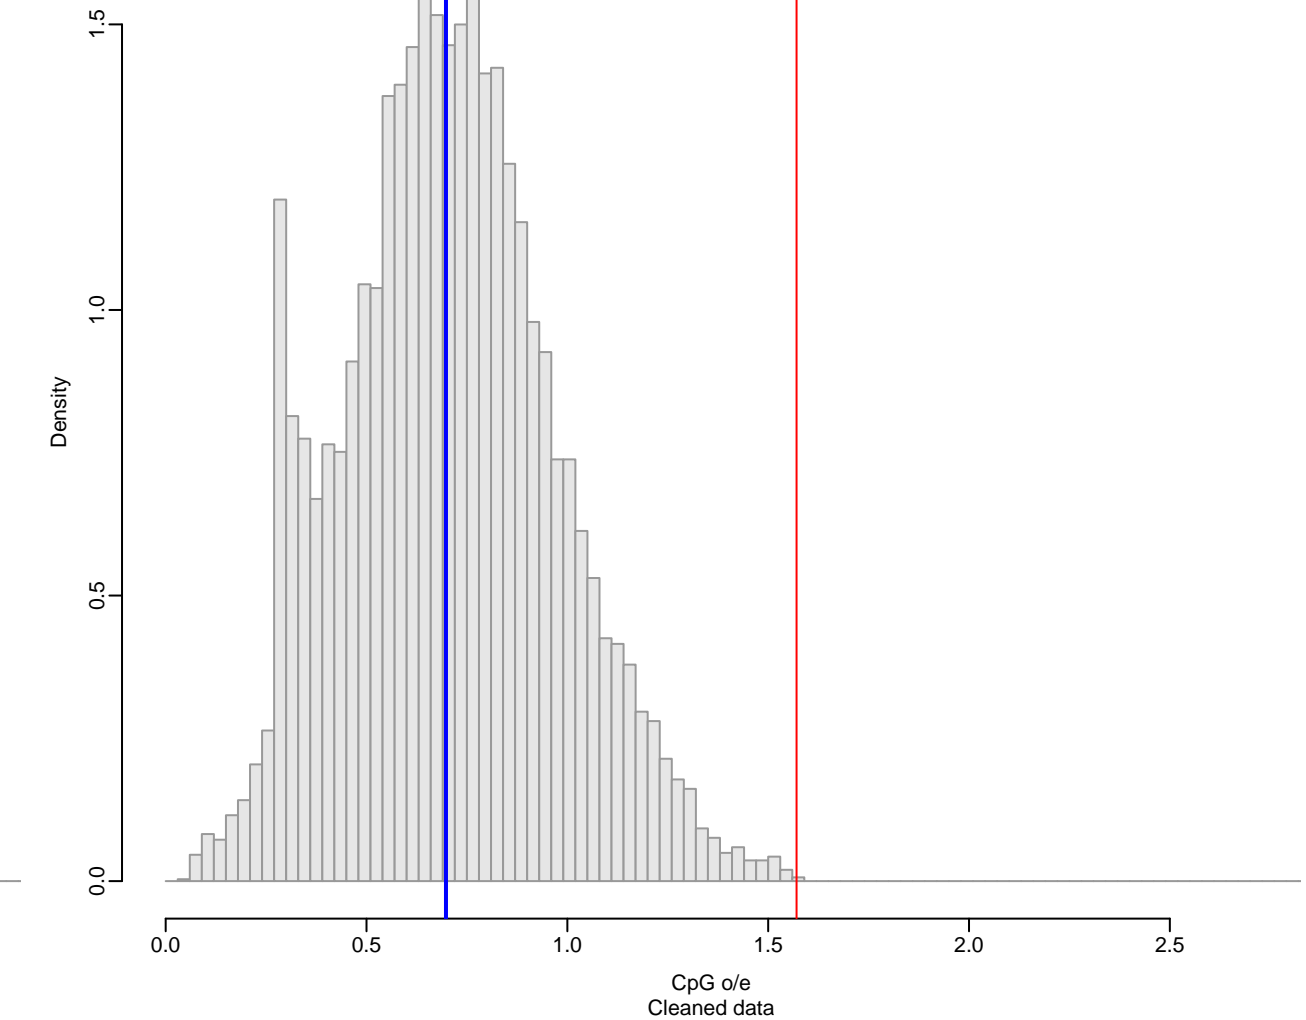

Zostera\_noltii

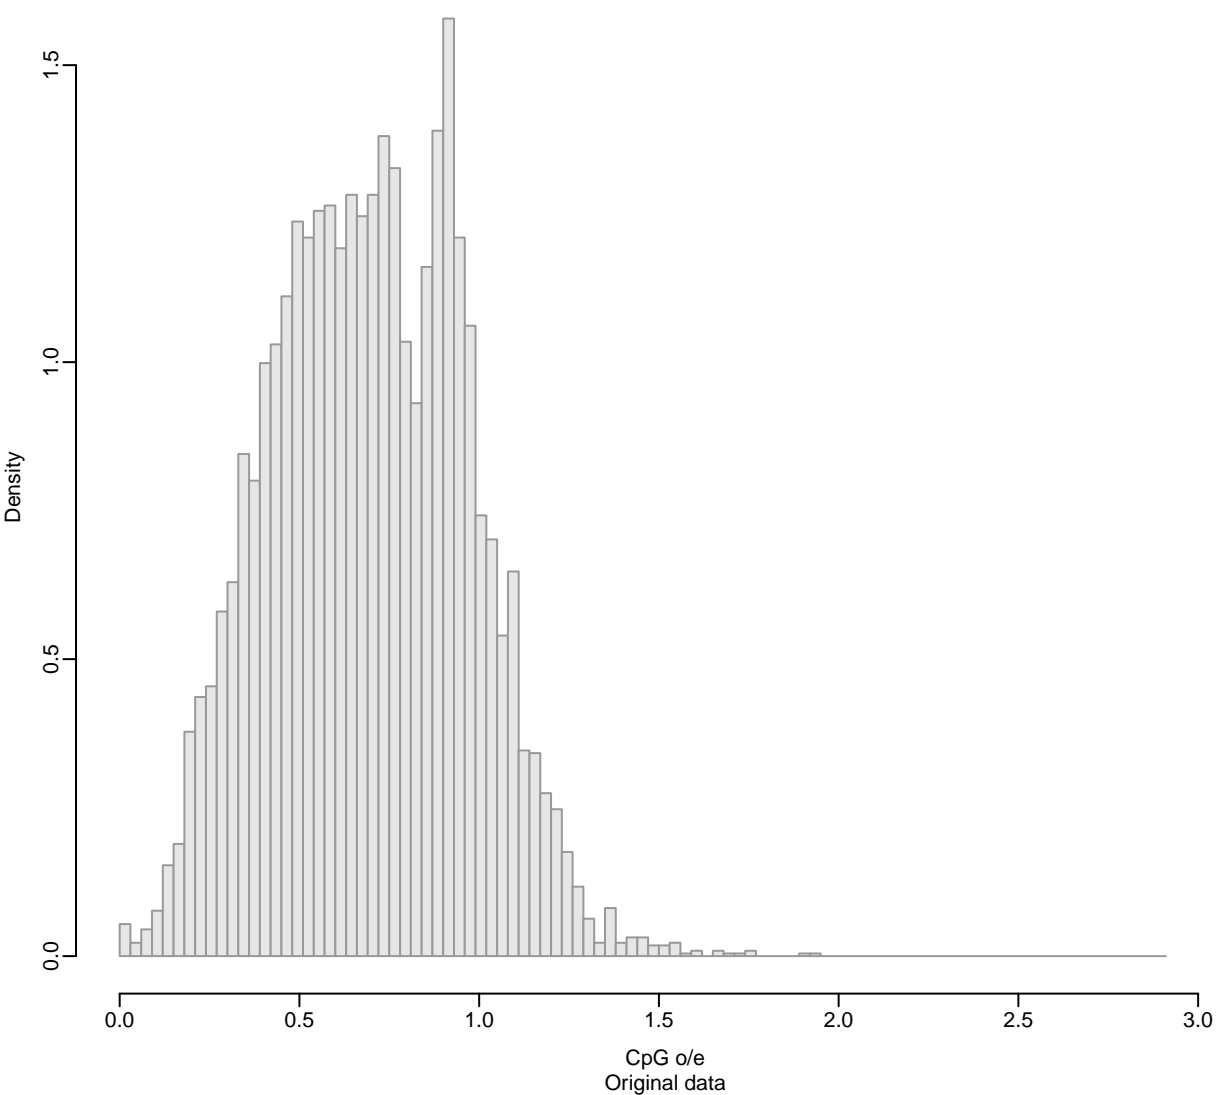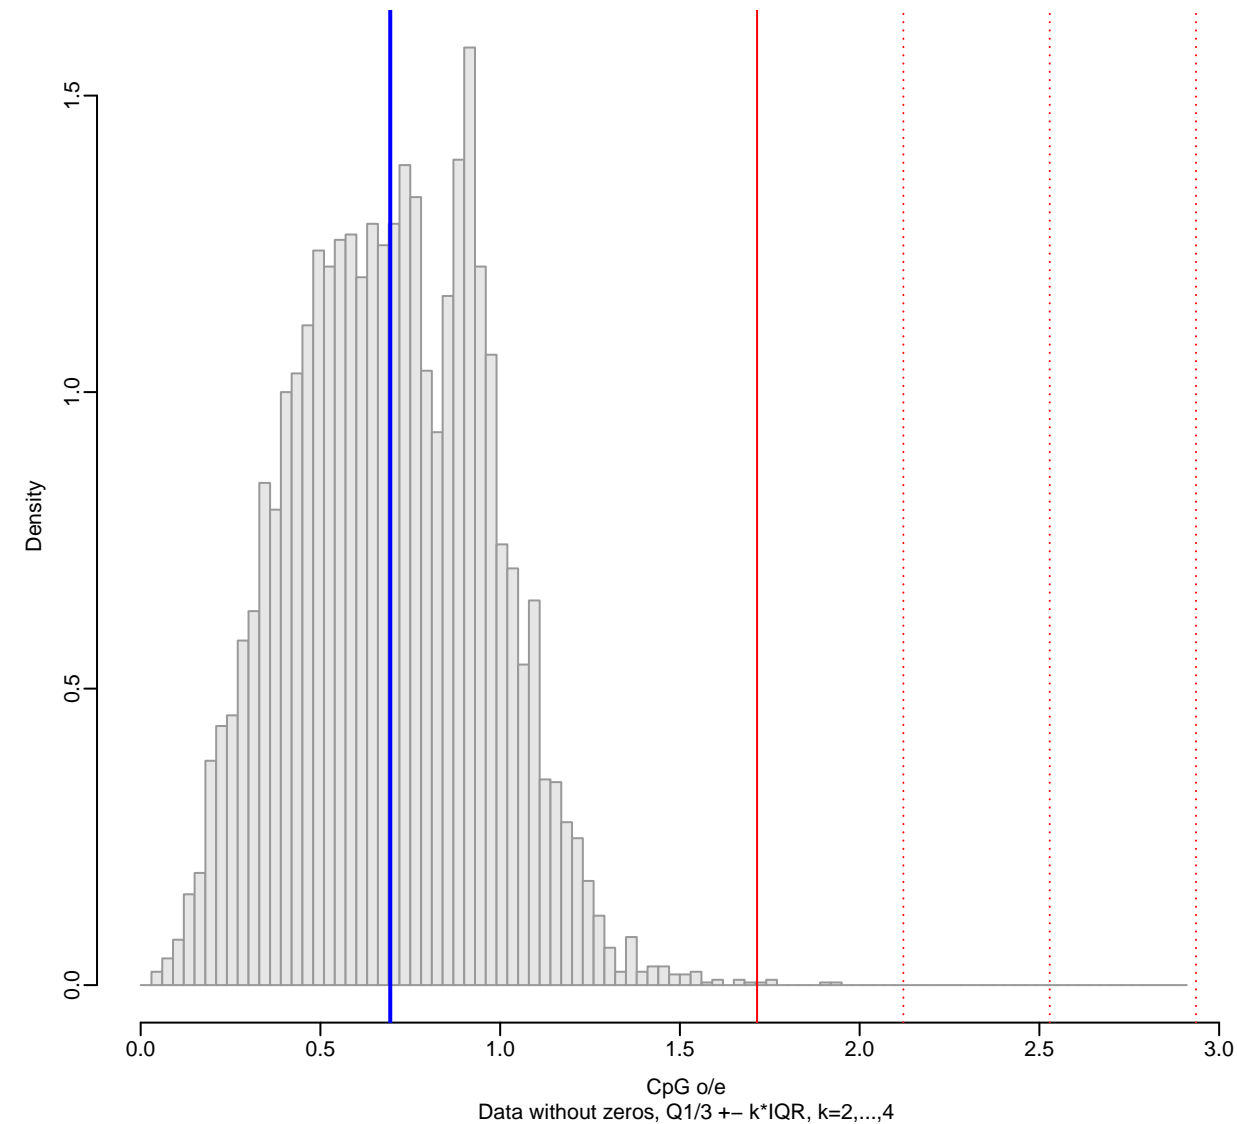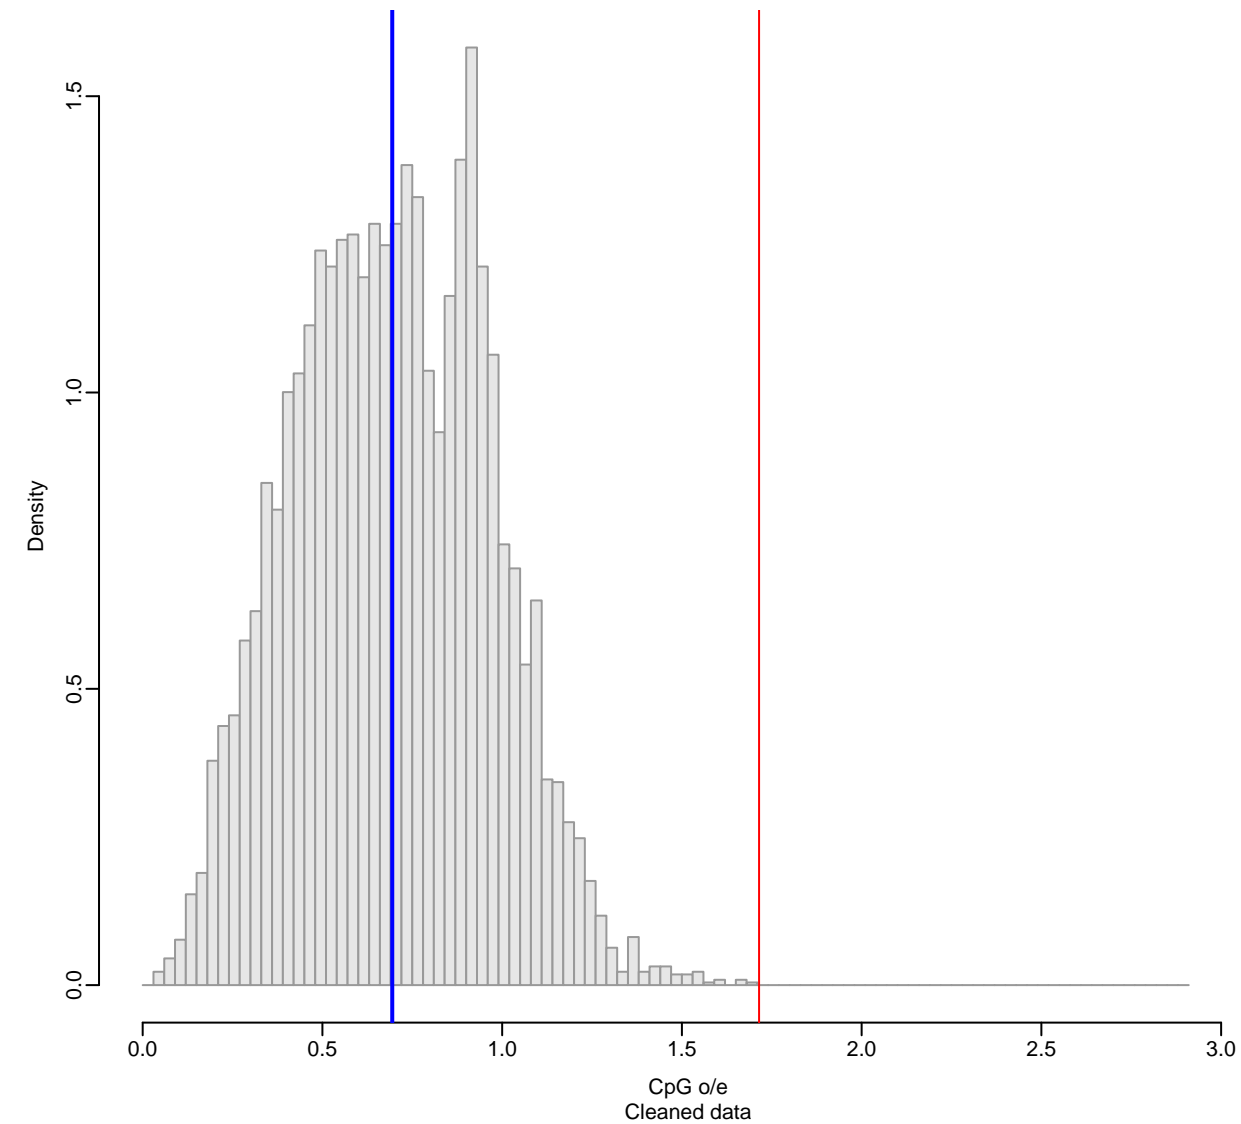

Supplement: 12859_2018_2115_MOESM1_ESM.pdf [file 12859_2018_2115_MOESM1_ESM.pdf]
