# Supplementary material for: Notos - a galaxy tool to analyze CpN observed expected ratios for inferring DNA methylation types
Source: PubMed Central journal article supplement (PMC5870242; doi:10.1186/s12859-018-2115-4), 2018-03-27

# Acanthoscurria\_gomesiana

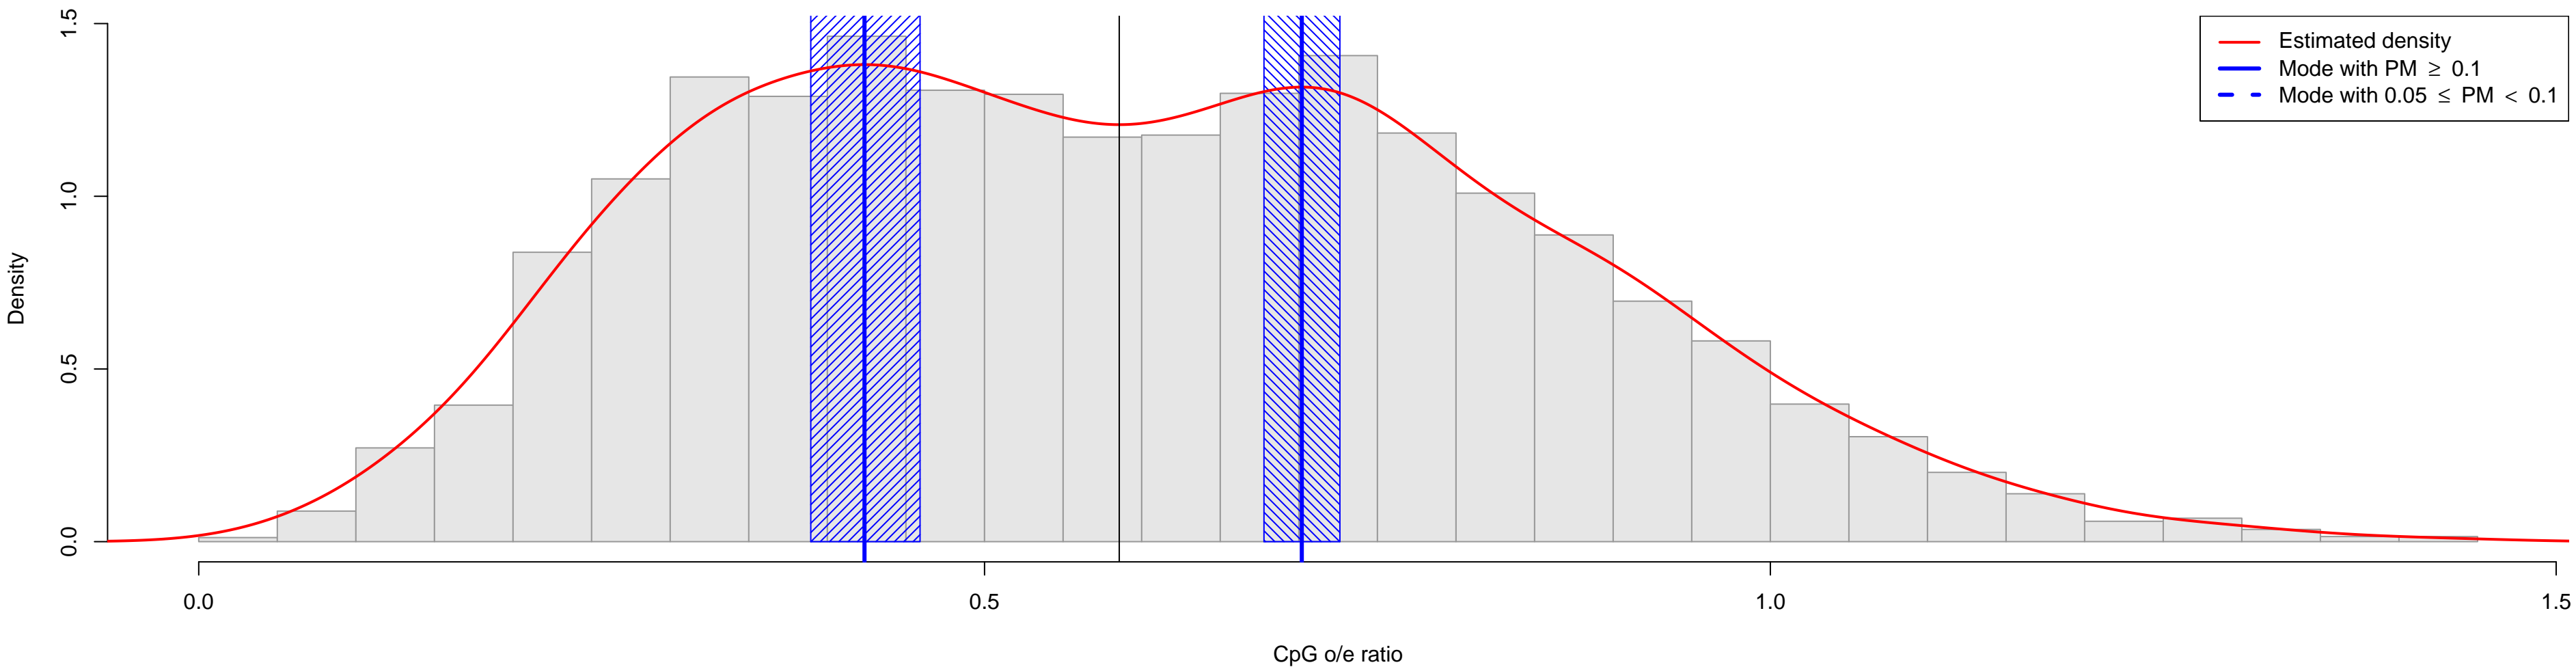

# Acerentomon\_franzi

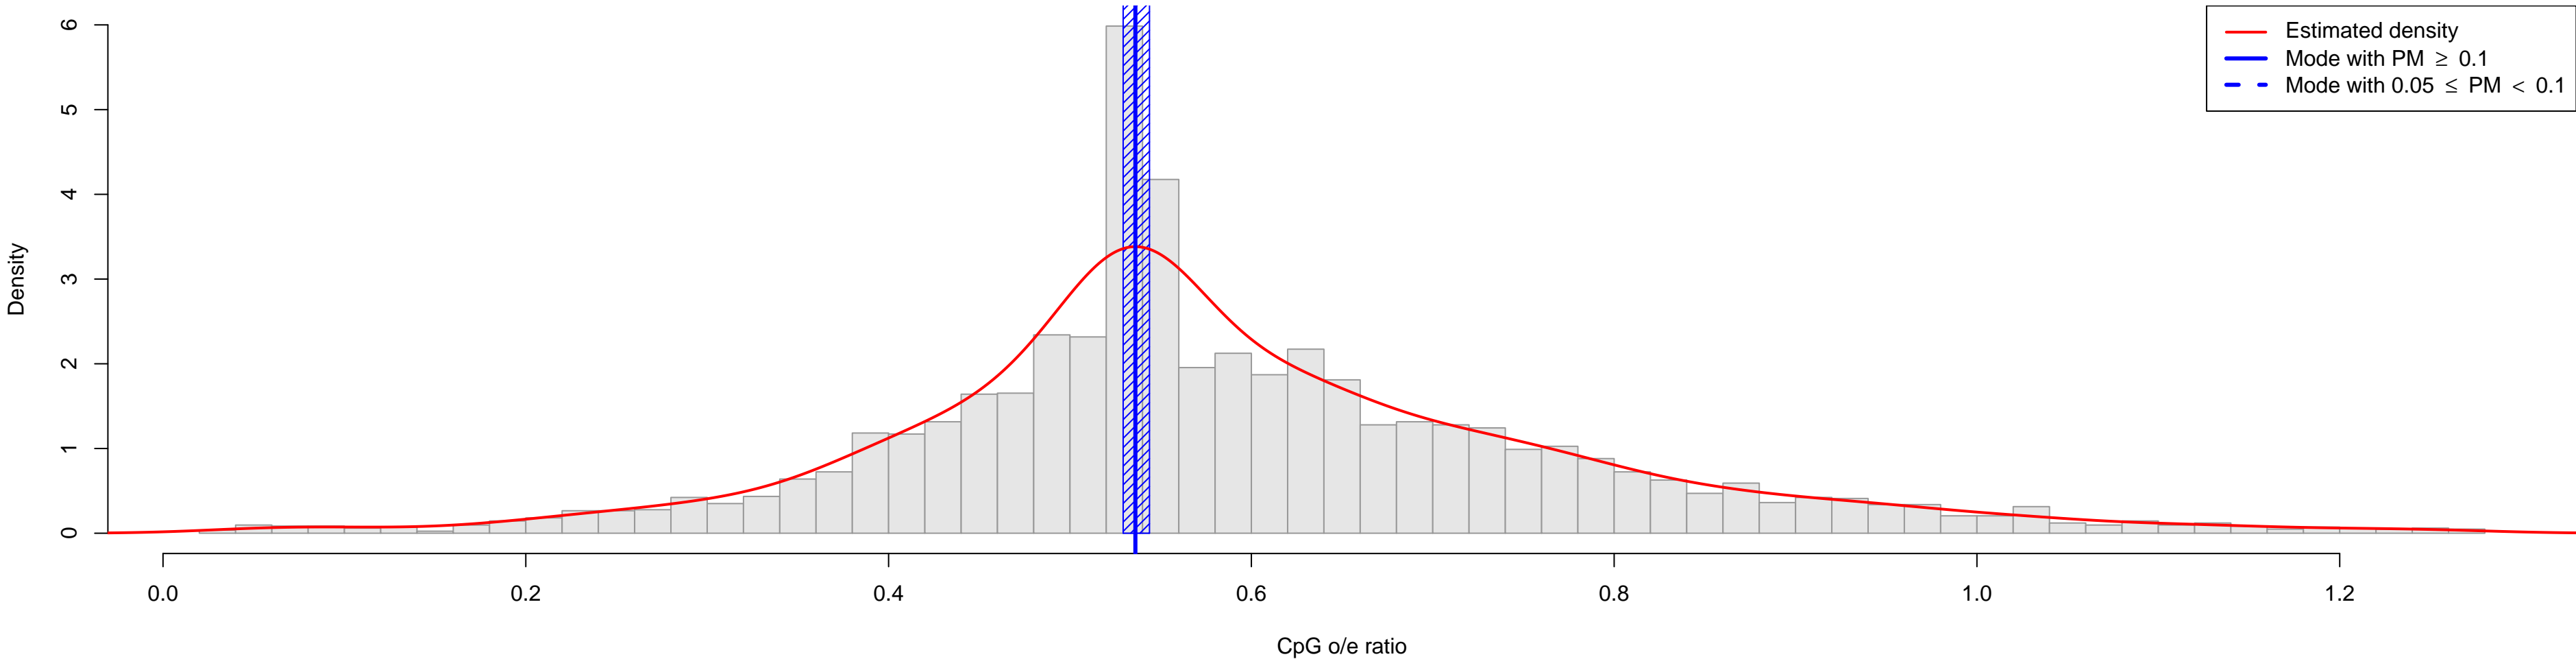

# Acetabularia\_acetabulum

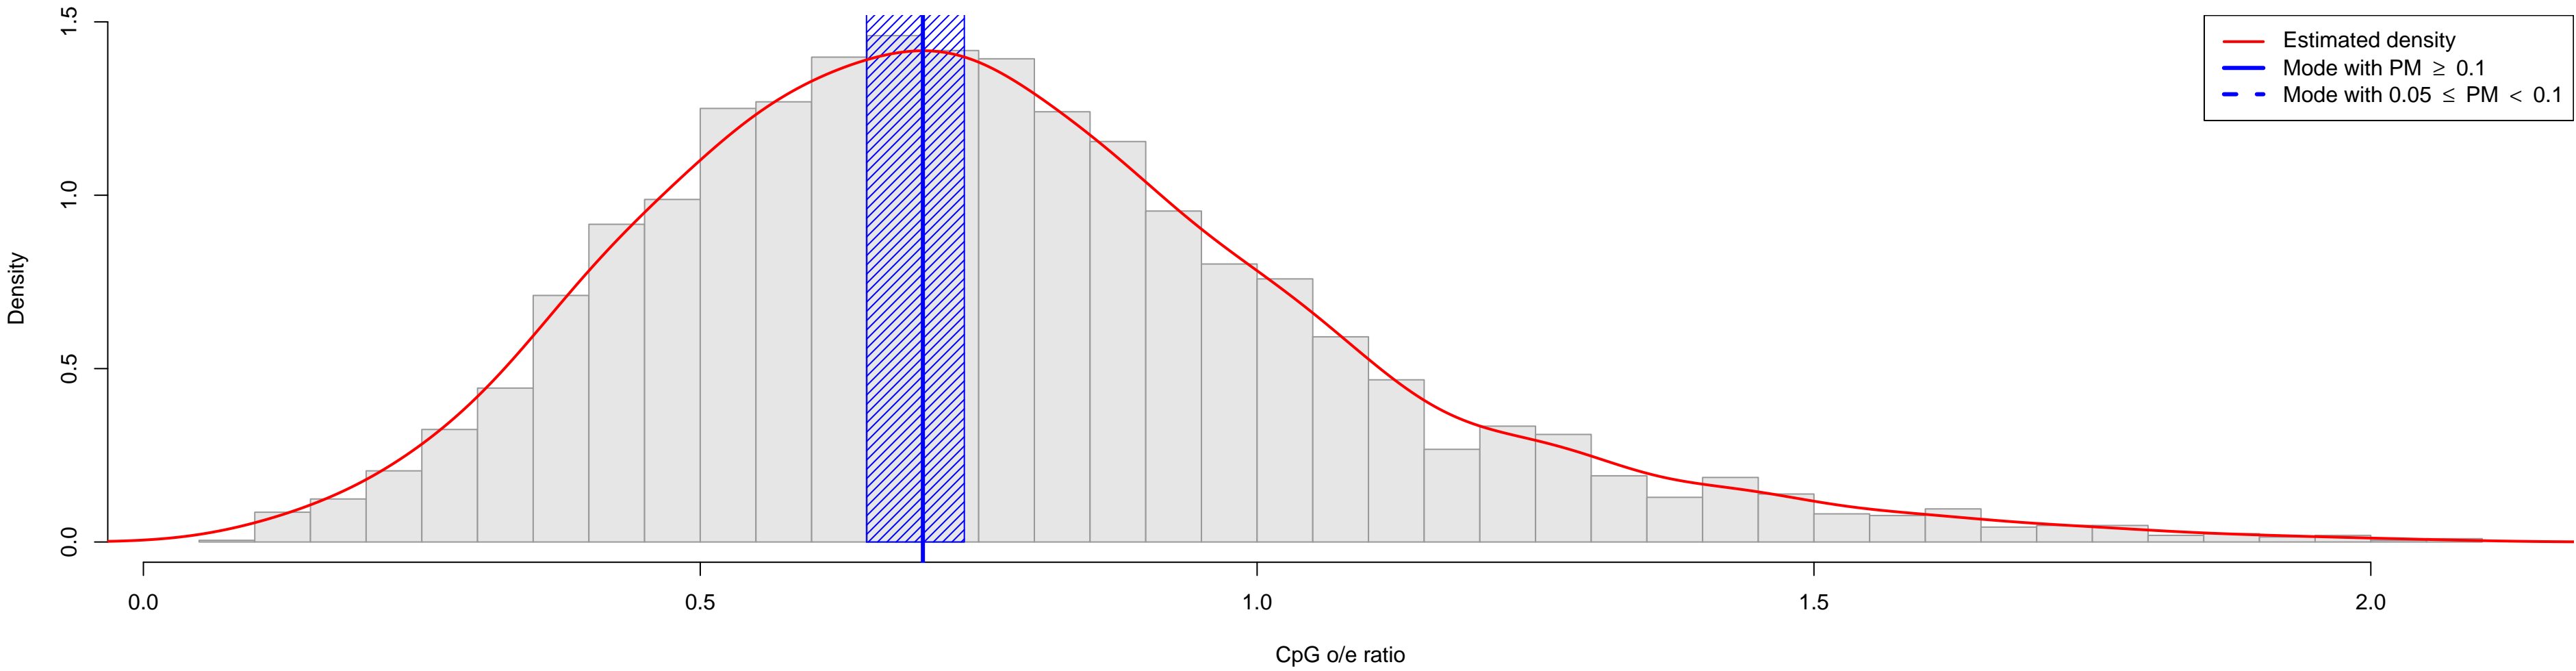

# Acipenser\_sinensis

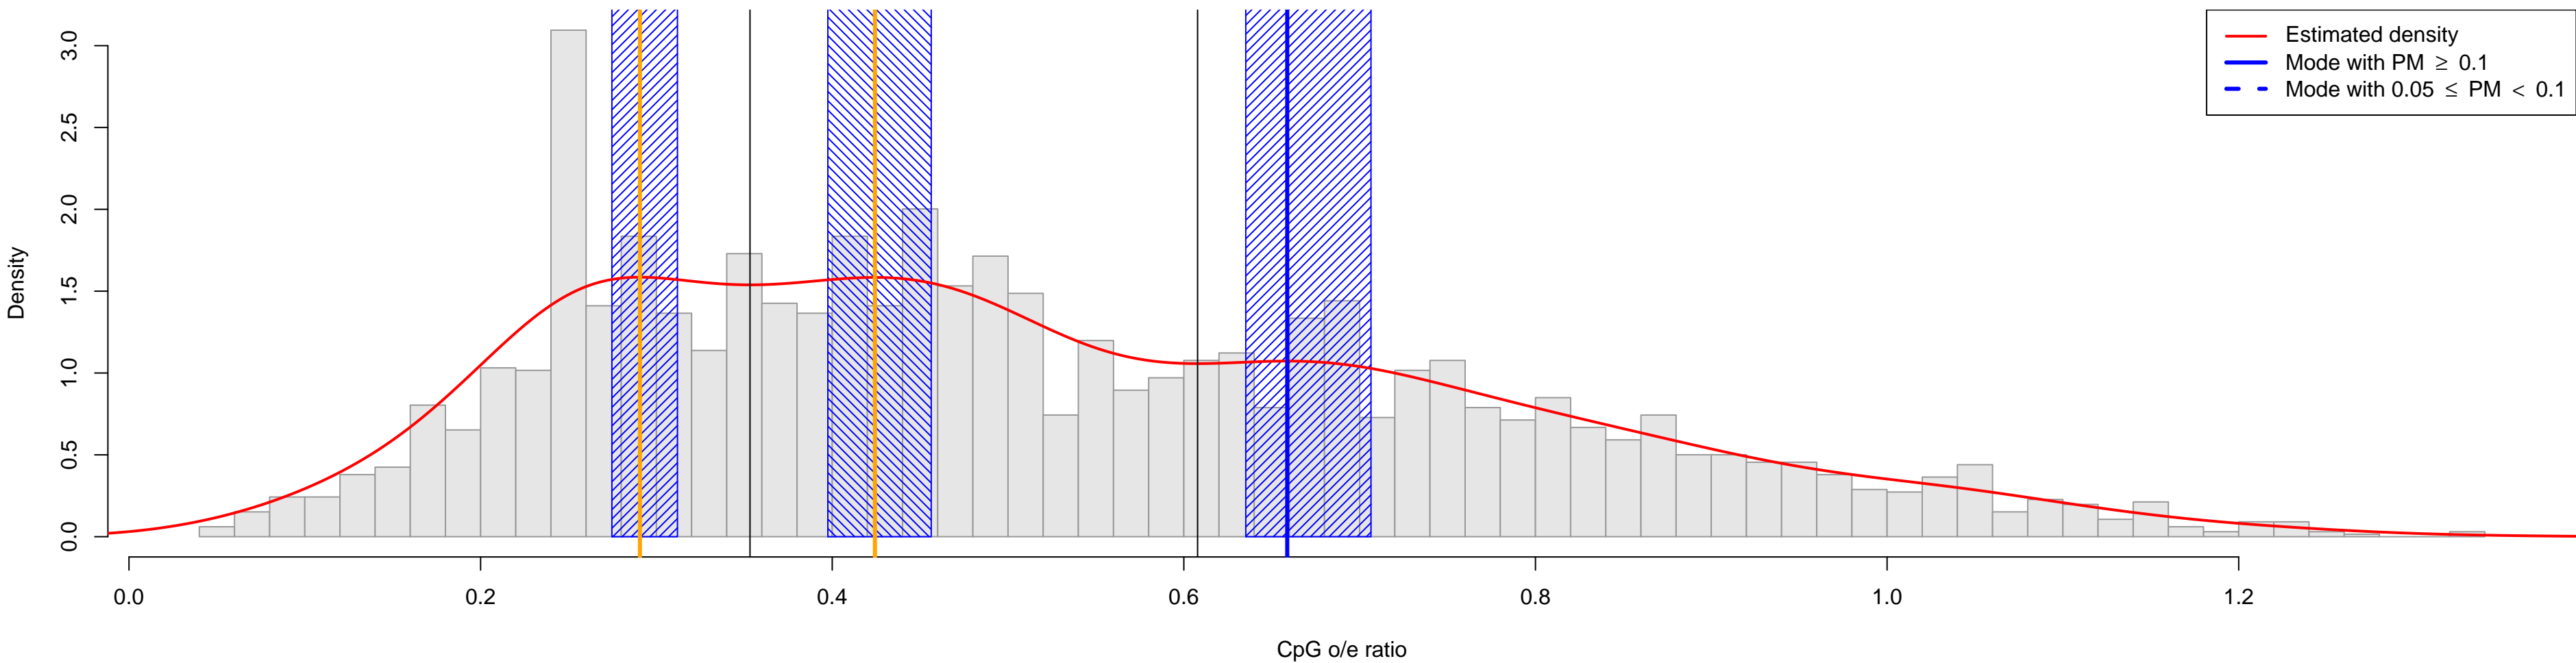

# Acipenser\_transmontanus

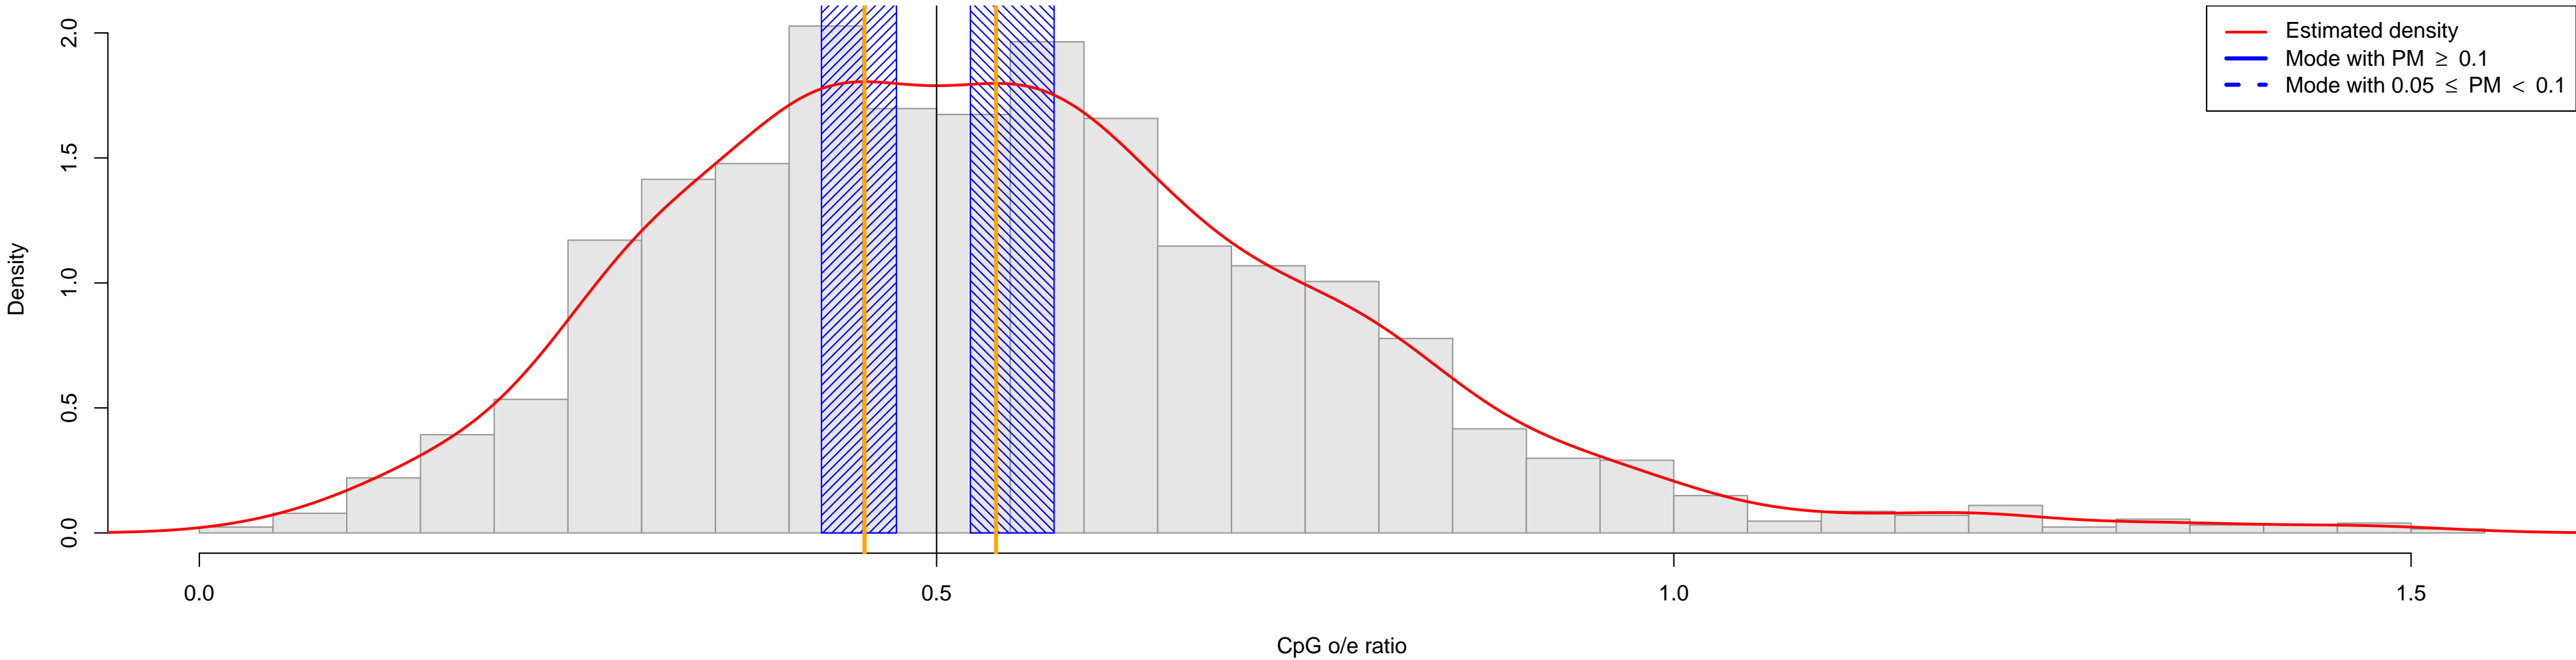

# Acropora\_millepora

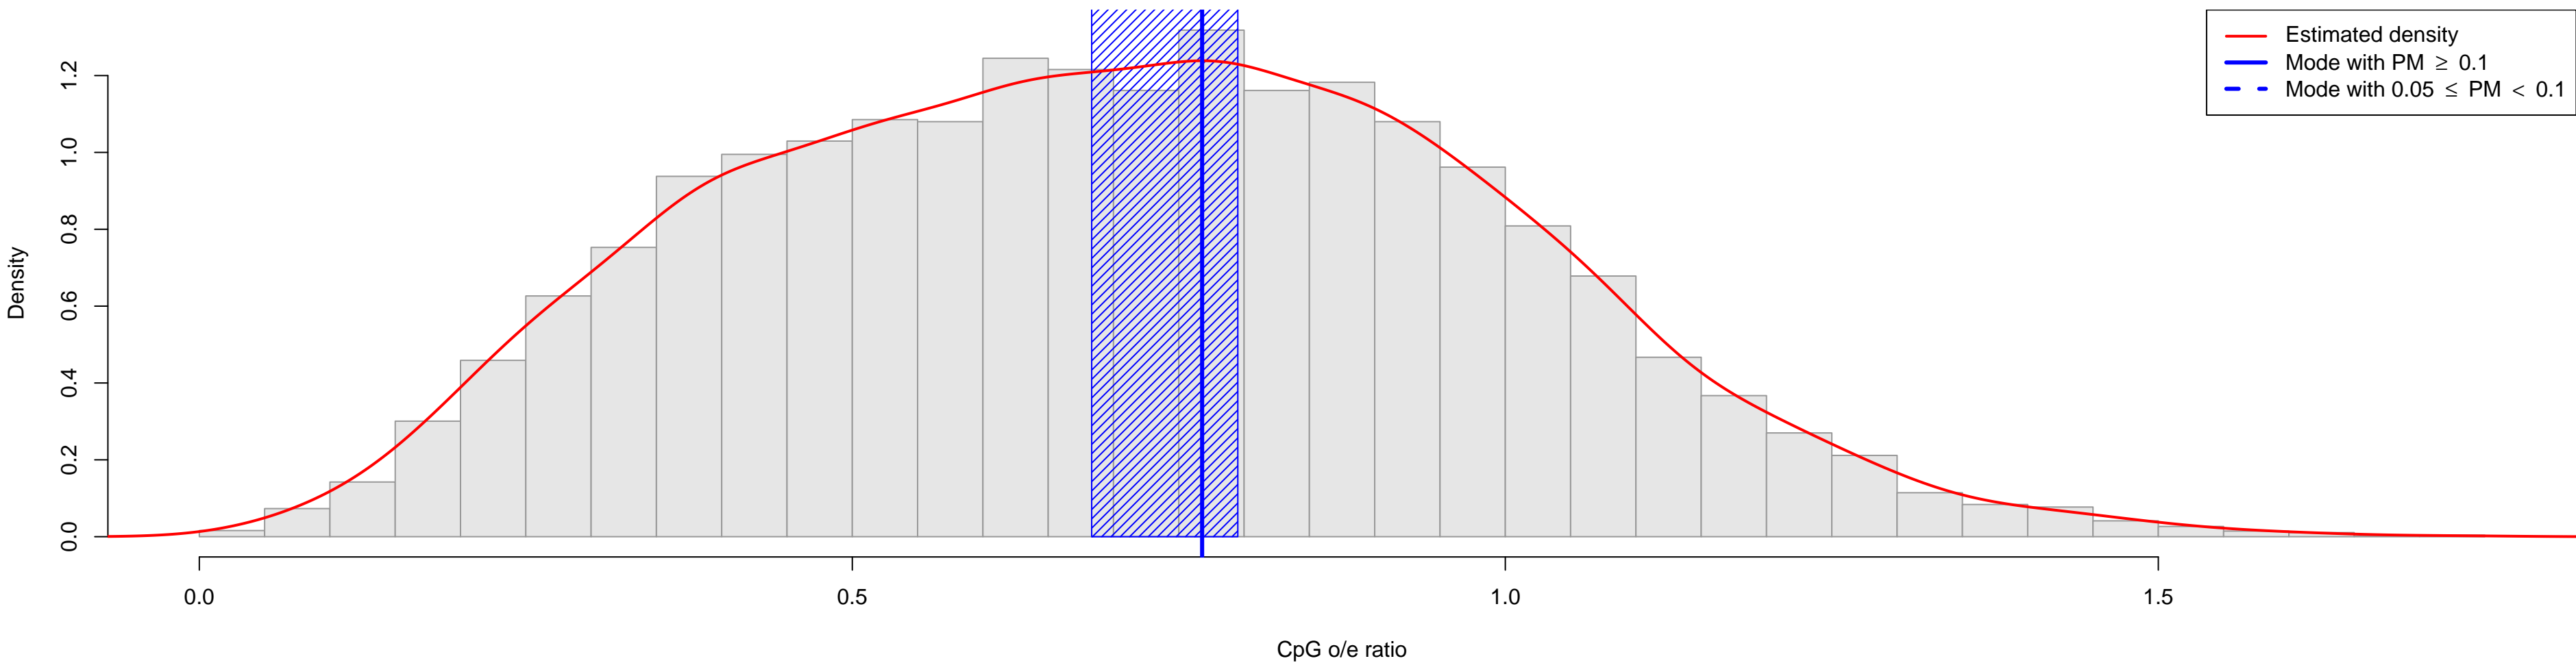

# Acropora\_palmata

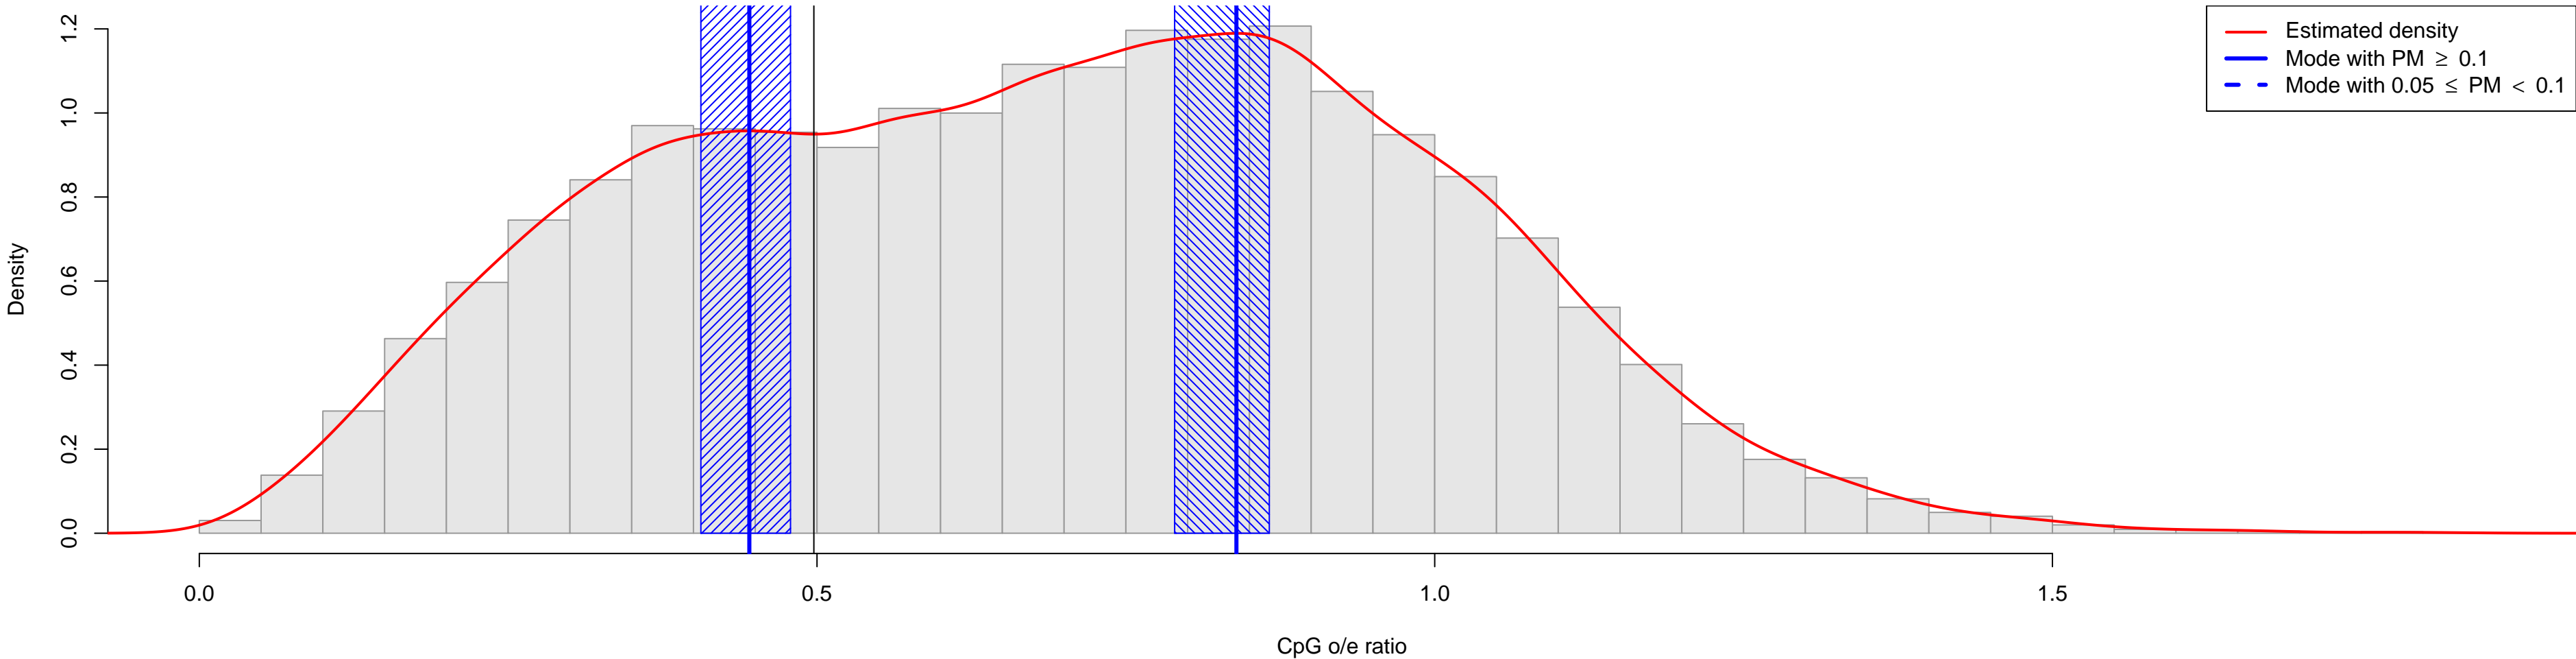

# Actinidia\_arguta

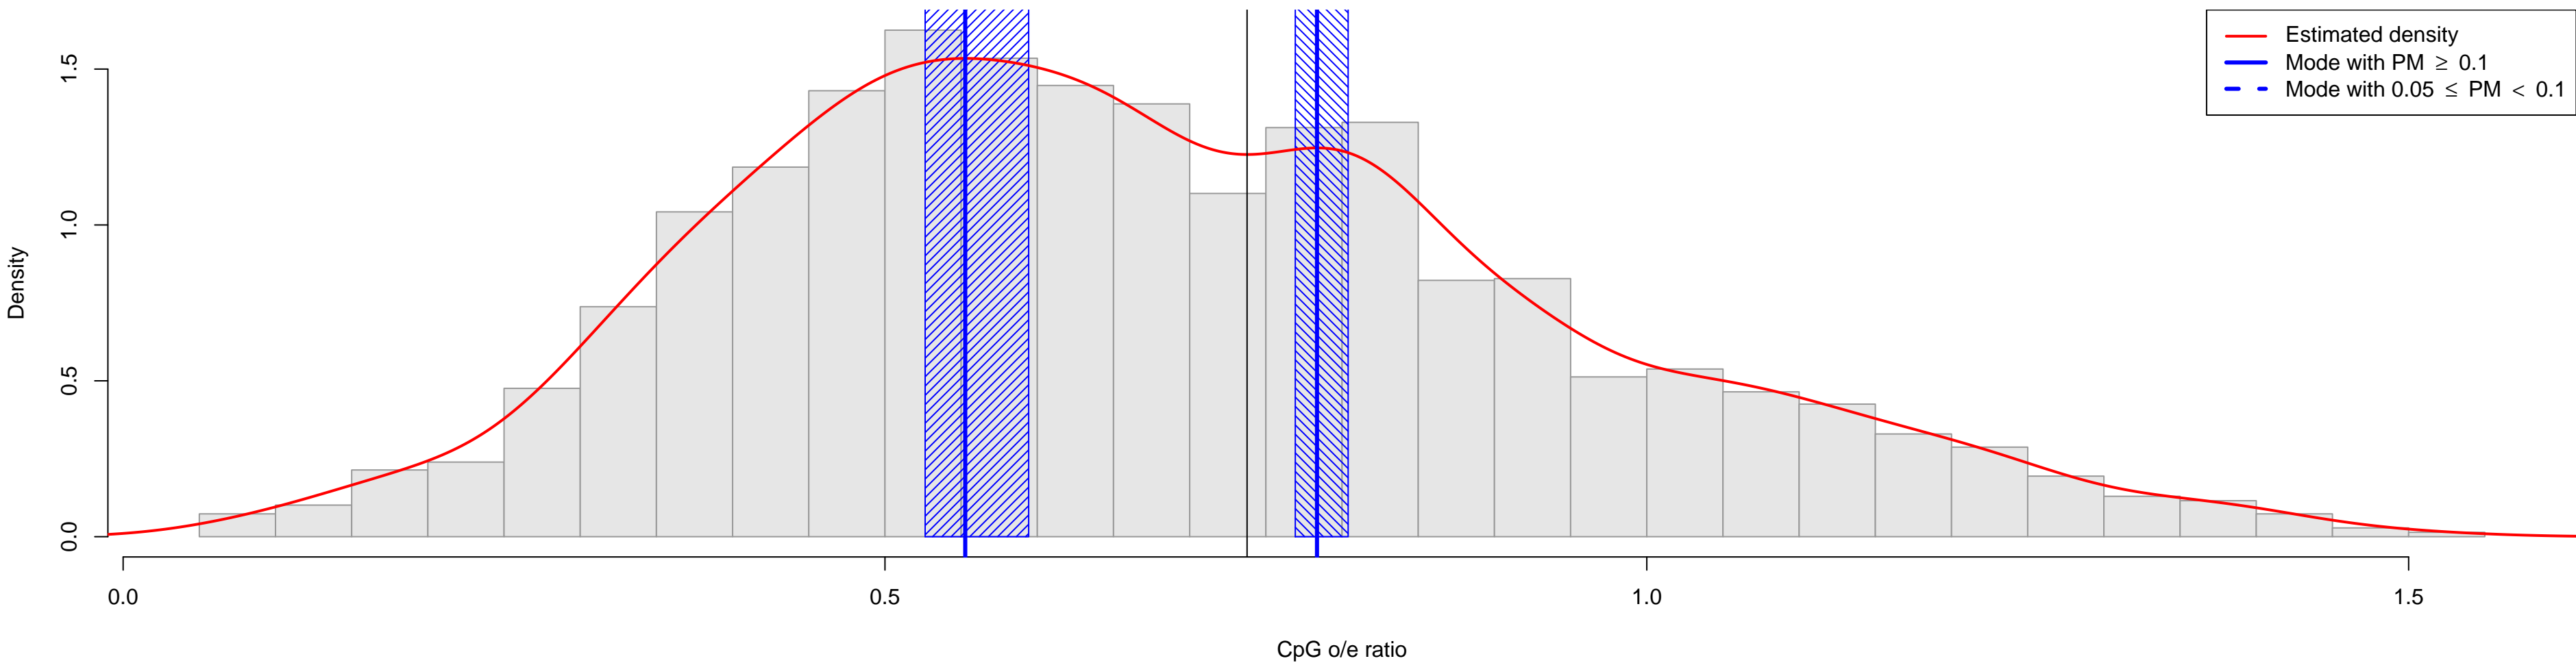



# Actinidia\_chinensis

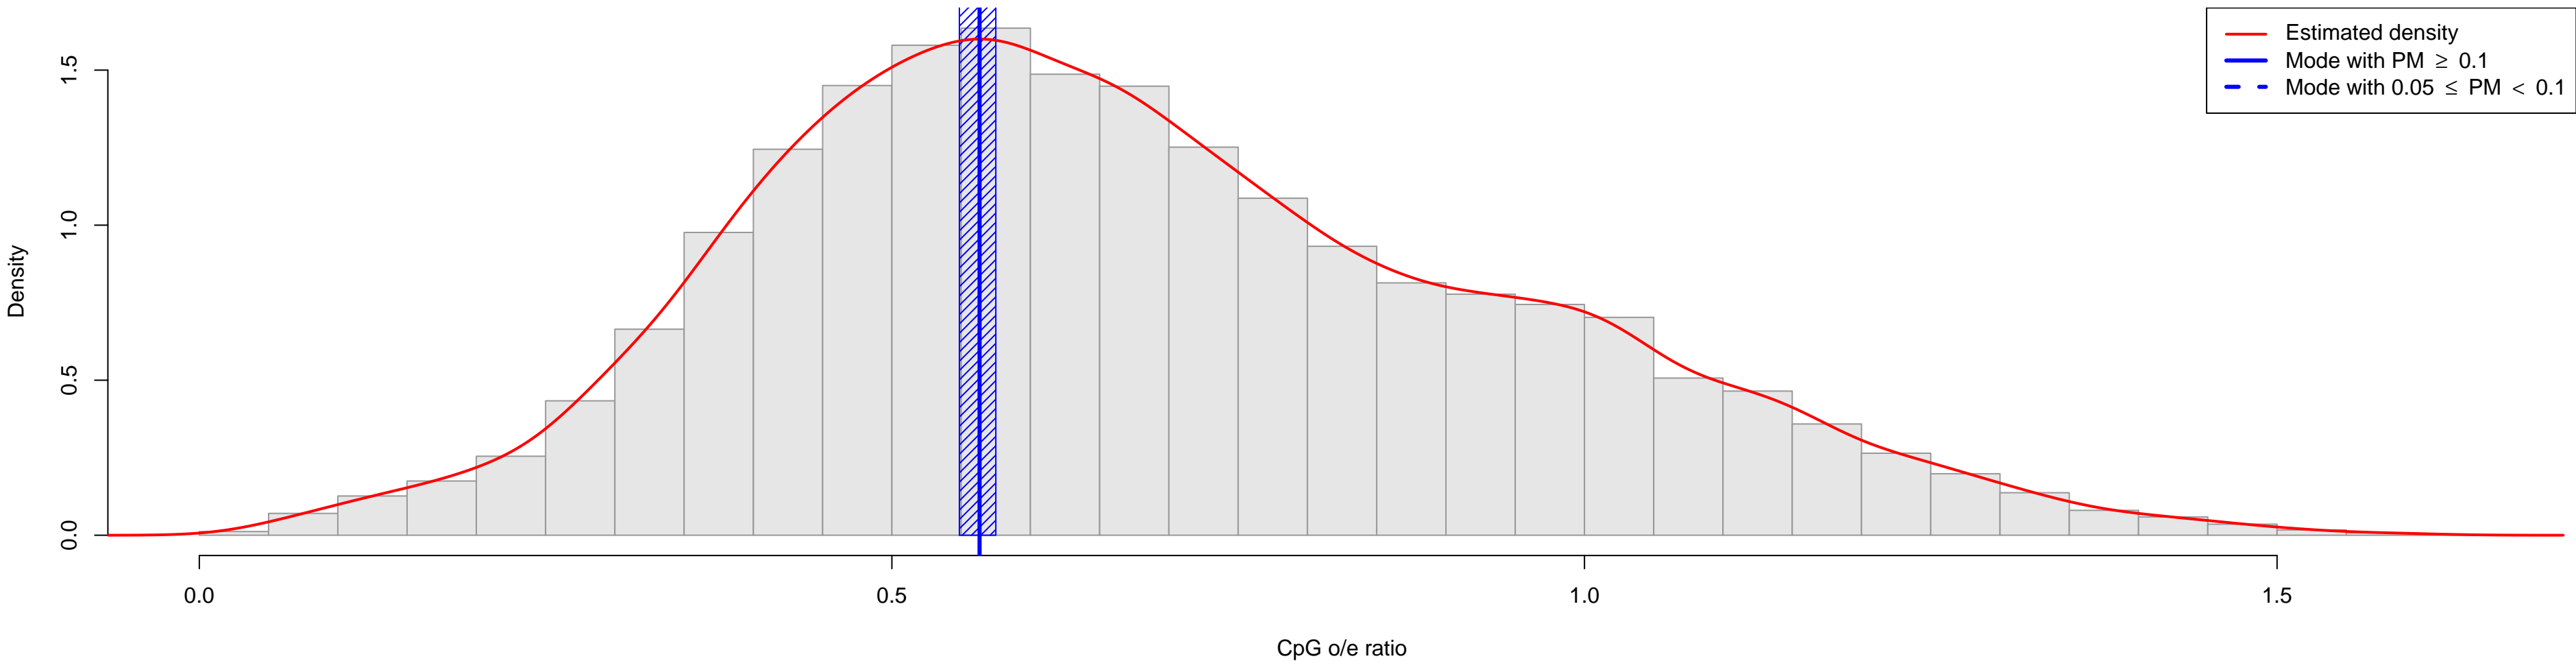

# Actinidia\_deliciosa

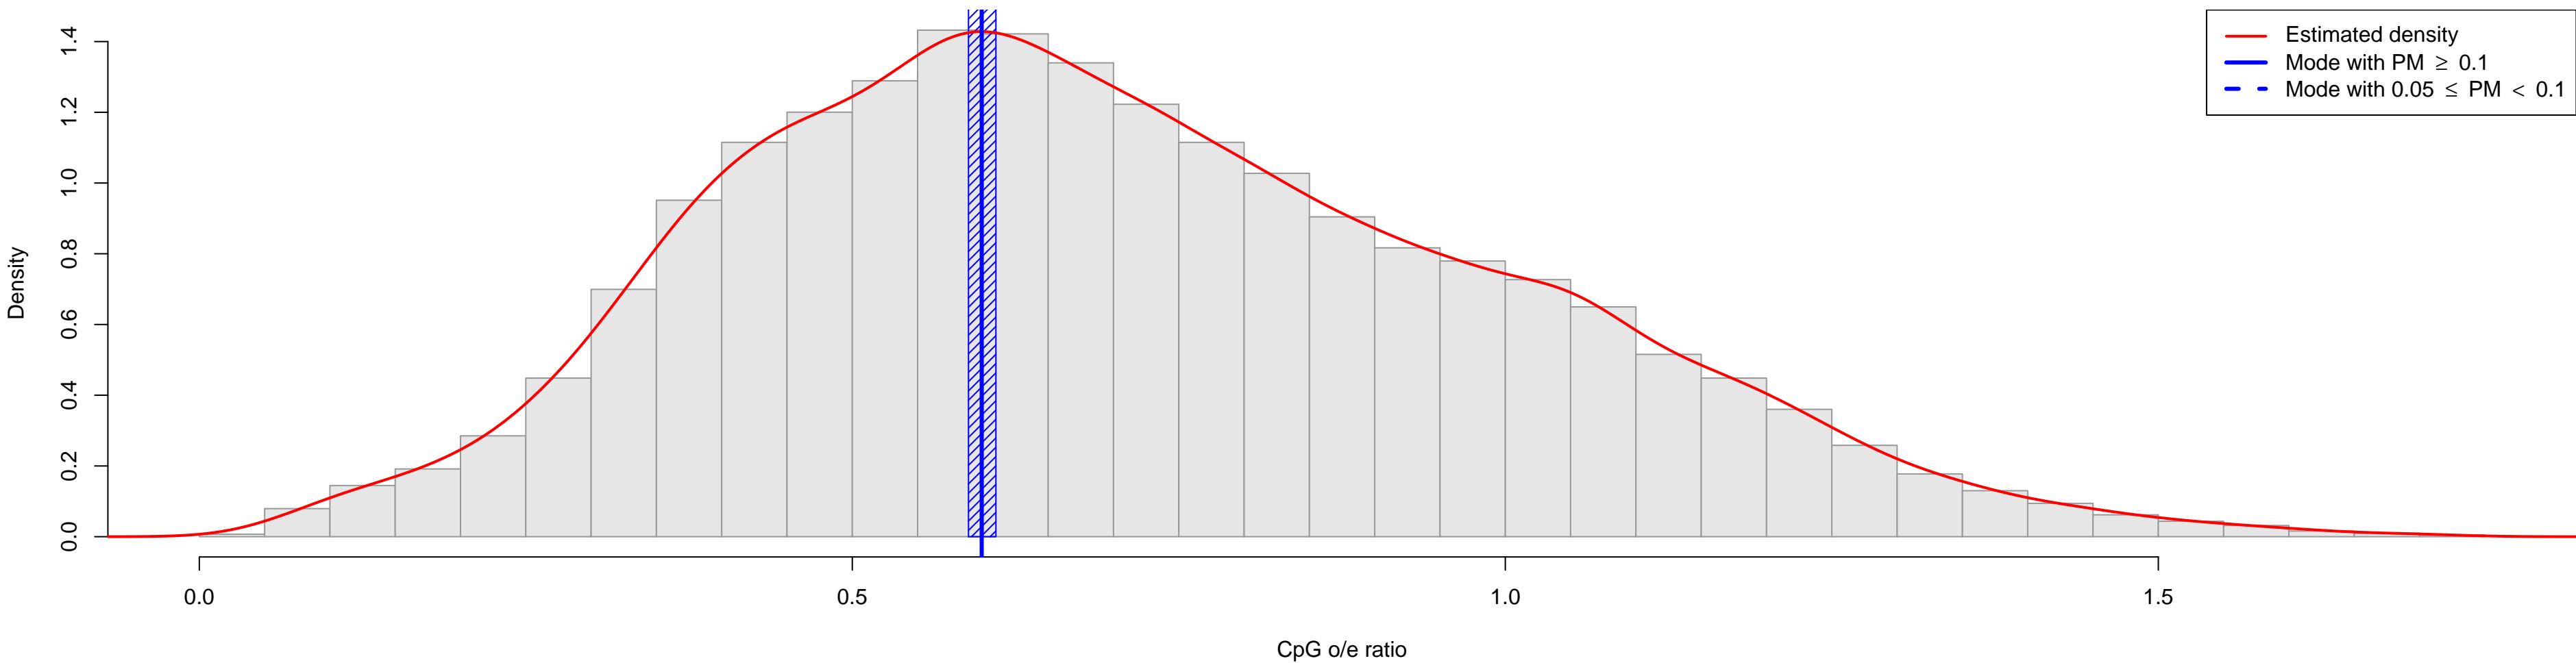

# Actinidia\_eriantha

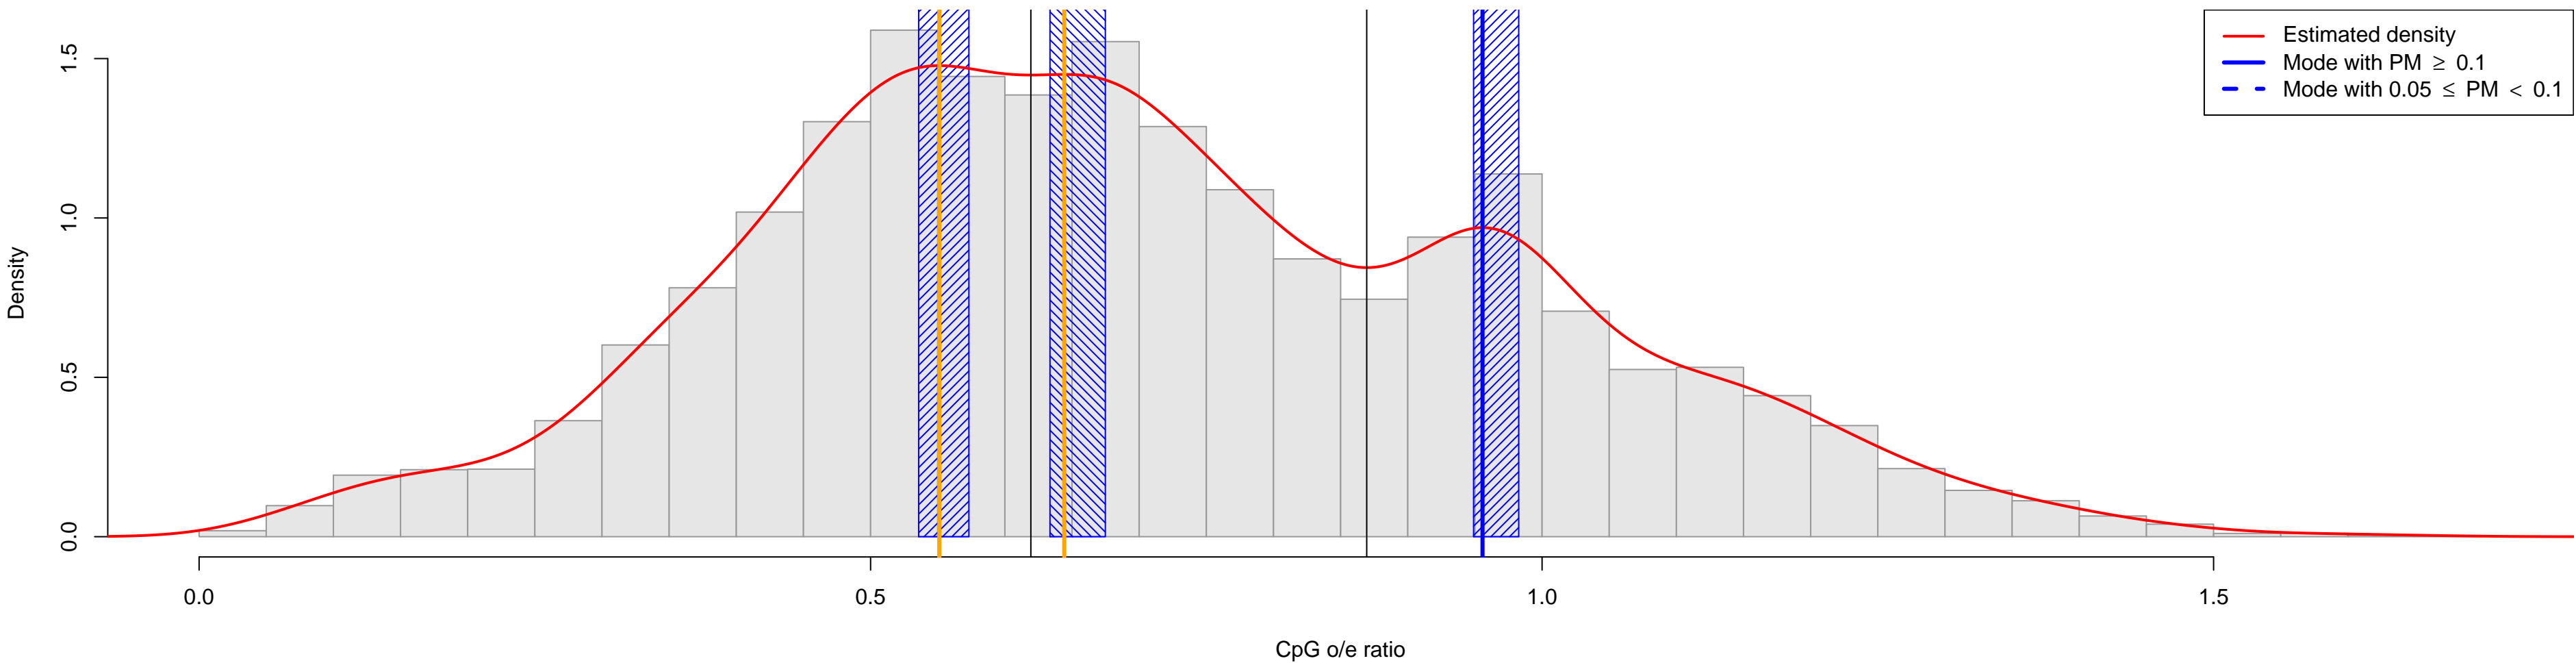

# Actinidia\_hemsleyana

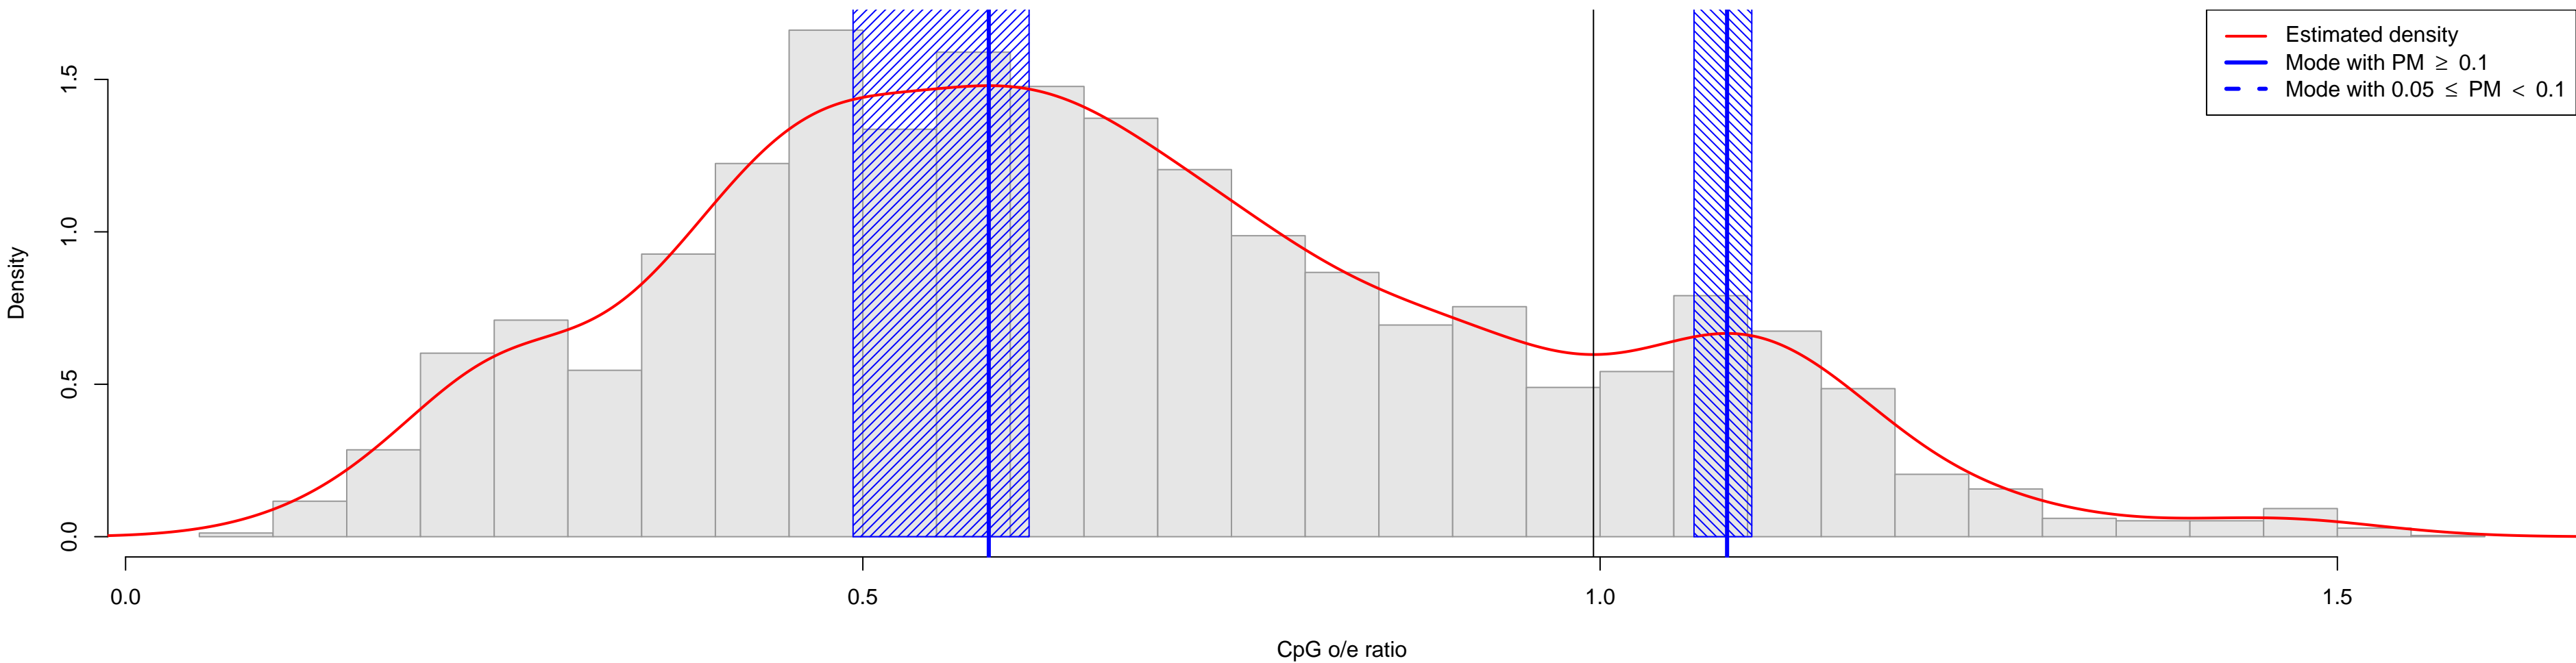

# Actinidia\_polygama

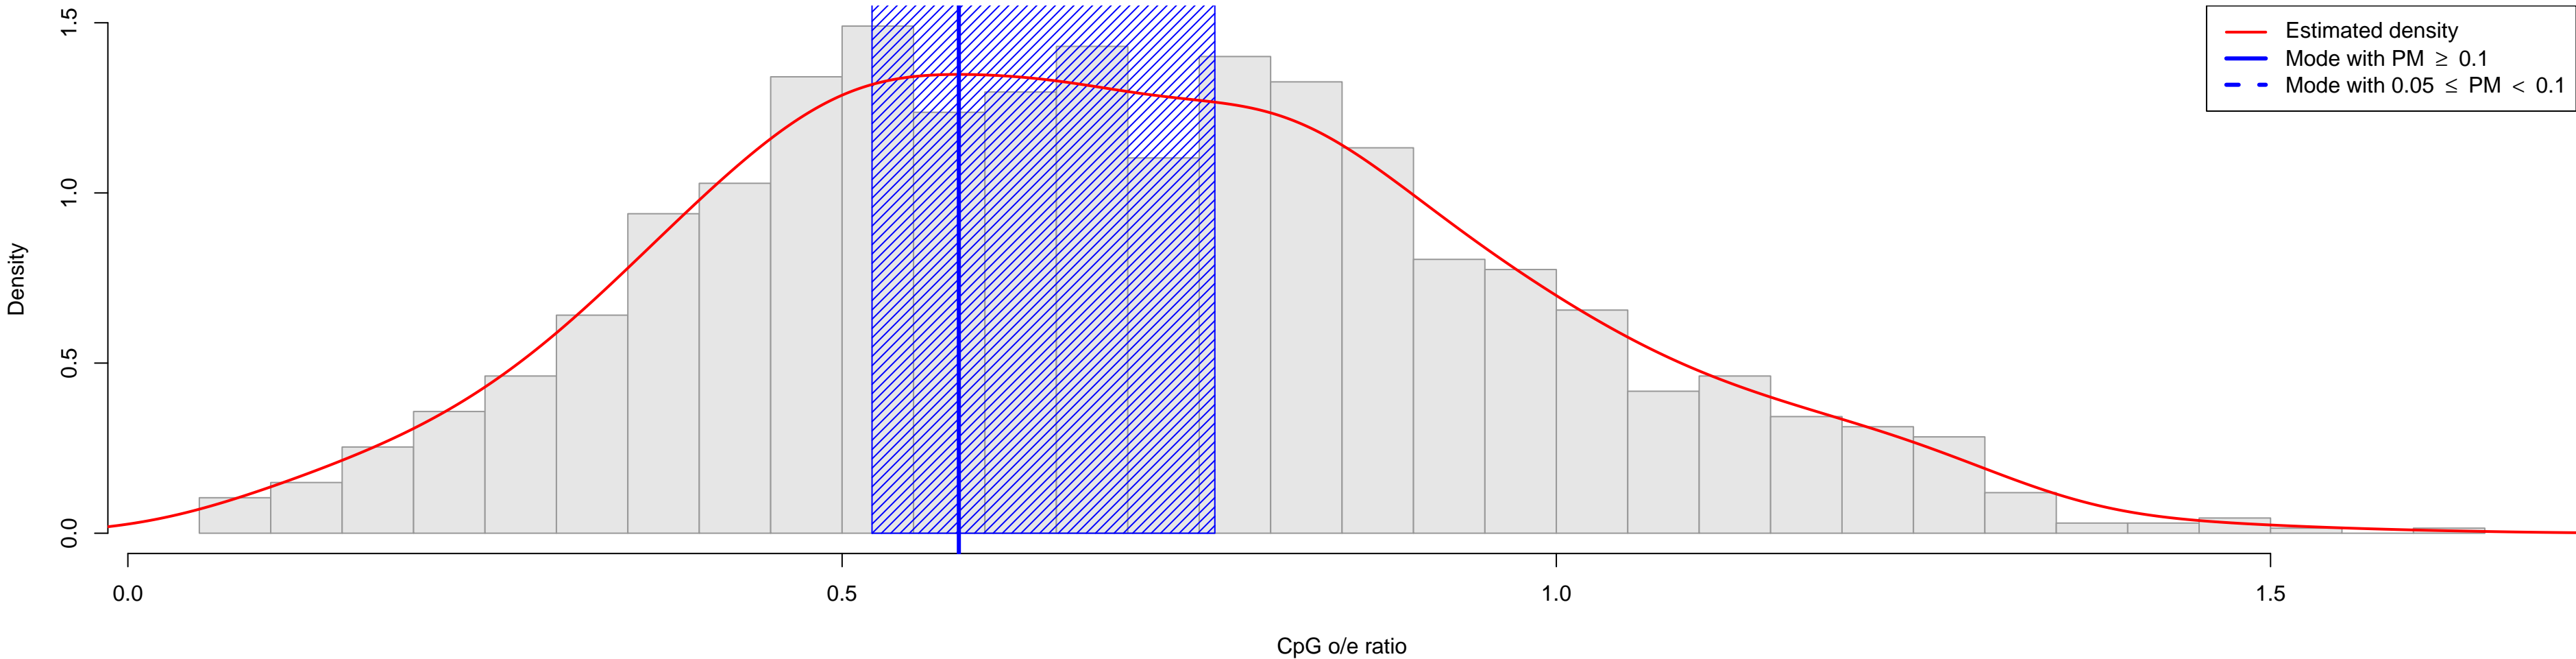

# Actinidia\_setosa

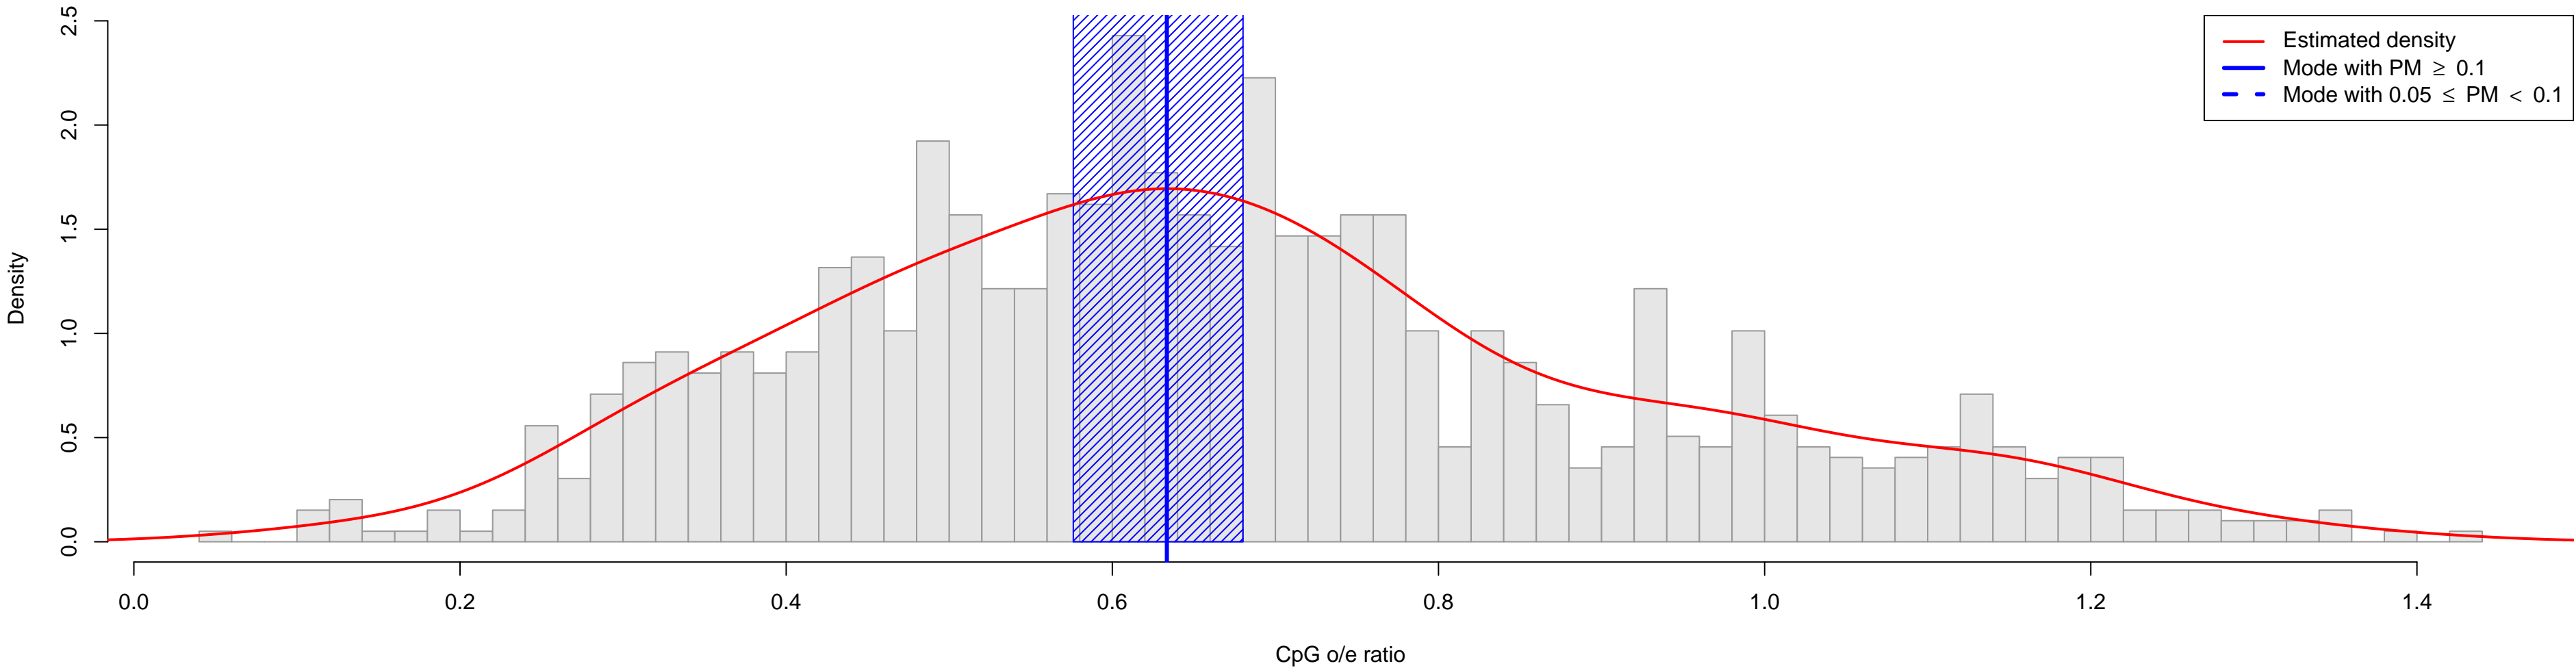

# Acyrrhosiphon\_kondoii

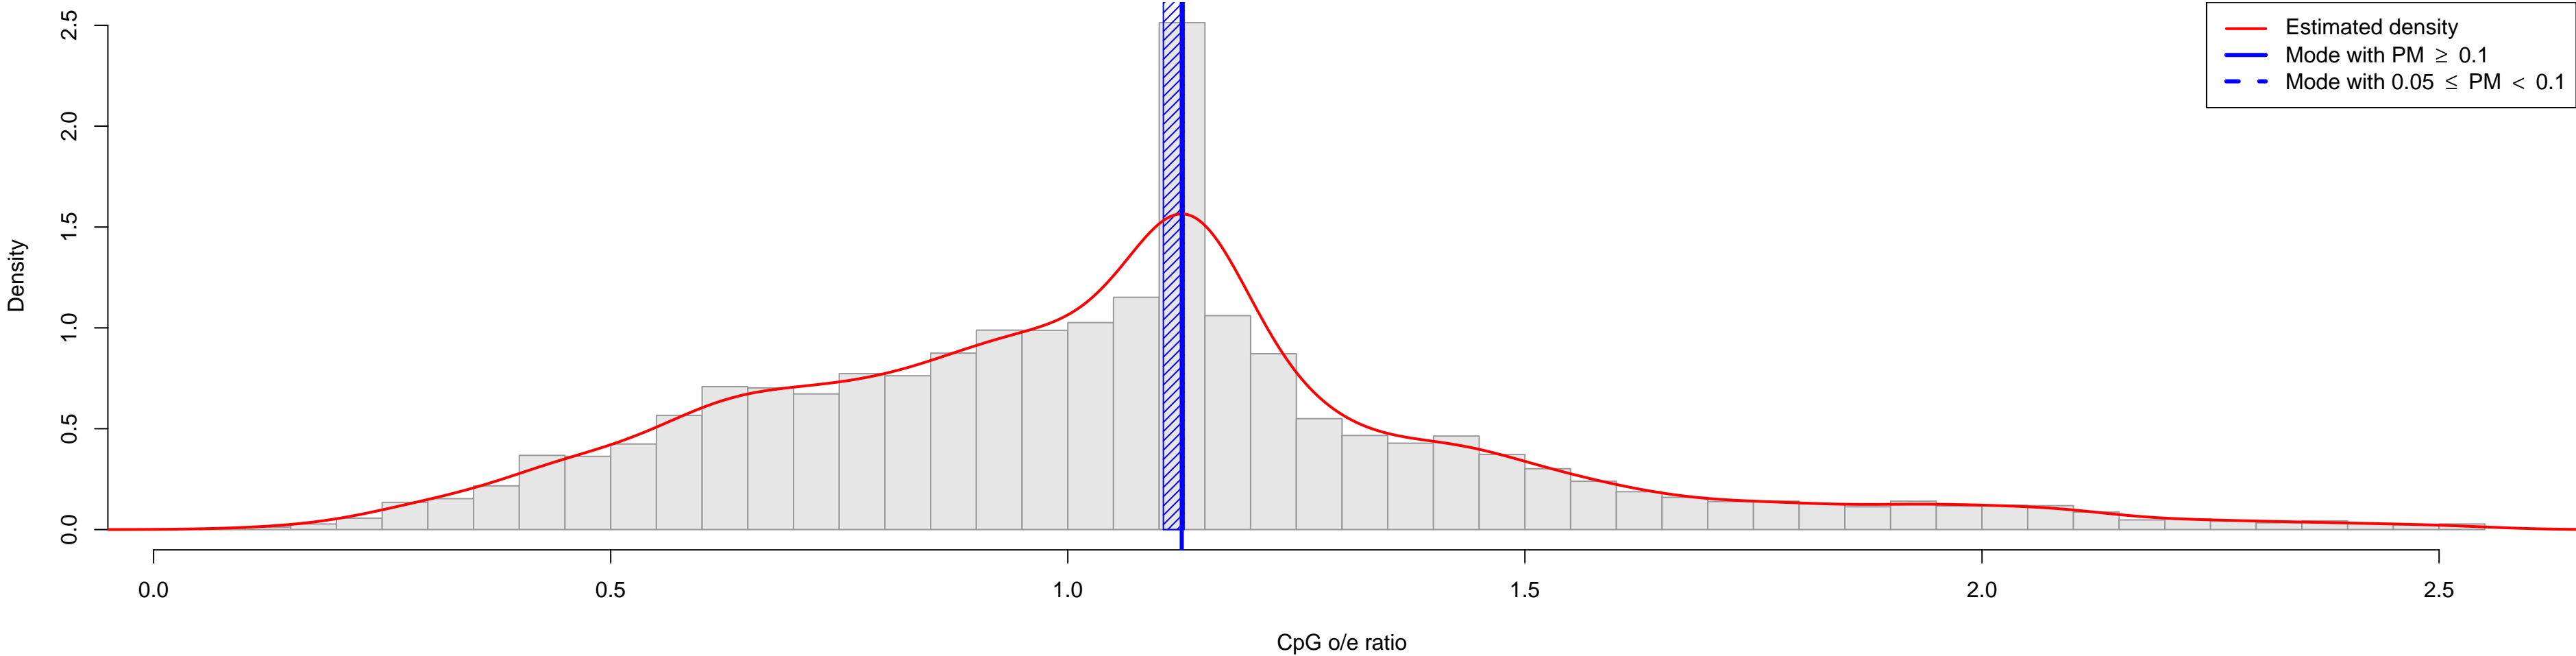

# Acyrtosiphon\_pisum

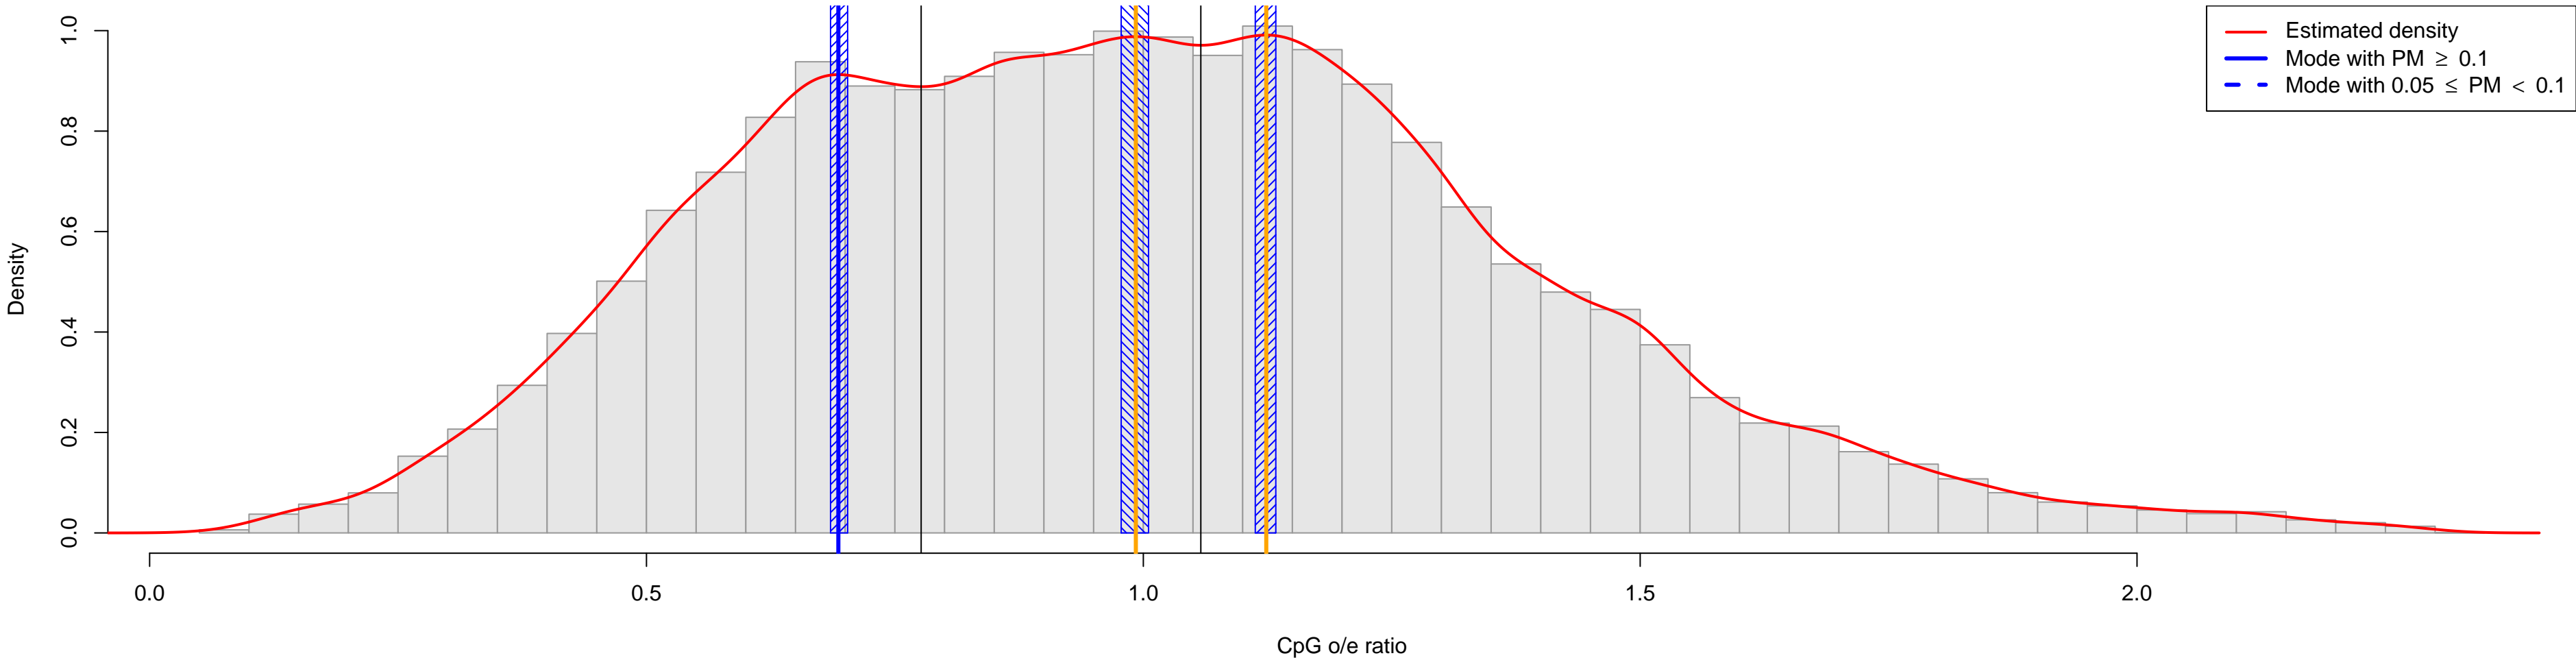



# Adelphocoris\_lineolatus

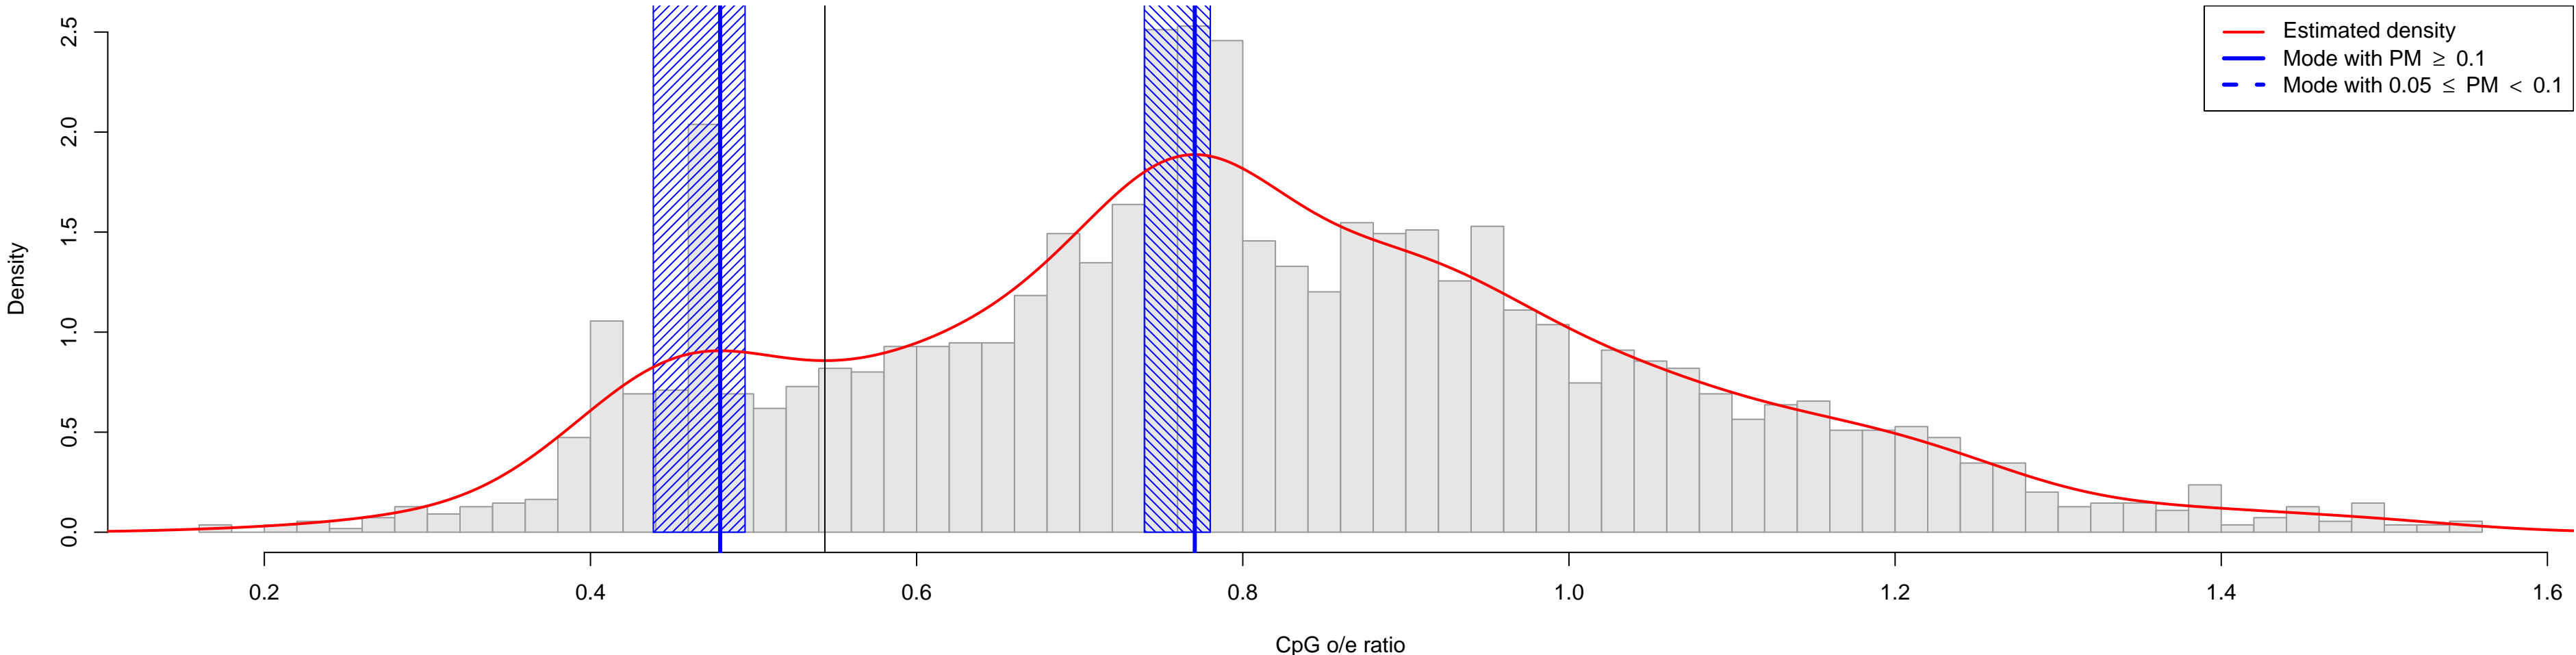

# Adonis\_aestivalis

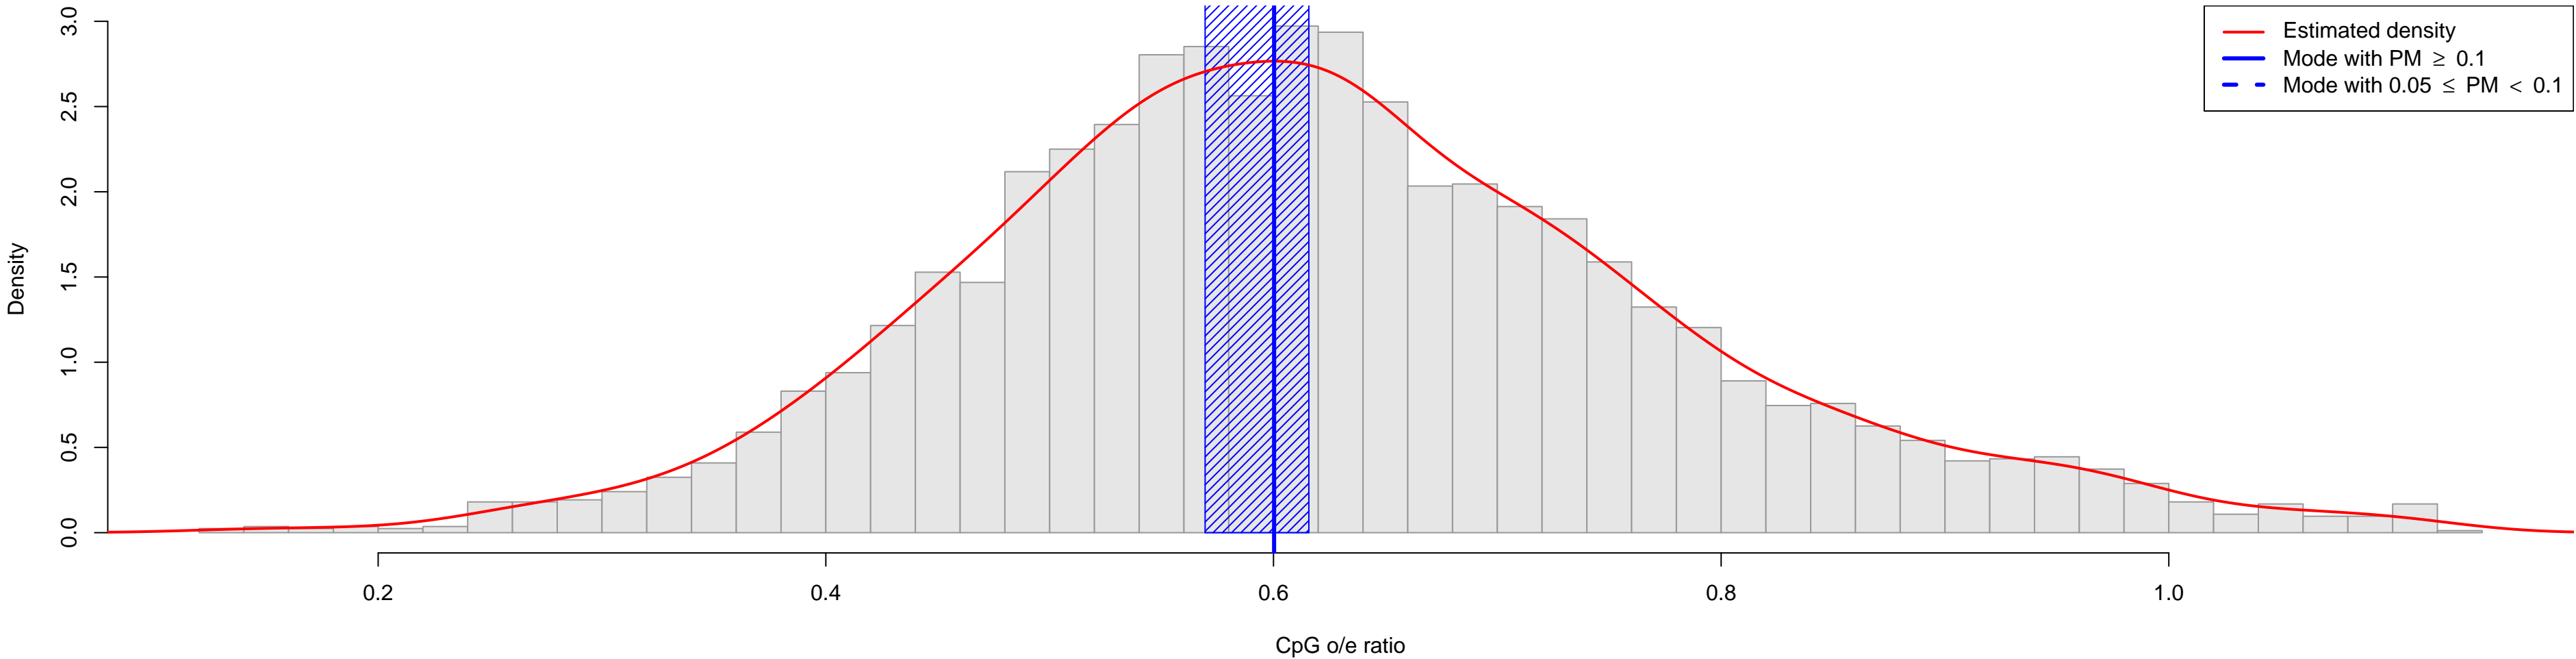

- Estimated density
- Mode with  $PM \geq 0.1$
- - Mode with  $0.05 \leq PM < 0.1$

# Aegilops\_speltoides

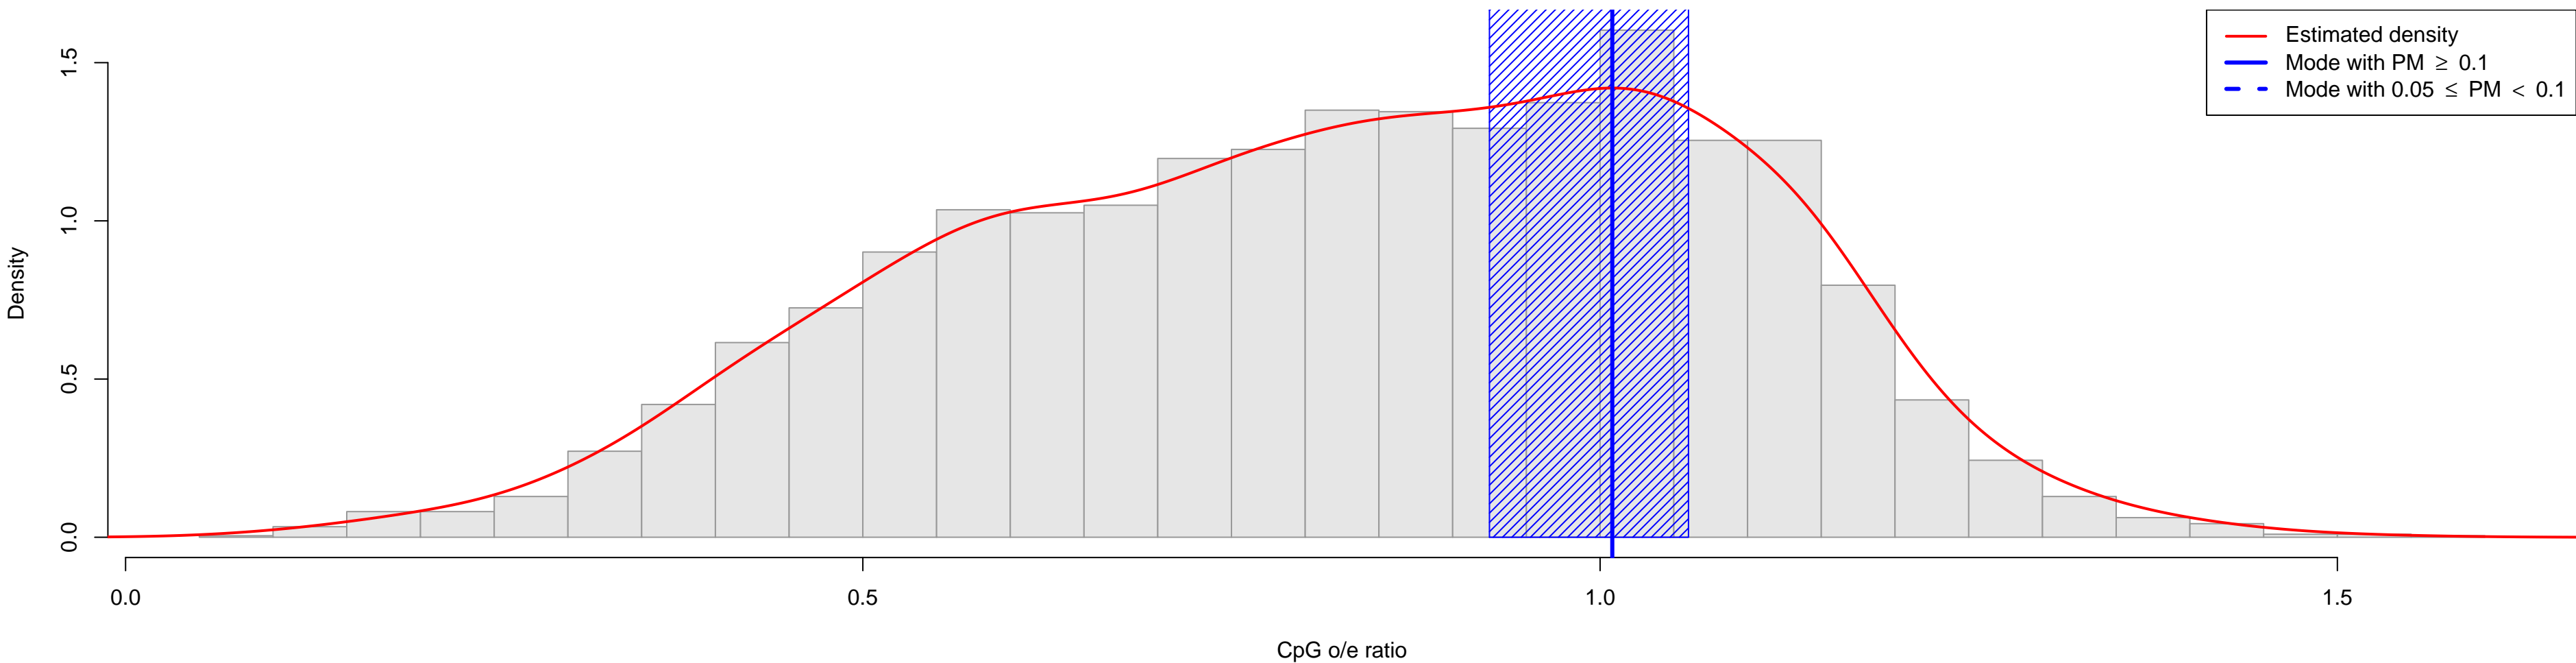

# Agrostis\_capillaris

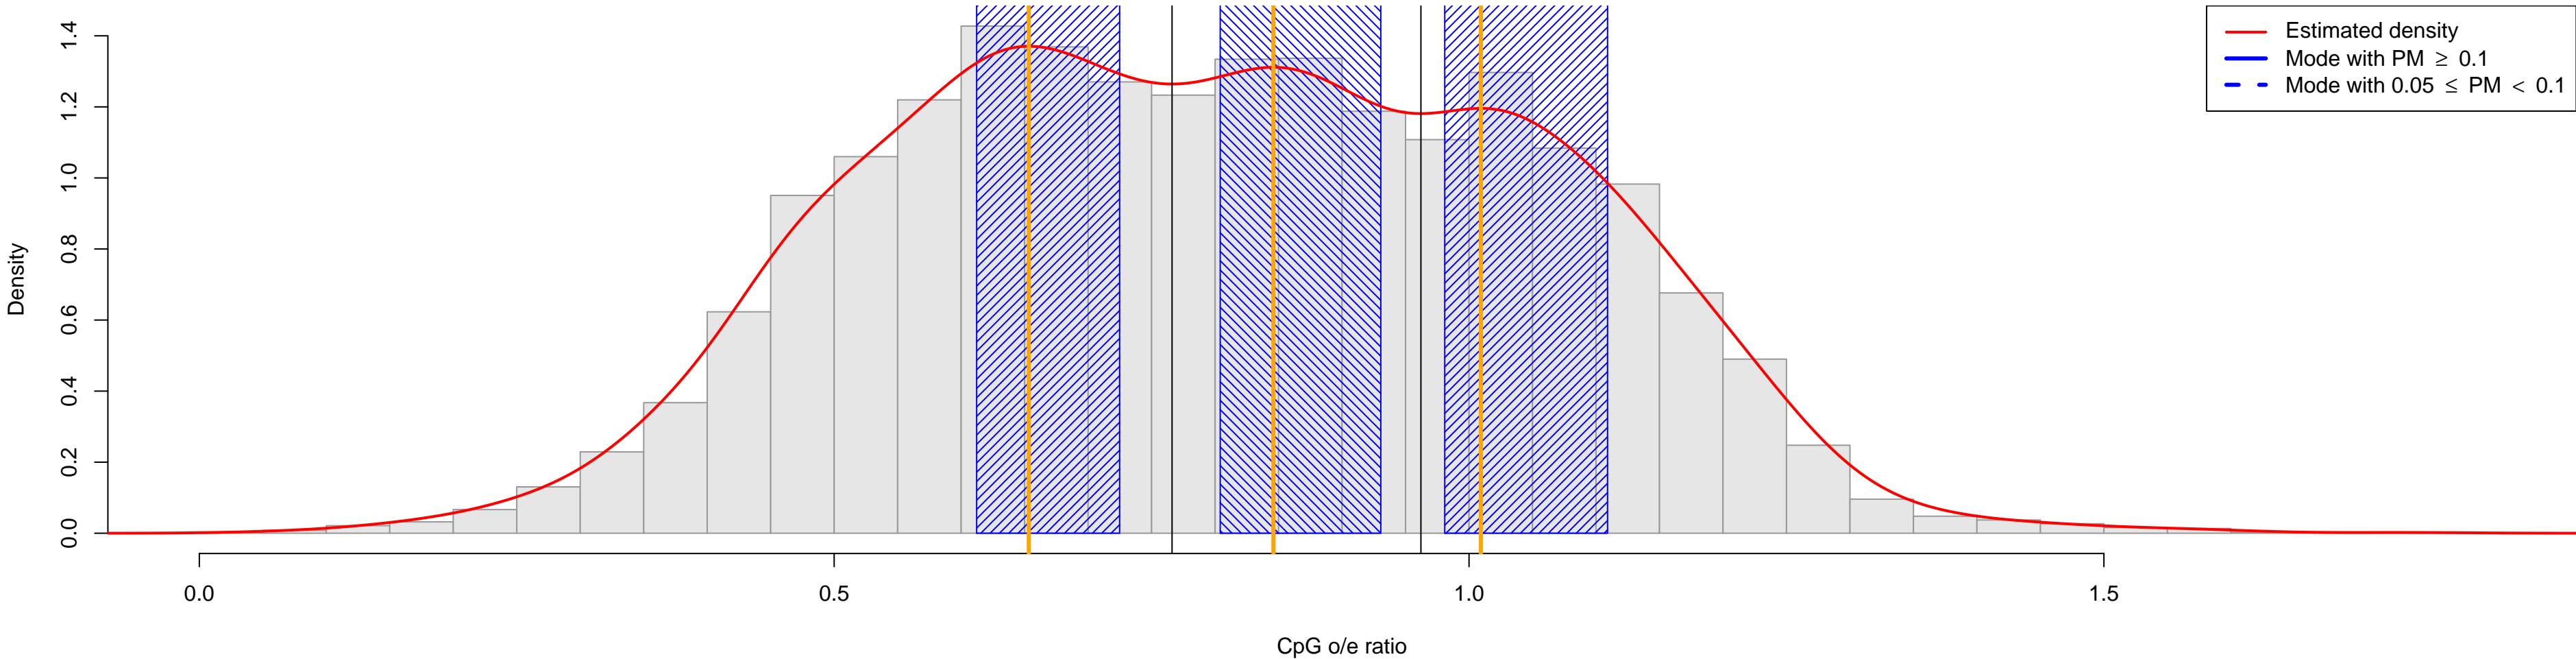

*Agrostis\_stolonifera*

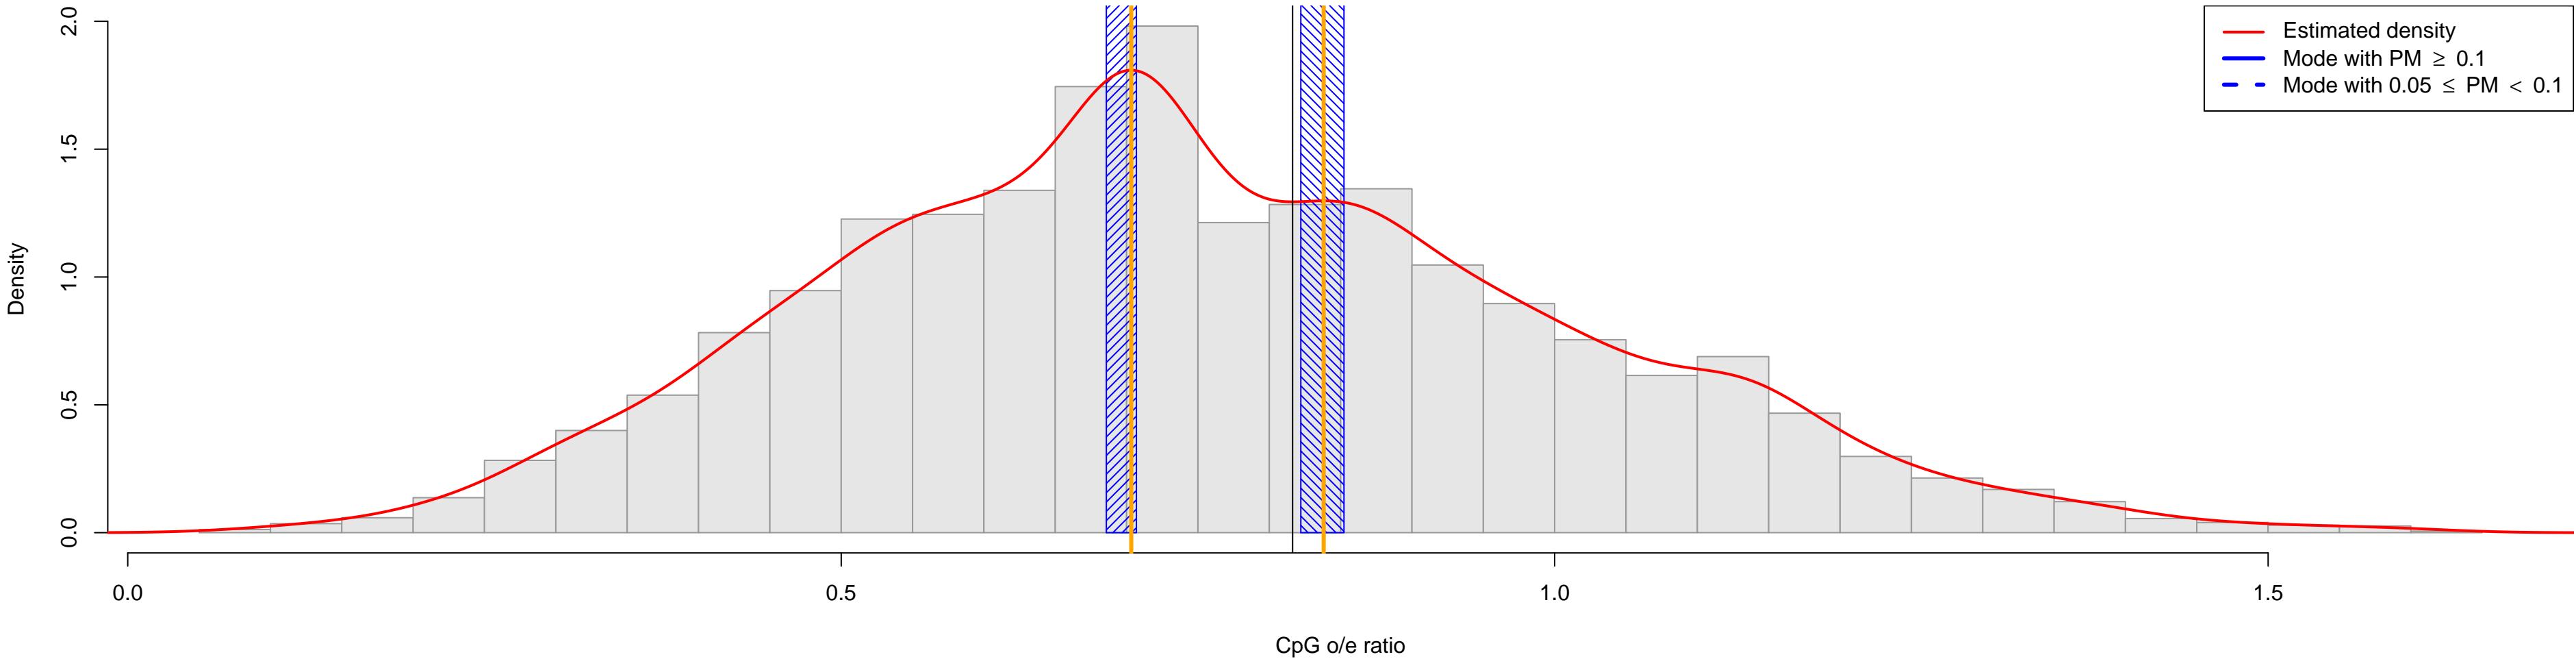

# Aiptasia\_pallida

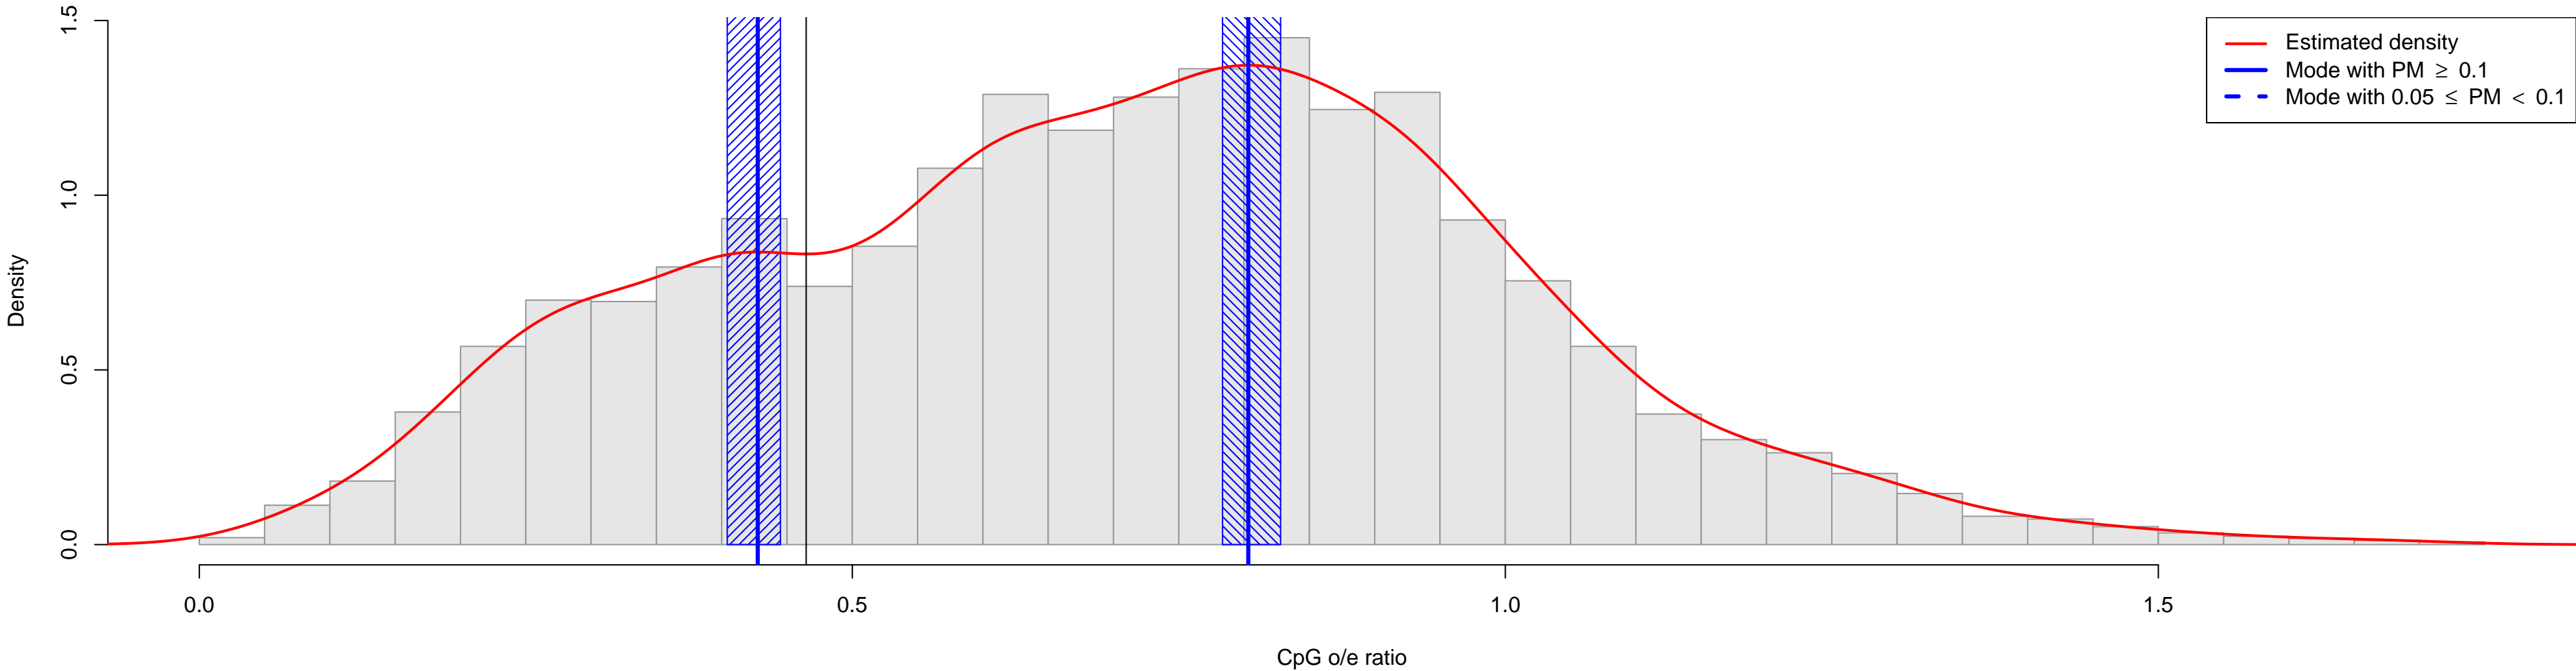

# Albugo\_candida

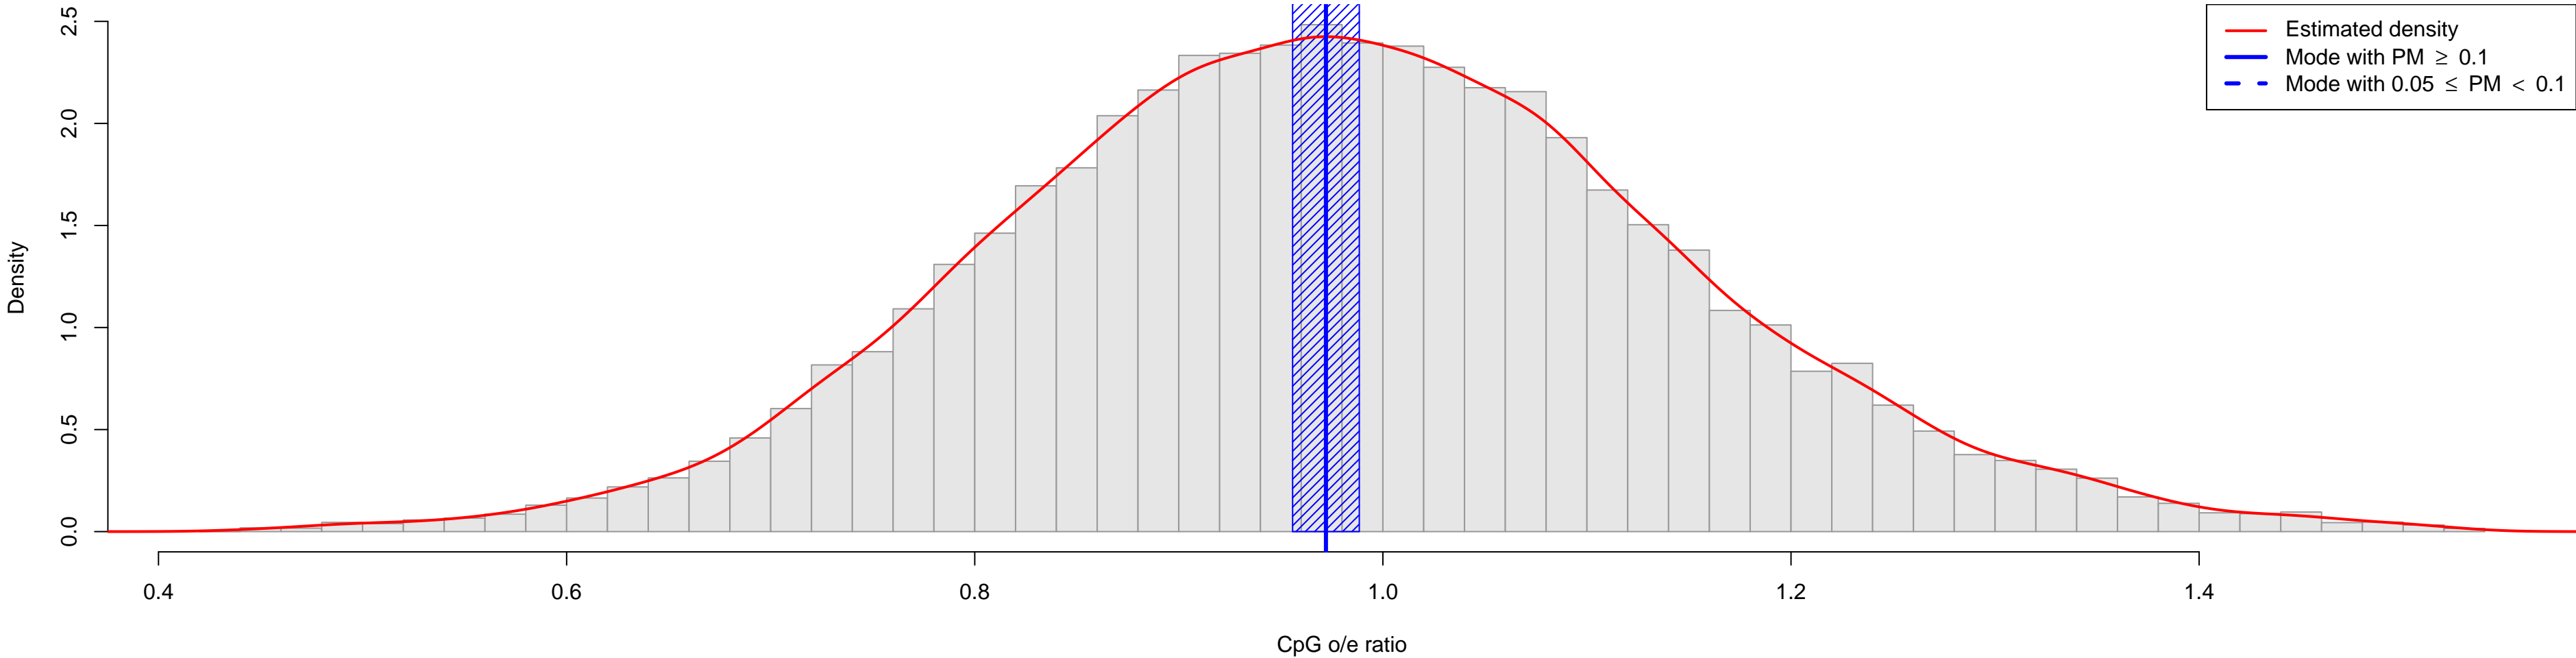

### Alexandrium\_catenella

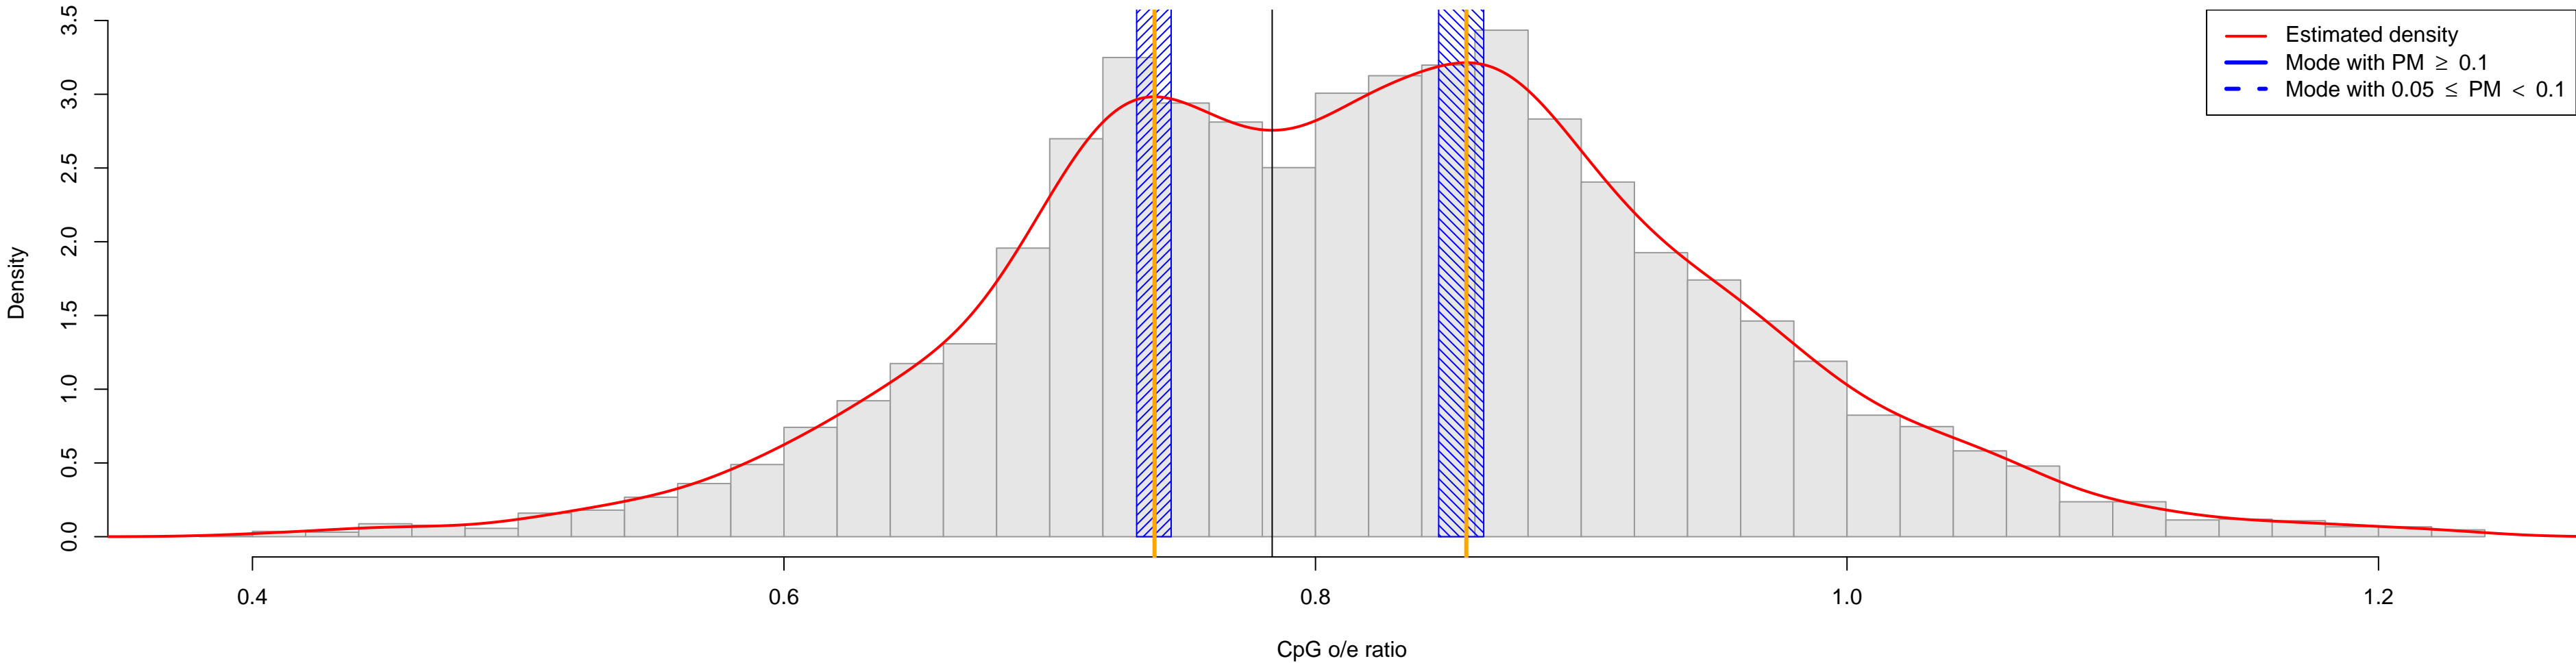



# Alexandrium\_minutum

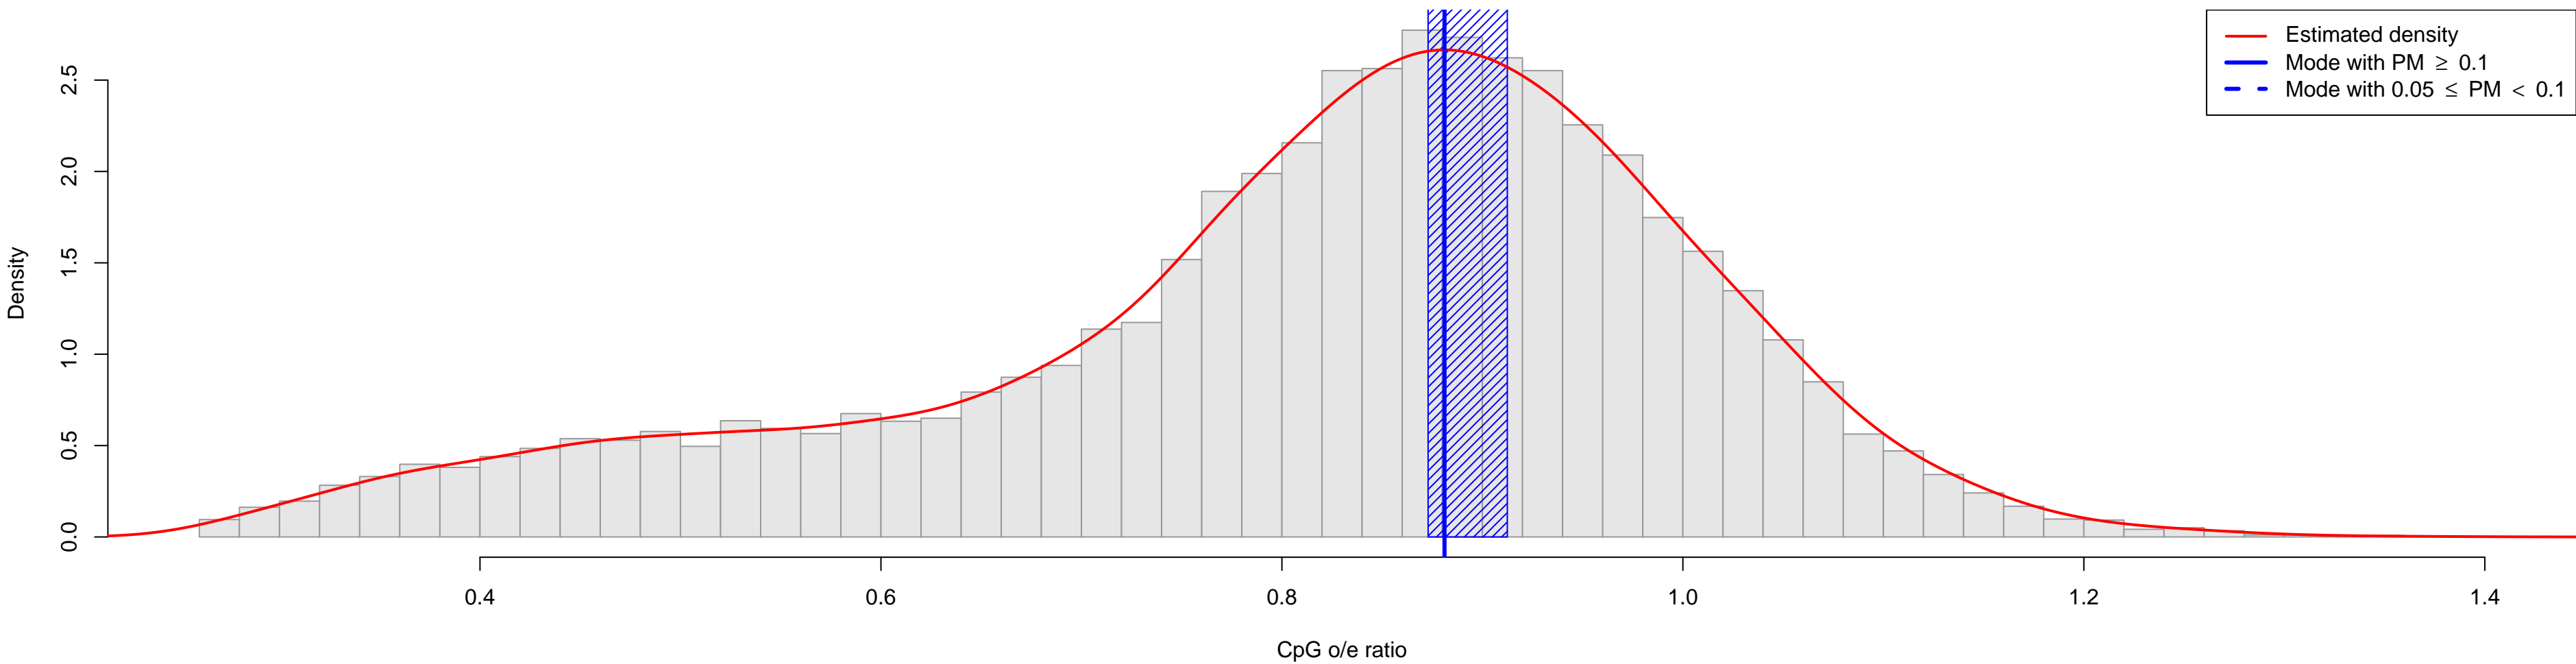

# Alexandrium\_ostenfeldii

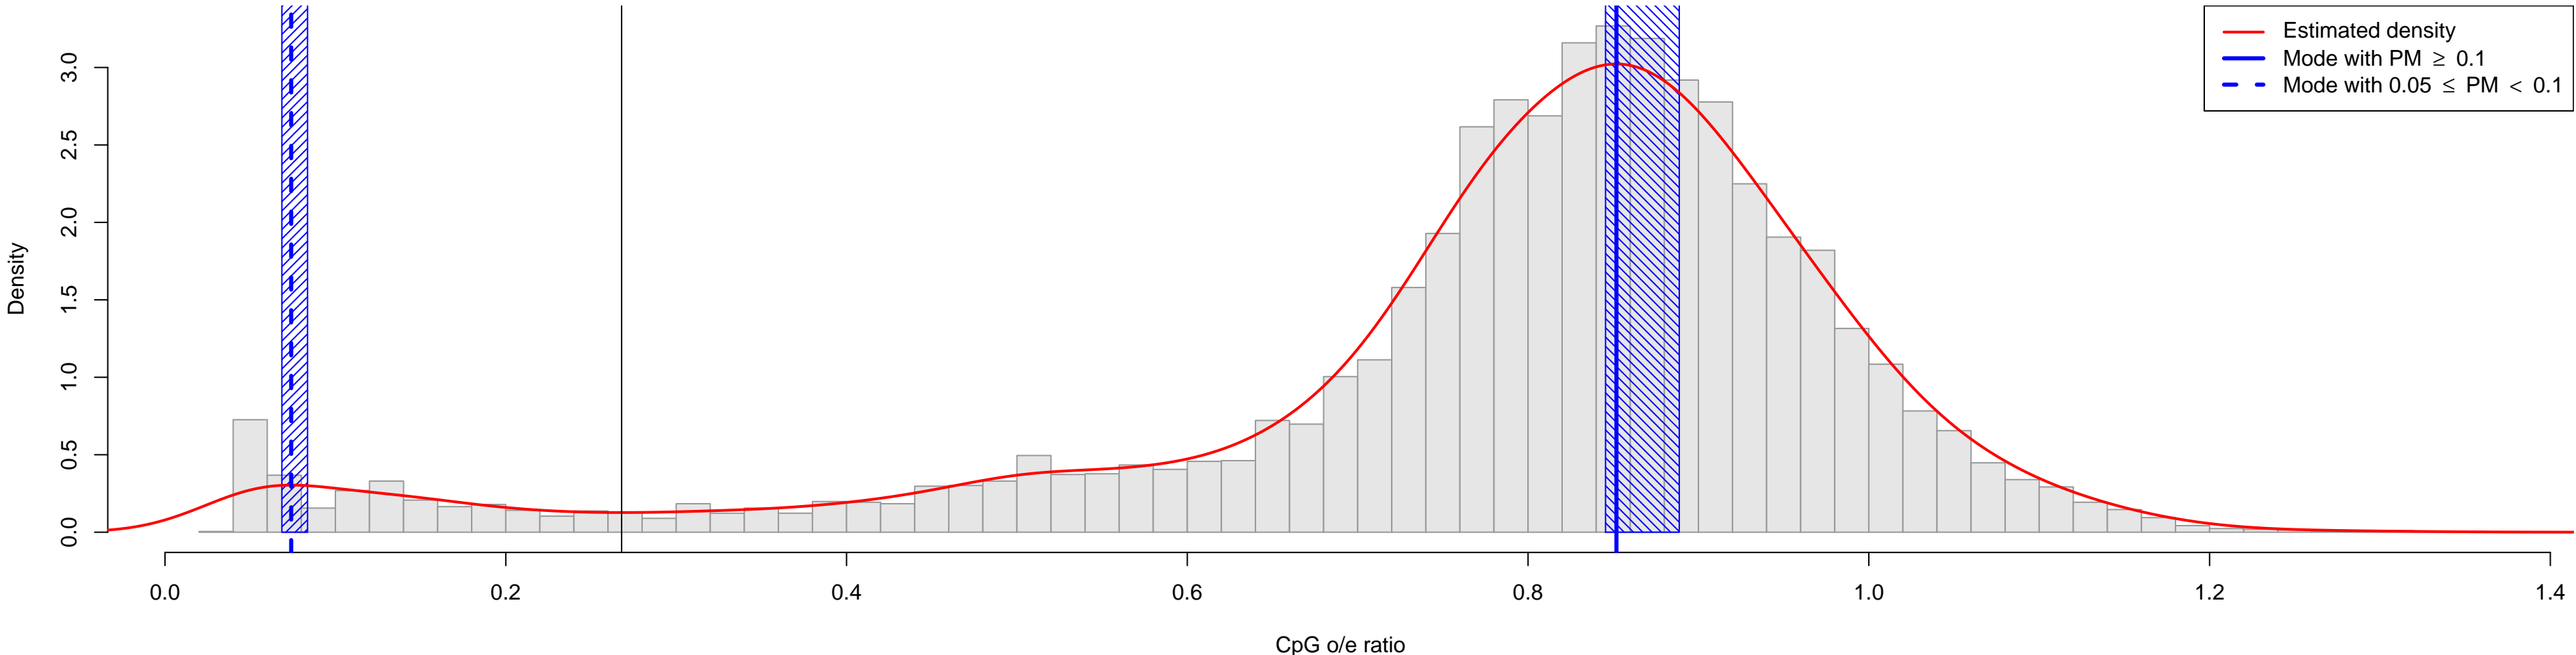

# Alexandrium\_tamarensis

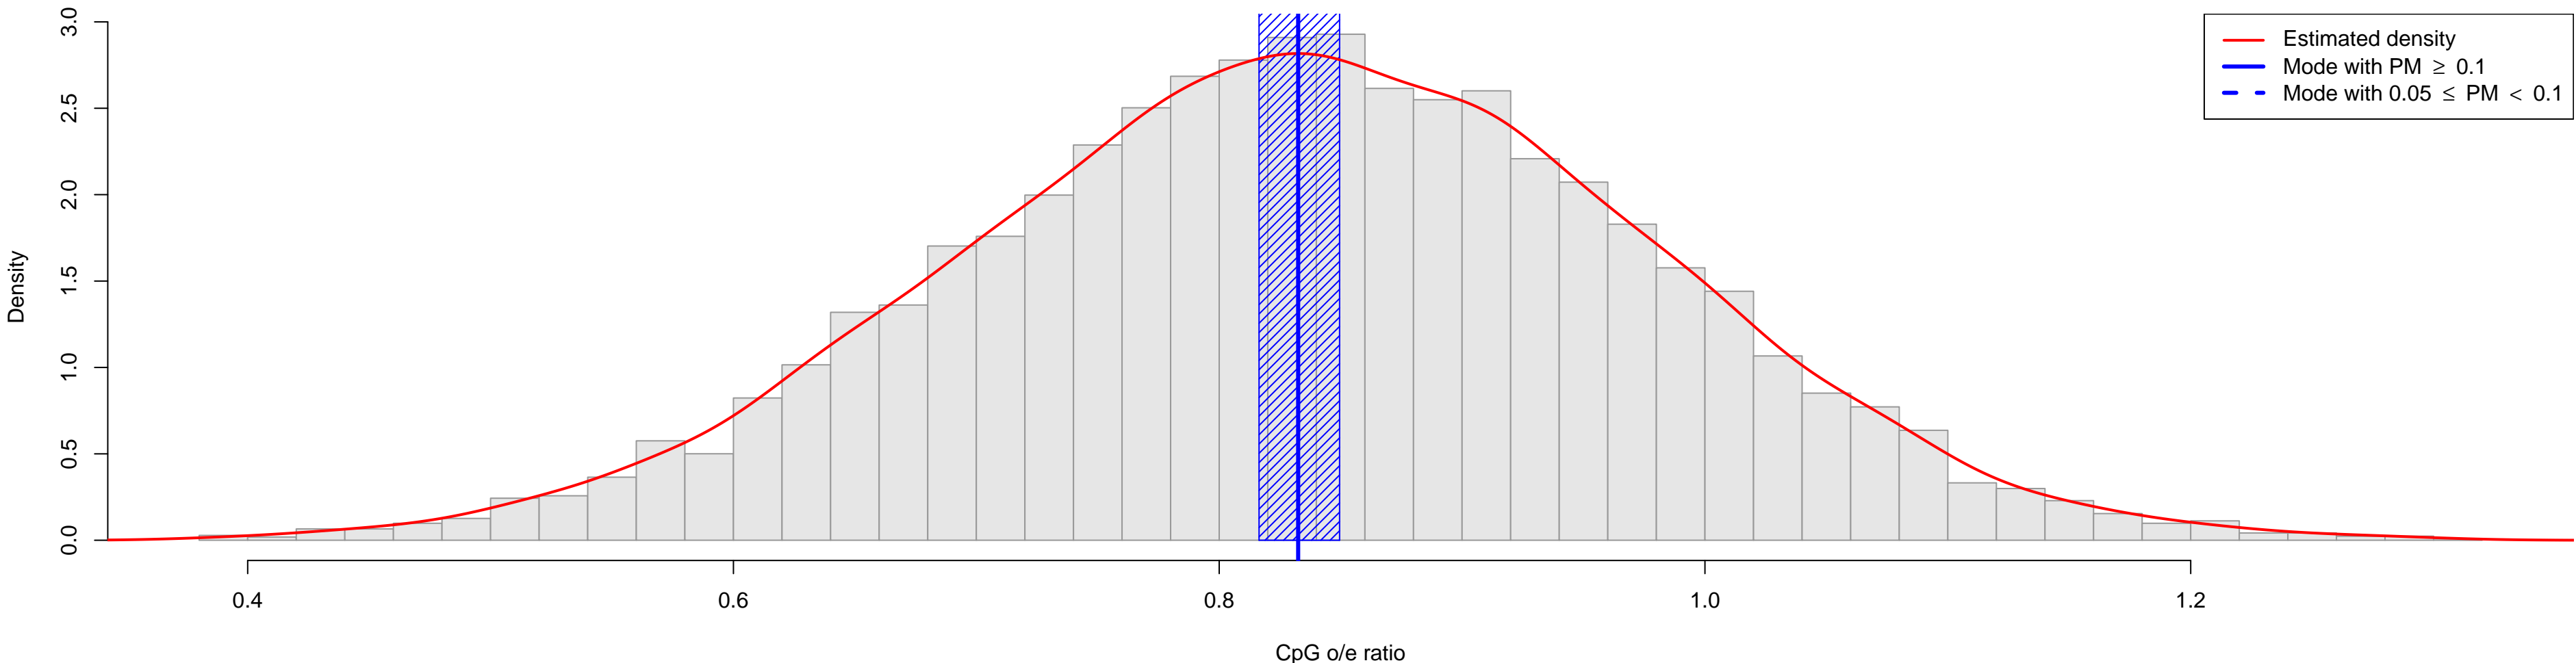

# Alligator\_mississippiensis

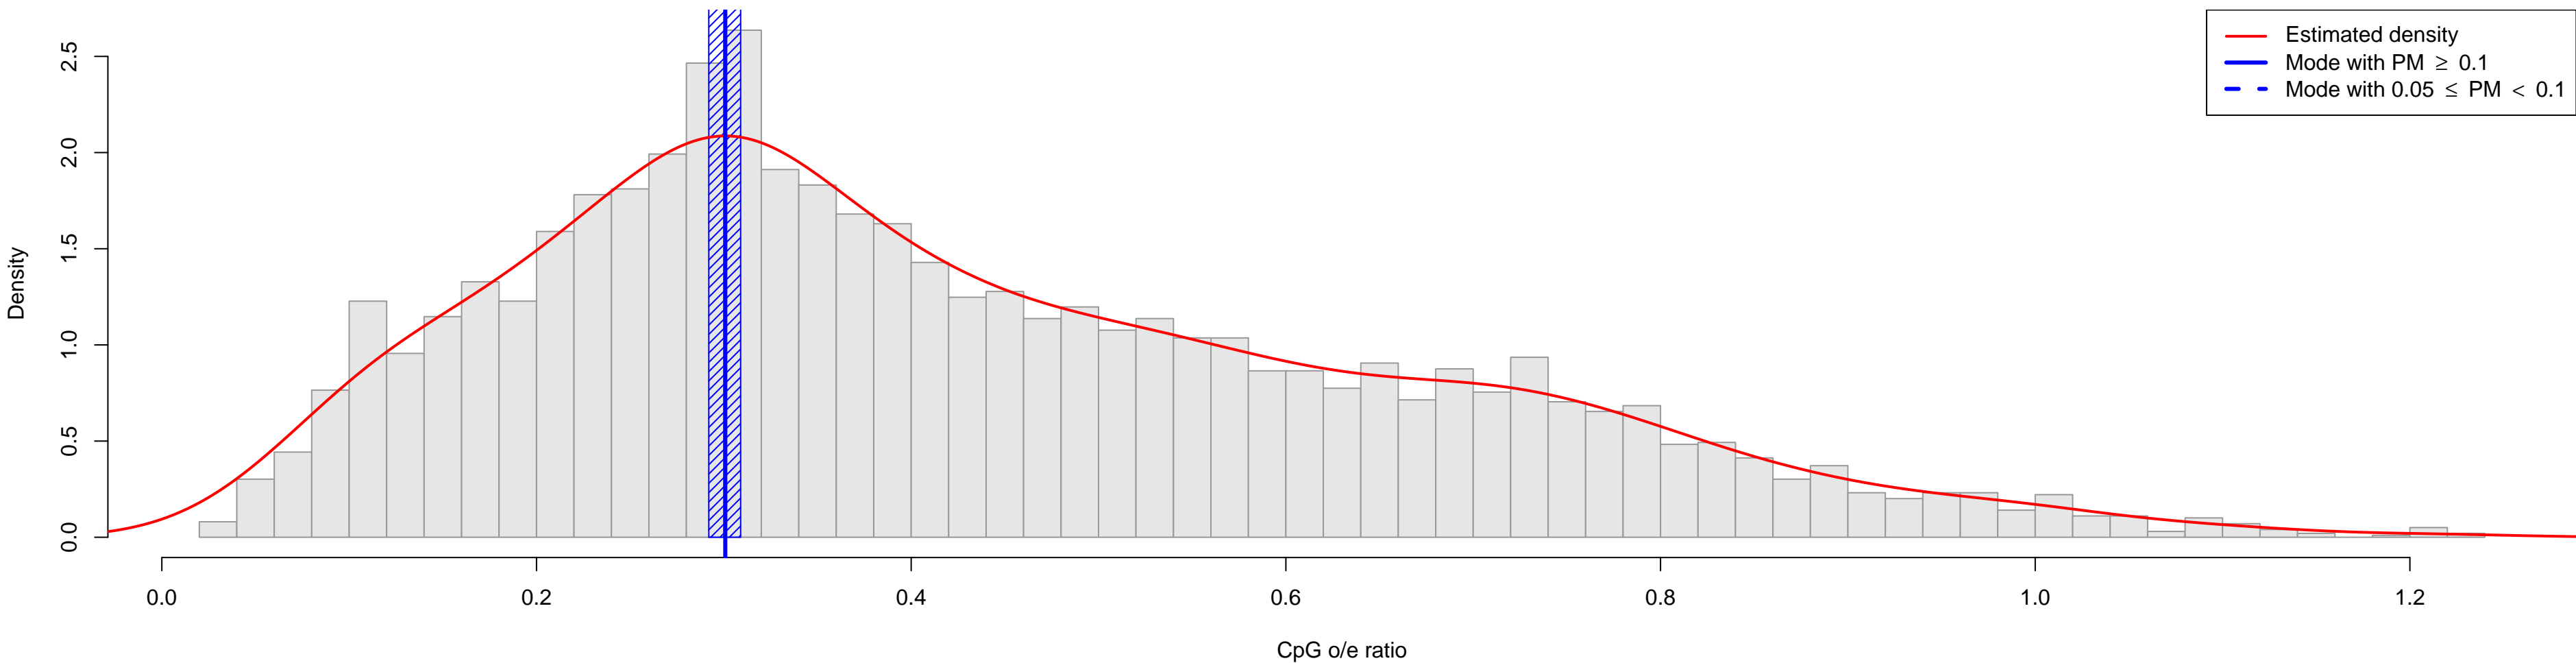

# Allium\_cepa

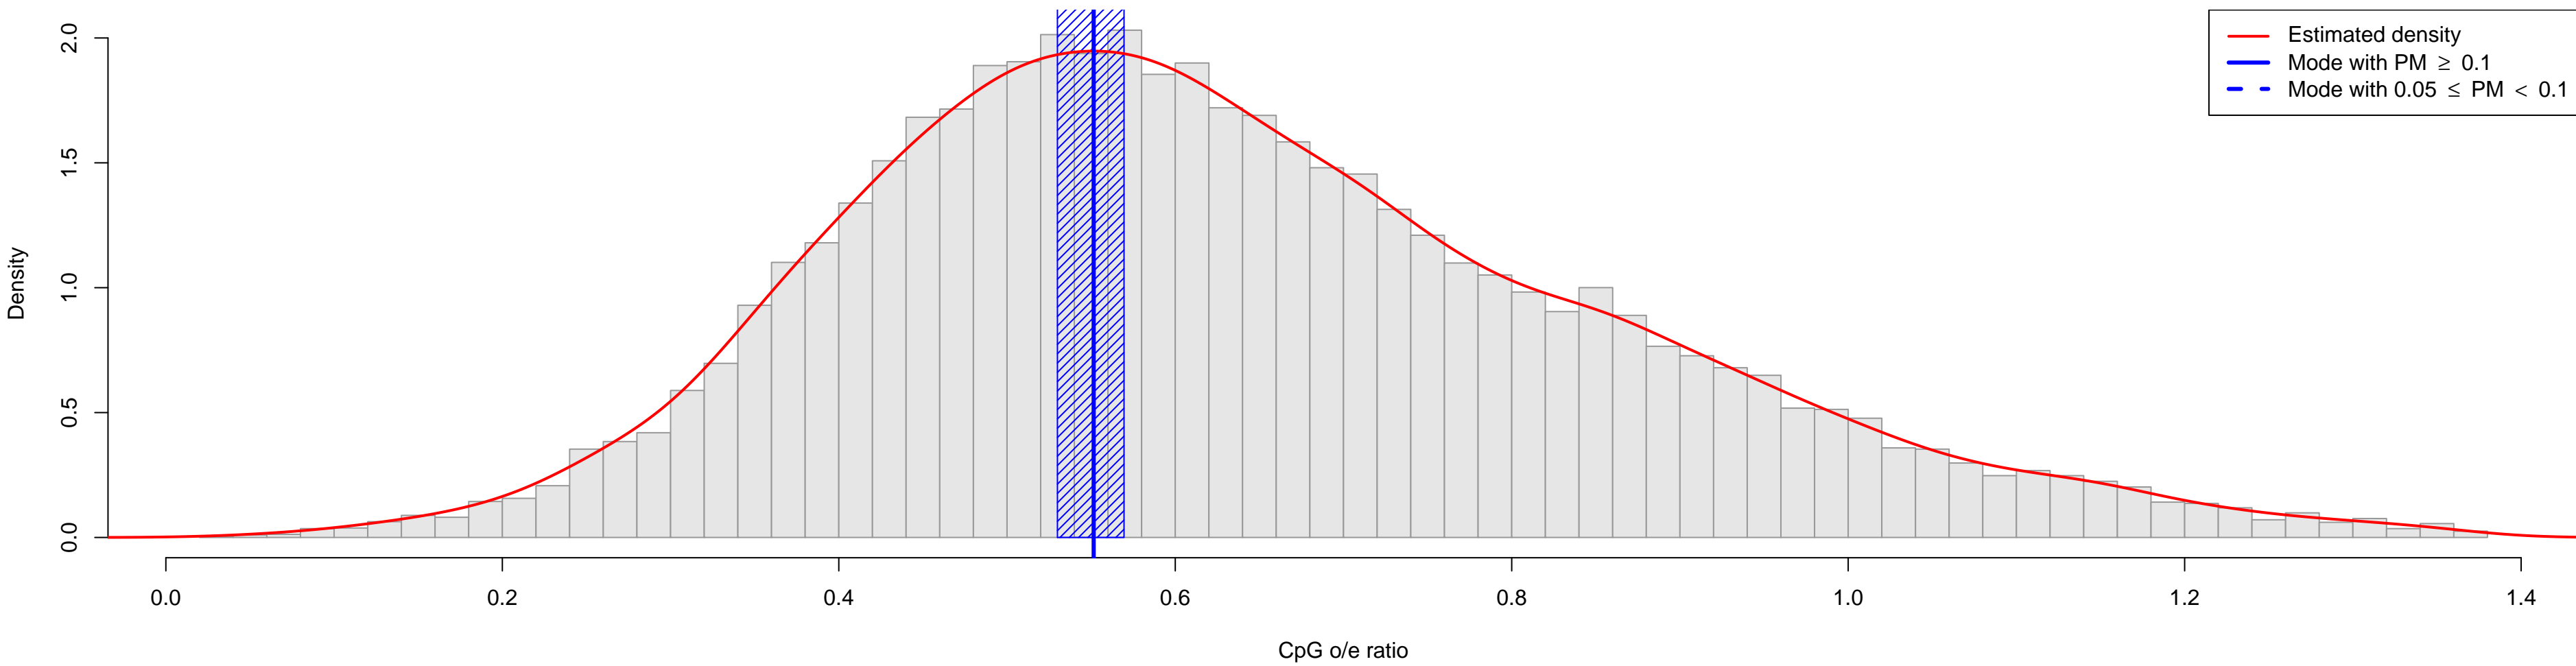

# Allium\_sativum

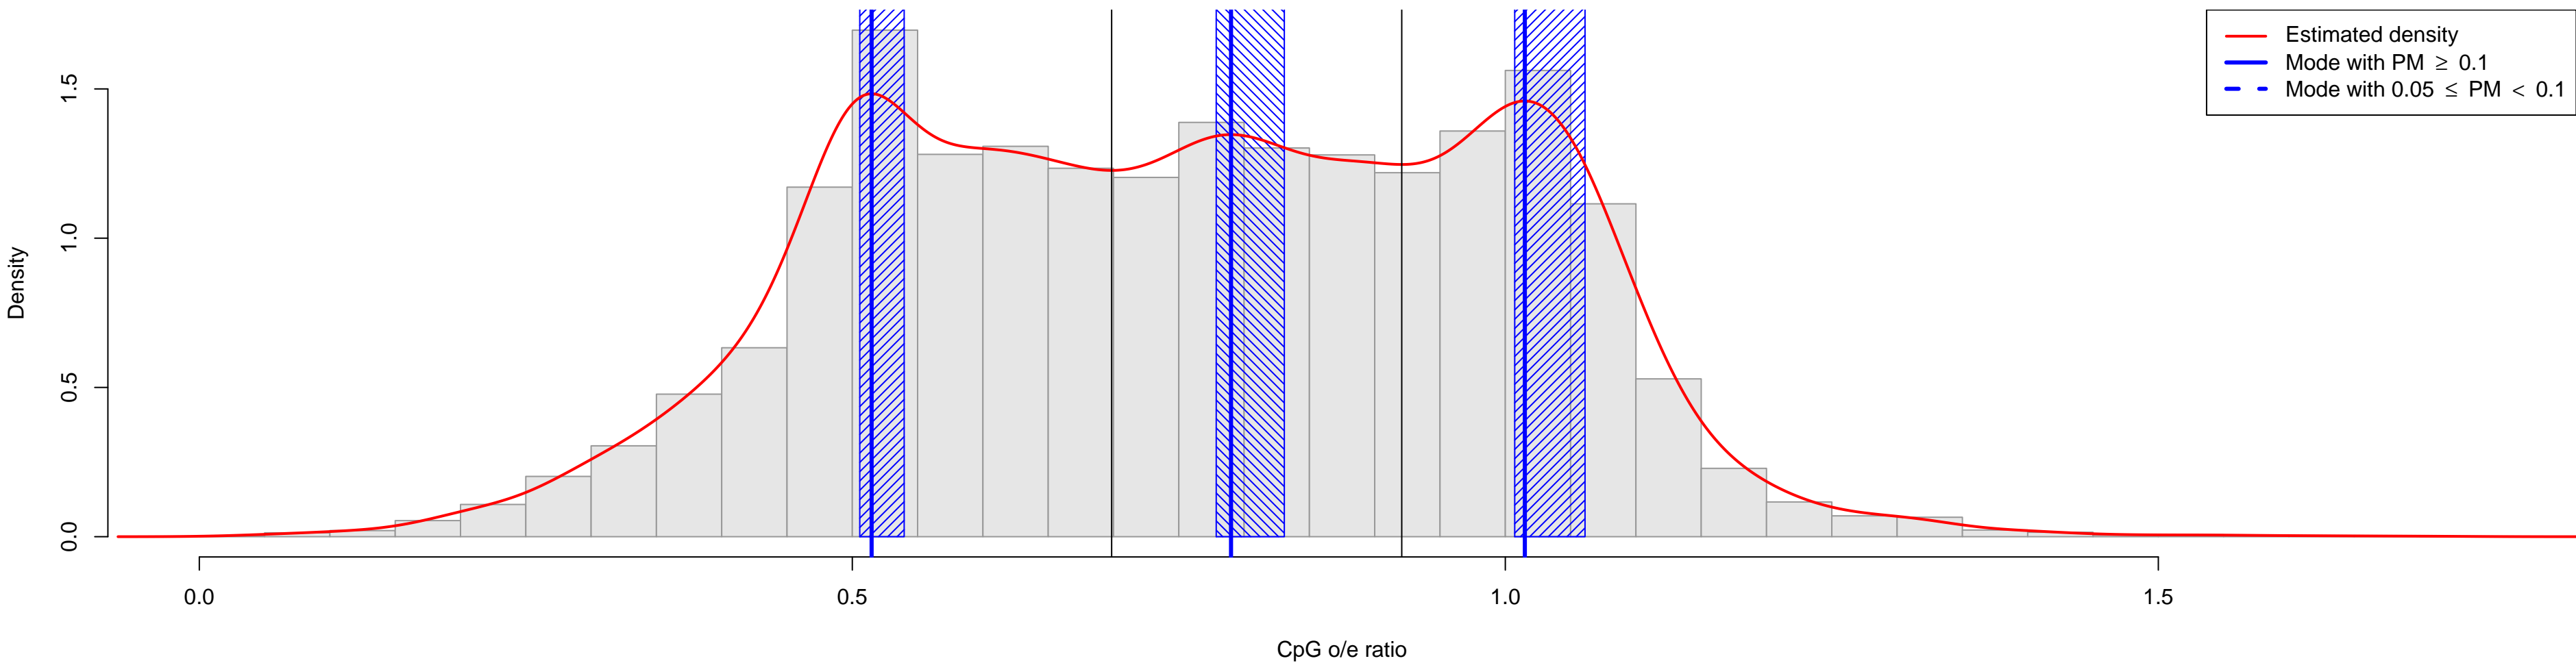

# Allomyces\_macrognus

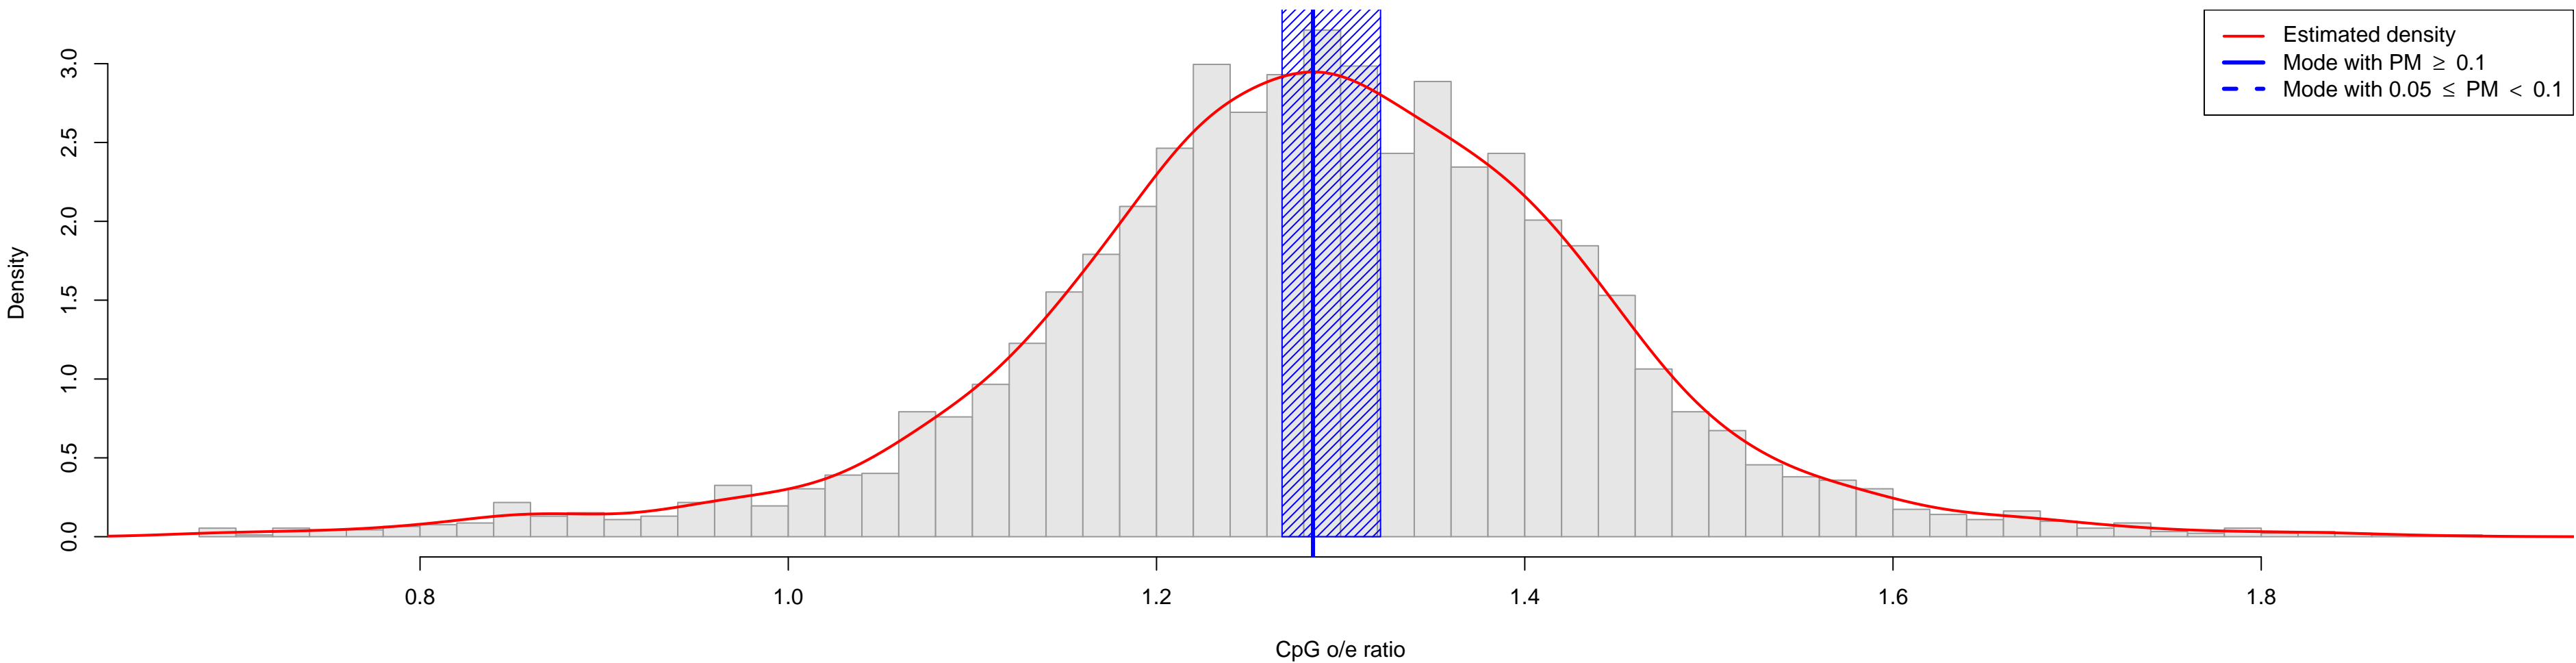

# Amblyomma\_variegatum

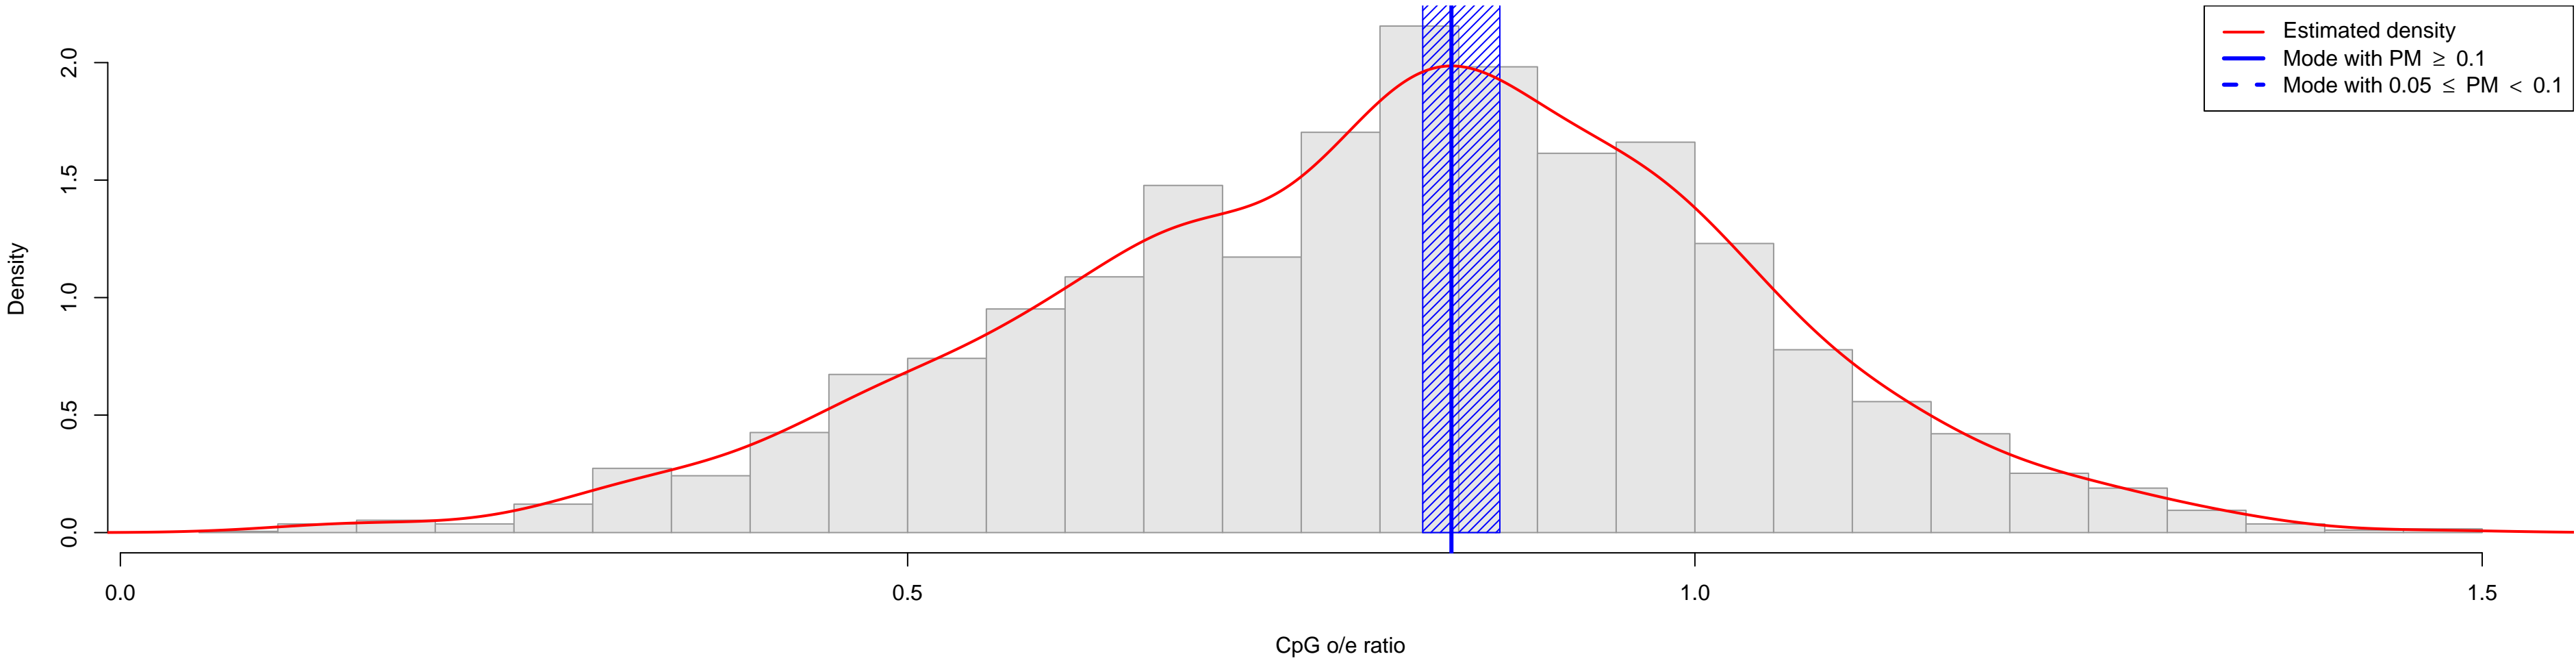



# Ambystoma\_mexicanum

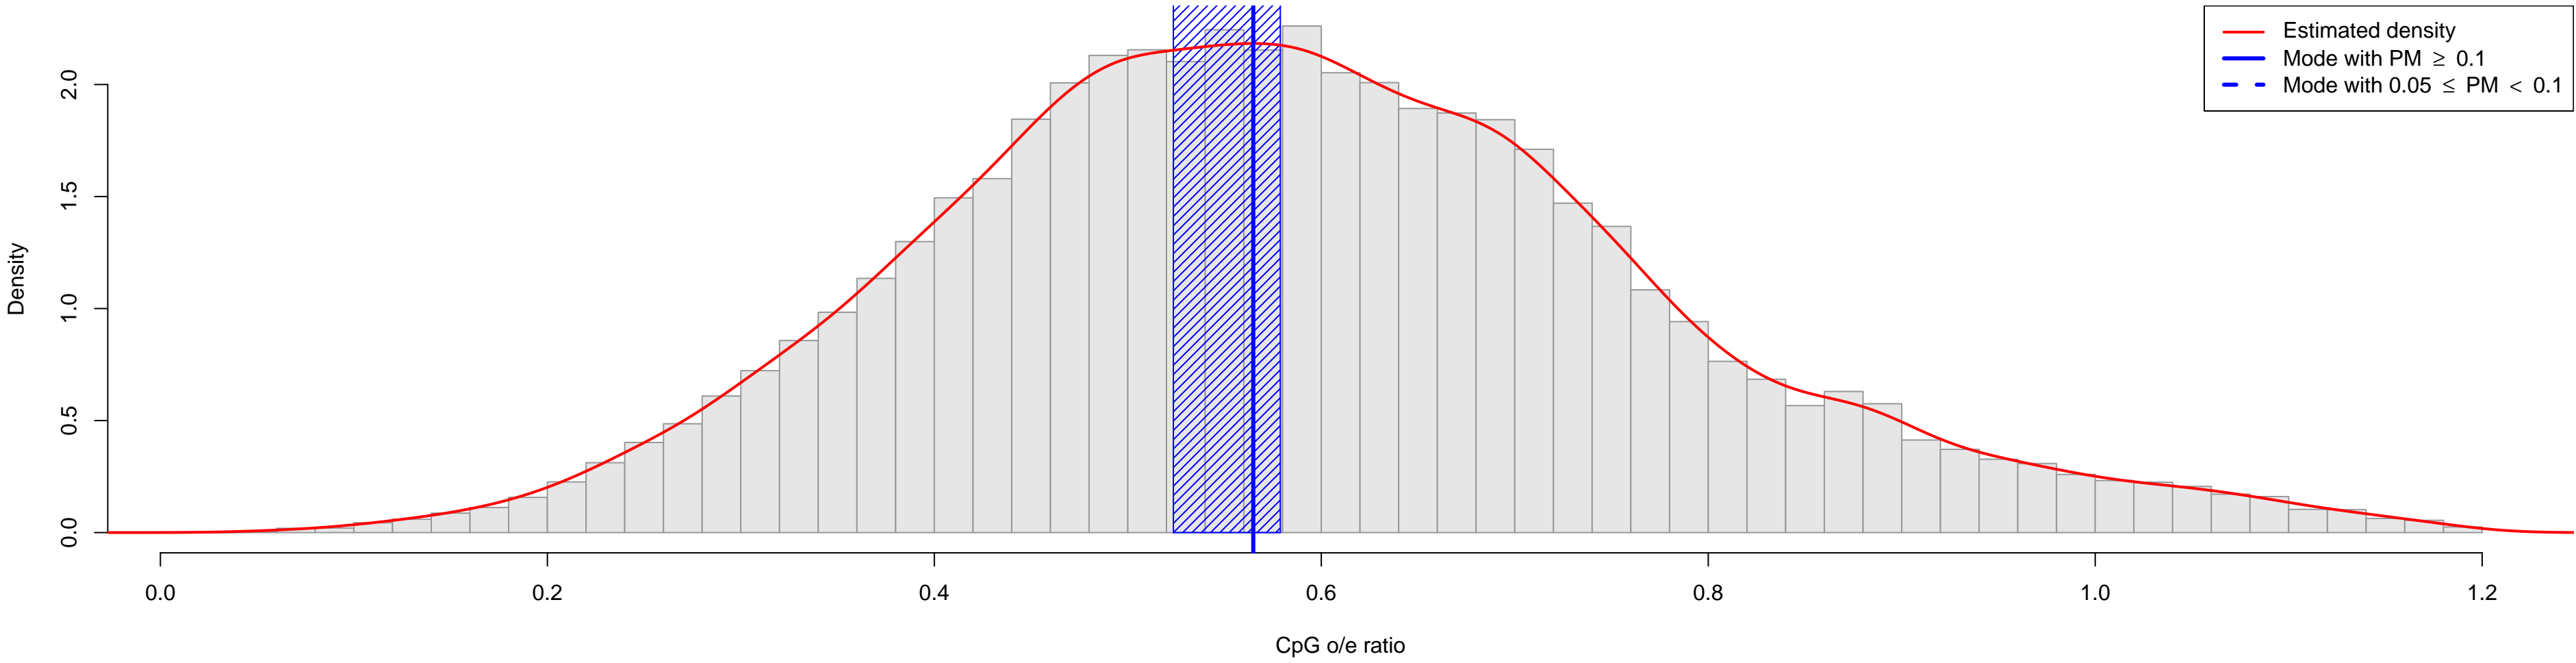

# Ambystoma\_tigrinum\_tigrinum

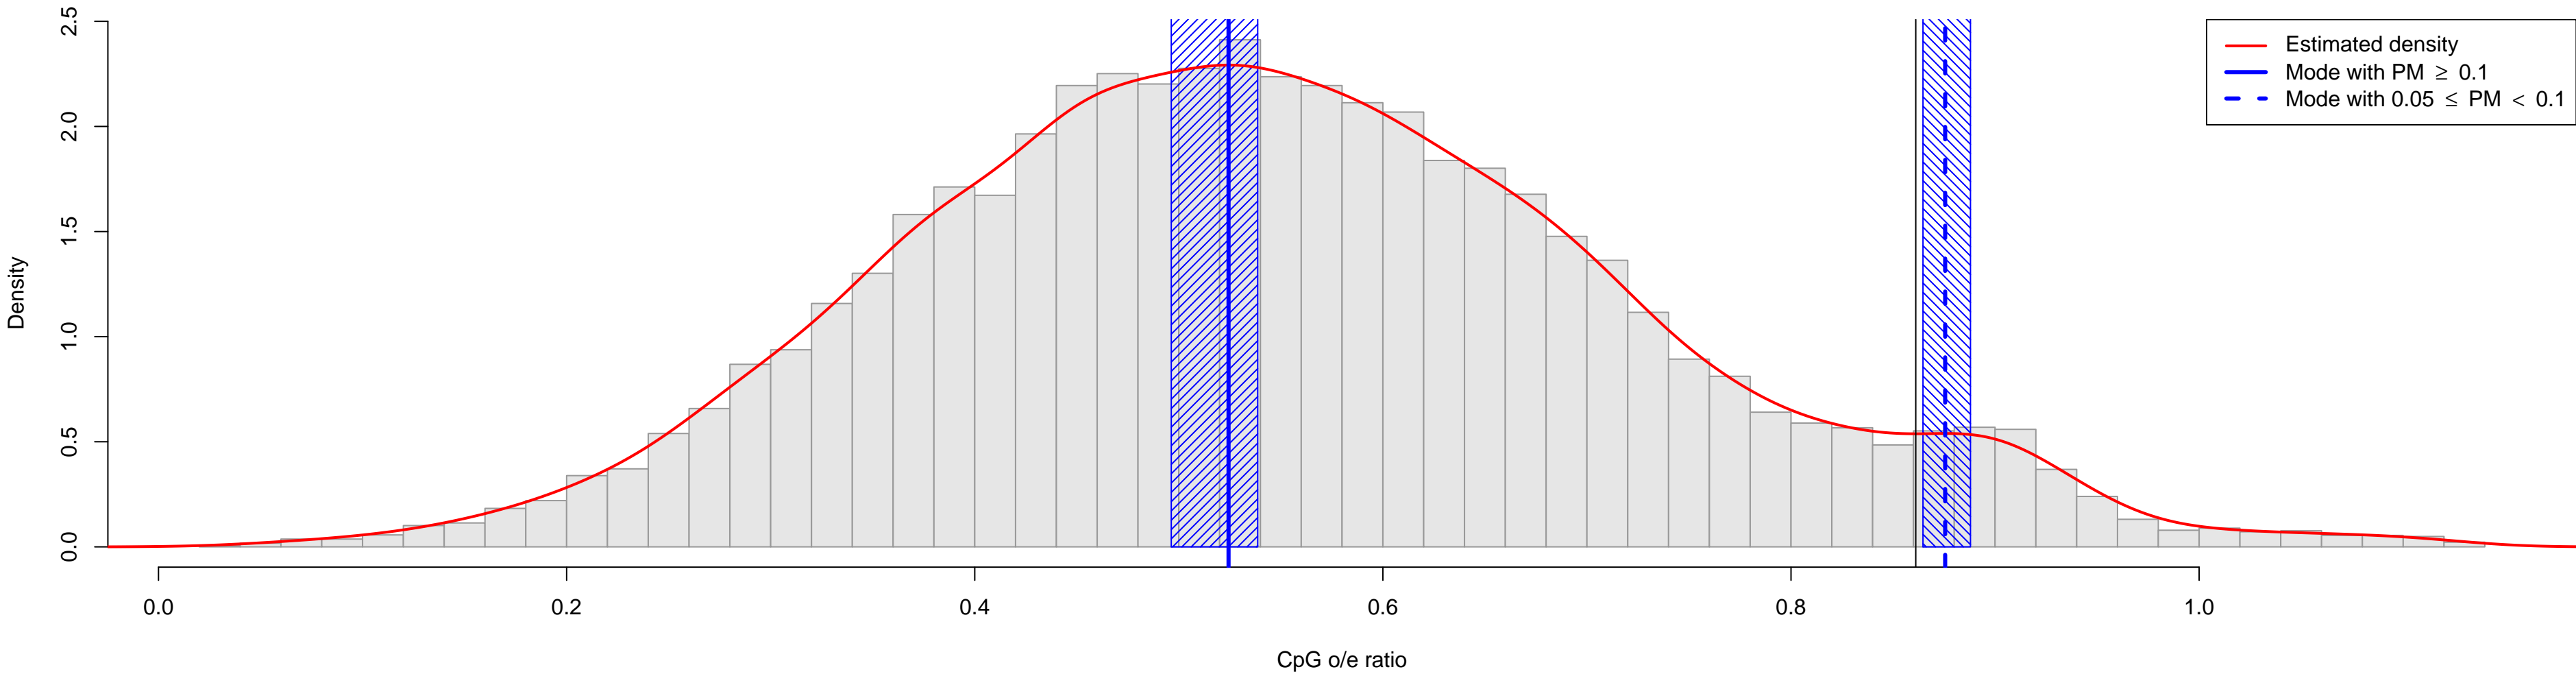

# Ampelisca\_abdita

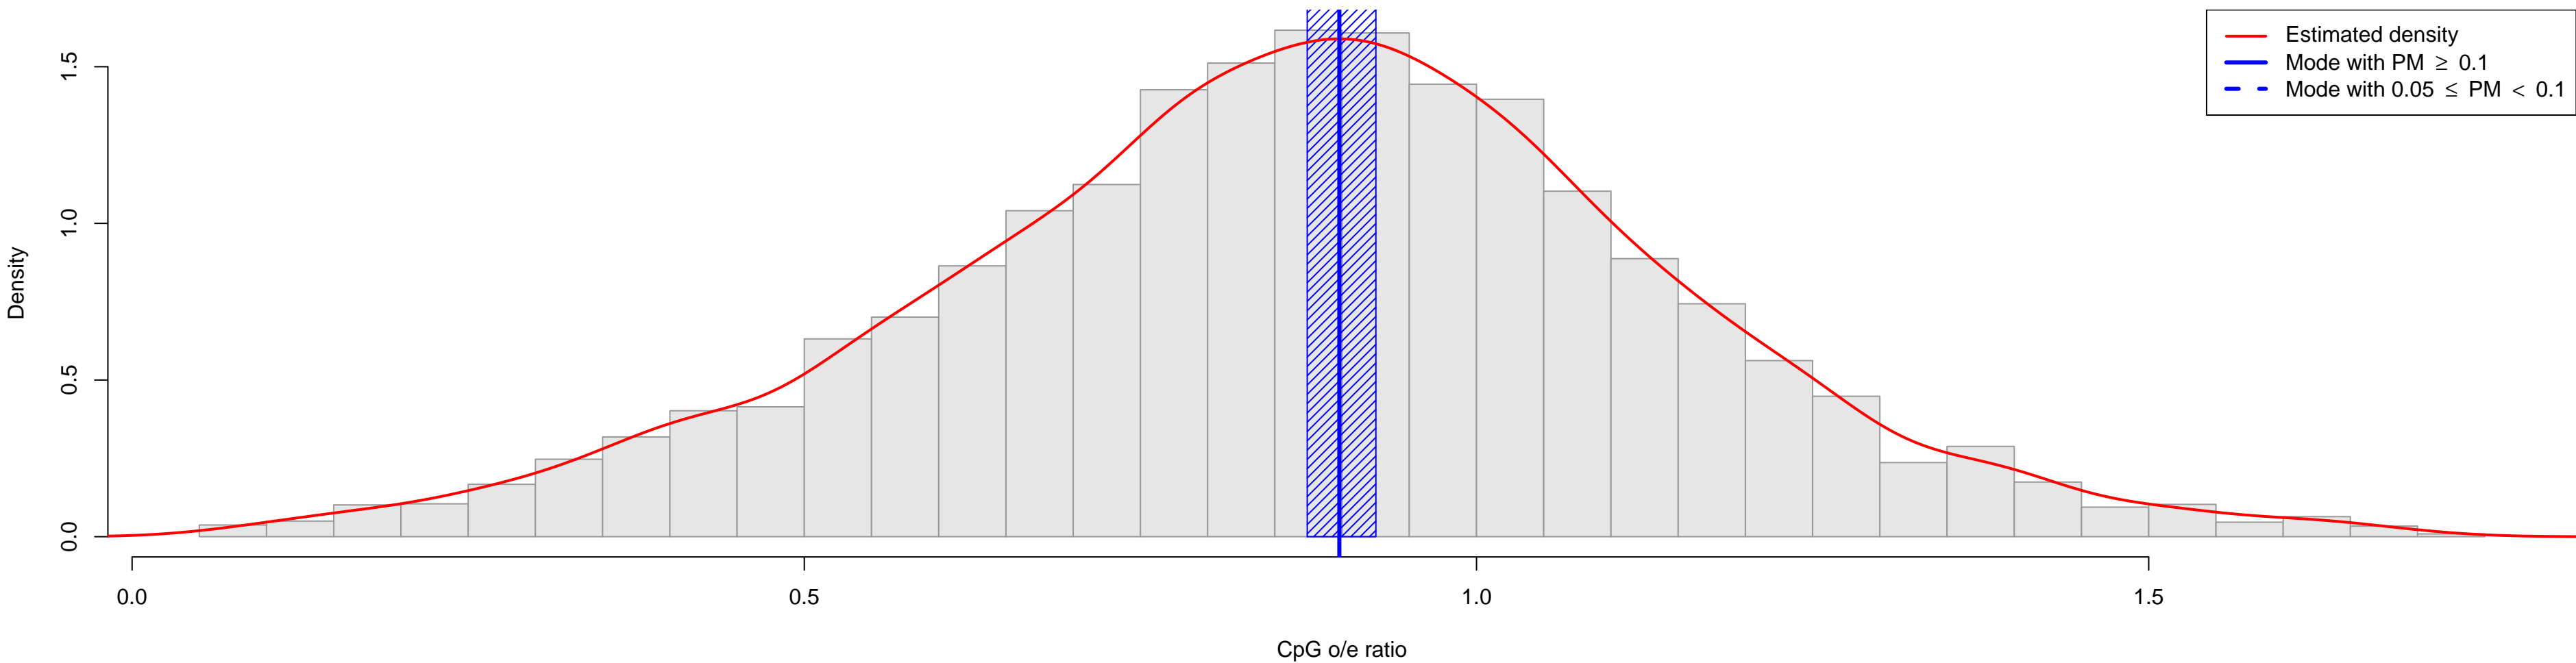

# Amphimedon\_queenslandica

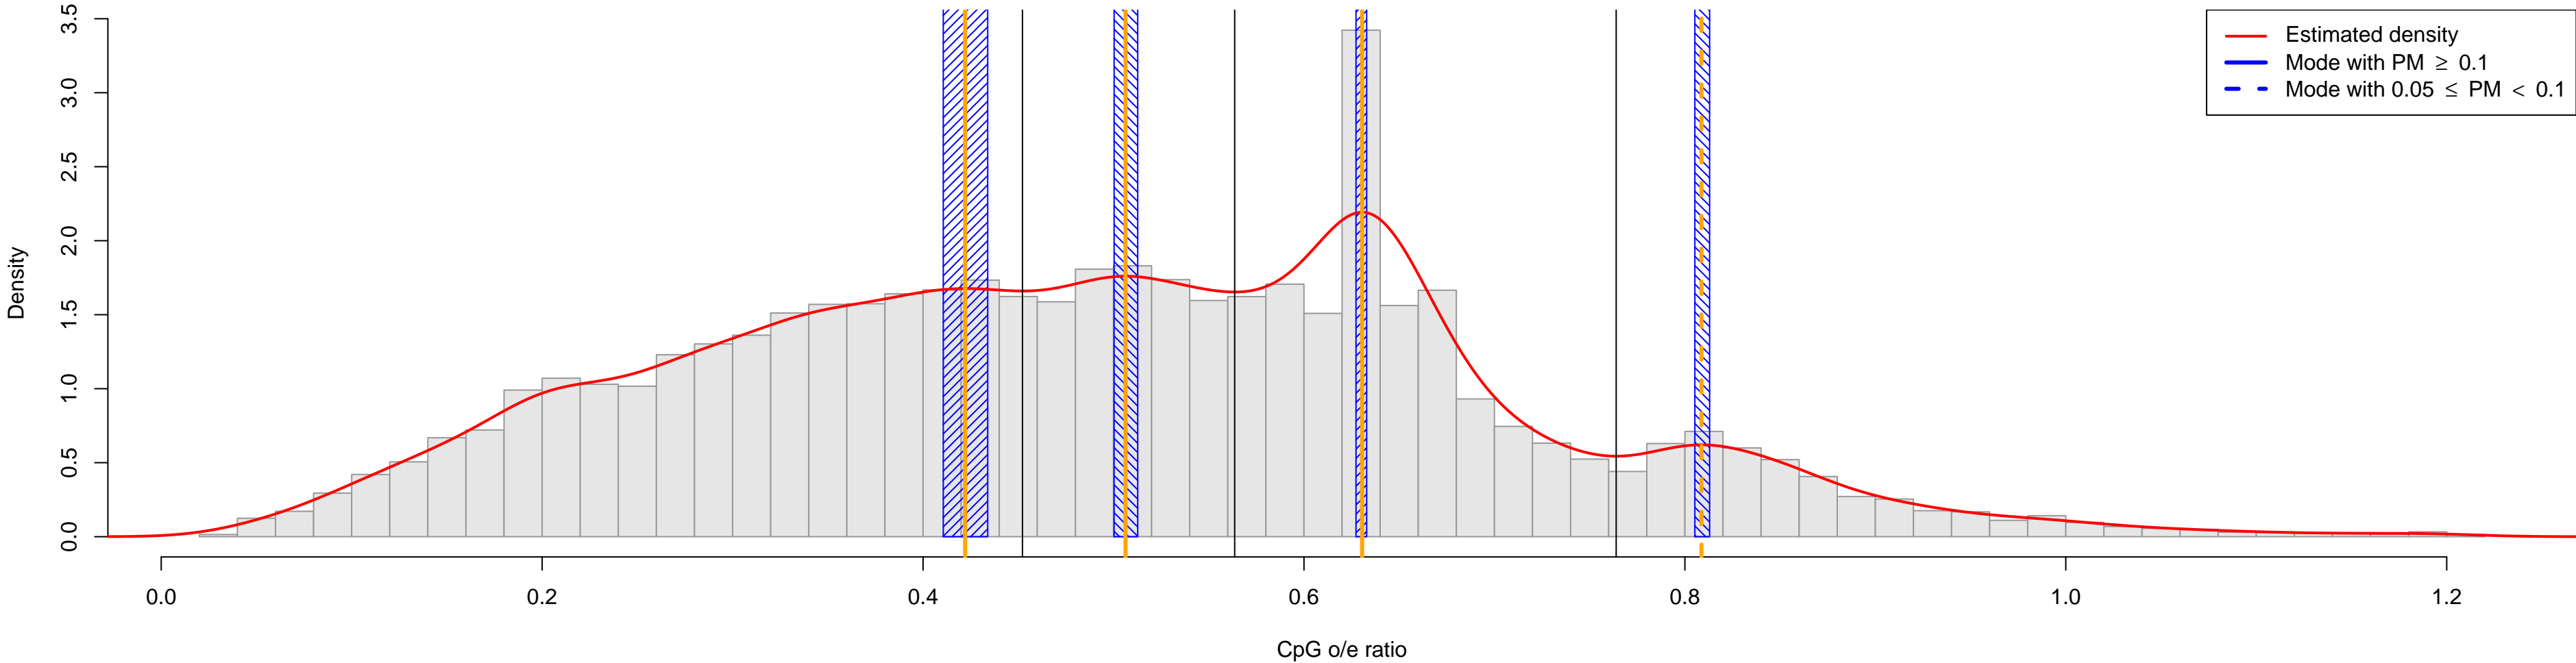

# Amphiura\_filiformis

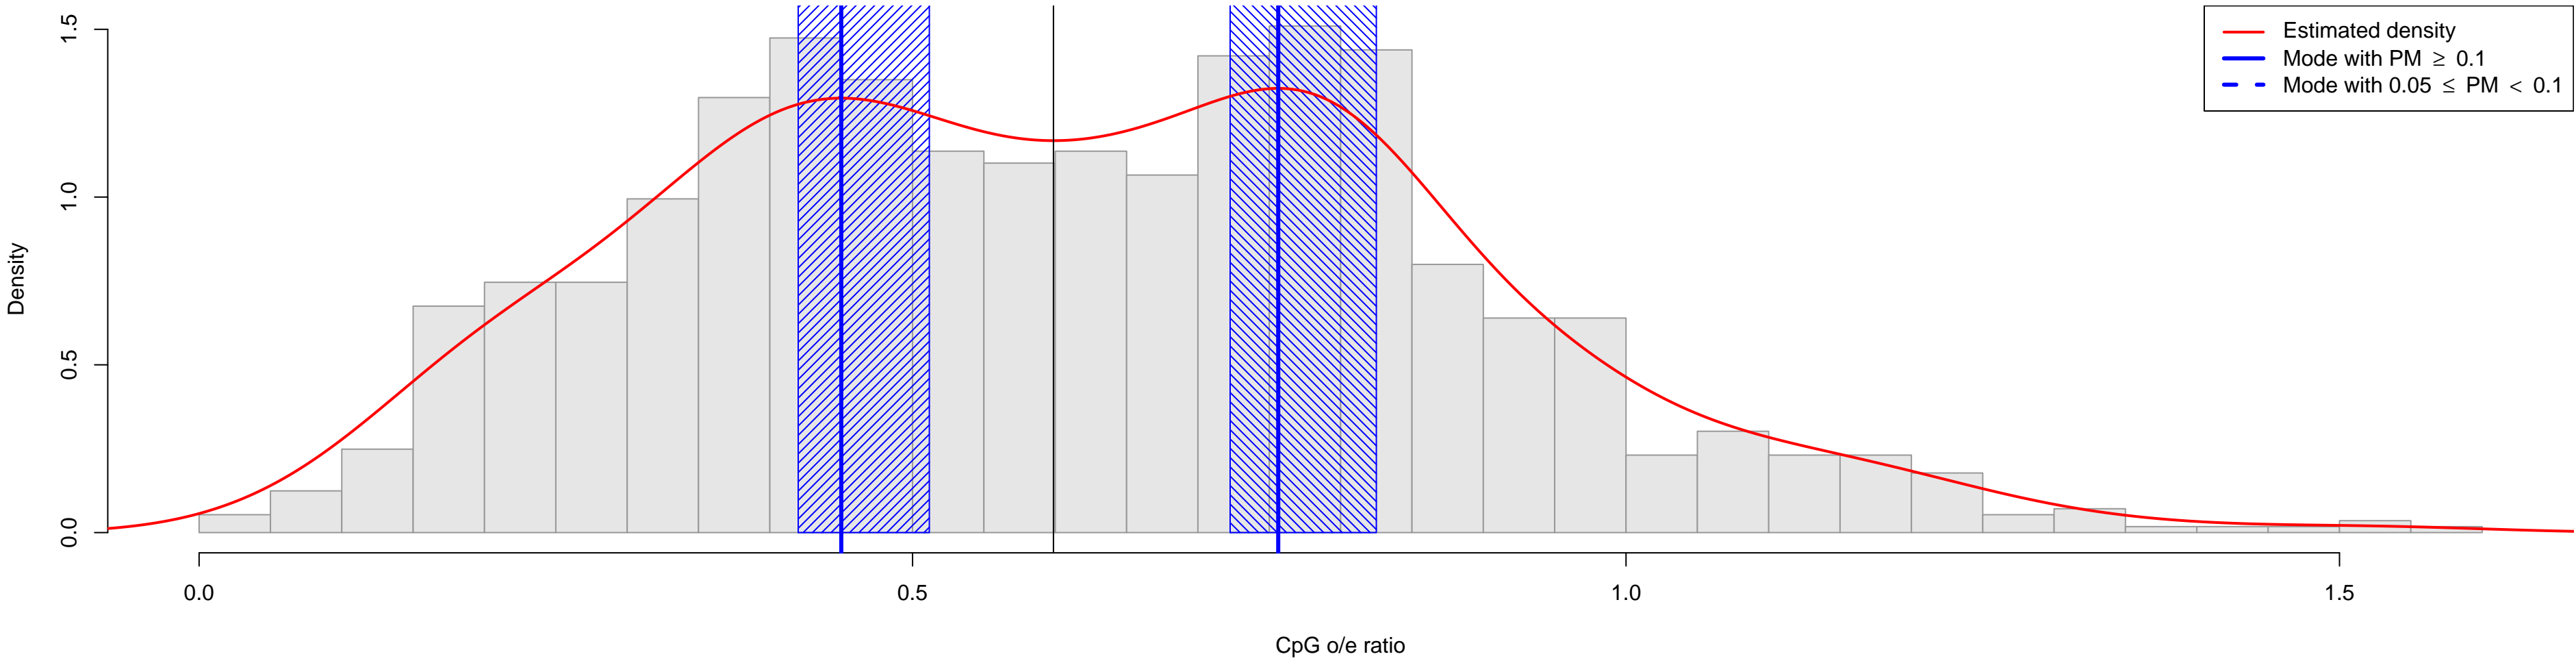

# Anas\_platyrhynchos

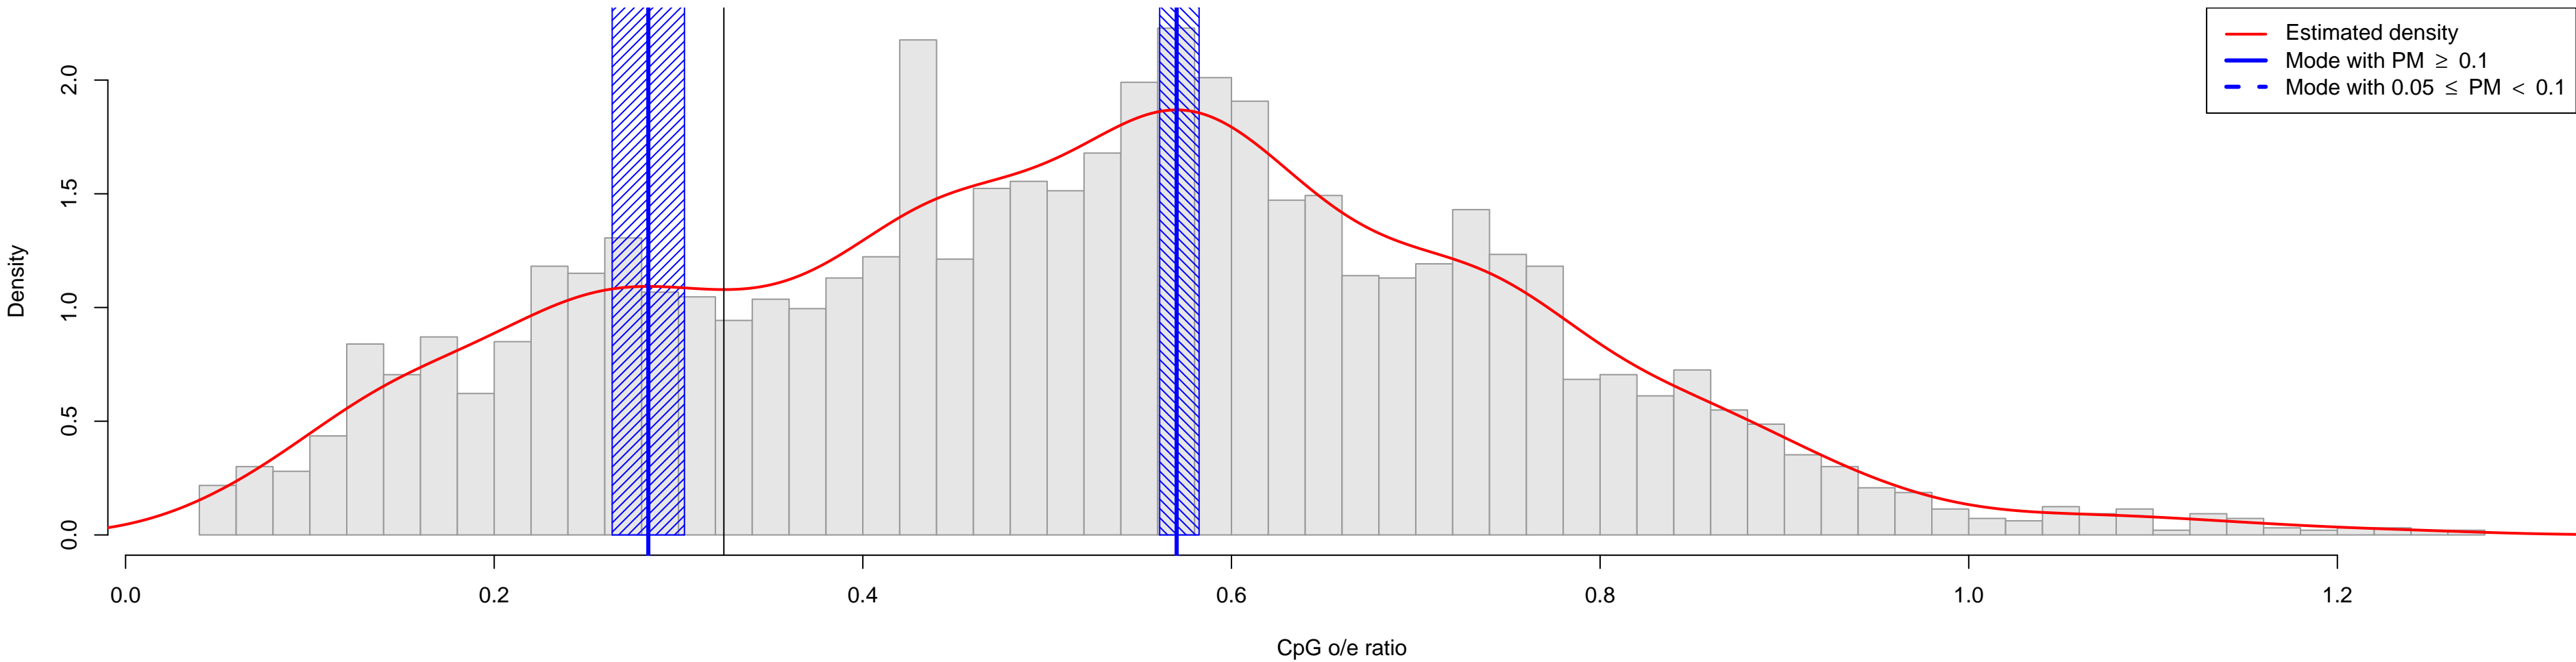

# Ancylostoma\_caninum

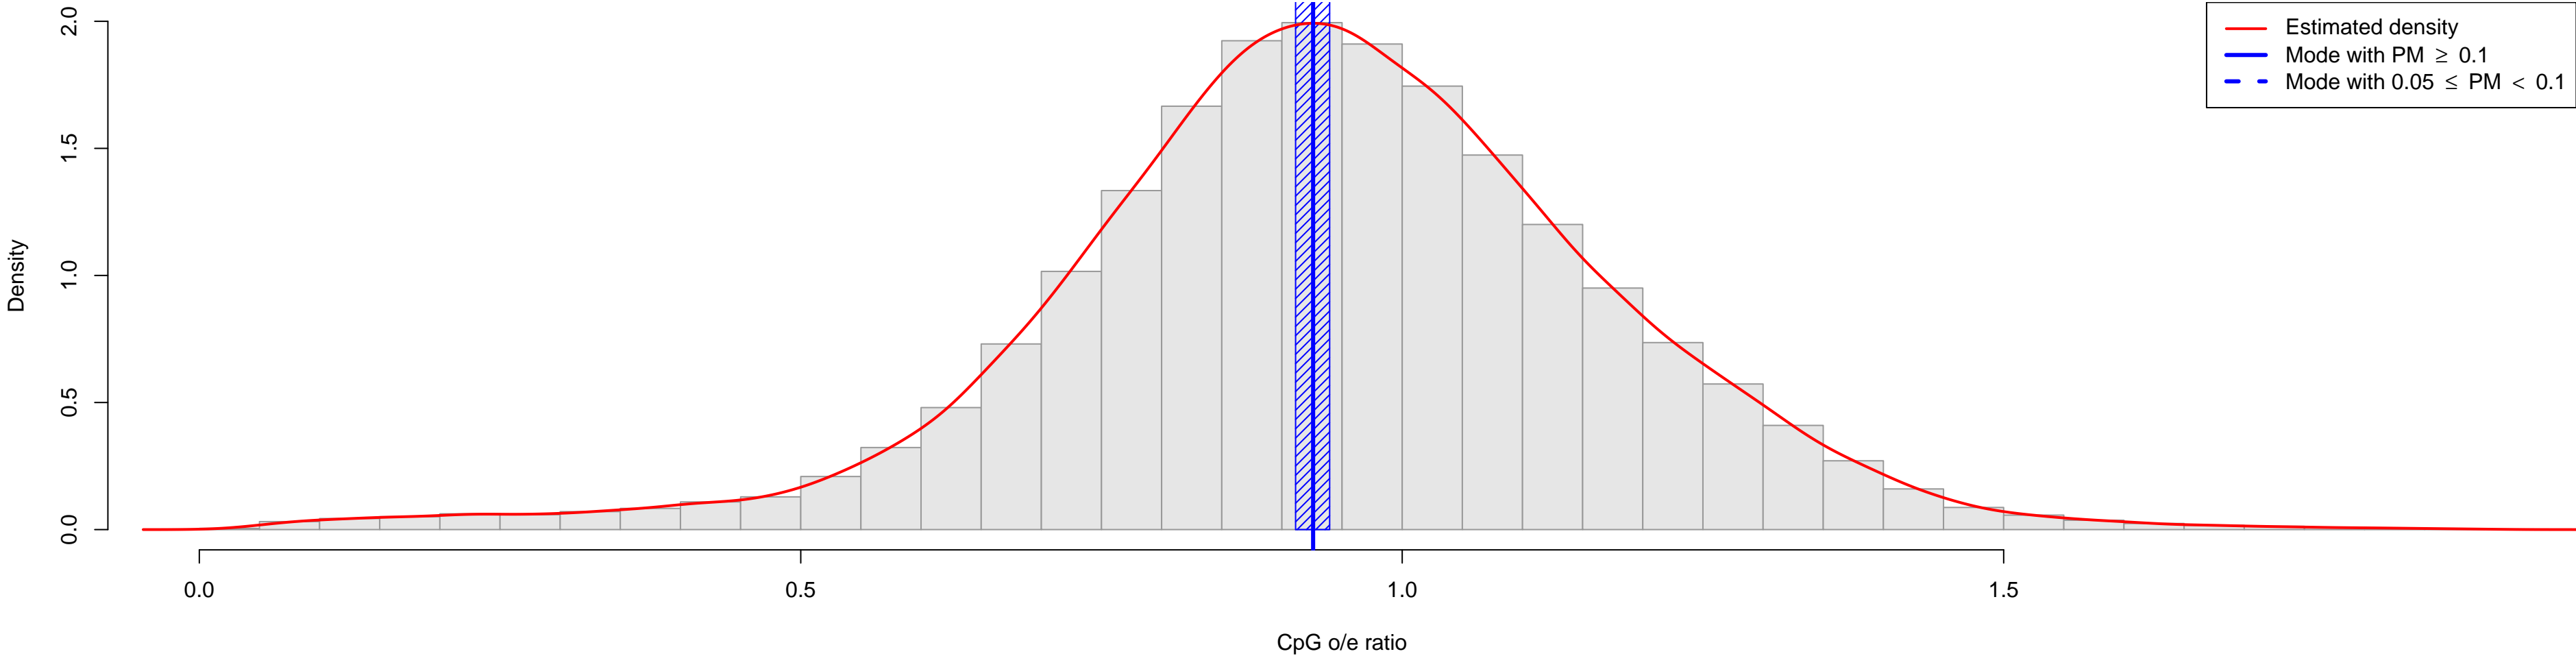

# Ancylostoma\_ceylanicum

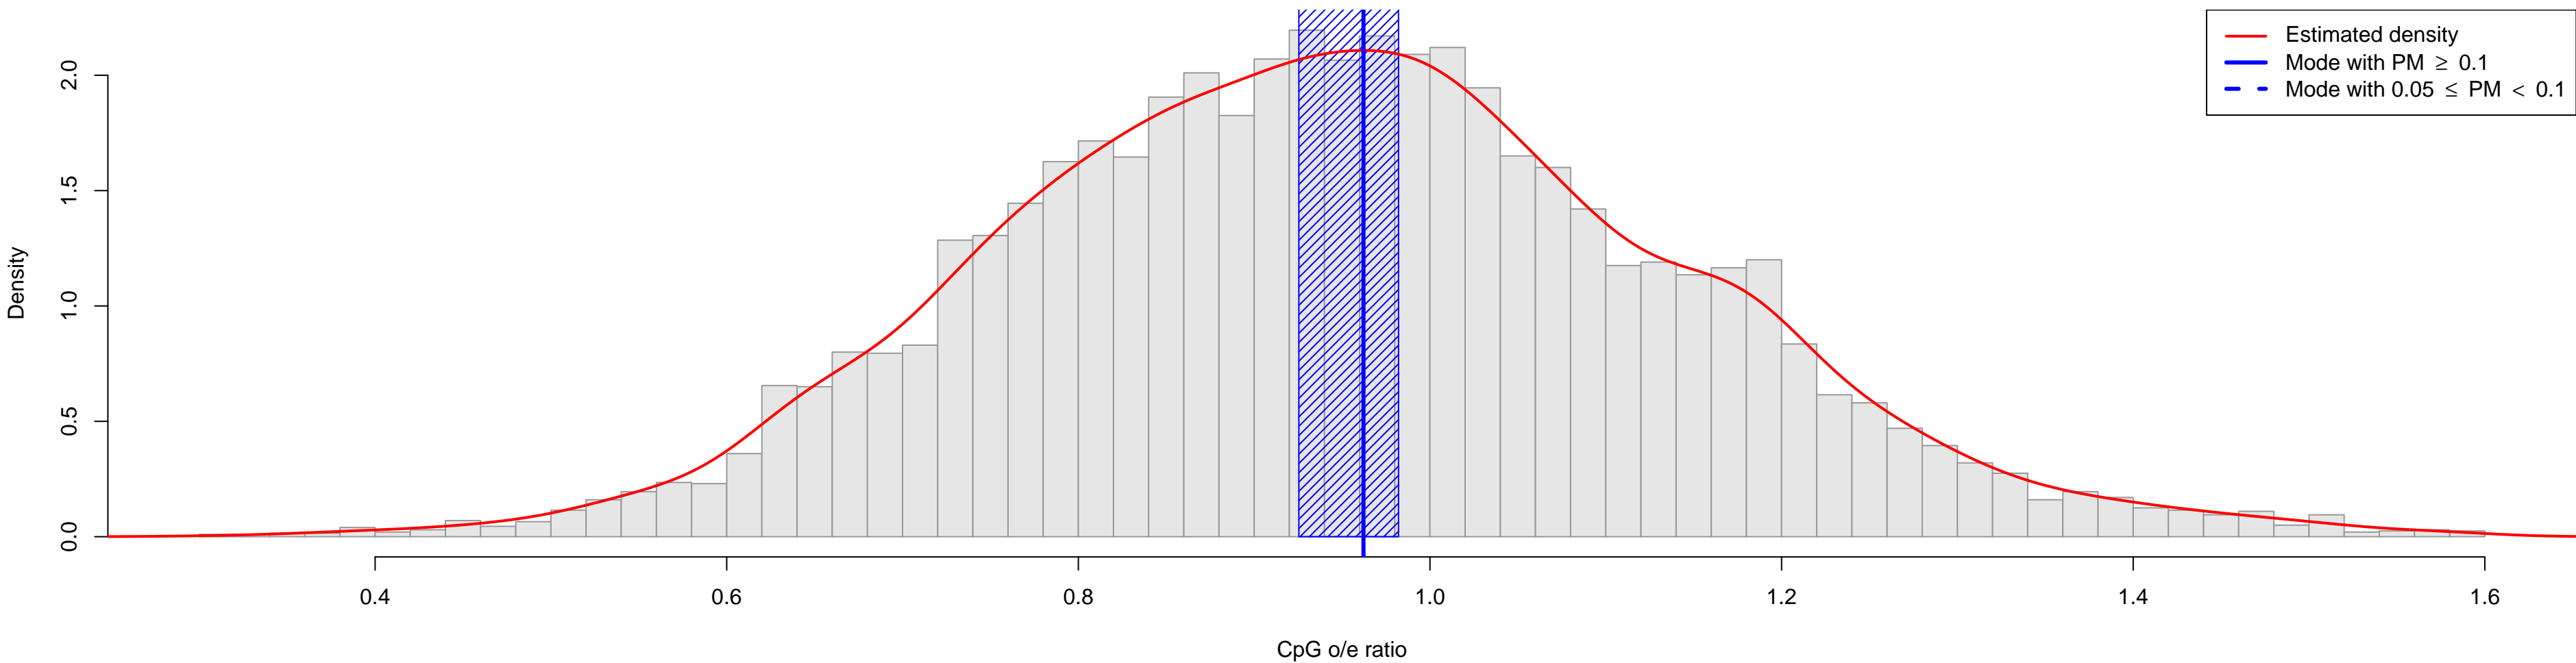



# Anemonia\_viridis

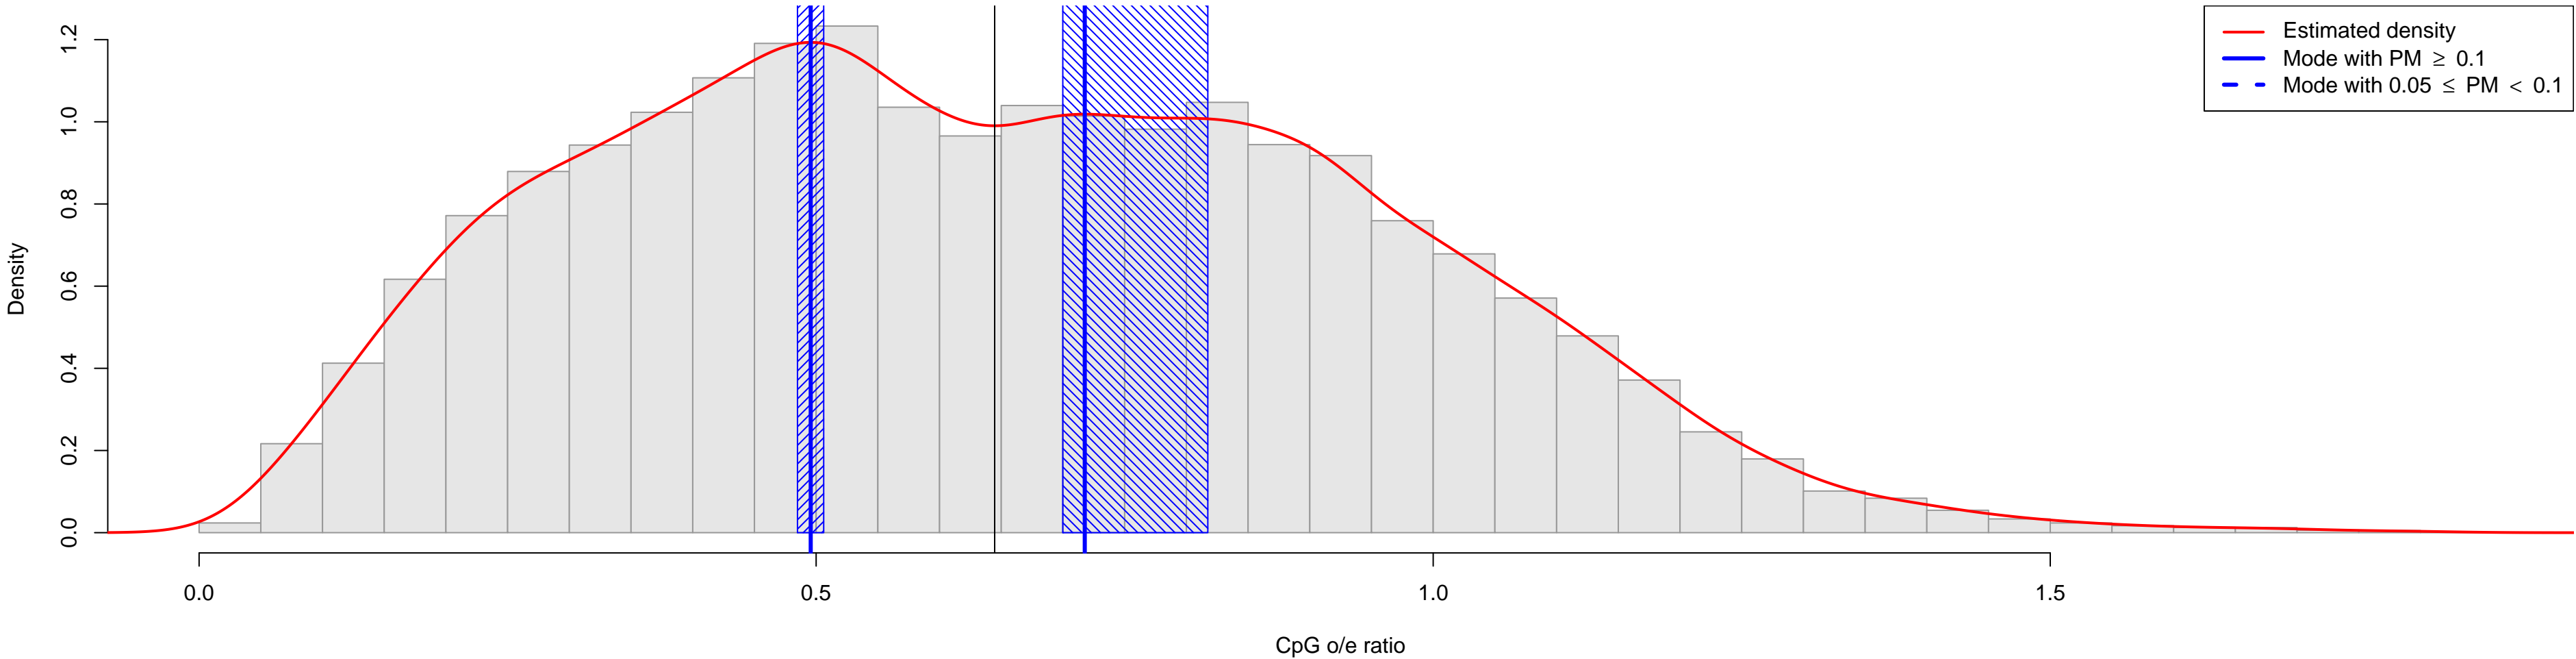

# Anolis\_carolinensis

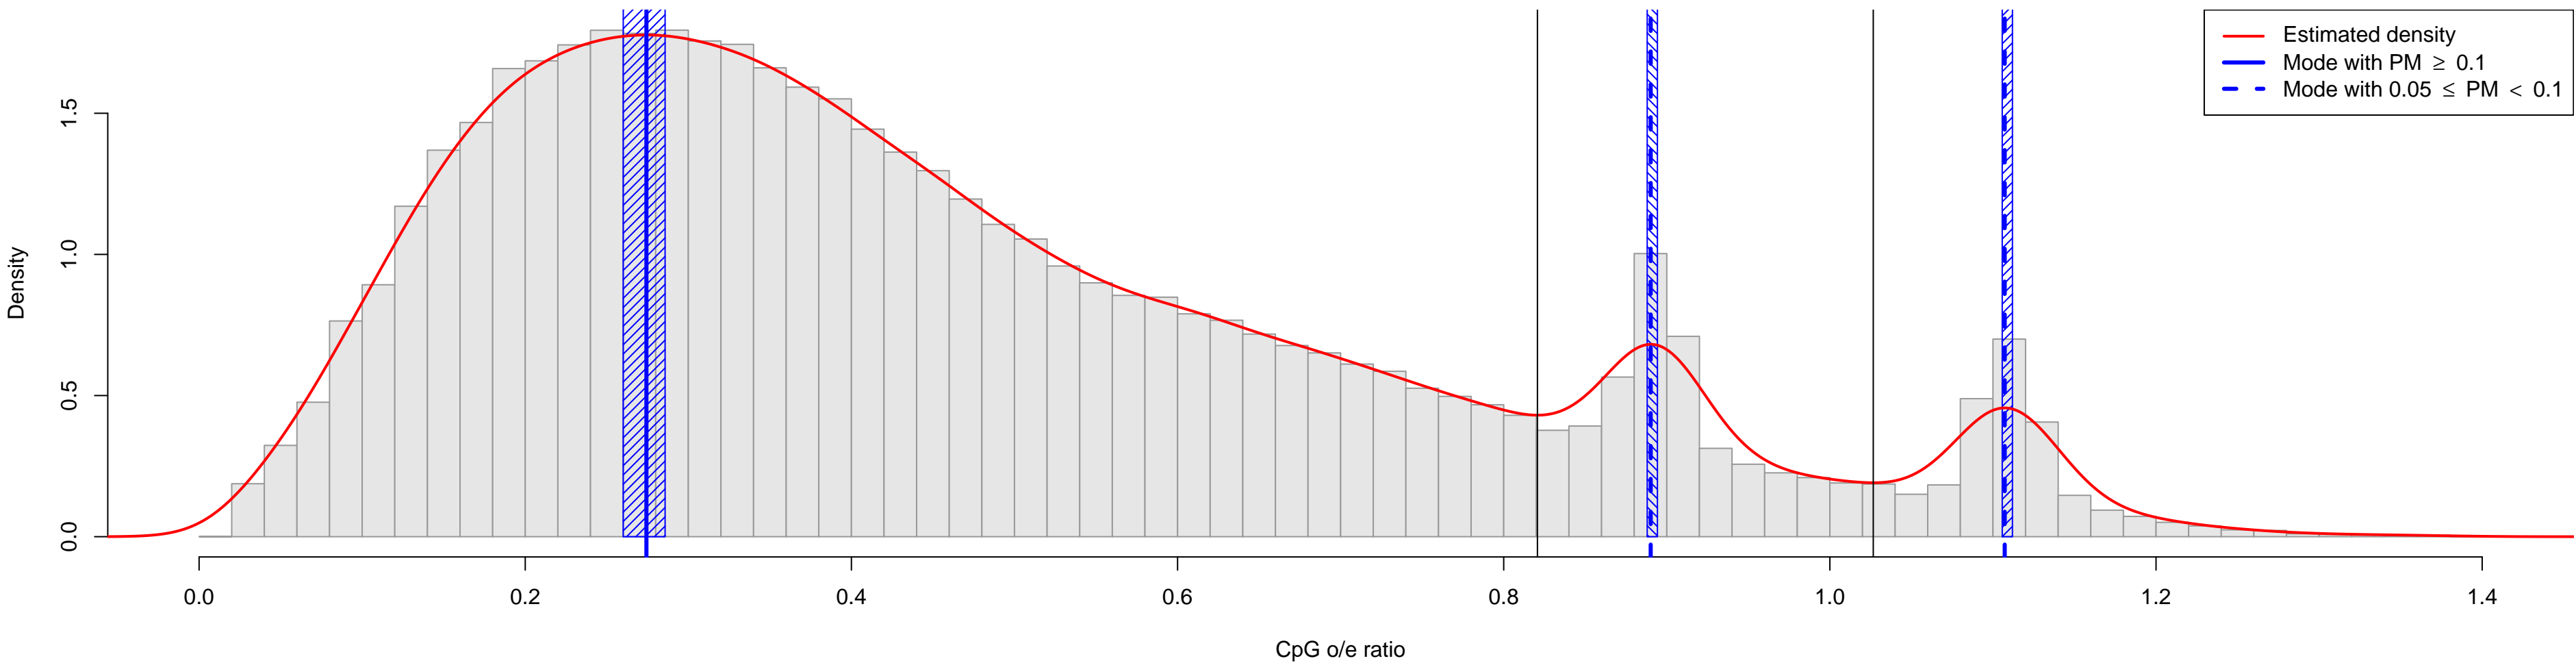

# Anopheles\_albimanus

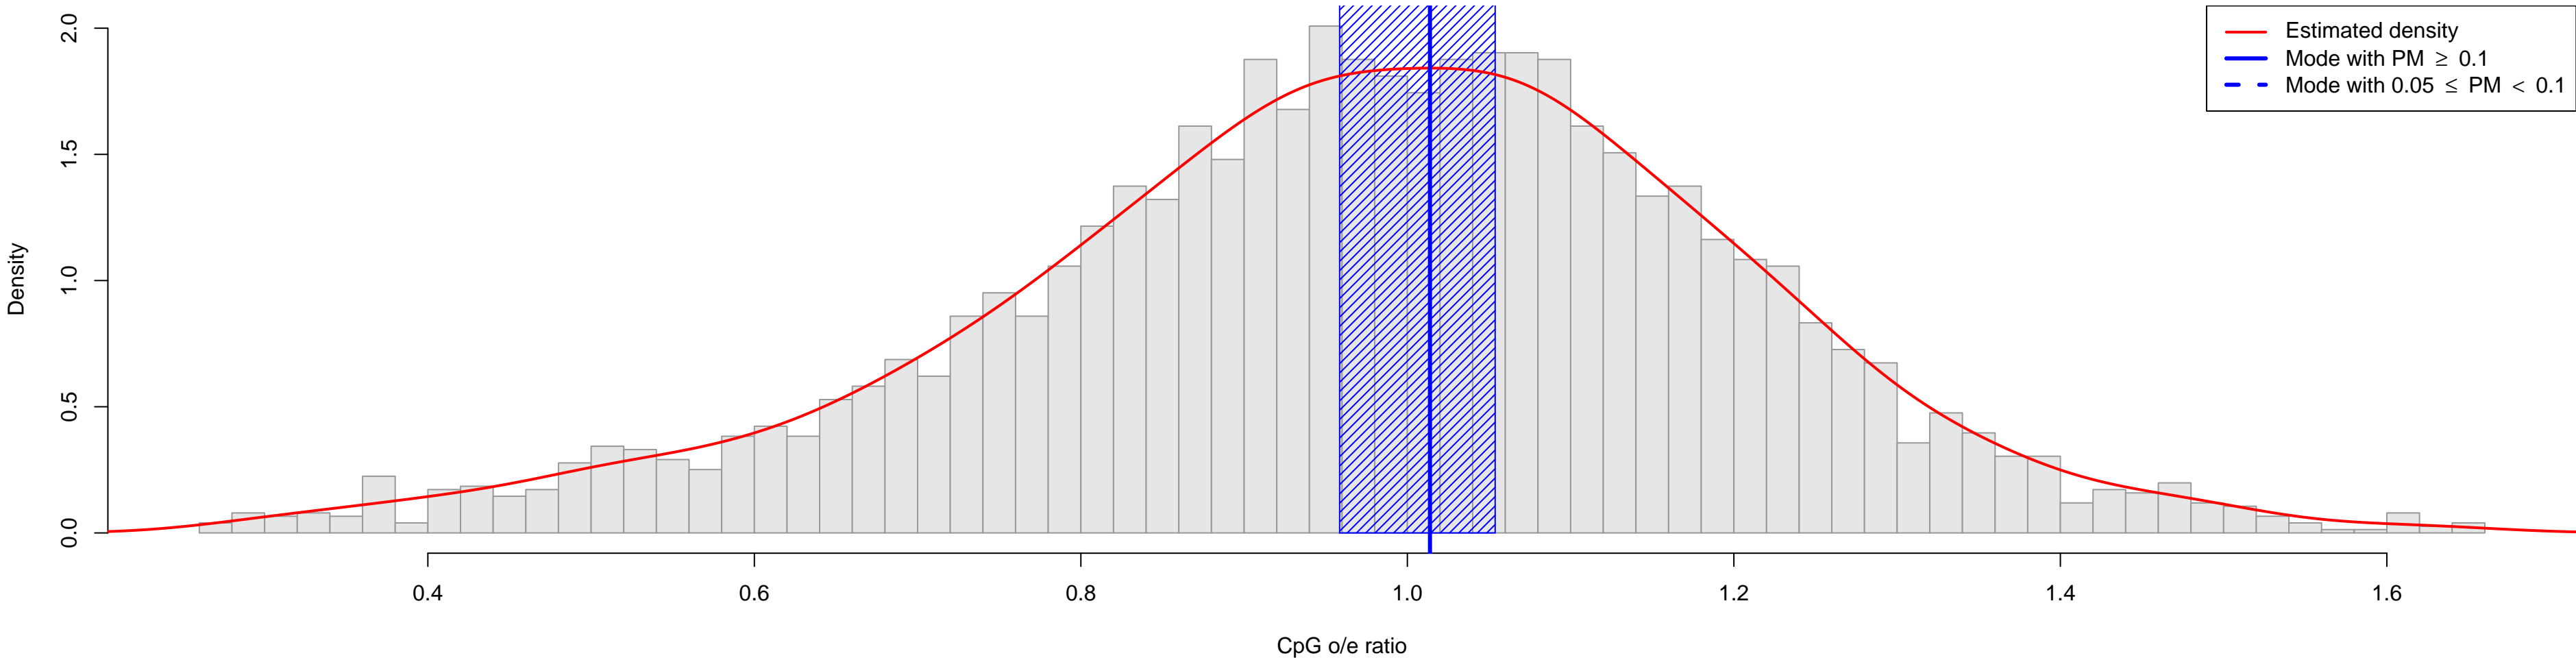

# Anopheles\_darlingi

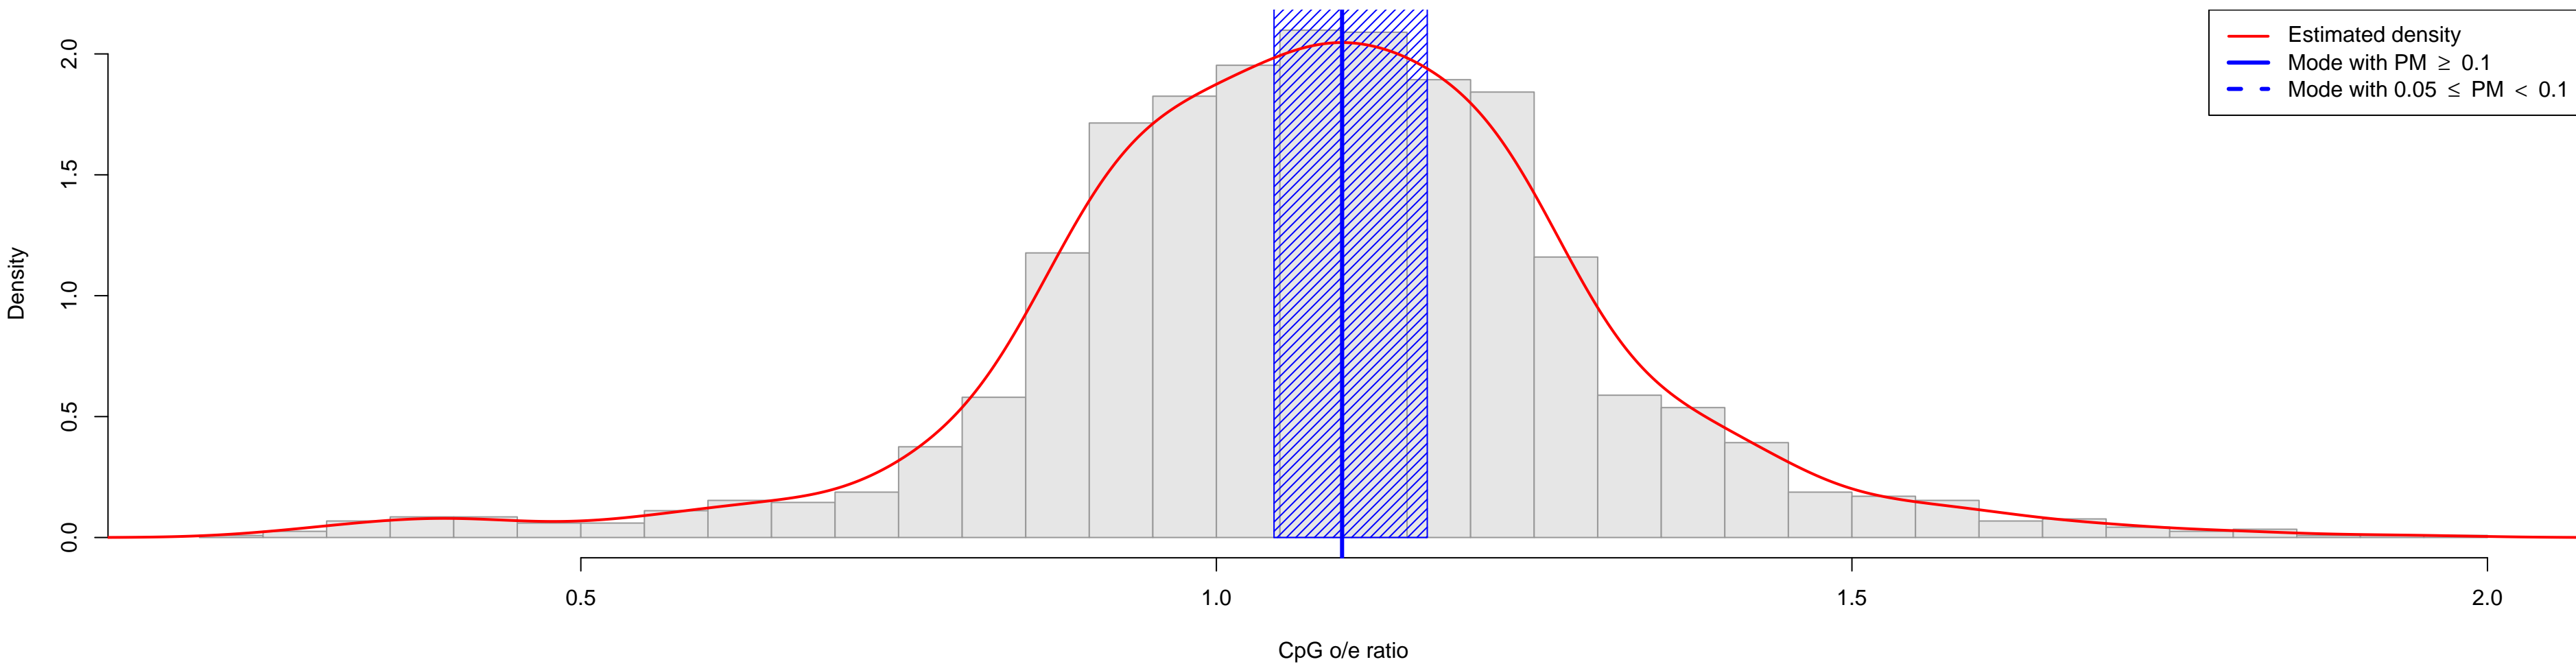

# Anopheles\_gambiae

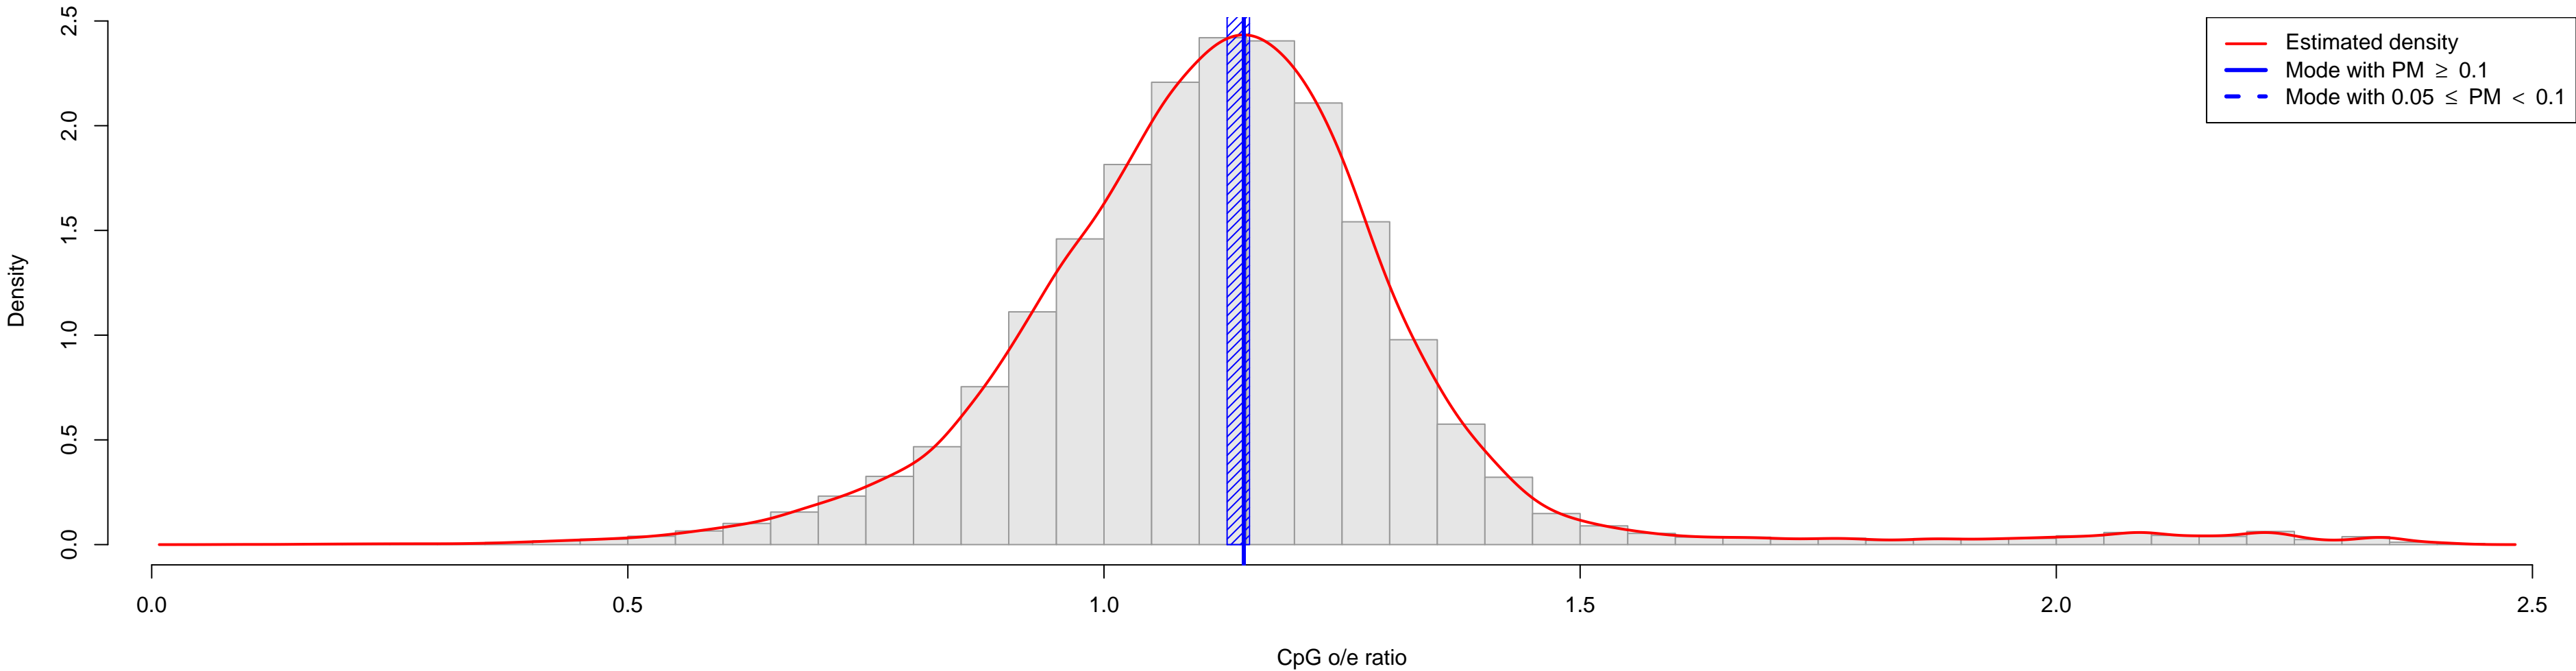

# Anopheles\_stephensi

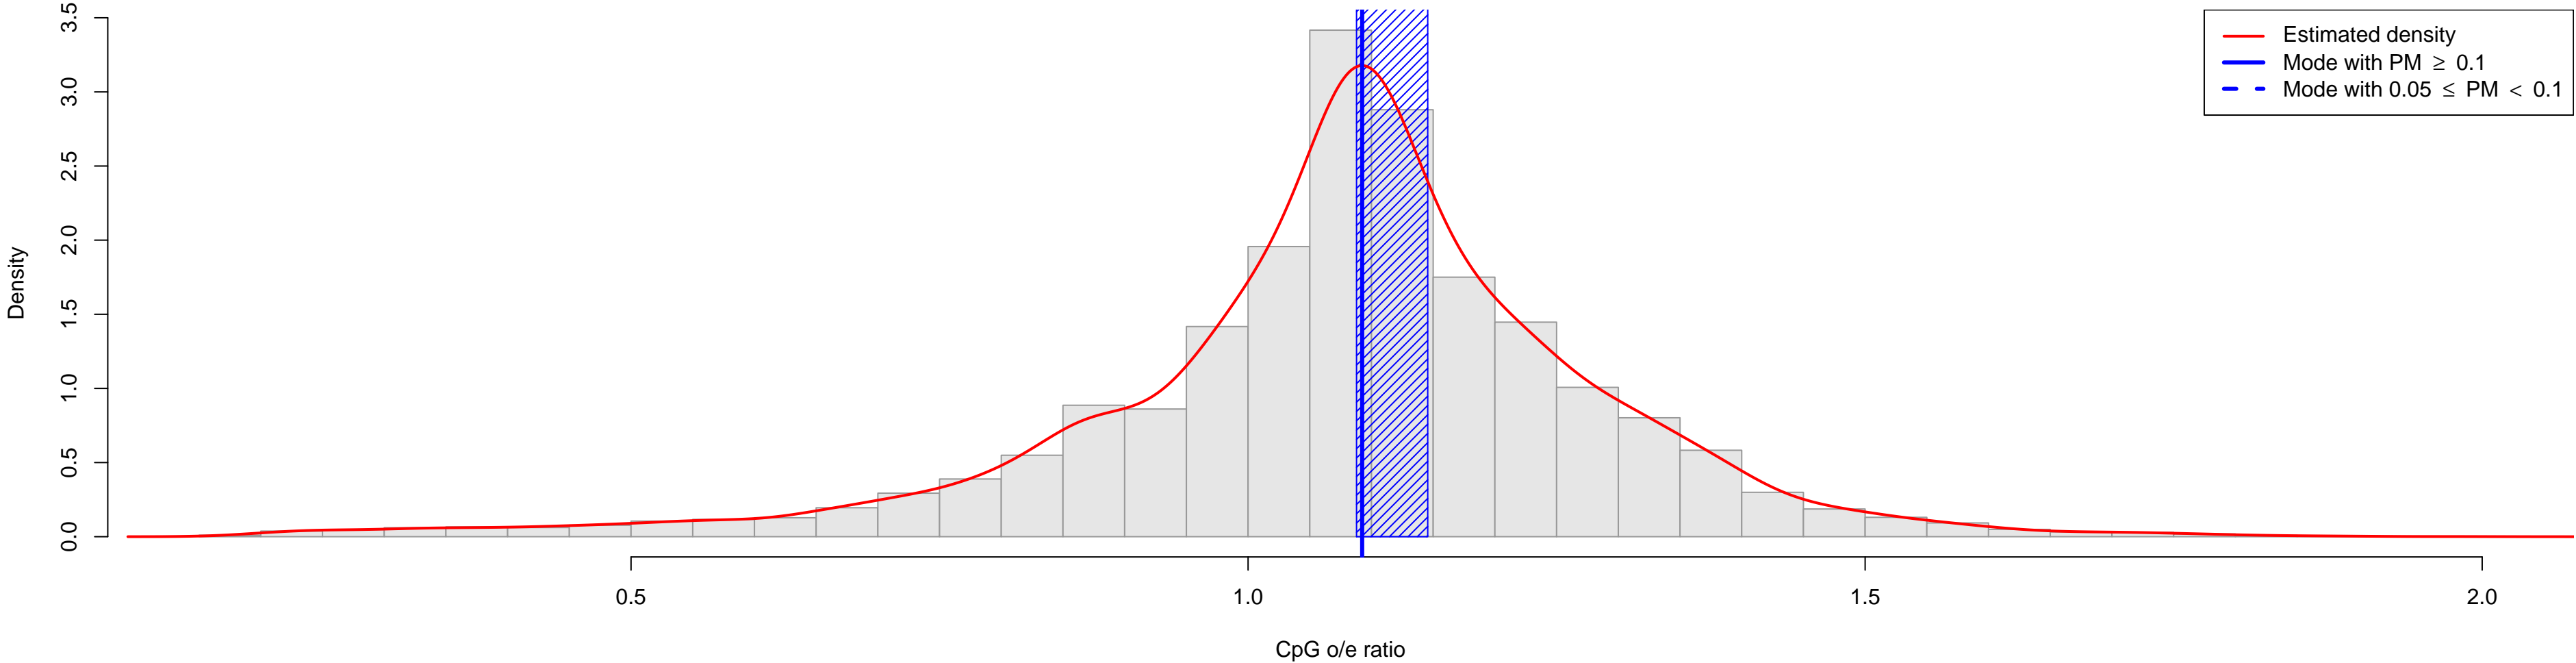

# Anophryoides\_haemophila

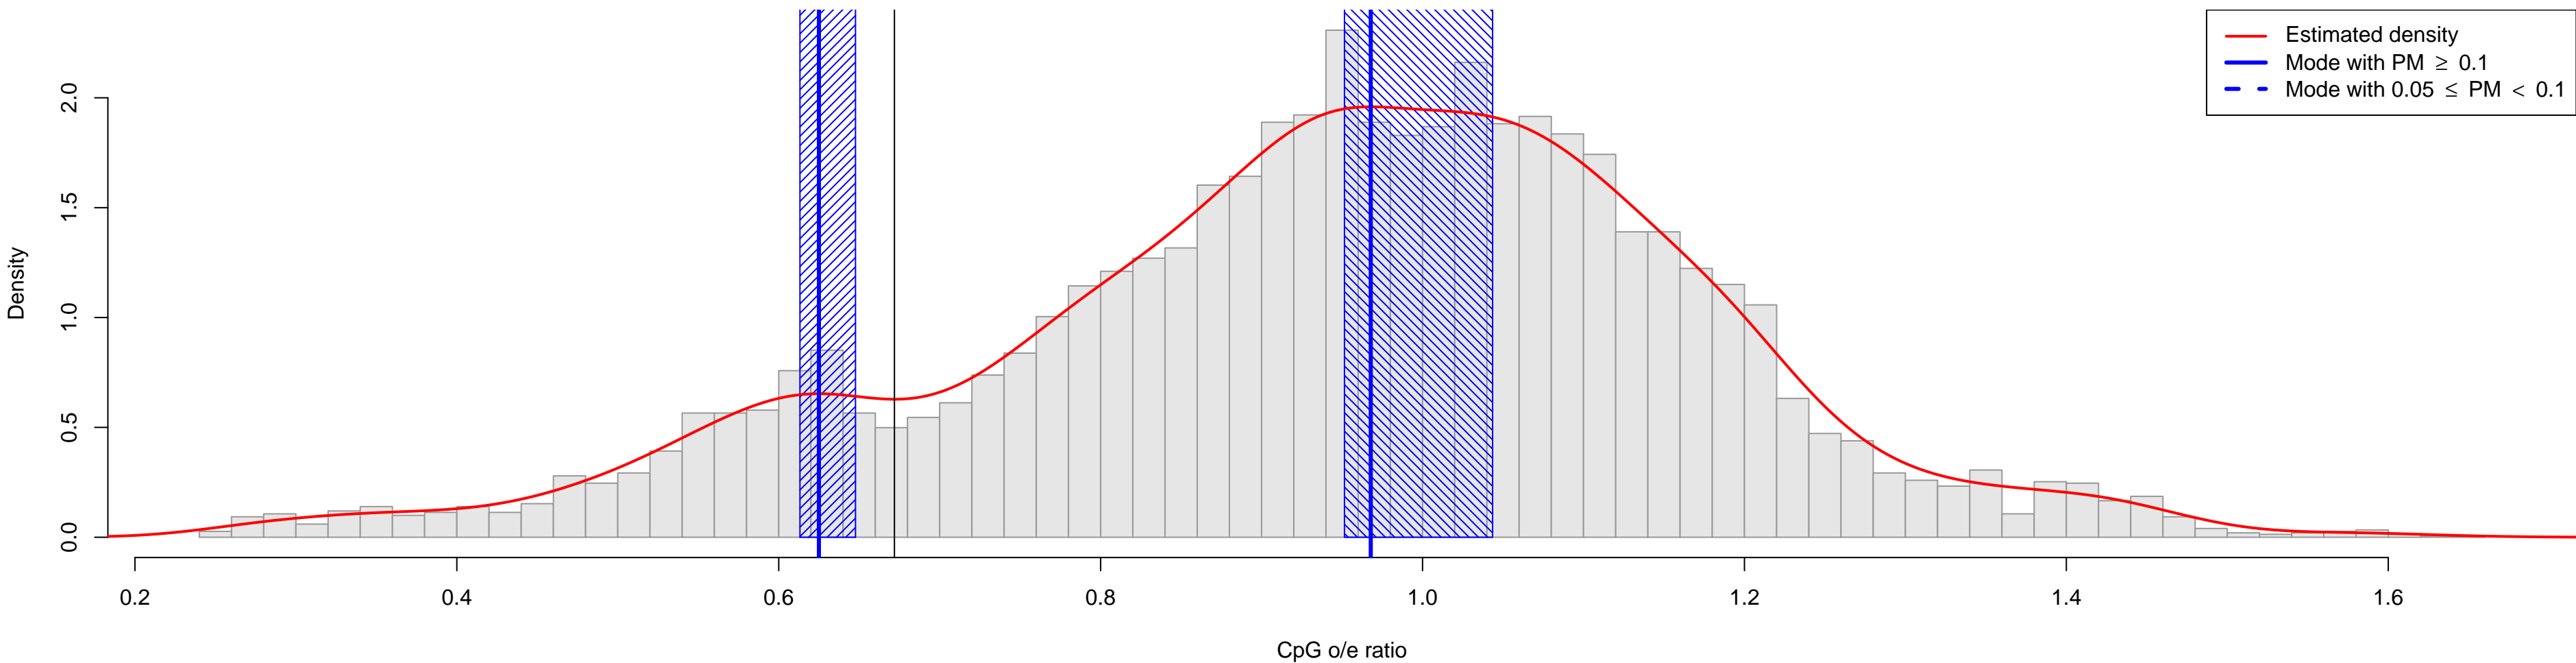

# Antheraea\_myliatta

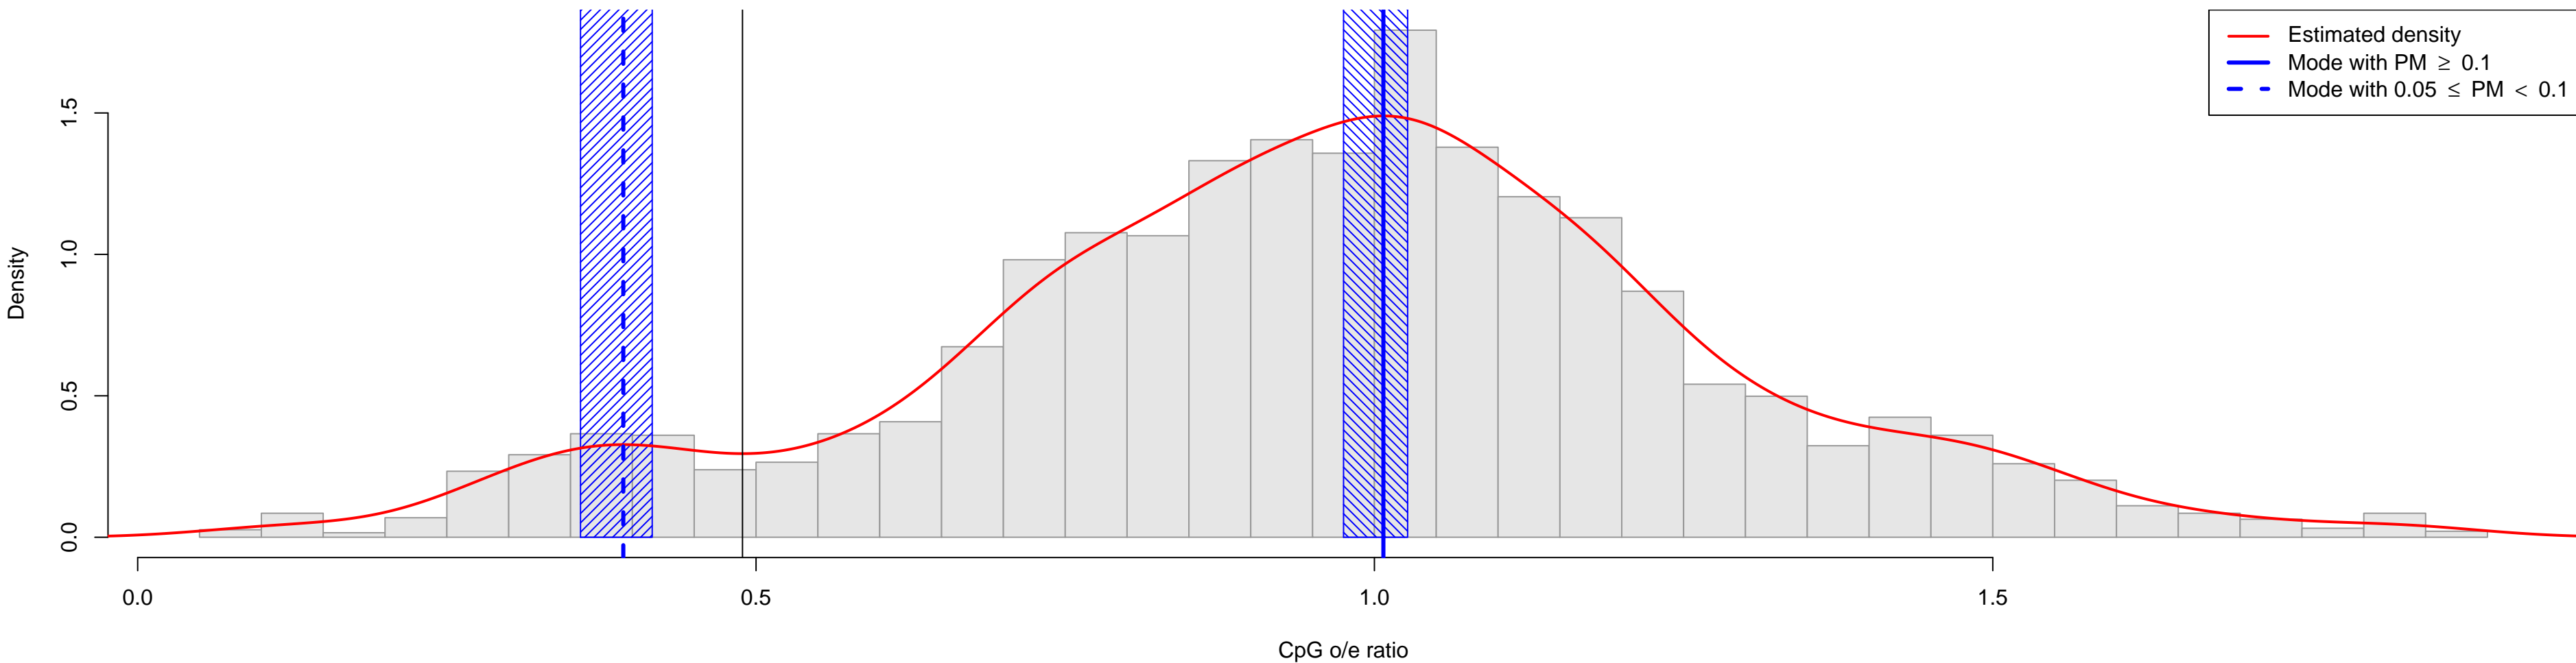



# Antrodia\_cinnamomea

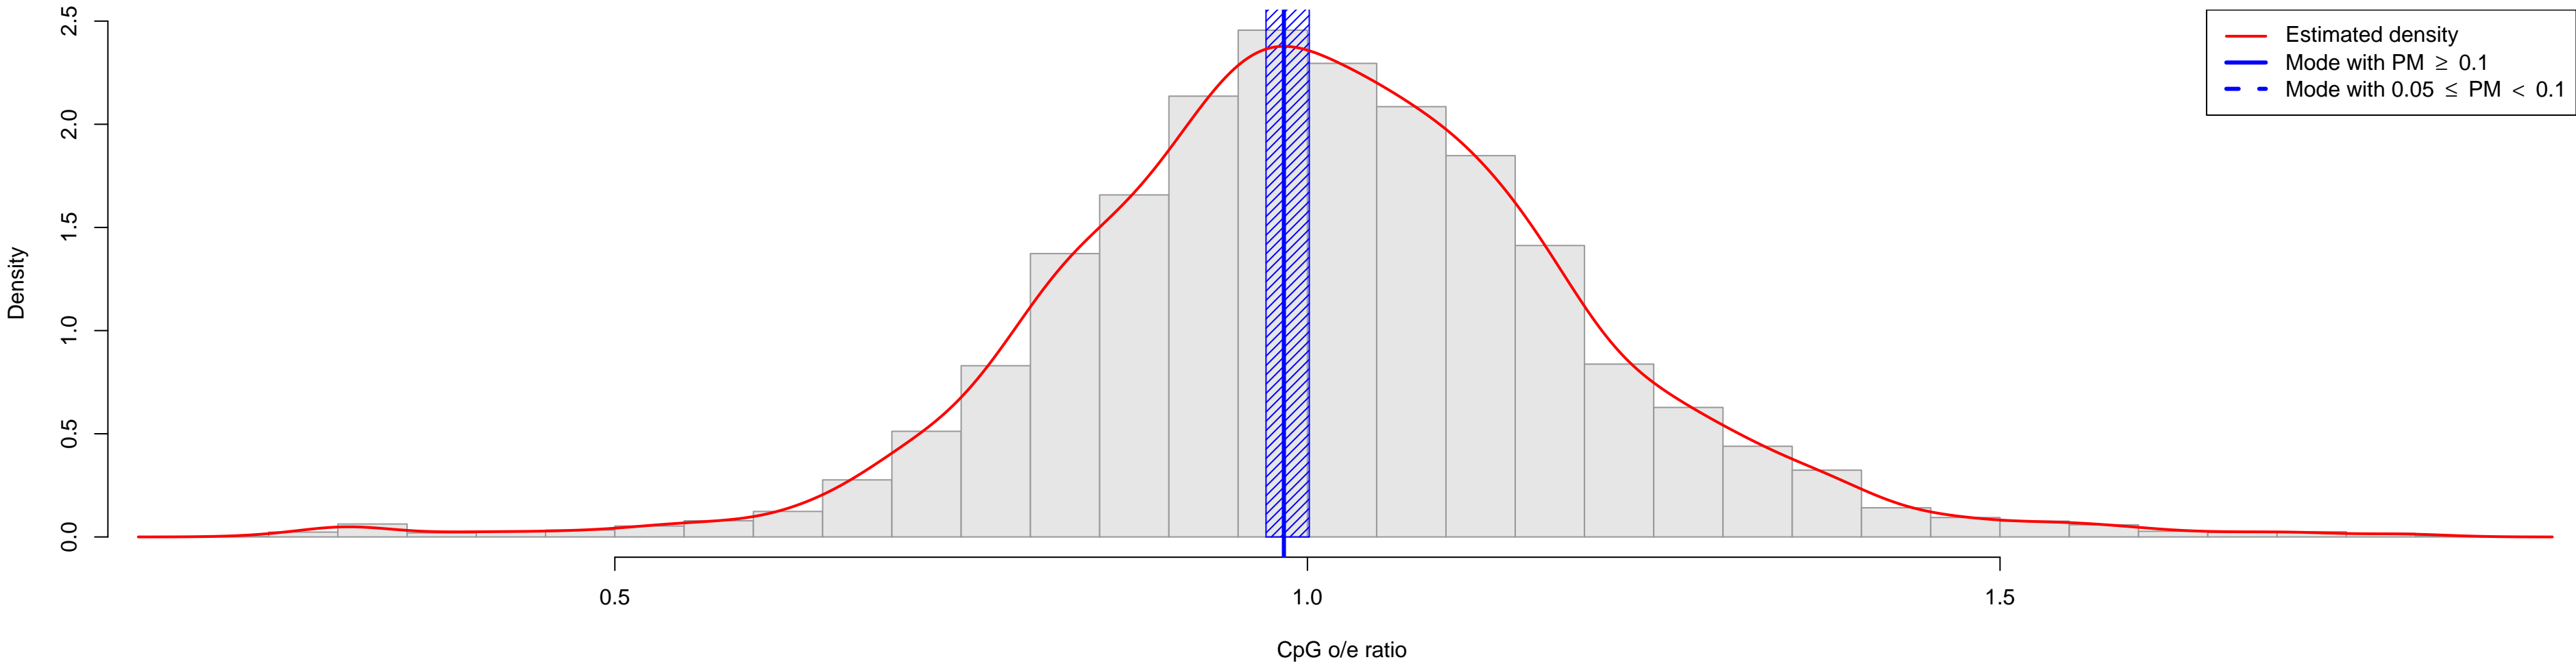

# Anurida\_maritima

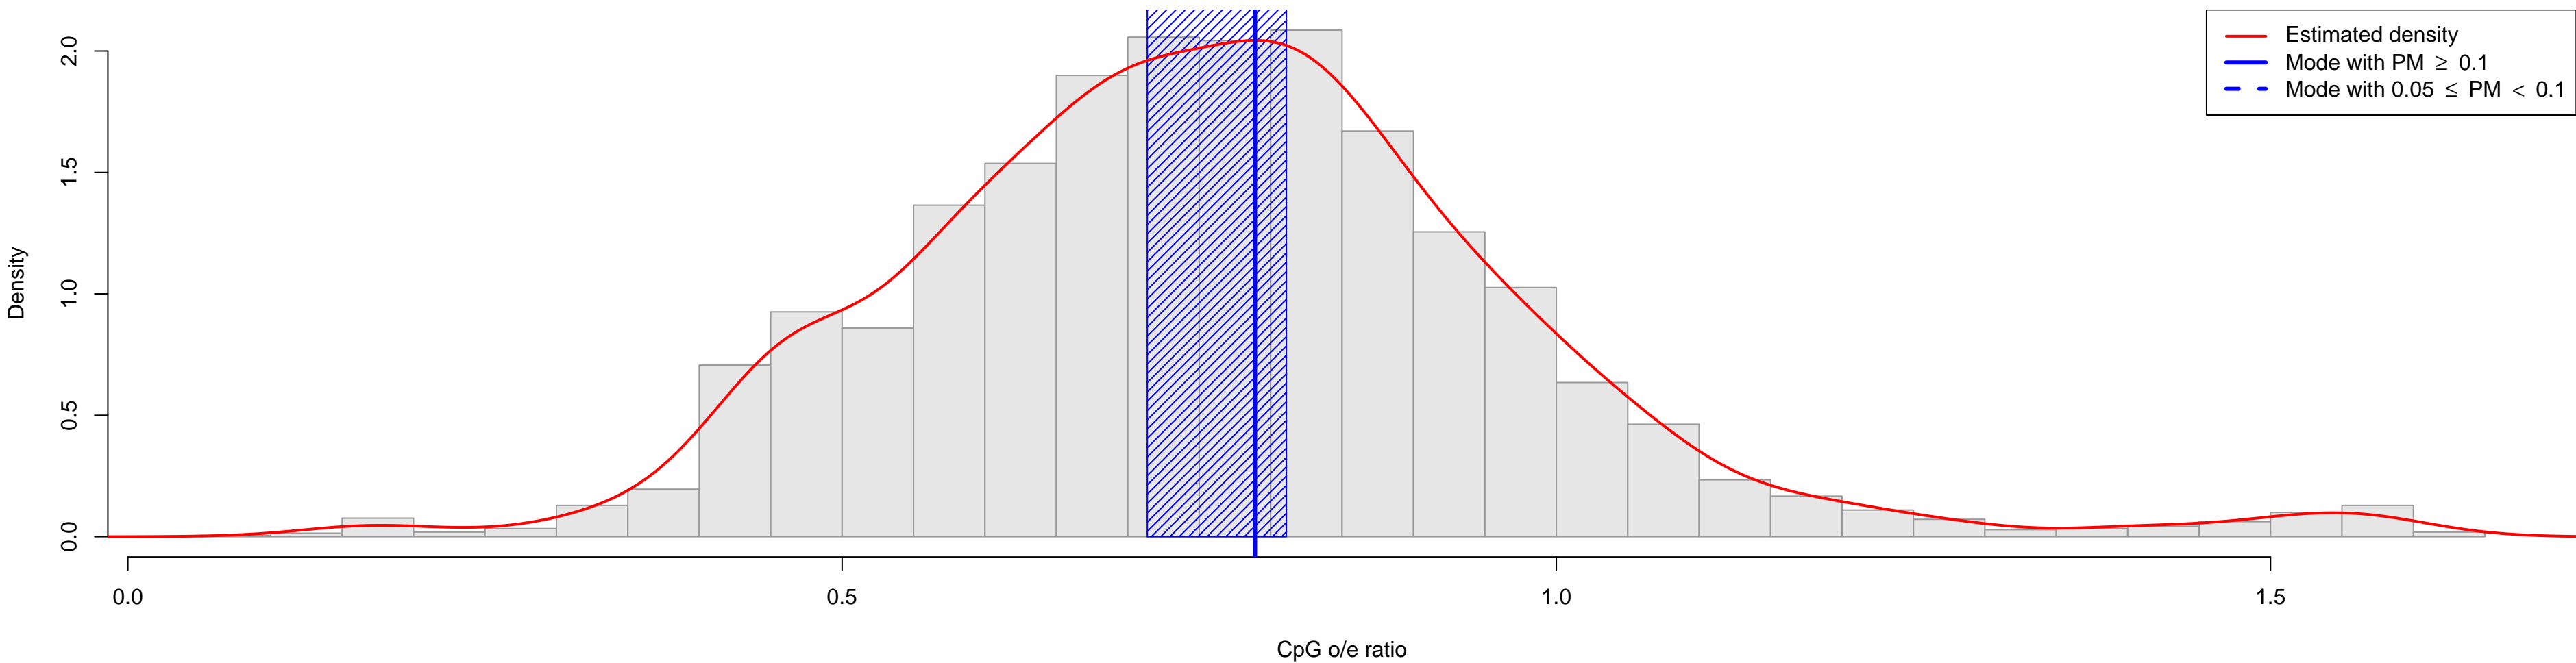

# Apis\_mellifera

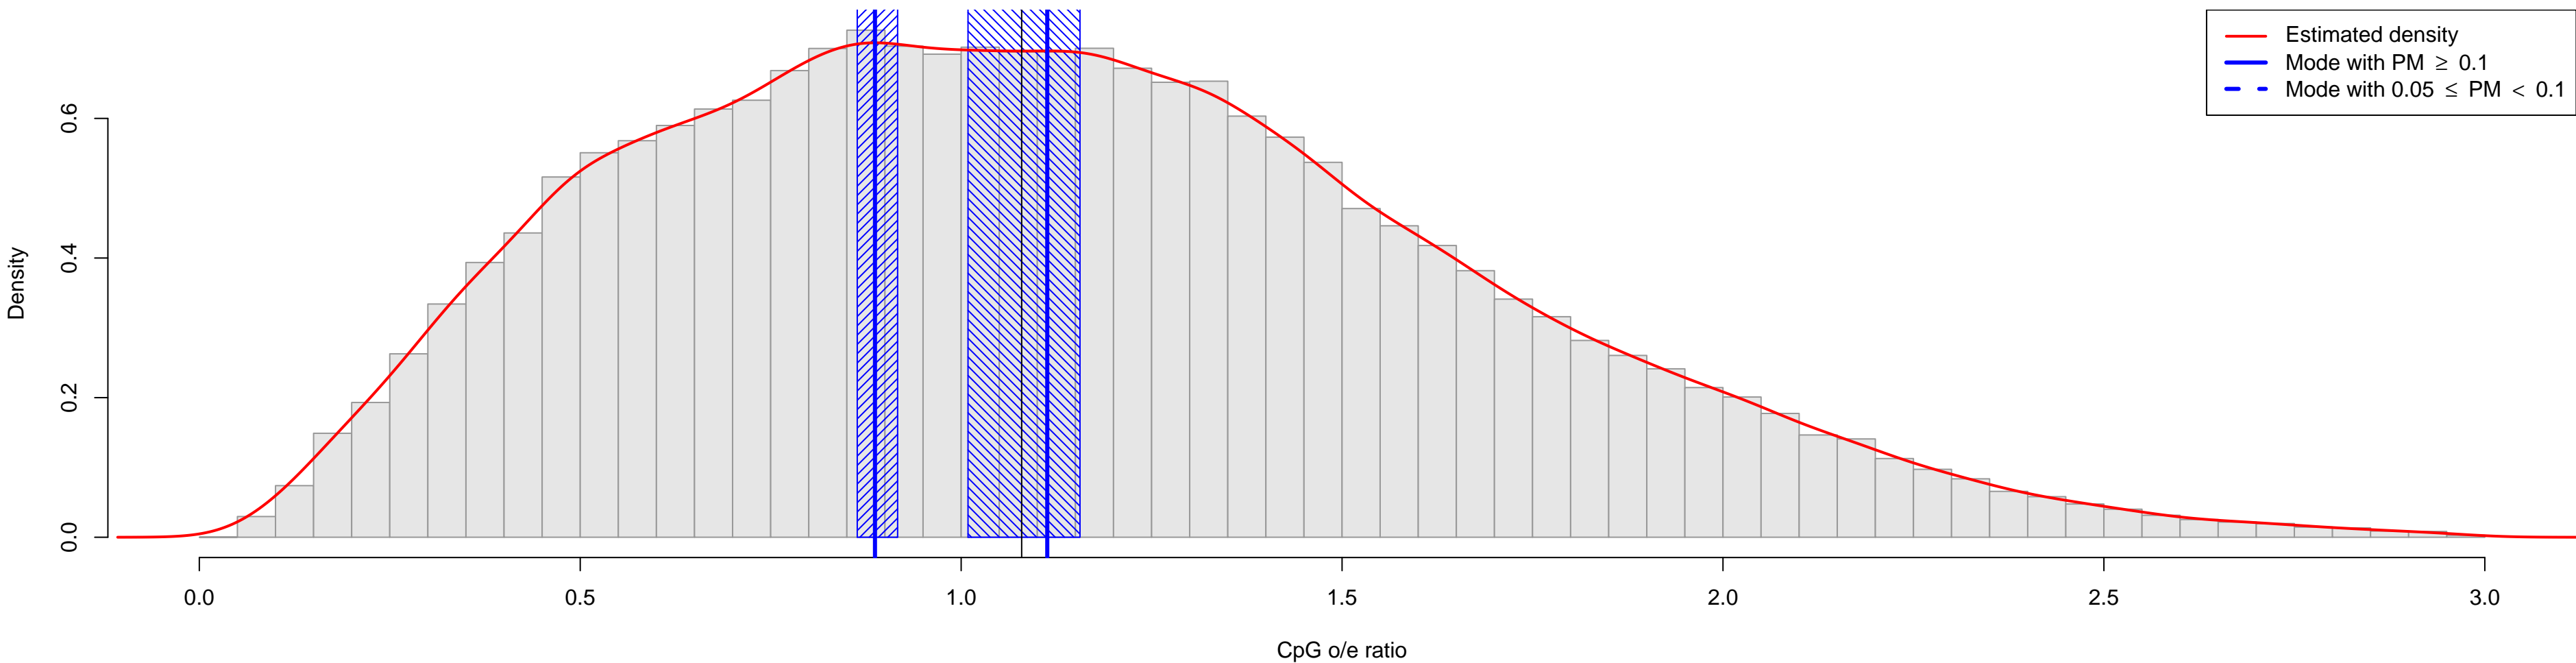

# Aplysia\_californica

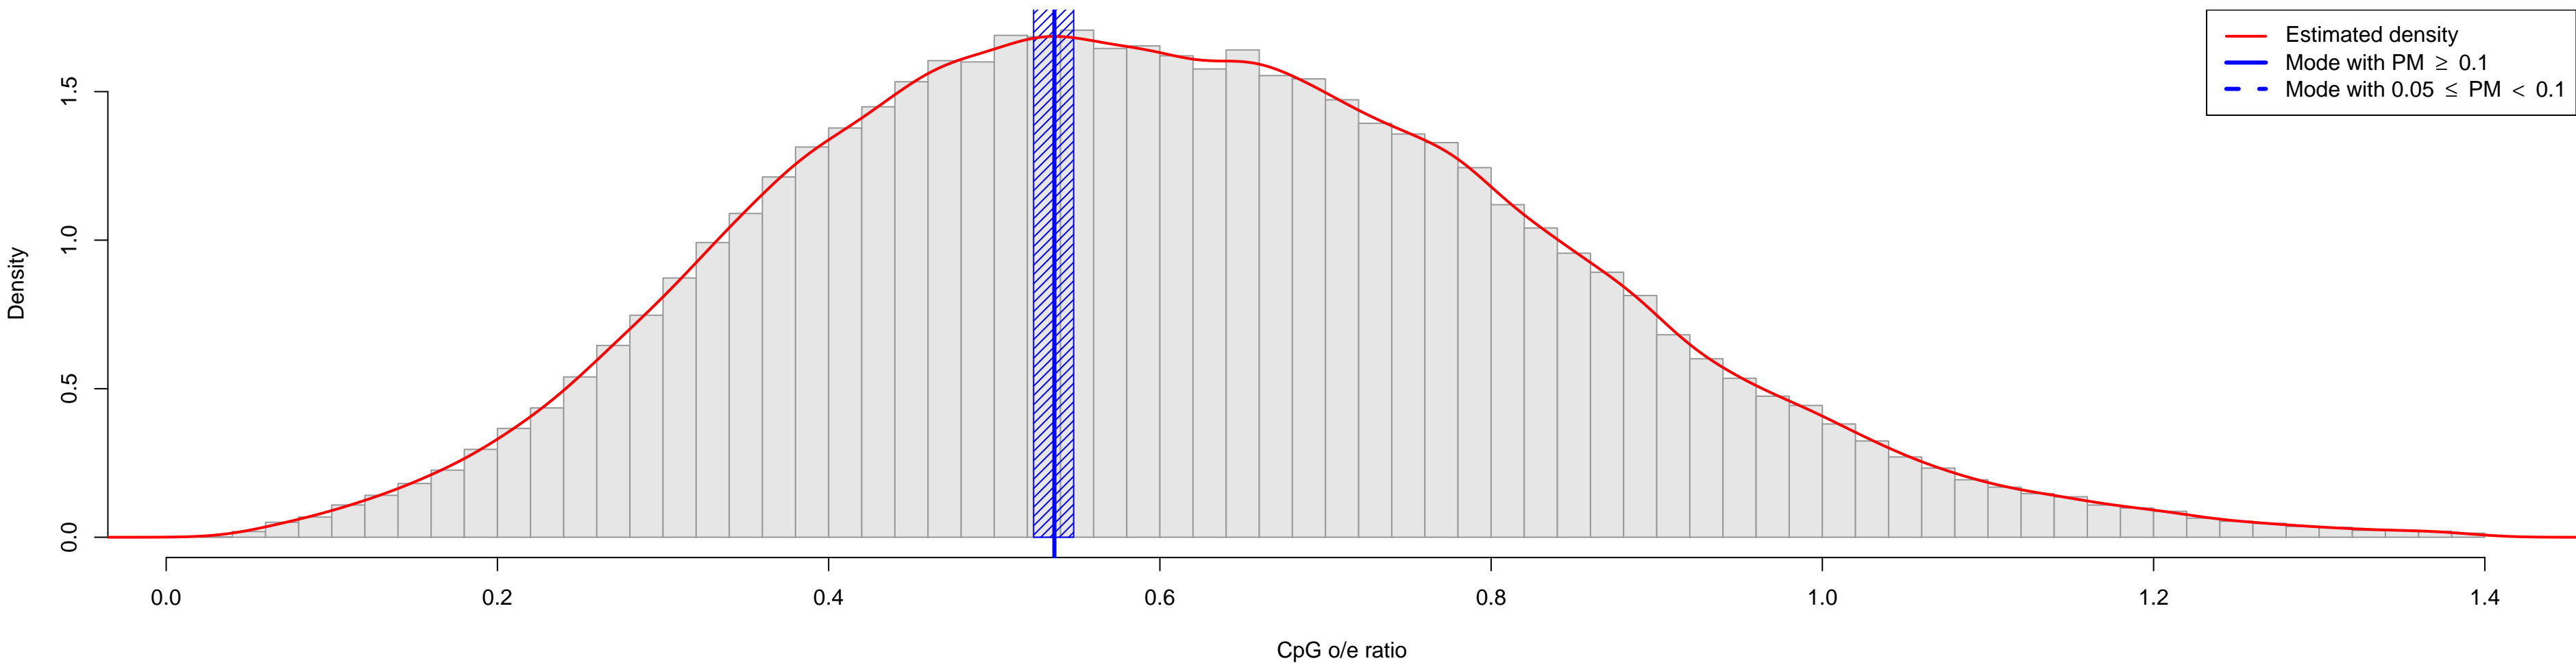

# Aplysia\_kurodai

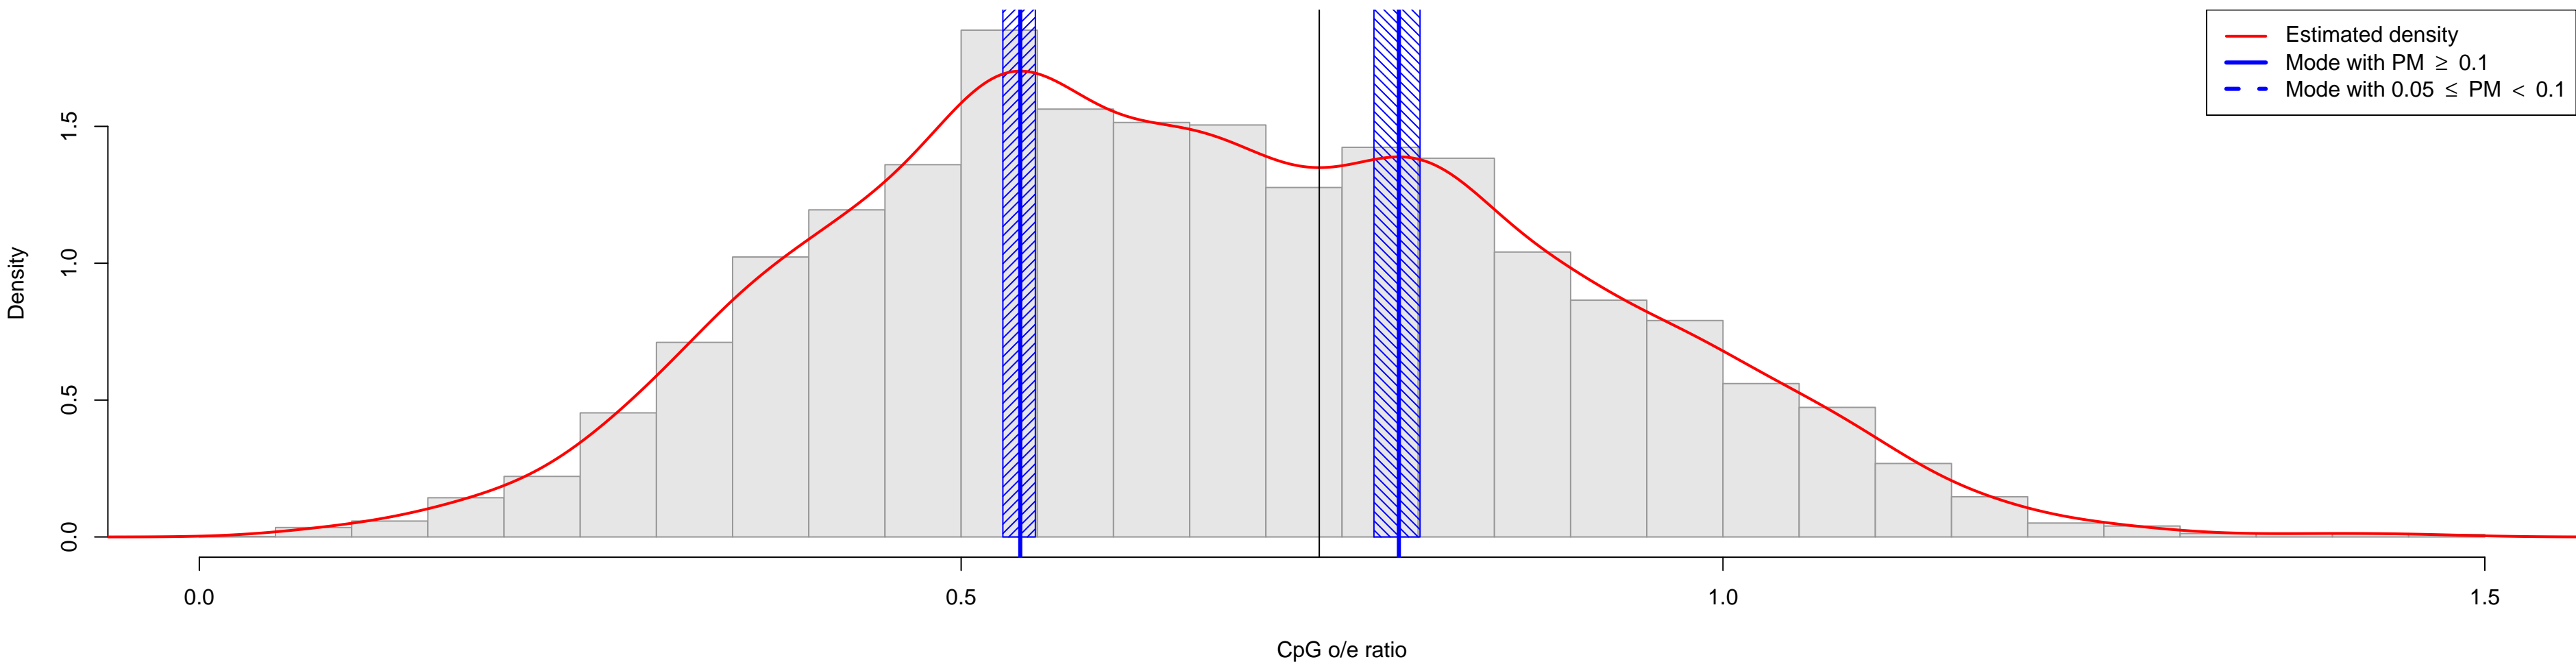

# Apostichopus\_japonicus

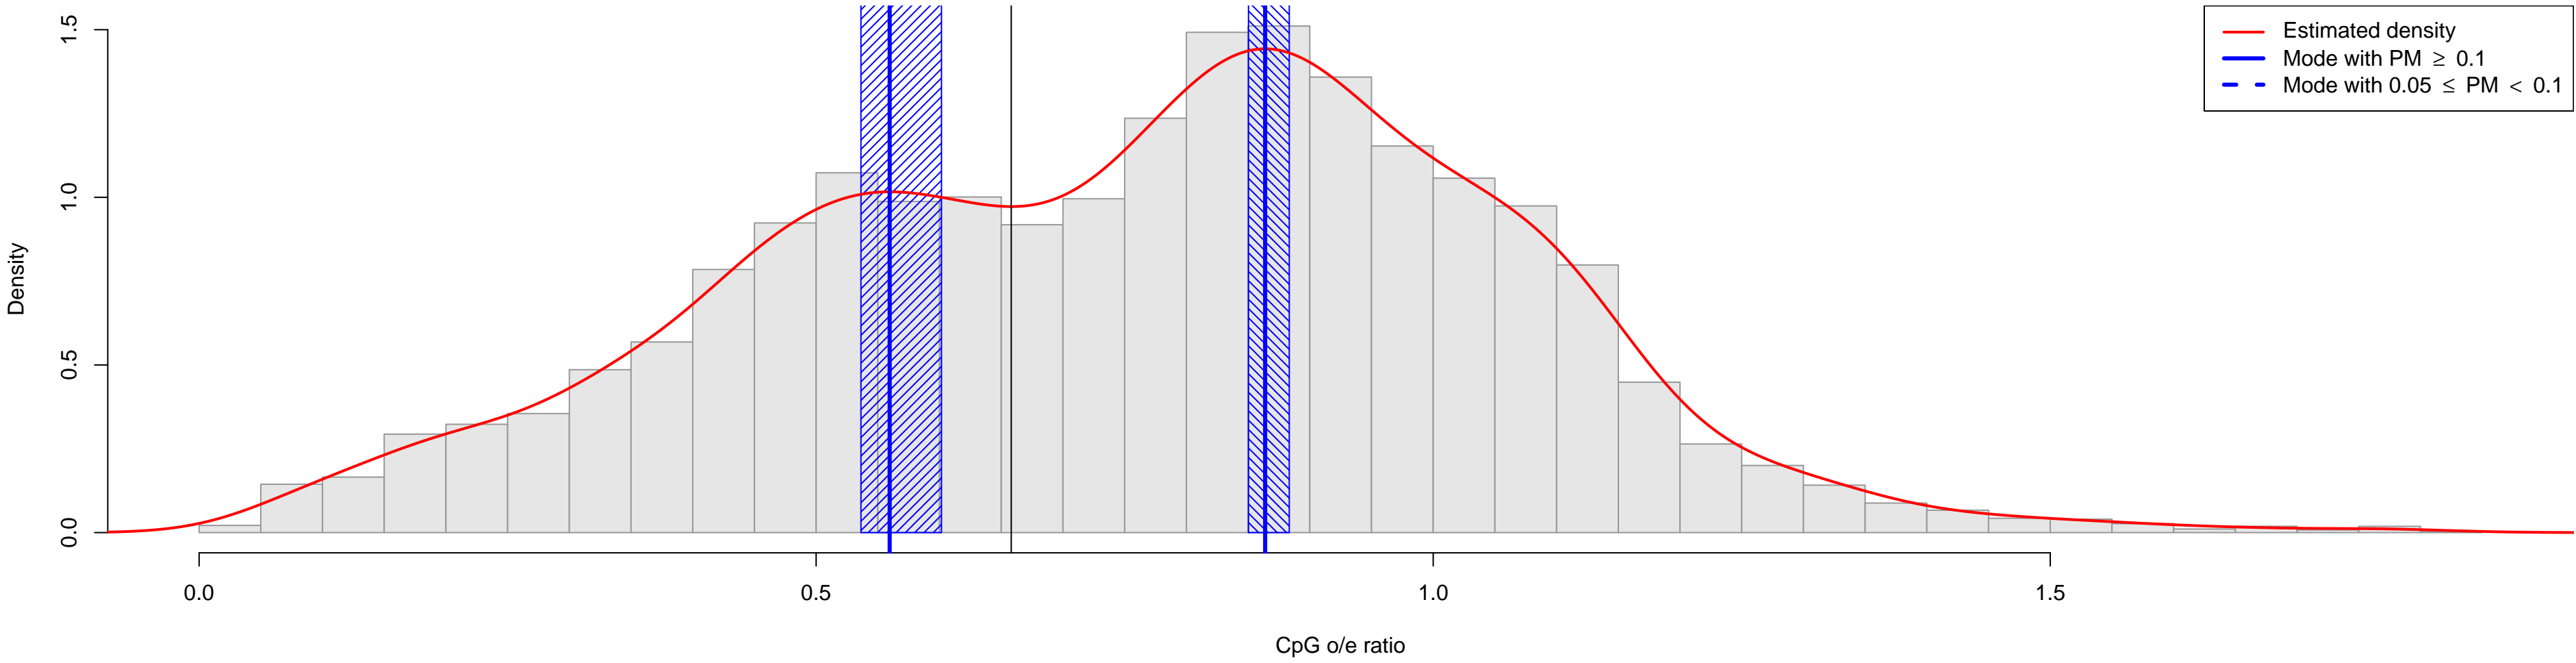

# Arabidopsis\_thaliana

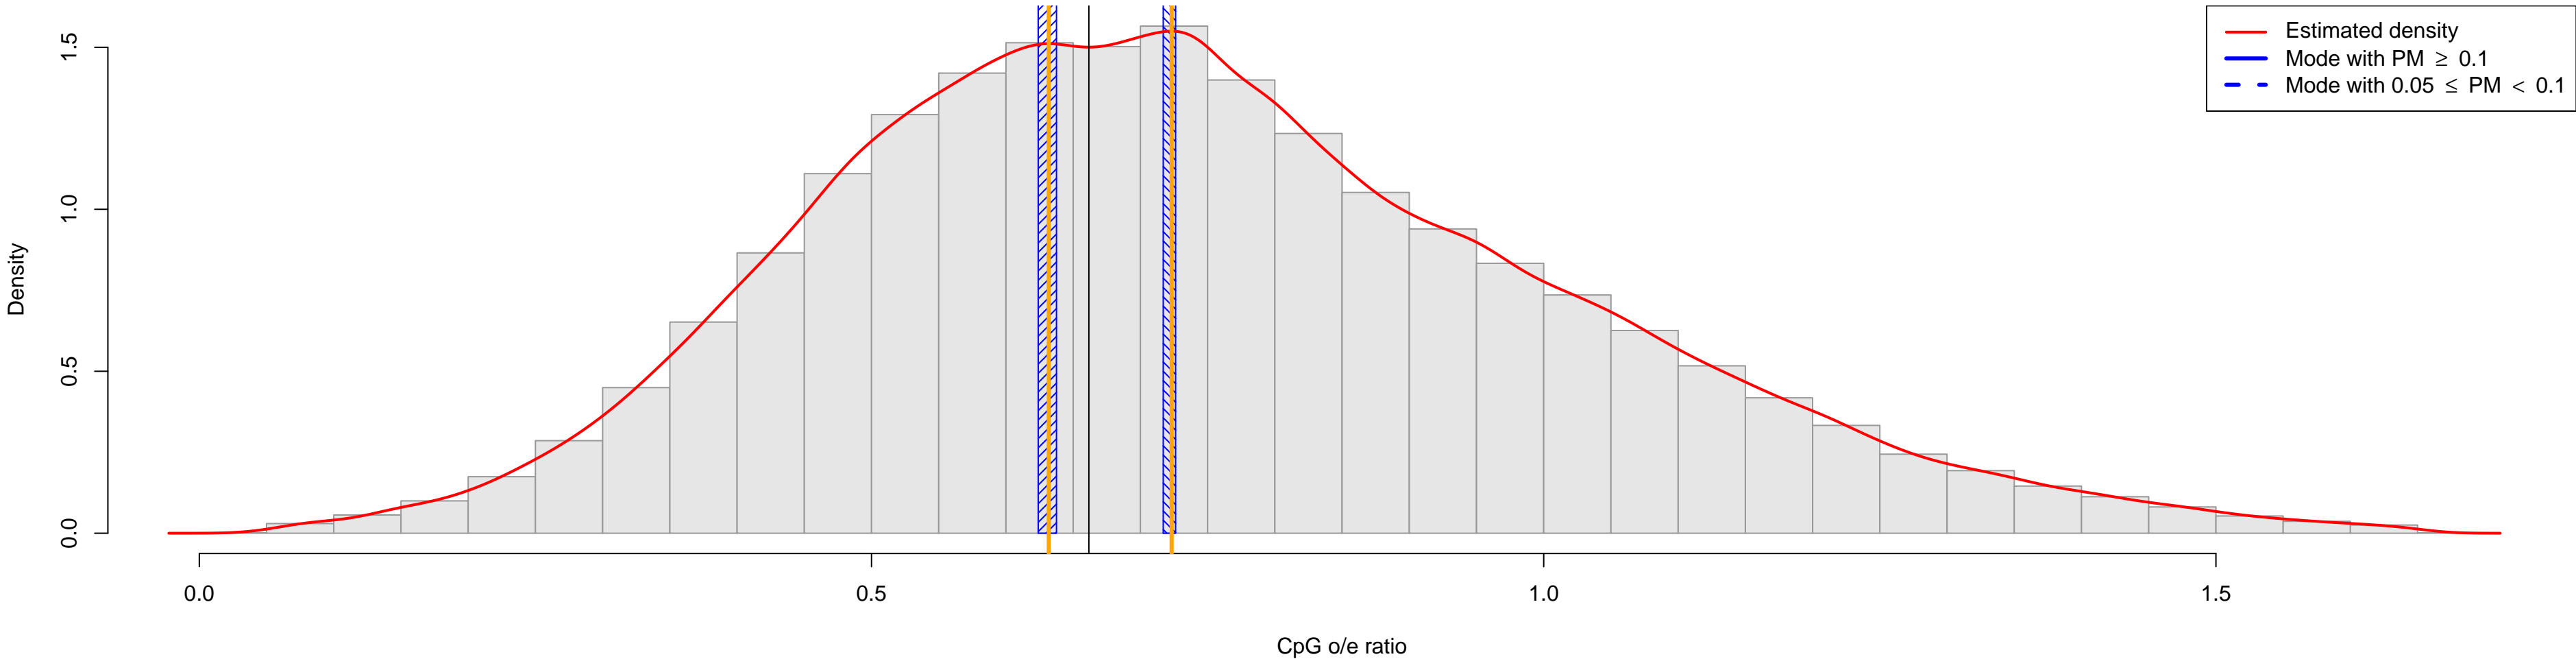

# Arachis\_hypogaea

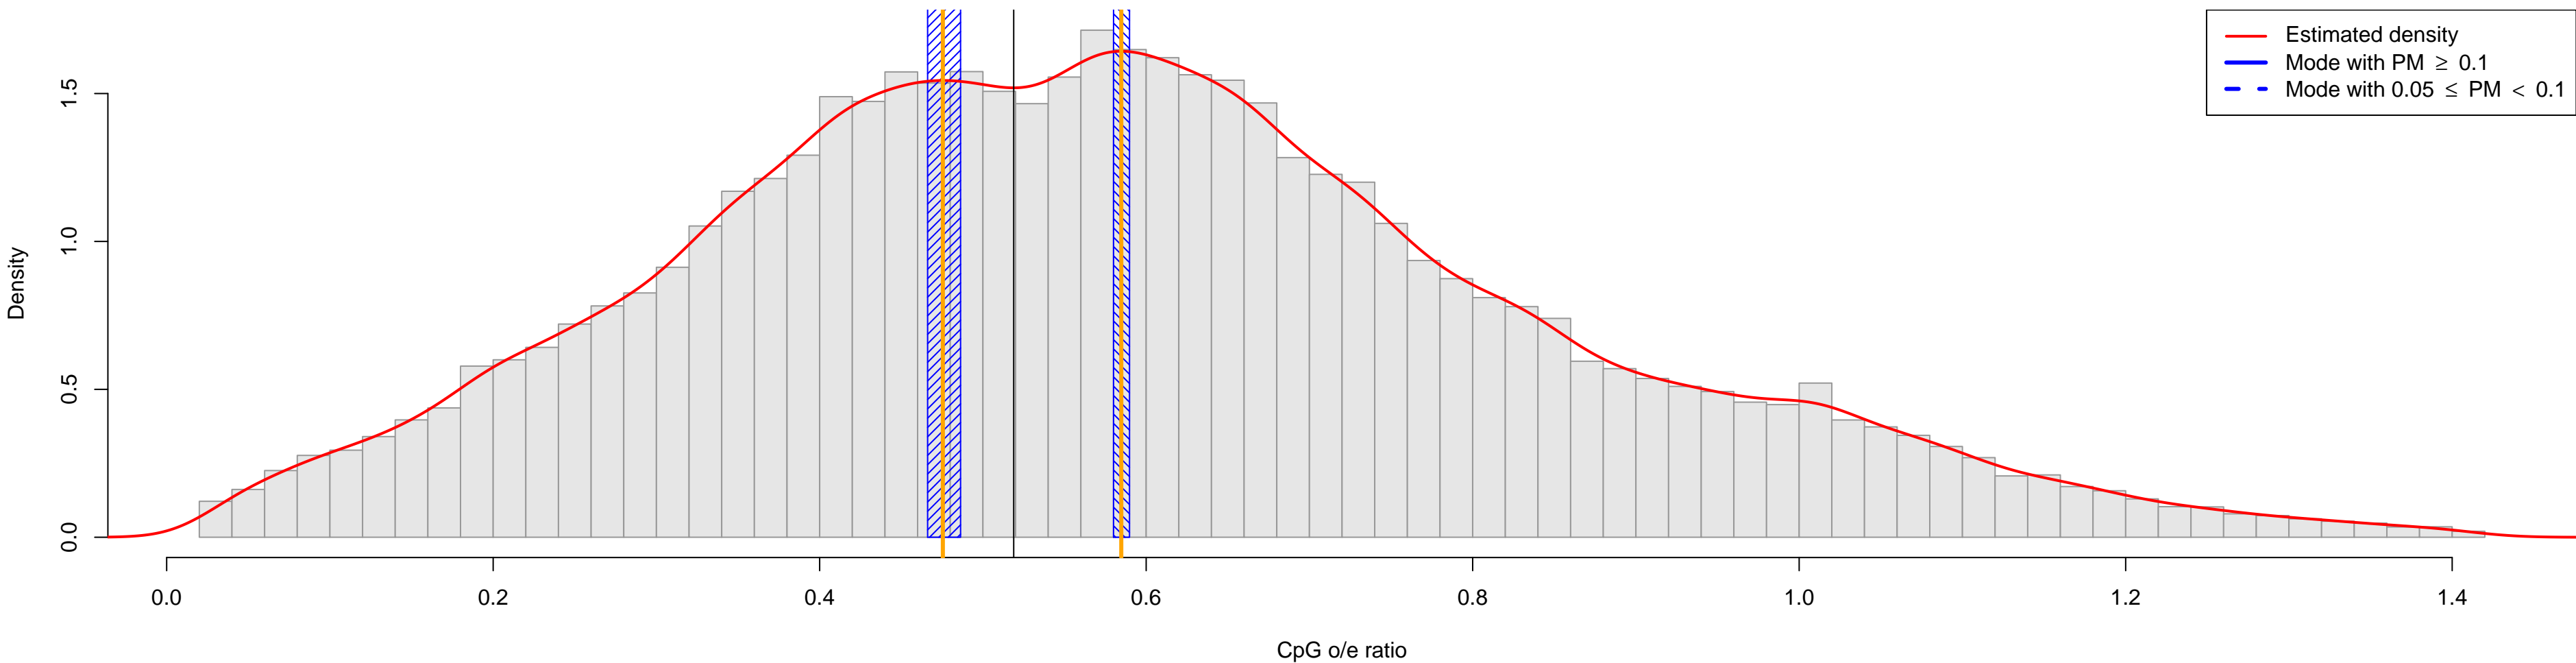



# Archispirostreptus\_gigas

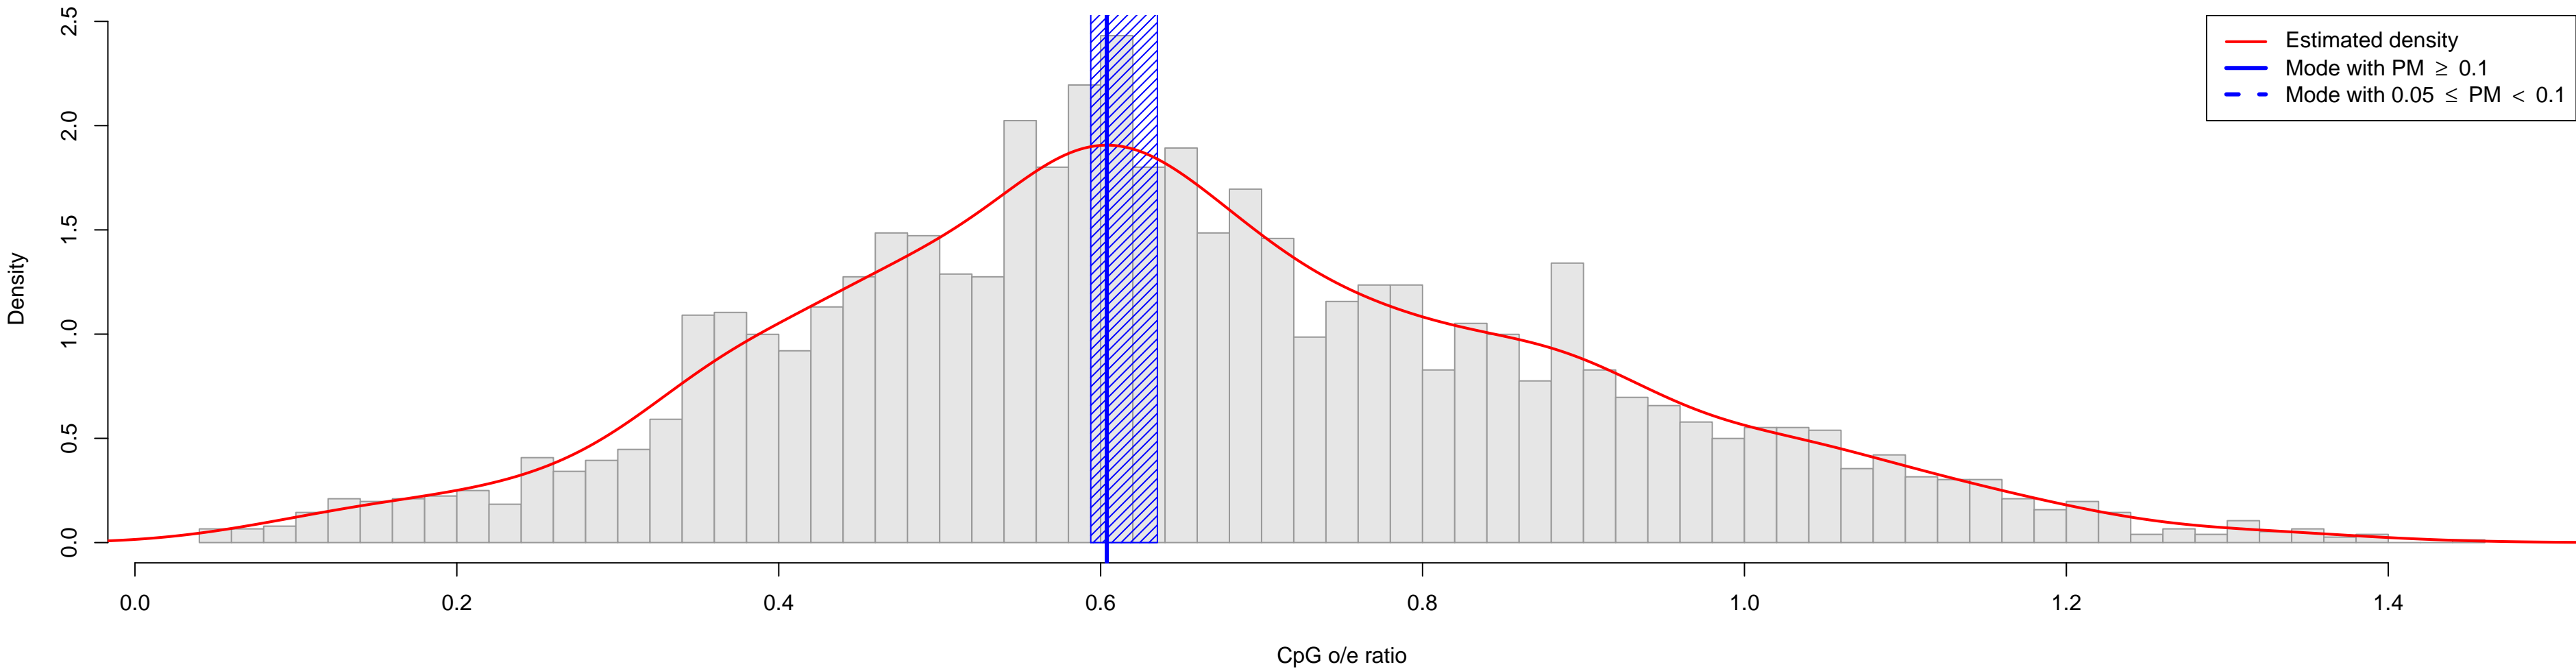

# Arenicola\_marina

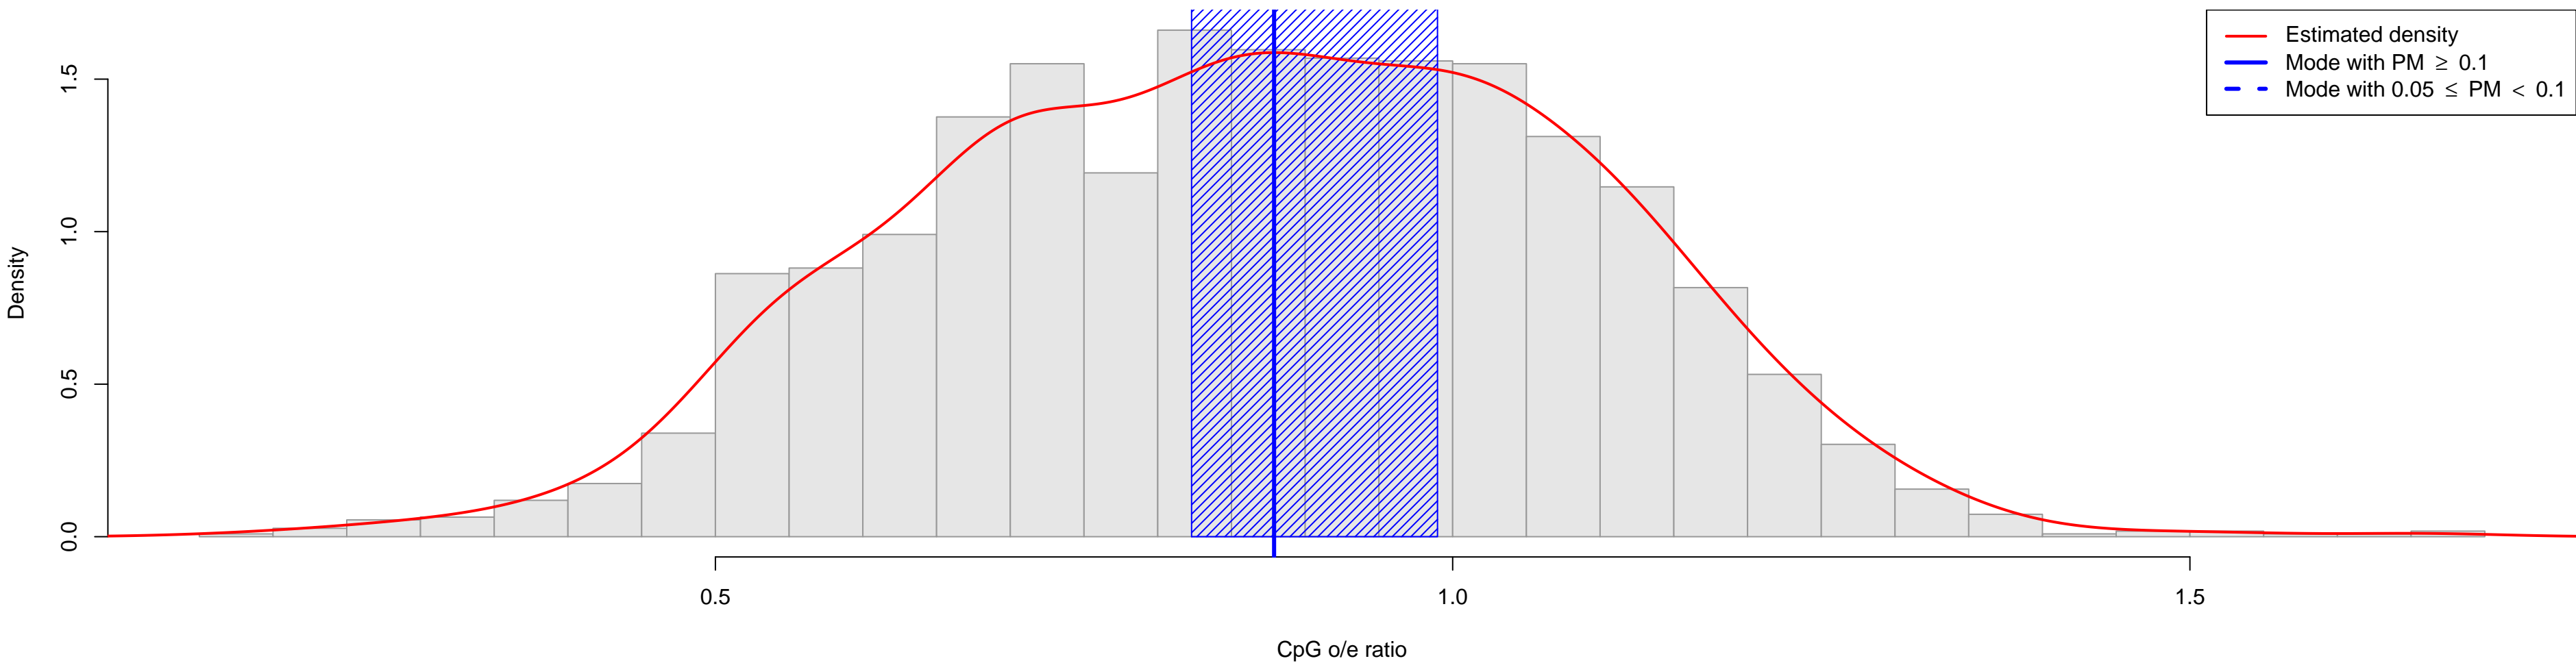

# Argopecten\_irradians

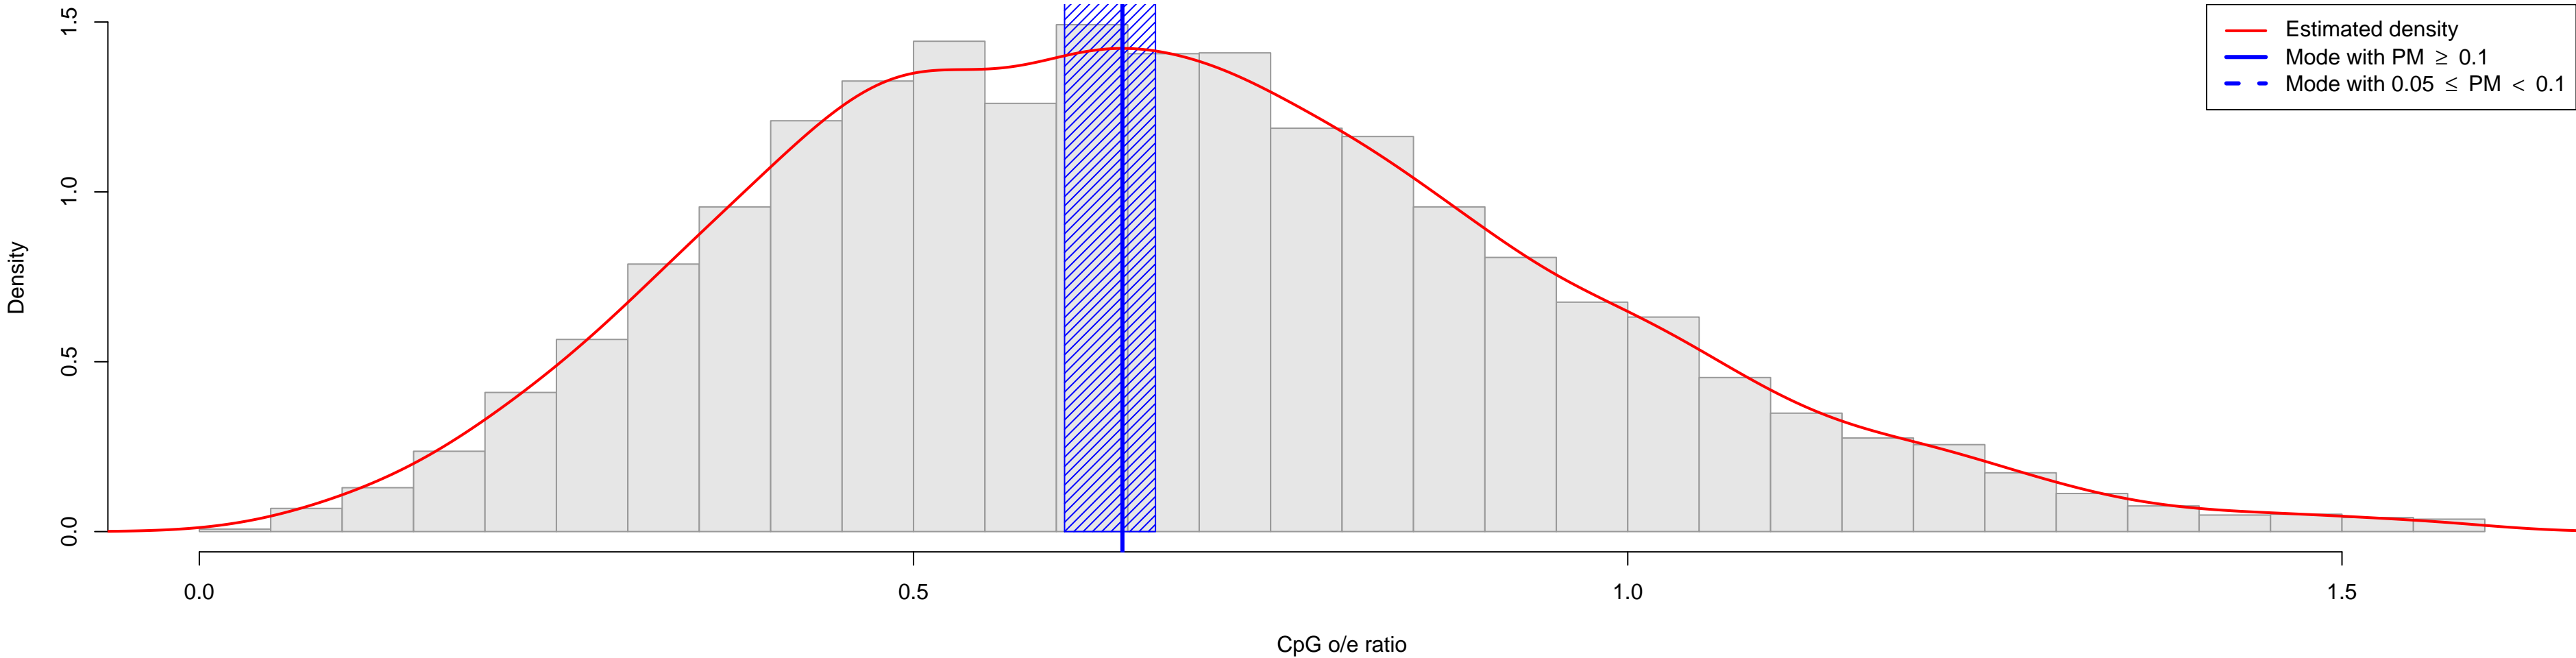

# Armadillidium\_vulgare

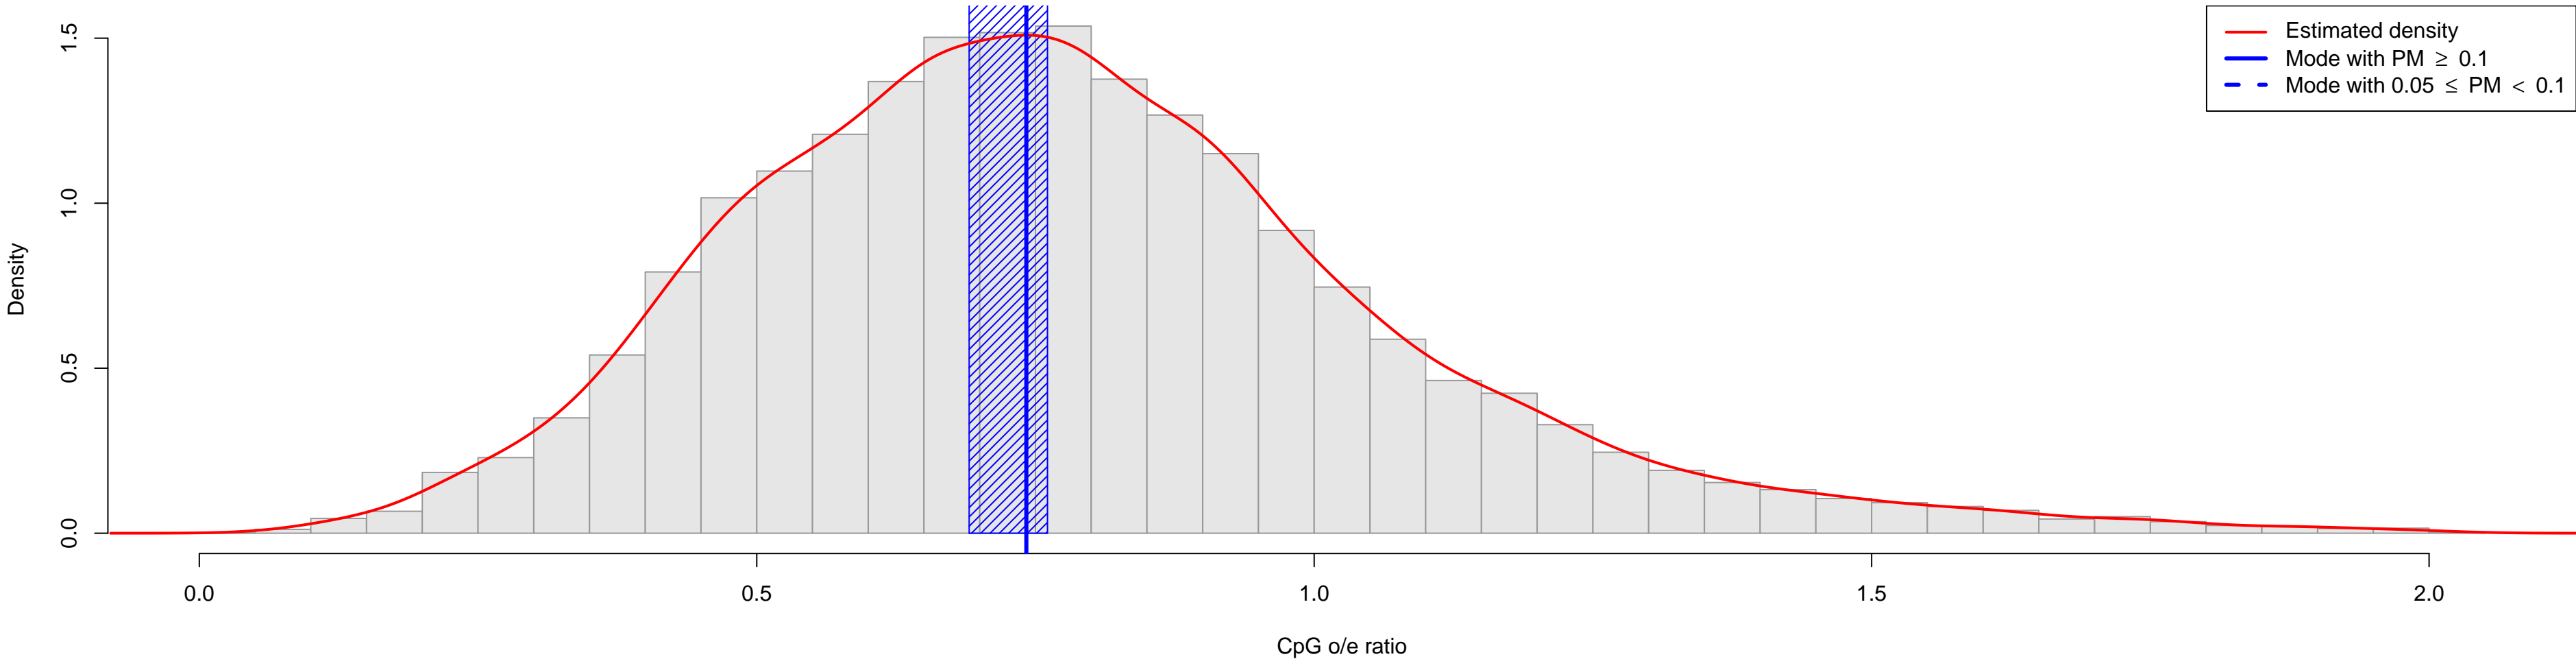

# Artemia\_franciscana

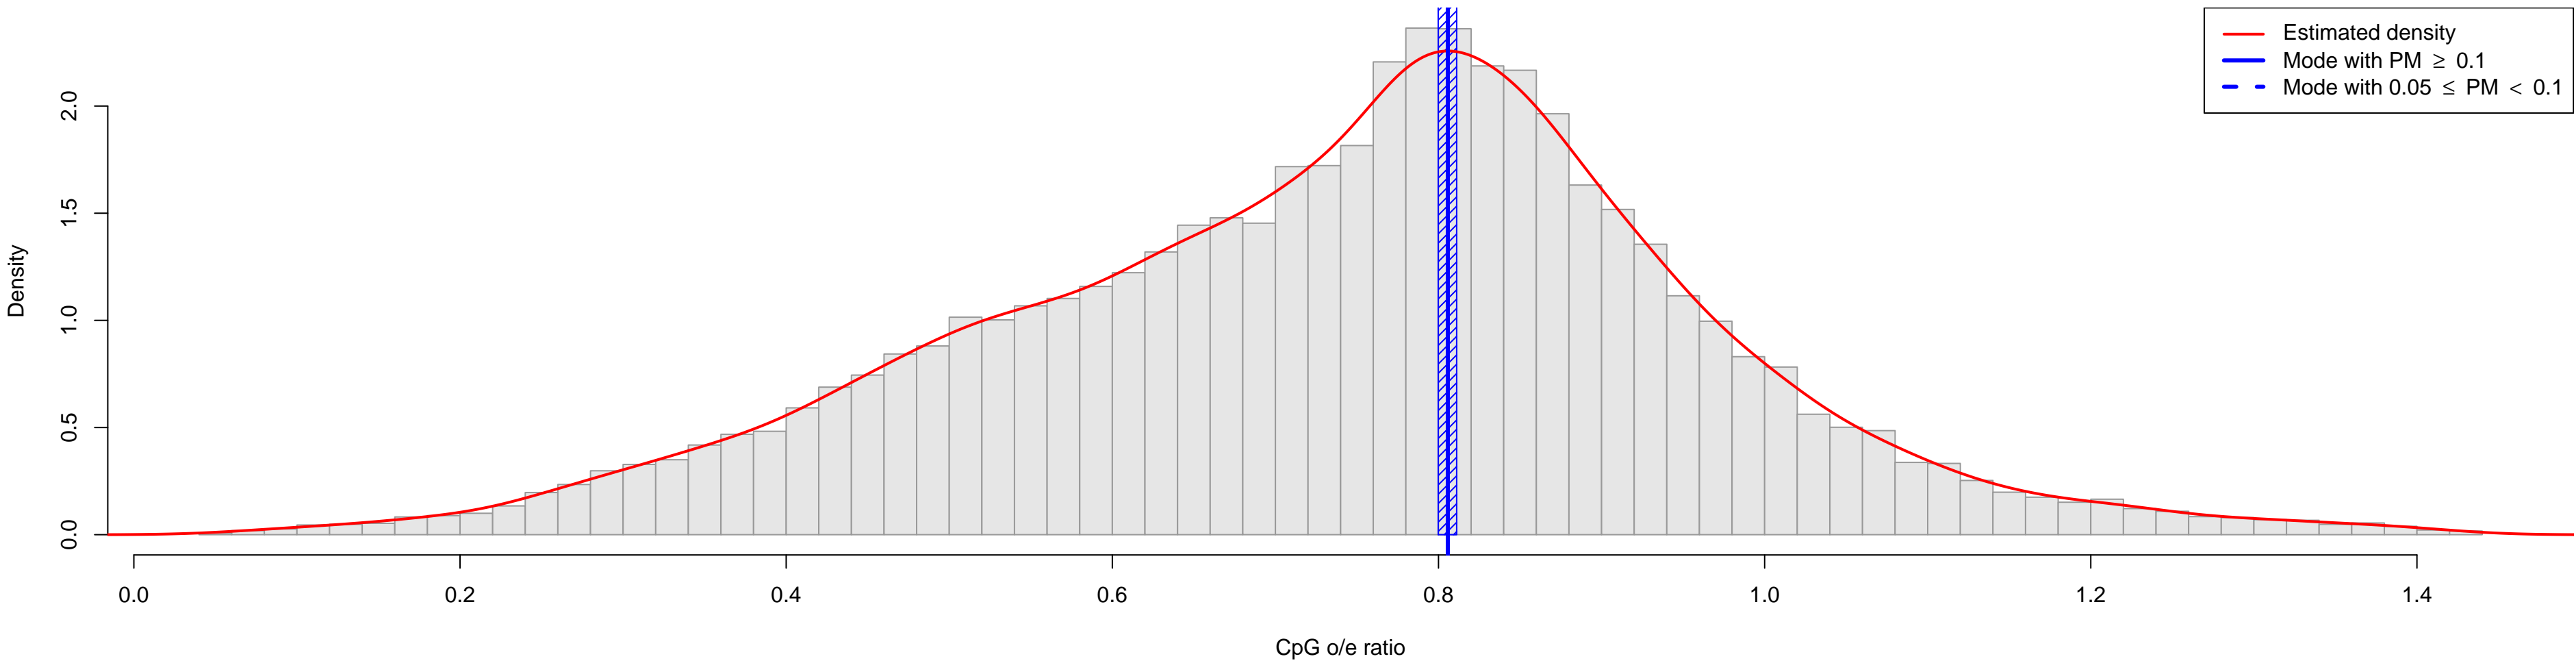

# Artemisia\_annua

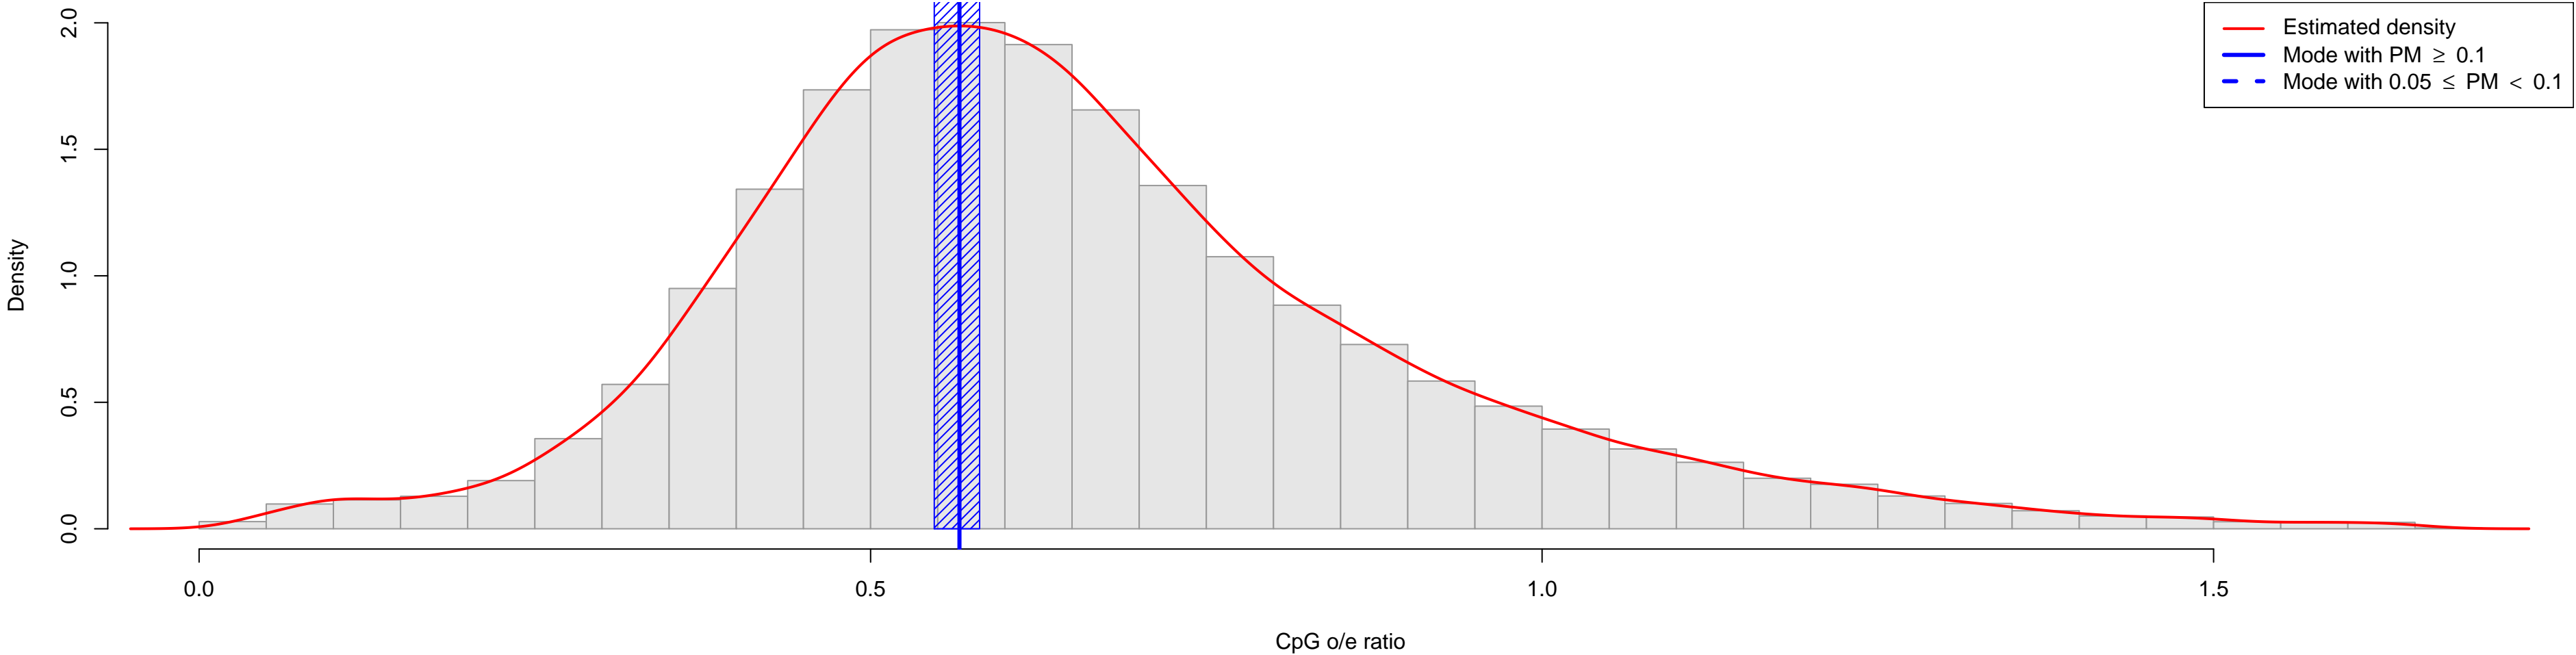

# Asparagus\_officinalis

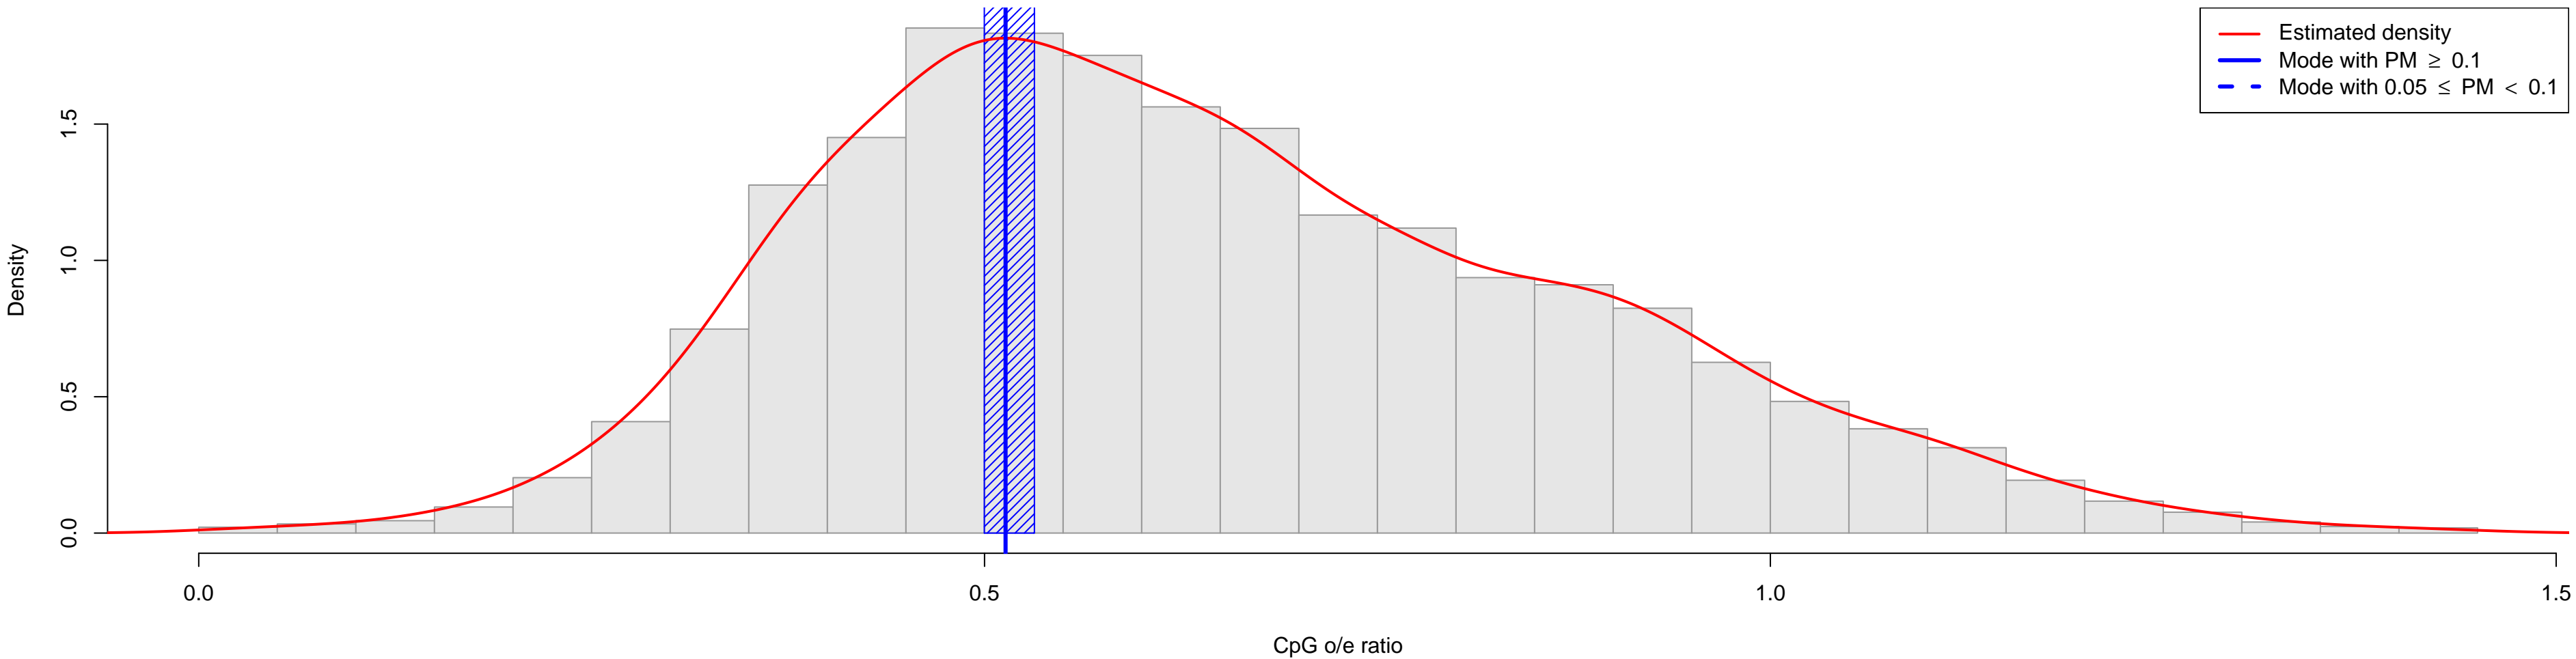

# Aspergillus\_flavus

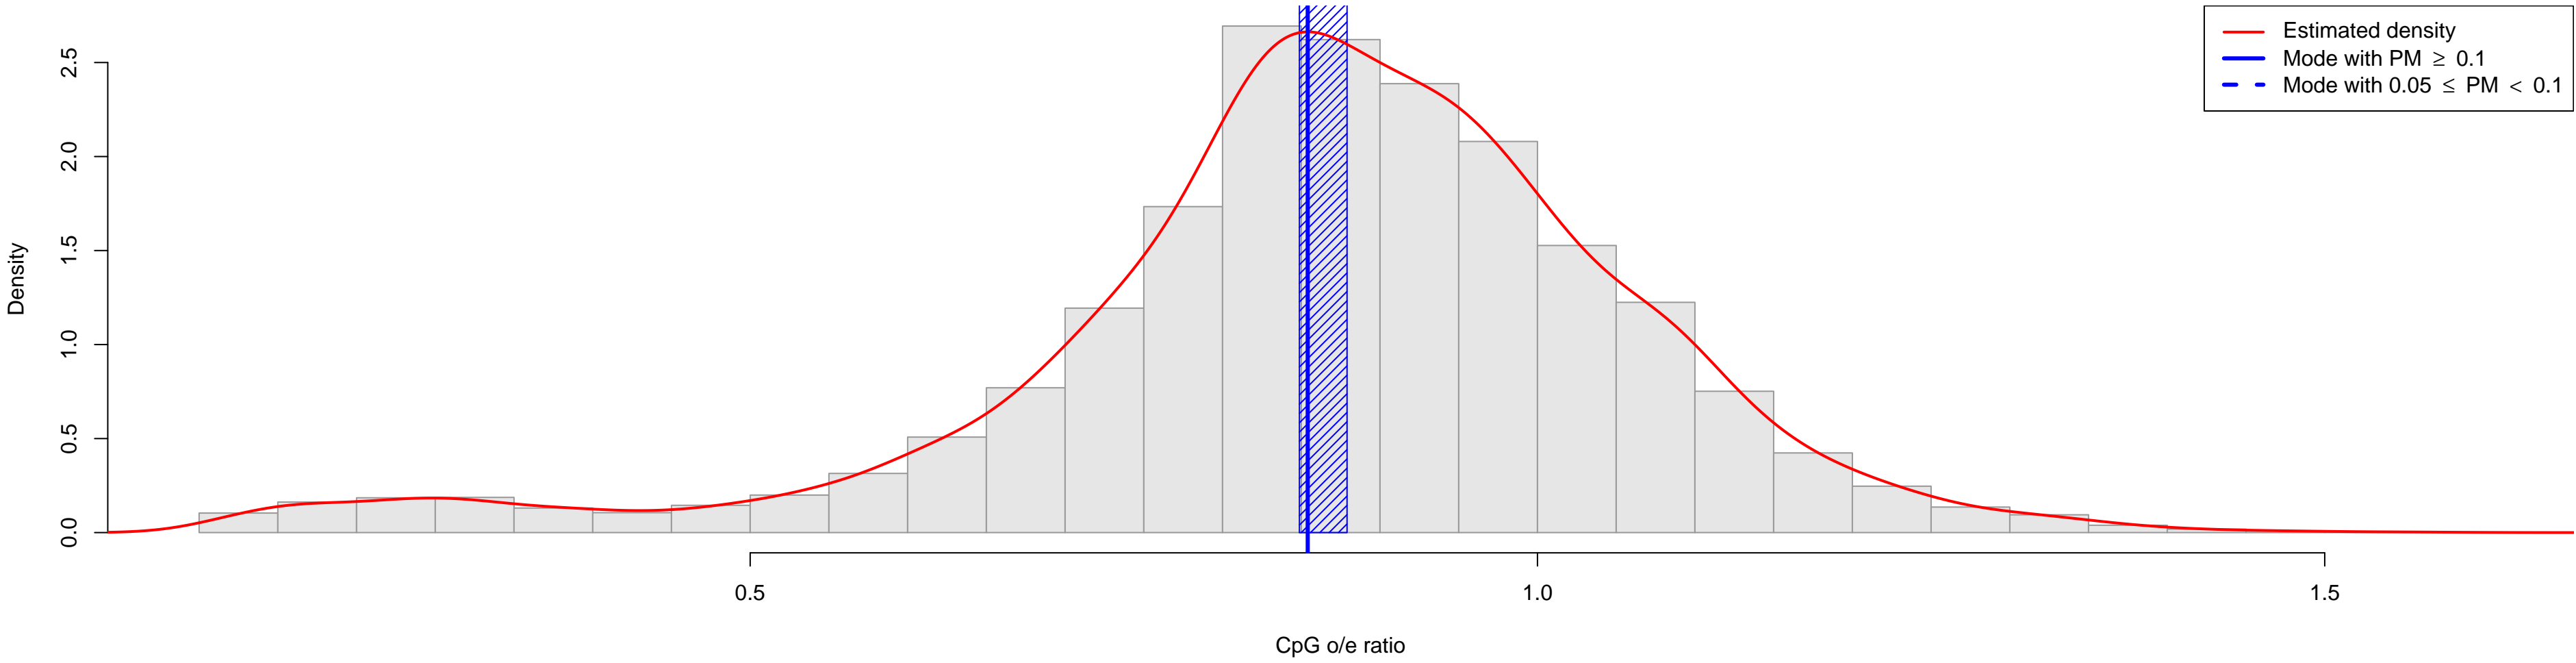



# Aspergillus\_niger

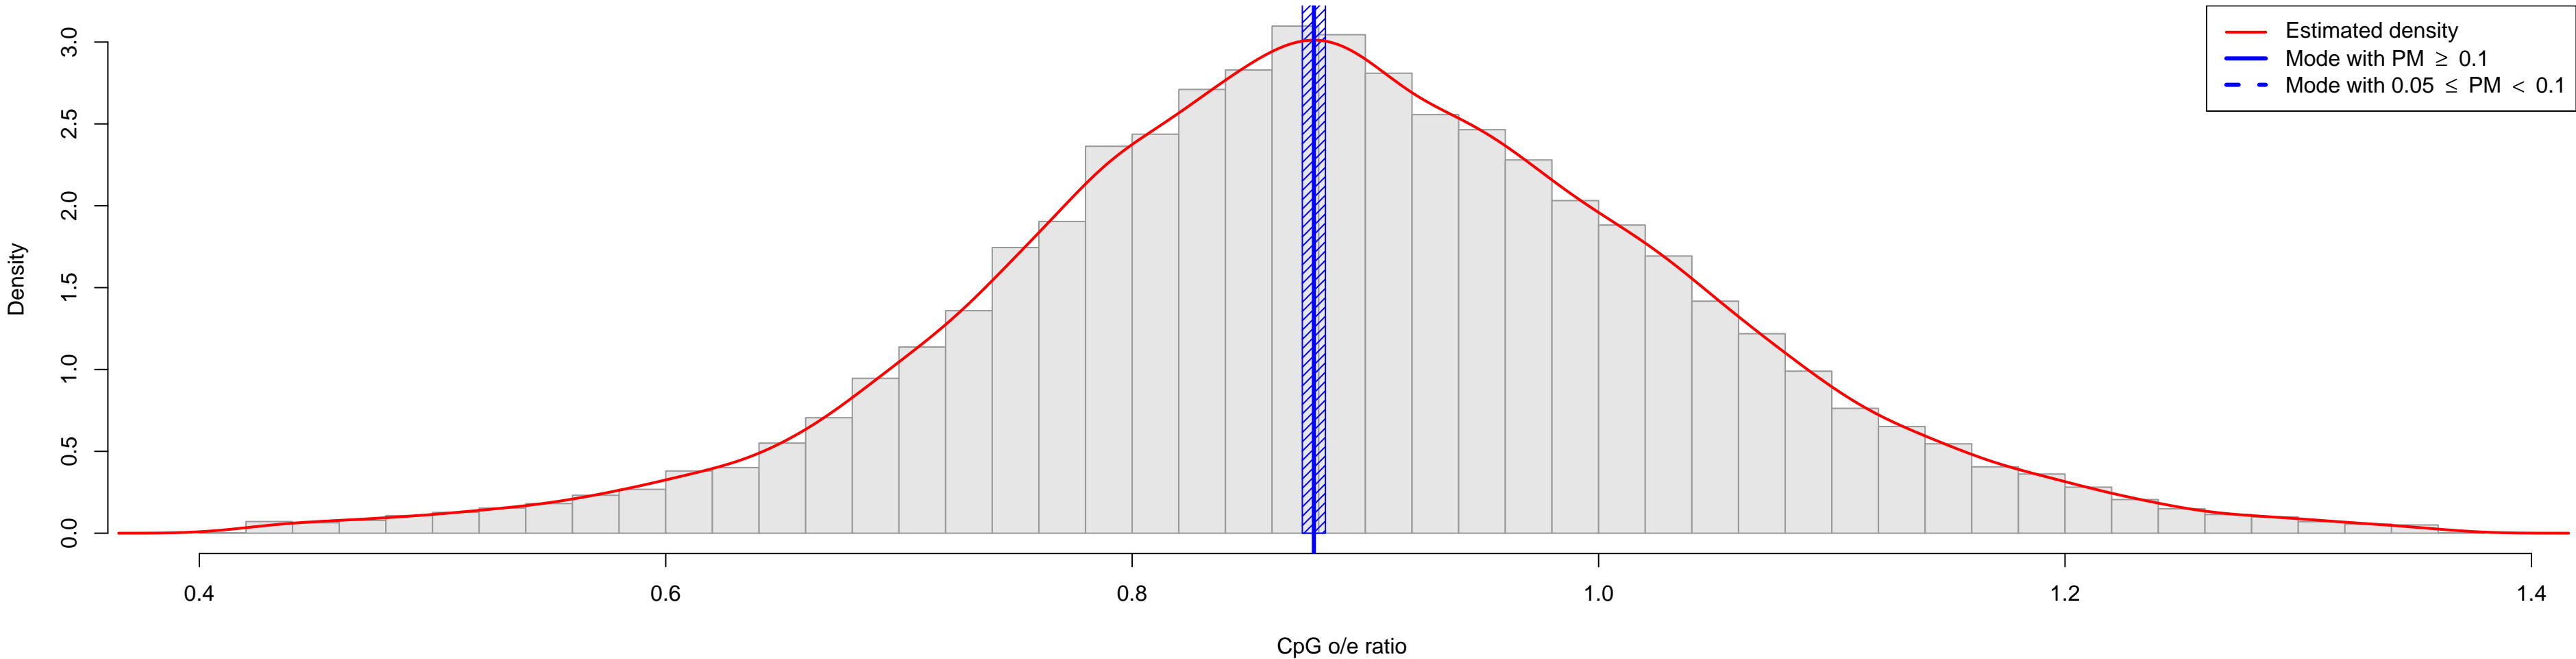

# Aspergillus\_oryzae

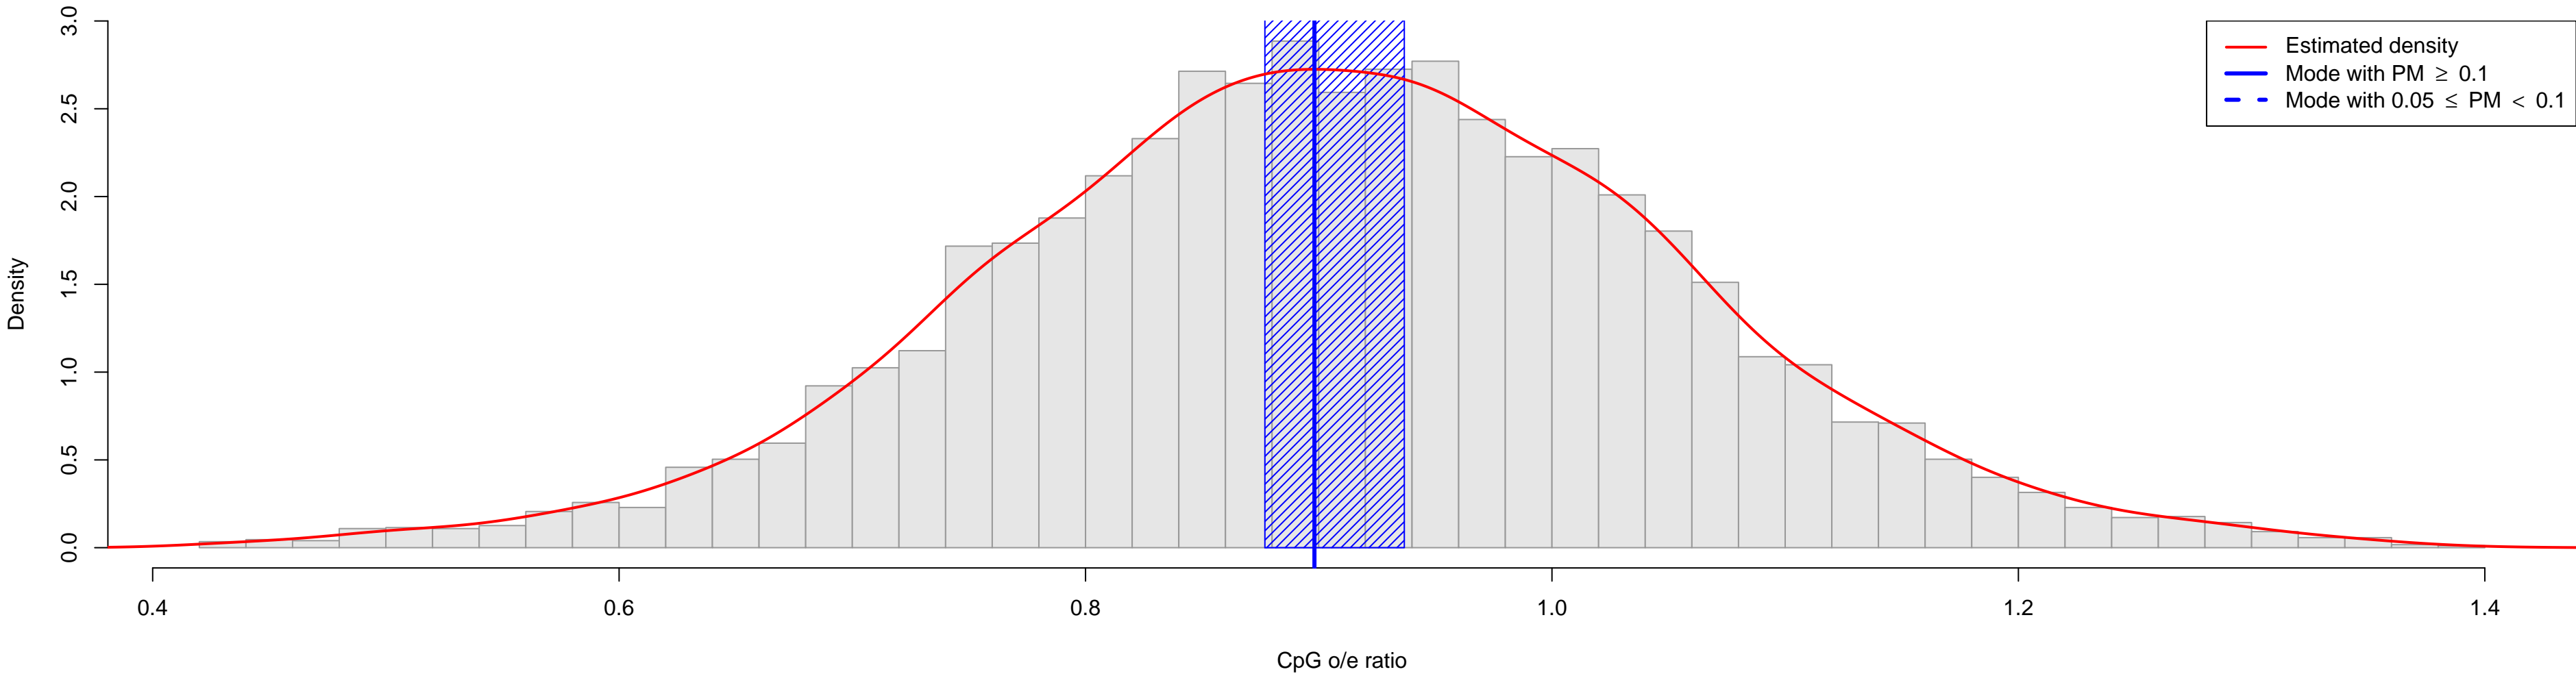

# Aspergillus\_terreus

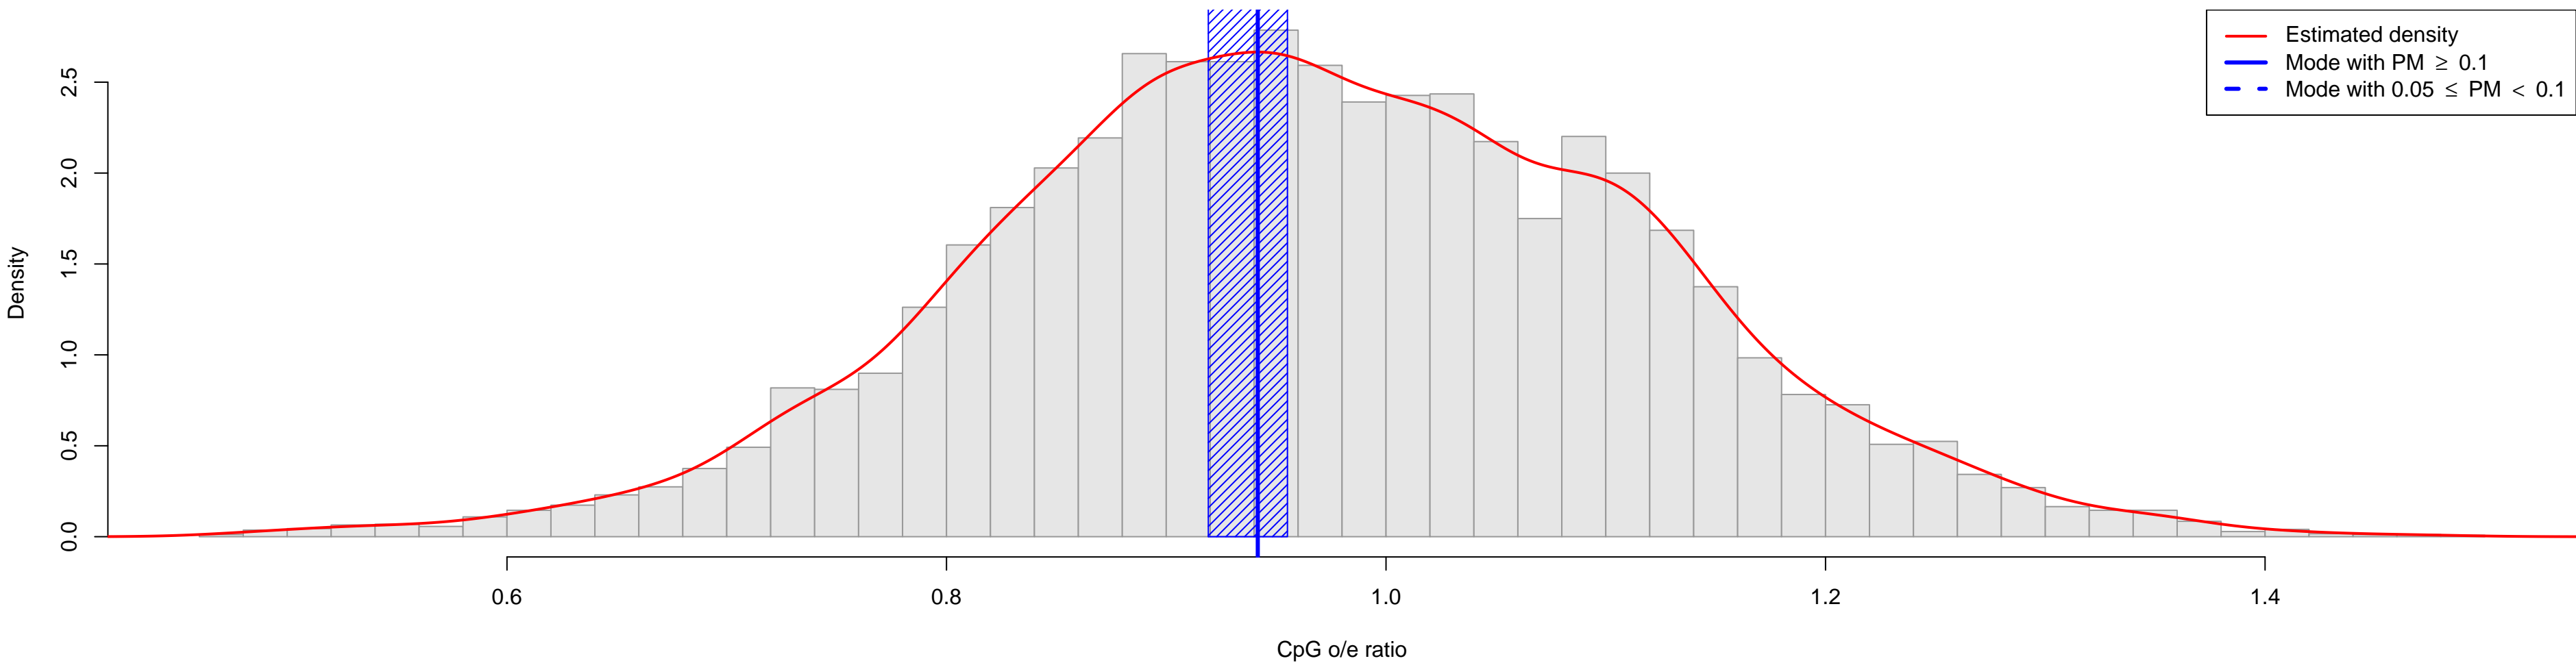

# Astatotilapia\_burtoni

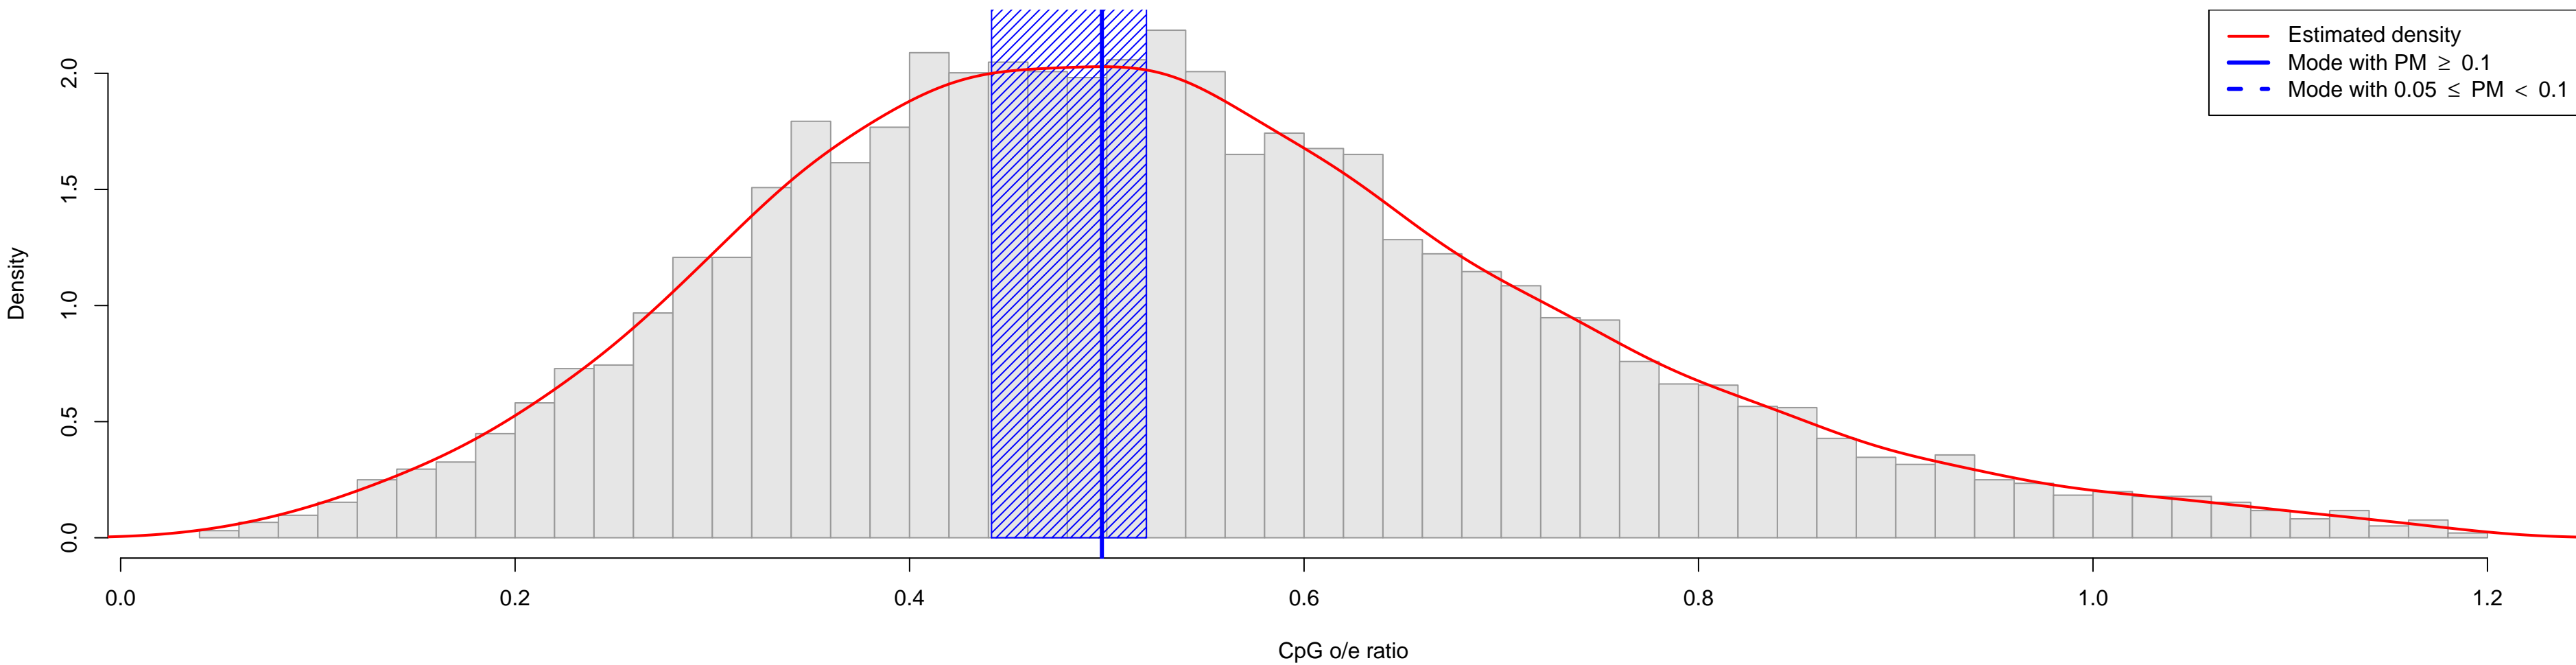

# Astyanax\_mexicanus

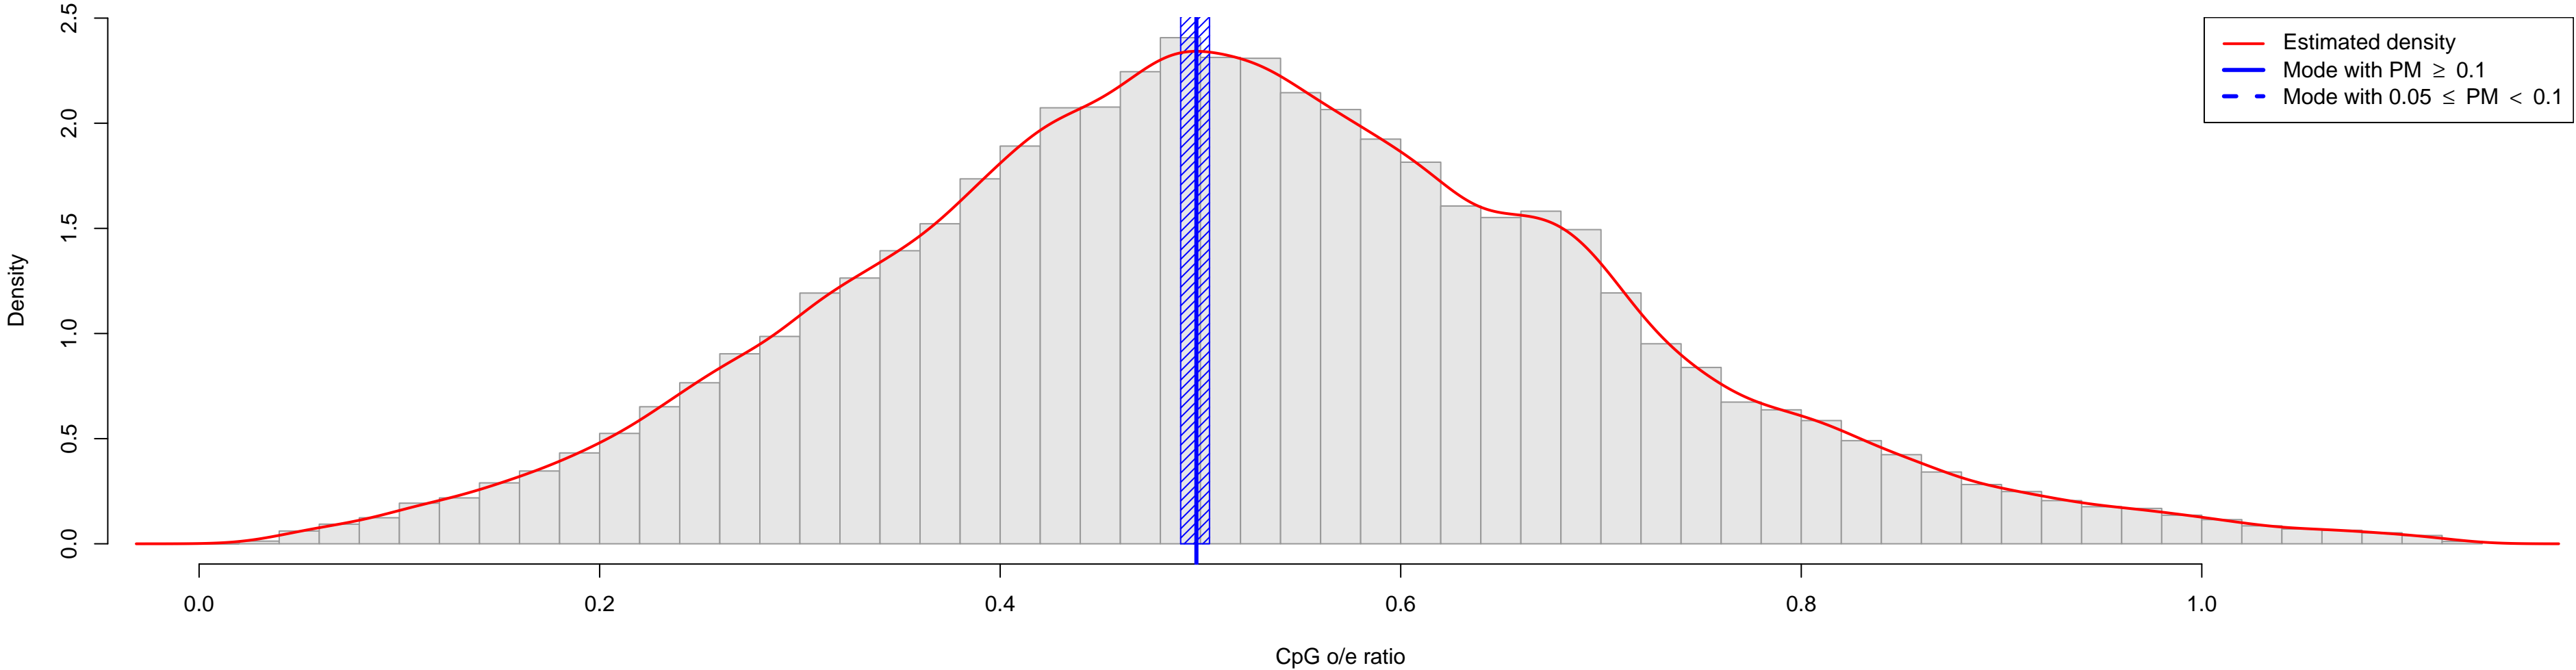

# Atta\_laevigata

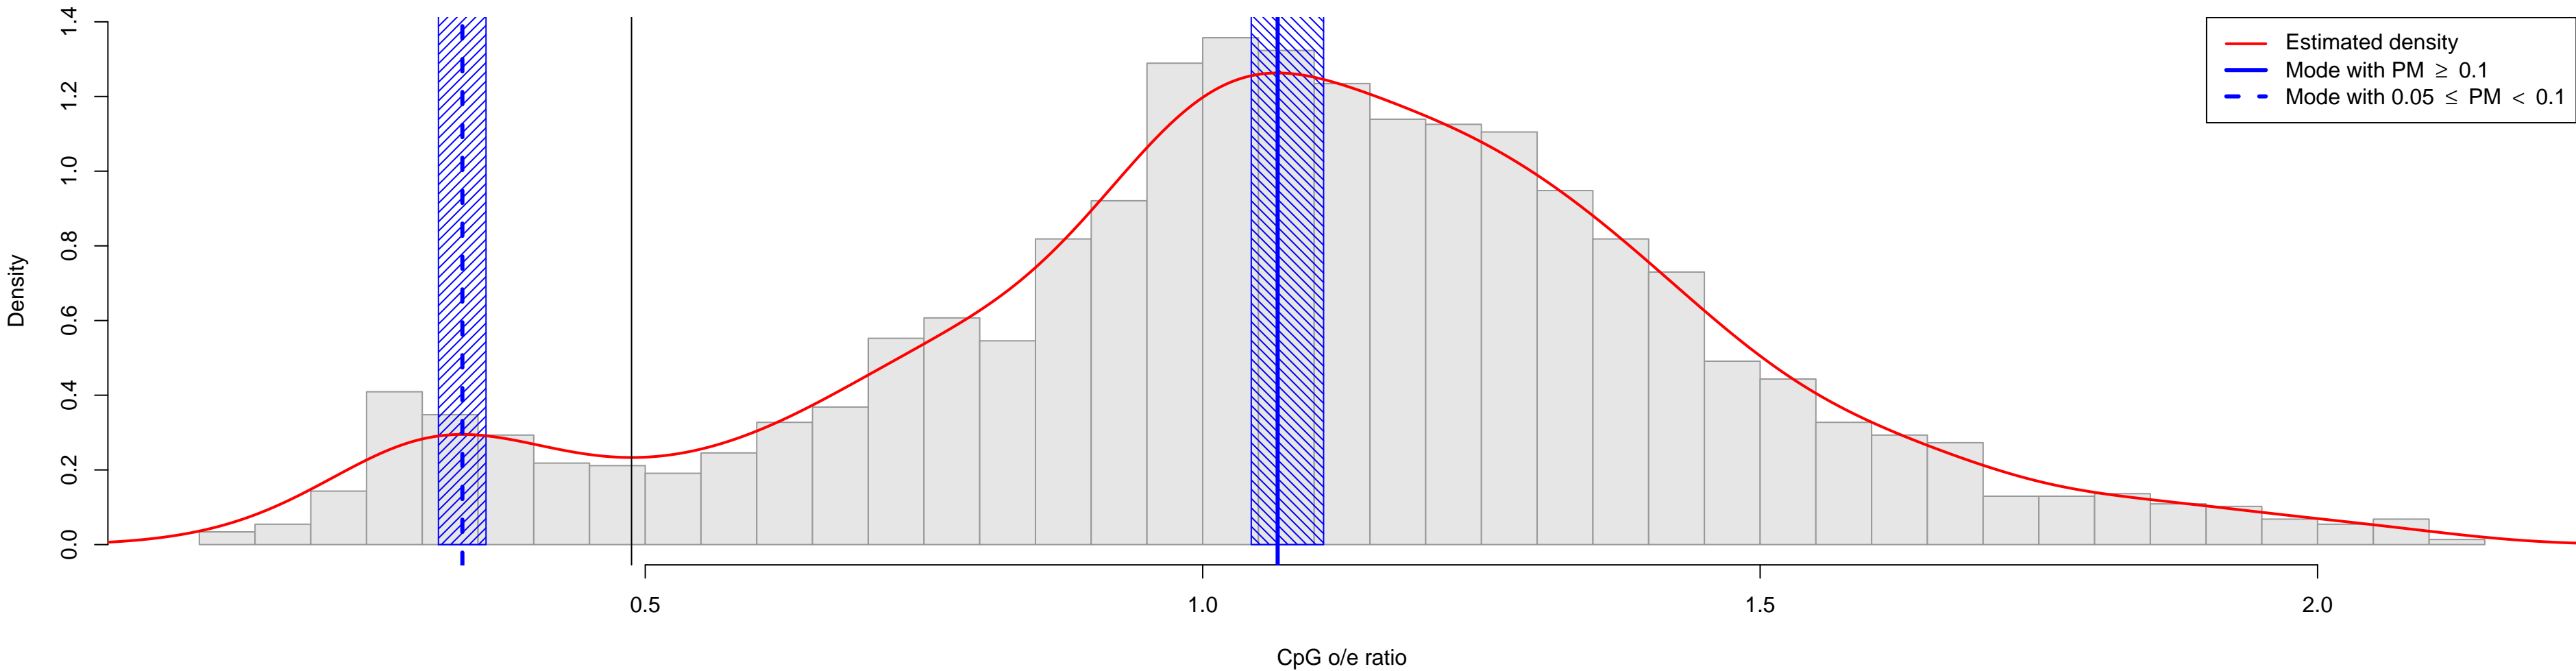

# Aureobasidium\_pullulans

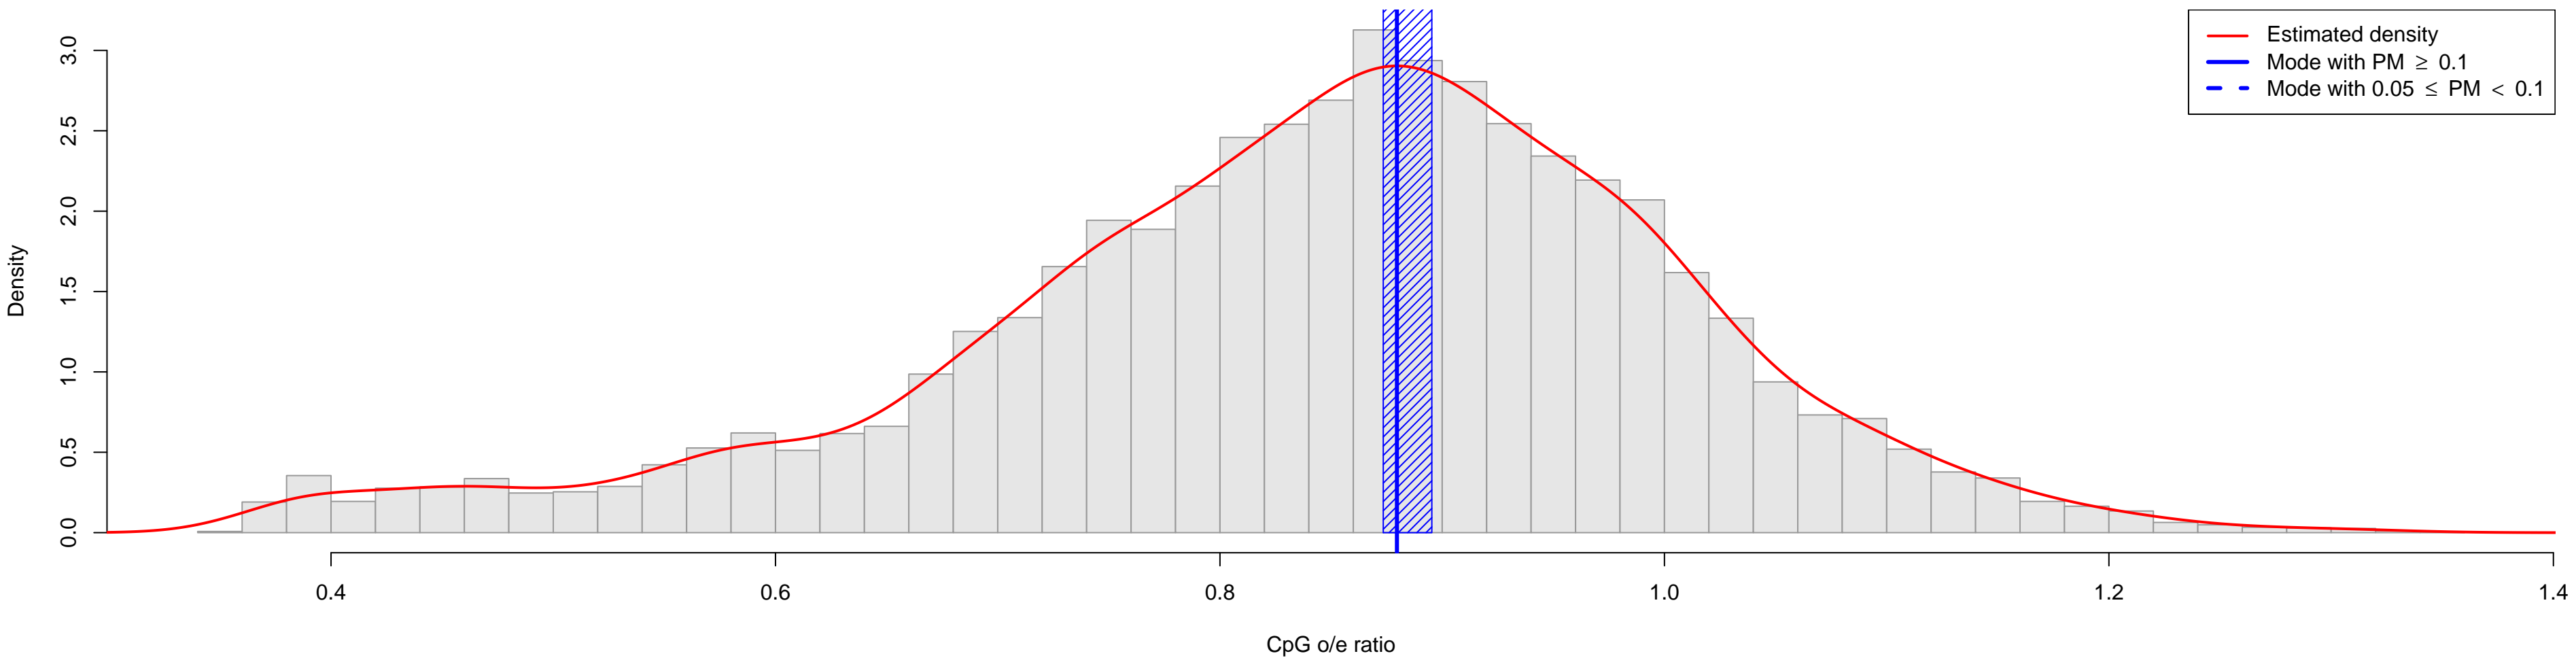

# Avena\_barbata

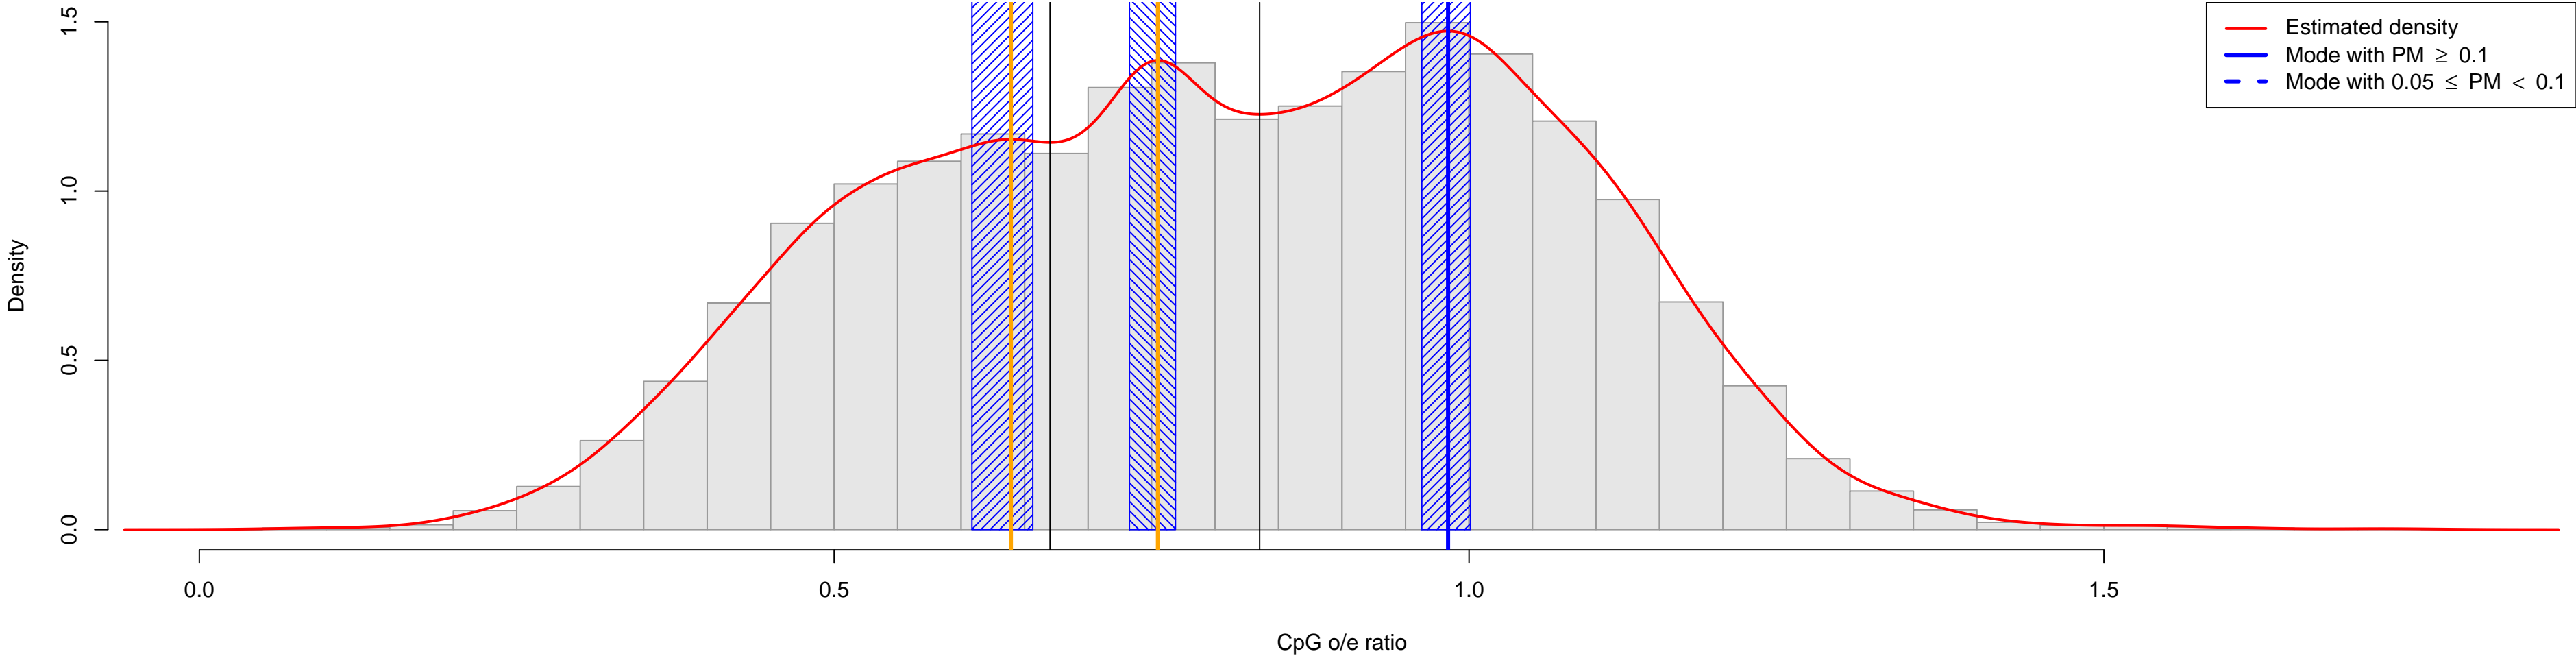



# Babesia\_equi

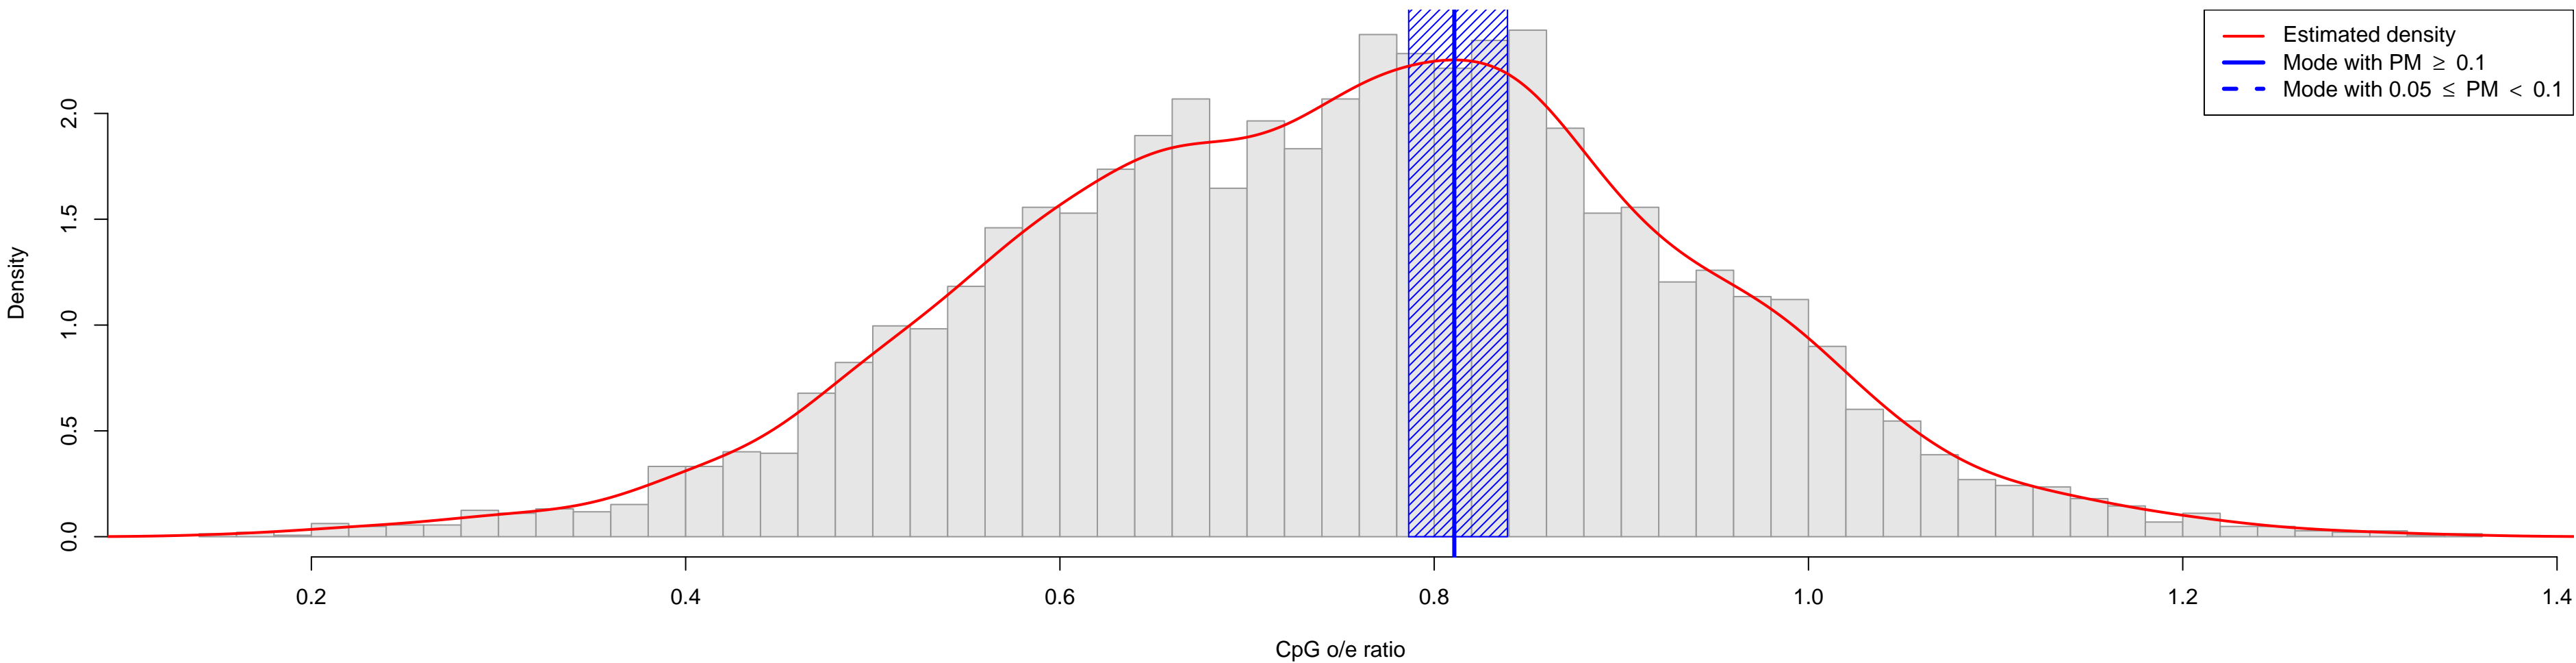

# Balanoglossus\_clavigerus

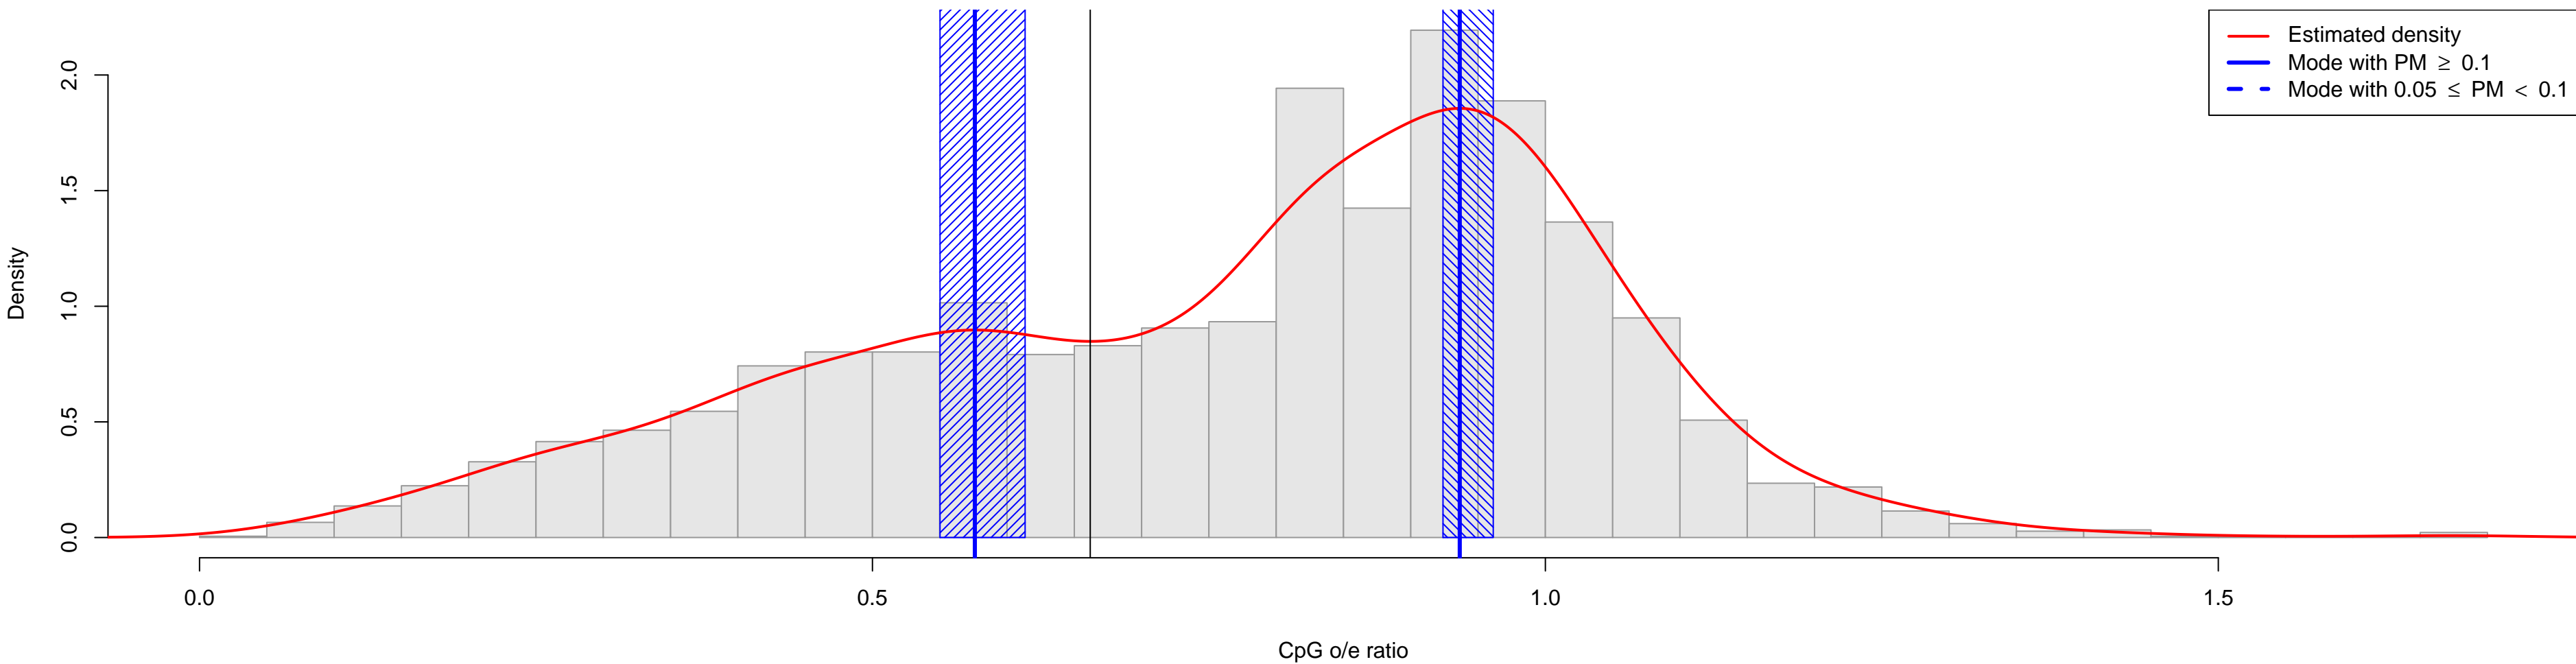

# Betula\_platyphylla

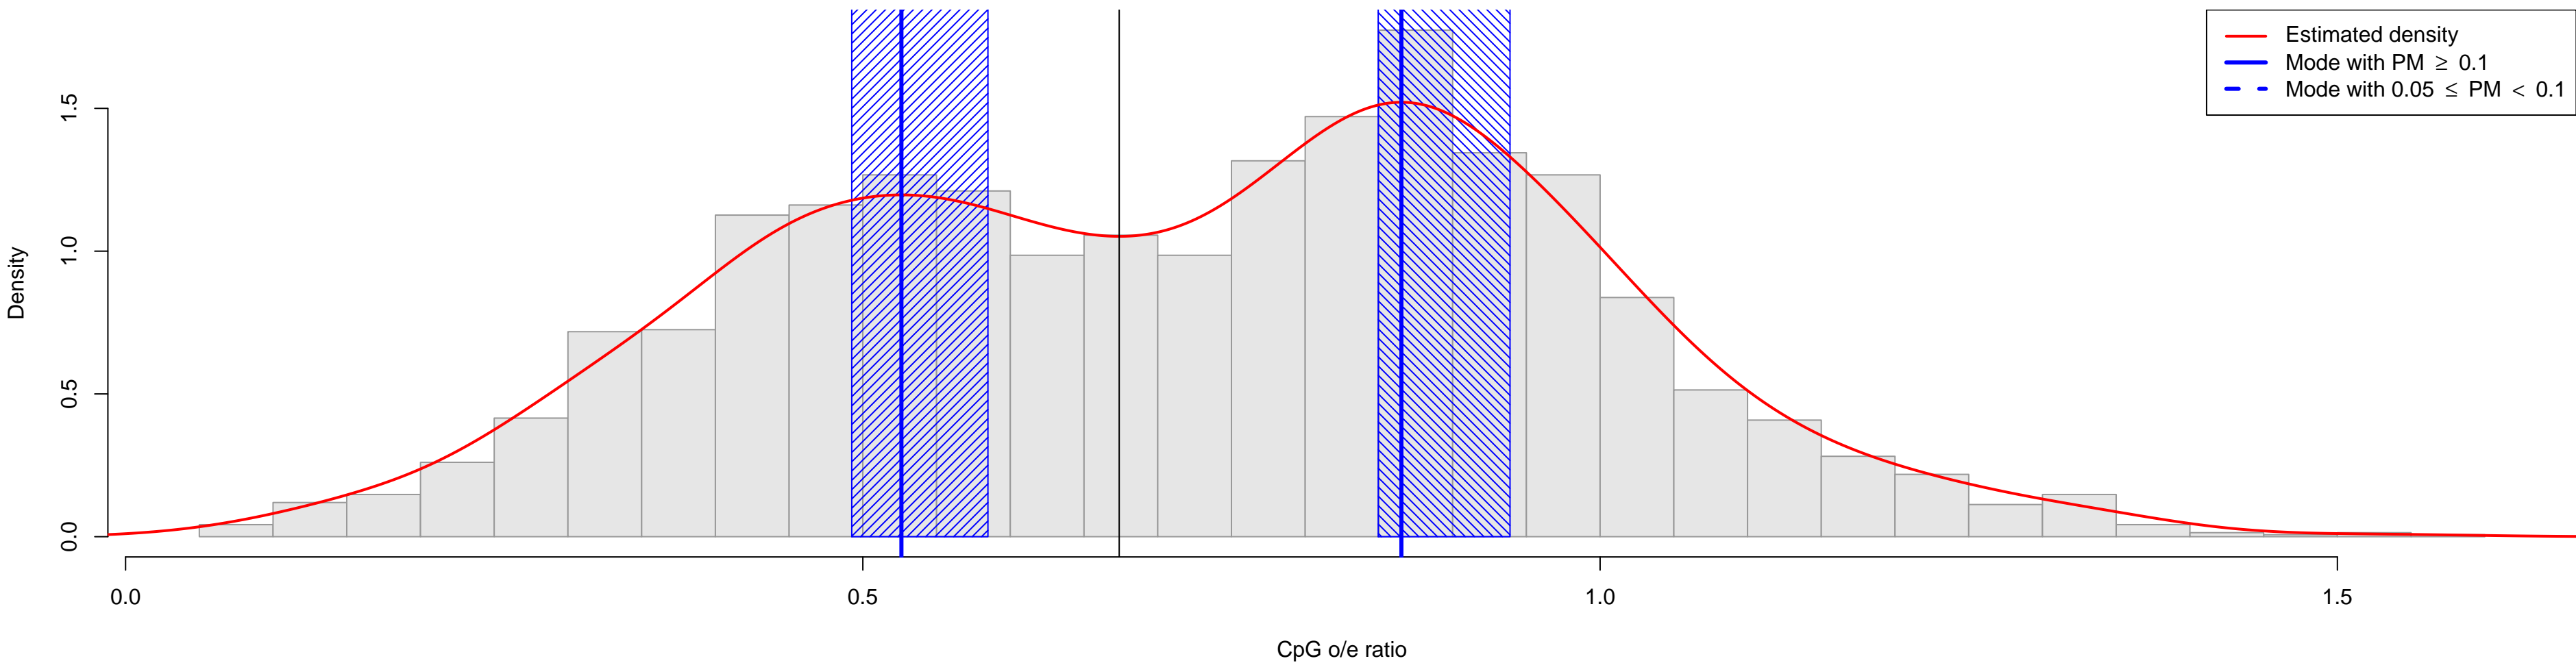

# Bicyclus\_anyana

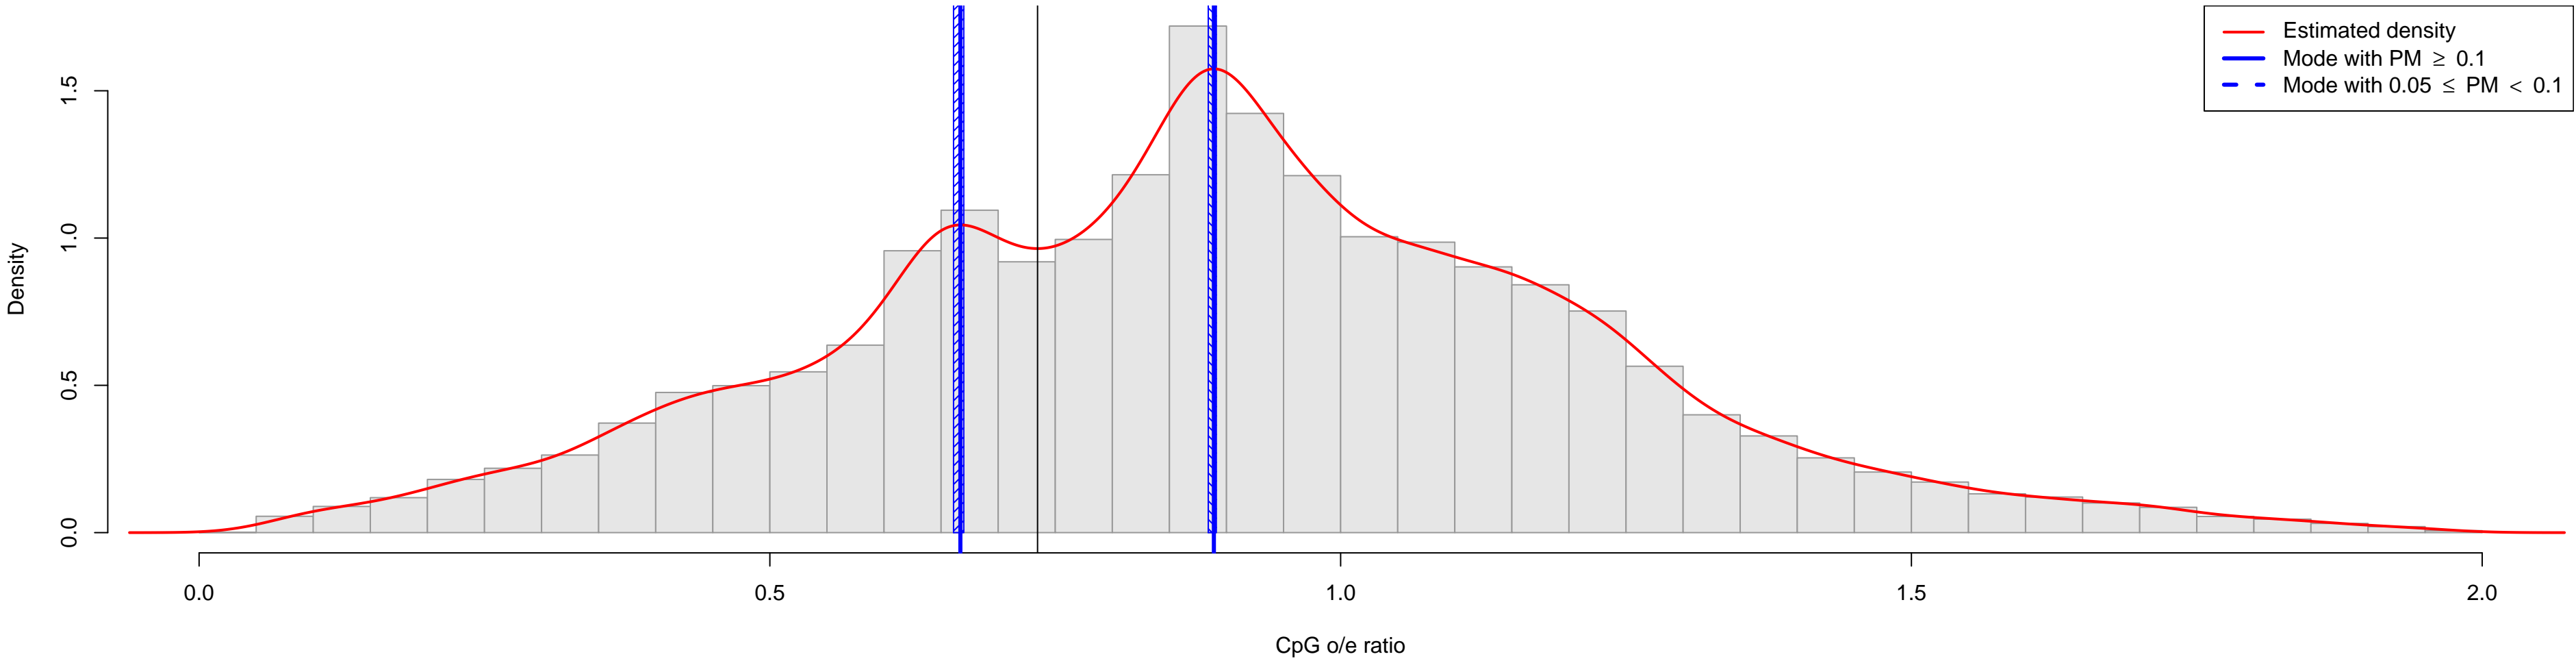

# Biomphalaria\_glabrata

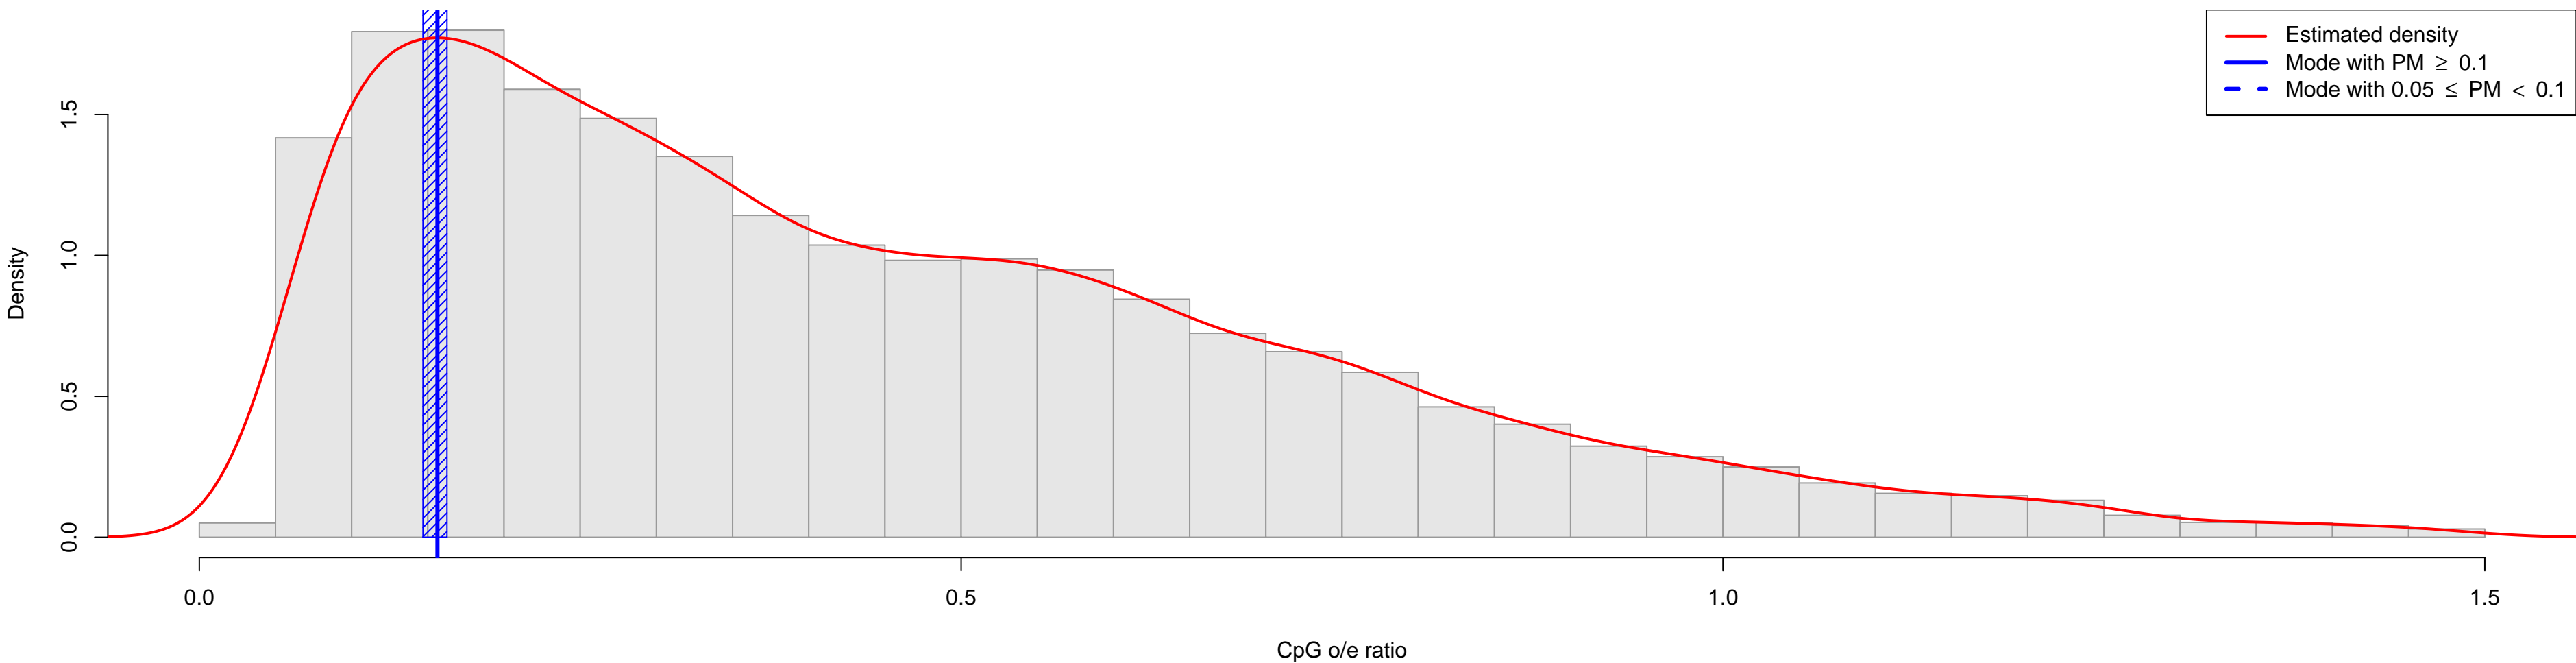

# Blomia\_tropicalis

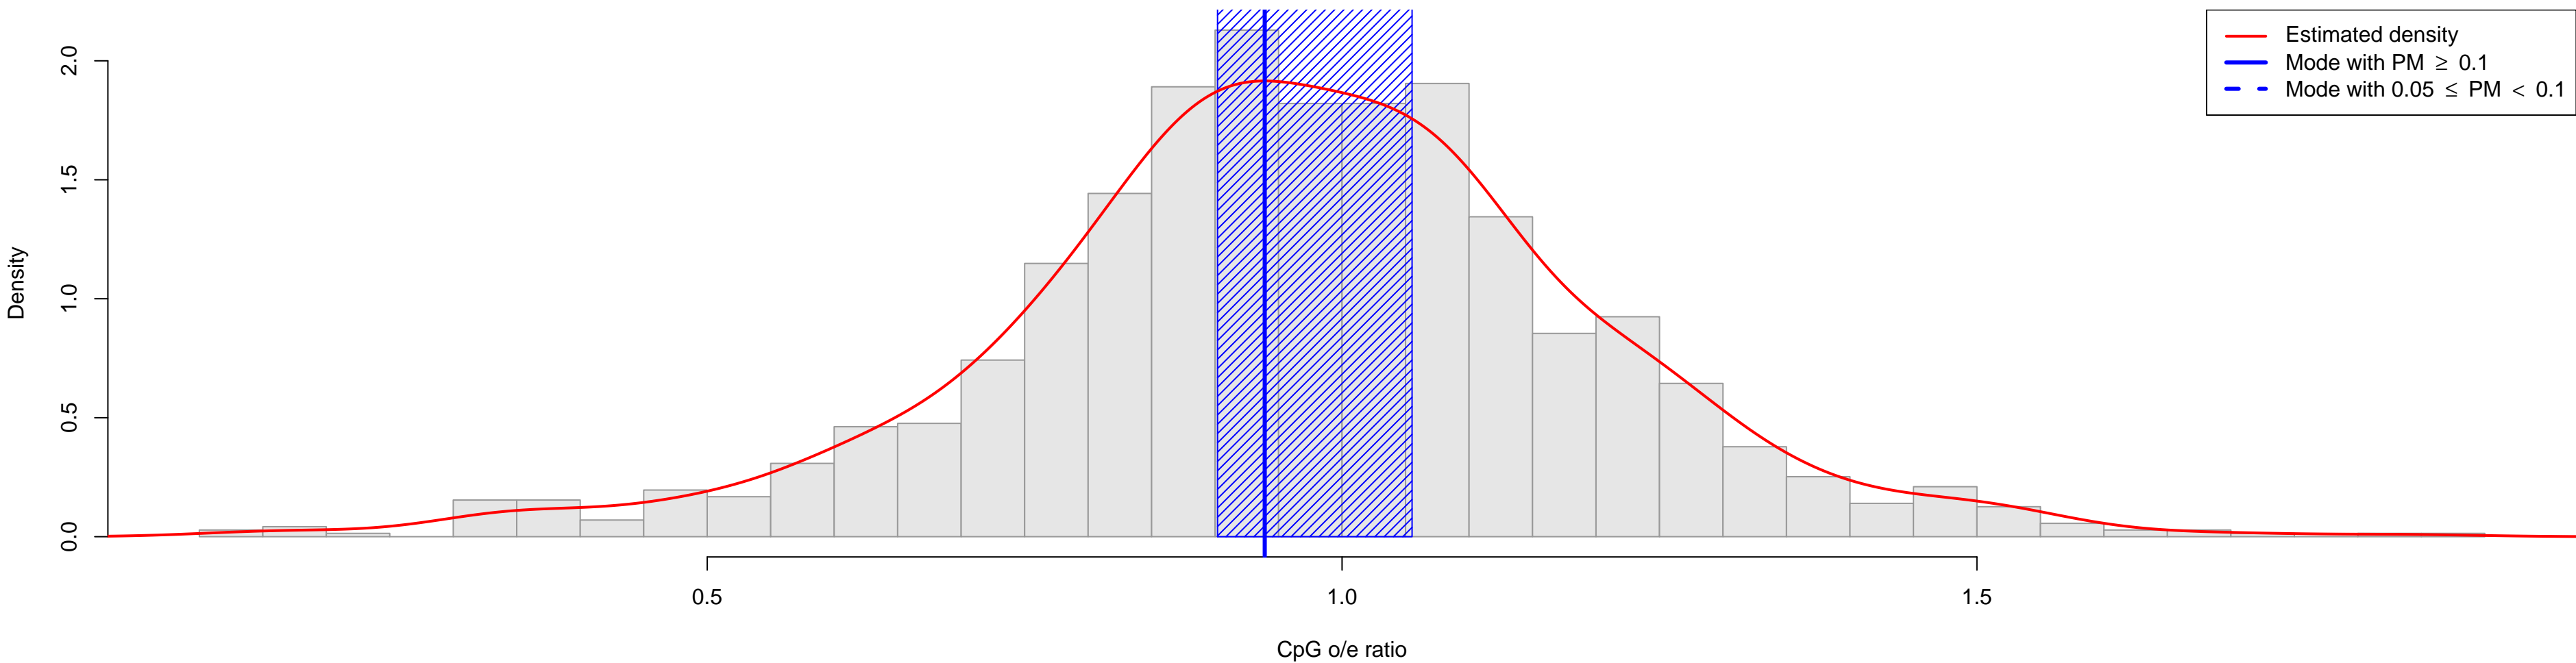

# Bombus\_terrestris

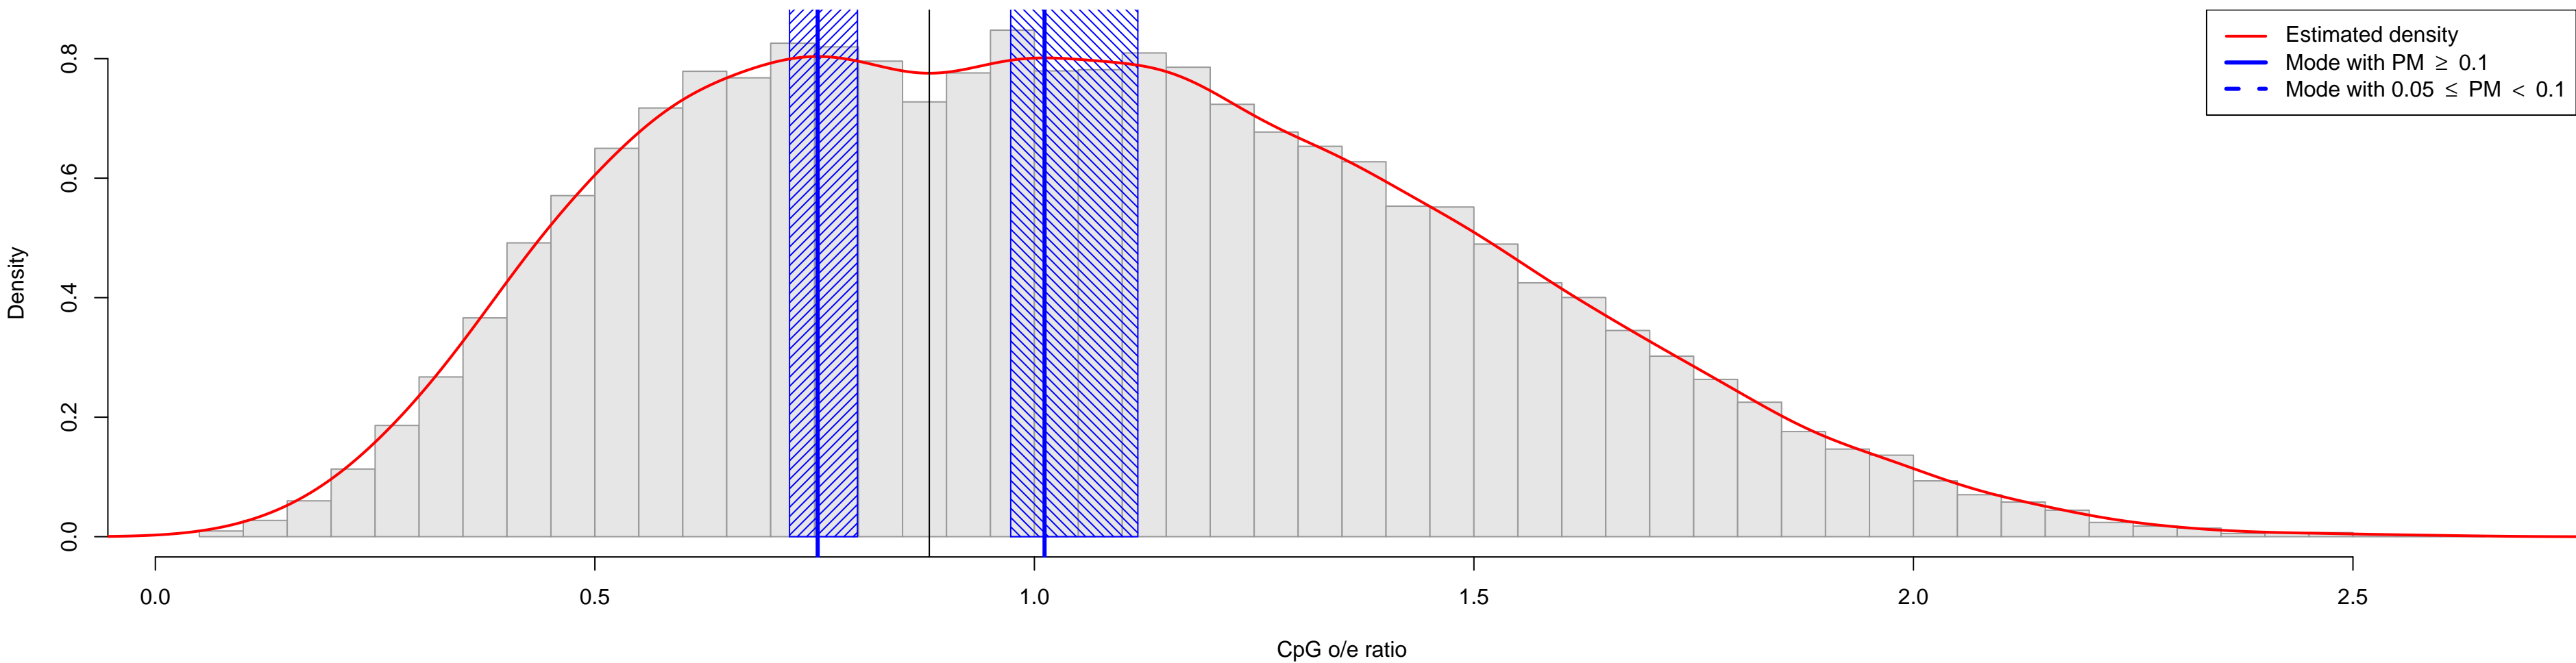

# Bombyx\_mori

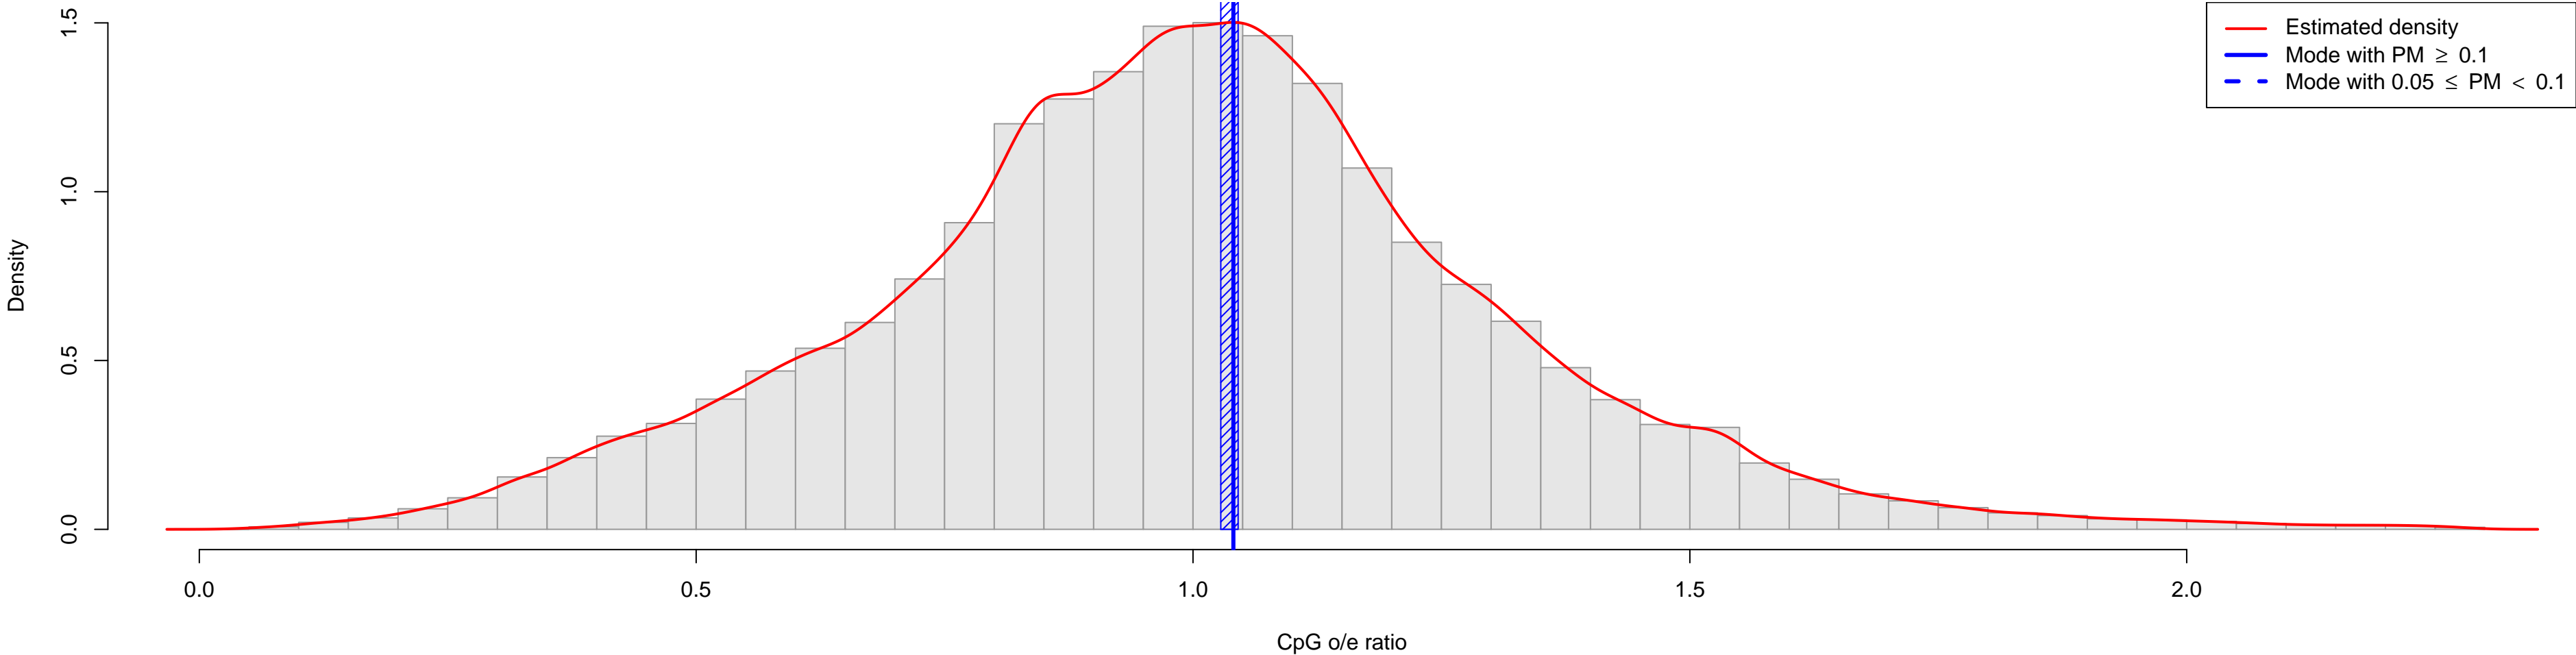



# Bos\_indicus

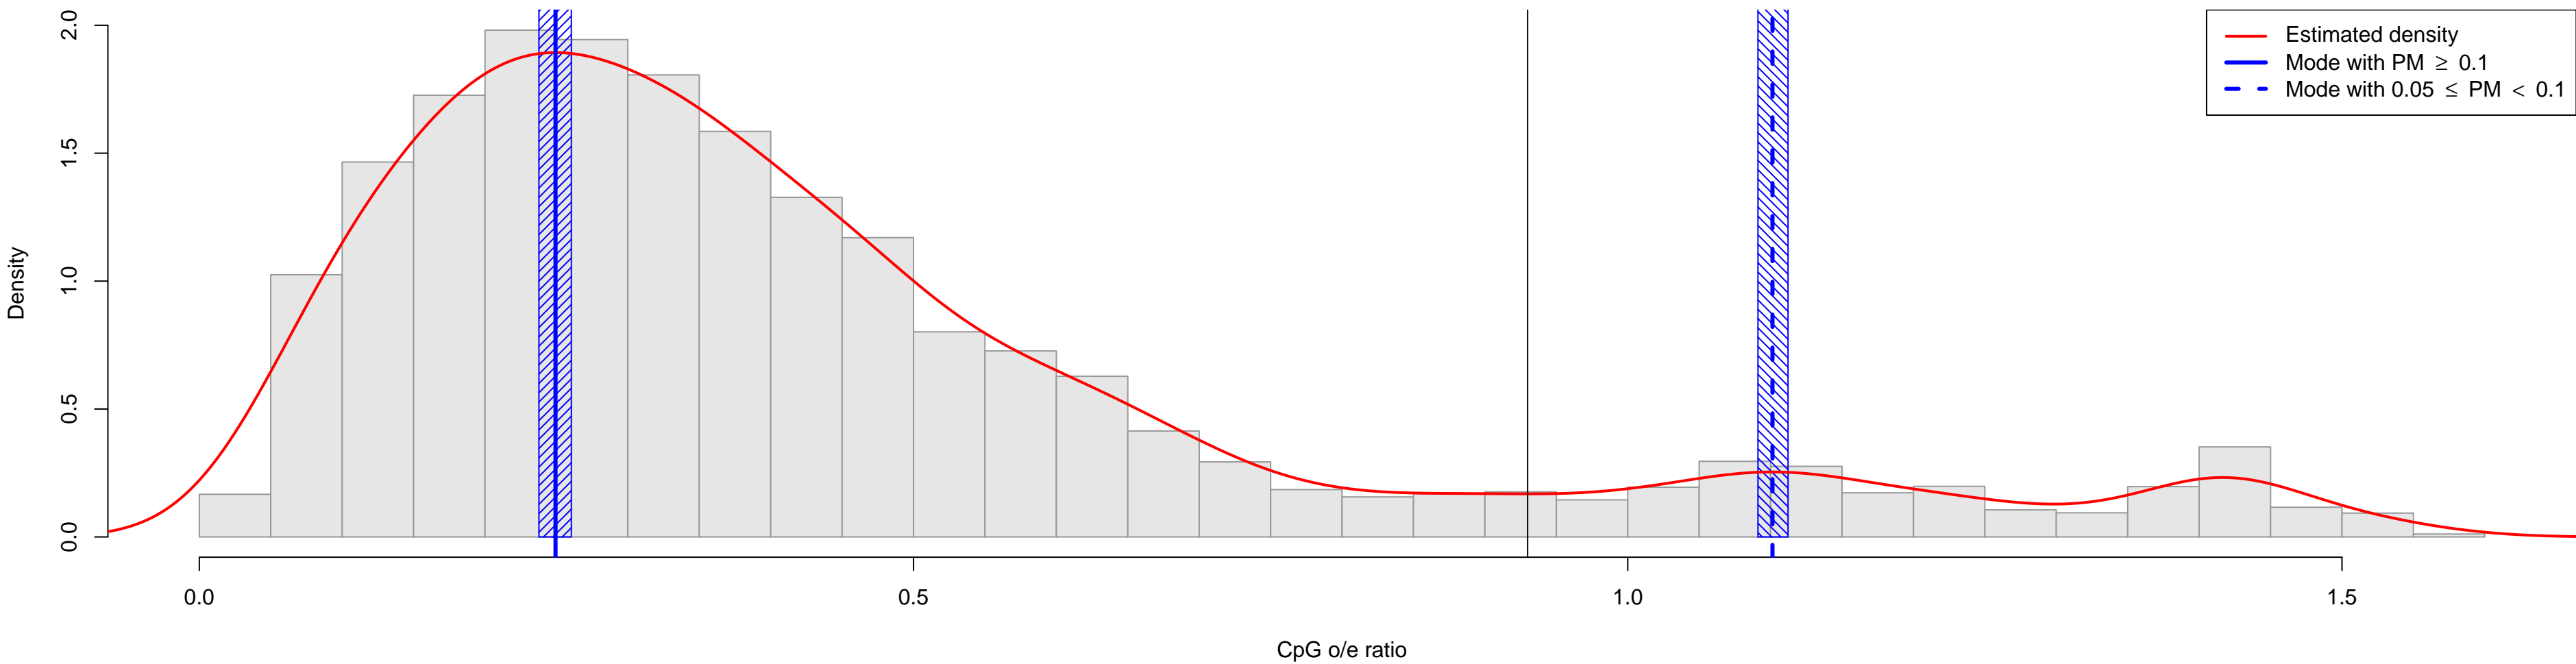

# Bos\_taurus

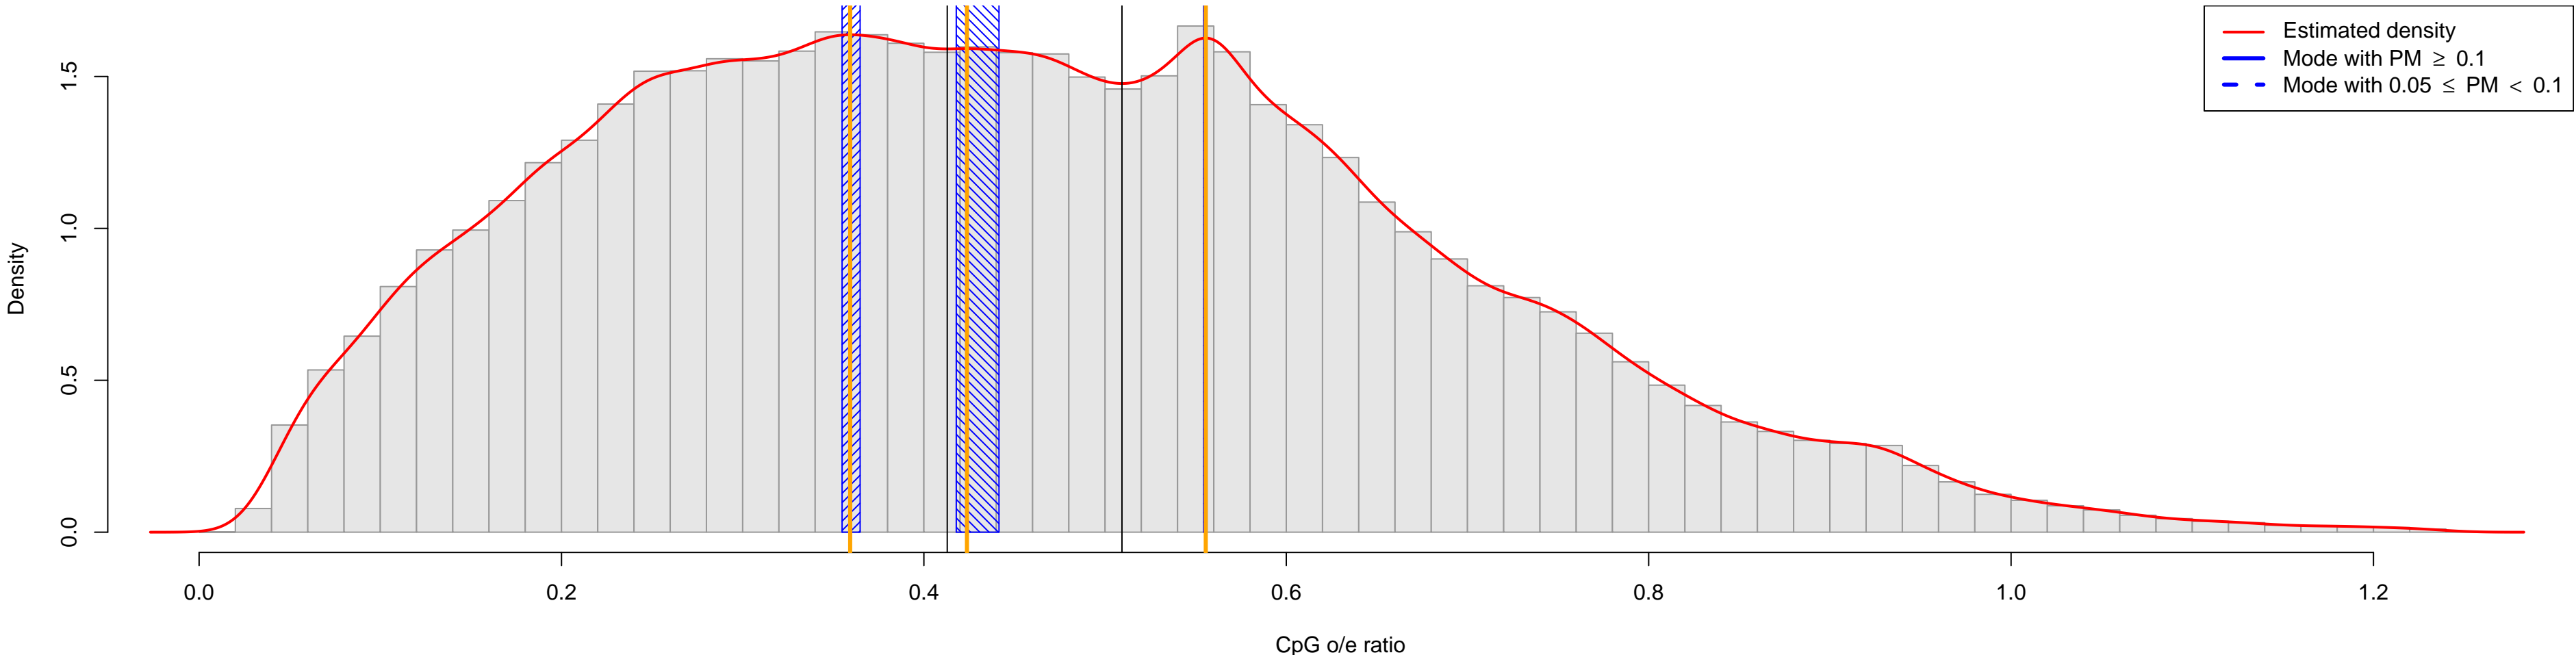

# Bothrops\_alternatus

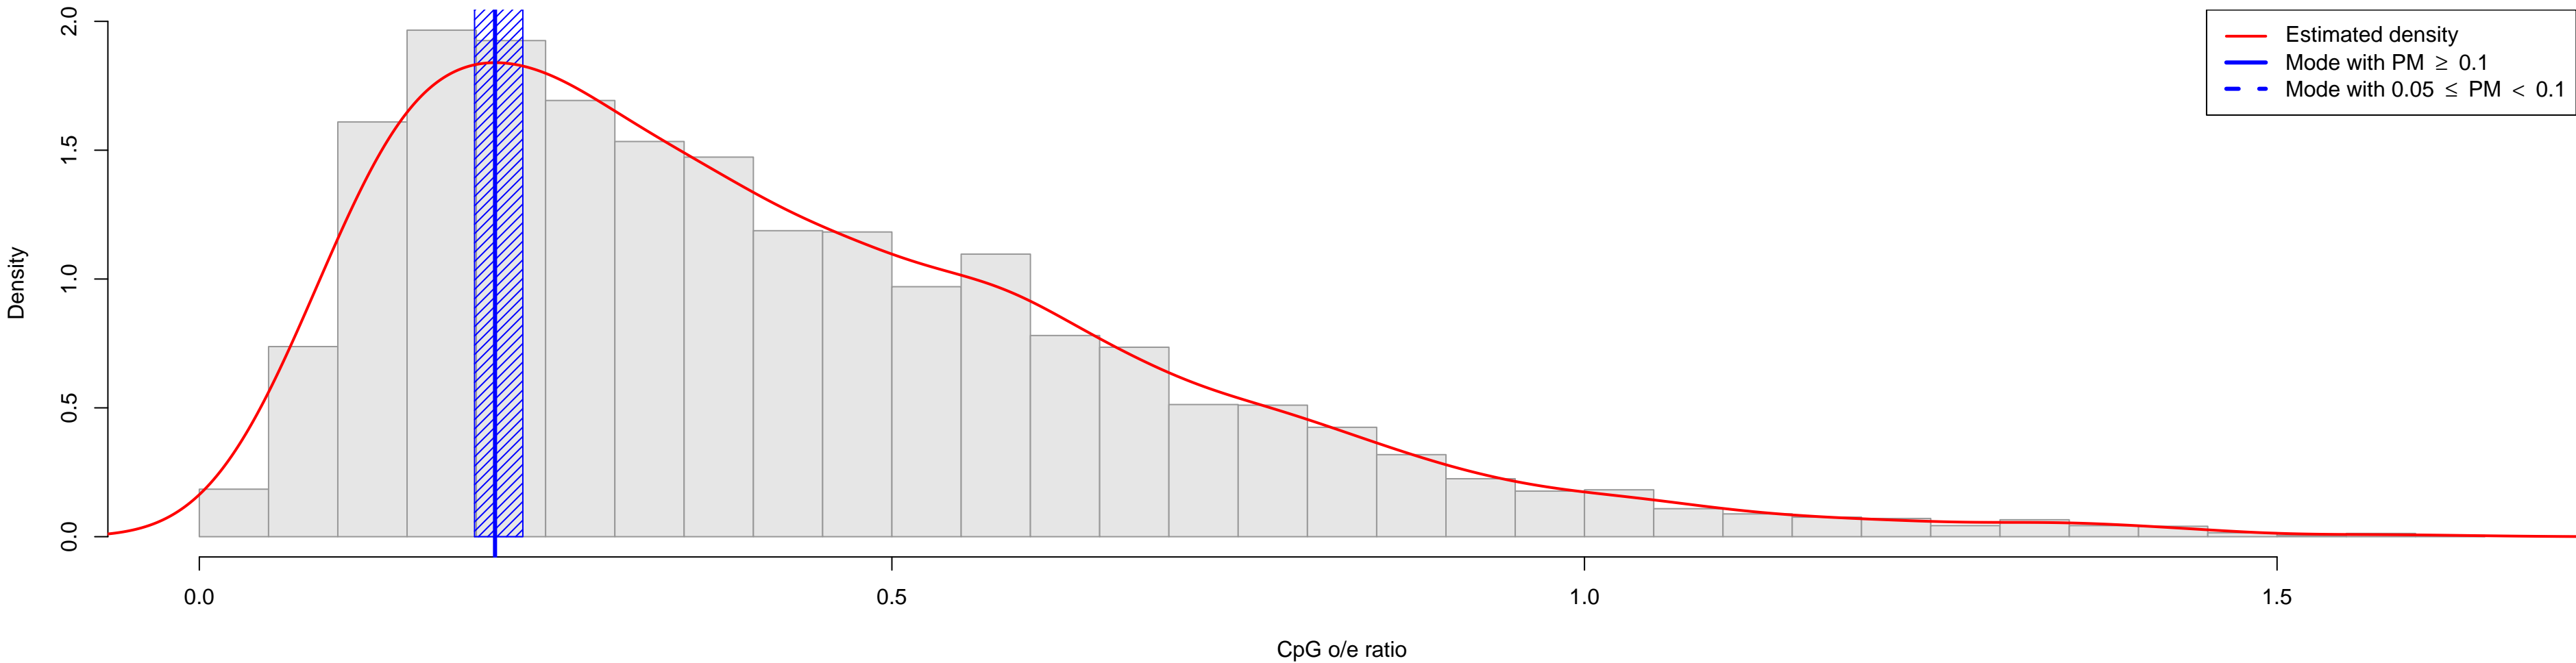

# Bothrops\_jararaca

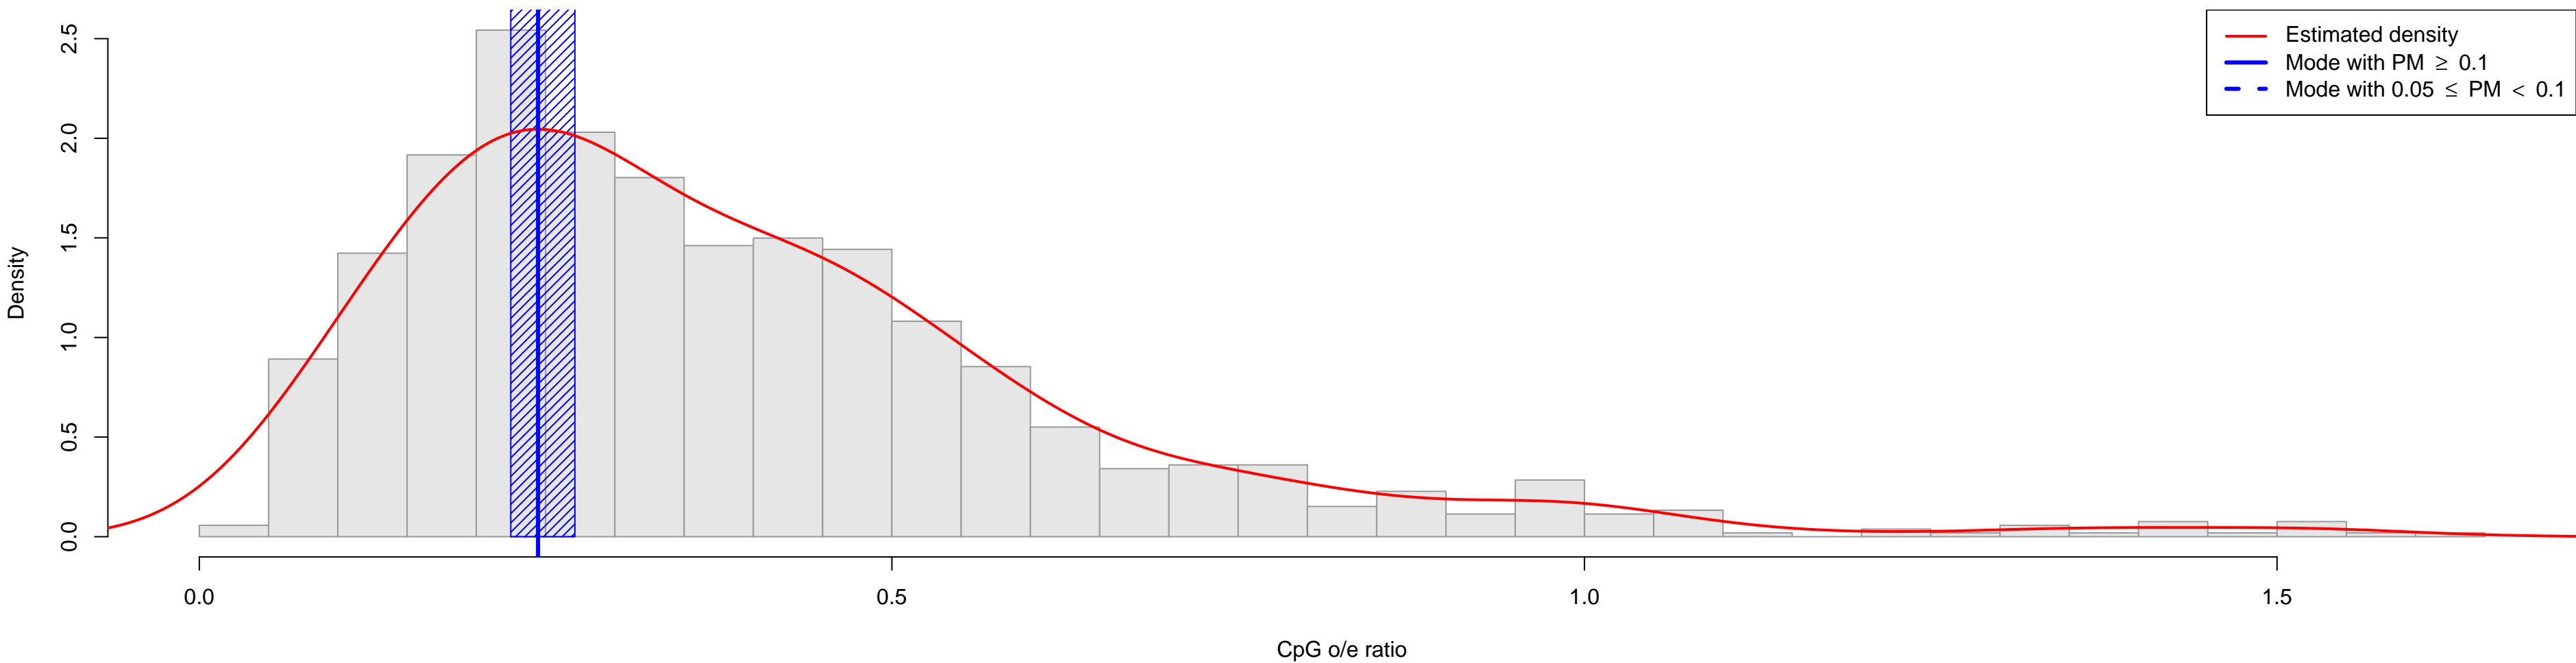

# Botryllus\_schlosseri

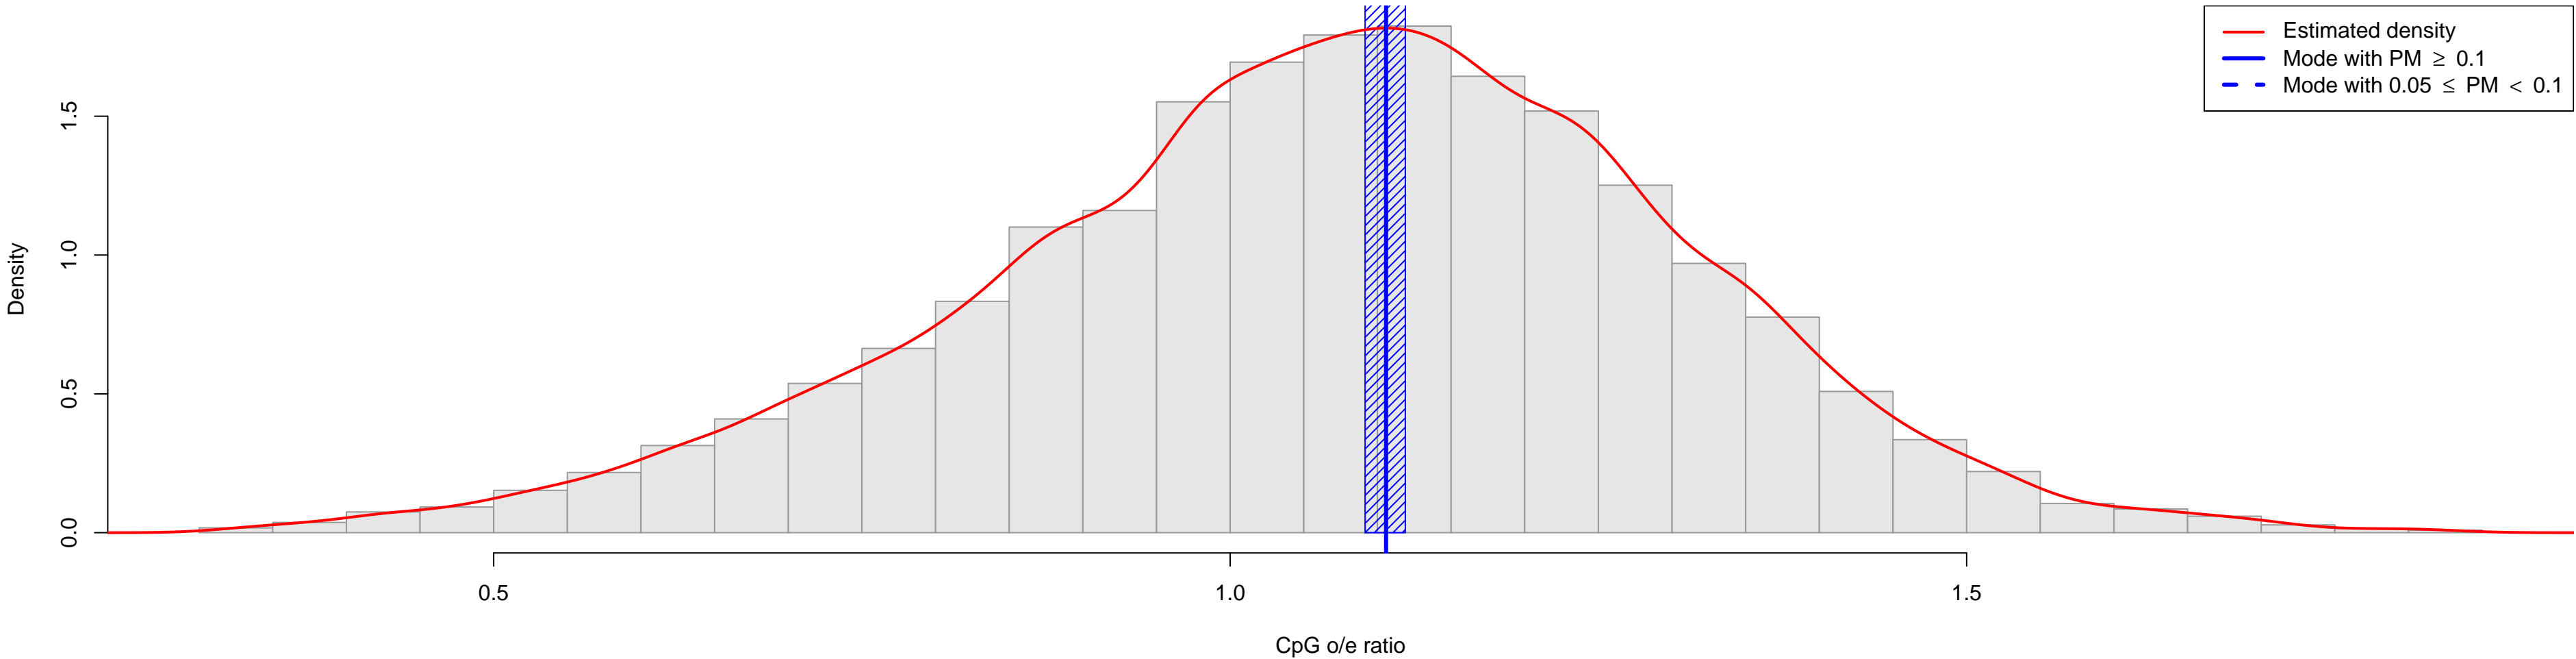

# Botryococcus\_braunii

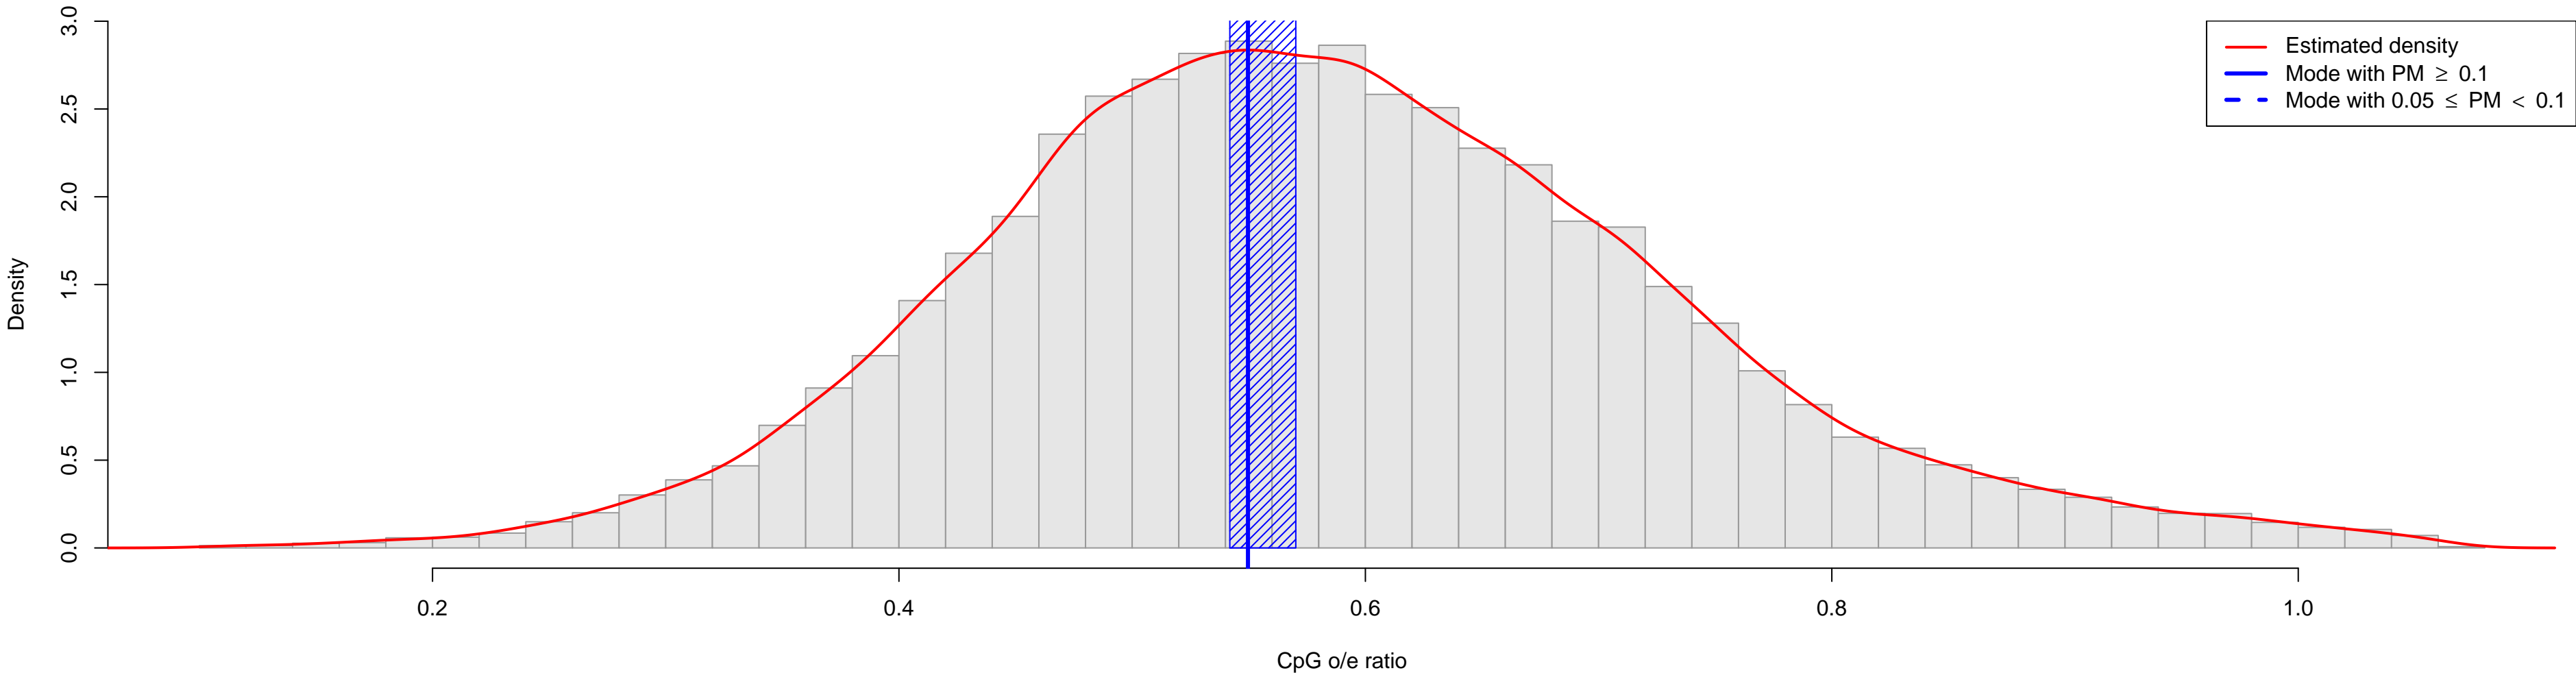

# Botryotinia\_fuckeliana

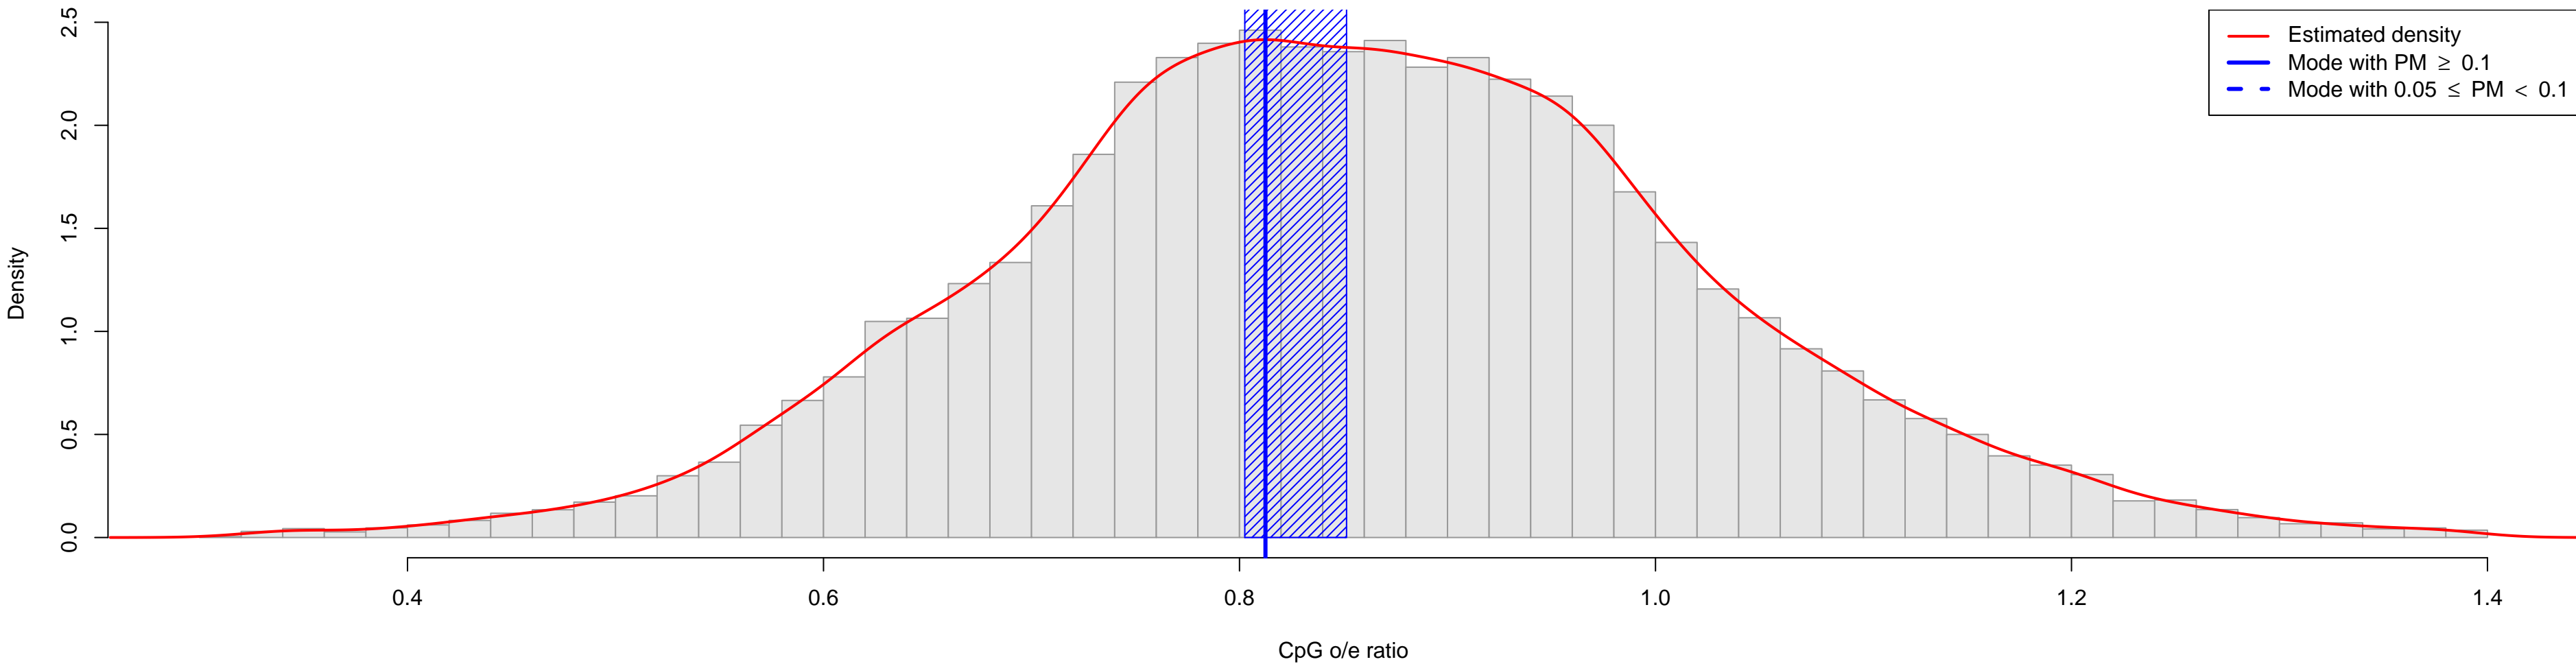

# Brachionus\_plicatilis

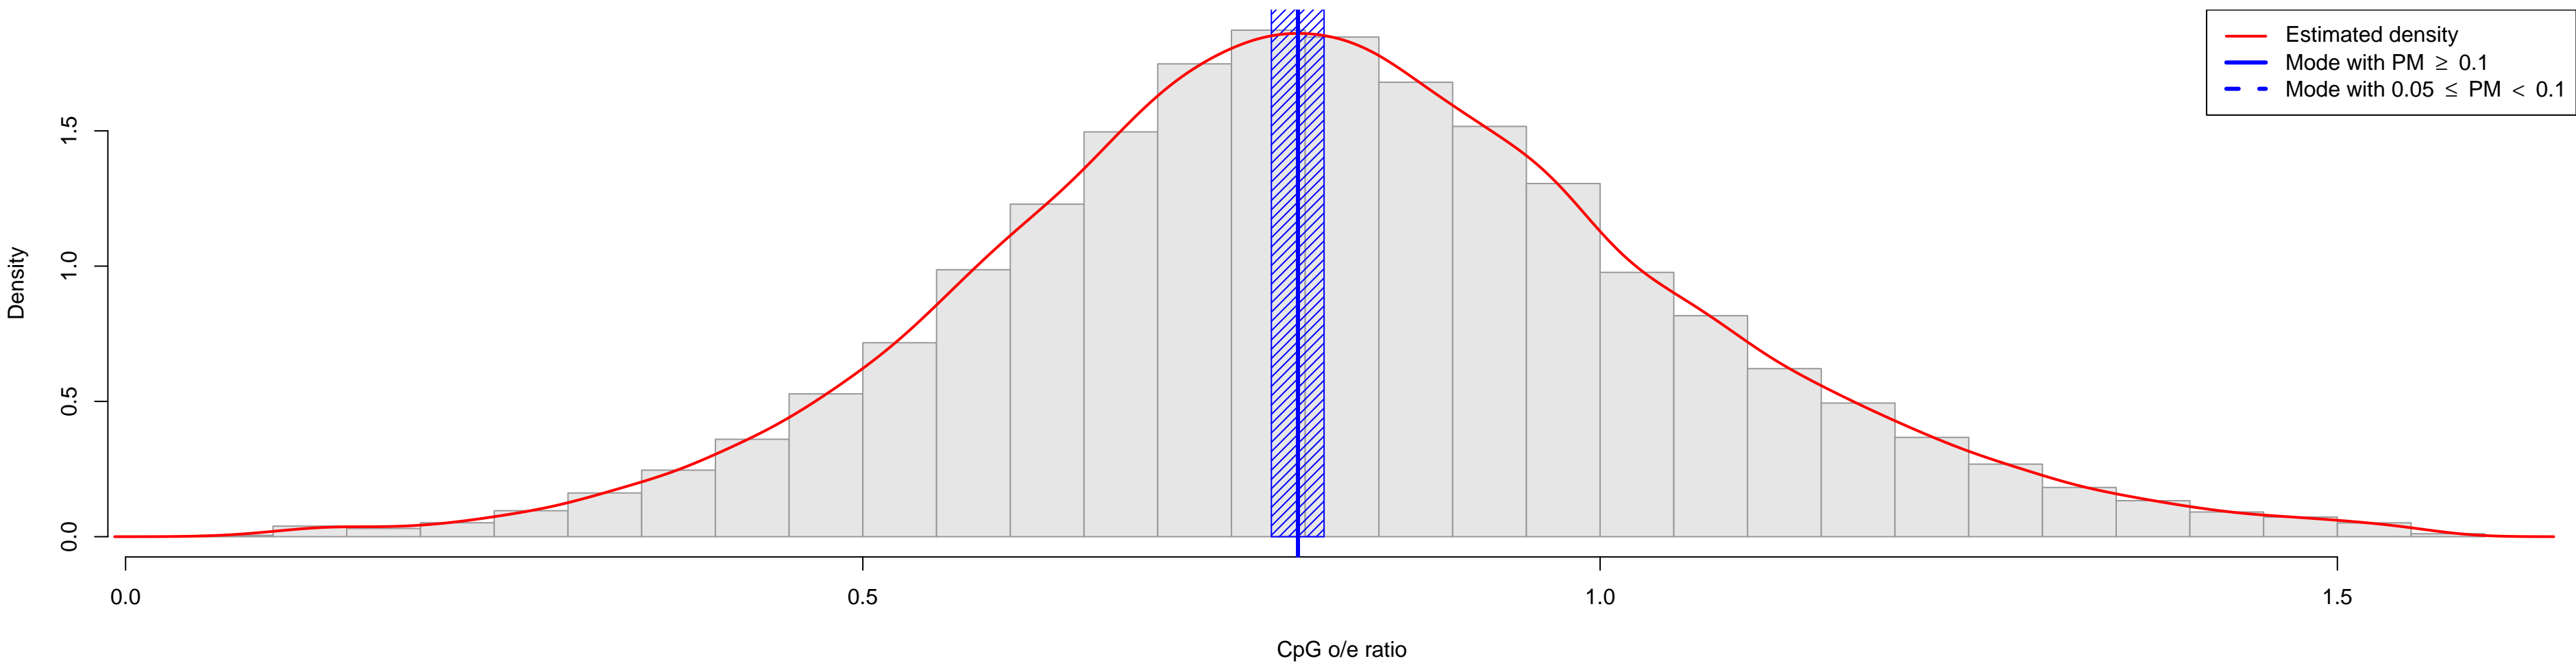



# Branchiostoma\_floridae

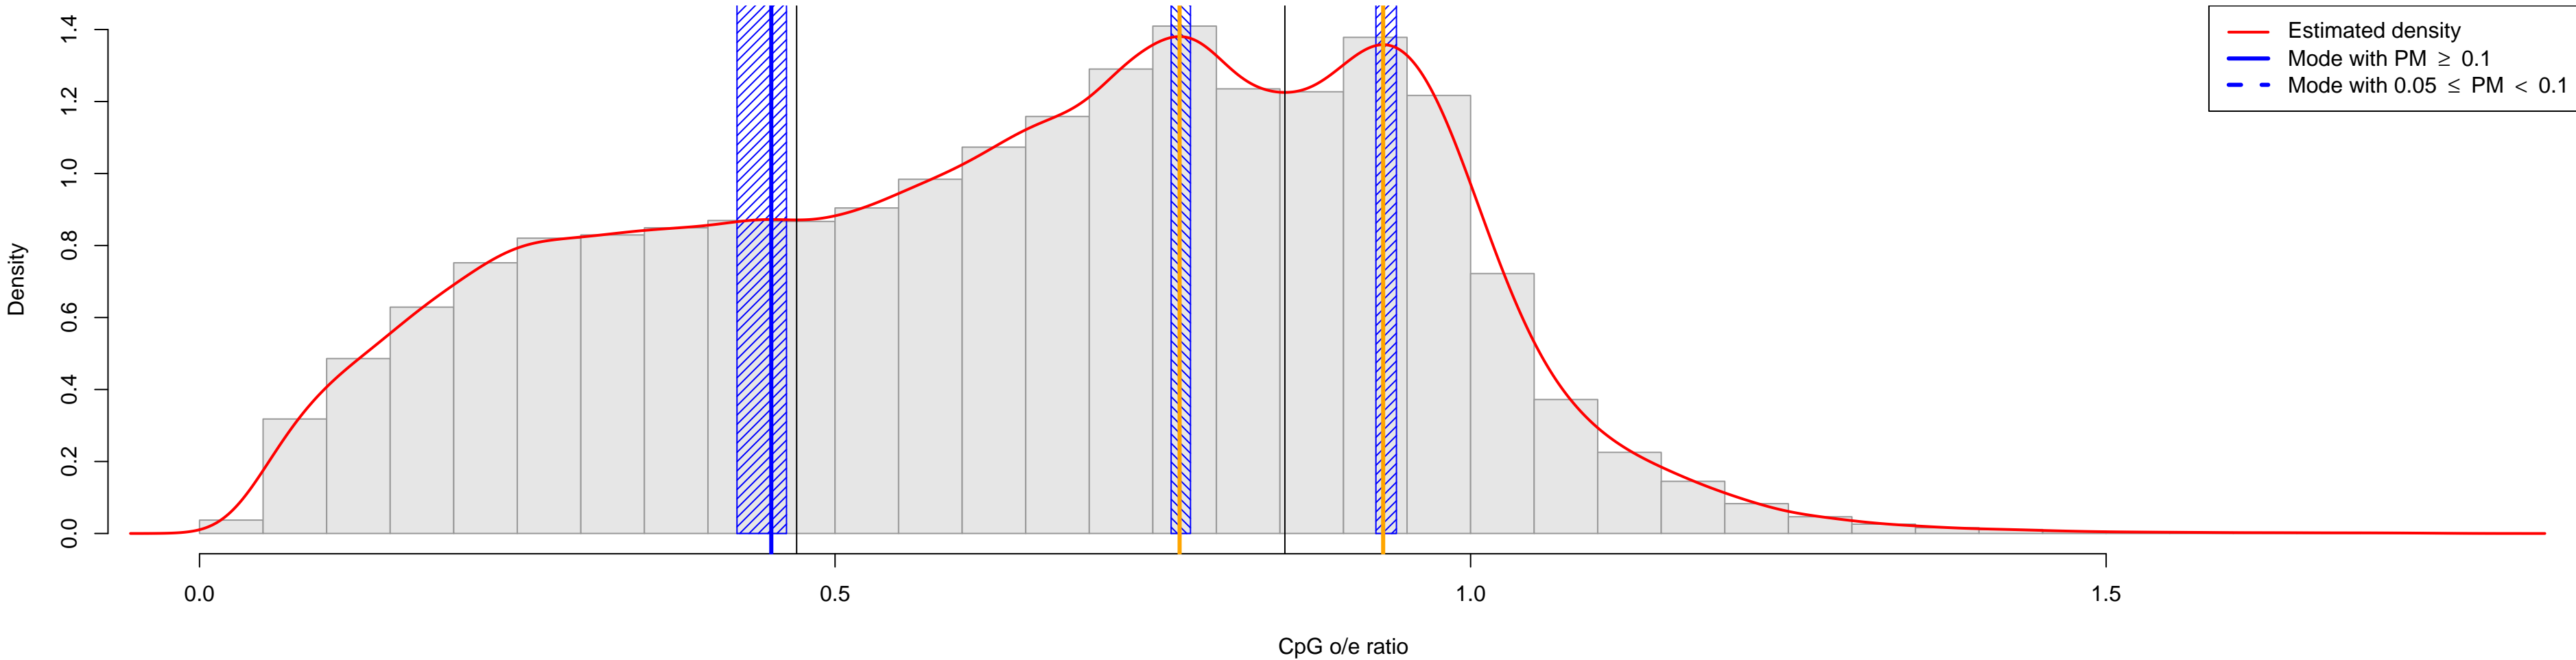

# Brassica\_napus

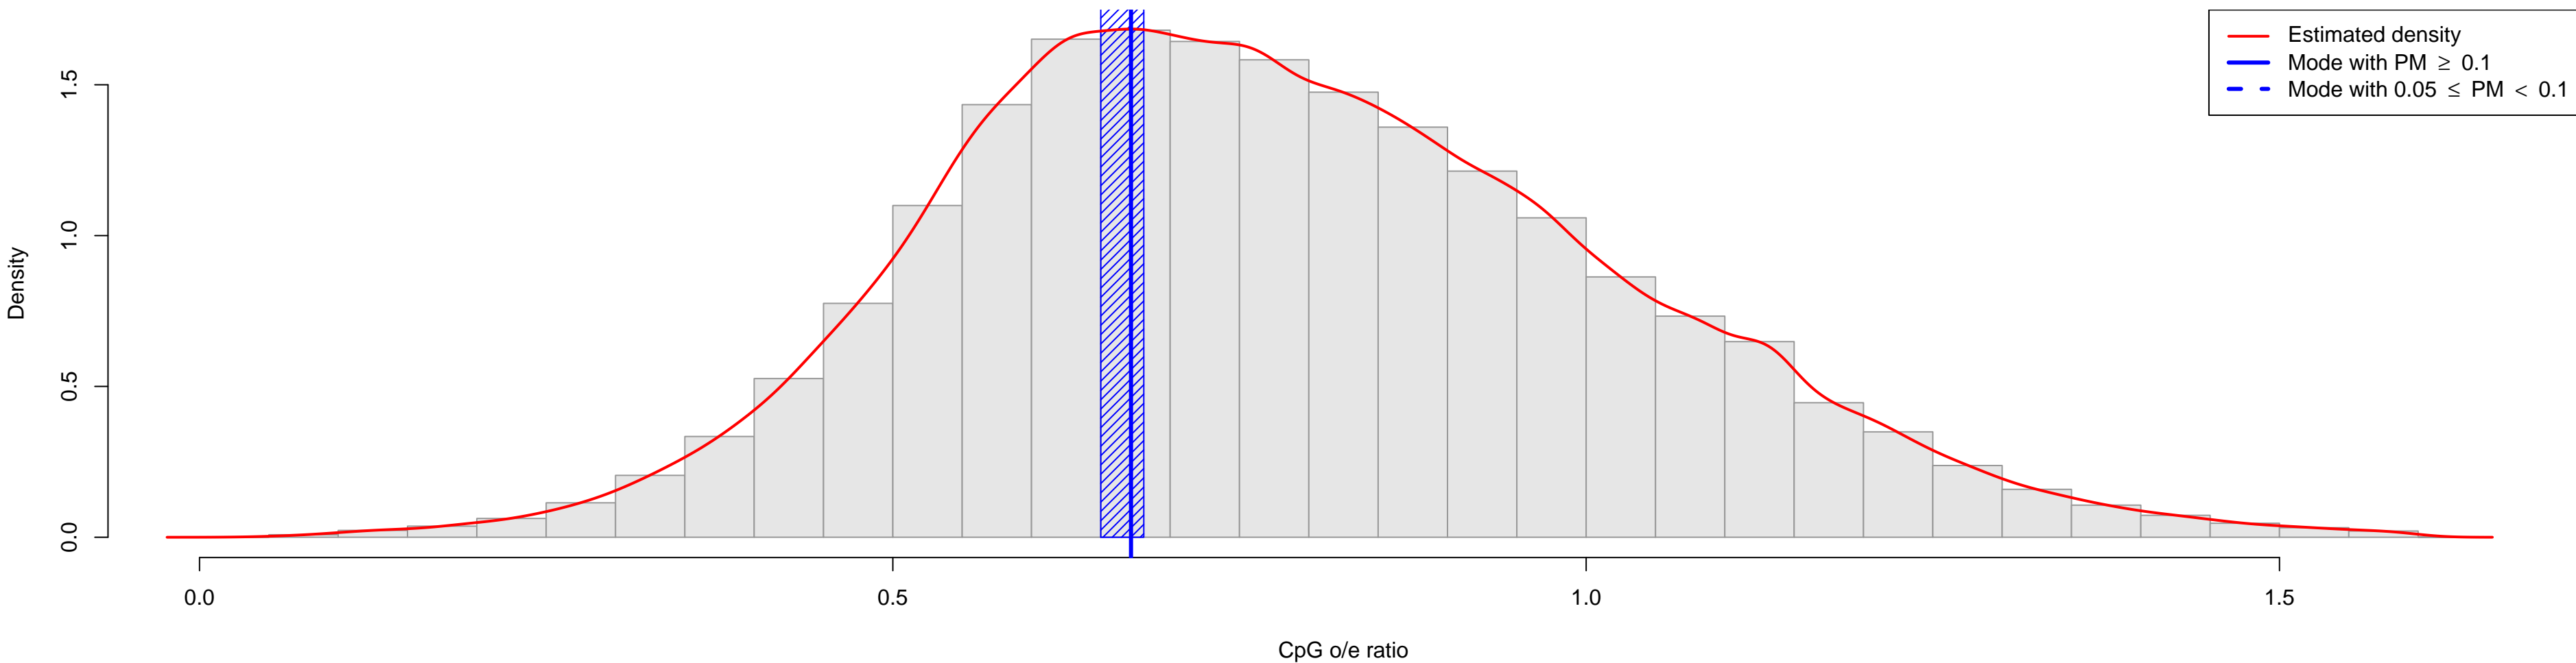

# Brassica\_oleracea

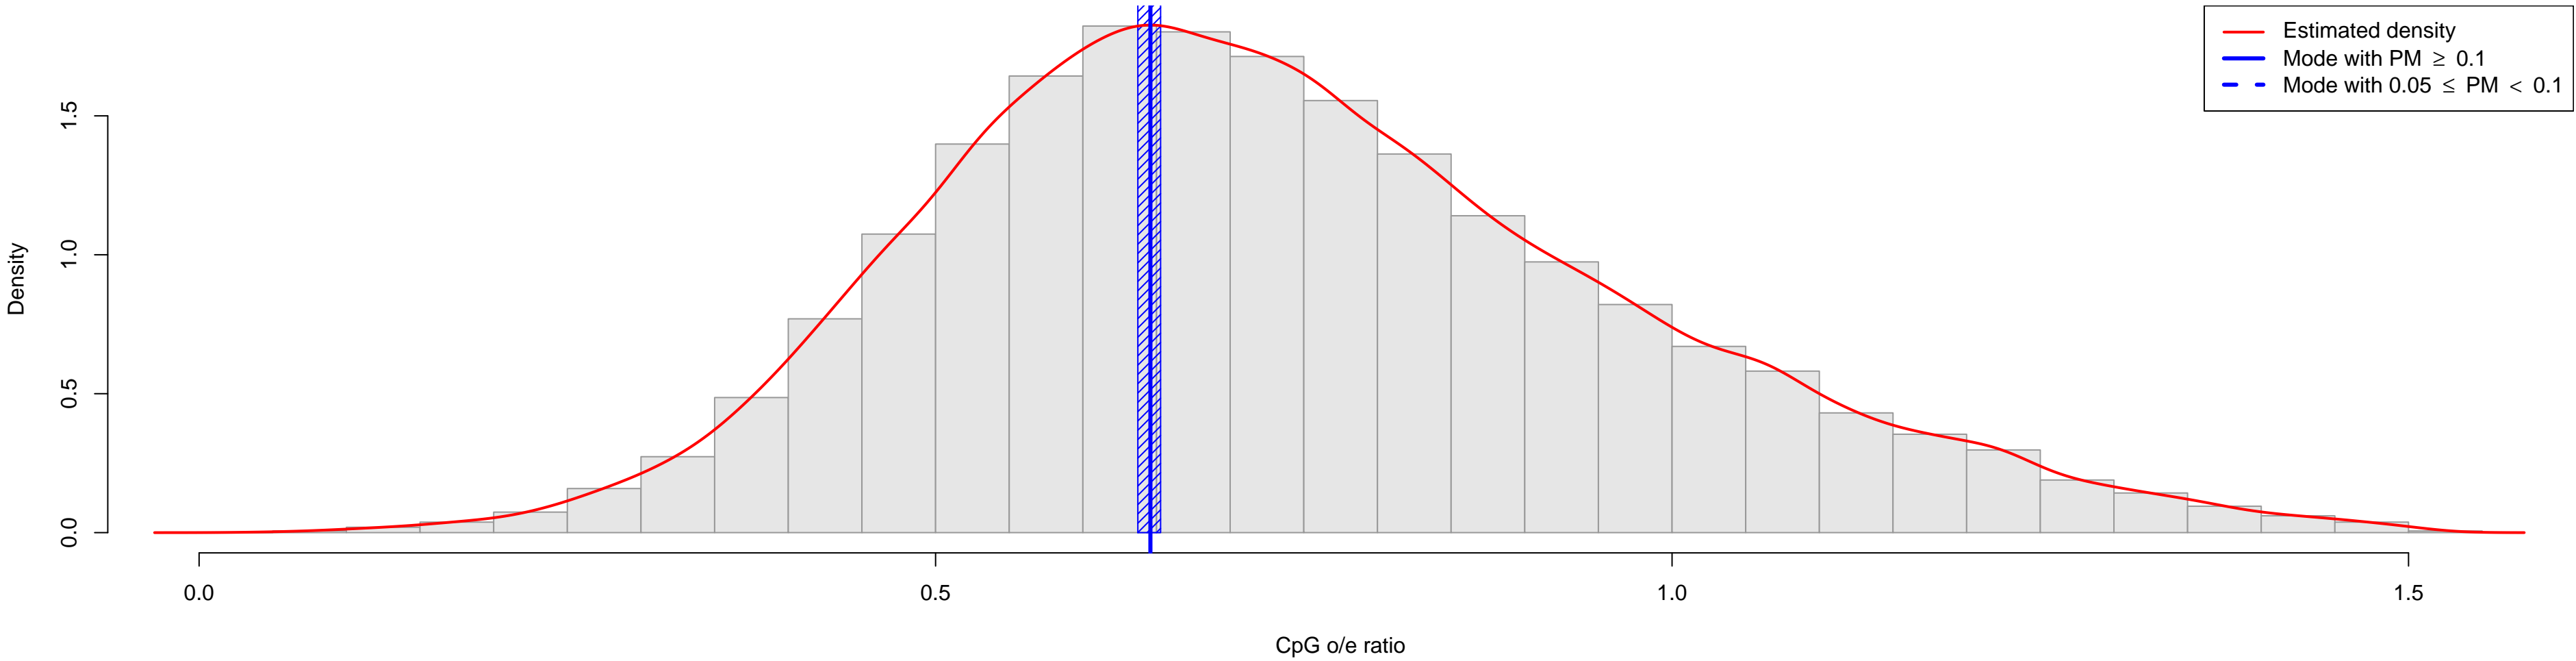

# Brassica\_rapa

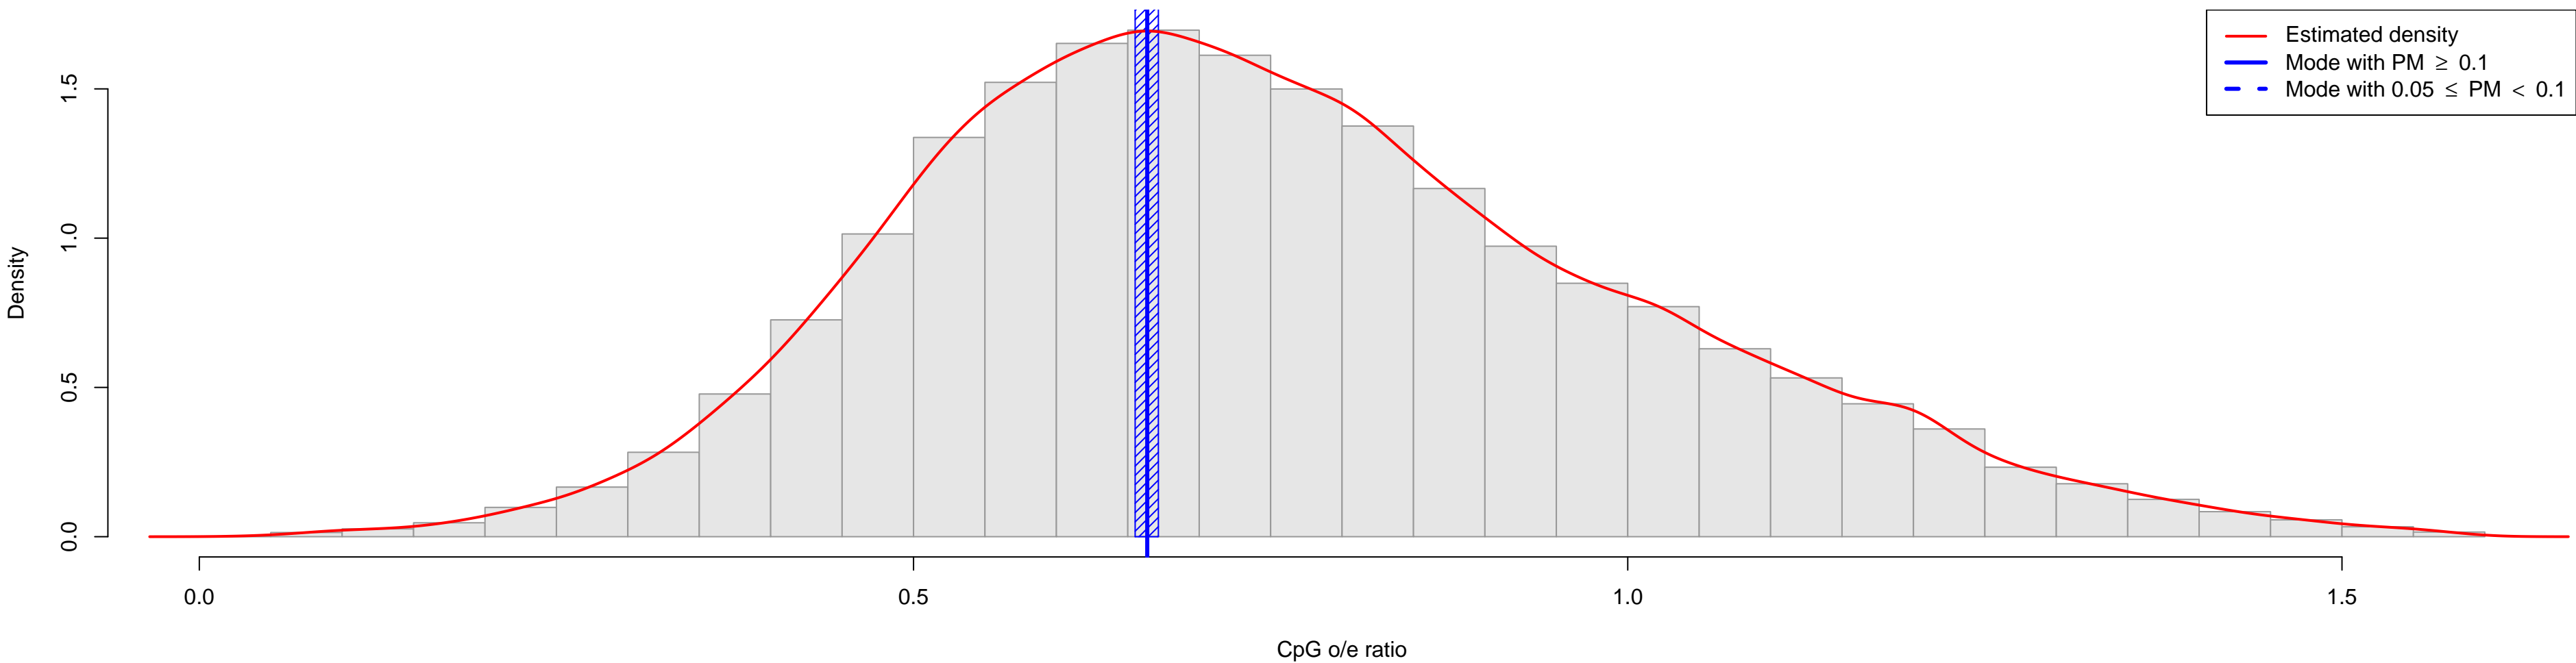

# Brugia\_malayi

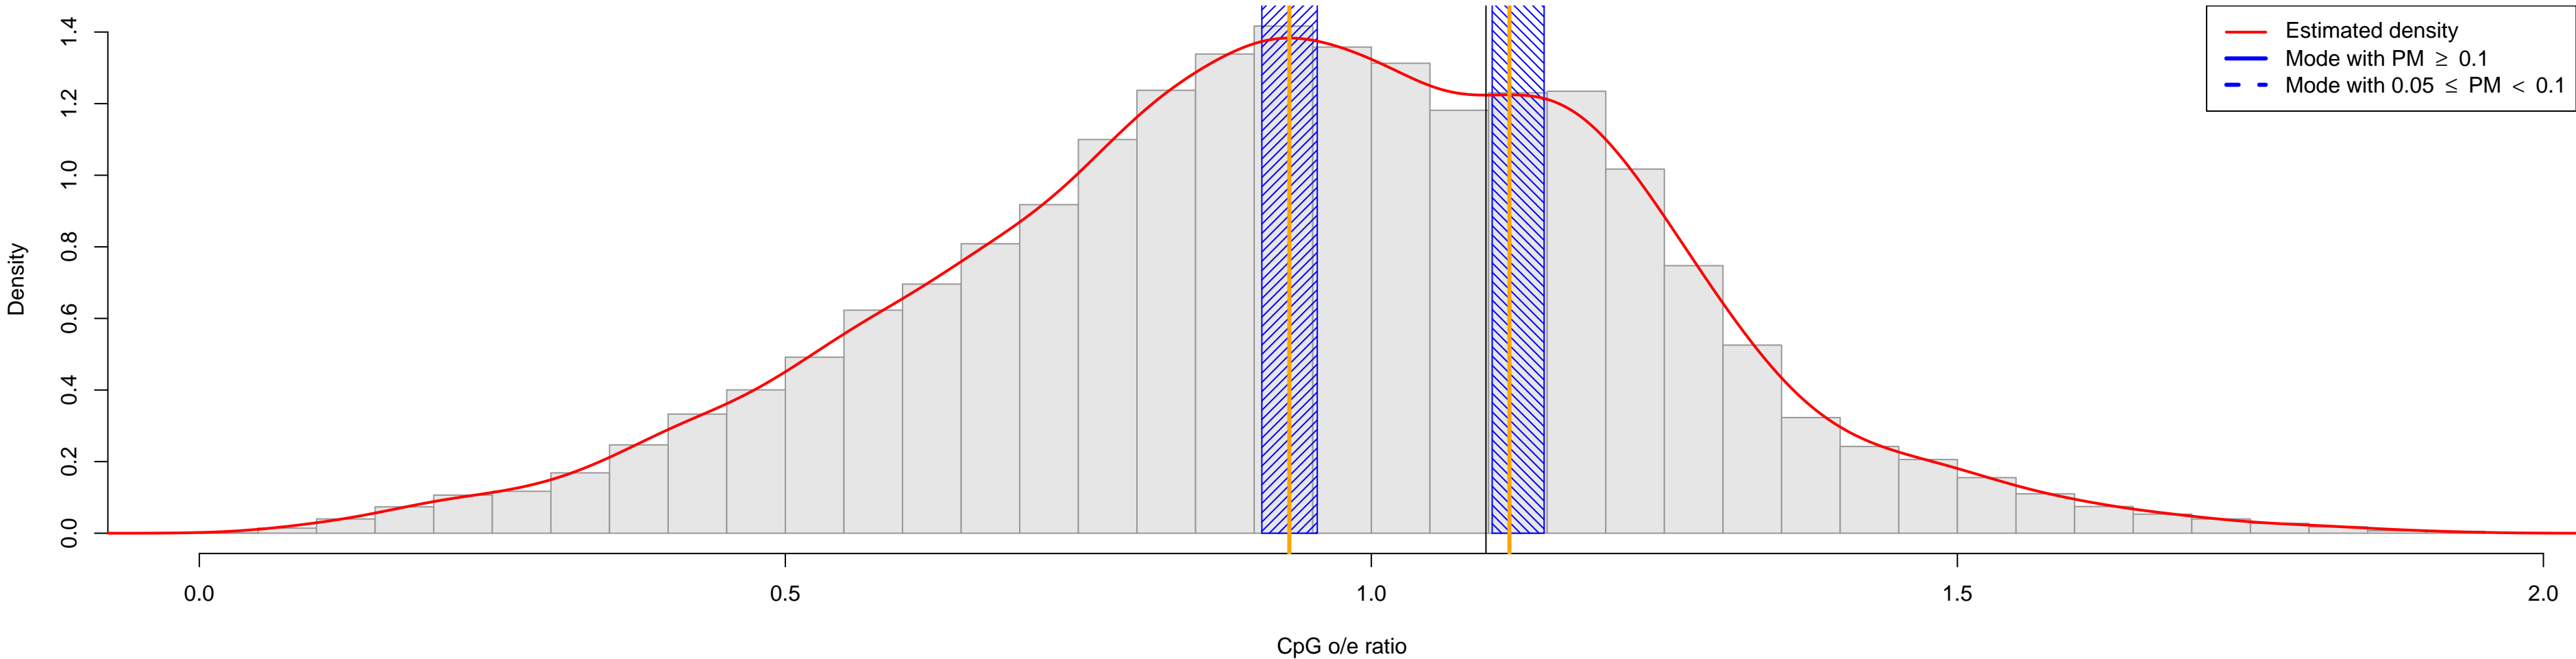

# Caenorhabditis\_brenneri

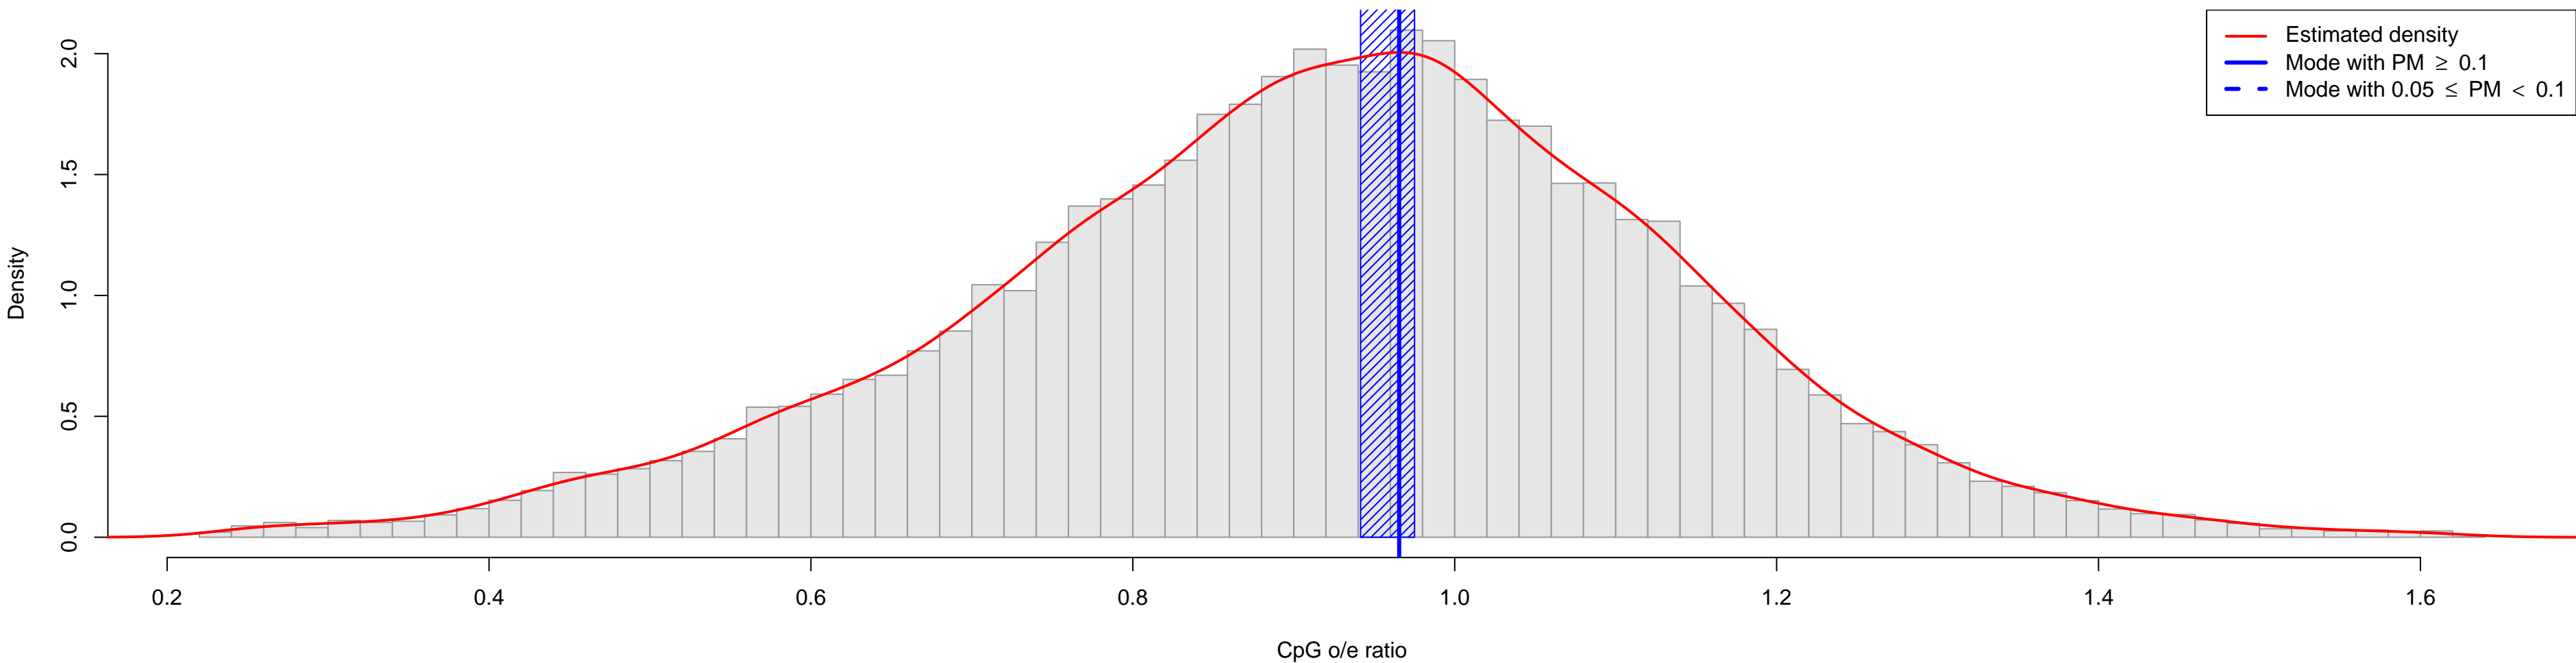

# Caenorhabditis\_briggsae

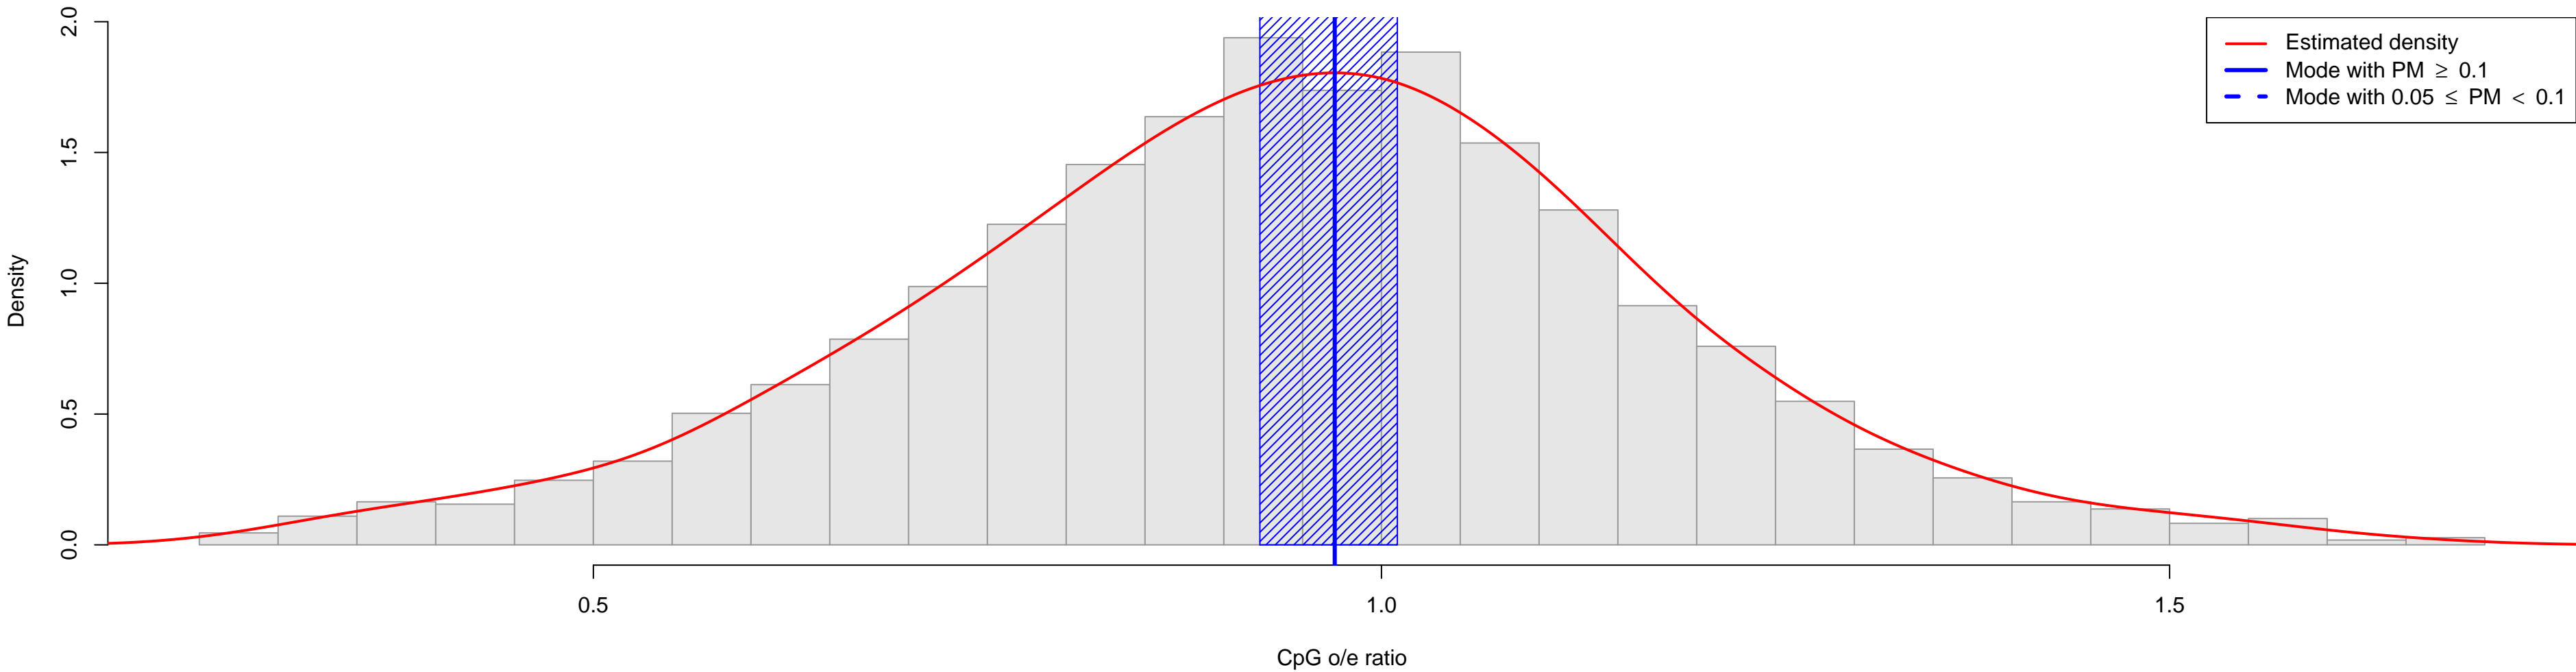

# Caenorhabditis\_elegans

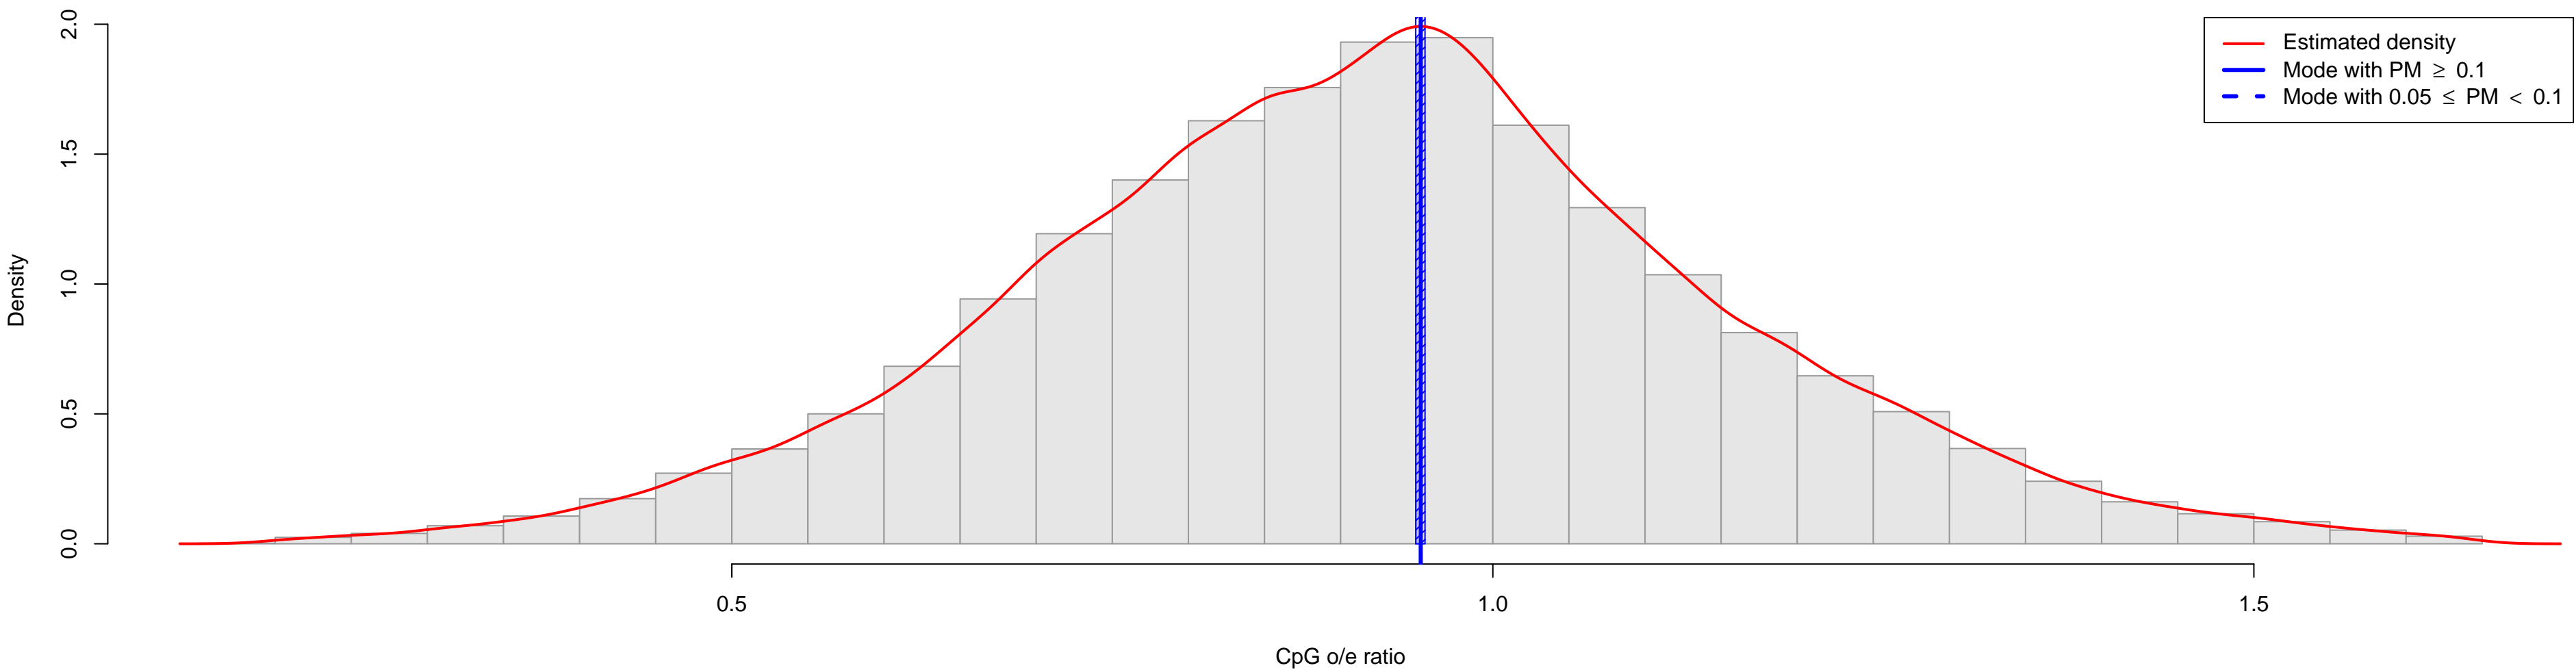



# Caenorhabditis\_japonica

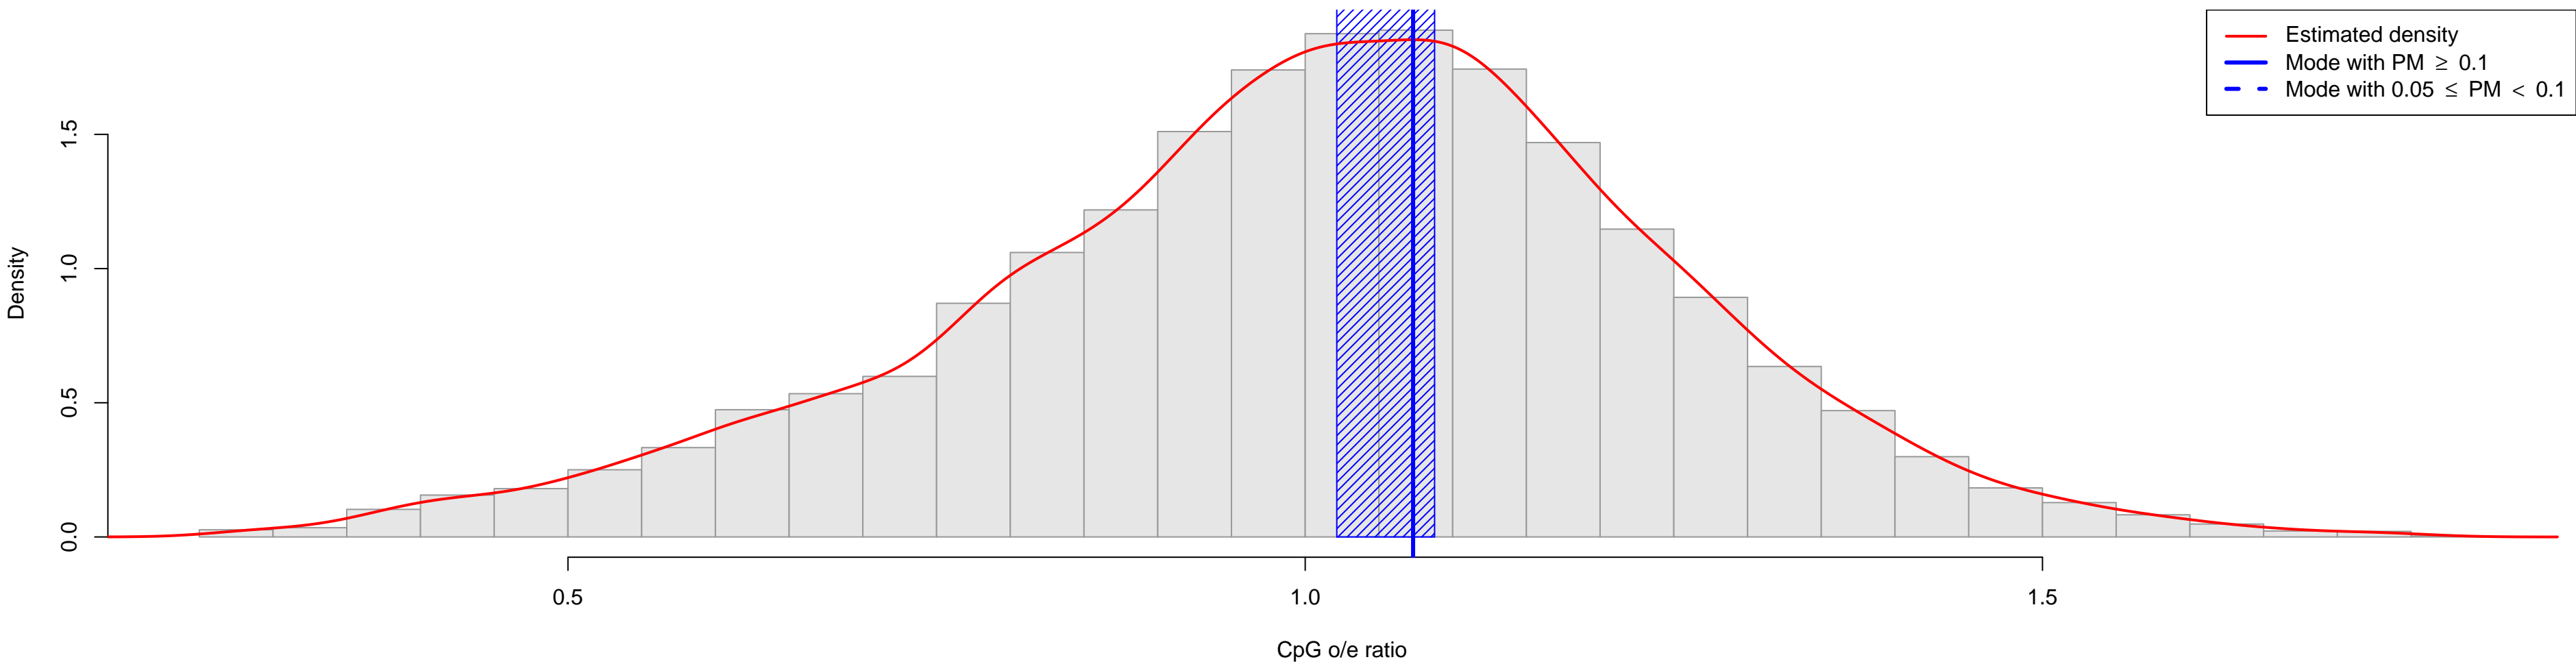

# Caenorhabditis\_remanei

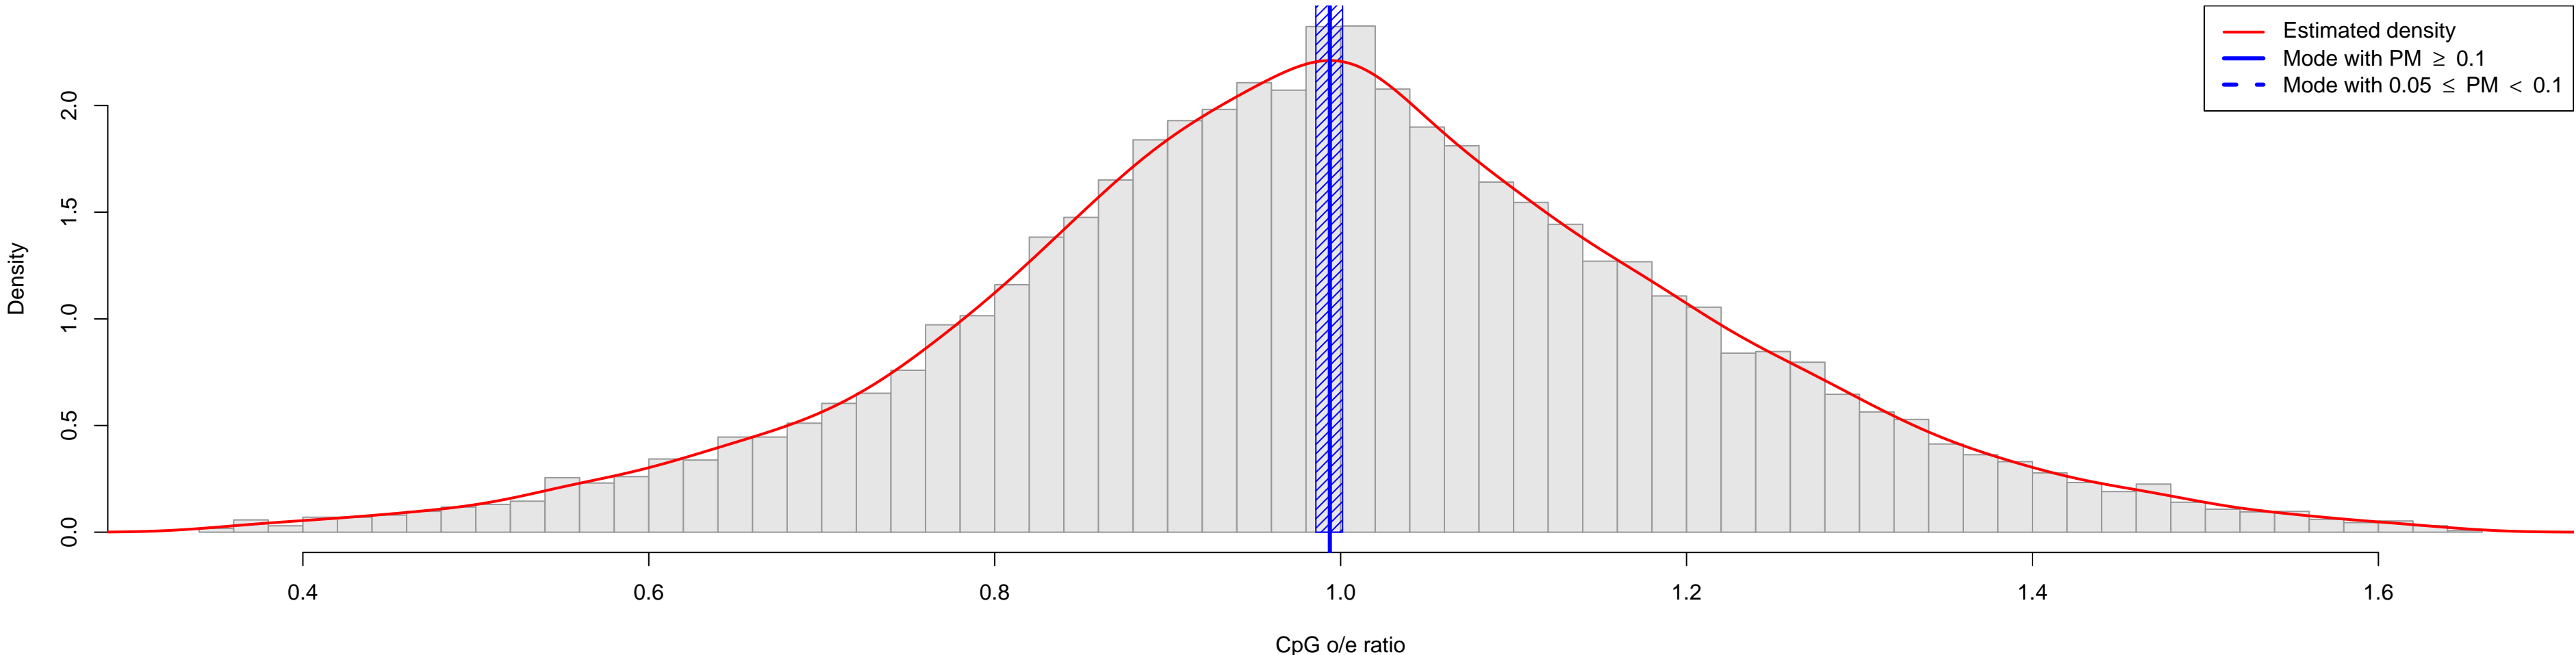

# Callinectes\_sapidus

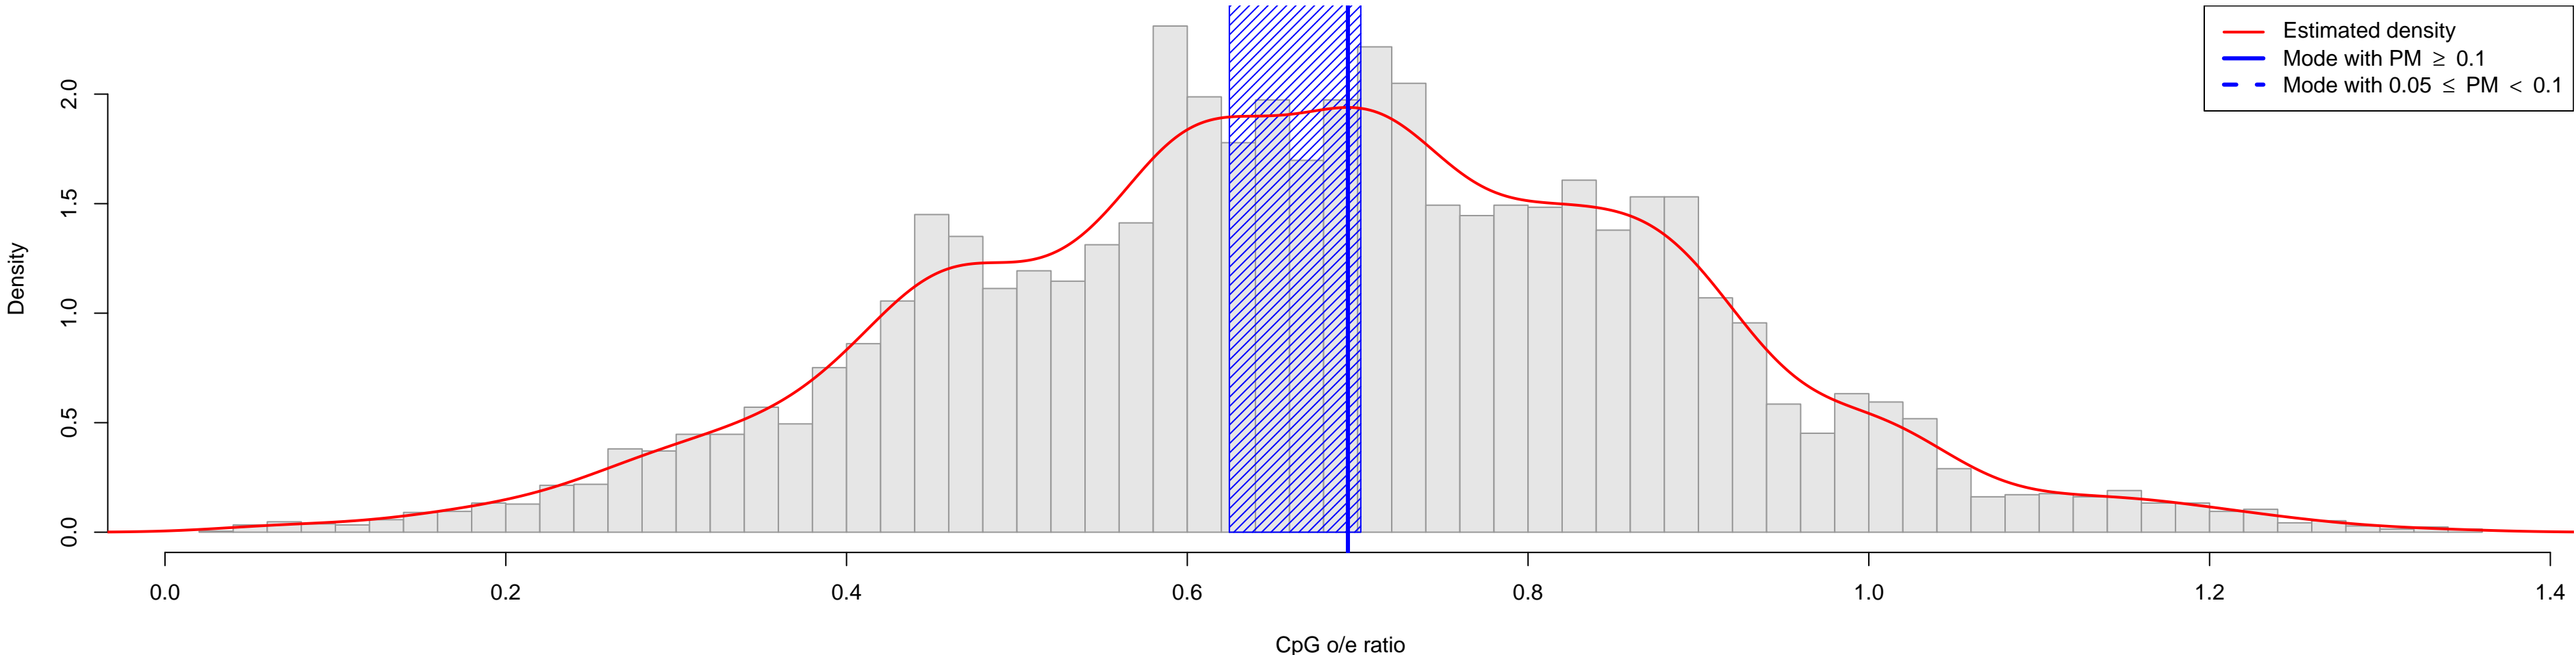

# Callorhinchus\_milii

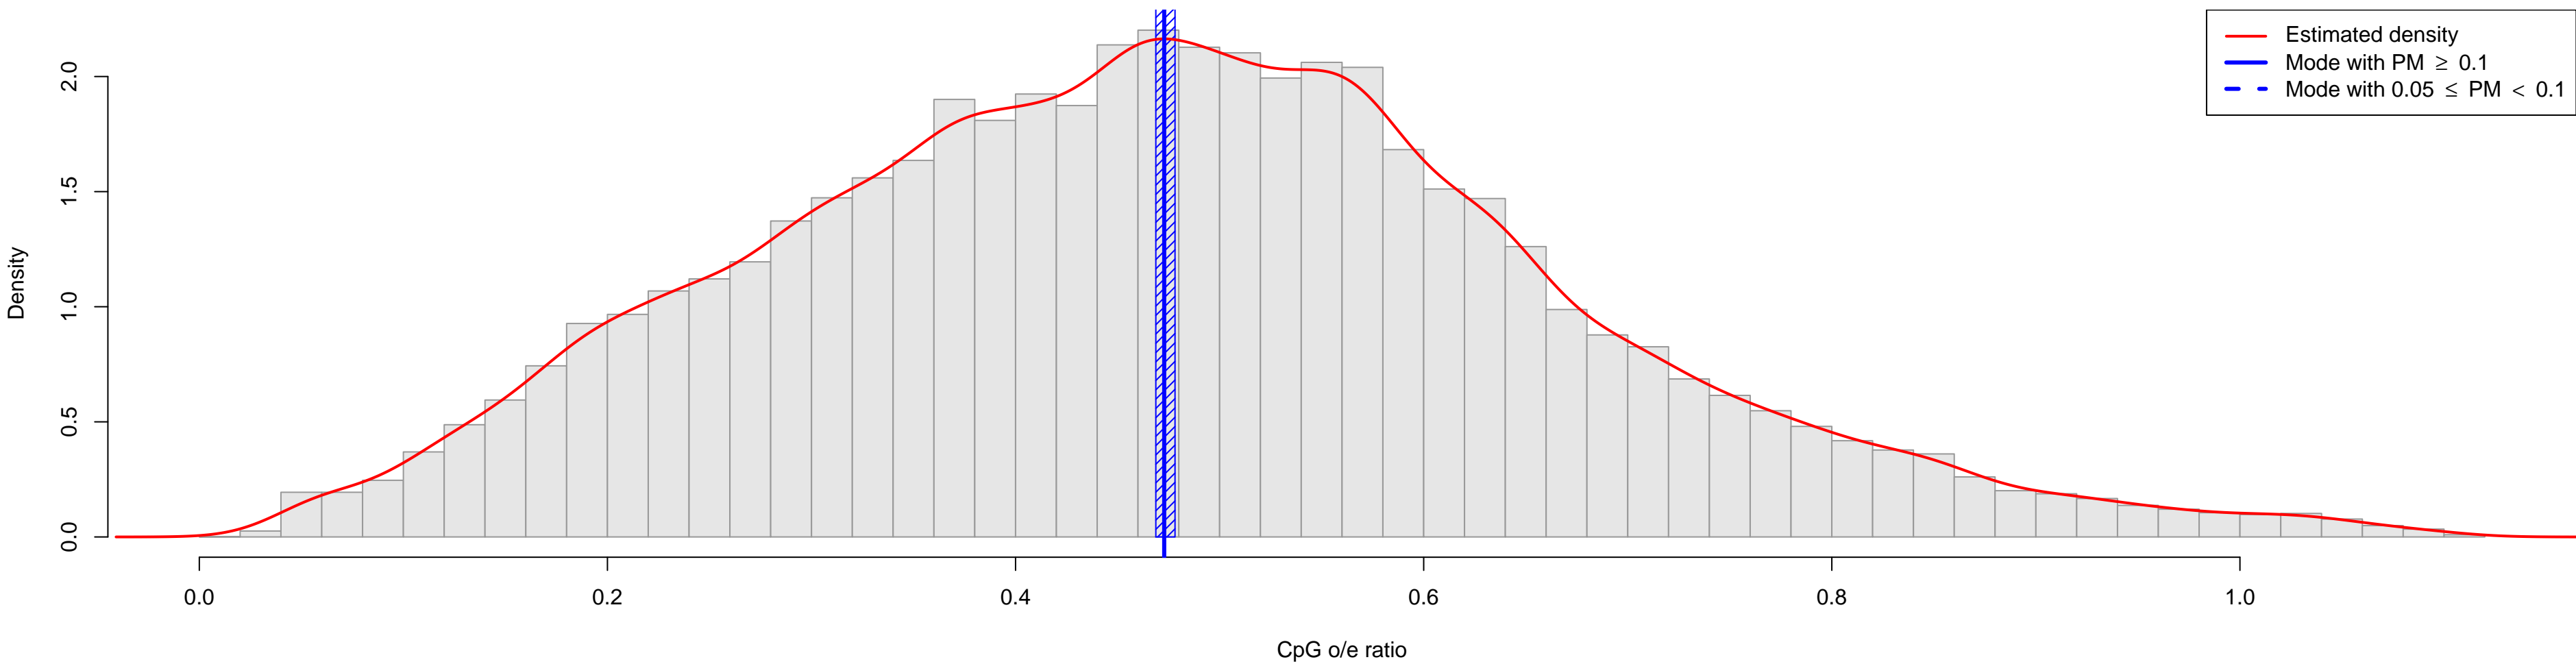

# Campodea\_fragilis

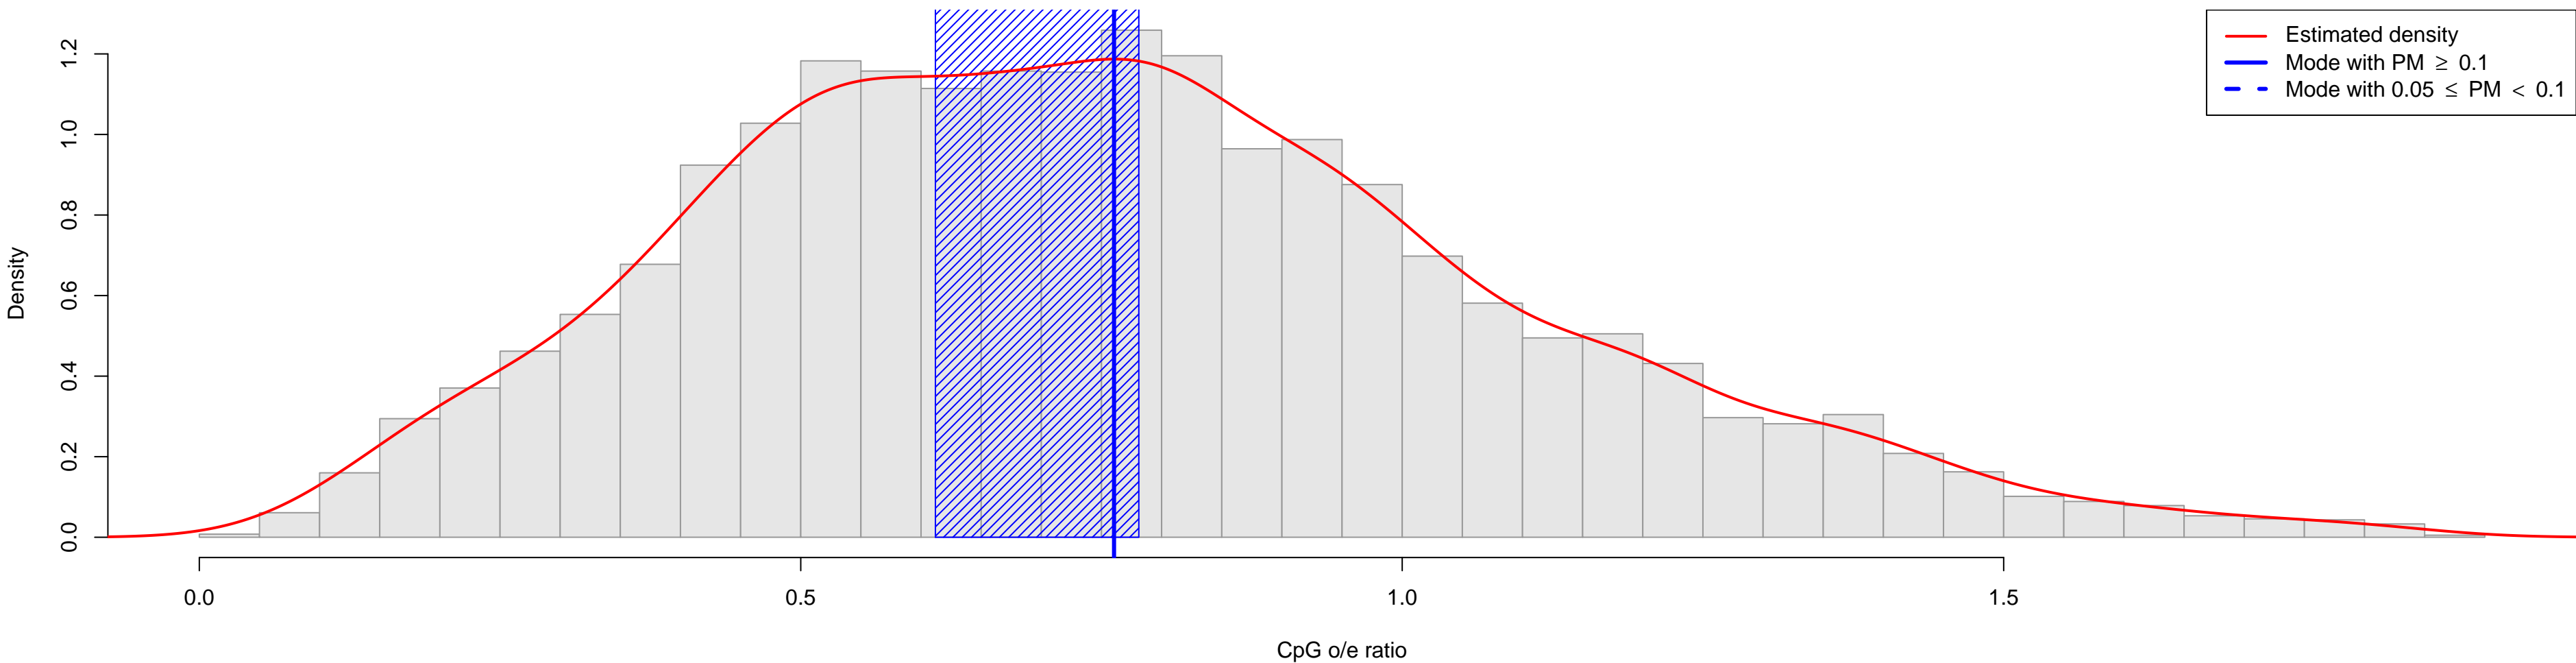

# Cancer\_magister

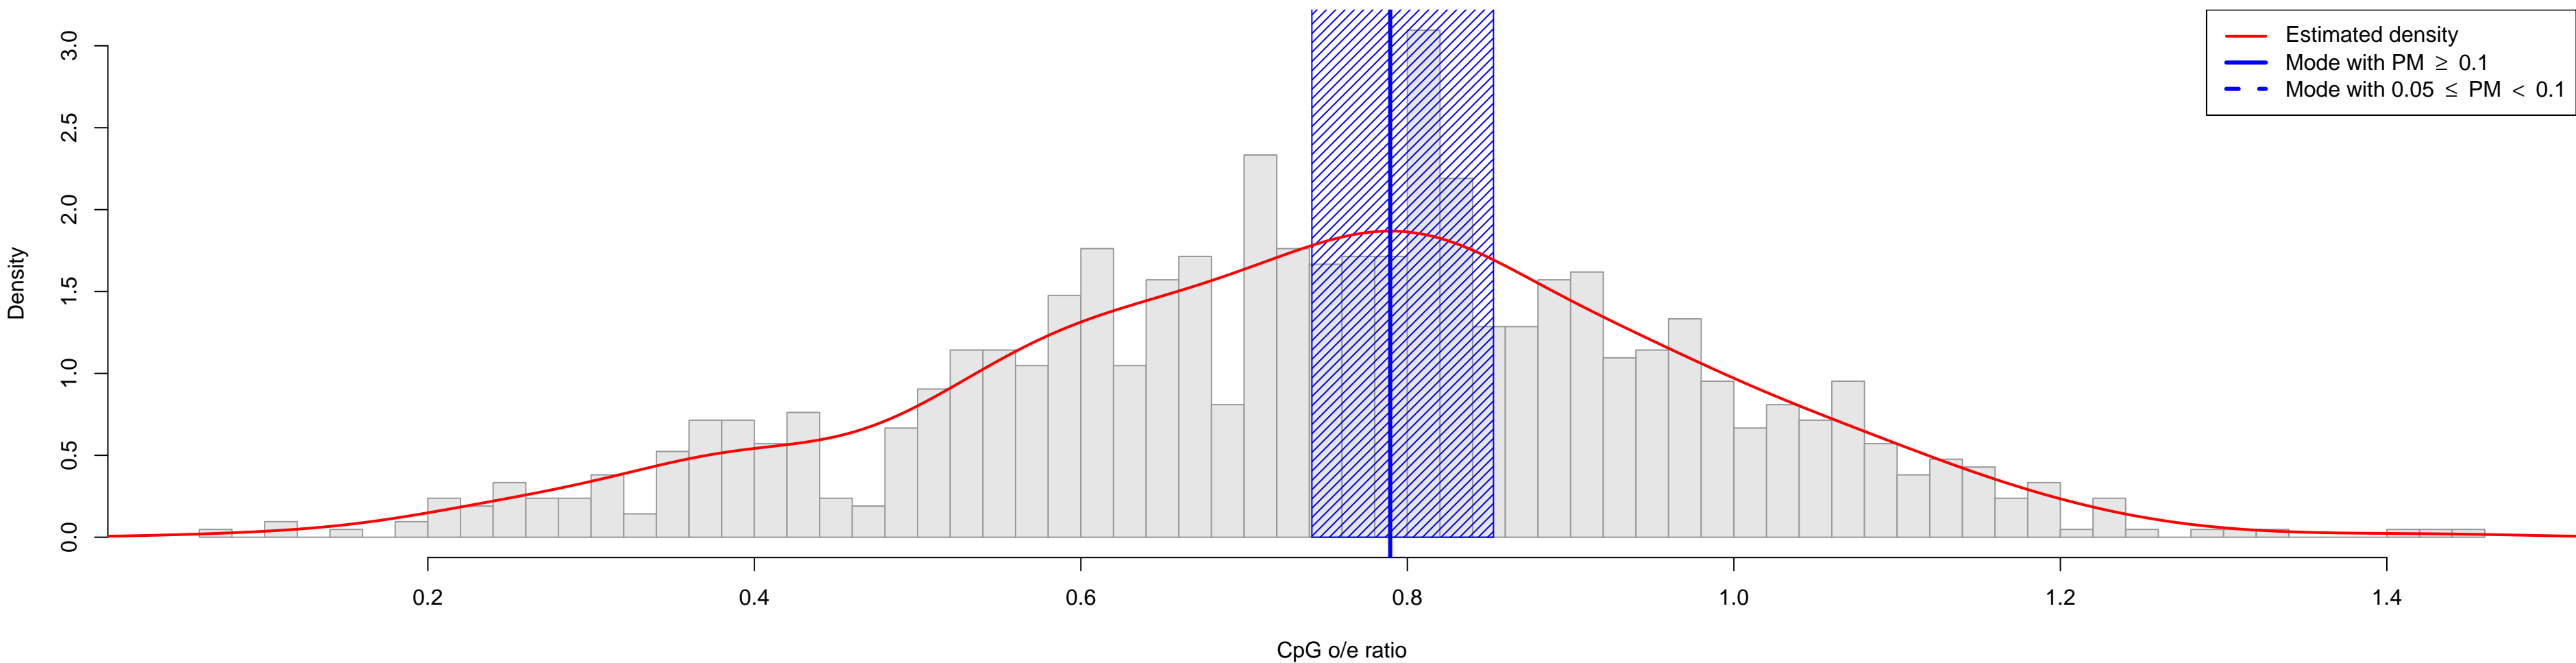

# Canis\_lupus

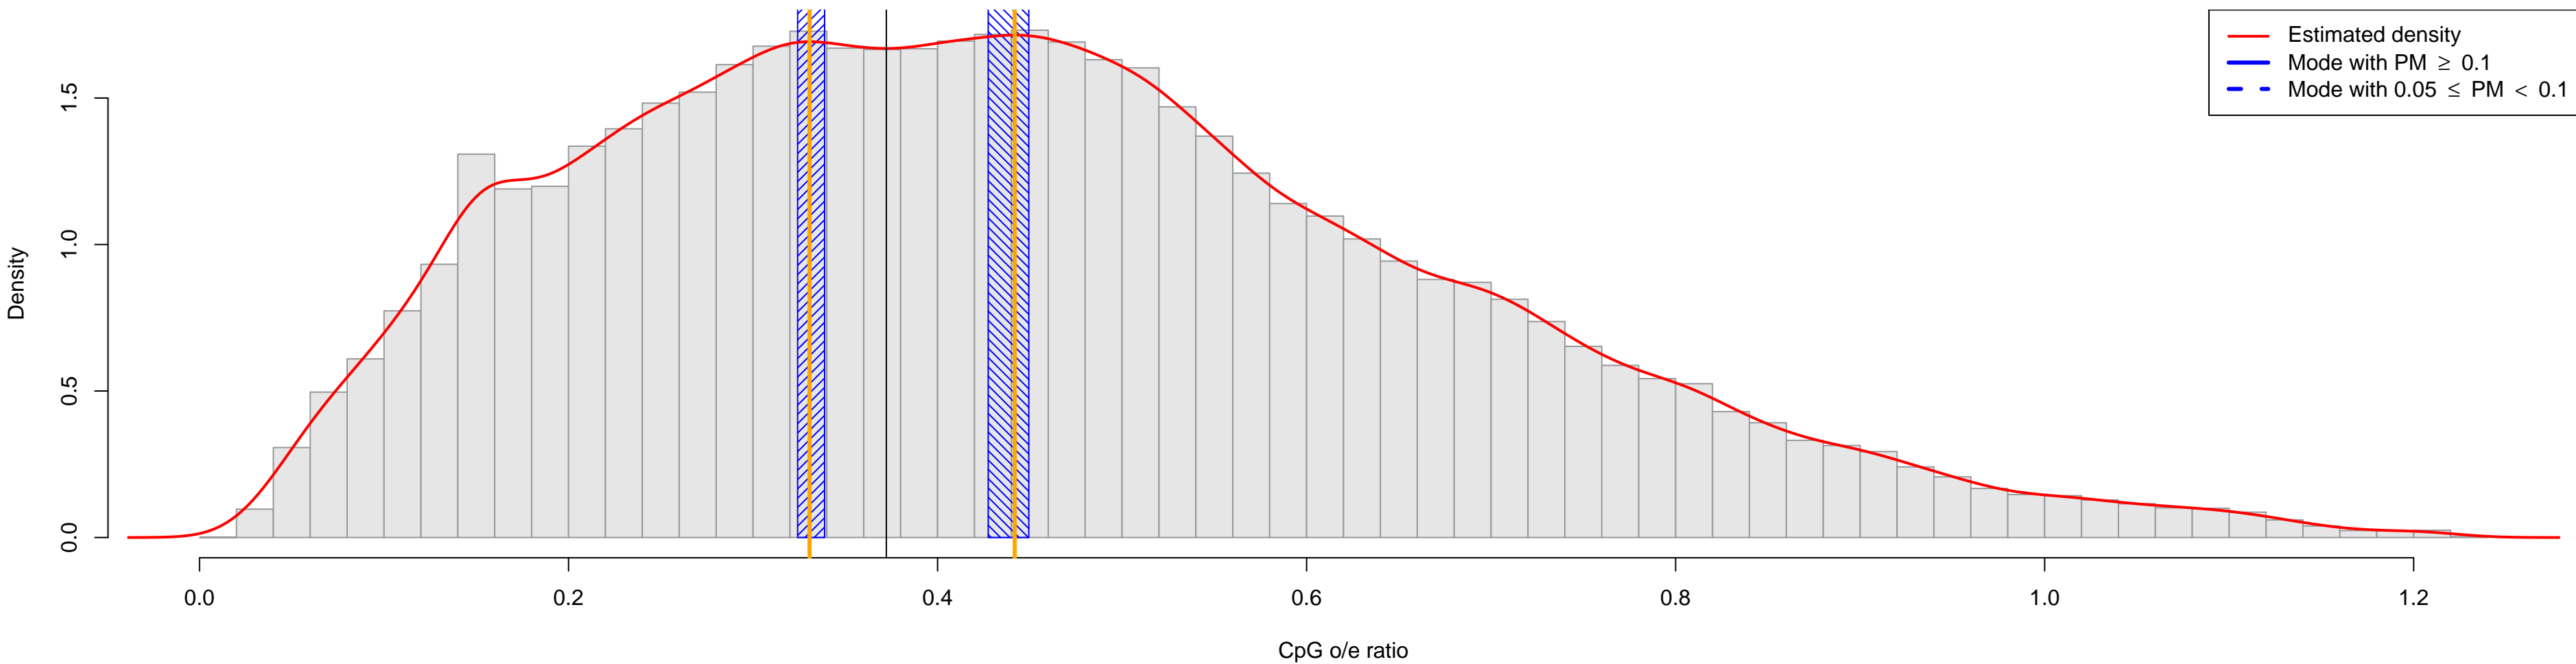

# Canis\_lupus\_familiaris

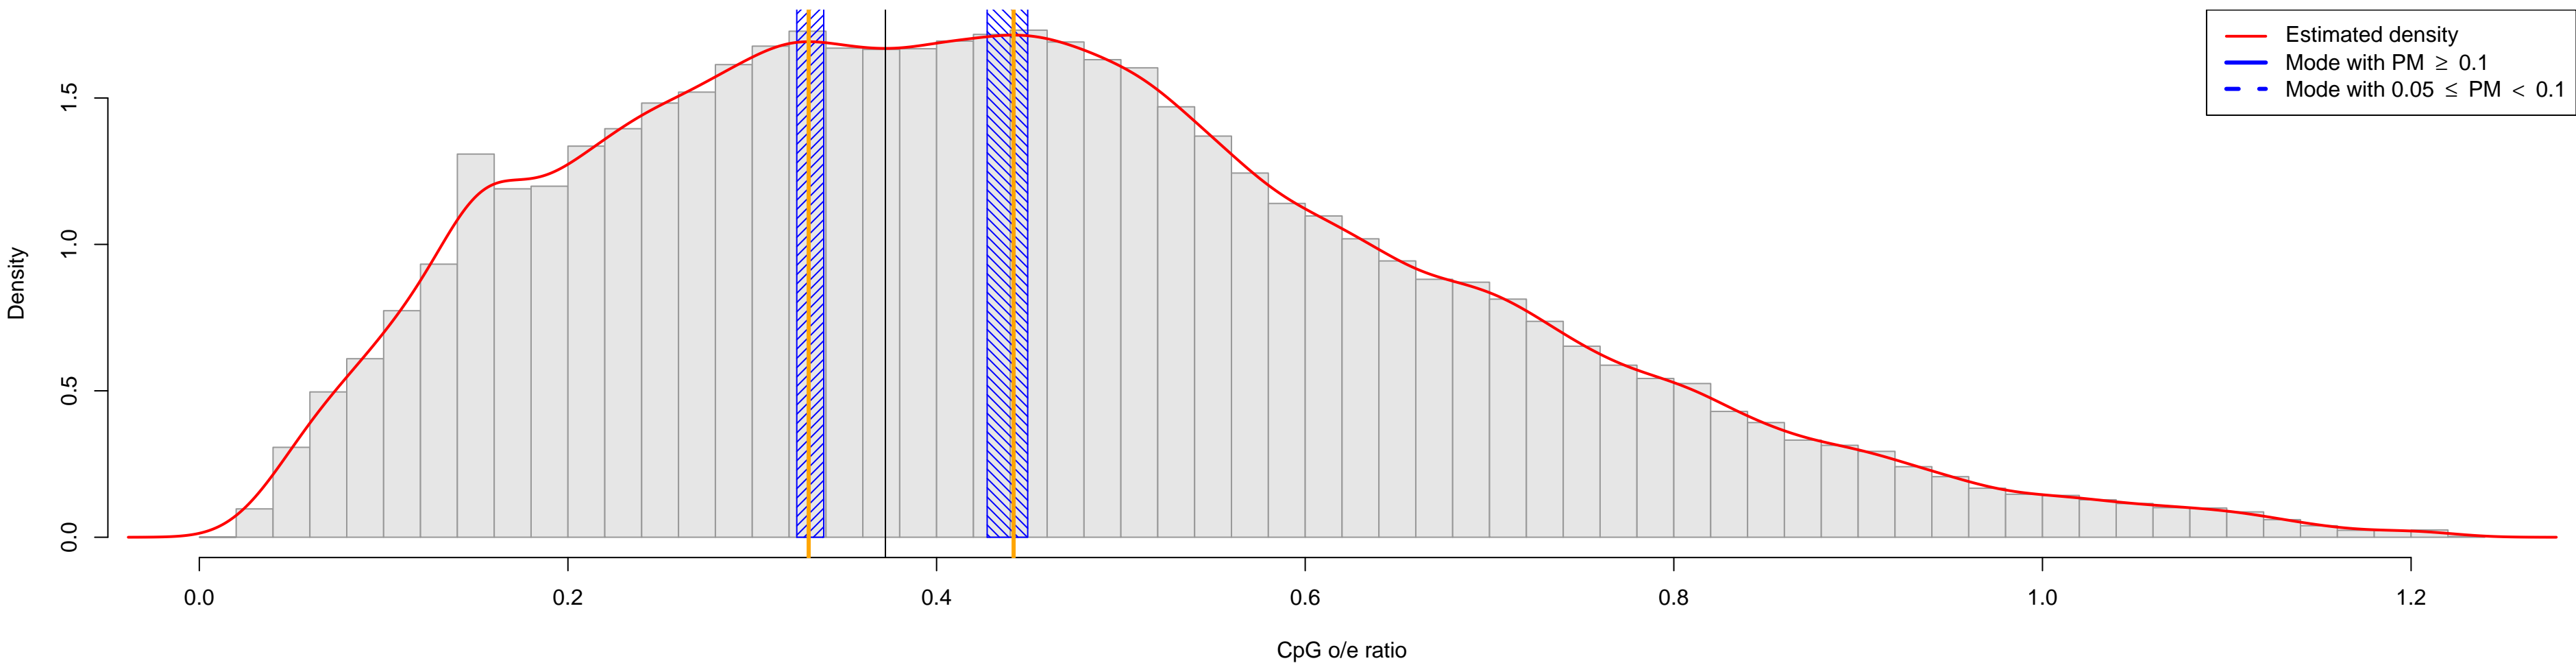



# Cannabis\_sativa

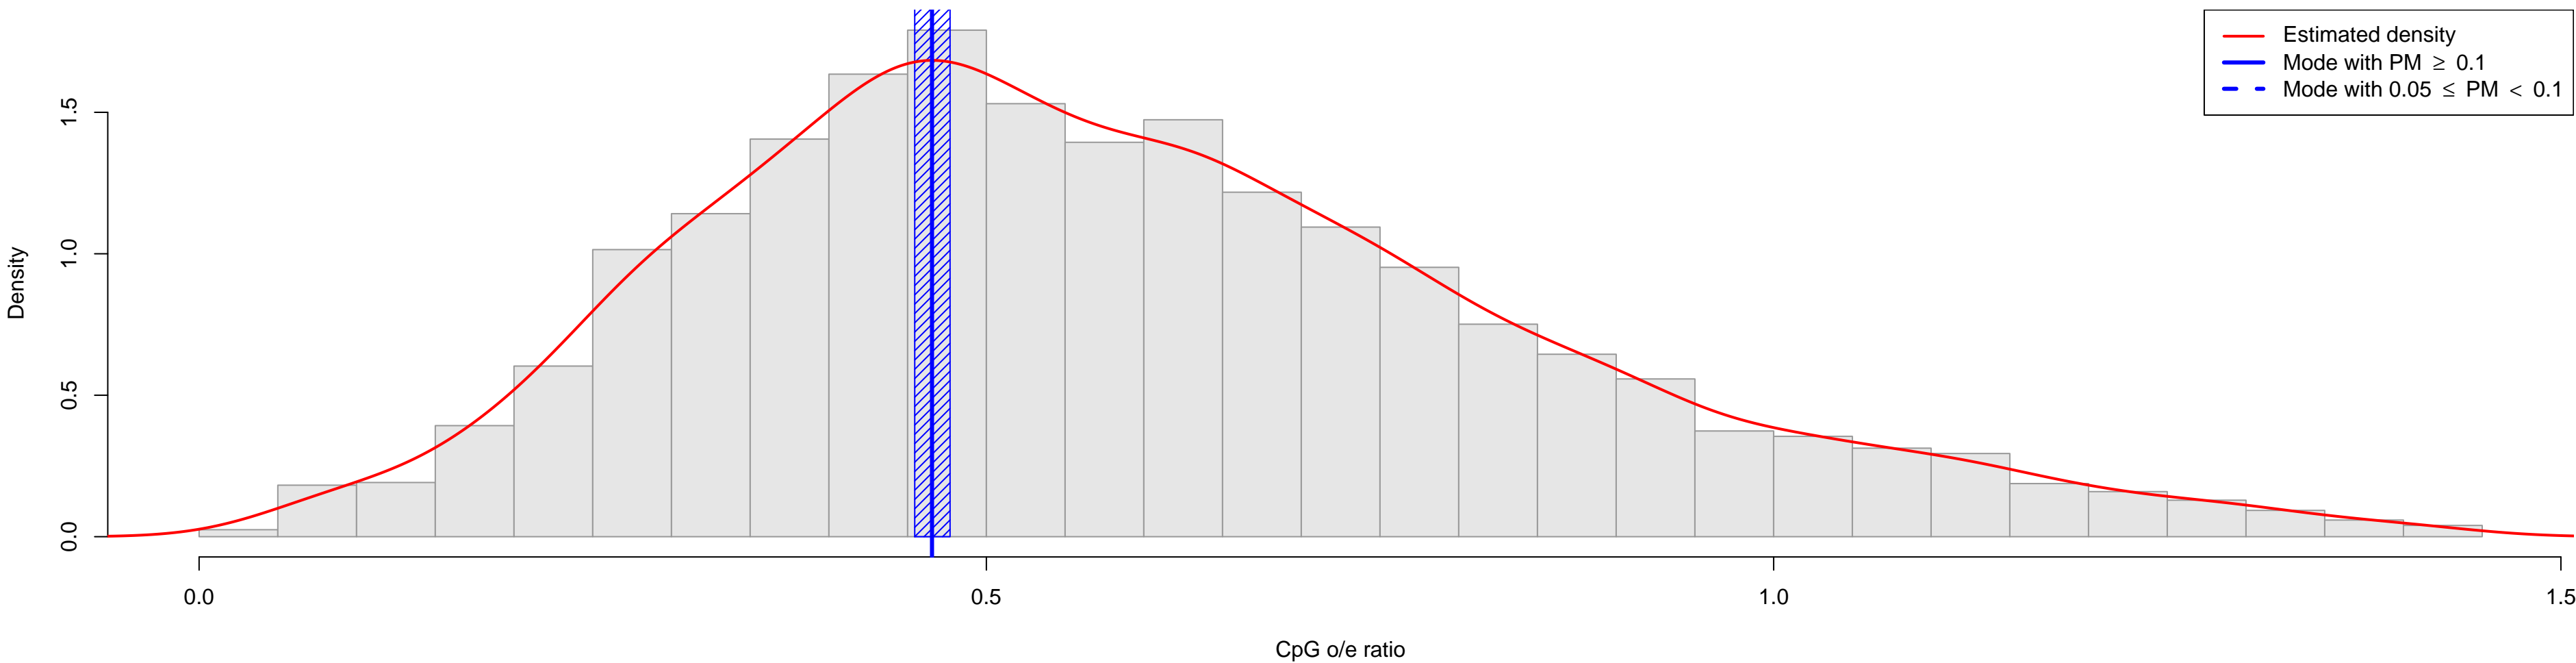

# Capra\_hircus

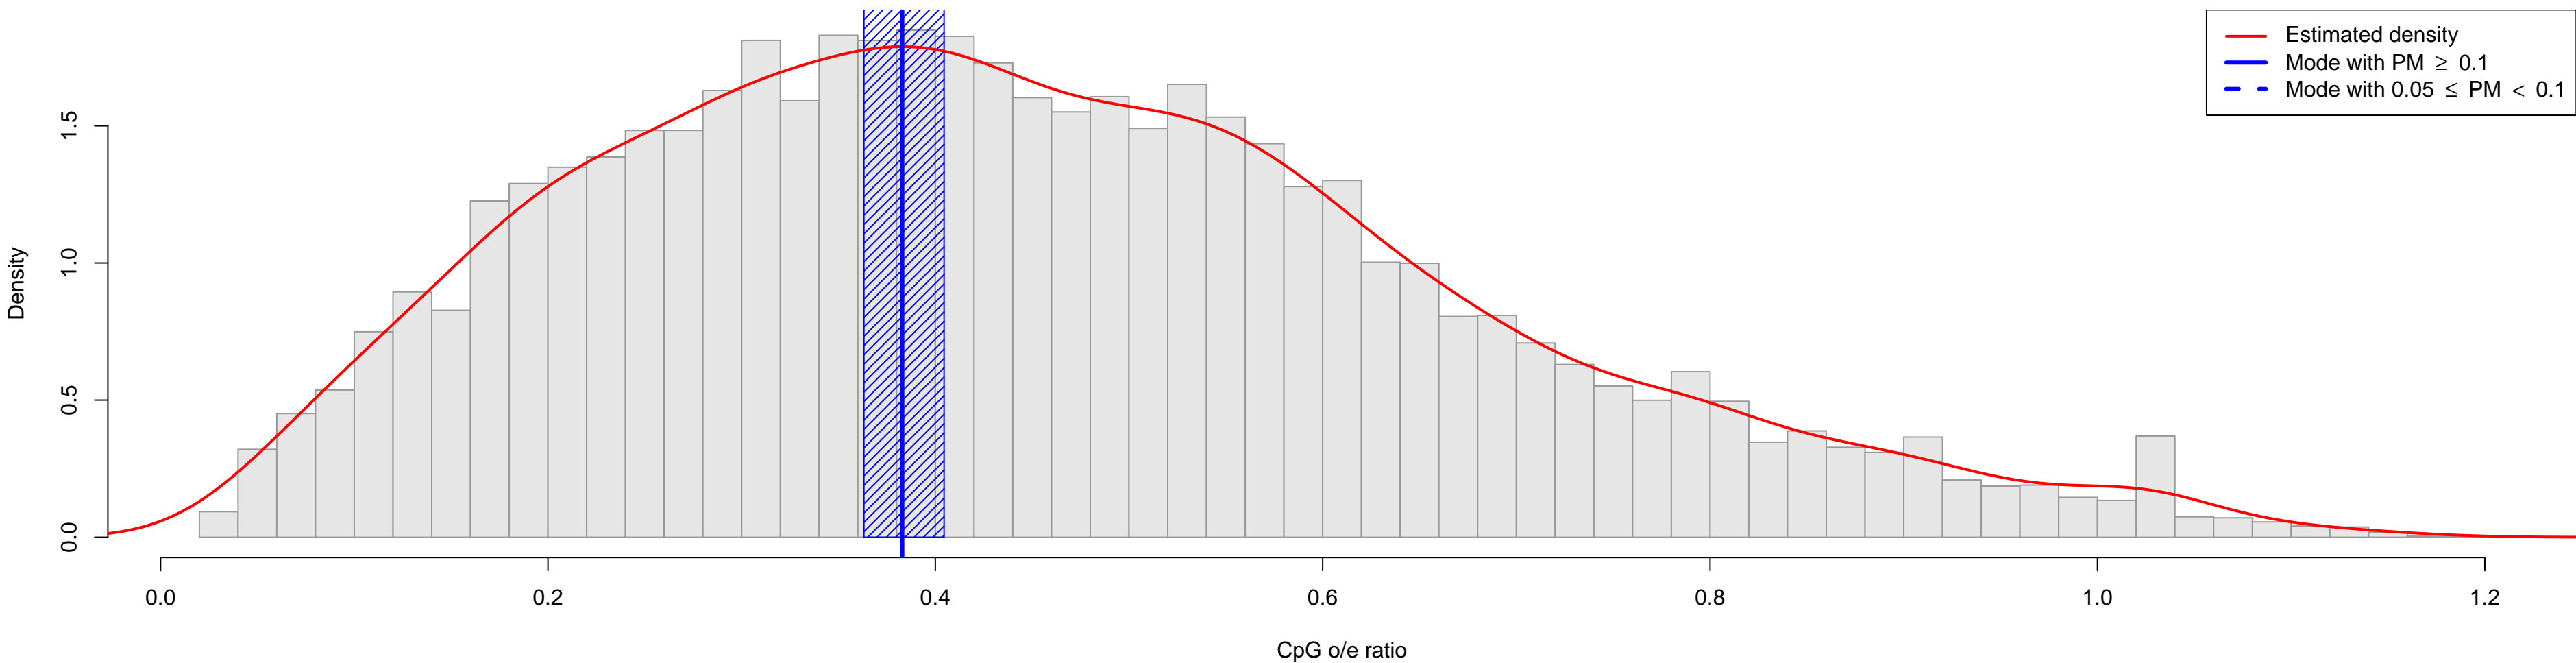

# Capsicum\_annuum

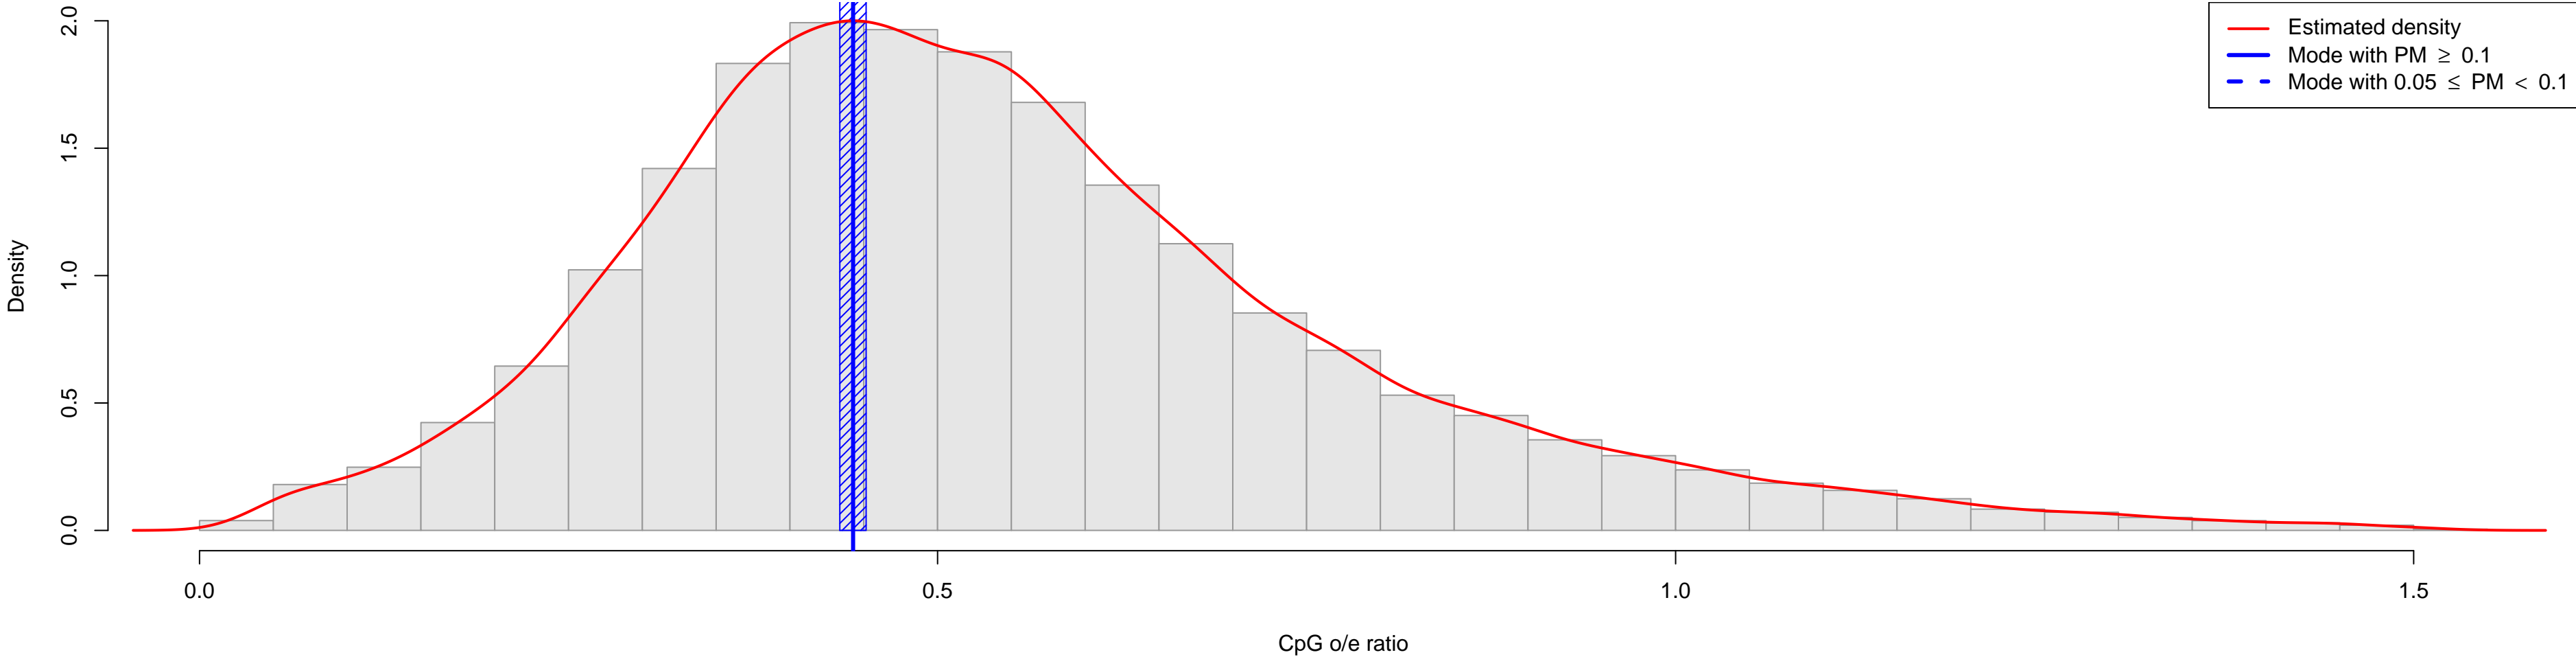

# Carassius\_auratus

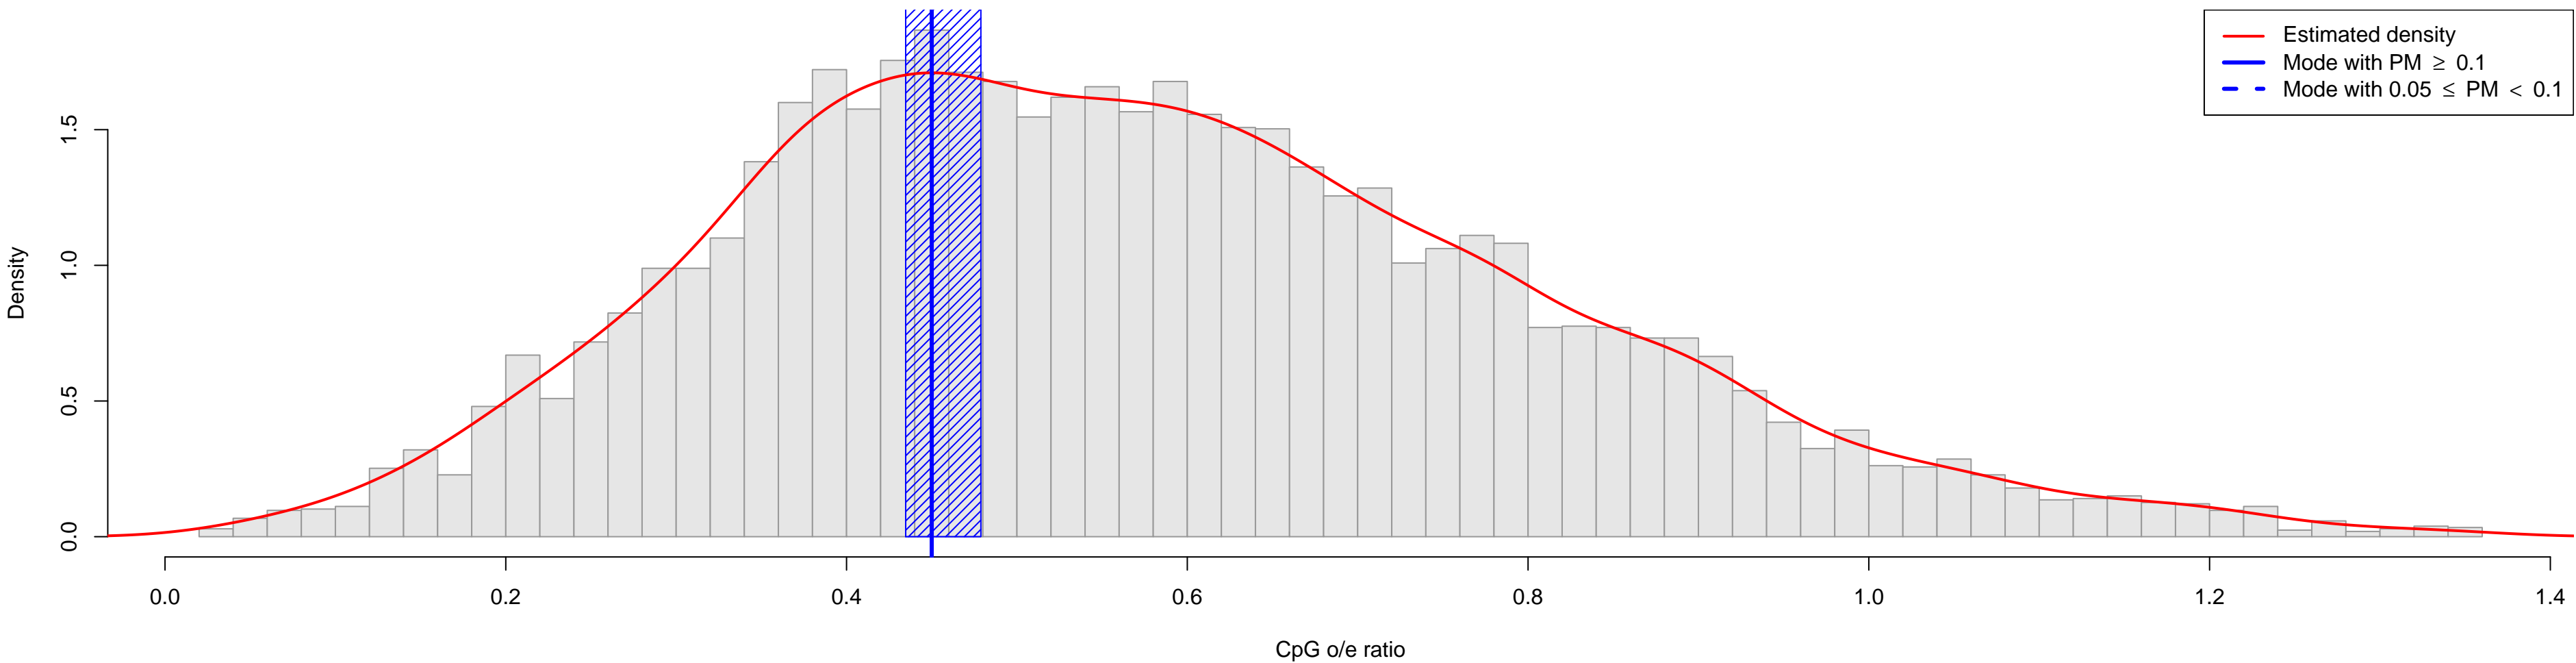

# Carcinus\_maenas

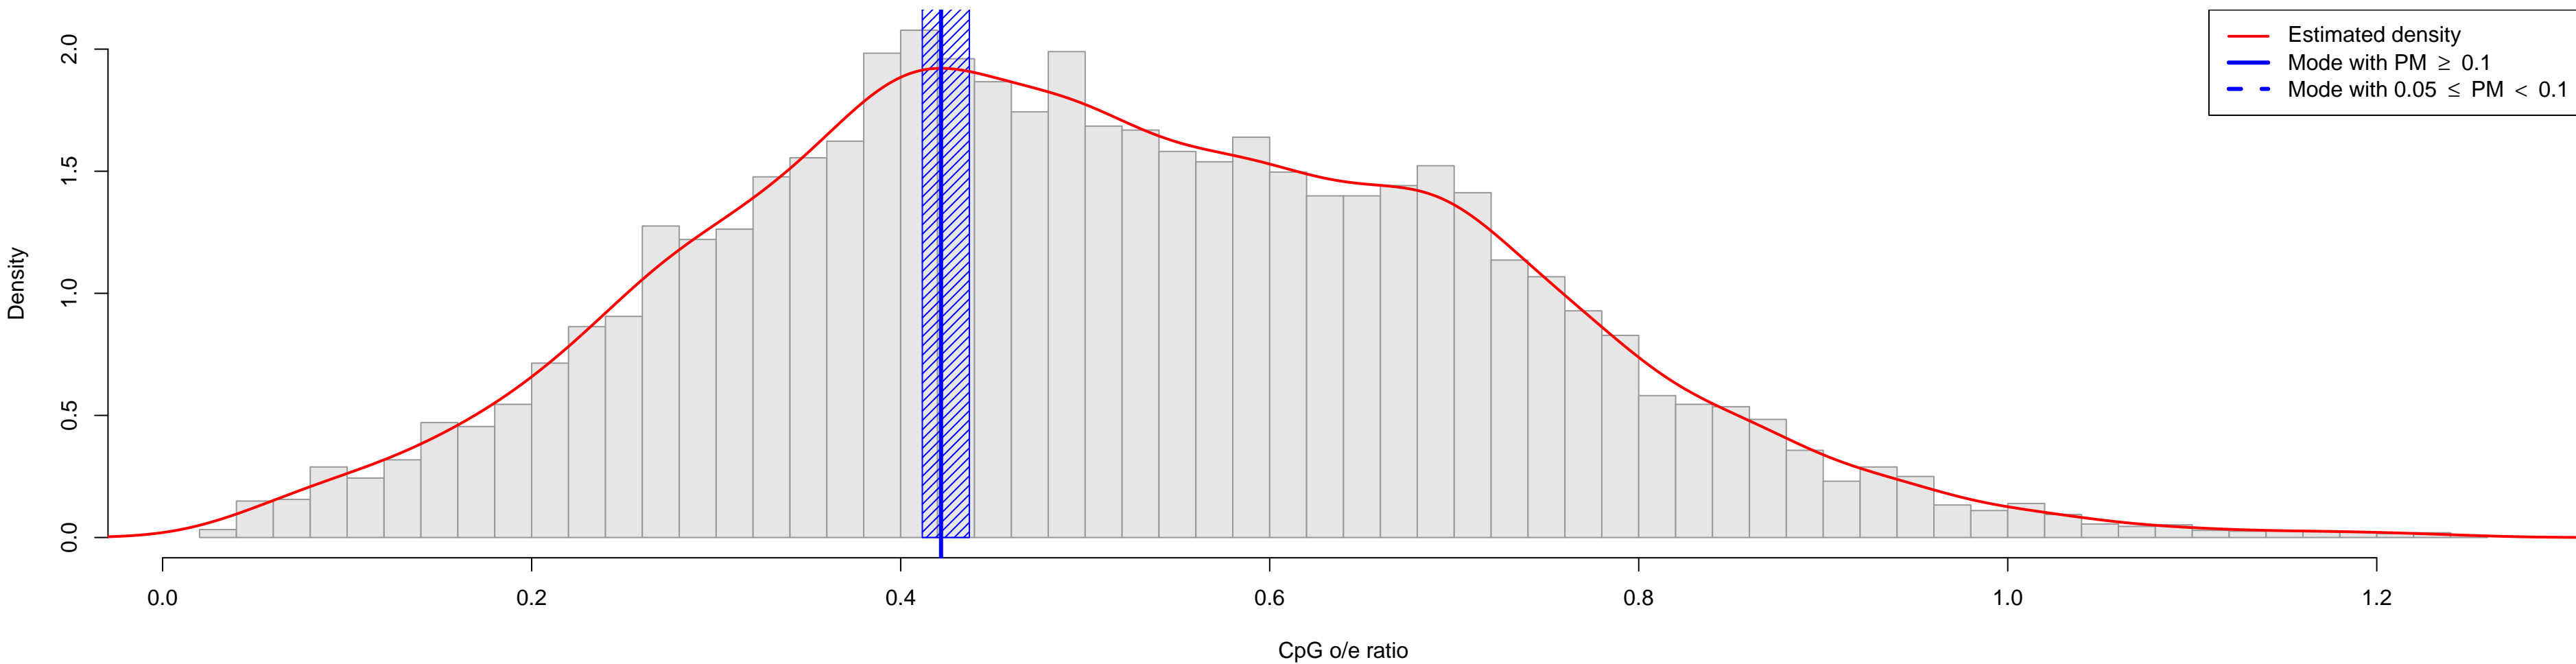

# Carica\_papaya

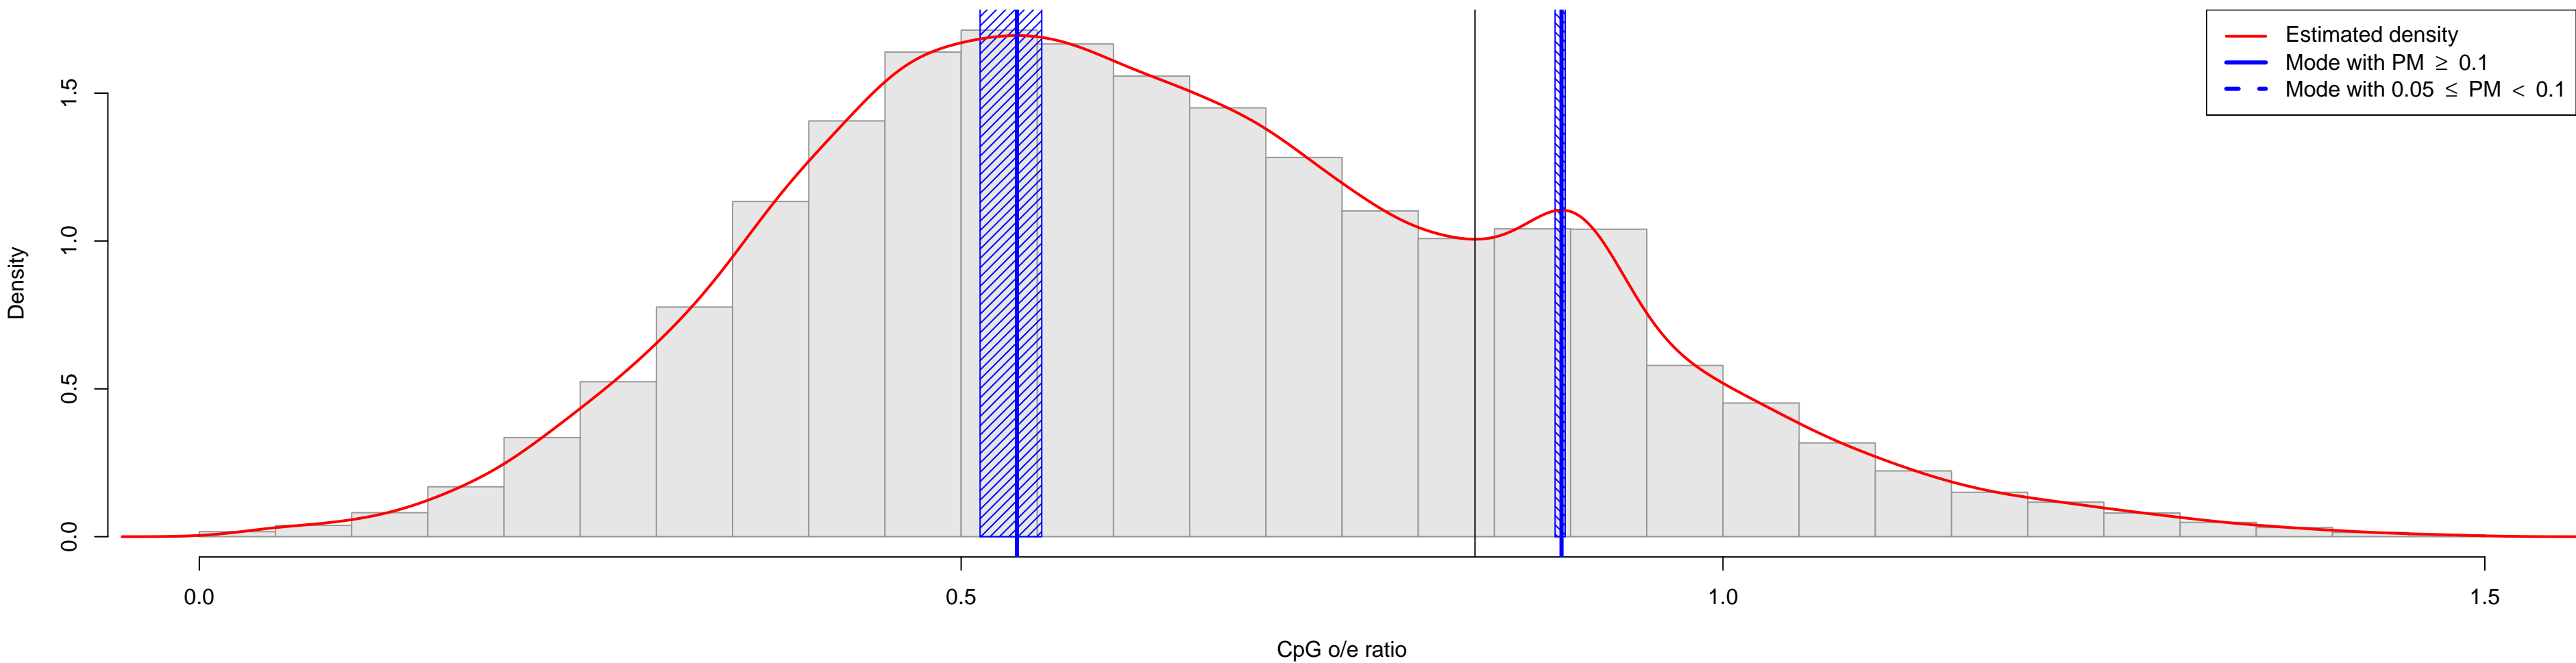

# Carteriospongia\_foliascens

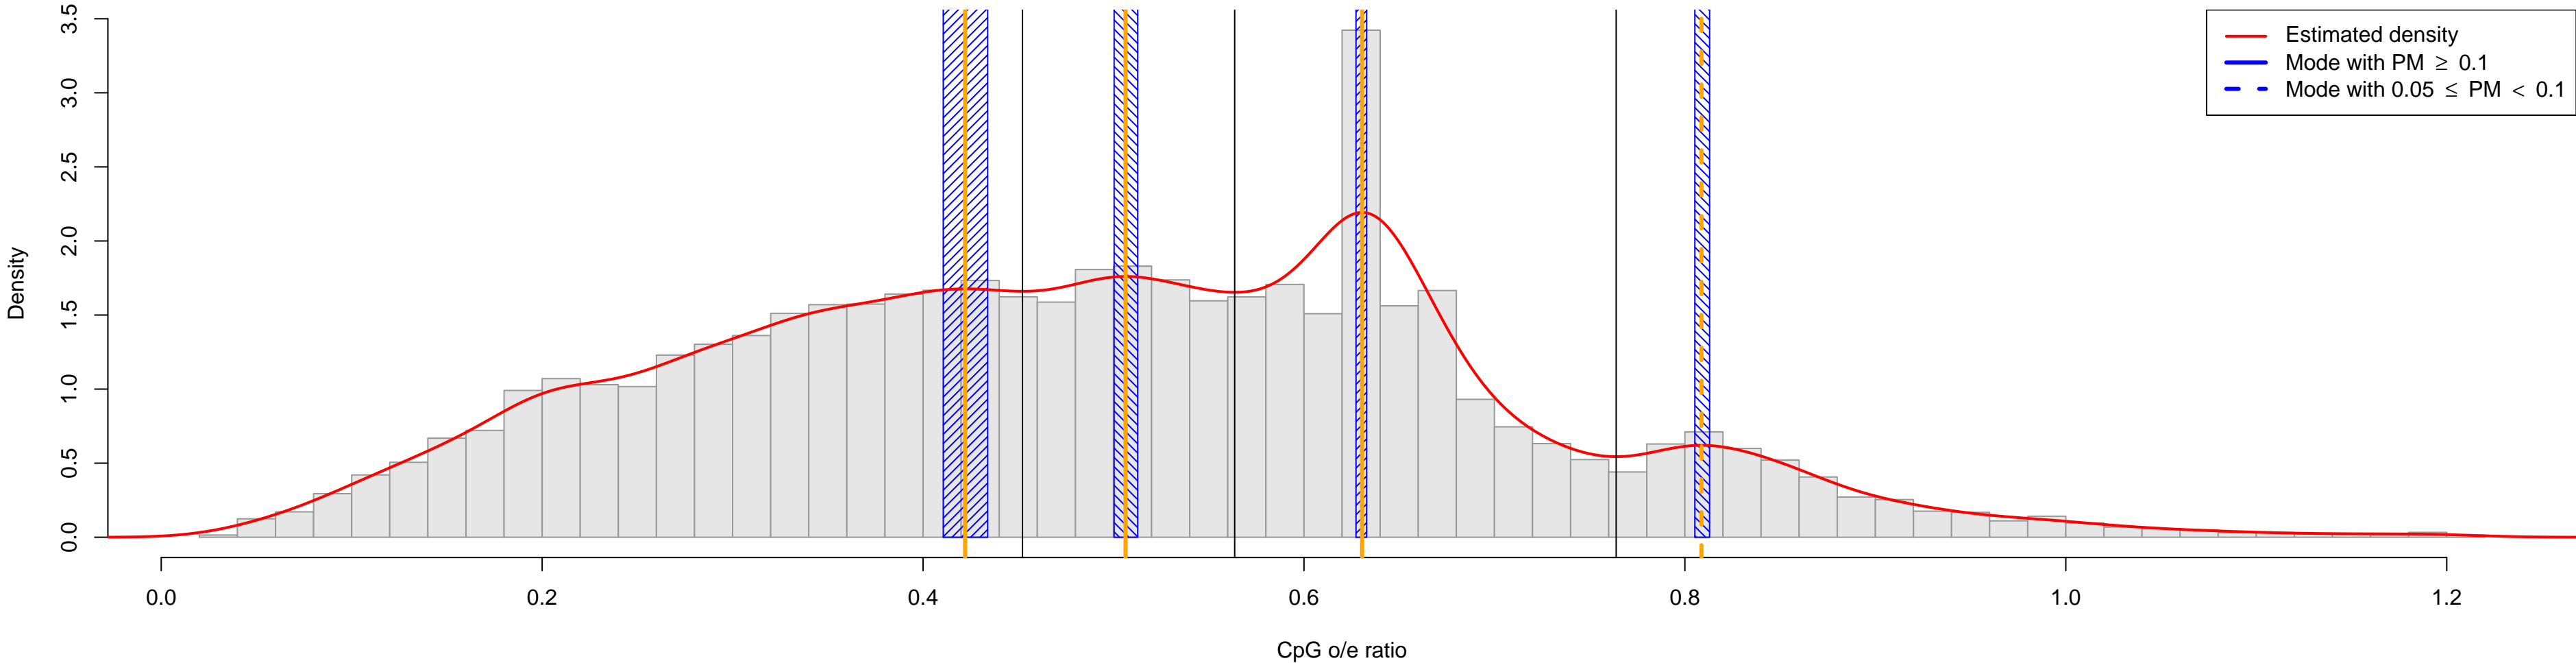

# Carthamus\_tinctorius

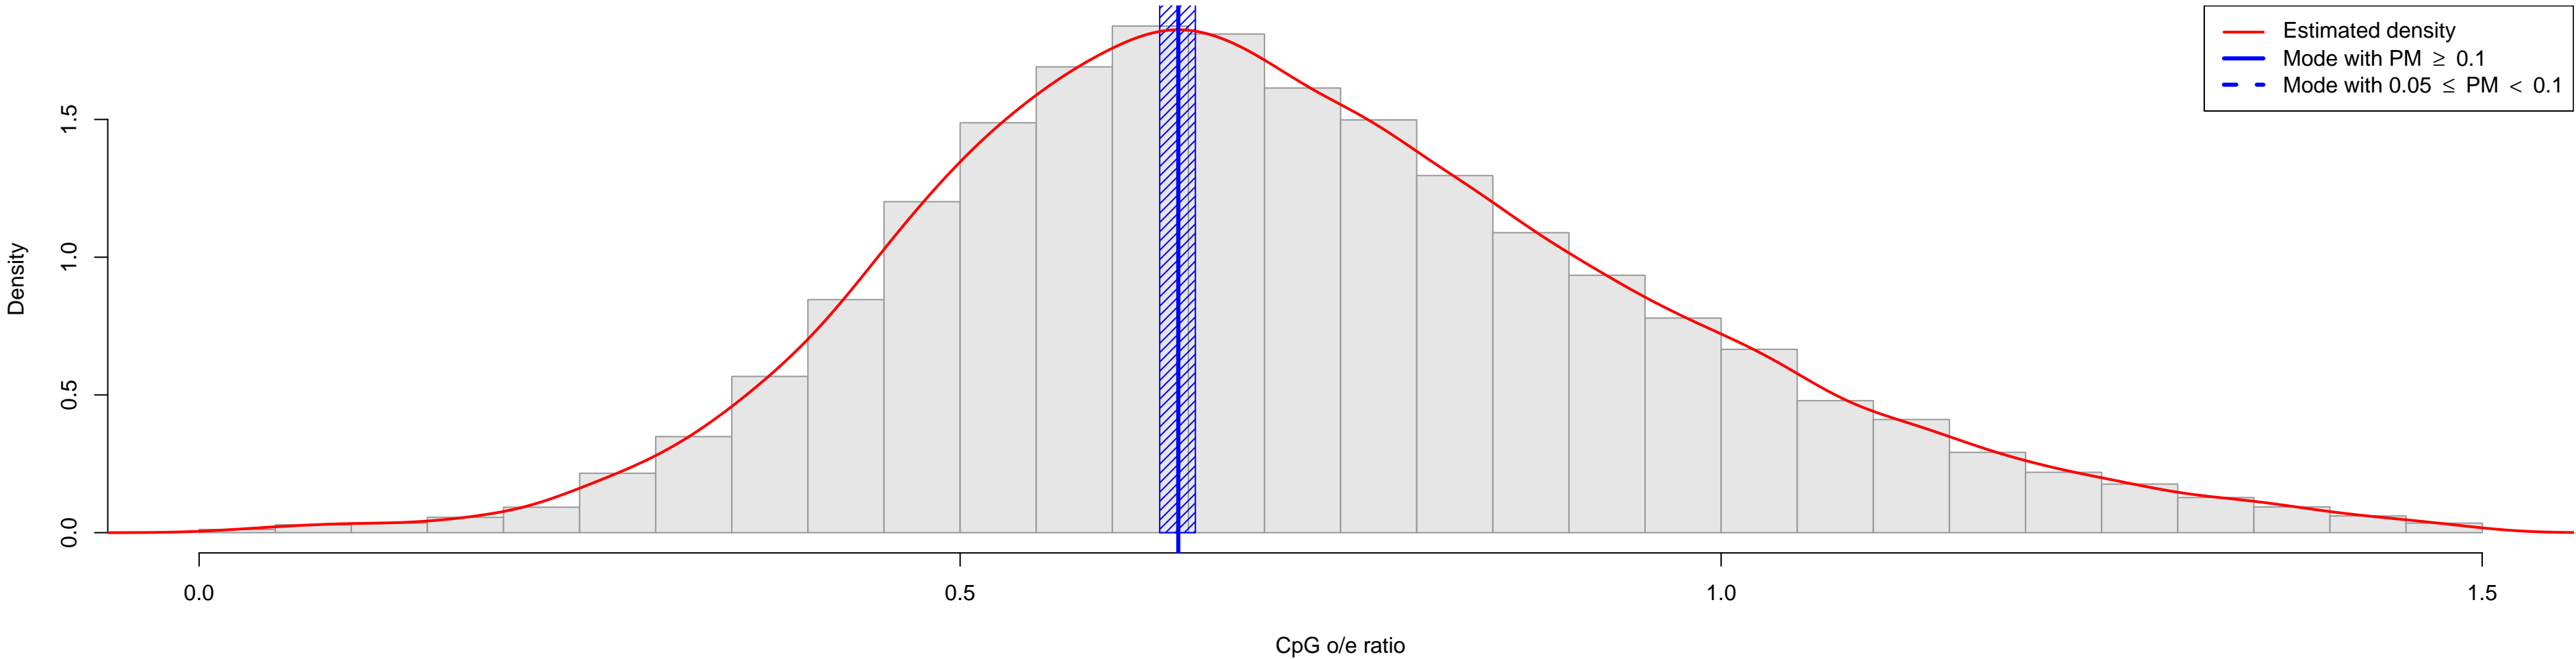



# Castanopsis\_sieboldii

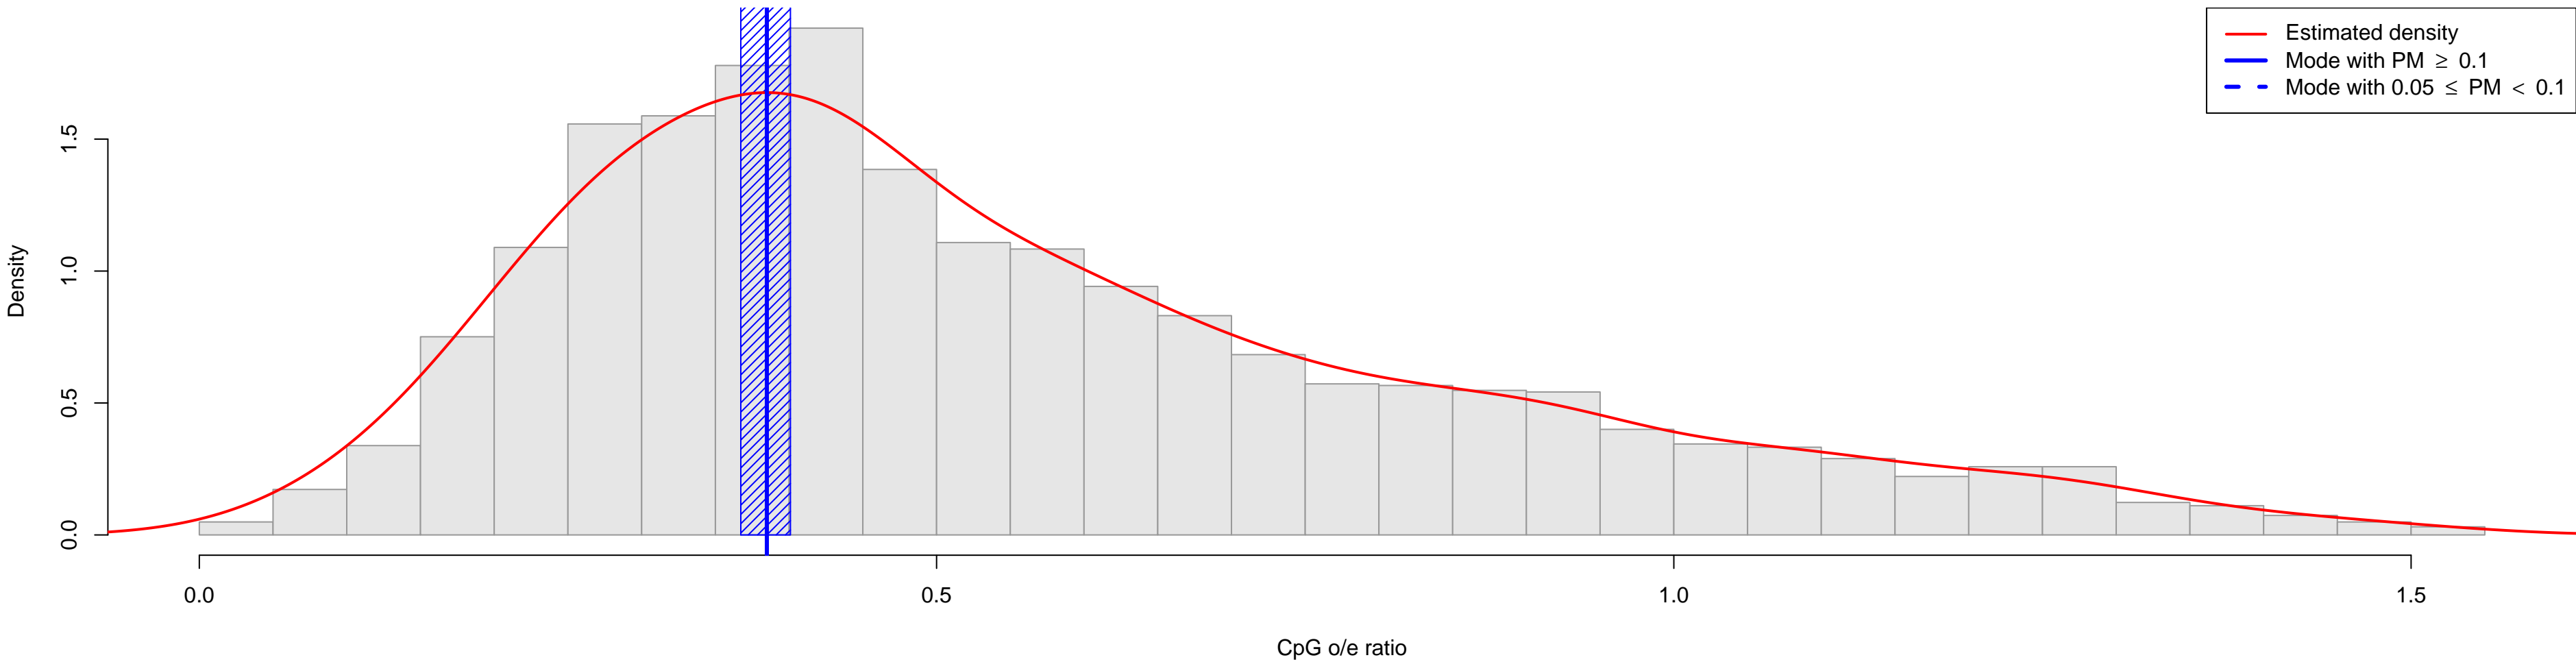

# Cavia\_porcellus

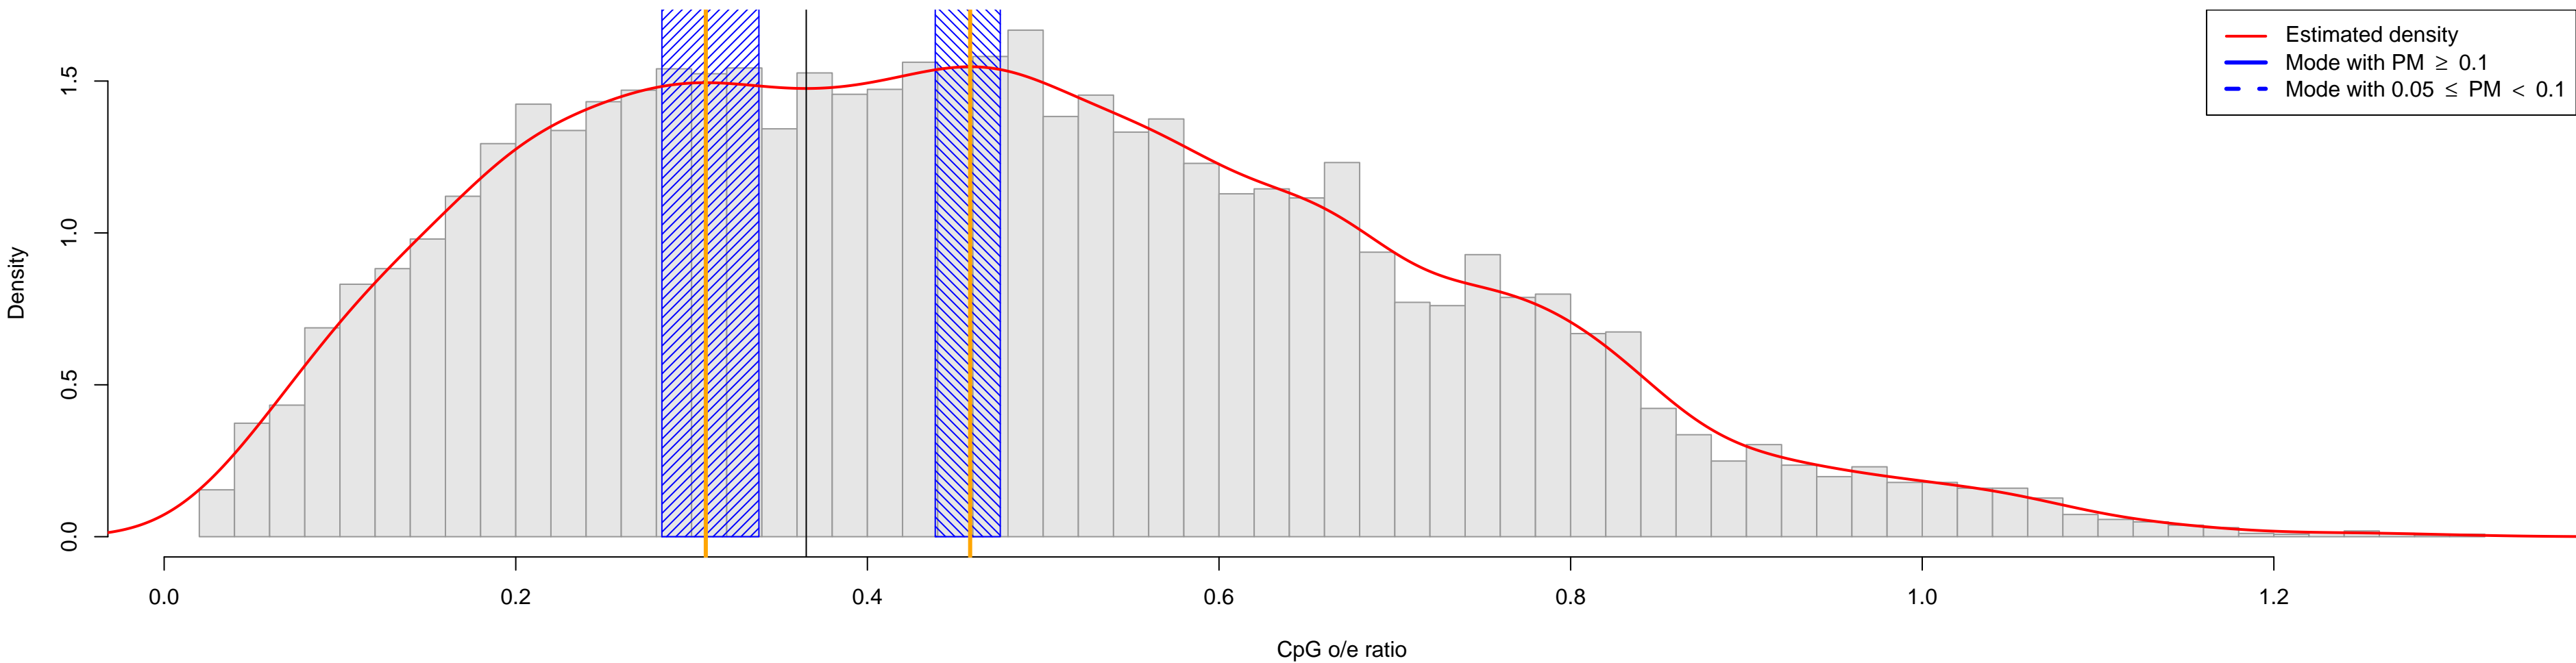

# Celuca\_pugilator

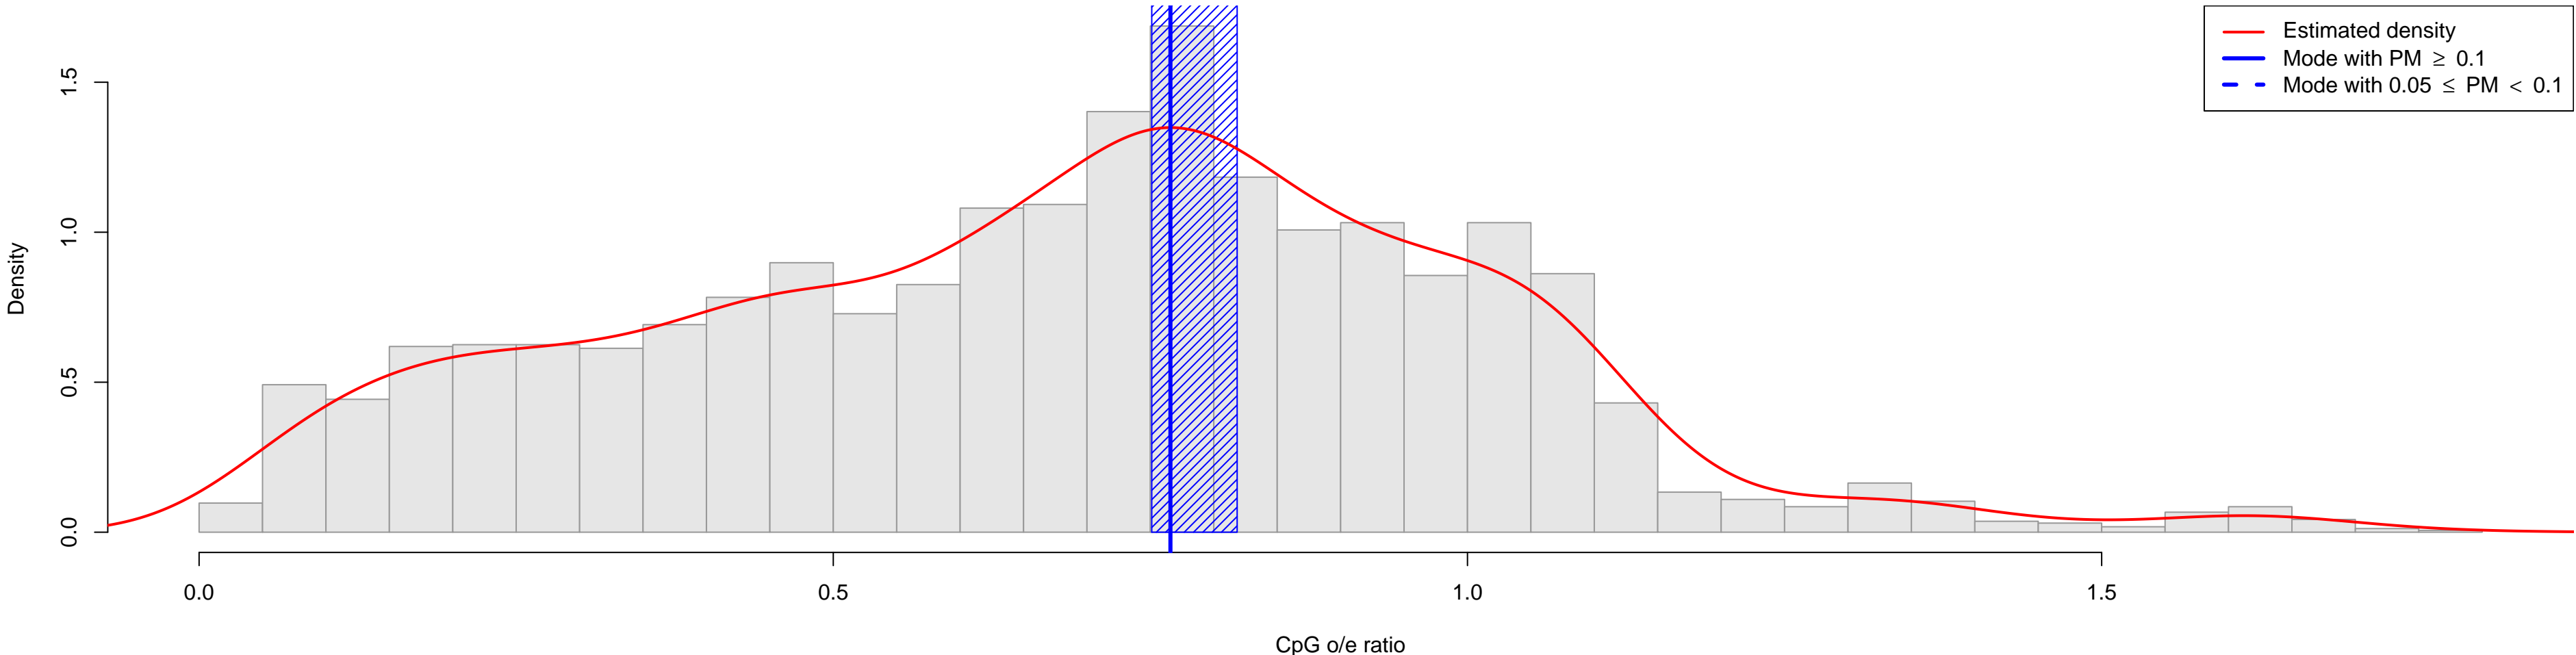

# Centaurea\_maculosa

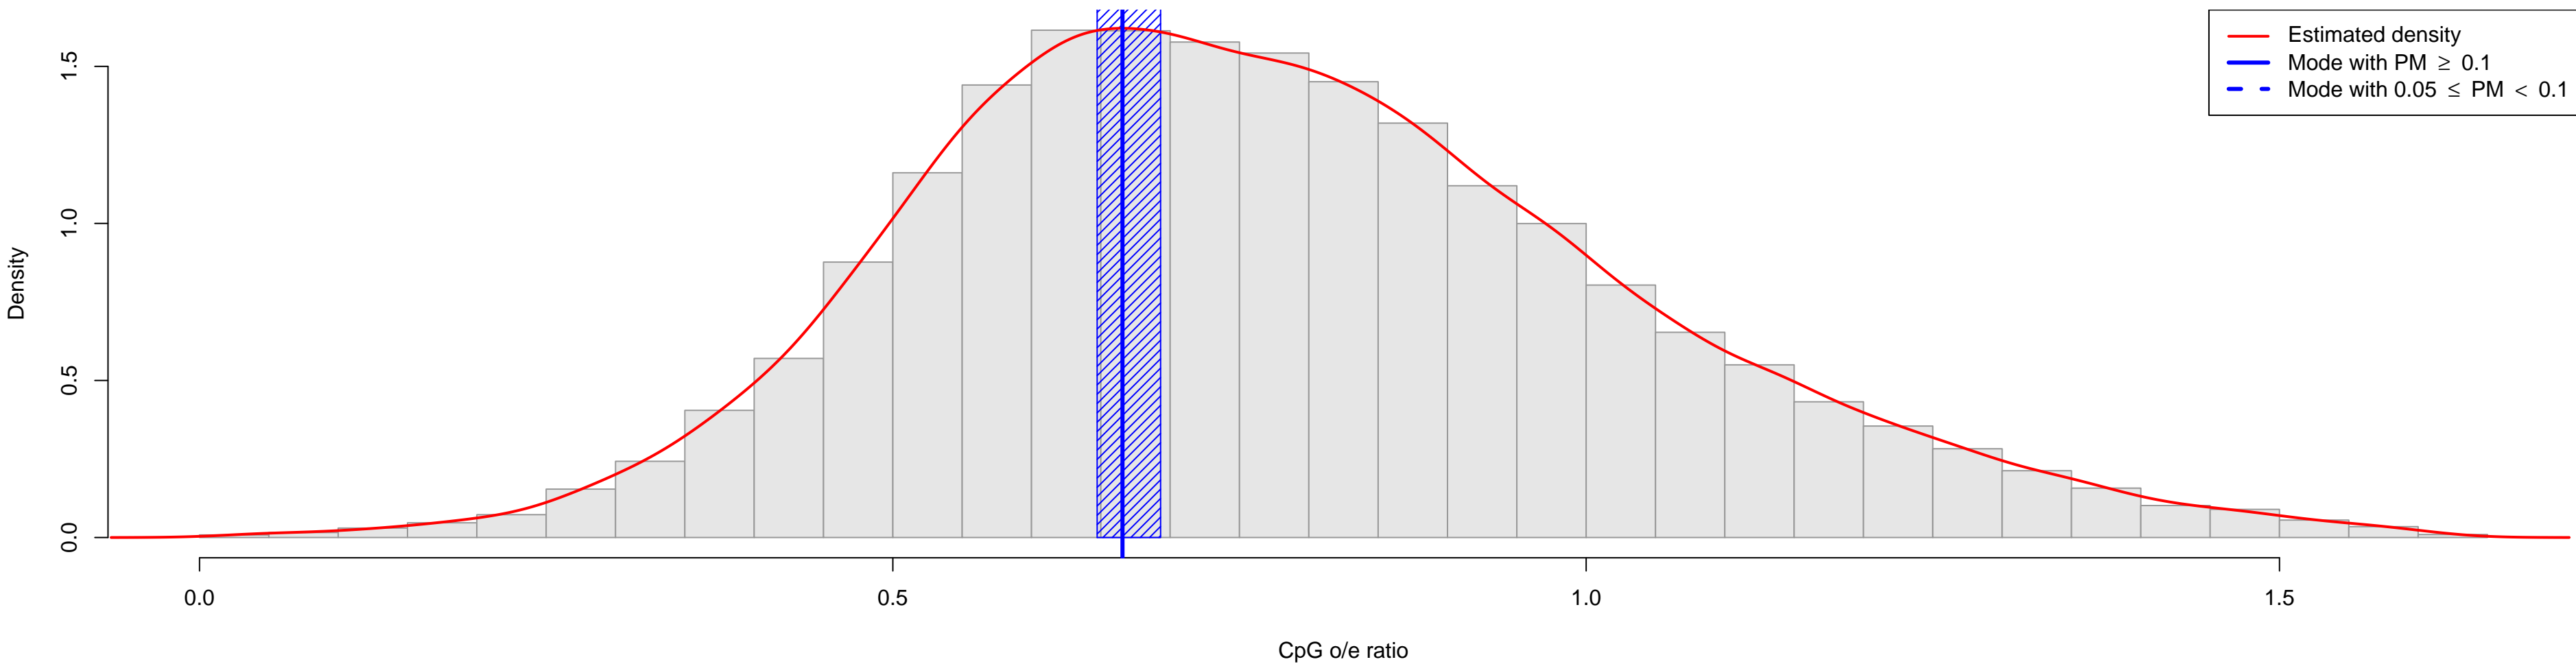

# Centella\_asiatca

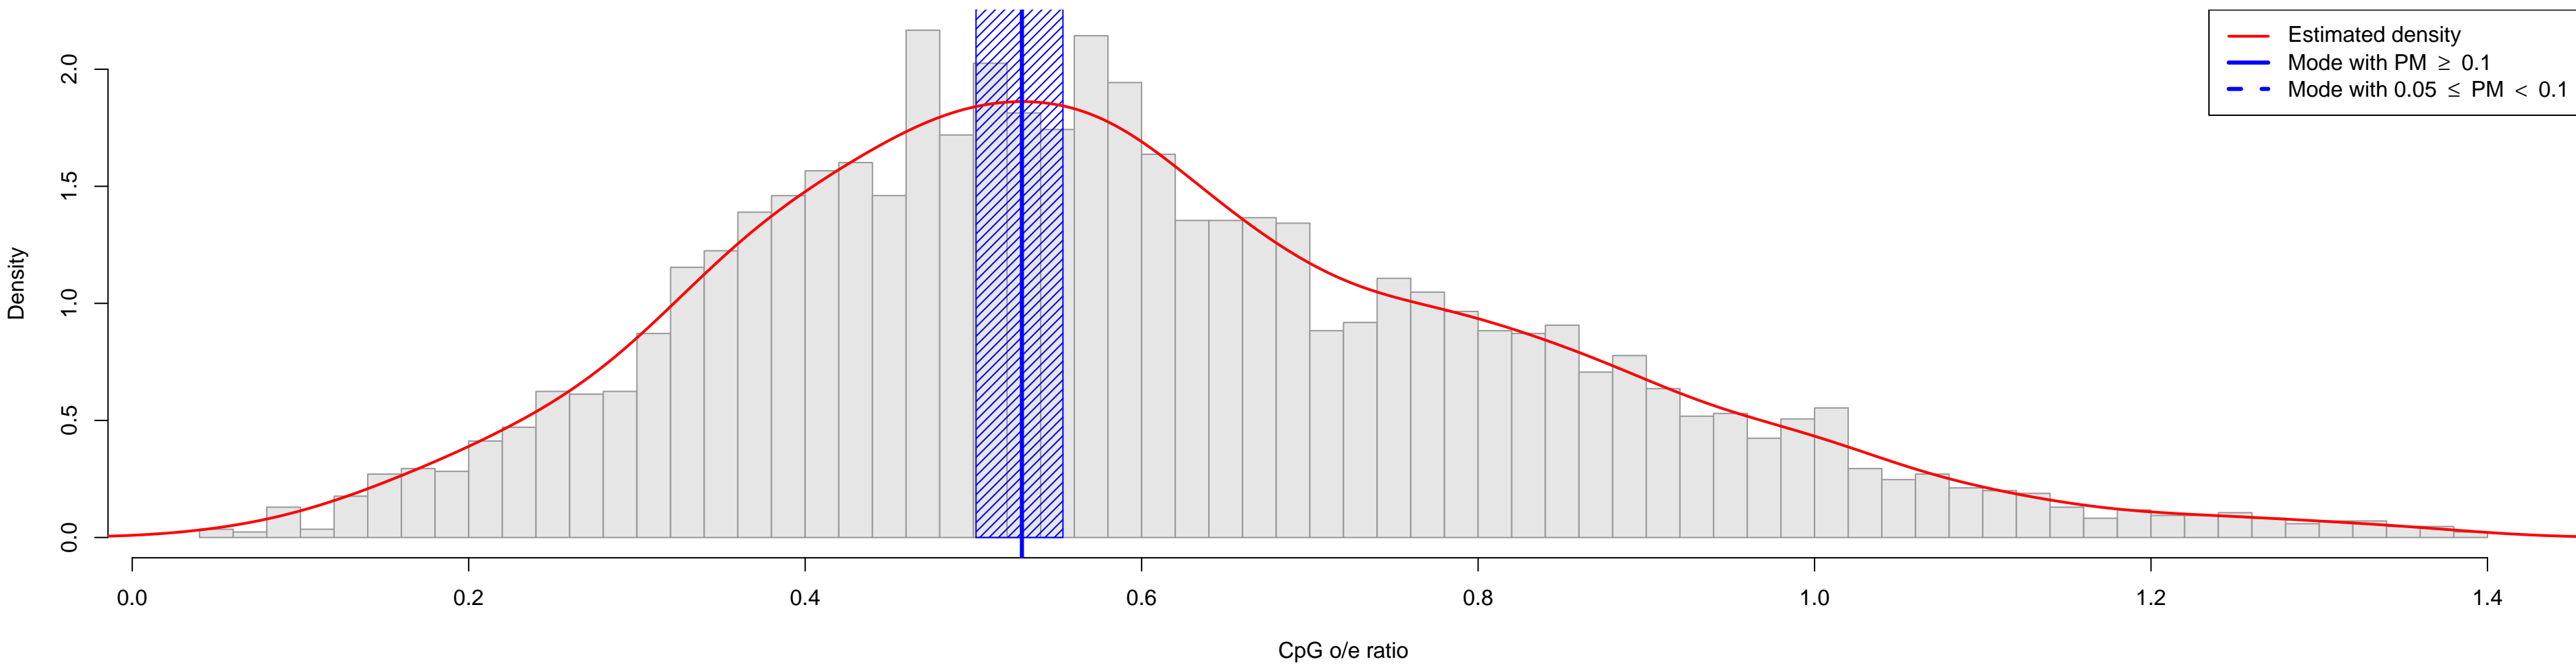

# Ceratopteris\_richardii

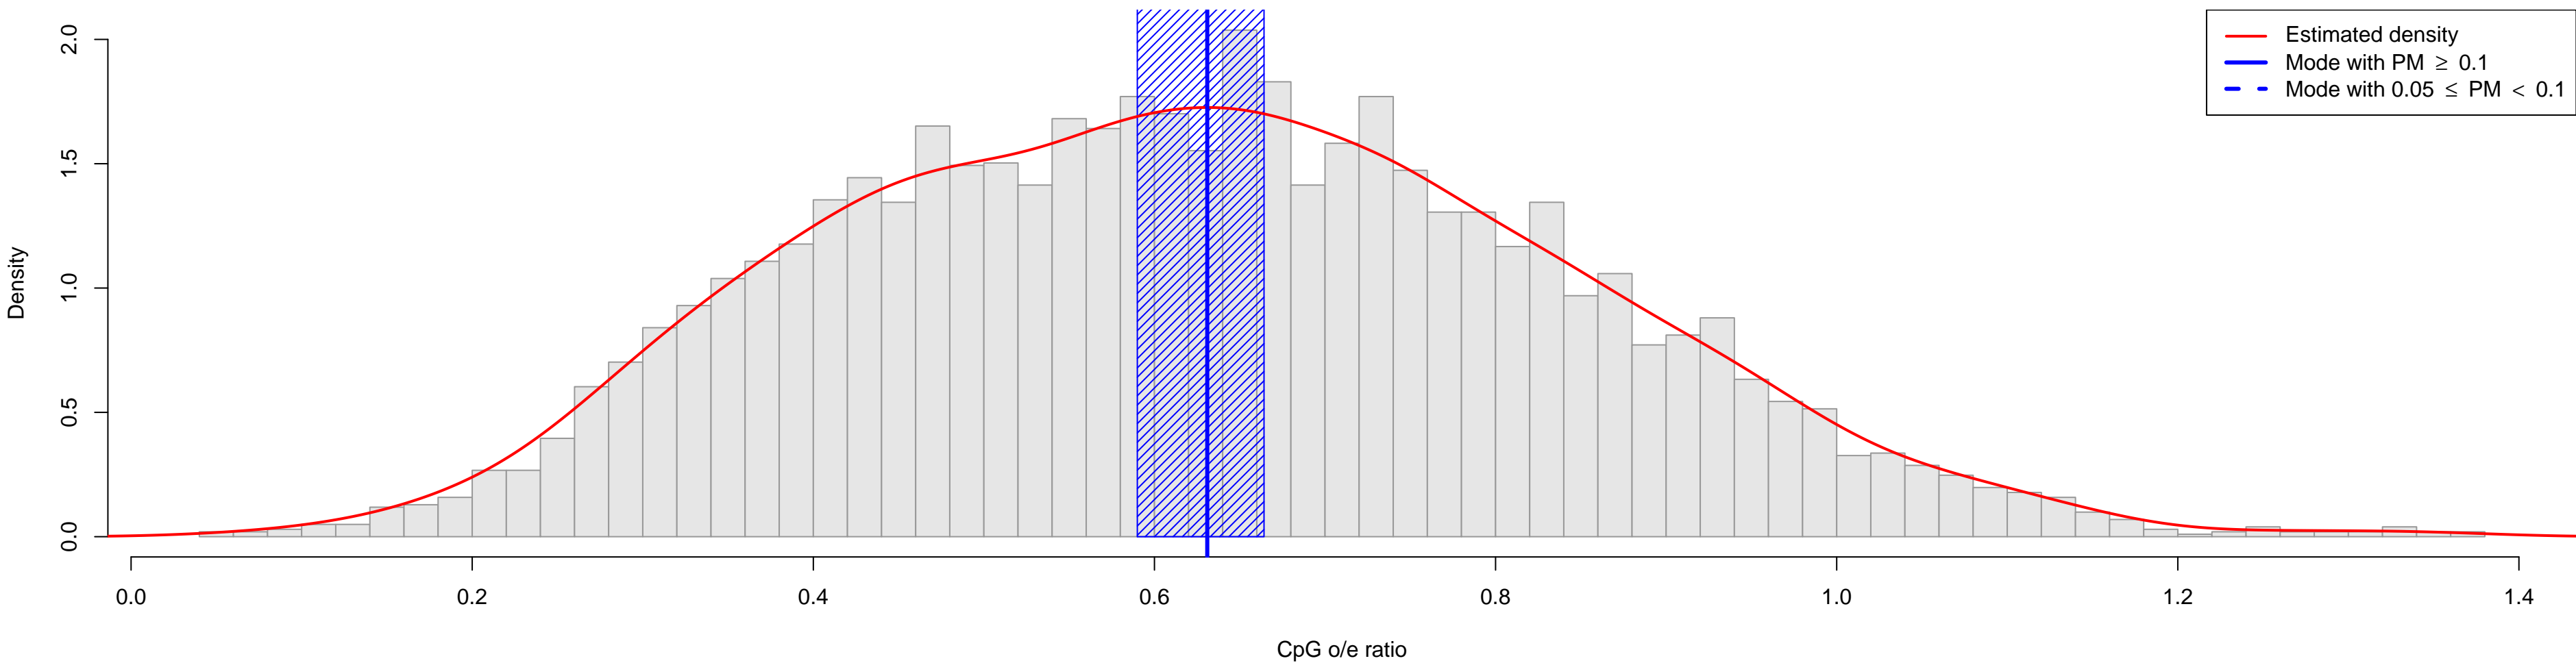

# Chaetomium\_cupreum

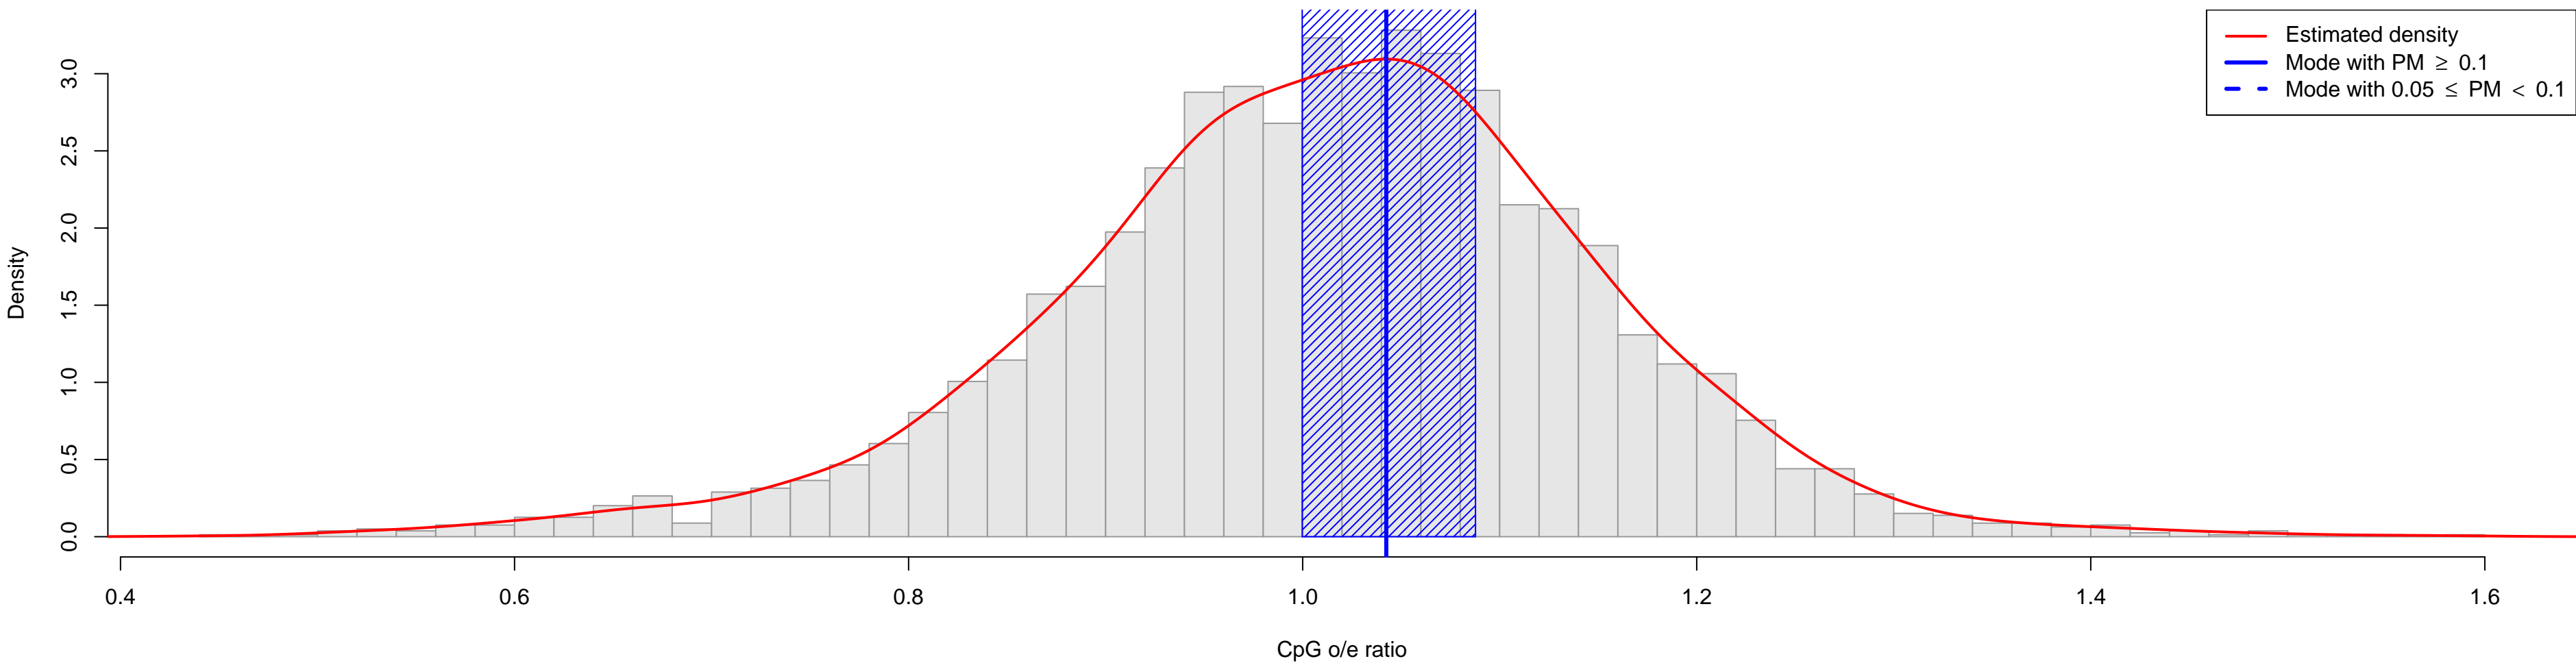

# Chironomus\_tentans

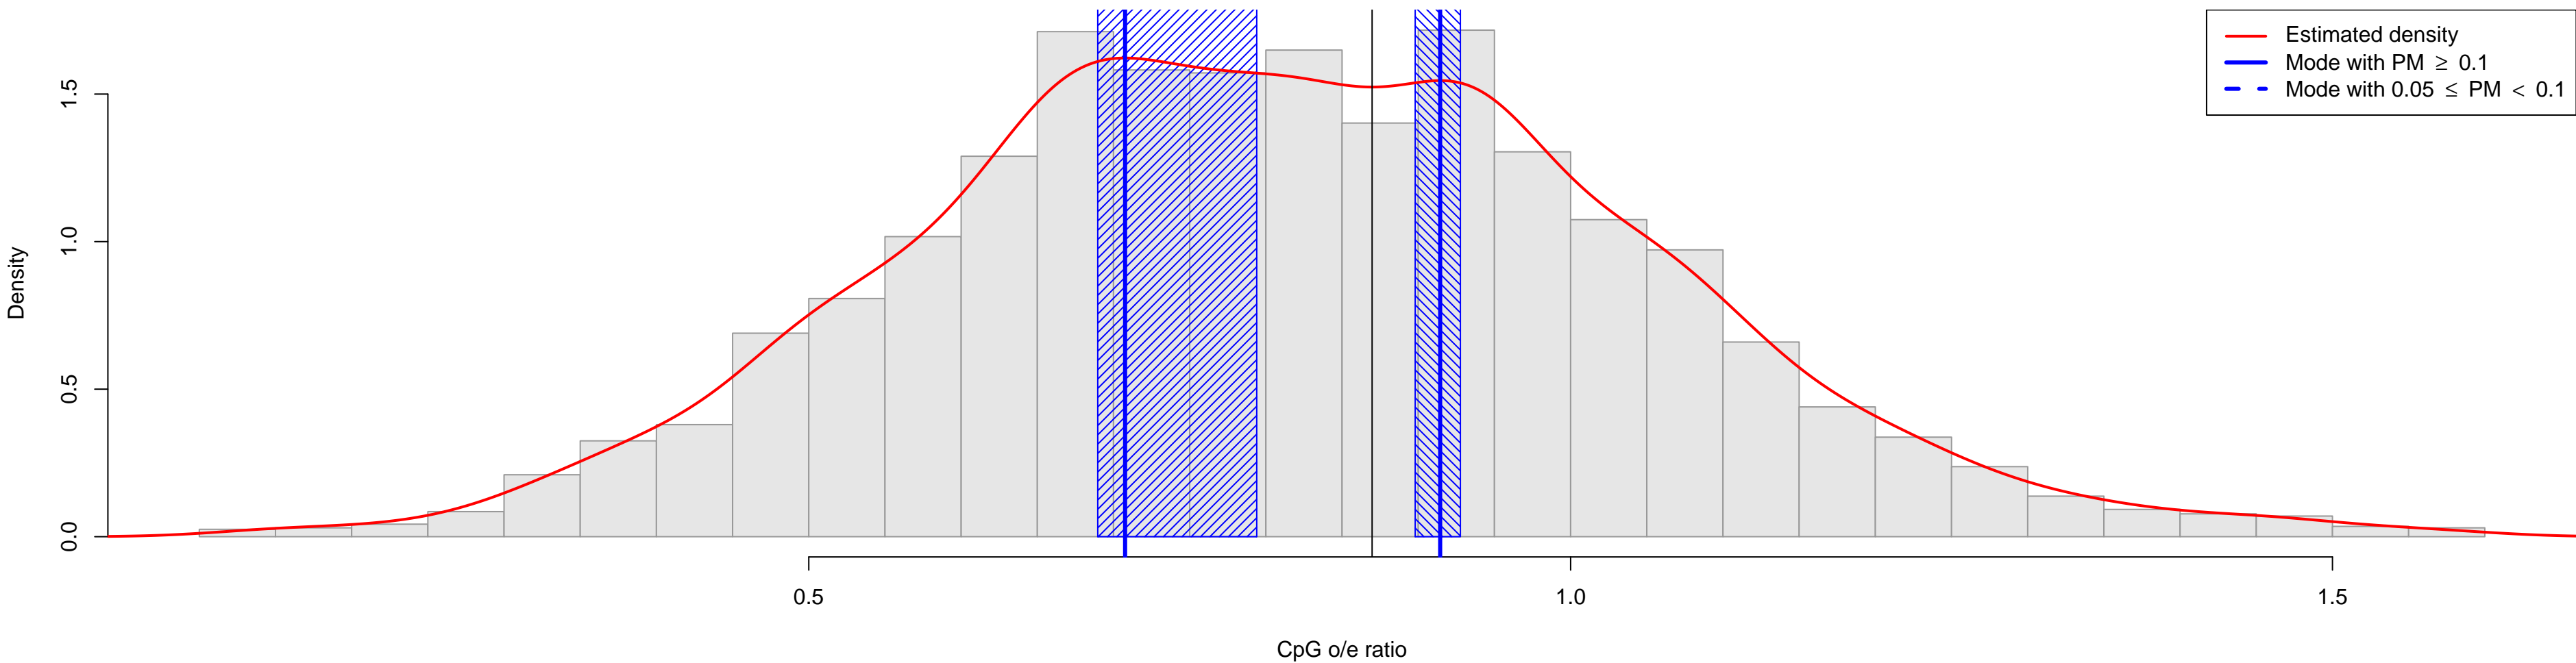



# Chlamydomonas\_incerta

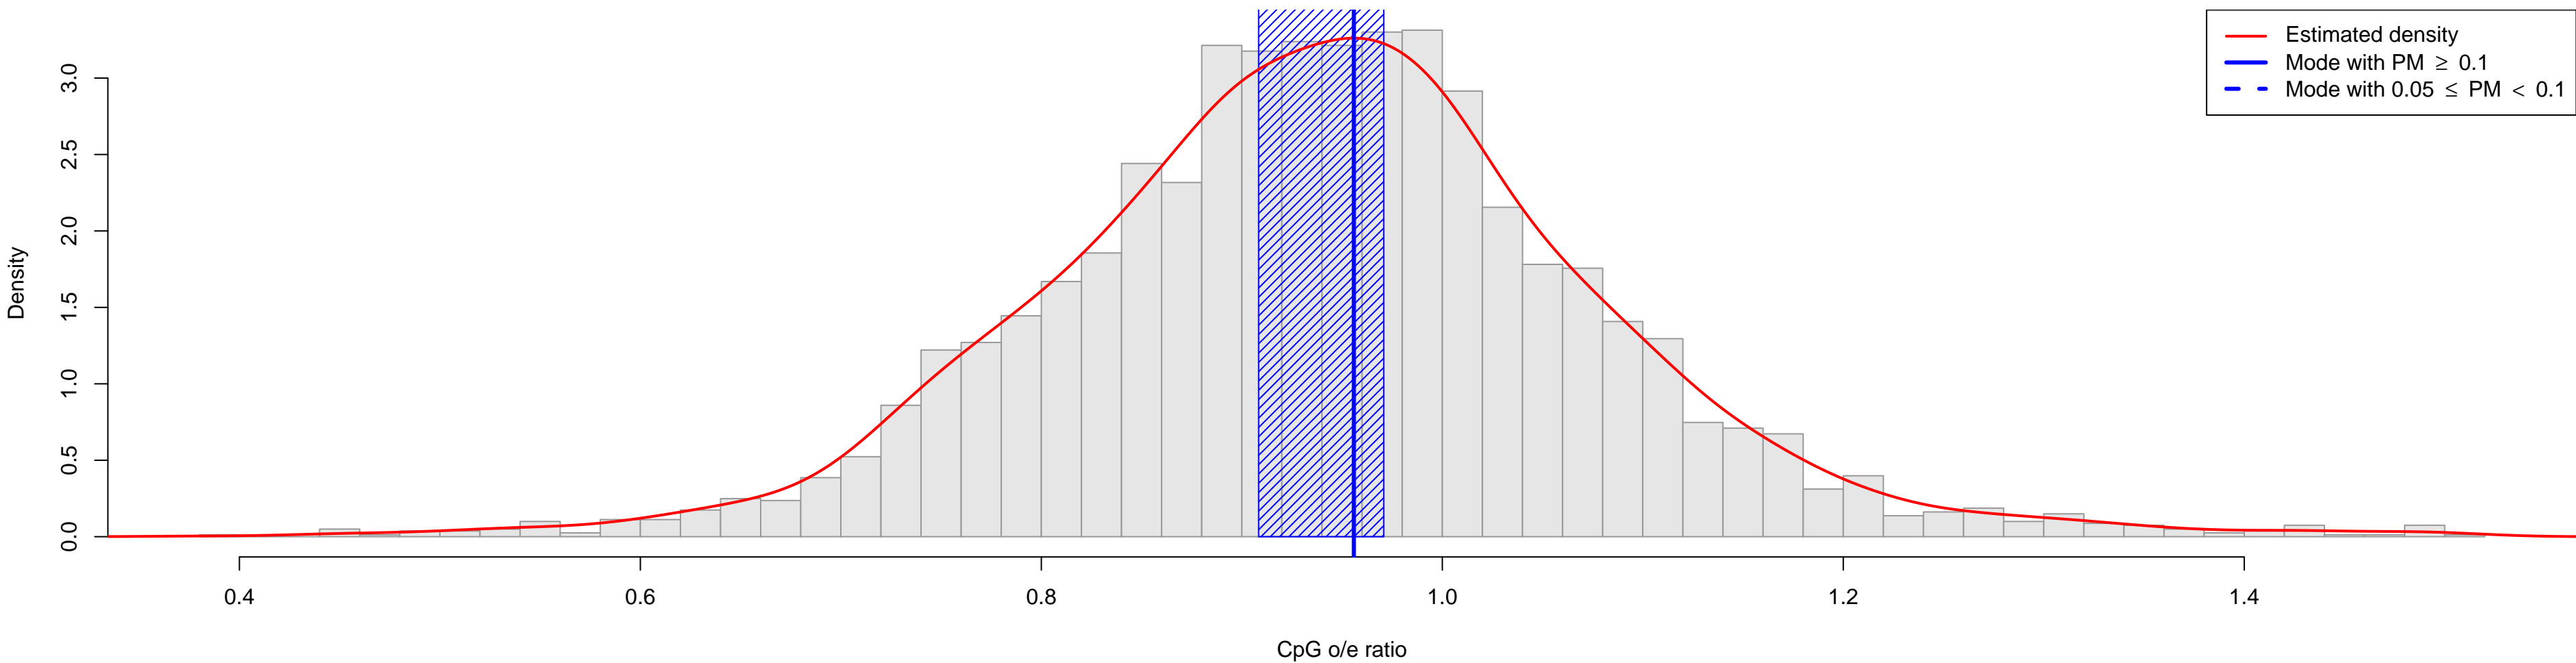

# Chlamydomonas\_reinhardtii

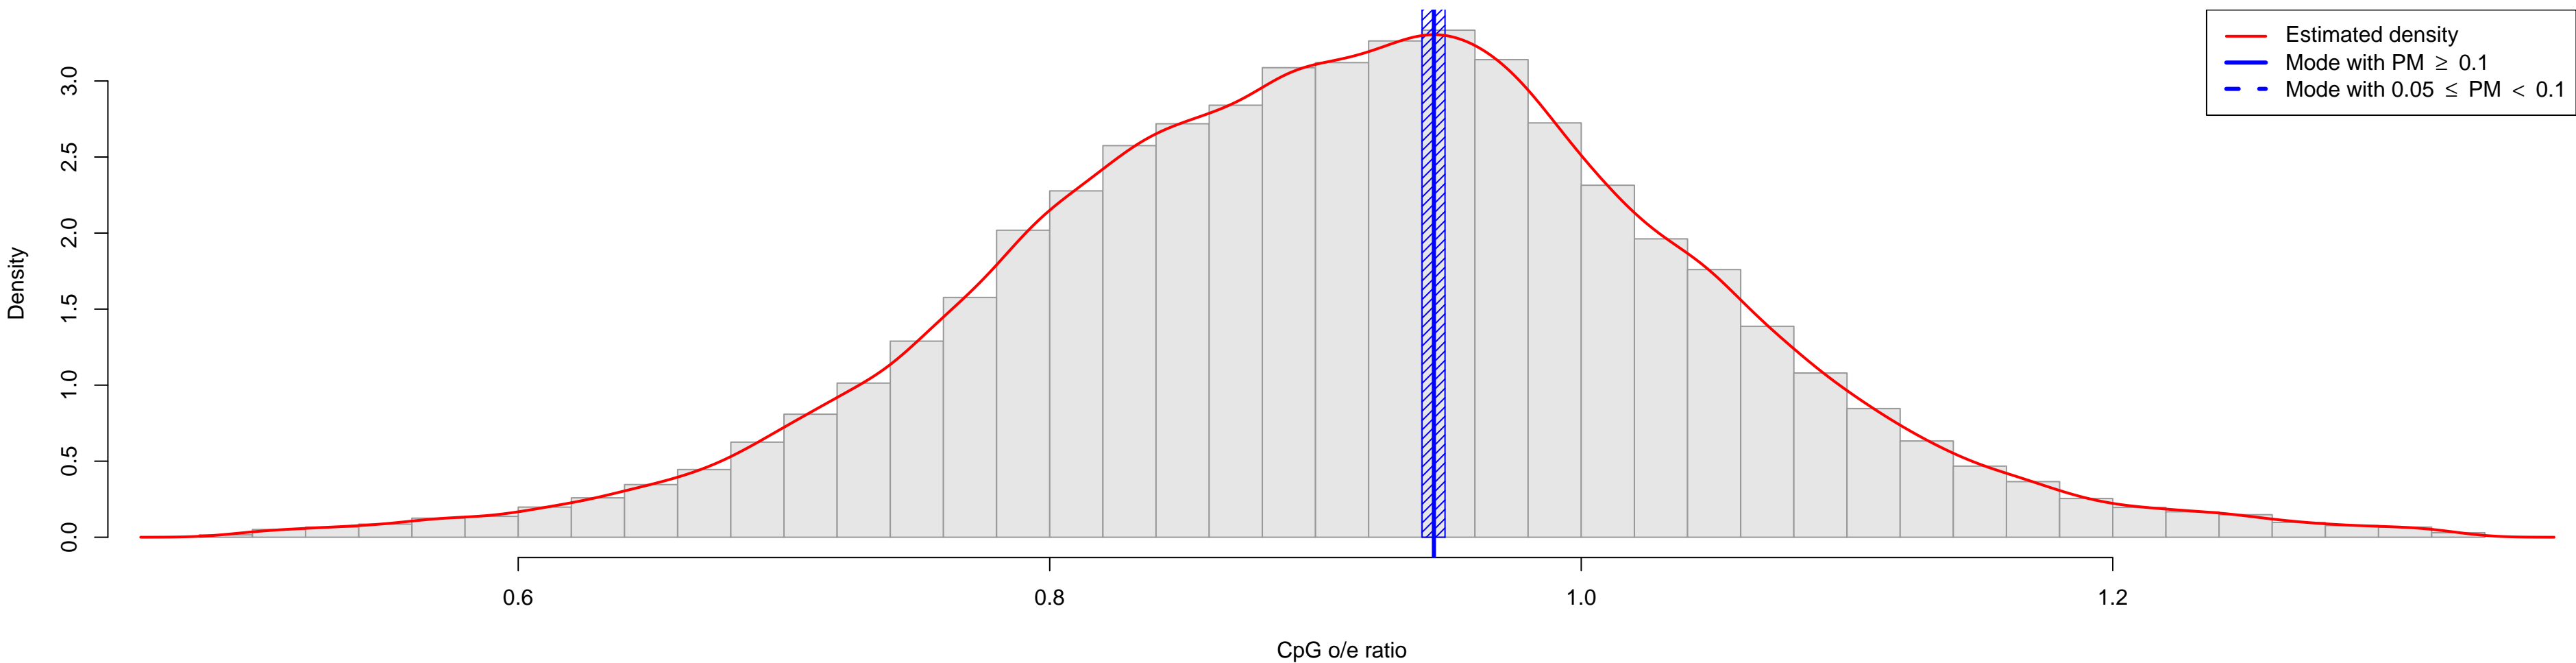

# Chlamys\_farreri

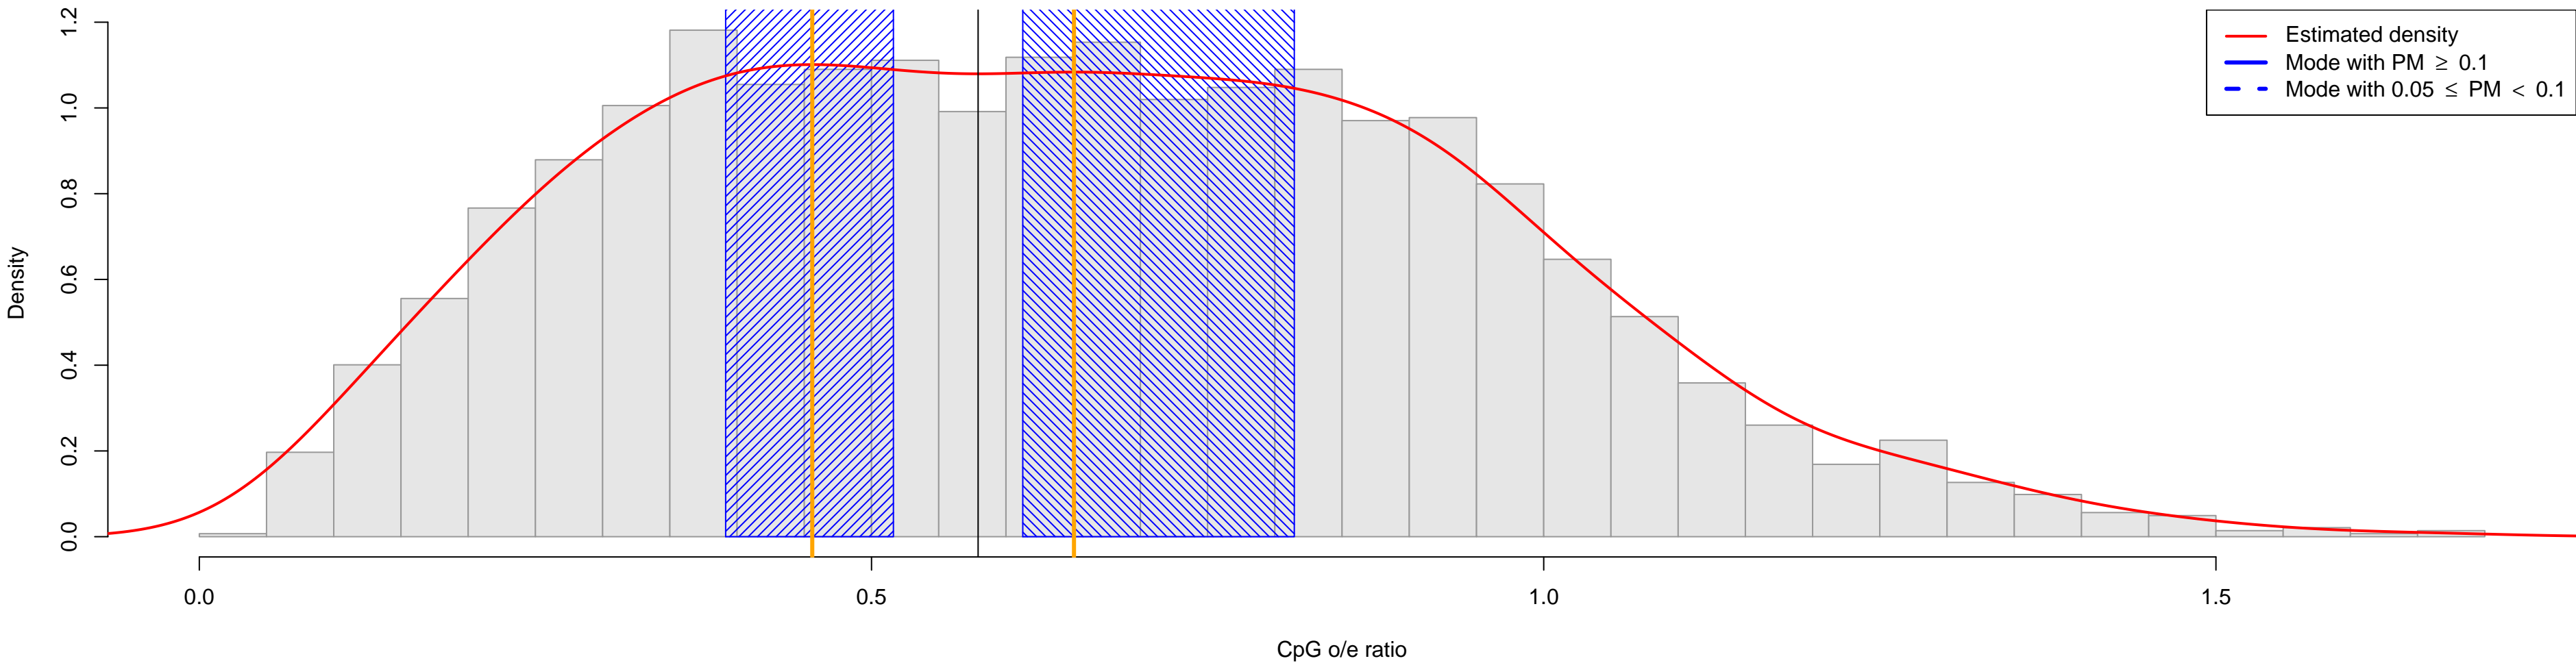

# Chlorocebus\_sabaeus

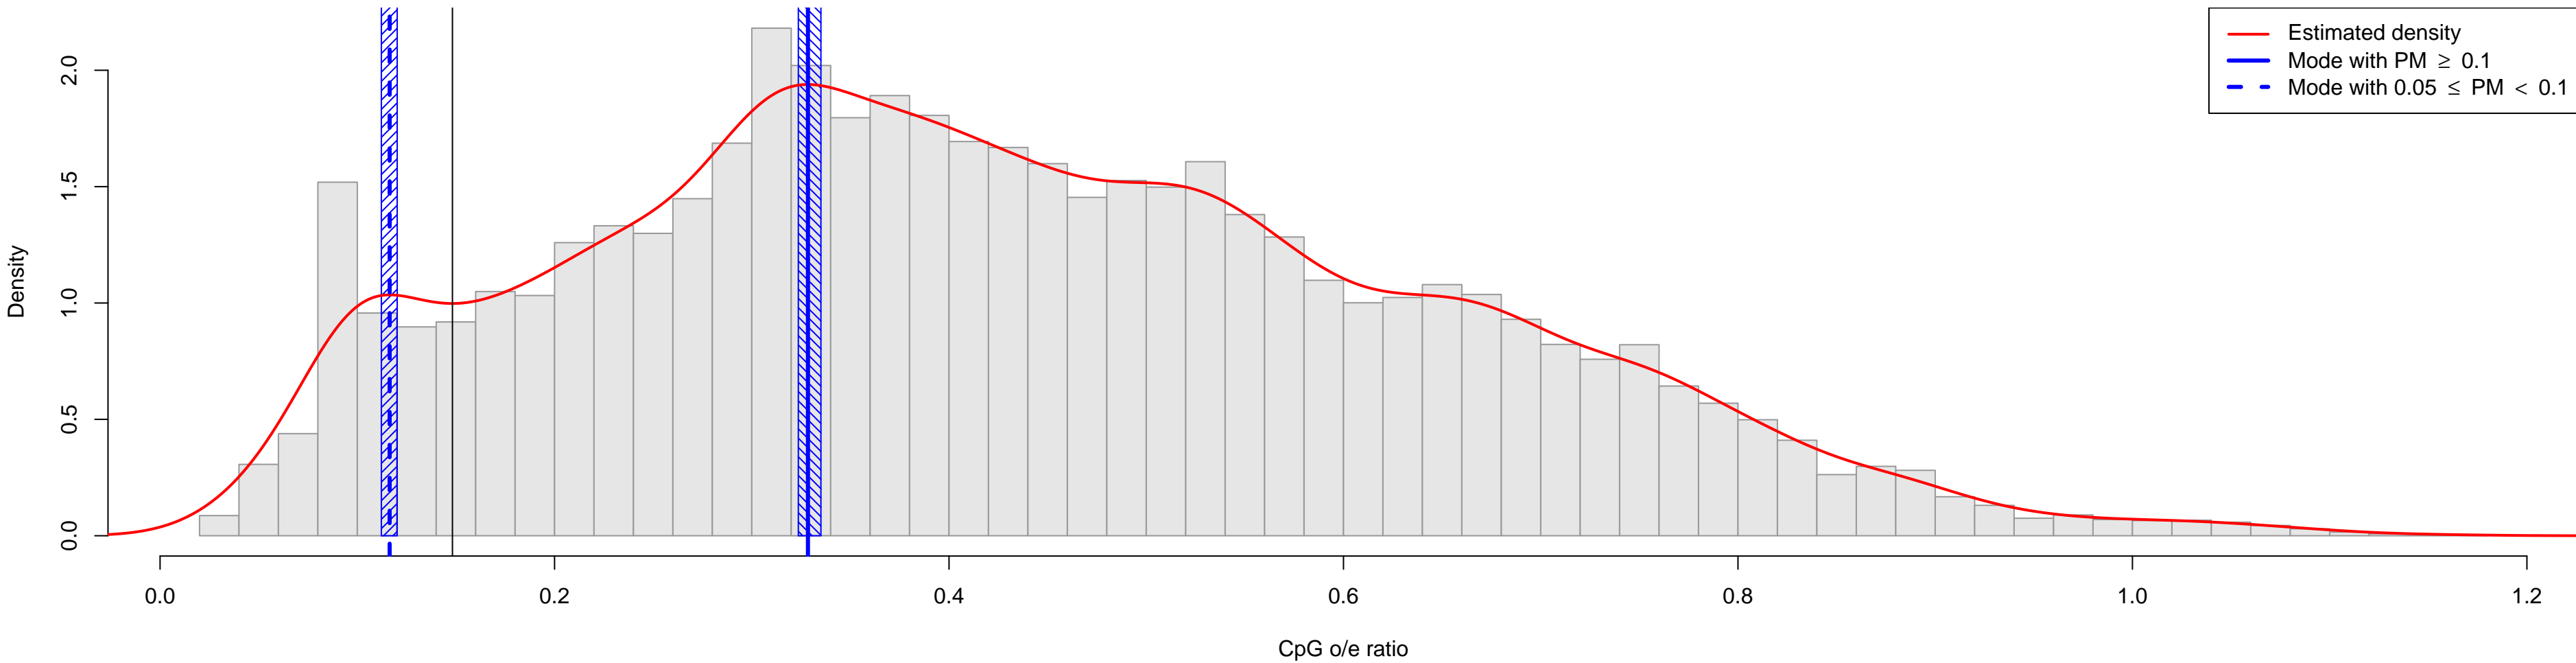

# Chlorokybus\_atmophyticus

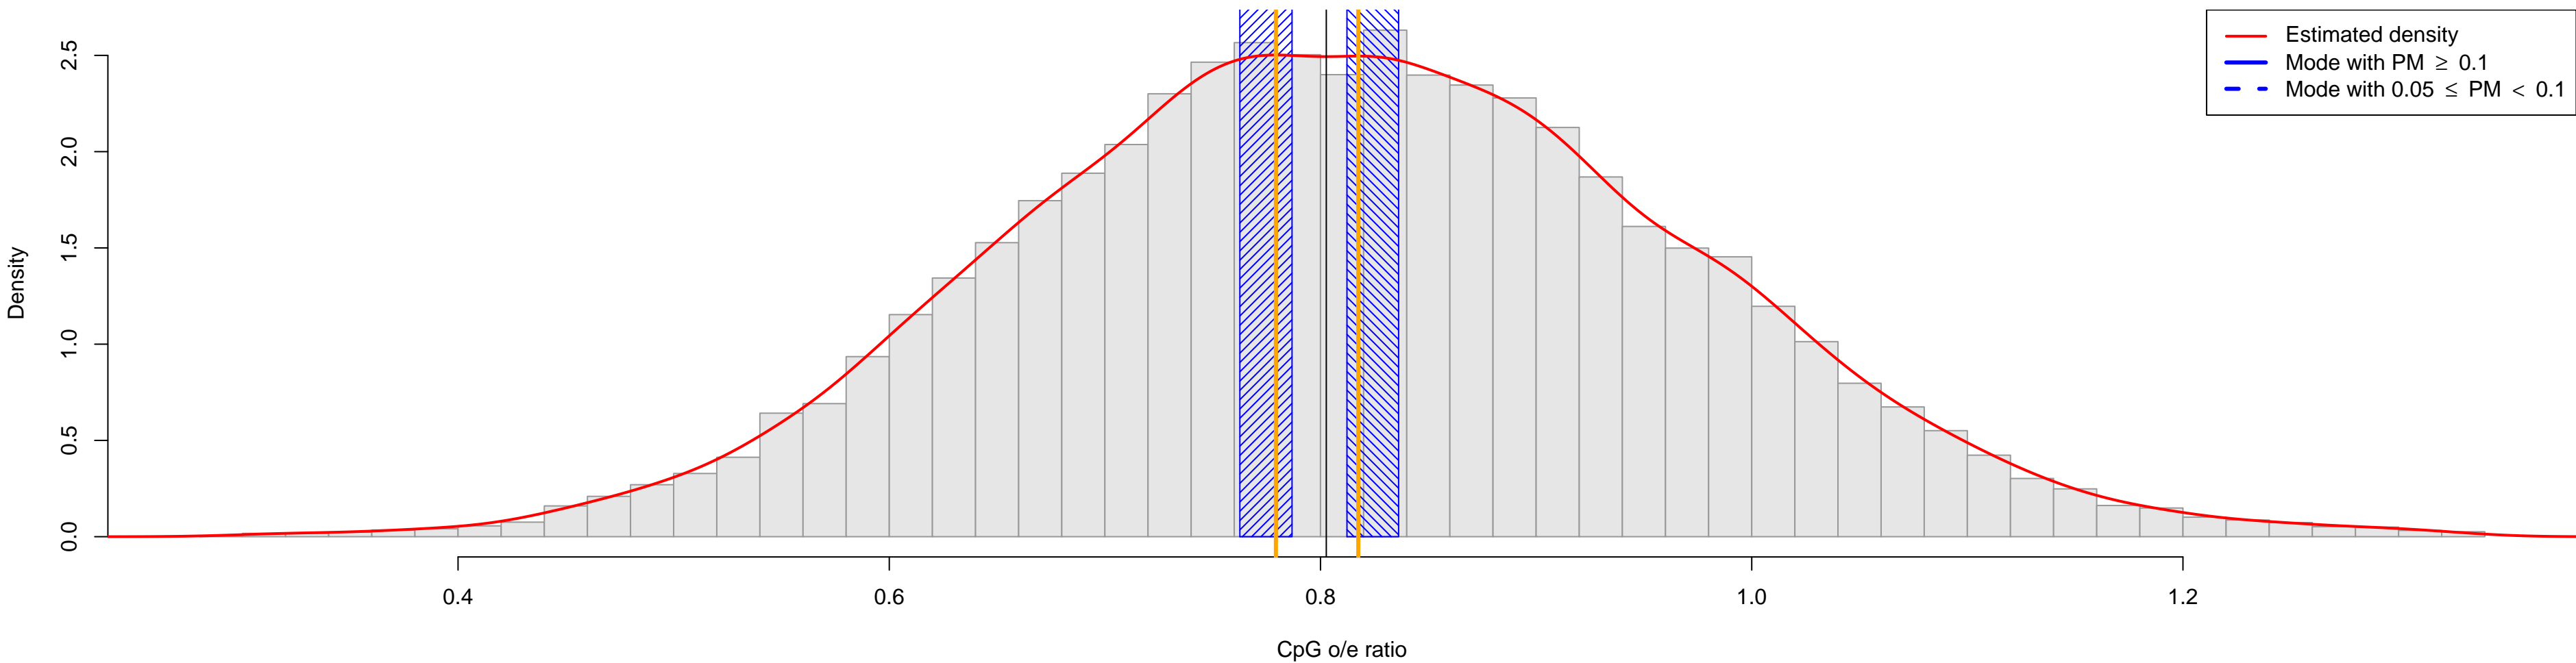

# Chondrus\_crispus

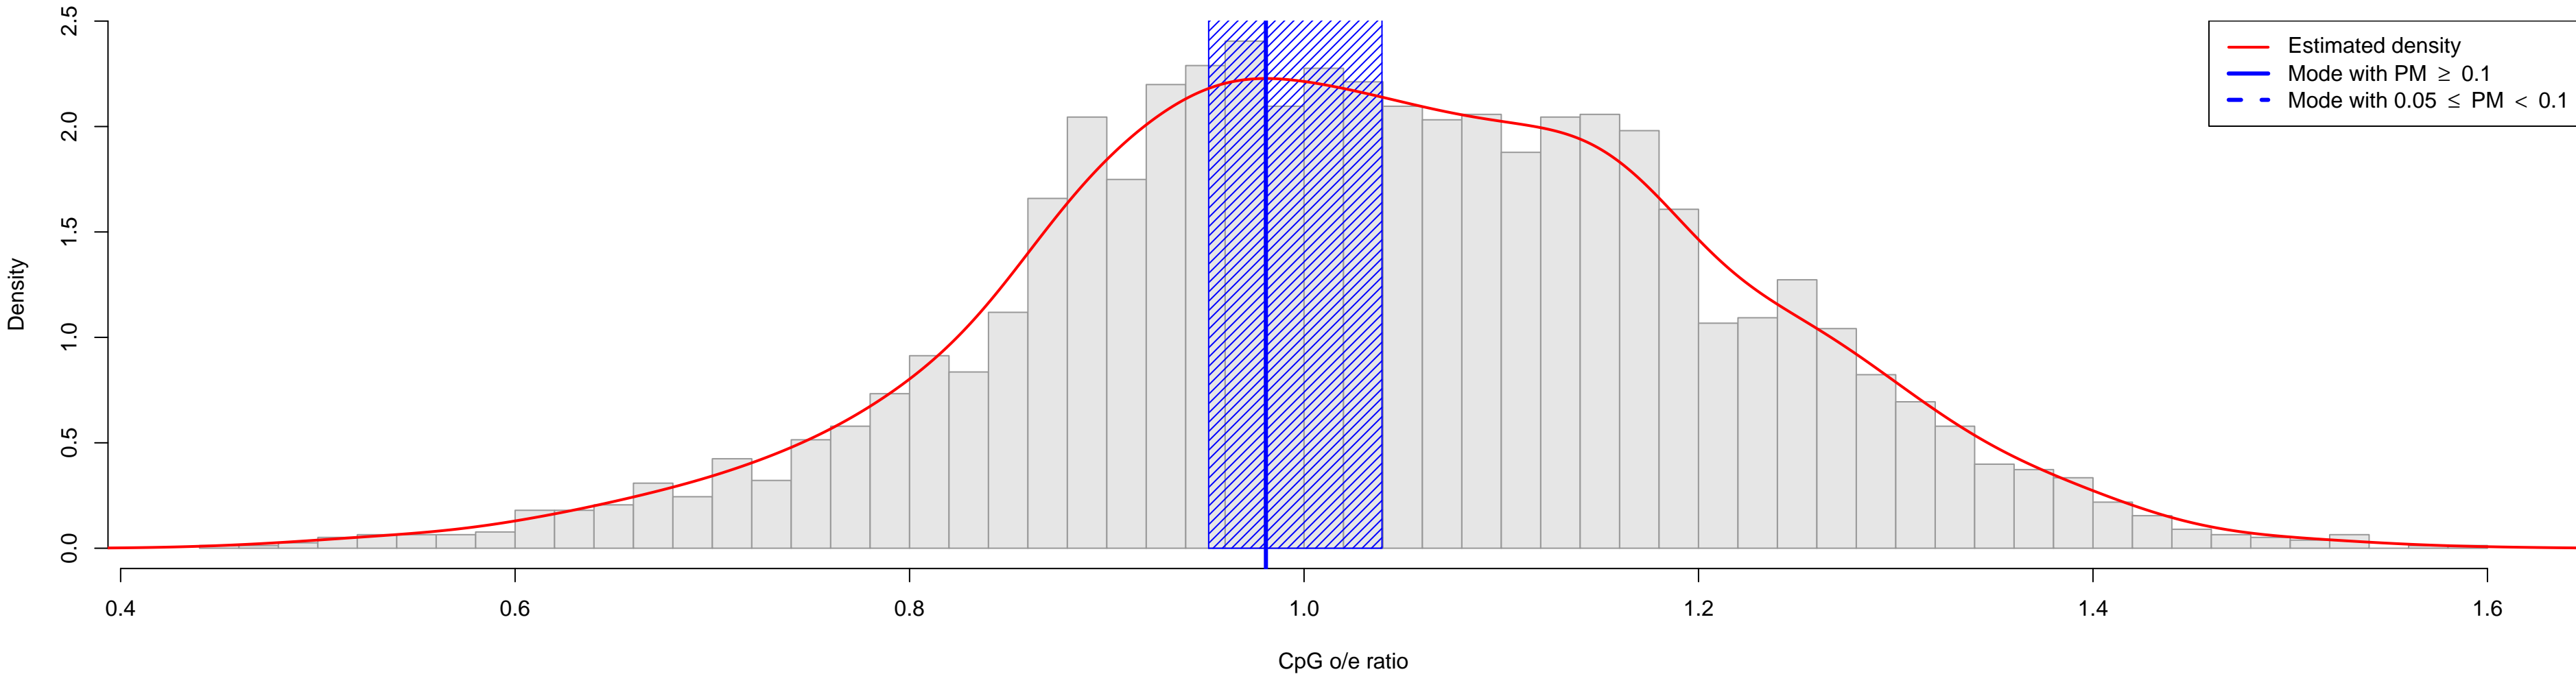

# Choristoneura\_fumiferana

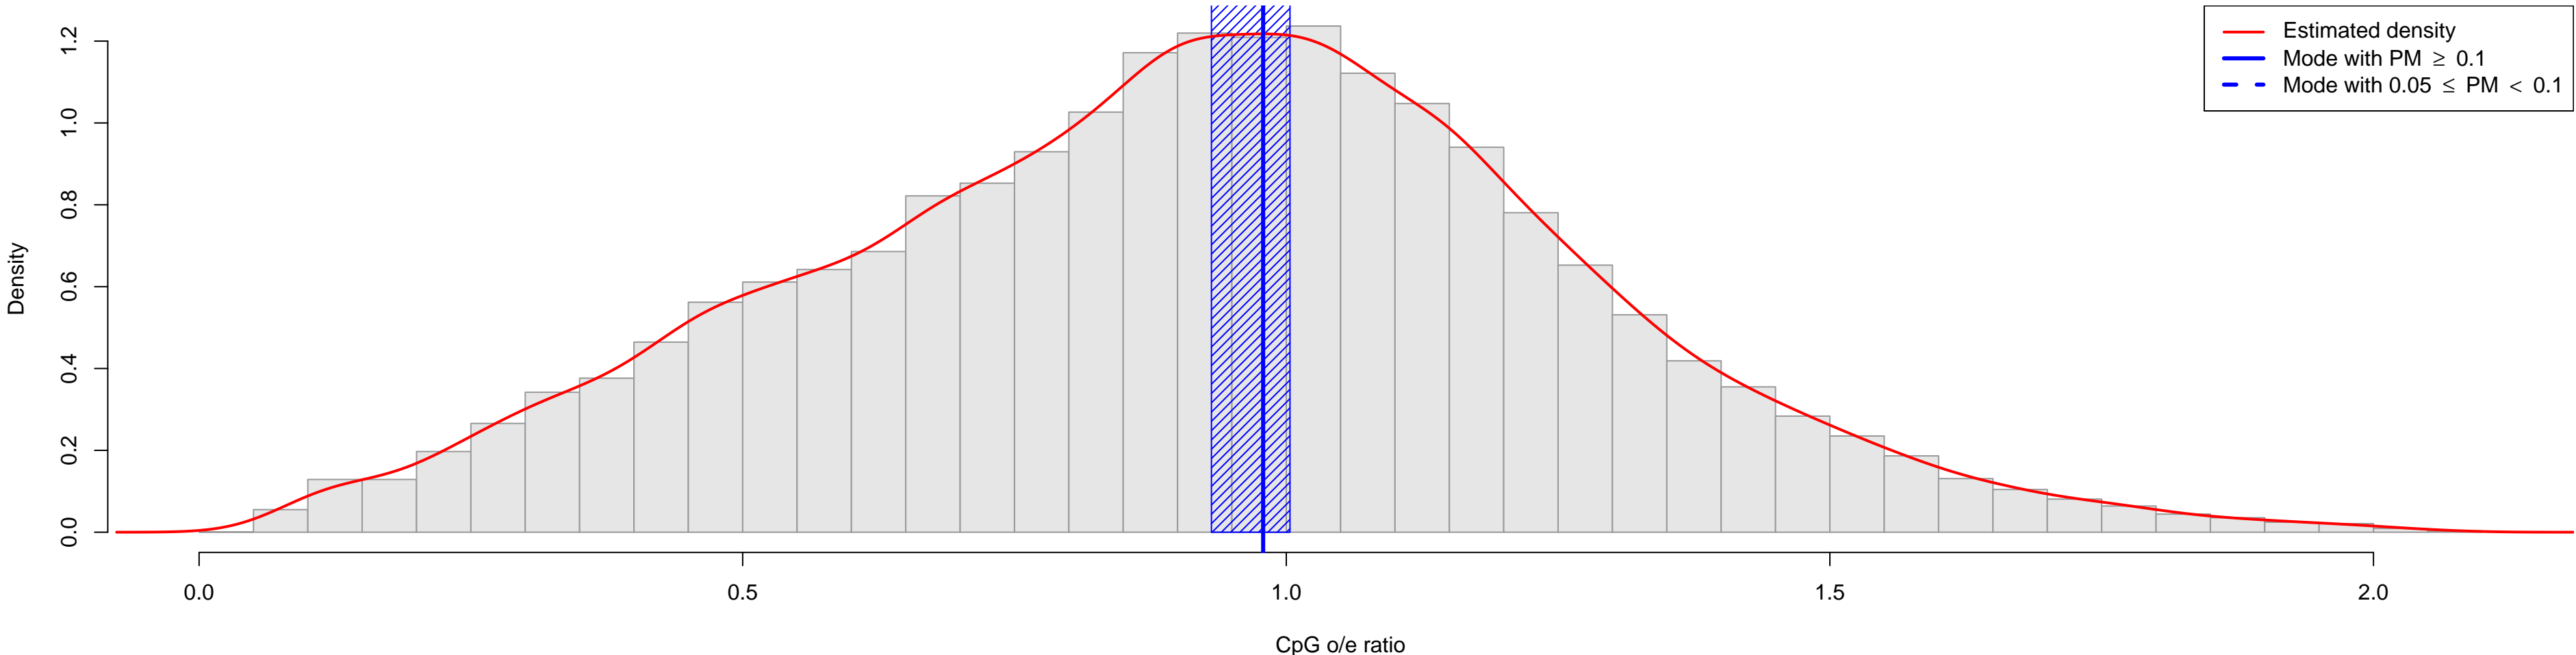

# Cicer\_arietinum

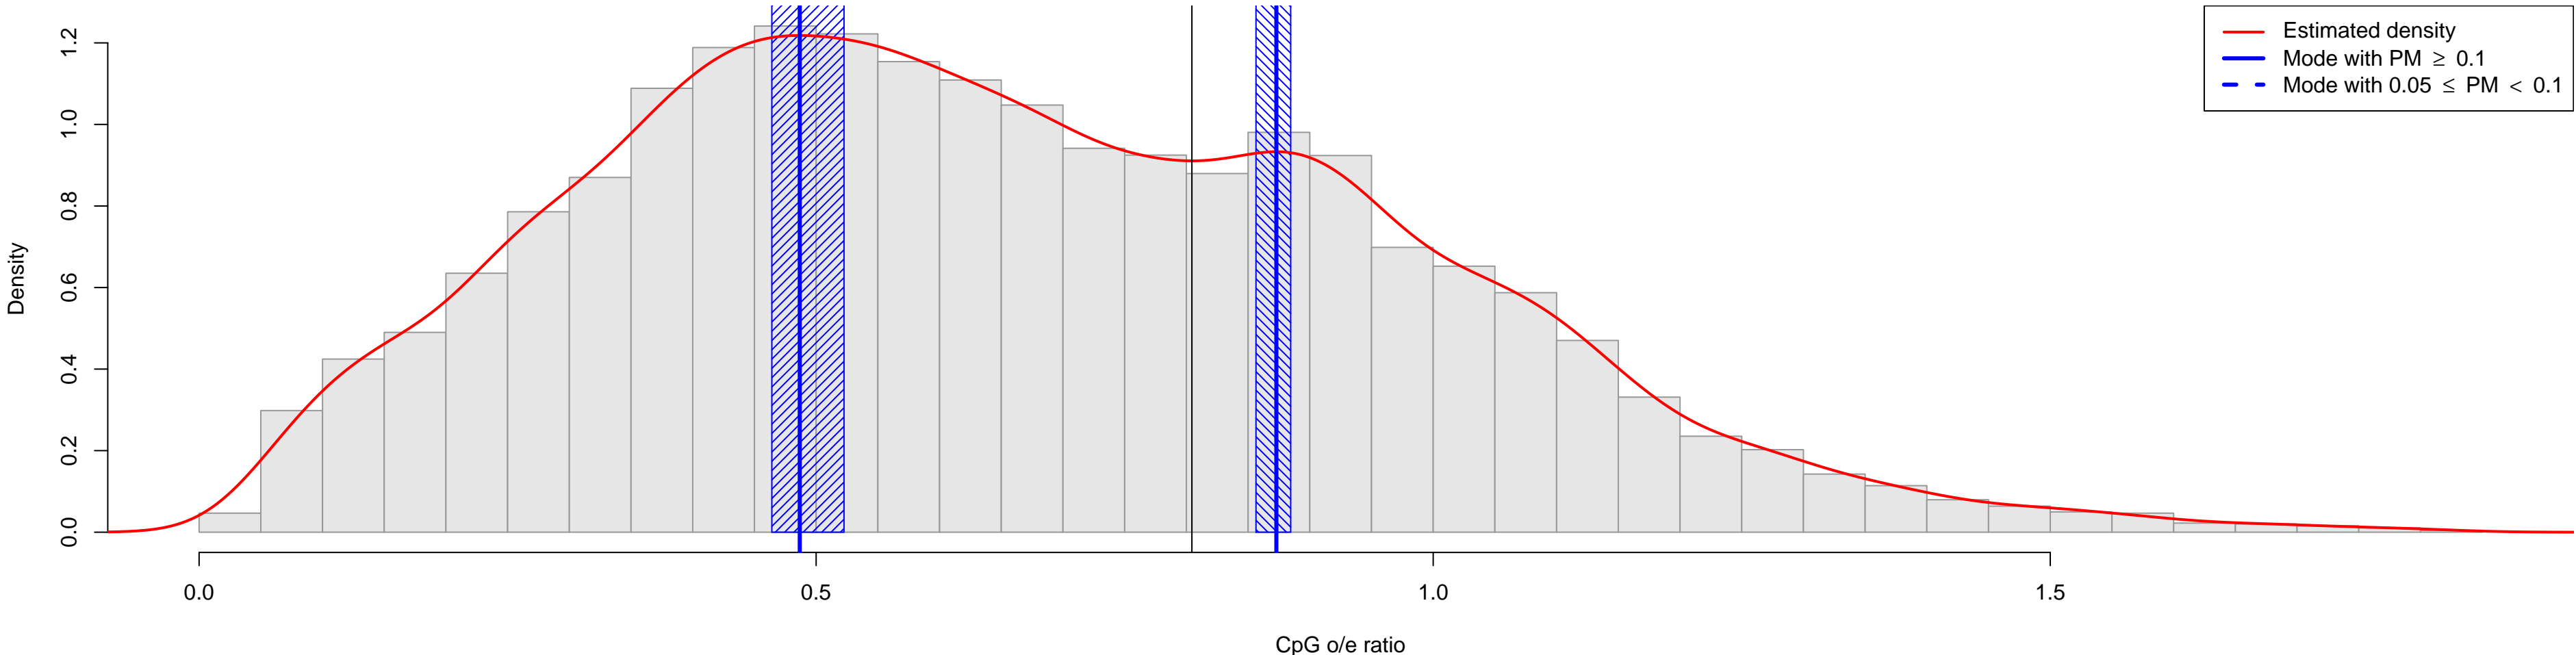



# Cichorium\_intybus

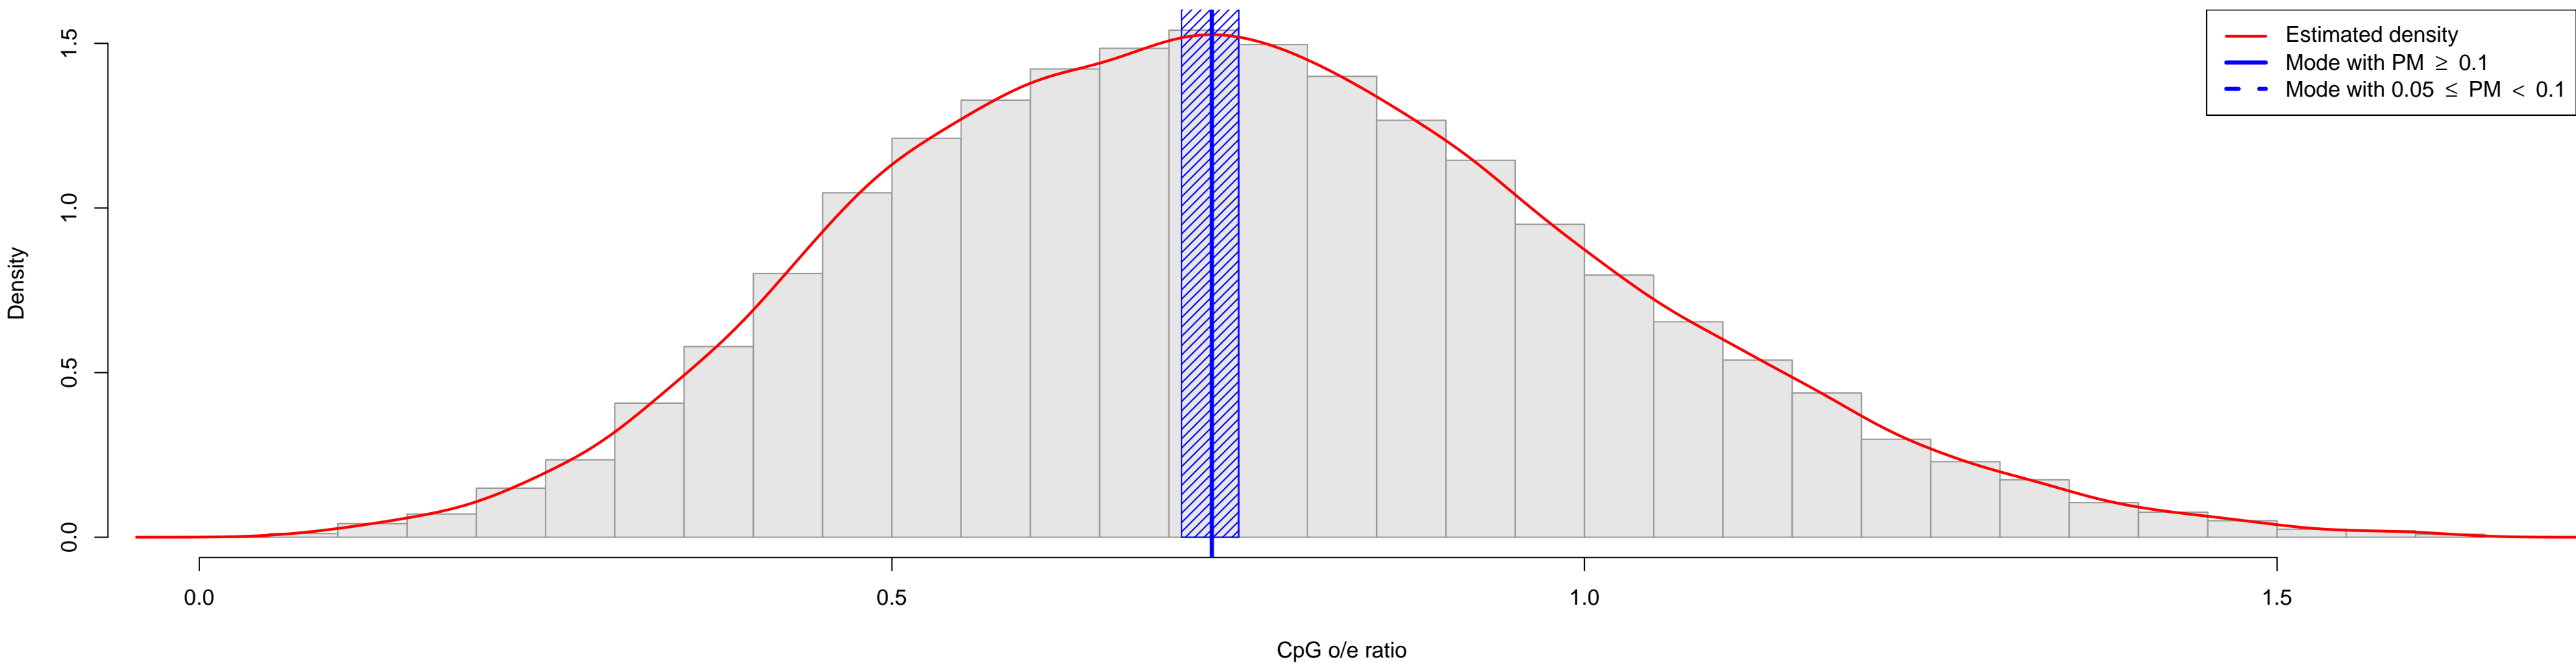

# Cimex\_lectularius

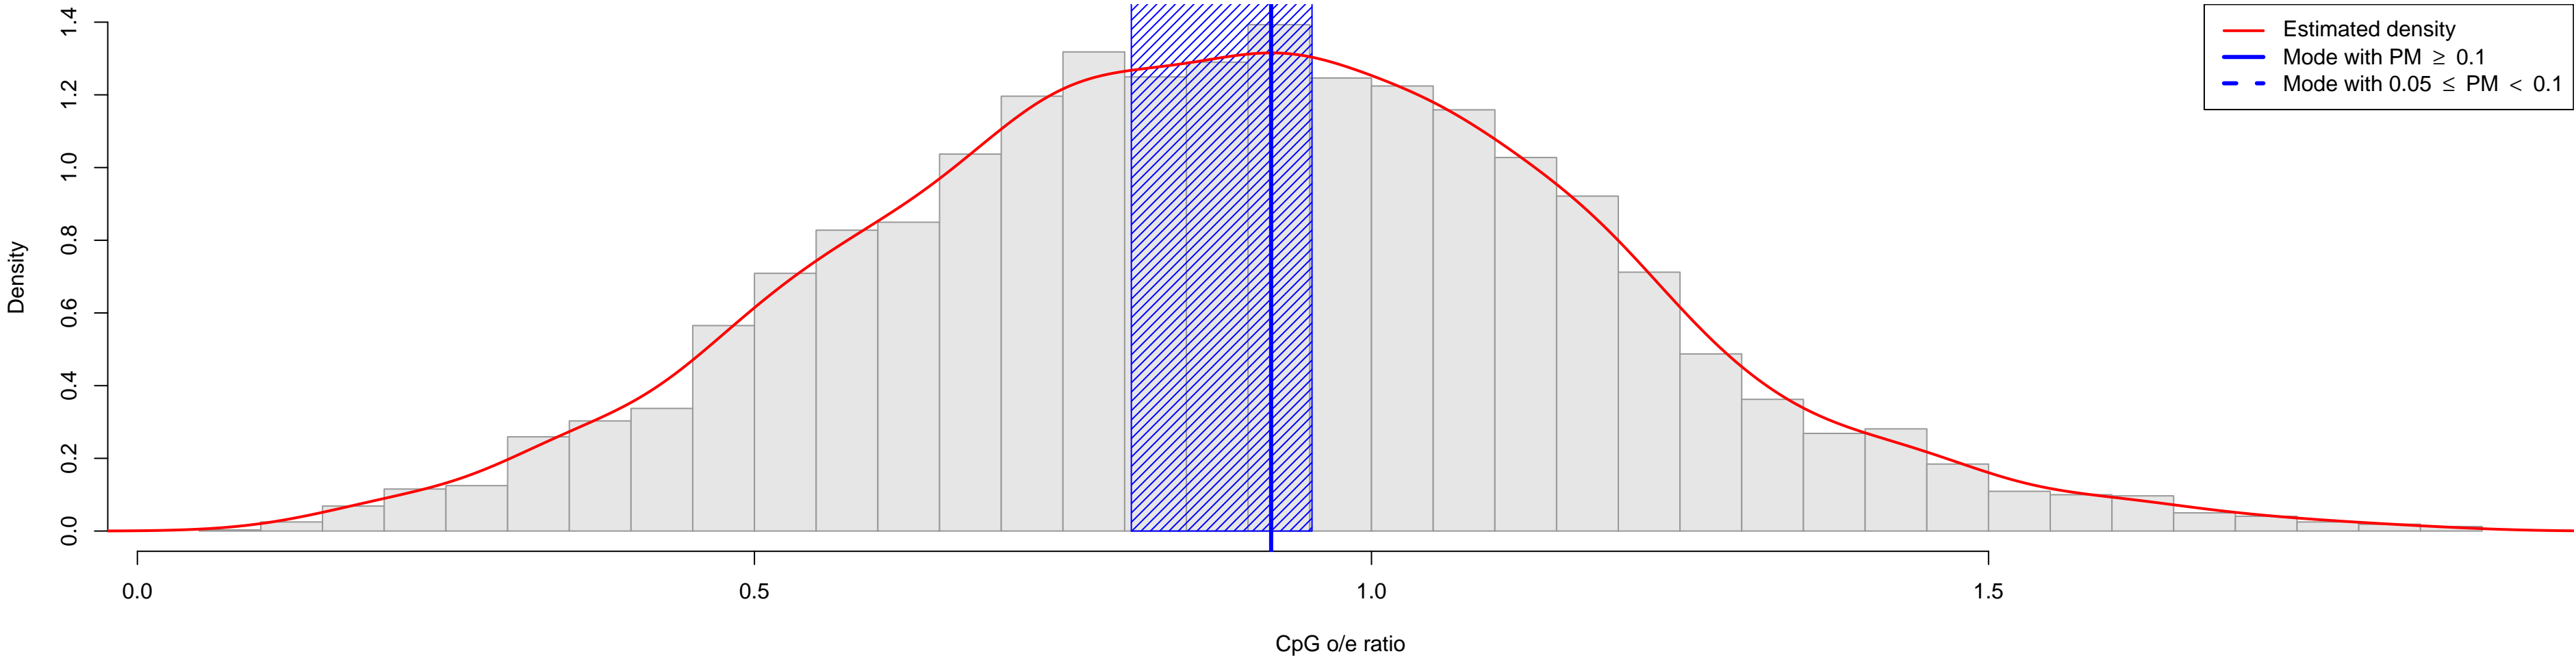

# Ciona\_intestinalis

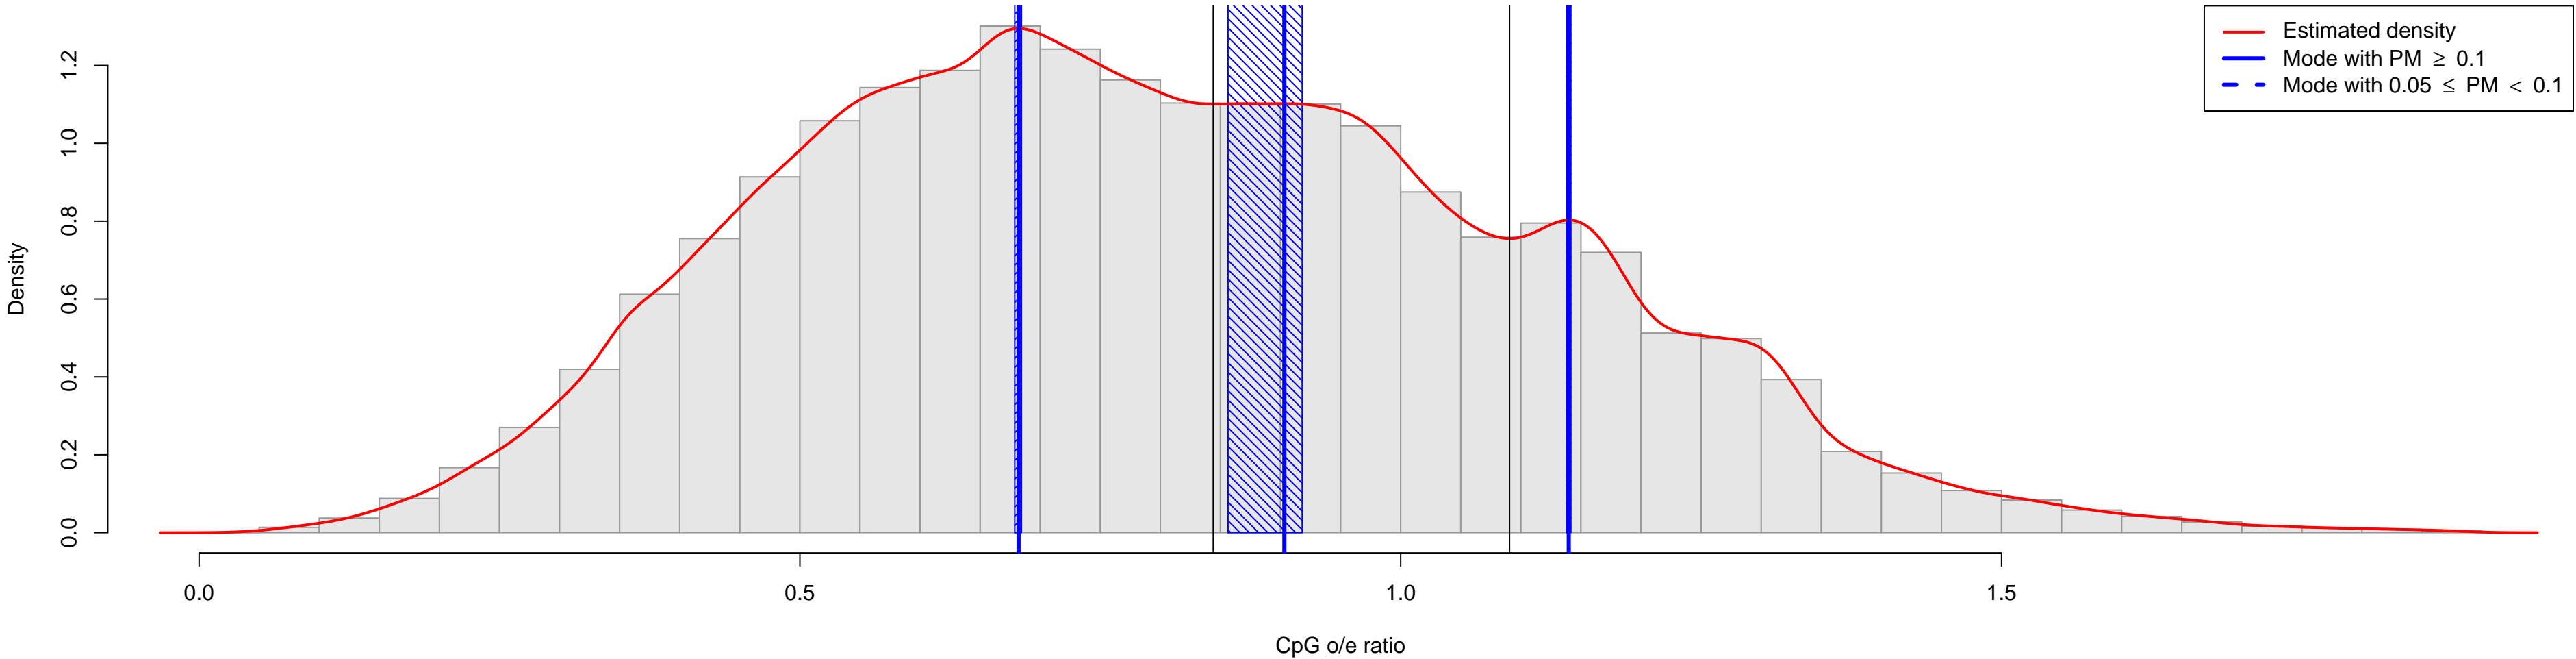

# Ciona\_savignyi

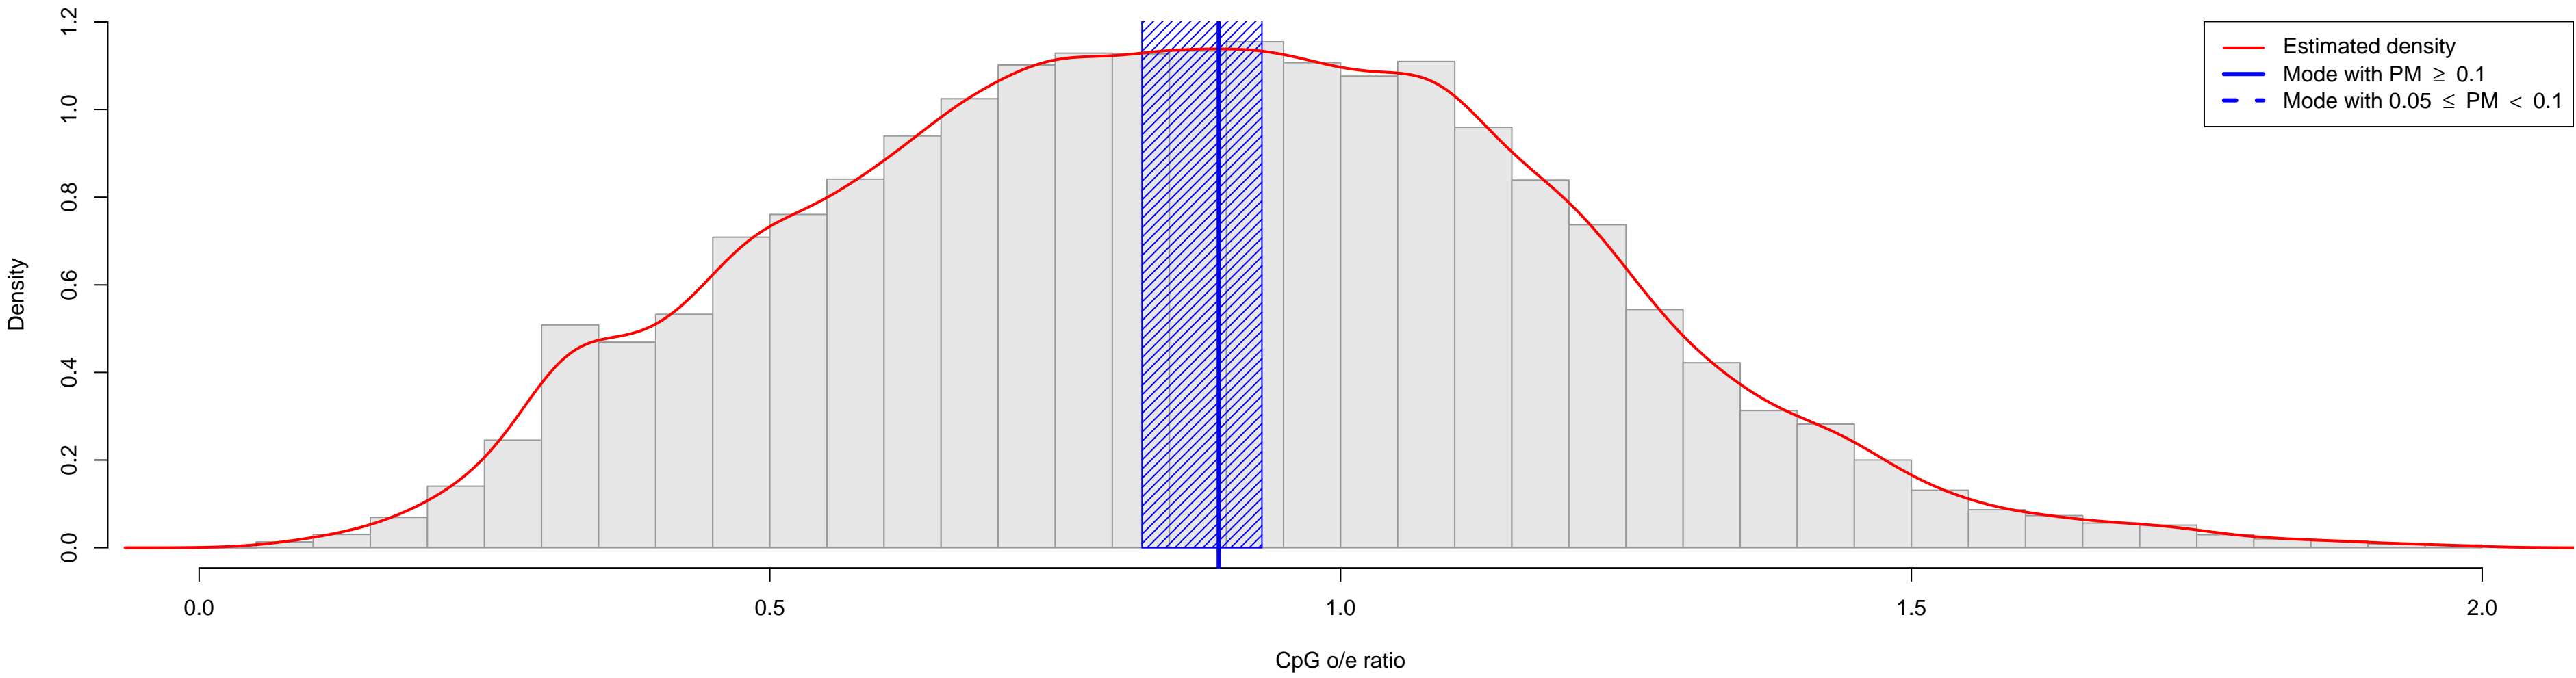

# Citrus\_aurantiifolia

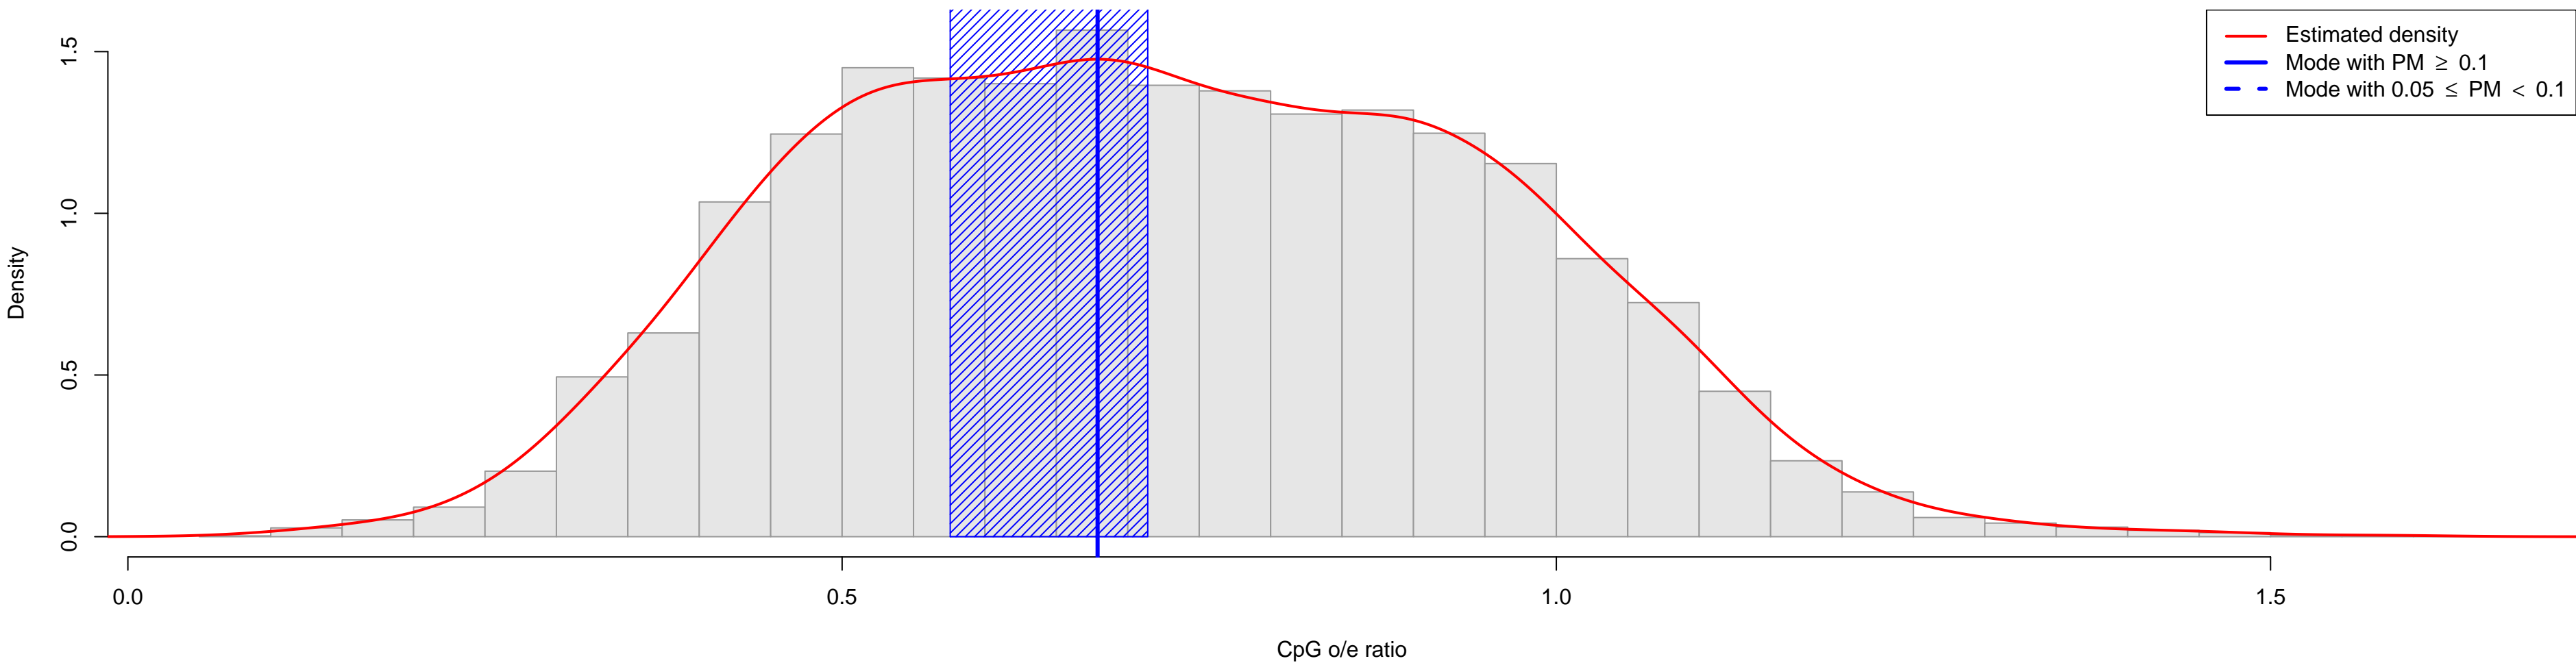

# Citrus\_aurantium

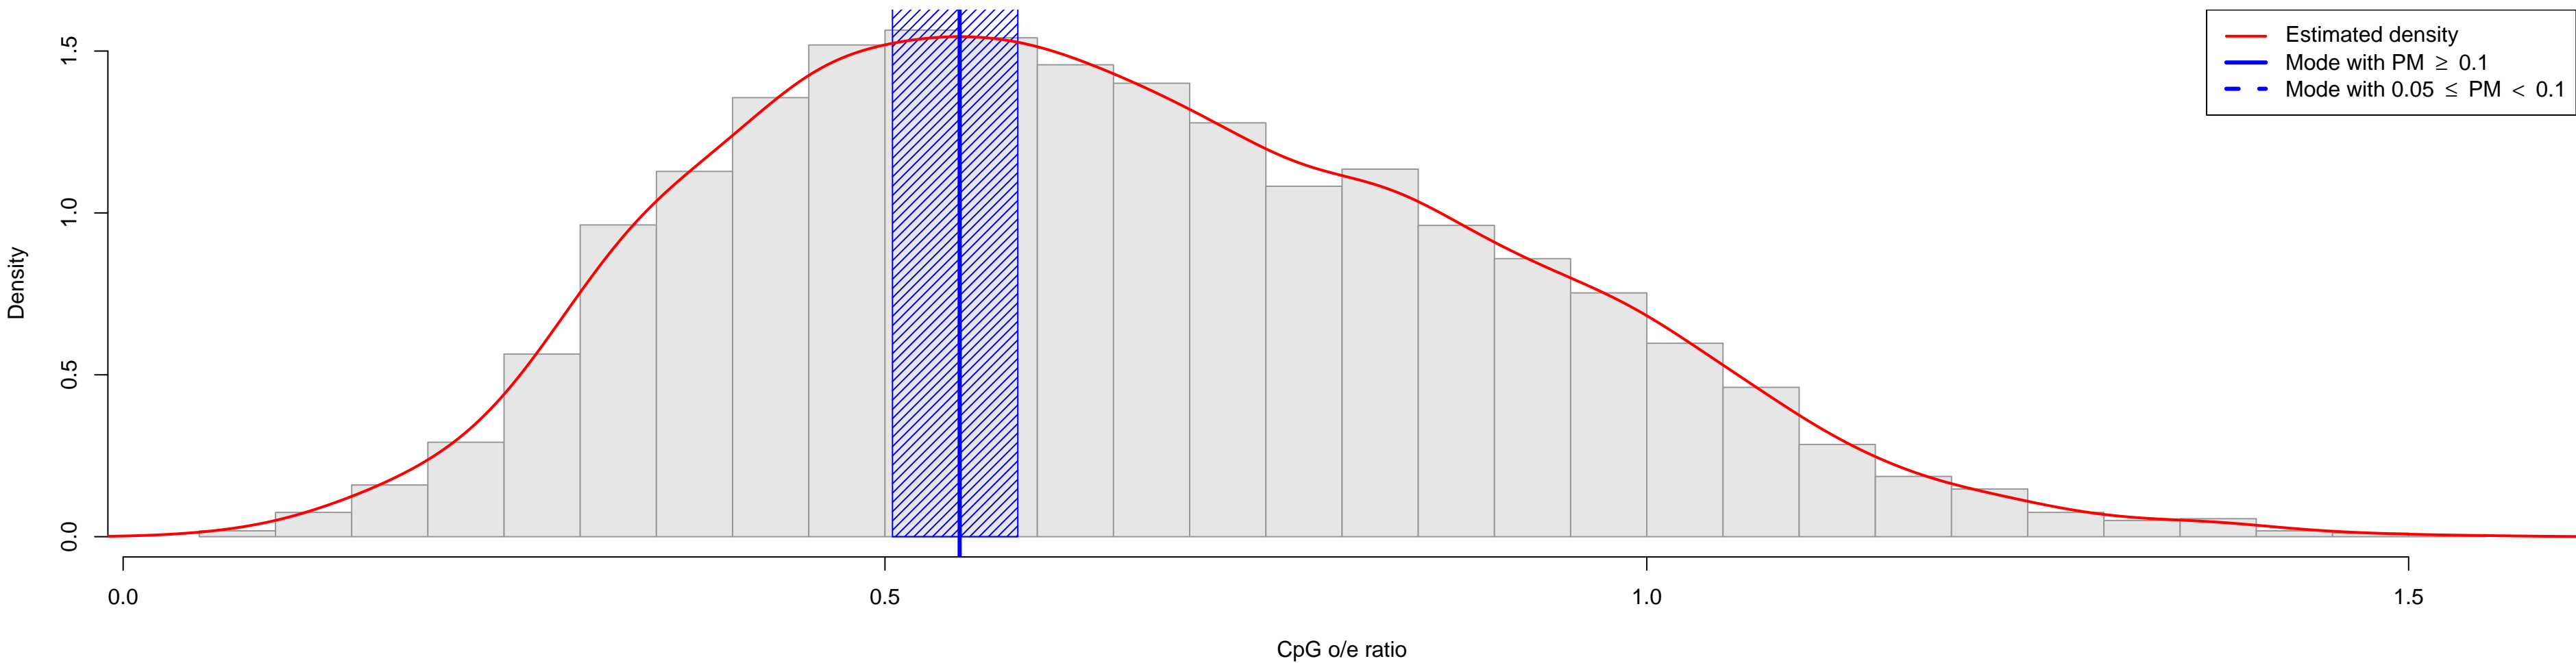

# Citrus\_clementina

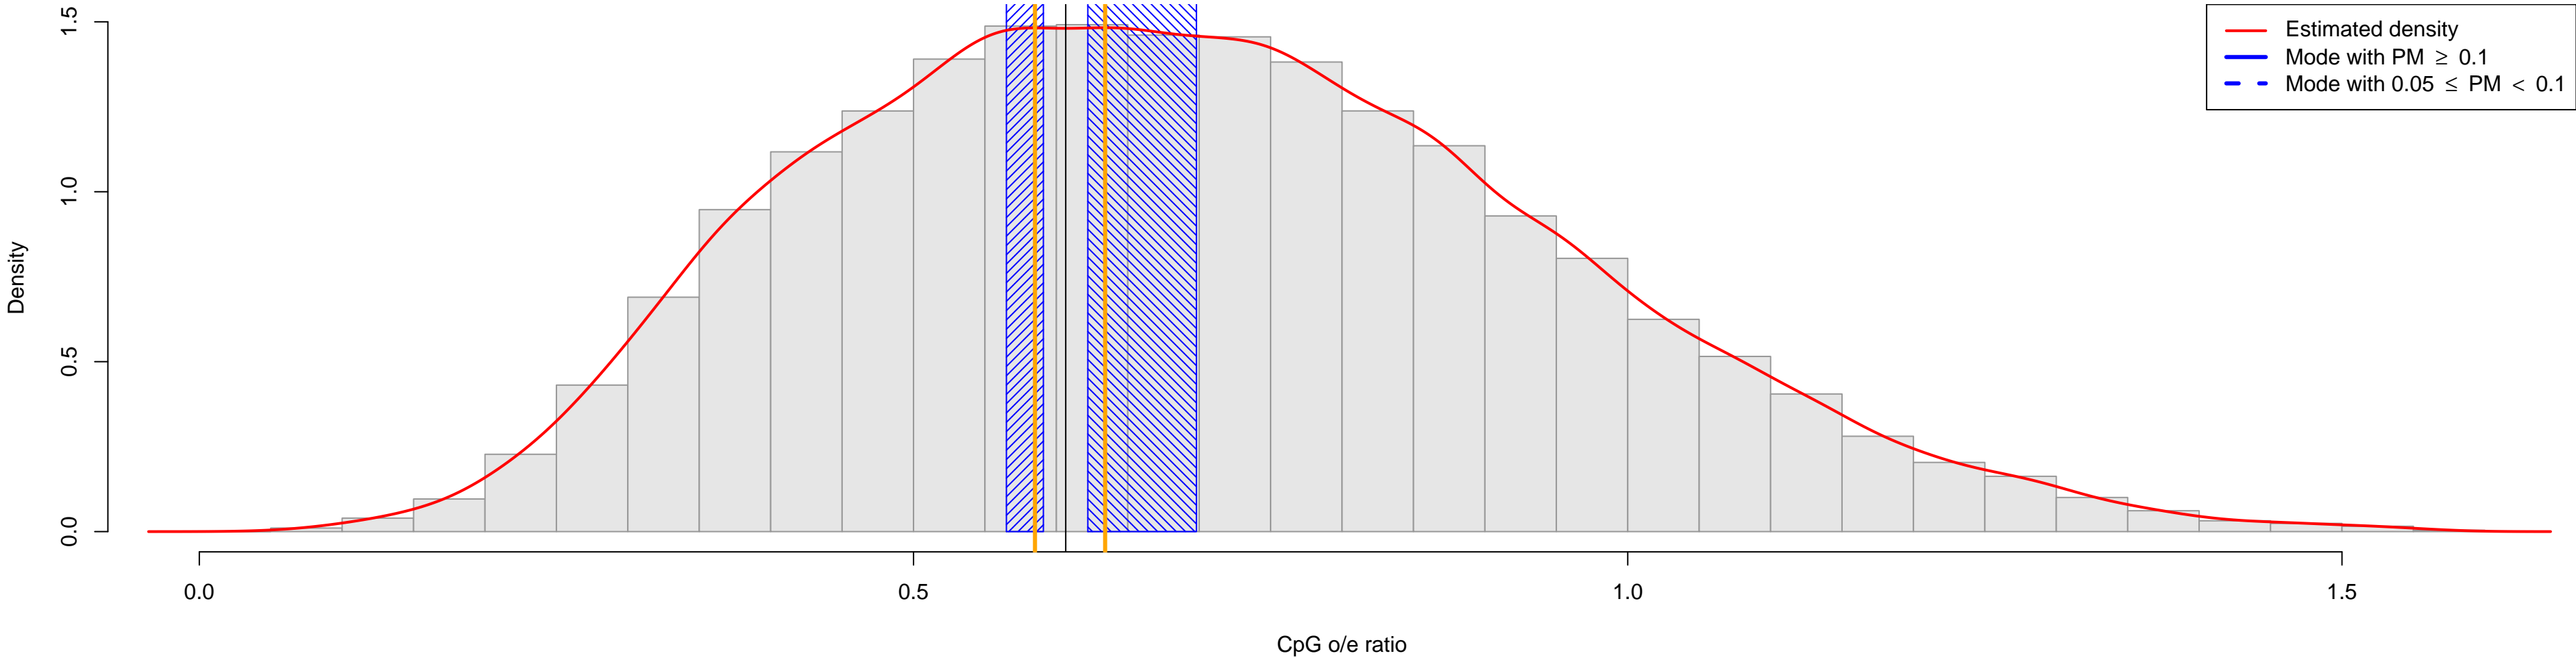

# Citrus\_jambhiri

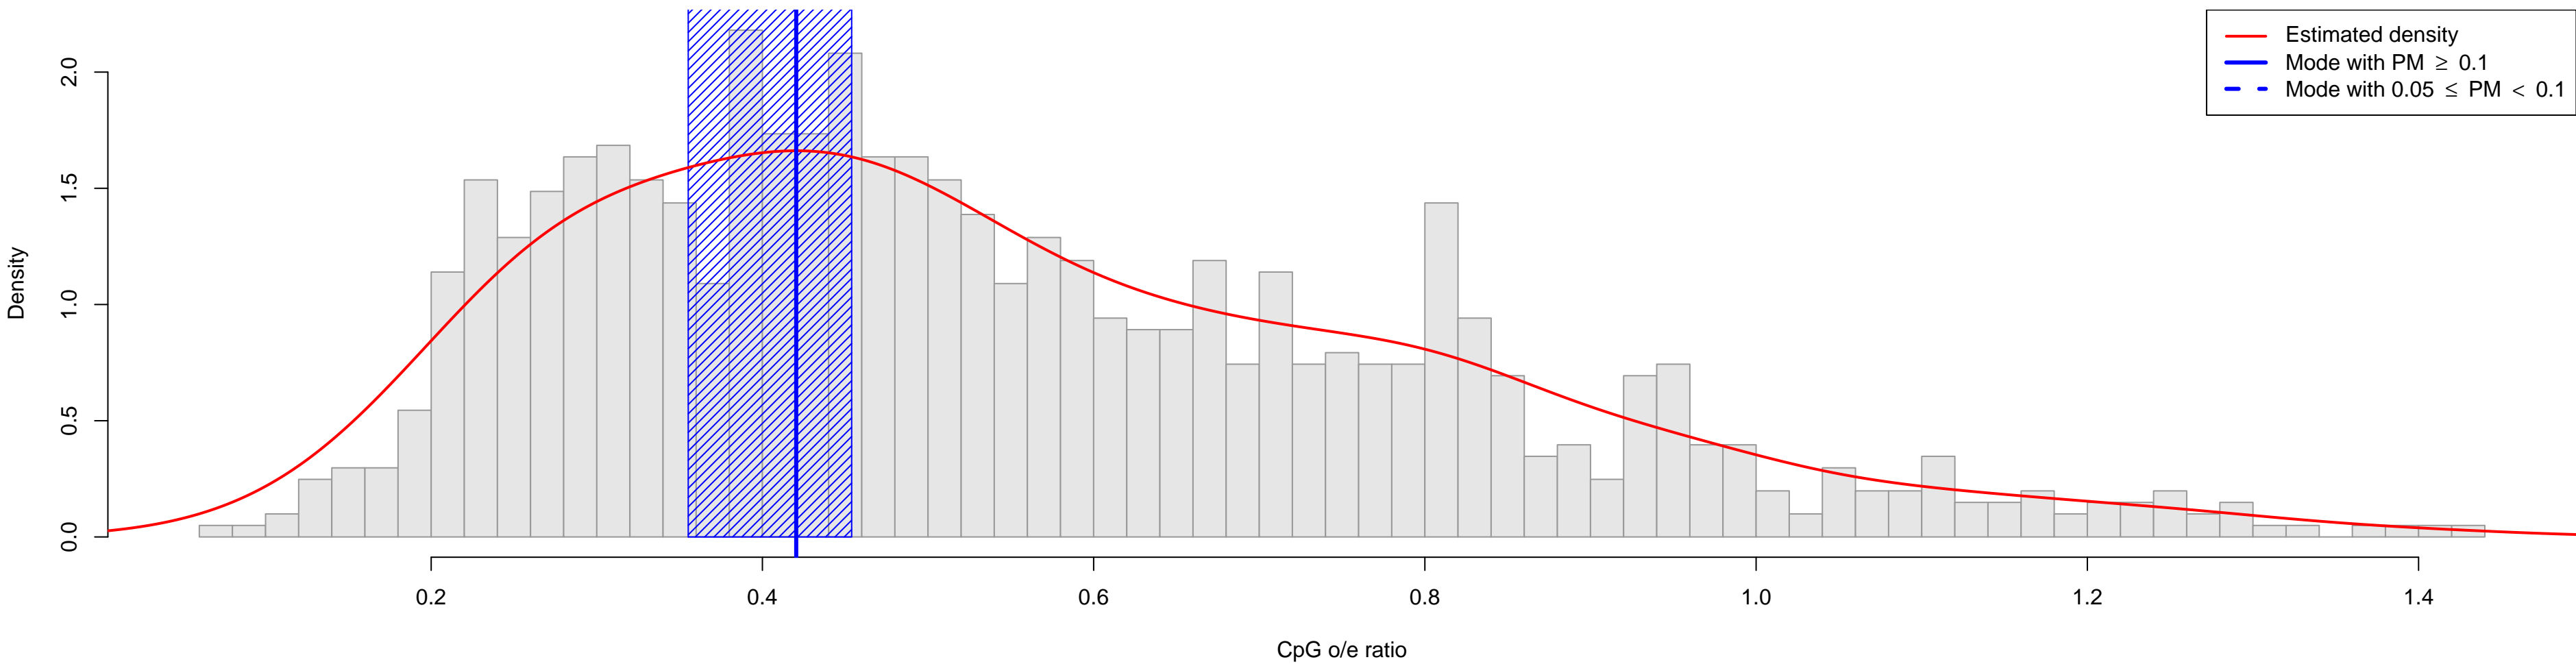



# Citrus\_latifolia

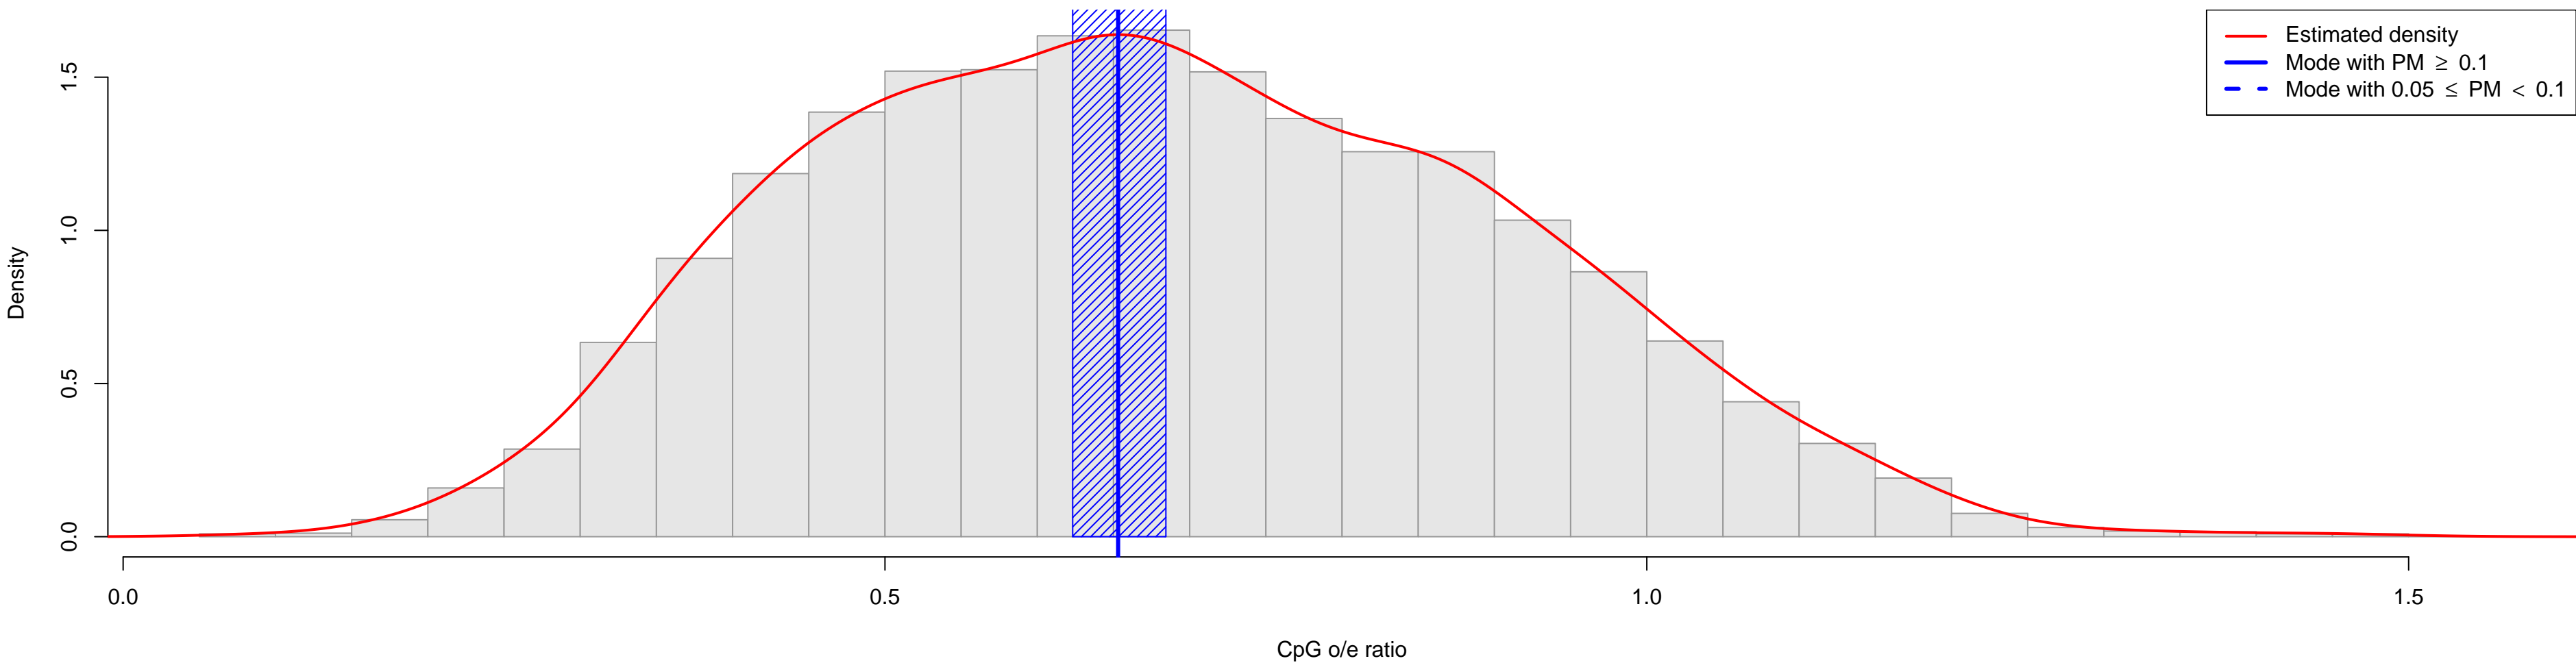

# Citrus\_limettioides

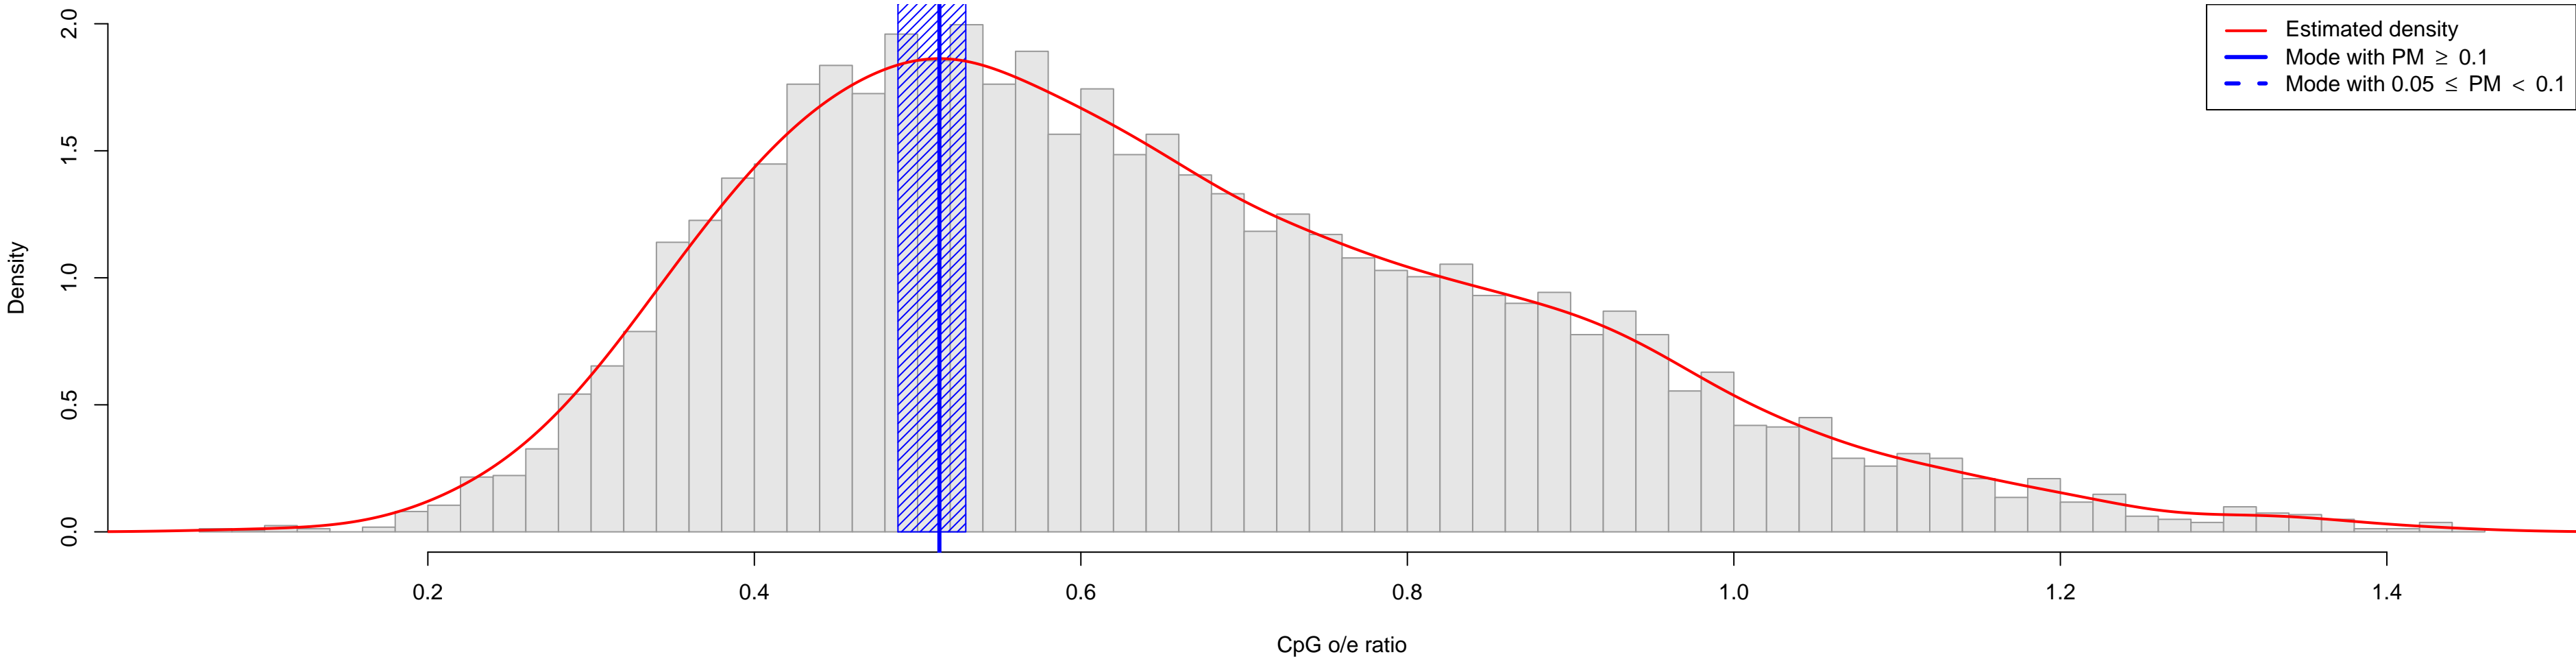

# Citrus\_limon

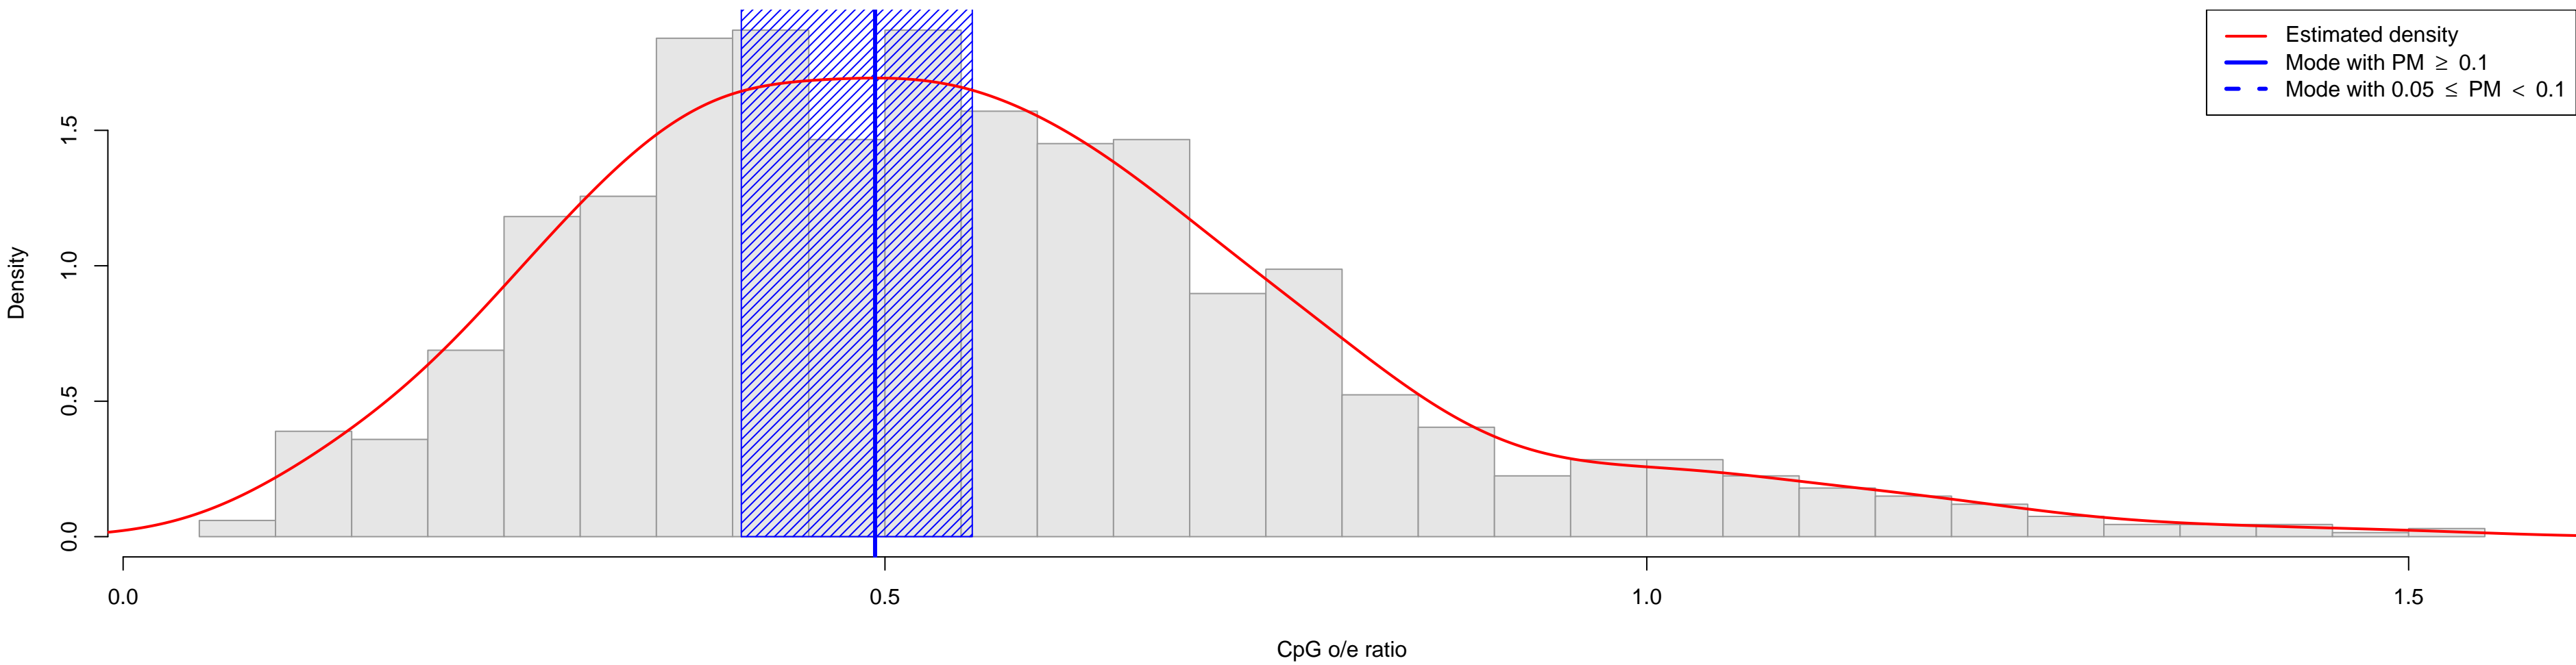

# Citrus\_limonia

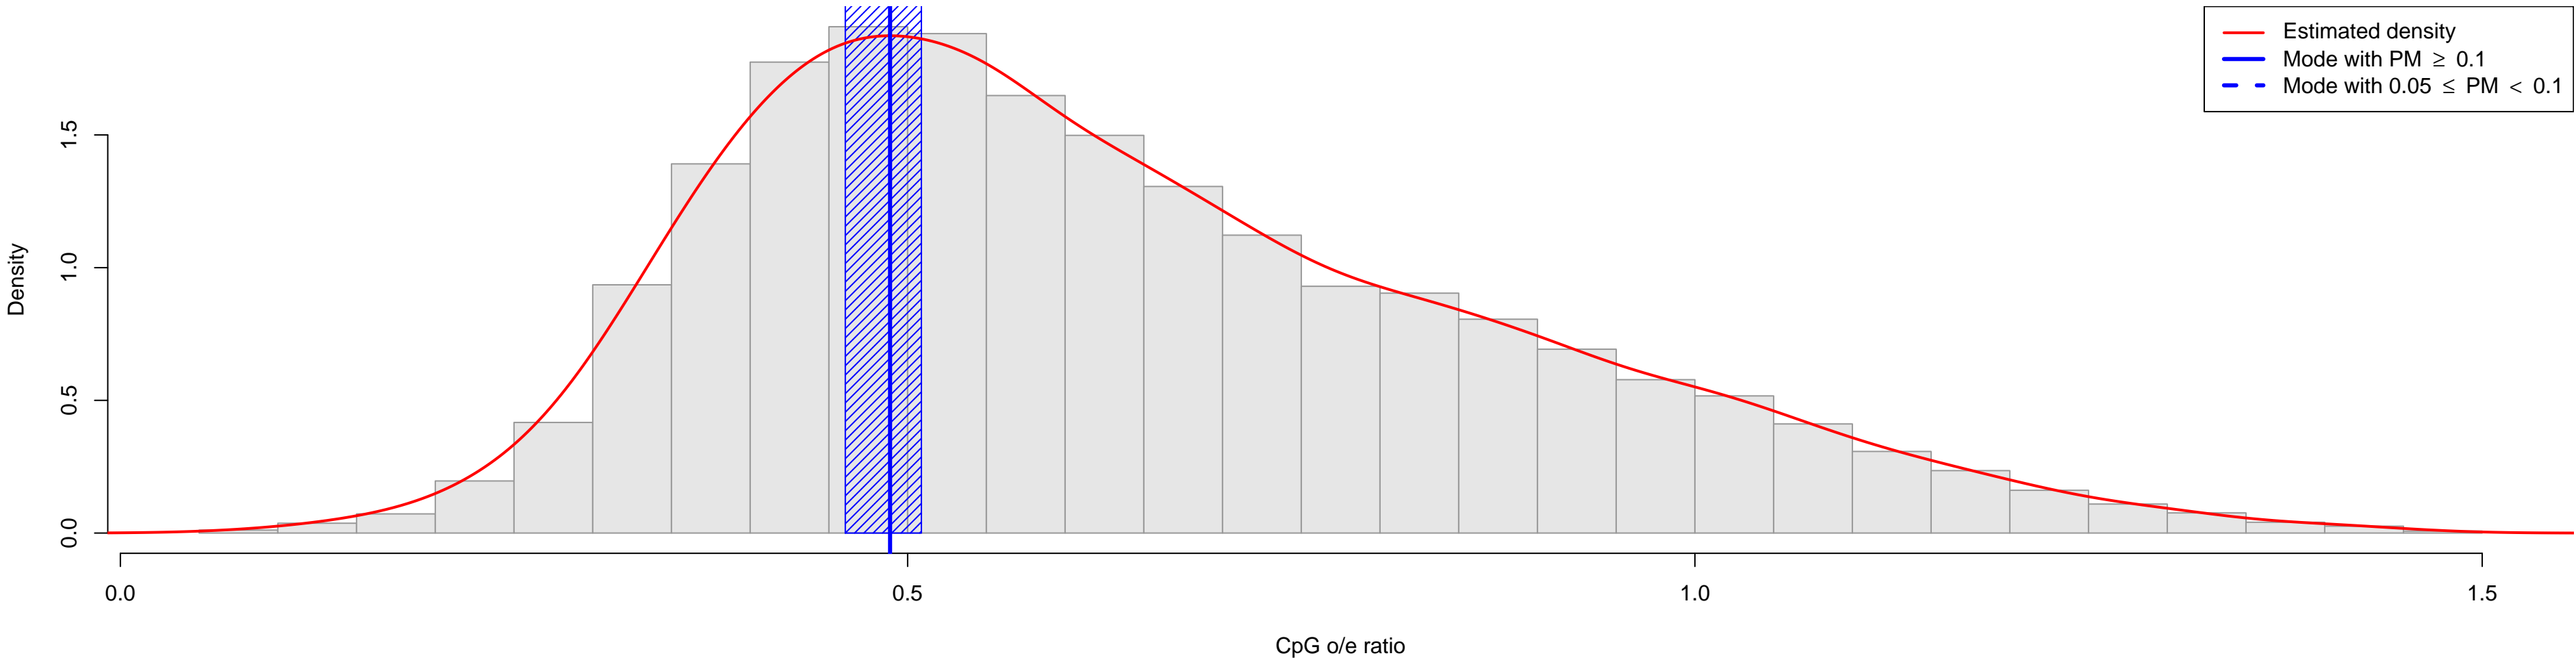

# Citrus\_macrophylla

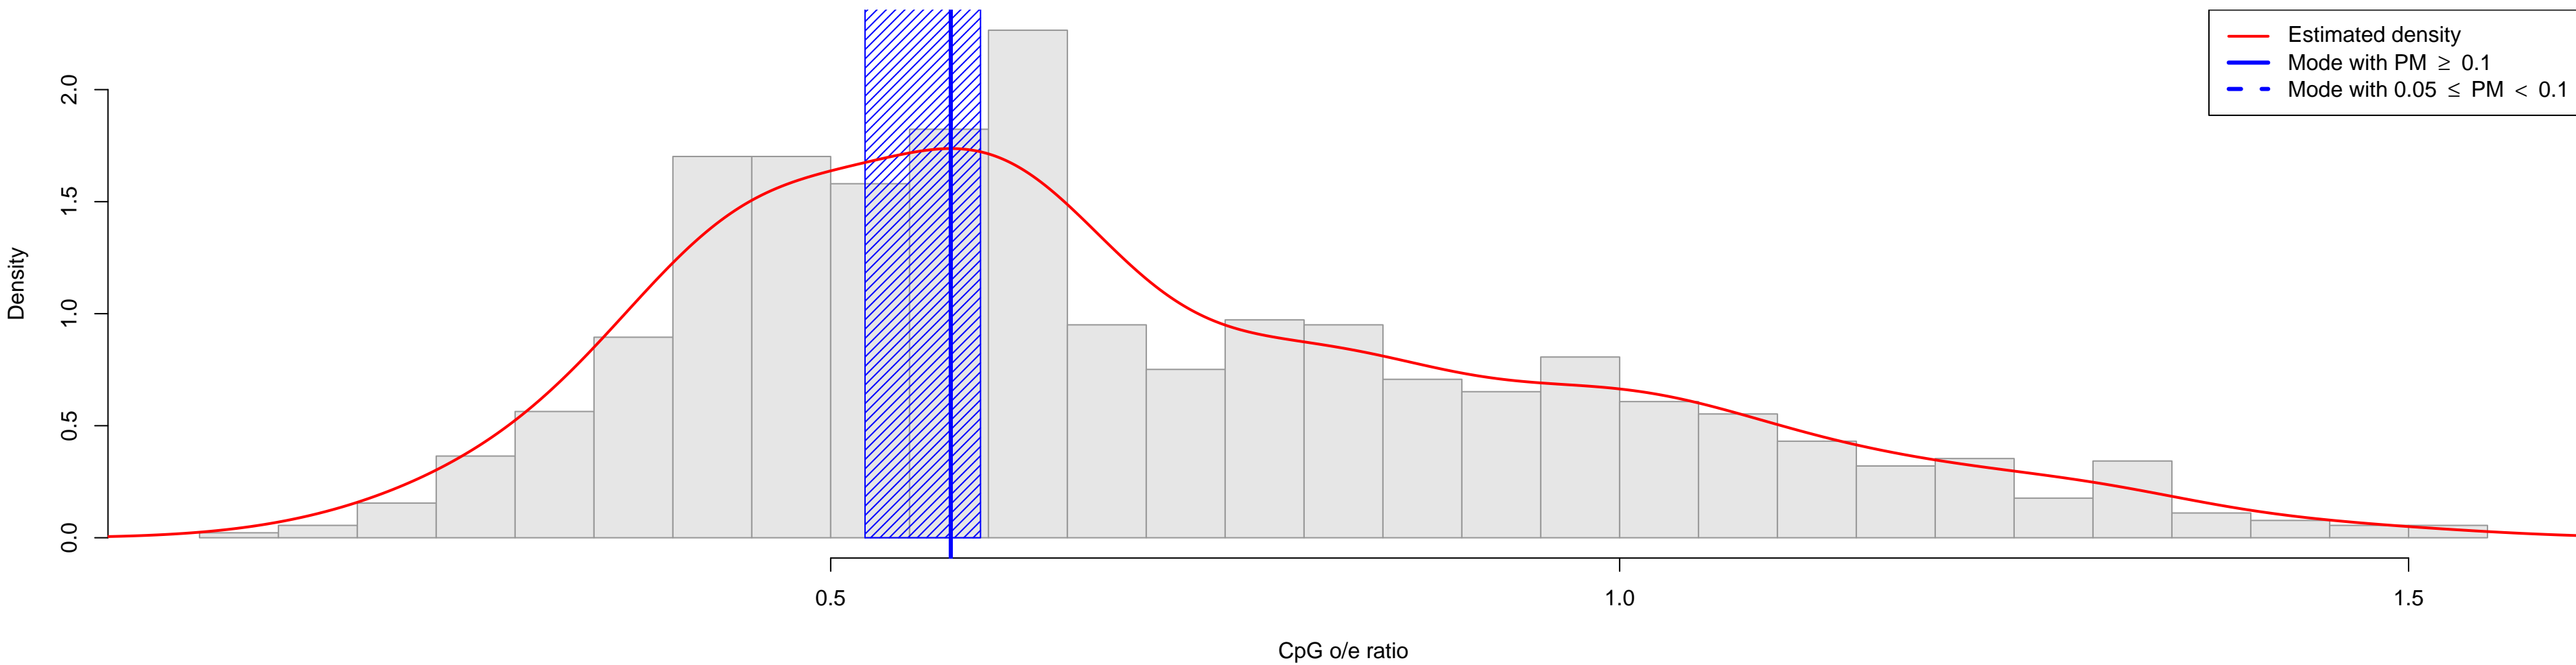

# Citrus\_medica

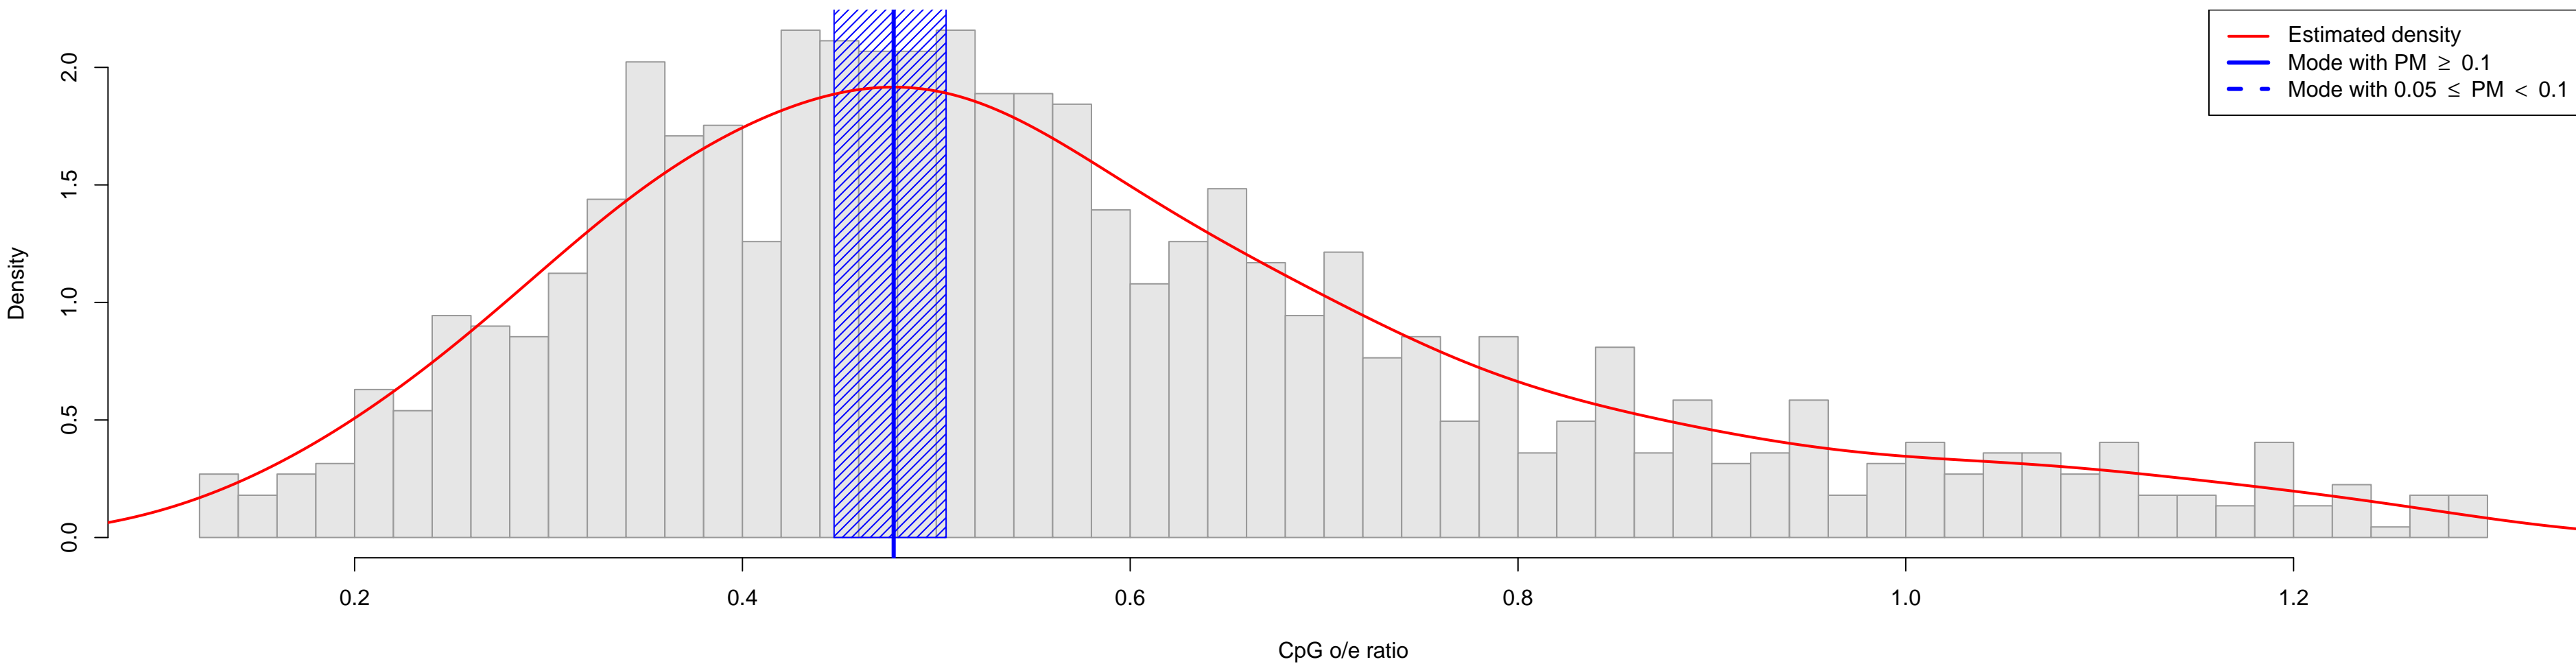

# Citrus\_reszni

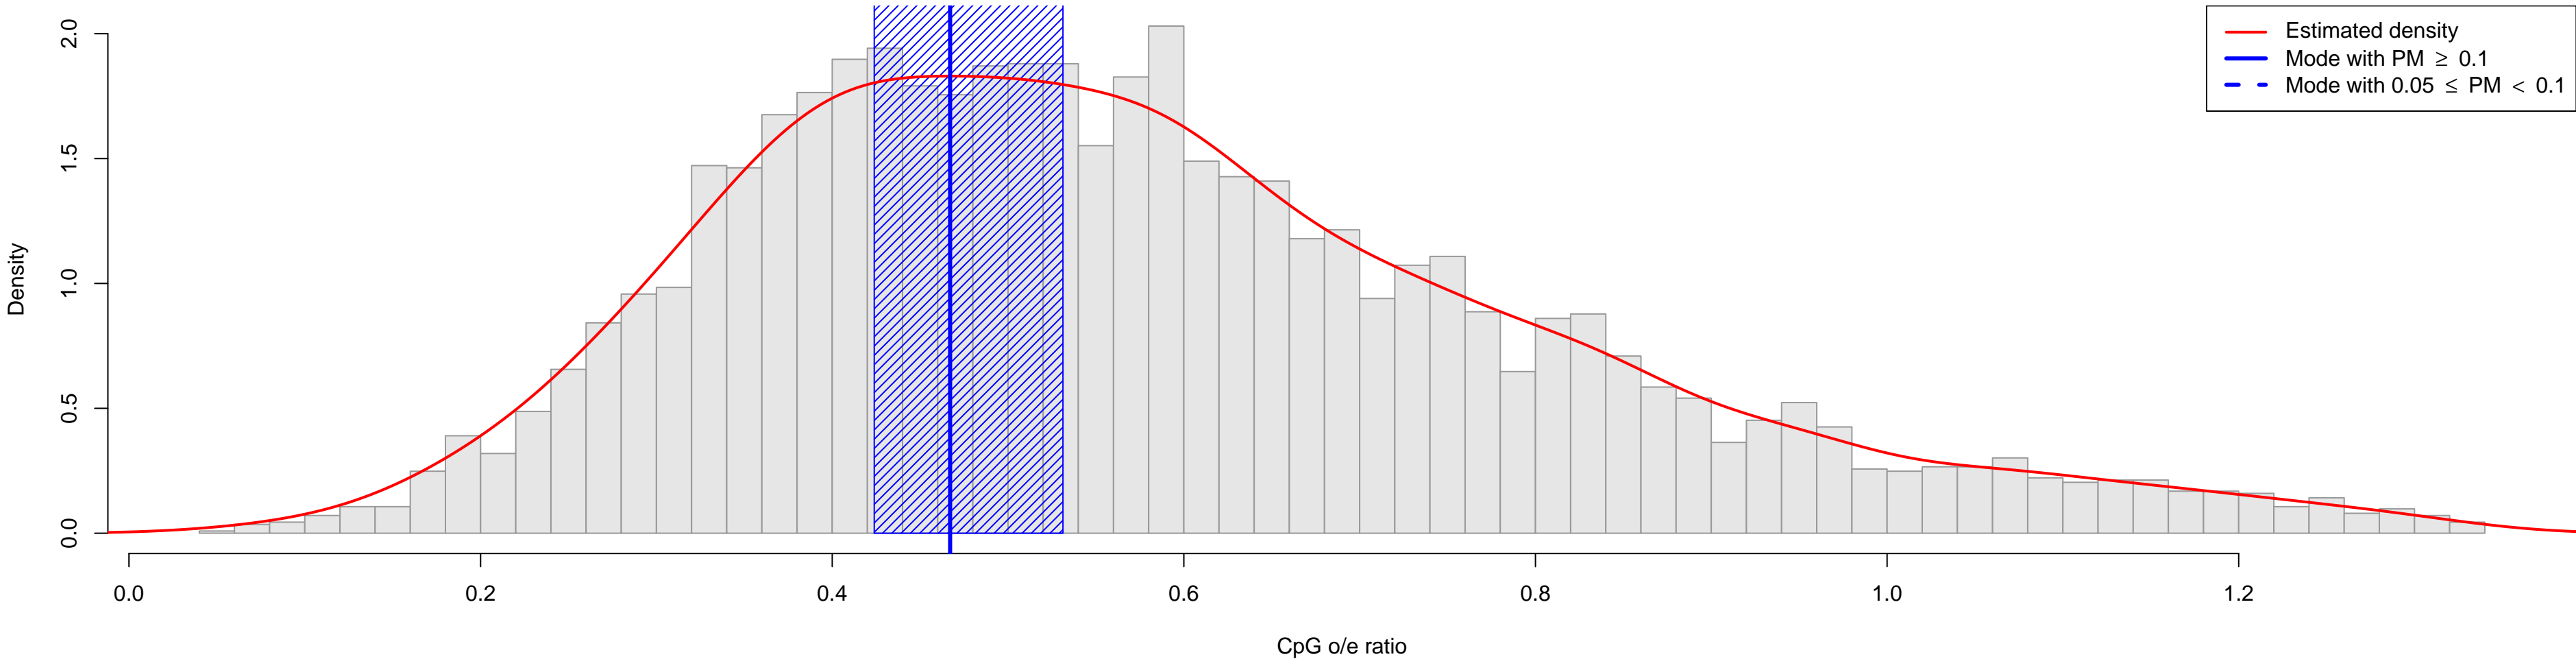

# Citrus\_reticulata

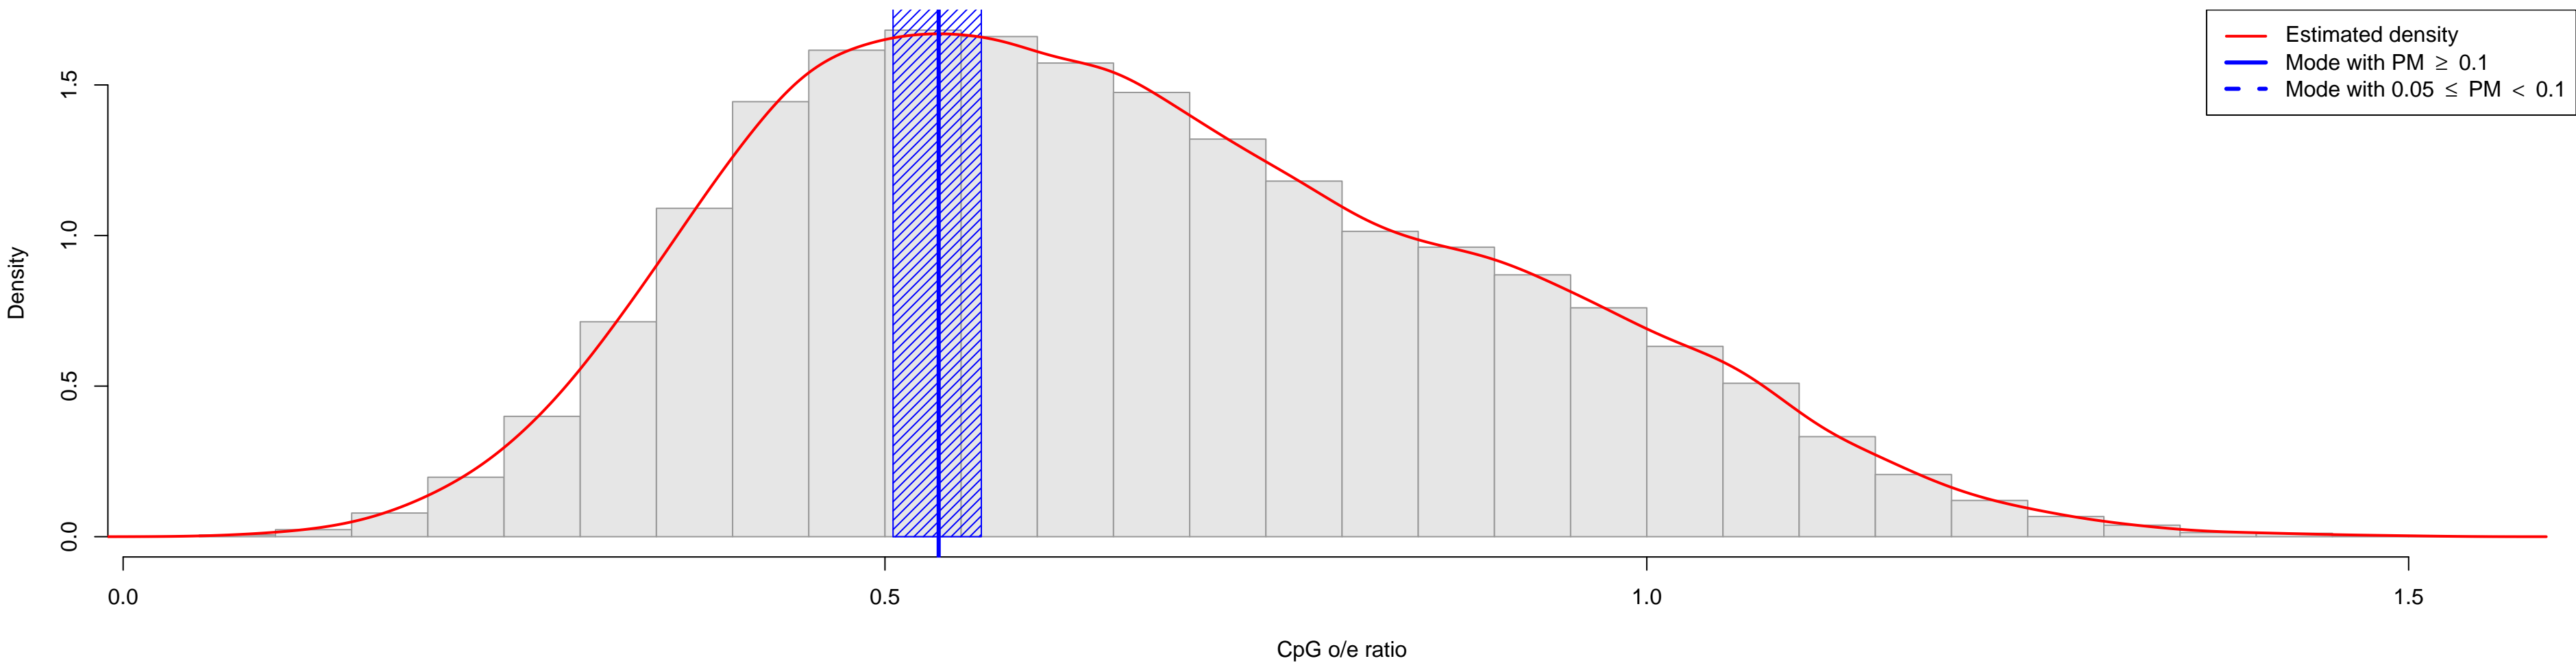



# Citrus\_sinensis

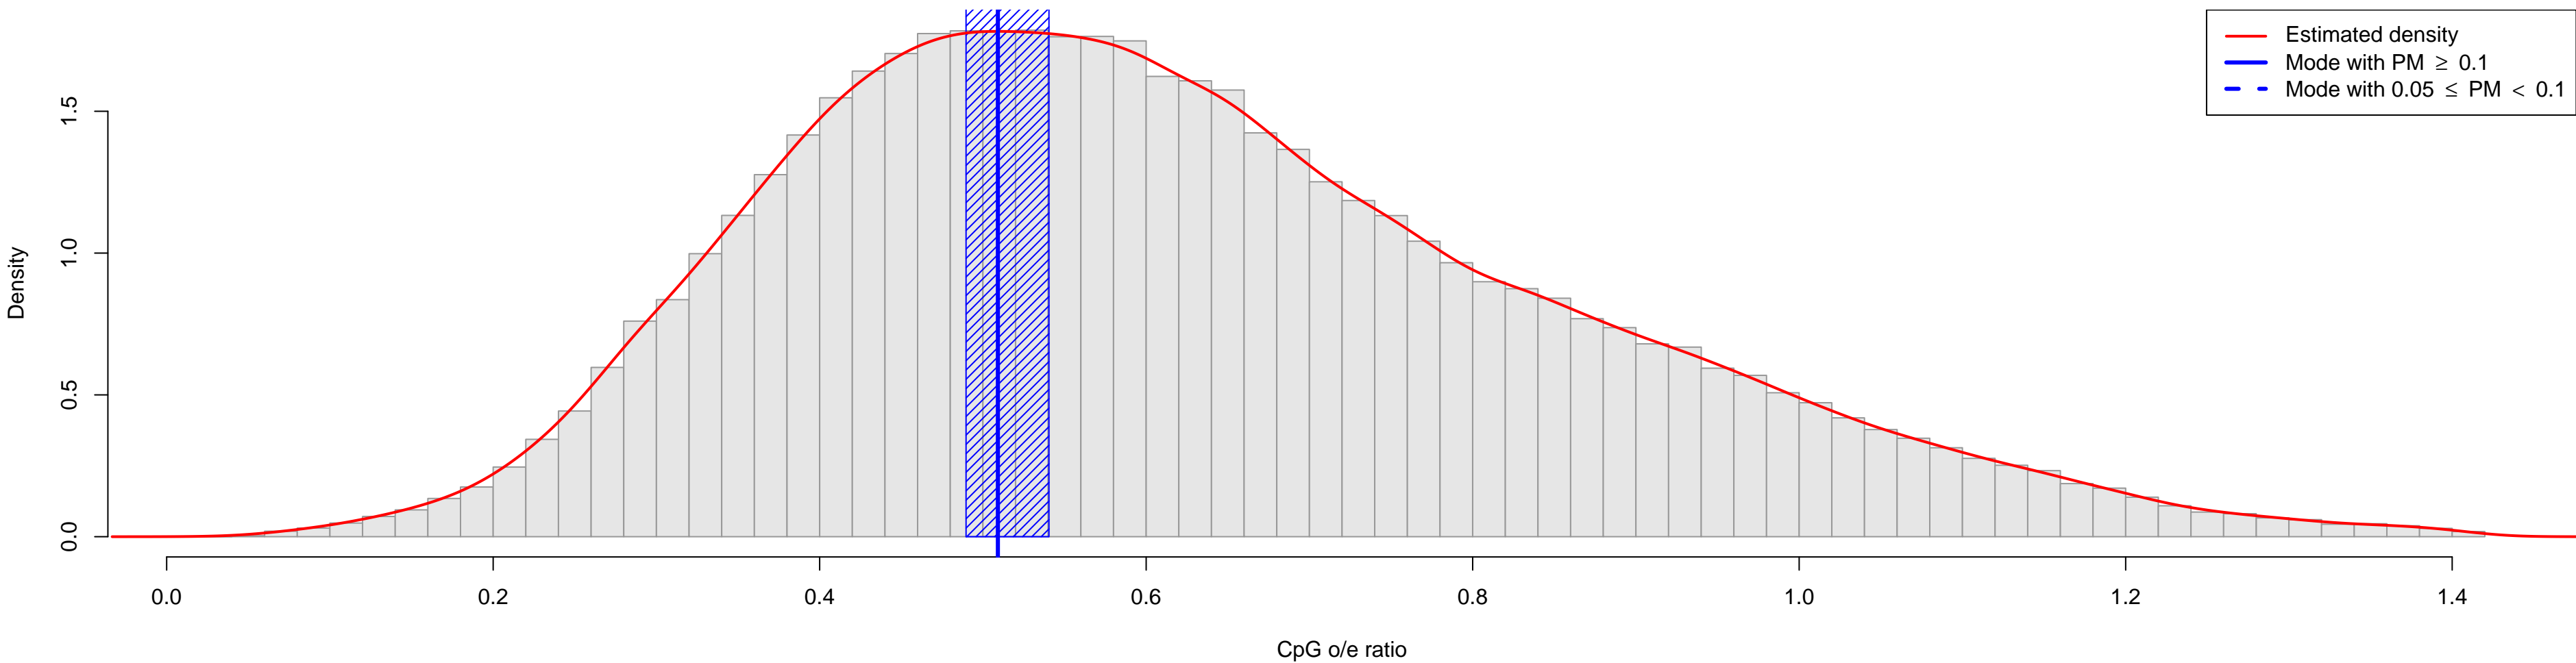

# Citrus\_sunki

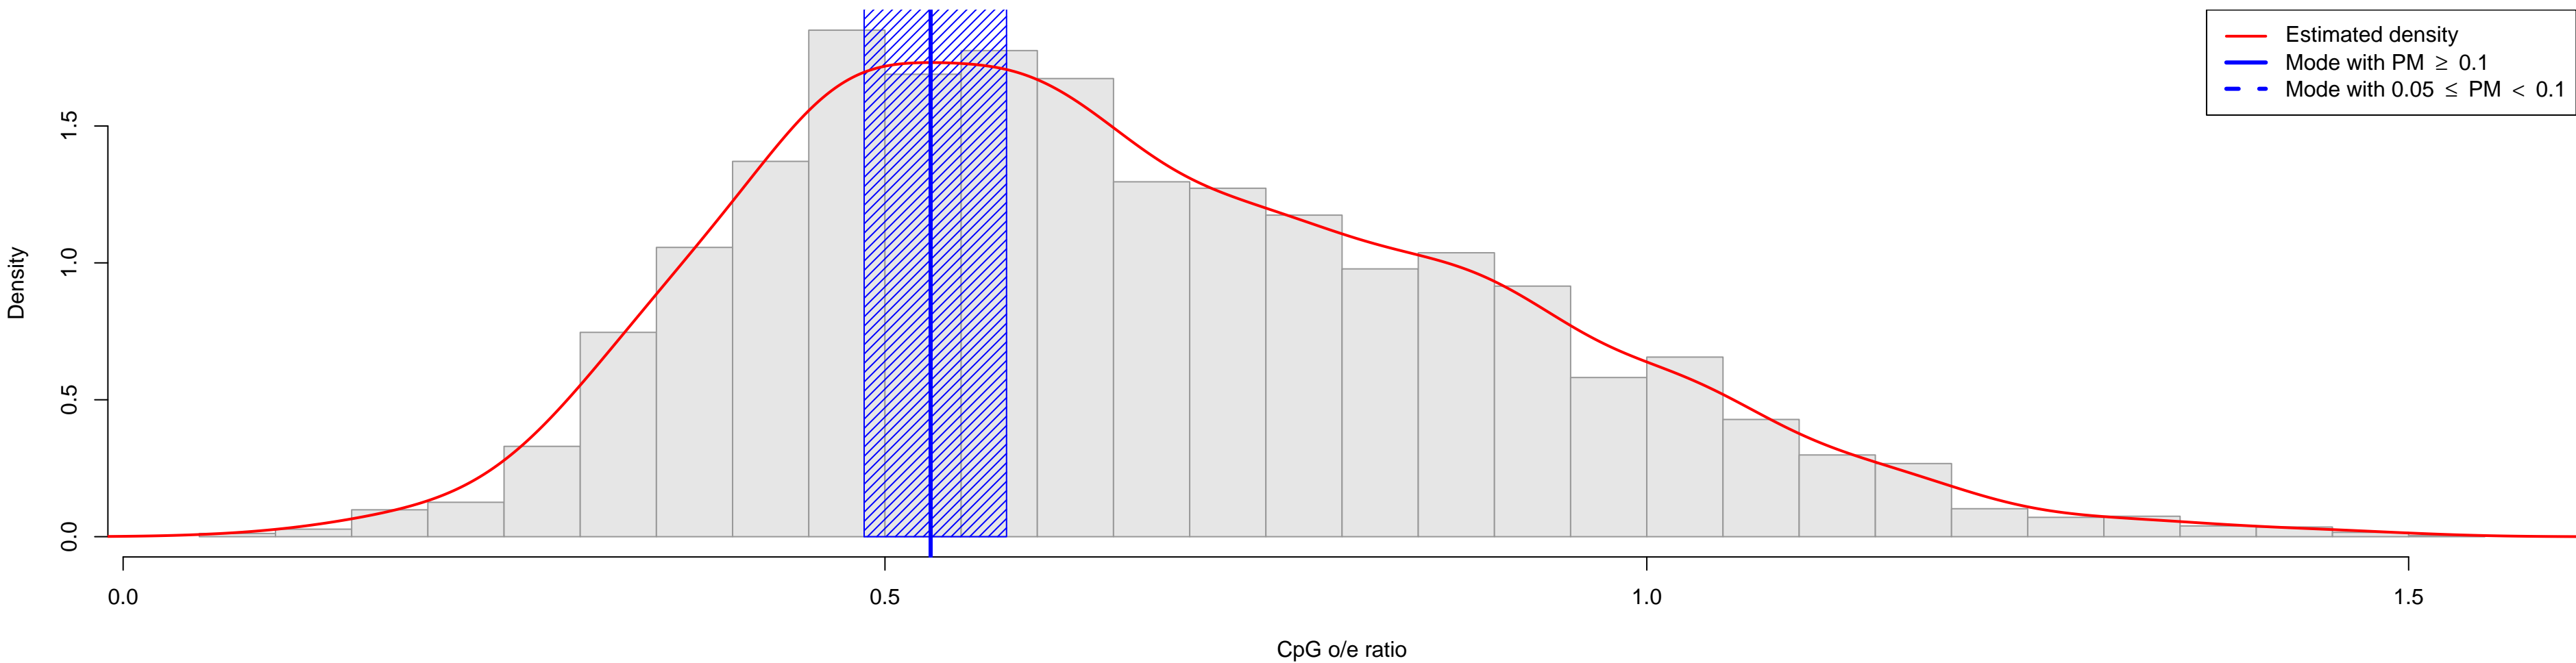

# Citrus\_unshiu

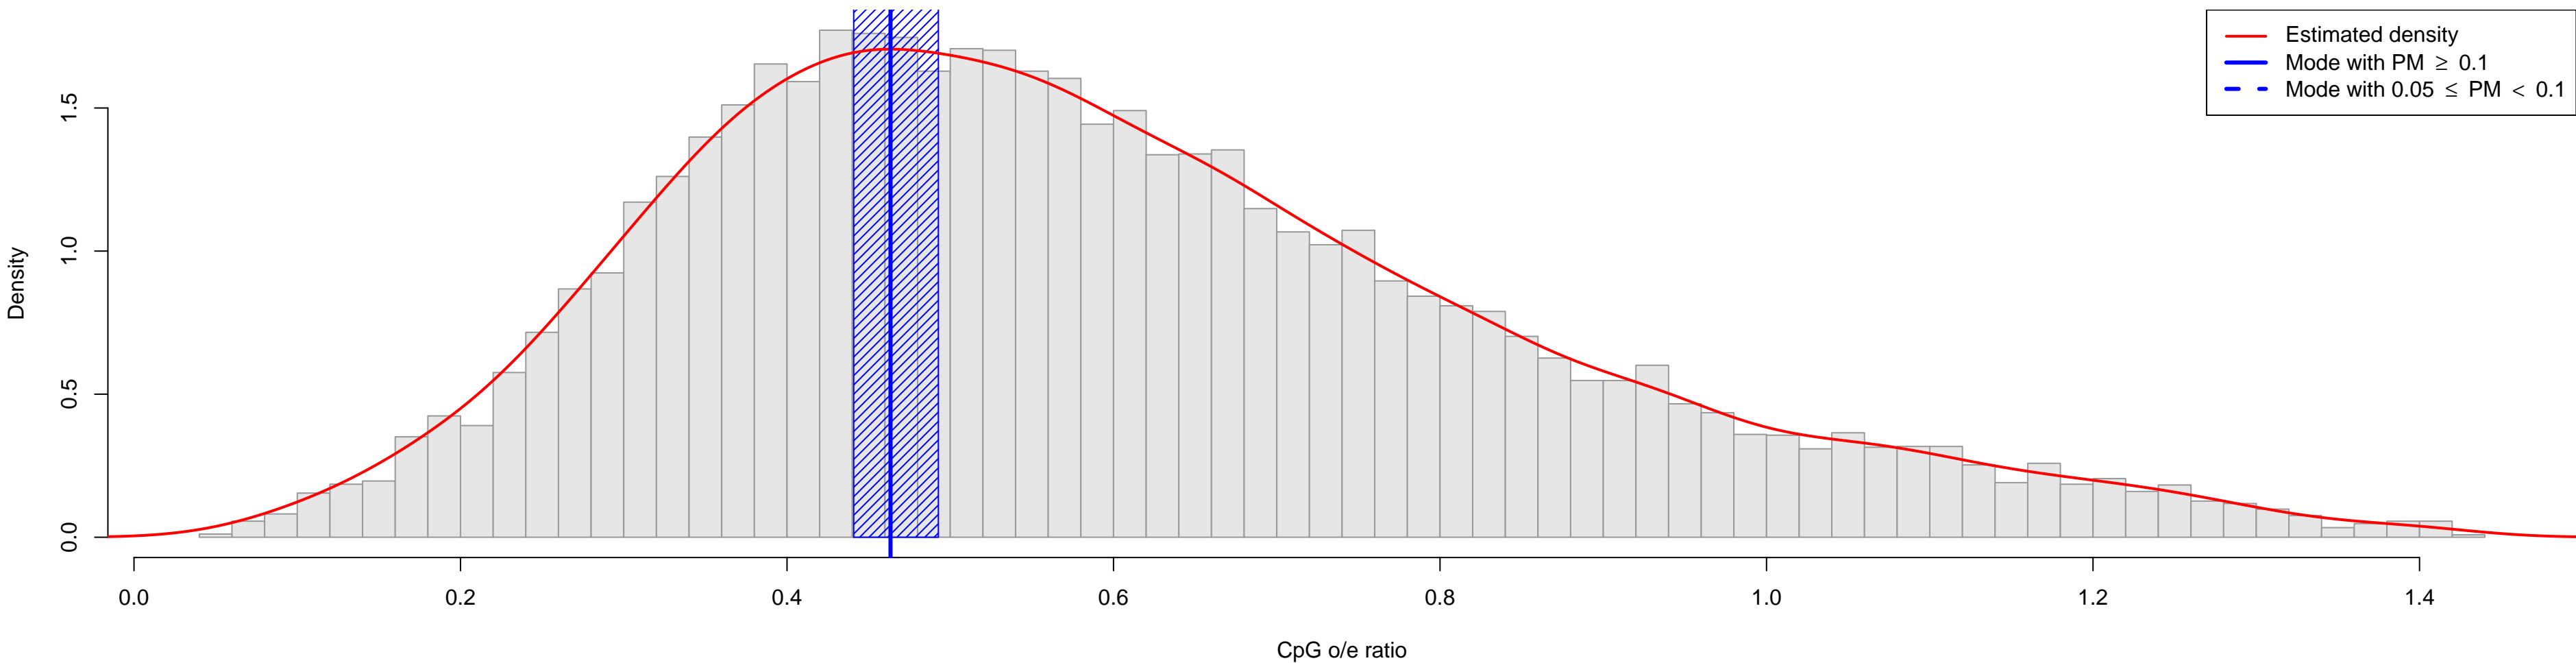

# Claviceps\_purpurea

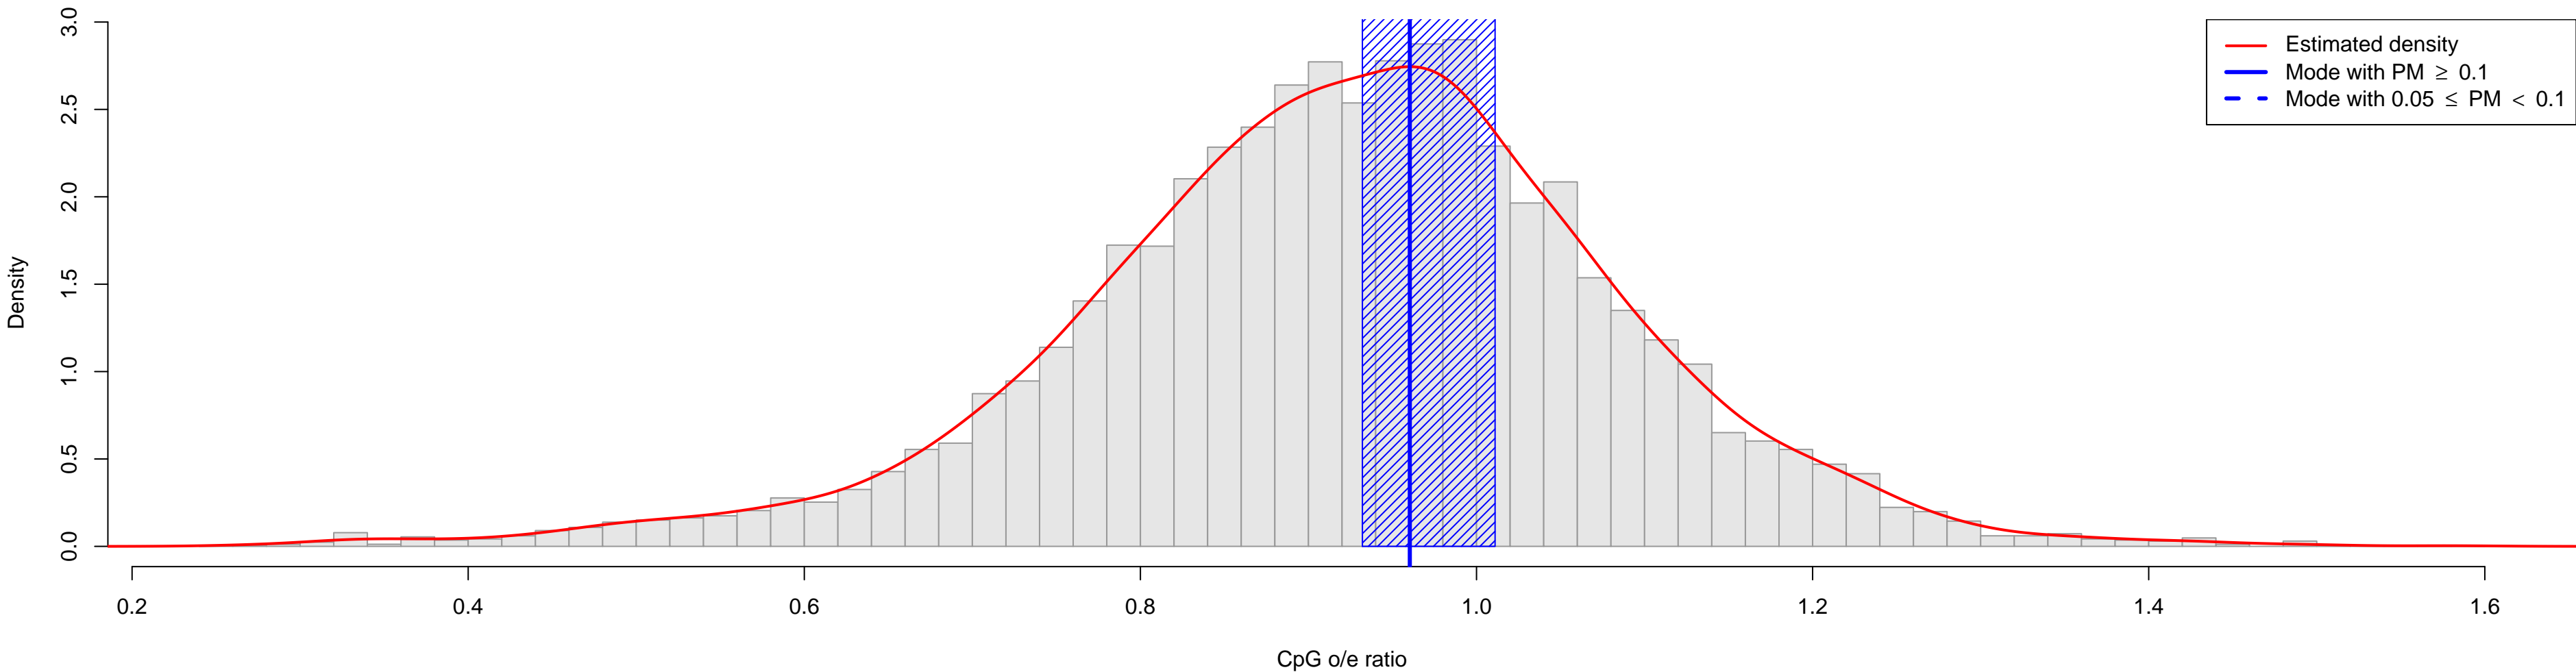

# Clonorchis\_sinensis

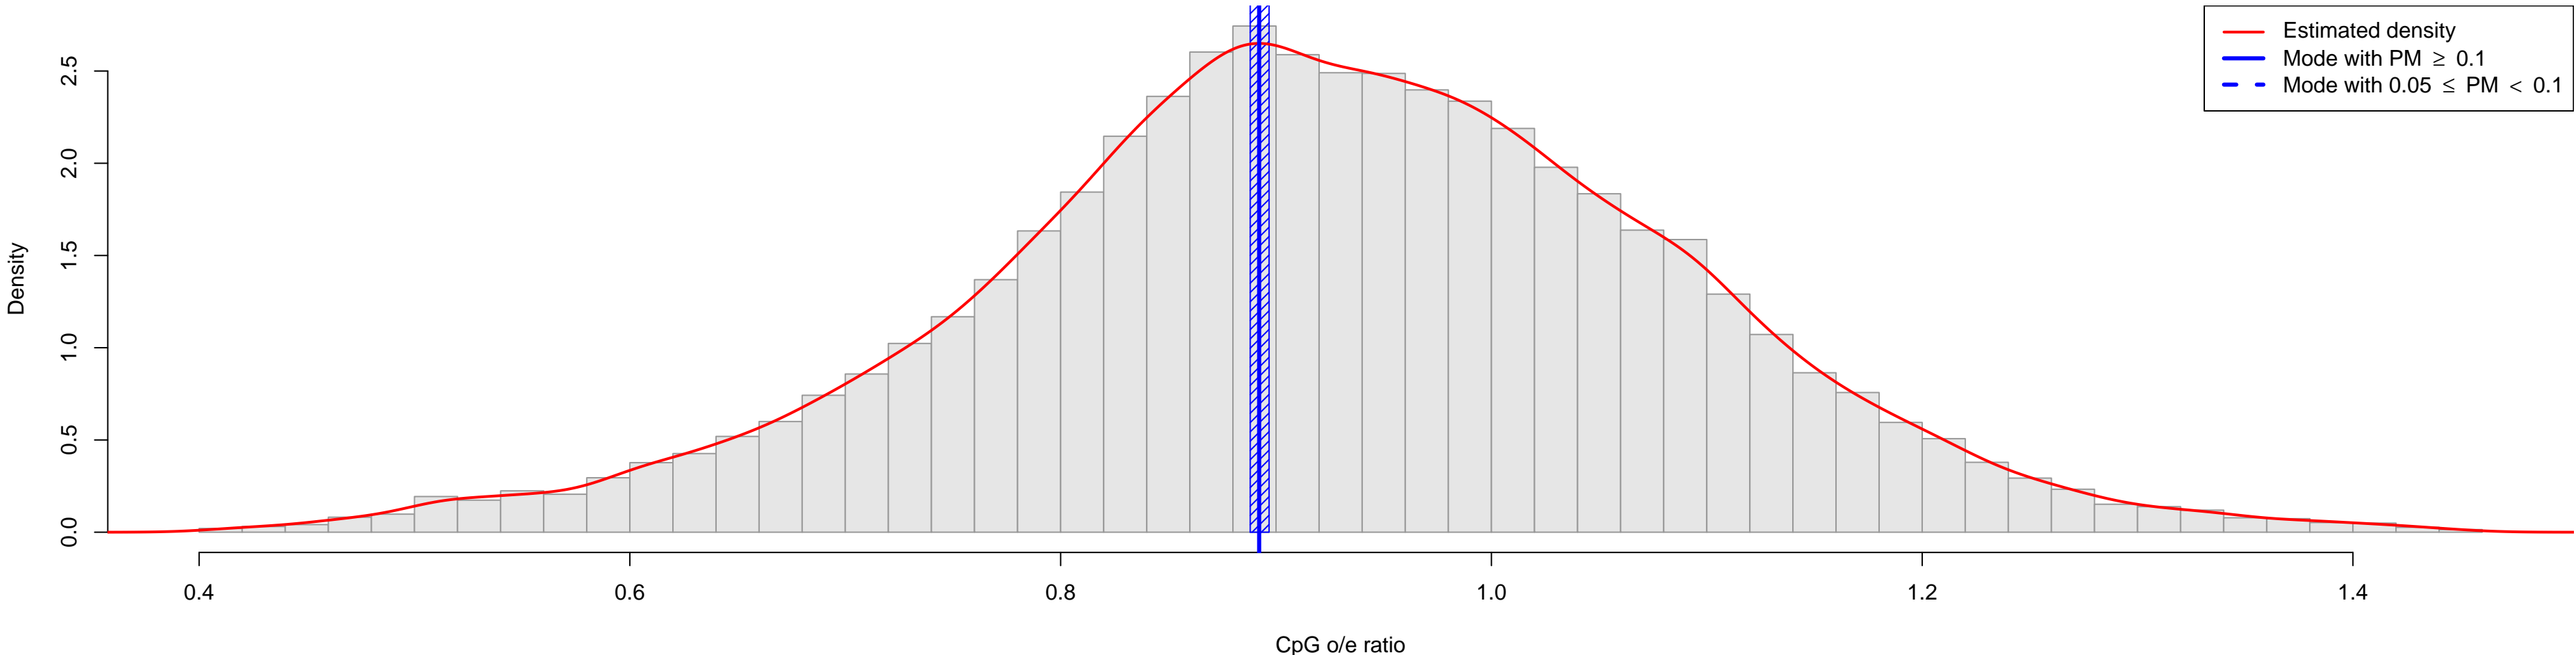

# Clytia\_hemisphaerica

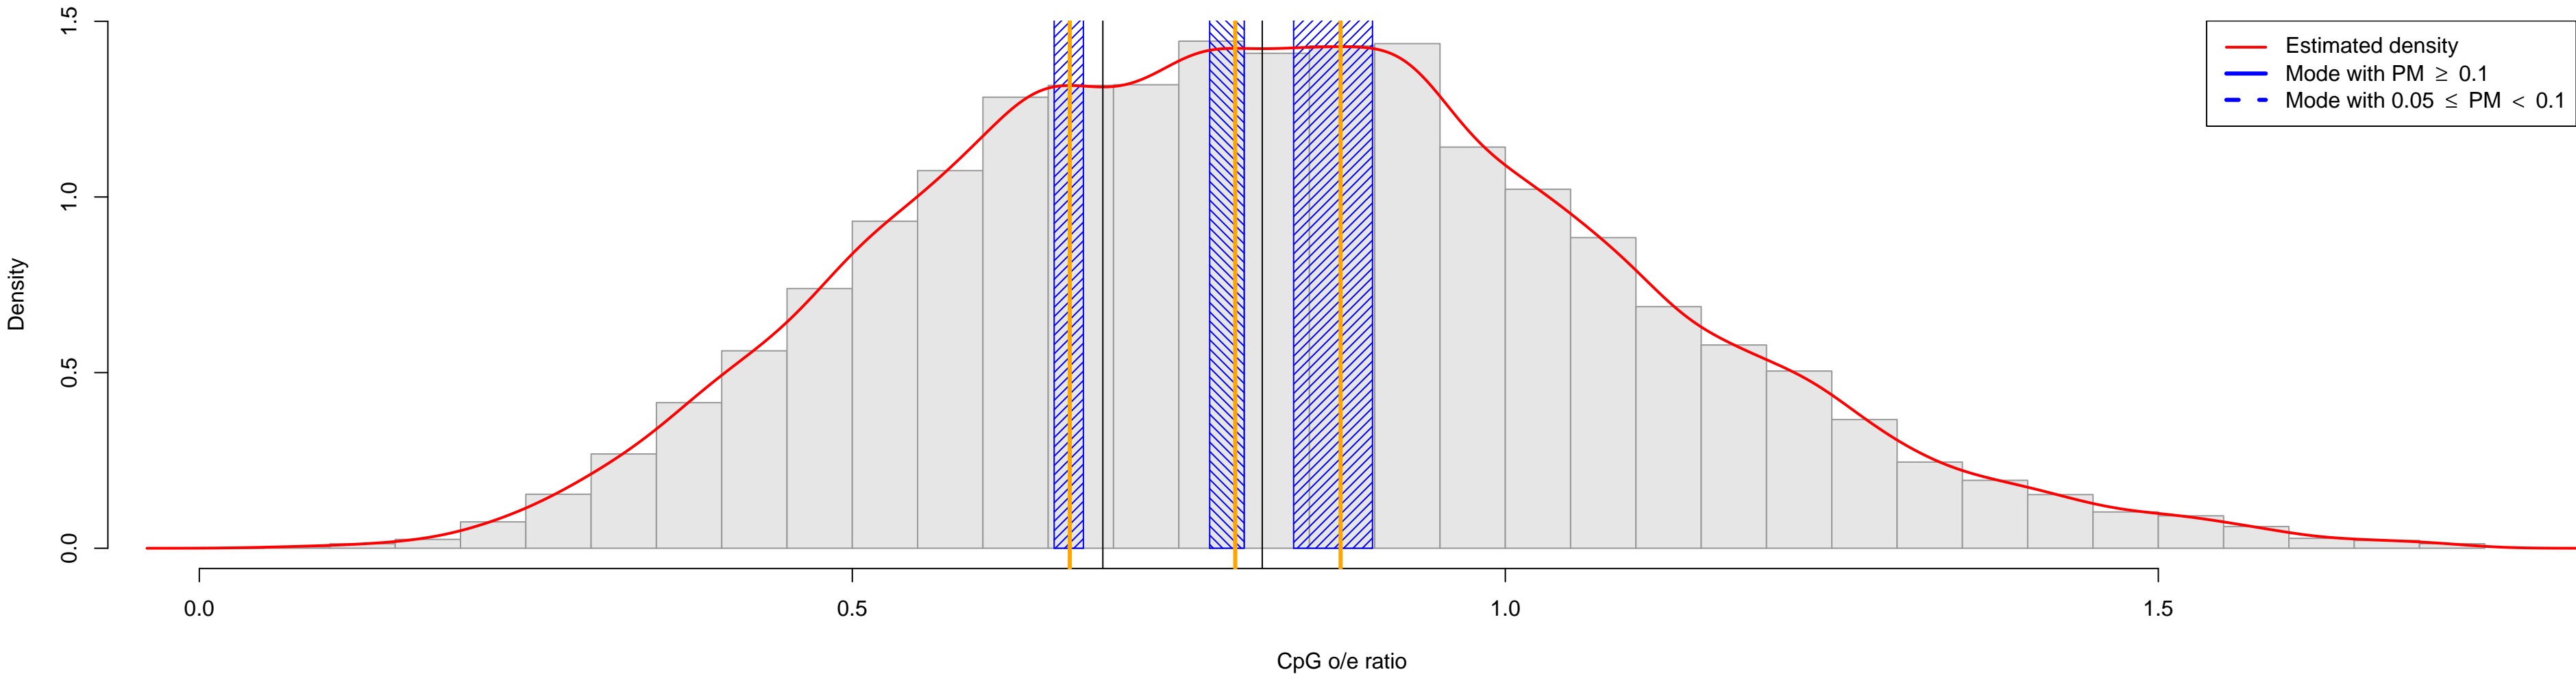

# Coccidioides\_posadasii

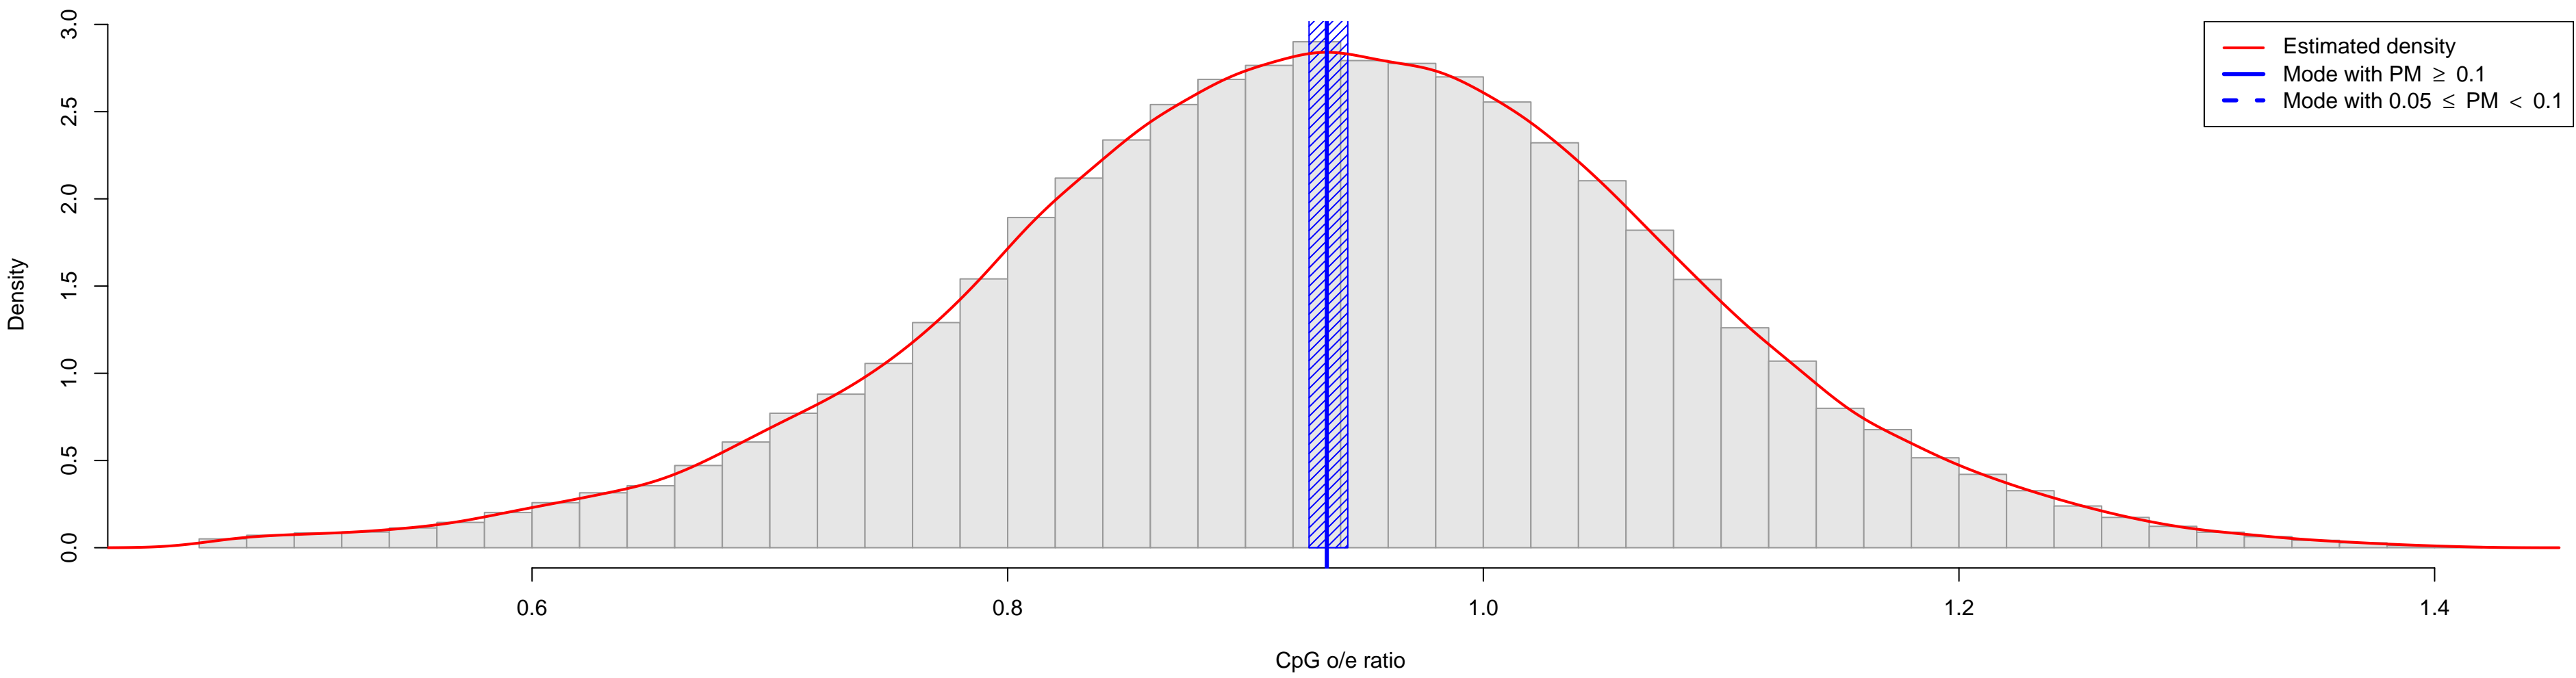

# Cochliomyia\_hominivorax

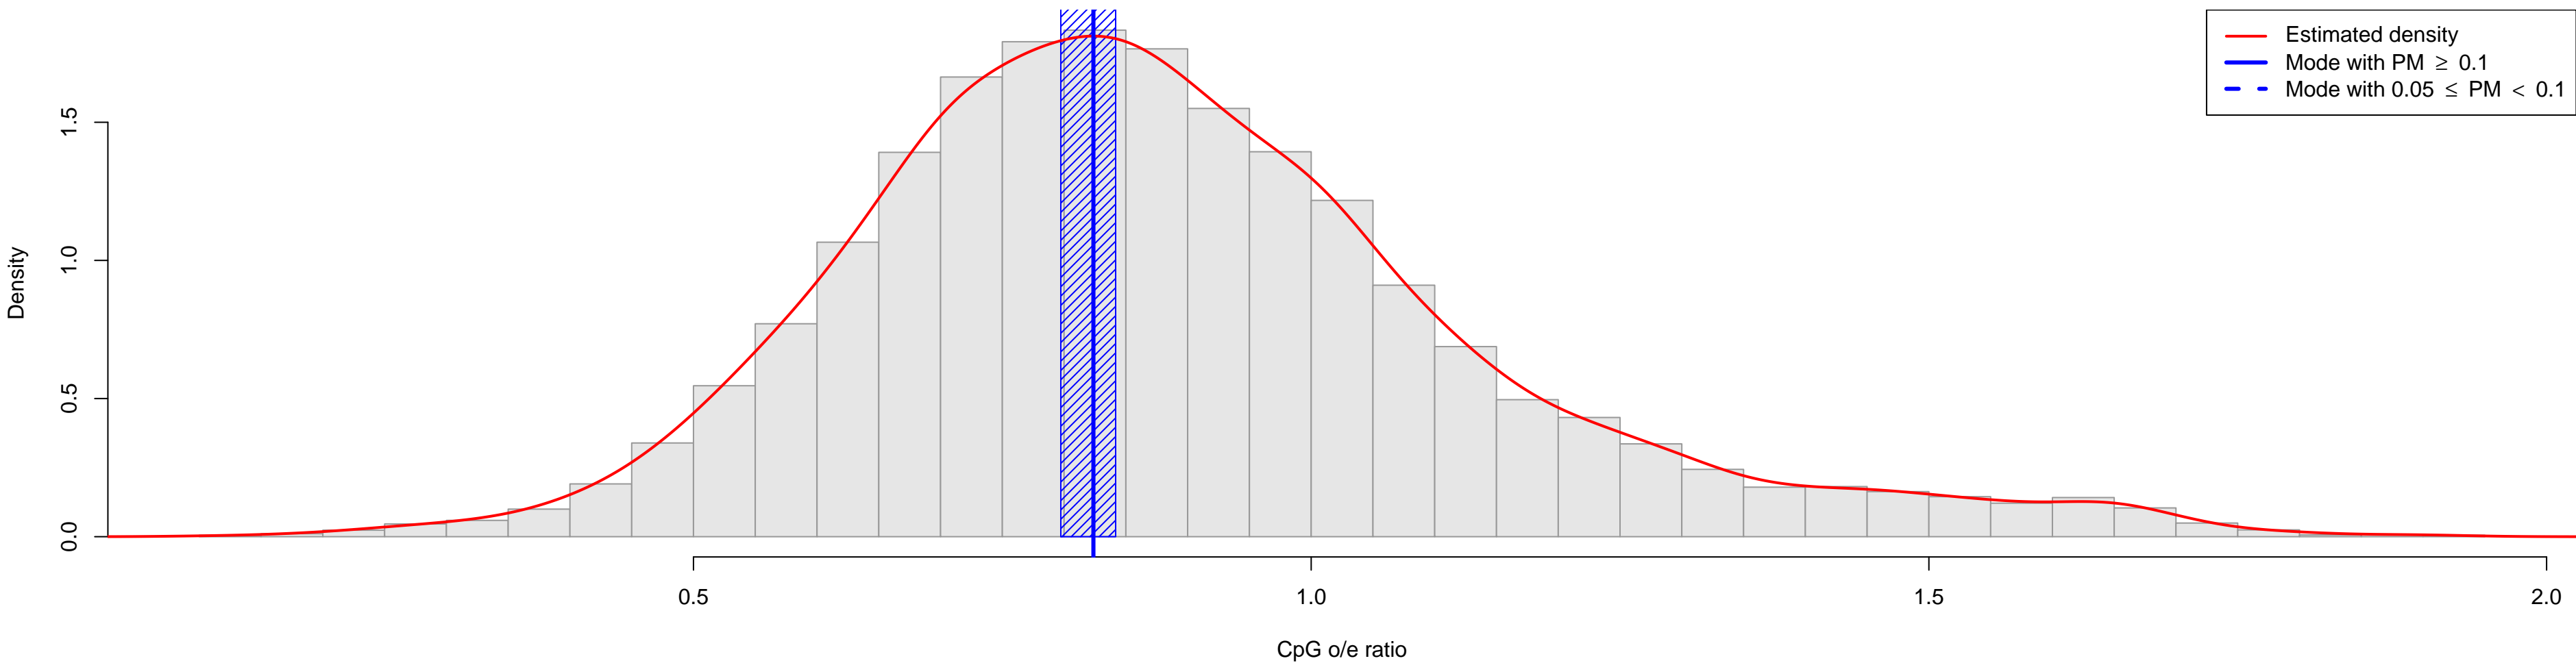



# Coffea\_canephora

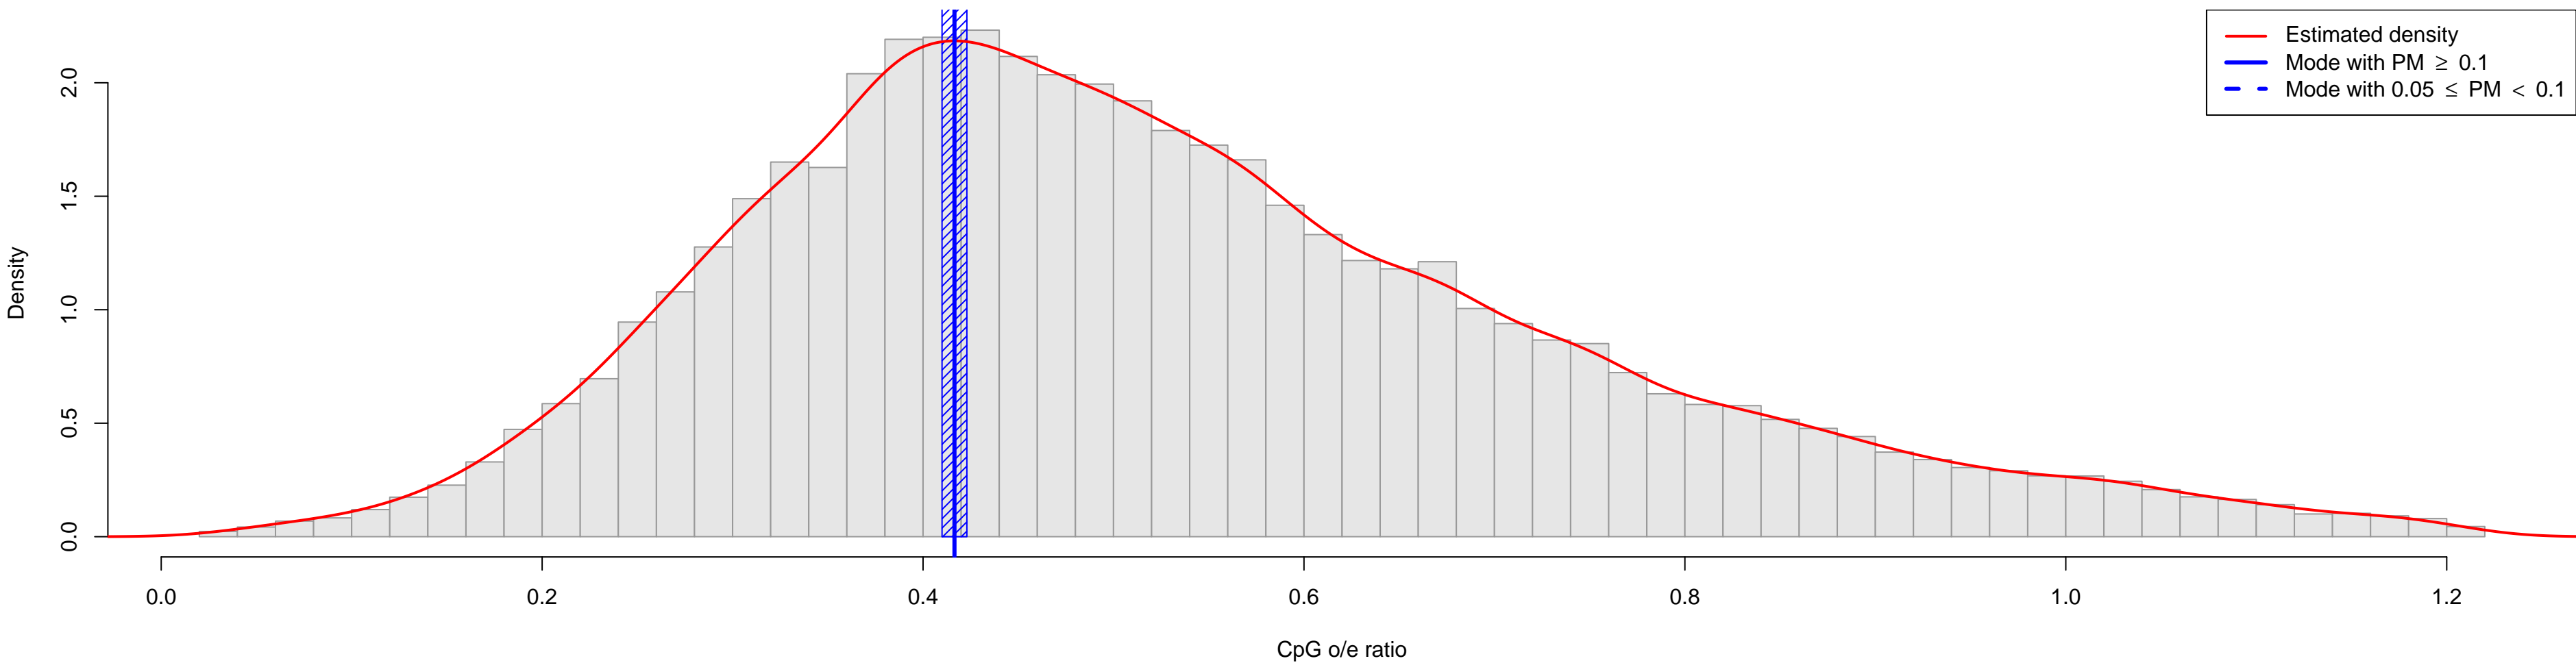

### Coleochaete\_scutata

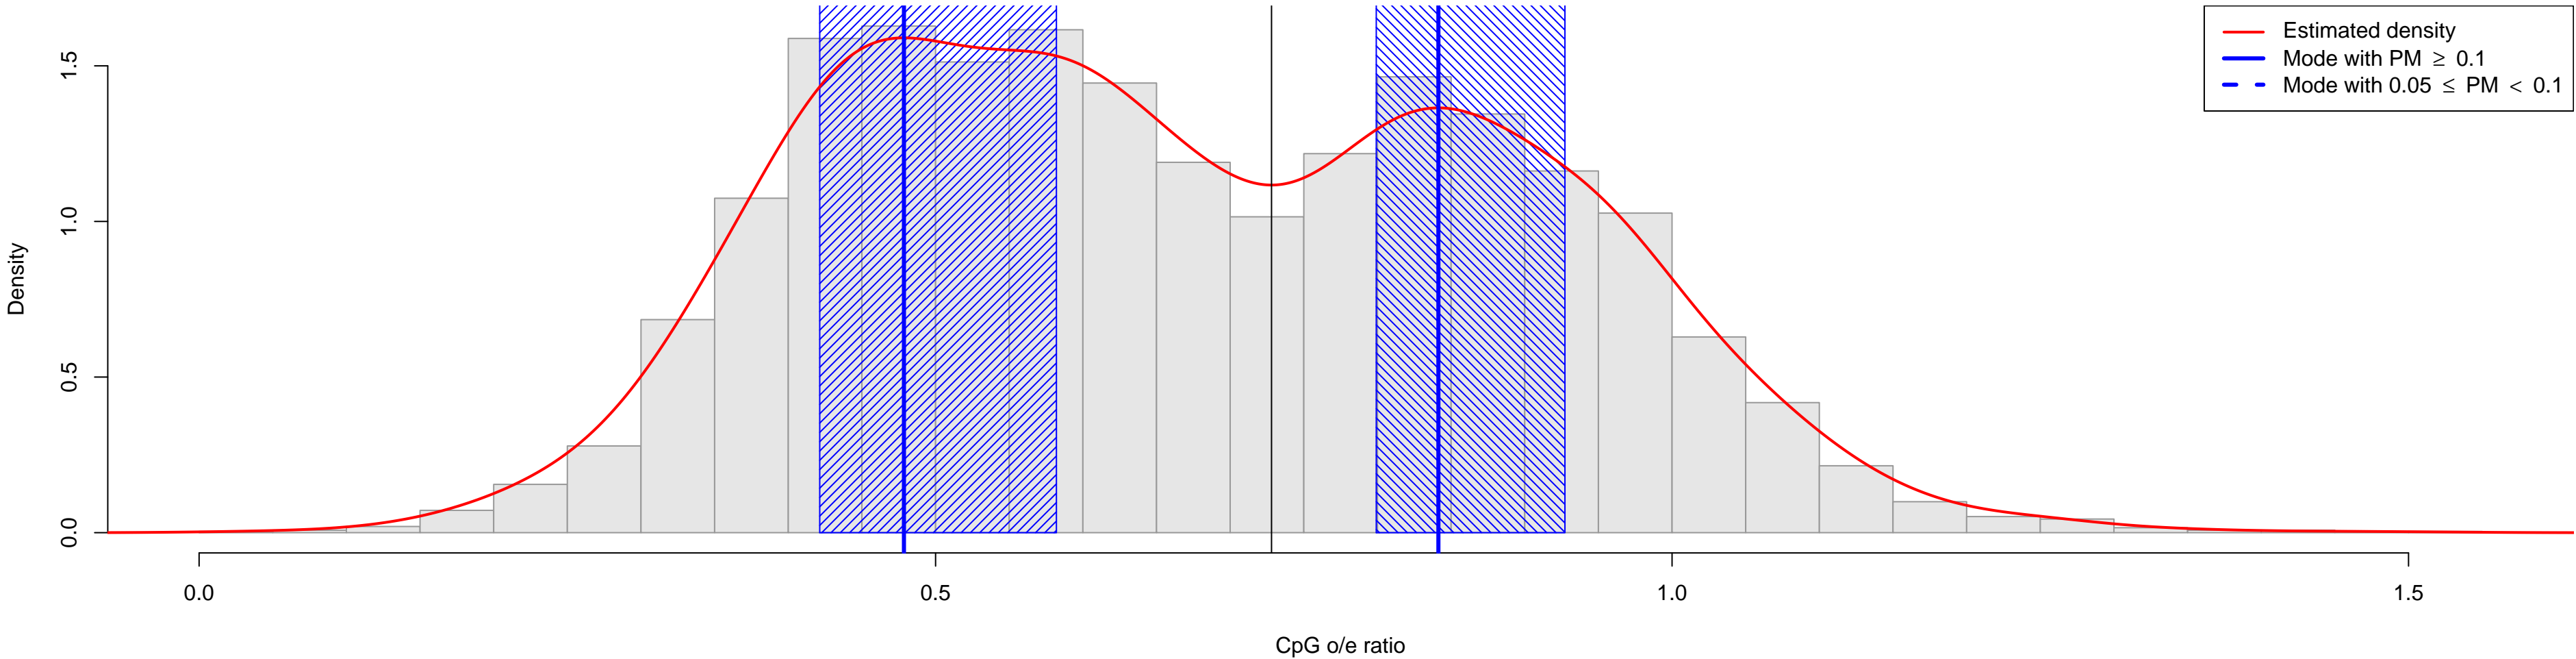

# Coprinopsis\_cinerea

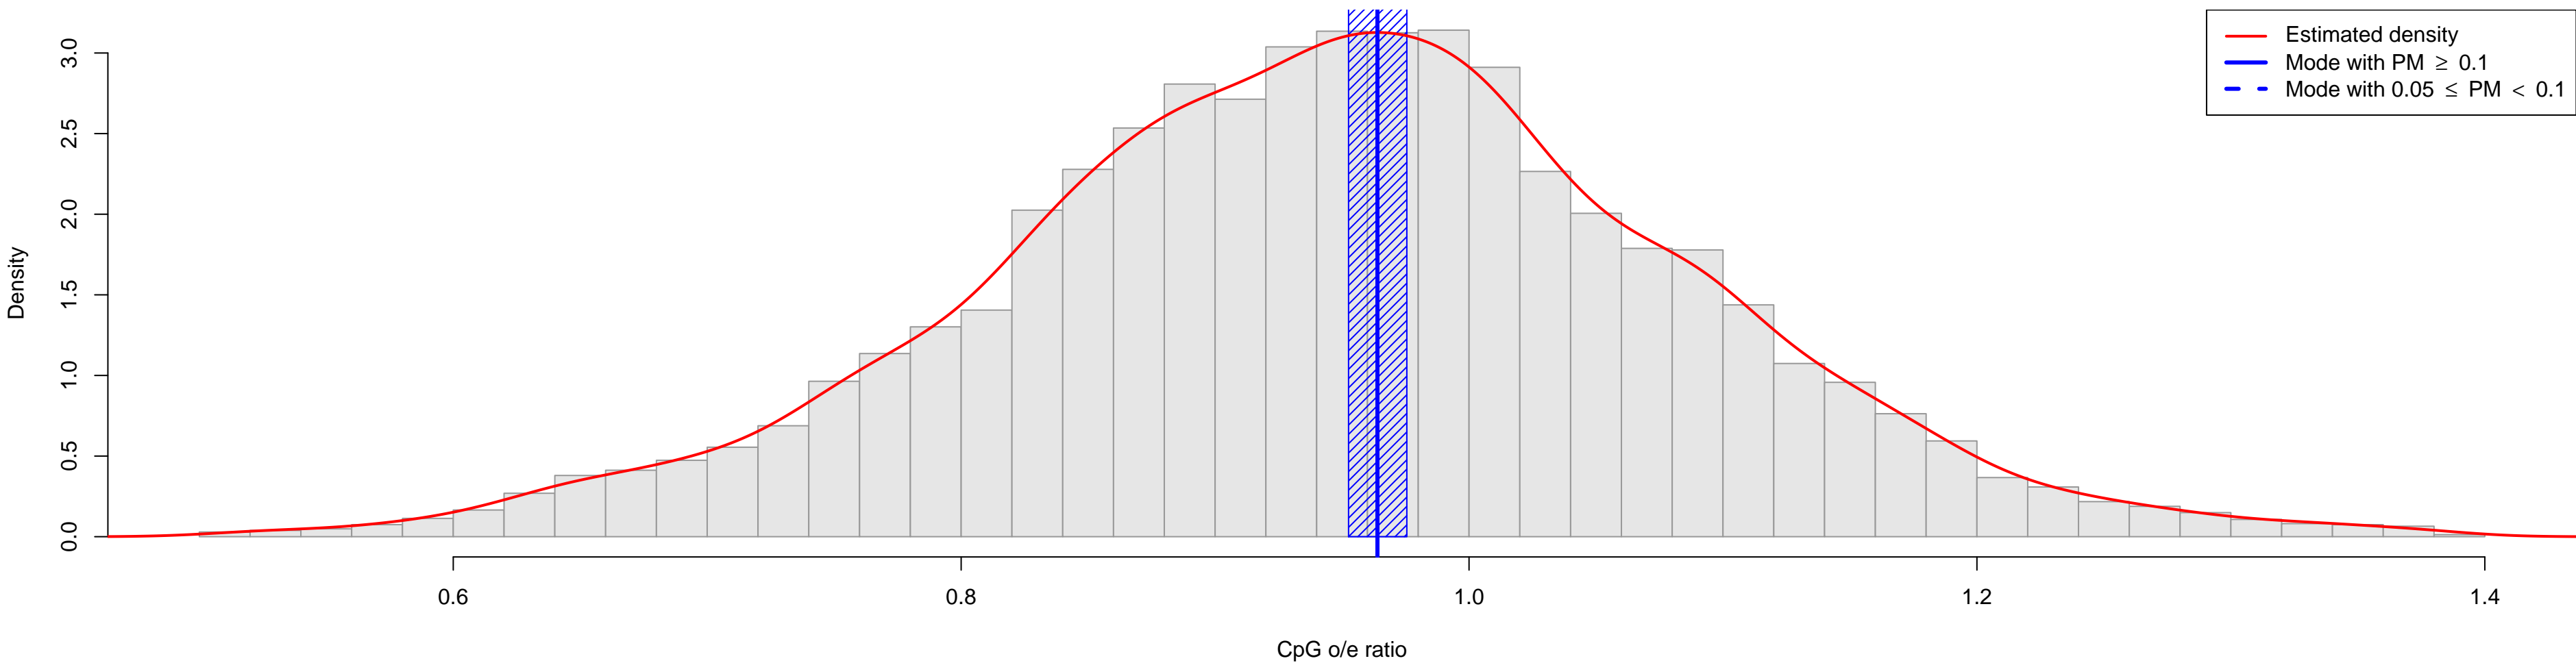

### Coptotermes\_formosanus

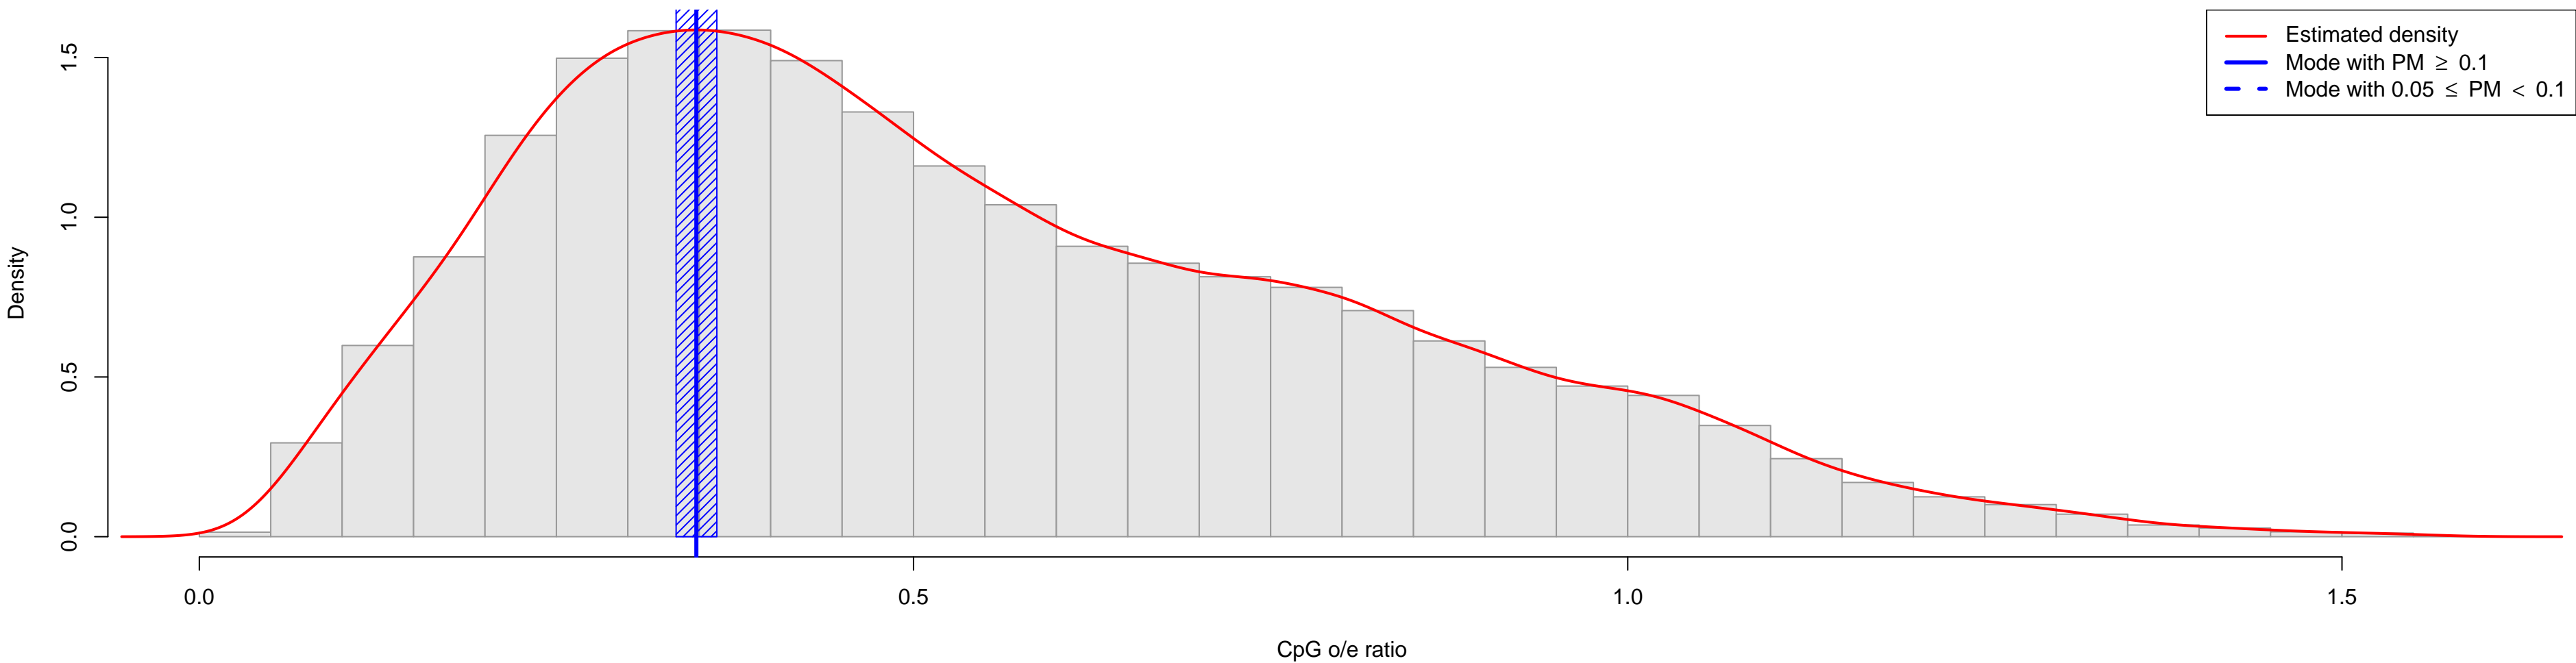

### Cordyceps\_militaris

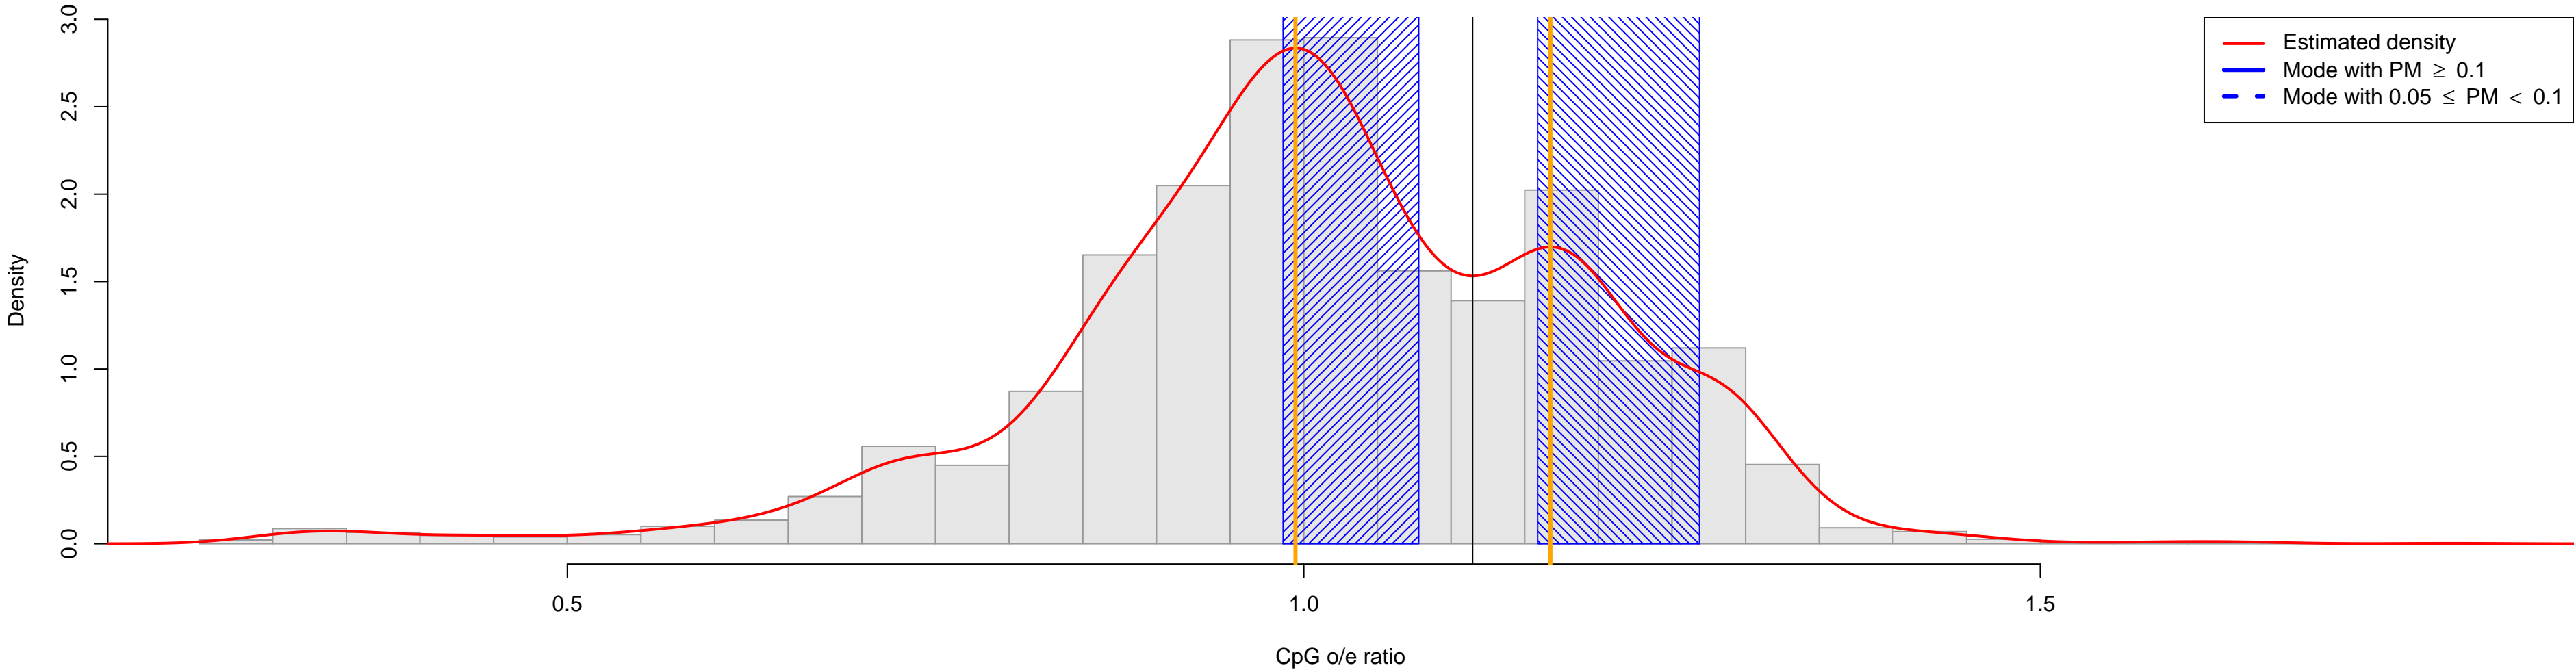

# Coregonus\_clupeaformis

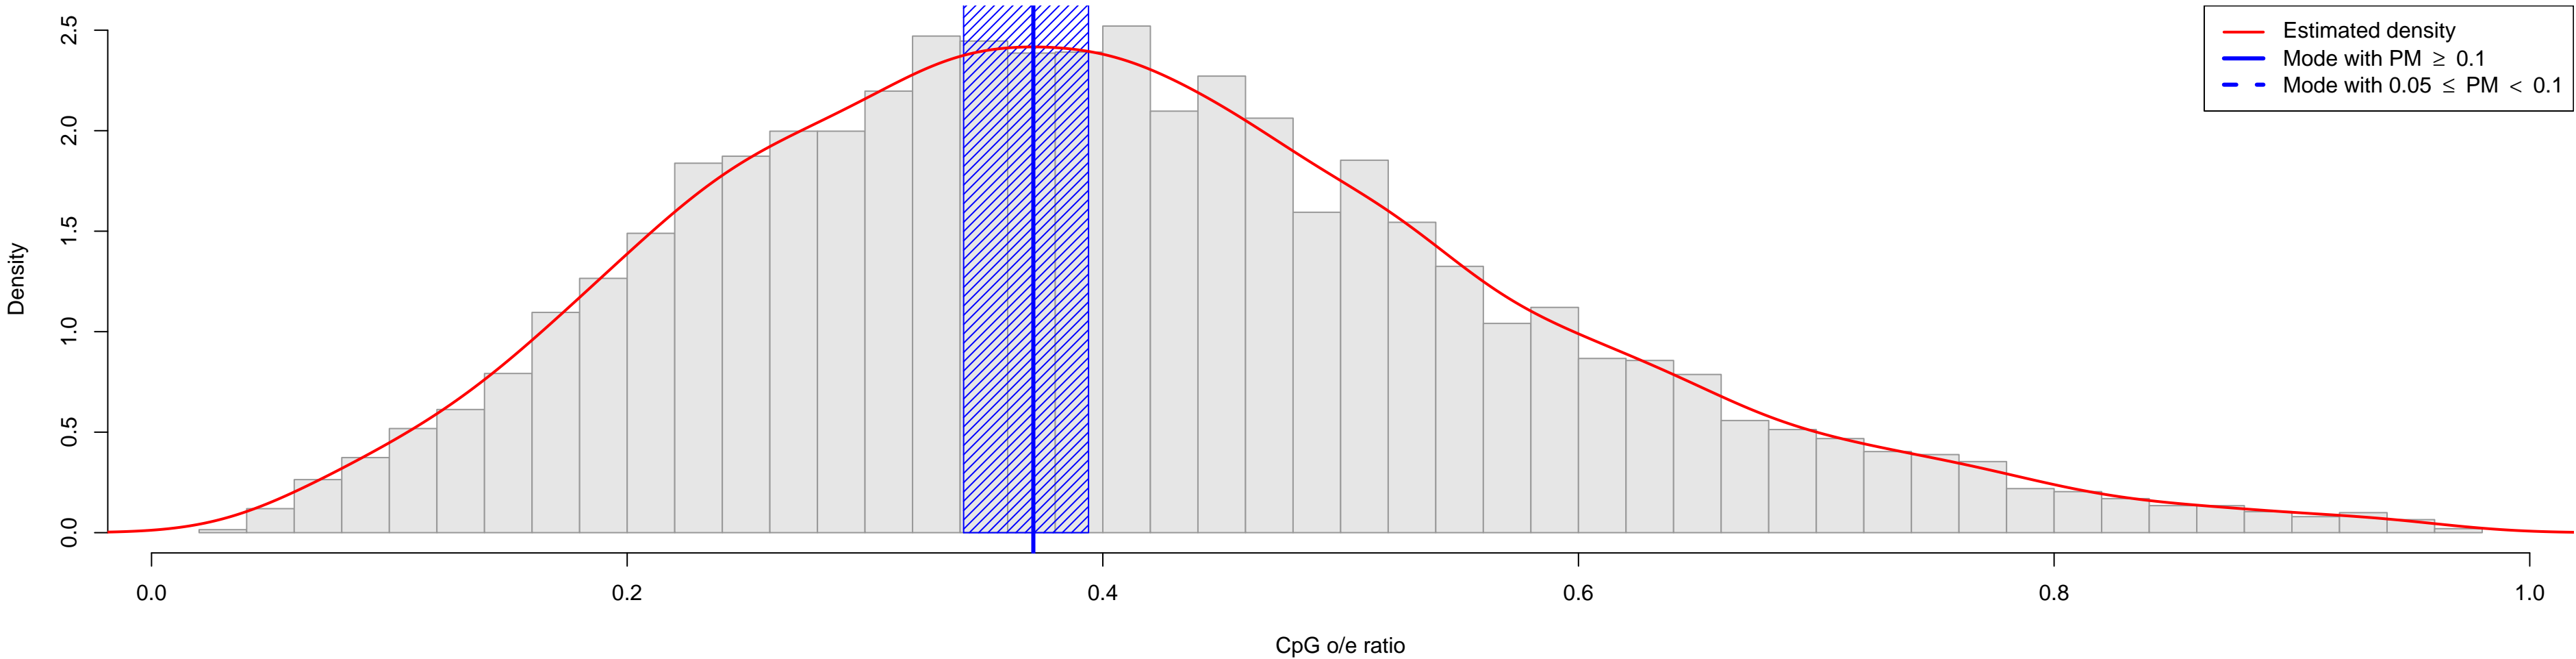

# Crassostrea\_gigas

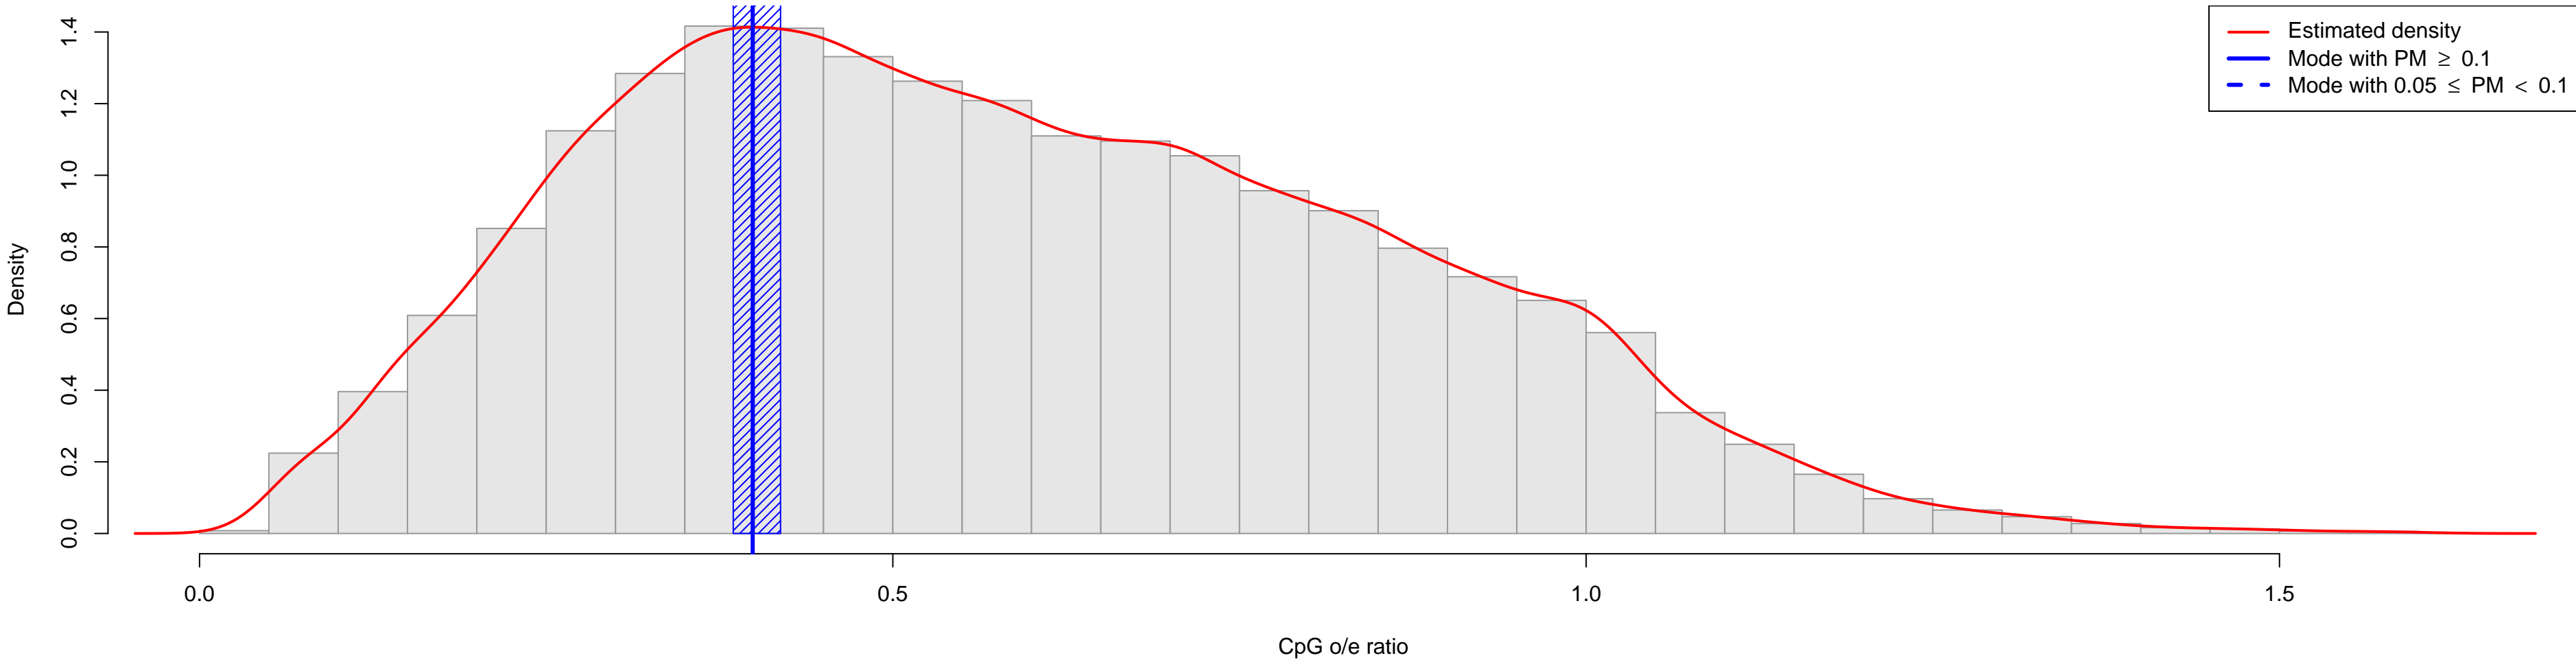

# Crassostrea\_virginica

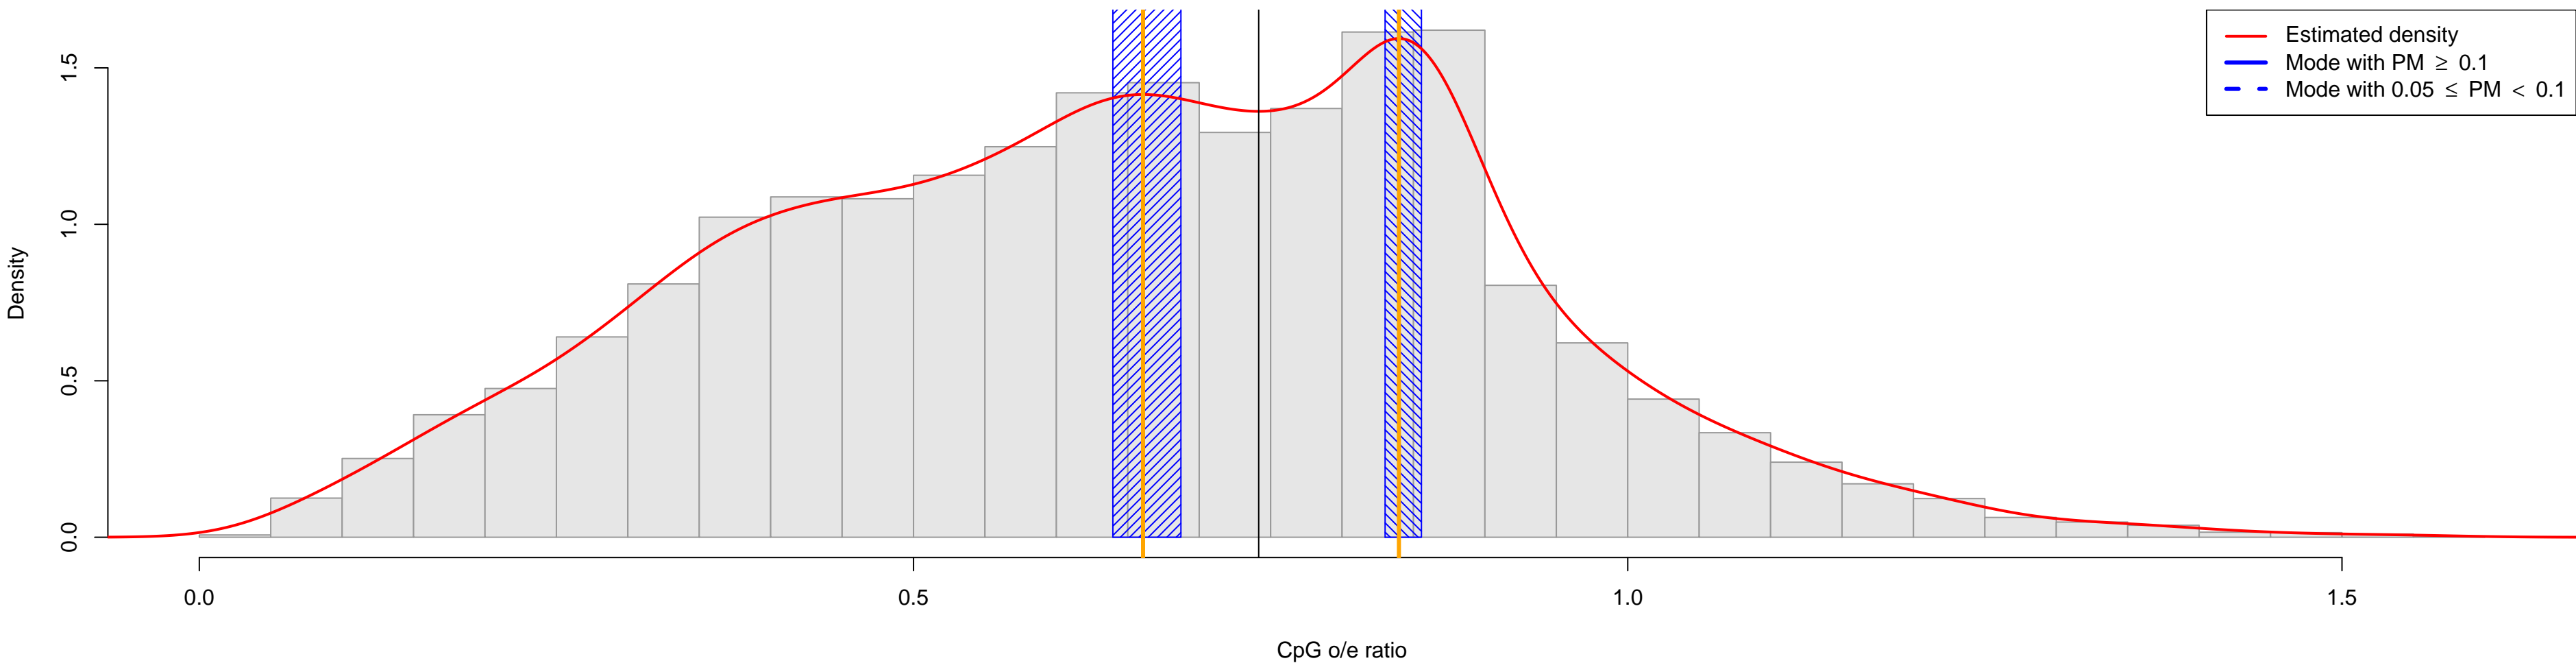



# Crocus\_sativus

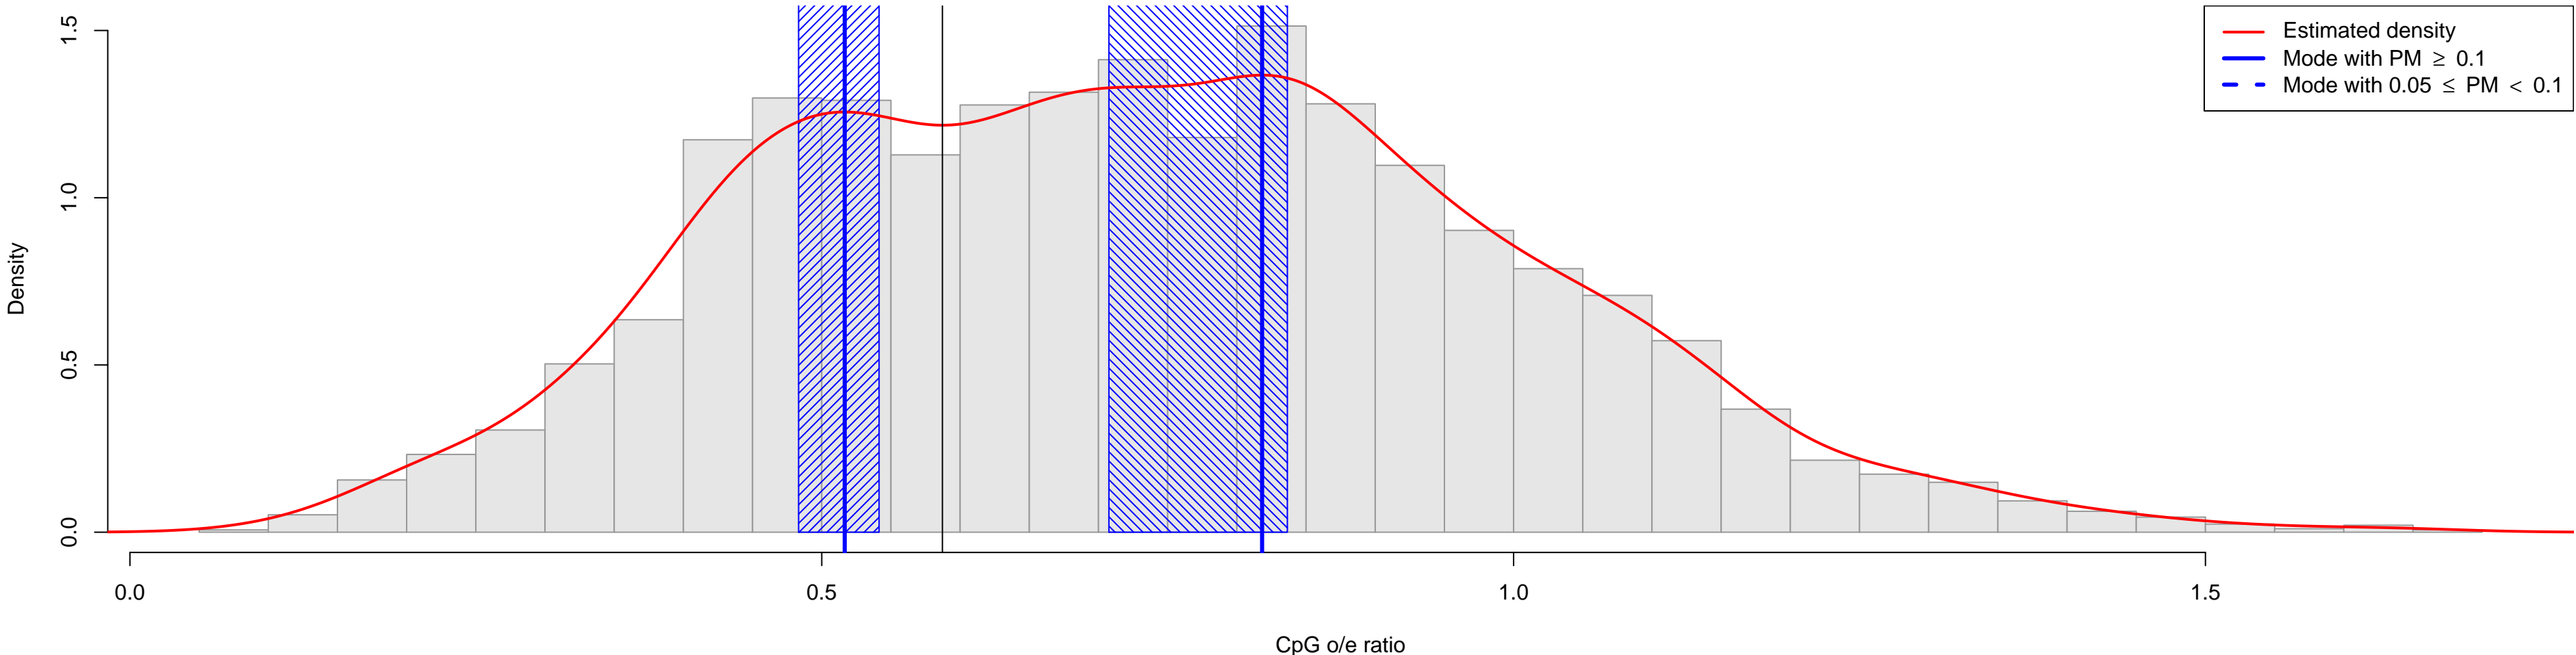

# Cryptococcus\_laurentii

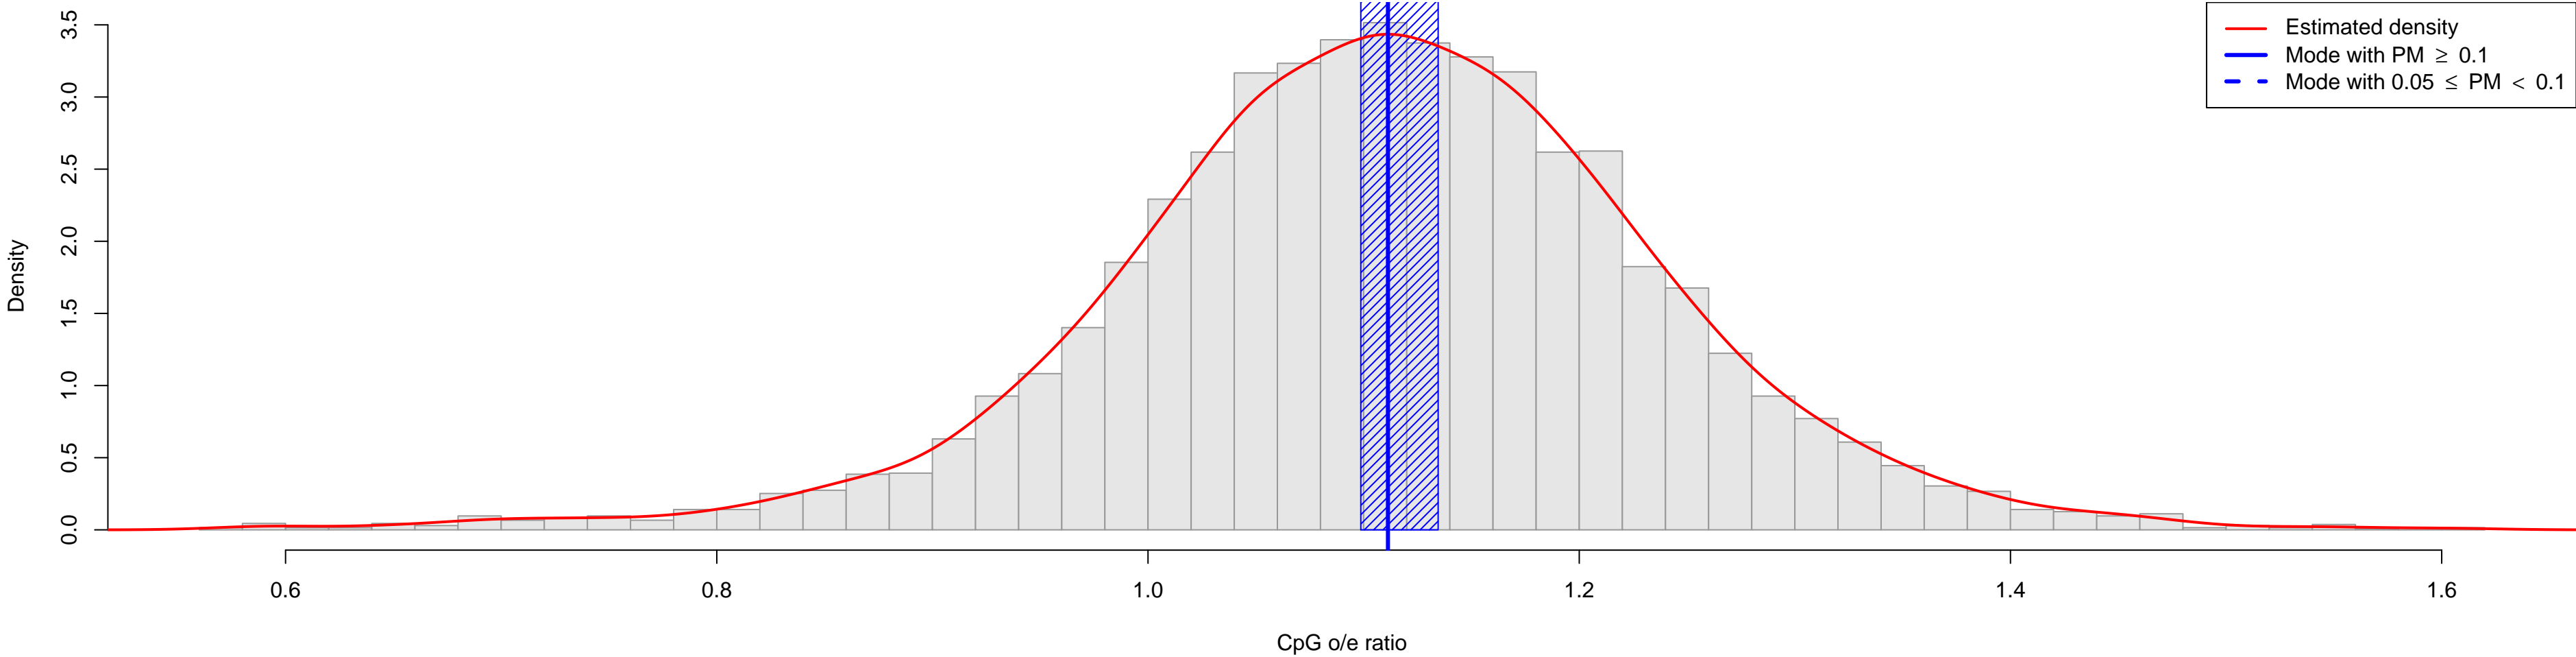

# Cryptopygus\_antarcticus

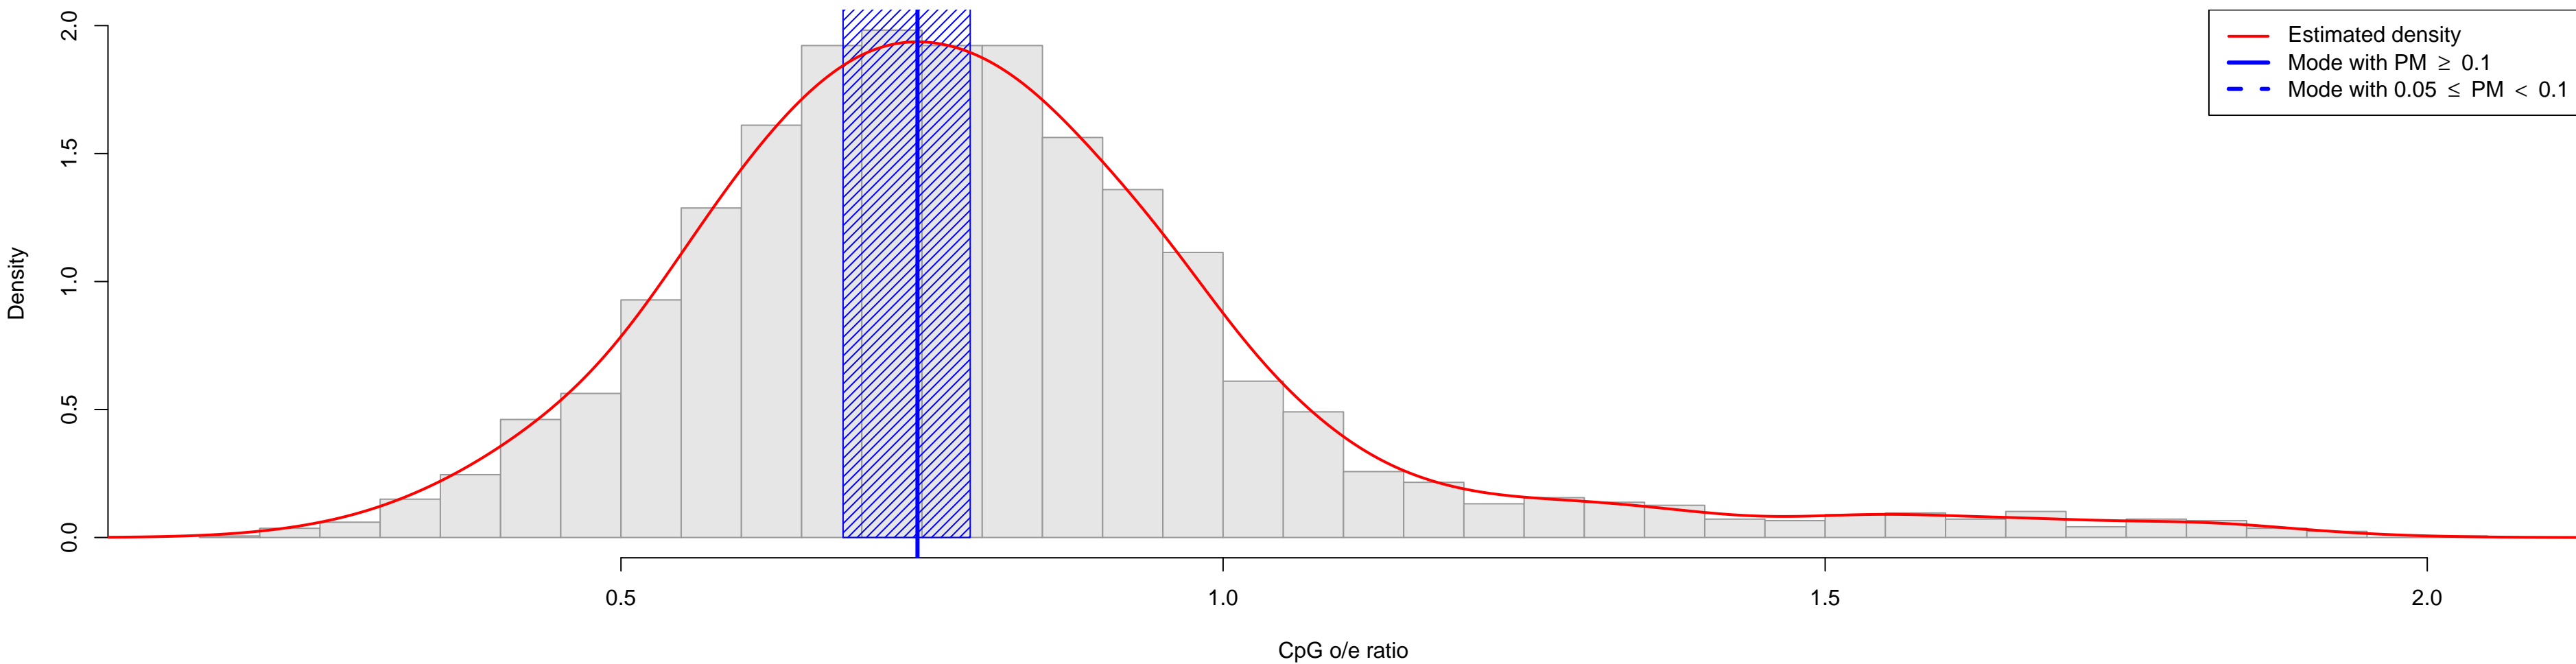

# Cryptosporidium\_parvum

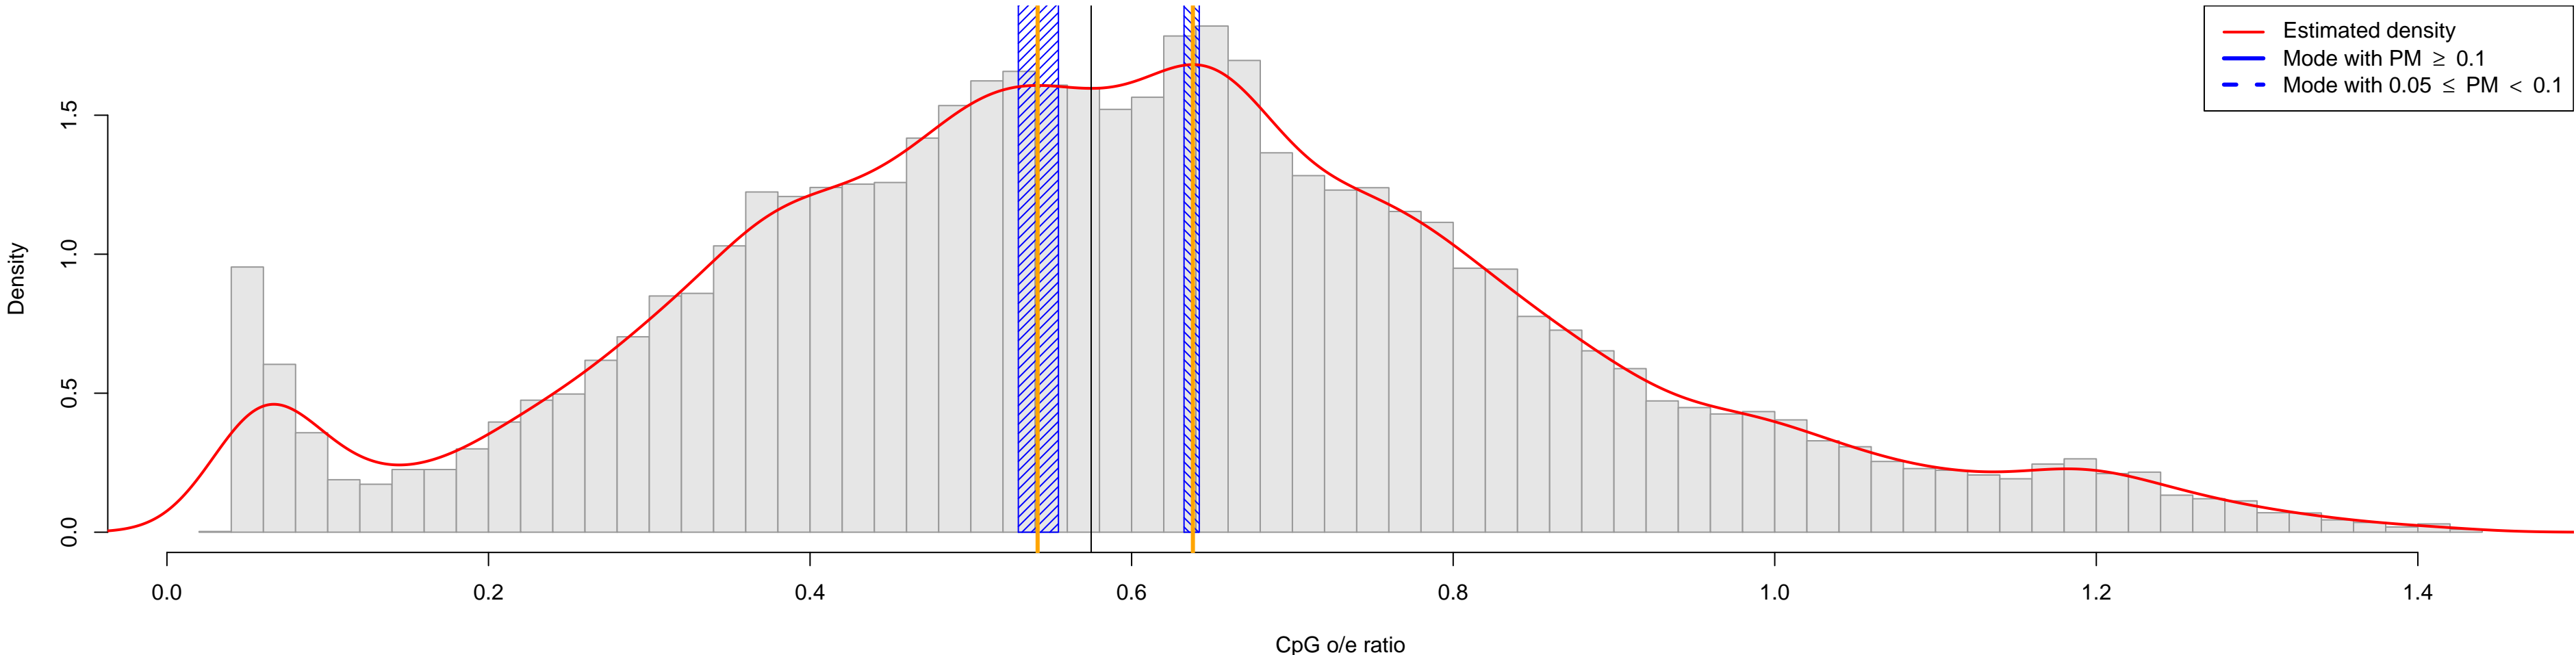

# Cucumis\_melo

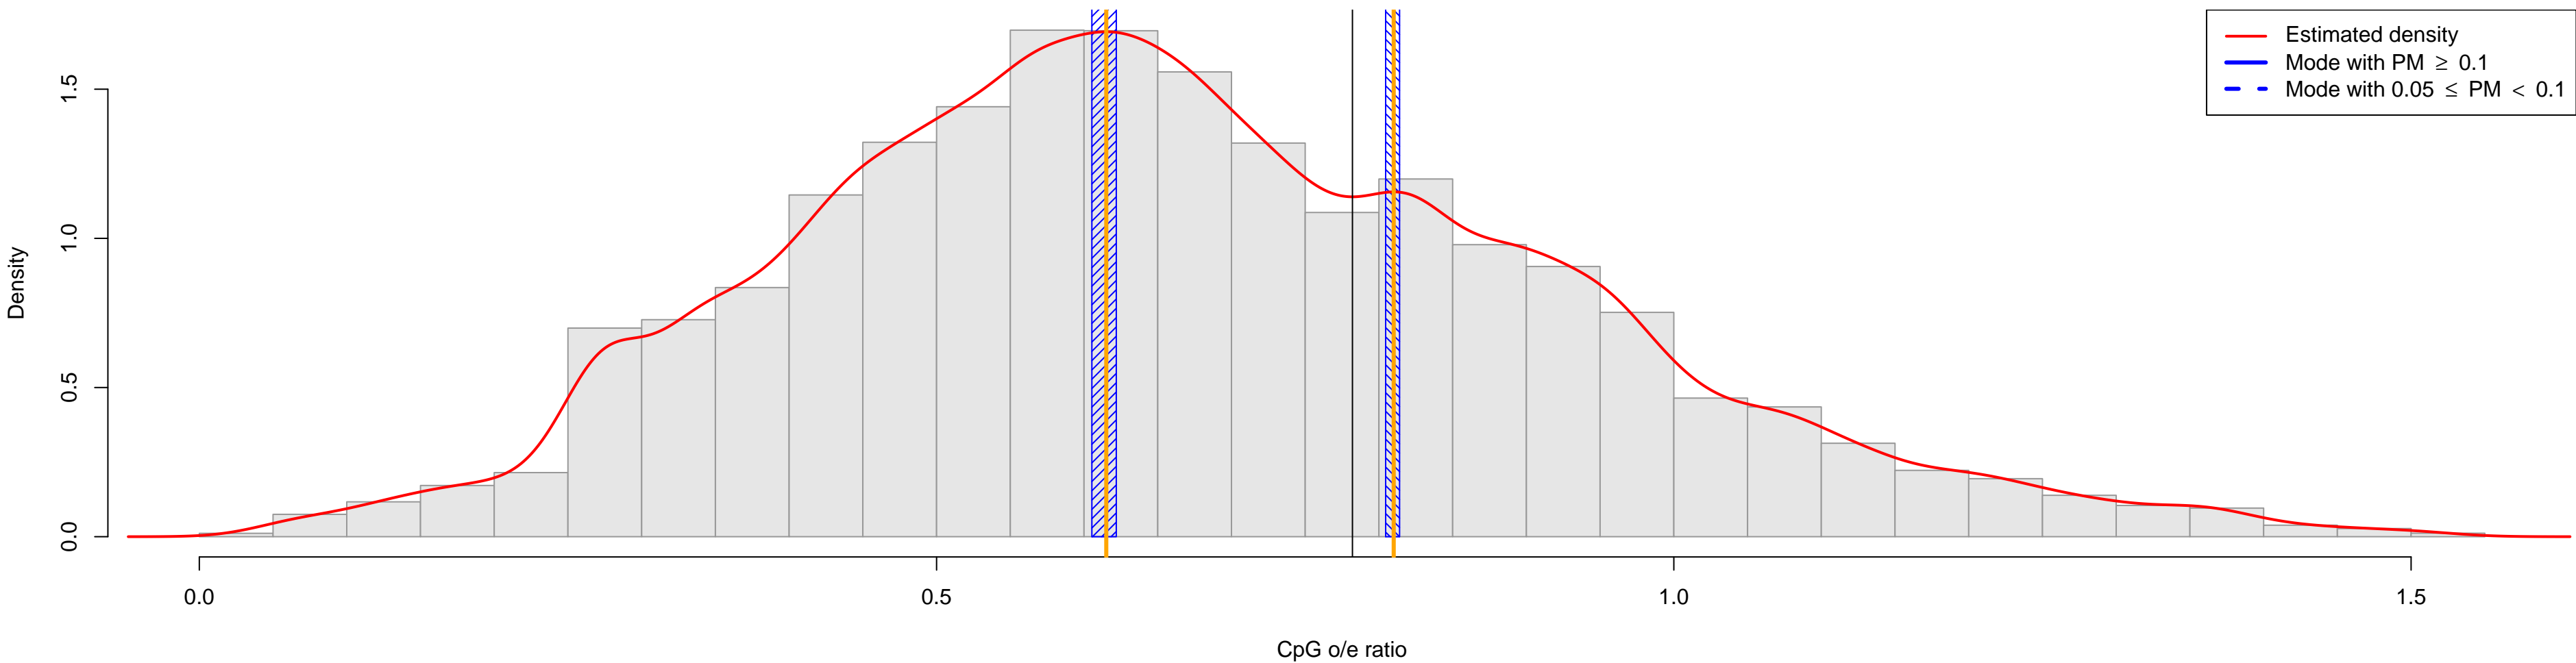

# Cucumis\_sativus

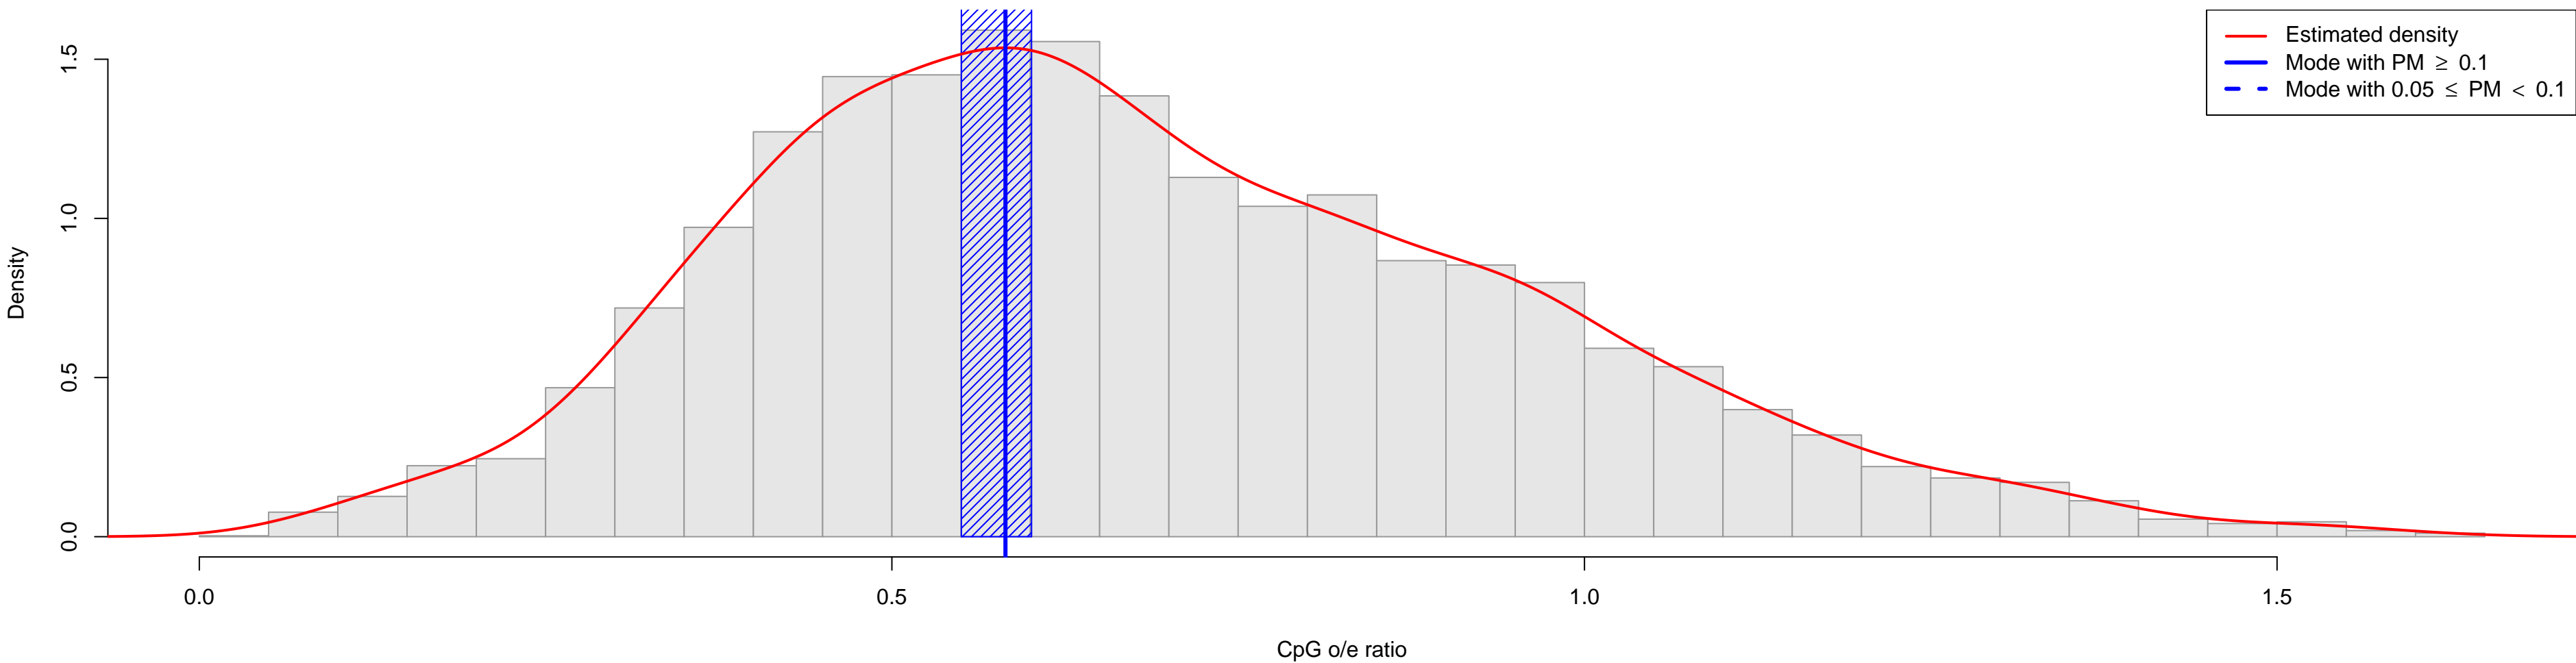

# Culex quinquefasciatus

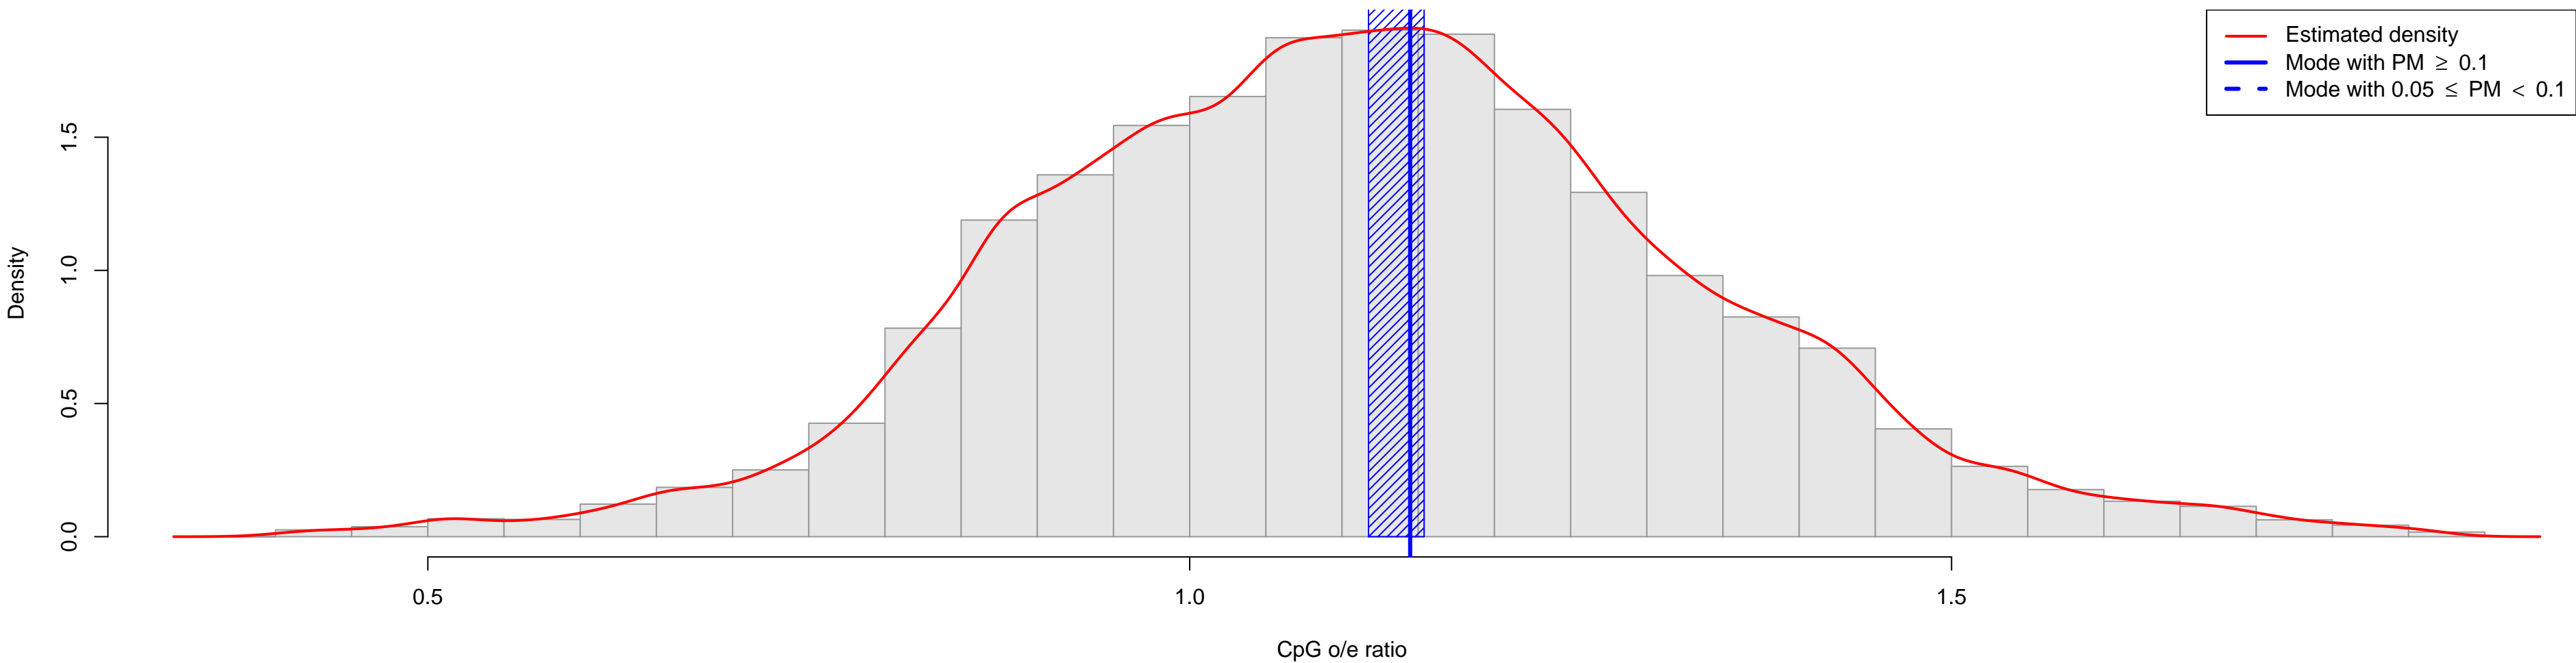

# Culex\_tarsalis

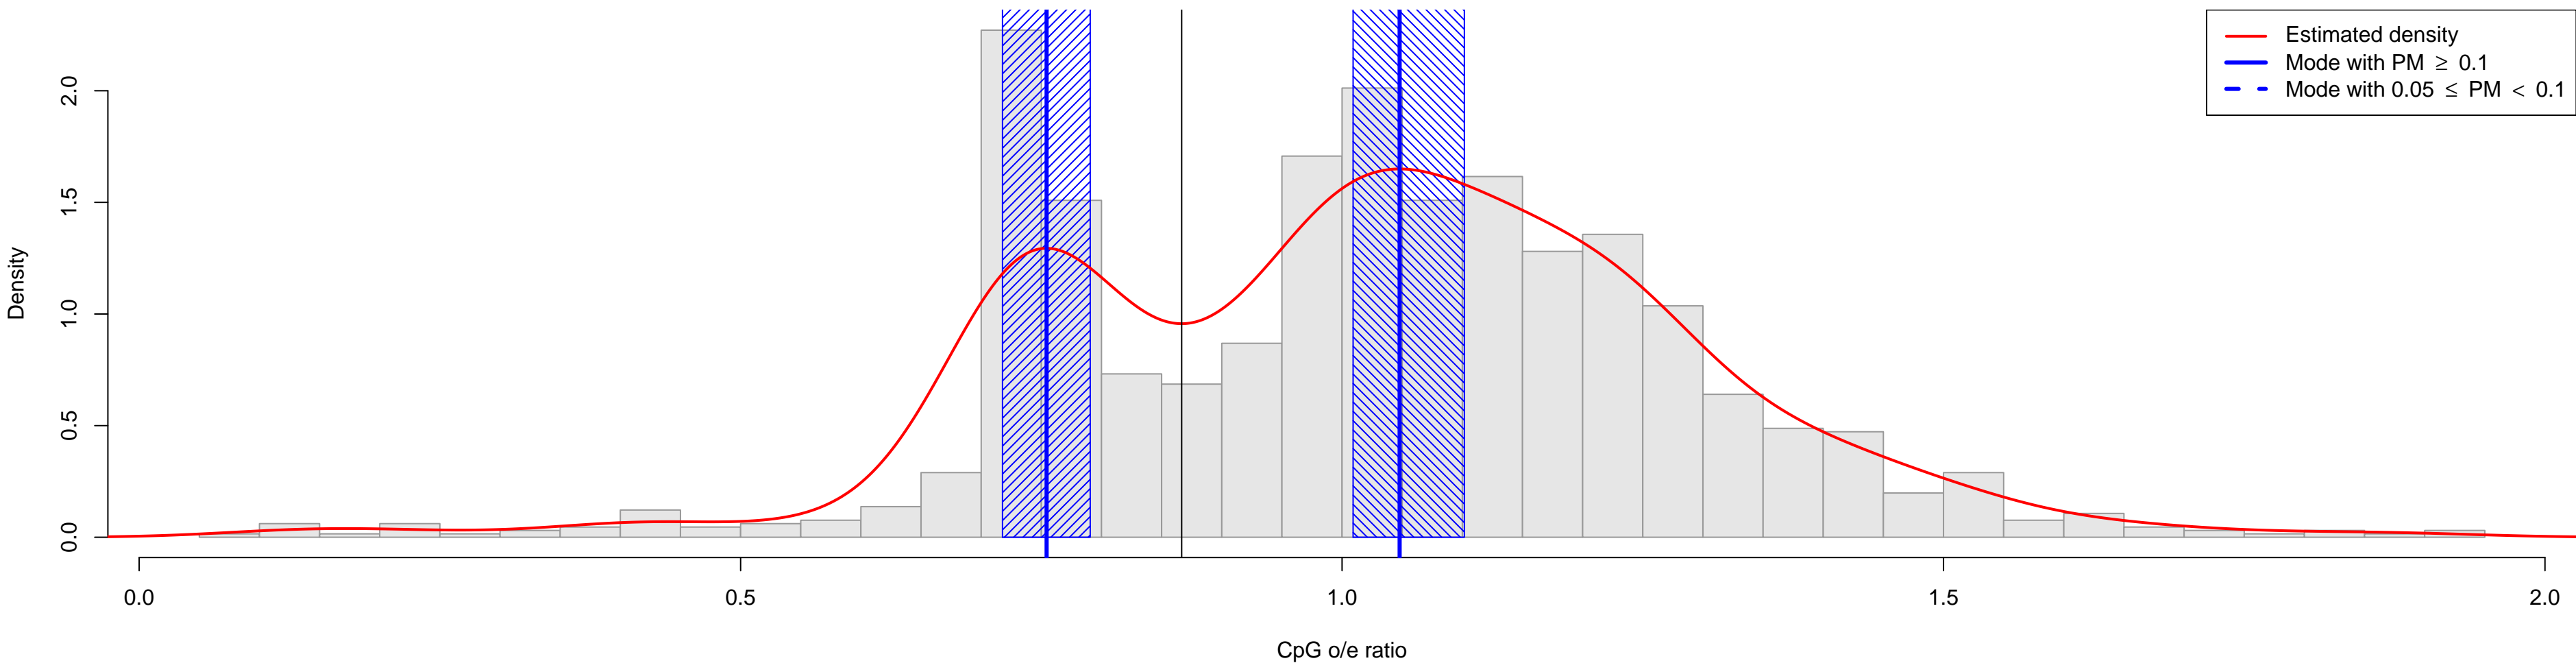



# Curcuma\_longa

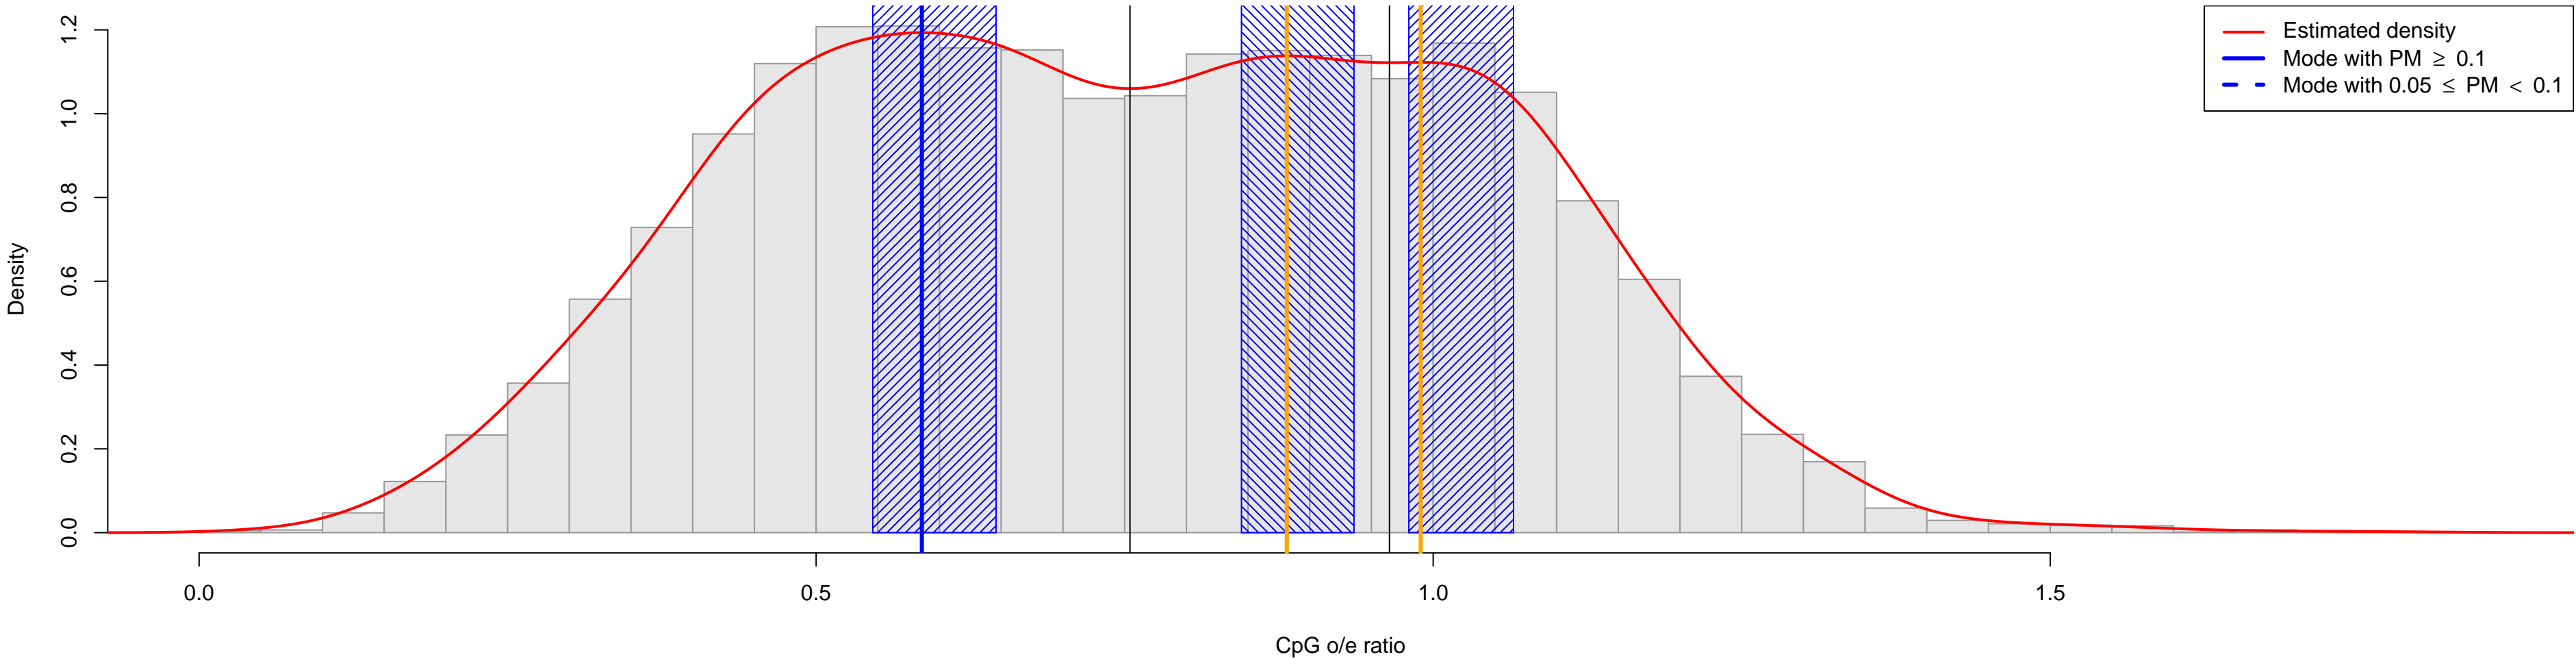

# Curvularia\_protuberata

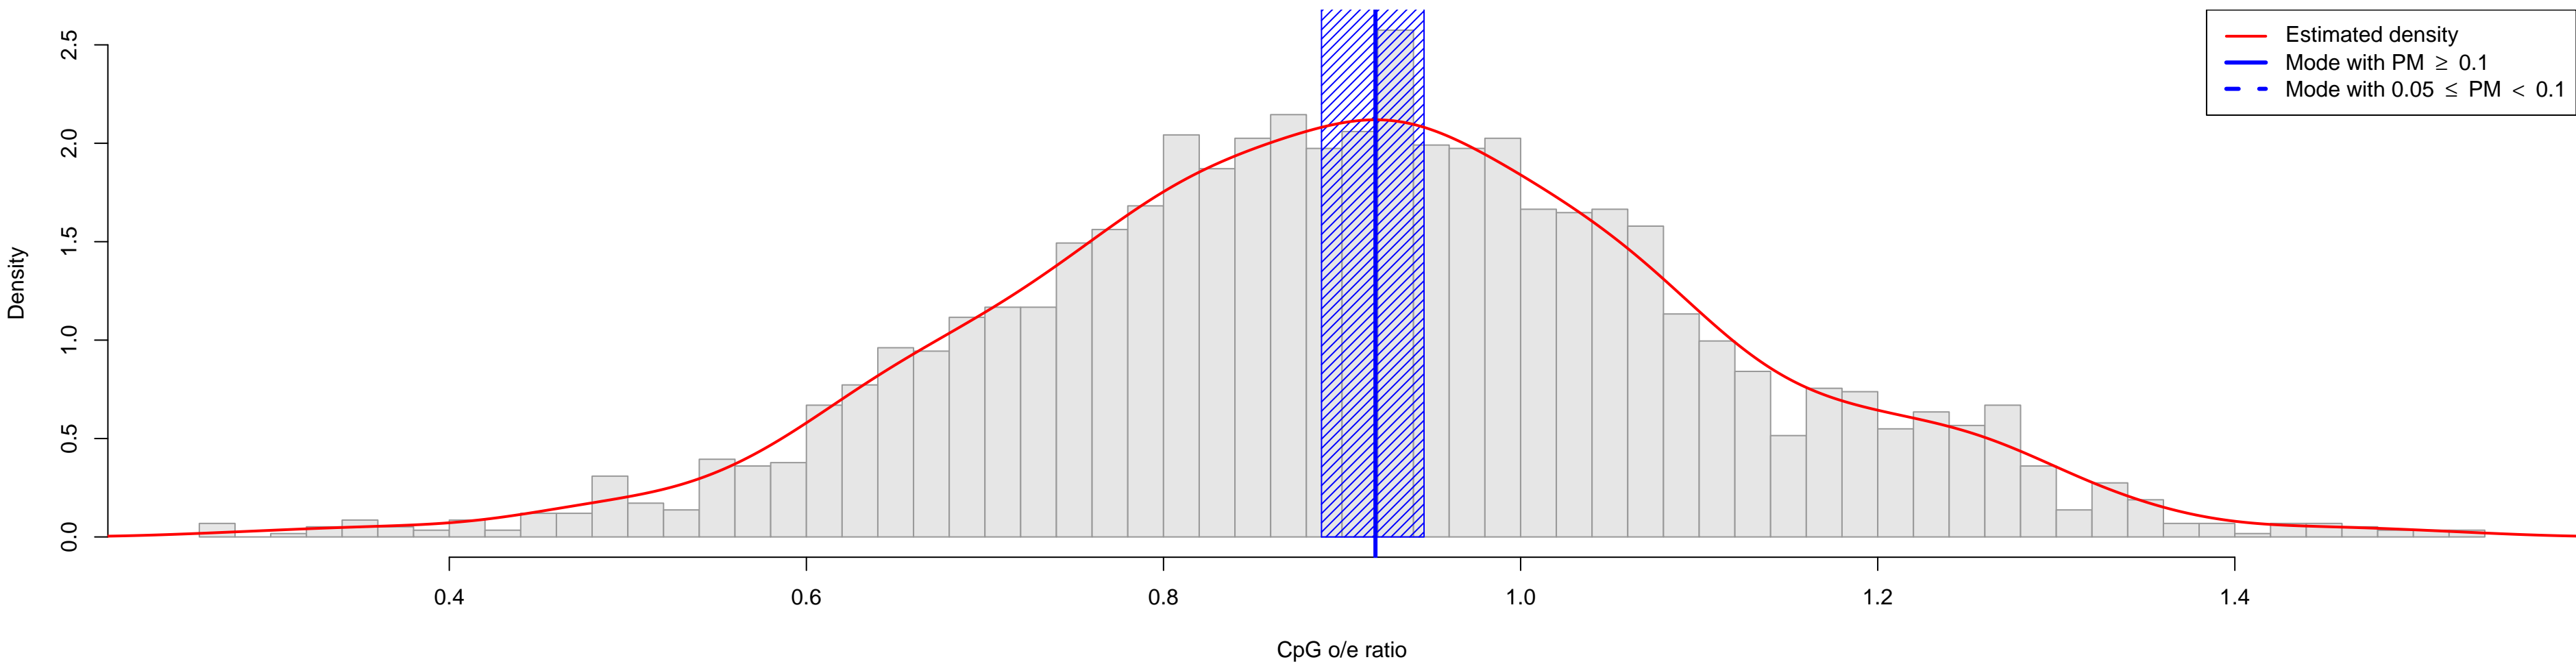

# Cyamopsis\_tetragonoloba

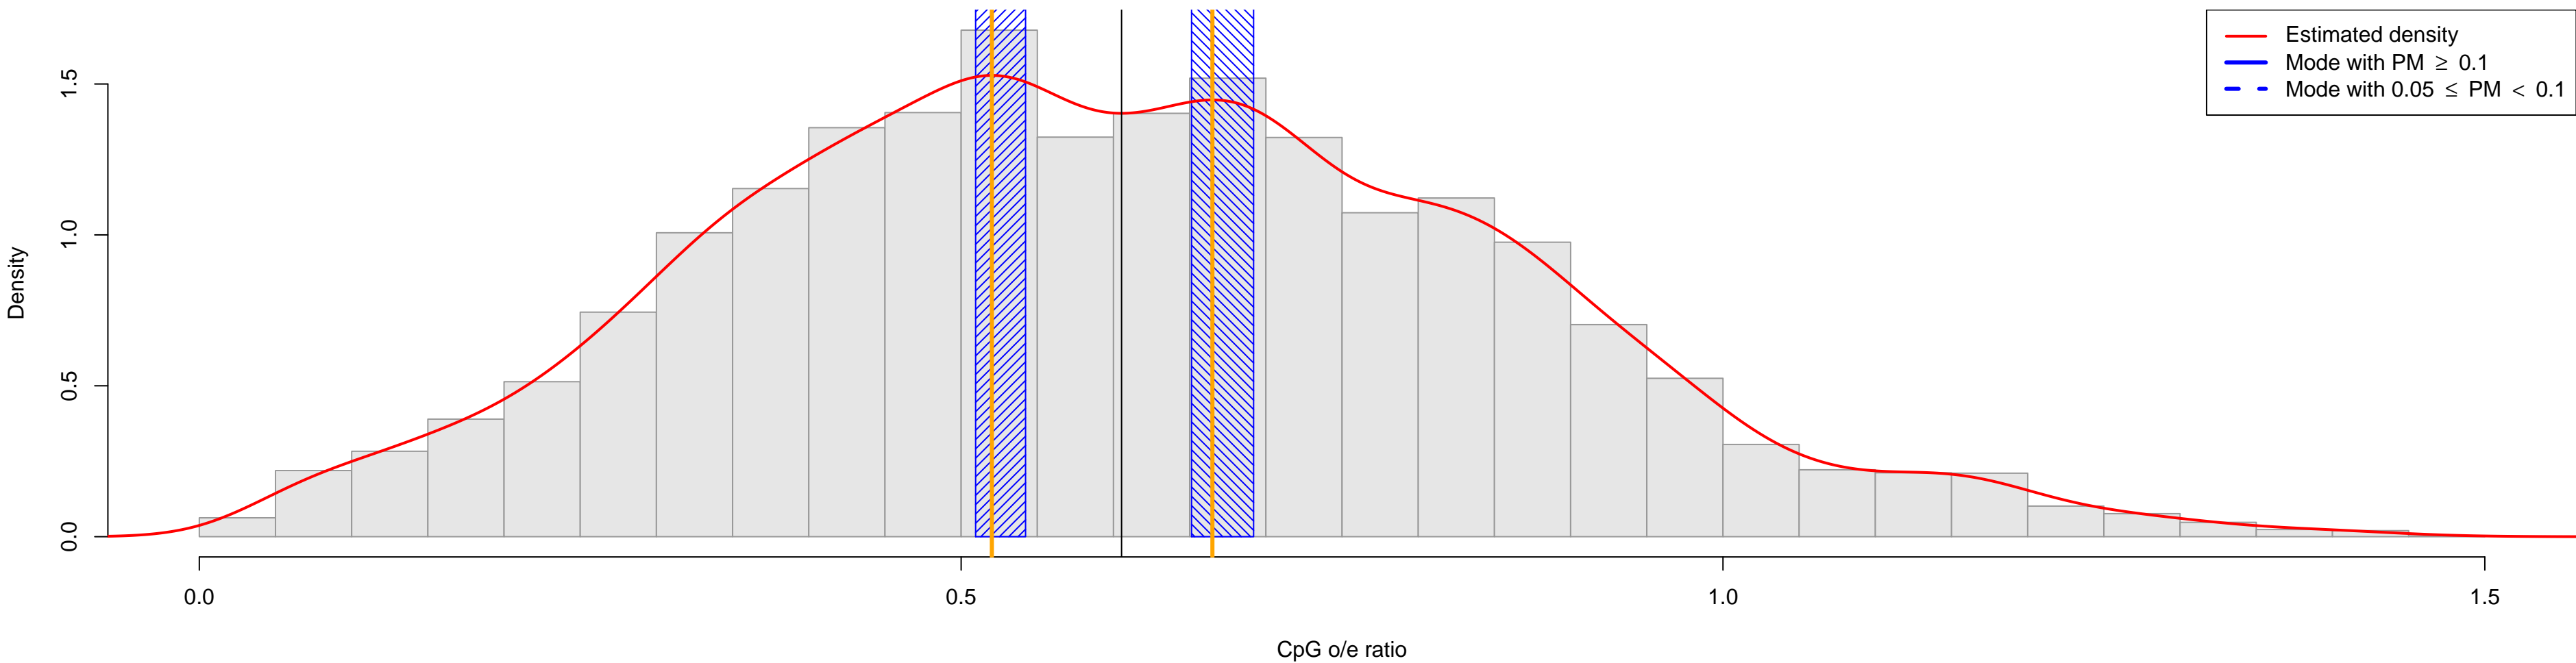

# Cycas\_rumphii

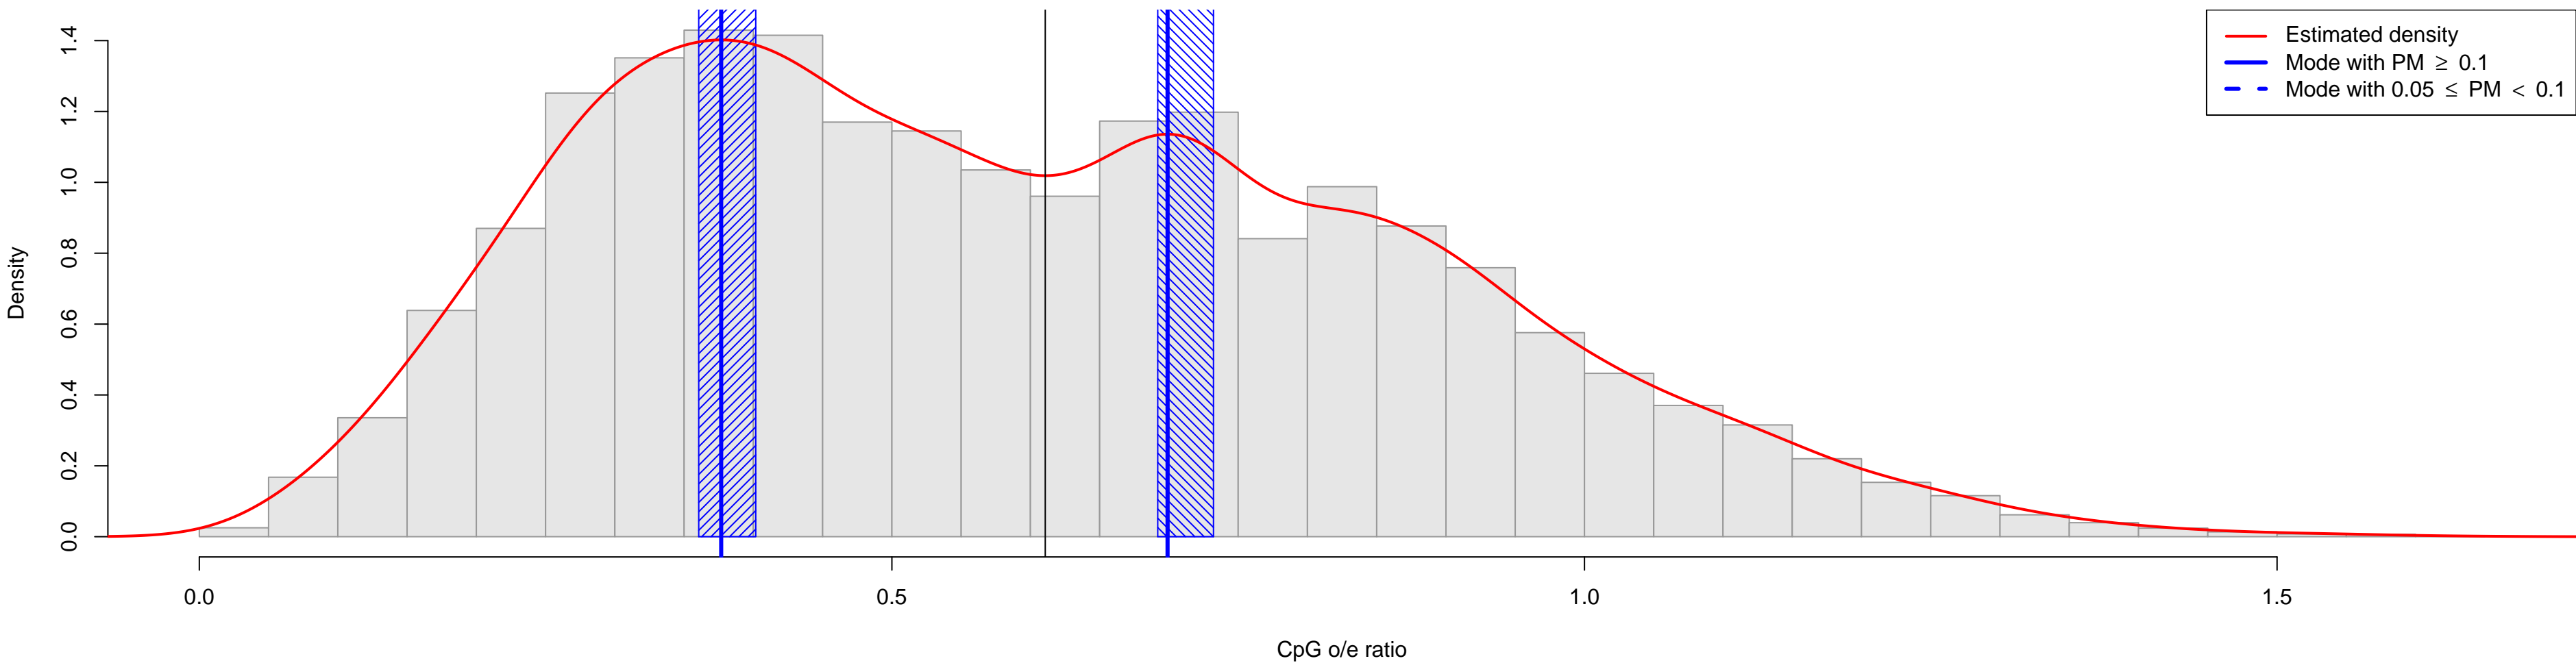

# Cynodon\_dactylon

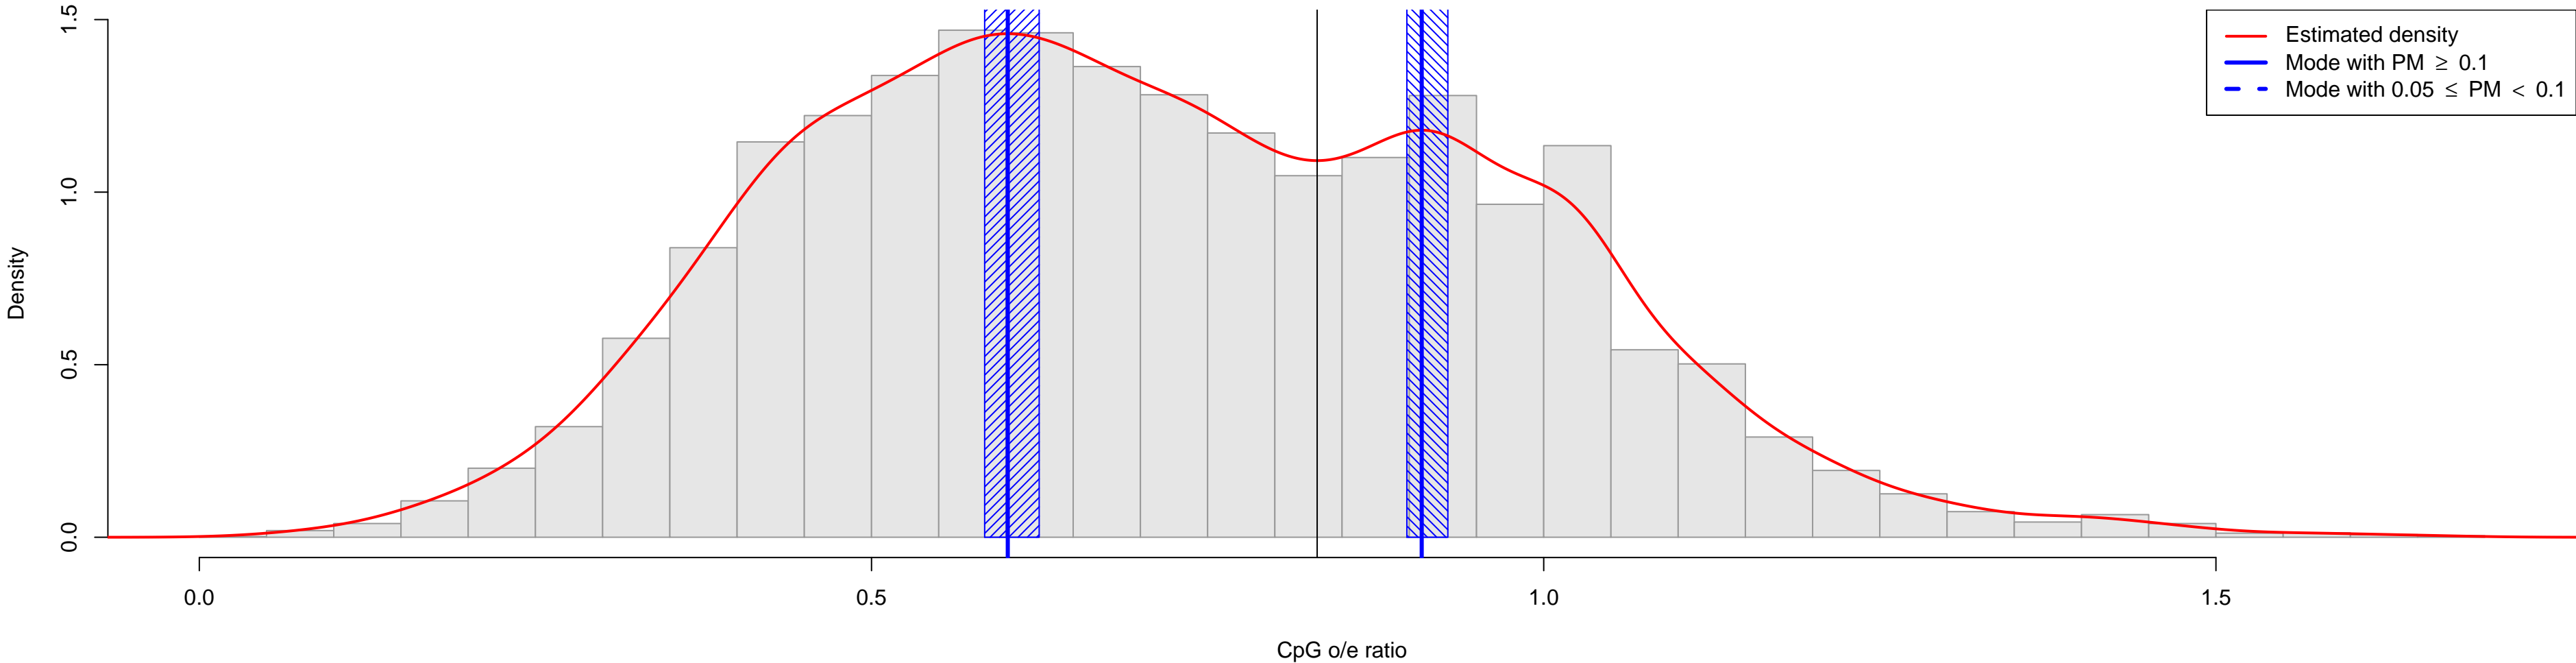

# Cyprinodon\_variegatus

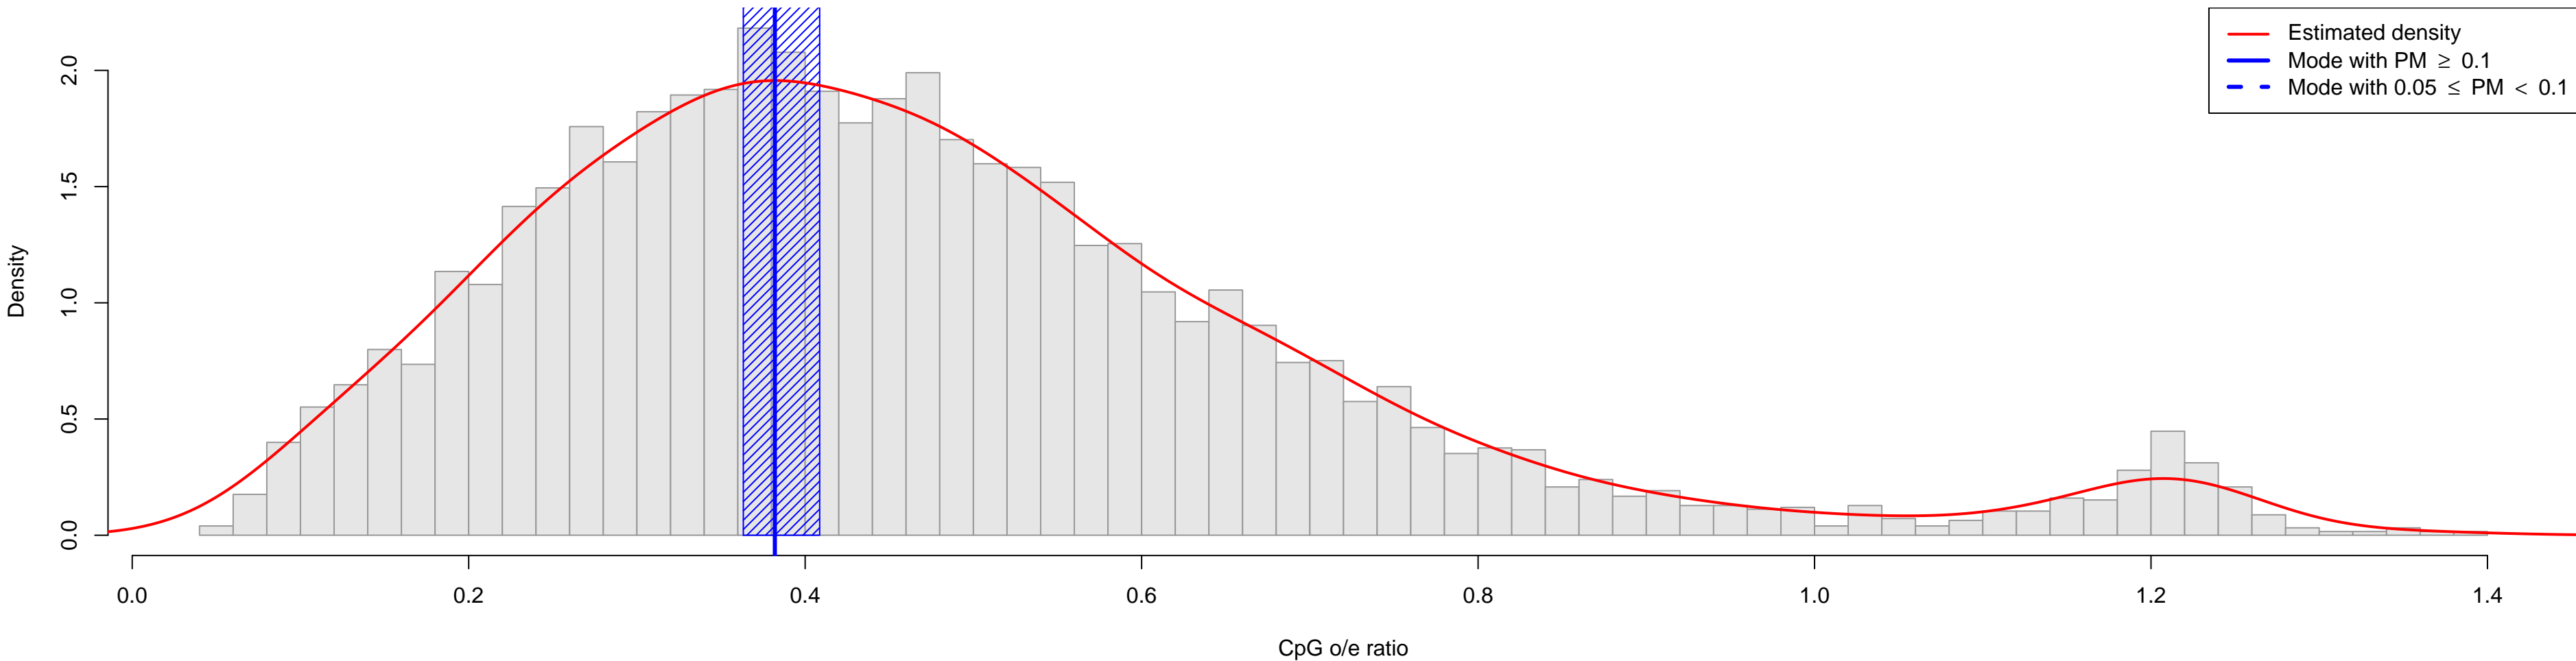

# Dactylis\_glomerata

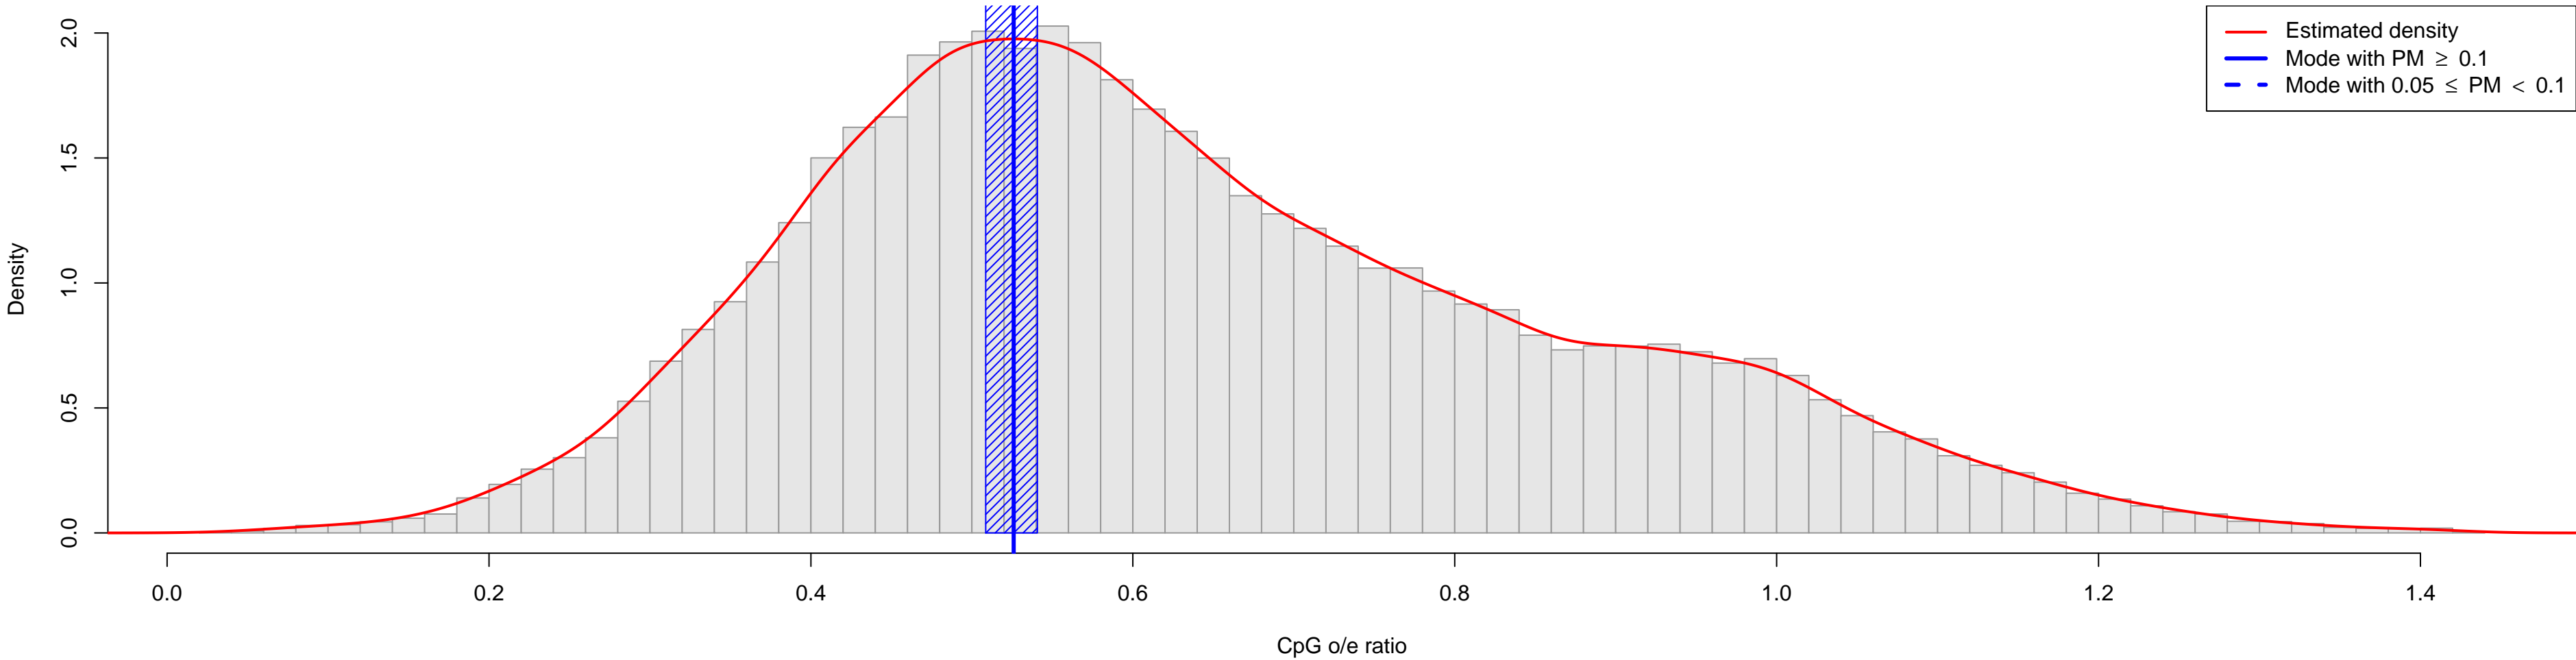

# Danaus\_plexippus

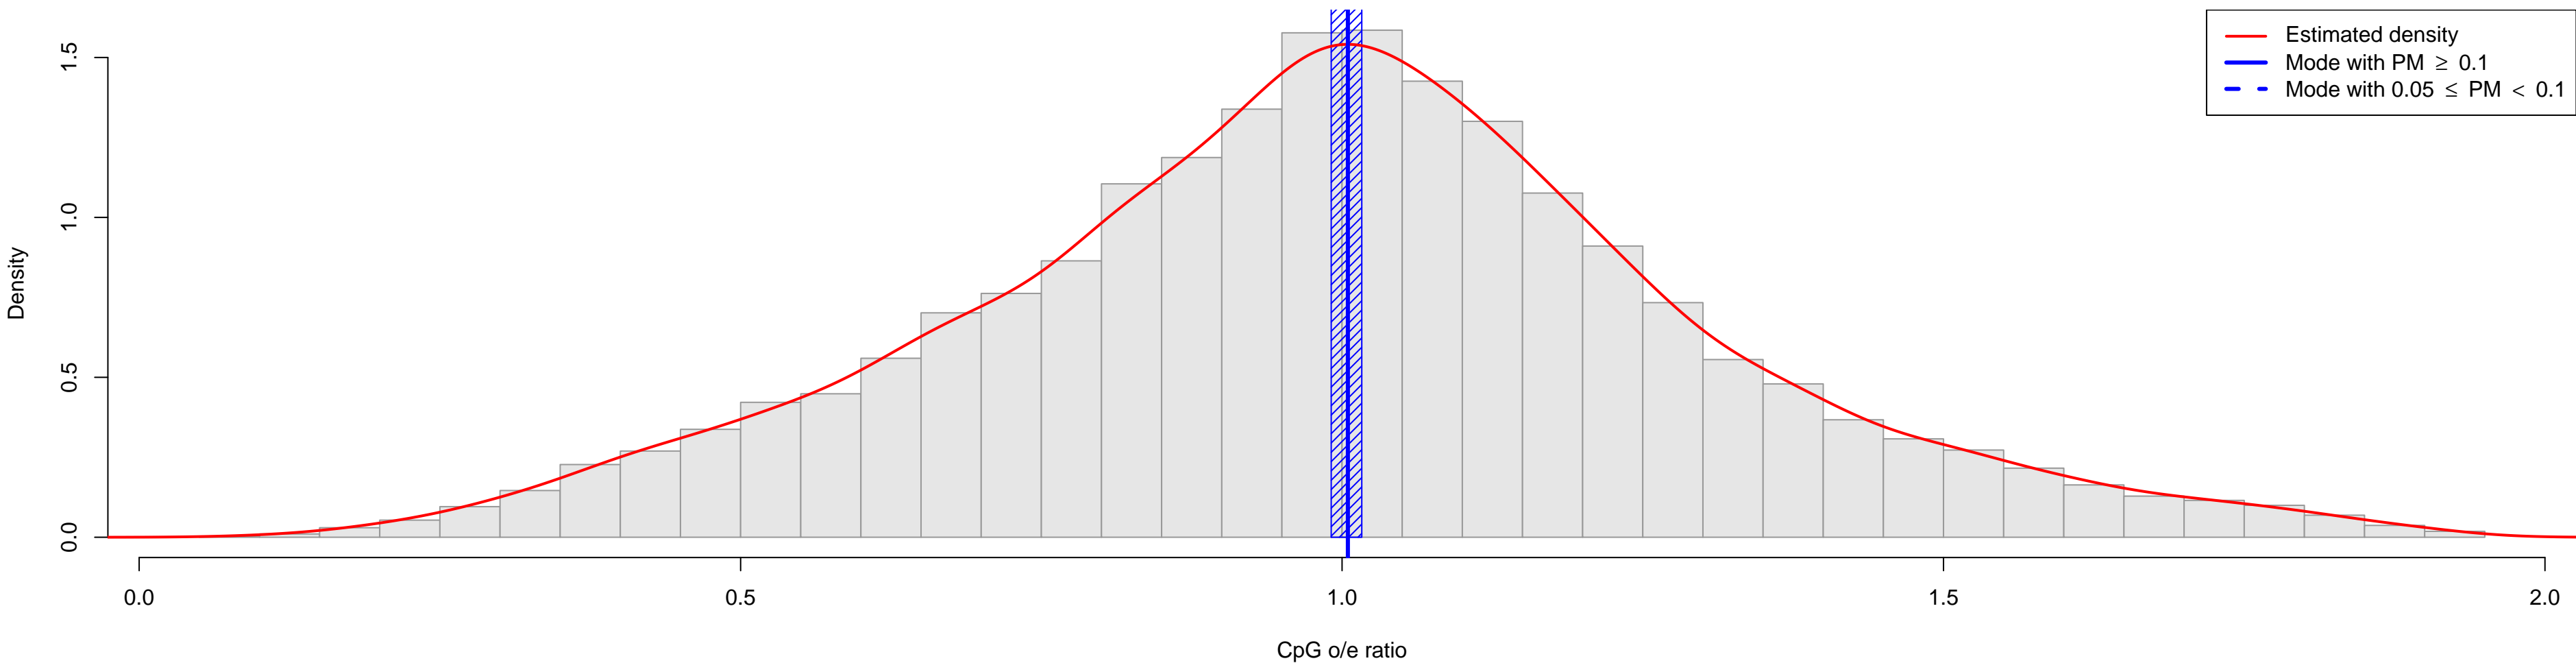



# Danio\_rerio

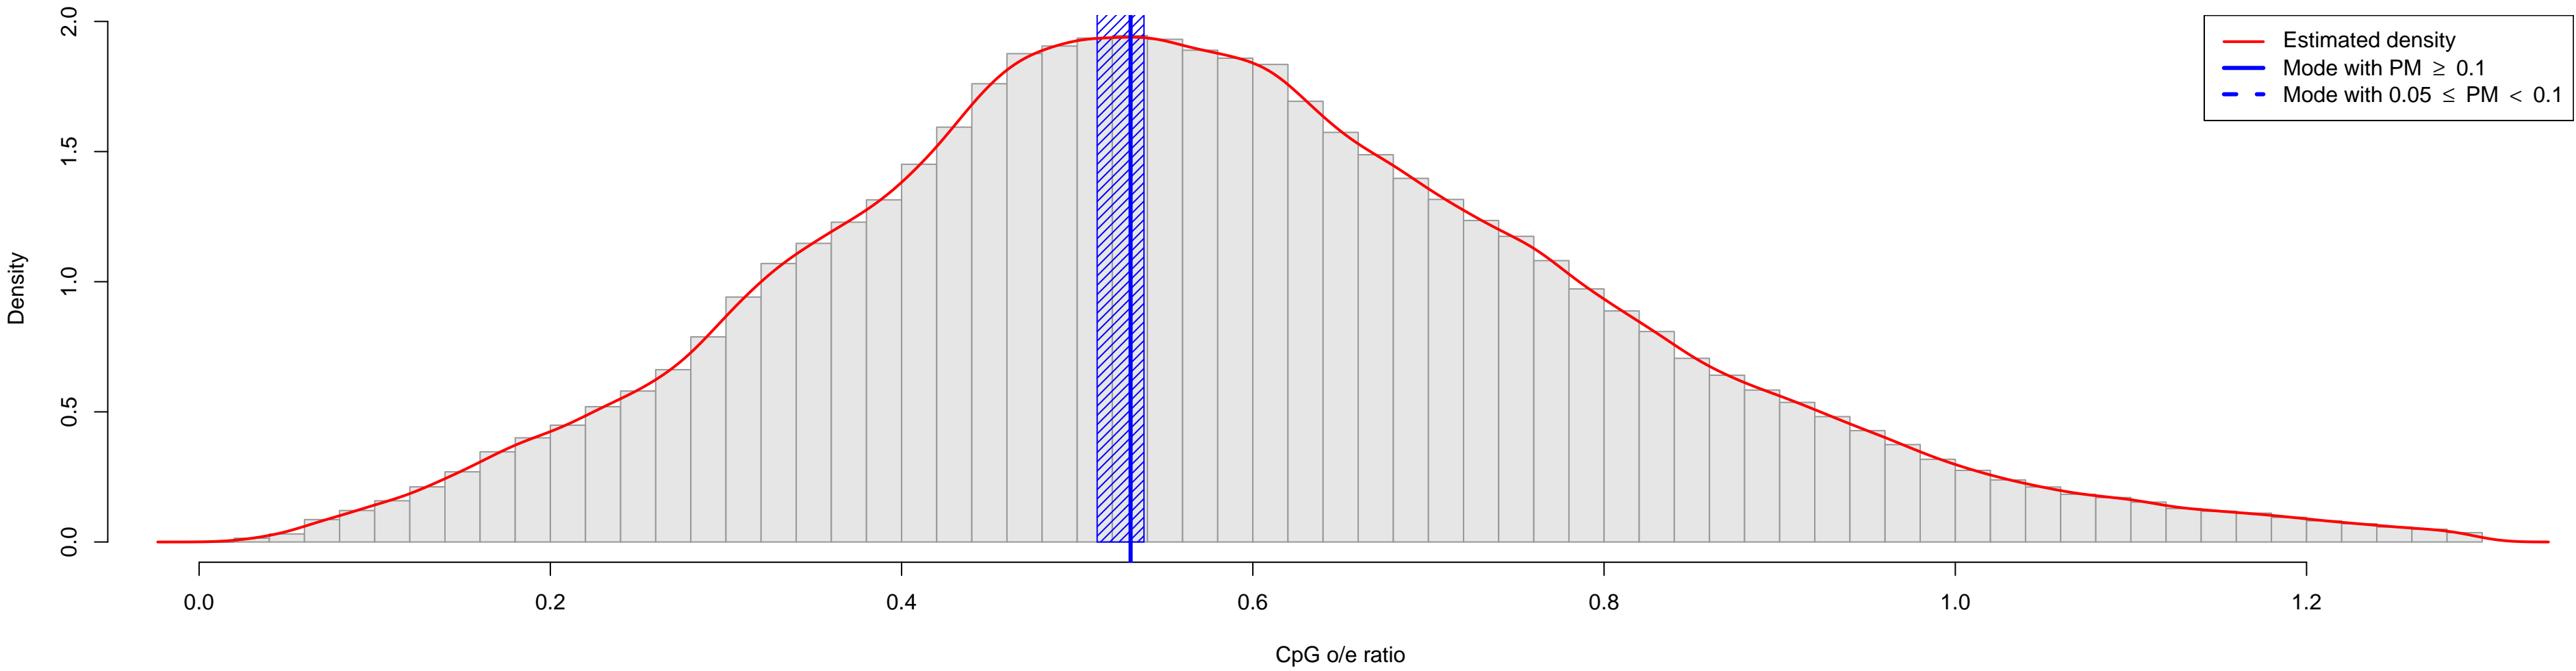

# Daphnia\_magna

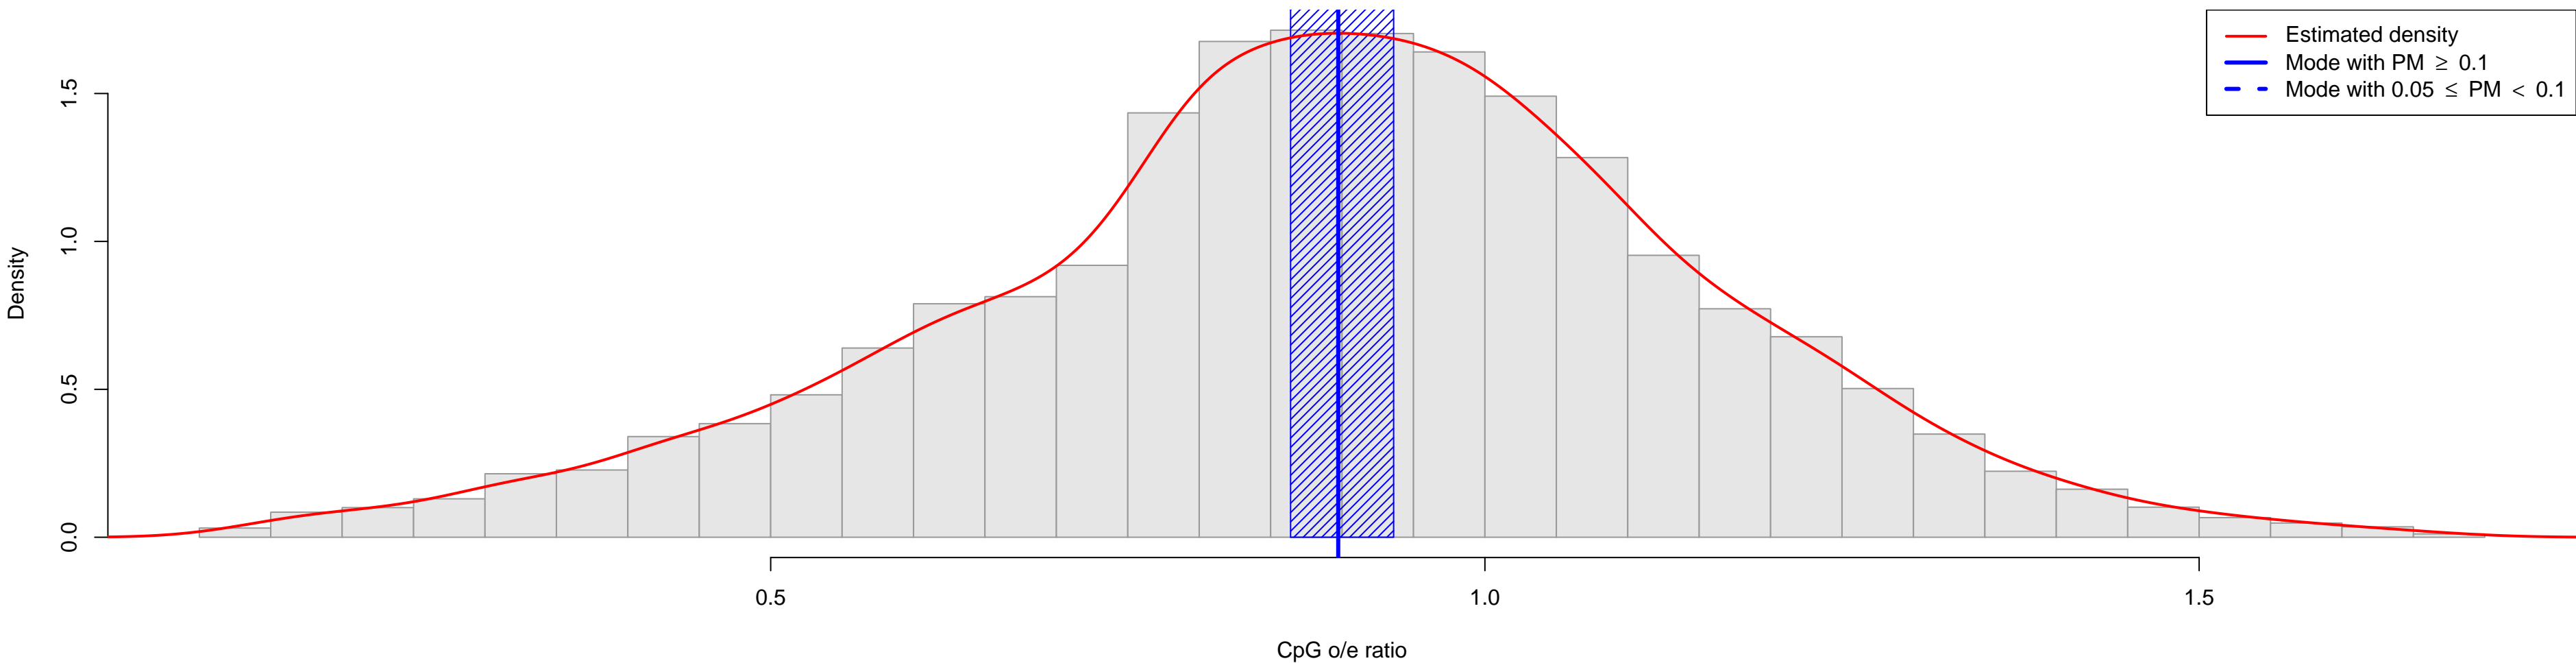

# Daphnia\_pulex

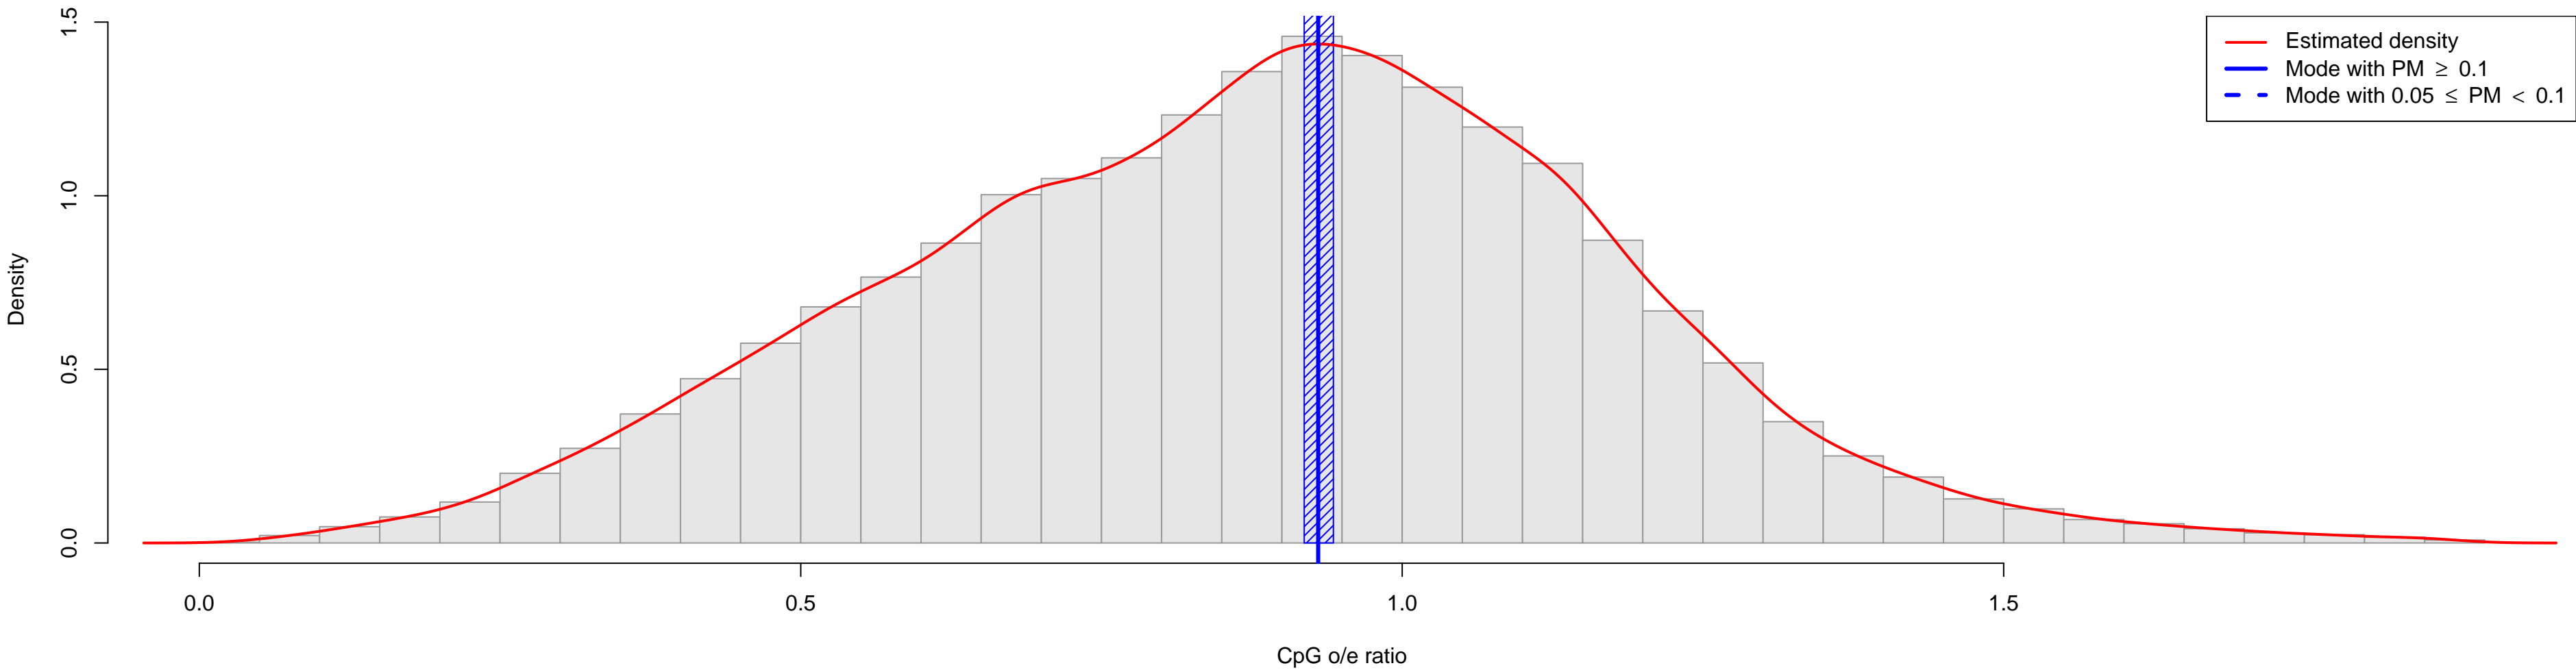

# Deinagkistrodon\_acutus

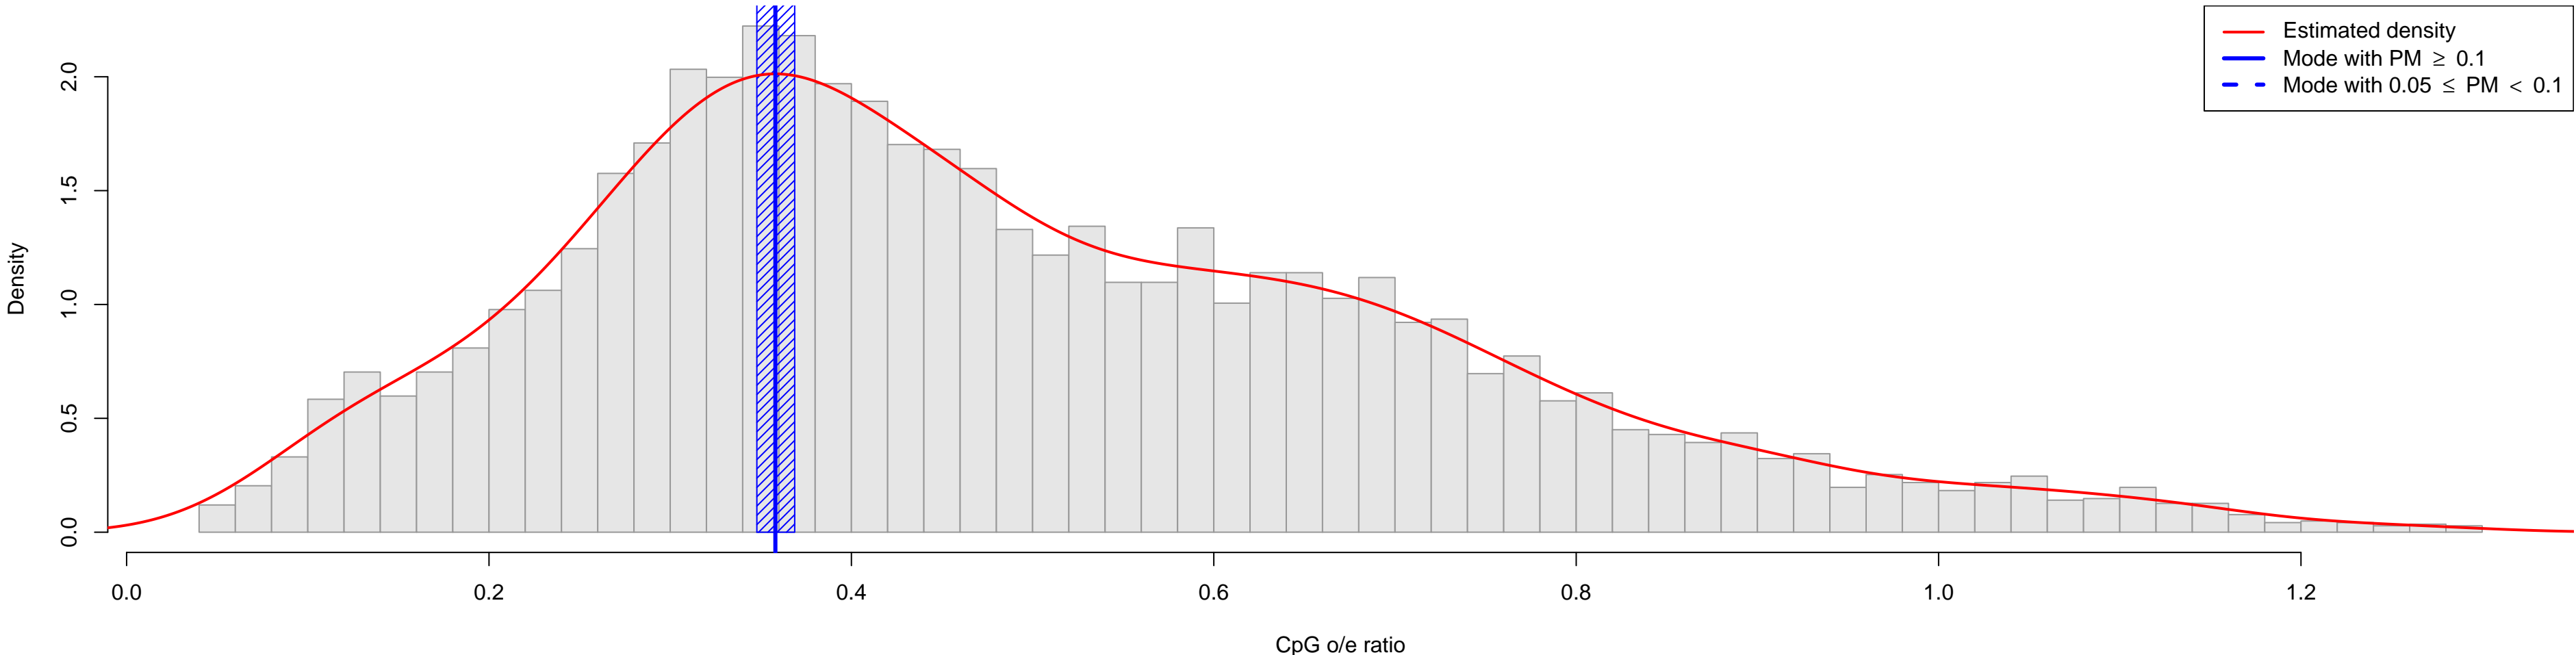

# Dendroctonus\_ponderosae

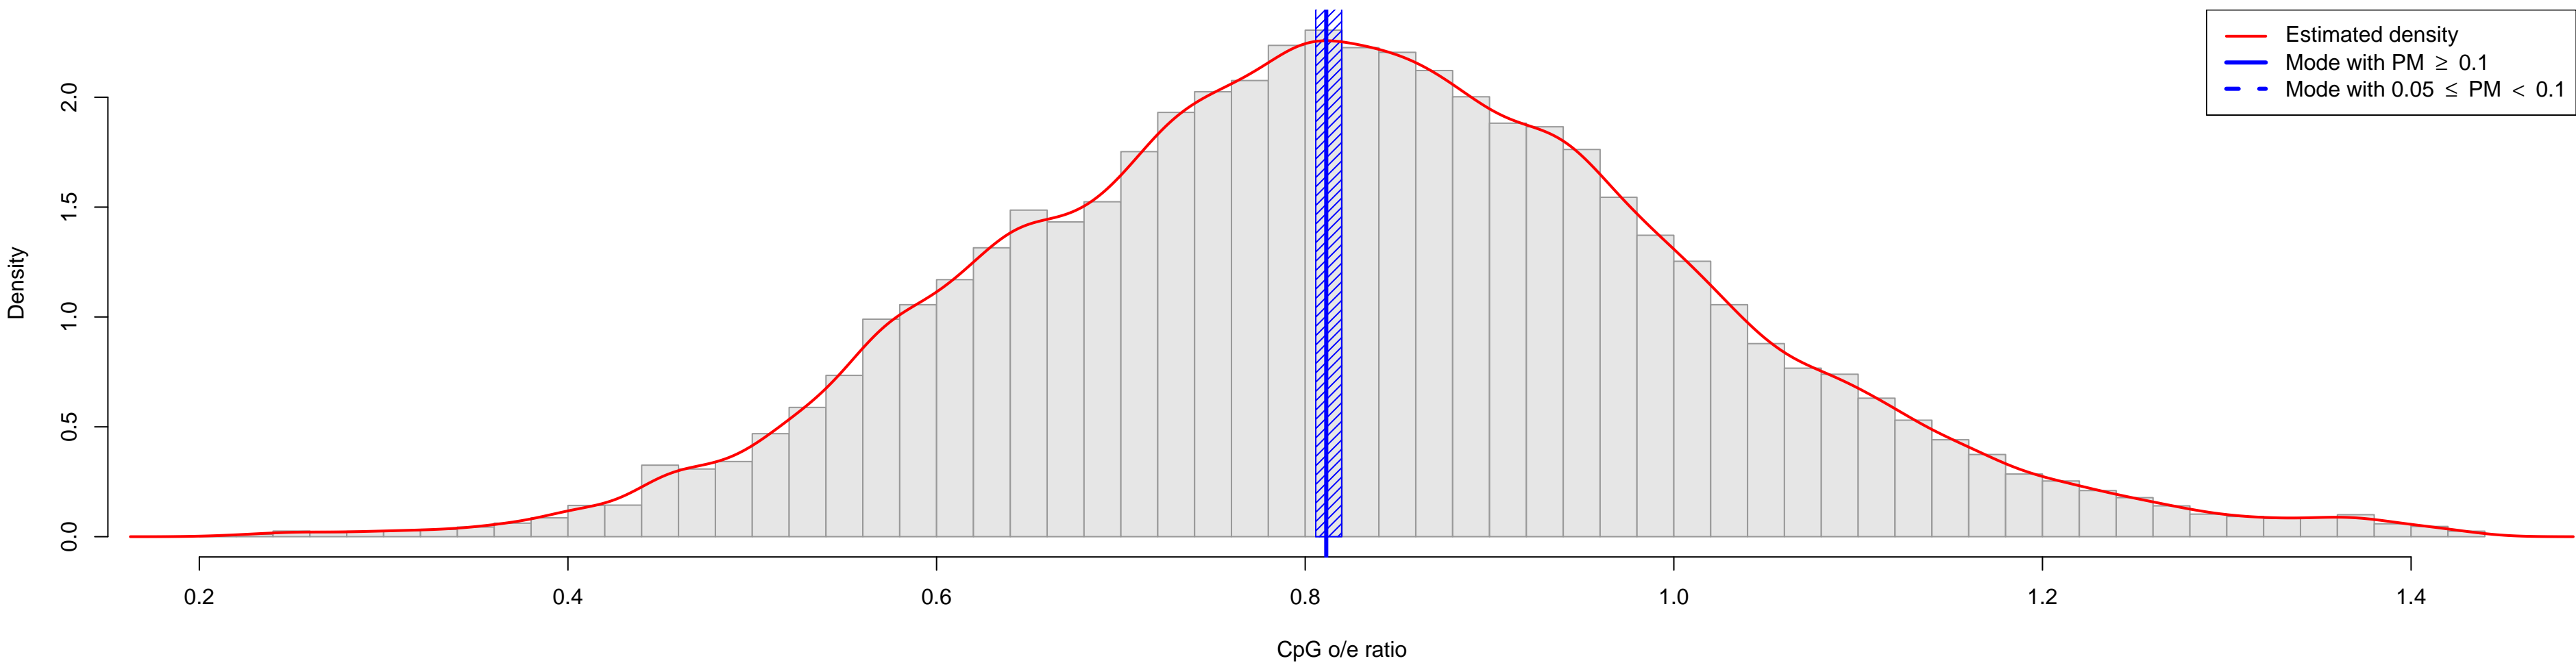

# Dermacentor\_variabilis

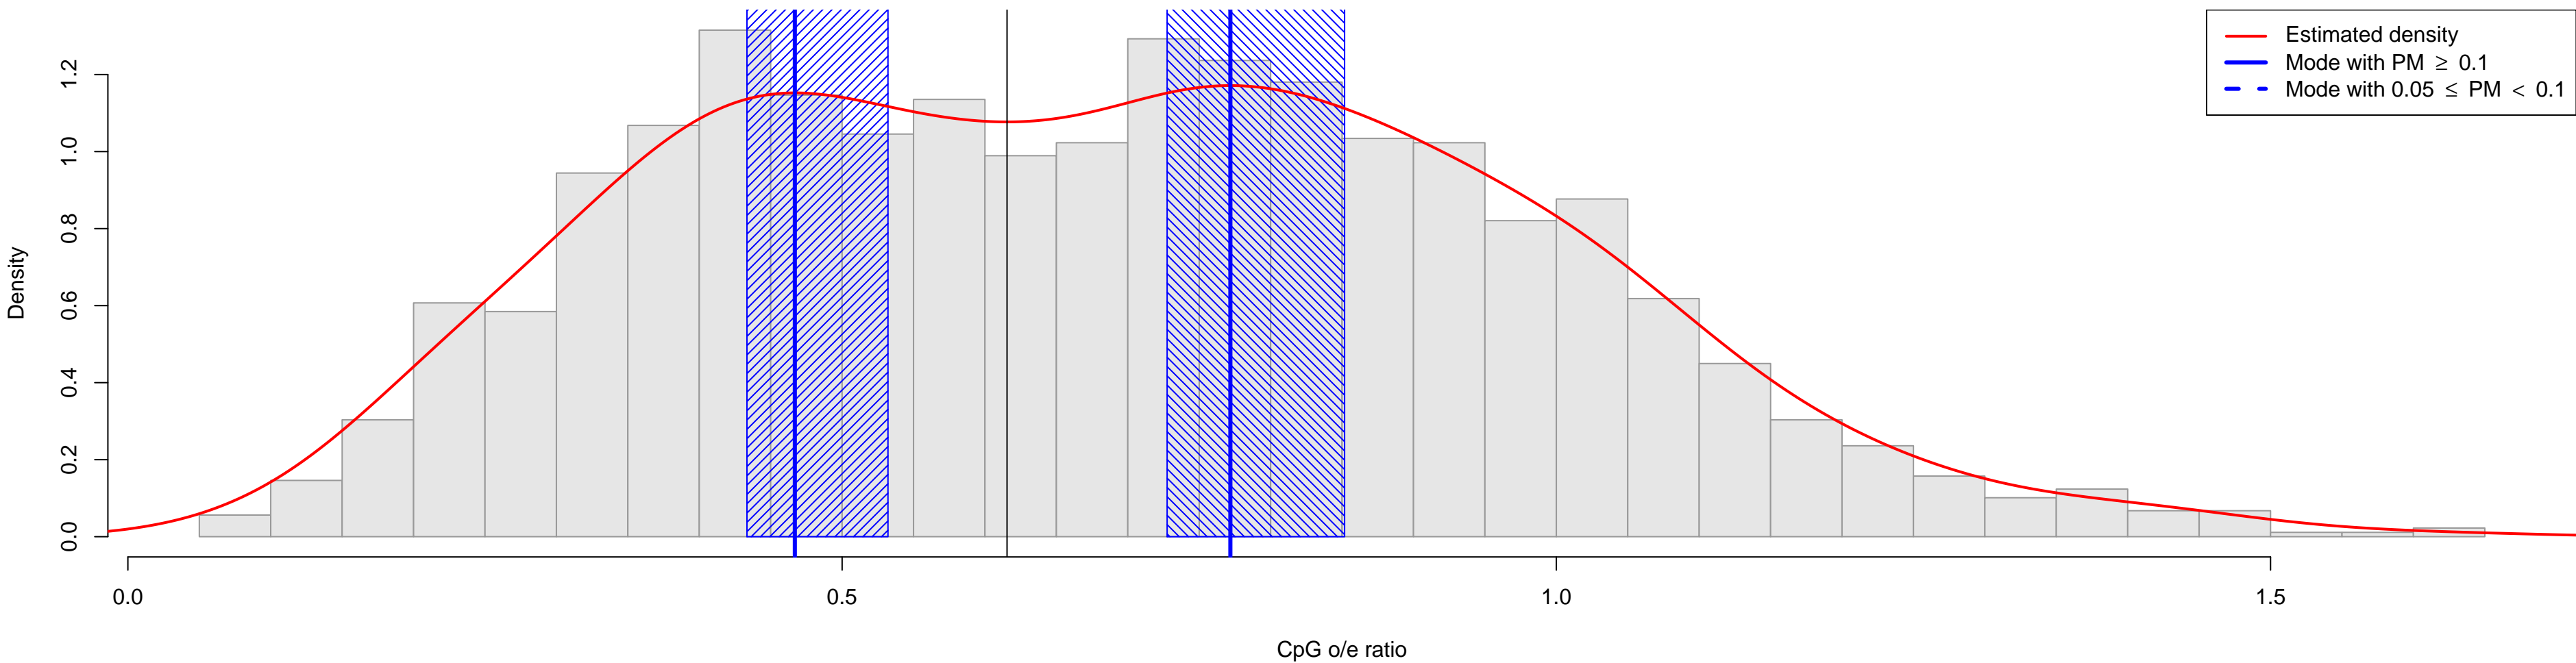

# Diaphorina\_citri

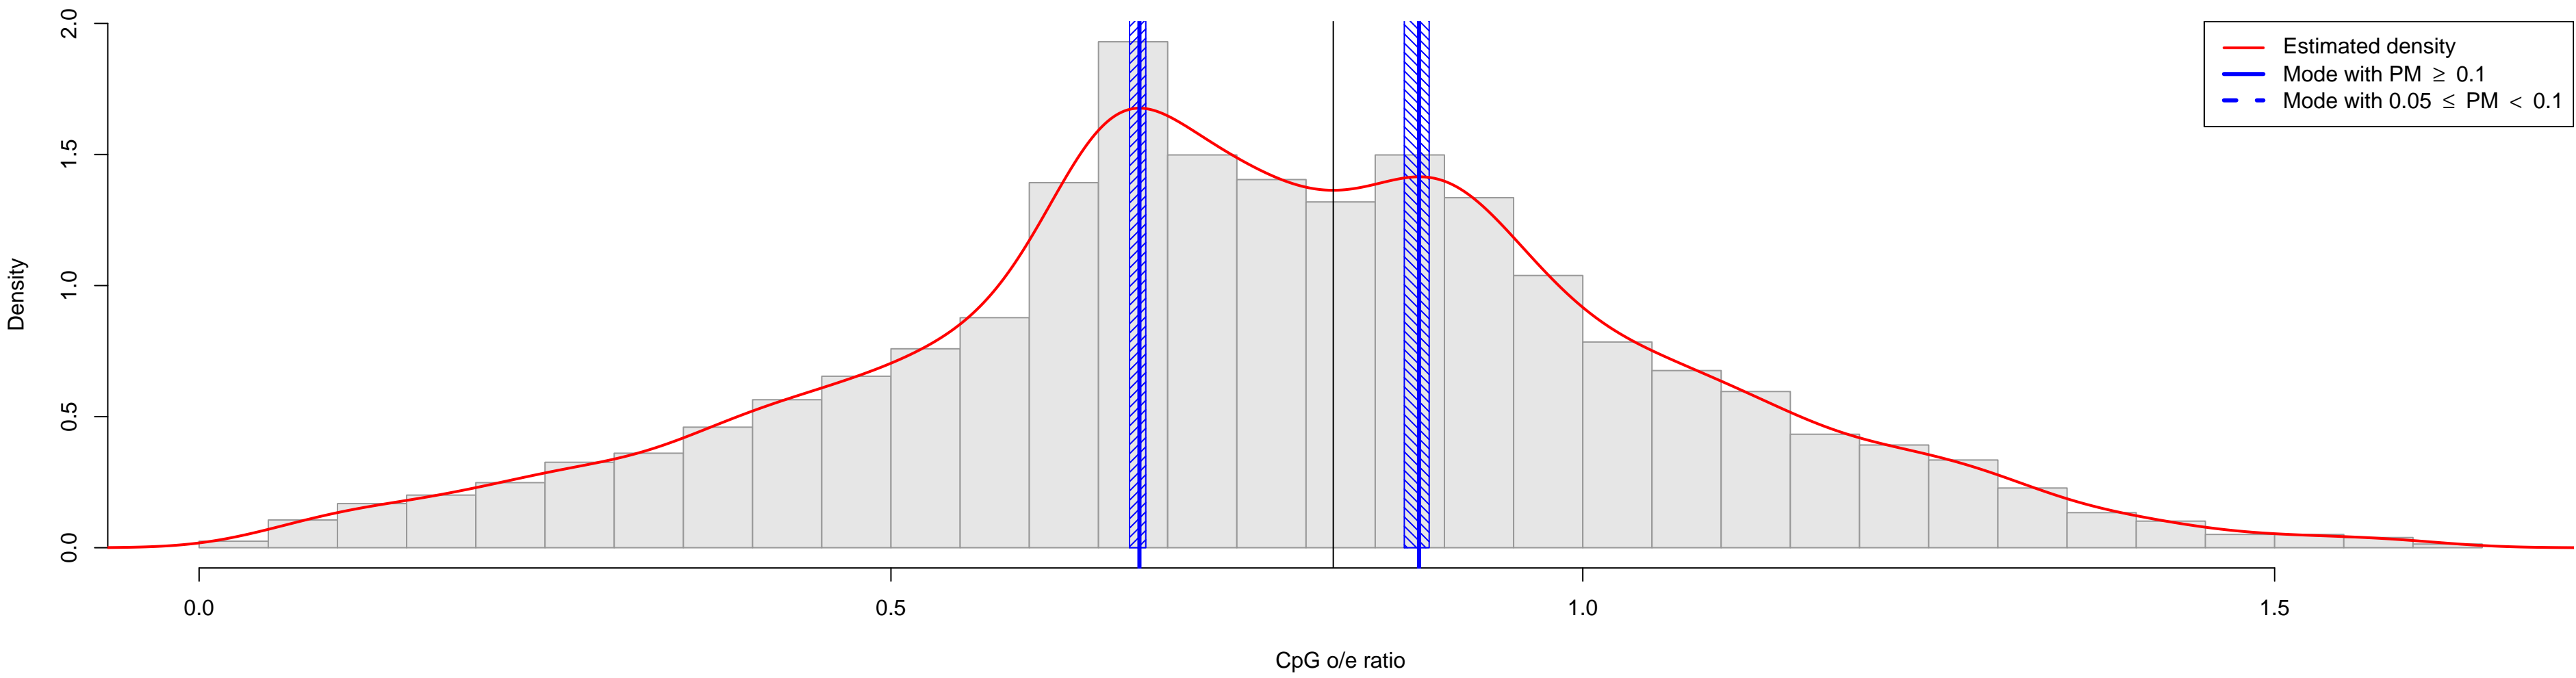

# Dipetalogaster\_maxima

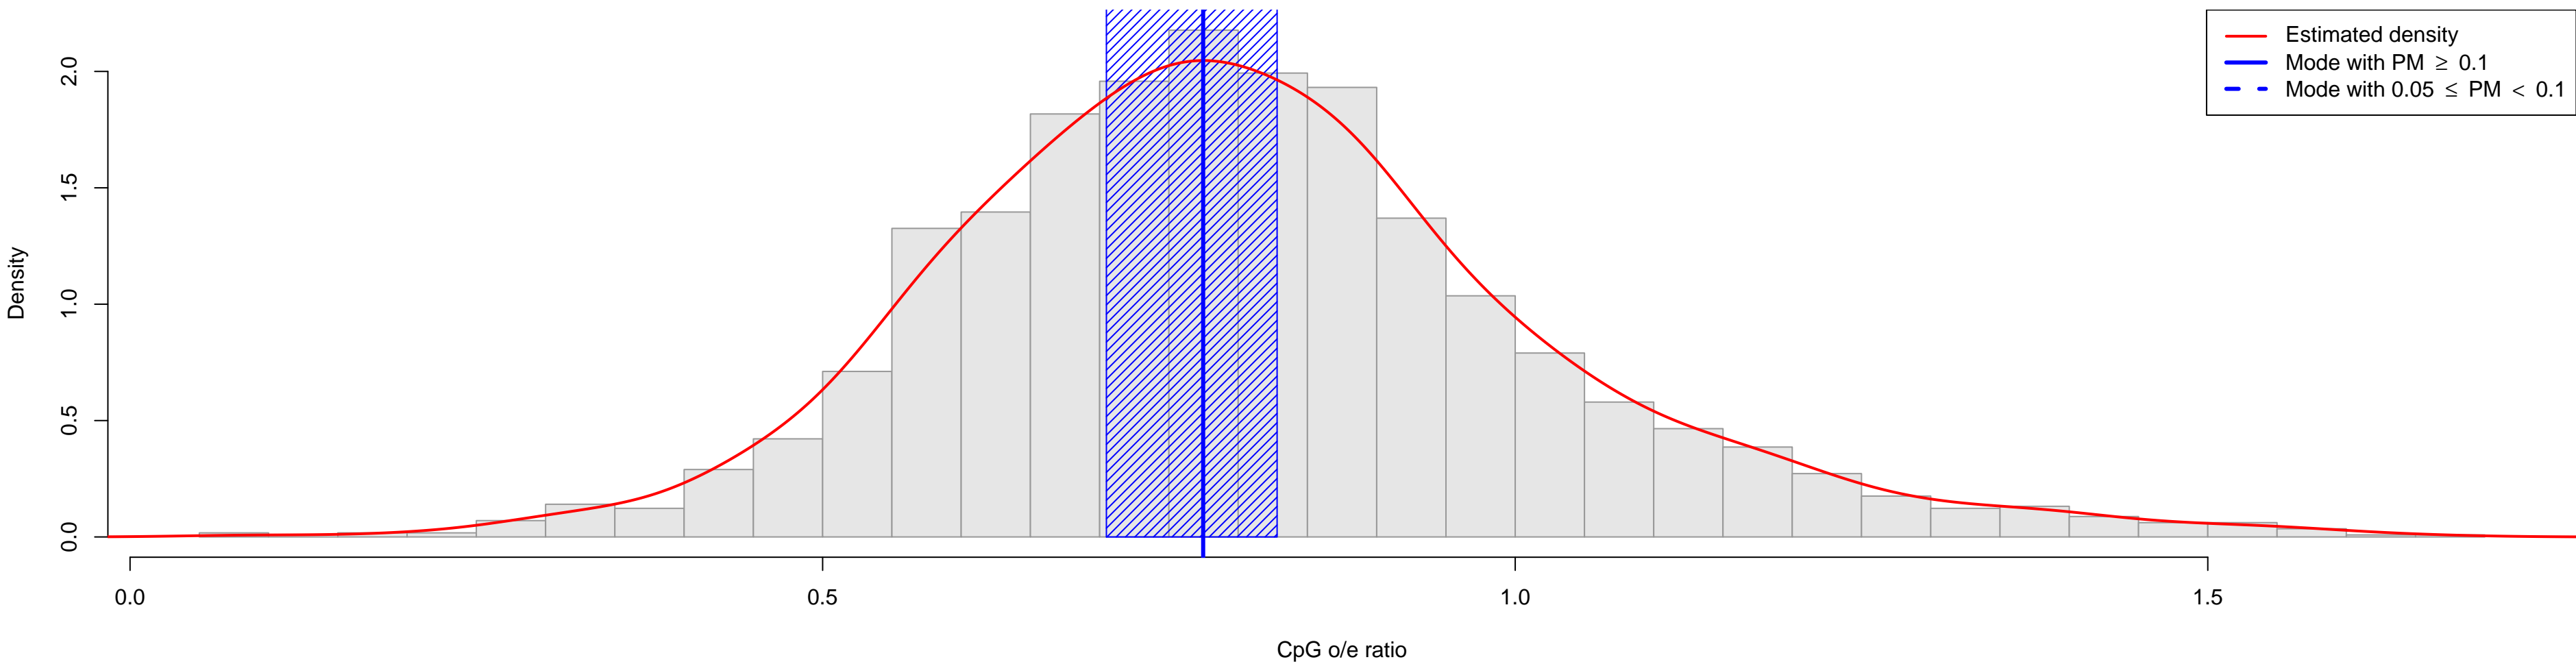



# Dirofilaria\_immitis

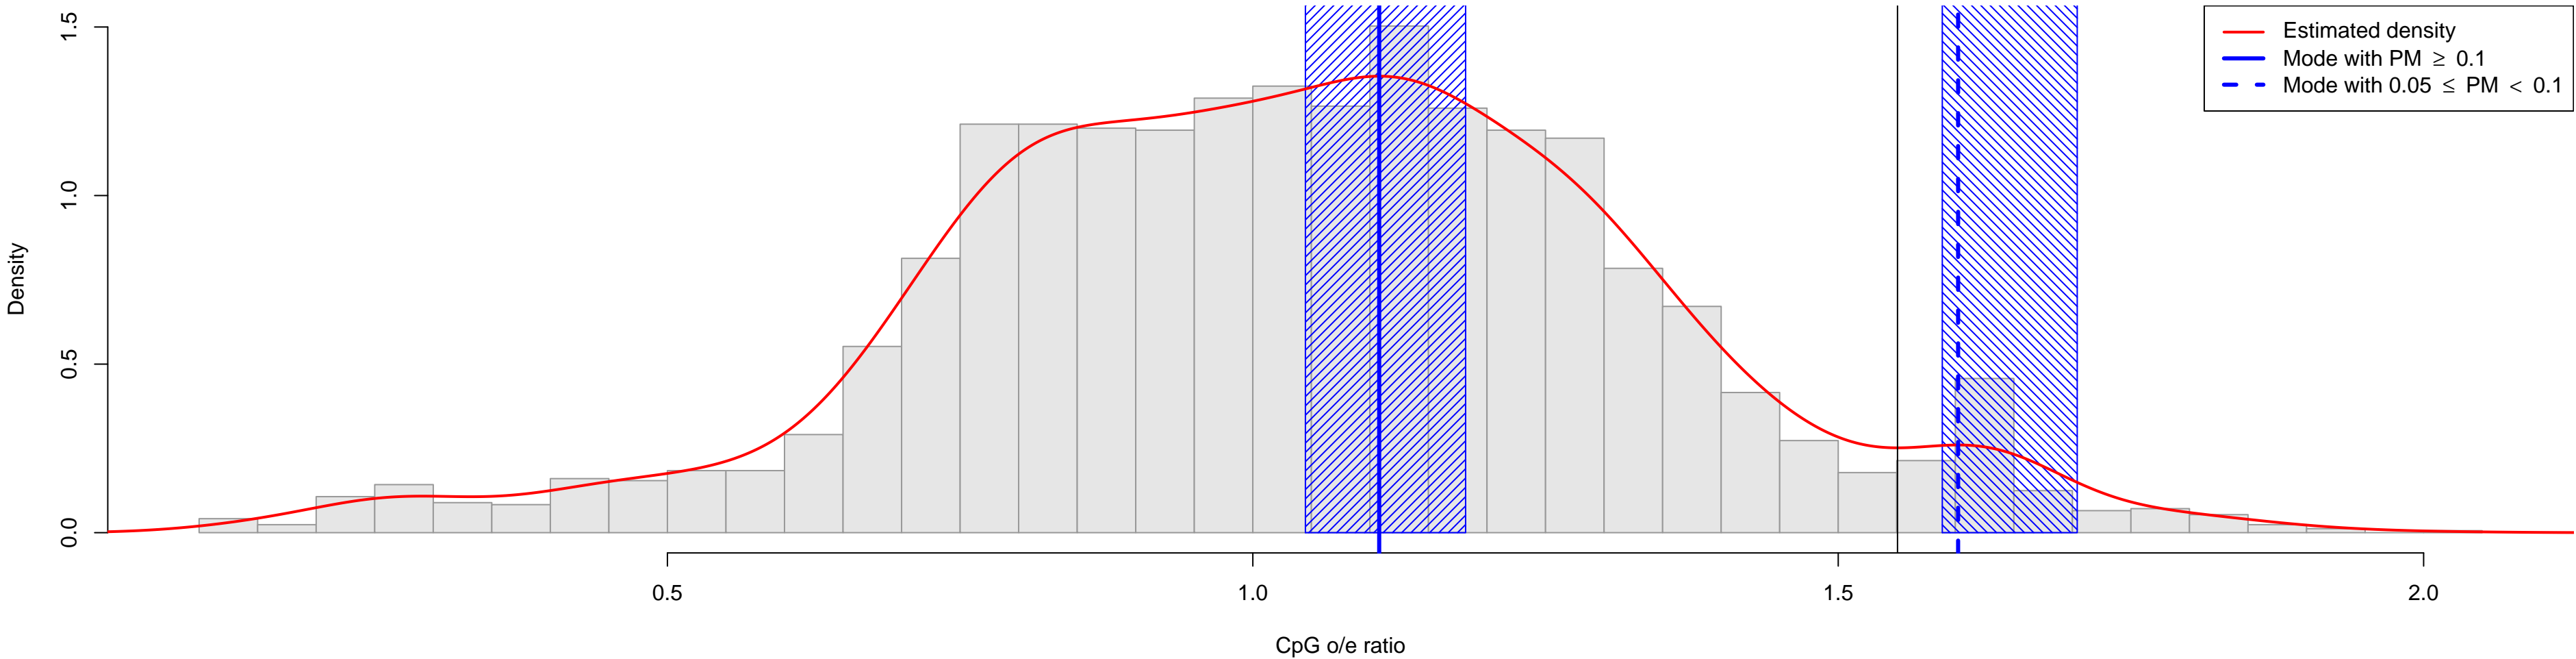

# Dissostichus\_mawsoni

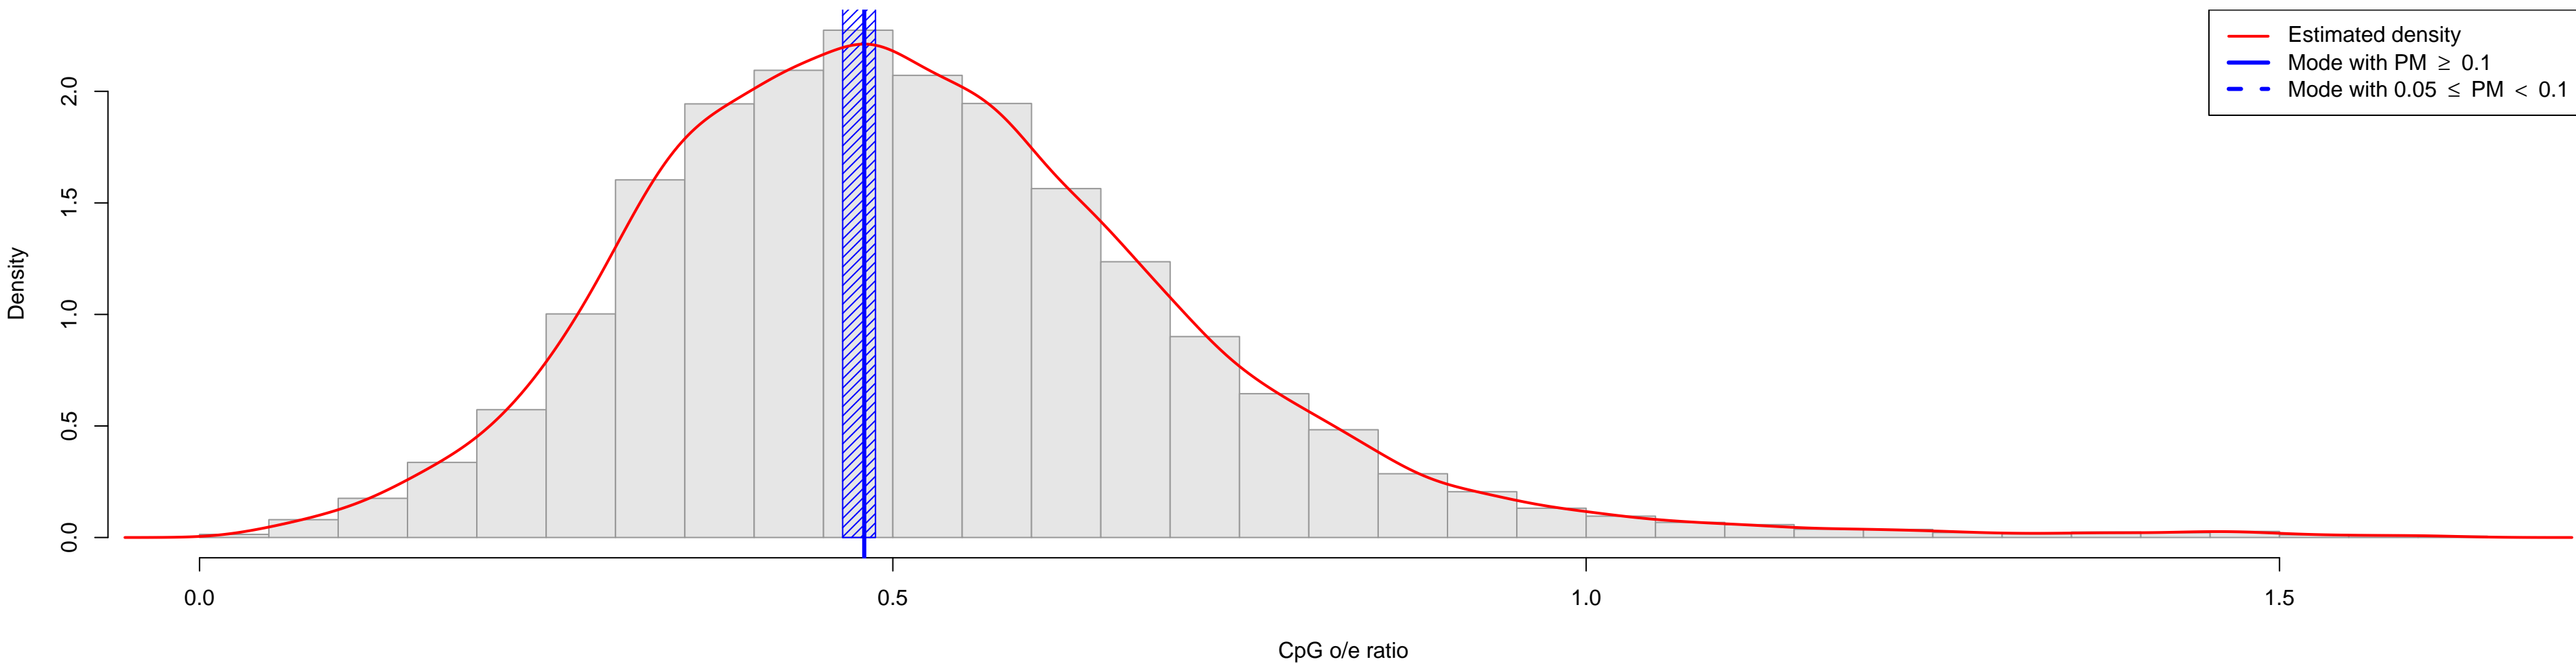

# Ditylenchus\_africanus

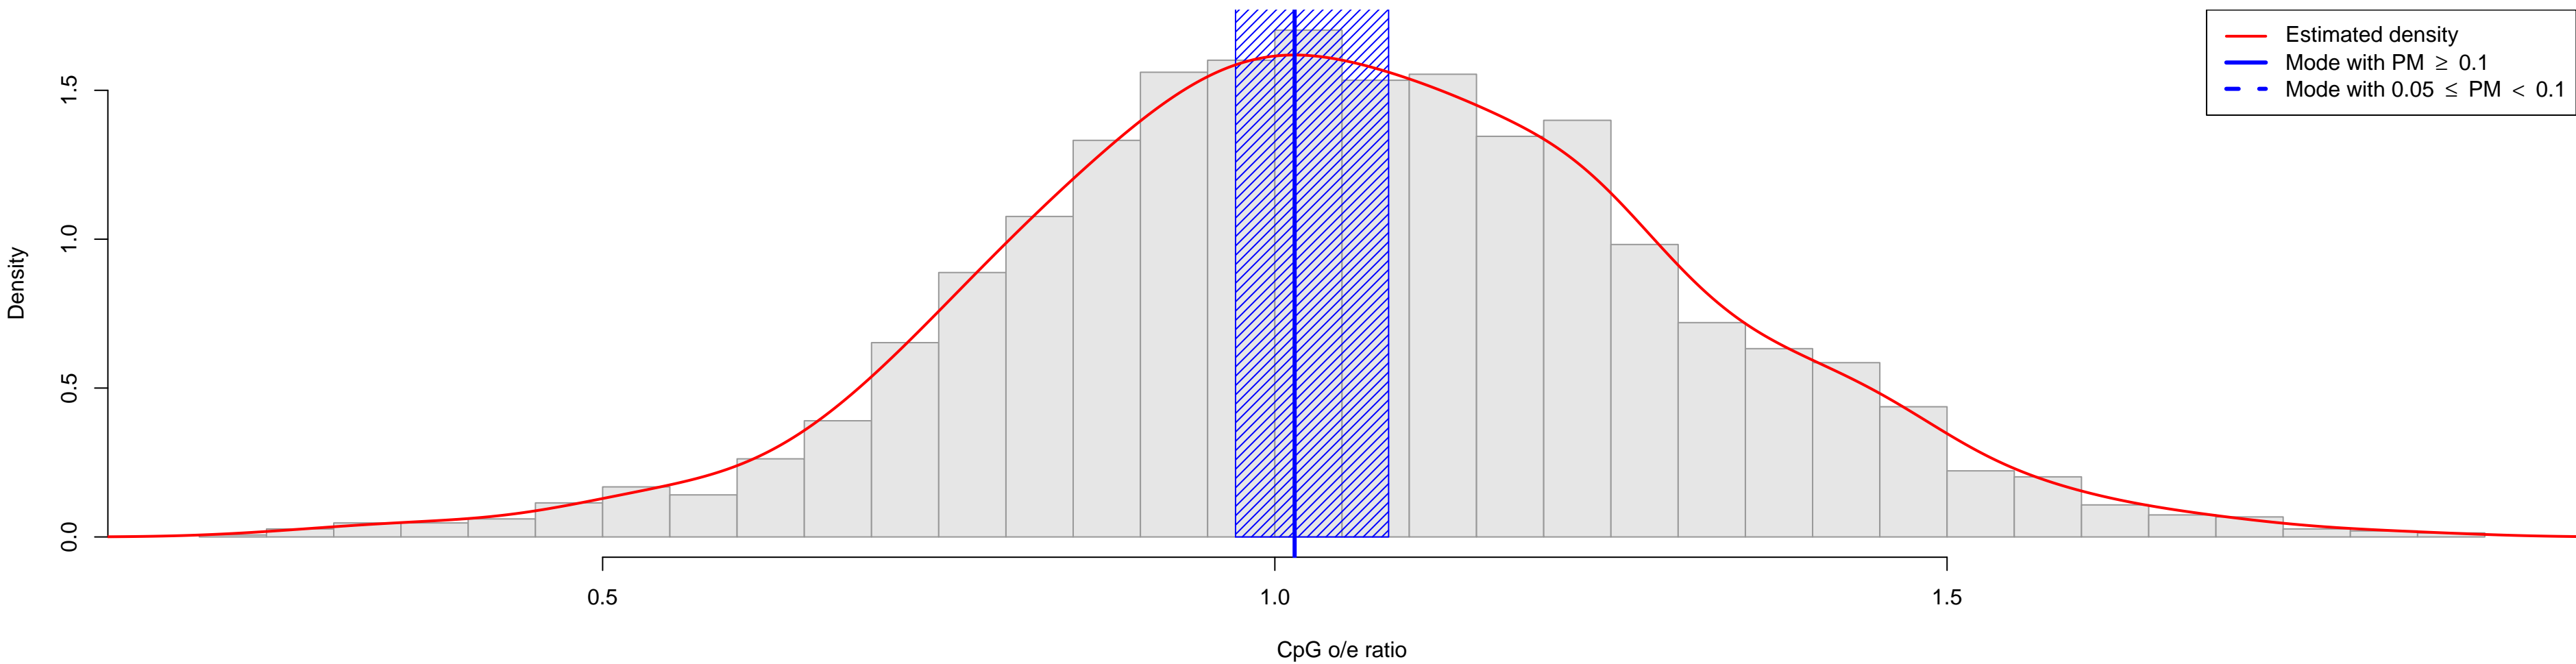

# Drosophila\_ananassae

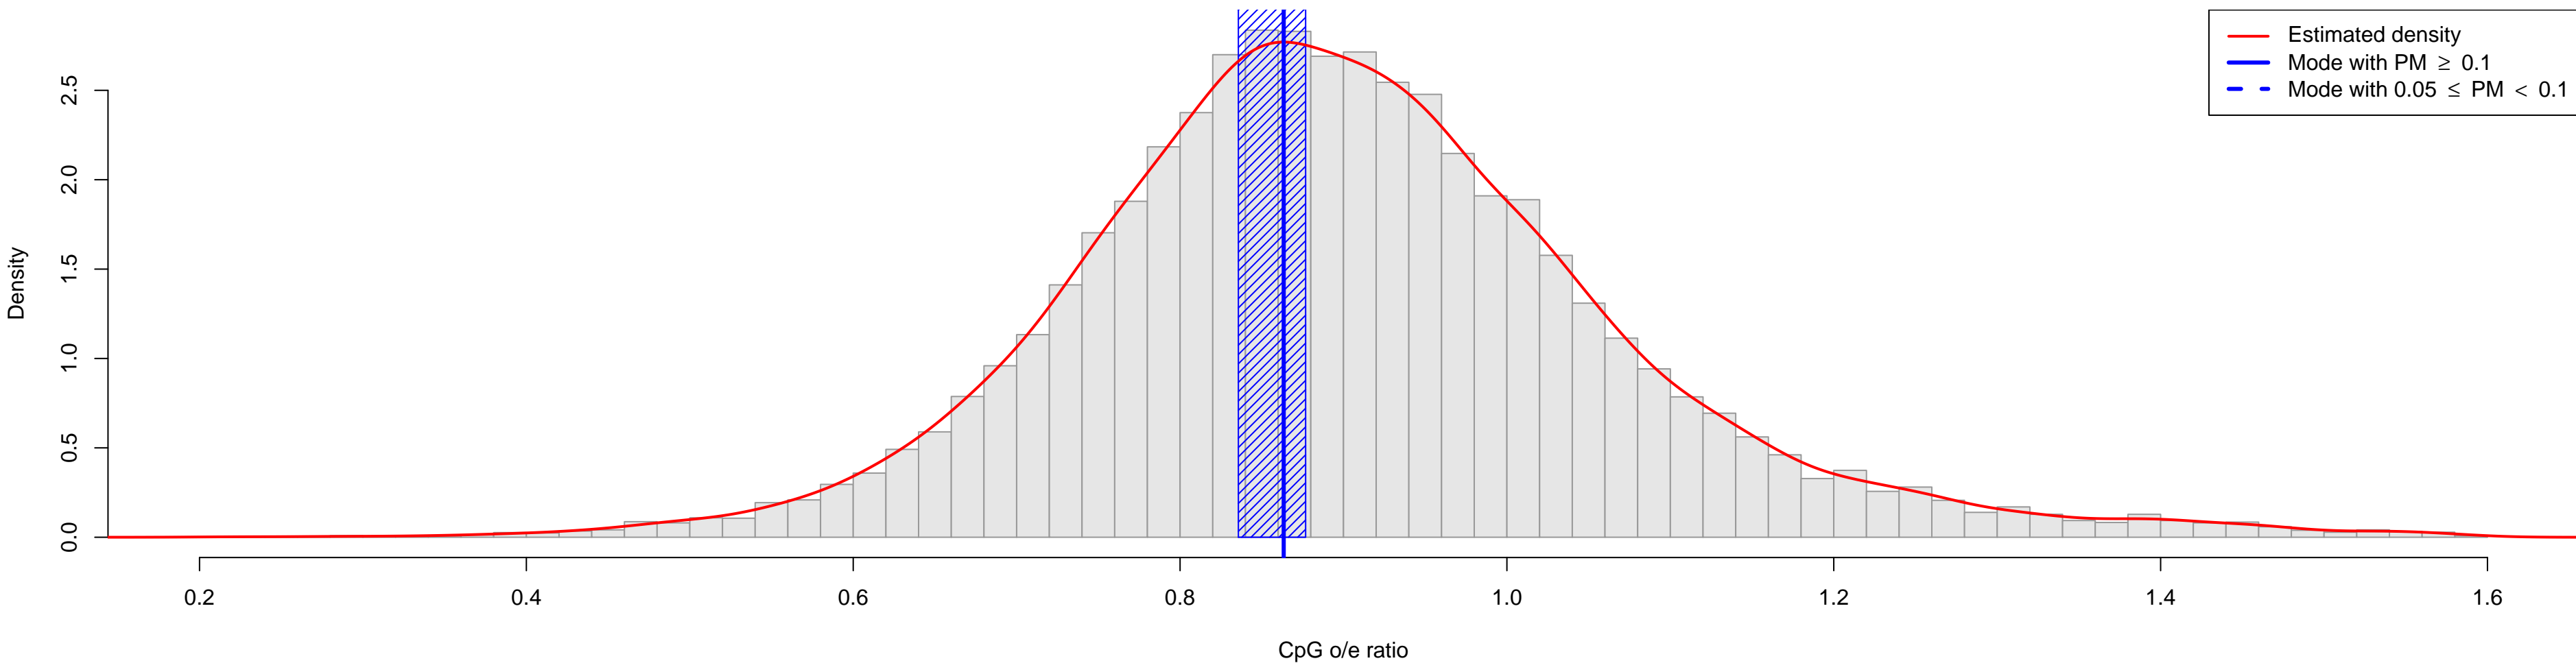

# Drosophila\_auraria

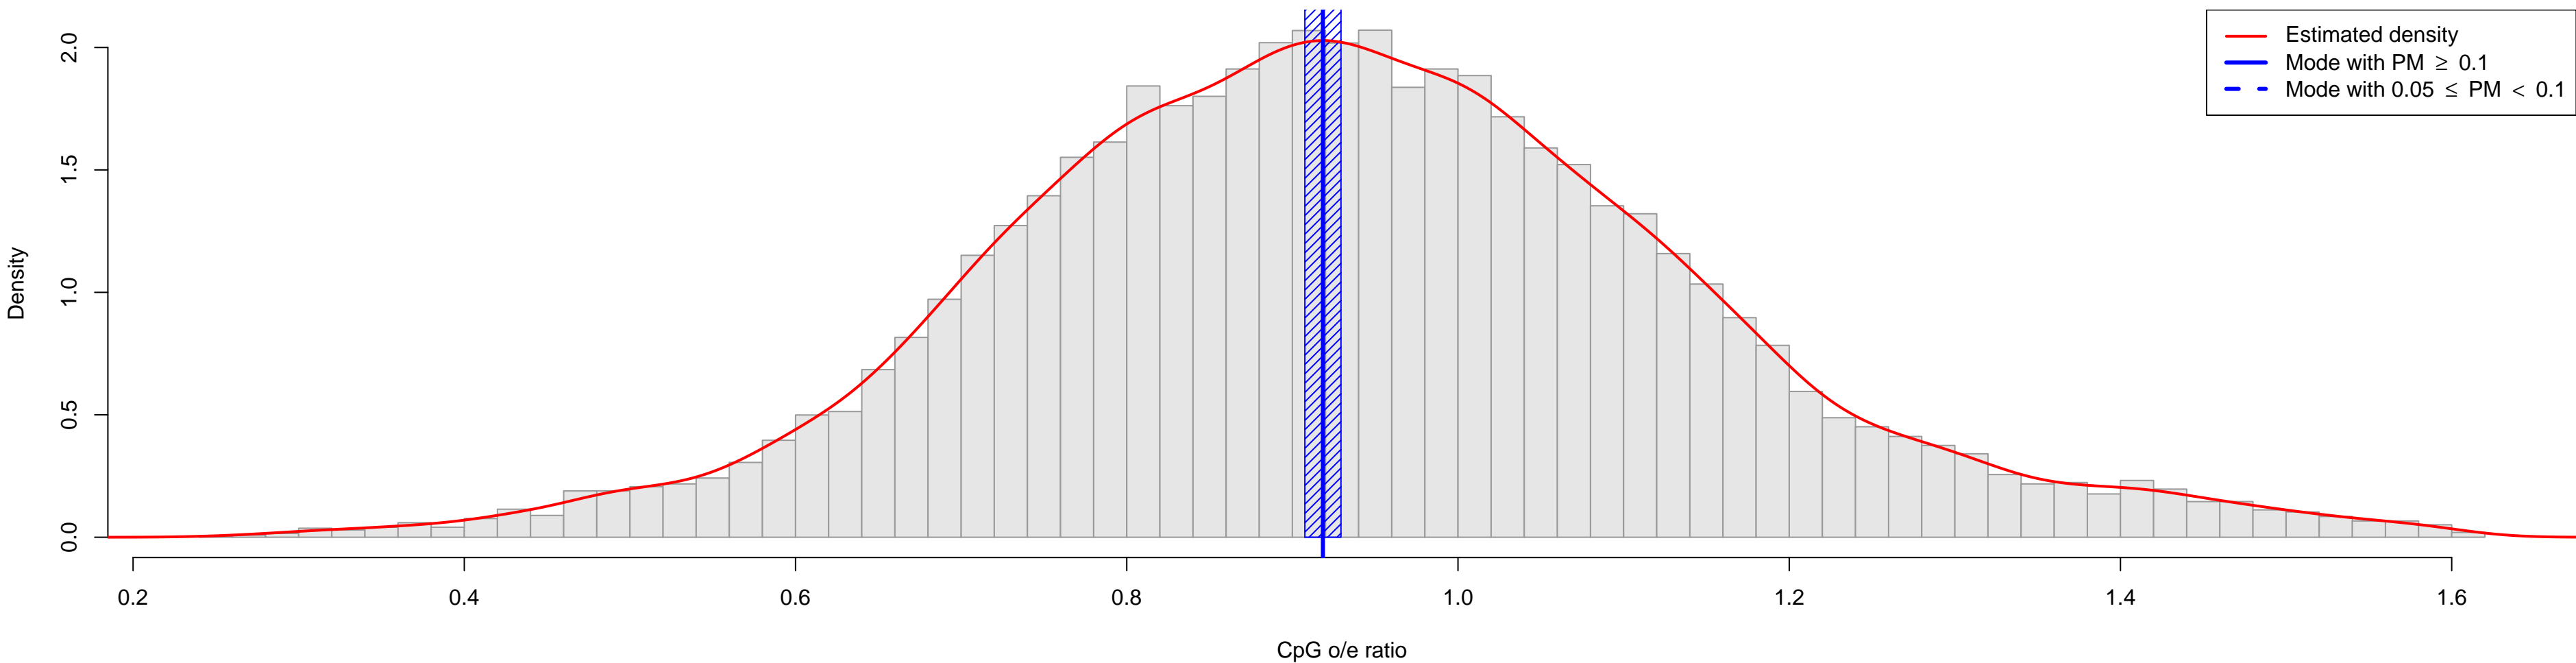

# Drosophila\_erecta

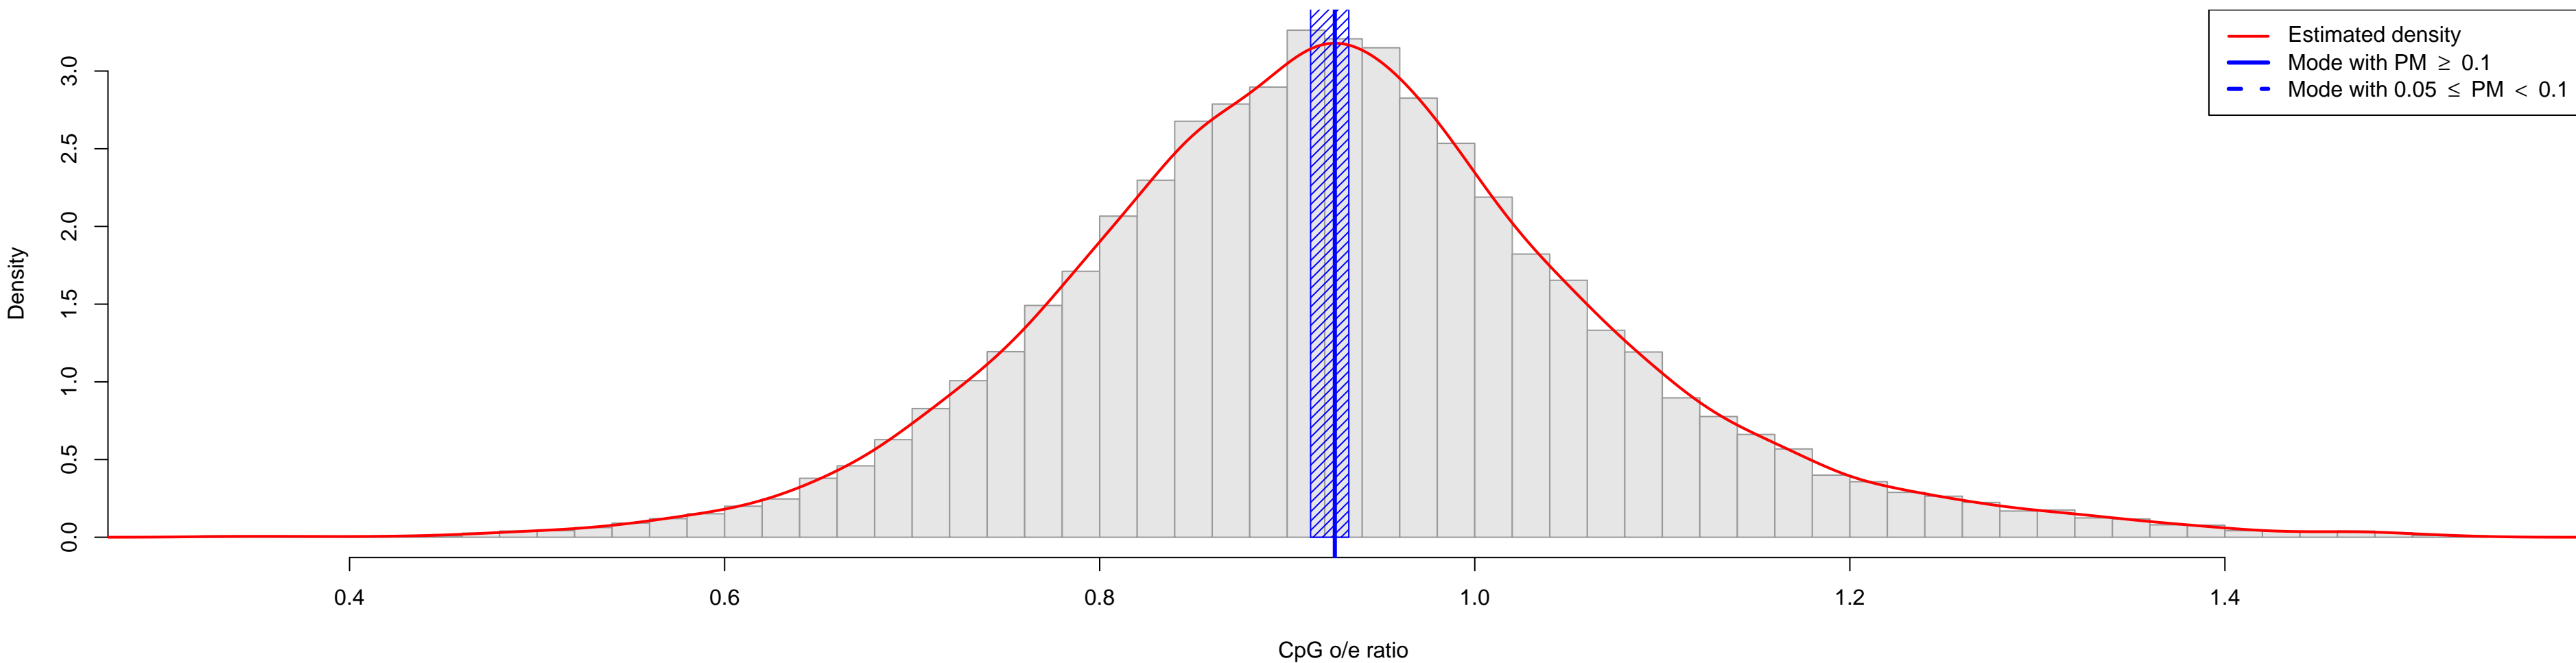

# Drosophila\_grimshawi

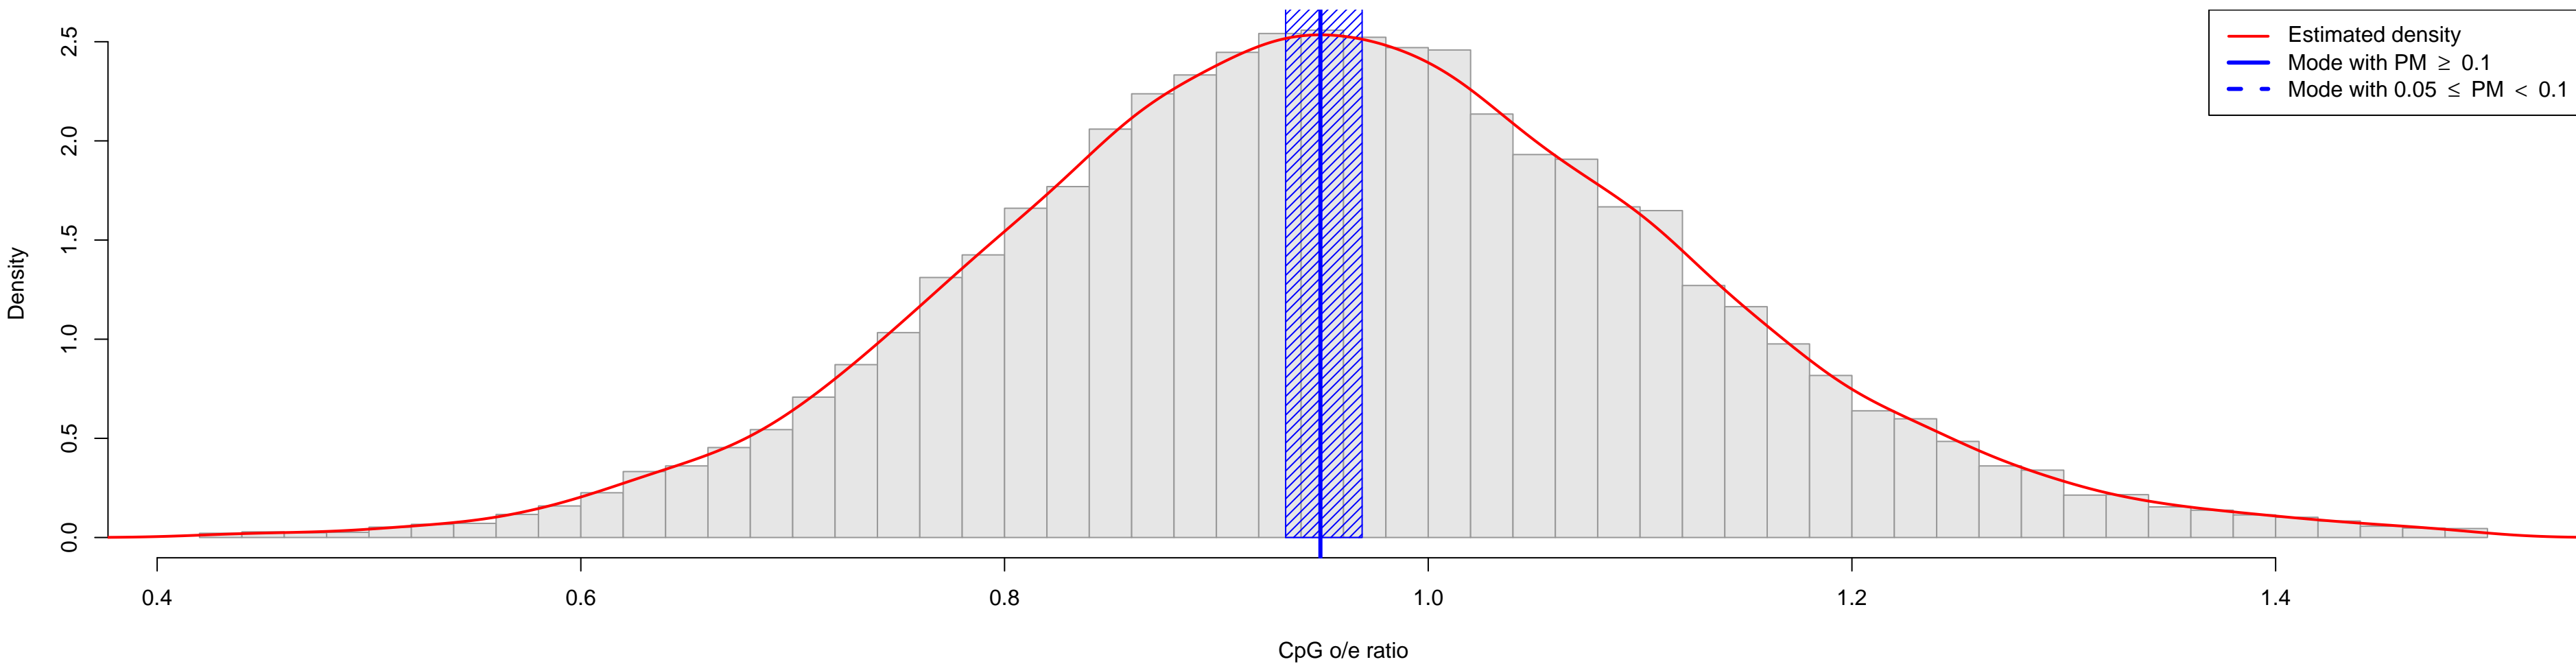

# Drosophila\_melanogaster

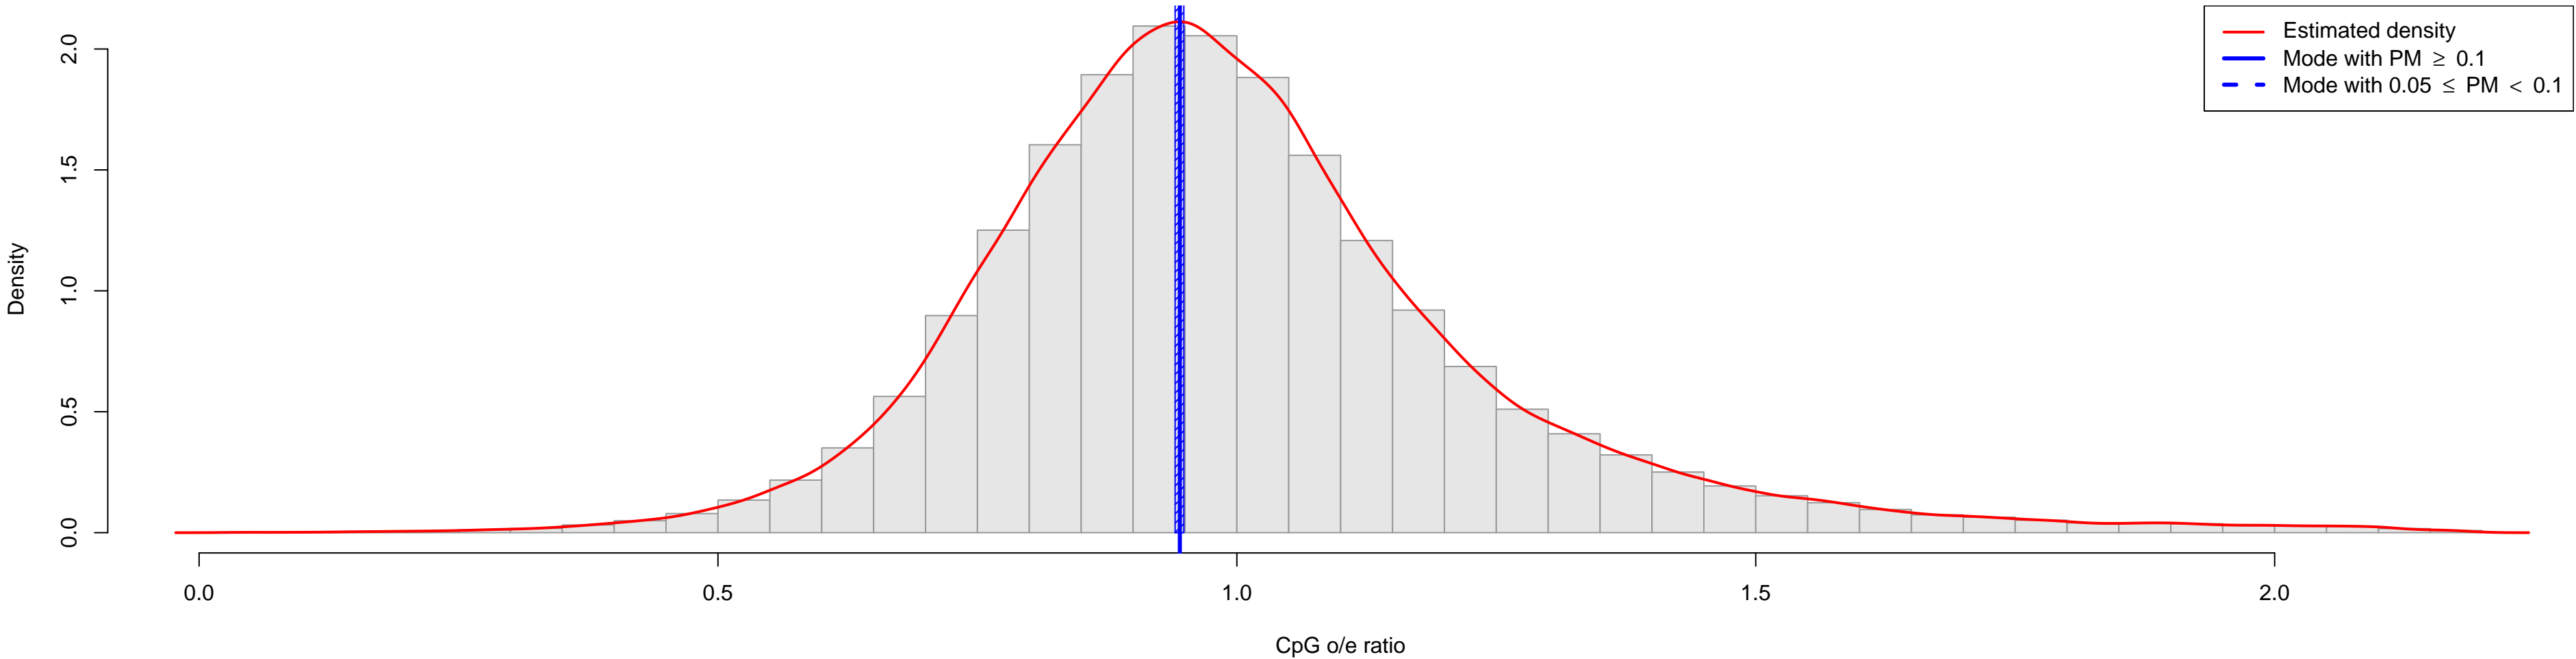



# Drosophila\_mojavensis

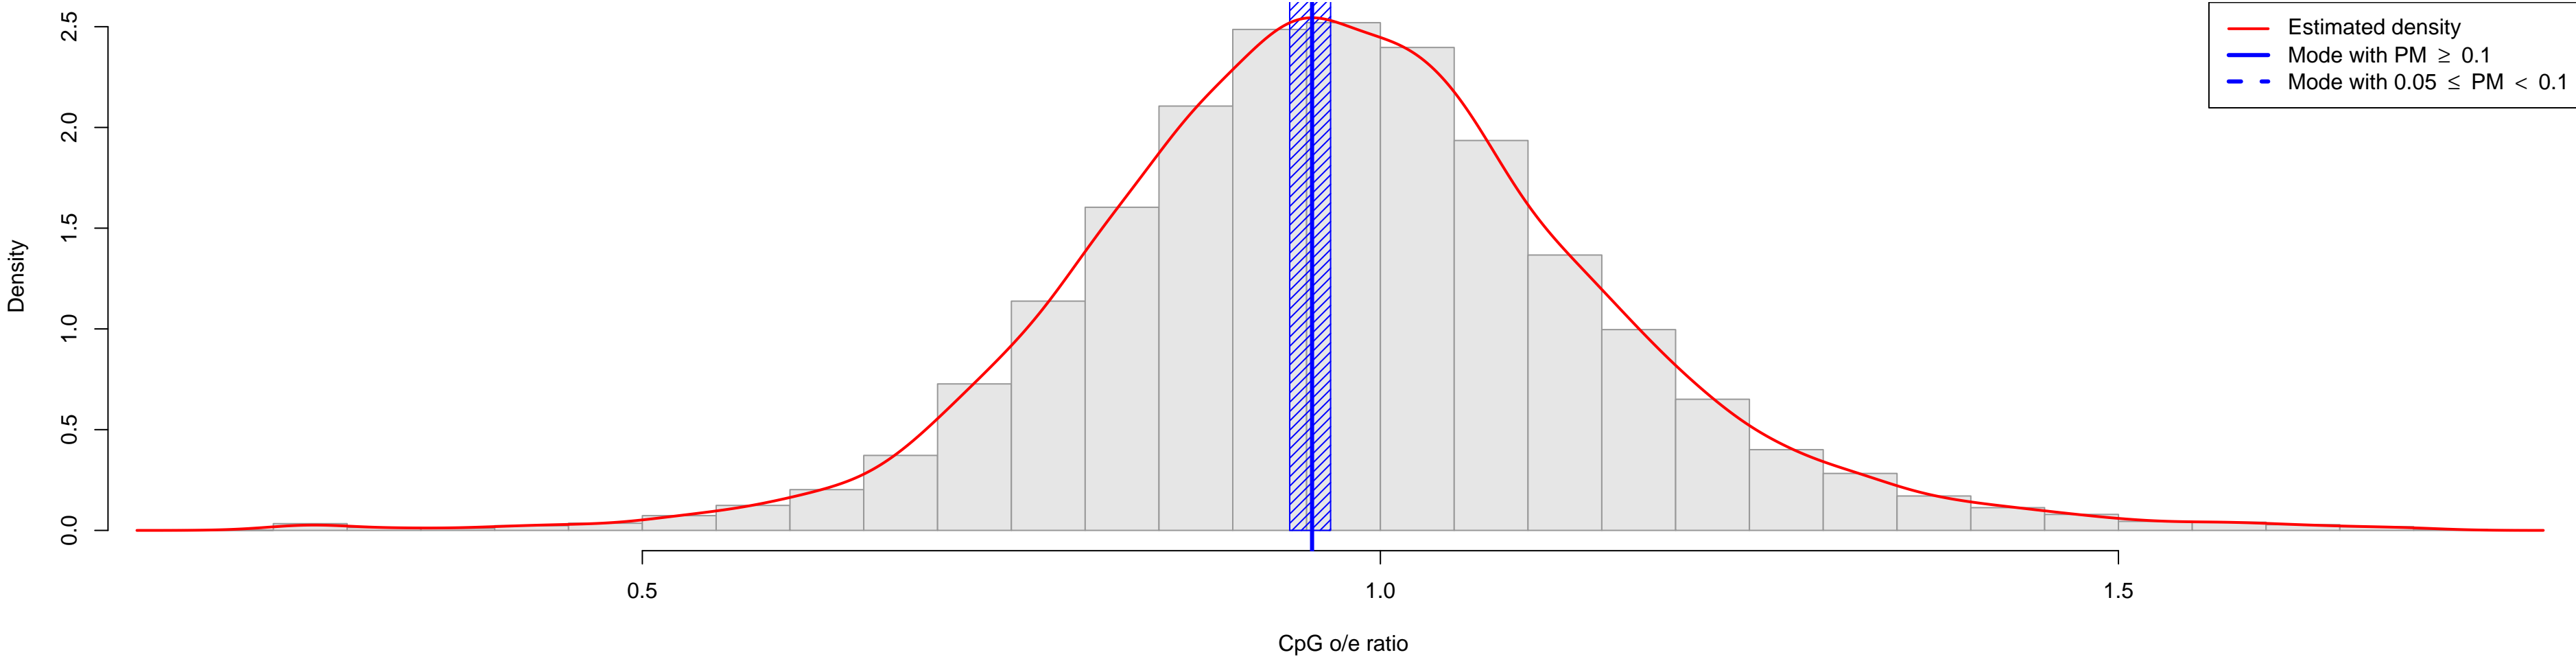

# Drosophila\_pseudoobscura

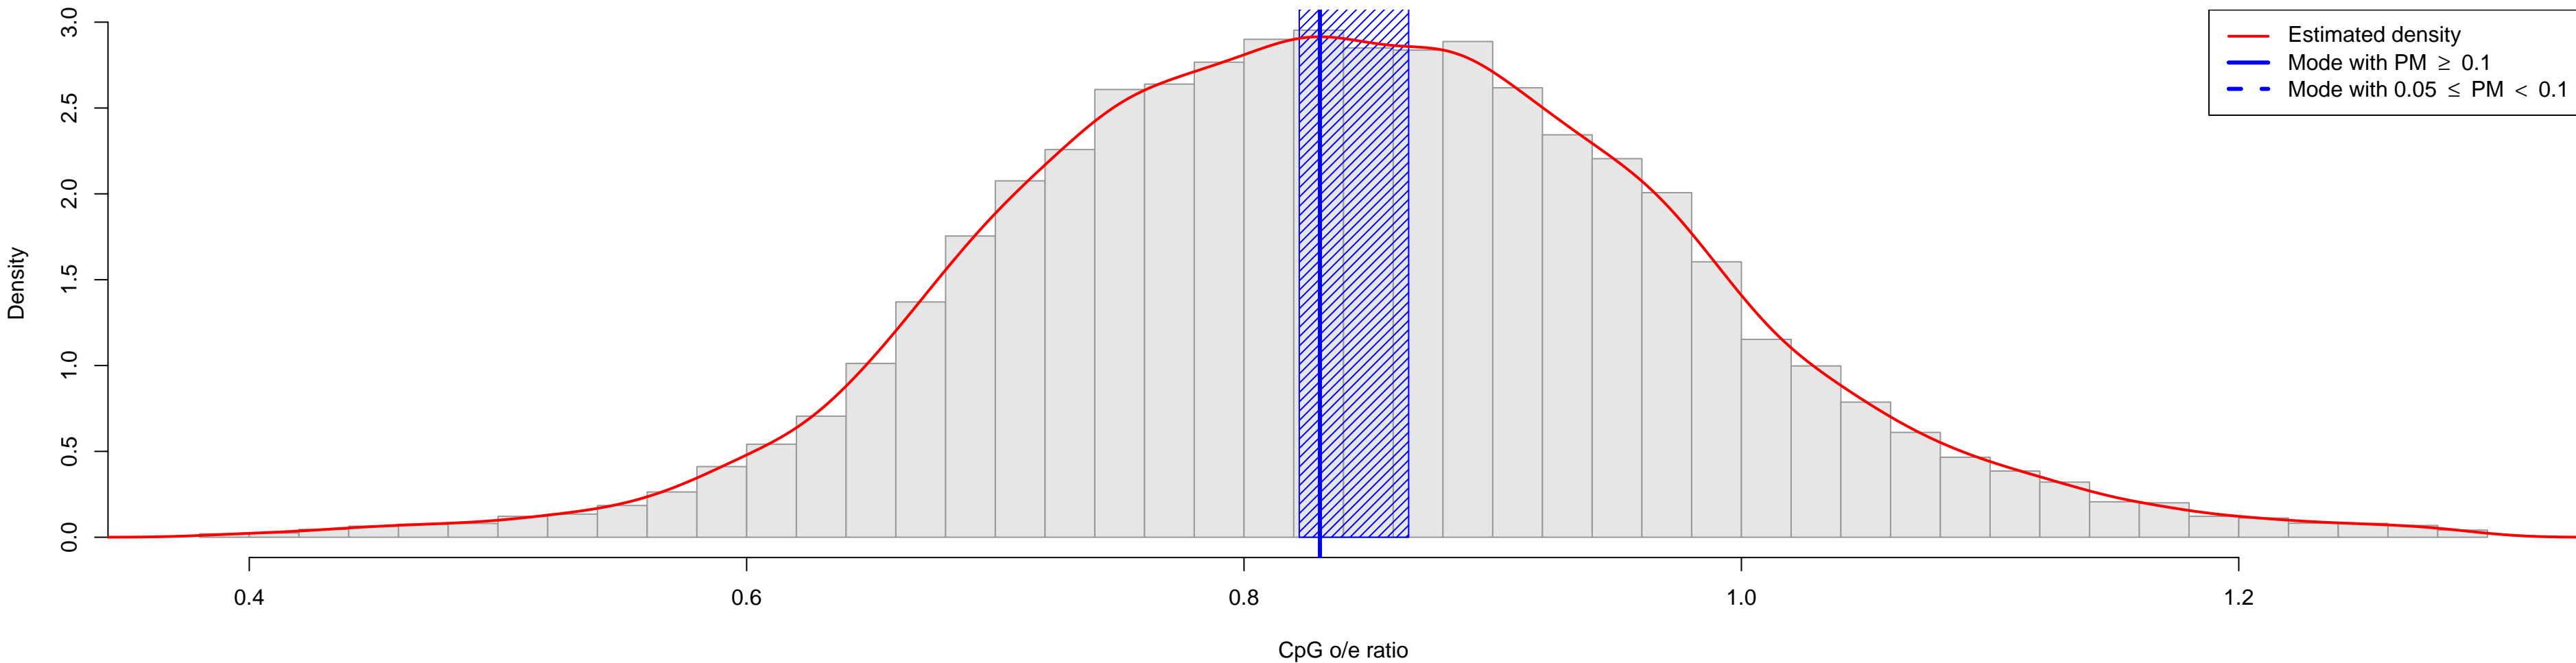

# Drosophila\_sechellia

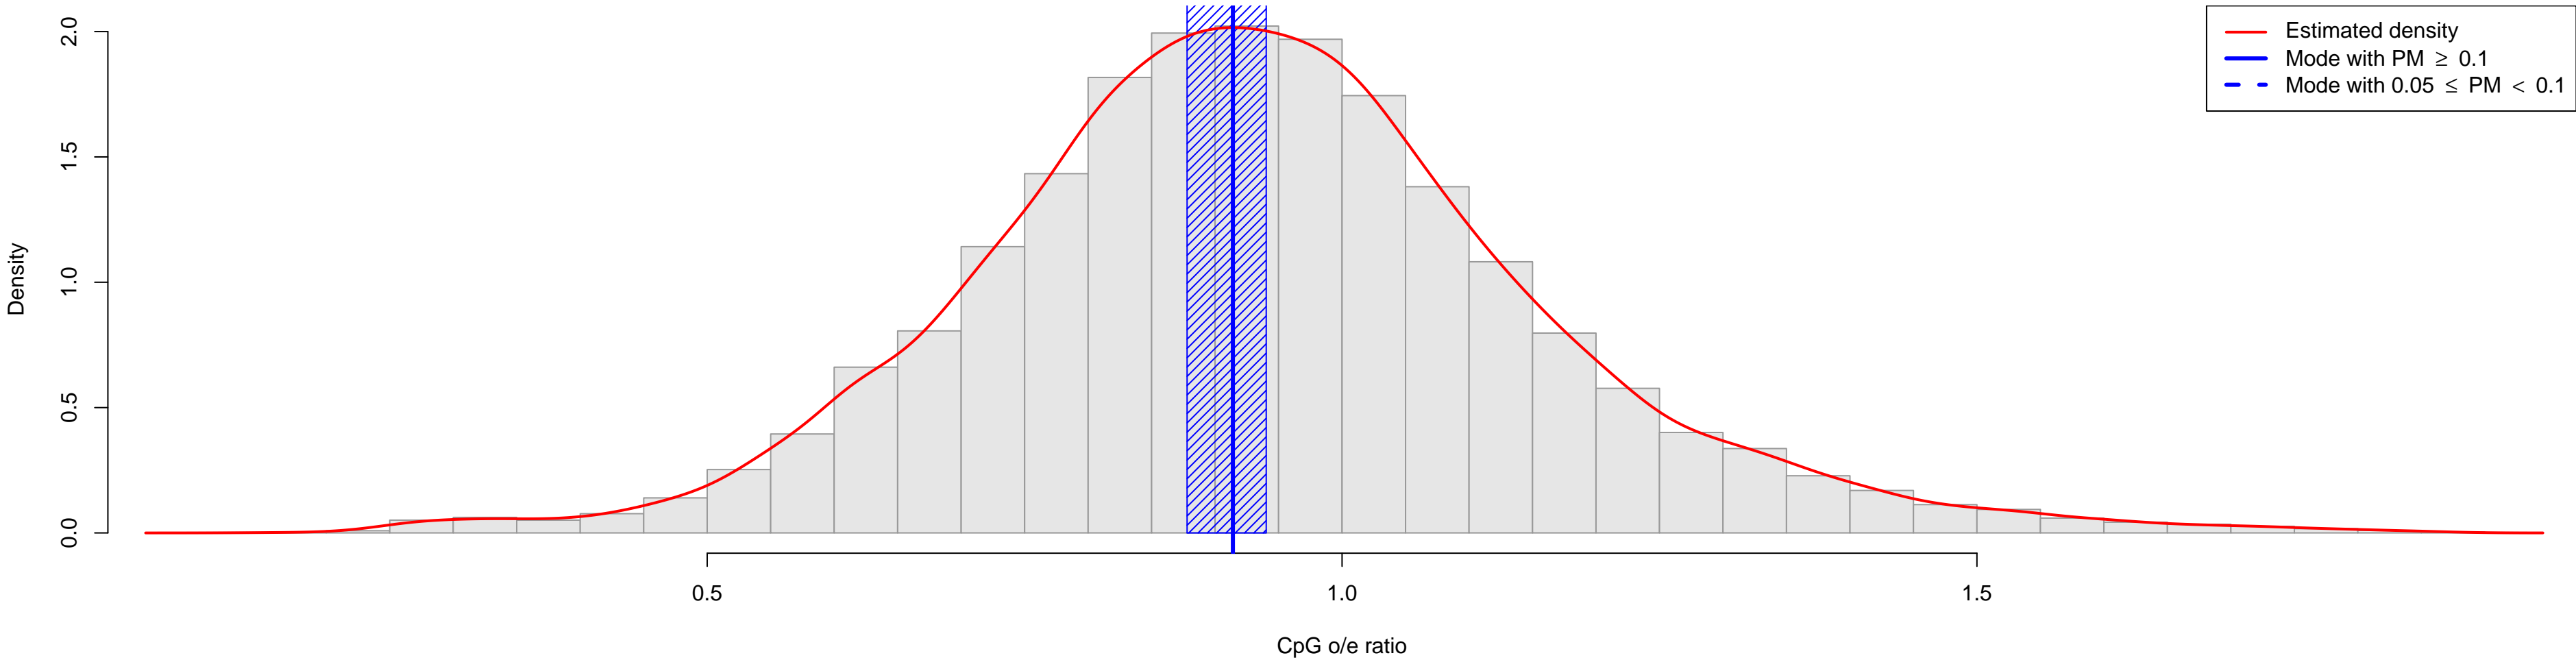

# Drosophila\_serrata

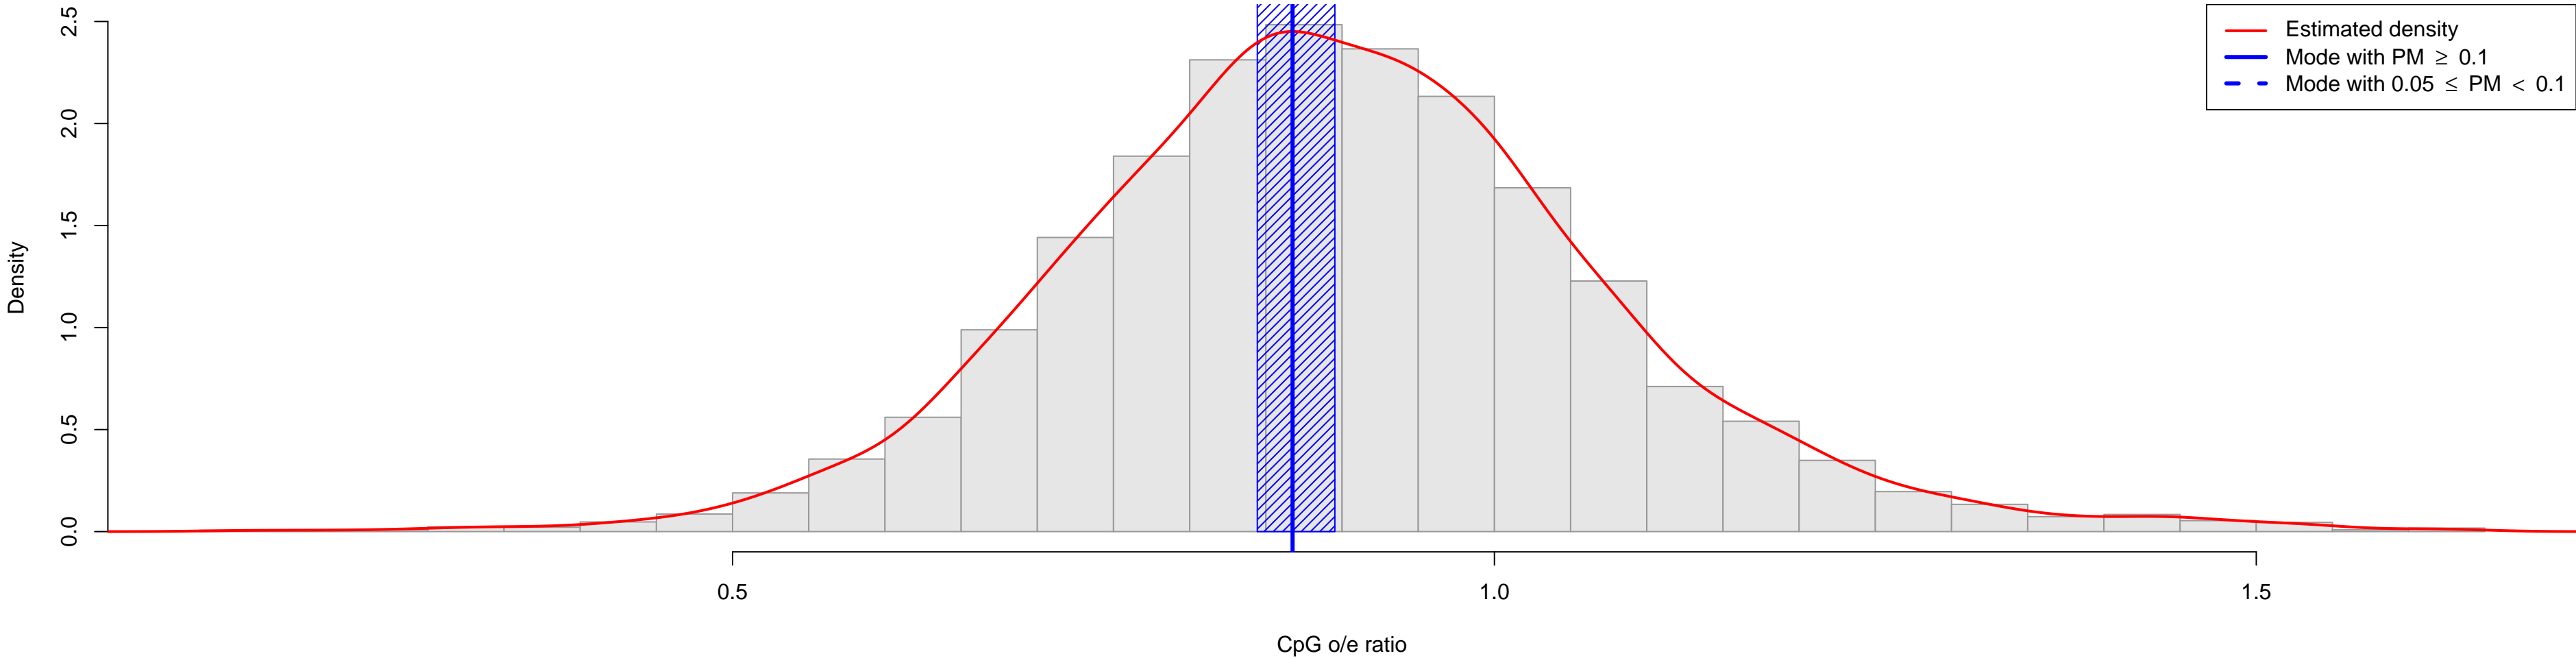

# Drosophila\_simulans

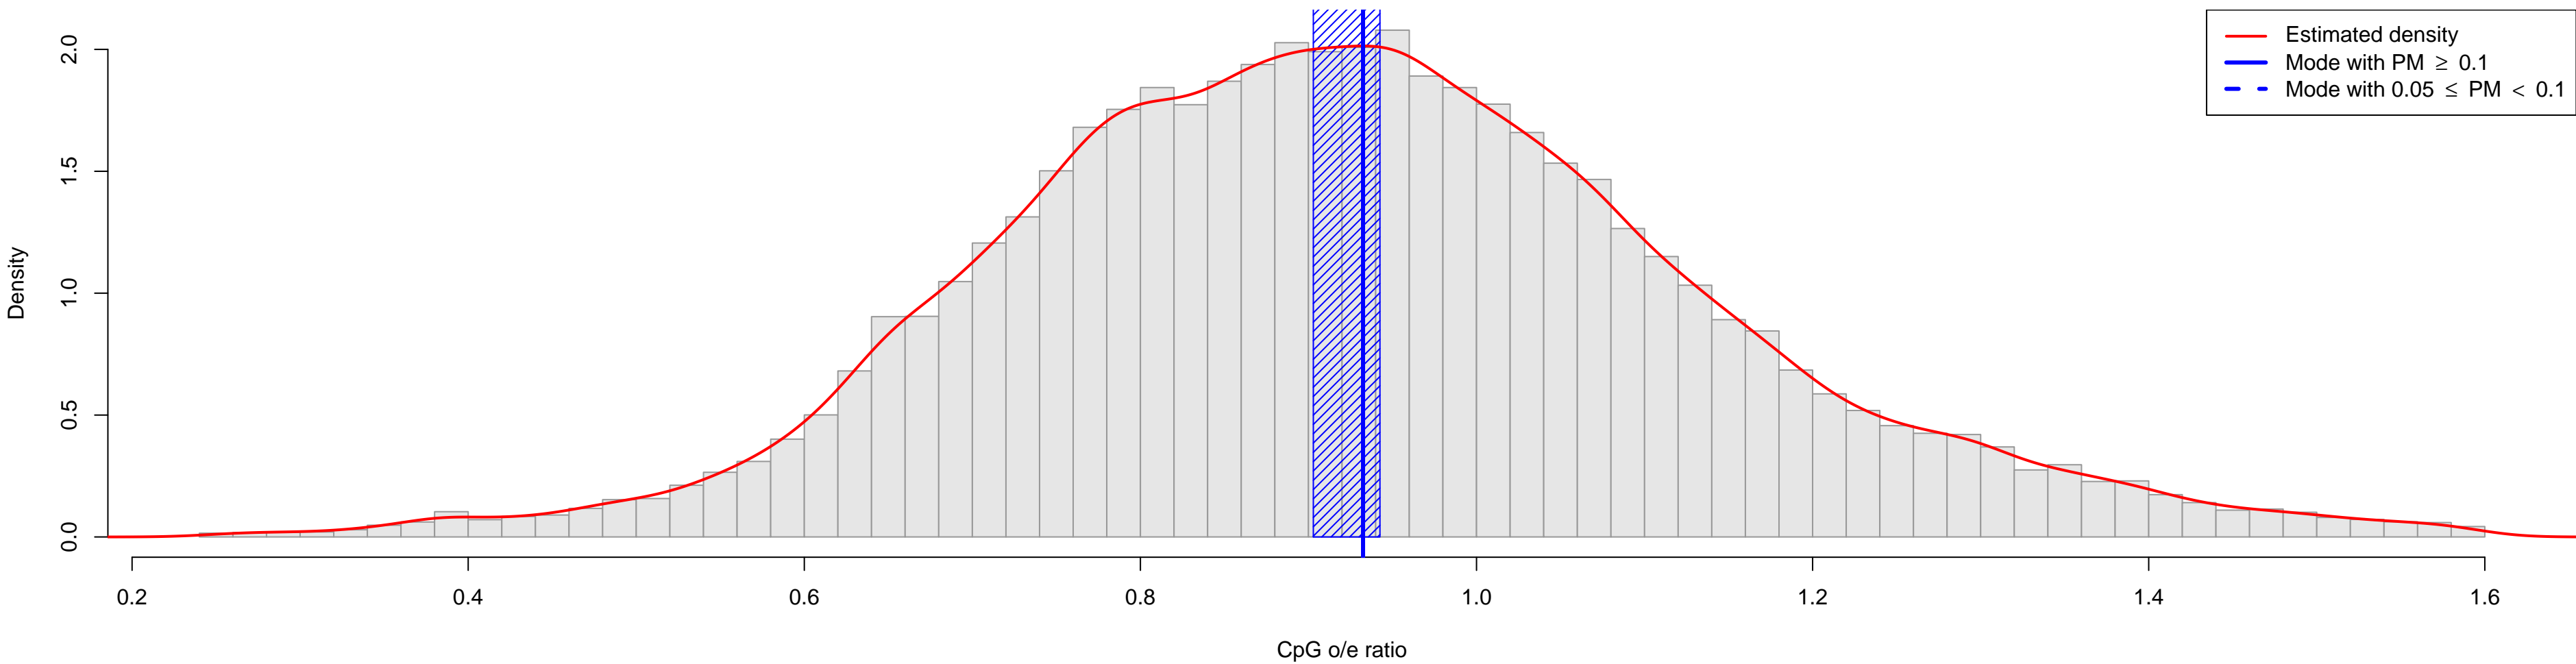

# Drosophila\_virilis

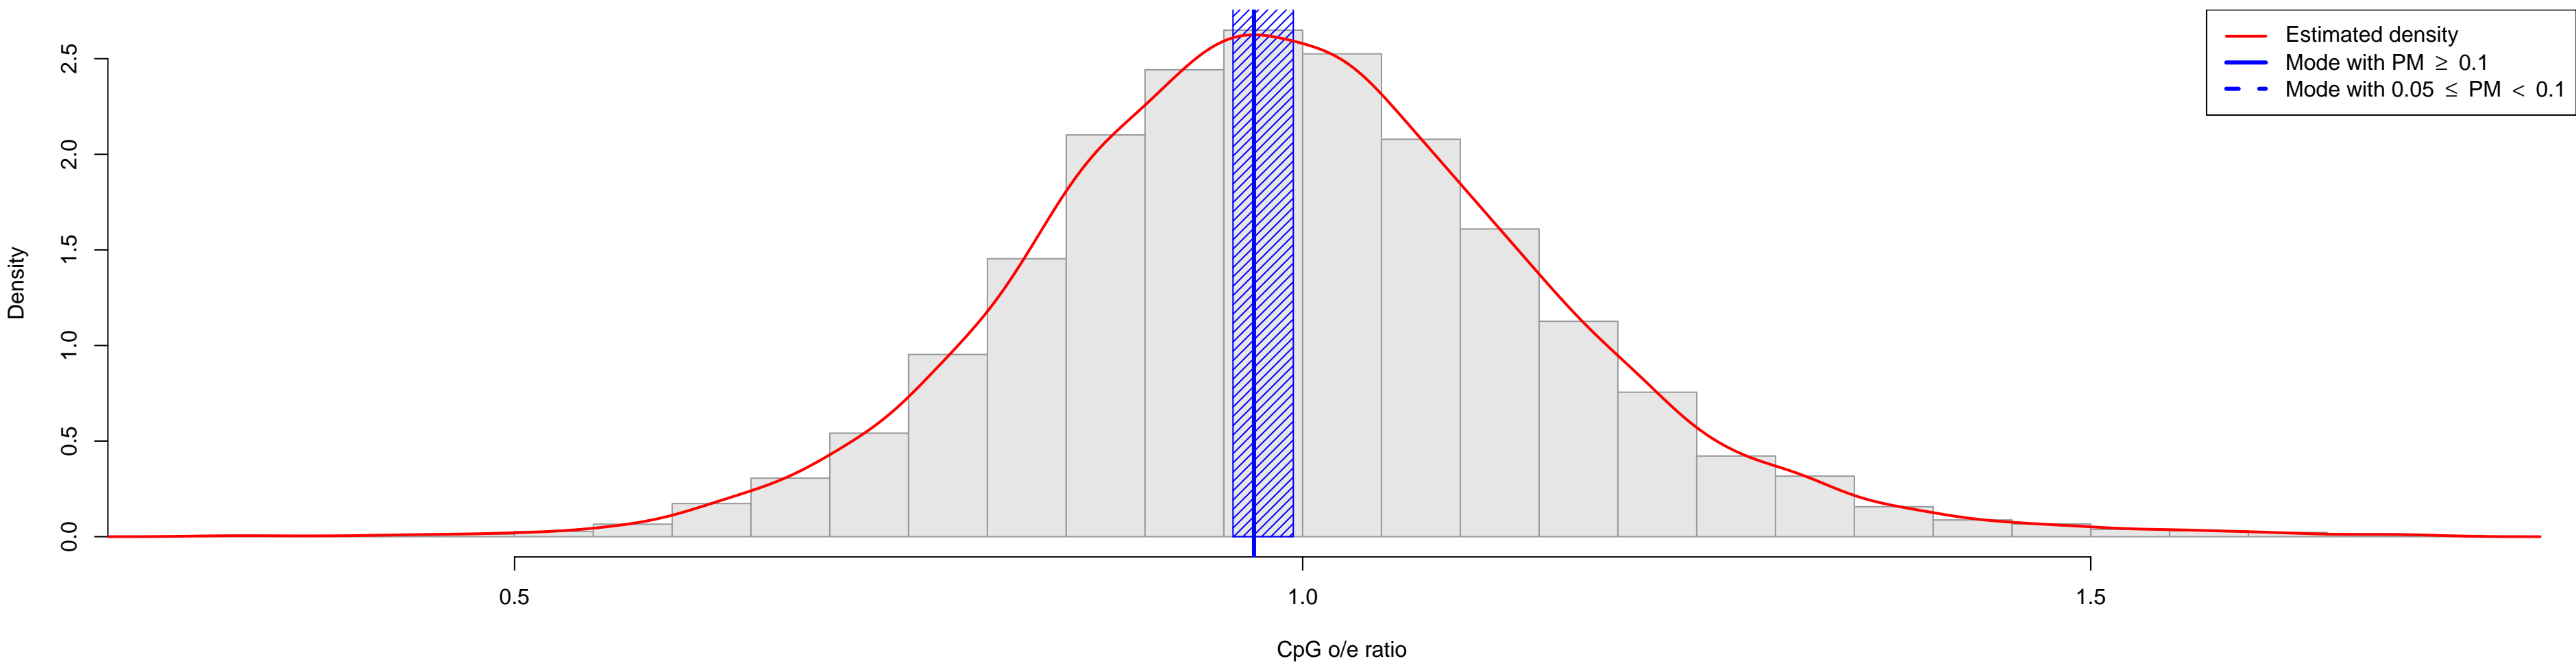

# Drosophila\_willistoni

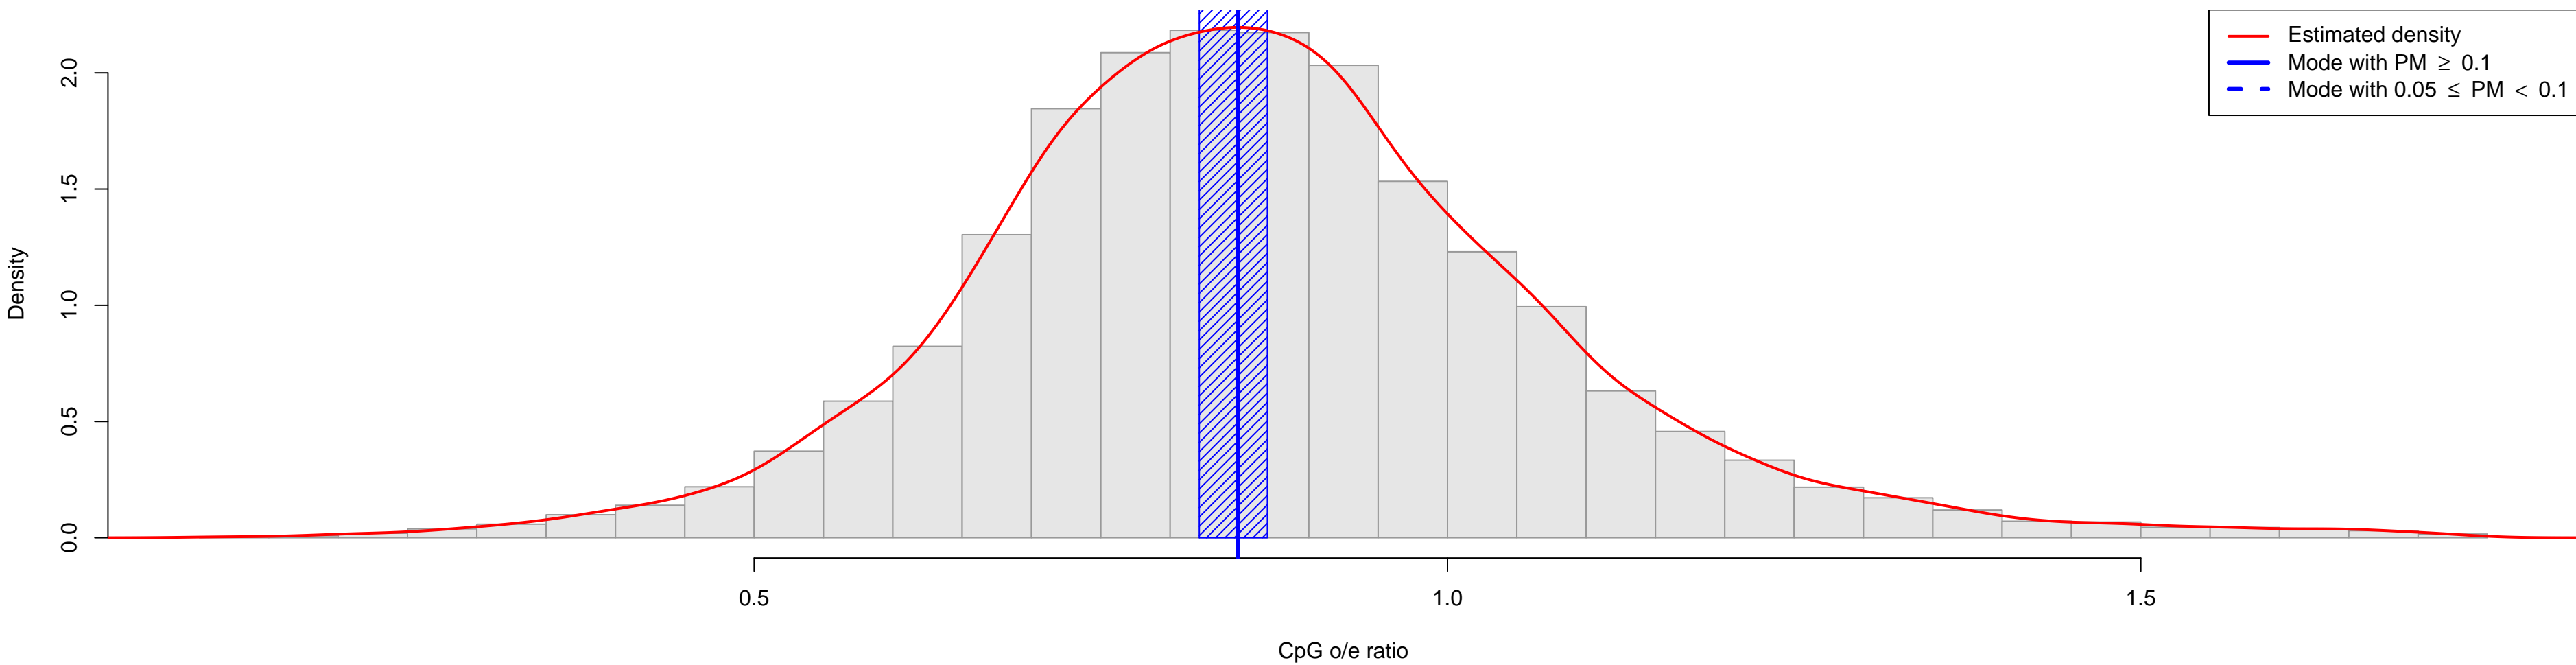

# Drosophila\_yakuba

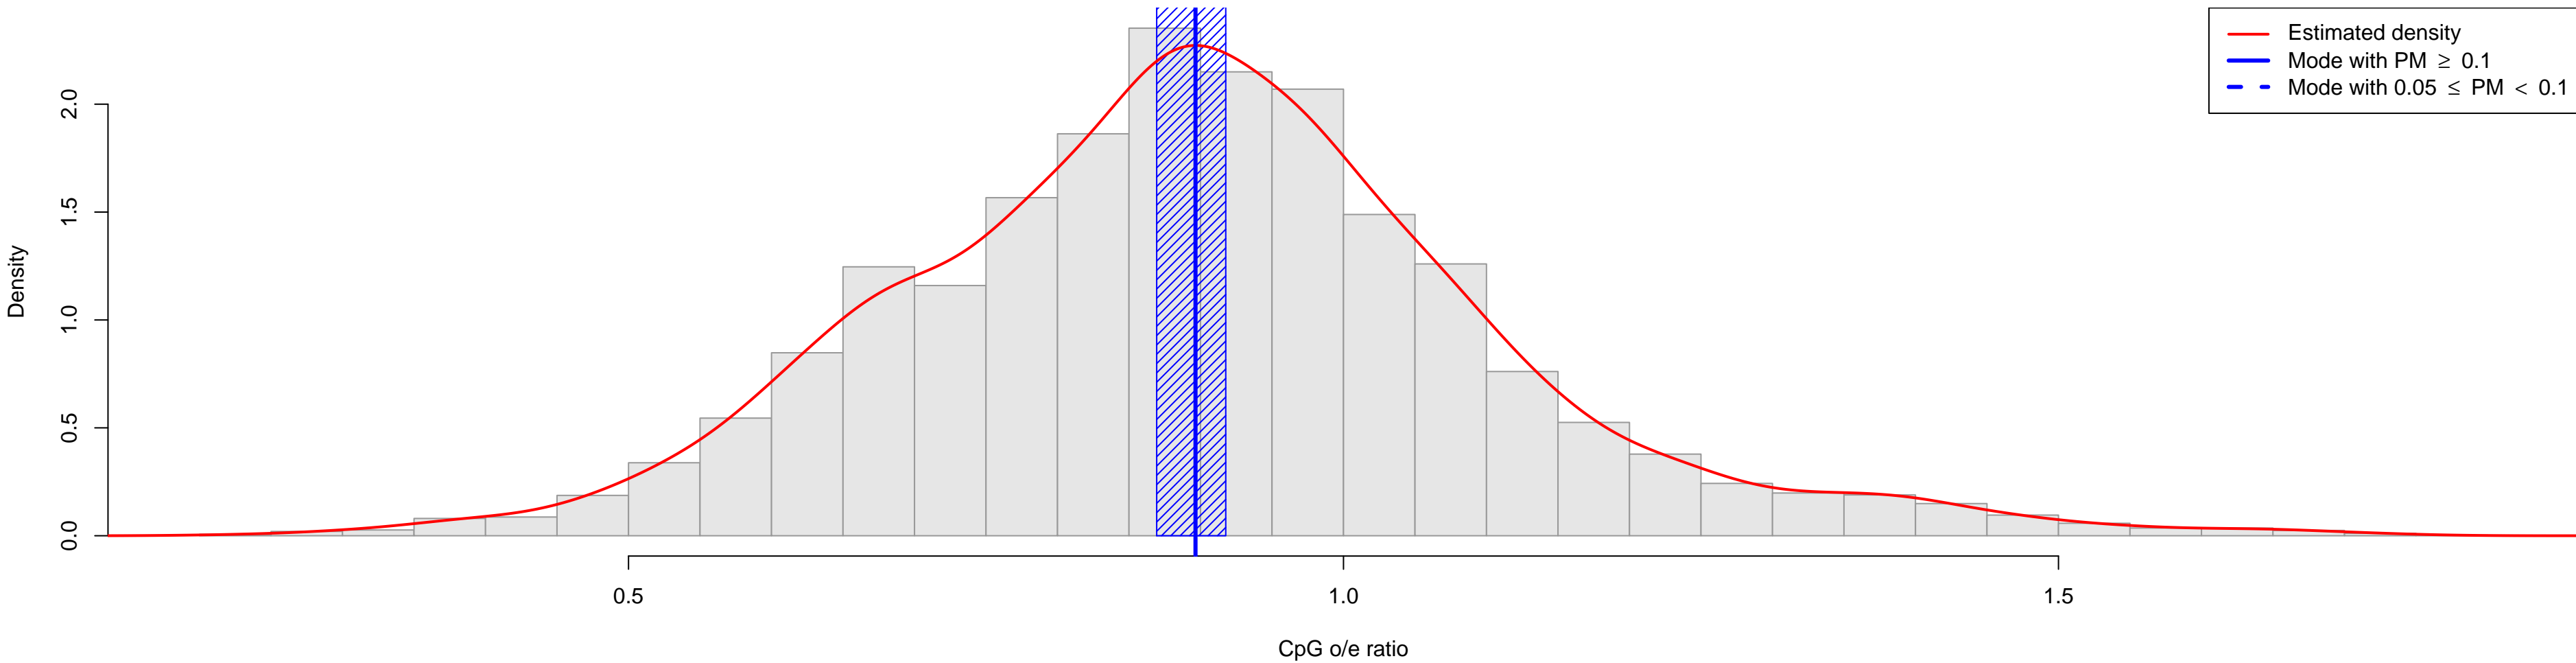



# Dugesia\_japonica

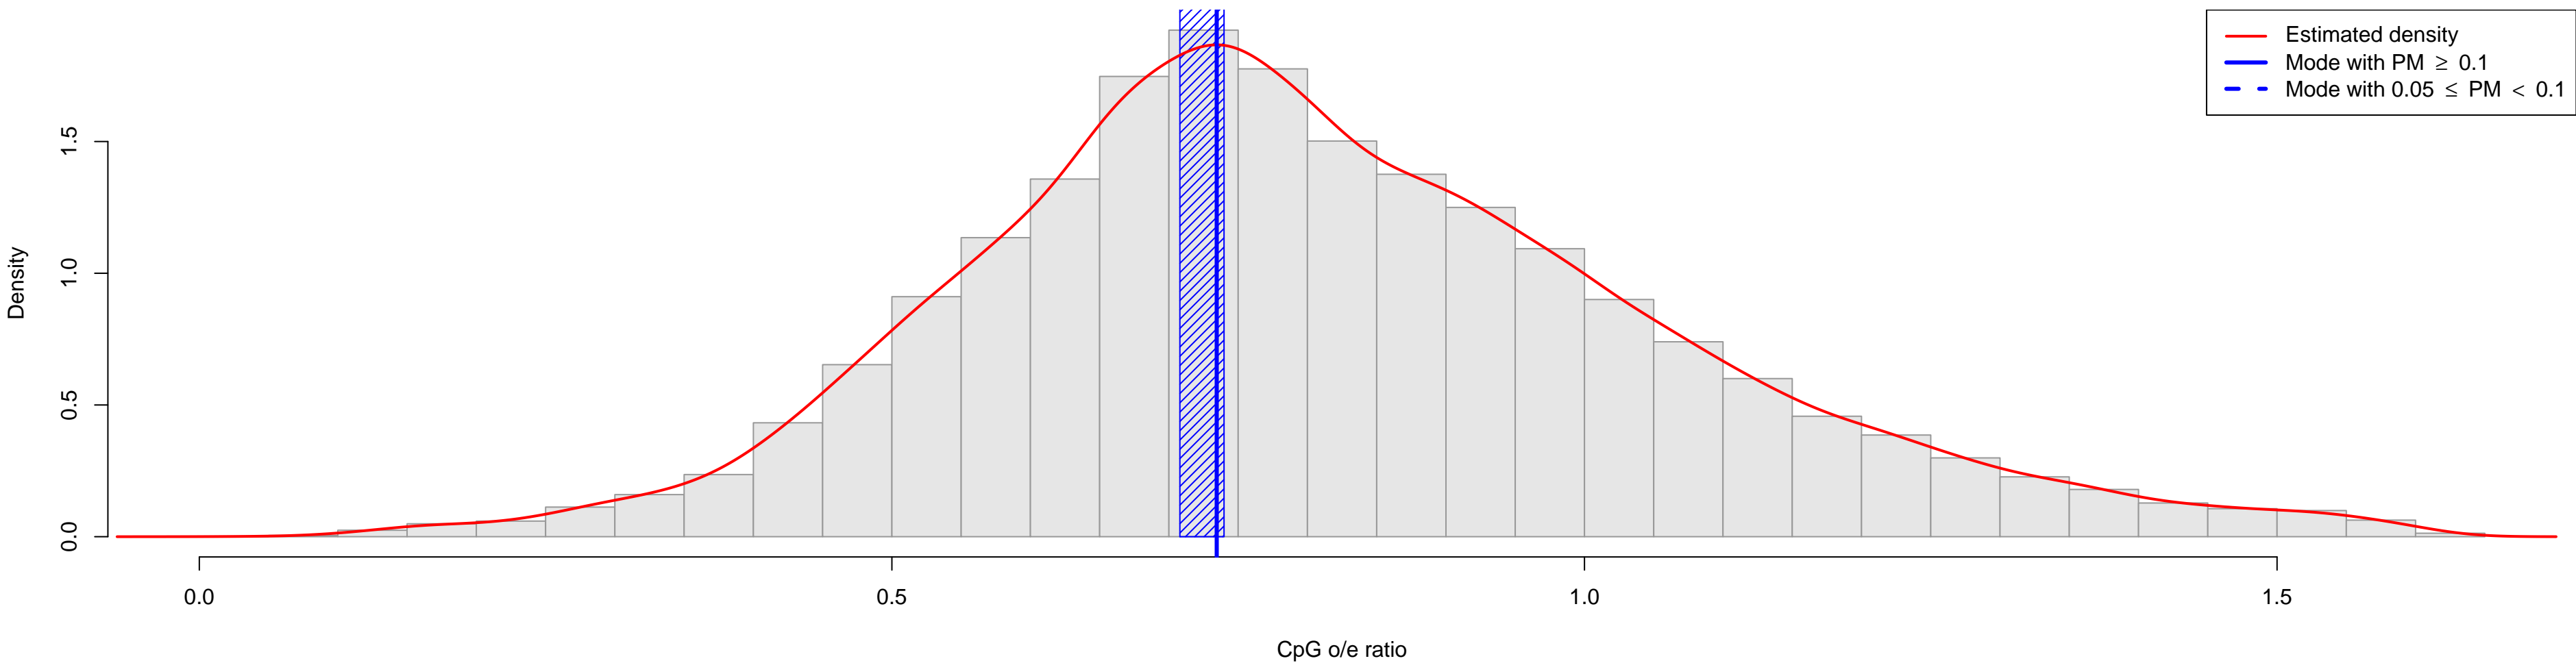

# Dunaliella\_salina

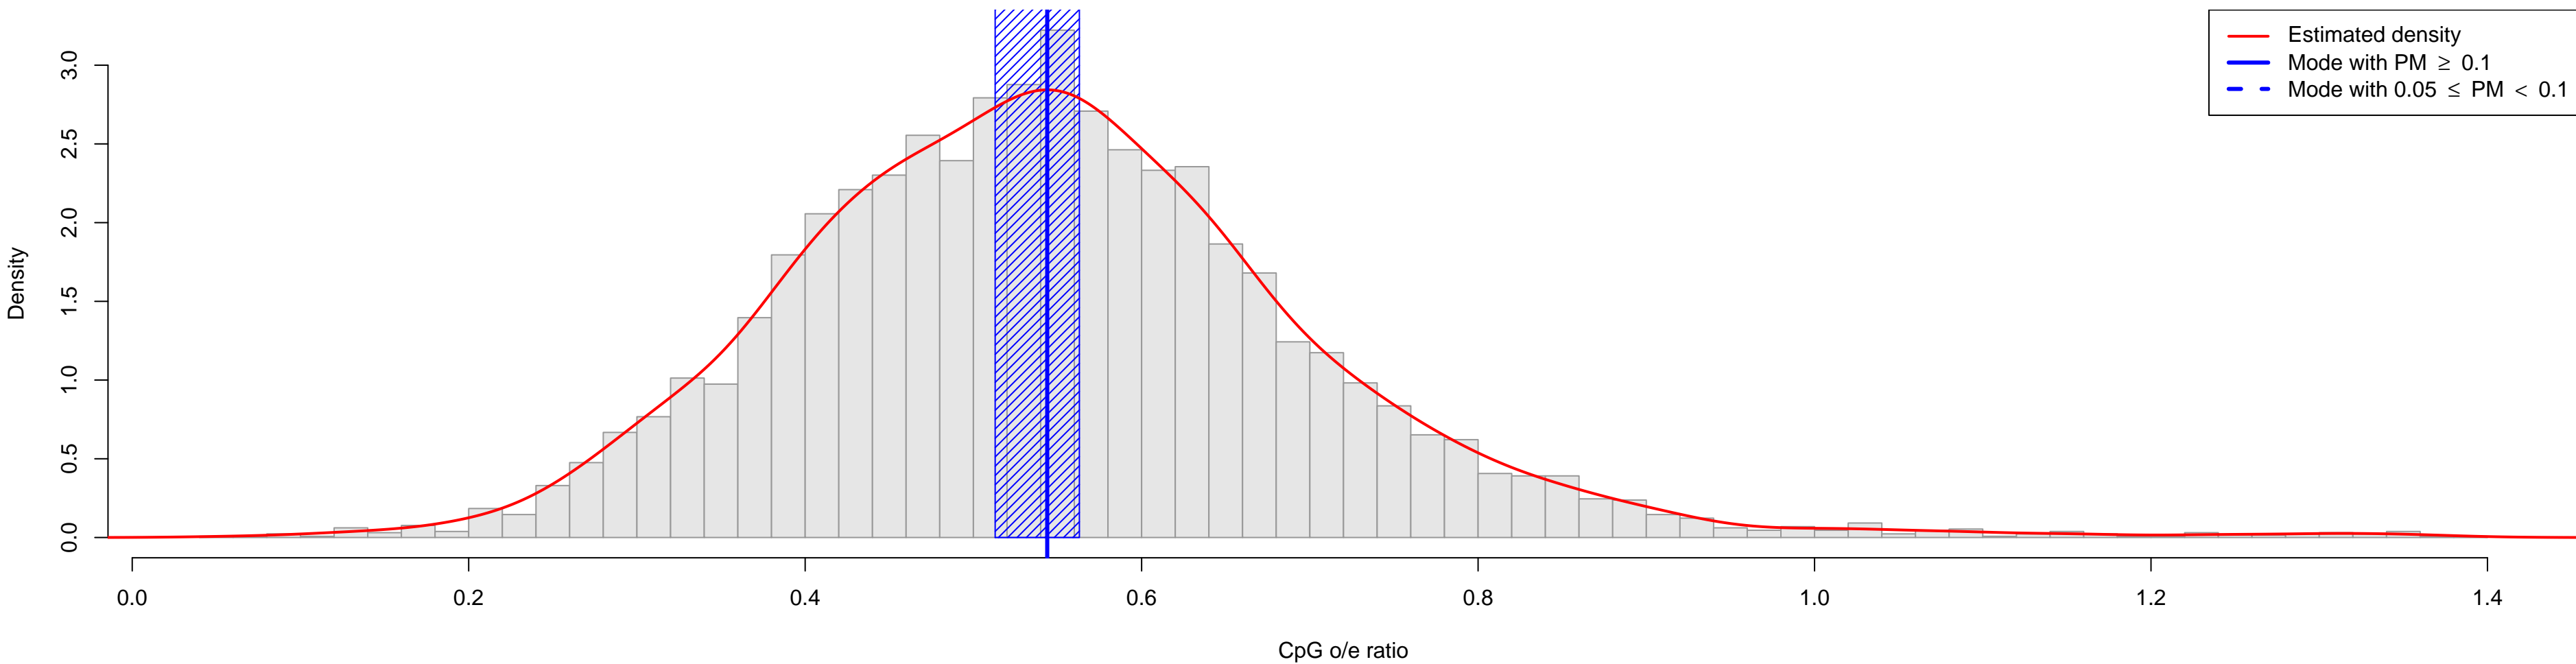

# Echinococcus\_granulosus

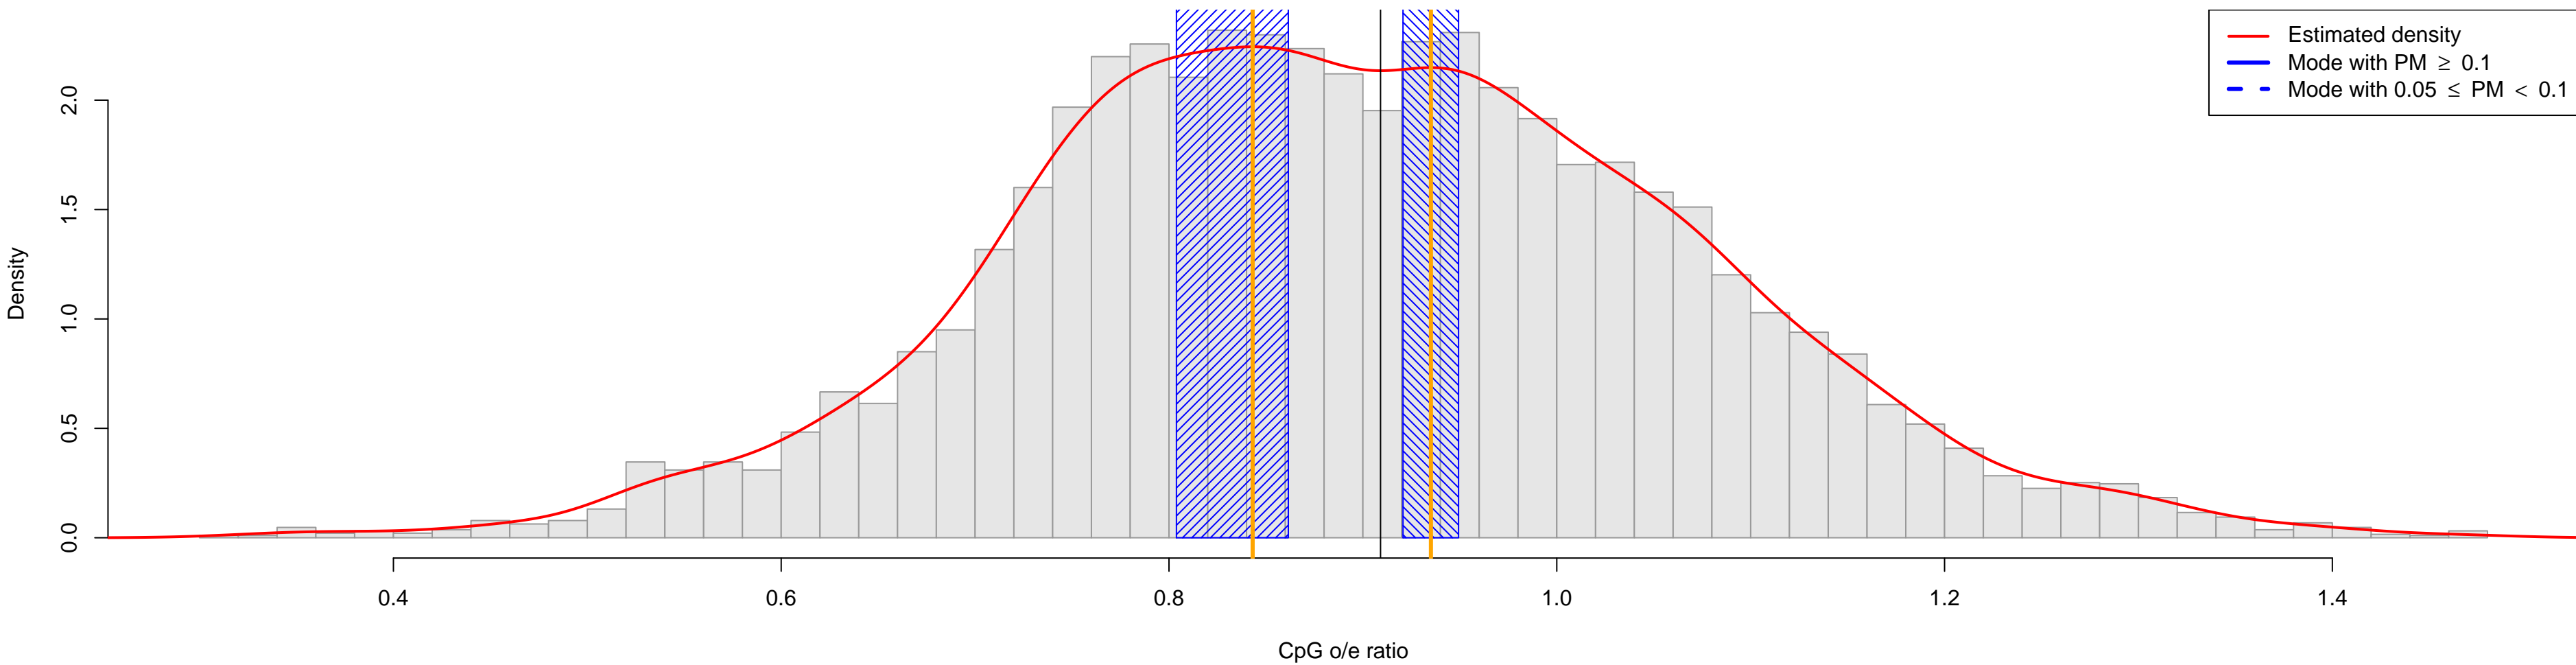

# Echinococcus\_multilocularis

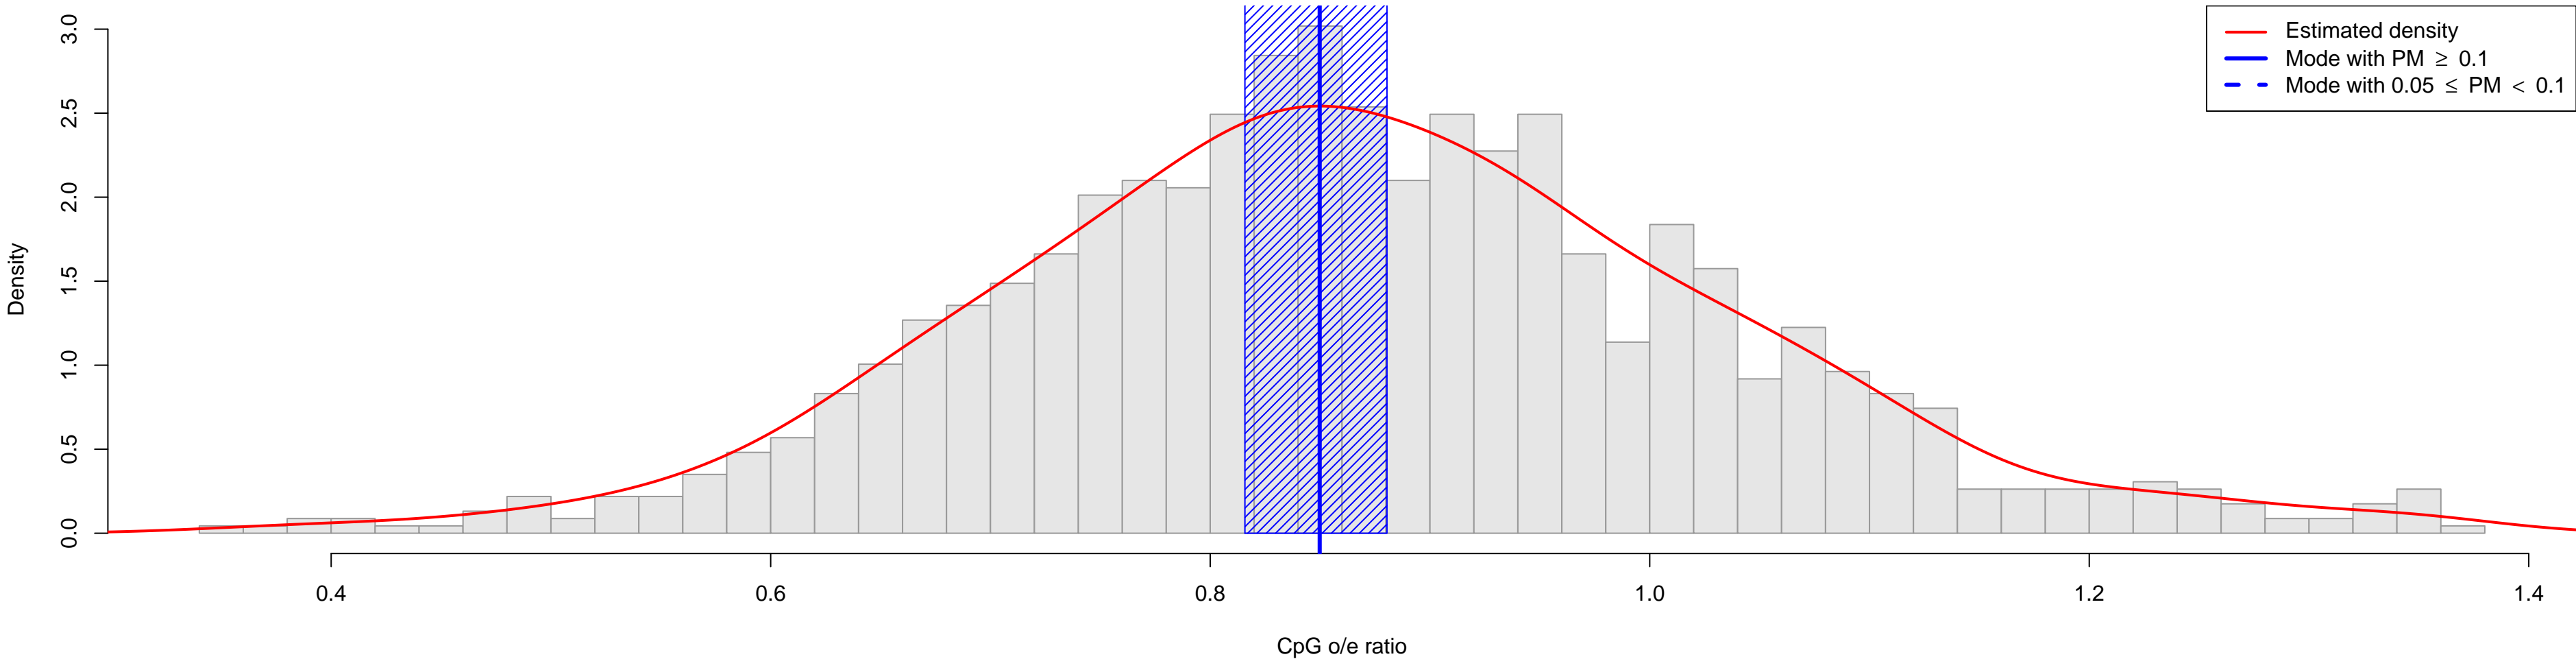

# Ectocarpus\_siliculosus

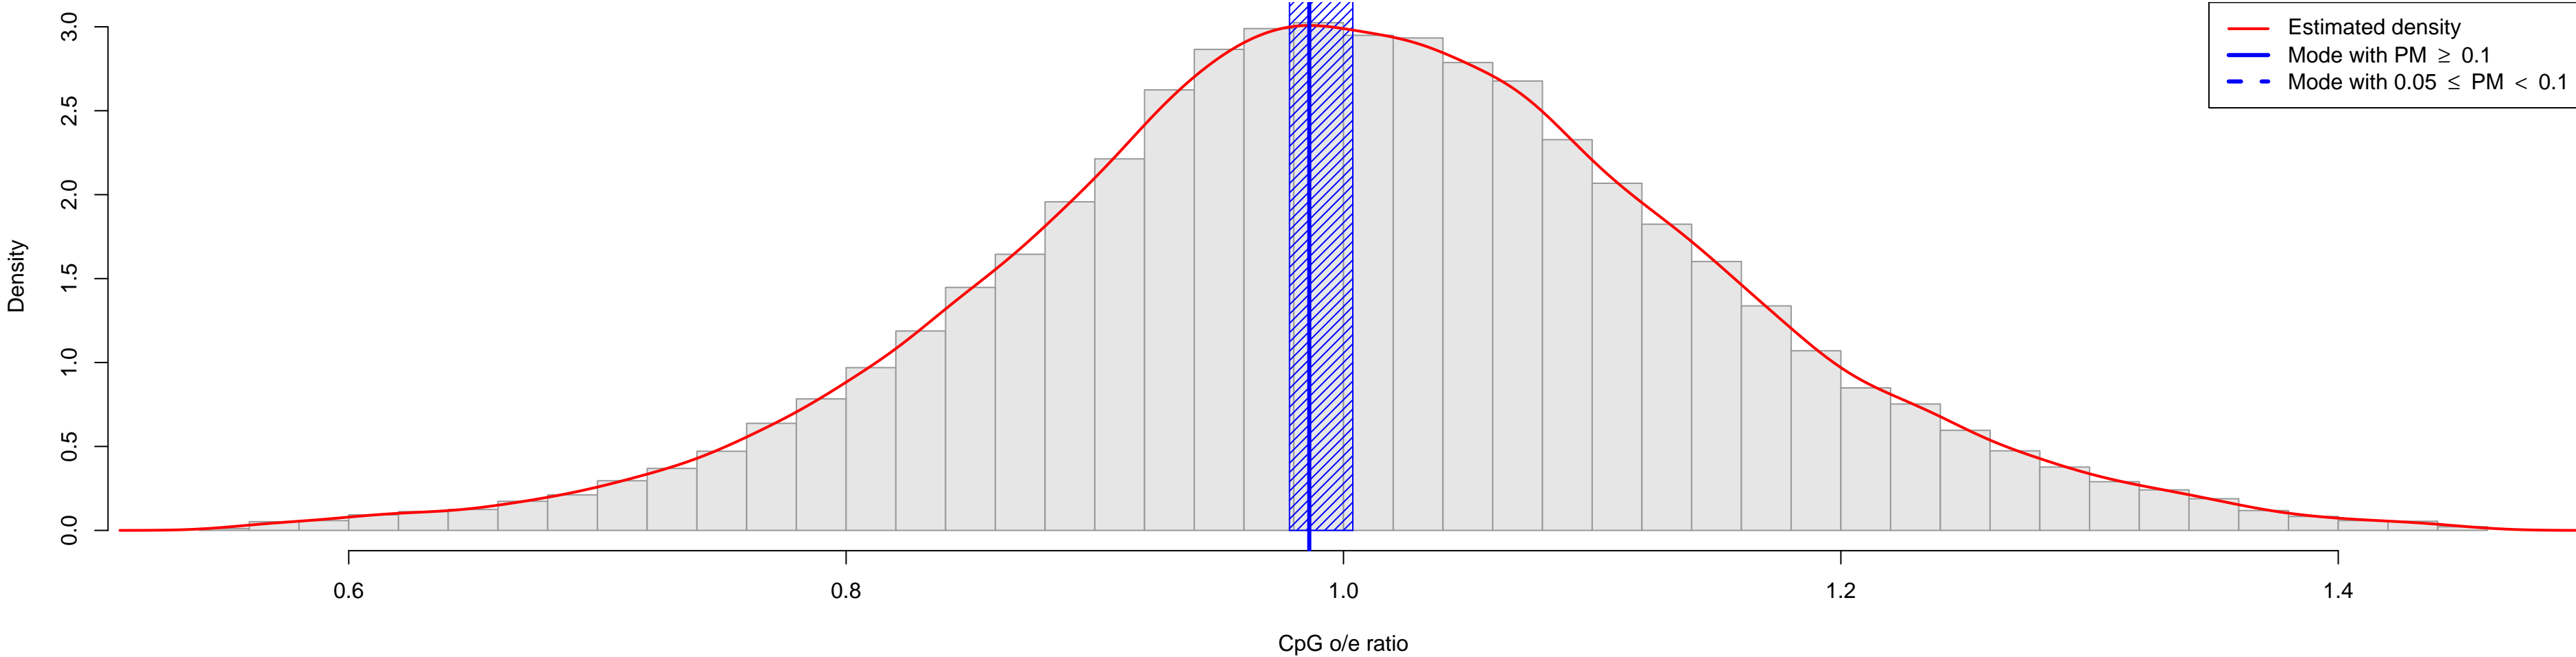

# Eimeria\_acervulina

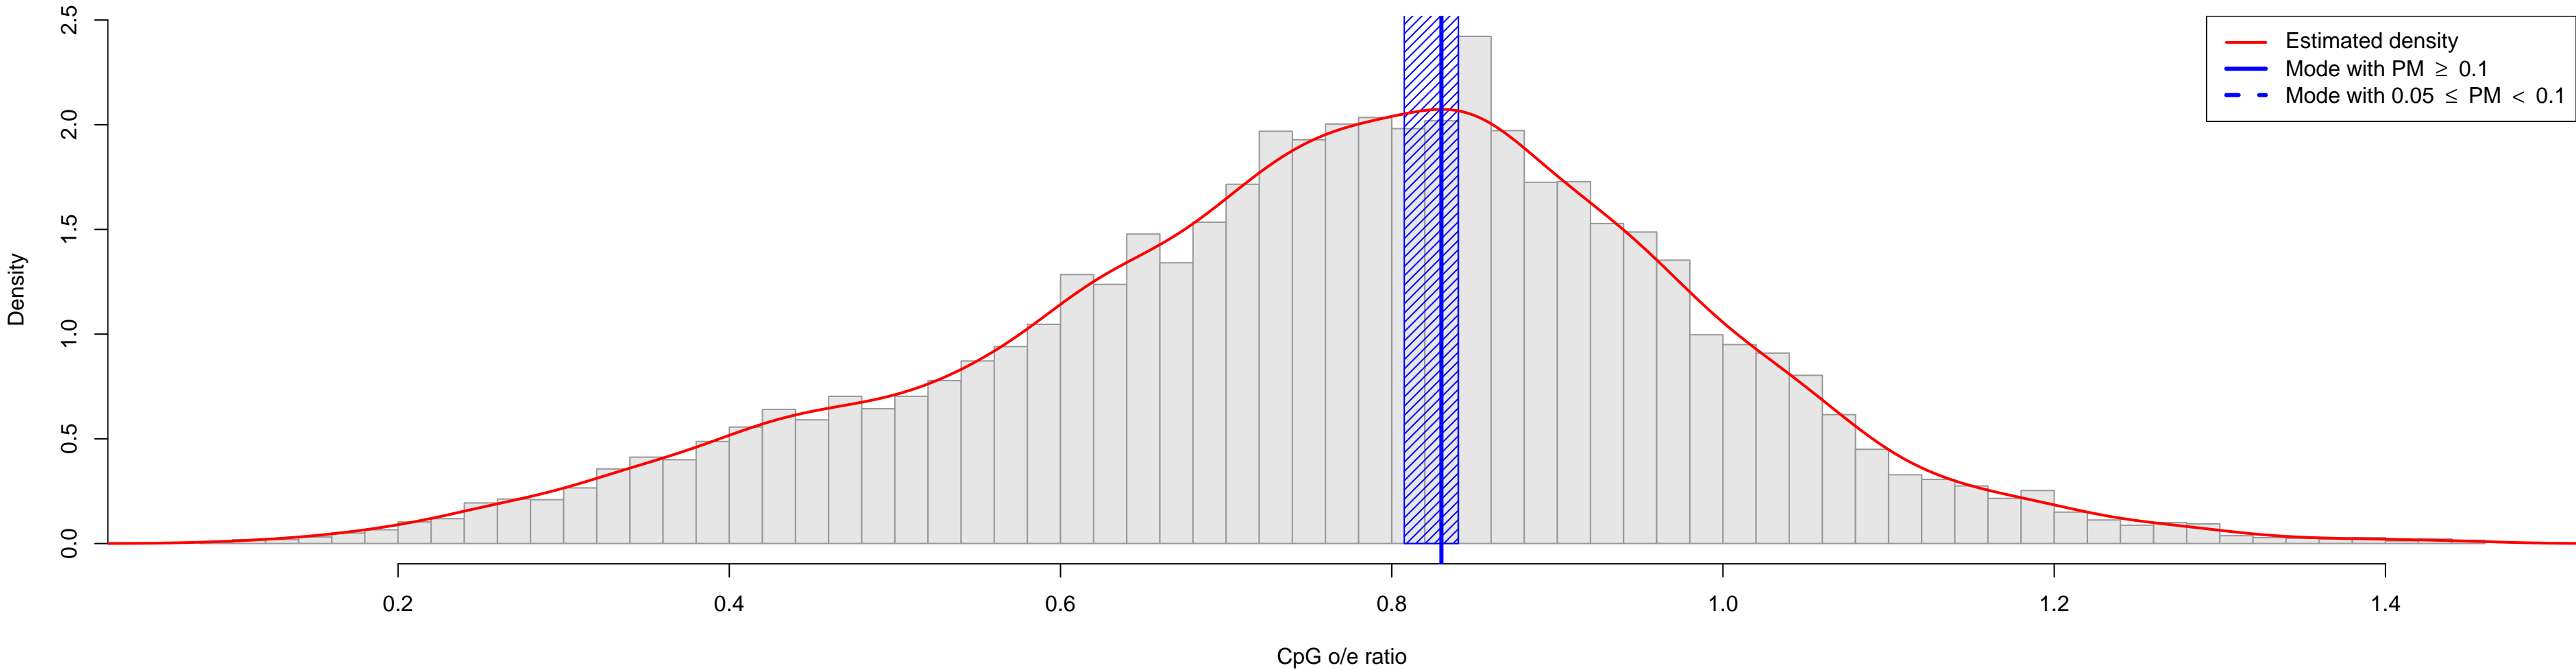

# Eimeria\_maxima

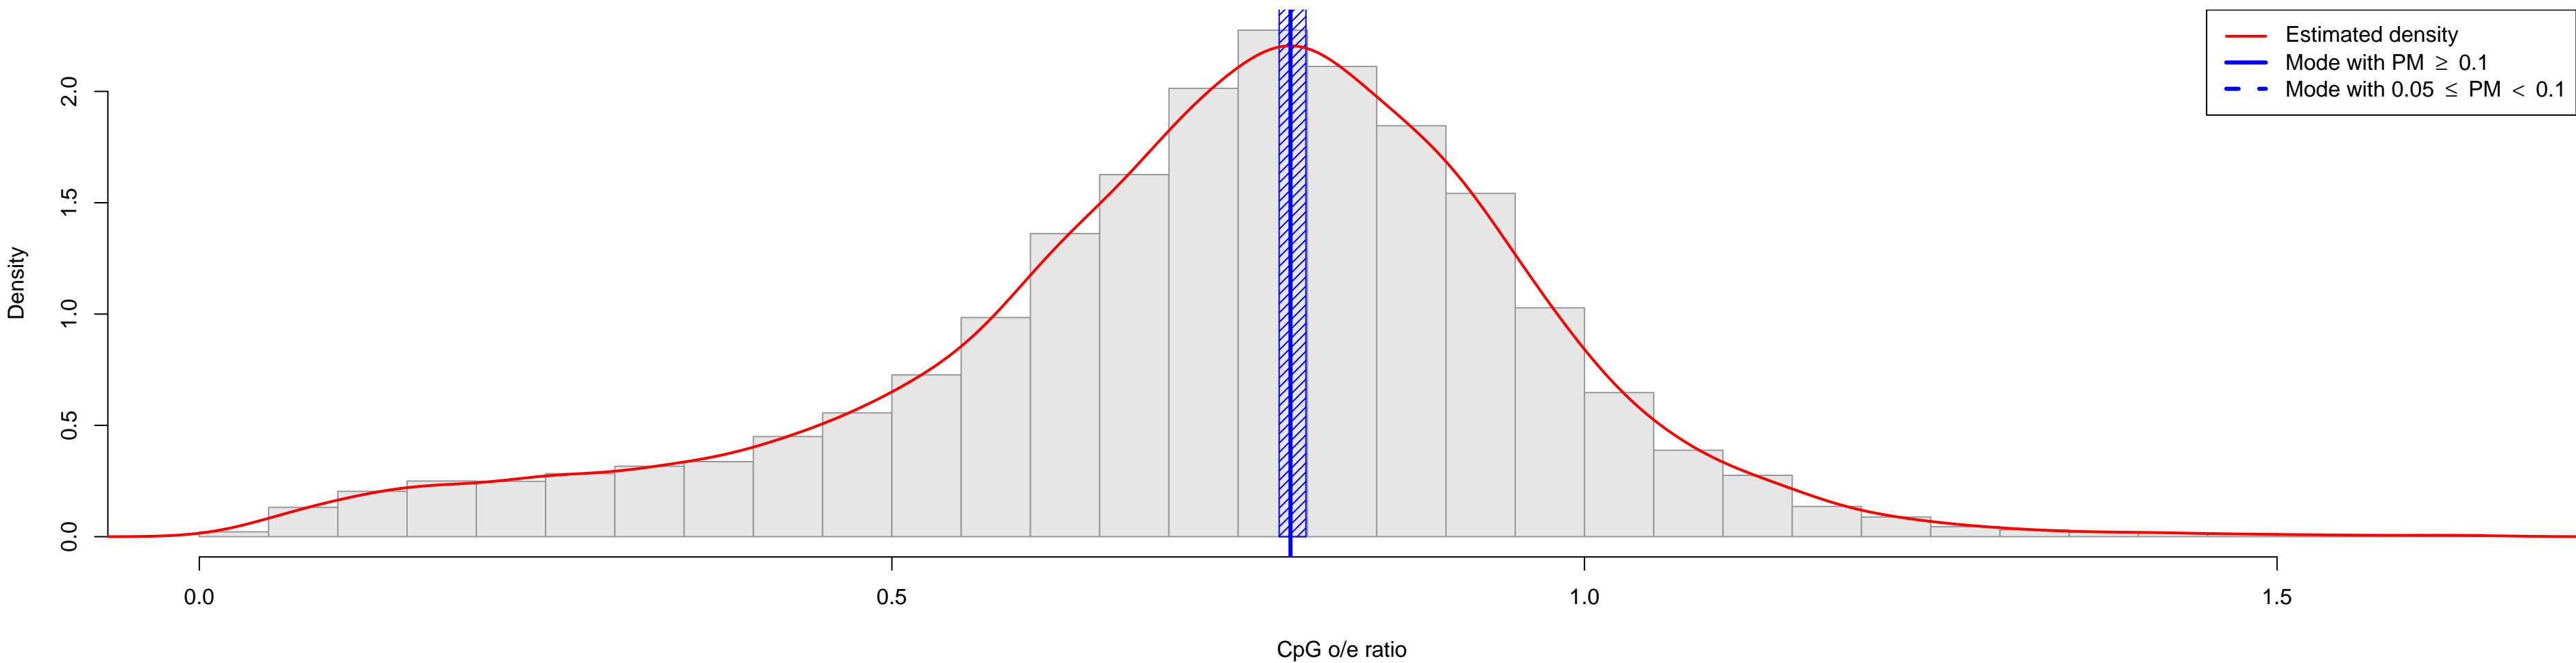

# Eimeria\_tenella

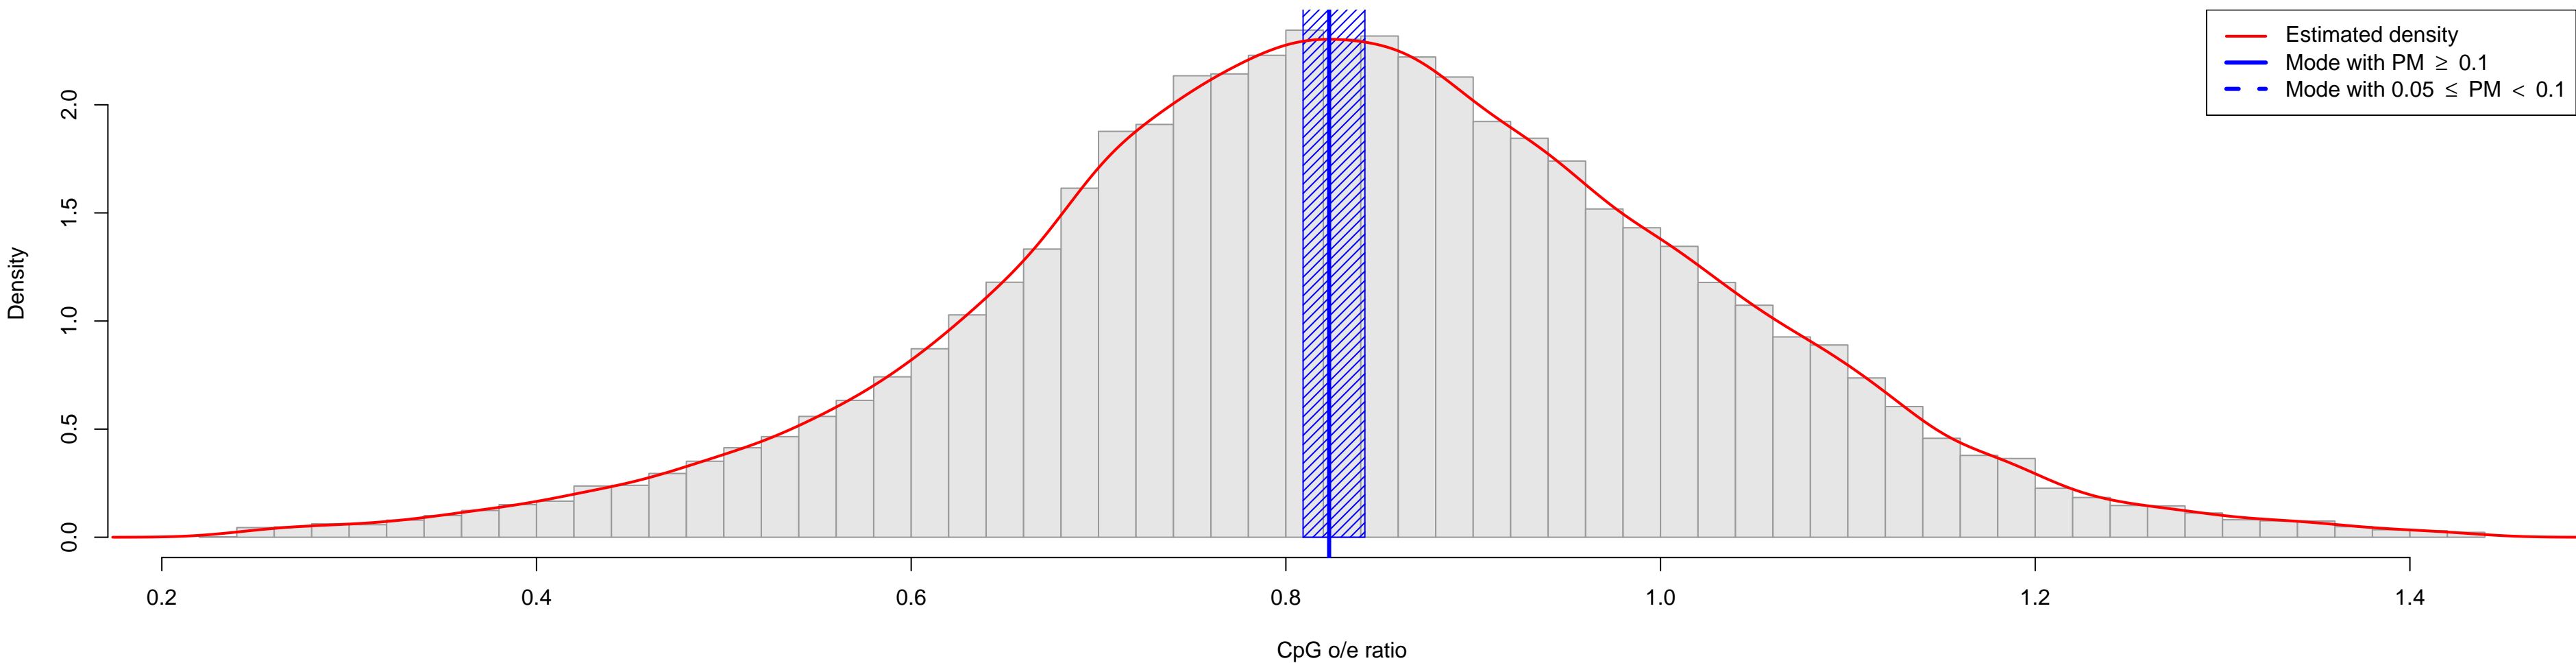



# Elaeis\_guineensis

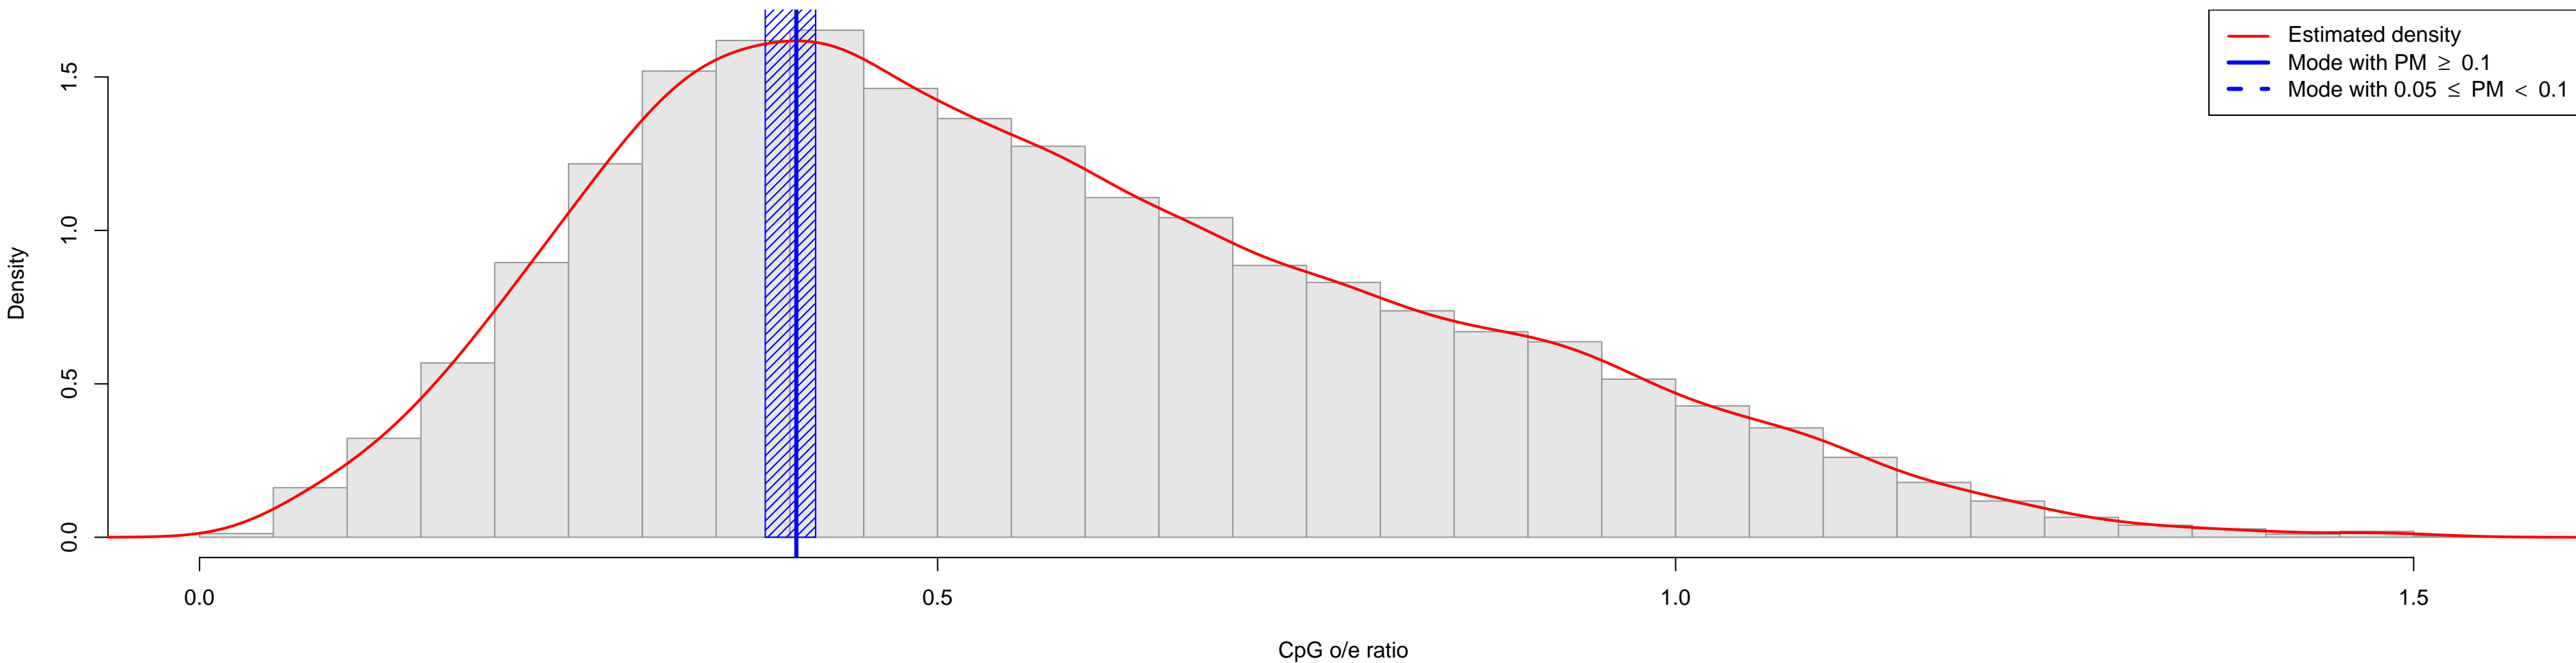

# Elaphe\_quadrivirgata

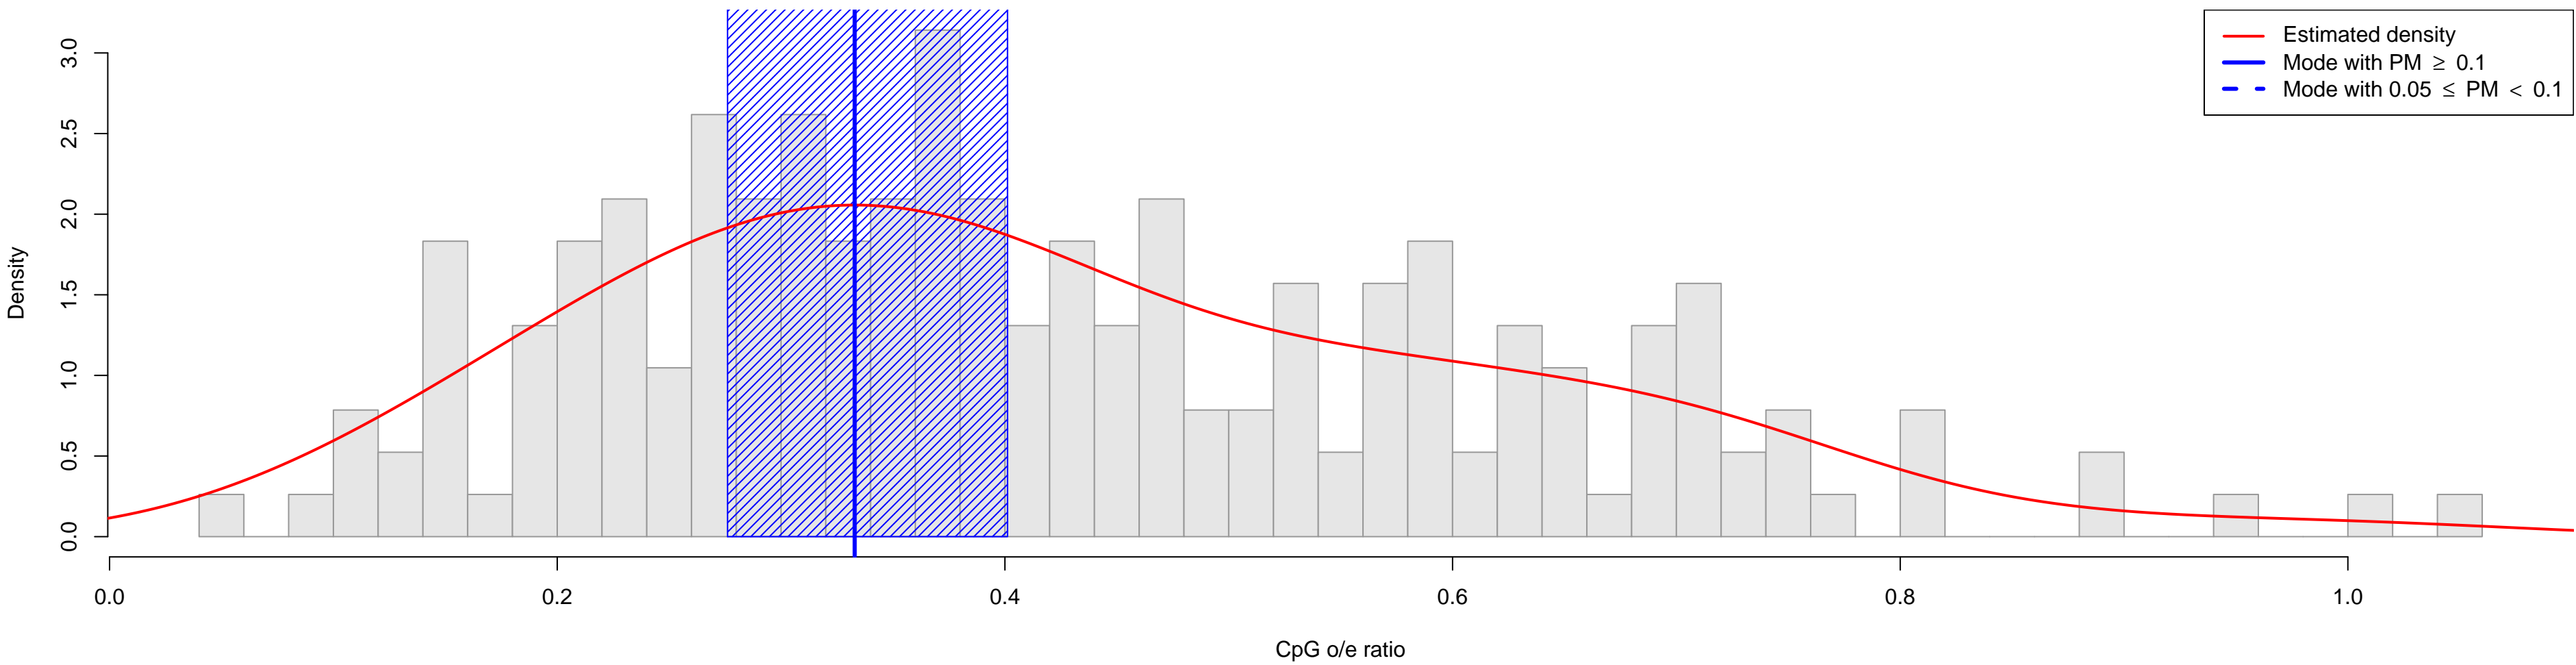

# Emiliana\_huxleyi

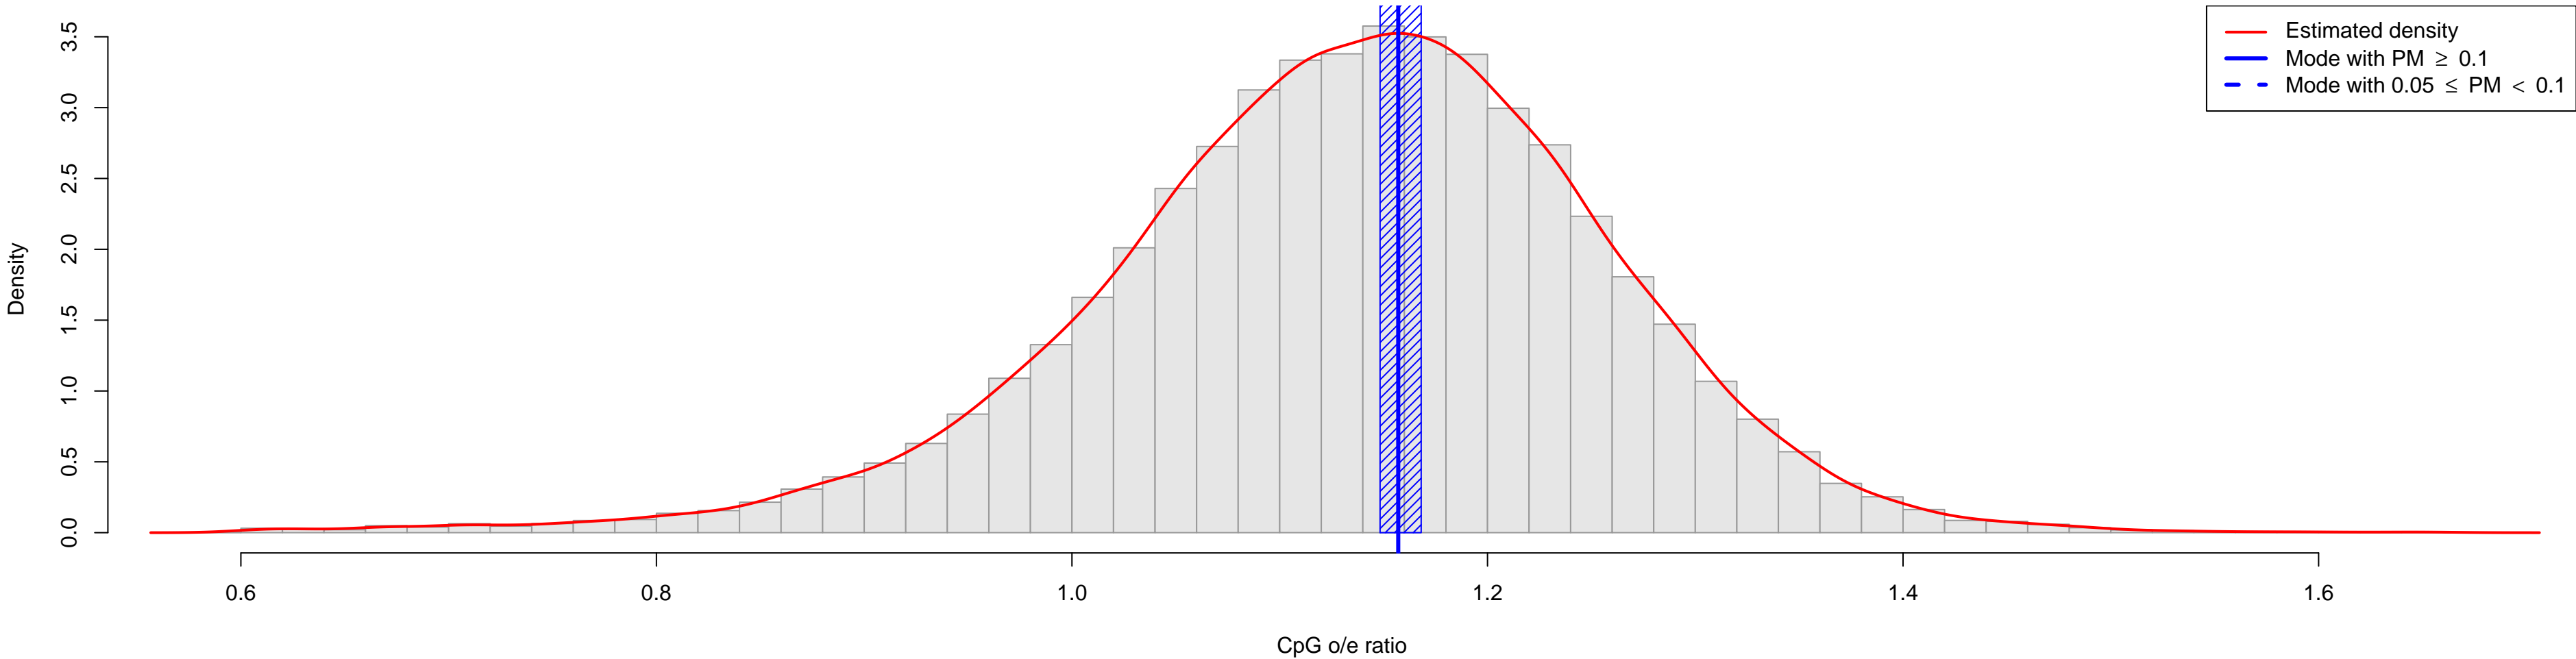

# Endeis\_spinosa

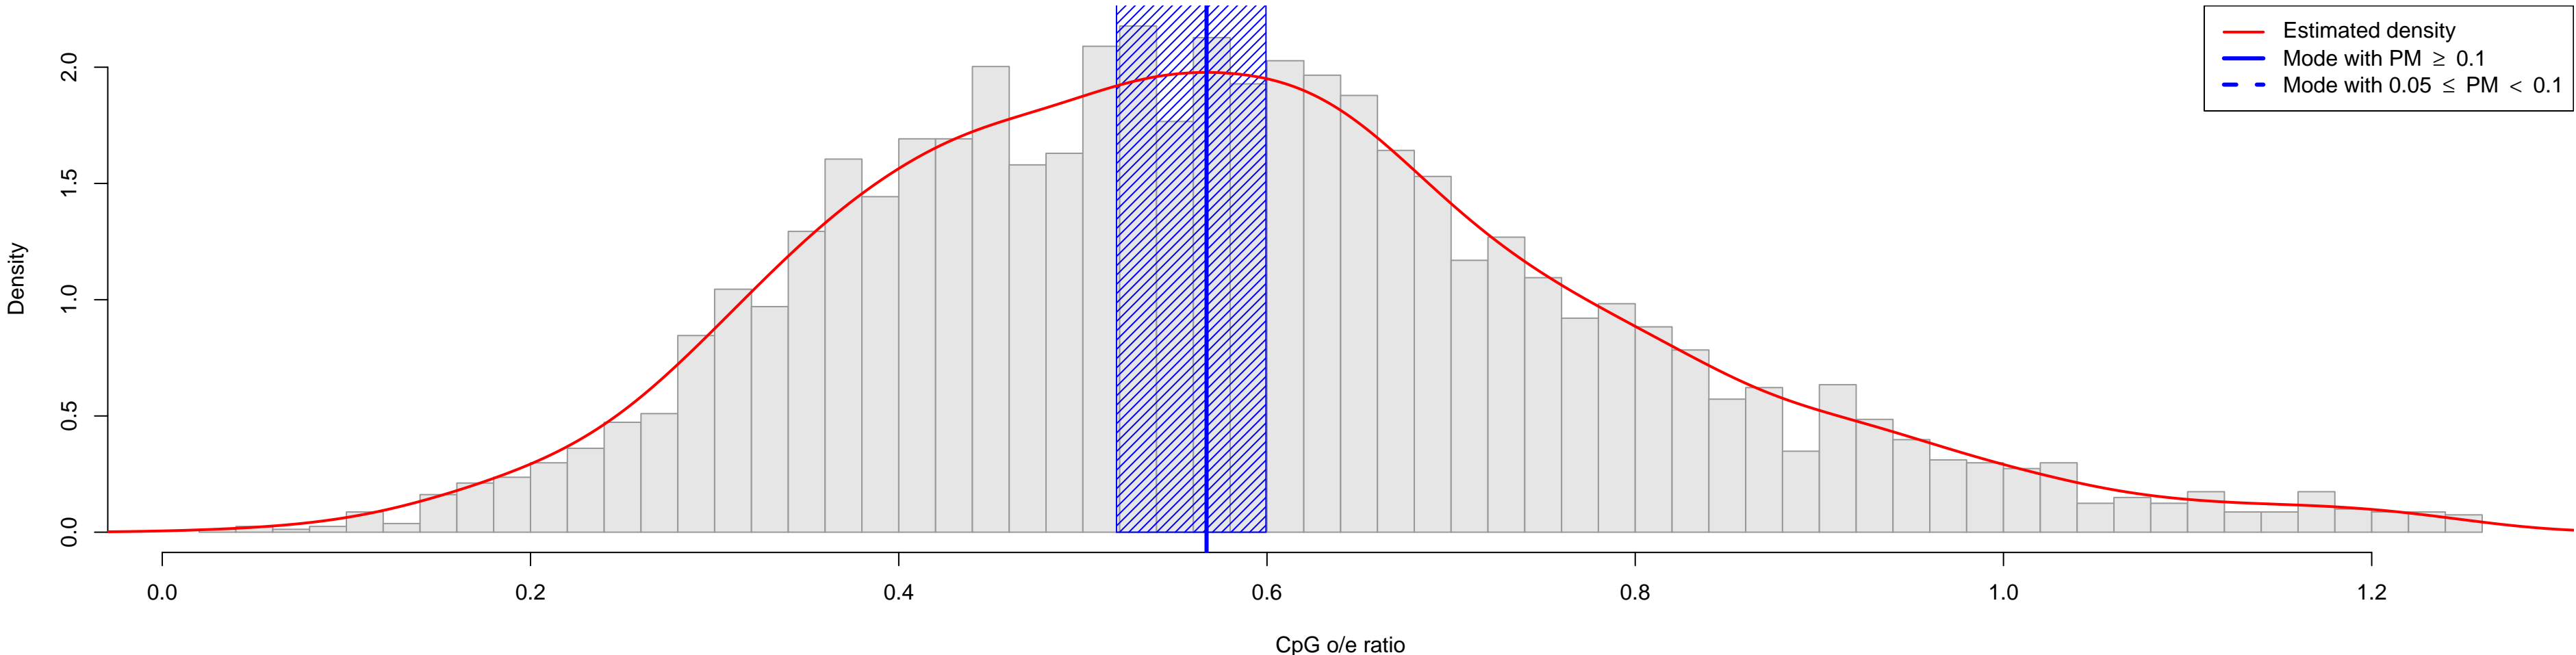

# Entamoeba\_histolytica

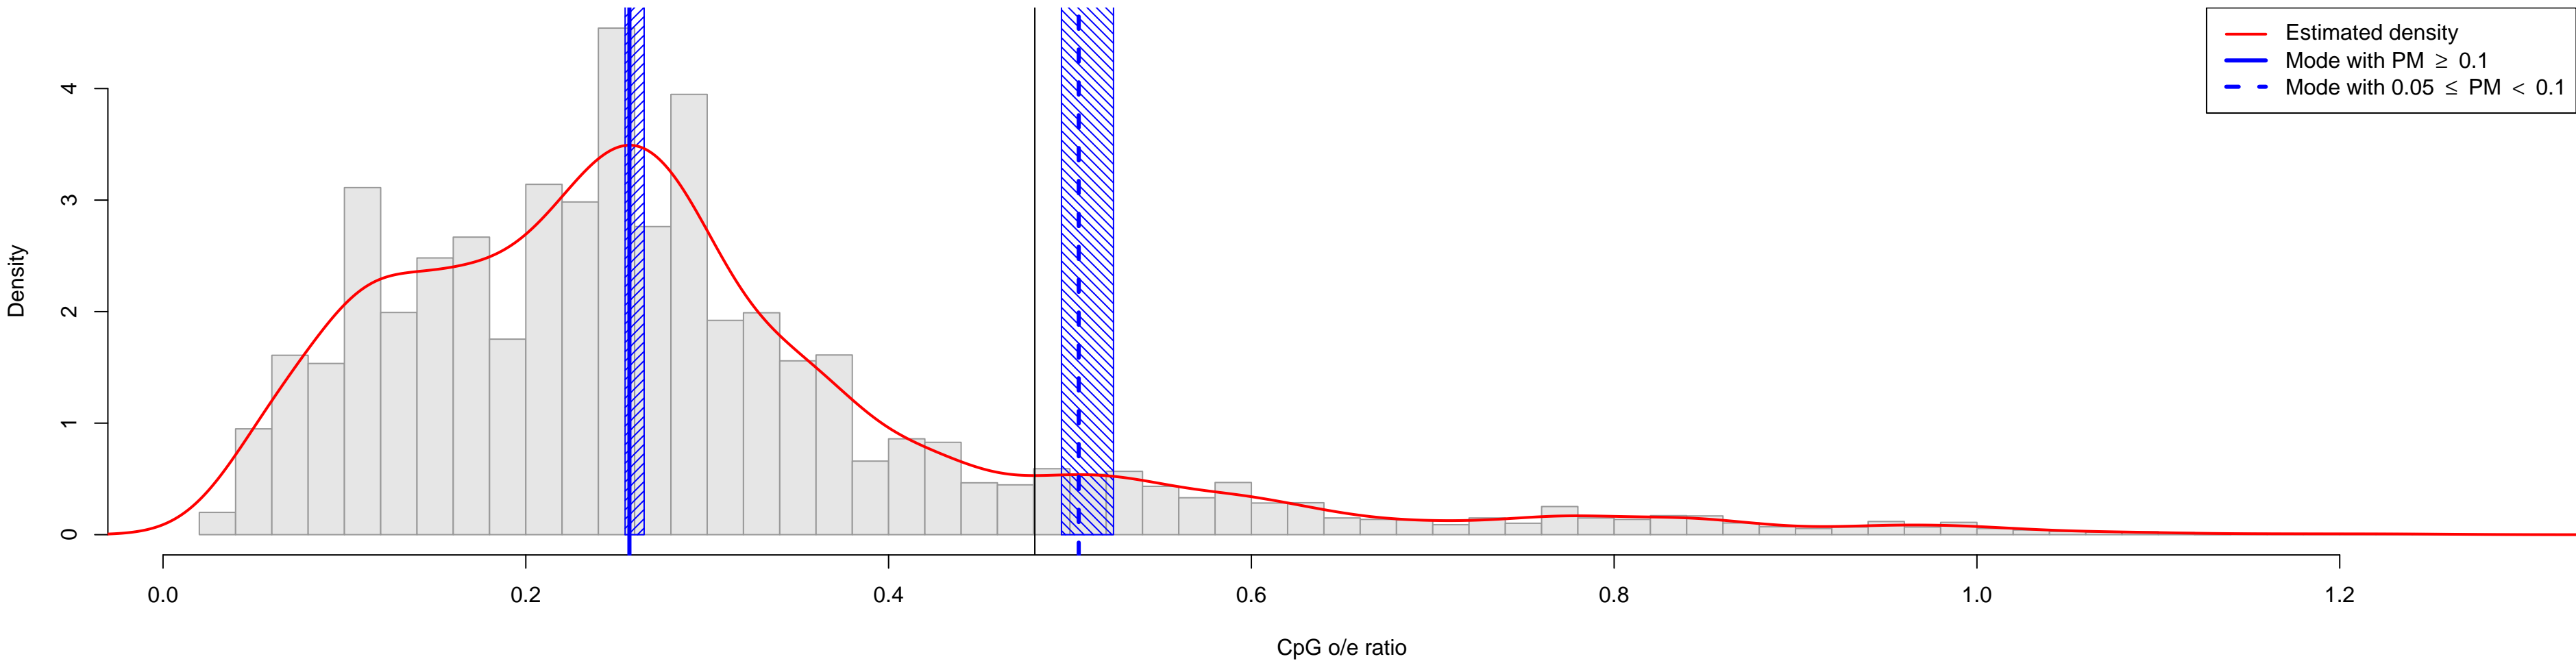

# Ephedra\_distachya

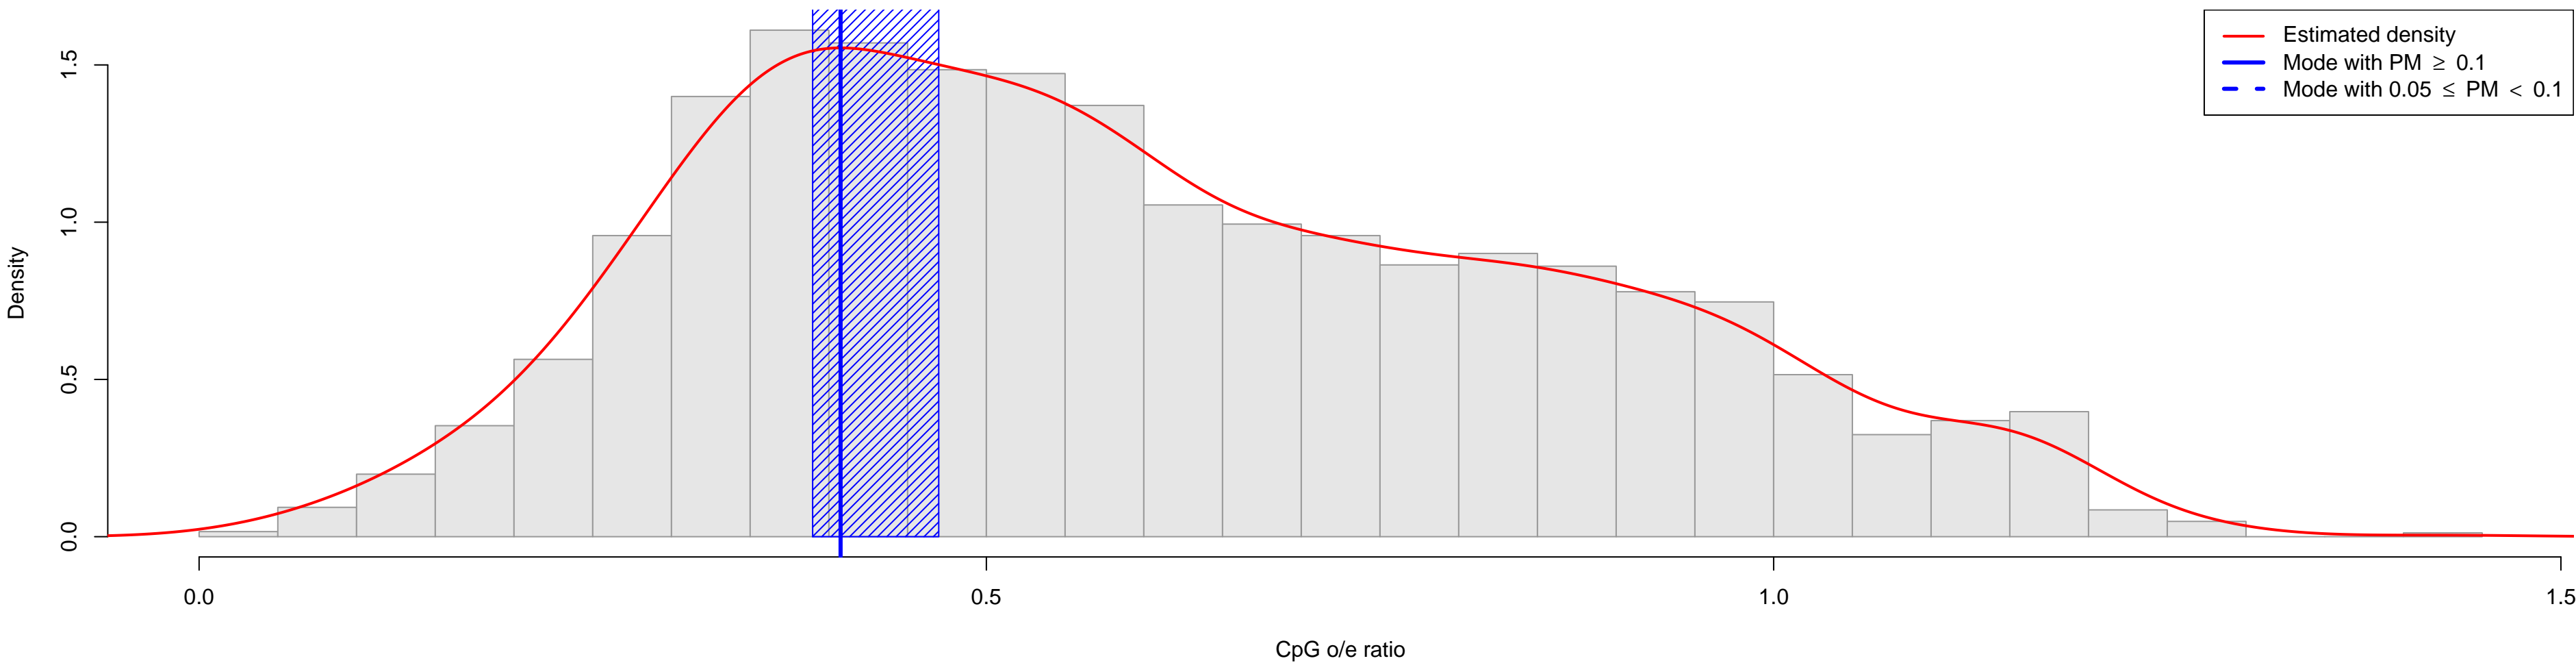

# Epichloe\_festucae

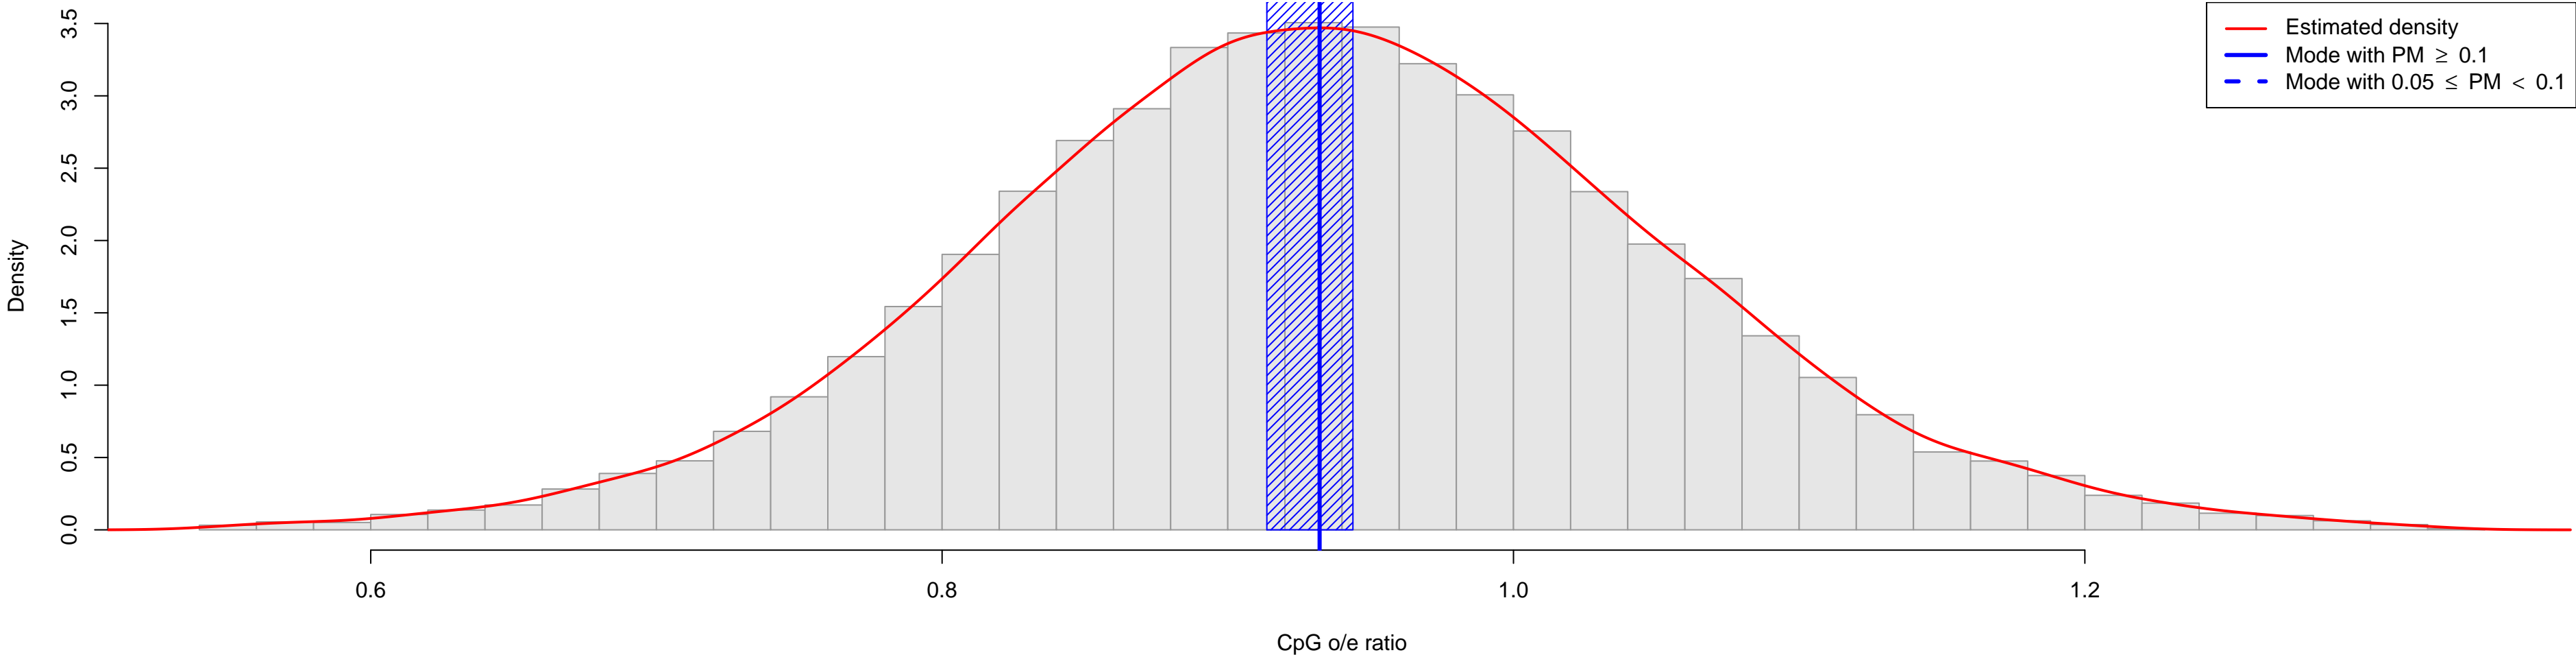

# Equus\_caballus

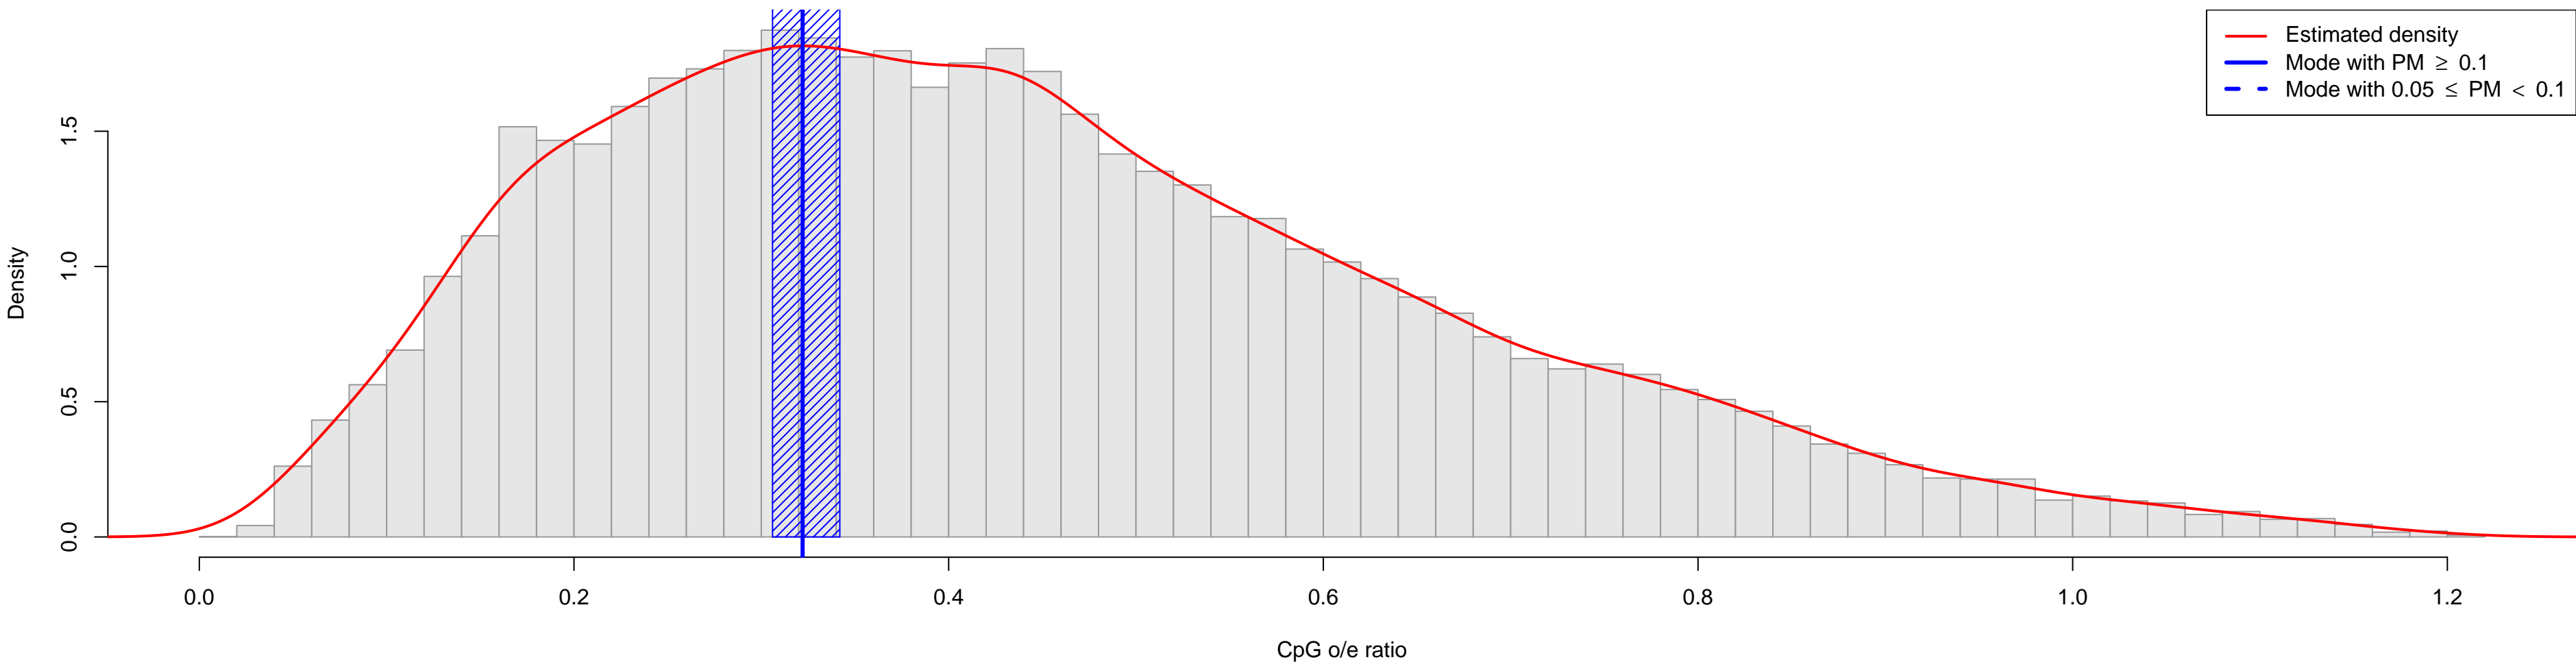



# Eriocheir\_sinensis

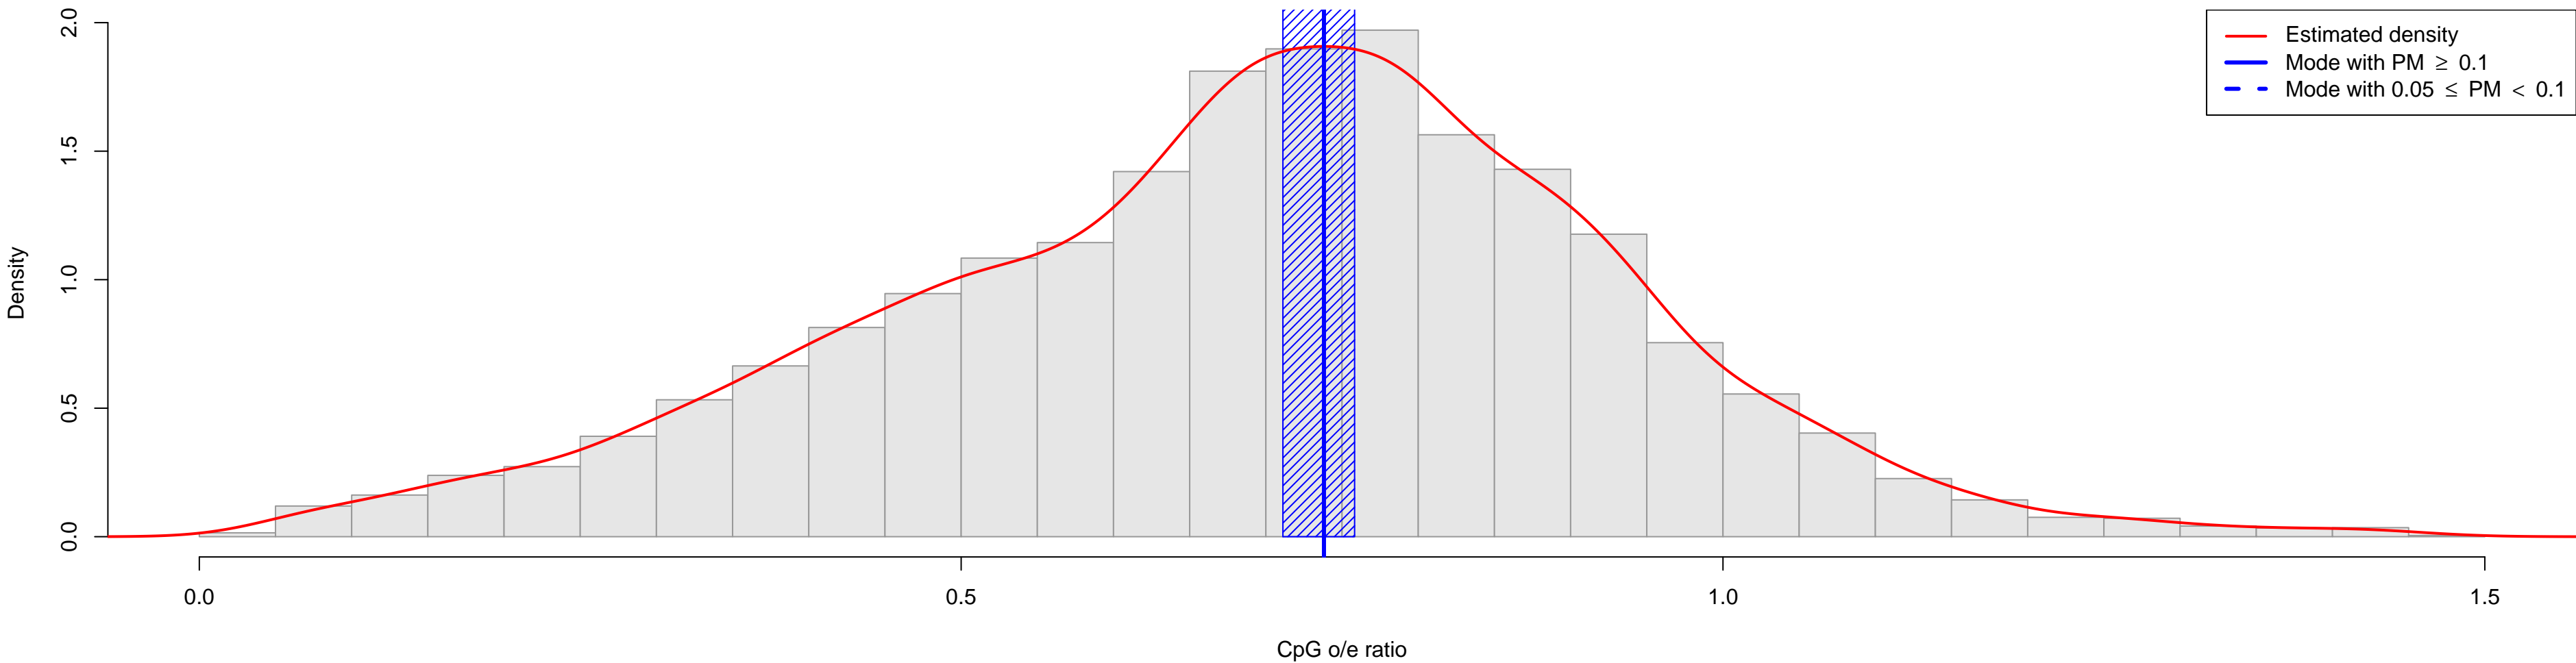

# Eschscholzia\_californica

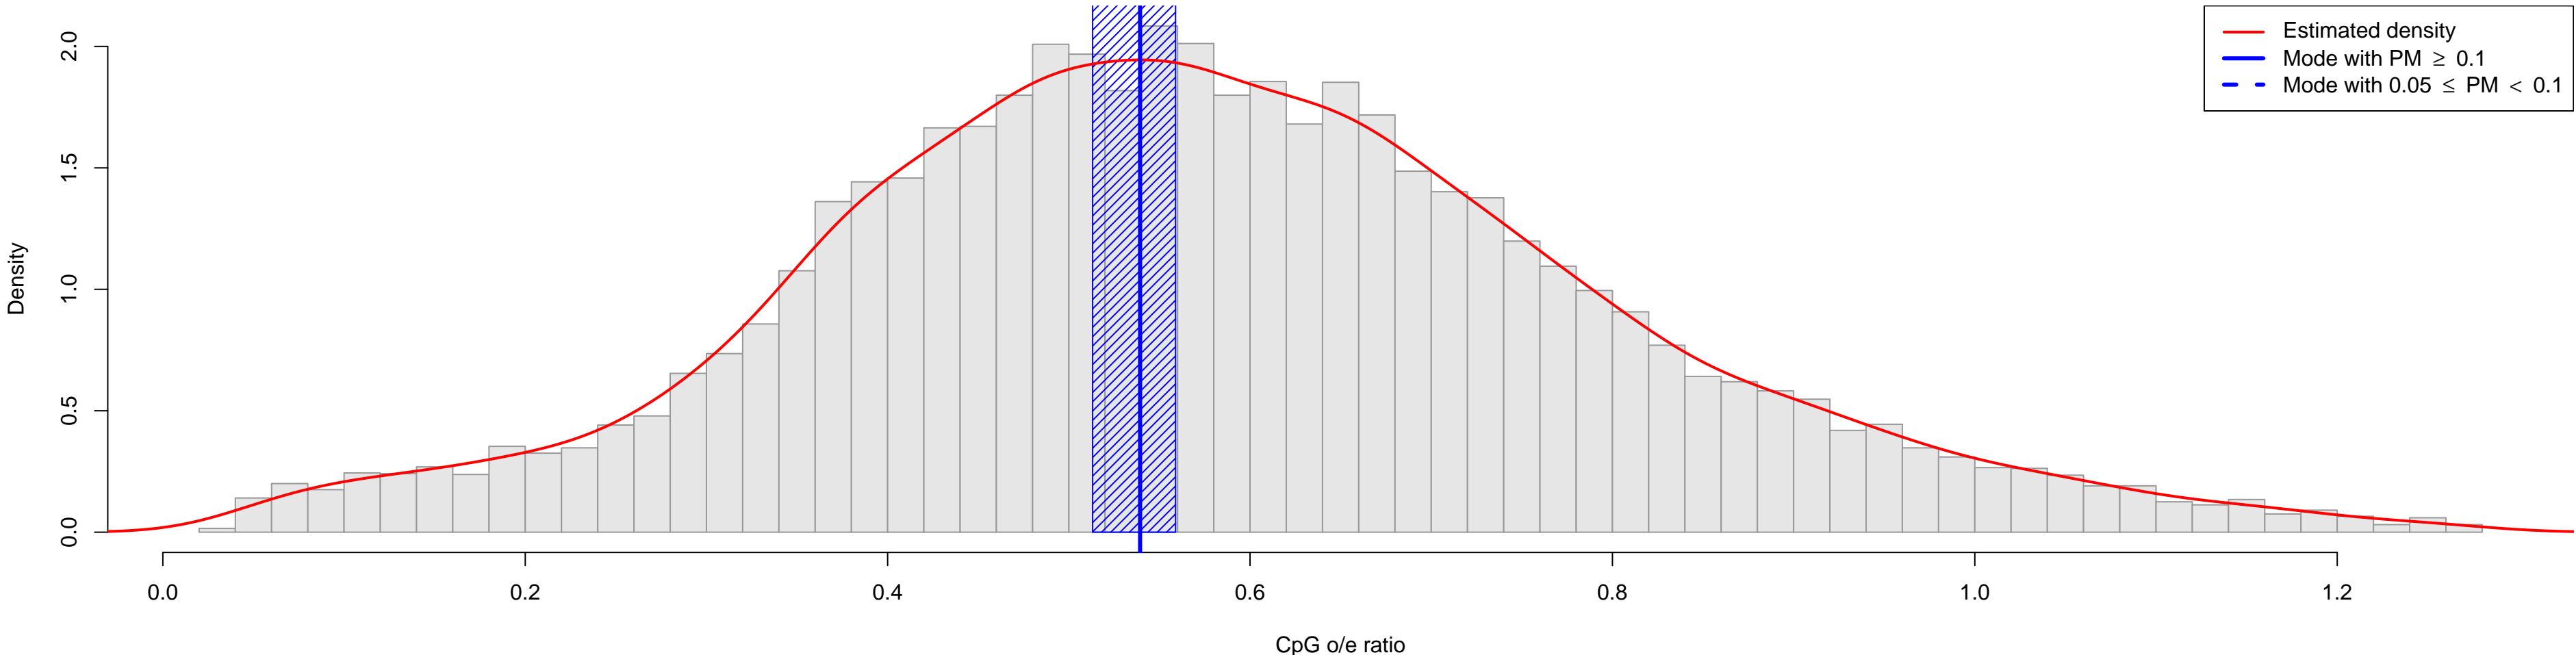

# Eucalyptus\_camaldulensis

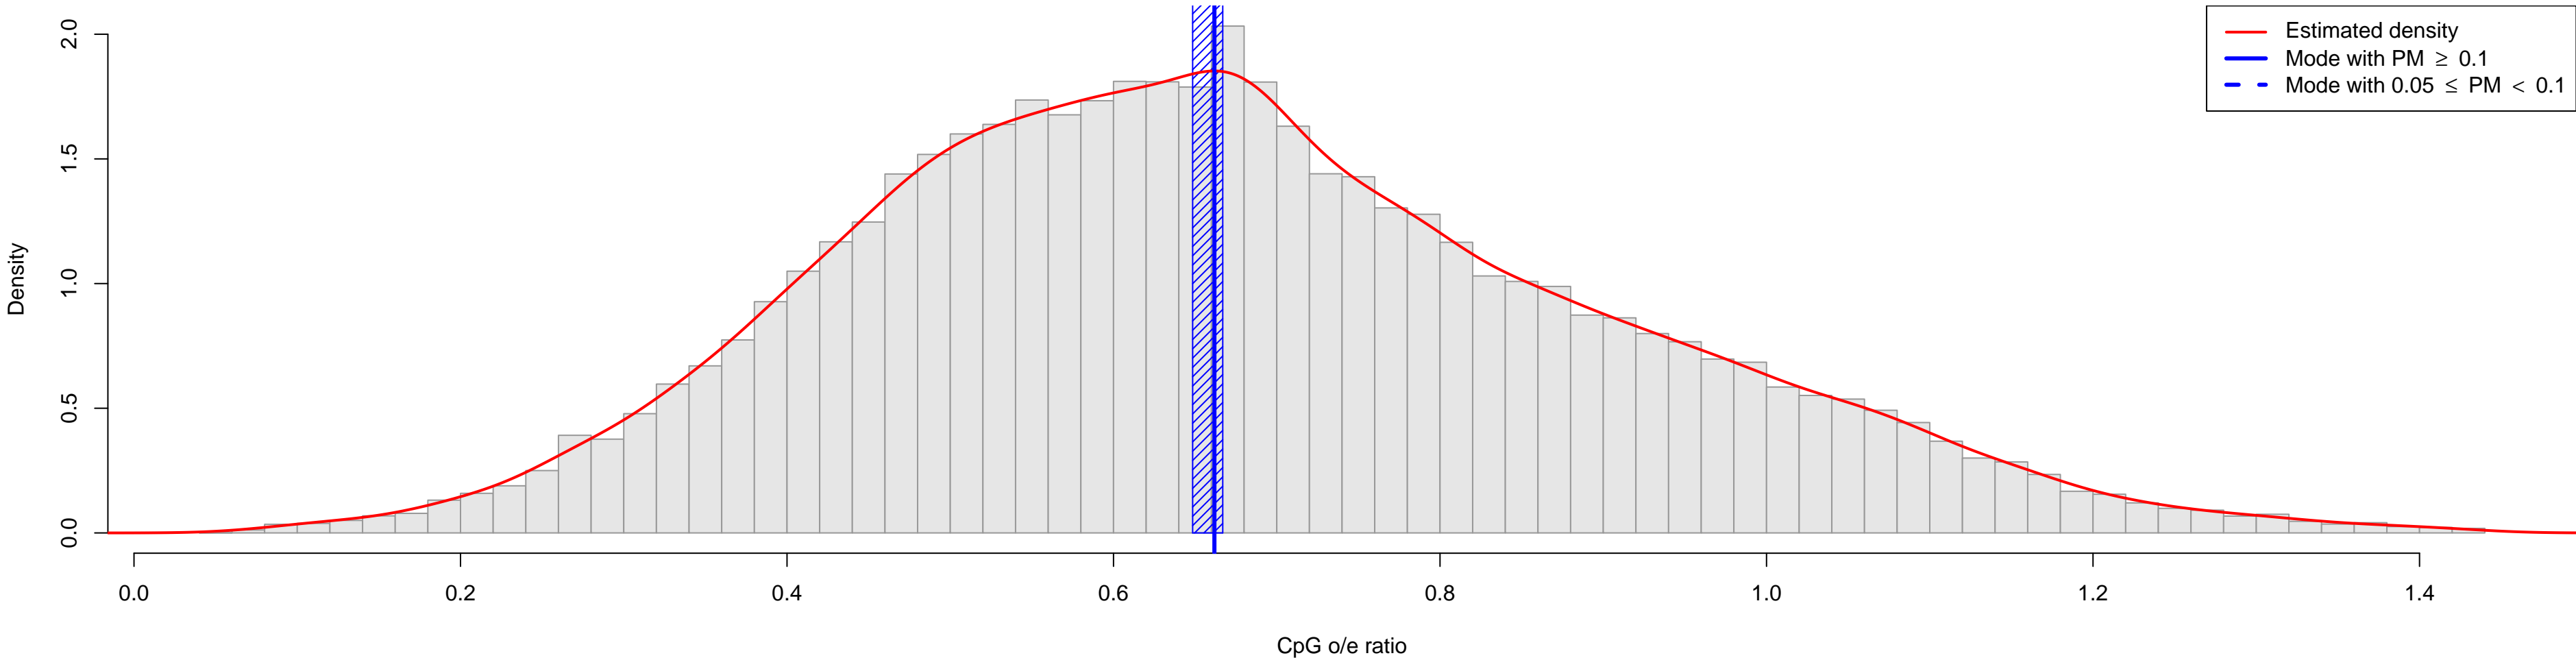

# Eucalyptus\_globulus

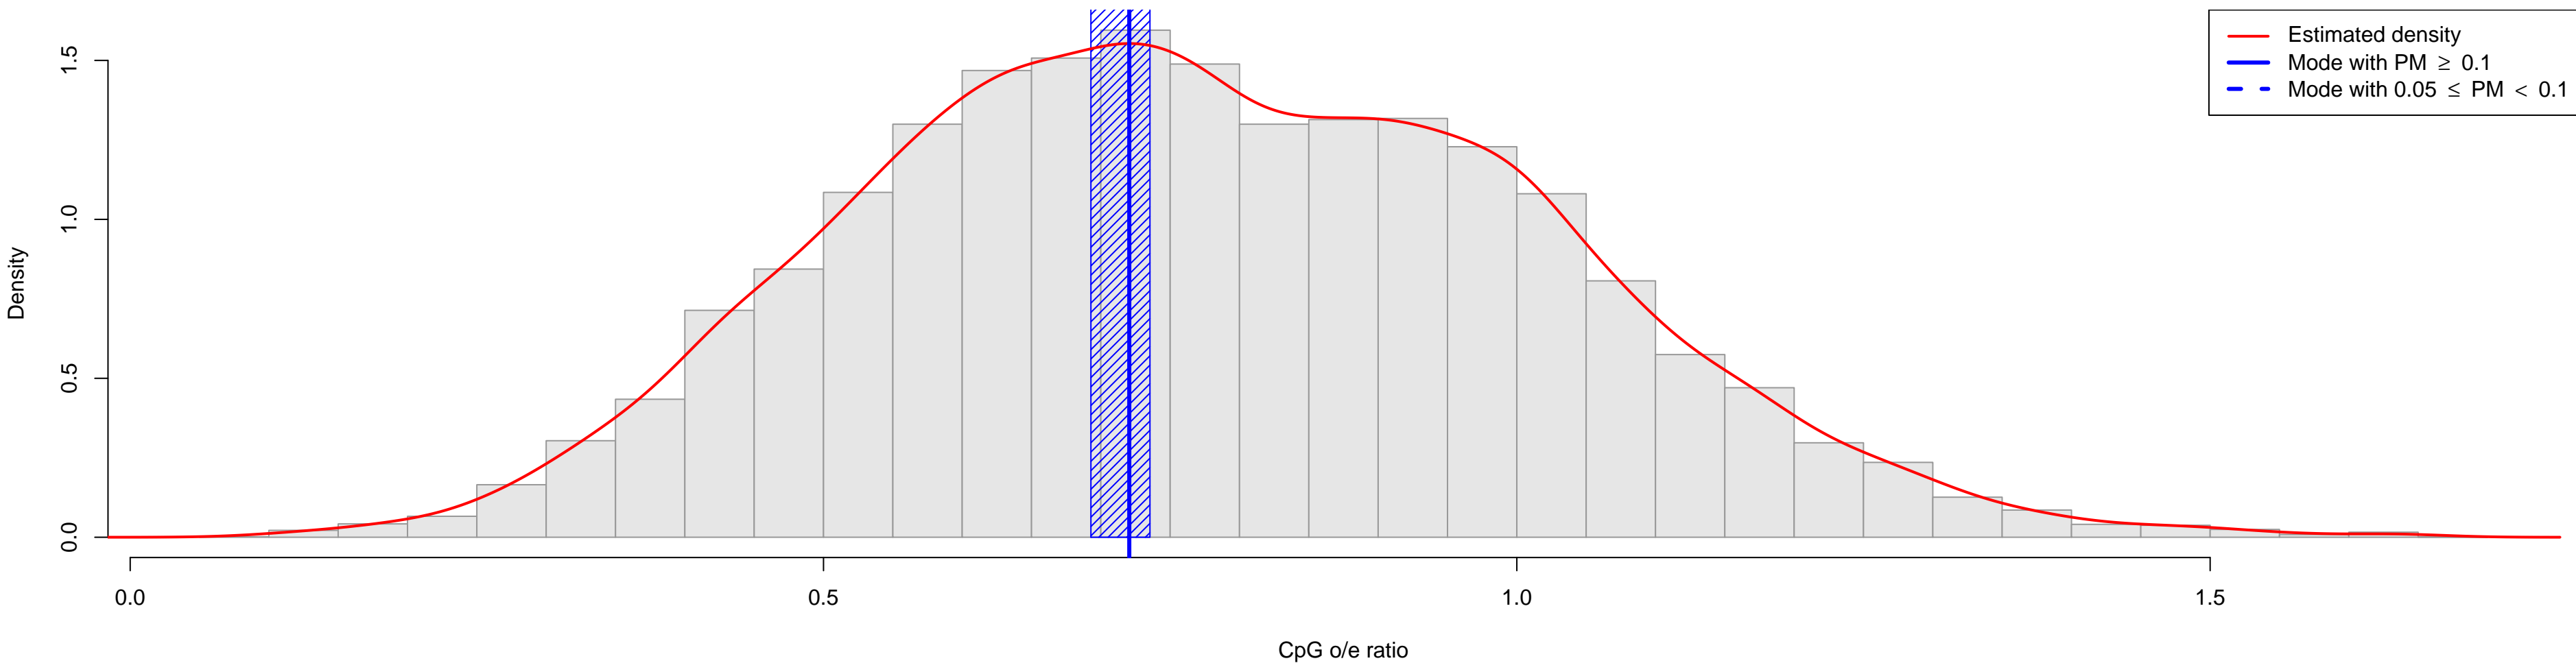

# Eucalyptus\_grandis

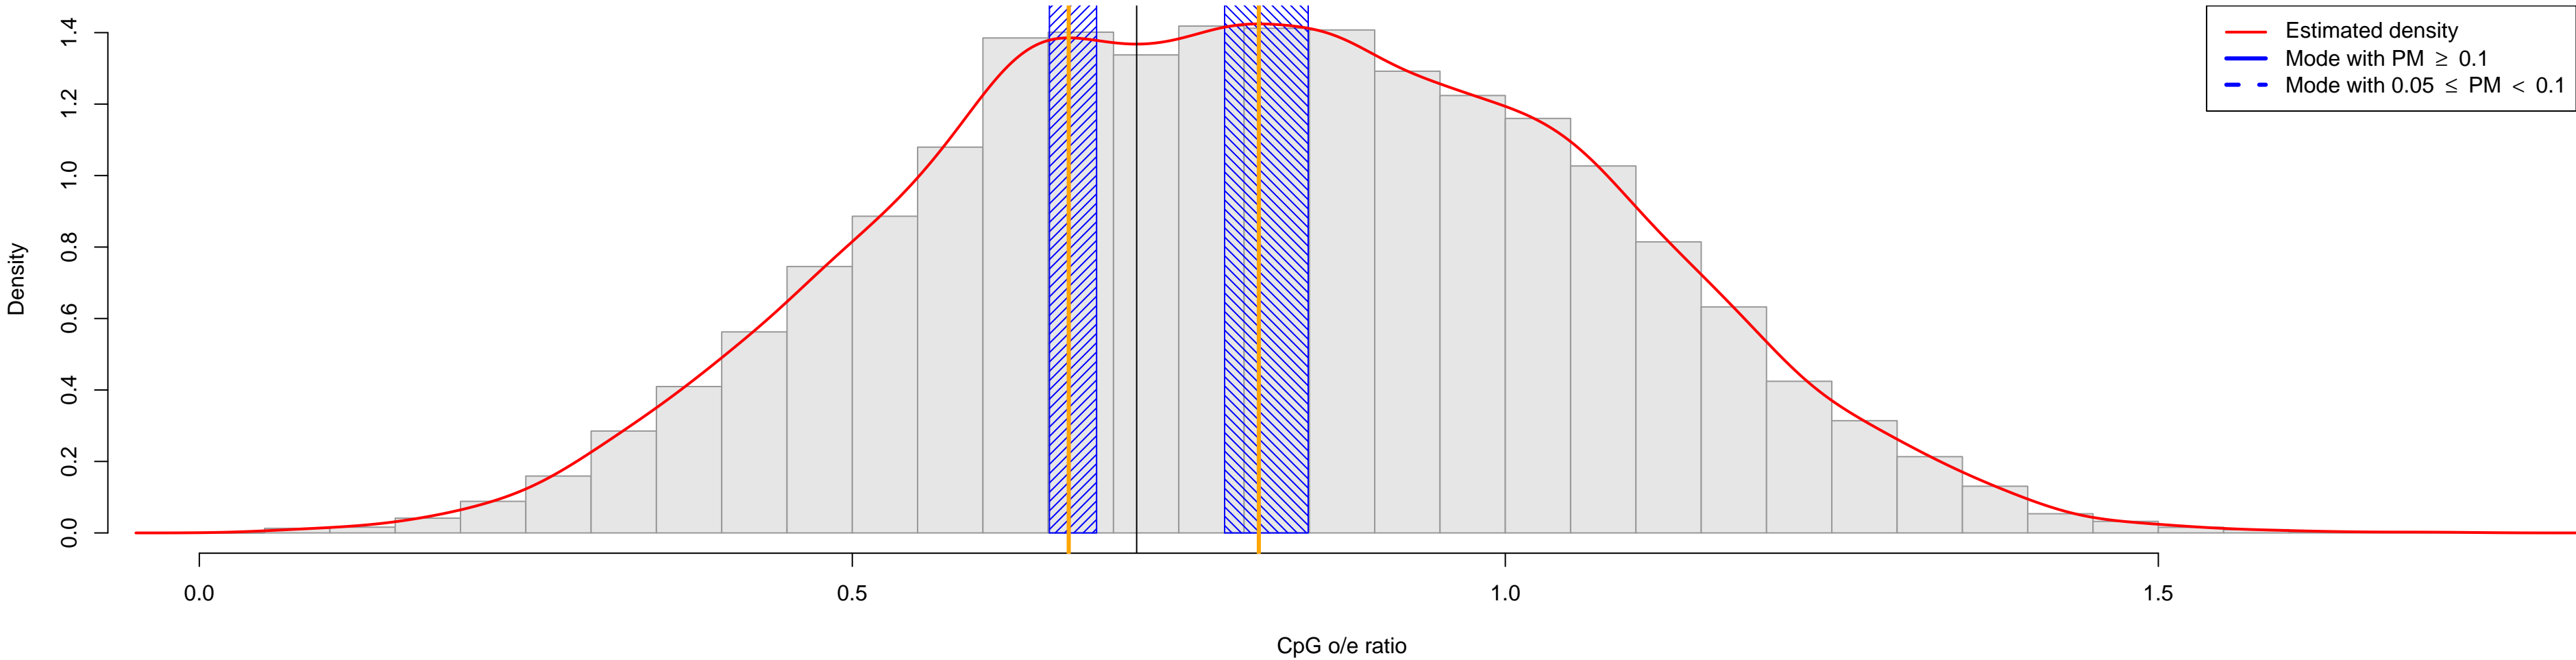

# Eucalyptus\_gunnii

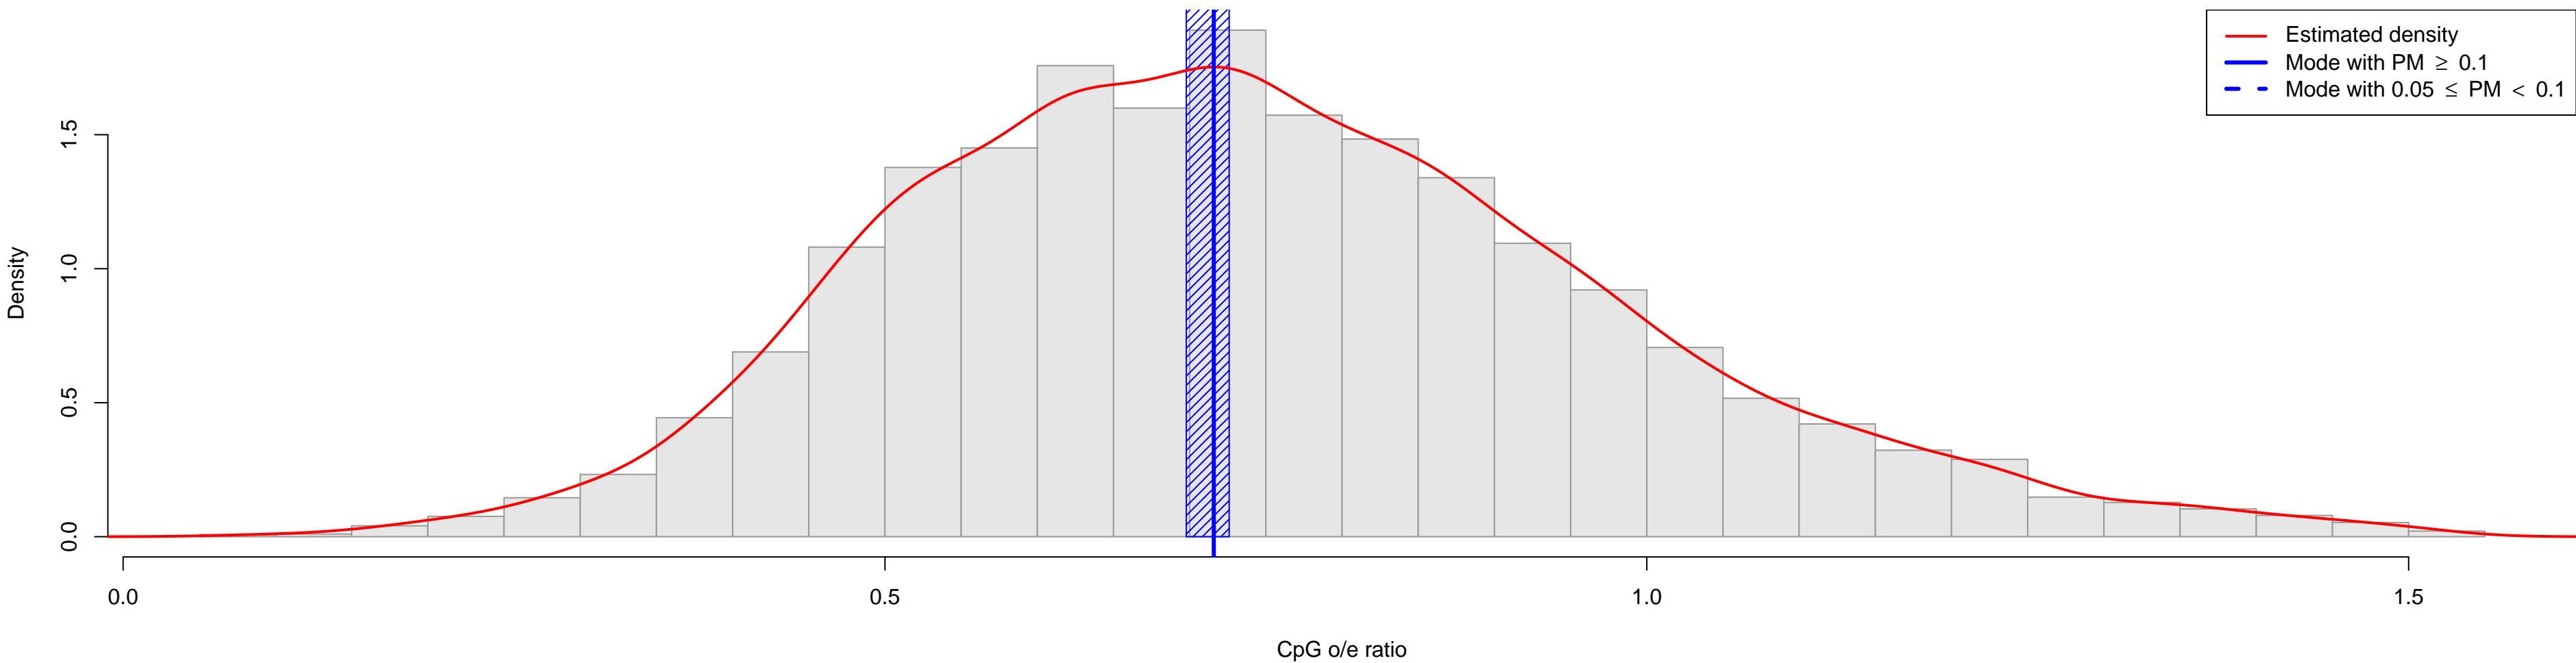

# Eucalyptus\_pellita

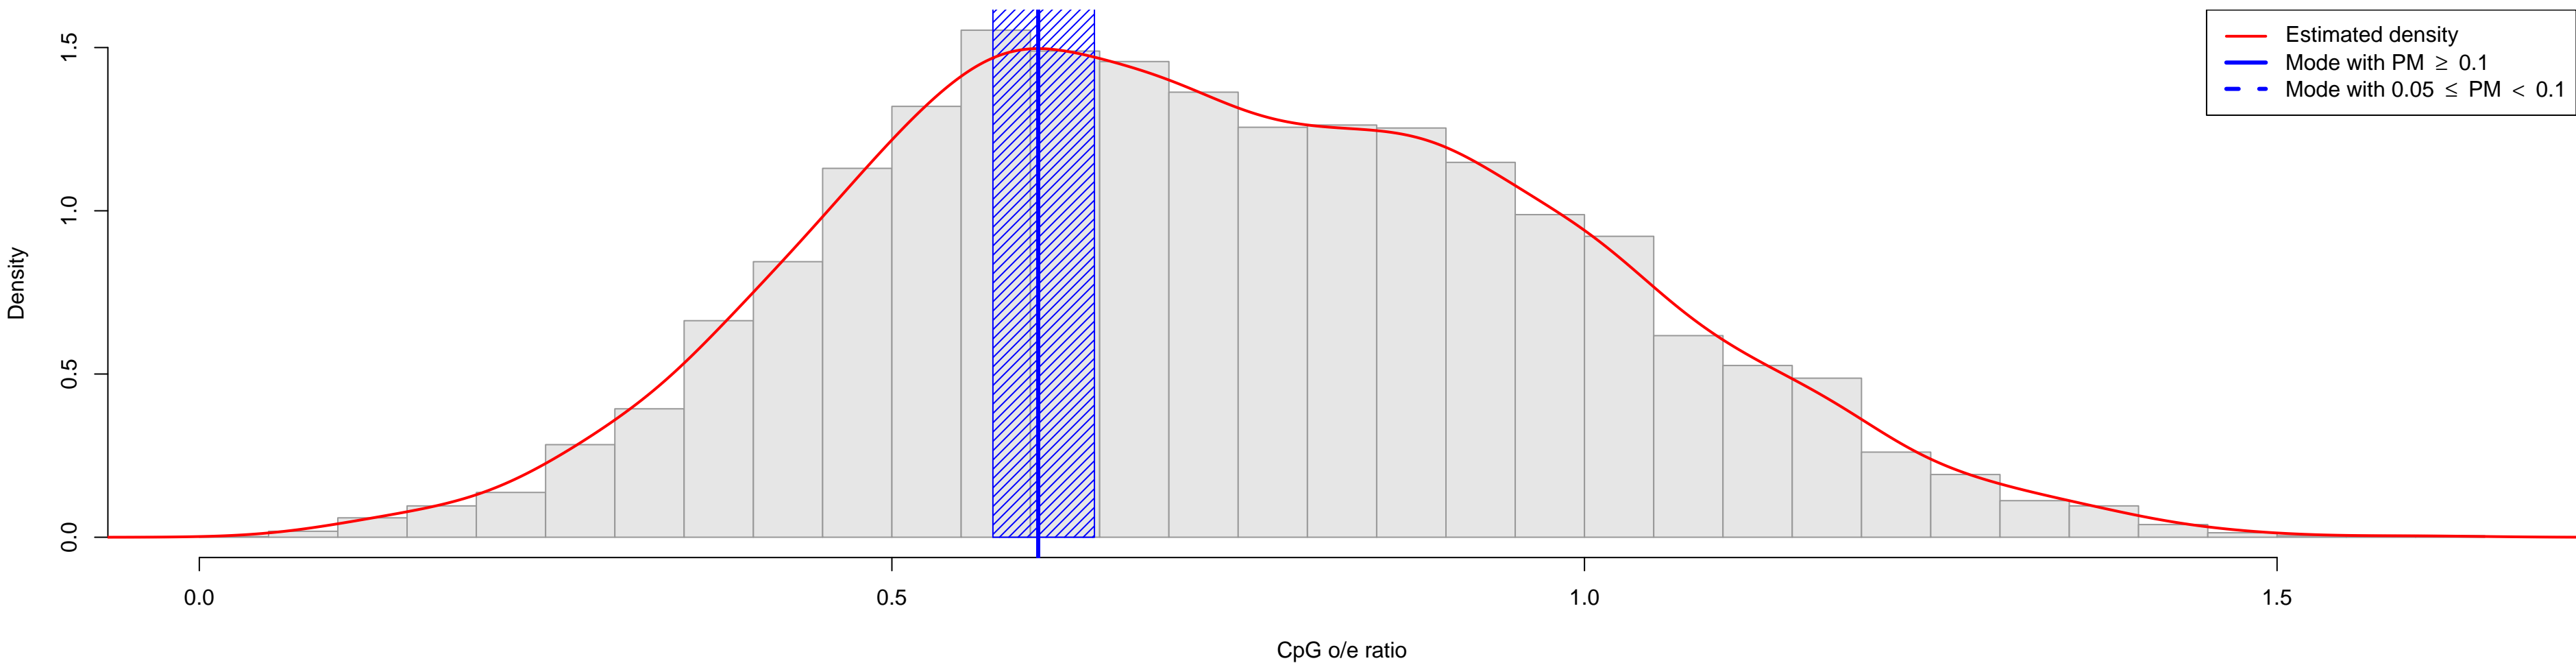

# Eucalyptus\_tereticornis

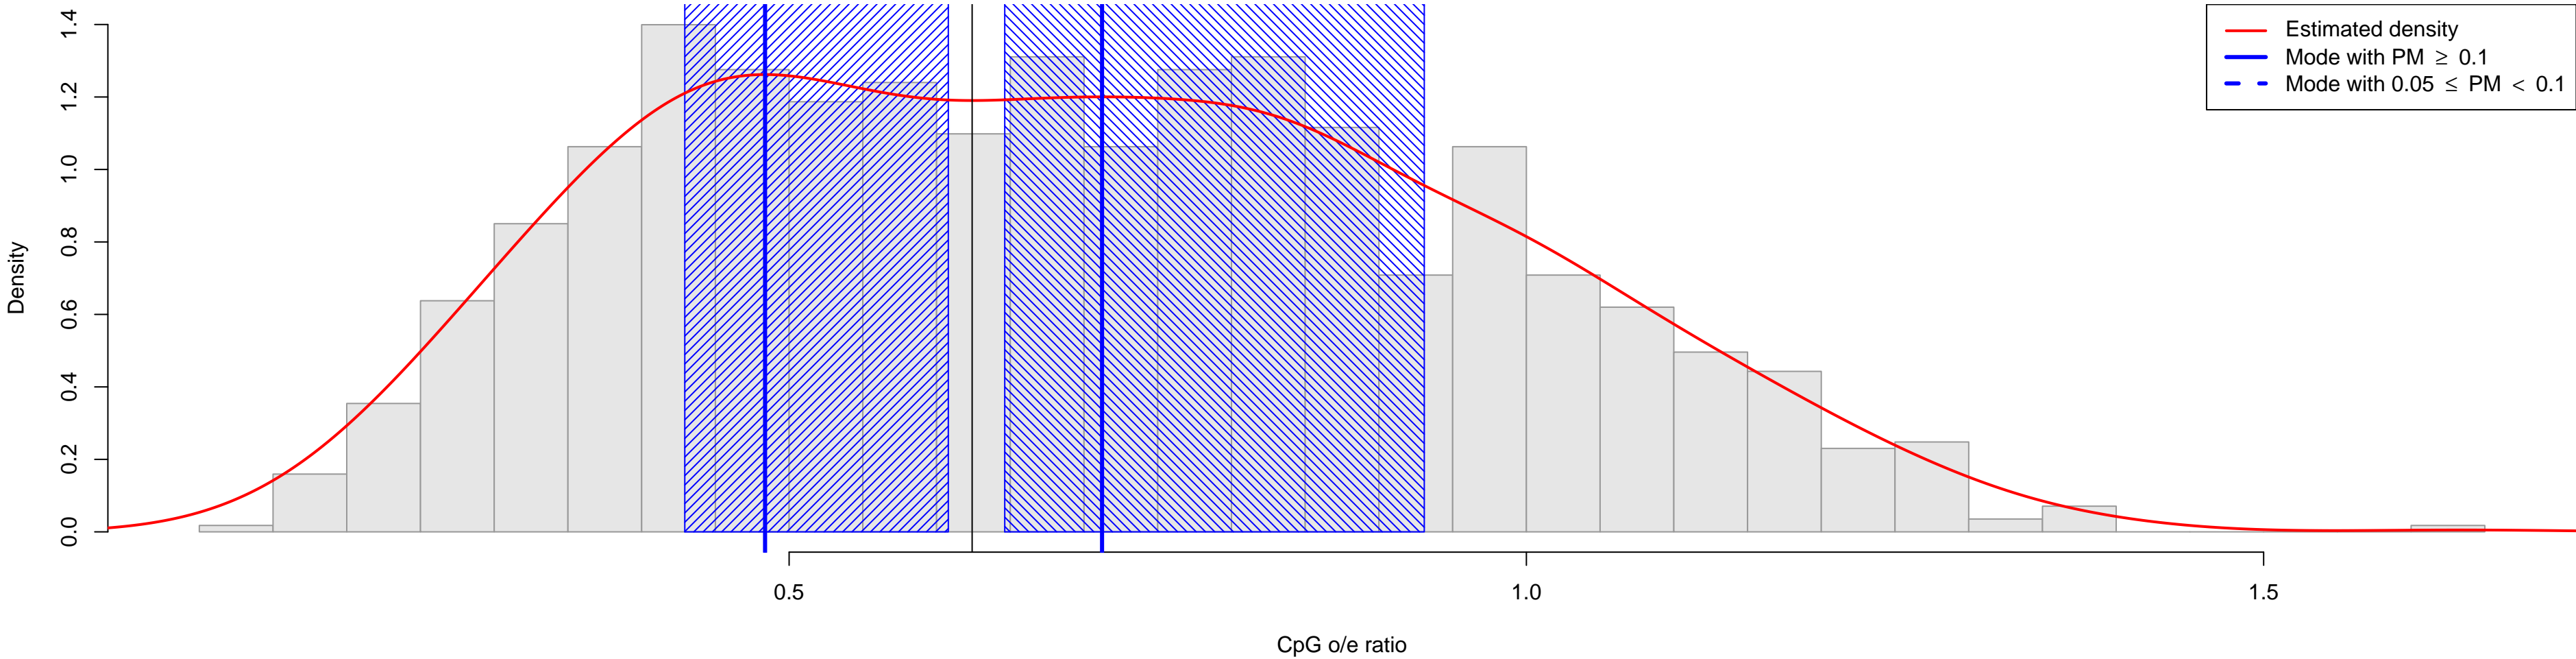



# Eucalyptus\_urophylla

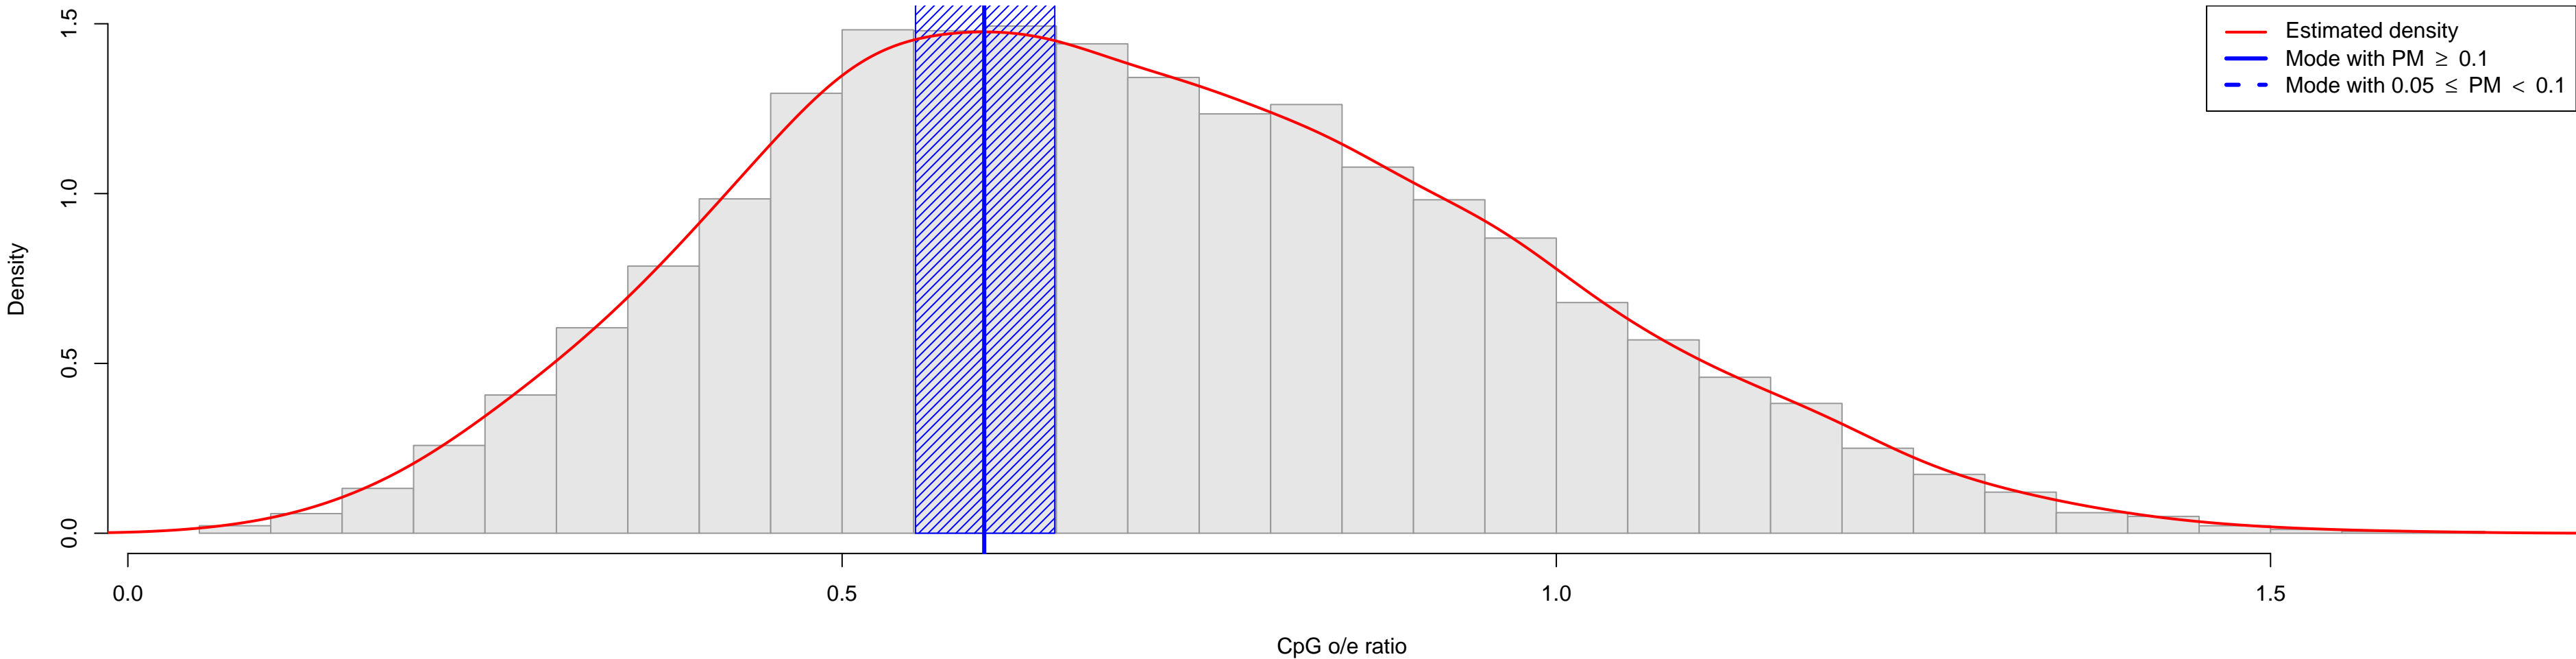

# Euglena\_gracilis

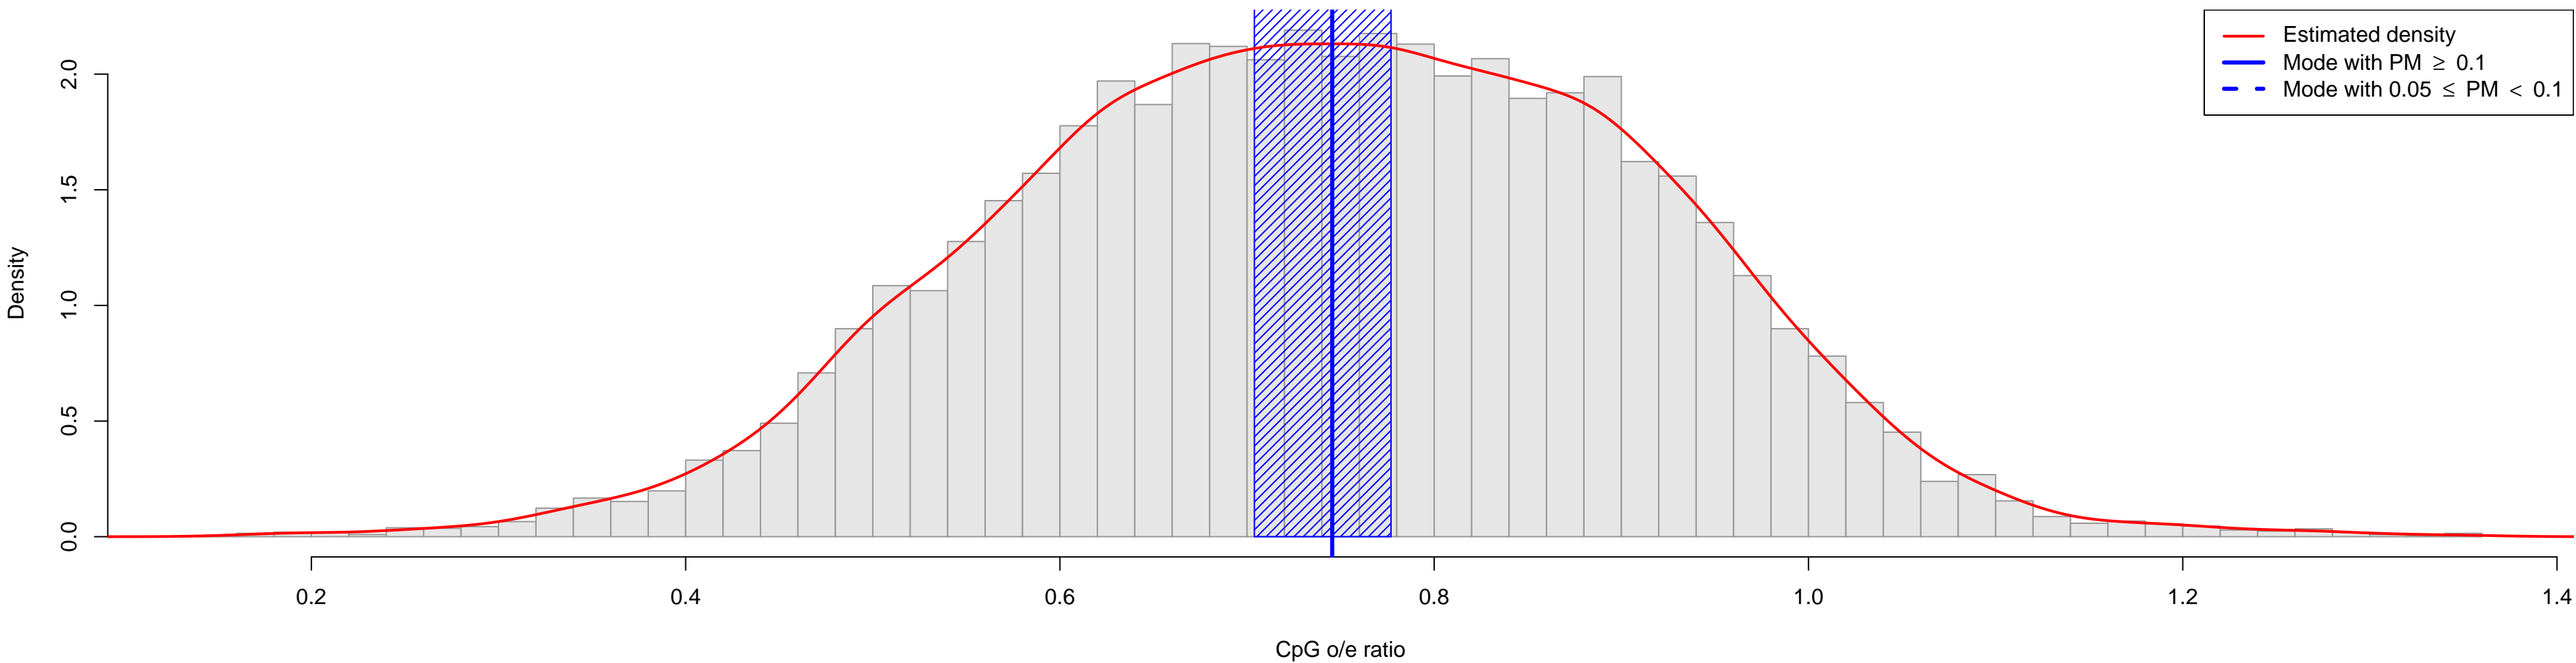

# Euprymna\_scolopes

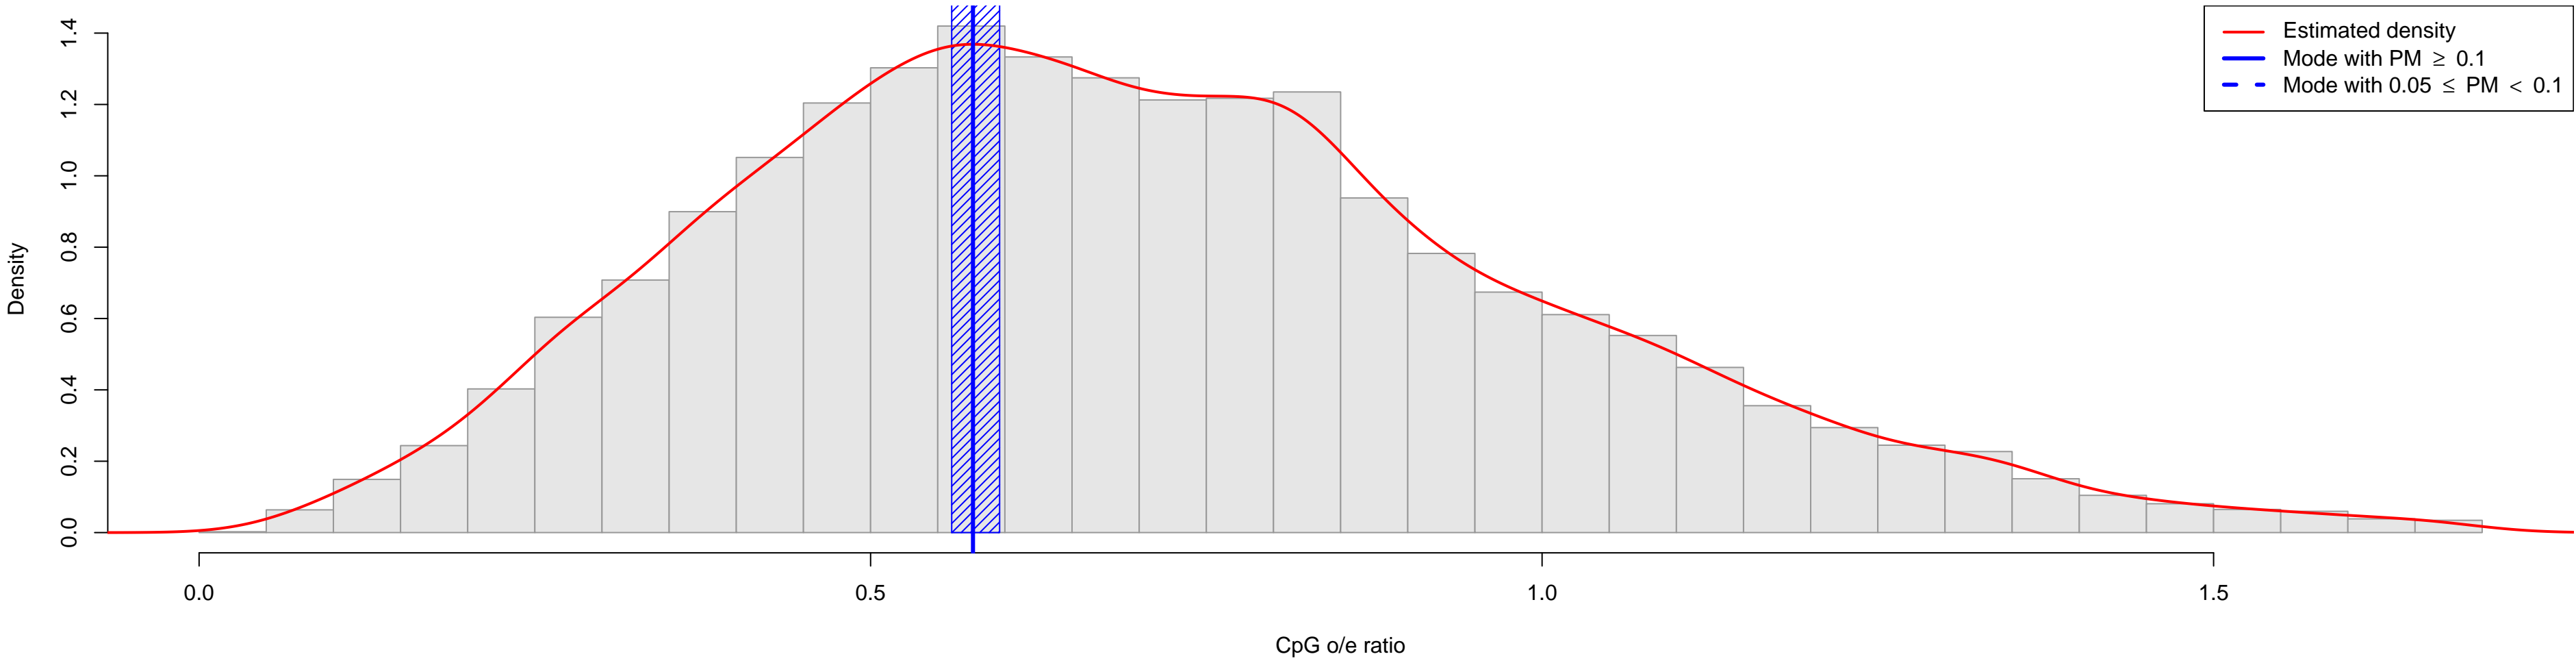

# Fasciola\_gigantica

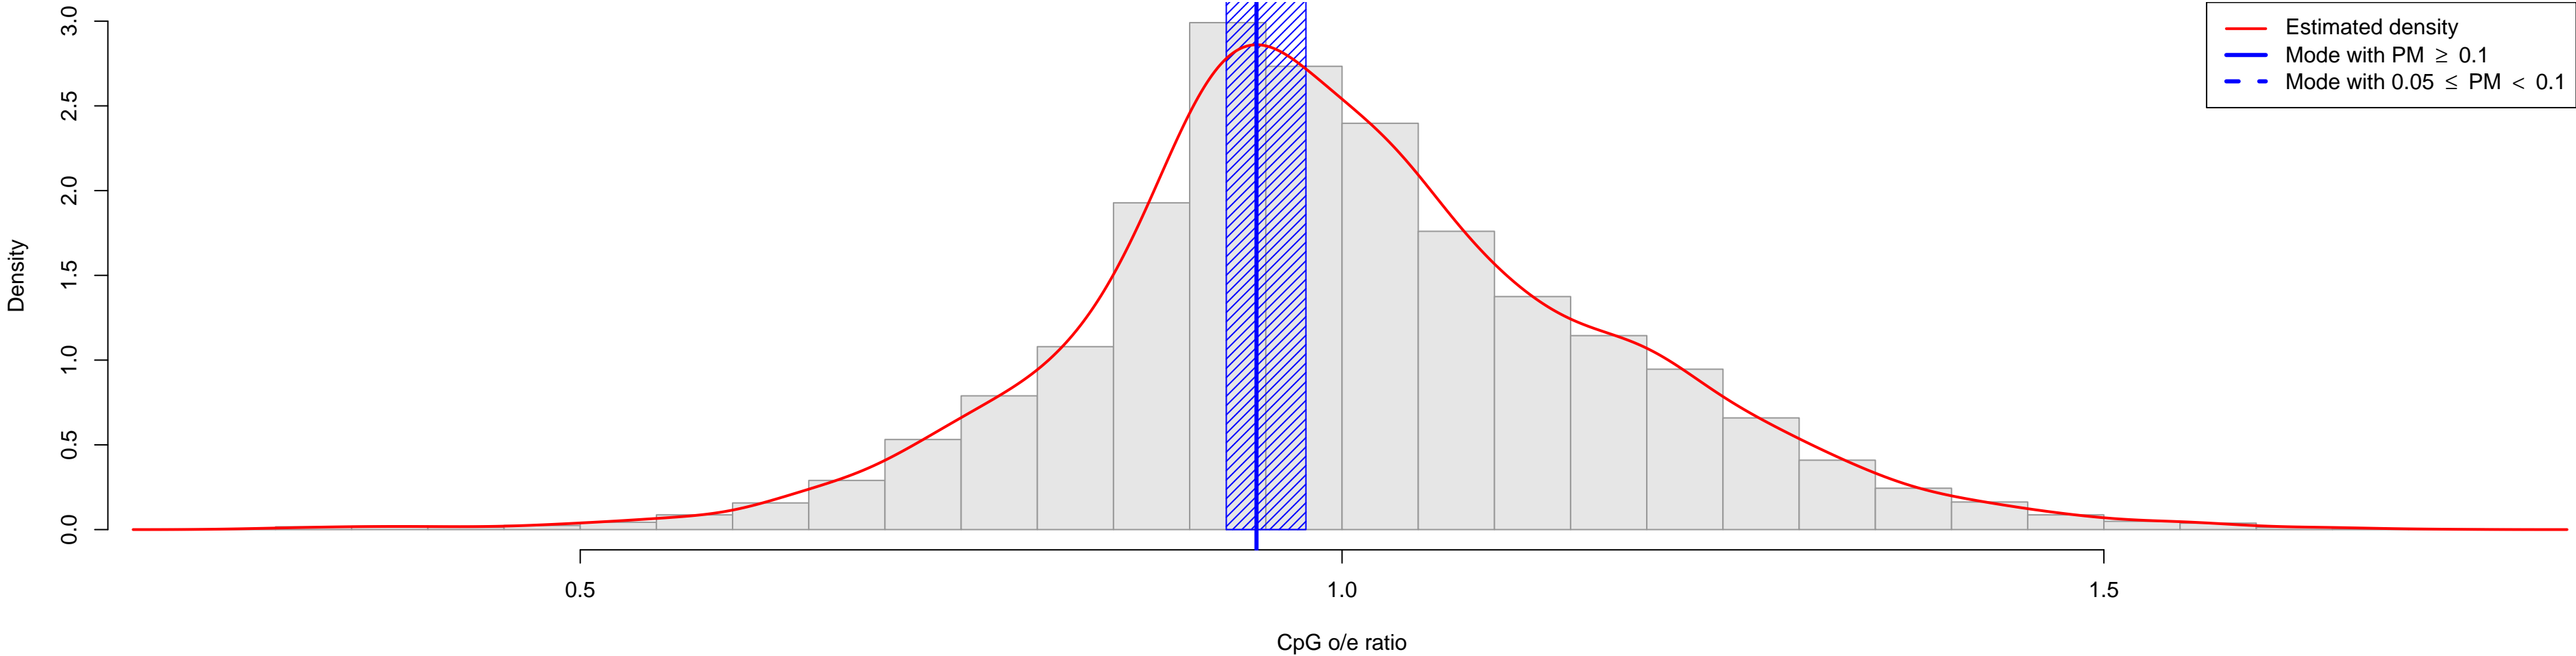

# Fasciola\_hepatica

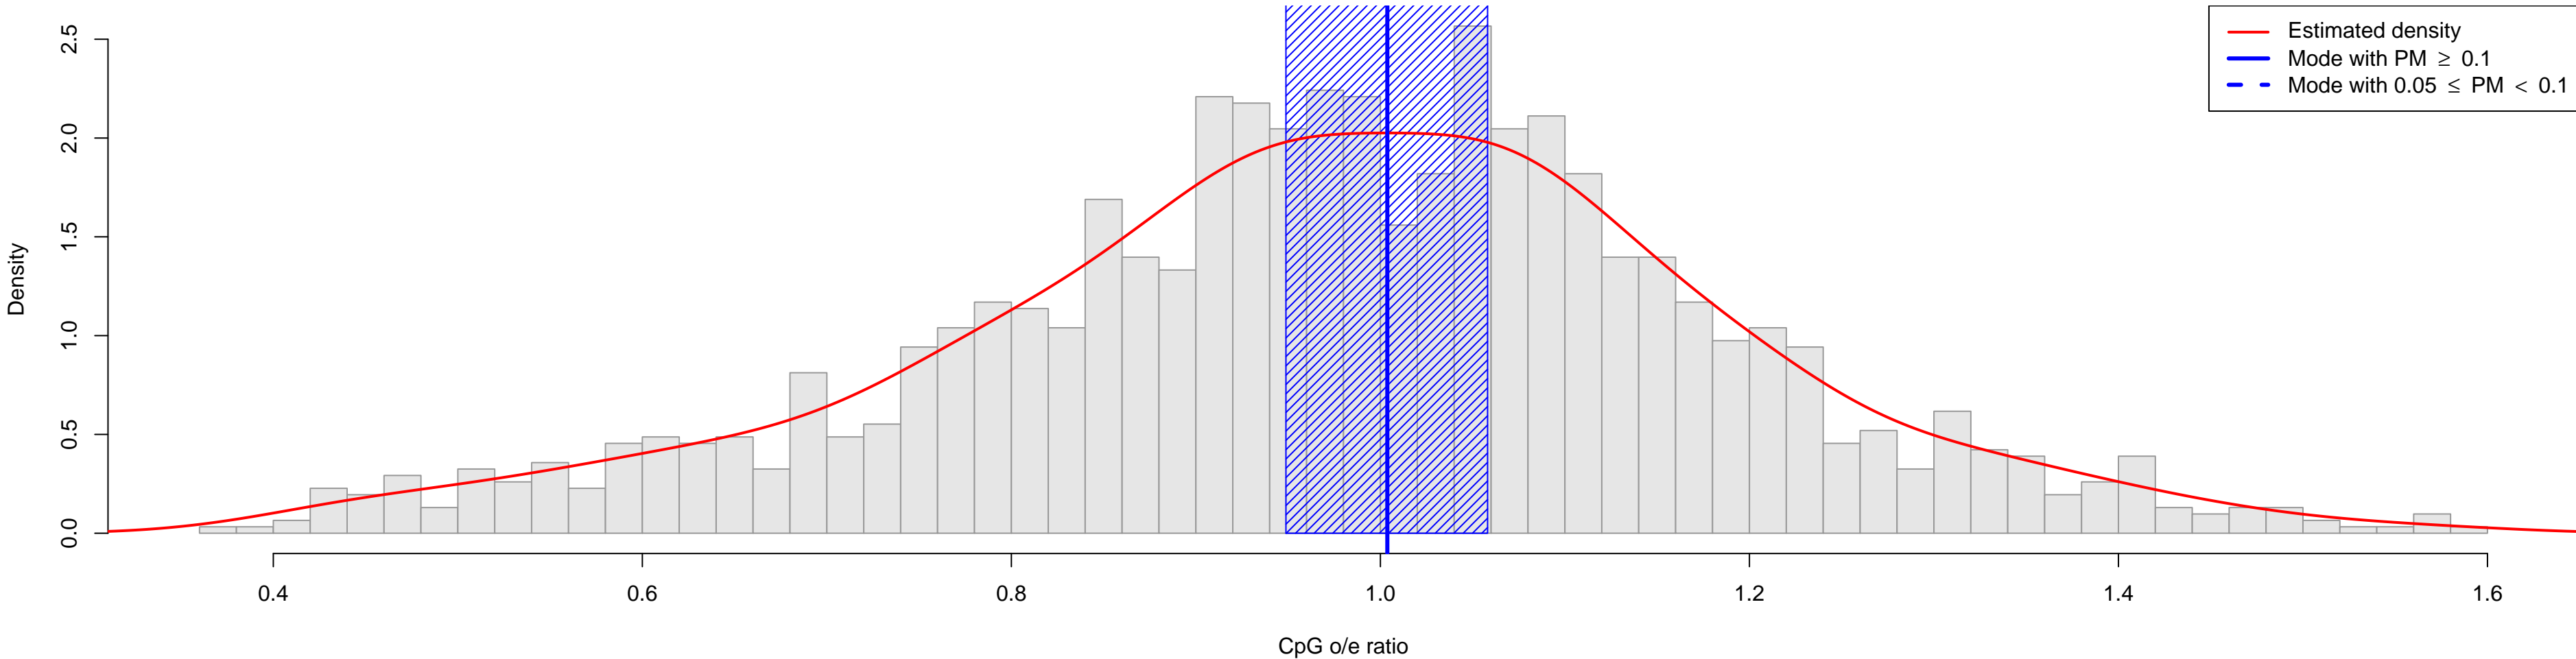

# Fenneropenaeus\_chinensis

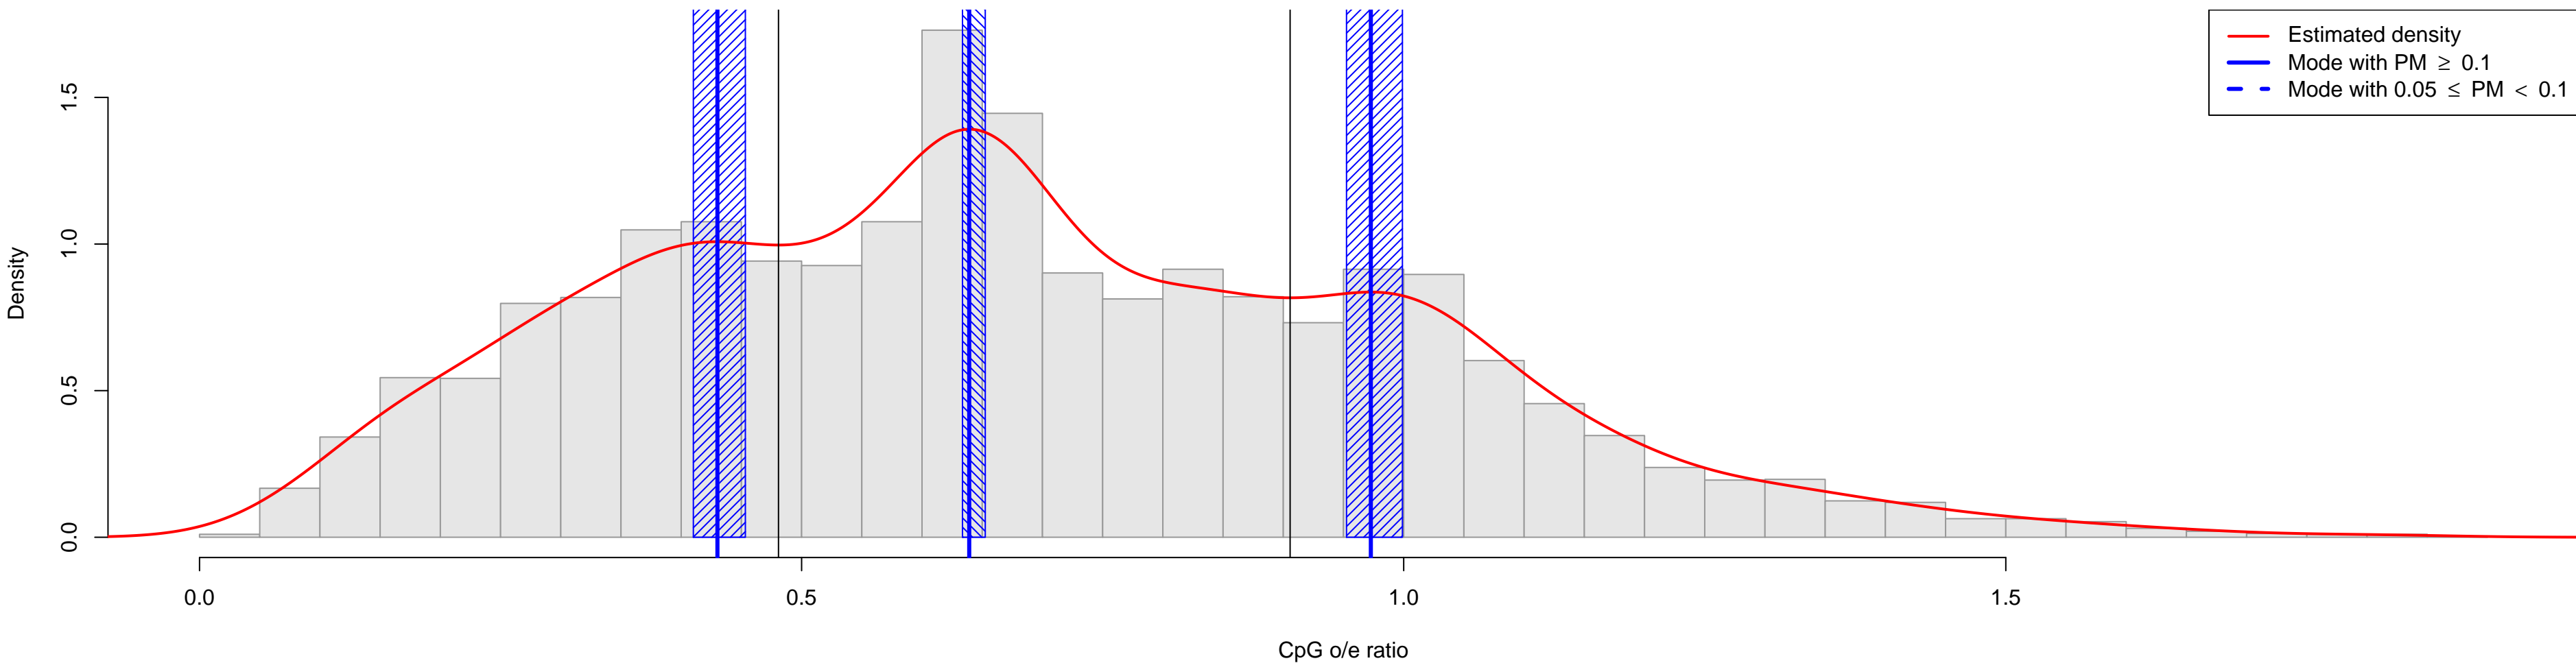

# Festuca\_pratensis

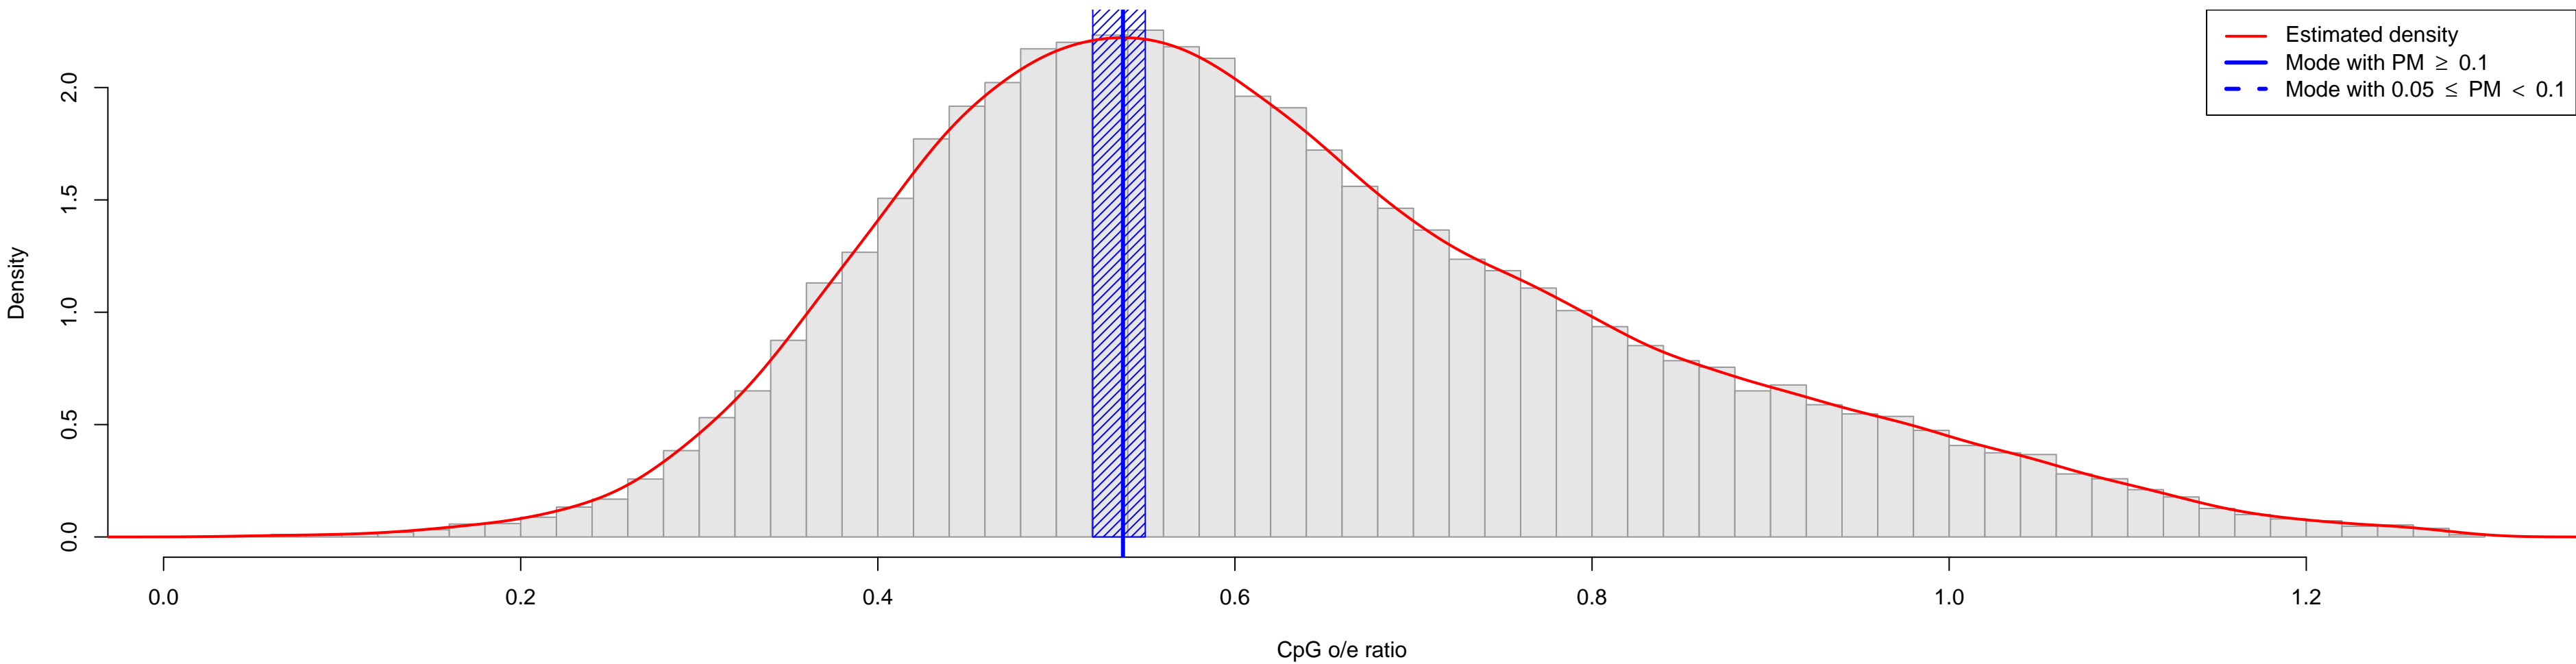

# Folsomia\_candida

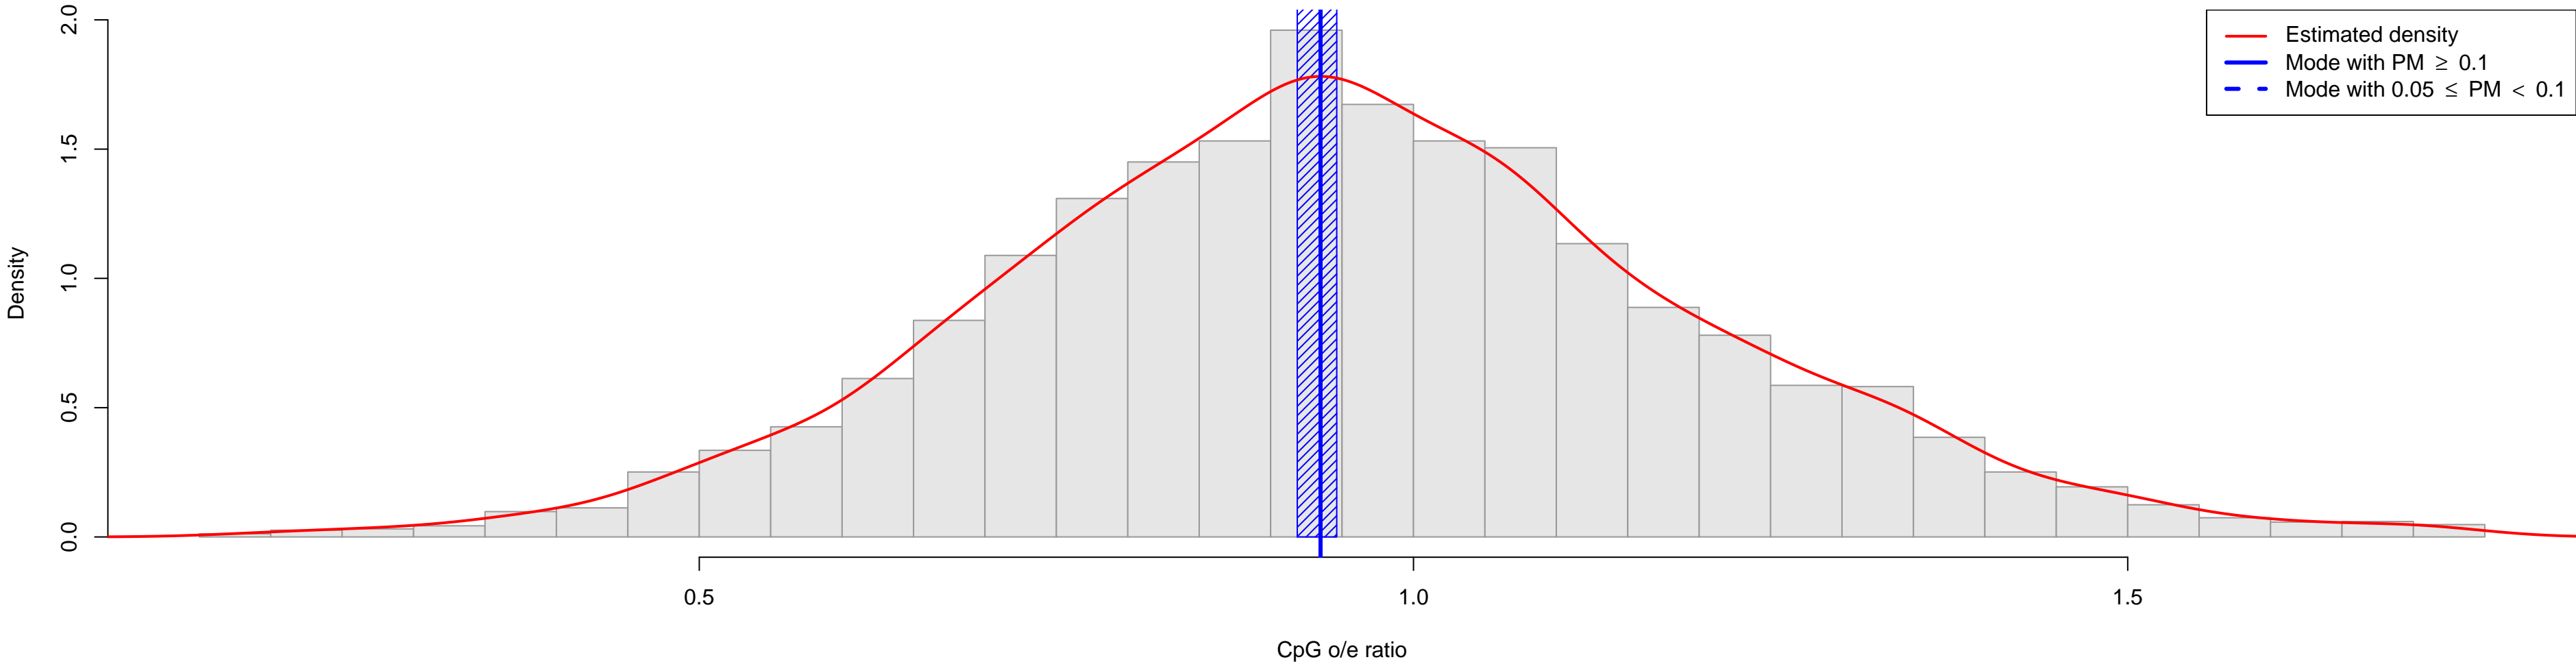



# Fragaria\_vesca

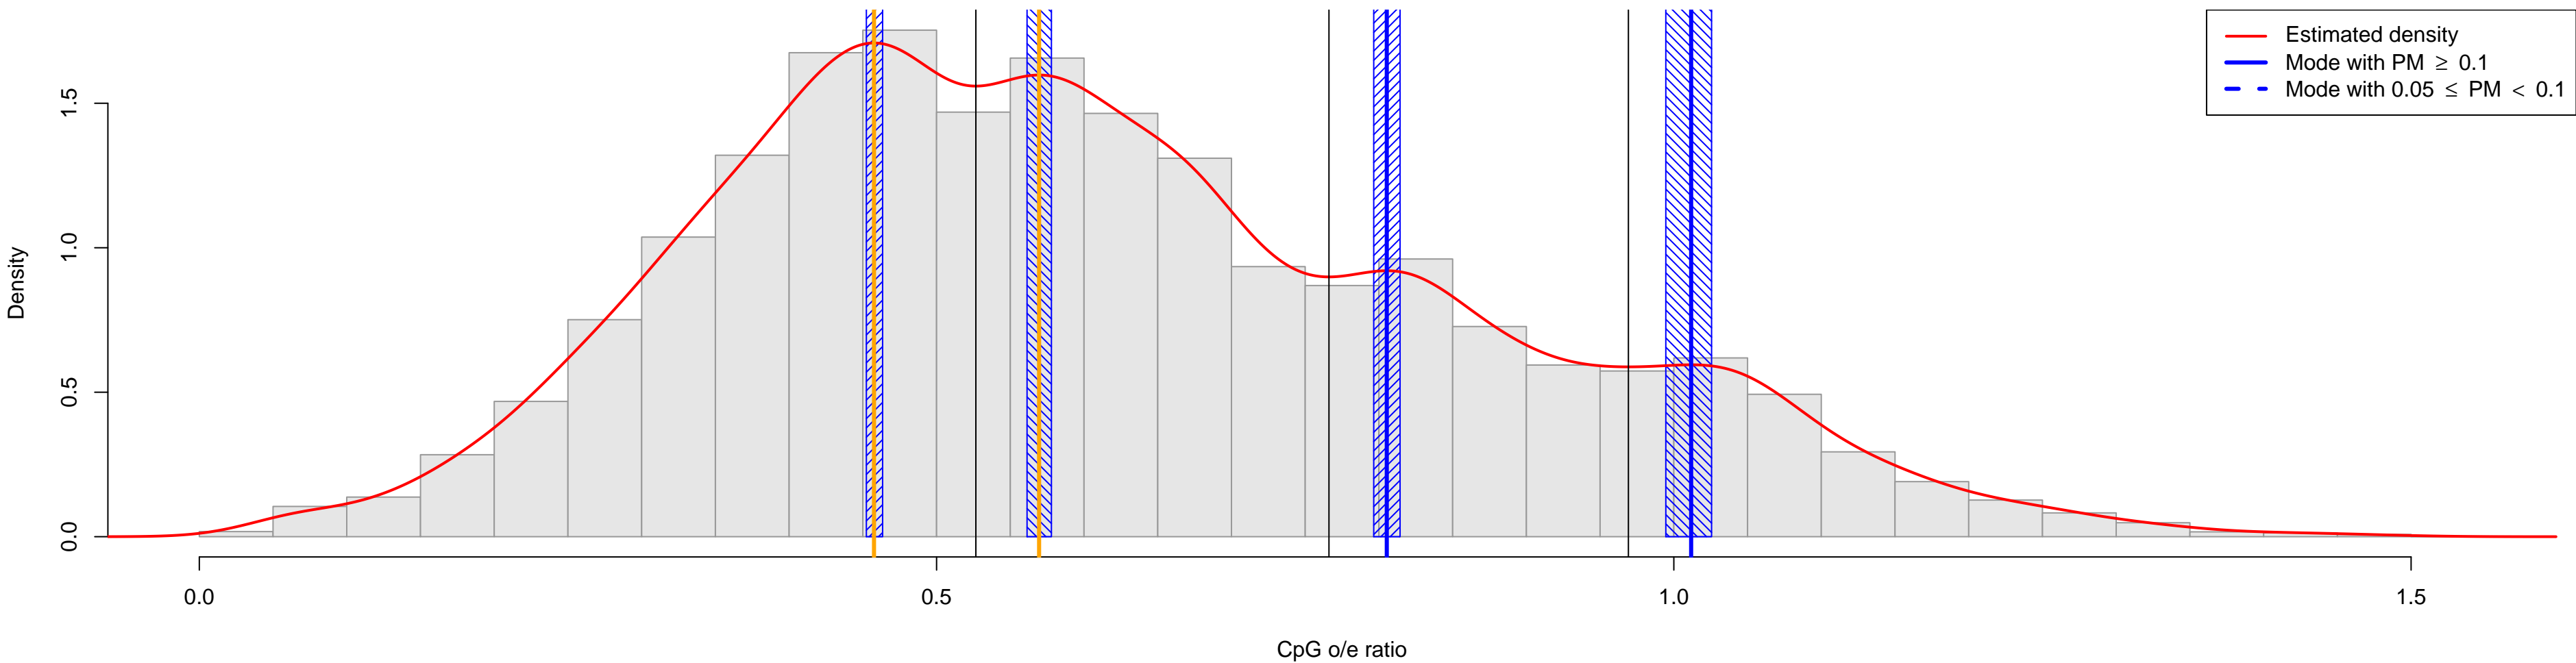

# Fucus\_serratus

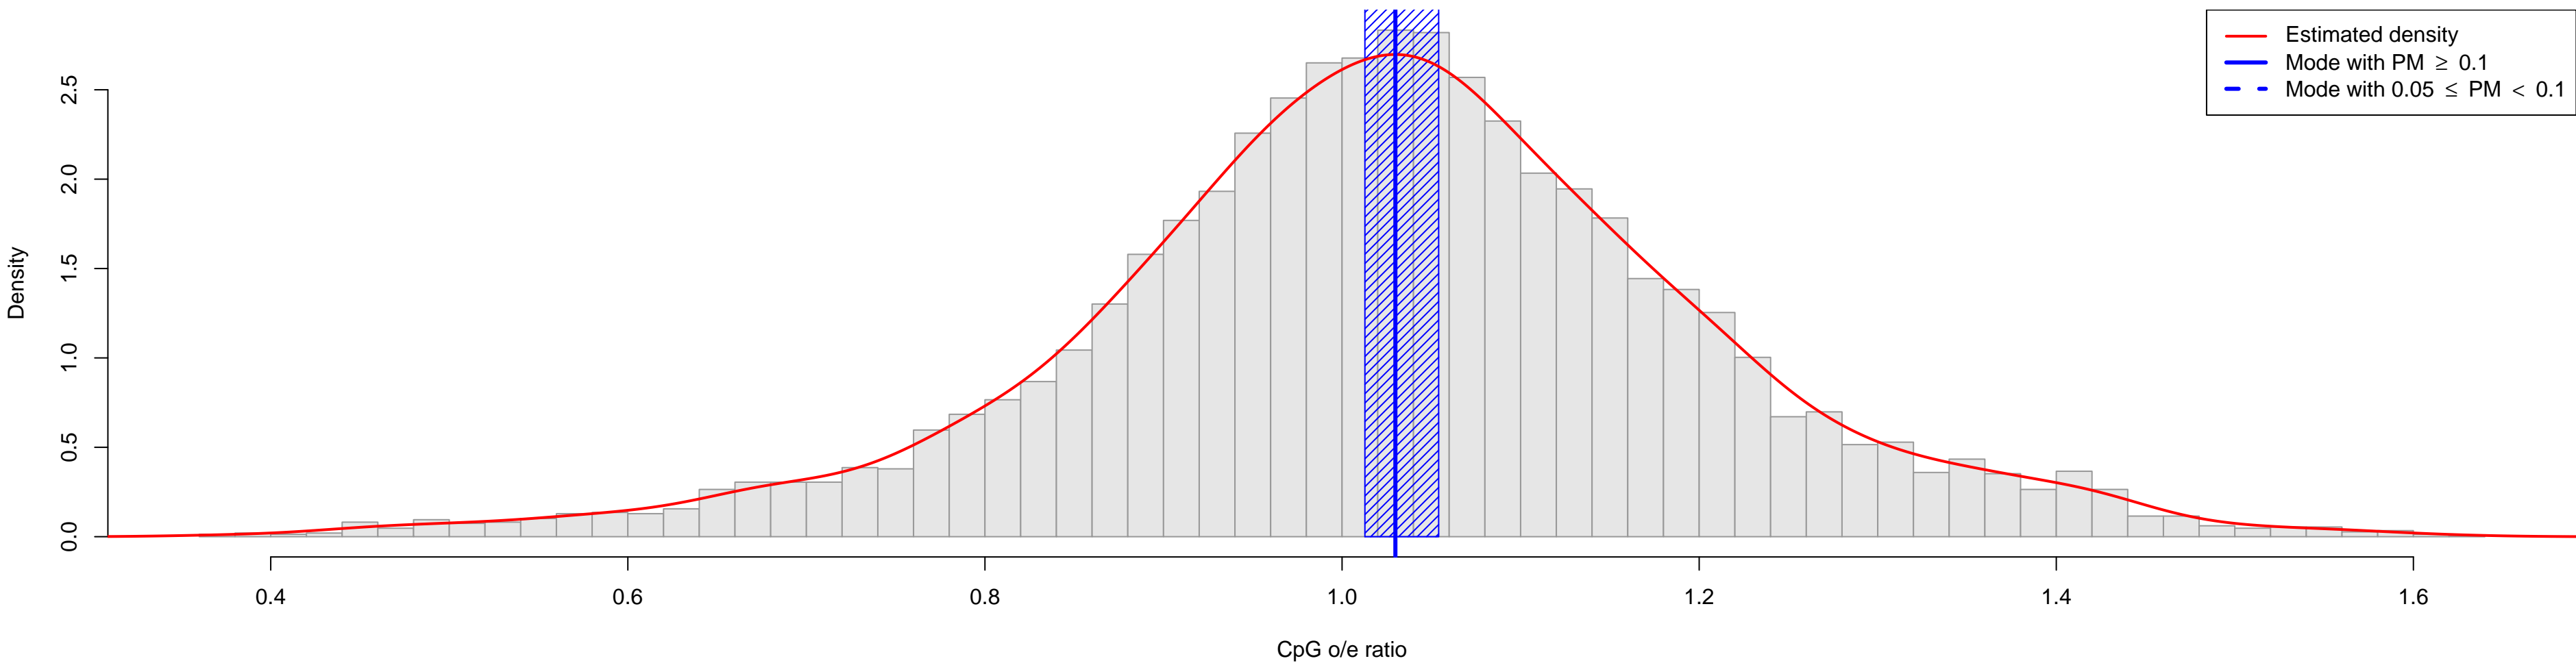

# Fucus\_vesiculosus

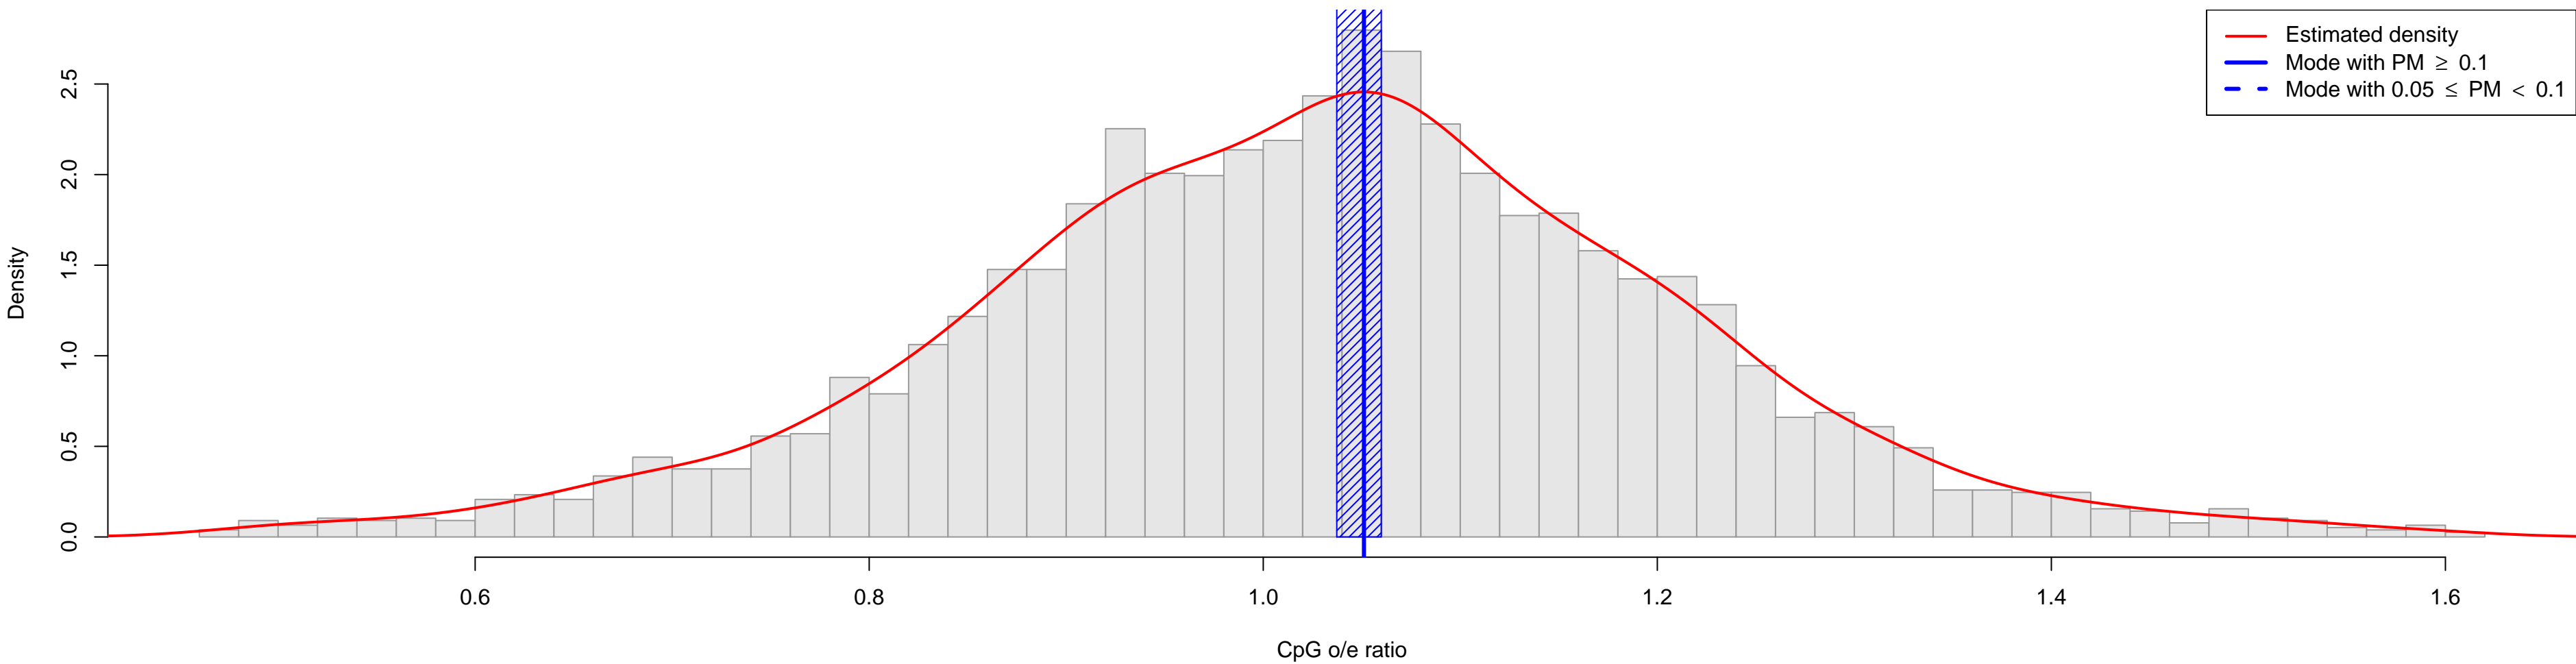

# Fumaria\_officinalis

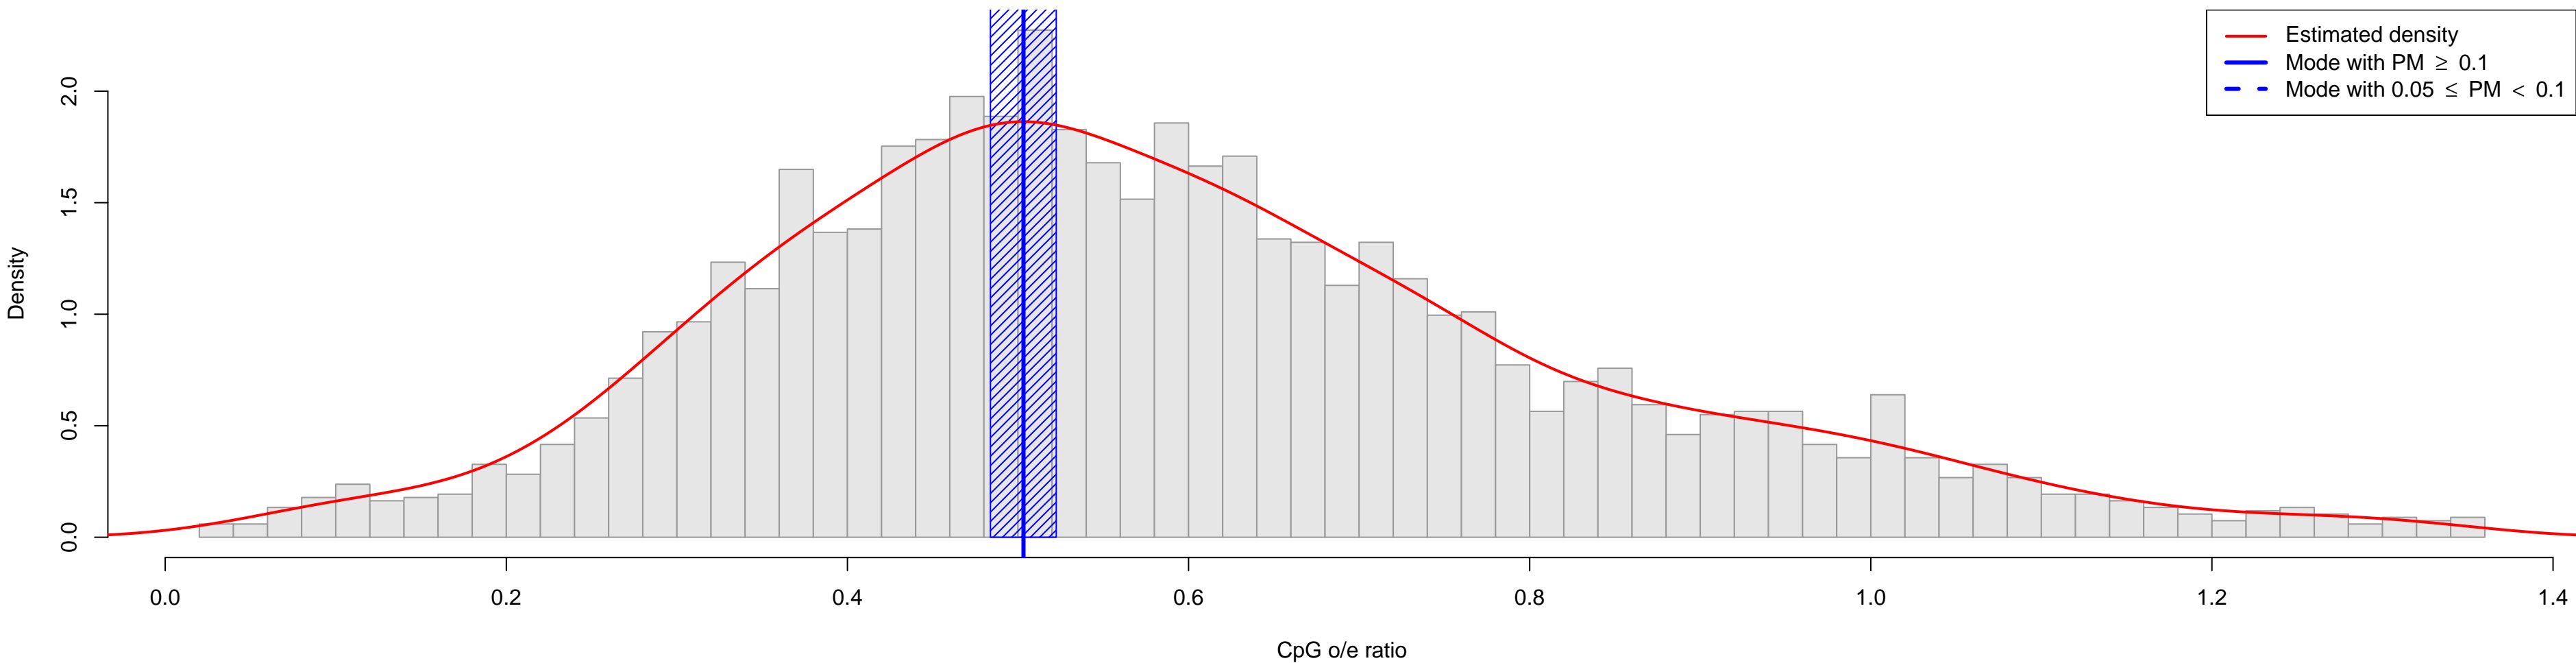

# Furcellaria\_lumbricalis

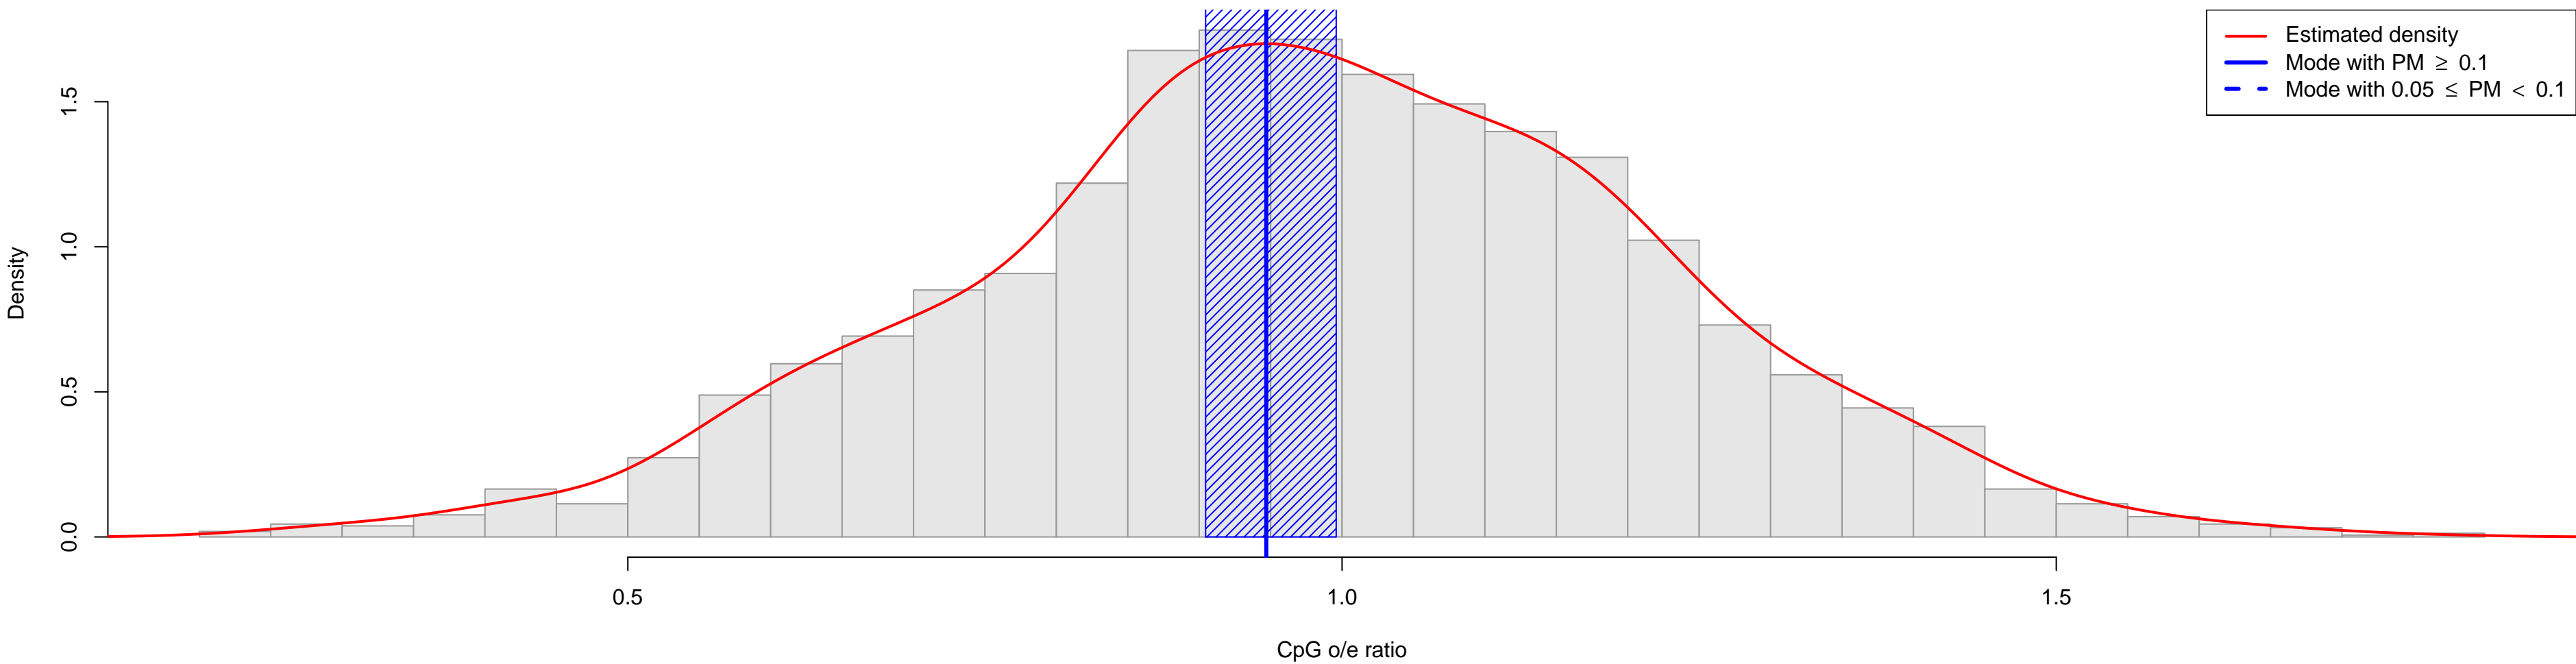

# Fusarium\_oxysporum

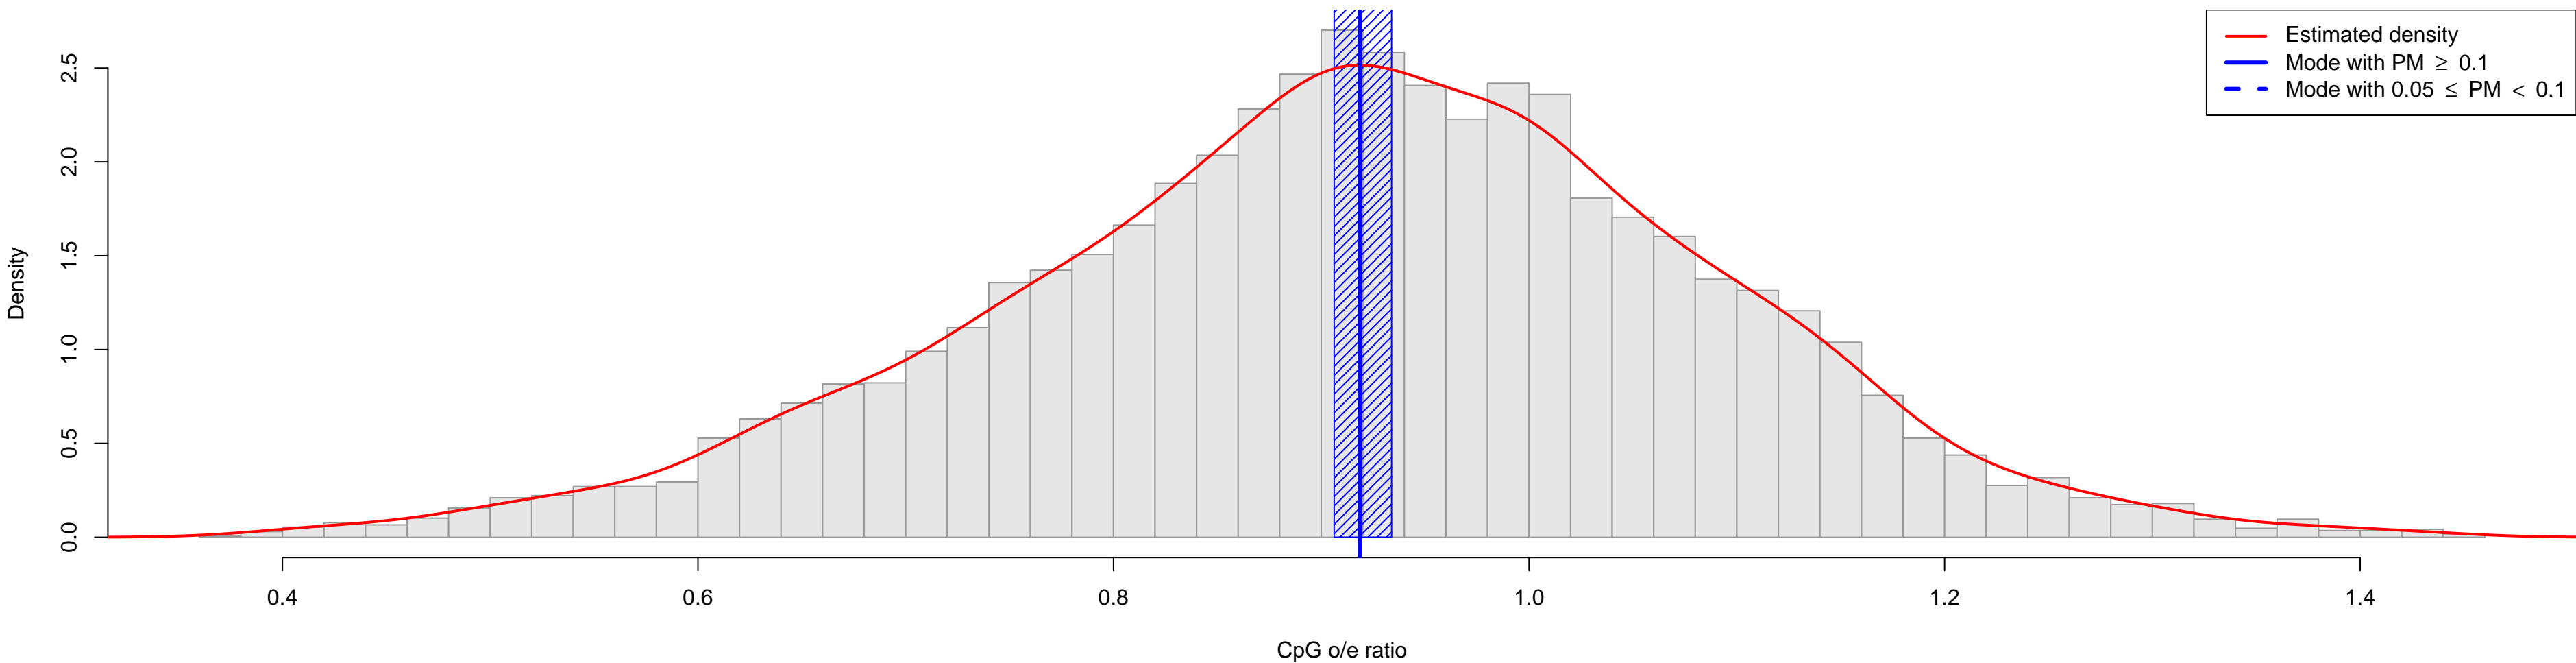

# Fusarium\_sporotrichioides

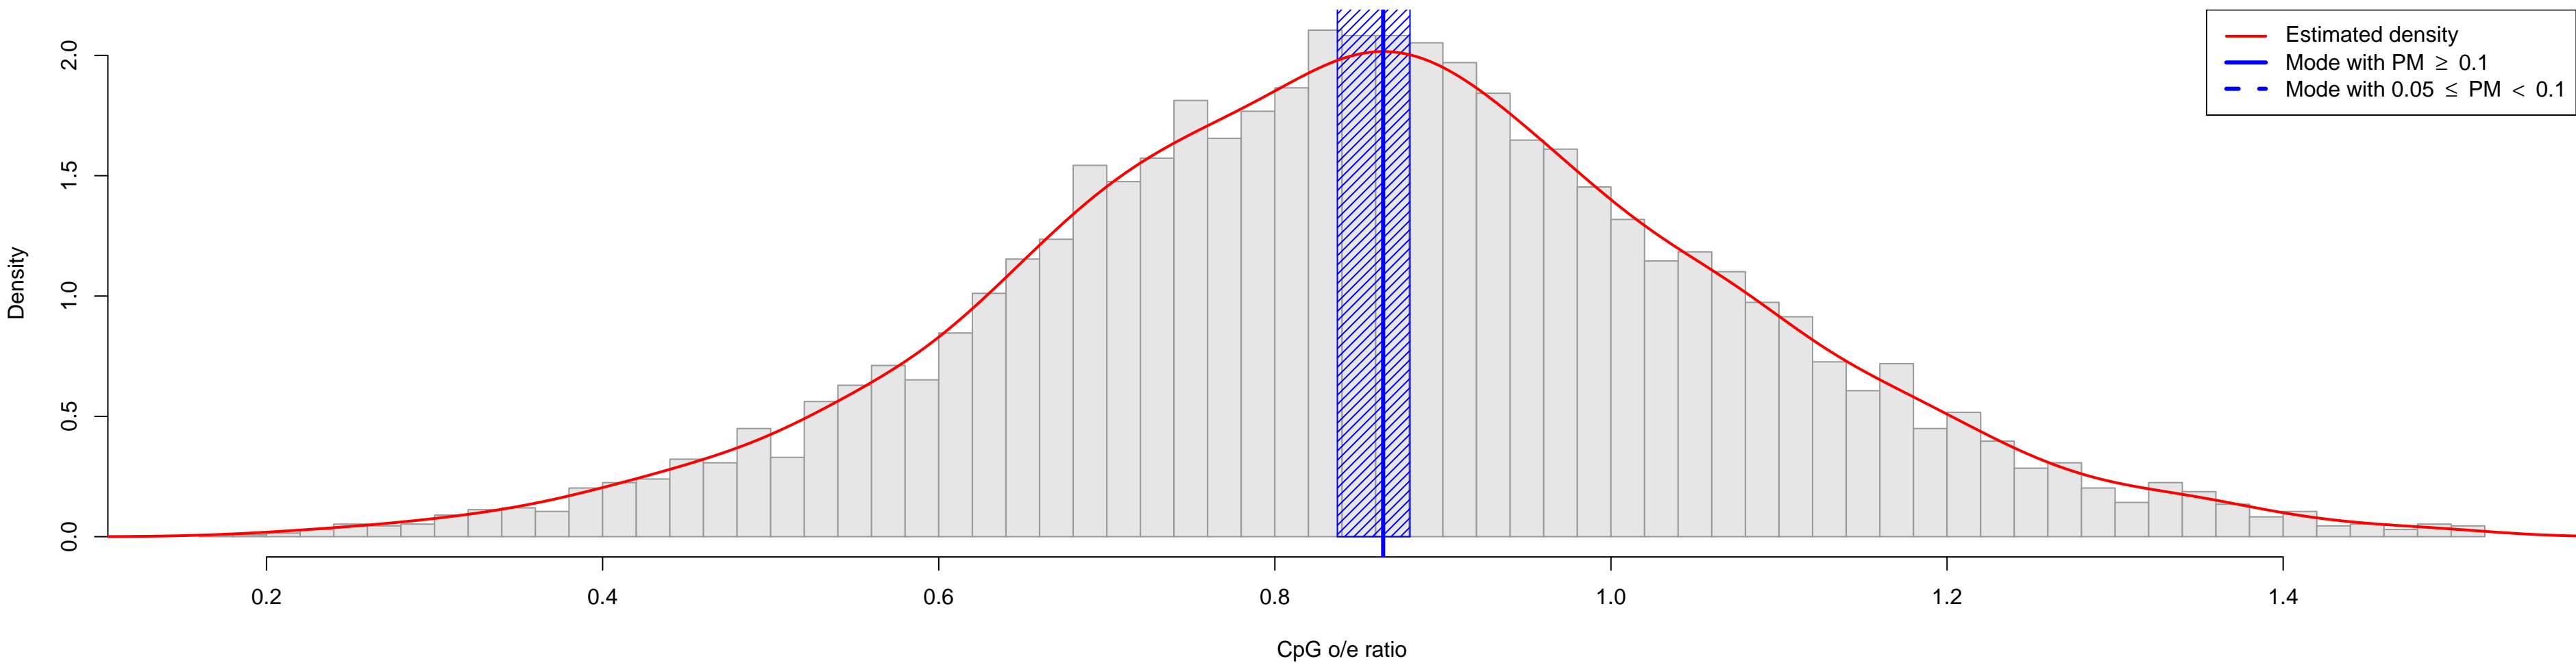

# Gadus\_morhua

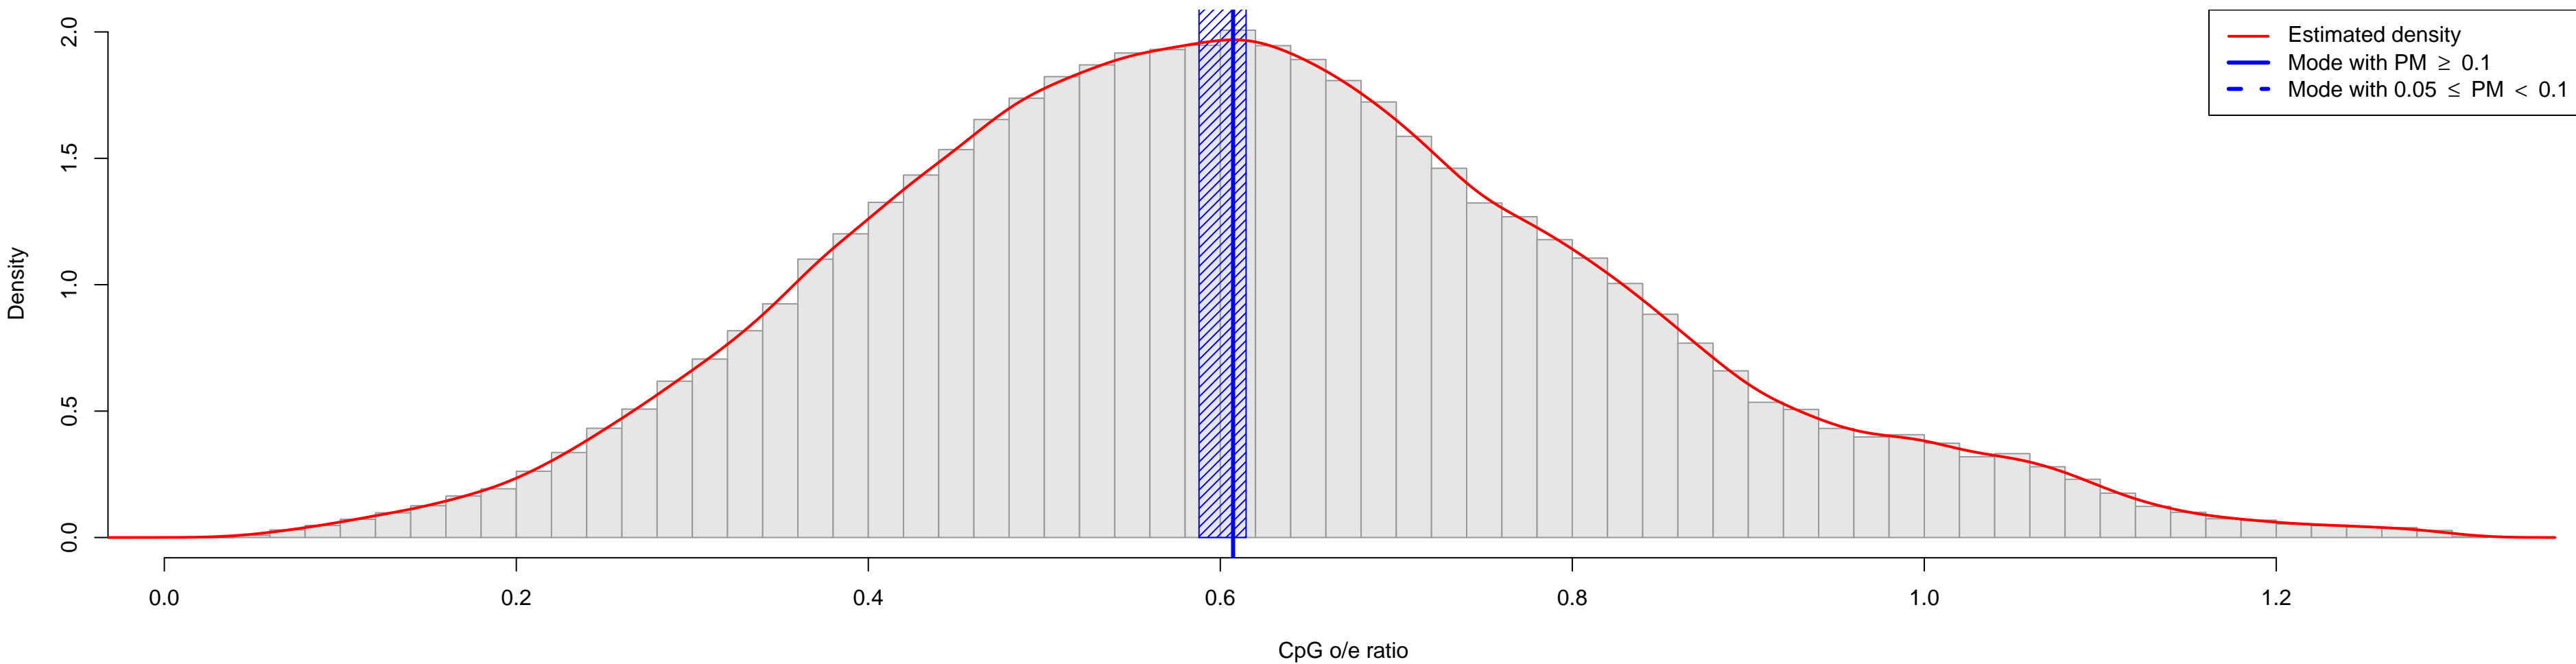



# Gallus\_gallus

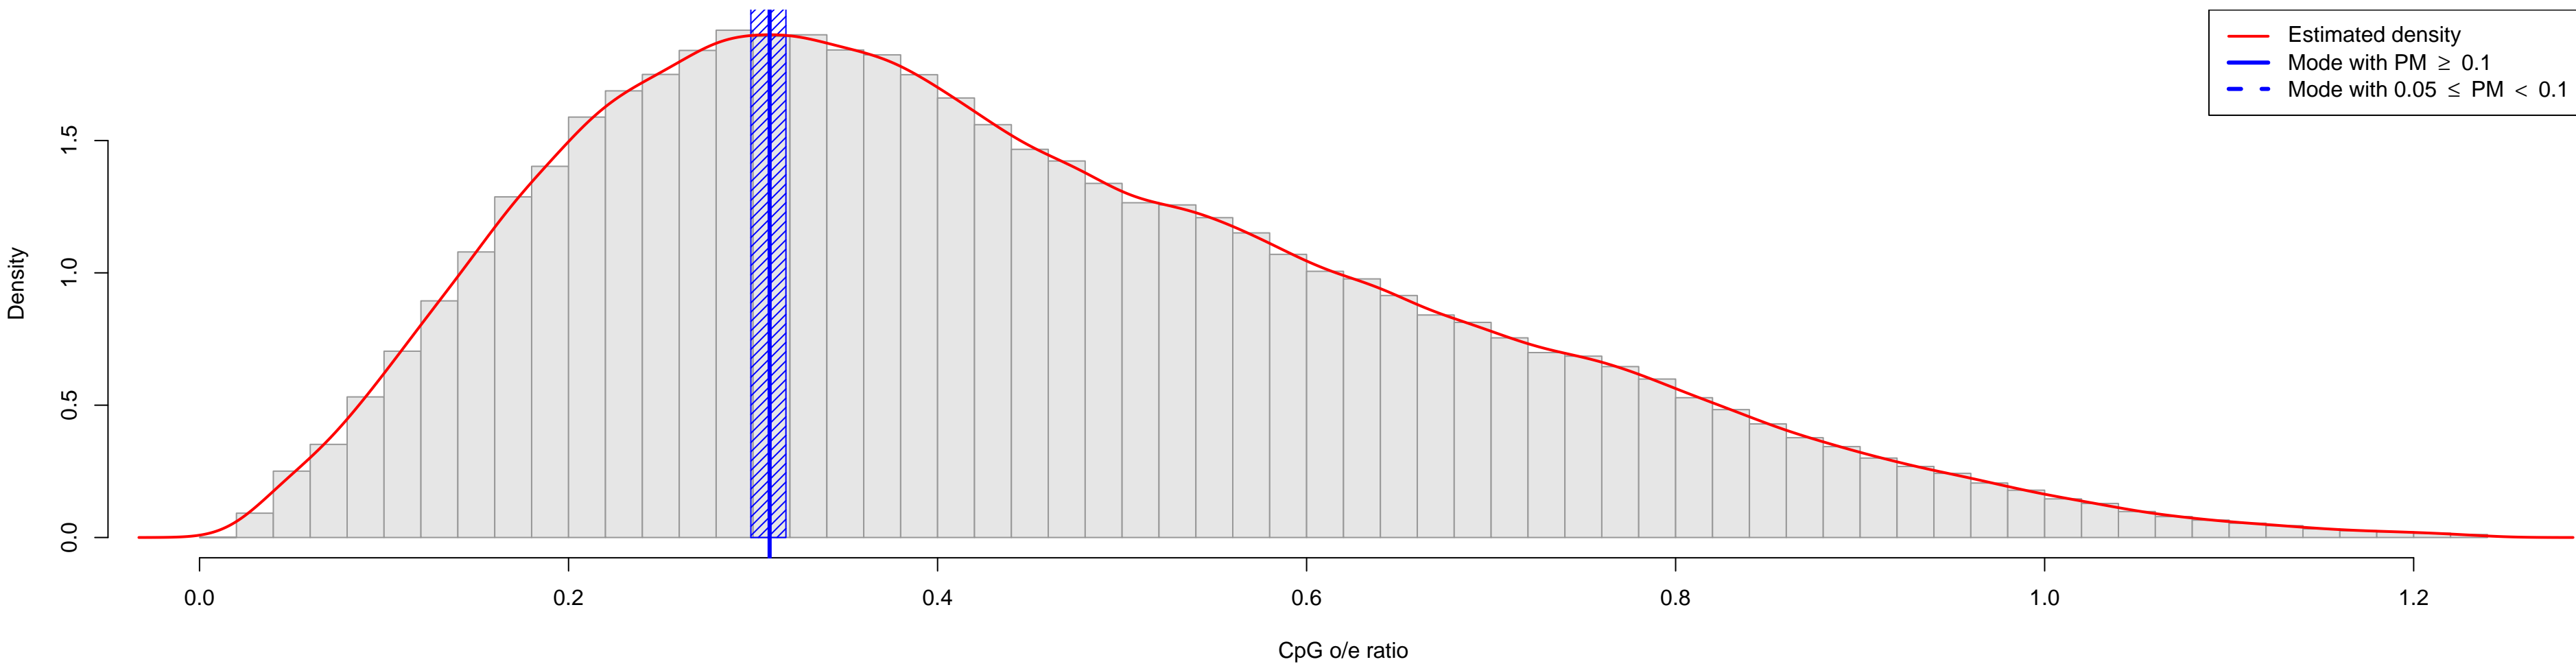

# Gammarus\_pulex

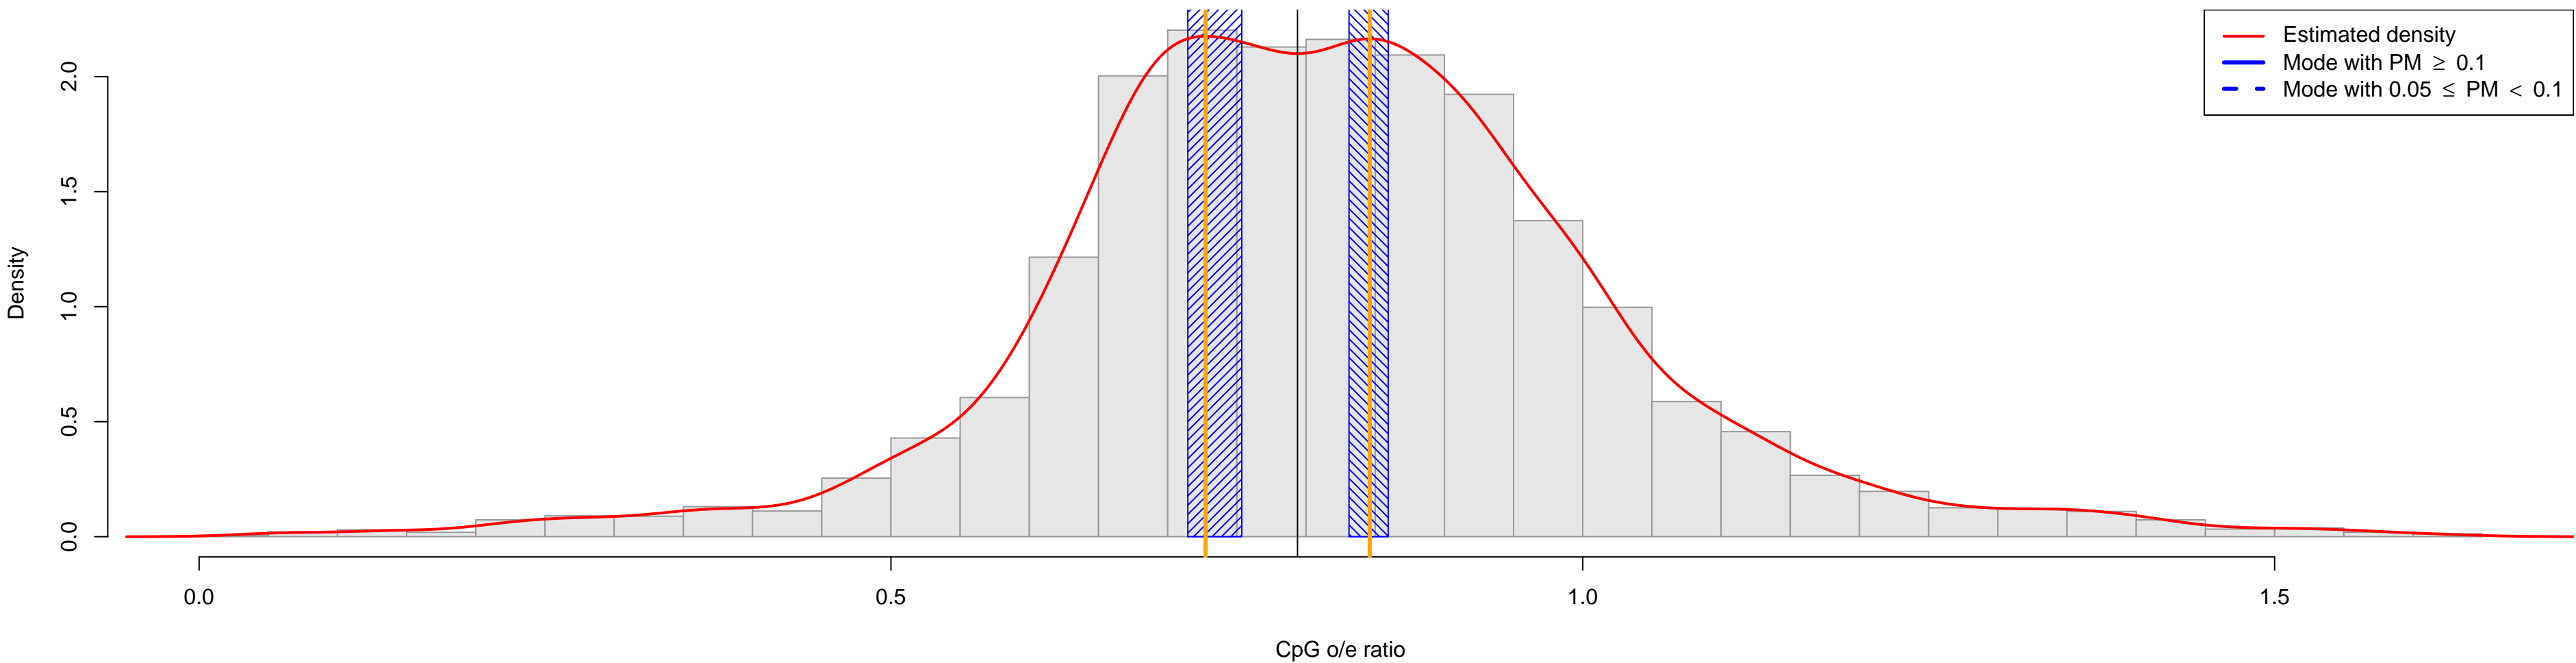

# Gasterosteus\_aculeatus

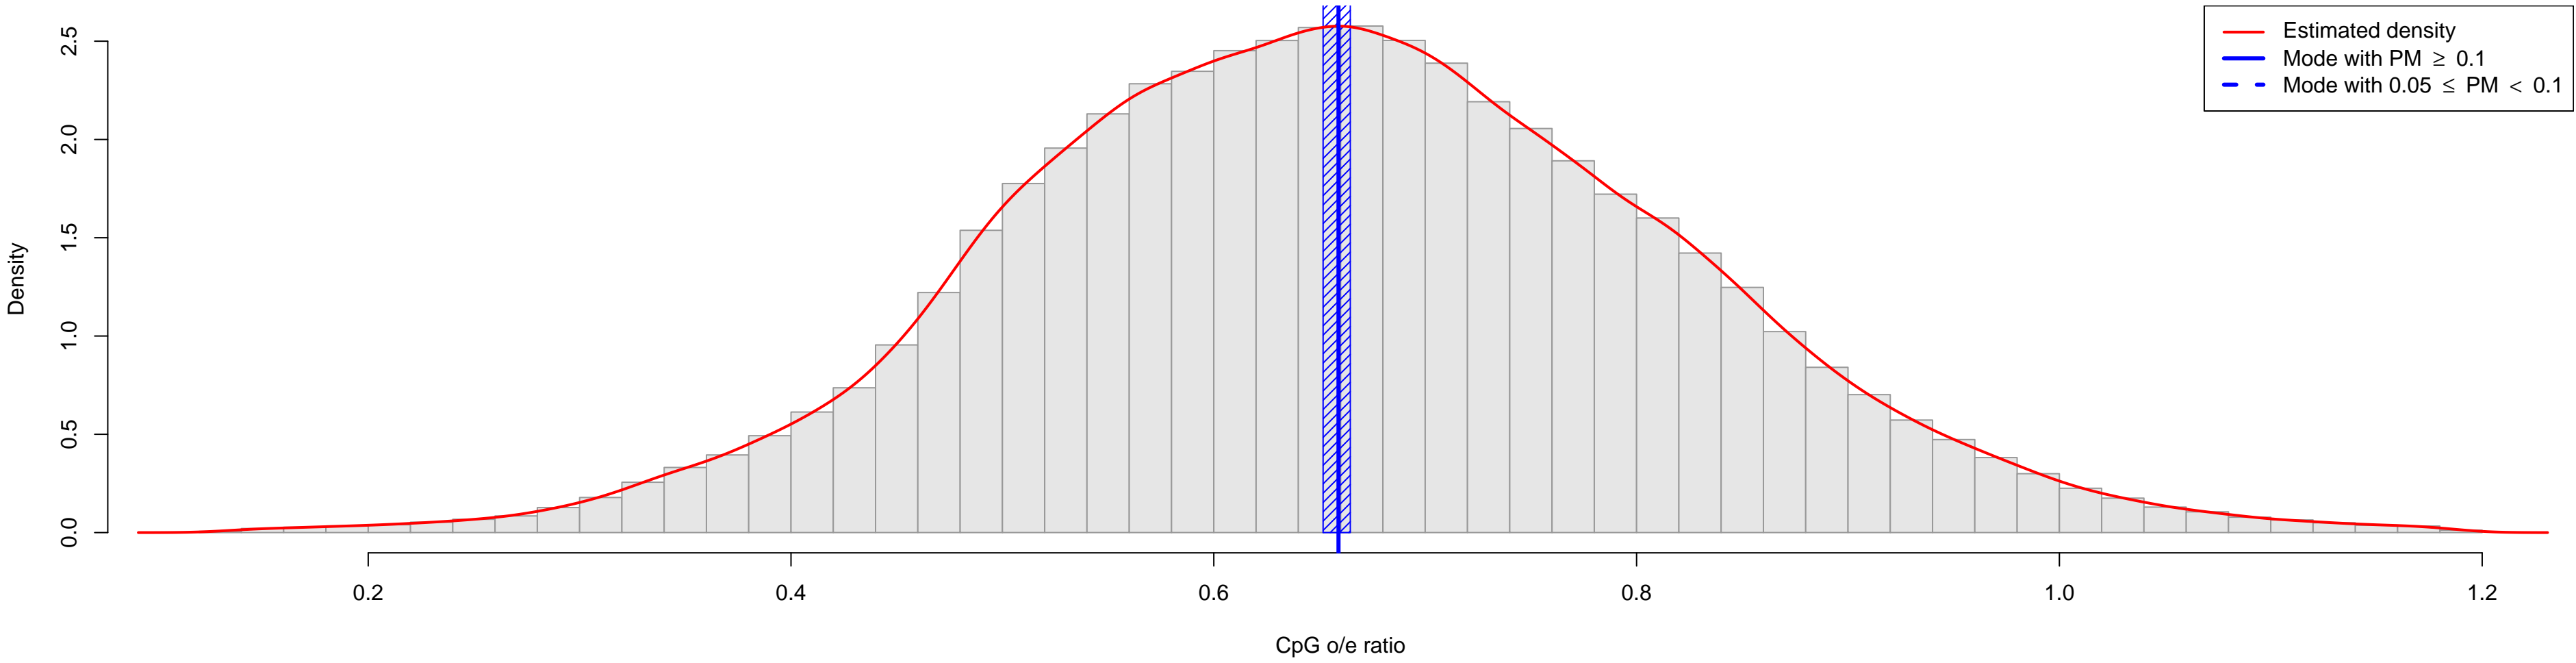

# Gekko\_japonicus

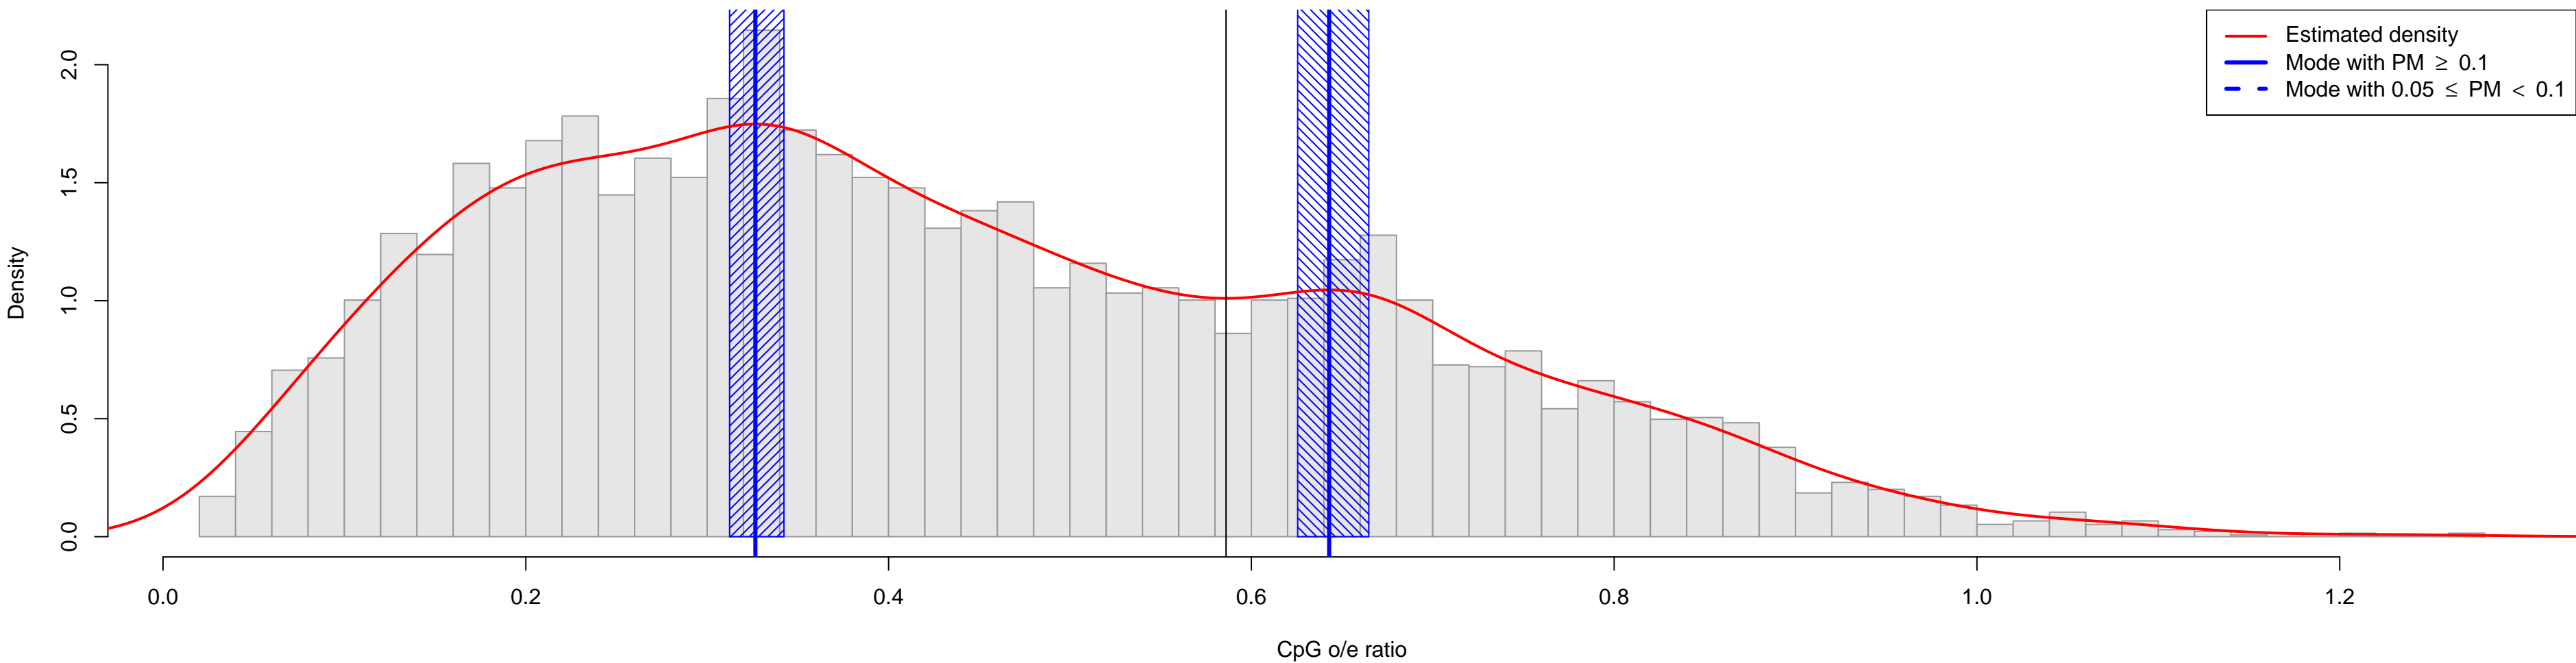

# Giardia\_intestinalis

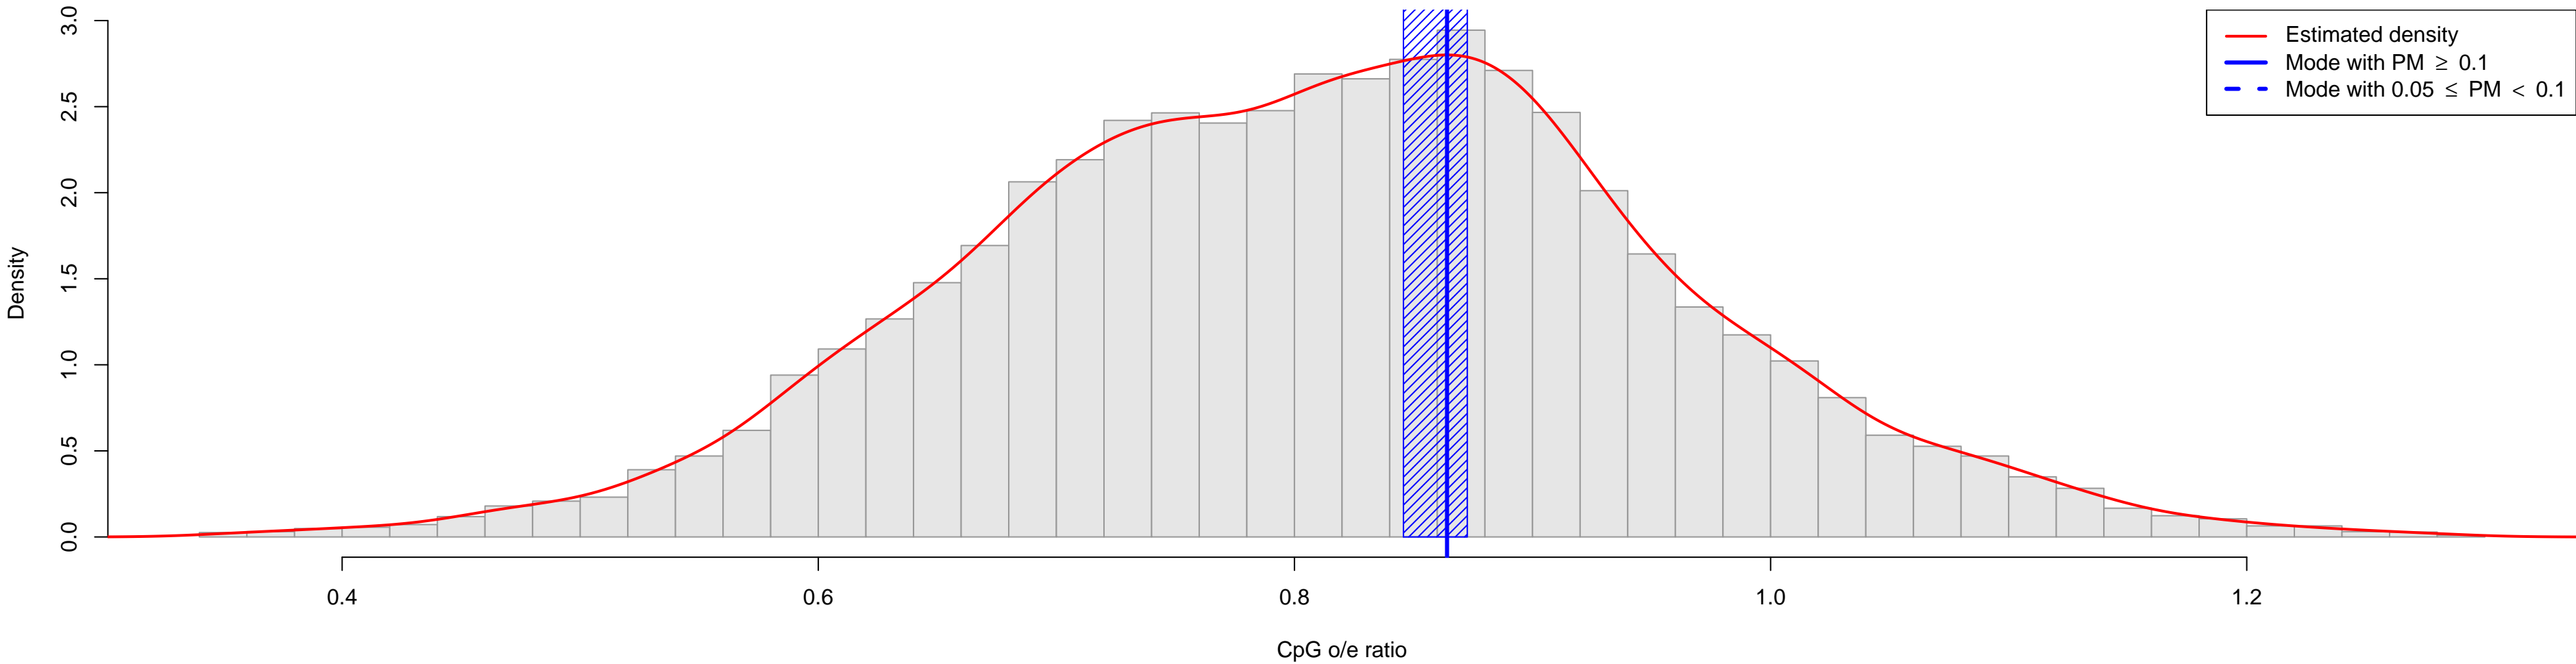

# Gibberella\_moniliformis

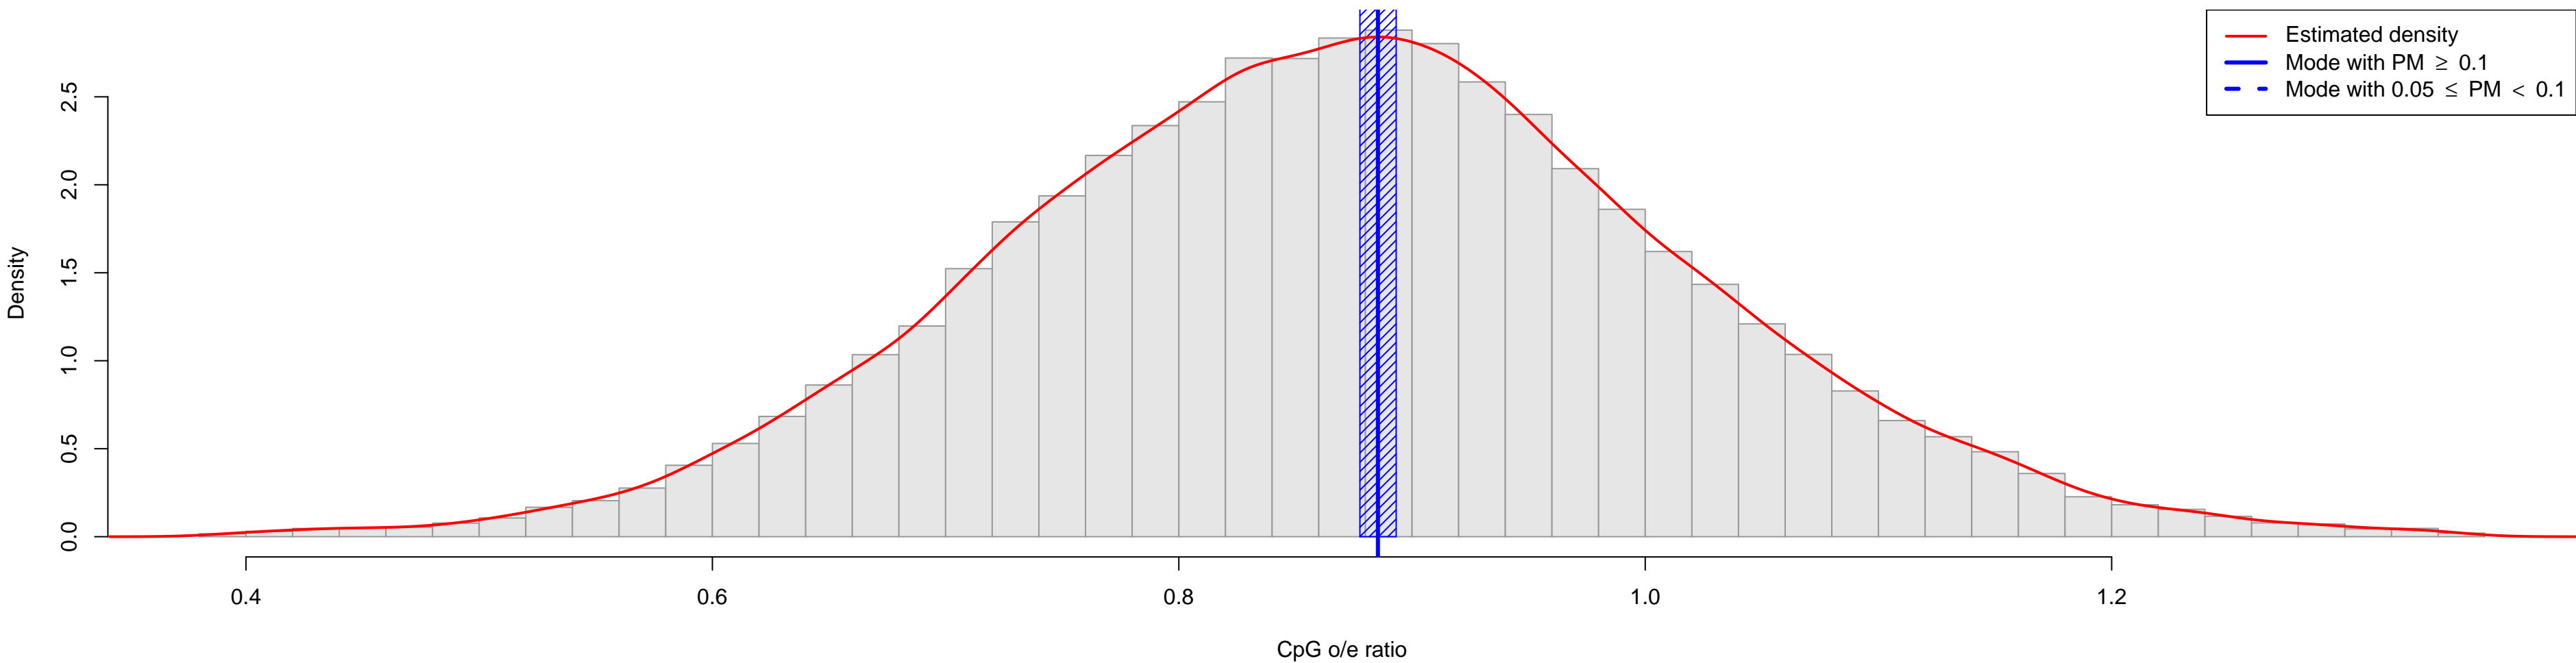

# Gibberella\_zeae

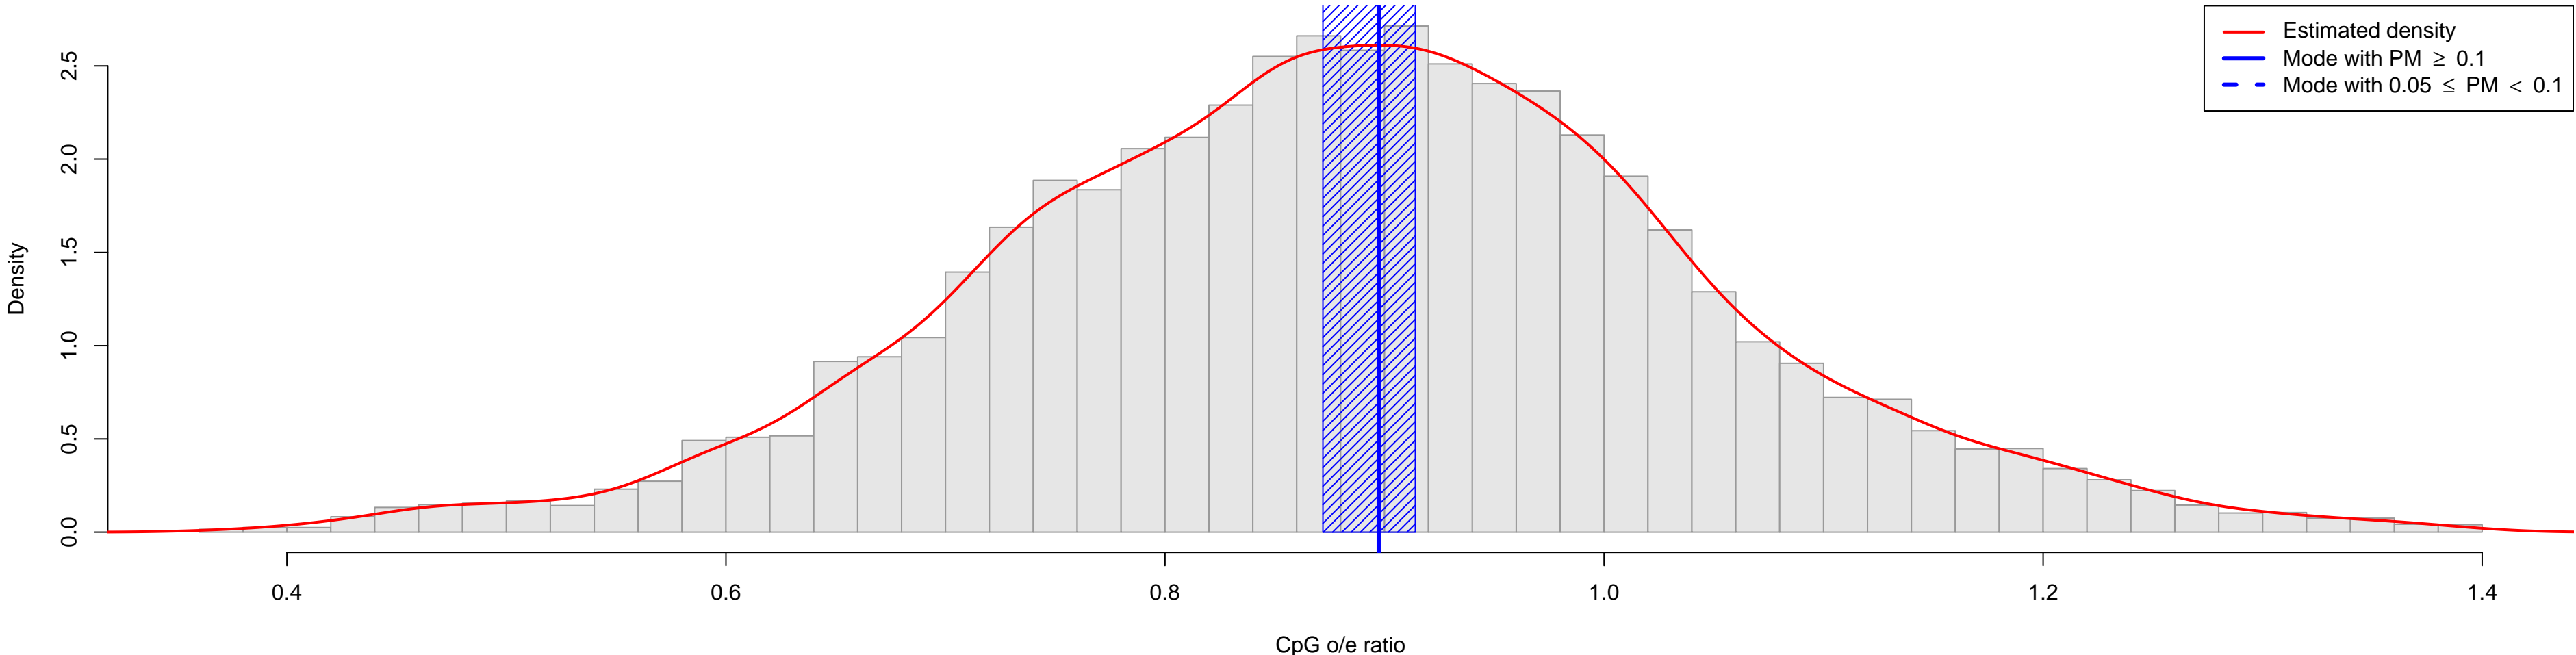

# Gillichthys\_mirabilis

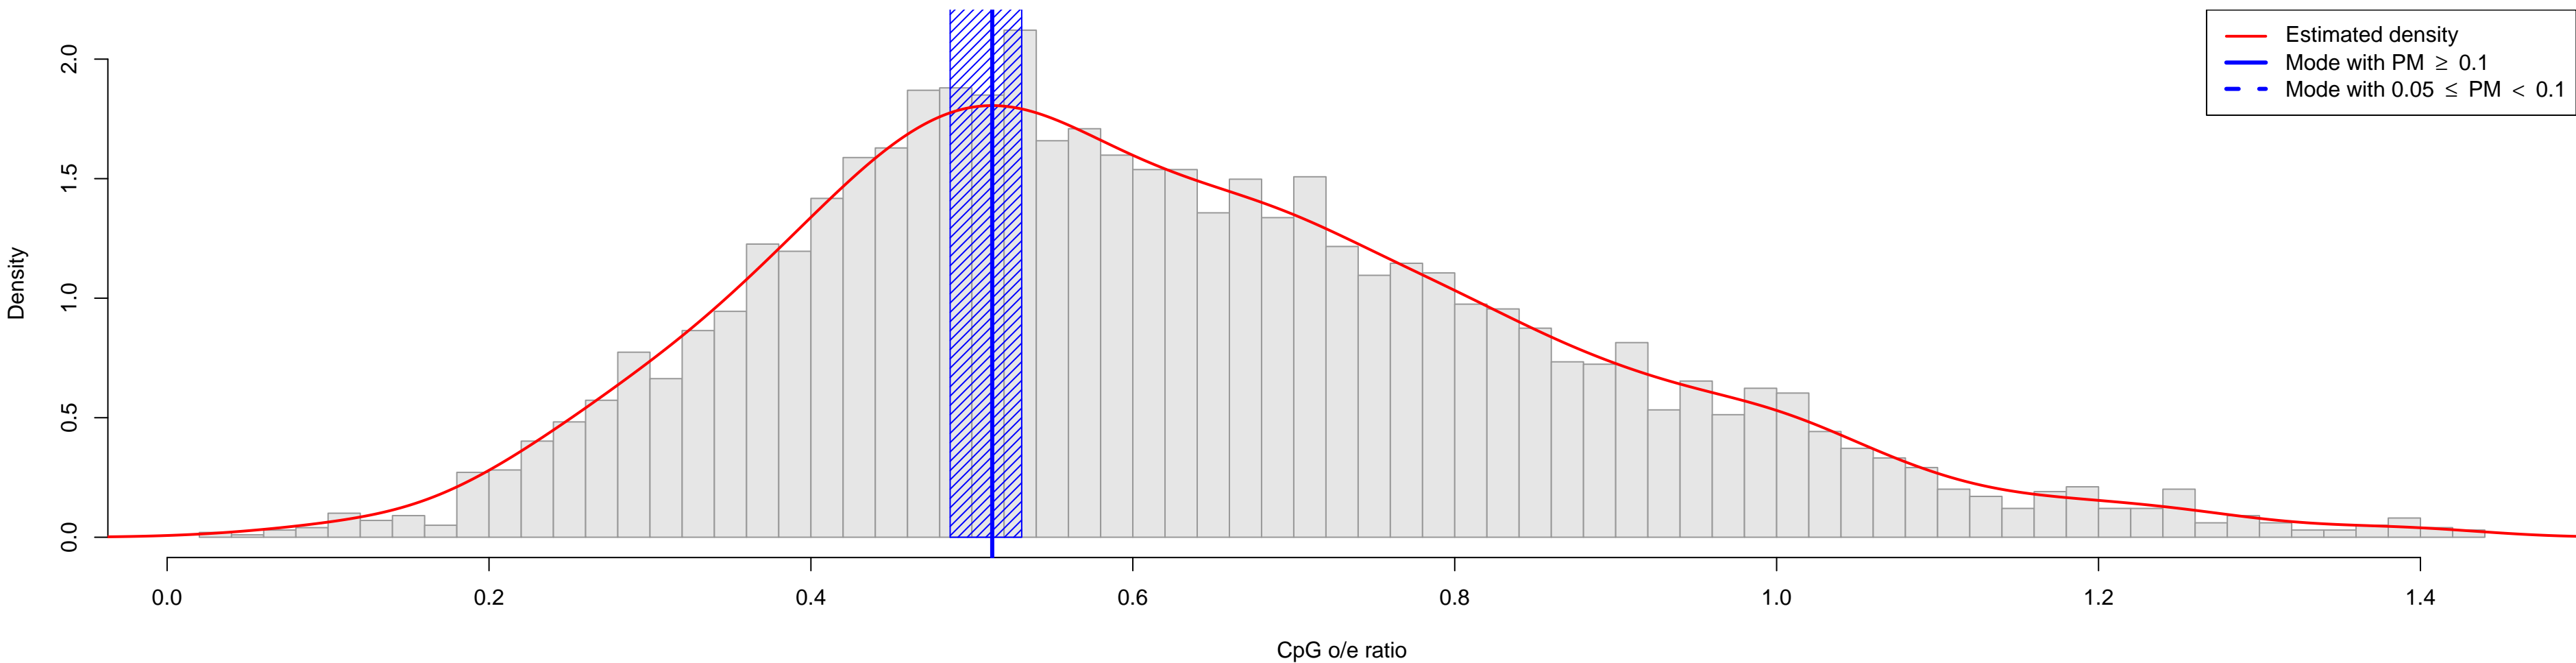



# Ginkgo\_biloba

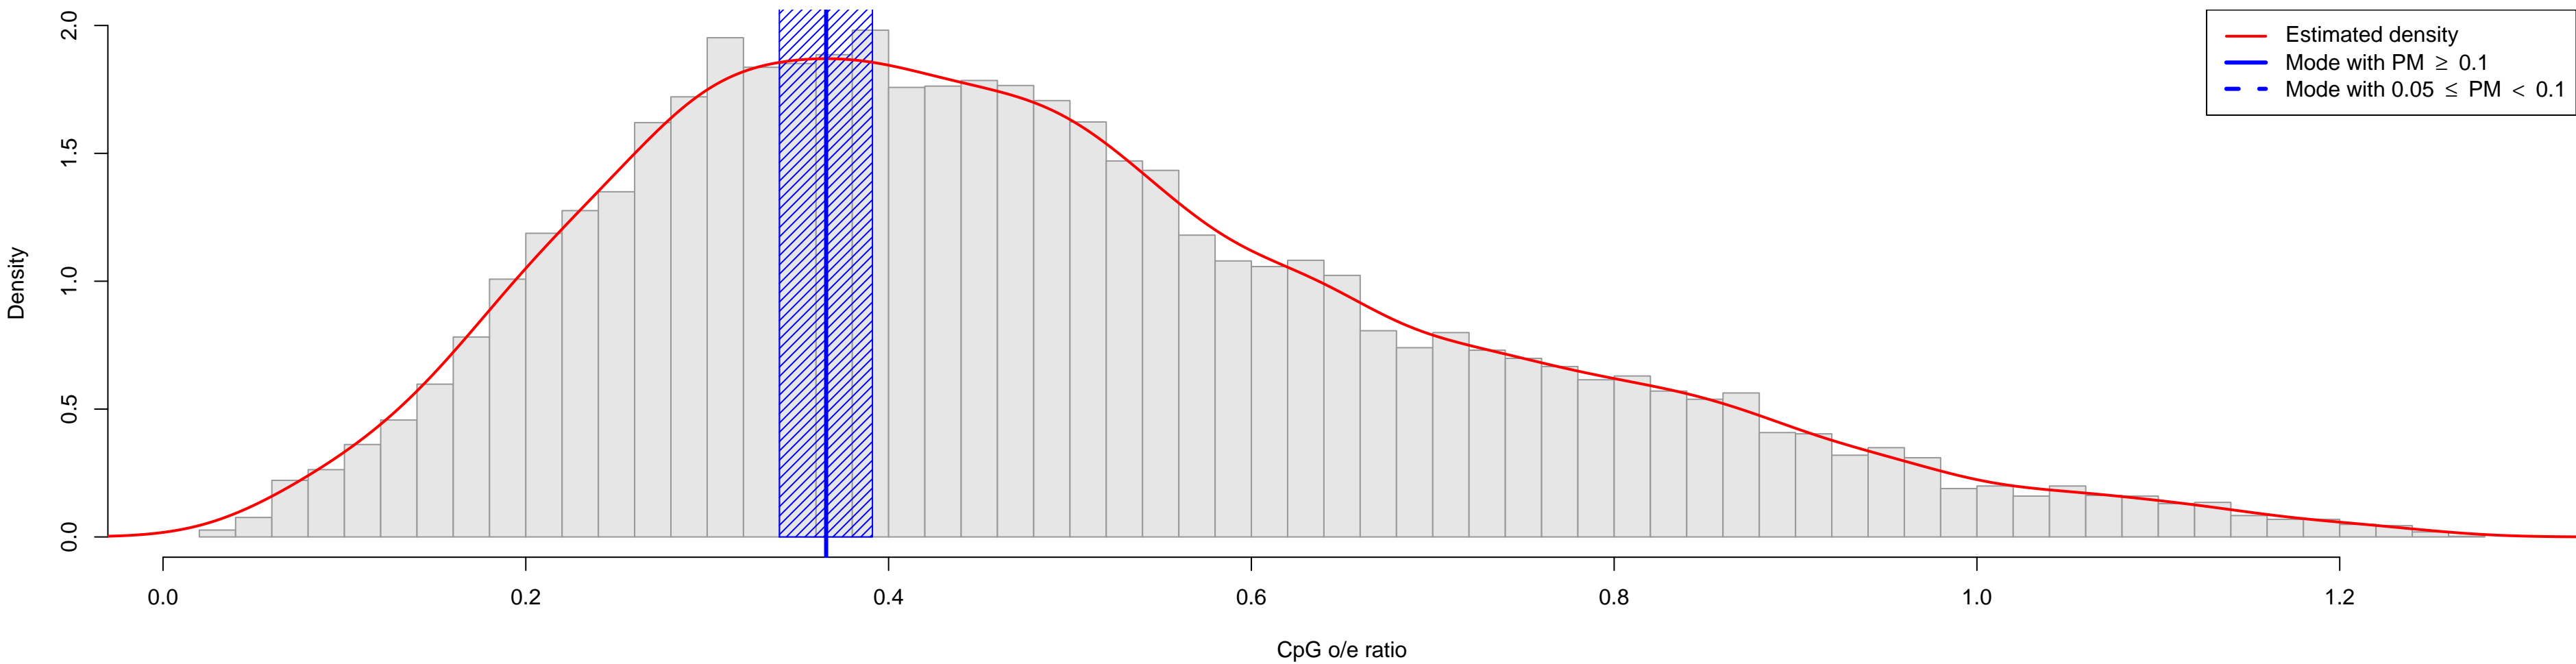

# Glaucocystis\_nostochinearum

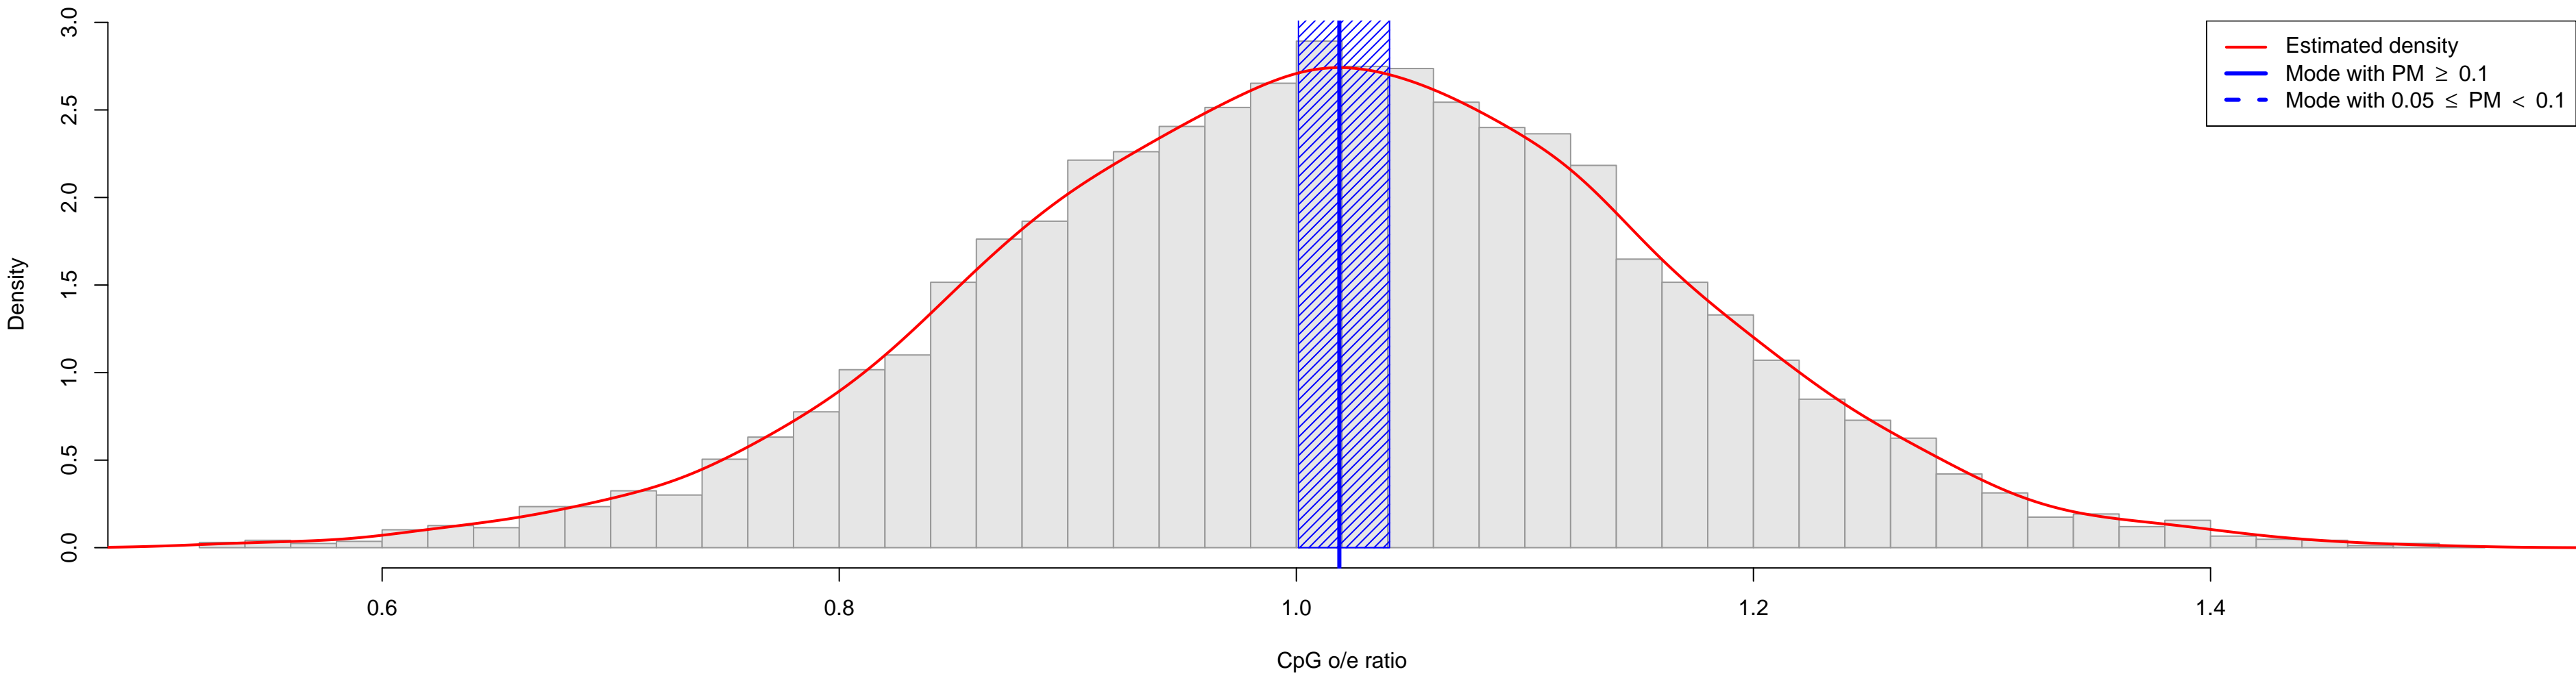

# Glomus\_intraradices

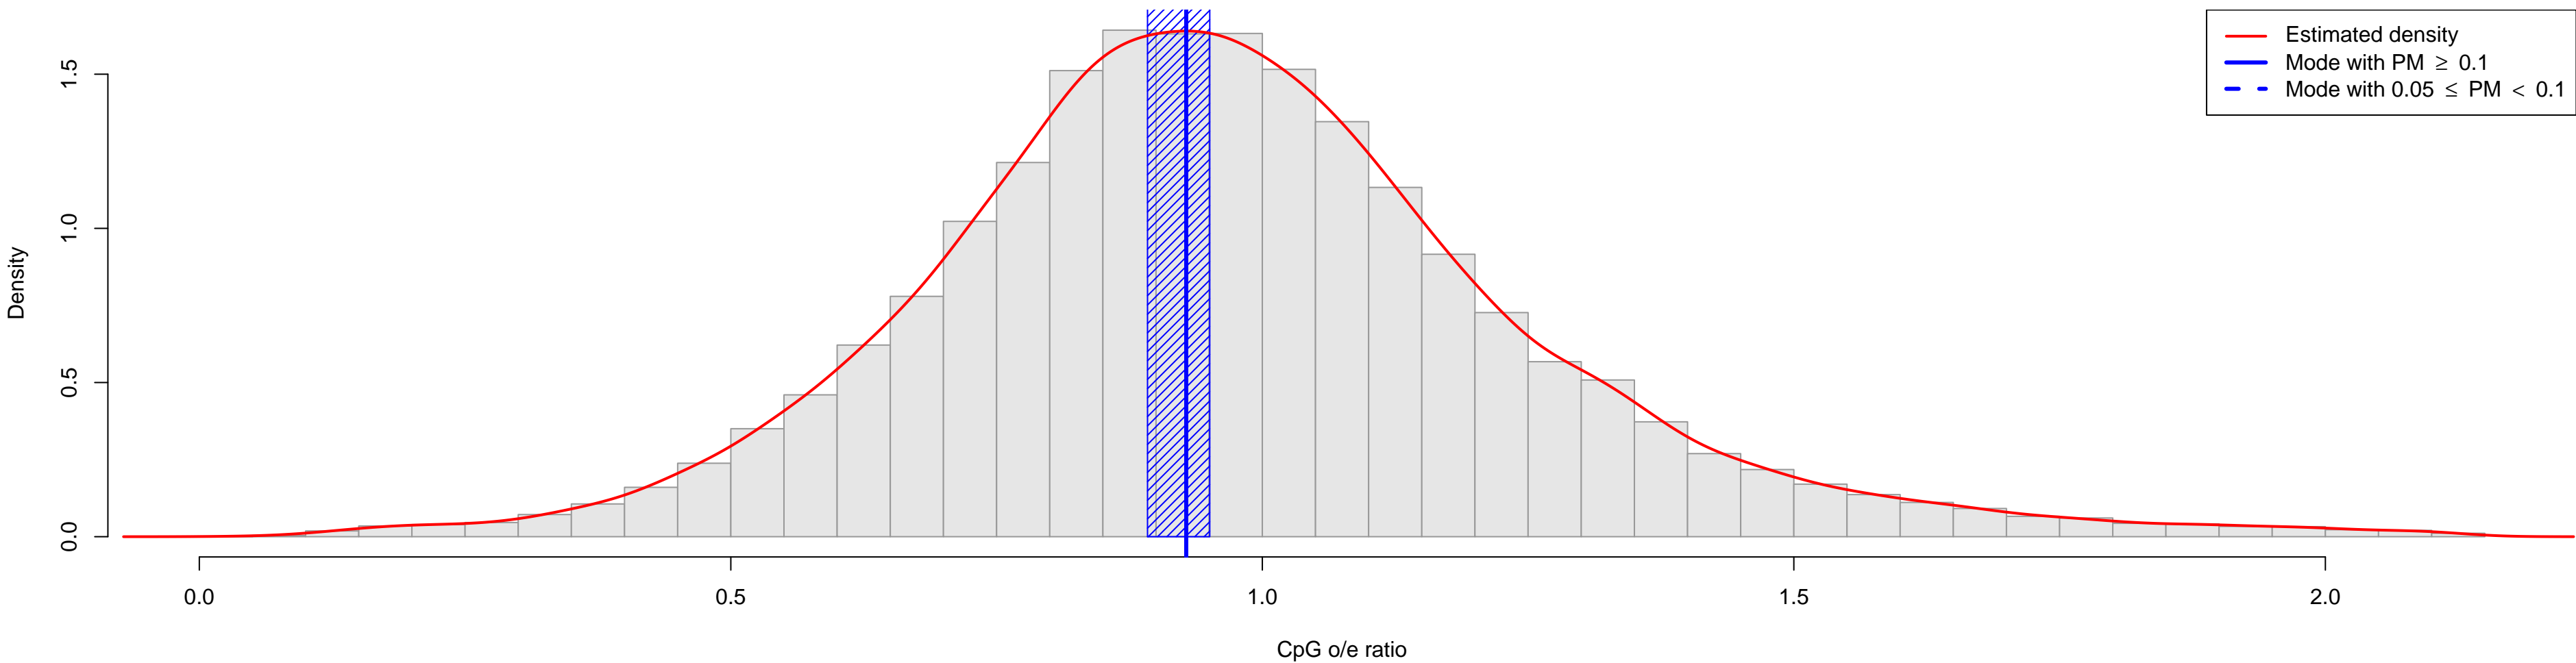

# Glossina\_morsitans\_morsitans

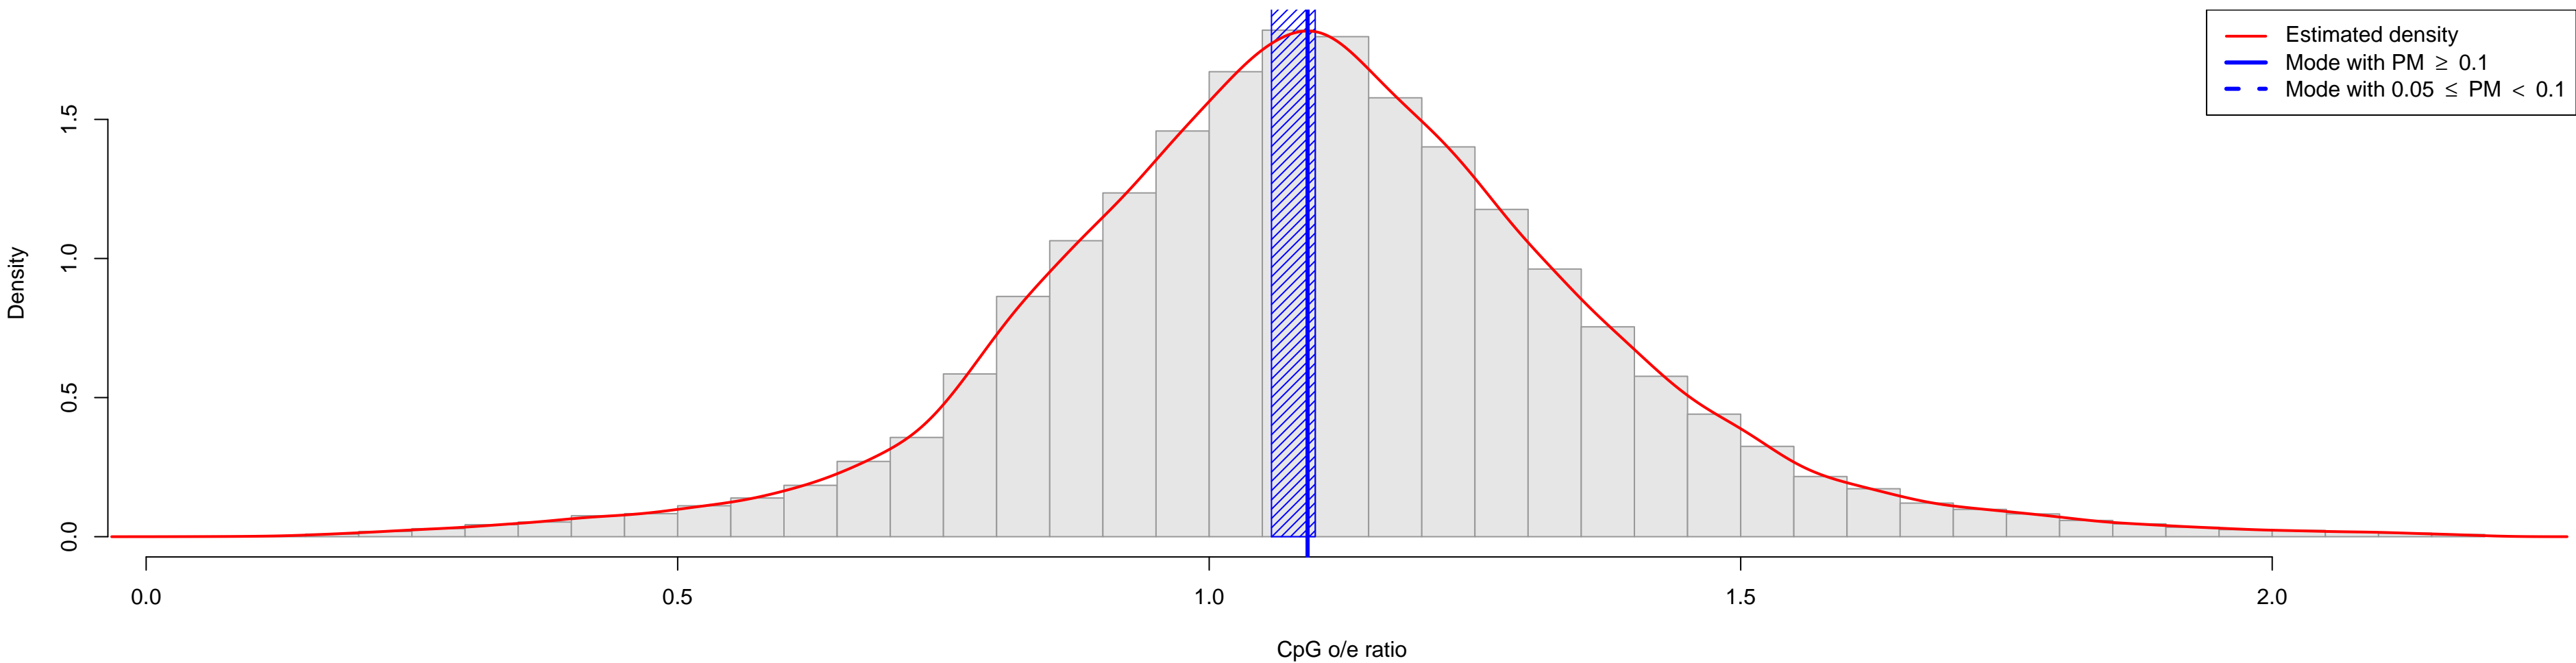

# Glycine\_max

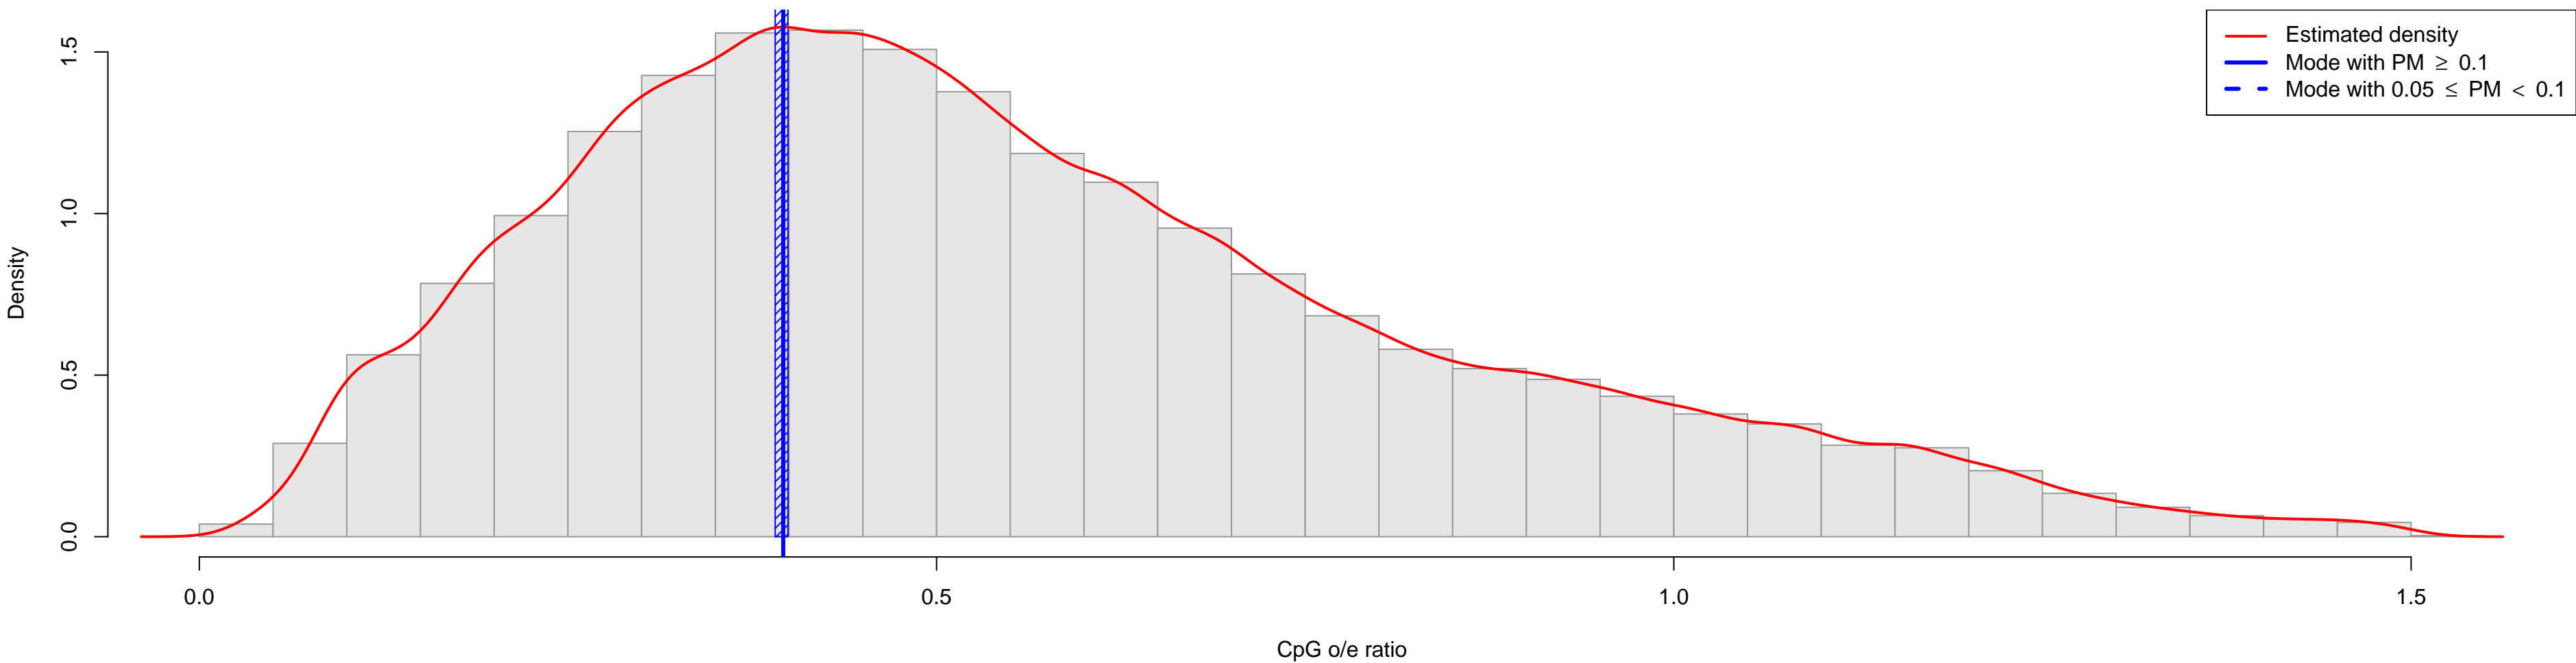

# Gnetum\_gnemon

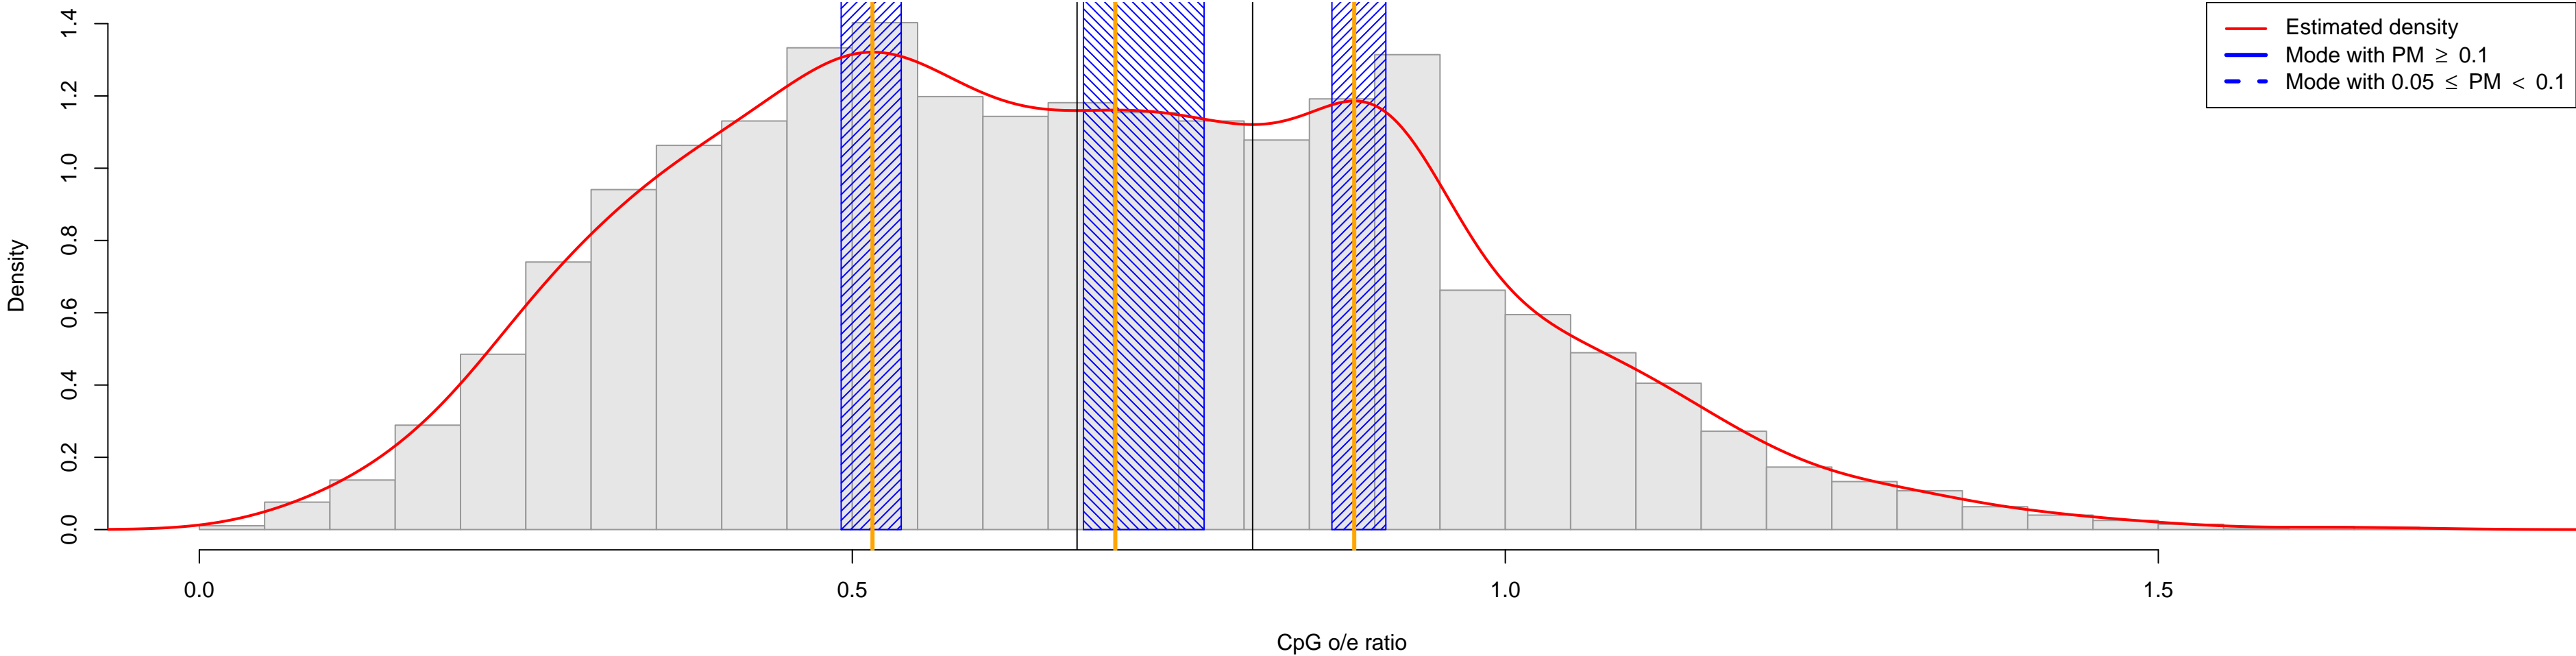

# Gobiocypris\_rarus

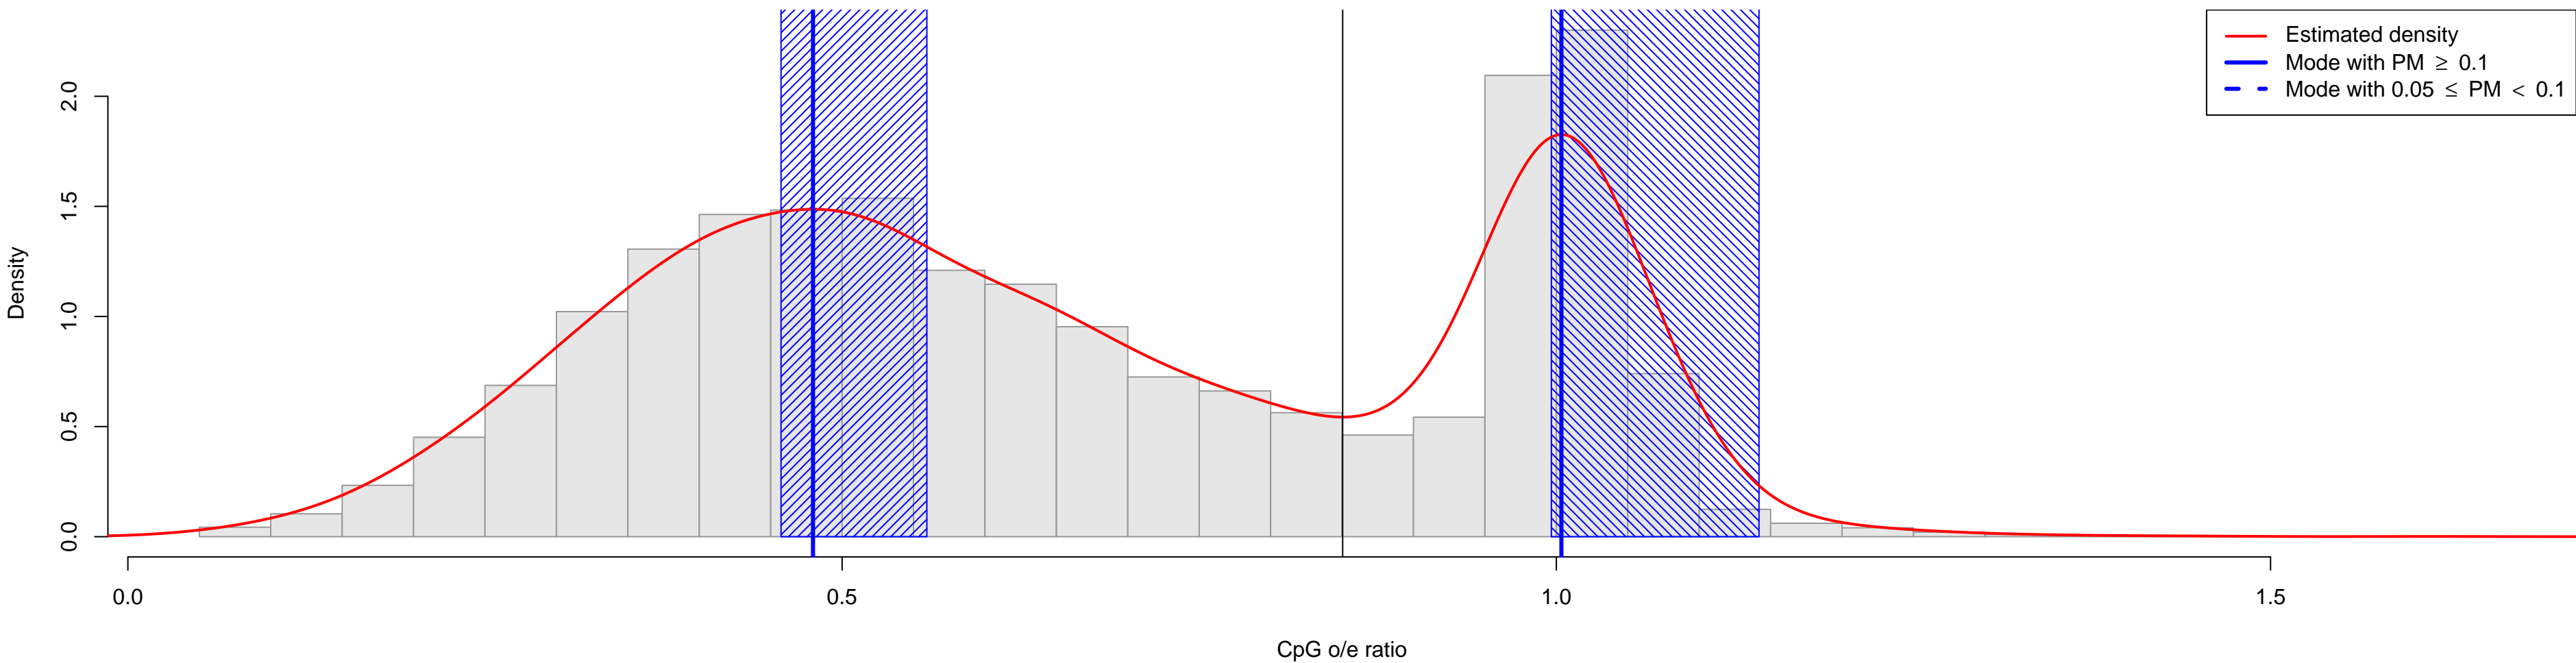

# Gracilaria\_changii

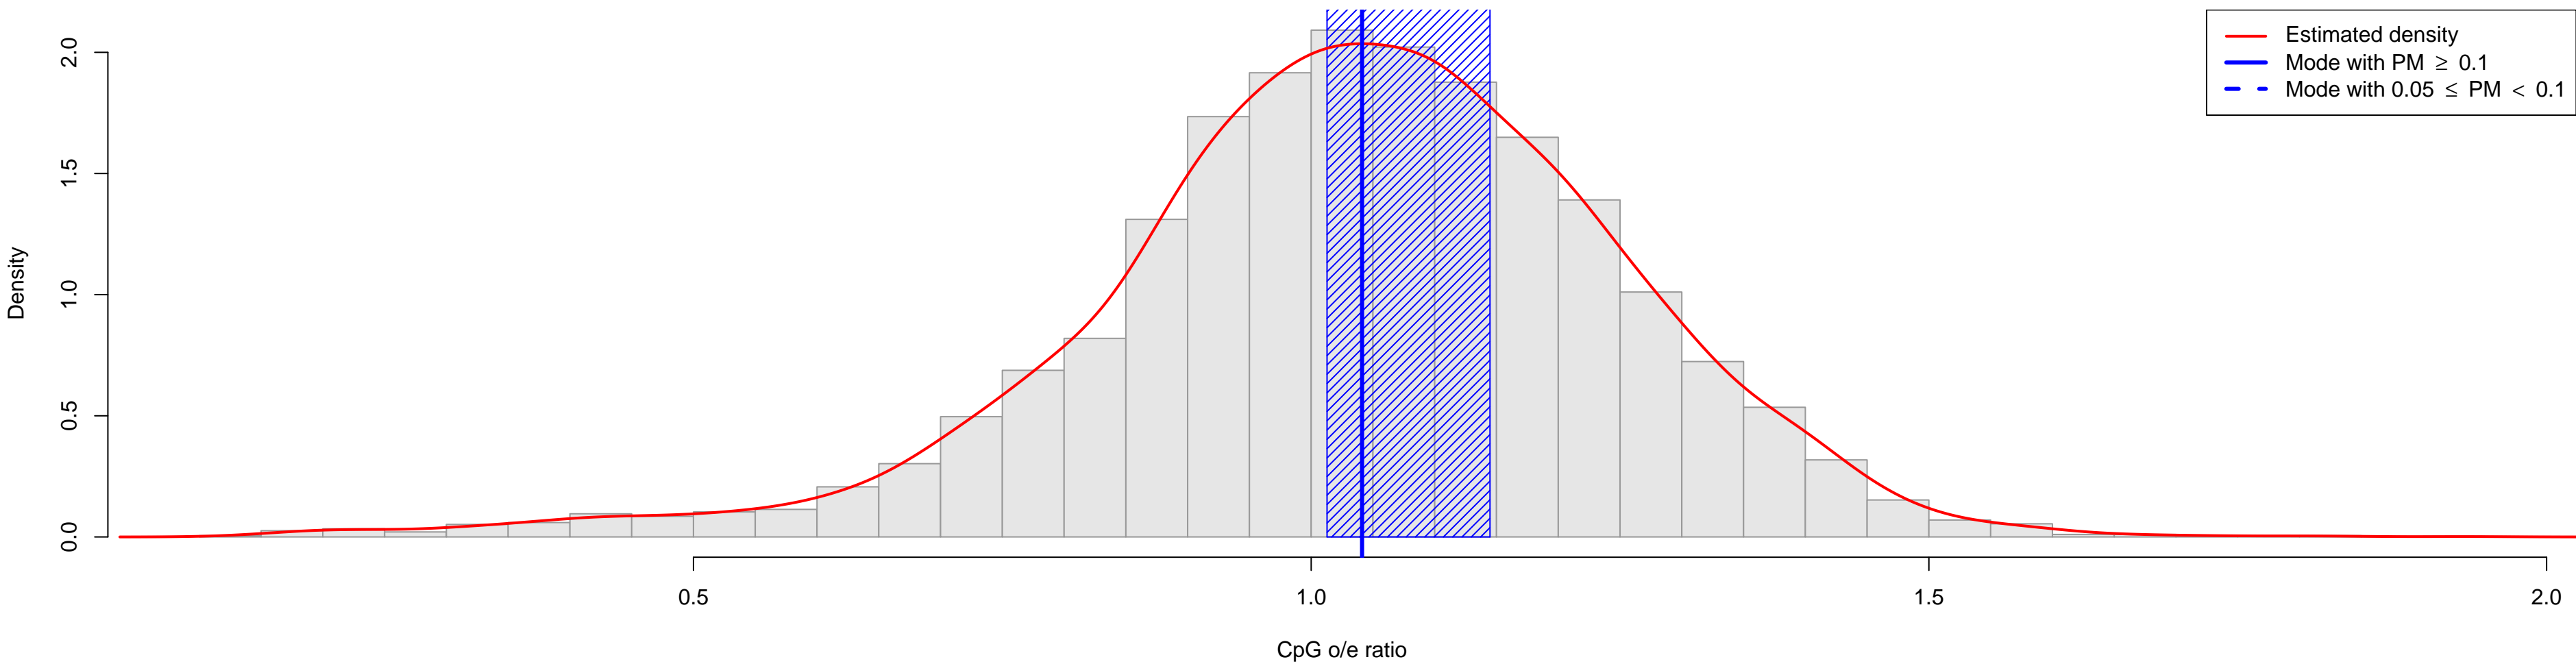



# Haematobia\_irritans\_irritans

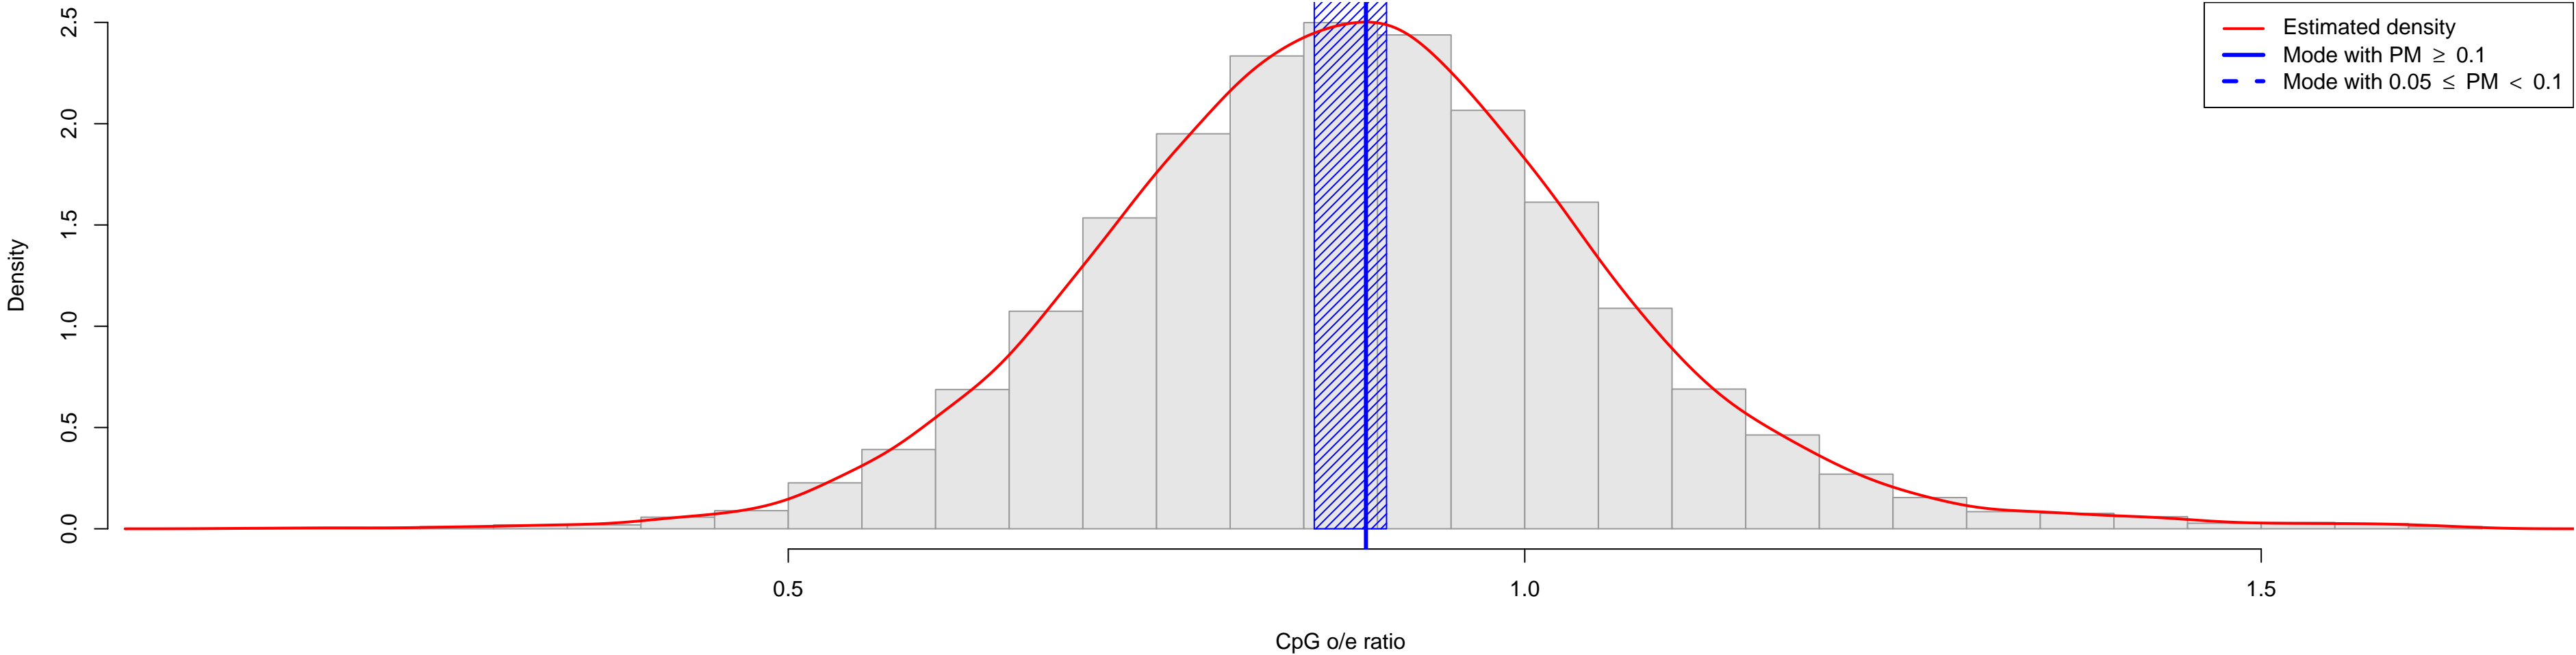

# Haemonchus\_contortus

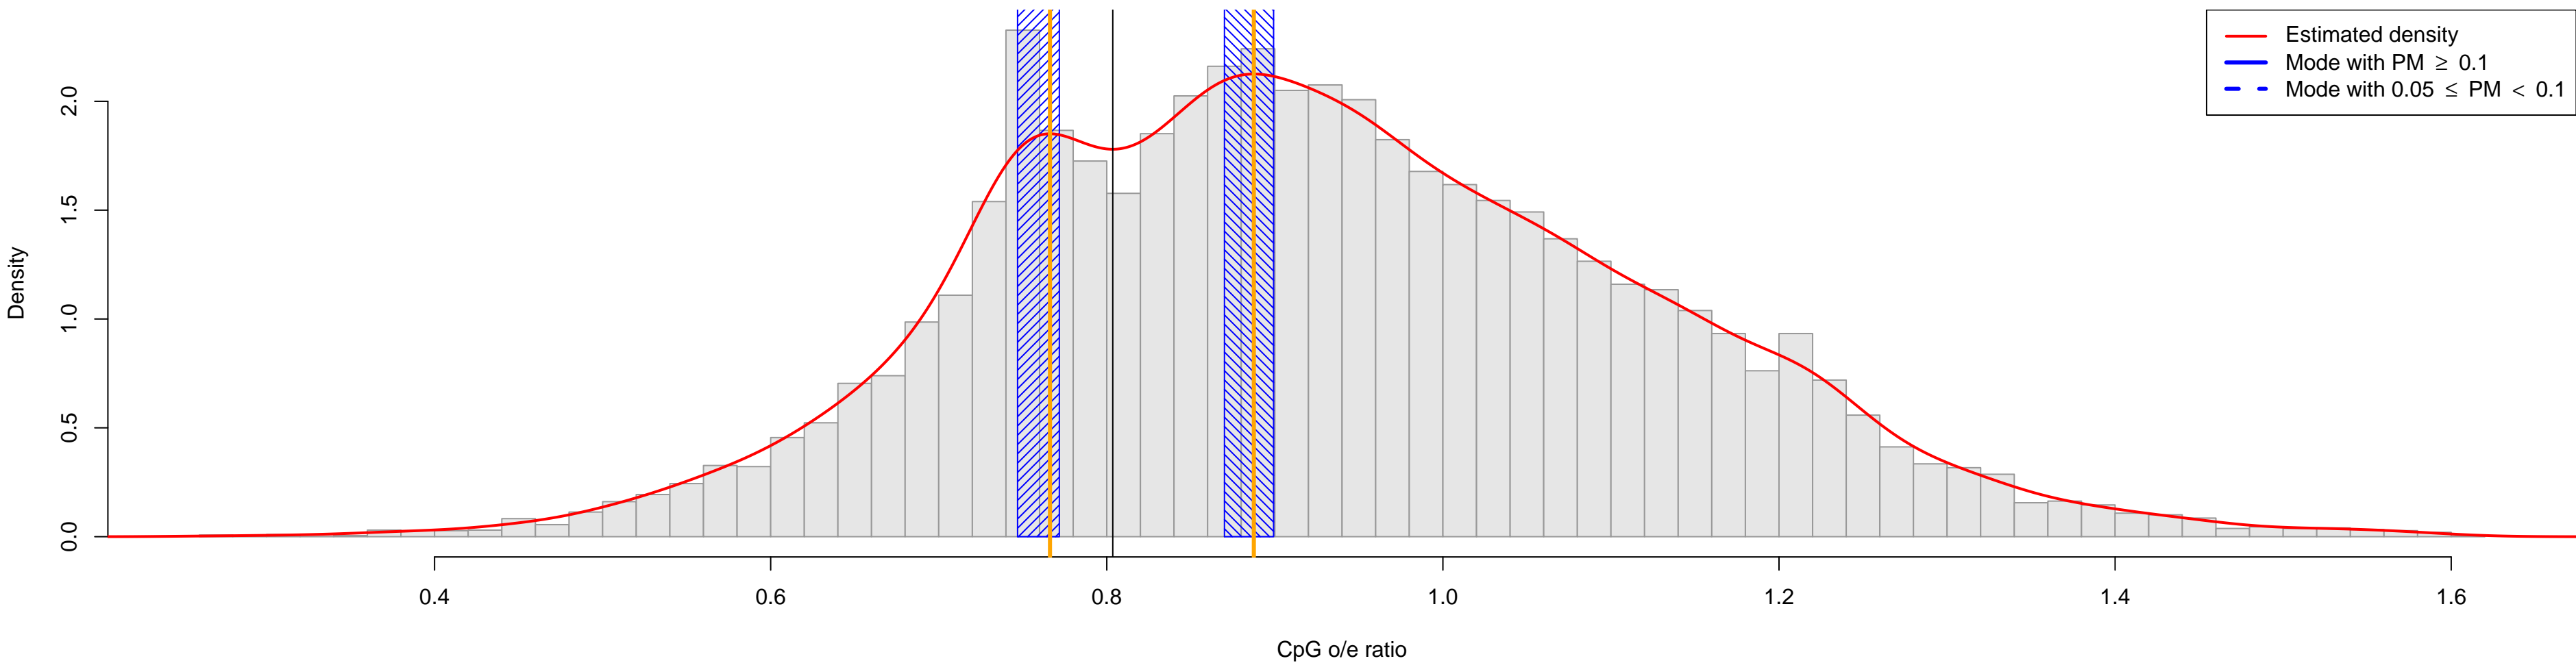

# Haliotis\_asinina

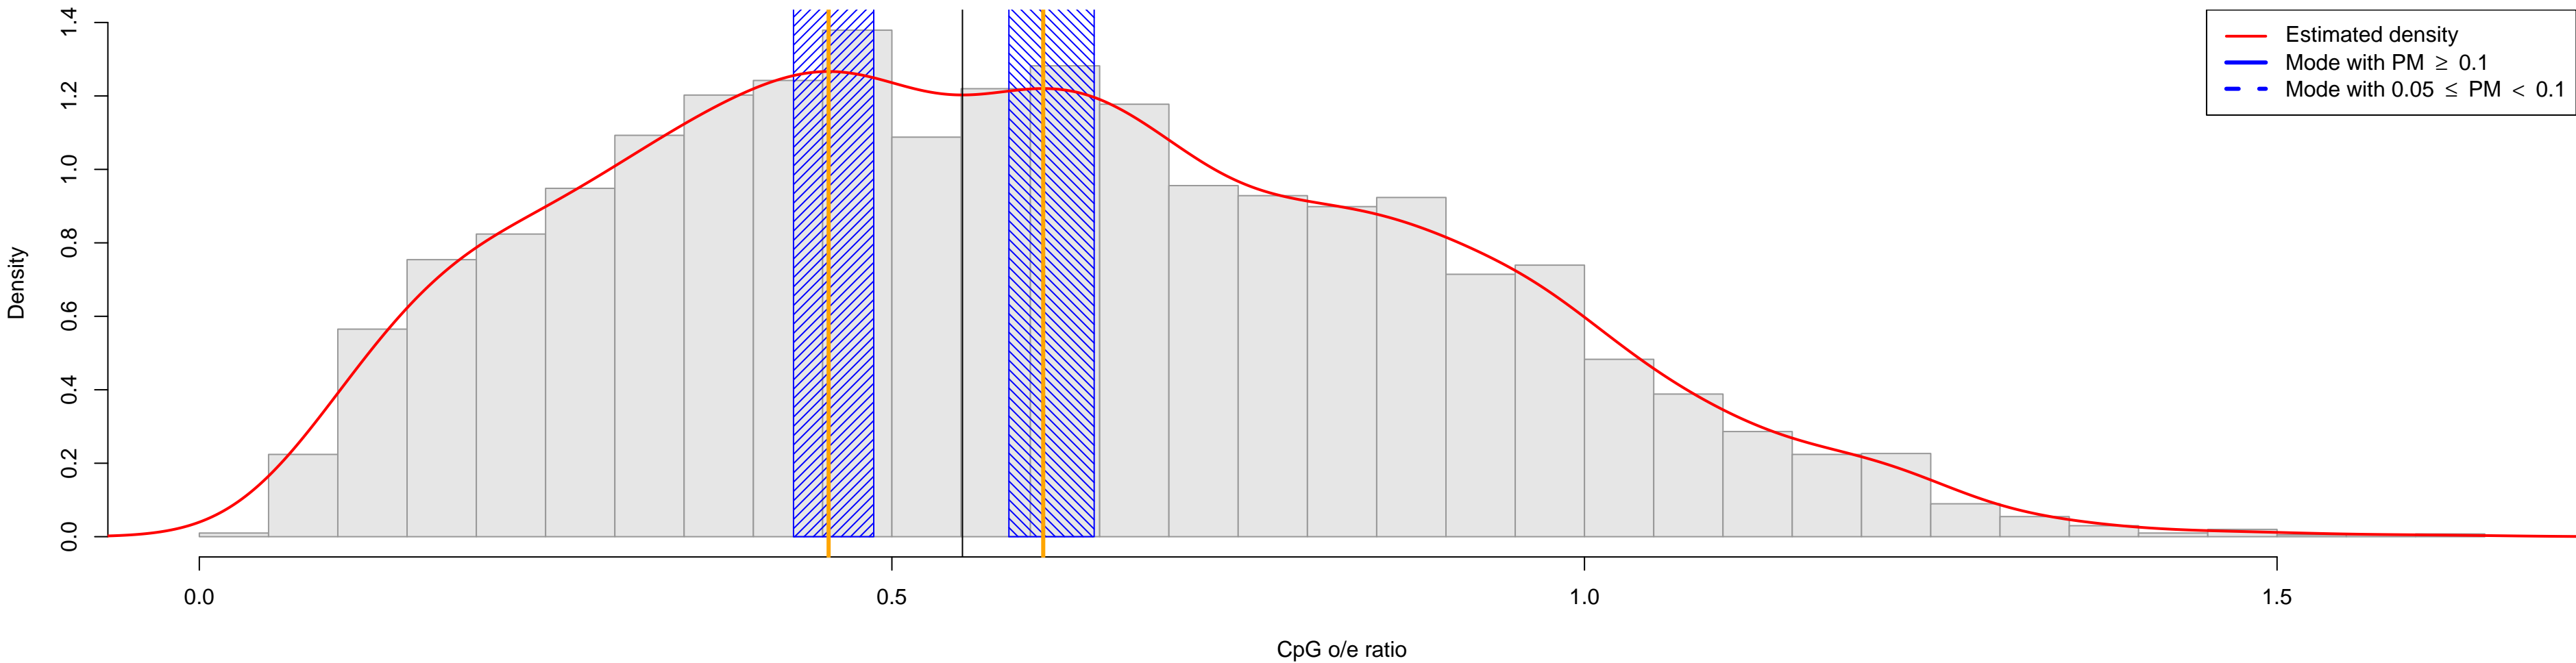

# Haliotis\_discus

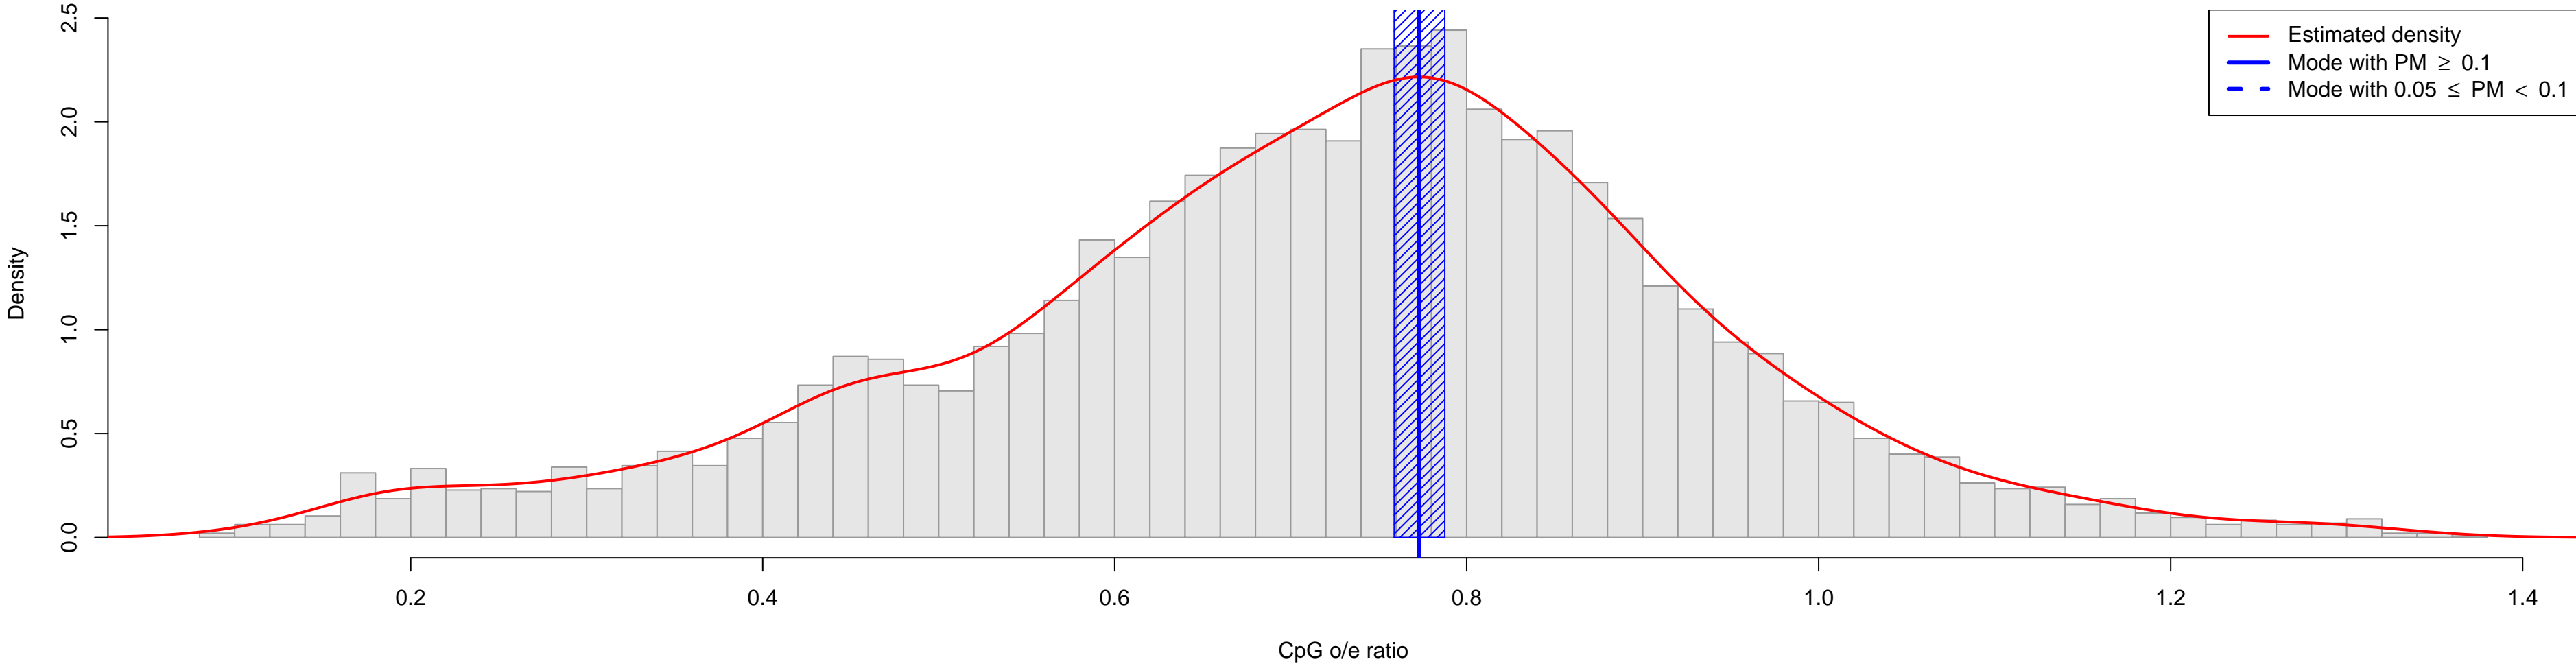

# Haliotis\_discus\_hannai

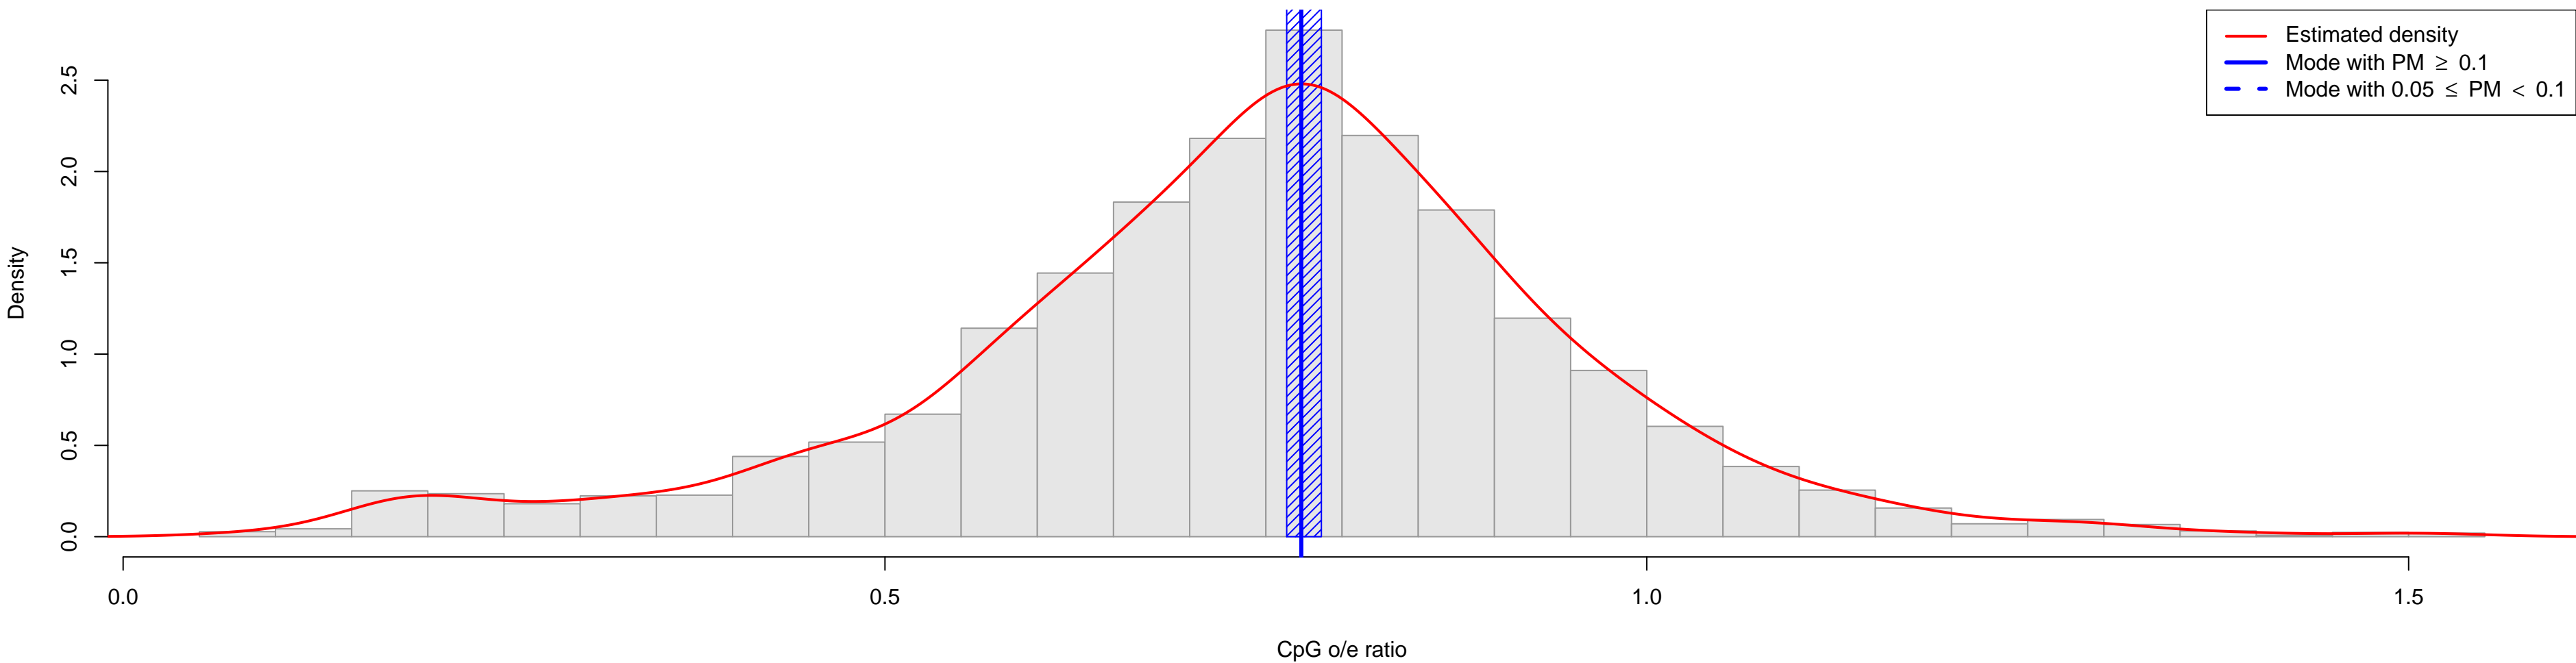

# Haliotis\_diversicolor

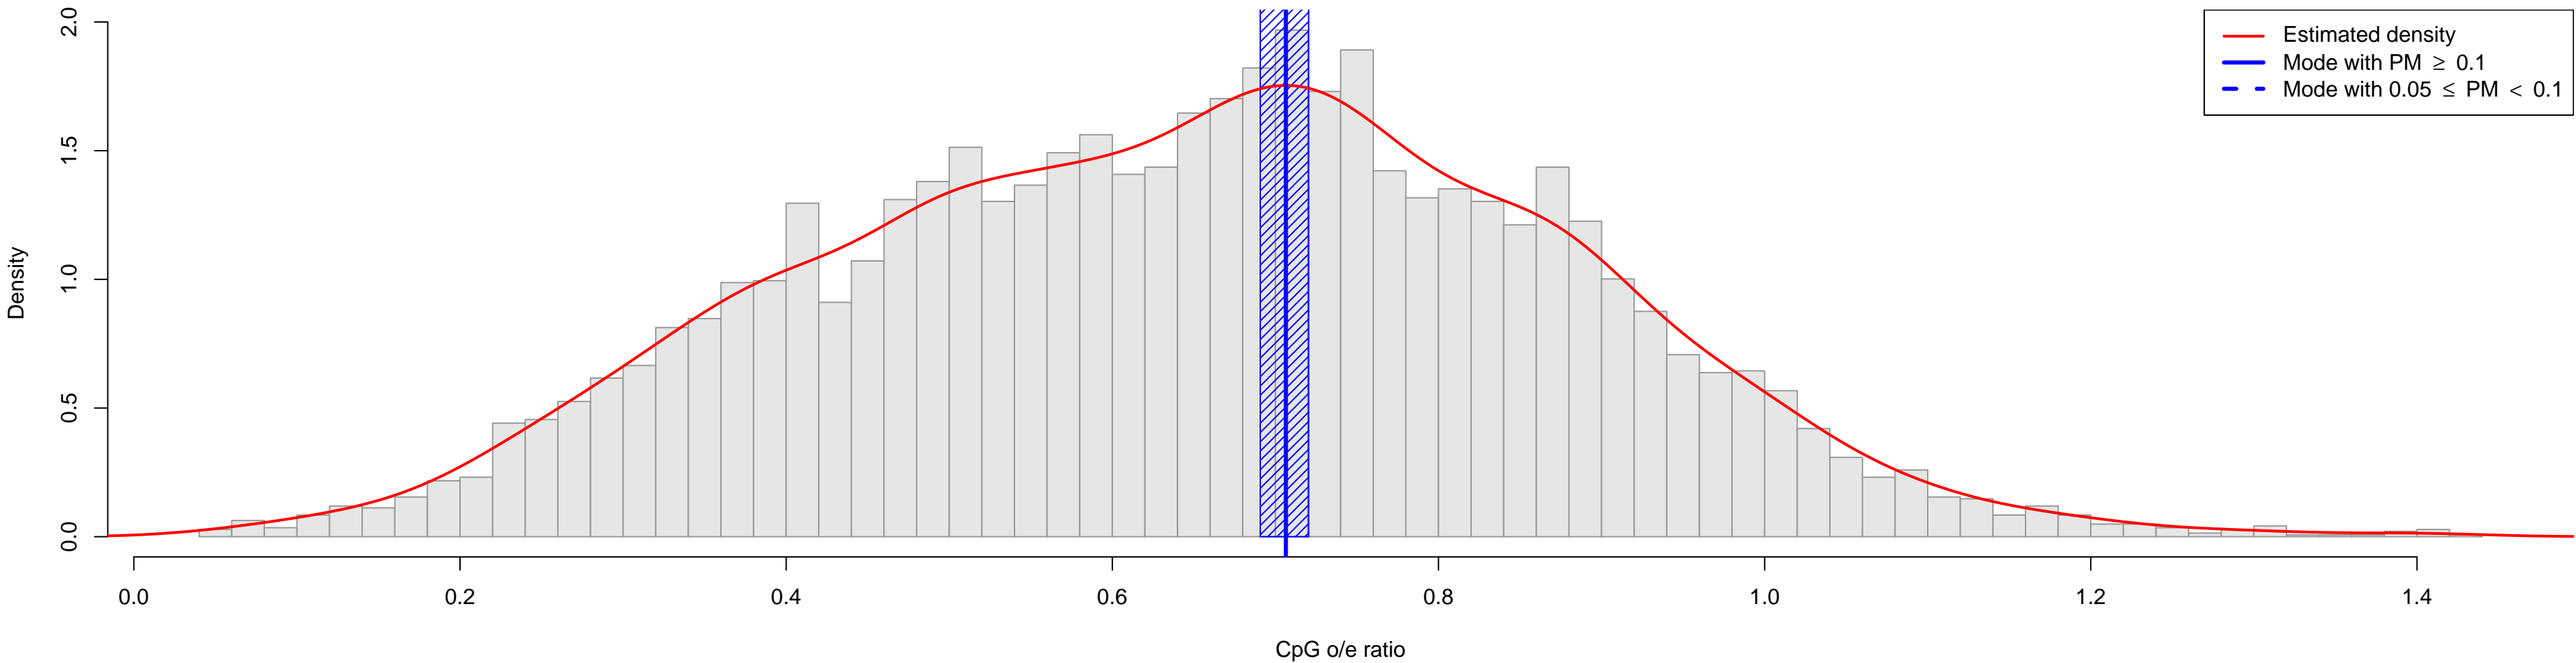

# Halocynthia\_oretzi

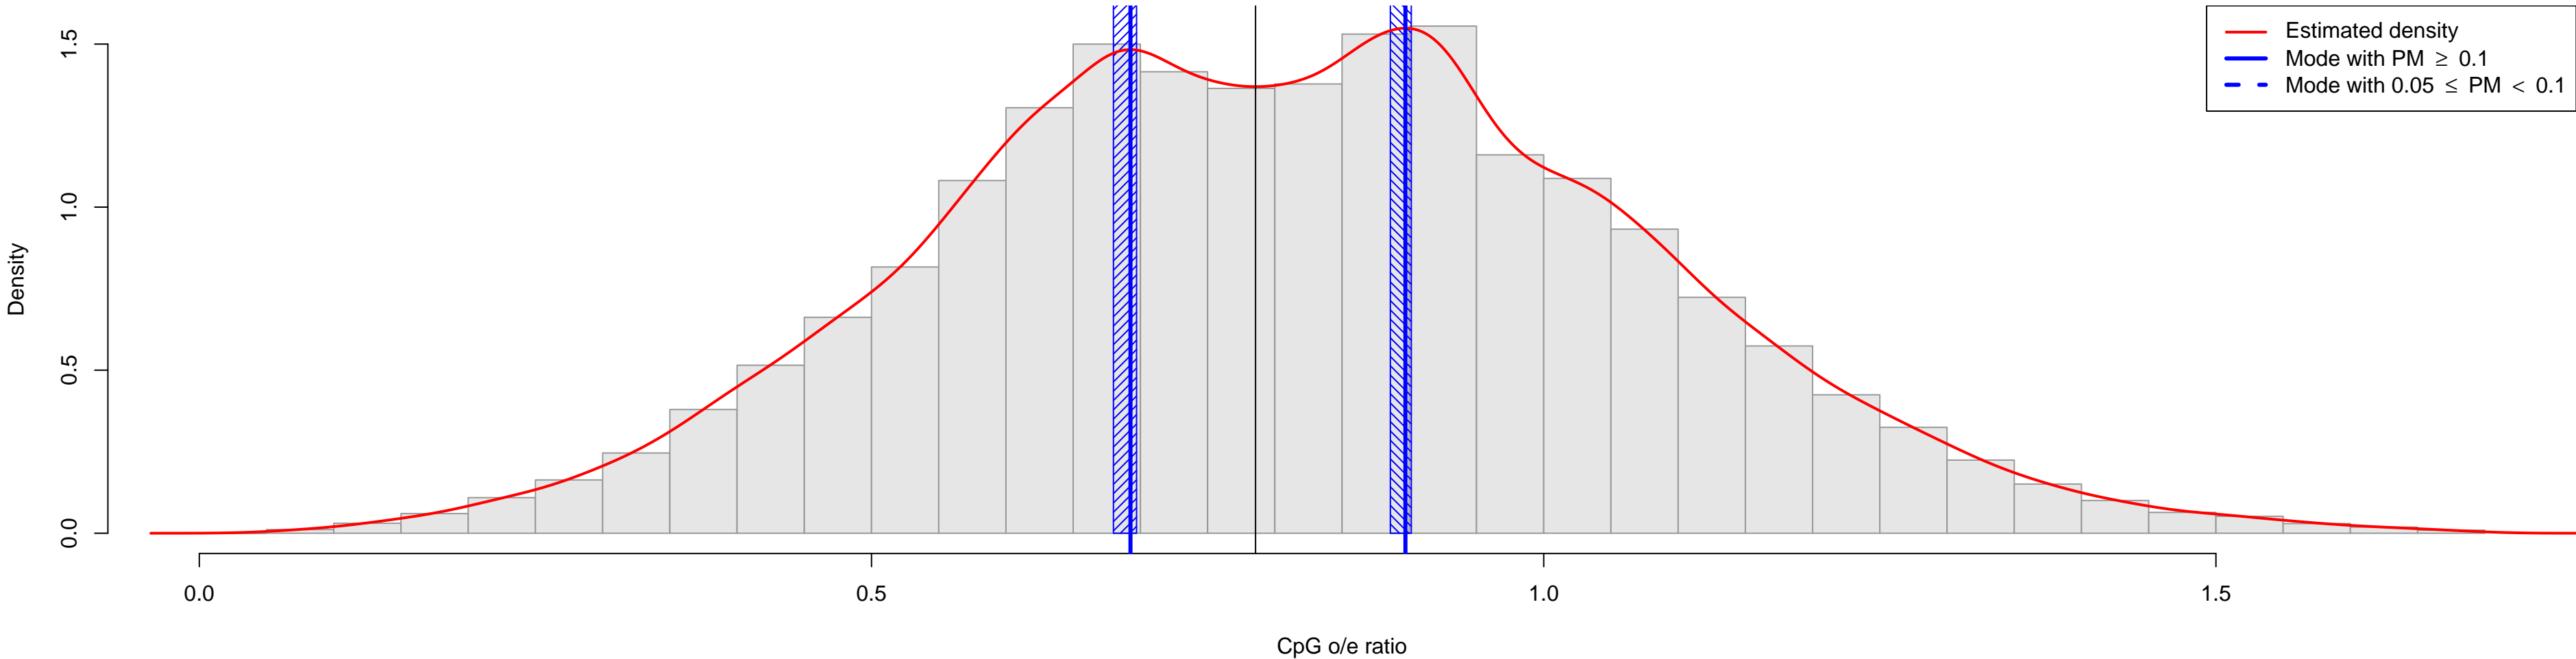

# Hedyotis\_terminalis

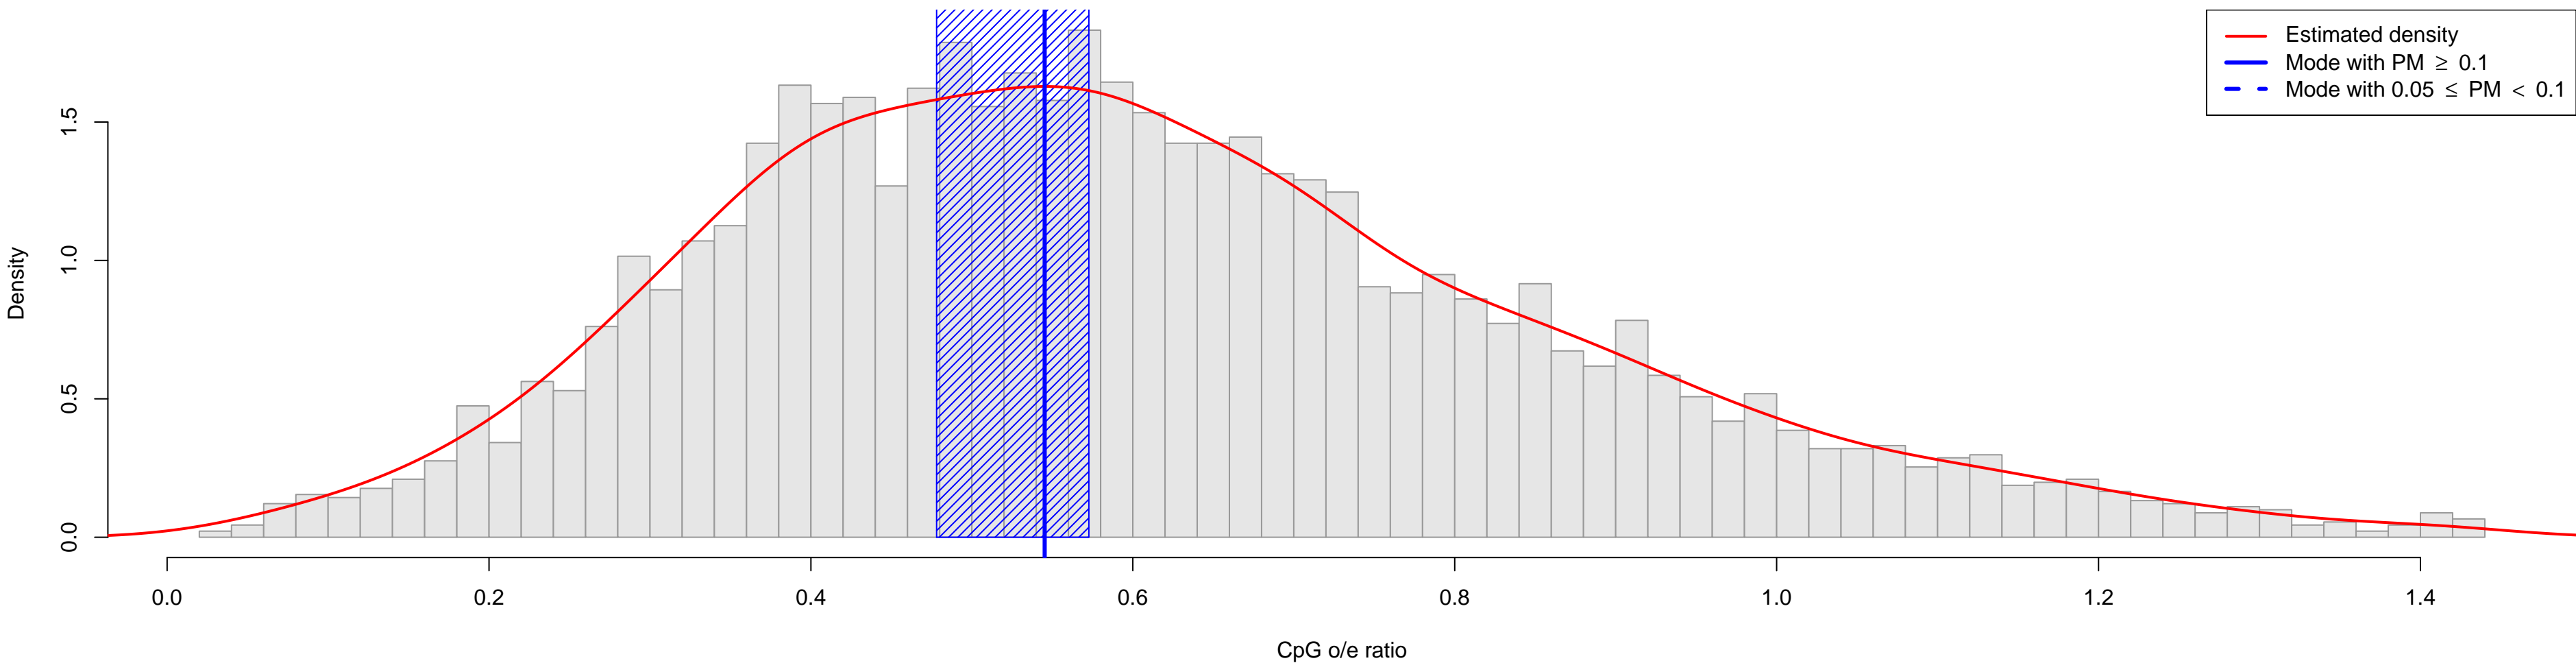



# Helianthus\_annuus

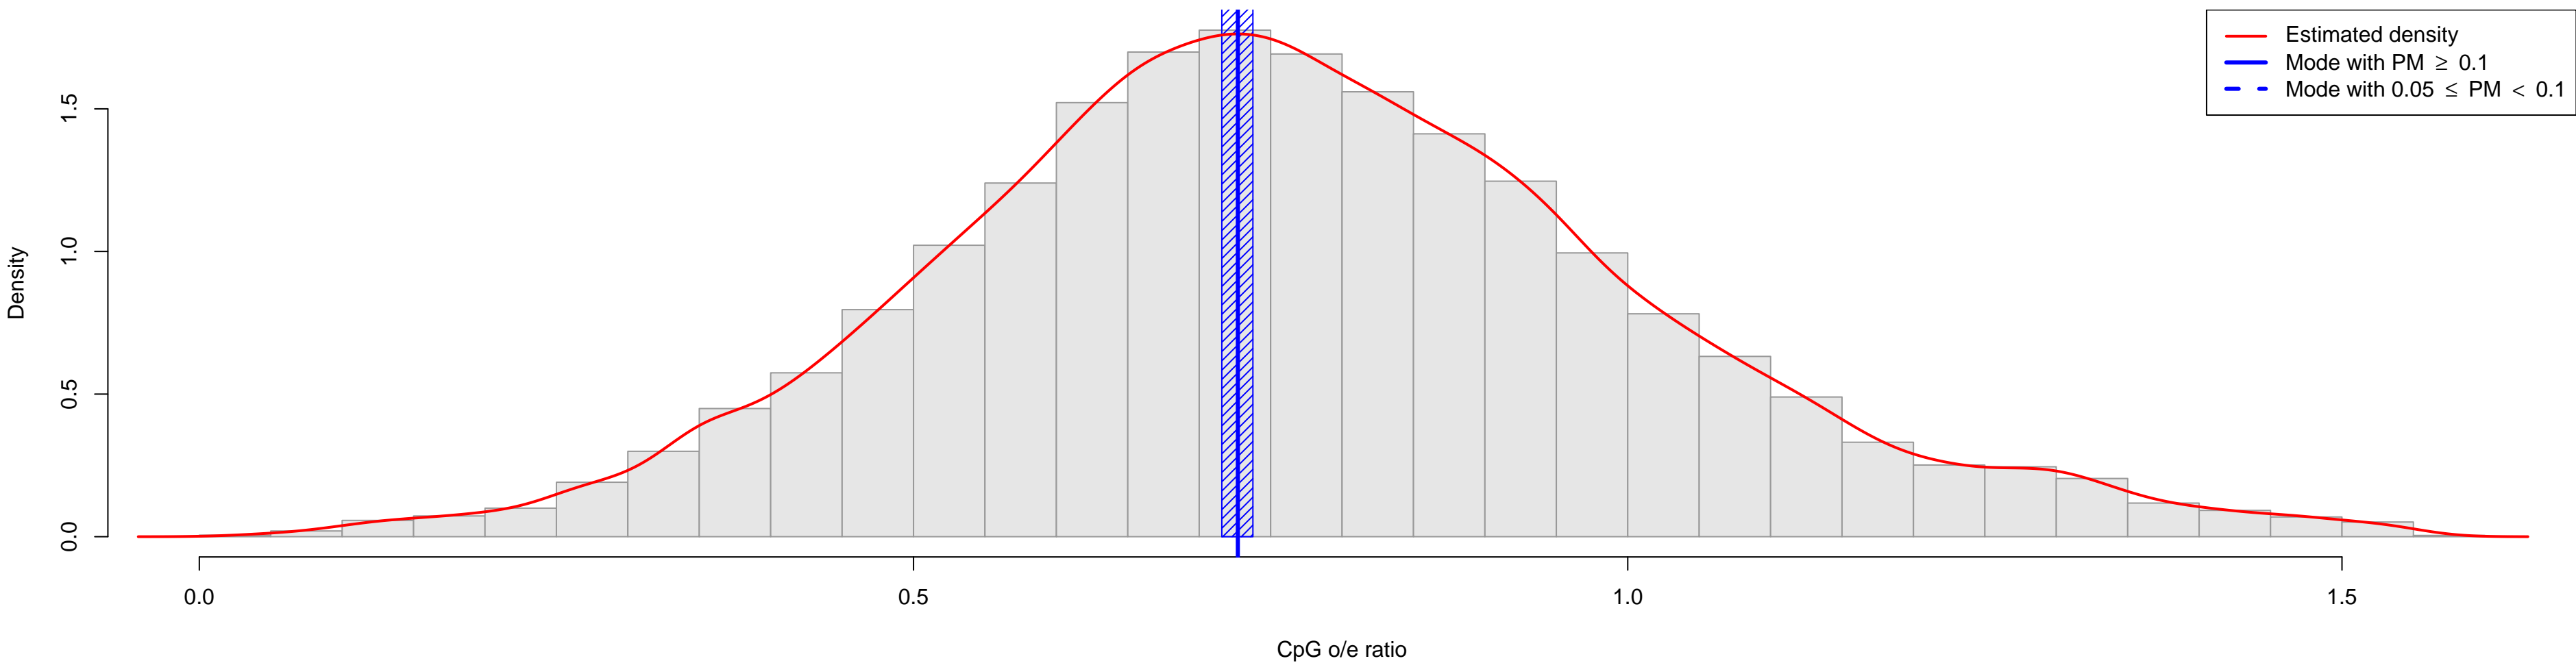

# Helianthus\_ciliaris

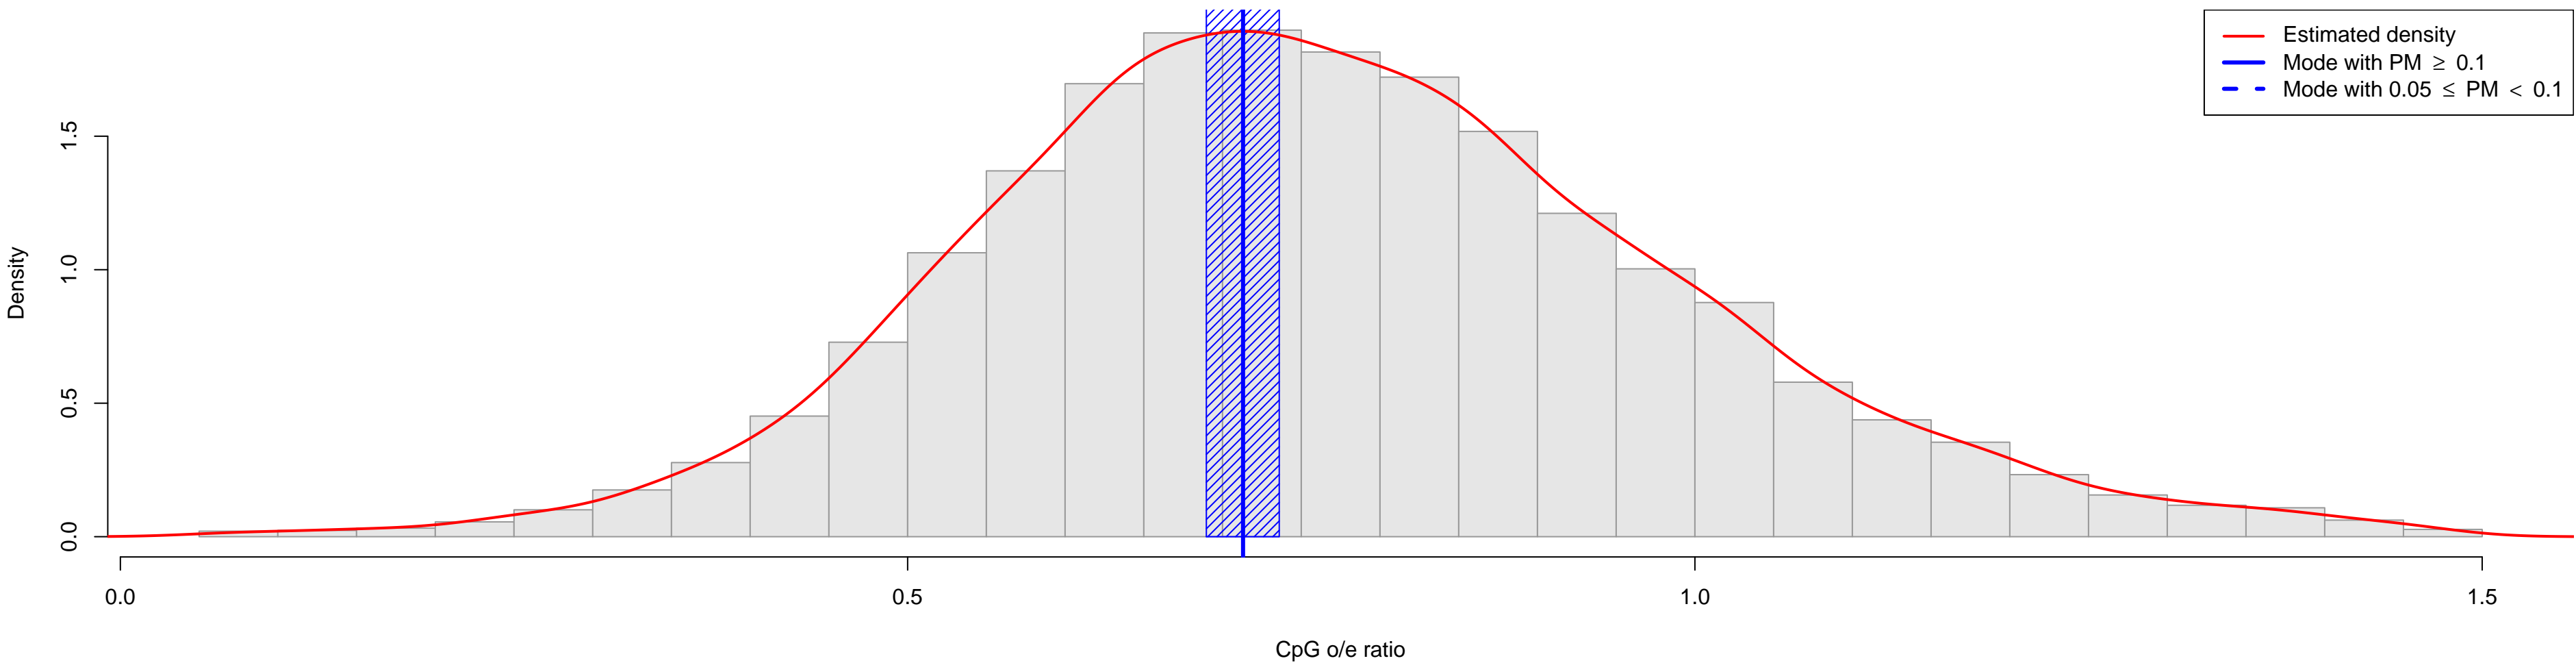

# Heliconius\_melpomene

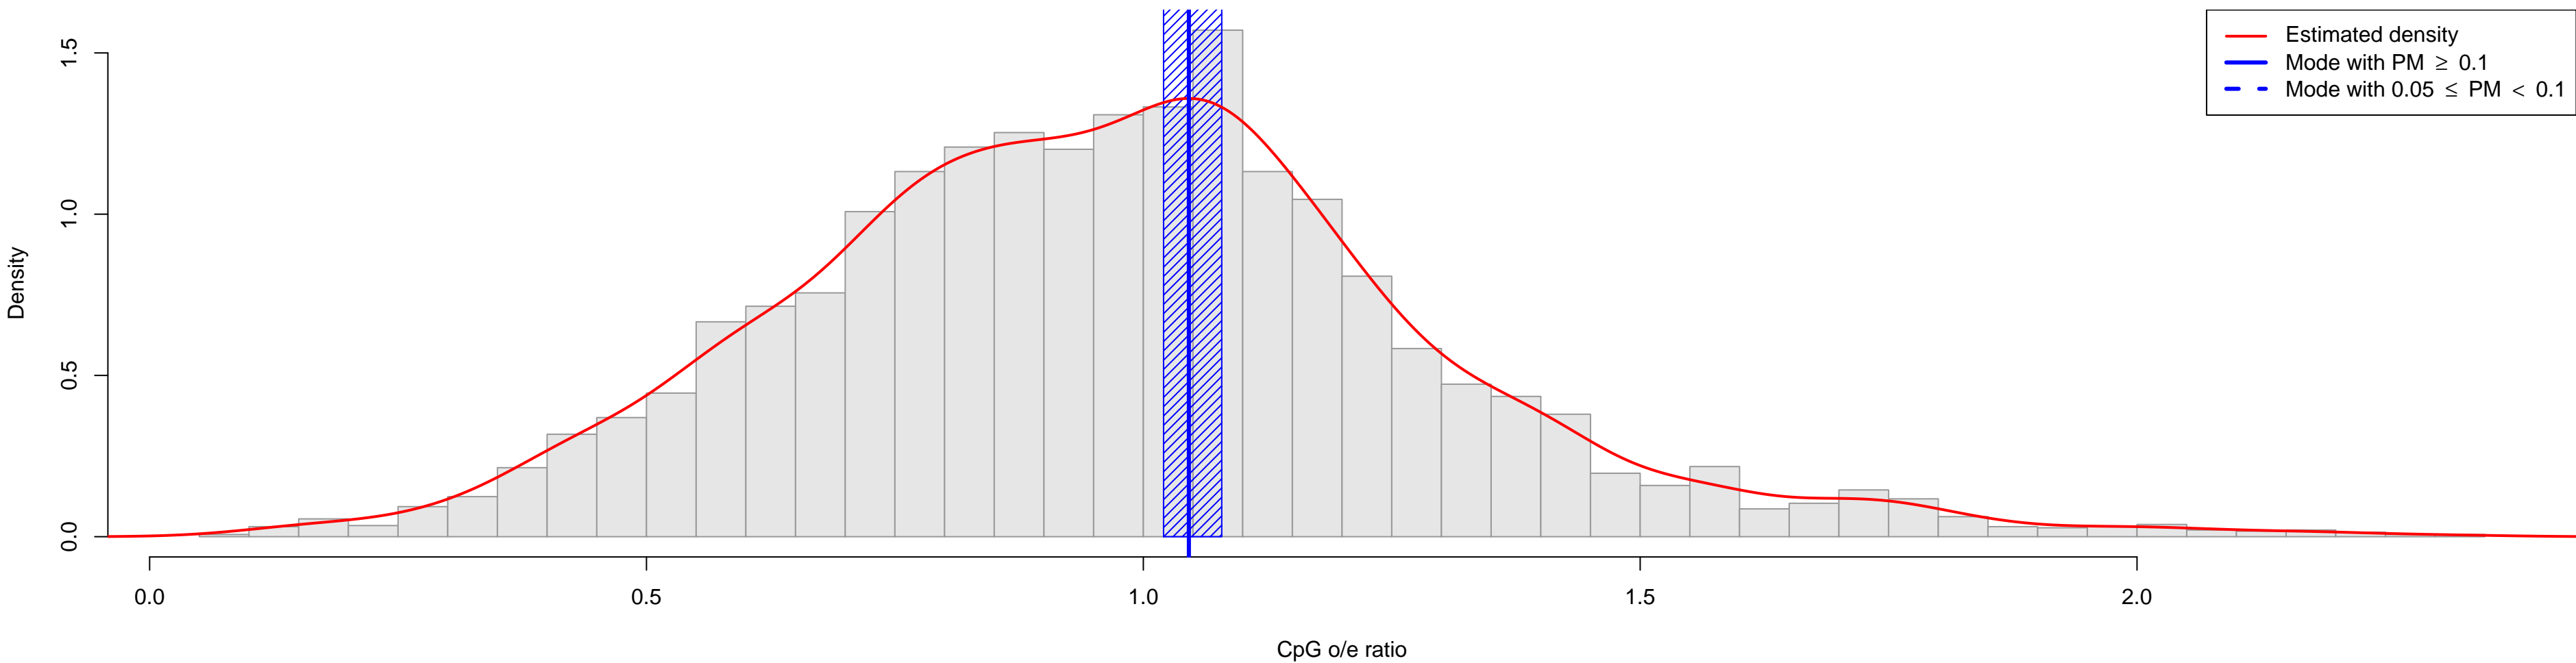

# Heliopsis\_virescens

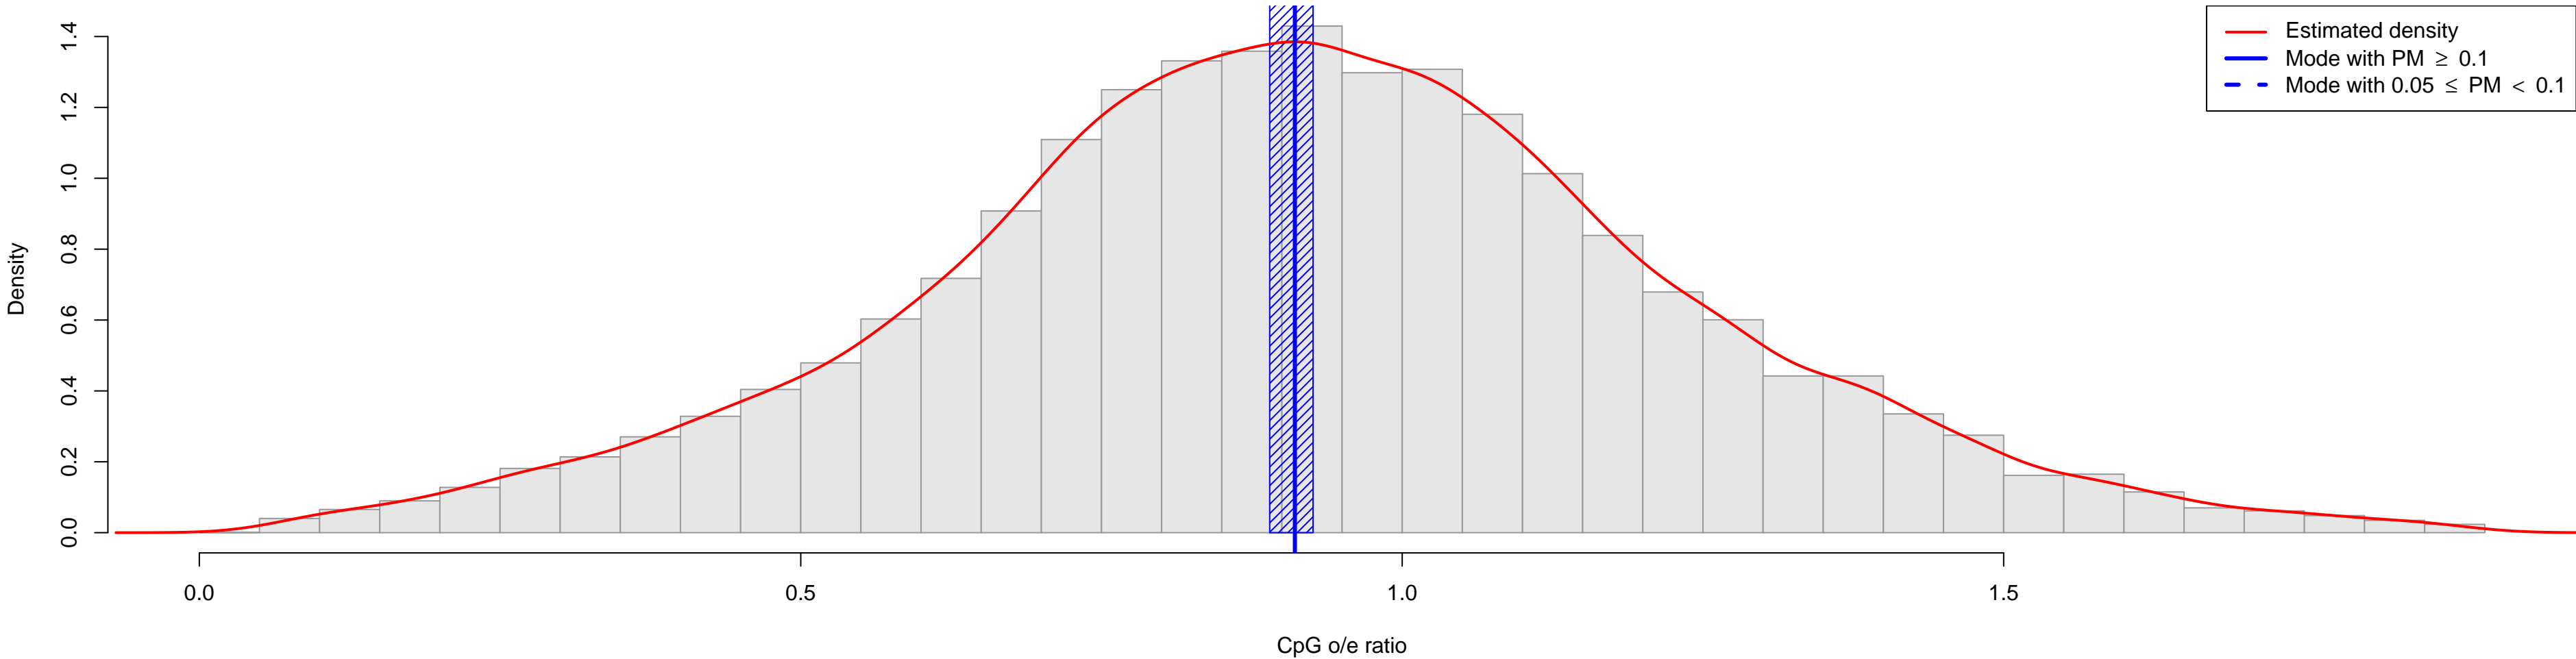

# Helobdella\_robusta

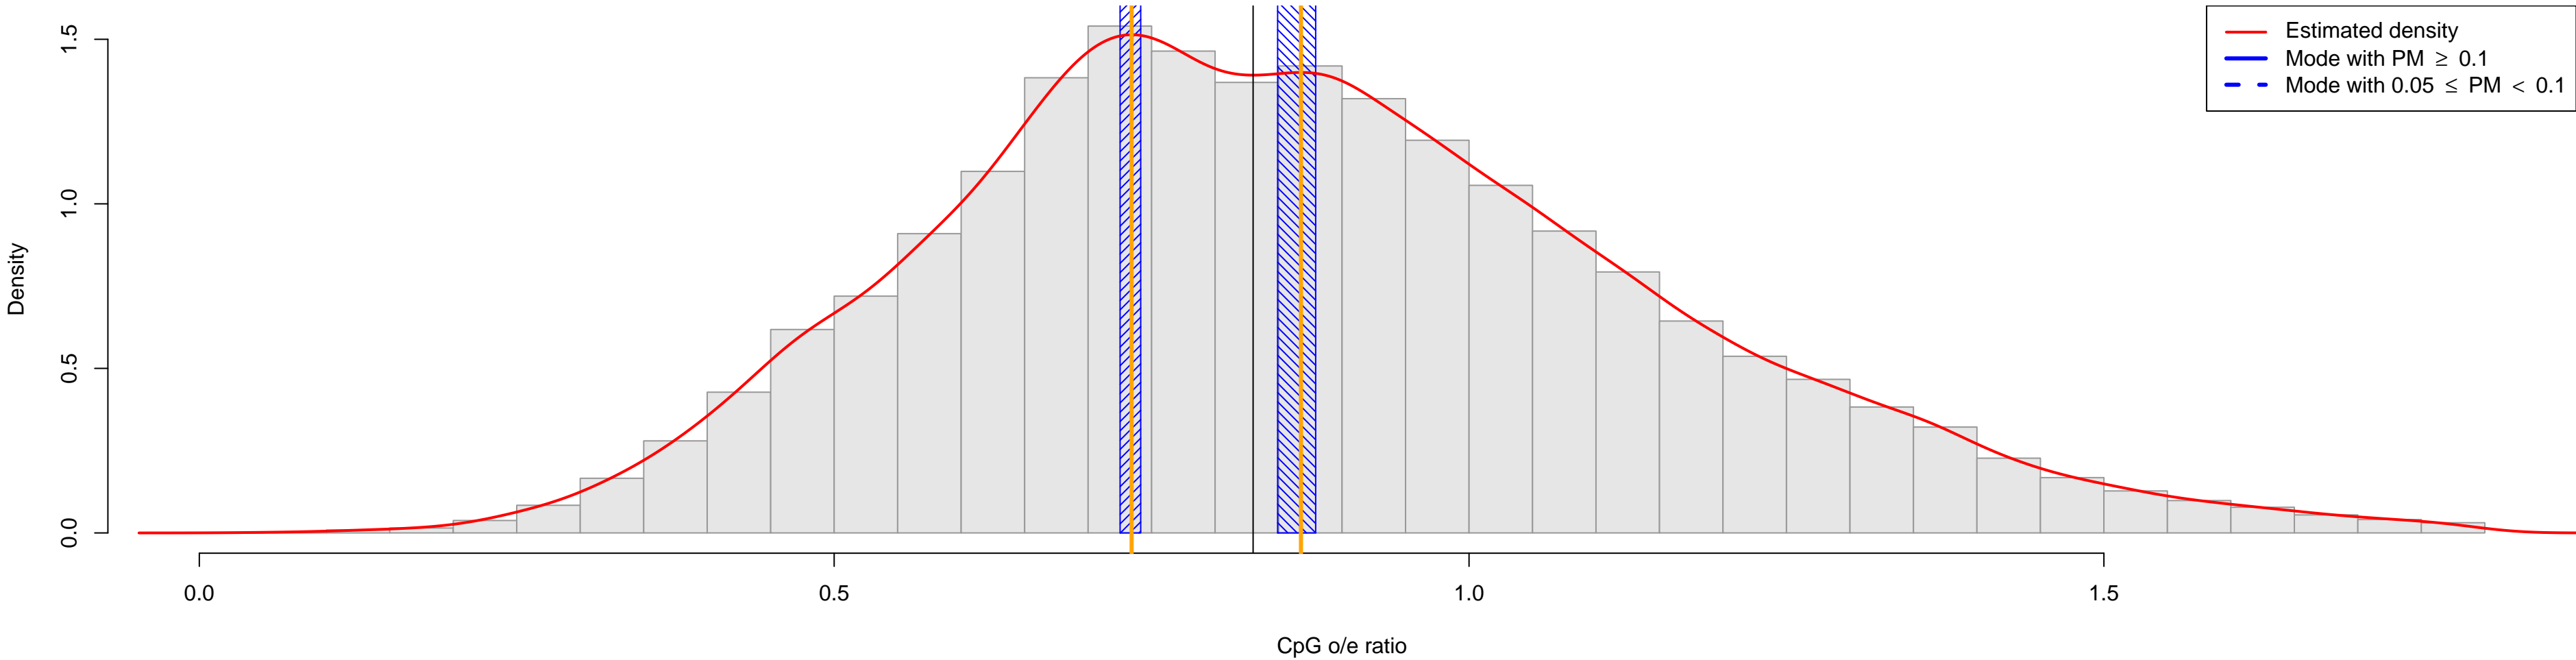

# Hemicentrotus\_pulcherrimus

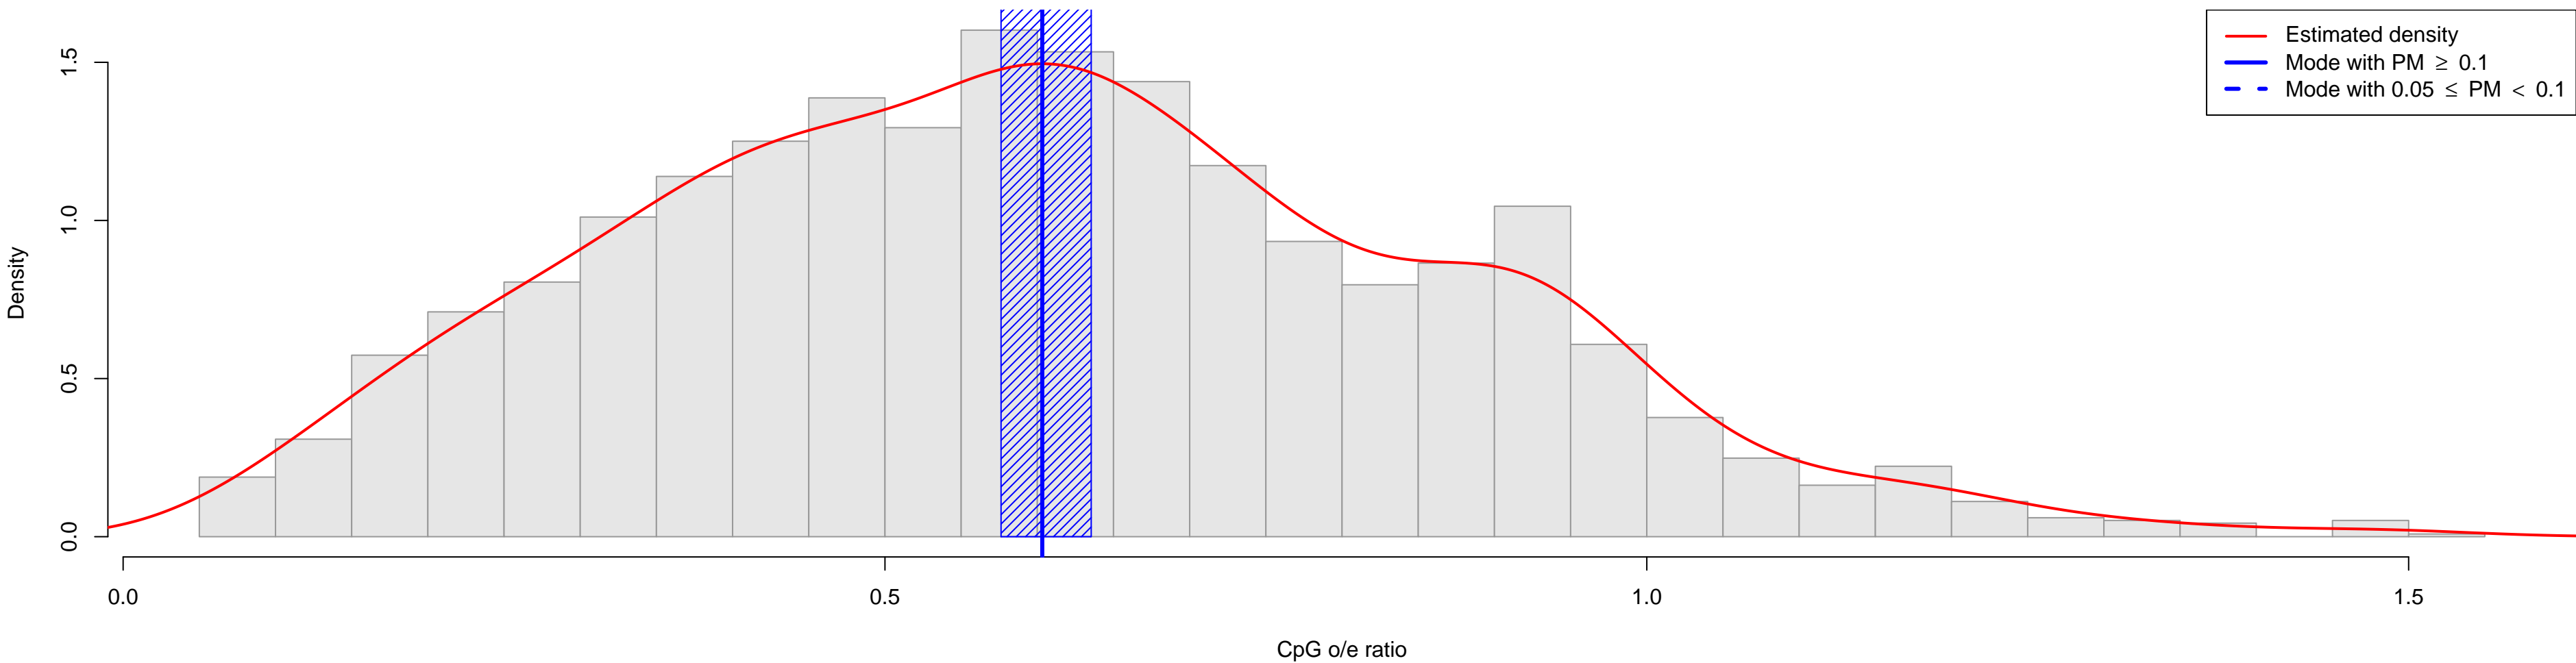

# Heterobasidion\_annosum

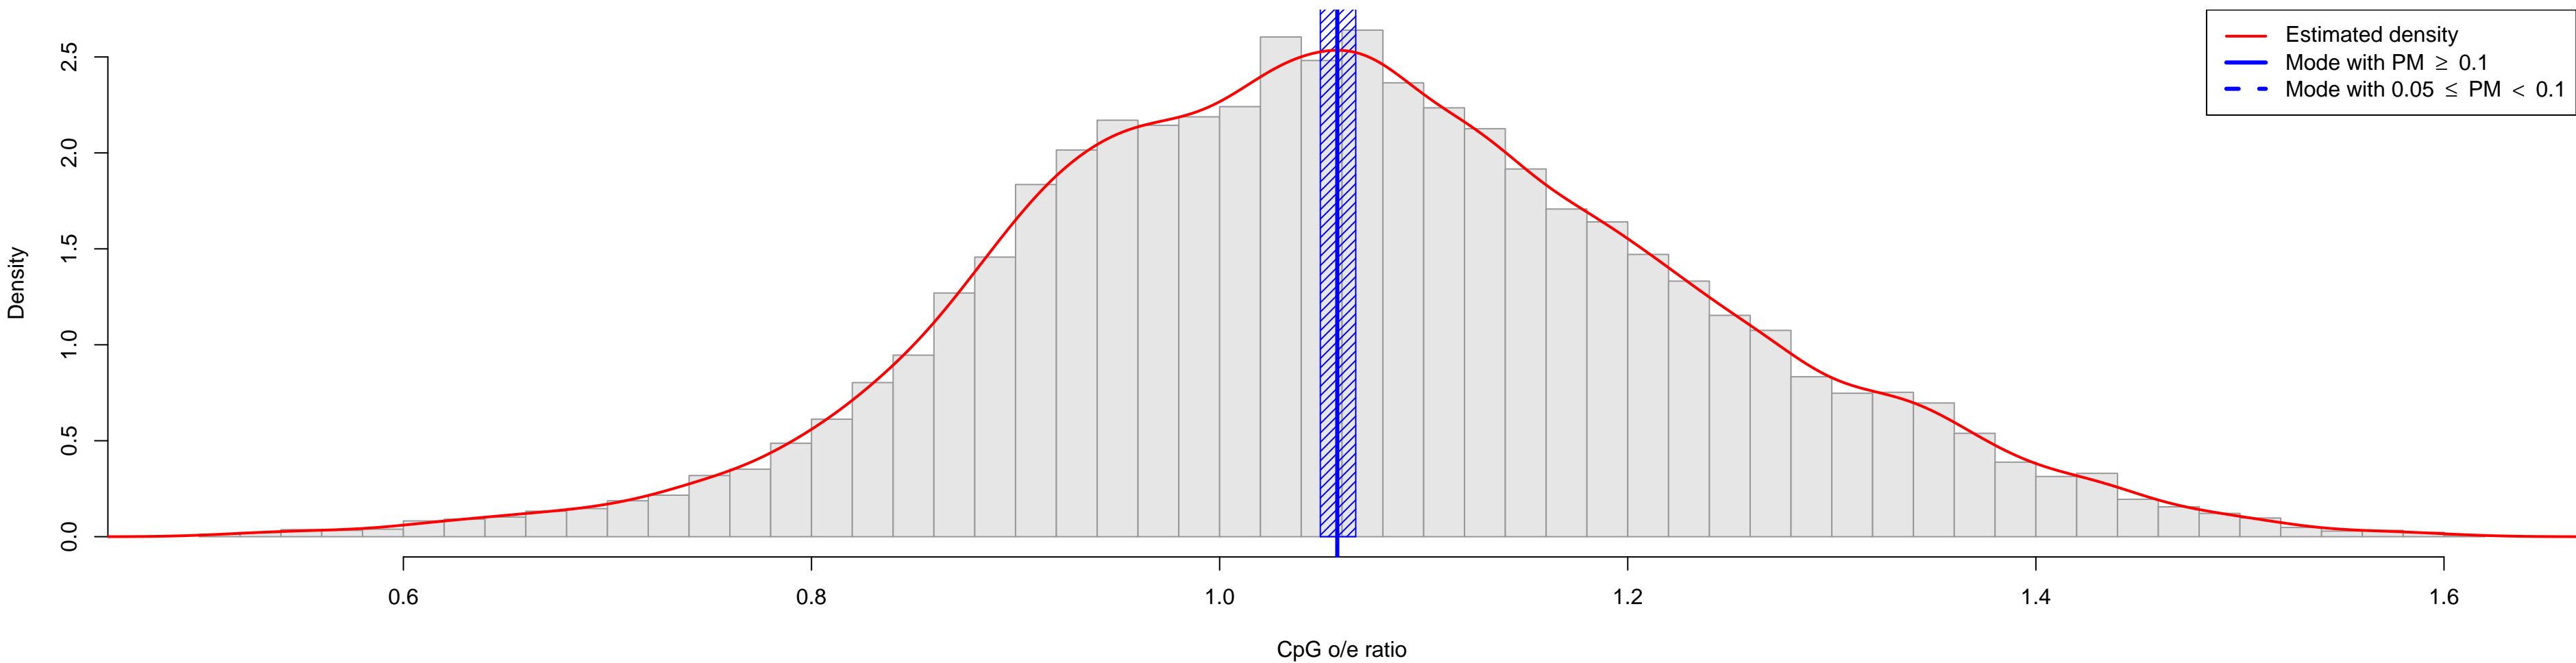

# Heterocapsa\_triquetra

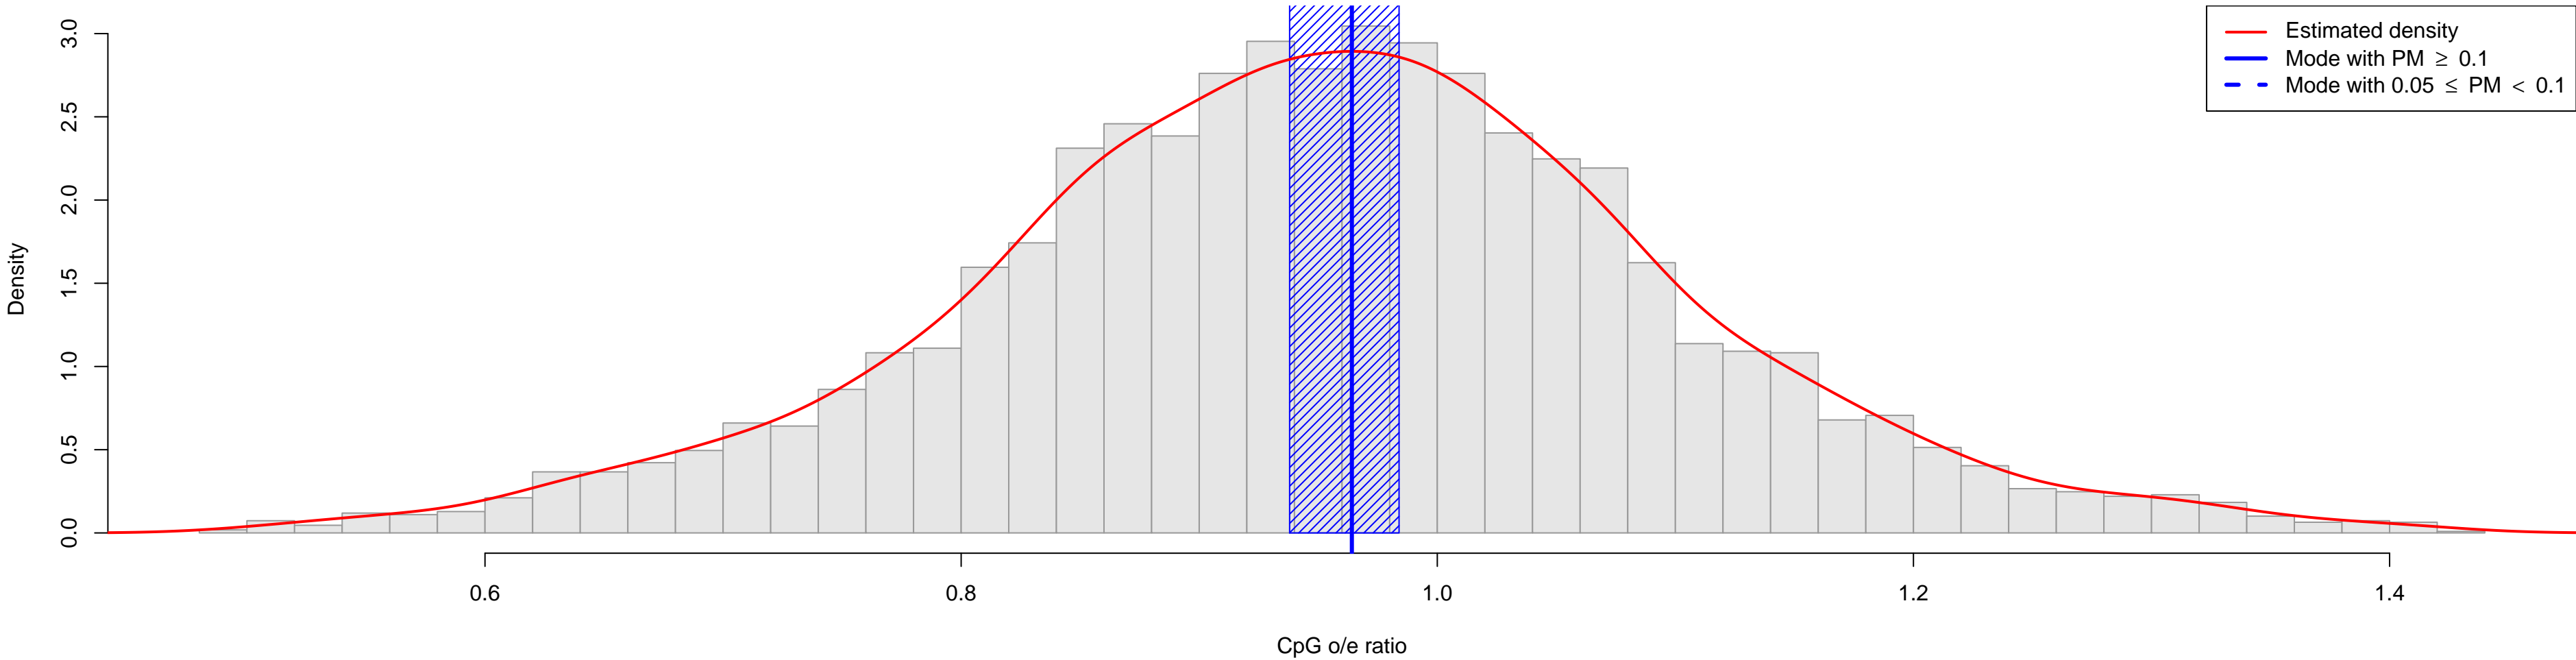



# Heterochone\_calyx

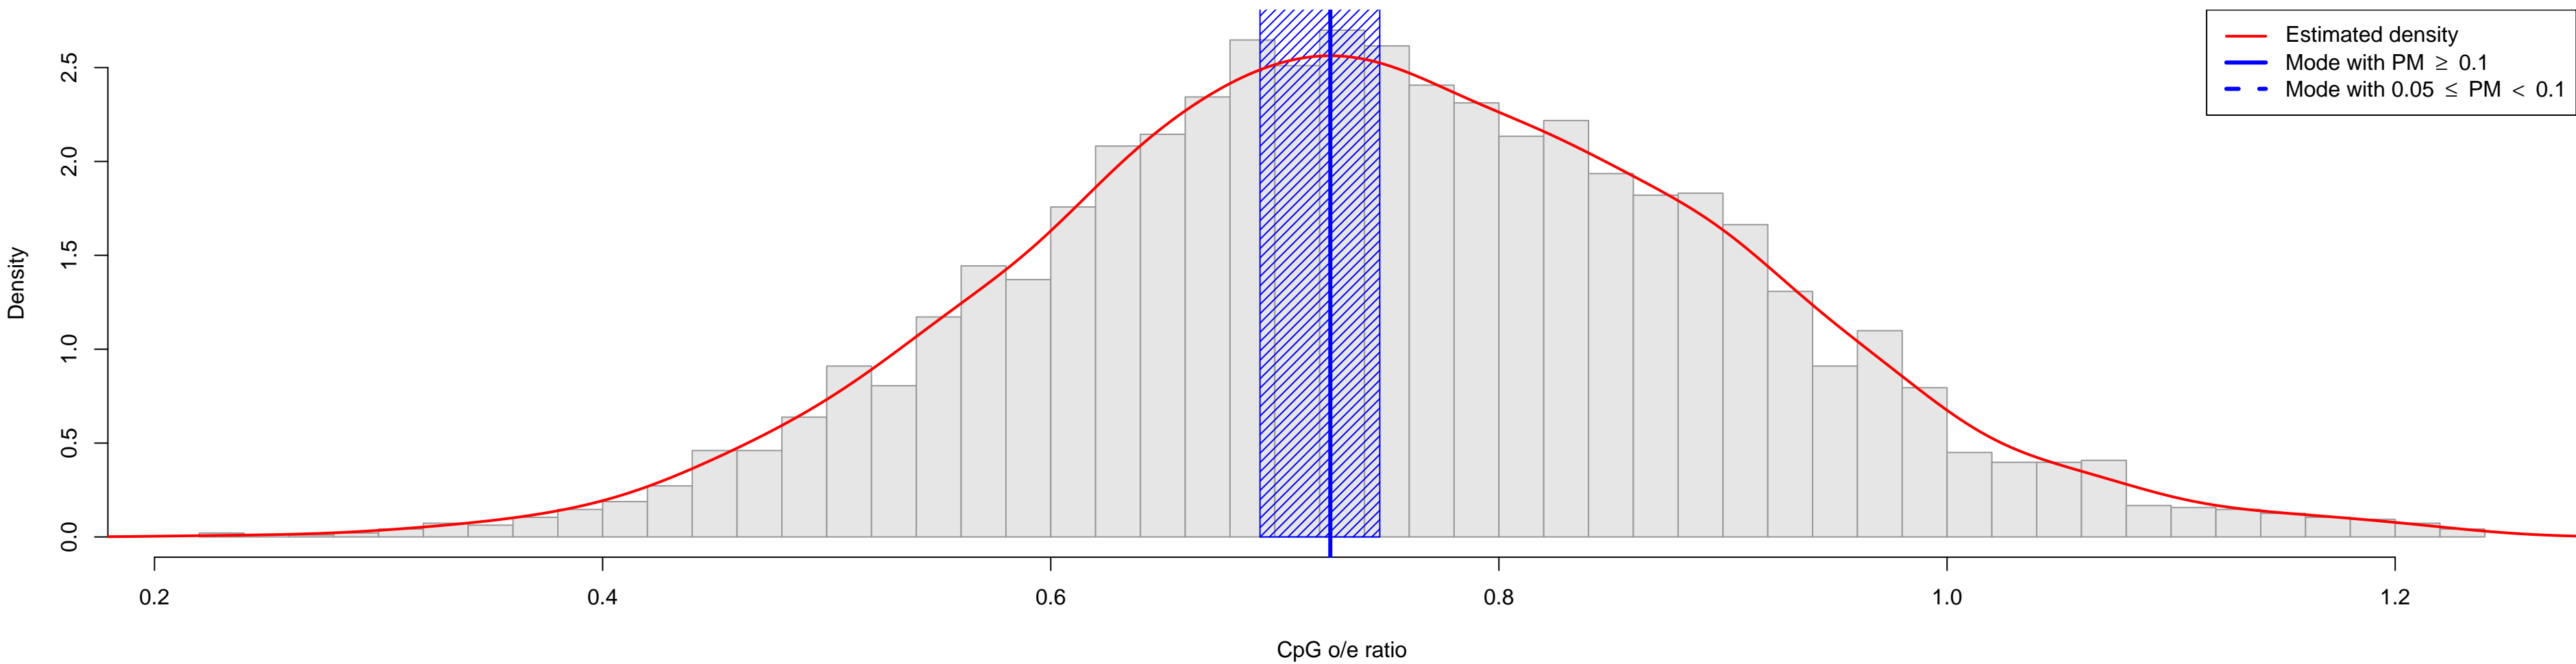

# Heterodera\_glycines

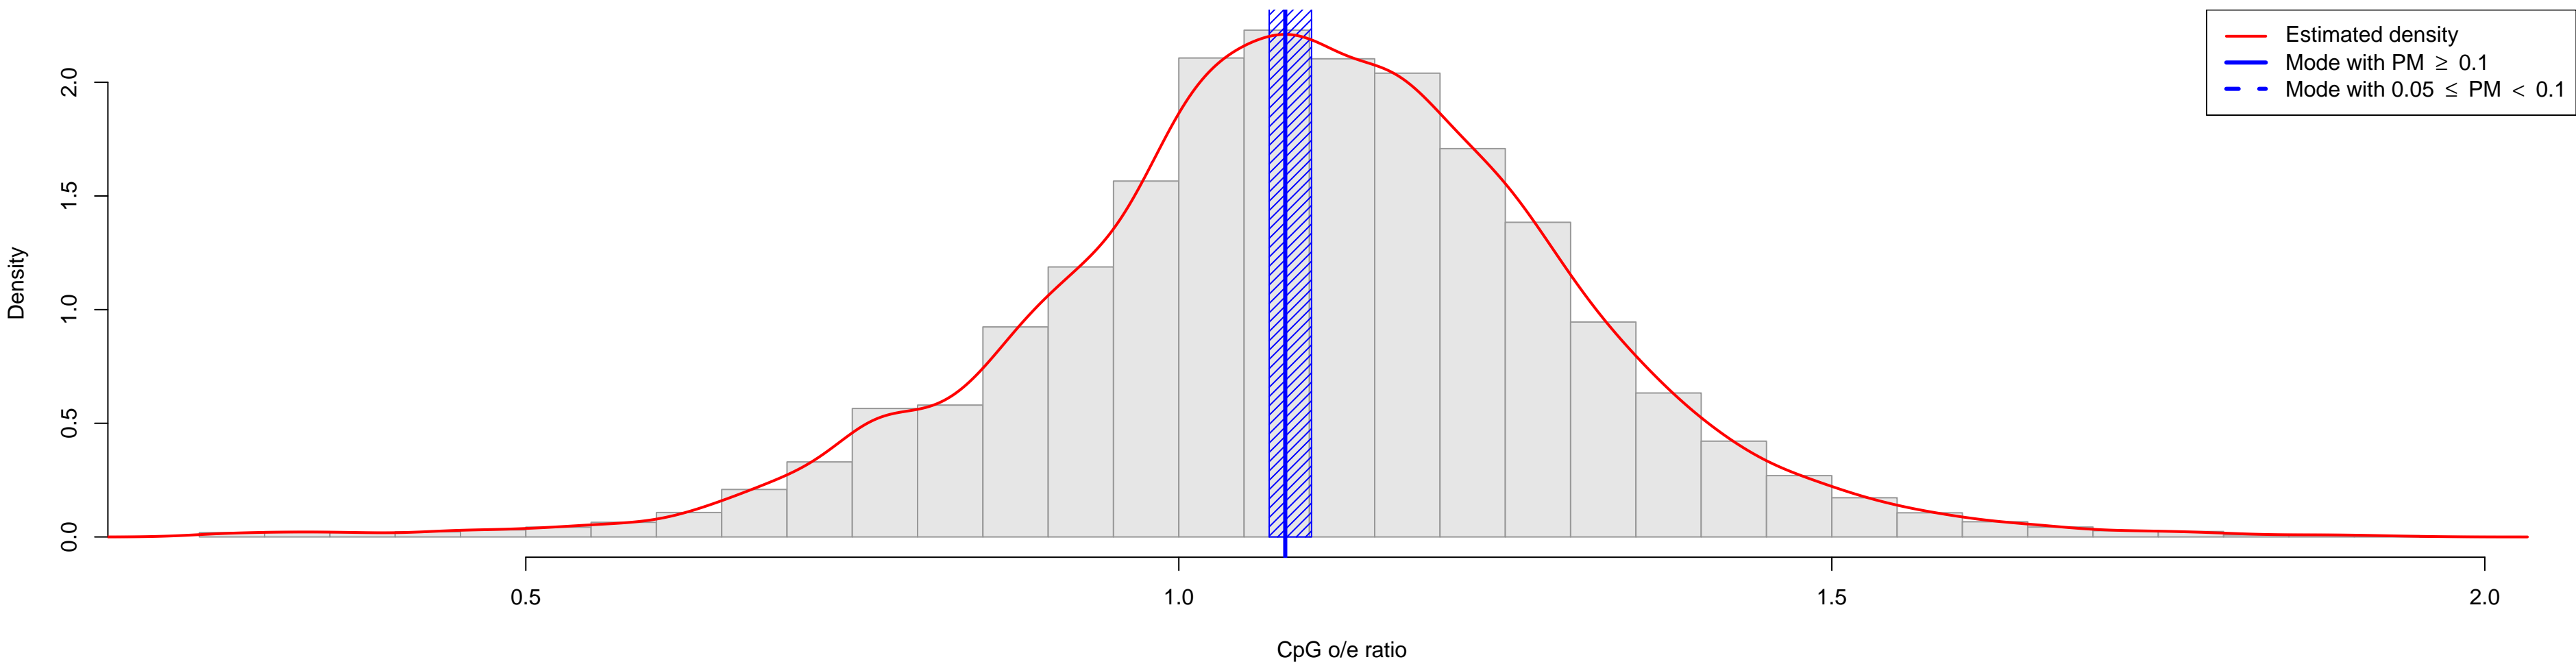

# Heterorhabditis\_bacteriophora

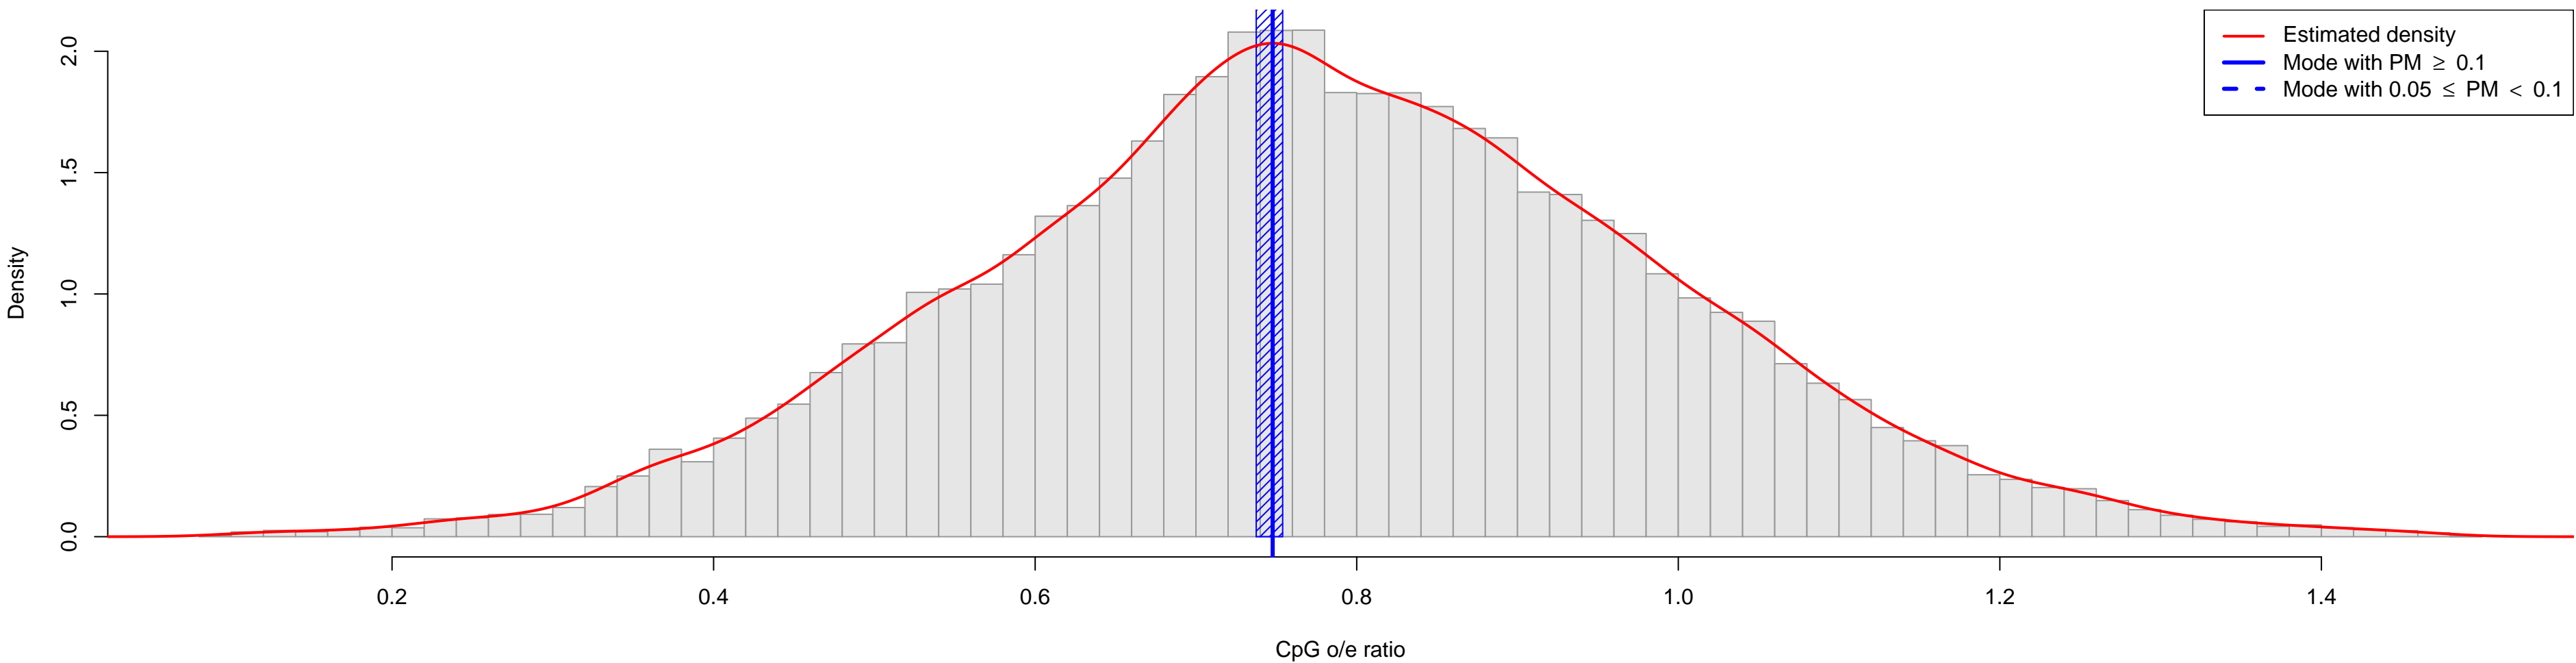

# Hippoglossus\_hippoglossus

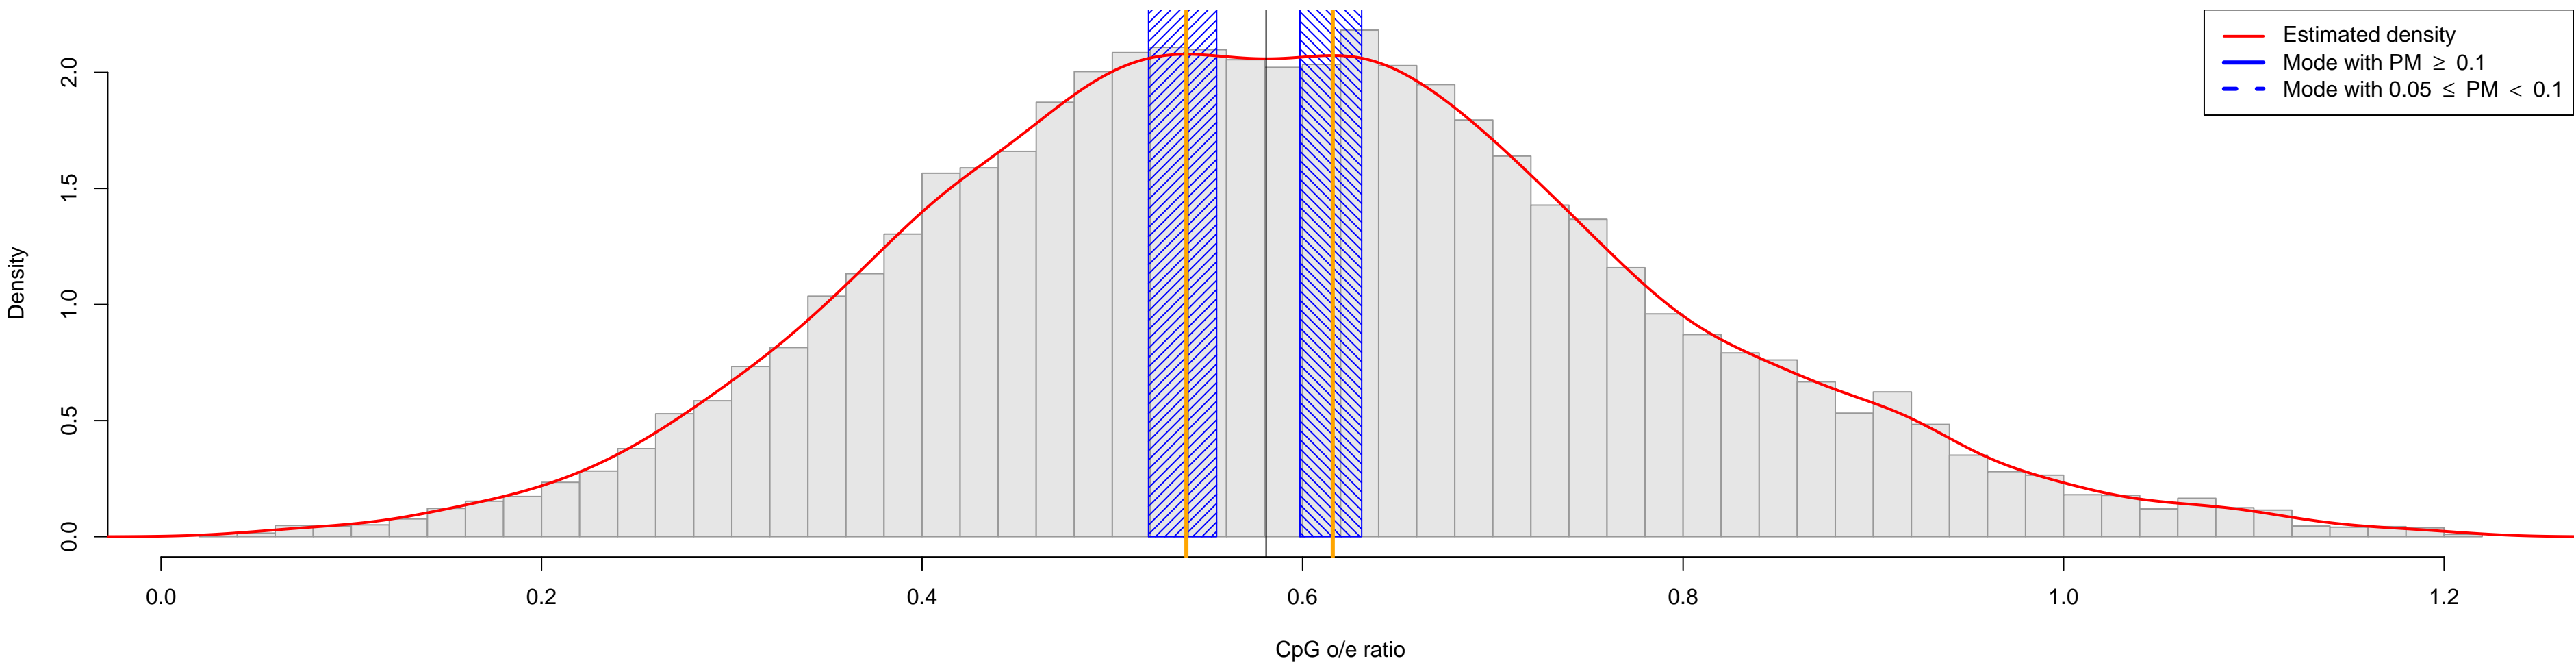

# Hirudo\_medicinalis

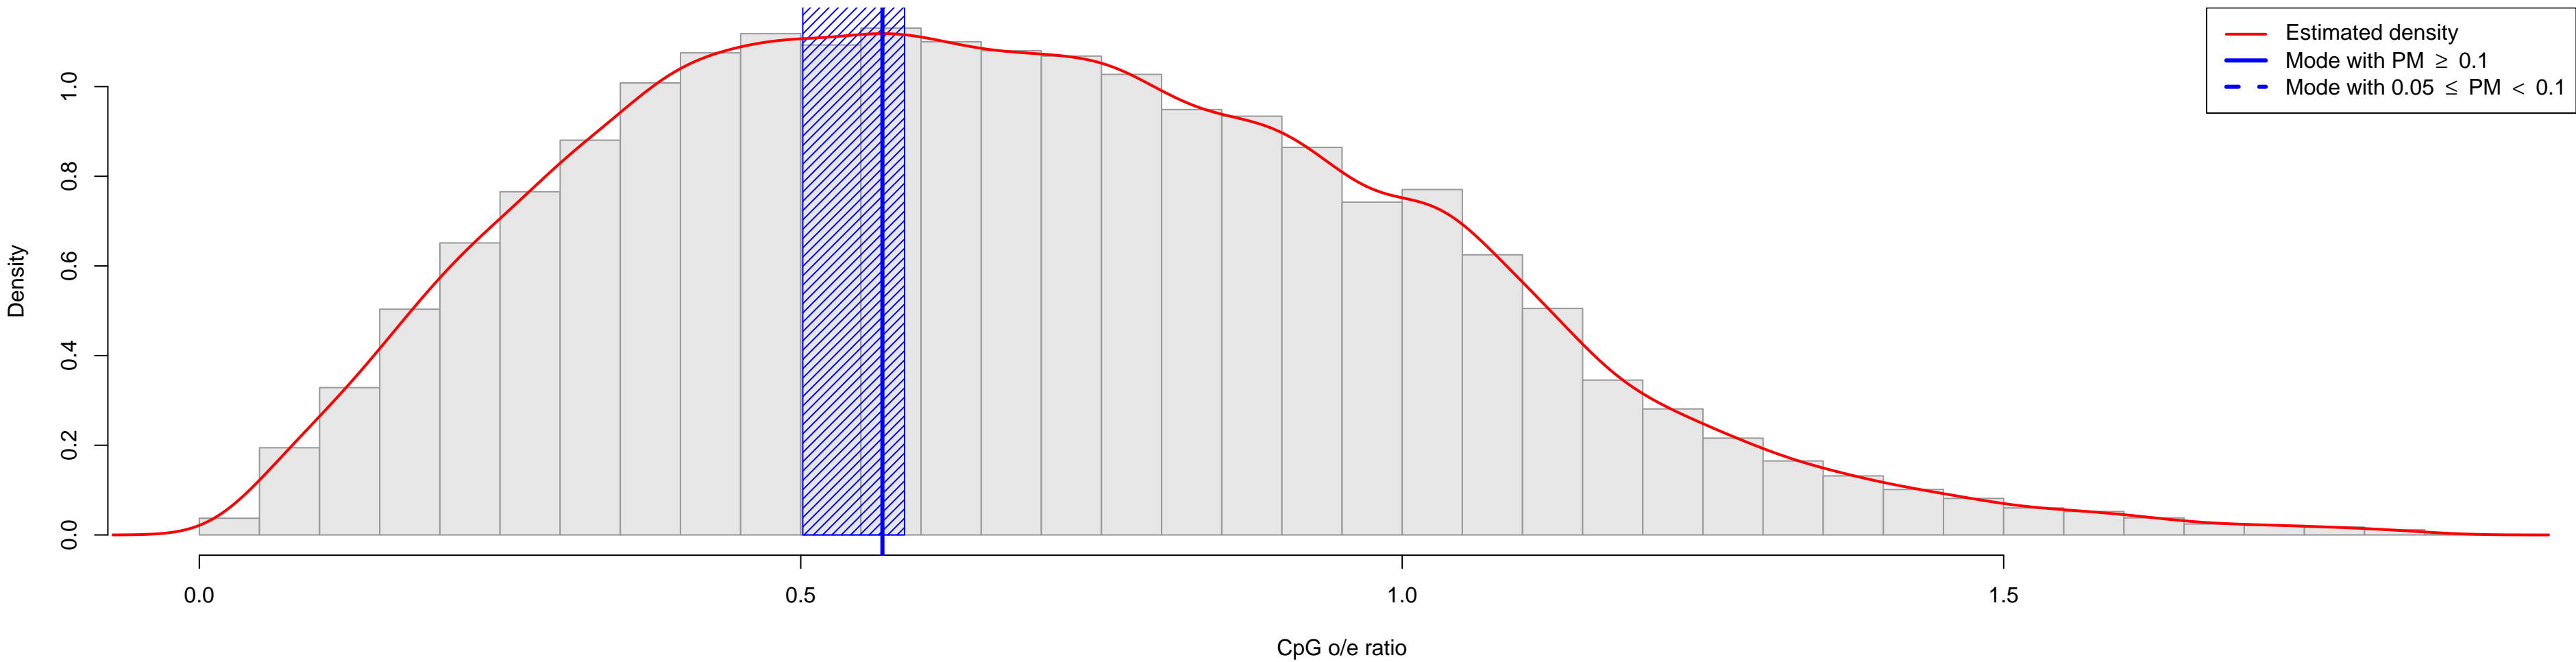

# Homalodisca\_coagulata

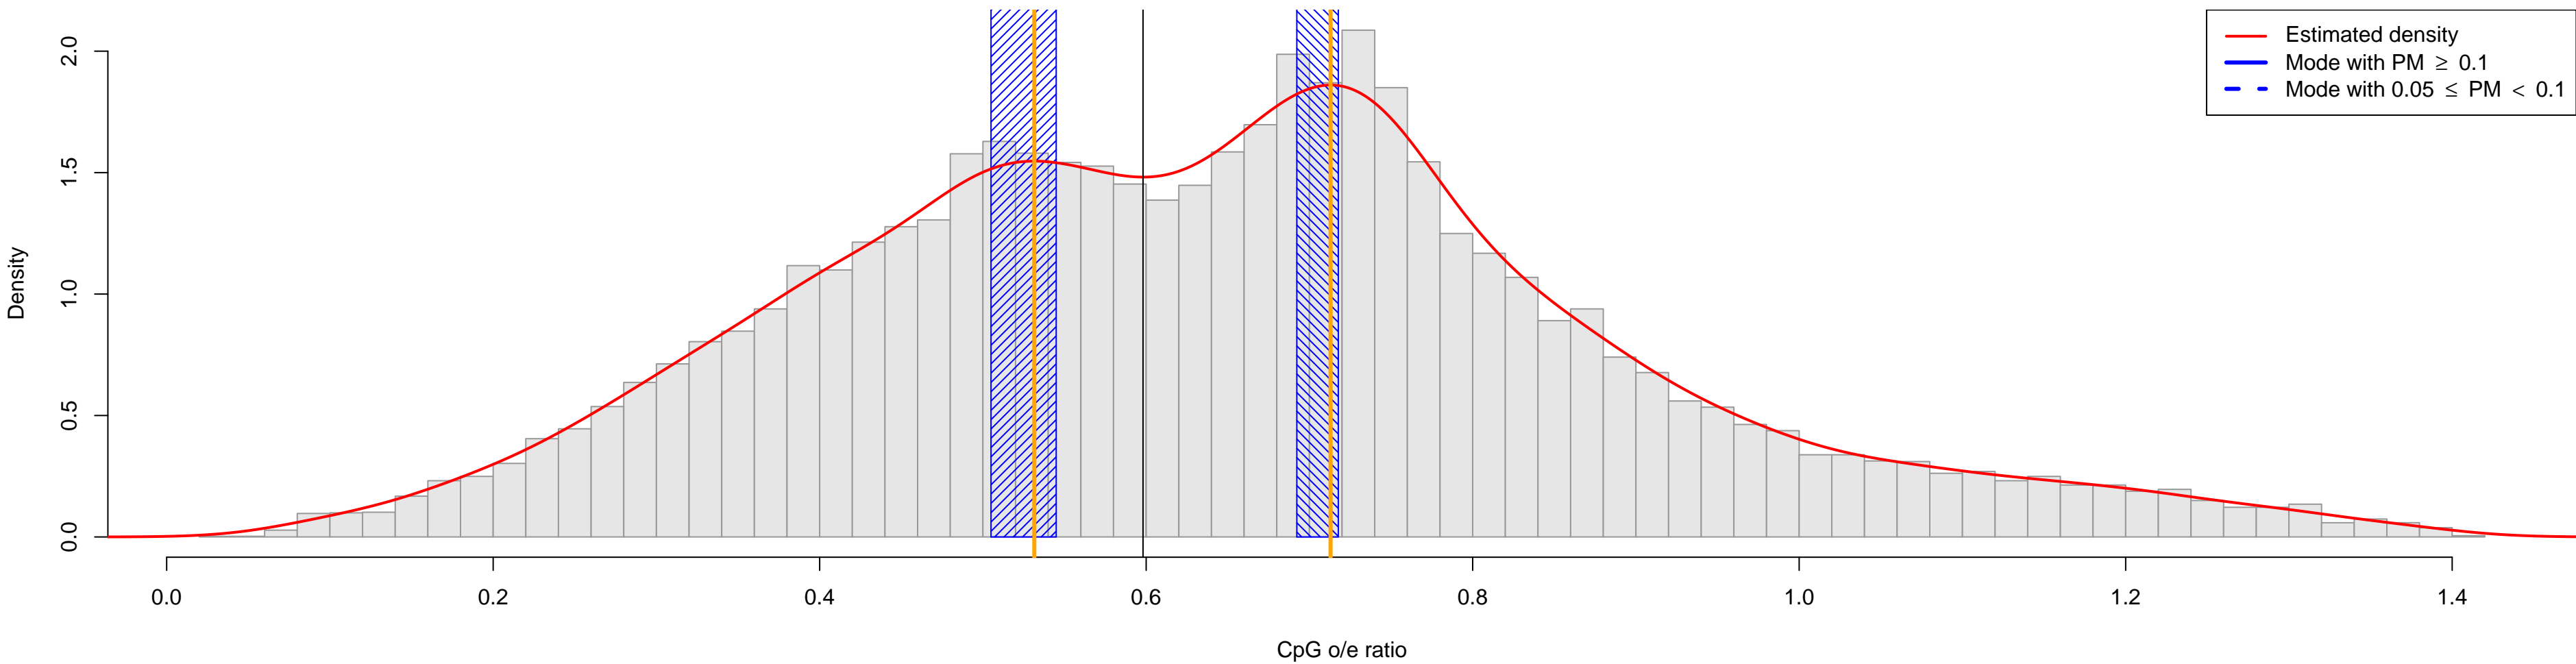

# Hydra\_magnipapillata

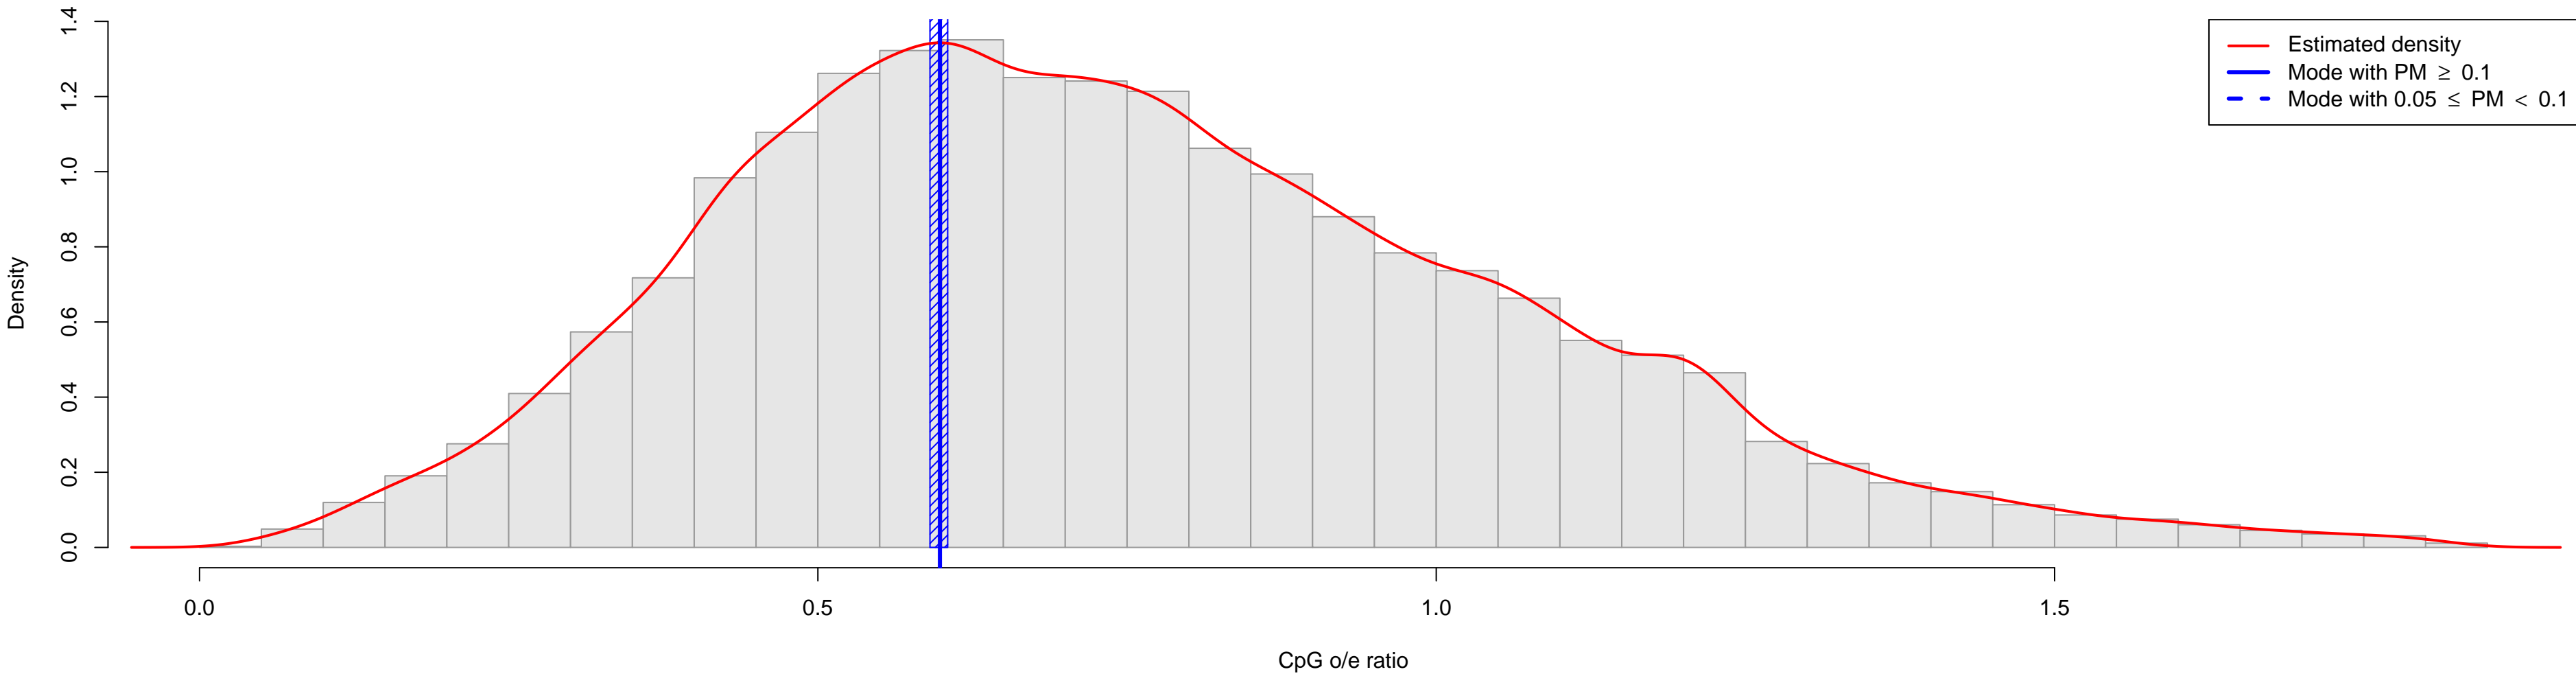

# Hydra\_oligactis

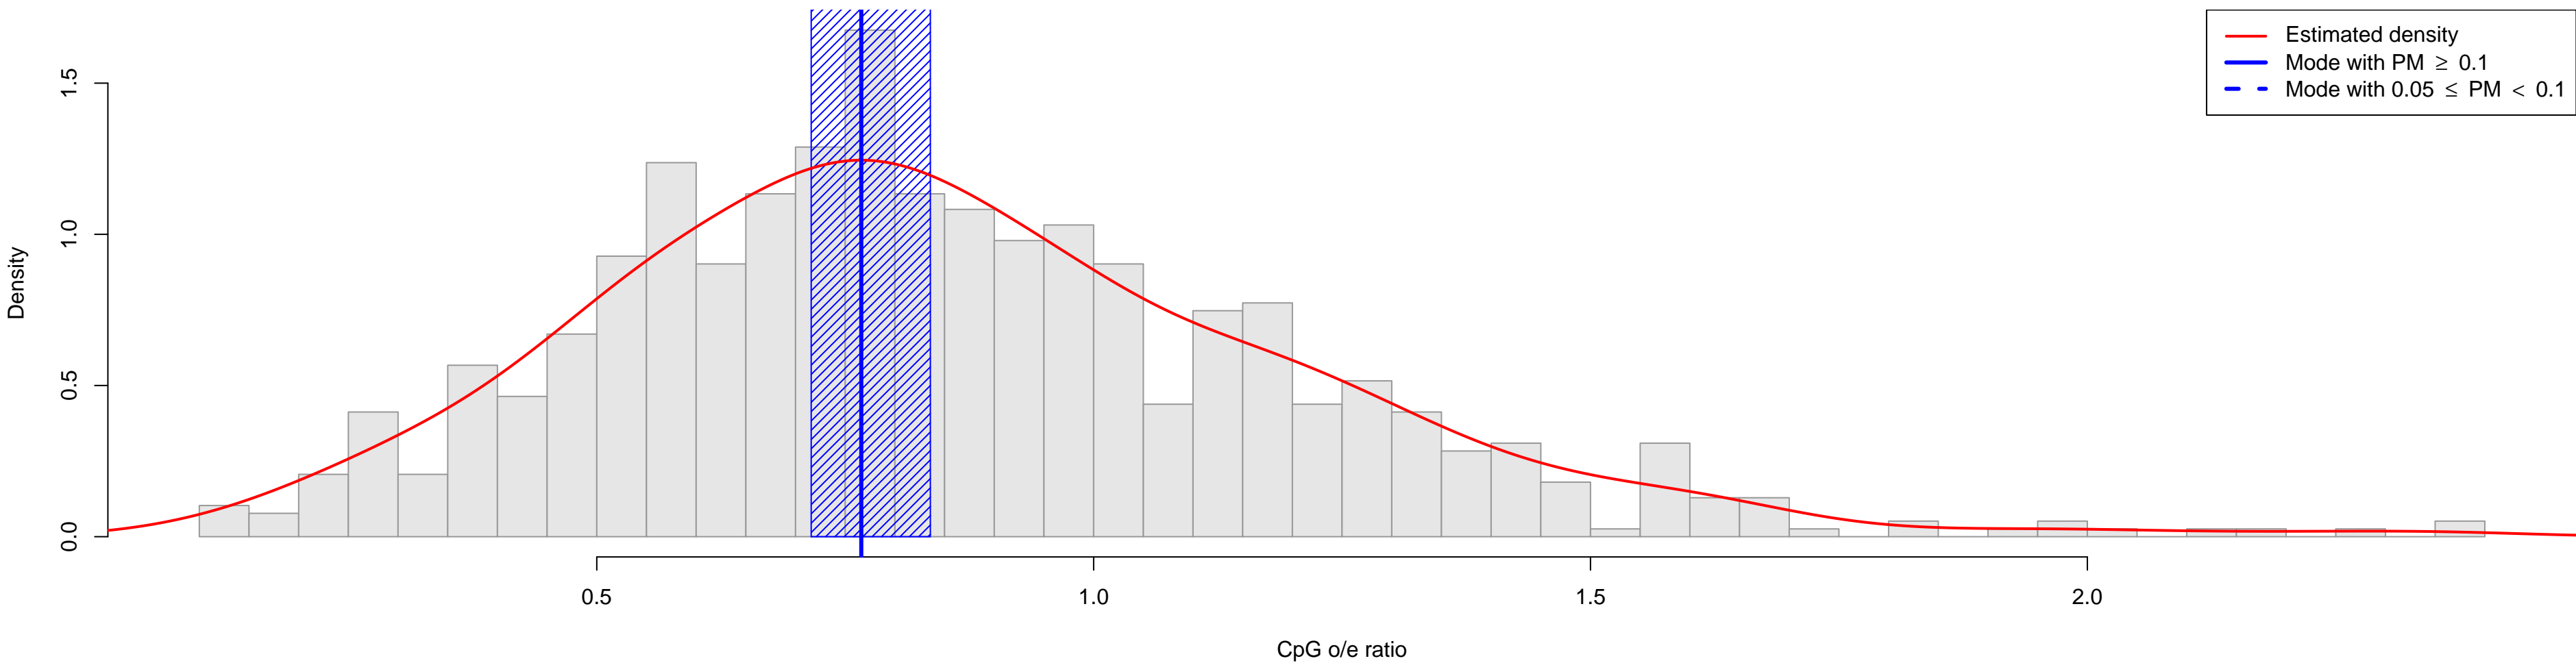



# Hydra\_vulgaris

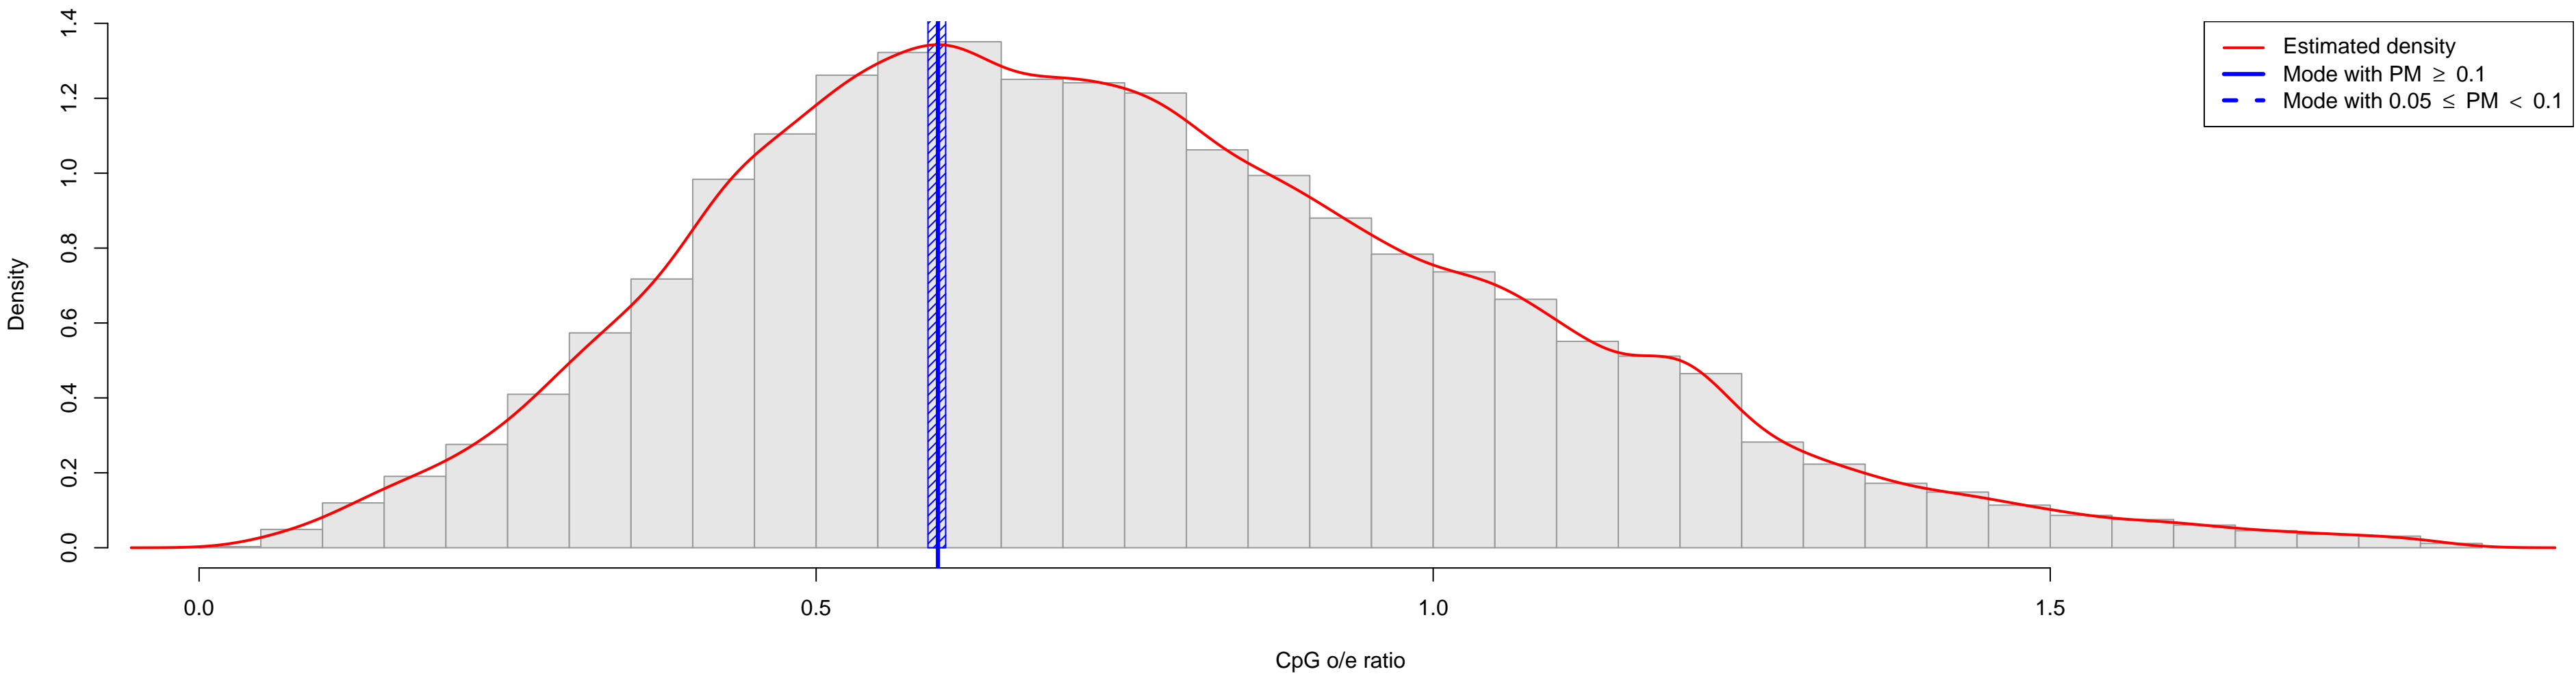

# Hydractinia\_echinata

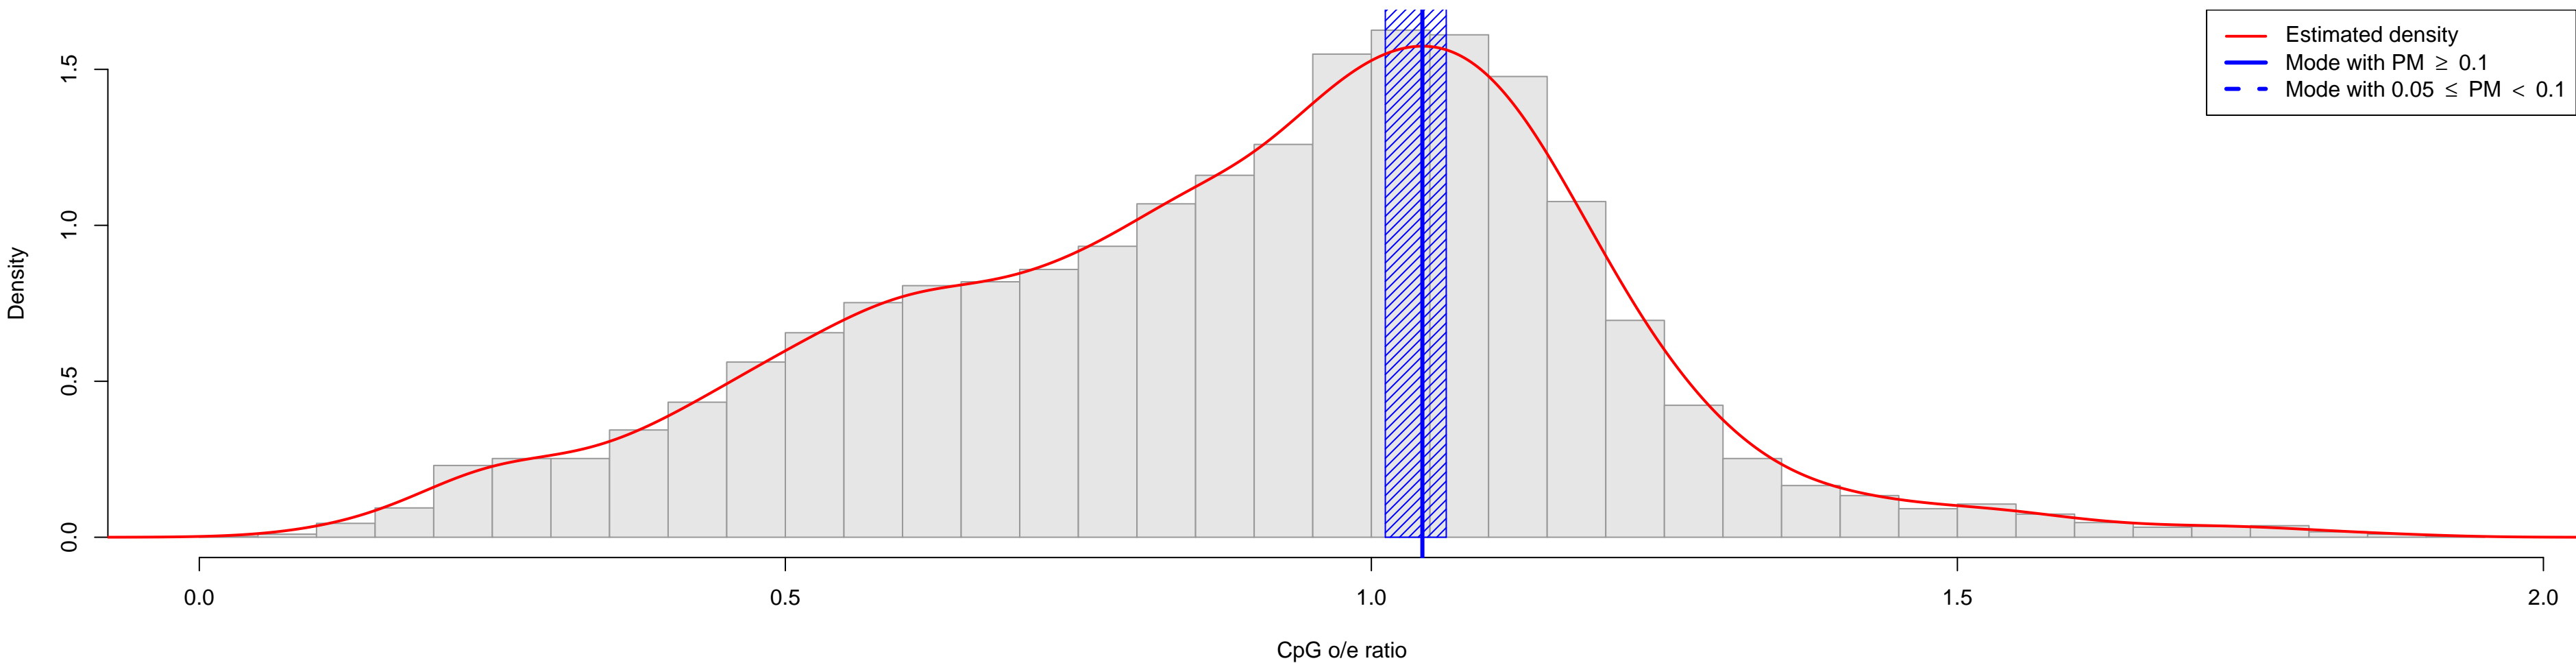

# Hyoscyamus\_niger

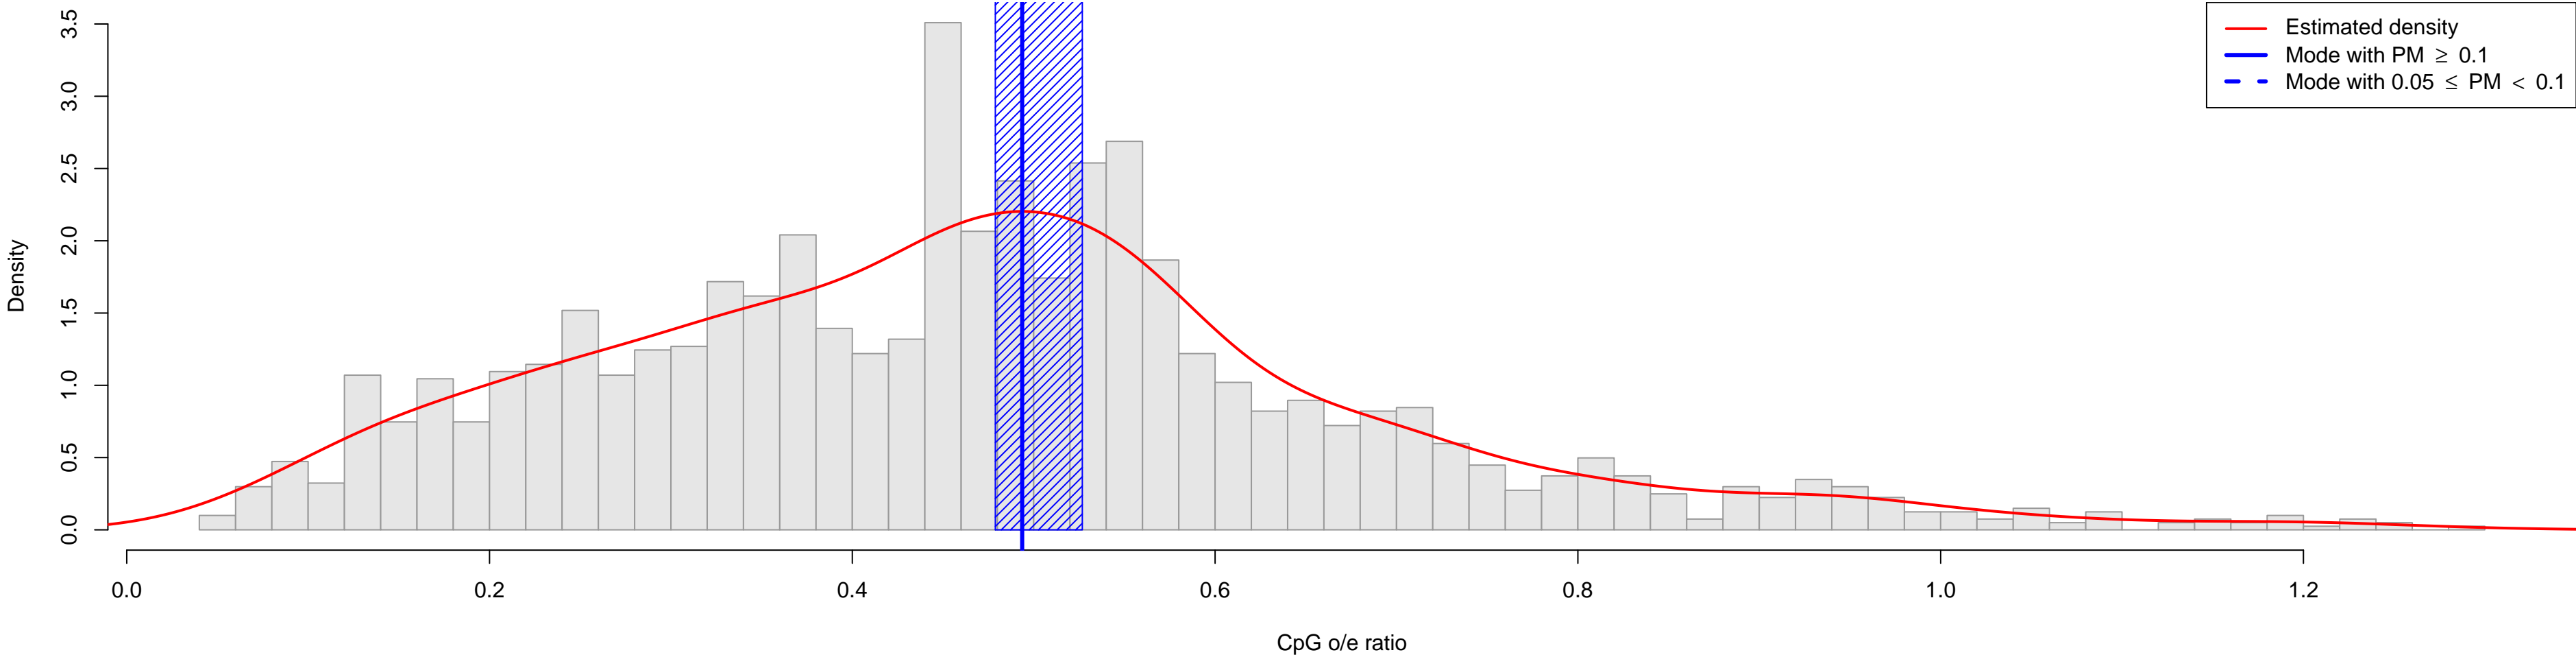

# Hypocrea\_lixii

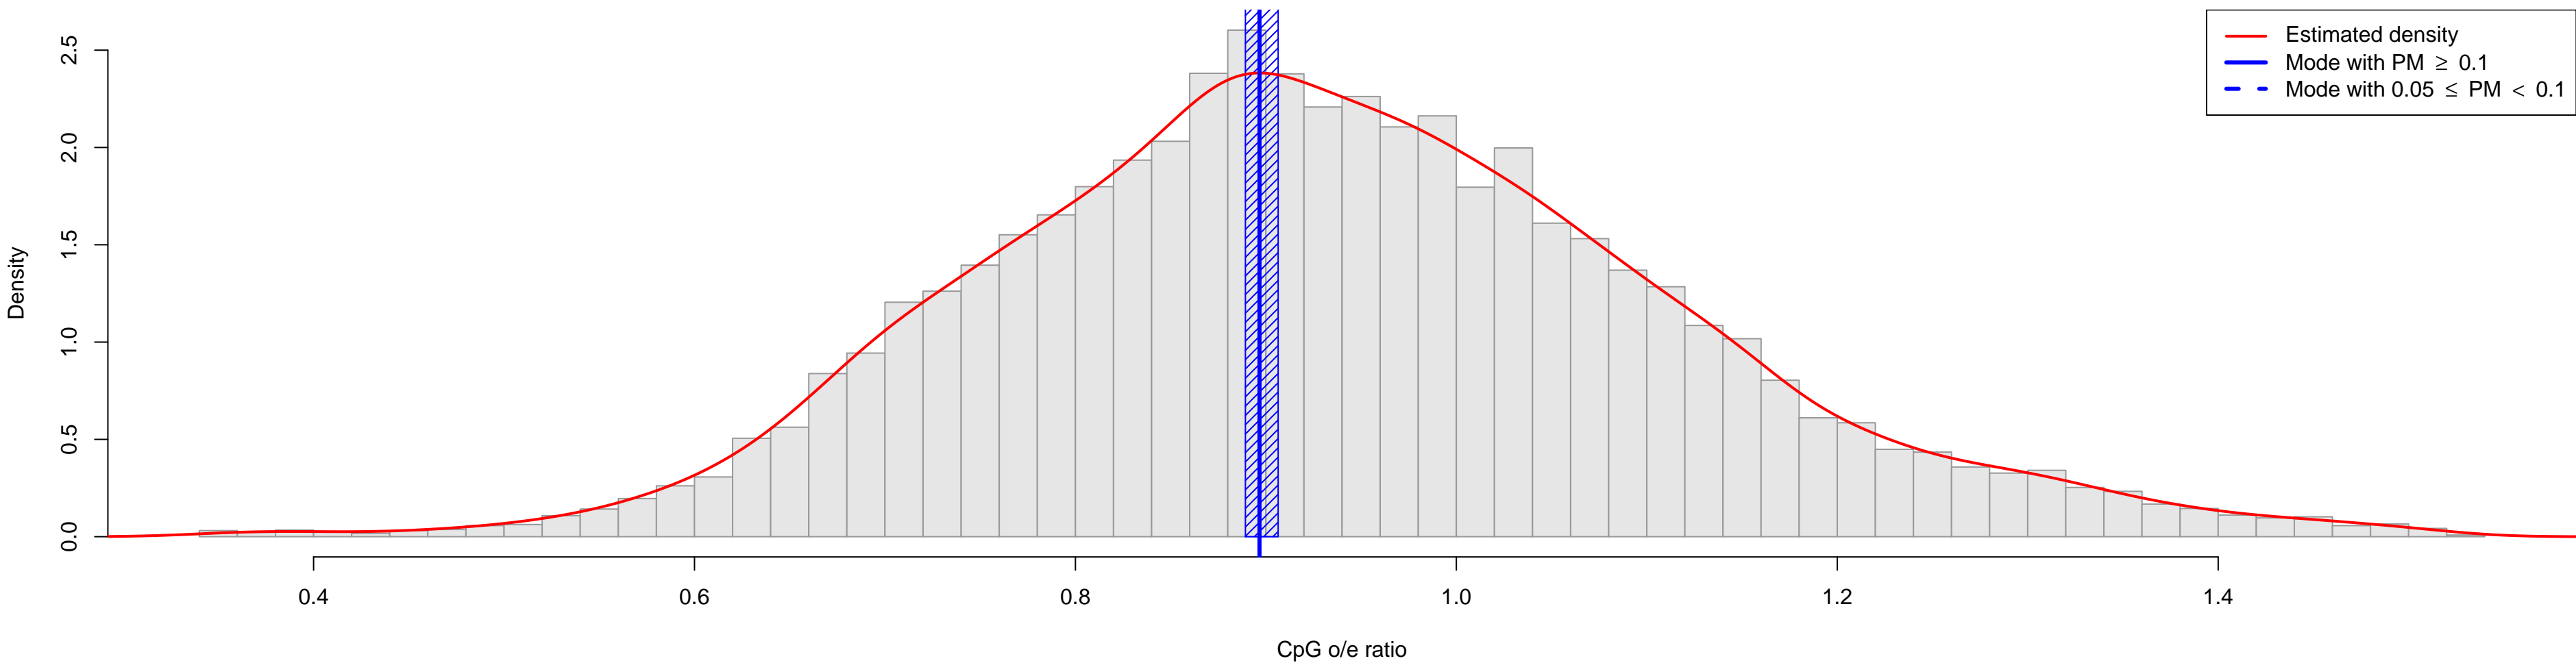

# Hypocrea\_virens

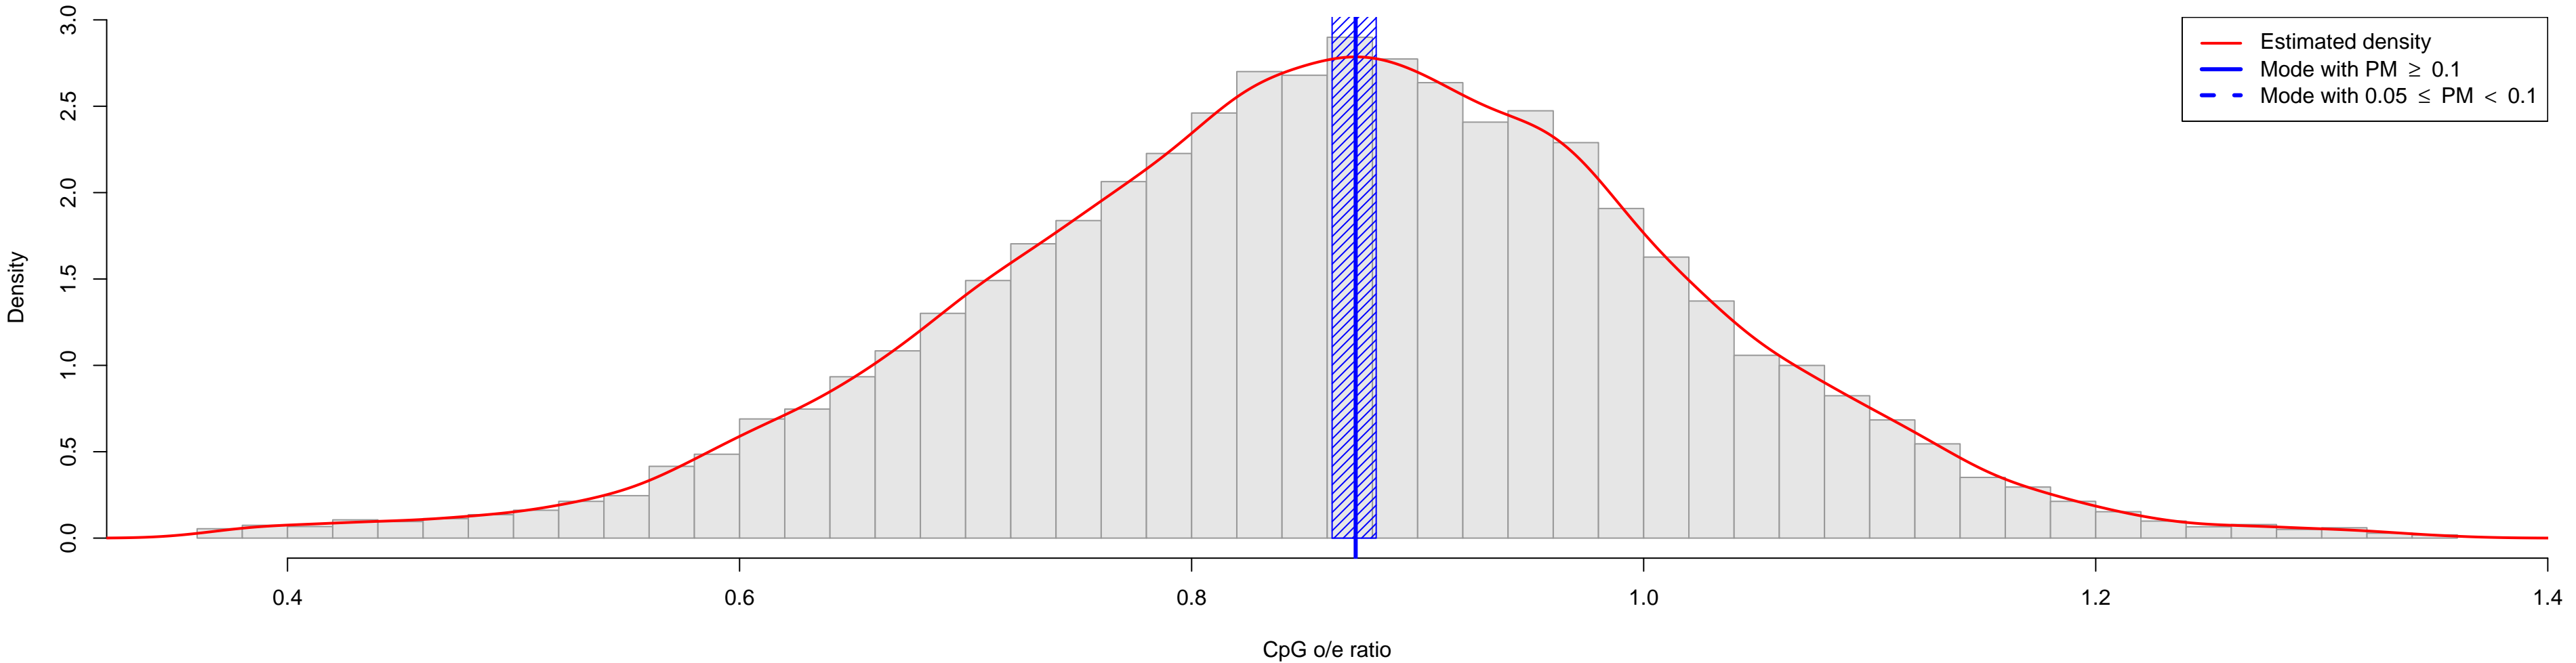

# Hyriopsis\_cumingii

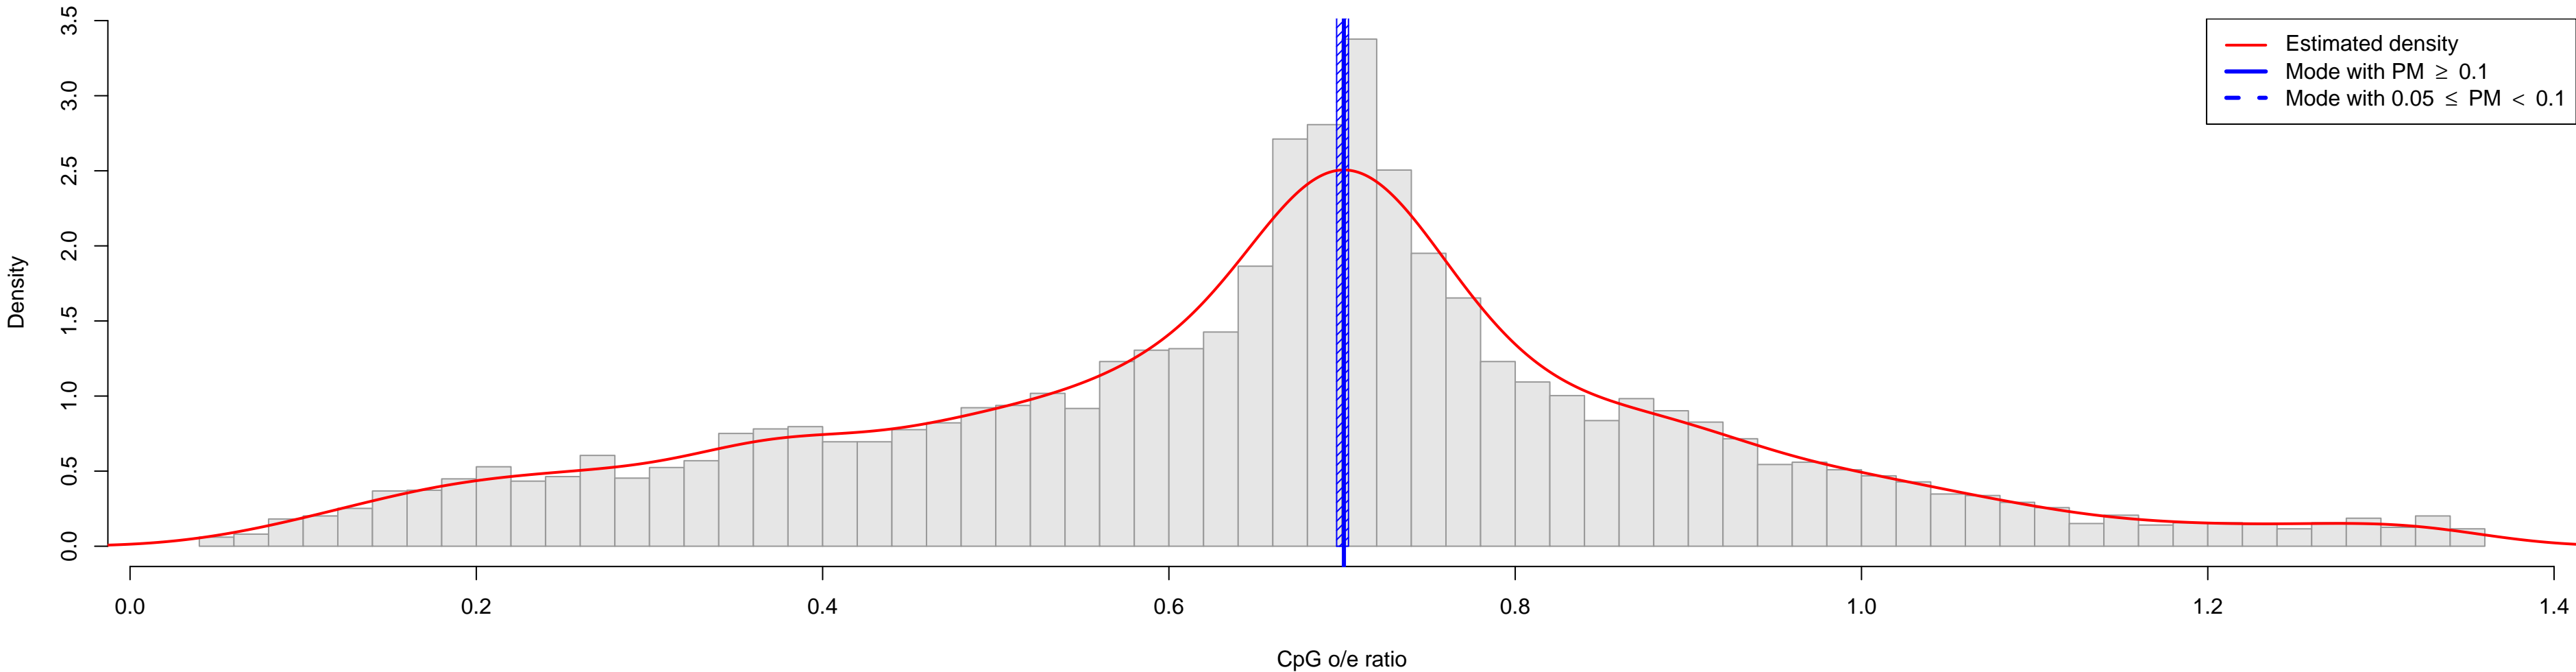

# Ictalurus\_furcatus

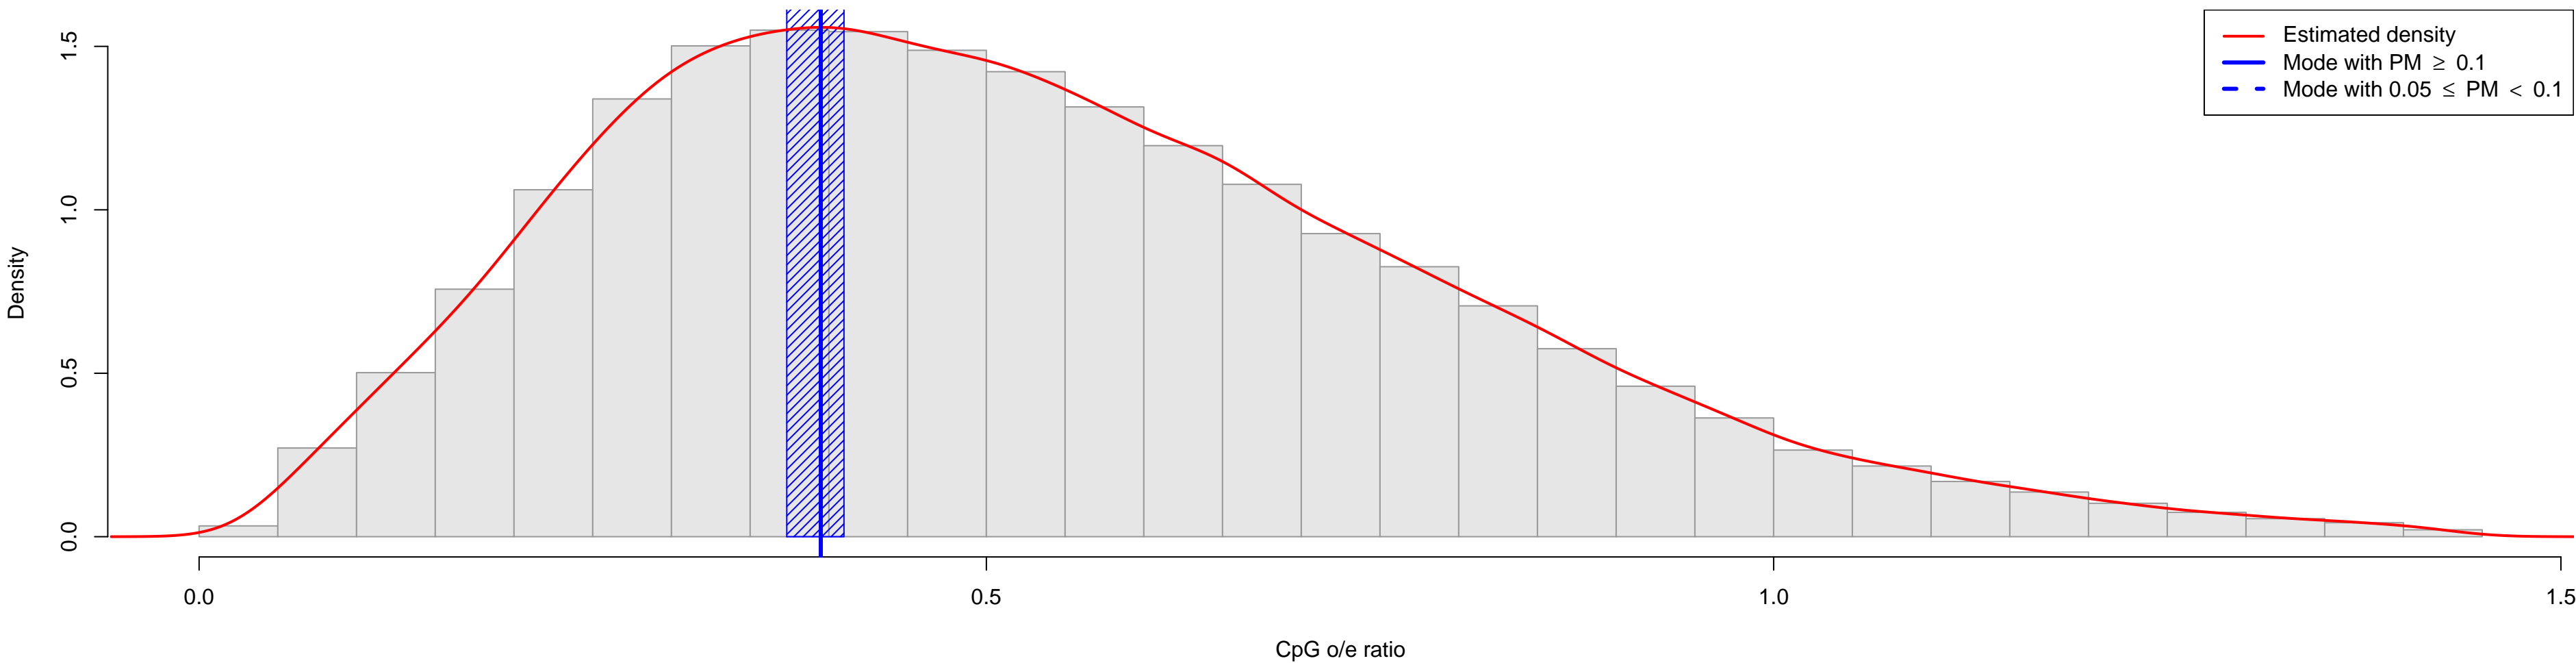

# Ictalurus\_punctatus

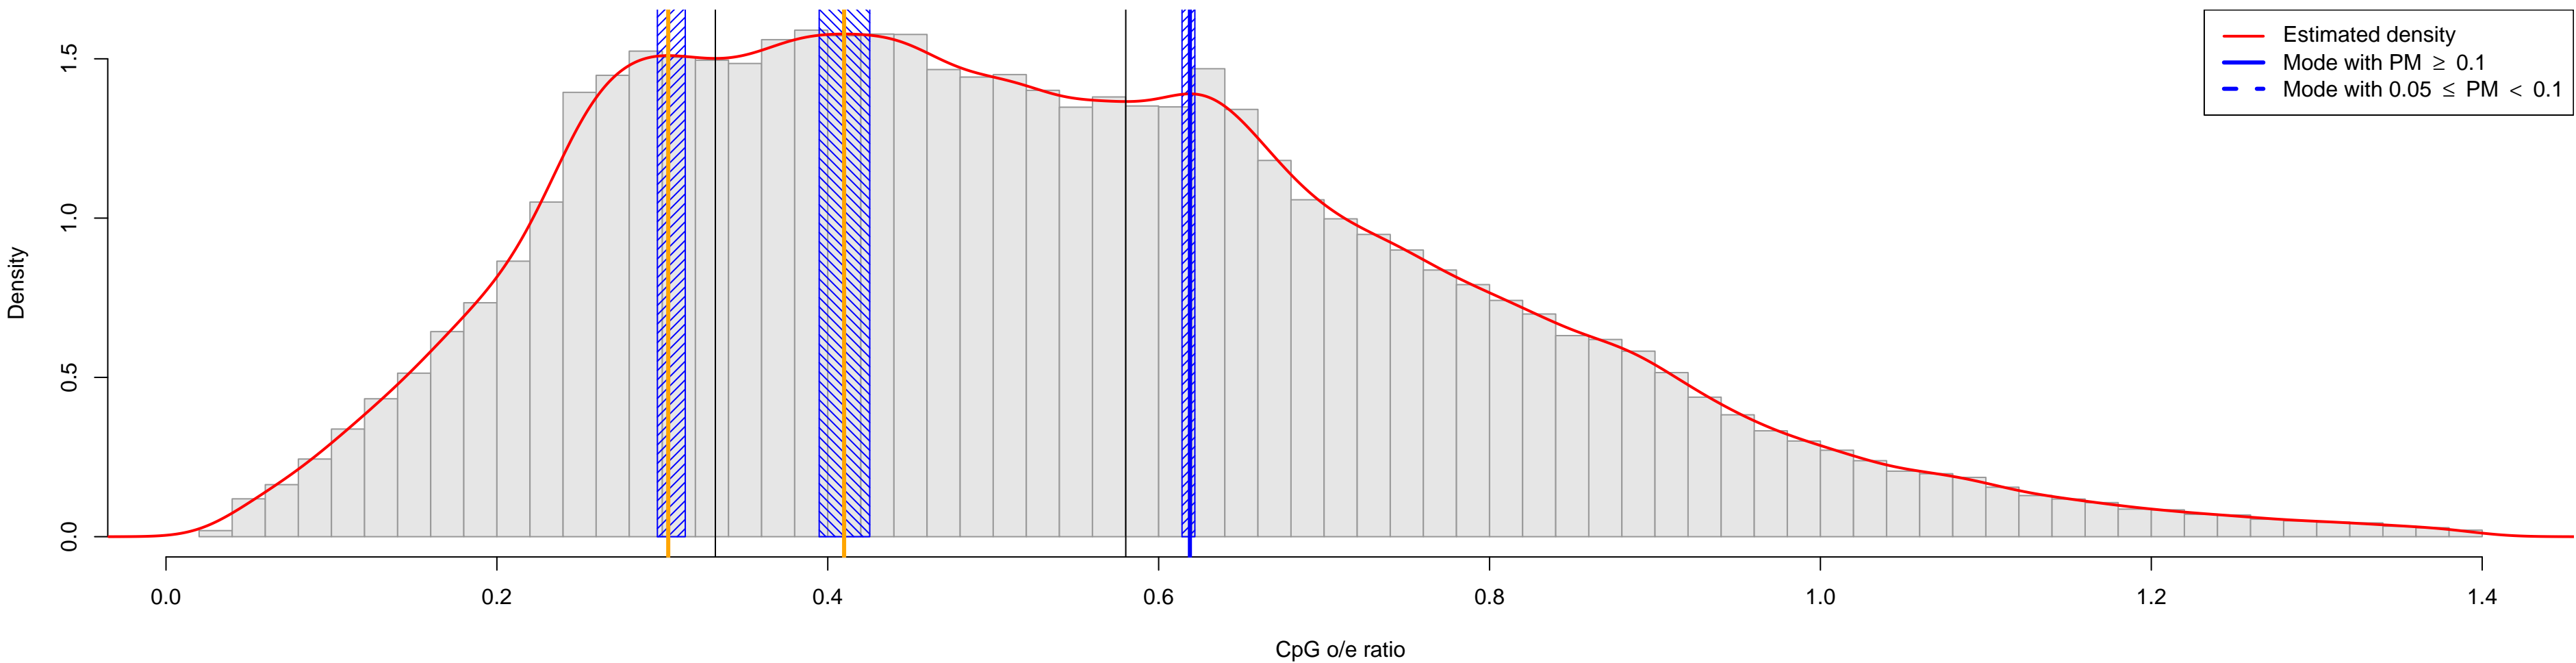



# Ipomoea\_batatas

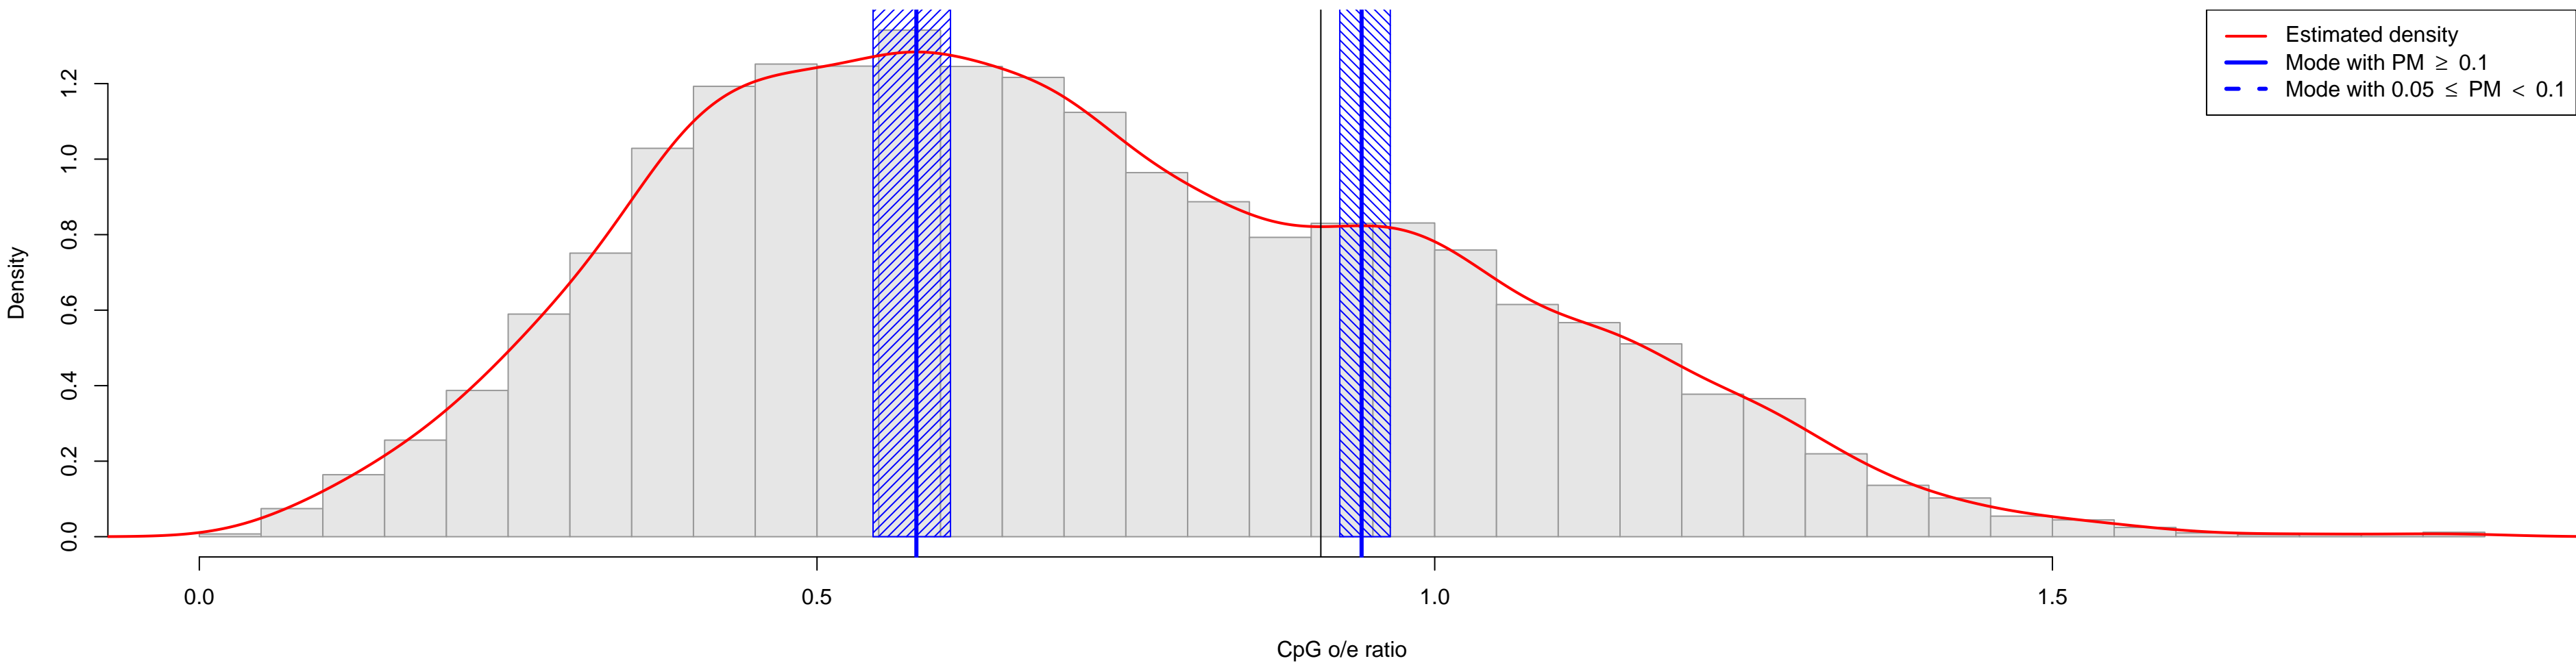

# Ischnura\_elegans

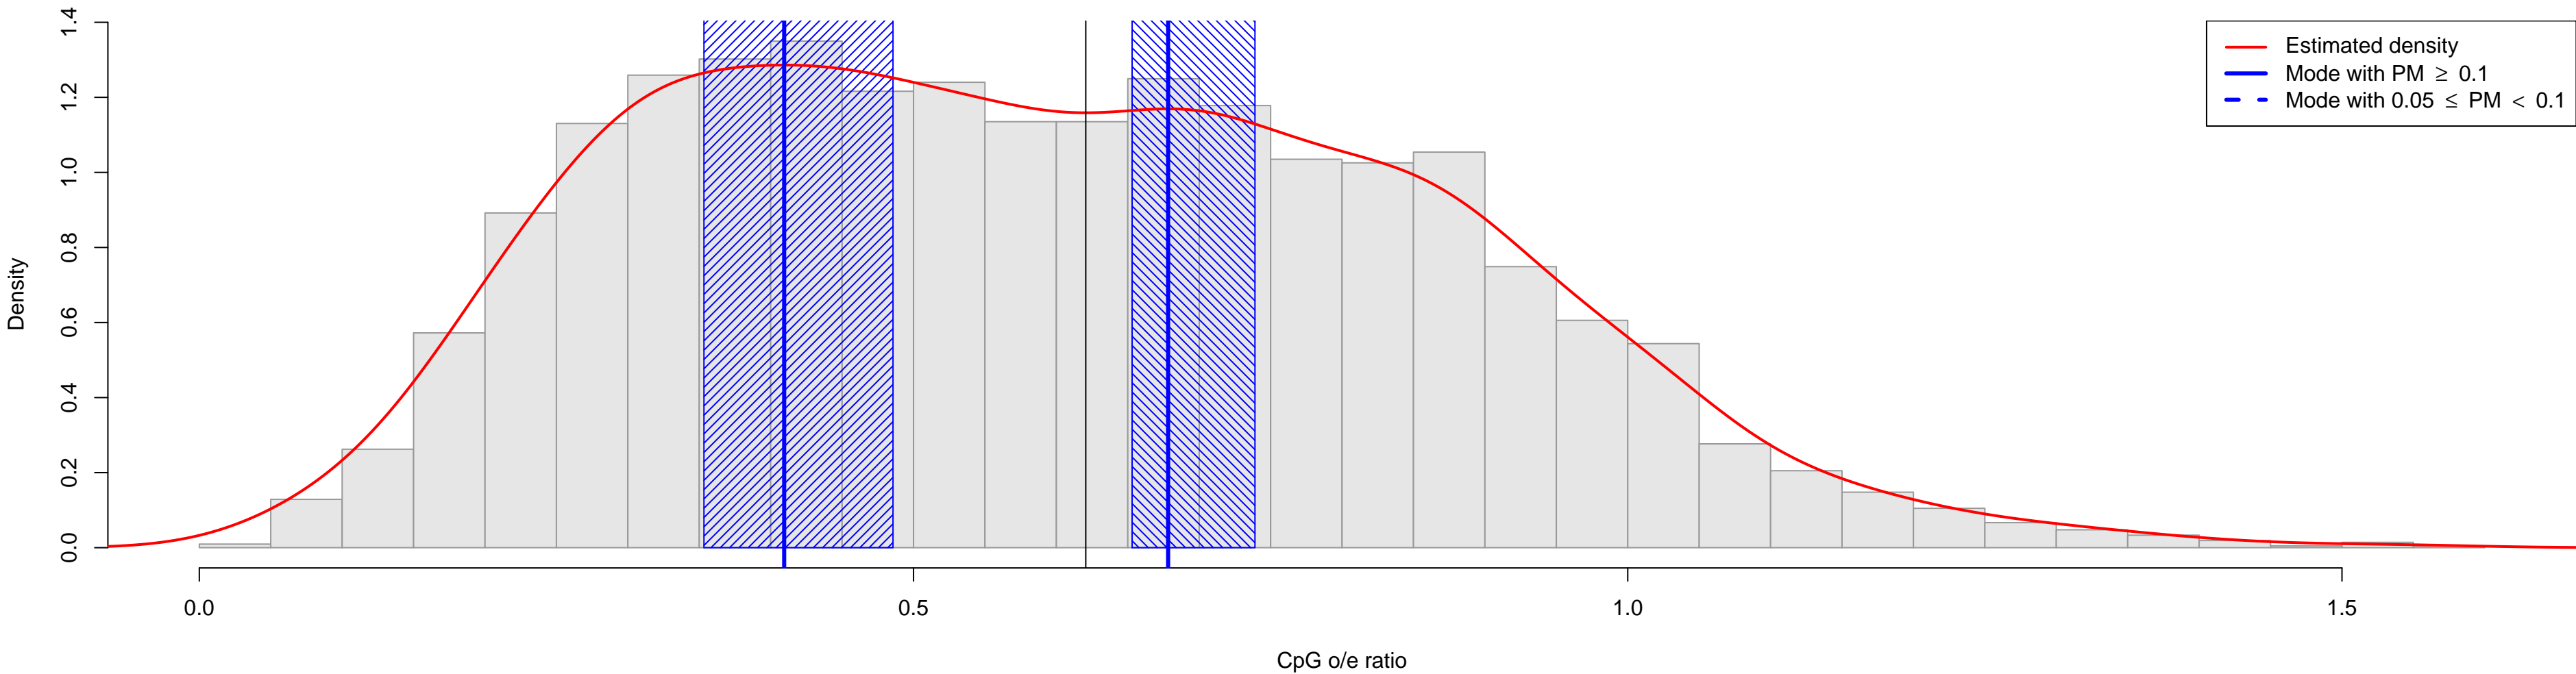

# Ixodes\_ricinus

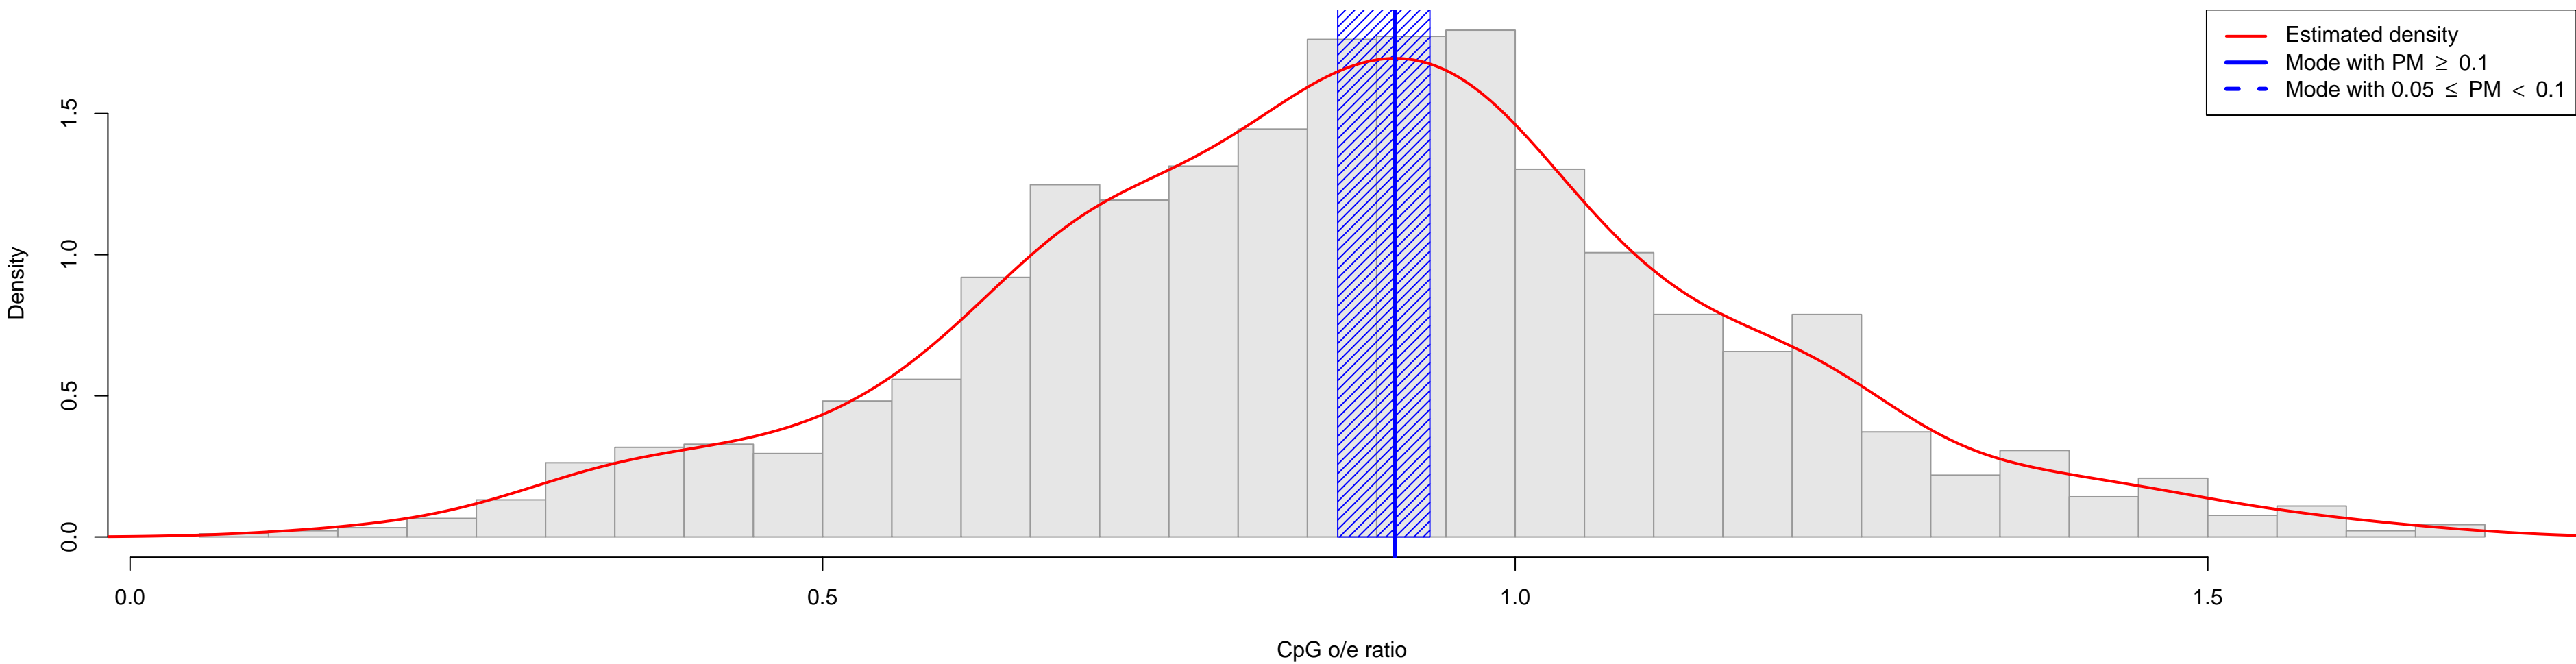

# Ixodes\_scapularis

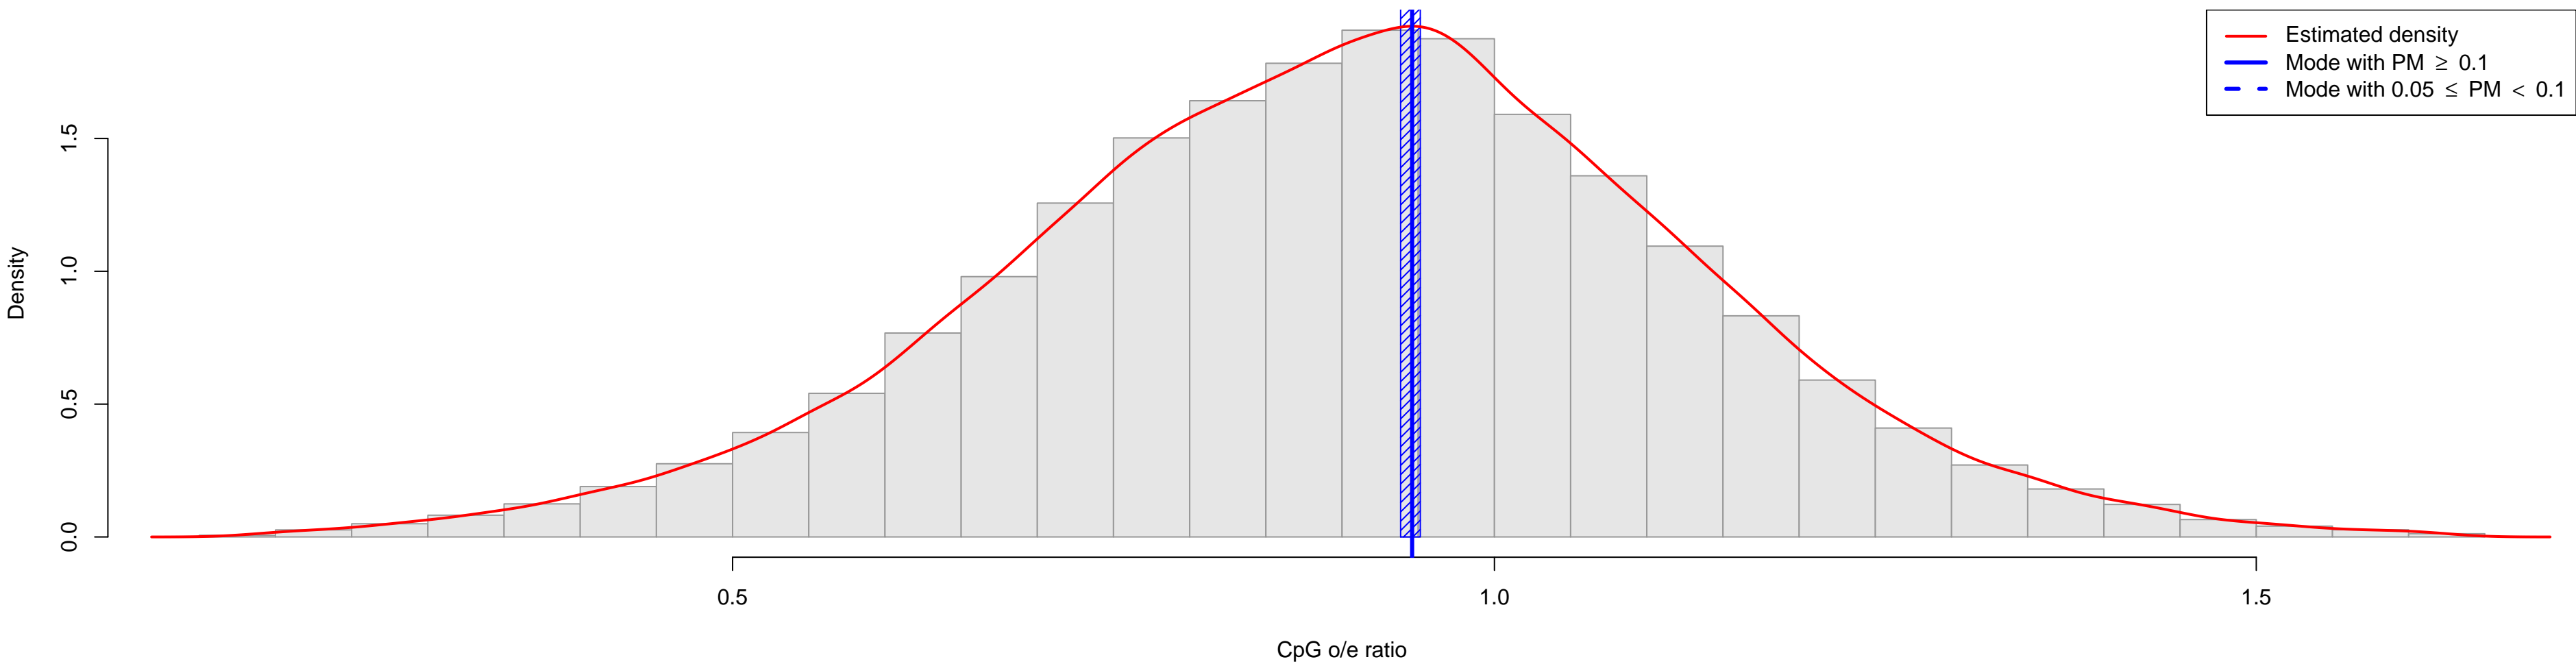

# Jakoba\_bahamiensis

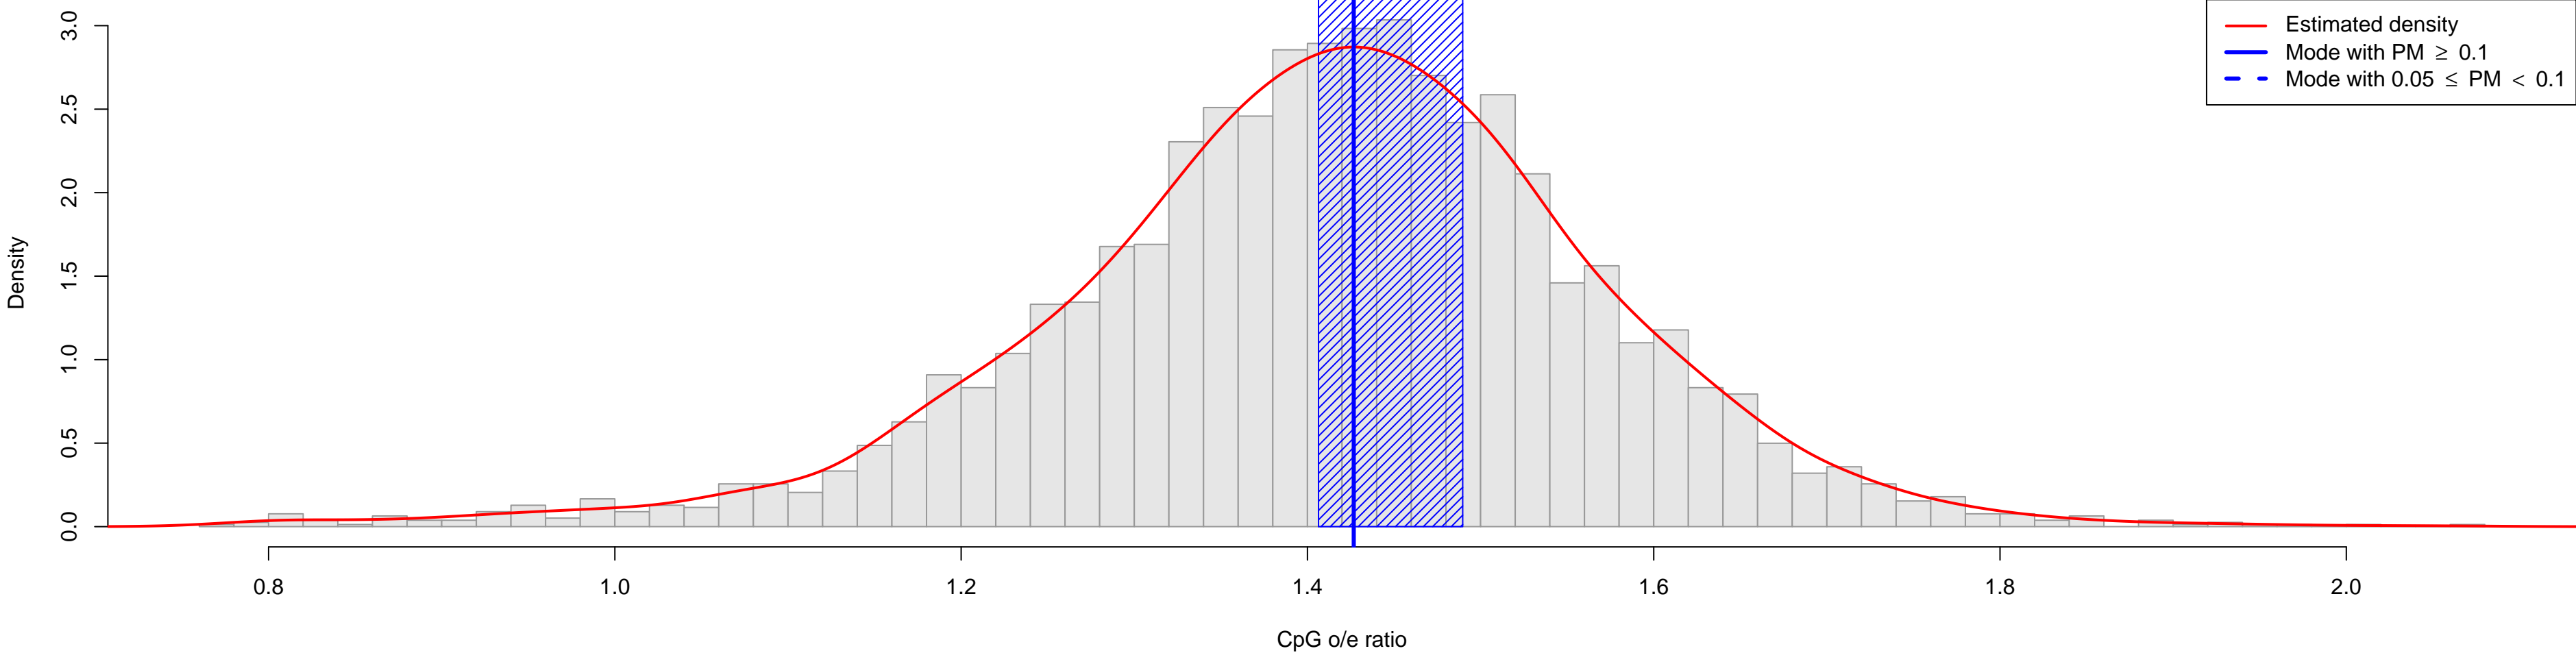

# Jakoba\_libera

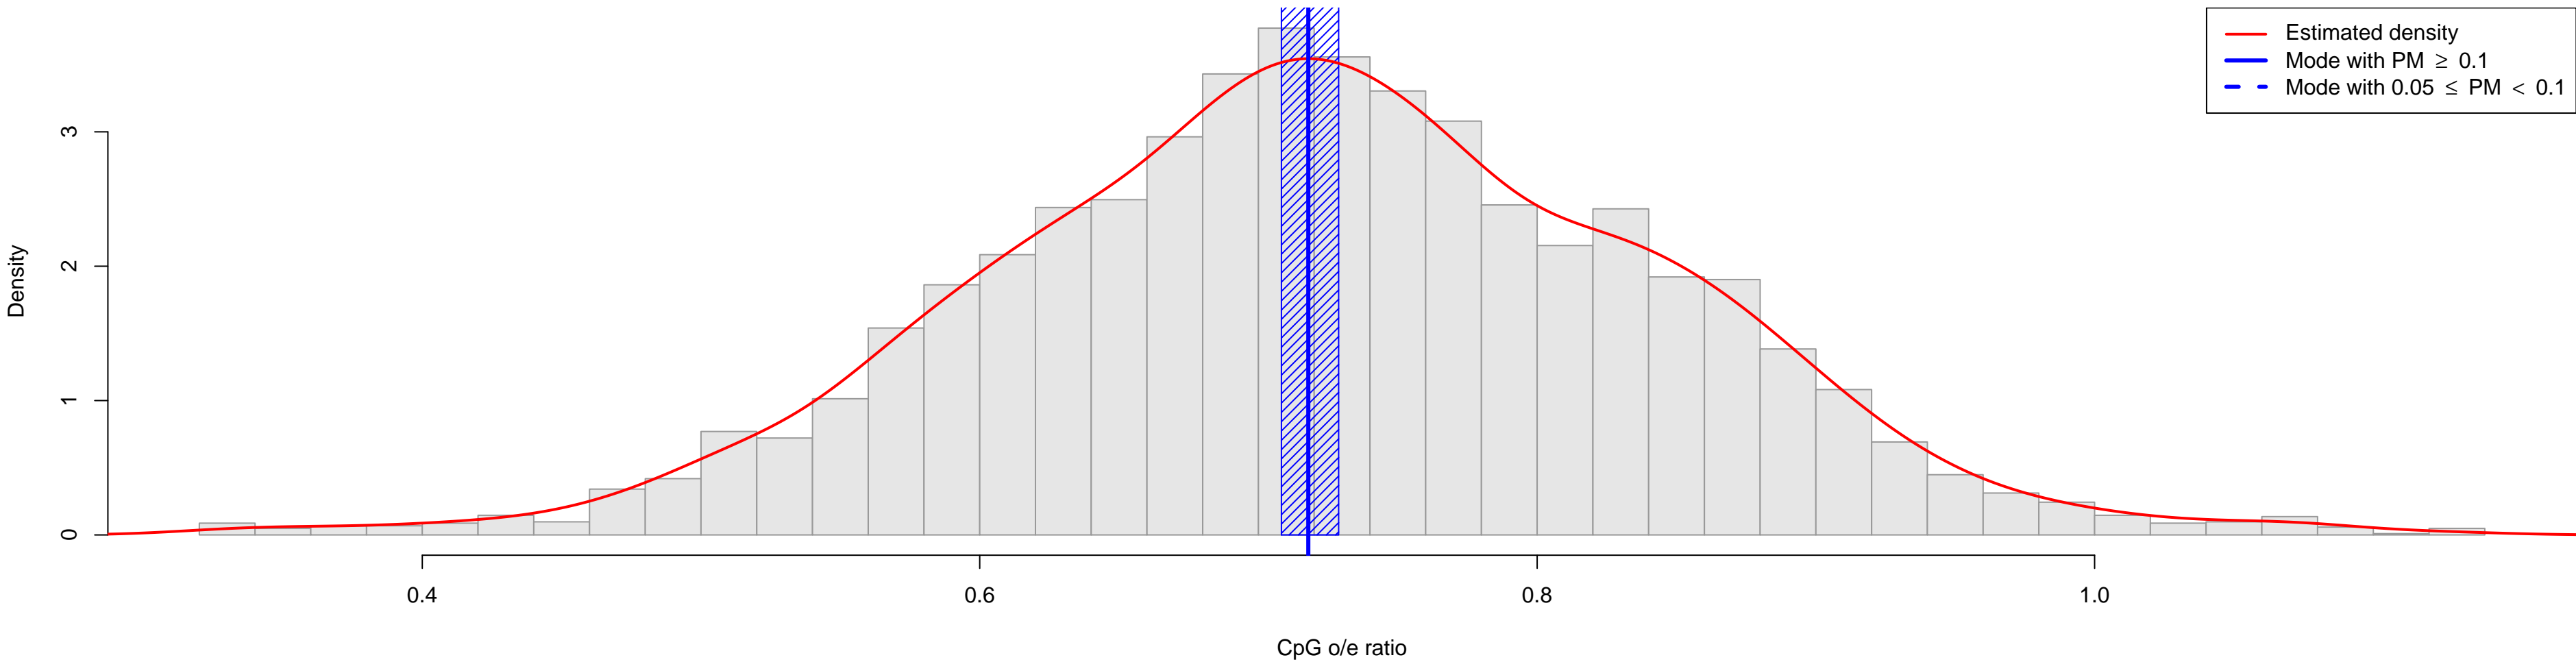

# Jatropha\_curcas

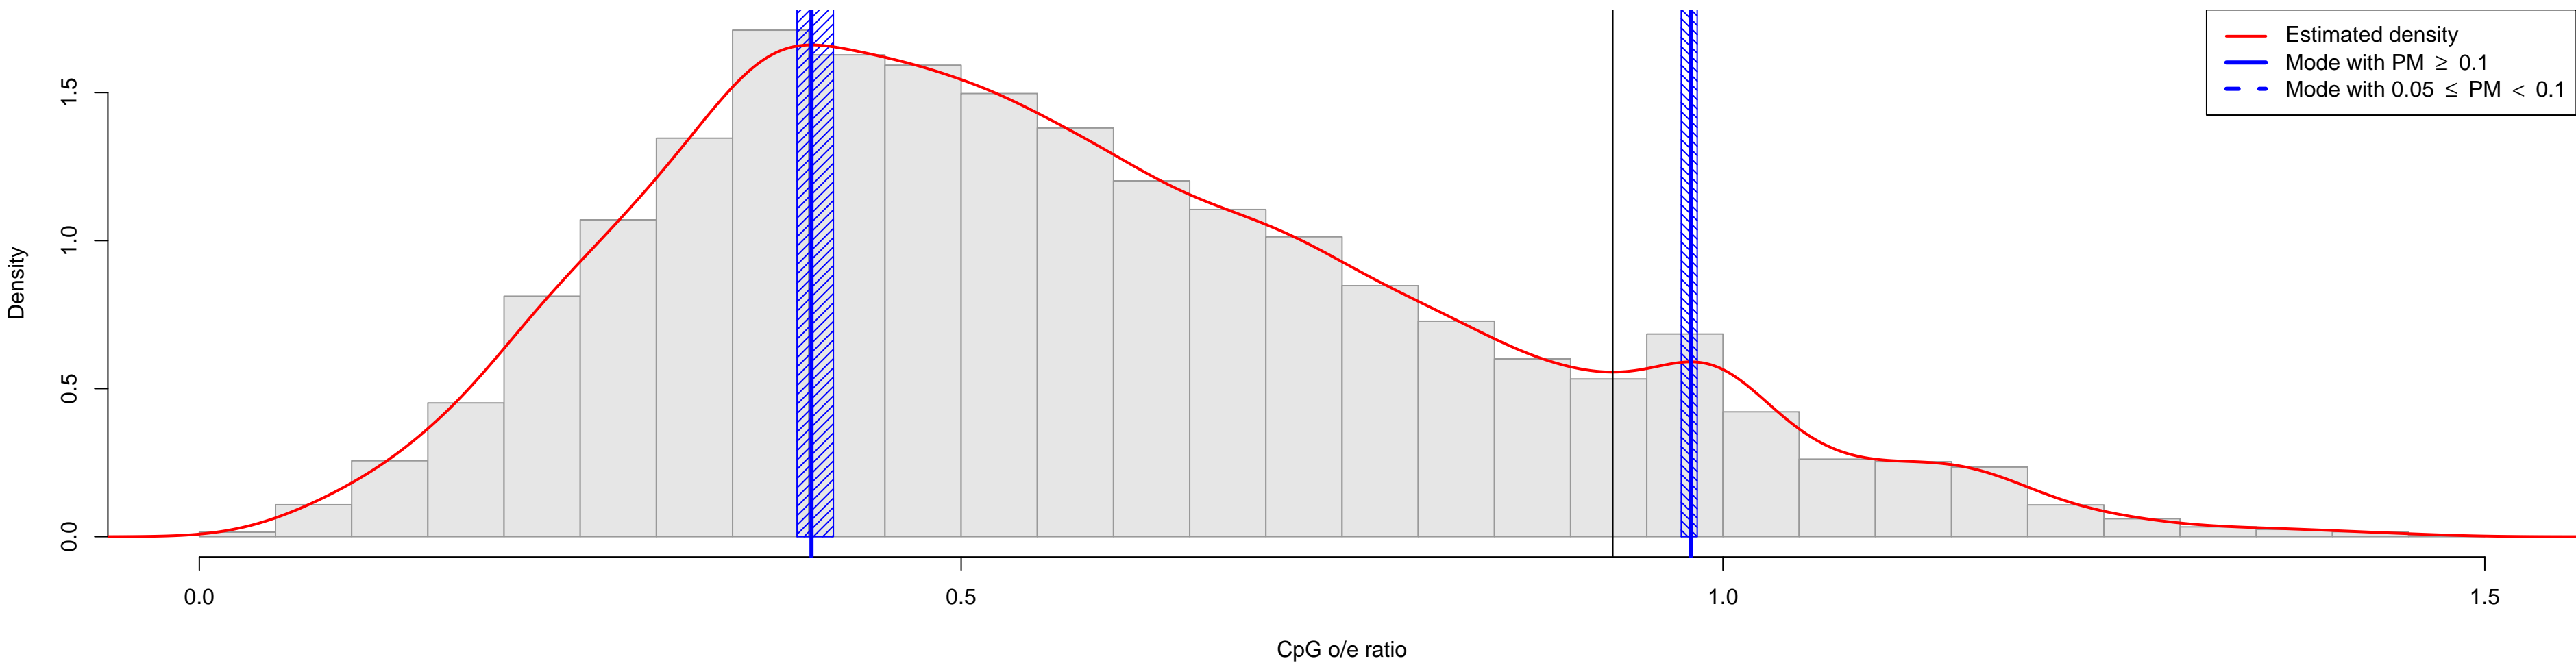

# Labeo\_rohita

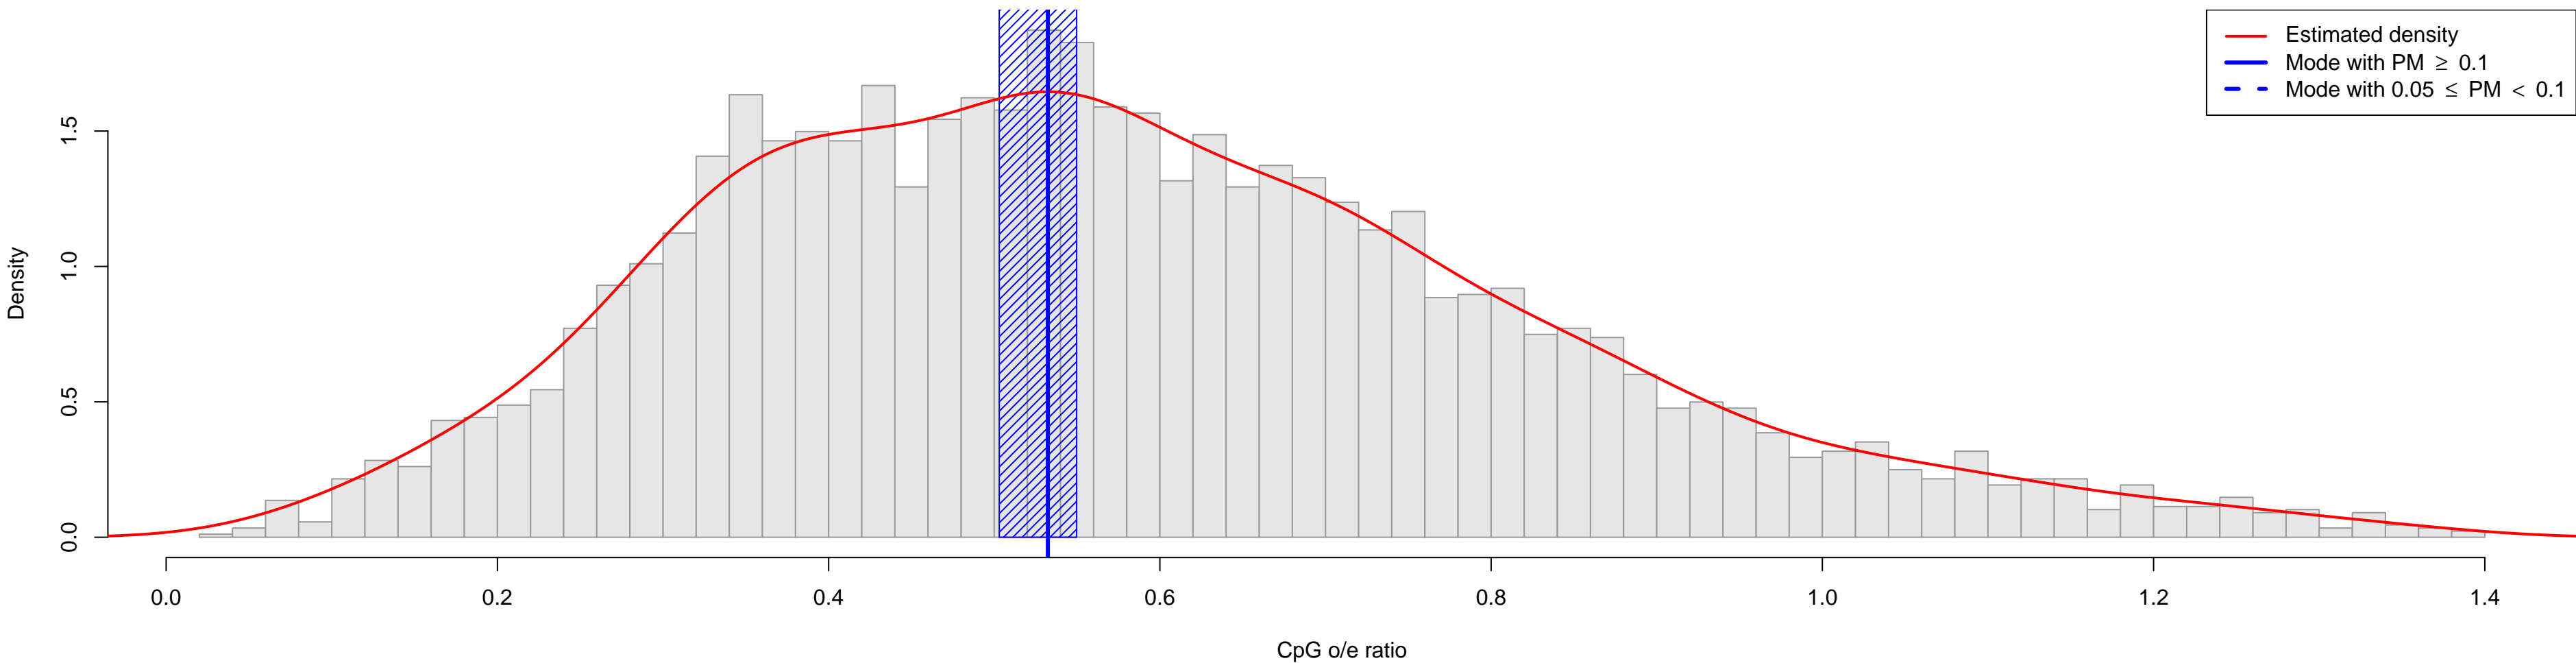



# Lagopus\_lagopus\_scotica

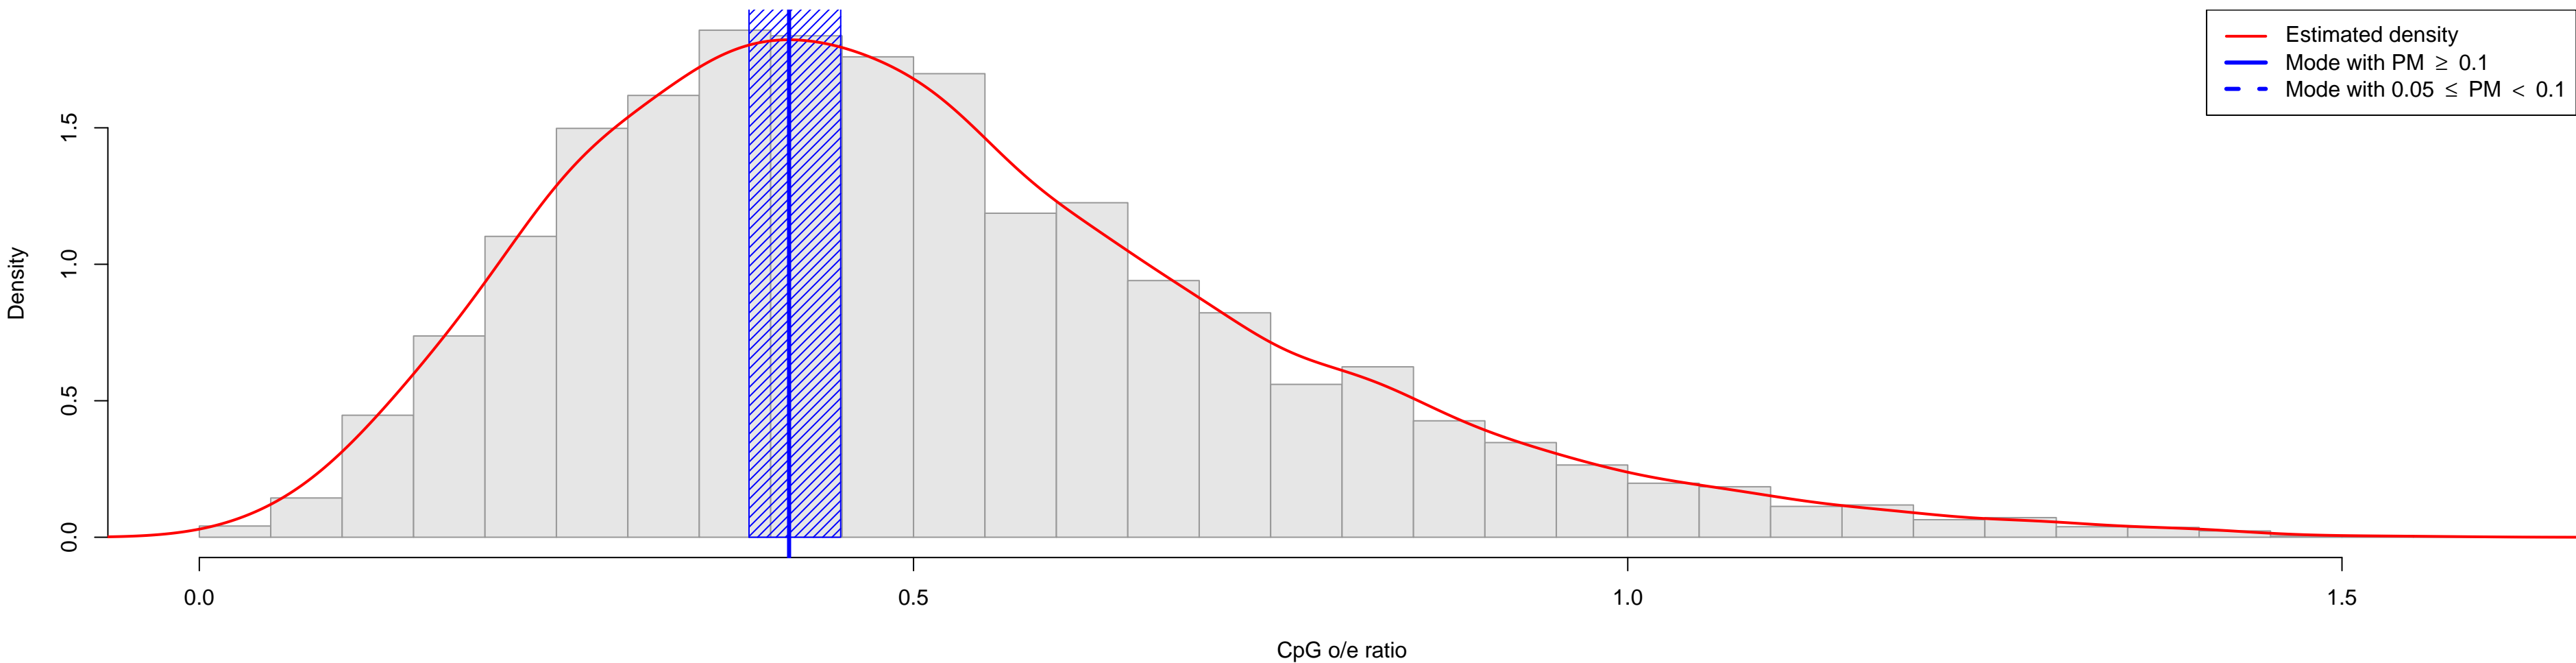

# Lama\_pacos

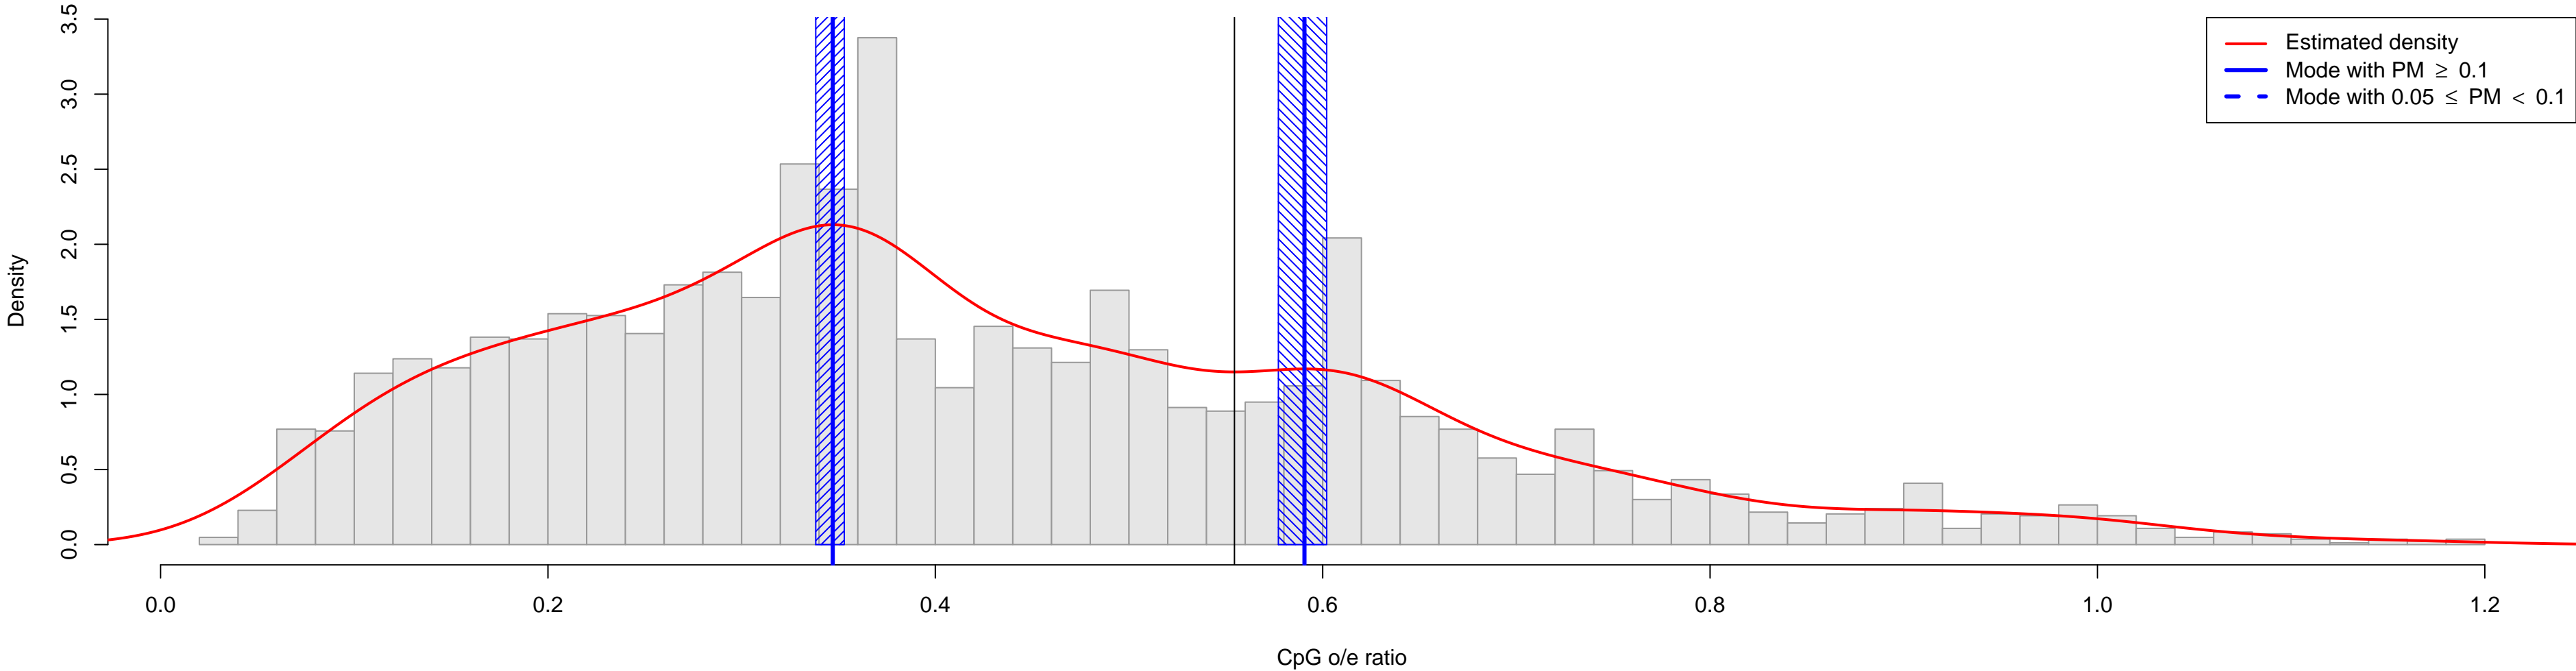

# Laminaria\_digitata

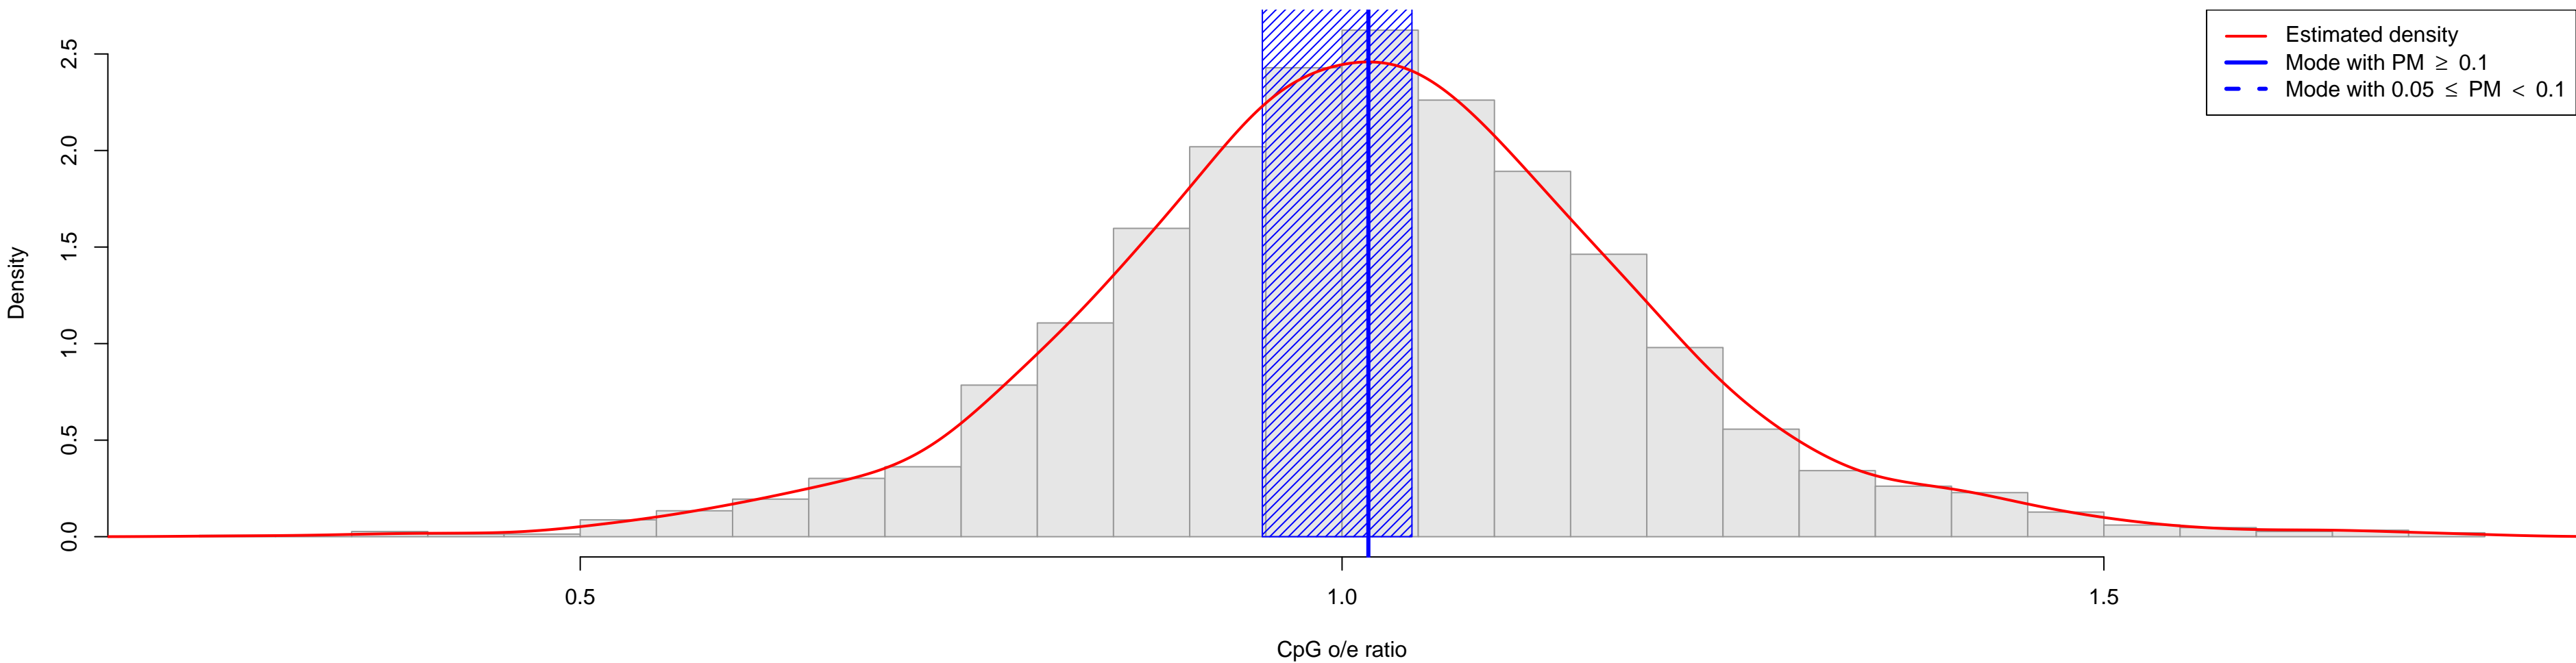

# Larimichthys\_crocea

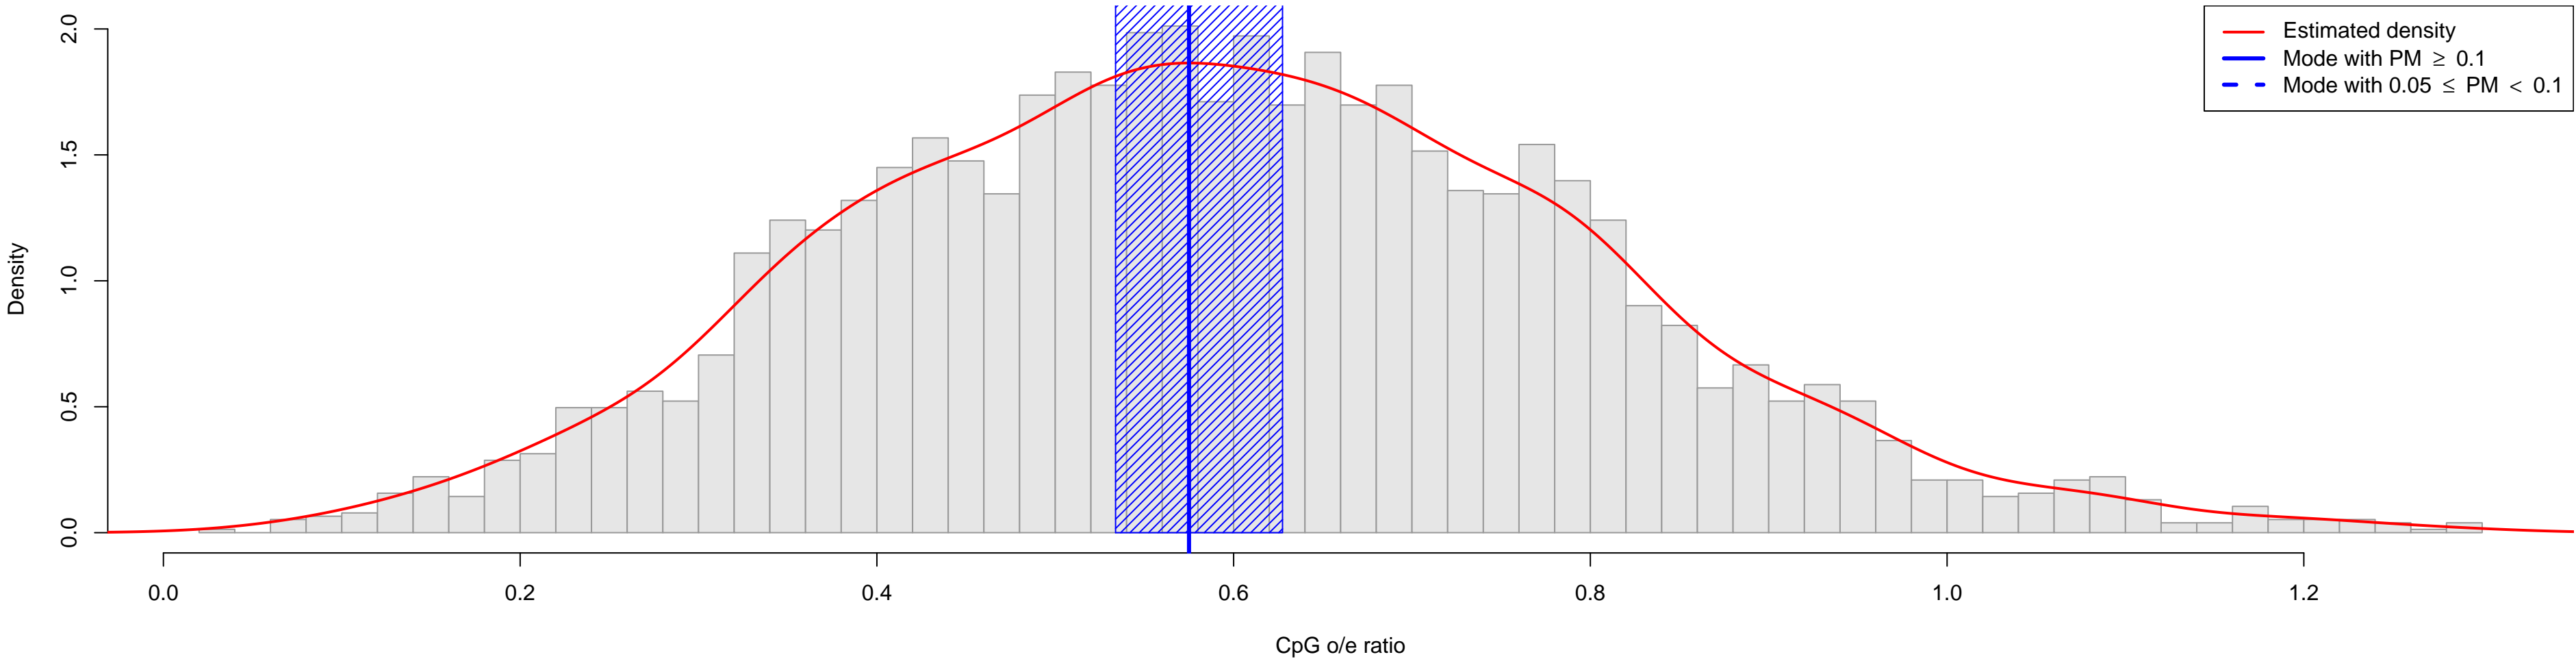

# Lates\_calcarifer

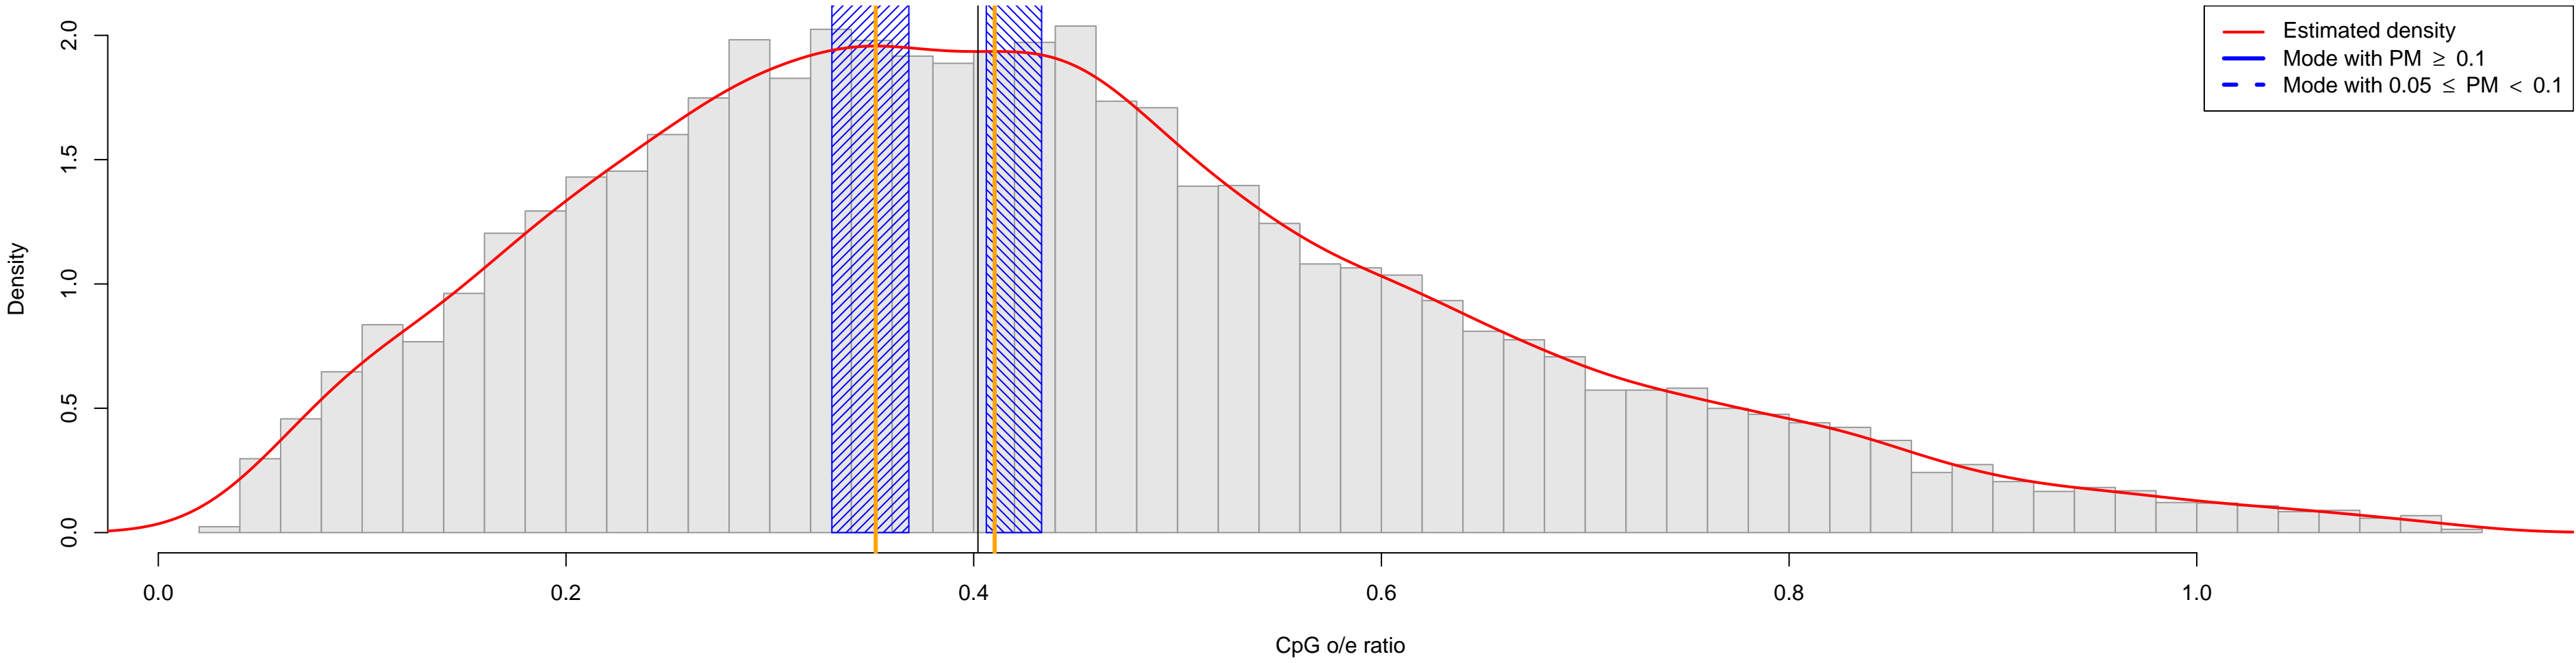

# Lathyrus\_odoratus

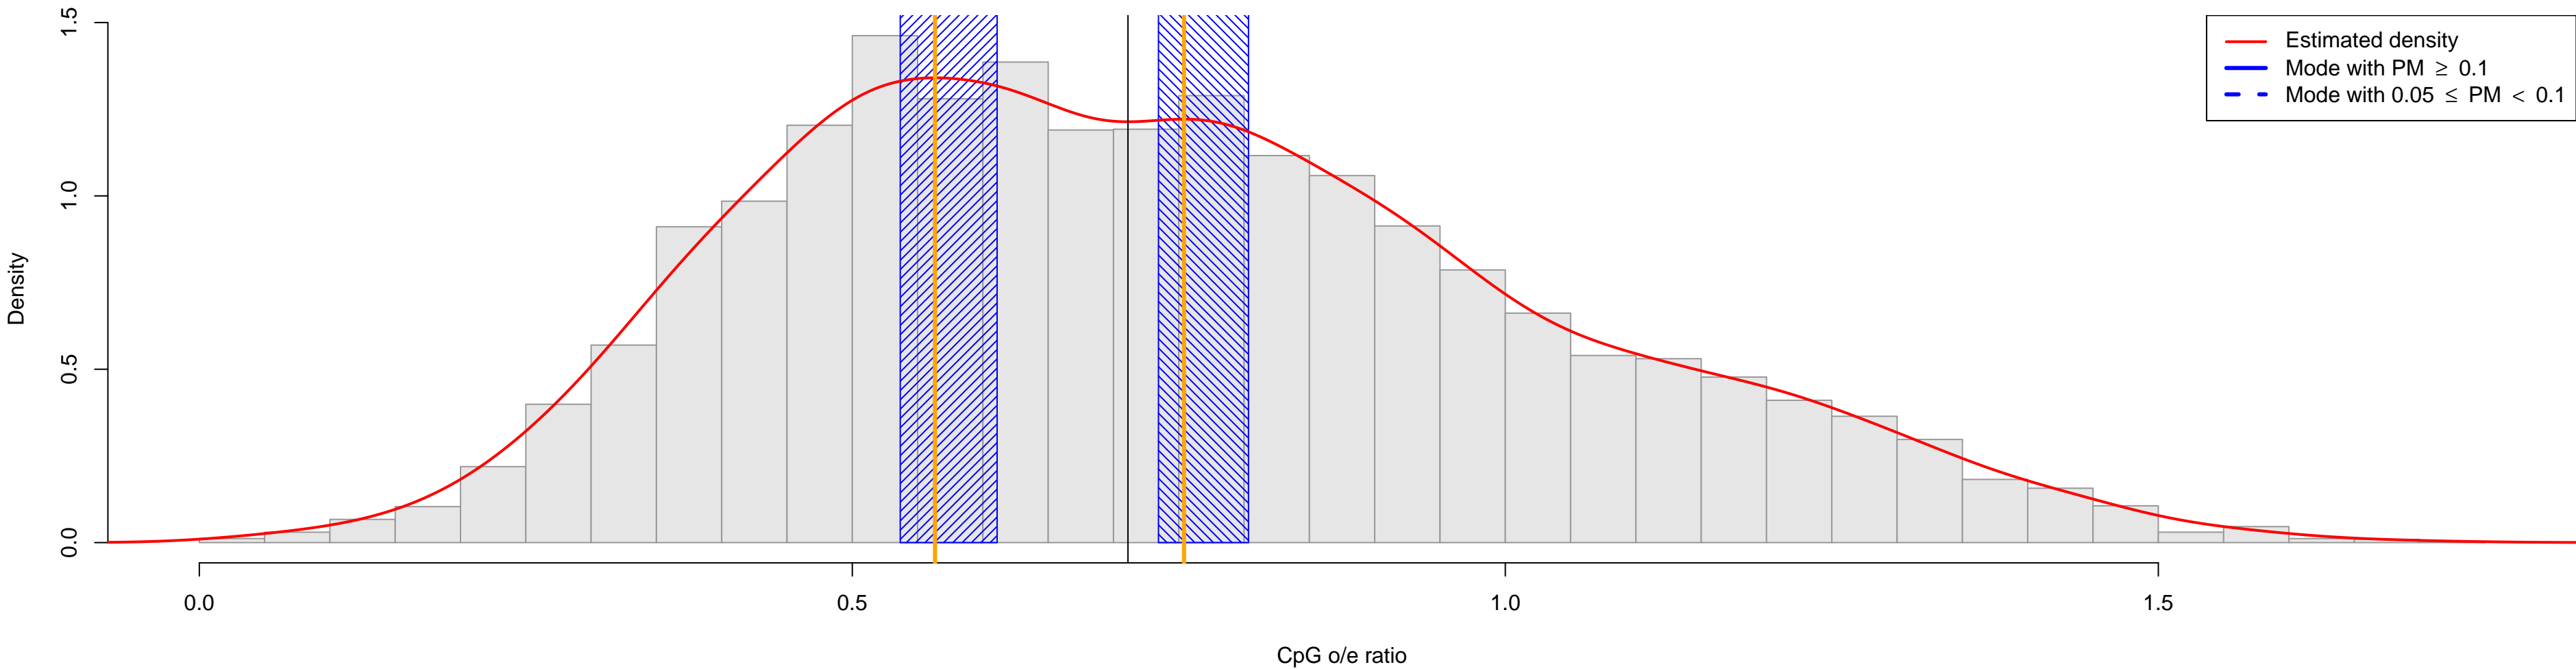

# Laupala\_kohalensis

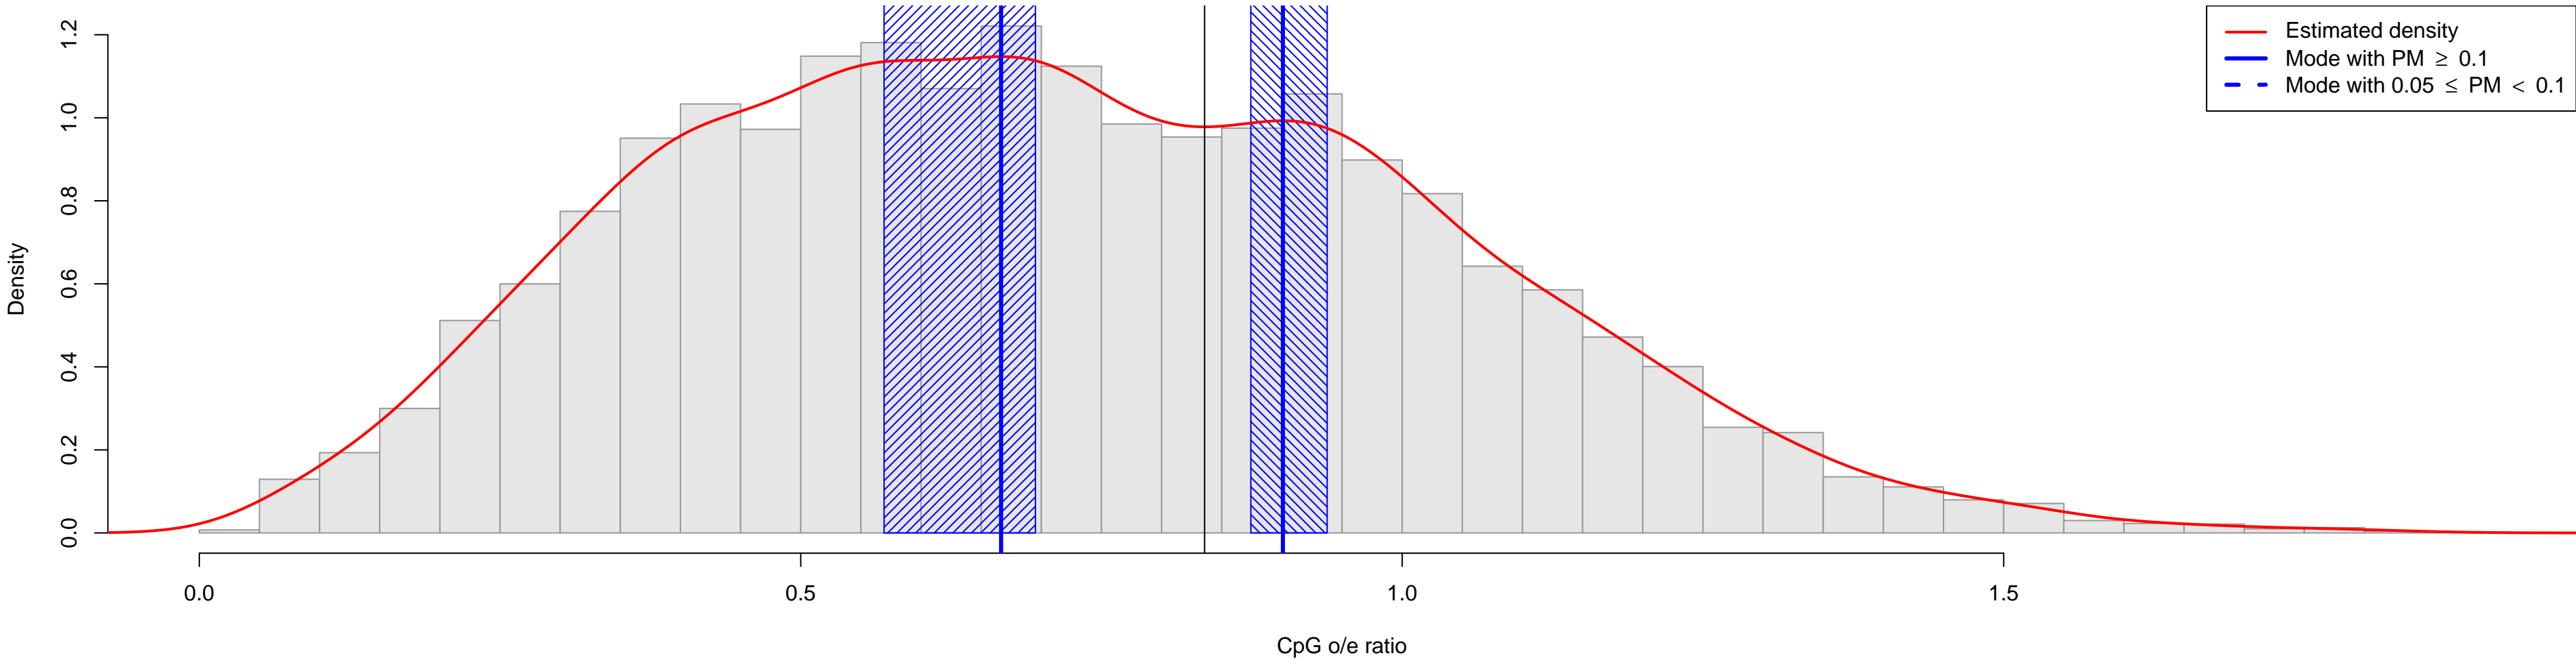

# Leishmania\_chagasi

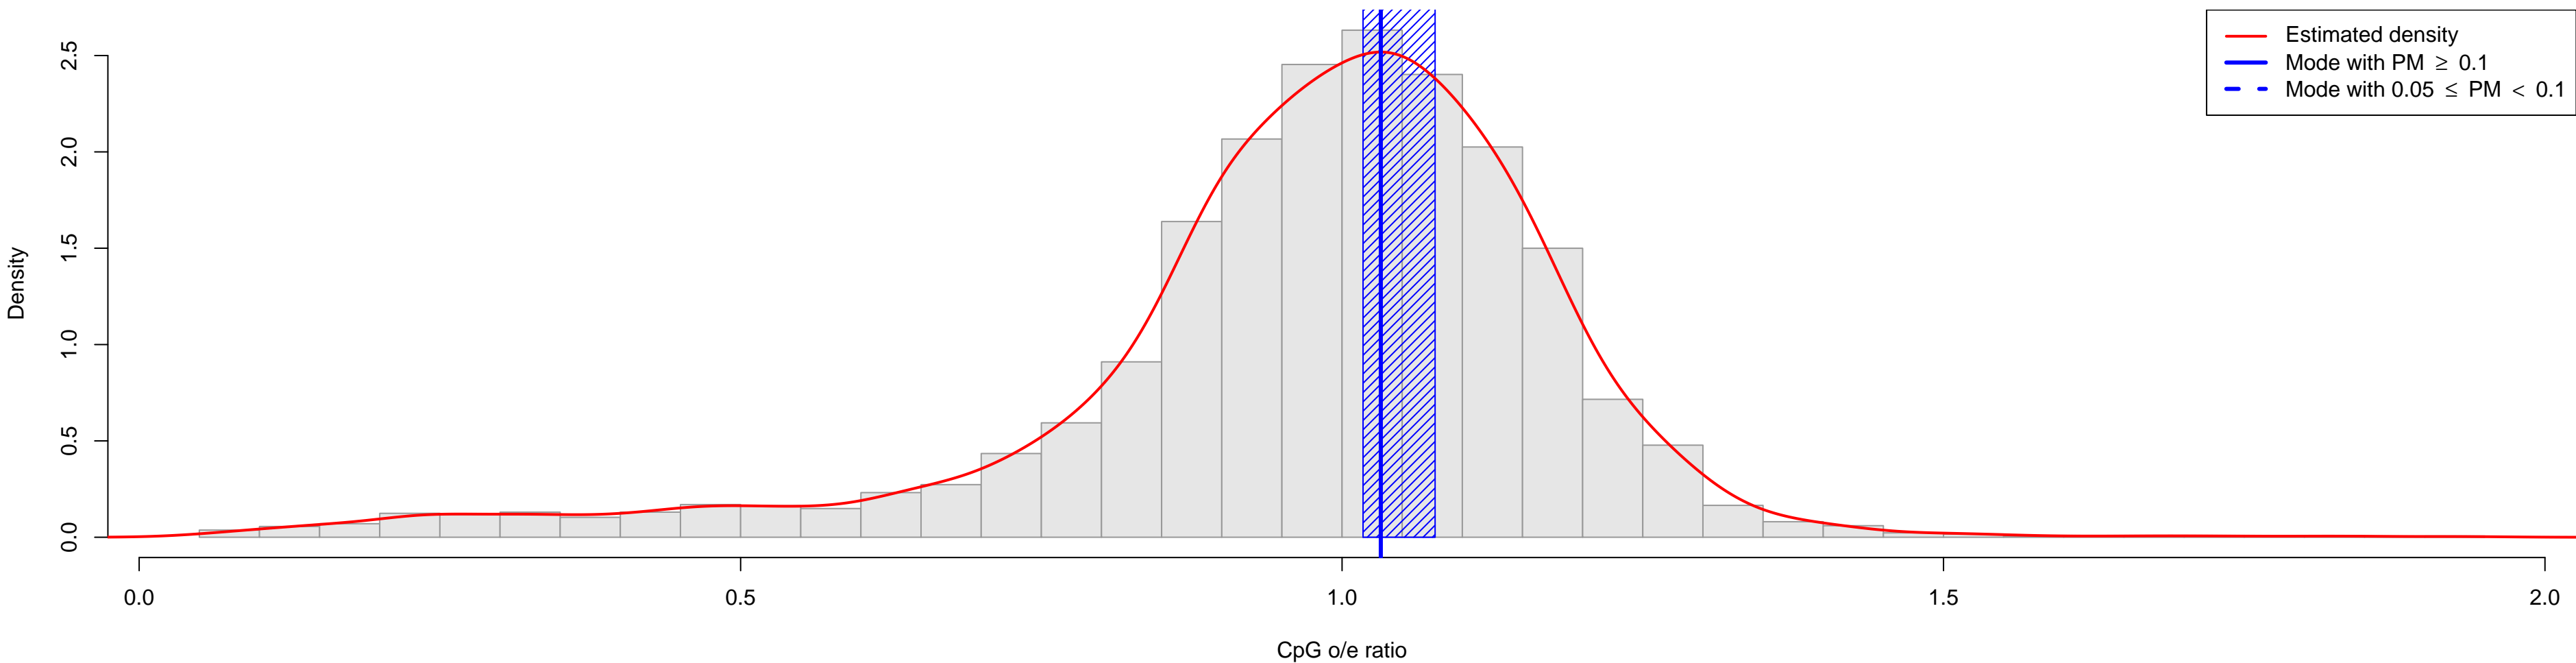



# Leishmania\_major

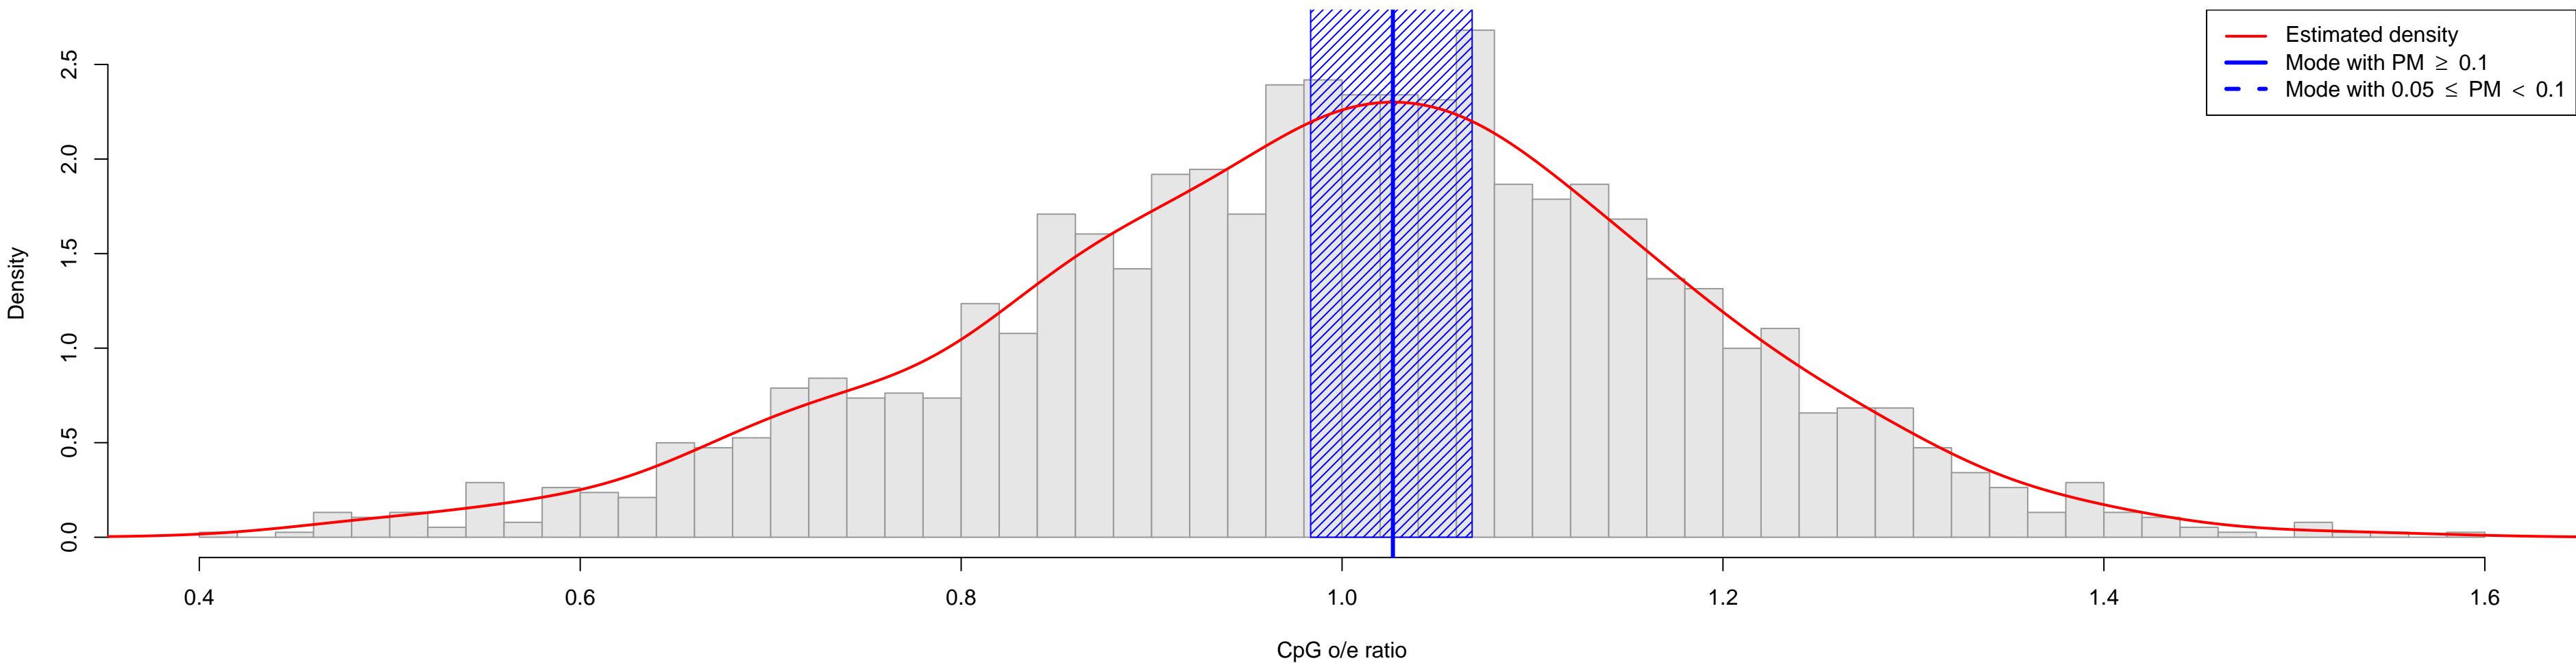

# Lepeophtheirus\_salmonis

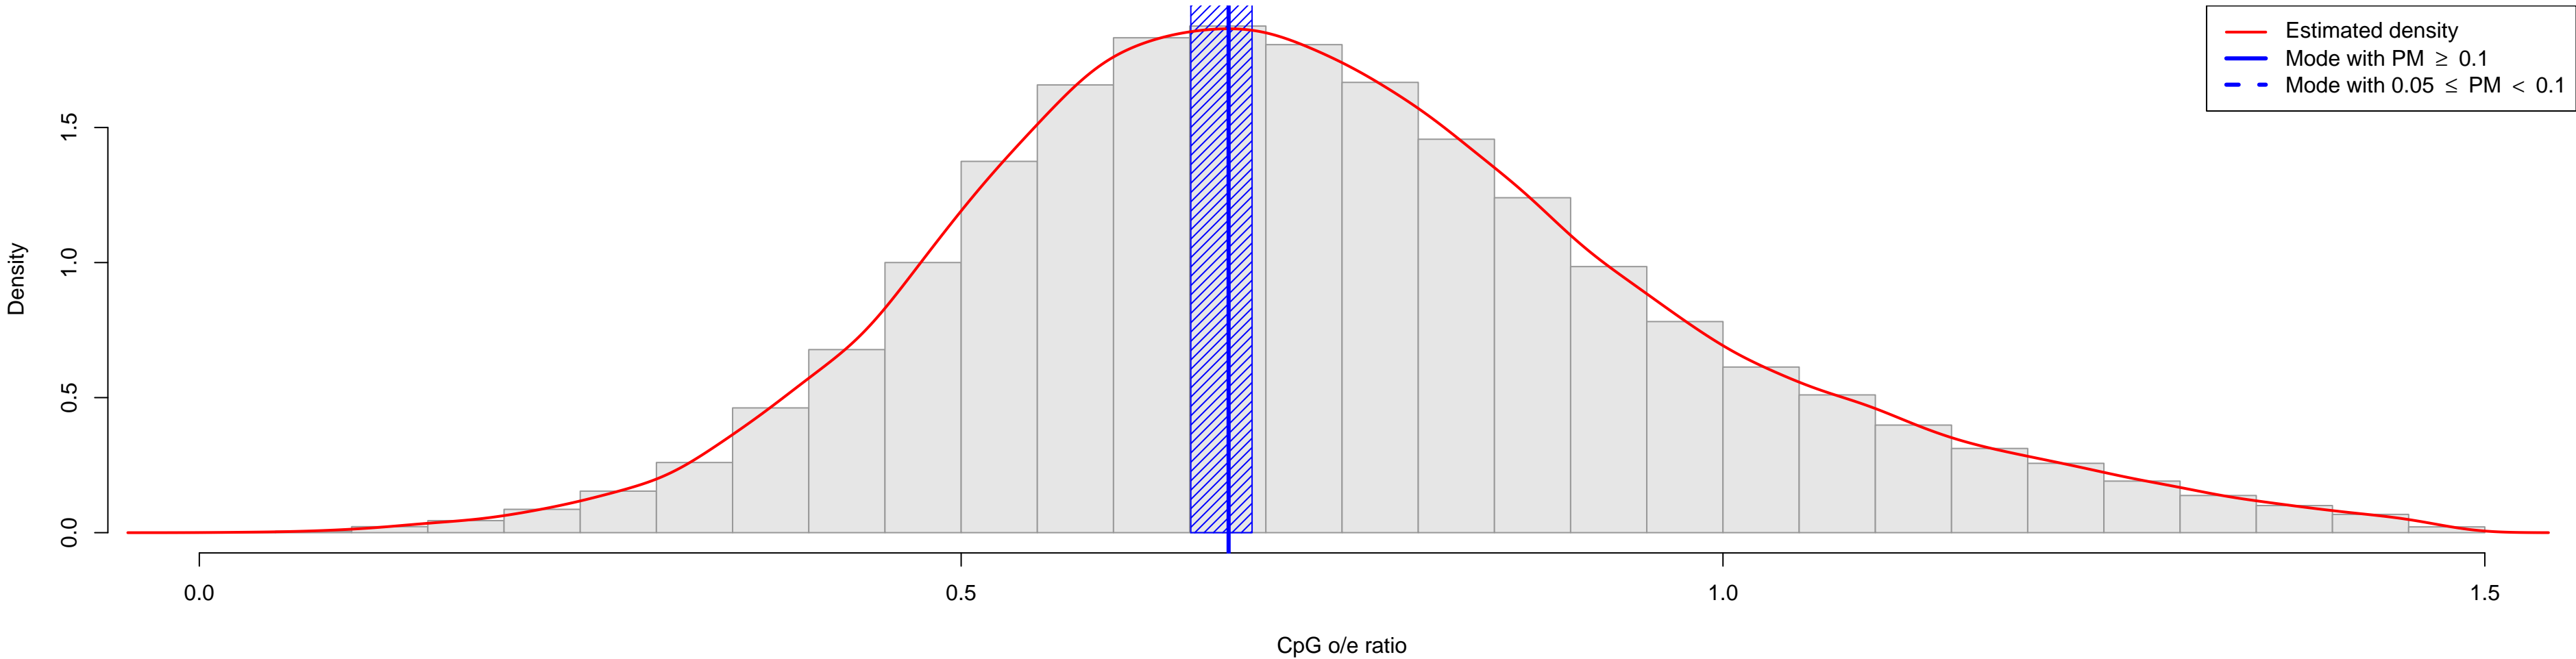

Lepismachilis\_y-signata

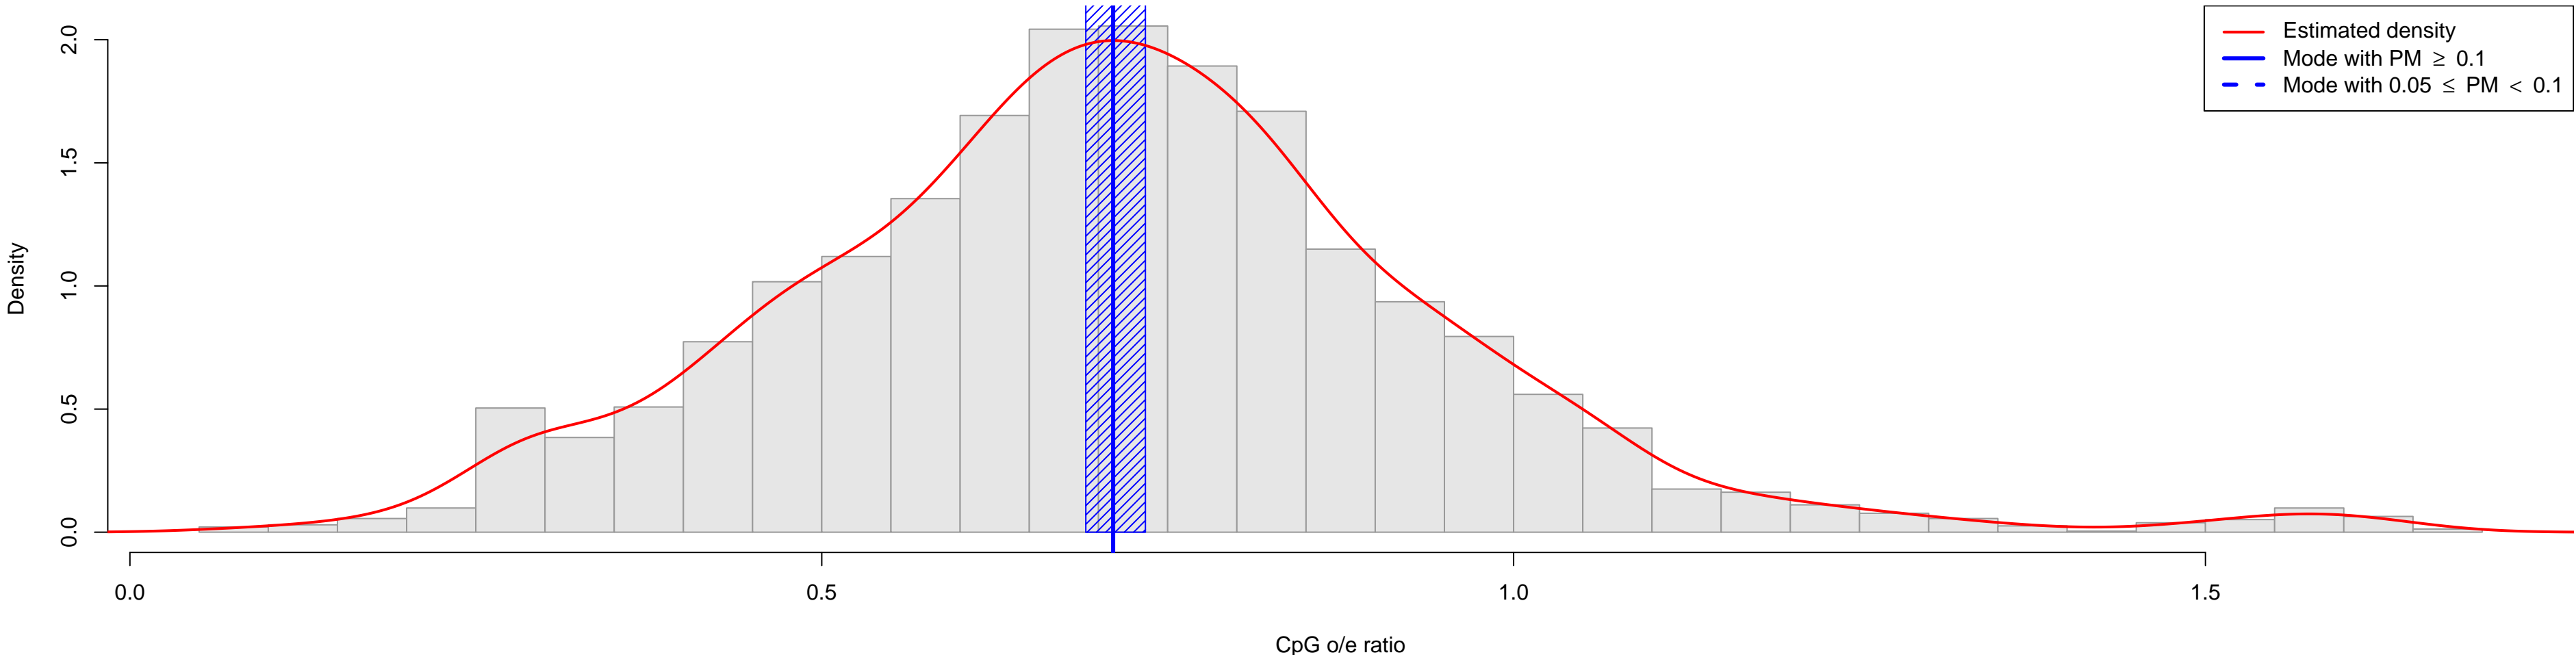

# Leptinotarsa\_decemlineata

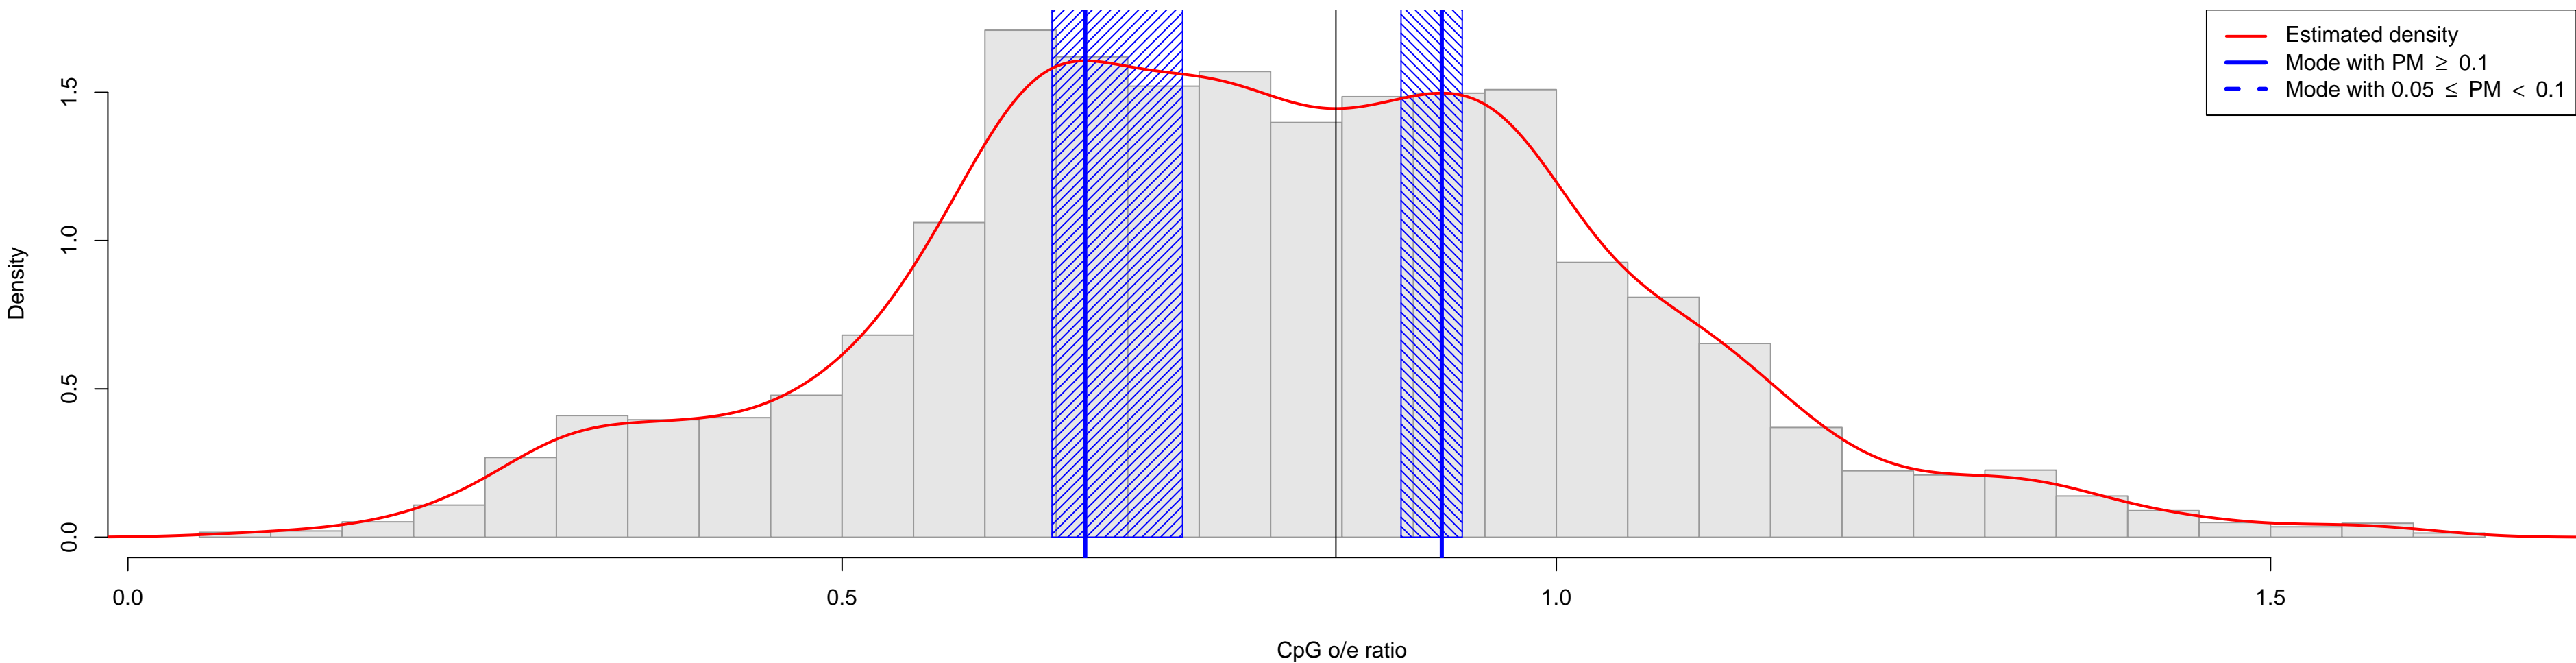

# Lernaeocera\_branchialis

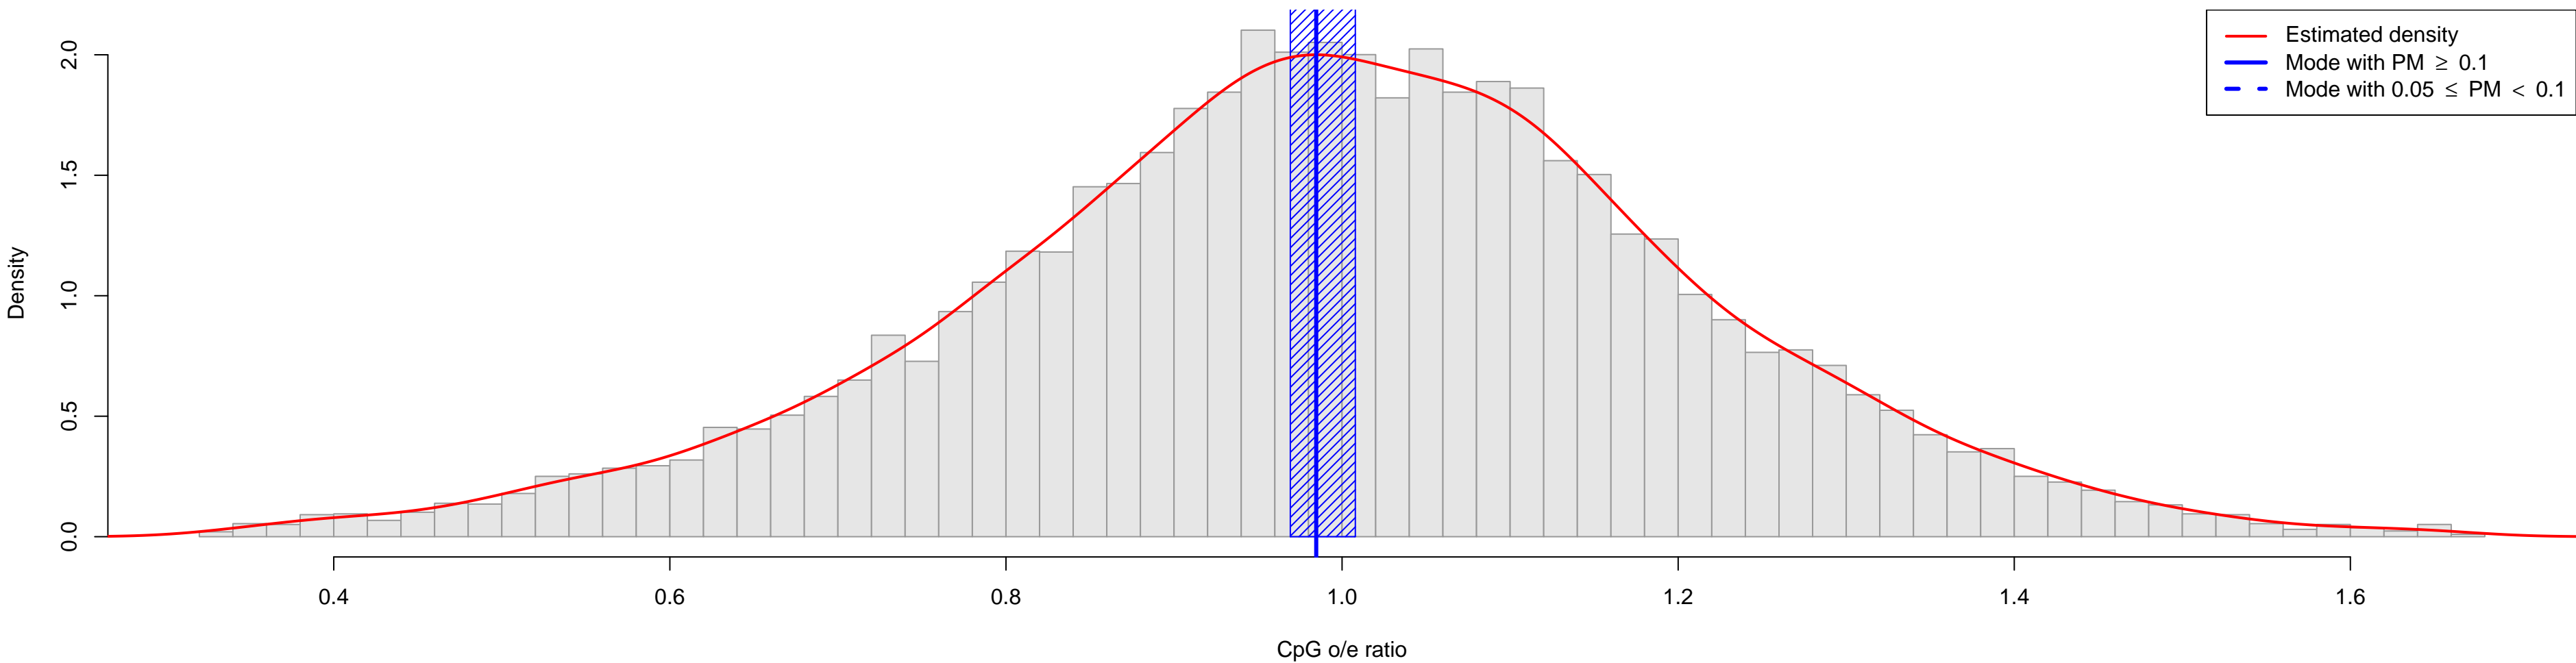

# Lethenteron\_camtschaticum

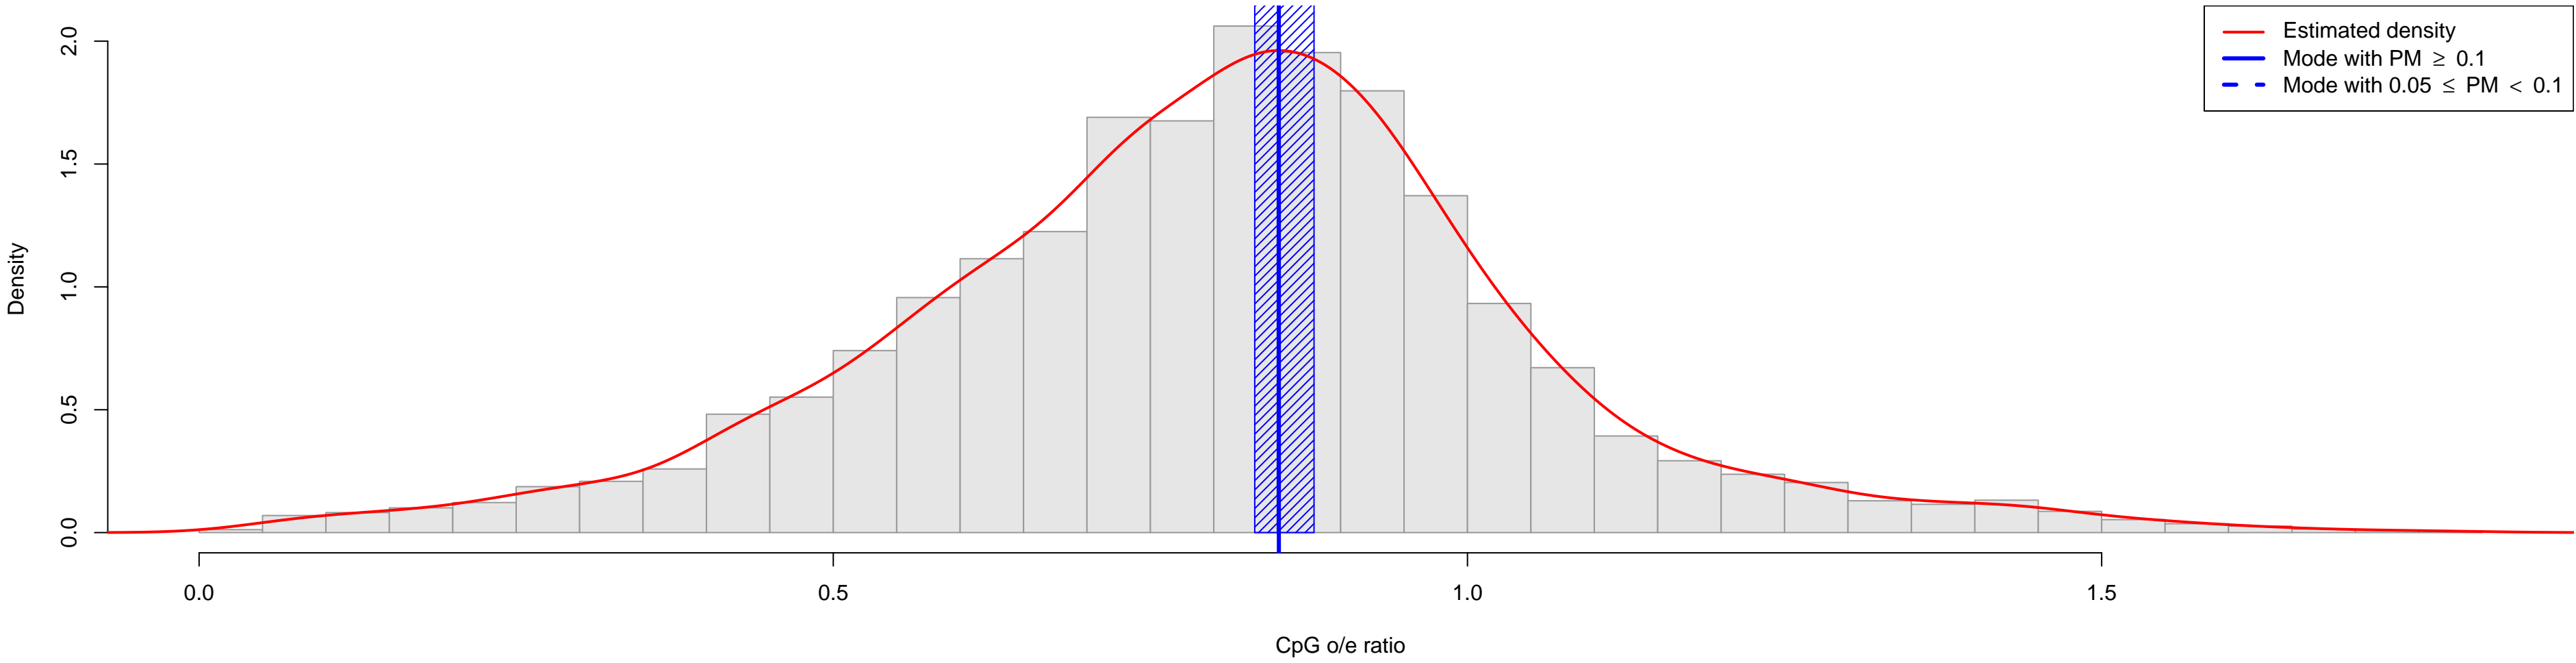

# Leymus\_chinensis

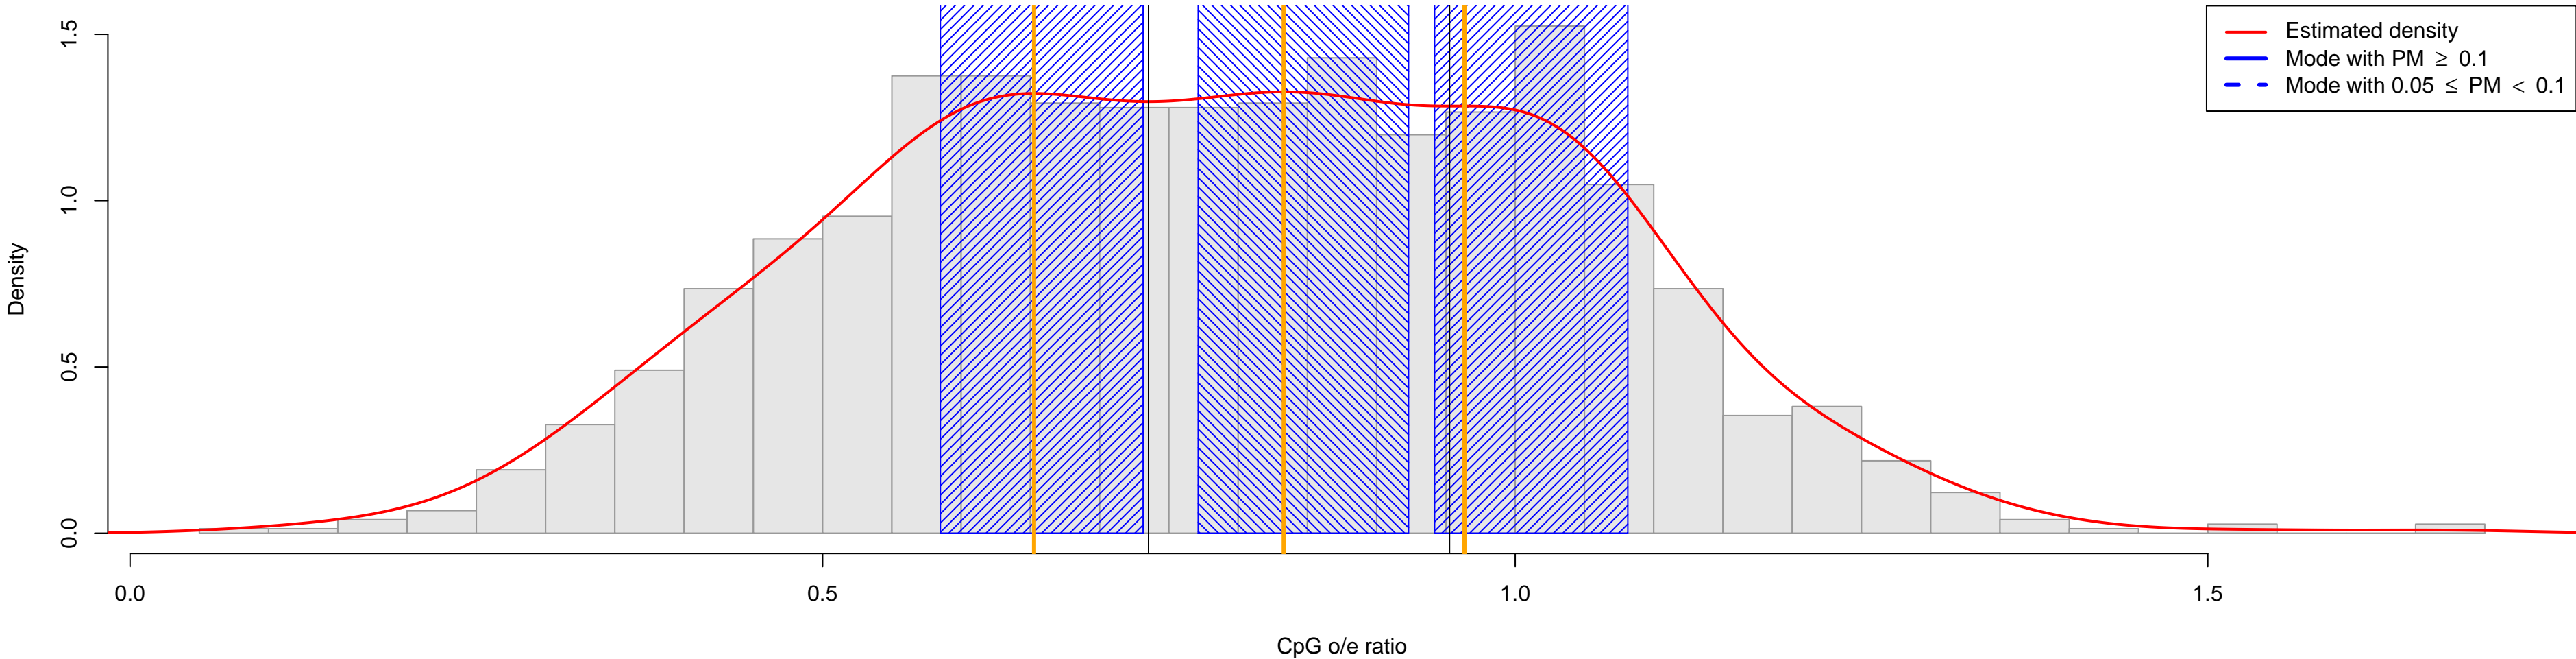

# Limnanthes\_alba

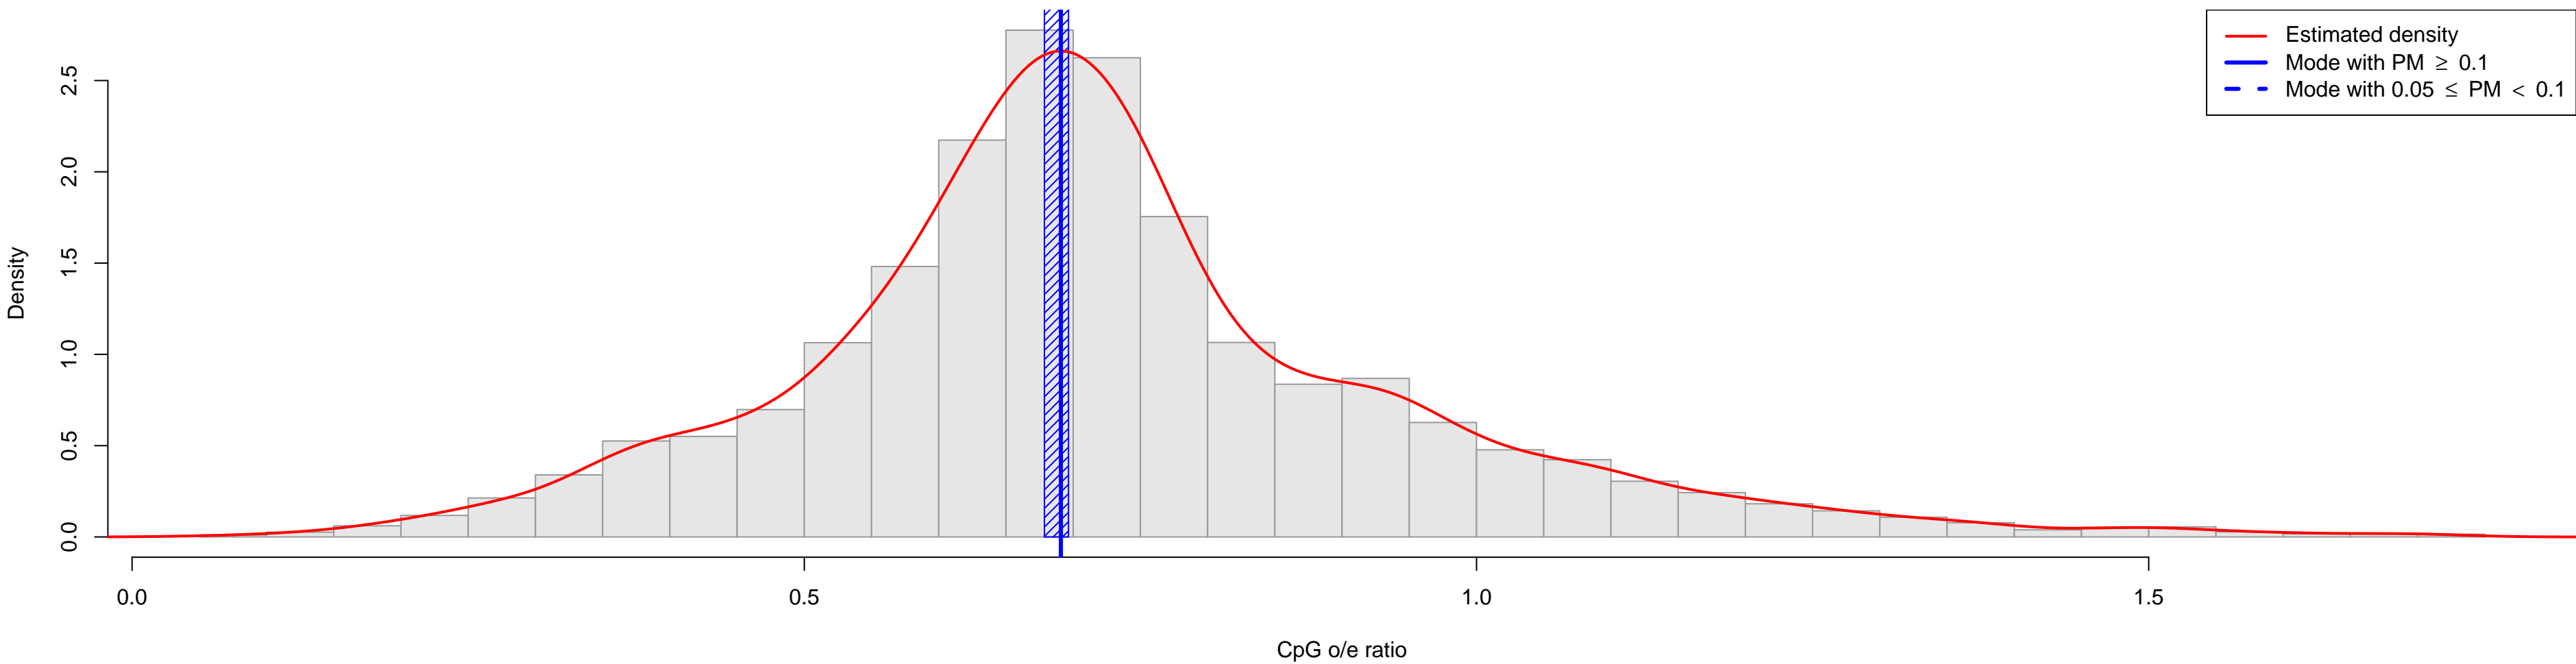



# Limonium\_bicolor

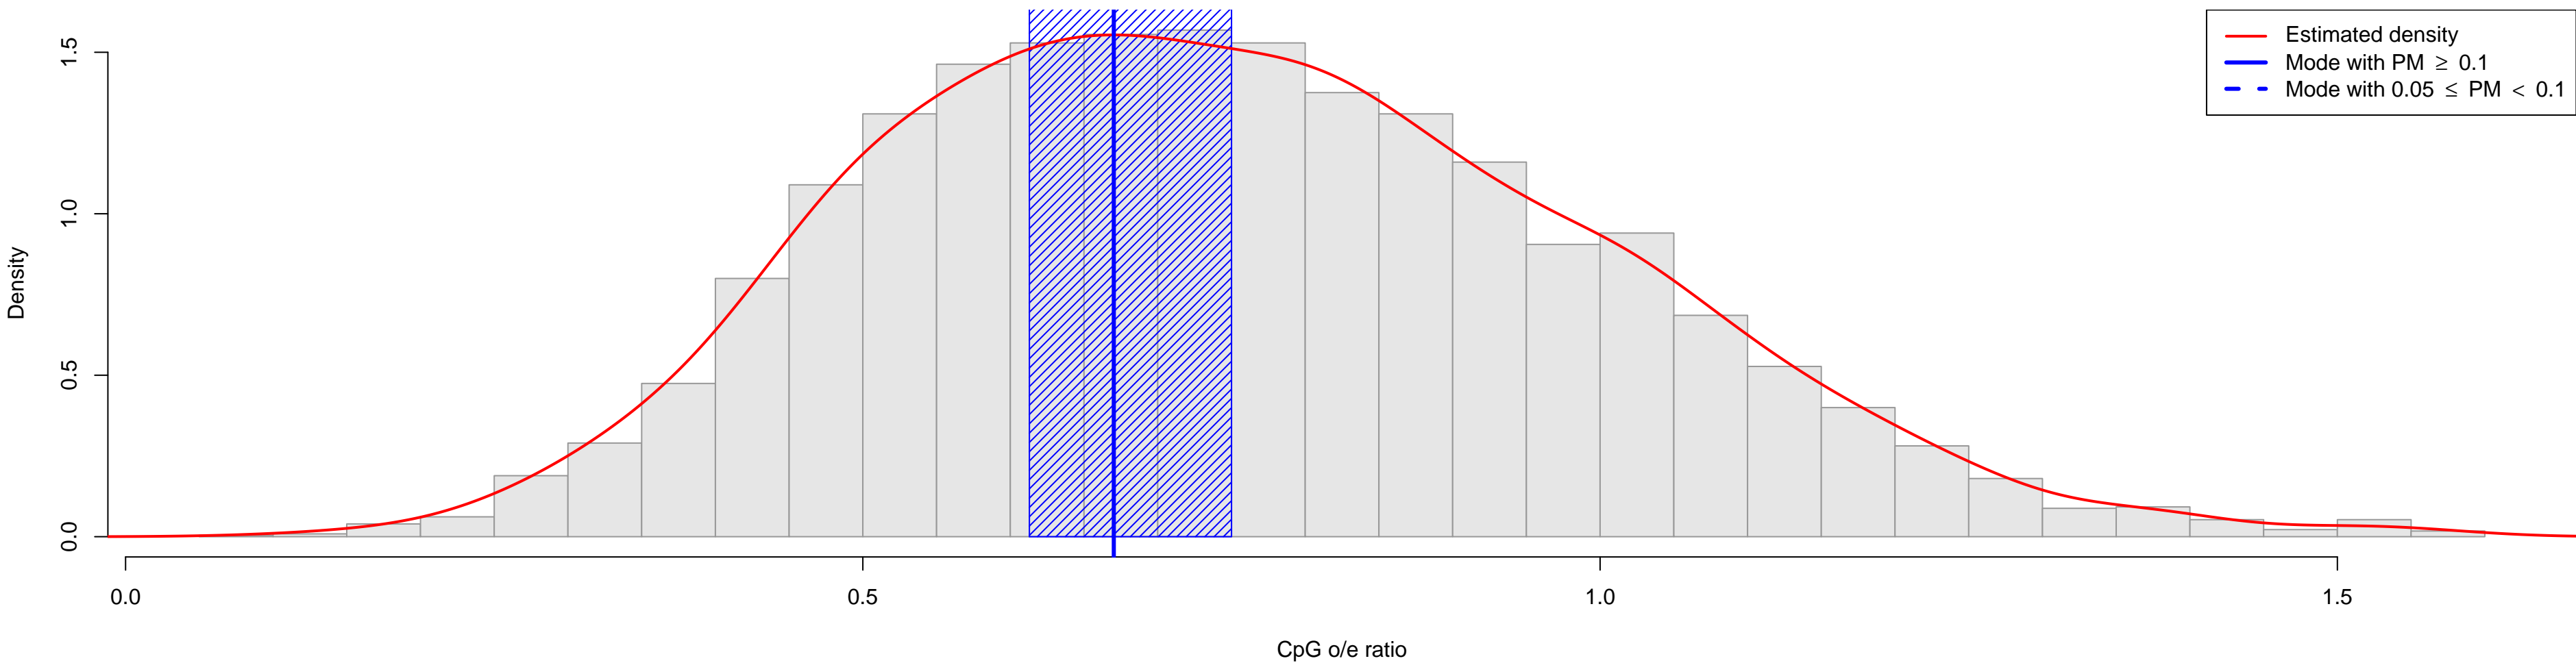

# Limulus\_polyphemus

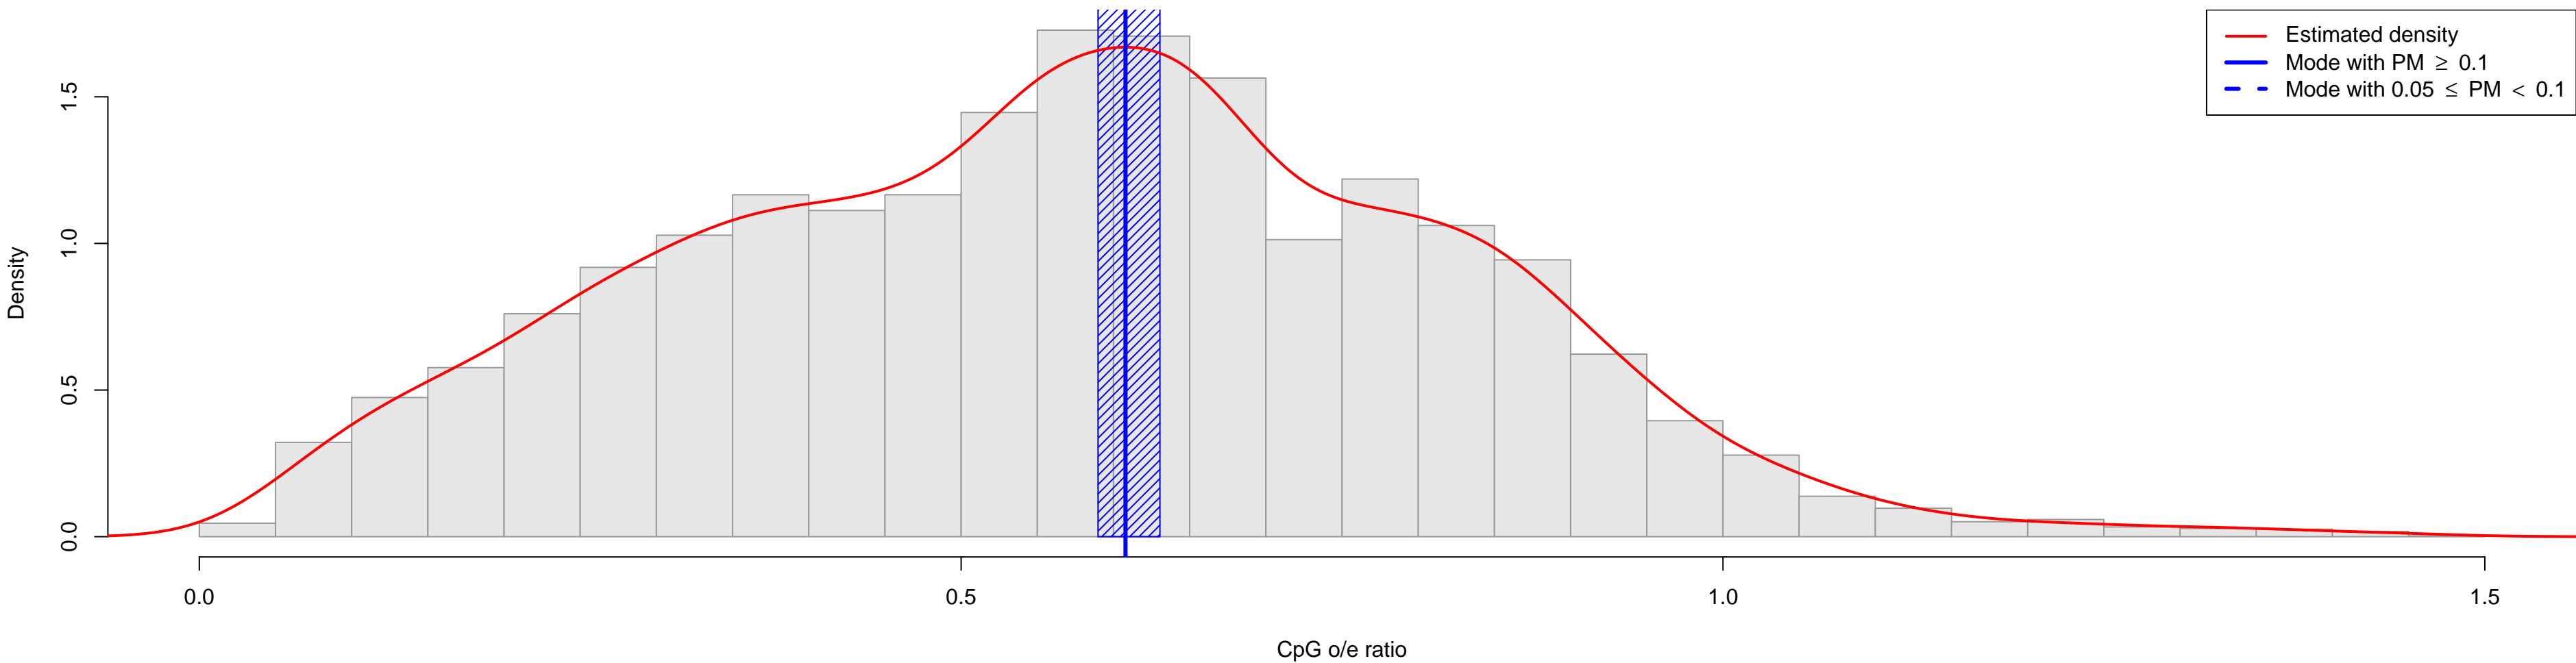

# Lithognathus\_mormyrus

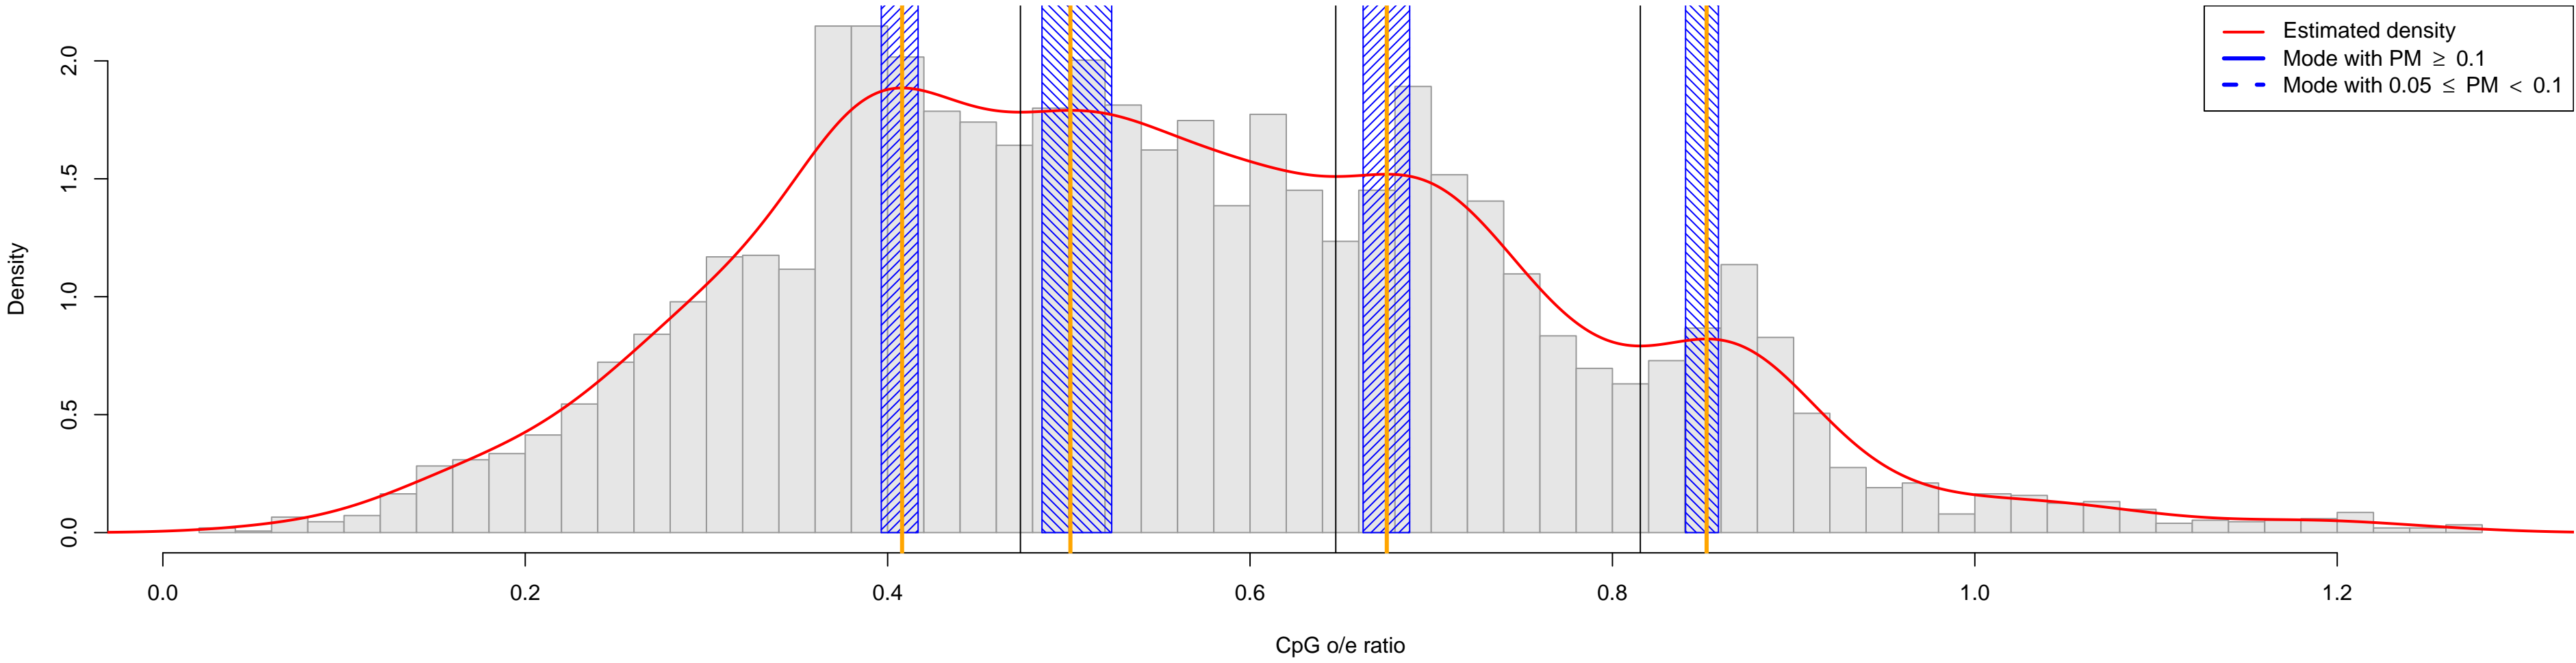

# Litopenaeus\_vannamei

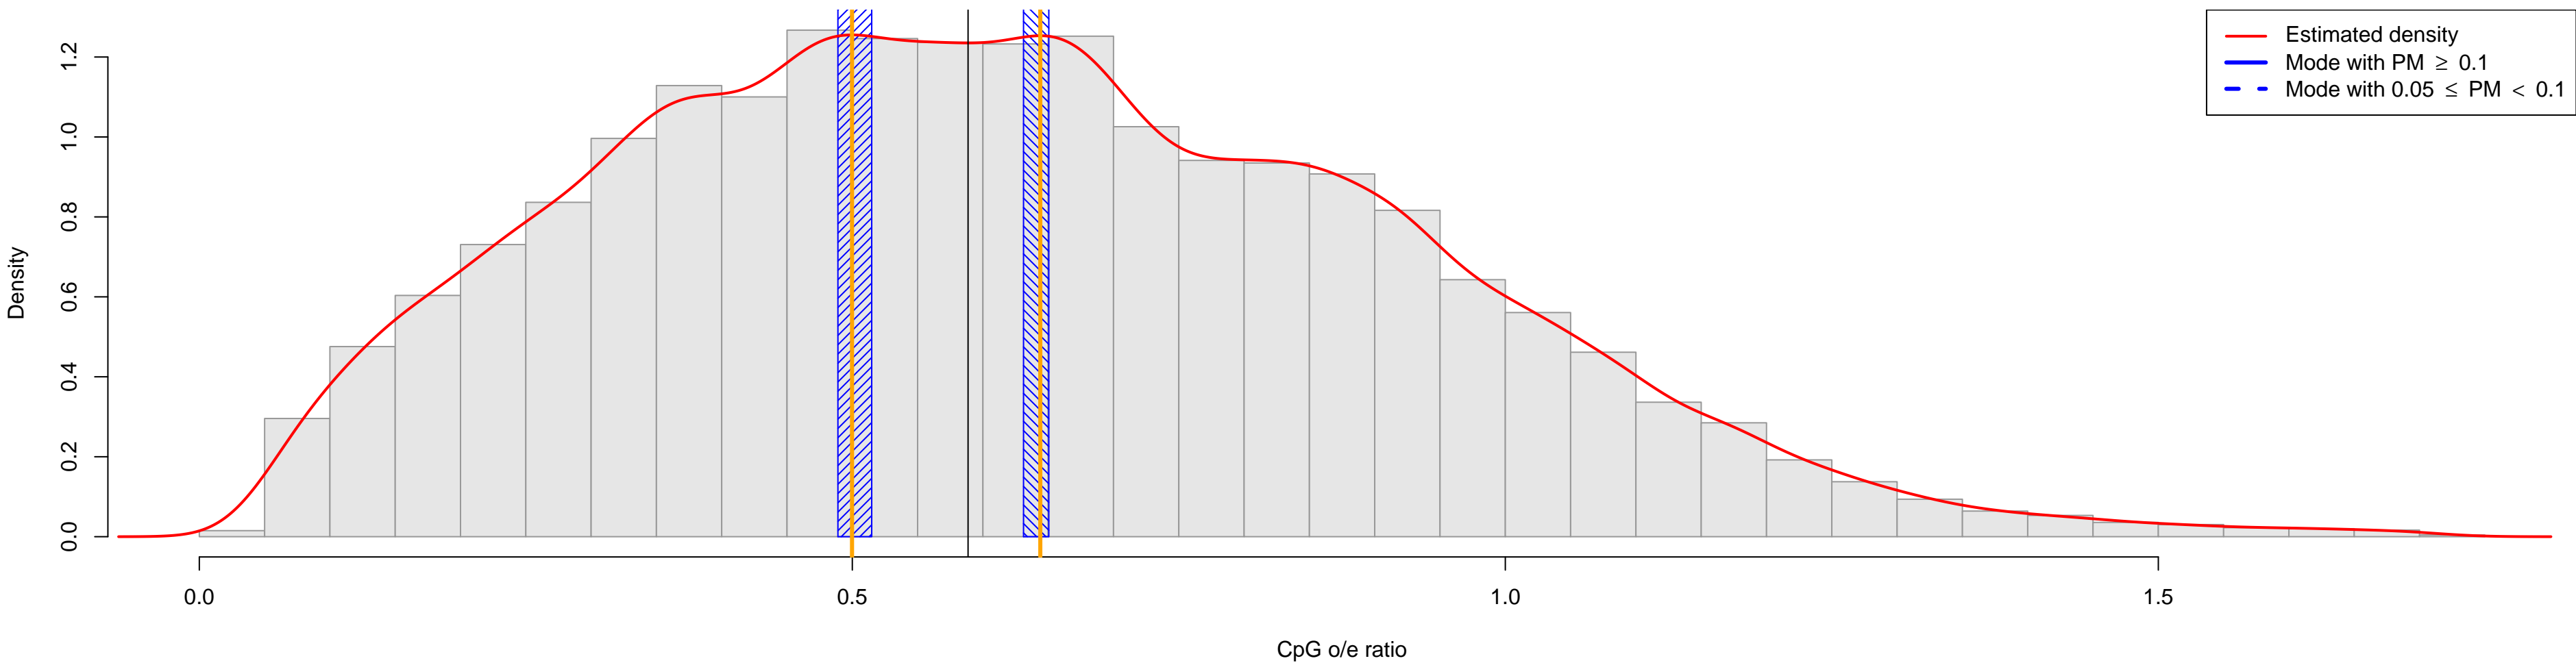

Littorina\_saxatilis

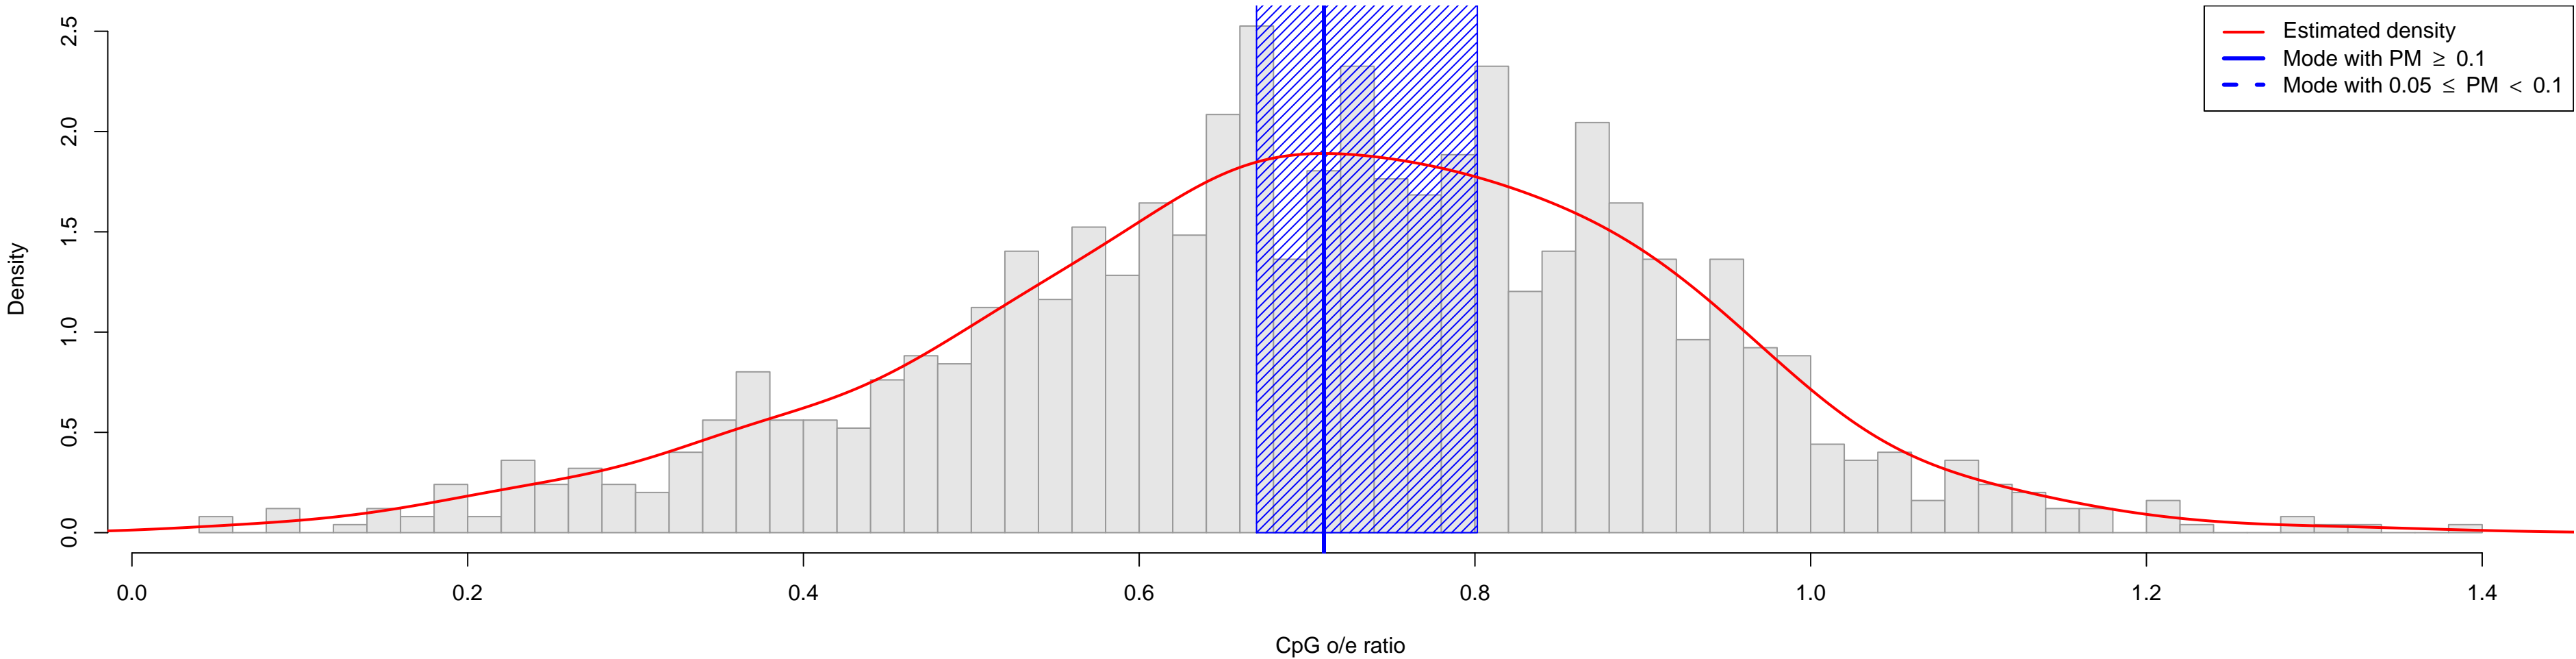

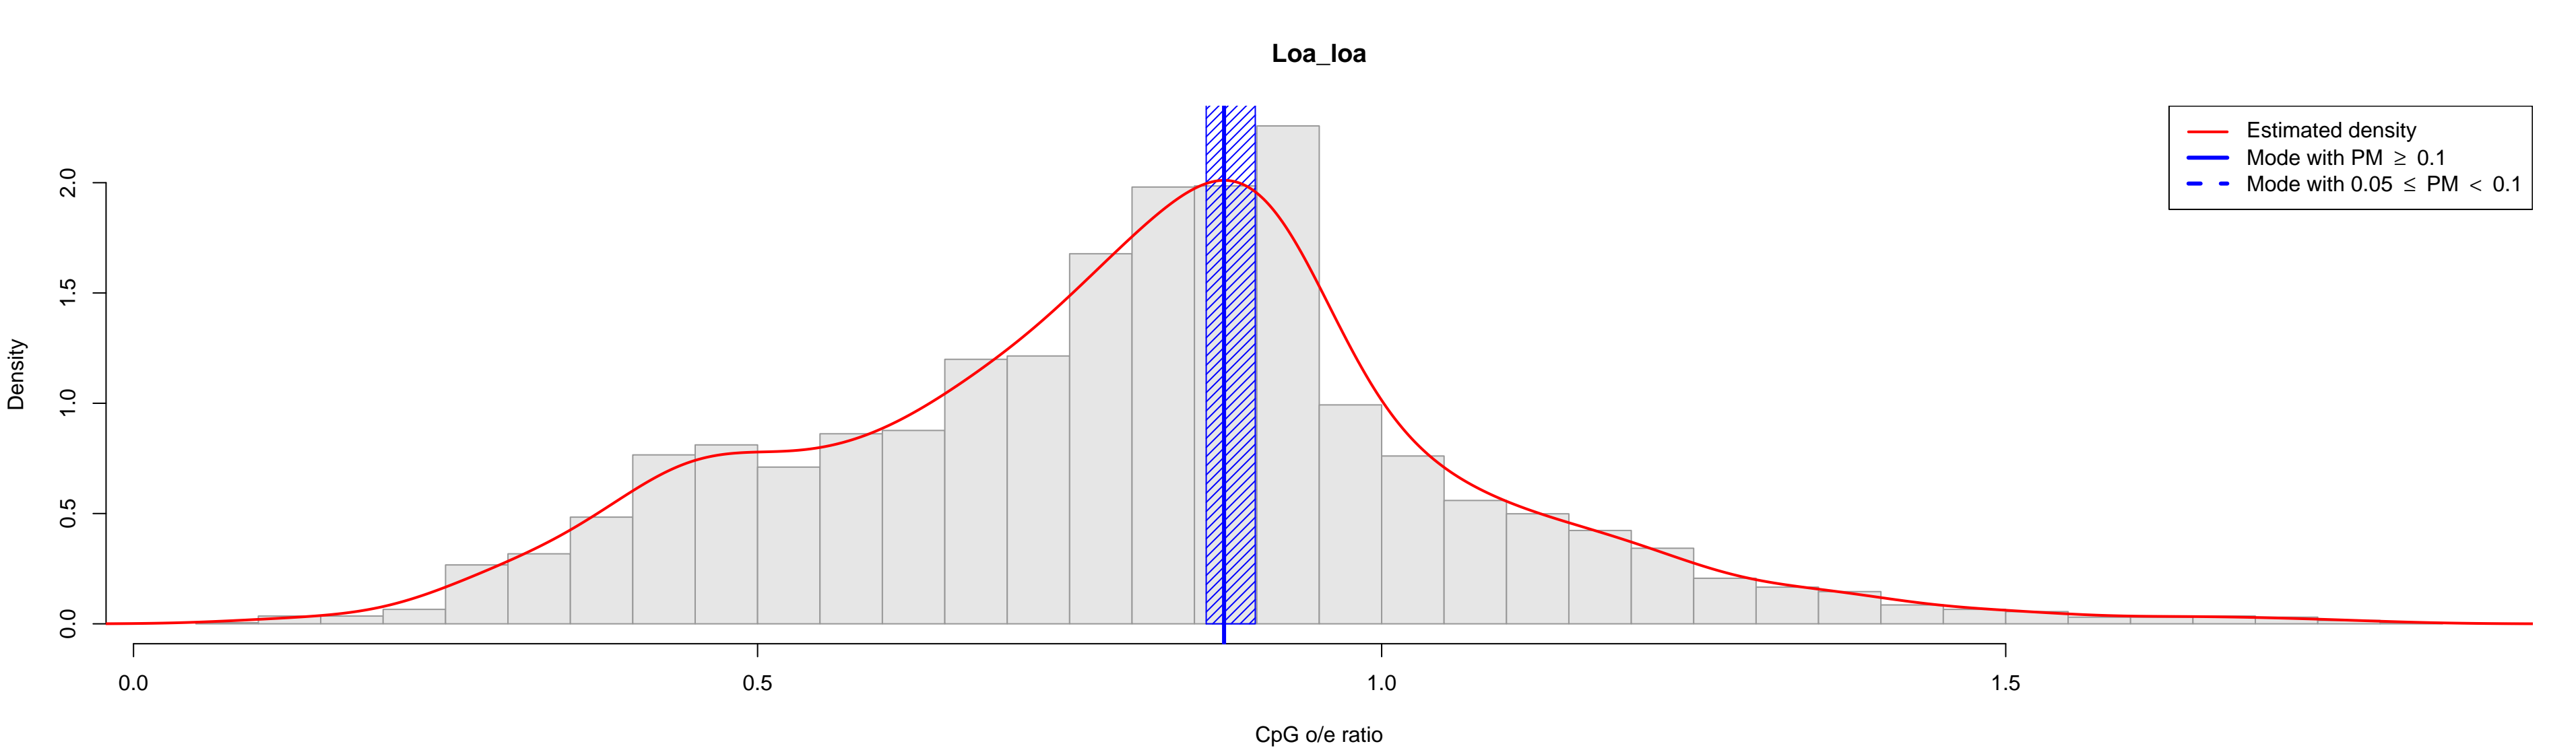

# Locusta\_migratoria

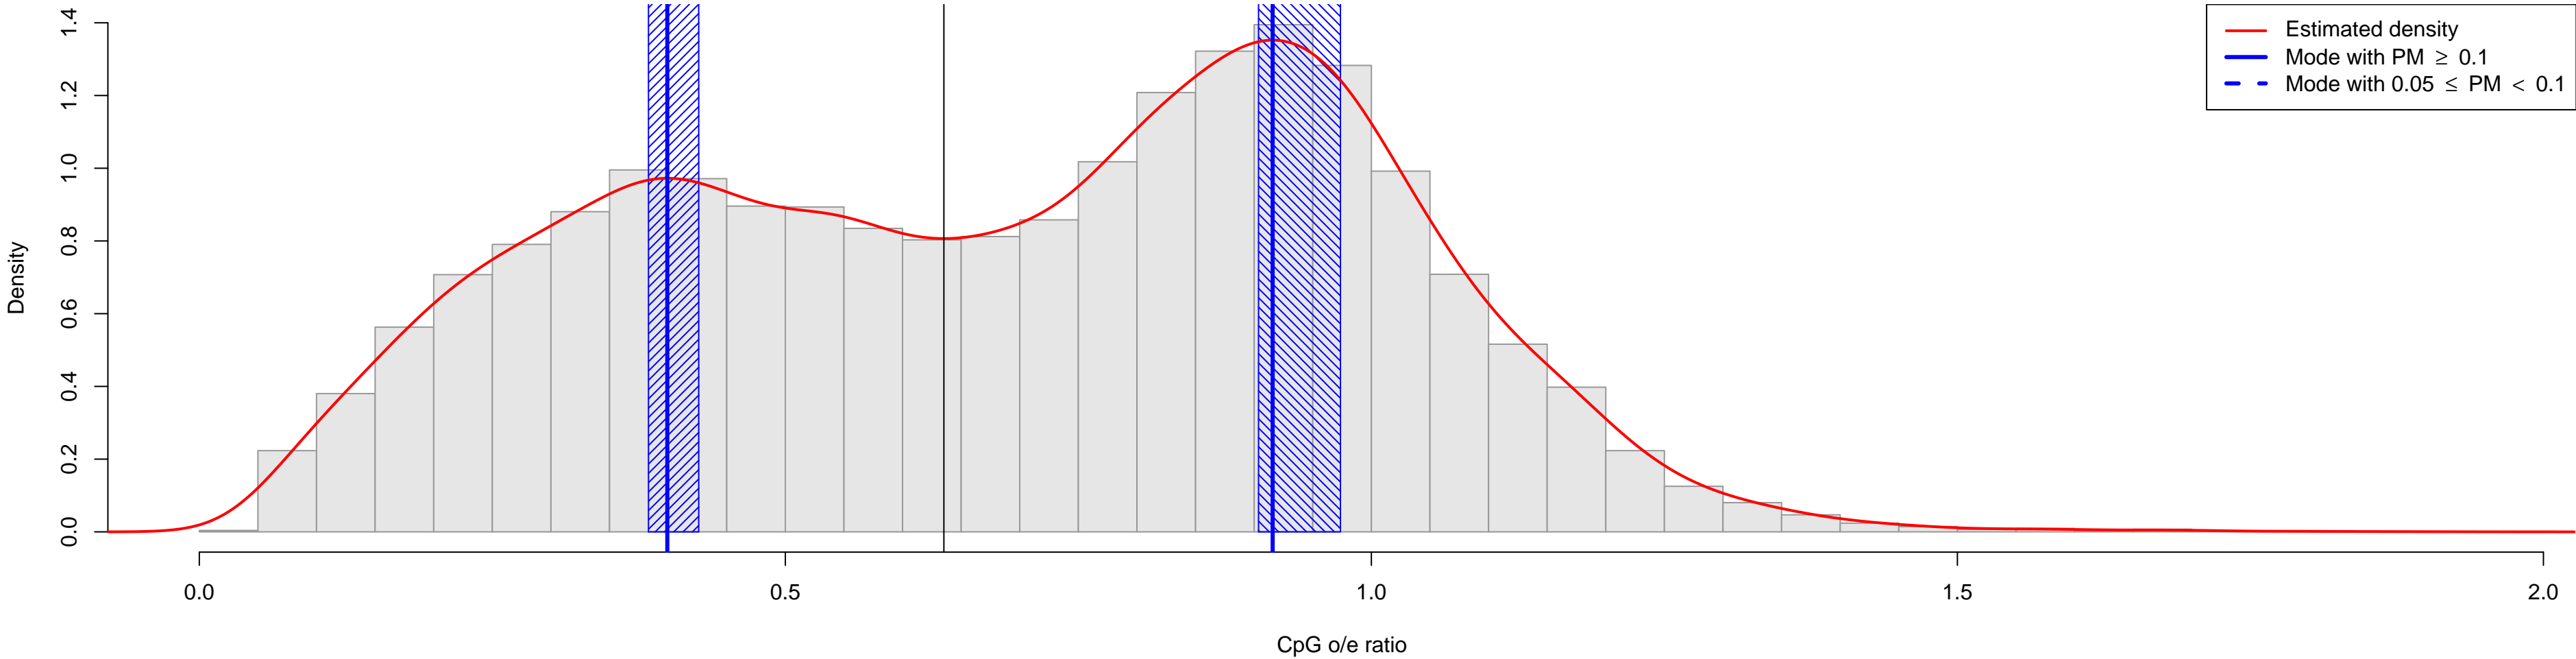

# Loligo\_pealei

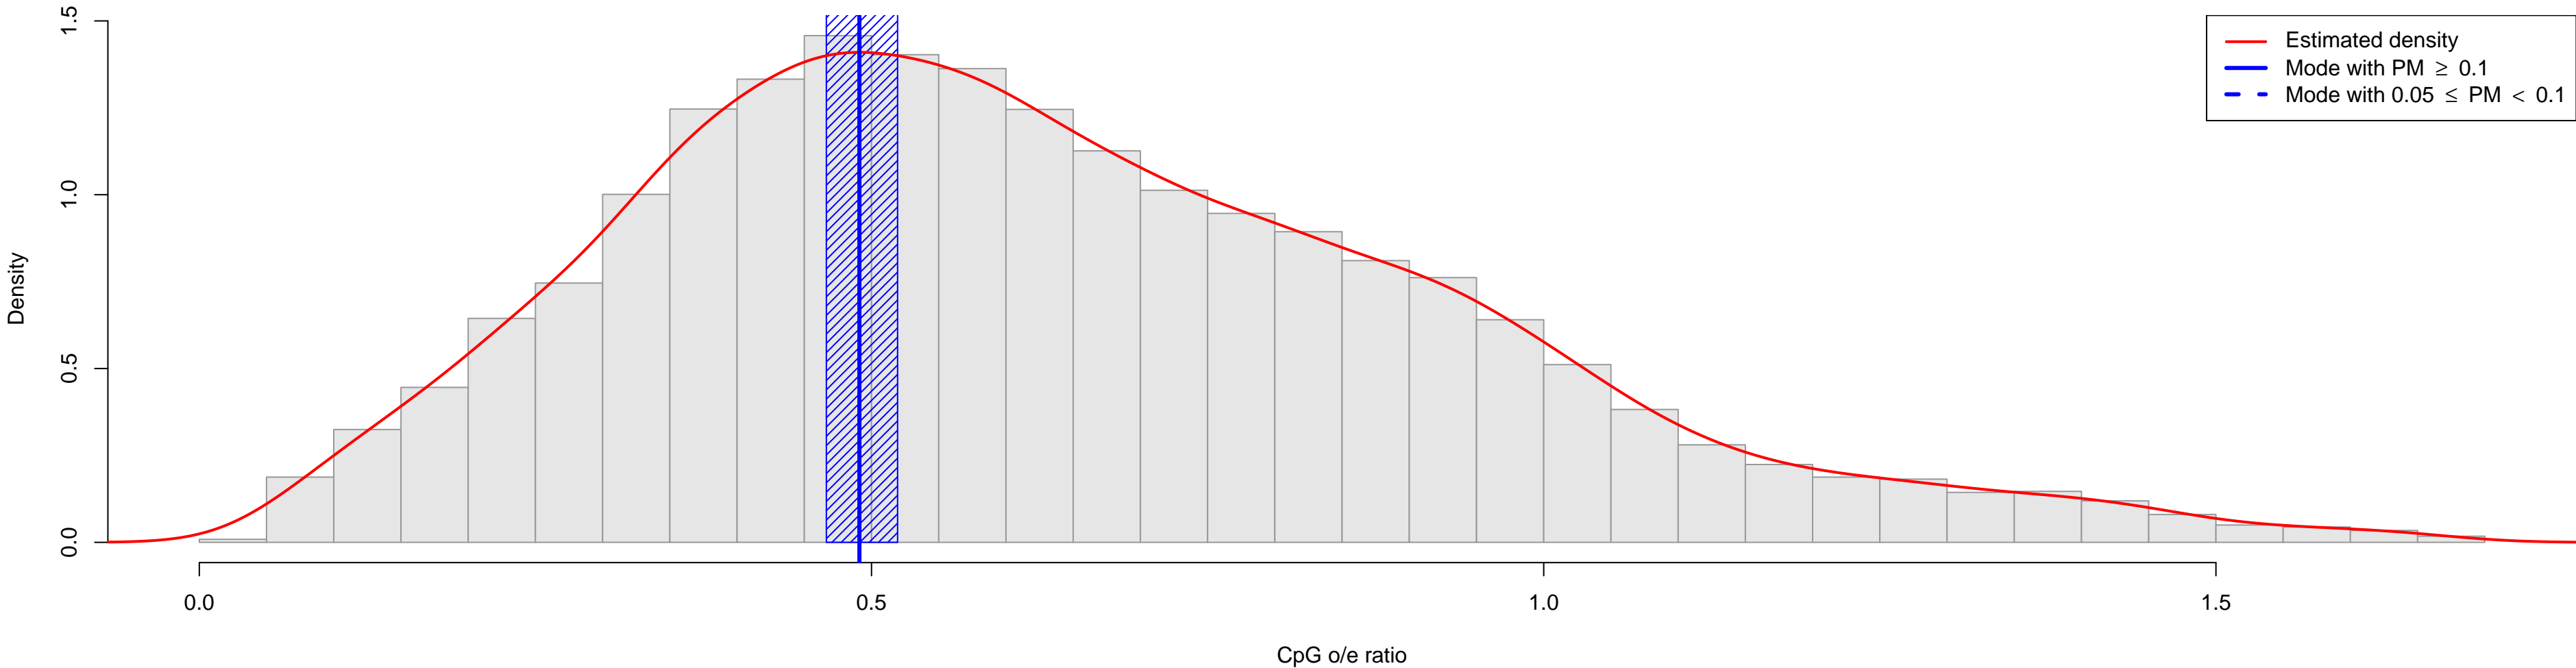



# Lolium\_perenne

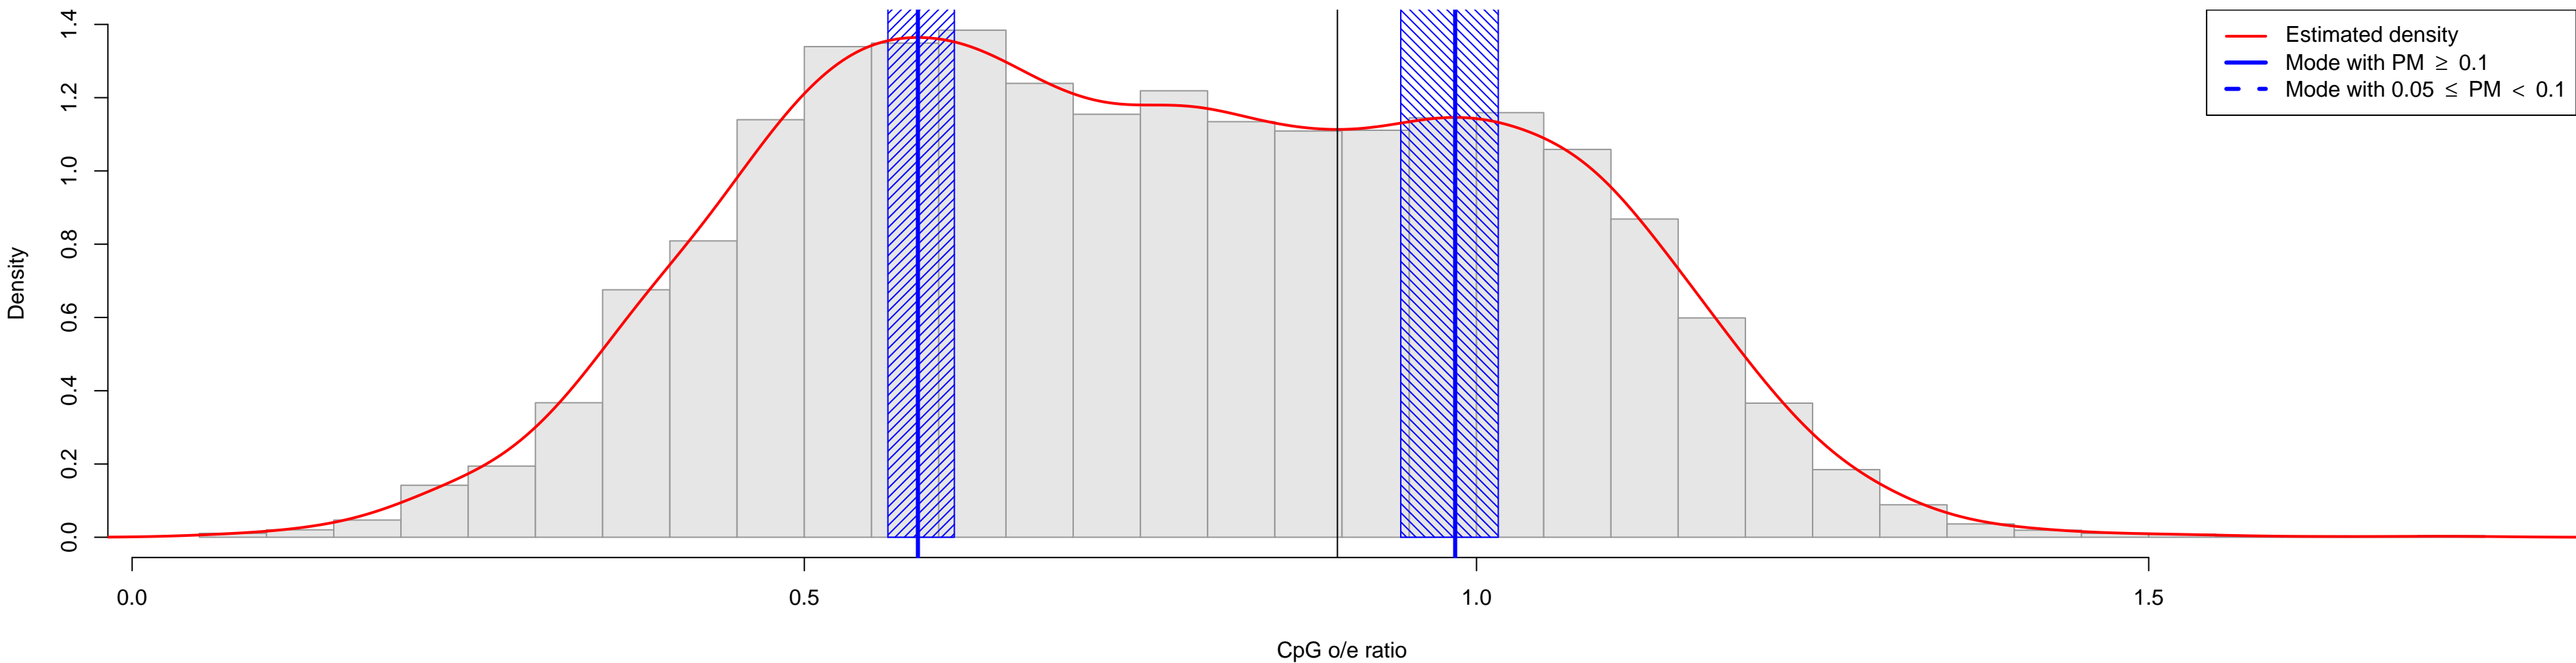

# Lottia\_gigantea

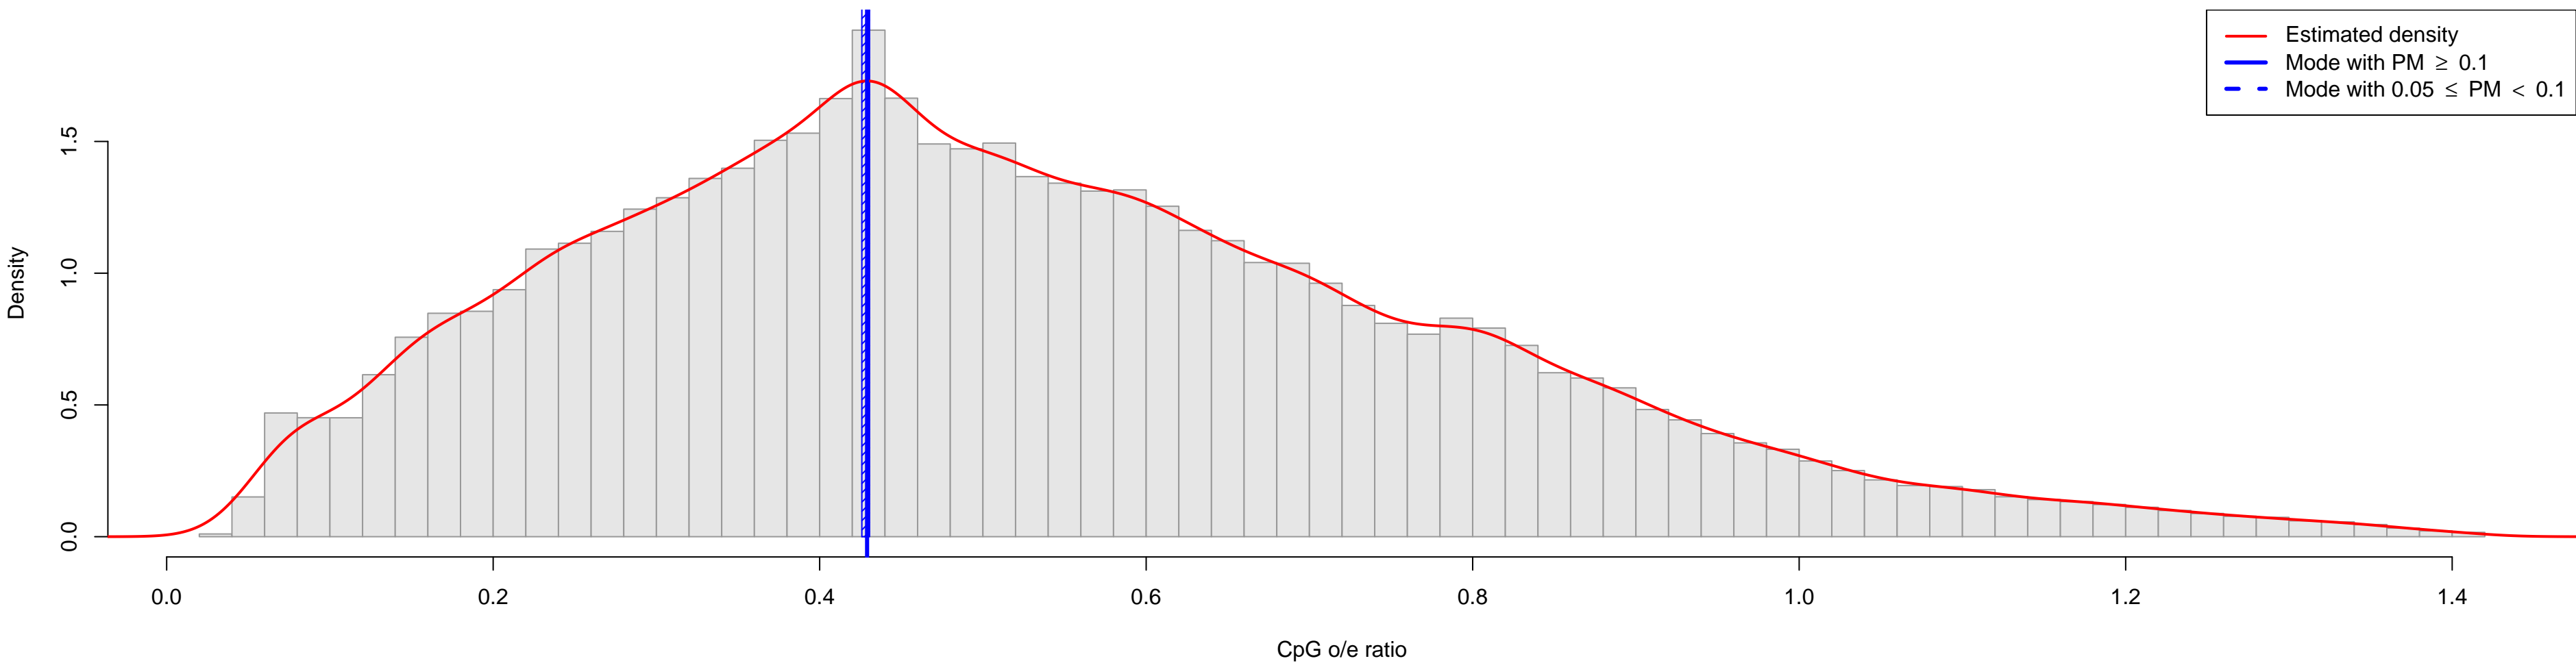

# Lotus\_japonicus

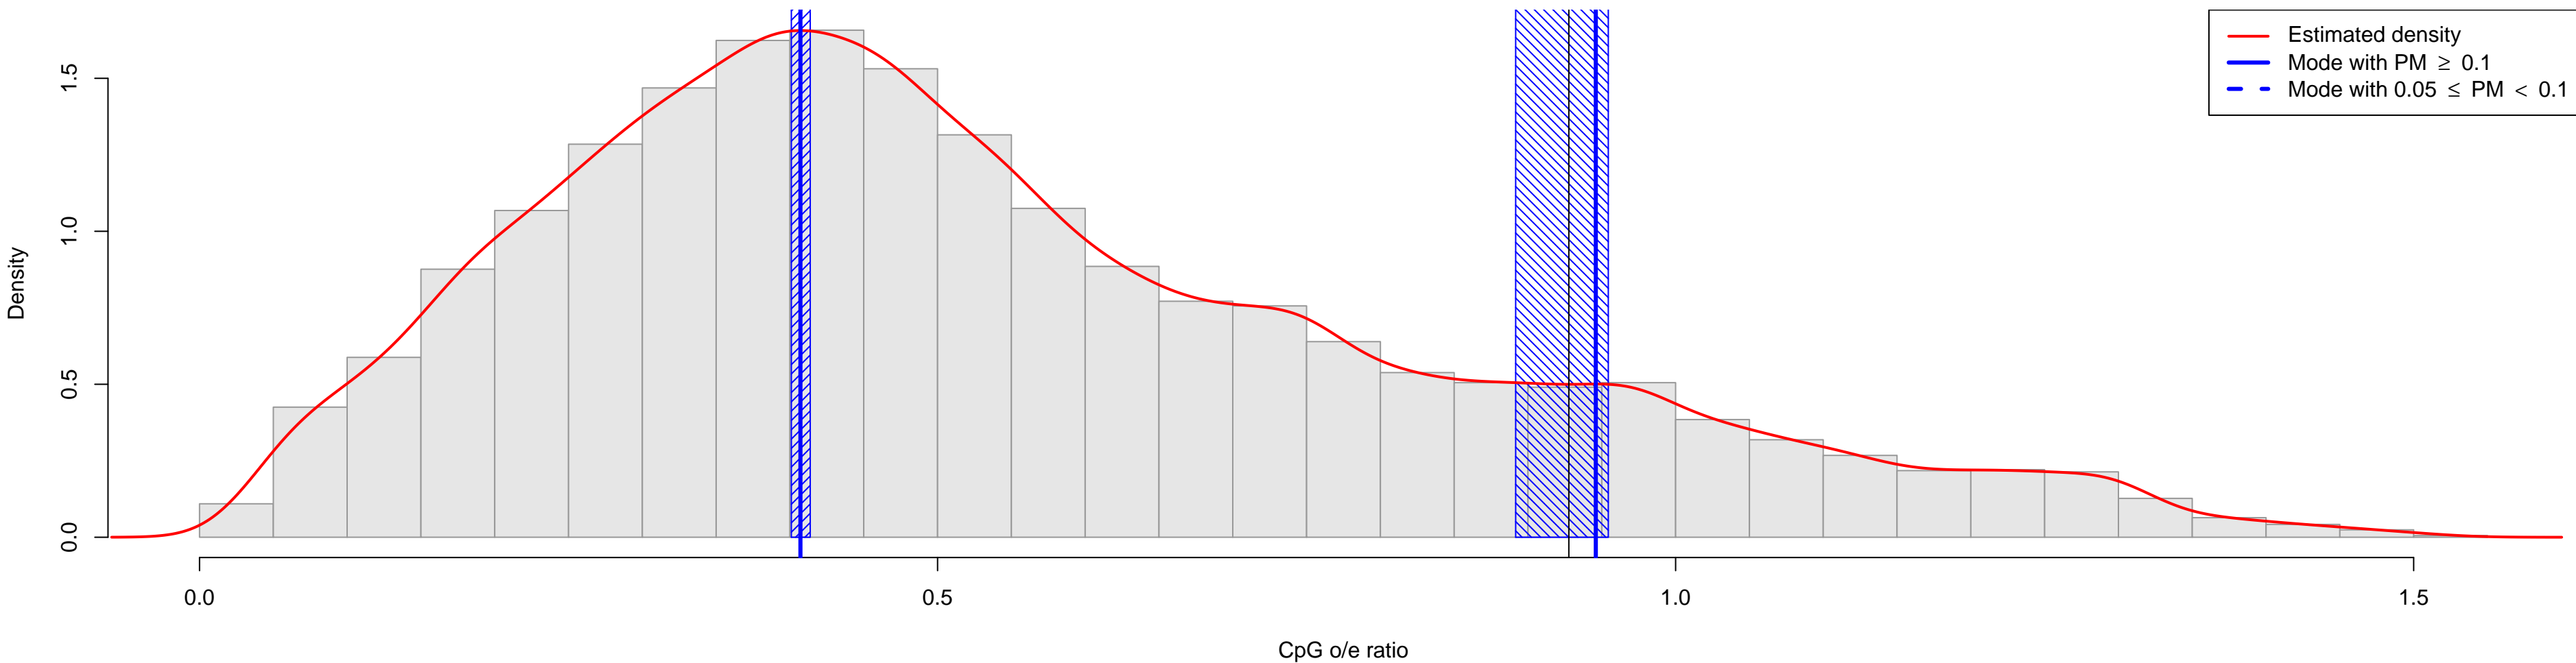

# Lumbricus\_rubellus

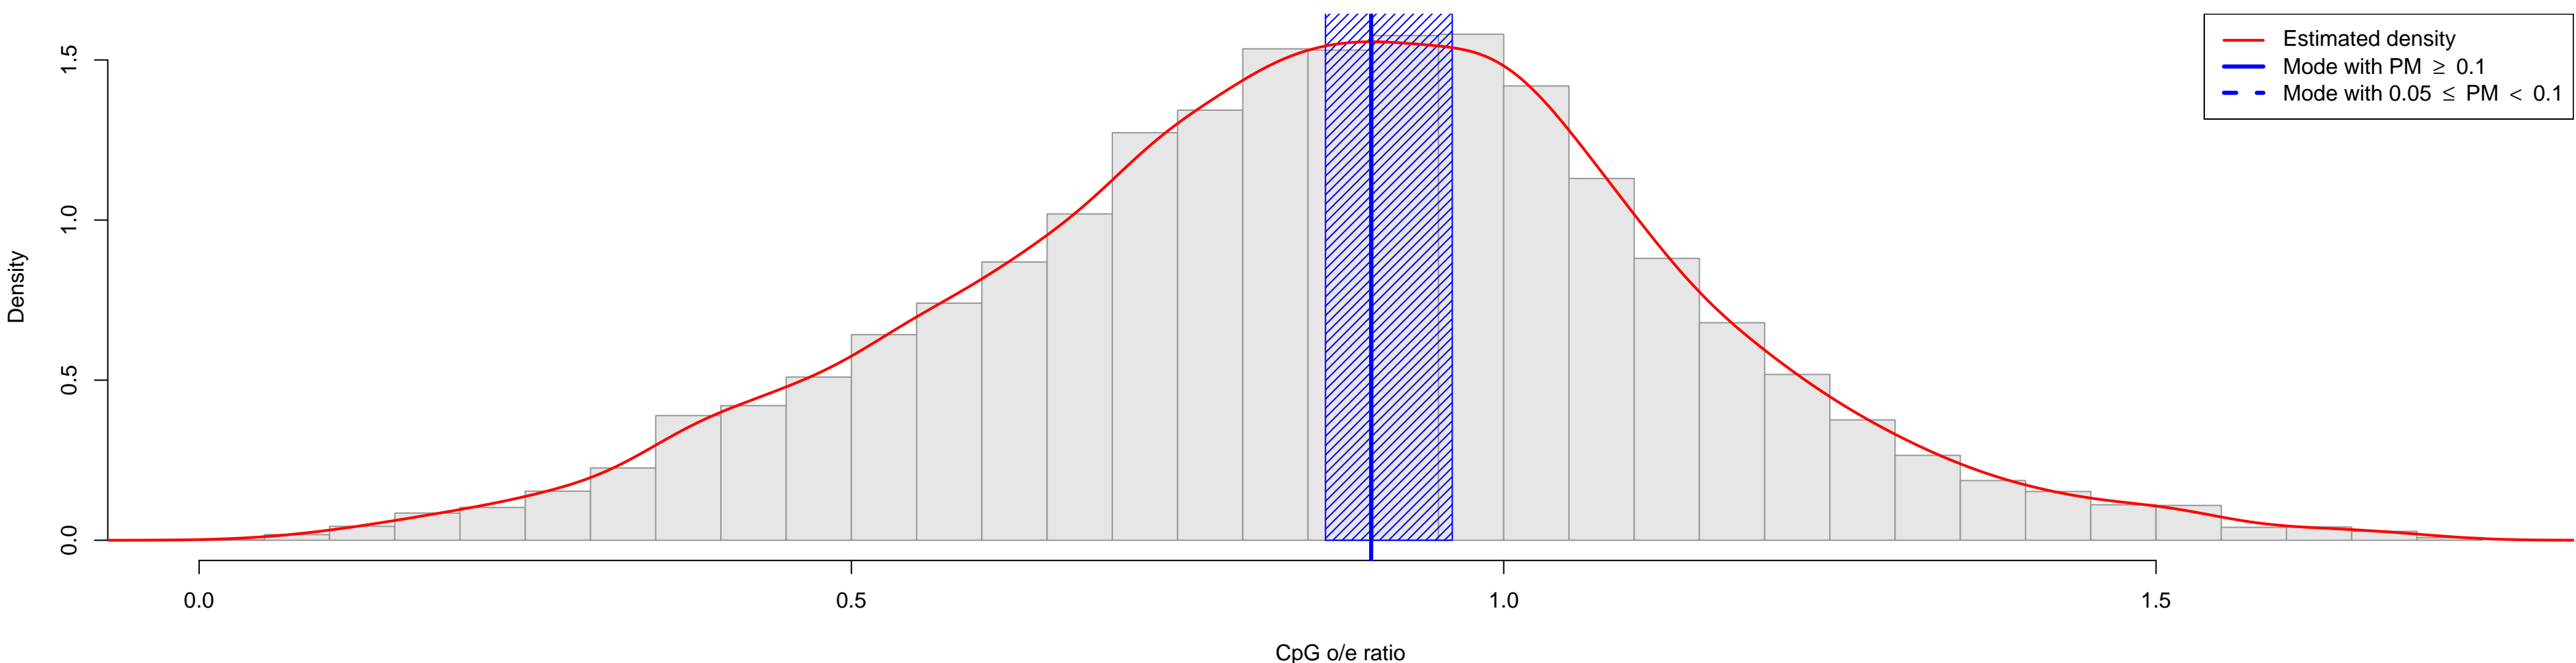

# Lutzomyia\_intermedia

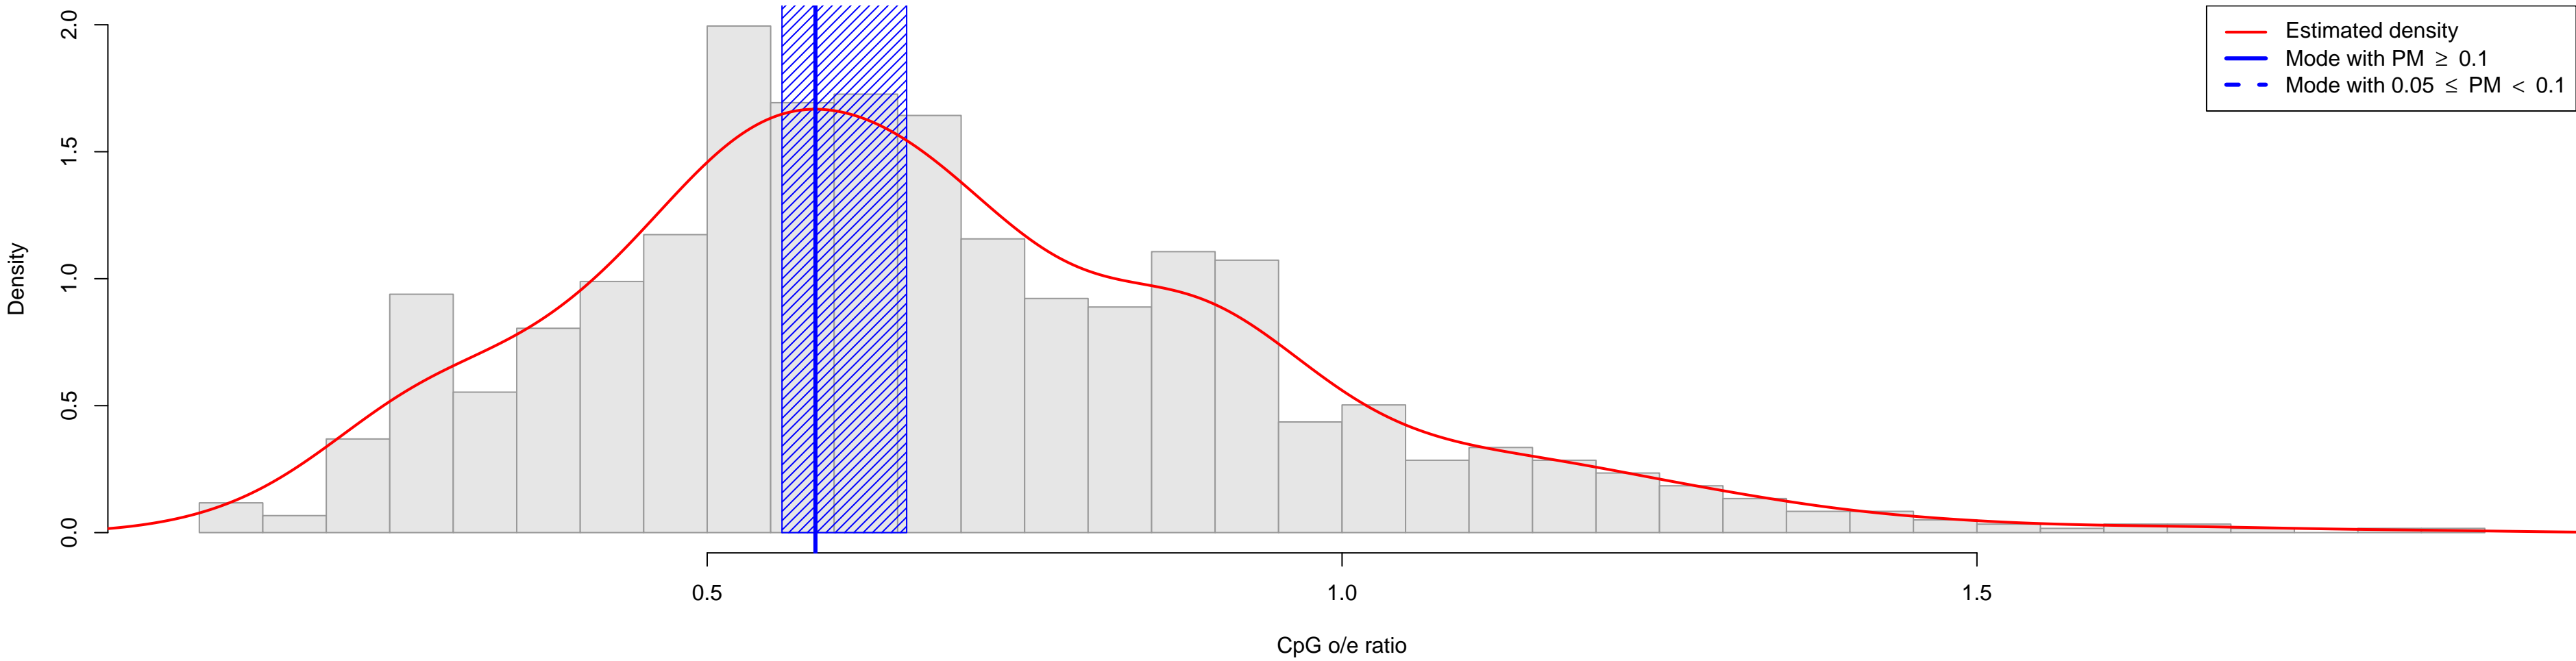

# Lutzomyia\_longipalpis

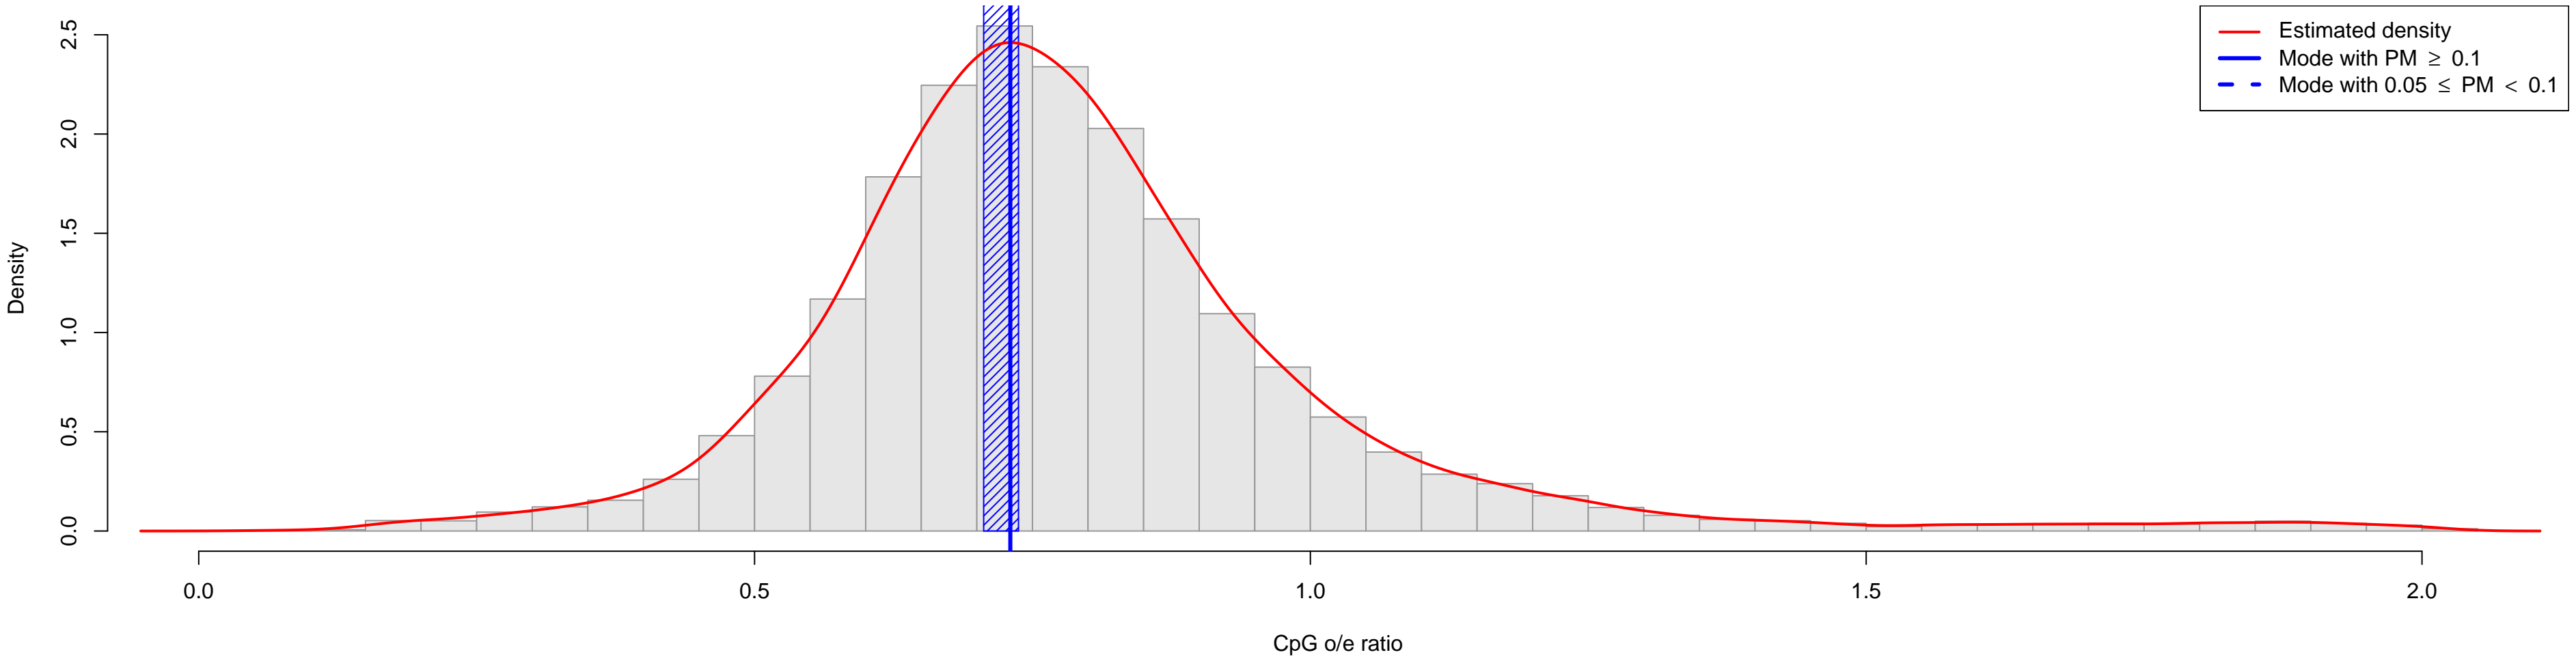

# Lutzomyia\_umbratilis

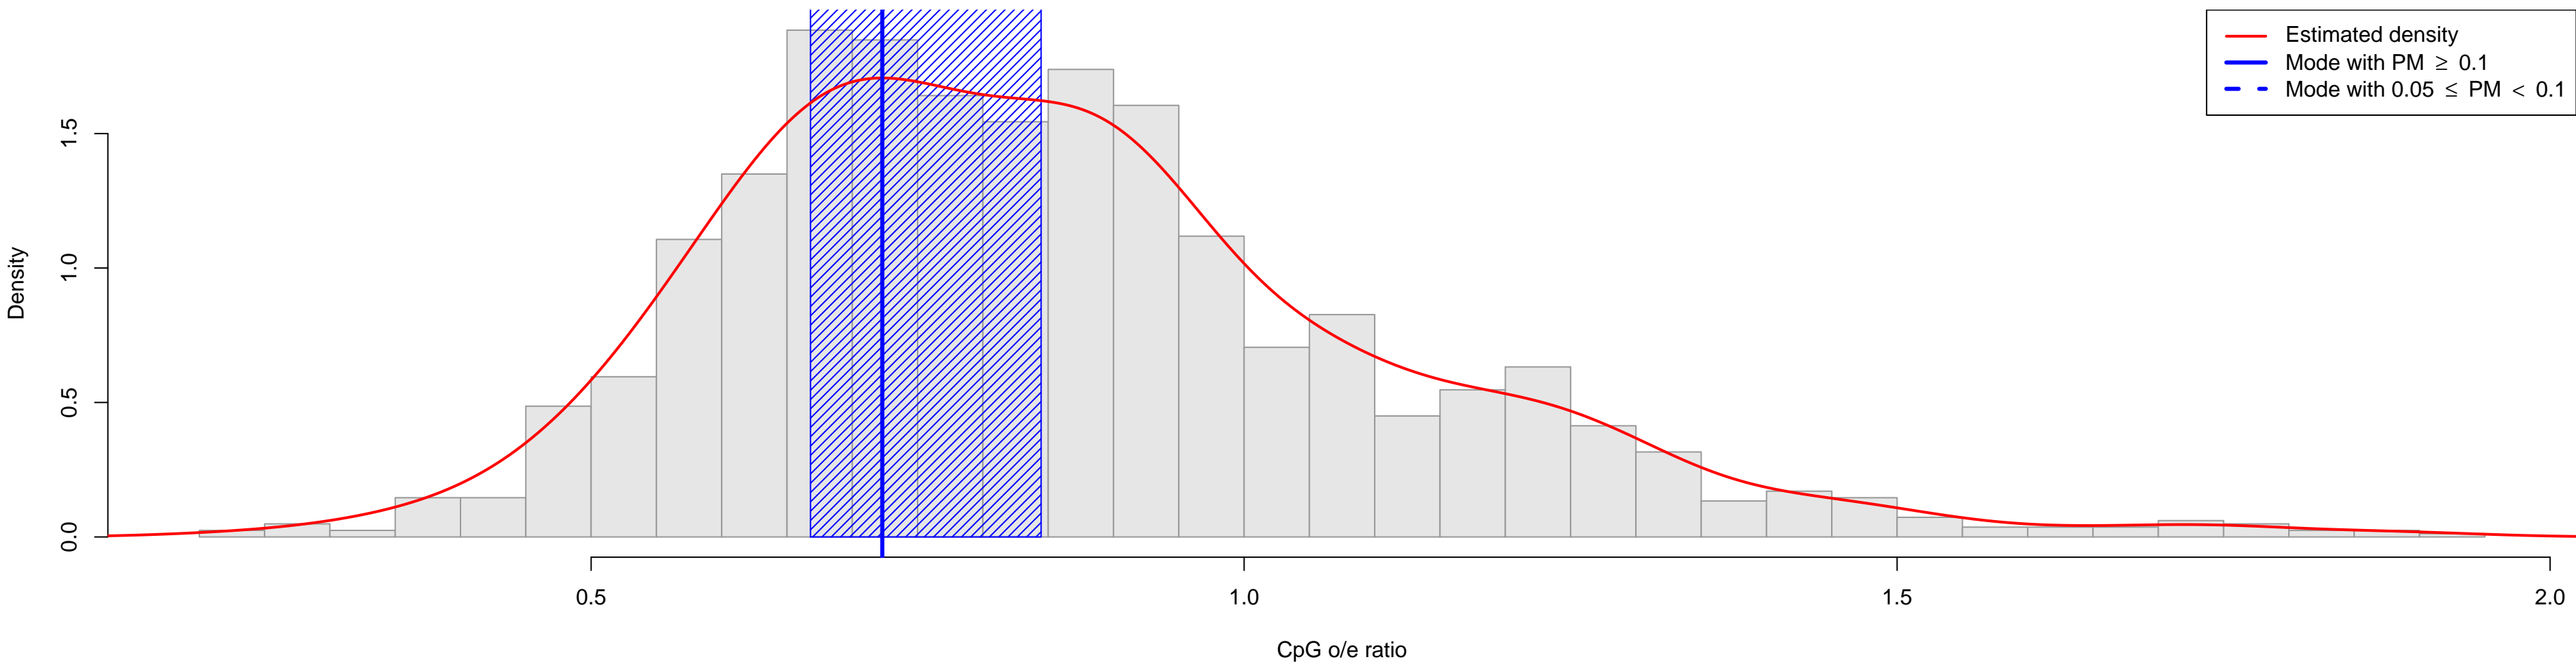

# Lymnaea\_stagnalis

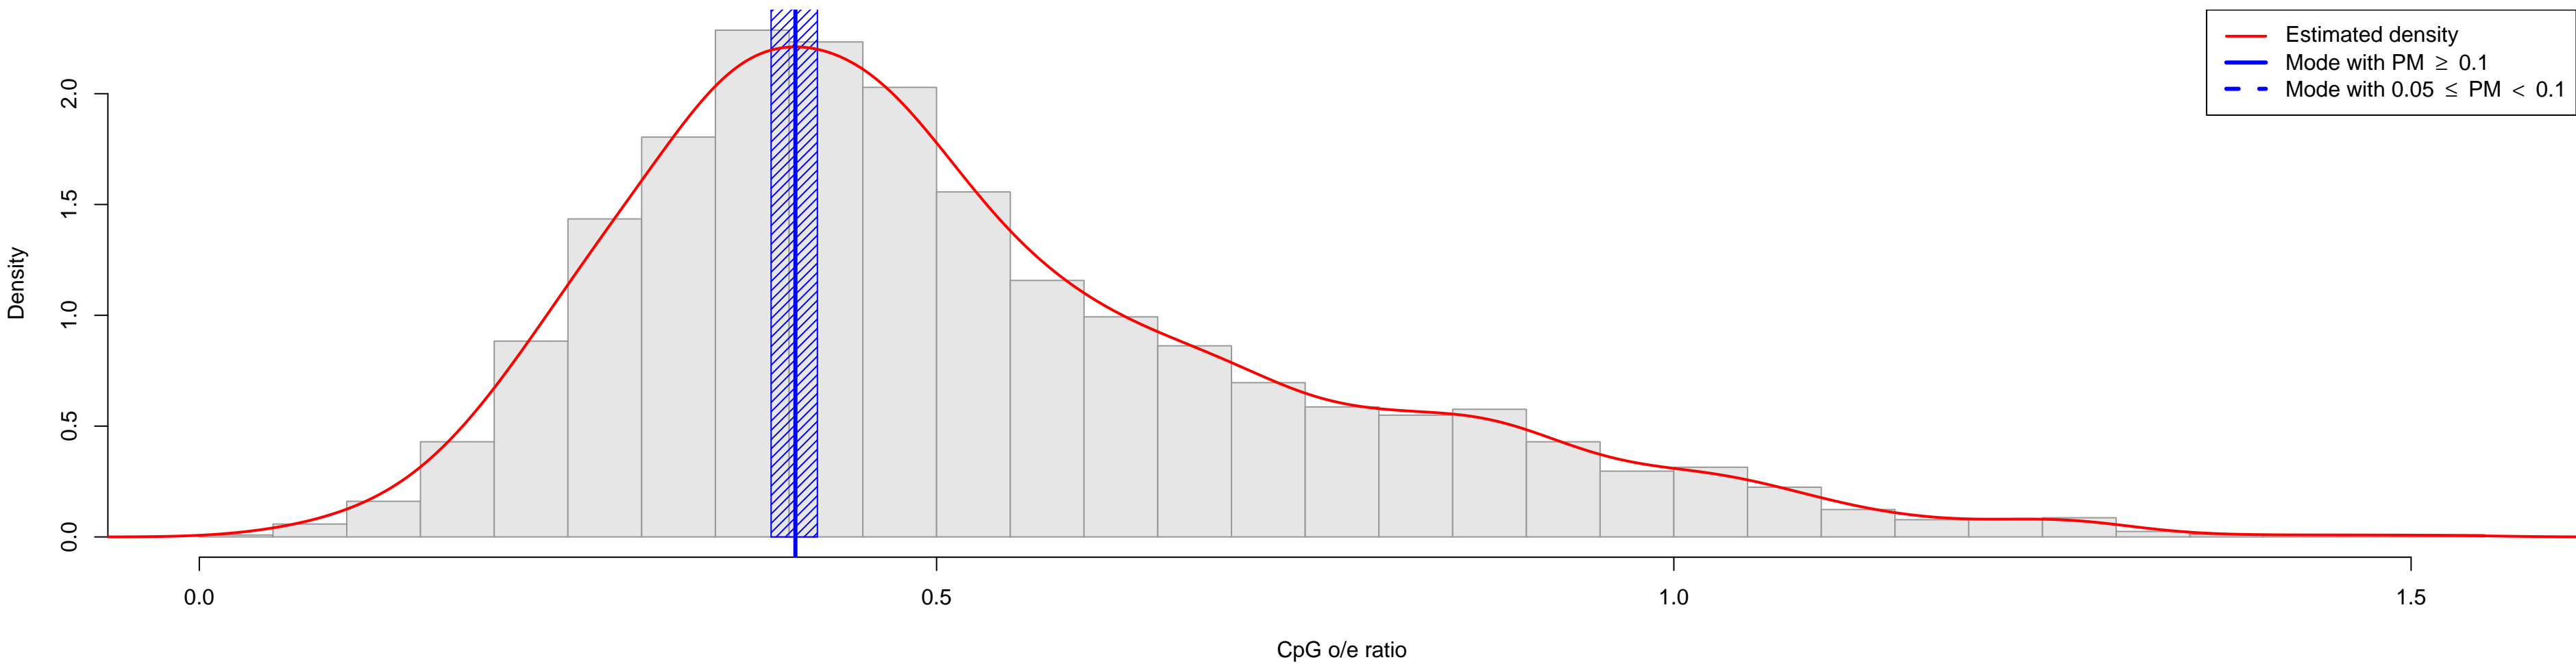



# Lysiphlebus\_testaceipes

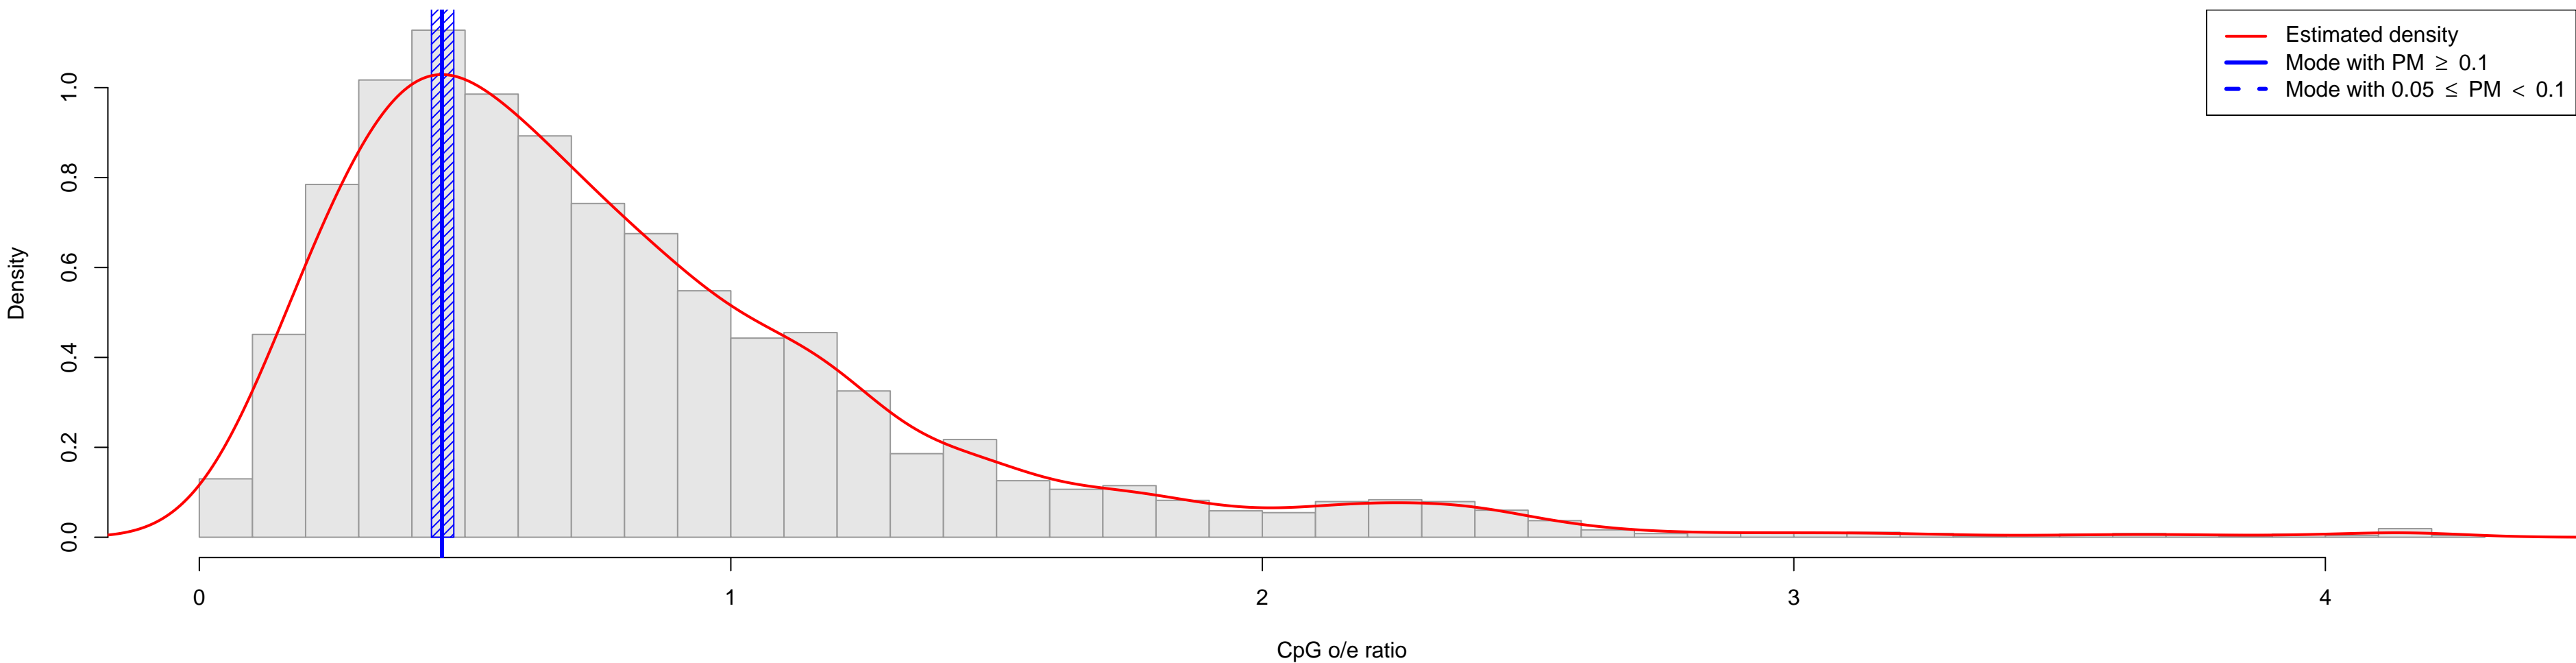

# Macaca\_fascicularis

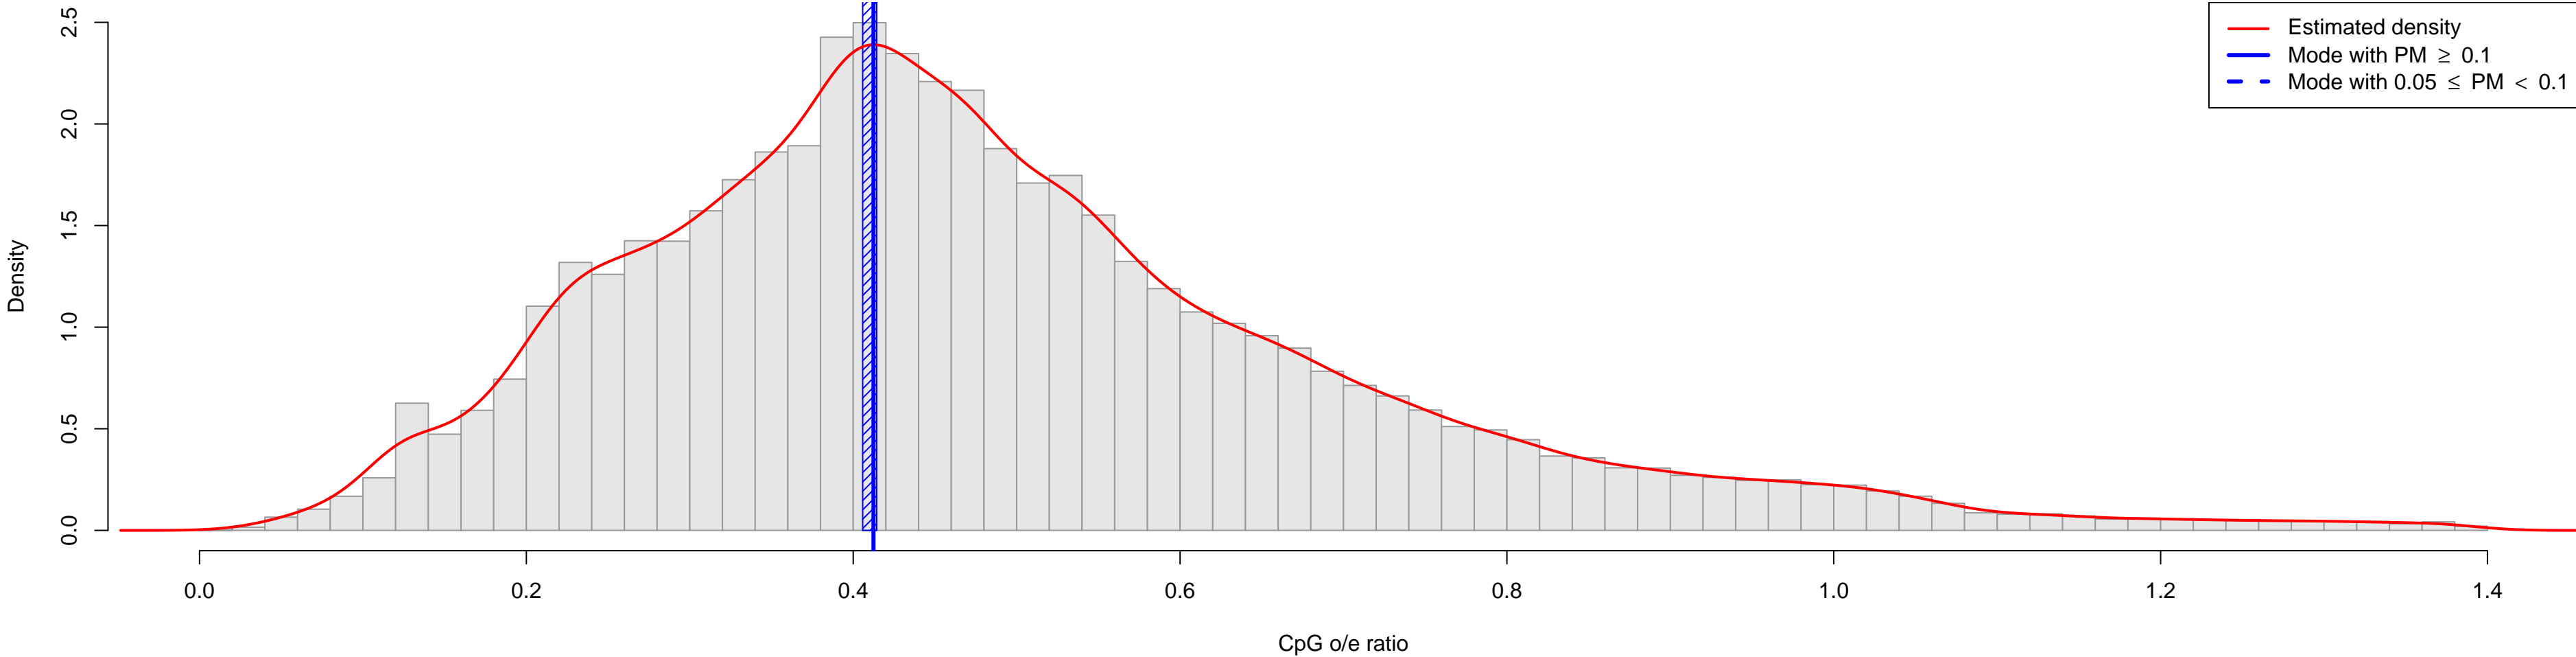

# Macaca\_mulatta

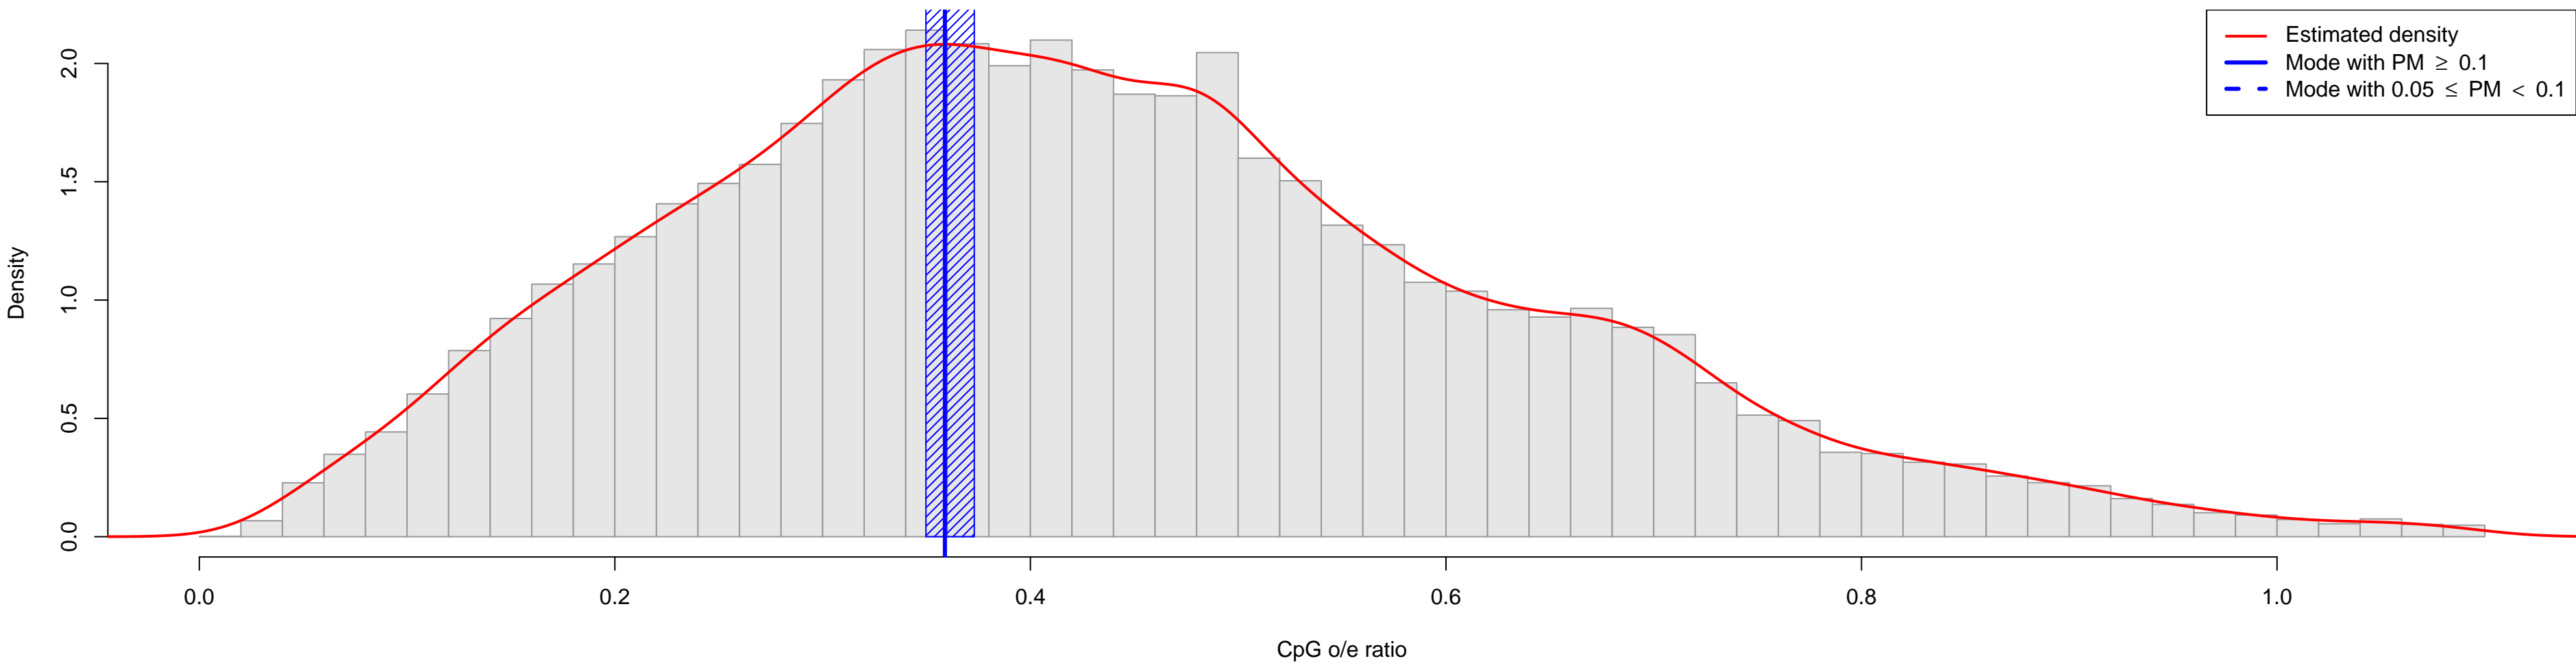

# Macaca\_nemestrina

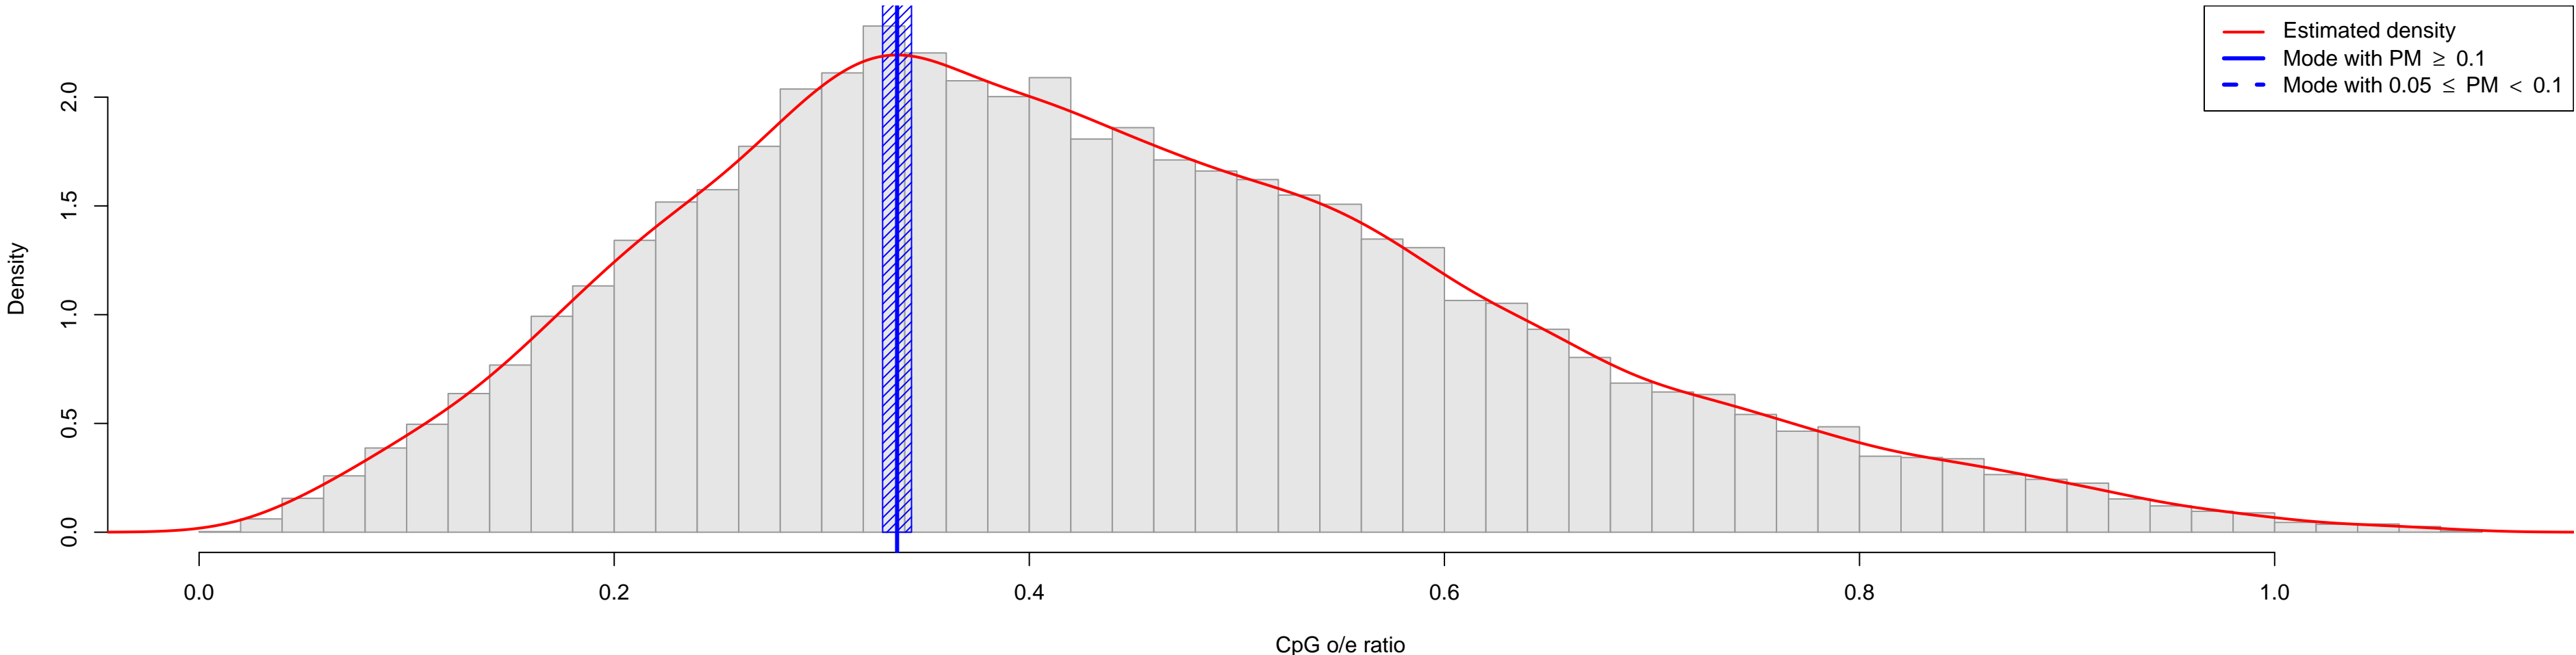

# Maconellicoccus\_hirsutus

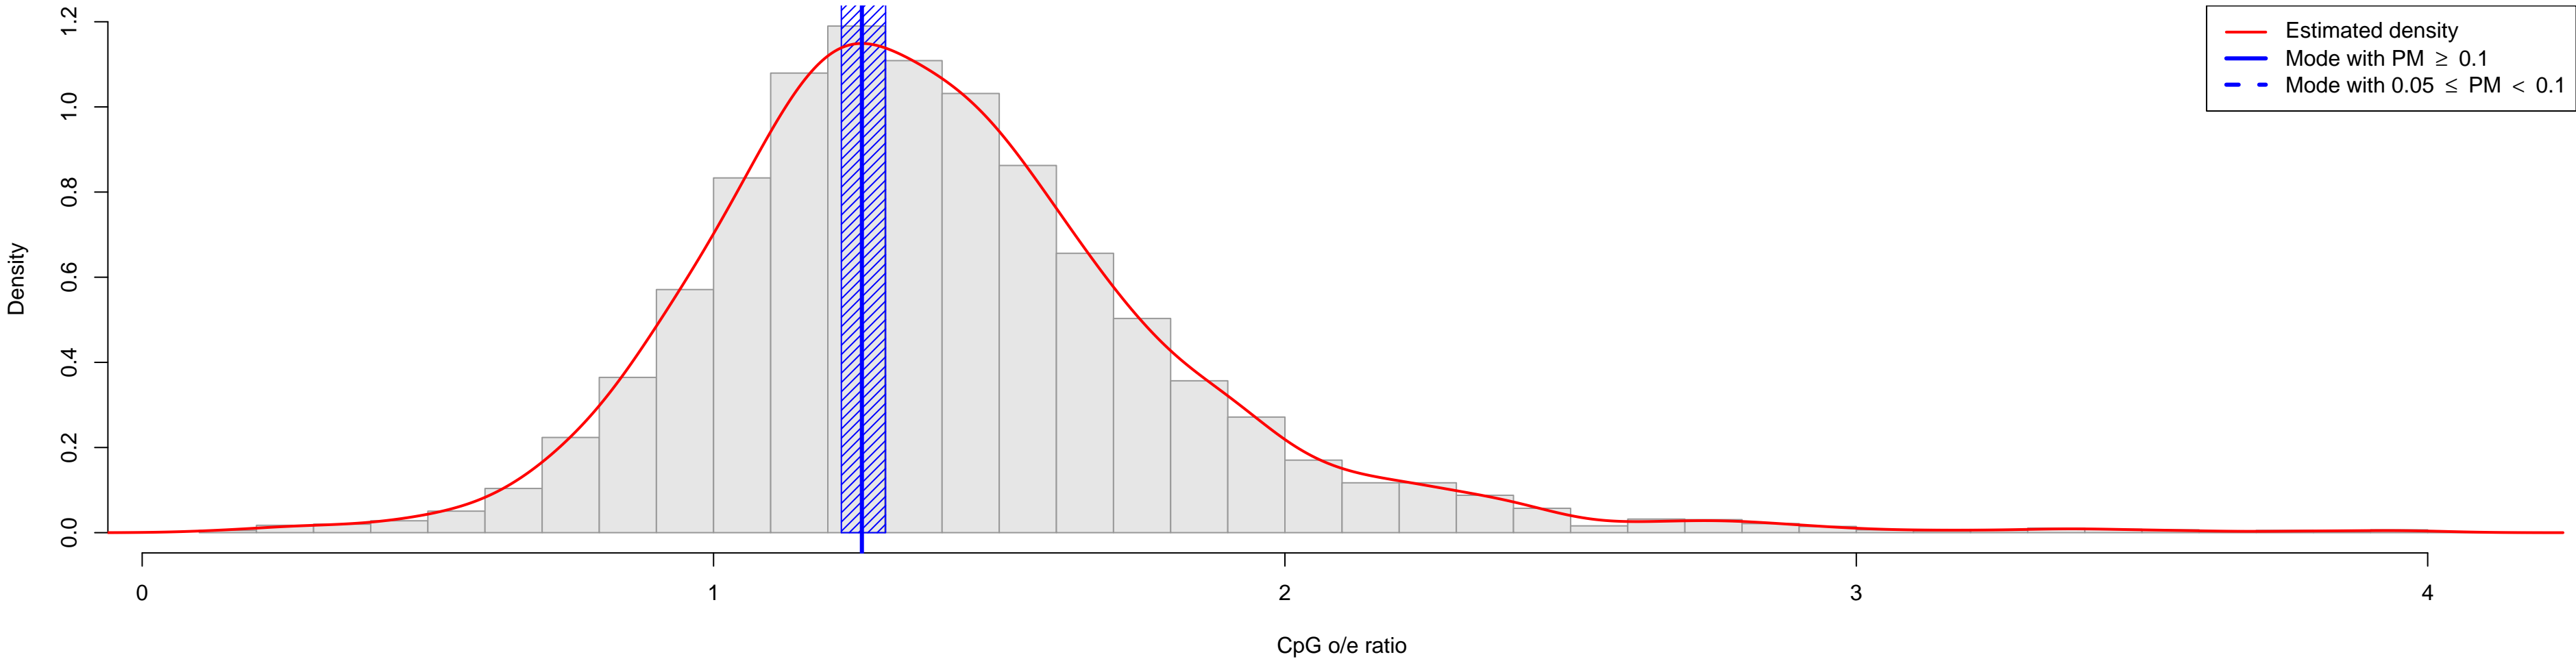

# Macrobrachium\_nipponense

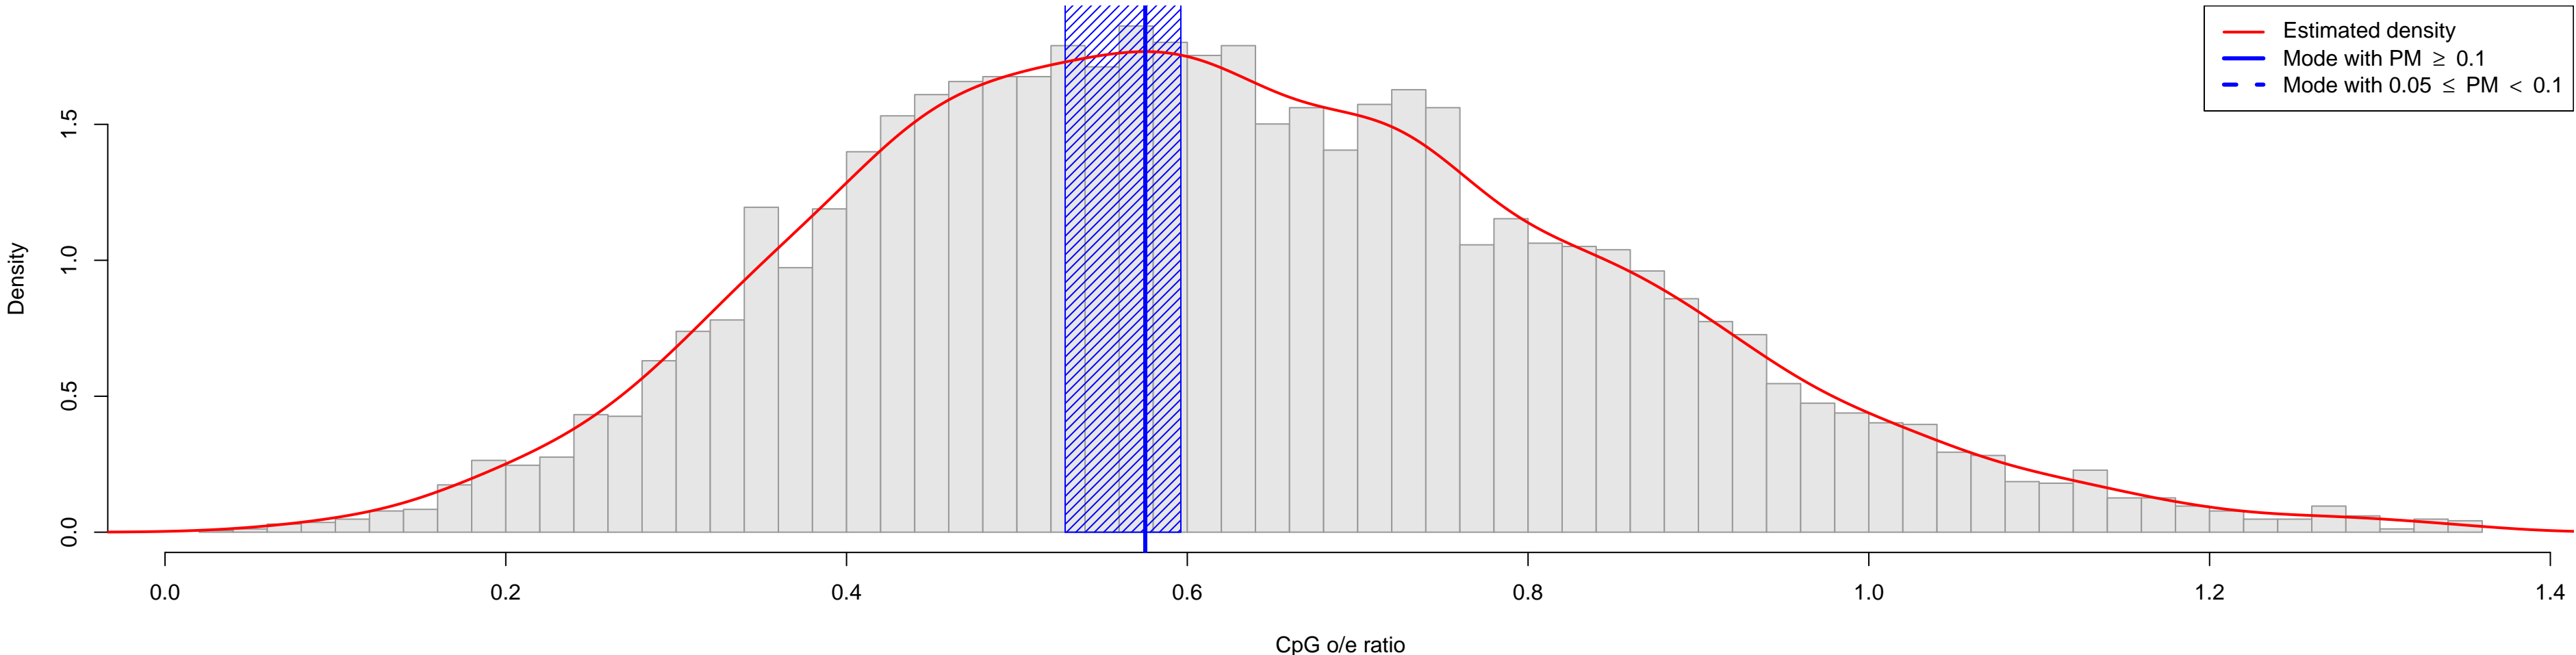

— Estimated density  
— Mode with  $PM \geq 0.1$   
- - Mode with  $0.05 \leq PM < 0.1$

# Macrobrachium\_rosenbergii

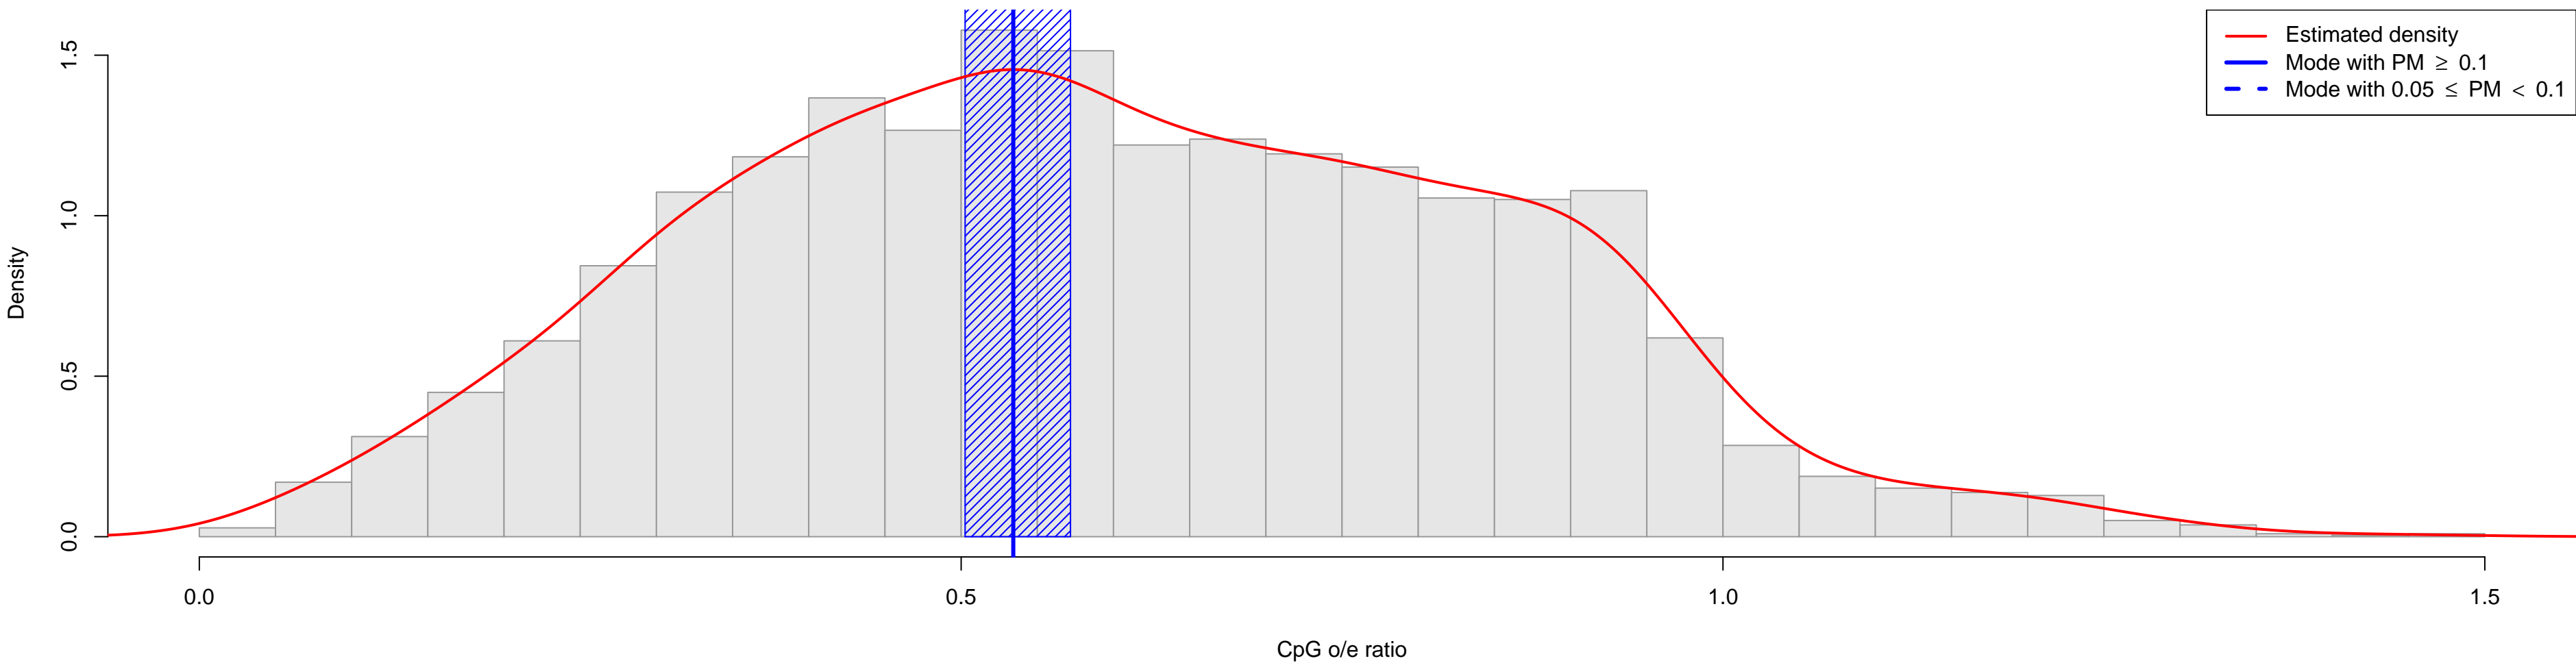

# Macropus\_eugenii

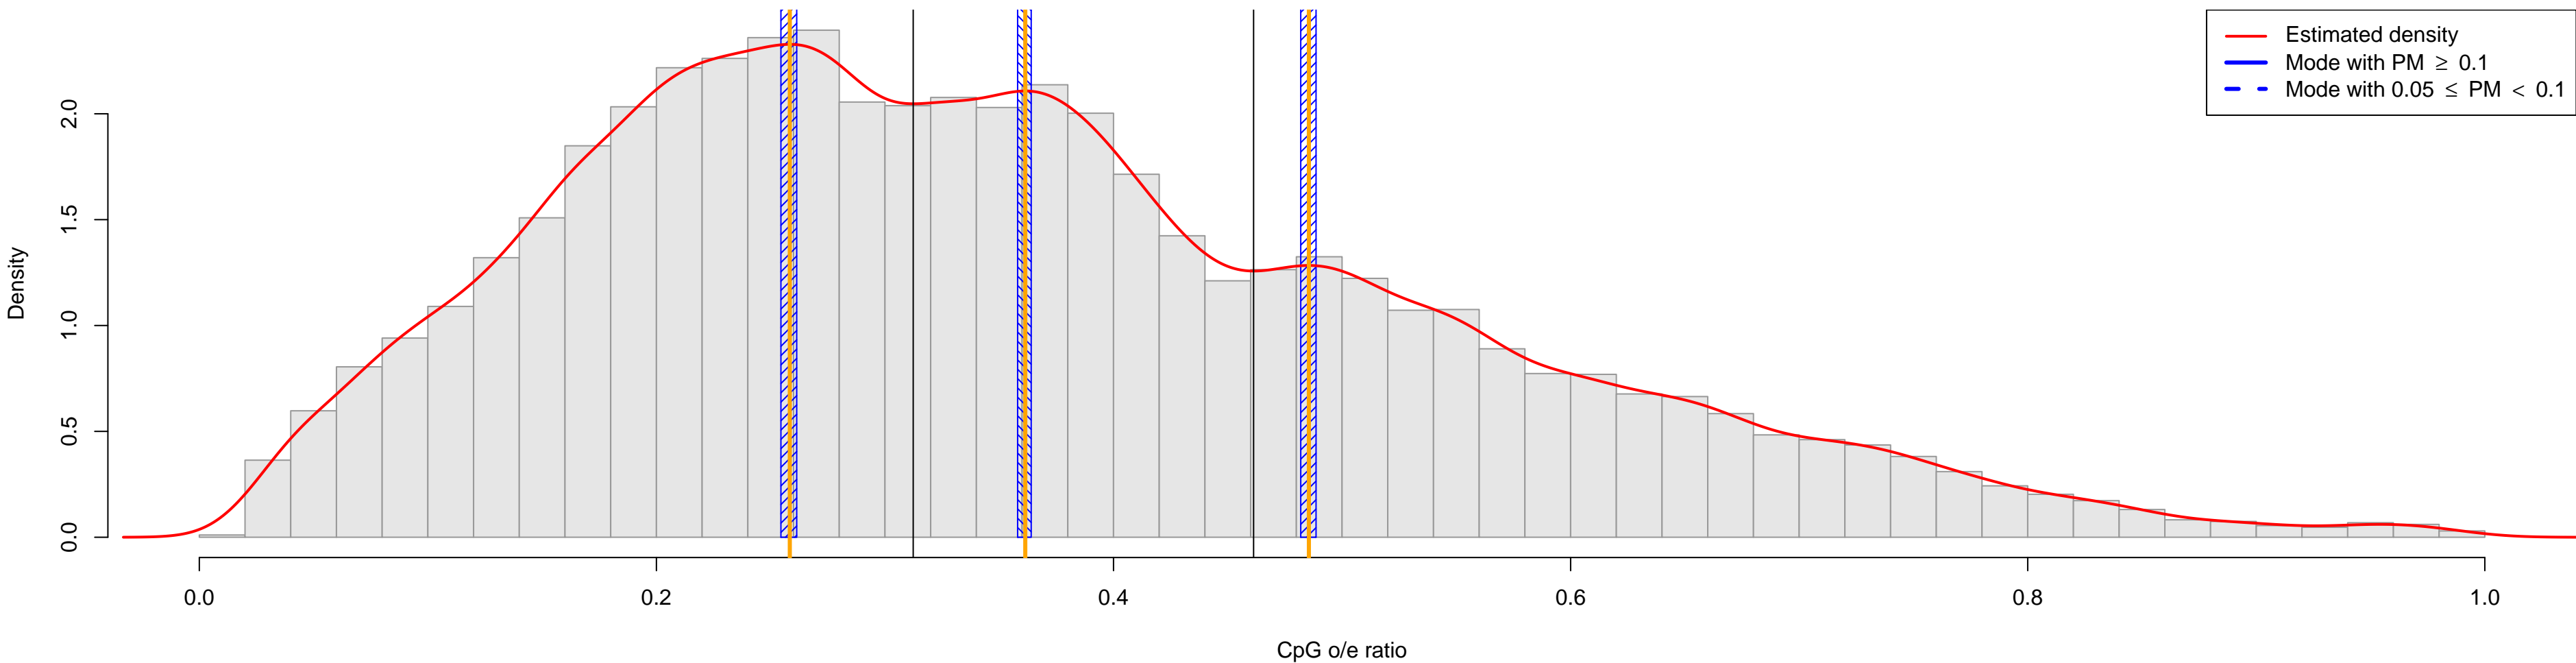



# Magnaporthe\_grisea

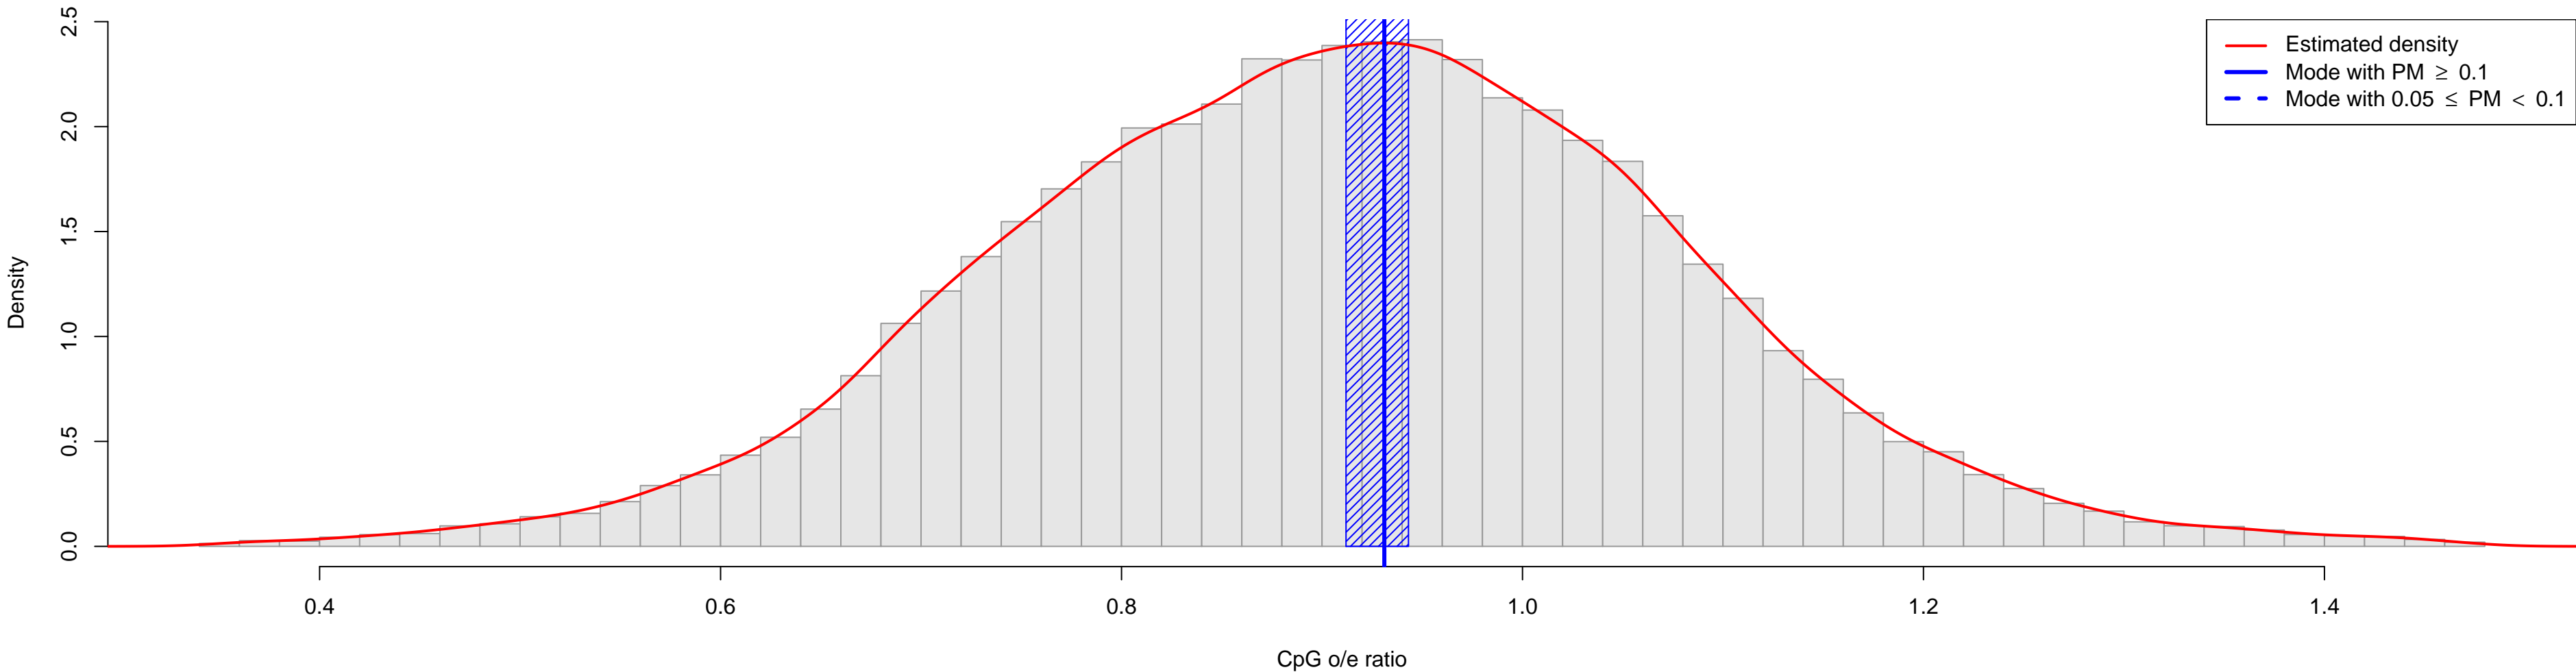

# Magnaporthe\_oryzae

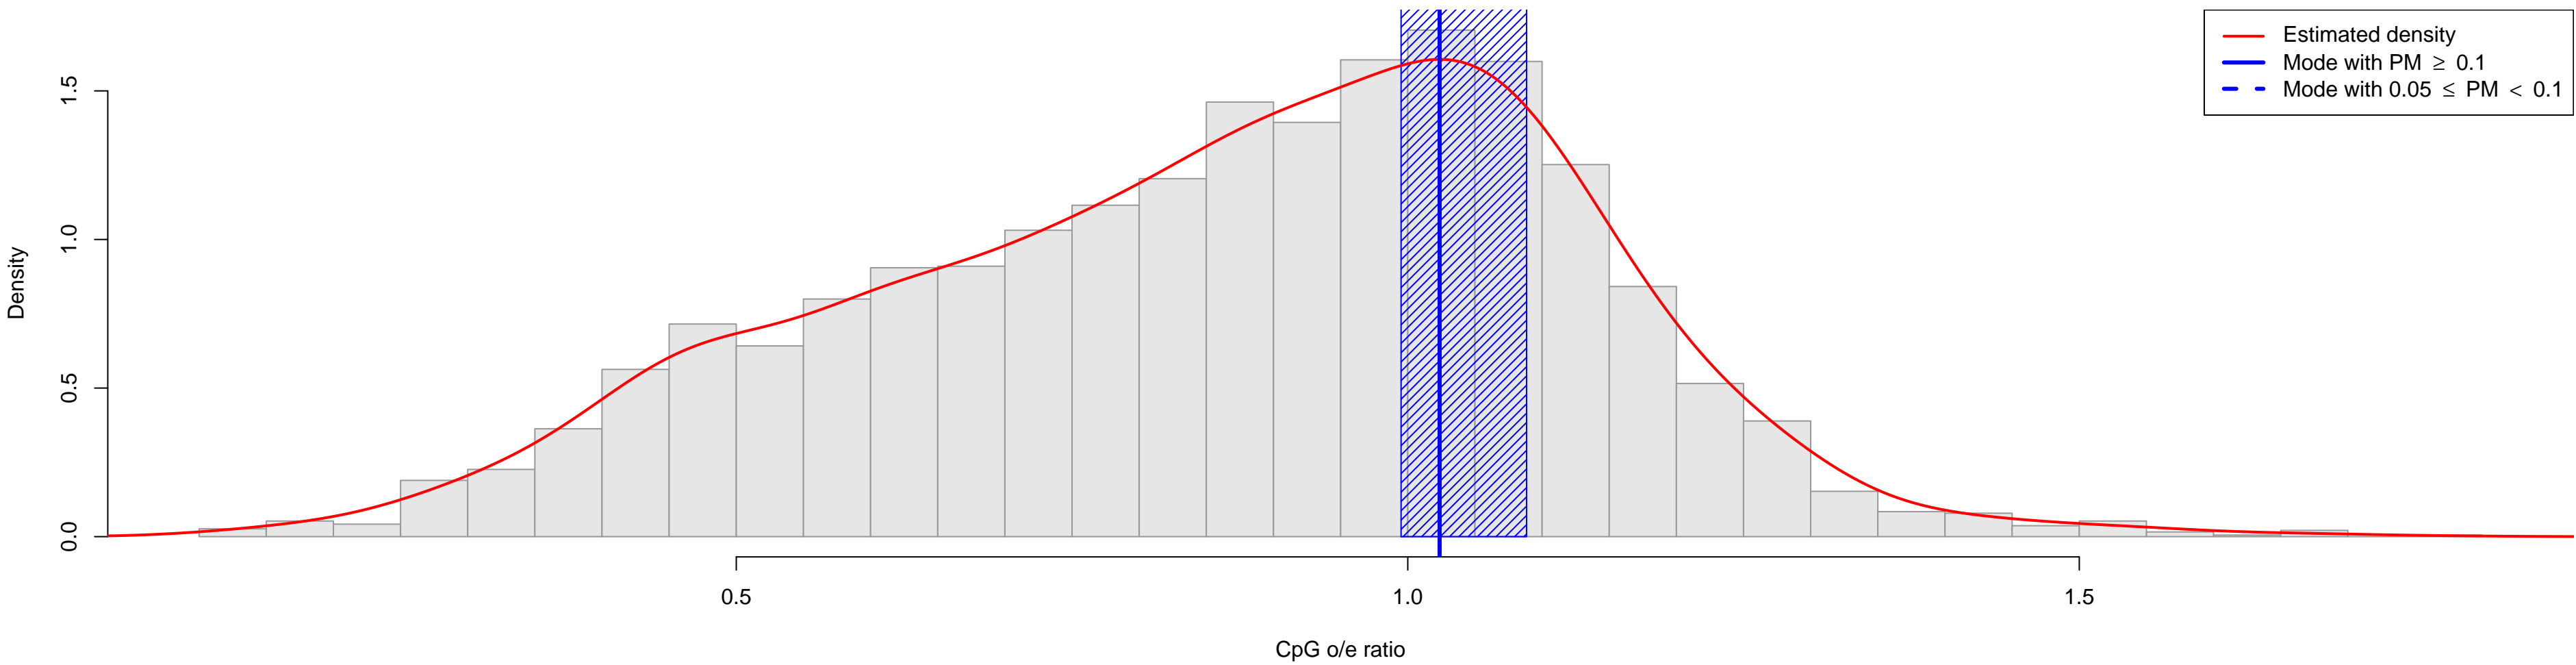

# Mahonia\_nervosa

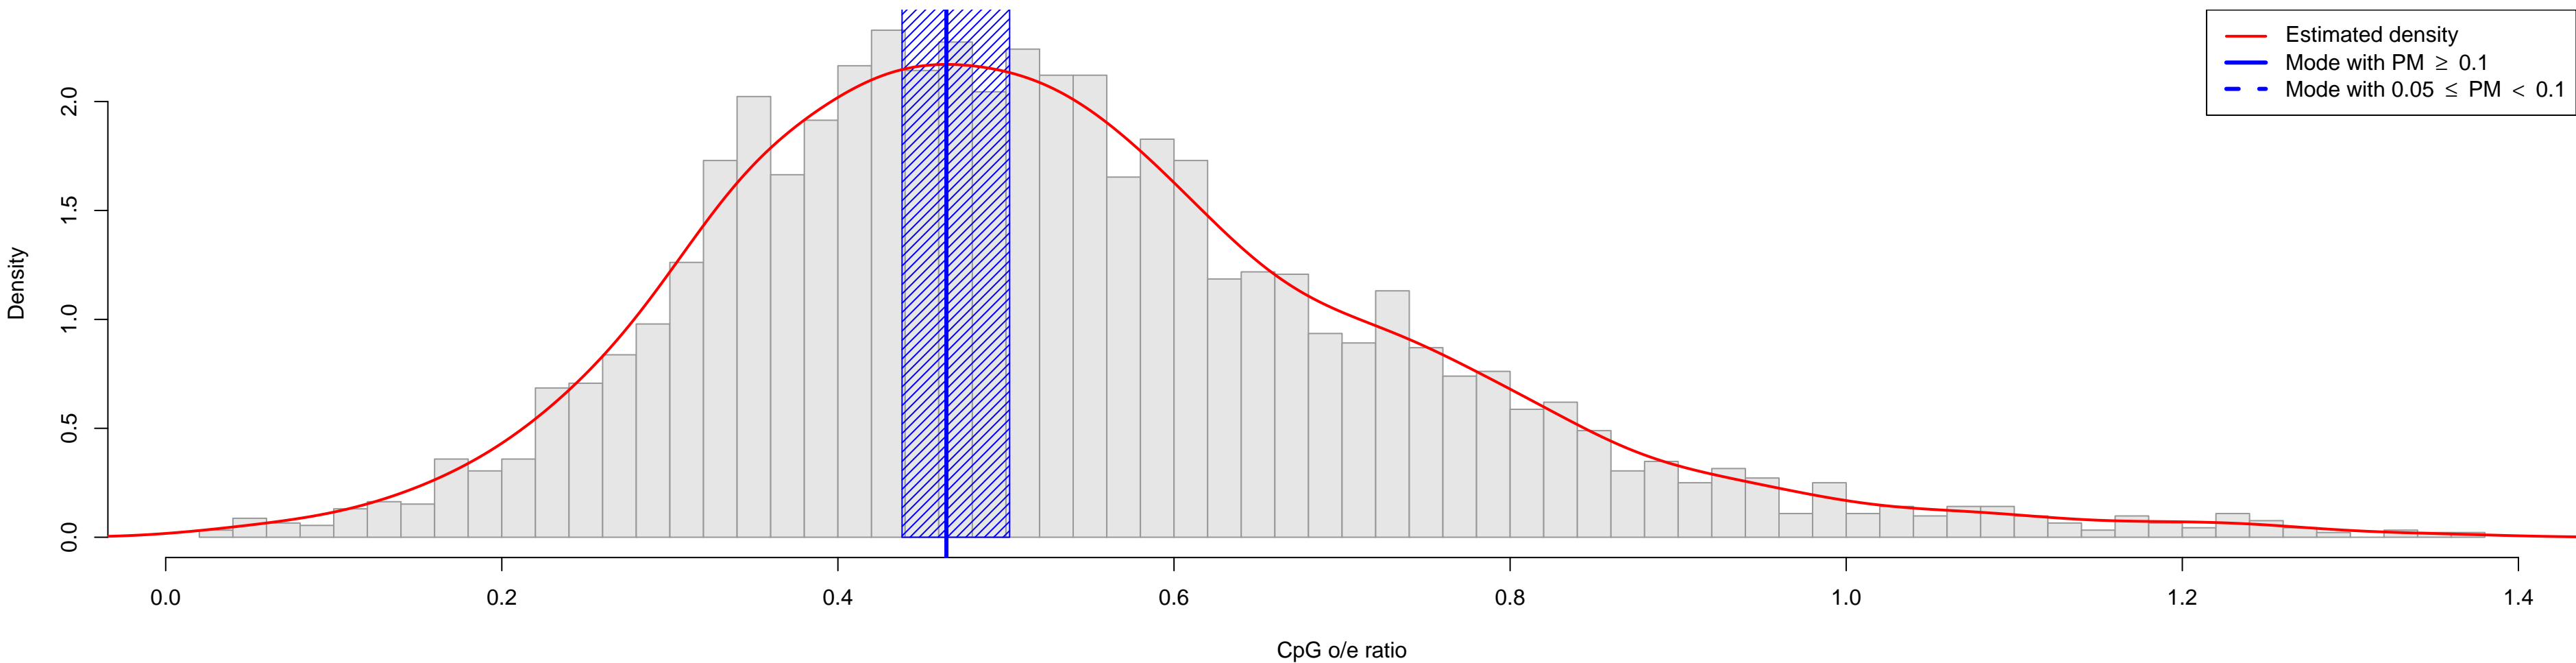

# Manihot\_esculenta

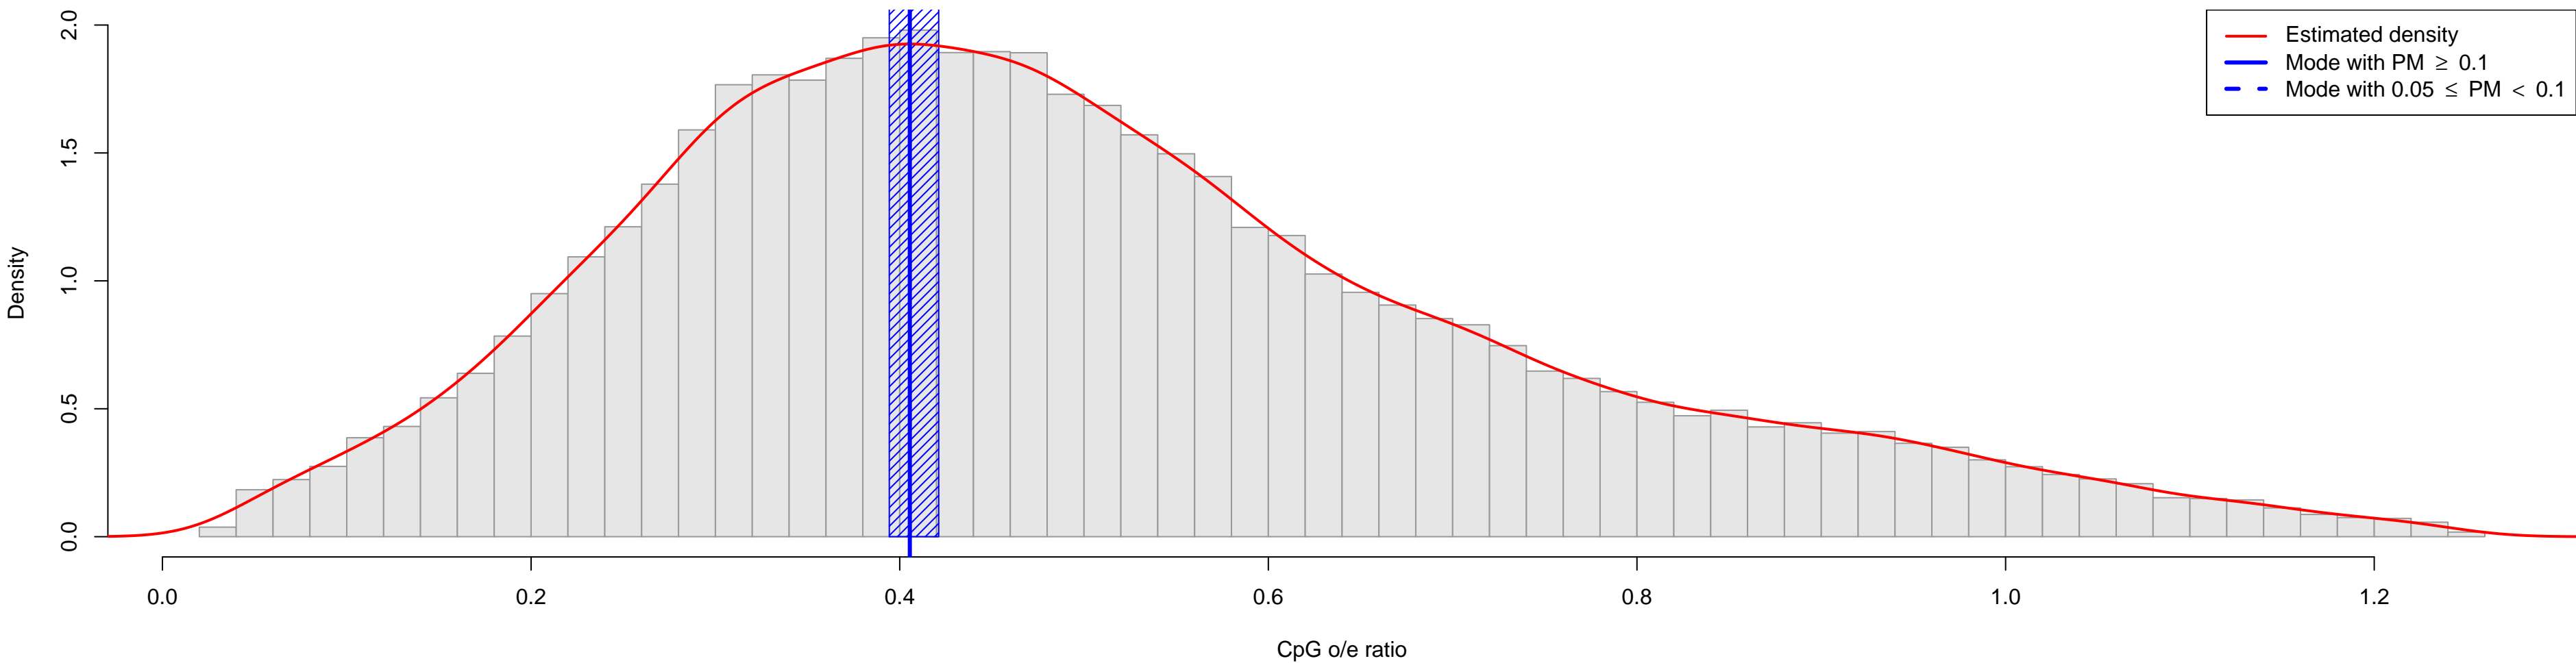

# Marsupenaeus\_japonicus

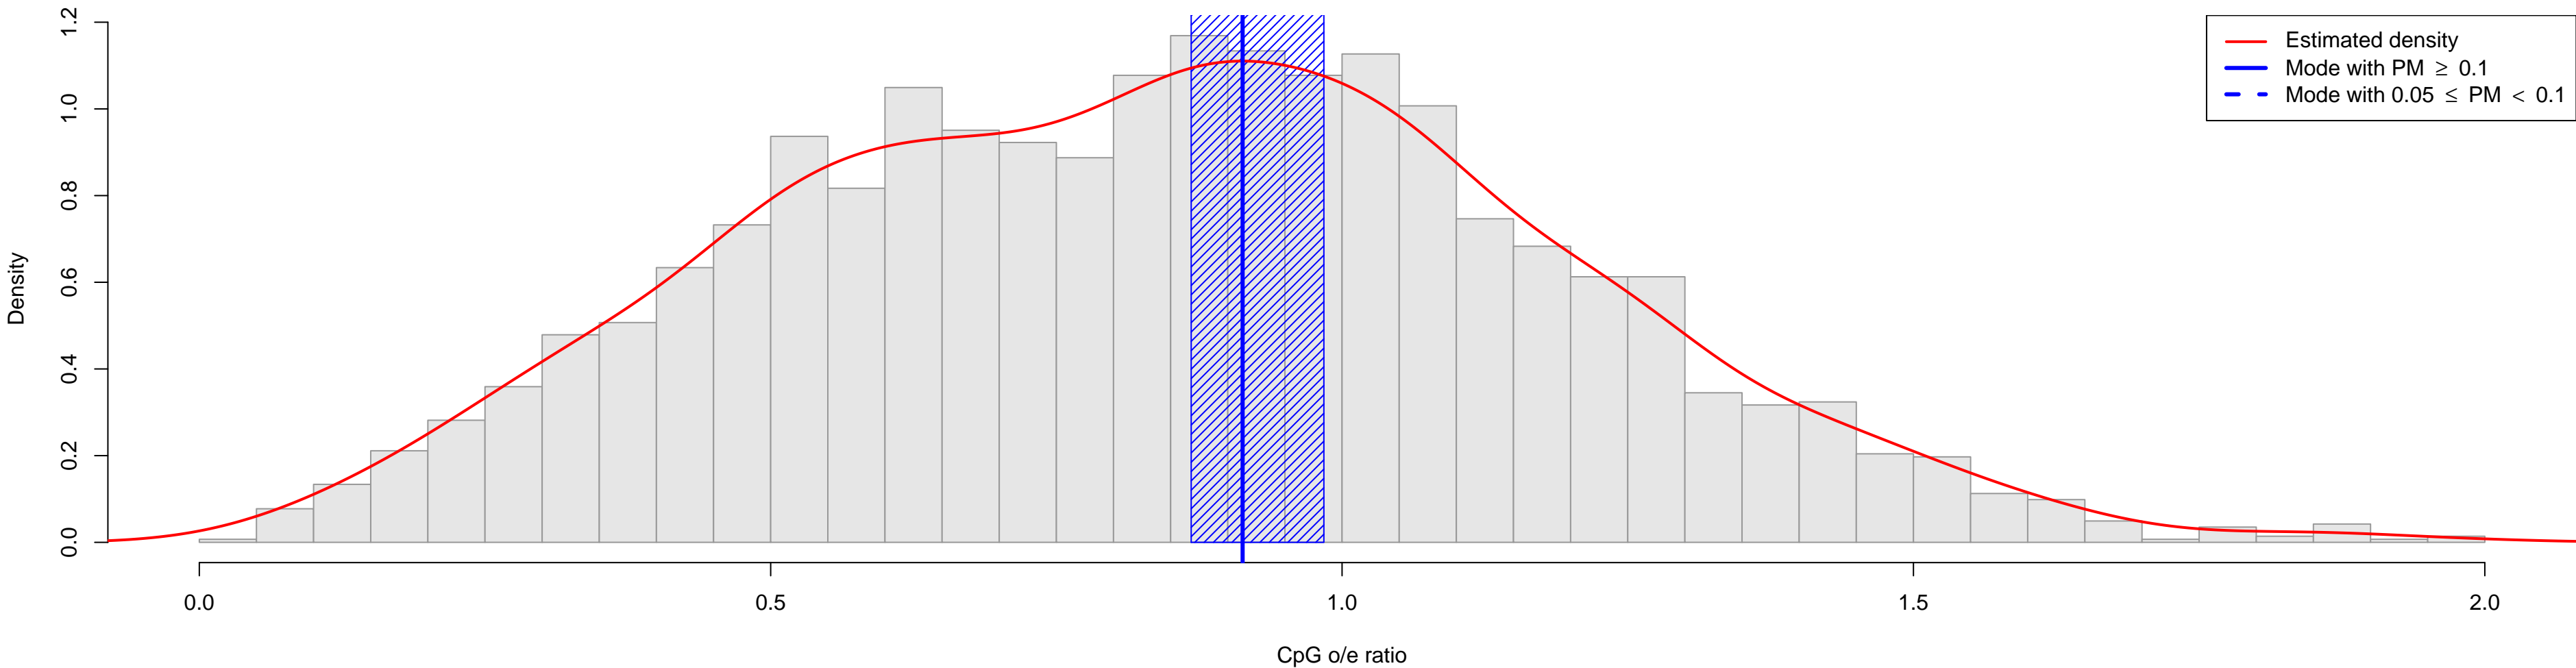

# Mastigamoeba\_balamuthi

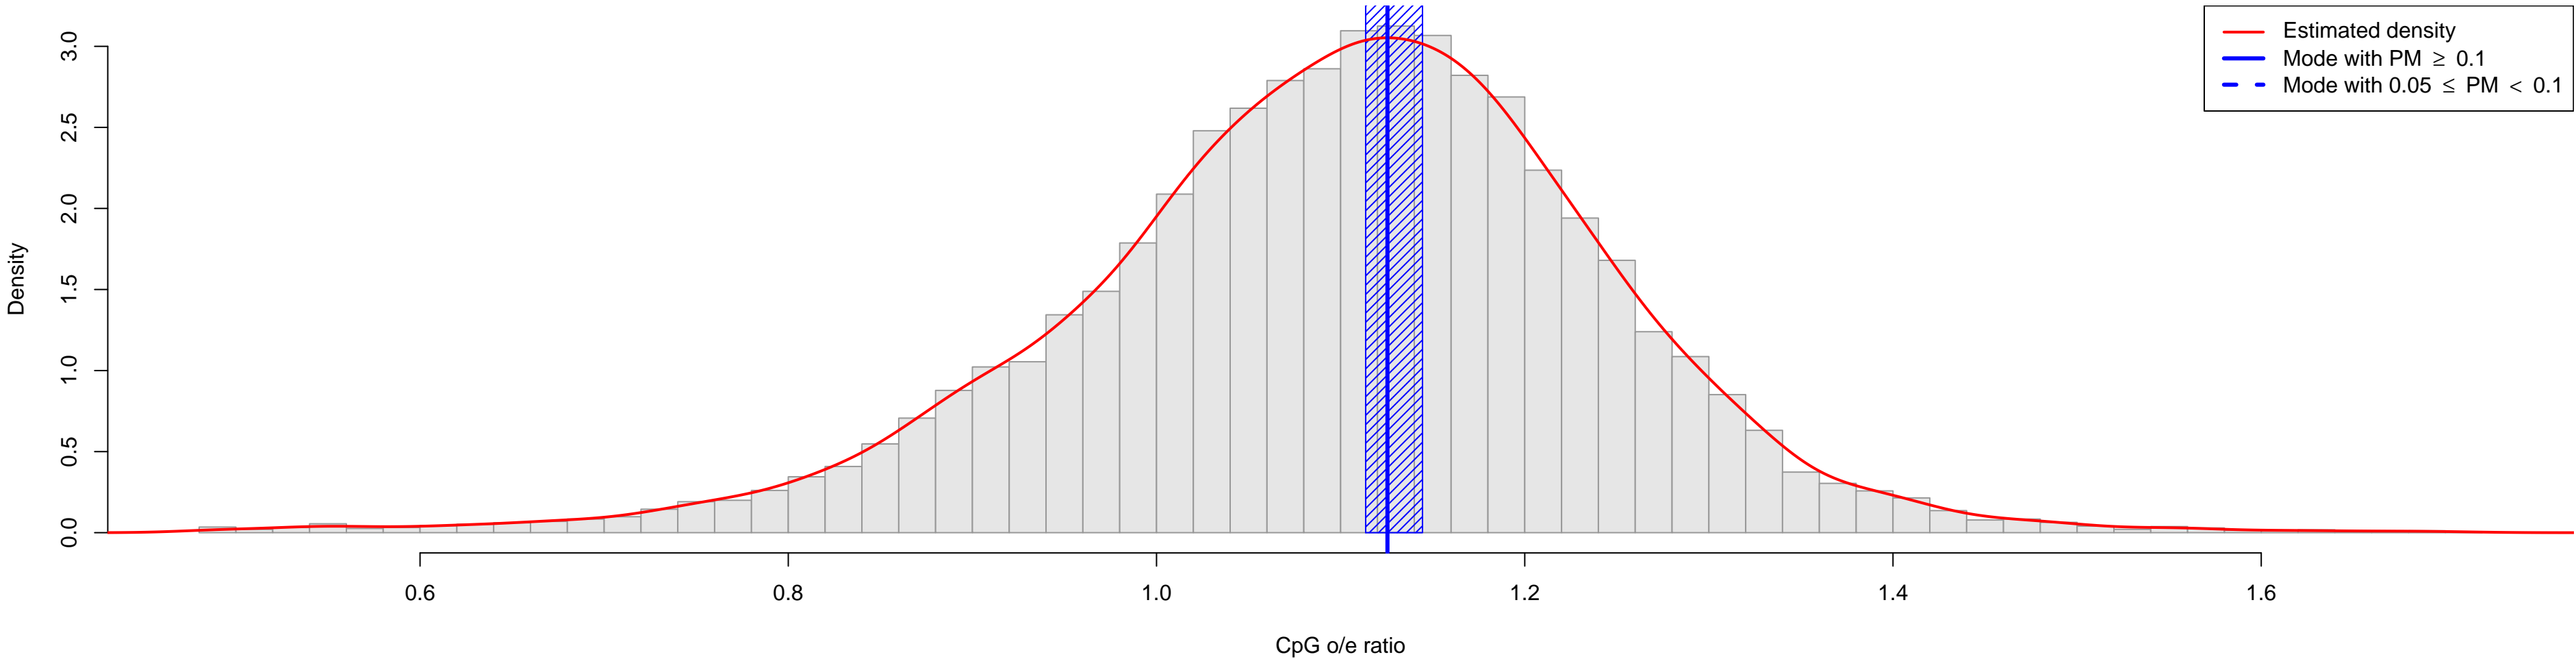

# Meleagris\_gallopavo

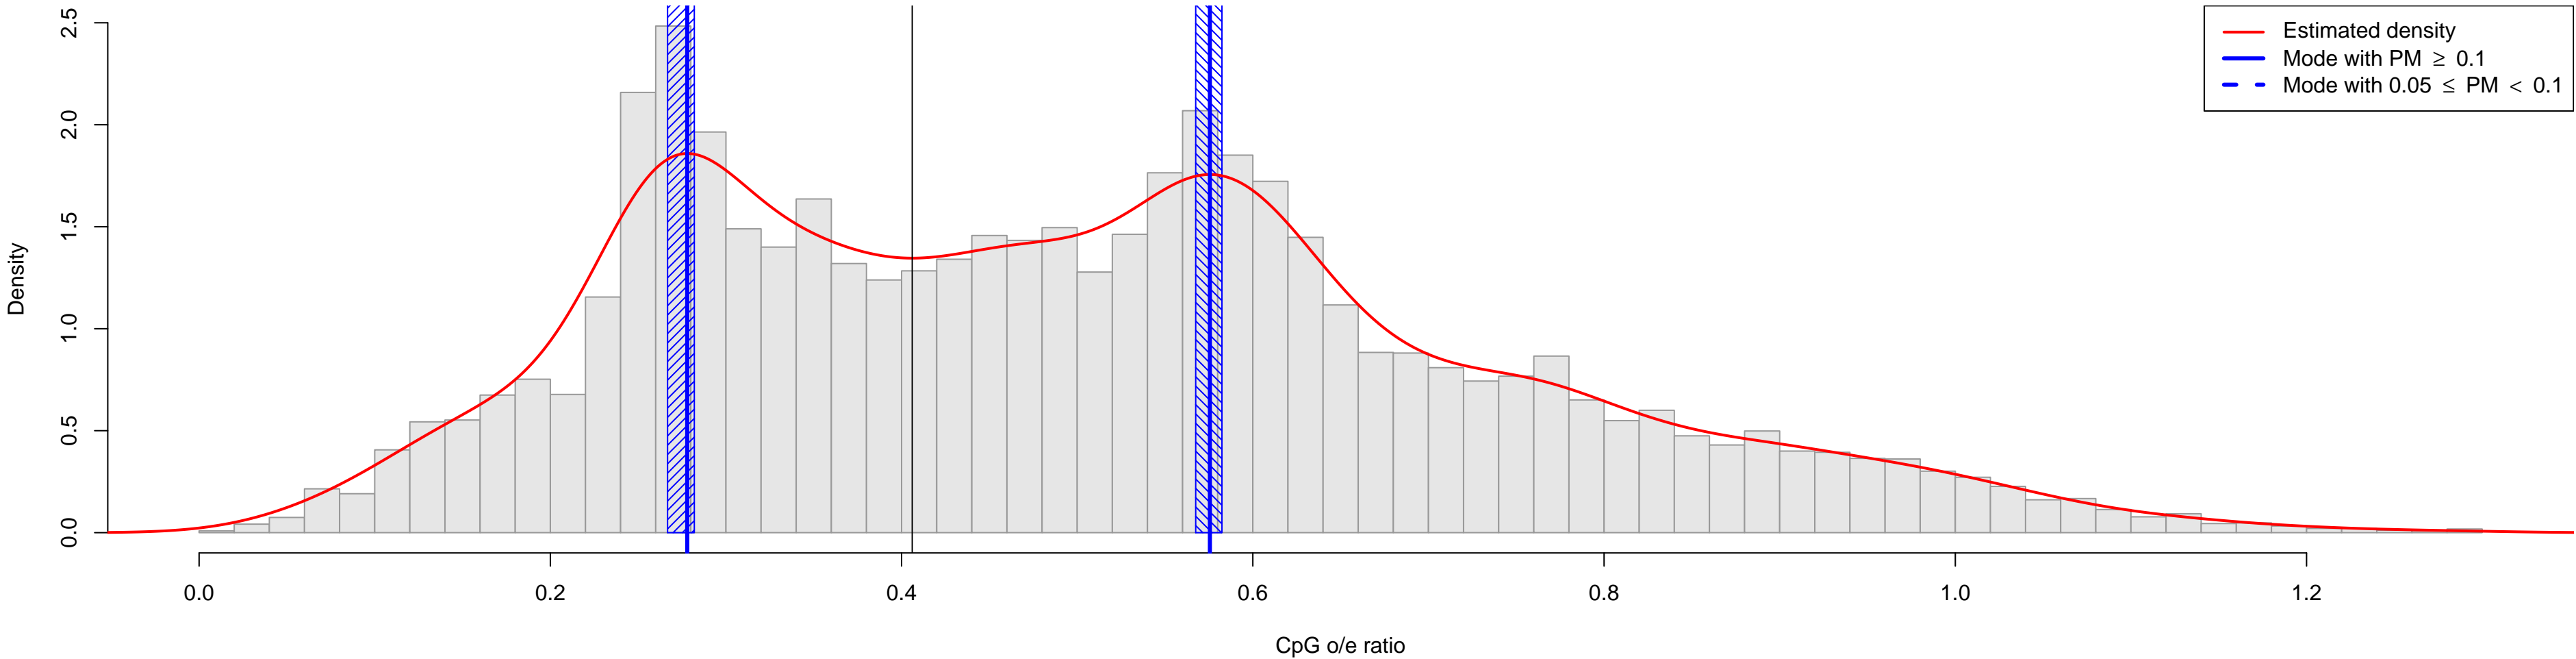

# Meloidogyne\_arenaria

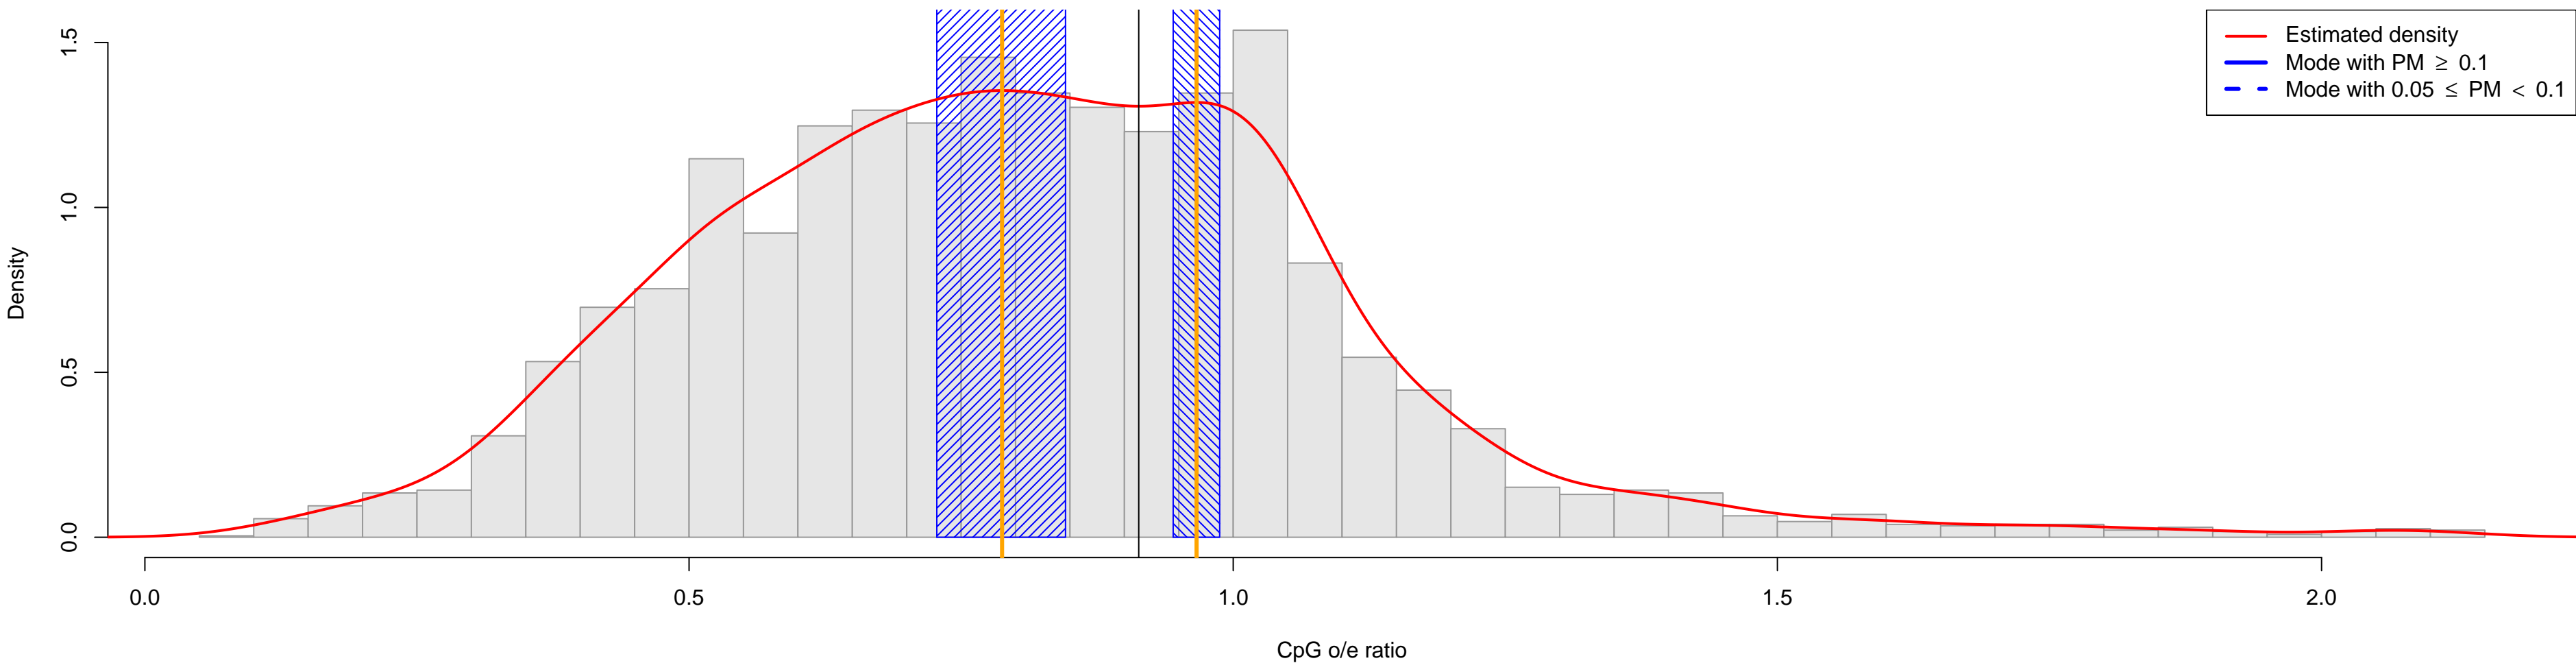



# Meloidogyne\_chitwoodi

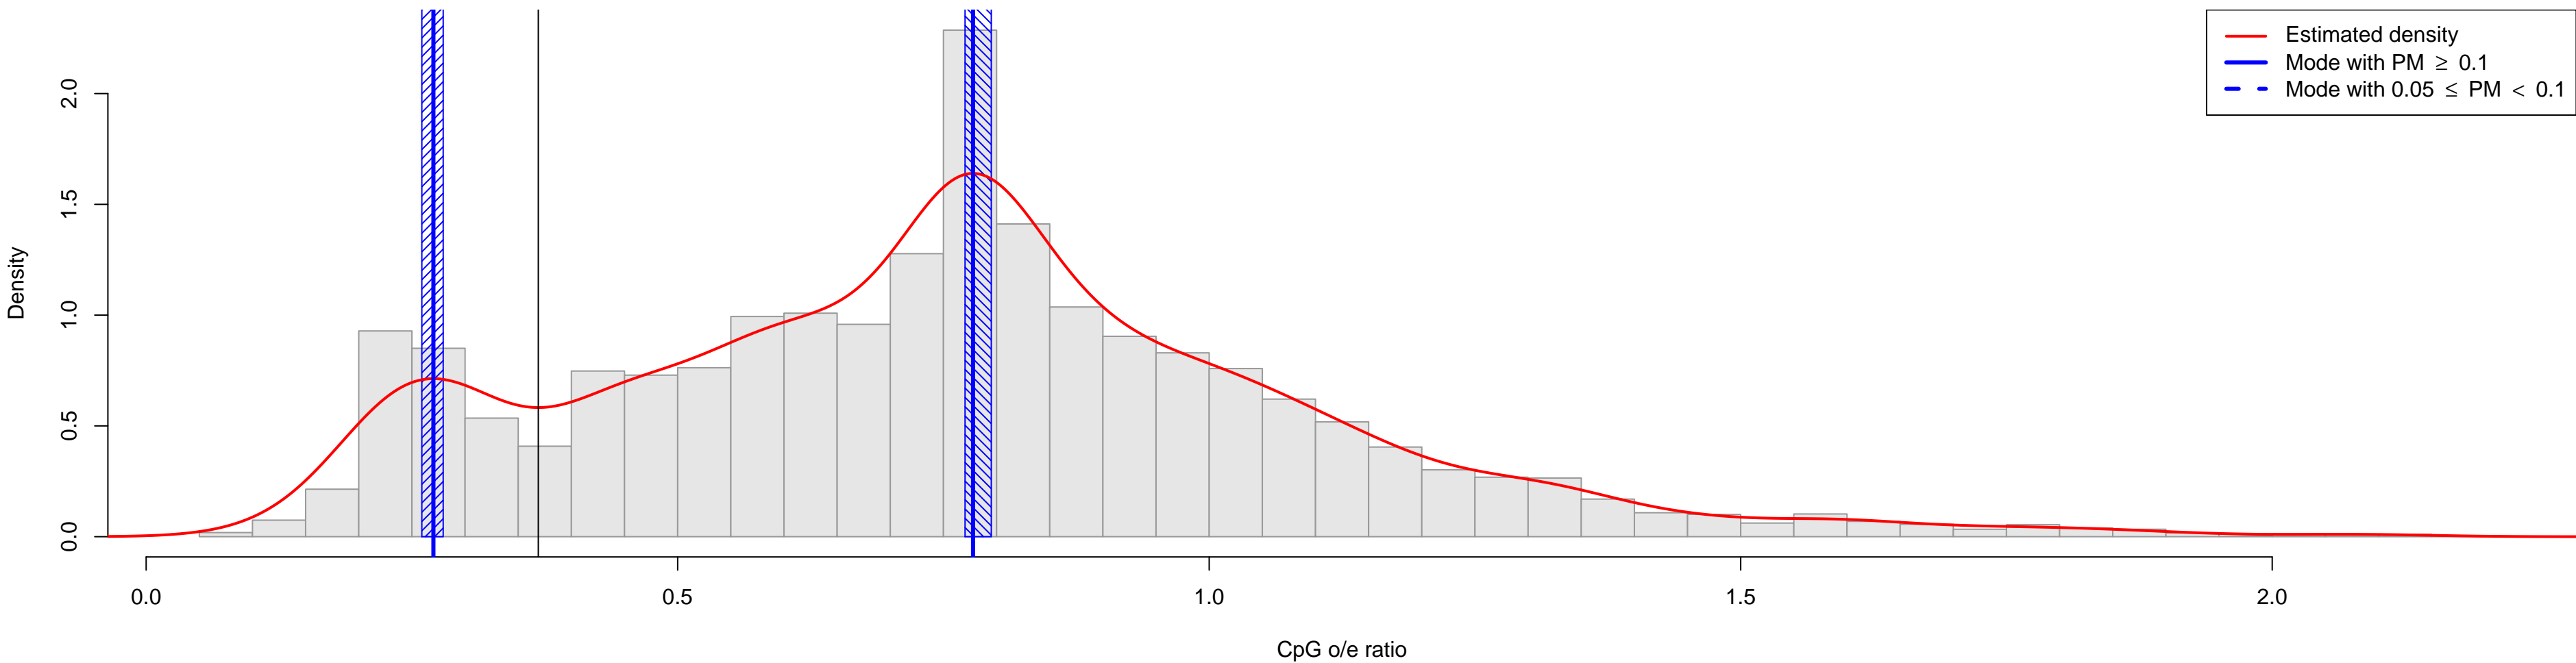

# Meloidogyne\_hapla

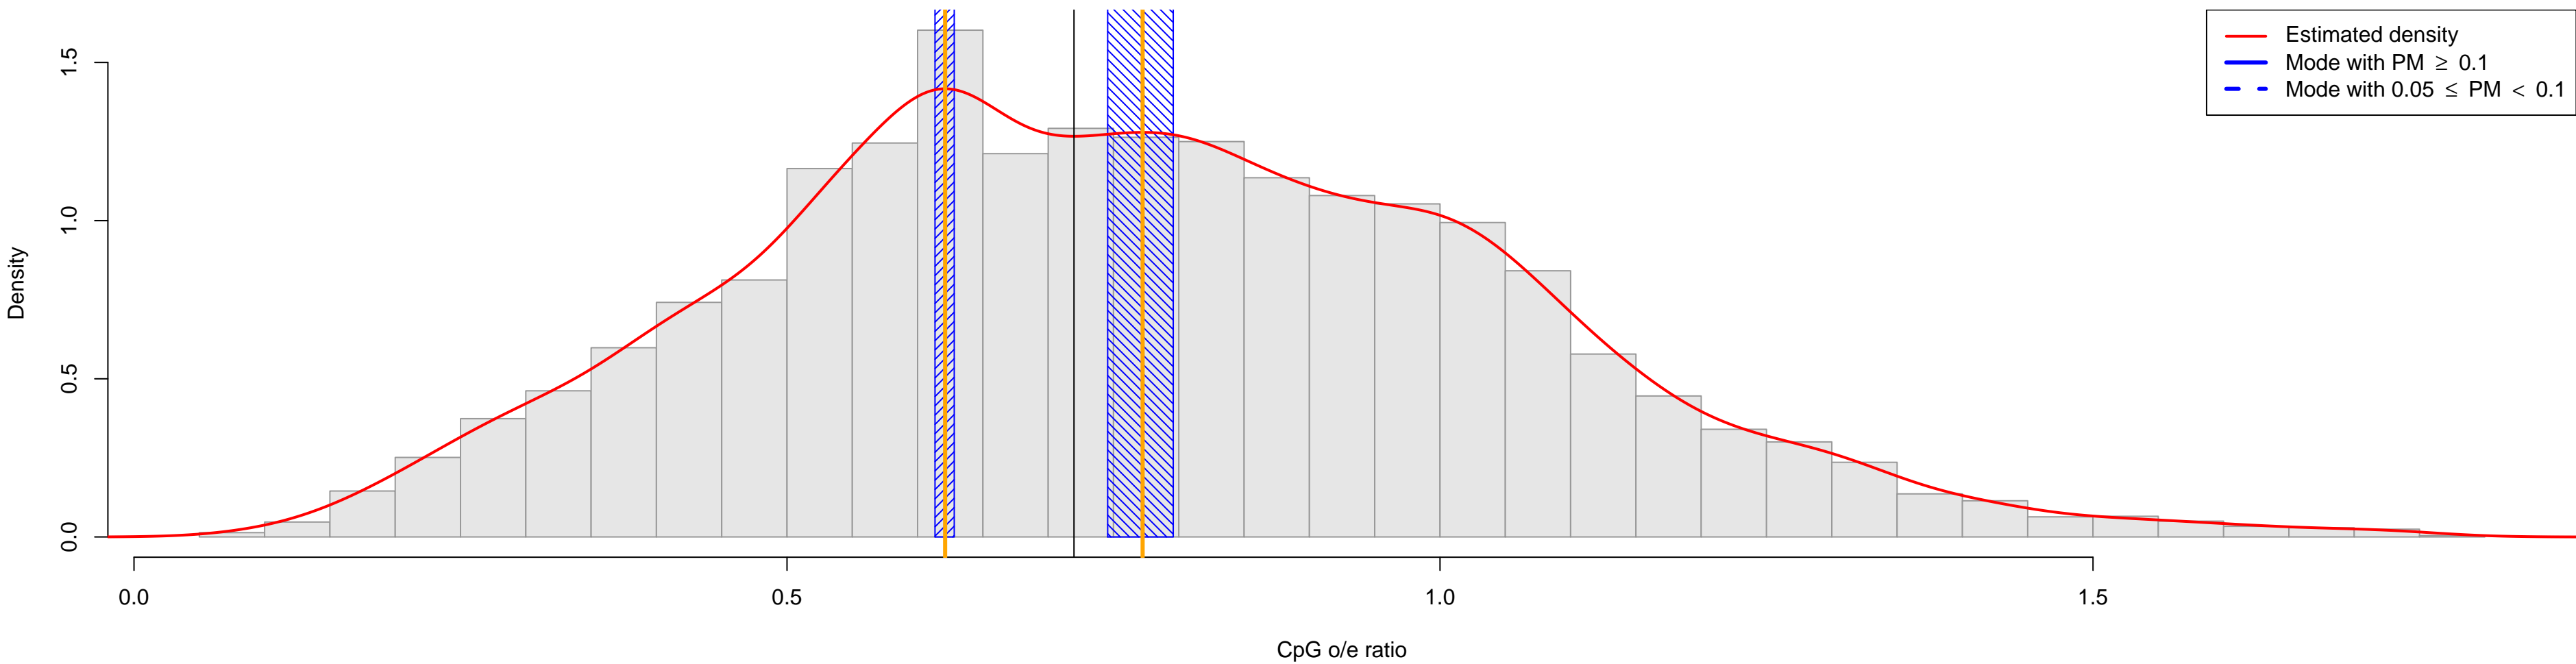

# Meloidogyne\_incognita

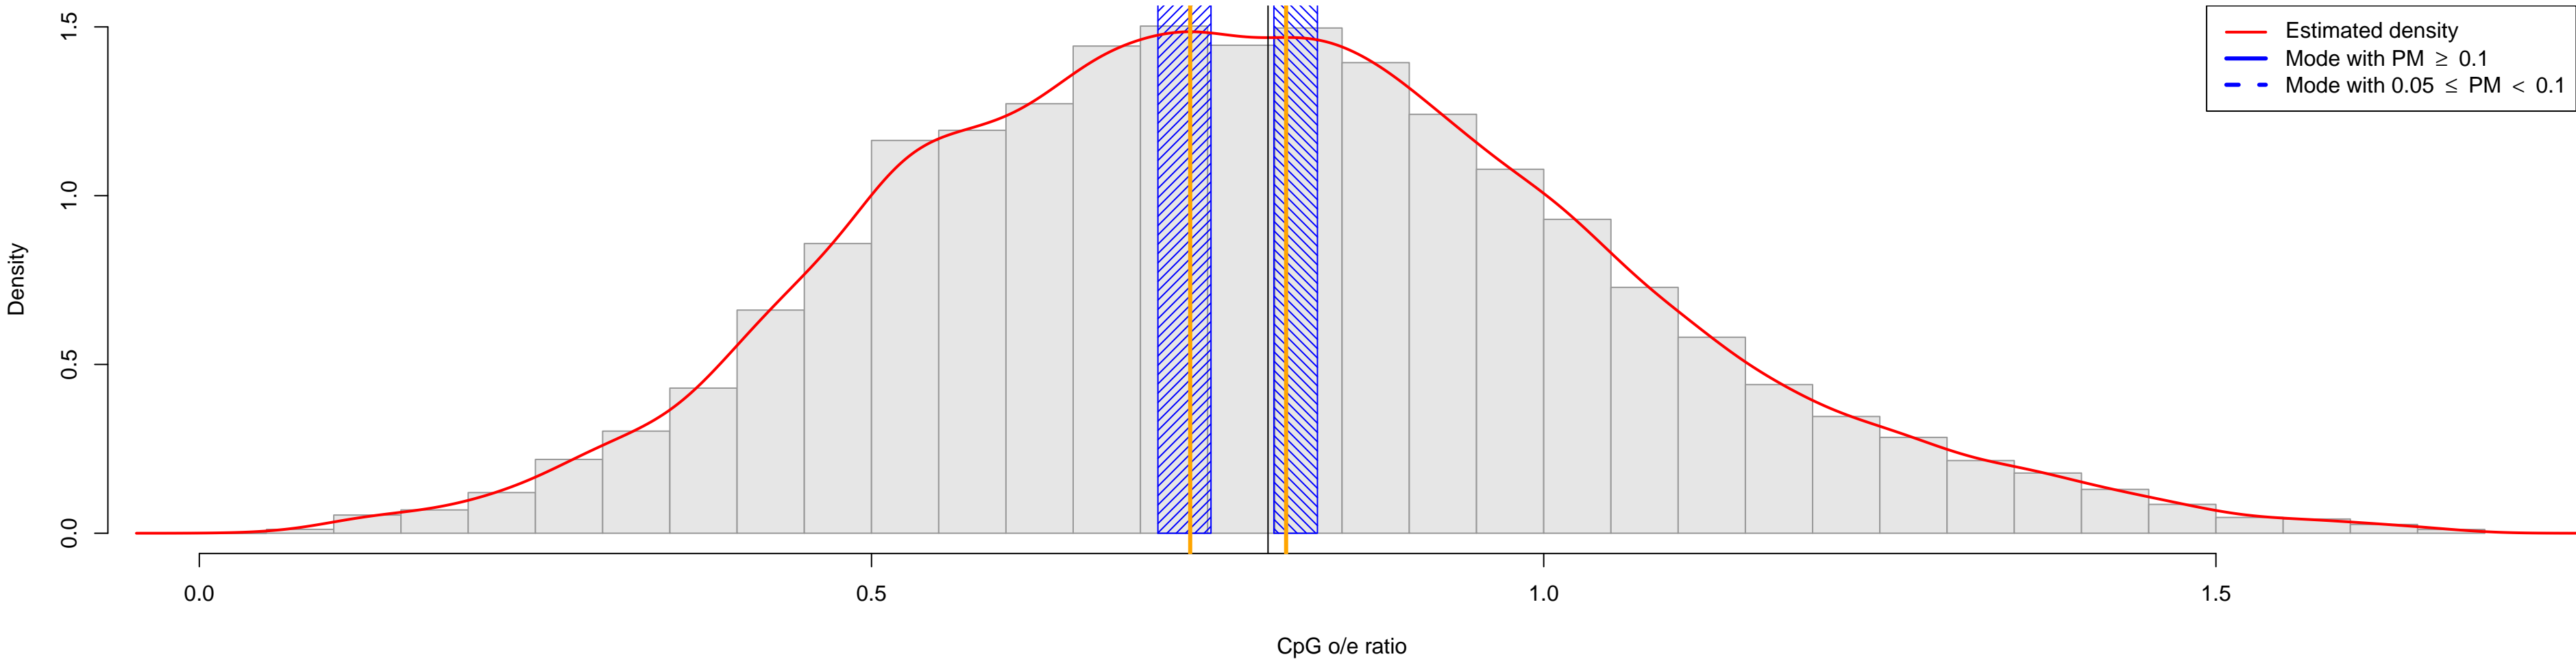

# Meloidogyne\_javanica

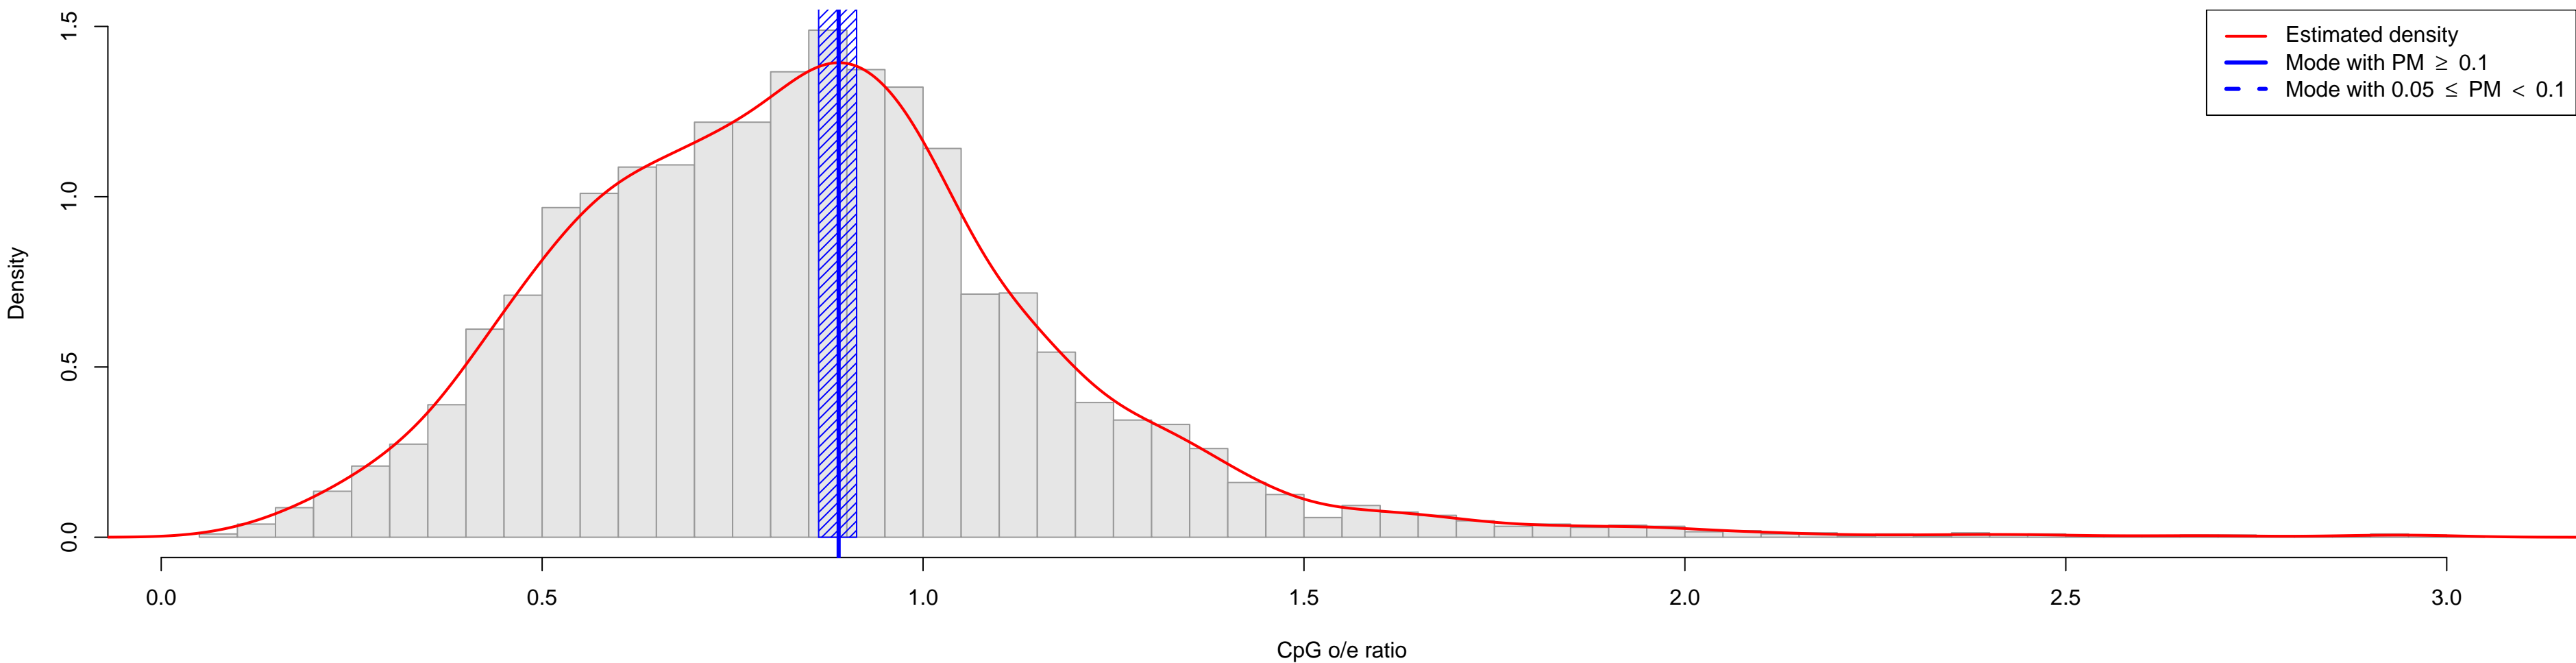

# Meloidogyne\_paranaensis

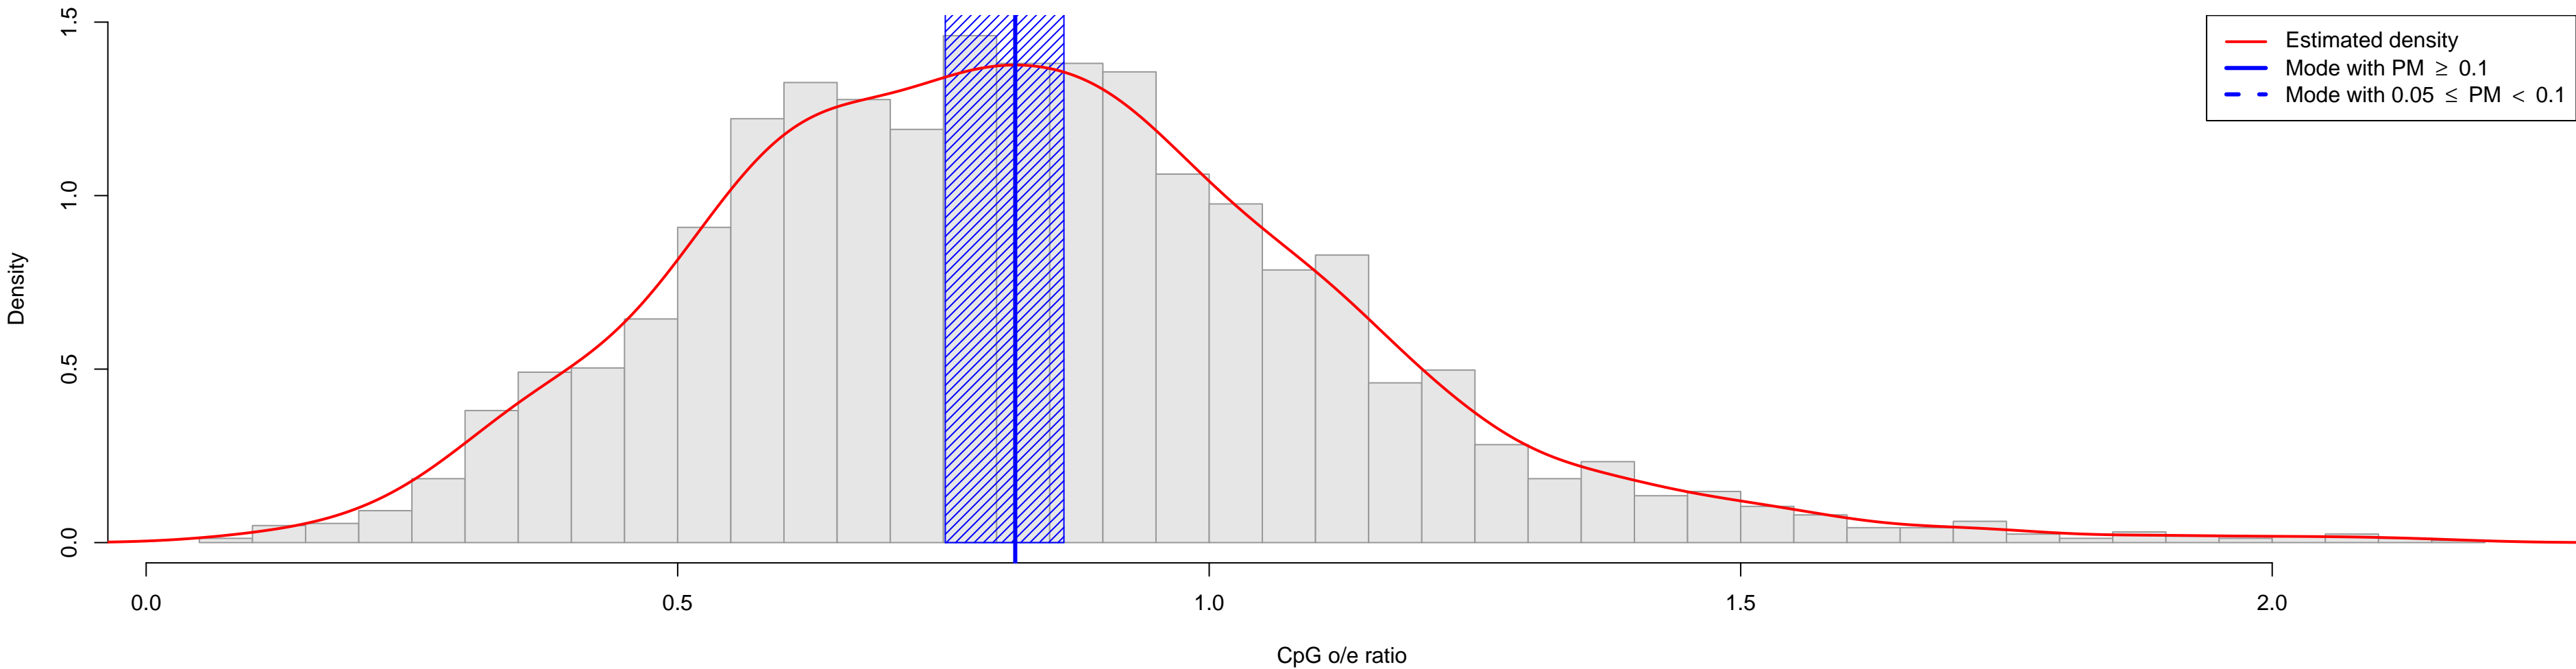

# Metarhizium\_acridum

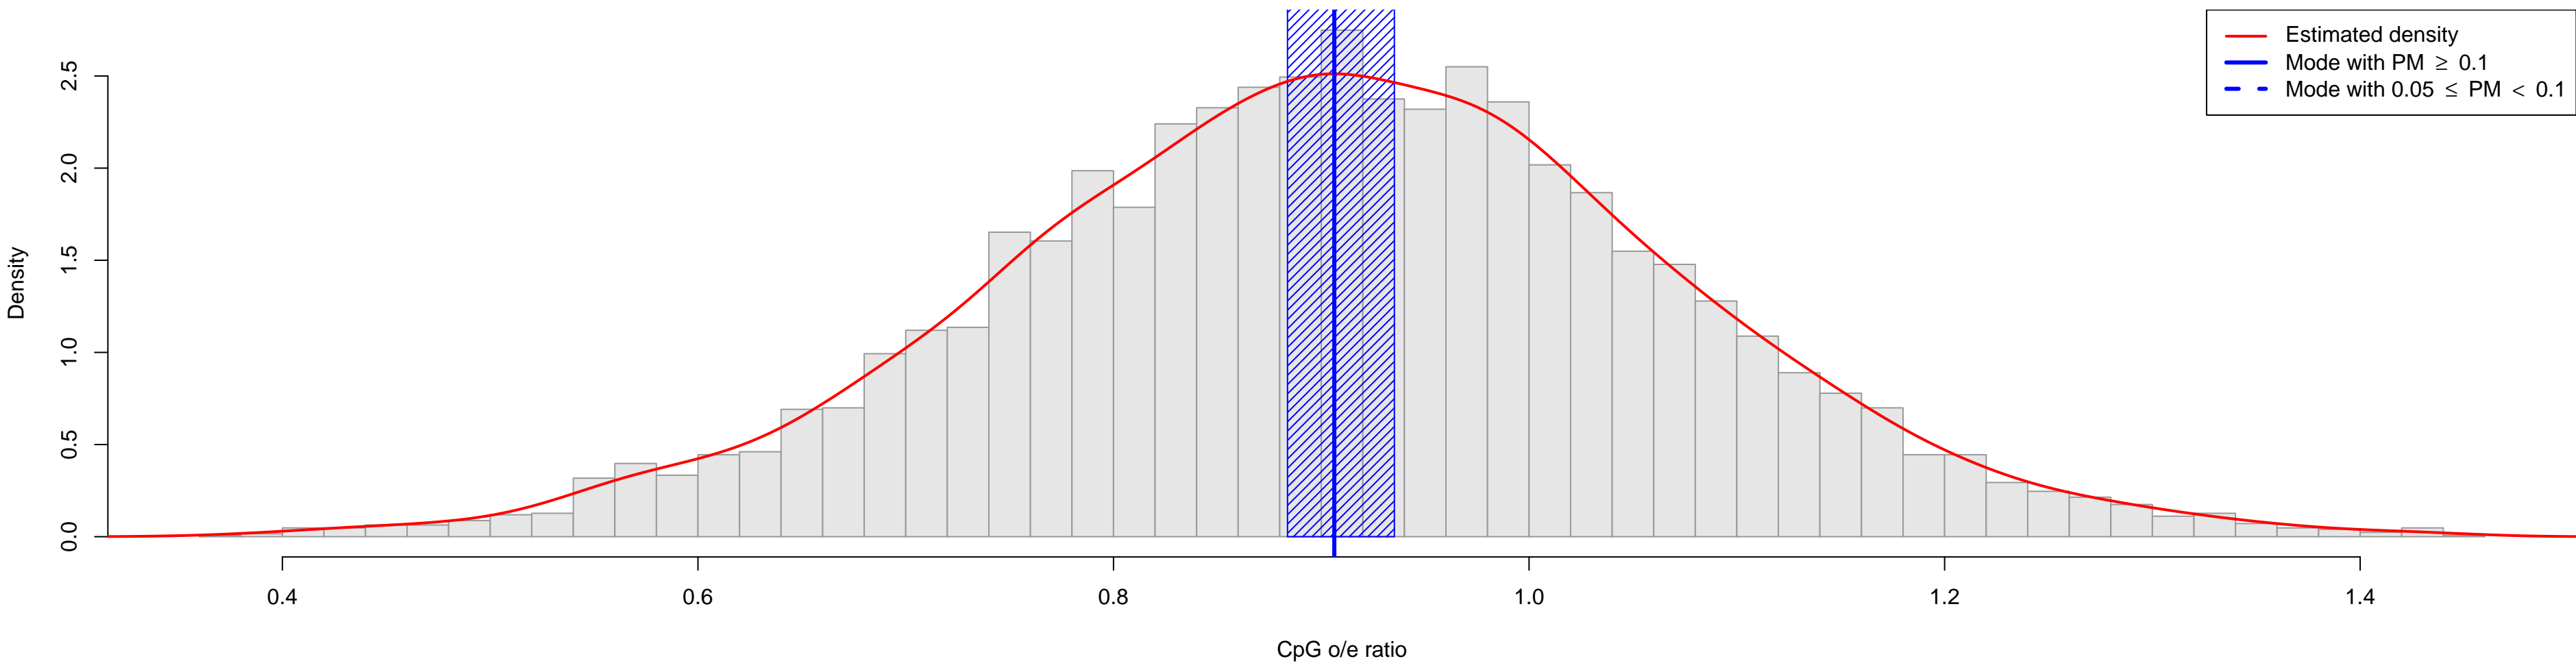

# Metridium\_senile

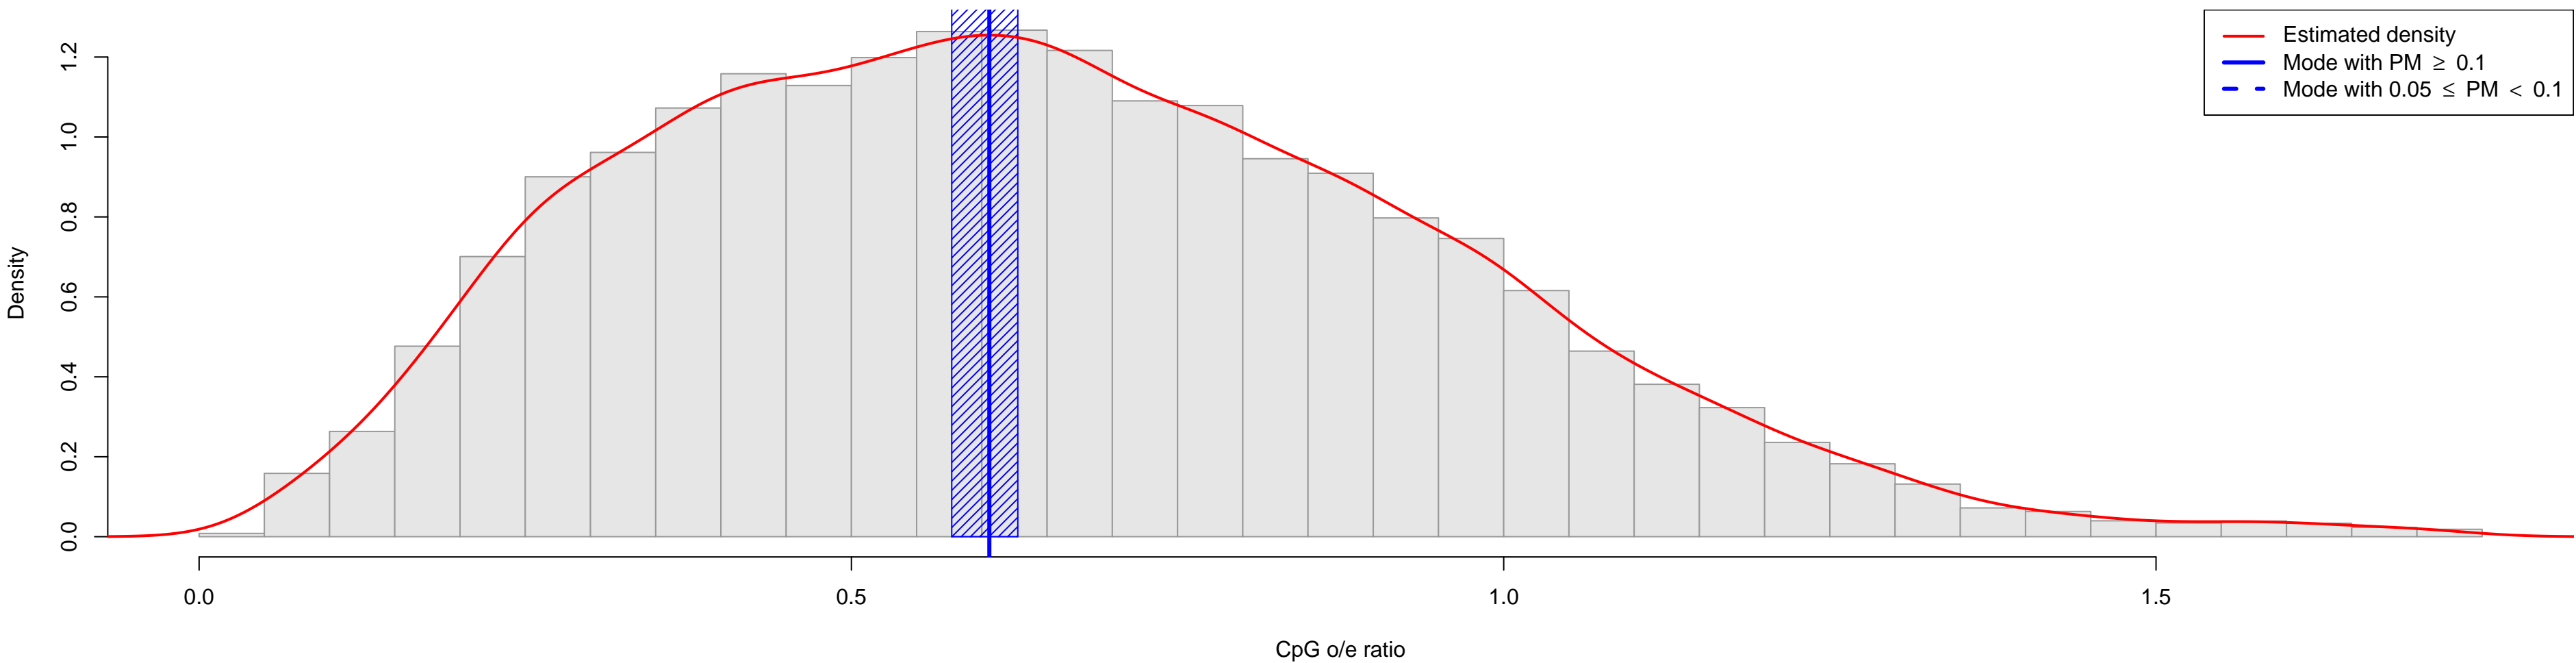

# Microbotryum\_violaceum

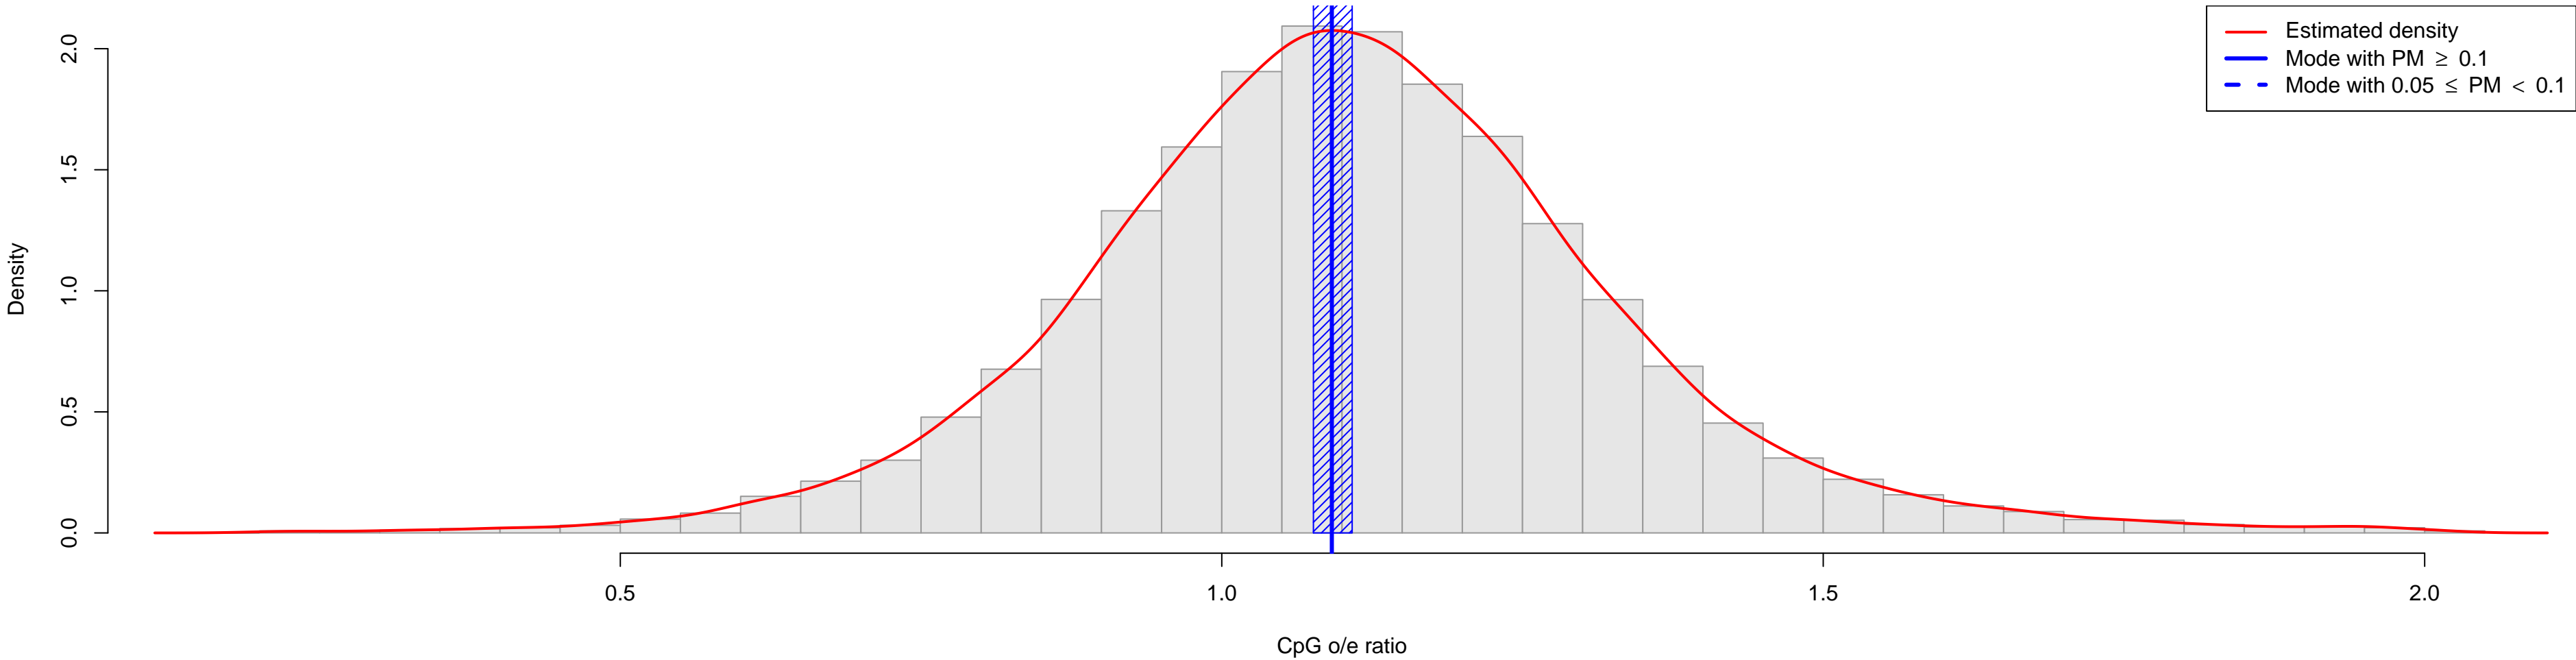



# Milnesium\_tardigradum

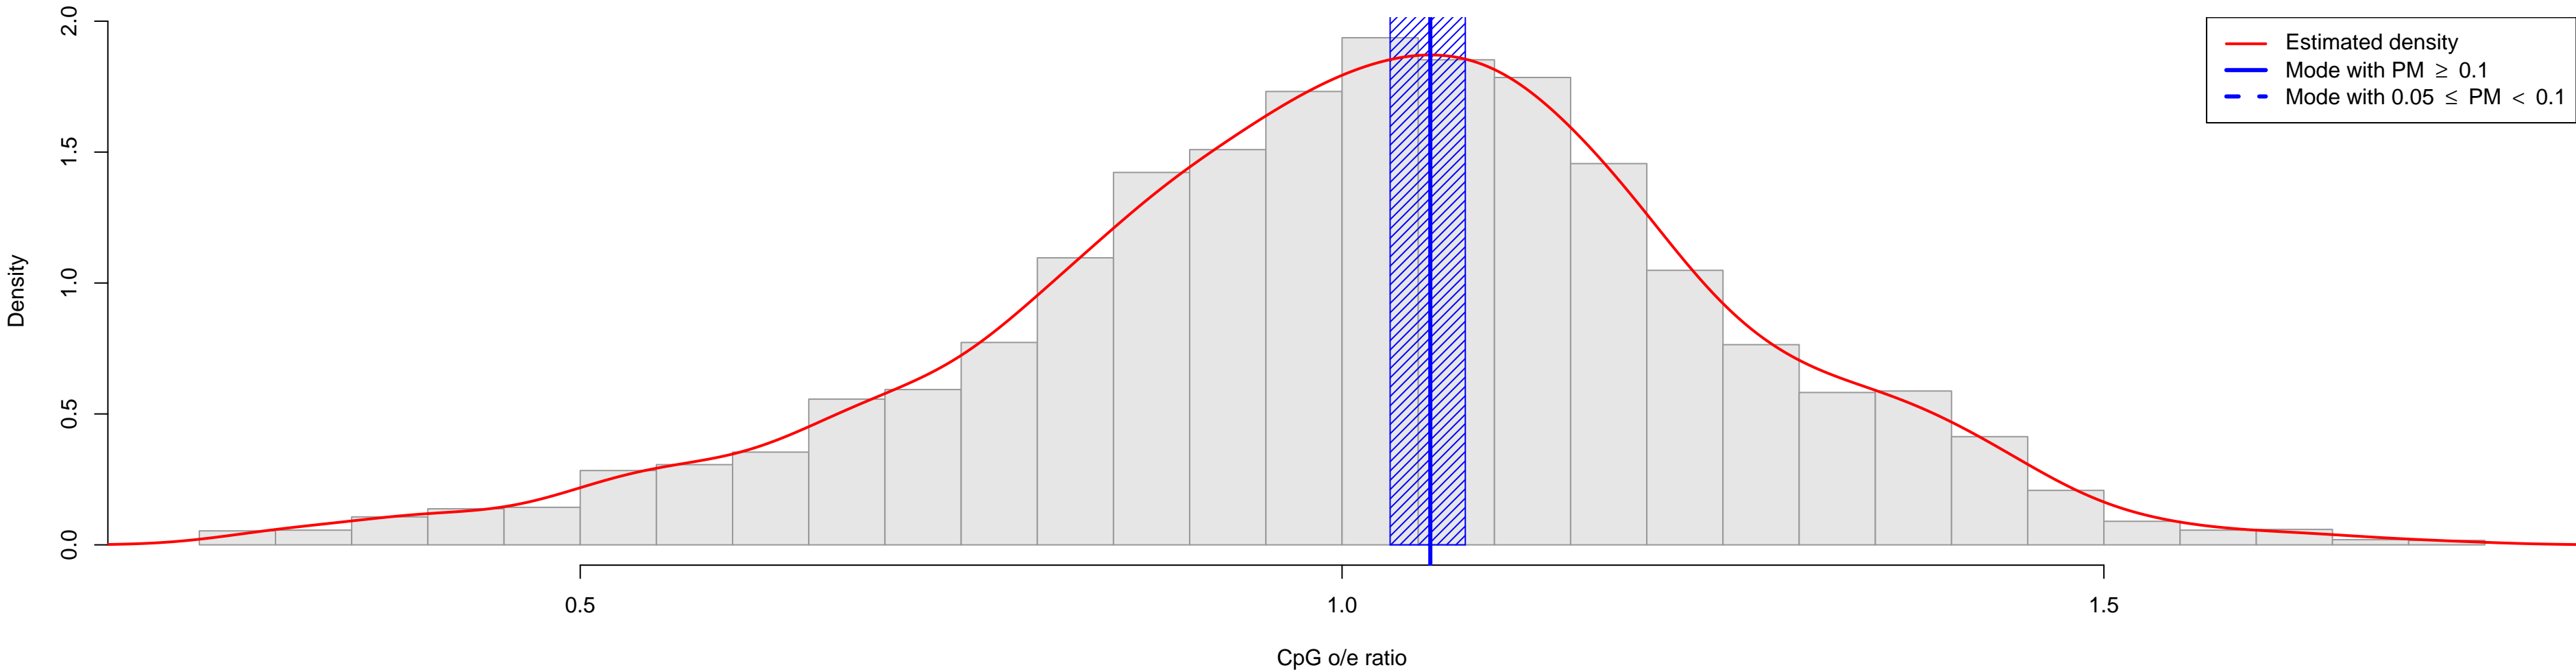

# Mimulus\_lewisii

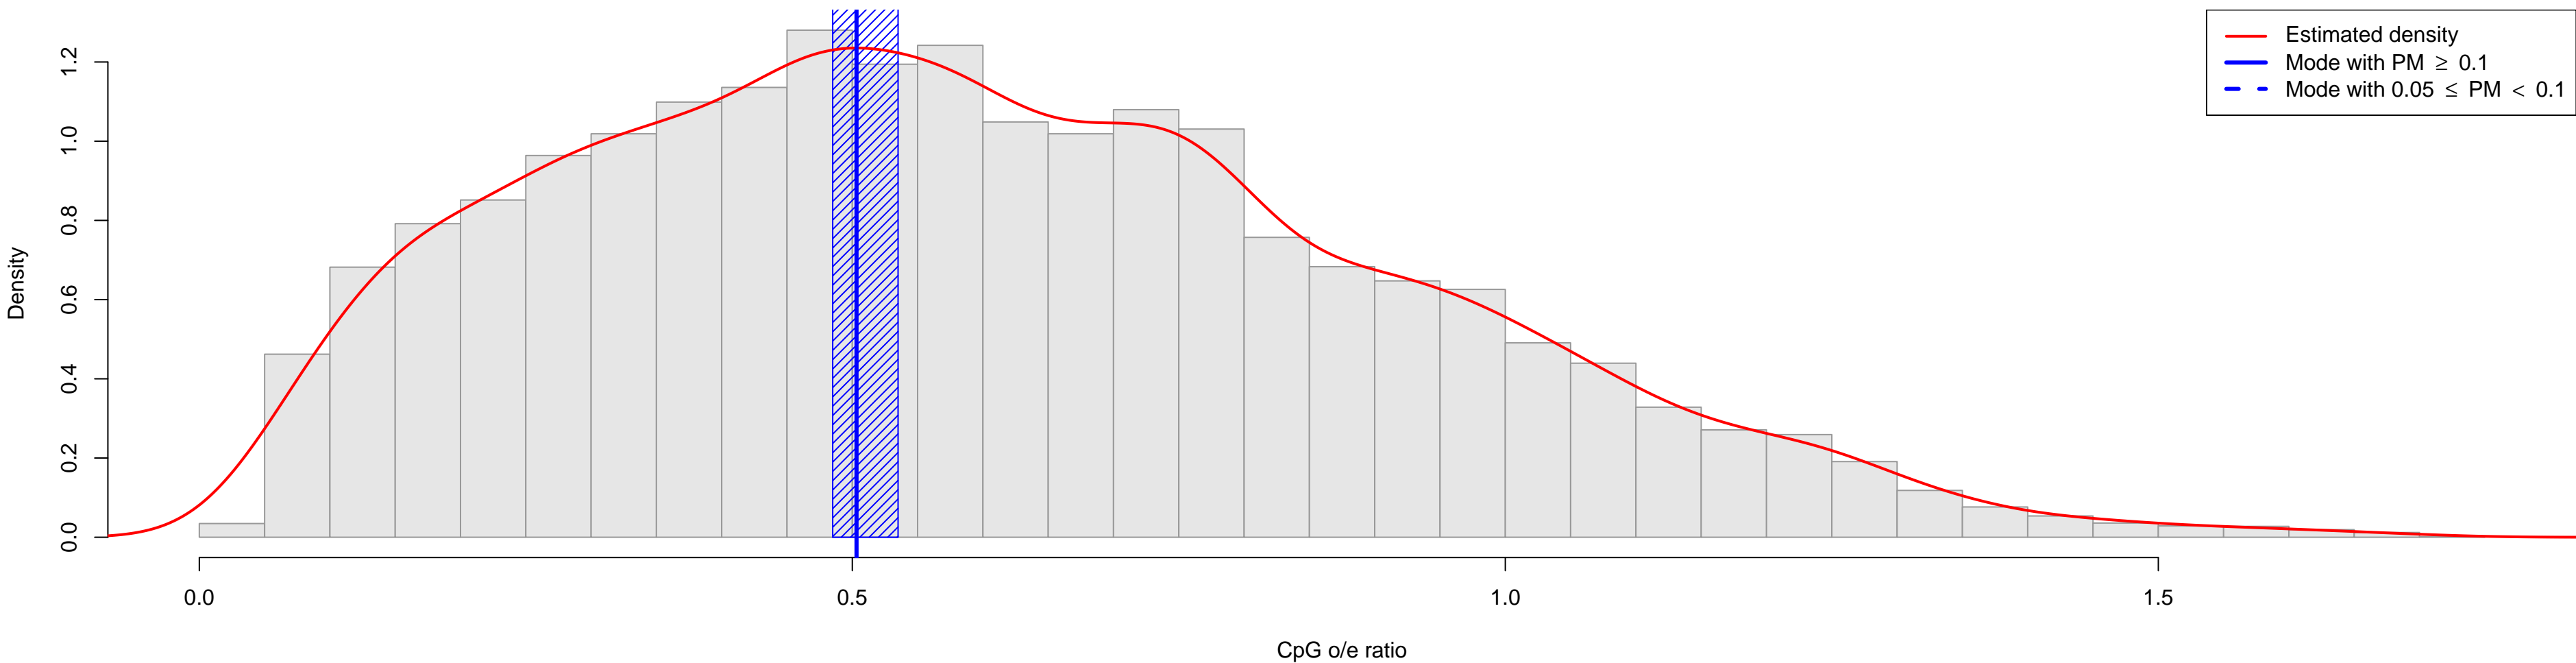

# Misgurnus\_anguillicaudatus

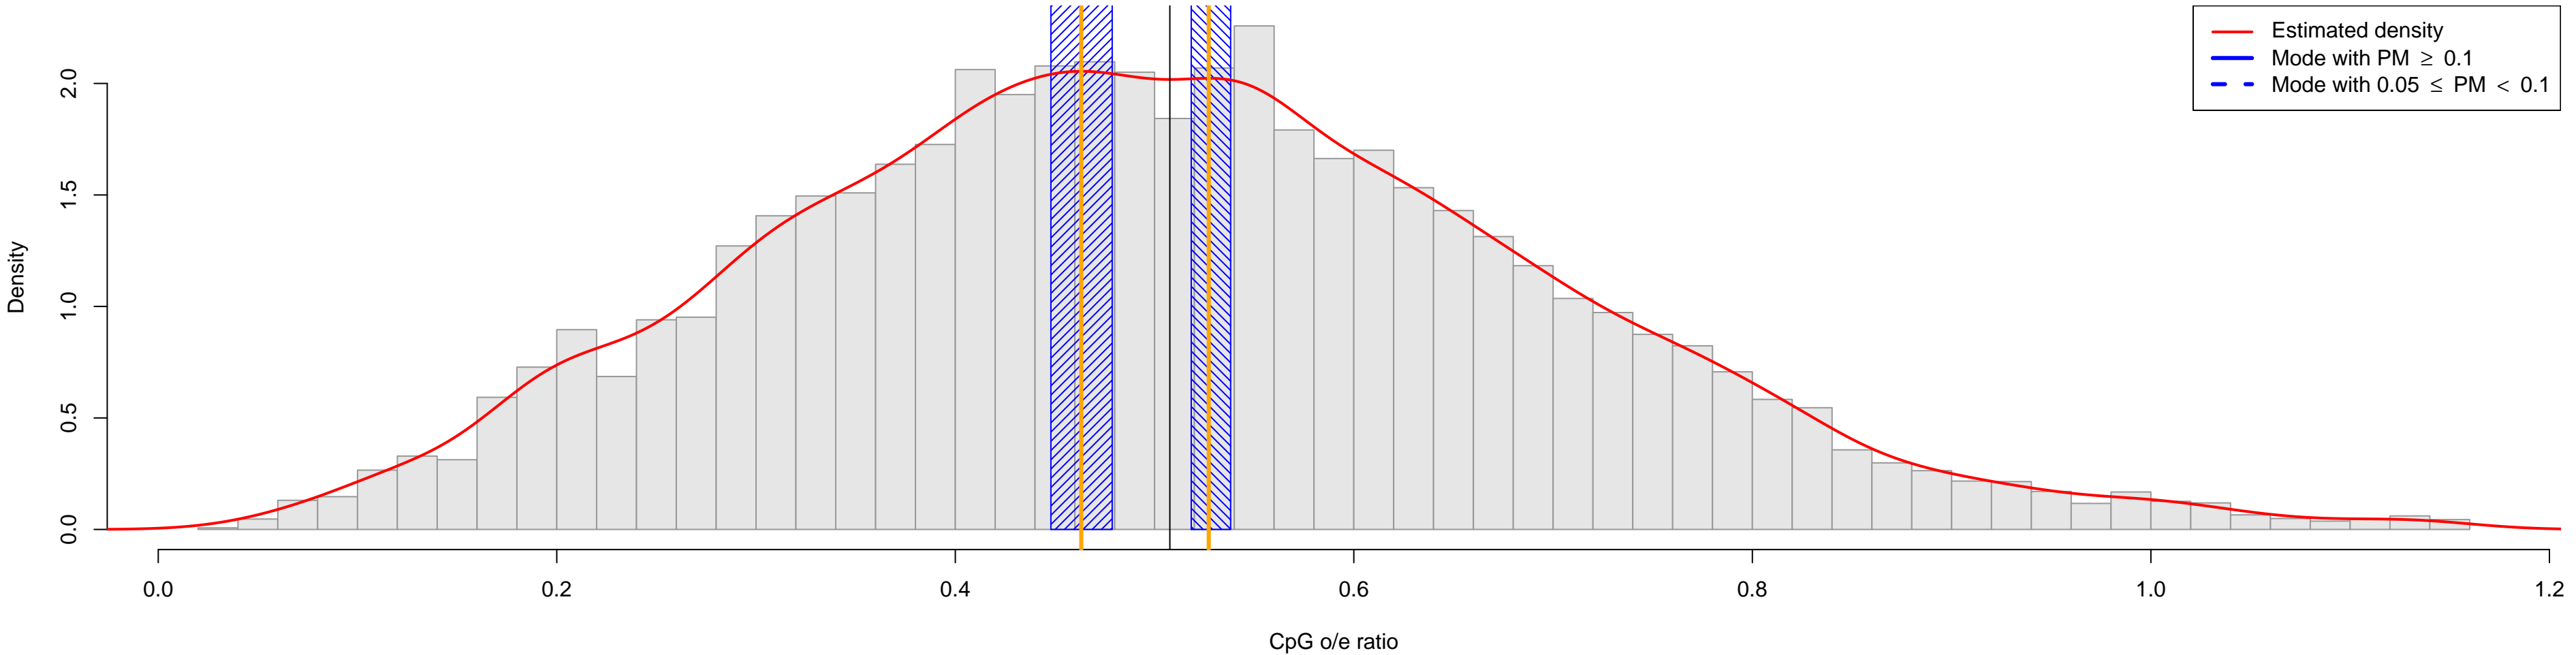

# Mizuhopecten\_yessoensis

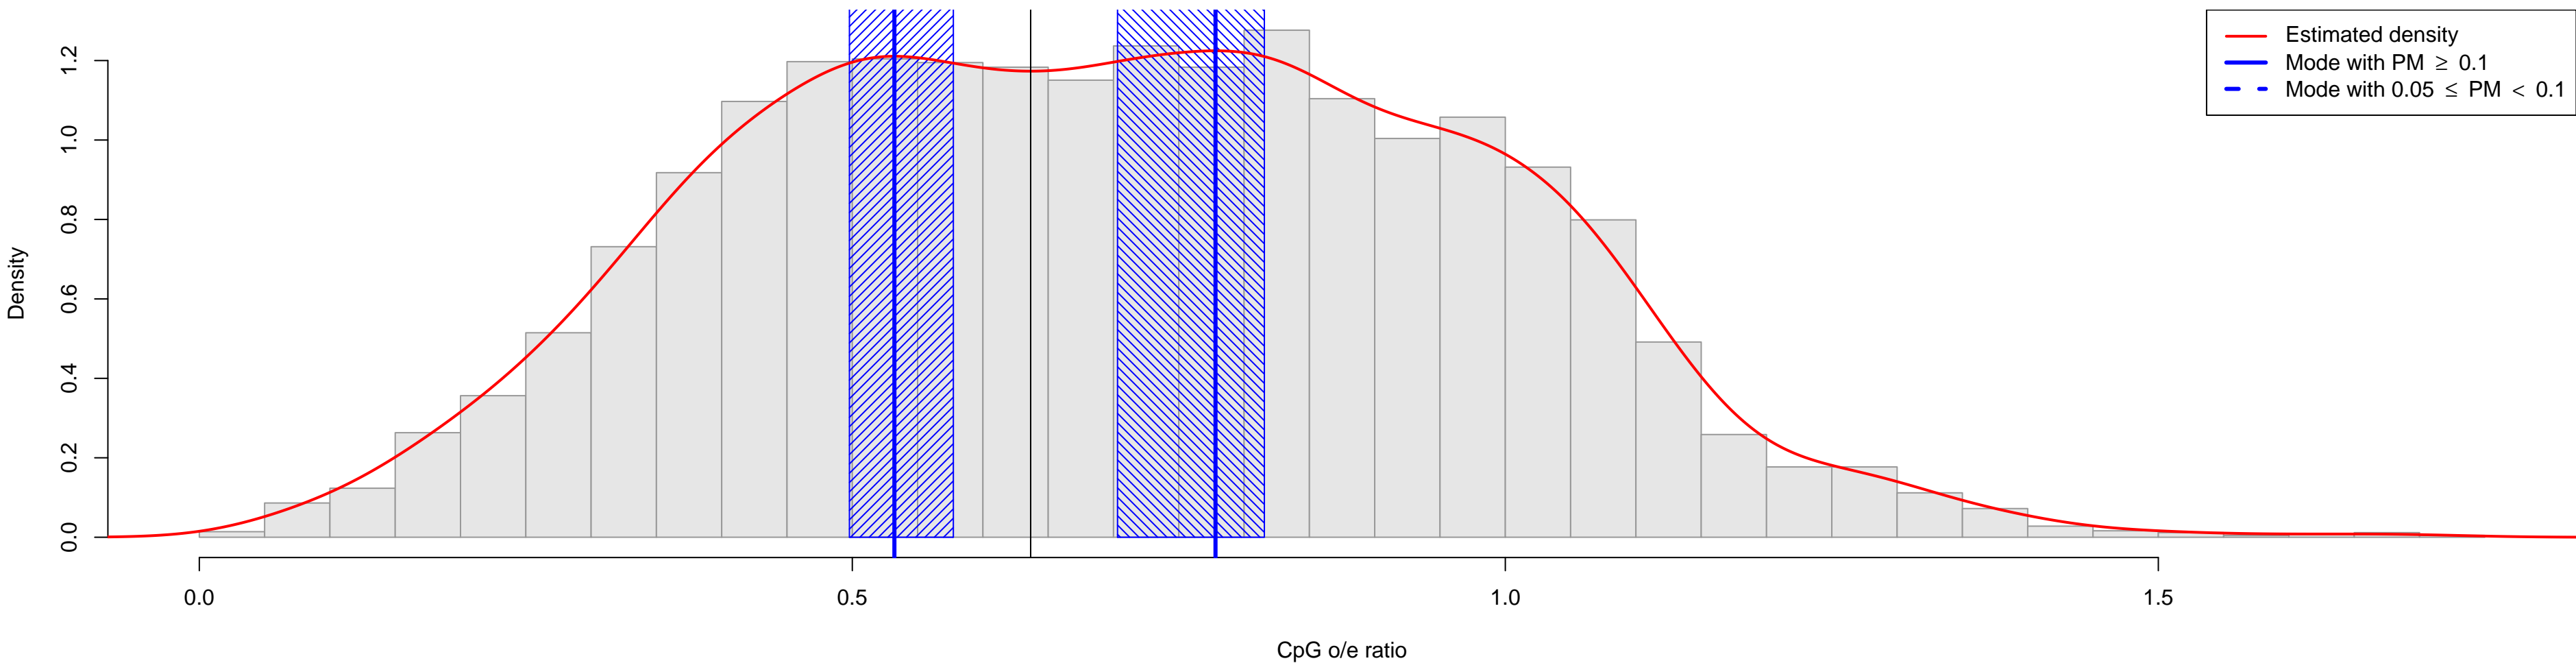

# Mnemiopsis\_leidy

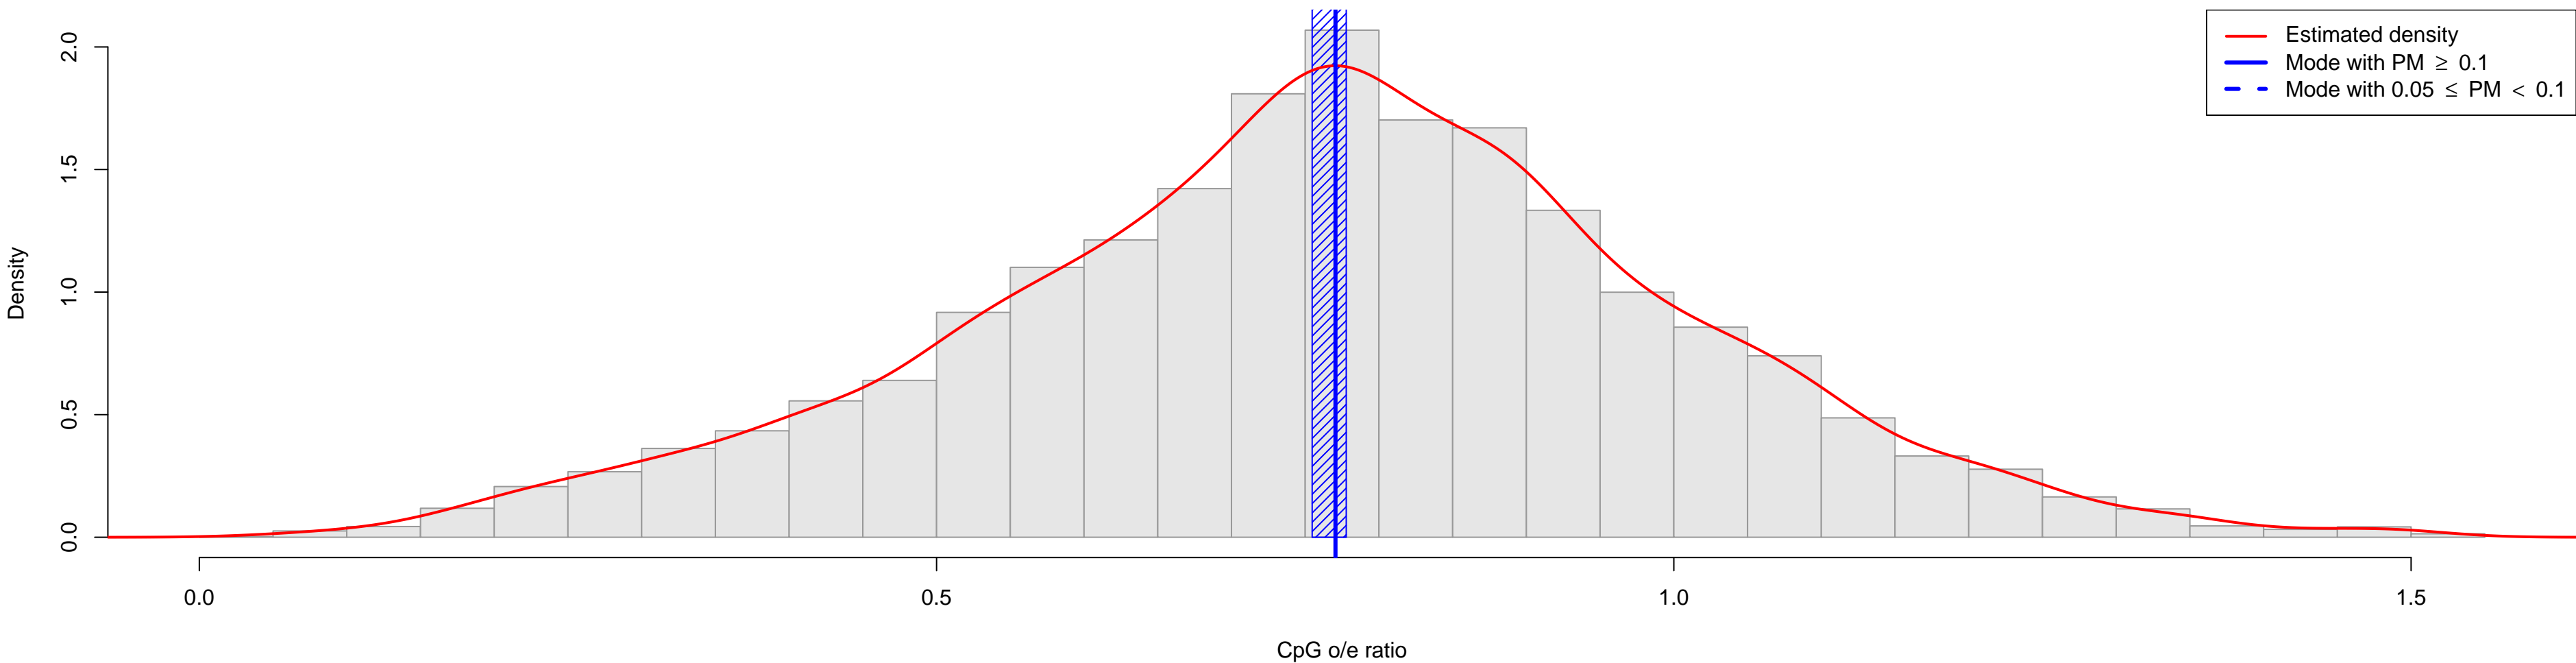

# Molgula\_tectiformis

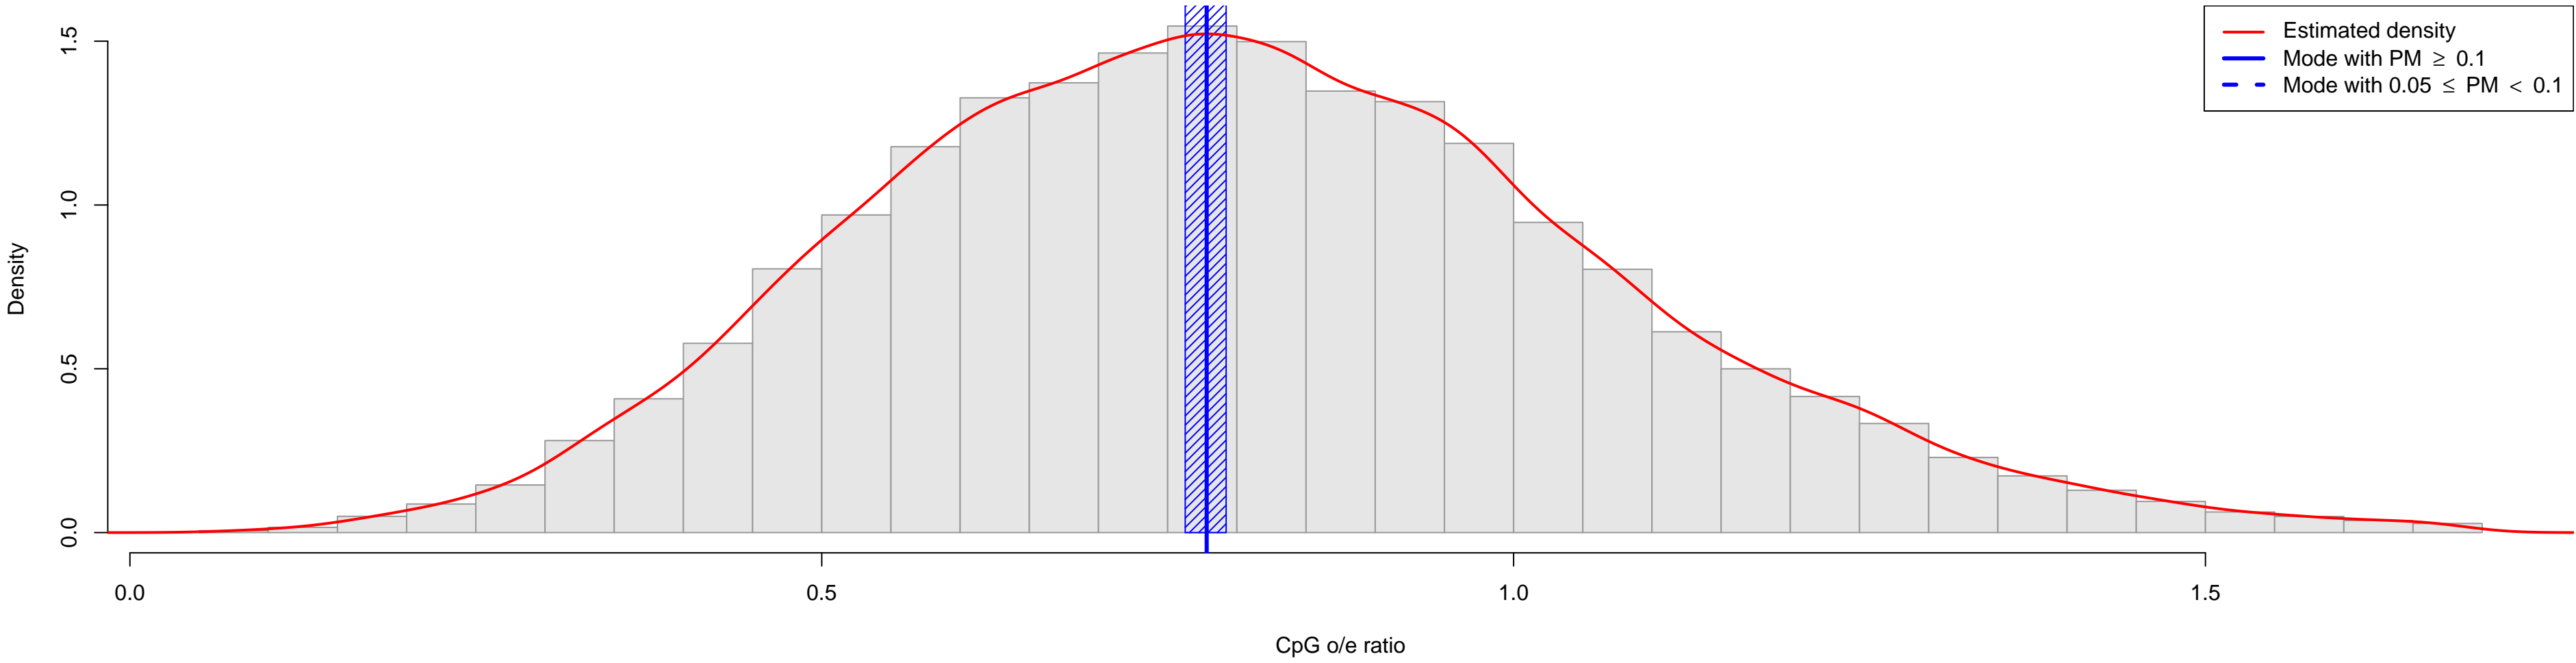

# Moniliophthora\_perniciosa

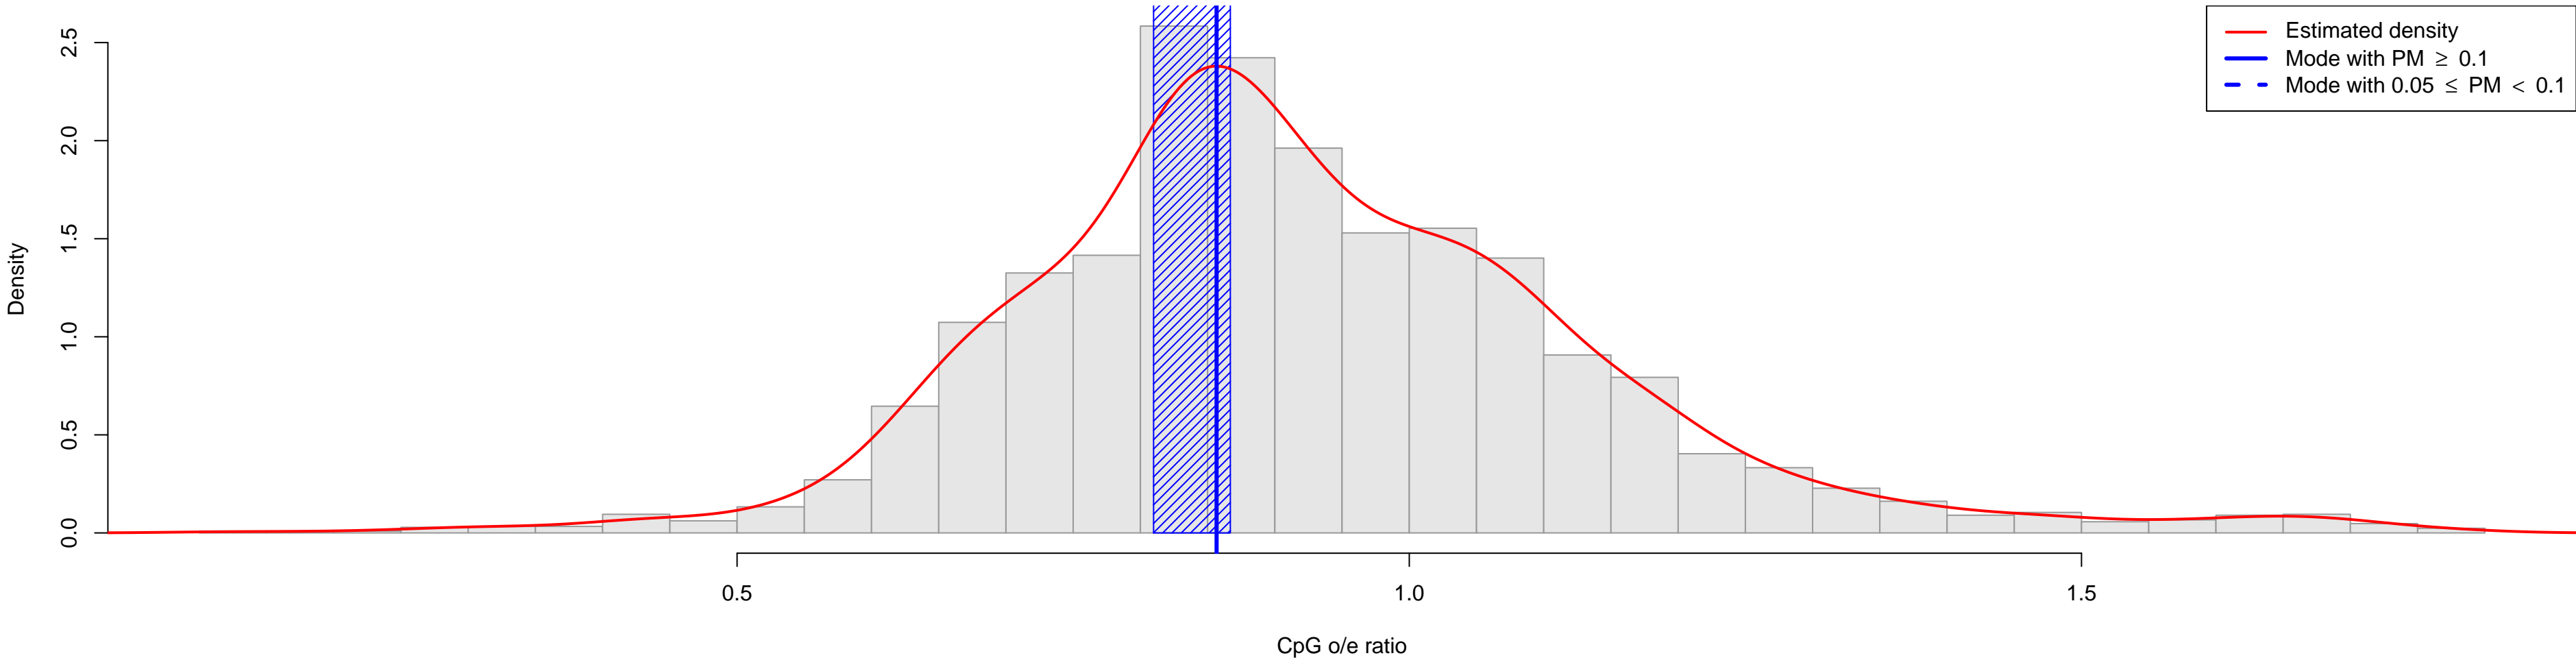

# Monosiga\_ovata

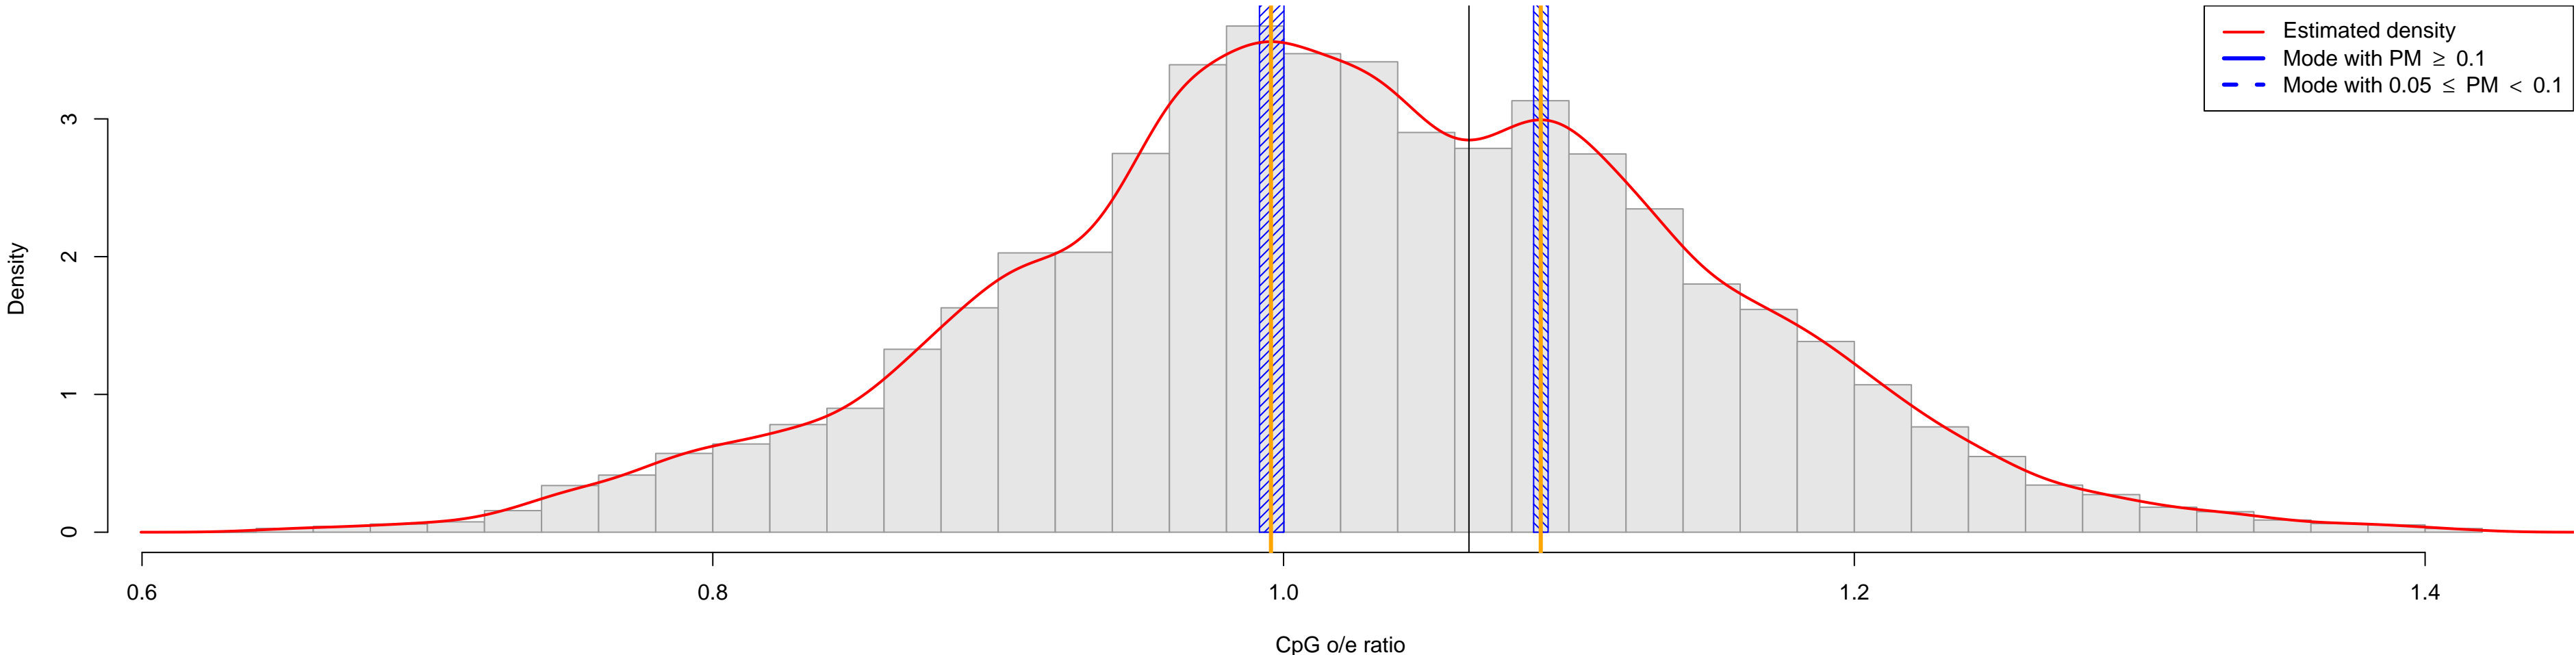

— Estimated density  
— Mode with  $PM \geq 0.1$   
- - Mode with  $0.05 \leq PM < 0.1$



# Morus\_indica

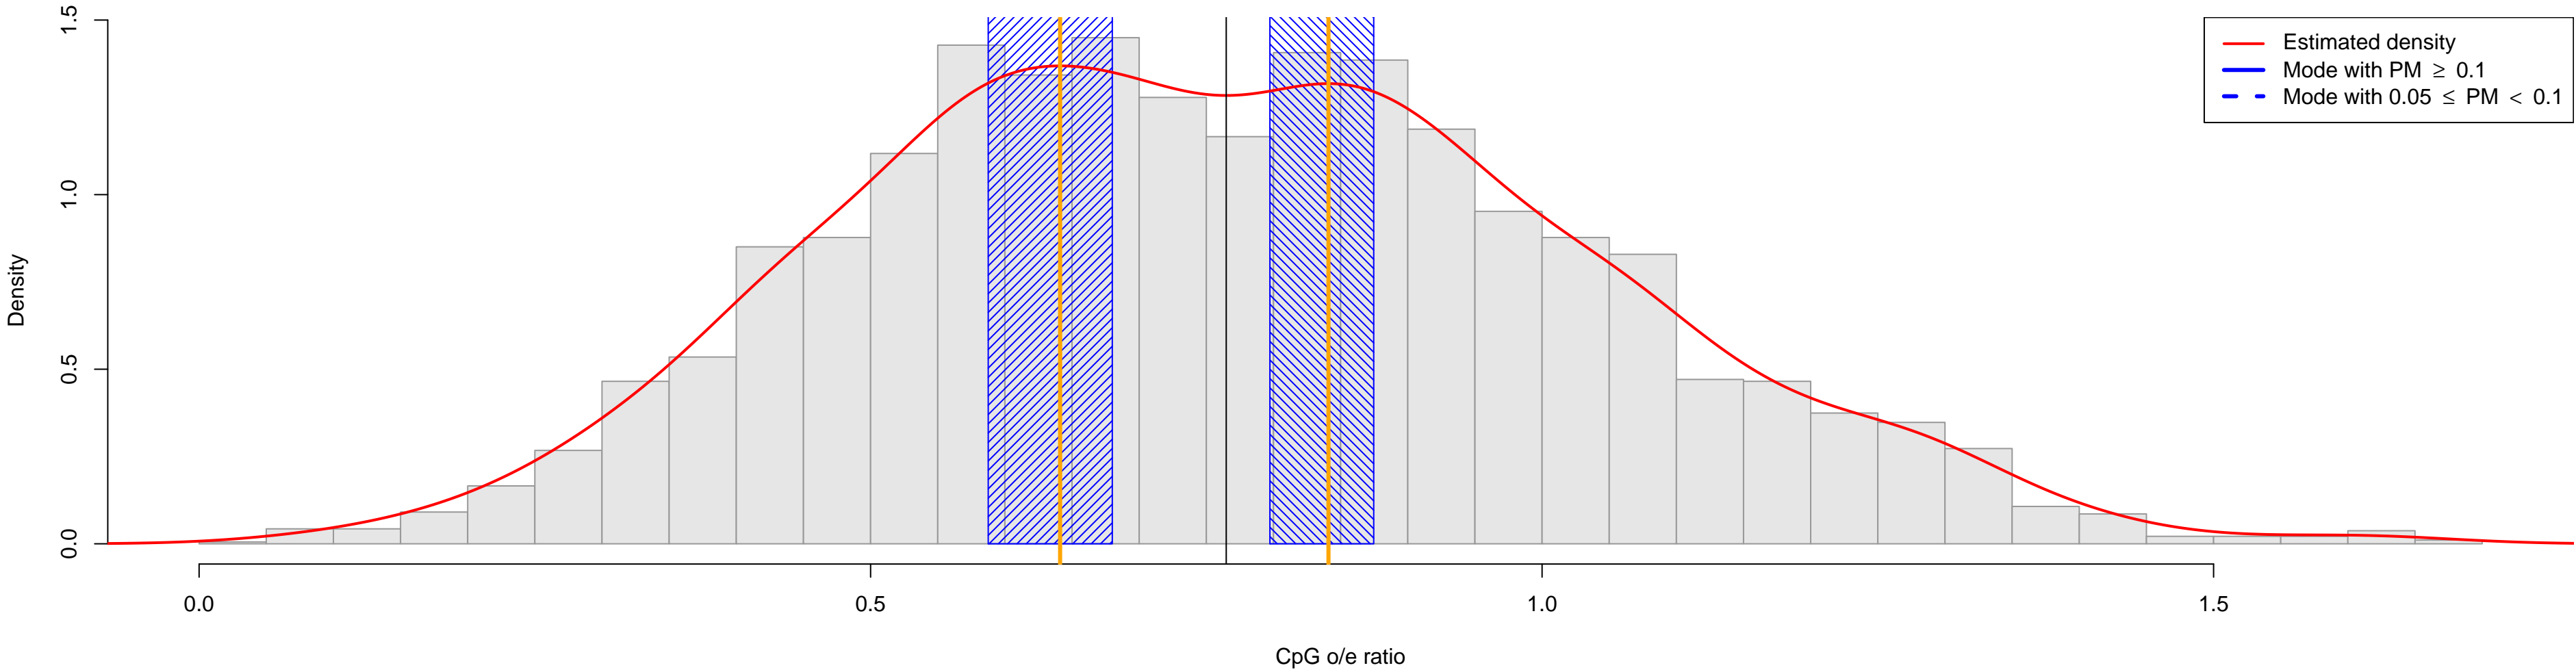

# Mycosphaerella\_fijiensis

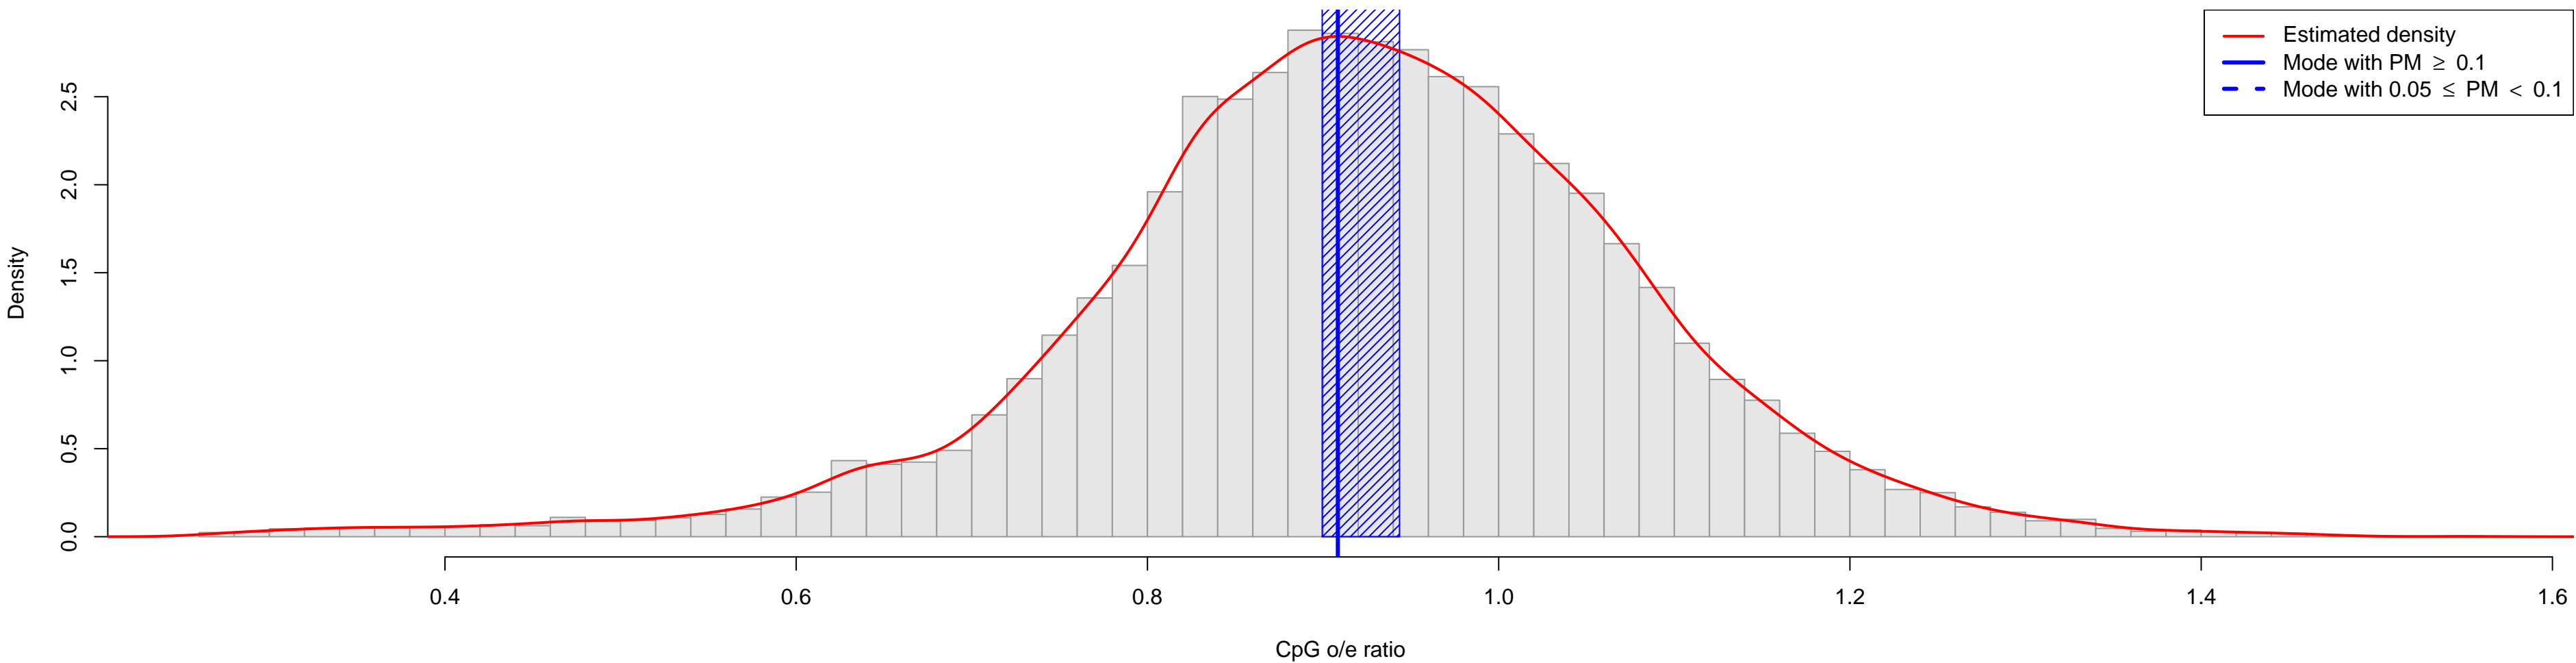

# Mytilus\_californianus

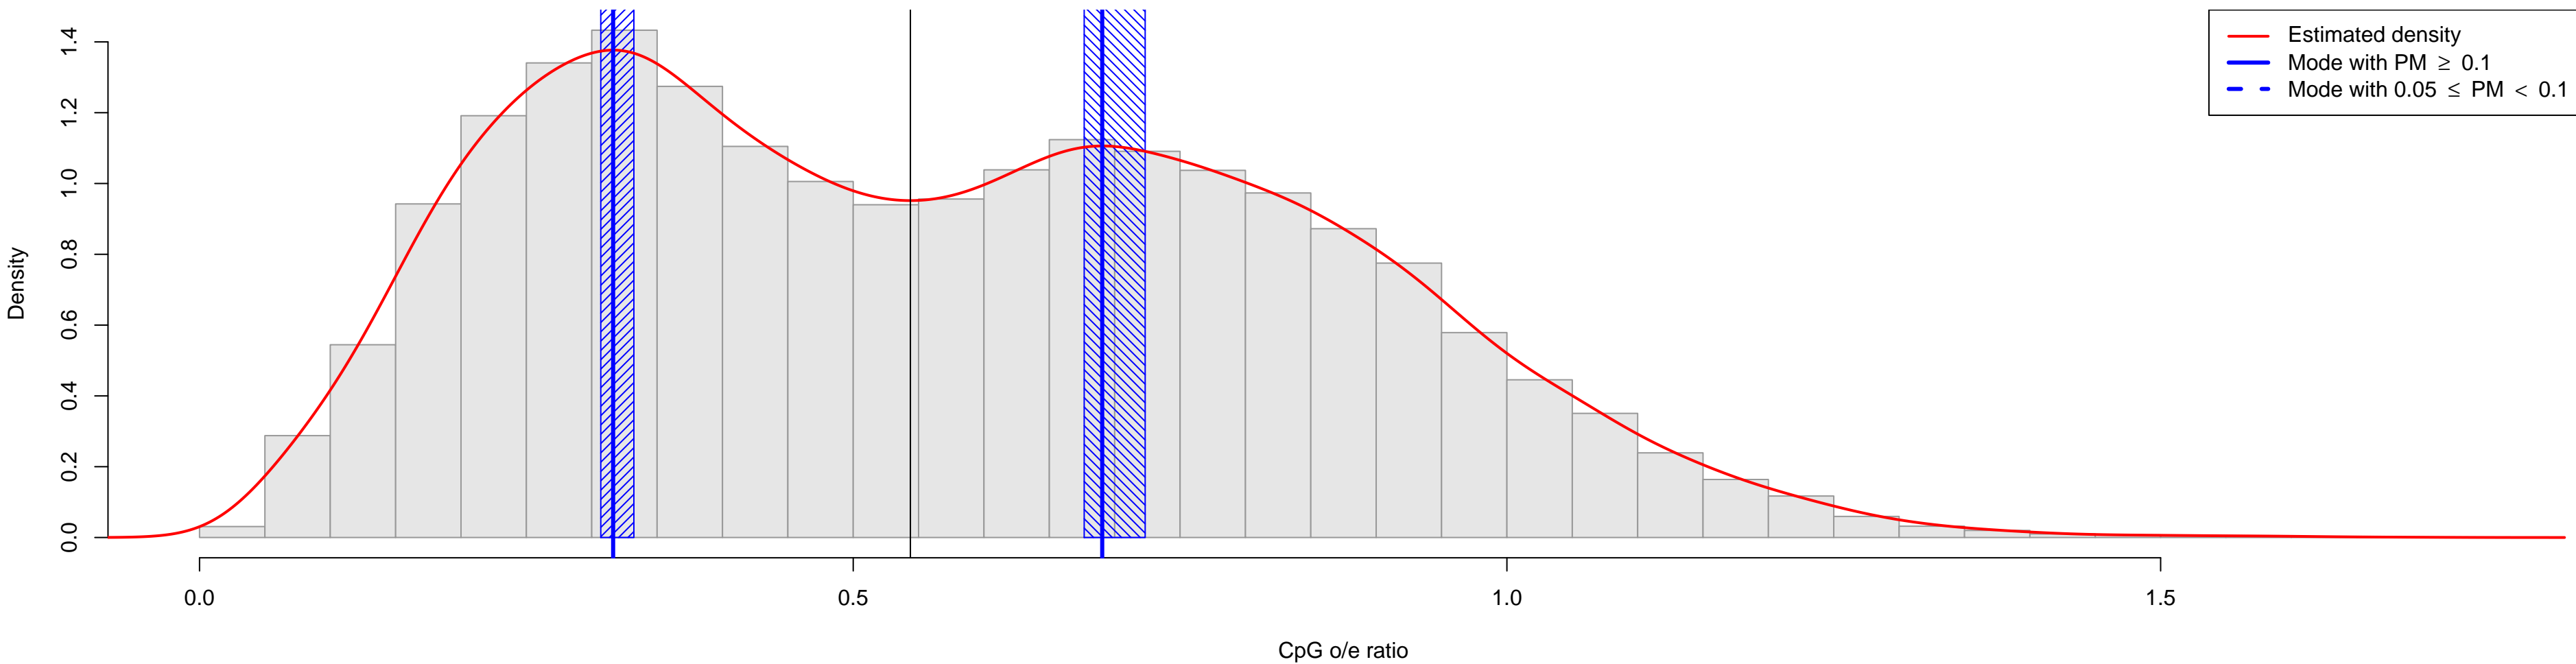

# Mytilus\_edulis

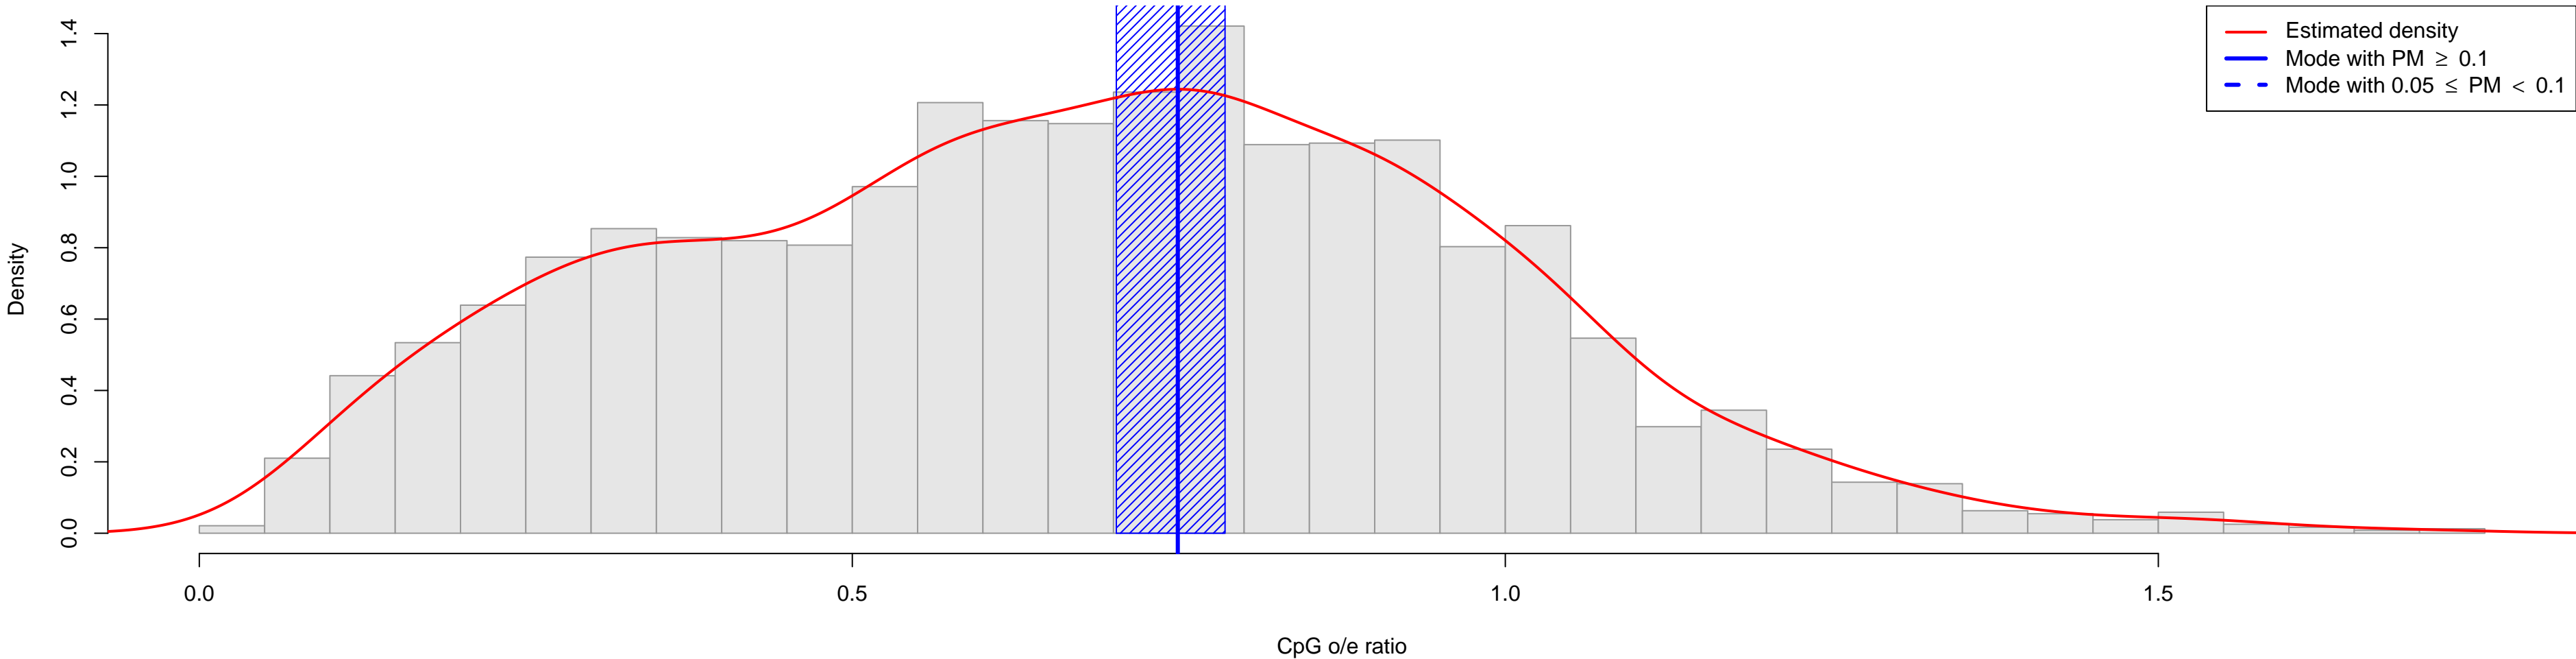

# Mytilus\_galloprovincialis

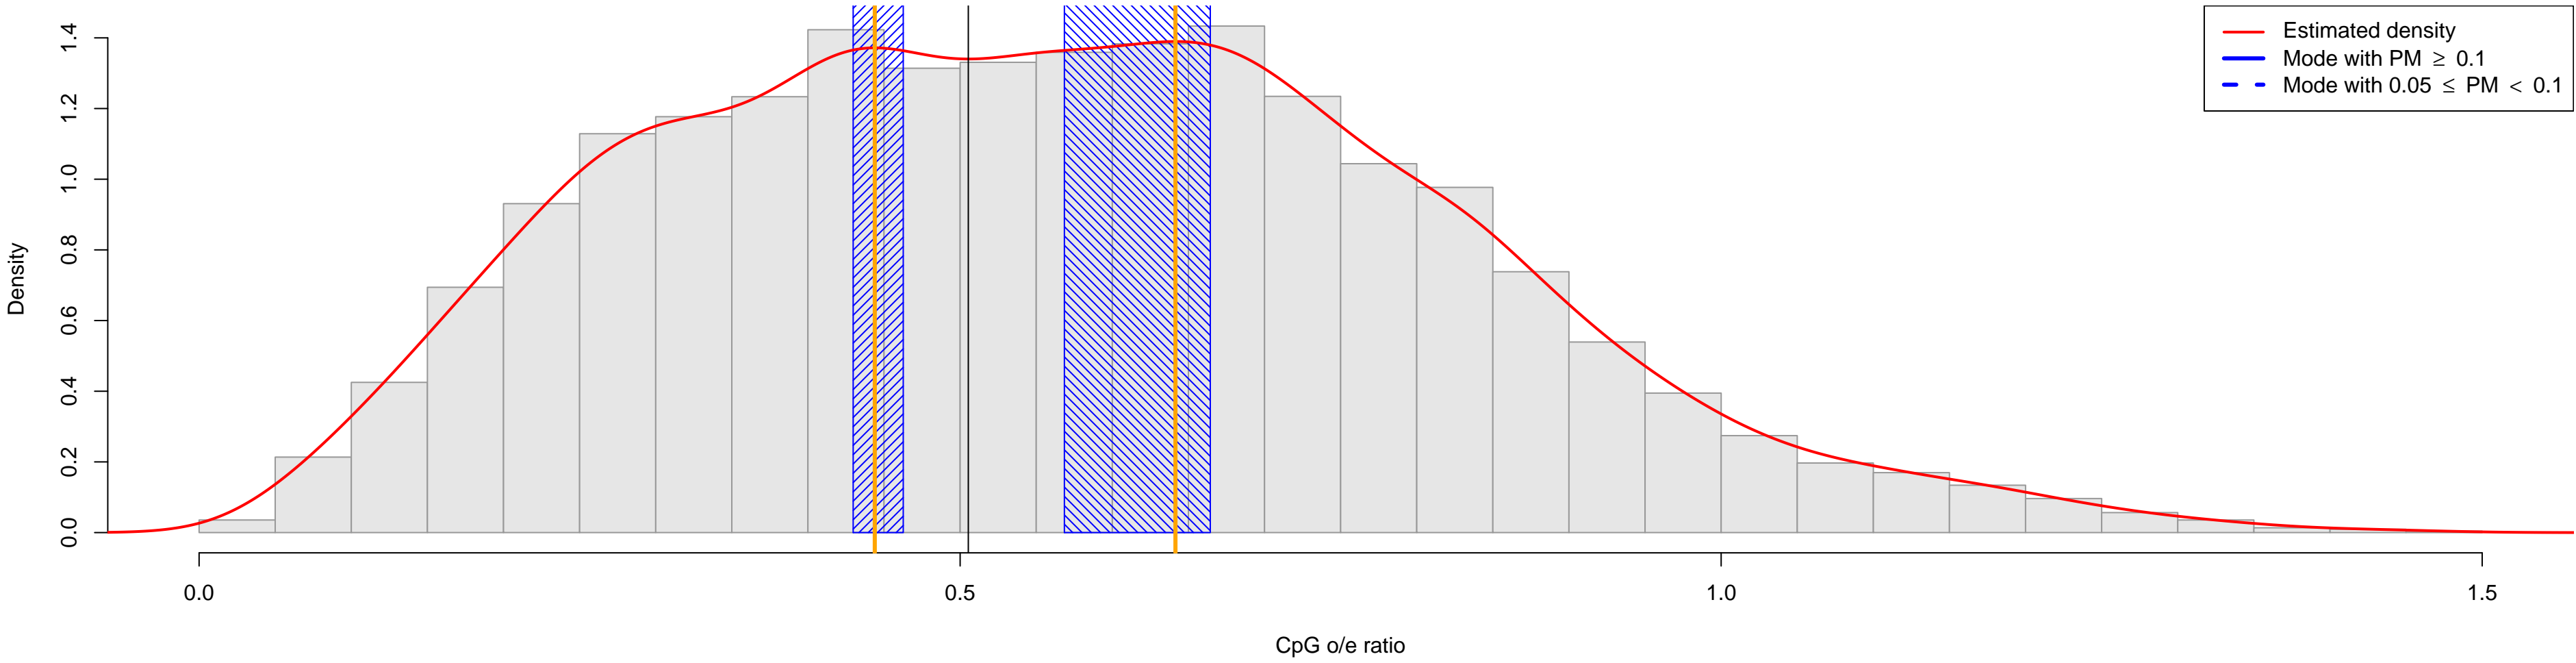

# Myzostoma\_cirrifерum

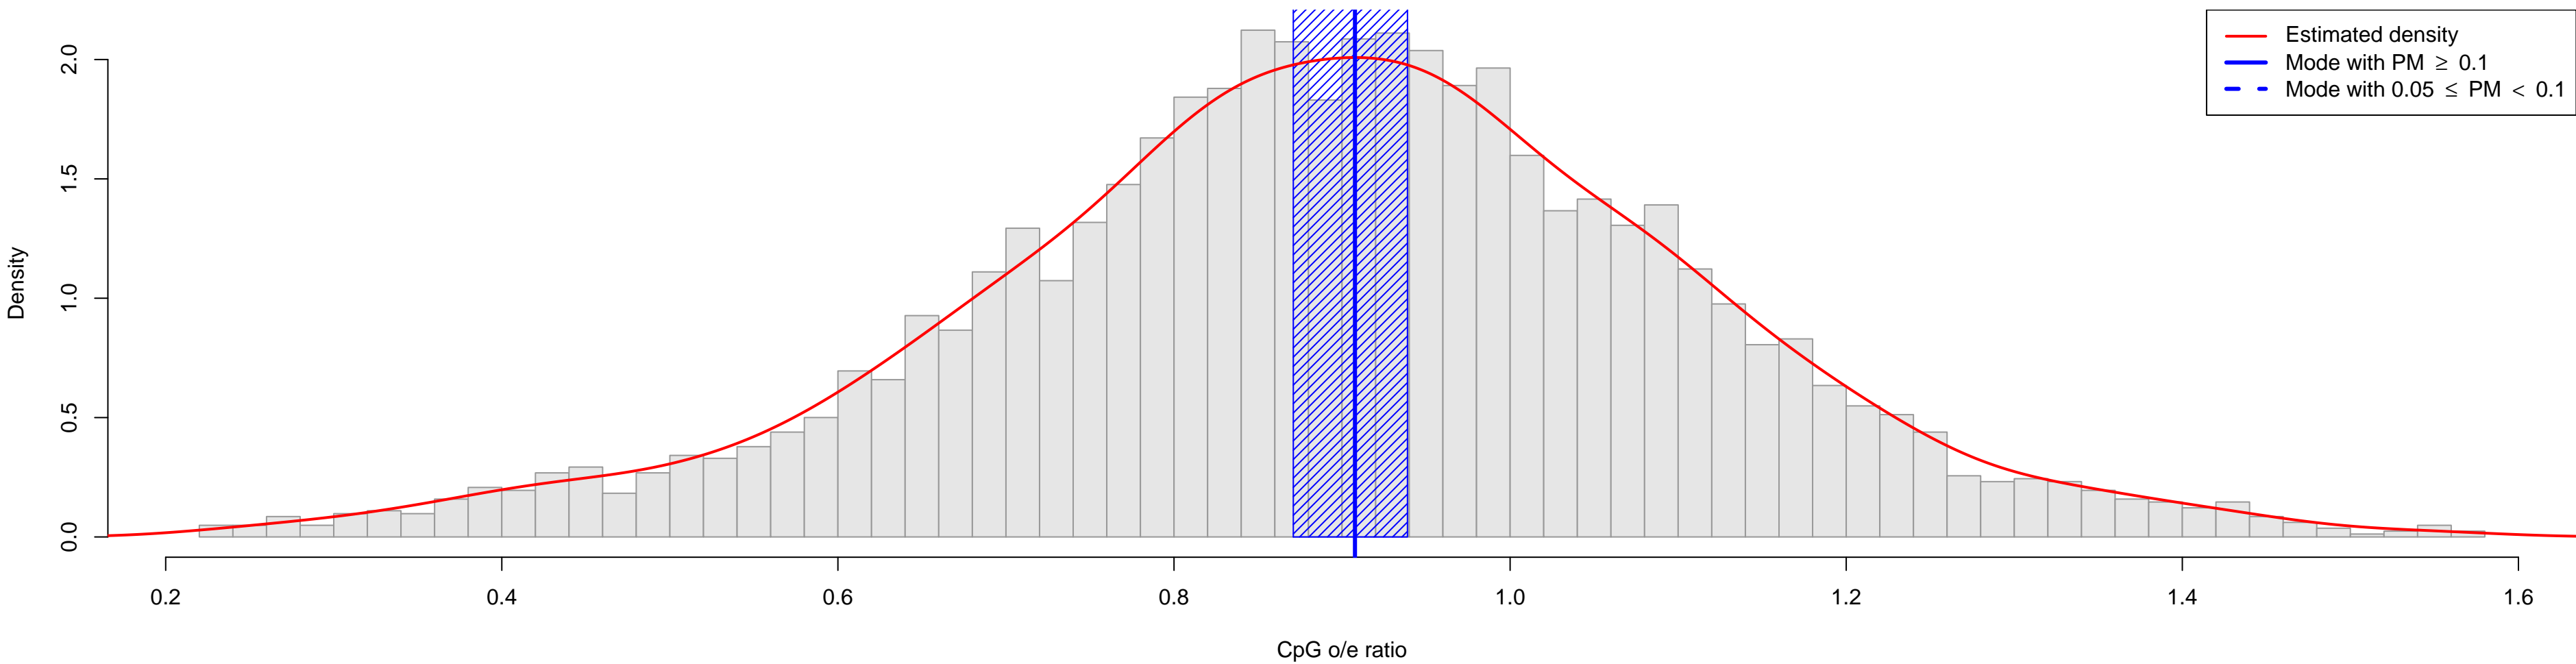

# Myzus\_ascalonicus

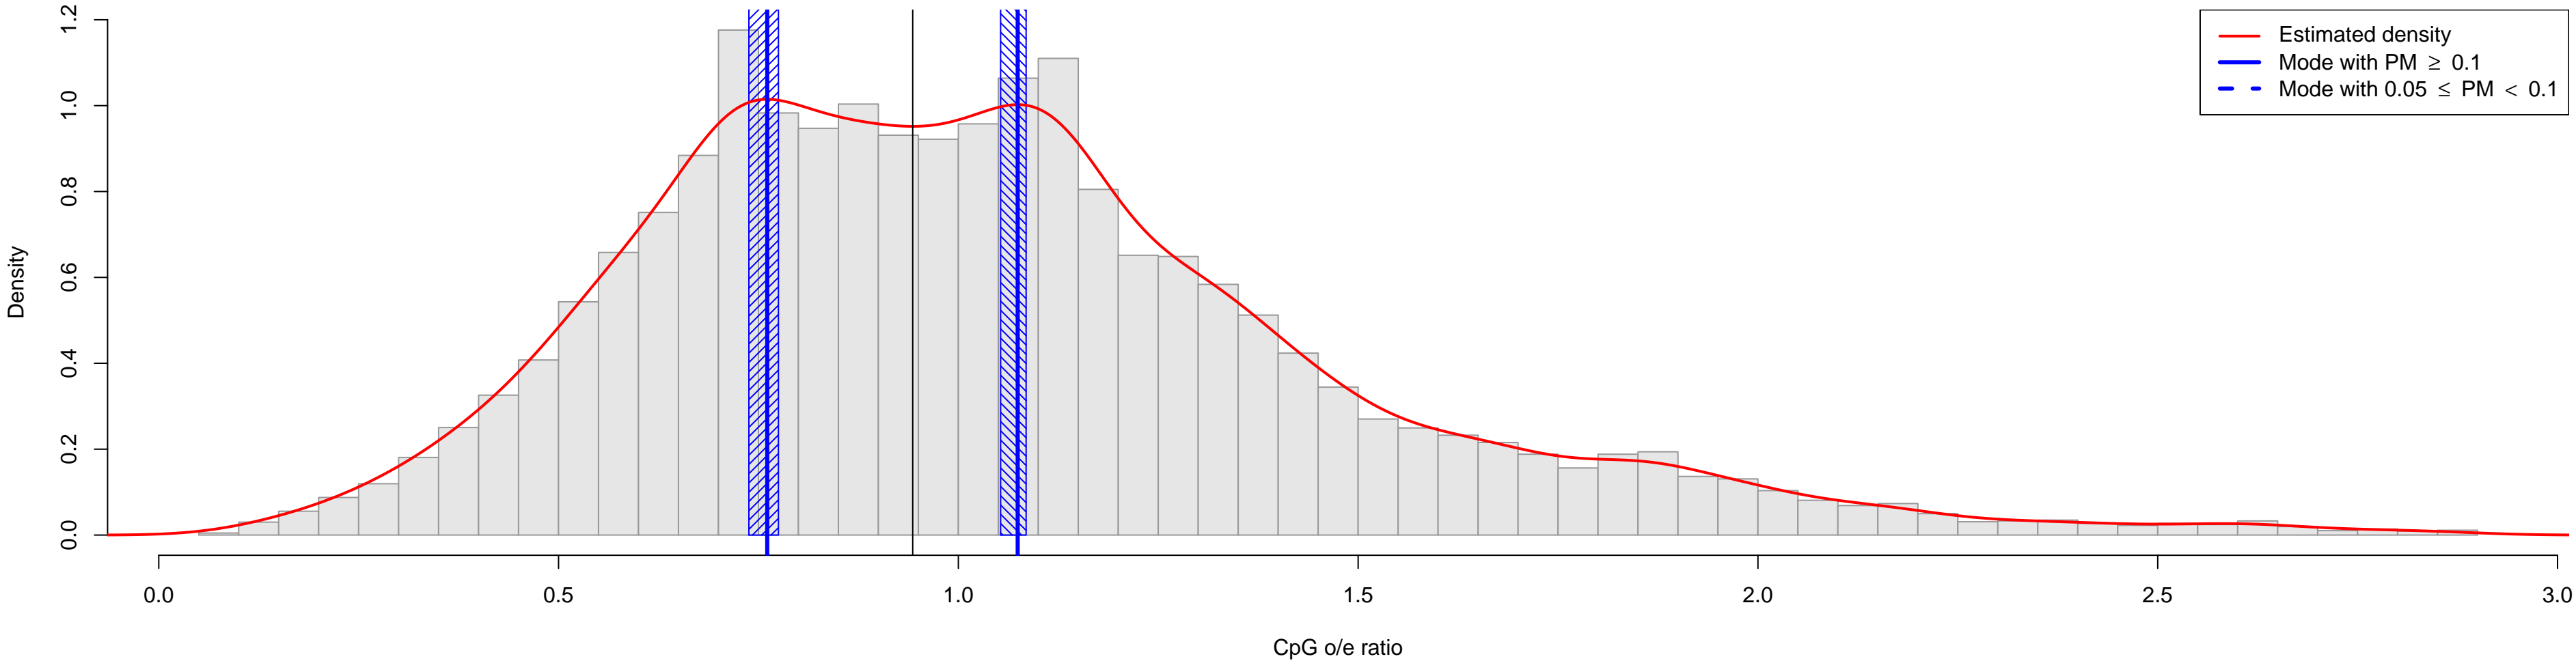

# Myzus\_persicae

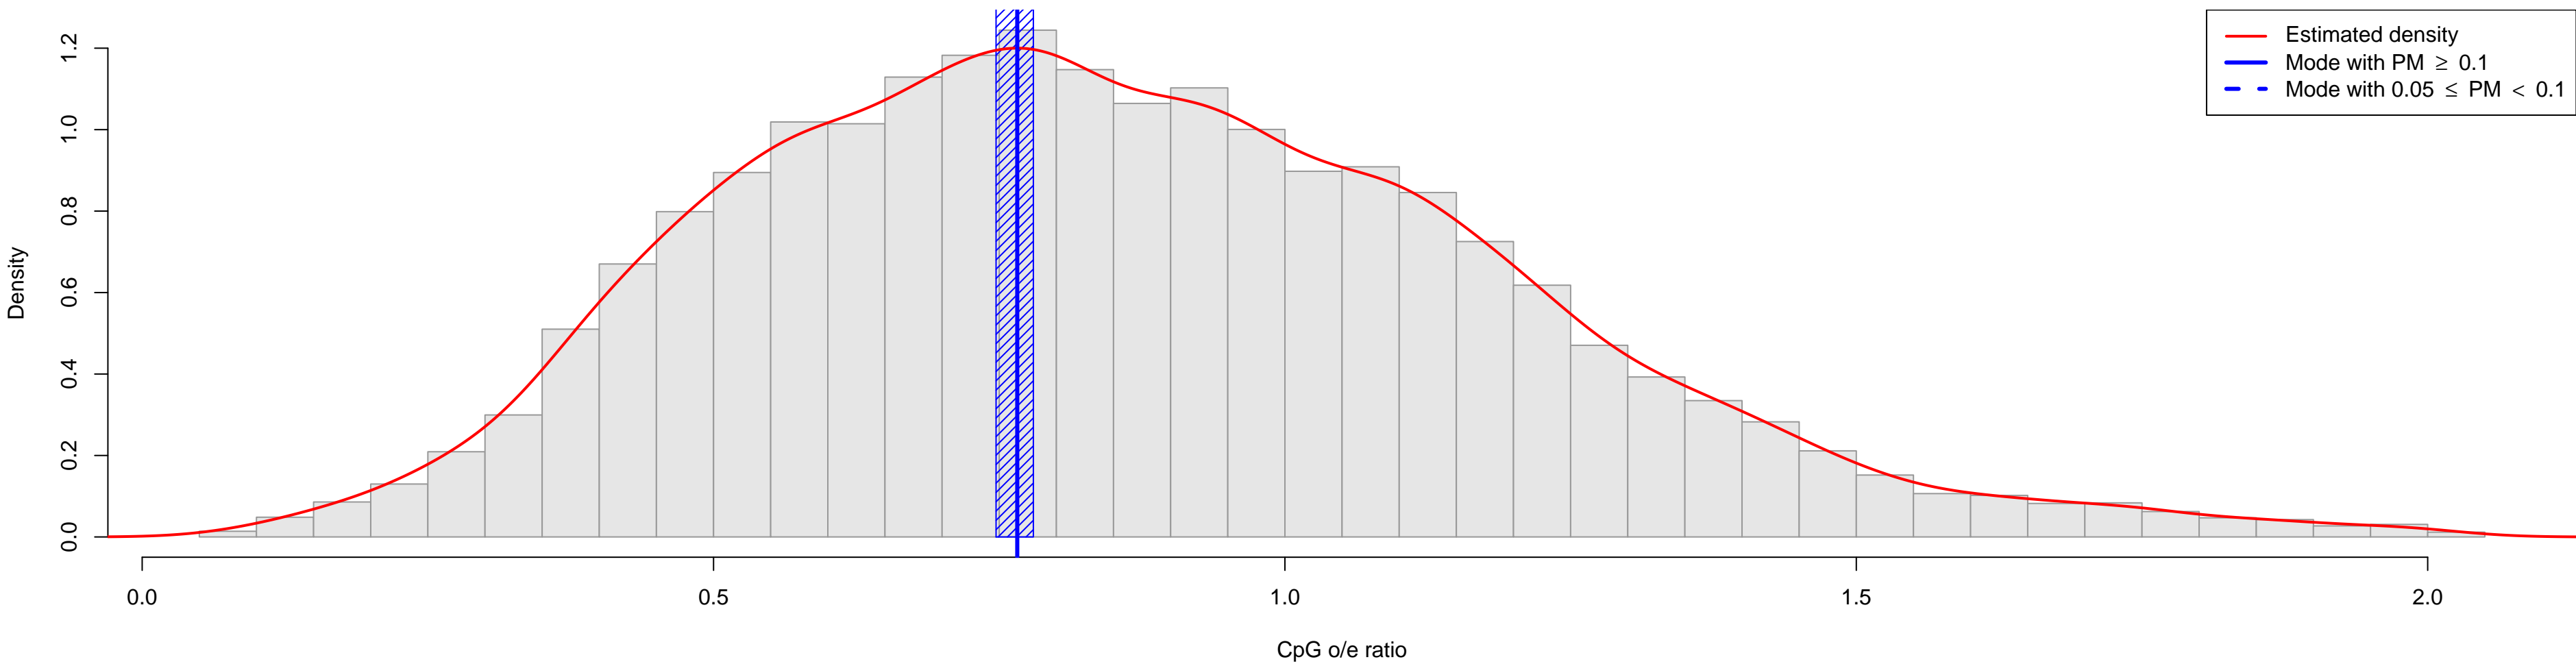



# Naegleria\_gruberi

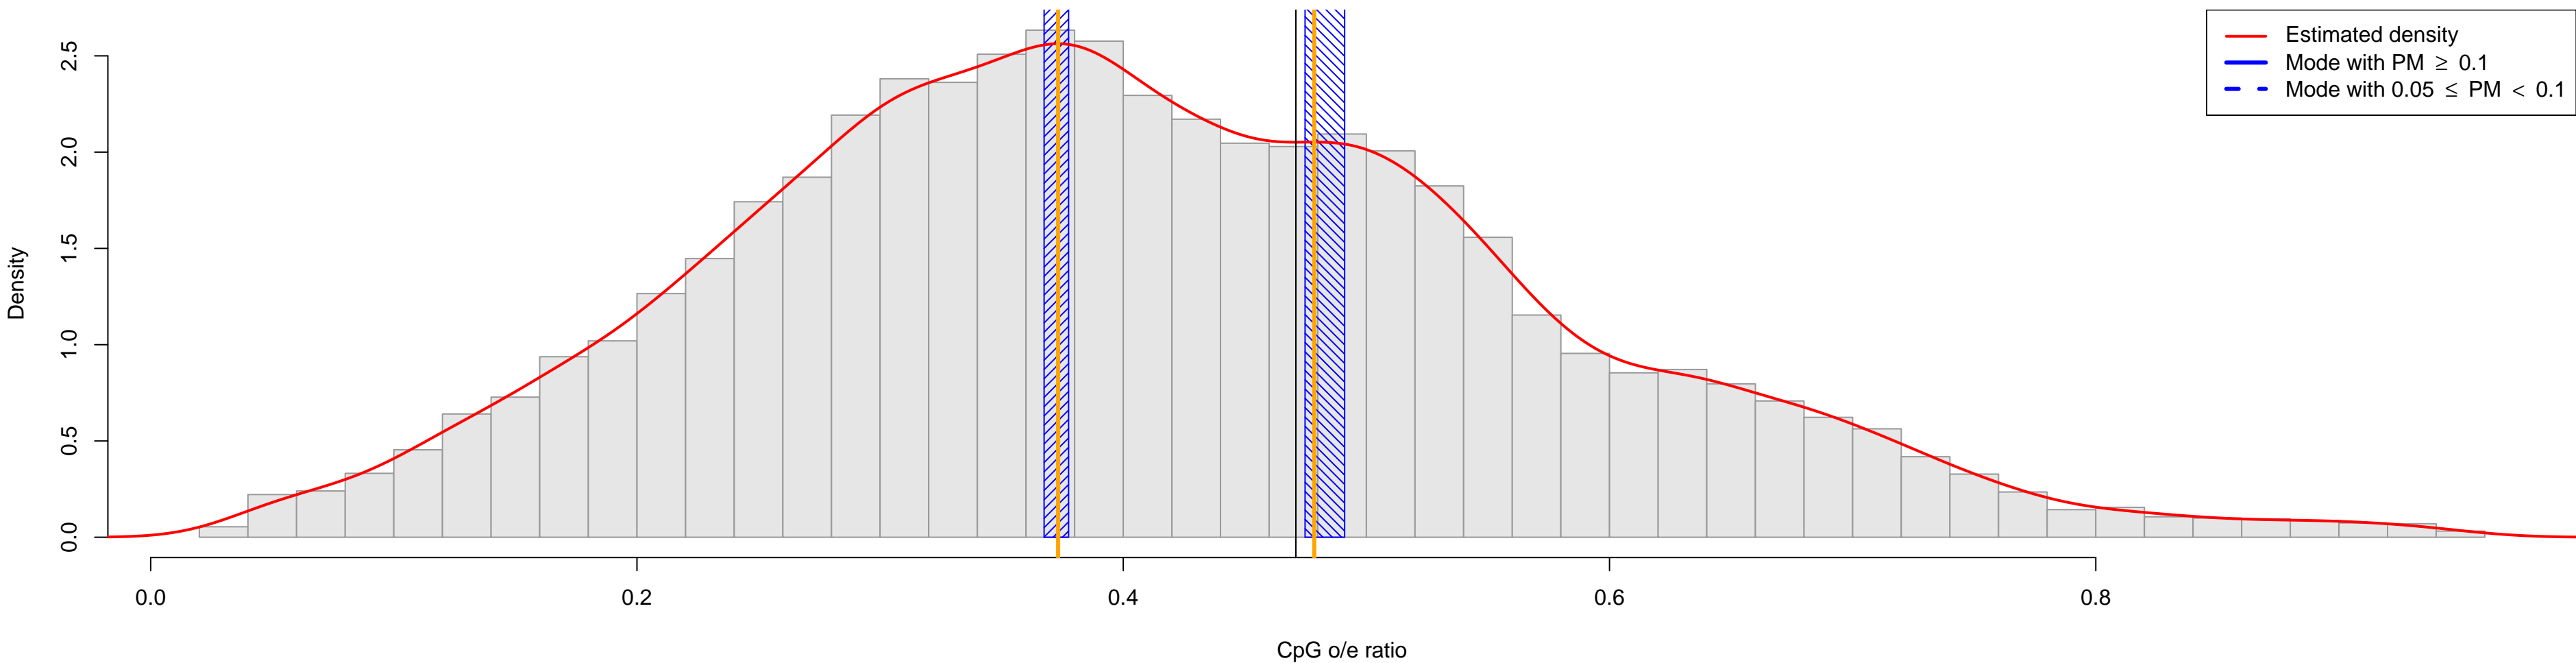

# Naja\_atra

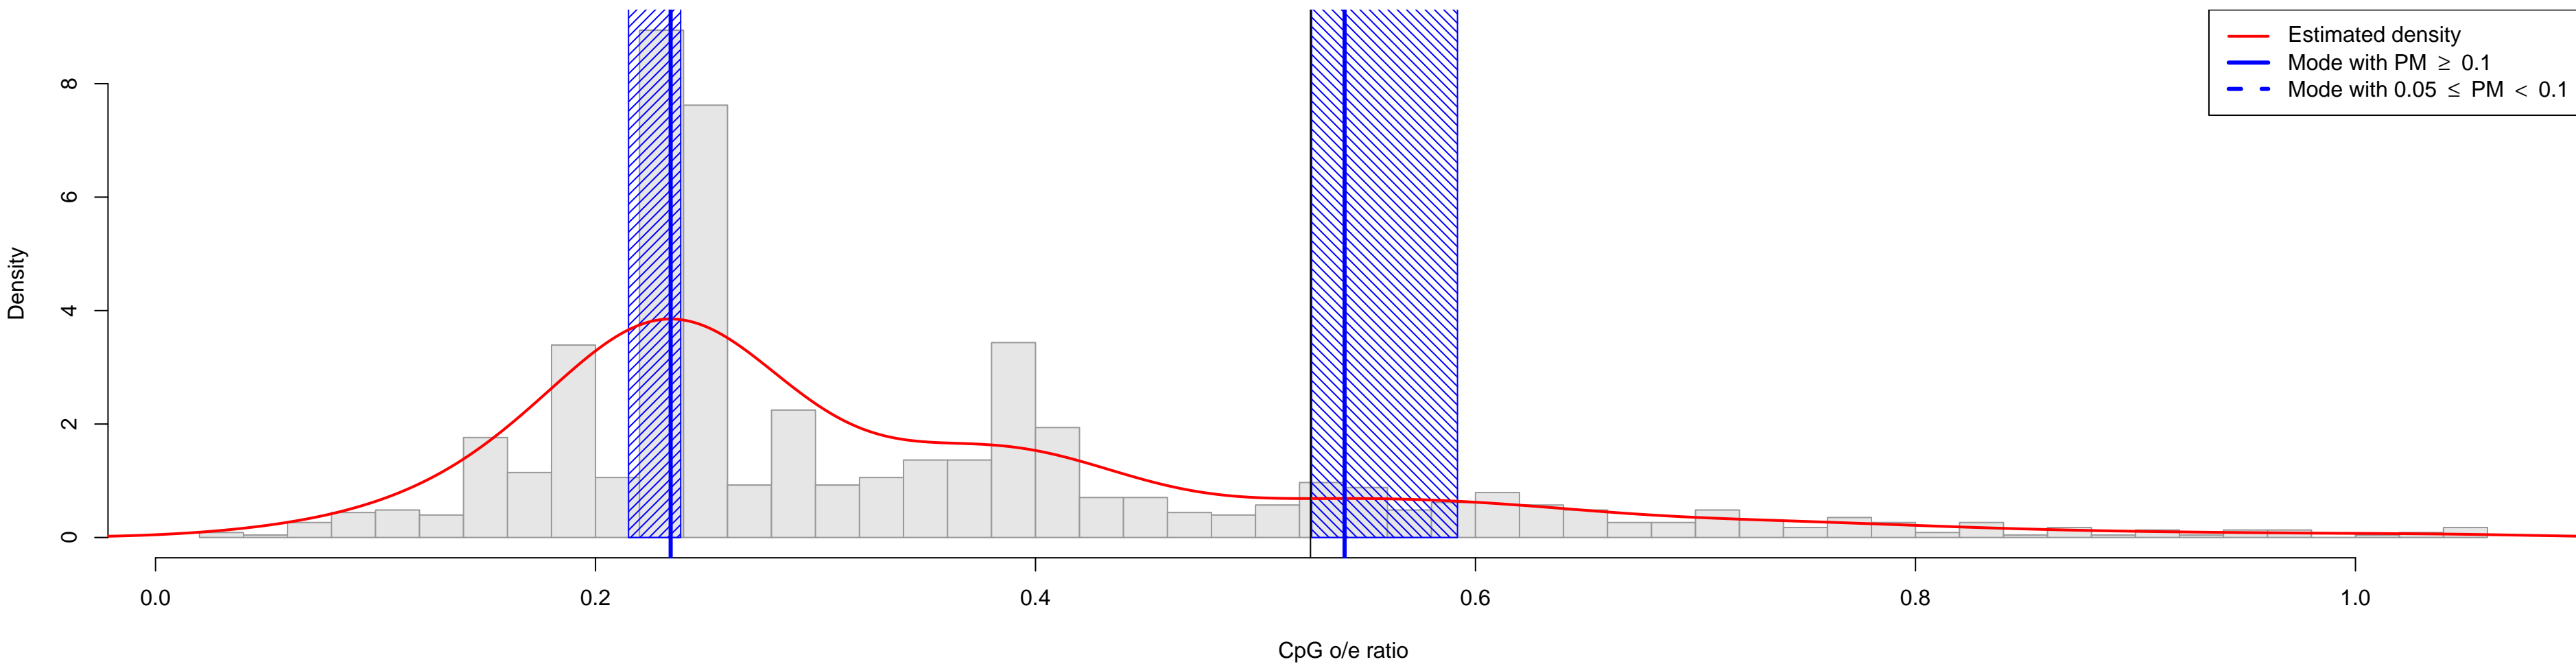

# Nasonia\_vitripennis

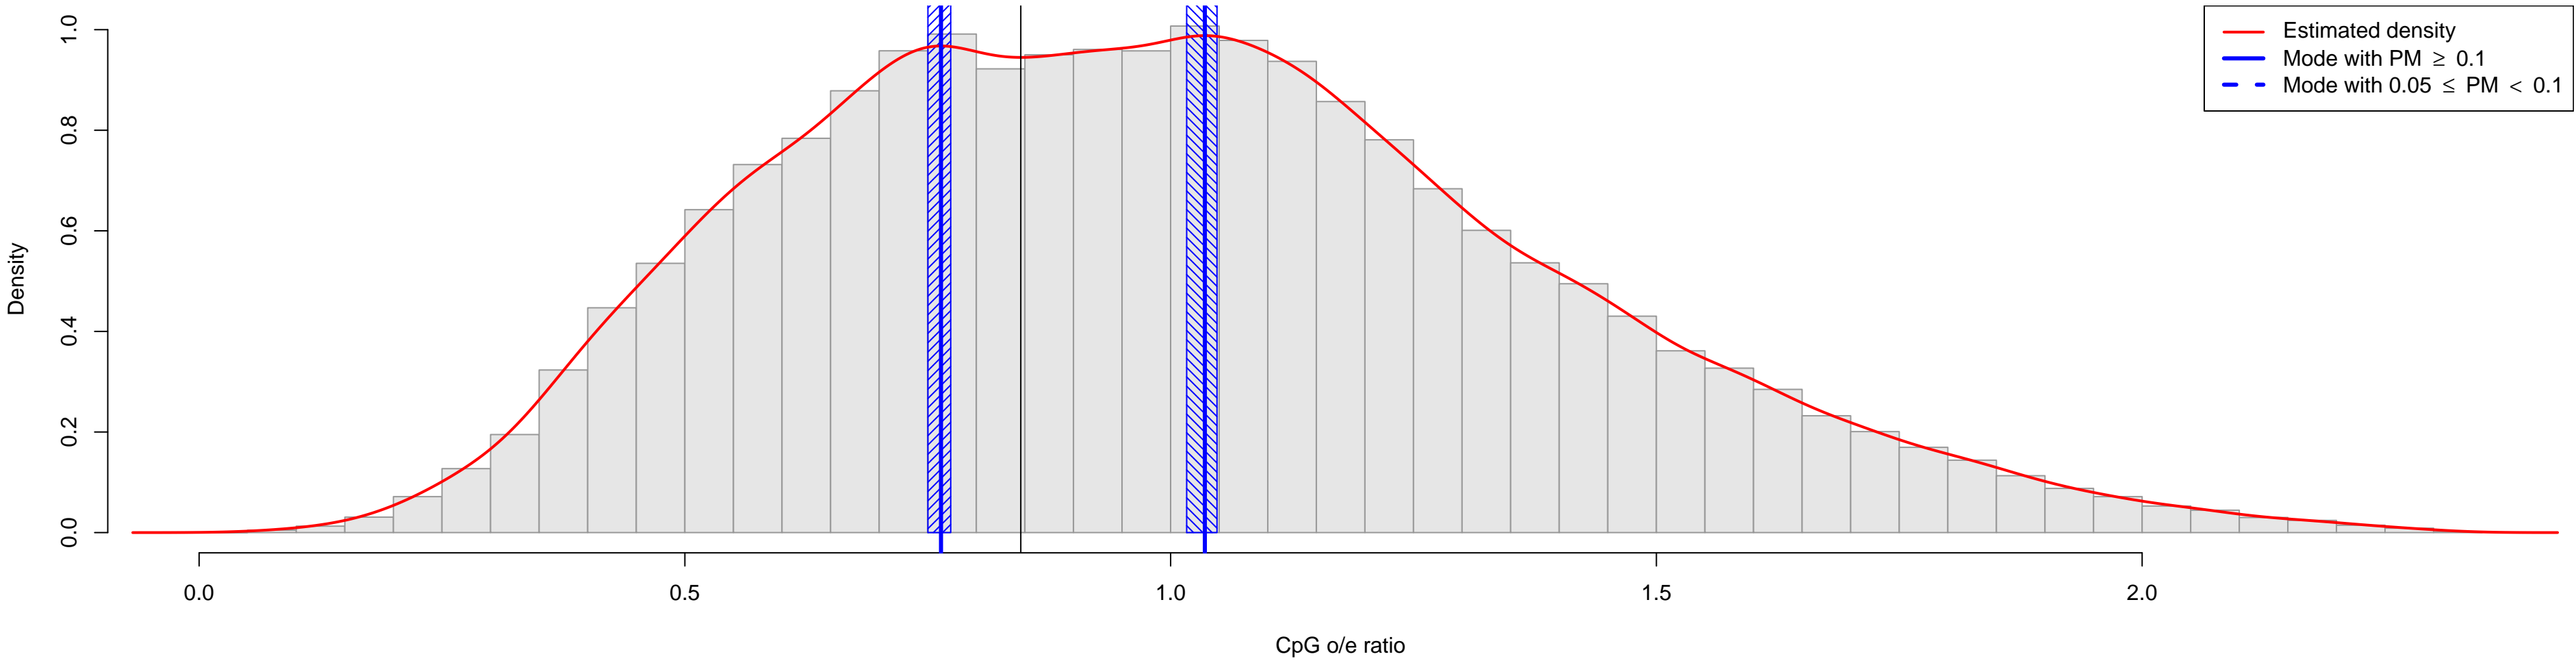

# Necator\_americanus

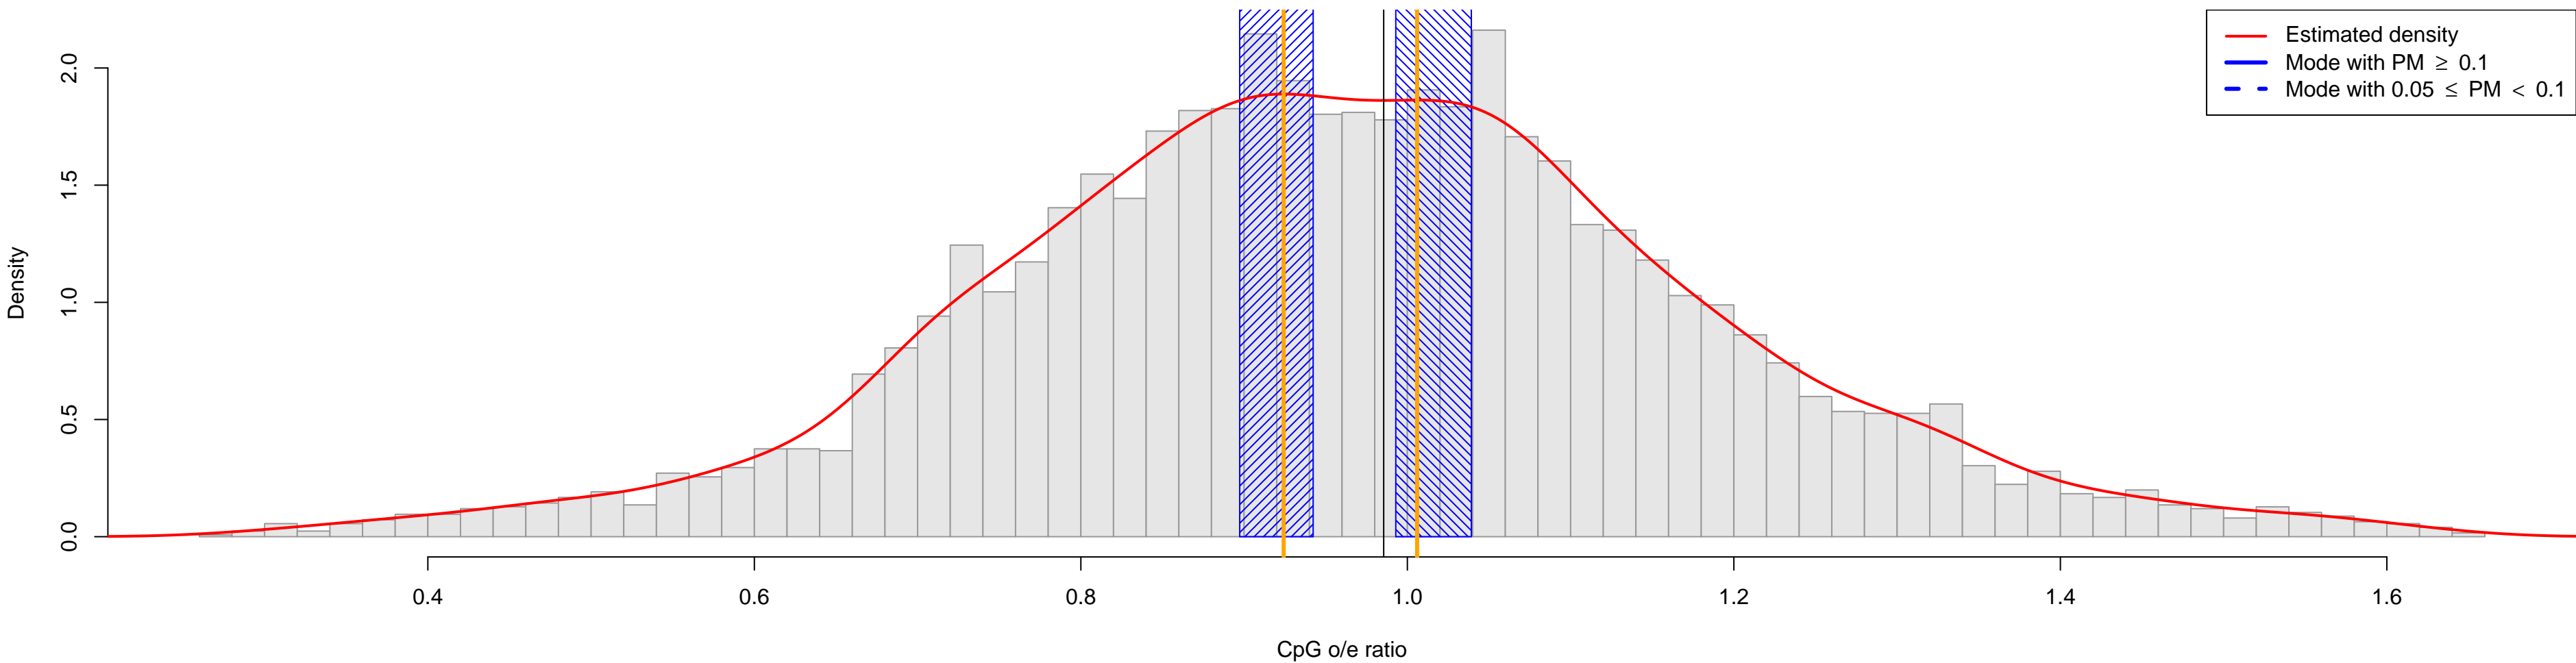

# Nematostella\_vectensis

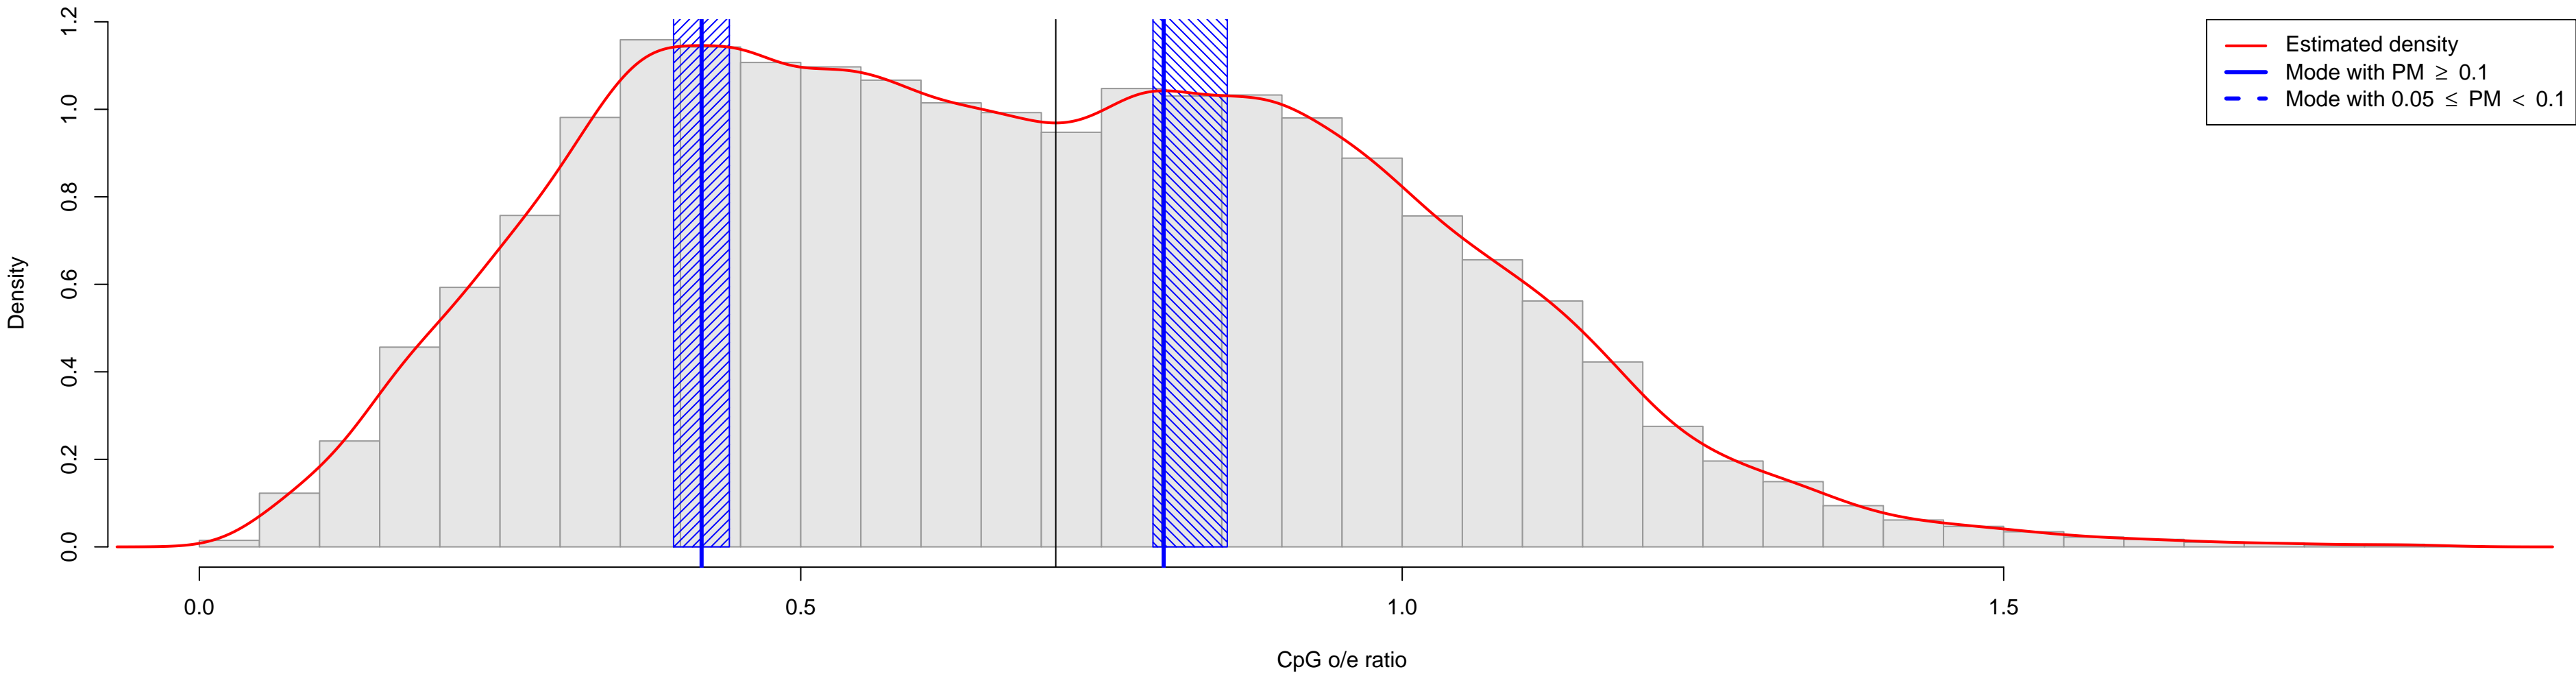

# Neotyphodium\_lolii

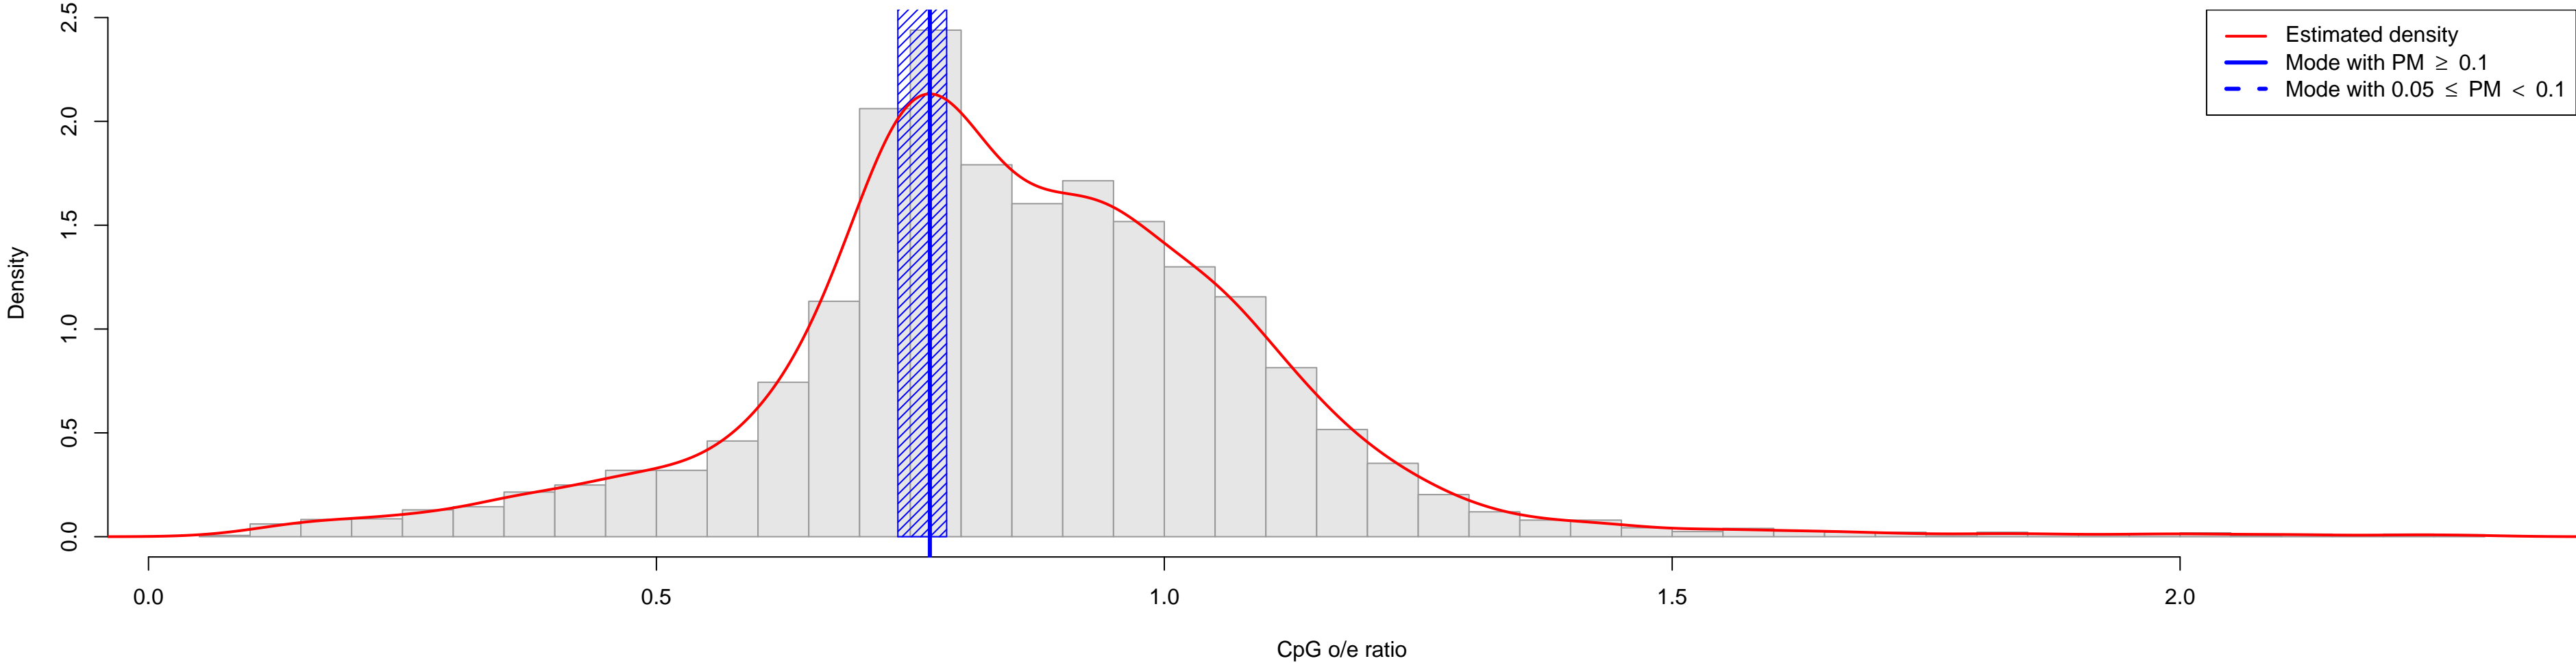

# Neurospora\_crassa

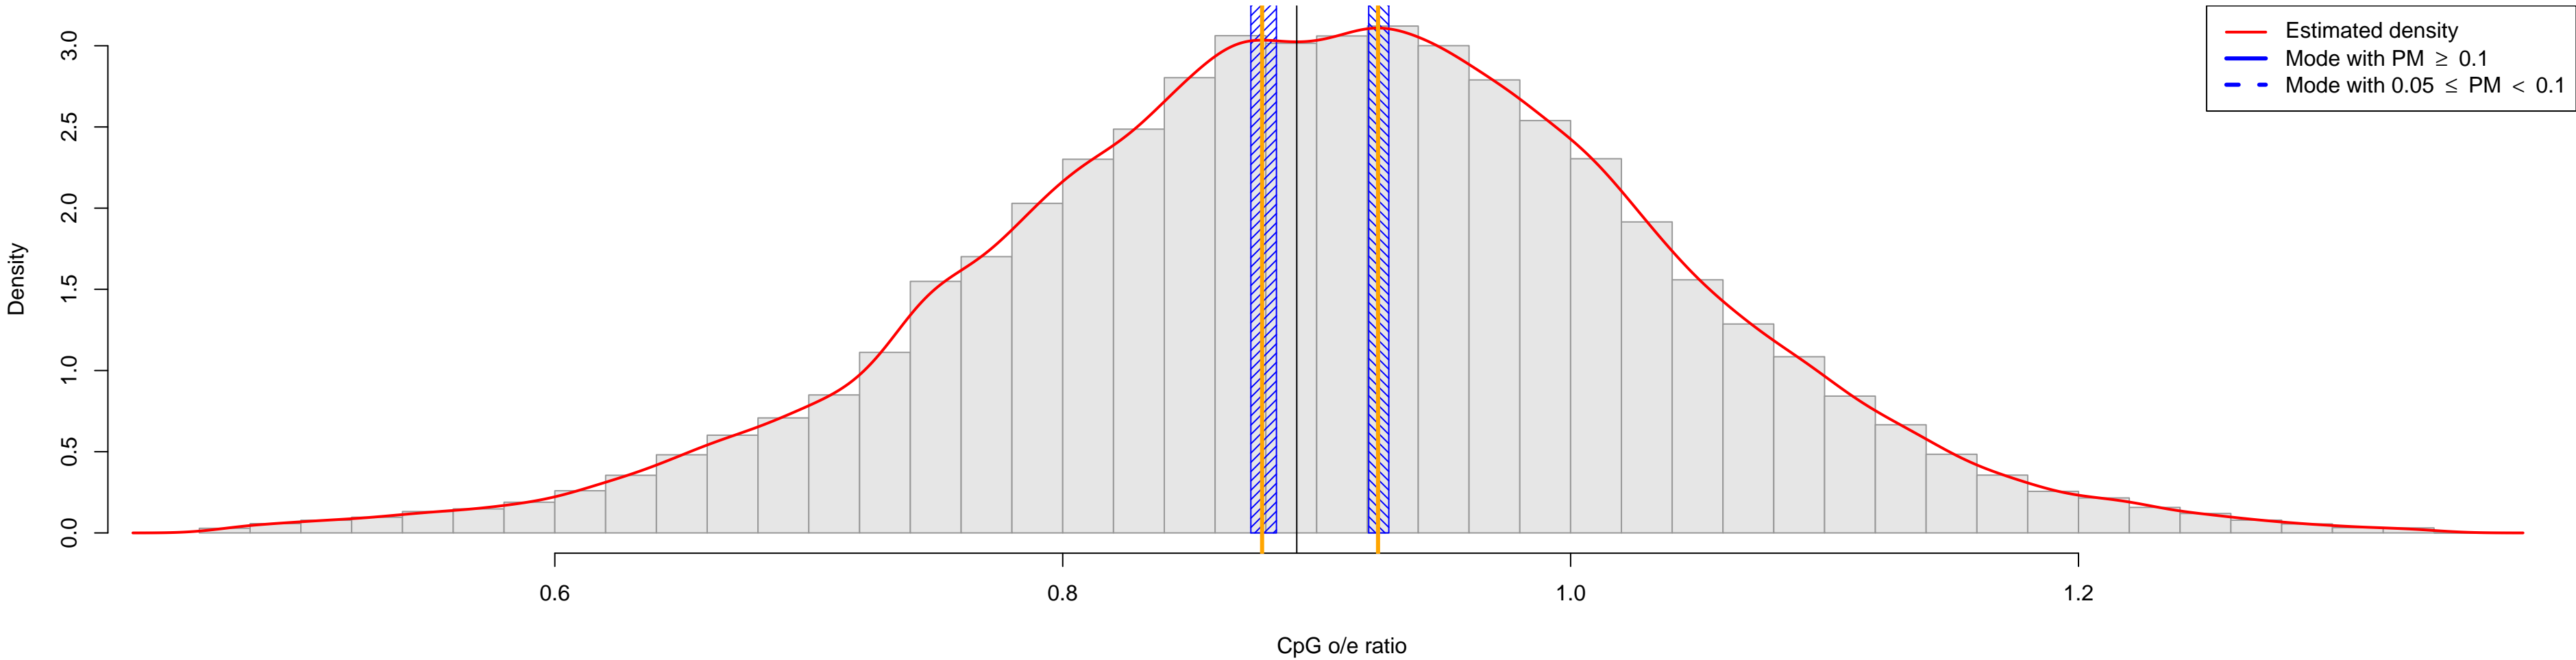

# Nicotiana\_sylvestris

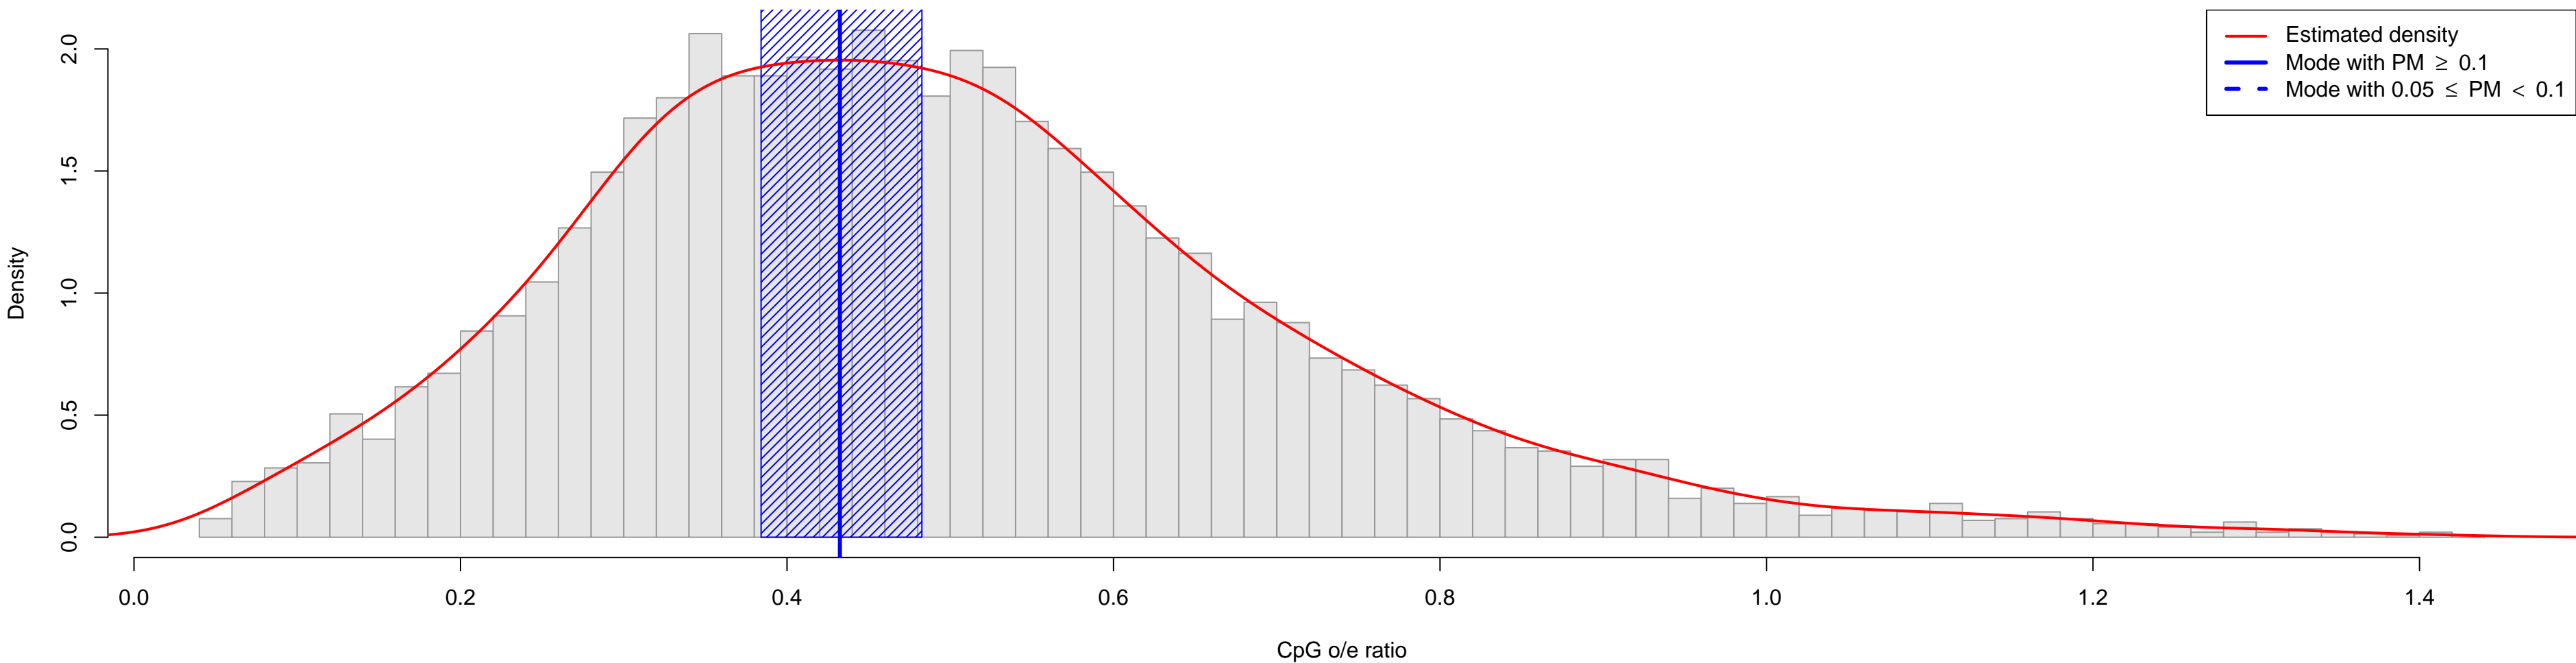



# Nicotiana\_tabacum

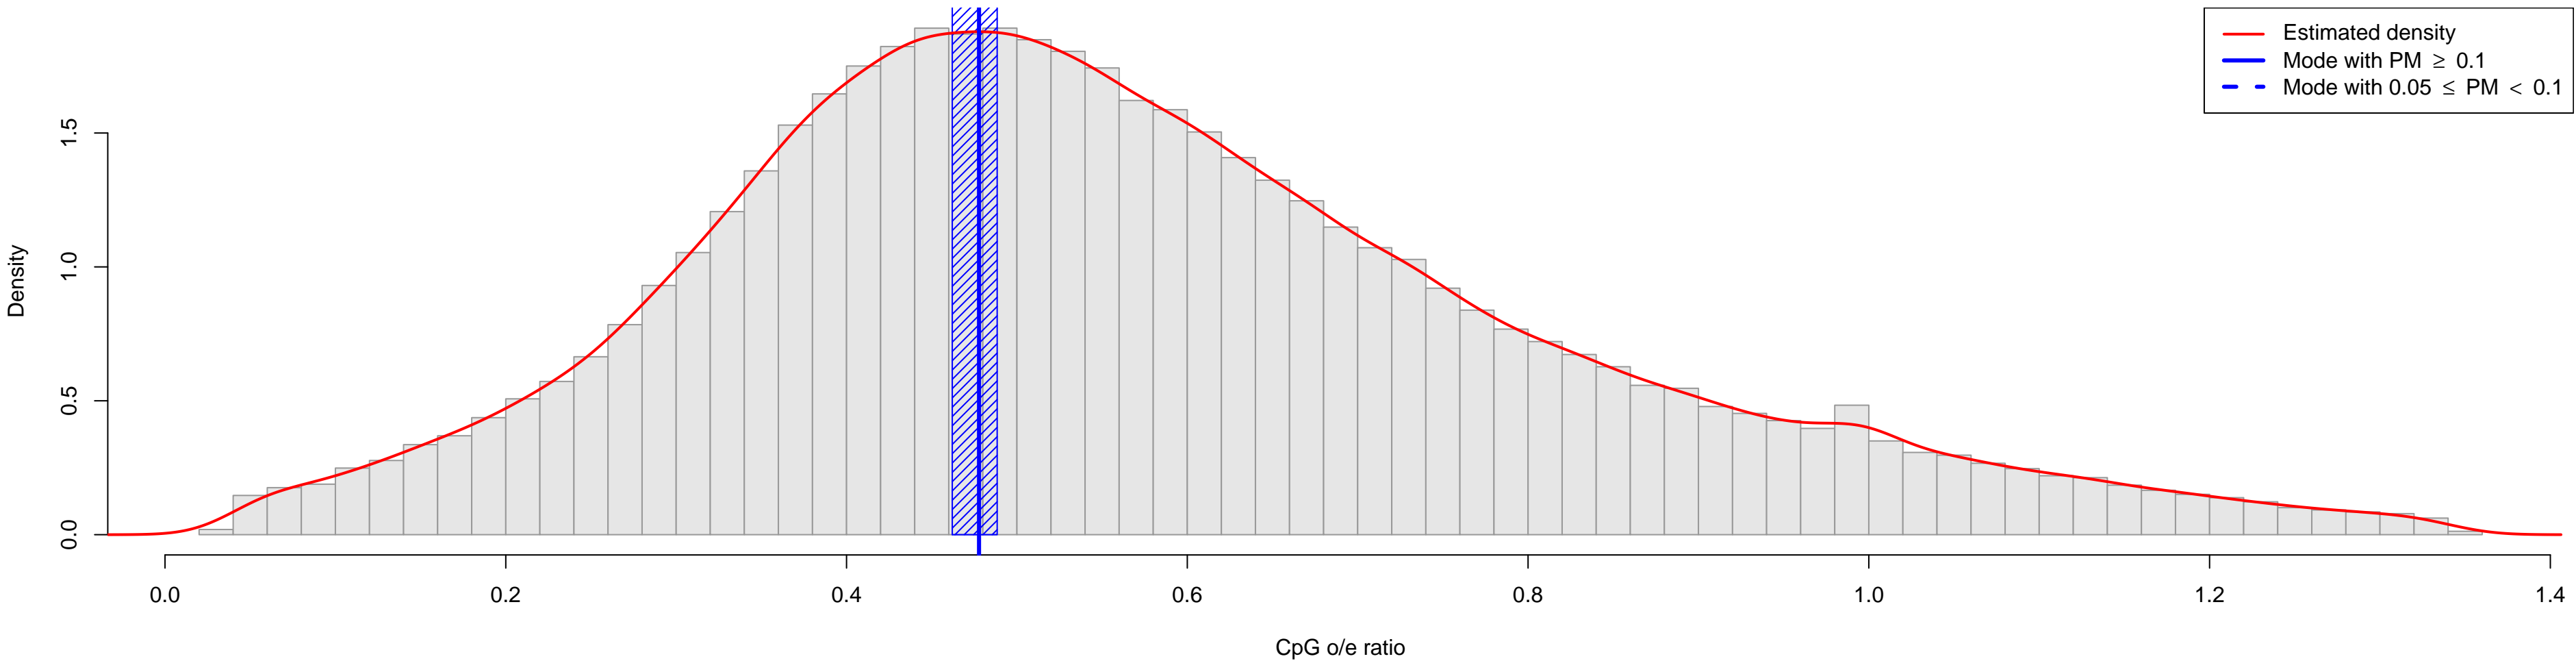

# Nilaparvata\_lugens

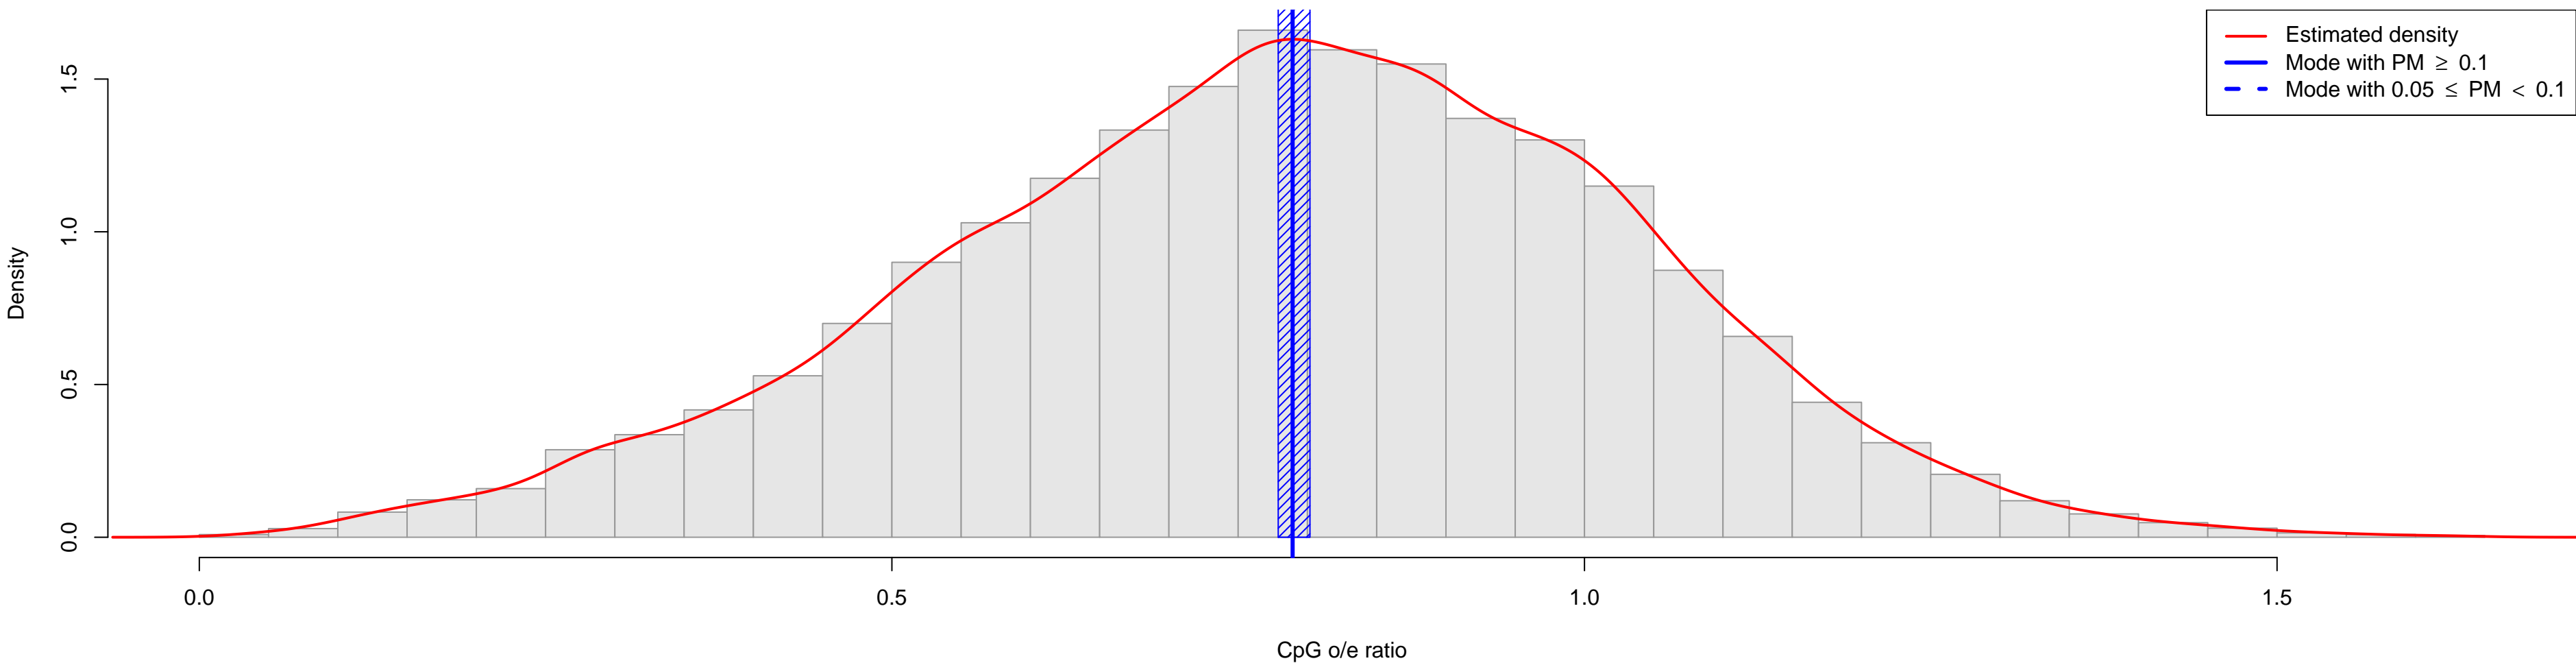

# Nippostrongylus\_brasiliensis

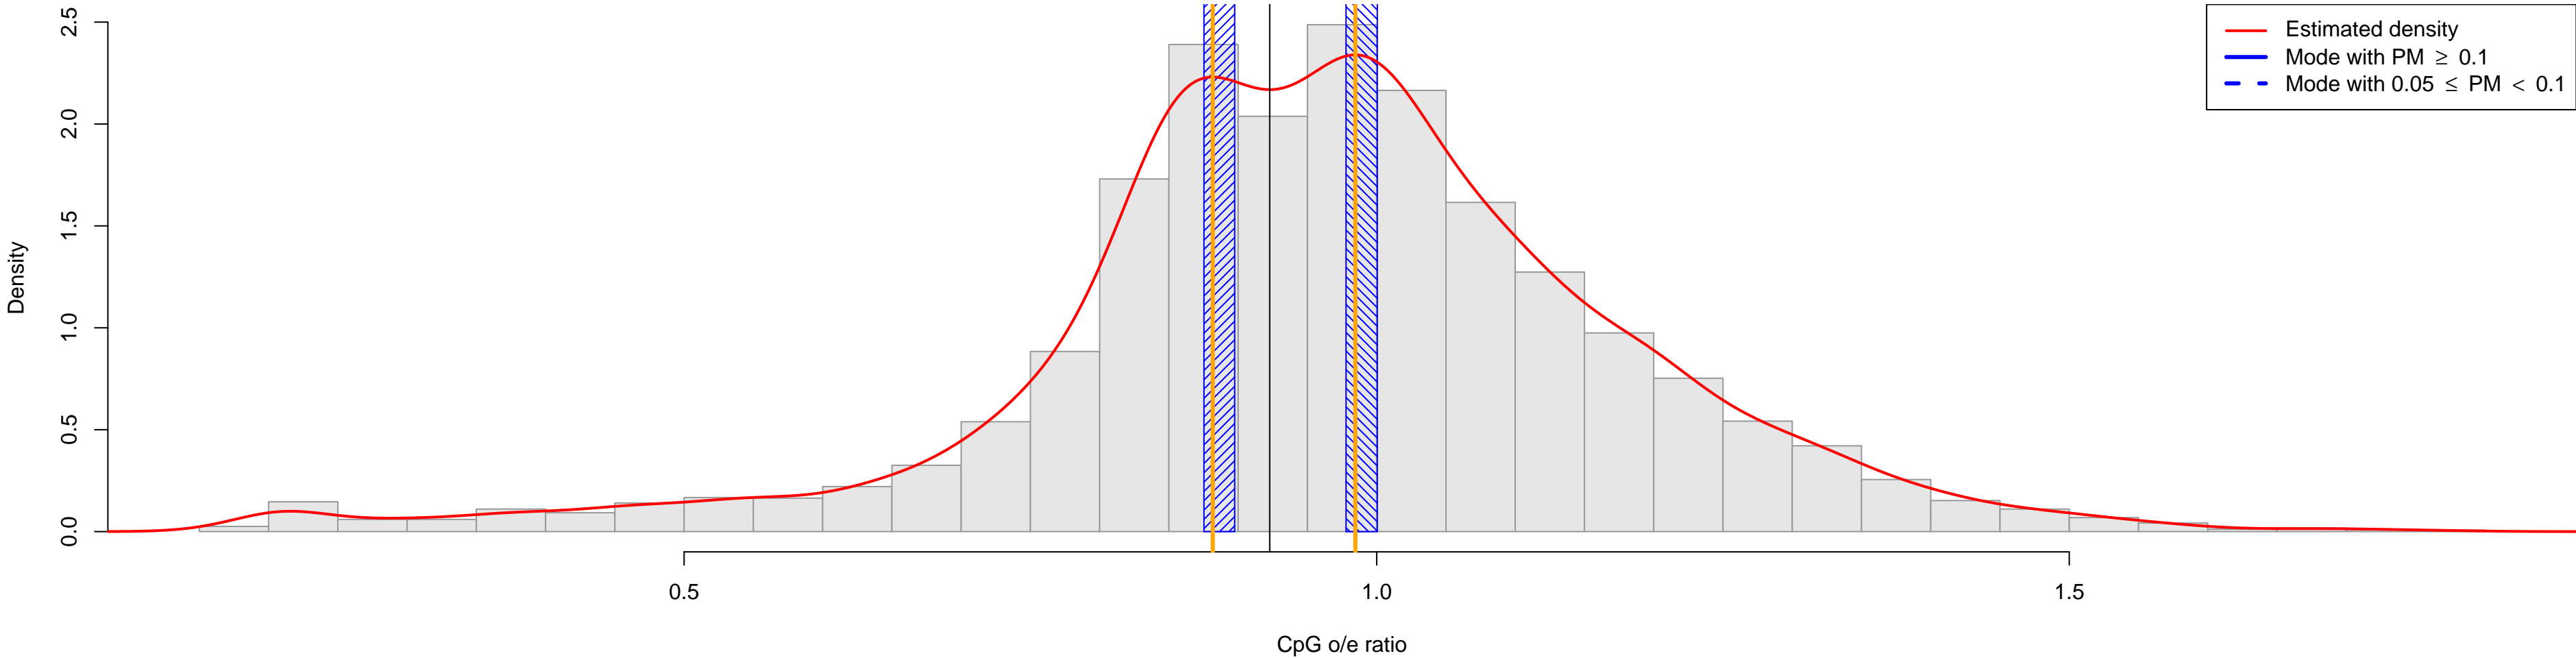

# Nitella\_hyalina

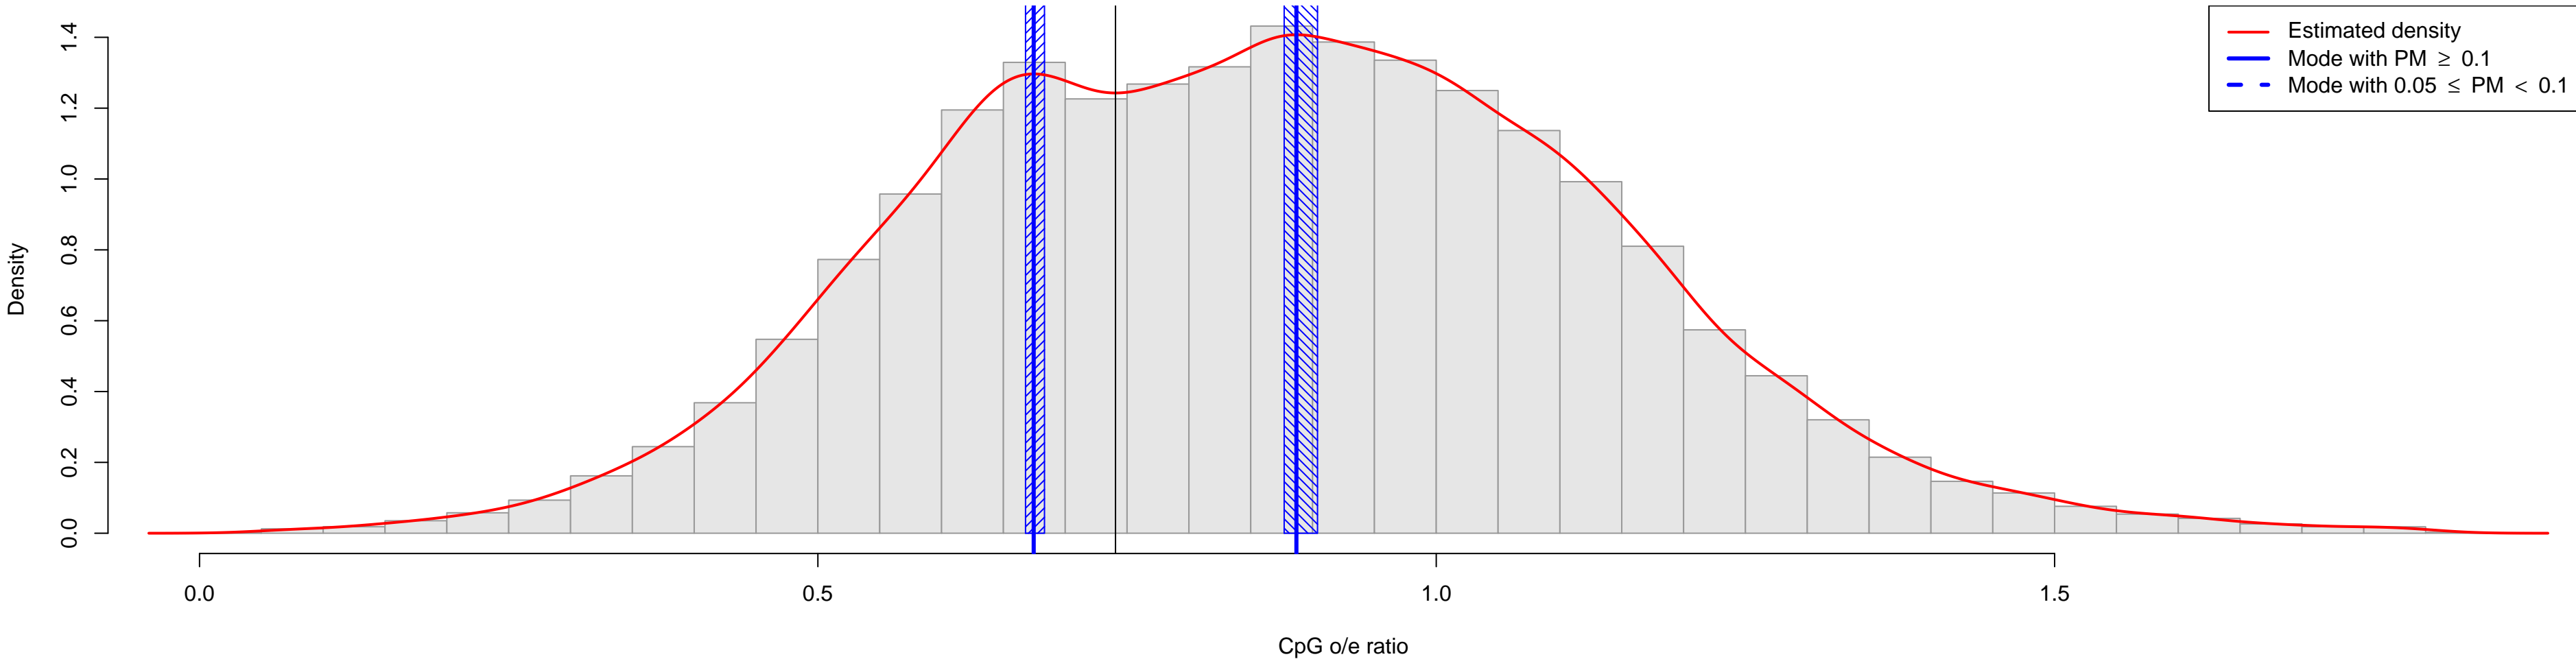

# Onchocerca\_flexuosa

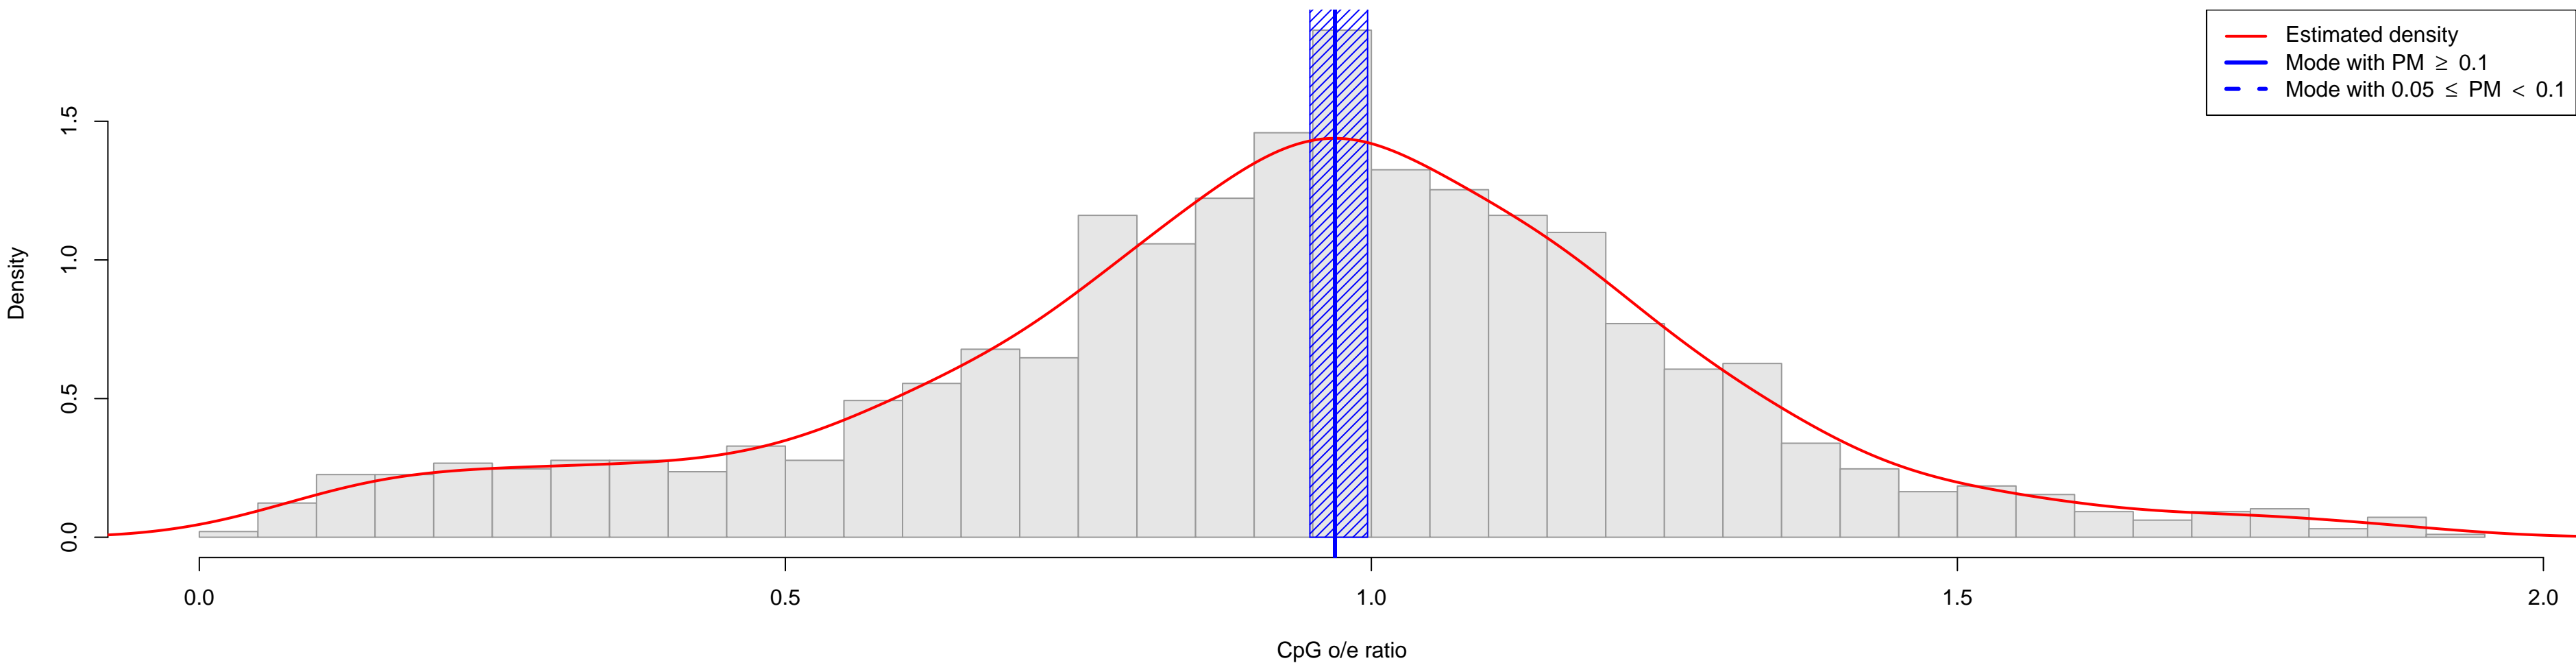

# Onchocerca\_volvulus

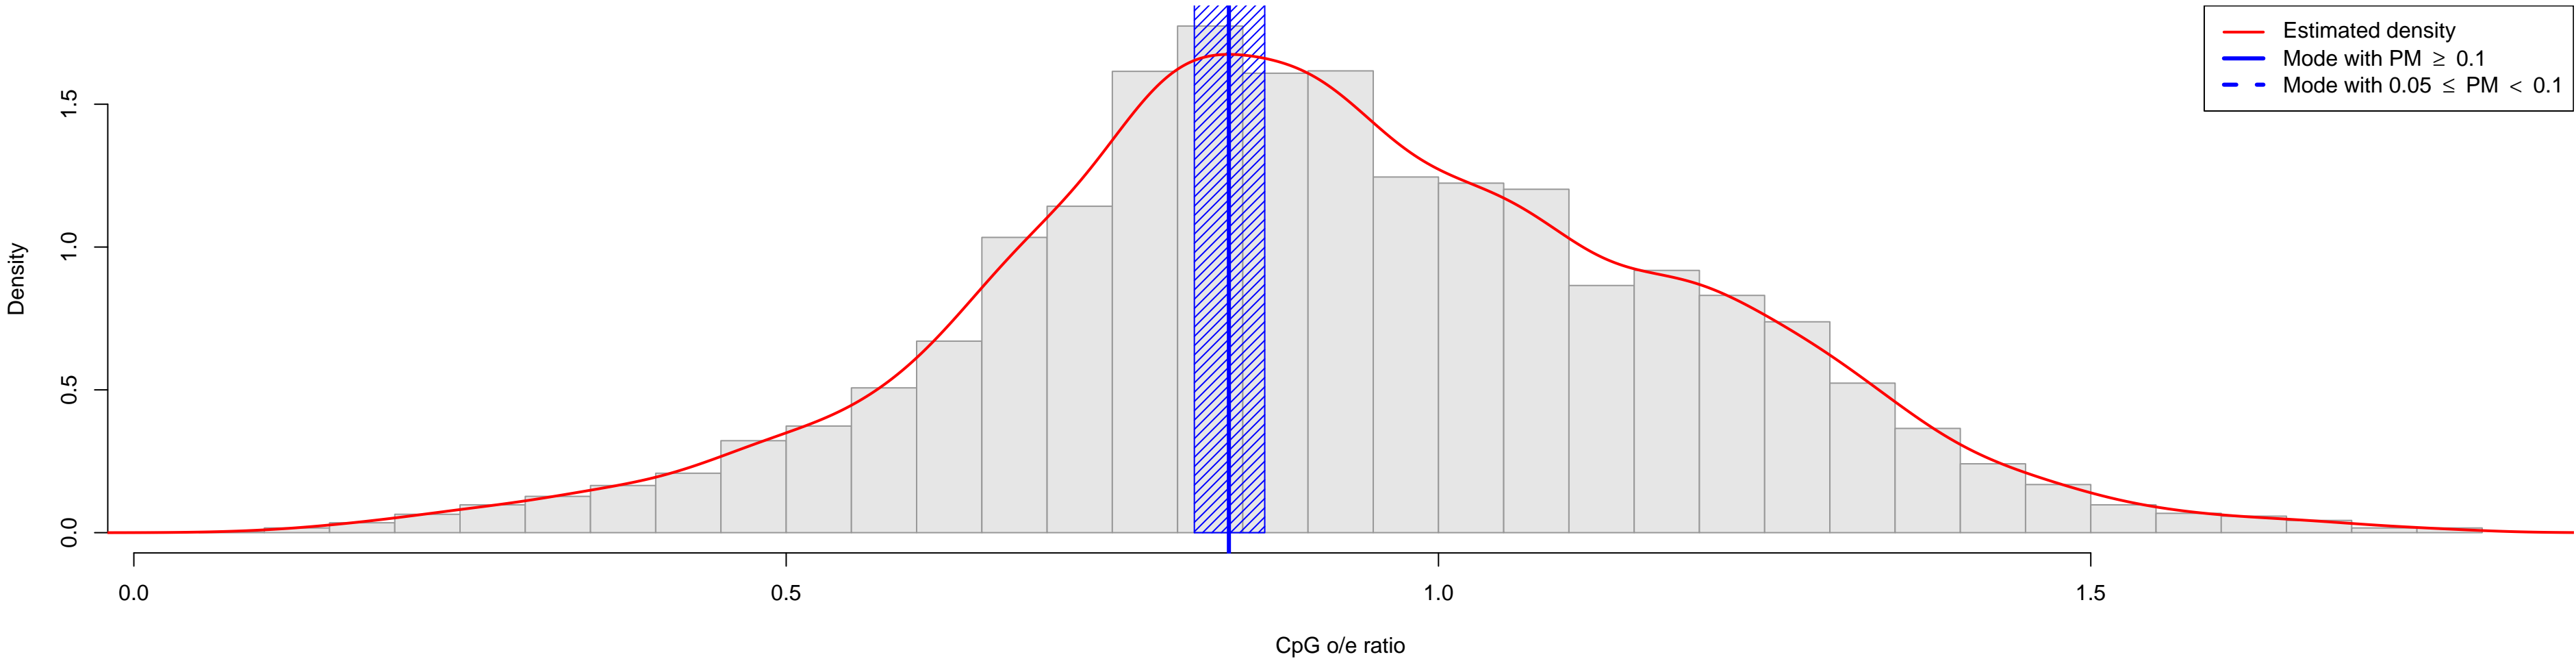

# Oncomelania\_hupensis

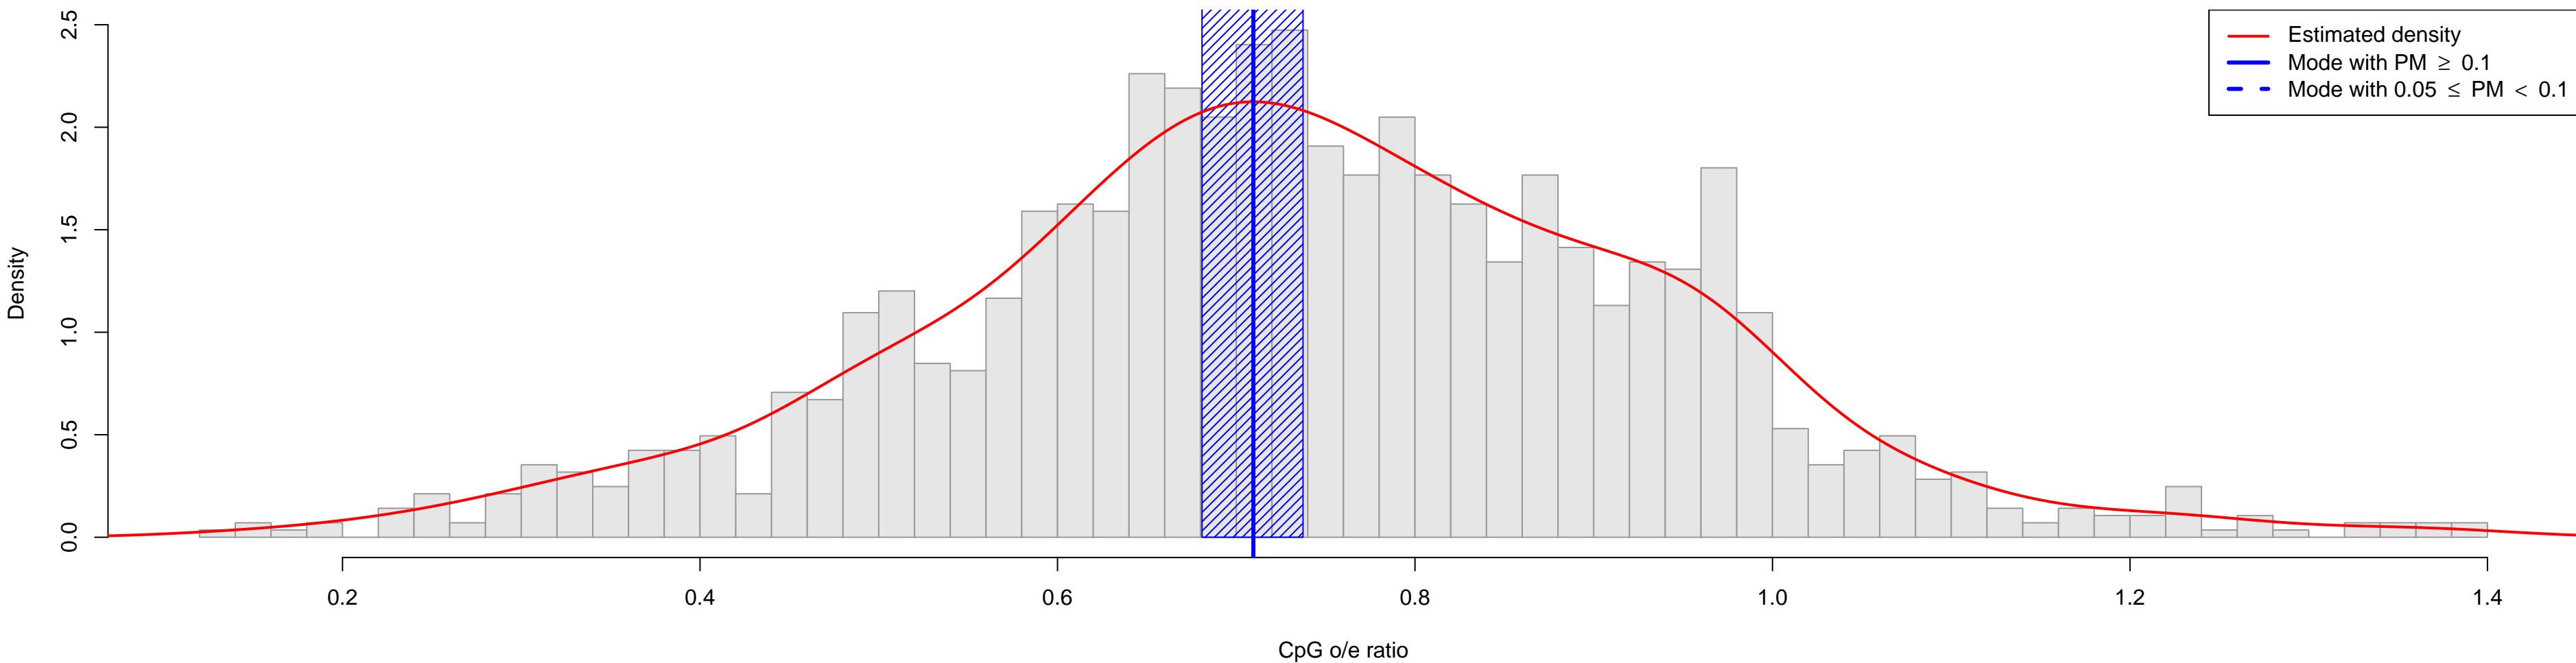

# Oncorhynchus\_kisutch

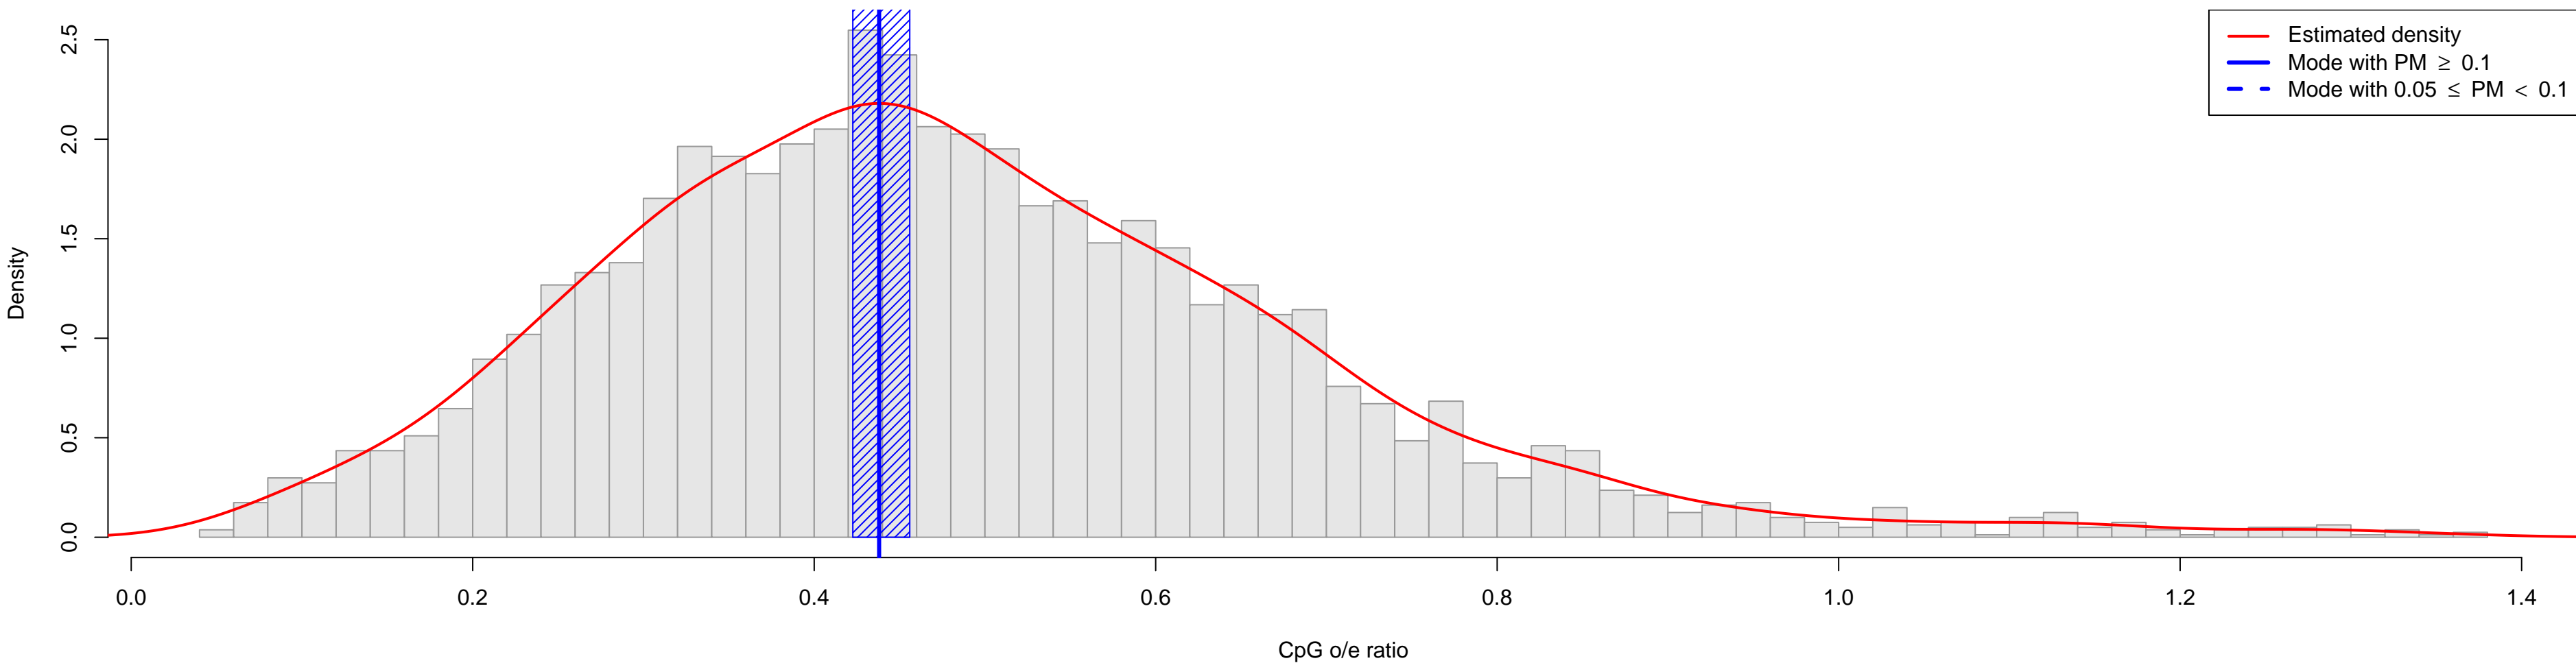



# Oncorhynchus\_mykiss

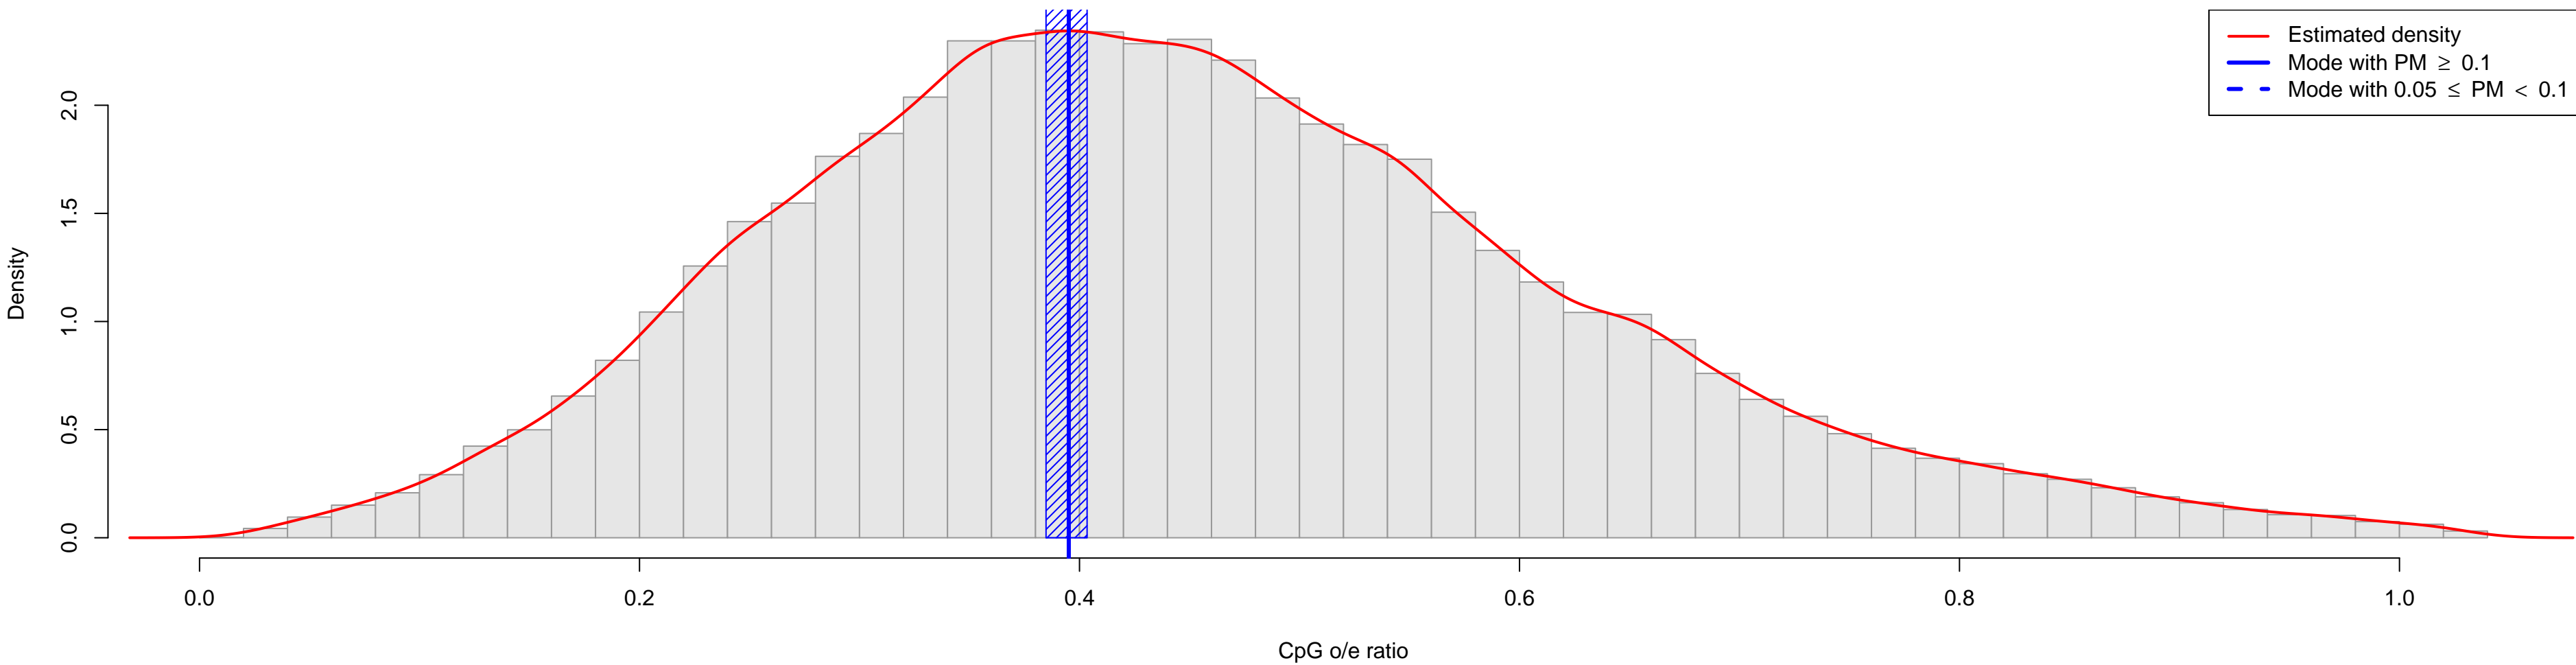

# Oncorhynchus\_nerka

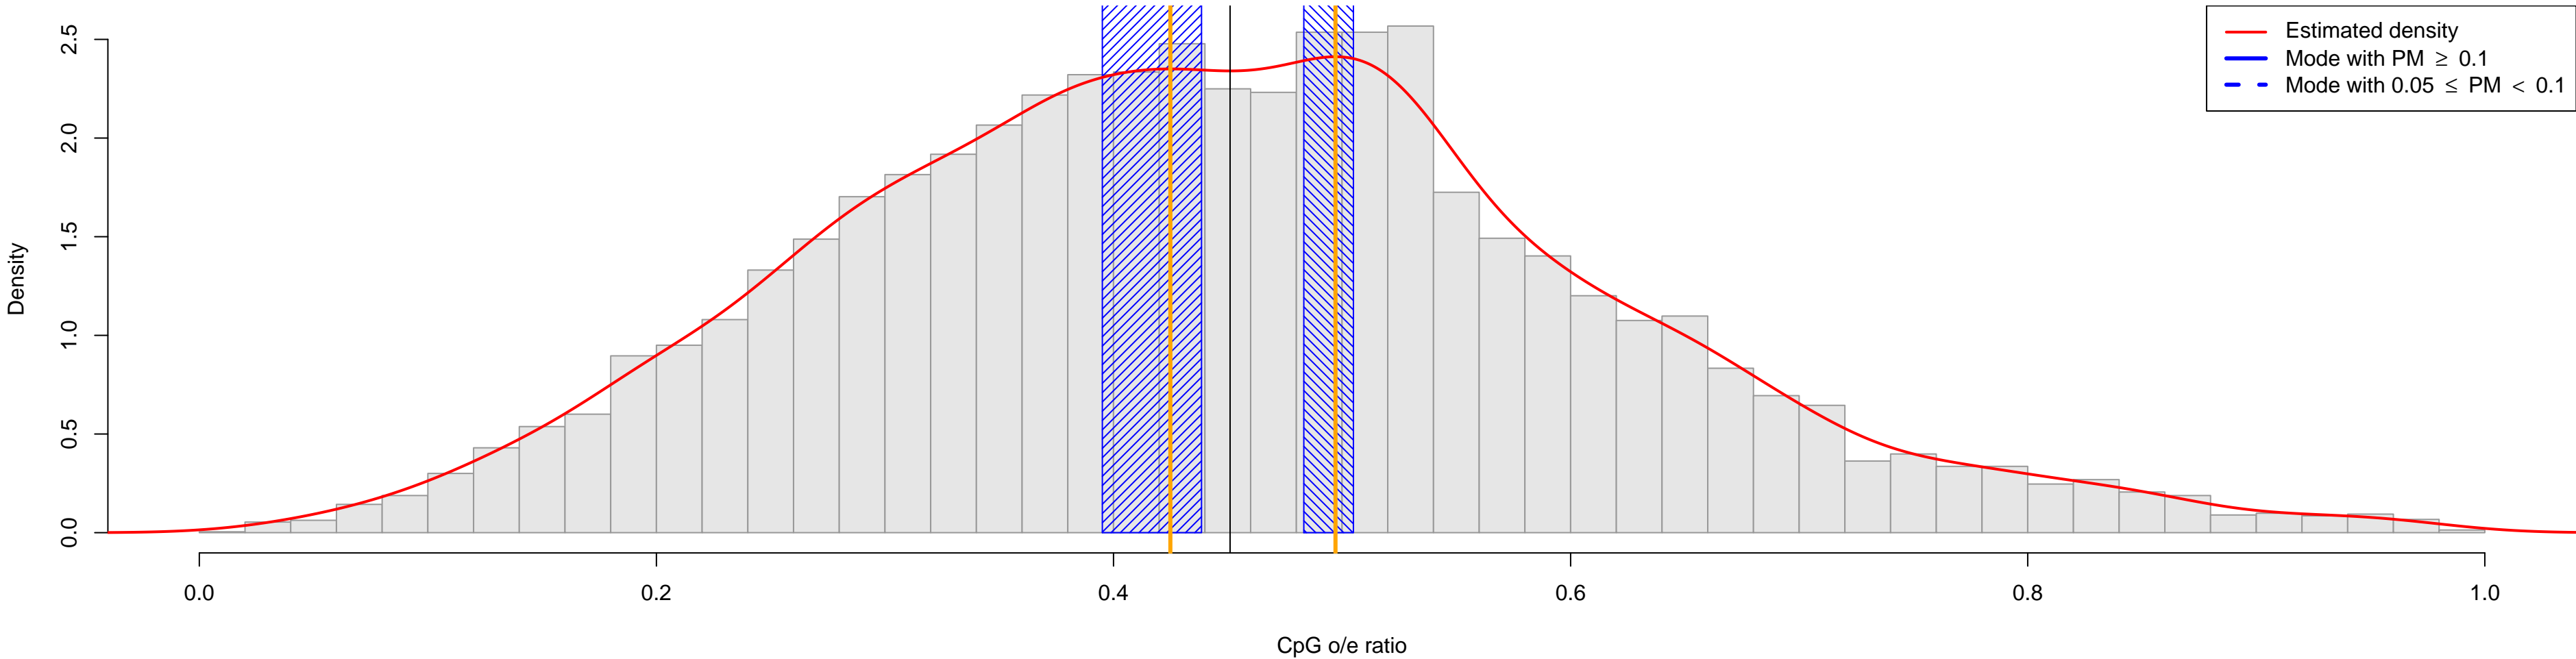

Oncorhynchus\_tshawytscha

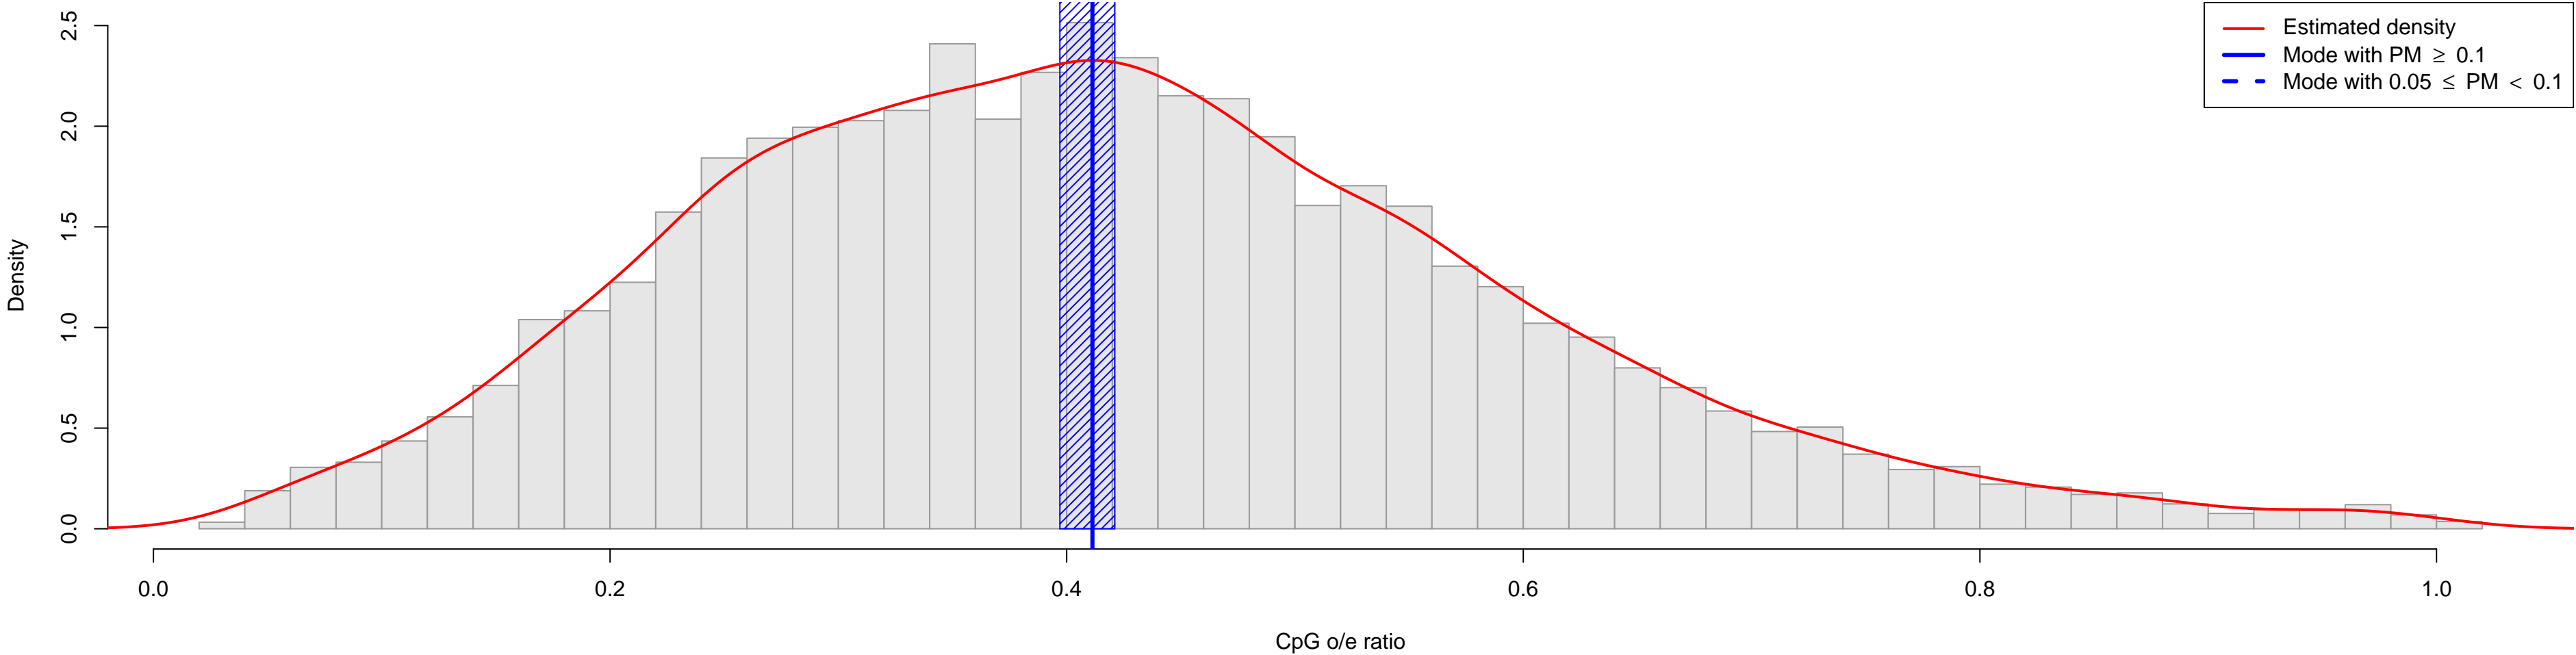

# Onthophagus\_taurus

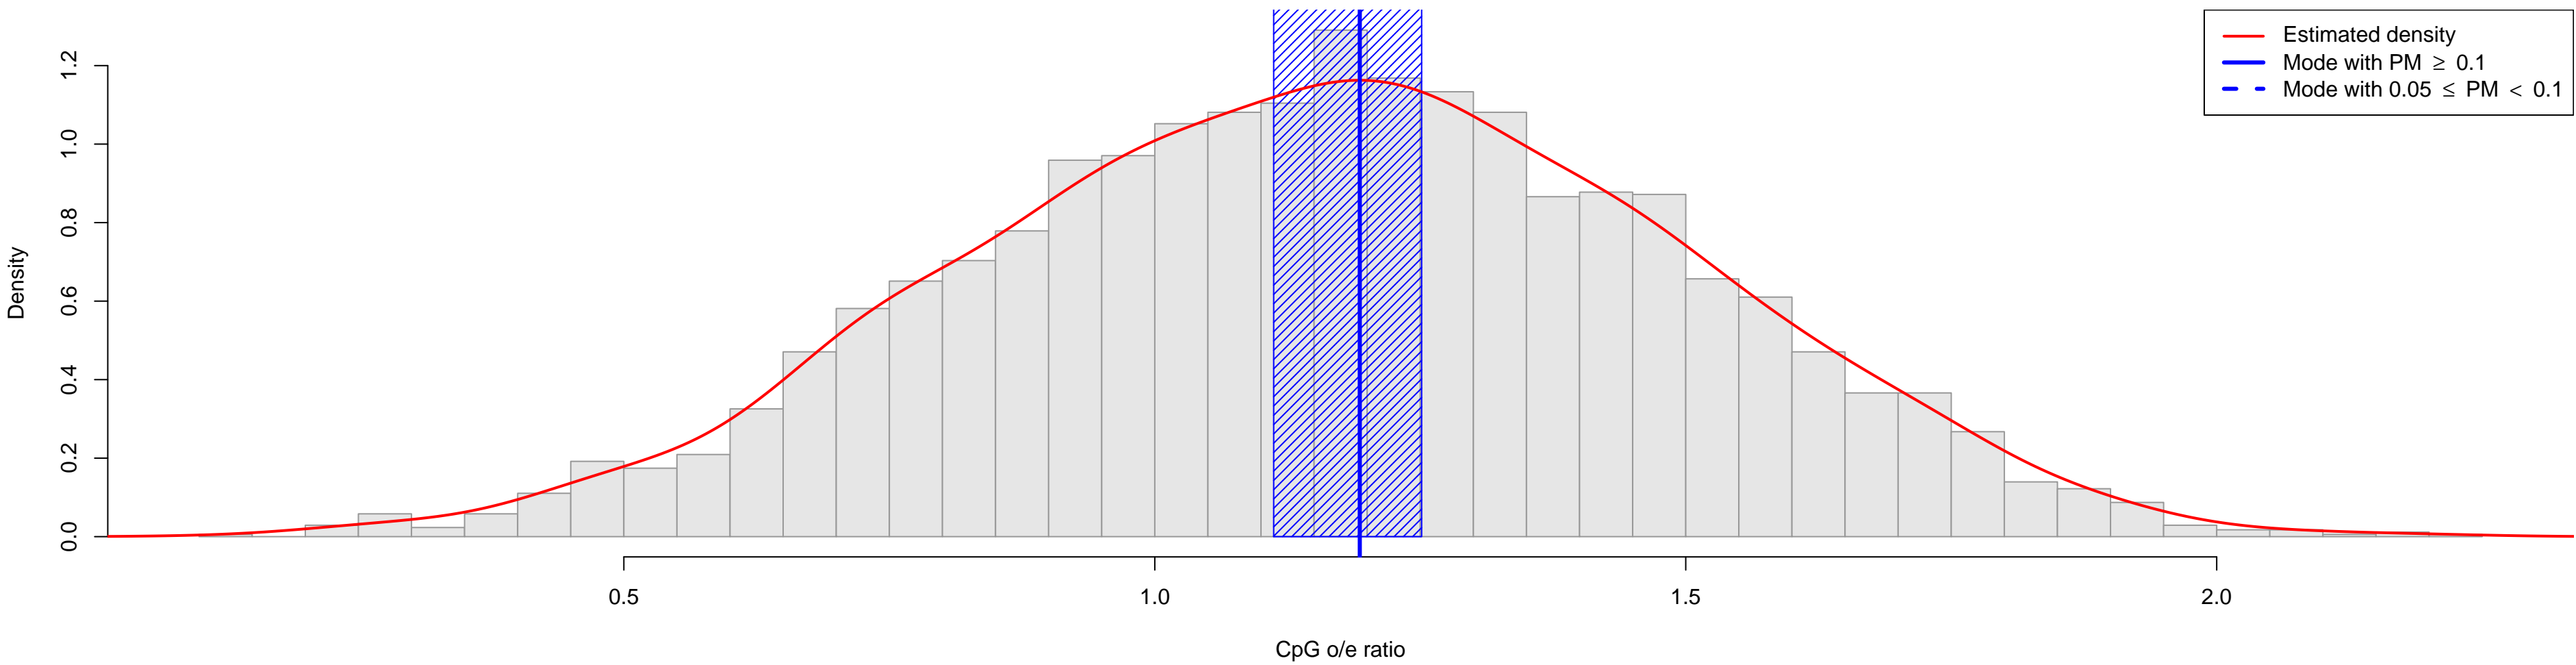

# Onychiurus\_arcticus

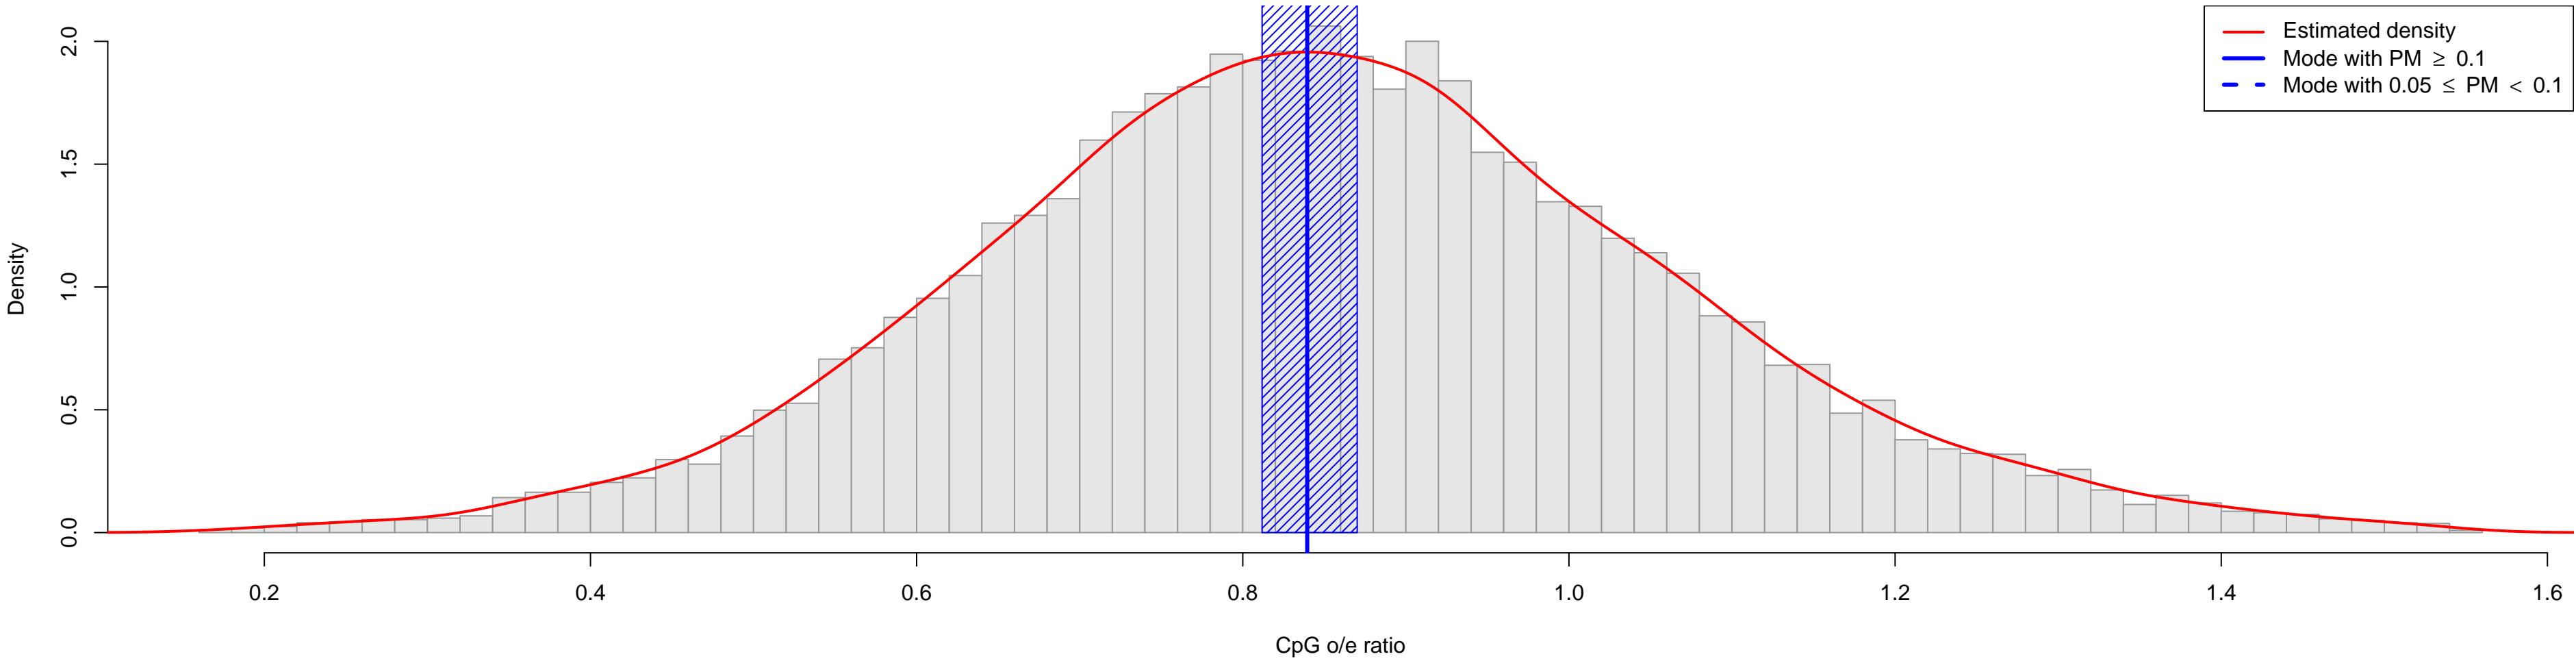

# Ophiostoma\_novo-ulmi

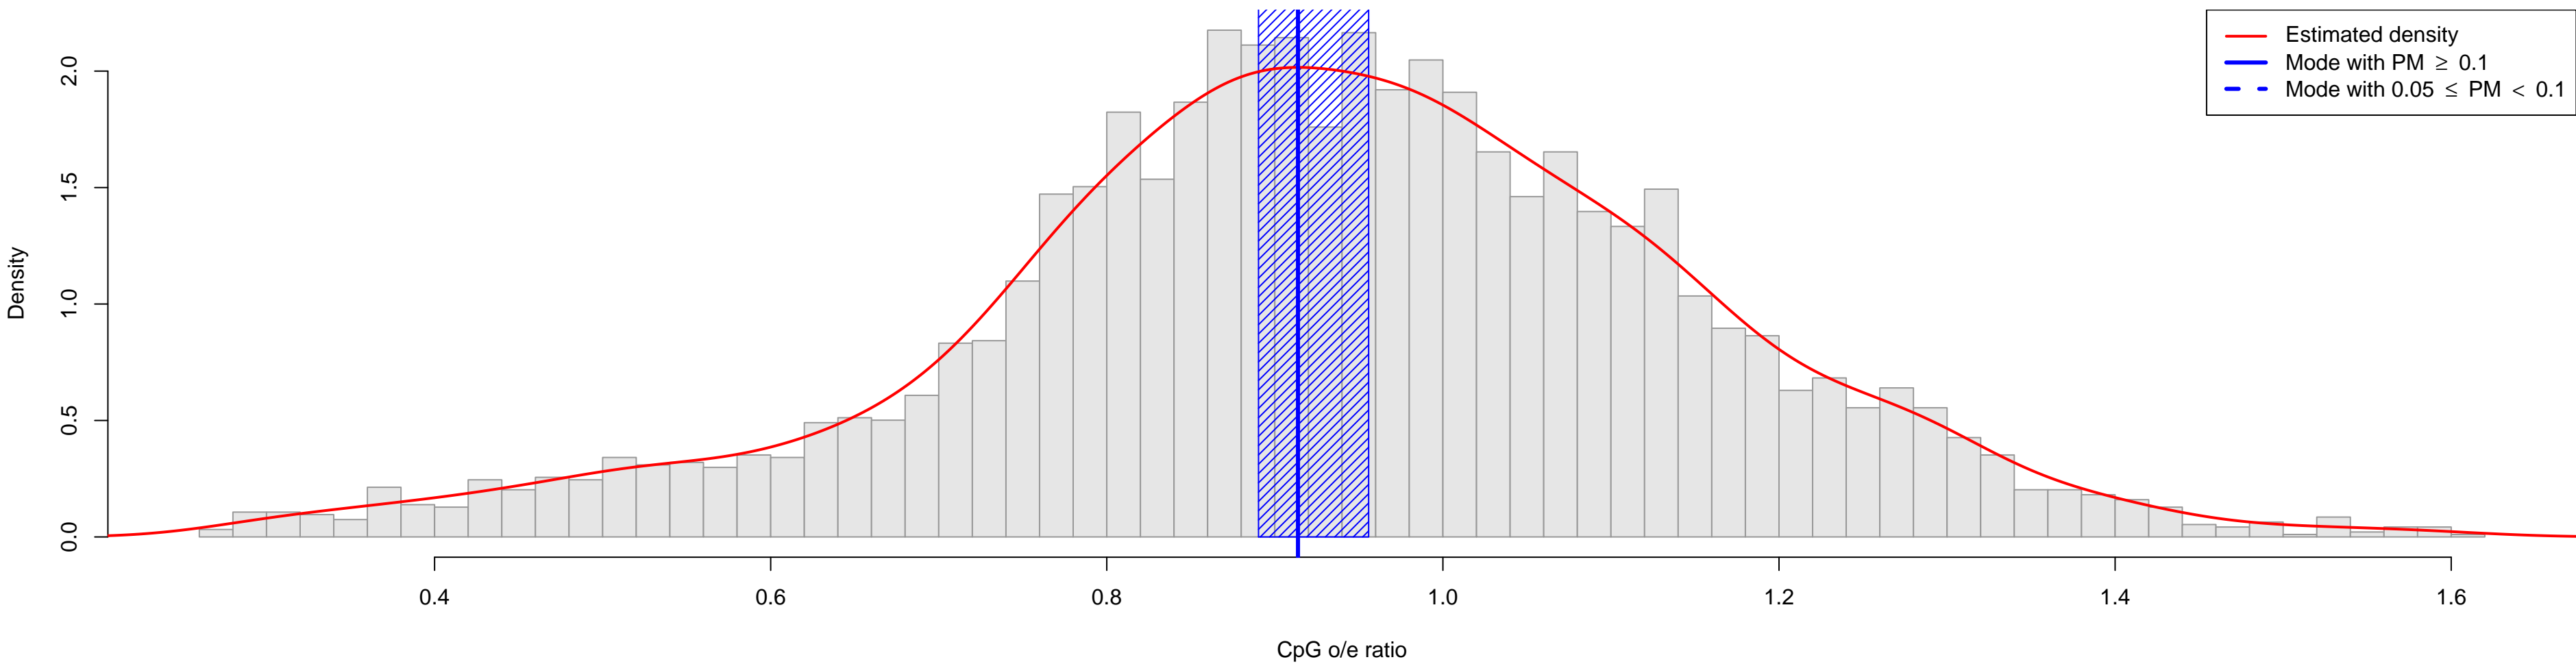

# Ophryotrocha\_puerilis

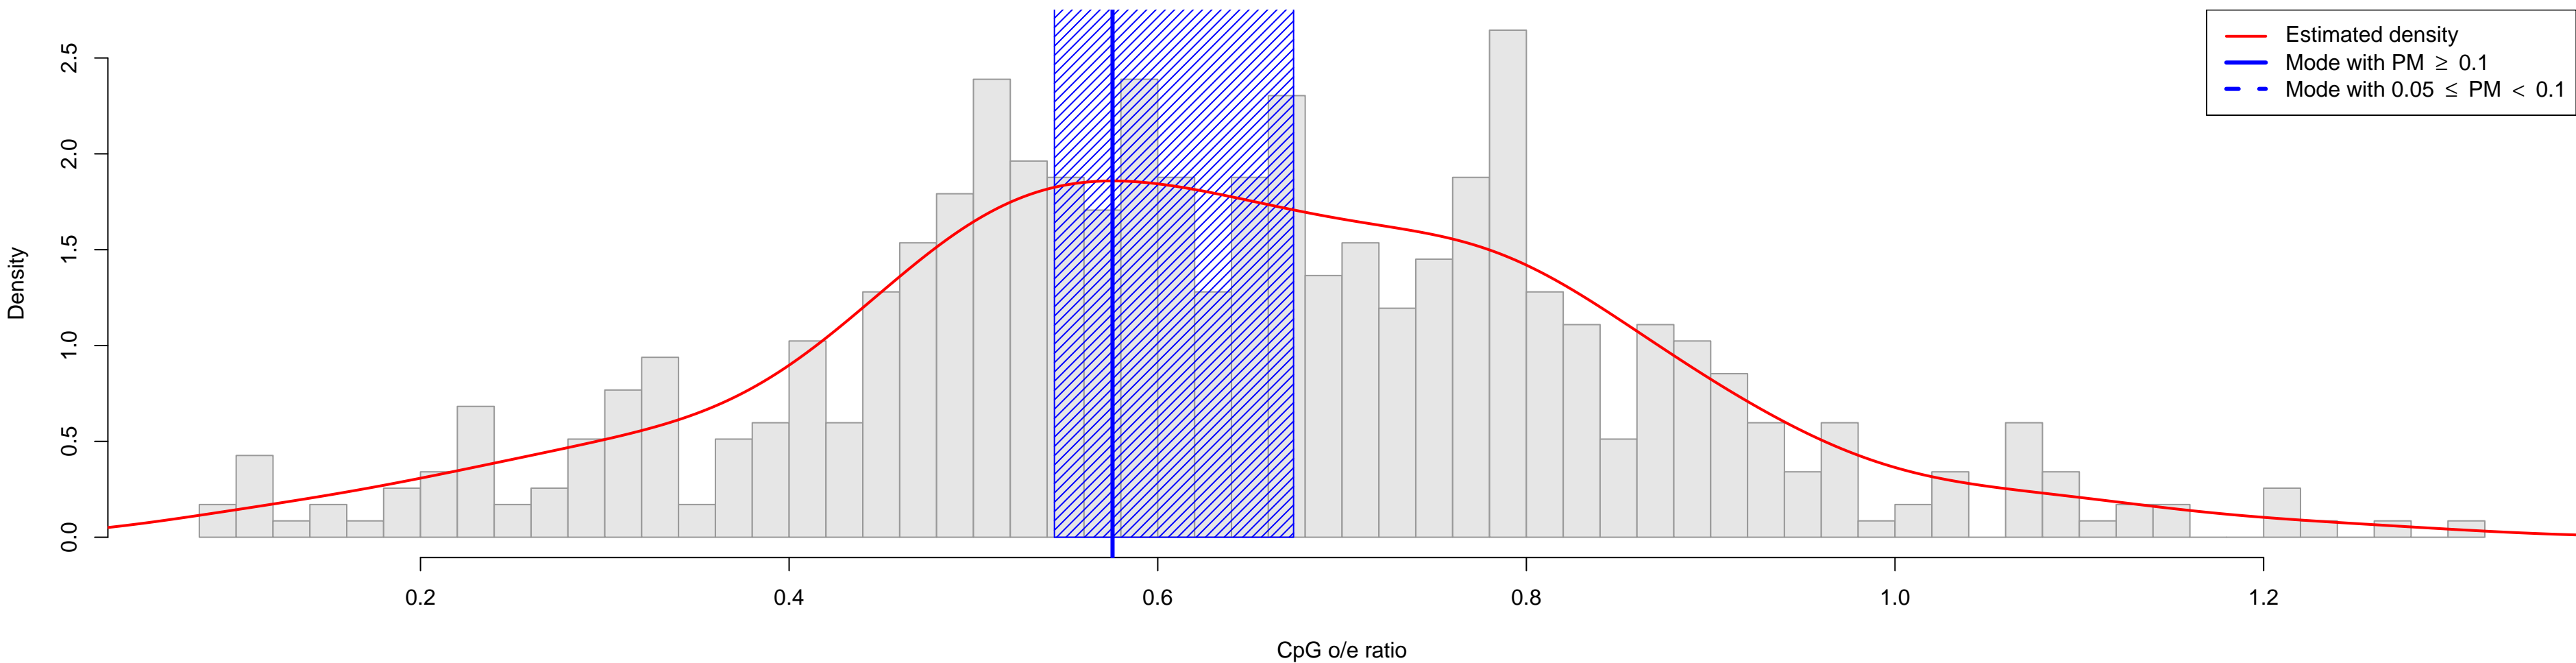

# Oreochromis\_niloticus

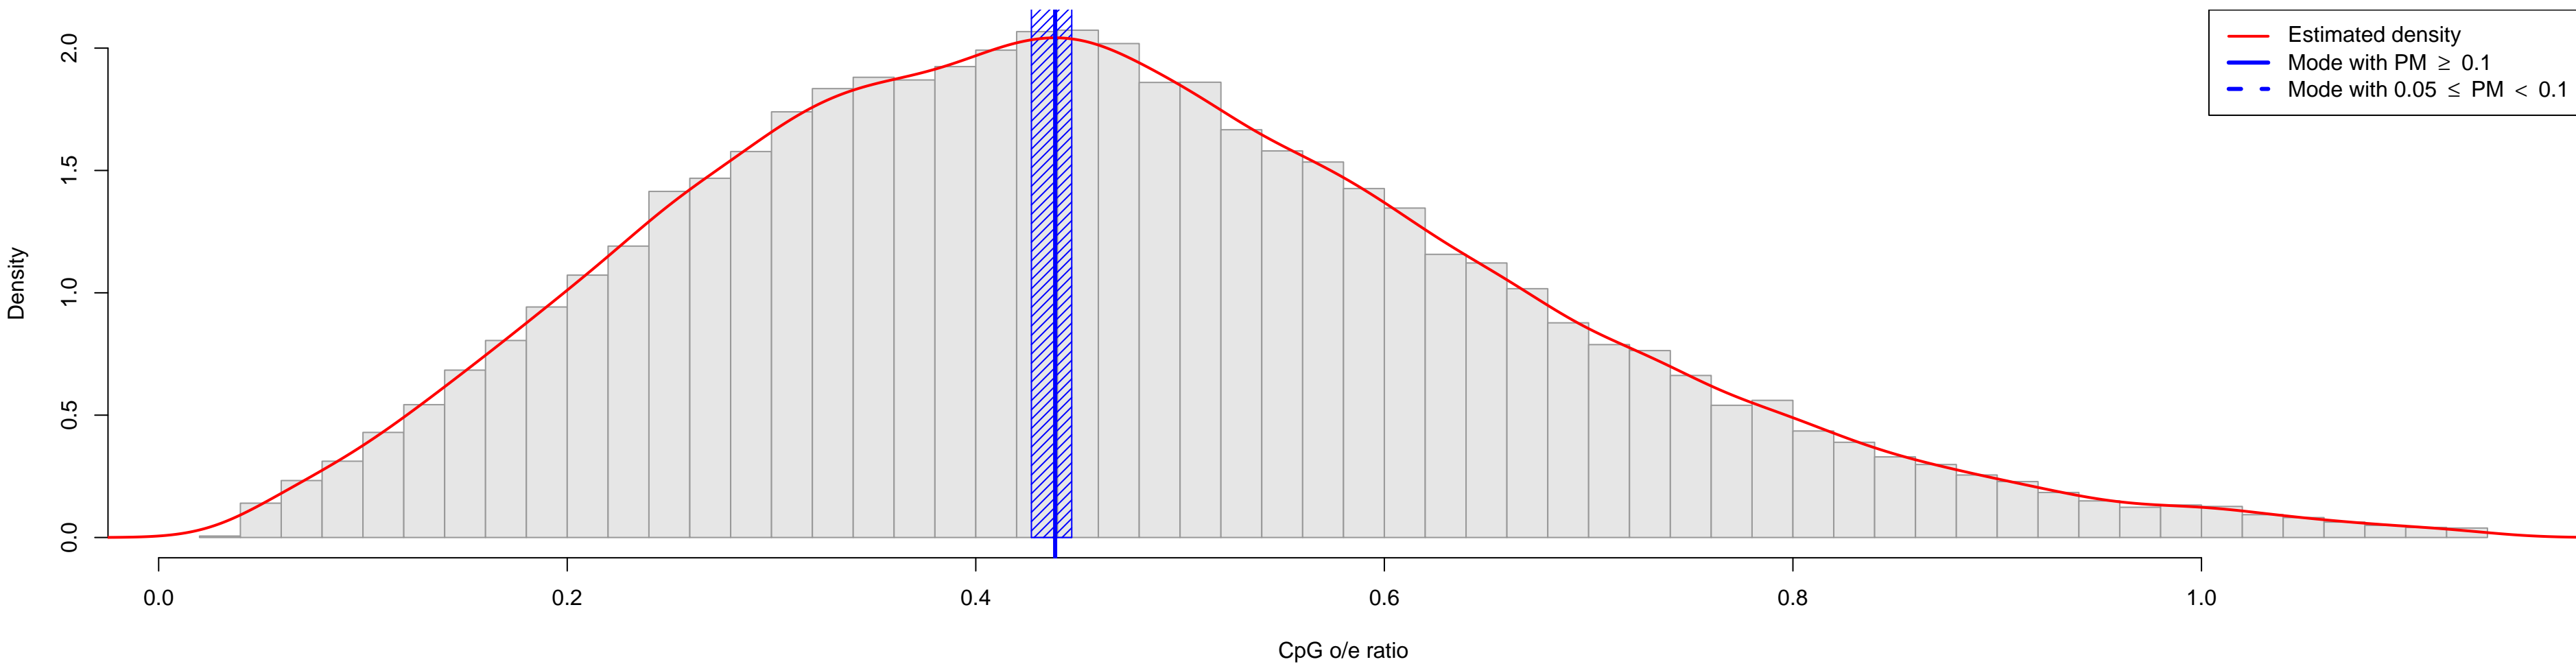



# Ornithorhynchus\_anatinus

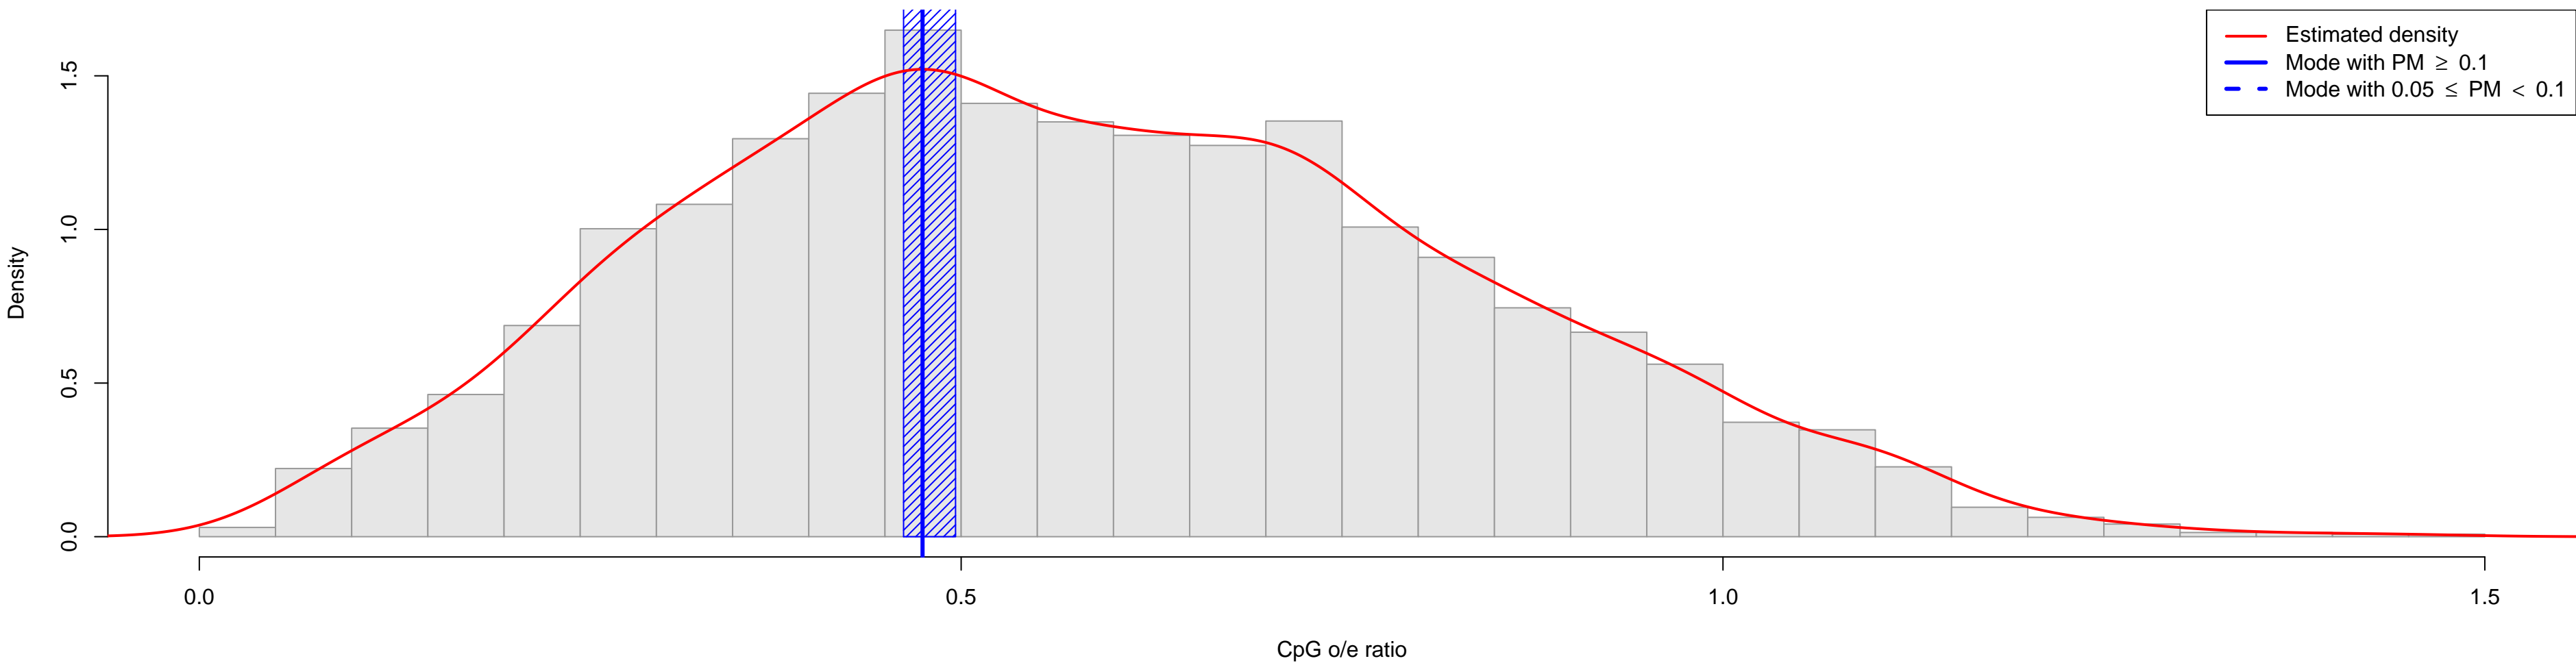

# Oryctolagus\_cuniculus

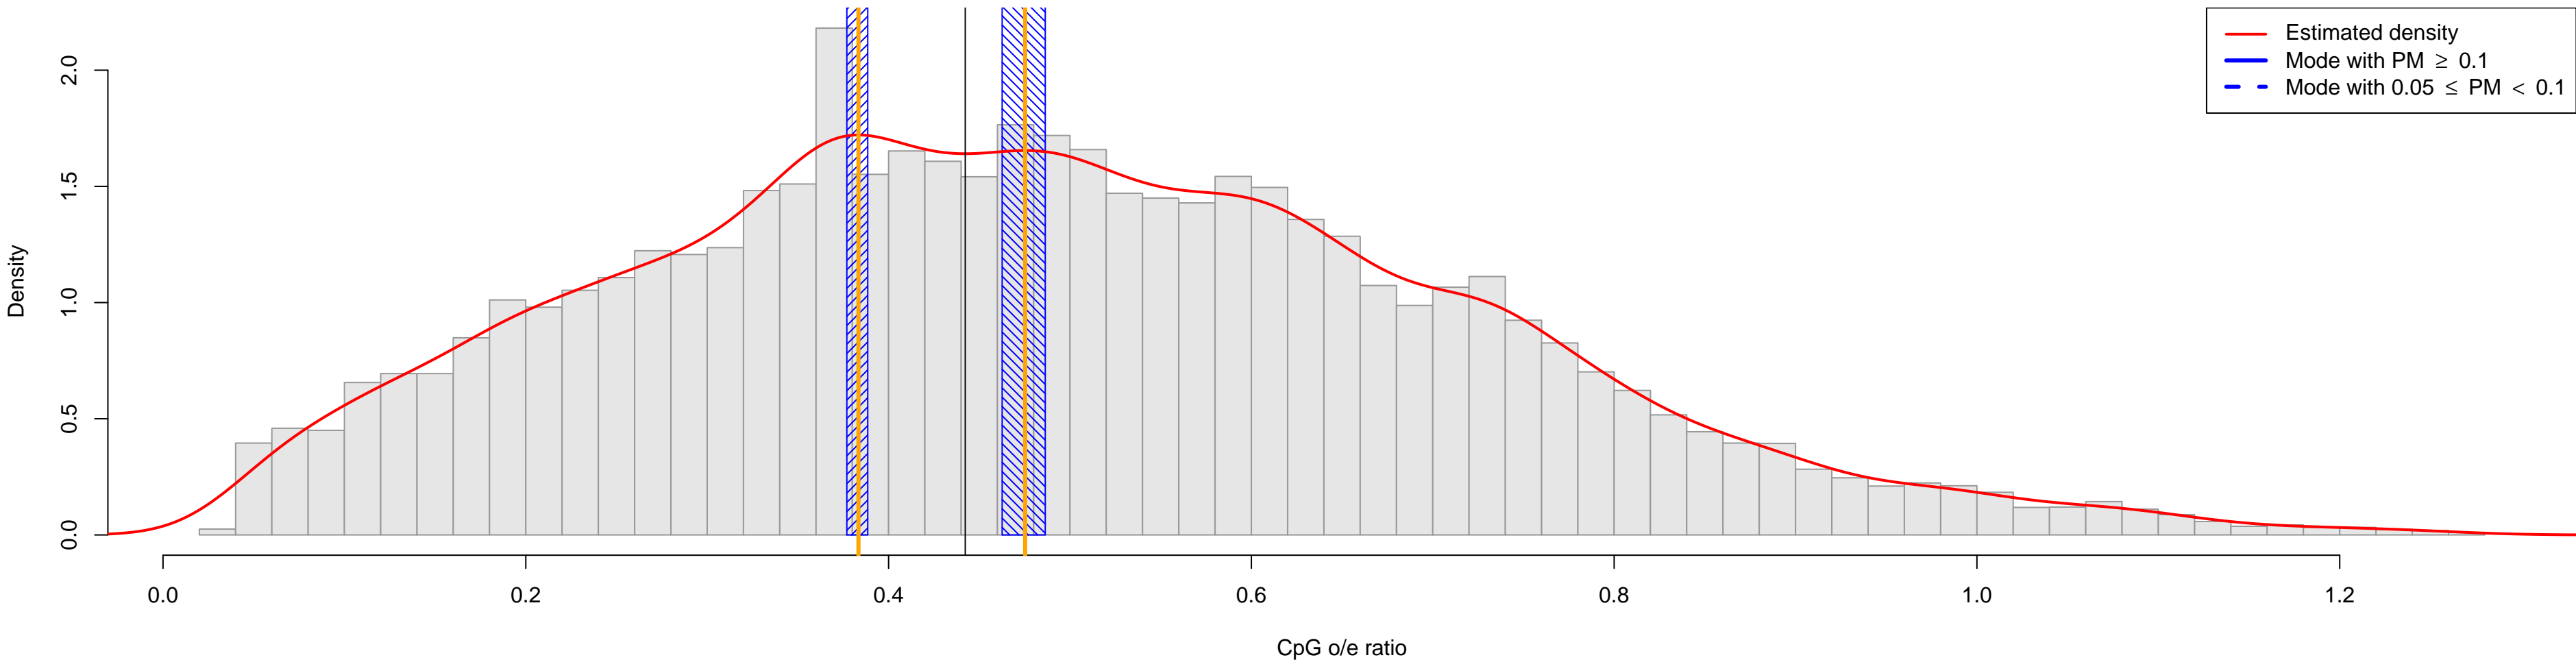

# Oryza\_longistaminata

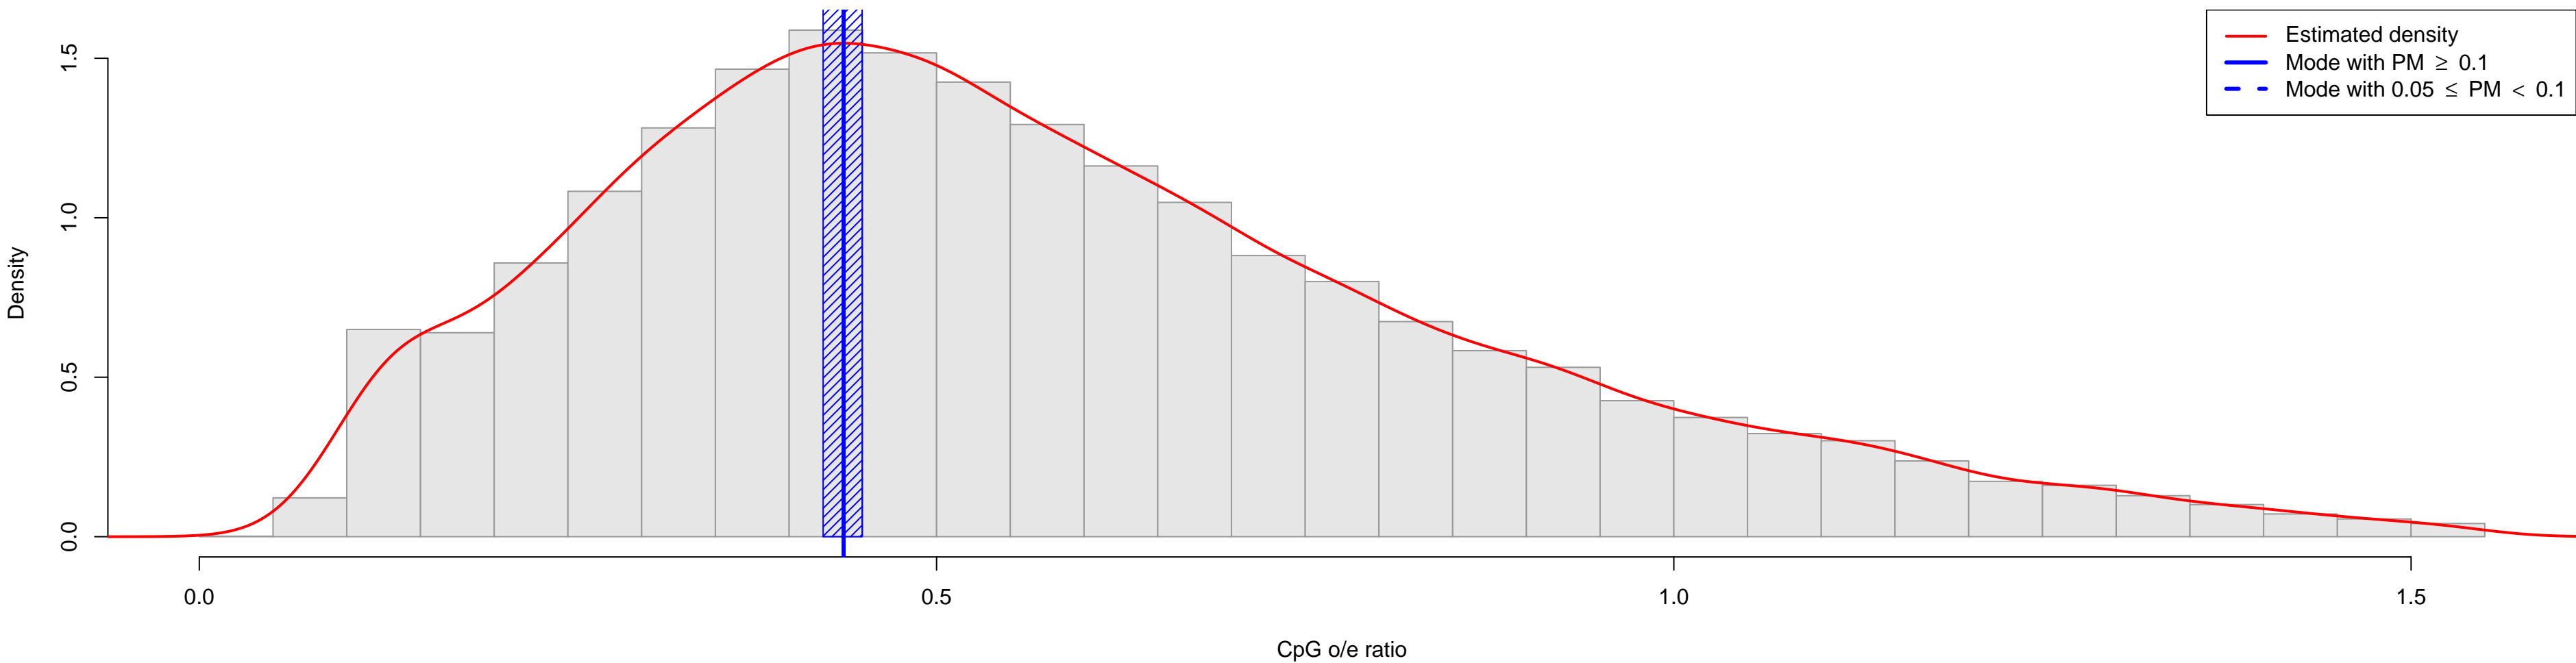

# Oryza\_minuta

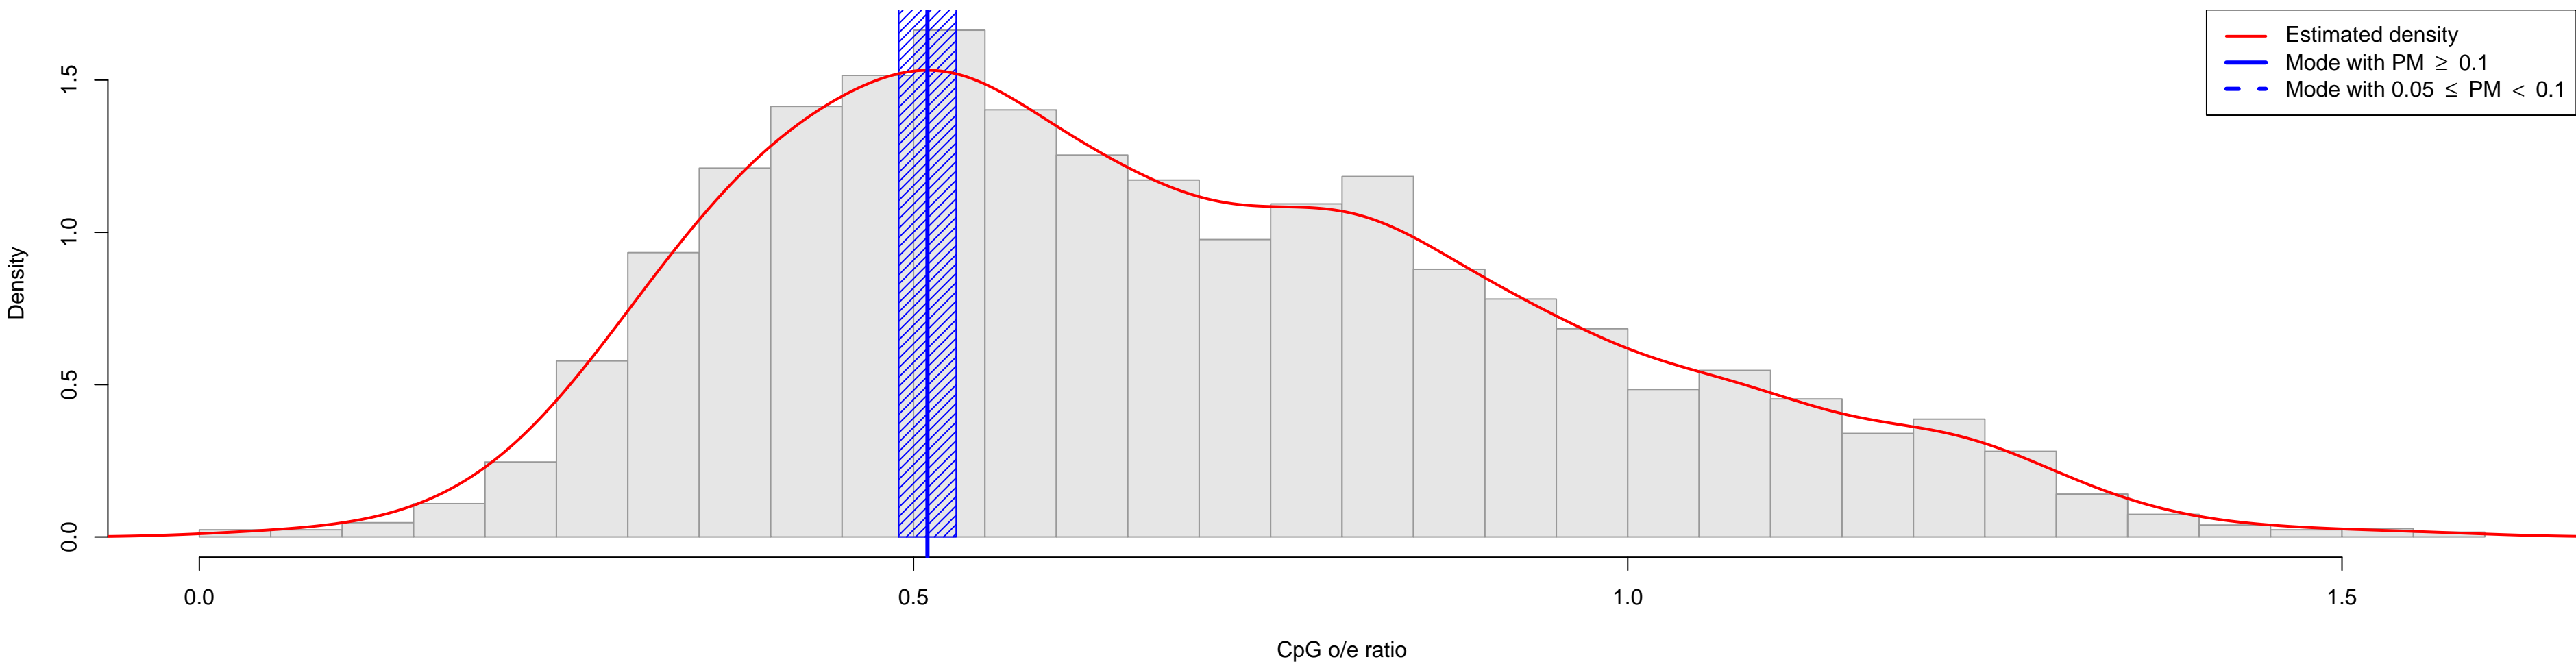

# Oryza\_officinalis

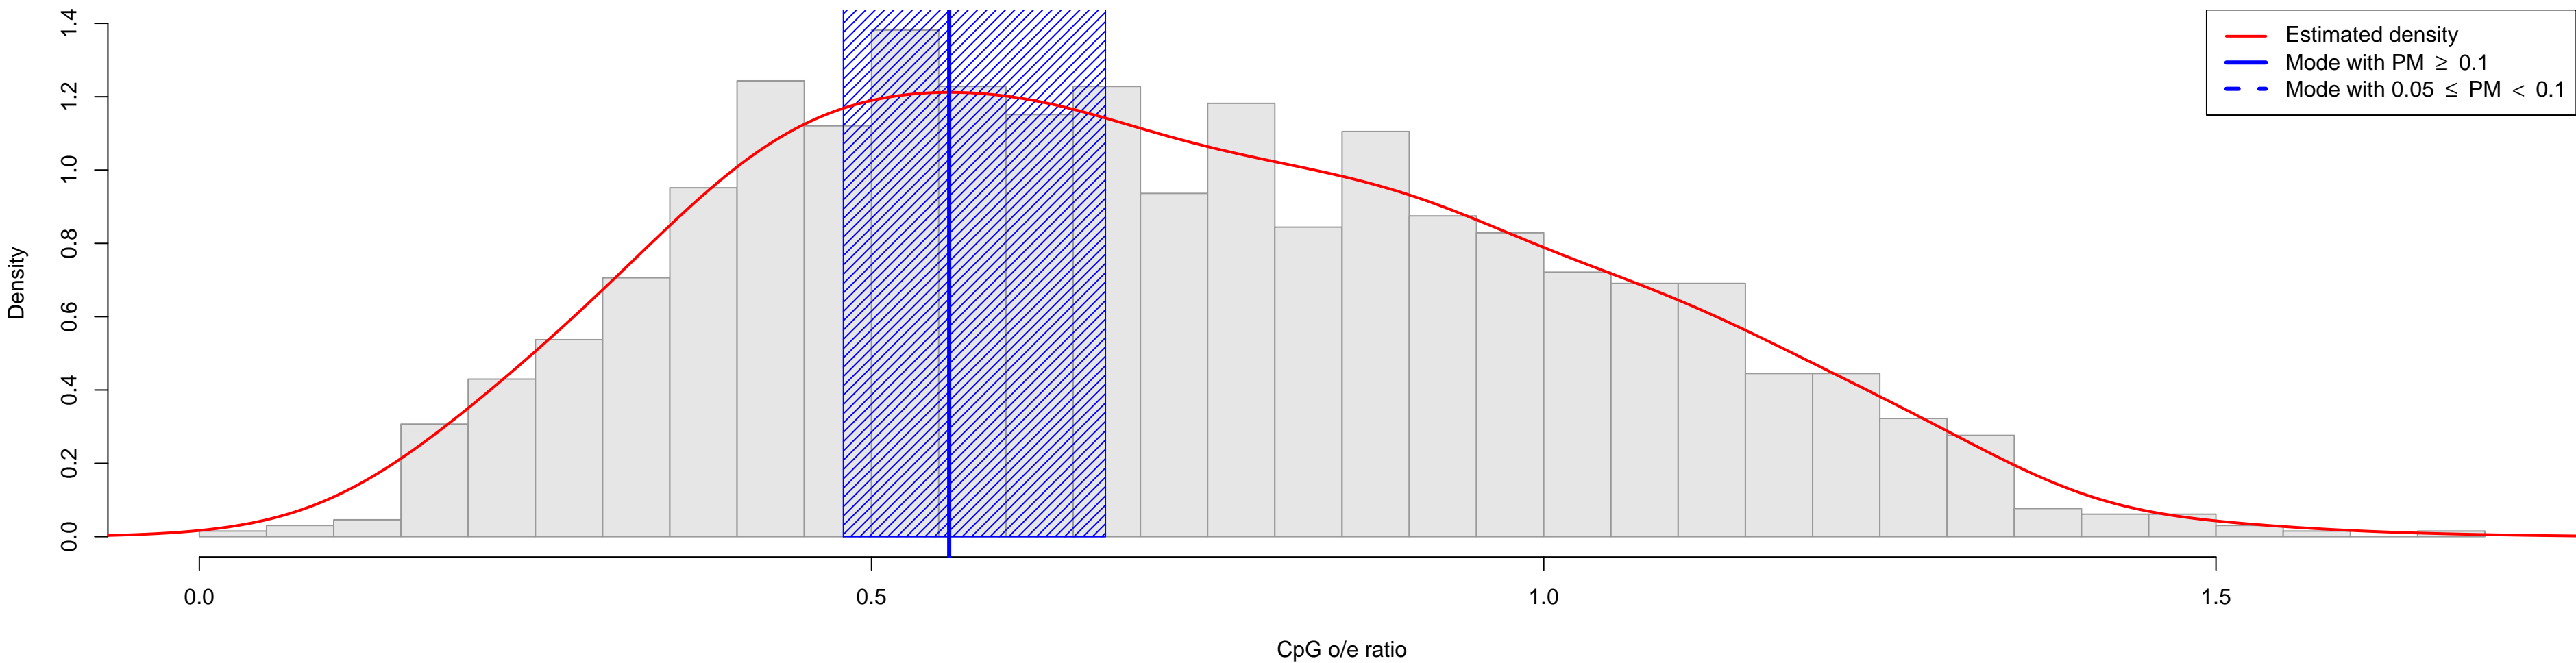

# Oryza\_sativa

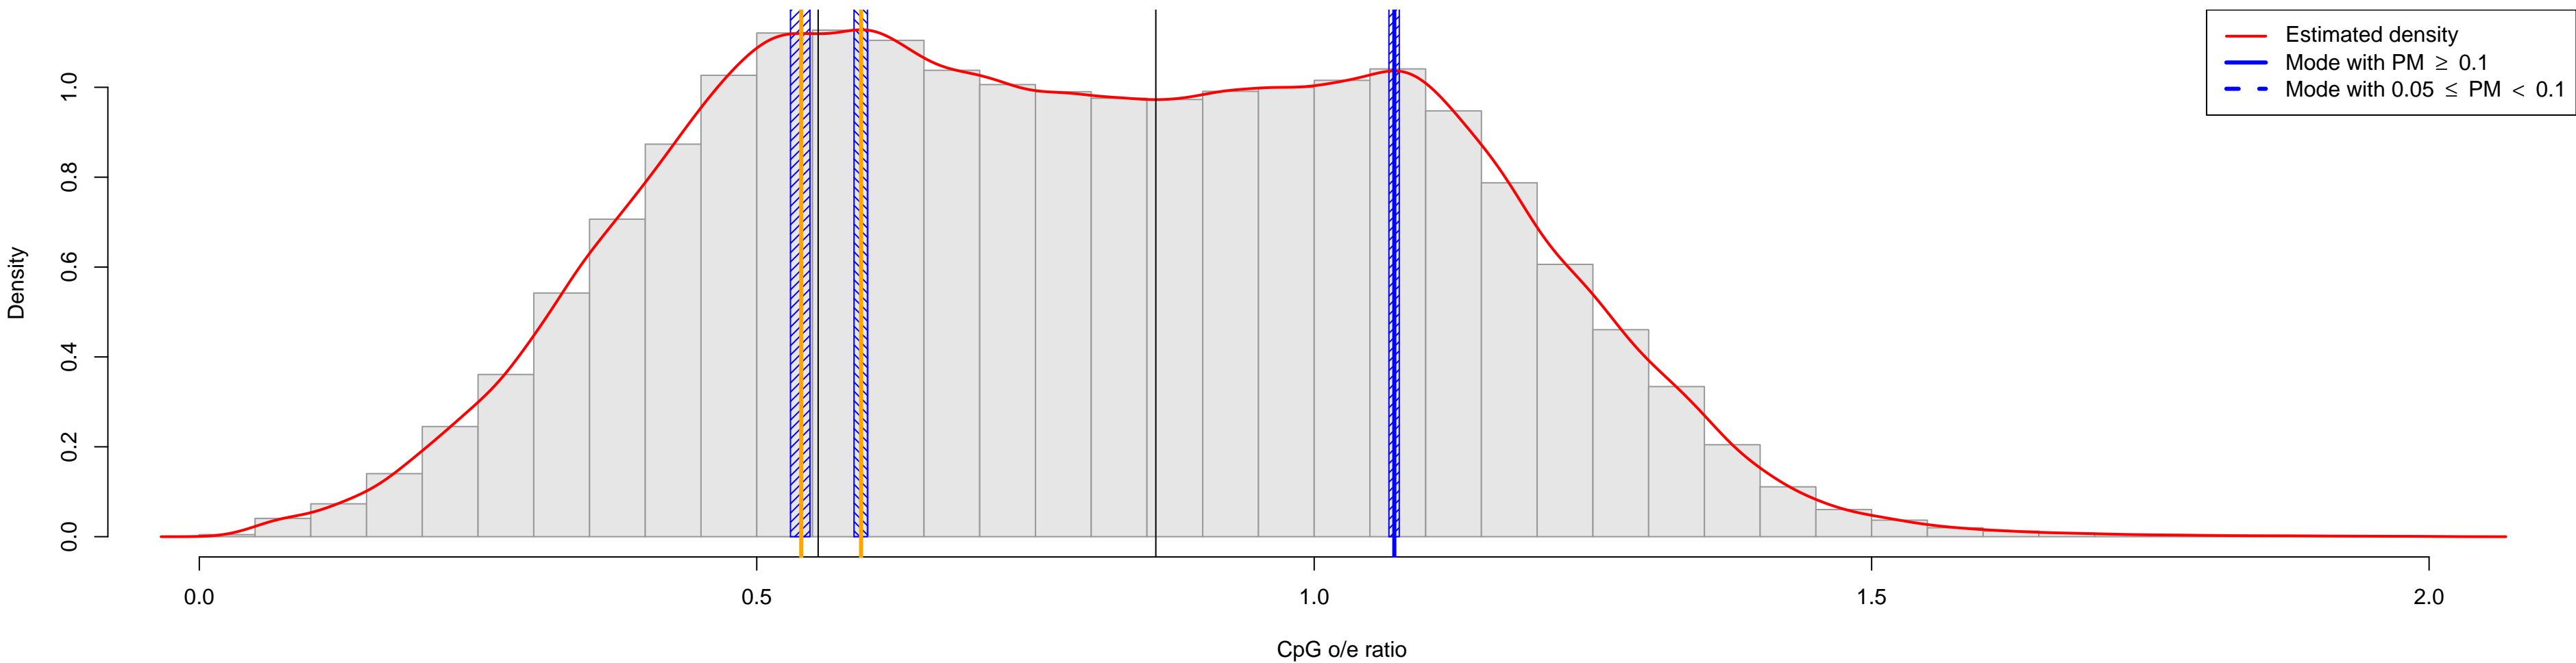

# Oryzias\_latipes

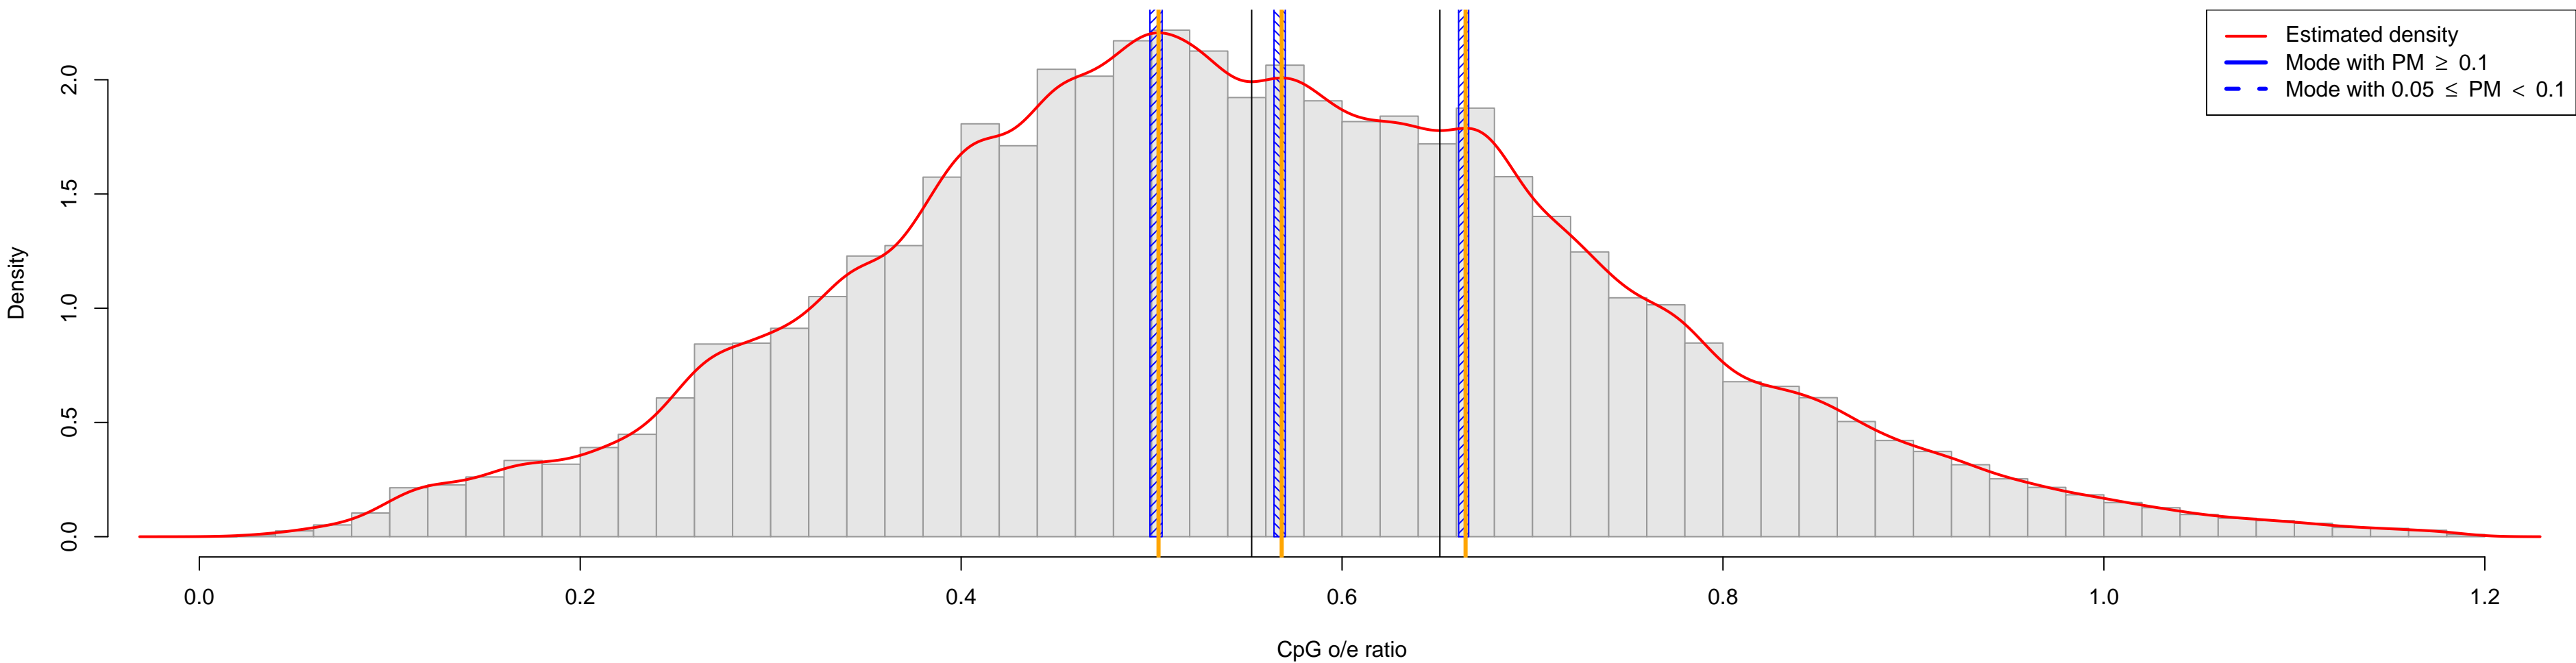

# Osmerus\_mordax

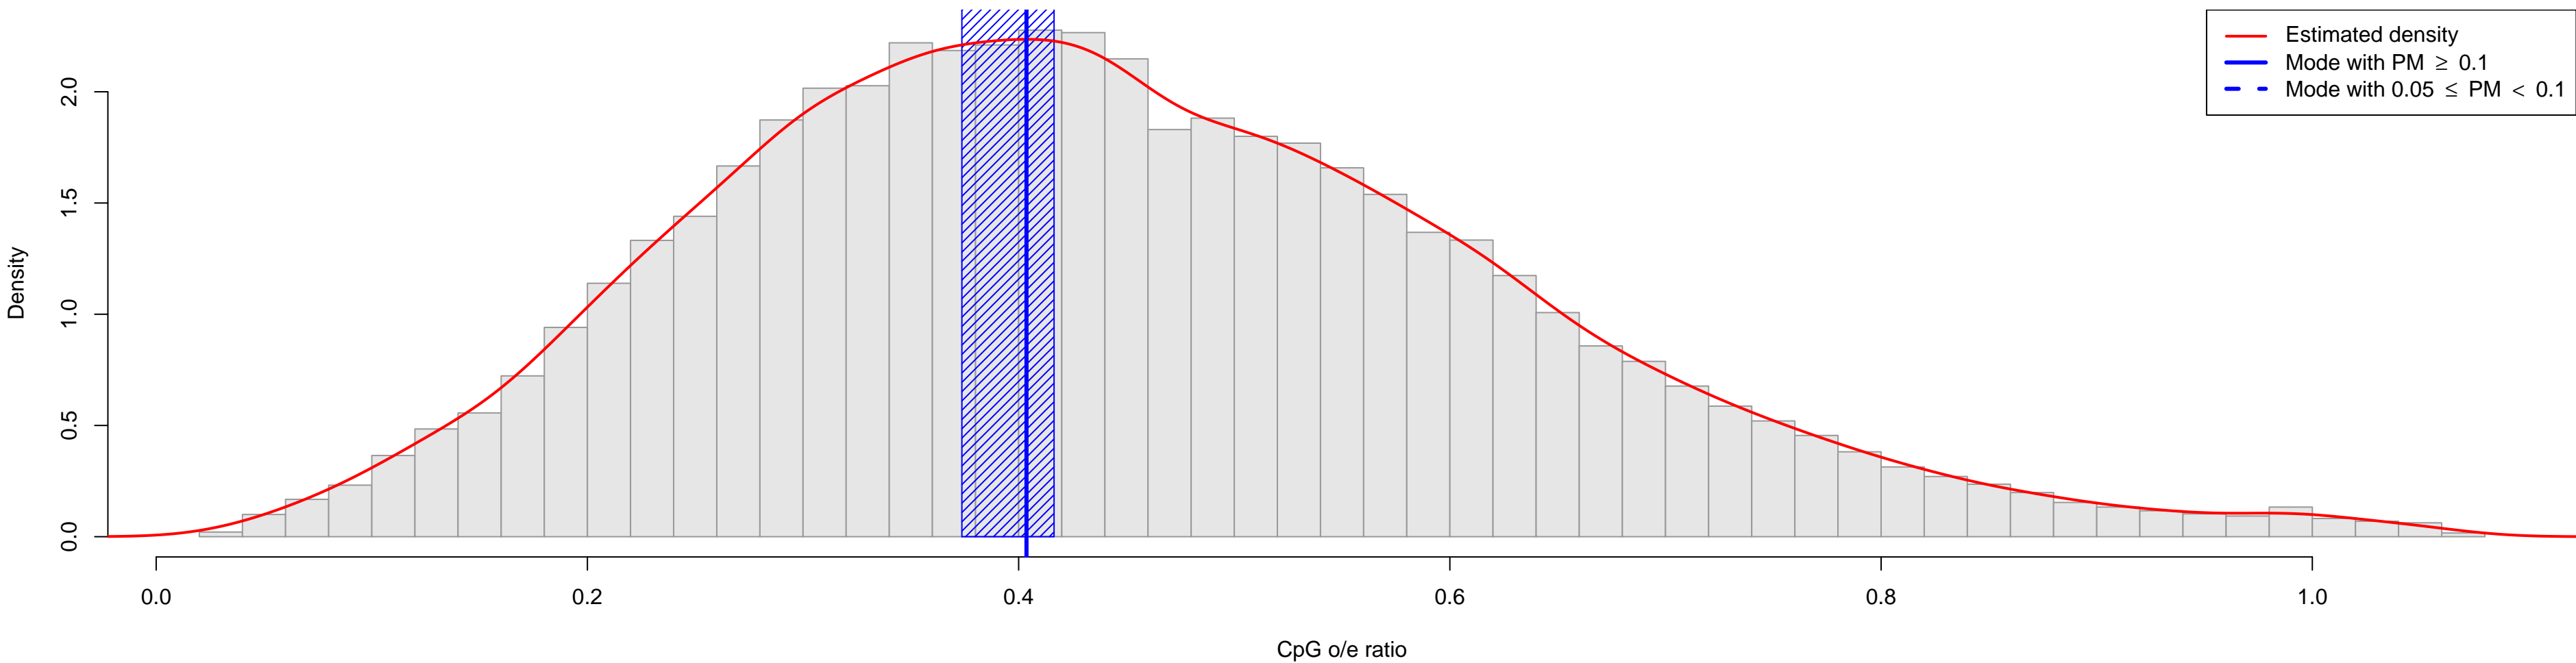



# Osmunda\_lancea

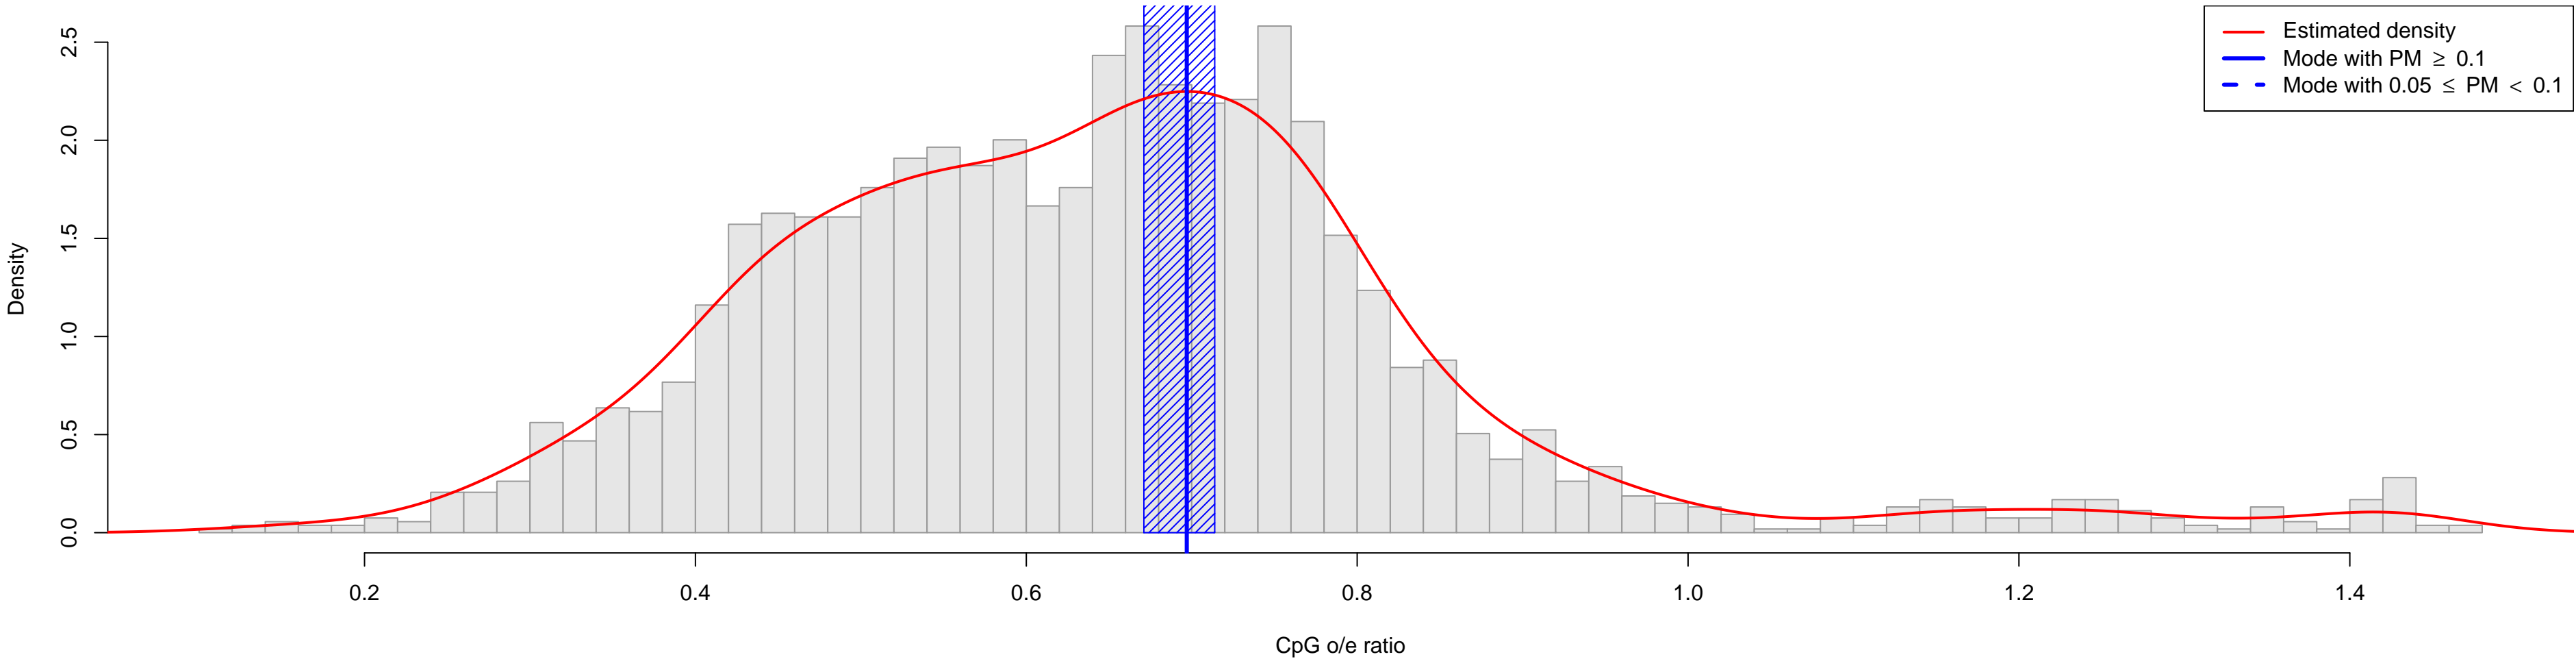

# Ostertagia\_ostertagi

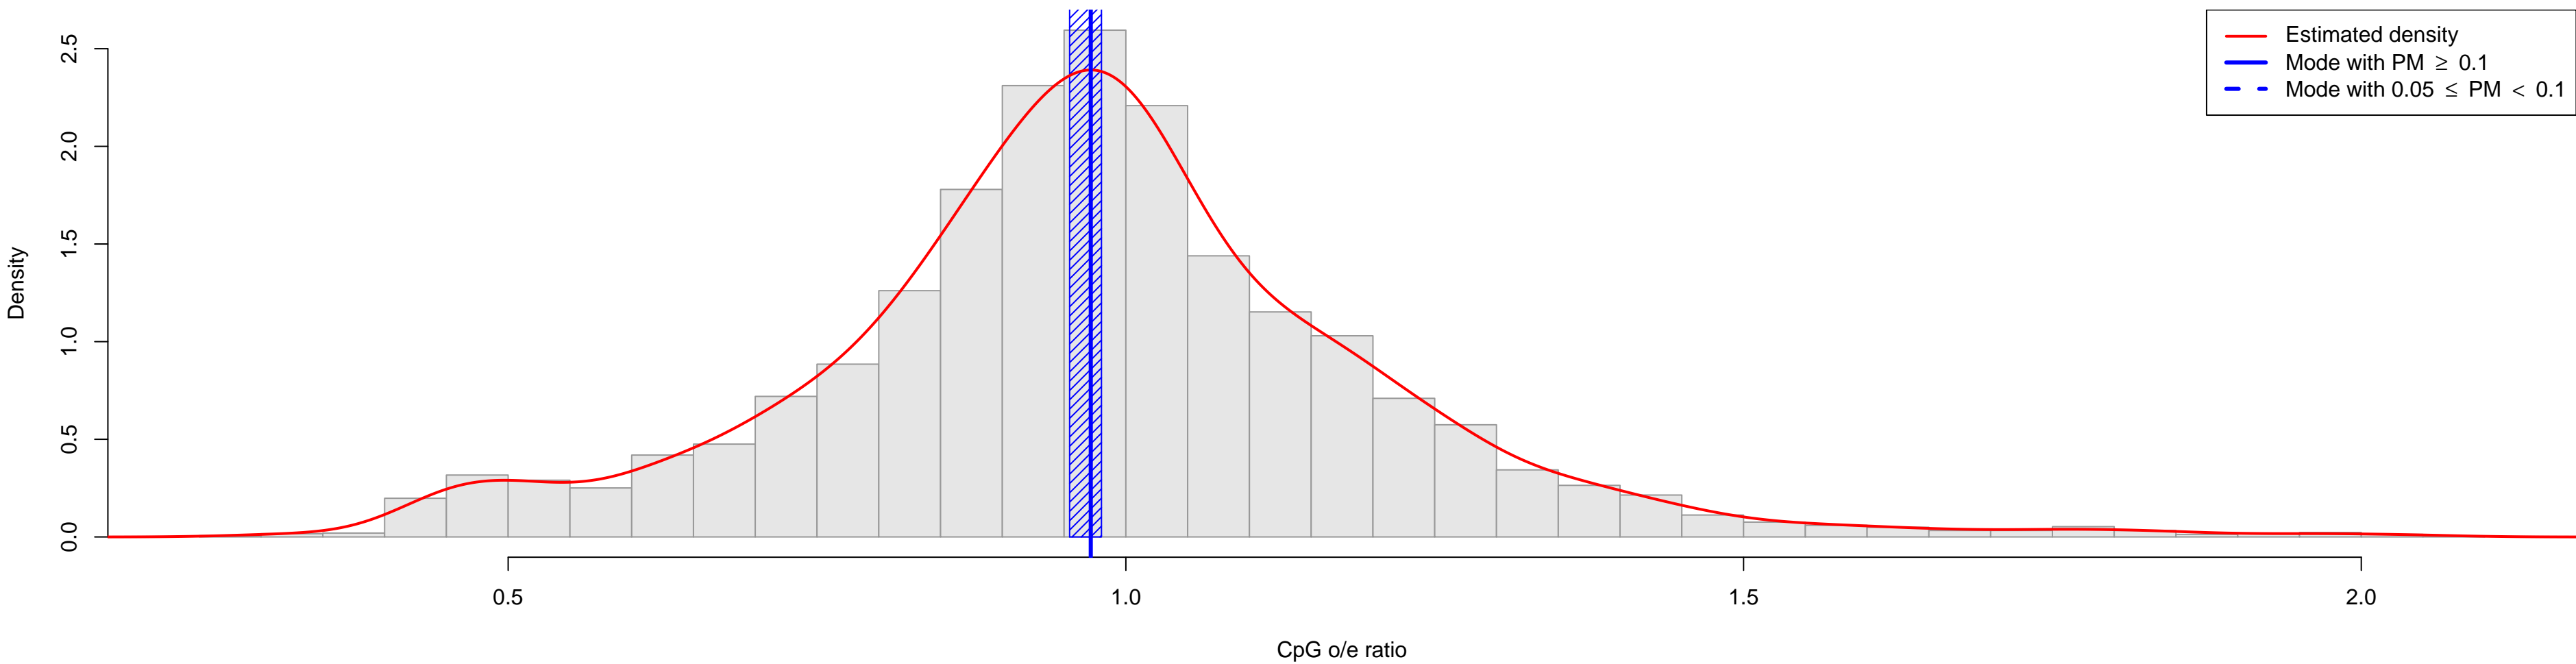

# Ostrinia\_nubilalis

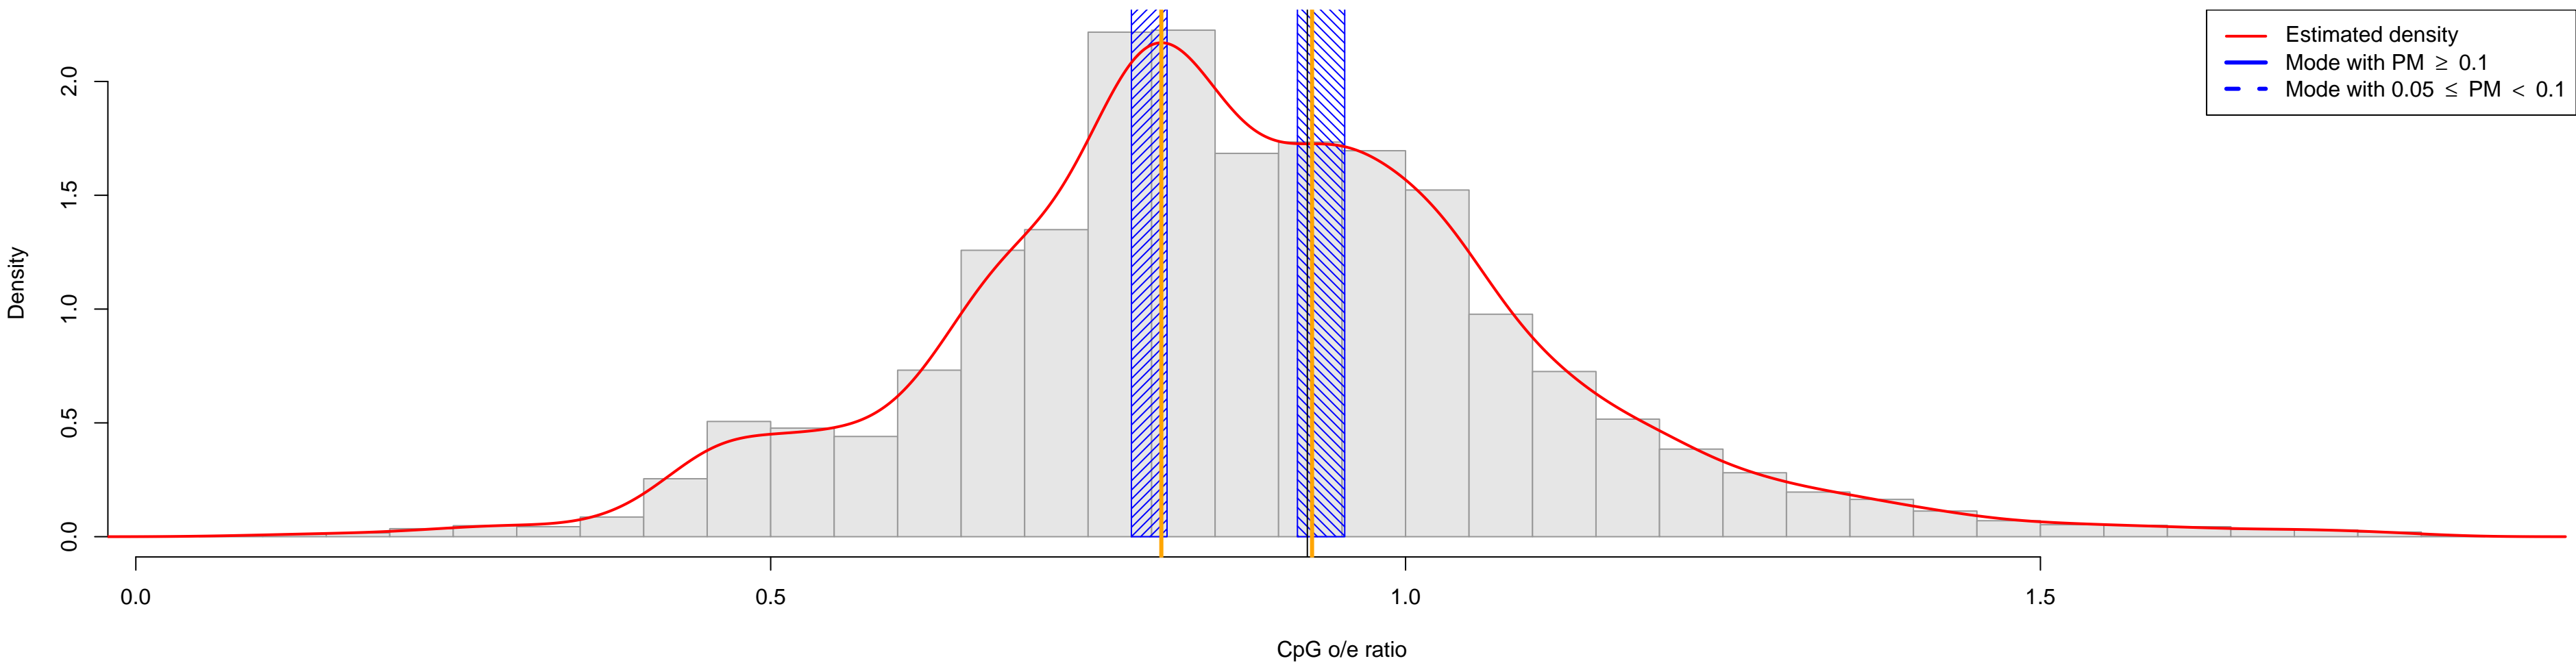

# Ovis\_aries

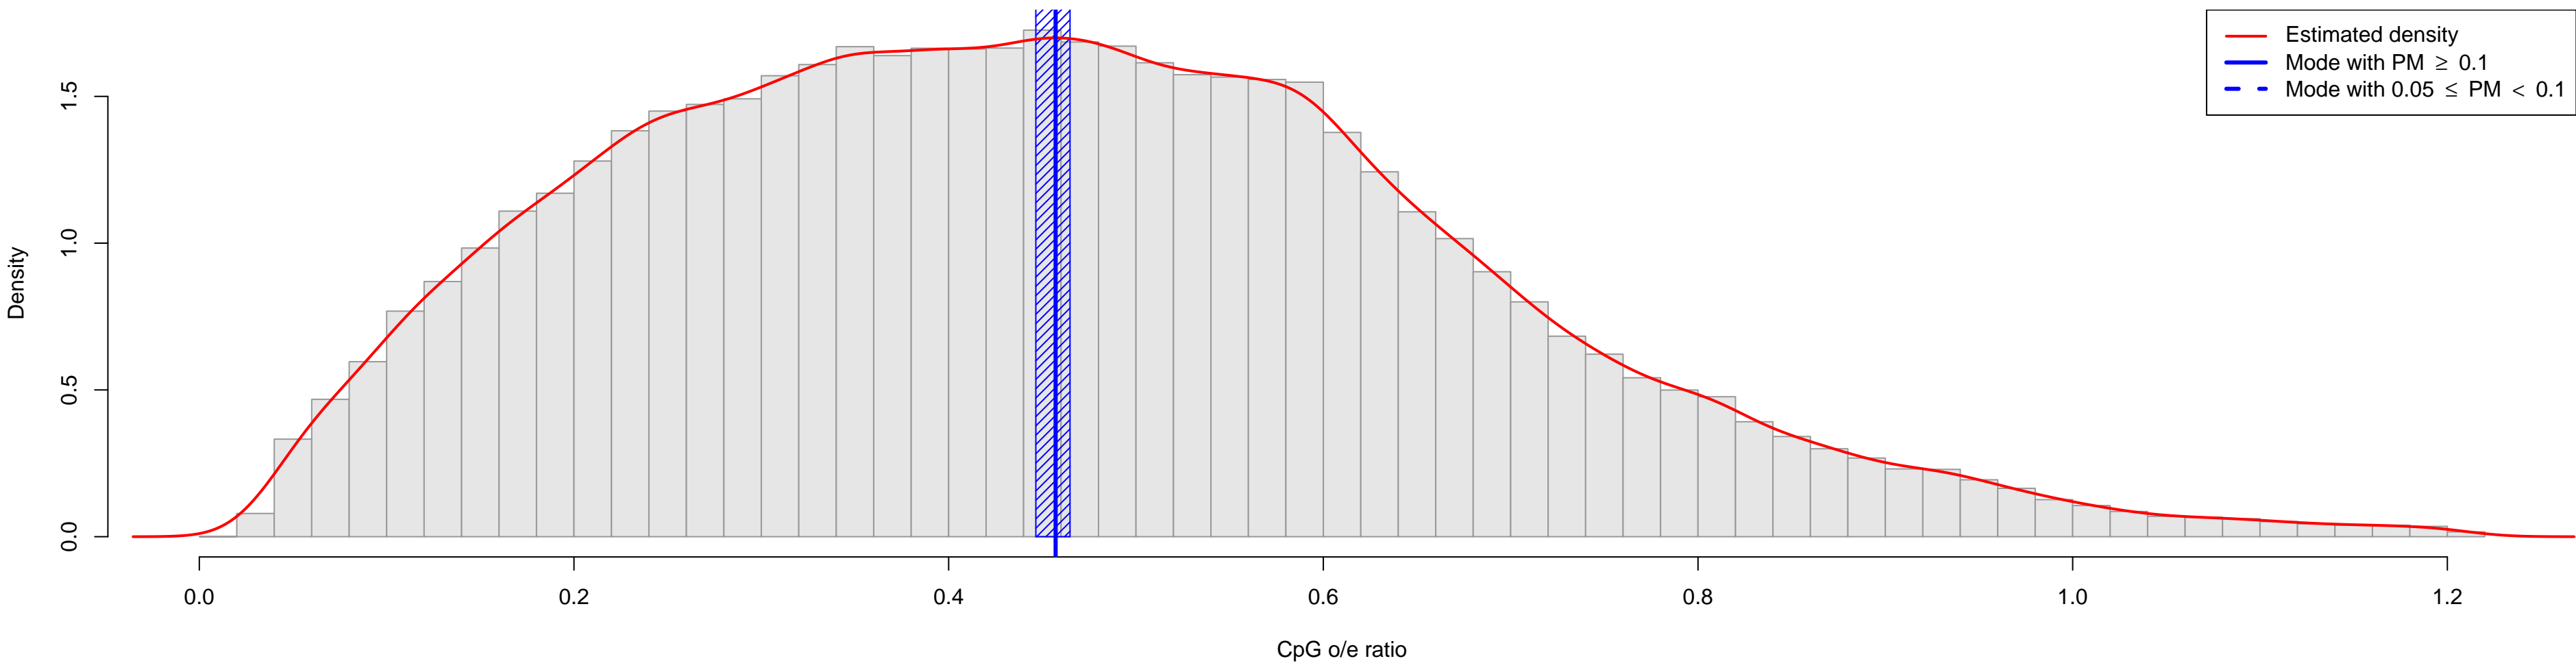

# Oxyrrhis\_marina

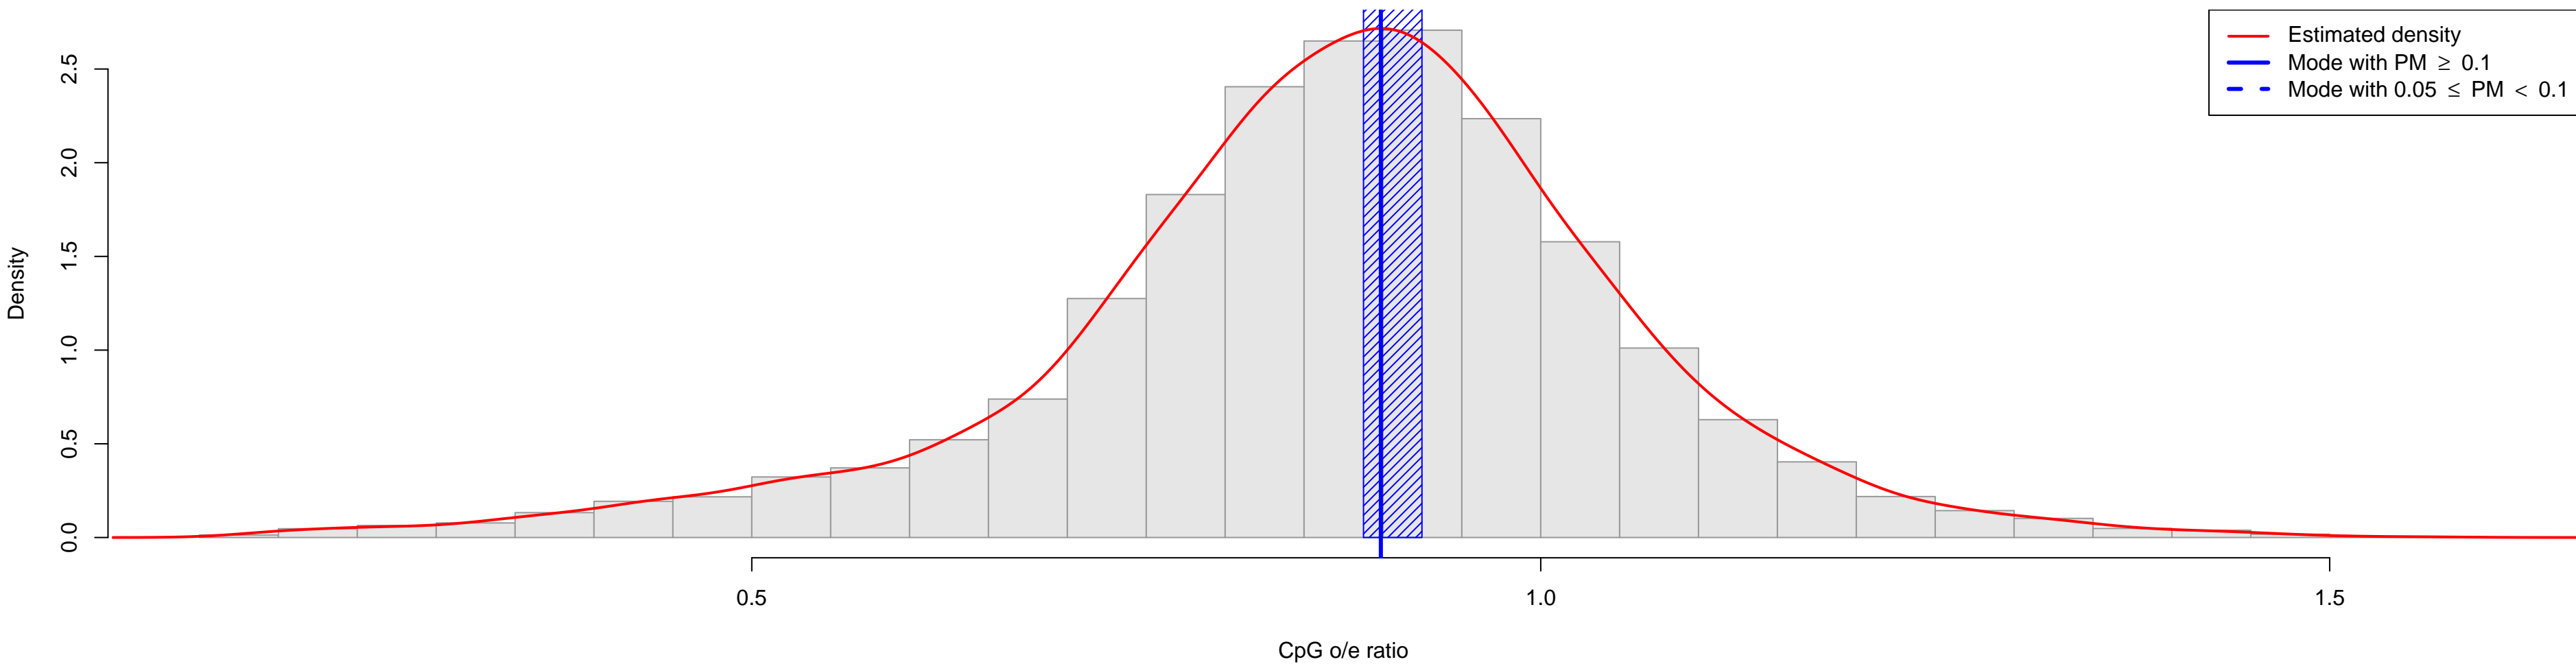

*Paeonia\_suffruticosa*

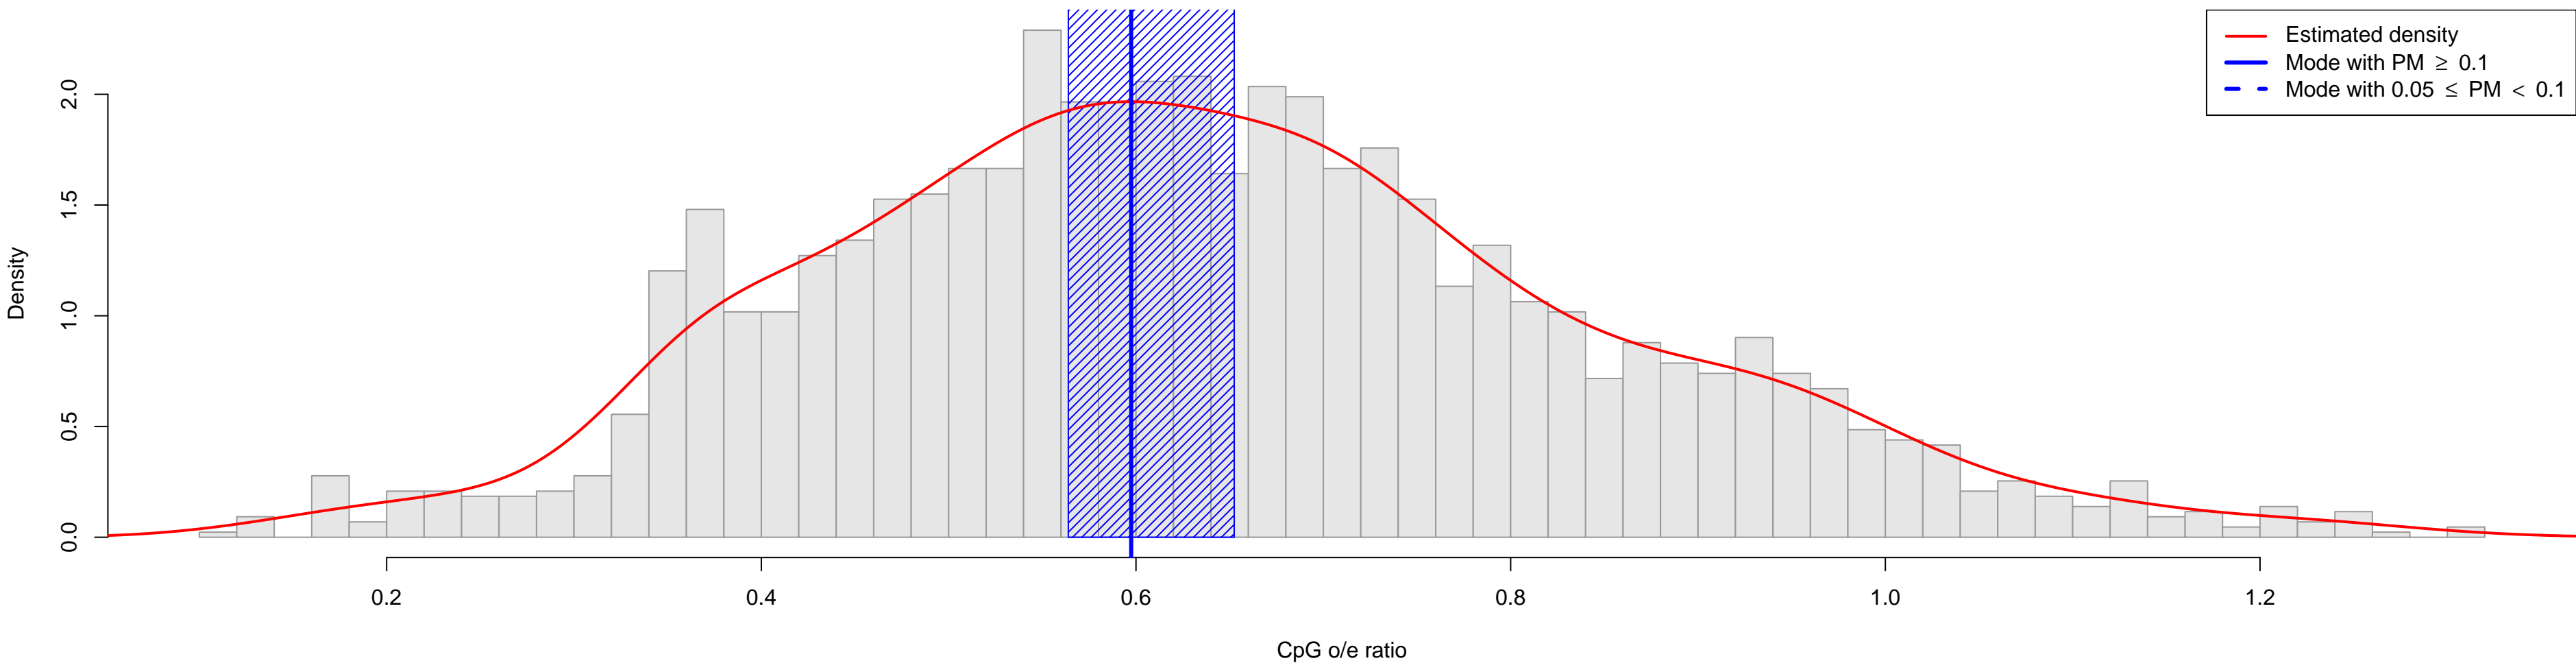

# Pagrus\_major

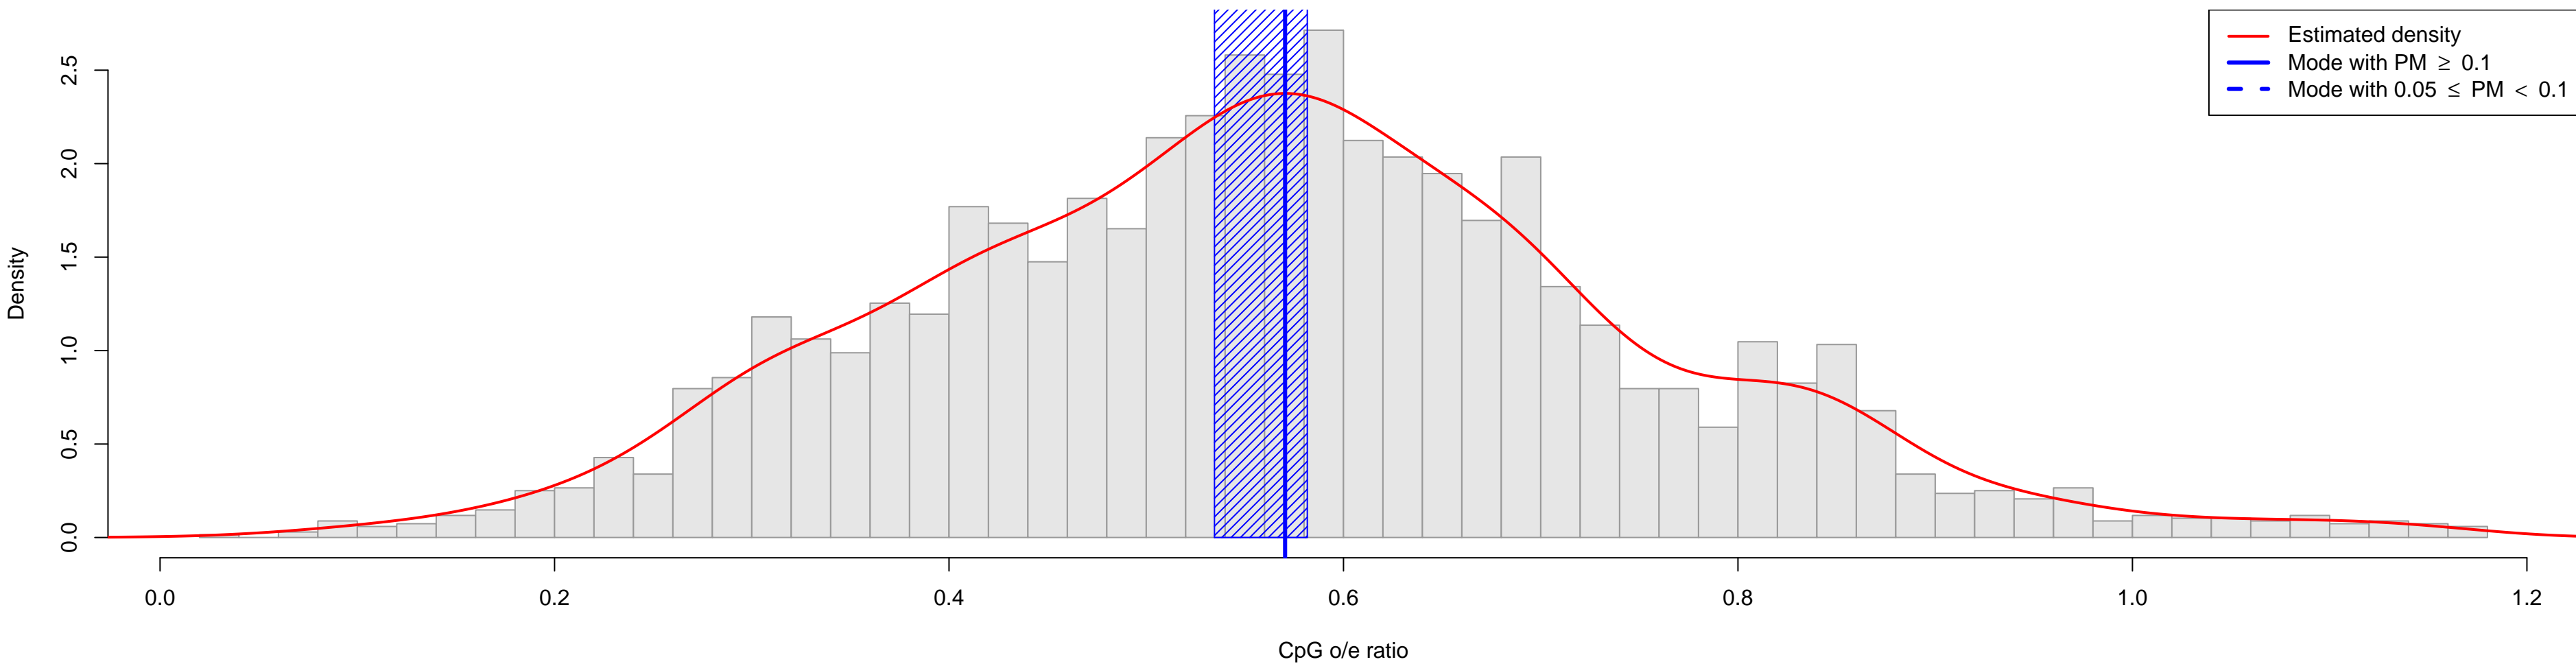

# Pan\_troglodytes

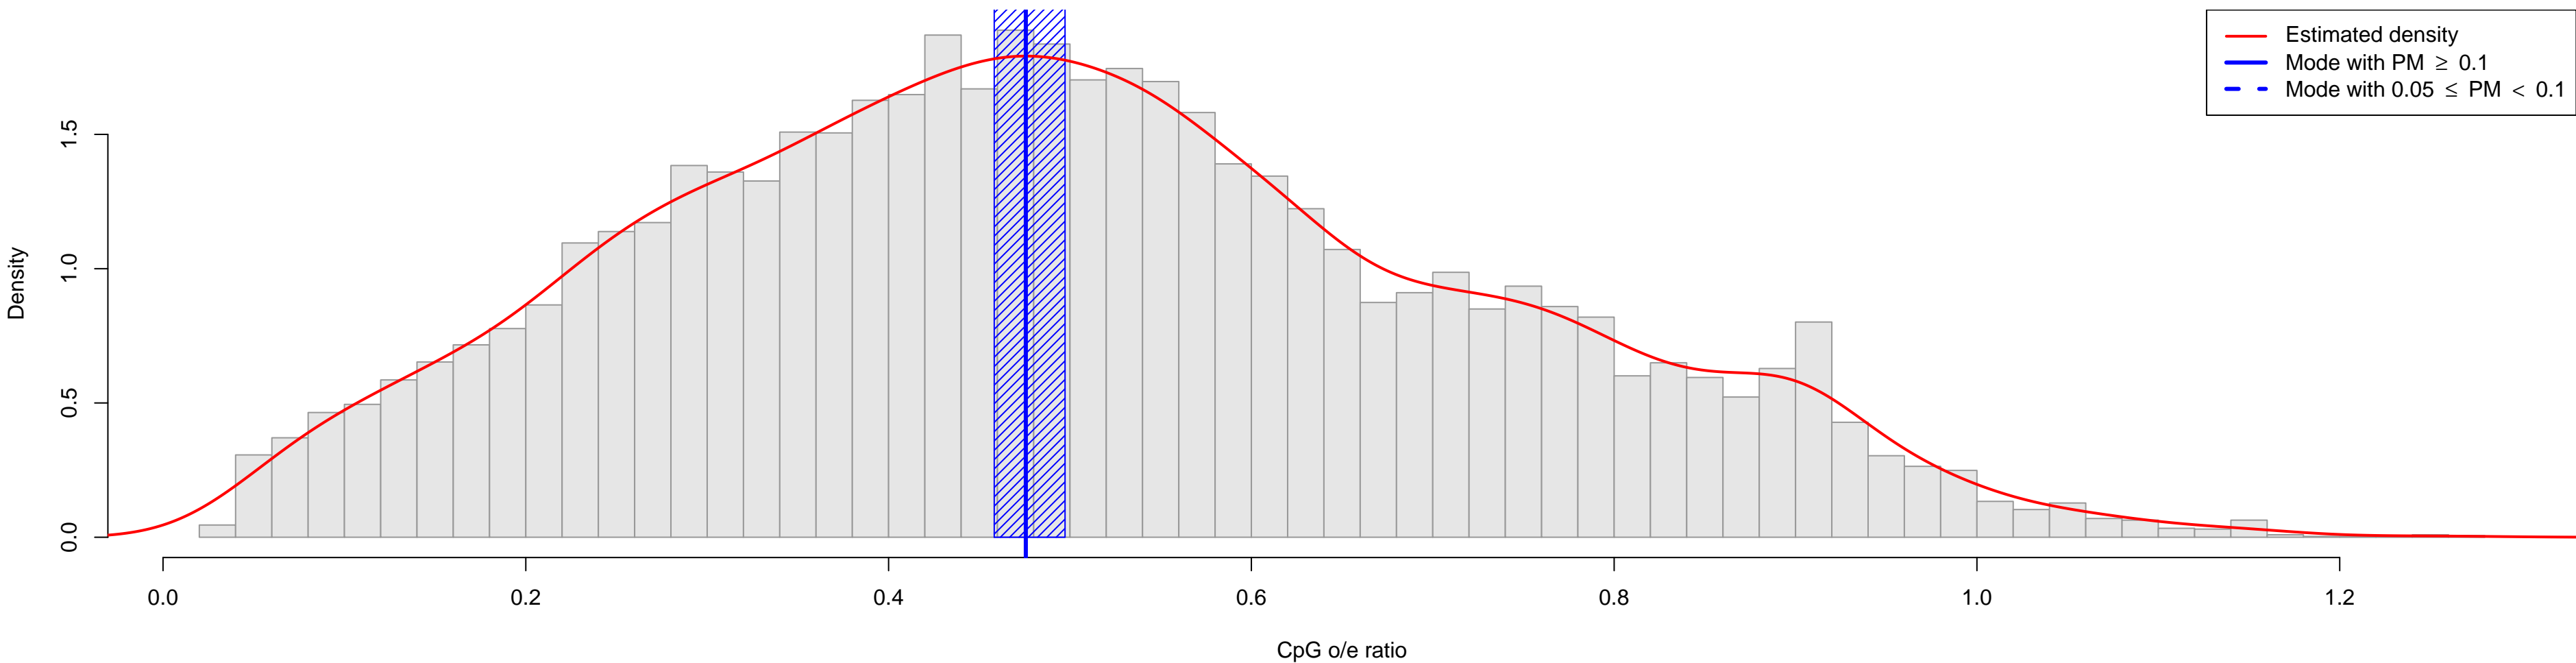



# Pan\_troglodytes\_verus

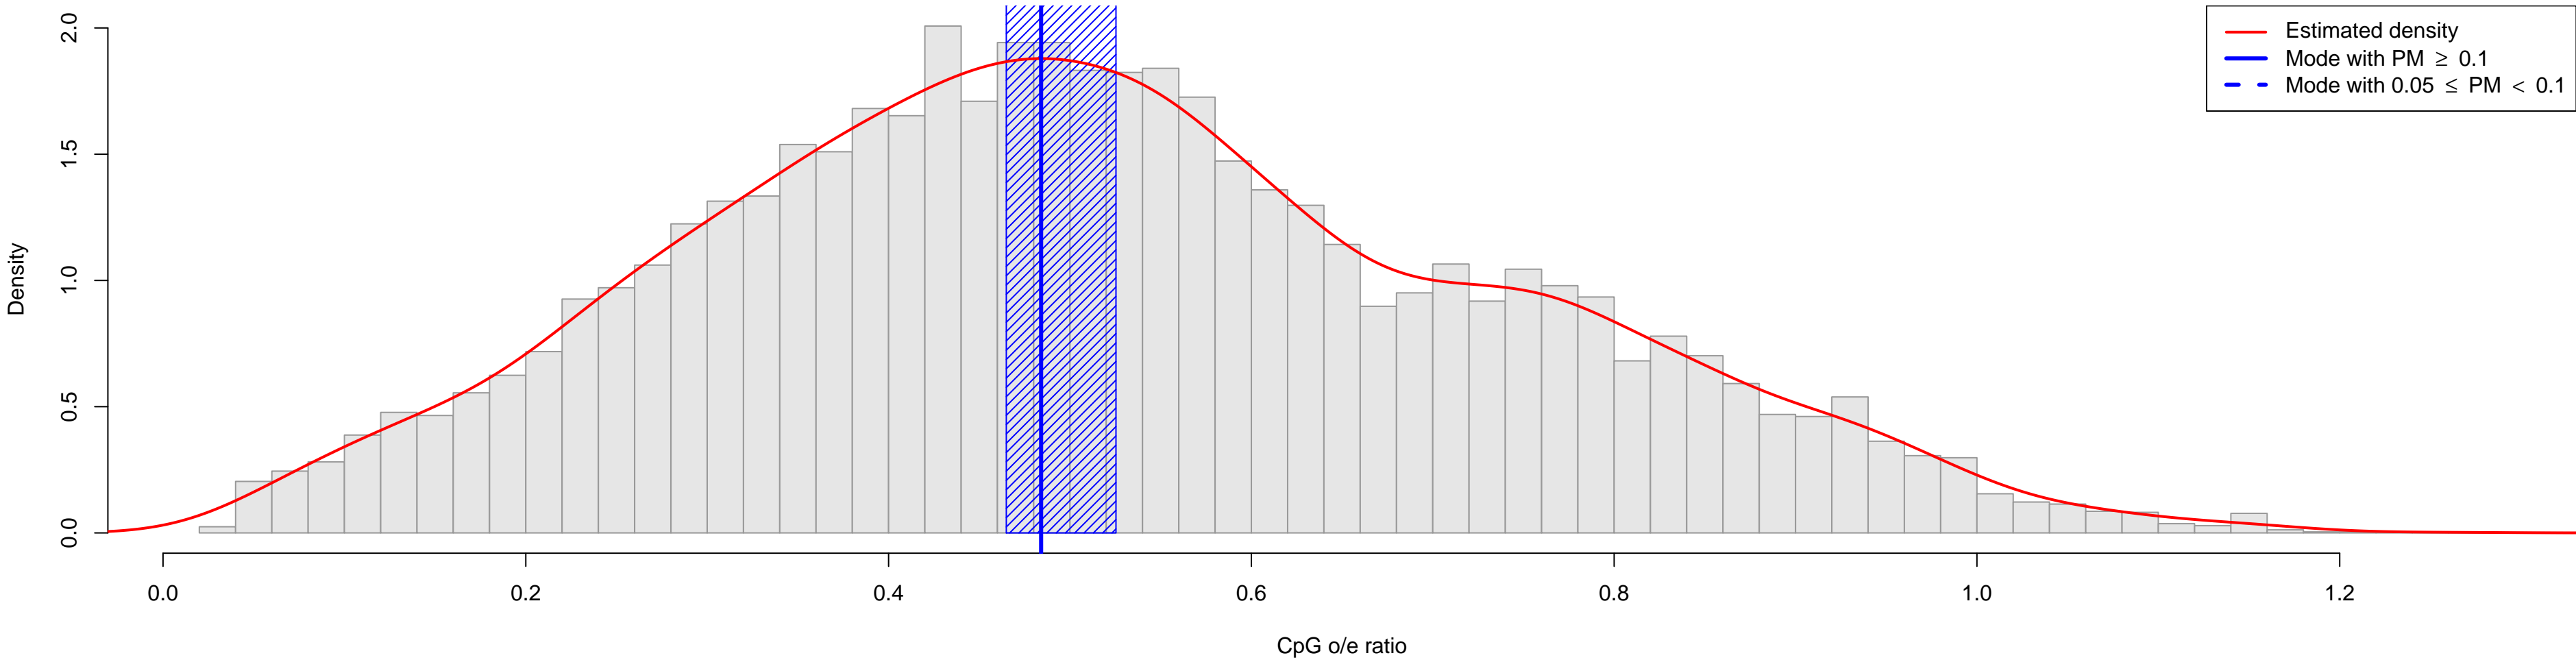

# Panagrolaimus\_superbus

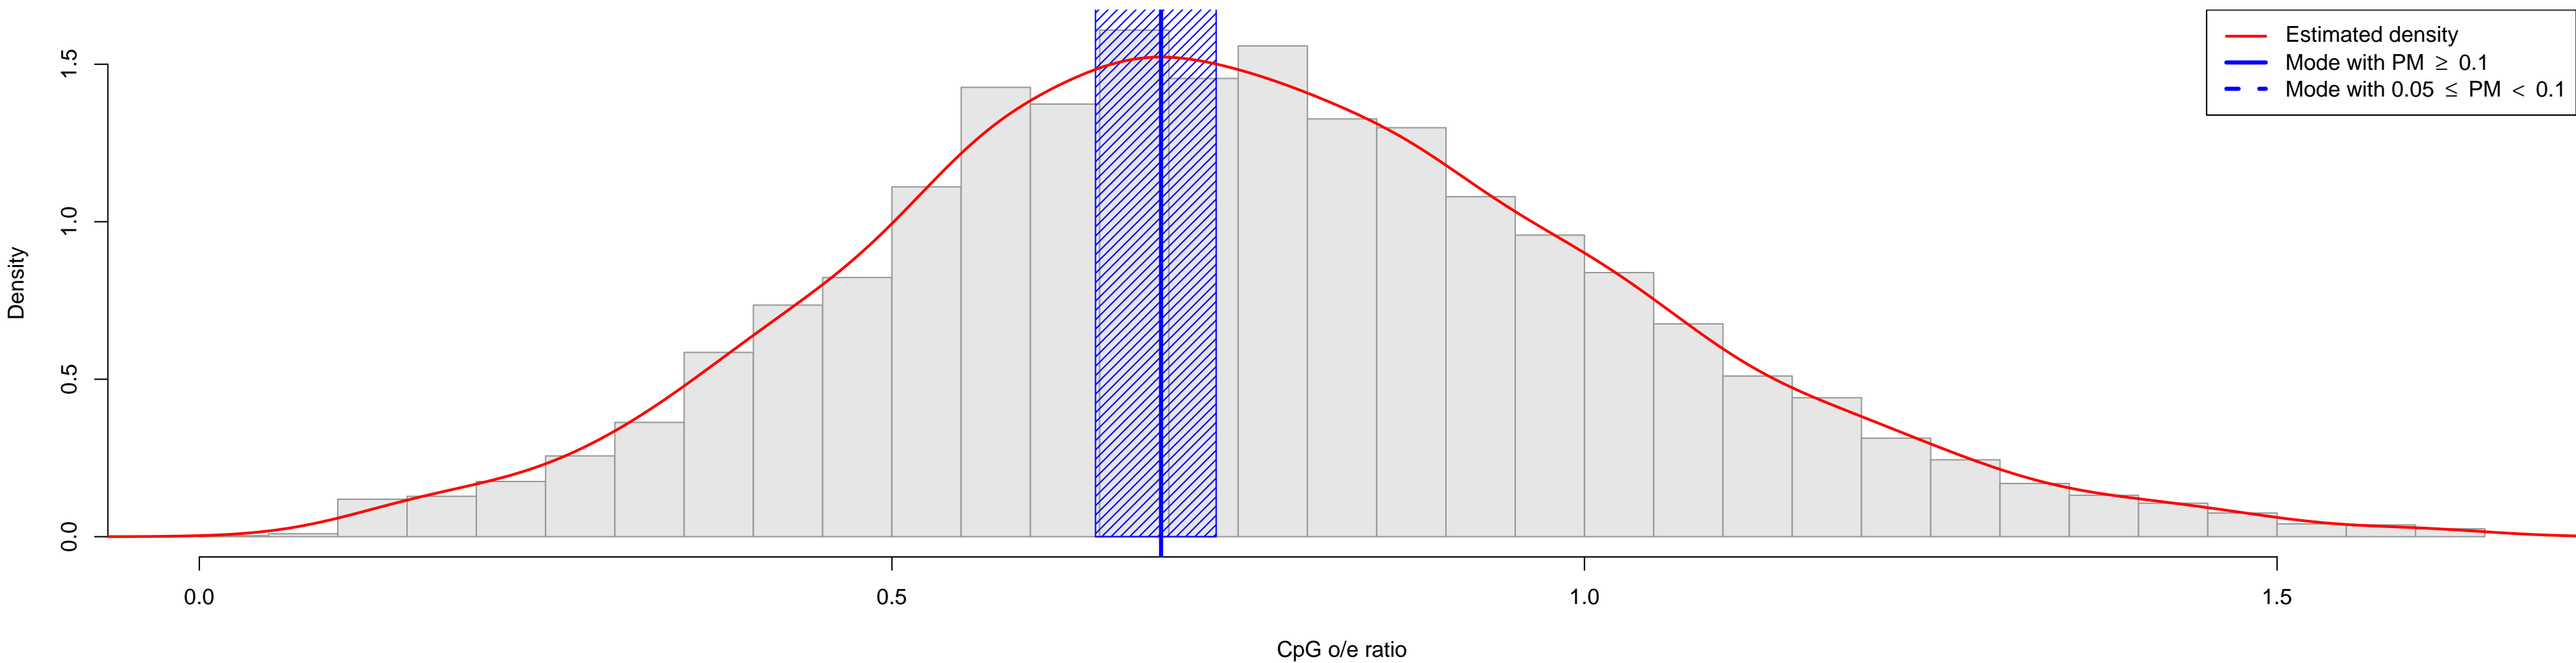

# Panicum\_virgatum

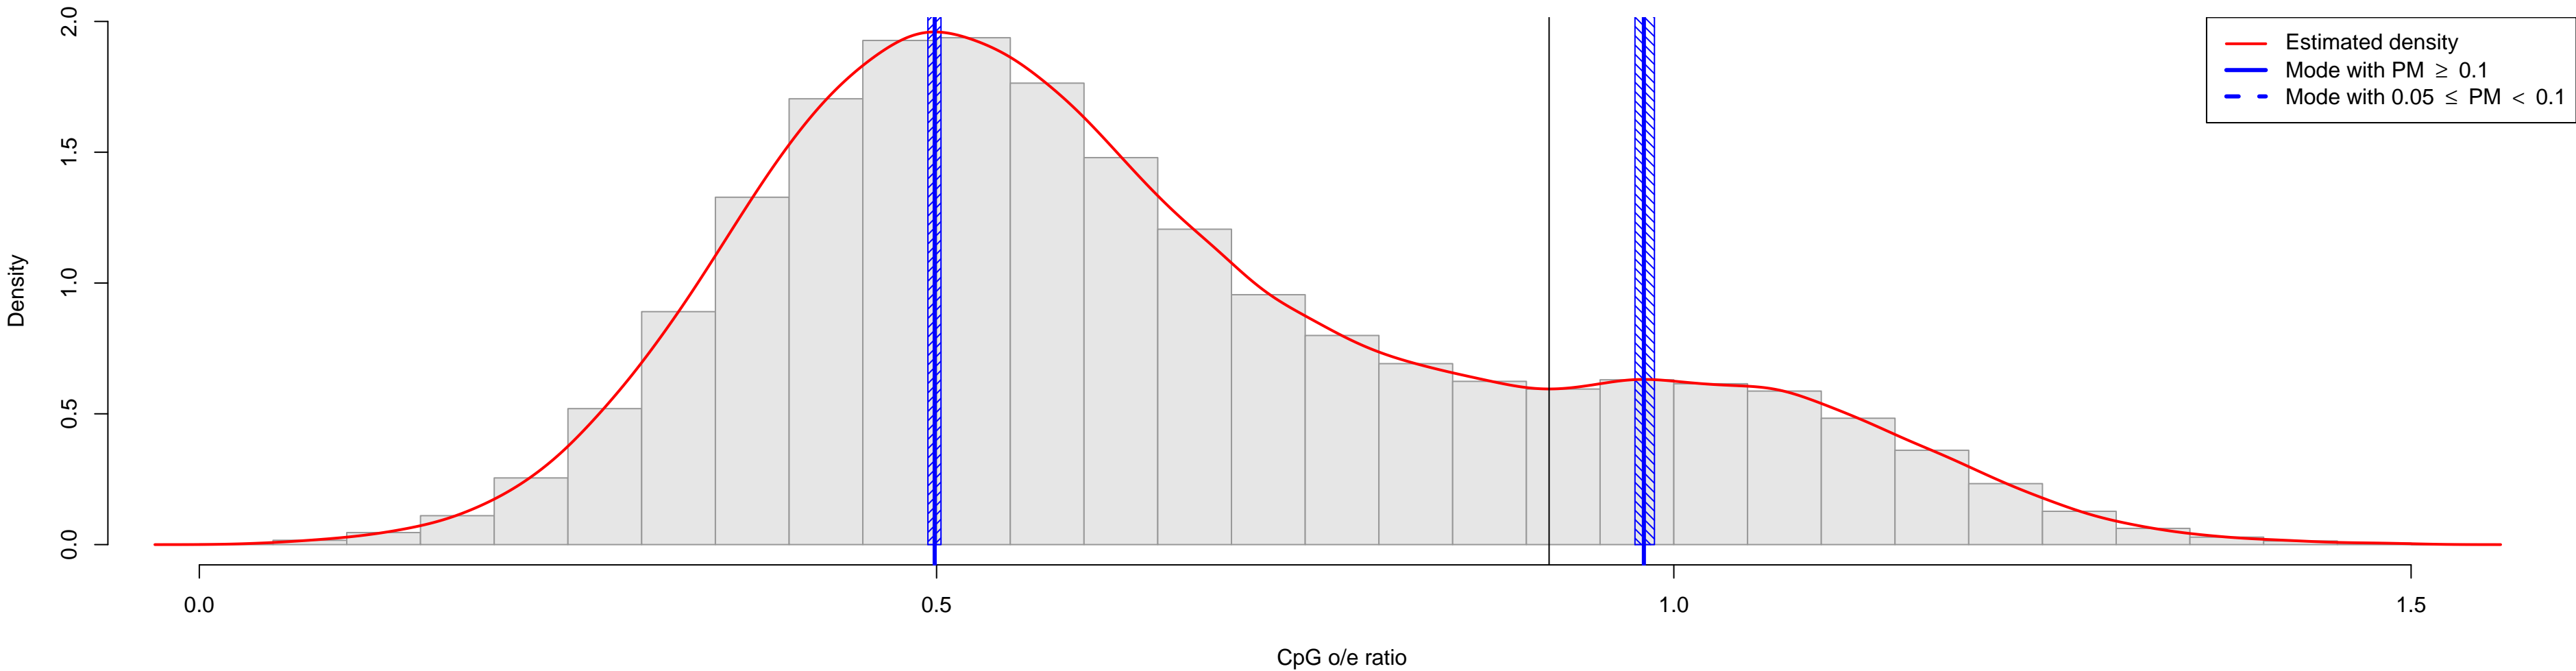

# Papilio\_polytes

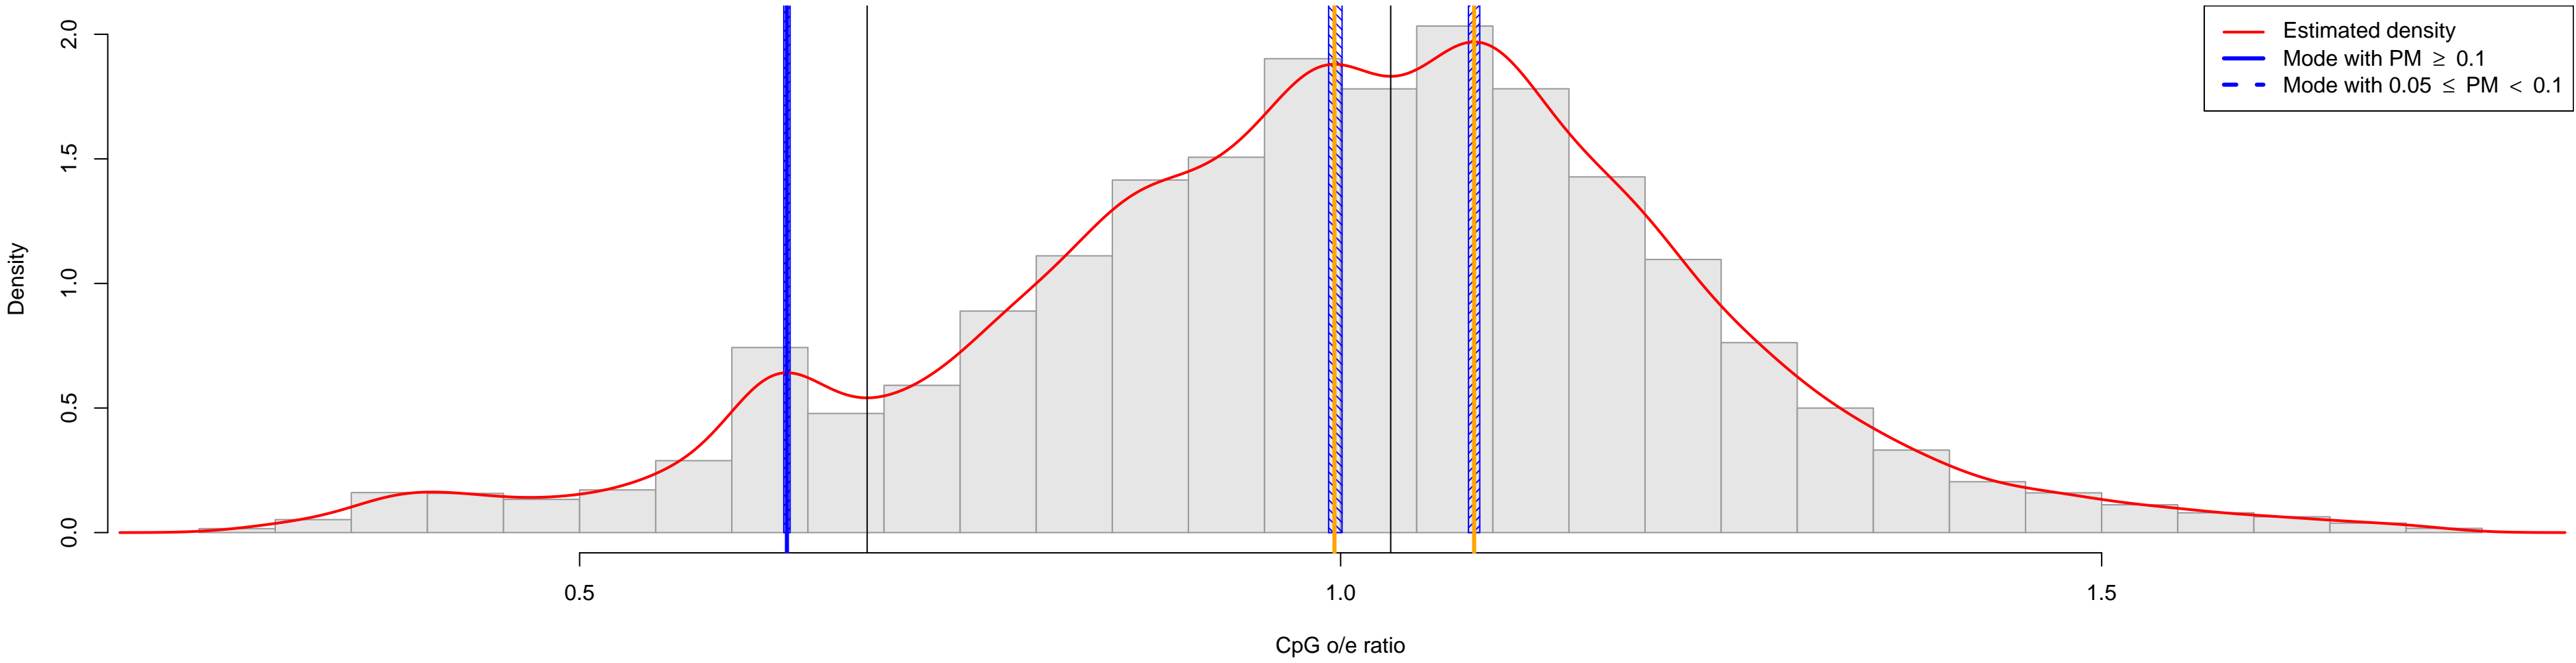

# Papilio\_xuthus

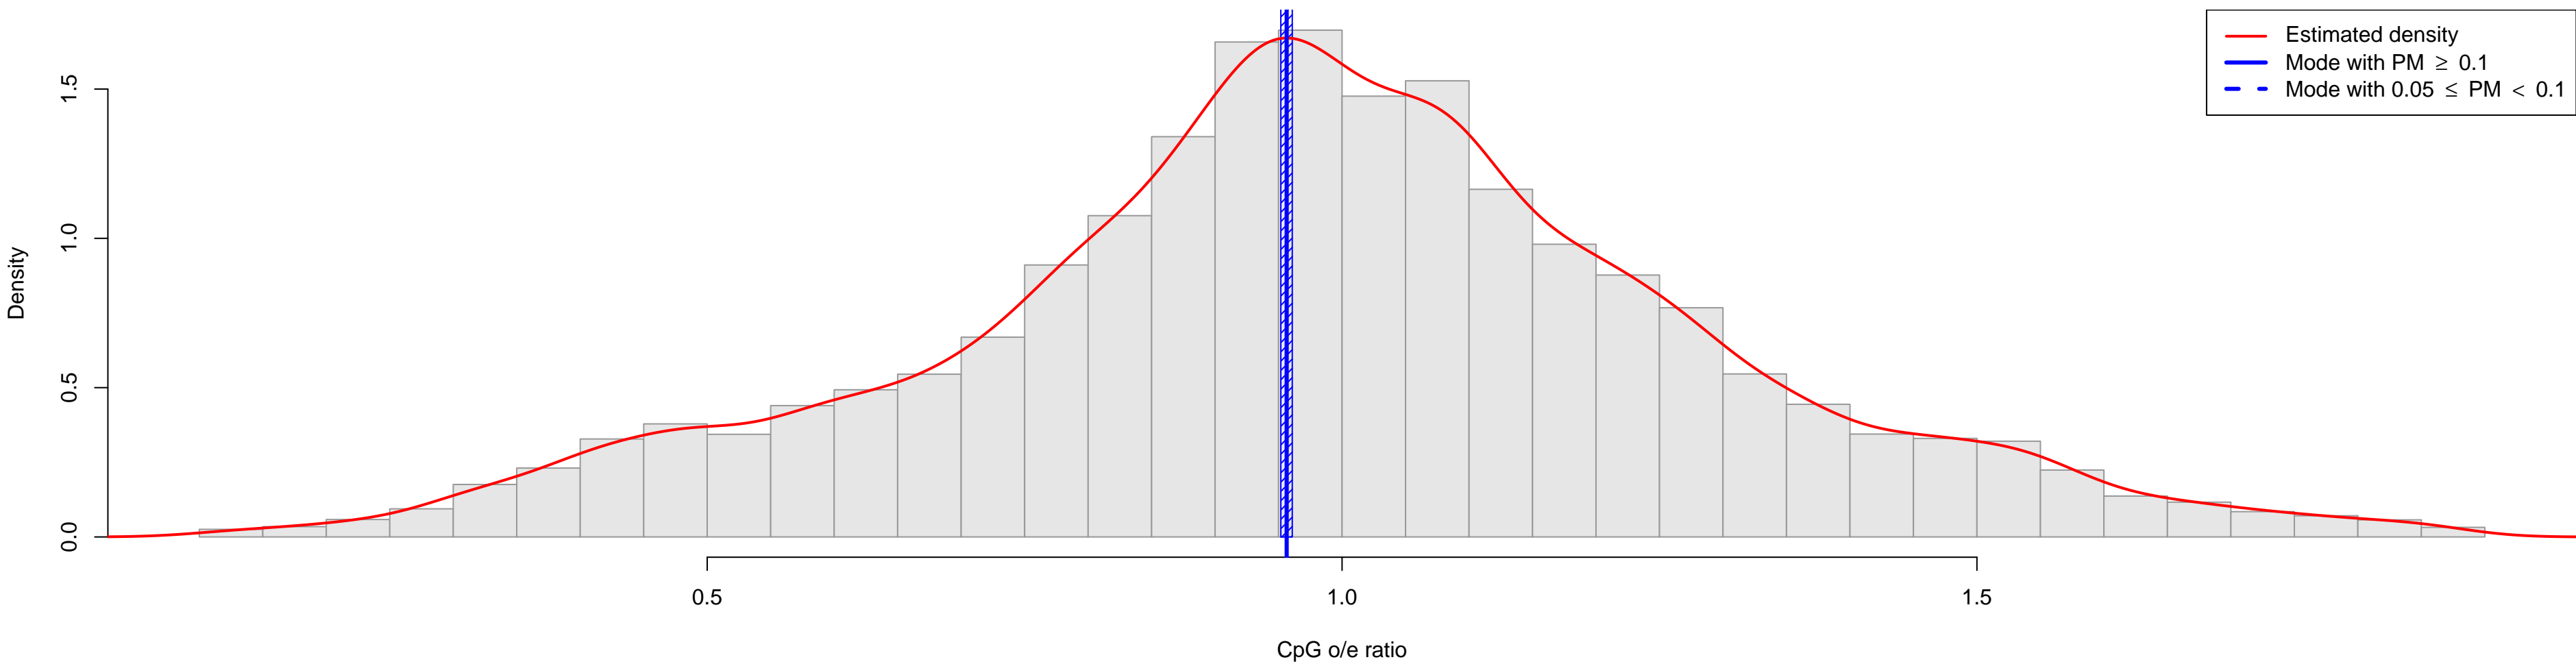

# Papio\_anubis

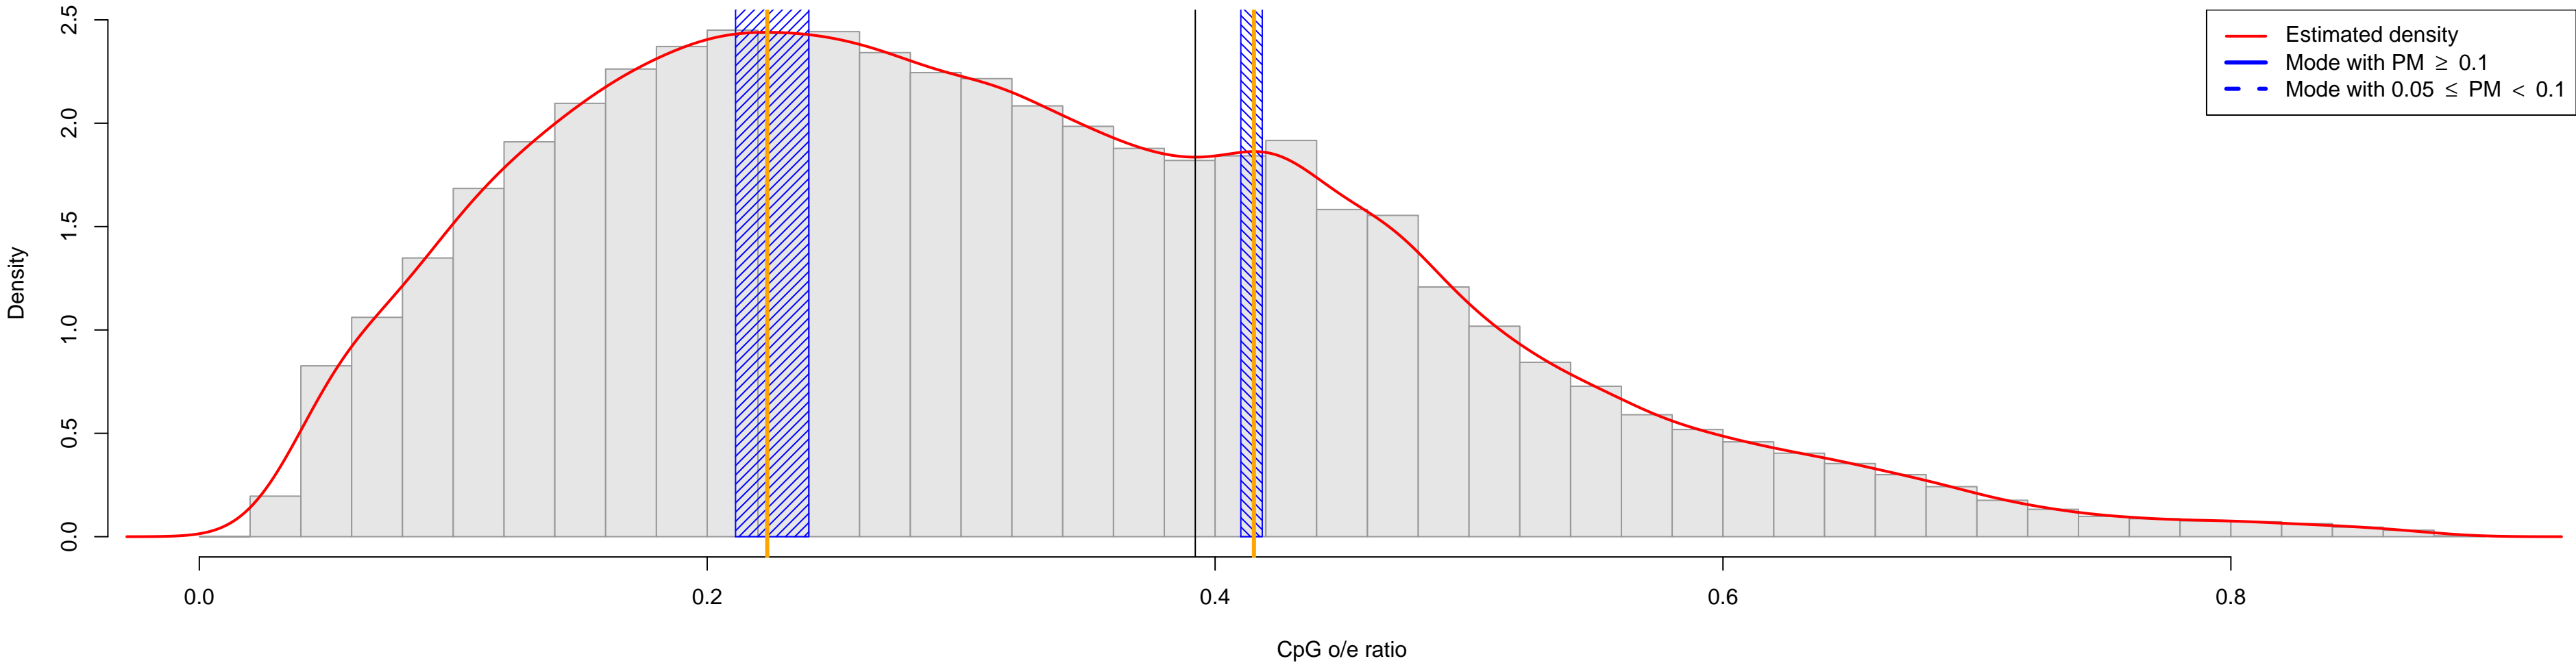

# Paracentrotus\_lividus

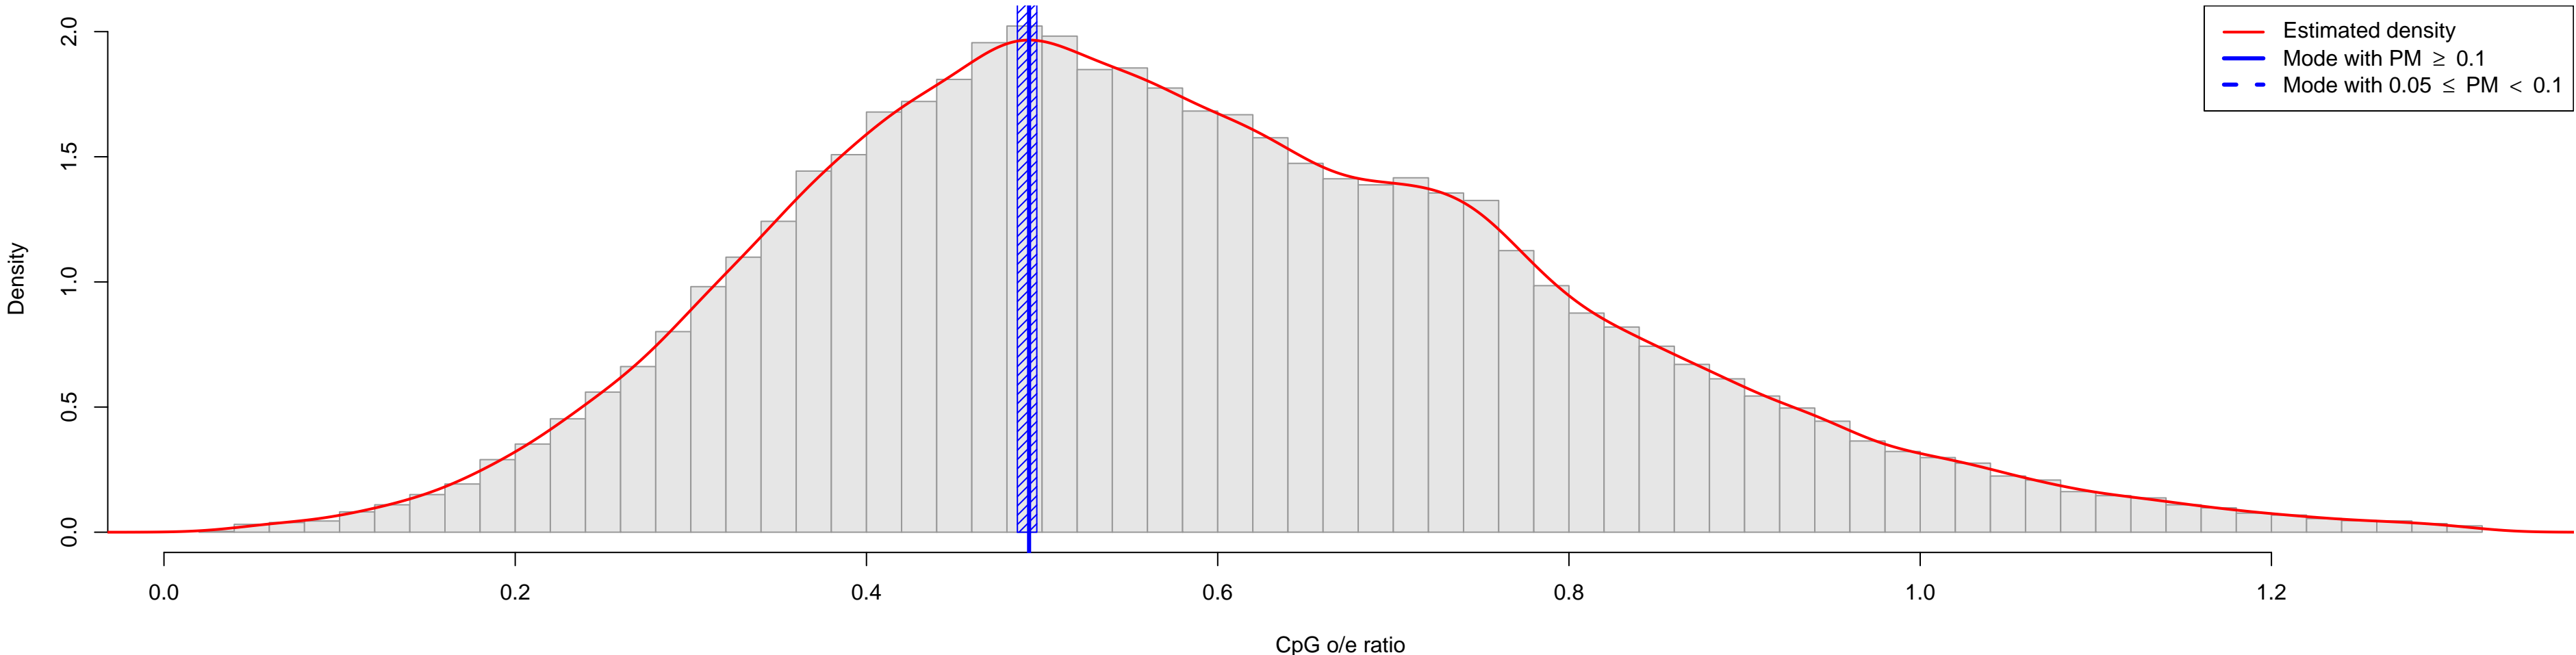

# Paracercomonas\_marina

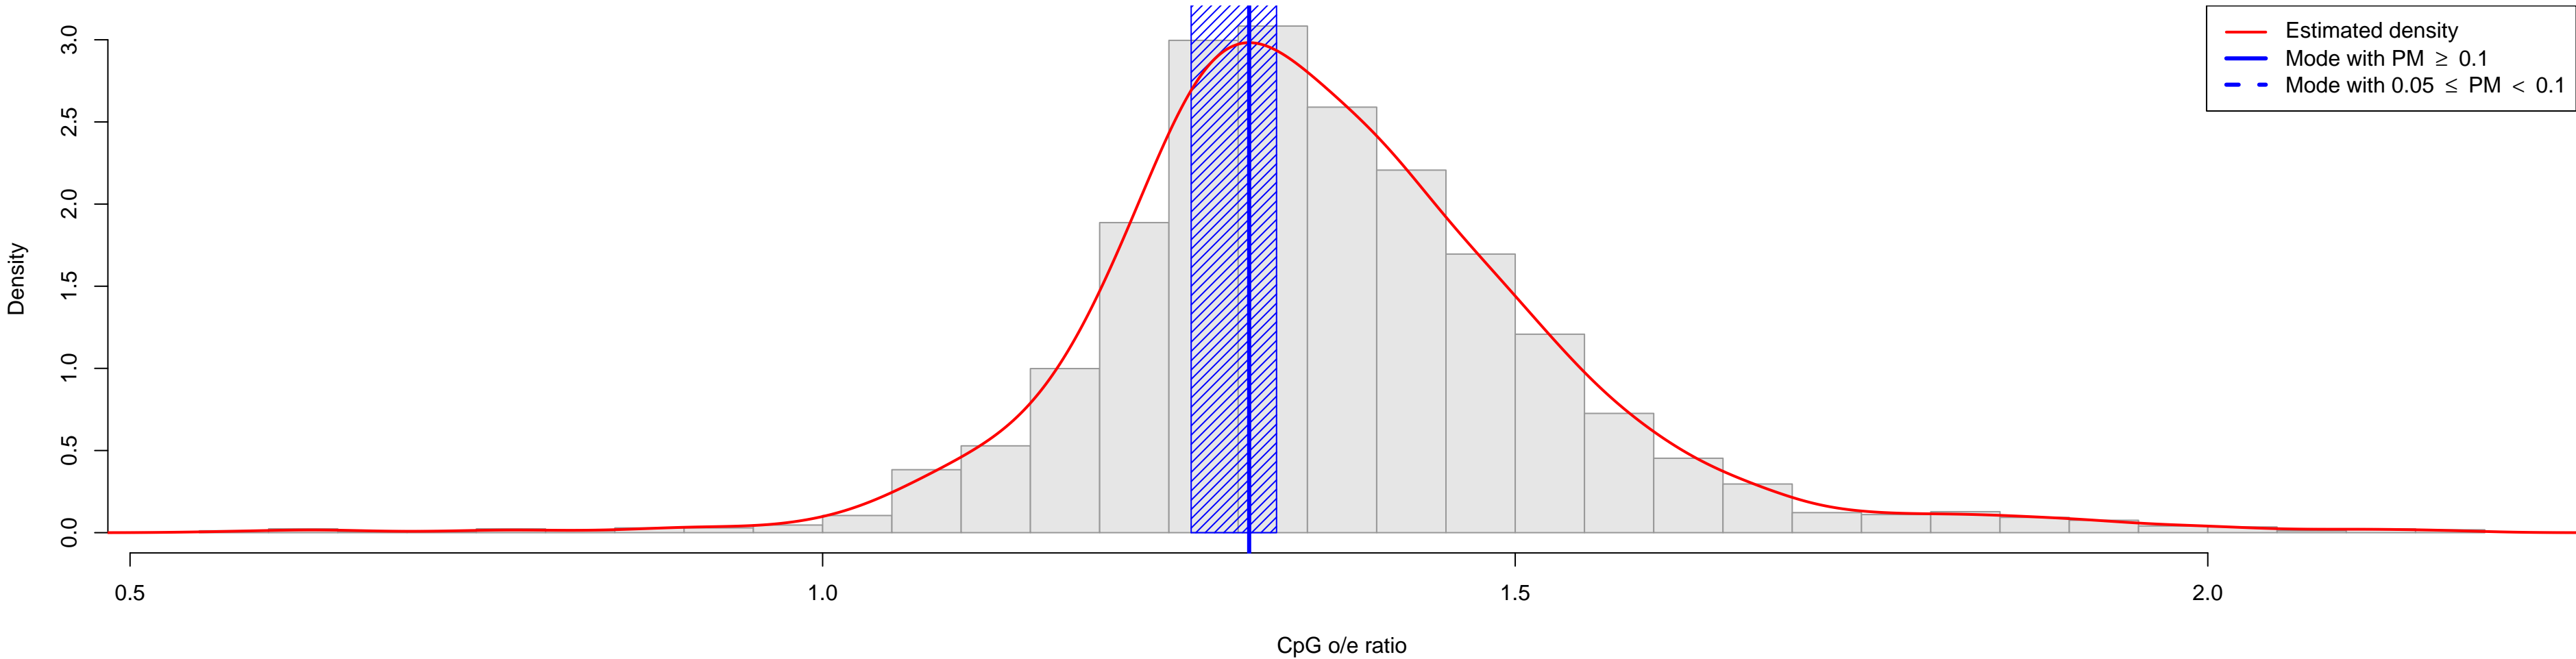



# Paracoccidioides\_brasiliensis

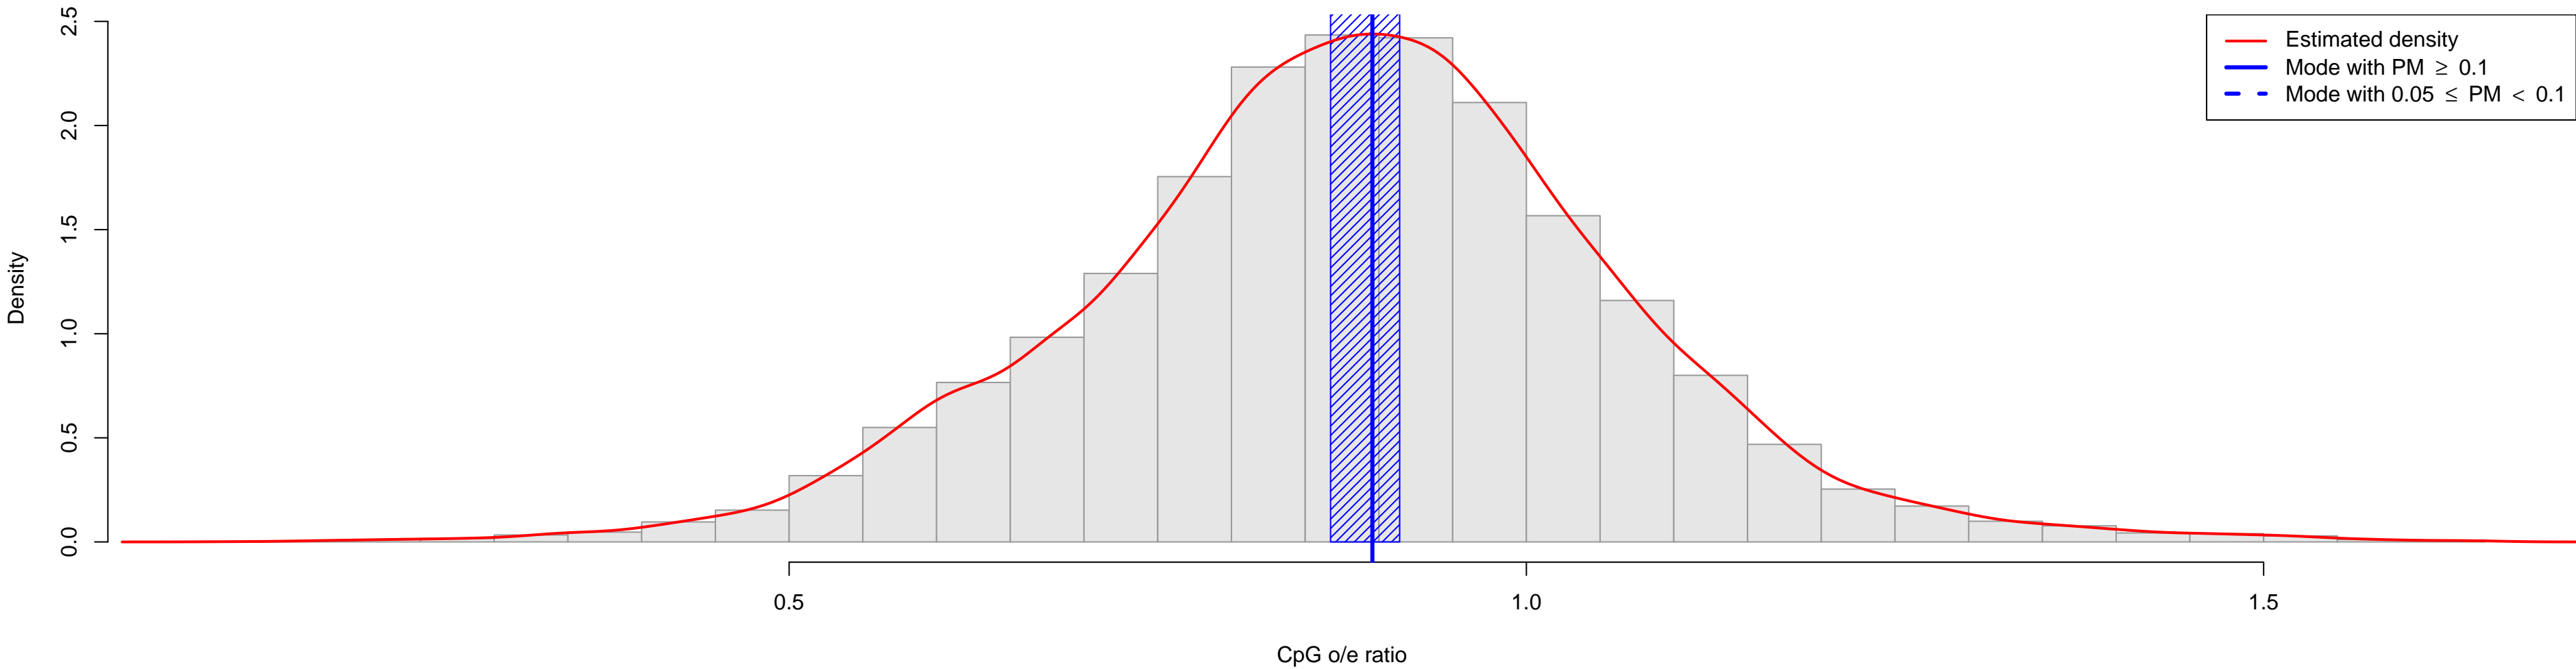

# Paralichthys\_olivaceus

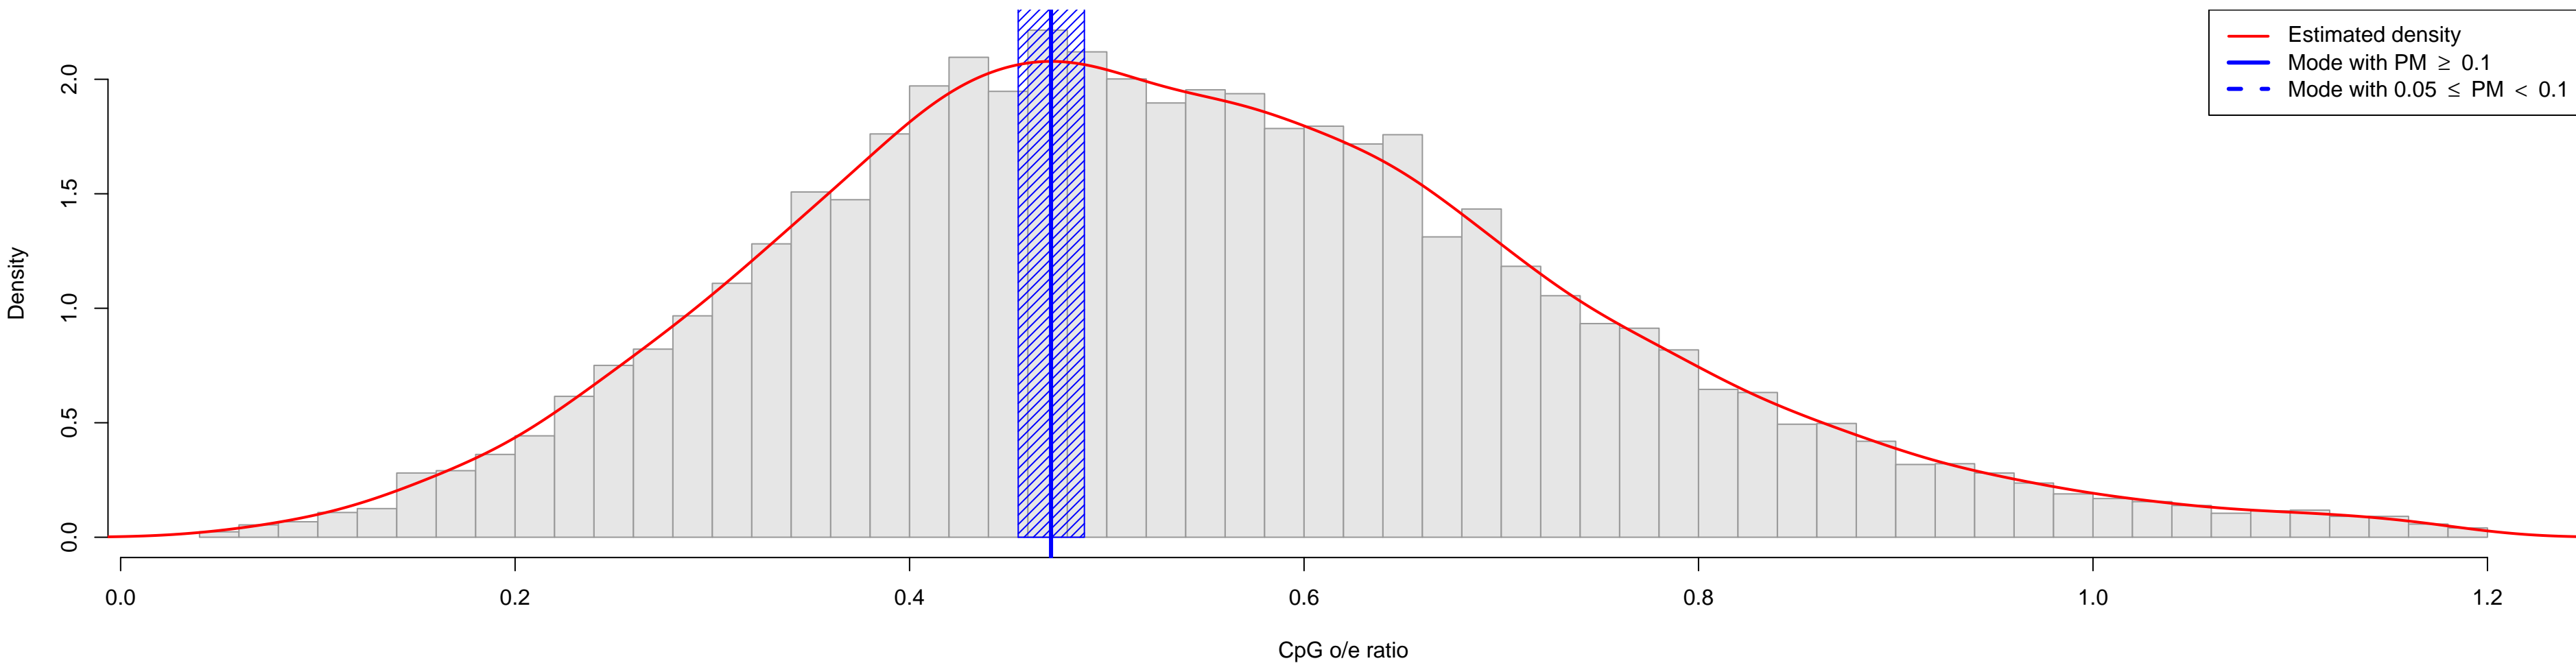

# Paramecium\_tetraurelia

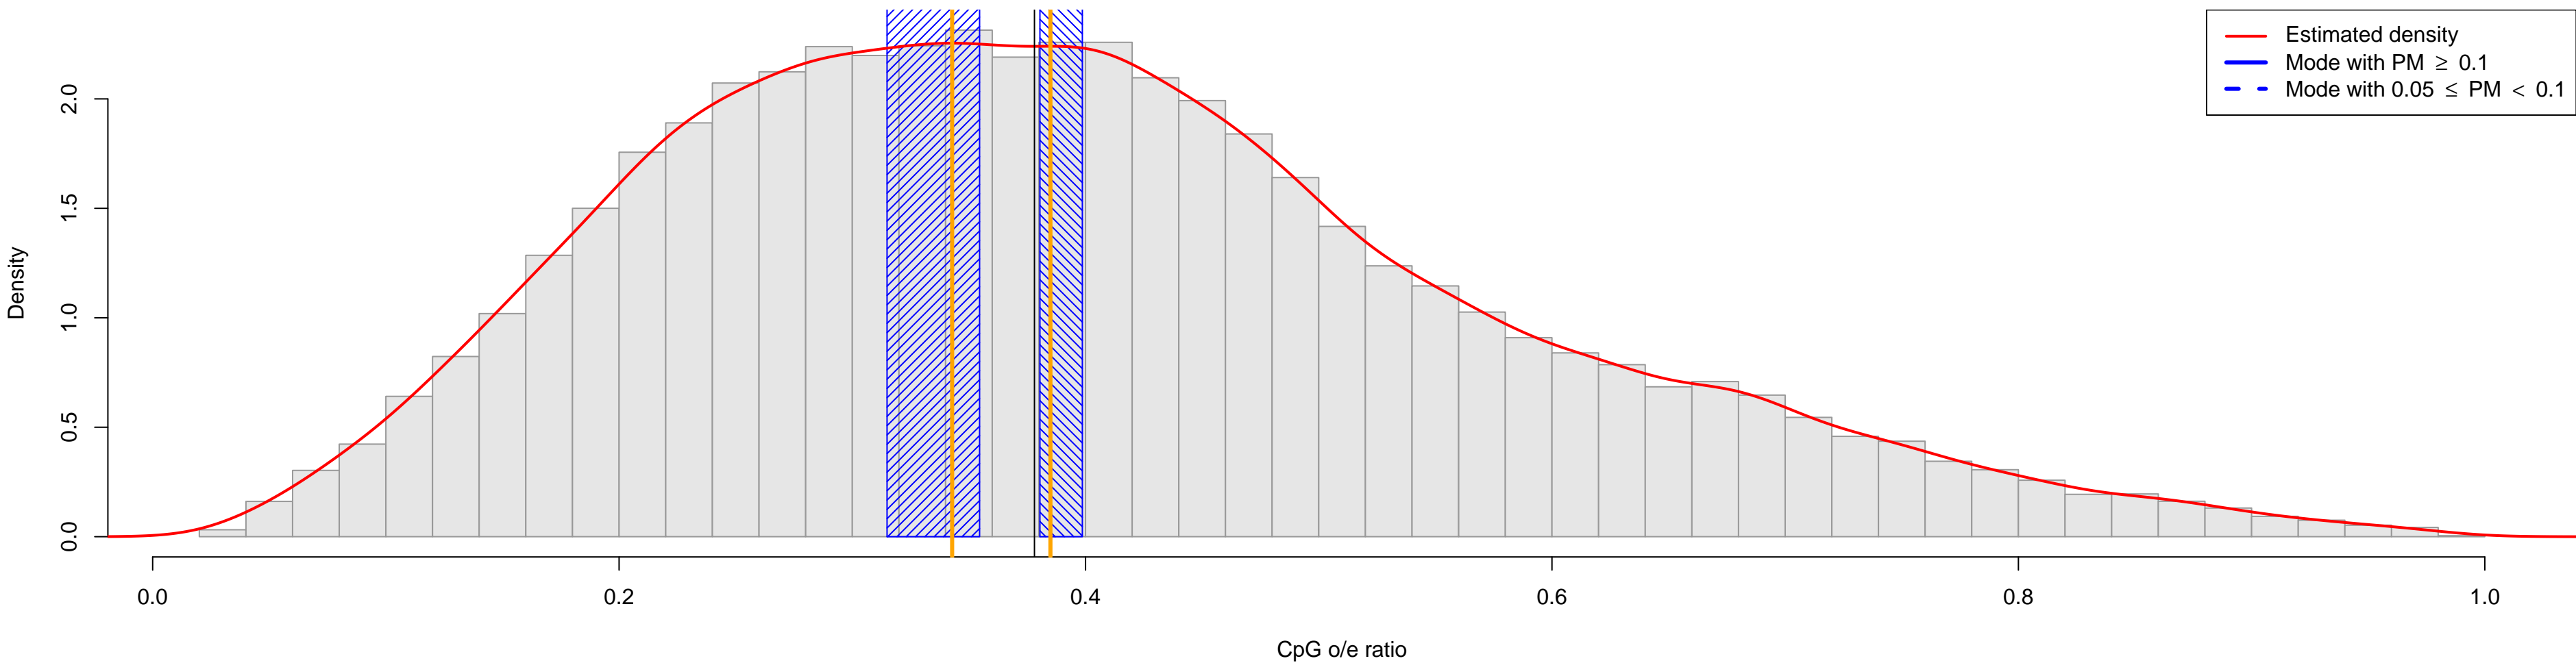

# Parasteatoda\_tepidariorum

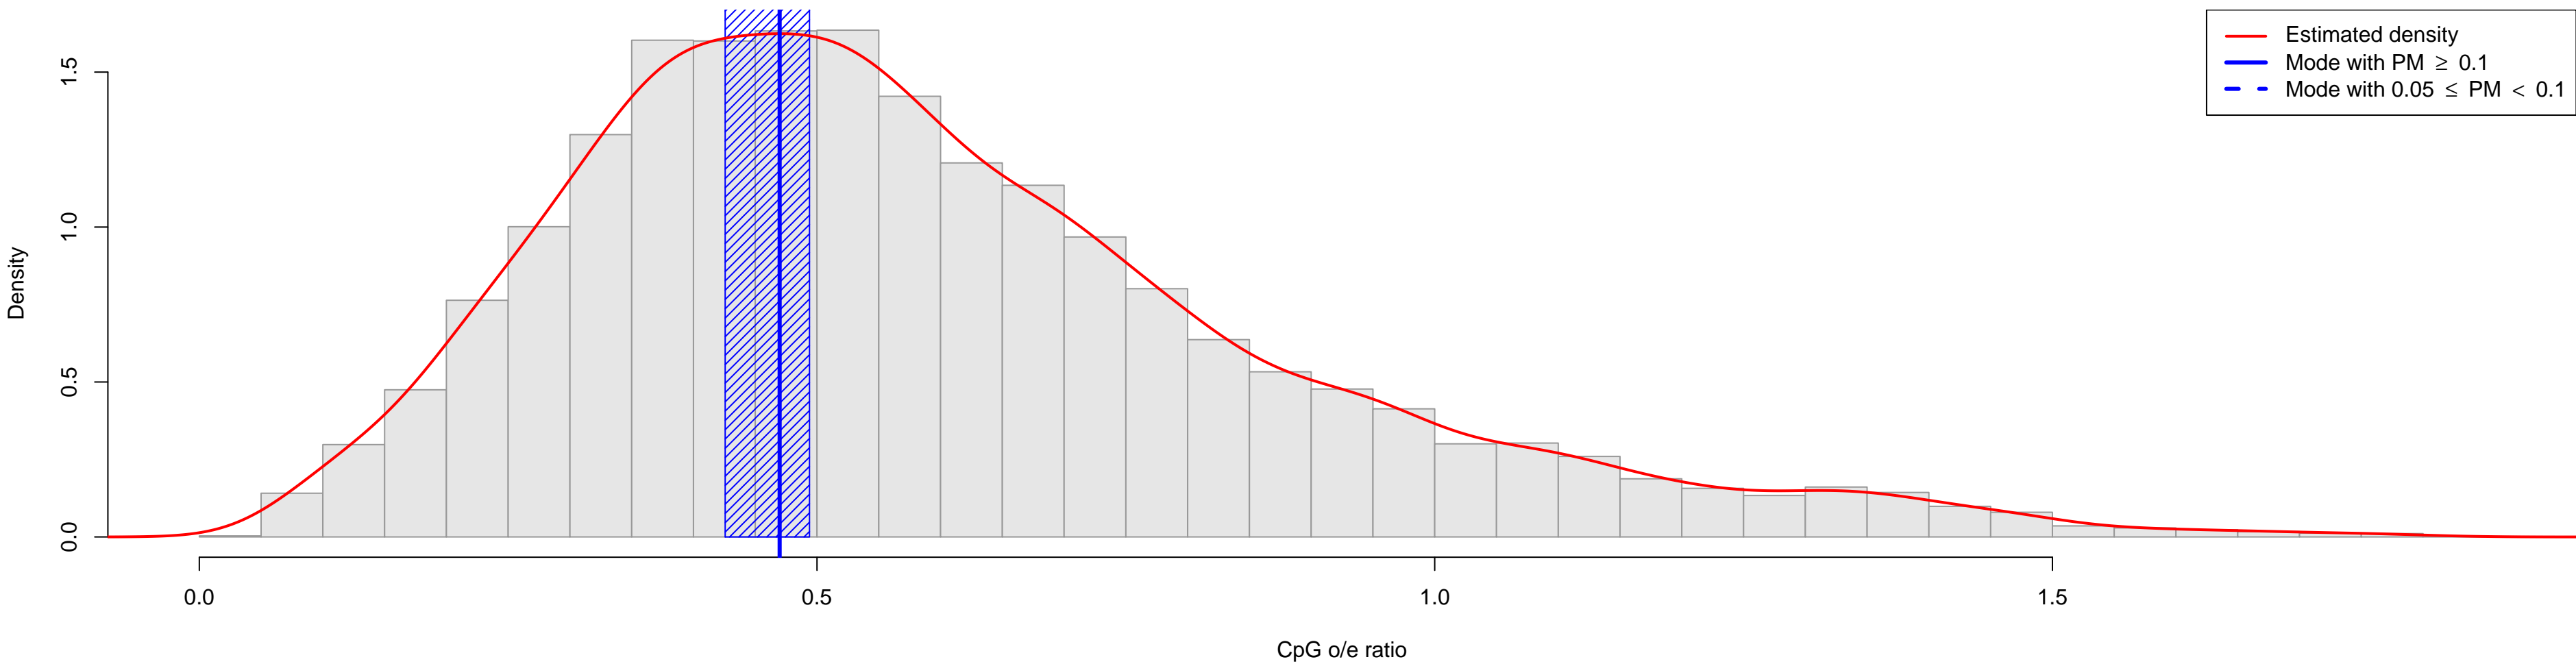

# Parastrongyloides\_trichosuri

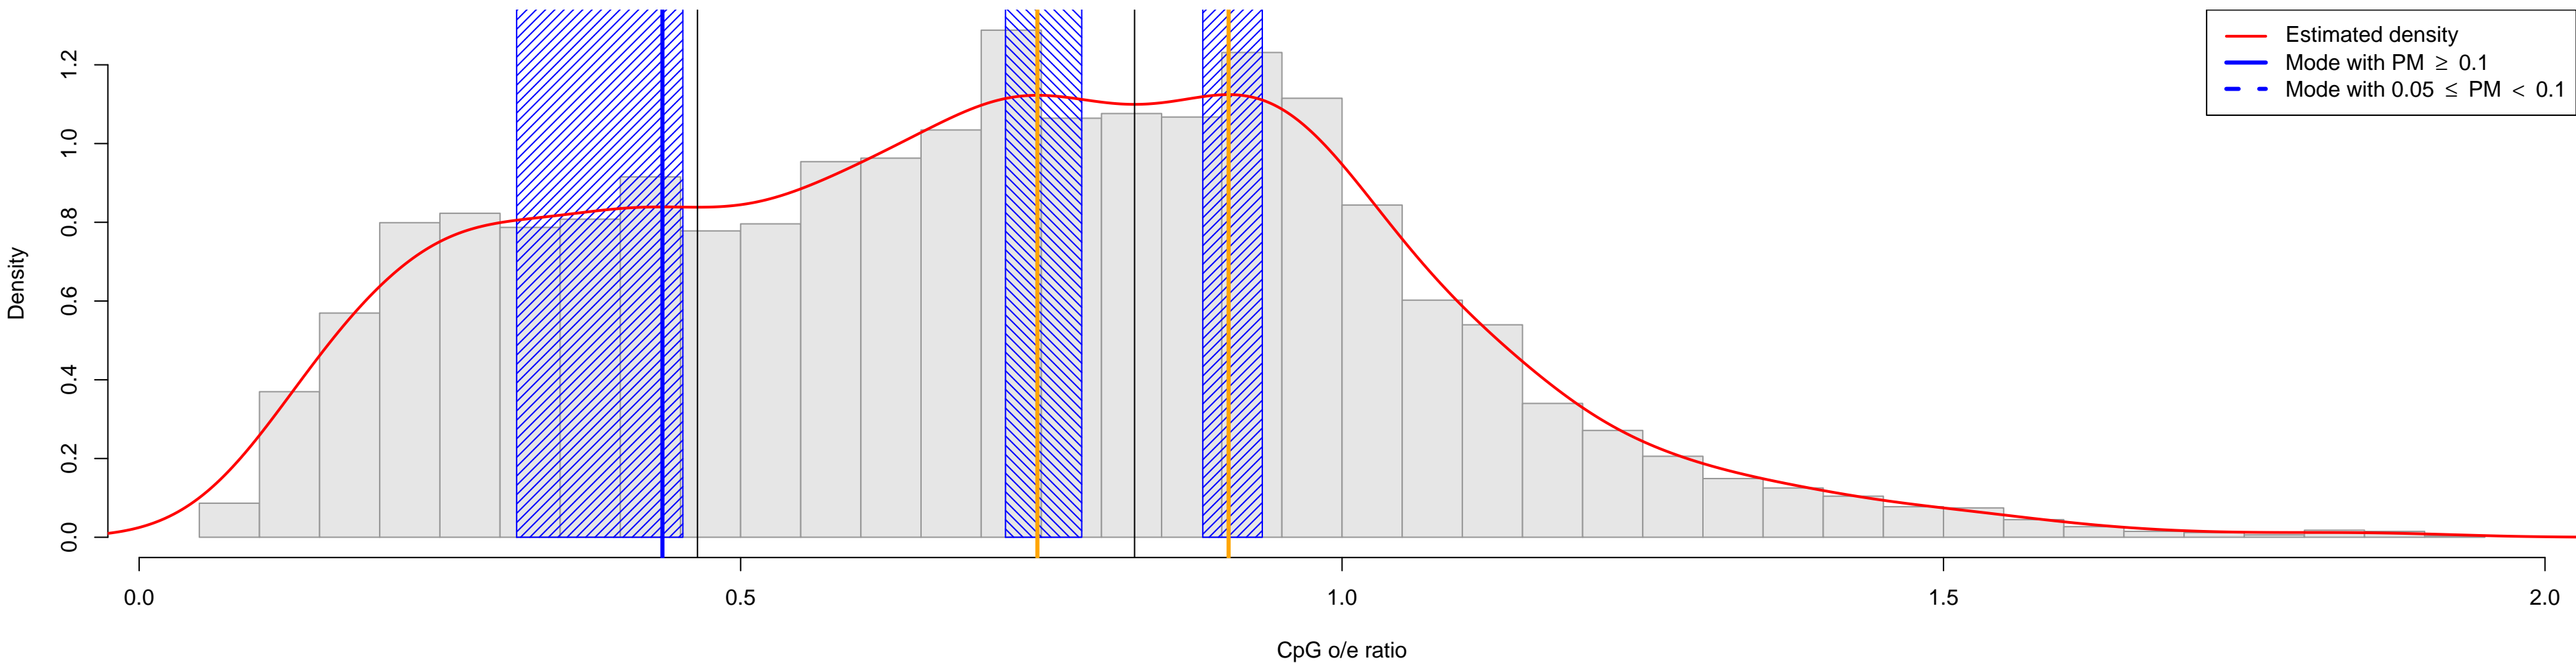

# Pavlova\_lutheri

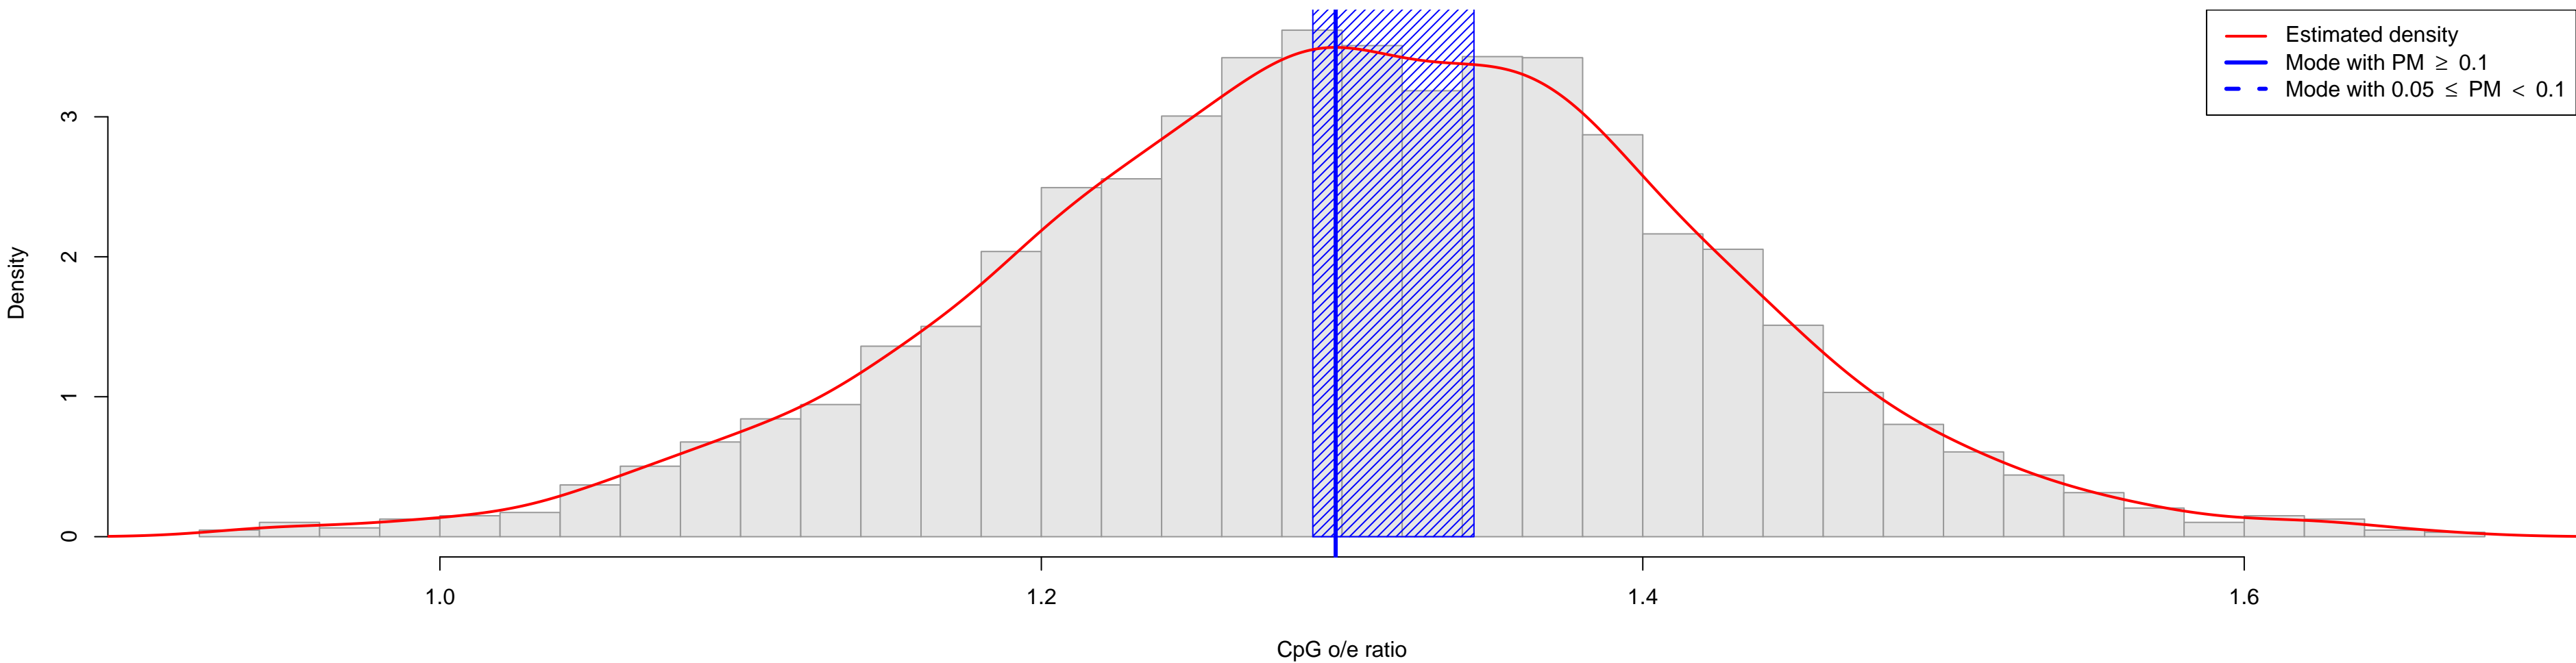

# Pemphigus\_spyrothecae

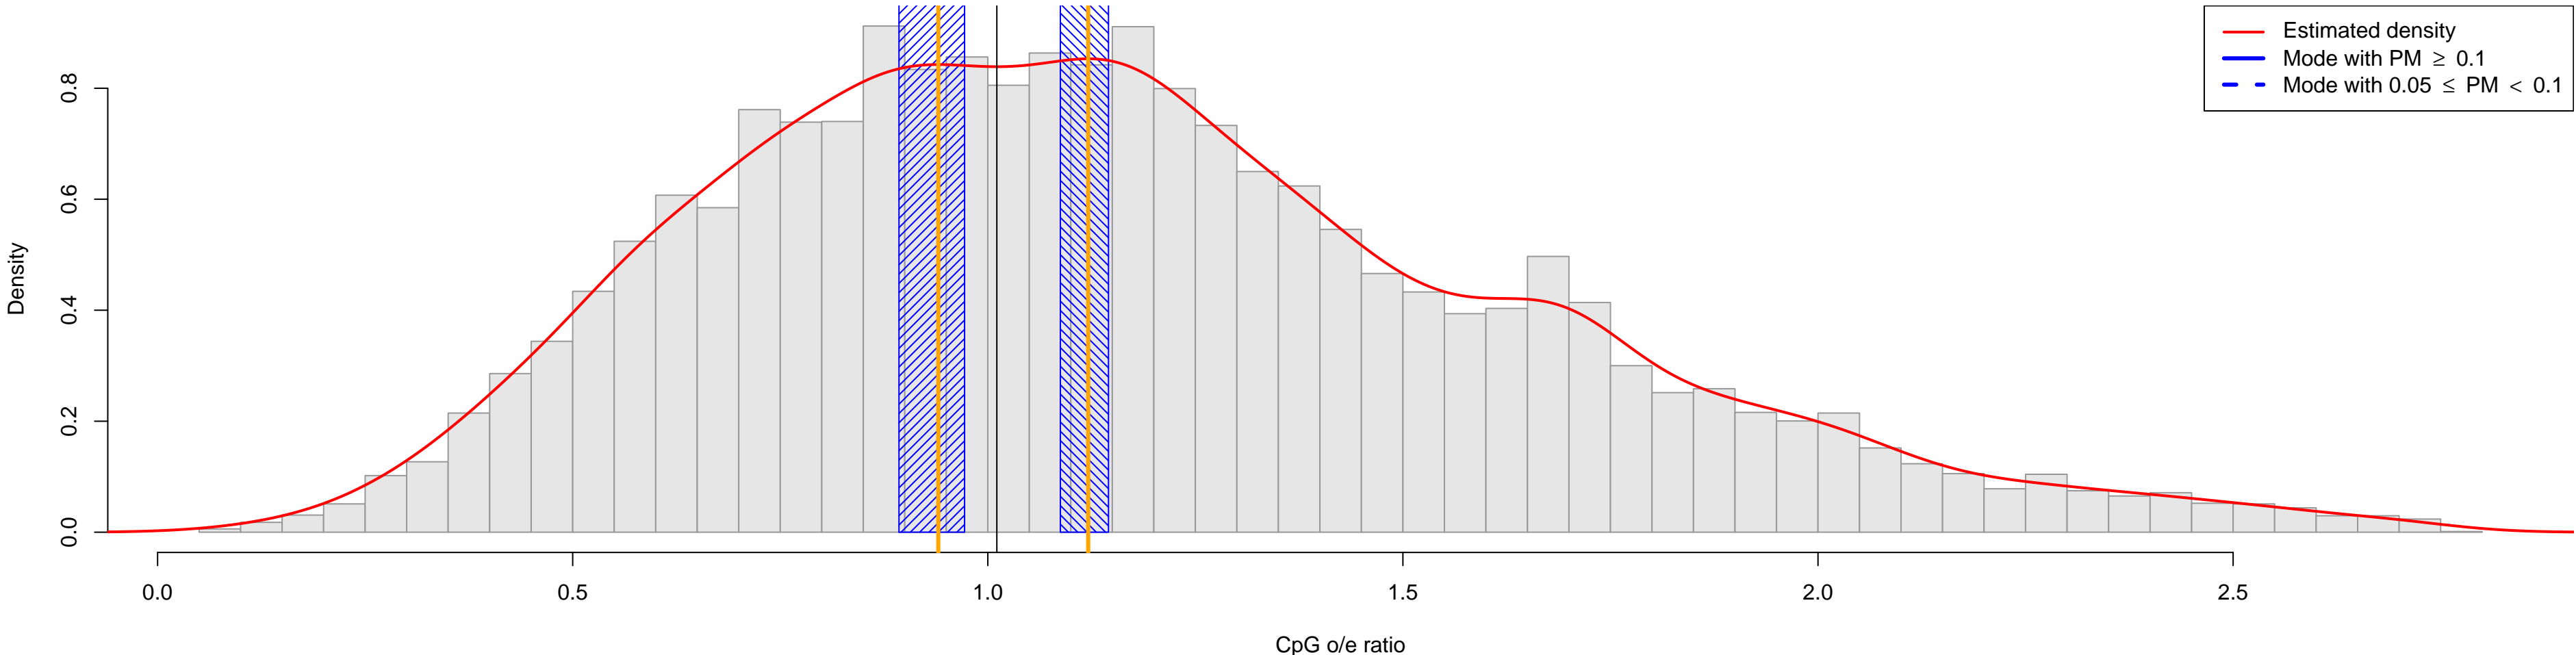

# Penaeus\_monodon

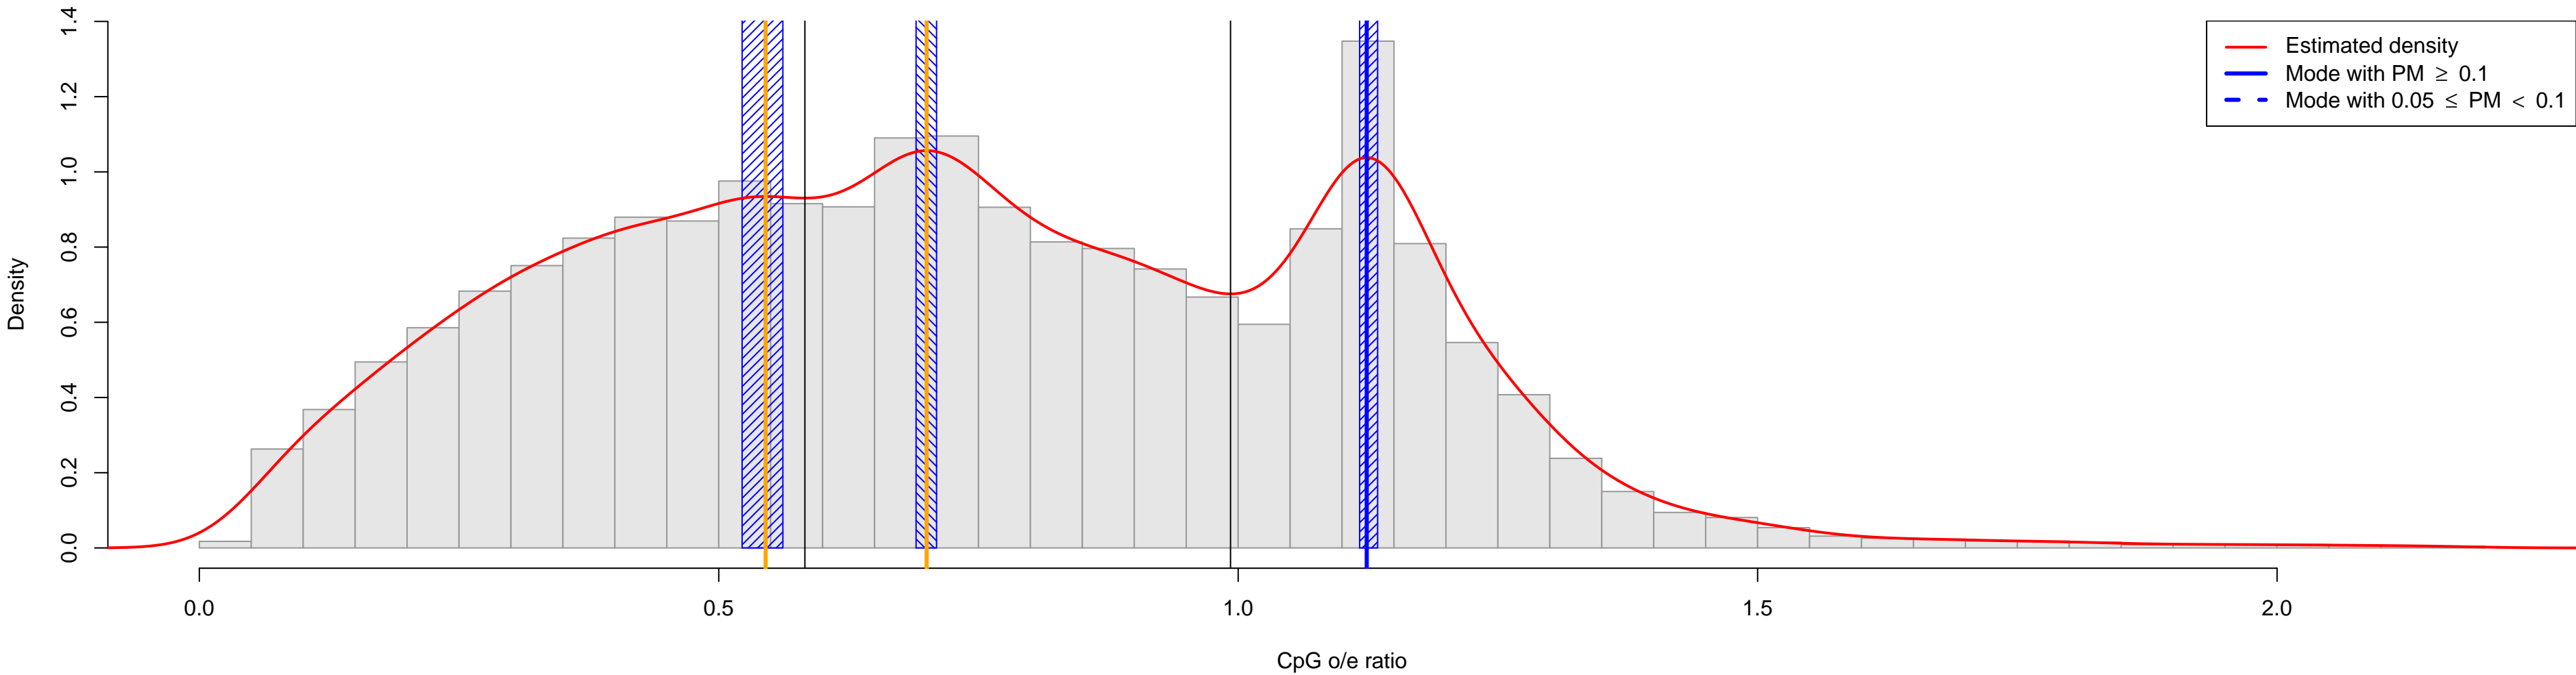



# Perca\_flavescens

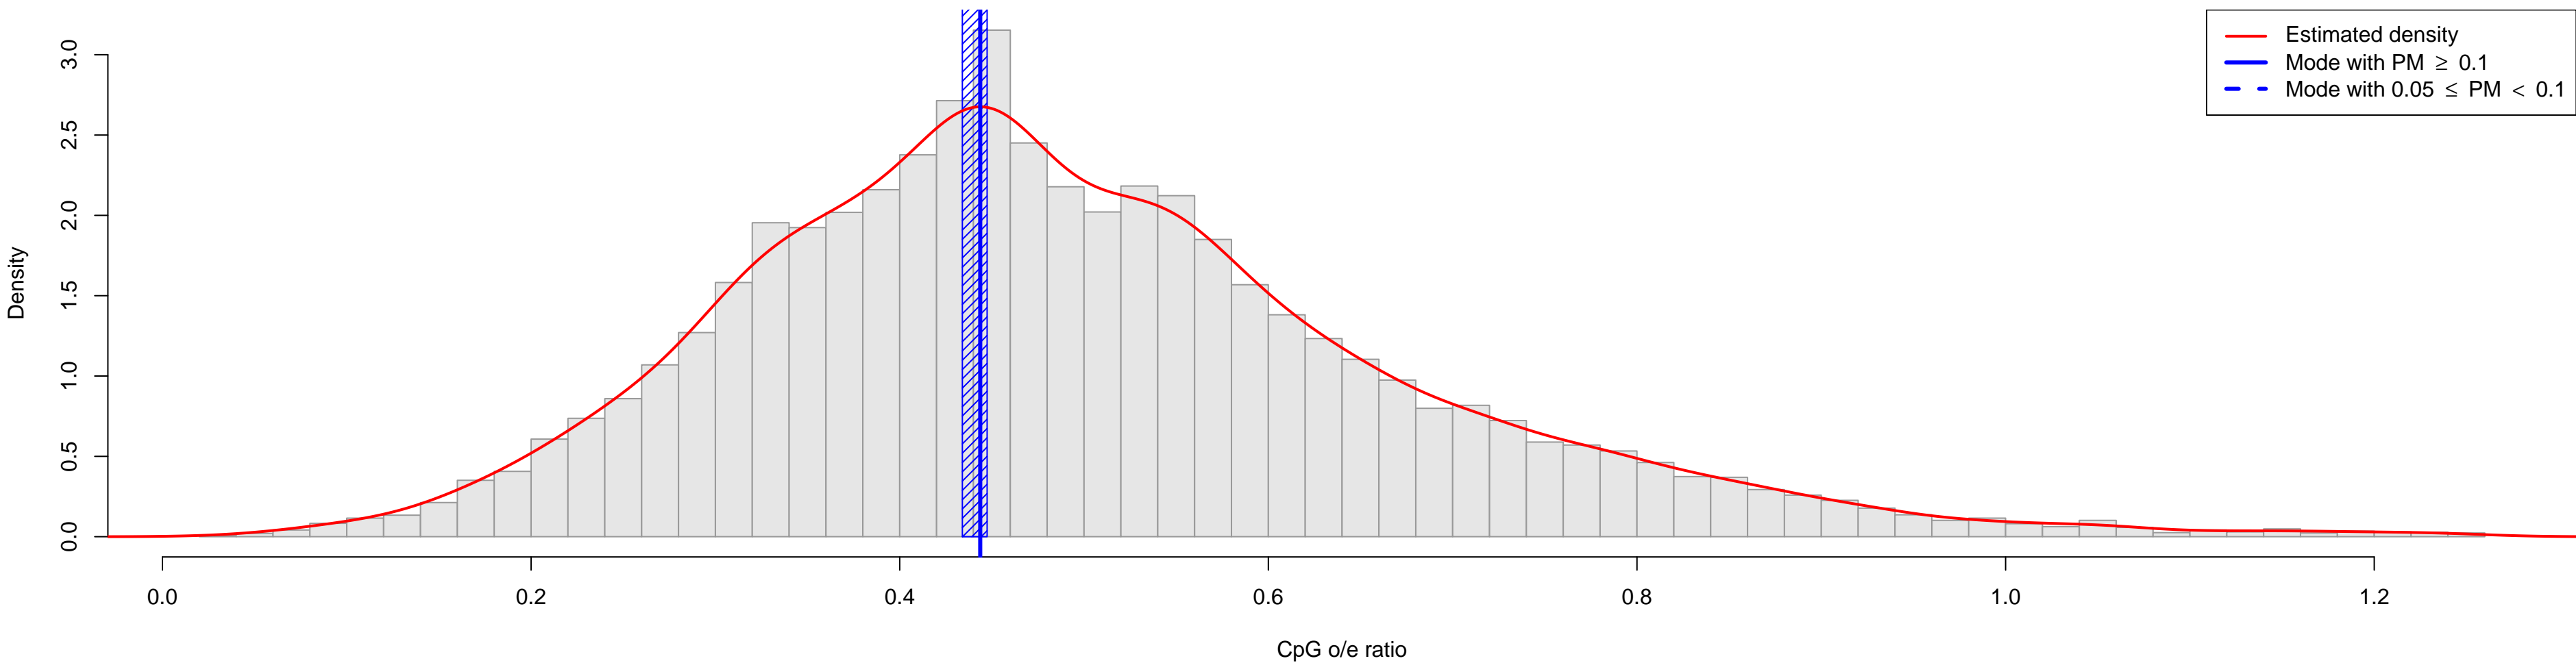

# Peregrinus\_maidis

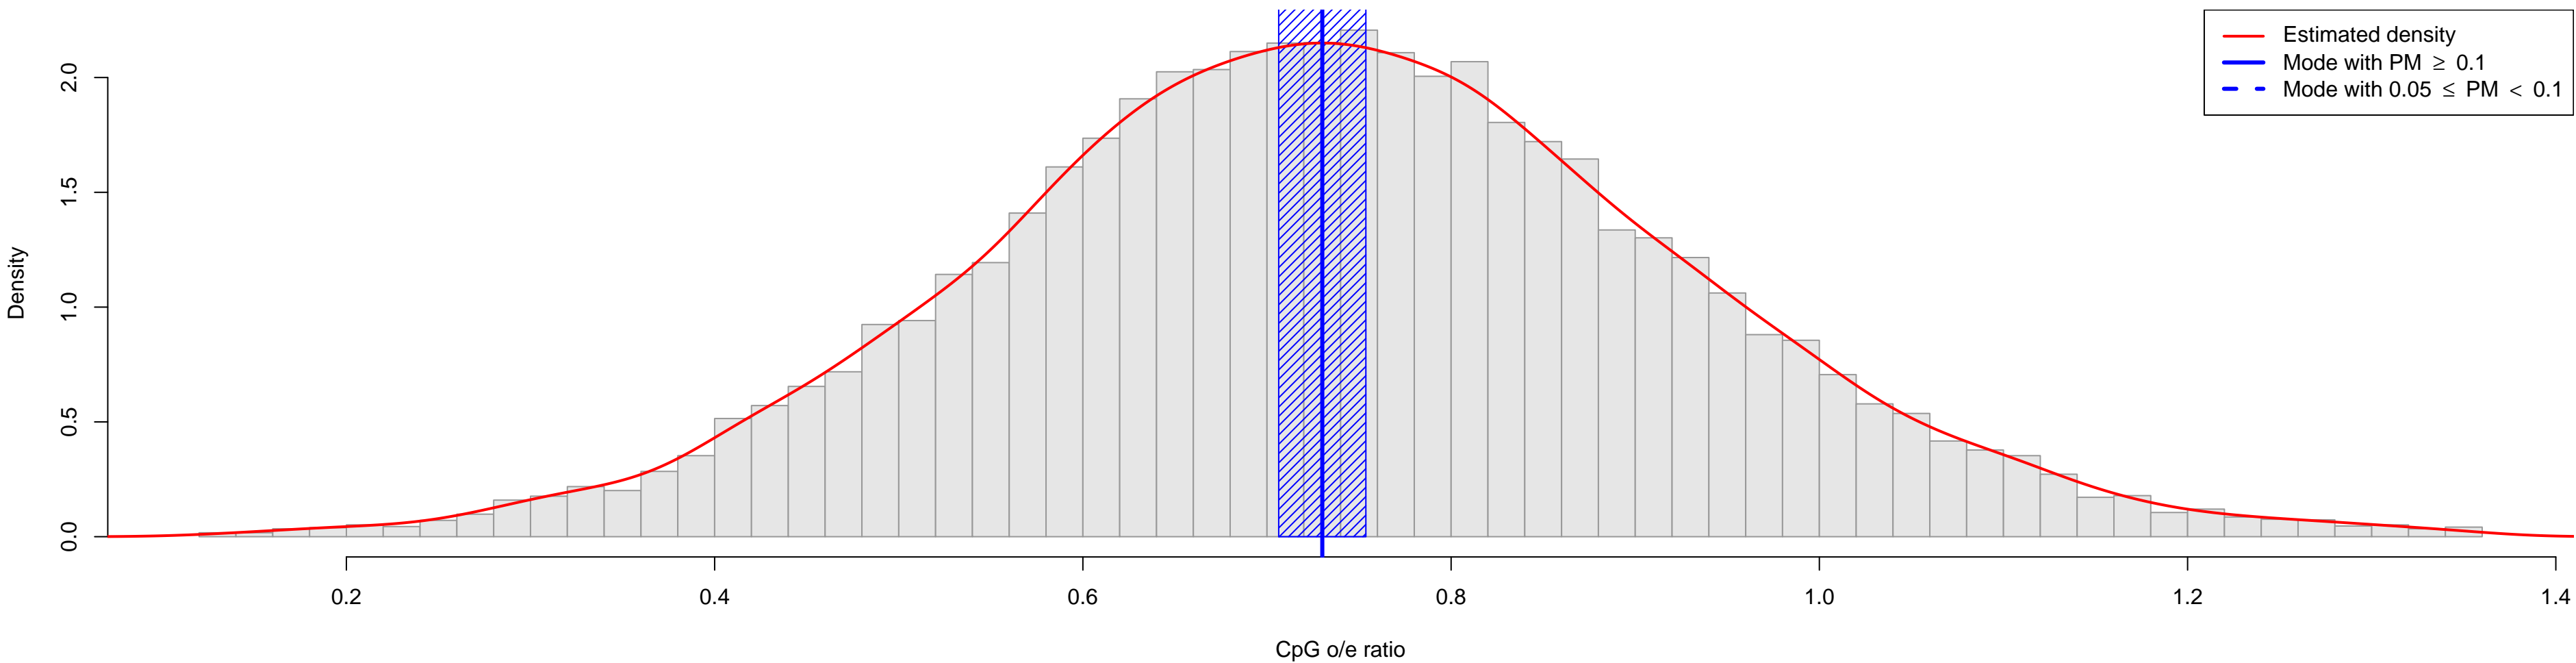

# Peromyscus\_maniculatus\_bairdii

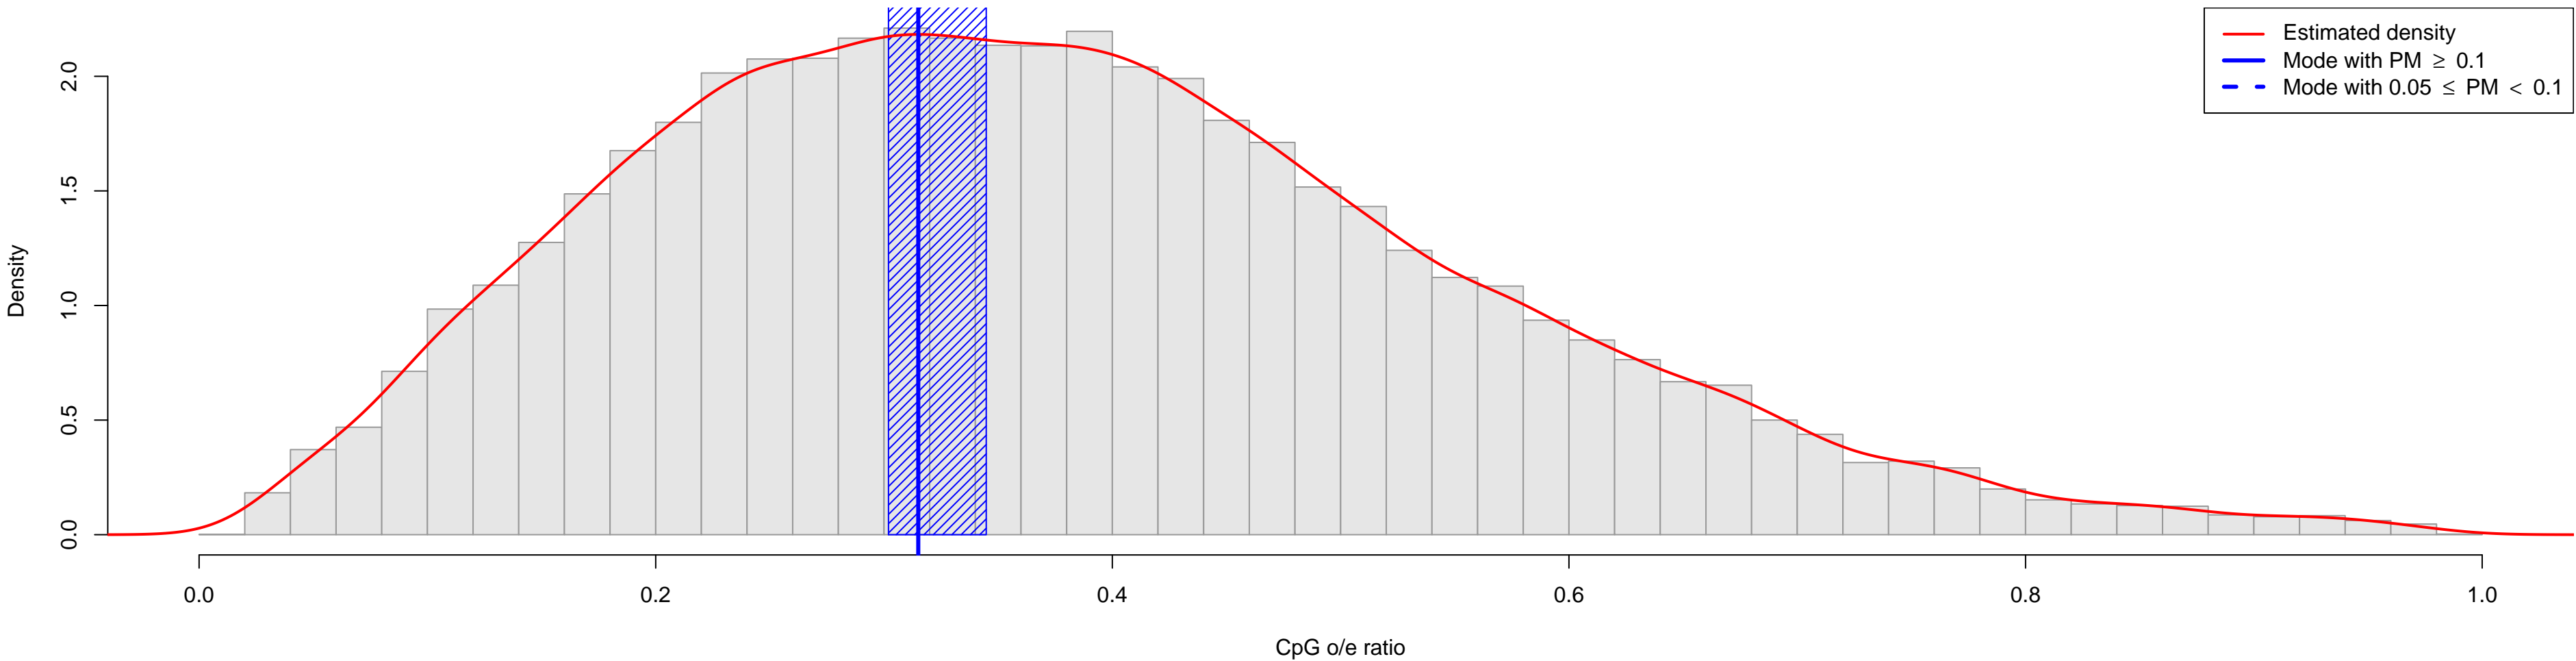

# Peromyscus\_polionotus\_subgriseus

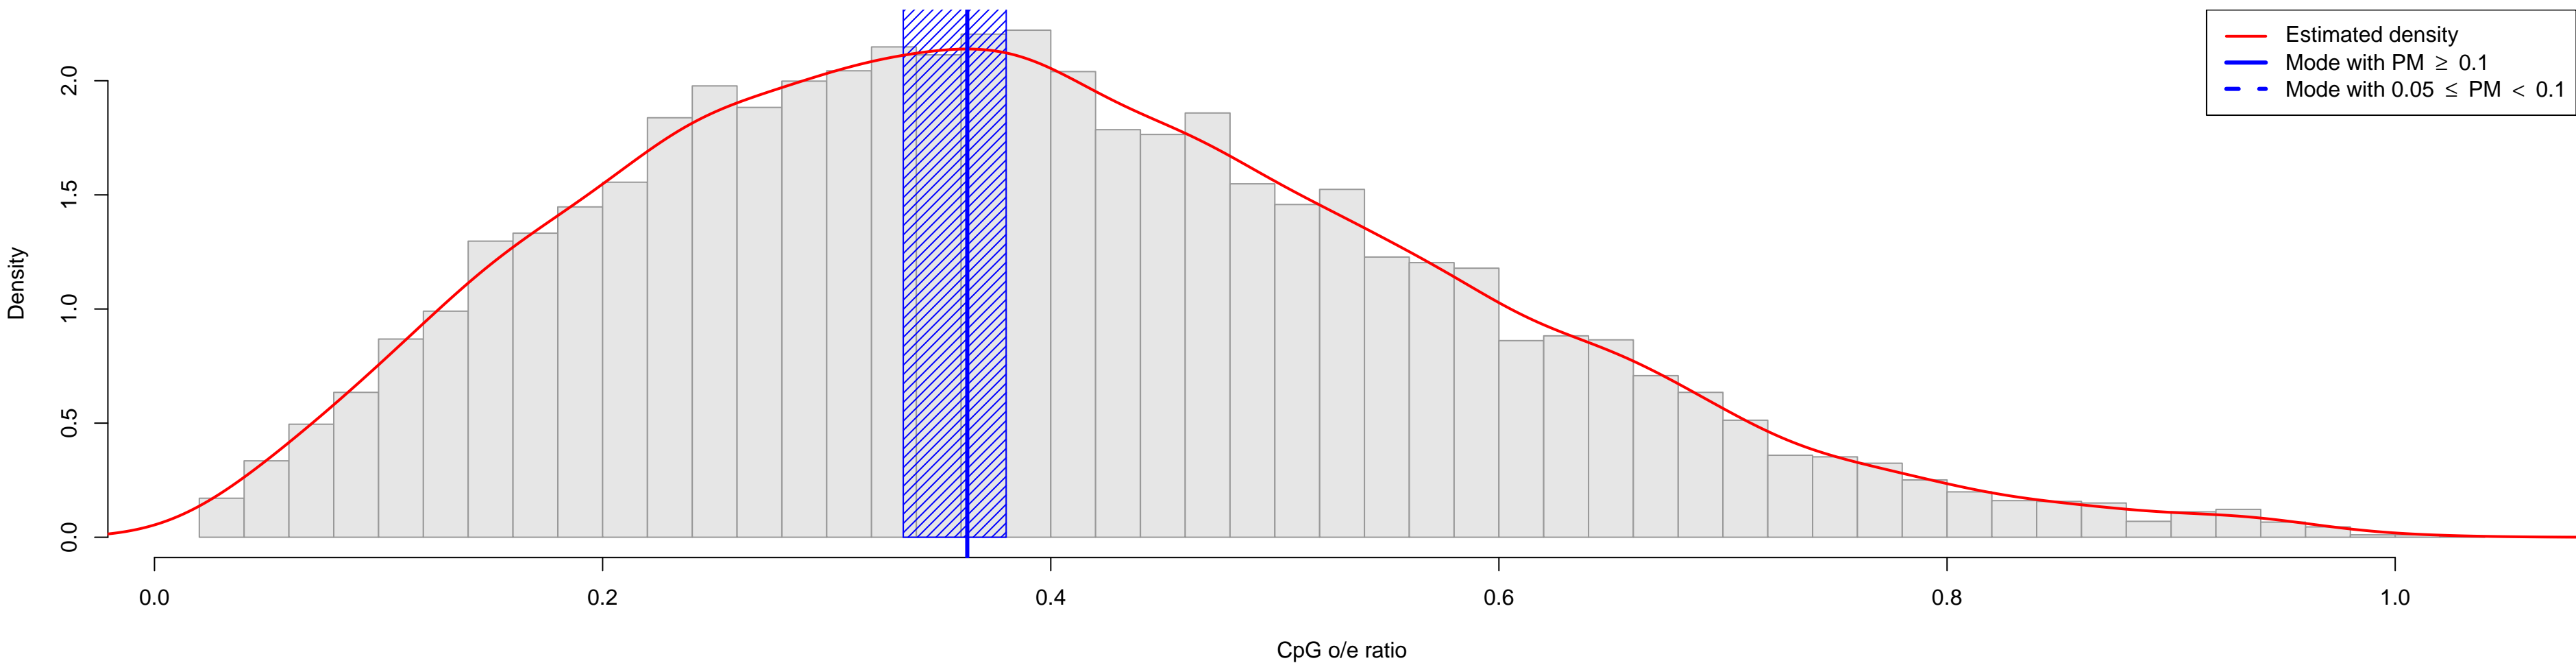

# Persea\_americana

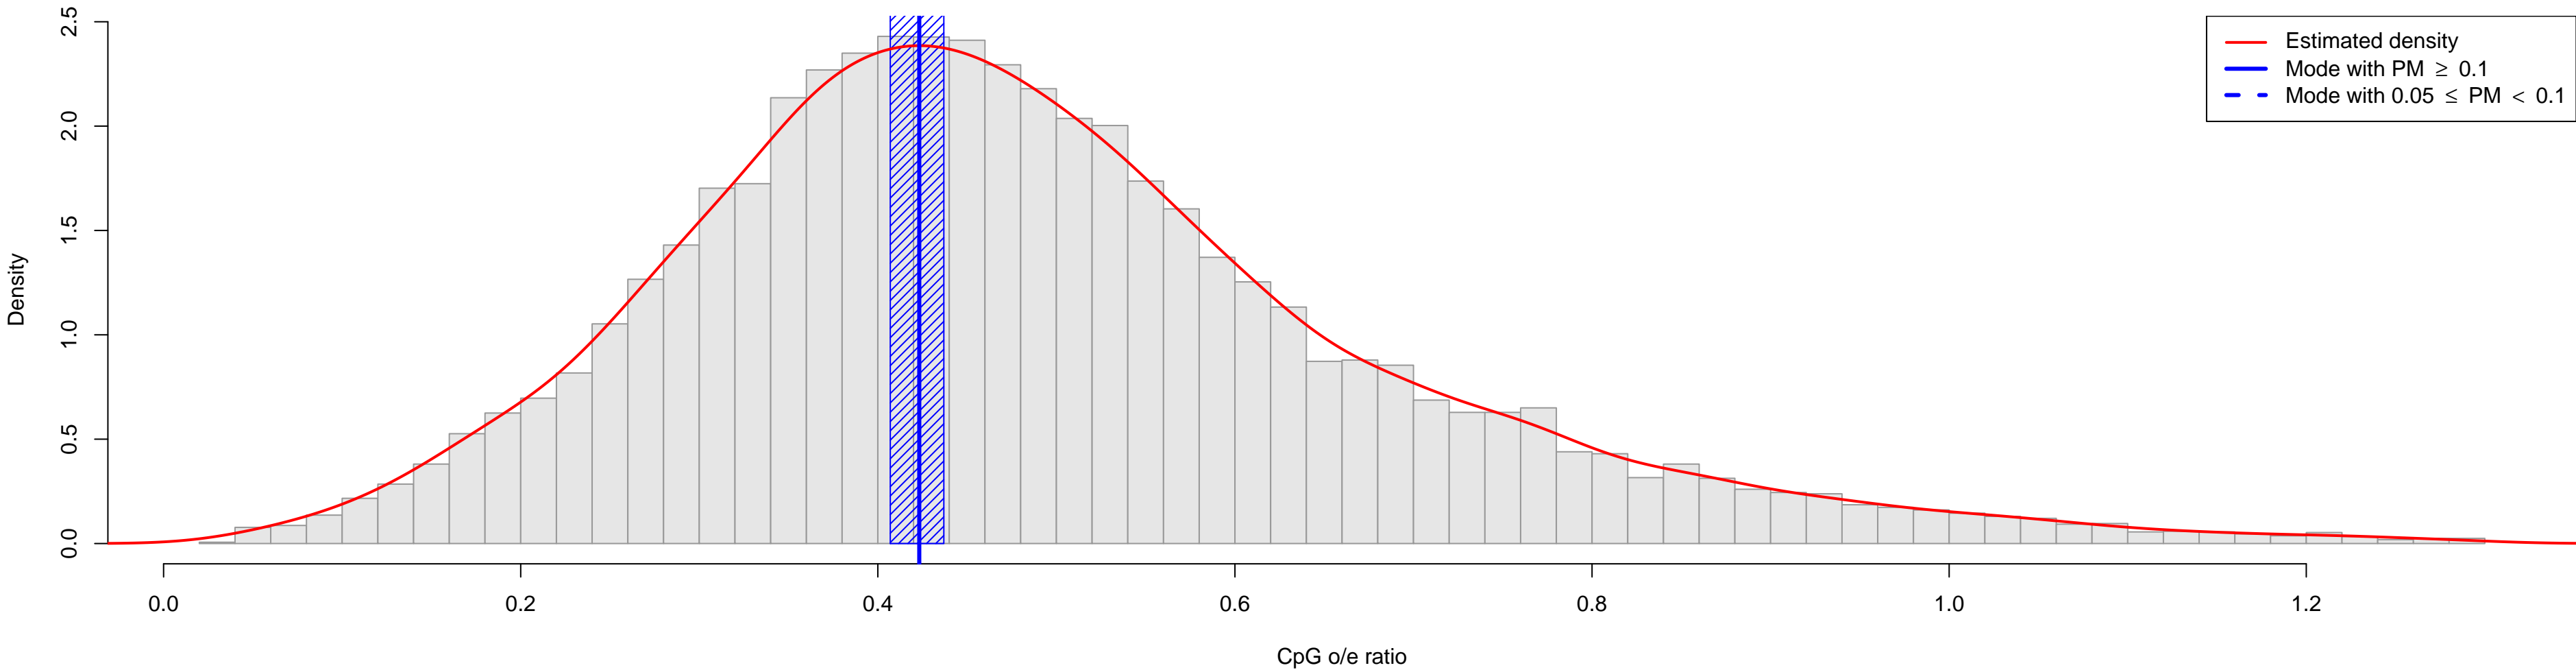

# Petrolisthes\_cinctipes

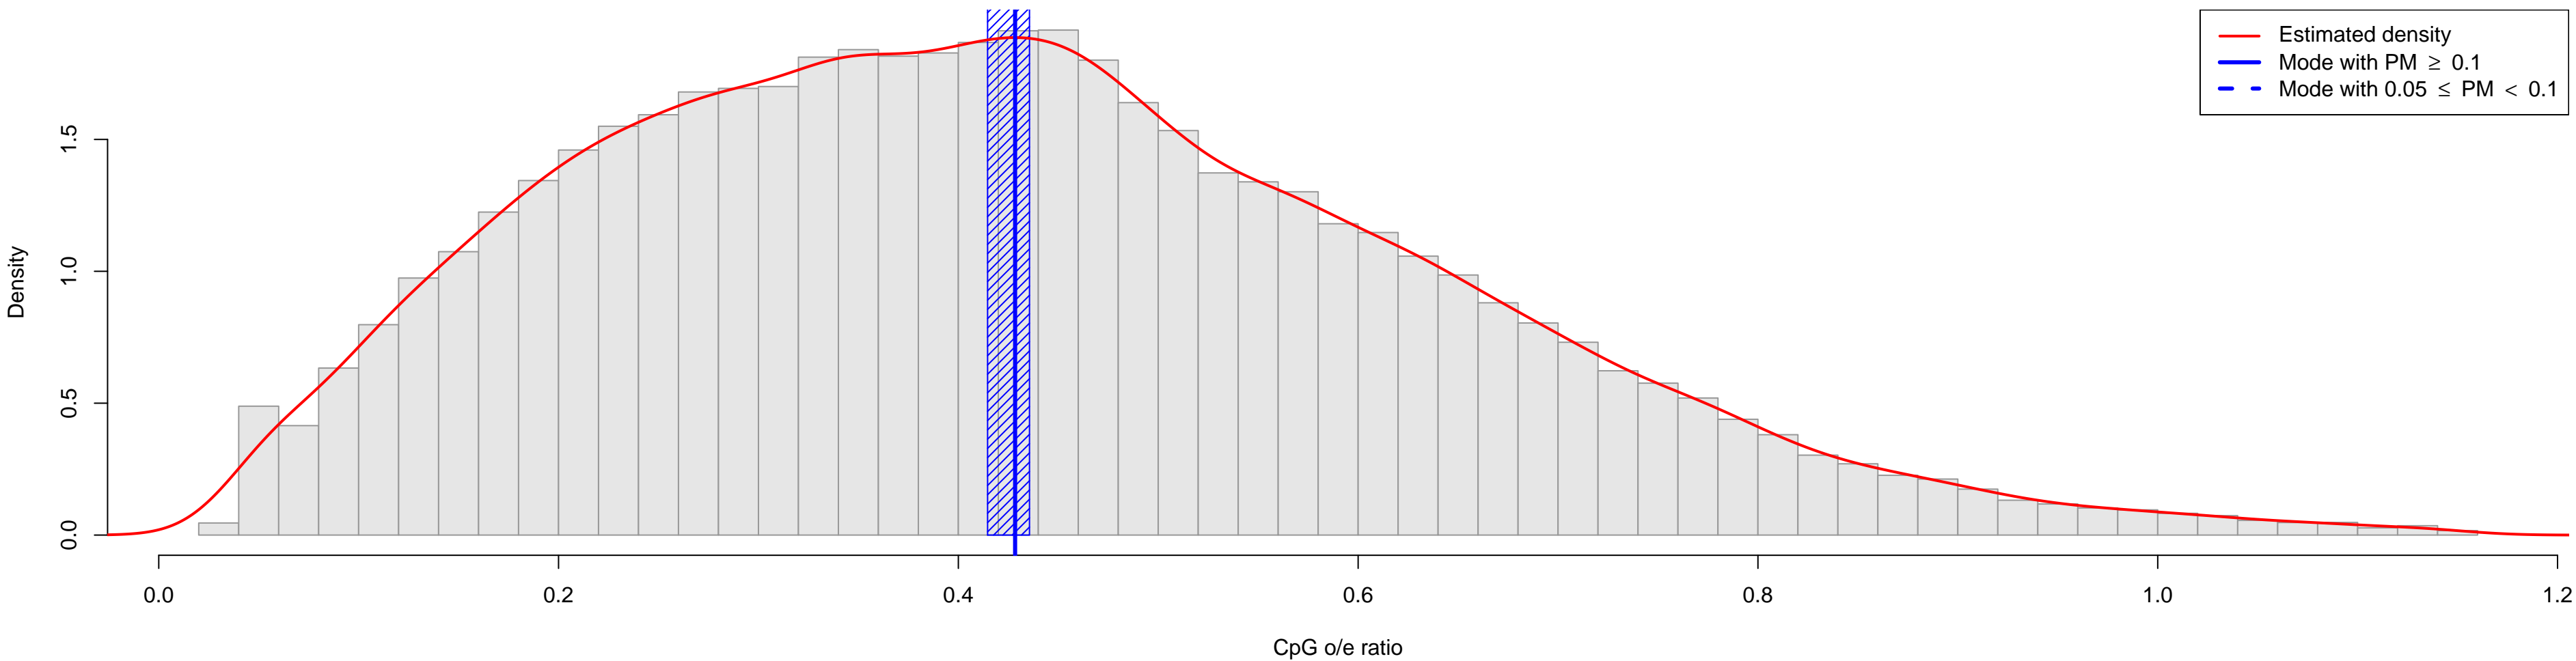

# Petromyzon\_marinus

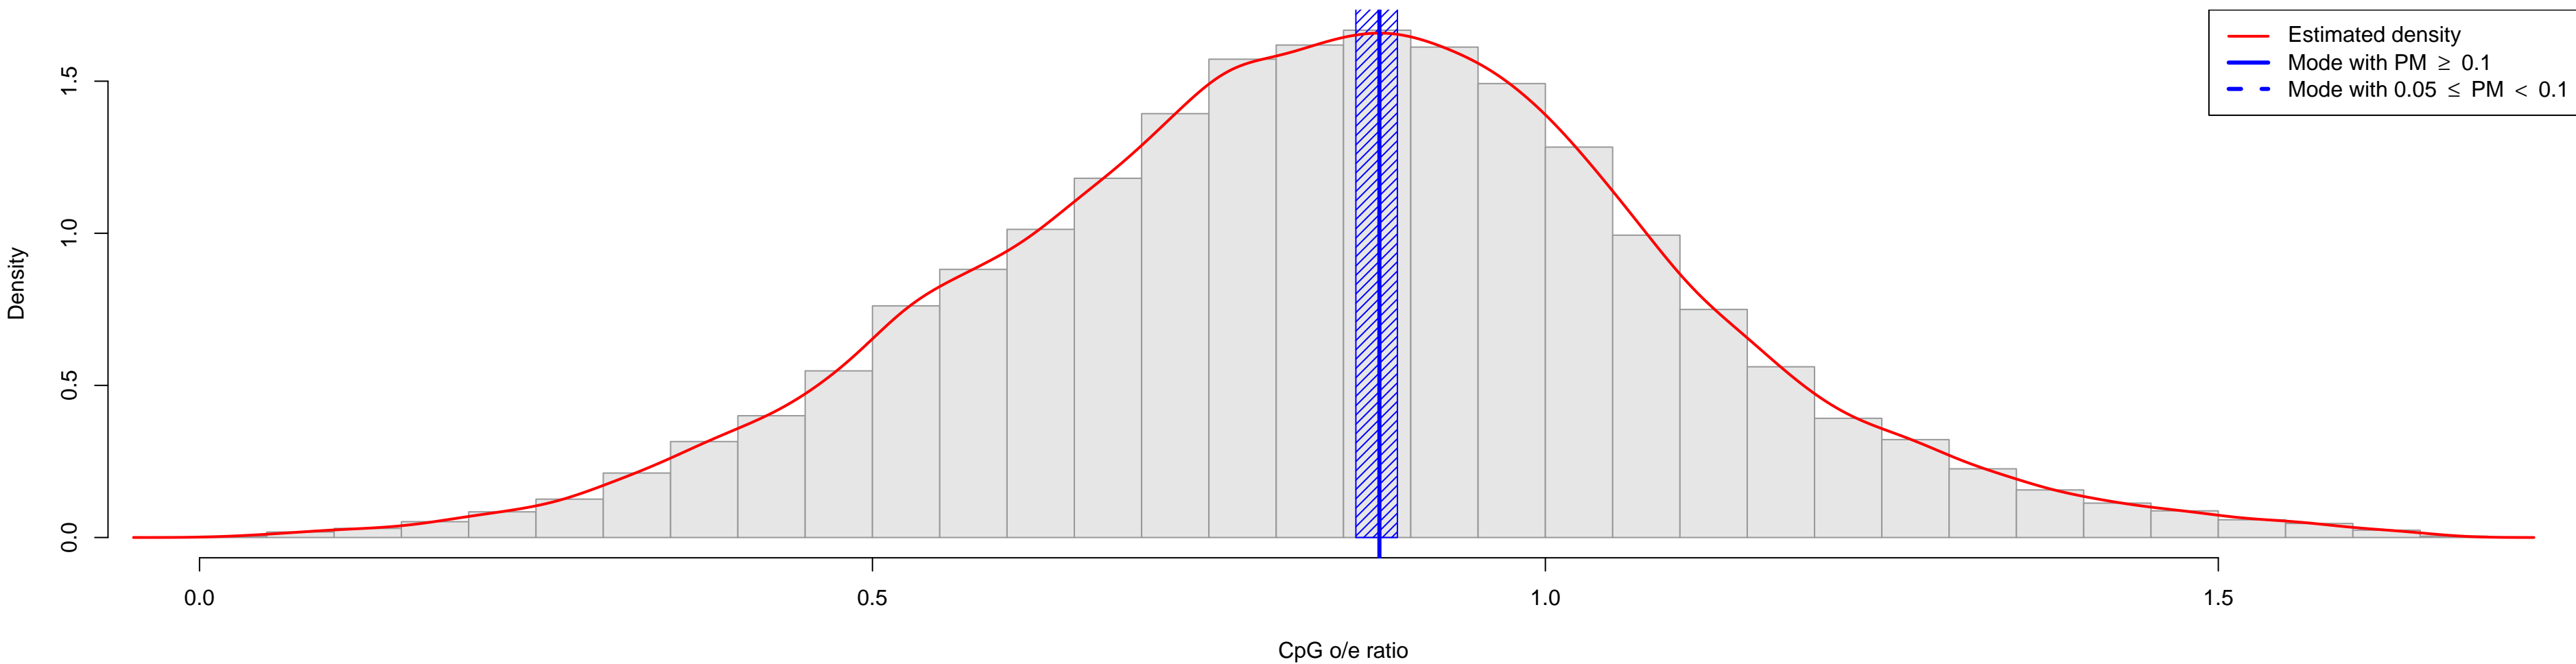

# Phakopsora\_pachyrhizi

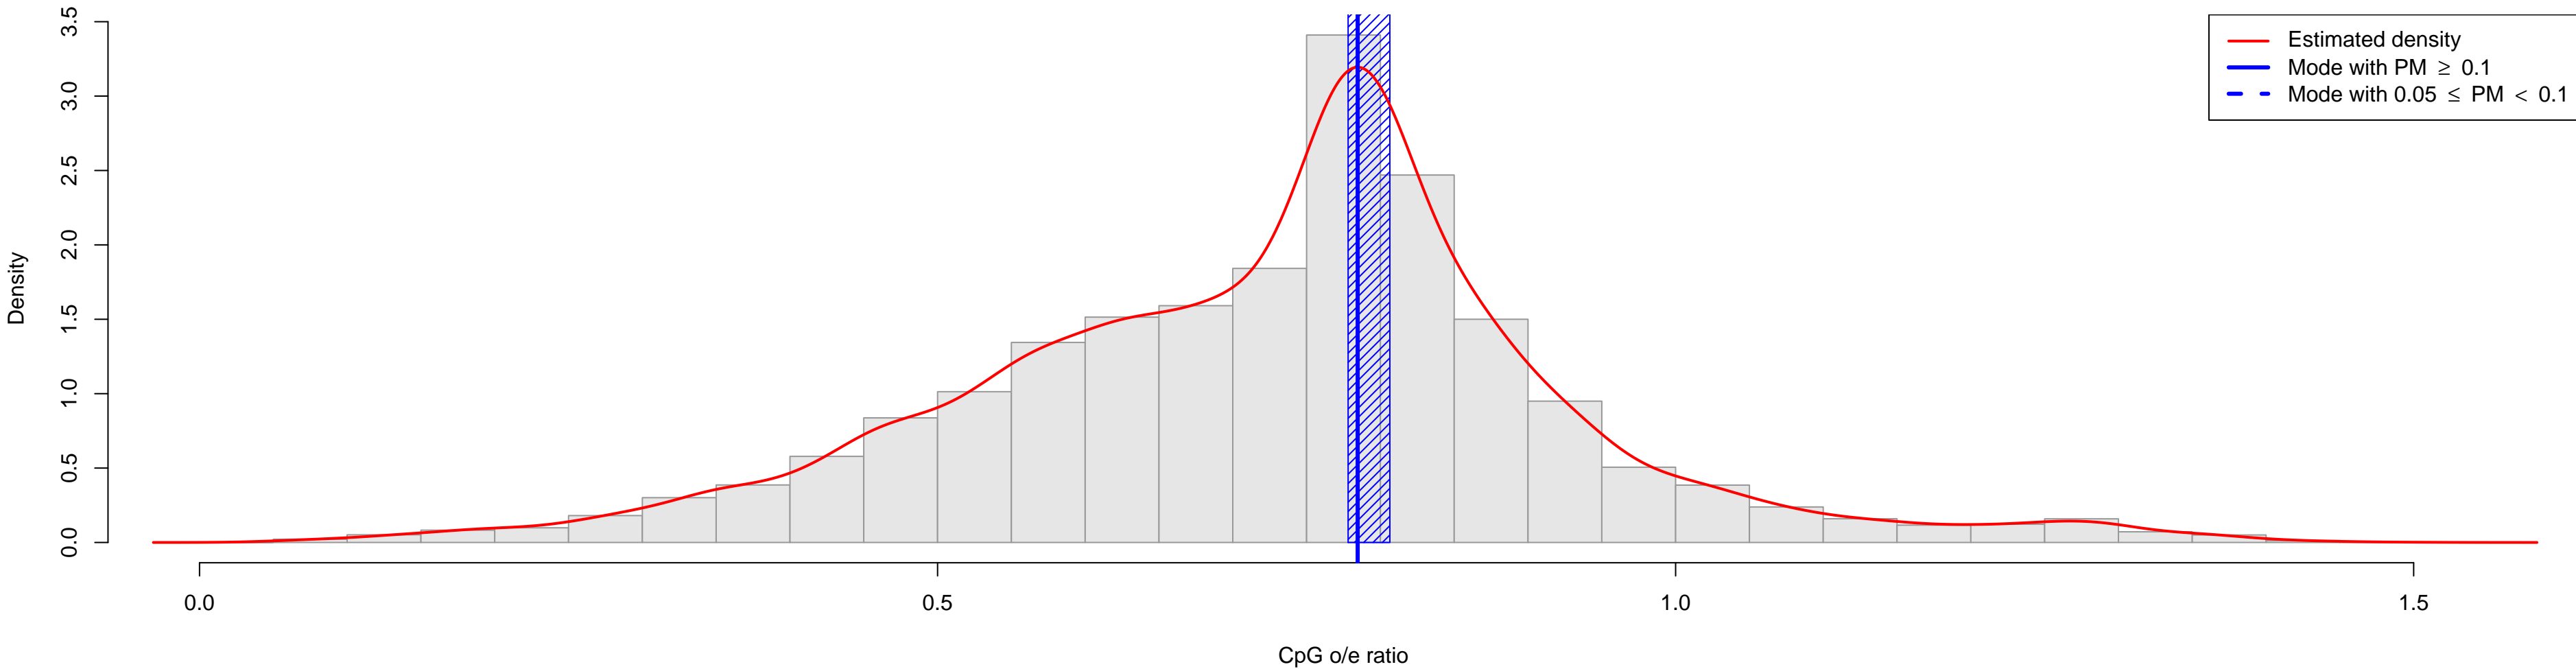



# Phanerochaete\_carnosa

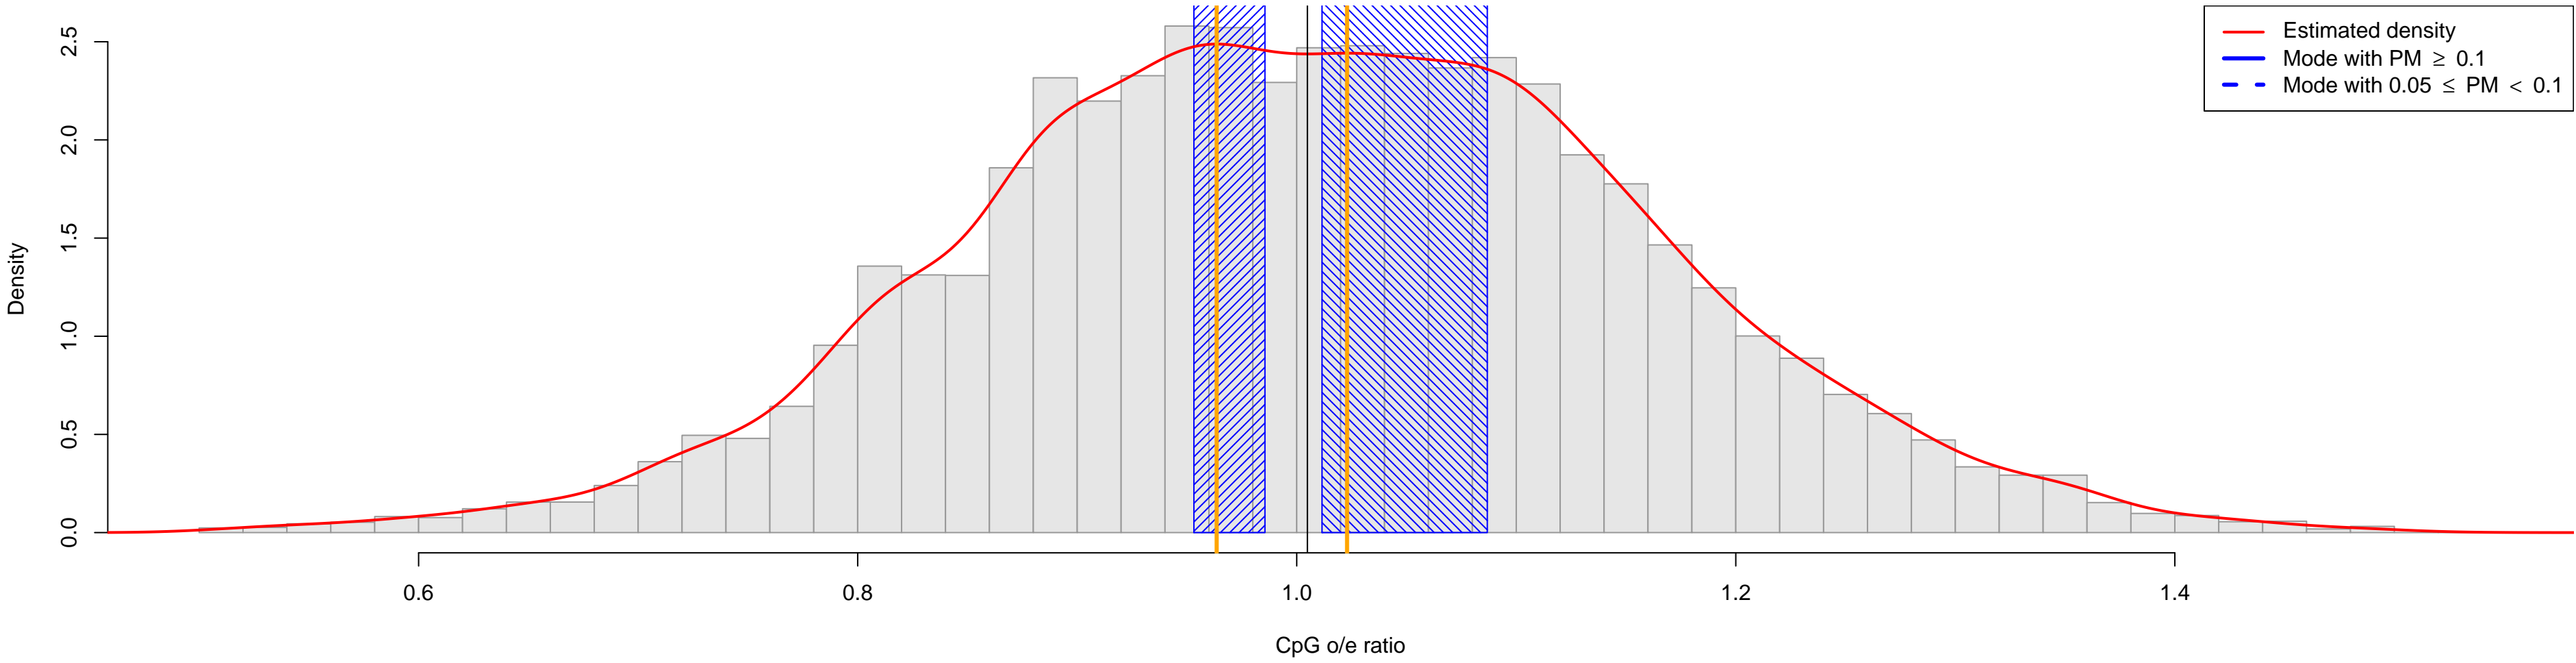

# Phanerochaete\_chrysosporium

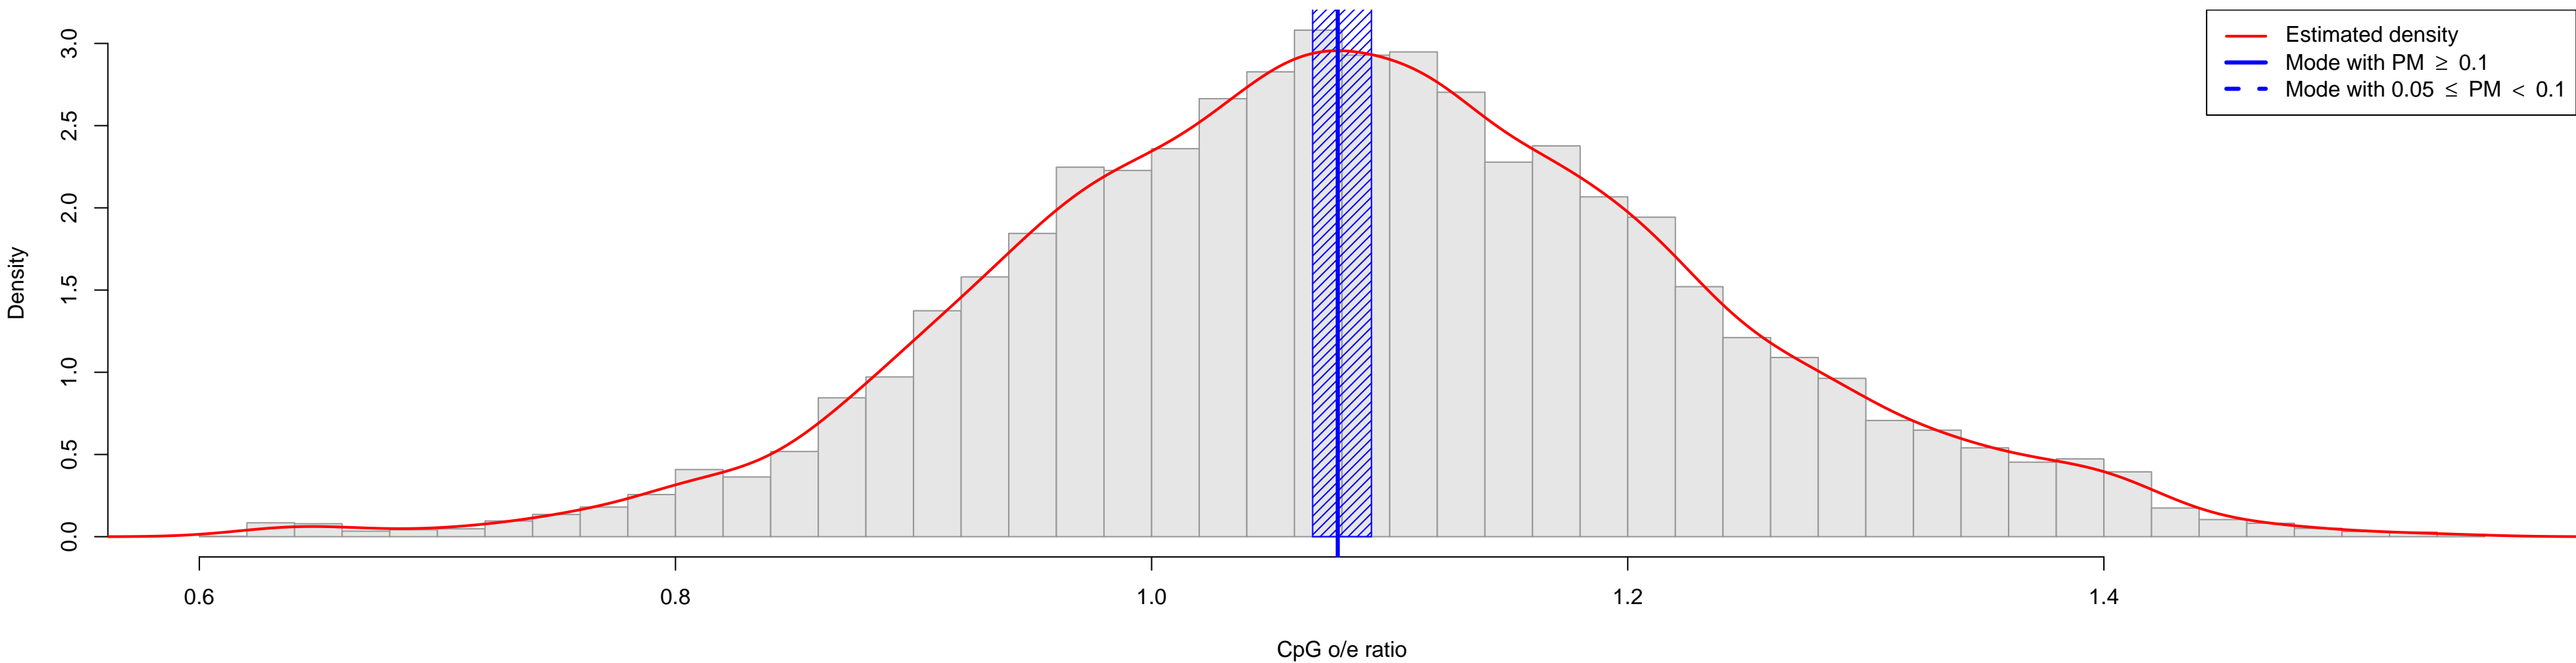

# Phaseolus\_coccineus

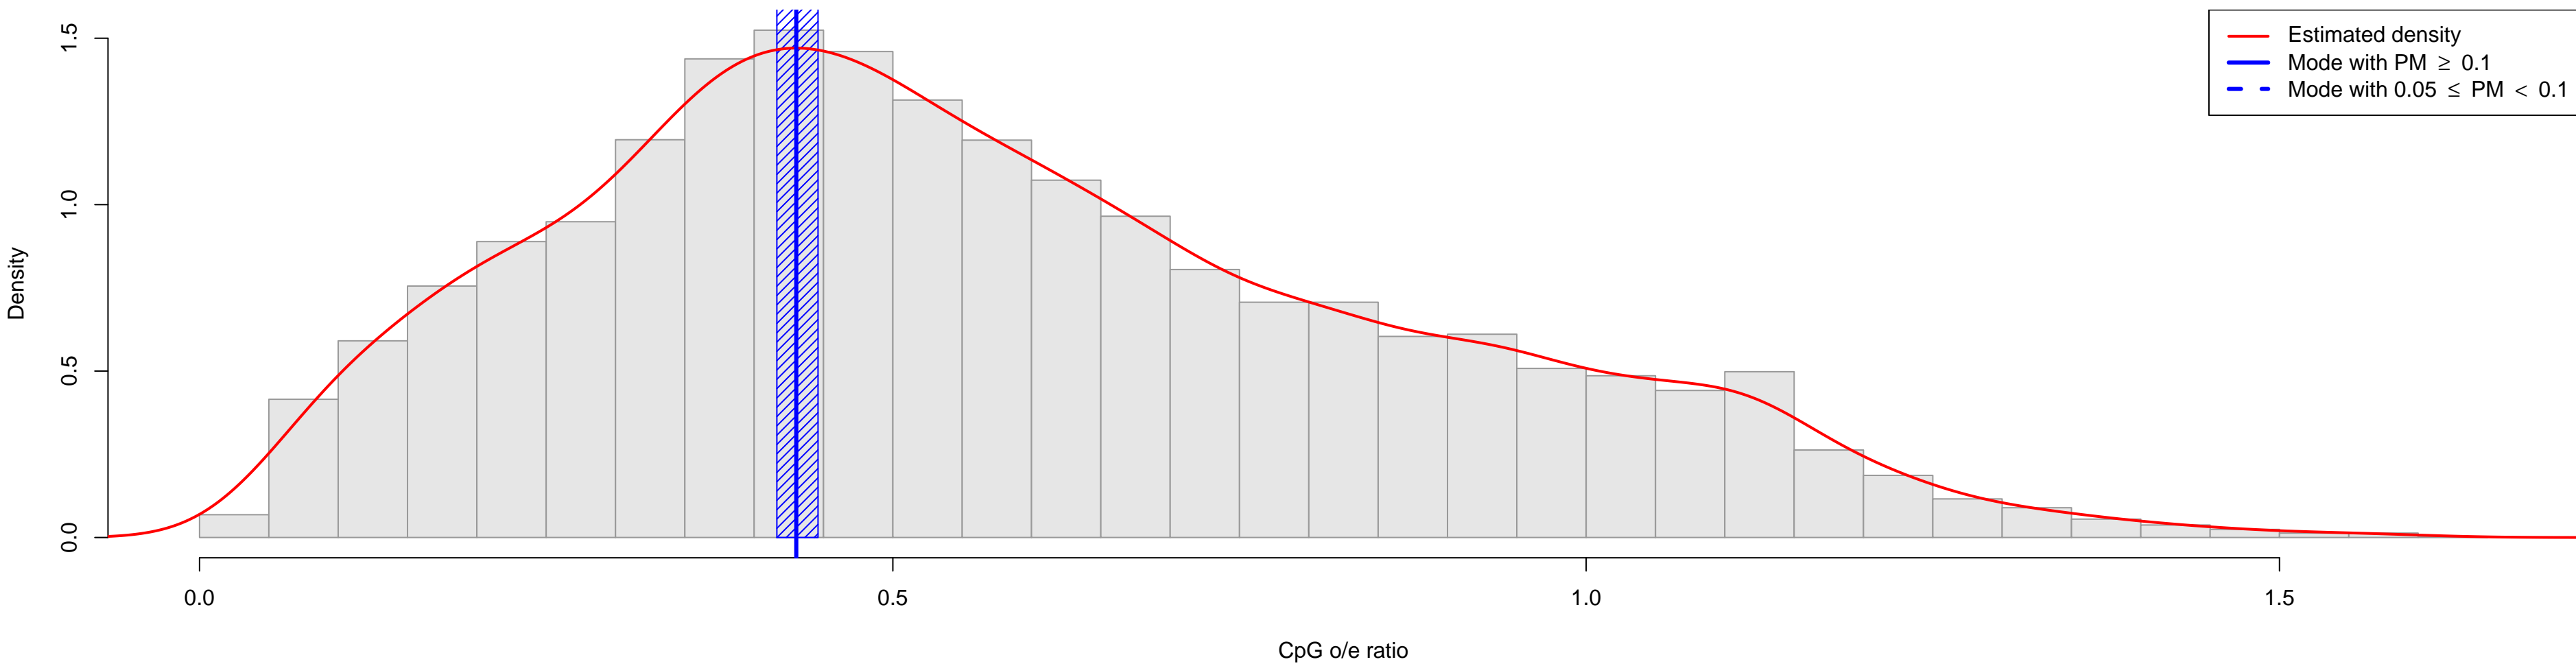

# Philodryas\_olfersii

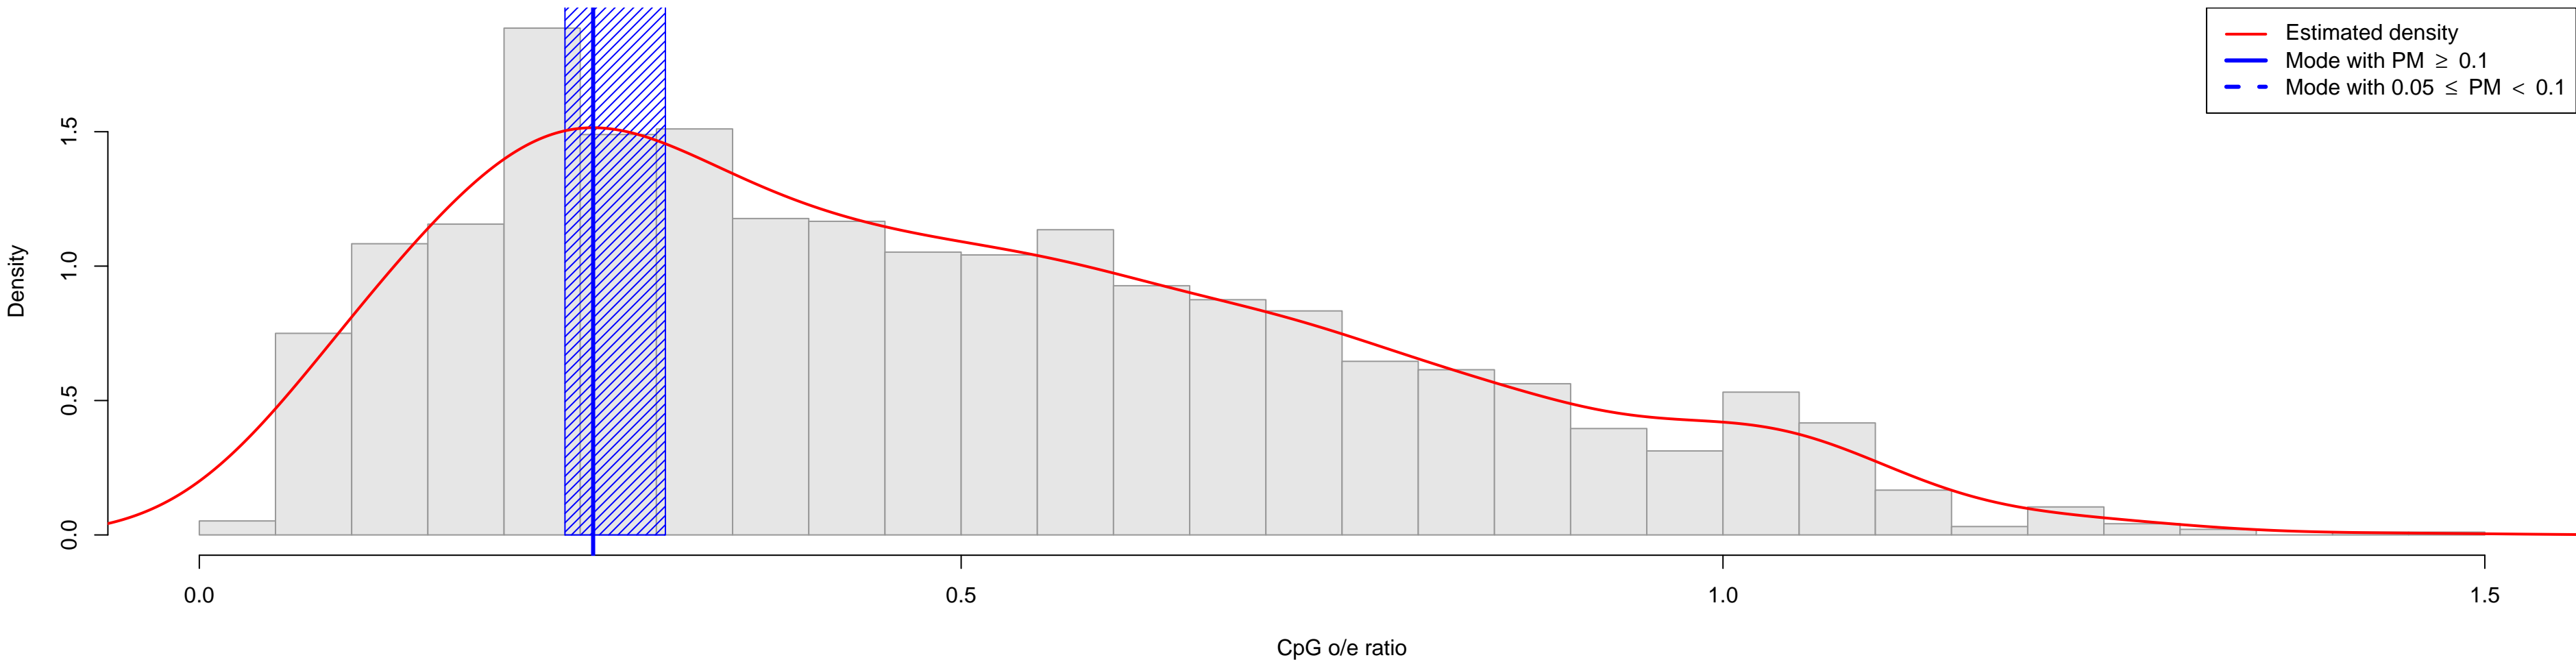

# Phlebotomus\_ perniciosus

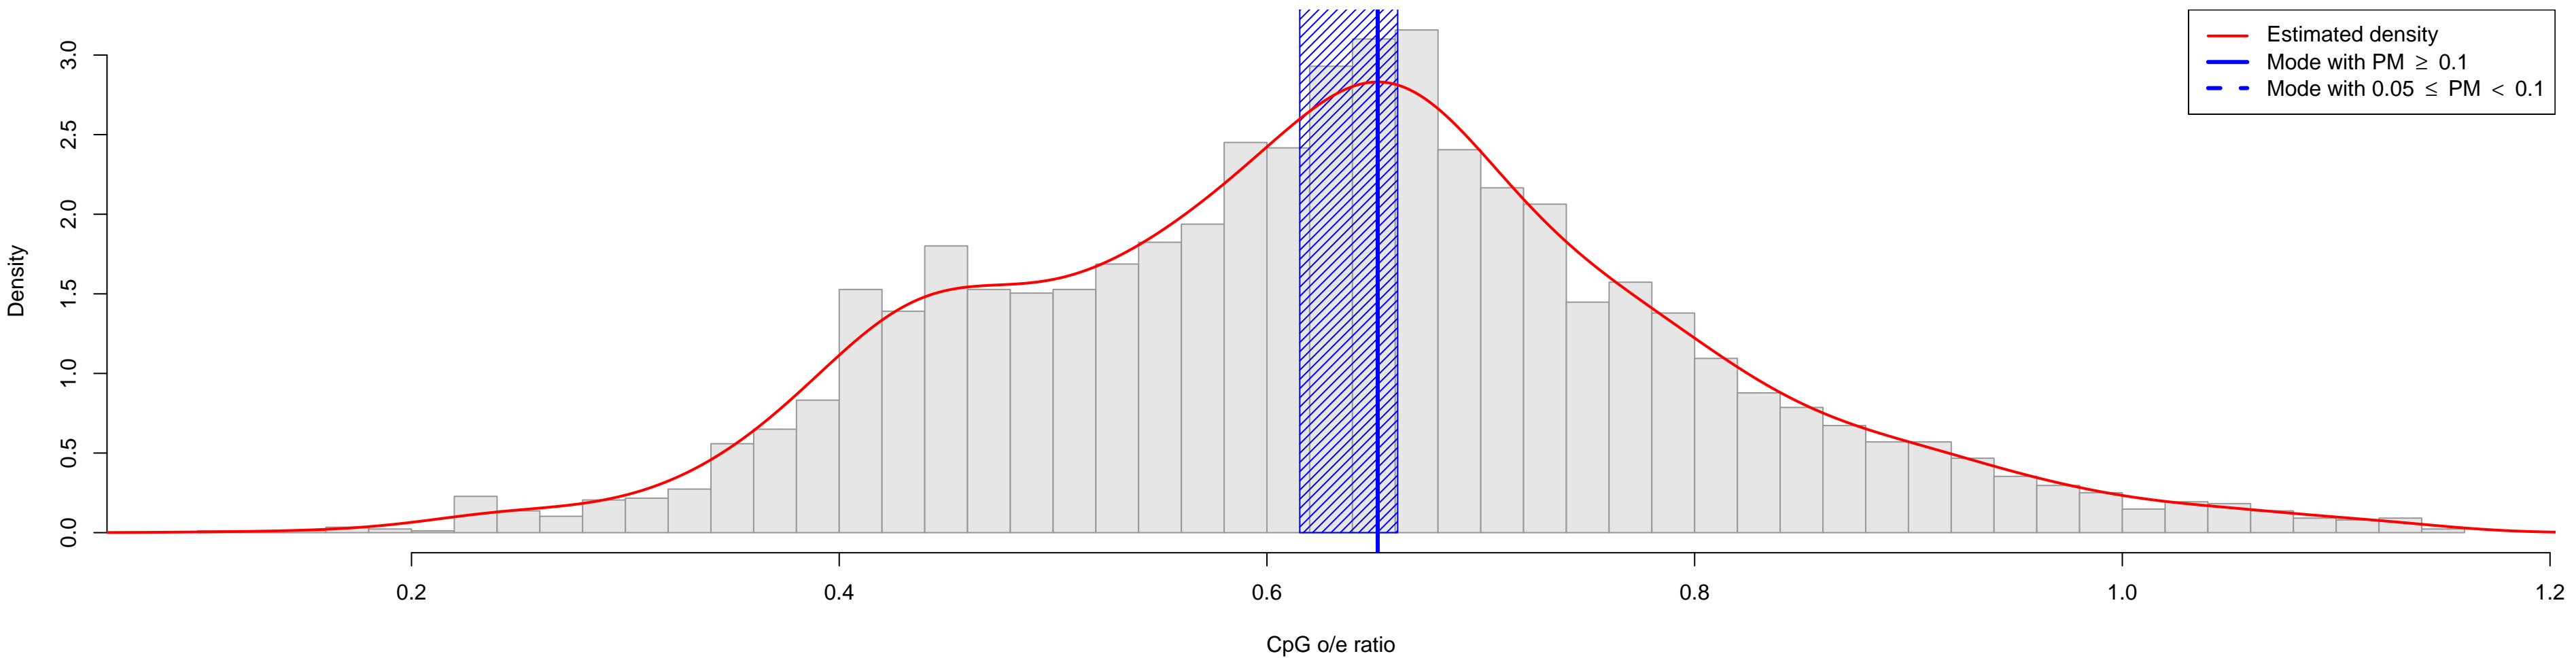

# Phycomyces\_blakesleeanus

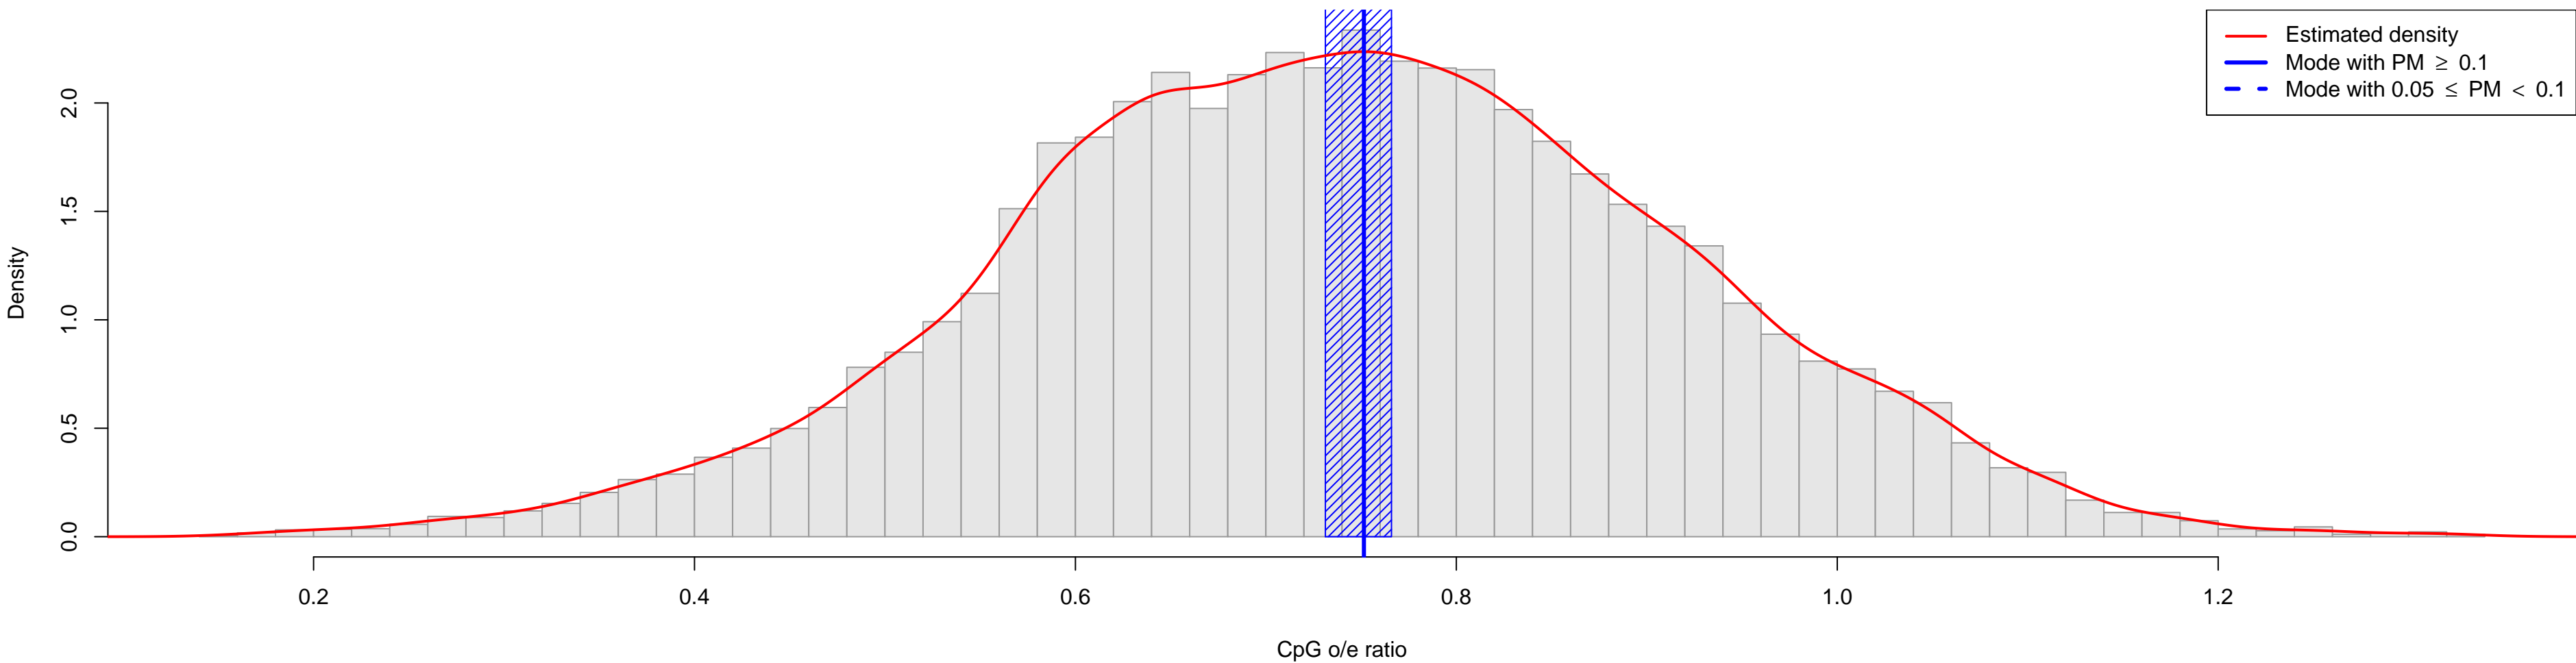

# Physcomitrella\_patens

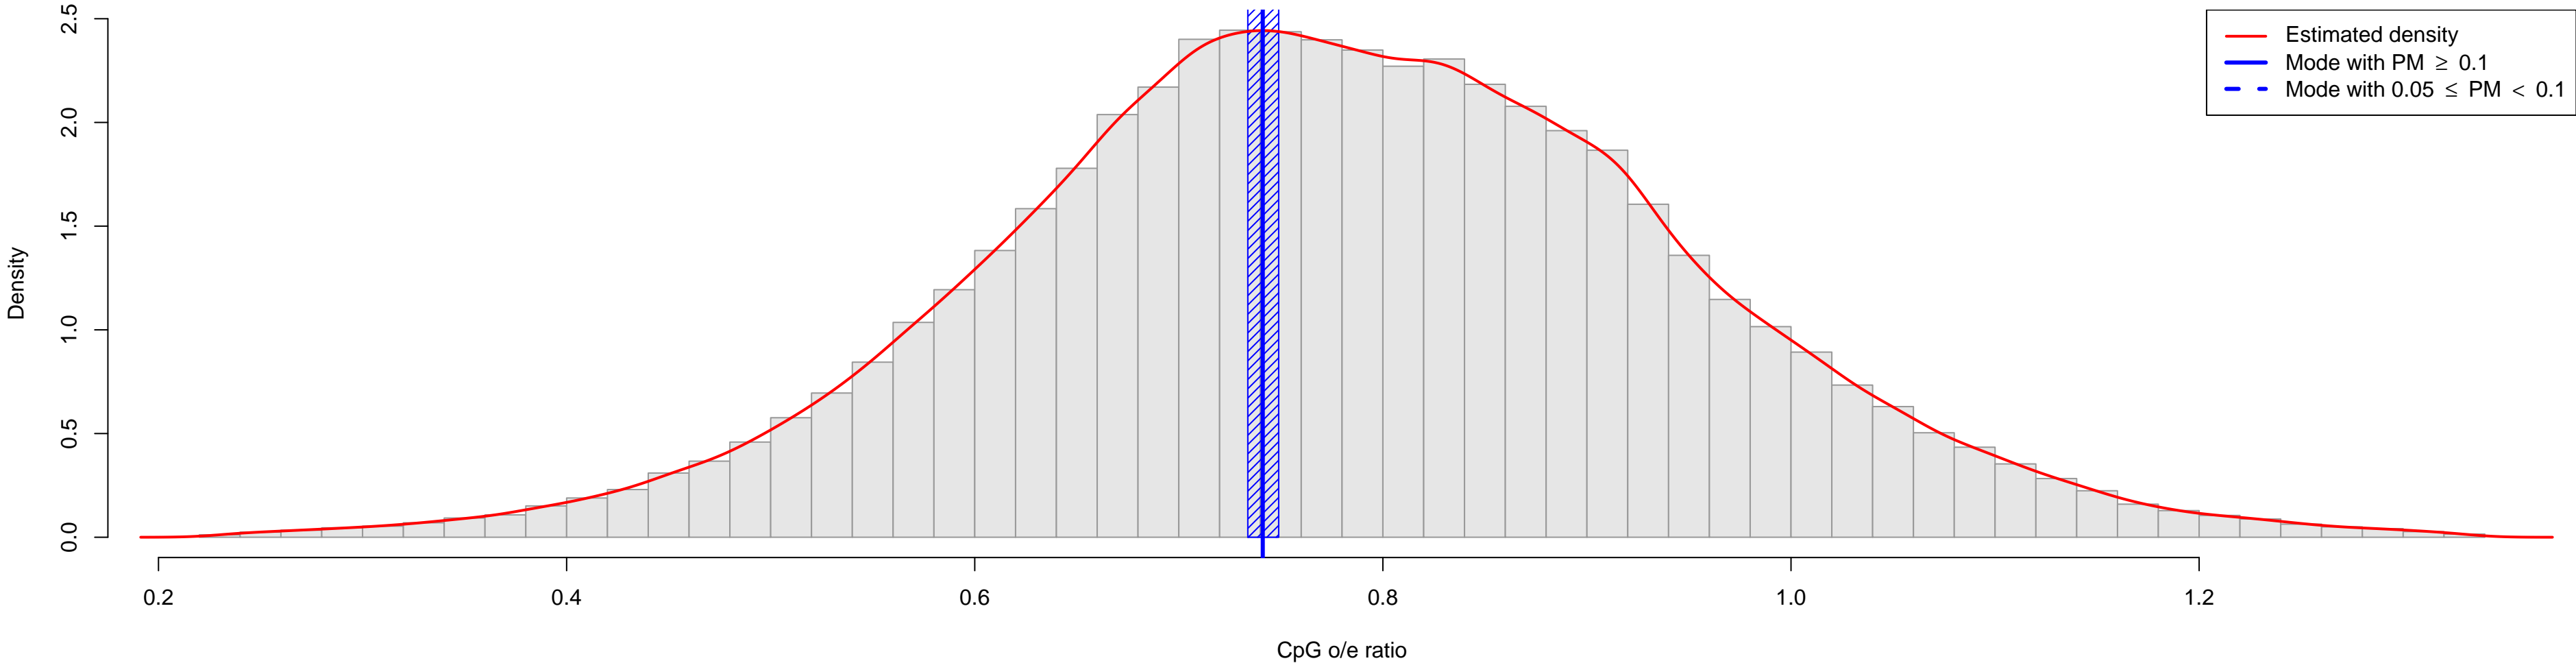

# Picea\_abies

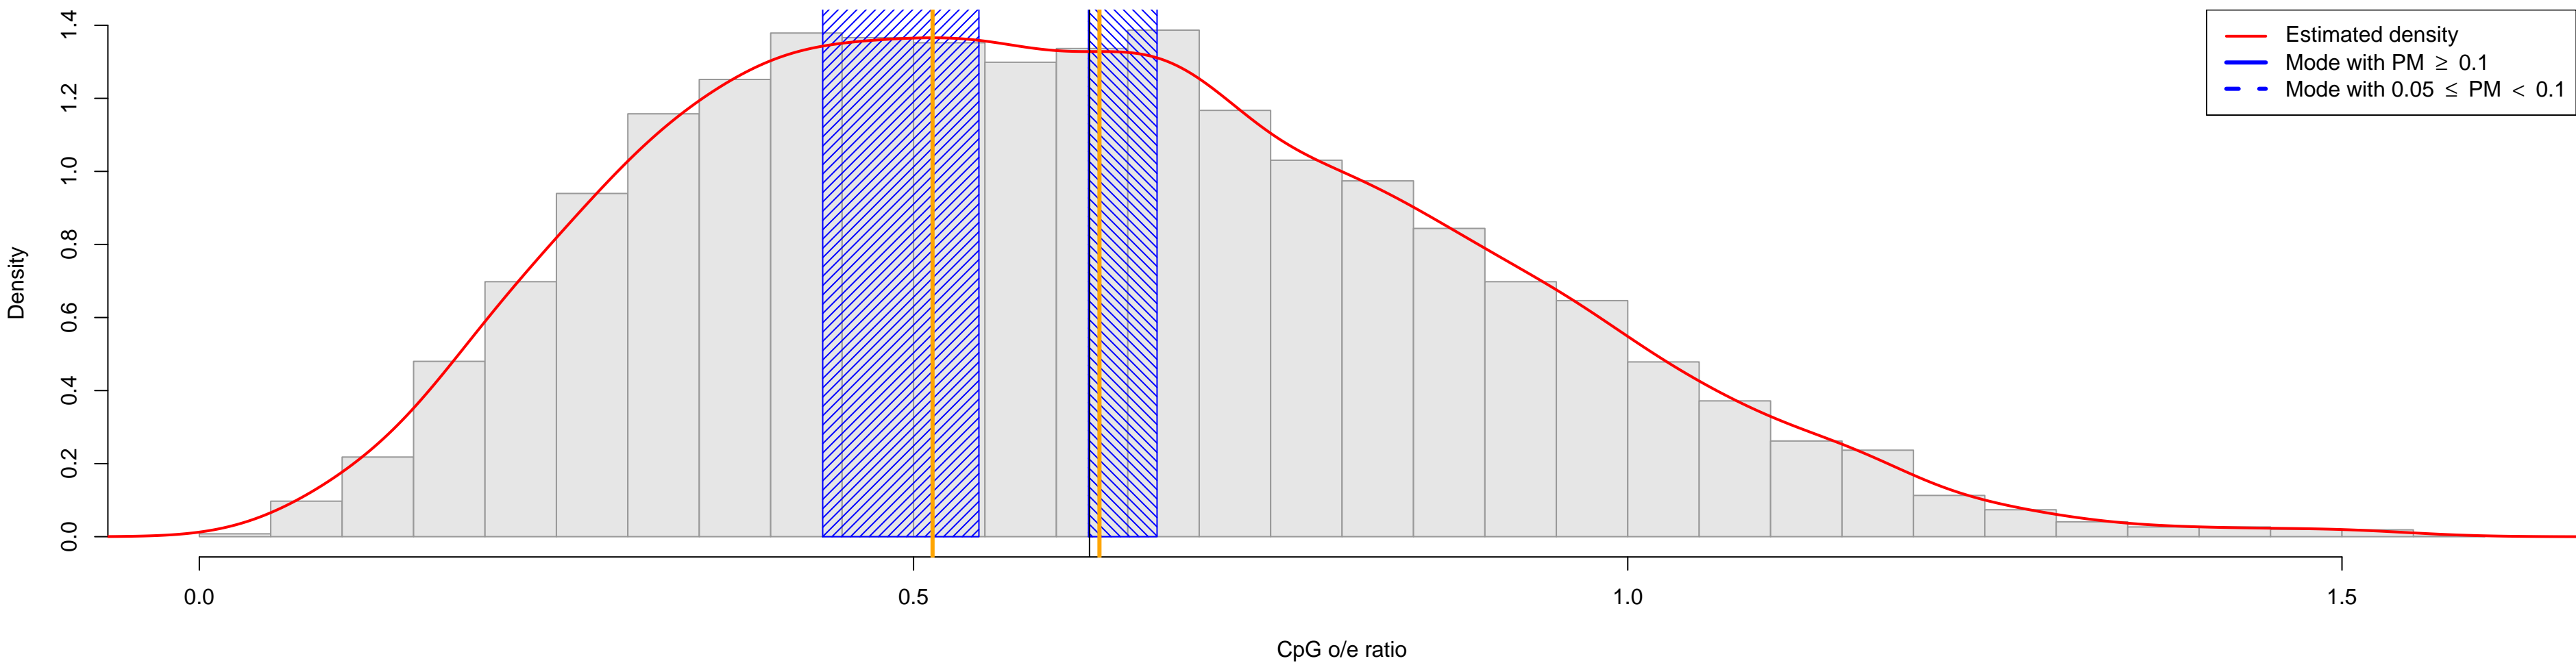



# Picea\_glauca

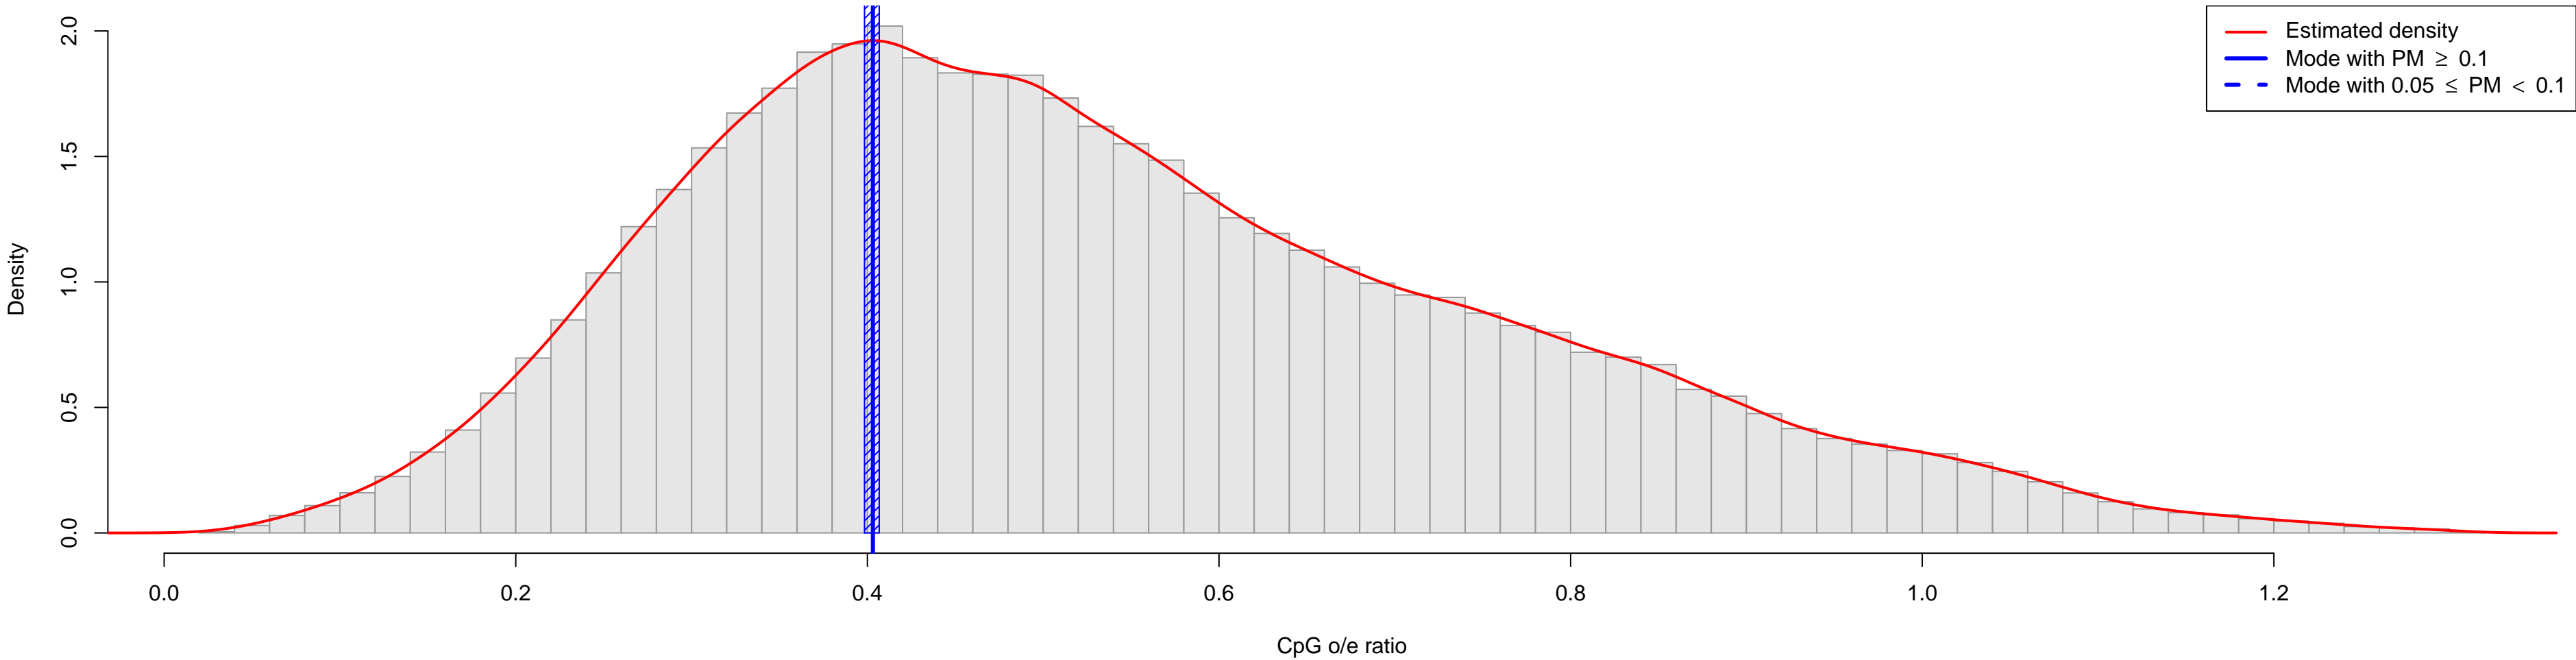

# Picea\_mariana

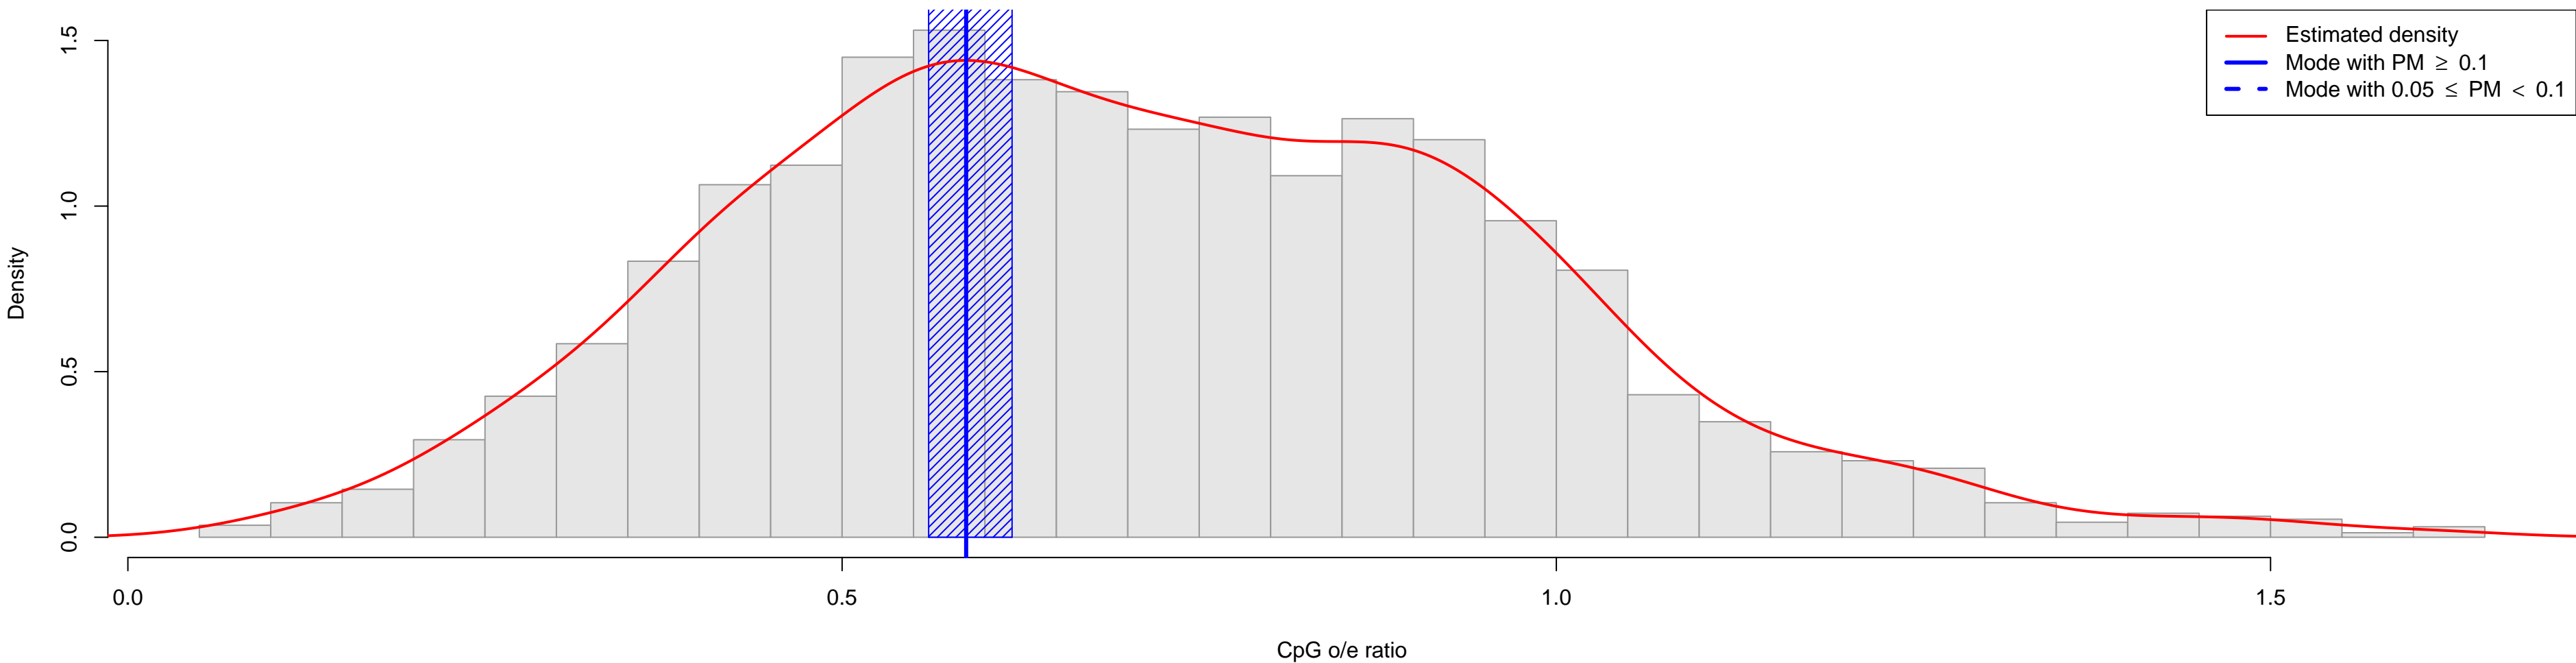

# Picea\_sitchensis

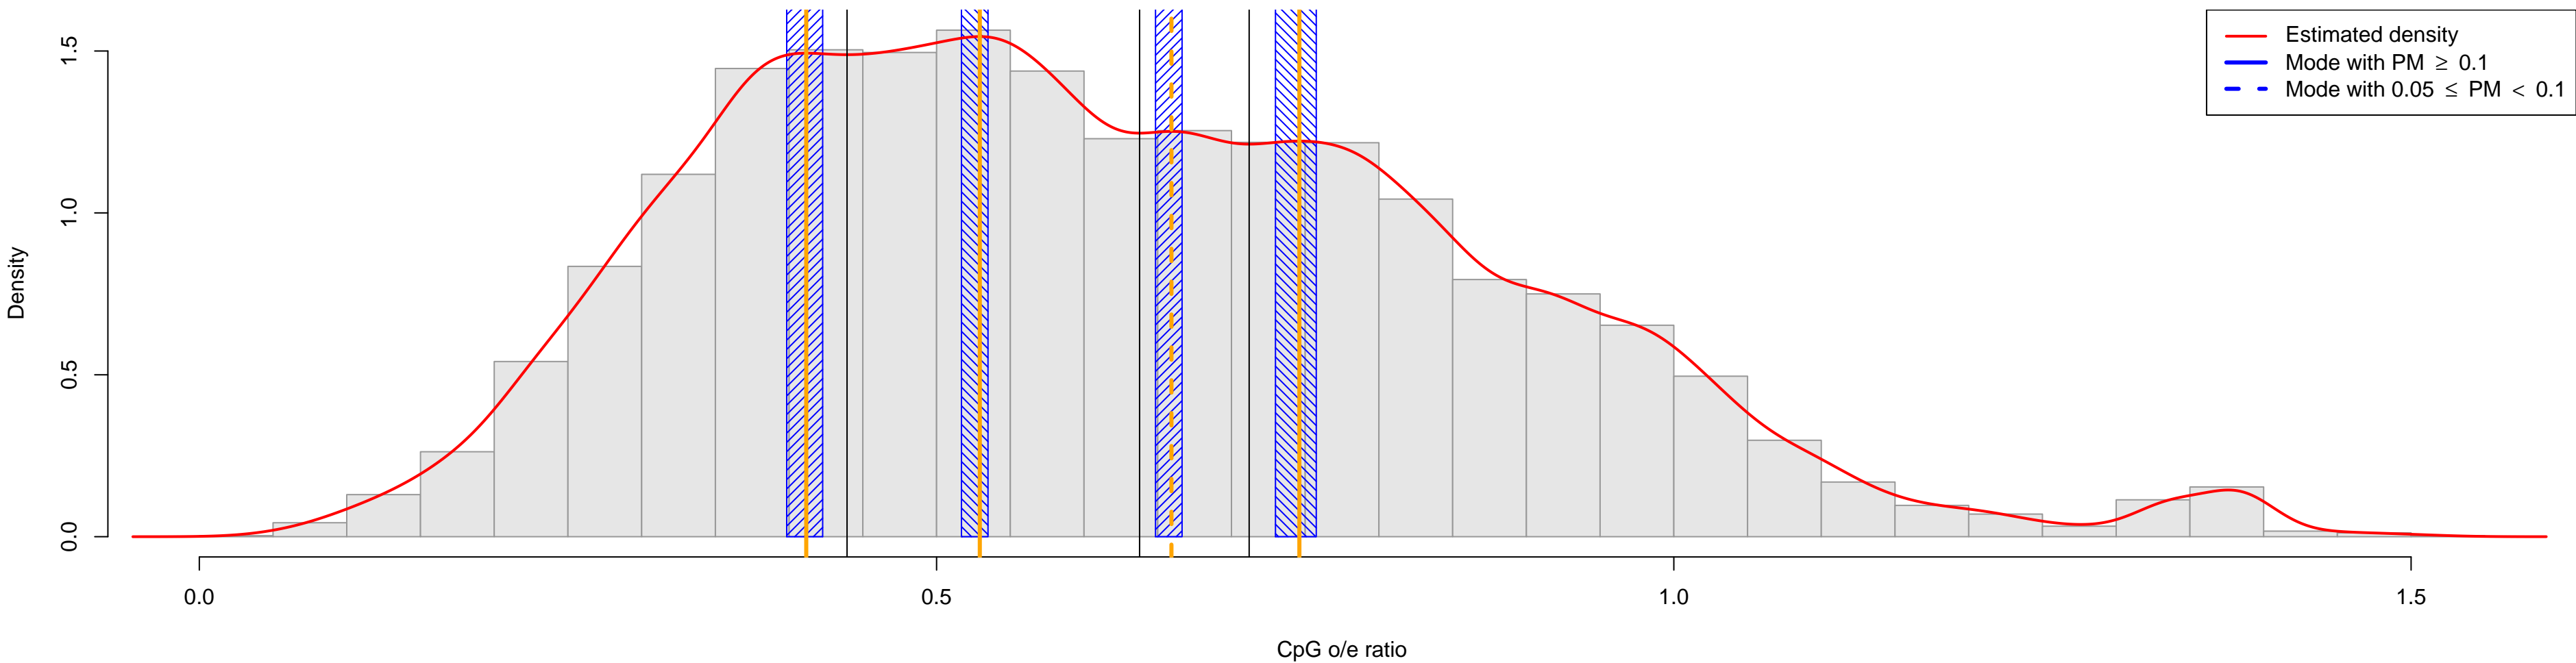

# Pichia\_stipitis

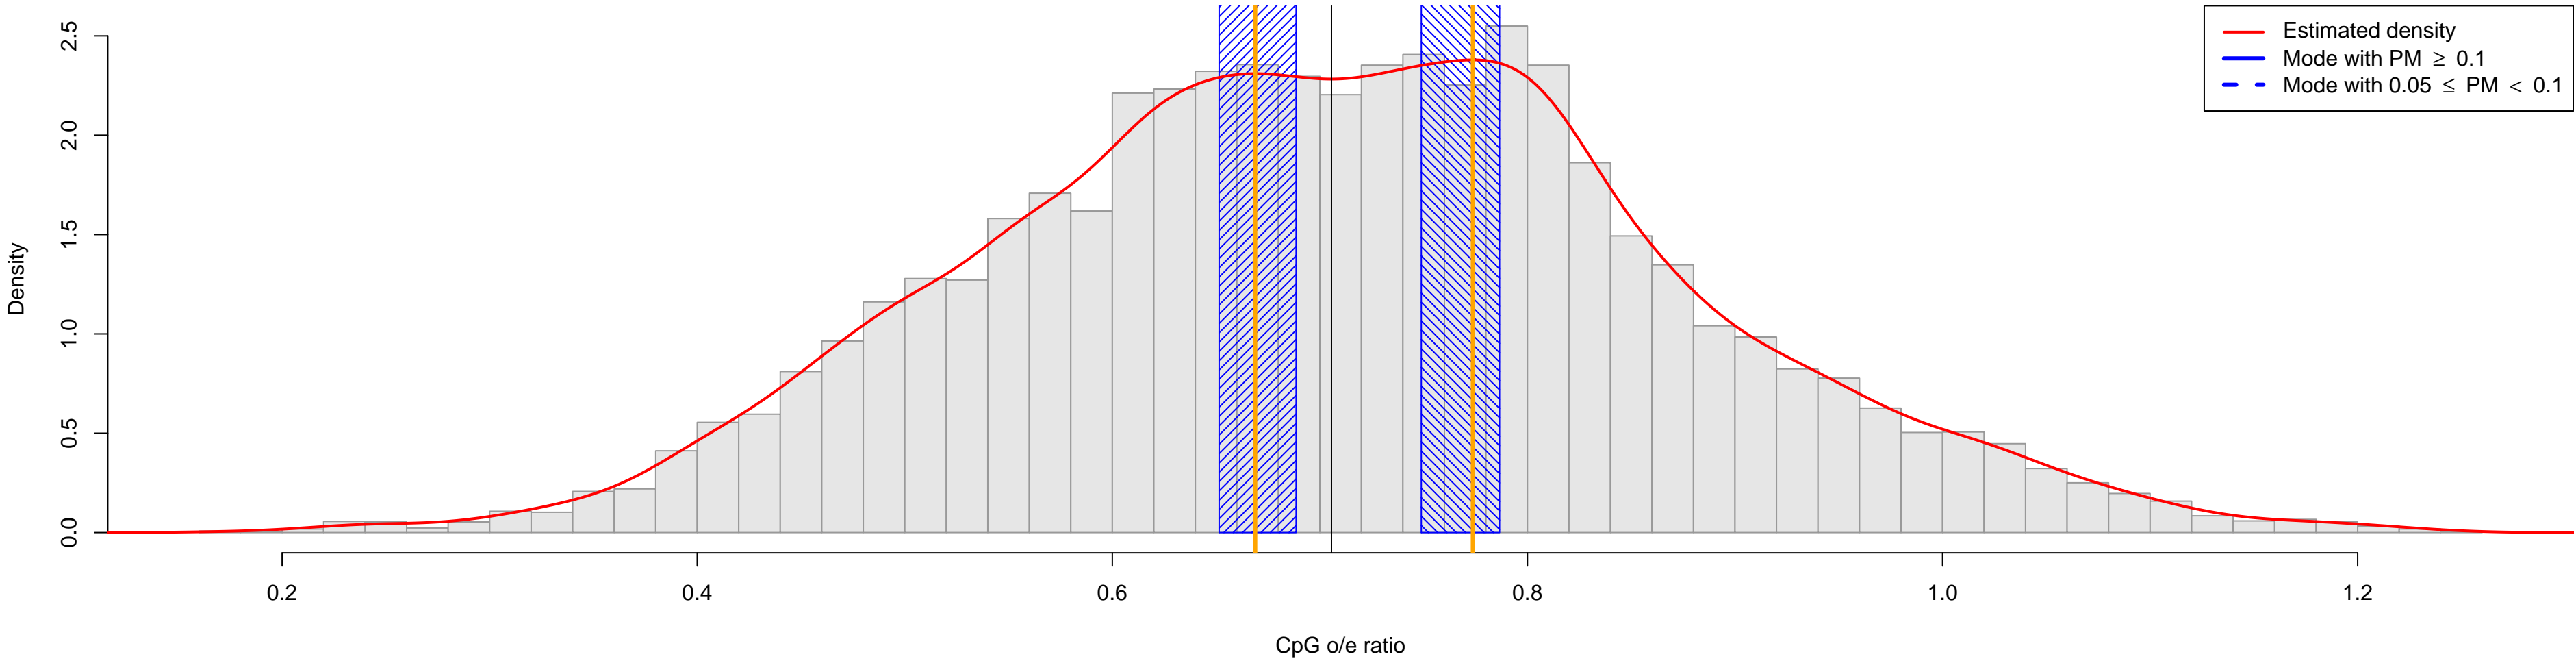

# Pimephales\_promelas

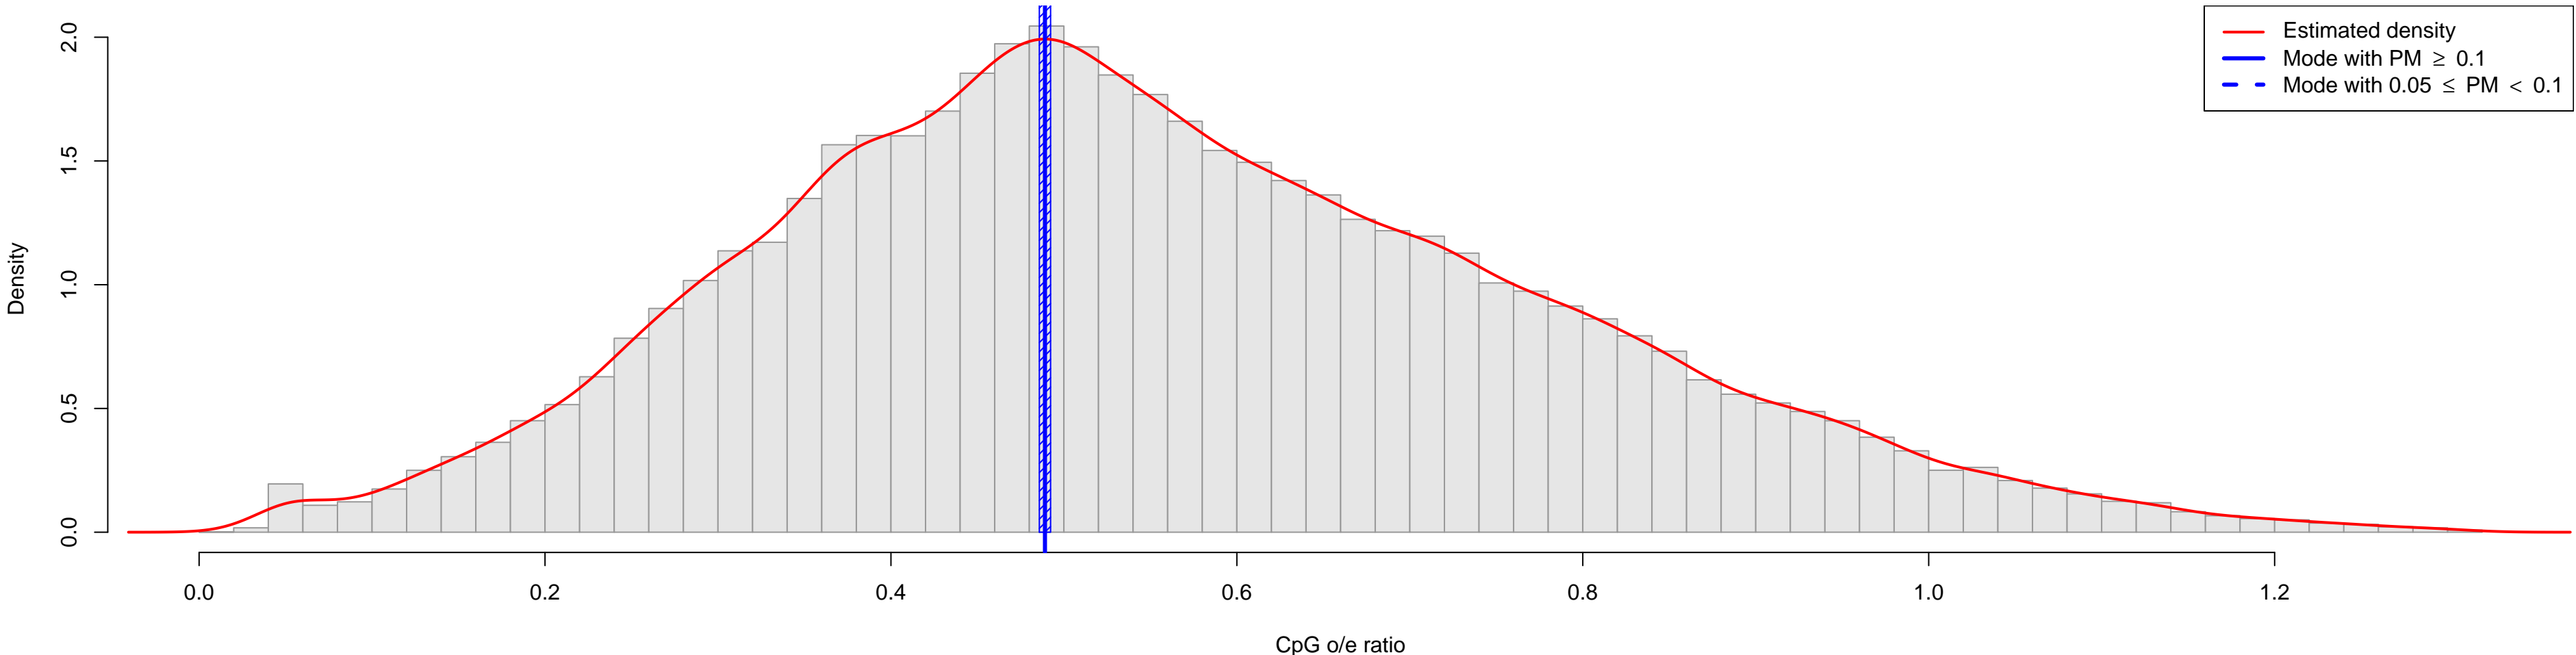

# Pinctada\_fucata

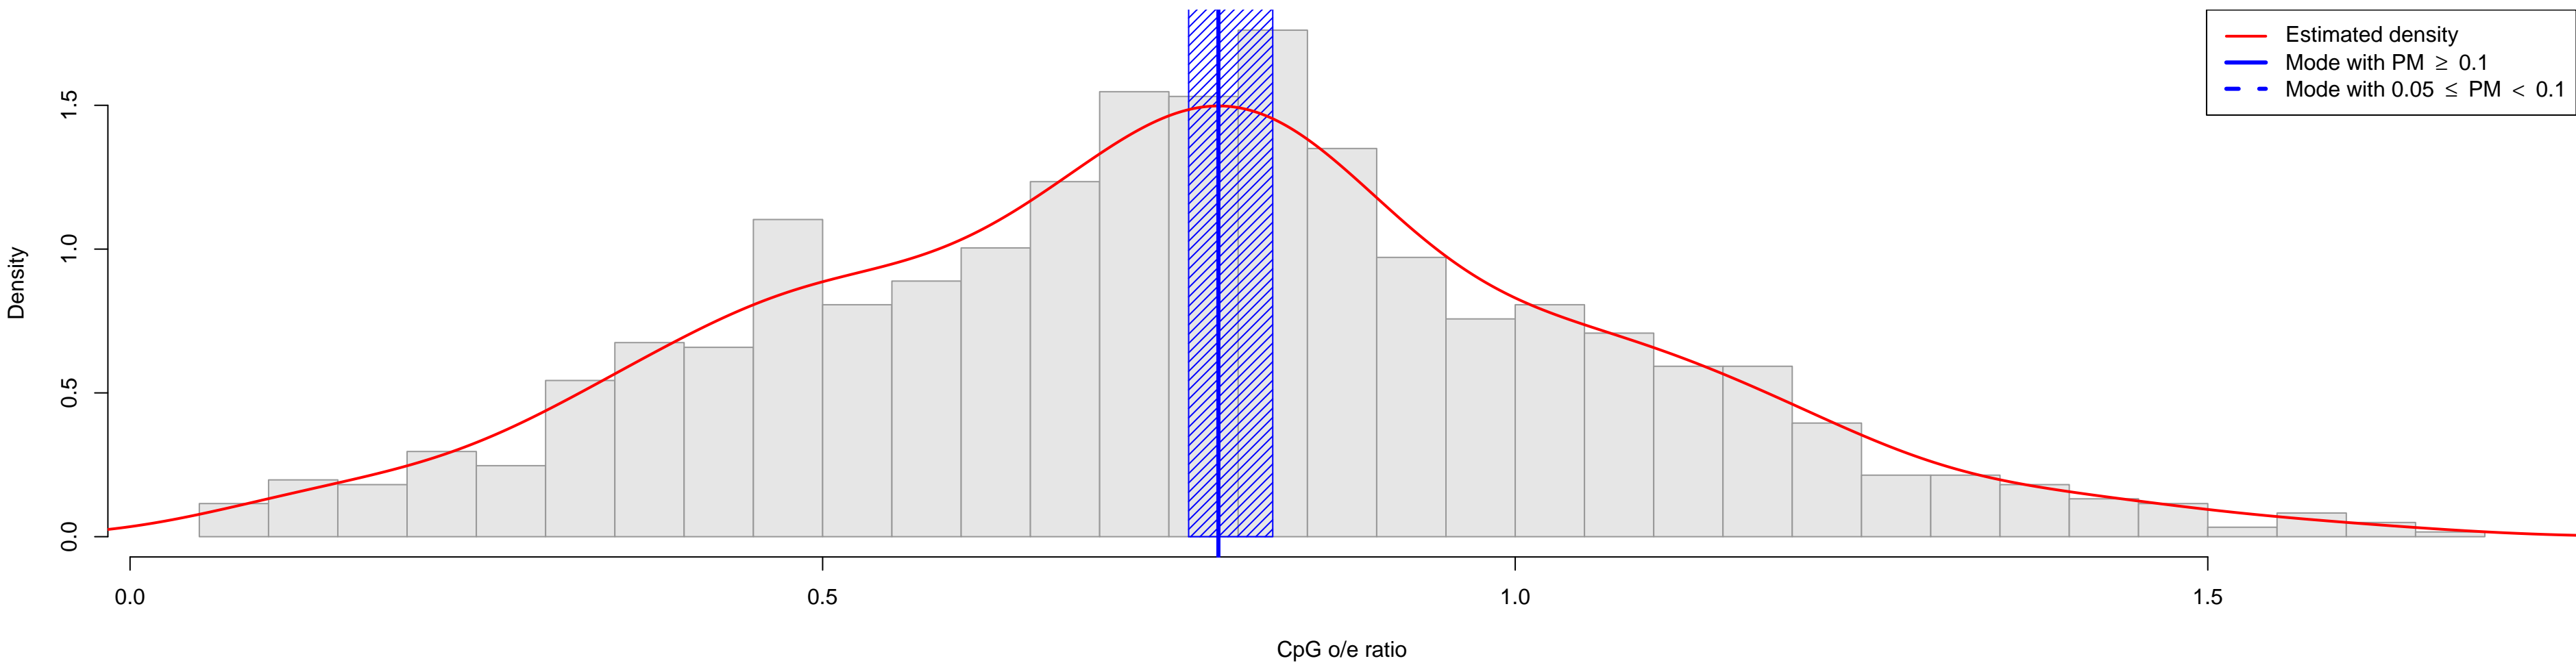

# Pinctada\_martensi

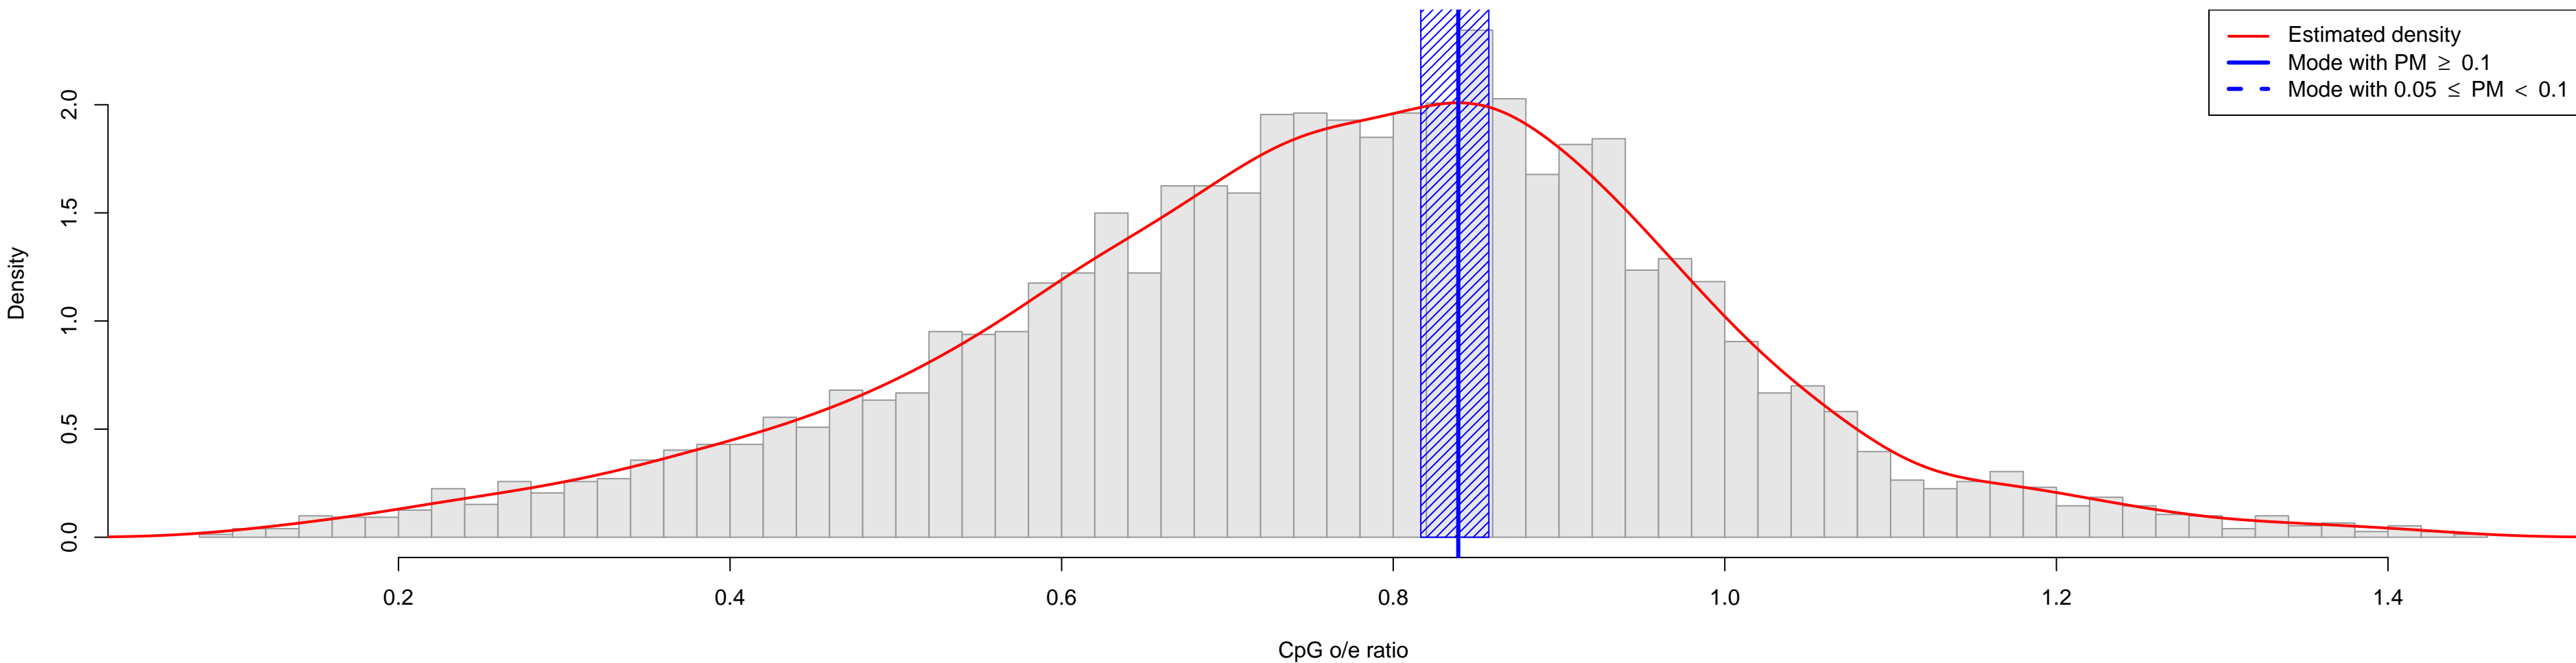

# Pinctada\_maxima

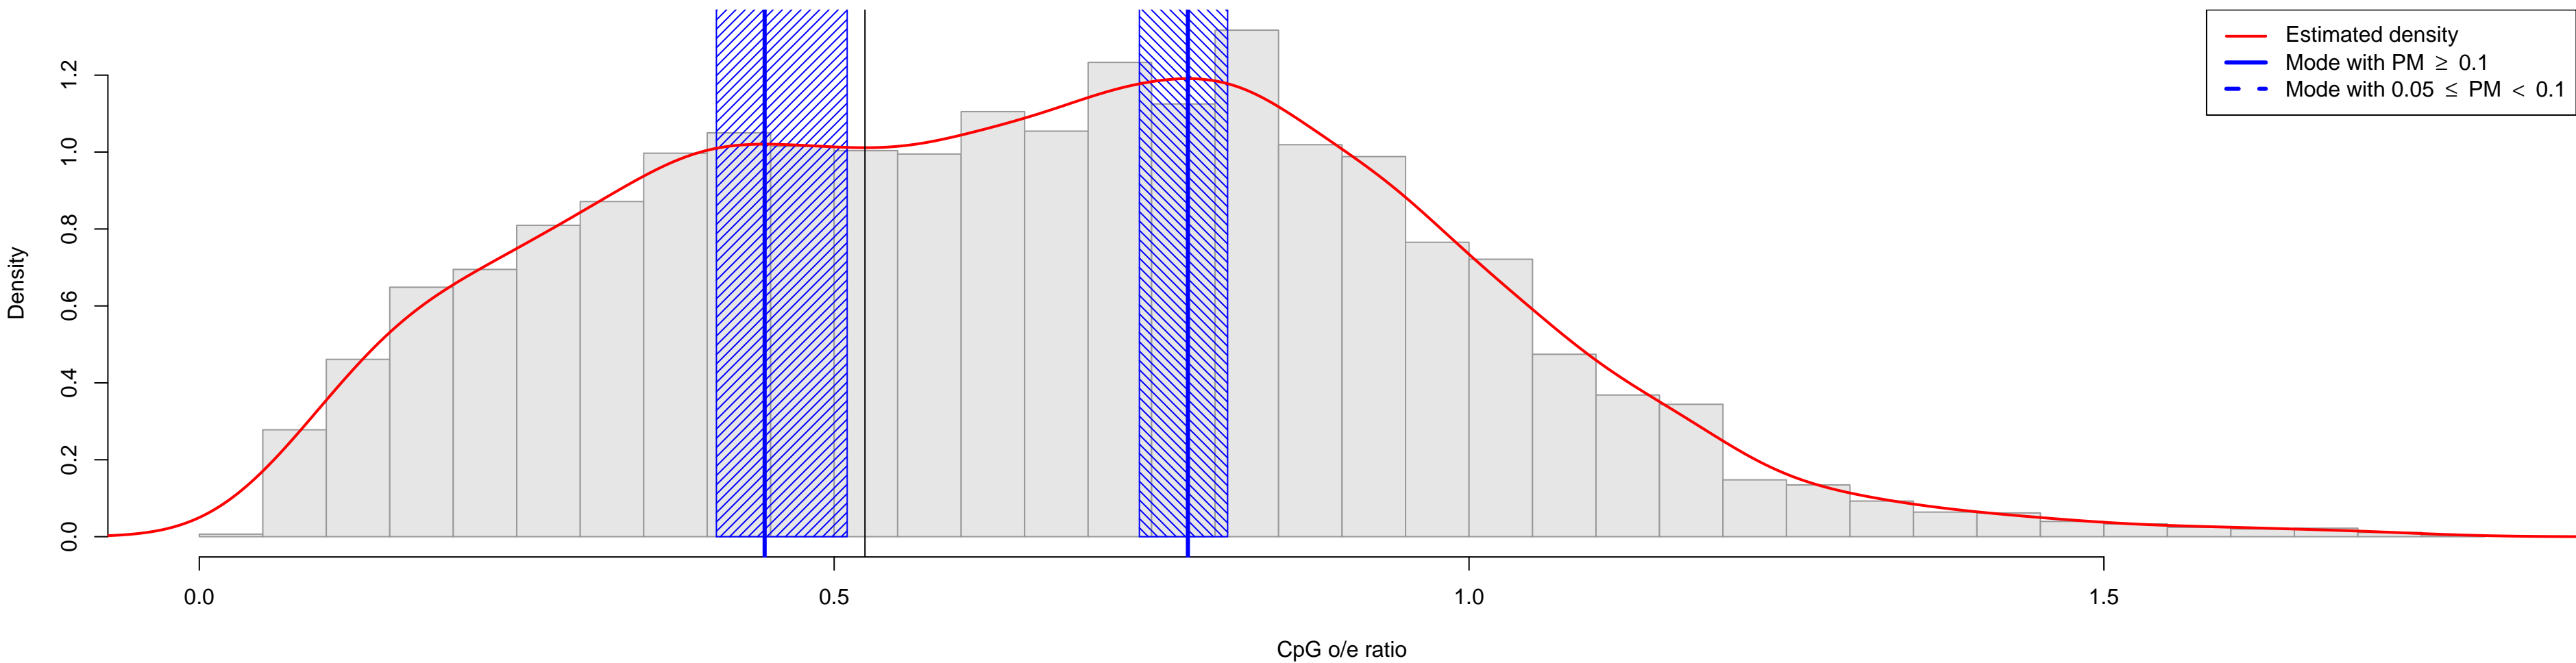



# Pinus\_banksiana

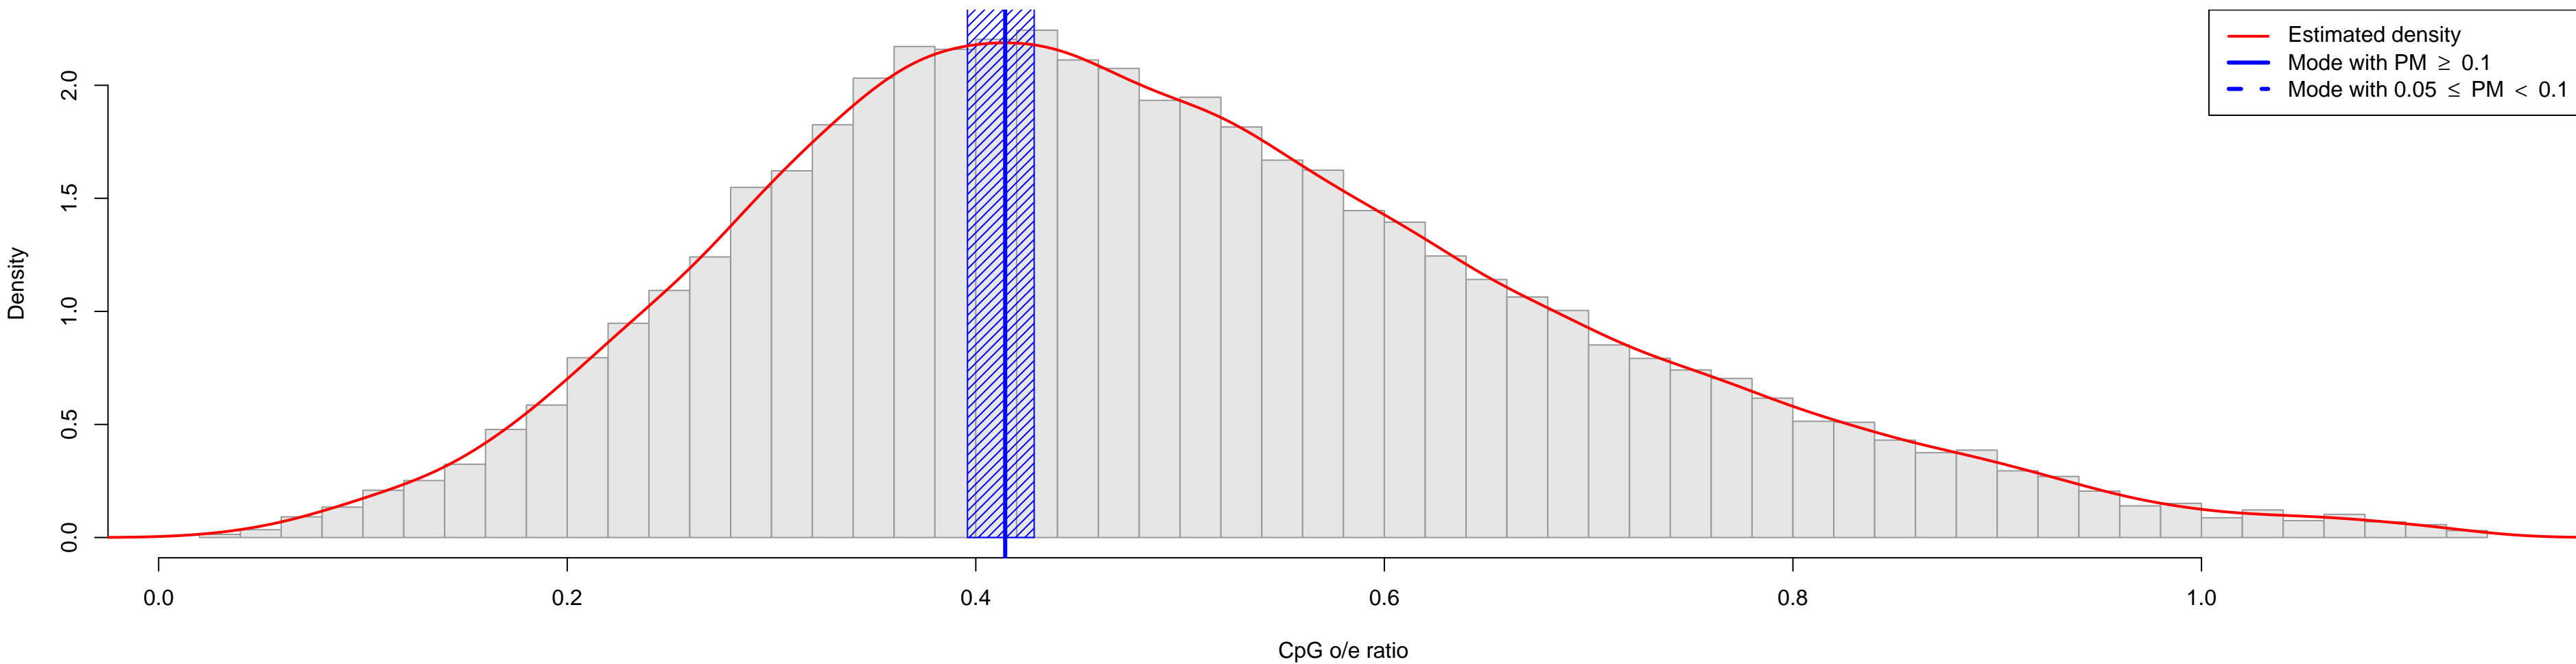

# Pinus\_contorta

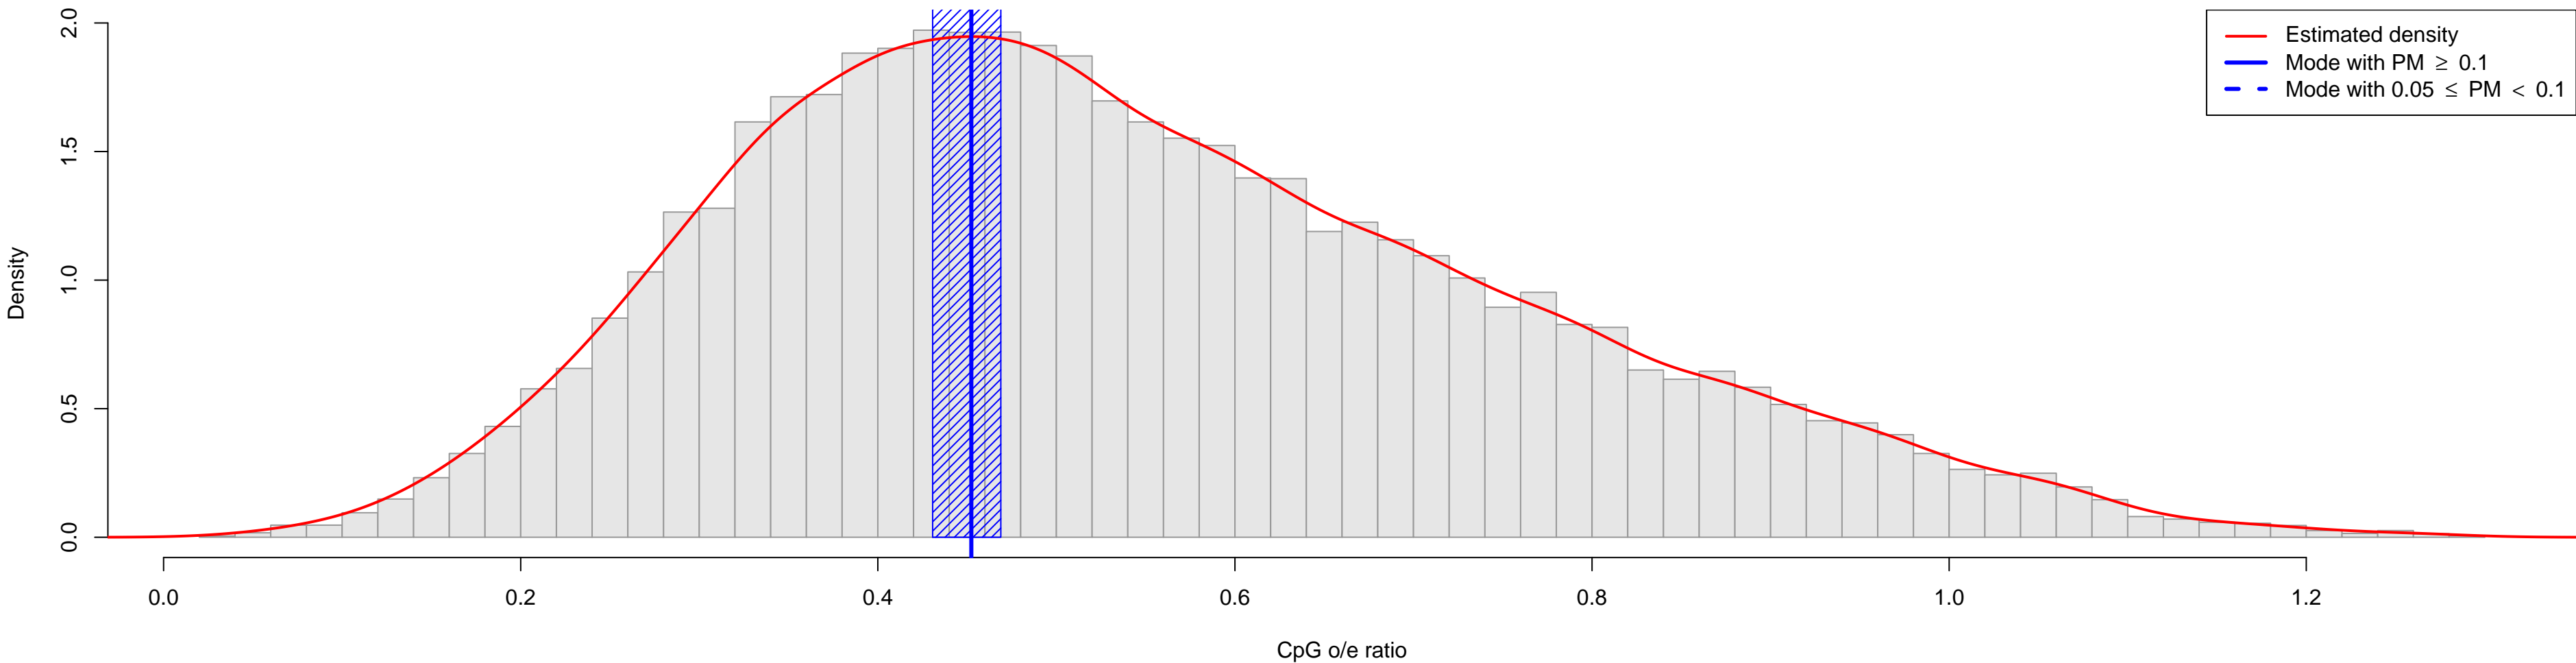

# Pinus\_densiflora

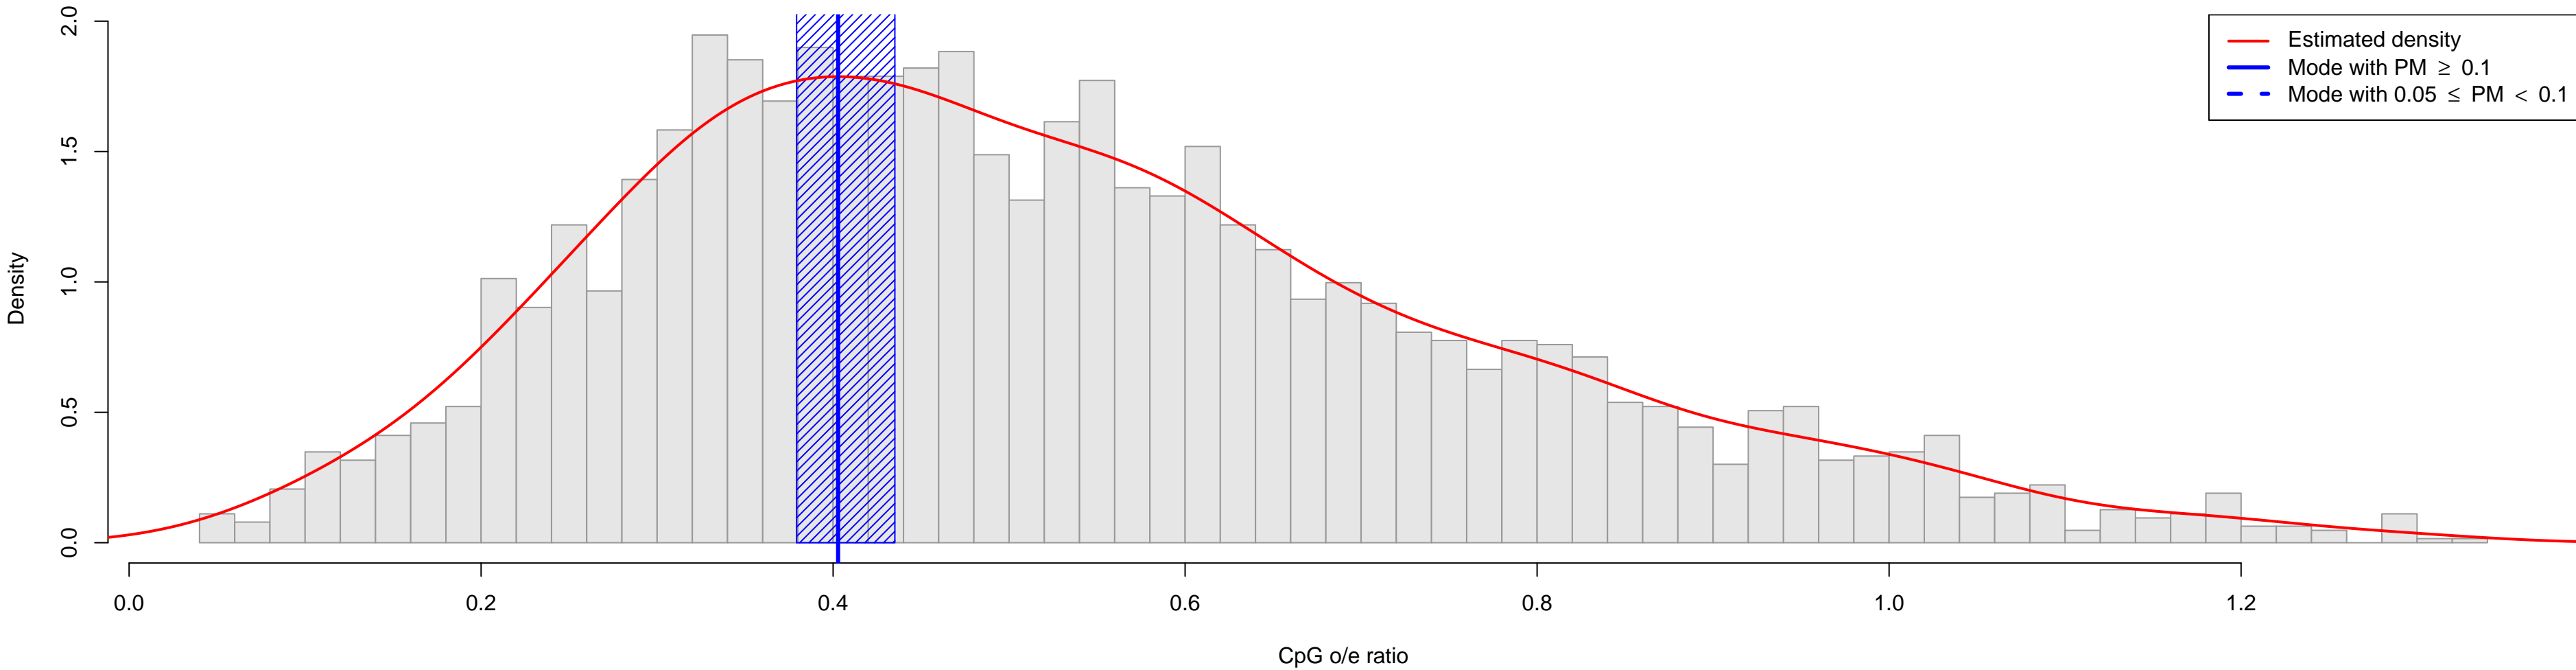

# Pinus\_pinaster

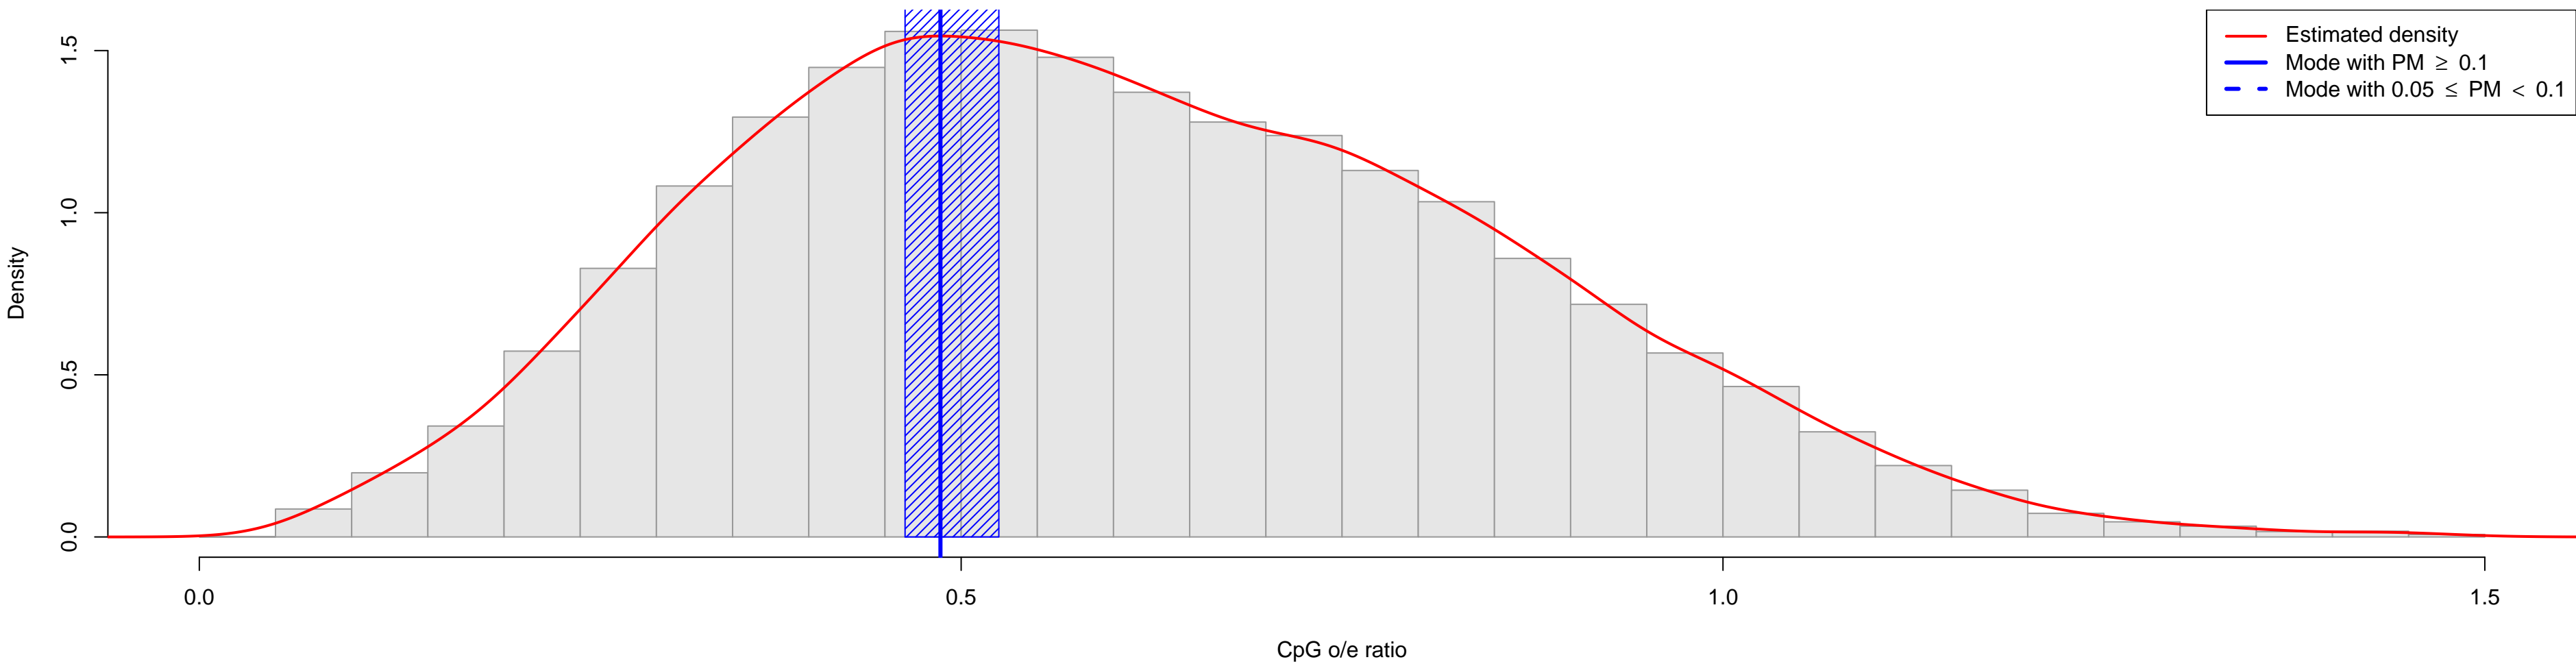

# Pinus\_radiata

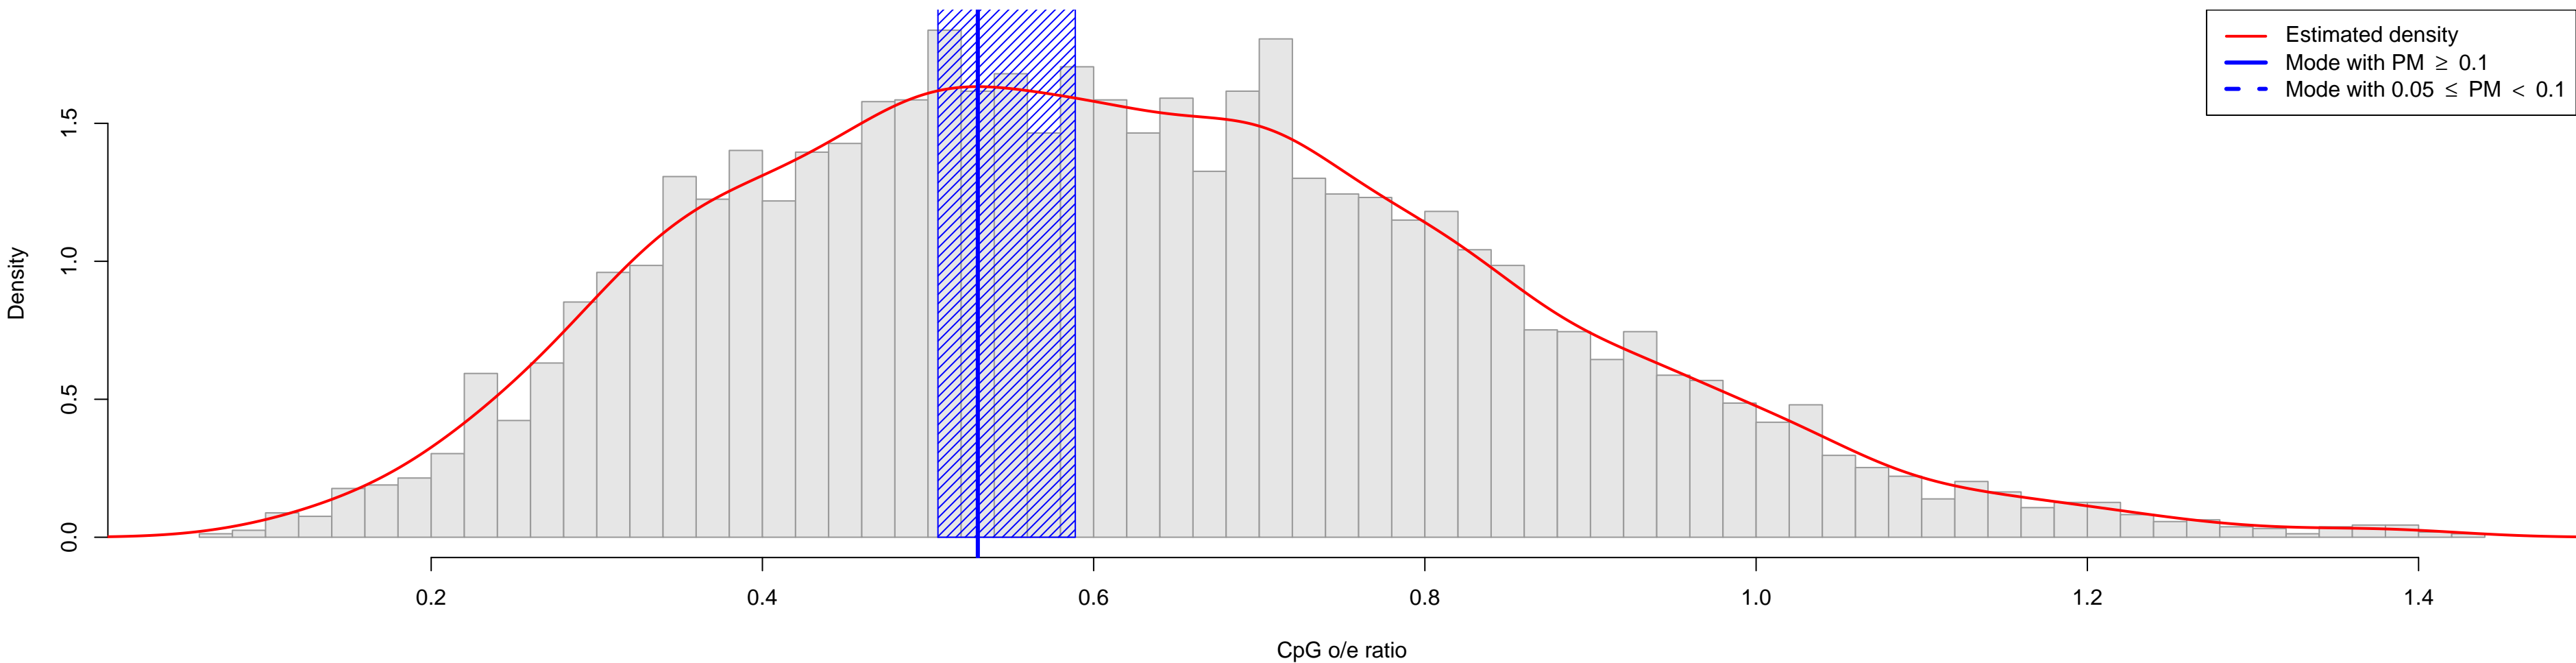

# Pinus\_sylvestris

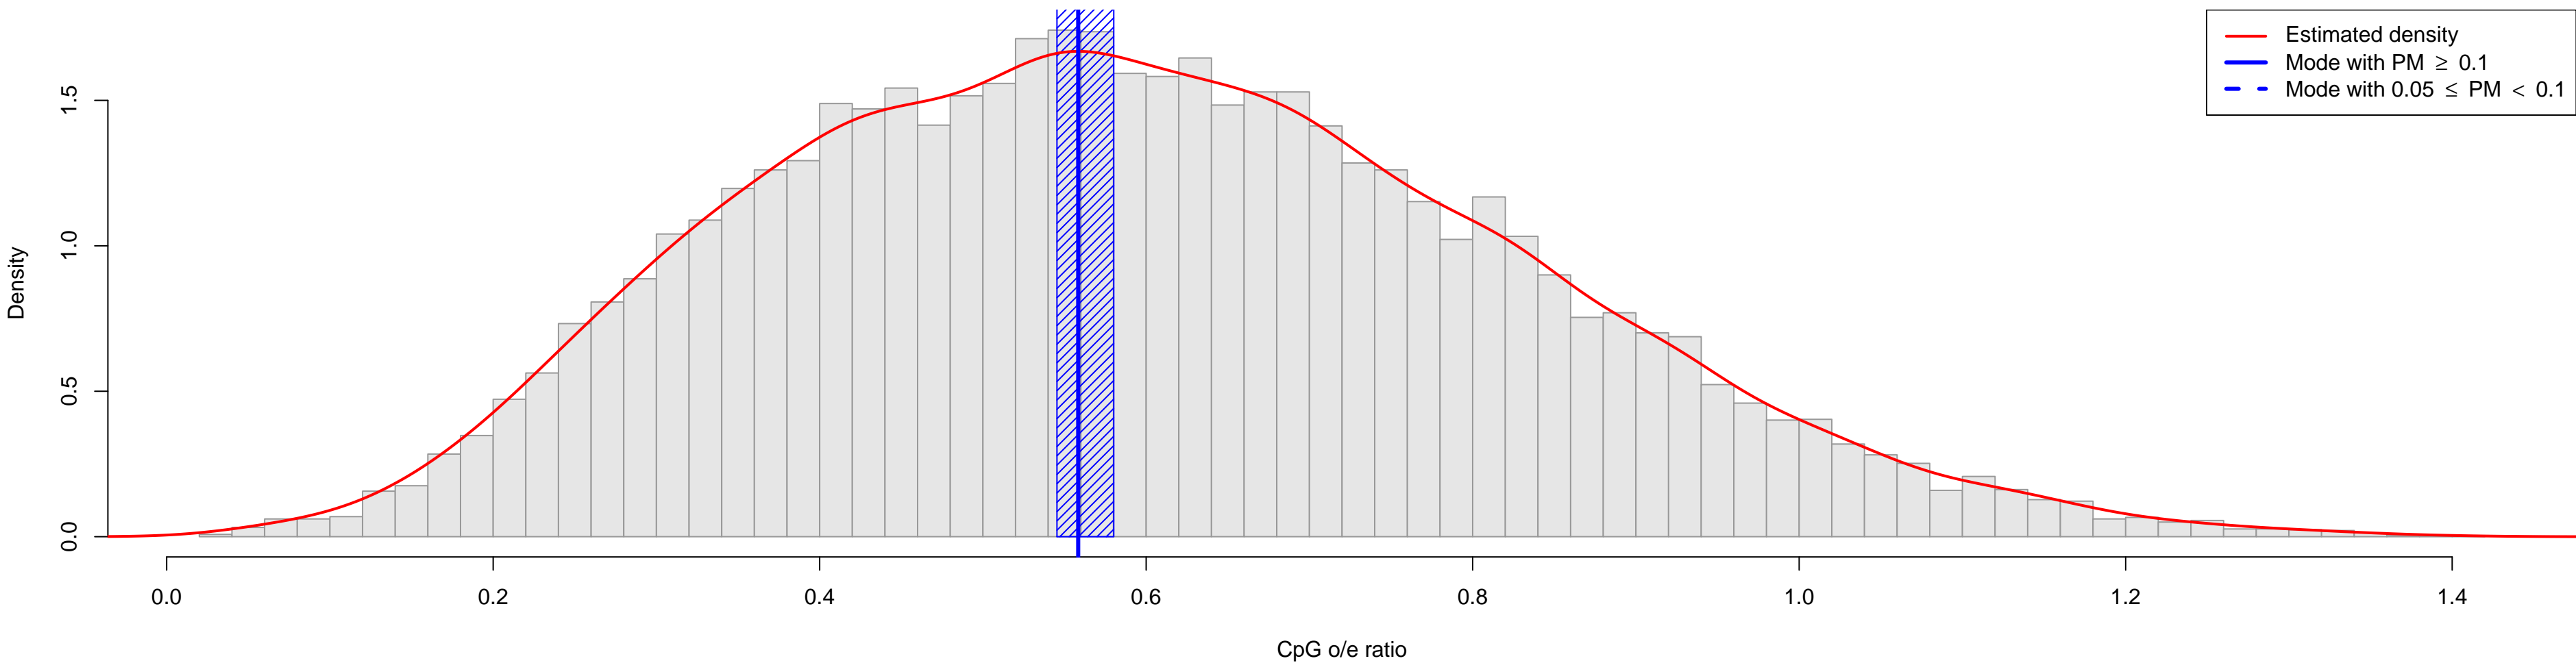

# Pinus\_taeda

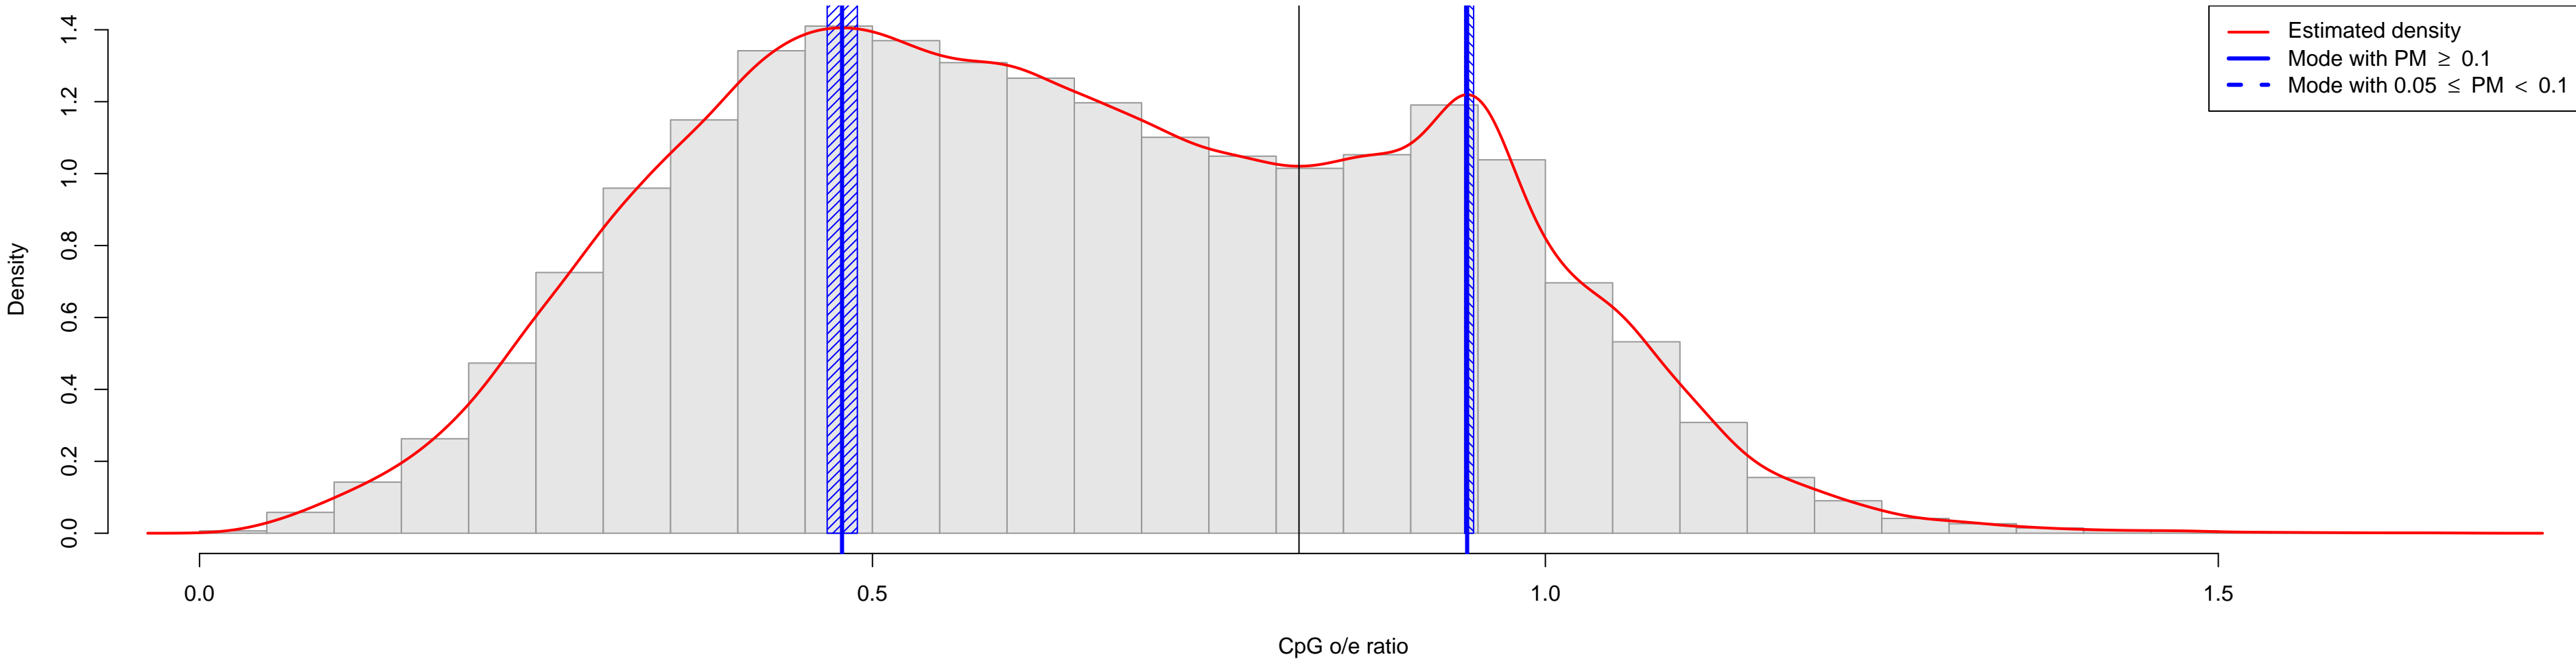

# Pinus\_thunbergii

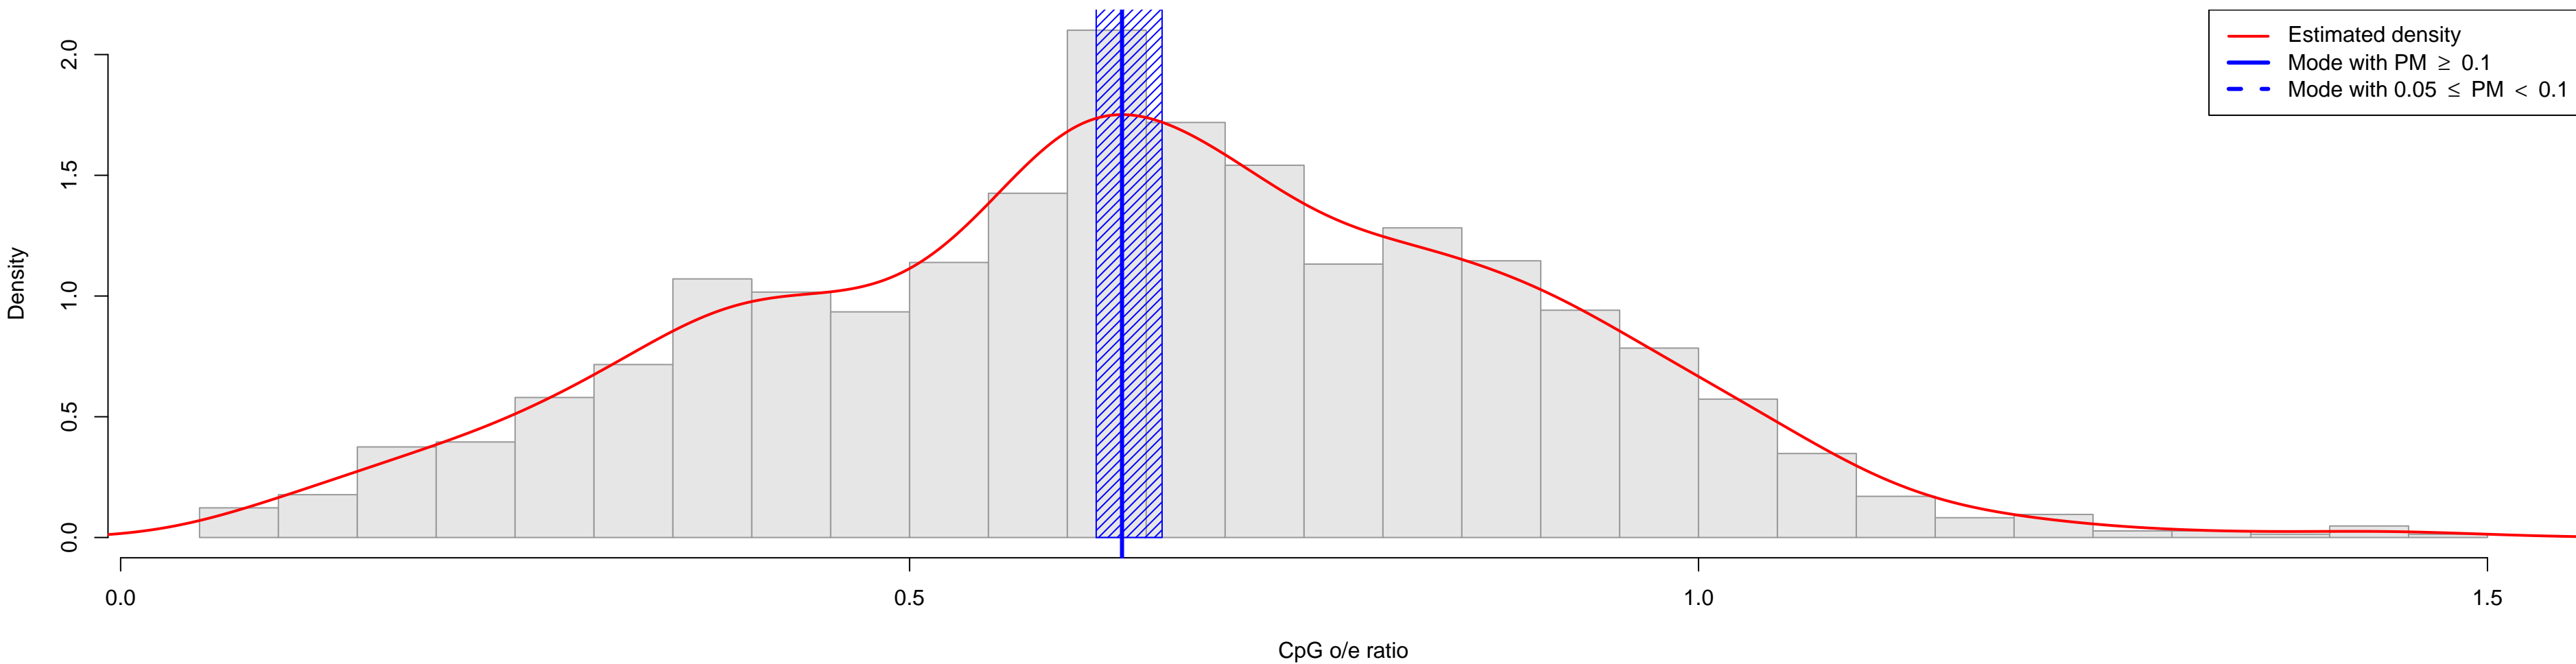



# Pissodes\_strobi

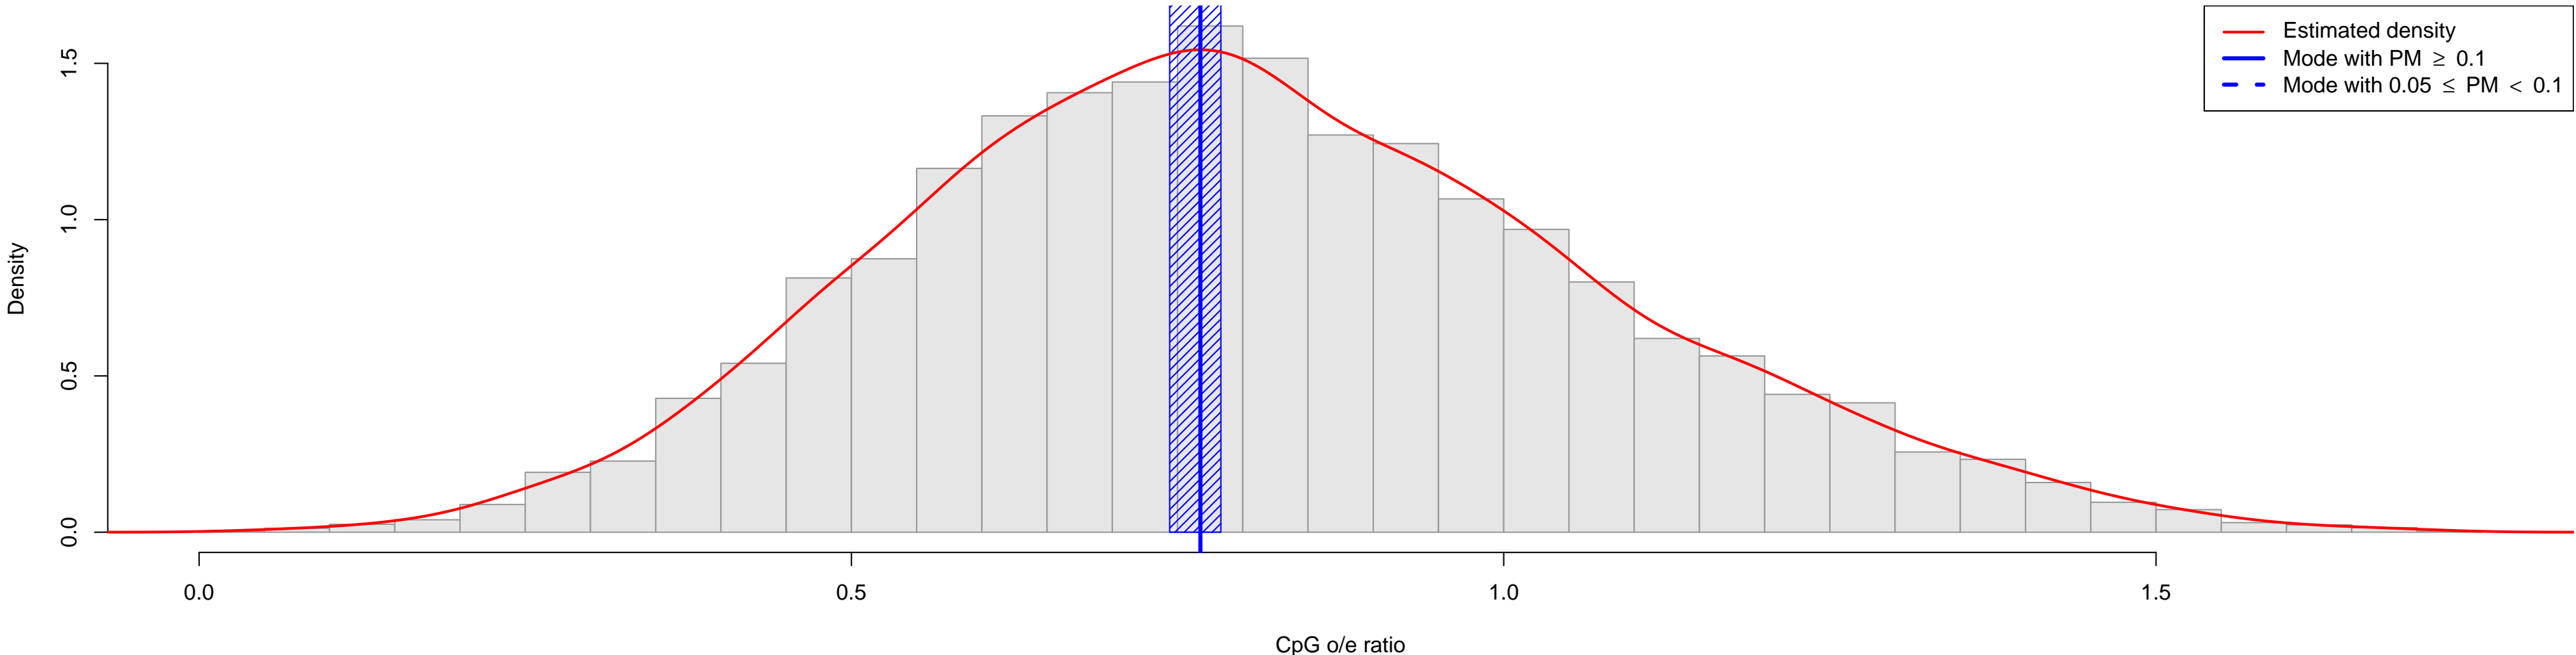

# Plasmodium\_berghei

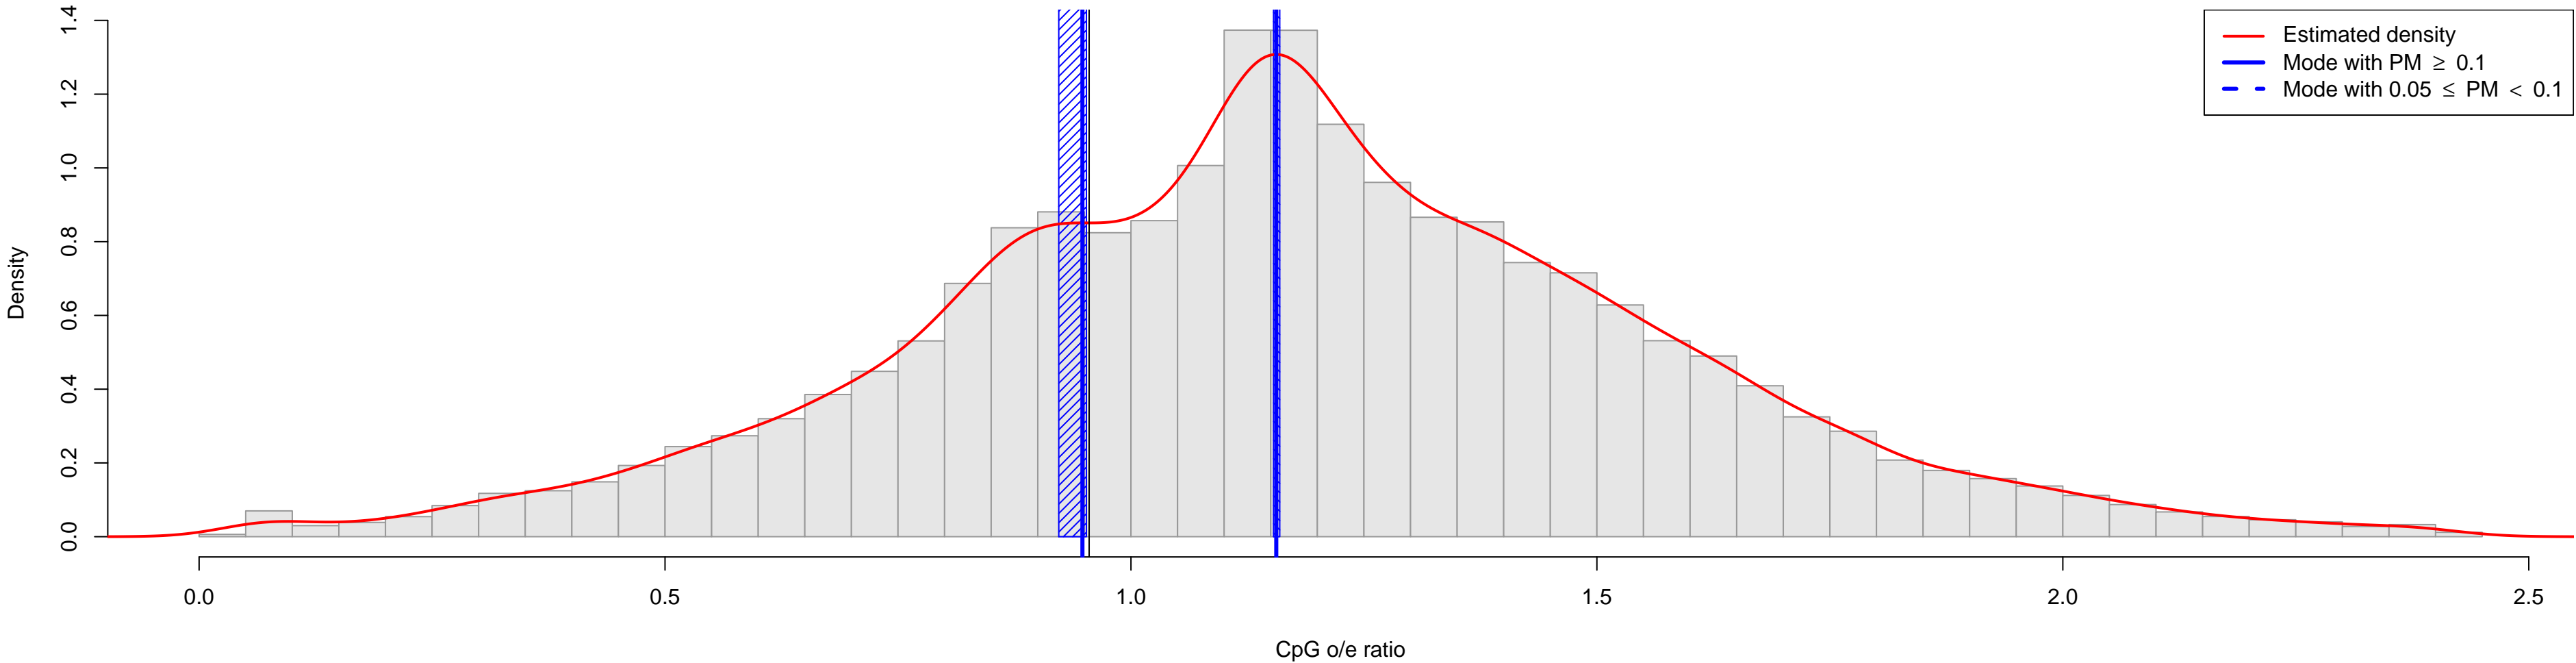

# Plasmodium\_falciparum 3D7

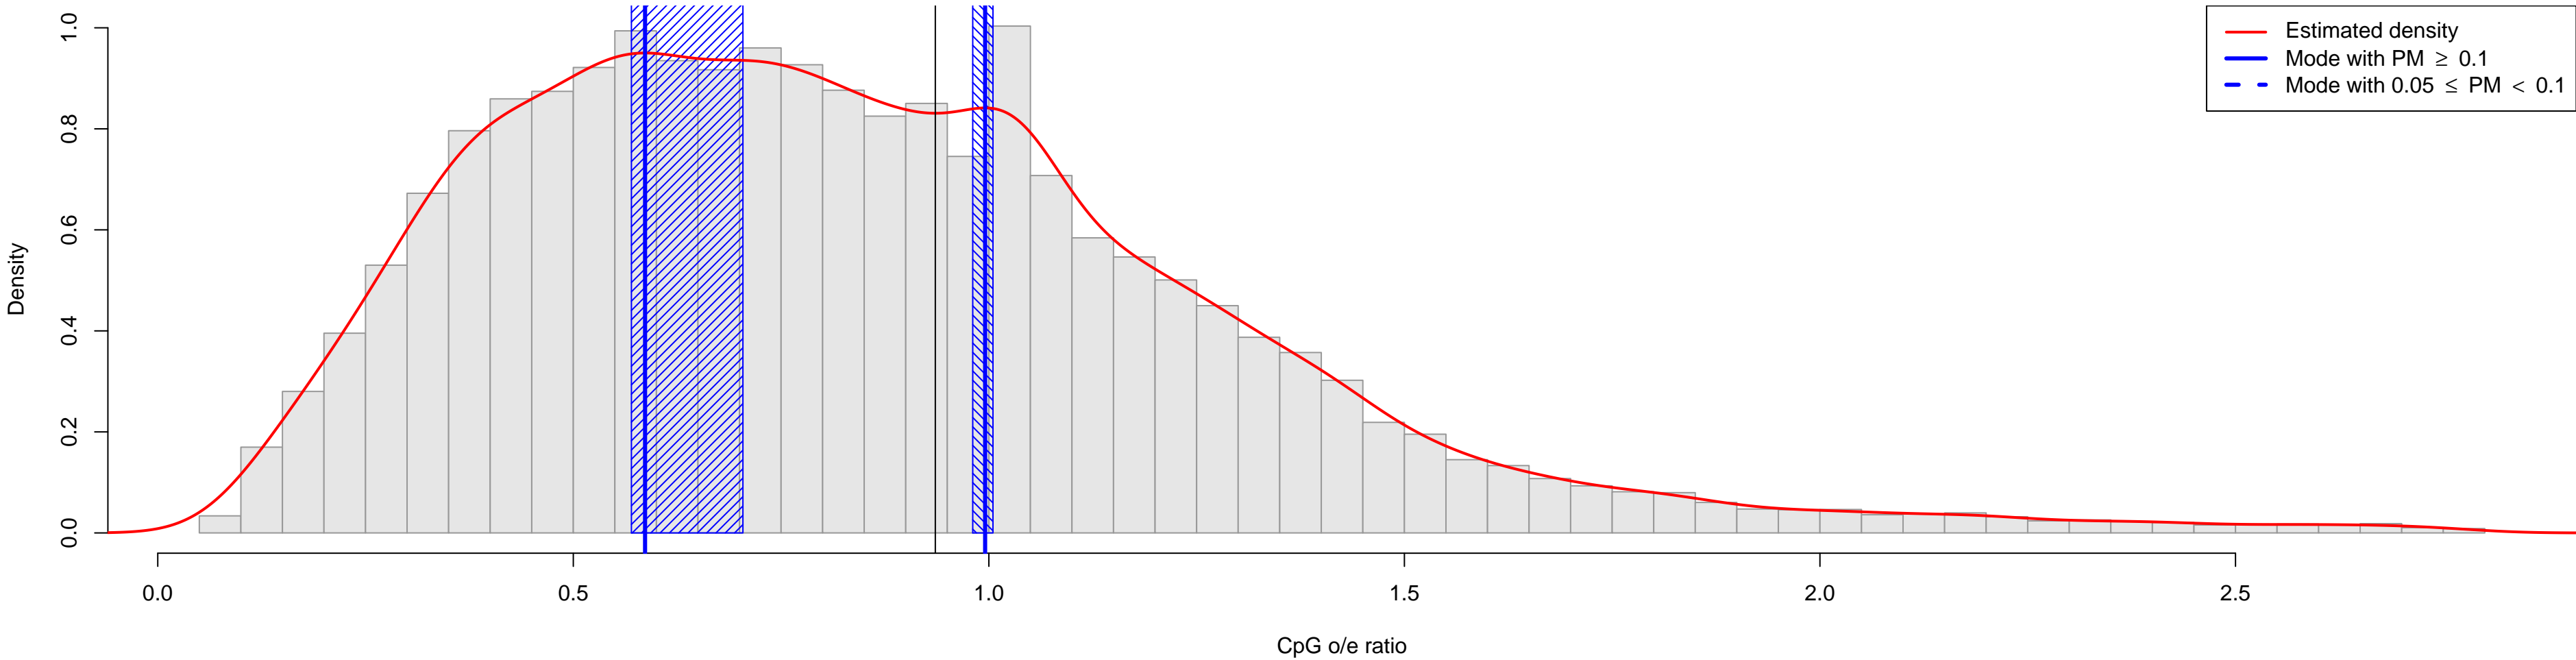

# Plasmodium\_falciparum

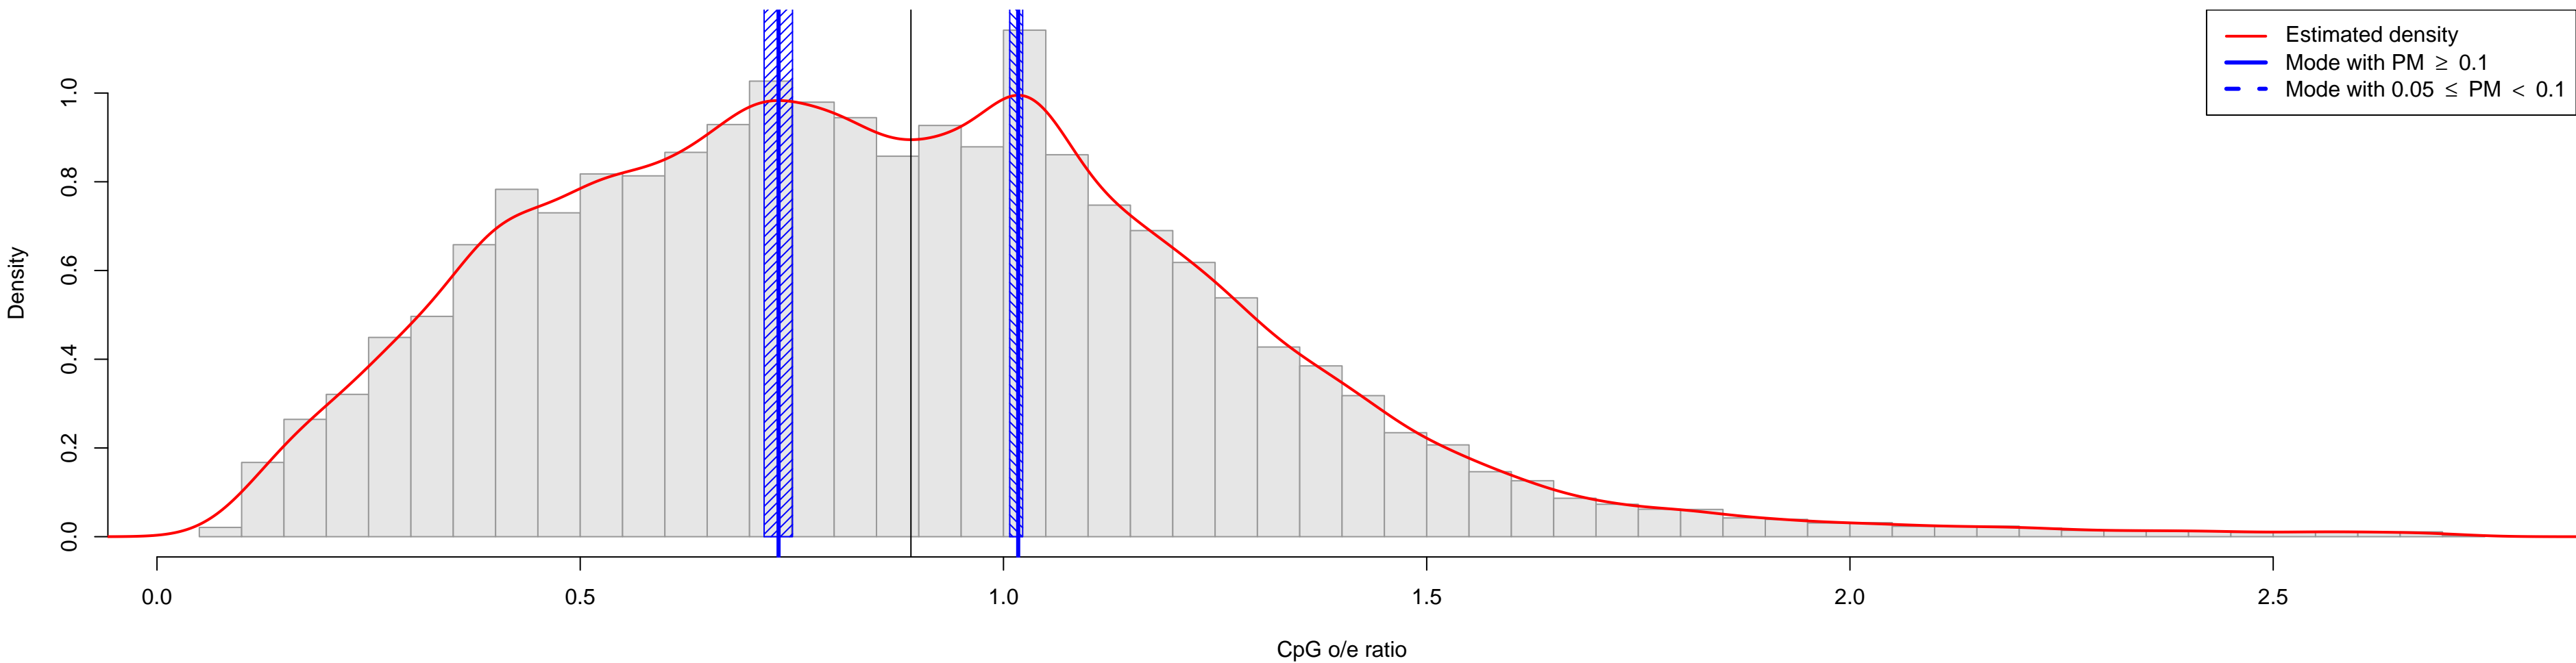

# Plasmodium\_vivax

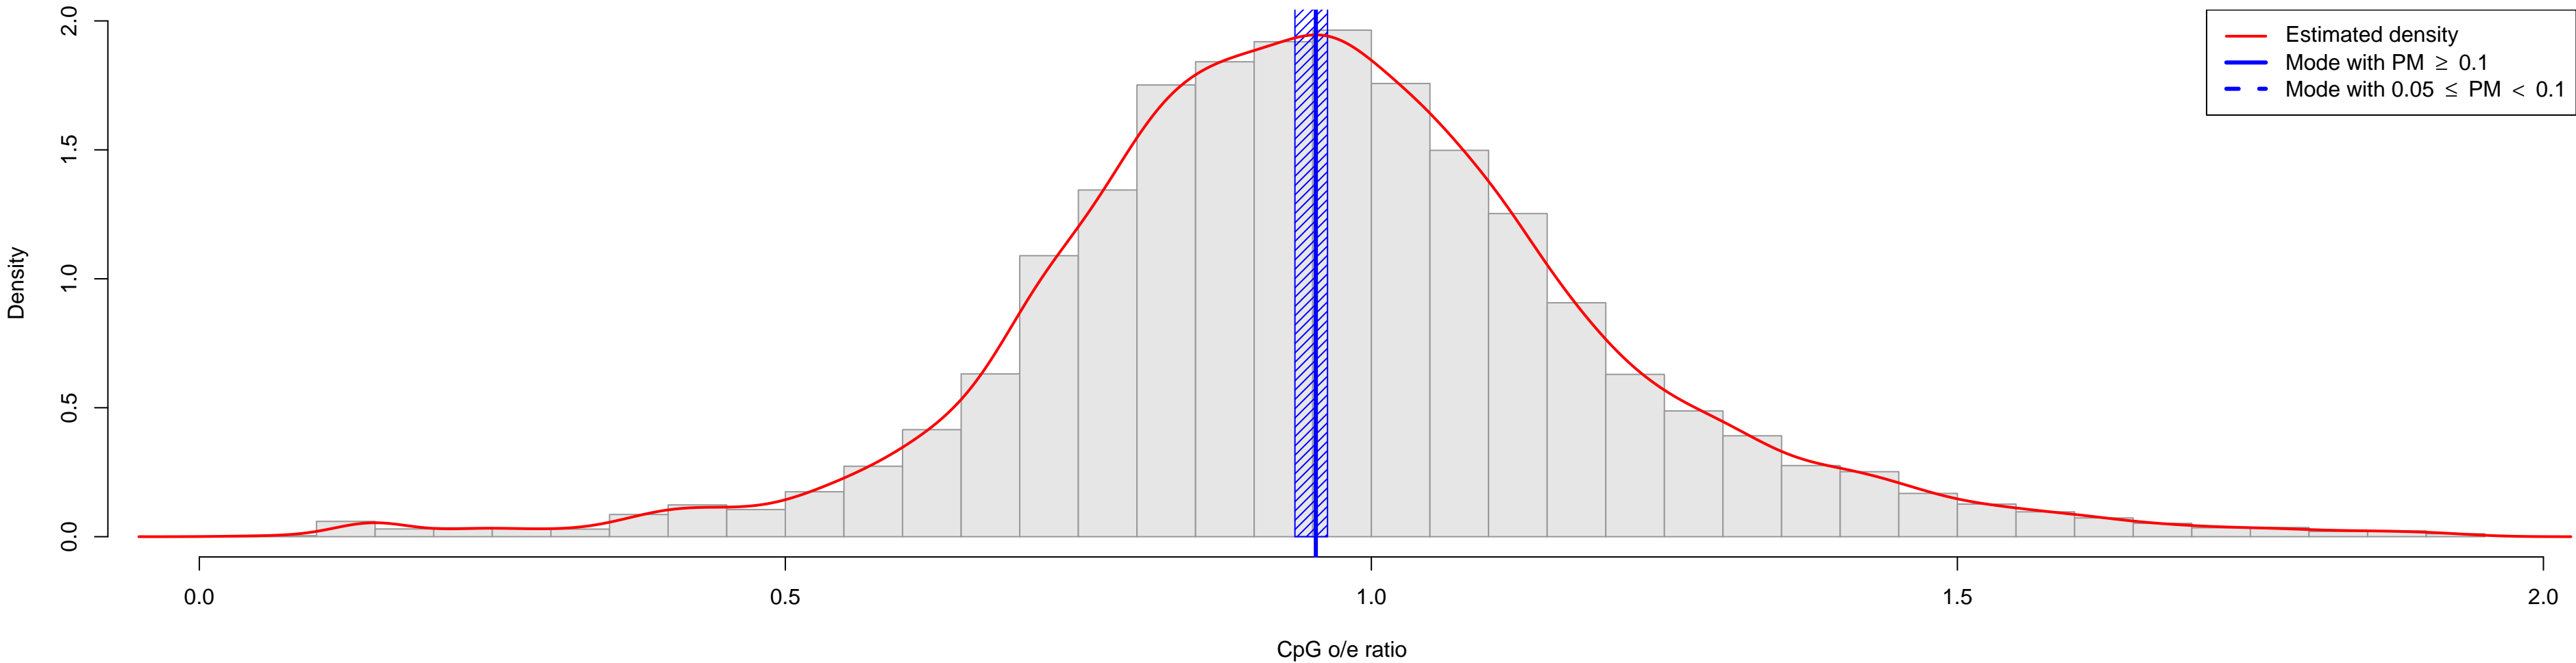

# Plasmodium\_yoelii

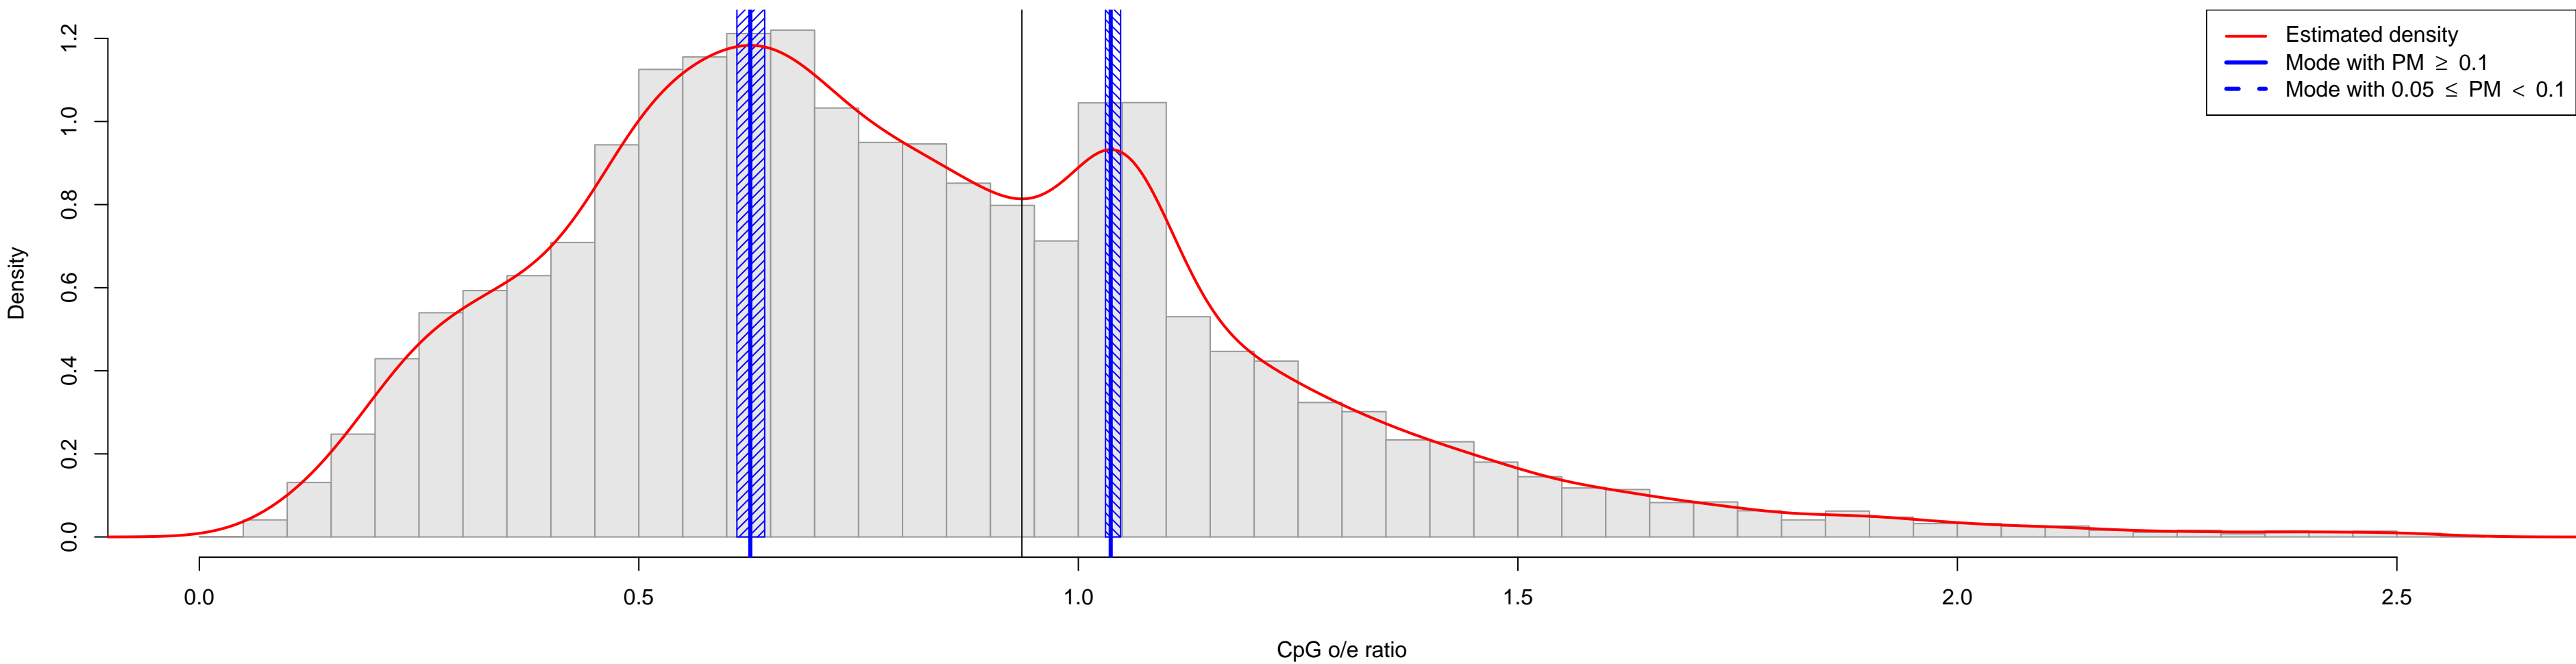

# Platichthys\_flesus

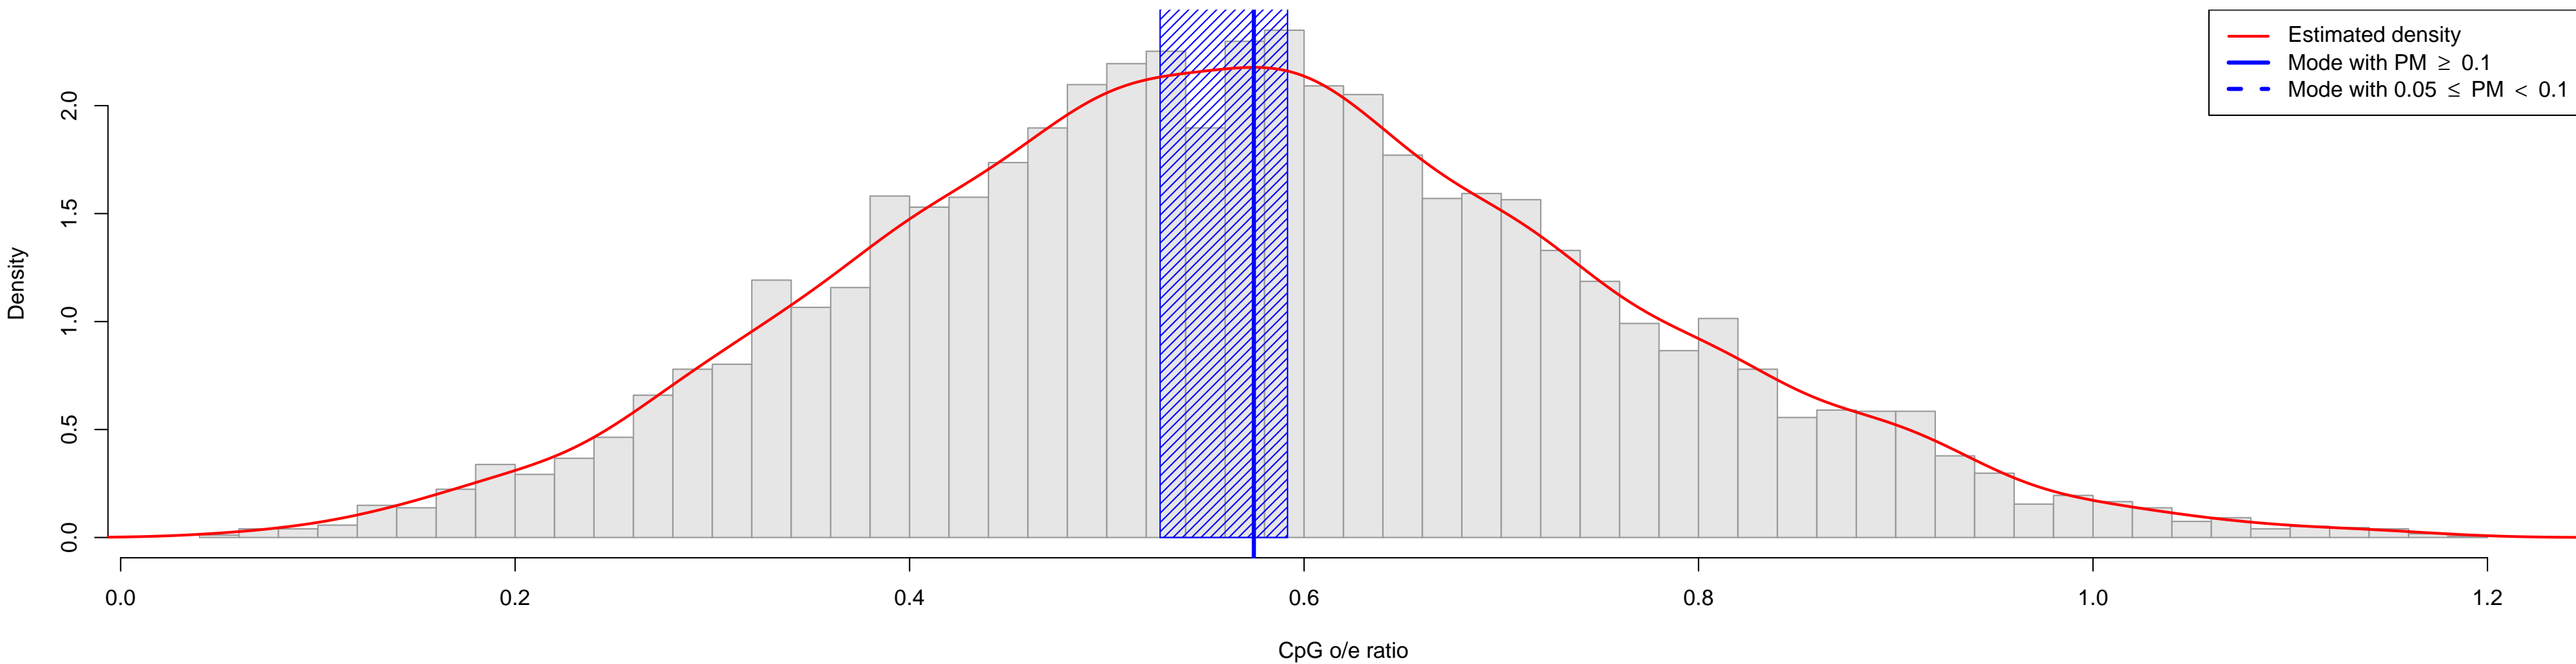

# Pleurobrachia\_pileus

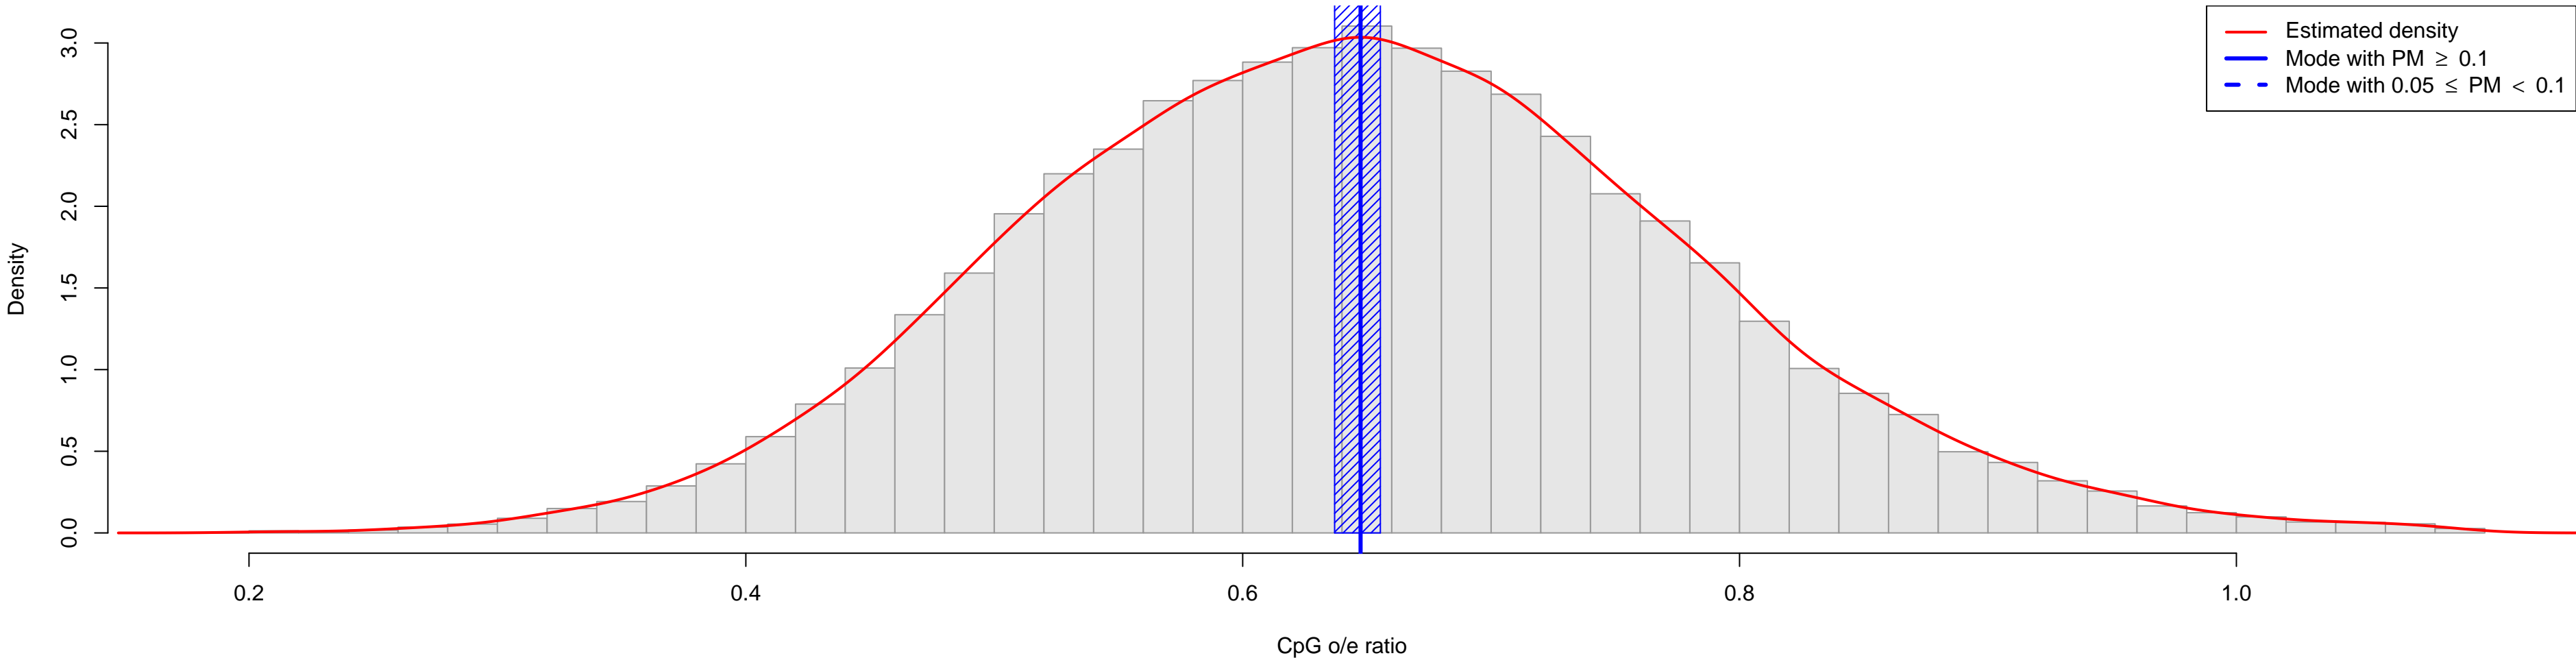



# Pleuronectes\_platessa

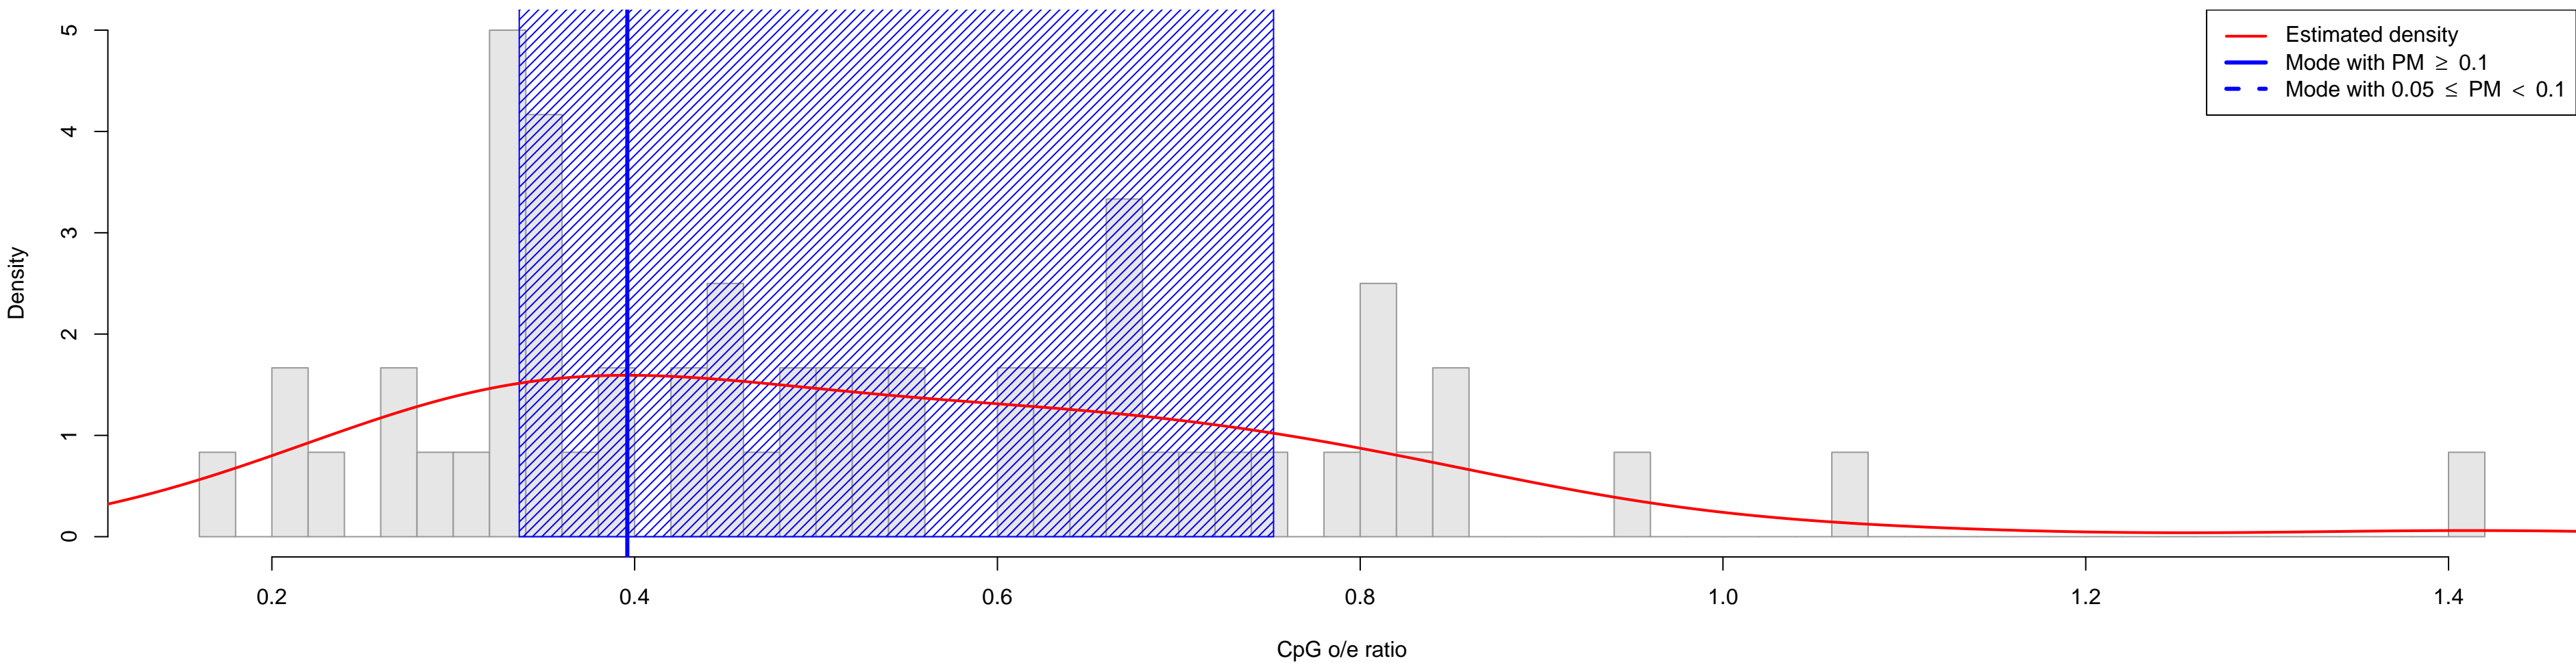

# Plutella\_xylostella

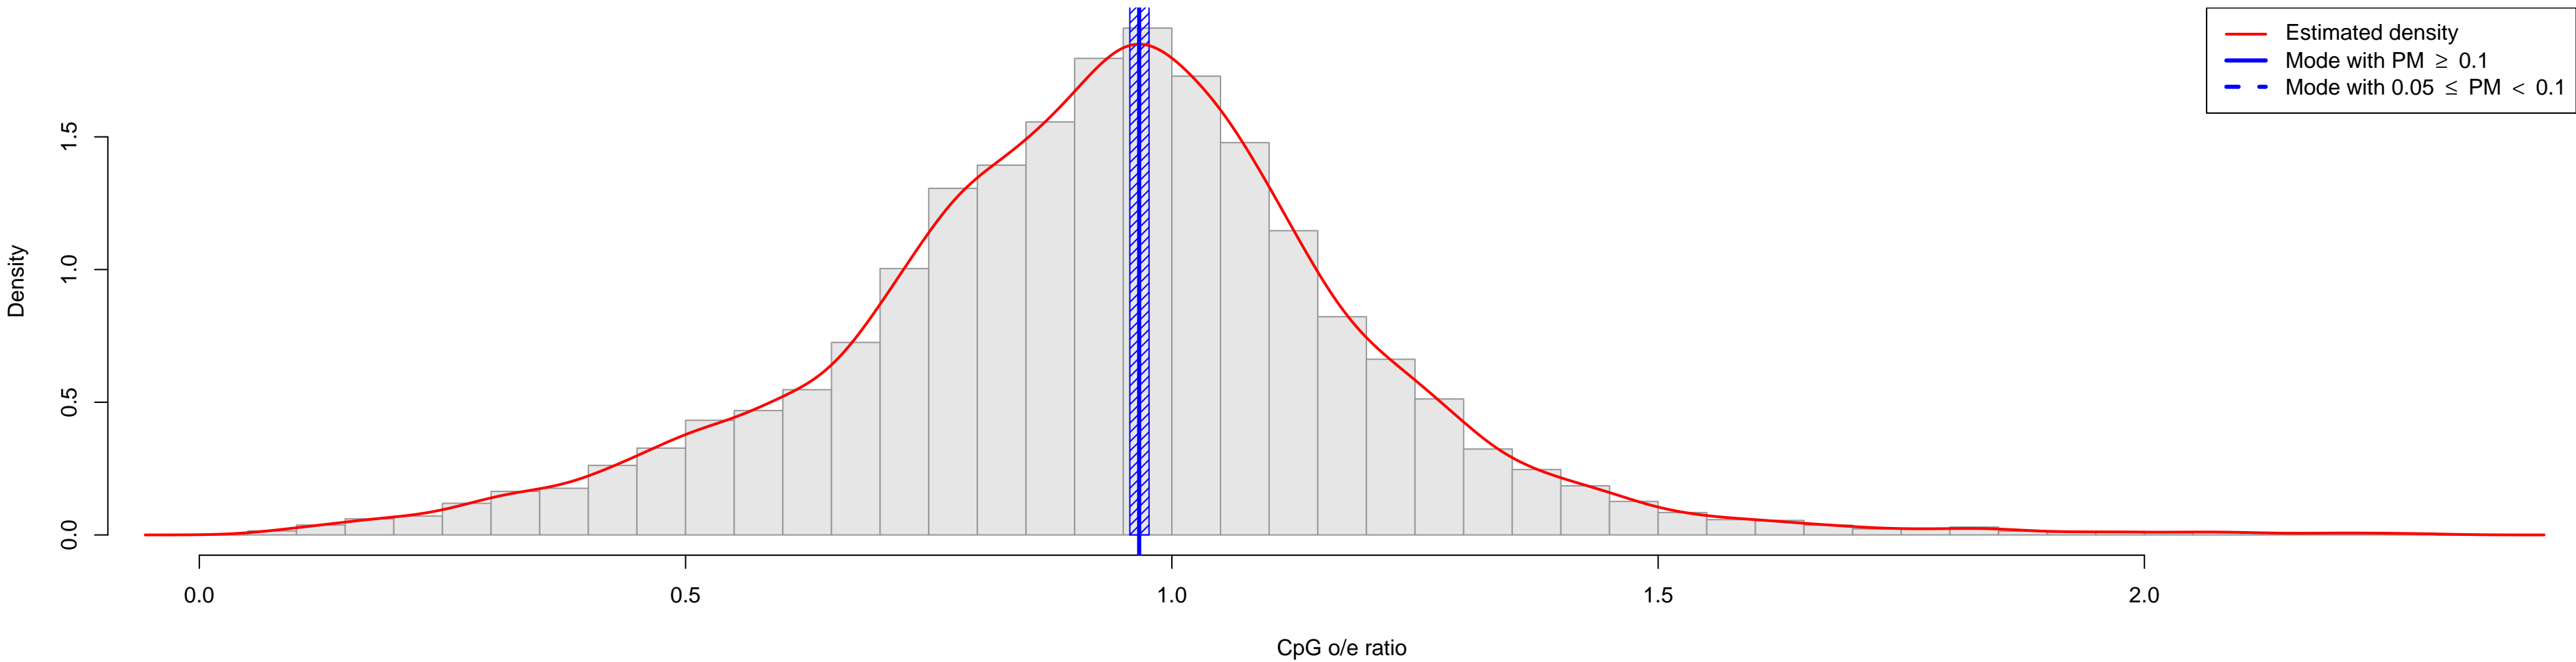

# Pneumocystis\_carinii

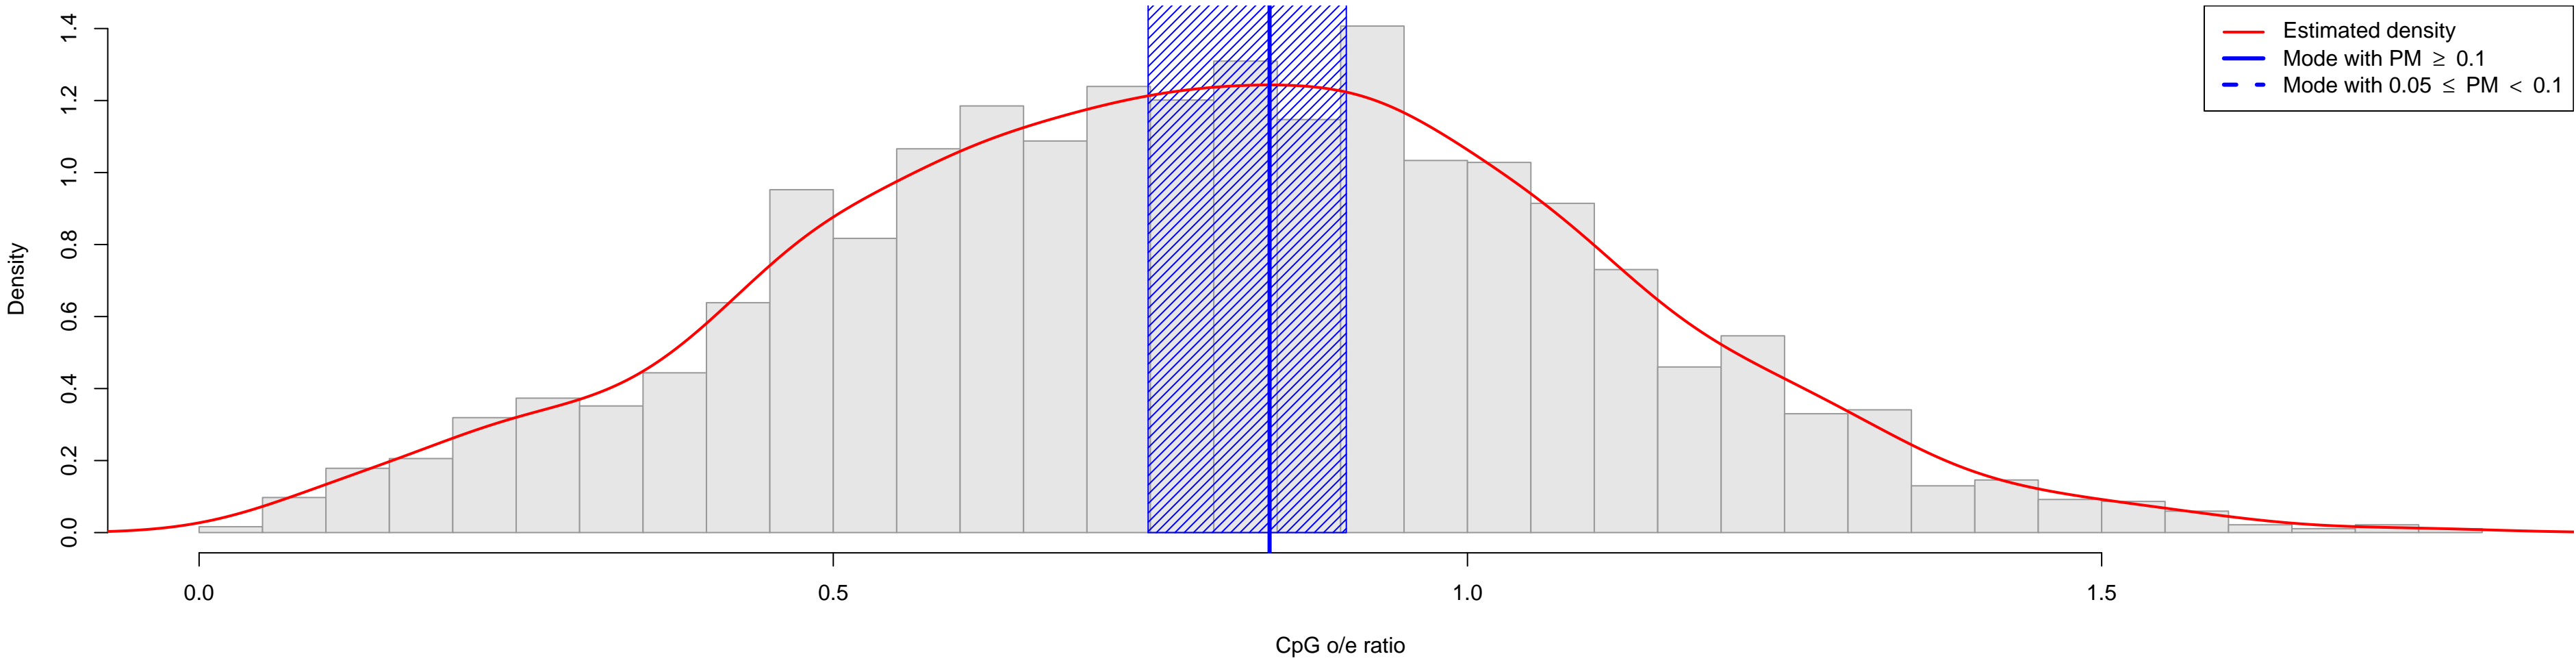

# Podocoryne\_carnea

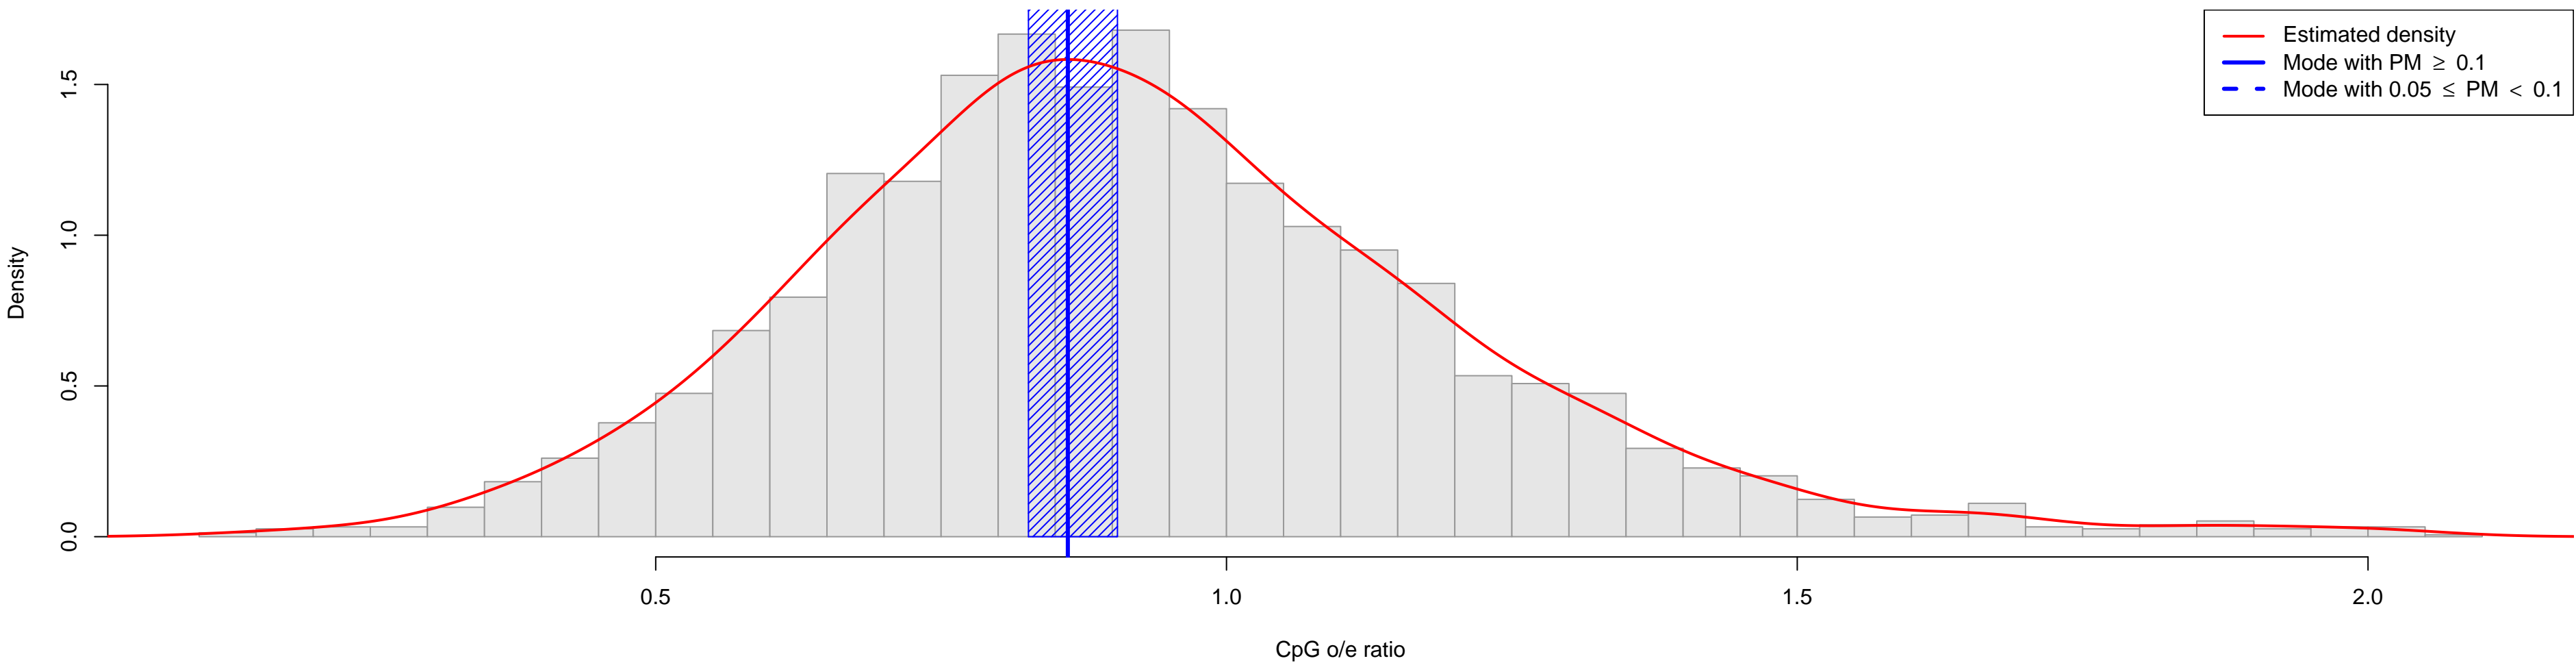

# Podospora\_anserina

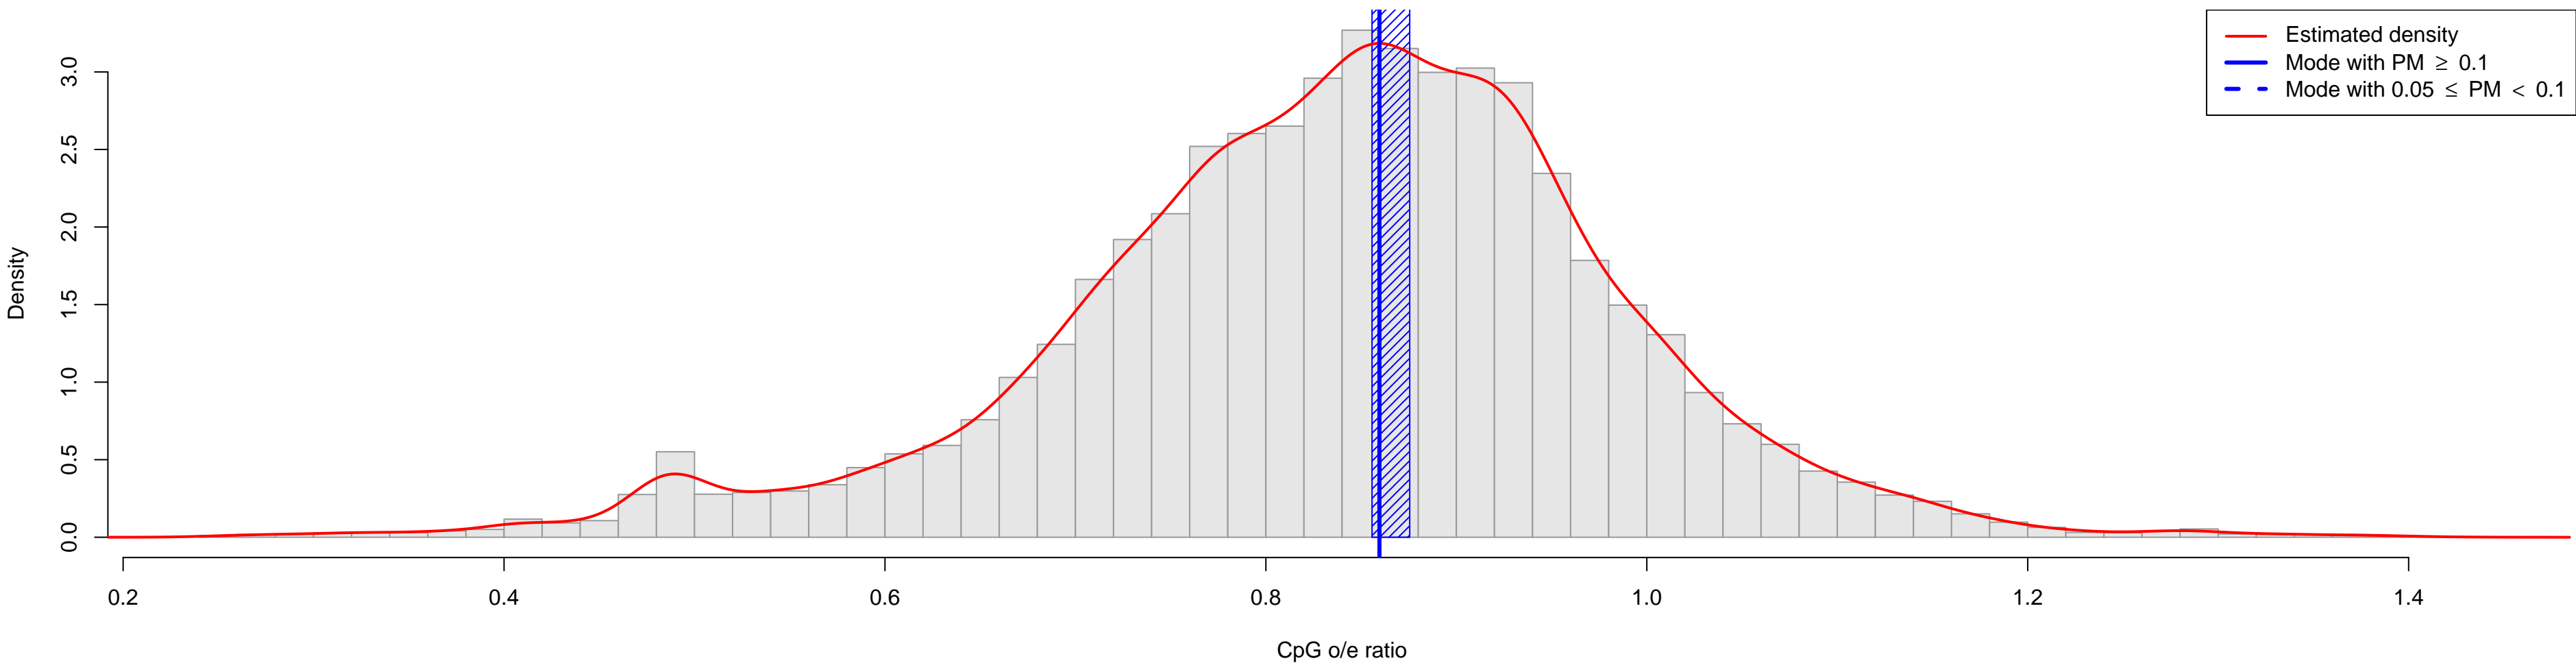

# Poecilia\_reticulata

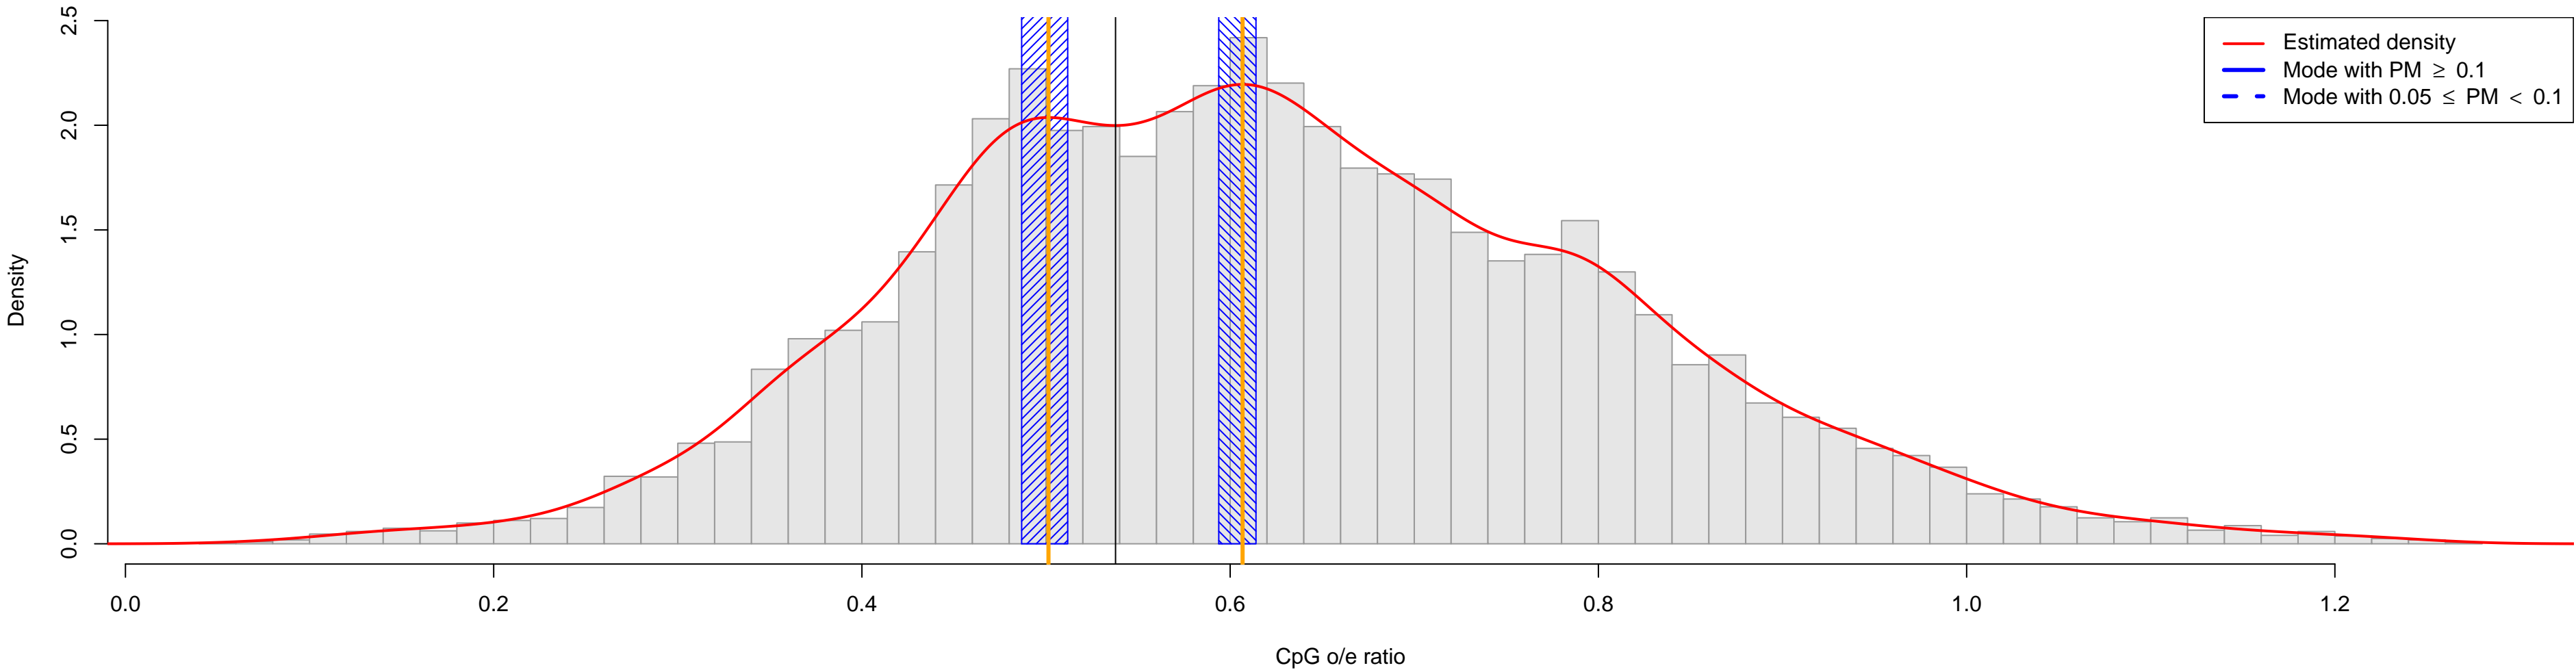

# Pollicipes\_pollicipes

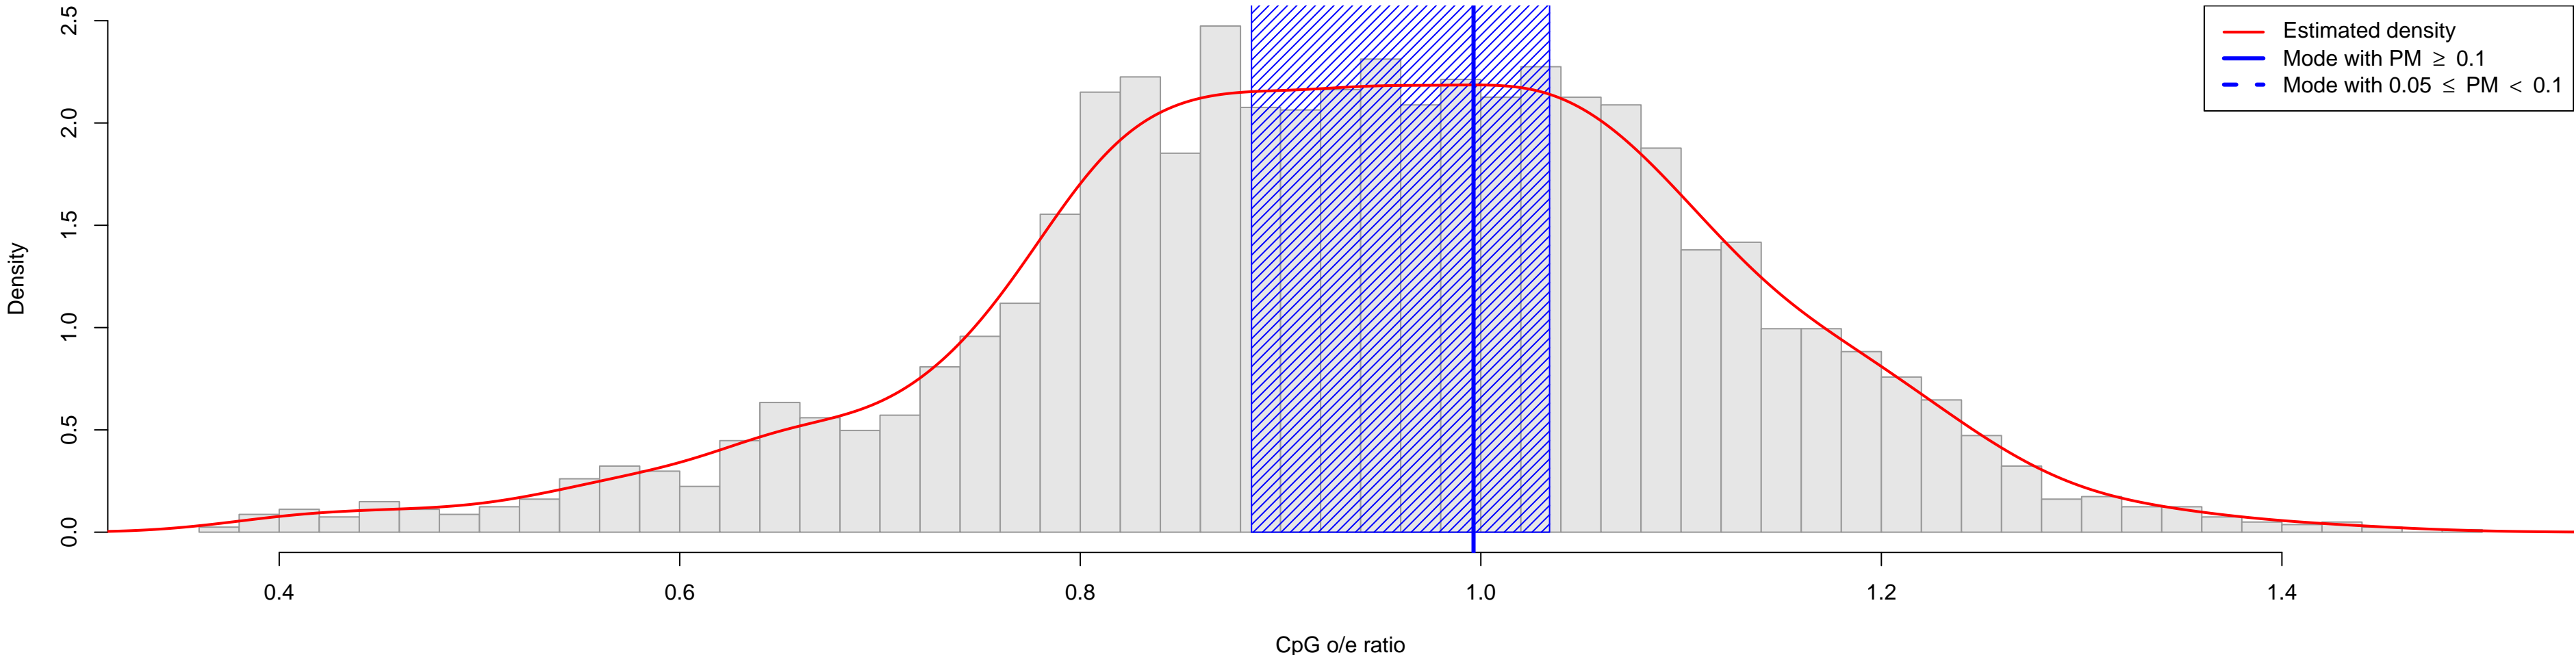

# Polygonum\_minus

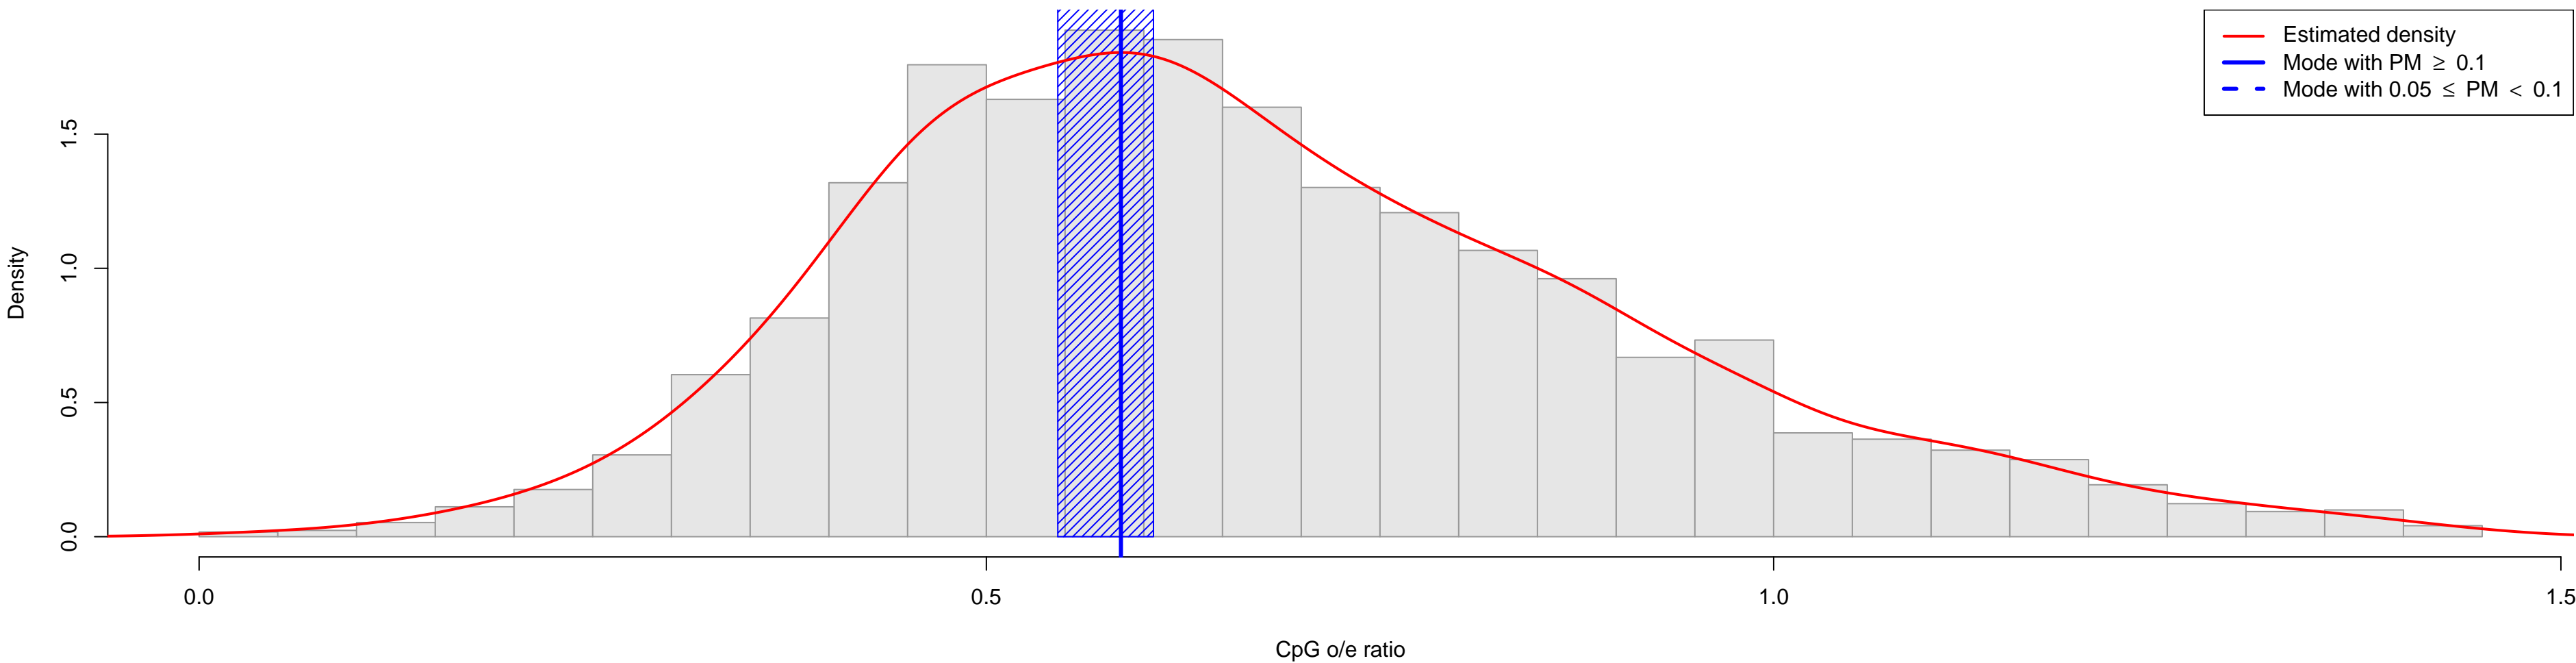



# Polypedilum\_vanderplanki

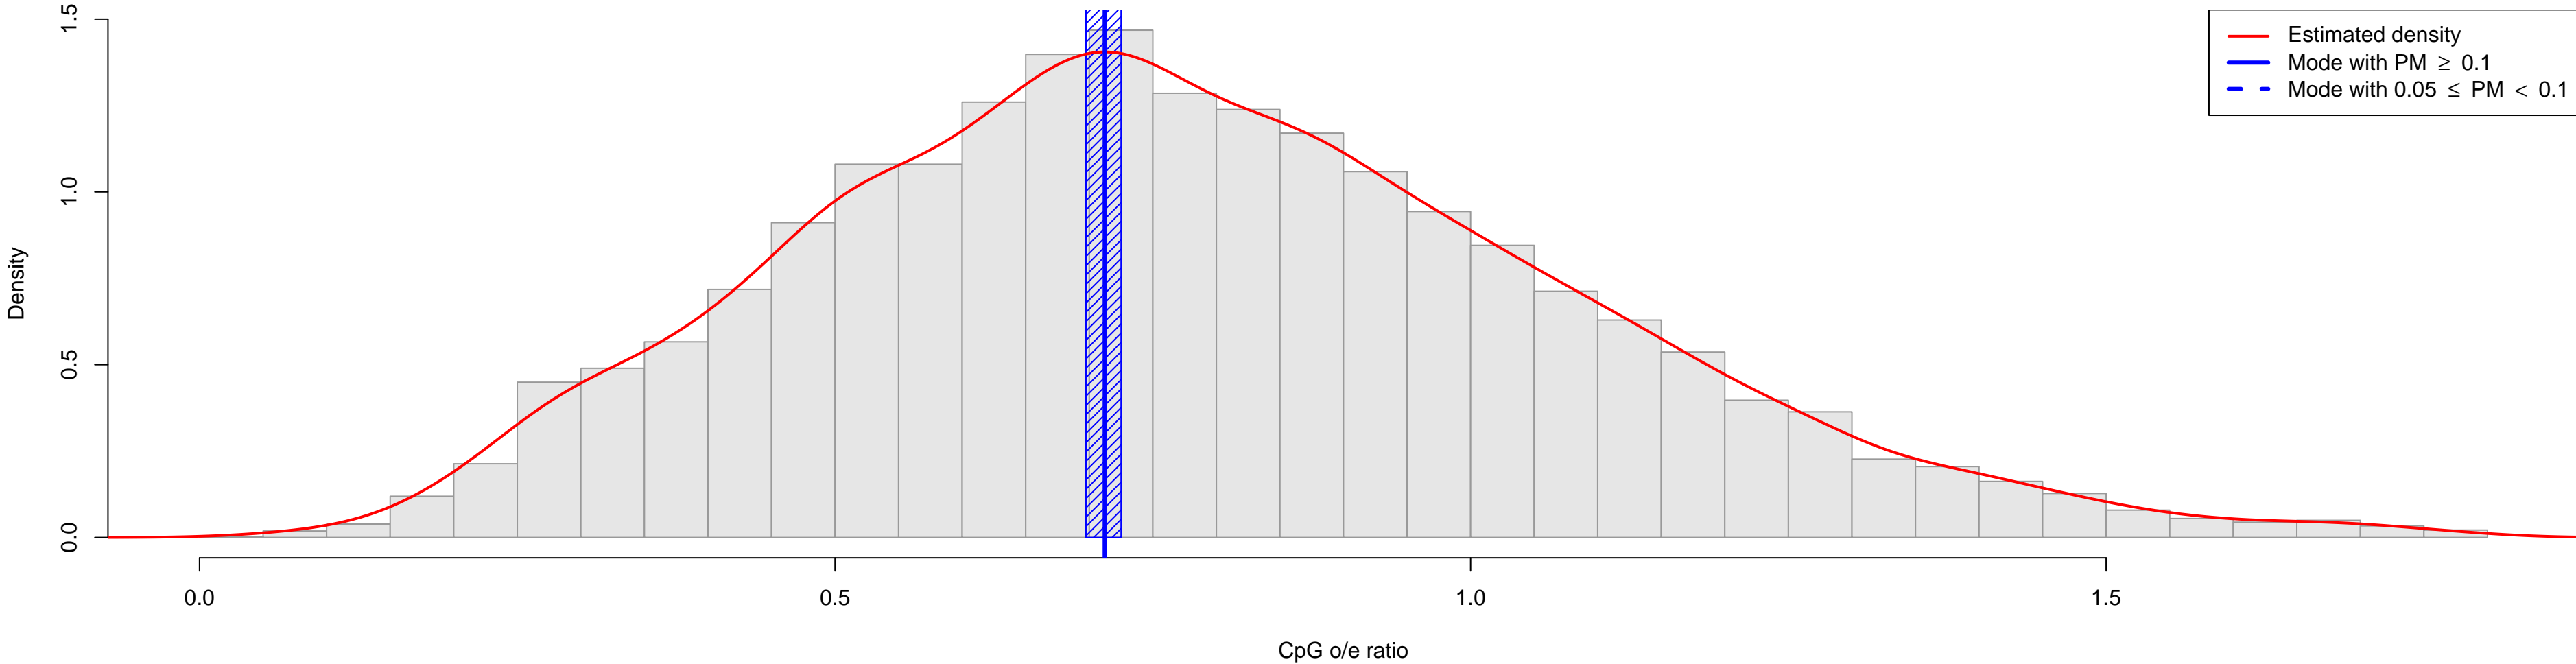

# Pongo\_abelii

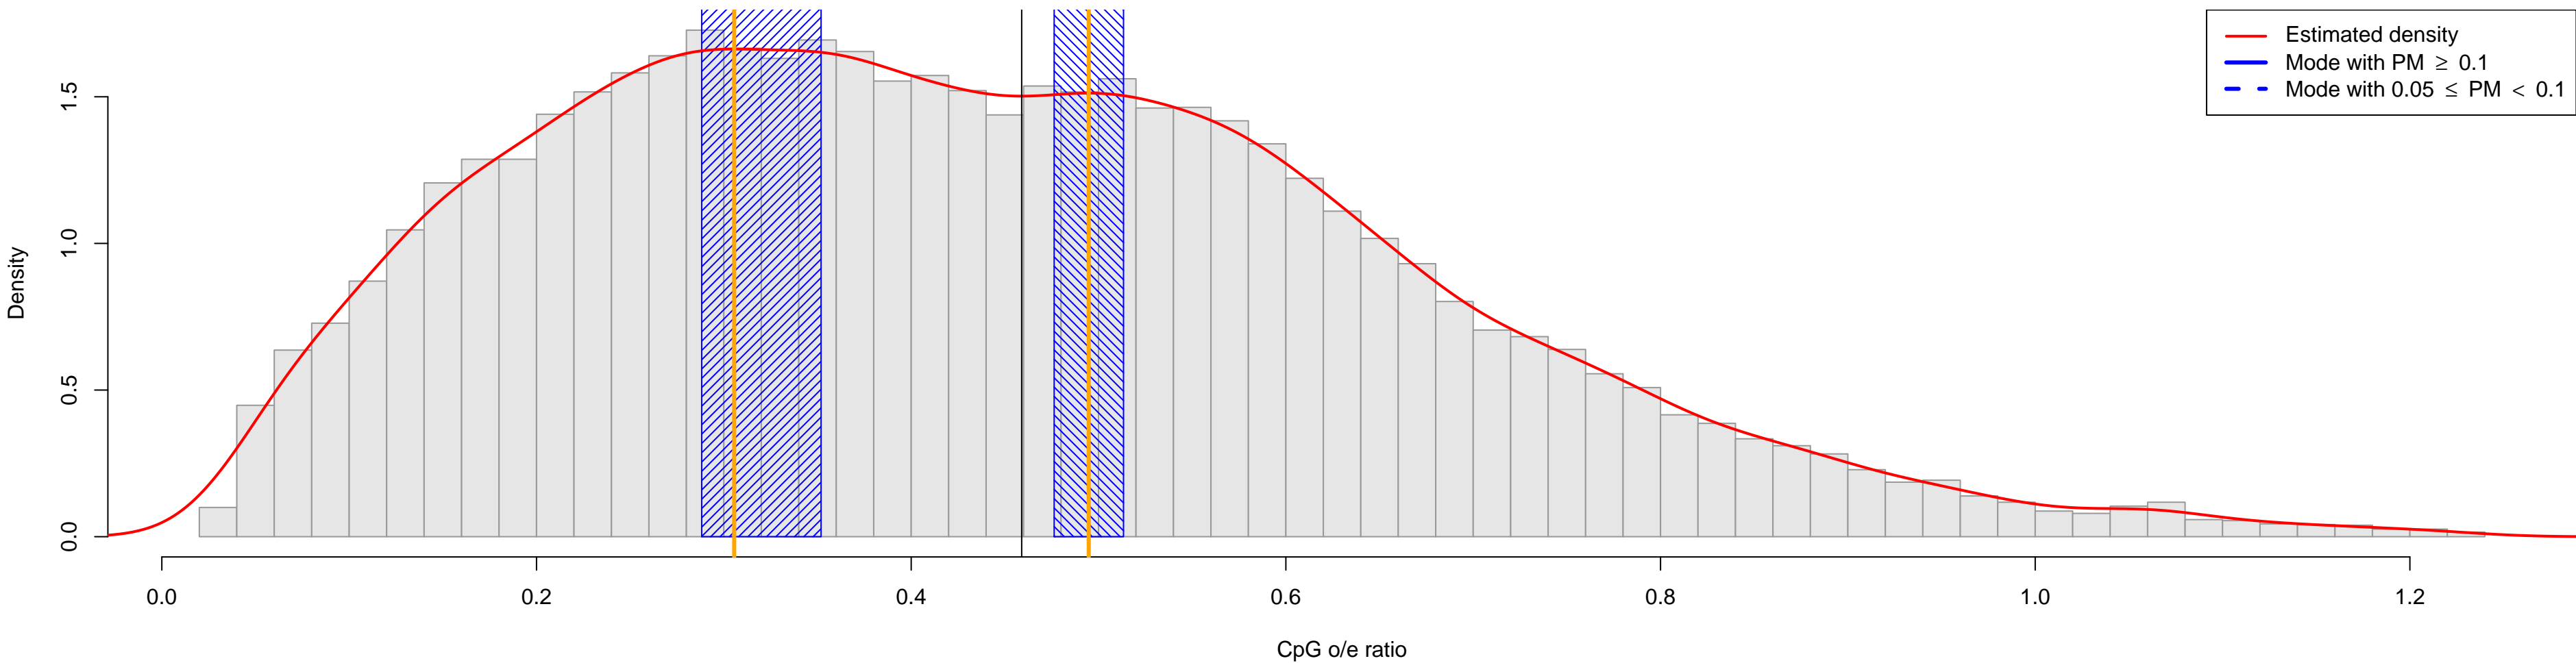

# Populus\_deltoides

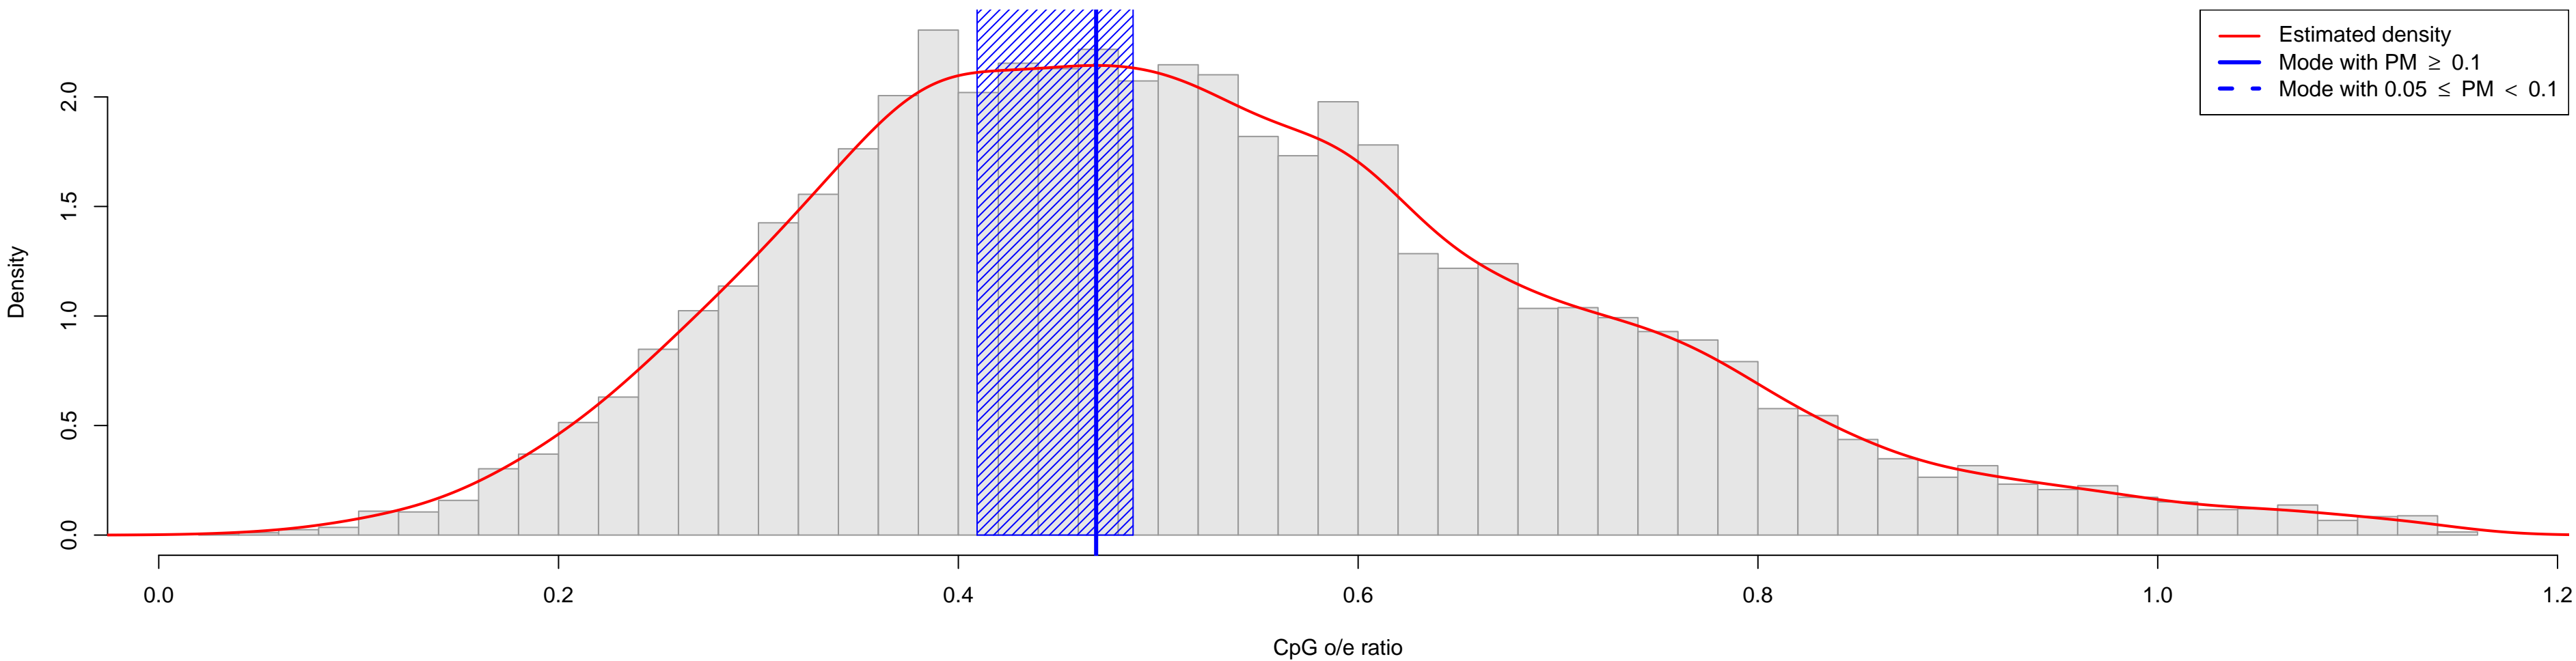

# Populus\_euphratica

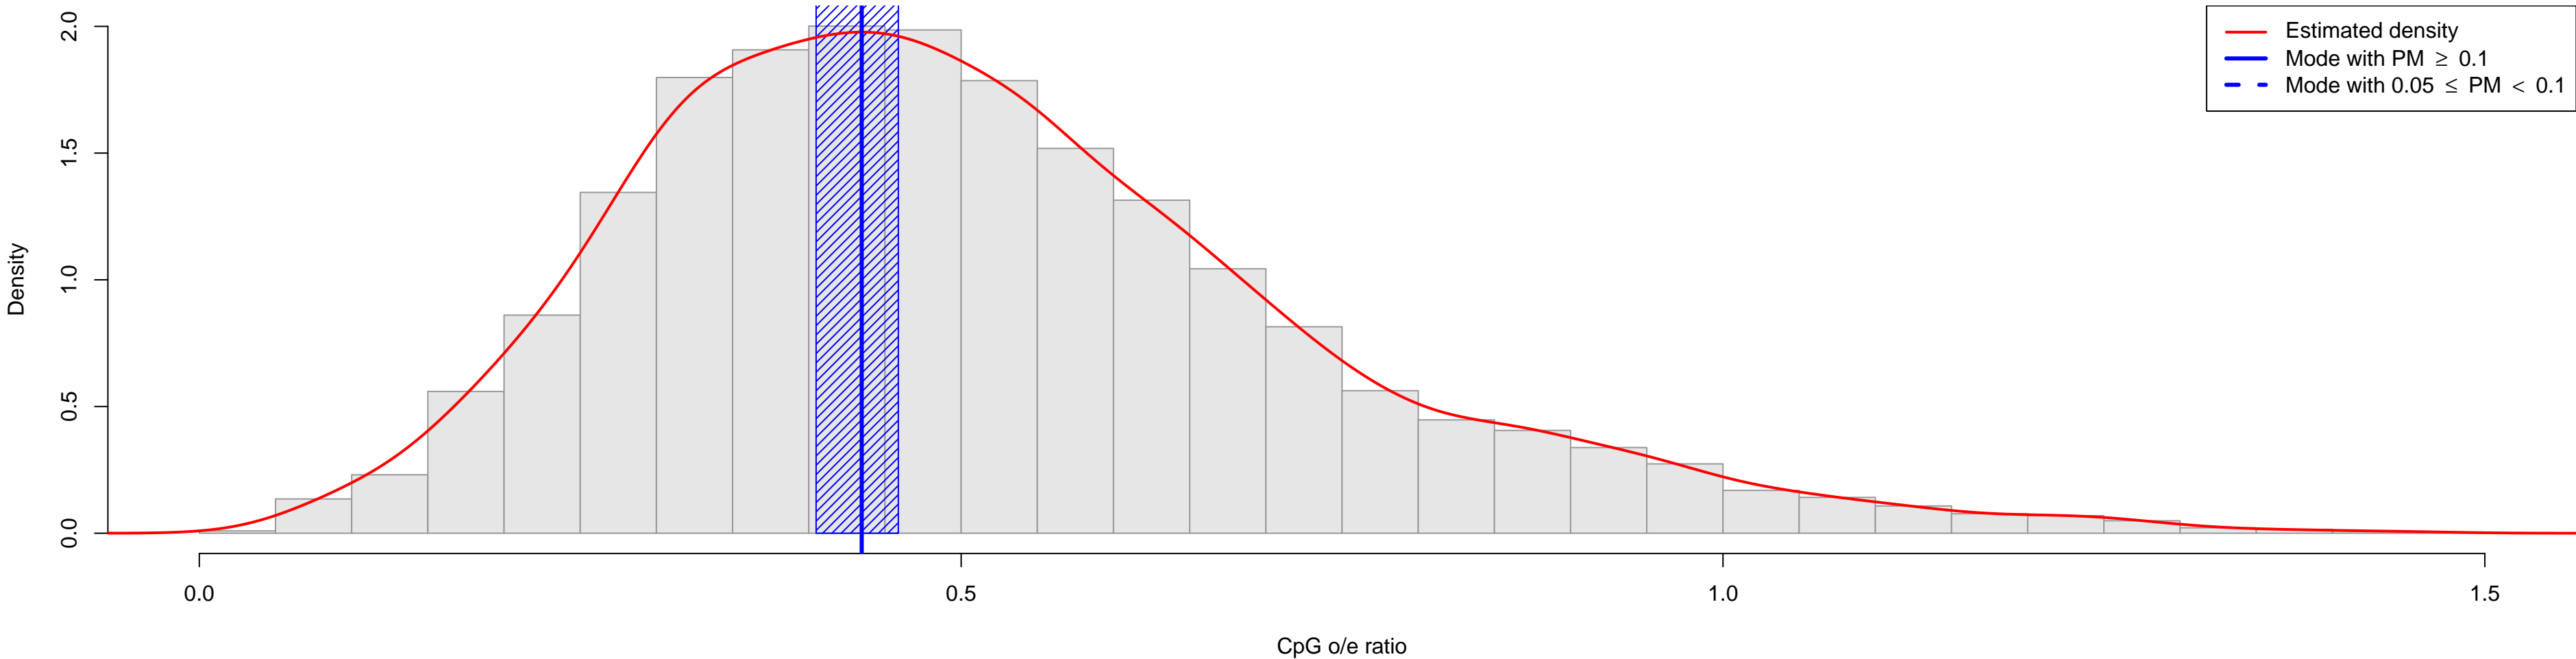

# Populus\_tremula

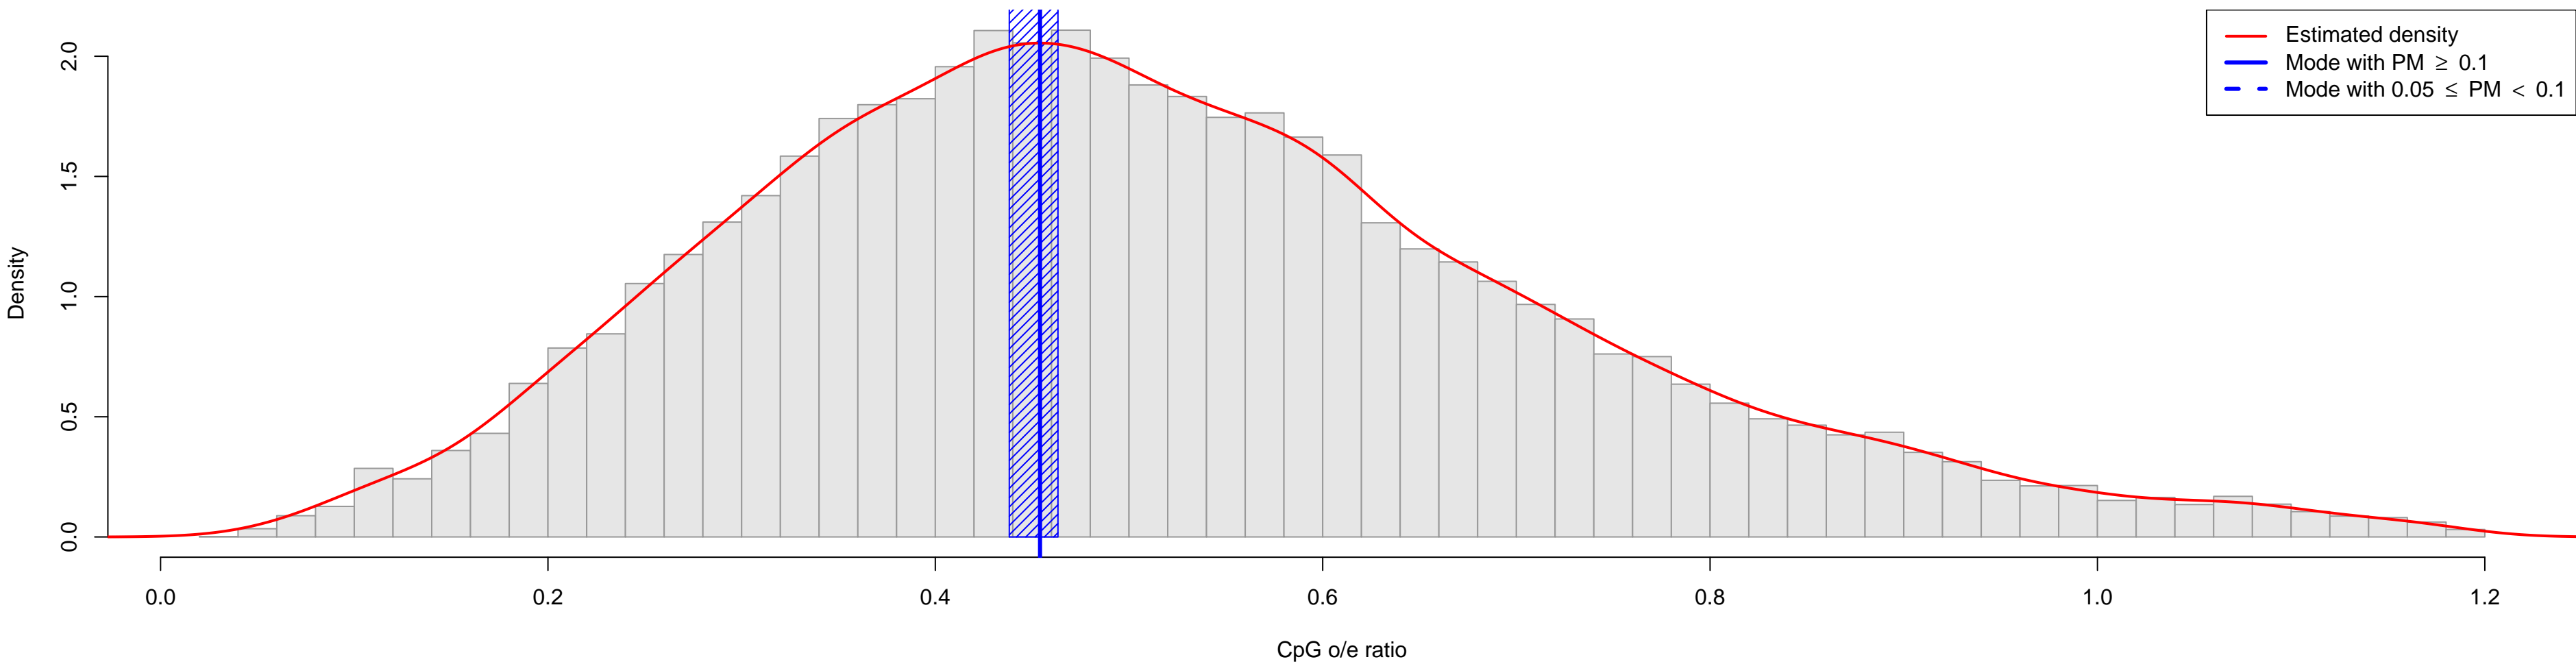

# Populus\_tremuloides

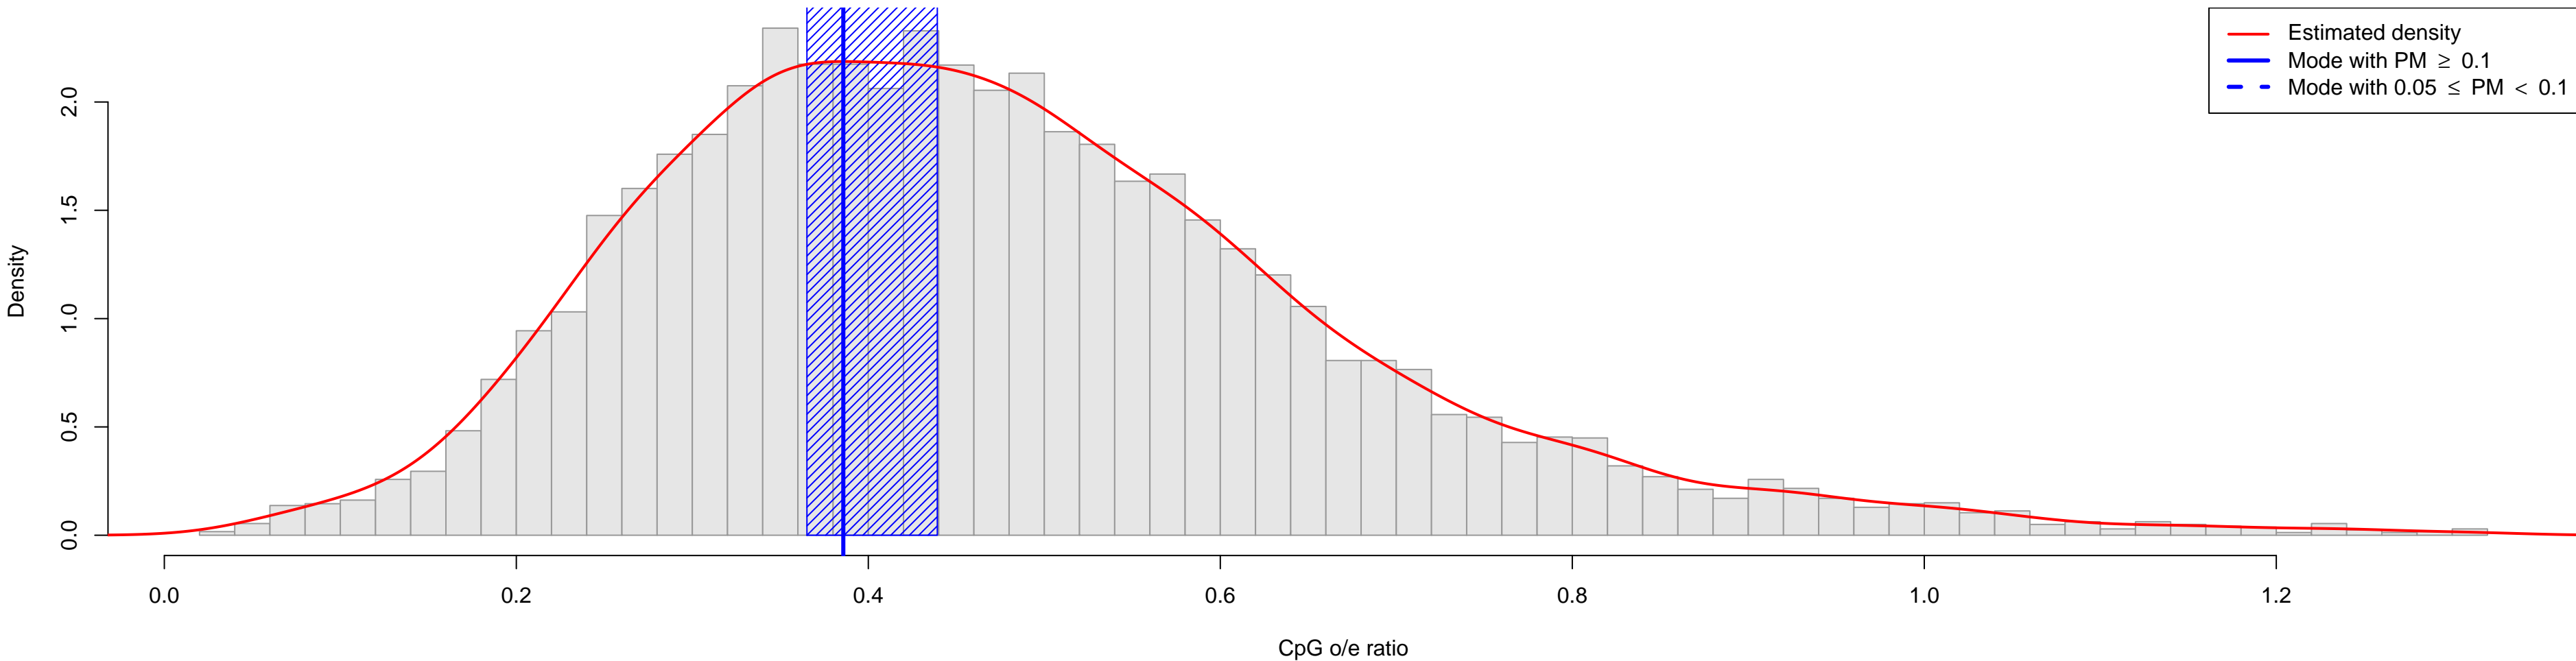

# Porphyra\_yezoensis

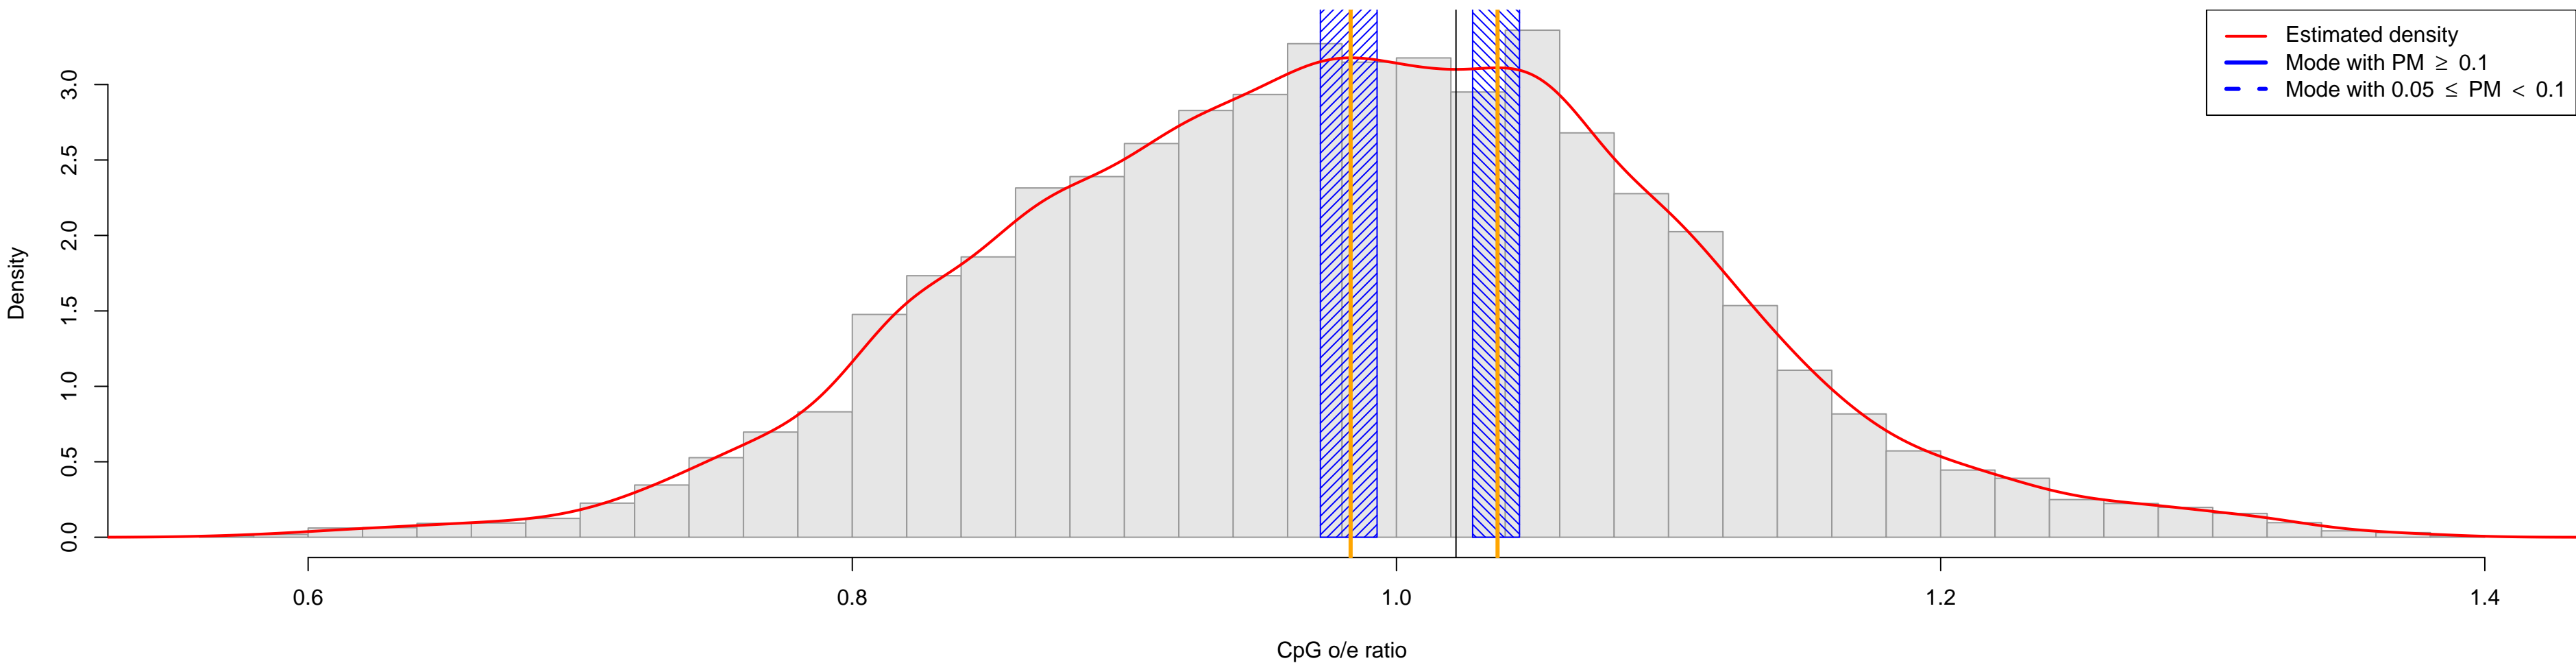

# Postia\_placenta

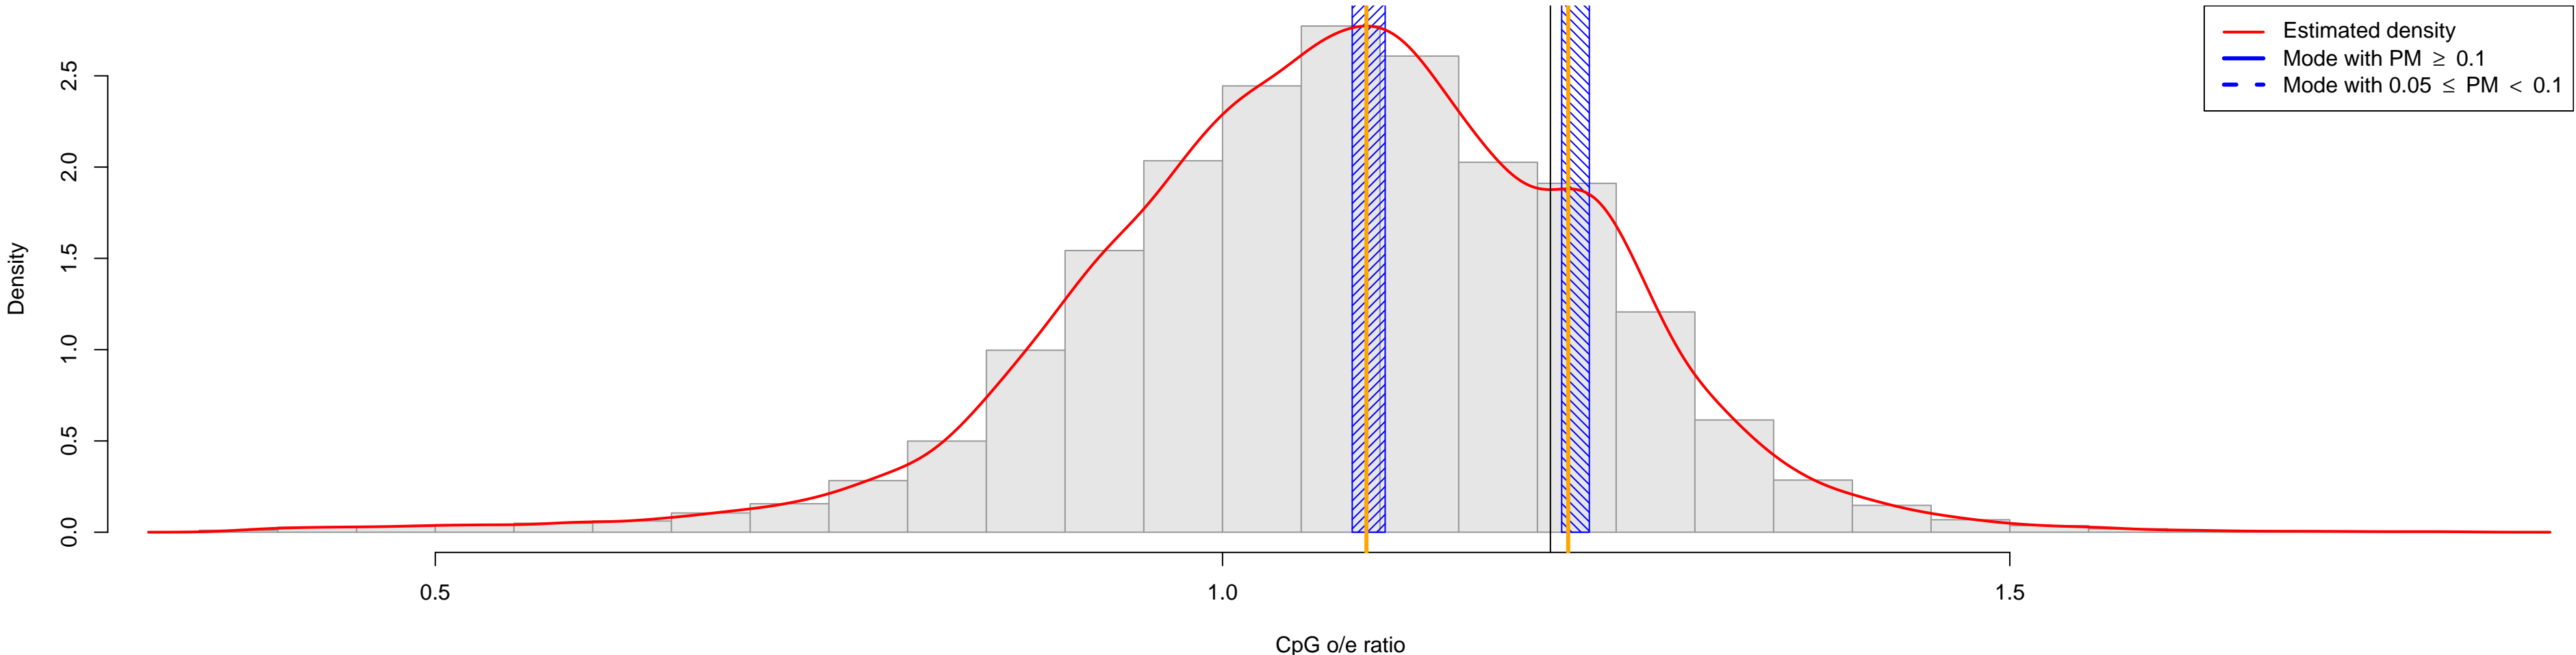



# Pristionchus\_pacificus

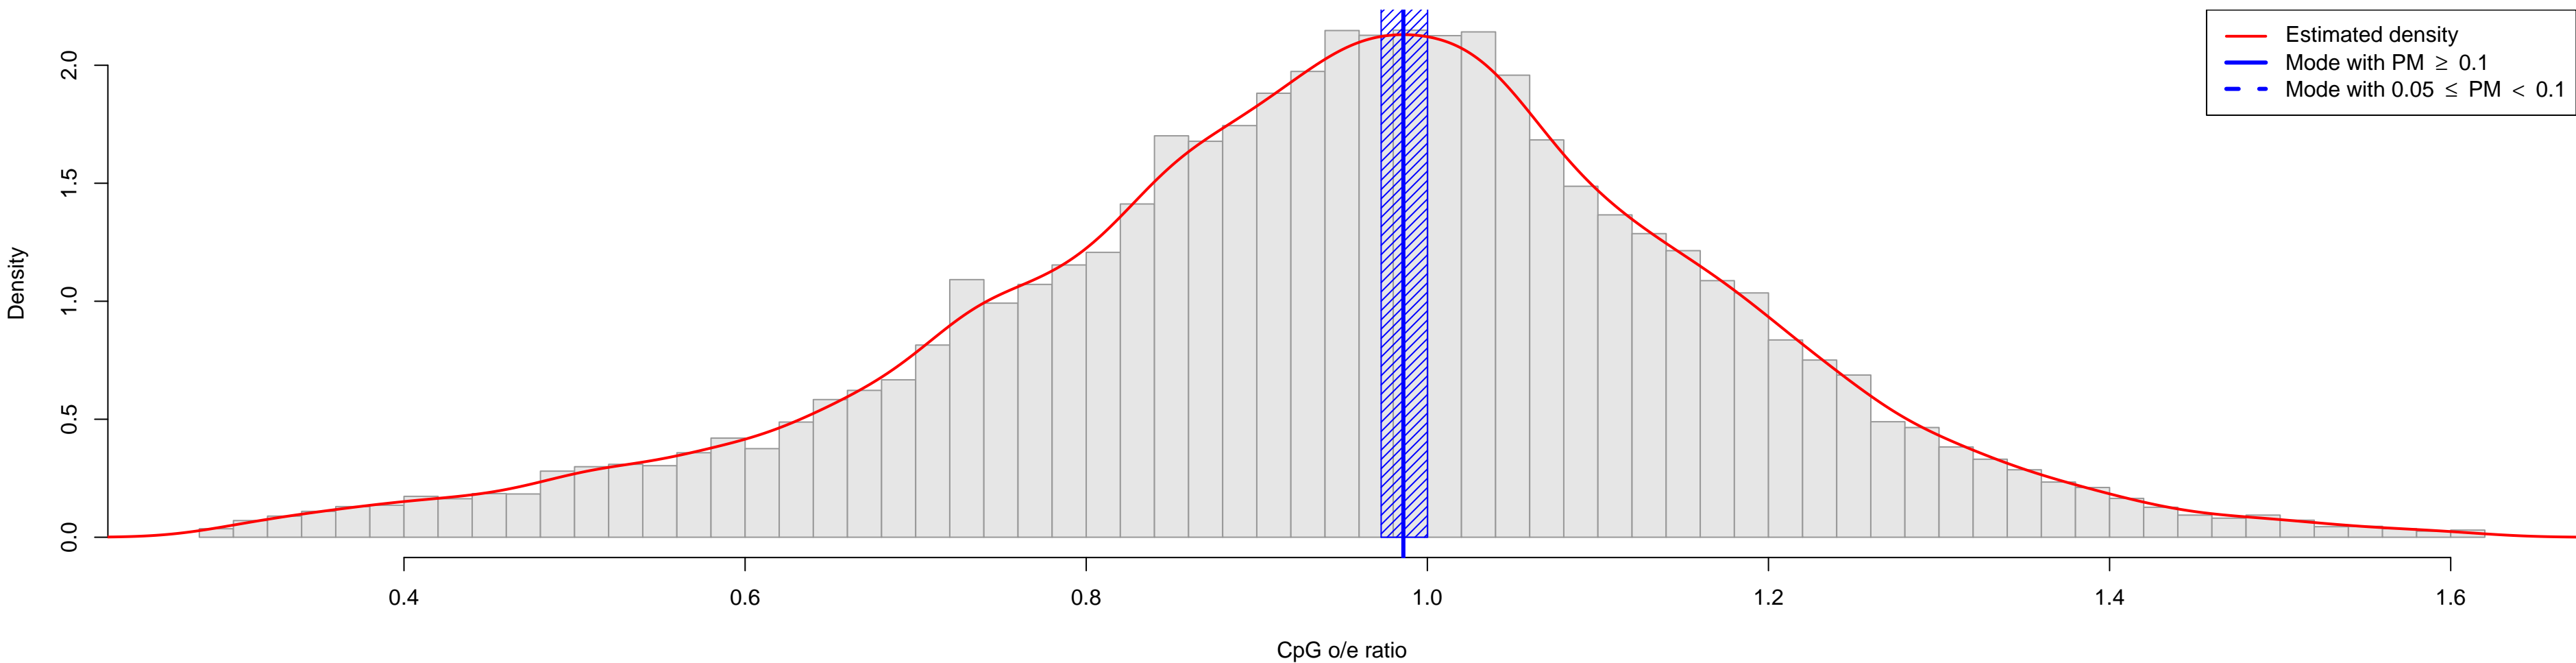

# Prunus\_armeniaca

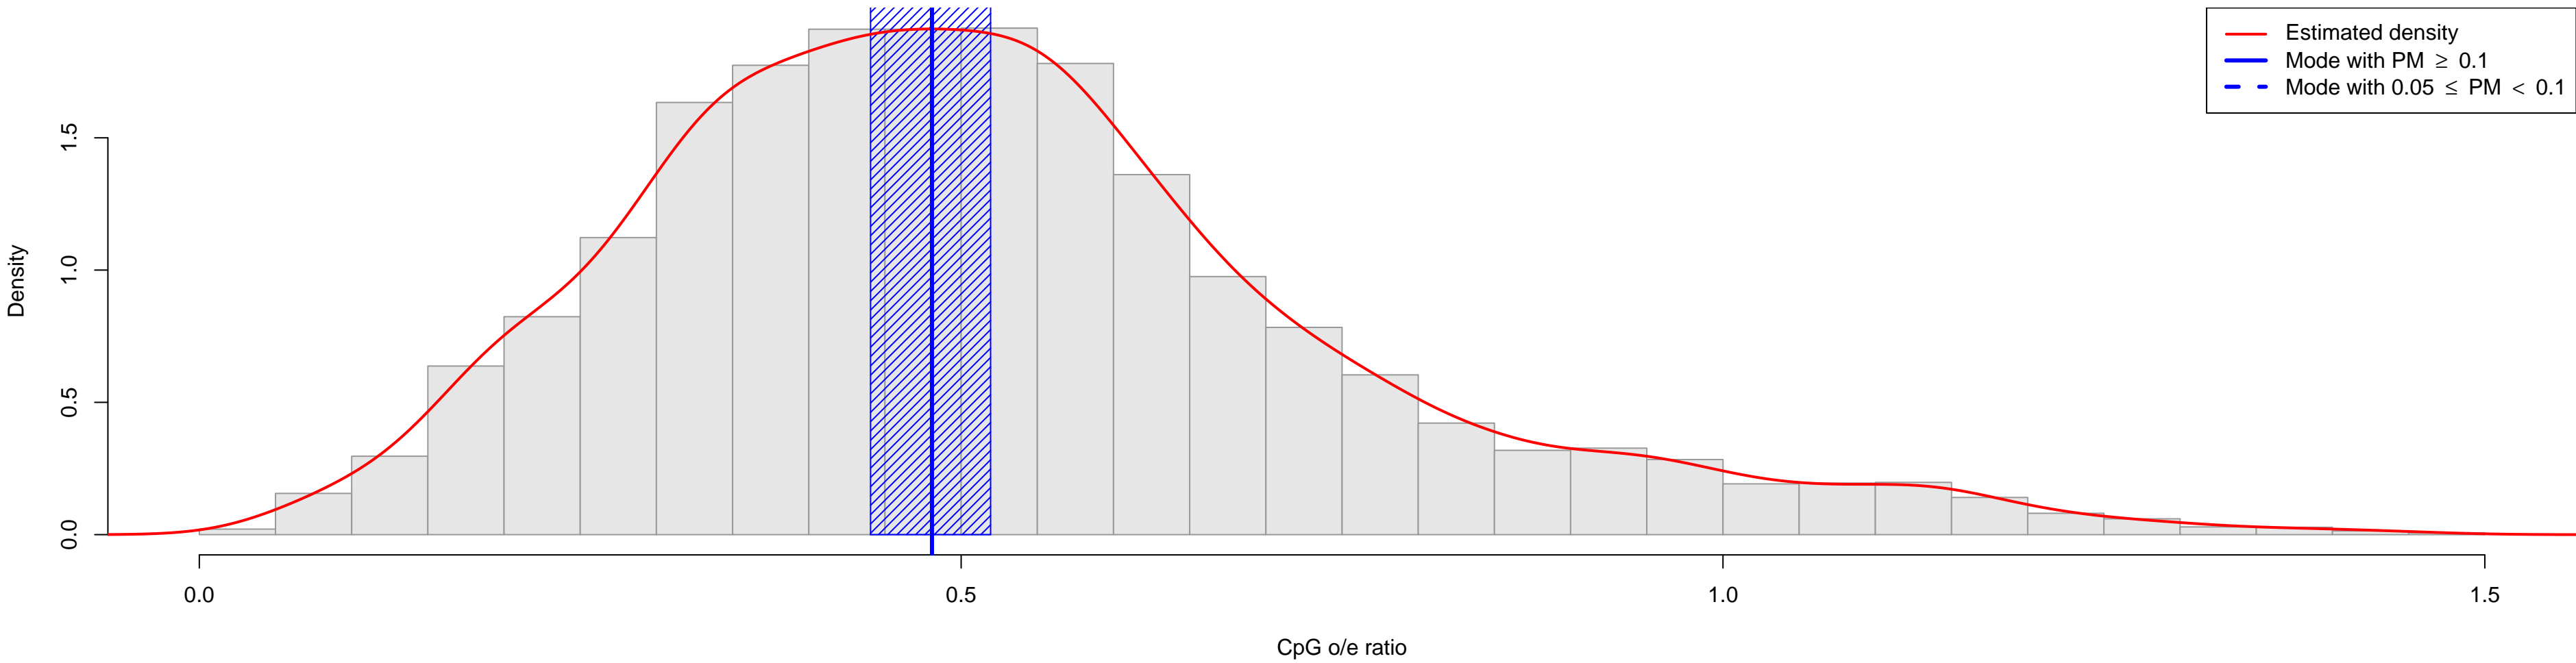

# Prunus\_persica

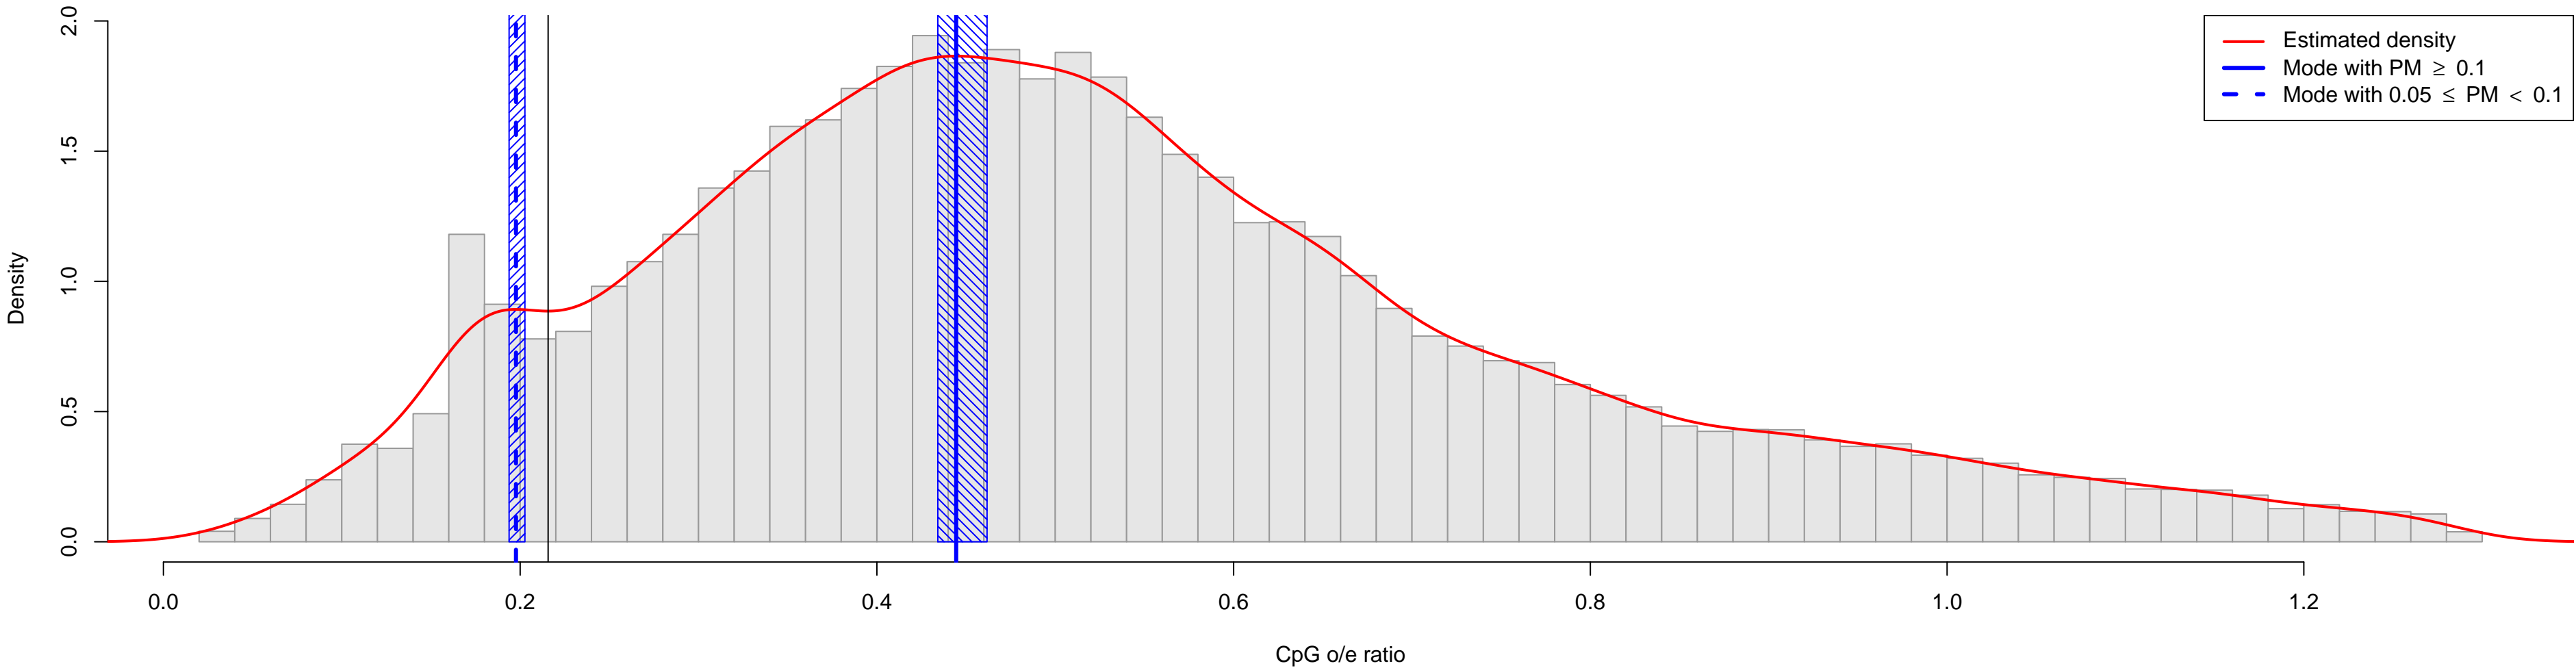

# Prymnesium\_parvum

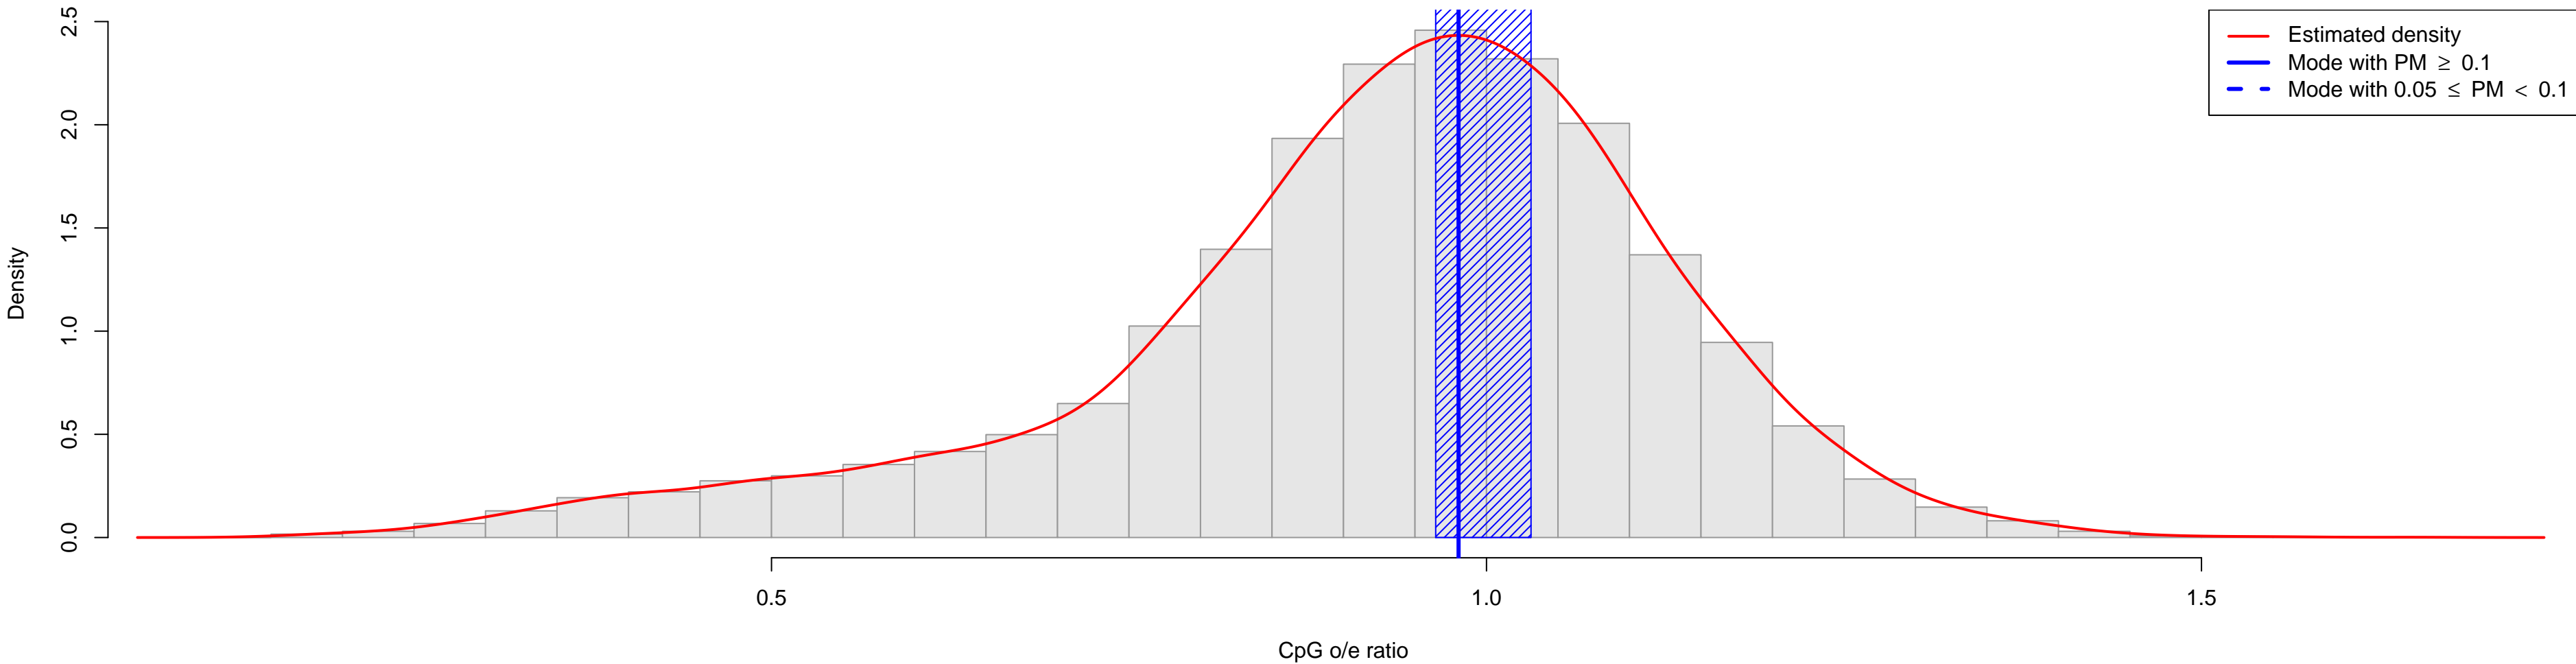

# Psetta\_maxima

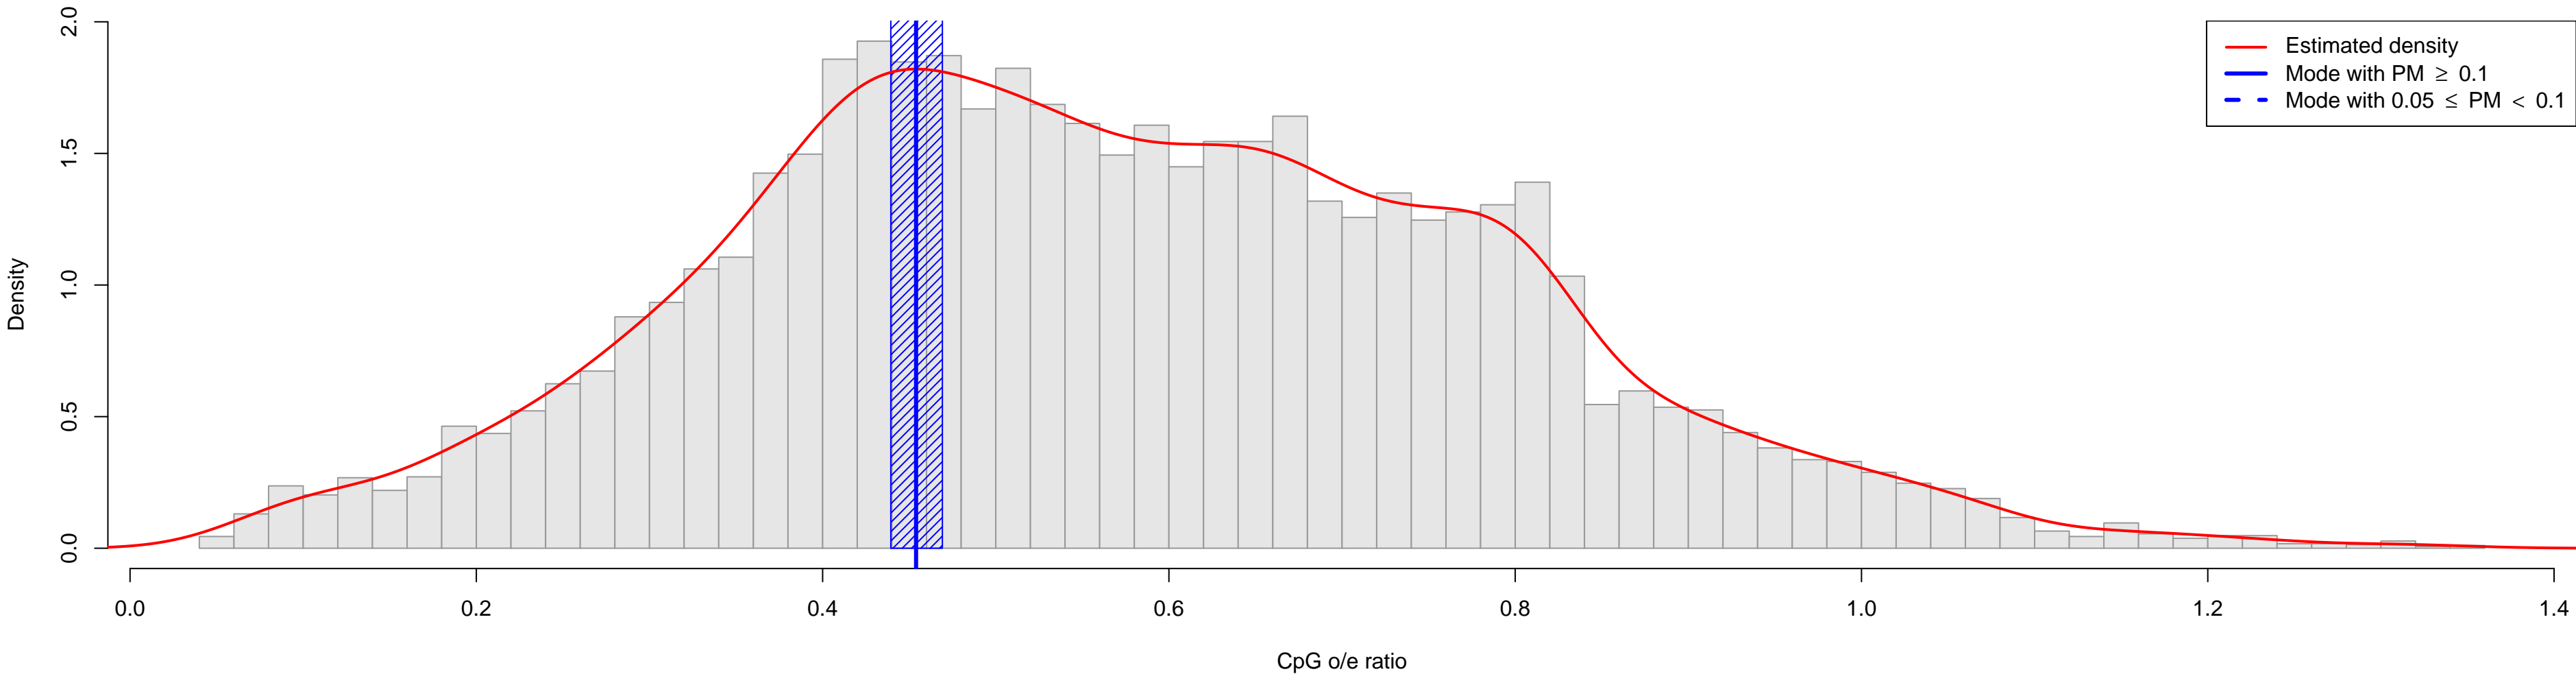

# Pteridium\_aquilinum

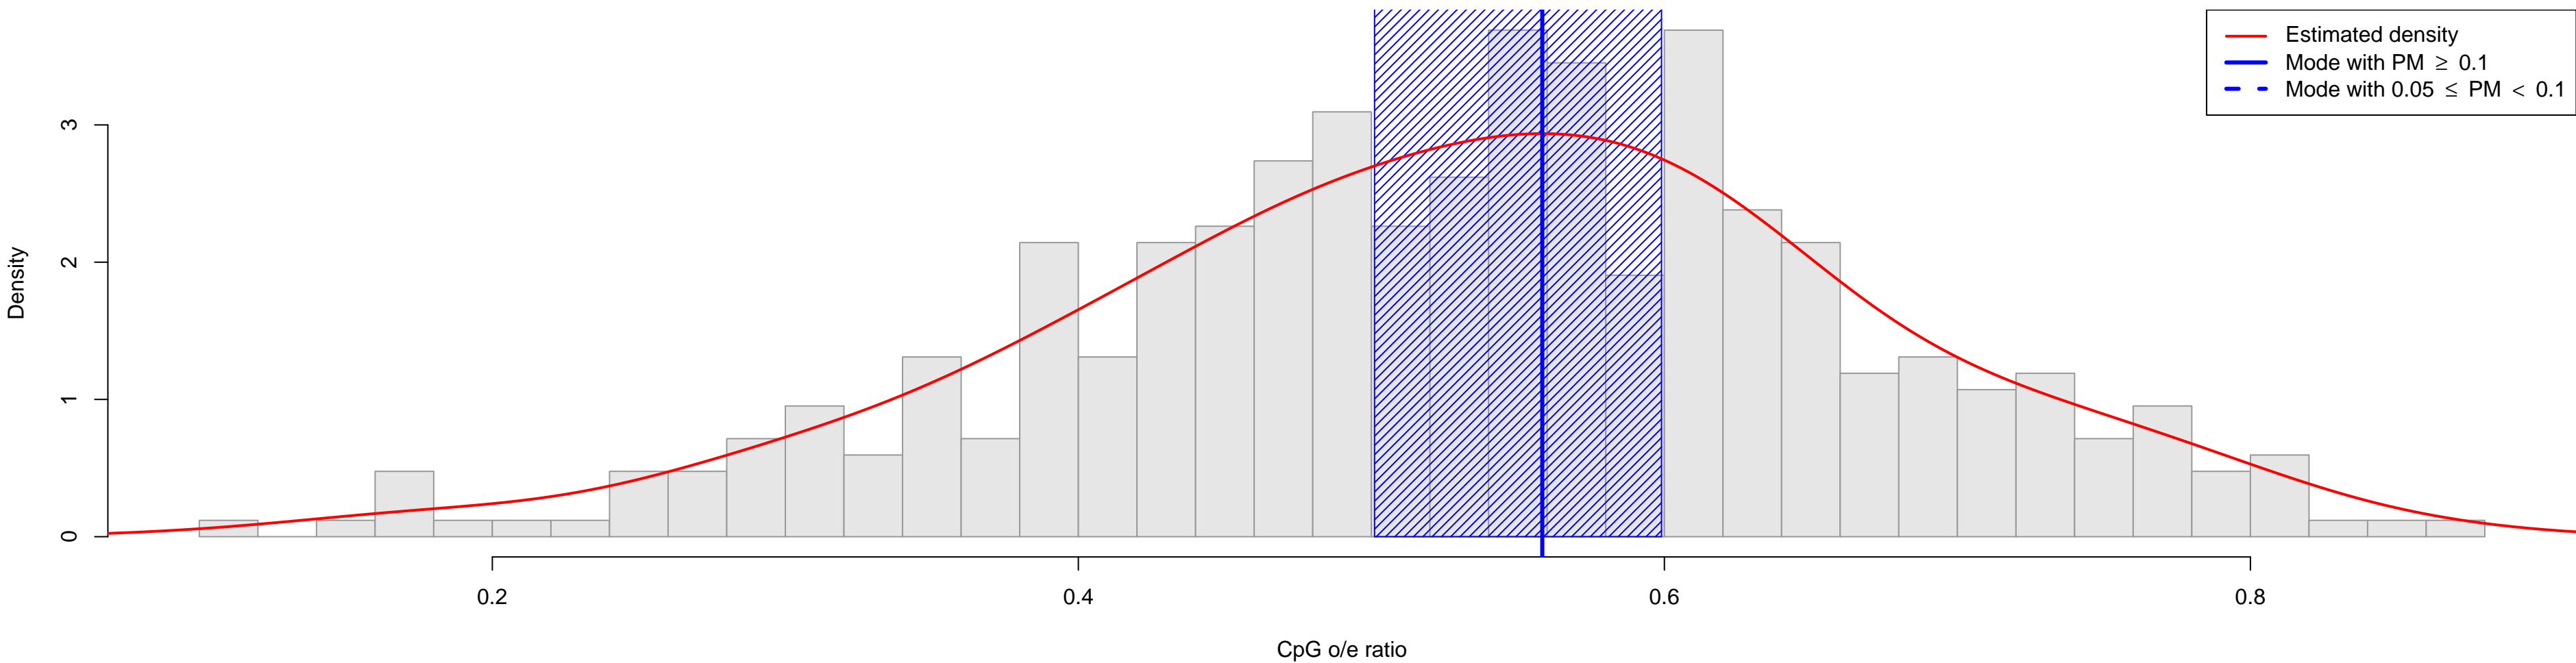

# Quercus\_petraea

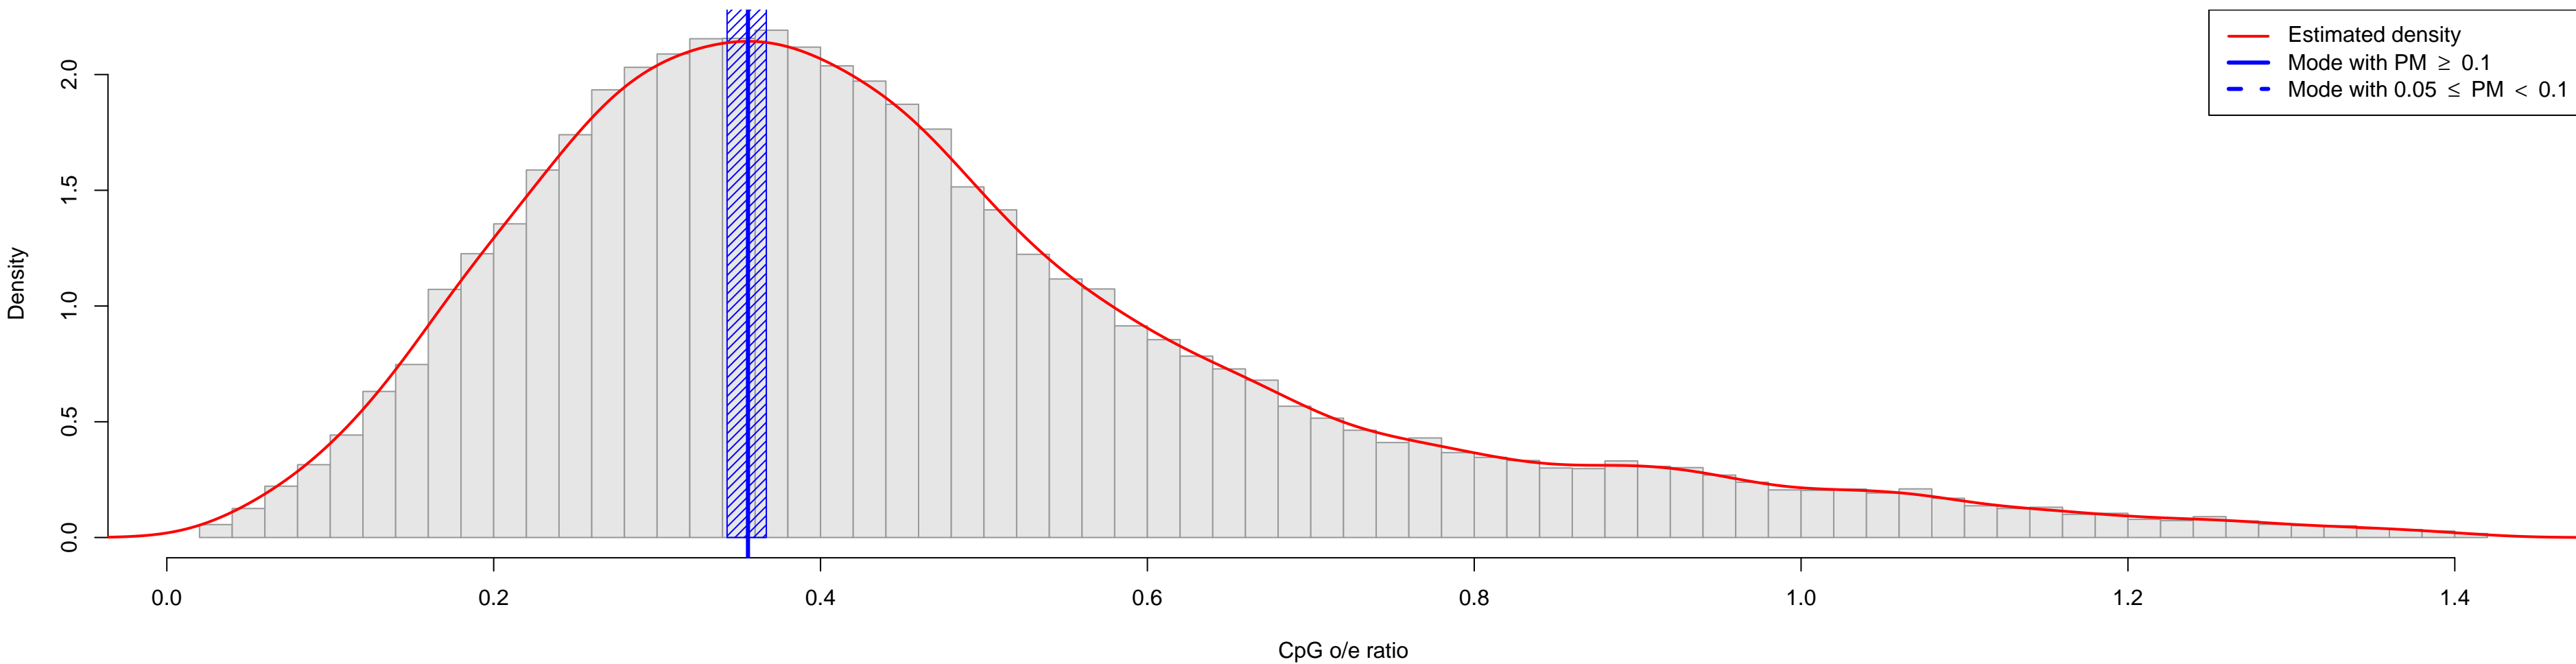

# Quercus\_robur

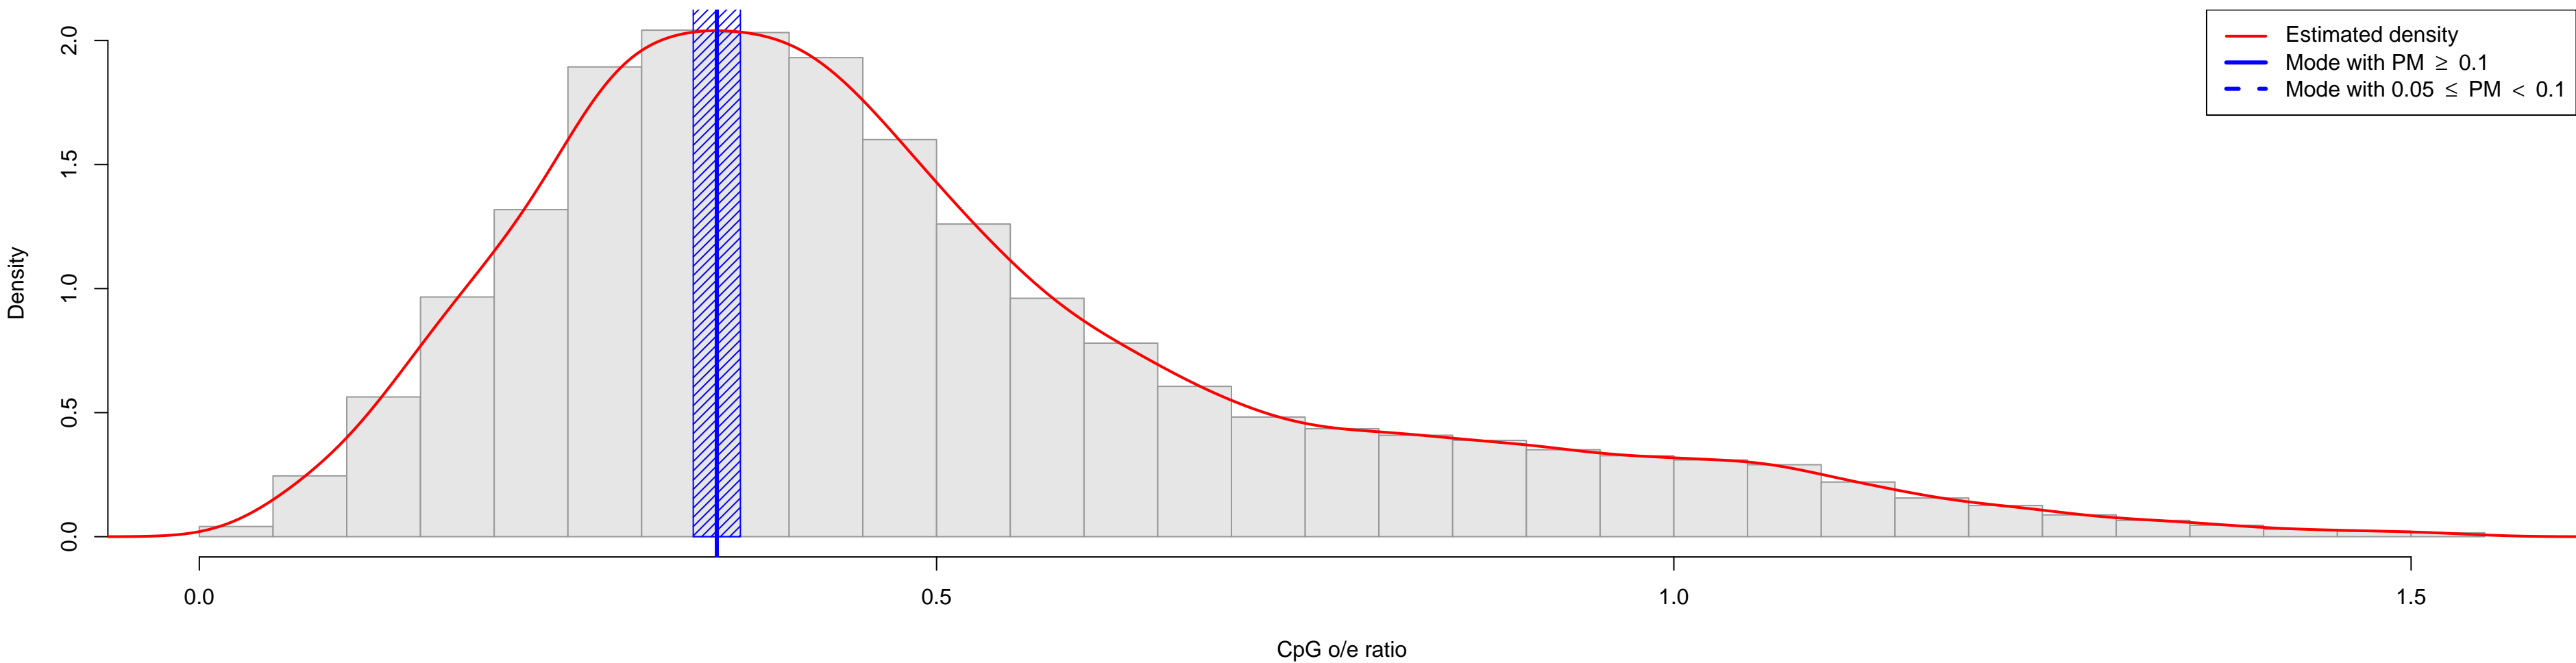



# Quercus\_suber

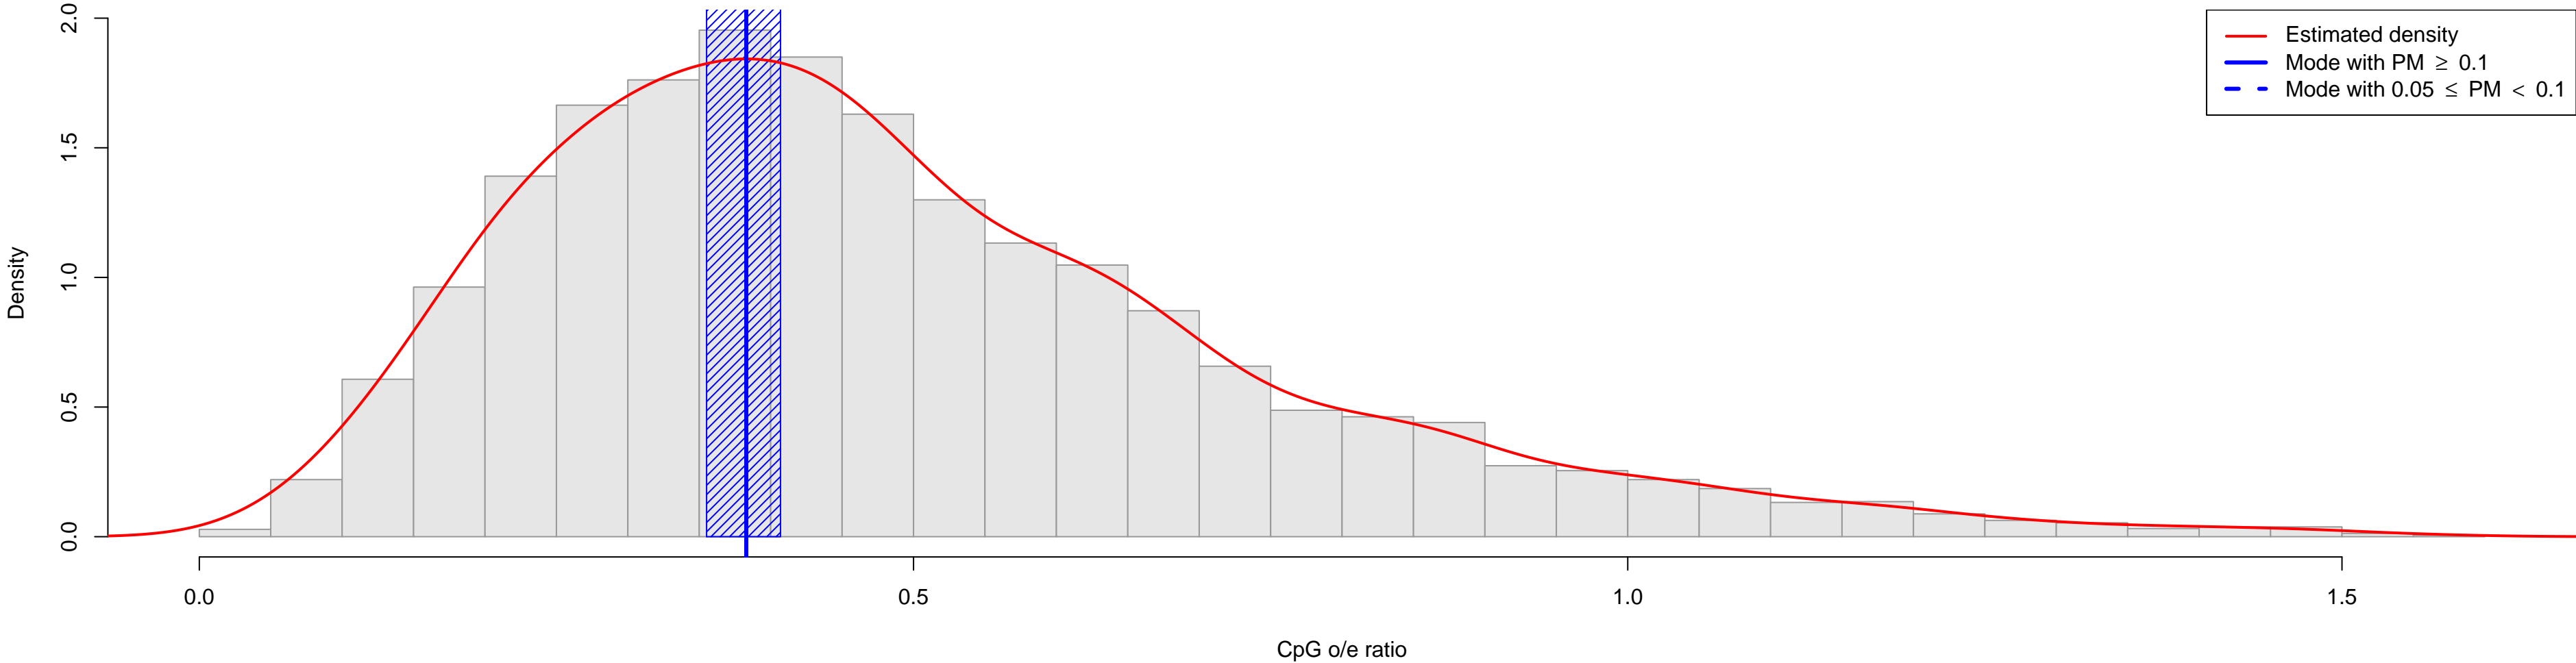

# Radopholus\_similis

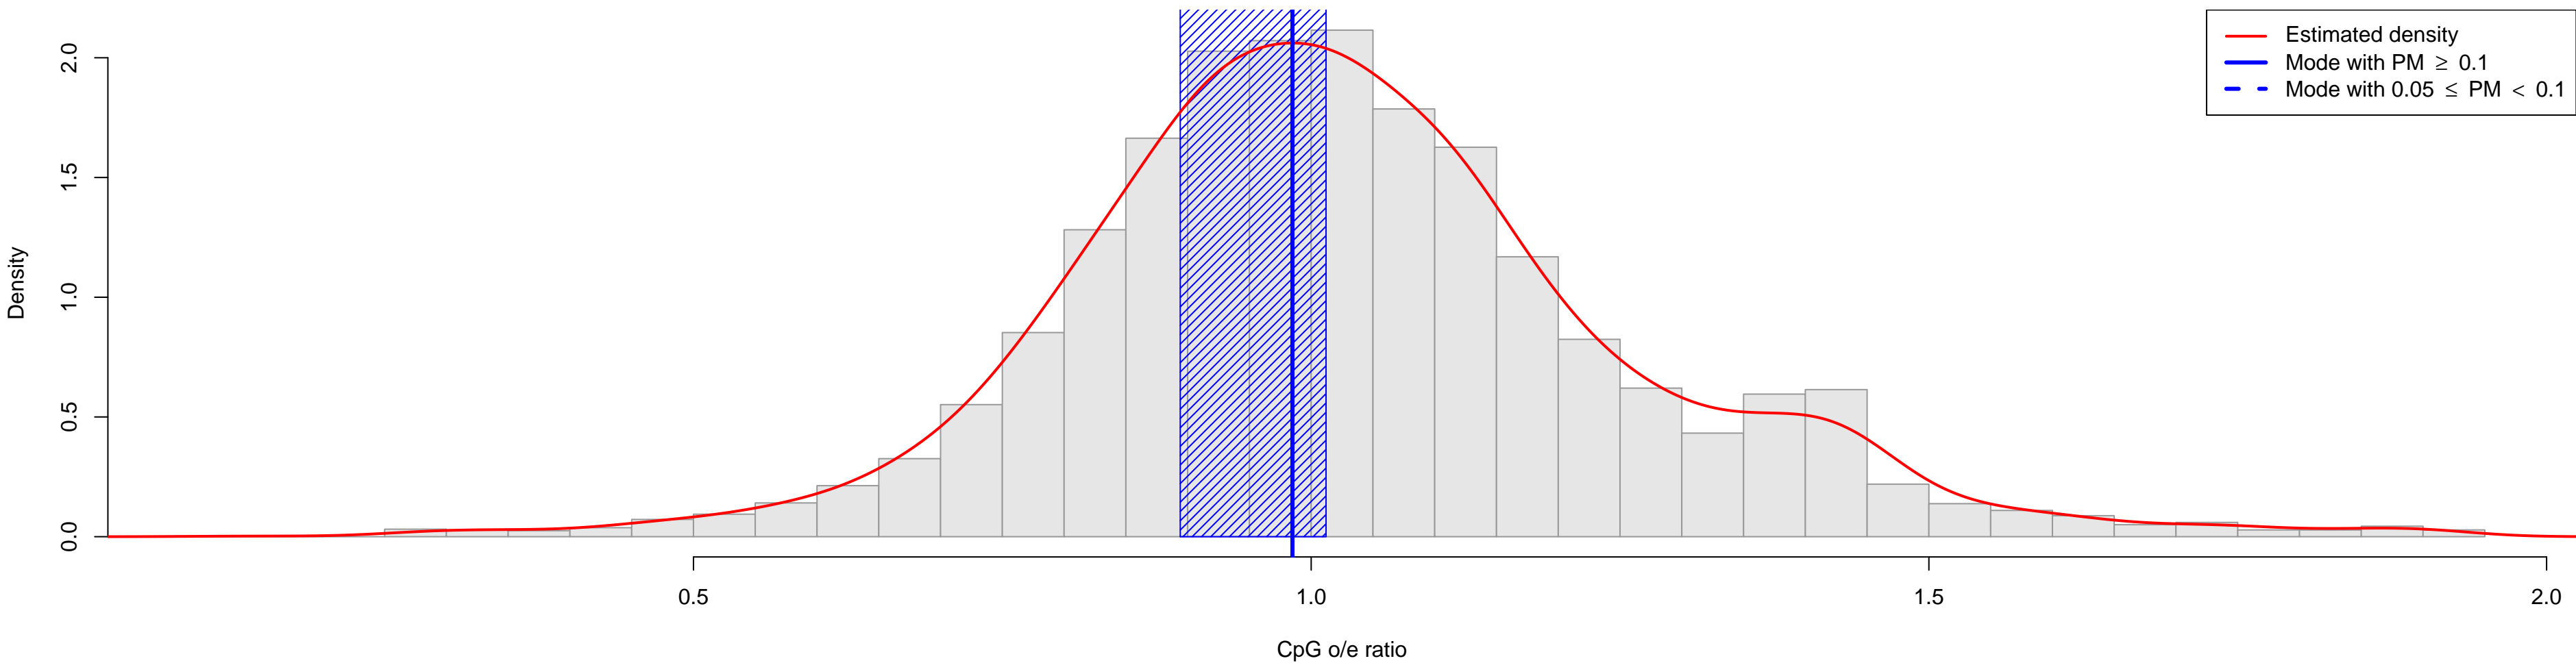

# Raphanus\_sativus

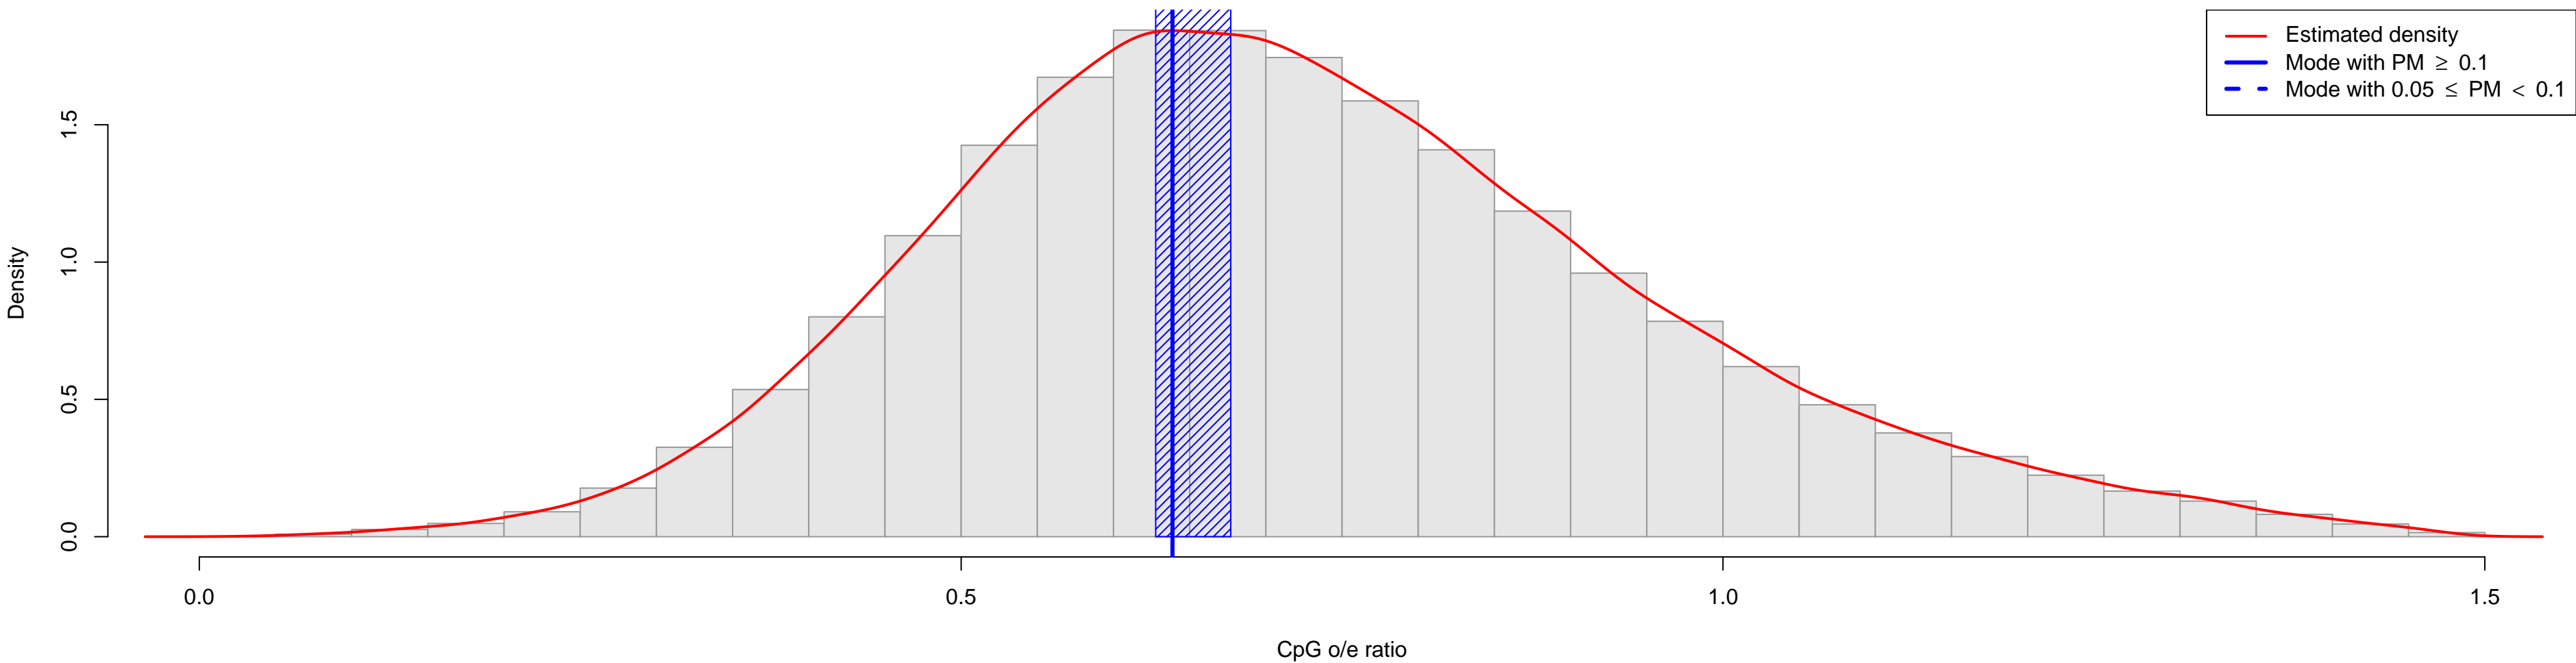

# Rattus\_norvegicus

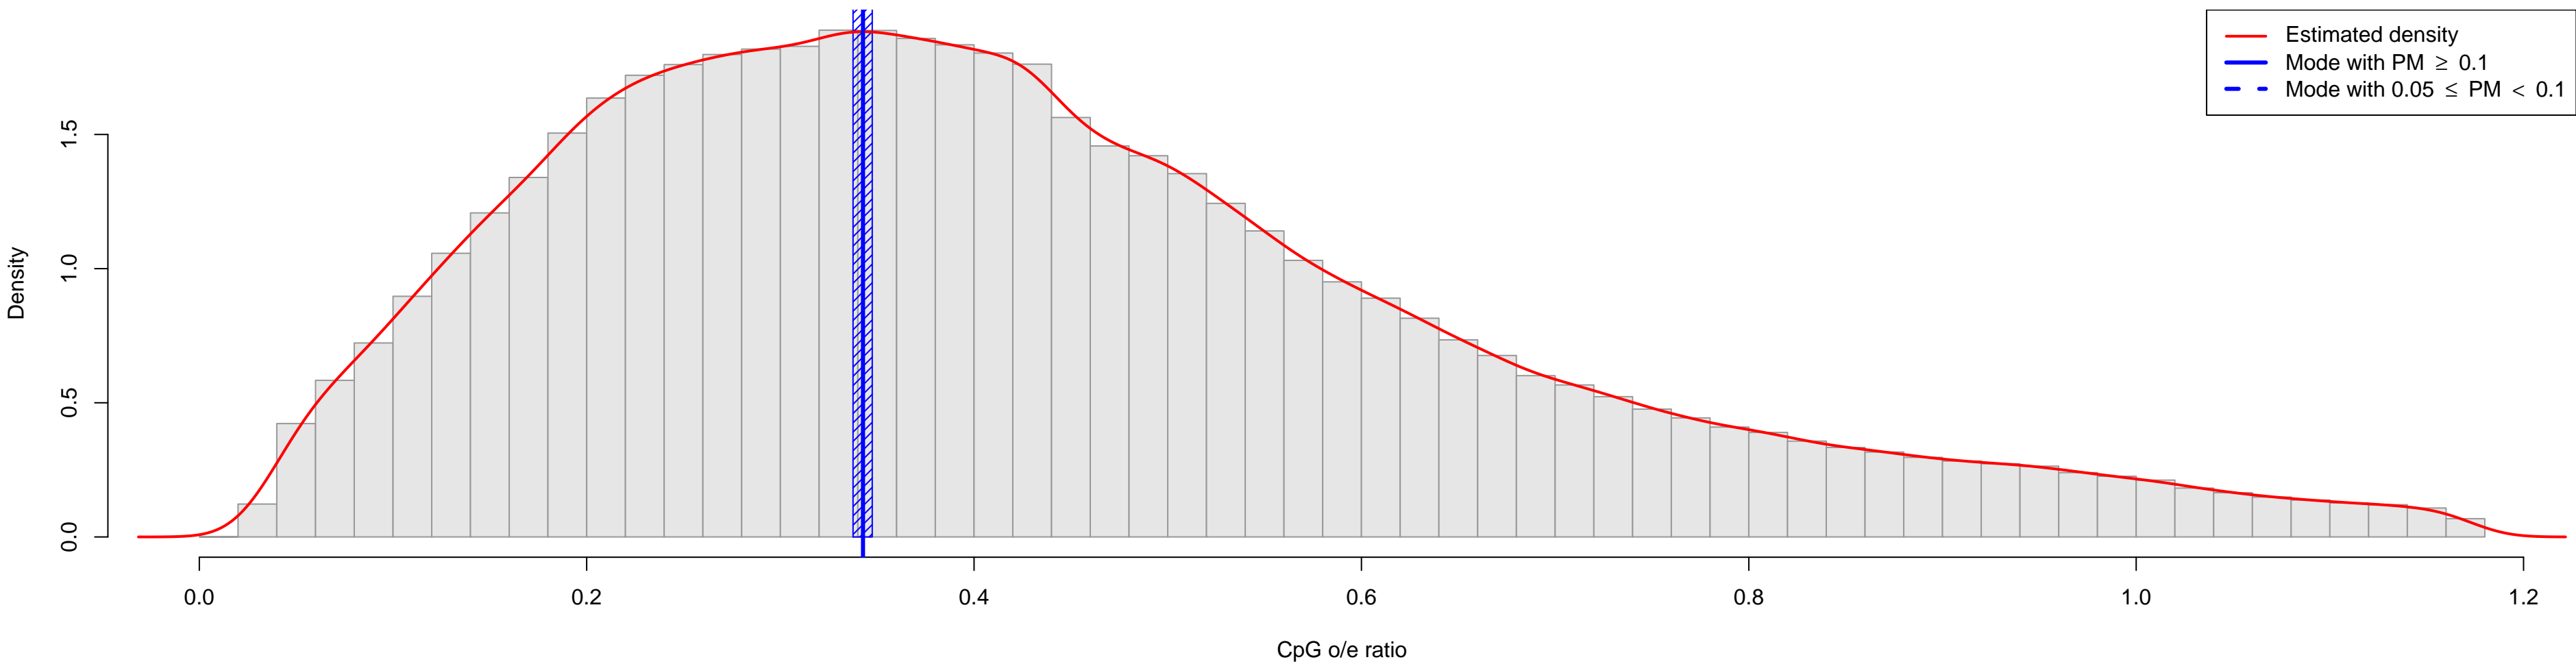

# Reclinomonas\_americana

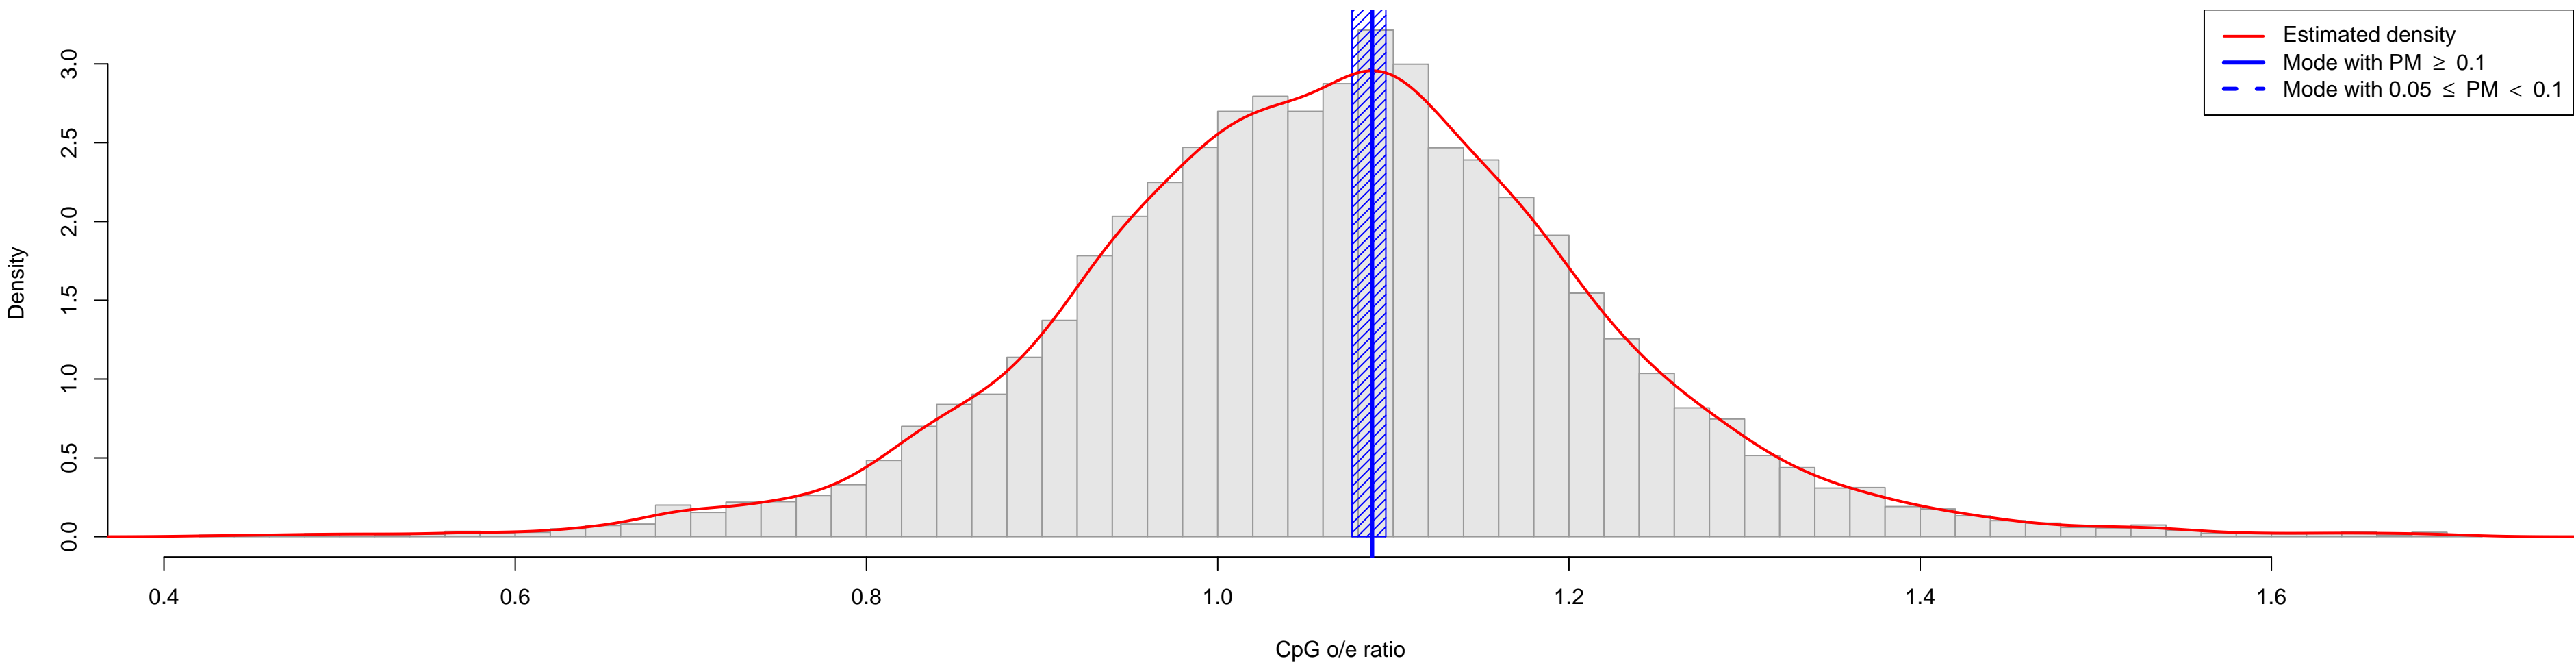

# Reticulitermes\_flavipes

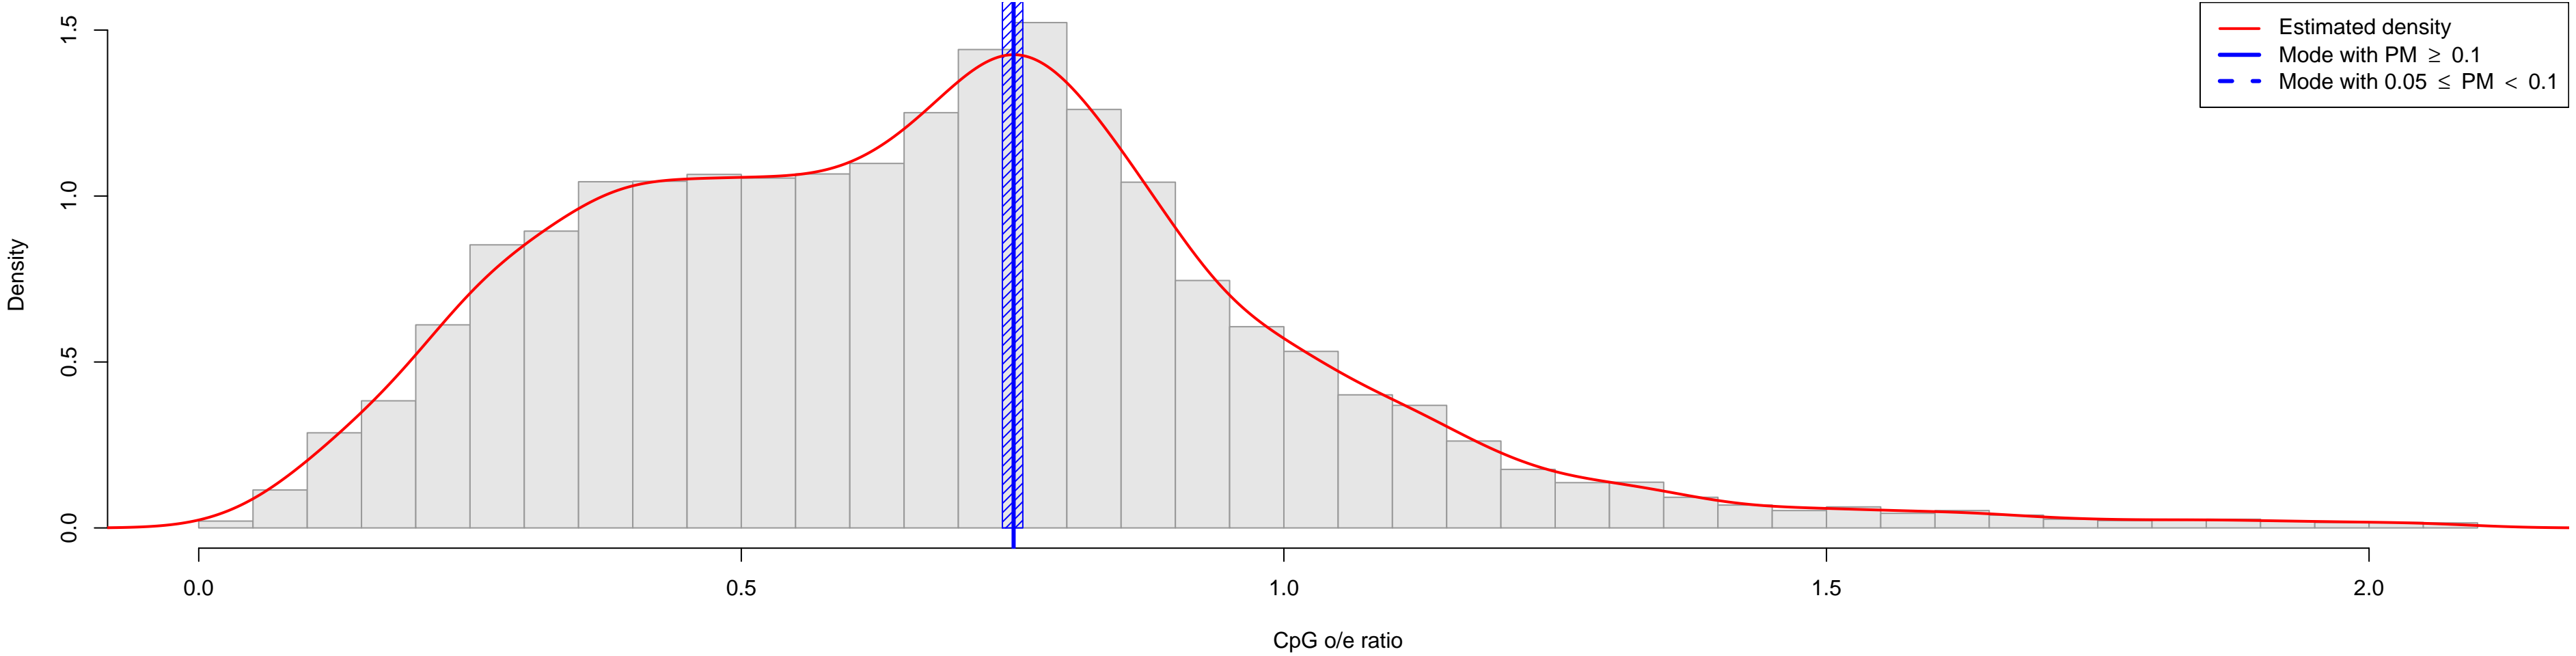

# Rhipicephalus\_appendiculatus

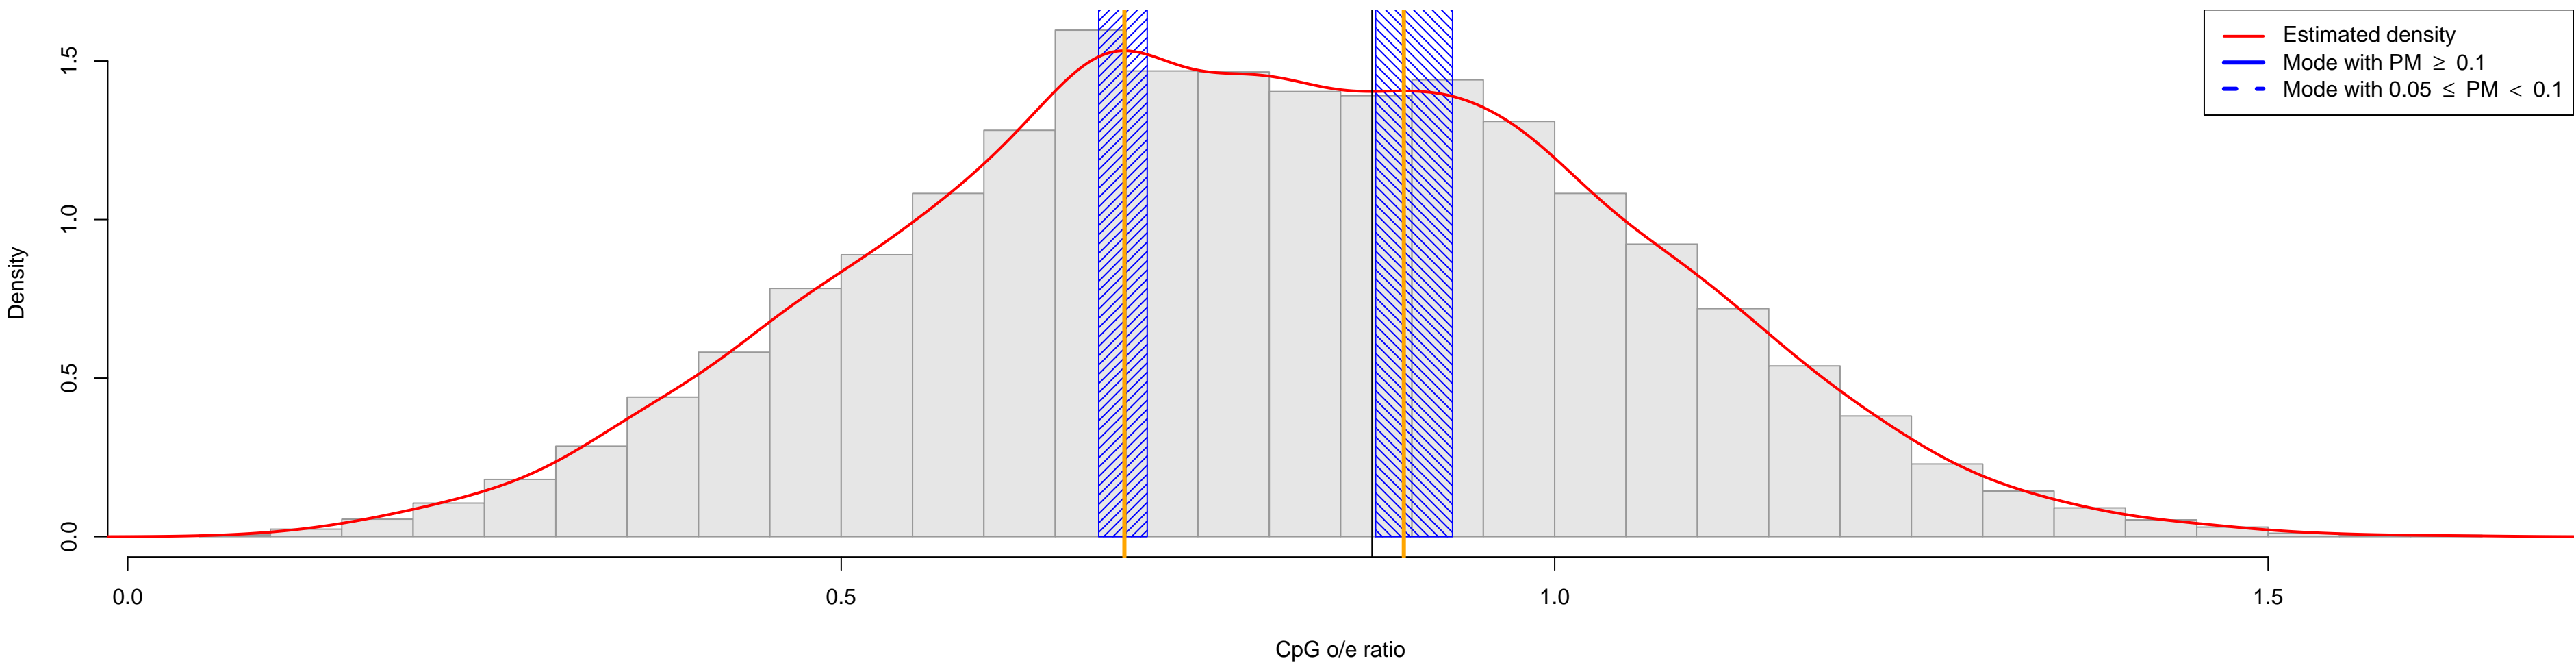

# Rhipicephalus\_microplus

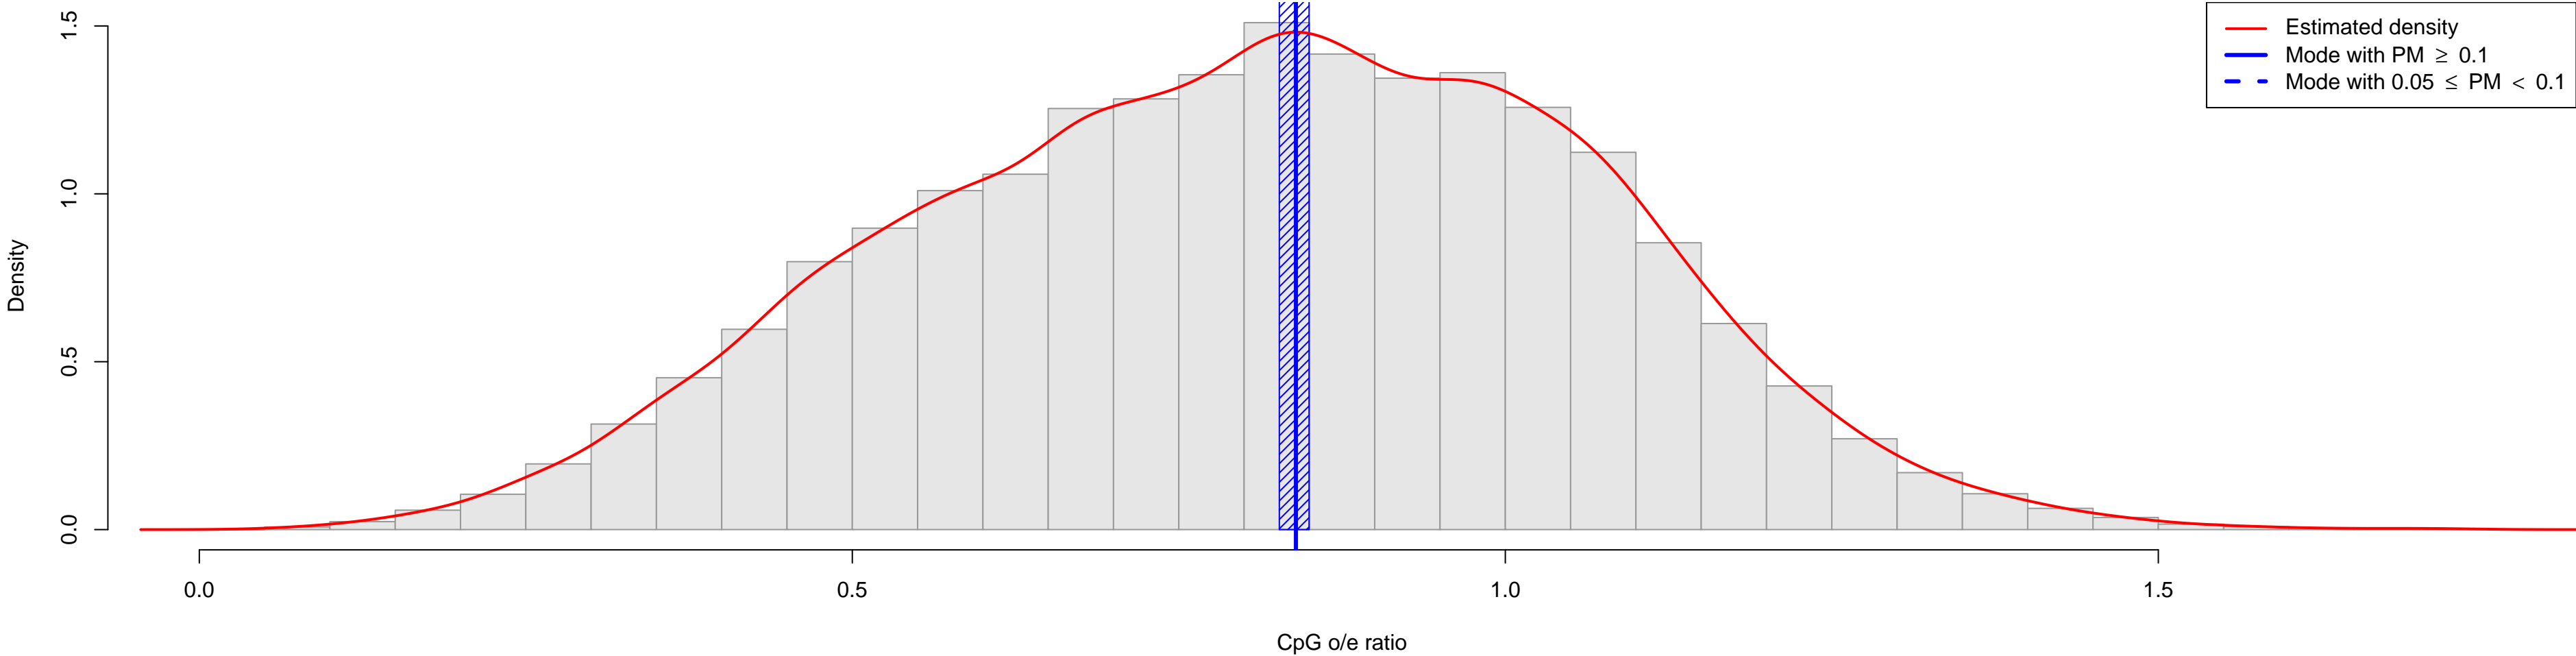



# Rhizopus\_oryzae

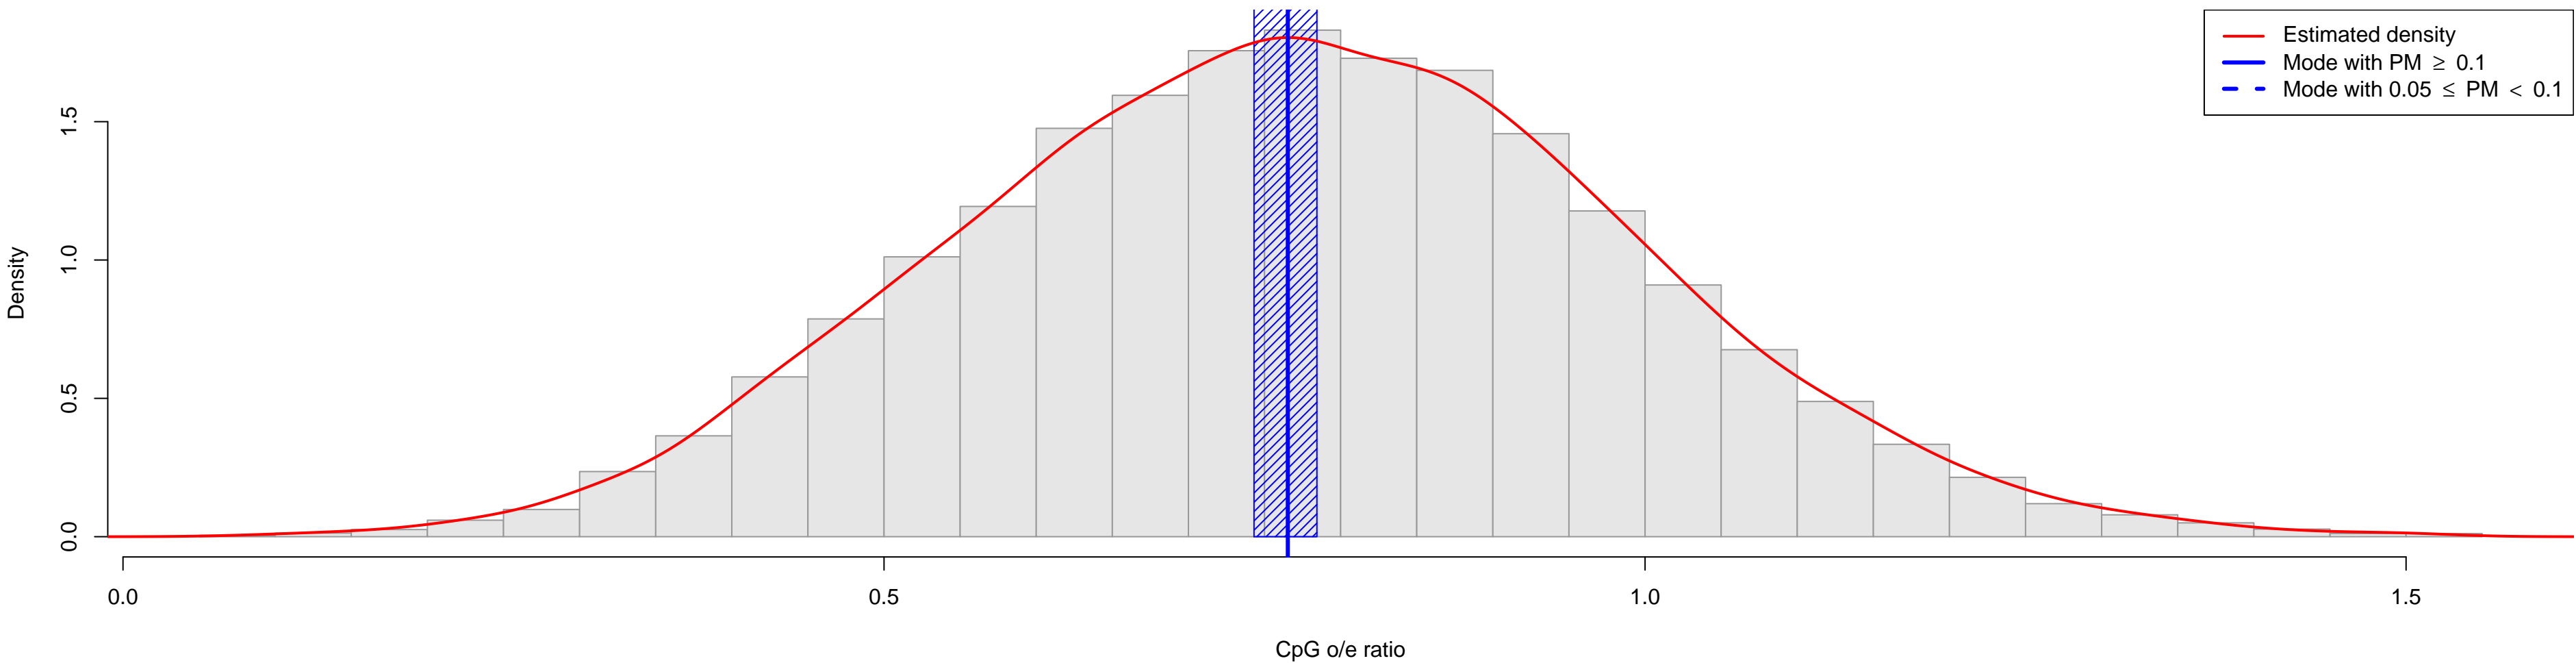

# Rhodnius\_prolixus

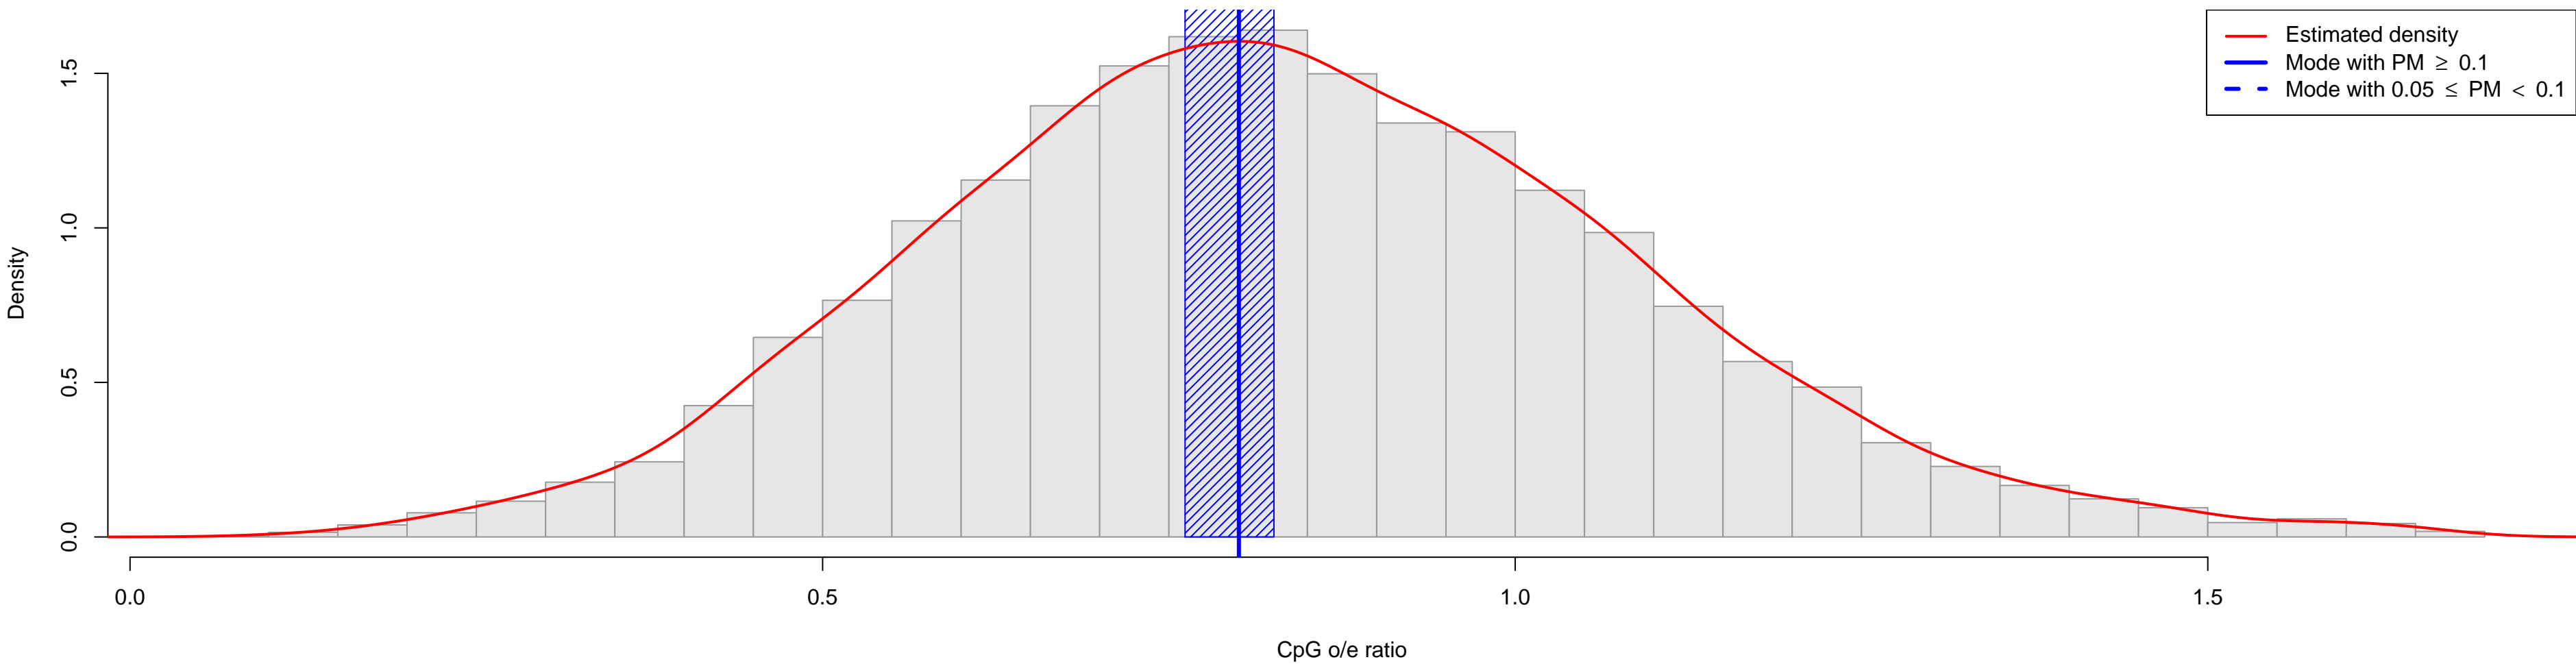

# Rhopalosiphum\_maidis

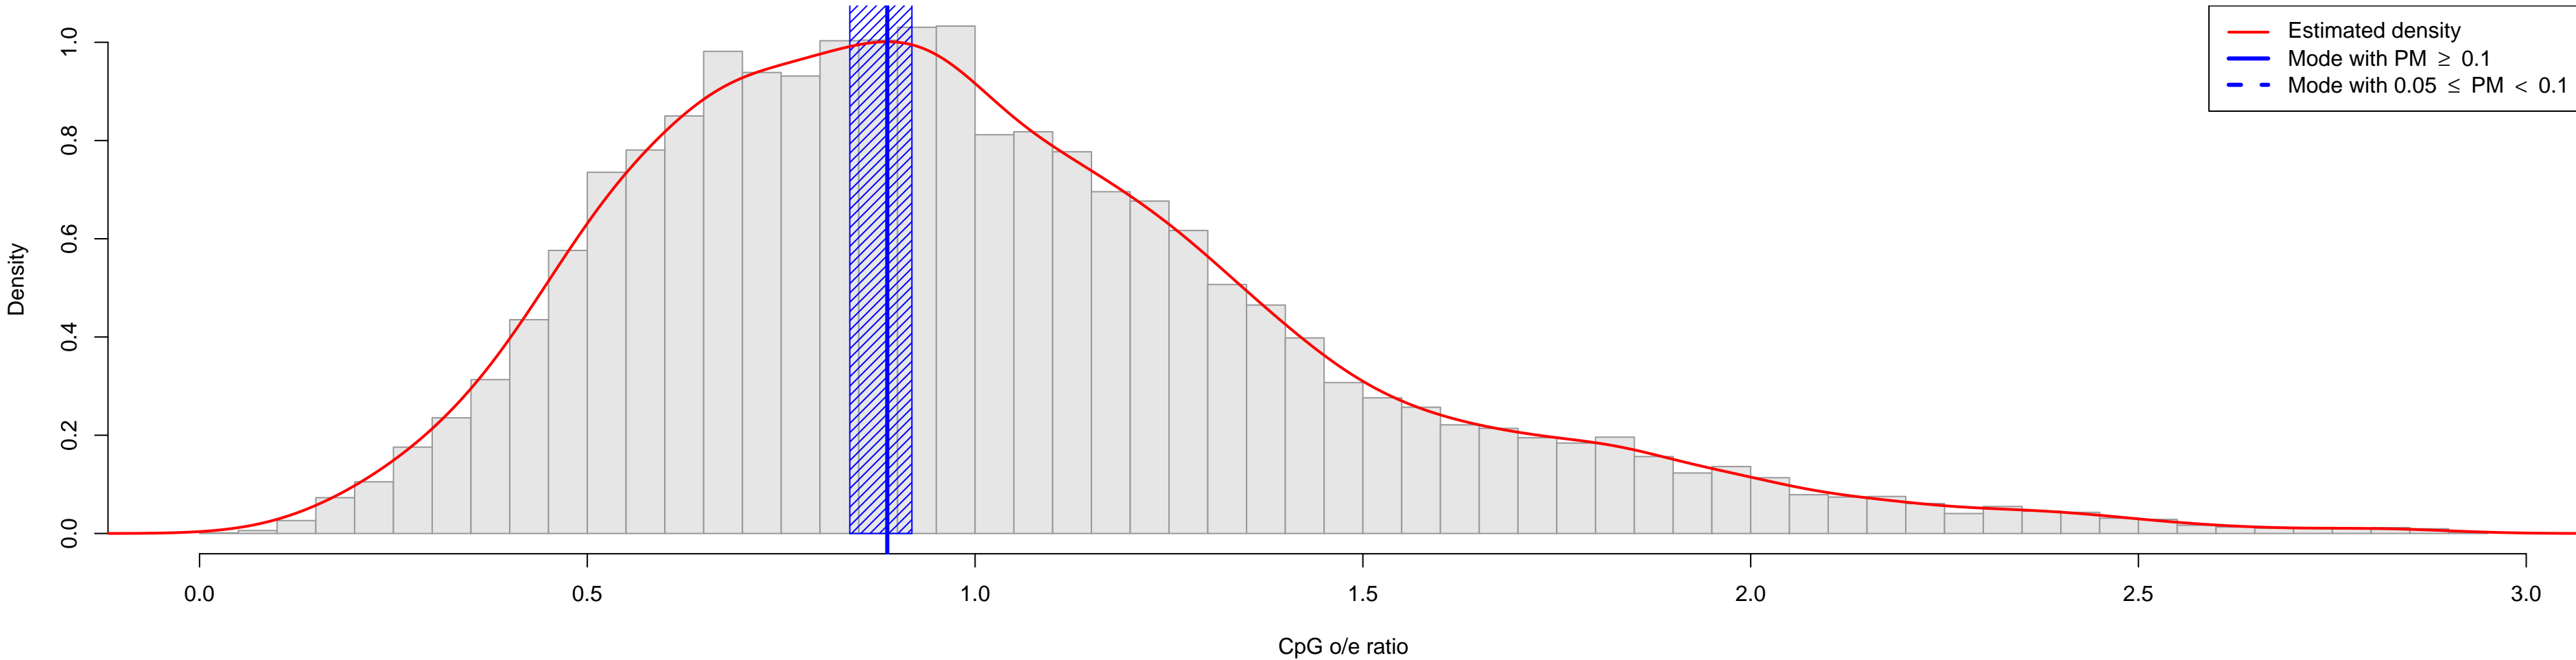

# Rhopalosiphum\_padi

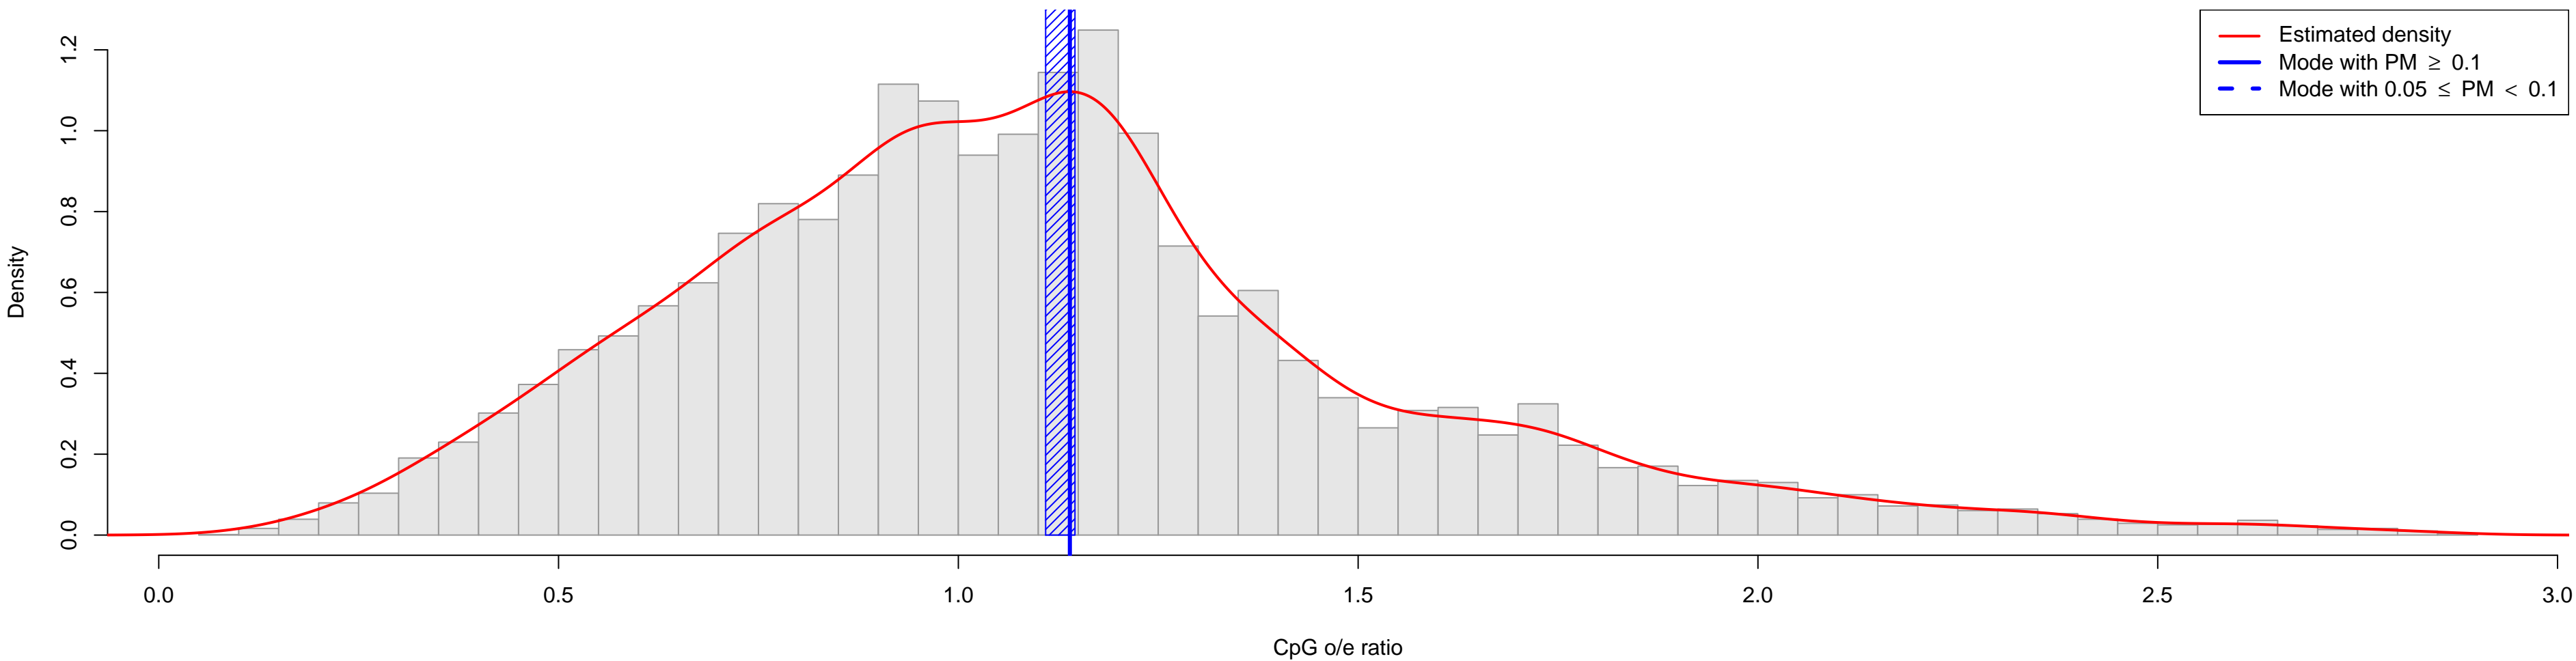

# Rhynchosciara\_americana

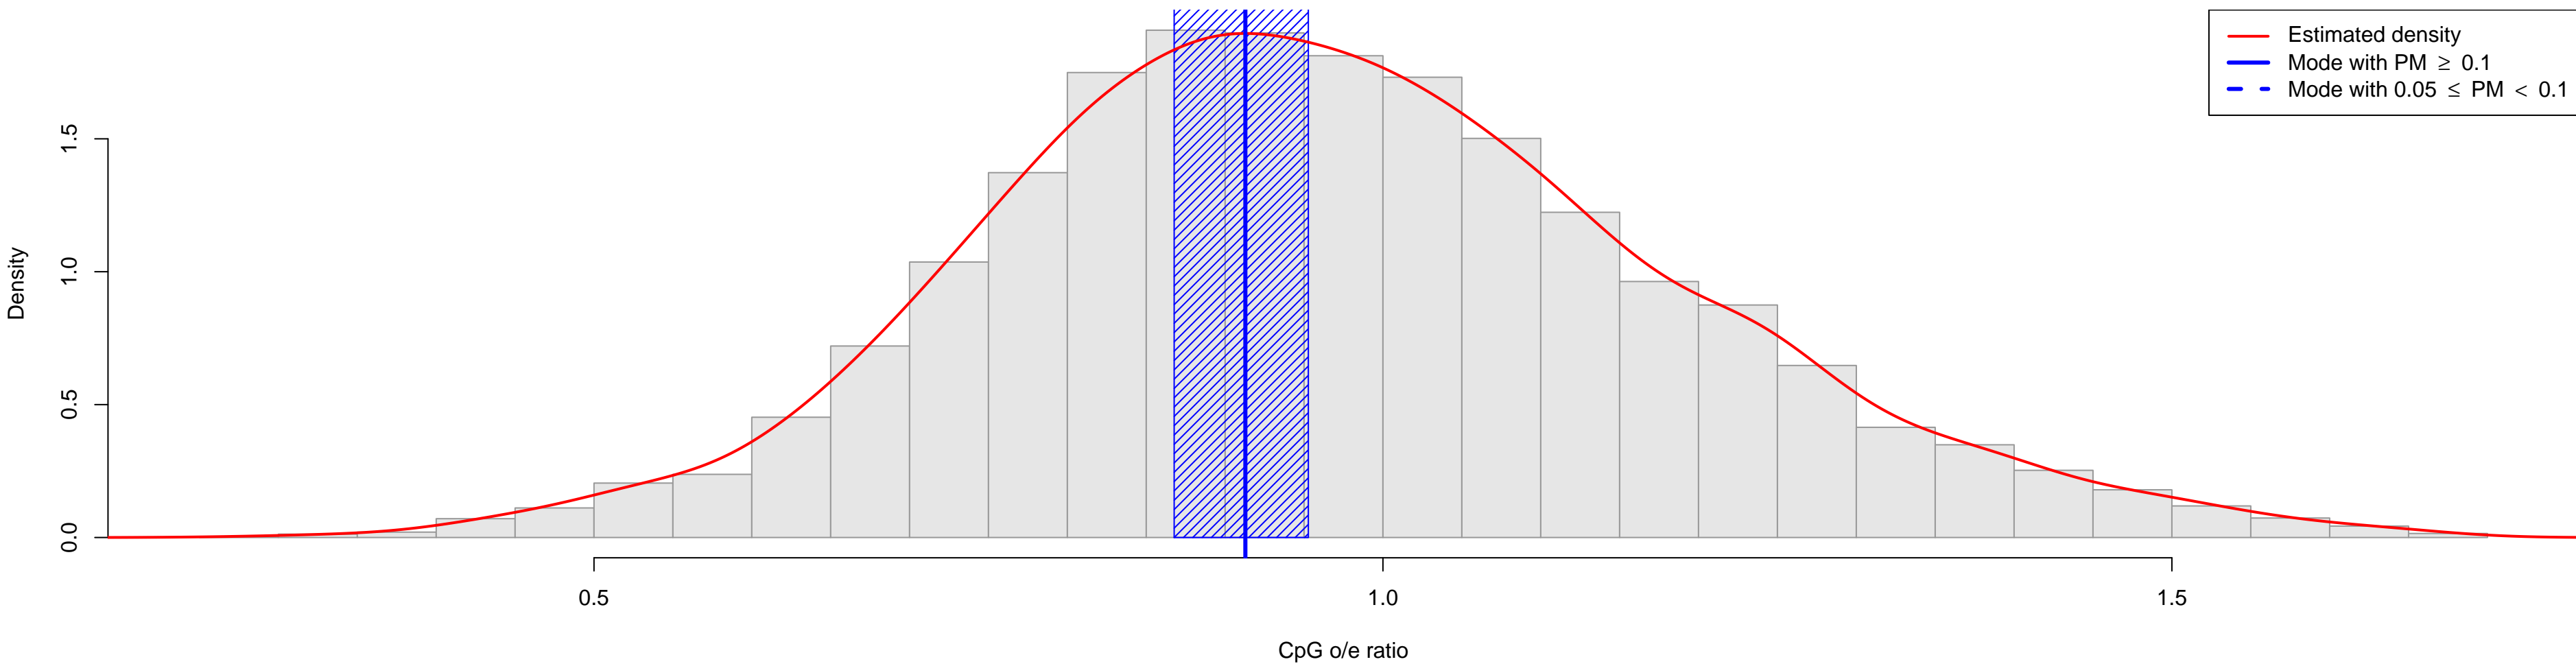

# Rutilus\_rutilus

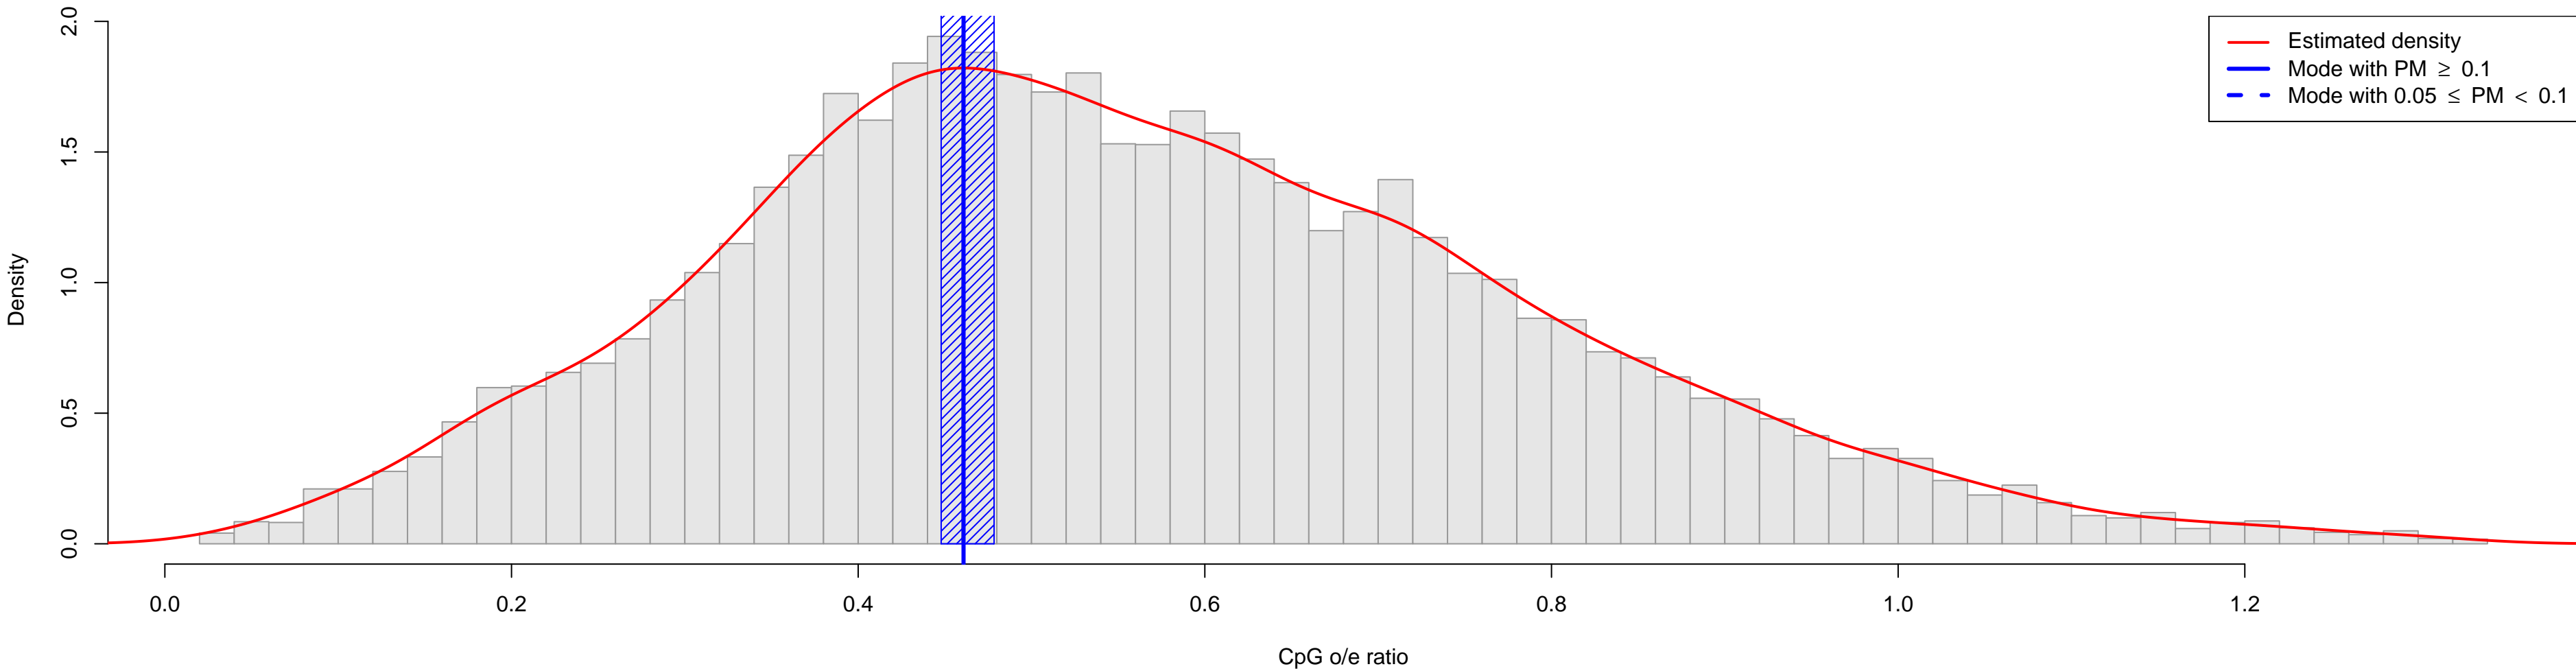

# Saccharomyces\_cerevisiae

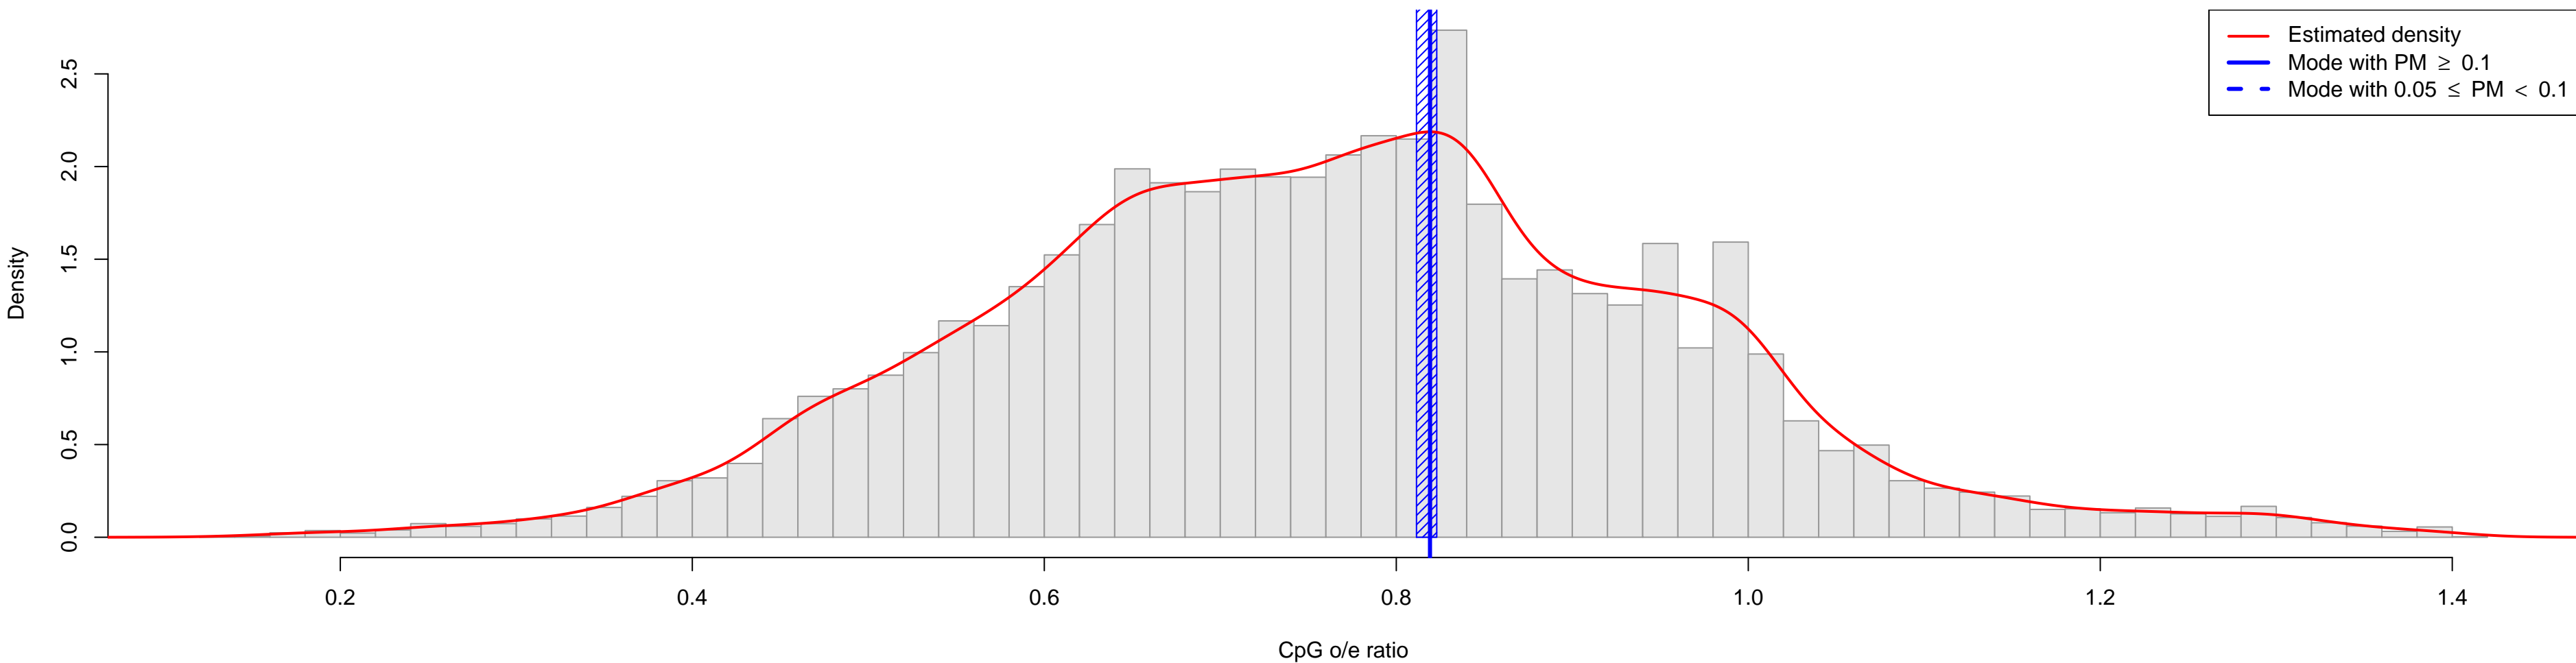

# Saccharomyces\_pastorianus

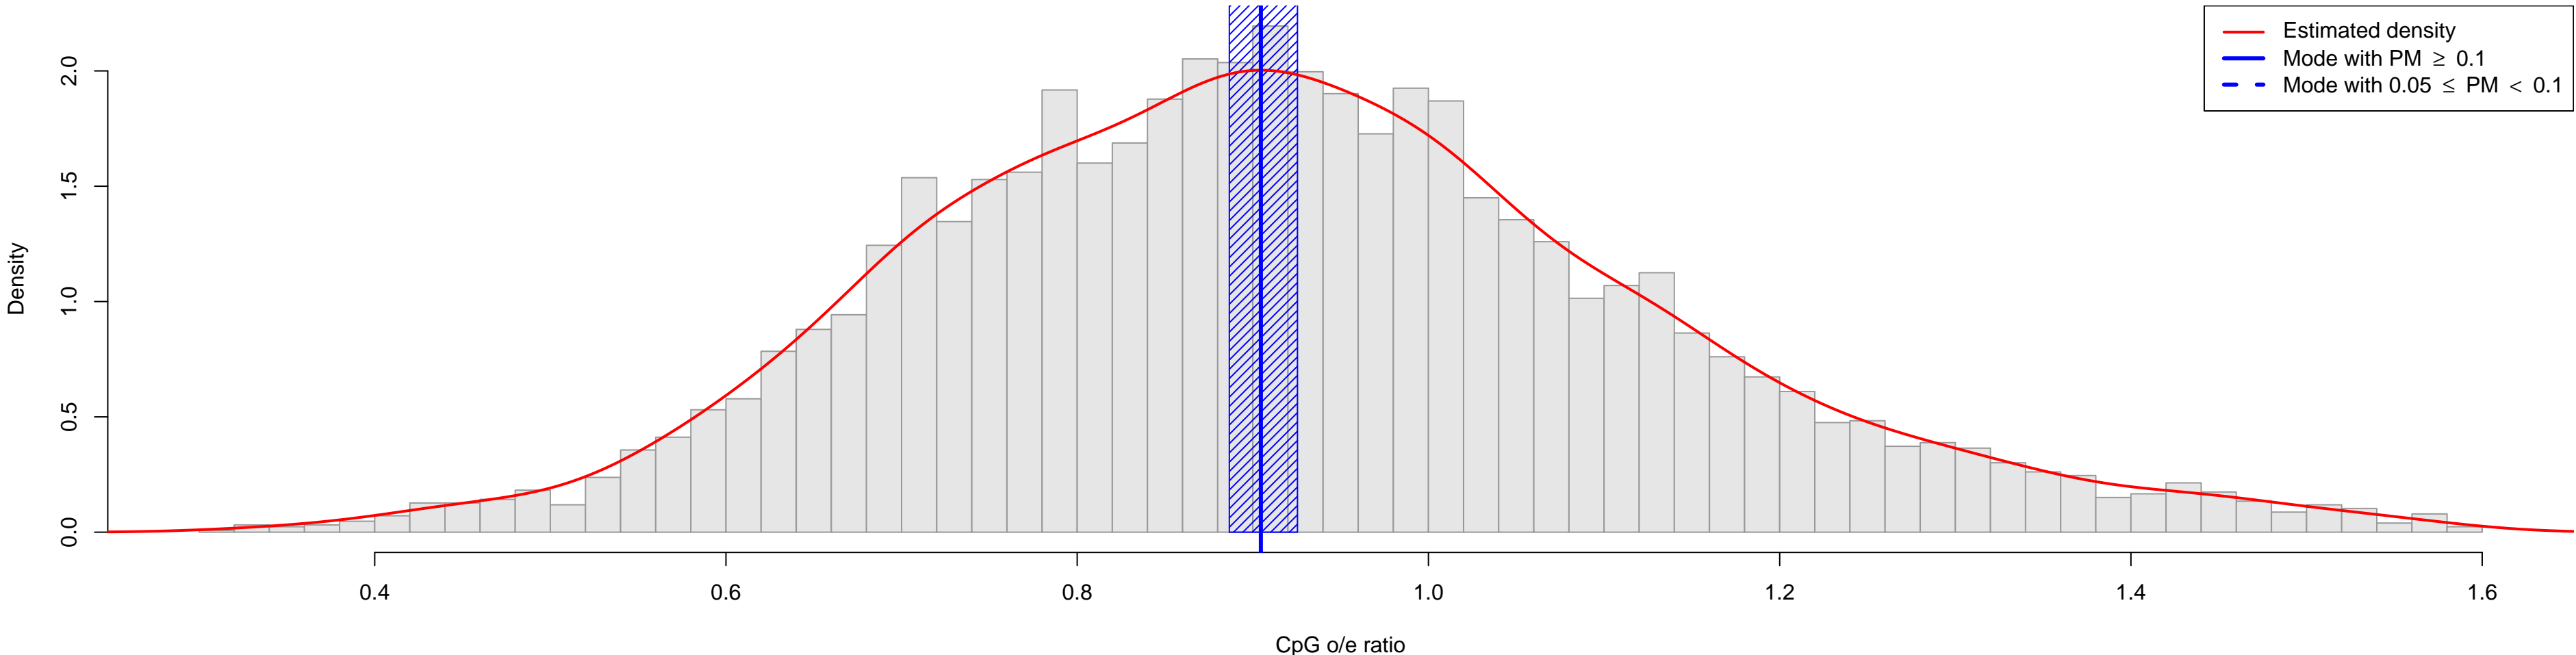



# Saccoglossus\_kowalevskii

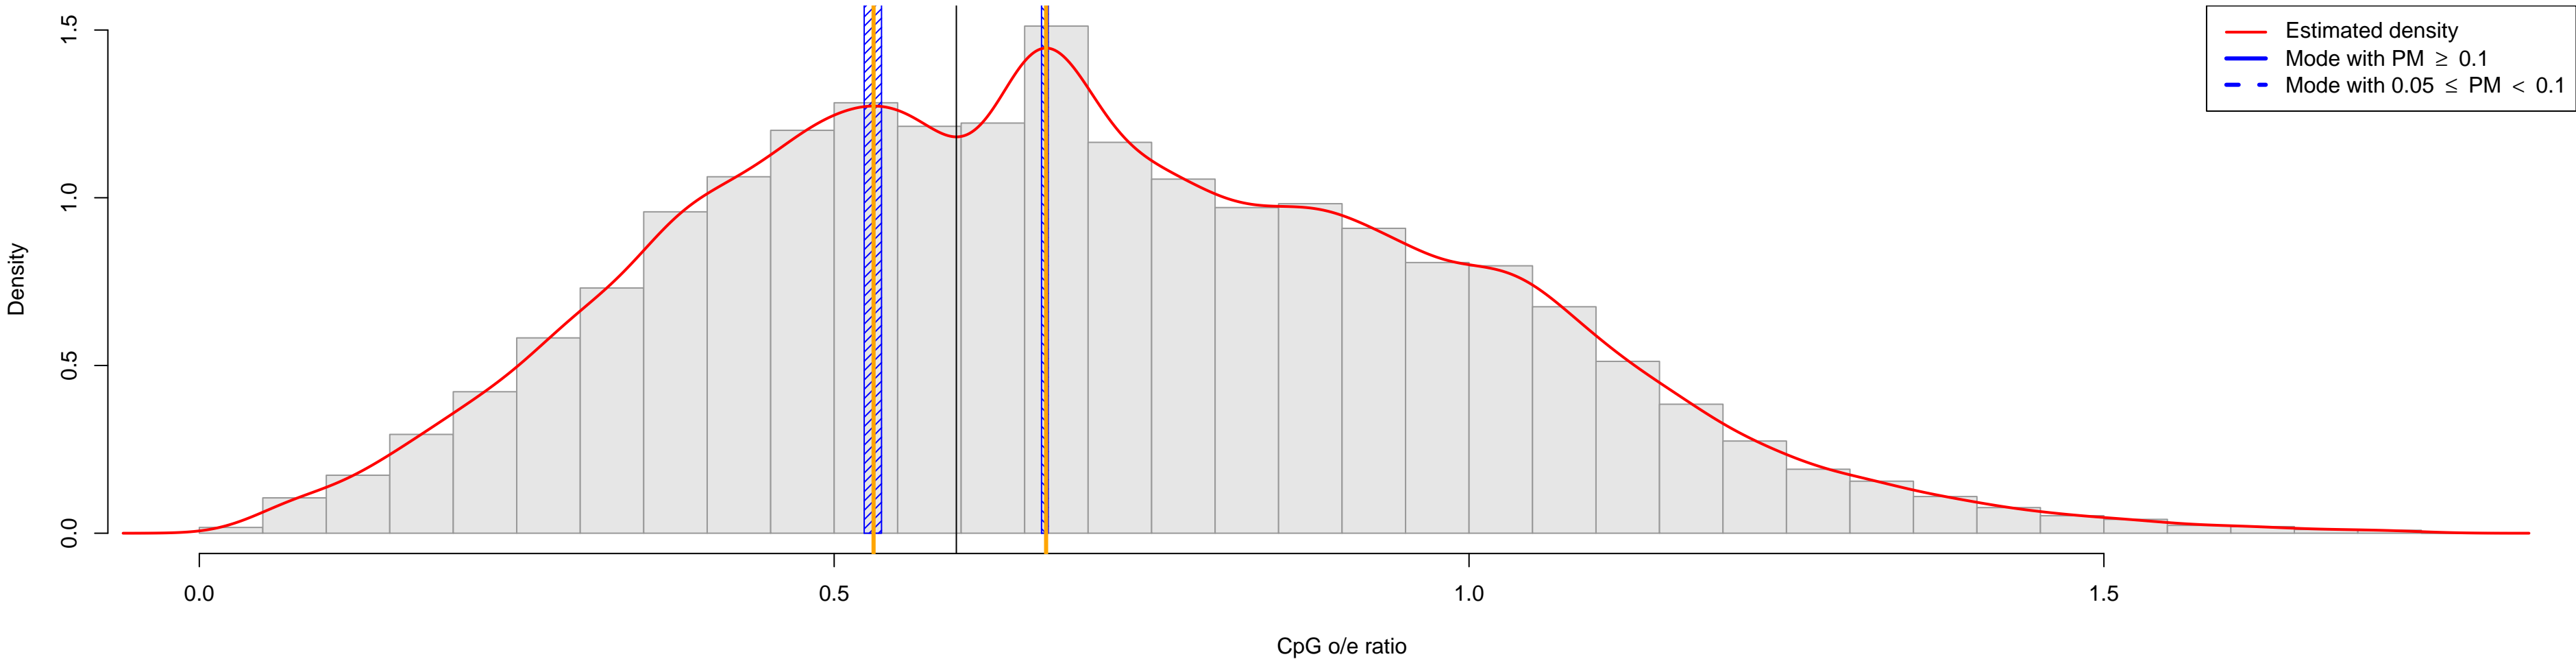

# Salmo\_salar

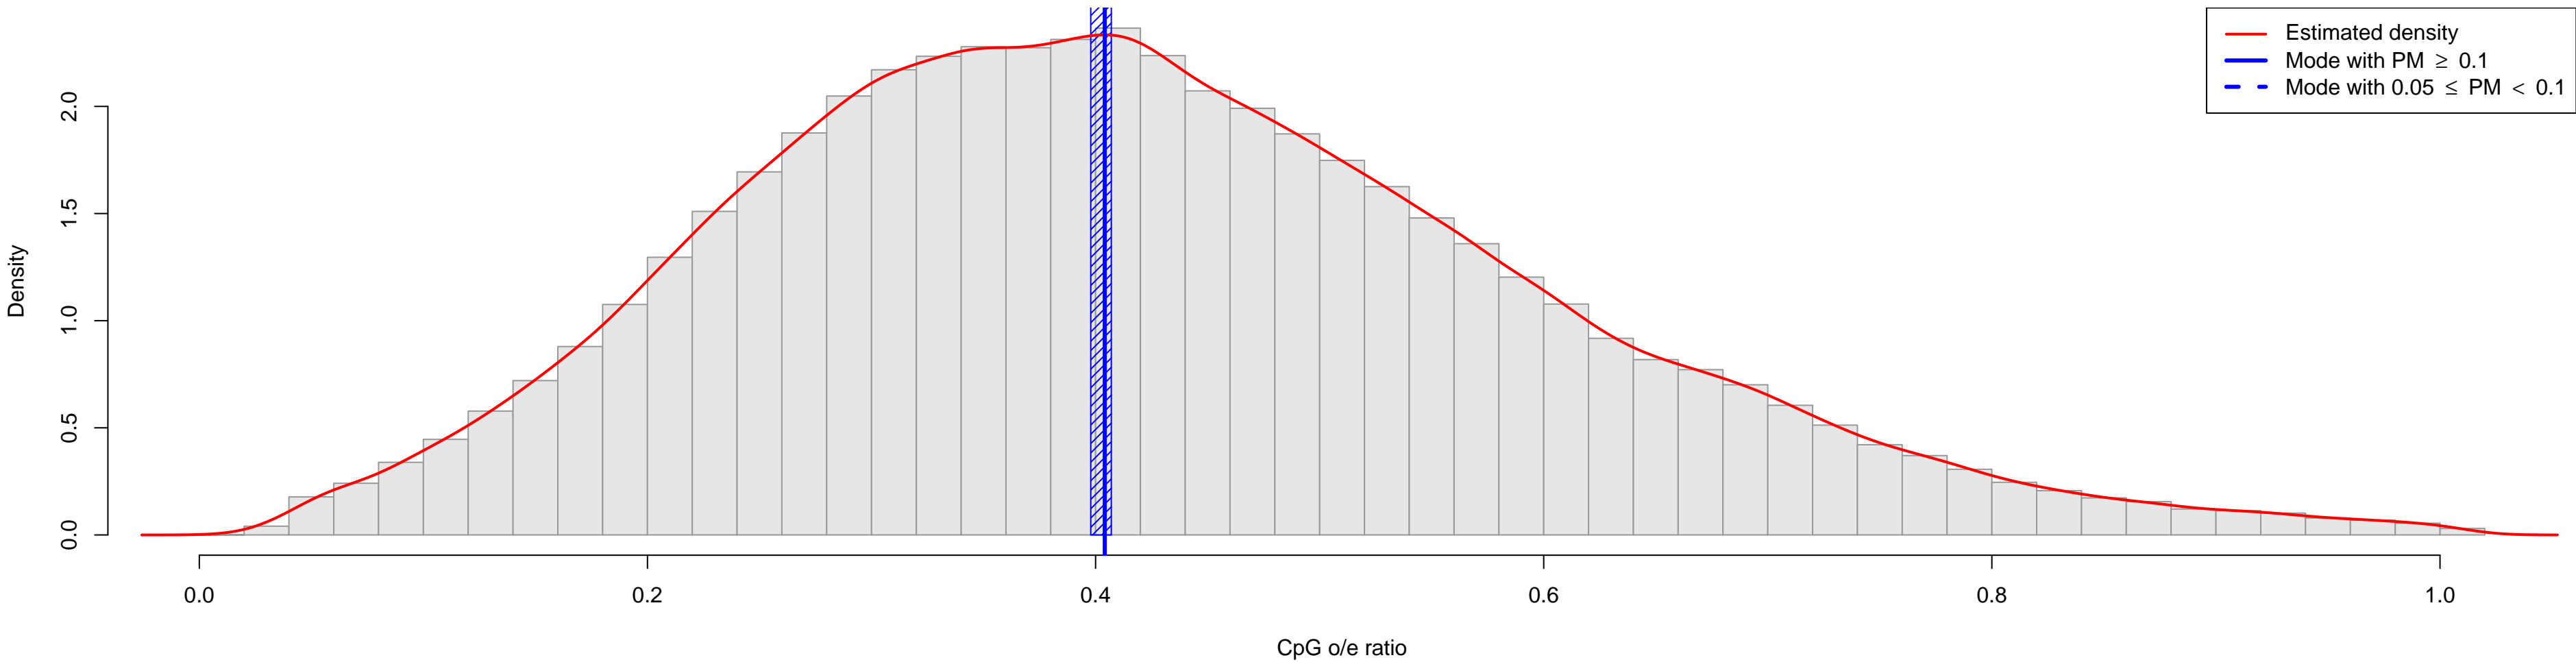

### Samia\_cynthia\_ricini

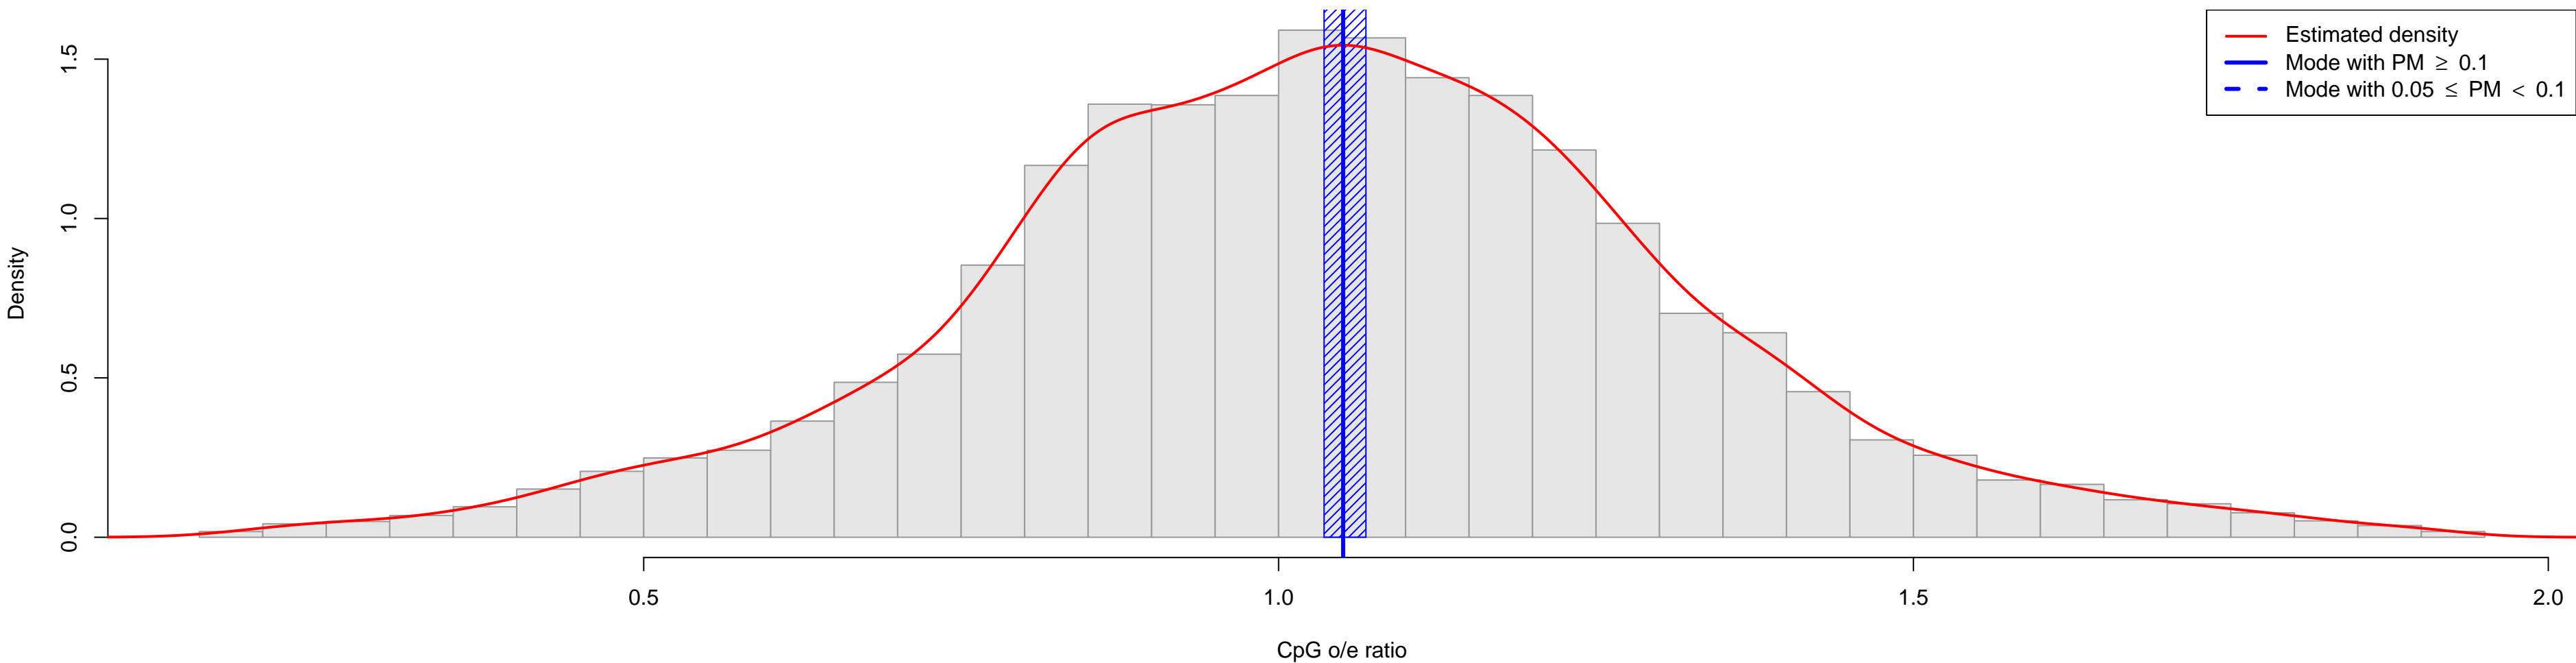

# Sanguinaria\_canadensis

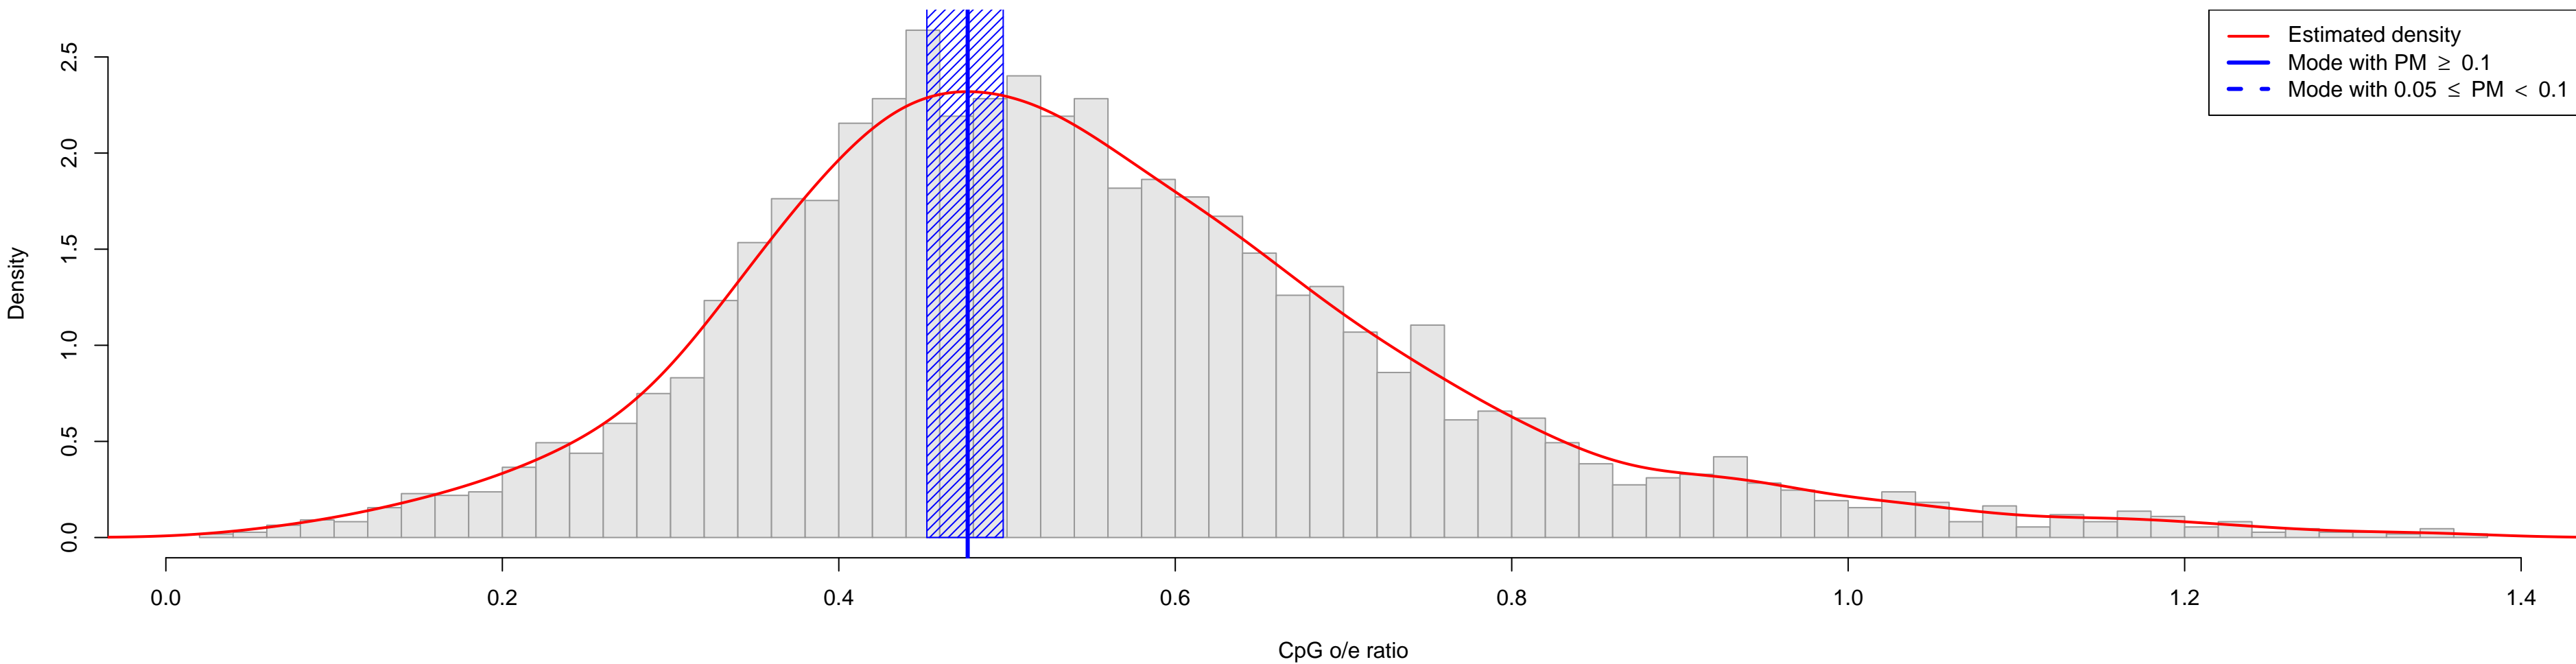

# Sarcocapnos\_crassifolia

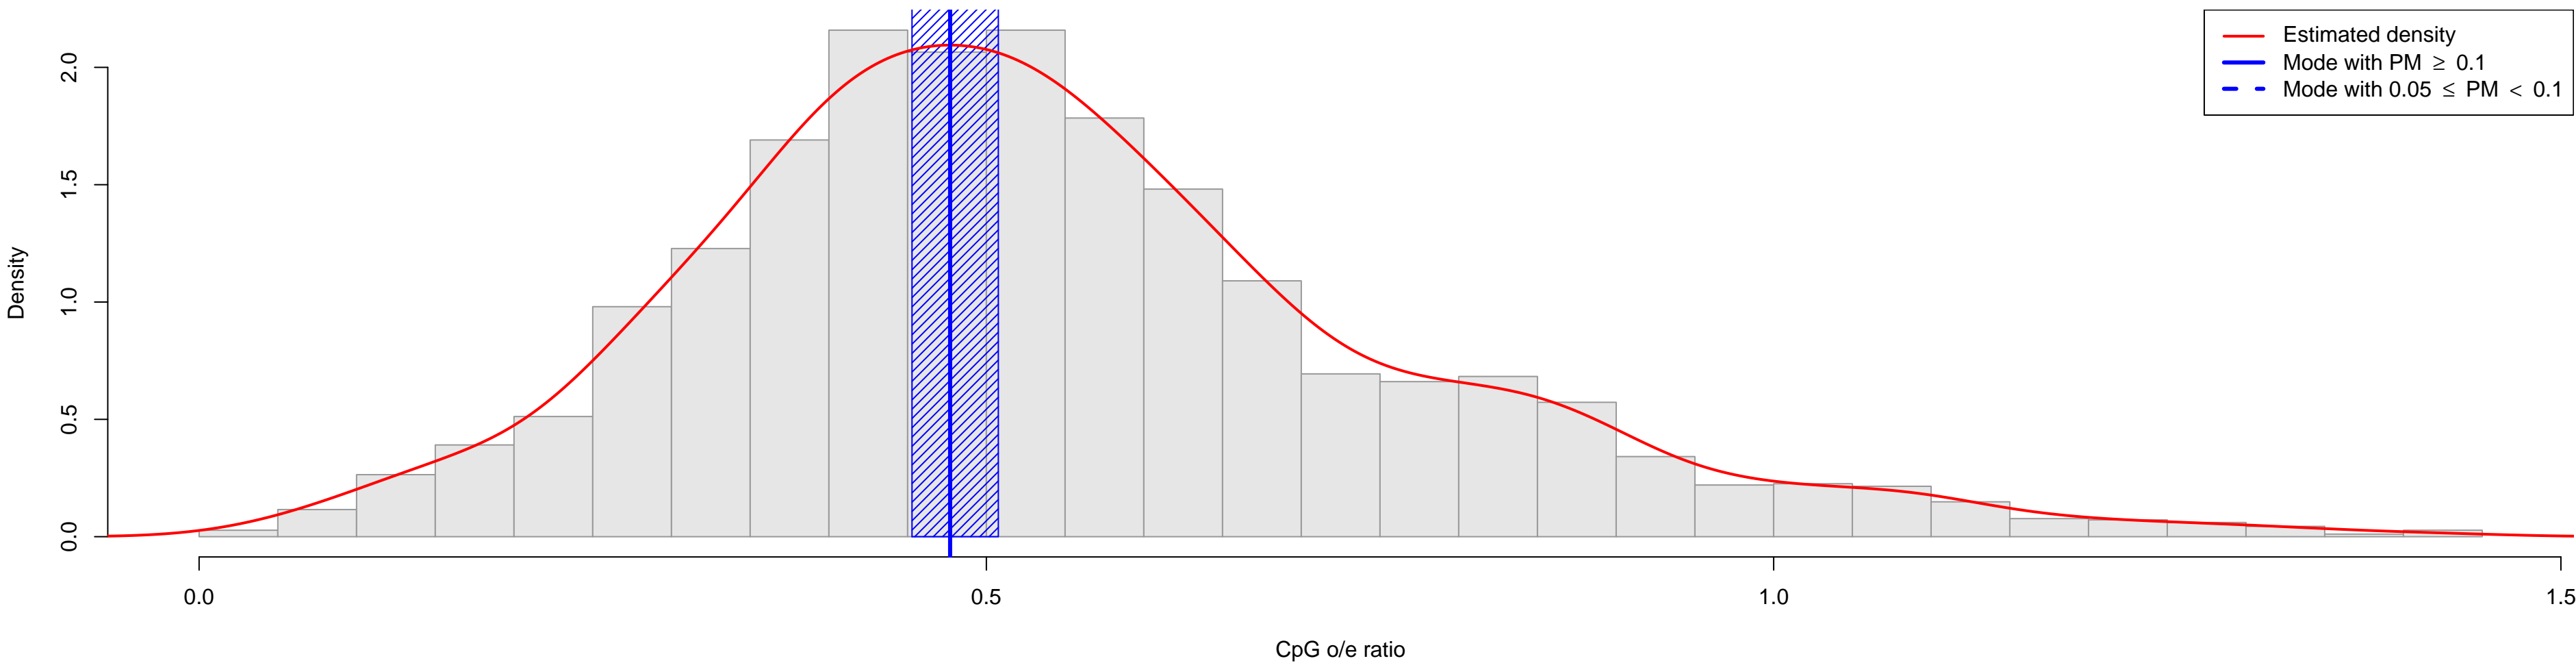

# Sarcocystis\_neurona

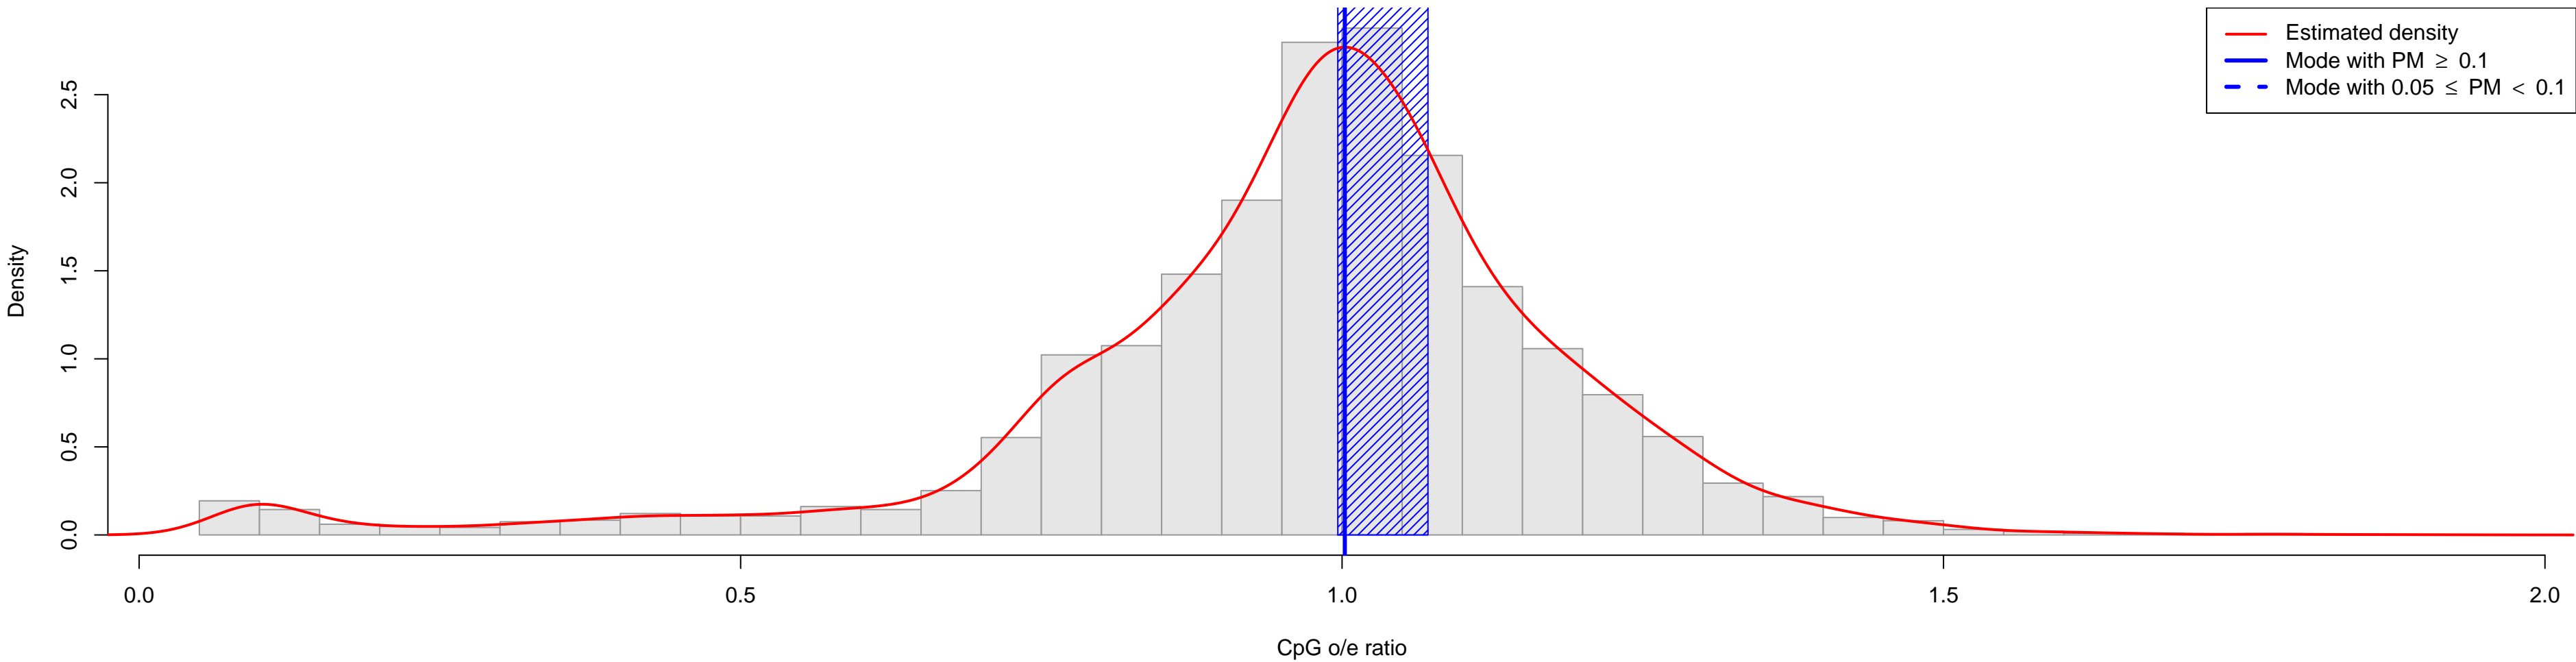

# Schistocerca\_gregaria

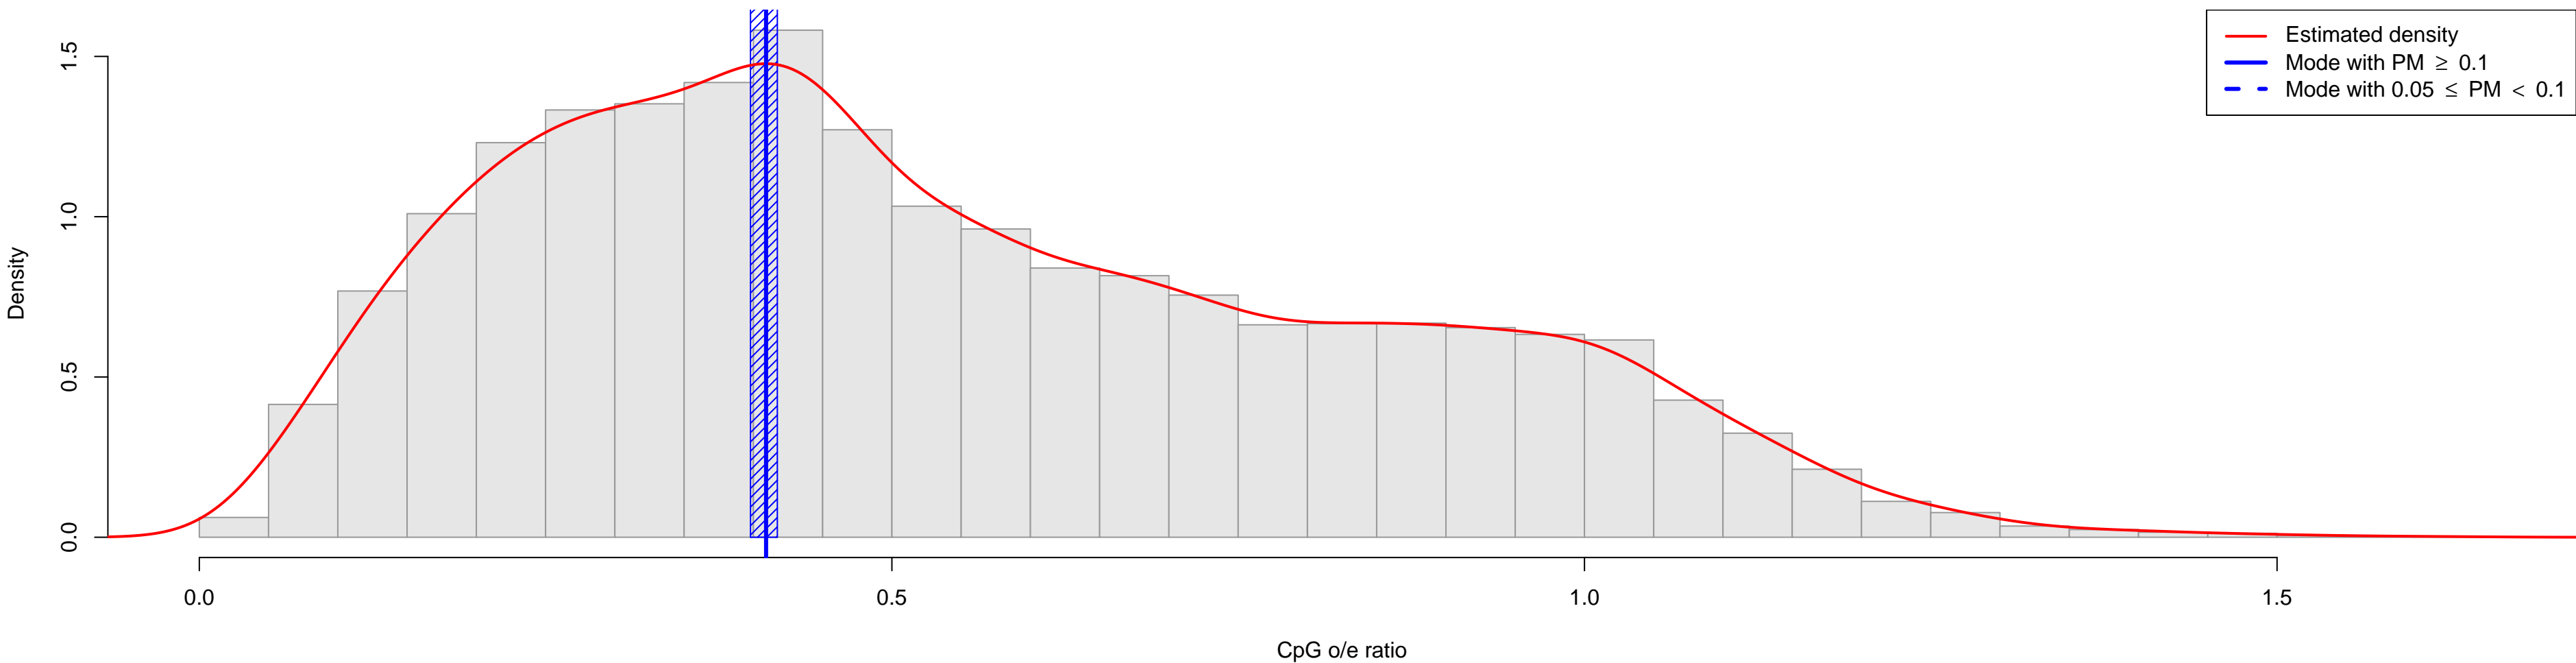

# Schistosoma\_japonicum

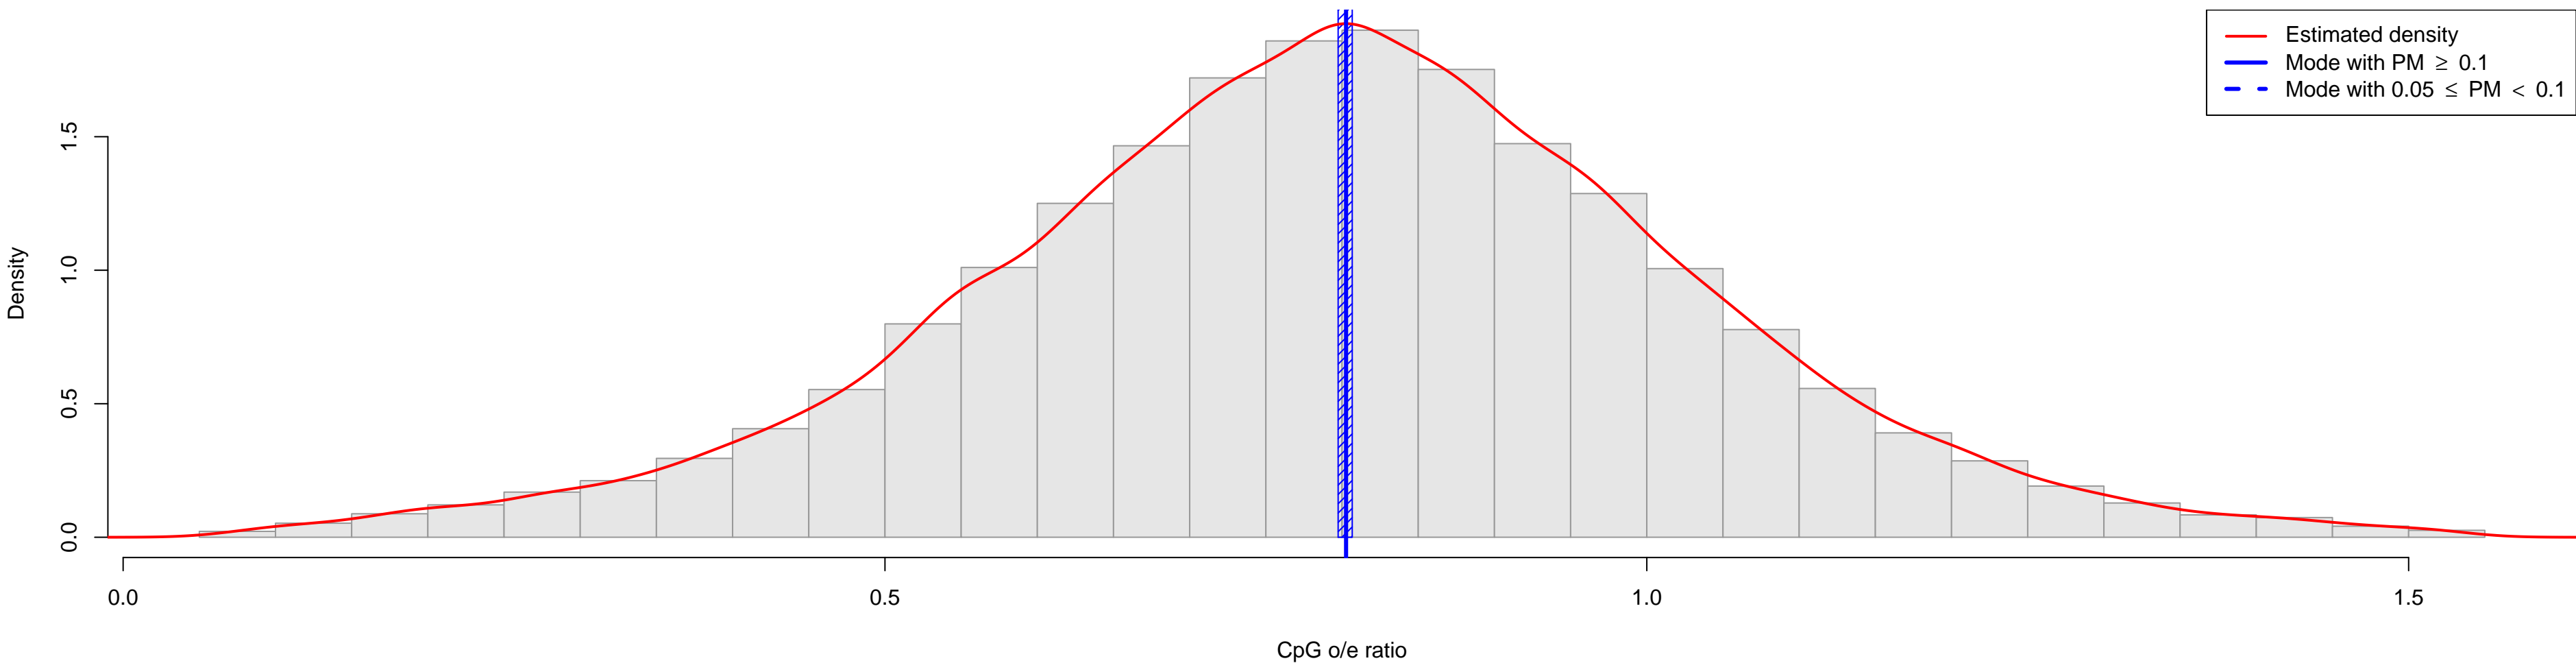



# Schistosoma\_mansoni

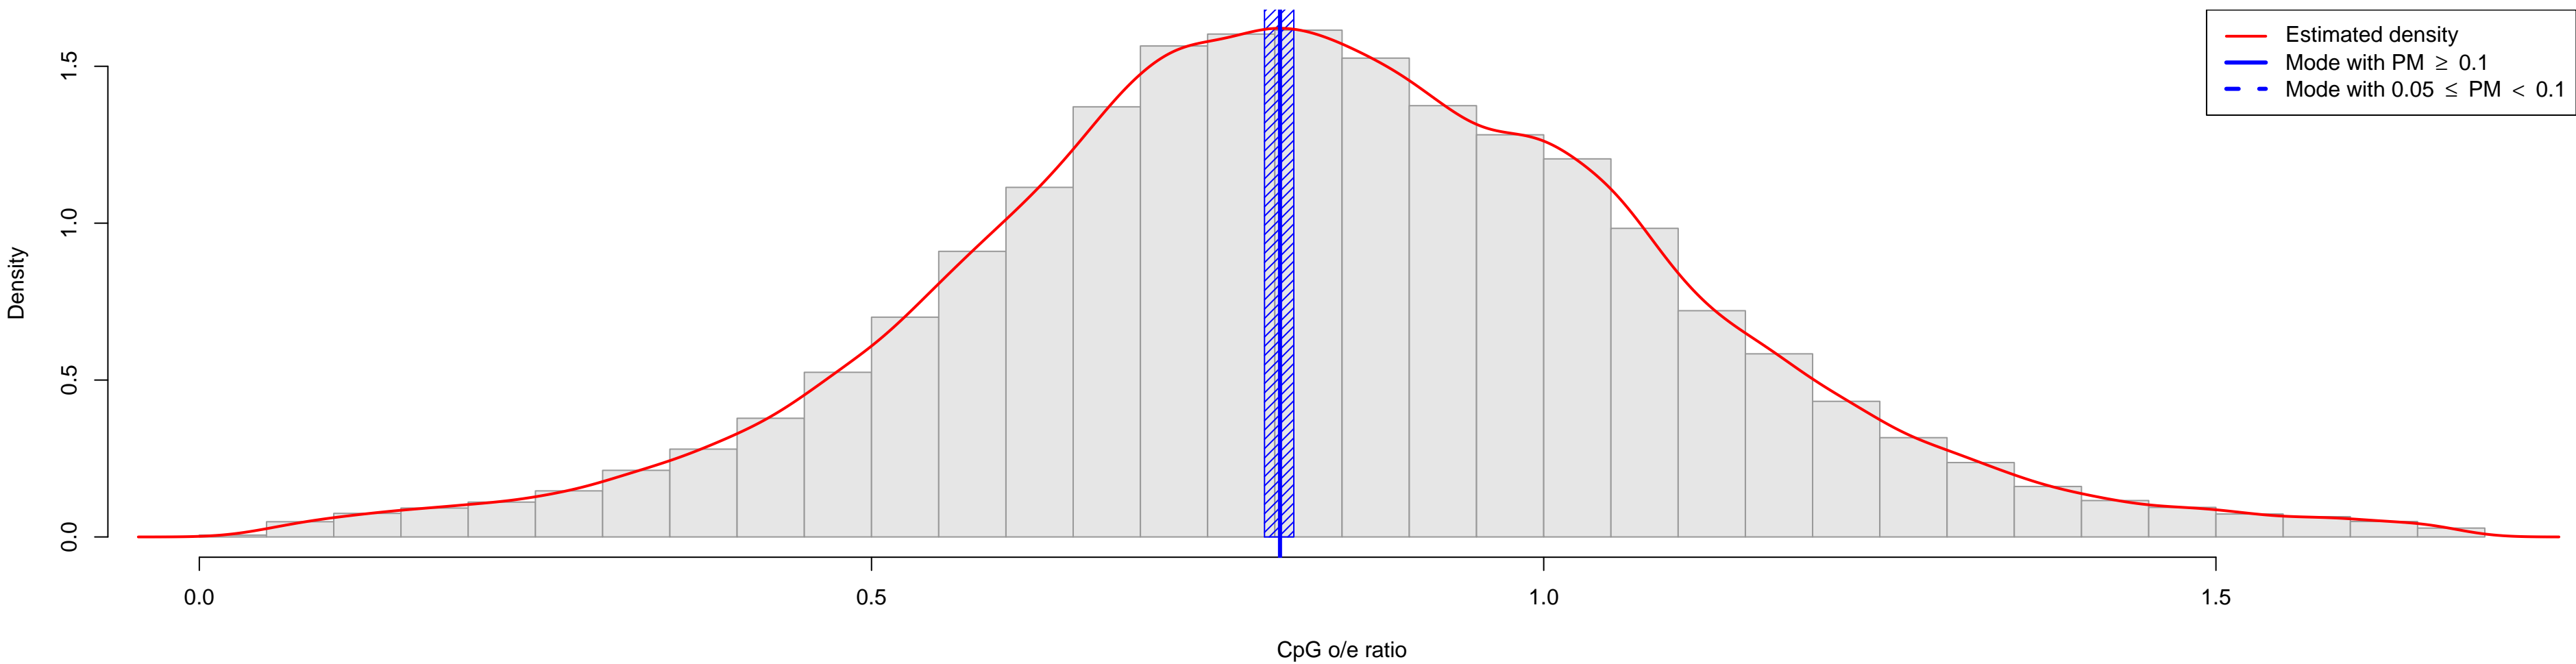

# Schizosaccharomyces\_pombe

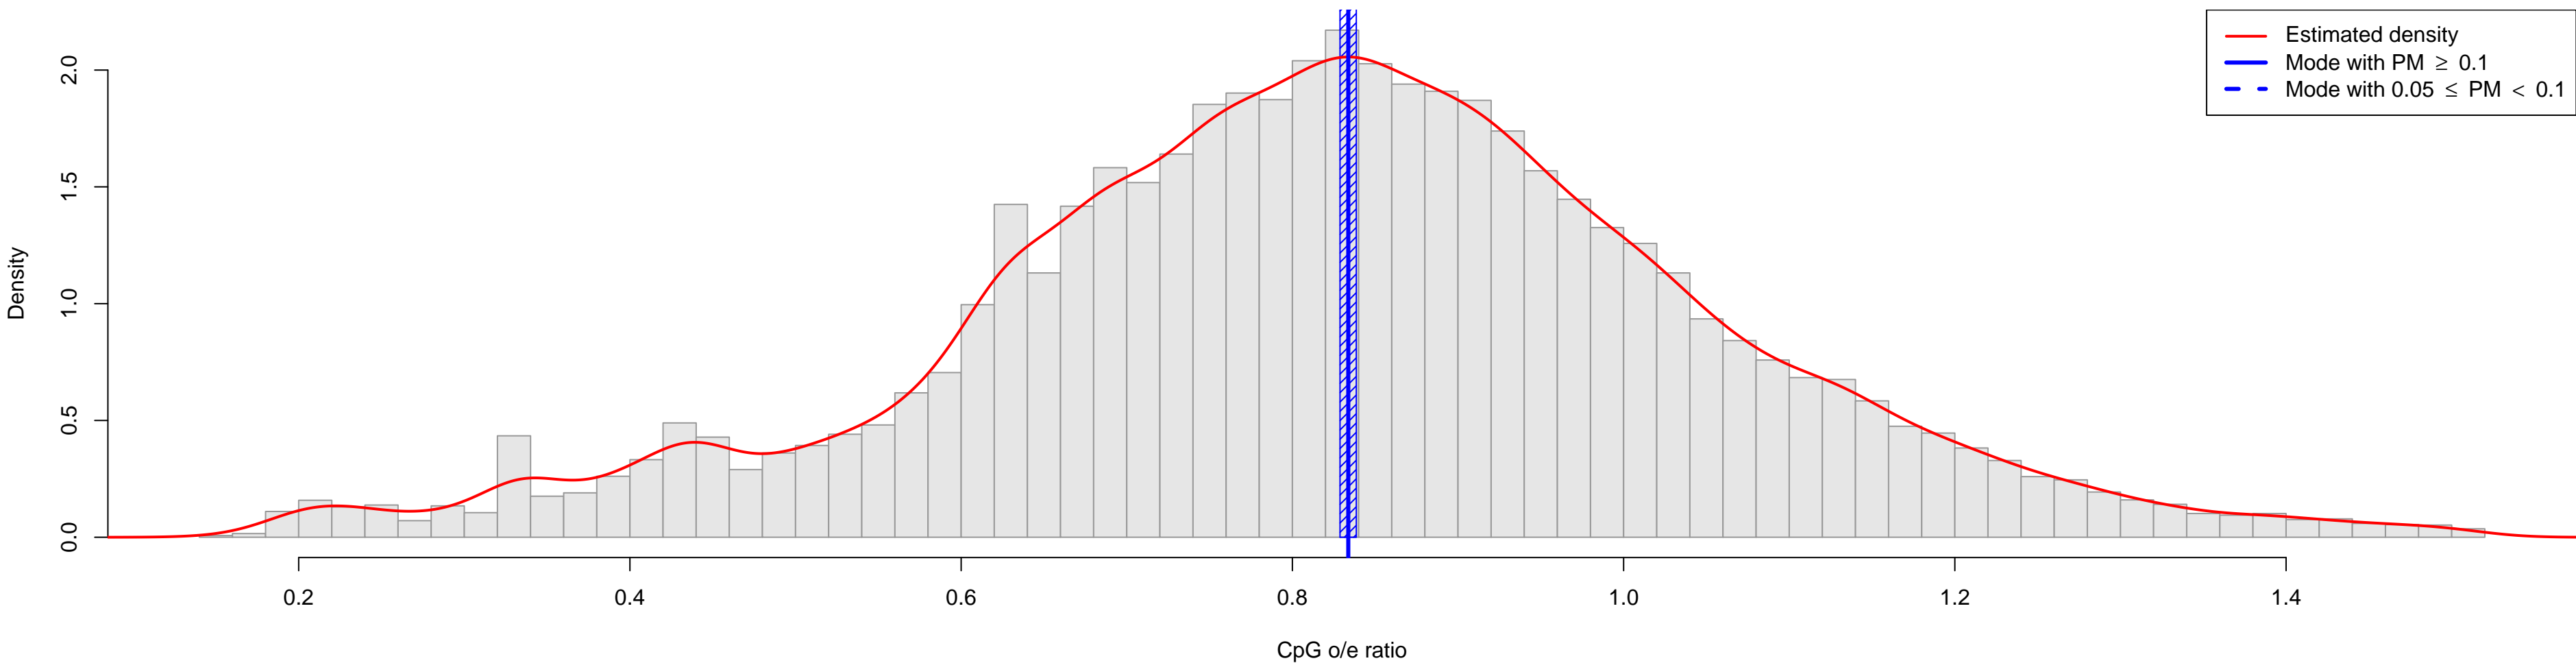

# Schmidtea\_mediterranea

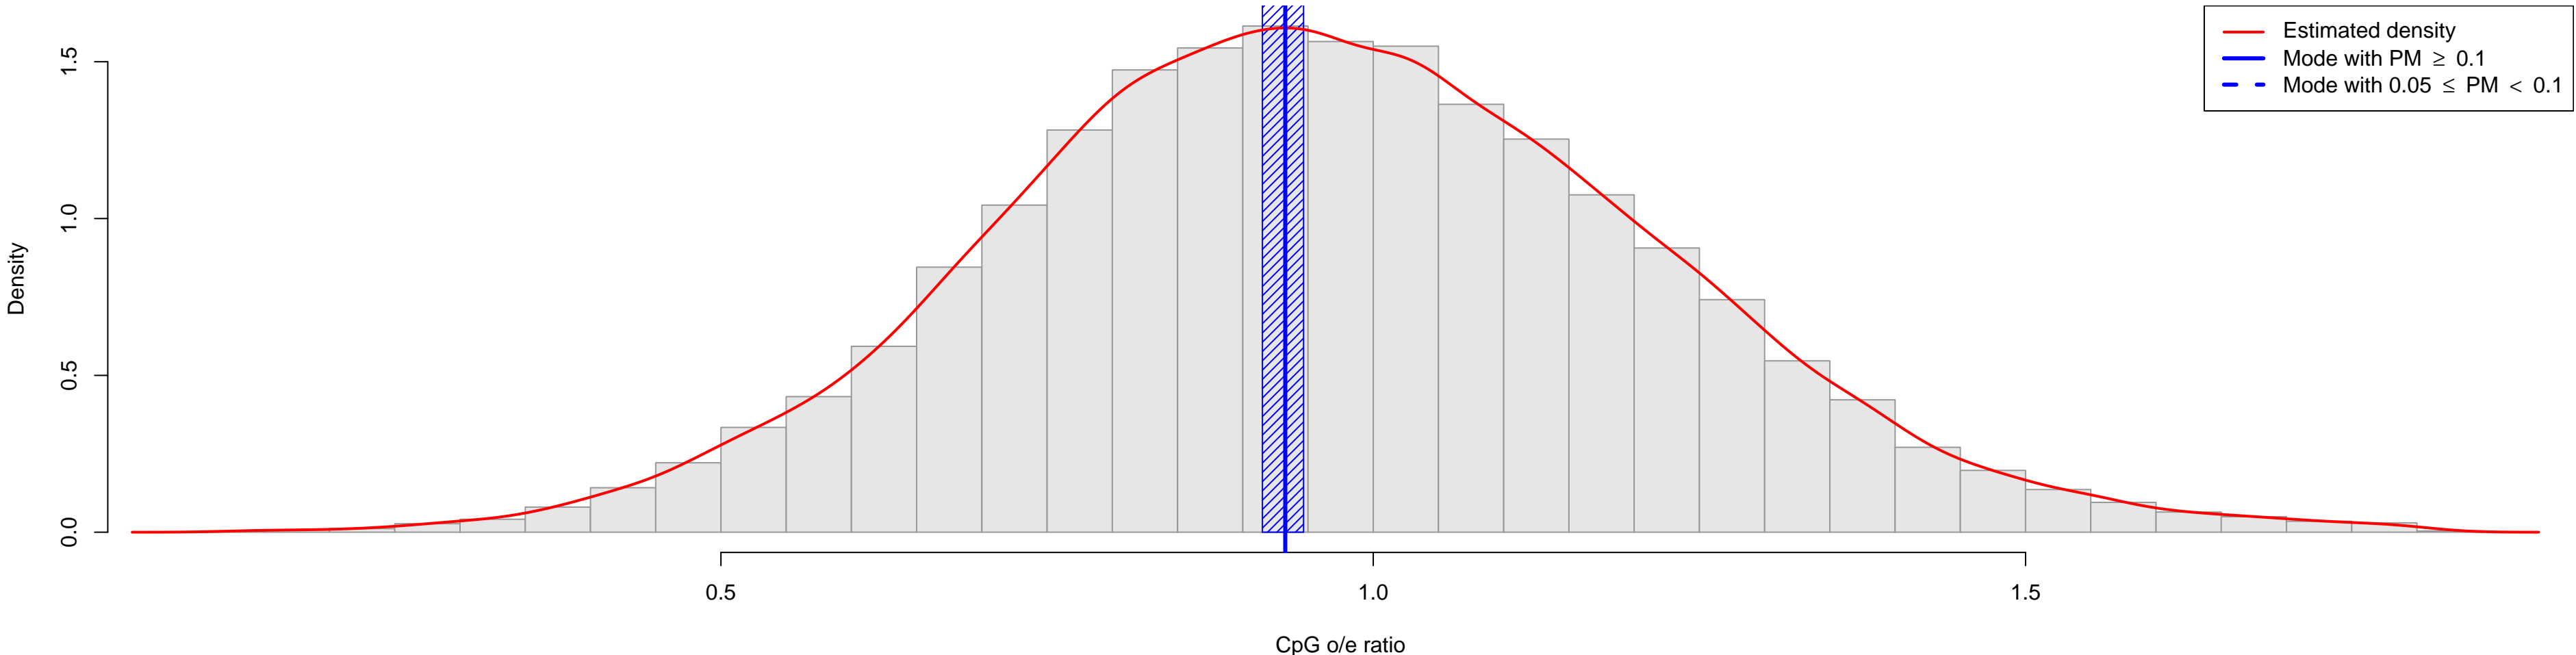

# Scophthalmus\_maximus



# Sebastes\_caurinus

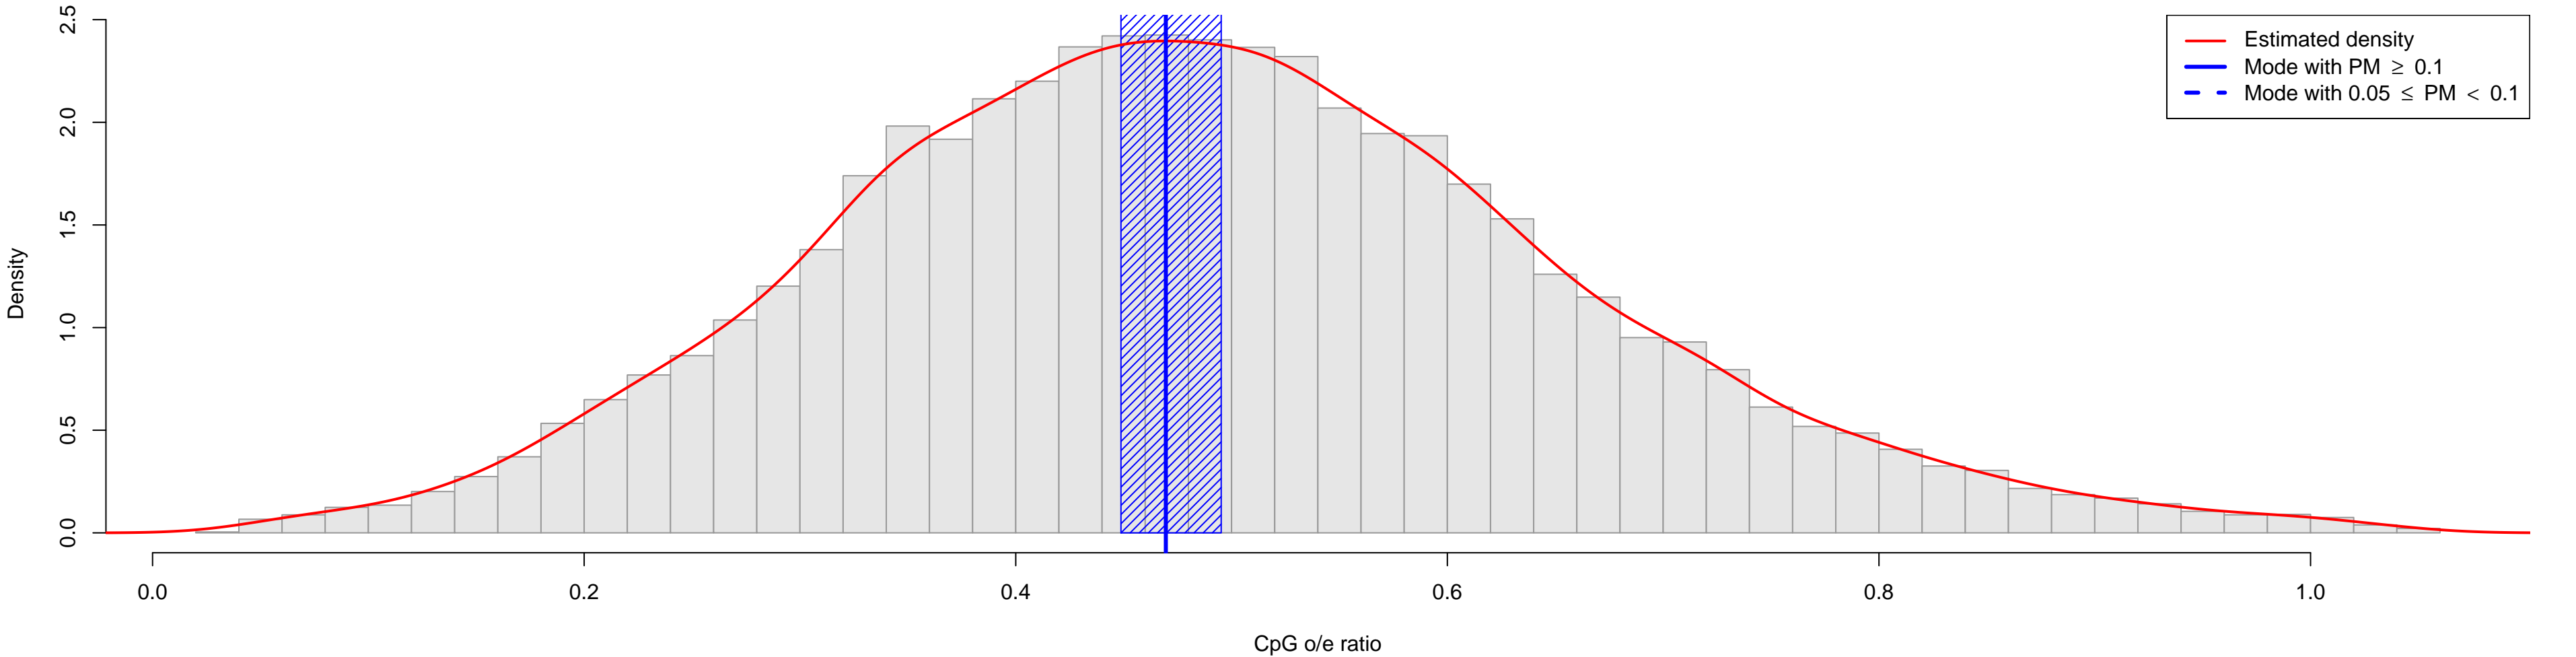

# Selaginella\_lepidophylla

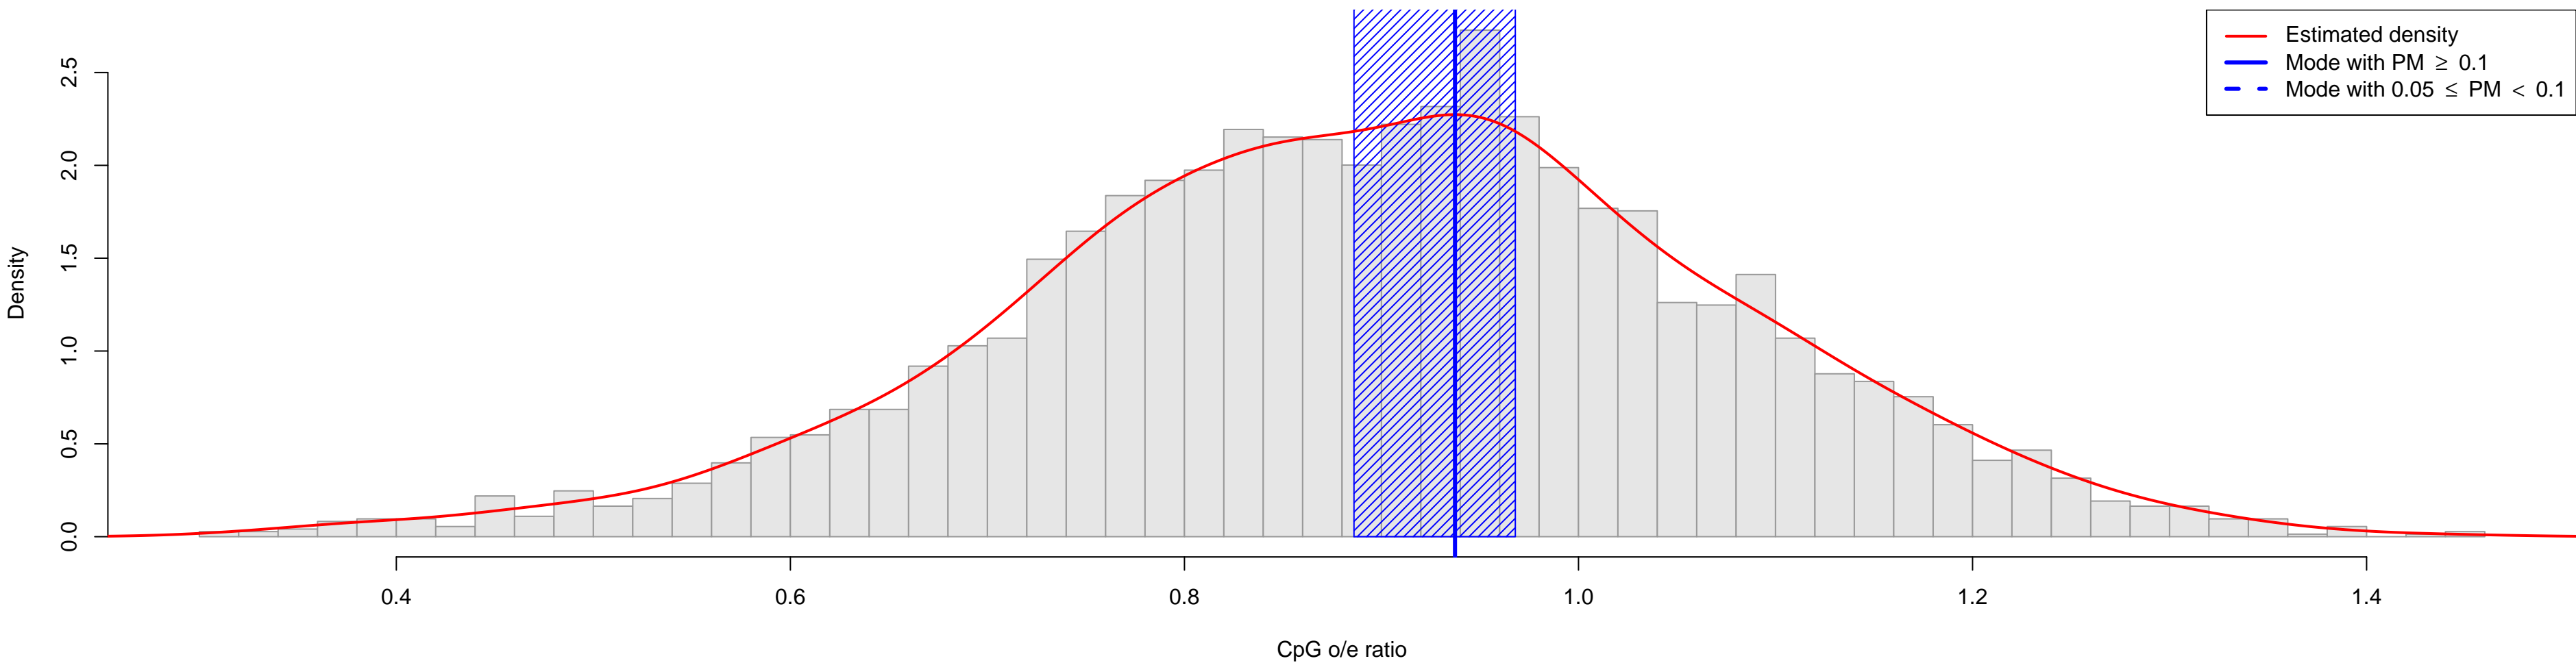

# Selaginella\_moellendorffii

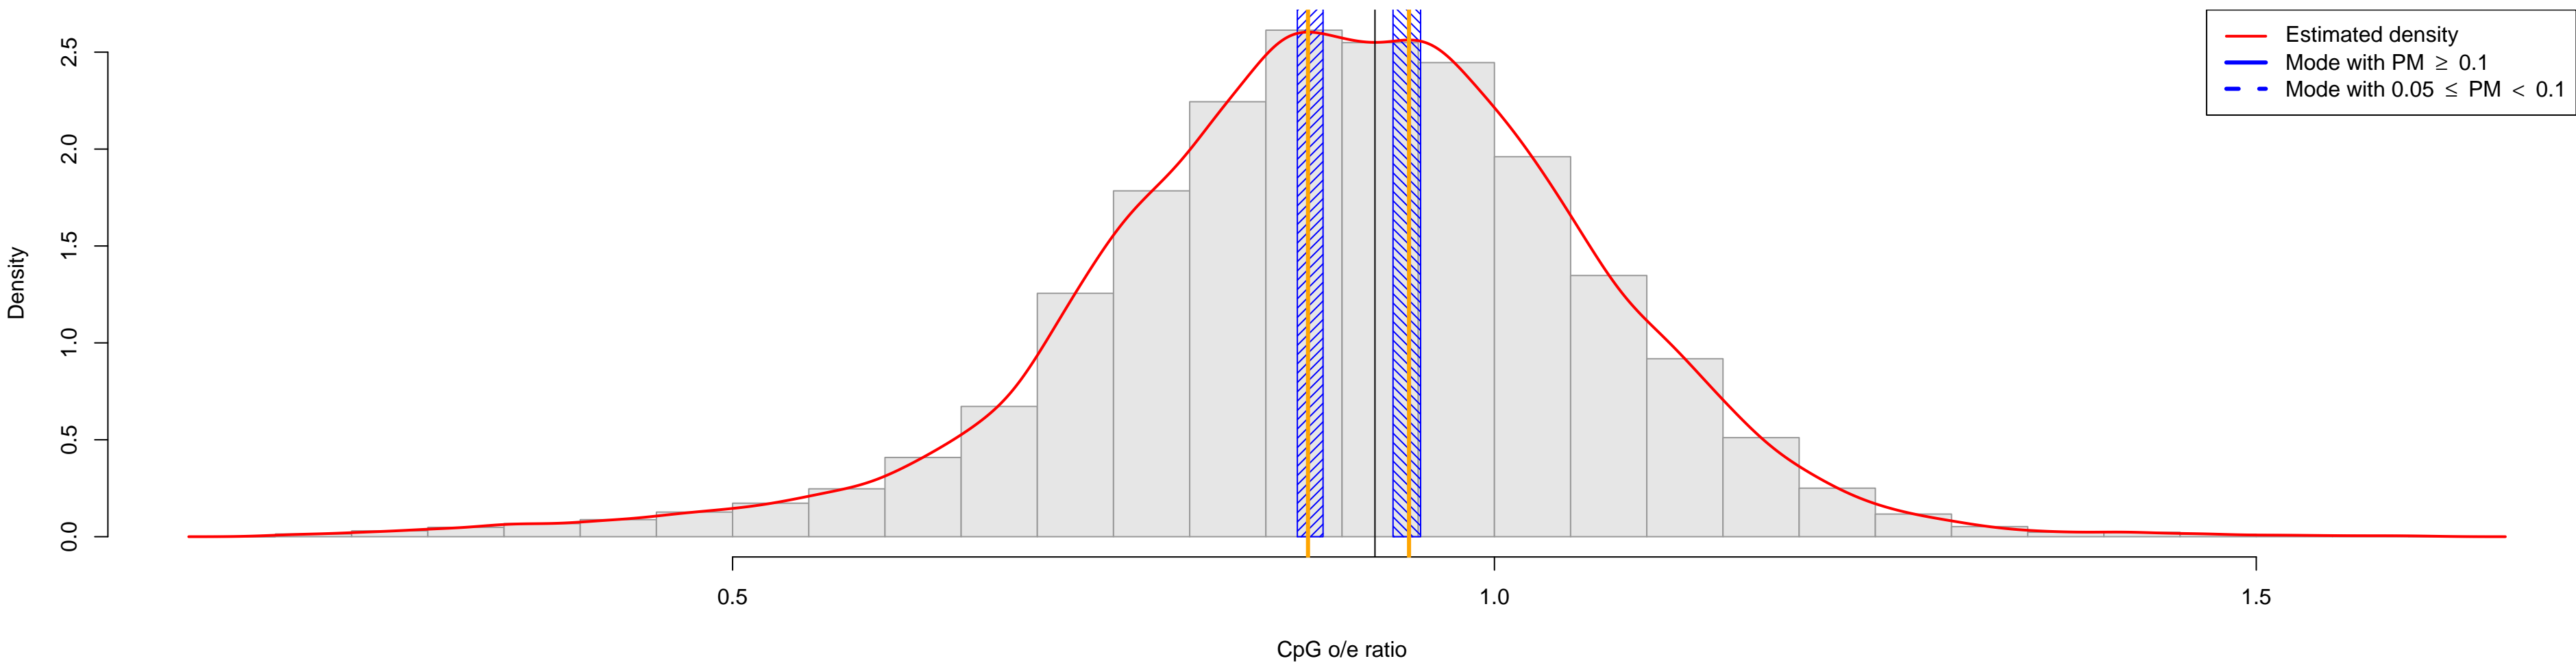

# Setaria\_italica

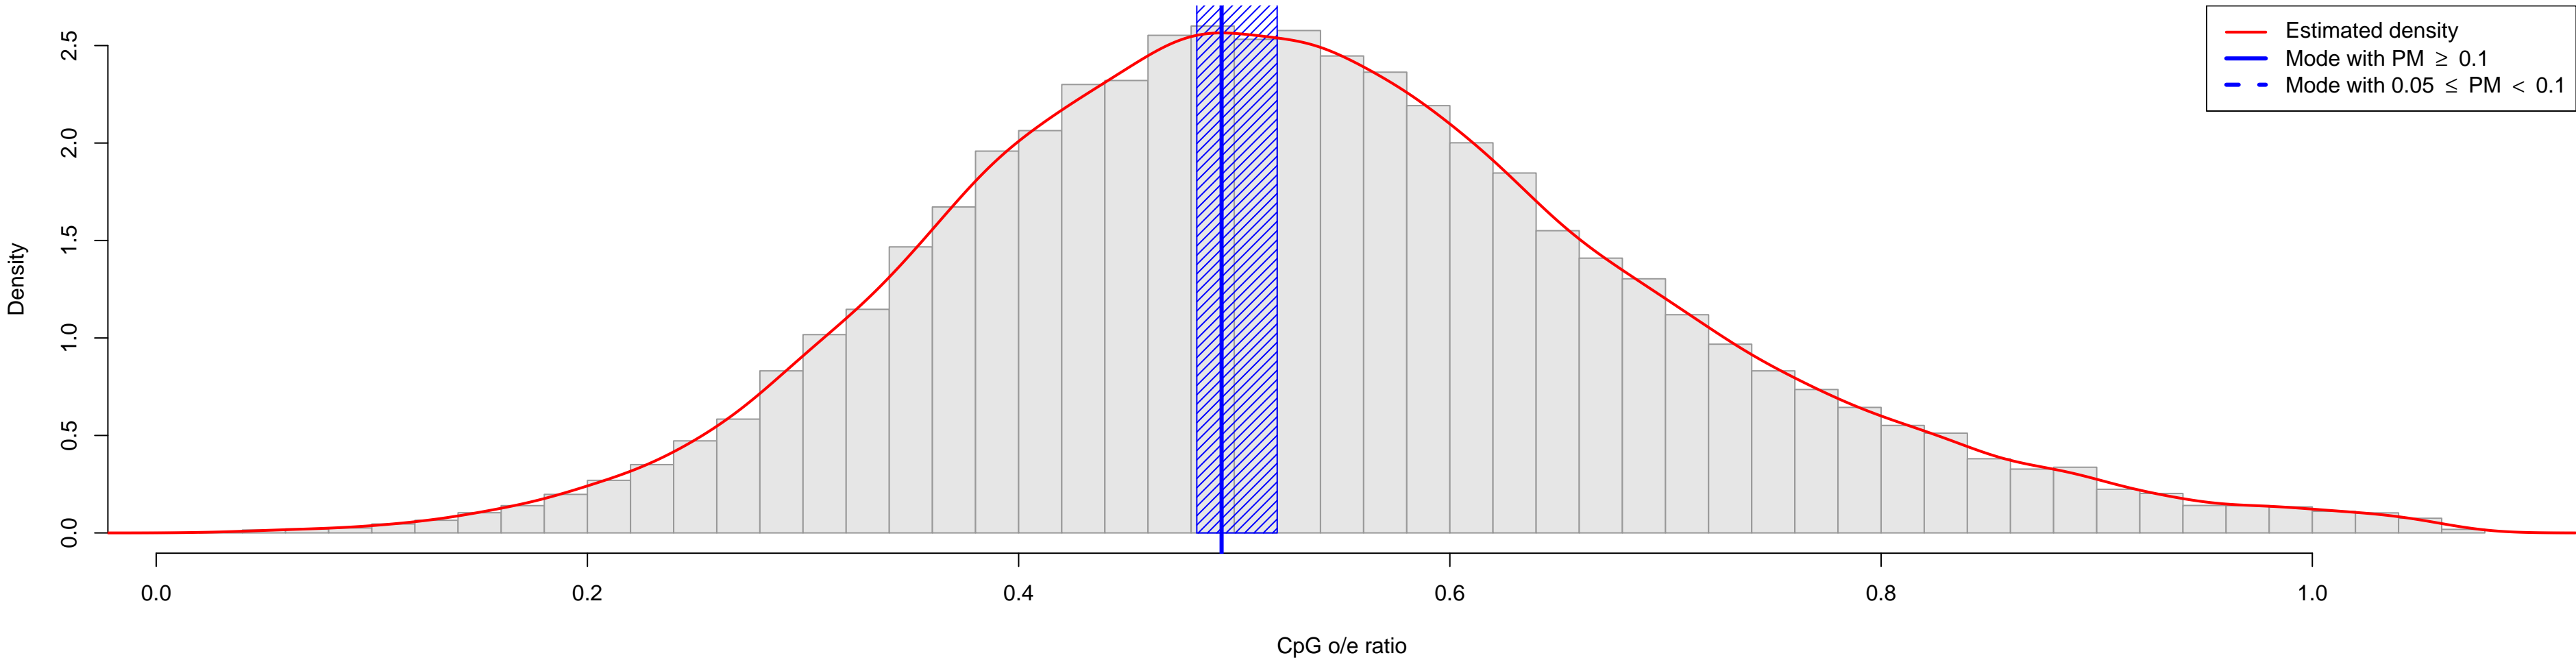



# Silene\_latifolia

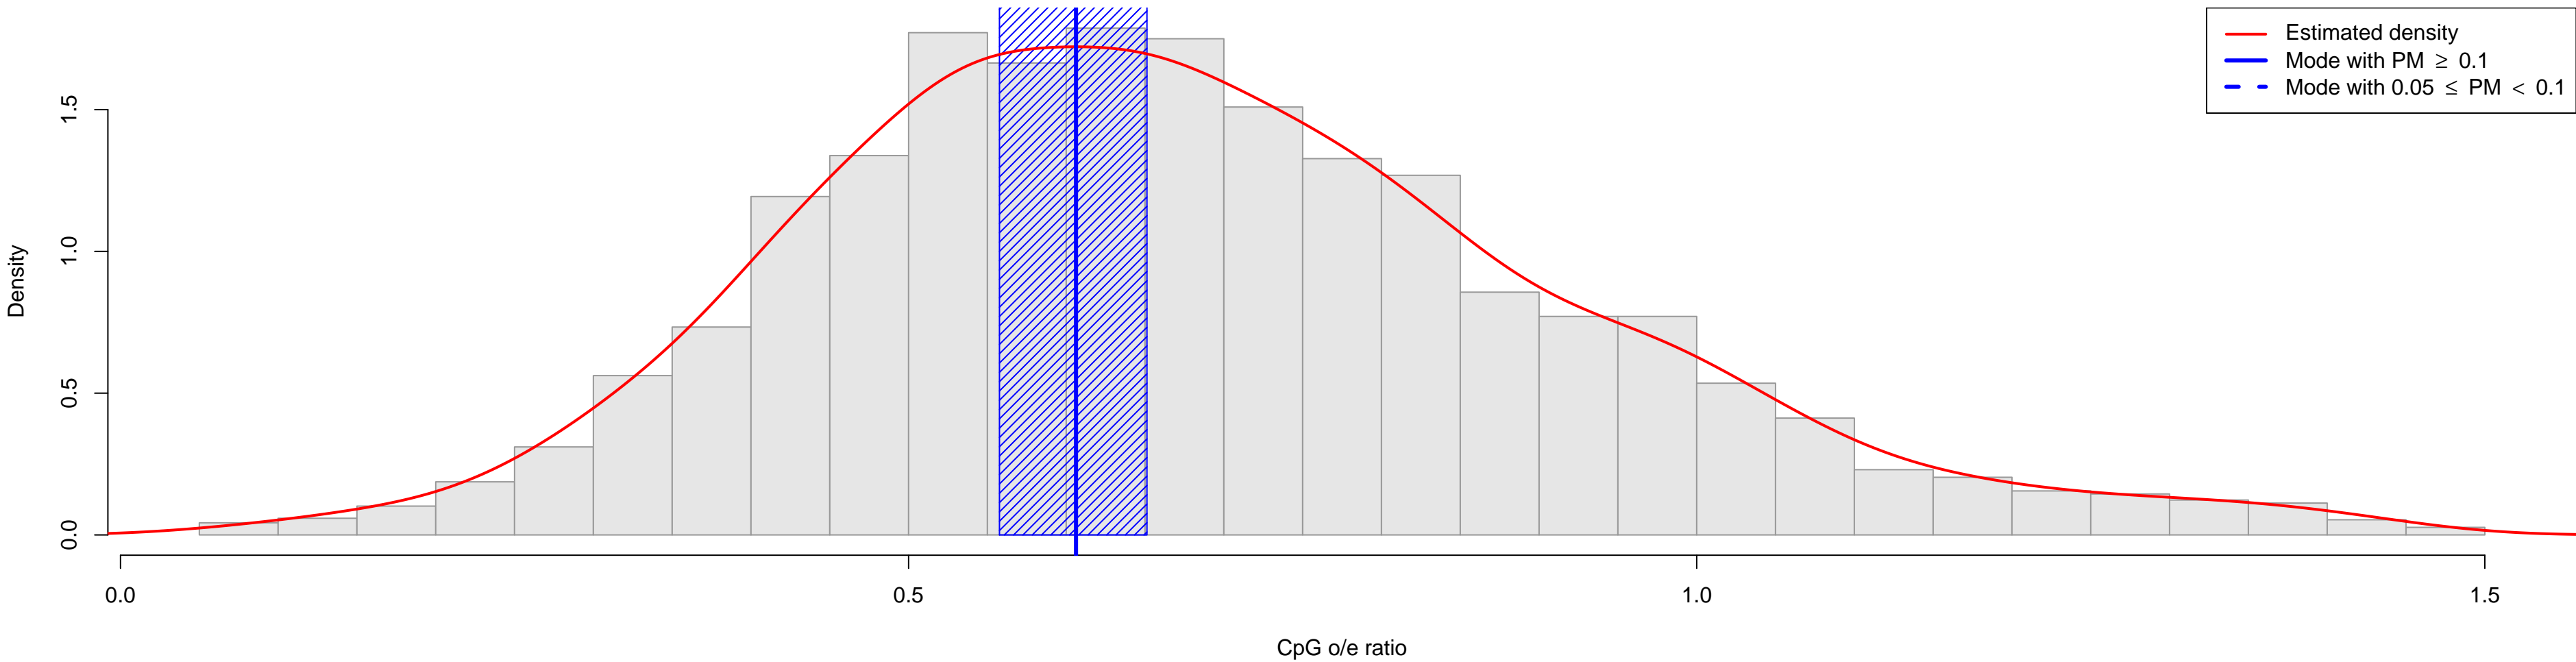

# Solanum\_chacoense

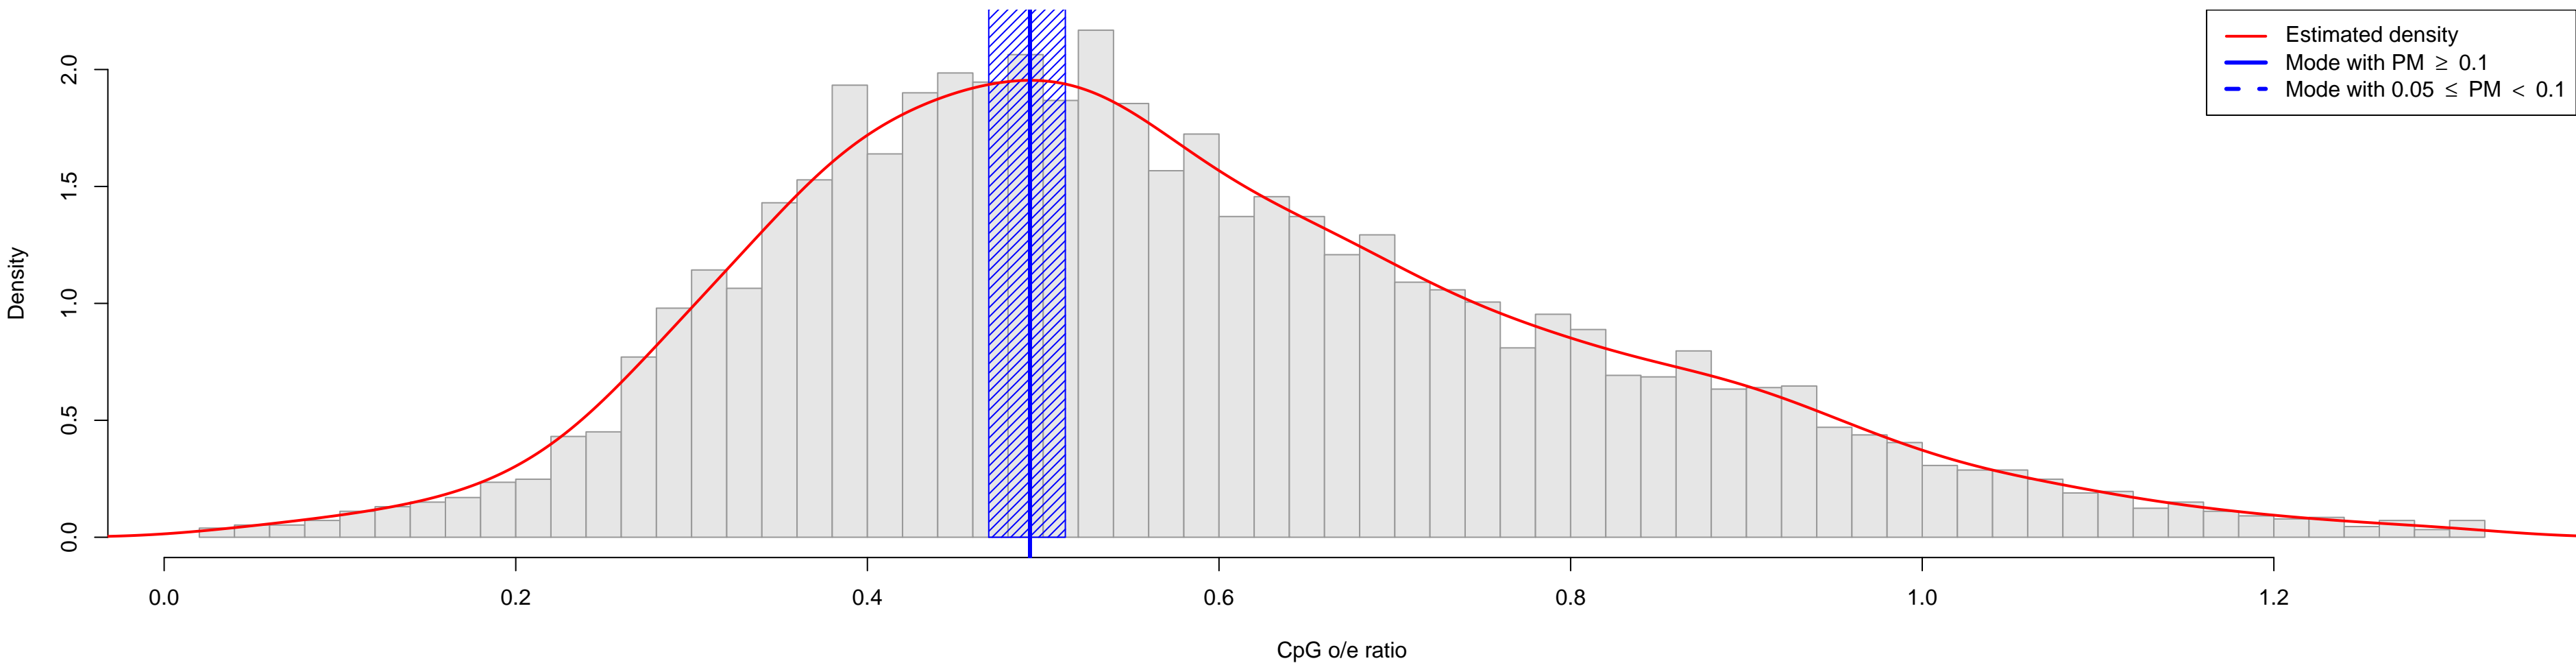

# Solanum\_lycopersicum

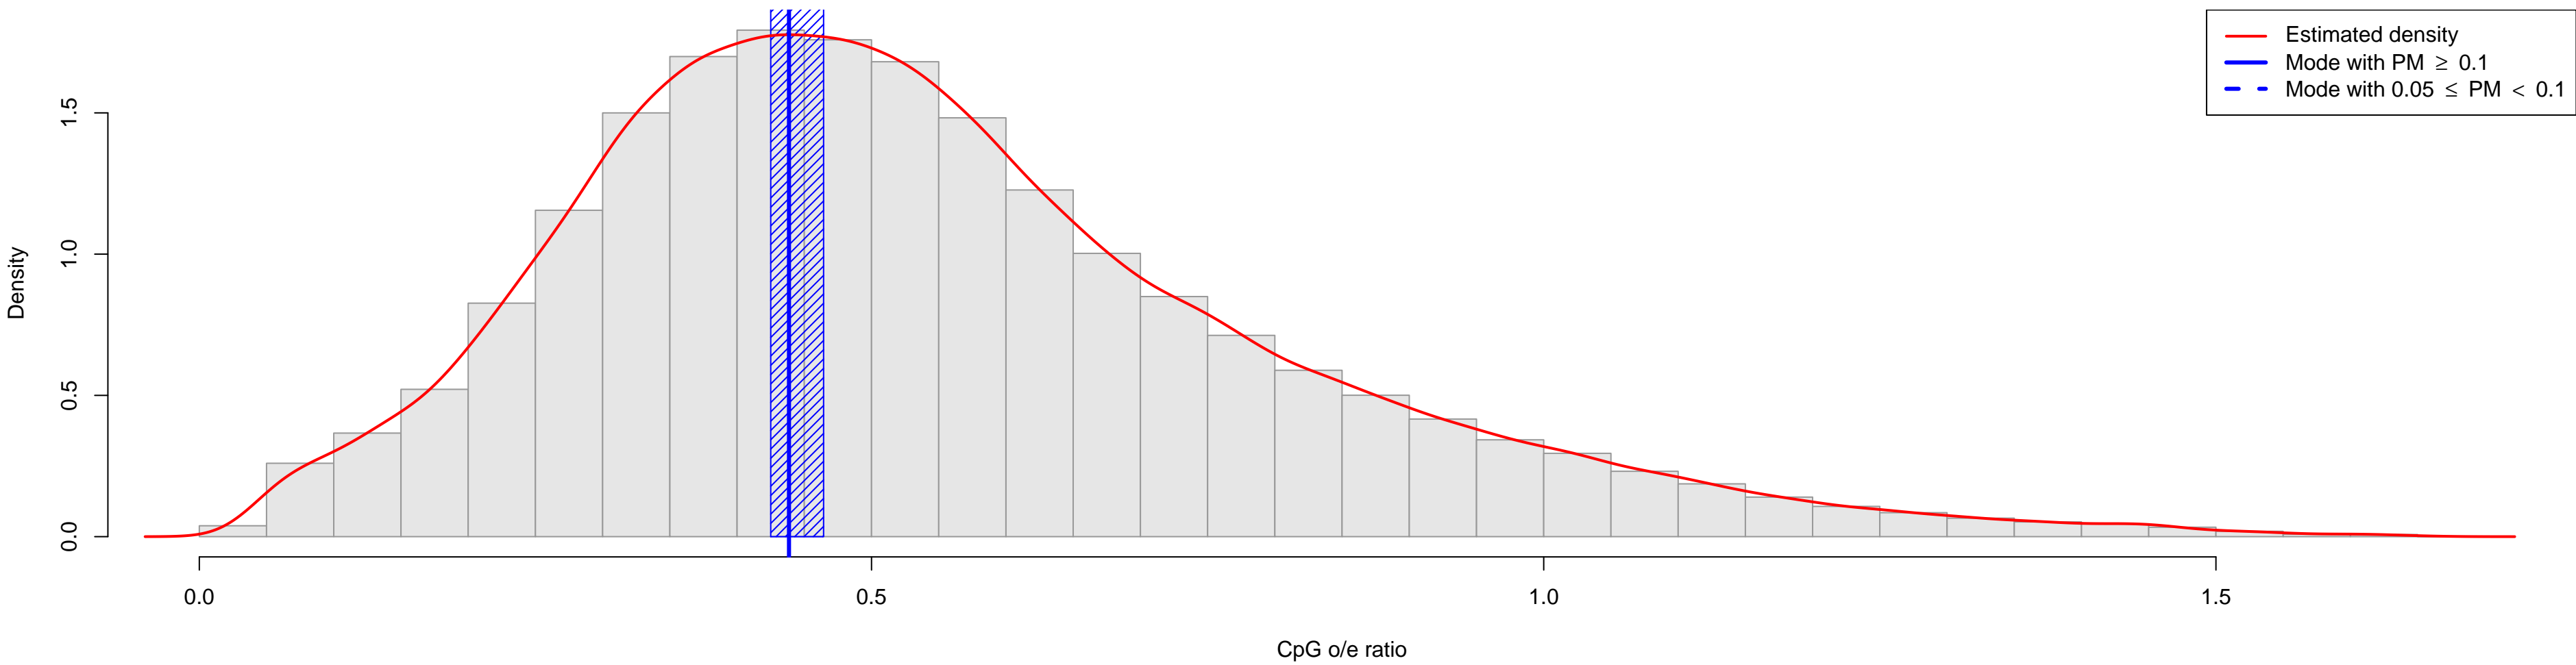

# Solanum\_melongena

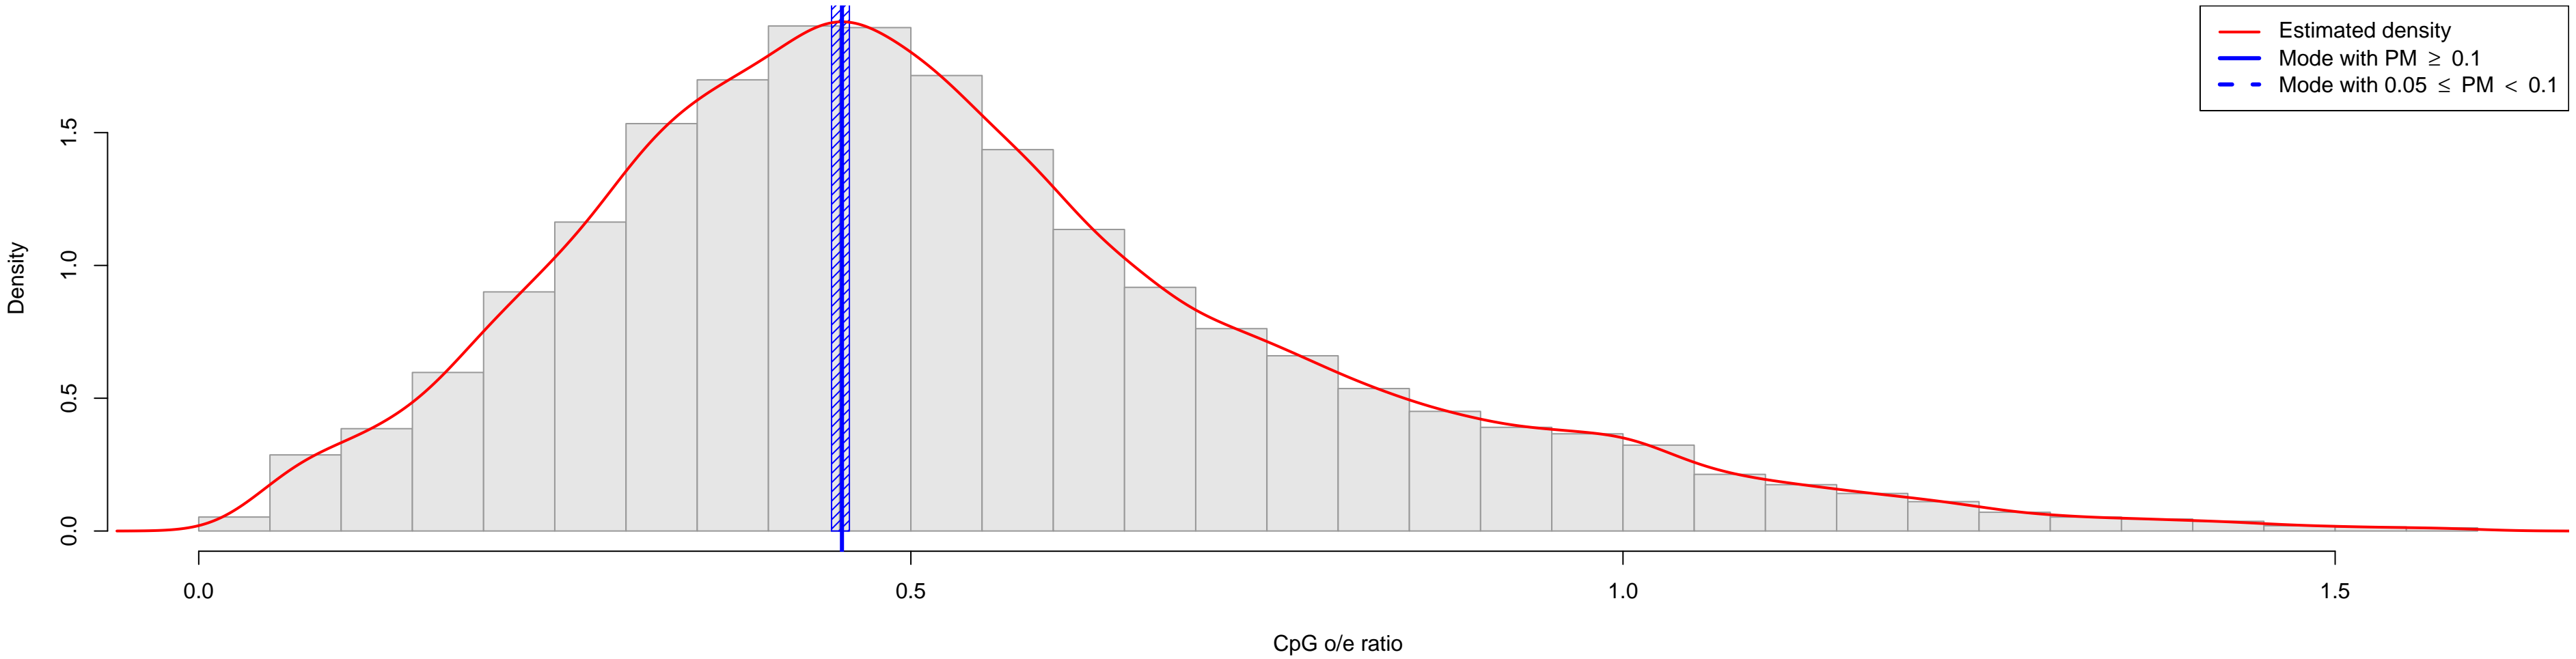

# Solanum\_pennellii

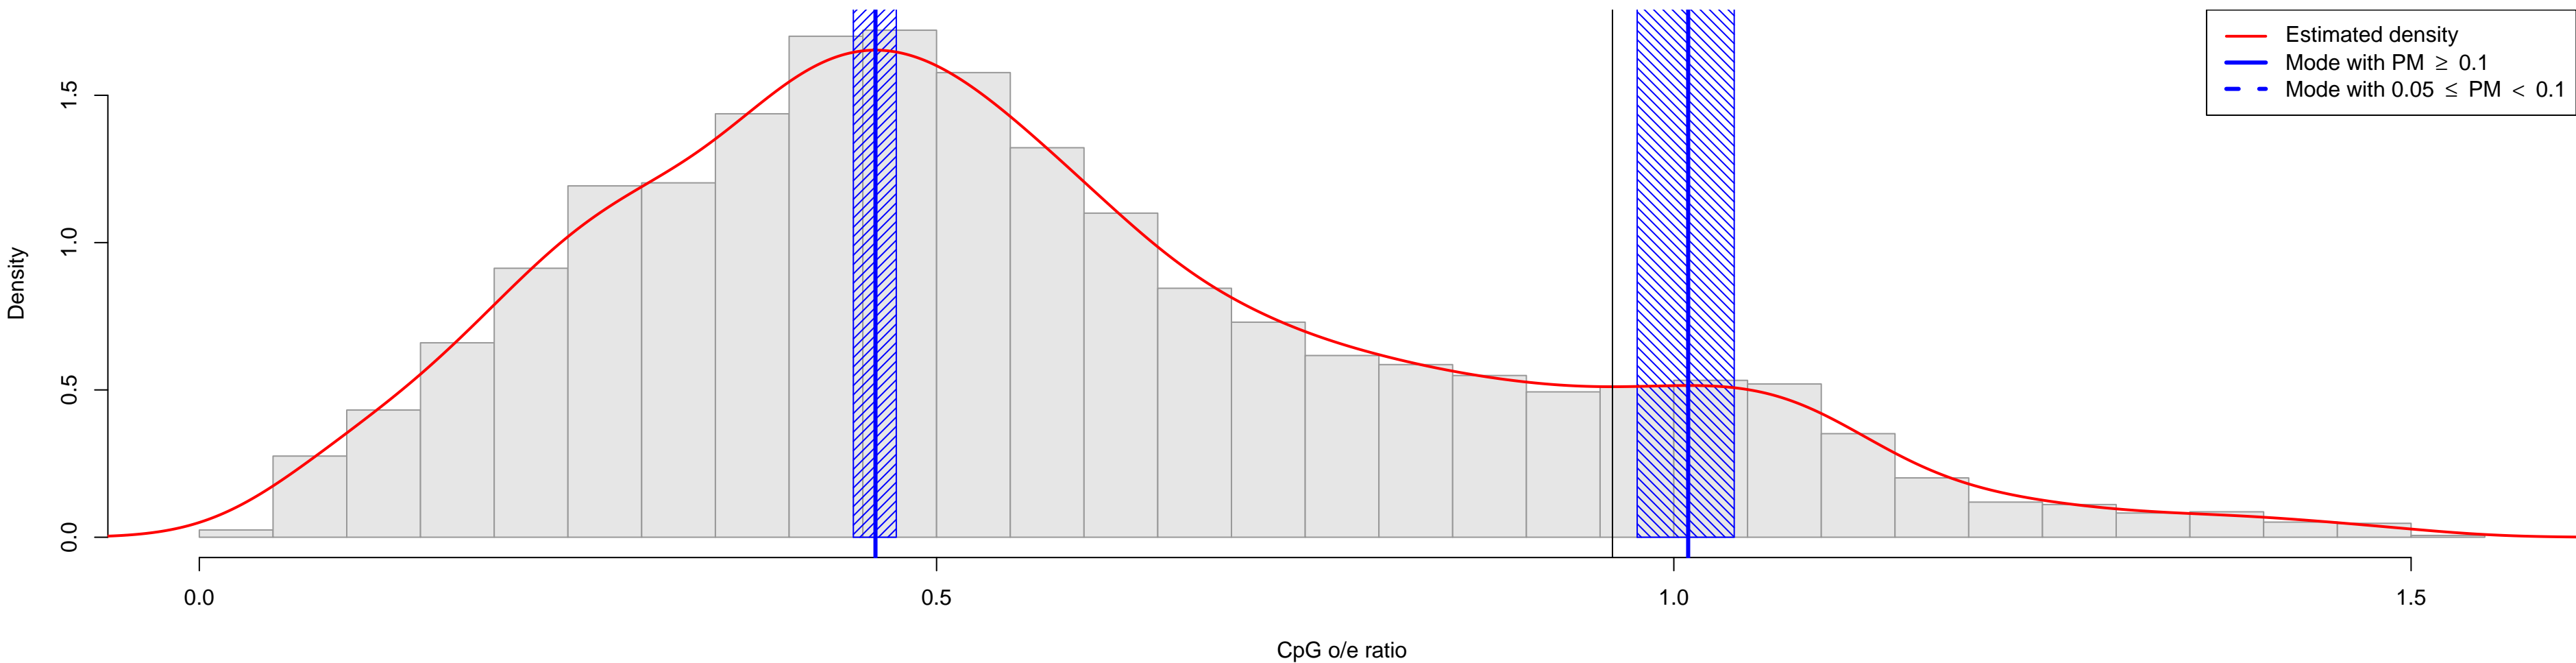

# Solanum\_tuberosum

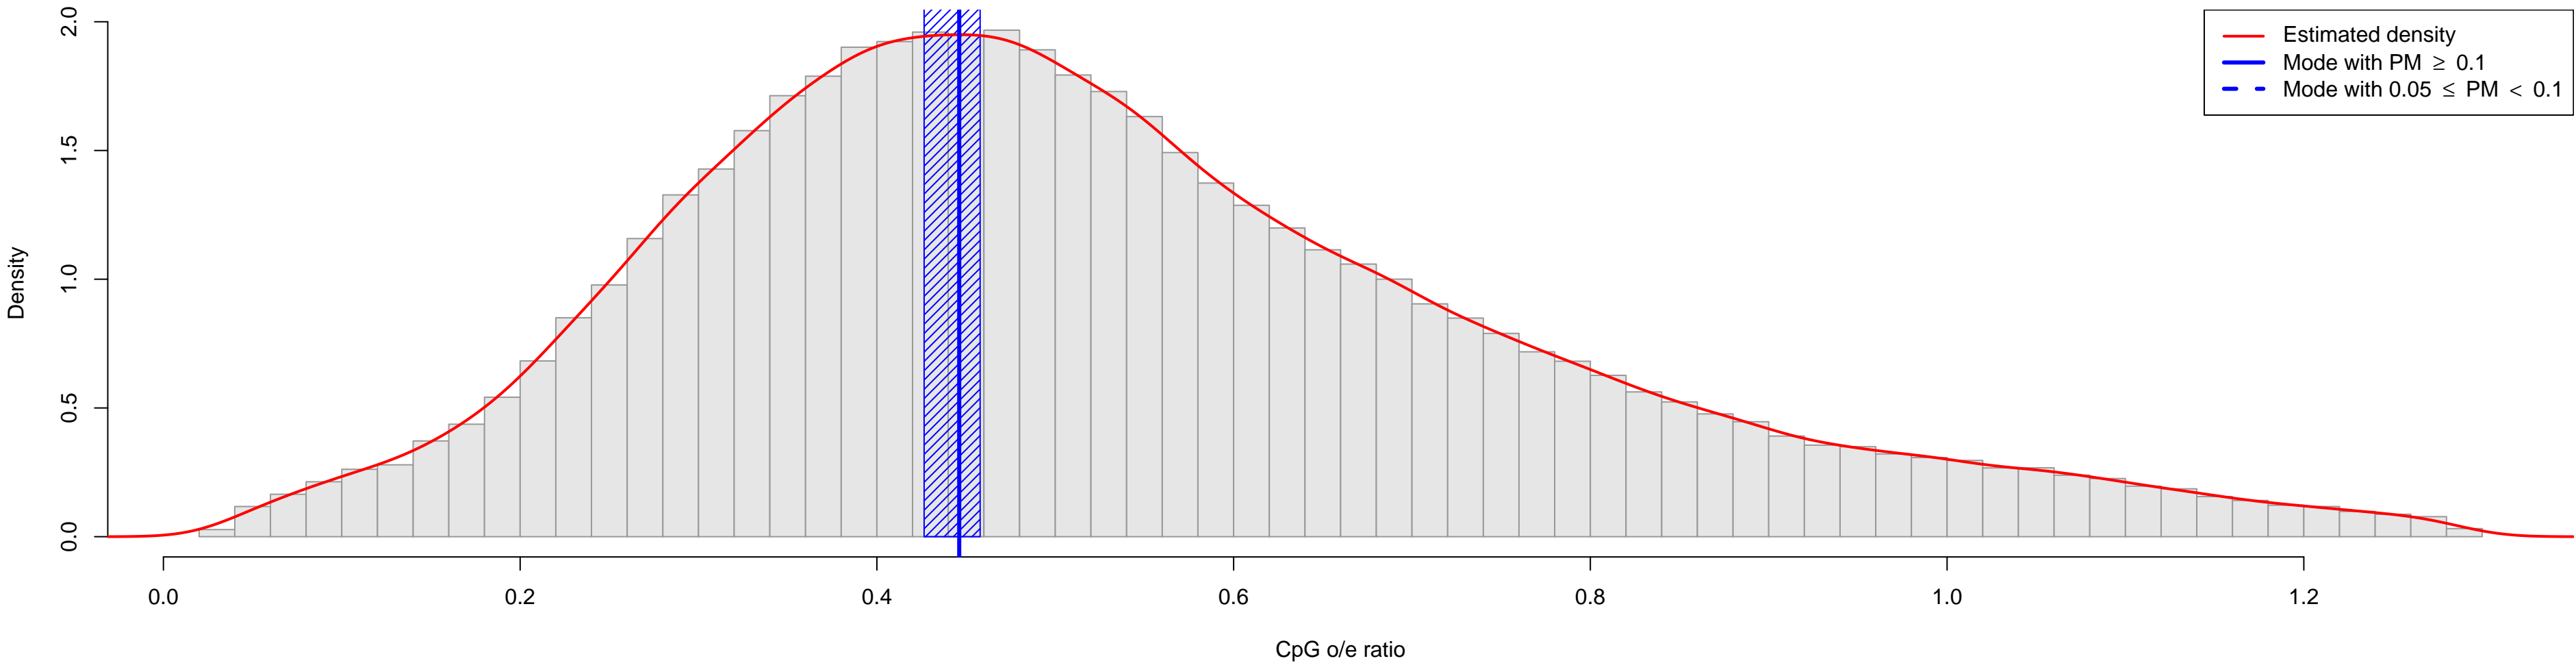

# Solea\_senegalensis

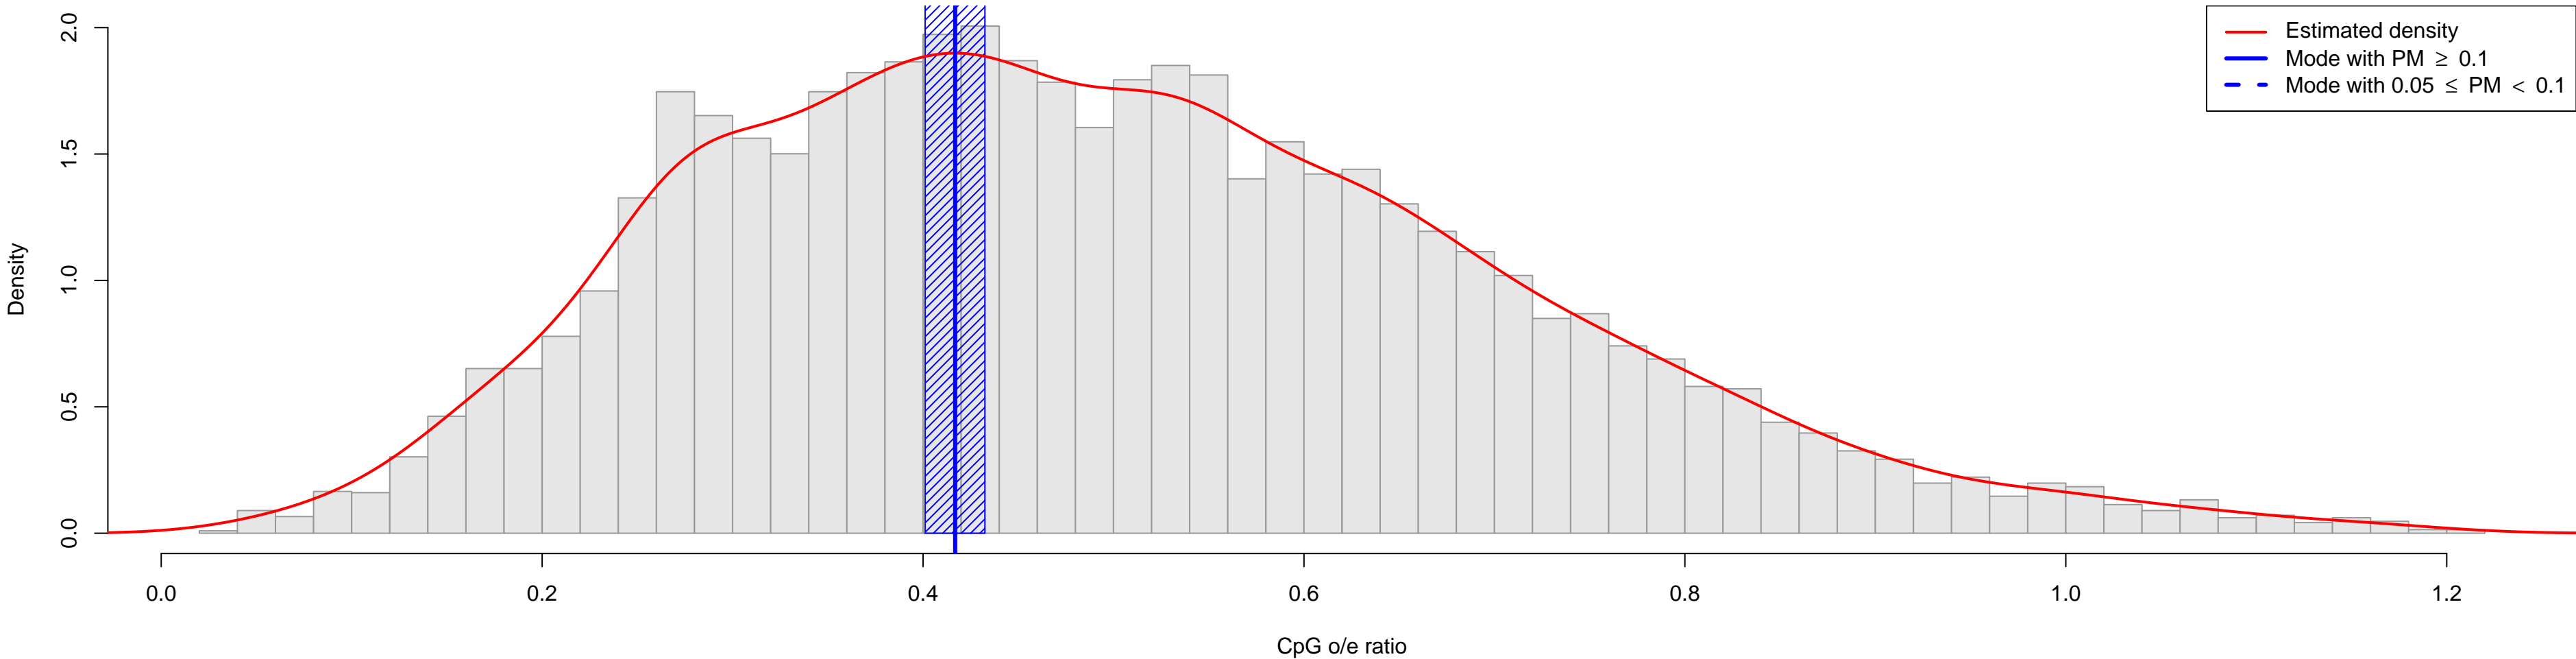

# Solenopsis\_invicta

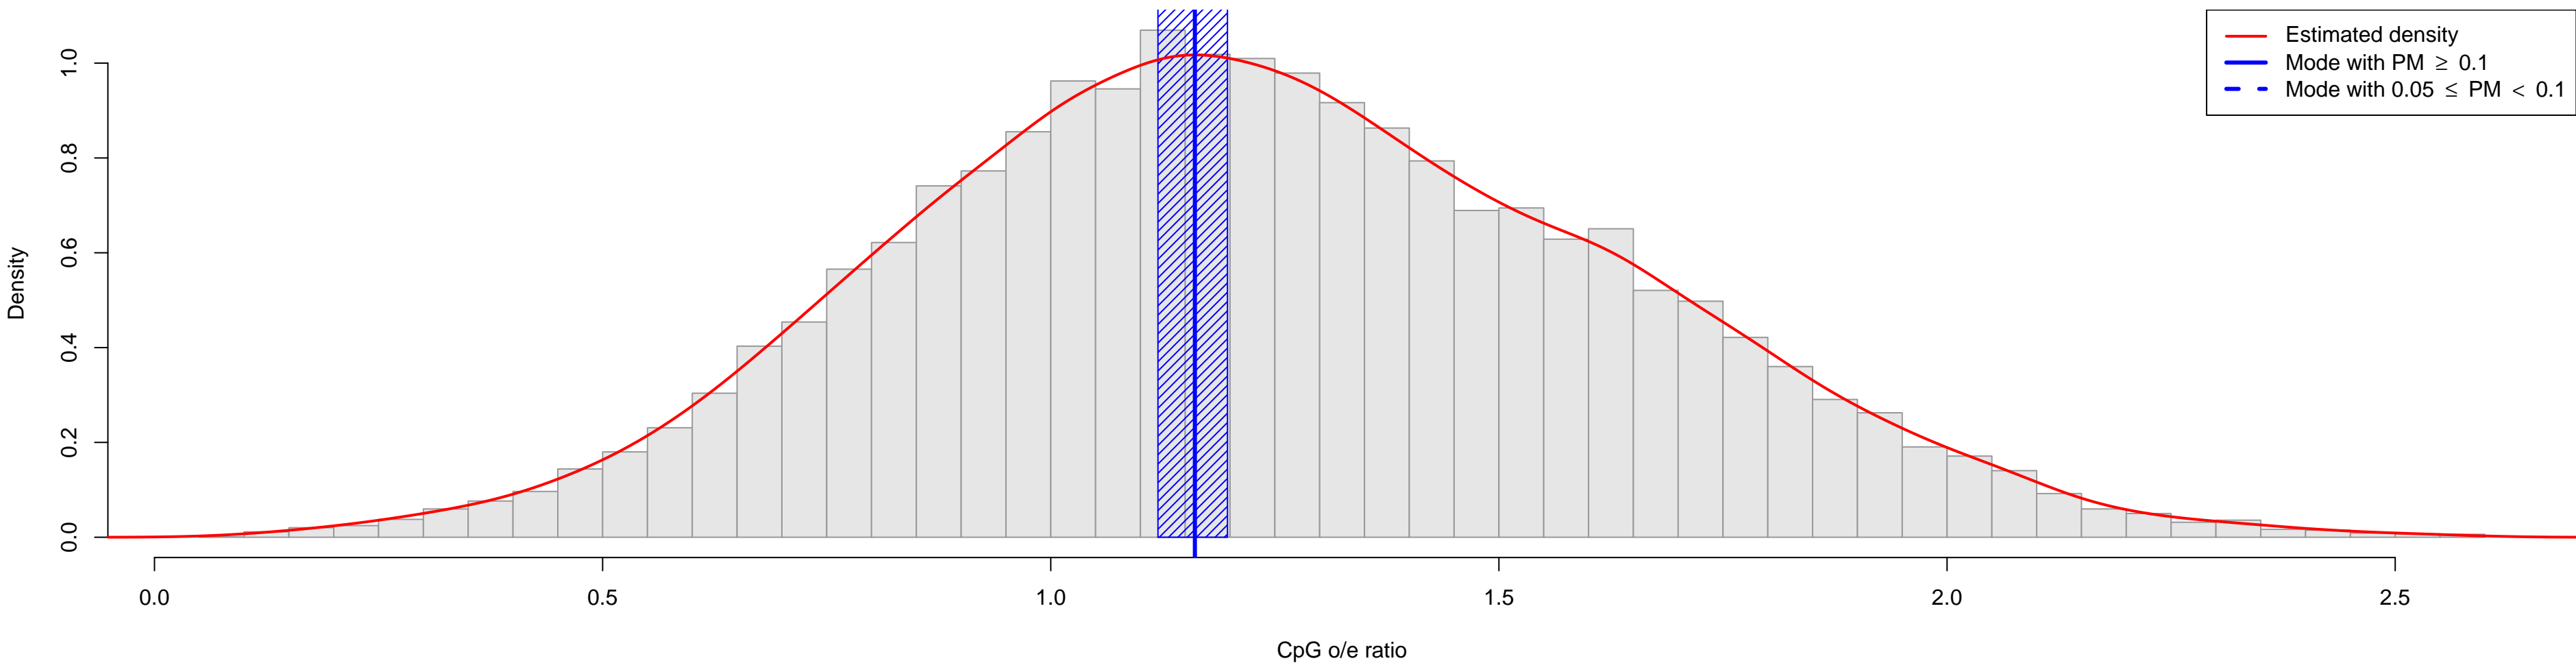



# Spalax\_galili

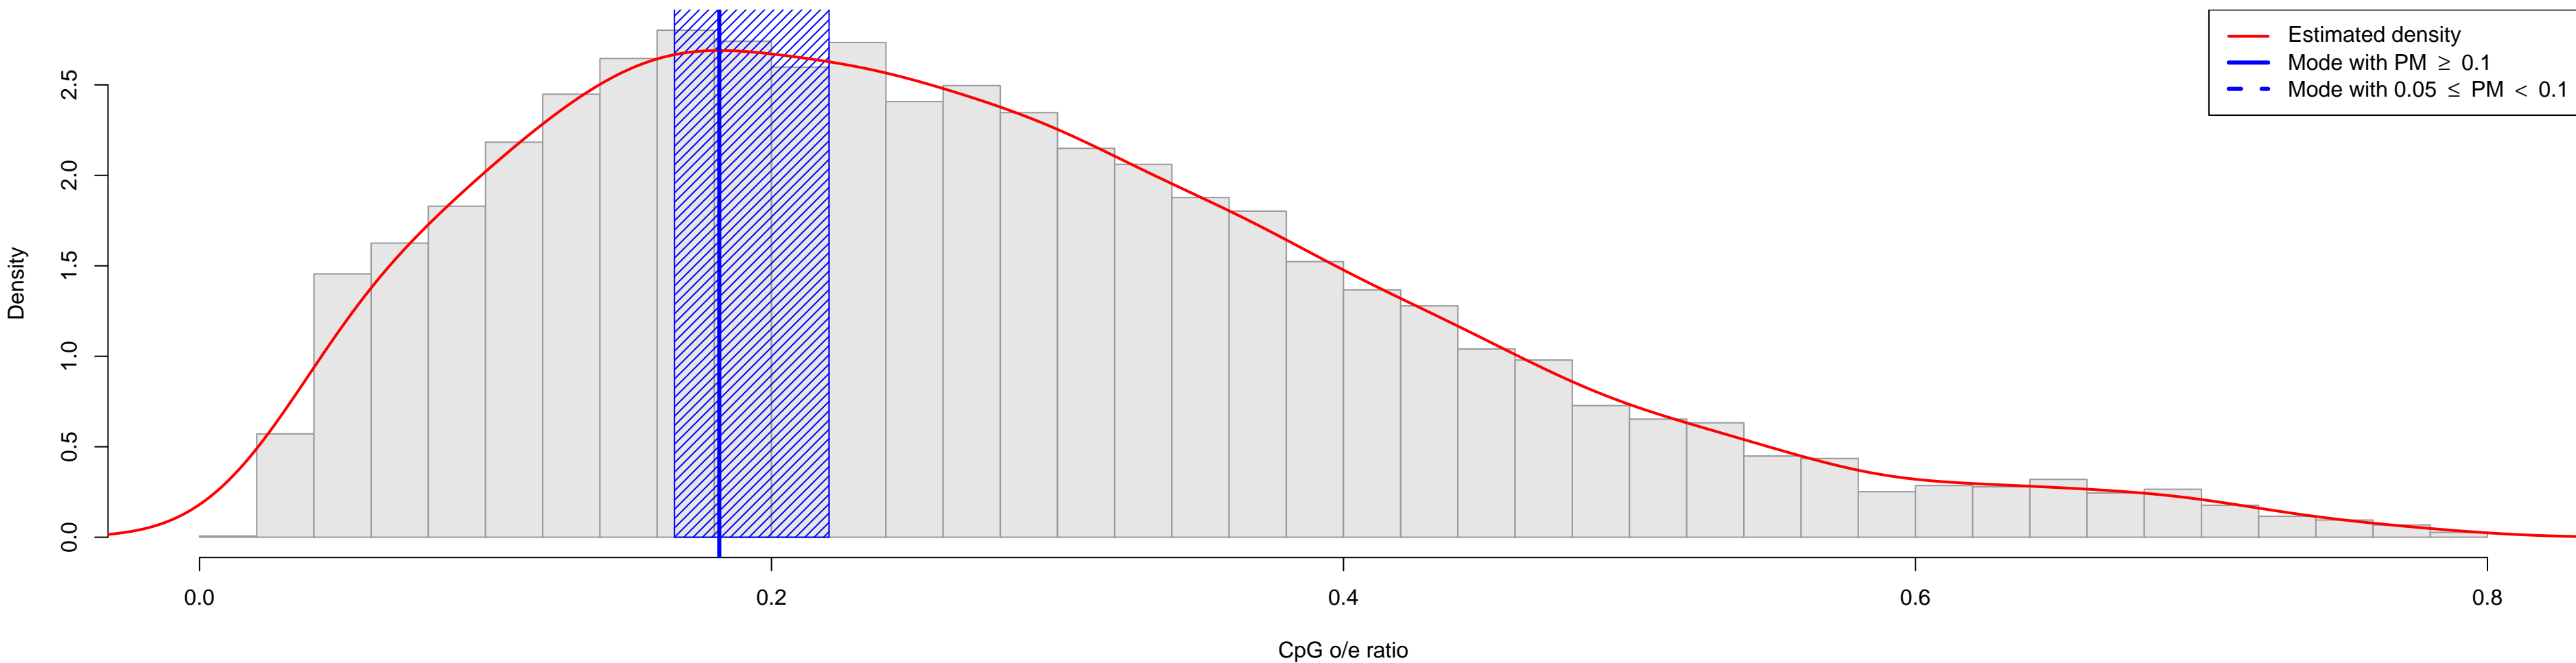

# Sparus\_aurata

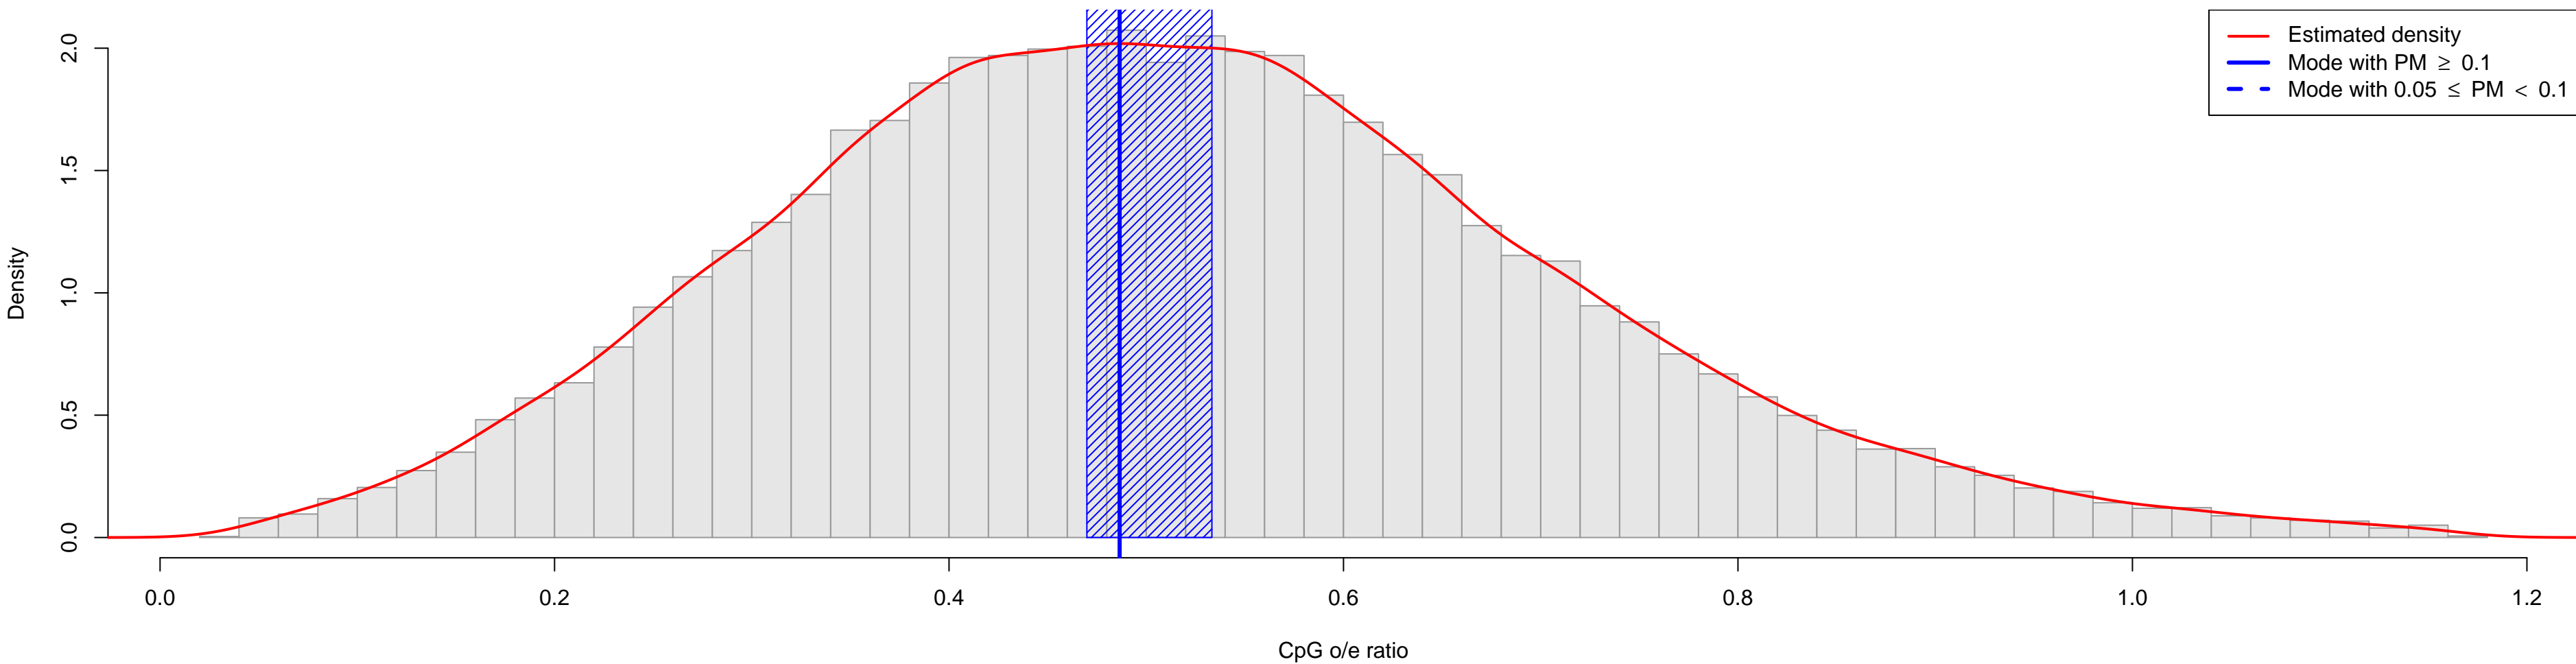

# Spermophilus\_lateralis

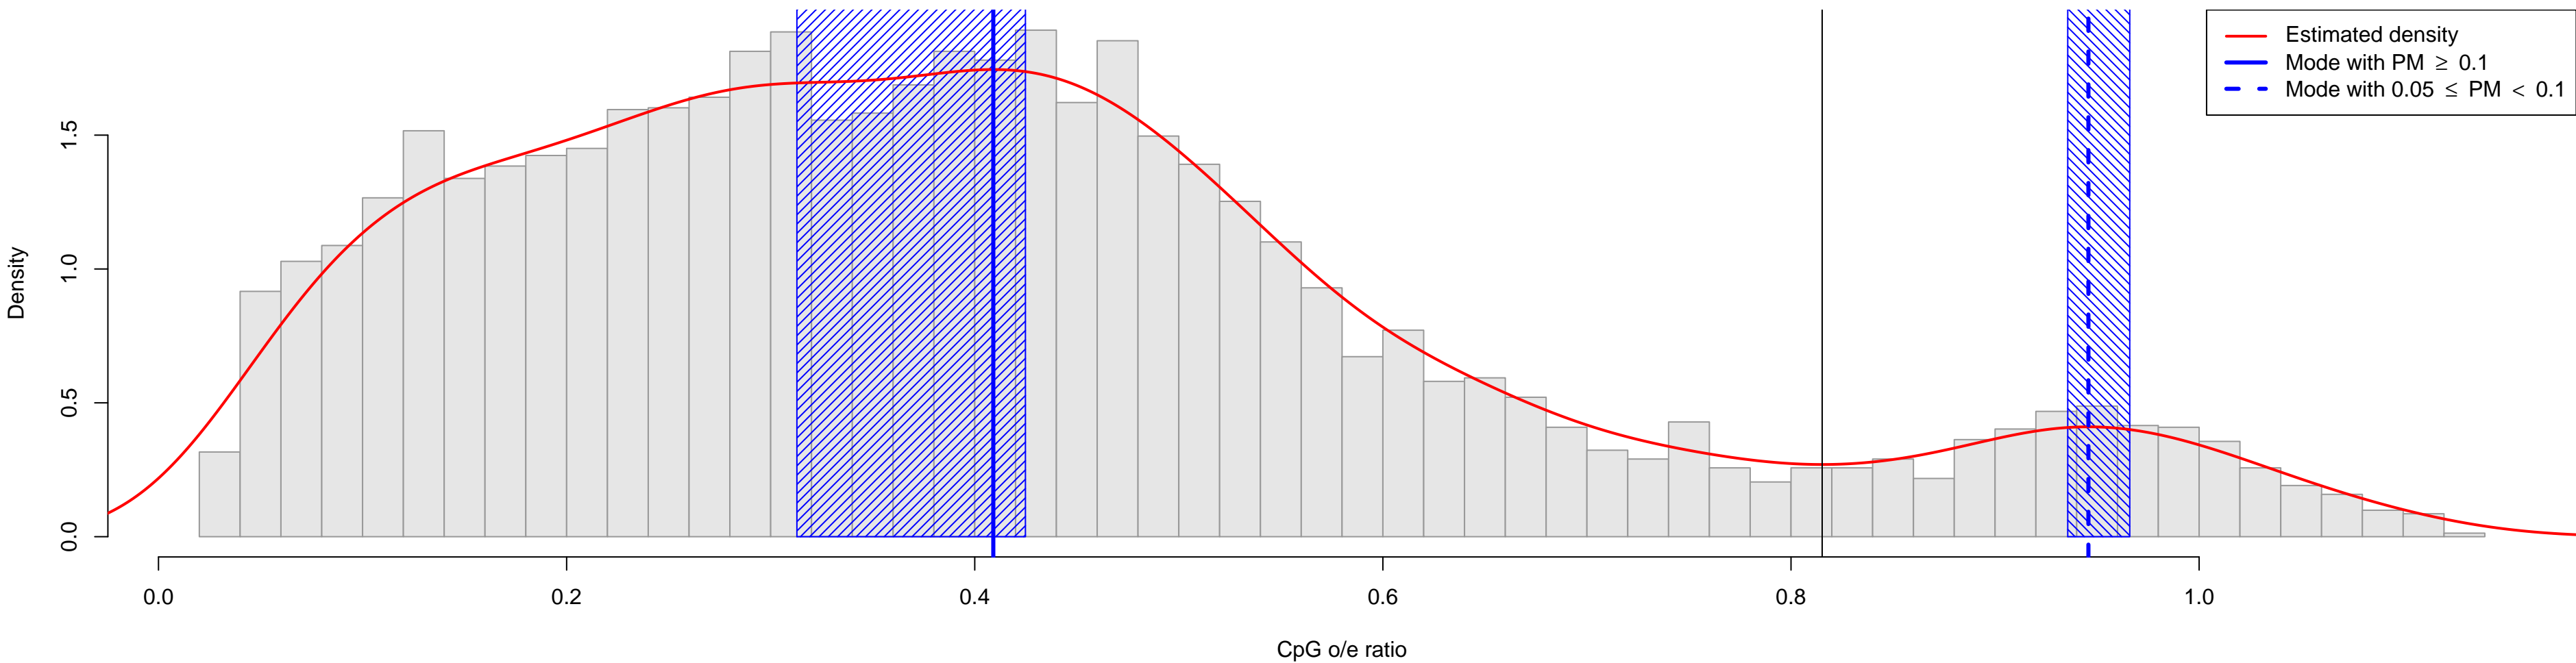

# Spirogyra\_pratensis

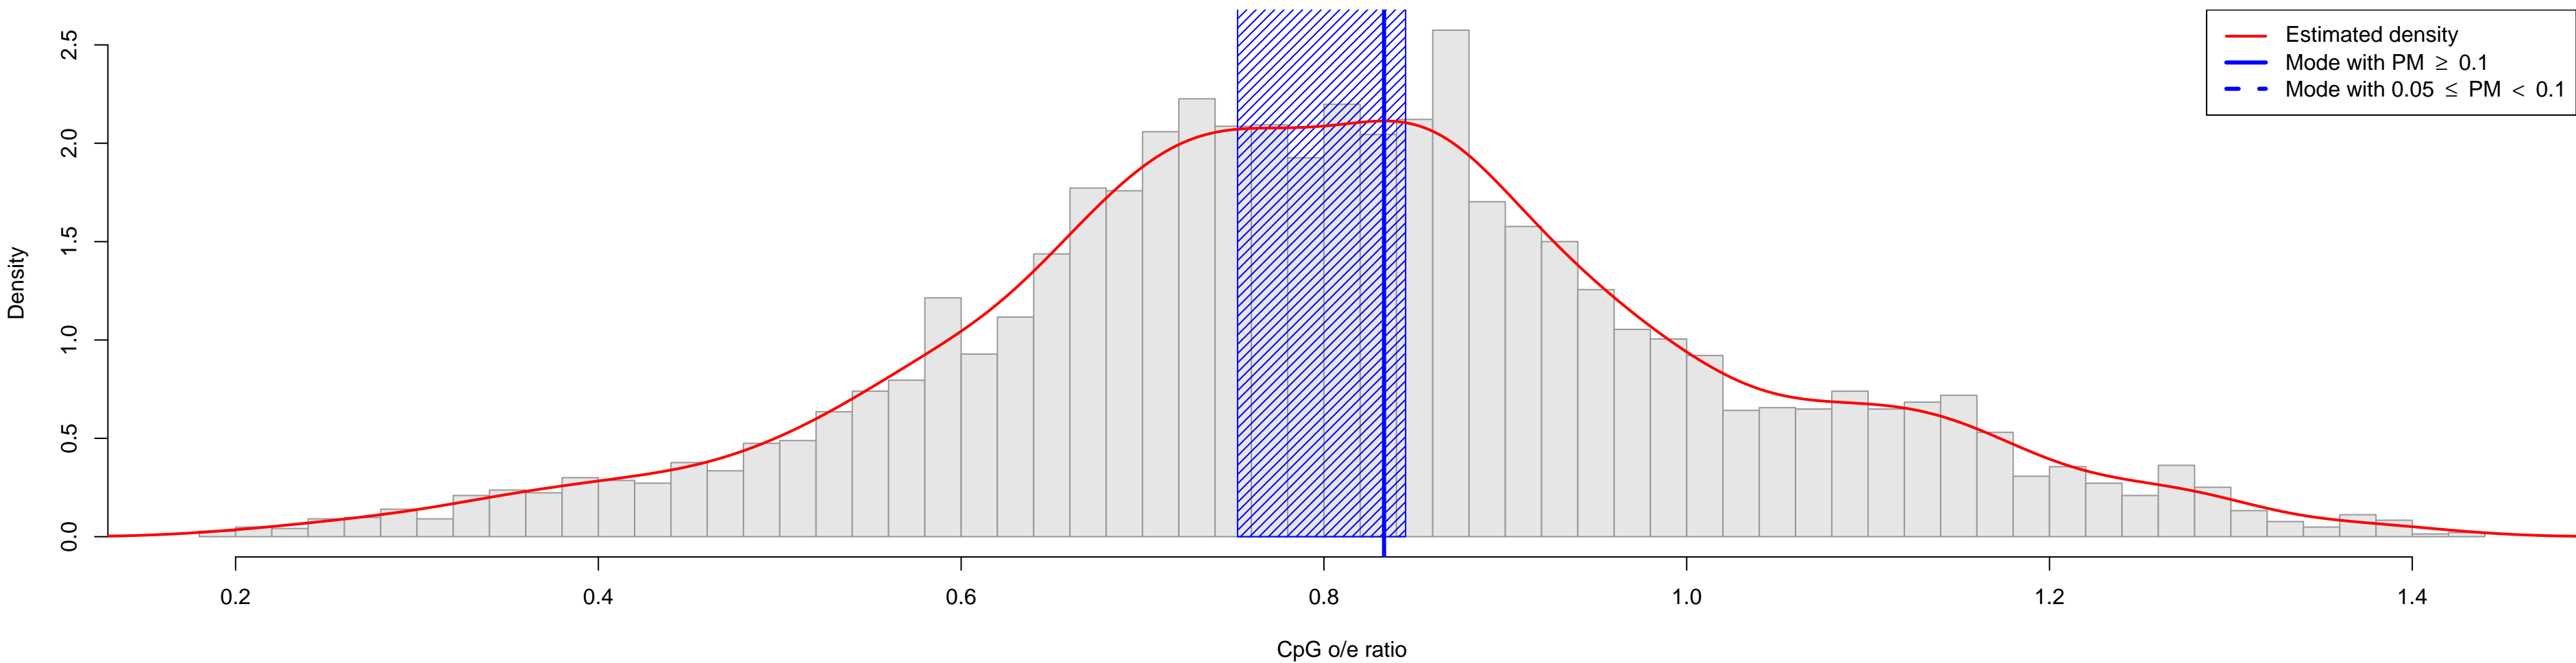

# Spodoptera\_littoralis

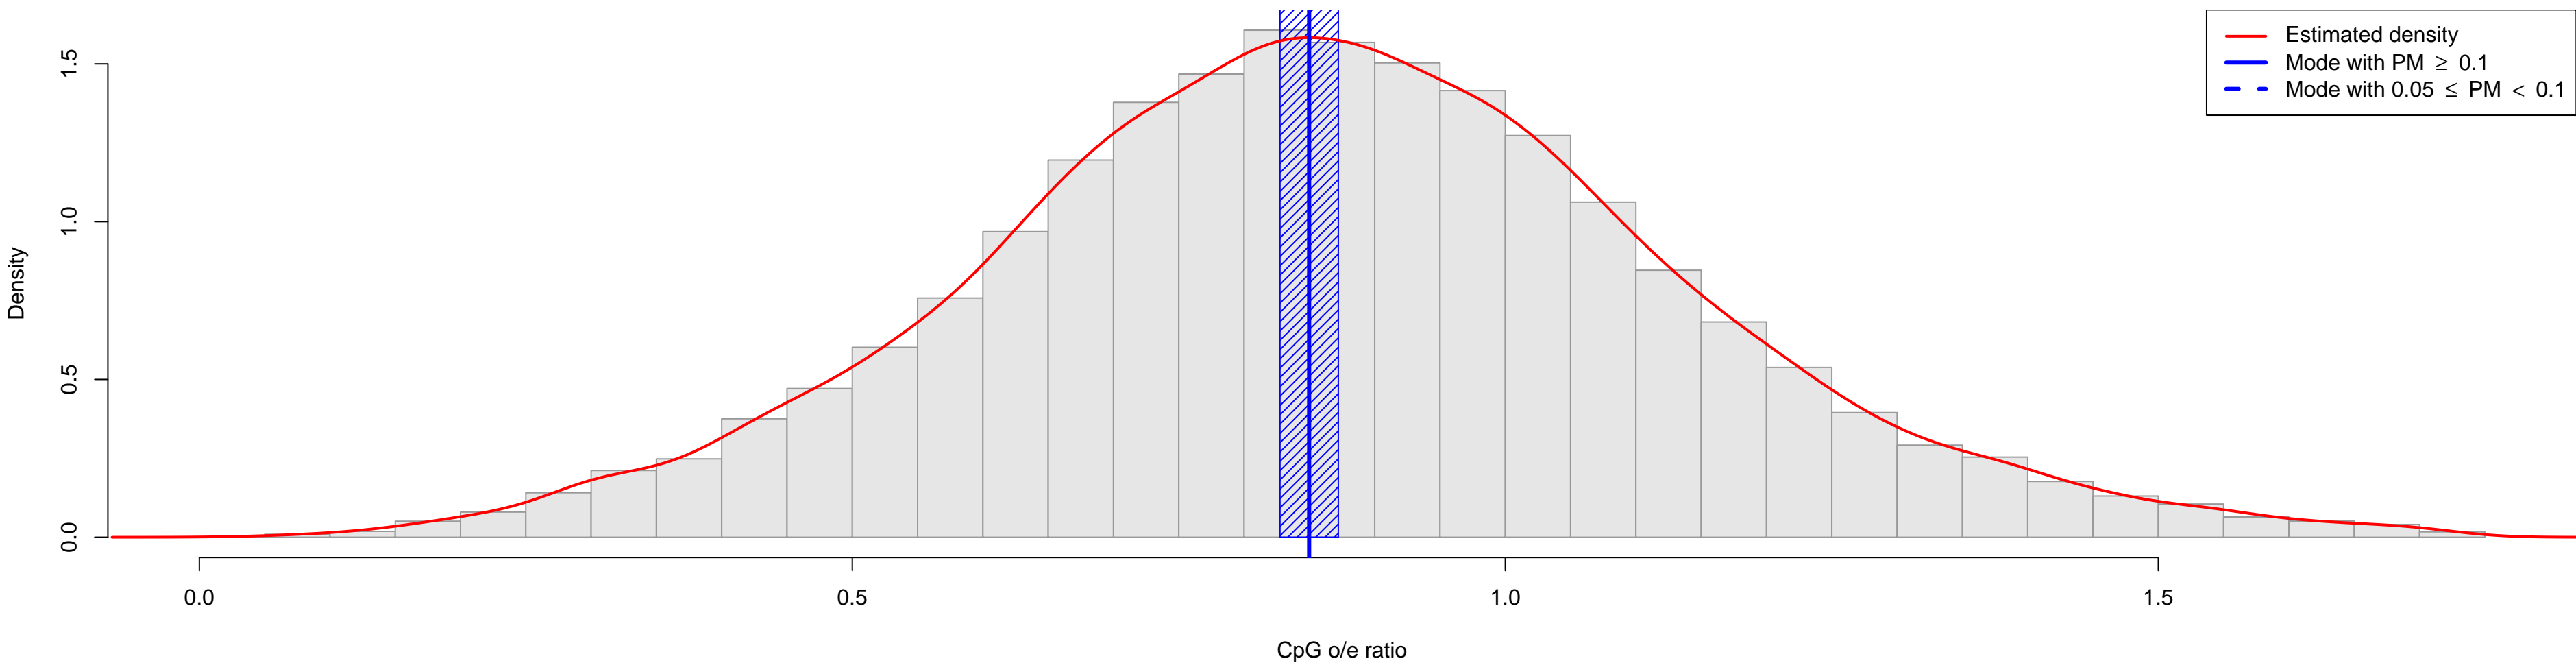

# Spodoptera\_litura

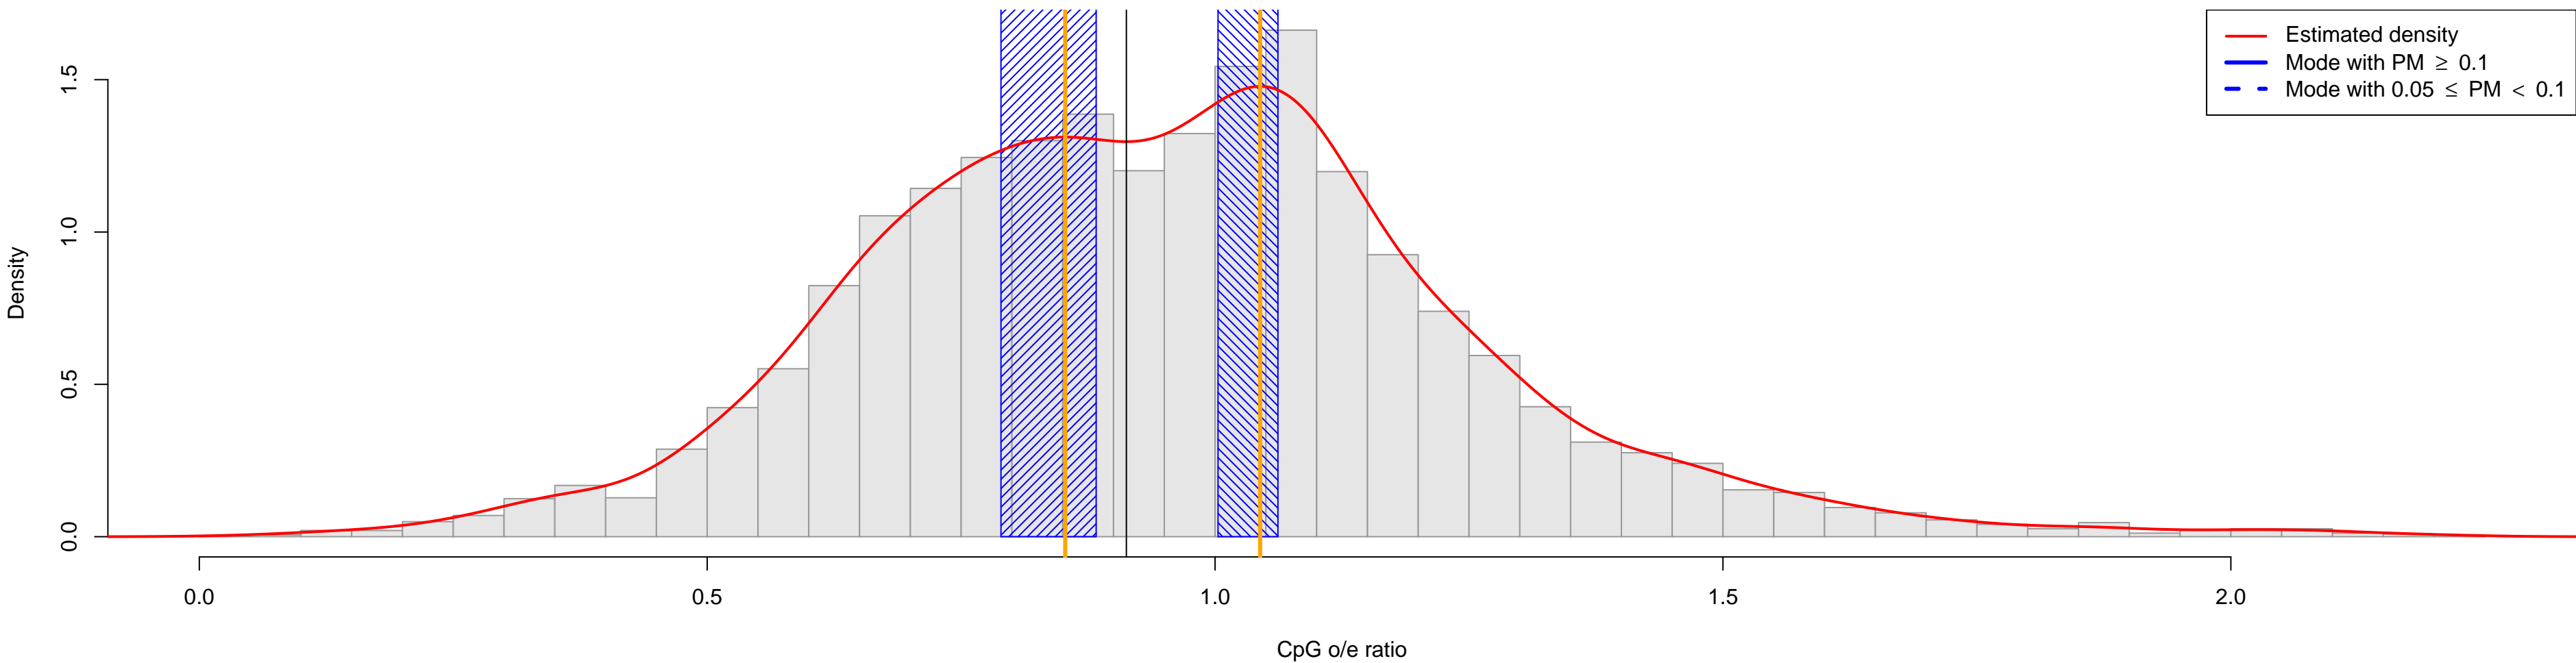

# Steinernema\_carpocapsae

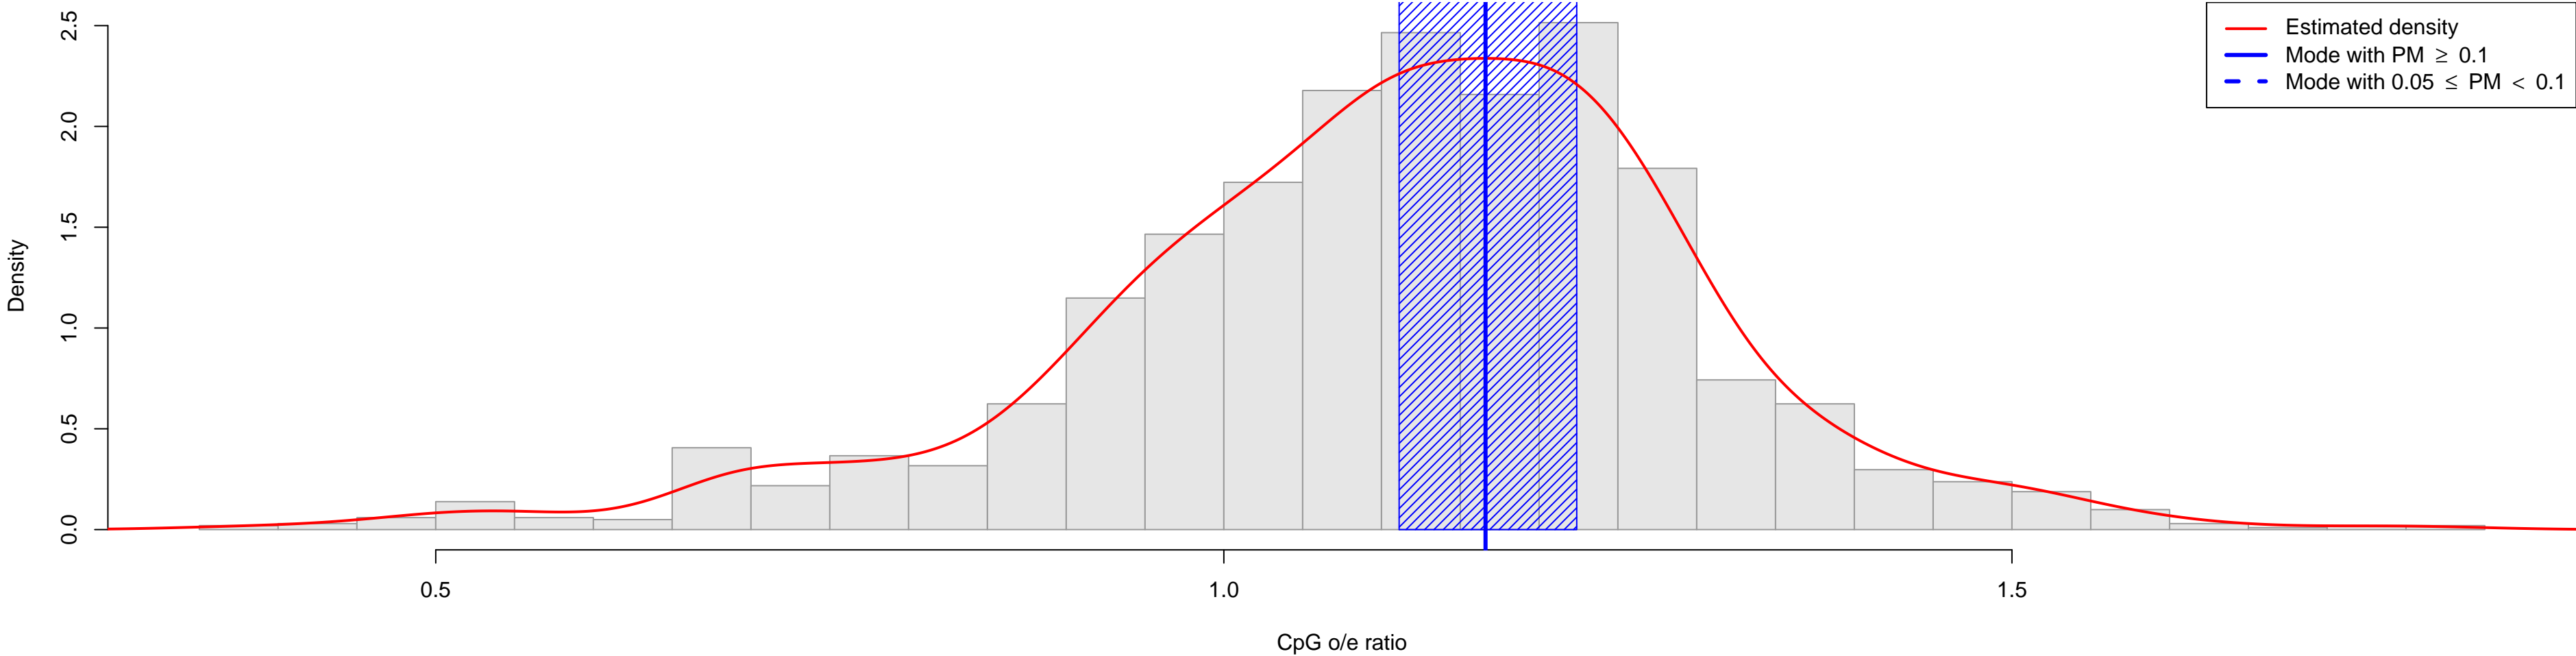

# Sterkiella\_histriomuscorum

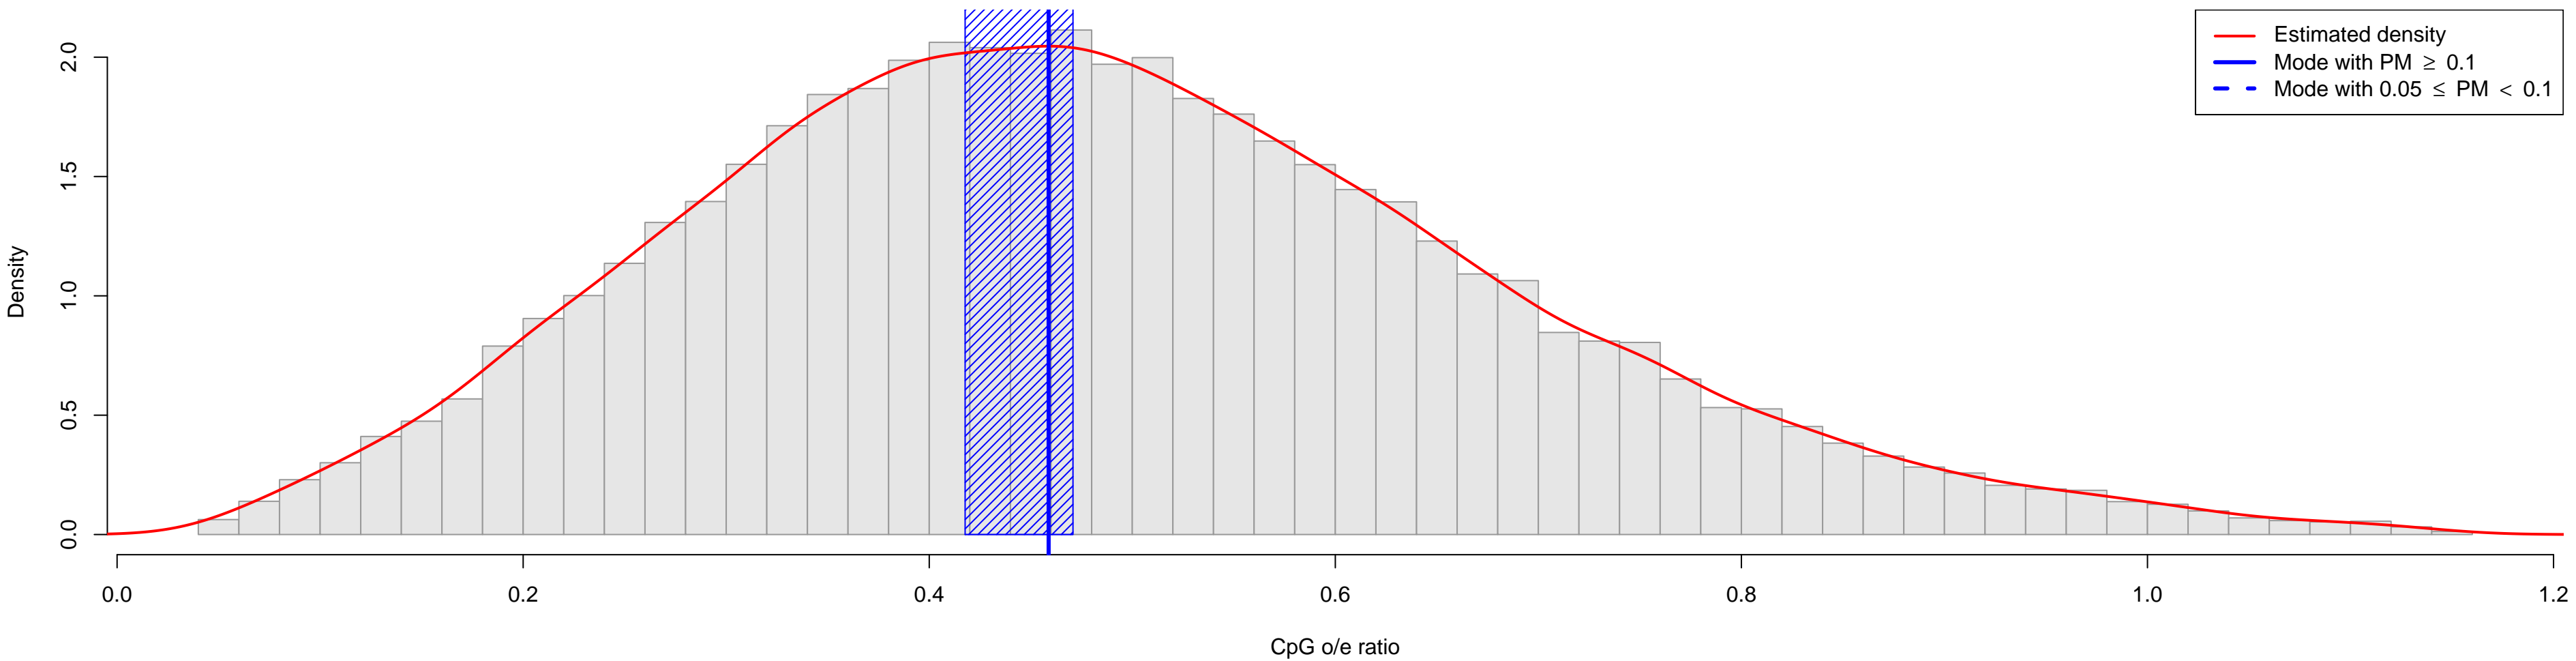



# Striga\_hermonthica

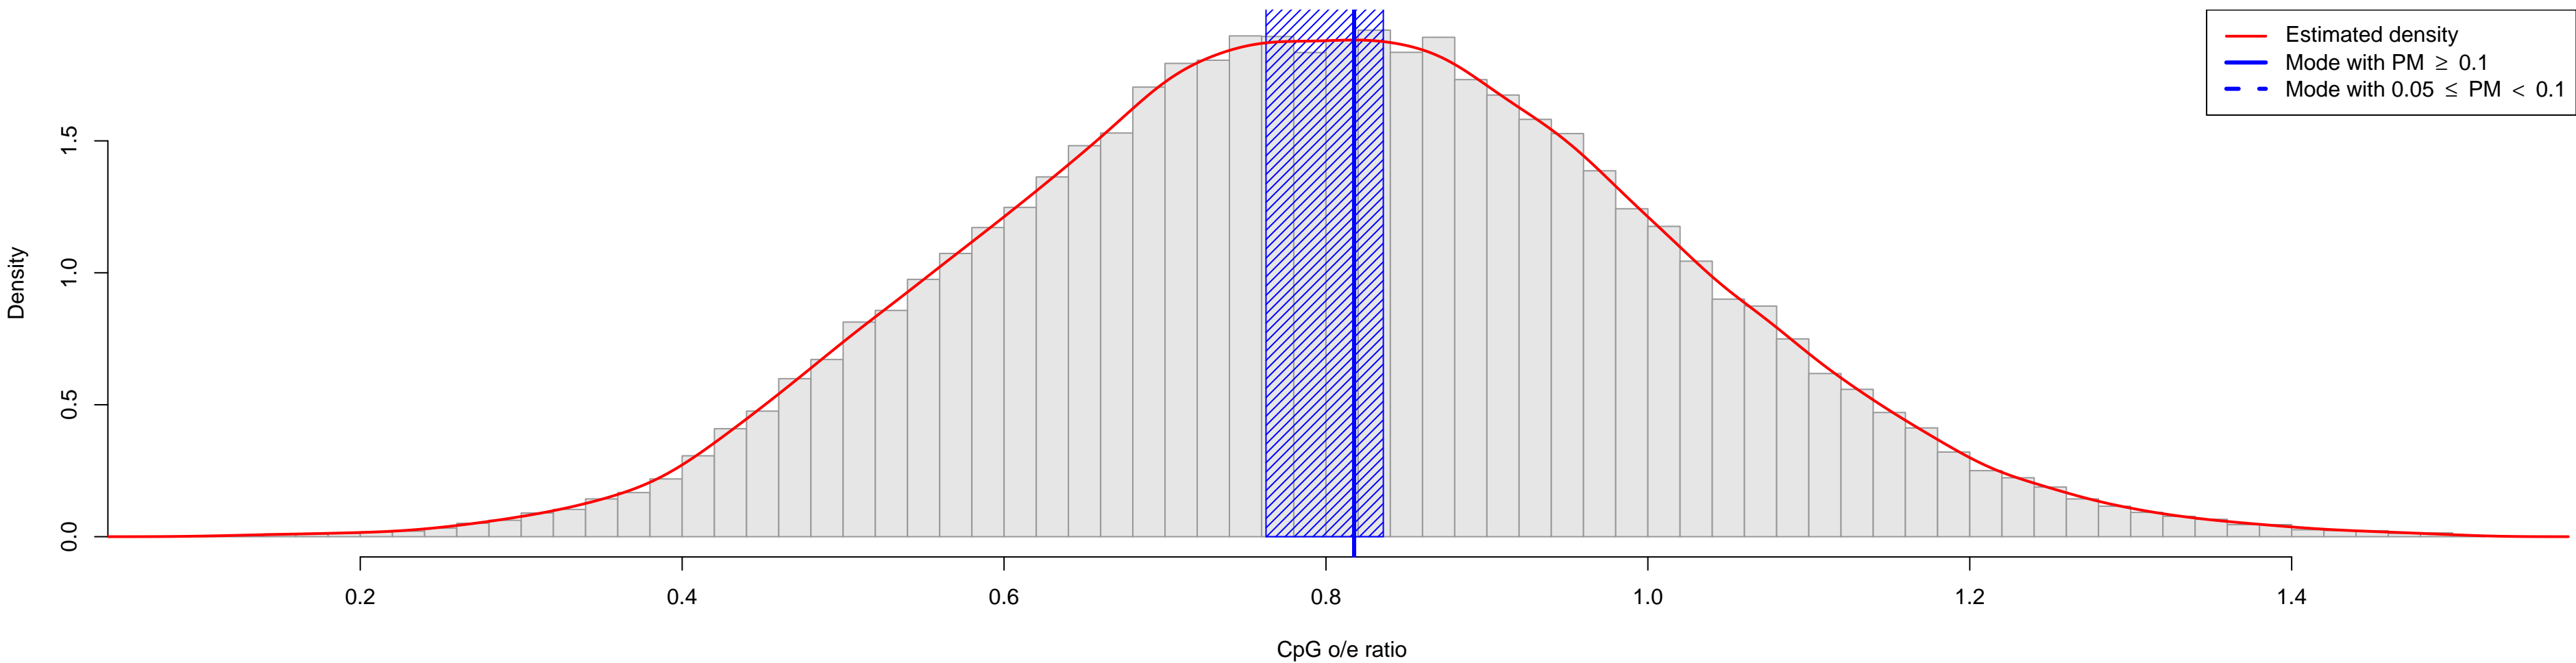

# Strongylocentrotus\_purpuratus

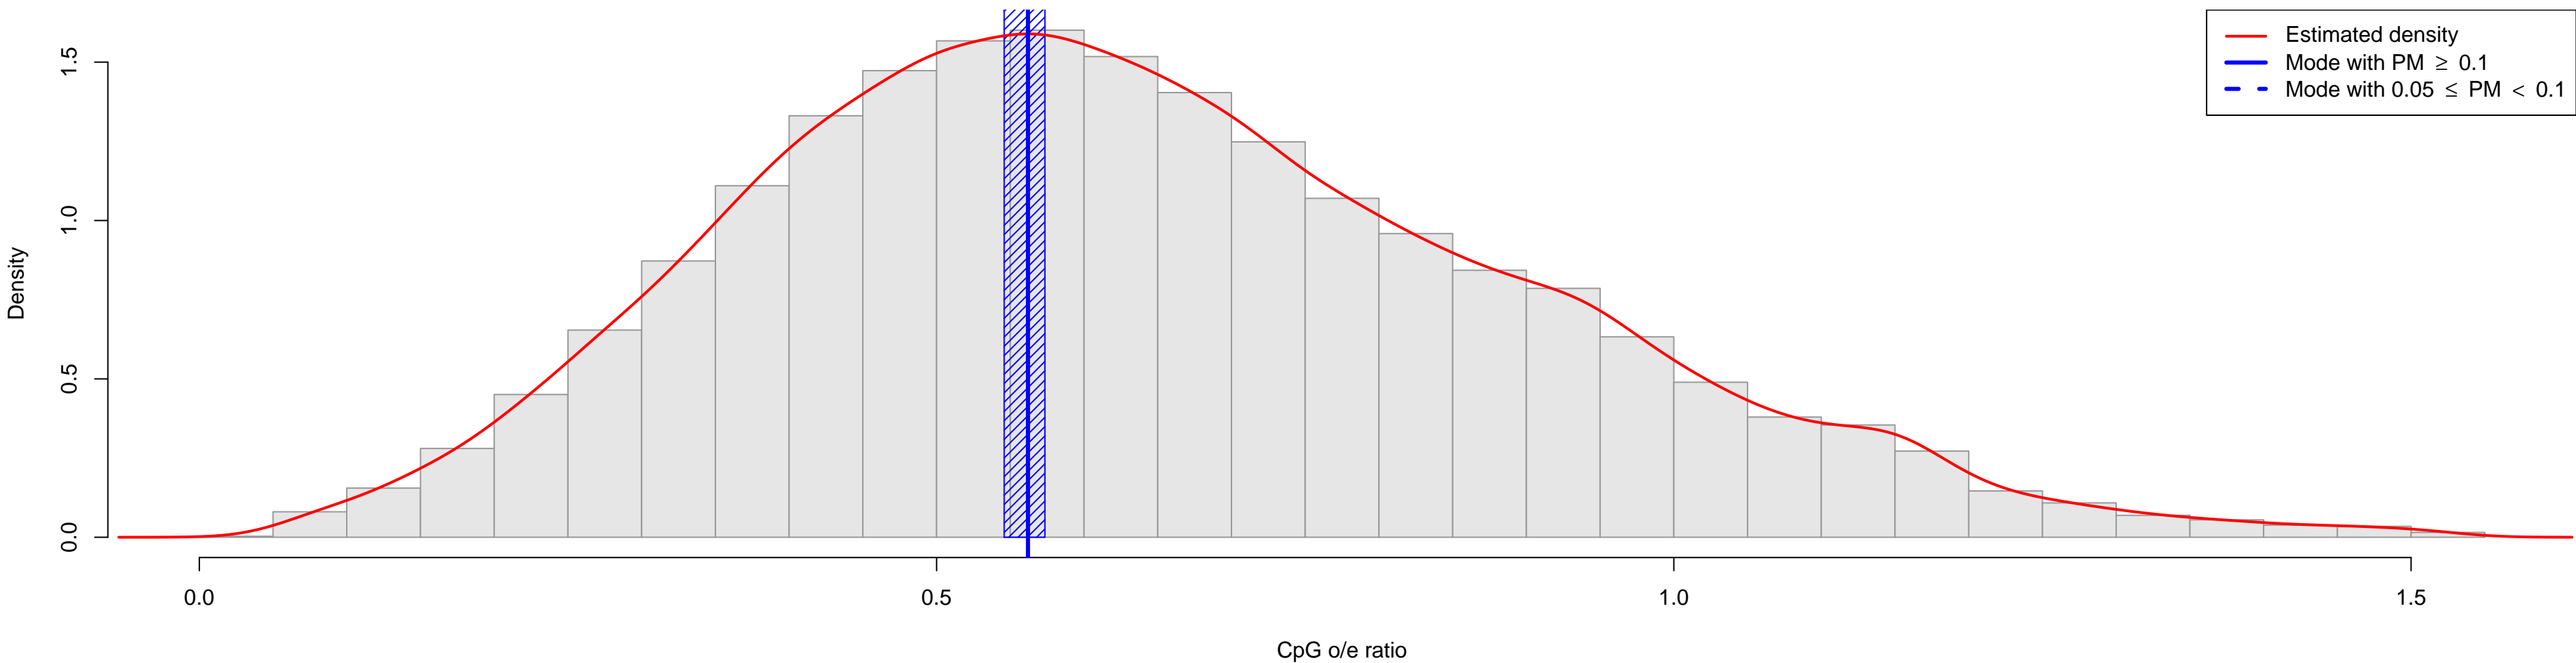

# Suberites\_domuncula

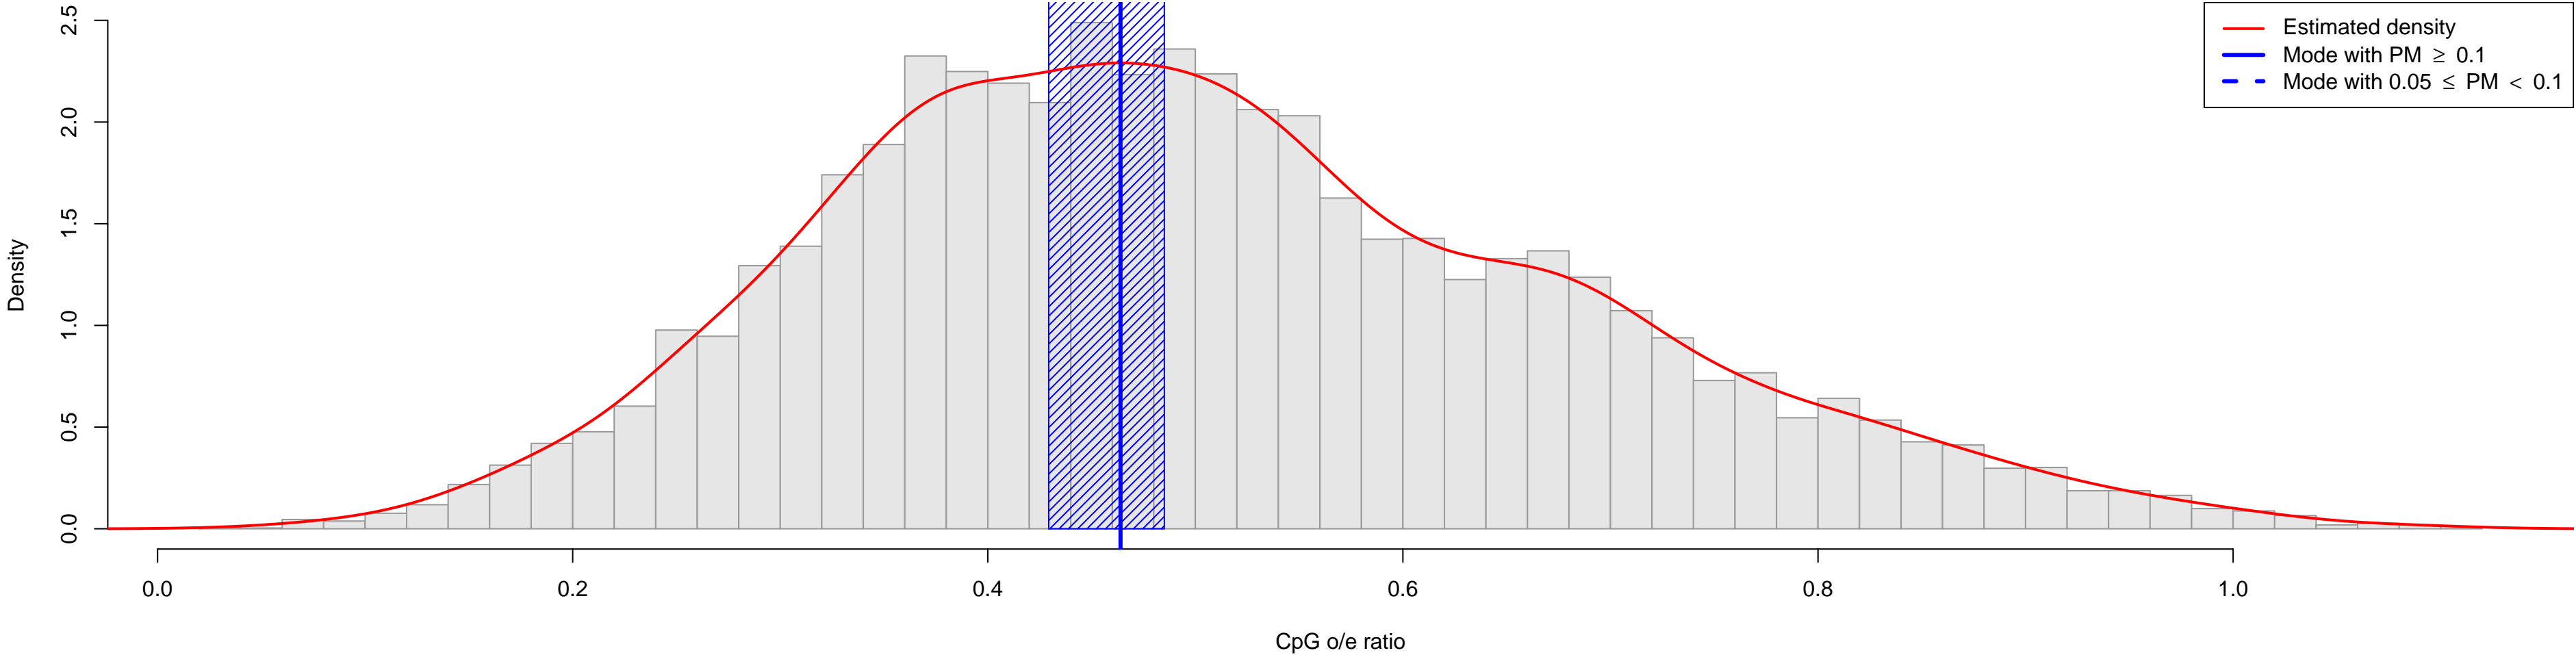

# Suidasia\_medanensis

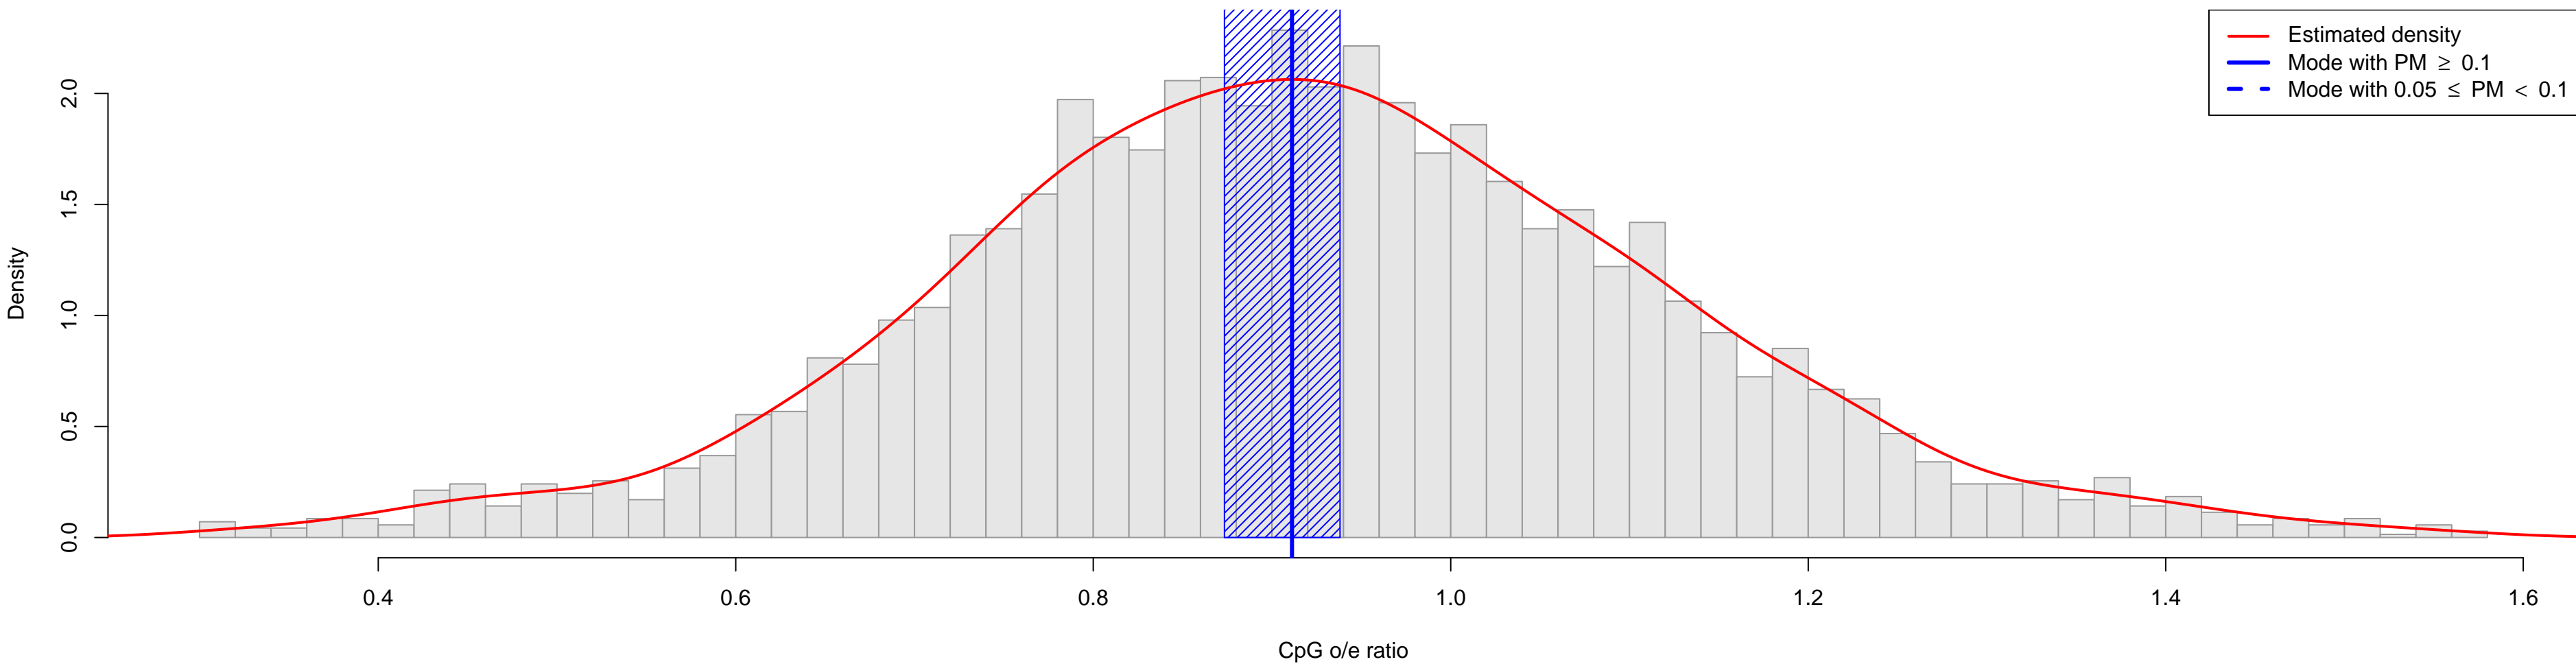

# Suillus\_luteus

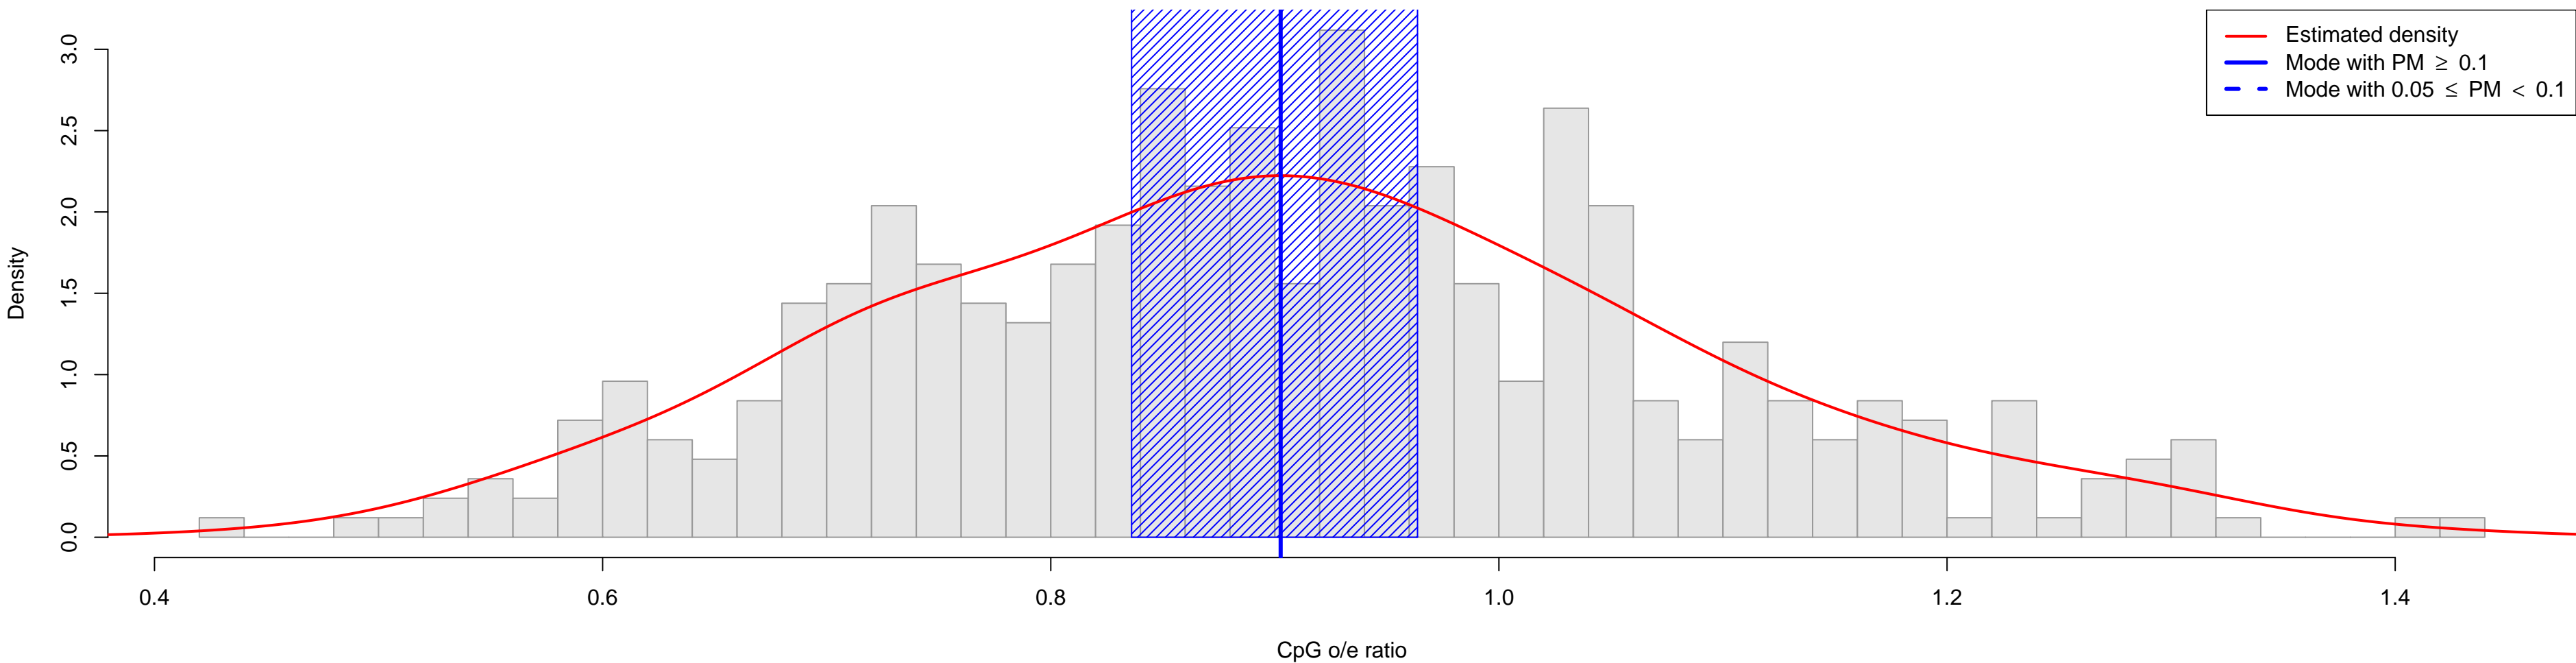

# Sus\_scrofa

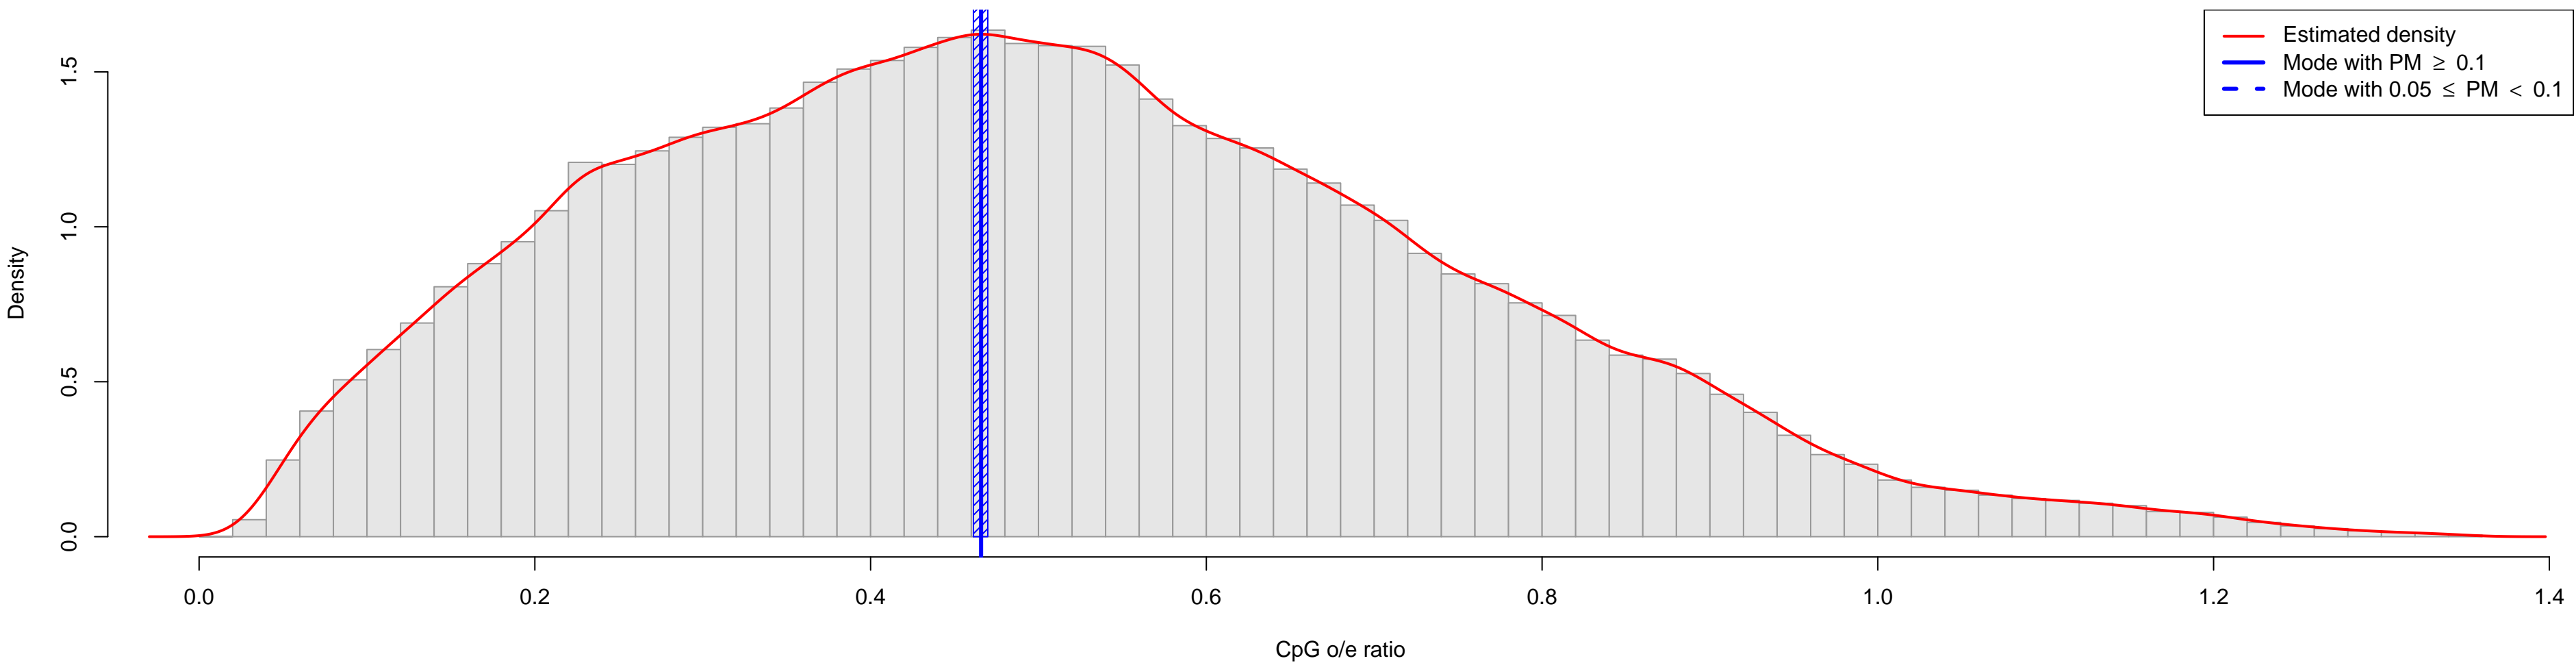

# Taenia\_solium

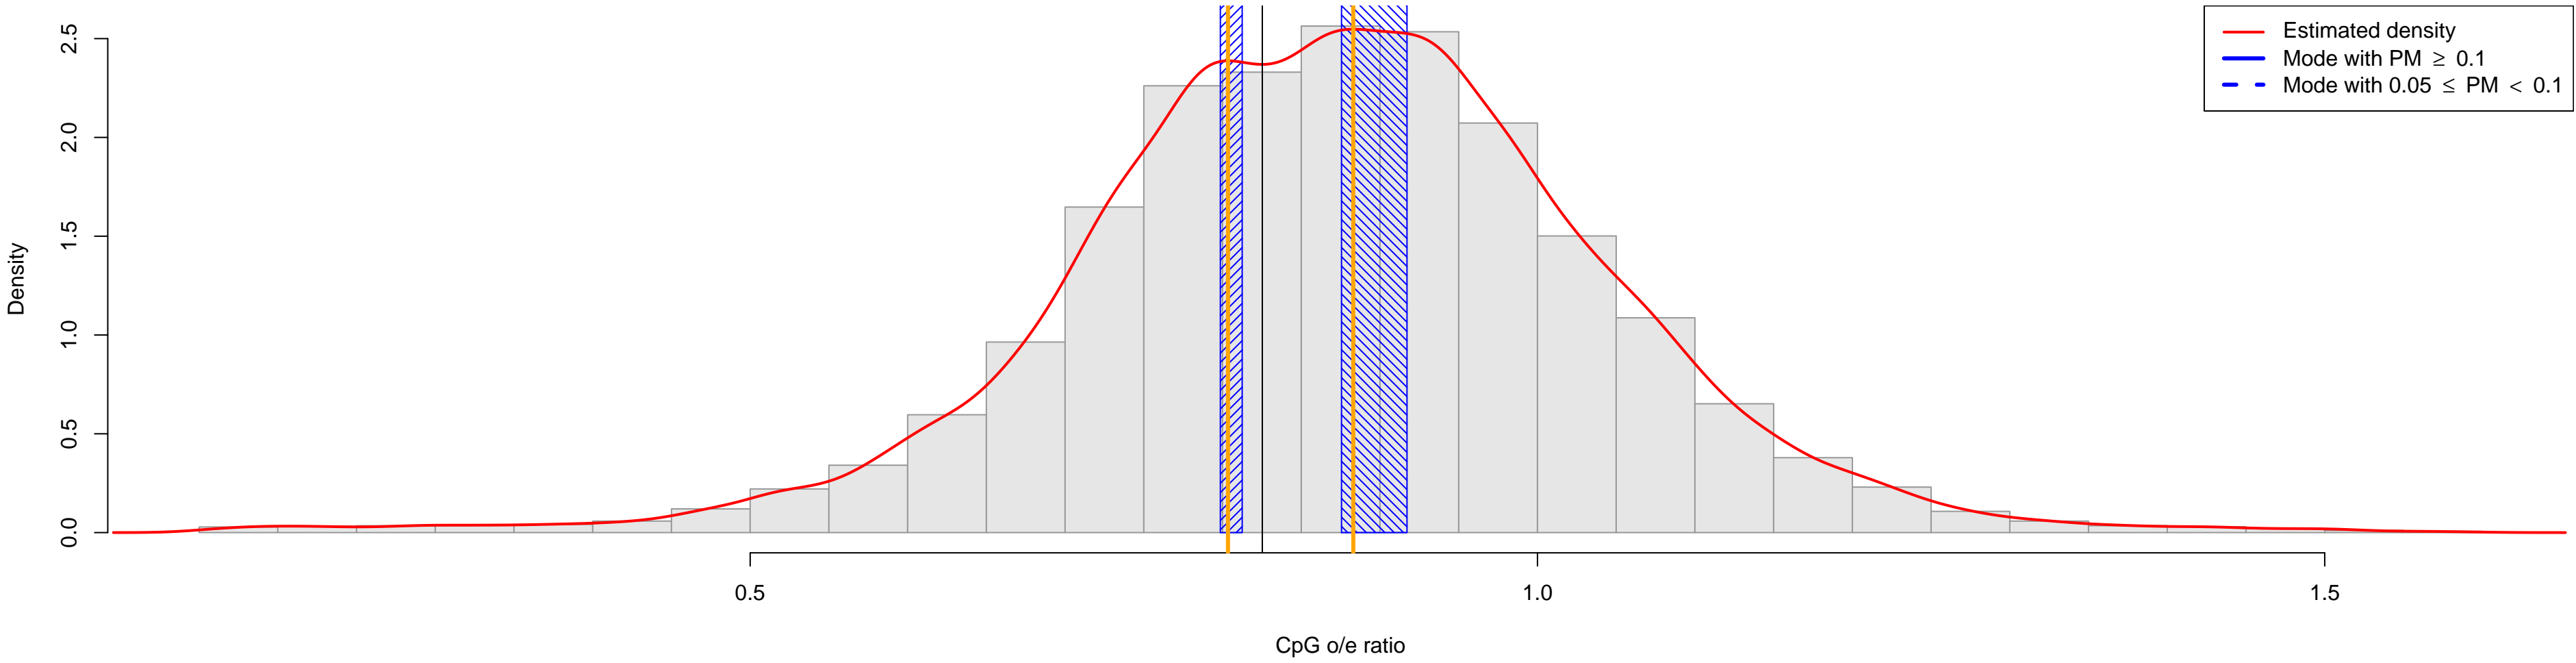

# Taeniopygia\_guttata

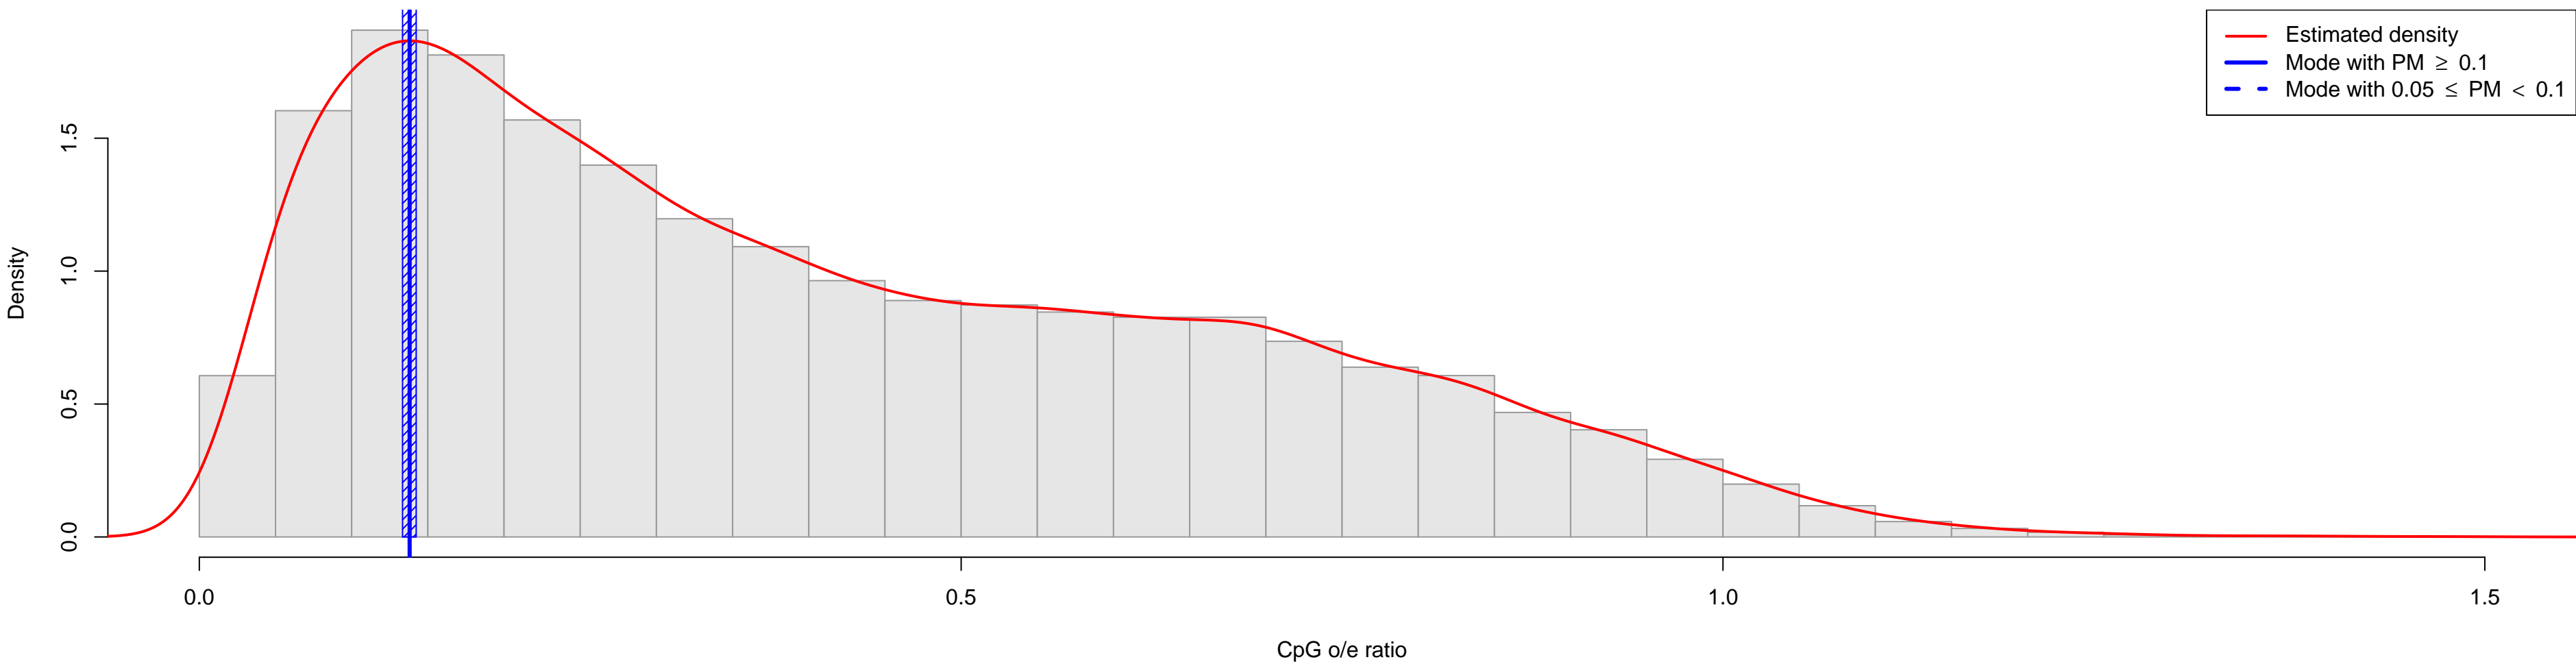



# Tamarix\_androssowii

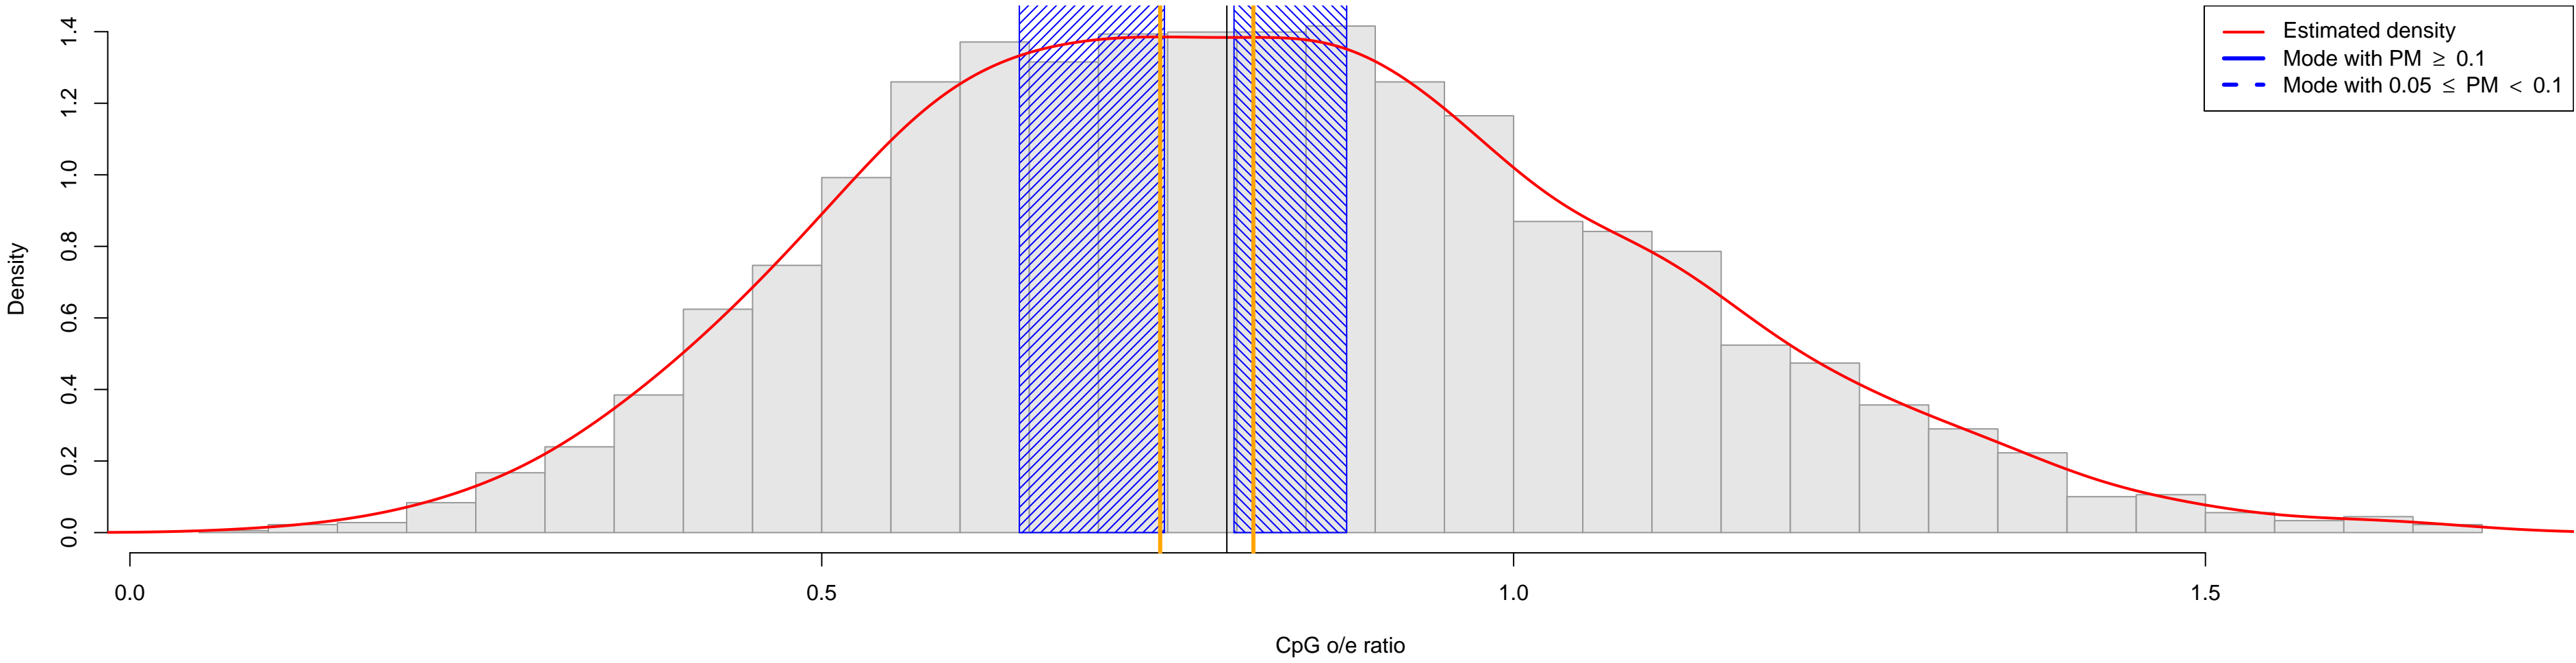

# Taphrina\_deformans

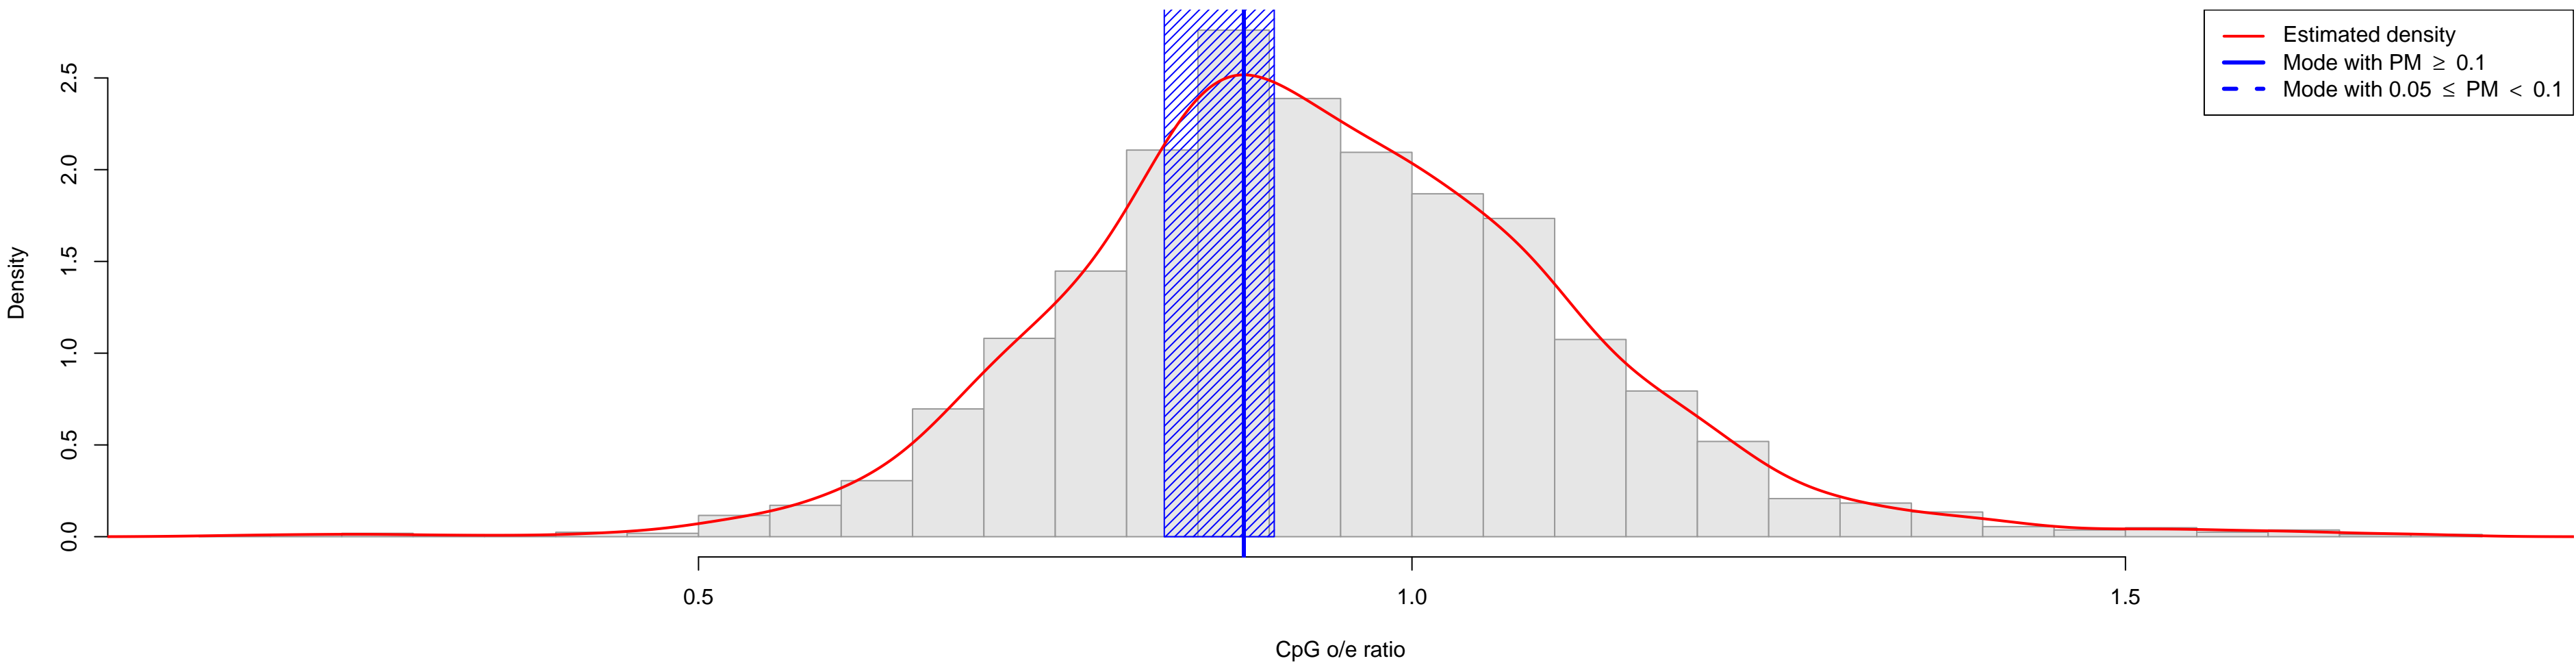

# Taraxacum\_kok-saghyz

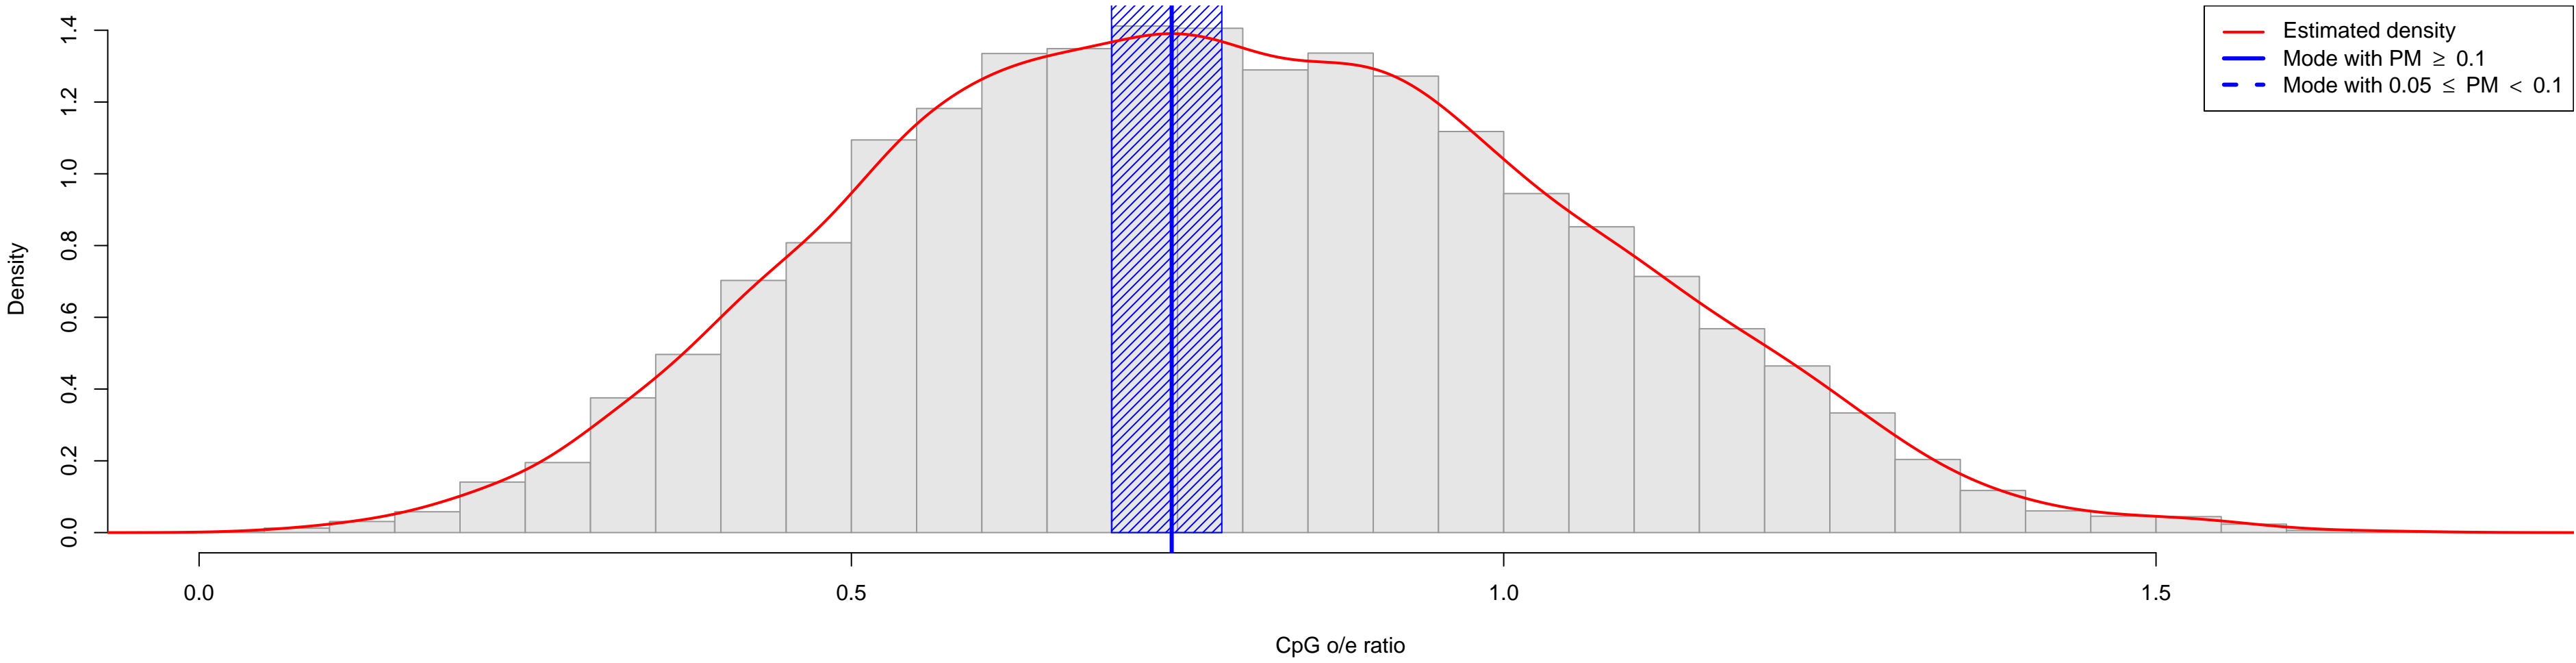

# Taraxacum\_officinale

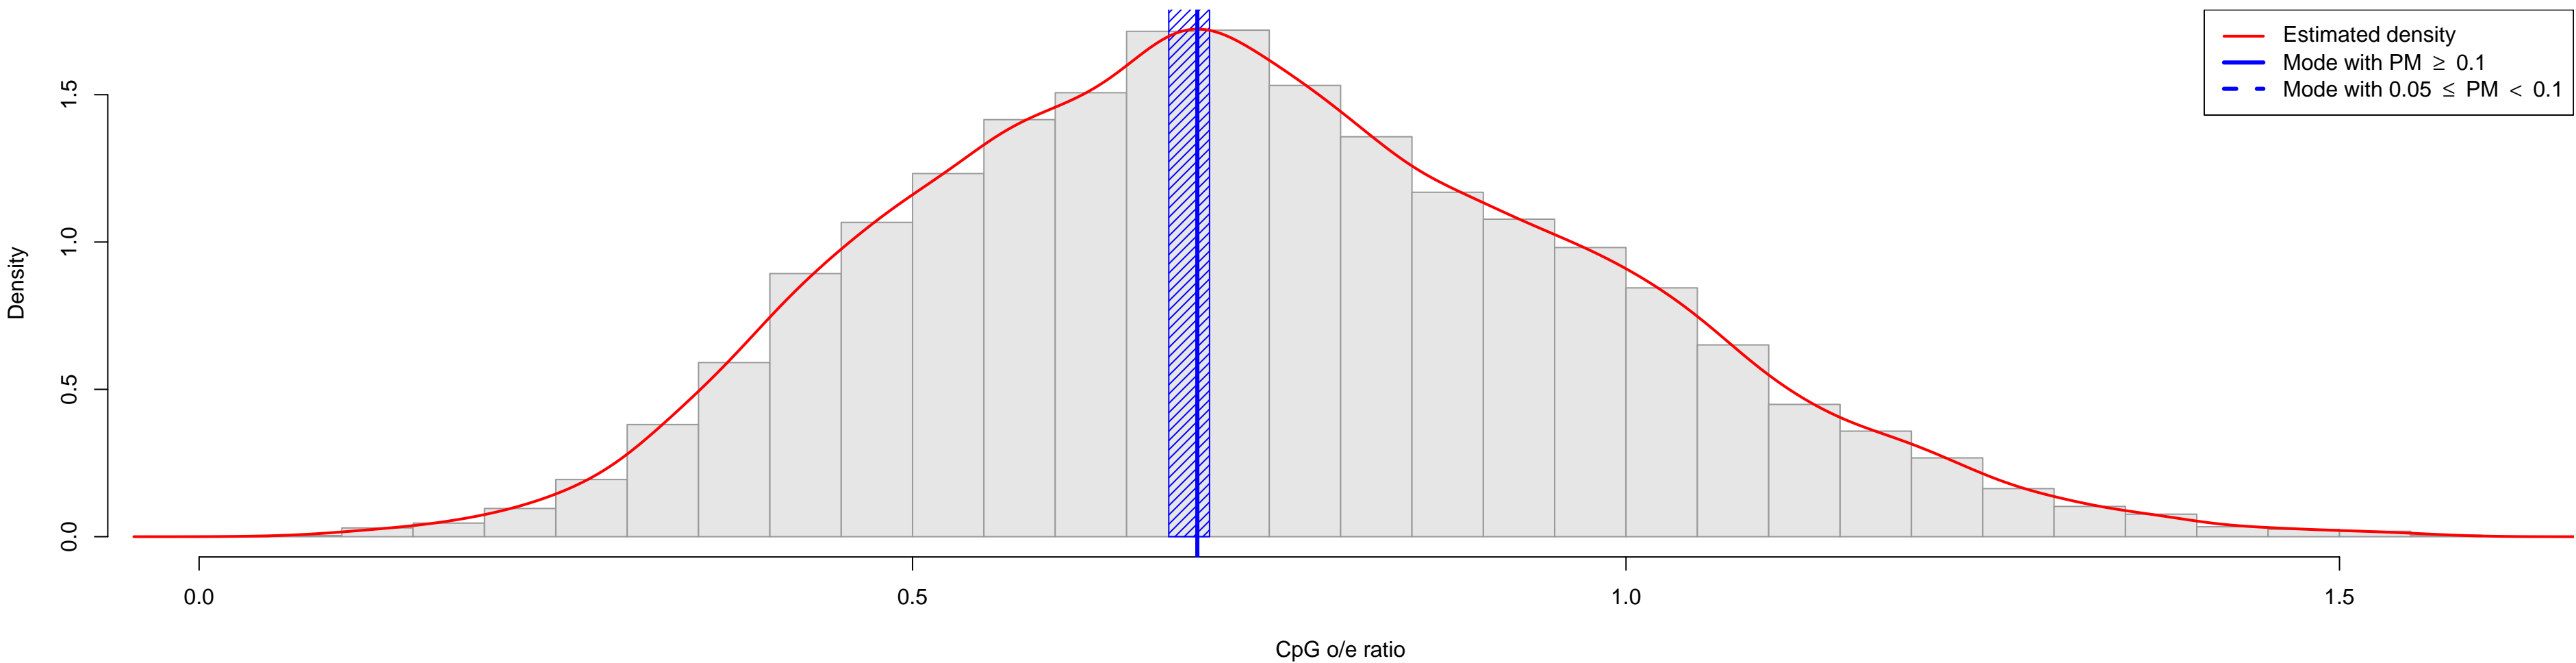

# Tegillarca\_granosa

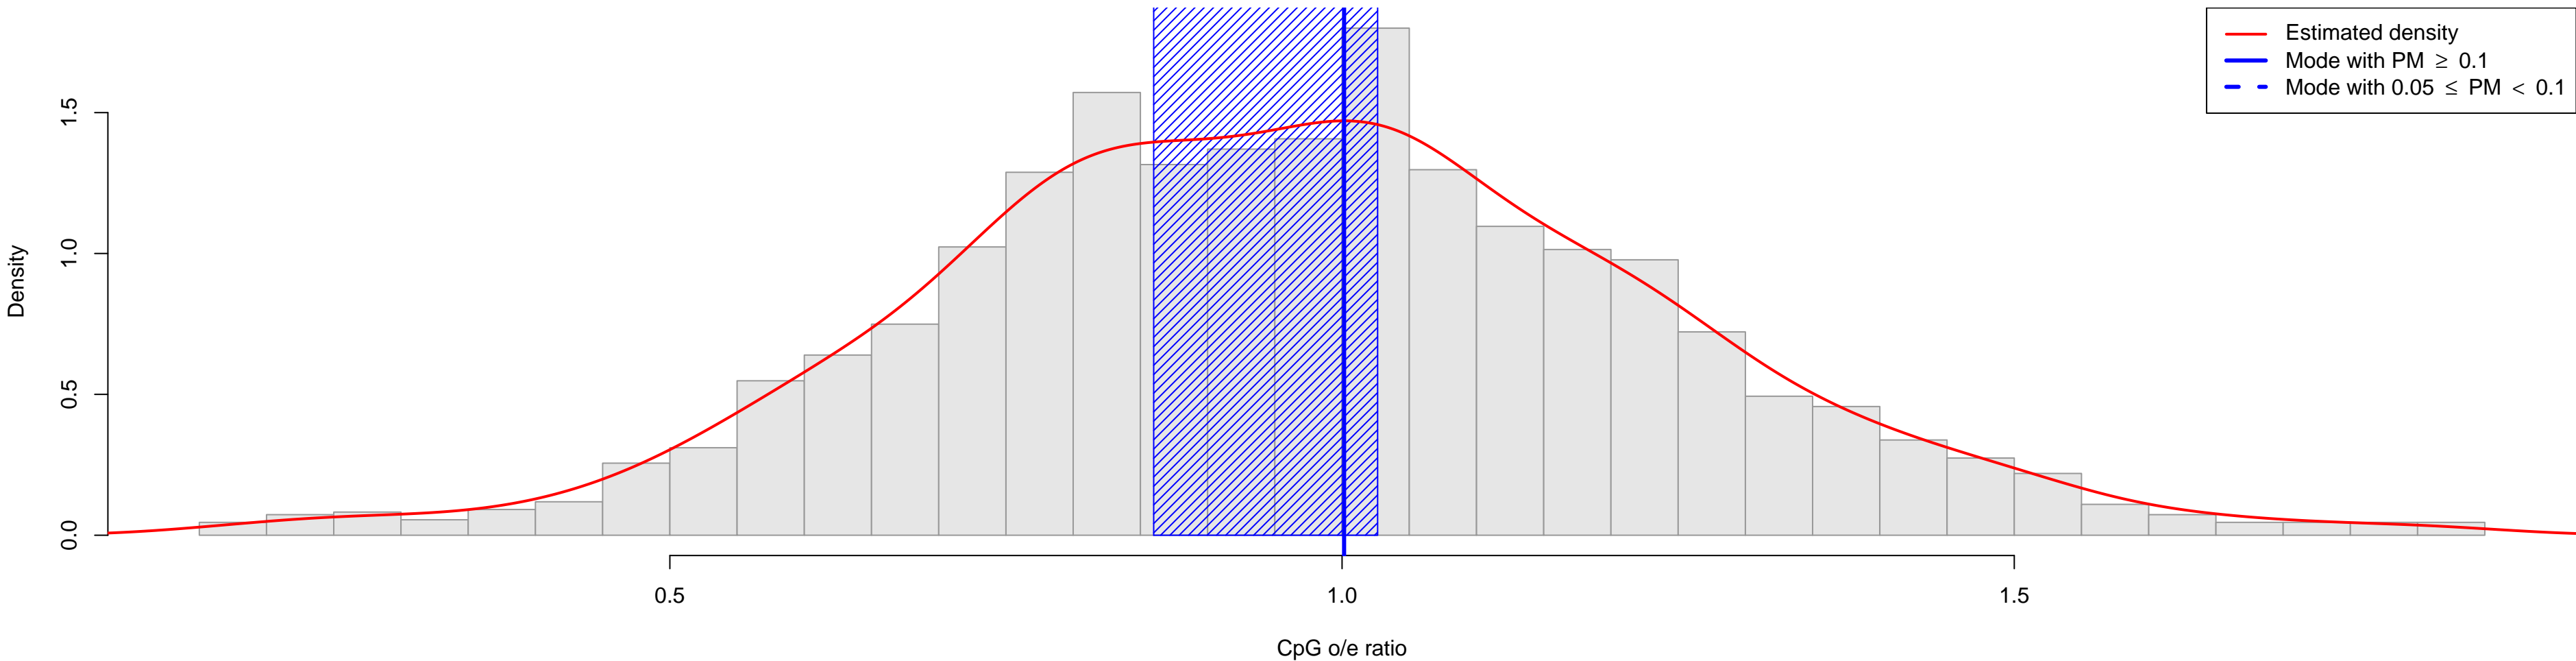

# Tetrahymena\_thermophila

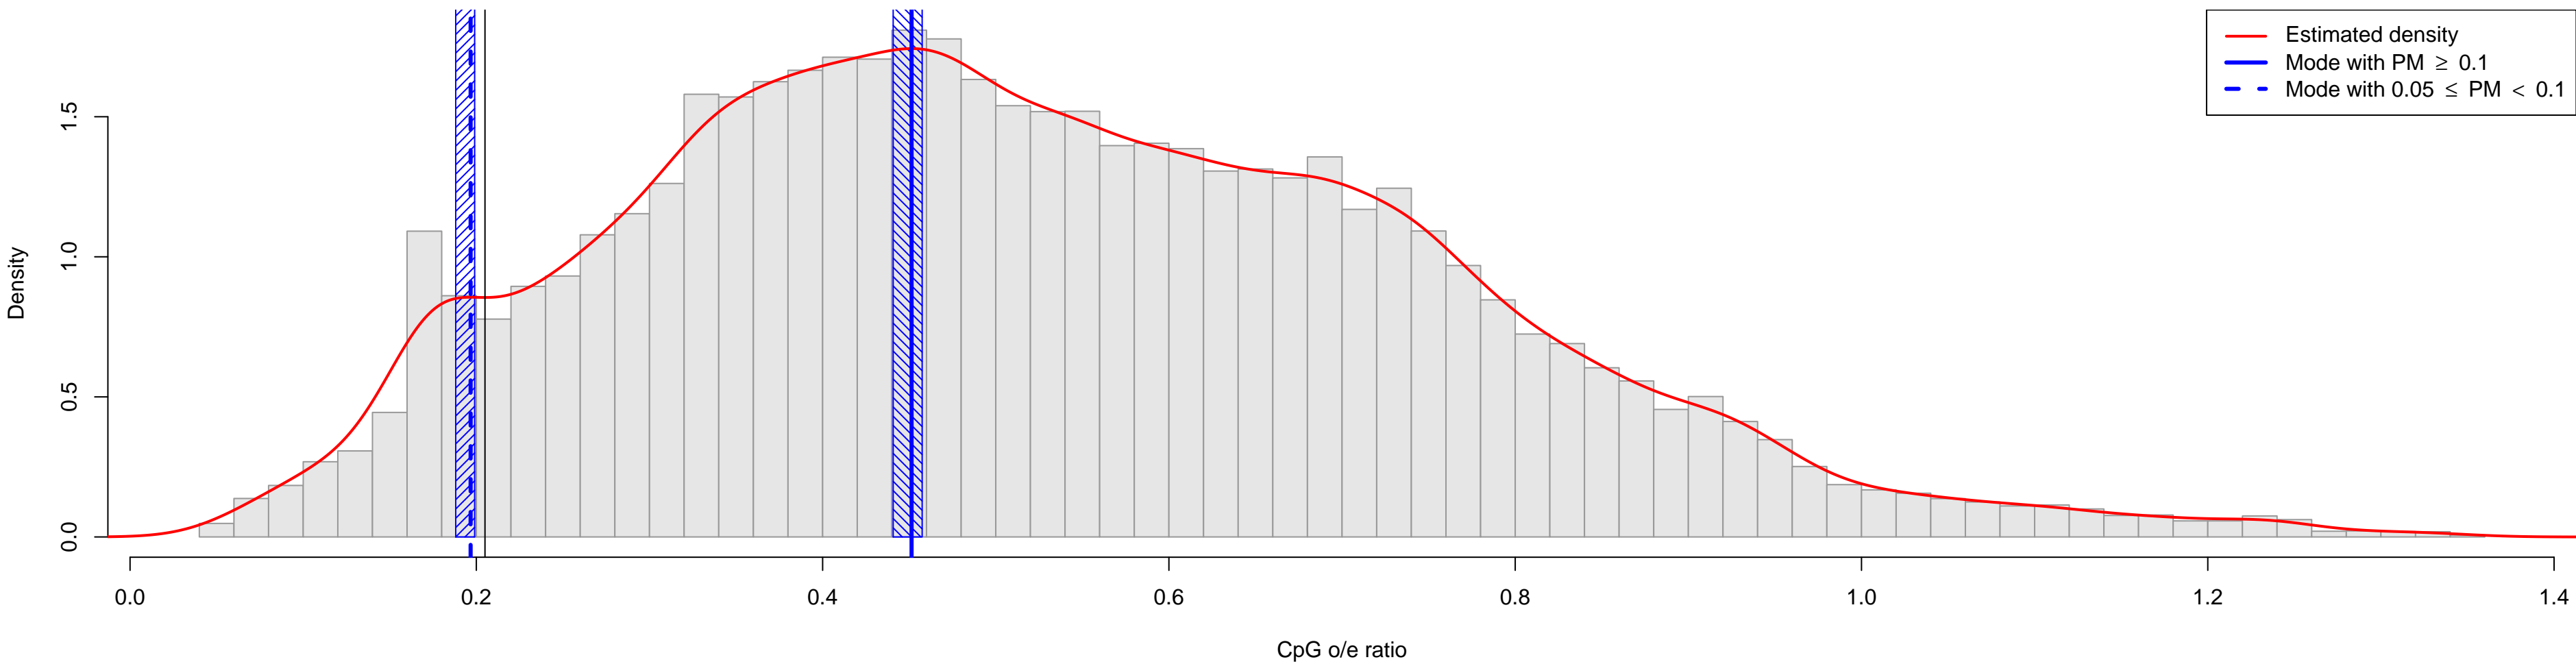

# Tetranychus\_urticae

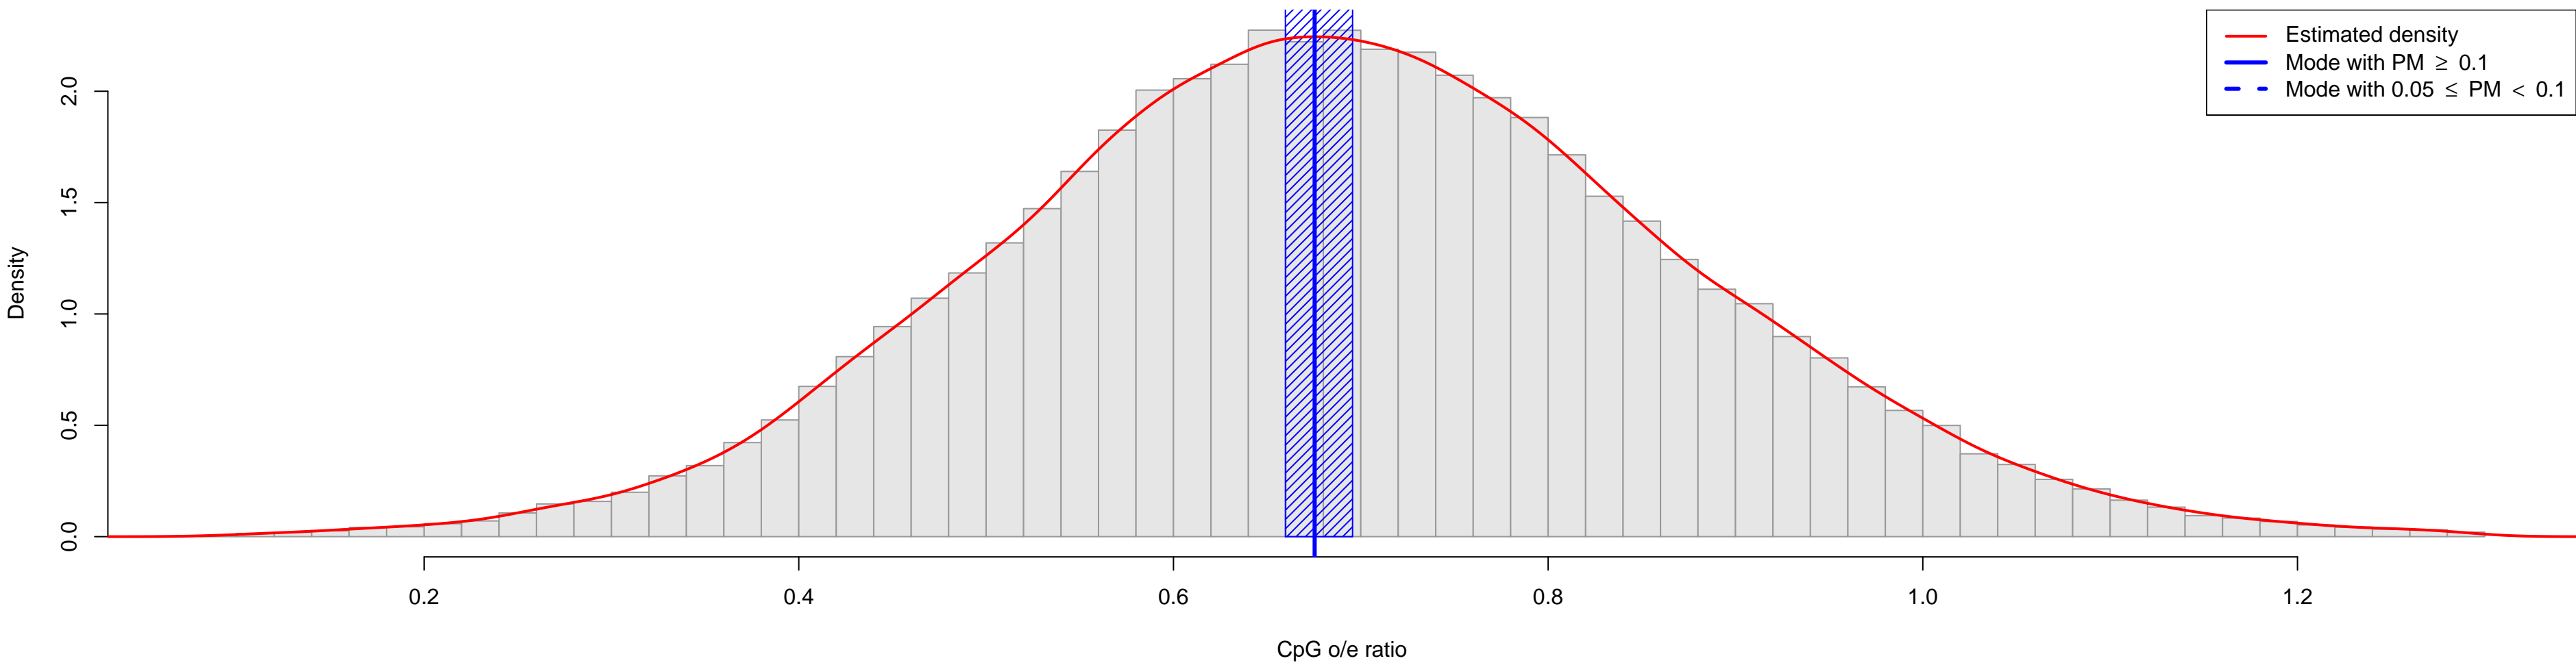

# Theileria\_annulata

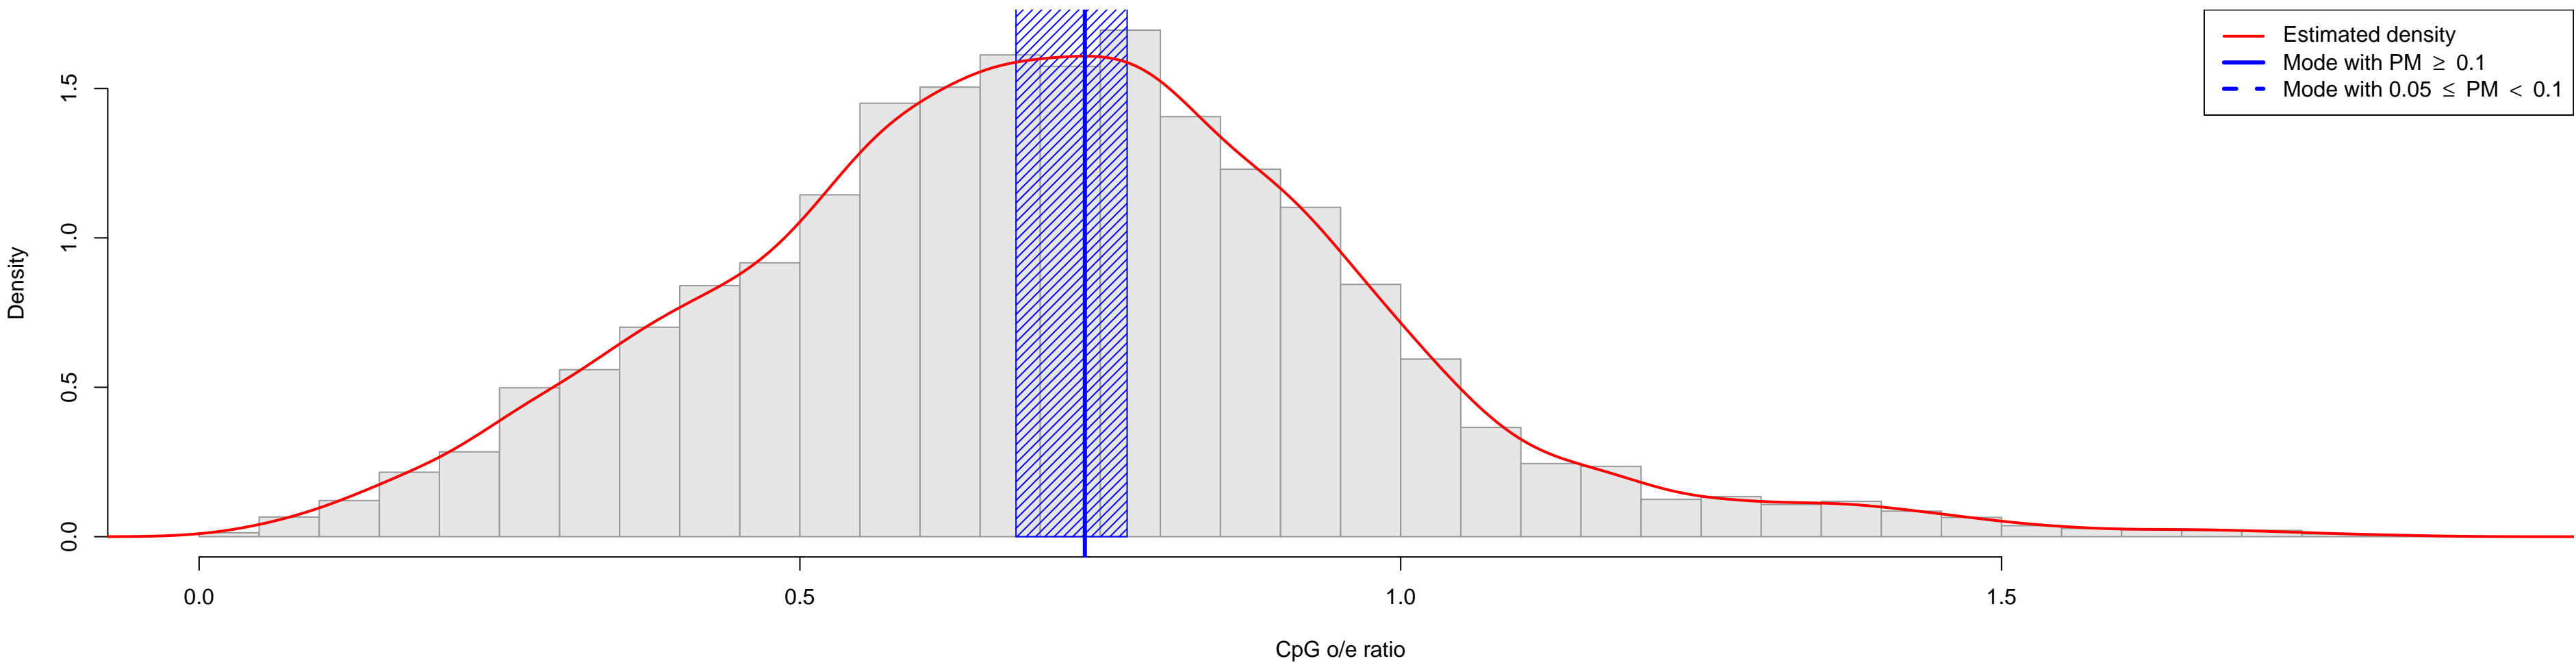



# Theileria\_orientalis

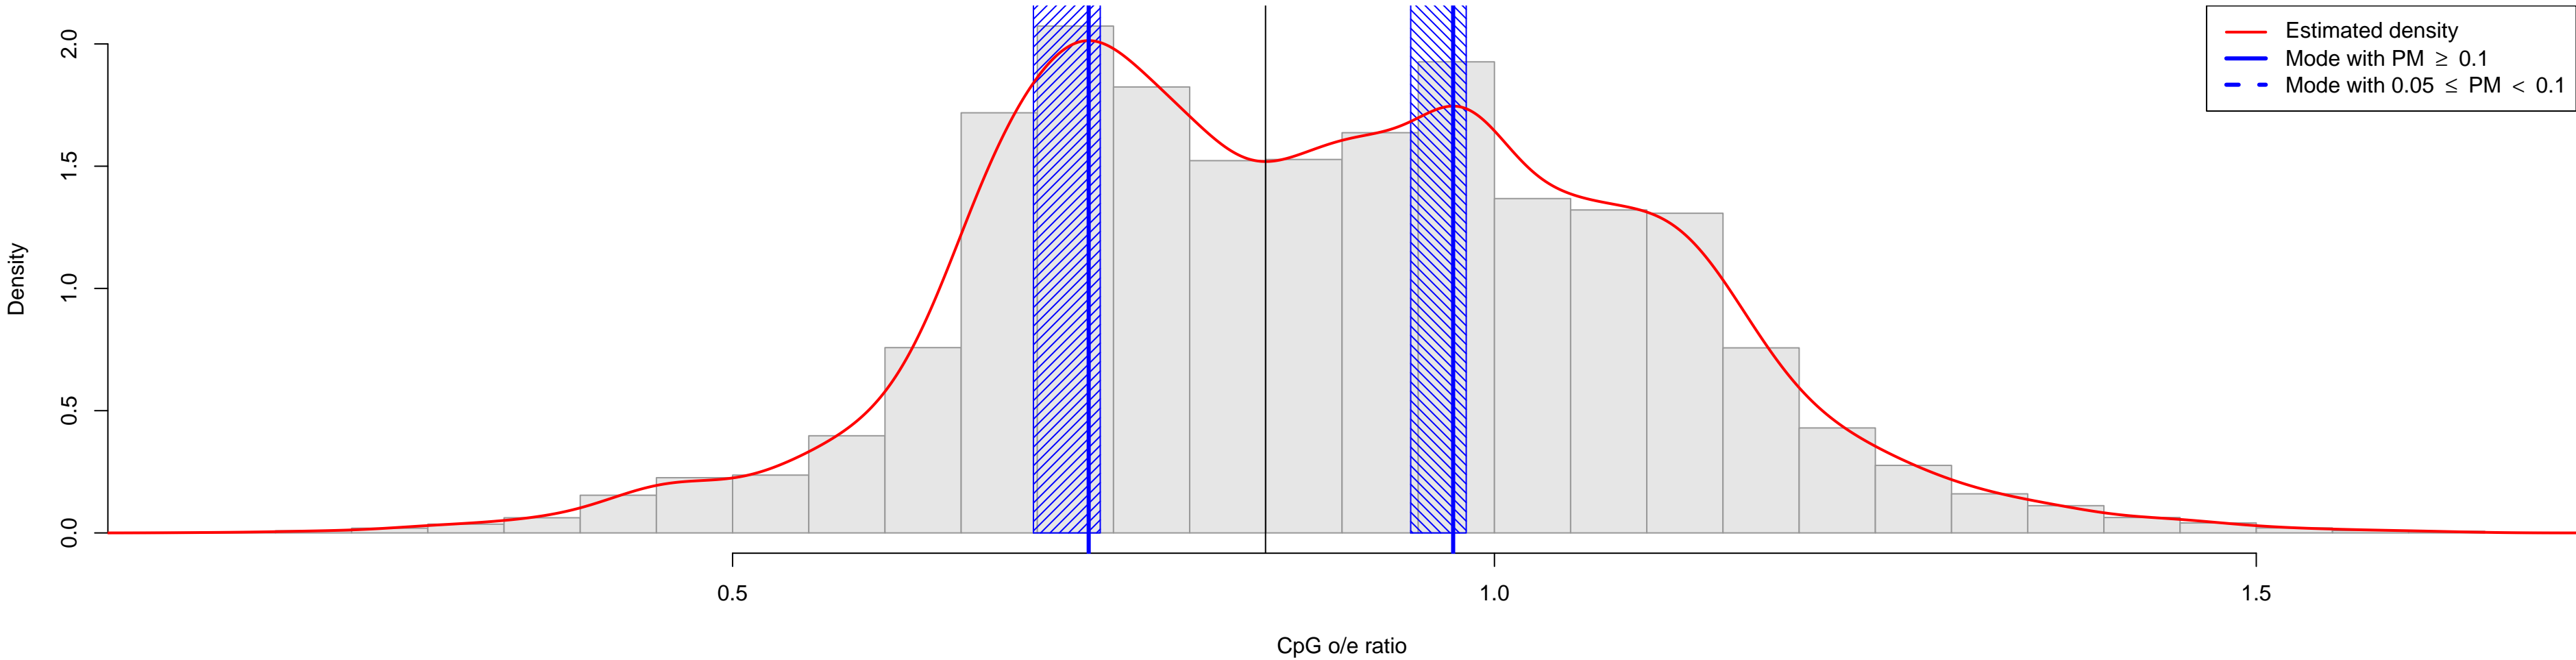

# Theileria\_parva

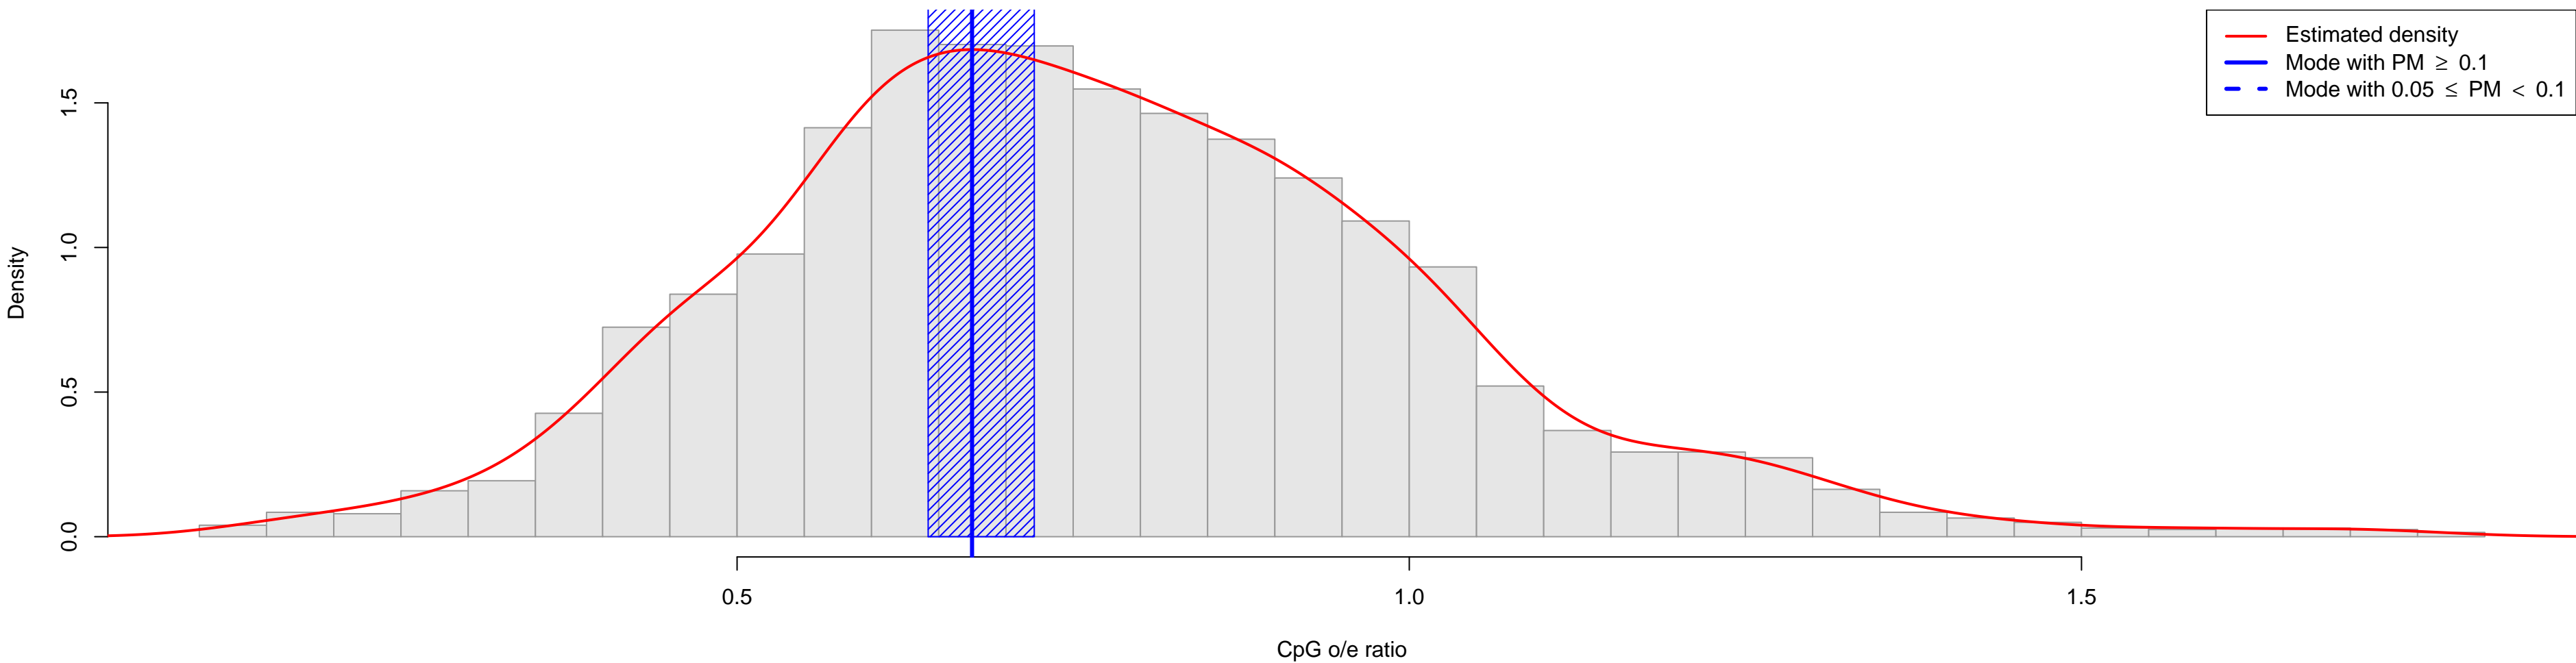

# Thellungiella\_halophila

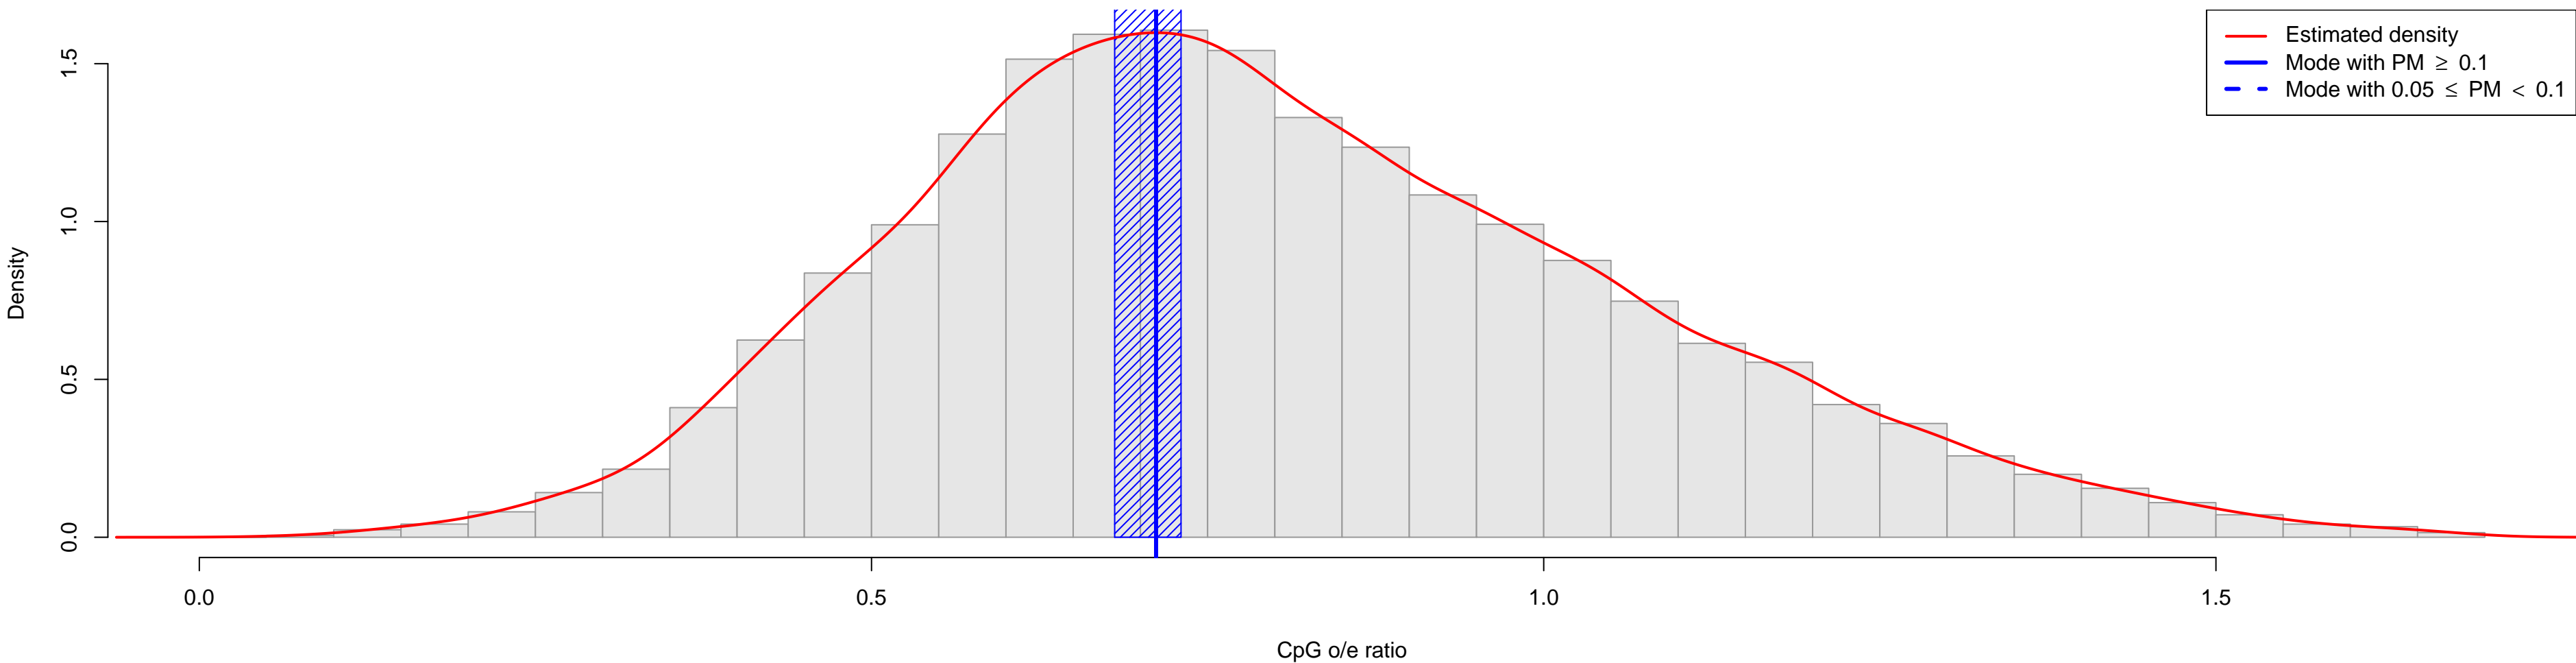

# Thlaspi\_caerulescens

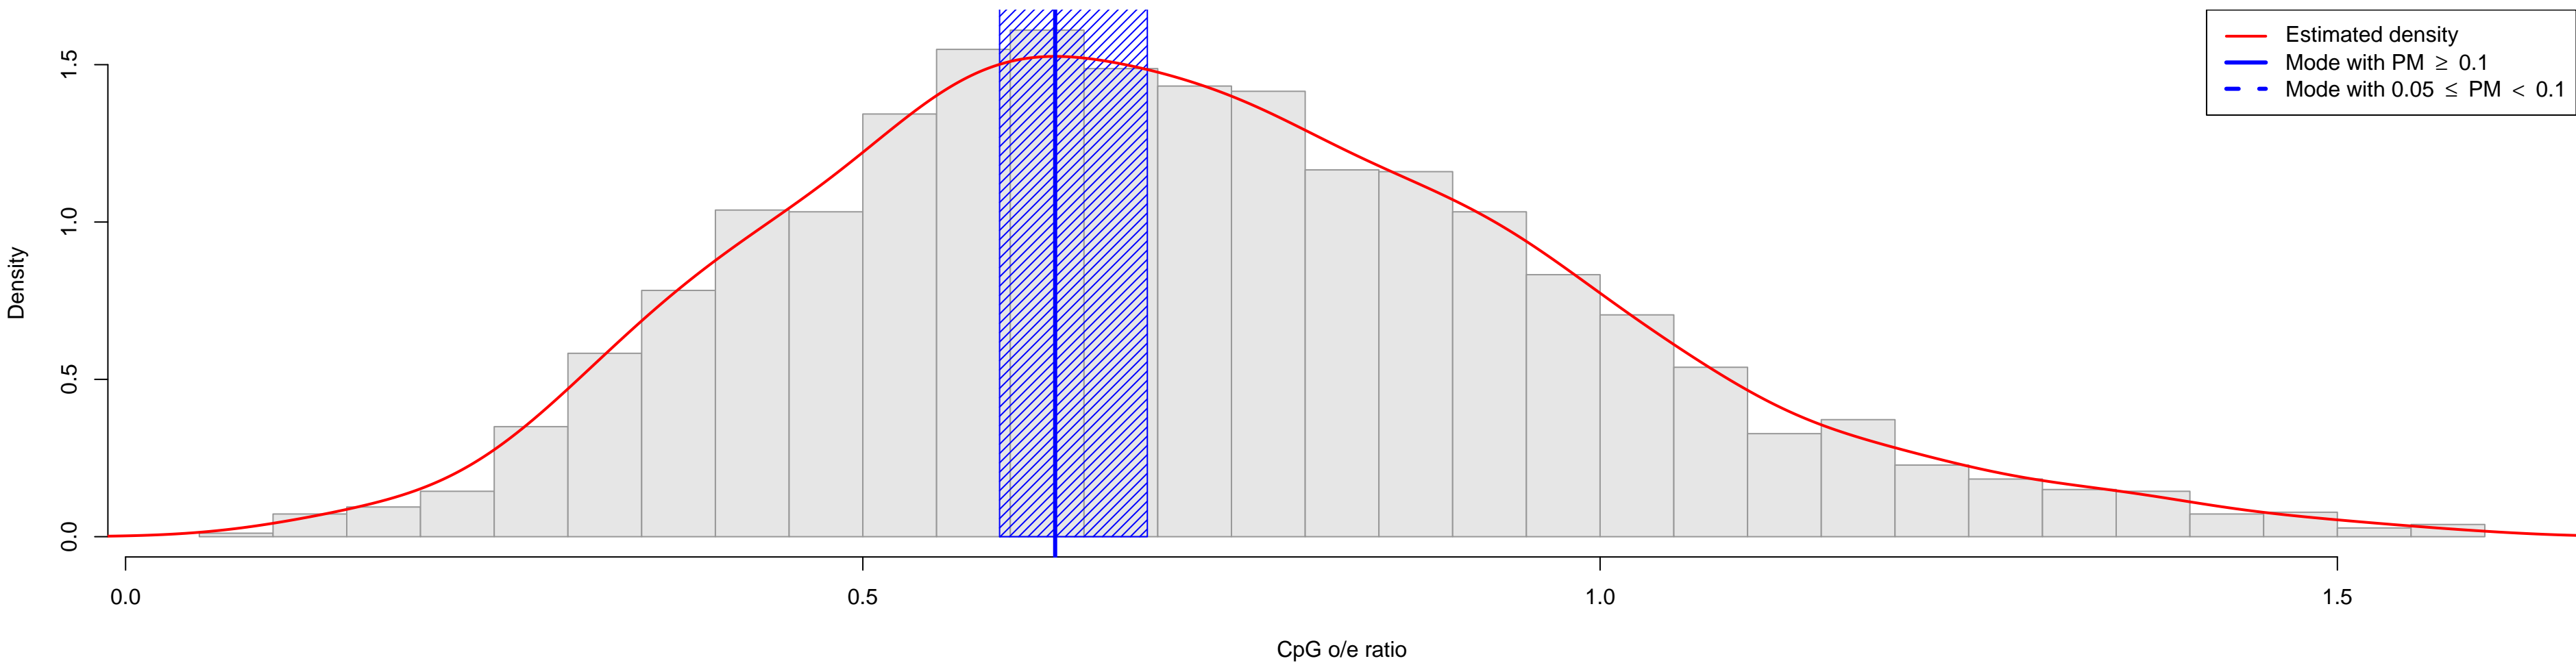

# Thunnus\_thynnus

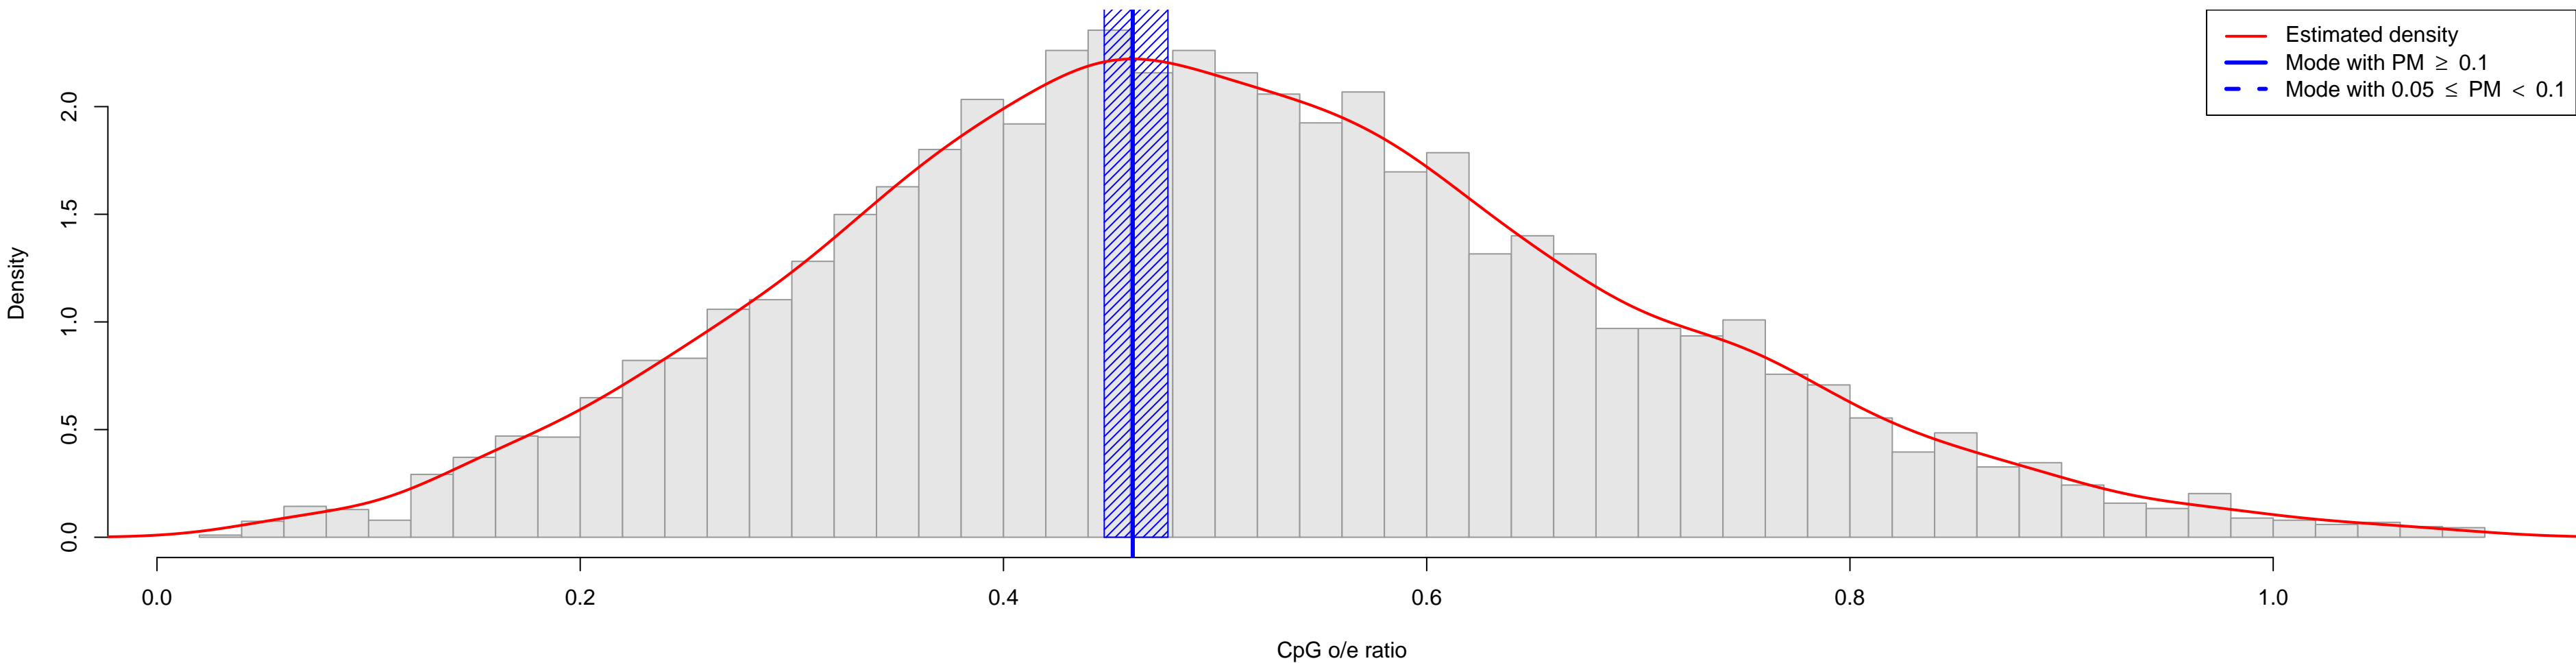

# Thymallus\_thymallus

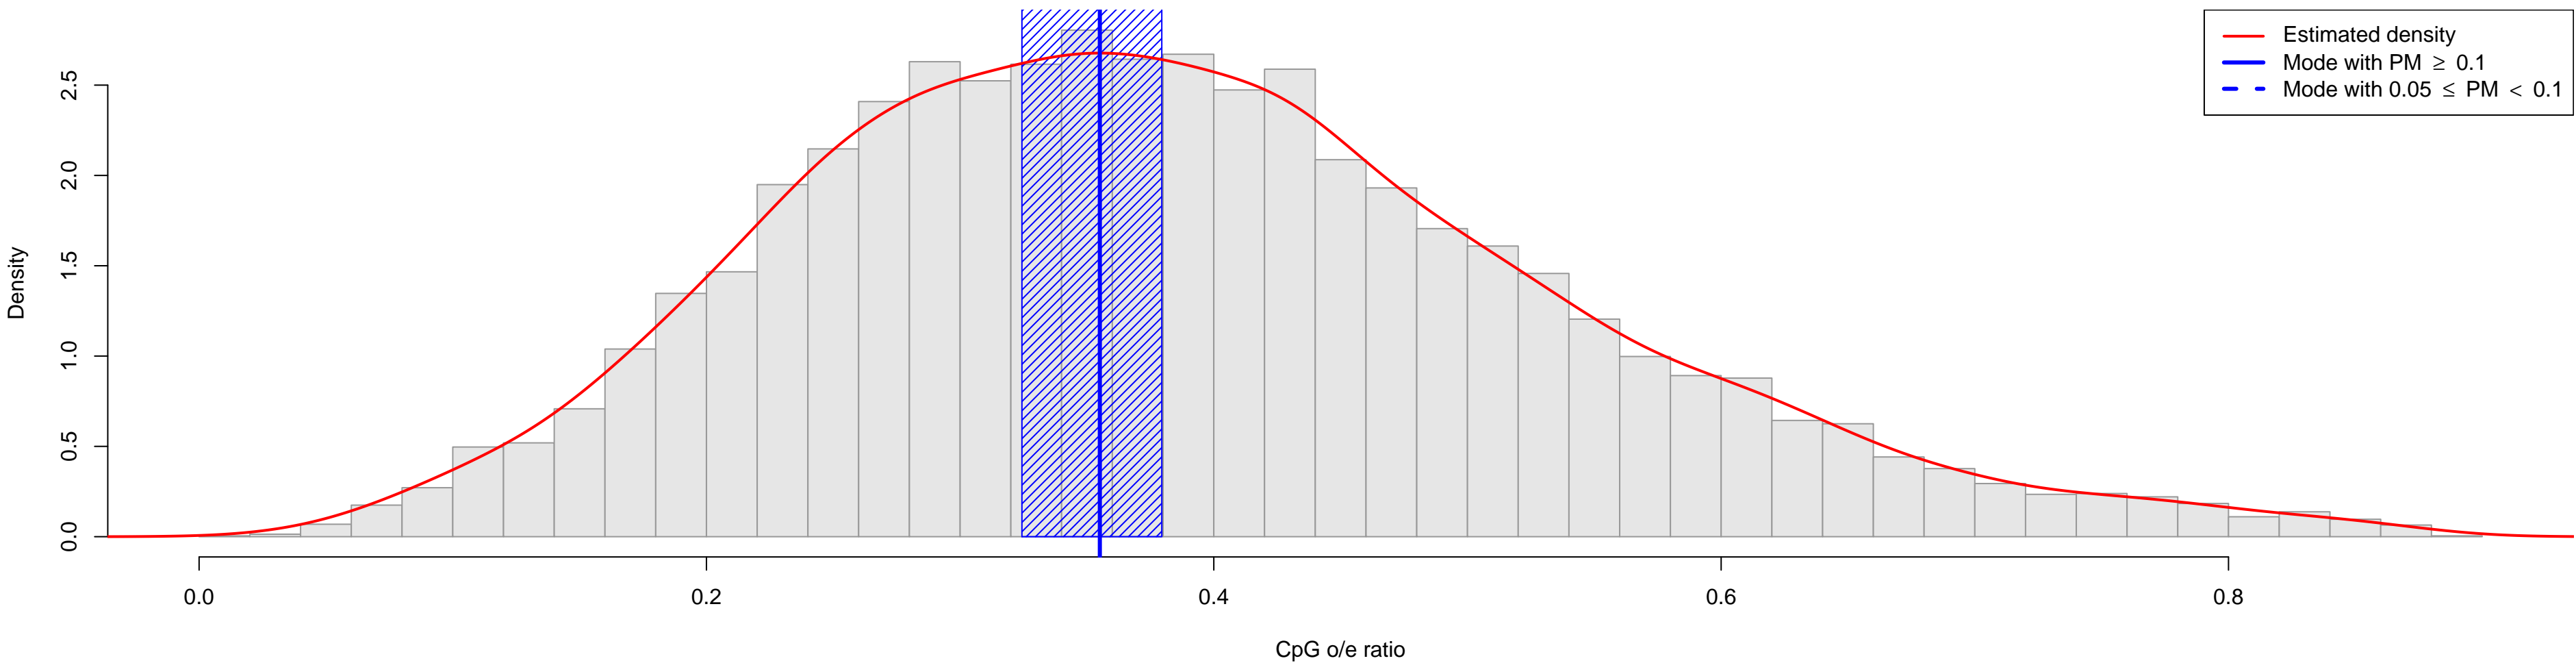

# Tigriopus\_californicus

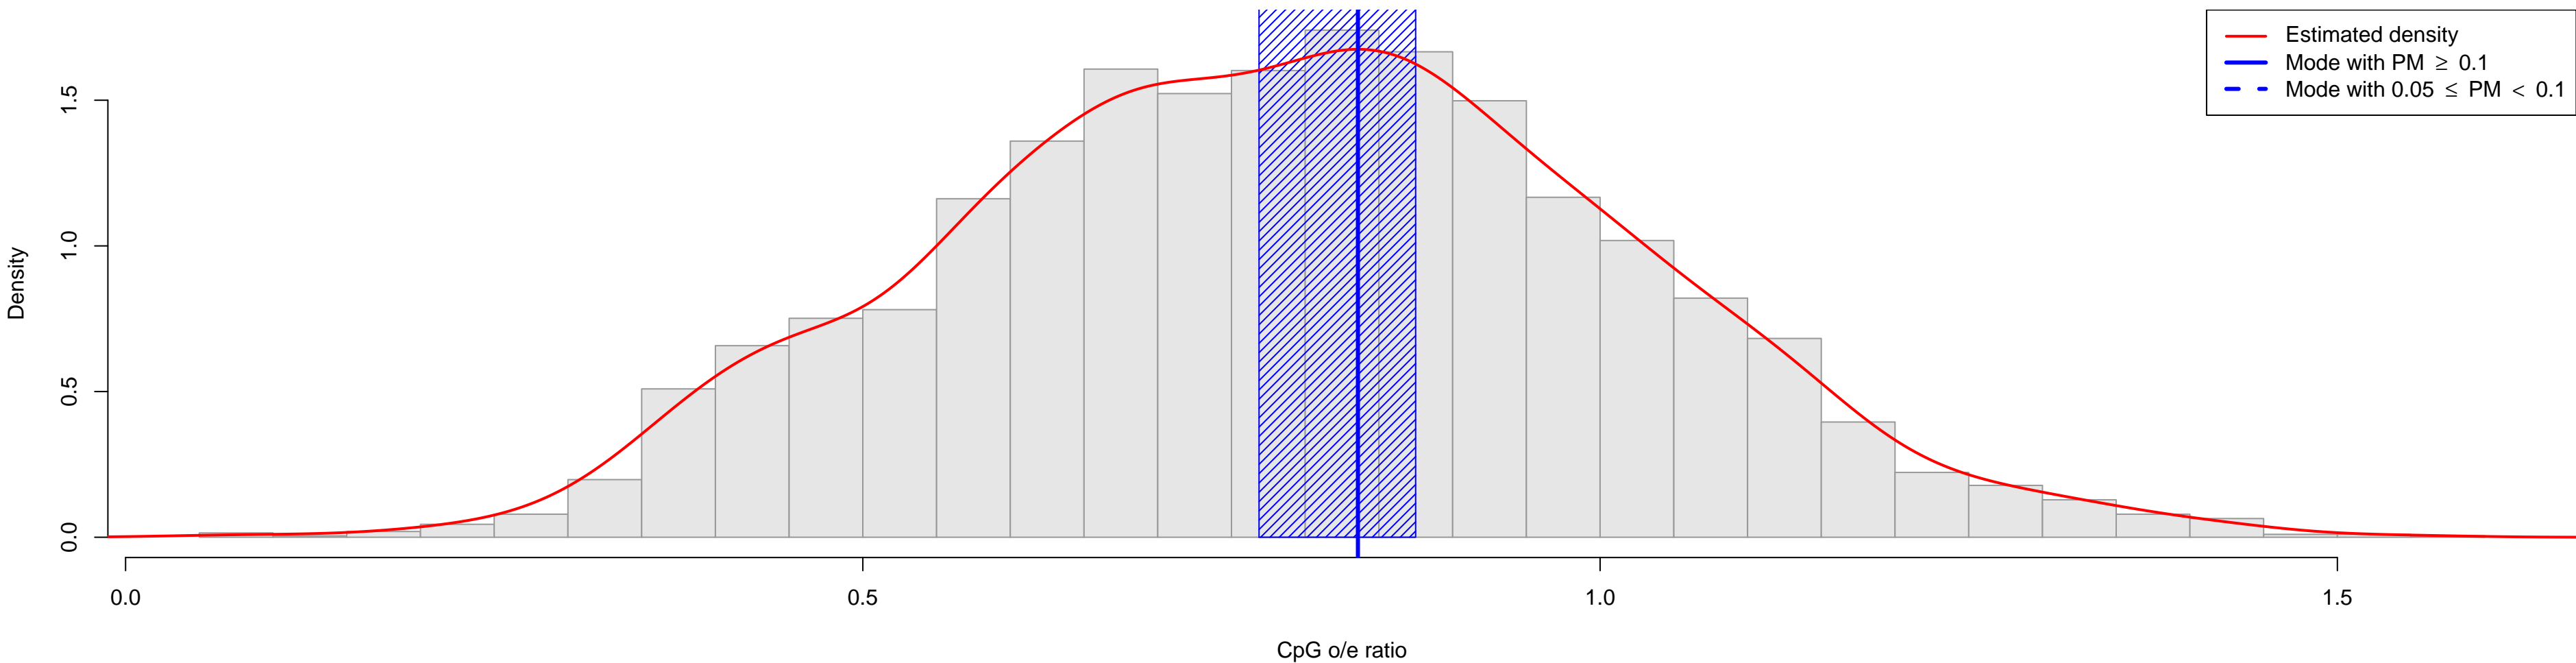

# Torpedo\_californica

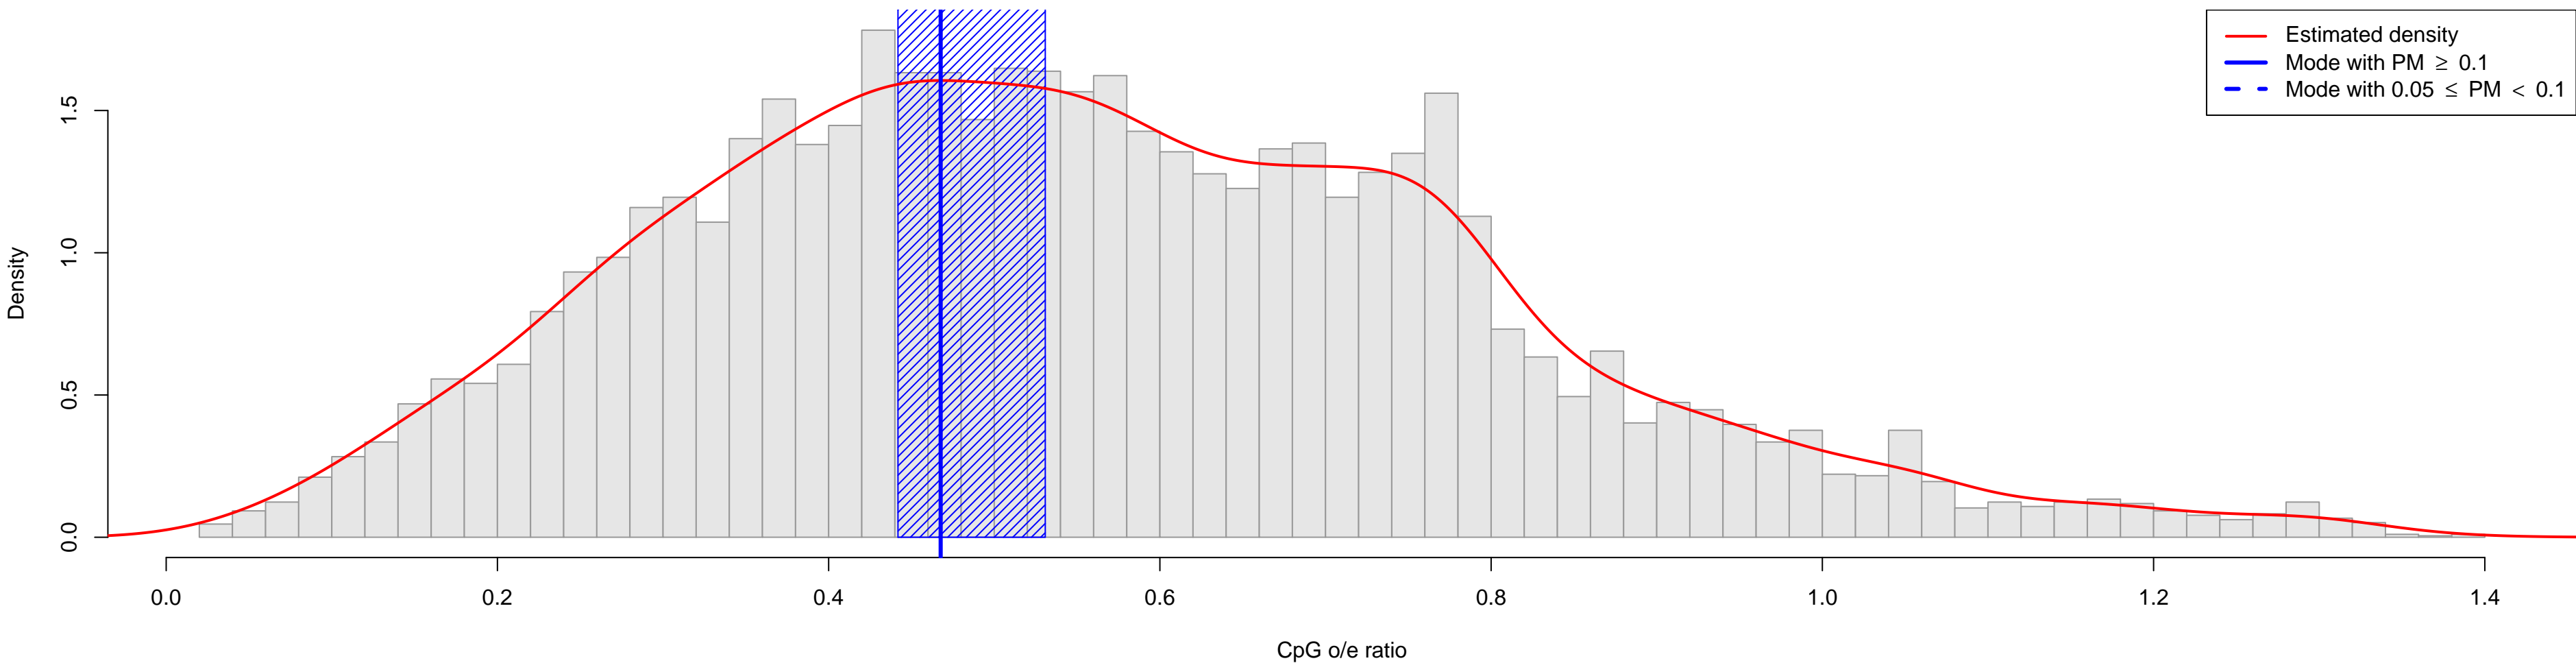



# Toxoplasma\_gondii

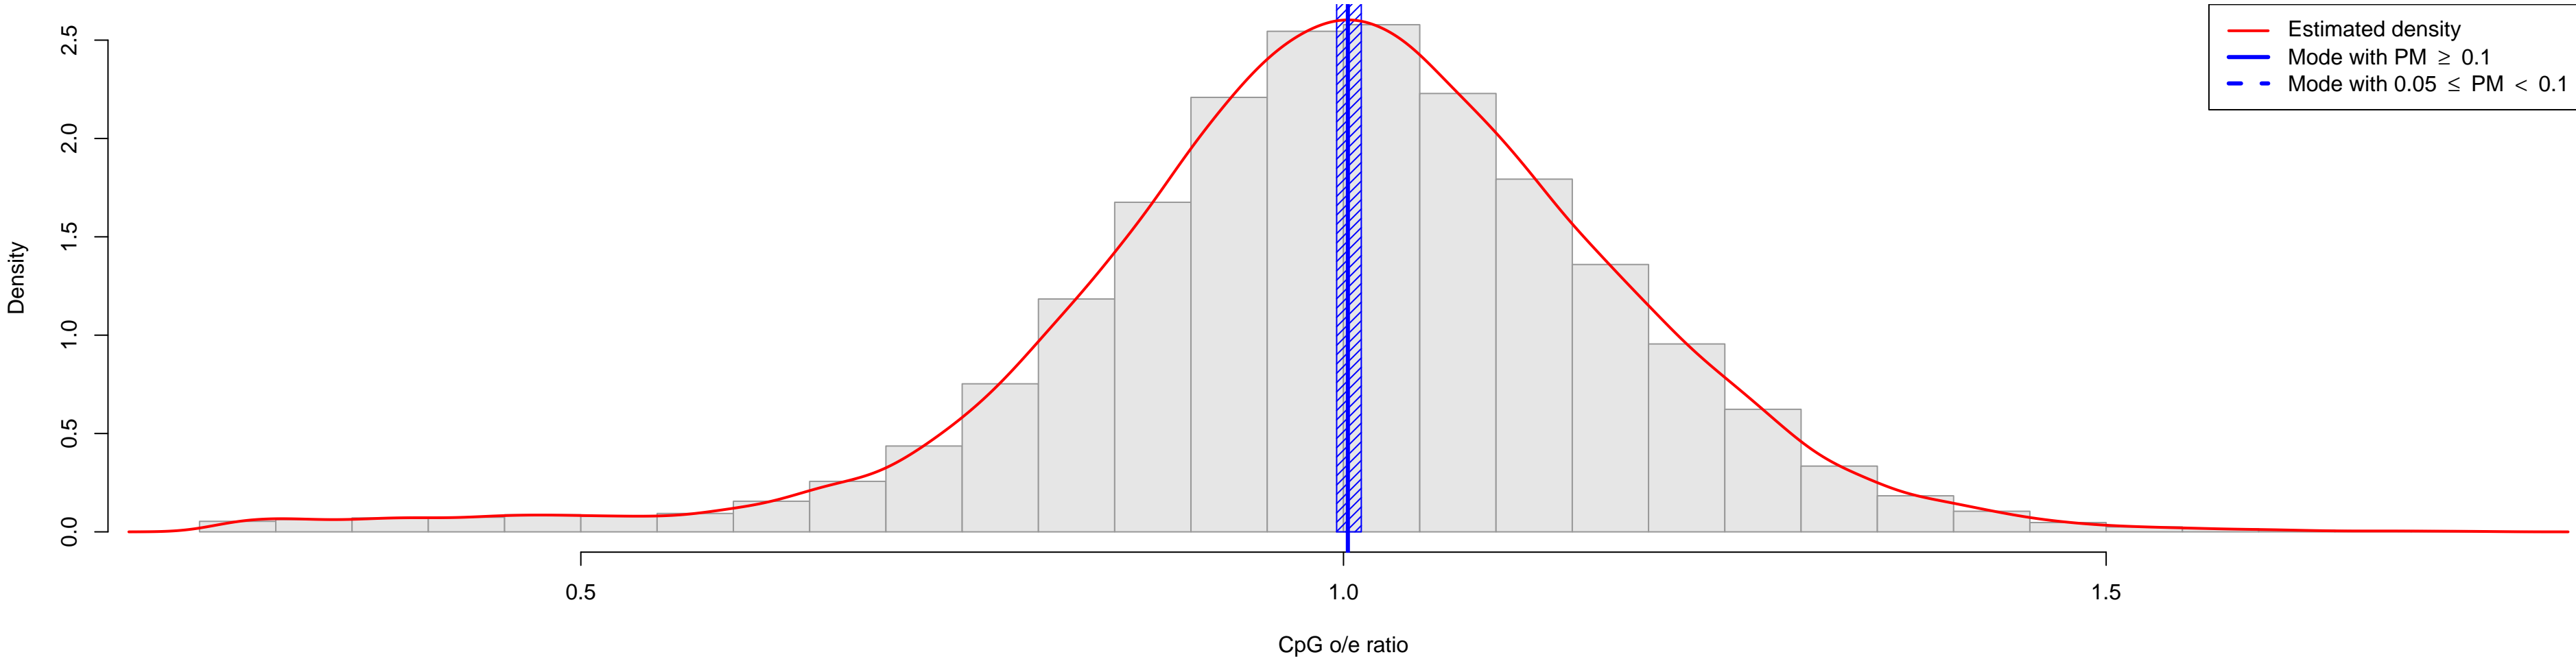

# Toxoptera\_citricida

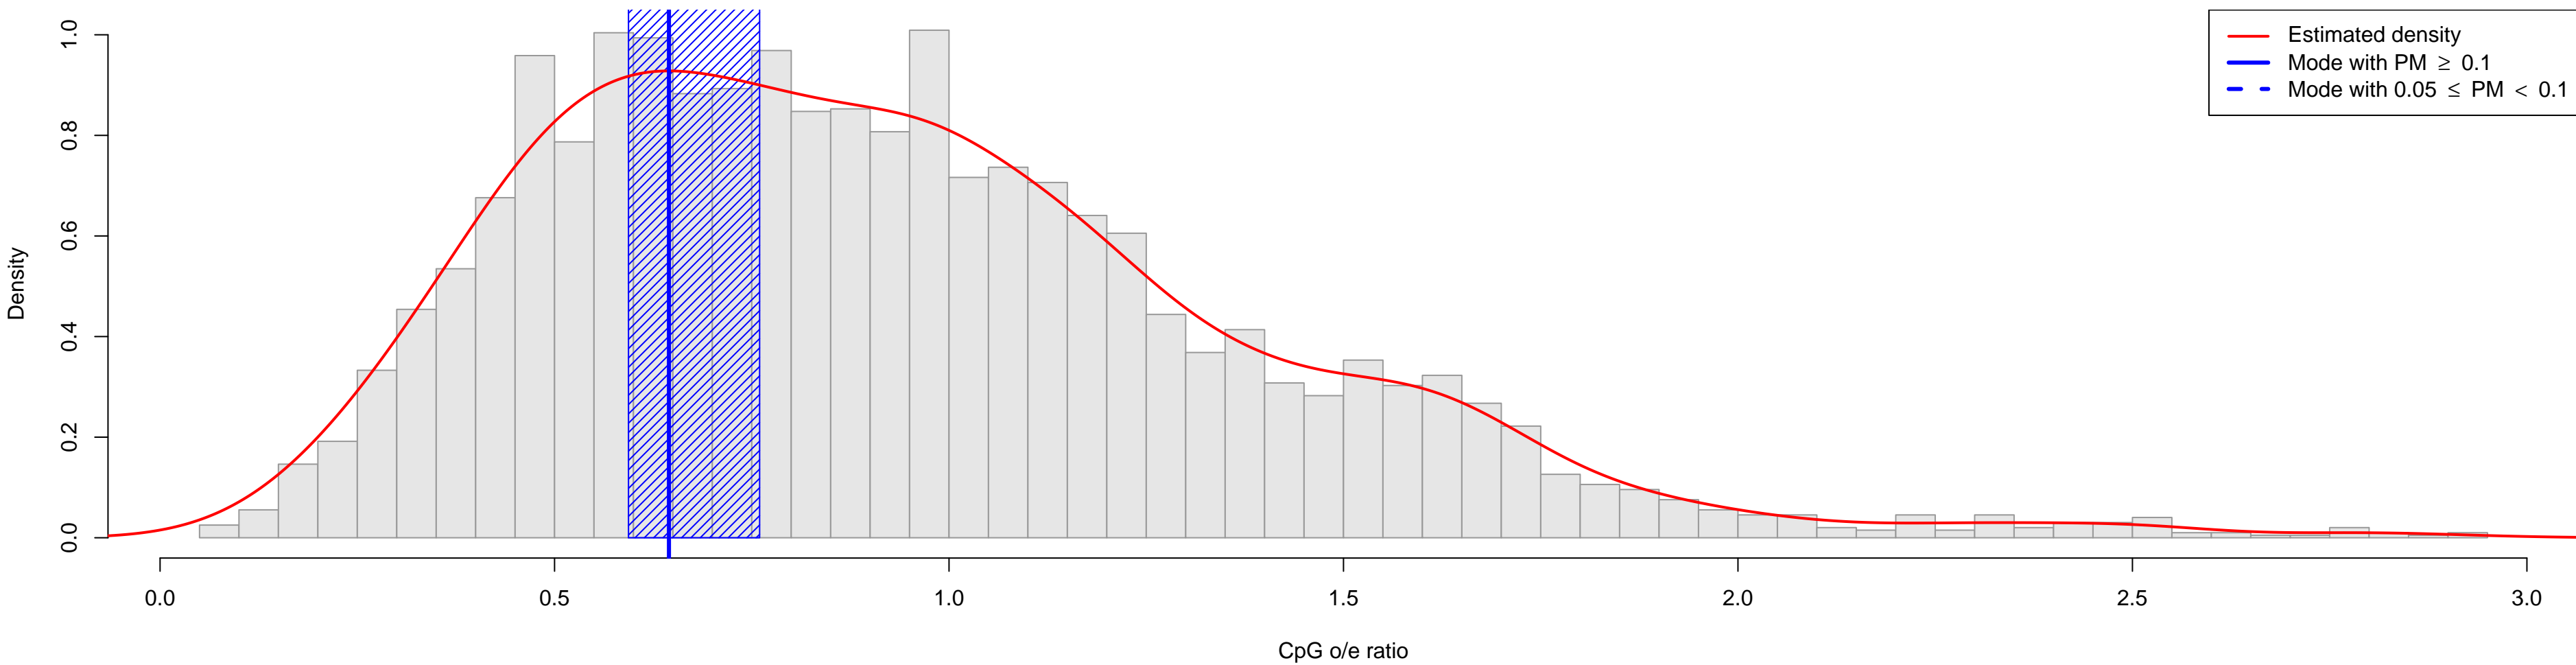

# Trachemys\_scripta

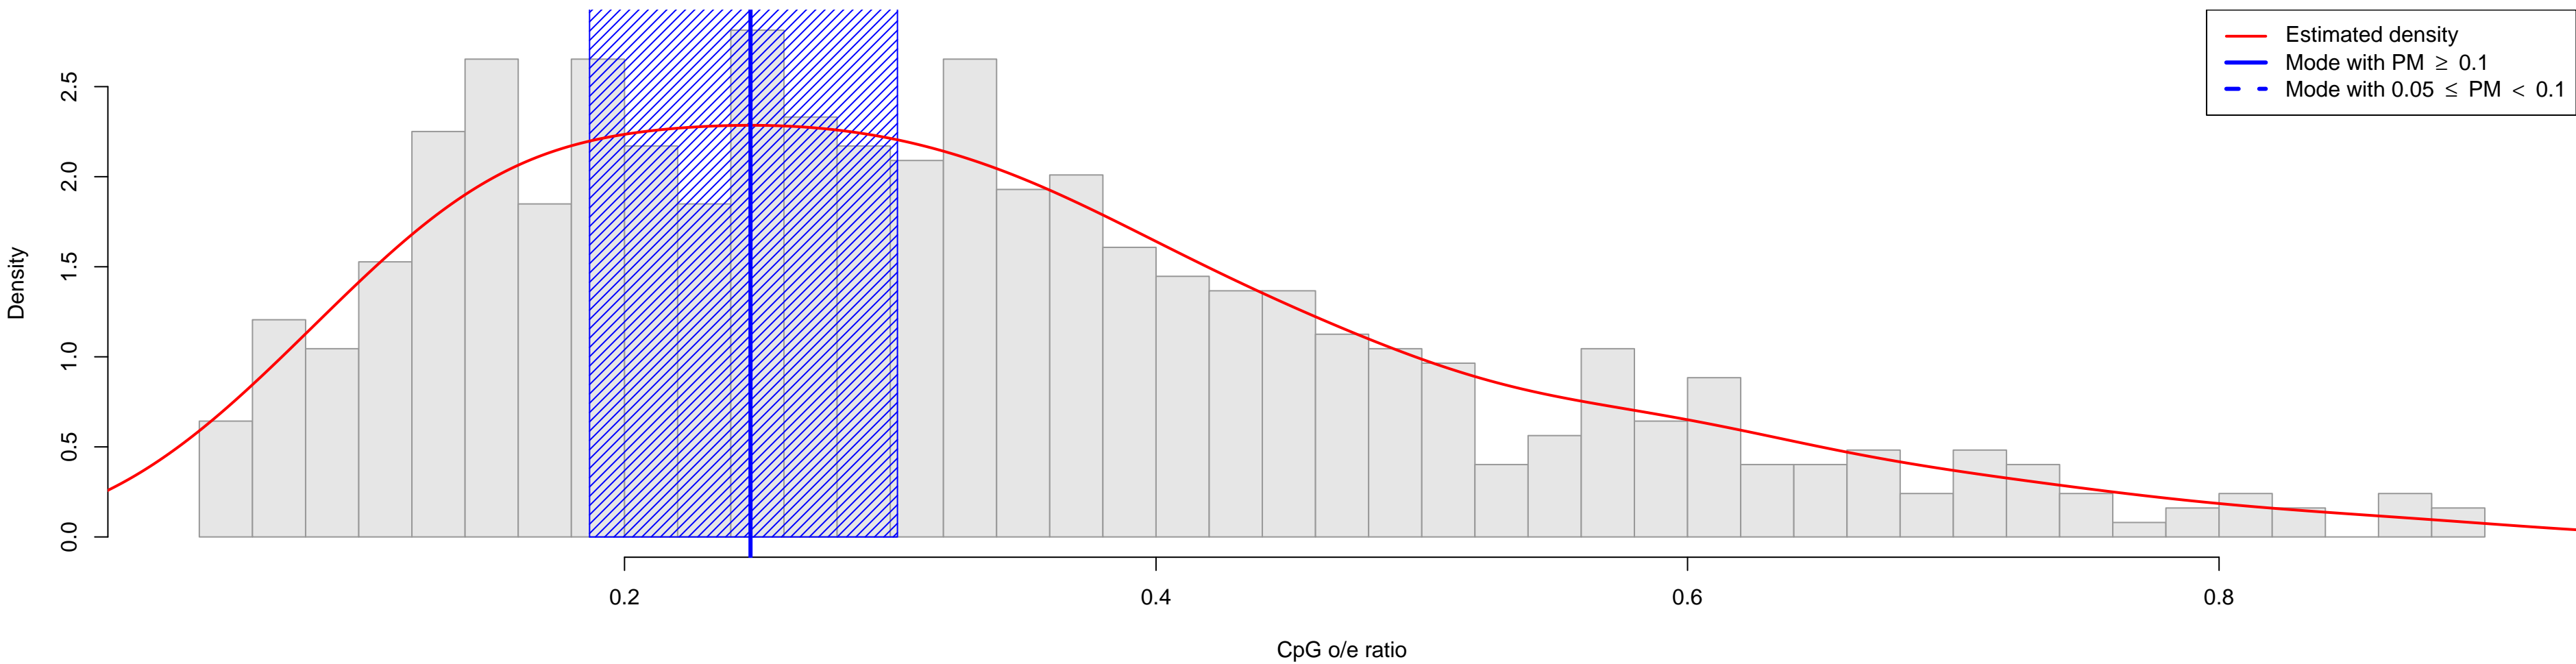

# Tremella\_mesenterica

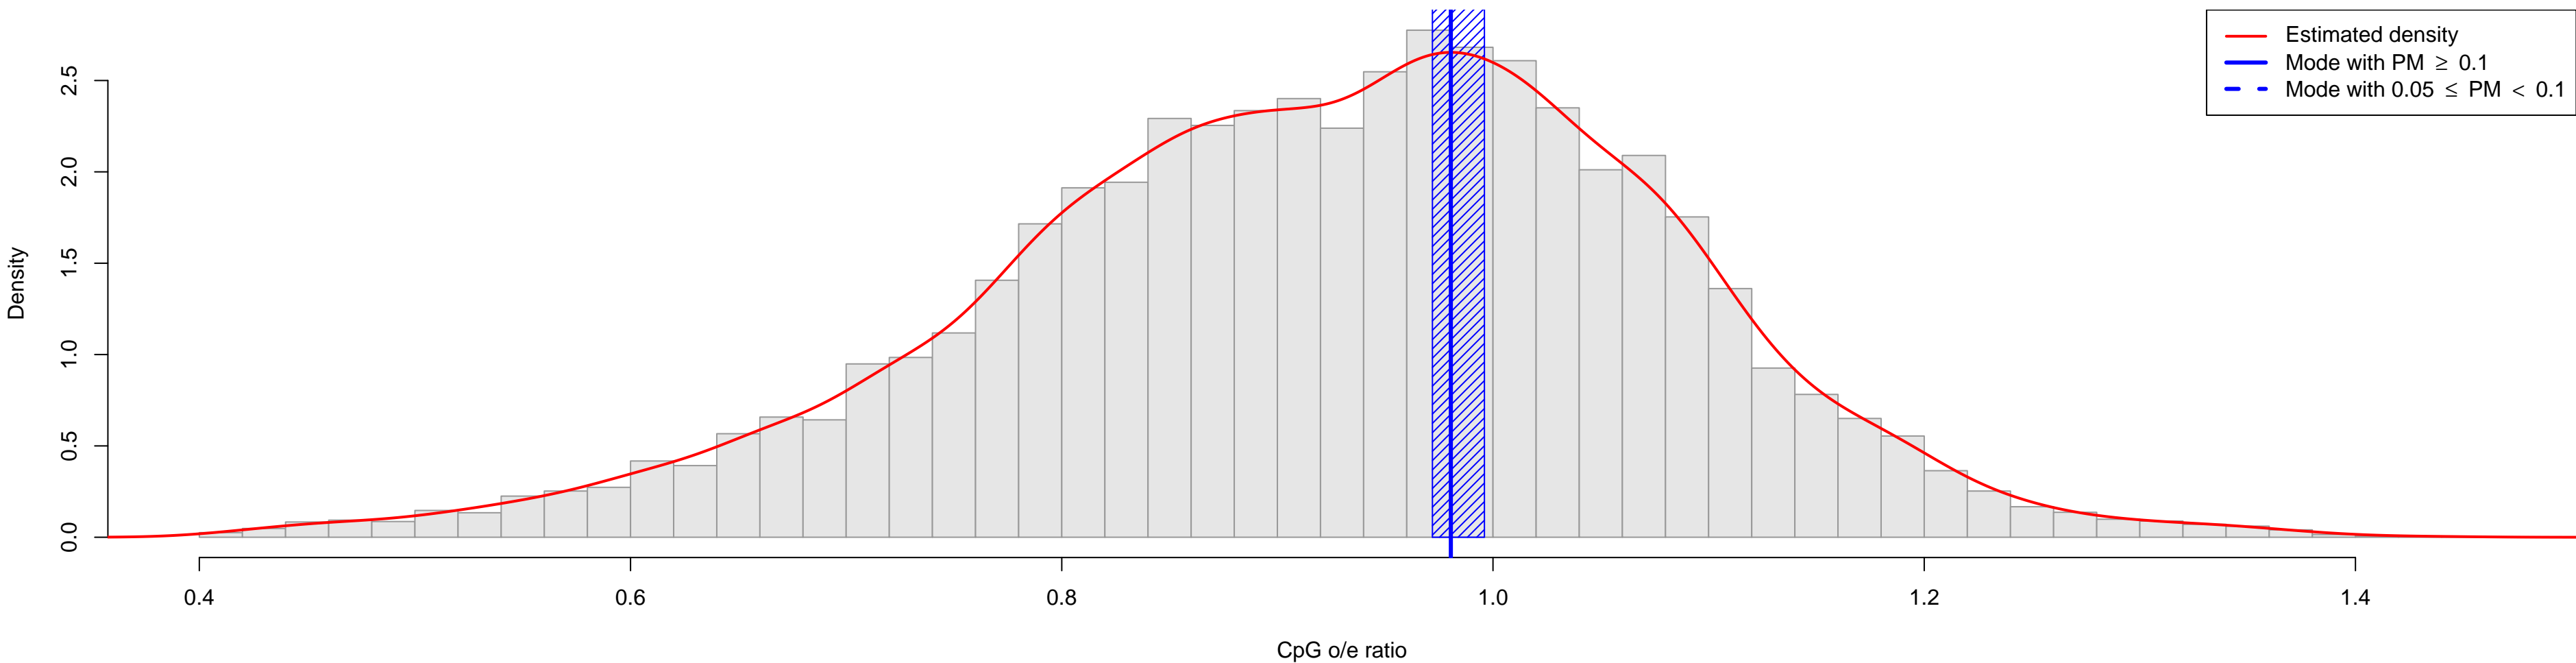

# Triatoma\_brasiliensis

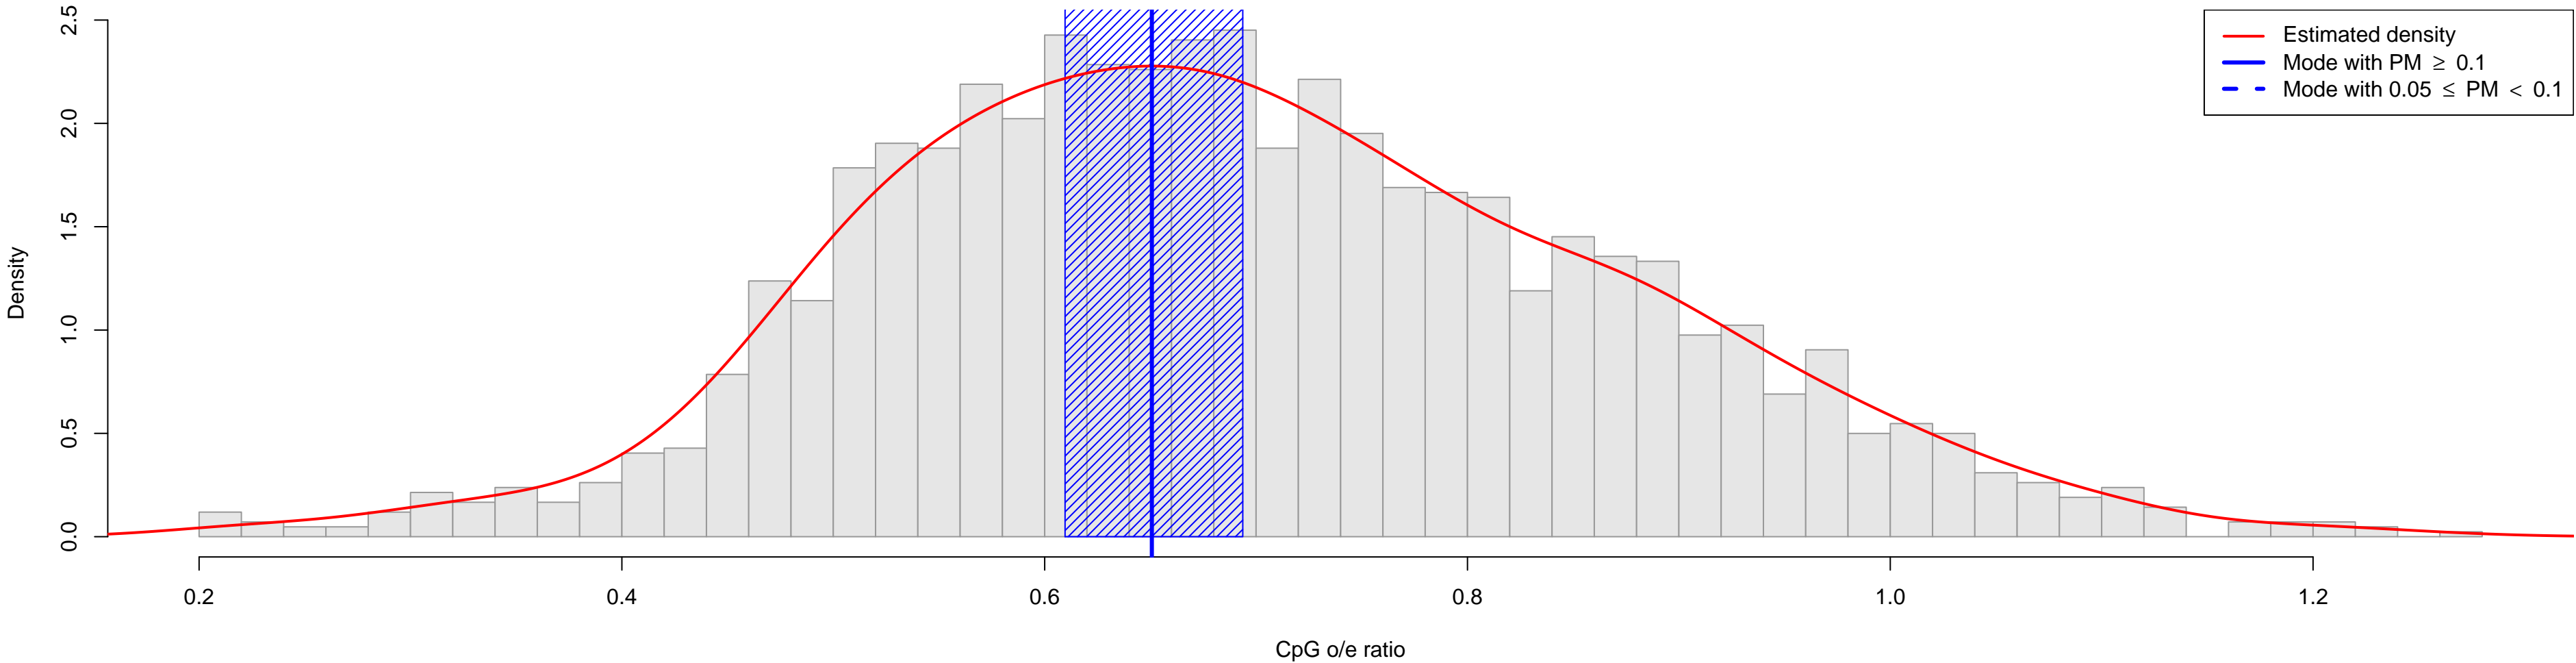

# Triatoma\_matogrossensis

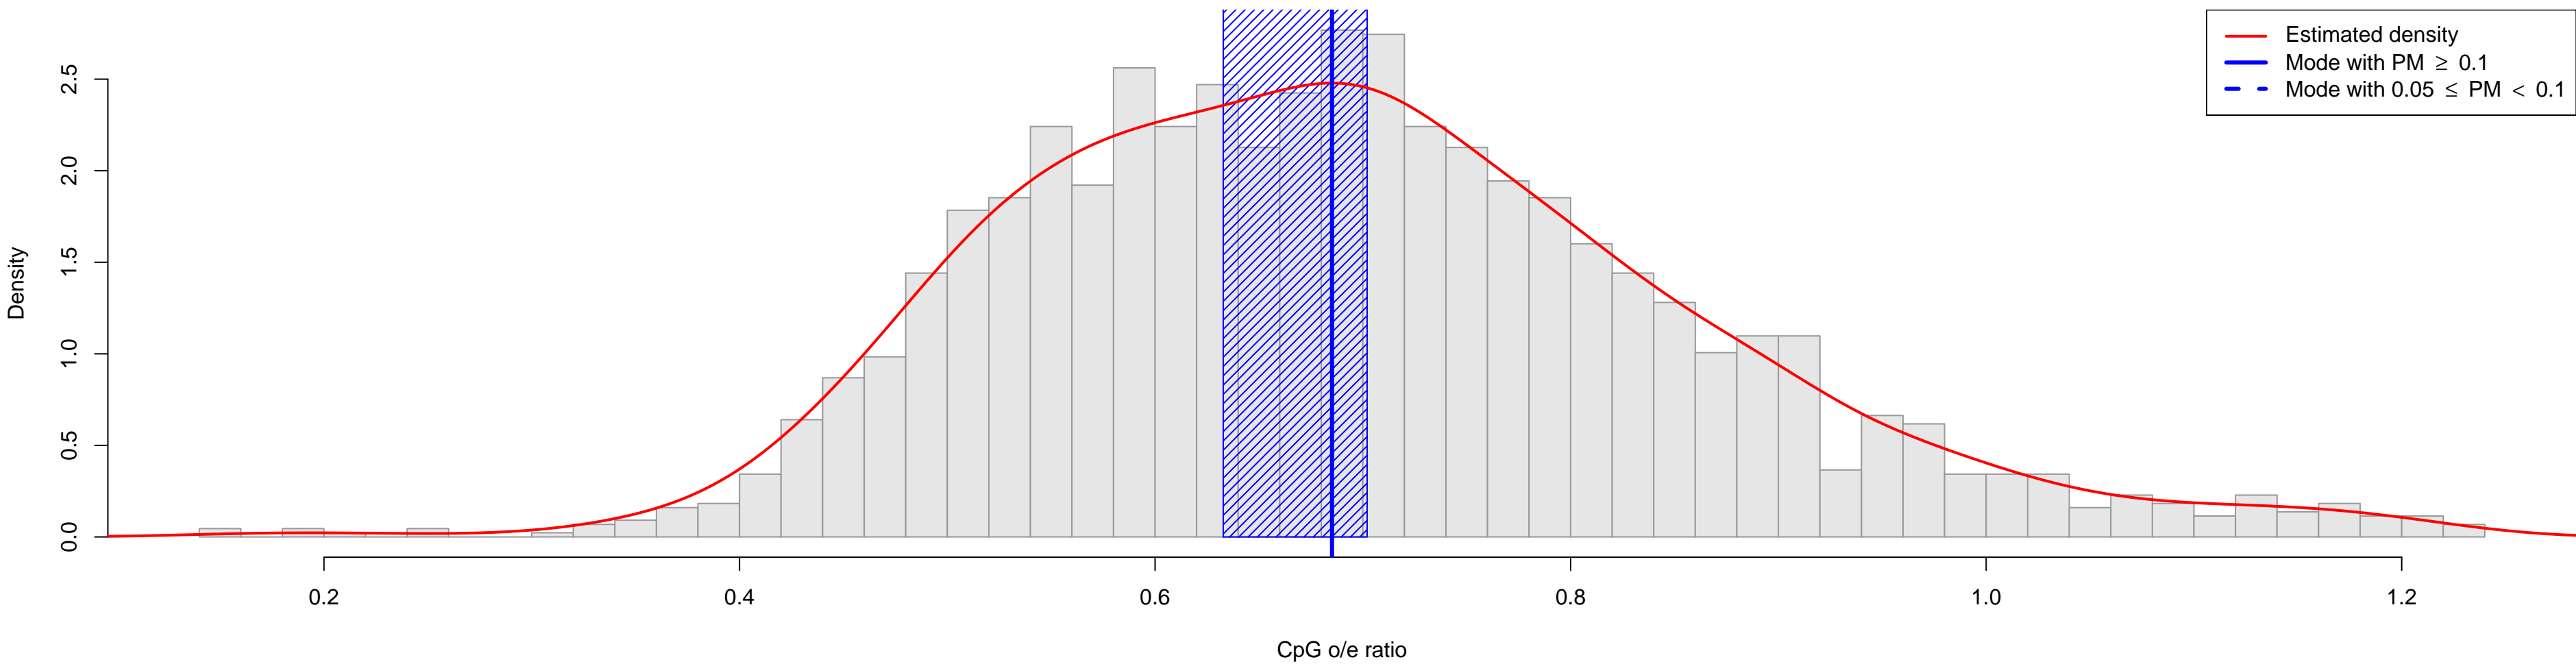

# Tribolium\_castaneum

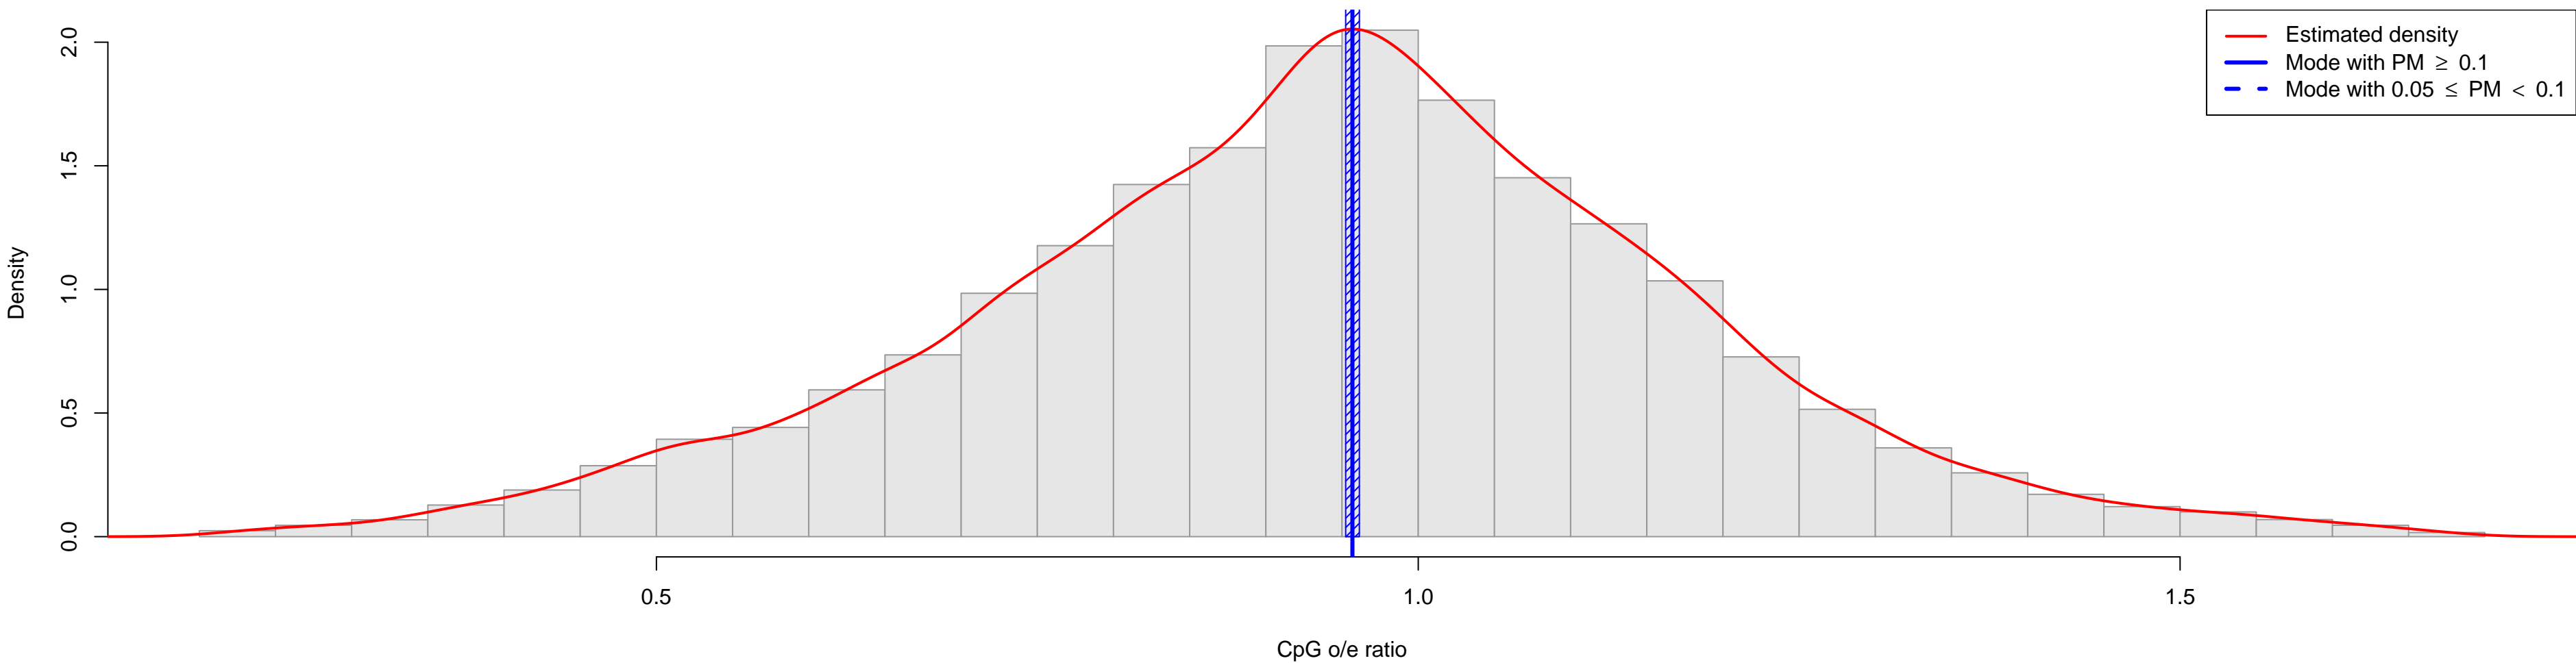

# Trichinella\_pseudospiralis

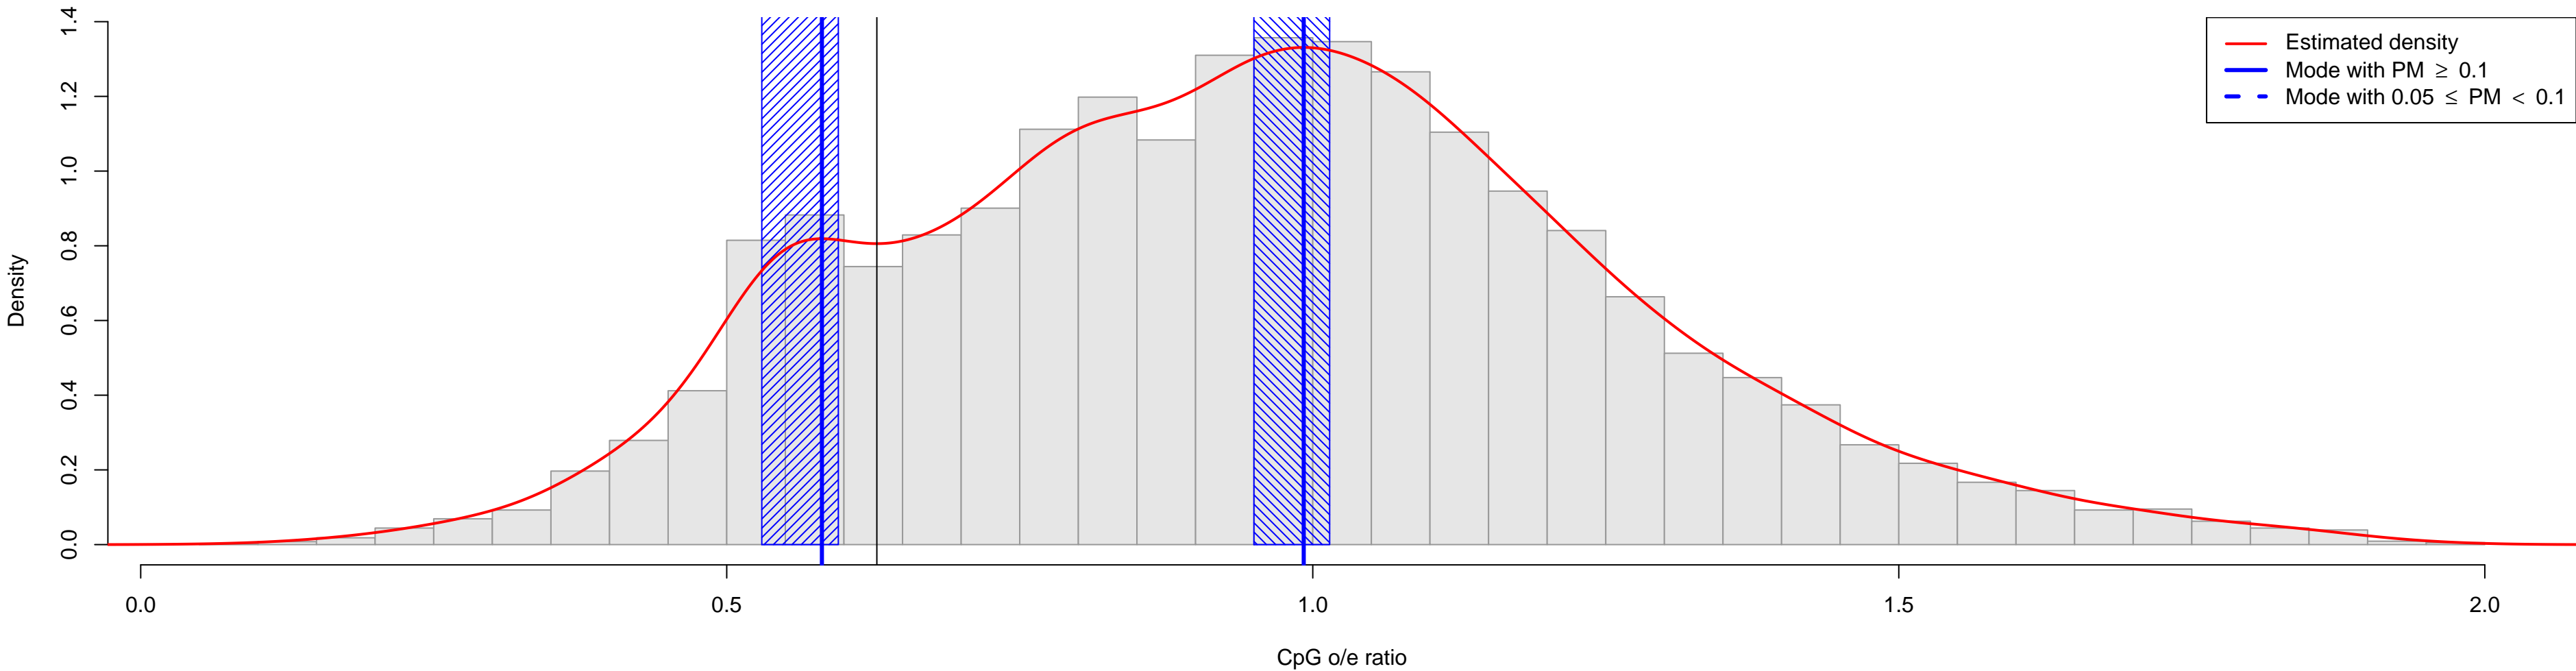



# Trichinella\_spiralis

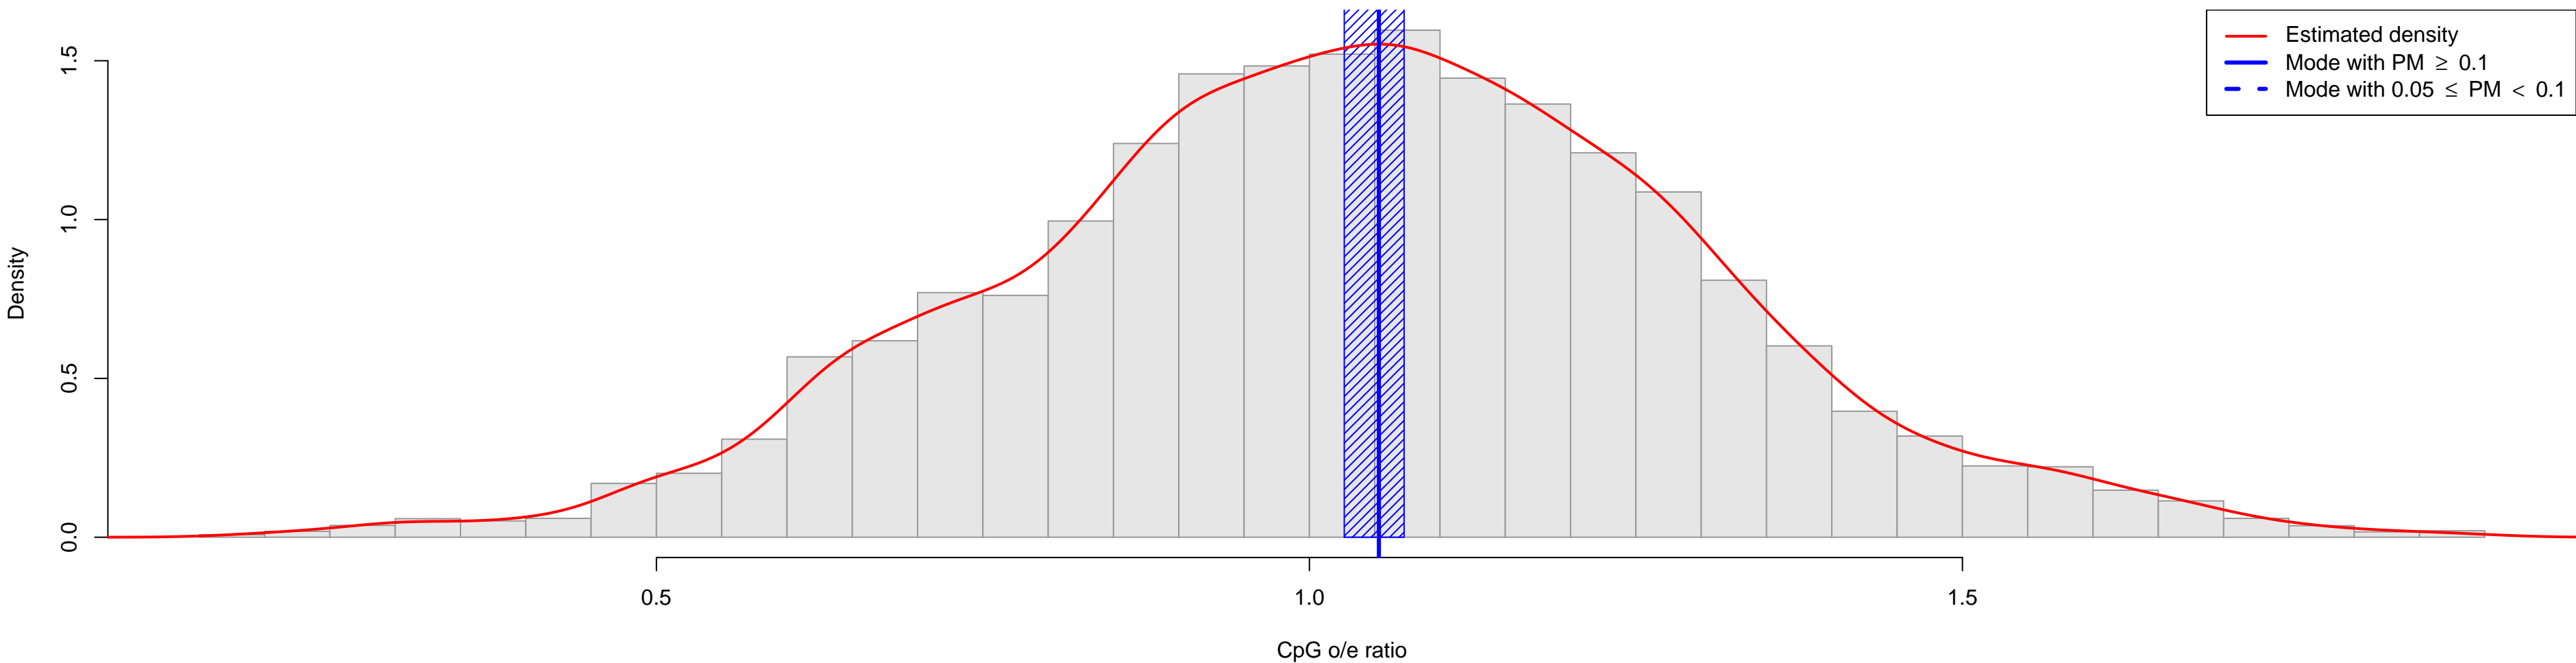

# Trichoderma\_atroviride

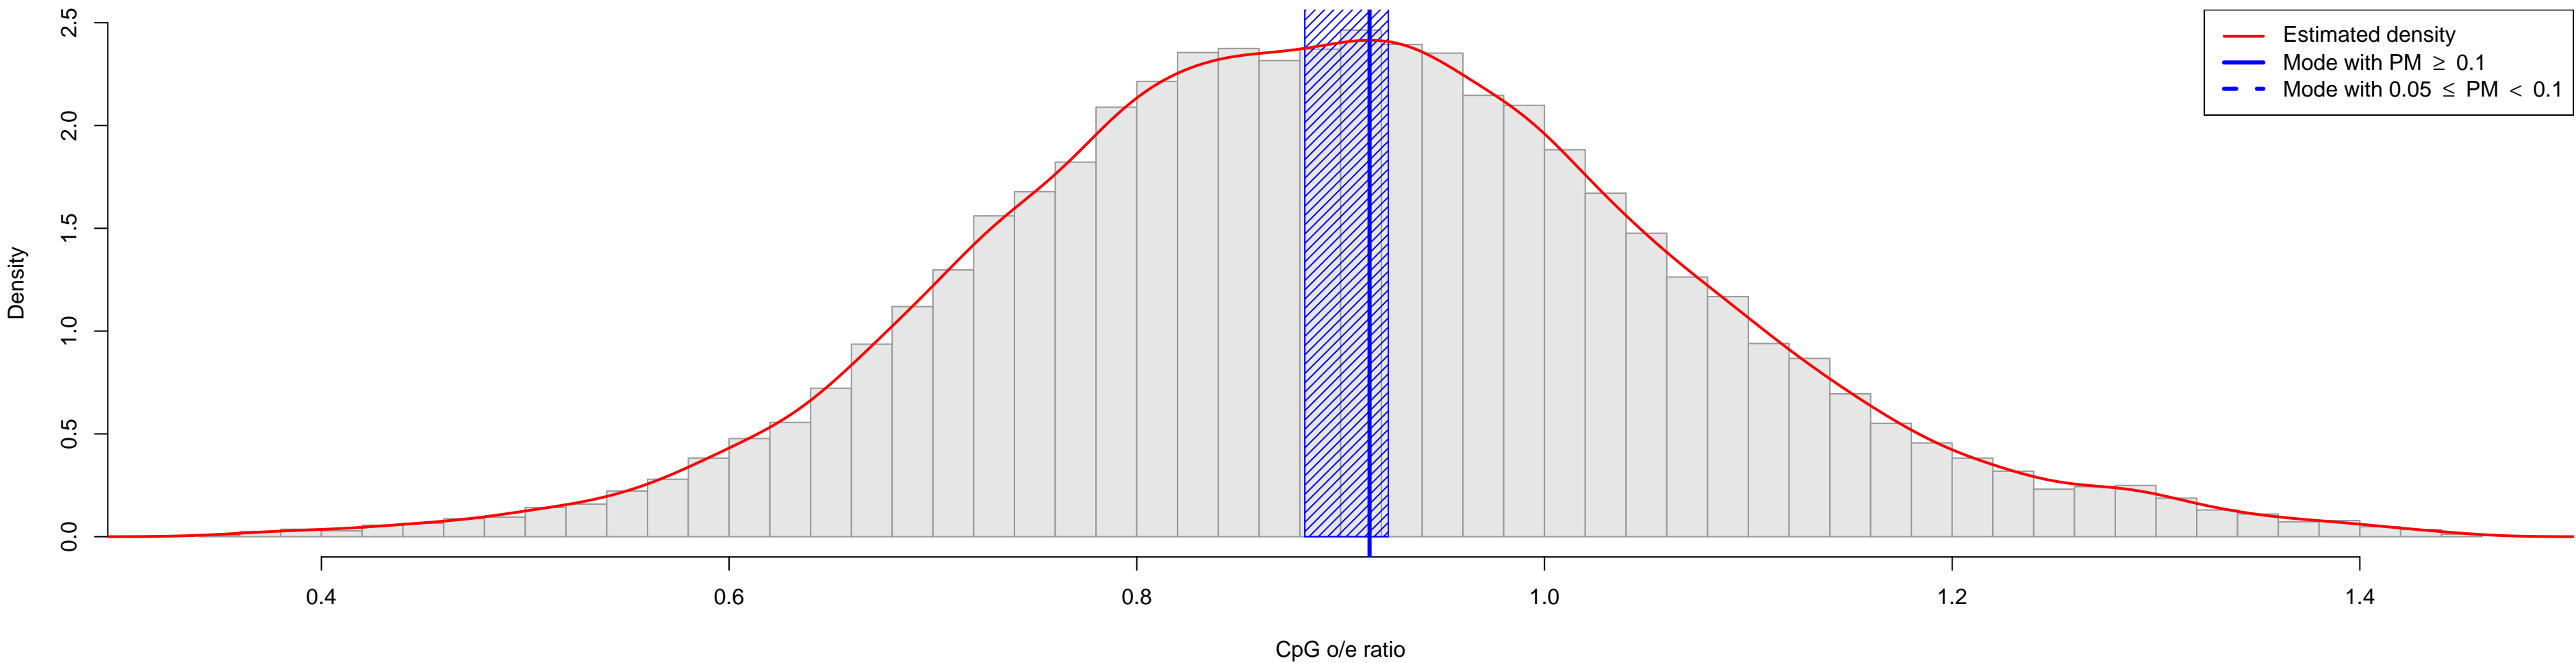

# Trichoplax\_adhaerens

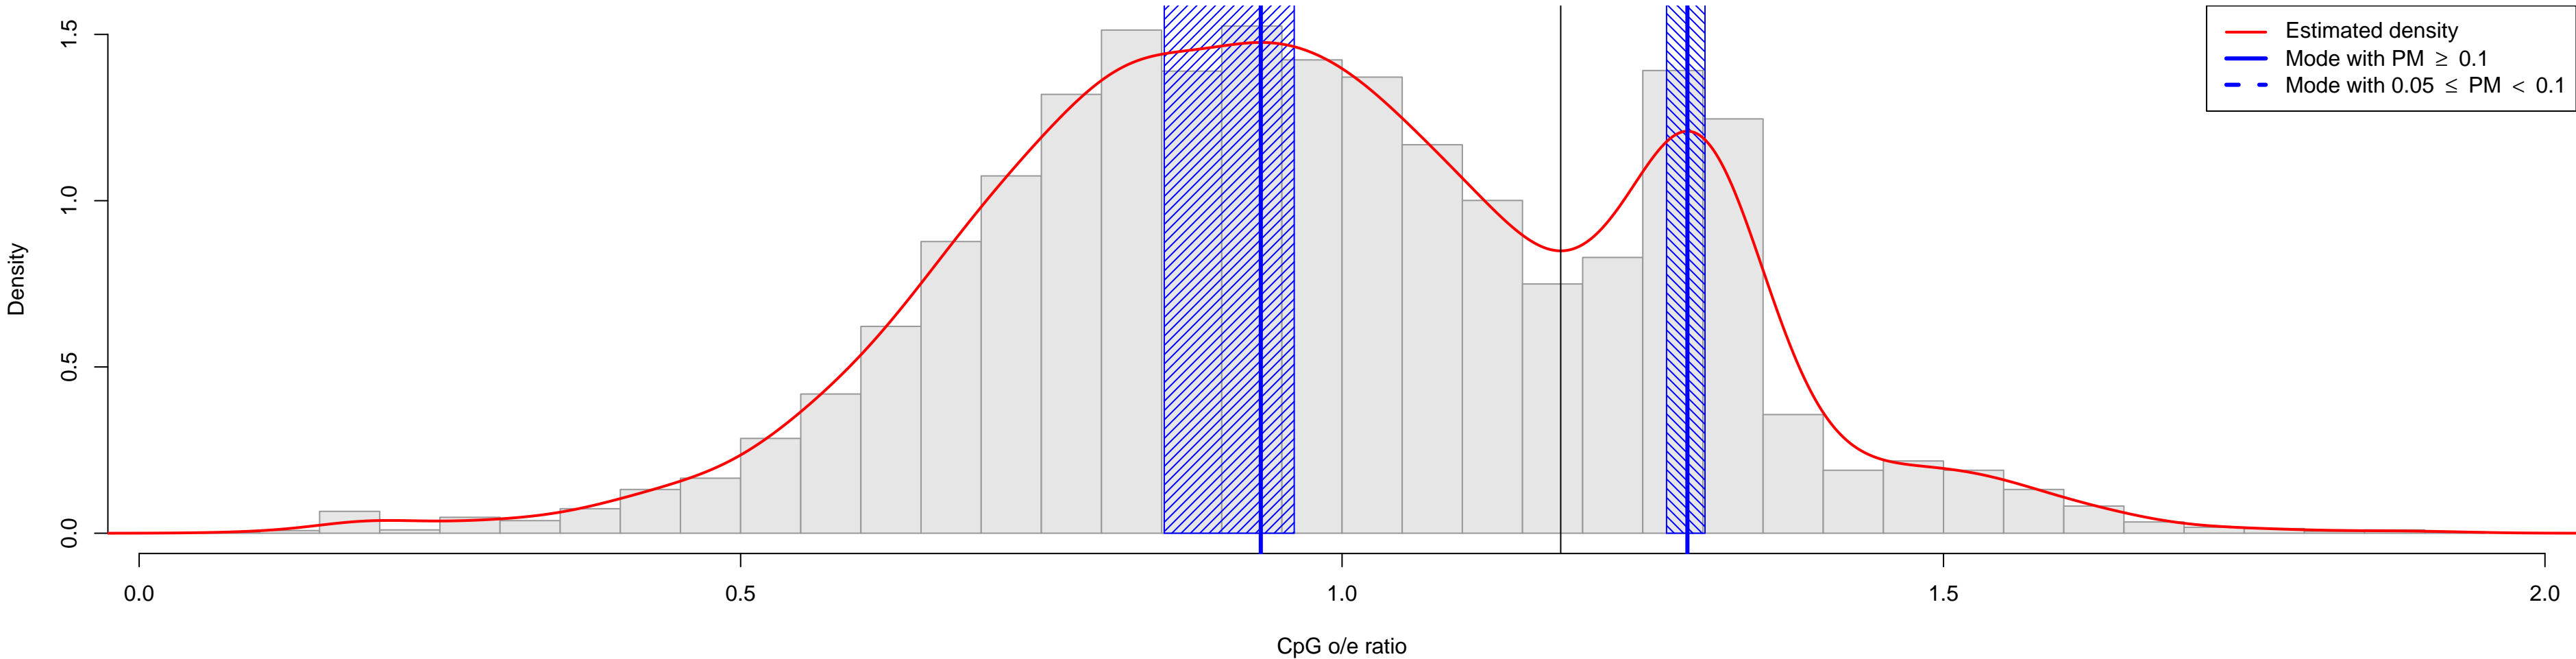

# Trichosurus\_vulpecula

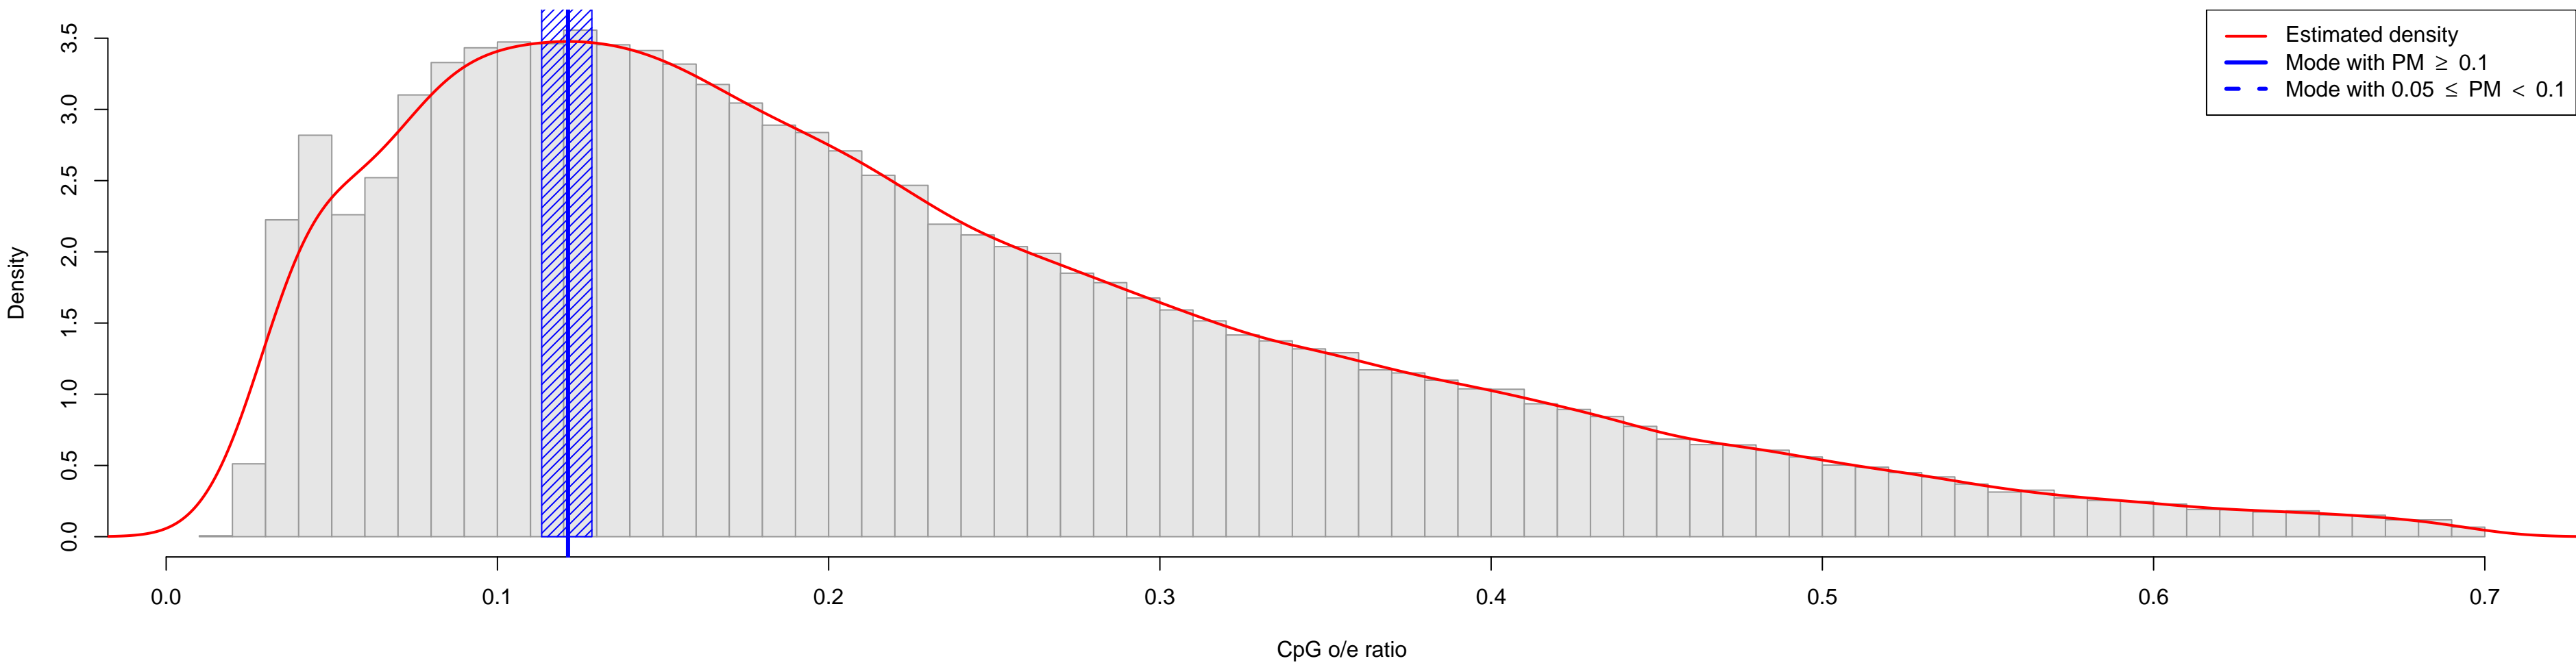

# Trichuris\_muris

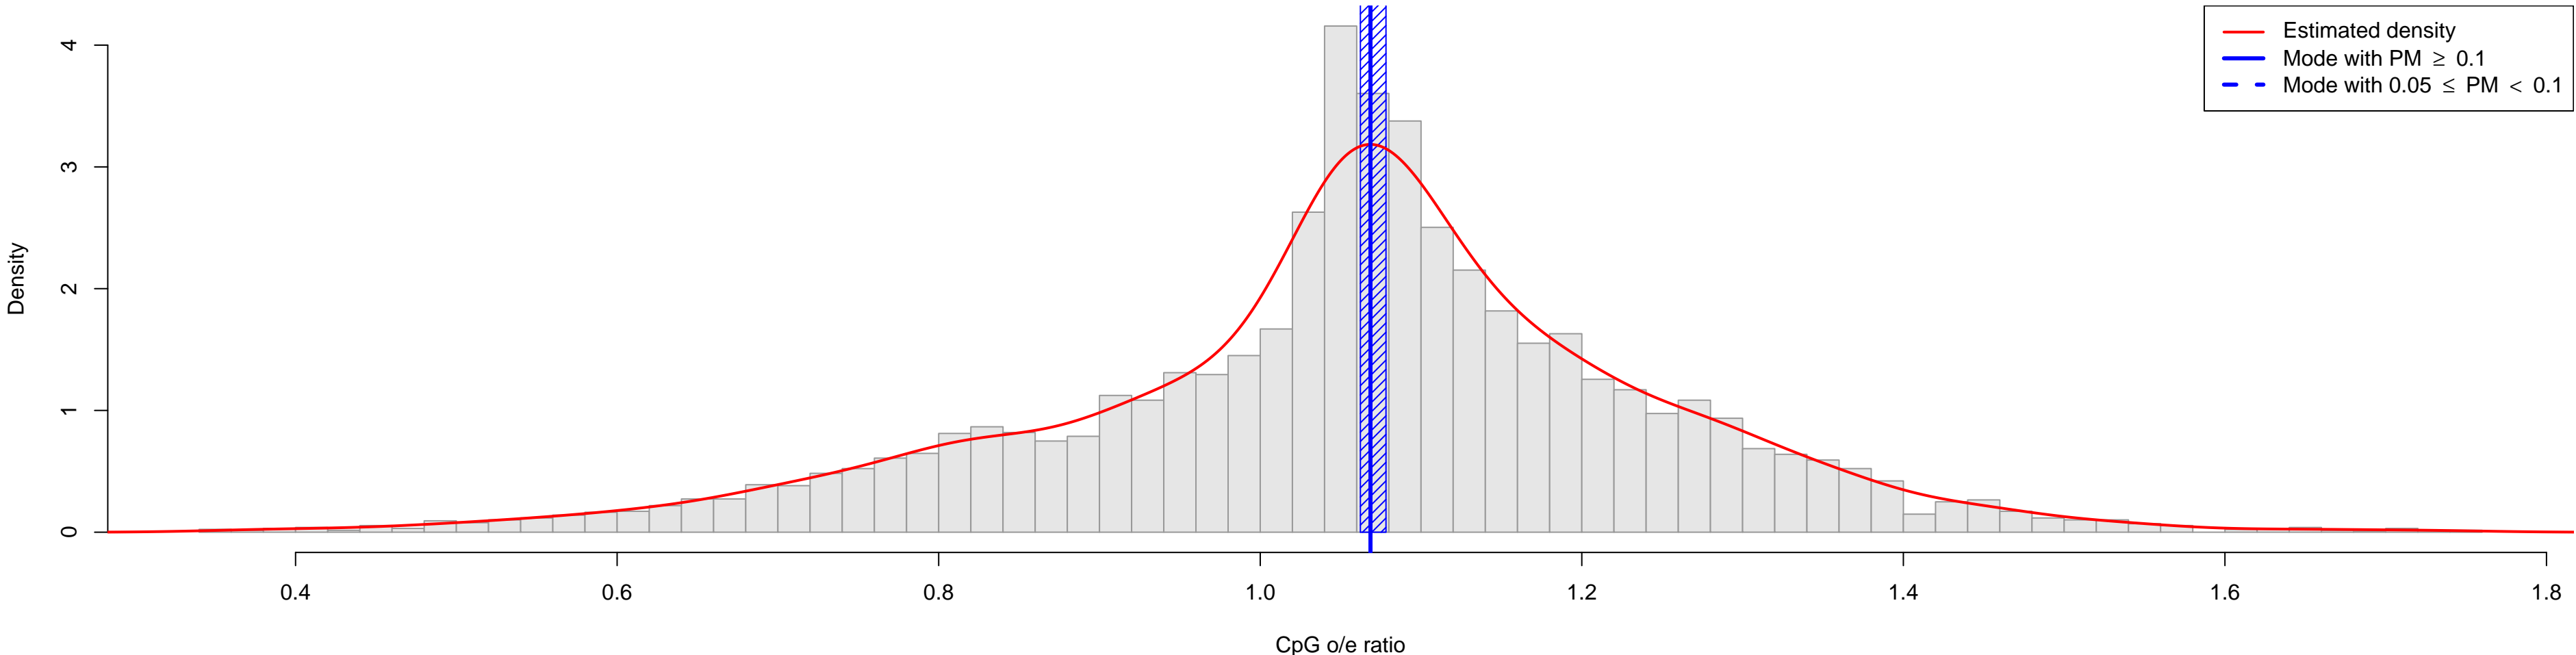

# Trichuris\_vulpis

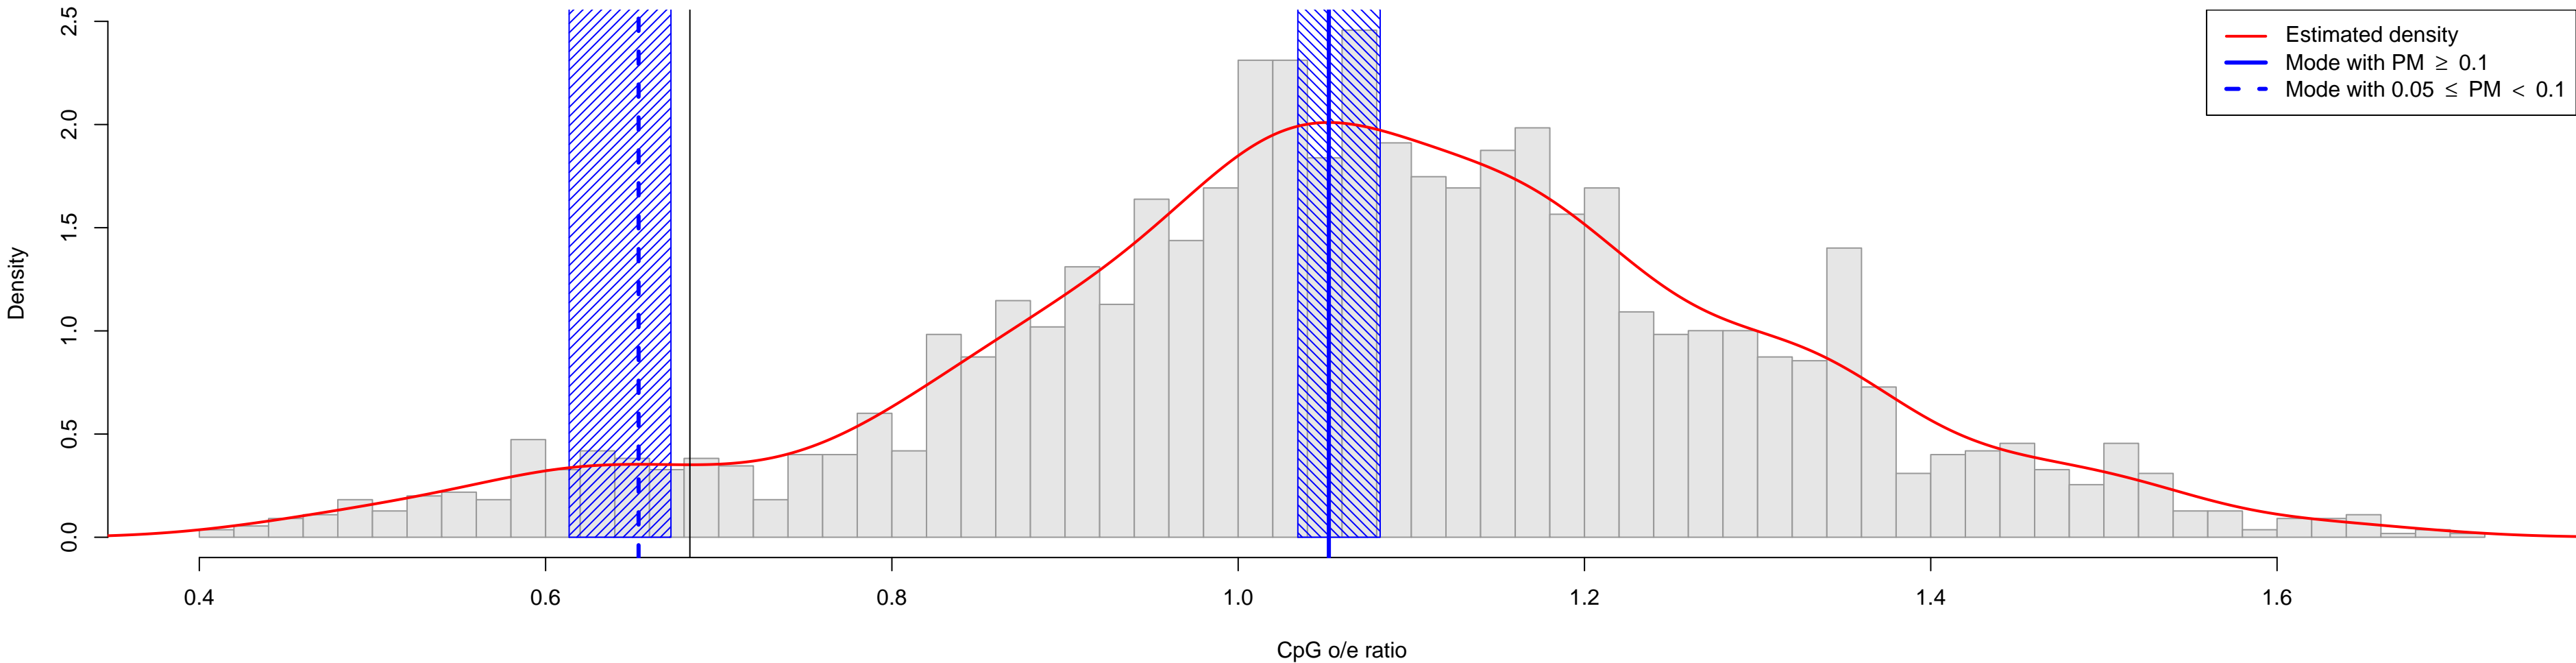

# Trifolium\_repens

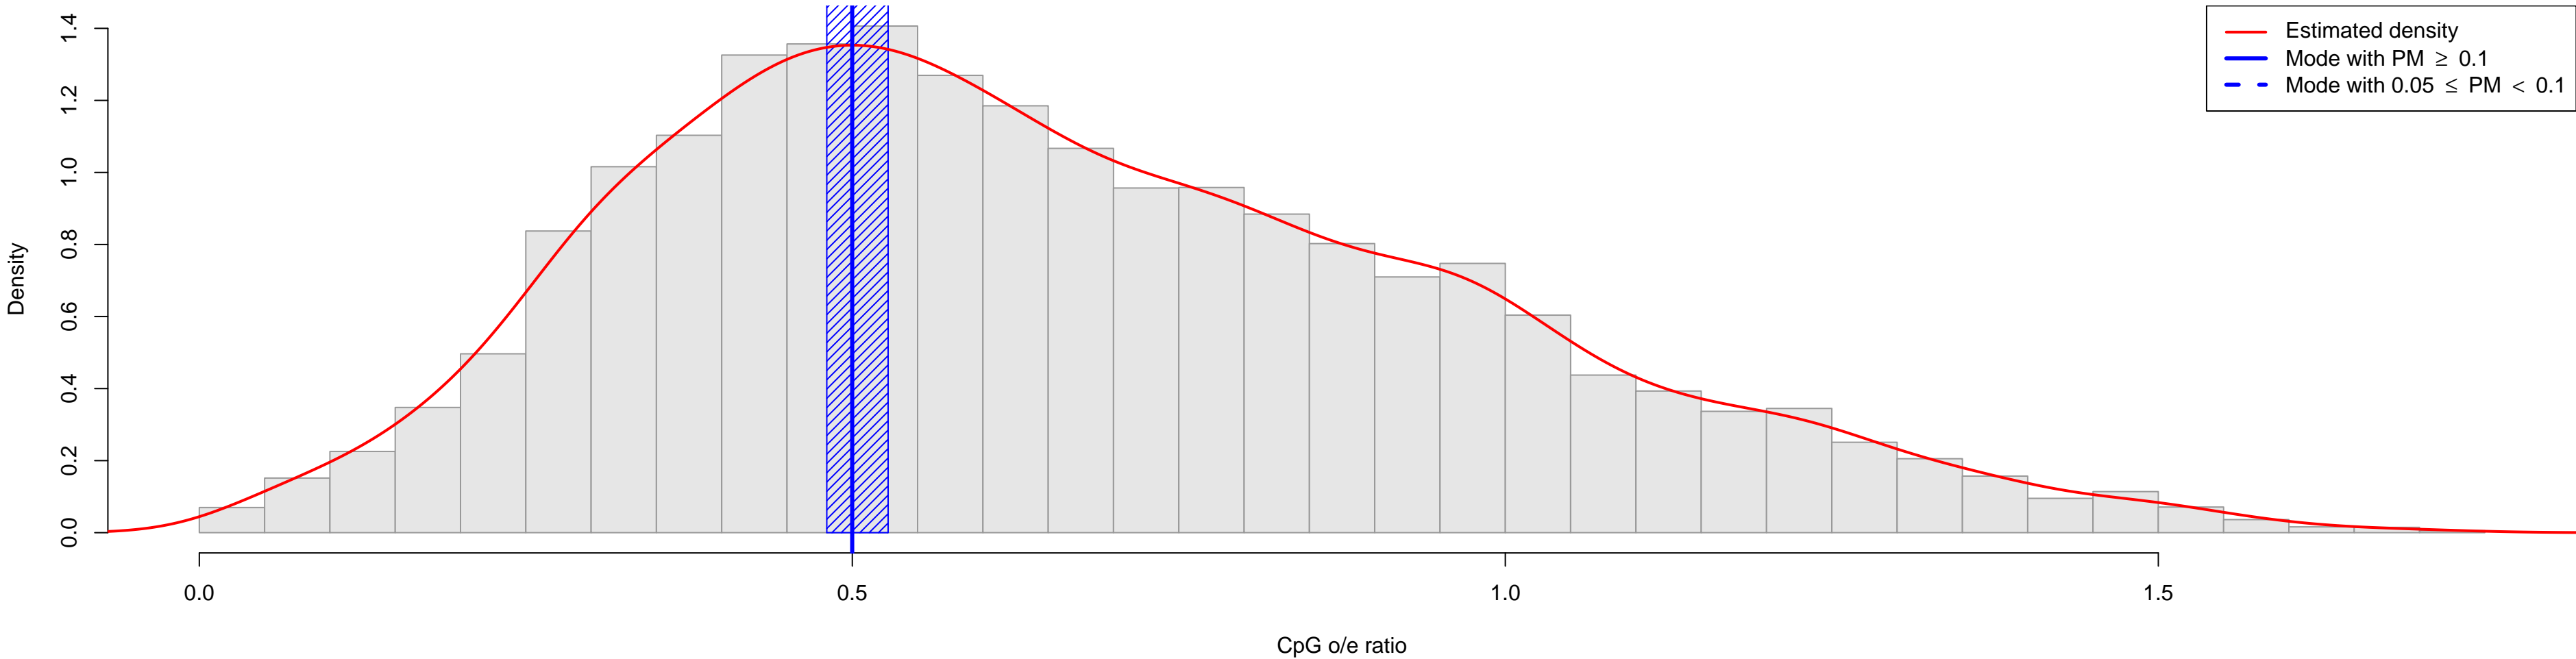

# Triops\_cancriformis

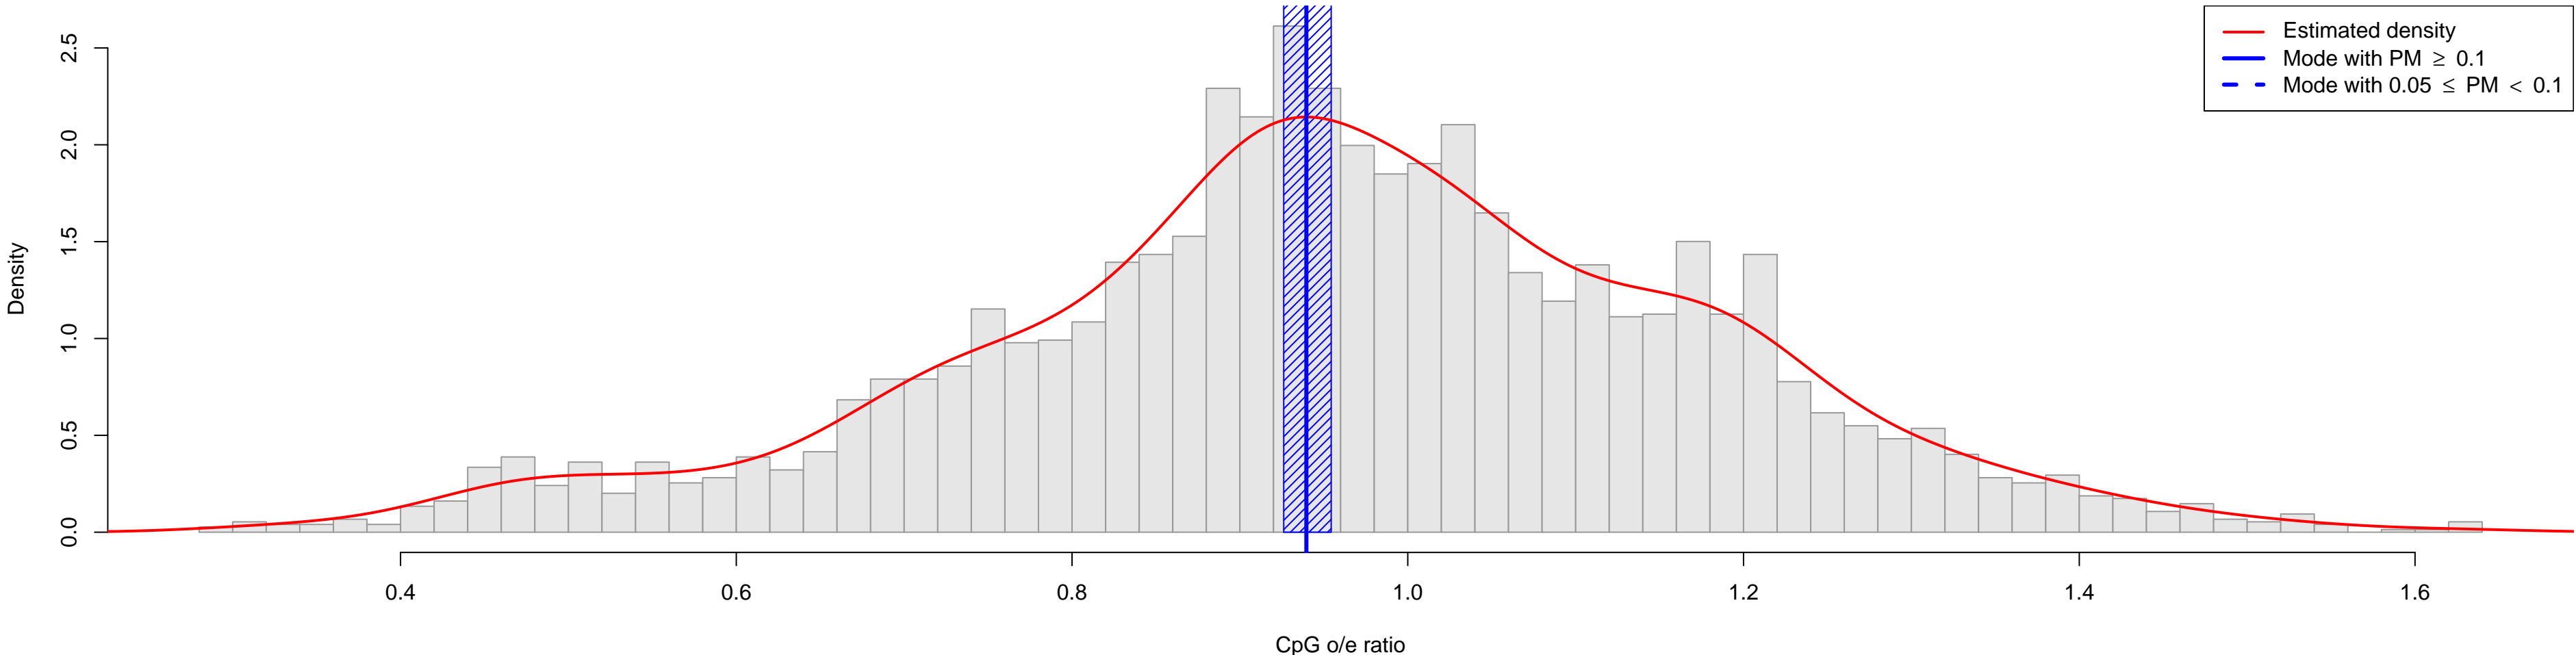



# Triticum\_aestivum

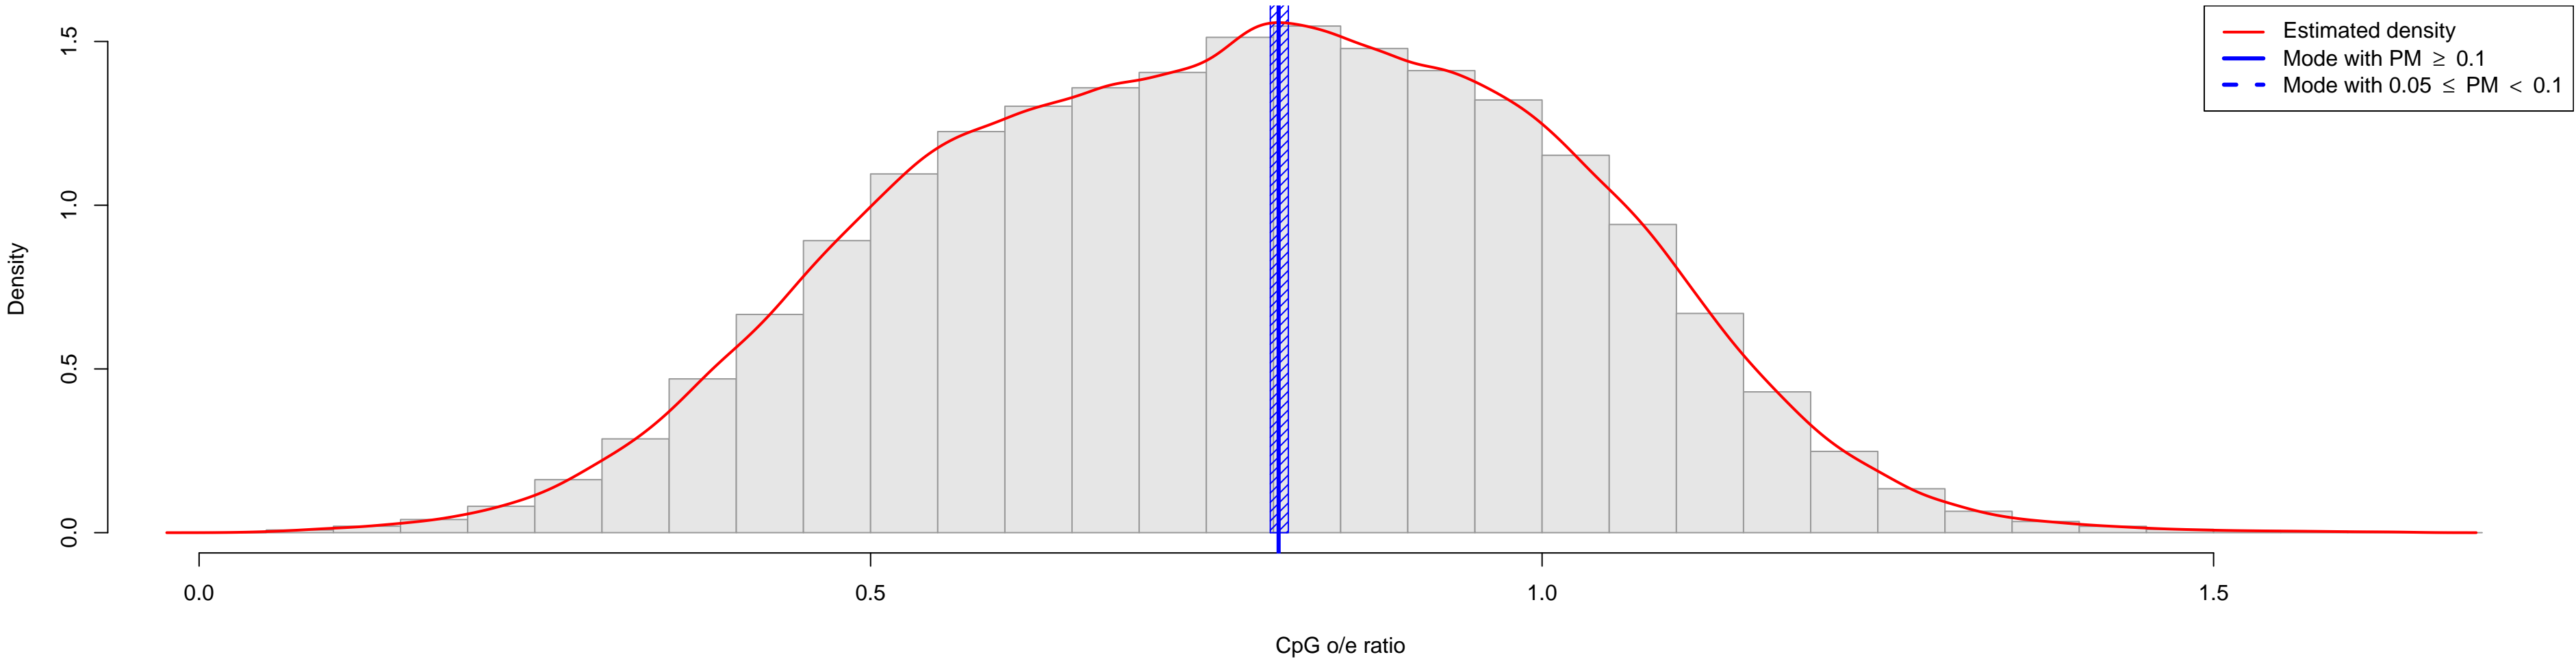

# Tritonia\_diomedea

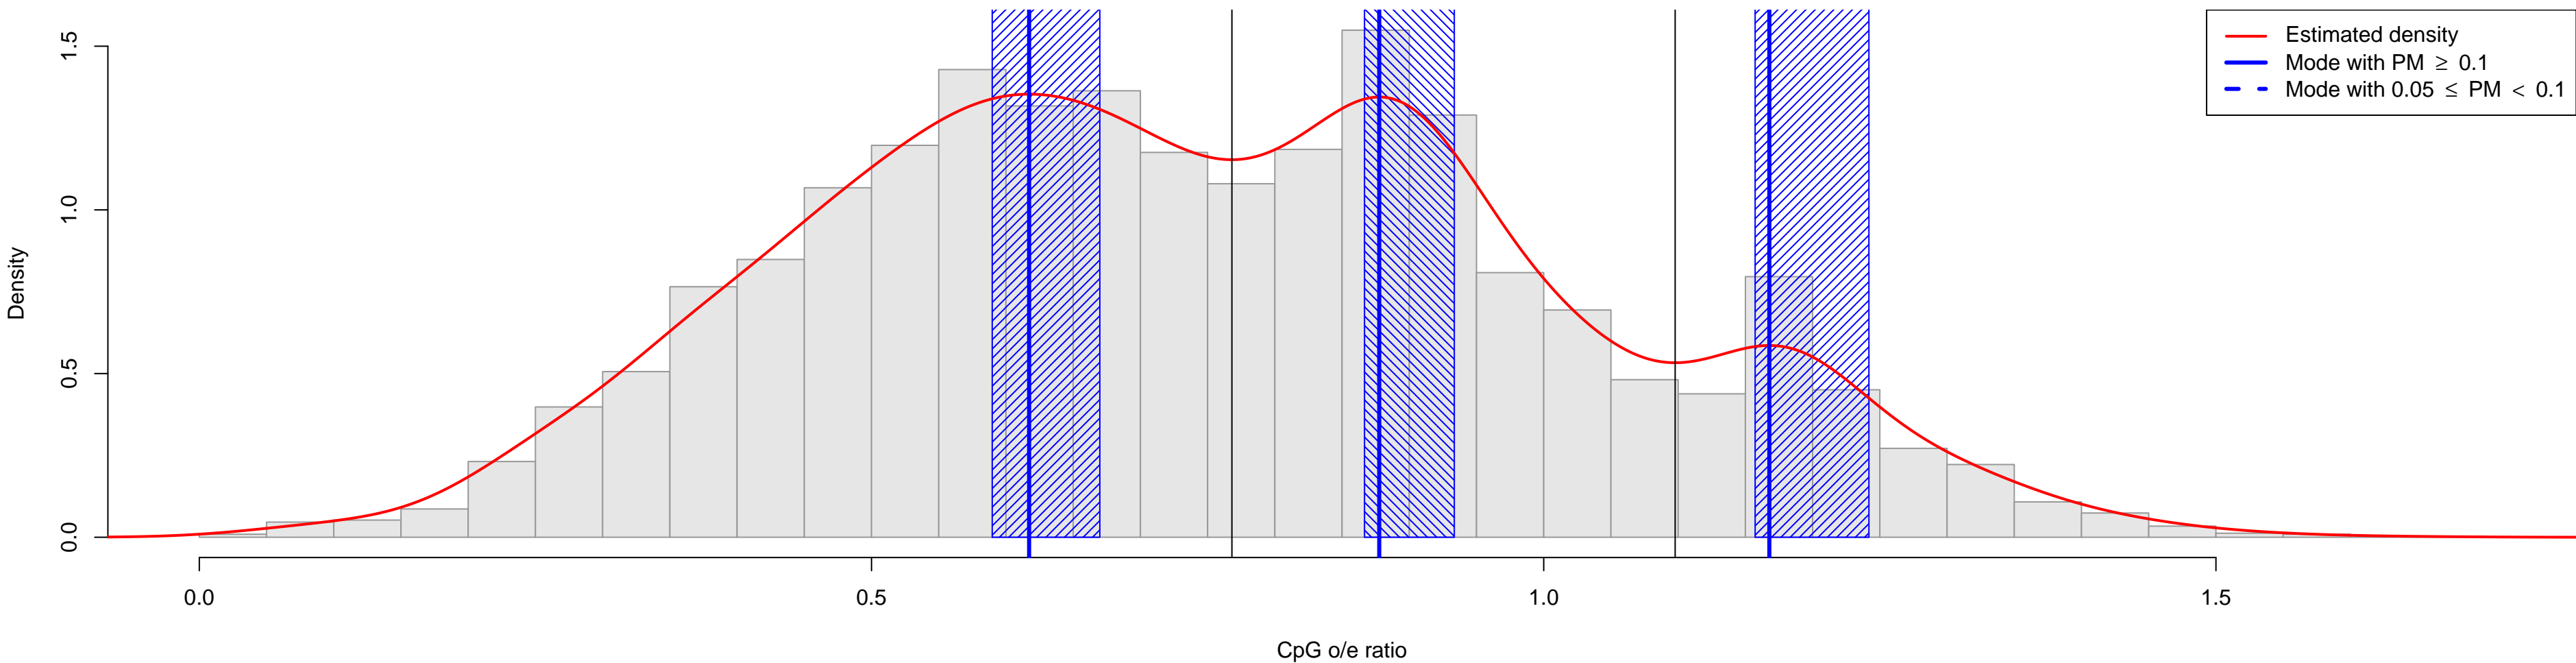

# Tritrichomonas\_foetus

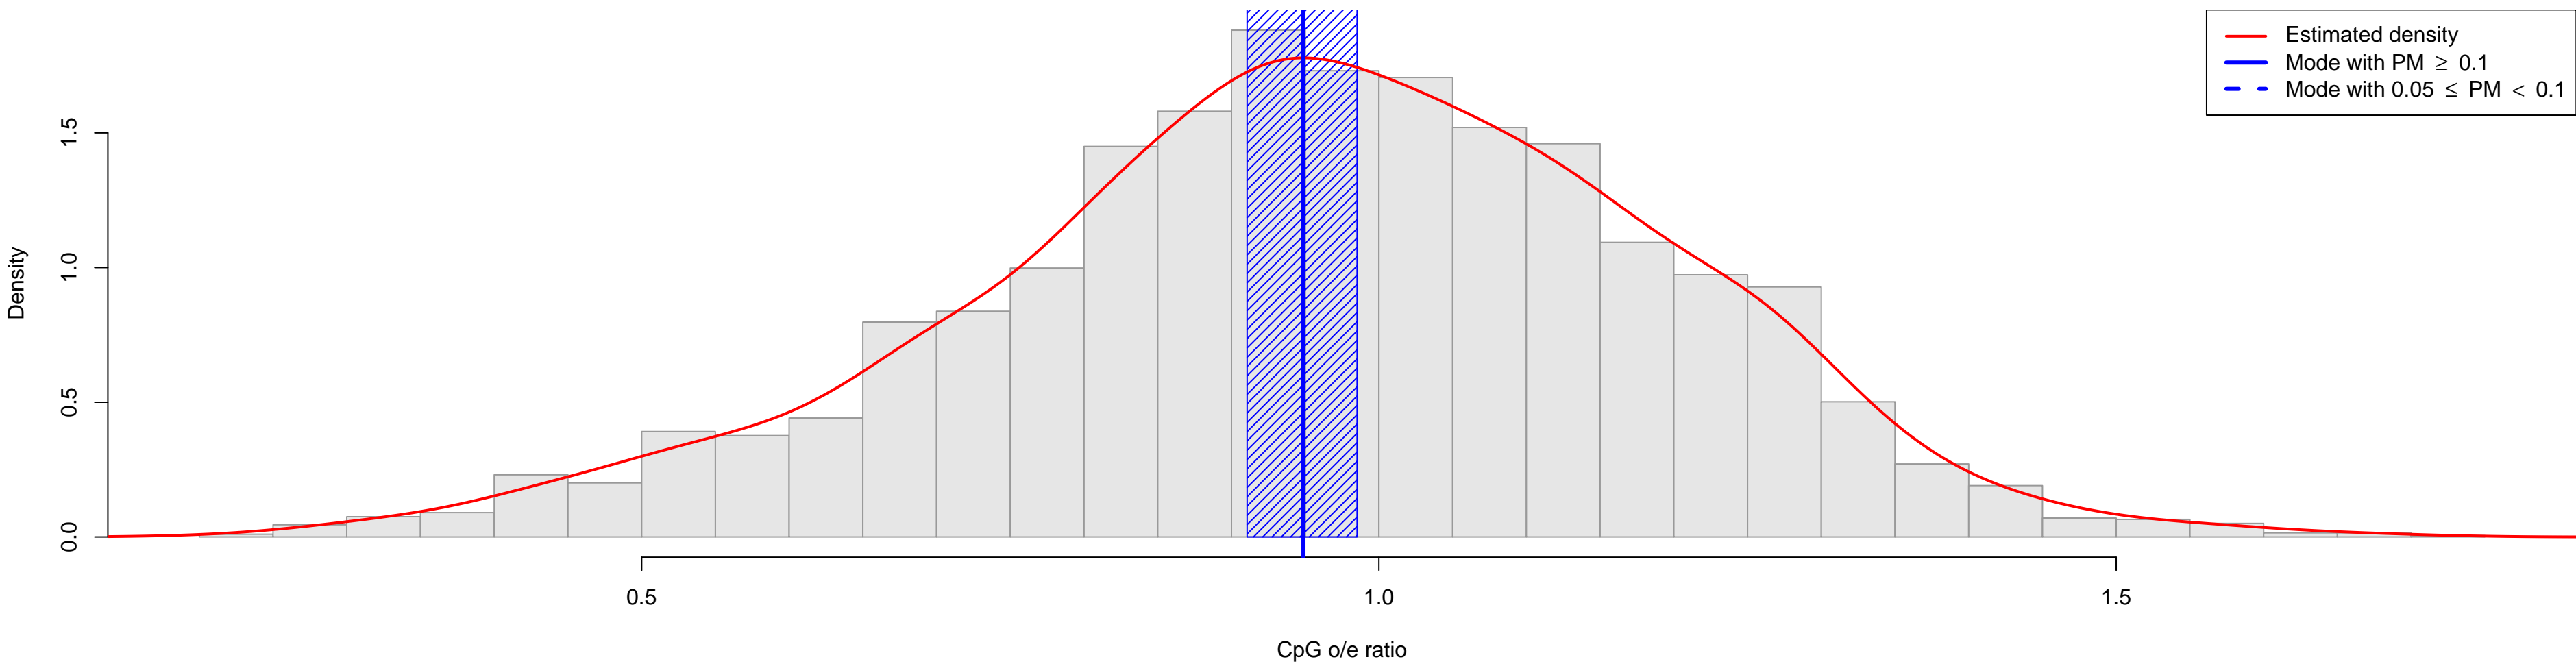

# Trypanosoma\_brucei

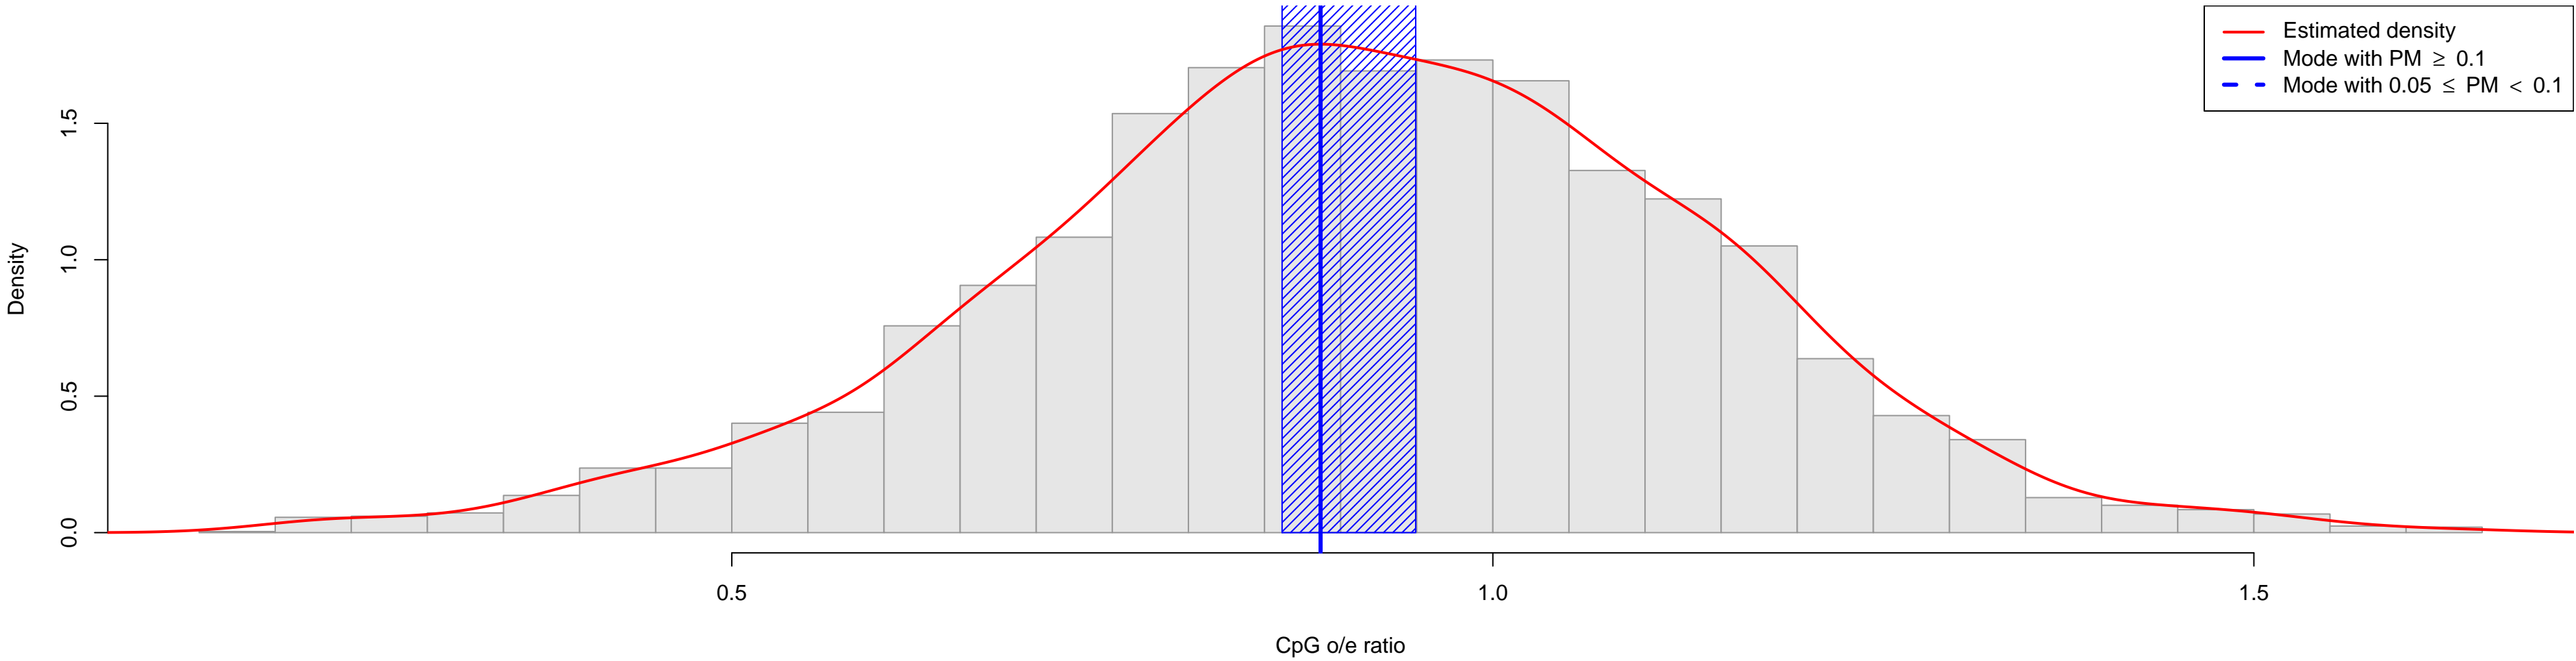

# Trypanosoma\_cruzi

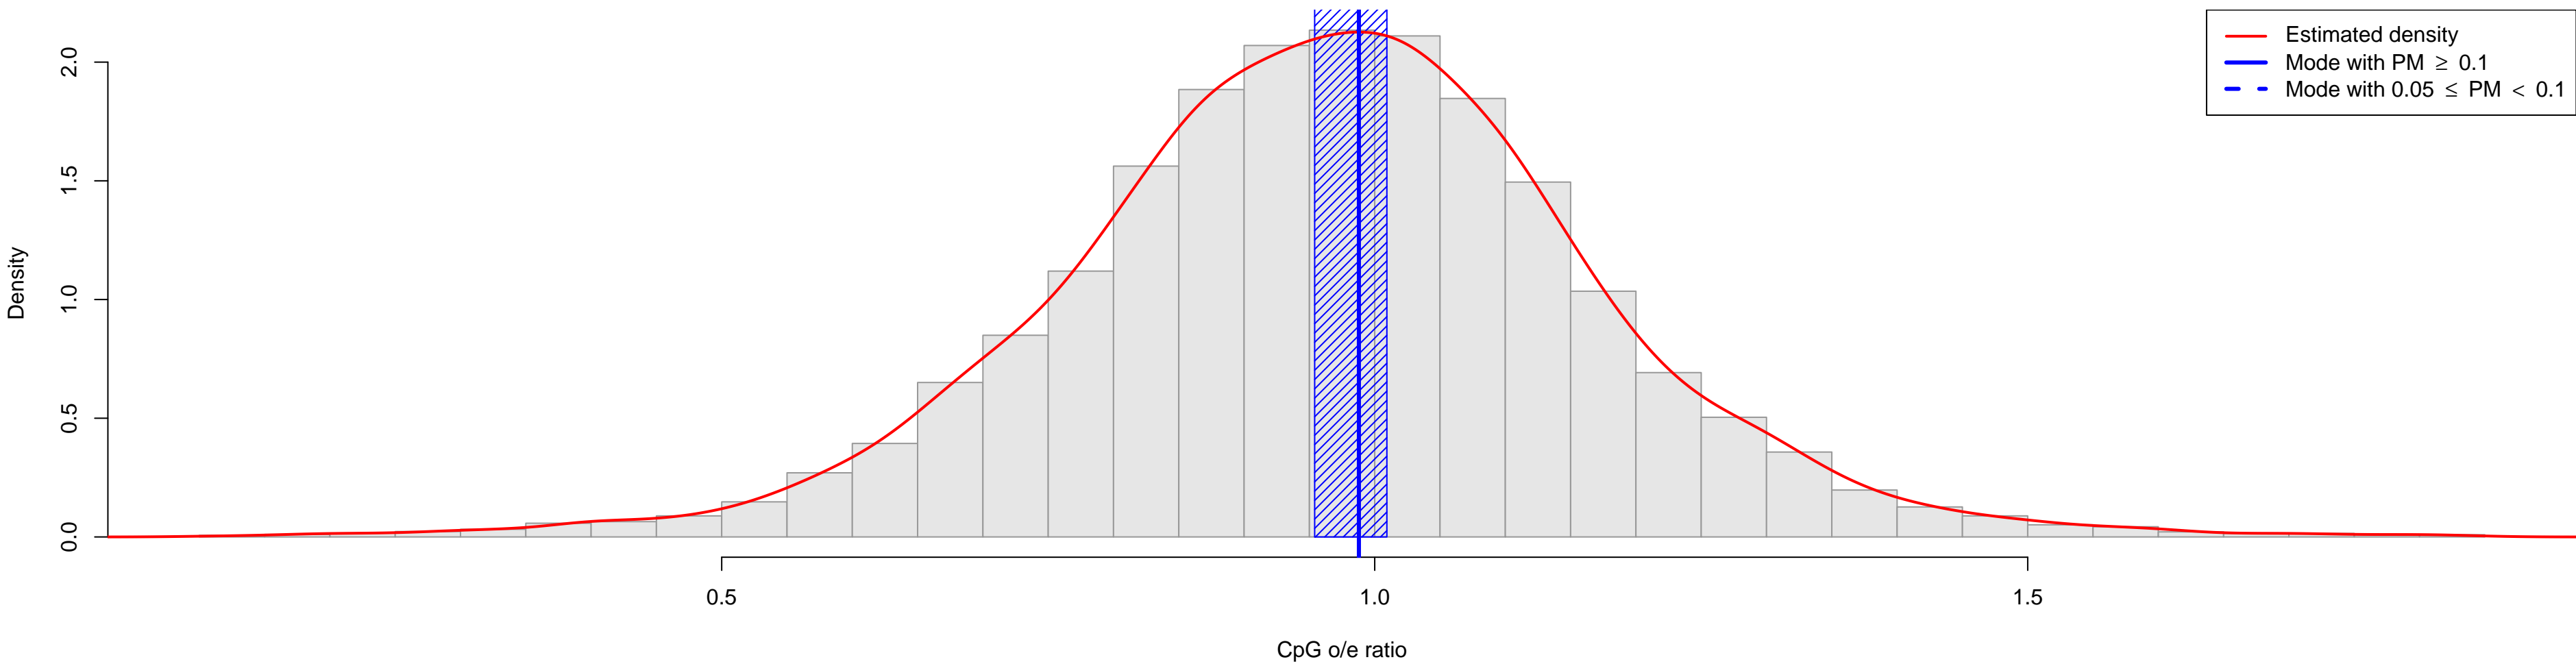

# Trypanosoma\_rangeli

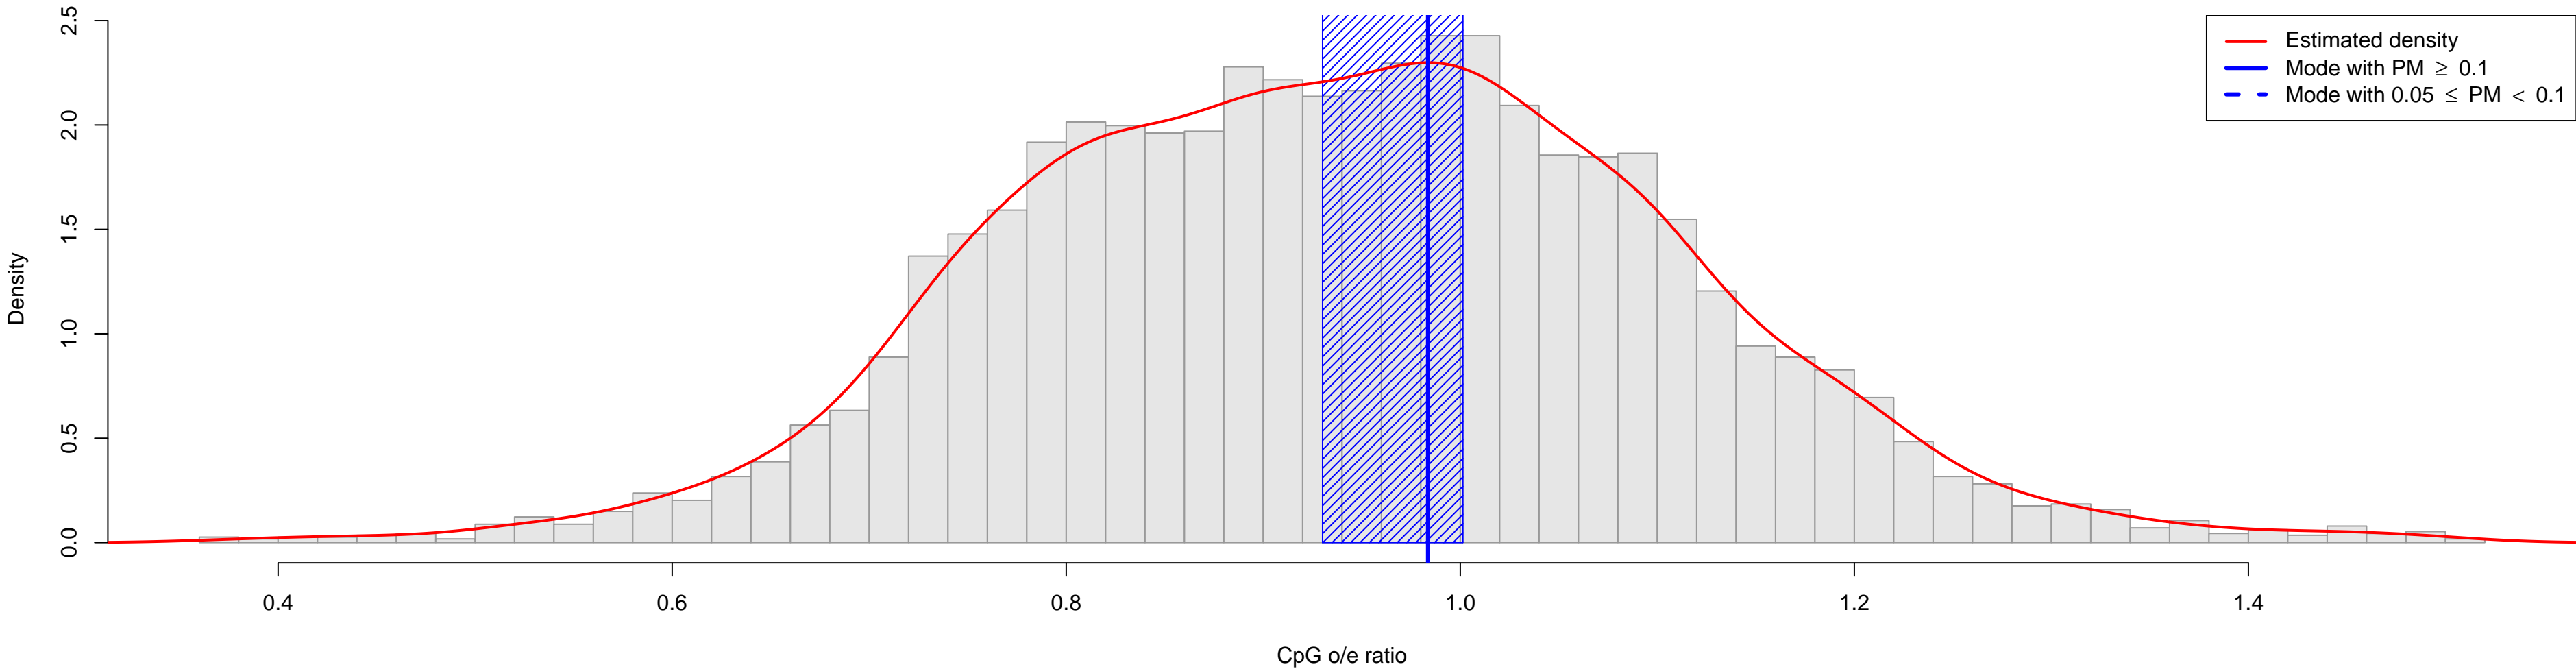

# Tuber\_borchii

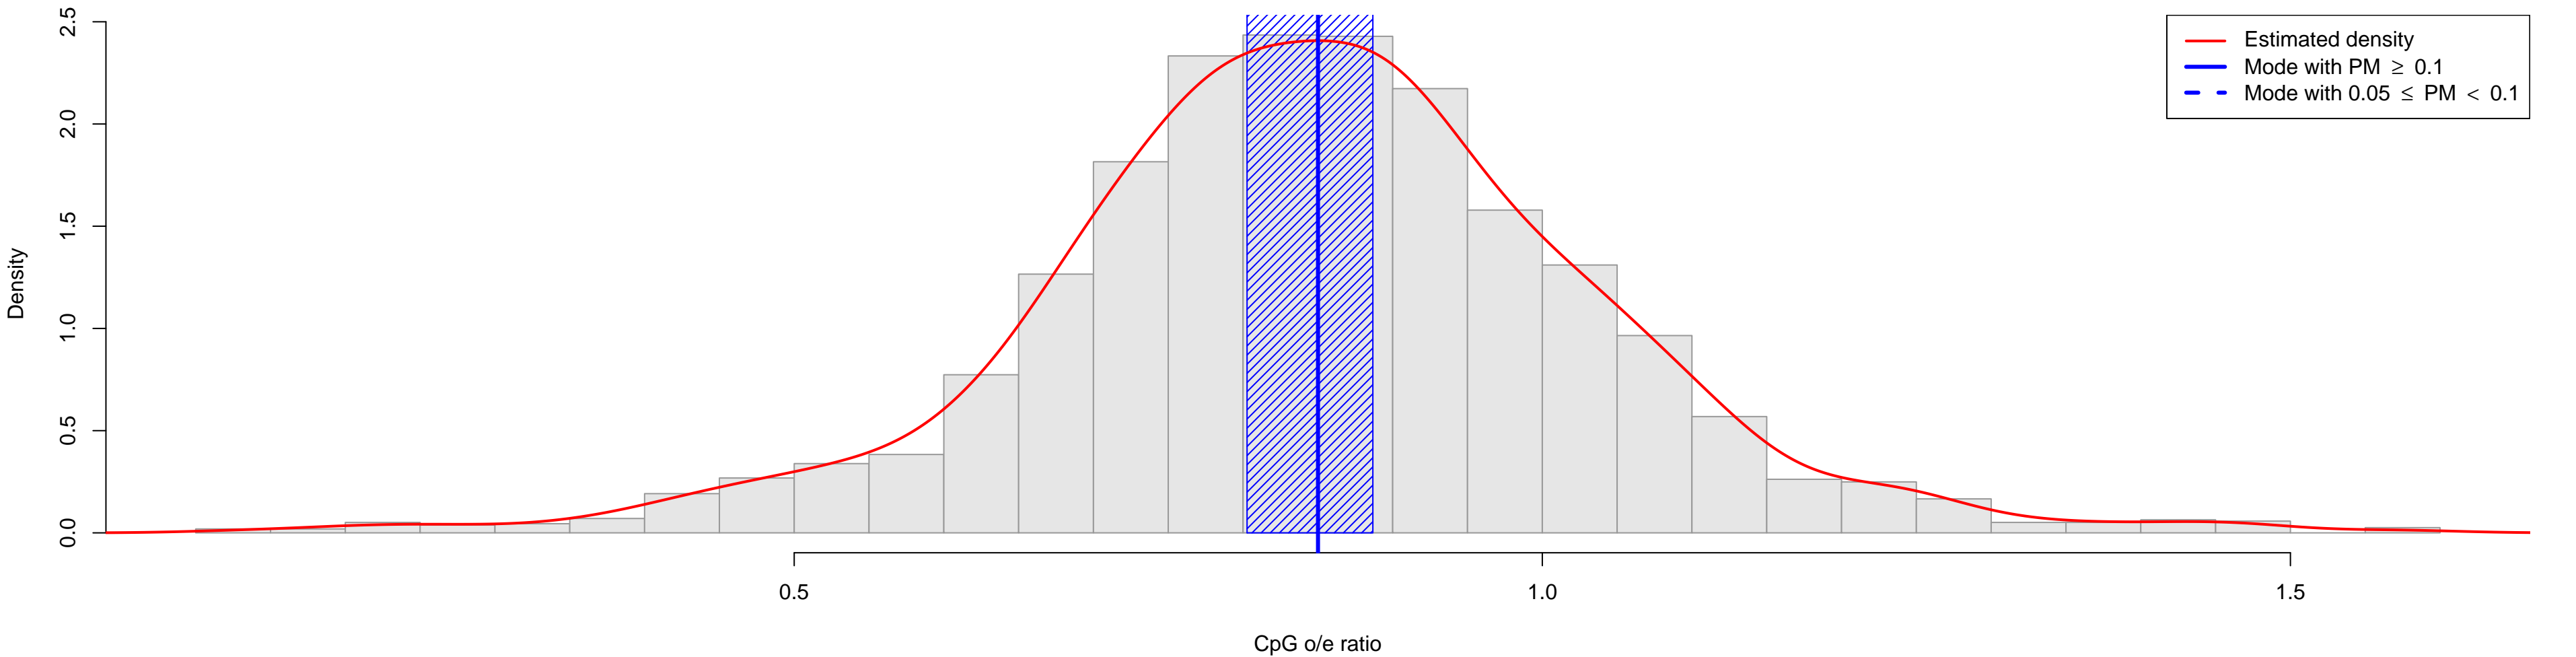

# Tuber\_melanosporum

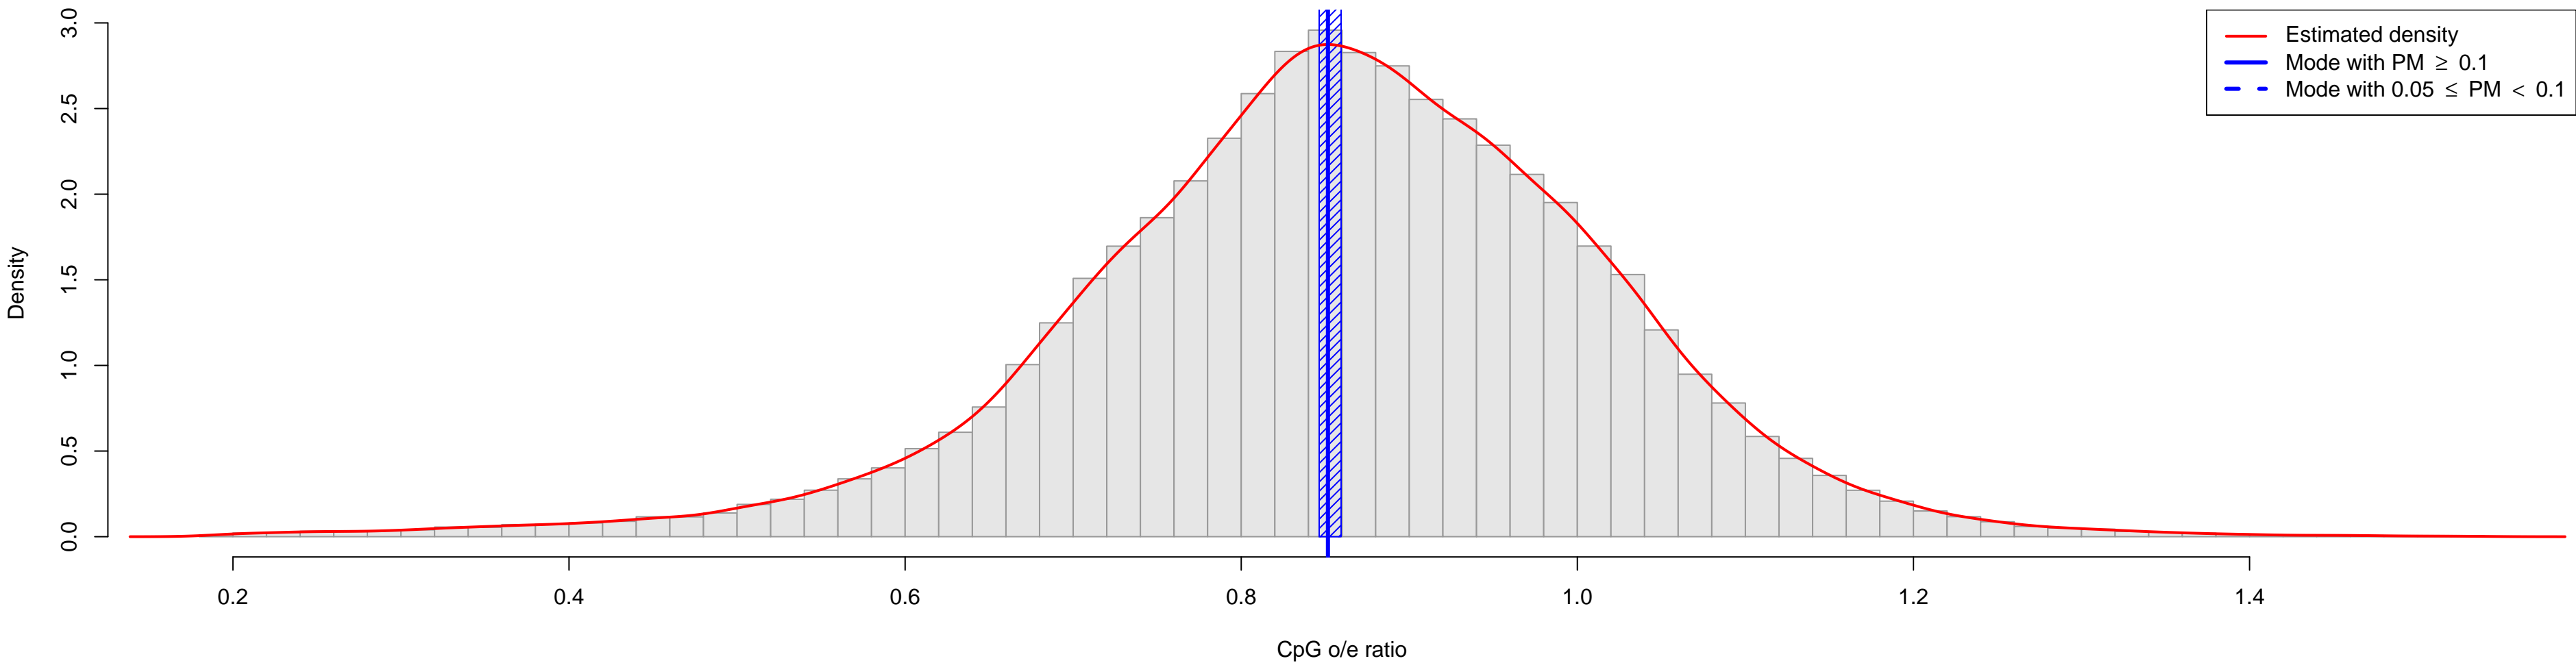



# Tubifex\_tubifex

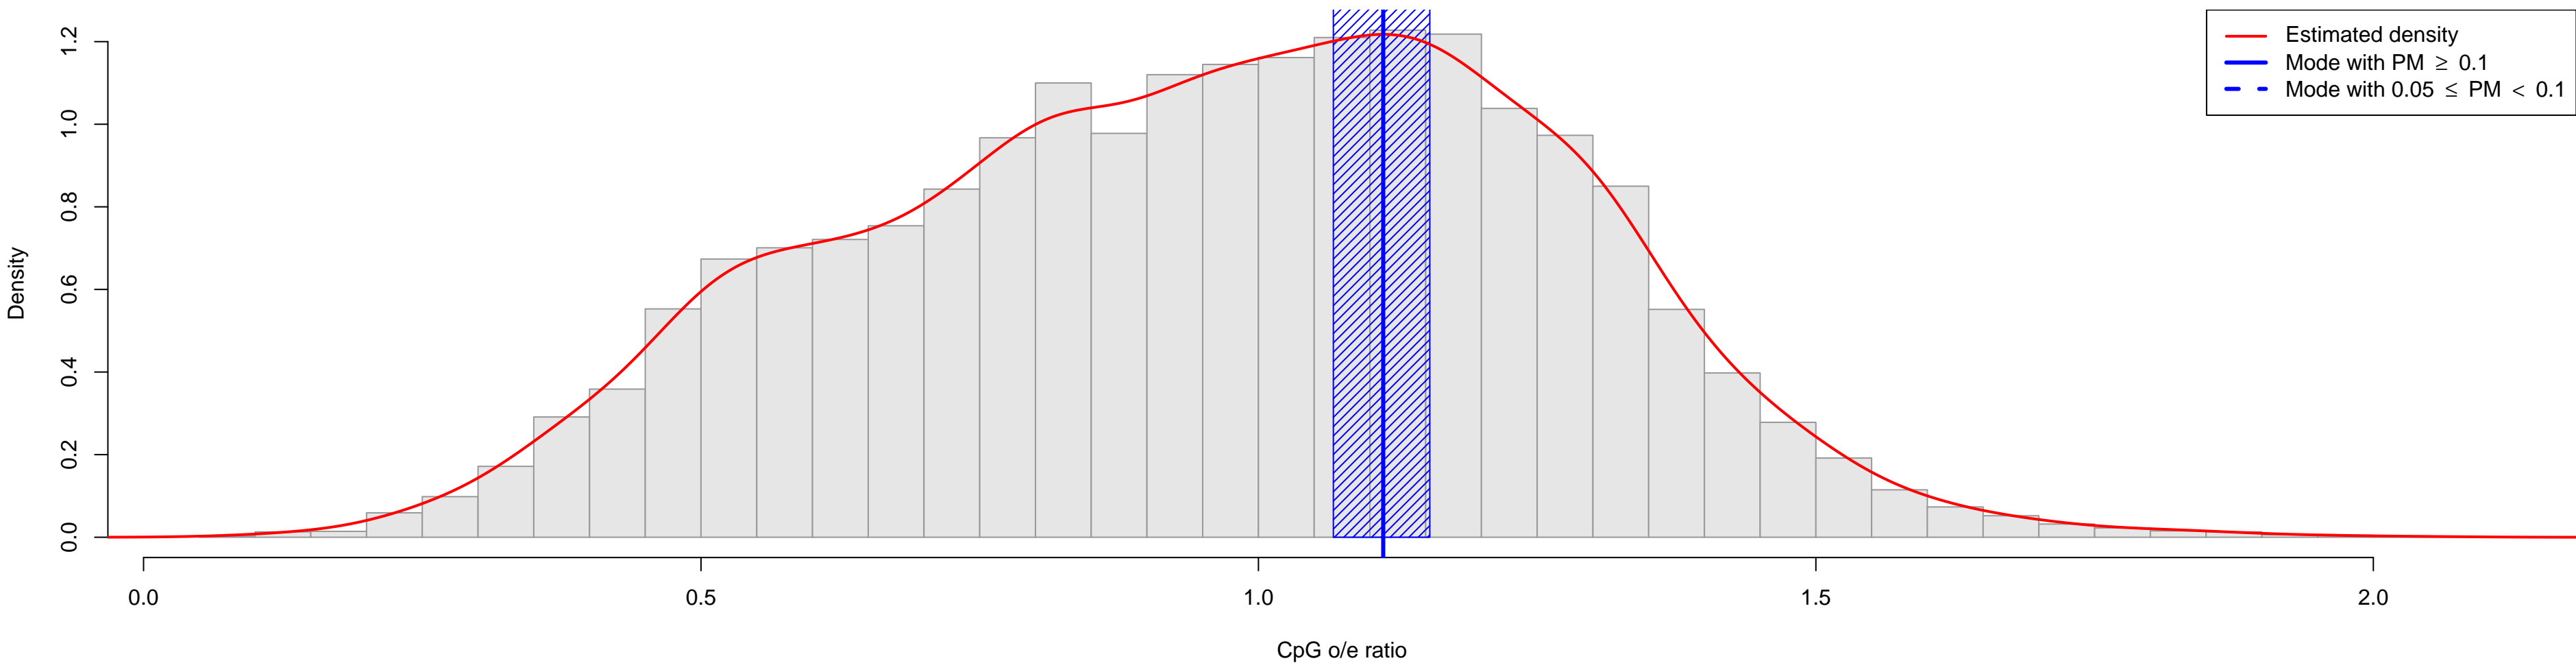

# Tursiops\_truncatus

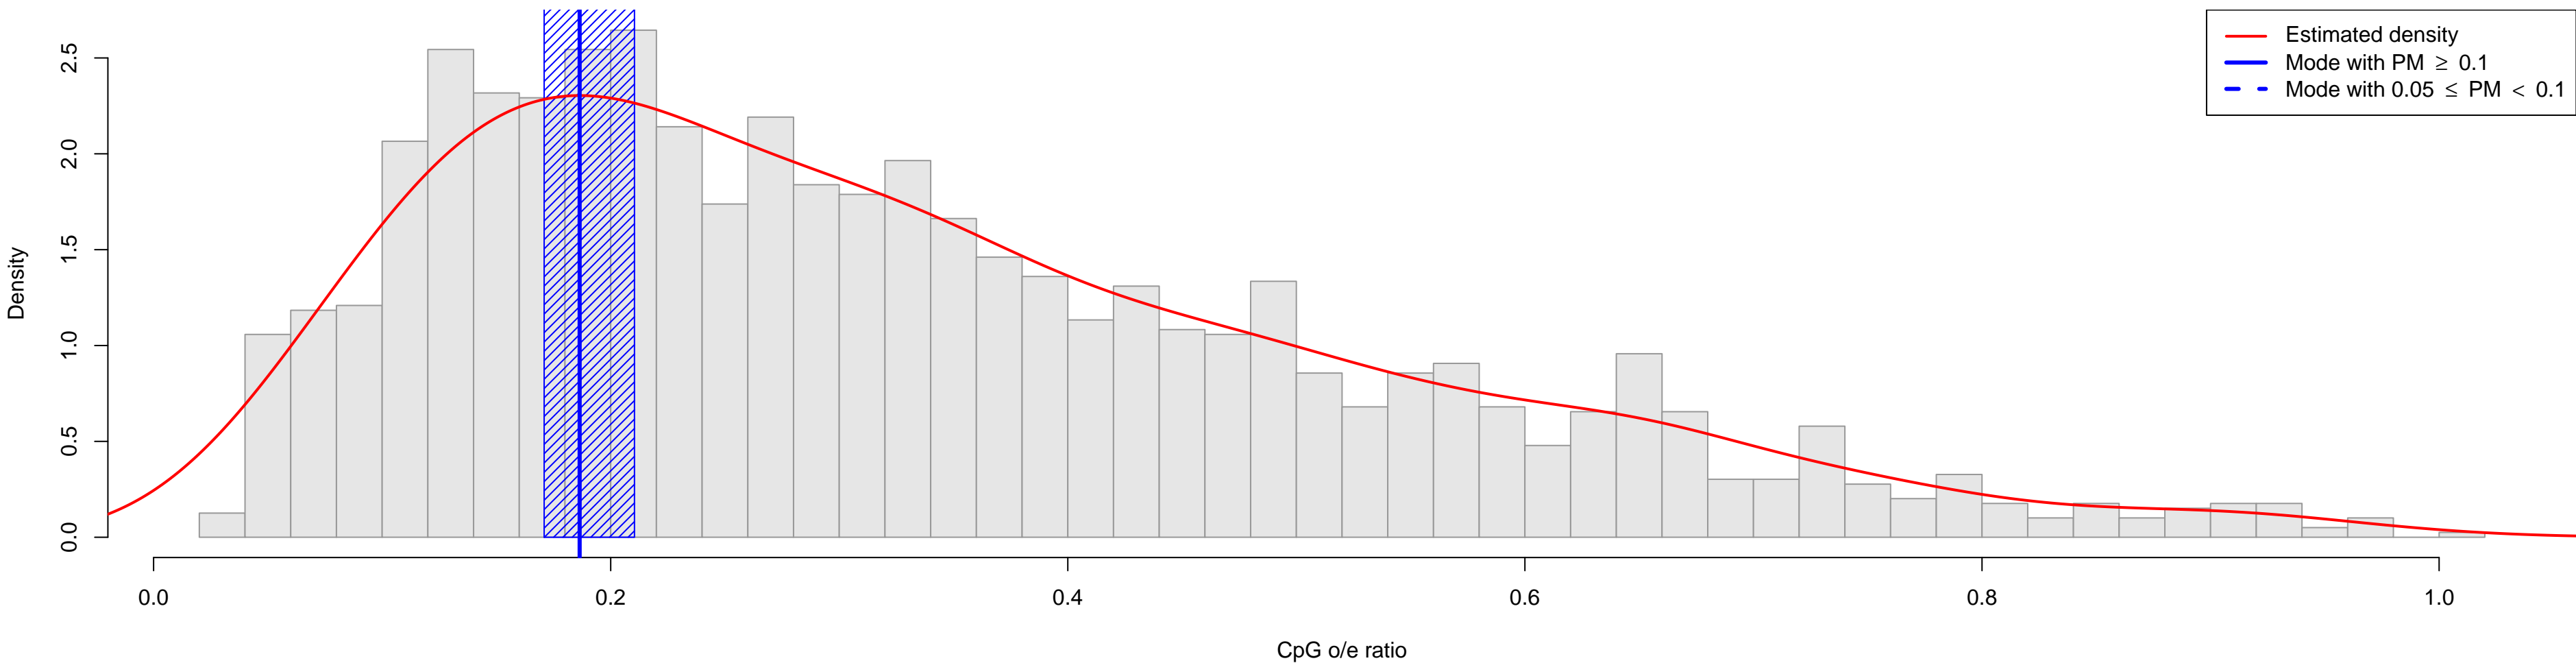

# Ulva\_prolifera

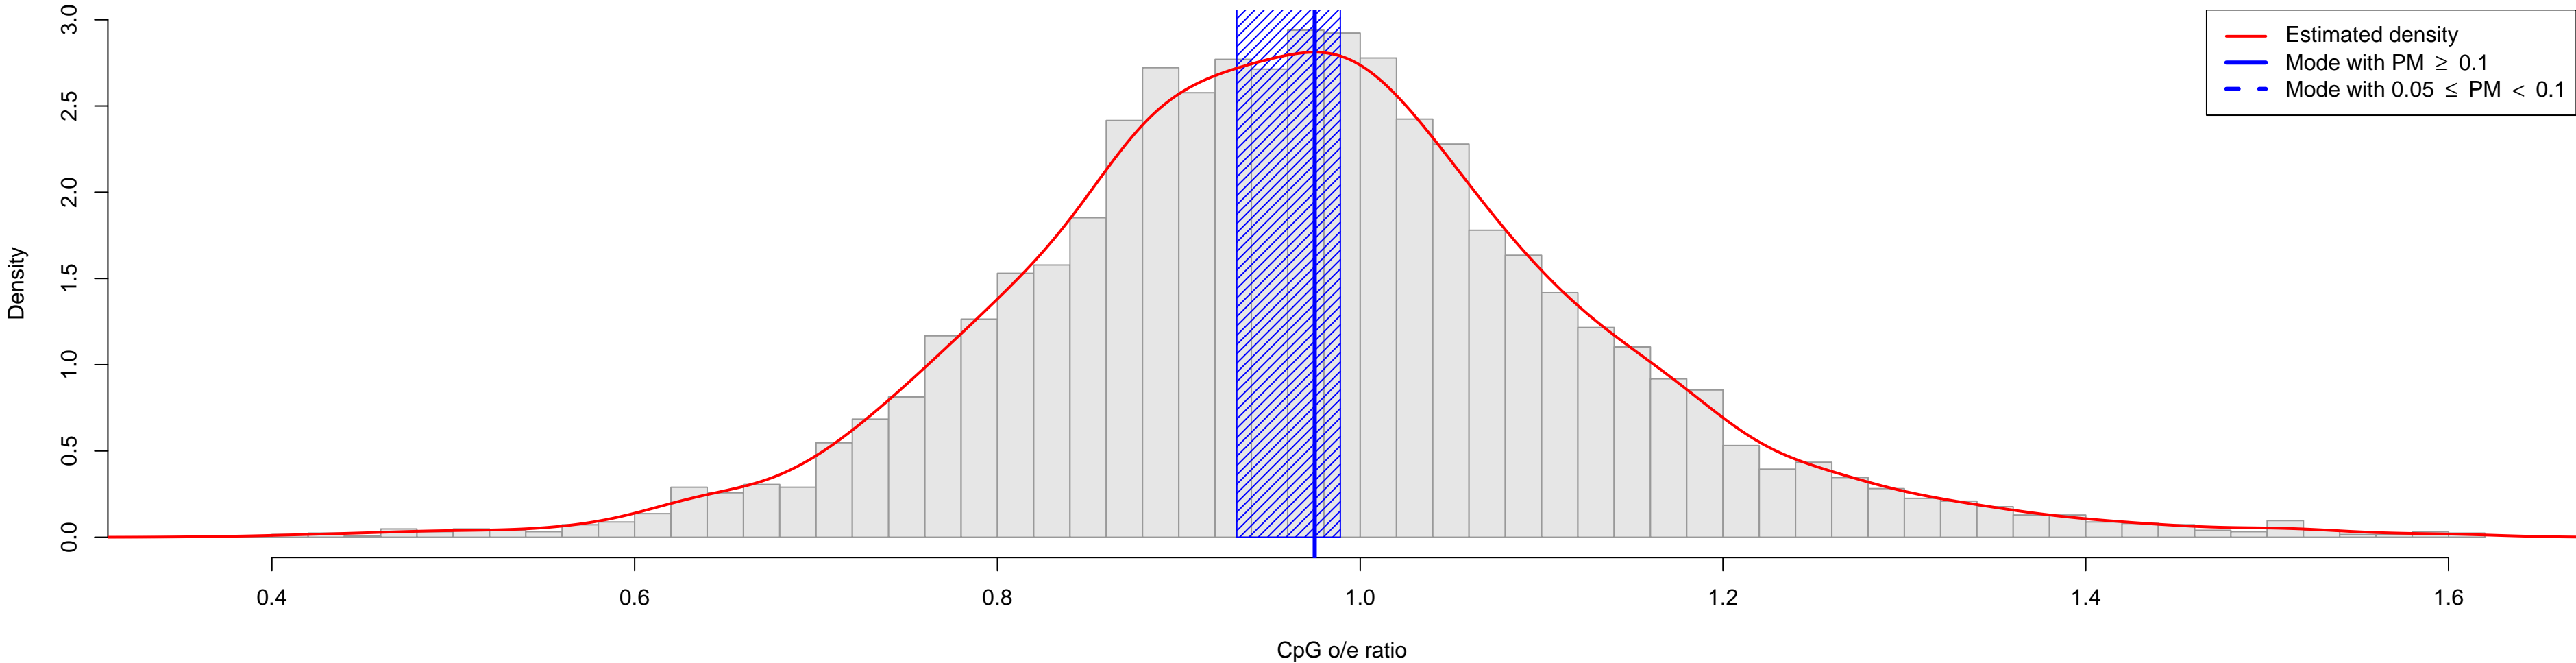

# Urochloa\_brizantha

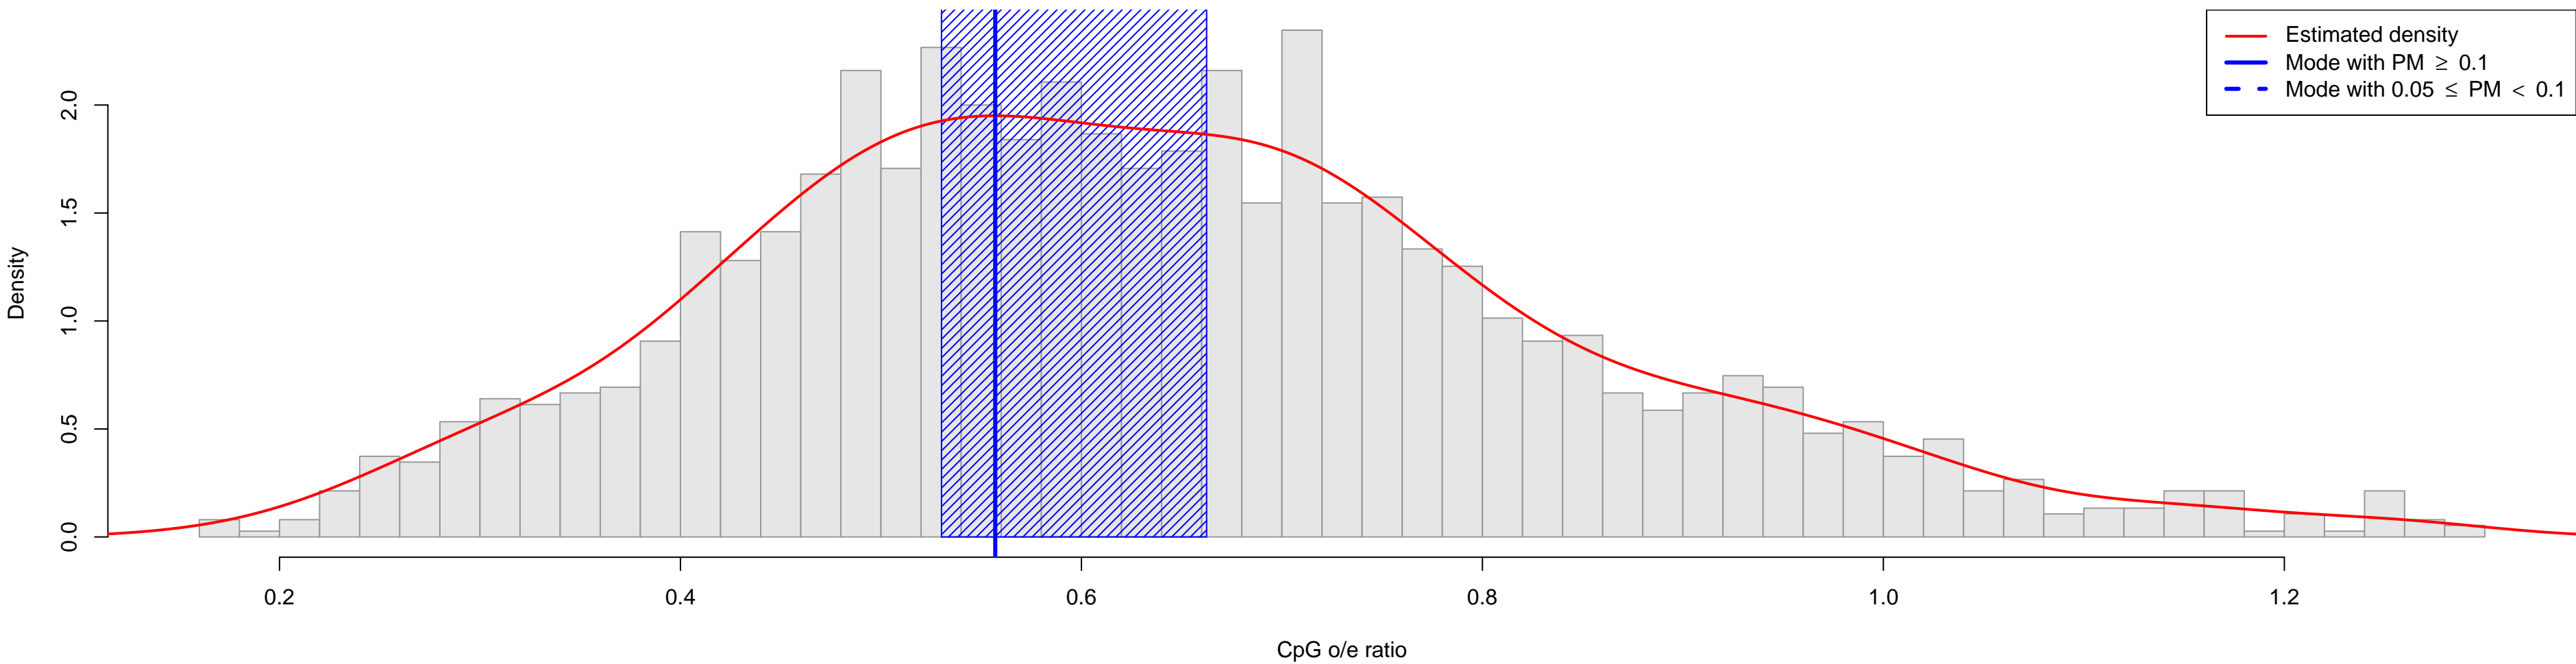

# Uromyces\_appendiculatus

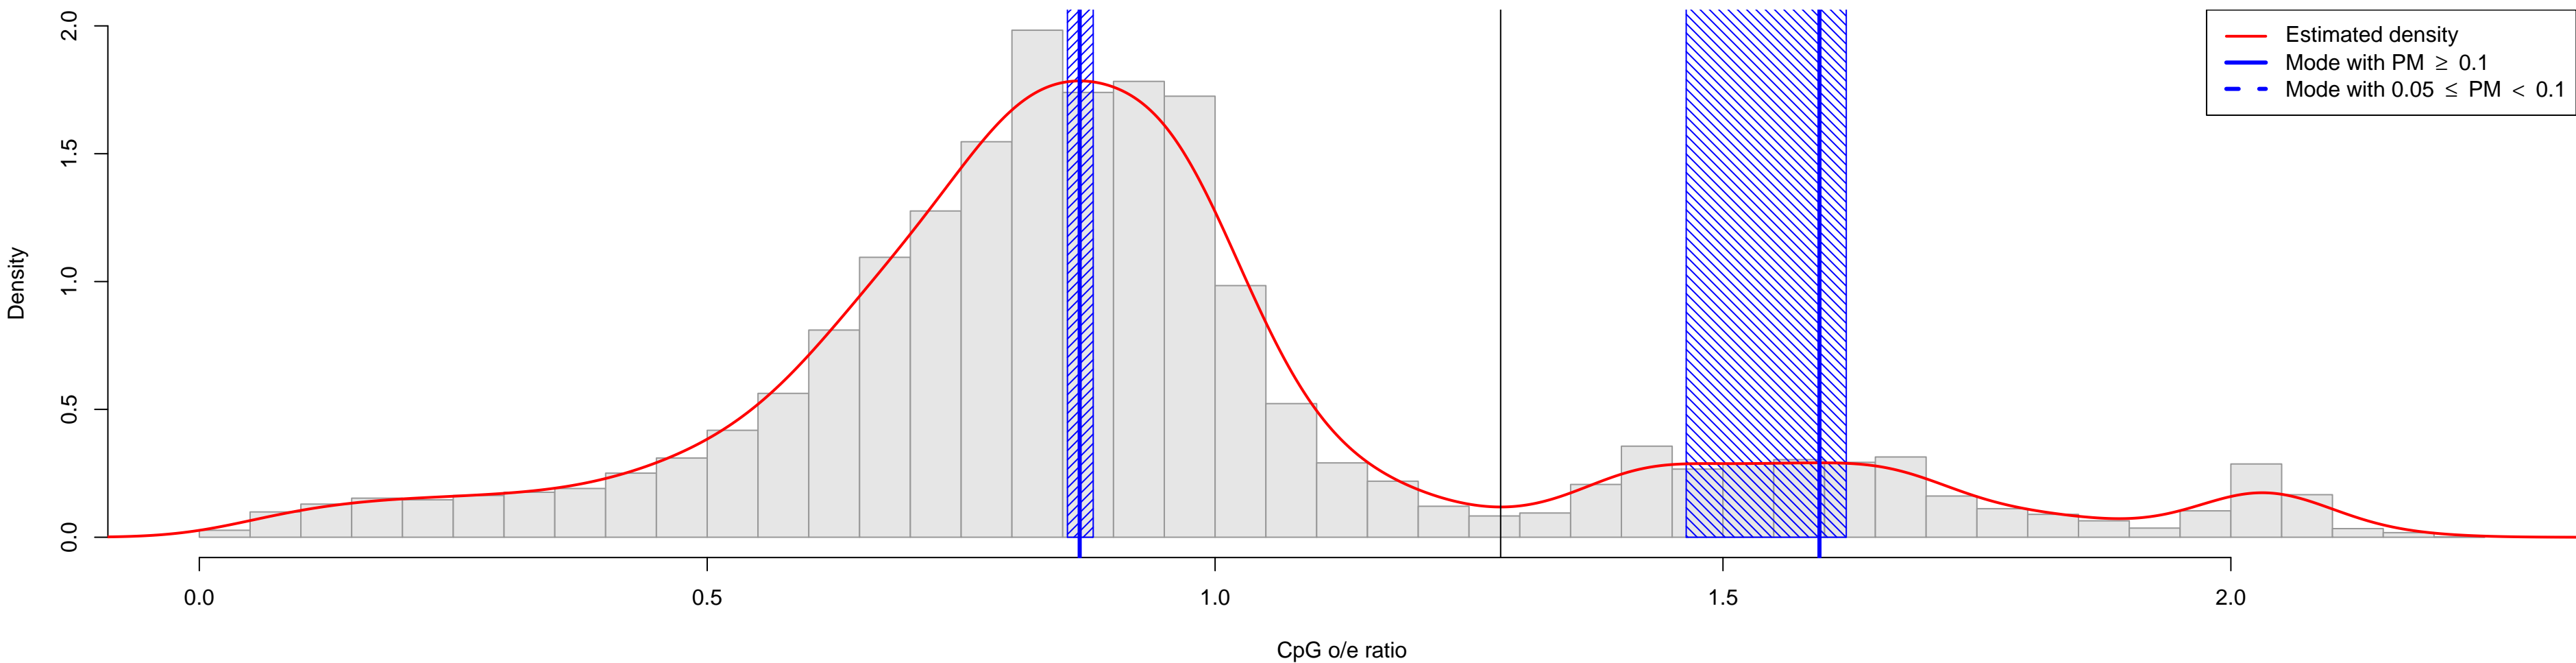

# Ursus\_americanus

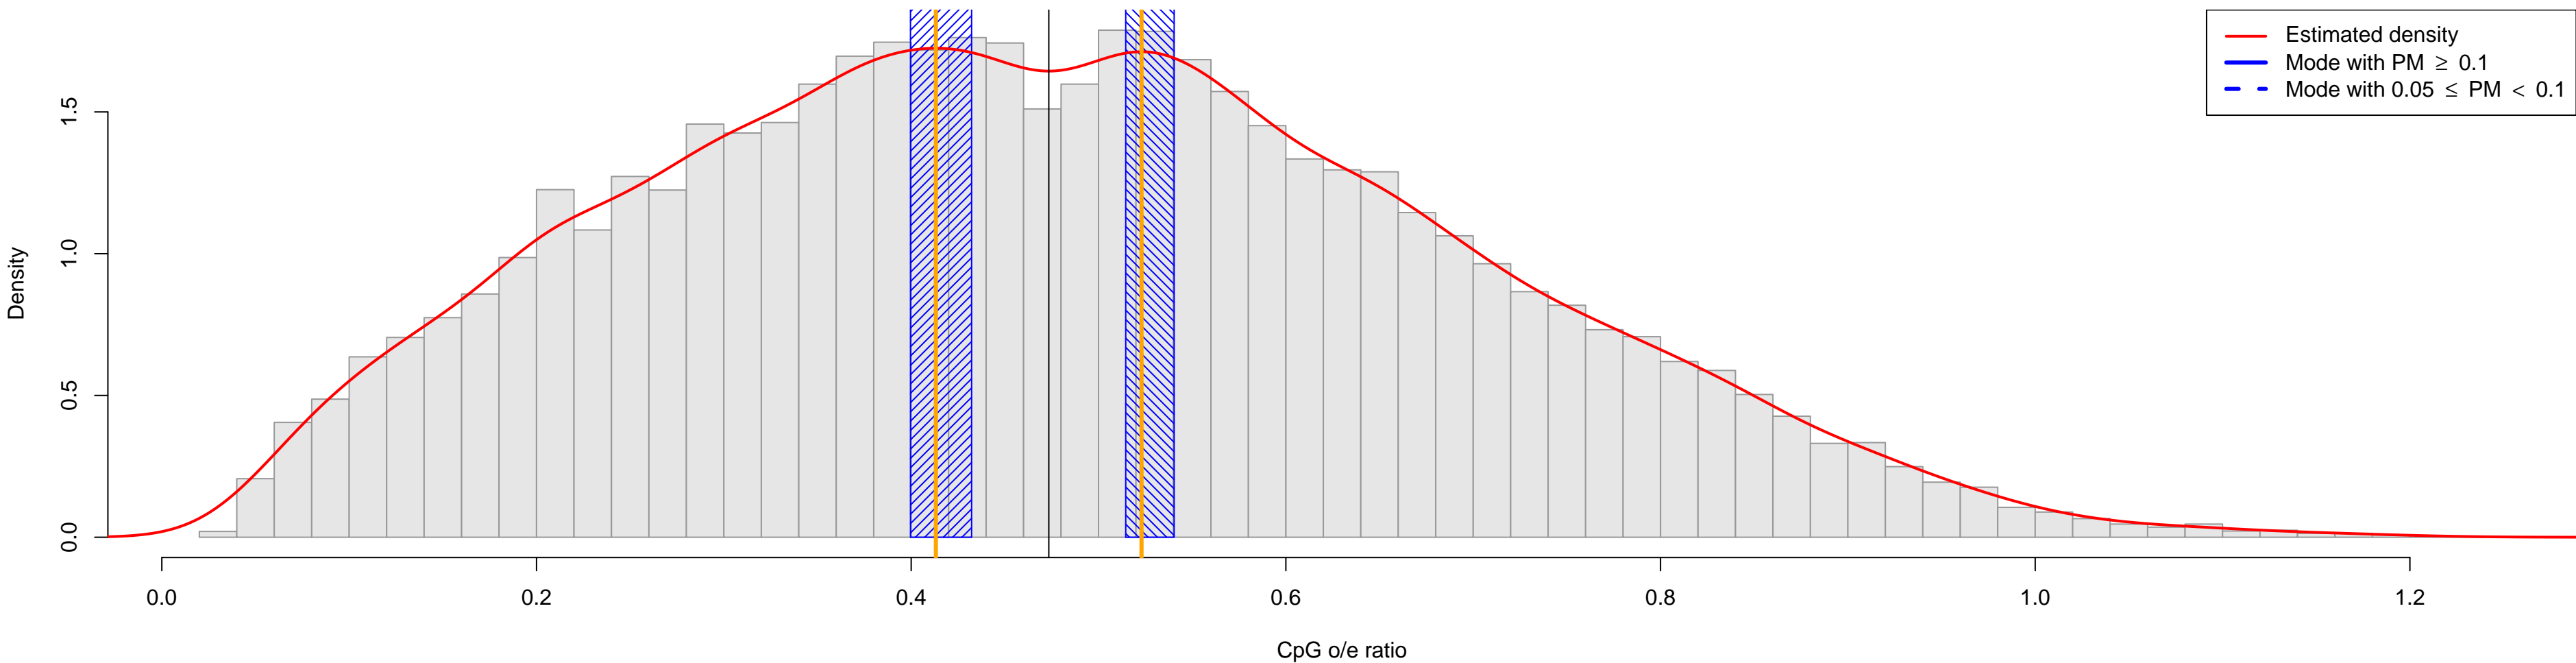

# Vespula\_squamosa

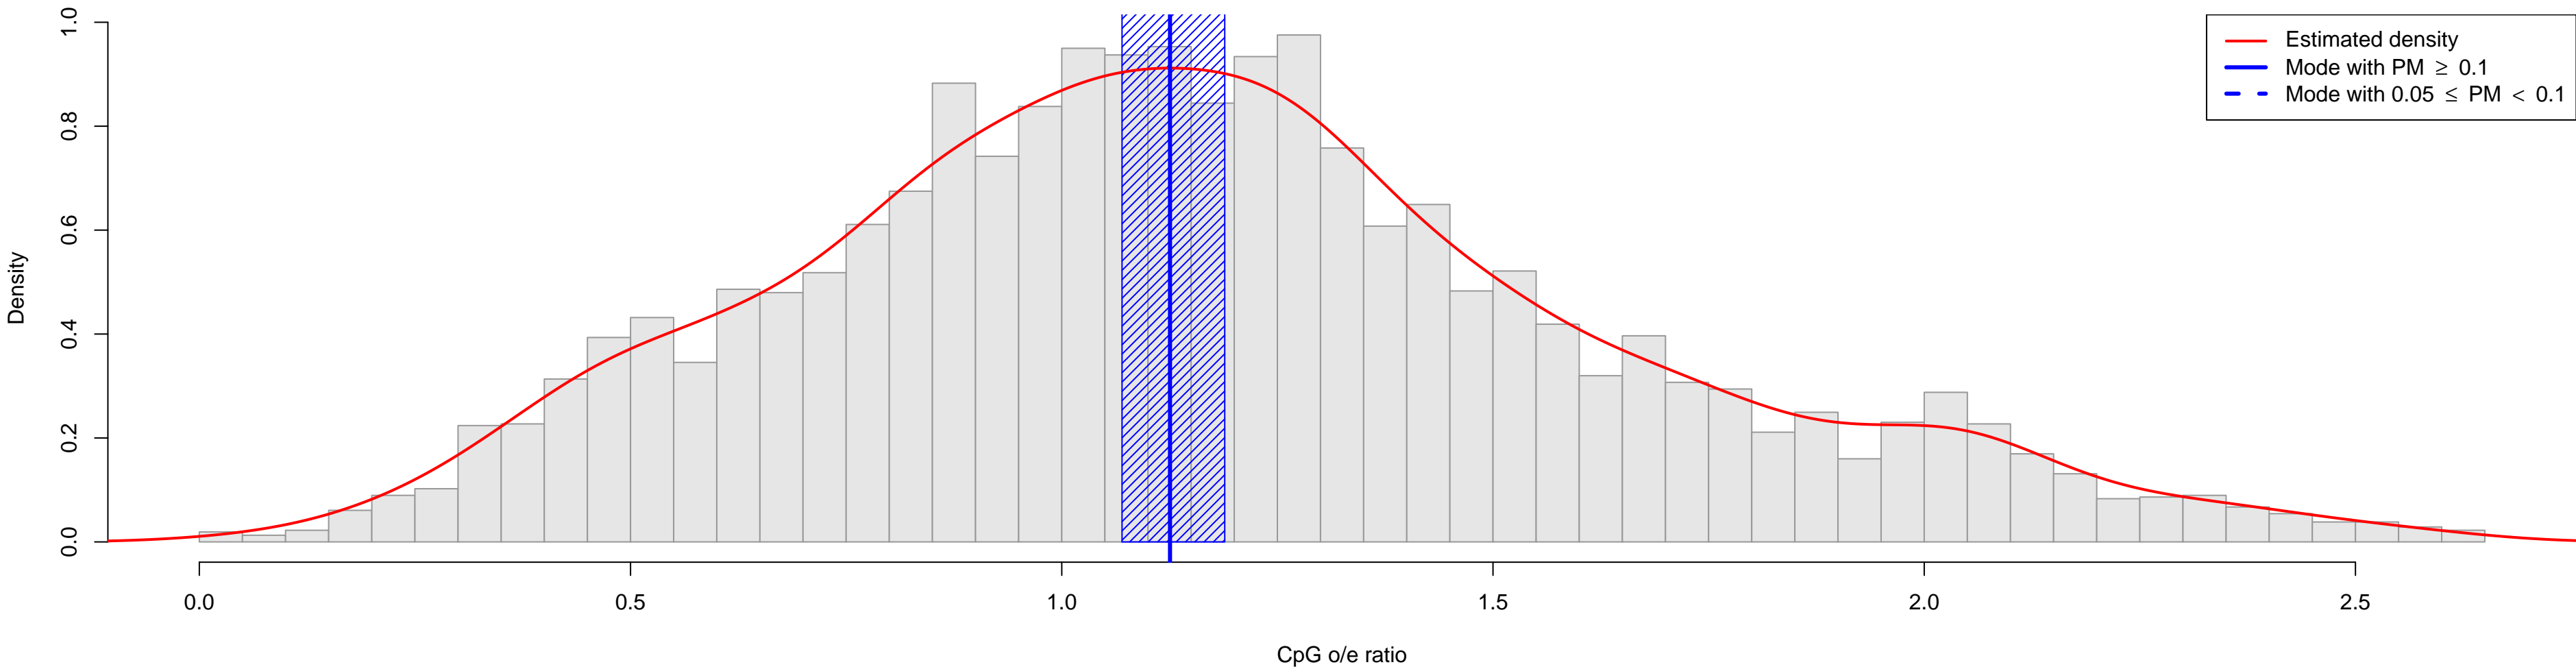

# Vigna\_unguiculata

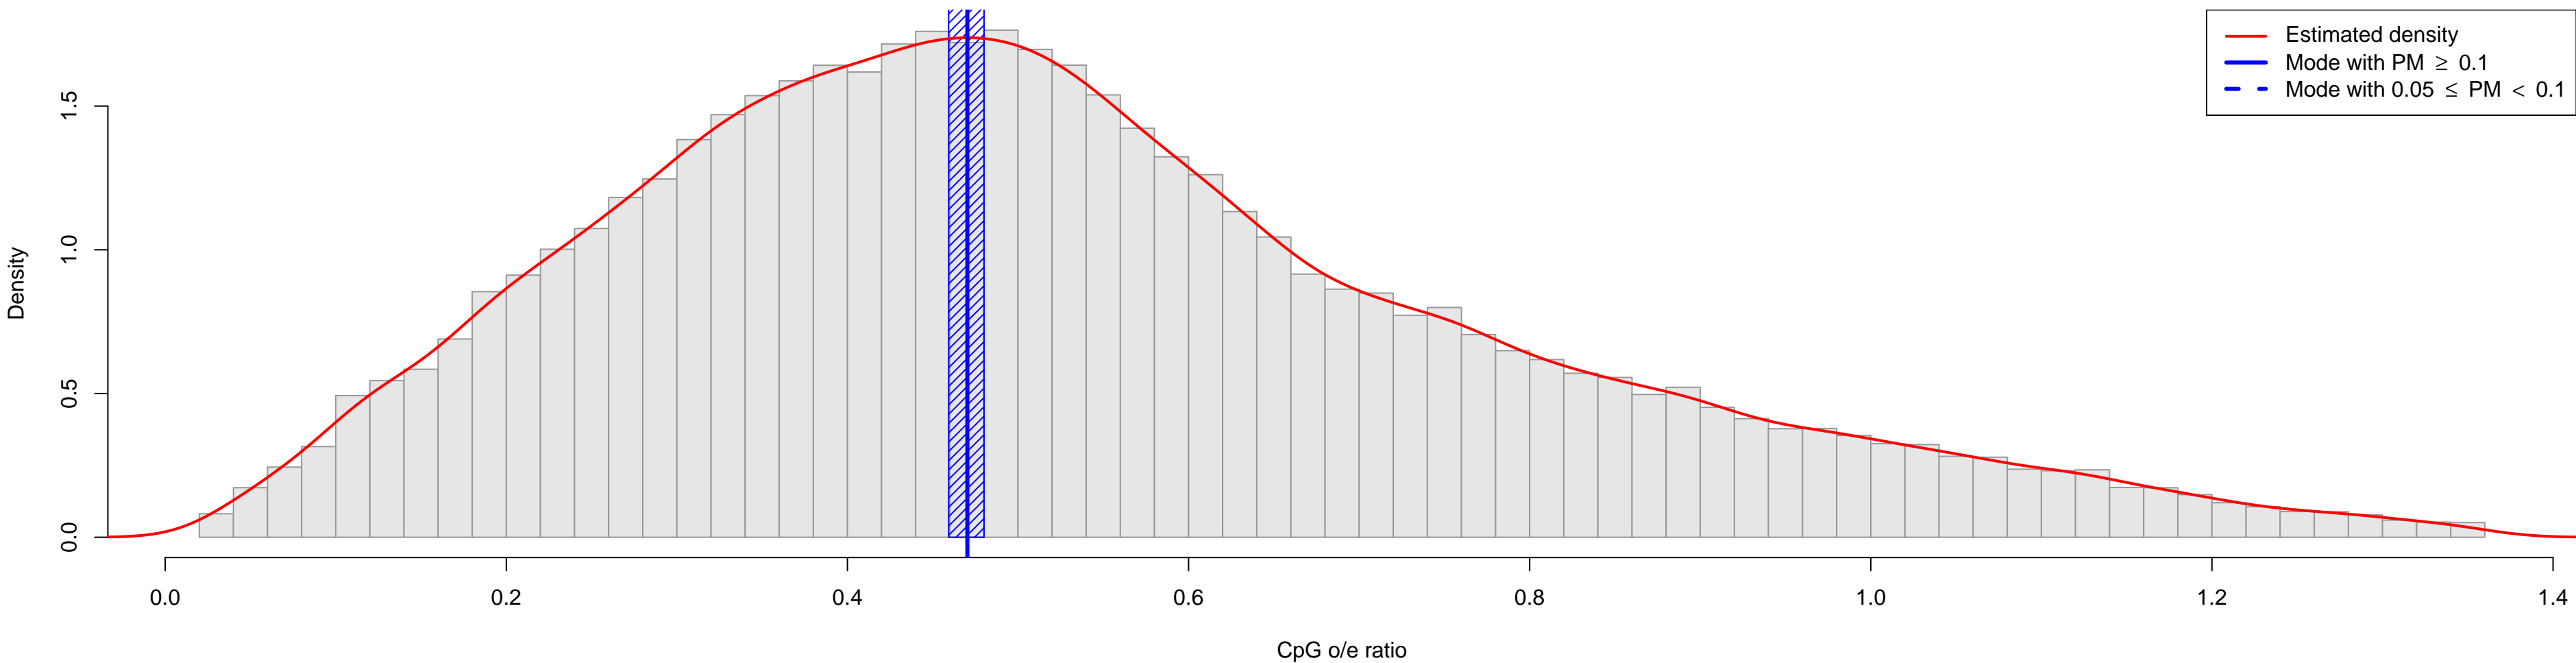



# Vitis\_vinifera

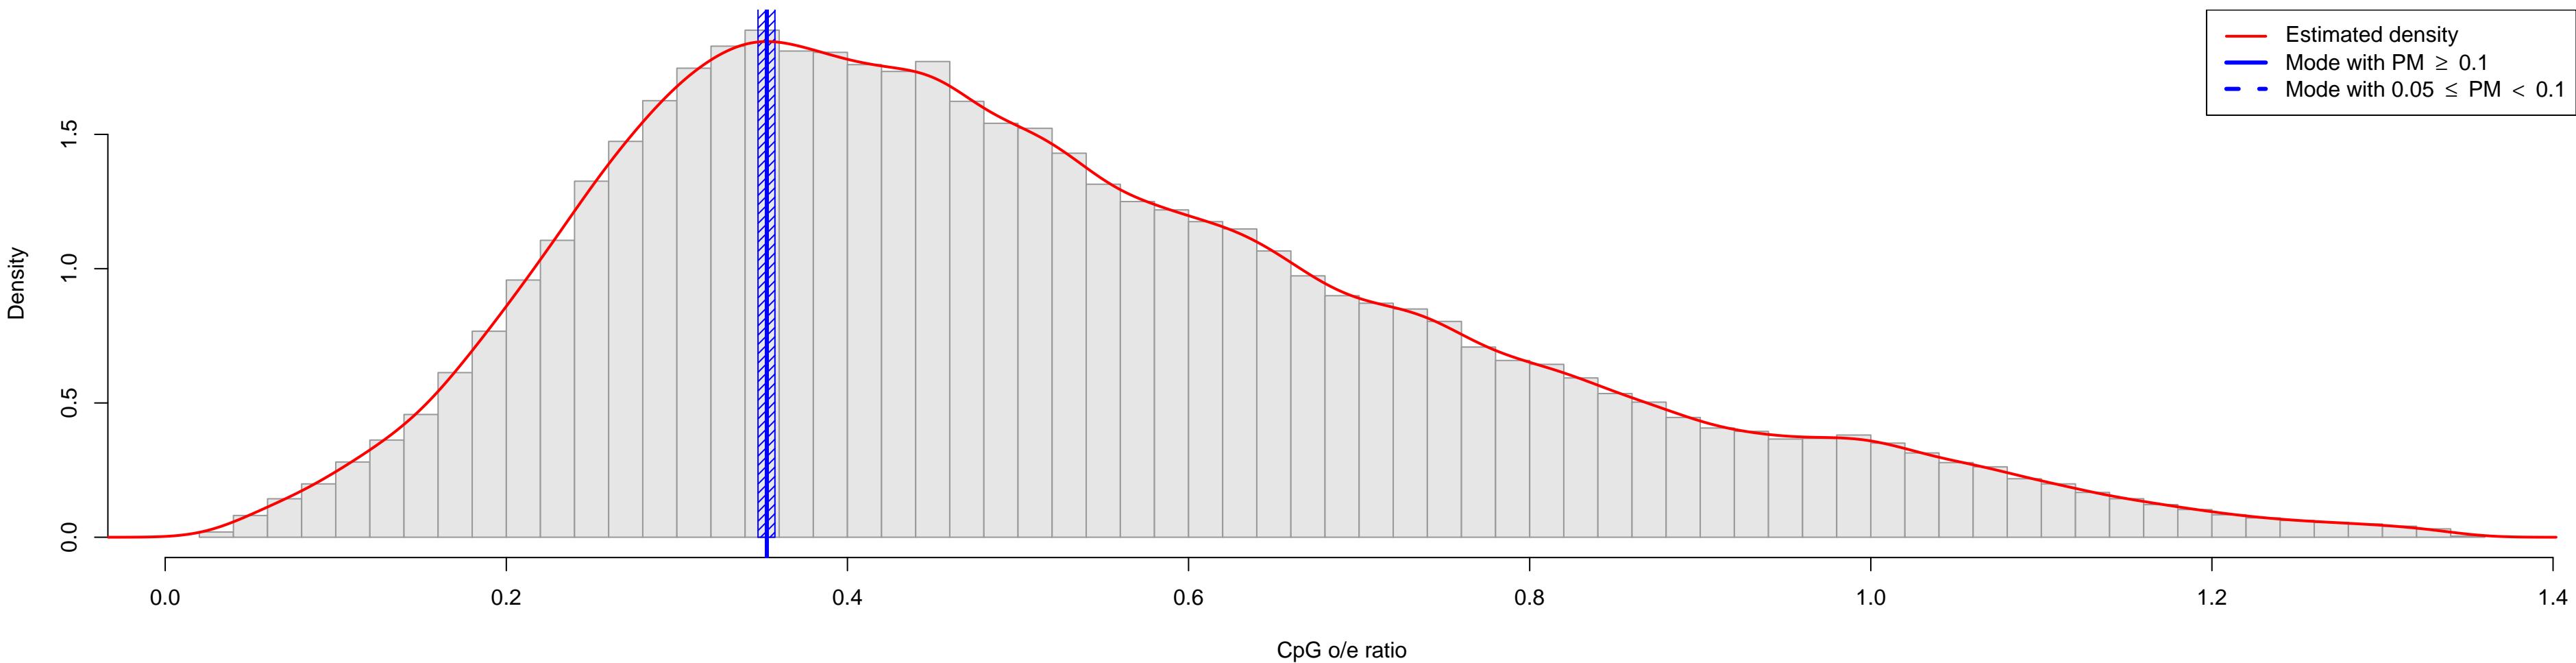

# Wrightia\_tinctoria

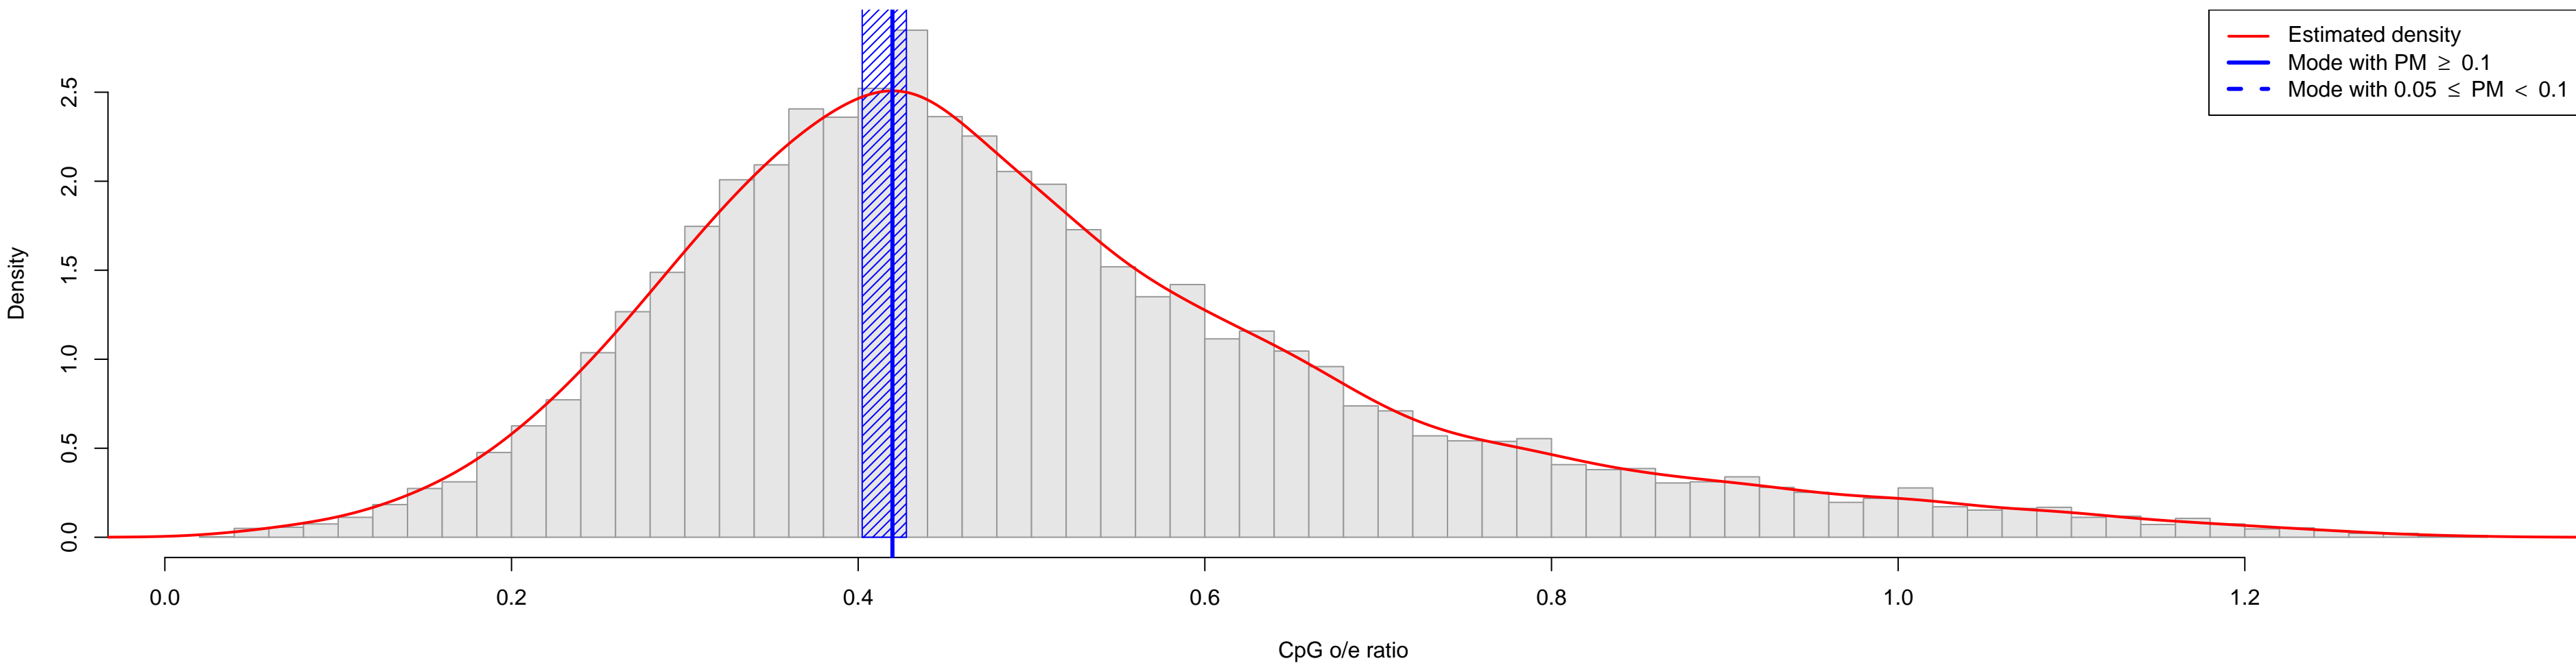

# Wuchereria\_bancrofti

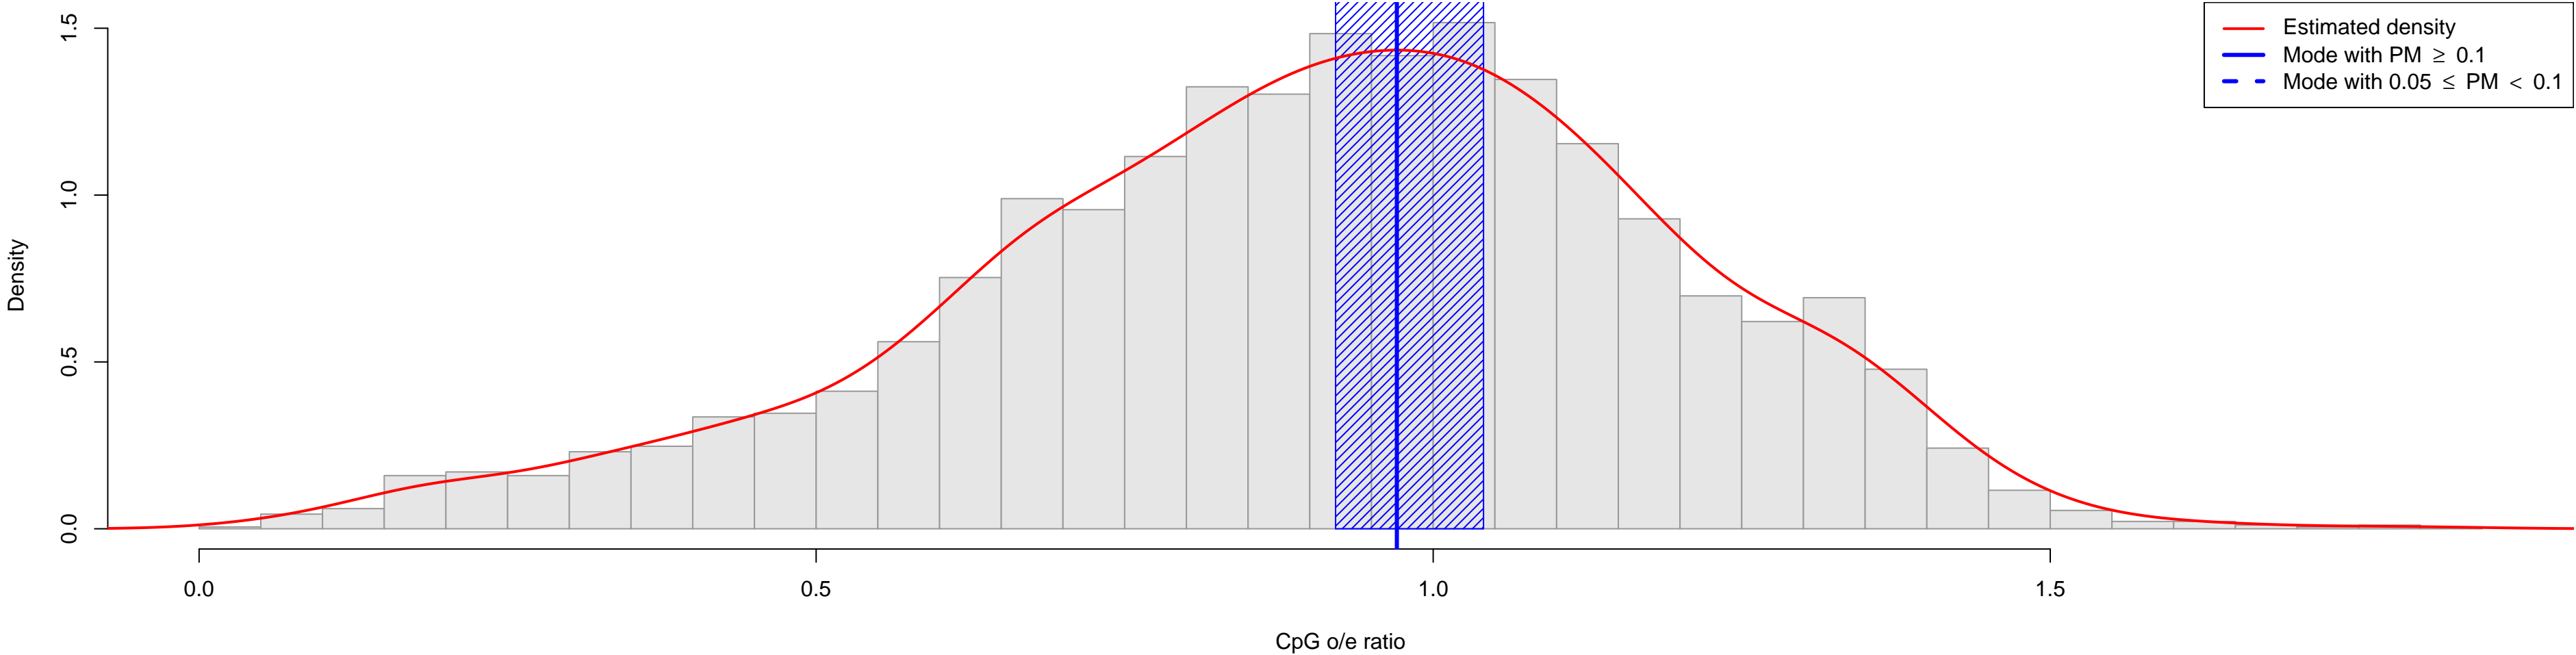

# Xenopus\_laevis

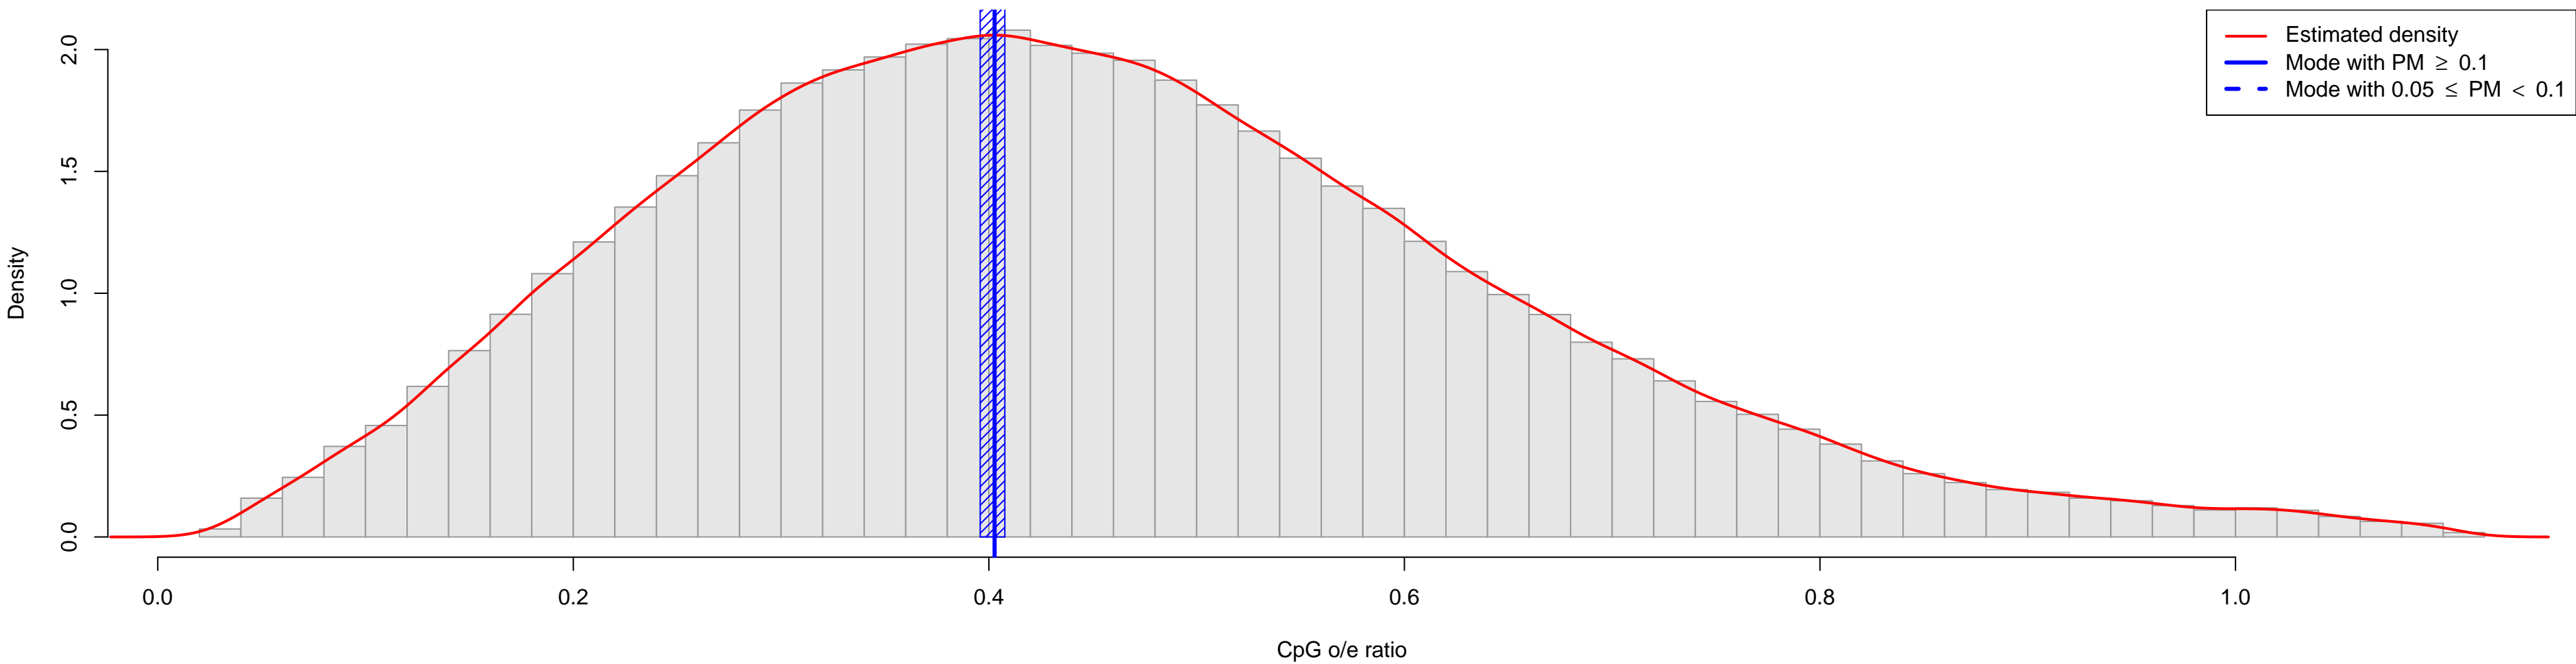

# Xenopus\_tropicalis

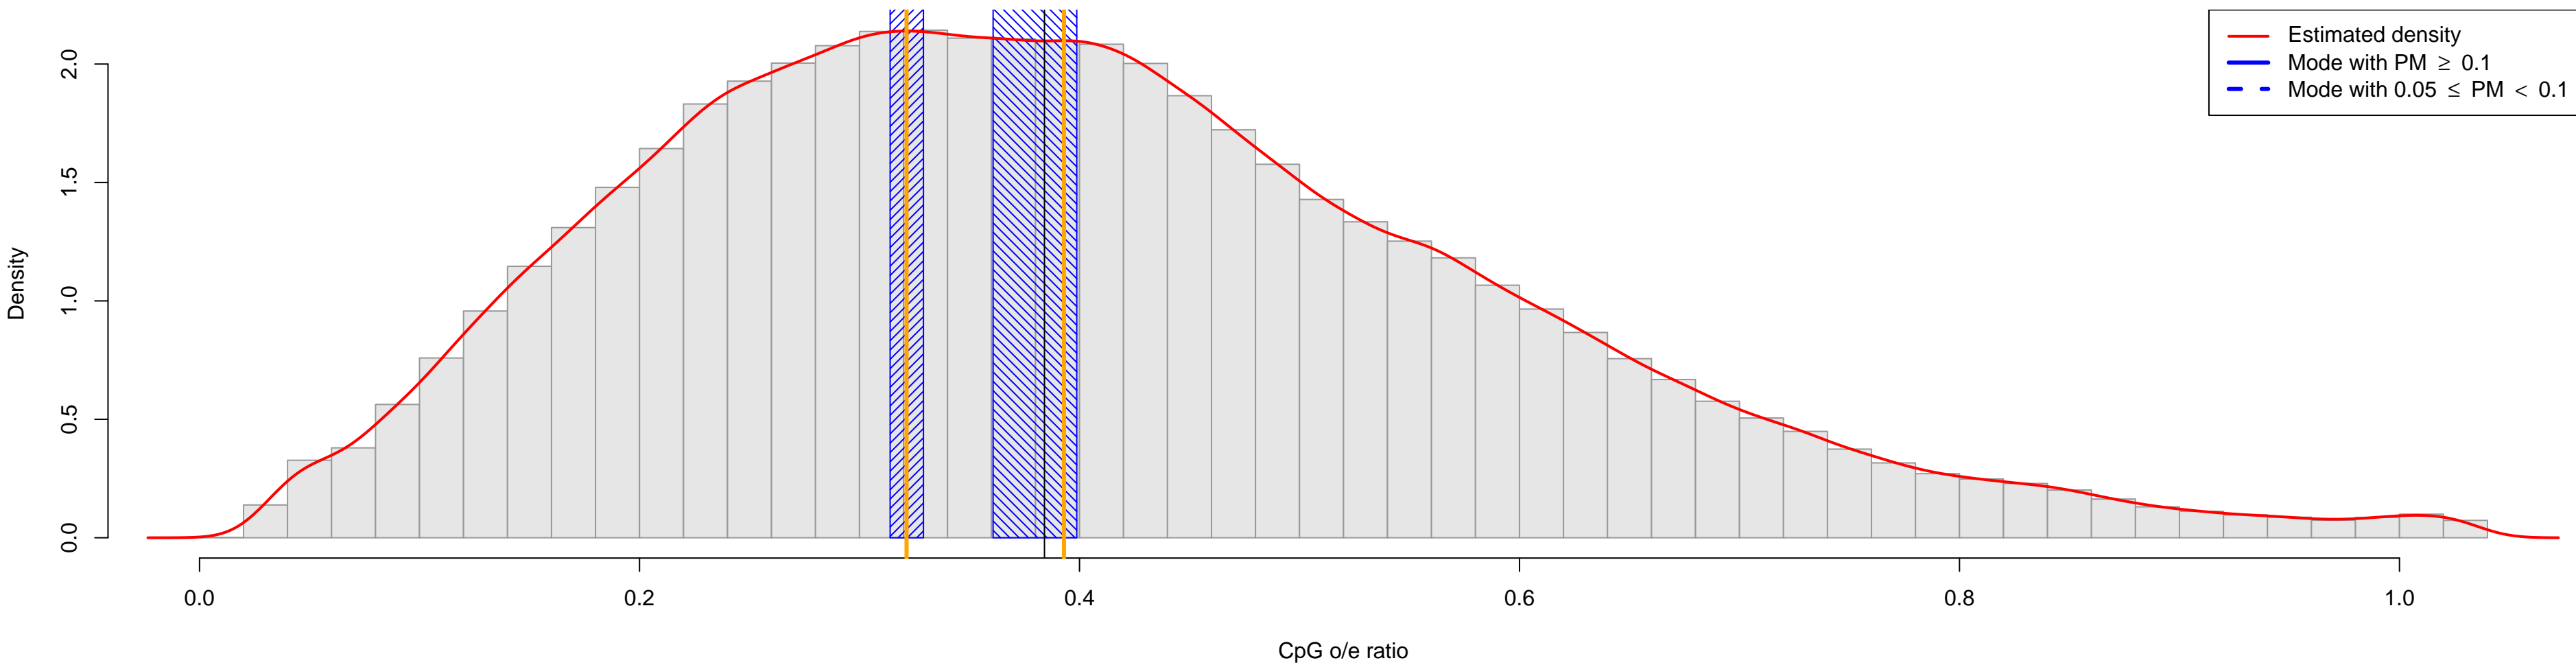

# Yarrowia\_lipolytica

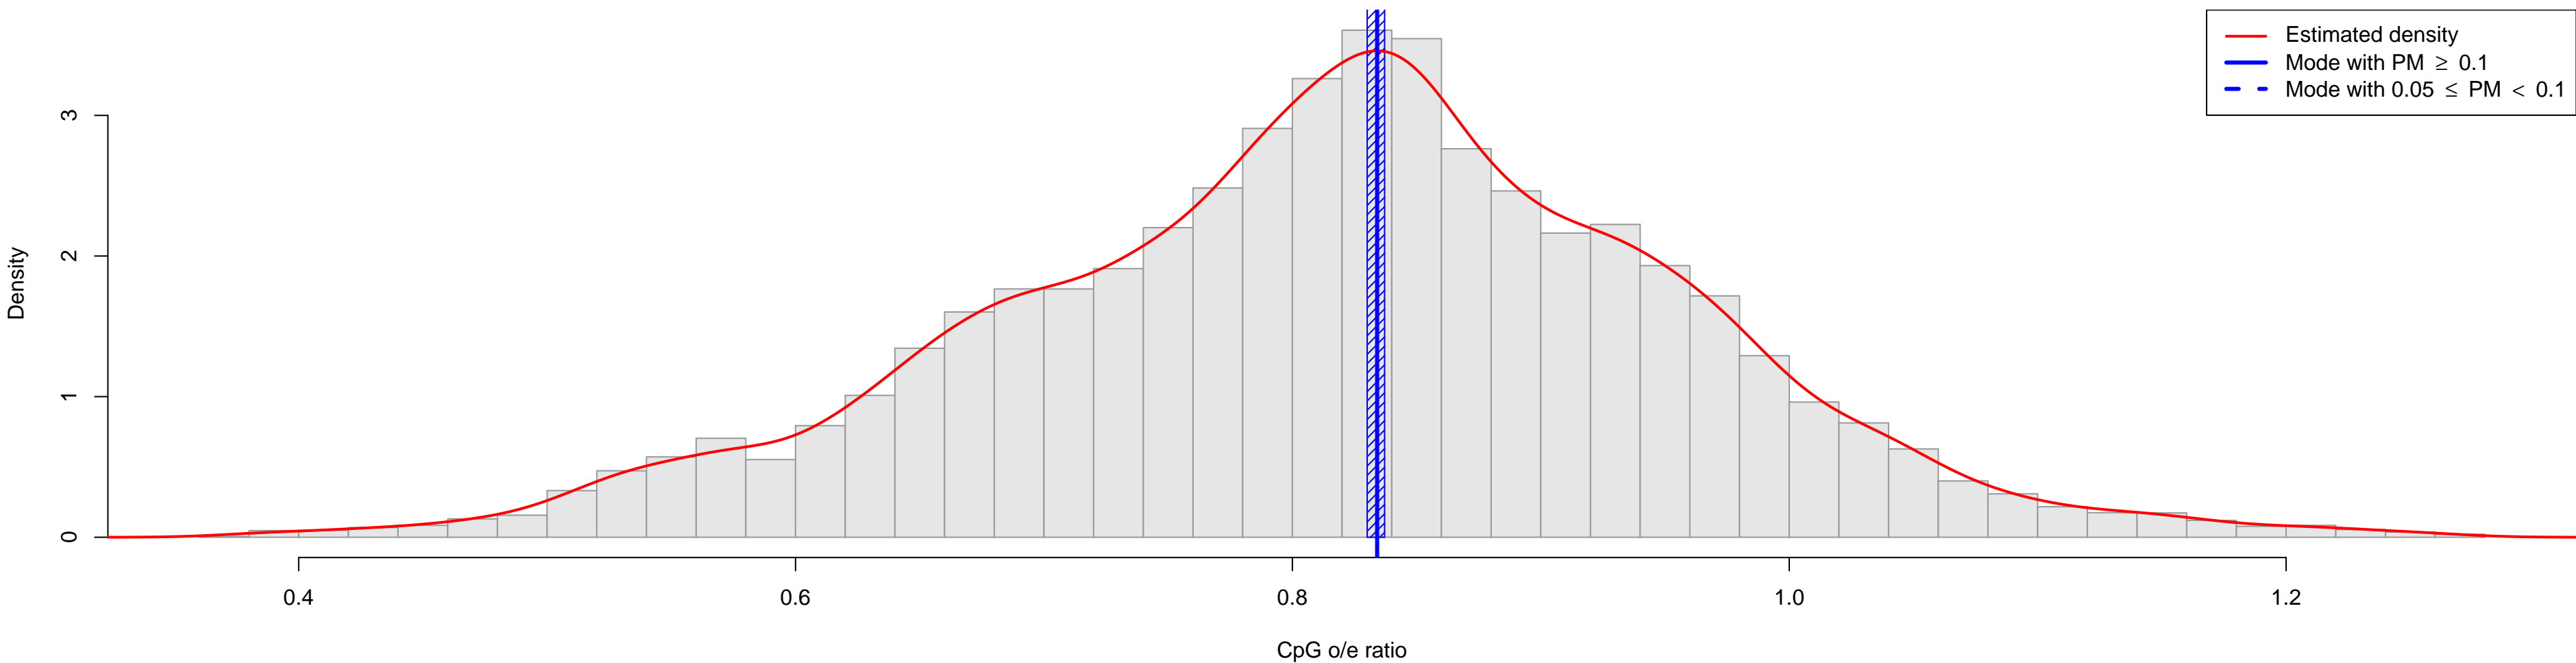

# Zamia\_fischeri

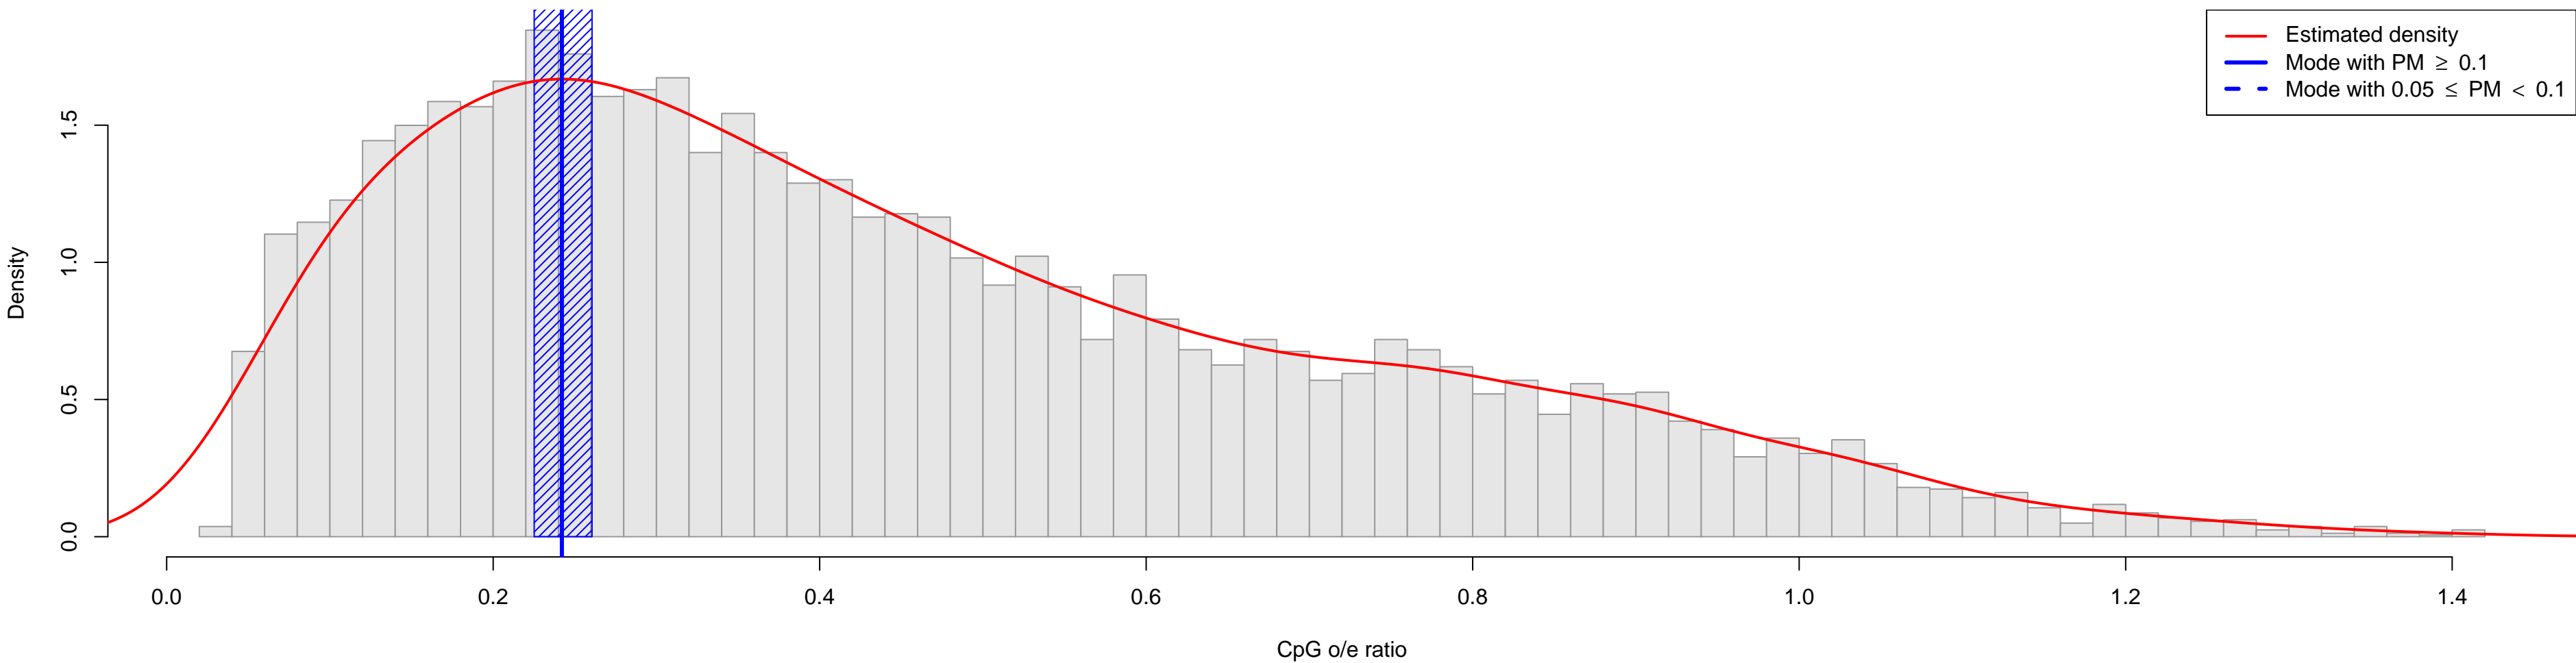

### Zantedeschia\_aethiopica

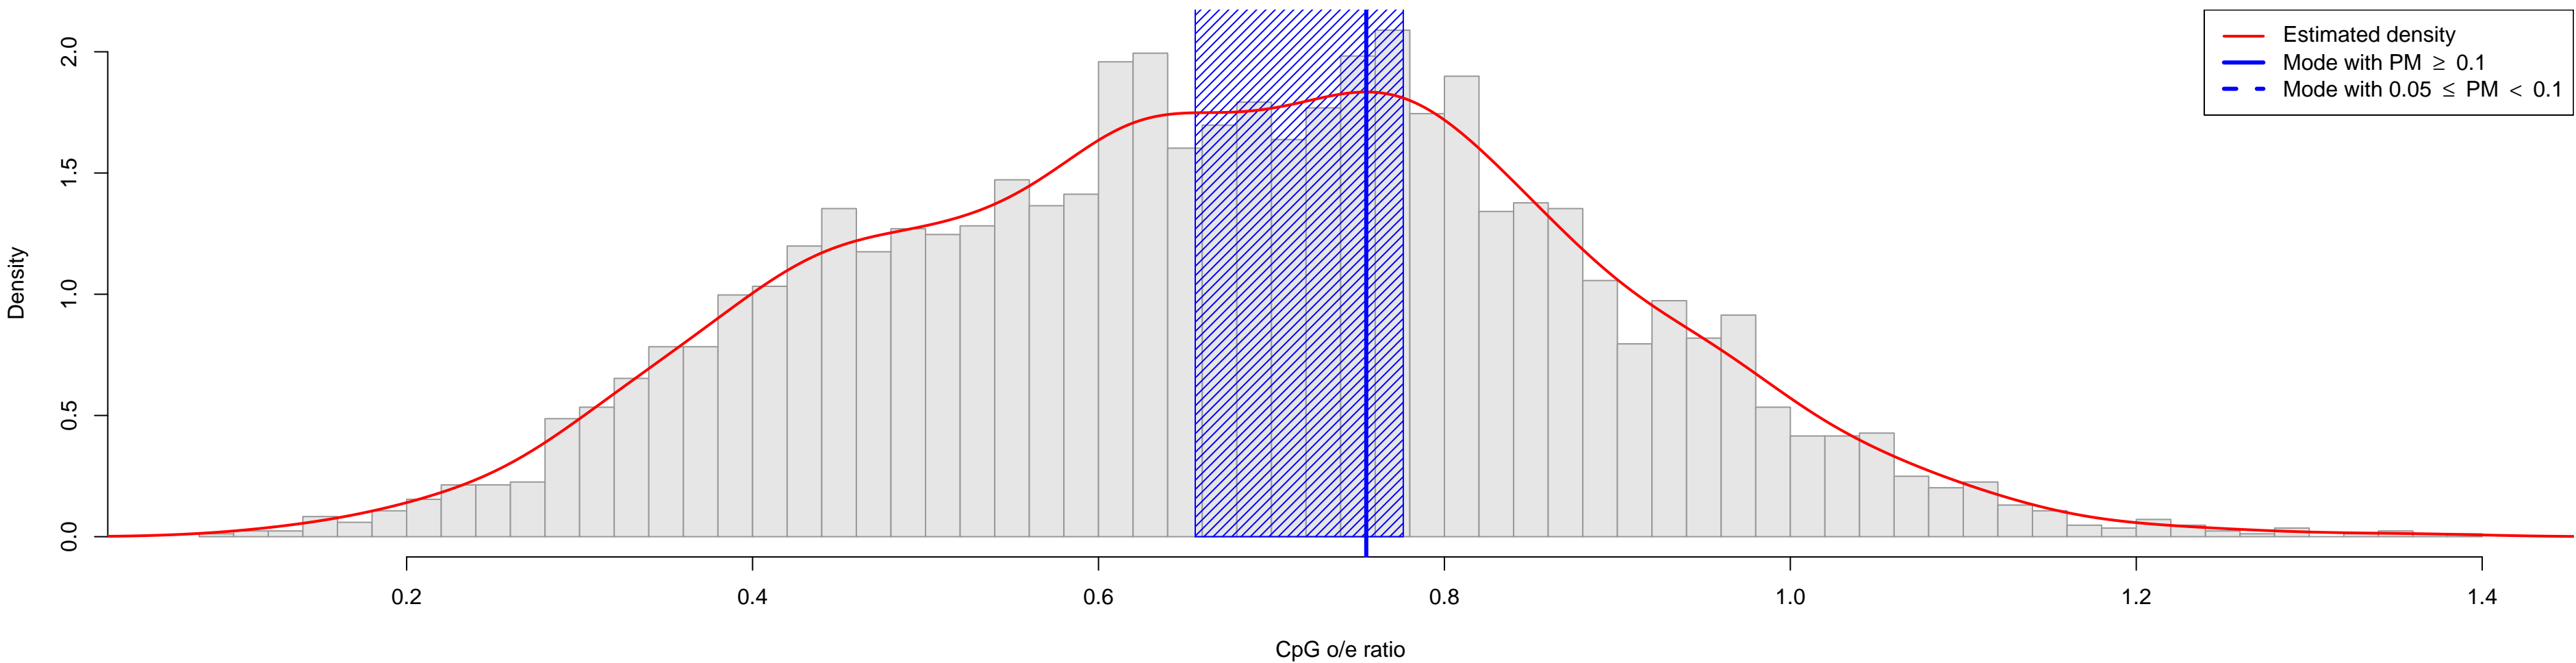



# Zea\_mays

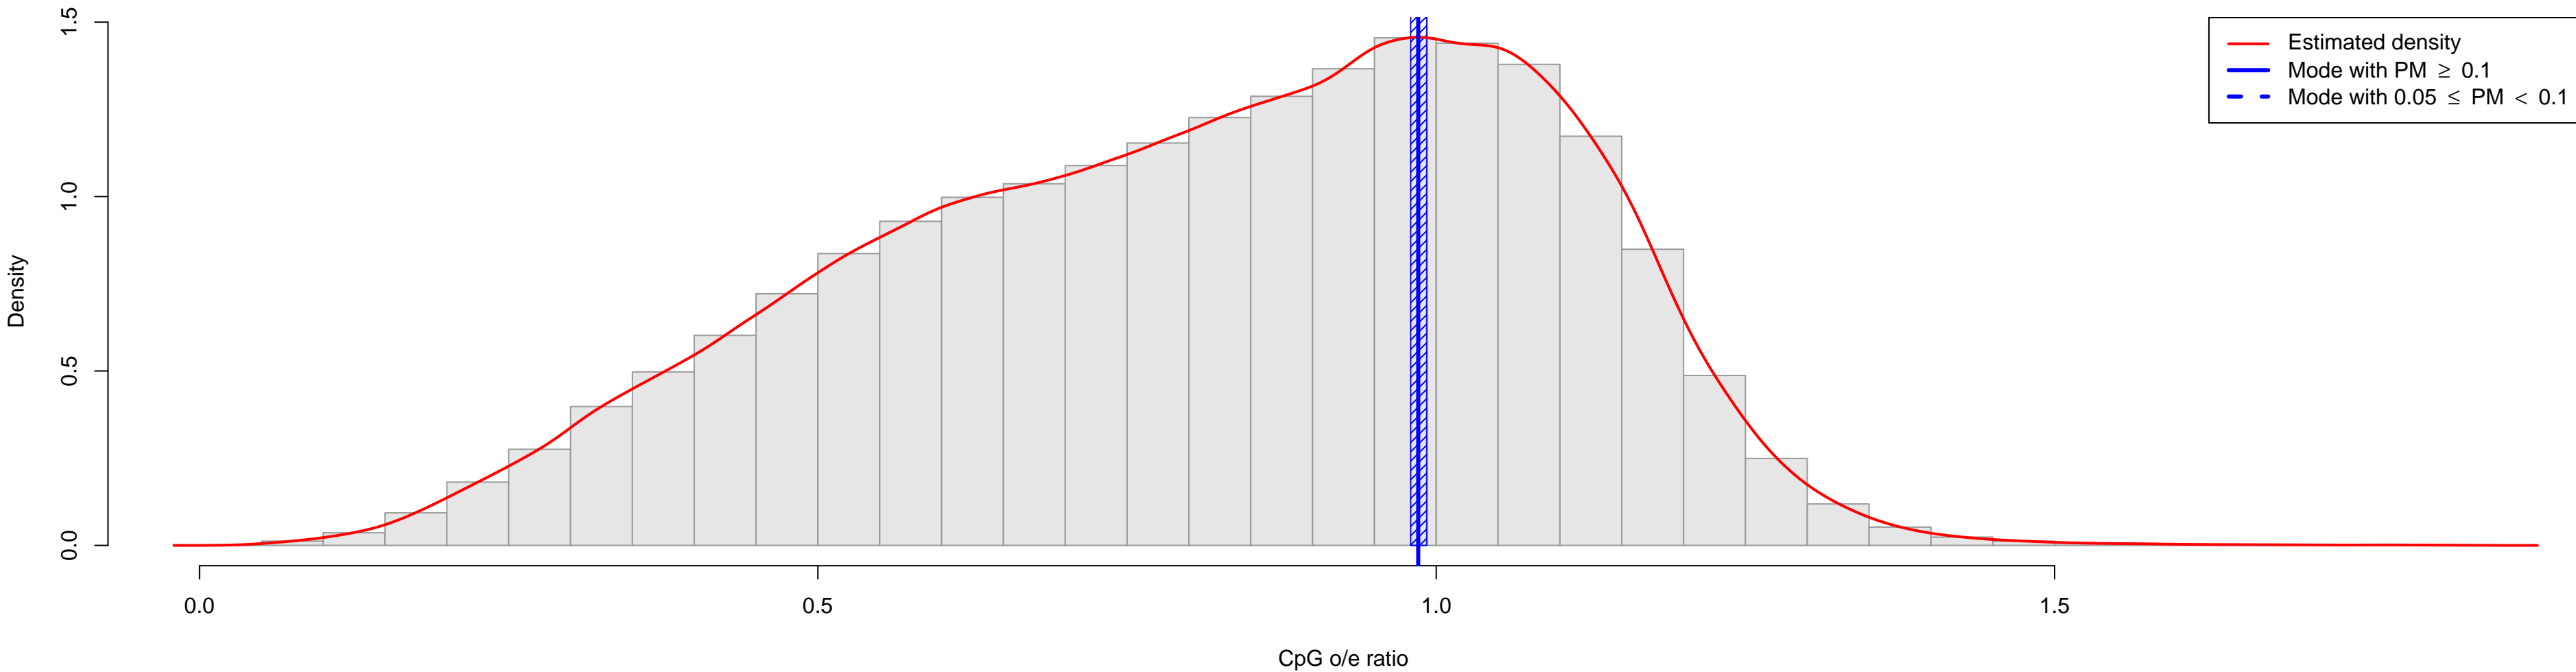

# Zostera\_marina

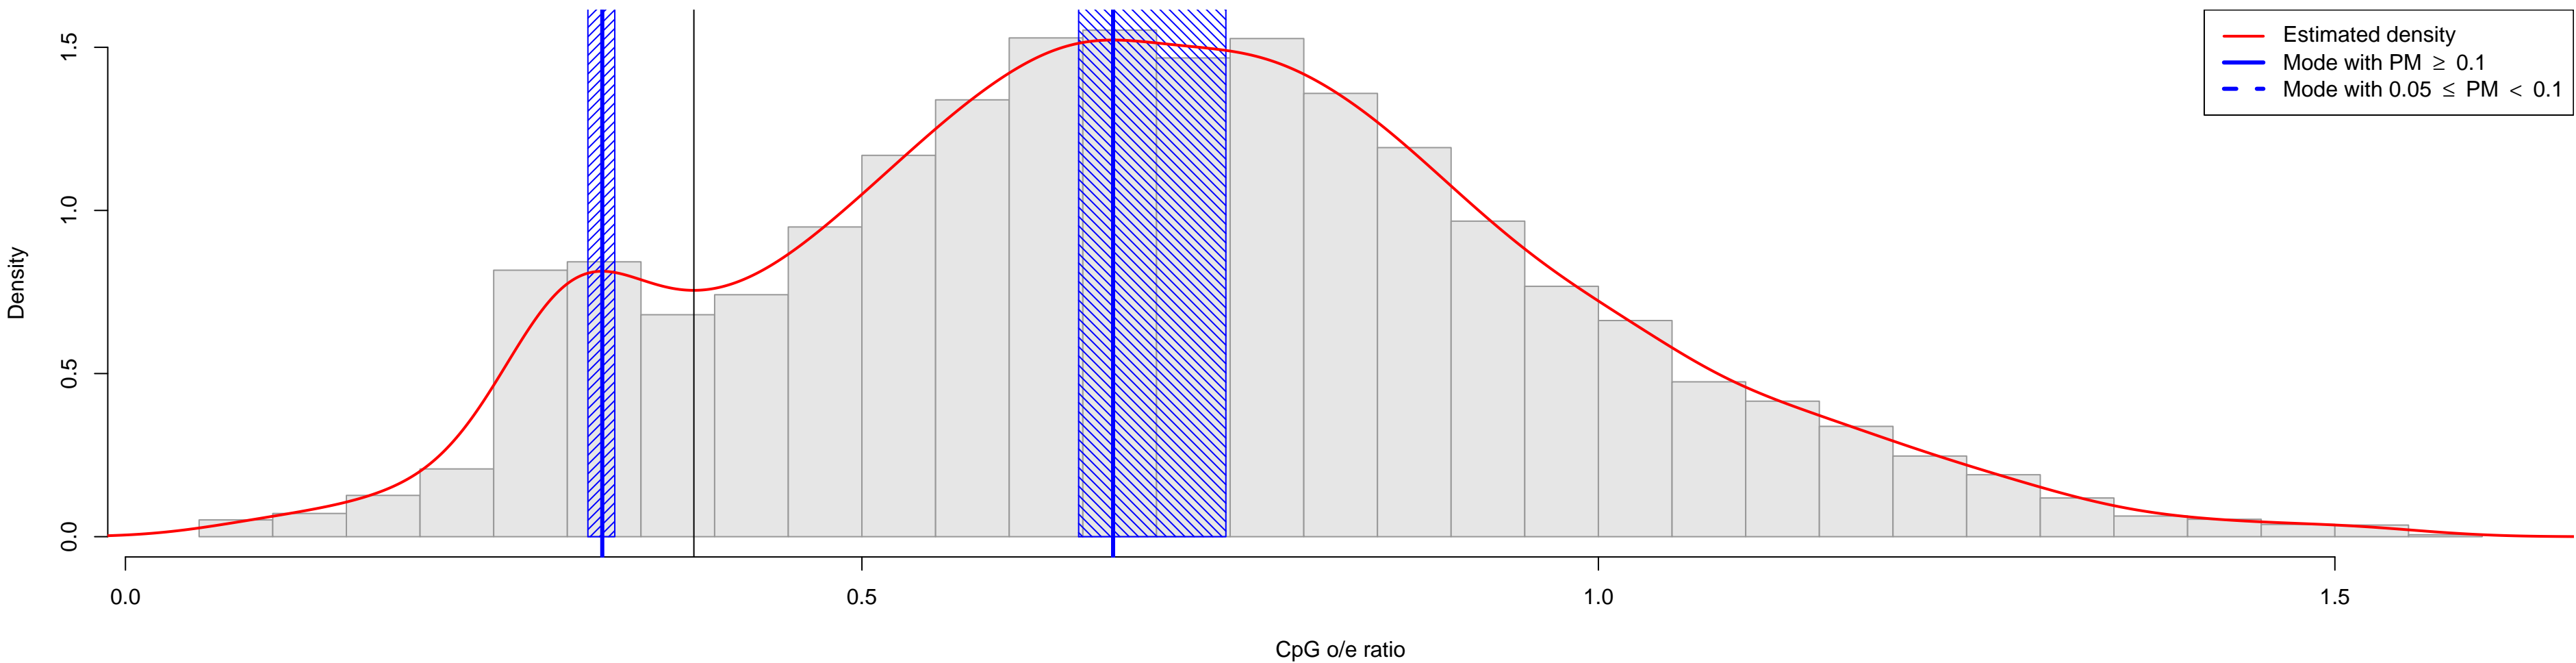

# Zostera\_noltii

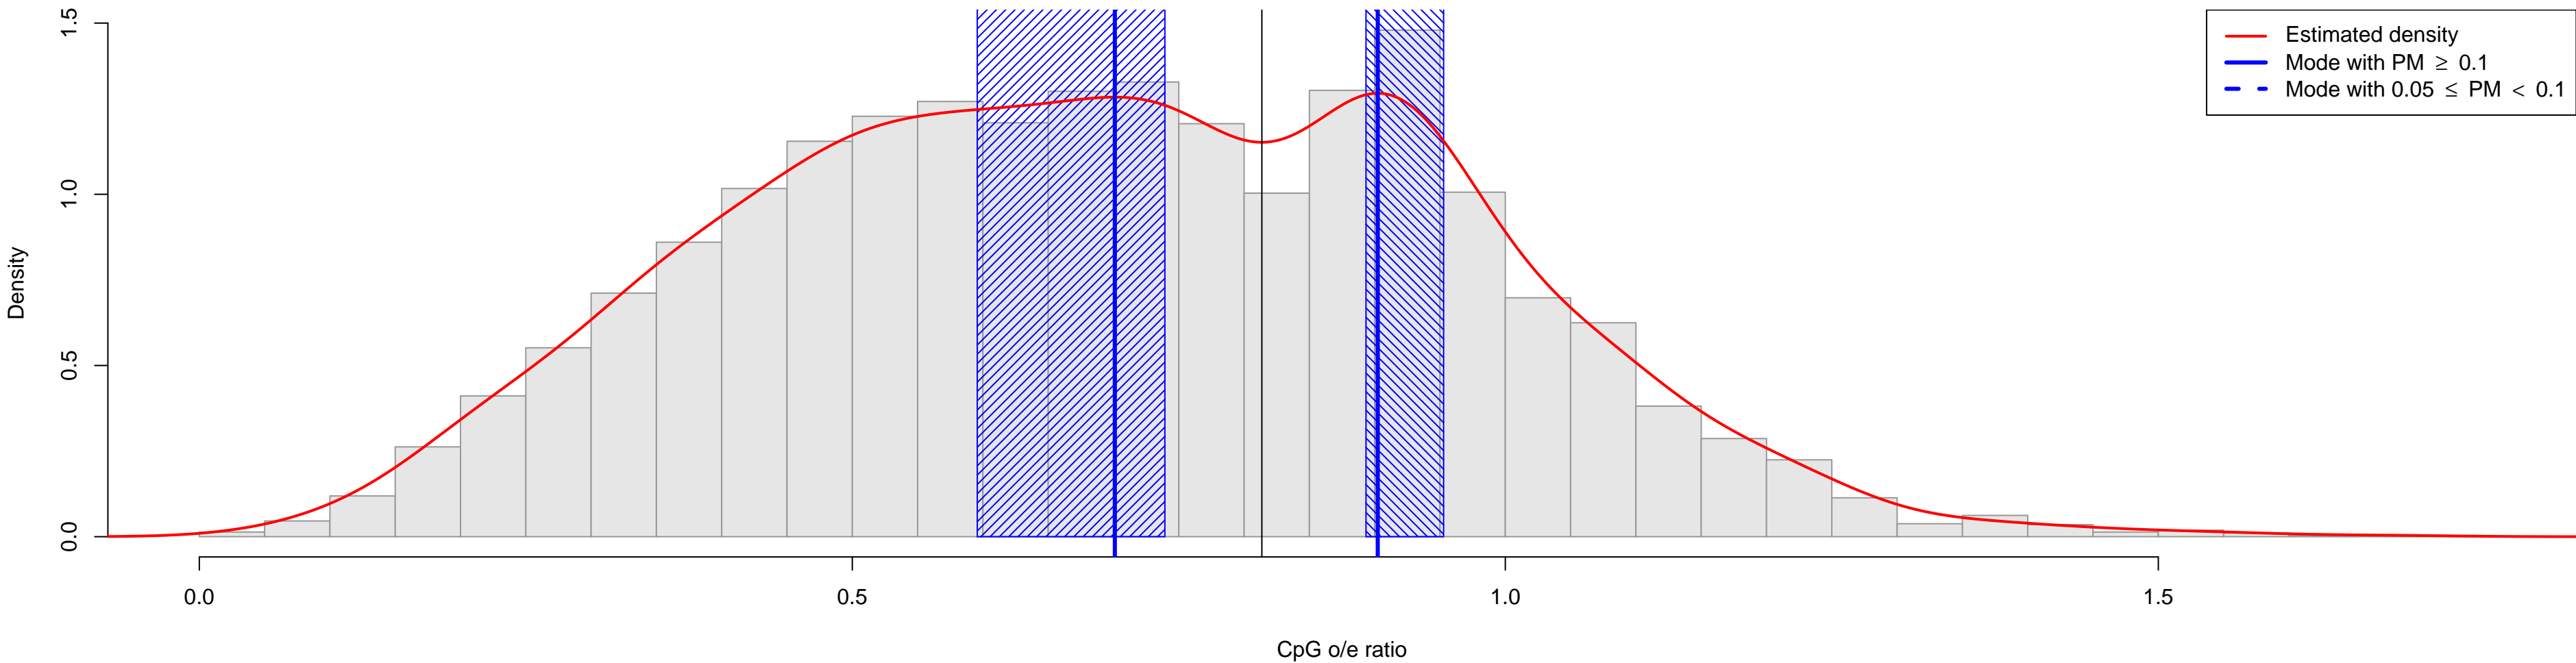

Supplement: 12859_2018_2115_MOESM4_ESM.pdf [file 12859_2018_2115_MOESM4_ESM.pdf]
