# Supplementary material for: Notos - a galaxy tool to analyze CpN observed expected ratios for inferring DNA methylation types
Source: PubMed Central journal article supplement (PMC5870242; doi:10.1186/s12859-018-2115-4), 2018-03-27
Supplement: 12859_2018_2115_MOESM3_ESM.pdf [file 12859_2018_2115_MOESM3_ESM.pdf]

## Kernel density estimation

Kernel density estimation is a non-parametric method to estimate an unknown one-dimensional distribution  $f$  based on a given sample from this distribution. Kernel density estimators are closely related to histograms, but usually they are smoother. Denoting the sample by  $x_1, \dots, x_n$ , the kernel density estimator of  $f$  is then defined as

$$\hat{f}_h(x) = \frac{1}{n} \sum_{i=1}^n K_h(x - x_i) = \frac{1}{nh} \sum_{i=1}^n K\left(\frac{x - x_i}{h}\right).$$

Here  $K$  is the so-called kernel, i.e., a non-negative function that integrates to one and  $h$  is the so-called bandwidth of the kernel. Furthermore, the so-called scaled kernel  $K_h$  is defined as  $K_h(x) = \frac{1}{h}K\left(\frac{x}{h}\right)$ . That is,  $K_h$  is obtained by stretching or shrinking, respectively,  $K$  regarding its width by the factor  $h$ , rescaling its height so that  $K$  again integrates up to one. A frequent choice for the kernel is the Gaussian kernel, i.e.,  $K(y) = \phi(y)$ , where  $\phi$  is the standard normal density function, i.e.,

$$\phi(y) = \frac{1}{\sqrt{2\pi}} e^{-\frac{1}{2}y^2}$$

Alternative kernel definitions are, e.g., uniform, triangular, and Epanechnikov, to name only a few. For the remainder of this document, we will consider the Gaussian kernel case.

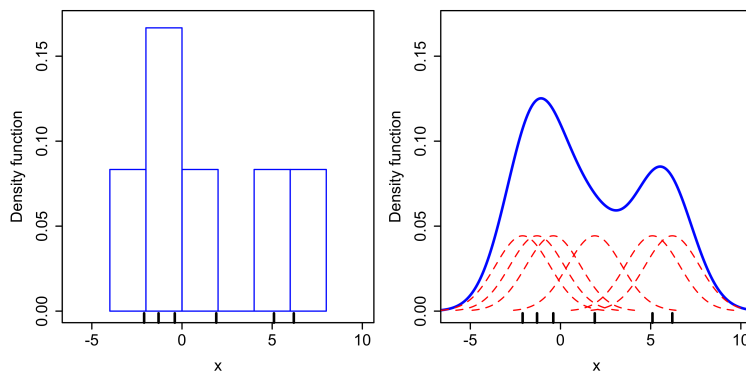

Figure 1: A histogram (left) and a kernel density estimator (right) for 6 data points  $x_1 = -2.1$ ,  $x_2 = -1.3$ ,  $x_3 = -0.4$ ,  $x_4 = 1.9$ ,  $x_5 = 5.1$ ,  $x_6 = 6.2$ , using Gaussian kernels with a variance of 2.25, i.e.,  $h = 1.5$ . The 6 individual kernels are colored in red, the resulting kernel density estimator in blue. The figure has been taken from Wikipedia ([https://en.wikipedia.org/wiki/Kernel\\_density\\_estimation](https://en.wikipedia.org/wiki/Kernel_density_estimation)).

Figure 1 illustrates the principle of kernel density estimation by means of a small sample with six observations.

The bandwidth  $h$  is an important parameter for kernel density estimation. It allows to control the smoothness of the kernel density estimator. More precisely, the higher  $h$  is chosen, the smoother the resulting kernel density estimator becomes. This effect is illustrated in Figure 2. On the one hand, one can observe the kernel density estimator becomes over-smoothed for high values of  $h$ , which results in much of the underlying structure to be obscured. On the other hand, the kernel density estimator becomes under-smoothed for low values of  $h$ , resulting in too many spurious data artifacts.

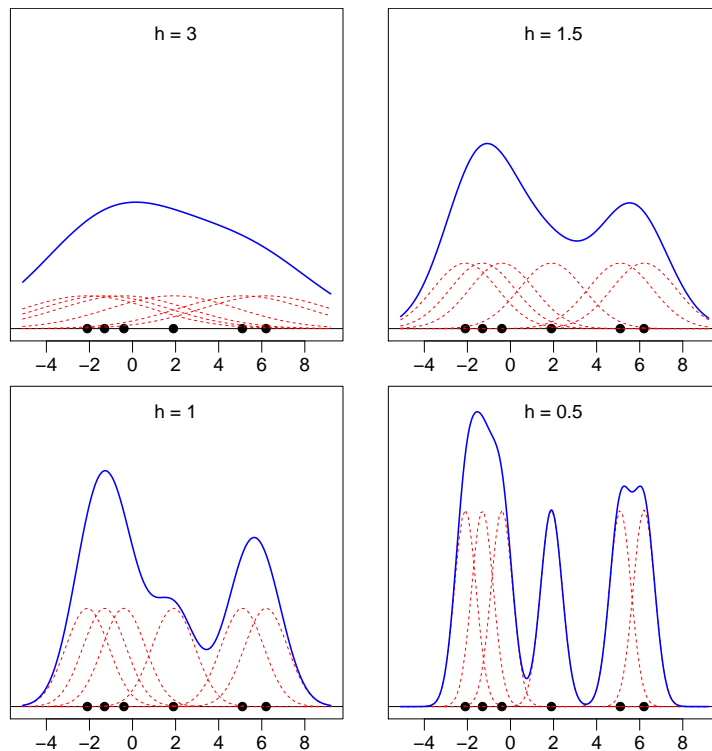

Figure 2: Kernel density estimators for  $h = 3, 1.5, 1, 0.5$  using the same data as above.

Various approaches exist to determine appropriate values for  $h$ , such as such as cross-validation, Silverman's rule (Silverman, 1986), and Scott's variation of Sil-

verman's rule (Scott, 1992). Silverman's rule sets

$$h = 0.9 \min \left( \hat{\sigma}_x, \frac{\text{IQR}_x}{1.34} \right) n^{-1/5},$$

where  $n$ ,  $\hat{\sigma}_x$  and  $\text{IQR}_x$  correspond to the sample size, the standard deviation of the sample and the sample's interquartile range. For Scott's variation of the bandwidth, the value 0.9 is replaced by 1.06.

## References

- Scott, D. W. (1992). *Multivariate Density Estimation: Theory, Practice, and Visualization*, Volume 156.
- Silverman, B. W. (1986). Density estimation for statistics and data analysis. *Monographs on Statistics and Applied Probability* 37(1), 1–22.
